# Supplementary material for: The transcriptional profile of keloidal Schwann cells
Source: PubMed Central journal article supplement (PMC9722693; doi:10.1038/s12276-022-00874-1), 2022-11-04
Supplement: 12276_2022_874_MOESM1_ESM.pdf [file 12276_2022_874_MOESM1_ESM.pdf]

## Supplementary Fig. 1

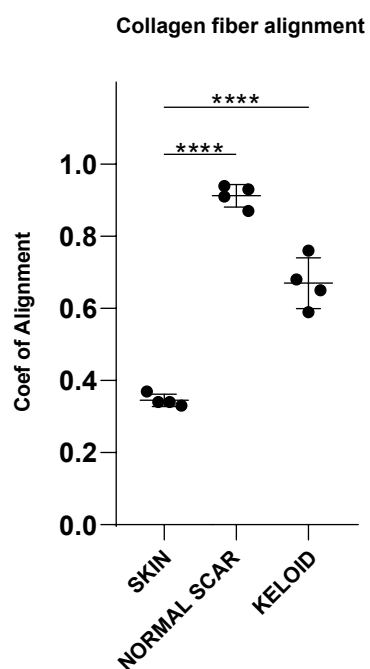

### Supplementary Fig. 1: Collagen alignment in skin, normal scar and keloid

Evaluation of the alignment coefficient of healthy skin, normal scar and keloid tissue. Maximum and minimum value with <1.5 interquartile range is shown by whiskers. The middle line represents the mean. Normally distributed data were compared by one-way ANOVA with Tukey post hoc test. \*\*\*\*p <0.0001.

# Supplementary Fig. 2

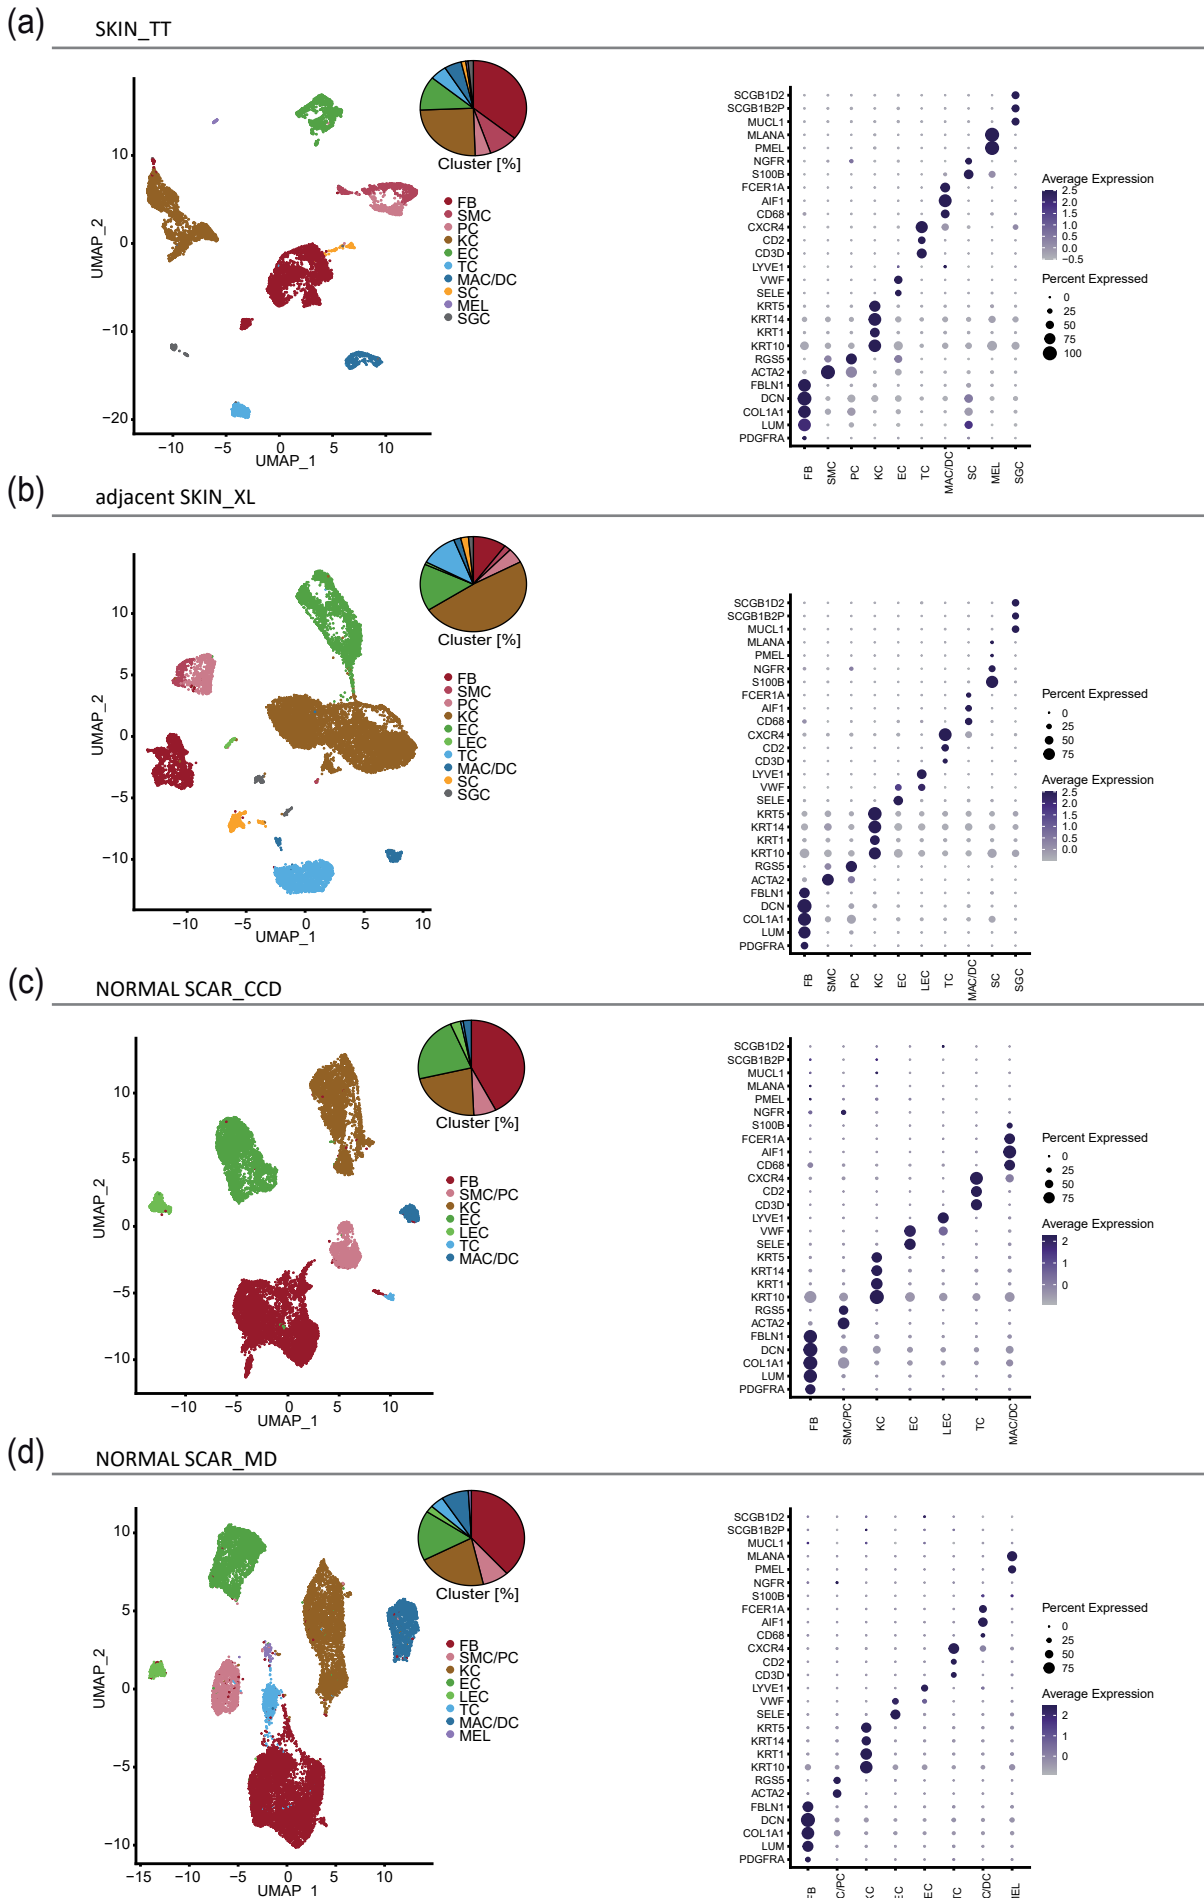



### Supplementary Fig. 2: Individual dataset integration unravels cluster consistency

UMAP-Plots and Dot plots individual integrations of datasets from distinct conditions and sources: SKIN\_TT, n=6 (a); adjacent SKIN\_XL, n=4 (b); NORMAL SCAR\_CCD, n=3 (c); NORMAL SCAR\_MD, n=3 (d); cluster classification as fibroblasts (FB), smooth muscle cells (SMC), pericytes (PC), smooth muscle cells and pericytes (SMC/PC), keratinocytes (KC), endothelial cells (EC), lymphatic endothelial cells (LEC), T-cells (TC), macrophages (MAC), dendritic cells (DC), macrophages and dendritic cells (MAC/DC), Schwann cells (SC), melanocytes (MEL), erythrocytes (ERY) and sweat gland cells (SGC); Pie plots show cluster composition within each dataset combination. Dot plots showing well-known marker genes to characterise clusters: *PDGFRA*, *LUM*, *COL1A1*, *DCN*, *FBLN1* for FB; *ACTA2*, *RGS5* for SMC and PC; *KRT10*, *KRT1*, *KRT14*, *KRT5* for KC; *SELE*, *VWF* for EC; *LYVE1* for LEC; *CD3D*, *CD2*, *CXCR4* for TC; *CD68*, *AIF1* for MAC; *FCER1A* for DC; *S100B*, *NGFR* for SC; *PMEL*, *MLANA* for MEL; Dot size symbolizes percentage of cells expressing the gene, colour gradient shows level of average gene expression.

### Supplementary Fig. 3

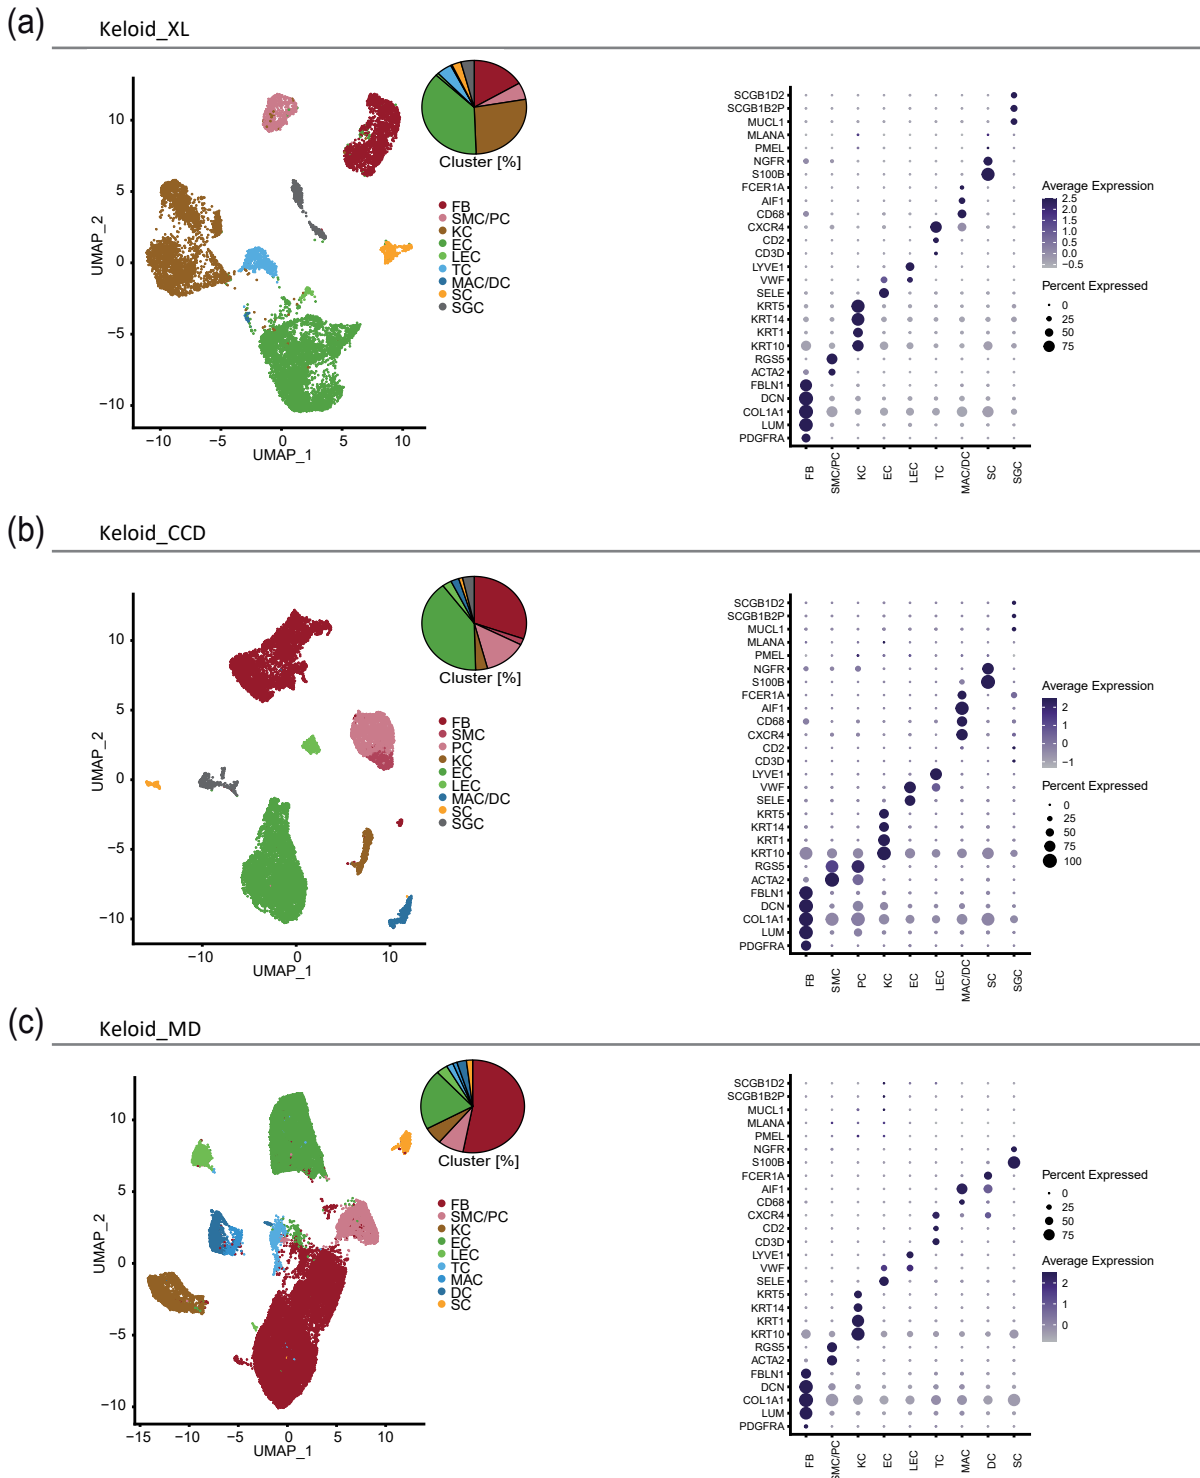

#### Supplementary Fig. 3: Individual dataset integration unravels cluster consistency

UMAP-plots and DotPlots individual integrations of datasets from distinct conditions and sources: KELOID\_XL,  $n=4$  (a); KELOID\_CCD,  $n=3$  (b); KELOID\_MD,  $n=4$  (c); cluster classification as fibroblasts (FB), smooth muscle cells (SMC), pericytes (PC), smooth muscle cells and pericytes (SMC/PC), keratinocytes (KC), endothelial cells (EC), lymphatic endothelial cells (LEC), T-cells (TC), macrophages (MAC), dendritic cells (DC), macrophages and dendritic cells (MAC/DC), Schwann cells (SC), melanocytes (MEL), erythrocytes (ERY) and sweat gland cells (SGC); Pie plots show cluster composition within each dataset combination. Dot plots showing well-known marker genes to characterise clusters: *PDGFRA*, *LUM*, *COL1A1*, *DCN*, *FBLN1* for FB; *ACTA2*, *RGS5* for SMC and PC; *KRT10*, *KRT1*, *KRT14*, *KRT5* for KC; *SELE*, *VWF* for EC; *LYVE1* for LEC; *CD3D*, *CD2*, *CXCR4* for TC; *CD68*, *AIF1* for MAC; *FCER1A* for DC; *S100B*, *NGFR* for SC; *PMEL*, *MLANA* for MEL; Dot size symbolizes percentage of cells expressing the gene, colour gradient shows level of average gene expression.

## Supplementary Fig. 4

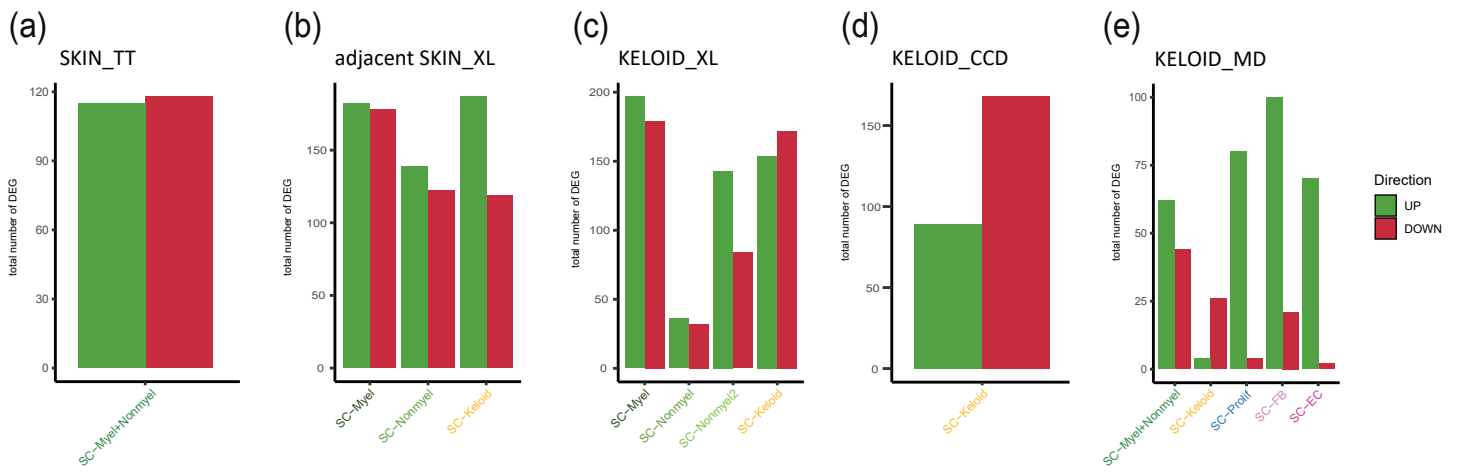

### Supplementary Fig. 4: Total number of differentially expressed genes in each individual computation

Bar plots show the total number of differentially expressed genes (fold change  $\geq 2$ ) between all Schwann cell cluster of SKIN\_TT (a); adjacent SKIN\_XL (b); KELOID\_XL (c); KELOID\_CCD (d); KELOID\_MD (e); green= UP regulation, red= DOWN regulation

Supplementary Fig. 5

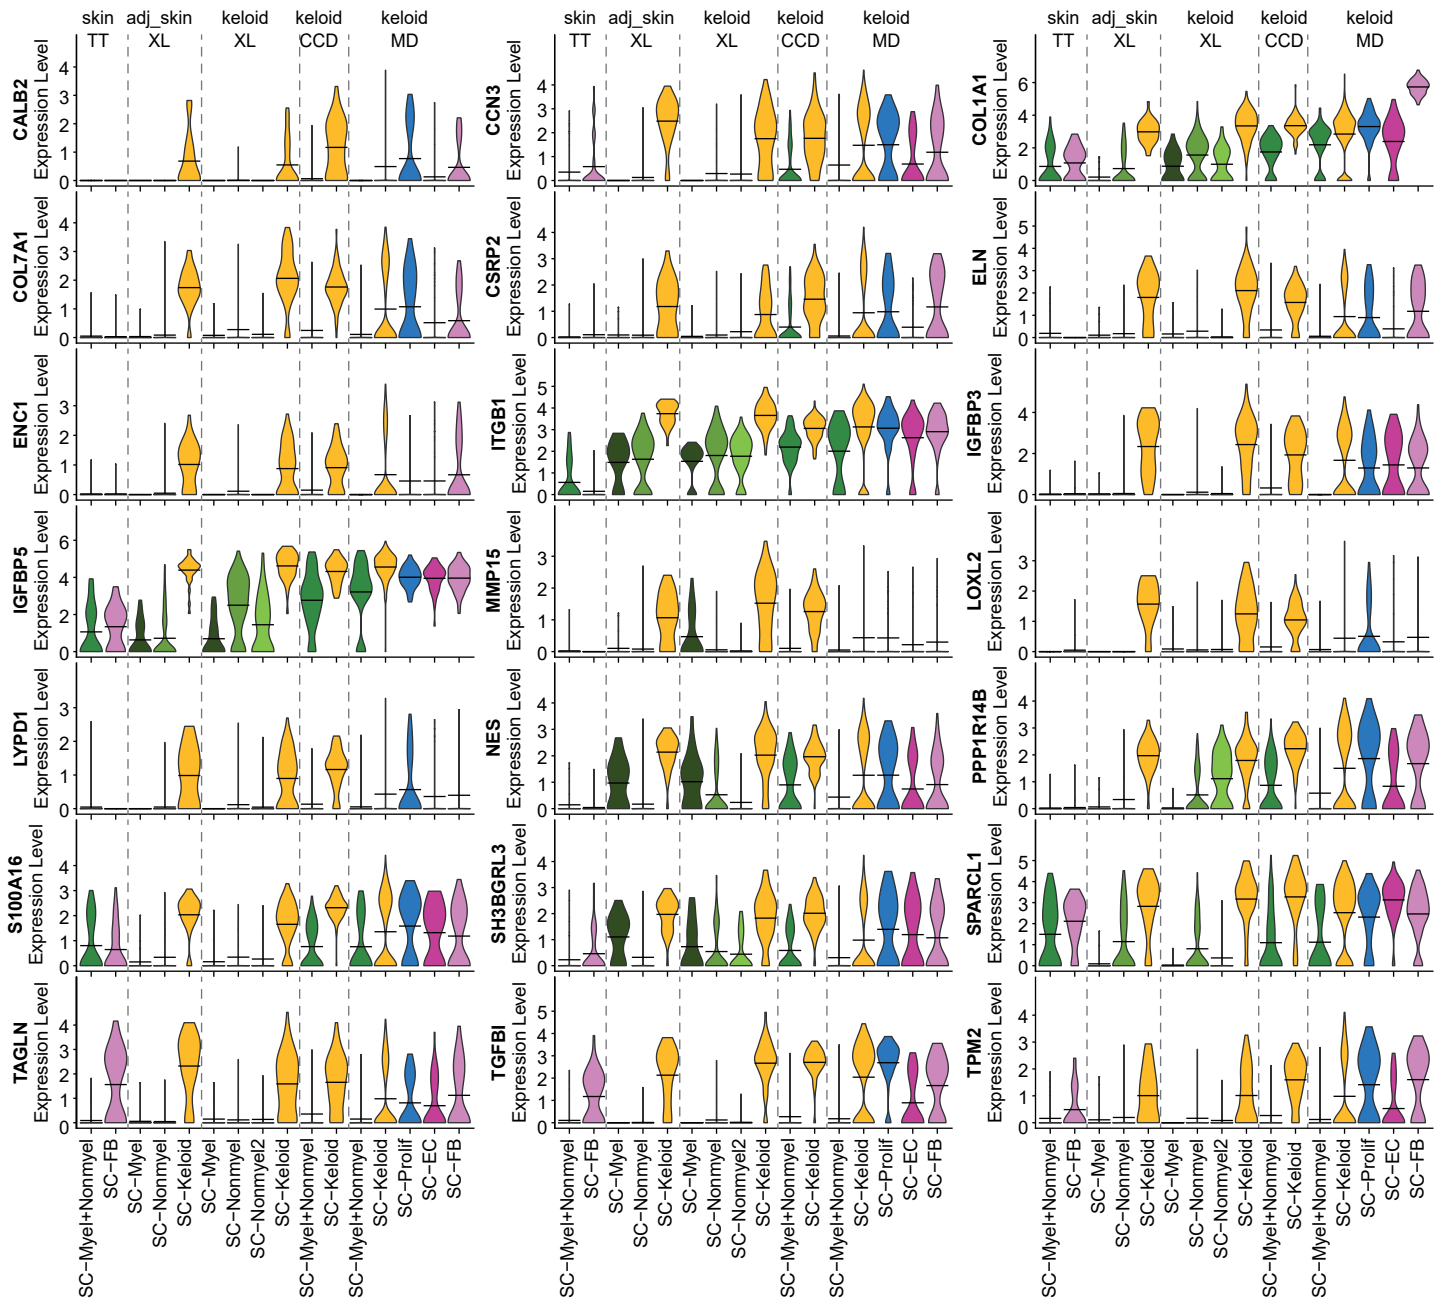

**Supplementary Fig. 5: SC-Keloid pattern gene expression in all Schwann cell subtypes**

Violin plots show the expression of the identified SC-Keloid expression pattern in all Schwann cell subtypes. Crossbeams mark the mean expression, vertical lines show maximum expression, violin width symbolizes frequency of cells on a distinct expression level.

## Supplementary Fig. 6

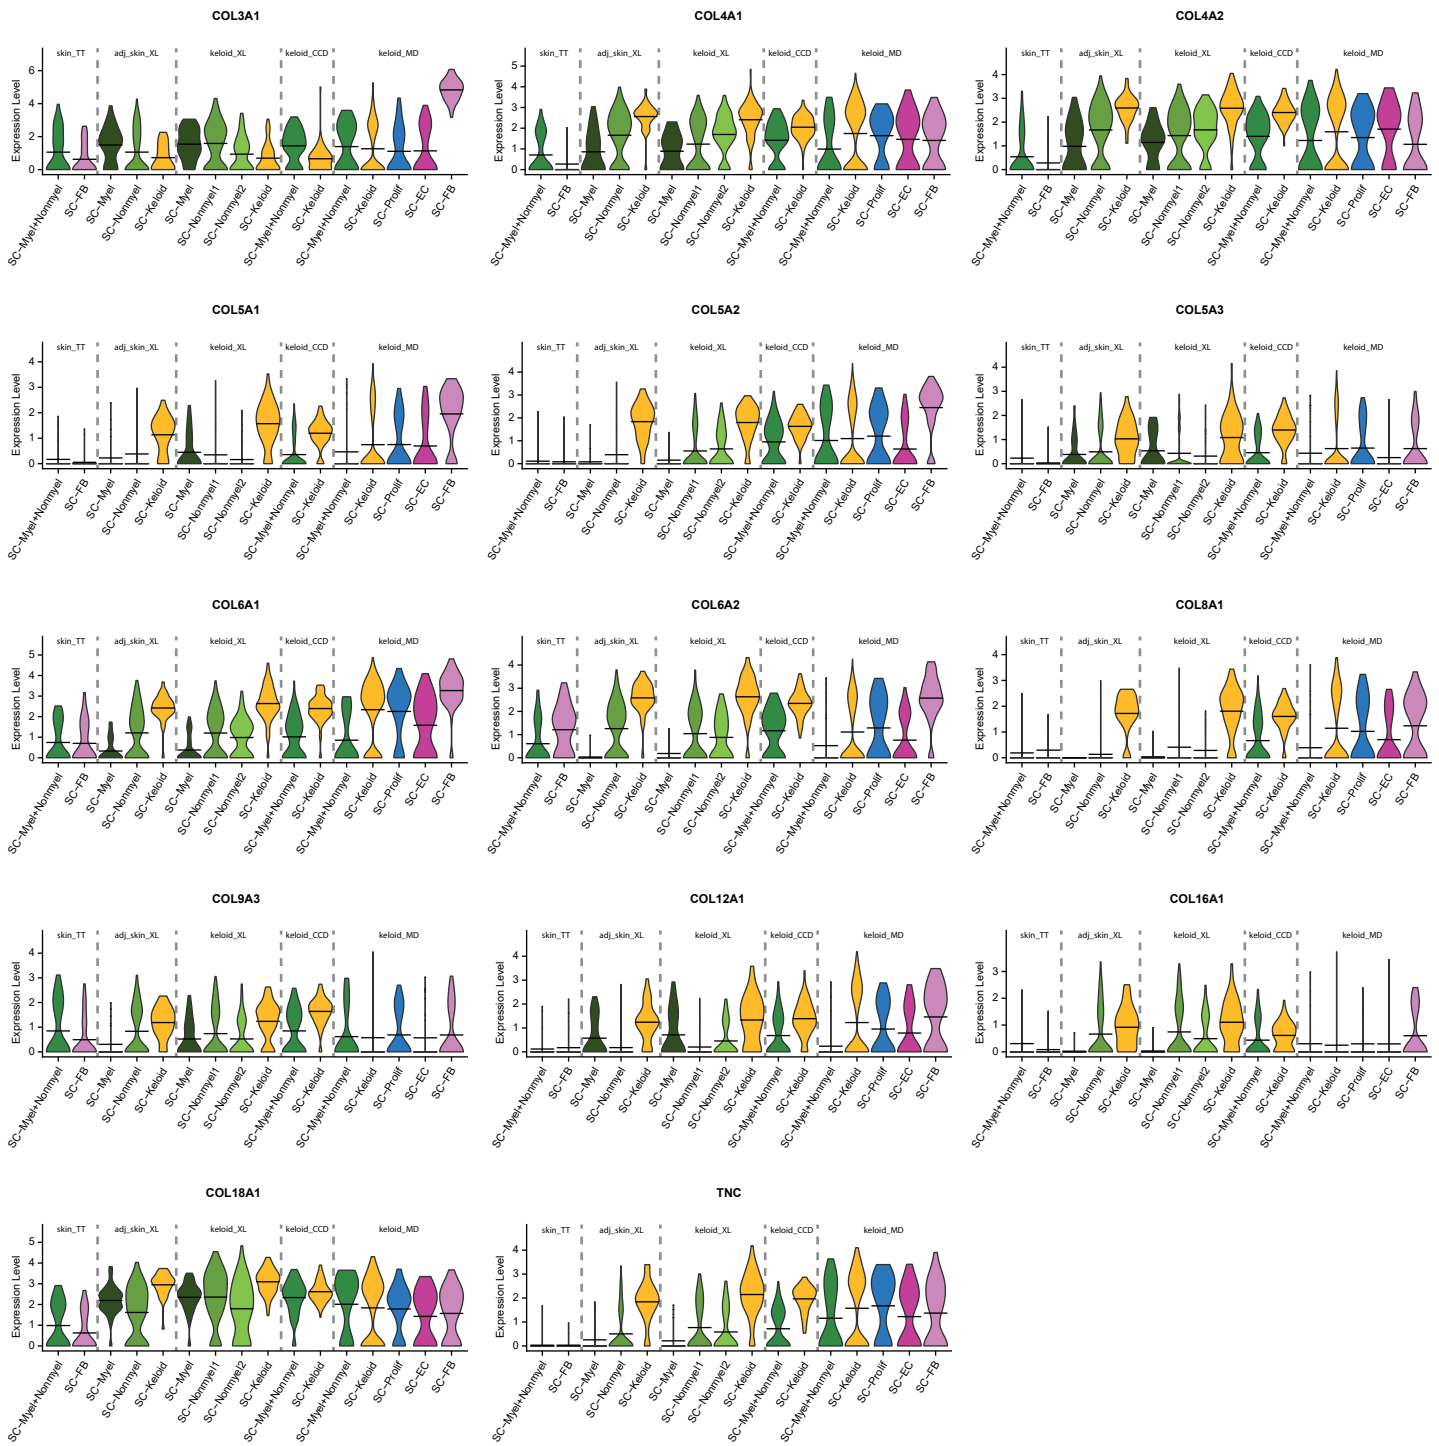

### Supplementary Fig. 6: Extracellular matrix associated gene expression in SC-Keloid of distinct sources

Violin plots show the expression of several genes associated with matrix formation in all Schwann cell subtypes. Crossbeams mark the mean expression, vertical lines show maximum expression, violin width symbolizes frequency of cells on a distinct expression level.

## Supplementary Fig. 7

### GO-Term comparison SC-Keloid

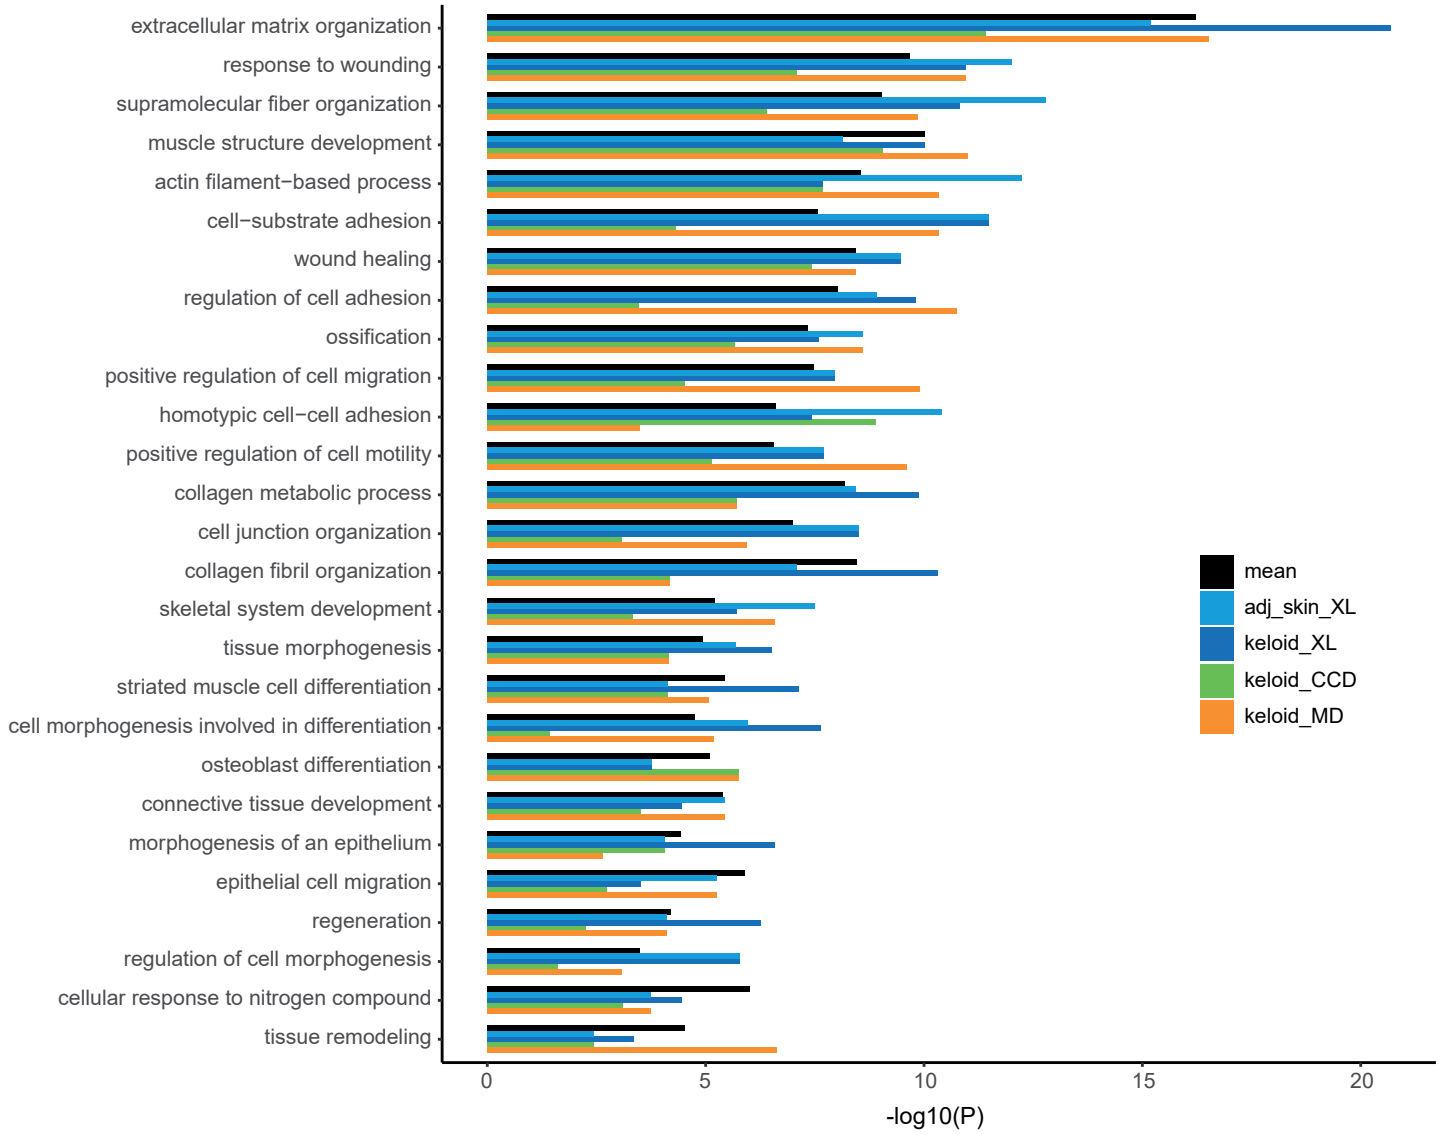

### Supplementary Fig. 7: Corresponding GO-Terms encourage reported functions of keloidal Schwann cells

Enrichment analysis of top 100 upregulated genes resulted by data confrontation of SC-Keloid with myelination and nonmyelinating Schwann cells. Bar length shows statistical significance; mean value is depicted in black.

## Supplementary Fig. 8

(a)

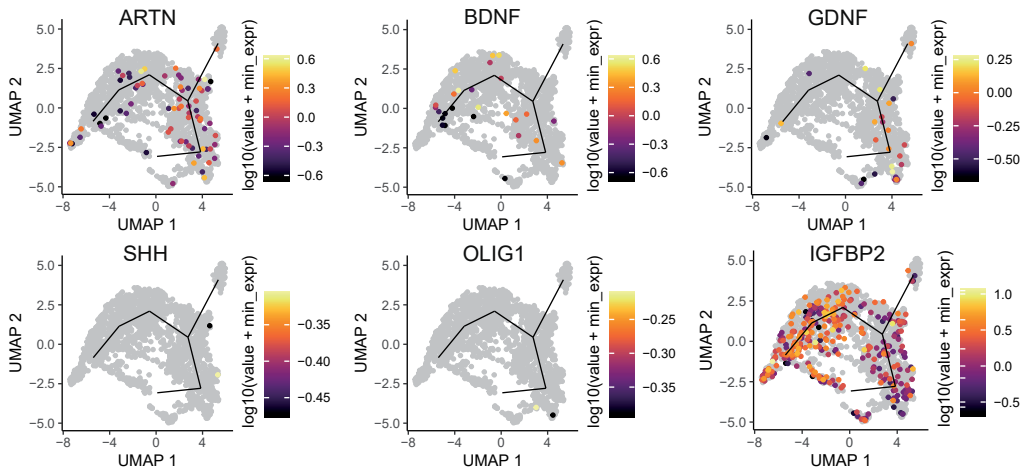

(b)

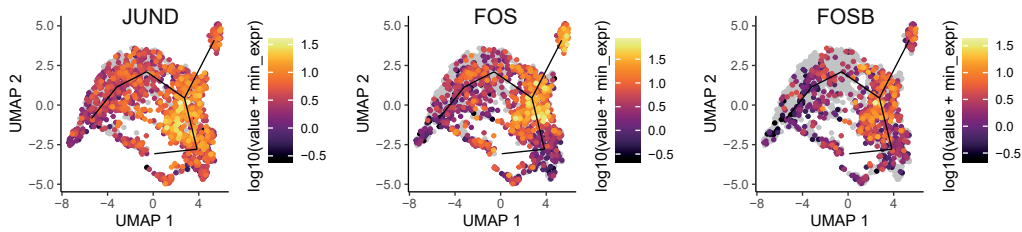

(c)

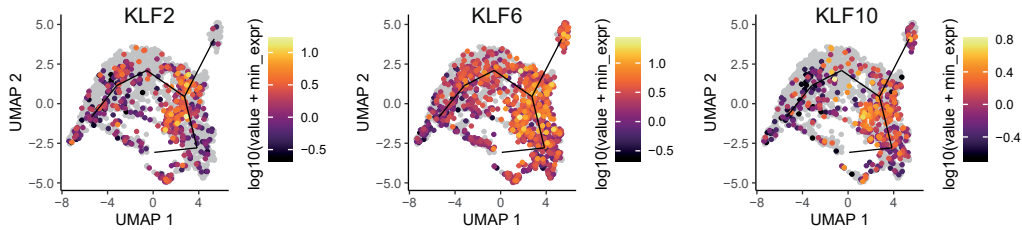

(d)

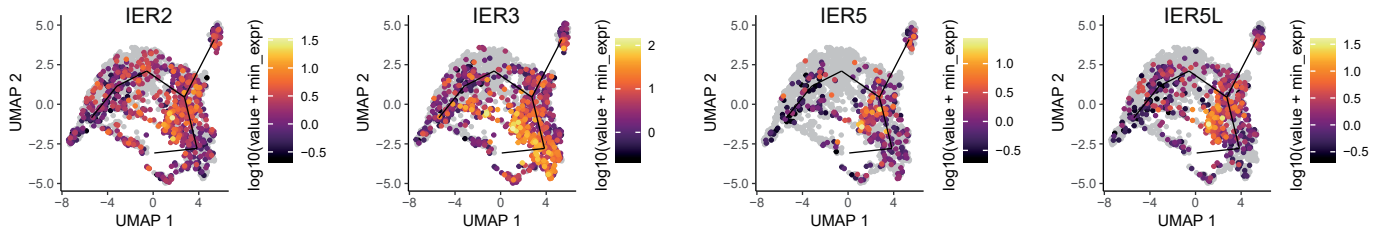

(e)

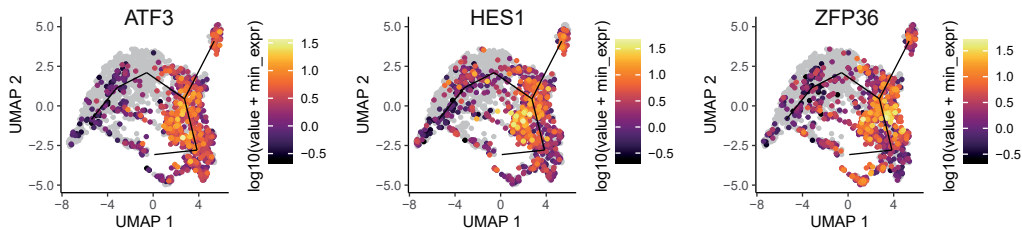

### Supplementary Fig. 8: Pivotal gene groups potentially involved in the Schwann cell dedifferentiation process

(a) Feature Plots with pseudotime track of BDNF, GDNF, ARTN, SHH, OLIG1 and IGFBP2. (b) Feature Plots with UMAP Plot of combined Schwann cell clusters of all individual computations as basis showing activator protein 1 (AP-1) members JUND, FOS and FOSB. (c) Feature Plots of the kruppel-like factors (KLF) members KLF2, KLF6 and KLF10. (d) Feature Plots of the immediate early response (IER) genes IER2, IER3, IER5L and IER5. (e) Feature Plots of ATF3, HES1 and ZFP36.

## Supplementary Fig. 9

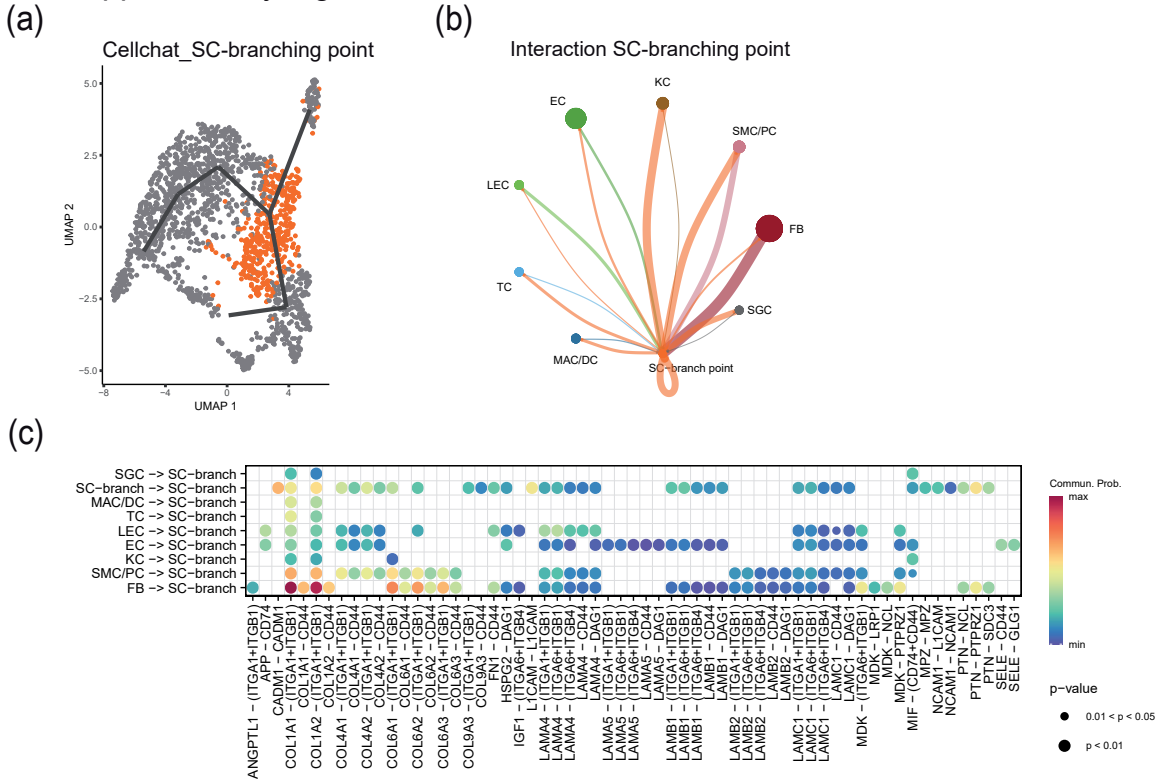

### Supplementary Fig. 9: Potential impact of different cell types in the Schwann cell dedifferentiation process

(a) UMAP-Plot of combined Schwann cell clusters with determining cells at the branching point highlighted in orange. (b) Circle plot of detected interactions between the distinct keloidal cell types and the determining Schwann cells at the branching point; fibroblasts (FB), smooth muscle cells and pericytes (SMC/PC), keratinocytes (KC), endothelial cells (EC), lymphatic endothelial cells (LEC), T-cells (TC), macrophages and dendritic cells (MAC/DC), sweat gland cells (SGC); bows are coloured according to the signal-sending cell type; bow thickness symbolizes extent of detected interactions. (c) Dotplot shows all identified interactions of the distinct keloidal cell types with the pivotal Schwann cells at the branching point; dots symbolize a detected interaction, dot size shows p-value, dot colour depicts extent of the communication probability.



# Supplementary Fig. 10

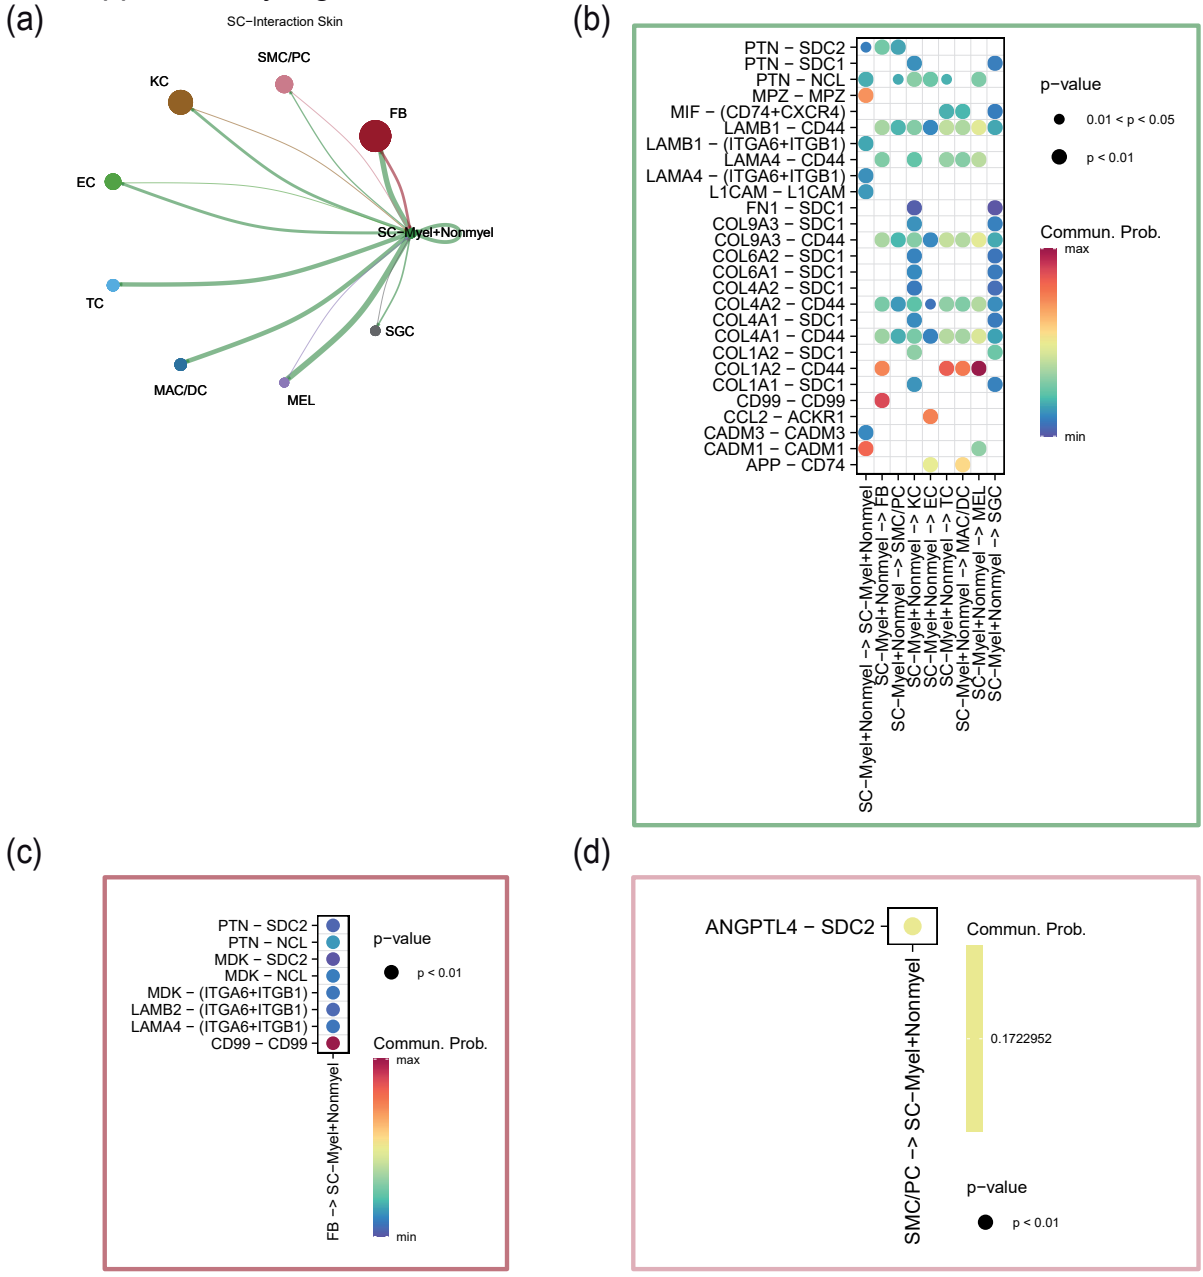

## Supplementary Fig. 10: Potential Schwann cell interaction in healthy skin.

(a) Circle plot of the detected interactions in healthy skin between myelinating + nonmyelinating Schwann cells (SC-Myel+Nonmyel) and the remaining cell types [fibroblasts (FB), smooth muscle cells and pericytes (SMC/PC), keratinocytes (KC), endothelial cells (EC), T-cells (TC), macrophages and dendritic cells (MAC/DC), melanocytes (MEL), sweat gland cells (SGC)]; bows are coloured according to the signal-sending celltype; bow thickness symbolizes extent of detected interactions. Dotplots show all identified interactions with cells present in keloids sent by (b) SC-Myel+Nonmyel, (c) FB and (d) SMC/PC; dots symbolize a detected interaction, dotsize shows p-value, dot colour depicts extent of the communication probability.

Supplementary Fig. 11

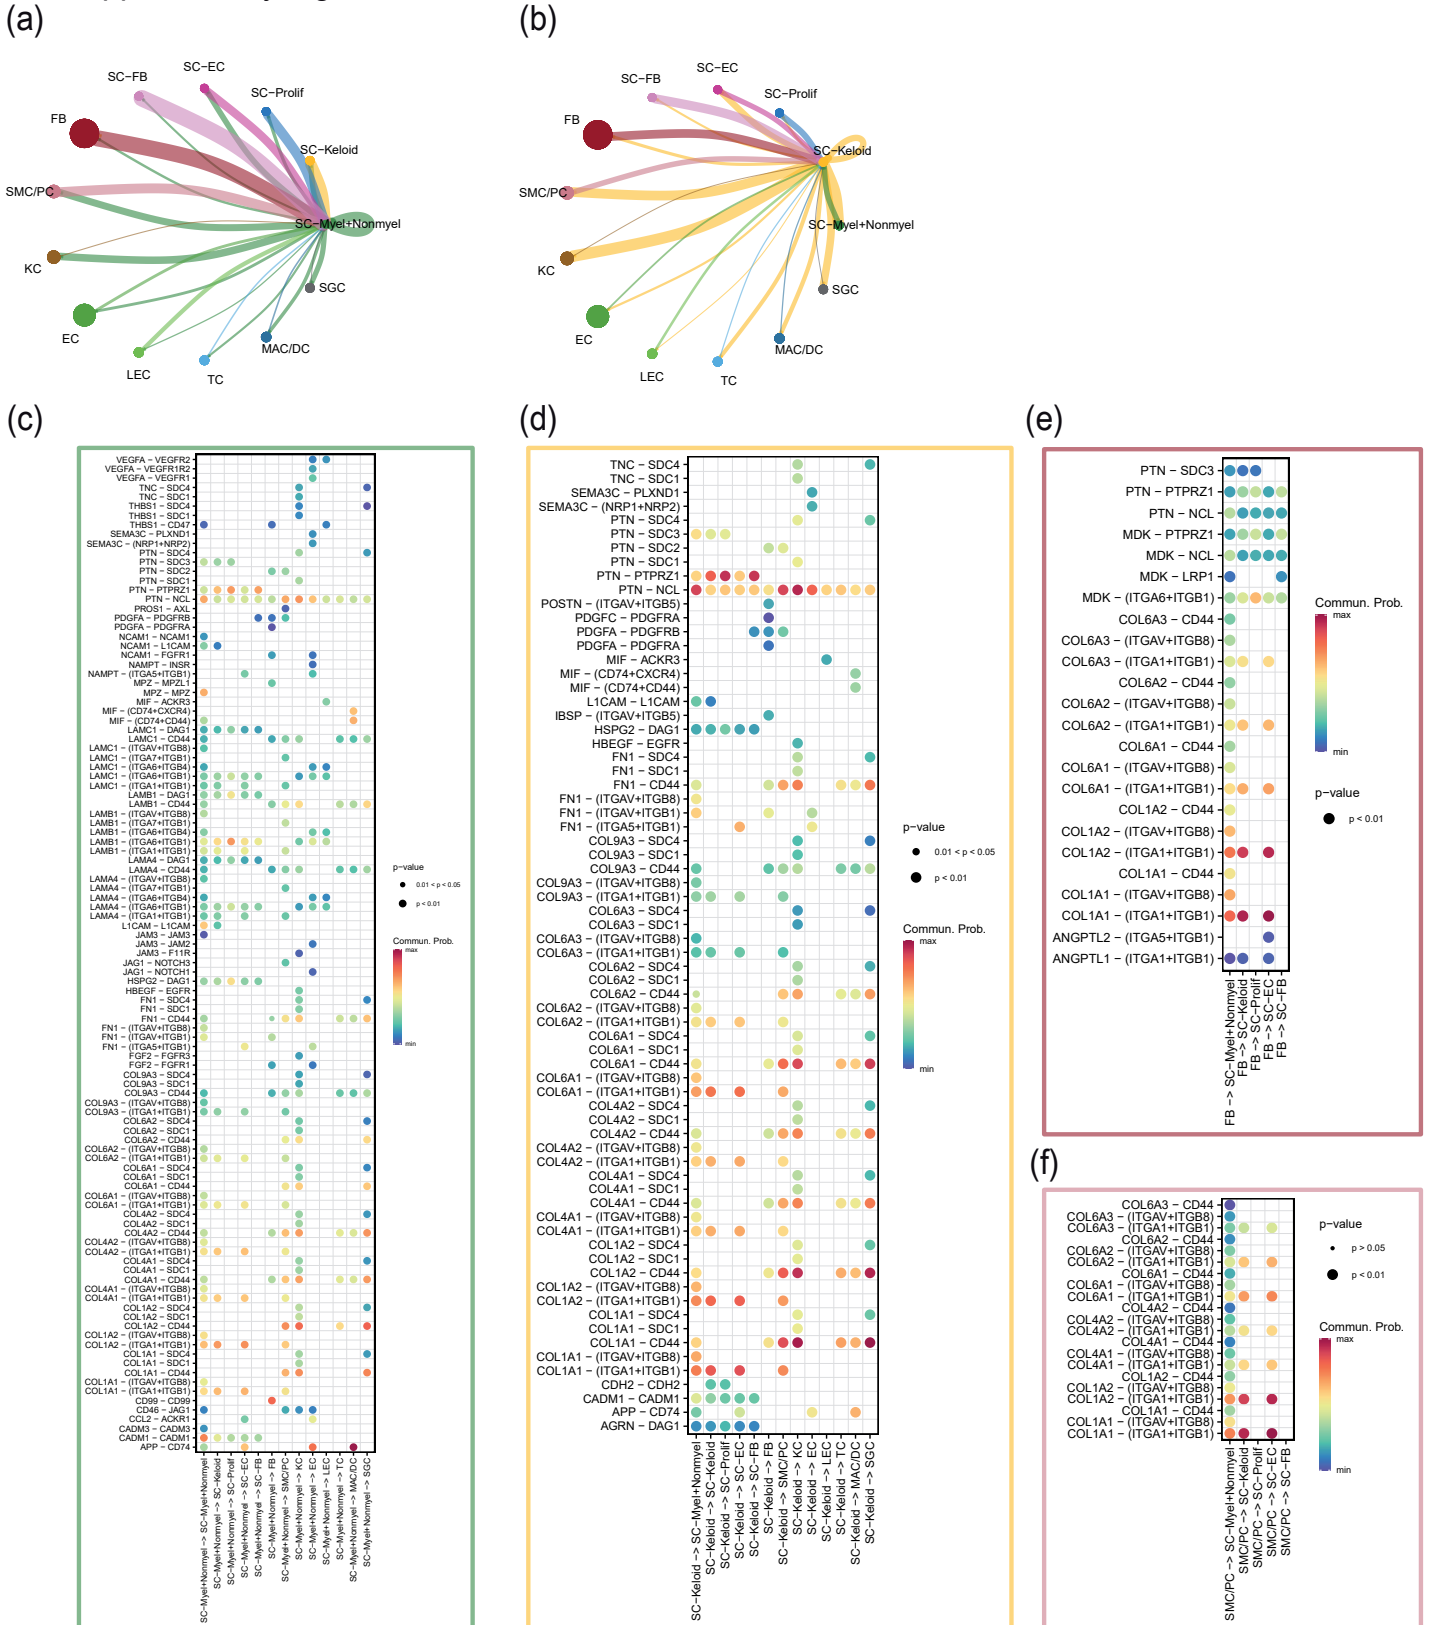

**Supplementary Fig. 11: Potential Schwann cell interaction in keloids .**

Circle plots of detected interactions in keloids between (a) myelinating and nonmyelinating Schwann cells (SC-Myel+Nonmyel), (b) keloidal Schwann cells (SC-Keloid) and the remaining cell types; fibroblasts (FB), smooth muscle cells and pericytes (SMC/PC), keratinocytes (KC), endothelial cells (EC), lymphatic endothelial cells (LEC), T-cells (TC), macrophages and dendritic cells (MAC/DC), sweat gland cells (SGC), proliferating Schwann cells (SC-Prolif), Schwann cells expressing genes typical for endothelial cells (SC-EC) or fibroblasts (SC-FB); bows are coloured according to the signal-sending cell type; bow thickness symbolizes extent of detected interactions. Dotplots show all identified interactions with cells present in keloids sent by (c) SC-Myel+Nonmyel, (d) SC-Keloid, (e) FB and (f) SMC/PC; dots symbolize a detected interaction, dotsize shows p-value, dot colour depicts extent of the communication probability.

Supplementary Table 1

| Differentially expressed genes_adjacent-skin-XL_comparing SC-Keloid vs. (SC-Myel, SC-Nonmyel) |             |             |       |       |             |               |                 |                 |
|-----------------------------------------------------------------------------------------------|-------------|-------------|-------|-------|-------------|---------------|-----------------|-----------------|
| gene                                                                                          | p_val       | avg_log2FC  | pct.1 | pct.2 | p_val_adj   | Foldchange_UP | Foldchange_DOWN | Ratio_pct1_pct2 |
| IGFBP5                                                                                        | 3,75985E-24 | 4,172214618 | 1     | 0,32  | 7,93367E-20 | 18,02858943   | 0,055467457     | 3,125           |
| TAGLN                                                                                         | 8,41937E-42 | 4,034051171 | 0,844 | 0,031 | 1,77657E-37 | 16,38213146   | 0,061042118     | 27,22580645     |
| IGFBP3                                                                                        | 5,44115E-46 | 3,979903772 | 0,906 | 0,027 | 1,14814E-41 | 15,7786708    | 0,063376695     | 33,55555556     |
| TGFBI                                                                                         | 7,82192E-48 | 3,809347934 | 0,812 | 0,008 | 1,6505E-43  | 14,01935367   | 0,071329965     | 101,5           |
| CCN3                                                                                          | 2,74623E-40 | 3,553600279 | 0,938 | 0,059 | 5,79481E-36 | 11,74195135   | 0,08516472      | 15,89830508     |
| PMEPA1                                                                                        | 6,37599E-25 | 2,991178137 | 1     | 0,289 | 1,3454E-20  | 7,951230464   | 0,125766698     | 3,460207612     |
| ELN                                                                                           | 9,39877E-25 | 2,744572089 | 0,812 | 0,105 | 1,98323E-20 | 6,701908962   | 0,149211218     | 7,733333333     |
| COL1A1                                                                                        | 2,80222E-20 | 2,687854737 | 1     | 0,328 | 5,91296E-16 | 6,443545503   | 0,155194062     | 3,048780488     |
| LOXL2                                                                                         | 1,24566E-57 | 2,566847202 | 0,906 | 0     | 2,62846E-53 | 5,925131621   | 0,168772622     | #DIV/0!         |
| APOD                                                                                          | 1,28159E-24 | 2,497995728 | 0,75  | 0,074 | 2,70428E-20 | 5,649000888   | 0,177022454     | 10,13513514     |
| ITGB1                                                                                         | 1,17015E-18 | 2,47289199  | 1     | 0,715 | 2,46913E-14 | 5,551555232   | 0,180129704     | 1,398601399     |
| NES                                                                                           | 1,65975E-27 | 2,445557305 | 0,969 | 0,16  | 3,50224E-23 | 5,447360344   | 0,183575151     | 6,05625         |
| COL7A1                                                                                        | 3,6255E-41  | 2,436012037 | 0,938 | 0,051 | 7,65017E-37 | 5,411438076   | 0,184793762     | 18,39215686     |
| S100A16                                                                                       | 2,91126E-22 | 2,328345725 | 0,906 | 0,207 | 6,14305E-18 | 5,022291356   | 0,199112303     | 4,376811594     |
| COL8A1                                                                                        | 5,14801E-33 | 2,326828989 | 0,875 | 0,07  | 1,08628E-28 | 5,017014086   | 0,199321745     | 12,5            |
| PTN                                                                                           | 7,39689E-16 | 2,298231868 | 0,969 | 0,422 | 1,56082E-11 | 4,918545907   | 0,203312121     | 2,296208531     |
| FN1                                                                                           | 1,301E-16   | 2,268482516 | 0,969 | 0,348 | 2,74525E-12 | 4,818160713   | 0,207548079     | 2,784482759     |
| PDLIM7                                                                                        | 4,71905E-37 | 2,256920578 | 0,875 | 0,055 | 9,95767E-33 | 4,779701683   | 0,209218078     | 15,90909091     |
| S100A13                                                                                       | 1,8595E-21  | 2,221078711 | 0,938 | 0,207 | 3,92374E-17 | 4,662419158   | 0,214480931     | 4,531400966     |
| PCDH20                                                                                        | 1,15617E-21 | 2,200924696 | 0,875 | 0,141 | 2,43964E-17 | 4,597739399   | 0,217498191     | 6,205673759     |
| TIMP4                                                                                         | 2,68071E-35 | 2,195462089 | 0,75  | 0,027 | 5,65656E-31 | 4,580363477   | 0,218323285     | 27,77777778     |
| PPP1R14B                                                                                      | 1,23462E-23 | 2,120857034 | 0,969 | 0,191 | 2,60518E-19 | 4,349522521   | 0,229910294     | 5,073298429     |
| MYL6                                                                                          | 1,03389E-17 | 2,011367588 | 1     | 0,715 | 2,18161E-13 | 4,031642142   | 0,248037887     | 1,398601399     |
| SH3BGRL3                                                                                      | 1,28347E-19 | 1,995802282 | 0,969 | 0,258 | 2,70824E-15 | 3,98837837    | 0,250728468     | 3,755813953     |
| PFN1                                                                                          | 3,5014E-17  | 1,978006745 | 0,969 | 0,469 | 7,3883E-13  | 3,939484189   | 0,253840339     | 2,066098081     |
| CSRP2                                                                                         | 2,098E-25   | 1,97308897  | 0,719 | 0,059 | 4,42699E-21 | 3,926078368   | 0,254707091     | 12,18644068     |
| COL5A2                                                                                        | 2,67889E-19 | 1,898472142 | 0,938 | 0,203 | 5,65273E-15 | 3,728181616   | 0,268227276     | 4,620689655     |
| TMSB10                                                                                        | 1,17749E-15 | 1,88373001  | 1     | 0,91  | 2,48462E-11 | 3,690279297   | 0,270982199     | 1,098901099     |
| COL1A2                                                                                        | 5,80342E-15 | 1,875042622 | 1     | 0,578 | 1,22458E-10 | 3,66812454    | 0,272618879     | 1,730103806     |
| SPARCL1                                                                                       | 3,94377E-10 | 1,841613943 | 0,875 | 0,406 | 8,32175E-06 | 3,584107584   | 0,279009482     | 2,155172414     |

Supplementary Table 1

| Differentially expressed genes_adjacent-skin-XL_comparing SC-Keloid vs. (SC-Myel, SC-Nonmyel) |             |             |       |       |             |               |                 |                 |
|-----------------------------------------------------------------------------------------------|-------------|-------------|-------|-------|-------------|---------------|-----------------|-----------------|
| gene                                                                                          | p_val       | avg_log2FC  | pct.1 | pct.2 | p_val_adj   | Foldchange_UP | Foldchange_DOWN | Ratio_pct1_pct2 |
| CYTL1                                                                                         | 4,2357E-43  | 1,809547978 | 0,688 | 0     | 8,93774E-39 | 3,505324434   | 0,285280298     | #DIV/0!         |
| ACTB                                                                                          | 1,38321E-13 | 1,783939308 | 1     | 0,871 | 2,91871E-09 | 3,443651882   | 0,290389399     | 1,148105626     |
| MYL9                                                                                          | 1,156E-11   | 1,781799974 | 0,938 | 0,449 | 2,43928E-07 | 3,438549165   | 0,290820329     | 2,08908686      |
| LYPD1                                                                                         | 1,45653E-28 | 1,775847192 | 0,656 | 0,031 | 3,07342E-24 | 3,424390413   | 0,292022778     | 21,16129032     |
| IGFBP2                                                                                        | 2,52383E-19 | 1,764717606 | 0,5   | 0,031 | 5,32554E-15 | 3,398074789   | 0,294284282     | 16,12903226     |
| RAB13                                                                                         | 1,23228E-26 | 1,762061509 | 0,875 | 0,105 | 2,60024E-22 | 3,391824465   | 0,294826578     | 8,333333333     |
| CALB2                                                                                         | 3,56695E-31 | 1,755884321 | 0,5   | 0     | 7,52662E-27 | 3,377332736   | 0,296091643     | #DIV/0!         |
| TNFAIP6                                                                                       | 2,41712E-12 | 1,74427061  | 0,875 | 0,316 | 5,10036E-08 | 3,350254308   | 0,298484804     | 2,768987342     |
| GAPDH                                                                                         | 1,56837E-12 | 1,741285951 | 1     | 0,633 | 3,30941E-08 | 3,343330438   | 0,299102951     | 1,579778831     |
| EMP3                                                                                          | 9,37977E-13 | 1,728605057 | 0,938 | 0,391 | 1,97923E-08 | 3,314072255   | 0,301743572     | 2,398976982     |
| S100A6                                                                                        | 1,59049E-17 | 1,723852974 | 1     | 0,973 | 3,35609E-13 | 3,303174013   | 0,302739122     | 1,027749229     |
| HMCN2                                                                                         | 4,51596E-39 | 1,723330261 | 0,625 | 0     | 9,52913E-35 | 3,301977434   | 0,302848829     | #DIV/0!         |
| CD151                                                                                         | 1,63957E-15 | 1,718128058 | 0,938 | 0,344 | 3,45966E-11 | 3,290092301   | 0,303942841     | 2,726744186     |
| TNC                                                                                           | 1,43898E-14 | 1,713868253 | 0,906 | 0,27  | 3,03638E-10 | 3,280392066   | 0,30484161      | 3,355555556     |
| ENC1                                                                                          | 6,16782E-35 | 1,677679442 | 0,75  | 0,027 | 1,30147E-30 | 3,199129608   | 0,312585022     | 27,77777778     |
| PLAC9                                                                                         | 1,92455E-18 | 1,664335135 | 0,719 | 0,098 | 4,061E-14   | 3,169675468   | 0,315489712     | 7,336734694     |
| ANGPTL7                                                                                       | 2,52819E-06 | 1,66379677  | 0,344 | 0,07  | 0,053347327 | 3,168492872   | 0,315607464     | 4,914285714     |
| TUBB3                                                                                         | 1,48872E-18 | 1,656575137 | 0,562 | 0,051 | 3,14135E-14 | 3,15267212    | 0,317191247     | 11,01960784     |
| TPM4                                                                                          | 9,21357E-15 | 1,64592728  | 0,969 | 0,414 | 1,94416E-10 | 3,12948938    | 0,319540947     | 2,34057971      |
| ACTG1                                                                                         | 8,79291E-11 | 1,638655876 | 0,938 | 0,855 | 1,85539E-06 | 3,113755956   | 0,321155548     | 1,097076023     |
| ACTN1                                                                                         | 7,19892E-23 | 1,614400712 | 0,844 | 0,113 | 1,51904E-18 | 3,061843856   | 0,326600587     | 7,469026549     |
| ANGPTL2                                                                                       | 2,27734E-28 | 1,601632401 | 0,781 | 0,059 | 4,80542E-24 | 3,034865123   | 0,329503935     | 13,23728814     |
| SCX                                                                                           | 1,03577E-15 | 1,598780221 | 0,375 | 0,02  | 2,18557E-11 | 3,028871181   | 0,330156002     | 18,75           |
| MMP15                                                                                         | 6,43568E-28 | 1,598644479 | 0,75  | 0,051 | 1,35799E-23 | 3,028586209   | 0,330187068     | 14,70588235     |
| CCN2                                                                                          | 1,65147E-21 | 1,59651362  | 0,719 | 0,074 | 3,48477E-17 | 3,024116293   | 0,330675114     | 9,716216216     |
| S100A11                                                                                       | 2,99964E-14 | 1,589368915 | 1     | 0,656 | 6,32953E-10 | 3,009176888   | 0,332316789     | 1,524390244     |
| ATP5F1E                                                                                       | 3,51941E-13 | 1,573708754 | 0,938 | 0,59  | 7,42632E-09 | 2,976689527   | 0,335943669     | 1,589830508     |
| COL6A2                                                                                        | 2,07111E-12 | 1,535338998 | 0,969 | 0,559 | 4,37025E-08 | 2,89856532    | 0,344998263     | 1,733452594     |
| SLC15A3                                                                                       | 5,08786E-23 | 1,516904404 | 0,812 | 0,094 | 1,07359E-18 | 2,861763407   | 0,349434897     | 8,638297872     |
| CLIC1                                                                                         | 3,45125E-13 | 1,514949366 | 0,906 | 0,359 | 7,28247E-09 | 2,857887975   | 0,349908747     | 2,52367688      |

Supplementary Table 1

| Differentially expressed genes_adjacent-skin-XL_comparing SC-Keloid vs. (SC-Myel, SC-Nonmyel) |             |             |       |       |             |               |                 |                 |
|-----------------------------------------------------------------------------------------------|-------------|-------------|-------|-------|-------------|---------------|-----------------|-----------------|
| gene                                                                                          | p_val       | avg_log2FC  | pct.1 | pct.2 | p_val_adj   | Foldchange_UP | Foldchange_DOWN | Ratio_pct1_pct2 |
| TPM2                                                                                          | 9,93652E-13 | 1,508973263 | 0,625 | 0,113 | 2,0967E-08  | 2,846074177   | 0,351361187     | 5,530973451     |
| TNFRSF12A                                                                                     | 8,08358E-11 | 1,508331261 | 0,844 | 0,332 | 1,70572E-06 | 2,844807949   | 0,351517578     | 2,542168675     |
| CAMK2N1                                                                                       | 4,02831E-22 | 1,507344125 | 0,781 | 0,09  | 8,50013E-18 | 2,842862112   | 0,351758179     | 8,677777778     |
| MYL12A                                                                                        | 2,2593E-12  | 1,507243911 | 0,938 | 0,461 | 4,76735E-08 | 2,842664644   | 0,351782614     | 2,034707158     |
| NRXN2                                                                                         | 4,06234E-26 | 1,498981596 | 0,531 | 0,016 | 8,57194E-22 | 2,826431231   | 0,353803053     | 33,1875         |
| MMP14                                                                                         | 8,92376E-17 | 1,487219812 | 0,812 | 0,16  | 1,883E-12   | 2,803482009   | 0,356699275     | 5,075           |
| COL12A1                                                                                       | 8,67368E-19 | 1,486346494 | 0,844 | 0,133 | 1,83023E-14 | 2,801785469   | 0,356915264     | 6,345864662     |
| SLN                                                                                           | 4,09886E-14 | 1,476862577 | 0,219 | 0     | 8,649E-10   | 2,783427638   | 0,359269264     | #DIV/0!         |
| ANXA1                                                                                         | 2,01285E-13 | 1,474887149 | 0,969 | 0,516 | 4,24732E-09 | 2,779619003   | 0,359761535     | 1,877906977     |
| LSM7                                                                                          | 2,87271E-15 | 1,460109946 | 0,875 | 0,23  | 6,06171E-11 | 2,751293301   | 0,363465429     | 3,804347826     |
| PLS3                                                                                          | 9,75771E-20 | 1,449626818 | 0,875 | 0,141 | 2,05897E-15 | 2,731373897   | 0,366116115     | 6,205673759     |
| RCN2                                                                                          | 4,40851E-18 | 1,447215095 | 0,906 | 0,184 | 9,3024E-14  | 2,726811731   | 0,366728656     | 4,923913043     |
| MIA                                                                                           | 4,02272E-12 | 1,441904453 | 1     | 0,406 | 8,48835E-08 | 2,716792634   | 0,368081092     | 2,463054187     |
| P4HB                                                                                          | 7,4364E-14  | 1,435190889 | 0,938 | 0,305 | 1,56915E-09 | 2,704179444   | 0,369797944     | 3,075409836     |
| CCND1                                                                                         | 2,17438E-12 | 1,422847949 | 0,812 | 0,246 | 4,58815E-08 | 2,681142592   | 0,372975314     | 3,300813008     |
| KCNMA1                                                                                        | 3,45974E-32 | 1,421534097 | 0,688 | 0,023 | 7,3004E-28  | 2,678702007   | 0,373315134     | 29,91304348     |
| ADAMTS16                                                                                      | 1,74045E-31 | 1,41888453  | 0,594 | 0,012 | 3,67253E-27 | 2,673786978   | 0,374001373     | 49,5            |
| CDK2AP1                                                                                       | 1,07941E-15 | 1,414723433 | 0,906 | 0,242 | 2,27765E-11 | 2,666086212   | 0,375081644     | 3,743801653     |
| MMP2                                                                                          | 8,21849E-24 | 1,414030664 | 0,656 | 0,047 | 1,73418E-19 | 2,664806289   | 0,375261798     | 13,95744681     |
| SERPINE2                                                                                      | 6,08488E-17 | 1,411572204 | 0,625 | 0,078 | 1,28397E-12 | 2,660269127   | 0,375901818     | 8,012820513     |
| TMSB4X                                                                                        | 5,68687E-12 | 1,394562976 | 1     | 0,816 | 1,19999E-07 | 2,629088992   | 0,38035989      | 1,225490196     |
| CALM1                                                                                         | 6,7871E-12  | 1,39026314  | 1     | 0,633 | 1,43215E-07 | 2,621264869   | 0,381495213     | 1,579778831     |
| DYNLT1                                                                                        | 6,99478E-21 | 1,385087959 | 0,75  | 0,094 | 1,47597E-16 | 2,611878812   | 0,382866156     | 7,978723404     |
| COL6A3                                                                                        | 1,13298E-15 | 1,382320339 | 0,375 | 0,02  | 2,39071E-11 | 2,606873071   | 0,383601339     | 18,75           |
| S100A10                                                                                       | 6,13335E-15 | 1,380588303 | 1     | 0,922 | 1,2942E-10  | 2,603745251   | 0,38406215      | 1,084598698     |
| CDH6                                                                                          | 7,54585E-24 | 1,375899404 | 0,75  | 0,066 | 1,59225E-19 | 2,595296564   | 0,38531242      | 11,36363636     |
| IL1RAP                                                                                        | 8,28871E-31 | 1,368108473 | 0,719 | 0,031 | 1,749E-26   | 2,581319057   | 0,387398837     | 23,19354839     |
| TAGLN2                                                                                        | 2,08858E-11 | 1,343286772 | 0,969 | 0,566 | 4,40711E-07 | 2,537287098   | 0,394121738     | 1,712014134     |
| CFL1                                                                                          | 4,08292E-14 | 1,343259148 | 0,969 | 0,77  | 8,61537E-10 | 2,537238516   | 0,394129284     | 1,258441558     |
| DSEL                                                                                          | 5,15818E-17 | 1,340063808 | 0,656 | 0,086 | 1,08843E-12 | 2,531625156   | 0,395003185     | 7,627906977     |

Supplementary Table 1

| Differentially expressed genes_adjacent-skin-XL_comparing SC-Keloid vs. (SC-Myel, SC-Nonmyel) |             |             |       |       |             |               |                 |                 |
|-----------------------------------------------------------------------------------------------|-------------|-------------|-------|-------|-------------|---------------|-----------------|-----------------|
| gene                                                                                          | p_val       | avg_log2FC  | pct.1 | pct.2 | p_val_adj   | Foldchange_UP | Foldchange_DOWN | Ratio_pct1_pct2 |
| CALR                                                                                          | 8,34849E-10 | 1,323024364 | 0,938 | 0,473 | 1,76162E-05 | 2,501900412   | 0,399696165     | 1,983086681     |
| HSBP1                                                                                         | 2,42266E-14 | 1,296607018 | 1     | 0,344 | 5,11206E-10 | 2,456504731   | 0,407082464     | 2,906976744     |
| ACTA2                                                                                         | 4,01004E-16 | 1,295386193 | 0,312 | 0,008 | 8,46158E-12 | 2,454426888   | 0,407427088     | 39              |
| S100A4                                                                                        | 1,28526E-06 | 1,292866627 | 1     | 0,625 | 0,027120371 | 2,450144145   | 0,408139253     | 1,6             |
| NGFR                                                                                          | 3,33899E-09 | 1,292185651 | 0,875 | 0,355 | 7,04561E-05 | 2,448987908   | 0,408331947     | 2,464788732     |
| PKM                                                                                           | 1,2732E-10  | 1,289333729 | 0,844 | 0,262 | 2,68659E-06 | 2,444151527   | 0,409139936     | 3,221374046     |
| LGALS1                                                                                        | 1,52054E-11 | 1,288943421 | 1     | 0,906 | 3,20849E-07 | 2,443490374   | 0,40925064      | 1,103752759     |
| PDIA4                                                                                         | 1,01488E-17 | 1,287868345 | 0,75  | 0,109 | 2,1415E-13  | 2,441670198   | 0,409555722     | 6,880733945     |
| ARPC2                                                                                         | 2,82933E-12 | 1,286865545 | 0,906 | 0,324 | 5,97017E-08 | 2,439973612   | 0,409840498     | 2,796296296     |
| PPIB                                                                                          | 3,38502E-11 | 1,276469243 | 0,969 | 0,473 | 7,14272E-07 | 2,422453953   | 0,412804544     | 2,048625793     |
| OST4                                                                                          | 2,25501E-11 | 1,266662562 | 0,906 | 0,426 | 4,7583E-07  | 2,406043226   | 0,415620131     | 2,126760563     |
| NME2                                                                                          | 4,73546E-11 | 1,263020178 | 0,969 | 0,488 | 9,9923E-07  | 2,399976331   | 0,416670776     | 1,985655738     |
| PRSS23                                                                                        | 4,91333E-08 | 1,260981224 | 0,781 | 0,309 | 0,001036761 | 2,396586852   | 0,417260071     | 2,527508091     |
| CDH2                                                                                          | 1,73906E-20 | 1,255844191 | 0,688 | 0,07  | 3,66958E-16 | 2,388068453   | 0,418748465     | 9,828571429     |
| ATOX1                                                                                         | 2,77625E-12 | 1,253386907 | 0,688 | 0,156 | 5,85817E-08 | 2,384004414   | 0,419462311     | 4,41025641      |
| ARL4C                                                                                         | 2,86381E-21 | 1,249733683 | 0,562 | 0,035 | 6,04293E-17 | 2,377975222   | 0,420525828     | 16,05714286     |
| PRRX1                                                                                         | 2,43387E-27 | 1,246116457 | 0,719 | 0,043 | 5,13571E-23 | 2,372020465   | 0,421581523     | 16,72093023     |
| RHOA                                                                                          | 1,51547E-10 | 1,237334437 | 1     | 0,562 | 3,1978E-06  | 2,357625284   | 0,424155614     | 1,779359431     |
| TPPP3                                                                                         | 6,51683E-08 | 1,236848674 | 0,5   | 0,121 | 0,001375115 | 2,356831592   | 0,424298454     | 4,132231405     |
| NDUFA4                                                                                        | 5,84138E-11 | 1,227422752 | 0,969 | 0,477 | 1,23259E-06 | 2,341483305   | 0,427079705     | 2,031446541     |
| VDAC1                                                                                         | 7,79493E-17 | 1,22592124  | 0,781 | 0,133 | 1,64481E-12 | 2,339047631   | 0,427524428     | 5,872180451     |
| MAFB                                                                                          | 1,41998E-14 | 1,210899788 | 0,625 | 0,094 | 2,99629E-10 | 2,314819637   | 0,4319991       | 6,64893617      |
| SERF2                                                                                         | 2,43532E-11 | 1,202355557 | 1     | 0,785 | 5,13877E-07 | 2,301150843   | 0,434565167     | 1,27388535      |
| FABP5                                                                                         | 2,17913E-10 | 1,200083872 | 0,656 | 0,16  | 4,59819E-06 | 2,297530275   | 0,435249977     | 4,1             |
| RGS3                                                                                          | 7,4854E-13  | 1,19639886  | 0,75  | 0,156 | 1,57949E-08 | 2,291669282   | 0,436363138     | 4,807692308     |
| PLOD1                                                                                         | 1,66175E-26 | 1,191718688 | 0,656 | 0,035 | 3,50646E-22 | 2,284247043   | 0,43778102      | 18,74285714     |
| COL6A1                                                                                        | 6,21281E-10 | 1,189532608 | 0,969 | 0,547 | 1,31097E-05 | 2,280788401   | 0,438444881     | 1,771480804     |
| MAGED2                                                                                        | 4,93379E-11 | 1,187662294 | 0,938 | 0,355 | 1,04108E-06 | 2,277833497   | 0,439013651     | 2,642253521     |
| MYL12B                                                                                        | 6,5859E-11  | 1,181781435 | 1     | 0,531 | 1,38969E-06 | 2,268567262   | 0,440806855     | 1,883239171     |
| ARPC3                                                                                         | 1,71857E-11 | 1,179544151 | 0,906 | 0,301 | 3,62636E-07 | 2,265051968   | 0,441490974     | 3,009966777     |

Supplementary Table 1

| Differentially expressed genes_adjacent-skin-XL_comparing SC-Keloid vs. (SC-Myel, SC-Nonmyel) |             |             |       |       |             |               |                 |                 |
|-----------------------------------------------------------------------------------------------|-------------|-------------|-------|-------|-------------|---------------|-----------------|-----------------|
| gene                                                                                          | p_val       | avg_log2FC  | pct.1 | pct.2 | p_val_adj   | Foldchange_UP | Foldchange_DOWN | Ratio_pct1_pct2 |
| GNG5                                                                                          | 1,42897E-11 | 1,1726542   | 0,938 | 0,391 | 3,01528E-07 | 2,254260435   | 0,443604468     | 2,398976982     |
| TIMM13                                                                                        | 8,62823E-17 | 1,166721002 | 0,75  | 0,121 | 1,82064E-12 | 2,245008648   | 0,445432583     | 6,198347107     |
| ECM1                                                                                          | 1,10576E-13 | 1,163218923 | 0,75  | 0,137 | 2,33327E-09 | 2,239565596   | 0,446515164     | 5,474452555     |
| COL18A1                                                                                       | 6,02772E-10 | 1,153507631 | 1     | 0,727 | 1,27191E-05 | 2,224540911   | 0,449530955     | 1,375515818     |
| NDUFS6                                                                                        | 5,58667E-13 | 1,151401883 | 0,906 | 0,25  | 1,17884E-08 | 2,221296354   | 0,450187566     | 3,624           |
| COTL1                                                                                         | 5,80568E-13 | 1,148772448 | 0,844 | 0,211 | 1,22506E-08 | 2,217251539   | 0,45100882      | 4               |
| CIAO2B                                                                                        | 2,76951E-09 | 1,148531201 | 0,906 | 0,328 | 5,84394E-05 | 2,216880802   | 0,451084244     | 2,762195122     |
| CTSZ                                                                                          | 4,30946E-13 | 1,148349801 | 0,781 | 0,18  | 9,09338E-09 | 2,216602076   | 0,451140965     | 4,338888889     |
| CYTOR                                                                                         | 6,03429E-17 | 1,141277513 | 0,594 | 0,062 | 1,27329E-12 | 2,205762579   | 0,45335795      | 9,580645161     |
| RTN1                                                                                          | 2,20066E-25 | 1,141166372 | 0,406 | 0     | 4,64361E-21 | 2,205592661   | 0,453392876     | #DIV/0!         |
| FLNA                                                                                          | 2,24119E-09 | 1,136814709 | 1     | 0,461 | 4,72914E-05 | 2,198949861   | 0,454762529     | 2,169197397     |
| SEM1                                                                                          | 2,71423E-09 | 1,134998682 | 0,812 | 0,305 | 5,72729E-05 | 2,196183621   | 0,455335333     | 2,662295082     |
| BEX3                                                                                          | 2,1903E-10  | 1,1348396   | 0,906 | 0,305 | 4,62174E-06 | 2,195941467   | 0,455385544     | 2,970491803     |
| FKBP1A                                                                                        | 2,85998E-09 | 1,129027162 | 0,844 | 0,293 | 6,03483E-05 | 2,187112092   | 0,457223936     | 2,880546075     |
| ANXA2                                                                                         | 3,2262E-08  | 1,12635282  | 1     | 0,863 | 0,000680761 | 2,18306157    | 0,458072284     | 1,158748552     |
| PHLDA2                                                                                        | 2,62142E-21 | 1,122011436 | 0,688 | 0,066 | 5,53147E-17 | 2,176502136   | 0,4594528       | 10,42424242     |
| STMP1                                                                                         | 5,16133E-16 | 1,120662538 | 0,781 | 0,133 | 1,08909E-11 | 2,17446809    | 0,459882582     | 5,872180451     |
| APRT                                                                                          | 6,69526E-15 | 1,120215911 | 0,844 | 0,172 | 1,41277E-10 | 2,173795027   | 0,460024974     | 4,906976744     |
| DNAJC15                                                                                       | 1,76927E-21 | 1,119429836 | 0,781 | 0,09  | 3,73333E-17 | 2,172610923   | 0,460275694     | 8,677777778     |
| PSMA7                                                                                         | 3,89791E-09 | 1,117511514 | 0,812 | 0,34  | 8,22497E-05 | 2,169723967   | 0,46088812      | 2,388235294     |
| PTMS                                                                                          | 3,25483E-10 | 1,115459343 | 0,969 | 0,562 | 6,86801E-06 | 2,166639823   | 0,46154418      | 1,724199288     |
| MARCKSL1                                                                                      | 1,2713E-13  | 1,113996863 | 0,844 | 0,188 | 2,68258E-09 | 2,164444582   | 0,462012291     | 4,489361702     |
| TXNDC17                                                                                       | 2,38135E-19 | 1,111774424 | 0,719 | 0,086 | 5,02489E-15 | 2,161112872   | 0,462724559     | 8,360465116     |
| CALD1                                                                                         | 4,97638E-09 | 1,111545361 | 0,906 | 0,418 | 0,000105007 | 2,160769769   | 0,462798033     | 2,167464115     |
| CCT5                                                                                          | 5,11095E-14 | 1,110149134 | 0,781 | 0,16  | 1,07846E-09 | 2,158679609   | 0,463246142     | 4,88125         |
| MYLK                                                                                          | 6,55424E-26 | 1,108927717 | 0,531 | 0,016 | 1,38301E-21 | 2,156852796   | 0,463638502     | 33,1875         |
| RPL36A                                                                                        | 6,68557E-08 | 1,10032706  | 0,969 | 0,664 | 0,001410722 | 2,144032924   | 0,466410748     | 1,459337349     |
| MYDGF                                                                                         | 9,06985E-09 | 1,09966004  | 0,75  | 0,266 | 0,000191383 | 2,143041875   | 0,46662644      | 2,819548872     |
| TMED9                                                                                         | 1,2614E-11  | 1,096682082 | 0,938 | 0,309 | 2,66167E-07 | 2,138622849   | 0,467590628     | 3,035598706     |
| DNPH1                                                                                         | 1,52952E-18 | 1,095102973 | 0,719 | 0,086 | 3,22744E-14 | 2,136283288   | 0,468102712     | 8,360465116     |

Supplementary Table 1

| Differentially expressed genes_adjacent-skin-XL_comparing SC-Keloid vs. (SC-Myel, SC-Nonmyel) |             |             |       |       |             |               |                 |                 |
|-----------------------------------------------------------------------------------------------|-------------|-------------|-------|-------|-------------|---------------|-----------------|-----------------|
| gene                                                                                          | p_val       | avg_log2FC  | pct.1 | pct.2 | p_val_adj   | Foldchange_UP | Foldchange_DOWN | Ratio_pct1_pct2 |
| THBS2                                                                                         | 1,0872E-15  | 1,086742506 | 0,625 | 0,082 | 2,29411E-11 | 2,123939255   | 0,470823258     | 7,62195122      |
| PLP2                                                                                          | 4,38818E-09 | 1,084524803 | 0,625 | 0,168 | 9,2595E-05  | 2,120676856   | 0,471547561     | 3,720238095     |
| PPFIBP1                                                                                       | 8,31379E-12 | 1,083163458 | 0,938 | 0,277 | 1,75429E-07 | 2,118676703   | 0,471992729     | 3,386281588     |
| PGK1                                                                                          | 1,04017E-12 | 1,082018327 | 0,75  | 0,16  | 2,19486E-08 | 2,116995682   | 0,47236752      | 4,6875          |
| PHACTR1                                                                                       | 2,68058E-16 | 1,077736212 | 0,469 | 0,035 | 5,6563E-12  | 2,110721467   | 0,473771654     | 13,4            |
| P4HA2                                                                                         | 1,39414E-11 | 1,077715147 | 0,781 | 0,195 | 2,94178E-07 | 2,110690649   | 0,473778571     | 4,005128205     |
| PDLIM1                                                                                        | 1,96597E-19 | 1,070230436 | 0,625 | 0,059 | 4,1484E-15  | 2,099768728   | 0,476242925     | 10,59322034     |
| GSTP1                                                                                         | 1,38982E-09 | 1,068126844 | 0,938 | 0,496 | 2,93266E-05 | 2,096709289   | 0,47693784      | 1,891129032     |
| SSR4                                                                                          | 7,11486E-10 | 1,068049488 | 0,906 | 0,352 | 1,50131E-05 | 2,096596868   | 0,476963414     | 2,573863636     |
| RPS2                                                                                          | 2,90465E-10 | 1,067111949 | 1     | 0,848 | 6,12911E-06 | 2,095234832   | 0,477273471     | 1,179245283     |
| RPS6                                                                                          | 1,13808E-09 | 1,065610537 | 1     | 0,781 | 2,40147E-05 | 2,093055456   | 0,477770428     | 1,280409731     |
| HLA-A                                                                                         | 1,06476E-07 | 1,062949738 | 0,969 | 0,68  | 0,002246741 | 2,089198739   | 0,478652405     | 1,425           |
| FXYS5                                                                                         | 2,26298E-15 | 1,060426231 | 0,719 | 0,113 | 4,77512E-11 | 2,085547586   | 0,479490378     | 6,362831858     |
| TIMP1                                                                                         | 3,31691E-09 | 1,059463825 | 0,969 | 0,59  | 6,999E-05   | 2,084156805   | 0,479810347     | 1,642372881     |
| ELOB                                                                                          | 1,77312E-10 | 1,059235007 | 1     | 0,445 | 3,74146E-06 | 2,083826274   | 0,479886453     | 2,247191011     |
| ANAPC11                                                                                       | 5,91328E-11 | 1,052860937 | 0,719 | 0,184 | 1,24776E-06 | 2,074639887   | 0,482011363     | 3,907608696     |
| ANXA5                                                                                         | 1,27555E-08 | 1,050376544 | 0,938 | 0,68  | 0,000269154 | 2,071070327   | 0,482842126     | 1,379411765     |
| PDIA6                                                                                         | 4,716E-11   | 1,045884708 | 0,906 | 0,277 | 9,95124E-07 | 2,06463207    | 0,484347799     | 3,270758123     |
| BRK1                                                                                          | 9,45657E-12 | 1,045821993 | 0,906 | 0,281 | 1,99543E-07 | 2,064542322   | 0,484368855     | 3,224199288     |
| SSR2                                                                                          | 2,63756E-09 | 1,042961473 | 0,906 | 0,367 | 5,56551E-05 | 2,060452882   | 0,485330196     | 2,46866485      |
| FKBP3                                                                                         | 1,18823E-19 | 1,042576585 | 0,719 | 0,082 | 2,50729E-15 | 2,05990326    | 0,485459691     | 8,768292683     |
| NAA10                                                                                         | 6,93317E-13 | 1,041868847 | 0,656 | 0,125 | 1,46297E-08 | 2,058892987   | 0,4856979       | 5,248           |
| COL20A1                                                                                       | 1,43347E-08 | 1,041313141 | 0,156 | 0,004 | 0,000302477 | 2,058100084   | 0,48588502      | 39              |
| LBH                                                                                           | 1,94499E-16 | 1,034403457 | 0,5   | 0,043 | 4,10411E-12 | 2,048266528   | 0,488217713     | 11,62790698     |
| TMEM219                                                                                       | 8,02601E-14 | 1,033168232 | 0,812 | 0,16  | 1,69357E-09 | 2,046513568   | 0,4886359       | 5,075           |
| C1orf122                                                                                      | 9,92262E-15 | 1,03228717  | 0,812 | 0,152 | 2,09377E-10 | 2,045264132   | 0,488934404     | 5,342105263     |
| C1QL1                                                                                         | 6,6483E-12  | 1,032275662 | 0,375 | 0,035 | 1,40286E-07 | 2,045247818   | 0,488938304     | 10,71428571     |
| NDUFS5                                                                                        | 1,42179E-09 | 1,025800982 | 0,938 | 0,426 | 3,00013E-05 | 2,036089504   | 0,491137545     | 2,201877934     |
| UQCRH                                                                                         | 5,68675E-11 | 1,025685597 | 0,906 | 0,336 | 1,19996E-06 | 2,035926666   | 0,491176827     | 2,696428571     |
| CALU                                                                                          | 1,16403E-07 | 1,020522435 | 0,844 | 0,387 | 0,002456214 | 2,028653451   | 0,492937815     | 2,180878553     |



Supplementary Table 1

| Differentially expressed genes_adjacent-skin-XL_comparing SC-Keloid vs. (SC-Myel, SC-Nonmyel) |             |             |       |       |             |               |                 |                 |
|-----------------------------------------------------------------------------------------------|-------------|-------------|-------|-------|-------------|---------------|-----------------|-----------------|
| gene                                                                                          | p_val       | avg_log2FC  | pct.1 | pct.2 | p_val_adj   | Foldchange_UP | Foldchange_DOWN | Ratio_pct1_pct2 |
| SPCS1                                                                                         | 6,74952E-10 | 1,019528464 | 0,812 | 0,262 | 1,42422E-05 | 2,027256255   | 0,493277551     | 3,099236641     |
| PDIA3                                                                                         | 1,33703E-07 | 1,018886679 | 0,844 | 0,383 | 0,002821263 | 2,026354628   | 0,493497035     | 2,203655352     |
| PGAM1                                                                                         | 1,29144E-11 | 1,014986062 | 0,719 | 0,16  | 2,72507E-07 | 2,020883369   | 0,494833109     | 4,49375         |
| PSMB6                                                                                         | 2,99465E-12 | 1,011743811 | 0,844 | 0,215 | 6,31902E-08 | 2,016346822   | 0,495946426     | 3,925581395     |
| RPL26                                                                                         | 3,75956E-10 | 1,011076536 | 1     | 0,82  | 7,93305E-06 | 2,015414438   | 0,496175864     | 1,219512195     |
| NME1                                                                                          | 2,19773E-12 | 1,009084832 | 0,625 | 0,113 | 4,63742E-08 | 2,012633989   | 0,49686133      | 5,530973451     |
| NDUFB2                                                                                        | 1,76887E-10 | 1,008143434 | 0,875 | 0,301 | 3,7325E-06  | 2,011321119   | 0,497185651     | 2,906976744     |
| PDGFC                                                                                         | 4,35563E-22 | 1,007112679 | 0,562 | 0,031 | 9,19081E-18 | 2,009884614   | 0,497541        | 18,12903226     |
| ATP5PD                                                                                        | 2,79358E-11 | 1,005349274 | 0,844 | 0,23  | 5,89473E-07 | 2,007429434   | 0,498149516     | 3,669565217     |
| RNF7                                                                                          | 3,26236E-08 | 0,999590193 | 0,562 | 0,141 | 0,00068839  | 1,999431968   | 0,500142048     | 3,985815603     |
| ATP5MG                                                                                        | 2,36403E-07 | 0,997404038 | 0,938 | 0,434 | 0,004988329 | 1,996404468   | 0,500900502     | 2,161290323     |
| NIBAN2                                                                                        | 1,96161E-09 | 0,991822847 | 0,875 | 0,273 | 4,1392E-05  | 1,988696125   | 0,502842032     | 3,205128205     |
| ATP5F1B                                                                                       | 1,58937E-09 | 0,991664141 | 0,938 | 0,367 | 3,35373E-05 | 1,988477366   | 0,502897351     | 2,555858311     |
| ATP5MF                                                                                        | 4,96727E-10 | 0,990883296 | 0,875 | 0,309 | 1,04814E-05 | 1,987401413   | 0,503169613     | 2,83171521      |
| SDCCAG8                                                                                       | 1,95389E-17 | 0,988476883 | 0,656 | 0,074 | 4,1229E-13  | 1,984089194   | 0,504009599     | 8,864864865     |
| MYH9                                                                                          | 6,07653E-10 | 0,987282781 | 0,656 | 0,16  | 1,28221E-05 | 1,982447666   | 0,504426935     | 4,1             |
| CD82                                                                                          | 5,04864E-12 | 0,987109621 | 0,656 | 0,117 | 1,06531E-07 | 1,982209737   | 0,504487483     | 5,606837607     |
| KIRREL3                                                                                       | 5,16264E-17 | 0,984803762 | 0,562 | 0,055 | 1,08937E-12 | 1,979044102   | 0,50529445      | 10,21818182     |
| ABHD2                                                                                         | 1,07359E-21 | 0,981873627 | 0,875 | 0,105 | 2,26537E-17 | 1,975028712   | 0,506321753     | 8,333333333     |
| MZT2B                                                                                         | 6,72828E-09 | 0,980410762 | 0,906 | 0,359 | 0,000141973 | 1,973027087   | 0,506835414     | 2,52367688      |
| GIPC1                                                                                         | 1,68353E-21 | 0,978565136 | 0,656 | 0,055 | 3,55243E-17 | 1,970504625   | 0,507484219     | 11,92727273     |
| LOXL3                                                                                         | 9,06058E-26 | 0,976121211 | 0,781 | 0,062 | 1,91187E-21 | 1,967169417   | 0,508344625     | 12,59677419     |
| RNASEH2C                                                                                      | 4,10837E-13 | 0,973581184 | 0,625 | 0,098 | 8,66906E-09 | 1,963709041   | 0,509240411     | 6,37755102      |
| SLC9A3R2                                                                                      | 6,91091E-14 | 0,97194427  | 0,75  | 0,145 | 1,45827E-09 | 1,961482236   | 0,509818535     | 5,172413793     |
| SERPINH1                                                                                      | 2,07858E-09 | 0,970359674 | 0,875 | 0,293 | 4,38601E-05 | 1,959329009   | 0,510378806     | 2,986348123     |
| PLOD3                                                                                         | 6,28472E-18 | 0,969548147 | 0,844 | 0,133 | 1,32614E-13 | 1,958227181   | 0,510665979     | 6,345864662     |
| CAP1                                                                                          | 1,0635E-08  | 0,969390486 | 0,875 | 0,352 | 0,000224409 | 1,958013193   | 0,510721788     | 2,485795455     |
| HLA-C                                                                                         | 2,30484E-07 | 0,96732598  | 0,938 | 0,742 | 0,004863438 | 1,955213268   | 0,511453158     | 1,264150943     |
| SHISA4                                                                                        | 4,41456E-11 | 0,962072589 | 0,656 | 0,137 | 9,31517E-07 | 1,948106553   | 0,513318945     | 4,788321168     |
| H3-3A                                                                                         | 3,93923E-10 | 0,960904952 | 1     | 0,812 | 8,31218E-06 | 1,946530502   | 0,513734565     | 1,231527094     |

Supplementary Table 1

| Differentially expressed genes_adjacent-skin-XL_comparing SC-Keloid vs. (SC-Myel, SC-Nonmyel) |             |             |       |       |             |               |                 |                 |
|-----------------------------------------------------------------------------------------------|-------------|-------------|-------|-------|-------------|---------------|-----------------|-----------------|
| gene                                                                                          | p_val       | avg_log2FC  | pct.1 | pct.2 | p_val_adj   | Foldchange_UP | Foldchange_DOWN | Ratio_pct1_pct2 |
| TPST2                                                                                         | 9,76652E-26 | 0,960626813 | 0,688 | 0,043 | 2,06083E-21 | 1,946155264   | 0,513833618     | 16              |
| RPL17                                                                                         | 1,49025E-07 | 0,959032349 | 1     | 0,742 | 0,003144586 | 1,944005565   | 0,51440182      | 1,347708895     |
| TENM3                                                                                         | 7,23932E-15 | 0,957547701 | 0,812 | 0,152 | 1,52757E-10 | 1,942006057   | 0,514931453     | 5,342105263     |
| ADAMTSL1                                                                                      | 6,15244E-33 | 0,957147971 | 0,594 | 0,008 | 1,29823E-28 | 1,941468057   | 0,515074145     | 74,25           |
| COPS9                                                                                         | 1,16903E-09 | 0,956487686 | 0,812 | 0,254 | 2,46676E-05 | 1,9405797     | 0,515309935     | 3,196850394     |
| ATP5MJ                                                                                        | 4,39108E-11 | 0,95420782  | 0,844 | 0,211 | 9,26562E-07 | 1,937515458   | 0,516124915     | 4               |
| RPS18                                                                                         | 1,76239E-09 | 0,952826188 | 1     | 0,91  | 3,71881E-05 | 1,935660837   | 0,516619431     | 1,098901099     |
| REEP3                                                                                         | 4,73057E-09 | 0,947504727 | 0,75  | 0,211 | 9,98197E-05 | 1,928534195   | 0,518528529     | 3,55450237      |
| TXNL4A                                                                                        | 4,19939E-13 | 0,946193014 | 0,688 | 0,129 | 8,86113E-09 | 1,926781549   | 0,519000195     | 5,333333333     |
| EEF1G                                                                                         | 2,03788E-08 | 0,944234447 | 0,969 | 0,551 | 0,000430012 | 1,924167573   | 0,519705255     | 1,75862069      |
| AURKAIP1                                                                                      | 9,89489E-13 | 0,944064378 | 0,812 | 0,191 | 2,08792E-08 | 1,923940761   | 0,519766523     | 4,251308901     |
| ATP5F1C                                                                                       | 3,44078E-10 | 0,942522015 | 0,844 | 0,242 | 7,26039E-06 | 1,921885004   | 0,520322495     | 3,487603306     |
| EMC10                                                                                         | 1,02213E-10 | 0,93961837  | 0,75  | 0,18  | 2,1568E-06  | 1,918020806   | 0,521370778     | 4,166666667     |
| MCRIP1                                                                                        | 7,42098E-11 | 0,939456263 | 0,781 | 0,211 | 1,5659E-06  | 1,917805301   | 0,521429365     | 3,701421801     |
| AP2S1                                                                                         | 2,54903E-11 | 0,938475567 | 0,594 | 0,117 | 5,37871E-07 | 1,916502084   | 0,521783936     | 5,076923077     |
| SCARA3                                                                                        | 5,1155E-14  | 0,937709312 | 0,75  | 0,133 | 1,07942E-09 | 1,915484447   | 0,522061143     | 5,639097744     |
| MEF2C                                                                                         | 2,27637E-13 | 0,933092425 | 0,719 | 0,133 | 4,80336E-09 | 1,909364346   | 0,52373451      | 5,406015038     |
| PERP                                                                                          | 1,73599E-15 | 0,932278512 | 0,656 | 0,09  | 3,66312E-11 | 1,90828746    | 0,524030064     | 7,288888889     |
| NAA38                                                                                         | 2,39382E-12 | 0,932158492 | 0,75  | 0,156 | 5,05121E-08 | 1,908128713   | 0,524073661     | 4,807692308     |
| RPL28                                                                                         | 5,24899E-10 | 0,932149671 | 1     | 0,863 | 1,10759E-05 | 1,908117046   | 0,524076865     | 1,158748552     |
| QPCT                                                                                          | 7,57111E-23 | 0,929673276 | 0,531 | 0,023 | 1,59758E-18 | 1,904844561   | 0,524977219     | 23,08695652     |
| IFI27L2                                                                                       | 3,69607E-11 | 0,926031853 | 0,875 | 0,238 | 7,79907E-07 | 1,900042715   | 0,526303957     | 3,676470588     |
| GPC1                                                                                          | 7,20353E-07 | 0,92573403  | 0,812 | 0,379 | 0,01520016  | 1,899650521   | 0,526412616     | 2,142480211     |
| ALDH1A3                                                                                       | 7,07559E-22 | 0,924543314 | 0,562 | 0,031 | 1,49302E-17 | 1,898083308   | 0,526847265     | 18,12903226     |
| UQCR11                                                                                        | 5,91166E-09 | 0,923640946 | 0,906 | 0,34  | 0,000124742 | 1,896896477   | 0,527176898     | 2,664705882     |
| NOP10                                                                                         | 3,03941E-13 | 0,923518911 | 0,719 | 0,133 | 6,41345E-09 | 1,896736028   | 0,527221493     | 5,406015038     |
| RPL10A                                                                                        | 2,73649E-09 | 0,923279384 | 1     | 0,754 | 5,77427E-05 | 1,896421144   | 0,527309033     | 1,326259947     |
| CHN1                                                                                          | 2,81721E-22 | 0,920740308 | 0,5   | 0,02  | 5,94459E-18 | 1,893086467   | 0,52823789      | 25              |
| ATP5F1D                                                                                       | 9,5967E-08  | 0,918658133 | 0,781 | 0,293 | 0,002025    | 1,890356234   | 0,529000821     | 2,66552901      |
| NDUFA13                                                                                       | 3,93899E-08 | 0,914713132 | 0,938 | 0,43  | 0,000831167 | 1,885194179   | 0,530449336     | 2,181395349     |

Supplementary Table 1

| Differentially expressed genes_adjacent-skin-XL_comparing SC-Keloid vs. (SC-Myel, SC-Nonmyel) |             |             |       |       |             |               |                 |                 |
|-----------------------------------------------------------------------------------------------|-------------|-------------|-------|-------|-------------|---------------|-----------------|-----------------|
| gene                                                                                          | p_val       | avg_log2FC  | pct.1 | pct.2 | p_val_adj   | Foldchange_UP | Foldchange_DOWN | Ratio_pct1_pct2 |
| RABAC1                                                                                        | 2,21101E-07 | 0,912935449 | 0,906 | 0,367 | 0,004665443 | 1,882872682   | 0,531103356     | 2,46866485      |
| FAM32A                                                                                        | 4,40666E-15 | 0,912216782 | 0,438 | 0,035 | 9,2985E-11  | 1,881934977   | 0,531367987     | 12,51428571     |
| CYBA                                                                                          | 2,63593E-10 | 0,912128823 | 0,938 | 0,301 | 5,56207E-06 | 1,881820242   | 0,531400385     | 3,11627907      |
| PRDX5                                                                                         | 4,48497E-08 | 0,908187168 | 0,844 | 0,293 | 0,000946373 | 1,876685849   | 0,532854234     | 2,880546075     |
| HMGN1                                                                                         | 1,7154E-08  | 0,907340828 | 0,875 | 0,309 | 0,000361967 | 1,875585236   | 0,533166918     | 2,83171521      |
| CXCL12                                                                                        | 8,12453E-22 | 0,906715814 | 0,656 | 0,051 | 1,71436E-17 | 1,874772859   | 0,53339795      | 12,8627451      |
| AP2M1                                                                                         | 1,00251E-08 | 0,906687846 | 0,844 | 0,277 | 0,00021154  | 1,874736515   | 0,533408291     | 3,046931408     |
| TIMM8B                                                                                        | 9,57393E-17 | 0,906584935 | 0,812 | 0,125 | 2,0202E-12  | 1,87460279    | 0,533446341     | 6,496           |
| HOXB2                                                                                         | 3,90621E-19 | 0,9051739   | 0,562 | 0,043 | 8,2425E-15  | 1,872770222   | 0,533968336     | 13,06976744     |
| ZNHIT1                                                                                        | 7,5306E-10  | 0,905017987 | 0,75  | 0,203 | 1,58903E-05 | 1,872567841   | 0,534026046     | 3,694581281     |
| VAMP5                                                                                         | 1,23611E-10 | 0,902965636 | 0,812 | 0,211 | 2,60831E-06 | 1,869905856   | 0,534786282     | 3,848341232     |
| NDUFAF8                                                                                       | 6,85646E-13 | 0,901792367 | 0,625 | 0,102 | 1,44678E-08 | 1,868385776   | 0,535221373     | 6,12745098      |
| COX7A2                                                                                        | 1,54088E-06 | 0,901581971 | 0,875 | 0,422 | 0,032514155 | 1,86811332    | 0,535299433     | 2,073459716     |
| ITPA                                                                                          | 1,33843E-21 | 0,900021706 | 0,656 | 0,055 | 2,82423E-17 | 1,866094059   | 0,535878669     | 11,92727273     |
| MAD2L2                                                                                        | 5,2274E-17  | 0,894617446 | 0,688 | 0,086 | 1,10303E-12 | 1,859116845   | 0,537889807     | 8               |
| STX8                                                                                          | 9,01486E-18 | 0,890436671 | 0,594 | 0,059 | 1,90223E-13 | 1,853737123   | 0,539450814     | 10,06779661     |
| PSMB1                                                                                         | 1,70009E-07 | 0,888787483 | 0,75  | 0,301 | 0,003587349 | 1,851619271   | 0,540067829     | 2,491694352     |
| NT5E                                                                                          | 2,65901E-27 | 0,888560329 | 0,438 | 0     | 5,61077E-23 | 1,851327754   | 0,54015287      | #DIV/0!         |
| PARVB                                                                                         | 4,97512E-21 | 0,887809025 | 0,562 | 0,035 | 1,0498E-16  | 1,850363901   | 0,540434236     | 16,05714286     |
| RPLP0                                                                                         | 1,14478E-06 | 0,885849177 | 0,938 | 0,633 | 0,024155921 | 1,847851956   | 0,541168894     | 1,481832543     |
| COX6B1                                                                                        | 2,71446E-08 | 0,883505608 | 0,906 | 0,387 | 0,000572778 | 1,844852671   | 0,542048704     | 2,341085271     |
| BBLN                                                                                          | 2,29481E-11 | 0,883246192 | 0,688 | 0,152 | 4,84228E-07 | 1,844520972   | 0,542146181     | 4,526315789     |
| SLIRP                                                                                         | 1,88539E-09 | 0,882373412 | 0,719 | 0,188 | 3,97837E-05 | 1,843405438   | 0,54247426      | 3,824468085     |
| LIMS1                                                                                         | 1,47941E-08 | 0,882010639 | 0,781 | 0,254 | 0,00031217  | 1,842941963   | 0,542610684     | 3,07480315      |
| RPL12                                                                                         | 1,53466E-09 | 0,881782011 | 1     | 0,809 | 3,23828E-05 | 1,84264993    | 0,54269668      | 1,236093943     |
| RTRAF                                                                                         | 4,26359E-09 | 0,881450226 | 0,844 | 0,258 | 8,9966E-05  | 1,842226214   | 0,542821502     | 3,271317829     |
| POMP                                                                                          | 6,09064E-09 | 0,872884177 | 0,812 | 0,277 | 0,000128519 | 1,831320345   | 0,546054109     | 2,931407942     |
| LTBP1                                                                                         | 2,65356E-23 | 0,870635447 | 0,438 | 0,008 | 5,59927E-19 | 1,828468087   | 0,546905908     | 54,75           |
| ARF3                                                                                          | 5,31765E-12 | 0,868512674 | 0,531 | 0,074 | 1,12208E-07 | 1,825779668   | 0,547711215     | 7,175675676     |
| ARF5                                                                                          | 2,6113E-08  | 0,867905204 | 0,812 | 0,254 | 0,00055101  | 1,825011056   | 0,547941886     | 3,196850394     |

Supplementary Table 1

| Differentially expressed genes_adjacent-skin-XL_comparing SC-Keloid vs. (SC-Myel, SC-Nonmyel) |             |             |       |       |             |               |                 |                 |
|-----------------------------------------------------------------------------------------------|-------------|-------------|-------|-------|-------------|---------------|-----------------|-----------------|
| gene                                                                                          | p_val       | avg_log2FC  | pct.1 | pct.2 | p_val_adj   | Foldchange_UP | Foldchange_DOWN | Ratio_pct1_pct2 |
| ACTG2                                                                                         | 2,86276E-12 | 0,866005285 | 0,188 | 0     | 6,04072E-08 | 1,822609238   | 0,548663959     | #DIV/0!         |
| TGFB1I1                                                                                       | 5,85437E-11 | 0,865722459 | 0,75  | 0,18  | 1,23533E-06 | 1,822251968   | 0,54877153      | 4,166666667     |
| TAX1BP3                                                                                       | 4,71243E-08 | 0,86475768  | 0,875 | 0,395 | 0,000994371 | 1,821033775   | 0,549138634     | 2,215189873     |
| BSG                                                                                           | 1,69711E-07 | 0,863840237 | 0,875 | 0,395 | 0,003581063 | 1,819876105   | 0,549487956     | 2,215189873     |
| LIMA1                                                                                         | 9,00804E-14 | 0,862454862 | 0,812 | 0,16  | 1,90079E-09 | 1,818129373   | 0,550015865     | 5,075           |
| LSM4                                                                                          | 4,73331E-10 | 0,862388329 | 0,531 | 0,098 | 9,98776E-06 | 1,818045529   | 0,550041231     | 5,418367347     |
| KCNN4                                                                                         | 8,55163E-26 | 0,862033371 | 0,562 | 0,02  | 1,80448E-21 | 1,817598275   | 0,550176578     | 28,1            |
| COL4A2                                                                                        | 6,93438E-07 | 0,861684464 | 1     | 0,715 | 0,014632227 | 1,817158753   | 0,550309651     | 1,398601399     |
| LIF                                                                                           | 1,29589E-15 | 0,861510607 | 0,375 | 0,02  | 2,73446E-11 | 1,816939784   | 0,550375972     | 18,75           |
| PDCD5                                                                                         | 9,21258E-10 | 0,861023766 | 0,75  | 0,199 | 1,94395E-05 | 1,816326756   | 0,550561729     | 3,768844221     |
| PSMB3                                                                                         | 4,0075E-09  | 0,860117422 | 0,719 | 0,199 | 8,45623E-05 | 1,815186044   | 0,550907717     | 3,613065327     |
| DPM2                                                                                          | 3,05311E-18 | 0,85983266  | 0,594 | 0,055 | 6,44236E-14 | 1,814827794   | 0,551016467     | 10,8            |
| ANP32B                                                                                        | 1,37162E-09 | 0,859019776 | 0,844 | 0,254 | 2,89426E-05 | 1,813805521   | 0,551327024     | 3,322834646     |
| COPE                                                                                          | 1,09697E-07 | 0,858684263 | 0,812 | 0,32  | 0,002314707 | 1,813383751   | 0,551455256     | 2,5375          |
| MXRA5                                                                                         | 5,0668E-20  | 0,855983818 | 0,438 | 0,016 | 1,06914E-15 | 1,809992624   | 0,552488439     | 27,375          |
| CD63                                                                                          | 1,36232E-09 | 0,854460859 | 1     | 0,824 | 2,87463E-05 | 1,808082941   | 0,553071973     | 1,213592233     |
| COX6A1                                                                                        | 1,54365E-07 | 0,852210274 | 0,906 | 0,387 | 0,003257246 | 1,805264555   | 0,553935432     | 2,341085271     |
| COL4A1                                                                                        | 1,07018E-06 | 0,852093078 | 0,969 | 0,703 | 0,022581915 | 1,805117912   | 0,553980432     | 1,378378378     |
| RCN3                                                                                          | 4,45799E-16 | 0,851880322 | 0,625 | 0,074 | 9,40679E-12 | 1,804851728   | 0,554062134     | 8,445945946     |
| SH3GLB1                                                                                       | 4,39761E-09 | 0,851805772 | 0,719 | 0,207 | 9,27939E-05 | 1,804758466   | 0,554090765     | 3,473429952     |
| EMILIN1                                                                                       | 1,37952E-16 | 0,848592995 | 0,625 | 0,07  | 2,91092E-12 | 1,800743872   | 0,55532606      | 8,928571429     |
| ACTR2                                                                                         | 5,17991E-12 | 0,840570454 | 0,844 | 0,195 | 1,09301E-07 | 1,790758084   | 0,55842272      | 4,328205128     |
| CD276                                                                                         | 2,40751E-20 | 0,839801362 | 0,719 | 0,074 | 5,08009E-16 | 1,789803695   | 0,558720492     | 9,716216216     |
| TUBB                                                                                          | 0,000120884 | 0,838684476 | 0,781 | 0,418 | 1           | 1,788418626   | 0,559153201     | 1,868421053     |
| SELENOH                                                                                       | 2,45519E-11 | 0,838527925 | 0,75  | 0,16  | 5,1807E-07  | 1,788224569   | 0,55921388      | 4,6875          |
| COL5A1                                                                                        | 6,76766E-10 | 0,83801236  | 0,781 | 0,207 | 1,42804E-05 | 1,787585639   | 0,559413758     | 3,77294686      |
| PSMD8                                                                                         | 1,03692E-07 | 0,837138502 | 0,688 | 0,238 | 0,002188015 | 1,786503205   | 0,559752704     | 2,890756303     |
| LOXL1                                                                                         | 4,29805E-27 | 0,836488049 | 0,531 | 0,012 | 9,06931E-23 | 1,785697924   | 0,560005131     | 44,25           |
| ARPC5                                                                                         | 6,3904E-05  | 0,836140219 | 0,781 | 0,422 | 1           | 1,785267449   | 0,560140163     | 1,8507109       |
| MIR4435-2HG                                                                                   | 9,46903E-25 | 0,834567242 | 0,594 | 0,027 | 1,99806E-20 | 1,783322024   | 0,56075122      | 22              |

Supplementary Table 1

| Differentially expressed genes_adjacent-skin-XL_comparing SC-Keloid vs. (SC-Myel, SC-Nonmyel) |             |             |       |       |             |               |                 |                 |
|-----------------------------------------------------------------------------------------------|-------------|-------------|-------|-------|-------------|---------------|-----------------|-----------------|
| gene                                                                                          | p_val       | avg_log2FC  | pct.1 | pct.2 | p_val_adj   | Foldchange_UP | Foldchange_DOWN | Ratio_pct1_pct2 |
| DDOST                                                                                         | 5,33167E-11 | 0,834093386 | 0,625 | 0,125 | 1,12504E-06 | 1,782736385   | 0,56093543      | 5               |
| CLTA                                                                                          | 7,37279E-09 | 0,832180286 | 0,938 | 0,328 | 0,000155573 | 1,780373936   | 0,561679757     | 2,859756098     |
| SNRPD2                                                                                        | 1,10324E-10 | 0,831799453 | 0,844 | 0,215 | 2,32794E-06 | 1,779904028   | 0,561828045     | 3,925581395     |
| CLEC11A                                                                                       | 2,58463E-12 | 0,830211734 | 0,594 | 0,098 | 5,45382E-08 | 1,777946279   | 0,56244669      | 6,06122449      |
| RACK1                                                                                         | 7,2383E-05  | 0,828908401 | 0,906 | 0,676 | 1           | 1,776340806   | 0,562955035     | 1,340236686     |
| MGST3                                                                                         | 7,88954E-09 | 0,828259104 | 0,938 | 0,344 | 0,000166477 | 1,775541528   | 0,563208455     | 2,726744186     |
| PLPP4                                                                                         | 3,124E-29   | 0,827941651 | 0,469 | 0     | 6,59194E-25 | 1,775150878   | 0,563332398     | #DIV/0!         |
| DCTN2                                                                                         | 3,91423E-12 | 0,827383355 | 0,781 | 0,168 | 8,25941E-08 | 1,774464061   | 0,563550439     | 4,648809524     |
| CBX3                                                                                          | 6,73901E-11 | 0,826157904 | 0,844 | 0,211 | 1,422E-06   | 1,772957439   | 0,564029332     | 4               |
| ISG15                                                                                         | 9,05705E-07 | 0,825750218 | 0,656 | 0,184 | 0,019111275 | 1,772456497   | 0,564188741     | 3,565217391     |
| RPL3                                                                                          | 4,1738E-07  | 0,823730066 | 0,969 | 0,883 | 0,008807141 | 1,769976329   | 0,564979307     | 1,097395243     |
| RPS24                                                                                         | 2,53779E-08 | 0,822636362 | 1     | 0,852 | 0,000535499 | 1,768635022   | 0,565407779     | 1,17370892      |
| SUMO2                                                                                         | 1,75872E-06 | 0,822564439 | 0,906 | 0,531 | 0,037110766 | 1,768546852   | 0,565435967     | 1,706214689     |
| SLC25A3                                                                                       | 9,84327E-06 | 0,822497303 | 0,844 | 0,438 | 0,207702845 | 1,768464554   | 0,565462281     | 1,926940639     |
| MRPL51                                                                                        | 2,3518E-09  | 0,821345969 | 0,781 | 0,215 | 4,96253E-05 | 1,767053805   | 0,565913725     | 3,63255814      |
| DYNLT2B                                                                                       | 1,4711E-22  | 0,820927624 | 0,531 | 0,023 | 3,10416E-18 | 1,766541478   | 0,566077849     | 23,08695652     |
| LAMB2                                                                                         | 4,71332E-09 | 0,82057001  | 0,75  | 0,199 | 9,94557E-05 | 1,766103644   | 0,566218185     | 3,768844221     |
| CSTB                                                                                          | 1,50861E-08 | 0,818715535 | 0,812 | 0,242 | 0,000318332 | 1,76383491    | 0,566946484     | 3,355371901     |
| RPLP2                                                                                         | 5,73248E-09 | 0,818572413 | 1     | 0,789 | 0,000120961 | 1,763659938   | 0,56700273      | 1,267427123     |
| SEC11A                                                                                        | 1,11207E-08 | 0,818386115 | 0,906 | 0,32  | 0,000234657 | 1,763432208   | 0,567075953     | 2,83125         |
| RPS5                                                                                          | 4,08024E-07 | 0,81795507  | 1     | 0,656 | 0,008609712 | 1,762905412   | 0,567245408     | 1,524390244     |
| CBR1                                                                                          | 9,50275E-11 | 0,817624946 | 0,812 | 0,207 | 2,00517E-06 | 1,762502062   | 0,567375223     | 3,922705314     |
| PSMB2                                                                                         | 1,00758E-12 | 0,817313315 | 0,75  | 0,152 | 2,1261E-08  | 1,762121393   | 0,567497792     | 4,934210526     |
| RPL29                                                                                         | 1,93016E-06 | 0,816433554 | 0,969 | 0,828 | 0,040728337 | 1,761047172   | 0,56784396      | 1,170289855     |
| DYNC2I2                                                                                       | 4,3842E-11  | 0,816117392 | 0,406 | 0,047 | 9,25109E-07 | 1,760661287   | 0,567968415     | 8,638297872     |
| TMEM160                                                                                       | 2,24956E-14 | 0,815827144 | 0,562 | 0,07  | 4,7468E-10  | 1,760307104   | 0,568082693     | 8,028571429     |
| SNU13                                                                                         | 6,28775E-09 | 0,815380734 | 0,844 | 0,262 | 0,000132678 | 1,7597625     | 0,568258501     | 3,221374046     |
| FIBIN                                                                                         | 4,17431E-10 | 0,814438171 | 0,656 | 0,141 | 8,80821E-06 | 1,758613161   | 0,568629885     | 4,65248227      |
| PPIA                                                                                          | 5,11582E-08 | 0,813533032 | 1     | 0,762 | 0,001079488 | 1,757510163   | 0,568986752     | 1,312335958     |
| RPLP1                                                                                         | 4,86137E-08 | 0,812024875 | 1     | 0,961 | 0,001025797 | 1,755673866   | 0,569581868     | 1,040582726     |

Supplementary Table 1

| Differentially expressed genes_adjacent-skin-XL_comparing SC-Keloid vs. (SC-Myel, SC-Nonmyel) |             |             |       |       |             |               |                 |                 |
|-----------------------------------------------------------------------------------------------|-------------|-------------|-------|-------|-------------|---------------|-----------------|-----------------|
| gene                                                                                          | p_val       | avg_log2FC  | pct.1 | pct.2 | p_val_adj   | Foldchange_UP | Foldchange_DOWN | Ratio_pct1_pct2 |
| CXXC5                                                                                         | 5,59181E-09 | 0,811283925 | 0,875 | 0,305 | 0,000117993 | 1,754772406   | 0,569874473     | 2,868852459     |
| MRPL57                                                                                        | 4,91302E-13 | 0,809323949 | 0,656 | 0,109 | 1,0367E-08  | 1,752390075   | 0,570649203     | 6,018348624     |
| CIB1                                                                                          | 1,70442E-10 | 0,806862061 | 0,75  | 0,18  | 3,59649E-06 | 1,749402258   | 0,571623819     | 4,166666667     |
| BCL7C                                                                                         | 2,50129E-08 | 0,805703095 | 0,594 | 0,152 | 0,000527798 | 1,747997468   | 0,572083208     | 3,907894737     |
| SRPRB                                                                                         | 4,7158E-17  | 0,805233224 | 0,469 | 0,031 | 9,9508E-13  | 1,747428255   | 0,572269561     | 15,12903226     |
| MICOS13                                                                                       | 2,32785E-10 | 0,80475637  | 0,75  | 0,18  | 4,91199E-06 | 1,746850774   | 0,572458744     | 4,166666667     |
| SSBP4                                                                                         | 2,82891E-14 | 0,803042321 | 0,625 | 0,09  | 5,96929E-10 | 1,744776593   | 0,57313928      | 6,944444444     |
| PFDN5                                                                                         | 7,78595E-06 | 0,802399214 | 0,938 | 0,523 | 0,164291329 | 1,743999001   | 0,573394824     | 1,793499044     |
| ANXA6                                                                                         | 1,12492E-15 | 0,800113146 | 0,719 | 0,105 | 2,37369E-11 | 1,74123768    | 0,574304135     | 6,847619048     |
| GNAI2                                                                                         | 2,08509E-07 | 0,799637095 | 0,906 | 0,375 | 0,004399757 | 1,740663214   | 0,574493671     | 2,416           |
| UAP1                                                                                          | 1,37531E-15 | 0,799310036 | 0,656 | 0,09  | 2,90203E-11 | 1,74026865    | 0,574623924     | 7,288888889     |
| ACTN4                                                                                         | 9,16559E-09 | 0,796310101 | 0,875 | 0,277 | 0,000193403 | 1,736653701   | 0,575820038     | 3,158844765     |
| NEDD8                                                                                         | 6,87122E-07 | 0,794757142 | 0,844 | 0,305 | 0,014498967 | 1,734785323   | 0,576440201     | 2,767213115     |
| RPS19                                                                                         | 1,20793E-07 | 0,793962304 | 1     | 0,785 | 0,002548848 | 1,733829823   | 0,576757872     | 1,27388535      |
| TRUB2                                                                                         | 5,03869E-18 | 0,793912367 | 0,469 | 0,027 | 1,06321E-13 | 1,733769811   | 0,576777836     | 17,37037037     |
| GABARAP                                                                                       | 9,28202E-05 | 0,790572046 | 0,906 | 0,539 | 1           | 1,729760198   | 0,578114817     | 1,680890538     |
| MRPL52                                                                                        | 1,51607E-11 | 0,78980929  | 0,719 | 0,145 | 3,19906E-07 | 1,728845911   | 0,578420548     | 4,95862069      |
| NME4                                                                                          | 1,78452E-12 | 0,789693474 | 0,562 | 0,082 | 3,76552E-08 | 1,72870713    | 0,578466984     | 6,853658537     |
| EIF4E2                                                                                        | 3,40648E-14 | 0,789599309 | 0,531 | 0,062 | 7,18801E-10 | 1,7285943     | 0,578504742     | 8,564516129     |
| RSU1                                                                                          | 3,46348E-12 | 0,788781348 | 0,625 | 0,105 | 7,30829E-08 | 1,727614521   | 0,578832829     | 5,952380952     |
| BCAP31                                                                                        | 9,23764E-11 | 0,787490117 | 0,719 | 0,156 | 1,94923E-06 | 1,726068975   | 0,579351124     | 4,608974359     |
| ATP5MC2                                                                                       | 1,41333E-07 | 0,787297111 | 0,938 | 0,43  | 0,002982267 | 1,725838074   | 0,579428635     | 2,181395349     |
| FAM162A                                                                                       | 1,42121E-15 | 0,782941317 | 0,75  | 0,113 | 2,99889E-11 | 1,720635271   | 0,581180693     | 6,637168142     |
| MRPL47                                                                                        | 2,92626E-13 | 0,782223209 | 0,594 | 0,086 | 6,1747E-09  | 1,71977903    | 0,581470051     | 6,906976744     |
| MTLN                                                                                          | 4,88998E-20 | 0,781071686 | 0,688 | 0,066 | 1,03184E-15 | 1,718406893   | 0,581934351     | 10,42424242     |
| NDUFA1                                                                                        | 2,80126E-07 | 0,779671036 | 0,875 | 0,359 | 0,005910941 | 1,716739376   | 0,5824996       | 2,437325905     |
| YBX1                                                                                          | 4,6484E-06  | 0,77850003  | 0,938 | 0,531 | 0,098085891 | 1,7153465     | 0,582972595     | 1,766478343     |
| RPL13                                                                                         | 8,88476E-09 | 0,778131842 | 1     | 0,902 | 0,000187477 | 1,714908785   | 0,583121393     | 1,10864745      |
| RPL19                                                                                         | 5,39805E-08 | 0,777891399 | 1     | 0,852 | 0,001139043 | 1,714622998   | 0,583218586     | 1,17370892      |
| PSMC5                                                                                         | 1,89234E-09 | 0,776492334 | 0,656 | 0,16  | 3,99303E-05 | 1,712961034   | 0,583784441     | 4,1             |

Supplementary Table 1

| Differentially expressed genes_adjacent-skin-XL_comparing SC-Keloid vs. (SC-Myel, SC-Nonmyel) |             |             |       |       |             |               |                 |                 |
|-----------------------------------------------------------------------------------------------|-------------|-------------|-------|-------|-------------|---------------|-----------------|-----------------|
| gene                                                                                          | p_val       | avg_log2FC  | pct.1 | pct.2 | p_val_adj   | Foldchange_UP | Foldchange_DOWN | Ratio_pct1_pct2 |
| CMSS1                                                                                         | 2,28279E-13 | 0,776315614 | 0,594 | 0,086 | 4,81691E-09 | 1,712751221   | 0,583855955     | 6,906976744     |
| TPI1                                                                                          | 5,31689E-08 | 0,774858014 | 0,906 | 0,371 | 0,001121917 | 1,711021649   | 0,584446141     | 2,442048518     |
| RPL6                                                                                          | 2,82298E-06 | 0,774507197 | 0,969 | 0,707 | 0,059567639 | 1,710605634   | 0,584588277     | 1,370579915     |
| COX7A2L                                                                                       | 3,61635E-13 | 0,773681852 | 0,812 | 0,16  | 7,63085E-09 | 1,709627301   | 0,584922807     | 5,075           |
| FADS1                                                                                         | 2,94022E-06 | 0,773620072 | 0,406 | 0,09  | 0,062041601 | 1,709554093   | 0,584947855     | 4,511111111     |
| NDUFAB1                                                                                       | 1,98304E-09 | 0,772481416 | 0,781 | 0,211 | 4,18441E-05 | 1,708205348   | 0,585409711     | 3,701421801     |
| A1BG                                                                                          | 1,27969E-13 | 0,77199641  | 0,812 | 0,156 | 2,70027E-09 | 1,707631179   | 0,585606548     | 5,205128205     |
| PLAT                                                                                          | 1,26672E-06 | 0,771860936 | 0,969 | 0,441 | 0,026728981 | 1,707470834   | 0,585661541     | 2,197278912     |
| ERP29                                                                                         | 4,2377E-13  | 0,771477353 | 0,719 | 0,129 | 8,94197E-09 | 1,707016914   | 0,585817277     | 5,573643411     |
| HOXC9                                                                                         | 5,38738E-27 | 0,771422595 | 0,469 | 0,004 | 1,13679E-22 | 1,706952124   | 0,585839512     | 117,25          |
| TMED3                                                                                         | 1,32268E-16 | 0,770023435 | 0,562 | 0,055 | 2,79098E-12 | 1,705297484   | 0,586407949     | 10,21818182     |
| SERPINE1                                                                                      | 5,24077E-18 | 0,768869511 | 0,562 | 0,047 | 1,10585E-13 | 1,703934065   | 0,586877169     | 11,95744681     |
| POLR2L                                                                                        | 3,07893E-08 | 0,766947133 | 0,969 | 0,43  | 0,000649686 | 1,701665102   | 0,587659698     | 2,253488372     |
| APMAP                                                                                         | 5,49842E-12 | 0,765883017 | 0,469 | 0,059 | 1,16022E-07 | 1,700410434   | 0,58809331      | 7,949152542     |
| PHPT1                                                                                         | 4,46774E-07 | 0,764806003 | 0,781 | 0,301 | 0,009427372 | 1,699141502   | 0,588532502     | 2,594684385     |
| CHMP3                                                                                         | 5,03293E-13 | 0,763219555 | 0,781 | 0,152 | 1,062E-08   | 1,697274082   | 0,589180033     | 5,138157895     |
| GMFG                                                                                          | 2,2608E-10  | 0,762612976 | 0,188 | 0,004 | 4,77051E-06 | 1,696560615   | 0,589427805     | 47              |
| HINT1                                                                                         | 3,7134E-07  | 0,761344787 | 0,906 | 0,434 | 0,007835648 | 1,695069923   | 0,589946165     | 2,087557604     |
| TMCO1                                                                                         | 1,45783E-08 | 0,761229005 | 0,781 | 0,227 | 0,000307617 | 1,694933892   | 0,589993512     | 3,440528634     |
| FHDC1                                                                                         | 3,89044E-19 | 0,760047228 | 0,531 | 0,035 | 8,20922E-15 | 1,693546064   | 0,590477        | 15,17142857     |
| ST3GAL4                                                                                       | 2,17734E-12 | 0,759934762 | 0,656 | 0,117 | 4,59441E-08 | 1,693414047   | 0,590523033     | 5,606837607     |
| EDF1                                                                                          | 2,61283E-06 | 0,758469285 | 0,906 | 0,445 | 0,055133285 | 1,691694766   | 0,591123186     | 2,035955056     |
| EVA1B                                                                                         | 4,79626E-16 | 0,758146728 | 0,656 | 0,082 | 1,01206E-11 | 1,69131658    | 0,591255364     | 8               |
| C4orf48                                                                                       | 7,49712E-13 | 0,757854306 | 0,688 | 0,125 | 1,58197E-08 | 1,690973799   | 0,591375219     | 5,504           |
| GNAS                                                                                          | 2,36606E-05 | 0,757373495 | 0,969 | 0,727 | 0,499262054 | 1,690410338   | 0,591572341     | 1,332874828     |
| NCS1                                                                                          | 3,74251E-14 | 0,757112795 | 0,531 | 0,062 | 7,89707E-10 | 1,690104903   | 0,591679249     | 8,564516129     |
| PYGB                                                                                          | 1,44507E-19 | 0,755780635 | 0,688 | 0,07  | 3,04923E-15 | 1,688545009   | 0,592225848     | 9,828571429     |
| CD99                                                                                          | 5,36756E-06 | 0,754261912 | 0,906 | 0,5   | 0,113260808 | 1,686768414   | 0,592849612     | 1,812           |
| RPL4                                                                                          | 9,49063E-06 | 0,753202094 | 0,875 | 0,465 | 0,200261764 | 1,685529753   | 0,593285285     | 1,88172043      |
| ATP6VOB                                                                                       | 8,27349E-07 | 0,752044622 | 0,812 | 0,277 | 0,017457891 | 1,684177998   | 0,593761468     | 2,931407942     |

Supplementary Table 1

| Differentially expressed genes_adjacent-skin-XL_comparing SC-Keloid vs. (SC-Myel, SC-Nonmyel) |             |             |       |       |             |               |                 |                 |
|-----------------------------------------------------------------------------------------------|-------------|-------------|-------|-------|-------------|---------------|-----------------|-----------------|
| gene                                                                                          | p_val       | avg_log2FC  | pct.1 | pct.2 | p_val_adj   | Foldchange_UP | Foldchange_DOWN | Ratio_pct1_pct2 |
| PPDPF                                                                                         | 3,06116E-06 | 0,751298041 | 1     | 0,668 | 0,064593486 | 1,683306677   | 0,594068813     | 1,497005988     |
| SSB                                                                                           | 6,28653E-11 | 0,749249878 | 0,875 | 0,223 | 1,32652E-06 | 1,680918618   | 0,594912799     | 3,923766816     |
| CMTM3                                                                                         | 1,3891E-11  | 0,749144129 | 0,719 | 0,145 | 2,93114E-07 | 1,680795411   | 0,594956408     | 4,95862069      |
| HLA-B                                                                                         | 0,000143643 | 0,748809308 | 0,938 | 0,734 | 1           | 1,680405378   | 0,595094501     | 1,277929155     |
| ABLIM3                                                                                        | 1,22444E-14 | 0,748162822 | 0,438 | 0,035 | 2,5837E-10  | 1,67965254    | 0,595361229     | 12,51428571     |
| OSTC                                                                                          | 3,85126E-10 | 0,746809471 | 0,719 | 0,168 | 8,12654E-06 | 1,678077645   | 0,595919982     | 4,279761905     |
| CTSA                                                                                          | 1,70757E-14 | 0,746121782 | 0,625 | 0,086 | 3,60314E-10 | 1,677277947   | 0,596204107     | 7,26744186      |
| UBA52                                                                                         | 1,12313E-06 | 0,744137687 | 1     | 0,656 | 0,023699228 | 1,674972822   | 0,597024613     | 1,524390244     |
| SMAP2                                                                                         | 2,89798E-16 | 0,744007147 | 0,469 | 0,035 | 6,11503E-12 | 1,674821272   | 0,597078636     | 13,4            |
| EEF1B2                                                                                        | 1,40984E-06 | 0,743930347 | 0,938 | 0,465 | 0,02974893  | 1,674732118   | 0,597110421     | 2,017204301     |
| PSMB10                                                                                        | 7,49278E-16 | 0,743325172 | 0,562 | 0,059 | 1,58105E-11 | 1,674029755   | 0,597360947     | 9,525423729     |
| RPL7A                                                                                         | 7,20574E-06 | 0,743045105 | 1     | 0,777 | 0,152048307 | 1,673704812   | 0,597476922     | 1,287001287     |
| OCIAD2                                                                                        | 2,00705E-19 | 0,742701091 | 0,344 | 0,004 | 4,23507E-15 | 1,67330576    | 0,597619409     | 86              |
| AEBP1                                                                                         | 4,55379E-08 | 0,742163539 | 0,906 | 0,301 | 0,000960896 | 1,672682399   | 0,597842125     | 3,009966777     |
| TAF10                                                                                         | 8,40653E-11 | 0,741976638 | 0,531 | 0,09  | 1,77386E-06 | 1,672465717   | 0,597919581     | 5,9             |
| LINC01116                                                                                     | 3,76123E-10 | 0,740828389 | 0,469 | 0,074 | 7,93658E-06 | 1,671135121   | 0,598395658     | 6,337837838     |
| MPG                                                                                           | 2,15641E-13 | 0,738380174 | 0,844 | 0,168 | 4,55025E-09 | 1,668301654   | 0,599411981     | 5,023809524     |
| TMEM50A                                                                                       | 3,50301E-08 | 0,736873614 | 0,844 | 0,281 | 0,00073917  | 1,66656041    | 0,600038255     | 3,003558719     |
| NRBF2                                                                                         | 2,78342E-17 | 0,735473492 | 0,656 | 0,074 | 5,8733E-13  | 1,664943813   | 0,600620869     | 8,864864865     |
| COPS6                                                                                         | 6,09801E-08 | 0,734146909 | 0,656 | 0,176 | 0,001286741 | 1,663413573   | 0,601173404     | 3,727272727     |
| MTPN                                                                                          | 6,21629E-12 | 0,734129086 | 0,688 | 0,133 | 1,3117E-07  | 1,663393023   | 0,601180831     | 5,172932331     |
| HEXB                                                                                          | 1,63045E-15 | 0,732449034 | 0,625 | 0,078 | 3,44041E-11 | 1,661457091   | 0,601881328     | 8,012820513     |
| UQCRCQ                                                                                        | 2,75692E-06 | 0,731653874 | 0,812 | 0,316 | 0,058173825 | 1,66054161    | 0,602213154     | 2,569620253     |
| TAF12                                                                                         | 1,52868E-07 | 0,728486413 | 0,375 | 0,066 | 0,003225666 | 1,656899862   | 0,603536775     | 5,681818182     |
| MEAF6                                                                                         | 2,37955E-09 | 0,728434613 | 0,719 | 0,176 | 5,02108E-05 | 1,656840372   | 0,603558446     | 4,085227273     |
| NARS1                                                                                         | 1,17417E-11 | 0,727915549 | 0,688 | 0,133 | 2,47762E-07 | 1,656244368   | 0,603775638     | 5,172932331     |
| RPL10                                                                                         | 9,12855E-08 | 0,727839023 | 1     | 0,926 | 0,001926215 | 1,656156517   | 0,603807665     | 1,079913607     |
| COPZ2                                                                                         | 3,60438E-12 | 0,727771517 | 0,594 | 0,098 | 7,60561E-08 | 1,656079025   | 0,603835919     | 6,06122449      |
| POSTN                                                                                         | 2,24722E-08 | 0,727348302 | 0,281 | 0,031 | 0,000474185 | 1,655593285   | 0,604013081     | 9,064516129     |
| MICOS10                                                                                       | 4,38759E-10 | 0,727344241 | 0,812 | 0,215 | 9,25825E-06 | 1,655588624   | 0,604014781     | 3,776744186     |



Supplementary Table 1

| Differentially expressed genes_adjacent-skin-XL_comparing SC-Keloid vs. (SC-Myel, SC-Nonmyel) |             |             |       |       |             |               |                 |                 |
|-----------------------------------------------------------------------------------------------|-------------|-------------|-------|-------|-------------|---------------|-----------------|-----------------|
| gene                                                                                          | p_val       | avg_log2FC  | pct.1 | pct.2 | p_val_adj   | Foldchange_UP | Foldchange_DOWN | Ratio_pct1_pct2 |
| SEPTIN7                                                                                       | 6,39873E-06 | 0,726691614 | 0,906 | 0,449 | 0,135019581 | 1,654839861   | 0,604288078     | 2,017817372     |
| PFDN1                                                                                         | 1,28589E-10 | 0,726124043 | 0,812 | 0,191 | 2,71337E-06 | 1,654188958   | 0,604525859     | 4,251308901     |
| LLPH                                                                                          | 1,13763E-17 | 0,724104461 | 0,5   | 0,035 | 2,4005E-13  | 1,651874933   | 0,605372707     | 14,28571429     |
| SMARCB1                                                                                       | 7,26066E-13 | 0,723923144 | 0,531 | 0,07  | 1,53207E-08 | 1,651667338   | 0,605448795     | 7,585714286     |
| FABP7                                                                                         | 6,94858E-18 | 0,722365341 | 0,375 | 0,012 | 1,46622E-13 | 1,649884853   | 0,606102903     | 31,25           |
| TRAPPC5                                                                                       | 7,32636E-14 | 0,716943046 | 0,75  | 0,137 | 1,54593E-09 | 1,643695485   | 0,608385196     | 5,474452555     |
| RPL22                                                                                         | 4,16124E-06 | 0,716391578 | 1     | 0,73  | 0,087806429 | 1,643067304   | 0,608617795     | 1,369863014     |
| APLNR                                                                                         | 2,86276E-12 | 0,716318085 | 0,188 | 0     | 6,04072E-08 | 1,642983607   | 0,6086488       | #DIV/0!         |
| IFT22                                                                                         | 4,7158E-17  | 0,715536997 | 0,469 | 0,031 | 9,9508E-13  | 1,642094321   | 0,608978417     | 15,12903226     |
| KIFAP3                                                                                        | 3,61288E-19 | 0,715332634 | 0,562 | 0,043 | 7,62355E-15 | 1,641861728   | 0,609064687     | 13,06976744     |
| CTHRC1                                                                                        | 1,43028E-17 | 0,714597322 | 0,312 | 0,004 | 3,01804E-13 | 1,641025119   | 0,609375194     | 78              |
| RPS26                                                                                         | 3,19387E-06 | 0,714011212 | 0,938 | 0,48  | 0,067393938 | 1,640358571   | 0,609622809     | 1,954166667     |
| CRIP2                                                                                         | 1,00108E-05 | 0,711555449 | 0,969 | 0,496 | 0,211237807 | 1,637568719   | 0,610661396     | 1,953629032     |
| PTPRZ1                                                                                        | 1,58349E-06 | 0,70952698  | 0,781 | 0,281 | 0,033413213 | 1,63526787    | 0,611520607     | 2,779359431     |
| CCT3                                                                                          | 1,40088E-07 | 0,708976383 | 0,719 | 0,215 | 0,002955992 | 1,634643898   | 0,611754035     | 3,344186047     |
| NDUFA12                                                                                       | 1,00963E-08 | 0,708554547 | 0,688 | 0,18  | 0,000213041 | 1,634166007   | 0,611932934     | 3,822222222     |
| CRIP1                                                                                         | 5,36606E-05 | 0,708443514 | 0,875 | 0,43  | 1           | 1,634040243   | 0,611980032     | 2,034883721     |
| MANF                                                                                          | 1,20184E-12 | 0,708364127 | 0,719 | 0,141 | 2,536E-08   | 1,633950329   | 0,612013708     | 5,09929078      |
| RPS3                                                                                          | 5,01589E-05 | 0,708279943 | 1     | 0,762 | 1           | 1,633854987   | 0,612049422     | 1,312335958     |
| HSD17B10                                                                                      | 2,02022E-13 | 0,707119856 | 0,688 | 0,113 | 4,26286E-09 | 1,632541715   | 0,612541775     | 6,088495575     |
| NAT14                                                                                         | 3,14613E-11 | 0,706524176 | 0,625 | 0,113 | 6,63865E-07 | 1,631867787   | 0,612794742     | 5,530973451     |
| RPS15A                                                                                        | 3,83325E-07 | 0,705922296 | 1     | 0,82  | 0,008088547 | 1,631187128   | 0,613050448     | 1,219512195     |
| TRNP1                                                                                         | 6,27223E-13 | 0,705010854 | 0,438 | 0,043 | 1,3235E-08  | 1,630156929   | 0,613437873     | 10,18604651     |
| SNRPD1                                                                                        | 2,54322E-08 | 0,70318932  | 0,625 | 0,16  | 0,000536646 | 1,628100006   | 0,614212884     | 3,90625         |
| RPS23                                                                                         | 6,50825E-06 | 0,702946893 | 1     | 0,816 | 0,137330688 | 1,627826448   | 0,614316103     | 1,225490196     |
| TMEM106C                                                                                      | 9,51785E-11 | 0,702897589 | 0,531 | 0,09  | 2,00836E-06 | 1,627770817   | 0,614337098     | 5,9             |
| TASP1                                                                                         | 3,24098E-12 | 0,702867832 | 0,312 | 0,02  | 6,83879E-08 | 1,627737243   | 0,614349769     | 15,6            |
| RPS4X                                                                                         | 2,92524E-06 | 0,700746502 | 1     | 0,832 | 0,061725461 | 1,625345587   | 0,61525377      | 1,201923077     |
| LRRFIP1                                                                                       | 2,22064E-12 | 0,700744593 | 0,625 | 0,102 | 4,68578E-08 | 1,625343437   | 0,615254584     | 6,12745098      |
| BMP1                                                                                          | 2,42673E-14 | 0,699413688 | 0,531 | 0,059 | 5,12064E-10 | 1,623844727   | 0,615822426     | 9               |

Supplementary Table 1

| Differentially expressed genes_adjacent-skin-XL_comparing SC-Keloid vs. (SC-Myel, SC-Nonmyel) |             |             |       |       |             |               |                 |                 |
|-----------------------------------------------------------------------------------------------|-------------|-------------|-------|-------|-------------|---------------|-----------------|-----------------|
| gene                                                                                          | p_val       | avg_log2FC  | pct.1 | pct.2 | p_val_adj   | Foldchange_UP | Foldchange_DOWN | Ratio_pct1_pct2 |
| ARHGAP21                                                                                      | 1,2573E-20  | 0,698824214 | 0,562 | 0,035 | 2,65304E-16 | 1,623181373   | 0,616074098     | 16,05714286     |
| EFHD2                                                                                         | 1,54355E-11 | 0,698763472 | 0,5   | 0,07  | 3,25705E-07 | 1,623113033   | 0,616100037     | 7,142857143     |
| KCNS3                                                                                         | 9,05393E-12 | 0,697505884 | 0,562 | 0,086 | 1,91047E-07 | 1,621698792   | 0,616637322     | 6,534883721     |
| PSMD2                                                                                         | 1,19973E-09 | 0,697257496 | 0,656 | 0,152 | 2,53154E-05 | 1,621419609   | 0,616743497     | 4,315789474     |
| ANAPC15                                                                                       | 1,41047E-17 | 0,697013938 | 0,438 | 0,023 | 2,97624E-13 | 1,621145902   | 0,616847625     | 19,04347826     |
| UQCRB                                                                                         | 7,81416E-05 | 0,695454411 | 0,844 | 0,438 | 1           | 1,61939442    | 0,617514787     | 1,926940639     |
| MRPL23                                                                                        | 2,52444E-10 | 0,694870808 | 0,656 | 0,137 | 5,32681E-06 | 1,61873947    | 0,617764636     | 4,788321168     |
| AKR7A2                                                                                        | 3,7775E-09  | 0,691381454 | 0,469 | 0,082 | 7,9709E-05  | 1,61482906    | 0,619260592     | 5,719512195     |
| IKBIP                                                                                         | 2,57971E-19 | 0,690461963 | 0,531 | 0,035 | 5,44345E-15 | 1,613800188   | 0,619655399     | 15,17142857     |
| C17orf49                                                                                      | 1,35016E-10 | 0,690113882 | 0,562 | 0,102 | 2,84897E-06 | 1,613410872   | 0,619804922     | 5,509803922     |
| EPB41L3                                                                                       | 1,13615E-10 | 0,689996517 | 0,438 | 0,059 | 2,39739E-06 | 1,613279623   | 0,619855347     | 7,423728814     |
| PIN1                                                                                          | 8,26451E-11 | 0,689859084 | 0,781 | 0,168 | 1,74389E-06 | 1,613125948   | 0,619914398     | 4,648809524     |
| CHCHD2                                                                                        | 4,07424E-06 | 0,689375922 | 0,969 | 0,512 | 0,085970452 | 1,612585798   | 0,620122043     | 1,892578125     |
| IER3IP1                                                                                       | 6,89442E-11 | 0,689190873 | 0,688 | 0,141 | 1,45479E-06 | 1,612378972   | 0,620201589     | 4,879432624     |
| DBNDD1                                                                                        | 3,124E-29   | 0,688879842 | 0,469 | 0     | 6,59194E-25 | 1,612031396   | 0,620335313     | #DIV/0!         |
| RPS10                                                                                         | 1,85163E-05 | 0,688512905 | 0,969 | 0,699 | 0,390711572 | 1,611621441   | 0,62049311      | 1,386266094     |
| PRELID1                                                                                       | 9,29321E-10 | 0,687772526 | 0,688 | 0,156 | 1,96096E-05 | 1,610794583   | 0,620811623     | 4,41025641      |
| RASA1                                                                                         | 2,80156E-10 | 0,687274798 | 0,344 | 0,035 | 5,91156E-06 | 1,610238957   | 0,62102584      | 9,828571429     |
| ACBD3                                                                                         | 1,51923E-10 | 0,686039462 | 0,625 | 0,121 | 3,20573E-06 | 1,608860749   | 0,621557833     | 5,165289256     |
| PSMD14                                                                                        | 1,1087E-23  | 0,685971637 | 0,656 | 0,043 | 2,33947E-19 | 1,608785113   | 0,621587055     | 15,25581395     |
| ARPC1B                                                                                        | 1,29677E-05 | 0,684645976 | 0,938 | 0,496 | 0,273630442 | 1,607307515   | 0,62215848      | 1,891129032     |
| LMAN2                                                                                         | 7,78316E-09 | 0,684121612 | 0,688 | 0,176 | 0,000164232 | 1,606723427   | 0,622384652     | 3,909090909     |
| CYB5R3                                                                                        | 9,59284E-08 | 0,683597922 | 0,75  | 0,242 | 0,002024186 | 1,606140301   | 0,622610615     | 3,099173554     |
| RPL13A                                                                                        | 4,70843E-06 | 0,681871095 | 1     | 0,801 | 0,099352563 | 1,604218989   | 0,623356292     | 1,248439451     |
| TCEAL8                                                                                        | 1,86582E-12 | 0,681530855 | 0,688 | 0,121 | 3,93707E-08 | 1,603840701   | 0,623503319     | 5,685950413     |
| FAAP20                                                                                        | 3,07283E-08 | 0,681366059 | 0,562 | 0,129 | 0,000648397 | 1,603657508   | 0,623574545     | 4,356589147     |
| PSMA1                                                                                         | 1,08334E-09 | 0,680918028 | 0,781 | 0,207 | 2,28595E-05 | 1,603159567   | 0,623768227     | 3,77294686      |
| AP1S1                                                                                         | 7,44737E-20 | 0,678119124 | 0,562 | 0,039 | 1,57147E-15 | 1,600052369   | 0,624979544     | 14,41025641     |
| AP1S2                                                                                         | 2,07585E-05 | 0,676580913 | 0,938 | 0,496 | 0,438024852 | 1,598347292   | 0,625646257     | 1,891129032     |
| ZYX                                                                                           | 1,47001E-10 | 0,67650903  | 0,531 | 0,094 | 3,10187E-06 | 1,598267655   | 0,625677431     | 5,64893617      |

Supplementary Table 1

| Differentially expressed genes_adjacent-skin-XL_comparing SC-Keloid vs. (SC-Myel, SC-Nonmyel) |             |             |       |       |             |               |                 |                 |
|-----------------------------------------------------------------------------------------------|-------------|-------------|-------|-------|-------------|---------------|-----------------|-----------------|
| gene                                                                                          | p_val       | avg_log2FC  | pct.1 | pct.2 | p_val_adj   | Foldchange_UP | Foldchange_DOWN | Ratio_pct1_pct2 |
| PDLIM4                                                                                        | 7,5994E-05  | 0,67572664  | 0,906 | 0,484 | 1           | 1,597401131   | 0,626016835     | 1,871900826     |
| EIF4G2                                                                                        | 1,37887E-05 | 0,673844587 | 0,875 | 0,449 | 0,290955445 | 1,595318617   | 0,626834032     | 1,948775056     |
| DAD1                                                                                          | 3,8634E-06  | 0,671850083 | 0,969 | 0,547 | 0,081521628 | 1,593114636   | 0,627701219     | 1,771480804     |
| SELENON                                                                                       | 1,22552E-14 | 0,671743423 | 0,594 | 0,074 | 2,58596E-10 | 1,59299686    | 0,627747628     | 8,027027027     |
| ATP5F1A                                                                                       | 2,64299E-07 | 0,671254969 | 0,656 | 0,195 | 0,005576977 | 1,59245761    | 0,627960201     | 3,364102564     |
| MRPL3                                                                                         | 1,23758E-13 | 0,670688724 | 0,531 | 0,066 | 2,61141E-09 | 1,591832707   | 0,628206718     | 8,045454545     |
| MRPS21                                                                                        | 4,082E-10   | 0,670380128 | 0,781 | 0,195 | 8,61342E-06 | 1,591492246   | 0,628341107     | 4,005128205     |
| UBE2M                                                                                         | 8,69443E-09 | 0,667607467 | 0,719 | 0,188 | 0,000183461 | 1,588436555   | 0,629549853     | 3,824468085     |
| MAP1B                                                                                         | 1,76407E-05 | 0,667386992 | 0,844 | 0,406 | 0,37223556  | 1,588193826   | 0,629646069     | 2,078817734     |
| NUCB2                                                                                         | 4,9271E-06  | 0,667279611 | 0,5   | 0,148 | 0,103966735 | 1,58807562    | 0,629692936     | 3,378378378     |
| COX5B                                                                                         | 4,67339E-06 | 0,667043412 | 0,875 | 0,375 | 0,098613155 | 1,58781564    | 0,629796039     | 2,333333333     |
| RPL34                                                                                         | 1,56648E-05 | 0,66688889  | 1     | 0,871 | 0,330543975 | 1,587645584   | 0,629863497     | 1,148105626     |
| BZW2                                                                                          | 7,01189E-11 | 0,664709927 | 0,531 | 0,086 | 1,47958E-06 | 1,585249506   | 0,630815525     | 6,174418605     |
| NDUFS8                                                                                        | 5,71526E-09 | 0,661838769 | 0,594 | 0,133 | 0,000120598 | 1,582097782   | 0,632072184     | 4,466165414     |
| GRN                                                                                           | 1,24078E-08 | 0,66060333  | 0,688 | 0,176 | 0,000261818 | 1,580743547   | 0,632613685     | 3,909090909     |
| OLA1                                                                                          | 1,71598E-09 | 0,65930738  | 0,531 | 0,102 | 3,62089E-05 | 1,579324227   | 0,633182207     | 5,205882353     |
| PSMA6                                                                                         | 2,30461E-09 | 0,657633206 | 0,688 | 0,168 | 4,86295E-05 | 1,577492566   | 0,633917409     | 4,095238095     |
| EIF5A                                                                                         | 0,000111594 | 0,656870948 | 0,812 | 0,367 | 1           | 1,576659306   | 0,634252432     | 2,21253406      |
| GDI2                                                                                          | 1,82373E-09 | 0,656561429 | 0,812 | 0,223 | 3,84825E-05 | 1,576321082   | 0,634388521     | 3,641255605     |
| PRDX4                                                                                         | 5,08872E-10 | 0,655740668 | 0,688 | 0,152 | 1,07377E-05 | 1,575424556   | 0,634749532     | 4,526315789     |
| BOP1                                                                                          | 1,16002E-11 | 0,655479362 | 0,375 | 0,035 | 2,44776E-07 | 1,575139235   | 0,634864511     | 10,71428571     |
| RPL36                                                                                         | 4,84438E-06 | 0,648676197 | 0,969 | 0,812 | 0,102221232 | 1,567729003   | 0,637865344     | 1,193349754     |
| PARK7                                                                                         | 1,59848E-05 | 0,648559014 | 0,781 | 0,348 | 0,337295323 | 1,567601669   | 0,637917157     | 2,244252874     |
| POLR2K                                                                                        | 1,13129E-08 | 0,648331722 | 0,719 | 0,188 | 0,000238713 | 1,567354717   | 0,638017667     | 3,824468085     |
| TXN2                                                                                          | 7,05346E-18 | 0,647512346 | 0,562 | 0,047 | 1,48835E-13 | 1,566464794   | 0,638380131     | 11,95744681     |
| PHB                                                                                           | 8,2542E-06  | 0,646832893 | 0,531 | 0,164 | 0,174171792 | 1,565727224   | 0,638680854     | 3,237804878     |
| PSMC3                                                                                         | 1,34576E-09 | 0,646492647 | 0,688 | 0,16  | 2,83969E-05 | 1,565358006   | 0,638831498     | 4,3             |
| RPL8                                                                                          | 2,64252E-05 | 0,646037795 | 0,938 | 0,777 | 0,557598502 | 1,564864558   | 0,639032941     | 1,207207207     |
| SDF4                                                                                          | 1,26449E-07 | 0,645909343 | 0,688 | 0,199 | 0,002668199 | 1,564725236   | 0,63908984      | 3,457286432     |
| NDUFC2                                                                                        | 1,54815E-06 | 0,645613808 | 0,875 | 0,312 | 0,032667575 | 1,564404735   | 0,63922077      | 2,804487179     |

Supplementary Table 1

| Differentially expressed genes_adjacent-skin-XL_comparing SC-Keloid vs. (SC-Myel, SC-Nonmyel) |             |             |       |       |             |               |                 |                 |
|-----------------------------------------------------------------------------------------------|-------------|-------------|-------|-------|-------------|---------------|-----------------|-----------------|
| gene                                                                                          | p_val       | avg_log2FC  | pct.1 | pct.2 | p_val_adj   | Foldchange_UP | Foldchange_DOWN | Ratio_pct1_pct2 |
| UQCRC1                                                                                        | 9,15428E-09 | 0,645241776 | 0,562 | 0,117 | 0,000193164 | 1,56400137    | 0,639385629     | 4,803418803     |
| RNH1                                                                                          | 9,571E-06   | 0,644993829 | 0,812 | 0,328 | 0,201957769 | 1,563732597   | 0,639495526     | 2,475609756     |
| ARL6IP4                                                                                       | 7,76178E-06 | 0,644800011 | 0,812 | 0,352 | 0,163781369 | 1,563522533   | 0,639581444     | 2,306818182     |
| NDUFB10                                                                                       | 8,53823E-08 | 0,644089635 | 0,781 | 0,234 | 0,001801653 | 1,562752852   | 0,639896449     | 3,337606838     |
| RPS3A                                                                                         | 5,47126E-05 | 0,643919328 | 0,969 | 0,766 | 1           | 1,562568383   | 0,639971992     | 1,265013055     |
| CHMP2A                                                                                        | 3,9707E-10  | 0,643687222 | 0,812 | 0,211 | 8,37858E-06 | 1,562317011   | 0,640074961     | 3,848341232     |
| CAVIN3                                                                                        | 1,68397E-05 | 0,642070581 | 0,969 | 0,555 | 0,355335292 | 1,560567307   | 0,640792612     | 1,745945946     |
| SKP1                                                                                          | 3,83058E-05 | 0,641664545 | 1     | 0,605 | 0,808290904 | 1,560128157   | 0,640972984     | 1,652892562     |
| TRAPPC1                                                                                       | 4,02001E-15 | 0,641405111 | 0,625 | 0,078 | 8,48261E-11 | 1,559847631   | 0,641088258     | 8,012820513     |
| NACA                                                                                          | 1,07808E-05 | 0,639864653 | 1     | 0,797 | 0,227486016 | 1,558182971   | 0,641773154     | 1,254705144     |
| DYNLL1                                                                                        | 7,72669E-08 | 0,639541248 | 1     | 0,516 | 0,001630409 | 1,557833716   | 0,641917035     | 1,937984496     |
| TSPO                                                                                          | 1,97021E-05 | 0,638173175 | 0,844 | 0,406 | 0,415734598 | 1,55635716    | 0,642526038     | 2,078817734     |
| CTSB                                                                                          | 2,40663E-11 | 0,63785483  | 0,562 | 0,09  | 5,07822E-07 | 1,556013773   | 0,642667833     | 6,244444444     |
| MZT2A                                                                                         | 1,63335E-09 | 0,637367619 | 0,594 | 0,121 | 3,44654E-05 | 1,555488382   | 0,642884905     | 4,909090909     |
| MIF                                                                                           | 7,38514E-05 | 0,636933547 | 0,906 | 0,57  | 1           | 1,555020443   | 0,643078363     | 1,589473684     |
| C19orf53                                                                                      | 2,92947E-06 | 0,63597615  | 0,75  | 0,289 | 0,061814759 | 1,553988847   | 0,643505262     | 2,595155709     |
| BANF1                                                                                         | 4,9481E-06  | 0,635124641 | 0,688 | 0,227 | 0,104409771 | 1,553071921   | 0,643885184     | 3,030837004     |
| RPL32                                                                                         | 3,49516E-06 | 0,634822963 | 1     | 0,938 | 0,073751443 | 1,552747197   | 0,644019839     | 1,066098081     |
| DNAJC10                                                                                       | 1,25246E-15 | 0,63480141  | 0,656 | 0,082 | 2,64283E-11 | 1,552724      | 0,64402946      | 8               |
| NUDT1                                                                                         | 4,64033E-13 | 0,631855665 | 0,469 | 0,051 | 9,79156E-09 | 1,549556828   | 0,645345806     | 9,196078431     |
| SLC35B1                                                                                       | 7,88975E-08 | 0,630793216 | 0,469 | 0,094 | 0,001664816 | 1,548416102   | 0,645821235     | 4,989361702     |
| CKLF                                                                                          | 1,41352E-09 | 0,630190764 | 0,5   | 0,086 | 2,98268E-05 | 1,547769638   | 0,646090978     | 5,813953488     |
| TUBA1B                                                                                        | 0,036503545 | 0,629680844 | 0,938 | 0,691 | 1           | 1,547222675   | 0,64631938      | 1,357452967     |
| SRA1                                                                                          | 2,2339E-10  | 0,629202339 | 0,469 | 0,07  | 4,71375E-06 | 1,546709587   | 0,646533783     | 6,7             |
| DRAP1                                                                                         | 7,7254E-05  | 0,628779246 | 0,781 | 0,336 | 1           | 1,546256057   | 0,646723417     | 2,324404762     |
| MAPRE3                                                                                        | 1,16171E-10 | 0,628604675 | 0,375 | 0,043 | 2,45131E-06 | 1,546068966   | 0,646801677     | 8,720930233     |
| ANXA4                                                                                         | 9,60629E-11 | 0,628286707 | 0,688 | 0,145 | 2,02702E-06 | 1,545728251   | 0,646944247     | 4,744827586     |
| NDUFB7                                                                                        | 1,77149E-05 | 0,627954952 | 0,844 | 0,328 | 0,373802353 | 1,545372844   | 0,647093032     | 2,573170732     |
| TBCA                                                                                          | 4,49368E-05 | 0,627942902 | 0,875 | 0,5   | 0,948210751 | 1,545359936   | 0,647098437     | 1,75            |
| MRPS34                                                                                        | 2,34145E-10 | 0,627727577 | 0,594 | 0,113 | 4,9407E-06  | 1,545129306   | 0,647195025     | 5,256637168     |

Supplementary Table 1

| Differentially expressed genes_adjacent-skin-XL_comparing SC-Keloid vs. (SC-Myel, SC-Nonmyel) |             |             |       |       |             |               |                 |                 |
|-----------------------------------------------------------------------------------------------|-------------|-------------|-------|-------|-------------|---------------|-----------------|-----------------|
| gene                                                                                          | p_val       | avg_log2FC  | pct.1 | pct.2 | p_val_adj   | Foldchange_UP | Foldchange_DOWN | Ratio_pct1_pct2 |
| LAP3                                                                                          | 1,93605E-14 | 0,62757391  | 0,5   | 0,051 | 4,08525E-10 | 1,544964737   | 0,647263964     | 9,803921569     |
| NRBP1                                                                                         | 4,00619E-10 | 0,627487558 | 0,656 | 0,137 | 8,45345E-06 | 1,544872267   | 0,647302707     | 4,788321168     |
| PSMA4                                                                                         | 2,96861E-08 | 0,626727563 | 0,719 | 0,207 | 0,000626406 | 1,54405866    | 0,647643788     | 3,473429952     |
| ZNF706                                                                                        | 2,40485E-07 | 0,626266612 | 0,969 | 0,371 | 0,005074471 | 1,543565402   | 0,647850748     | 2,611859838     |
| PLPP5                                                                                         | 3,61686E-15 | 0,625431657 | 0,469 | 0,039 | 7,63193E-11 | 1,542672327   | 0,648225798     | 12,02564103     |
| BRI3                                                                                          | 1,31501E-06 | 0,62540539  | 0,781 | 0,273 | 0,027747991 | 1,54264424    | 0,6482376       | 2,860805861     |
| SYNCRIP                                                                                       | 8,67577E-09 | 0,623478143 | 0,625 | 0,148 | 0,000183067 | 1,54058485    | 0,649104137     | 4,222972973     |
| SEC61G                                                                                        | 3,73667E-05 | 0,622434915 | 0,75  | 0,363 | 0,788473882 | 1,53947124    | 0,649573681     | 2,066115702     |
| LAMTOR5                                                                                       | 2,16223E-06 | 0,622374706 | 0,875 | 0,352 | 0,04562527  | 1,539406993   | 0,649600791     | 2,485795455     |
| TMEM147                                                                                       | 1,43922E-10 | 0,622312309 | 0,594 | 0,109 | 3,03691E-06 | 1,539340415   | 0,649628887     | 5,449541284     |
| RPL11                                                                                         | 4,00939E-06 | 0,621048452 | 1     | 0,871 | 0,084602221 | 1,537992483   | 0,650198236     | 1,148105626     |
| MYL3                                                                                          | 0,004841742 | 0,62049564  | 0,031 | 0     | 1           | 1,537403267   | 0,650447427     | #DIV/0!         |
| P3H2                                                                                          | 9,69112E-18 | 0,619282021 | 0,344 | 0,008 | 2,04492E-13 | 1,536110522   | 0,650994825     | 43              |
| GAP43                                                                                         | 6,89484E-07 | 0,619050431 | 0,312 | 0,051 | 0,0145488   | 1,535863956   | 0,651099335     | 6,117647059     |
| SPTSSA                                                                                        | 1,55593E-06 | 0,618921069 | 0,906 | 0,359 | 0,032831648 | 1,535726246   | 0,651157719     | 2,52367688      |
| HIGD1A                                                                                        | 1,05639E-10 | 0,618836377 | 0,688 | 0,141 | 2,22909E-06 | 1,535636096   | 0,651195946     | 4,879432624     |
| RIC8A                                                                                         | 2,63322E-17 | 0,617602552 | 0,531 | 0,043 | 5,55636E-13 | 1,534323347   | 0,651753102     | 12,34883721     |
| RPL35                                                                                         | 9,1366E-06  | 0,617490788 | 1     | 0,793 | 0,192791309 | 1,534204489   | 0,651803594     | 1,261034048     |
| TIMM10                                                                                        | 6,64612E-16 | 0,617465309 | 0,531 | 0,051 | 1,4024E-11  | 1,534177394   | 0,651815106     | 10,41176471     |
| SPPL2A                                                                                        | 6,06116E-05 | 0,6172588   | 0,781 | 0,352 | 1           | 1,533957807   | 0,651908413     | 2,21875         |
| HMGB1                                                                                         | 3,95027E-06 | 0,6172048   | 1     | 0,824 | 0,083354737 | 1,533900391   | 0,651932815     | 1,213592233     |
| ACSBG1                                                                                        | 9,90862E-17 | 0,617178771 | 0,375 | 0,016 | 2,09082E-12 | 1,533872717   | 0,651944577     | 23,4375         |
| URM1                                                                                          | 2,27157E-10 | 0,613163036 | 0,531 | 0,094 | 4,79323E-06 | 1,529609126   | 0,65376179      | 5,64893617      |
| SSNA1                                                                                         | 8,58711E-08 | 0,613089431 | 0,594 | 0,145 | 0,001811965 | 1,529531089   | 0,653795145     | 4,096551724     |
| FIBP                                                                                          | 4,8988E-10  | 0,61246499  | 0,562 | 0,105 | 1,03369E-05 | 1,528869206   | 0,654078188     | 5,352380952     |
| LSM1                                                                                          | 4,80798E-15 | 0,611077589 | 0,625 | 0,078 | 1,01453E-10 | 1,52739964    | 0,6547075       | 8,012820513     |
| TUSC3                                                                                         | 1,38925E-21 | 0,610499127 | 0,344 | 0     | 2,93145E-17 | 1,526787338   | 0,654970064     | #DIV/0!         |
| CREB3                                                                                         | 7,21863E-08 | 0,610401323 | 0,5   | 0,109 | 0,001523202 | 1,526683837   | 0,655014467     | 4,587155963     |
| RPL37A                                                                                        | 2,00353E-06 | 0,609741938 | 1     | 0,902 | 0,042276416 | 1,525986224   | 0,655313911     | 1,10864745      |
| IL11                                                                                          | 1,83852E-05 | 0,608702389 | 0,156 | 0,016 | 0,387946114 | 1,524887054   | 0,655786274     | 9,75            |

Supplementary Table 1

| Differentially expressed genes_adjacent-skin-XL_comparing SC-Keloid vs. (SC-Myel, SC-Nonmyel) |             |             |       |       |             |               |                 |                 |
|-----------------------------------------------------------------------------------------------|-------------|-------------|-------|-------|-------------|---------------|-----------------|-----------------|
| gene                                                                                          | p_val       | avg_log2FC  | pct.1 | pct.2 | p_val_adj   | Foldchange_UP | Foldchange_DOWN | Ratio_pct1_pct2 |
| ZCRB1                                                                                         | 5,64784E-13 | 0,608026882 | 0,688 | 0,113 | 1,19175E-08 | 1,52417323    | 0,656093402     | 6,088495575     |
| SEPTIN9                                                                                       | 5,46209E-08 | 0,607929082 | 0,781 | 0,227 | 0,001152556 | 1,524069911   | 0,65613788      | 3,440528634     |
| ACOT7                                                                                         | 2,9033E-18  | 0,606907637 | 0,531 | 0,039 | 6,12626E-14 | 1,522991233   | 0,656602598     | 13,61538462     |
| NDUFA7                                                                                        | 3,55047E-12 | 0,606088296 | 0,625 | 0,105 | 7,49185E-08 | 1,522126535   | 0,656975604     | 5,952380952     |
| B4GALT1                                                                                       | 3,48157E-09 | 0,605912269 | 0,5   | 0,094 | 7,34646E-05 | 1,521940828   | 0,657055768     | 5,319148936     |
| PCBD1                                                                                         | 8,94097E-10 | 0,605575297 | 0,375 | 0,047 | 1,88663E-05 | 1,521585388   | 0,657209256     | 7,978723404     |
| ATP5PF                                                                                        | 5,91898E-05 | 0,605560854 | 0,781 | 0,375 | 1           | 1,521570156   | 0,657215835     | 2,082666667     |
| PARP1                                                                                         | 6,44279E-07 | 0,605423709 | 0,469 | 0,113 | 0,013594923 | 1,521425519   | 0,657278314     | 4,150442478     |
| AKT1                                                                                          | 1,12093E-09 | 0,605284664 | 0,781 | 0,188 | 2,36528E-05 | 1,521278893   | 0,657341665     | 4,154255319     |
| PDHB                                                                                          | 2,42673E-14 | 0,604988443 | 0,531 | 0,059 | 5,12064E-10 | 1,520966569   | 0,657476647     | 9               |
| SUGT1                                                                                         | 7,90171E-08 | 0,604519183 | 0,531 | 0,121 | 0,001667341 | 1,520471931   | 0,657690537     | 4,388429752     |
| HSPB2                                                                                         | 0,000301659 | 0,603975146 | 0,438 | 0,148 | 1           | 1,519898673   | 0,657938597     | 2,959459459     |
| DECR1                                                                                         | 3,98814E-07 | 0,60338366  | 0,562 | 0,145 | 0,00841538  | 1,519275661   | 0,658208399     | 3,875862069     |
| RPL35A                                                                                        | 1,34564E-05 | 0,603295968 | 1     | 0,84  | 0,283943411 | 1,519183318   | 0,658248408     | 1,19047619      |
| MLEC                                                                                          | 5,81527E-09 | 0,602947275 | 0,625 | 0,141 | 0,000122708 | 1,518816181   | 0,658407523     | 4,432624113     |
| PSMD1                                                                                         | 5,08269E-10 | 0,602309281 | 0,594 | 0,117 | 1,0725E-05  | 1,518144673   | 0,658698751     | 5,076923077     |
| UBL5                                                                                          | 7,11952E-05 | 0,602140718 | 0,906 | 0,527 | 1           | 1,517967305   | 0,658775717     | 1,719165085     |
| CD2BP2                                                                                        | 5,75559E-13 | 0,601452865 | 0,562 | 0,078 | 1,21449E-08 | 1,517243737   | 0,659089885     | 7,205128205     |
| HADHB                                                                                         | 2,87858E-05 | 0,600659669 | 0,625 | 0,219 | 0,60740838  | 1,516409783   | 0,659452353     | 2,853881279     |
| SDC3                                                                                          | 2,06975E-06 | 0,600005121 | 0,938 | 0,398 | 0,043673803 | 1,515721947   | 0,659751613     | 2,35678392      |
| SWI5                                                                                          | 7,08319E-12 | 0,599690613 | 0,531 | 0,078 | 1,49462E-07 | 1,515391554   | 0,659895455     | 6,807692308     |
| ATP5MC3                                                                                       | 1,50772E-06 | 0,599106176 | 0,844 | 0,332 | 0,031814504 | 1,514777792   | 0,660162834     | 2,542168675     |
| DUSP10                                                                                        | 2,01087E-19 | 0,598201932 | 0,469 | 0,023 | 4,24314E-15 | 1,513828666   | 0,660576737     | 20,39130435     |
| YWHAB                                                                                         | 0,000144927 | 0,596912817 | 0,812 | 0,445 | 1           | 1,512476595   | 0,661167256     | 1,824719101     |
| CTSD                                                                                          | 1,92675E-05 | 0,59581634  | 0,844 | 0,367 | 0,406562689 | 1,511327519   | 0,661669948     | 2,29972752      |
| RPL37                                                                                         | 1,06417E-06 | 0,594811822 | 1     | 0,898 | 0,022454962 | 1,51027558    | 0,662130815     | 1,113585746     |
| NABP2                                                                                         | 3,76964E-13 | 0,594784687 | 0,438 | 0,043 | 7,95431E-09 | 1,510247174   | 0,662143268     | 10,18604651     |
| MTX2                                                                                          | 2,44254E-17 | 0,593988568 | 0,531 | 0,043 | 5,15401E-13 | 1,509414008   | 0,662508758     | 12,34883721     |
| TMEM47                                                                                        | 1,0548E-08  | 0,593682836 | 0,719 | 0,188 | 0,000222573 | 1,50909417    | 0,66264917      | 3,824468085     |
| PLPP1                                                                                         | 4,73794E-05 | 0,593371895 | 0,969 | 0,57  | 0,999752774 | 1,508768954   | 0,662792005     | 1,7             |

Supplementary Table 1

| Differentially expressed genes_adjacent-skin-XL_comparing SC-Keloid vs. (SC-Myel, SC-Nonmyel) |             |             |       |       |             |               |                 |                 |
|-----------------------------------------------------------------------------------------------|-------------|-------------|-------|-------|-------------|---------------|-----------------|-----------------|
| gene                                                                                          | p_val       | avg_log2FC  | pct.1 | pct.2 | p_val_adj   | Foldchange_UP | Foldchange_DOWN | Ratio_pct1_pct2 |
| MPDU1                                                                                         | 3,071E-13   | 0,592646143 | 0,438 | 0,043 | 6,48011E-09 | 1,508010154   | 0,663125508     | 10,18604651     |
| CDKN2A                                                                                        | 2,00705E-19 | 0,592250411 | 0,344 | 0,004 | 4,23507E-15 | 1,507596563   | 0,663307429     | 86              |
| CCDC167                                                                                       | 1,34816E-15 | 0,592174219 | 0,438 | 0,031 | 2,84476E-11 | 1,507516945   | 0,663342461     | 14,12903226     |
| EDNRB                                                                                         | 3,64754E-07 | 0,591194188 | 0,656 | 0,184 | 0,007696675 | 1,506493228   | 0,663793226     | 3,565217391     |
| EXOSC10                                                                                       | 1,29997E-08 | 0,590178976 | 0,406 | 0,066 | 0,000274307 | 1,505433495   | 0,664260496     | 6,151515152     |
| LSM10                                                                                         | 1,22053E-12 | 0,590116576 | 0,531 | 0,07  | 2,57544E-08 | 1,505368383   | 0,664289227     | 7,585714286     |
| EFEMP2                                                                                        | 1,62891E-11 | 0,590072492 | 0,531 | 0,078 | 3,43716E-07 | 1,505322385   | 0,664309526     | 6,807692308     |
| STMN1                                                                                         | 0,000460134 | 0,588454757 | 0,875 | 0,438 | 1           | 1,503635369   | 0,665054853     | 1,997716895     |
| MELTF                                                                                         | 1,86558E-08 | 0,588238575 | 0,219 | 0,016 | 0,000393656 | 1,503410072   | 0,665154517     | 13,6875         |
| RPL26L1                                                                                       | 1,2471E-11  | 0,588077518 | 0,531 | 0,078 | 2,6315E-07  | 1,503242247   | 0,665228776     | 6,807692308     |
| ANXA11                                                                                        | 1,0508E-12  | 0,58767225  | 0,625 | 0,098 | 2,21729E-08 | 1,50282003    | 0,665415672     | 6,37755102      |
| NCBP2                                                                                         | 1,1201E-11  | 0,587646911 | 0,469 | 0,059 | 2,36352E-07 | 1,502793635   | 0,665427359     | 7,949152542     |
| KRTCAP2                                                                                       | 4,00777E-06 | 0,586964979 | 0,906 | 0,352 | 0,084568053 | 1,502083464   | 0,665741967     | 2,573863636     |
| SNX17                                                                                         | 2,28791E-11 | 0,586954415 | 0,562 | 0,09  | 4,82772E-07 | 1,502072465   | 0,665746842     | 6,244444444     |
| SMIM26                                                                                        | 5,11562E-07 | 0,586477999 | 0,594 | 0,164 | 0,010794478 | 1,501576523   | 0,665966725     | 3,62195122      |
| C1QBP                                                                                         | 4,06621E-08 | 0,585250508 | 0,594 | 0,145 | 0,000858012 | 1,500299477   | 0,666533592     | 4,096551724     |
| RTN3                                                                                          | 1,24016E-05 | 0,584445713 | 0,531 | 0,156 | 0,261685793 | 1,499462781   | 0,666905516     | 3,403846154     |
| MYO10                                                                                         | 2,3932E-12  | 0,583637966 | 0,406 | 0,039 | 5,04989E-08 | 1,498623486   | 0,667279013     | 10,41025641     |
| C11orf58                                                                                      | 1,04775E-05 | 0,583289224 | 0,875 | 0,359 | 0,221085833 | 1,498261268   | 0,667440333     | 2,437325905     |
| HYI                                                                                           | 1,21188E-08 | 0,583287814 | 0,562 | 0,125 | 0,00025572  | 1,498259804   | 0,667440986     | 4,496           |
| CRLF1                                                                                         | 1,41588E-11 | 0,583229217 | 0,281 | 0,016 | 2,98764E-07 | 1,498198951   | 0,667468095     | 17,5625         |
| REEP5                                                                                         | 1,42268E-06 | 0,582833385 | 0,812 | 0,277 | 0,030019997 | 1,497787947   | 0,667651253     | 2,931407942     |
| MACIR                                                                                         | 5,47843E-13 | 0,582077758 | 0,438 | 0,043 | 1,156E-08   | 1,49700367    | 0,668001035     | 10,18604651     |
| IFI27                                                                                         | 0,005375672 | 0,580844946 | 0,5   | 0,242 | 1           | 1,495724997   | 0,668572099     | 2,066115702     |
| FHL3                                                                                          | 2,15942E-12 | 0,580697896 | 0,406 | 0,039 | 4,5566E-08  | 1,495572549   | 0,668640248     | 10,41025641     |
| CAPZB                                                                                         | 7,12848E-05 | 0,580363177 | 0,719 | 0,305 | 1           | 1,495225602   | 0,668795397     | 2,357377049     |
| SNRPD3                                                                                        | 7,28727E-09 | 0,580276666 | 0,688 | 0,164 | 0,000153769 | 1,495135943   | 0,668835502     | 4,195121951     |
| SNX3                                                                                          | 0,000205302 | 0,579743122 | 0,812 | 0,371 | 1           | 1,494583108   | 0,6690829       | 2,188679245     |
| COL5A3                                                                                        | 6,60168E-06 | 0,579415517 | 0,781 | 0,281 | 0,139302038 | 1,494243759   | 0,669234852     | 2,779359431     |
| PSMC1                                                                                         | 3,66446E-07 | 0,578857175 | 0,5   | 0,121 | 0,007732382 | 1,493665579   | 0,669493904     | 4,132231405     |

Supplementary Table 1

| Differentially expressed genes_adjacent-skin-XL_comparing SC-Keloid vs. (SC-Myel, SC-Nonmyel) |             |             |       |       |             |               |                 |                 |
|-----------------------------------------------------------------------------------------------|-------------|-------------|-------|-------|-------------|---------------|-----------------|-----------------|
| gene                                                                                          | p_val       | avg_log2FC  | pct.1 | pct.2 | p_val_adj   | Foldchange_UP | Foldchange_DOWN | Ratio_pct1_pct2 |
| SEC61B                                                                                        | 1,56385E-05 | 0,578297358 | 0,906 | 0,438 | 0,329987962 | 1,493086095   | 0,669753742     | 2,068493151     |
| GLT8D1                                                                                        | 2,52672E-11 | 0,576574408 | 0,625 | 0,109 | 5,33162E-07 | 1,49130403    | 0,670554079     | 5,733944954     |
| EIF6                                                                                          | 1,02563E-09 | 0,576277872 | 0,625 | 0,133 | 2,16418E-05 | 1,490997534   | 0,670691921     | 4,69924812      |
| FSCN1                                                                                         | 6,56269E-11 | 0,576070705 | 0,625 | 0,117 | 1,38479E-06 | 1,490783447   | 0,670788237     | 5,341880342     |
| ISLR                                                                                          | 2,73095E-21 | 0,575855689 | 0,375 | 0,004 | 5,76258E-17 | 1,49056128    | 0,670888217     | 93,75           |
| SERBP1                                                                                        | 1,91503E-06 | 0,575438748 | 0,875 | 0,336 | 0,040408948 | 1,490130568   | 0,671082133     | 2,604166667     |
| RPS7                                                                                          | 4,13701E-05 | 0,575327785 | 1     | 0,824 | 0,872951003 | 1,490015962   | 0,67113375      | 1,213592233     |
| C5orf15                                                                                       | 6,9939E-09  | 0,575211457 | 0,625 | 0,145 | 0,000147578 | 1,489895823   | 0,671187867     | 4,310344828     |
| CAPG                                                                                          | 3,19317E-23 | 0,574808762 | 0,406 | 0,004 | 6,73791E-19 | 1,489480011   | 0,67137524      | 101,5           |
| TPGS1                                                                                         | 2,91529E-10 | 0,574360458 | 0,594 | 0,109 | 6,15156E-06 | 1,48901724    | 0,671583896     | 5,449541284     |
| PRLR                                                                                          | 0,000247725 | 0,574319583 | 0,156 | 0,023 | 1           | 1,488975053   | 0,671602924     | 6,782608696     |
| DYRK2                                                                                         | 1,26059E-11 | 0,574271275 | 0,406 | 0,043 | 2,65998E-07 | 1,488925197   | 0,671625413     | 9,441860465     |
| MTCH2                                                                                         | 5,9331E-06  | 0,573268435 | 0,375 | 0,082 | 0,125194427 | 1,487890581   | 0,672092432     | 4,573170732     |
| MORF4L2                                                                                       | 4,99404E-06 | 0,573140246 | 0,938 | 0,41  | 0,105379137 | 1,487758382   | 0,672152153     | 2,287804878     |
| DCTN3                                                                                         | 1,99675E-07 | 0,572667149 | 0,625 | 0,168 | 0,004213349 | 1,487270588   | 0,672372605     | 3,720238095     |
| SRPX                                                                                          | 1,49624E-12 | 0,572247601 | 0,5   | 0,062 | 3,15721E-08 | 1,486838139   | 0,672568166     | 8,064516129     |
| SLC25A5                                                                                       | 1,21953E-06 | 0,572237275 | 0,875 | 0,34  | 0,025733231 | 1,486827498   | 0,672572979     | 2,573529412     |
| DUT                                                                                           | 2,10918E-05 | 0,5705945   | 0,656 | 0,242 | 0,445058645 | 1,485135434   | 0,673339264     | 2,710743802     |
| PPM1G                                                                                         | 8,76082E-10 | 0,568427029 | 0,5   | 0,086 | 1,84862E-05 | 1,482905876   | 0,674351634     | 5,813953488     |
| SLC1A5                                                                                        | 8,64449E-12 | 0,56815764  | 0,438 | 0,051 | 1,82407E-07 | 1,482629005   | 0,674477564     | 8,588235294     |
| RPS20                                                                                         | 3,72948E-05 | 0,566872899 | 0,938 | 0,547 | 0,786957122 | 1,481309289   | 0,675078464     | 1,714808044     |
| GLO1                                                                                          | 3,1714E-08  | 0,566775307 | 0,594 | 0,137 | 0,000669196 | 1,481209089   | 0,675124132     | 4,335766423     |
| UQCC2                                                                                         | 4,38893E-09 | 0,566762504 | 0,594 | 0,125 | 9,26109E-05 | 1,481195944   | 0,675130123     | 4,752           |
| EMC7                                                                                          | 4,45928E-07 | 0,56552525  | 0,688 | 0,199 | 0,009409531 | 1,479926216   | 0,675709362     | 3,457286432     |
| CHID1                                                                                         | 2,75274E-14 | 0,565366656 | 0,688 | 0,105 | 5,80856E-10 | 1,479763538   | 0,675783647     | 6,552380952     |
| TPM3                                                                                          | 1,14805E-06 | 0,56521995  | 0,781 | 0,273 | 0,024224989 | 1,47961307    | 0,67585237      | 2,860805861     |
| LY6E                                                                                          | 5,87694E-11 | 0,565152629 | 0,75  | 0,16  | 1,24009E-06 | 1,479544029   | 0,675883908     | 4,6875          |
| SRI                                                                                           | 1,07423E-05 | 0,564778214 | 0,812 | 0,312 | 0,226673373 | 1,4791601     | 0,676059339     | 2,602564103     |
| FAM89B                                                                                        | 1,62891E-11 | 0,564681199 | 0,531 | 0,078 | 3,43716E-07 | 1,479060637   | 0,676104803     | 6,807692308     |
| TRIR                                                                                          | 0,000291214 | 0,564201901 | 0,875 | 0,41  | 1           | 1,478569338   | 0,676329459     | 2,134146341     |



Supplementary Table 1

| Differentially expressed genes_adjacent-skin-XL_comparing SC-Keloid vs. (SC-Myel, SC-Nonmyel) |             |             |       |       |             |               |                 |                 |
|-----------------------------------------------------------------------------------------------|-------------|-------------|-------|-------|-------------|---------------|-----------------|-----------------|
| gene                                                                                          | p_val       | avg_log2FC  | pct.1 | pct.2 | p_val_adj   | Foldchange_UP | Foldchange_DOWN | Ratio_pct1_pct2 |
| GUK1                                                                                          | 1,90277E-05 | 0,56397763  | 0,844 | 0,379 | 0,401502502 | 1,478339508   | 0,676434604     | 2,226912929     |
| CLDN4                                                                                         | 1,59511E-16 | 0,563697503 | 0,375 | 0,016 | 3,36584E-12 | 1,478052489   | 0,676565959     | 23,4375         |
| NPM1                                                                                          | 0,000278114 | 0,561952259 | 0,906 | 0,539 | 1           | 1,476265553   | 0,677384904     | 1,680890538     |
| TNFRSF19                                                                                      | 4,27264E-13 | 0,561639693 | 0,688 | 0,109 | 9,01569E-09 | 1,475945749   | 0,677531678     | 6,311926606     |
| POLR2G                                                                                        | 6,42263E-11 | 0,56126385  | 0,656 | 0,129 | 1,35524E-06 | 1,475561294   | 0,677708208     | 5,085271318     |
| PTPRE                                                                                         | 2,84766E-08 | 0,561176236 | 0,469 | 0,09  | 0,000600884 | 1,475471686   | 0,677749366     | 5,211111111     |
| TOMM6                                                                                         | 1,40007E-07 | 0,560783145 | 0,812 | 0,25  | 0,002954284 | 1,475069719   | 0,677934058     | 3,248           |
| CMPK1                                                                                         | 2,29989E-06 | 0,560710118 | 0,625 | 0,188 | 0,048529927 | 1,474995055   | 0,677968374     | 3,324468085     |
| RPS9                                                                                          | 7,39803E-05 | 0,560557262 | 1     | 0,789 | 1           | 1,474838785   | 0,67804021      | 1,267427123     |
| RRAGA                                                                                         | 6,58558E-09 | 0,560498381 | 0,656 | 0,152 | 0,000138962 | 1,474778594   | 0,678067884     | 4,315789474     |
| APOC2                                                                                         | 1,24307E-11 | 0,559850657 | 0,375 | 0,035 | 2,623E-07   | 1,474116614   | 0,678372383     | 10,71428571     |
| VDAC2                                                                                         | 5,87317E-06 | 0,559642338 | 0,75  | 0,262 | 0,123929827 | 1,473903773   | 0,678470344     | 2,86259542      |
| UFC1                                                                                          | 1,62058E-11 | 0,558748314 | 0,719 | 0,137 | 3,41959E-07 | 1,472990692   | 0,678890916     | 5,248175182     |
| CHST3                                                                                         | 2,09208E-12 | 0,558475102 | 0,656 | 0,109 | 4,4145E-08  | 1,47271177    | 0,679019494     | 6,018348624     |
| EIF3M                                                                                         | 2,28222E-07 | 0,558163646 | 0,656 | 0,188 | 0,004815715 | 1,472393867   | 0,6791661       | 3,489361702     |
| RPS27L                                                                                        | 0,000211355 | 0,558075906 | 0,844 | 0,406 | 1           | 1,472304324   | 0,679207406     | 2,078817734     |
| ALKBH7                                                                                        | 1,16085E-09 | 0,556246491 | 0,656 | 0,141 | 2,44951E-05 | 1,470438546   | 0,680069224     | 4,65248227      |
| COX4I1                                                                                        | 8,0391E-05  | 0,555801695 | 0,906 | 0,504 | 1           | 1,469985267   | 0,680278927     | 1,797619048     |
| HOXD-AS2                                                                                      | 1,33663E-19 | 0,555661205 | 0,406 | 0,012 | 2,82043E-15 | 1,469842125   | 0,680345176     | 33,83333333     |
| PRAF2                                                                                         | 6,60292E-09 | 0,555658643 | 0,406 | 0,066 | 0,000139328 | 1,469839516   | 0,680346384     | 6,151515152     |
| SRP72                                                                                         | 4,29191E-09 | 0,555064918 | 0,719 | 0,18  | 9,05635E-05 | 1,469234744   | 0,680626431     | 3,994444444     |
| DOK1                                                                                          | 2,89553E-10 | 0,554938606 | 0,344 | 0,035 | 6,10986E-06 | 1,469106114   | 0,680686024     | 9,828571429     |
| TMEM230                                                                                       | 7,35497E-08 | 0,554379104 | 0,688 | 0,184 | 0,001551972 | 1,46853648    | 0,680950057     | 3,739130435     |
| DCBLD2                                                                                        | 6,51352E-06 | 0,554211699 | 0,5   | 0,145 | 0,1374417   | 1,468366086   | 0,681029077     | 3,448275862     |
| RHOC                                                                                          | 0,000312485 | 0,553881136 | 0,938 | 0,527 | 1           | 1,468029679   | 0,681185138     | 1,779886148     |
| AFAP1L1                                                                                       | 5,69635E-19 | 0,553574655 | 0,469 | 0,023 | 1,20199E-14 | 1,46771785    | 0,681329862     | 20,39130435     |
| ARF4                                                                                          | 1,16459E-05 | 0,552866932 | 0,781 | 0,324 | 0,245739348 | 1,466998028   | 0,681664174     | 2,410493827     |
| UNC5B                                                                                         | 1,82586E-19 | 0,552738878 | 0,375 | 0,008 | 3,85275E-15 | 1,466867823   | 0,681724682     | 46,875          |
| AP2A1                                                                                         | 1,06718E-07 | 0,552127556 | 0,406 | 0,074 | 0,00225185  | 1,46624639    | 0,682013614     | 5,486486486     |
| BTF3L4                                                                                        | 1,95567E-09 | 0,551910323 | 0,625 | 0,129 | 4,12666E-05 | 1,466025627   | 0,682116316     | 4,84496124      |

Supplementary Table 1

| Differentially expressed genes_adjacent-skin-XL_comparing SC-Keloid vs. (SC-Myel, SC-Nonmyel) |             |             |       |       |             |               |                 |                 |
|-----------------------------------------------------------------------------------------------|-------------|-------------|-------|-------|-------------|---------------|-----------------|-----------------|
| gene                                                                                          | p_val       | avg_log2FC  | pct.1 | pct.2 | p_val_adj   | Foldchange_UP | Foldchange_DOWN | Ratio_pct1_pct2 |
| NDUFB3                                                                                        | 8,91972E-10 | 0,551418708 | 0,656 | 0,141 | 1,88215E-05 | 1,465526147   | 0,682348795     | 4,65248227      |
| PRKAR1B                                                                                       | 1,12056E-11 | 0,550879423 | 0,375 | 0,035 | 2,3645E-07  | 1,46497843    | 0,682603907     | 10,71428571     |
| DESI1                                                                                         | 6,7021E-10  | 0,55086944  | 0,406 | 0,055 | 1,41421E-05 | 1,464968293   | 0,68260863      | 7,381818182     |
| JTB                                                                                           | 9,97371E-07 | 0,550652304 | 0,75  | 0,23  | 0,021045521 | 1,464747821   | 0,682711376     | 3,260869565     |
| CUTA                                                                                          | 1,32821E-05 | 0,550180191 | 0,719 | 0,273 | 0,280266545 | 1,46426857    | 0,682934825     | 2,633699634     |
| NDUFS4                                                                                        | 9,26729E-06 | 0,549931644 | 0,719 | 0,262 | 0,195549151 | 1,464016328   | 0,683052491     | 2,744274809     |
| APP                                                                                           | 3,0478E-05  | 0,549816008 | 0,844 | 0,406 | 0,643116158 | 1,463898988   | 0,683107242     | 2,078817734     |
| HS2ST1                                                                                        | 1,39928E-07 | 0,549747207 | 0,25  | 0,027 | 0,002952628 | 1,463829178   | 0,683139819     | 9,259259259     |
| FBN1                                                                                          | 5,17299E-12 | 0,549550849 | 0,531 | 0,074 | 1,09155E-07 | 1,463629956   | 0,683232805     | 7,175675676     |
| TRAF1                                                                                         | 2,19124E-17 | 0,549548652 | 0,438 | 0,023 | 4,62374E-13 | 1,463627727   | 0,683233845     | 19,04347826     |
| CMC1                                                                                          | 2,15119E-17 | 0,549257873 | 0,5   | 0,035 | 4,53922E-13 | 1,463332759   | 0,683371567     | 14,28571429     |
| PRDX6                                                                                         | 2,39676E-06 | 0,548914362 | 0,812 | 0,312 | 0,050573985 | 1,462984375   | 0,683534299     | 2,602564103     |
| SQLE                                                                                          | 2,32831E-09 | 0,54759265  | 0,438 | 0,07  | 4,91296E-05 | 1,461644689   | 0,6841608       | 6,257142857     |
| C2orf27A                                                                                      | 6,96316E-22 | 0,546867177 | 0,469 | 0,016 | 1,4693E-17  | 1,460909873   | 0,684504923     | 29,3125         |
| EID1                                                                                          | 4,1613E-05  | 0,54552204  | 0,969 | 0,57  | 0,878075411 | 1,459548387   | 0,685143438     | 1,7             |
| NDUFB4                                                                                        | 1,07526E-05 | 0,545054853 | 0,812 | 0,336 | 0,22689104  | 1,459075819   | 0,685365344     | 2,416666667     |
| METTL9                                                                                        | 1,48175E-13 | 0,544316662 | 0,656 | 0,098 | 3,12664E-09 | 1,458329437   | 0,685716118     | 6,693877551     |
| ACTR10                                                                                        | 4,41915E-06 | 0,544246025 | 0,594 | 0,18  | 0,09324855  | 1,458258036   | 0,685749693     | 3,3             |
| TMBIM4                                                                                        | 1,1109E-05  | 0,544071775 | 0,812 | 0,324 | 0,234411009 | 1,458081918   | 0,685832523     | 2,50617284      |
| PCNA                                                                                          | 9,46056E-08 | 0,543886623 | 0,375 | 0,062 | 0,001996274 | 1,457894803   | 0,685920546     | 6,048387097     |
| CDK4                                                                                          | 6,04836E-09 | 0,542904385 | 0,531 | 0,105 | 0,000127626 | 1,456902554   | 0,686387705     | 5,057142857     |
| ITIH5                                                                                         | 0,000216124 | 0,542055553 | 0,469 | 0,168 | 1           | 1,456045615   | 0,686791671     | 2,791666667     |
| CNIH4                                                                                         | 6,12691E-08 | 0,540390867 | 0,469 | 0,094 | 0,00129284  | 1,454366493   | 0,687584598     | 4,989361702     |
| TMEM115                                                                                       | 5,87232E-07 | 0,54027445  | 0,344 | 0,059 | 0,012391183 | 1,454249139   | 0,687640084     | 5,830508475     |
| SPCS2                                                                                         | 0,000379257 | 0,539528905 | 0,875 | 0,418 | 1           | 1,453497817   | 0,687995529     | 2,093301435     |
| ECHDC1                                                                                        | 1,86116E-09 | 0,539465902 | 0,625 | 0,133 | 3,92724E-05 | 1,453434344   | 0,688025575     | 4,69924812      |
| ADH5                                                                                          | 2,84037E-06 | 0,539335793 | 0,594 | 0,168 | 0,05993463  | 1,453303272   | 0,688087627     | 3,535714286     |
| COX8A                                                                                         | 7,42334E-05 | 0,539024516 | 0,812 | 0,375 | 1           | 1,45298974    | 0,688236105     | 2,165333333     |
| MRPS12                                                                                        | 4,11174E-16 | 0,538687993 | 0,469 | 0,035 | 8,67619E-12 | 1,452650855   | 0,688396662     | 13,4            |
| VKORC1                                                                                        | 8,46223E-07 | 0,538666269 | 0,656 | 0,191 | 0,017856142 | 1,452628982   | 0,688407028     | 3,434554974     |

Supplementary Table 1

| Differentially expressed genes_adjacent-skin-XL_comparing SC-Keloid vs. (SC-Myel, SC-Nonmyel) |             |             |       |       |             |               |                 |                 |
|-----------------------------------------------------------------------------------------------|-------------|-------------|-------|-------|-------------|---------------|-----------------|-----------------|
| gene                                                                                          | p_val       | avg_log2FC  | pct.1 | pct.2 | p_val_adj   | Foldchange_UP | Foldchange_DOWN | Ratio_pct1_pct2 |
| HAGH                                                                                          | 3,73533E-11 | 0,538536267 | 0,594 | 0,102 | 7,88192E-07 | 1,45249809    | 0,688469064     | 5,823529412     |
| ACP1                                                                                          | 7,15714E-16 | 0,538275764 | 0,688 | 0,09  | 1,51023E-11 | 1,452235841   | 0,688593389     | 7,644444444     |
| RBIS                                                                                          | 4,43793E-06 | 0,53822531  | 0,781 | 0,273 | 0,093644721 | 1,452185054   | 0,688617471     | 2,860805861     |
| ILK                                                                                           | 3,37245E-07 | 0,538222784 | 0,688 | 0,207 | 0,007116214 | 1,452182512   | 0,688618677     | 3,323671498     |
| RAB34                                                                                         | 2,20931E-07 | 0,538165346 | 0,688 | 0,199 | 0,004661874 | 1,452124697   | 0,688646094     | 3,457286432     |
| S100B                                                                                         | 0,001632504 | 0,537796454 | 1     | 0,805 | 1           | 1,451753441   | 0,6888222       | 1,242236025     |
| TMA7                                                                                          | 0,000302107 | 0,537631377 | 0,938 | 0,652 | 1           | 1,451587338   | 0,688901022     | 1,438650307     |
| EIF3L                                                                                         | 1,33815E-06 | 0,537586731 | 0,688 | 0,215 | 0,02823627  | 1,451542417   | 0,688922341     | 3,2             |
| SEMA3C                                                                                        | 9,39893E-06 | 0,536338446 | 0,938 | 0,395 | 0,198326859 | 1,45028702    | 0,689518686     | 2,374683544     |
| DNM1                                                                                          | 9,87864E-16 | 0,536222317 | 0,281 | 0,004 | 2,08449E-11 | 1,450170284   | 0,689574191     | 70,25           |
| EPDR1                                                                                         | 3,95687E-08 | 0,535836573 | 0,406 | 0,07  | 0,00083494  | 1,449782594   | 0,689758592     | 5,8             |
| SNRPB2                                                                                        | 4,75861E-05 | 0,535761295 | 0,656 | 0,242 | 1           | 1,449706948   | 0,689794583     | 2,710743802     |
| EEF1E1                                                                                        | 2,16004E-10 | 0,535582069 | 0,406 | 0,051 | 4,55789E-06 | 1,449526862   | 0,689880282     | 7,960784314     |
| DNAJB11                                                                                       | 4,0548E-07  | 0,53467486  | 0,625 | 0,172 | 0,008556038 | 1,448615643   | 0,690314235     | 3,63372093      |
| AP3S1                                                                                         | 3,09333E-07 | 0,534208285 | 0,531 | 0,133 | 0,006527244 | 1,448147229   | 0,690537523     | 3,992481203     |
| SPARC                                                                                         | 1,67658E-05 | 0,534176048 | 1     | 0,926 | 0,353774692 | 1,448114871   | 0,690552952     | 1,079913607     |
| COX5A                                                                                         | 1,79196E-08 | 0,533581309 | 0,656 | 0,16  | 0,000378122 | 1,447518021   | 0,690837686     | 4,1             |
| MORN2                                                                                         | 1,08008E-15 | 0,533011693 | 0,531 | 0,051 | 2,27908E-11 | 1,446946613   | 0,691110502     | 10,41176471     |
| ITGB1BP1                                                                                      | 6,37682E-07 | 0,532574588 | 0,781 | 0,227 | 0,013455723 | 1,446508286   | 0,691319925     | 3,440528634     |
| UBE2S                                                                                         | 7,91444E-05 | 0,532160623 | 0,594 | 0,207 | 1           | 1,446093287   | 0,69151832      | 2,869565217     |
| TTYH3                                                                                         | 6,98239E-08 | 0,531674092 | 0,312 | 0,043 | 0,001473355 | 1,445605692   | 0,691751565     | 7,255813953     |
| GPAA1                                                                                         | 2,42399E-09 | 0,531381308 | 0,625 | 0,133 | 5,11486E-05 | 1,445312347   | 0,691891965     | 4,69924812      |
| ACTL6A                                                                                        | 7,6787E-13  | 0,529620949 | 0,438 | 0,043 | 1,62028E-08 | 1,44354987    | 0,692736718     | 10,18604651     |
| SNRNP200                                                                                      | 1,33027E-07 | 0,529543229 | 0,5   | 0,113 | 0,002807008 | 1,443472107   | 0,692774038     | 4,424778761     |
| CSNK2B                                                                                        | 2,88556E-05 | 0,529214228 | 0,625 | 0,215 | 0,608882415 | 1,443142965   | 0,692932041     | 2,906976744     |
| PYCR1                                                                                         | 1,27193E-17 | 0,529129952 | 0,312 | 0,004 | 2,68389E-13 | 1,443058666   | 0,69297252      | 78              |
| NDUFS7                                                                                        | 1,2802E-08  | 0,528660765 | 0,688 | 0,168 | 0,000270134 | 1,442589437   | 0,693197922     | 4,095238095     |
| PSMB7                                                                                         | 9,99137E-07 | 0,528500323 | 0,688 | 0,215 | 0,021082797 | 1,442429015   | 0,693275017     | 3,2             |
| USF2                                                                                          | 1,89393E-06 | 0,527987987 | 0,625 | 0,188 | 0,039963853 | 1,441916865   | 0,693521259     | 3,324468085     |
| LRRCC1                                                                                        | 7,25359E-08 | 0,526961962 | 0,469 | 0,094 | 0,001530579 | 1,440891758   | 0,694014658     | 4,989361702     |

Supplementary Table 1

| Differentially expressed genes_adjacent-skin-XL_comparing SC-Keloid vs. (SC-Myel, SC-Nonmyel) |             |             |       |       |             |               |                 |                 |
|-----------------------------------------------------------------------------------------------|-------------|-------------|-------|-------|-------------|---------------|-----------------|-----------------|
| gene                                                                                          | p_val       | avg_log2FC  | pct.1 | pct.2 | p_val_adj   | Foldchange_UP | Foldchange_DOWN | Ratio_pct1_pct2 |
| GSTZ1                                                                                         | 1,29948E-13 | 0,526550231 | 0,469 | 0,047 | 2,74203E-09 | 1,4404806     | 0,694212751     | 9,978723404     |
| MRPL15                                                                                        | 3,19317E-23 | 0,526462621 | 0,406 | 0,004 | 6,73791E-19 | 1,440393127   | 0,694254909     | 101,5           |
| NNT                                                                                           | 1,2714E-17  | 0,526303124 | 0,344 | 0,008 | 2,68278E-13 | 1,440233893   | 0,694331667     | 43              |
| PRKDC                                                                                         | 1,39386E-07 | 0,526235155 | 0,656 | 0,176 | 0,002941179 | 1,440166042   | 0,694364379     | 3,727272727     |
| YWHAH                                                                                         | 2,06445E-05 | 0,525948476 | 0,719 | 0,273 | 0,435618556 | 1,439879894   | 0,694502371     | 2,633699634     |
| PDAP1                                                                                         | 2,38541E-08 | 0,525317599 | 0,719 | 0,191 | 0,000503346 | 1,439250386   | 0,694806136     | 3,764397906     |
| HOXB7                                                                                         | 2,20066E-25 | 0,525129395 | 0,406 | 0     | 4,64361E-21 | 1,439062643   | 0,694896782     | #DIV/0!         |
| MDH2                                                                                          | 1,18006E-06 | 0,525112311 | 0,656 | 0,199 | 0,024900411 | 1,439045603   | 0,694905011     | 3,296482412     |
| COX17                                                                                         | 6,05974E-07 | 0,525010083 | 0,688 | 0,199 | 0,012786665 | 1,438943637   | 0,694954253     | 3,457286432     |
| OPRD1                                                                                         | 1,0613E-19  | 0,524924345 | 0,312 | 0     | 2,23945E-15 | 1,438858125   | 0,694995554     | #DIV/0!         |
| COX6C                                                                                         | 4,41202E-06 | 0,524648854 | 0,938 | 0,461 | 0,093097957 | 1,438583393   | 0,69512828      | 2,034707158     |
| CCPG1                                                                                         | 8,84602E-09 | 0,524545969 | 0,656 | 0,148 | 0,00018666  | 1,438480804   | 0,695177855     | 4,432432432     |
| ZNF428                                                                                        | 3,92765E-06 | 0,524379657 | 0,812 | 0,305 | 0,082877431 | 1,438314987   | 0,695257999     | 2,662295082     |
| TCEA1                                                                                         | 1,54645E-07 | 0,523970164 | 0,844 | 0,262 | 0,00326316  | 1,437906795   | 0,695455368     | 3,221374046     |
| ZNF385A                                                                                       | 9,69112E-18 | 0,523362778 | 0,344 | 0,008 | 2,04492E-13 | 1,437301553   | 0,695748222     | 43              |
| NDUFA11                                                                                       | 0,000111281 | 0,523021766 | 0,812 | 0,344 | 1           | 1,436961856   | 0,695912697     | 2,360465116     |
| SCAND1                                                                                        | 7,46874E-09 | 0,522742353 | 0,719 | 0,184 | 0,000157598 | 1,436683358   | 0,69604749      | 3,907608696     |
| ROMO1                                                                                         | 2,57838E-06 | 0,522017014 | 0,719 | 0,242 | 0,054406368 | 1,435961445   | 0,696397527     | 2,97107438      |
| HMGN3                                                                                         | 3,96906E-05 | 0,521239839 | 0,812 | 0,34  | 0,83751069  | 1,435188105   | 0,696772776     | 2,388235294     |
| AGTRAP                                                                                        | 2,54026E-10 | 0,521136641 | 0,375 | 0,043 | 5,36021E-06 | 1,435085449   | 0,696822618     | 8,720930233     |
| GNB1                                                                                          | 2,30978E-05 | 0,521013195 | 0,812 | 0,32  | 0,487387371 | 1,434962658   | 0,696882246     | 2,5375          |
| VPS25                                                                                         | 1,9508E-14  | 0,520986855 | 0,469 | 0,043 | 4,11638E-10 | 1,434936461   | 0,696894969     | 10,90697674     |
| DR1                                                                                           | 7,64549E-09 | 0,519796621 | 0,469 | 0,082 | 0,000161327 | 1,433753115   | 0,69747015      | 5,719512195     |
| GNG10                                                                                         | 1,59374E-07 | 0,519661549 | 0,719 | 0,203 | 0,003362951 | 1,433618887   | 0,697535453     | 3,541871921     |
| AKAP12                                                                                        | 2,18881E-05 | 0,519586161 | 0,469 | 0,141 | 0,461860409 | 1,433543975   | 0,697571904     | 3,326241135     |
| BCL2L13                                                                                       | 8,2354E-13  | 0,518575324 | 0,344 | 0,023 | 1,73775E-08 | 1,432539902   | 0,698060835     | 14,95652174     |
| SLC35B2                                                                                       | 2,24393E-09 | 0,518131969 | 0,5   | 0,09  | 4,73491E-05 | 1,432099735   | 0,698275389     | 5,555555556     |
| TMED2                                                                                         | 7,58628E-08 | 0,517528699 | 0,719 | 0,199 | 0,001600781 | 1,431501021   | 0,698567438     | 3,613065327     |
| MED11                                                                                         | 1,20084E-11 | 0,517443829 | 0,375 | 0,035 | 2,5339E-07  | 1,431416812   | 0,698608534     | 10,71428571     |
| COA3                                                                                          | 1,19307E-13 | 0,516859849 | 0,594 | 0,078 | 2,5175E-09  | 1,430837514   | 0,698891377     | 7,615384615     |

Supplementary Table 1

| Differentially expressed genes_adjacent-skin-XL_comparing SC-Keloid vs. (SC-Myel, SC-Nonmyel) |             |             |       |       |             |               |                 |                 |
|-----------------------------------------------------------------------------------------------|-------------|-------------|-------|-------|-------------|---------------|-----------------|-----------------|
| gene                                                                                          | p_val       | avg_log2FC  | pct.1 | pct.2 | p_val_adj   | Foldchange_UP | Foldchange_DOWN | Ratio_pct1_pct2 |
| KDELR1                                                                                        | 5,75219E-08 | 0,516111715 | 0,75  | 0,215 | 0,001213769 | 1,430095722   | 0,699253892     | 3,488372093     |
| C1orf43                                                                                       | 1,07259E-05 | 0,514333697 | 0,656 | 0,223 | 0,226327729 | 1,428334317   | 0,700116204     | 2,941704036     |
| ITGA1                                                                                         | 2,84154E-07 | 0,514315704 | 0,688 | 0,199 | 0,005995939 | 1,428316503   | 0,700124936     | 3,457286432     |
| VIM                                                                                           | 0,001640874 | 0,514232538 | 1     | 0,988 | 1           | 1,428234169   | 0,700165296     | 1,012145749     |
| PHB2                                                                                          | 1,06586E-06 | 0,514065161 | 0,625 | 0,184 | 0,022490618 | 1,428068479   | 0,700246532     | 3,39673913      |
| RPL31                                                                                         | 0,000225636 | 0,513761272 | 0,875 | 0,441 | 1           | 1,427767702   | 0,700394048     | 1,984126984     |
| NUDT21                                                                                        | 6,41542E-07 | 0,51352622  | 0,438 | 0,094 | 0,01353718  | 1,427535101   | 0,700508169     | 4,659574468     |
| HSP90B1                                                                                       | 0,000731824 | 0,51344568  | 0,844 | 0,543 | 1           | 1,427455409   | 0,700547277     | 1,554327808     |
| SHTN1                                                                                         | 6,79406E-16 | 0,513091237 | 0,469 | 0,035 | 1,43362E-11 | 1,427104754   | 0,700719409     | 13,4            |
| RGS16                                                                                         | 1,80366E-08 | 0,512754098 | 0,75  | 0,23  | 0,00038059  | 1,426771297   | 0,700883177     | 3,260869565     |
| TMEM141                                                                                       | 4,53448E-10 | 0,512013657 | 0,469 | 0,07  | 9,56821E-06 | 1,426039217   | 0,701242987     | 6,7             |
| FAM114A1                                                                                      | 6,6626E-07  | 0,511489934 | 0,625 | 0,18  | 0,014058751 | 1,425521634   | 0,701497596     | 3,472222222     |
| MAZ                                                                                           | 2,8838E-06  | 0,51100833  | 0,531 | 0,148 | 0,060851059 | 1,425045842   | 0,701731811     | 3,587837838     |
| MVP                                                                                           | 3,84429E-12 | 0,510869231 | 0,5   | 0,062 | 8,11184E-08 | 1,424908451   | 0,701799473     | 8,064516129     |
| APEX1                                                                                         | 9,94847E-09 | 0,510718034 | 0,594 | 0,133 | 0,000209923 | 1,424759126   | 0,701873027     | 4,466165414     |
| COPZ1                                                                                         | 2,0275E-07  | 0,51061014  | 0,469 | 0,102 | 0,004278236 | 1,424652578   | 0,701925519     | 4,598039216     |
| SMC4                                                                                          | 5,21449E-08 | 0,509751282 | 0,344 | 0,051 | 0,00110031  | 1,423804713   | 0,70234351      | 6,745098039     |
| PEF1                                                                                          | 2,11029E-10 | 0,509438463 | 0,562 | 0,098 | 4,45293E-06 | 1,423496024   | 0,702495816     | 5,734693878     |
| ARHGAP12                                                                                      | 6,21281E-08 | 0,508608728 | 0,5   | 0,105 | 0,001310964 | 1,422677566   | 0,702899957     | 4,761904762     |
| CNN2                                                                                          | 1,2714E-17  | 0,508384364 | 0,344 | 0,008 | 2,68278E-13 | 1,422456332   | 0,703009279     | 43              |
| BAX                                                                                           | 4,3271E-06  | 0,50755742  | 0,531 | 0,152 | 0,091306147 | 1,421641222   | 0,703412355     | 3,493421053     |
| CSPG4                                                                                         | 7,00097E-10 | 0,507391638 | 0,562 | 0,102 | 1,47728E-05 | 1,42147787    | 0,703493189     | 5,509803922     |
| MRPL20                                                                                        | 2,44208E-07 | 0,507220431 | 0,656 | 0,184 | 0,005153024 | 1,42130919    | 0,703576679     | 3,565217391     |
| ERH                                                                                           | 7,8485E-06  | 0,506905914 | 0,844 | 0,32  | 0,165611118 | 1,420999369   | 0,70373008      | 2,6375          |
| GALR1                                                                                         | 1,83586E-09 | 0,506427208 | 0,438 | 0,066 | 3,87385E-05 | 1,42052794    | 0,703963626     | 6,636363636     |
| ADARB1                                                                                        | 2,4996E-17  | 0,505198971 | 0,438 | 0,023 | 5,2744E-13  | 1,41931909    | 0,7045632       | 19,04347826     |
| MCAM                                                                                          | 0,000179067 | 0,505051899 | 0,812 | 0,41  | 1           | 1,419174408   | 0,704635029     | 1,980487805     |
| MRPL40                                                                                        | 3,72671E-08 | 0,504686057 | 0,5   | 0,102 | 0,000786374 | 1,418814576   | 0,704813735     | 4,901960784     |
| RRAS                                                                                          | 5,11302E-05 | 0,504370645 | 0,656 | 0,234 | 1           | 1,418504419   | 0,704967843     | 2,803418803     |
| NAPRT                                                                                         | 3,22509E-12 | 0,504148523 | 0,5   | 0,062 | 6,80527E-08 | 1,418286038   | 0,70507639      | 8,064516129     |

Supplementary Table 1

| Differentially expressed genes_adjacent-skin-XL_comparing SC-Keloid vs. (SC-Myel, SC-Nonmyel) |             |             |       |       |             |               |                 |                 |
|-----------------------------------------------------------------------------------------------|-------------|-------------|-------|-------|-------------|---------------|-----------------|-----------------|
| gene                                                                                          | p_val       | avg_log2FC  | pct.1 | pct.2 | p_val_adj   | Foldchange_UP | Foldchange_DOWN | Ratio_pct1_pct2 |
| MFSD12                                                                                        | 4,92965E-07 | 0,50413729  | 0,656 | 0,184 | 0,010402047 | 1,418274995   | 0,70508188      | 3,565217391     |
| CCT7                                                                                          | 2,67114E-07 | 0,503759178 | 0,562 | 0,137 | 0,005636372 | 1,417903332   | 0,705266697     | 4,102189781     |
| SMARCE1                                                                                       | 4,37306E-08 | 0,503567712 | 0,688 | 0,176 | 0,000922759 | 1,417715169   | 0,705360302     | 3,909090909     |
| GPR17                                                                                         | 1,46005E-13 | 0,503431436 | 0,438 | 0,039 | 3,08084E-09 | 1,417581259   | 0,705426933     | 11,23076923     |
| PXDN                                                                                          | 9,22226E-13 | 0,503402029 | 0,5   | 0,059 | 1,94599E-08 | 1,417552364   | 0,705441313     | 8,474576271     |
| GRSF1                                                                                         | 2,35926E-10 | 0,503378026 | 0,406 | 0,051 | 4,97828E-06 | 1,41752878    | 0,705453049     | 7,960784314     |
| COA1                                                                                          | 5,86215E-13 | 0,503324937 | 0,438 | 0,043 | 1,23697E-08 | 1,417476617   | 0,705479009     | 10,18604651     |
| PPP1R7                                                                                        | 4,34639E-11 | 0,503128389 | 0,531 | 0,082 | 9,17131E-07 | 1,417283518   | 0,705575128     | 6,475609756     |
| TGFB1                                                                                         | 2,38844E-08 | 0,502837    | 0,625 | 0,148 | 0,000503985 | 1,416997291   | 0,705717651     | 4,222972973     |
| M6PR                                                                                          | 7,74708E-11 | 0,502640209 | 0,625 | 0,113 | 1,63471E-06 | 1,416804019   | 0,705813921     | 5,530973451     |
| LDHB                                                                                          | 7,17001E-06 | 0,502214907 | 0,688 | 0,25  | 0,151294484 | 1,416386411   | 0,706022024     | 2,752           |
| PRKCSH                                                                                        | 2,71895E-07 | 0,501891951 | 0,562 | 0,137 | 0,00573726  | 1,416069379   | 0,706180089     | 4,102189781     |
| MTHFD1L                                                                                       | 5,75596E-16 | 0,501873523 | 0,25  | 0     | 1,21456E-11 | 1,416051292   | 0,706189109     | #DIV/0!         |
| ARHGDI1                                                                                       | 6,41032E-05 | 0,501674673 | 0,812 | 0,367 | 1           | 1,415856127   | 0,706286452     | 2,21253406      |
| TRMT112                                                                                       | 0,001315498 | 0,501041581 | 0,75  | 0,375 | 1           | 1,415234949   | 0,706596456     | 2               |
| PRKRA                                                                                         | 7,25359E-08 | 0,500588188 | 0,469 | 0,094 | 0,001530579 | 1,414790256   | 0,706818552     | 4,989361702     |
| GUSB                                                                                          | 2,59159E-09 | 0,500463692 | 0,594 | 0,121 | 5,46852E-05 | 1,414668174   | 0,706879549     | 4,909090909     |
| ERCC1                                                                                         | 1,40401E-12 | 0,499560342 | 0,562 | 0,078 | 2,9626E-08  | 1,41378265    | 0,707322303     | 7,205128205     |
| COX16                                                                                         | 6,22092E-07 | 0,499299349 | 0,656 | 0,191 | 0,013126757 | 1,41352691    | 0,707450274     | 3,434554974     |
| MESD                                                                                          | 7,32547E-14 | 0,498946006 | 0,594 | 0,078 | 1,54575E-09 | 1,413180754   | 0,707623563     | 7,615384615     |
| PGLS                                                                                          | 5,46318E-09 | 0,498745128 | 0,562 | 0,117 | 0,000115279 | 1,412983999   | 0,707722098     | 4,803418803     |
| NDUFA9                                                                                        | 5,57435E-10 | 0,498305088 | 0,438 | 0,062 | 1,17624E-05 | 1,412553087   | 0,707937995     | 7,064516129     |
| TUBA1A                                                                                        | 0,003477473 | 0,498032743 | 1     | 0,664 | 1           | 1,412286457   | 0,708071649     | 1,506024096     |
| SERPINB8                                                                                      | 2,00549E-07 | 0,497254275 | 0,312 | 0,047 | 0,00423179  | 1,411524602   | 0,708453822     | 6,638297872     |
| HIKESHI                                                                                       | 7,82443E-10 | 0,496010639 | 0,625 | 0,125 | 1,65103E-05 | 1,41030836    | 0,709064789     | 5               |
| RSPO3                                                                                         | 3,29263E-08 | 0,49583053  | 0,25  | 0,023 | 0,000694779 | 1,410132306   | 0,709153315     | 10,86956522     |
| SNRPG                                                                                         | 4,91975E-05 | 0,495028288 | 0,719 | 0,289 | 1           | 1,409348389   | 0,709547766     | 2,487889273     |
| NHP2                                                                                          | 2,14619E-09 | 0,494916447 | 0,625 | 0,133 | 4,52867E-05 | 1,409239138   | 0,709602773     | 4,69924812      |
| MCUR1                                                                                         | 2,87606E-09 | 0,493578727 | 0,594 | 0,121 | 6,06878E-05 | 1,407933045   | 0,710261048     | 4,909090909     |
| GADD45GIP1                                                                                    | 2,72486E-06 | 0,493140544 | 0,625 | 0,184 | 0,057497254 | 1,407505485   | 0,710476805     | 3,39673913      |

Supplementary Table 1

| Differentially expressed genes_adjacent-skin-XL_comparing SC-Keloid vs. (SC-Myel, SC-Nonmyel) |             |             |       |       |             |               |                 |                 |
|-----------------------------------------------------------------------------------------------|-------------|-------------|-------|-------|-------------|---------------|-----------------|-----------------|
| gene                                                                                          | p_val       | avg_log2FC  | pct.1 | pct.2 | p_val_adj   | Foldchange_UP | Foldchange_DOWN | Ratio_pct1_pct2 |
| SIGIRR                                                                                        | 3,77936E-08 | 0,492784454 | 0,625 | 0,148 | 0,000797483 | 1,407158123   | 0,710652189     | 4,222972973     |
| TXNL1                                                                                         | 6,01004E-06 | 0,492295022 | 0,594 | 0,18  | 0,12681786  | 1,406680828   | 0,710893317     | 3,3             |
| TBCB                                                                                          | 0,000488155 | 0,491763147 | 0,812 | 0,344 | 1           | 1,406162326   | 0,711155449     | 2,360465116     |
| DGUOK                                                                                         | 3,03045E-09 | 0,491266197 | 0,656 | 0,145 | 6,39455E-05 | 1,405678043   | 0,711400456     | 4,524137931     |
| EIF2AK4                                                                                       | 3,71174E-12 | 0,490619184 | 0,469 | 0,055 | 7,83214E-08 | 1,405047772   | 0,711719573     | 8,527272727     |
| GNG11                                                                                         | 1,6649E-09  | 0,490503387 | 0,719 | 0,168 | 3,51312E-05 | 1,404935002   | 0,711776701     | 4,279761905     |
| EXTL2                                                                                         | 1,35367E-09 | 0,490081903 | 0,344 | 0,039 | 2,85638E-05 | 1,404524609   | 0,711984677     | 8,820512821     |
| UFD1                                                                                          | 6,11375E-06 | 0,48943738  | 0,438 | 0,105 | 0,129006141 | 1,403897279   | 0,712302826     | 4,171428571     |
| RPL14                                                                                         | 0,001239654 | 0,489408254 | 1     | 0,785 | 1           | 1,403868937   | 0,712317207     | 1,27388535      |
| NDUFA6                                                                                        | 1,90002E-07 | 0,489070857 | 0,656 | 0,172 | 0,004009222 | 1,403540658   | 0,712483813     | 3,813953488     |
| CAPN1                                                                                         | 5,0917E-09  | 0,488339982 | 0,625 | 0,137 | 0,00010744  | 1,402829799   | 0,712844852     | 4,562043796     |
| IFNAR1                                                                                        | 7,41583E-07 | 0,488265762 | 0,594 | 0,156 | 0,015648152 | 1,402757632   | 0,712881525     | 3,807692308     |
| STUB1                                                                                         | 8,44234E-06 | 0,48767491  | 0,656 | 0,211 | 0,178141776 | 1,402183254   | 0,713173544     | 3,109004739     |
| TCEAL7                                                                                        | 1,15834E-10 | 0,487199723 | 0,531 | 0,086 | 2,44421E-06 | 1,401721486   | 0,713408484     | 6,174418605     |
| FKBP8                                                                                         | 7,28475E-05 | 0,486476092 | 0,812 | 0,301 | 1           | 1,401018584   | 0,713766407     | 2,697674419     |
| EIF3I                                                                                         | 8,83479E-08 | 0,486259258 | 0,688 | 0,184 | 0,001864229 | 1,400808029   | 0,713873692     | 3,739130435     |
| ATP5PO                                                                                        | 1,60226E-06 | 0,485935687 | 0,781 | 0,254 | 0,033809221 | 1,400493888   | 0,714033382     | 3,07480315      |
| HTATSF1                                                                                       | 8,39107E-10 | 0,485709484 | 0,406 | 0,055 | 1,7706E-05  | 1,400274319   | 0,714145783     | 7,381818182     |
| HRAS                                                                                          | 1,48171E-06 | 0,485633017 | 0,438 | 0,102 | 0,031265647 | 1,400200102   | 0,714183636     | 4,294117647     |
| VPS29                                                                                         | 2,40518E-05 | 0,484734549 | 0,625 | 0,219 | 0,50751691  | 1,399328371   | 0,714628547     | 2,853881279     |
| PXDC1                                                                                         | 6,48449E-06 | 0,484590148 | 0,688 | 0,227 | 0,136829135 | 1,399188316   | 0,714700079     | 3,030837004     |
| SURF4                                                                                         | 1,14285E-07 | 0,484515465 | 0,625 | 0,16  | 0,002411519 | 1,399115888   | 0,714737077     | 3,90625         |
| CFAP20                                                                                        | 5,39203E-11 | 0,484477129 | 0,656 | 0,121 | 1,13777E-06 | 1,39907871    | 0,71475607      | 5,421487603     |
| MRPL38                                                                                        | 8,10967E-08 | 0,483420503 | 0,562 | 0,129 | 0,001711221 | 1,398054404   | 0,715279747     | 4,356589147     |
| SLC16A3                                                                                       | 7,24756E-09 | 0,48326956  | 0,188 | 0,008 | 0,000152931 | 1,397908139   | 0,715354587     | 23,5            |
| TXNDC15                                                                                       | 1,18104E-06 | 0,483082423 | 0,531 | 0,141 | 0,024921226 | 1,397726824   | 0,715447384     | 3,765957447     |
| MFAP2                                                                                         | 2,57203E-21 | 0,48291444  | 0,375 | 0,004 | 5,42725E-17 | 1,397564086   | 0,715530694     | 93,75           |
| MYG1                                                                                          | 6,90102E-08 | 0,482795977 | 0,375 | 0,062 | 0,001456185 | 1,397449333   | 0,71558945      | 6,048387097     |
| TCEAL4                                                                                        | 3,55263E-06 | 0,482648966 | 0,844 | 0,305 | 0,07496412  | 1,39730694    | 0,715662373     | 2,767213115     |
| RPL39                                                                                         | 0,001287941 | 0,482458801 | 0,969 | 0,855 | 1           | 1,39712277    | 0,715756712     | 1,133333333     |

Supplementary Table 1

| Differentially expressed genes_adjacent-skin-XL_comparing SC-Keloid vs. (SC-Myel, SC-Nonmyel) |             |             |       |       |             |               |                 |                 |
|-----------------------------------------------------------------------------------------------|-------------|-------------|-------|-------|-------------|---------------|-----------------|-----------------|
| gene                                                                                          | p_val       | avg_log2FC  | pct.1 | pct.2 | p_val_adj   | Foldchange_UP | Foldchange_DOWN | Ratio_pct1_pct2 |
| SSRP1                                                                                         | 3,17659E-08 | 0,482457768 | 0,469 | 0,09  | 0,000670293 | 1,39712177    | 0,715757224     | 5,211111111     |
| PDZD11                                                                                        | 7,99979E-15 | 0,4822885   | 0,5   | 0,047 | 1,68803E-10 | 1,396957858   | 0,715841207     | 10,63829787     |
| PRKACB                                                                                        | 6,43083E-11 | 0,481950464 | 0,375 | 0,039 | 1,35697E-06 | 1,396630577   | 0,716008955     | 9,615384615     |
| MRPL13                                                                                        | 5,26874E-11 | 0,481938675 | 0,438 | 0,055 | 1,11176E-06 | 1,396619164   | 0,716014806     | 7,963636364     |
| ATP6V1G1                                                                                      | 2,7465E-05  | 0,481894    | 0,844 | 0,324 | 0,579538626 | 1,396575917   | 0,716036979     | 2,604938272     |
| MRPL17                                                                                        | 4,08383E-09 | 0,479932749 | 0,344 | 0,043 | 8,6173E-05  | 1,394678653   | 0,717011046     | 8               |
| MINPP1                                                                                        | 1,02526E-12 | 0,479750905 | 0,281 | 0,012 | 2,1634E-08  | 1,394502871   | 0,717101428     | 23,41666667     |
| VBP1                                                                                          | 2,0123E-06  | 0,479613944 | 0,531 | 0,141 | 0,042461523 | 1,394370491   | 0,717169508     | 3,765957447     |
| SSR1                                                                                          | 1,71068E-08 | 0,479275943 | 0,625 | 0,145 | 0,000360971 | 1,394043851   | 0,71733755      | 4,310344828     |
| YIPF3                                                                                         | 1,28902E-08 | 0,478970817 | 0,625 | 0,145 | 0,000271995 | 1,393749045   | 0,717489281     | 4,310344828     |
| BAD                                                                                           | 1,91275E-08 | 0,47861594  | 0,594 | 0,129 | 0,00040361  | 1,393406251   | 0,717665792     | 4,604651163     |
| TLE5                                                                                          | 4,40757E-05 | 0,478580681 | 0,906 | 0,41  | 0,930041277 | 1,393372197   | 0,717683331     | 2,209756098     |
| SF3B5                                                                                         | 1,20569E-07 | 0,478454806 | 0,656 | 0,18  | 0,002544125 | 1,39325063    | 0,717745952     | 3,644444444     |
| TLN1                                                                                          | 0,000177088 | 0,478407757 | 0,812 | 0,352 | 1           | 1,393205194   | 0,71776936      | 2,306818182     |
| NIPSNAP3A                                                                                     | 9,78982E-12 | 0,477668556 | 0,344 | 0,027 | 2,06575E-07 | 1,392491533   | 0,718137221     | 12,74074074     |
| CES1                                                                                          | 2,48095E-09 | 0,477362602 | 0,219 | 0,012 | 5,23505E-05 | 1,392196258   | 0,718289533     | 18,25           |
| TALDO1                                                                                        | 0,000195558 | 0,477334207 | 0,75  | 0,32  | 1           | 1,392168857   | 0,71830367      | 2,34375         |
| DNAJC1                                                                                        | 1,08432E-07 | 0,477285233 | 0,531 | 0,125 | 0,002288015 | 1,392121599   | 0,718328055     | 4,248           |
| POP7                                                                                          | 3,85602E-12 | 0,477111257 | 0,406 | 0,039 | 8,13659E-08 | 1,391953732   | 0,718414684     | 10,41025641     |
| EIF3K                                                                                         | 9,73766E-05 | 0,477041305 | 0,781 | 0,312 | 1           | 1,391886241   | 0,718449519     | 2,503205128     |
| B3GAT3                                                                                        | 5,10815E-10 | 0,476237719 | 0,594 | 0,109 | 1,07787E-05 | 1,391111172   | 0,718849809     | 5,449541284     |
| DPH3                                                                                          | 8,26184E-07 | 0,475797428 | 0,406 | 0,086 | 0,0174333   | 1,390686688   | 0,719069226     | 4,720930233     |
| FKBP10                                                                                        | 4,45123E-09 | 0,475697289 | 0,531 | 0,102 | 9,39255E-05 | 1,390590163   | 0,719119138     | 5,205882353     |
| PSMA2                                                                                         | 3,24863E-05 | 0,475507574 | 0,688 | 0,254 | 0,685493179 | 1,390407312   | 0,719213709     | 2,708661417     |
| LAMTOR4                                                                                       | 0,00019156  | 0,475269673 | 0,75  | 0,32  | 1           | 1,390178052   | 0,719332318     | 2,34375         |
| PPP4C                                                                                         | 3,39249E-09 | 0,474914039 | 0,562 | 0,109 | 7,15849E-05 | 1,389835406   | 0,71950966      | 5,155963303     |
| ZNF787                                                                                        | 0,000691403 | 0,473776507 | 0,312 | 0,094 | 1           | 1,388739985   | 0,7200772       | 3,319148936     |
| ANP32A                                                                                        | 1,18792E-09 | 0,47376427  | 0,688 | 0,148 | 2,50662E-05 | 1,388728205   | 0,720083308     | 4,648648649     |
| SNRPB                                                                                         | 0,001554573 | 0,473723568 | 0,719 | 0,375 | 1           | 1,388689027   | 0,720103623     | 1,917333333     |
| CDK6                                                                                          | 1,2292E-07  | 0,473697824 | 0,5   | 0,105 | 0,002593744 | 1,388664247   | 0,720116473     | 4,761904762     |



Supplementary Table 1

| Differentially expressed genes_adjacent-skin-XL_comparing SC-Keloid vs. (SC-Myel, SC-Nonmyel) |             |             |       |       |             |               |                 |                 |
|-----------------------------------------------------------------------------------------------|-------------|-------------|-------|-------|-------------|---------------|-----------------|-----------------|
| gene                                                                                          | p_val       | avg_log2FC  | pct.1 | pct.2 | p_val_adj   | Foldchange_UP | Foldchange_DOWN | Ratio_pct1_pct2 |
| RUNX1                                                                                         | 1,99622E-09 | 0,472971778 | 0,625 | 0,129 | 4,21223E-05 | 1,387965567   | 0,720478969     | 4,84496124      |
| TATDN1                                                                                        | 3,78582E-13 | 0,47173454  | 0,5   | 0,059 | 7,98845E-09 | 1,386775775   | 0,721097108     | 8,474576271     |
| GNB5                                                                                          | 2,37538E-09 | 0,471606333 | 0,219 | 0,012 | 5,0123E-05  | 1,386652543   | 0,721161192     | 18,25           |
| AKR1A1                                                                                        | 2,49974E-06 | 0,471535769 | 0,469 | 0,117 | 0,052746924 | 1,386584722   | 0,721196465     | 4,008547009     |
| SLITRK6                                                                                       | 2,14689E-09 | 0,470590671 | 0,688 | 0,152 | 4,53016E-05 | 1,385676678   | 0,72166907      | 4,526315789     |
| AGAP2-AS1                                                                                     | 5,01789E-11 | 0,469911662 | 0,312 | 0,023 | 1,05883E-06 | 1,385024658   | 0,722008806     | 13,56521739     |
| KLF2                                                                                          | 5,21873E-06 | 0,469629364 | 0,781 | 0,297 | 0,110120397 | 1,384753671   | 0,722150098     | 2,62962963      |
| SNRPE                                                                                         | 7,51796E-06 | 0,469227093 | 0,625 | 0,203 | 0,158636542 | 1,384367611   | 0,722351485     | 3,078817734     |
| COMMD1                                                                                        | 1,41896E-08 | 0,468890675 | 0,5   | 0,098 | 0,000299415 | 1,384044831   | 0,722519948     | 5,102040816     |
| PKN1                                                                                          | 1,49638E-09 | 0,468807251 | 0,625 | 0,129 | 3,1575E-05  | 1,383964801   | 0,722561729     | 4,84496124      |
| PDGFA                                                                                         | 0,015885062 | 0,468779111 | 0,781 | 0,402 | 1           | 1,383937807   | 0,722575823     | 1,94278607      |
| ABHD12                                                                                        | 2,50863E-07 | 0,468636576 | 0,5   | 0,113 | 0,005293468 | 1,383801084   | 0,722647216     | 4,424778761     |
| HBEGF                                                                                         | 2,45176E-05 | 0,468624412 | 0,812 | 0,34  | 0,517346134 | 1,383789416   | 0,722653308     | 2,388235294     |
| LINC00623                                                                                     | 1,14679E-10 | 0,468124119 | 0,594 | 0,105 | 2,41985E-06 | 1,383309633   | 0,722903951     | 5,657142857     |
| TMEM134                                                                                       | 1,16828E-07 | 0,467921637 | 0,406 | 0,074 | 0,002465178 | 1,3831155     | 0,723005418     | 5,486486486     |
| STK17A                                                                                        | 1,80278E-09 | 0,467331806 | 0,688 | 0,152 | 3,80406E-05 | 1,382550143   | 0,723301072     | 4,526315789     |
| RAB32                                                                                         | 8,93296E-09 | 0,466904033 | 0,5   | 0,094 | 0,000188494 | 1,382140264   | 0,723515569     | 5,319148936     |
| ST6GAL1                                                                                       | 1,46247E-13 | 0,466515628 | 0,531 | 0,062 | 3,08595E-09 | 1,381768212   | 0,723710382     | 8,564516129     |
| MRPL41                                                                                        | 3,1655E-07  | 0,465889346 | 0,75  | 0,227 | 0,006679516 | 1,381168509   | 0,724024617     | 3,303964758     |
| RPS17                                                                                         | 0,002655389 | 0,465317426 | 0,812 | 0,48  | 1           | 1,380621088   | 0,724311695     | 1,691666667     |
| THOC7                                                                                         | 3,25369E-06 | 0,465280105 | 0,5   | 0,137 | 0,068656094 | 1,380585374   | 0,724330432     | 3,649635036     |
| VCAN                                                                                          | 1,22029E-11 | 0,464905574 | 0,406 | 0,043 | 2,57494E-07 | 1,380227013   | 0,724518496     | 9,441860465     |
| GNB2                                                                                          | 0,000151709 | 0,464664077 | 0,844 | 0,383 | 1           | 1,379995992   | 0,724639786     | 2,203655352     |
| SLC66A2                                                                                       | 3,09295E-09 | 0,464477553 | 0,375 | 0,051 | 6,52643E-05 | 1,379817585   | 0,72473348      | 7,352941176     |
| NDUFB8                                                                                        | 0,000102612 | 0,464372135 | 0,781 | 0,324 | 1           | 1,379716766   | 0,724786438     | 2,410493827     |
| EIF4EBP1                                                                                      | 2,89649E-10 | 0,463970973 | 0,406 | 0,051 | 6,11189E-06 | 1,37933317    | 0,724988003     | 7,960784314     |
| PIH1D1                                                                                        | 1,114E-08   | 0,463632168 | 0,5   | 0,094 | 0,000235065 | 1,379009282   | 0,725158281     | 5,319148936     |
| STMN3                                                                                         | 1,58874E-13 | 0,463495236 | 0,469 | 0,047 | 3,3524E-09  | 1,378878402   | 0,725227111     | 9,978723404     |
| SND1                                                                                          | 8,10967E-08 | 0,463136505 | 0,562 | 0,129 | 0,001711221 | 1,378535581   | 0,725407464     | 4,356589147     |
| MXRA7                                                                                         | 1,18982E-07 | 0,462993243 | 0,688 | 0,184 | 0,002510634 | 1,378398697   | 0,725479502     | 3,739130435     |

Supplementary Table 1

| Differentially expressed genes_adjacent-skin-XL_comparing SC-Keloid vs. (SC-Myel, SC-Nonmyel) |             |             |       |       |             |               |                 |                 |
|-----------------------------------------------------------------------------------------------|-------------|-------------|-------|-------|-------------|---------------|-----------------|-----------------|
| gene                                                                                          | p_val       | avg_log2FC  | pct.1 | pct.2 | p_val_adj   | Foldchange_UP | Foldchange_DOWN | Ratio_pct1_pct2 |
| YWHAQ                                                                                         | 0,000284942 | 0,462630785 | 0,875 | 0,477 | 1           | 1,378052436   | 0,725661792     | 1,834381551     |
| WDR83OS                                                                                       | 8,29222E-05 | 0,462551801 | 0,906 | 0,41  | 1           | 1,377976993   | 0,725701521     | 2,209756098     |
| HDLBP                                                                                         | 1,73491E-07 | 0,462549558 | 0,656 | 0,168 | 0,003660827 | 1,377974851   | 0,72570265      | 3,904761905     |
| LRPAP1                                                                                        | 0,000375834 | 0,462432688 | 0,562 | 0,23  | 1           | 1,377863228   | 0,72576144      | 2,443478261     |
| UTP14A                                                                                        | 1,53958E-07 | 0,461974113 | 0,219 | 0,02  | 0,003248661 | 1,37742533    | 0,725992167     | 10,95           |
| RPS14                                                                                         | 0,001715062 | 0,461931192 | 1     | 0,863 | 1           | 1,377384352   | 0,726013766     | 1,158748552     |
| WDR1                                                                                          | 2,01079E-06 | 0,461495249 | 0,688 | 0,227 | 0,04242964  | 1,376968206   | 0,726233181     | 3,030837004     |
| BCHE                                                                                          | 2,54624E-06 | 0,461456987 | 0,25  | 0,035 | 0,053728244 | 1,376931689   | 0,726252441     | 7,142857143     |
| SIGMAR1                                                                                       | 1,69856E-13 | 0,461255777 | 0,469 | 0,047 | 3,58412E-09 | 1,376739664   | 0,726353737     | 9,978723404     |
| EBP                                                                                           | 2,65494E-12 | 0,461123304 | 0,438 | 0,047 | 5,60218E-08 | 1,376613253   | 0,726420436     | 9,319148936     |
| CHCHD1                                                                                        | 1,69015E-15 | 0,460760746 | 0,531 | 0,051 | 3,56638E-11 | 1,376267344   | 0,726603014     | 10,41176471     |
| NMD3                                                                                          | 1,80167E-08 | 0,46057335  | 0,344 | 0,047 | 0,00038017  | 1,376088589   | 0,7266974       | 7,319148936     |
| IFI27L1                                                                                       | 3,11952E-12 | 0,460253334 | 0,438 | 0,047 | 6,58251E-08 | 1,375783381   | 0,726858613     | 9,319148936     |
| TRAPPC2L                                                                                      | 3,32103E-12 | 0,460118851 | 0,5   | 0,062 | 7,00771E-08 | 1,375655141   | 0,726926371     | 8,064516129     |
| ECHS1                                                                                         | 1,61119E-07 | 0,459932112 | 0,625 | 0,16  | 0,003399778 | 1,375477091   | 0,727020469     | 3,90625         |
| STK32B                                                                                        | 1,0613E-19  | 0,459536661 | 0,312 | 0     | 2,23945E-15 | 1,375100117   | 0,727219777     | #DIV/0!         |
| SELENOF                                                                                       | 8,38965E-05 | 0,459172949 | 0,75  | 0,32  | 1           | 1,374753489   | 0,727403136     | 2,34375         |
| AGPAT2                                                                                        | 1,97842E-08 | 0,458728461 | 0,406 | 0,066 | 0,000417466 | 1,374329999   | 0,727627281     | 6,151515152     |
| TTR                                                                                           | 0,082317662 | 0,458632455 | 0,031 | 0,004 | 1           | 1,374238546   | 0,727675703     | 7,75            |
| RGMB                                                                                          | 1,93978E-10 | 0,457330352 | 0,656 | 0,133 | 4,09314E-06 | 1,372998788   | 0,728332762     | 4,932330827     |
| NID1                                                                                          | 4,16806E-09 | 0,456860804 | 0,531 | 0,102 | 8,79503E-05 | 1,372551997   | 0,728569848     | 5,205882353     |
| CHST14                                                                                        | 8,61967E-11 | 0,45677379  | 0,375 | 0,039 | 1,81884E-06 | 1,372469215   | 0,728613792     | 9,615384615     |
| BCS1L                                                                                         | 1,82463E-09 | 0,456772445 | 0,312 | 0,031 | 3,85015E-05 | 1,372467936   | 0,728614472     | 10,06451613     |
| SUMO1                                                                                         | 6,29765E-05 | 0,456558075 | 0,625 | 0,23  | 1           | 1,372264016   | 0,728722745     | 2,717391304     |
| SNAPC2                                                                                        | 2,47651E-12 | 0,455795642 | 0,406 | 0,039 | 5,22567E-08 | 1,371538996   | 0,72910796      | 10,41025641     |
| UBE2A                                                                                         | 1,35507E-08 | 0,45543938  | 0,688 | 0,164 | 0,000285933 | 1,371200348   | 0,72928803      | 4,195121951     |
| JAG1                                                                                          | 2,72578E-08 | 0,455349493 | 0,562 | 0,125 | 0,000575167 | 1,371114918   | 0,72933347      | 4,496           |
| RPL27                                                                                         | 0,000642574 | 0,455286932 | 0,969 | 0,688 | 1           | 1,371055462   | 0,729365097     | 1,408430233     |
| PGP                                                                                           | 3,5898E-06  | 0,455236329 | 0,5   | 0,133 | 0,075748431 | 1,371007373   | 0,72939068      | 3,759398496     |
| PAIP1                                                                                         | 1,18032E-07 | 0,455016527 | 0,531 | 0,121 | 0,002490602 | 1,370798508   | 0,729501815     | 4,388429752     |

Supplementary Table 1

| Differentially expressed genes_adjacent-skin-XL_comparing SC-Keloid vs. (SC-Myel, SC-Nonmyel) |             |             |       |       |             |               |                 |                 |
|-----------------------------------------------------------------------------------------------|-------------|-------------|-------|-------|-------------|---------------|-----------------|-----------------|
| gene                                                                                          | p_val       | avg_log2FC  | pct.1 | pct.2 | p_val_adj   | Foldchange_UP | Foldchange_DOWN | Ratio_pct1_pct2 |
| ORAI1                                                                                         | 2,35856E-09 | 0,454917907 | 0,531 | 0,098 | 4,97681E-05 | 1,370704806   | 0,729551684     | 5,418367347     |
| ABRACL                                                                                        | 2,41715E-14 | 0,454714724 | 0,312 | 0,012 | 5,10043E-10 | 1,370511776   | 0,729654438     | 26              |
| RPS13                                                                                         | 0,003625039 | 0,454661577 | 1     | 0,82  | 1           | 1,370461289   | 0,729681319     | 1,219512195     |
| CERCAM                                                                                        | 1,26742E-13 | 0,454615188 | 0,438 | 0,039 | 2,67437E-09 | 1,370417223   | 0,729704781     | 11,23076923     |
| IFI44L                                                                                        | 1,51026E-15 | 0,454324042 | 0,5   | 0,043 | 3,1868E-11  | 1,370140691   | 0,729852056     | 11,62790698     |
| GPX7                                                                                          | 2,48769E-14 | 0,454169652 | 0,375 | 0,023 | 5,24927E-10 | 1,369994073   | 0,729930165     | 16,30434783     |
| CHMP5                                                                                         | 2,23283E-06 | 0,453836836 | 0,781 | 0,262 | 0,047114951 | 1,369678066   | 0,730098572     | 2,980916031     |
| ITGA3                                                                                         | 3,49126E-10 | 0,453412392 | 0,594 | 0,109 | 7,3669E-06  | 1,369275163   | 0,7303134       | 5,449541284     |
| SLC31A2                                                                                       | 4,03999E-12 | 0,451900956 | 0,219 | 0,004 | 8,52479E-08 | 1,367841395   | 0,731078913     | 54,75           |
| SEC13                                                                                         | 3,06776E-10 | 0,449900231 | 0,5   | 0,078 | 6,47329E-06 | 1,365945792   | 0,732093474     | 6,41025641      |
| RAB23                                                                                         | 4,26111E-13 | 0,449707206 | 0,312 | 0,016 | 8,99136E-09 | 1,365763048   | 0,732191431     | 19,5            |
| MSC                                                                                           | 5,75596E-16 | 0,44781706  | 0,25  | 0     | 1,21456E-11 | 1,363974866   | 0,733151339     | #DIV/0!         |
| PAFAH1B3                                                                                      | 8,75235E-12 | 0,447342393 | 0,344 | 0,027 | 1,84683E-07 | 1,363526173   | 0,733392596     | 12,74074074     |
| SUPT4H1                                                                                       | 1,24274E-08 | 0,447176123 | 0,562 | 0,121 | 0,00026223  | 1,363369036   | 0,733477124     | 4,644628099     |
| PTPMT1                                                                                        | 1,21509E-13 | 0,446942058 | 0,469 | 0,047 | 2,56395E-09 | 1,363147859   | 0,733596135     | 9,978723404     |
| CRELD1                                                                                        | 4,26642E-06 | 0,446871484 | 0,375 | 0,082 | 0,090025755 | 1,363081178   | 0,733632022     | 4,573170732     |
| GARS1                                                                                         | 2,44211E-08 | 0,446624187 | 0,469 | 0,09  | 0,000515309 | 1,362847548   | 0,733757786     | 5,211111111     |
| PLN                                                                                           | 2,86276E-12 | 0,446182098 | 0,188 | 0     | 6,04072E-08 | 1,362429991   | 0,733982668     | #DIV/0!         |
| ATP6V1F                                                                                       | 5,32424E-05 | 0,446162342 | 0,625 | 0,227 | 1           | 1,362411334   | 0,733992719     | 2,753303965     |
| RPN2                                                                                          | 9,28061E-05 | 0,445601308 | 0,656 | 0,258 | 1           | 1,361881623   | 0,734278209     | 2,542635659     |
| WDR61                                                                                         | 4,65033E-09 | 0,445163437 | 0,531 | 0,102 | 9,81265E-05 | 1,361468343   | 0,734501103     | 5,205882353     |
| RPL41                                                                                         | 5,18822E-05 | 0,44505044  | 1     | 0,953 | 1           | 1,361361712   | 0,734558634     | 1,049317943     |
| HNRNPA1L2                                                                                     | 0,001203934 | 0,444706392 | 0,125 | 0,02  | 1           | 1,361037099   | 0,73473383      | 6,25            |
| NOPCHAP1                                                                                      | 7,60701E-08 | 0,444535525 | 0,375 | 0,062 | 0,001605155 | 1,360875913   | 0,734820854     | 6,048387097     |
| C20orf27                                                                                      | 5,8259E-11  | 0,443954802 | 0,344 | 0,031 | 1,22932E-06 | 1,360328234   | 0,735116698     | 11,09677419     |
| UBE2L3                                                                                        | 2,74095E-05 | 0,443821874 | 0,625 | 0,215 | 0,578368189 | 1,360202901   | 0,735184434     | 2,906976744     |
| XRCC6                                                                                         | 2,08791E-05 | 0,443659073 | 0,688 | 0,242 | 0,440570765 | 1,360049418   | 0,7352674       | 2,842975207     |
| SMUG1                                                                                         | 6,60693E-14 | 0,443339103 | 0,25  | 0,004 | 1,39413E-09 | 1,359747811   | 0,735430491     | 62,5            |
| KIF9                                                                                          | 1,68712E-11 | 0,443334422 | 0,406 | 0,043 | 3,55998E-07 | 1,359743399   | 0,735432877     | 9,441860465     |
| NDUFA3                                                                                        | 5,66591E-08 | 0,443137335 | 0,625 | 0,152 | 0,001195564 | 1,359557656   | 0,735533352     | 4,111842105     |

Supplementary Table 1

| Differentially expressed genes_adjacent-skin-XL_comparing SC-Keloid vs. (SC-Myel, SC-Nonmyel) |             |             |       |       |             |               |                 |                 |
|-----------------------------------------------------------------------------------------------|-------------|-------------|-------|-------|-------------|---------------|-----------------|-----------------|
| gene                                                                                          | p_val       | avg_log2FC  | pct.1 | pct.2 | p_val_adj   | Foldchange_UP | Foldchange_DOWN | Ratio_pct1_pct2 |
| RCN1                                                                                          | 6,22734E-06 | 0,442814709 | 0,688 | 0,219 | 0,131403066 | 1,359253656   | 0,735697855     | 3,141552511     |
| HOXC8                                                                                         | 4,55359E-09 | 0,442478821 | 0,312 | 0,035 | 9,60852E-05 | 1,358937232   | 0,73586916      | 8,914285714     |
| BPNT2                                                                                         | 5,70593E-10 | 0,442424837 | 0,594 | 0,113 | 1,20401E-05 | 1,358886384   | 0,735896696     | 5,256637168     |
| NENF                                                                                          | 5,77844E-06 | 0,44236689  | 0,781 | 0,266 | 0,121930956 | 1,358831804   | 0,735926255     | 2,936090226     |
| PGGT1B                                                                                        | 2,67442E-07 | 0,44232118  | 0,312 | 0,047 | 0,005643297 | 1,358788751   | 0,735949572     | 6,638297872     |
| NDUFA8                                                                                        | 1,51075E-10 | 0,442158539 | 0,469 | 0,066 | 3,18783E-06 | 1,358635578   | 0,736032544     | 7,106060606     |
| PEPD                                                                                          | 1,35762E-07 | 0,442077318 | 0,625 | 0,16  | 0,002864715 | 1,358559092   | 0,736073982     | 3,90625         |
| CMYA5                                                                                         | 1,4652E-10  | 0,44203044  | 0,5   | 0,078 | 3,09171E-06 | 1,358514948   | 0,7360979       | 6,41025641      |
| PSENE1                                                                                        | 4,52463E-10 | 0,441901578 | 0,531 | 0,09  | 9,54743E-06 | 1,35839361    | 0,736163651     | 5,9             |
| KCNMB1                                                                                        | 7,90851E-18 | 0,441653989 | 0,281 | 0     | 1,66877E-13 | 1,358160509   | 0,736289999     | #DIV/0!         |
| VAR1                                                                                          | 1,64952E-07 | 0,440938836 | 0,344 | 0,055 | 0,003480651 | 1,357487427   | 0,736655073     | 6,254545455     |
| PCBP4                                                                                         | 2,82247E-06 | 0,440890586 | 0,75  | 0,25  | 0,059557011 | 1,357442028   | 0,736679711     | 3               |
| TMEM208                                                                                       | 5,52128E-08 | 0,440782027 | 0,5   | 0,102 | 0,001165045 | 1,357339887   | 0,736735146     | 4,901960784     |
| SMIM20                                                                                        | 3,35513E-10 | 0,440584032 | 0,375 | 0,043 | 7,07967E-06 | 1,357153619   | 0,736836262     | 8,720930233     |
| SLC25A11                                                                                      | 2,63556E-10 | 0,440360955 | 0,5   | 0,078 | 5,5613E-06  | 1,356943786   | 0,736950204     | 6,41025641      |
| POLR2E                                                                                        | 2,87422E-08 | 0,440223925 | 0,688 | 0,172 | 0,000606489 | 1,356814906   | 0,737020205     | 4               |
| KPNA3                                                                                         | 9,35701E-06 | 0,439598319 | 0,312 | 0,062 | 0,19744232  | 1,356226668   | 0,737339873     | 5,032258065     |
| WDR81                                                                                         | 8,91574E-05 | 0,439503087 | 0,156 | 0,02  | 1           | 1,356137148   | 0,737388546     | 7,8             |
| ATRAID                                                                                        | 2,58943E-05 | 0,438935333 | 0,75  | 0,281 | 0,546394719 | 1,355603562   | 0,737678793     | 2,669039146     |
| SLBP                                                                                          | 2,28444E-07 | 0,438690932 | 0,469 | 0,102 | 0,004820392 | 1,355373934   | 0,737803771     | 4,598039216     |
| SLC25A6                                                                                       | 0,001434869 | 0,437809253 | 0,719 | 0,355 | 1           | 1,354545873   | 0,738254806     | 2,025352113     |
| FAM207A                                                                                       | 4,87019E-13 | 0,437319768 | 0,312 | 0,016 | 1,02766E-08 | 1,354086374   | 0,738505327     | 19,5            |
| RANBP1                                                                                        | 1,62618E-05 | 0,437119523 | 0,656 | 0,219 | 0,343140682 | 1,353898441   | 0,738607838     | 2,99543379      |
| BOLA3                                                                                         | 1,41687E-09 | 0,436844632 | 0,438 | 0,066 | 2,98974E-05 | 1,353640494   | 0,738748586     | 6,636363636     |
| CCDC124                                                                                       | 1,17076E-08 | 0,436824293 | 0,531 | 0,105 | 0,000247043 | 1,35362141    | 0,738759001     | 5,057142857     |
| STIM1                                                                                         | 4,42467E-07 | 0,436710955 | 0,344 | 0,059 | 0,00933649  | 1,353515074   | 0,73881704      | 5,830508475     |
| NDUFV1                                                                                        | 3,02366E-07 | 0,436603423 | 0,562 | 0,137 | 0,006380227 | 1,353414193   | 0,73887211      | 4,102189781     |
| ADAMTS2                                                                                       | 1,40767E-13 | 0,43616801  | 0,344 | 0,02  | 2,97033E-09 | 1,353005787   | 0,739095139     | 17,2            |
| IBSP                                                                                          | 9,12354E-07 | 0,436058109 | 0,094 | 0     | 0,019251588 | 1,352902722   | 0,739151443     | #DIV/0!         |
| ANKRD10                                                                                       | 0,002136908 | 0,435776686 | 0,844 | 0,465 | 1           | 1,352638841   | 0,739295642     | 1,815053763     |

Supplementary Table 1

| Differentially expressed genes_adjacent-skin-XL_comparing SC-Keloid vs. (SC-Myel, SC-Nonmyel) |             |             |       |       |             |               |                 |                 |
|-----------------------------------------------------------------------------------------------|-------------|-------------|-------|-------|-------------|---------------|-----------------|-----------------|
| gene                                                                                          | p_val       | avg_log2FC  | pct.1 | pct.2 | p_val_adj   | Foldchange_UP | Foldchange_DOWN | Ratio_pct1_pct2 |
| PLGRKT                                                                                        | 2,11379E-11 | 0,435492436 | 0,406 | 0,043 | 4,46031E-07 | 1,35237236    | 0,739441318     | 9,441860465     |
| CHPF                                                                                          | 1,23735E-12 | 0,435420461 | 0,625 | 0,094 | 2,61094E-08 | 1,352304894   | 0,739478208     | 6,64893617      |
| RPL23A                                                                                        | 9,16318E-05 | 0,43523722  | 1     | 0,852 | 1           | 1,352133144   | 0,739572138     | 1,17370892      |
| TOMM22                                                                                        | 2,96249E-09 | 0,434757287 | 0,5   | 0,09  | 6,25116E-05 | 1,351683412   | 0,739818208     | 5,555555556     |
| MACF1                                                                                         | 5,01042E-08 | 0,43468207  | 0,719 | 0,184 | 0,001057249 | 1,351612942   | 0,739856781     | 3,907608696     |
| TPT1                                                                                          | 5,59574E-05 | 0,434136829 | 1     | 0,934 | 1           | 1,35110222    | 0,740136449     | 1,070663812     |
| DHX34                                                                                         | 8,61561E-07 | 0,433867563 | 0,125 | 0,004 | 0,018179807 | 1,350850073   | 0,740274602     | 31,25           |
| HYAL2                                                                                         | 3,14623E-10 | 0,432495478 | 0,5   | 0,078 | 6,63886E-06 | 1,349565948   | 0,74097898      | 6,41025641      |
| UBE2F                                                                                         | 1,18068E-09 | 0,431978038 | 0,438 | 0,066 | 2,49135E-05 | 1,349081997   | 0,741244789     | 6,636363636     |
| SET                                                                                           | 0,003039772 | 0,431802841 | 0,906 | 0,555 | 1           | 1,348918178   | 0,741334809     | 1,632432432     |
| GTF3C6                                                                                        | 1,12991E-10 | 0,431524694 | 0,5   | 0,074 | 2,38422E-06 | 1,348658136   | 0,74147775      | 6,756756757     |
| RBMX2                                                                                         | 5,11613E-11 | 0,431446717 | 0,438 | 0,055 | 1,07955E-06 | 1,348585244   | 0,741517827     | 7,963636364     |
| ANO6                                                                                          | 2,56914E-12 | 0,431196869 | 0,469 | 0,055 | 5,42114E-08 | 1,348351714   | 0,741646255     | 8,527272727     |
| MAML2                                                                                         | 5,57293E-08 | 0,431169845 | 0,562 | 0,125 | 0,001175944 | 1,348326458   | 0,741660148     | 4,496           |
| CAMLG                                                                                         | 8,12833E-07 | 0,430692986 | 0,656 | 0,184 | 0,017151593 | 1,347880865   | 0,741905332     | 3,565217391     |
| COPS8                                                                                         | 1,51032E-13 | 0,430614309 | 0,75  | 0,125 | 3,18692E-09 | 1,34780736    | 0,741945793     | 6               |
| HM13                                                                                          | 3,64583E-06 | 0,430588803 | 0,594 | 0,18  | 0,076930657 | 1,347783532   | 0,74195891      | 3,3             |
| RPL9                                                                                          | 0,001883592 | 0,43058443  | 1     | 0,84  | 1           | 1,347779447   | 0,741961159     | 1,19047619      |
| EMC6                                                                                          | 6,97568E-07 | 0,430340628 | 0,375 | 0,07  | 0,014719382 | 1,347551704   | 0,742086554     | 5,357142857     |
| PYM1                                                                                          | 3,02825E-10 | 0,430153931 | 0,312 | 0,027 | 6,38991E-06 | 1,34737733    | 0,742182592     | 11,555555556    |
| MBTPS1                                                                                        | 3,80935E-07 | 0,429875053 | 0,5   | 0,117 | 0,008038106 | 1,347116902   | 0,742326073     | 4,273504274     |
| UBE2D2                                                                                        | 1,12489E-05 | 0,429799824 | 0,719 | 0,266 | 0,237362104 | 1,347046659   | 0,742364782     | 2,703007519     |
| ADAM9                                                                                         | 1,75885E-09 | 0,429689649 | 0,531 | 0,098 | 3,71135E-05 | 1,346943793   | 0,742421477     | 5,418367347     |
| MICU1                                                                                         | 1,81491E-09 | 0,429635376 | 0,594 | 0,121 | 3,82964E-05 | 1,346893123   | 0,742449407     | 4,909090909     |
| HDHD5                                                                                         | 1,7341E-09  | 0,429511549 | 0,344 | 0,039 | 3,65911E-05 | 1,346777524   | 0,742513134     | 8,820512821     |
| MAP2K2                                                                                        | 2,16335E-06 | 0,429499462 | 0,719 | 0,227 | 0,04564883  | 1,34676624    | 0,742519355     | 3,167400881     |
| CSRP1                                                                                         | 0,006832456 | 0,429397544 | 0,812 | 0,523 | 1           | 1,346671102   | 0,742571812     | 1,552581262     |
| UBE2G1                                                                                        | 0,001524635 | 0,429324422 | 0,344 | 0,117 | 1           | 1,346602848   | 0,74260945      | 2,94017094      |
| RALA                                                                                          | 2,09869E-06 | 0,428542913 | 0,469 | 0,113 | 0,044284464 | 1,34587359    | 0,74301183      | 4,150442478     |
| HDAC9                                                                                         | 1,57978E-10 | 0,428502273 | 0,219 | 0,008 | 3,33348E-06 | 1,345835678   | 0,743032761     | 27,375          |

Supplementary Table 1

| Differentially expressed genes_adjacent-skin-XL_comparing SC-Keloid vs. (SC-Myel, SC-Nonmyel) |             |             |       |       |             |               |                 |                 |
|-----------------------------------------------------------------------------------------------|-------------|-------------|-------|-------|-------------|---------------|-----------------|-----------------|
| gene                                                                                          | p_val       | avg_log2FC  | pct.1 | pct.2 | p_val_adj   | Foldchange_UP | Foldchange_DOWN | Ratio_pct1_pct2 |
| SNRPC                                                                                         | 4,00195E-08 | 0,428178561 | 0,469 | 0,094 | 0,000844451 | 1,345533734   | 0,743199501     | 4,989361702     |
| PTOV1                                                                                         | 3,56047E-07 | 0,427895211 | 0,594 | 0,152 | 0,00751295  | 1,345269492   | 0,743345483     | 3,907894737     |
| DSTN                                                                                          | 0,004882178 | 0,427882392 | 0,781 | 0,402 | 1           | 1,345257539   | 0,743352087     | 1,94278607      |
| SCPEP1                                                                                        | 1,81114E-10 | 0,427666773 | 0,531 | 0,086 | 3,82169E-06 | 1,345056498   | 0,743463194     | 6,174418605     |
| DNAJC4                                                                                        | 6,72404E-05 | 0,427272485 | 0,312 | 0,074 | 1           | 1,344688944   | 0,74366641      | 4,216216216     |
| VAT1                                                                                          | 6,74059E-06 | 0,427097298 | 0,594 | 0,176 | 0,14223328  | 1,344525669   | 0,743756719     | 3,375           |
| CYB5B                                                                                         | 3,97904E-08 | 0,426848547 | 0,375 | 0,059 | 0,000839617 | 1,344293864   | 0,74388497      | 6,355932203     |
| FRG1                                                                                          | 2,62903E-07 | 0,426071598 | 0,438 | 0,09  | 0,005547524 | 1,343570103   | 0,744285689     | 4,866666667     |
| ELP5                                                                                          | 1,97839E-08 | 0,426068179 | 0,406 | 0,066 | 0,00041746  | 1,343566918   | 0,744287453     | 6,151515152     |
| SRPX2                                                                                         | 6,60272E-18 | 0,425584239 | 0,375 | 0,012 | 1,39324E-13 | 1,343116306   | 0,74453716      | 31,25           |
| DEF8                                                                                          | 5,11383E-11 | 0,425284379 | 0,375 | 0,039 | 1,07907E-06 | 1,342837172   | 0,744691926     | 9,615384615     |
| ARPC4                                                                                         | 6,06871E-07 | 0,424270164 | 0,625 | 0,172 | 0,012805582 | 1,341893489   | 0,745215629     | 3,63372093      |
| TSR3                                                                                          | 4,0351E-08  | 0,423886737 | 0,469 | 0,09  | 0,000851447 | 1,341536899   | 0,745413712     | 5,211111111     |
| GRHPR                                                                                         | 1,43763E-07 | 0,423809851 | 0,688 | 0,18  | 0,003033542 | 1,341465406   | 0,745453439     | 3,822222222     |
| TIMP2                                                                                         | 0,000284519 | 0,423789767 | 0,906 | 0,504 | 1           | 1,341446732   | 0,745463816     | 1,797619048     |
| AMACR                                                                                         | 1,5116E-08  | 0,423668848 | 0,156 | 0,004 | 0,000318962 | 1,341334303   | 0,7455263       | 39              |
| NDUFB11                                                                                       | 1,41859E-05 | 0,423641453 | 0,719 | 0,25  | 0,299336733 | 1,341308833   | 0,745540457     | 2,876           |
| EIF2A                                                                                         | 2,65579E-07 | 0,423325821 | 0,5   | 0,113 | 0,005603984 | 1,341015415   | 0,745703583     | 4,424778761     |
| CYBC1                                                                                         | 1,05106E-06 | 0,423192063 | 0,344 | 0,062 | 0,022178476 | 1,34089109    | 0,745772724     | 5,548387097     |
| CCT6A                                                                                         | 2,0813E-07  | 0,423173179 | 0,562 | 0,137 | 0,004391741 | 1,340873539   | 0,745782485     | 4,102189781     |
| TMEM179B                                                                                      | 5,90187E-07 | 0,422871447 | 0,562 | 0,141 | 0,012453539 | 1,340593131   | 0,745938478     | 3,985815603     |
| C14orf119                                                                                     | 3,25367E-12 | 0,422651579 | 0,406 | 0,039 | 6,86557E-08 | 1,340388839   | 0,746052168     | 10,41025641     |
| SYAP1                                                                                         | 7,03788E-10 | 0,422574602 | 0,625 | 0,125 | 1,48506E-05 | 1,340317323   | 0,746091976     | 5               |
| SOCS4                                                                                         | 7,55883E-05 | 0,422570231 | 0,281 | 0,062 | 1           | 1,340313262   | 0,746094237     | 4,532258065     |
| EEF1D                                                                                         | 0,001414457 | 0,42239561  | 0,906 | 0,566 | 1           | 1,340151043   | 0,746184548     | 1,600706714     |
| AARSD1                                                                                        | 7,90453E-06 | 0,421835175 | 0,312 | 0,062 | 0,166793541 | 1,339630543   | 0,74647447      | 5,032258065     |
| CENPB                                                                                         | 1,89251E-05 | 0,421703396 | 0,375 | 0,094 | 0,39933877  | 1,339508184   | 0,746542658     | 3,989361702     |
| GLRX5                                                                                         | 1,95411E-12 | 0,421533307 | 0,562 | 0,078 | 4,12337E-08 | 1,33935027    | 0,746630678     | 7,205128205     |
| GLDC                                                                                          | 9,87864E-16 | 0,420729492 | 0,281 | 0,004 | 2,08449E-11 | 1,338604243   | 0,747046788     | 70,25           |
| GLIPR1                                                                                        | 6,60693E-14 | 0,41983747  | 0,25  | 0,004 | 1,39413E-09 | 1,337776836   | 0,747508832     | 62,5            |

Supplementary Table 1

| Differentially expressed genes_adjacent-skin-XL_comparing SC-Keloid vs. (SC-Myel, SC-Nonmyel) |             |             |       |       |             |               |                 |                 |
|-----------------------------------------------------------------------------------------------|-------------|-------------|-------|-------|-------------|---------------|-----------------|-----------------|
| gene                                                                                          | p_val       | avg_log2FC  | pct.1 | pct.2 | p_val_adj   | Foldchange_UP | Foldchange_DOWN | Ratio_pct1_pct2 |
| EIF3D                                                                                         | 6,20904E-05 | 0,419573236 | 0,5   | 0,16  | 1           | 1,337531841   | 0,747645753     | 3,125           |
| COL22A1                                                                                       | 1,0613E-19  | 0,419514382 | 0,312 | 0     | 2,23945E-15 | 1,337477278   | 0,747676253     | #DIV/0!         |
| ACTR6                                                                                         | 1,69889E-09 | 0,419294071 | 0,438 | 0,066 | 3,58483E-05 | 1,33727305    | 0,747790438     | 6,636363636     |
| JPT1                                                                                          | 5,91617E-12 | 0,419144366 | 0,438 | 0,047 | 1,24837E-07 | 1,337134292   | 0,747868038     | 9,319148936     |
| DNM3                                                                                          | 2,22625E-14 | 0,419001675 | 0,438 | 0,035 | 4,69761E-10 | 1,337002048   | 0,747942011     | 12,51428571     |
| NDUFB1                                                                                        | 4,84283E-07 | 0,418454138 | 0,781 | 0,238 | 0,010218851 | 1,33649472    | 0,748225926     | 3,281512605     |
| CETN2                                                                                         | 2,62558E-12 | 0,418403654 | 0,5   | 0,062 | 5,54024E-08 | 1,336447953   | 0,748252109     | 8,064516129     |
| MFGE8                                                                                         | 0,000290483 | 0,418334273 | 0,812 | 0,359 | 1           | 1,336383683   | 0,748288095     | 2,26183844      |
| TMED1                                                                                         | 2,39522E-09 | 0,417935383 | 0,469 | 0,078 | 5,05415E-05 | 1,336014238   | 0,748495017     | 6,012820513     |
| NAV1                                                                                          | 1,80143E-06 | 0,417400473 | 0,312 | 0,055 | 0,038011942 | 1,335518974   | 0,748772589     | 5,672727273     |
| RPS19BP1                                                                                      | 1,2443E-07  | 0,417353342 | 0,719 | 0,195 | 0,002625599 | 1,335475345   | 0,748797051     | 3,687179487     |
| TMEM54                                                                                        | 7,90851E-18 | 0,417351475 | 0,281 | 0     | 1,66877E-13 | 1,335473617   | 0,74879802      | #DIV/0!         |
| C3orf70                                                                                       | 8,89803E-11 | 0,417246264 | 0,531 | 0,082 | 1,87757E-06 | 1,335376229   | 0,748852629     | 6,475609756     |
| ZCCHC17                                                                                       | 9,26114E-05 | 0,417203423 | 0,406 | 0,117 | 1           | 1,335336575   | 0,748874867     | 3,47008547      |
| EDEM2                                                                                         | 3,25118E-10 | 0,417173437 | 0,312 | 0,027 | 6,86031E-06 | 1,335308821   | 0,748890432     | 11,55555556     |
| MVB12A                                                                                        | 1,76693E-10 | 0,41701713  | 0,531 | 0,086 | 3,72841E-06 | 1,335164157   | 0,748971574     | 6,174418605     |
| ORAI2                                                                                         | 9,77947E-13 | 0,416831262 | 0,281 | 0,012 | 2,06357E-08 | 1,334992153   | 0,749068073     | 23,41666667     |
| TMEM45A                                                                                       | 3,92384E-14 | 0,416792104 | 0,375 | 0,023 | 8,2797E-10  | 1,334955919   | 0,749088405     | 16,30434783     |
| KDEL3                                                                                         | 1,49741E-19 | 0,416679888 | 0,5   | 0,027 | 3,15968E-15 | 1,334852087   | 0,749146673     | 18,51851852     |
| CCDC28B                                                                                       | 9,16227E-15 | 0,416580579 | 0,344 | 0,016 | 1,93333E-10 | 1,334760205   | 0,749198243     | 21,5            |
| TUFM                                                                                          | 3,52486E-06 | 0,415996848 | 0,75  | 0,238 | 0,074378091 | 1,334220255   | 0,749501438     | 3,151260504     |
| CNPY2                                                                                         | 0,000106433 | 0,41563788  | 0,781 | 0,309 | 1           | 1,333888319   | 0,749687951     | 2,527508091     |
| PIGF                                                                                          | 3,52702E-09 | 0,415205322 | 0,469 | 0,078 | 7,44236E-05 | 1,333488443   | 0,749912761     | 6,012820513     |
| SRM                                                                                           | 1,79257E-06 | 0,414325268 | 0,531 | 0,141 | 0,037825035 | 1,332675254   | 0,750370352     | 3,765957447     |
| LAPTM4B                                                                                       | 2,97506E-08 | 0,412919735 | 0,469 | 0,09  | 0,000627768 | 1,331377539   | 0,75110175      | 5,211111111     |
| POP5                                                                                          | 1,7026E-11  | 0,412852626 | 0,438 | 0,051 | 3,59265E-07 | 1,33131561    | 0,75113669      | 8,588235294     |
| TMEM167A                                                                                      | 1,22694E-07 | 0,412625813 | 0,594 | 0,141 | 0,002588969 | 1,331106323   | 0,751254789     | 4,212765957     |
| RPL24                                                                                         | 0,001762604 | 0,41255992  | 1     | 0,773 | 1           | 1,331045529   | 0,751289102     | 1,293661061     |
| POLR2J                                                                                        | 1,30385E-07 | 0,412370114 | 0,656 | 0,168 | 0,002751264 | 1,330870423   | 0,751387951     | 3,904761905     |
| SLC25A39                                                                                      | 3,17659E-08 | 0,411851011 | 0,469 | 0,09  | 0,000670293 | 1,330391643   | 0,75165836      | 5,211111111     |

Supplementary Table 1

| Differentially expressed genes_adjacent-skin-XL_comparing SC-Keloid vs. (SC-Myel, SC-Nonmyel) |             |             |       |       |             |               |                 |                 |
|-----------------------------------------------------------------------------------------------|-------------|-------------|-------|-------|-------------|---------------|-----------------|-----------------|
| gene                                                                                          | p_val       | avg_log2FC  | pct.1 | pct.2 | p_val_adj   | Foldchange_UP | Foldchange_DOWN | Ratio_pct1_pct2 |
| DNAL4                                                                                         | 1,00455E-14 | 0,411743747 | 0,344 | 0,016 | 2,1197E-10  | 1,330292732   | 0,751714248     | 21,5            |
| LSM3                                                                                          | 4,30116E-06 | 0,411510952 | 0,625 | 0,184 | 0,090758863 | 1,330078092   | 0,751835555     | 3,39673913      |
| HAX1                                                                                          | 8,8752E-07  | 0,411466998 | 0,469 | 0,109 | 0,018727562 | 1,330037569   | 0,751858461     | 4,302752294     |
| TCTN1                                                                                         | 1,81501E-11 | 0,411415094 | 0,375 | 0,035 | 3,82984E-07 | 1,329989719   | 0,751885511     | 10,71428571     |
| ADSL                                                                                          | 2,82236E-12 | 0,41098867  | 0,375 | 0,031 | 5,95546E-08 | 1,329596666   | 0,752107782     | 12,09677419     |
| ARHGAP18                                                                                      | 2,38781E-12 | 0,410972342 | 0,25  | 0,008 | 5,03852E-08 | 1,329581619   | 0,752116294     | 31,25           |
| DIMT1                                                                                         | 1,85005E-15 | 0,410306404 | 0,438 | 0,031 | 3,90379E-11 | 1,328968034   | 0,752463546     | 14,12903226     |
| DLGAP4                                                                                        | 1,10486E-05 | 0,409097269 | 0,625 | 0,203 | 0,233135864 | 1,327854682   | 0,753094457     | 3,078817734     |
| TRPT1                                                                                         | 1,39899E-07 | 0,409035808 | 0,406 | 0,074 | 0,002951999 | 1,327798114   | 0,75312654      | 5,486486486     |
| PTPRK                                                                                         | 0,000125068 | 0,409010009 | 0,281 | 0,066 | 1           | 1,32777437    | 0,753140008     | 4,257575758     |
| PLAUR                                                                                         | 3,66209E-06 | 0,408778346 | 0,531 | 0,148 | 0,077273796 | 1,327561178   | 0,753260954     | 3,587837838     |
| DDT                                                                                           | 4,77234E-05 | 0,408596857 | 0,656 | 0,23  | 1           | 1,327394183   | 0,75335572      | 2,852173913     |
| POLR3G                                                                                        | 2,19342E-14 | 0,408545393 | 0,312 | 0,012 | 4,62834E-10 | 1,327346832   | 0,753382594     | 26              |
| ABHD17A                                                                                       | 4,78672E-07 | 0,408409641 | 0,625 | 0,168 | 0,010100448 | 1,32722194    | 0,753453488     | 3,720238095     |
| DBN1                                                                                          | 4,81619E-09 | 0,408335156 | 0,438 | 0,07  | 0,000101626 | 1,327153419   | 0,753492389     | 6,257142857     |
| DOCK6                                                                                         | 1,90127E-05 | 0,408193174 | 0,156 | 0,016 | 0,401186735 | 1,327022815   | 0,753566547     | 9,75            |
| TRIAP1                                                                                        | 4,90197E-12 | 0,408091699 | 0,312 | 0,02  | 1,03436E-07 | 1,326929478   | 0,753619553     | 15,6            |
| CCNY                                                                                          | 3,11297E-06 | 0,407800725 | 0,438 | 0,105 | 0,06568686  | 1,32666188    | 0,753771564     | 4,171428571     |
| RALY                                                                                          | 4,0704E-08  | 0,407749371 | 0,688 | 0,172 | 0,000858895 | 1,326614657   | 0,753798395     | 4               |
| TMEM126A                                                                                      | 6,39052E-07 | 0,407734462 | 0,375 | 0,07  | 0,013484639 | 1,326600948   | 0,753806185     | 5,357142857     |
| ZSWIM7                                                                                        | 4,70877E-12 | 0,40751394  | 0,562 | 0,082 | 9,93598E-08 | 1,326398187   | 0,753921416     | 6,853658537     |
| DDX52                                                                                         | 3,25329E-10 | 0,407382016 | 0,375 | 0,043 | 6,86477E-06 | 1,326276903   | 0,75399036      | 8,720930233     |
| TIPRL                                                                                         | 3,16401E-08 | 0,407276498 | 0,562 | 0,121 | 0,000667639 | 1,326179903   | 0,754045509     | 4,644628099     |
| RFLNB                                                                                         | 6,91427E-09 | 0,406901202 | 0,188 | 0,008 | 0,000145898 | 1,325834962   | 0,754241688     | 23,5            |
| RNASEK                                                                                        | 0,005300078 | 0,406113137 | 0,906 | 0,527 | 1           | 1,325110929   | 0,754653802     | 1,719165085     |
| EFHC1                                                                                         | 2,65218E-05 | 0,405109709 | 0,406 | 0,105 | 0,559636828 | 1,324189604   | 0,755178863     | 3,866666667     |
| CNIH1                                                                                         | 3,62015E-08 | 0,403552212 | 0,469 | 0,09  | 0,000763887 | 1,322760814   | 0,755994576     | 5,211111111     |
| VEGFB                                                                                         | 1,29401E-08 | 0,40322031  | 0,594 | 0,129 | 0,000273049 | 1,322456538   | 0,756168517     | 4,604651163     |
| COA5                                                                                          | 0,017863454 | 0,403216761 | 0,188 | 0,062 | 1           | 1,322453285   | 0,756170378     | 3,032258065     |
| ZDHHC9                                                                                        | 2,03294E-05 | 0,403136035 | 0,156 | 0,016 | 0,428970333 | 1,32237929    | 0,75621269      | 9,75            |



Supplementary Table 1

| Differentially expressed genes_adjacent-skin-XL_comparing SC-Keloid vs. (SC-Myel, SC-Nonmyel) |             |             |       |       |             |               |                 |                 |
|-----------------------------------------------------------------------------------------------|-------------|-------------|-------|-------|-------------|---------------|-----------------|-----------------|
| gene                                                                                          | p_val       | avg_log2FC  | pct.1 | pct.2 | p_val_adj   | Foldchange_UP | Foldchange_DOWN | Ratio_pct1_pct2 |
| UXS1                                                                                          | 4,17914E-06 | 0,402951855 | 0,406 | 0,094 | 0,08818403  | 1,32221048    | 0,756309237     | 4,319148936     |
| PGA5                                                                                          | 6,3574E-05  | 0,402856952 | 0,062 | 0     | 1           | 1,322123505   | 0,756358991     | #DIV/0!         |
| CD320                                                                                         | 1,97701E-06 | 0,402598351 | 0,375 | 0,078 | 0,041716958 | 1,321886538   | 0,756494579     | 4,807692308     |
| RGS2                                                                                          | 7,11541E-06 | 0,402446205 | 0,406 | 0,098 | 0,150142189 | 1,32174714    | 0,756574362     | 4,142857143     |
| RRS1                                                                                          | 0,050929149 | 0,402204072 | 0,094 | 0,027 | 1           | 1,321525325   | 0,756701352     | 3,481481481     |
| USB1                                                                                          | 7,06114E-09 | 0,40134729  | 0,312 | 0,035 | 0,000148997 | 1,320740736   | 0,757150872     | 8,914285714     |
| RAB5IF                                                                                        | 2,29229E-08 | 0,400846539 | 0,594 | 0,133 | 0,000483695 | 1,320282394   | 0,757413721     | 4,466165414     |
| BABAM1                                                                                        | 1,84586E-06 | 0,400804894 | 0,344 | 0,066 | 0,038949426 | 1,320244283   | 0,757435584     | 5,212121212     |
| ATP6AP1                                                                                       | 3,96151E-05 | 0,400665506 | 0,594 | 0,191 | 0,835917608 | 1,320116731   | 0,757508769     | 3,109947644     |
| NAALADL1                                                                                      | 2,65168E-08 | 0,400339311 | 0,219 | 0,016 | 0,00055953  | 1,319818286   | 0,757680061     | 13,6875         |
| MBD3                                                                                          | 7,00659E-13 | 0,400049499 | 0,5   | 0,059 | 1,47846E-08 | 1,319553184   | 0,757832281     | 8,474576271     |
| SLC52A2                                                                                       | 8,70774E-15 | 0,39978063  | 0,531 | 0,055 | 1,83742E-10 | 1,319307288   | 0,757973529     | 9,654545455     |
| PSMD4                                                                                         | 2,17881E-06 | 0,399731396 | 0,562 | 0,152 | 0,045975141 | 1,319262265   | 0,757999396     | 3,697368421     |
| FAM118A                                                                                       | 3,13778E-10 | 0,39968457  | 0,312 | 0,027 | 6,62103E-06 | 1,319219446   | 0,758023999     | 11,55555556     |
| MRPL16                                                                                        | 5,983E-07   | 0,399607956 | 0,375 | 0,07  | 0,01262473  | 1,319149391   | 0,758064255     | 5,357142857     |
| DBI                                                                                           | 0,000525529 | 0,399297592 | 0,844 | 0,453 | 1           | 1,318865636   | 0,758227353     | 1,863134658     |
| CBX5                                                                                          | 0,000969397 | 0,399295314 | 0,562 | 0,23  | 1           | 1,318863553   | 0,75822855      | 2,443478261     |
| TMEM59L                                                                                       | 9,87864E-16 | 0,399271081 | 0,281 | 0,004 | 2,08449E-11 | 1,318841401   | 0,758241286     | 70,25           |
| P3H1                                                                                          | 6,28233E-11 | 0,399264157 | 0,438 | 0,055 | 1,32563E-06 | 1,318835071   | 0,758244925     | 7,963636364     |
| EMC4                                                                                          | 7,93947E-07 | 0,398971462 | 0,656 | 0,18  | 0,016753065 | 1,318567531   | 0,758398775     | 3,644444444     |
| PRPS2                                                                                         | 1,13285E-13 | 0,398952633 | 0,406 | 0,031 | 2,39044E-09 | 1,318550323   | 0,758408672     | 13,09677419     |
| R3HCC1                                                                                        | 6,96119E-08 | 0,398912915 | 0,344 | 0,051 | 0,001468881 | 1,318514023   | 0,758429552     | 6,745098039     |
| OS9                                                                                           | 5,15103E-07 | 0,398813009 | 0,719 | 0,207 | 0,010869184 | 1,318422719   | 0,758482075     | 3,473429952     |
| SRP14                                                                                         | 0,001146824 | 0,398143763 | 1     | 0,723 | 1           | 1,317811264   | 0,758834005     | 1,383125864     |
| SLC20A1                                                                                       | 6,67402E-07 | 0,398039846 | 0,438 | 0,094 | 0,014082858 | 1,317716345   | 0,758888667     | 4,659574468     |
| TMEM222                                                                                       | 2,0714E-06  | 0,398013898 | 0,312 | 0,055 | 0,043708599 | 1,317692646   | 0,758902316     | 5,672727273     |
| YIPF5                                                                                         | 2,27455E-07 | 0,397927747 | 0,438 | 0,09  | 0,004799529 | 1,317613962   | 0,758947635     | 4,866666667     |
| GART                                                                                          | 1,85851E-11 | 0,397869006 | 0,406 | 0,043 | 3,92165E-07 | 1,317560314   | 0,758978537     | 9,441860465     |
| KDM1B                                                                                         | 2,55053E-08 | 0,397832013 | 0,219 | 0,016 | 0,000538188 | 1,31752653    | 0,758997999     | 13,6875         |
| MTMR2                                                                                         | 1,02526E-12 | 0,3974307   | 0,281 | 0,012 | 2,1634E-08  | 1,317160086   | 0,759209158     | 23,41666667     |

Supplementary Table 1

| Differentially expressed genes_adjacent-skin-XL_comparing SC-Keloid vs. (SC-Myel, SC-Nonmyel) |             |             |       |       |             |               |                 |                 |
|-----------------------------------------------------------------------------------------------|-------------|-------------|-------|-------|-------------|---------------|-----------------|-----------------|
| gene                                                                                          | p_val       | avg_log2FC  | pct.1 | pct.2 | p_val_adj   | Foldchange_UP | Foldchange_DOWN | Ratio_pct1_pct2 |
| SNX5                                                                                          | 5,18672E-09 | 0,397288419 | 0,531 | 0,102 | 0,000109445 | 1,317030192   | 0,759284036     | 5,205882353     |
| NDUFB9                                                                                        | 3,51202E-06 | 0,397034606 | 0,656 | 0,195 | 0,074107031 | 1,316798508   | 0,759417628     | 3,364102564     |
| DGKB                                                                                          | 1,88354E-08 | 0,396944884 | 0,406 | 0,066 | 0,000397447 | 1,316716618   | 0,759464858     | 6,151515152     |
| RUVBL2                                                                                        | 2,54051E-11 | 0,396889268 | 0,562 | 0,086 | 5,36072E-07 | 1,316665859   | 0,759494137     | 6,534883721     |
| ENO1                                                                                          | 0,001692114 | 0,396775672 | 0,875 | 0,445 | 1           | 1,316562191   | 0,75955394      | 1,966292135     |
| RASSF8                                                                                        | 9,41179E-07 | 0,396298943 | 0,594 | 0,16  | 0,019859823 | 1,316127213   | 0,759804972     | 3,7125          |
| METTL23                                                                                       | 3,08926E-08 | 0,396116415 | 0,375 | 0,059 | 0,000651864 | 1,315960709   | 0,759901107     | 6,355932203     |
| ZMPSTE24                                                                                      | 1,98356E-11 | 0,396071534 | 0,438 | 0,051 | 4,18551E-07 | 1,315919772   | 0,759924747     | 8,588235294     |
| ZFAND6                                                                                        | 1,39132E-05 | 0,394930504 | 0,625 | 0,203 | 0,293581694 | 1,31487942    | 0,760526011     | 3,078817734     |
| RPS25                                                                                         | 0,001280136 | 0,394603632 | 1     | 0,82  | 1           | 1,314581541   | 0,760698343     | 1,219512195     |
| TM9SF1                                                                                        | 4,86095E-10 | 0,394525785 | 0,531 | 0,09  | 1,02571E-05 | 1,314510608   | 0,760739391     | 5,9             |
| SMARCA5                                                                                       | 1,06497E-06 | 0,393484925 | 0,719 | 0,223 | 0,022471923 | 1,313562572   | 0,761288439     | 3,224215247     |
| YBEY                                                                                          | 1,17927E-11 | 0,393372905 | 0,344 | 0,027 | 2,48837E-07 | 1,313460583   | 0,761347553     | 12,74074074     |
| RTCB                                                                                          | 5,45918E-06 | 0,393311273 | 0,344 | 0,07  | 0,115194137 | 1,313404472   | 0,761380078     | 4,914285714     |
| UBXN6                                                                                         | 6,72671E-07 | 0,393211437 | 0,312 | 0,051 | 0,014194039 | 1,313313586   | 0,761432769     | 6,117647059     |
| PCYT1A                                                                                        | 5,7268E-10  | 0,393012372 | 0,438 | 0,062 | 1,20841E-05 | 1,313132386   | 0,761537839     | 7,064516129     |
| LEF1                                                                                          | 2,41715E-14 | 0,392540779 | 0,312 | 0,012 | 5,10043E-10 | 1,312703215   | 0,761786814     | 26              |
| RAMP1                                                                                         | 1,46005E-13 | 0,392466065 | 0,438 | 0,039 | 3,08084E-09 | 1,312635235   | 0,761826266     | 11,23076923     |
| KMT5A                                                                                         | 7,1866E-11  | 0,392302473 | 0,406 | 0,047 | 1,51644E-06 | 1,3124864     | 0,761912657     | 8,638297872     |
| DMAC1                                                                                         | 4,67745E-11 | 0,391547661 | 0,469 | 0,062 | 9,8699E-07  | 1,311799891   | 0,762311391     | 7,564516129     |
| SMC2                                                                                          | 1,14696E-07 | 0,391437357 | 0,375 | 0,062 | 0,002420196 | 1,311699599   | 0,762369677     | 6,048387097     |
| RPS16                                                                                         | 0,004340366 | 0,391386841 | 1     | 0,777 | 1           | 1,311653671   | 0,762396372     | 1,287001287     |
| RECQL                                                                                         | 4,26297E-12 | 0,391294617 | 0,531 | 0,074 | 8,9953E-08  | 1,311569826   | 0,76244511      | 7,175675676     |
| RABL6                                                                                         | 3,46601E-08 | 0,39123122  | 0,469 | 0,09  | 0,000731362 | 1,311512192   | 0,762478615     | 5,211111111     |
| PLOD2                                                                                         | 4,36762E-14 | 0,390207712 | 0,281 | 0,008 | 9,21611E-10 | 1,310582081   | 0,763019741     | 35,125          |
| MTHFD2                                                                                        | 1,53242E-09 | 0,389712032 | 0,344 | 0,039 | 3,23356E-05 | 1,31013187    | 0,763281943     | 8,820512821     |
| TADA3                                                                                         | 2,29309E-10 | 0,389523915 | 0,594 | 0,105 | 4,83865E-06 | 1,309961049   | 0,763381477     | 5,657142857     |
| CBWD2                                                                                         | 1,59791E-09 | 0,389483912 | 0,312 | 0,031 | 3,37176E-05 | 1,309924727   | 0,763402644     | 10,06451613     |
| BCAT2                                                                                         | 5,0197E-07  | 0,389441094 | 0,281 | 0,039 | 0,010592072 | 1,30988585    | 0,763425301     | 7,205128205     |
| IMPDH2                                                                                        | 4,90138E-07 | 0,389070634 | 0,562 | 0,145 | 0,010342395 | 1,309549536   | 0,763621362     | 3,875862069     |

Supplementary Table 1

| Differentially expressed genes_adjacent-skin-XL_comparing SC-Keloid vs. (SC-Myel, SC-Nonmyel) |             |             |       |       |             |               |                 |                 |
|-----------------------------------------------------------------------------------------------|-------------|-------------|-------|-------|-------------|---------------|-----------------|-----------------|
| gene                                                                                          | p_val       | avg_log2FC  | pct.1 | pct.2 | p_val_adj   | Foldchange_UP | Foldchange_DOWN | Ratio_pct1_pct2 |
| SDHC                                                                                          | 9,34443E-10 | 0,388233711 | 0,5   | 0,082 | 1,97177E-05 | 1,308790073   | 0,764064475     | 6,097560976     |
| SLC39A3                                                                                       | 1,21646E-14 | 0,388051518 | 0,406 | 0,027 | 2,56684E-10 | 1,308624801   | 0,764160972     | 15,03703704     |
| IDNK                                                                                          | 0,001371418 | 0,387792156 | 0,125 | 0,02  | 1           | 1,308389563   | 0,764298362     | 6,25            |
| CHMP1A                                                                                        | 1,37632E-06 | 0,387604377 | 0,344 | 0,062 | 0,029041819 | 1,308219276   | 0,764397849     | 5,548387097     |
| CBWD1                                                                                         | 1,64926E-08 | 0,387145507 | 0,375 | 0,055 | 0,000348011 | 1,307803244   | 0,764641015     | 6,818181818     |
| UBA2                                                                                          | 3,132E-06   | 0,387132929 | 0,5   | 0,129 | 0,066088396 | 1,307791842   | 0,764647681     | 3,875968992     |
| MXRA8                                                                                         | 0,006665234 | 0,387049138 | 0,844 | 0,426 | 1           | 1,307715889   | 0,764692093     | 1,981220657     |
| NUDT15                                                                                        | 7,46552E-05 | 0,386714314 | 0,156 | 0,02  | 1           | 1,307412426   | 0,764869585     | 7,8             |
| LAMTOR2                                                                                       | 1,04095E-07 | 0,386285764 | 0,562 | 0,125 | 0,002196502 | 1,307024119   | 0,765096822     | 4,496           |
| PLEKHJ1                                                                                       | 1,86611E-11 | 0,386032242 | 0,438 | 0,051 | 3,93768E-07 | 1,306794458   | 0,765231283     | 8,588235294     |
| NUDCD2                                                                                        | 1,14172E-06 | 0,385787586 | 0,594 | 0,16  | 0,024091397 | 1,306572867   | 0,765361064     | 3,7125          |
| CIB2                                                                                          | 4,03999E-12 | 0,385529192 | 0,219 | 0,004 | 8,52479E-08 | 1,306338875   | 0,765498156     | 54,75           |
| MRPL19                                                                                        | 2,76678E-11 | 0,385326448 | 0,531 | 0,078 | 5,83819E-07 | 1,306155306   | 0,76560574      | 6,807692308     |
| RBCK1                                                                                         | 8,28595E-07 | 0,384980902 | 0,438 | 0,094 | 0,017484174 | 1,3058425     | 0,765789136     | 4,659574468     |
| CNPY3                                                                                         | 4,16485E-12 | 0,384771947 | 0,438 | 0,047 | 8,78825E-08 | 1,30565338    | 0,765900058     | 9,319148936     |
| COX20                                                                                         | 3,74796E-06 | 0,3829195   | 0,75  | 0,242 | 0,079085727 | 1,303977974   | 0,766884119     | 3,099173554     |
| SMS                                                                                           | 1,84608E-07 | 0,382894046 | 0,594 | 0,145 | 0,003895408 | 1,303954967   | 0,76689765      | 4,096551724     |
| HIGD2A                                                                                        | 4,40576E-09 | 0,381907261 | 0,625 | 0,129 | 9,29659E-05 | 1,303063383   | 0,767422378     | 4,84496124      |
| GTF3A                                                                                         | 4,39769E-11 | 0,381715972 | 0,562 | 0,09  | 9,27957E-07 | 1,30289062    | 0,767524138     | 6,244444444     |
| RPS15                                                                                         | 0,002594662 | 0,381362682 | 1     | 0,906 | 1           | 1,302571605   | 0,767712114     | 1,103752759     |
| CHCHD5                                                                                        | 2,87844E-07 | 0,381220915 | 0,406 | 0,078 | 0,006073803 | 1,302443613   | 0,767787557     | 5,205128205     |
| MRPL36                                                                                        | 8,46482E-11 | 0,38099372  | 0,5   | 0,074 | 1,78616E-06 | 1,302238521   | 0,767908477     | 6,756756757     |
| LIMK1                                                                                         | 5,97464E-09 | 0,380860794 | 0,25  | 0,02  | 0,000126071 | 1,302118542   | 0,767979234     | 12,5            |
| ATP2B1                                                                                        | 1,95035E-10 | 0,380744156 | 0,531 | 0,086 | 4,11544E-06 | 1,302013273   | 0,768041326     | 6,174418605     |
| RPL18A                                                                                        | 0,002170887 | 0,380714766 | 1     | 0,793 | 1           | 1,301986749   | 0,768056972     | 1,261034048     |
| DDA1                                                                                          | 6,33541E-08 | 0,380474409 | 0,406 | 0,07  | 0,001336834 | 1,301769853   | 0,768184943     | 5,8             |
| ARL6IP5                                                                                       | 0,000447869 | 0,380408738 | 0,75  | 0,328 | 1           | 1,301710599   | 0,768219911     | 2,286585366     |
| MRPL28                                                                                        | 5,43746E-10 | 0,380188231 | 0,469 | 0,07  | 1,14736E-05 | 1,301511655   | 0,768337338     | 6,7             |
| CDC123                                                                                        | 1,7434E-09  | 0,379738725 | 0,438 | 0,066 | 3,67875E-05 | 1,301106202   | 0,768576769     | 6,636363636     |
| GSDMD                                                                                         | 9,01089E-08 | 0,379489621 | 0,438 | 0,082 | 0,001901388 | 1,300881564   | 0,768709487     | 5,341463415     |

Supplementary Table 1

| Differentially expressed genes_adjacent-skin-XL_comparing SC-Keloid vs. (SC-Myel, SC-Nonmyel) |             |             |       |       |             |               |                 |                 |
|-----------------------------------------------------------------------------------------------|-------------|-------------|-------|-------|-------------|---------------|-----------------|-----------------|
| gene                                                                                          | p_val       | avg_log2FC  | pct.1 | pct.2 | p_val_adj   | Foldchange_UP | Foldchange_DOWN | Ratio_pct1_pct2 |
| BCL2                                                                                          | 9,16263E-06 | 0,37932465  | 0,438 | 0,109 | 0,19334064  | 1,300732818   | 0,768797394     | 4,018348624     |
| MDK                                                                                           | 0,011117037 | 0,379076574 | 0,344 | 0,145 | 1           | 1,300509172   | 0,768929602     | 2,372413793     |
| CIAO2A                                                                                        | 5,02386E-14 | 0,379043157 | 0,375 | 0,023 | 1,06008E-09 | 1,300479049   | 0,768947413     | 16,30434783     |
| DTD1                                                                                          | 5,92885E-07 | 0,378547478 | 0,5   | 0,117 | 0,012510463 | 1,300032309   | 0,769211652     | 4,273504274     |
| ATP6V1D                                                                                       | 6,38968E-06 | 0,378260908 | 0,438 | 0,109 | 0,134828681 | 1,299774102   | 0,76936446      | 4,018348624     |
| TM9SF2                                                                                        | 7,15869E-08 | 0,378195828 | 0,531 | 0,113 | 0,001510555 | 1,29971547    | 0,769399167     | 4,699115044     |
| ERCC8                                                                                         | 2,52232E-10 | 0,377956008 | 0,188 | 0,004 | 5,32235E-06 | 1,299499436   | 0,769527075     | 47              |
| CNIH3                                                                                         | 9,87864E-16 | 0,377672035 | 0,281 | 0,004 | 2,08449E-11 | 1,299243674   | 0,76967856      | 70,25           |
| VPS28                                                                                         | 3,55638E-05 | 0,377577187 | 0,656 | 0,227 | 0,750431063 | 1,29915826    | 0,769729163     | 2,889867841     |
| RRP15                                                                                         | 4,90429E-05 | 0,37704658  | 0,375 | 0,098 | 1           | 1,298680532   | 0,770012313     | 3,826530612     |
| SLC39A7                                                                                       | 2,46918E-07 | 0,376935165 | 0,594 | 0,148 | 0,005210227 | 1,298580243   | 0,770071781     | 4,013513514     |
| HPRT1                                                                                         | 2,11462E-10 | 0,376914722 | 0,438 | 0,059 | 4,46205E-06 | 1,298561842   | 0,770082693     | 7,423728814     |
| CALM2                                                                                         | 0,003225786 | 0,376810987 | 0,969 | 0,848 | 1           | 1,298468474   | 0,770138067     | 1,142688679     |
| MEGF8                                                                                         | 2,29201E-06 | 0,376530801 | 0,344 | 0,066 | 0,048363718 | 1,298216323   | 0,77028765      | 5,212121212     |
| MRPL54                                                                                        | 7,64549E-09 | 0,37520557  | 0,469 | 0,082 | 0,000161327 | 1,297024355   | 0,770995546     | 5,719512195     |
| MLLT11                                                                                        | 3,15447E-10 | 0,374927852 | 0,375 | 0,043 | 6,65625E-06 | 1,296774703   | 0,771143976     | 8,720930233     |
| GOT2                                                                                          | 7,37666E-07 | 0,374789001 | 0,188 | 0,016 | 0,015565494 | 1,296649901   | 0,771218198     | 11,75           |
| TNIP1                                                                                         | 1,6211E-08  | 0,374507203 | 0,438 | 0,074 | 0,000342069 | 1,296396655   | 0,771368853     | 5,918918919     |
| PPP1CA                                                                                        | 1,71675E-09 | 0,374056156 | 0,469 | 0,074 | 3,62252E-05 | 1,29599141    | 0,771610053     | 6,337837838     |
| FASTK                                                                                         | 1,78074E-06 | 0,373529325 | 0,406 | 0,09  | 0,037575365 | 1,295518238   | 0,771891874     | 4,511111111     |
| KRT10                                                                                         | 8,56866E-05 | 0,373494831 | 0,906 | 0,449 | 1           | 1,295487263   | 0,77191033      | 2,017817372     |
| FAM174C                                                                                       | 2,07713E-07 | 0,373468502 | 0,406 | 0,078 | 0,004382957 | 1,295463621   | 0,771924417     | 5,205128205     |
| JMJD7                                                                                         | 0,000486824 | 0,373291435 | 0,094 | 0,008 | 1           | 1,295304634   | 0,772019164     | 11,75           |
| MRPS26                                                                                        | 4,36552E-07 | 0,372872951 | 0,469 | 0,102 | 0,00921169  | 1,294928958   | 0,772243136     | 4,598039216     |
| SSBP1                                                                                         | 4,65446E-06 | 0,372536093 | 0,656 | 0,203 | 0,098213786 | 1,294626637   | 0,772423471     | 3,231527094     |
| PPP2R1A                                                                                       | 3,11676E-05 | 0,372518176 | 0,531 | 0,164 | 0,657667304 | 1,294610559   | 0,772433063     | 3,237804878     |
| TSG101                                                                                        | 2,60416E-06 | 0,372495373 | 0,5   | 0,129 | 0,054950464 | 1,294590097   | 0,772445272     | 3,875968992     |
| REX1BD                                                                                        | 3,93675E-07 | 0,372419377 | 0,656 | 0,172 | 0,008306936 | 1,294521904   | 0,772485963     | 3,813953488     |
| MT1F                                                                                          | 1,6383E-10  | 0,372364441 | 0,469 | 0,066 | 3,45698E-06 | 1,294472611   | 0,772515379     | 7,106060606     |
| LMF2                                                                                          | 2,95078E-12 | 0,371936449 | 0,531 | 0,07  | 6,22644E-08 | 1,294088648   | 0,772744589     | 7,585714286     |

Supplementary Table 1

| Differentially expressed genes_adjacent-skin-XL_comparing SC-Keloid vs. (SC-Myel, SC-Nonmyel) |             |             |       |       |             |               |                 |                 |
|-----------------------------------------------------------------------------------------------|-------------|-------------|-------|-------|-------------|---------------|-----------------|-----------------|
| gene                                                                                          | p_val       | avg_log2FC  | pct.1 | pct.2 | p_val_adj   | Foldchange_UP | Foldchange_DOWN | Ratio_pct1_pct2 |
| AMOTL1                                                                                        | 1,43796E-05 | 0,371620028 | 0,375 | 0,09  | 0,303422967 | 1,293804852   | 0,77291409      | 4,166666667     |
| RPL21                                                                                         | 0,009607627 | 0,371374252 | 0,938 | 0,766 | 1           | 1,293584459   | 0,773045775     | 1,224543081     |
| YAF2                                                                                          | 0,000426252 | 0,371214617 | 0,312 | 0,09  | 1           | 1,293441332   | 0,773131317     | 3,466666667     |
| CENPF                                                                                         | 0,013054404 | 0,371012873 | 0,062 | 0,008 | 1           | 1,293260472   | 0,773239438     | 7,75            |
| OXCT1                                                                                         | 1,41616E-06 | 0,370118017 | 0,281 | 0,043 | 0,02988246  | 1,292458554   | 0,773719201     | 6,534883721     |
| C1QTNF3                                                                                       | 1,57978E-10 | 0,369928453 | 0,219 | 0,008 | 3,33348E-06 | 1,292288741   | 0,773820871     | 27,375          |
| SNW1                                                                                          | 1,87015E-07 | 0,369847189 | 0,594 | 0,148 | 0,003946205 | 1,292215952   | 0,77386446      | 4,013513514     |
| F2R                                                                                           | 6,00279E-06 | 0,369786264 | 0,25  | 0,039 | 0,1266649   | 1,292161382   | 0,773897142     | 6,41025641      |
| HOXD8                                                                                         | 6,91427E-09 | 0,369242482 | 0,188 | 0,008 | 0,000145898 | 1,291674431   | 0,774188894     | 23,5            |
| NAA20                                                                                         | 1,28255E-06 | 0,369100103 | 0,469 | 0,109 | 0,027062998 | 1,291546963   | 0,774265303     | 4,302752294     |
| SUCLG1                                                                                        | 2,84806E-06 | 0,368937192 | 0,375 | 0,078 | 0,060097016 | 1,291401128   | 0,774352739     | 4,807692308     |
| LGI1                                                                                          | 0,000633004 | 0,367857151 | 0,188 | 0,039 | 1           | 1,290434711   | 0,774932658     | 4,820512821     |
| ZNF506                                                                                        | 0,027767885 | 0,367679309 | 0,188 | 0,07  | 1           | 1,290275648   | 0,77502819      | 2,685714286     |
| FAM104B                                                                                       | 2,84493E-08 | 0,367665365 | 0,312 | 0,039 | 0,000600308 | 1,290263177   | 0,775035681     | 8               |
| SRP9                                                                                          | 4,64131E-06 | 0,367600167 | 0,75  | 0,242 | 0,097936273 | 1,290204869   | 0,775070707     | 3,099173554     |
| PSMD13                                                                                        | 4,13014E-08 | 0,367578612 | 0,656 | 0,156 | 0,000871501 | 1,290185593   | 0,775082287     | 4,205128205     |
| IAH1                                                                                          | 1,16993E-05 | 0,367555812 | 0,656 | 0,219 | 0,24686625  | 1,290165203   | 0,775094536     | 2,99543379      |
| MLX                                                                                           | 3,65877E-09 | 0,367551948 | 0,375 | 0,051 | 7,72037E-05 | 1,290161748   | 0,775096612     | 7,352941176     |
| PRKAB1                                                                                        | 1,55244E-05 | 0,367502934 | 0,188 | 0,023 | 0,32758078  | 1,290117917   | 0,775122946     | 8,173913043     |
| RPL7                                                                                          | 0,009573799 | 0,367296046 | 0,969 | 0,73  | 1           | 1,289932922   | 0,775234109     | 1,32739726      |
| AGPS                                                                                          | 3,14761E-12 | 0,367186381 | 0,375 | 0,031 | 6,64178E-08 | 1,289834873   | 0,77529304      | 12,09677419     |
| PRR13                                                                                         | 6,33541E-08 | 0,366820386 | 0,406 | 0,07  | 0,001336834 | 1,289507698   | 0,775489748     | 5,8             |
| LYPLA1                                                                                        | 8,66868E-17 | 0,366766006 | 0,469 | 0,031 | 1,82918E-12 | 1,289459093   | 0,775518979     | 15,12903226     |
| RER1                                                                                          | 1,96381E-05 | 0,366734113 | 0,562 | 0,176 | 0,414384298 | 1,289430588   | 0,775536124     | 3,193181818     |
| ATP5PB                                                                                        | 2,6776E-07  | 0,36664669  | 0,625 | 0,16  | 0,005650005 | 1,289352455   | 0,77558312      | 3,90625         |
| MSI2                                                                                          | 1,17927E-11 | 0,366448614 | 0,344 | 0,027 | 2,48837E-07 | 1,289175445   | 0,775689612     | 12,74074074     |
| SMIM7                                                                                         | 8,26201E-05 | 0,366197264 | 0,531 | 0,176 | 1           | 1,28895086    | 0,775824766     | 3,017045455     |
| GLB1                                                                                          | 3,13778E-10 | 0,365384755 | 0,312 | 0,027 | 6,62103E-06 | 1,288225143   | 0,776261825     | 11,55555556     |
| ERLEC1                                                                                        | 7,00443E-08 | 0,365316793 | 0,562 | 0,125 | 0,001478005 | 1,288164459   | 0,776298393     | 4,496           |
| TMEM87B                                                                                       | 1,80314E-07 | 0,365289575 | 0,25  | 0,027 | 0,003804814 | 1,288140157   | 0,776313039     | 9,259259259     |

Supplementary Table 1

| Differentially expressed genes_adjacent-skin-XL_comparing SC-Keloid vs. (SC-Myel, SC-Nonmyel) |             |             |       |       |             |               |                 |                 |
|-----------------------------------------------------------------------------------------------|-------------|-------------|-------|-------|-------------|---------------|-----------------|-----------------|
| gene                                                                                          | p_val       | avg_log2FC  | pct.1 | pct.2 | p_val_adj   | Foldchange_UP | Foldchange_DOWN | Ratio_pct1_pct2 |
| ILF2                                                                                          | 7,45939E-05 | 0,365244768 | 0,625 | 0,223 | 1           | 1,288100151   | 0,77633715      | 2,802690583     |
| DNAJC8                                                                                        | 1,4543E-05  | 0,365202581 | 0,75  | 0,25  | 0,306871073 | 1,288062485   | 0,776359852     | 3               |
| PRTFDC1                                                                                       | 9,32316E-16 | 0,364812055 | 0,281 | 0,004 | 1,96728E-11 | 1,287713864   | 0,776570035     | 70,25           |
| THAP2                                                                                         | 5,34526E-05 | 0,364598698 | 0,188 | 0,027 | 1           | 1,28752344    | 0,776684889     | 6,962962963     |
| NOL7                                                                                          | 4,63255E-05 | 0,364516176 | 0,688 | 0,246 | 0,977514618 | 1,287449796   | 0,776729316     | 2,796747967     |
| NANS                                                                                          | 1,66398E-06 | 0,364051589 | 0,438 | 0,098 | 0,035111722 | 1,287035269   | 0,776979484     | 4,469387755     |
| ADAM12                                                                                        | 6,59591E-09 | 0,363986553 | 0,188 | 0,008 | 0,00013918  | 1,286977252   | 0,777014511     | 23,5            |
| RAB1B                                                                                         | 8,67864E-06 | 0,363009615 | 0,5   | 0,137 | 0,183127984 | 1,286106055   | 0,777540854     | 3,649635036     |
| PBDC1                                                                                         | 2,71813E-09 | 0,36300886  | 0,406 | 0,059 | 5,73552E-05 | 1,286105382   | 0,777541261     | 6,881355932     |
| CLPP                                                                                          | 1,07506E-06 | 0,362743286 | 0,344 | 0,062 | 0,022684808 | 1,285868655   | 0,777684405     | 5,548387097     |
| MLF2                                                                                          | 0,000318367 | 0,362097609 | 0,688 | 0,27  | 1           | 1,285293294   | 0,778032535     | 2,548148148     |
| SHMT2                                                                                         | 1,75258E-09 | 0,361530585 | 0,375 | 0,047 | 3,69813E-05 | 1,284788233   | 0,778338386     | 7,978723404     |
| DNAJC9                                                                                        | 6,28034E-07 | 0,360846908 | 0,25  | 0,031 | 0,013252142 | 1,284179531   | 0,778707319     | 8,064516129     |
| NSA2                                                                                          | 4,64355E-05 | 0,36081701  | 0,594 | 0,203 | 0,97983605  | 1,284152918   | 0,778723457     | 2,926108374     |
| DCTN1                                                                                         | 5,02498E-07 | 0,360498502 | 0,562 | 0,137 | 0,010603201 | 1,283869443   | 0,778895398     | 4,102189781     |
| PIEZO1                                                                                        | 2,01277E-07 | 0,360485885 | 0,344 | 0,055 | 0,00424715  | 1,283858216   | 0,778902209     | 6,254545455     |
| RPSA                                                                                          | 0,039722648 | 0,36020764  | 0,906 | 0,688 | 1           | 1,283610628   | 0,779052446     | 1,316860465     |
| ARL16                                                                                         | 7,27095E-11 | 0,360107755 | 0,438 | 0,055 | 1,53424E-06 | 1,283521761   | 0,779106386     | 7,963636364     |
| BLMH                                                                                          | 1,44034E-09 | 0,360034483 | 0,344 | 0,039 | 3,03927E-05 | 1,283456574   | 0,779145956     | 8,820512821     |
| PSMD7                                                                                         | 1,28427E-05 | 0,359656032 | 0,562 | 0,164 | 0,270994399 | 1,283119939   | 0,77935037      | 3,426829268     |
| KRT16                                                                                         | 0,023665185 | 0,359215995 | 0,125 | 0,035 | 1           | 1,282728634   | 0,779588117     | 3,571428571     |
| INPPL1                                                                                        | 8,0086E-05  | 0,35920084  | 0,281 | 0,062 | 1           | 1,282715159   | 0,779596306     | 4,532258065     |
| MMP24OS                                                                                       | 2,28626E-09 | 0,359149627 | 0,594 | 0,121 | 4,82423E-05 | 1,282669626   | 0,779623981     | 4,909090909     |
| DRAXIN                                                                                        | 1,0613E-19  | 0,359049535 | 0,312 | 0     | 2,23945E-15 | 1,28258064    | 0,779678072     | #DIV/0!         |
| FKBP9                                                                                         | 1,0912E-09  | 0,358303527 | 0,688 | 0,141 | 2,30254E-05 | 1,281917597   | 0,780081342     | 4,879432624     |
| RWDD1                                                                                         | 5,11752E-06 | 0,358189009 | 0,719 | 0,234 | 0,107984844 | 1,281815845   | 0,780143266     | 3,072649573     |
| SDF2L1                                                                                        | 7,10248E-08 | 0,358024846 | 0,469 | 0,094 | 0,001498694 | 1,281669997   | 0,780232043     | 4,989361702     |
| CREB3L1                                                                                       | 5,75596E-16 | 0,357990874 | 0,25  | 0     | 1,21456E-11 | 1,281639817   | 0,780250416     | #DIV/0!         |
| C11orf49                                                                                      | 4,44048E-14 | 0,356951963 | 0,375 | 0,023 | 9,36986E-10 | 1,280717217   | 0,780812491     | 16,30434783     |
| ZMAT2                                                                                         | 1,7738E-07  | 0,356783543 | 0,438 | 0,086 | 0,003742891 | 1,280567715   | 0,780903648     | 5,093023256     |

Supplementary Table 1

| Differentially expressed genes_adjacent-skin-XL_comparing SC-Keloid vs. (SC-Myel, SC-Nonmyel) |             |             |       |       |             |               |                 |                 |
|-----------------------------------------------------------------------------------------------|-------------|-------------|-------|-------|-------------|---------------|-----------------|-----------------|
| gene                                                                                          | p_val       | avg_log2FC  | pct.1 | pct.2 | p_val_adj   | Foldchange_UP | Foldchange_DOWN | Ratio_pct1_pct2 |
| METTL2A                                                                                       | 8,58517E-09 | 0,356524523 | 0,281 | 0,027 | 0,000181156 | 1,280337824   | 0,781043863     | 10,40740741     |
| MACROH2A1                                                                                     | 1,2102E-05  | 0,356471469 | 0,5   | 0,145 | 0,255365055 | 1,280290741   | 0,781072586     | 3,448275862     |
| BUD23                                                                                         | 1,02E-08    | 0,356449495 | 0,5   | 0,094 | 0,00021523  | 1,280271241   | 0,781084483     | 5,319148936     |
| NDUFC1                                                                                        | 0,00042243  | 0,356014694 | 0,781 | 0,359 | 1           | 1,27988545    | 0,781319922     | 2,175487465     |
| ALG14                                                                                         | 0,001159845 | 0,355928238 | 0,281 | 0,082 | 1           | 1,279808752   | 0,781366746     | 3,426829268     |
| UBE2D1                                                                                        | 5,57612E-08 | 0,35588188  | 0,469 | 0,09  | 0,001176618 | 1,279767629   | 0,781391854     | 5,211111111     |
| ESYT2                                                                                         | 1,8799E-07  | 0,355807059 | 0,688 | 0,184 | 0,003966775 | 1,279701259   | 0,781432379     | 3,739130435     |
| SPAST                                                                                         | 0,003333189 | 0,355740154 | 0,125 | 0,023 | 1           | 1,279641914   | 0,781468619     | 5,434782609     |
| HINT2                                                                                         | 4,09636E-07 | 0,355565473 | 0,5   | 0,113 | 0,008643726 | 1,279486985   | 0,781563245     | 4,424778761     |
| CISD3                                                                                         | 2,254E-11   | 0,3552175   | 0,406 | 0,043 | 4,75617E-07 | 1,279178415   | 0,781751778     | 9,441860465     |
| PPCS                                                                                          | 6,39045E-07 | 0,355088029 | 0,375 | 0,07  | 0,013484484 | 1,279063624   | 0,781821937     | 5,357142857     |
| SF3B6                                                                                         | 0,003648123 | 0,355034136 | 0,719 | 0,344 | 1           | 1,279015844   | 0,781851143     | 2,090116279     |
| PRCC                                                                                          | 1,83211E-08 | 0,354976195 | 0,375 | 0,055 | 0,000386594 | 1,278964477   | 0,781882545     | 6,818181818     |
| PPP1R2                                                                                        | 8,32881E-12 | 0,354938768 | 0,625 | 0,102 | 1,75746E-07 | 1,278931298   | 0,781902829     | 6,12745098      |
| COMMD7                                                                                        | 5,52128E-08 | 0,354715471 | 0,5   | 0,102 | 0,001165045 | 1,278733364   | 0,782023859     | 4,901960784     |
| GTF2H5                                                                                        | 3,13818E-05 | 0,353290133 | 0,656 | 0,227 | 0,662187226 | 1,277470639   | 0,782796856     | 2,889867841     |
| UTP11                                                                                         | 3,05972E-07 | 0,353280461 | 0,375 | 0,066 | 0,00645632  | 1,277462075   | 0,782802104     | 5,681818182     |
| KARS1                                                                                         | 5,87105E-09 | 0,35326892  | 0,438 | 0,07  | 0,000123885 | 1,277451855   | 0,782808367     | 6,257142857     |
| UBE2D4                                                                                        | 1,09475E-11 | 0,35322096  | 0,344 | 0,027 | 2,31003E-07 | 1,27740939    | 0,78283439      | 12,74074074     |
| BUD31                                                                                         | 3,92826E-06 | 0,352834706 | 0,656 | 0,203 | 0,082890191 | 1,277067433   | 0,783044007     | 3,231527094     |
| C12orf75                                                                                      | 4,03182E-13 | 0,352546554 | 0,375 | 0,027 | 8,50753E-09 | 1,276812388   | 0,783200421     | 13,88888889     |
| NIFK                                                                                          | 0,000398237 | 0,352456121 | 0,344 | 0,102 | 1           | 1,276732355   | 0,783249517     | 3,37254902      |
| MRPS23                                                                                        | 1,75258E-09 | 0,352301337 | 0,375 | 0,047 | 3,69813E-05 | 1,276595385   | 0,783333554     | 7,978723404     |
| CTSK                                                                                          | 1,08341E-05 | 0,35198348  | 0,312 | 0,062 | 0,228609655 | 1,276314154   | 0,783506159     | 5,032258065     |
| NUCB1                                                                                         | 0,000214794 | 0,351855392 | 0,75  | 0,285 | 1           | 1,276200843   | 0,783575724     | 2,631578947     |
| PEX10                                                                                         | 2,60611E-07 | 0,351376402 | 0,375 | 0,066 | 0,005499158 | 1,275777201   | 0,783835923     | 5,681818182     |
| NAT10                                                                                         | 1,90127E-05 | 0,350459171 | 0,156 | 0,016 | 0,401186735 | 1,27496635    | 0,784334426     | 9,75            |
| PITPNA-AS1                                                                                    | 0,000142816 | 0,350073595 | 0,188 | 0,031 | 1           | 1,274625647   | 0,784544076     | 6,064516129     |
| COPRS                                                                                         | 2,82414E-06 | 0,349800528 | 0,469 | 0,117 | 0,059592171 | 1,274384415   | 0,784692584     | 4,008547009     |
| LIX1L                                                                                         | 2,69906E-09 | 0,349583351 | 0,438 | 0,066 | 5,69529E-05 | 1,274192589   | 0,784810718     | 6,636363636     |

Supplementary Table 1

| Differentially expressed genes_adjacent-skin-XL_comparing SC-Keloid vs. (SC-Myel, SC-Nonmyel) |             |             |       |       |             |               |                 |                 |
|-----------------------------------------------------------------------------------------------|-------------|-------------|-------|-------|-------------|---------------|-----------------|-----------------|
| gene                                                                                          | p_val       | avg_log2FC  | pct.1 | pct.2 | p_val_adj   | Foldchange_UP | Foldchange_DOWN | Ratio_pct1_pct2 |
| TEAD2                                                                                         | 0,000655683 | 0,349314279 | 0,156 | 0,027 | 1           | 1,273954966   | 0,784957104     | 5,777777778     |
| COMTD1                                                                                        | 3,72083E-08 | 0,3488788   | 0,281 | 0,031 | 0,000785132 | 1,273570479   | 0,78519408      | 9,064516129     |
| FANCE                                                                                         | 0,000486824 | 0,348780812 | 0,094 | 0,008 | 1           | 1,273483981   | 0,785247412     | 11,75           |
| CMAS                                                                                          | 8,60164E-07 | 0,348389586 | 0,312 | 0,051 | 0,018150325 | 1,273138688   | 0,785460382     | 6,117647059     |
| TSPAN4                                                                                        | 7,0889E-05  | 0,34810712  | 0,438 | 0,125 | 1           | 1,272889444   | 0,785614183     | 3,504           |
| JKAMP                                                                                         | 1,03527E-07 | 0,348032044 | 0,469 | 0,094 | 0,002184527 | 1,272823206   | 0,785655066     | 4,989361702     |
| WNT16                                                                                         | 6,3574E-05  | 0,347851448 | 0,062 | 0     | 1           | 1,272663885   | 0,78575342      | #DIV/0!         |
| ADIPOR1                                                                                       | 4,93566E-07 | 0,347457061 | 0,5   | 0,113 | 0,010414737 | 1,272316026   | 0,78596825      | 4,424778761     |
| MAGOH                                                                                         | 5,8376E-06  | 0,347421688 | 0,594 | 0,18  | 0,123179255 | 1,272284831   | 0,785987521     | 3,3             |
| ABHD14B                                                                                       | 4,32897E-07 | 0,347257894 | 0,406 | 0,078 | 0,009134556 | 1,272140392   | 0,786076762     | 5,205128205     |
| BRMS1                                                                                         | 6,60624E-08 | 0,347247302 | 0,344 | 0,051 | 0,001393983 | 1,272131052   | 0,786082533     | 6,745098039     |
| ZNF322                                                                                        | 3,25531E-10 | 0,346718606 | 0,406 | 0,051 | 6,86904E-06 | 1,271664948   | 0,786370657     | 7,960784314     |
| SMIM19                                                                                        | 2,98808E-06 | 0,346618591 | 0,562 | 0,156 | 0,063051576 | 1,271576792   | 0,786425174     | 3,602564103     |
| SNRPF                                                                                         | 6,11663E-06 | 0,34657946  | 0,594 | 0,168 | 0,129066942 | 1,271542303   | 0,786446505     | 3,535714286     |
| NELFE                                                                                         | 1,75209E-05 | 0,346577328 | 0,375 | 0,09  | 0,369707907 | 1,271540424   | 0,786447667     | 4,166666667     |
| DHRS7                                                                                         | 0,000161513 | 0,346003543 | 0,469 | 0,152 | 1           | 1,271034811   | 0,786760513     | 3,085526316     |
| PSMD3                                                                                         | 2,15233E-10 | 0,345912185 | 0,531 | 0,086 | 4,54164E-06 | 1,270954325   | 0,786810336     | 6,174418605     |
| CLSPN                                                                                         | 4,5807E-05  | 0,345648425 | 0,094 | 0,004 | 0,966573495 | 1,270721986   | 0,786954197     | 23,5            |
| IRAK1                                                                                         | 3,36857E-10 | 0,345625685 | 0,312 | 0,027 | 7,10802E-06 | 1,270701956   | 0,786966602     | 11,55555556     |
| DHX29                                                                                         | 6,3373E-07  | 0,34540228  | 0,5   | 0,121 | 0,013372347 | 1,2705052     | 0,787088475     | 4,132231405     |
| RRBP1                                                                                         | 0,000238018 | 0,344971927 | 0,625 | 0,25  | 1           | 1,270126267   | 0,787323297     | 2,5             |
| TPMT                                                                                          | 3,07079E-10 | 0,344954712 | 0,406 | 0,051 | 6,47967E-06 | 1,270111111   | 0,787332692     | 7,960784314     |
| RAB31                                                                                         | 1,64036E-09 | 0,344857877 | 0,562 | 0,105 | 3,46132E-05 | 1,270025863   | 0,78738554      | 5,352380952     |
| HELLS                                                                                         | 3,64608E-05 | 0,344812046 | 0,219 | 0,035 | 0,769358508 | 1,269985518   | 0,787410554     | 6,257142857     |
| ZNF580                                                                                        | 3,05456E-06 | 0,344755521 | 0,406 | 0,09  | 0,064454248 | 1,269935761   | 0,787441405     | 4,511111111     |
| PHC2                                                                                          | 1,77849E-06 | 0,344663657 | 0,531 | 0,137 | 0,037527896 | 1,2698549     | 0,787491547     | 3,875912409     |
| B3GALT6                                                                                       | 3,15172E-15 | 0,344103976 | 0,375 | 0,02  | 6,65044E-11 | 1,269362367   | 0,787797107     | 18,75           |
| RPS12                                                                                         | 0,001767624 | 0,343830509 | 1     | 0,832 | 1           | 1,269121778   | 0,78794645      | 1,201923077     |
| CALHM2                                                                                        | 8,46963E-16 | 0,343479277 | 0,312 | 0,008 | 1,78718E-11 | 1,268812841   | 0,788138304     | 39              |
| PCDHB5                                                                                        | 0,004841742 | 0,343352824 | 0,031 | 0     | 1           | 1,268701634   | 0,788207387     | #DIV/0!         |



Supplementary Table 1

| Differentially expressed genes_adjacent-skin-XL_comparing SC-Keloid vs. (SC-Myel, SC-Nonmyel) |             |             |       |       |             |               |                 |                 |
|-----------------------------------------------------------------------------------------------|-------------|-------------|-------|-------|-------------|---------------|-----------------|-----------------|
| gene                                                                                          | p_val       | avg_log2FC  | pct.1 | pct.2 | p_val_adj   | Foldchange_UP | Foldchange_DOWN | Ratio_pct1_pct2 |
| NCK2                                                                                          | 1,92396E-11 | 0,343167918 | 0,438 | 0,051 | 4,05974E-07 | 1,268539038   | 0,788308416     | 8,588235294     |
| TPD52L2                                                                                       | 1,10416E-05 | 0,342587343 | 0,438 | 0,109 | 0,232989384 | 1,26802865    | 0,788625714     | 4,018348624     |
| ARNT2                                                                                         | 1,18109E-12 | 0,342514302 | 0,281 | 0,012 | 2,49221E-08 | 1,267964455   | 0,788665641     | 23,41666667     |
| SRP19                                                                                         | 3,88259E-10 | 0,341735578 | 0,562 | 0,098 | 8,19265E-06 | 1,267280229   | 0,789091455     | 5,734693878     |
| CCS                                                                                           | 9,21037E-08 | 0,34105292  | 0,438 | 0,082 | 0,001943481 | 1,266680716   | 0,789464928     | 5,341463415     |
| SMPDL3A                                                                                       | 5,39277E-11 | 0,340914973 | 0,25  | 0,012 | 1,13793E-06 | 1,266559606   | 0,789540418     | 20,83333333     |
| ITGA7                                                                                         | 1,56895E-06 | 0,340660708 | 0,375 | 0,074 | 0,033106457 | 1,266336403   | 0,789679581     | 5,067567568     |
| TECR                                                                                          | 0,000184294 | 0,34059503  | 0,812 | 0,344 | 1           | 1,266278754   | 0,789715532     | 2,360465116     |
| LSM2                                                                                          | 8,77573E-05 | 0,340295558 | 0,594 | 0,199 | 1           | 1,26601593    | 0,789879477     | 2,984924623     |
| UBE2C                                                                                         | 0,004841742 | 0,340012375 | 0,031 | 0     | 1           | 1,265767451   | 0,790034535     | #DIV/0!         |
| UCK2                                                                                          | 1,76518E-09 | 0,339811261 | 0,312 | 0,031 | 3,7247E-05  | 1,265591014   | 0,790144675     | 10,06451613     |
| KDELR2                                                                                        | 0,000261715 | 0,339655033 | 0,688 | 0,277 | 1           | 1,265453972   | 0,790230243     | 2,483754513     |
| KIFC3                                                                                         | 9,65054E-06 | 0,339523707 | 0,344 | 0,074 | 0,203636023 | 1,265338784   | 0,79030218      | 4,648648649     |
| ENOPH1                                                                                        | 7,96316E-05 | 0,33927305  | 0,438 | 0,133 | 1           | 1,265118961   | 0,790439501     | 3,293233083     |
| MARCHF2                                                                                       | 1,33906E-06 | 0,338389872 | 0,406 | 0,086 | 0,028255507 | 1,264344728   | 0,790923534     | 4,720930233     |
| ETFA                                                                                          | 1,77074E-05 | 0,338158936 | 0,5   | 0,141 | 0,373642817 | 1,264142356   | 0,79105015      | 3,546099291     |
| ATP5MK                                                                                        | 0,002046656 | 0,33809465  | 0,938 | 0,461 | 1           | 1,264086027   | 0,7910854       | 2,034707158     |
| DPYSL3                                                                                        | 4,21575E-08 | 0,33763212  | 0,281 | 0,031 | 0,000889566 | 1,263680825   | 0,791339063     | 9,064516129     |
| COMMD10                                                                                       | 1,27017E-11 | 0,337471867 | 0,344 | 0,027 | 2,68019E-07 | 1,263540465   | 0,791426969     | 12,74074074     |
| NDUFB6                                                                                        | 1,25402E-06 | 0,337246117 | 0,656 | 0,188 | 0,026461019 | 1,263342764   | 0,79155082      | 3,489361702     |
| DCK                                                                                           | 5,62455E-11 | 0,337235949 | 0,312 | 0,023 | 1,18684E-06 | 1,26333386    | 0,791556398     | 13,56521739     |
| COL11A1                                                                                       | 7,70517E-07 | 0,337206667 | 0,25  | 0,031 | 0,01625868  | 1,263308218   | 0,791572465     | 8,064516129     |
| APH1A                                                                                         | 1,30473E-05 | 0,337107268 | 0,469 | 0,133 | 0,275312012 | 1,263221182   | 0,791627004     | 3,526315789     |
| GGH                                                                                           | 8,75235E-12 | 0,336826765 | 0,344 | 0,027 | 1,84683E-07 | 1,262975598   | 0,791780935     | 12,74074074     |
| TRPV2                                                                                         | 9,87864E-16 | 0,336740535 | 0,281 | 0,004 | 2,08449E-11 | 1,262900112   | 0,791828261     | 70,25           |
| PLD3                                                                                          | 3,3259E-07  | 0,336689206 | 0,656 | 0,176 | 0,007017973 | 1,262855181   | 0,791856434     | 3,727272727     |
| RPN1                                                                                          | 1,31281E-06 | 0,336676176 | 0,562 | 0,148 | 0,027701698 | 1,262843775   | 0,791863586     | 3,797297297     |
| ITPRIPL2                                                                                      | 1,00375E-05 | 0,336520981 | 0,344 | 0,074 | 0,21180149  | 1,262707934   | 0,791948774     | 4,648648649     |
| SAE1                                                                                          | 8,57361E-06 | 0,336029959 | 0,344 | 0,074 | 0,180911771 | 1,262278244   | 0,79221836      | 4,648648649     |
| ATP6VOE1                                                                                      | 0,001632141 | 0,335955533 | 0,719 | 0,316 | 1           | 1,262213127   | 0,79225923      | 2,275316456     |

Supplementary Table 1

| Differentially expressed genes_adjacent-skin-XL_comparing SC-Keloid vs. (SC-Myel, SC-Nonmyel) |             |             |       |       |             |               |                 |                 |
|-----------------------------------------------------------------------------------------------|-------------|-------------|-------|-------|-------------|---------------|-----------------|-----------------|
| gene                                                                                          | p_val       | avg_log2FC  | pct.1 | pct.2 | p_val_adj   | Foldchange_UP | Foldchange_DOWN | Ratio_pct1_pct2 |
| CPLX1                                                                                         | 0,079594089 | 0,335096261 | 0,031 | 0,004 | 1           | 1,261461575   | 0,792731241     | 7,75            |
| MAGOHB                                                                                        | 6,47688E-06 | 0,334721424 | 0,25  | 0,039 | 0,136668547 | 1,261133868   | 0,792937233     | 6,41025641      |
| RAD51C                                                                                        | 3,25118E-10 | 0,334551069 | 0,312 | 0,027 | 6,86031E-06 | 1,260984961   | 0,79303087      | 11,55555556     |
| PNO1                                                                                          | 6,85679E-07 | 0,334540104 | 0,25  | 0,031 | 0,014468514 | 1,260975376   | 0,793036897     | 8,064516129     |
| EIF4A1                                                                                        | 0,006267916 | 0,334351757 | 0,969 | 0,68  | 1           | 1,260810764   | 0,793140437     | 1,425           |
| EBPL                                                                                          | 4,26856E-12 | 0,333906508 | 0,406 | 0,039 | 9,00709E-08 | 1,260421709   | 0,793385256     | 10,41025641     |
| CPNE2                                                                                         | 1,89579E-09 | 0,333113583 | 0,469 | 0,074 | 4,0003E-05  | 1,259729154   | 0,793821431     | 6,337837838     |
| SMDT1                                                                                         | 2,63979E-06 | 0,332811113 | 0,656 | 0,191 | 0,05570226  | 1,259465072   | 0,793987878     | 3,434554974     |
| CHP1                                                                                          | 0,000328667 | 0,332288937 | 0,344 | 0,102 | 1           | 1,259009298   | 0,79427531      | 3,37254902      |
| SEC61A1                                                                                       | 2,79215E-07 | 0,33209989  | 0,531 | 0,121 | 0,005891712 | 1,258844331   | 0,794379396     | 4,388429752     |
| TMEM240                                                                                       | 0,016562311 | 0,33190249  | 0,094 | 0,02  | 1           | 1,258672098   | 0,794488097     | 4,7             |
| C1GALT1C1                                                                                     | 2,79642E-10 | 0,331838294 | 0,438 | 0,059 | 5,90073E-06 | 1,258616092   | 0,79452345      | 7,423728814     |
| RAB8A                                                                                         | 0,000100594 | 0,331067387 | 0,344 | 0,09  | 1           | 1,257943728   | 0,794948119     | 3,822222222     |
| HARS1                                                                                         | 2,14284E-09 | 0,33089104  | 0,438 | 0,066 | 4,5216E-05  | 1,257789973   | 0,795045295     | 6,636363636     |
| PRMT1                                                                                         | 0,003338449 | 0,330746086 | 0,594 | 0,277 | 1           | 1,257663604   | 0,79512518      | 2,144404332     |
| NUTF2                                                                                         | 2,72369E-06 | 0,330575398 | 0,406 | 0,09  | 0,057472657 | 1,257514816   | 0,795219259     | 4,511111111     |
| LINC00920                                                                                     | 1,12672E-12 | 0,330487732 | 0,281 | 0,012 | 2,3775E-08  | 1,257438405   | 0,795267582     | 23,41666667     |
| MMADHC                                                                                        | 1,53903E-06 | 0,330260141 | 0,406 | 0,086 | 0,032475139 | 1,257240054   | 0,795393049     | 4,720930233     |
| CDK7                                                                                          | 1,85141E-05 | 0,329947471 | 0,188 | 0,023 | 0,390665998 | 1,256967607   | 0,79556545      | 8,173913043     |
| SUPT3H                                                                                        | 0,030543175 | 0,329868912 | 0,188 | 0,07  | 1           | 1,256899163   | 0,795608772     | 2,685714286     |
| BTBD6                                                                                         | 3,80295E-07 | 0,329787292 | 0,438 | 0,09  | 0,008024611 | 1,256828057   | 0,795653785     | 4,866666667     |
| ANKRD9                                                                                        | 0,003488919 | 0,329771625 | 0,125 | 0,023 | 1           | 1,256814408   | 0,795662425     | 5,434782609     |
| MIR503HG                                                                                      | 2,52232E-10 | 0,329449497 | 0,188 | 0,004 | 5,32235E-06 | 1,256533816   | 0,795840102     | 47              |
| KRT10-AS1                                                                                     | 1,74709E-07 | 0,329252872 | 0,25  | 0,027 | 0,003686534 | 1,256362574   | 0,795948575     | 9,259259259     |
| DCTN6                                                                                         | 0,000260329 | 0,328874045 | 0,594 | 0,227 | 1           | 1,256032718   | 0,796157604     | 2,616740088     |
| DUSP1                                                                                         | 0,000268886 | 0,328688622 | 0,938 | 0,492 | 1           | 1,255871296   | 0,796259938     | 1,906504065     |
| NOVA1                                                                                         | 3,21766E-06 | 0,328674538 | 0,438 | 0,102 | 0,067895903 | 1,255859036   | 0,796267711     | 4,294117647     |
| NBPF1                                                                                         | 0,033585021 | 0,328605892 | 0,094 | 0,023 | 1           | 1,255799281   | 0,7963056       | 4,086956522     |
| INTS8                                                                                         | 3,28579E-06 | 0,328548217 | 0,219 | 0,027 | 0,069333472 | 1,255749079   | 0,796337435     | 8,111111111     |
| SEC14L2                                                                                       | 7,87421E-05 | 0,328507857 | 0,25  | 0,051 | 1           | 1,255713949   | 0,796359713     | 4,901960784     |

Supplementary Table 1

| Differentially expressed genes_adjacent-skin-XL_comparing SC-Keloid vs. (SC-Myel, SC-Nonmyel) |             |             |       |       |             |               |                 |                 |
|-----------------------------------------------------------------------------------------------|-------------|-------------|-------|-------|-------------|---------------|-----------------|-----------------|
| gene                                                                                          | p_val       | avg_log2FC  | pct.1 | pct.2 | p_val_adj   | Foldchange_UP | Foldchange_DOWN | Ratio_pct1_pct2 |
| OPRL1                                                                                         | 0,079594089 | 0,32841833  | 0,031 | 0,004 | 1           | 1,255636028   | 0,796409132     | 7,75            |
| ANO4                                                                                          | 1,23802E-12 | 0,32828442  | 0,281 | 0,012 | 2,61235E-08 | 1,255519486   | 0,796483058     | 23,41666667     |
| PPP1R12A                                                                                      | 7,37255E-07 | 0,328281604 | 0,75  | 0,23  | 0,015556819 | 1,255517036   | 0,796484613     | 3,260869565     |
| DERL2                                                                                         | 3,79079E-09 | 0,327961982 | 0,469 | 0,078 | 7,99894E-05 | 1,255238913   | 0,796661089     | 6,012820513     |
| CCNI                                                                                          | 0,011301623 | 0,327699451 | 0,844 | 0,48  | 1           | 1,255010515   | 0,796806073     | 1,758333333     |
| MTHFS                                                                                         | 2,03907E-07 | 0,32764846  | 0,219 | 0,02  | 0,004302644 | 1,254966157   | 0,796834237     | 10,95           |
| RPS8                                                                                          | 0,014300261 | 0,327449406 | 0,969 | 0,863 | 1           | 1,254793017   | 0,796944186     | 1,122827346     |
| EIF3H                                                                                         | 0,000504555 | 0,32744096  | 0,719 | 0,312 | 1           | 1,254785671   | 0,796948852     | 2,304487179     |
| HCFC1R1                                                                                       | 5,37316E-05 | 0,327301476 | 0,719 | 0,258 | 1           | 1,254664361   | 0,797025907     | 2,786821705     |
| CHMP1B                                                                                        | 1,94E-07    | 0,327244261 | 0,469 | 0,098 | 0,004093585 | 1,254614604   | 0,797057516     | 4,785714286     |
| ADGRG1                                                                                        | 3,59796E-11 | 0,326866821 | 0,531 | 0,078 | 7,59206E-07 | 1,254286412   | 0,797266071     | 6,807692308     |
| C5orf34                                                                                       | 1,39097E-05 | 0,326549249 | 0,125 | 0,008 | 0,293508116 | 1,254010345   | 0,797441588     | 15,625          |
| DCUN1D5                                                                                       | 6,73458E-11 | 0,326522659 | 0,469 | 0,062 | 1,42106E-06 | 1,253987232   | 0,797456285     | 7,564516129     |
| EIF2B3                                                                                        | 6,93869E-11 | 0,326471053 | 0,344 | 0,031 | 1,46413E-06 | 1,253942378   | 0,797484811     | 11,09677419     |
| GFPT1                                                                                         | 3,88452E-06 | 0,325984887 | 0,281 | 0,047 | 0,081967219 | 1,253519889   | 0,797753597     | 5,978723404     |
| FAM50A                                                                                        | 5,25599E-08 | 0,325963431 | 0,594 | 0,137 | 0,001109067 | 1,253501246   | 0,797765461     | 4,335766423     |
| UBE2I                                                                                         | 9,45231E-08 | 0,325861636 | 0,719 | 0,195 | 0,001994531 | 1,253412804   | 0,797821753     | 3,687179487     |
| RAMAC                                                                                         | 5,09162E-13 | 0,325269194 | 0,312 | 0,016 | 1,07438E-08 | 1,252898197   | 0,798149445     | 19,5            |
| ZDHHC12                                                                                       | 3,3871E-08  | 0,325037373 | 0,281 | 0,031 | 0,000714712 | 1,252696889   | 0,798277707     | 9,064516129     |
| MRPS33                                                                                        | 2,82997E-06 | 0,324869989 | 0,406 | 0,09  | 0,059715213 | 1,252551557   | 0,79837033      | 4,511111111     |
| ABI1                                                                                          | 0,00784636  | 0,324643728 | 0,312 | 0,121 | 1           | 1,252355132   | 0,79849555      | 2,578512397     |
| SCOC                                                                                          | 1,03758E-05 | 0,324554606 | 0,688 | 0,219 | 0,218939381 | 1,252277772   | 0,798544878     | 3,141552511     |
| SYT11                                                                                         | 3,91798E-05 | 0,324001796 | 0,688 | 0,242 | 0,826732185 | 1,251798017   | 0,798850922     | 2,842975207     |
| TMEM121                                                                                       | 1,43243E-10 | 0,323972829 | 0,219 | 0,008 | 3,02257E-06 | 1,251772883   | 0,798866962     | 27,375          |
| G6PC3                                                                                         | 3,45065E-10 | 0,323932912 | 0,406 | 0,051 | 7,28122E-06 | 1,251738249   | 0,798889065     | 7,960784314     |
| UBE2Q2                                                                                        | 8,02793E-12 | 0,323800245 | 0,531 | 0,074 | 1,69397E-07 | 1,251623147   | 0,798962533     | 7,175675676     |
| GCSH                                                                                          | 5,33942E-05 | 0,323769215 | 0,531 | 0,164 | 1           | 1,251596227   | 0,798979717     | 3,237804878     |
| DCTPP1                                                                                        | 1,68138E-09 | 0,32366262  | 0,344 | 0,039 | 3,54787E-05 | 1,251503755   | 0,799038753     | 8,820512821     |
| ATP5MC1                                                                                       | 4,28417E-05 | 0,323259101 | 0,656 | 0,227 | 0,904002969 | 1,251153761   | 0,799262274     | 2,889867841     |
| NUDT8                                                                                         | 6,6835E-09  | 0,322970762 | 0,25  | 0,02  | 0,000141028 | 1,250903729   | 0,799422031     | 12,5            |

Supplementary Table 1

| Differentially expressed genes_adjacent-skin-XL_comparing SC-Keloid vs. (SC-Myel, SC-Nonmyel) |             |             |       |       |             |               |                 |                 |
|-----------------------------------------------------------------------------------------------|-------------|-------------|-------|-------|-------------|---------------|-----------------|-----------------|
| gene                                                                                          | p_val       | avg_log2FC  | pct.1 | pct.2 | p_val_adj   | Foldchange_UP | Foldchange_DOWN | Ratio_pct1_pct2 |
| FDPS                                                                                          | 5,2444E-07  | 0,32292321  | 0,594 | 0,152 | 0,011066205 | 1,250862499   | 0,799448381     | 3,907894737     |
| C8orf76                                                                                       | 2,17326E-05 | 0,322814444 | 0,156 | 0,016 | 0,458580025 | 1,250768199   | 0,799508655     | 9,75            |
| RGL2                                                                                          | 1,30054E-06 | 0,322447763 | 0,438 | 0,098 | 0,027442635 | 1,250450339   | 0,799711887     | 4,469387755     |
| GOLGA2                                                                                        | 6,77313E-08 | 0,32234398  | 0,719 | 0,184 | 0,001429197 | 1,250360389   | 0,799769417     | 3,907608696     |
| GNA12                                                                                         | 6,53221E-07 | 0,322073379 | 0,375 | 0,07  | 0,013783618 | 1,250125885   | 0,799919442     | 5,357142857     |
| ASAP2                                                                                         | 0,000289532 | 0,321972224 | 0,625 | 0,238 | 1           | 1,250038236   | 0,79997553      | 2,62605042      |
| SELENOT                                                                                       | 0,000437405 | 0,321609438 | 0,688 | 0,281 | 1           | 1,249723935   | 0,80017672      | 2,448398577     |
| GOLGA5                                                                                        | 1,79804E-05 | 0,321396795 | 0,188 | 0,023 | 0,379403857 | 1,249539748   | 0,80029467      | 8,173913043     |
| FBXO7                                                                                         | 3,57882E-06 | 0,321261052 | 0,5   | 0,129 | 0,075516664 | 1,249422185   | 0,800369972     | 3,875968992     |
| MRPL9                                                                                         | 5,14469E-12 | 0,321241838 | 0,5   | 0,062 | 1,08558E-07 | 1,249405545   | 0,800380632     | 8,064516129     |
| MGAT4B                                                                                        | 6,73211E-07 | 0,321081847 | 0,594 | 0,152 | 0,014205428 | 1,249266997   | 0,800469397     | 3,907894737     |
| NFIL3                                                                                         | 0,000180694 | 0,320783505 | 0,688 | 0,27  | 1           | 1,249008681   | 0,800634947     | 2,548148148     |
| GSTO1                                                                                         | 5,07141E-06 | 0,320459155 | 0,625 | 0,188 | 0,107011727 | 1,248727908   | 0,800814968     | 3,324468085     |
| GPSM2                                                                                         | 5,87627E-10 | 0,320414023 | 0,469 | 0,07  | 1,23995E-05 | 1,248688845   | 0,800840021     | 6,7             |
| DPY30                                                                                         | 7,98674E-07 | 0,320292226 | 0,531 | 0,129 | 0,016852812 | 1,248583431   | 0,800907633     | 4,11627907      |
| SCARB2                                                                                        | 0,000398693 | 0,32022355  | 0,875 | 0,441 | 1           | 1,248523997   | 0,800945759     | 1,984126984     |
| GABRA2                                                                                        | 8,59744E-08 | 0,320211066 | 0,688 | 0,18  | 0,001814146 | 1,248513193   | 0,80095269      | 3,822222222     |
| POLR3GL                                                                                       | 6,04459E-06 | 0,319962852 | 0,406 | 0,094 | 0,127546957 | 1,248298406   | 0,801090504     | 4,319148936     |
| BCKDHA                                                                                        | 4,7449E-08  | 0,319832587 | 0,375 | 0,059 | 0,001001222 | 1,248185699   | 0,801162841     | 6,355932203     |
| DTYMK                                                                                         | 1,09317E-07 | 0,31949891  | 0,375 | 0,062 | 0,002306702 | 1,247897042   | 0,801348161     | 6,048387097     |
| MCUB                                                                                          | 0,001371418 | 0,319239116 | 0,125 | 0,02  | 1           | 1,247672348   | 0,801492477     | 6,25            |
| ADRM1                                                                                         | 0,001284837 | 0,319198668 | 0,469 | 0,176 | 1           | 1,247637367   | 0,801514948     | 2,664772727     |
| SDHAF2                                                                                        | 1,80411E-09 | 0,318875387 | 0,469 | 0,074 | 3,80685E-05 | 1,247357826   | 0,801694573     | 6,337837838     |
| NRM                                                                                           | 1,4529E-06  | 0,31839786  | 0,281 | 0,043 | 0,030657605 | 1,246945024   | 0,801959975     | 6,534883721     |
| WDR18                                                                                         | 1,04183E-07 | 0,317854966 | 0,375 | 0,062 | 0,002198366 | 1,24647588    | 0,802261814     | 6,048387097     |
| MLH1                                                                                          | 3,30275E-05 | 0,317306624 | 0,219 | 0,035 | 0,696912488 | 1,246002207   | 0,802566796     | 6,257142857     |
| PITPNA                                                                                        | 2,58449E-06 | 0,31726357  | 0,438 | 0,102 | 0,054535414 | 1,245965023   | 0,802590748     | 4,294117647     |
| ANKRD54                                                                                       | 1,7341E-09  | 0,317207772 | 0,344 | 0,039 | 3,65911E-05 | 1,245916835   | 0,80262179      | 8,820512821     |
| CNKSRI                                                                                        | 0,216675772 | 0,317104338 | 0,031 | 0,008 | 1           | 1,245827513   | 0,802679335     | 3,875           |
| NDRG4                                                                                         | 0,216675772 | 0,316834843 | 0,031 | 0,008 | 1           | 1,245594814   | 0,80282929      | 3,875           |

Supplementary Table 1

| Differentially expressed genes_adjacent-skin-XL_comparing SC-Keloid vs. (SC-Myel, SC-Nonmyel) |             |             |       |       |             |               |                 |                 |
|-----------------------------------------------------------------------------------------------|-------------|-------------|-------|-------|-------------|---------------|-----------------|-----------------|
| gene                                                                                          | p_val       | avg_log2FC  | pct.1 | pct.2 | p_val_adj   | Foldchange_UP | Foldchange_DOWN | Ratio_pct1_pct2 |
| FAU                                                                                           | 0,005295918 | 0,316797532 | 1     | 0,832 | 1           | 1,245562601   | 0,802850053     | 1,201923077     |
| RPS21                                                                                         | 0,00924843  | 0,316607774 | 1     | 0,719 | 1           | 1,245398783   | 0,802955659     | 1,390820584     |
| OSTM1                                                                                         | 5,18265E-06 | 0,316454871 | 0,375 | 0,082 | 0,109359146 | 1,245266796   | 0,803040764     | 4,573170732     |
| GREB1                                                                                         | 1,39097E-05 | 0,316070232 | 0,125 | 0,008 | 0,293508116 | 1,244934839   | 0,803254892     | 15,625          |
| CARHSP1                                                                                       | 0,000184559 | 0,31576346  | 0,312 | 0,082 | 1           | 1,244670146   | 0,803425713     | 3,804878049     |
| NPL                                                                                           | 5,89503E-14 | 0,315520276 | 0,25  | 0,004 | 1,24391E-09 | 1,24446036    | 0,803561152     | 62,5            |
| SIDT2                                                                                         | 4,18583E-08 | 0,315504515 | 0,25  | 0,023 | 0,000883252 | 1,244446764   | 0,803569931     | 10,86956522     |
| SUSD4                                                                                         | 9,06462E-07 | 0,3153256   | 0,125 | 0,004 | 0,019127258 | 1,244292445   | 0,803669591     | 31,25           |
| YIF1B                                                                                         | 2,25587E-09 | 0,314469599 | 0,438 | 0,066 | 4,7601E-05  | 1,243554381   | 0,804146578     | 6,636363636     |
| STK10                                                                                         | 4,50007E-07 | 0,313945841 | 0,281 | 0,039 | 0,009495599 | 1,243103002   | 0,804438569     | 7,205128205     |
| NUDT22                                                                                        | 2,30976E-11 | 0,313157229 | 0,438 | 0,051 | 4,87383E-07 | 1,242423677   | 0,804878415     | 8,588235294     |
| GORAB                                                                                         | 7,59646E-09 | 0,312593911 | 0,188 | 0,008 | 0,000160293 | 1,241938653   | 0,805192751     | 23,5            |
| TSEN15                                                                                        | 1,1764E-13  | 0,312428071 | 0,406 | 0,031 | 2,48233E-09 | 1,241795898   | 0,805285315     | 13,09677419     |
| PTGR1                                                                                         | 1,5926E-11  | 0,312136218 | 0,469 | 0,059 | 3,36054E-07 | 1,241544711   | 0,805448238     | 7,949152542     |
| SPAG7                                                                                         | 0,000214295 | 0,312092738 | 0,375 | 0,109 | 1           | 1,241507294   | 0,805472513     | 3,440366972     |
| POLG2                                                                                         | 2,03294E-05 | 0,311779761 | 0,156 | 0,016 | 0,428970333 | 1,241237992   | 0,80564727      | 9,75            |
| GTPBP2                                                                                        | 1,92051E-07 | 0,311526977 | 0,25  | 0,027 | 0,004052478 | 1,241020526   | 0,805788445     | 9,259259259     |
| DCSTAMP                                                                                       | 1,33967E-08 | 0,311376777 | 0,125 | 0     | 0,000282684 | 1,240891329   | 0,805872341     | #DIV/0!         |
| VCP                                                                                           | 1,74429E-07 | 0,311309282 | 0,625 | 0,152 | 0,003680625 | 1,240833277   | 0,805910044     | 4,111842105     |
| ARPC1A                                                                                        | 7,09663E-05 | 0,311116583 | 0,594 | 0,199 | 1           | 1,240667551   | 0,806017695     | 2,984924623     |
| EFTUD2                                                                                        | 7,99636E-09 | 0,310911541 | 0,312 | 0,035 | 0,000168731 | 1,240491234   | 0,806132258     | 8,914285714     |
| CSK                                                                                           | 3,79454E-10 | 0,31066467  | 0,375 | 0,043 | 8,00686E-06 | 1,240278983   | 0,806270213     | 8,720930233     |
| PFN2                                                                                          | 7,20697E-09 | 0,310626342 | 0,5   | 0,09  | 0,000152074 | 1,240246032   | 0,806291634     | 5,555555556     |
| RGS20                                                                                         | 1,33967E-08 | 0,310469159 | 0,125 | 0     | 0,000282684 | 1,240110914   | 0,806379485     | #DIV/0!         |
| RFC4                                                                                          | 4,5807E-05  | 0,310087534 | 0,094 | 0,004 | 0,966573495 | 1,23978292    | 0,806592818     | 23,5            |
| BCAP29                                                                                        | 2,4257E-05  | 0,309986939 | 0,594 | 0,191 | 0,511847132 | 1,239696477   | 0,806649062     | 3,109947644     |
| DERL1                                                                                         | 7,69876E-13 | 0,30984512  | 0,406 | 0,035 | 1,62452E-08 | 1,239574619   | 0,806728361     | 11,6            |
| DBNL                                                                                          | 4,11565E-08 | 0,309606911 | 0,5   | 0,098 | 0,000868444 | 1,239369965   | 0,806861573     | 5,102040816     |
| CENPW                                                                                         | 2,86276E-12 | 0,309004159 | 0,188 | 0     | 6,04072E-08 | 1,238852269   | 0,807198747     | #DIV/0!         |
| TRIP6                                                                                         | 5,6068E-07  | 0,308911164 | 0,594 | 0,152 | 0,011830901 | 1,238772416   | 0,80725078      | 3,907894737     |

Supplementary Table 1

| Differentially expressed genes_adjacent-skin-XL_comparing SC-Keloid vs. (SC-Myel, SC-Nonmyel) |             |             |       |       |             |               |                 |                 |
|-----------------------------------------------------------------------------------------------|-------------|-------------|-------|-------|-------------|---------------|-----------------|-----------------|
| gene                                                                                          | p_val       | avg_log2FC  | pct.1 | pct.2 | p_val_adj   | Foldchange_UP | Foldchange_DOWN | Ratio_pct1_pct2 |
| ENY2                                                                                          | 9,43521E-06 | 0,308629823 | 0,812 | 0,285 | 0,199092297 | 1,238530866   | 0,807408219     | 2,849122807     |
| CHST1                                                                                         | 2,66394E-10 | 0,308291334 | 0,188 | 0,004 | 5,62118E-06 | 1,238240312   | 0,807597677     | 47              |
| TK1                                                                                           | 4,5807E-05  | 0,308211714 | 0,094 | 0,004 | 0,966573495 | 1,238171978   | 0,807642248     | 23,5            |
| IFT20                                                                                         | 2,30034E-15 | 0,308075421 | 0,531 | 0,051 | 4,85396E-11 | 1,238055012   | 0,807718551     | 10,41176471     |
| MPC1                                                                                          | 8,25323E-05 | 0,307451652 | 0,656 | 0,227 | 1           | 1,237519838   | 0,808067854     | 2,889867841     |
| MCM3                                                                                          | 3,52698E-08 | 0,307420619 | 0,25  | 0,023 | 0,000744228 | 1,237493219   | 0,808085236     | 10,86956522     |
| AUP1                                                                                          | 5,41025E-07 | 0,307289789 | 0,594 | 0,148 | 0,011416173 | 1,237381002   | 0,808158521     | 4,013513514     |
| ACADM                                                                                         | 2,01277E-07 | 0,307218585 | 0,344 | 0,055 | 0,00424715  | 1,237319933   | 0,808198408     | 6,254545455     |
| TWF2                                                                                          | 6,92349E-09 | 0,307040579 | 0,344 | 0,043 | 0,000146093 | 1,237167276   | 0,808298133     | 8               |
| TIMM22                                                                                        | 4,04517E-08 | 0,306872533 | 0,25  | 0,023 | 0,000853571 | 1,237023179   | 0,80839229      | 10,86956522     |
| HAUS1                                                                                         | 2,66329E-14 | 0,306775127 | 0,312 | 0,012 | 5,61981E-10 | 1,236939661   | 0,808446872     | 26              |
| VAC14                                                                                         | 6,06826E-11 | 0,306608233 | 0,312 | 0,023 | 1,28046E-06 | 1,236796579   | 0,8085404       | 13,56521739     |
| DPP7                                                                                          | 3,80125E-07 | 0,306032306 | 0,625 | 0,16  | 0,00802102  | 1,236302945   | 0,808863236     | 3,90625         |
| PELO                                                                                          | 0,247238819 | 0,305841135 | 0,219 | 0,129 | 1           | 1,236139133   | 0,808970425     | 1,697674419     |
| RNF187                                                                                        | 2,08401E-05 | 0,305672627 | 0,594 | 0,188 | 0,439745967 | 1,23599476    | 0,809064919     | 3,159574468     |
| FSTL3                                                                                         | 0,000150814 | 0,305487016 | 0,781 | 0,32  | 1           | 1,235835753   | 0,809169016     | 2,440625        |
| LIN52                                                                                         | 0,036851882 | 0,3048389   | 0,125 | 0,039 | 1           | 1,235280691   | 0,809532609     | 3,205128205     |
| PSMB9                                                                                         | 2,78278E-07 | 0,3045081   | 0,469 | 0,098 | 0,00587194  | 1,234997482   | 0,80971825      | 4,785714286     |
| IGSF8                                                                                         | 0,000288619 | 0,304385497 | 0,469 | 0,156 | 1           | 1,234892534   | 0,809787065     | 3,006410256     |
| NDUFS2                                                                                        | 4,67267E-09 | 0,304248153 | 0,562 | 0,109 | 9,85981E-05 | 1,234774978   | 0,80986416      | 5,155963303     |
| MCM4                                                                                          | 8,54581E-07 | 0,304052232 | 0,219 | 0,023 | 0,018032515 | 1,234607304   | 0,809974149     | 9,52173913      |
| PCDHGC3                                                                                       | 6,466E-11   | 0,303820228 | 0,25  | 0,012 | 1,36439E-06 | 1,234408779   | 0,810104413     | 20,83333333     |
| NUBP2                                                                                         | 4,7968E-08  | 0,303728214 | 0,469 | 0,09  | 0,001012173 | 1,234330052   | 0,810156083     | 5,211111111     |
| TRIM58                                                                                        | 8,22802E-07 | 0,303594648 | 0,188 | 0,016 | 0,01736194  | 1,234215782   | 0,810231091     | 11,75           |
| LINC00665                                                                                     | 8,49478E-10 | 0,303497273 | 0,25  | 0,016 | 1,79248E-05 | 1,234132482   | 0,81028578      | 15,625          |
| IDH2                                                                                          | 4,88462E-07 | 0,303484418 | 0,281 | 0,039 | 0,01030703  | 1,234121485   | 0,810293        | 7,205128205     |
| DHRS4-AS1                                                                                     | 2,65168E-08 | 0,303437015 | 0,219 | 0,016 | 0,00055953  | 1,234080936   | 0,810319624     | 13,6875         |
| RPL36AL                                                                                       | 0,006015039 | 0,303180306 | 0,875 | 0,473 | 1           | 1,233861366   | 0,810463823     | 1,849894292     |
| RMDN1                                                                                         | 6,30011E-07 | 0,303136415 | 0,344 | 0,059 | 0,013293862 | 1,23382383    | 0,81048848      | 5,830508475     |
| FAF2                                                                                          | 0,000268309 | 0,302937073 | 0,281 | 0,07  | 1           | 1,23365336    | 0,810600475     | 4,014285714     |

Supplementary Table 1

| Differentially expressed genes_adjacent-skin-XL_comparing SC-Keloid vs. (SC-Myel, SC-Nonmyel) |             |             |       |       |             |               |                 |                 |
|-----------------------------------------------------------------------------------------------|-------------|-------------|-------|-------|-------------|---------------|-----------------|-----------------|
| gene                                                                                          | p_val       | avg_log2FC  | pct.1 | pct.2 | p_val_adj   | Foldchange_UP | Foldchange_DOWN | Ratio_pct1_pct2 |
| KLHL36                                                                                        | 1,79492E-05 | 0,302606801 | 0,281 | 0,055 | 0,378745038 | 1,233370975   | 0,810786066     | 5,109090909     |
| LDLRAP1                                                                                       | 4,58437E-12 | 0,302572726 | 0,438 | 0,047 | 9,67347E-08 | 1,233341845   | 0,810805215     | 9,319148936     |
| ATXN10                                                                                        | 1,91697E-05 | 0,301962751 | 0,438 | 0,117 | 0,404500592 | 1,232820495   | 0,811148098     | 3,743589744     |
| COX7B                                                                                         | 0,002900042 | 0,301309278 | 0,75  | 0,359 | 1           | 1,232262211   | 0,811515594     | 2,08913649      |
| PSMA3                                                                                         | 0,000413037 | 0,300998918 | 0,625 | 0,254 | 1           | 1,23199715    | 0,81169019      | 2,460629921     |
| IARS2                                                                                         | 9,33487E-05 | 0,300815098 | 0,281 | 0,062 | 1           | 1,231840185   | 0,811793617     | 4,532258065     |
| TPRN                                                                                          | 0,003590182 | 0,300772733 | 0,156 | 0,035 | 1           | 1,231804012   | 0,811817456     | 4,457142857     |
| NFIX                                                                                          | 0,00010839  | 0,300685448 | 0,688 | 0,25  | 1           | 1,231729489   | 0,811866573     | 2,752           |
| PBXIP1                                                                                        | 0,000632975 | 0,300486291 | 0,25  | 0,062 | 1           | 1,231559467   | 0,811978656     | 4,032258065     |
| CENPH                                                                                         | 1,59484E-07 | 0,300181854 | 0,219 | 0,02  | 0,003365275 | 1,231299611   | 0,812150017     | 10,95           |
| CAPNS1                                                                                        | 0,000129179 | 0,300172562 | 0,719 | 0,262 | 1           | 1,23129168    | 0,812155248     | 2,744274809     |
| MRPS36                                                                                        | 2,01009E-07 | 0,300142908 | 0,562 | 0,133 | 0,004241491 | 1,231266372   | 0,812171942     | 4,22556391      |
| ASB3                                                                                          | 0,000390215 | 0,299752936 | 0,25  | 0,059 | 1           | 1,230933596   | 0,812391508     | 4,237288136     |
| VANGL1                                                                                        | 2,8258E-09  | 0,299180108 | 0,219 | 0,012 | 5,96273E-05 | 1,230444945   | 0,812714135     | 18,25           |
| PTTG1IP                                                                                       | 1,08578E-05 | 0,298965778 | 0,75  | 0,258 | 0,229109575 | 1,230262162   | 0,812834883     | 2,906976744     |
| POLR2H                                                                                        | 5,56188E-08 | 0,298862841 | 0,562 | 0,129 | 0,001173613 | 1,230174385   | 0,812892881     | 4,356589147     |
| COMMD6                                                                                        | 0,002311566 | 0,298808715 | 0,812 | 0,395 | 1           | 1,230128233   | 0,812923379     | 2,055696203     |
| TAF6                                                                                          | 1,45029E-07 | 0,298793604 | 0,281 | 0,035 | 0,003060257 | 1,230115348   | 0,812931894     | 8,028571429     |
| RPL39L                                                                                        | 6,24833E-11 | 0,298664593 | 0,344 | 0,031 | 1,31846E-06 | 1,230005352   | 0,813004593     | 11,09677419     |
| TOR1AIP2                                                                                      | 6,45154E-06 | 0,298412999 | 0,5   | 0,133 | 0,136133995 | 1,229790868   | 0,813146386     | 3,759398496     |
| POFUT1                                                                                        | 2,76082E-06 | 0,298310895 | 0,25  | 0,035 | 0,058256123 | 1,229703835   | 0,813203937     | 7,142857143     |
| SLFN5                                                                                         | 1,31816E-11 | 0,298025708 | 0,344 | 0,027 | 2,78145E-07 | 1,229460776   | 0,813364704     | 12,74074074     |
| DHRS7B                                                                                        | 1,63999E-07 | 0,29709402  | 0,25  | 0,027 | 0,003460546 | 1,228667049   | 0,813890143     | 9,259259259     |
| THAP11                                                                                        | 8,3444E-11  | 0,296923284 | 0,375 | 0,039 | 1,76075E-06 | 1,228521651   | 0,813986468     | 9,615384615     |
| ETHE1                                                                                         | 0,000161827 | 0,296864145 | 0,375 | 0,105 | 1           | 1,228471293   | 0,814019835     | 3,571428571     |
| SNRNP25                                                                                       | 8,87823E-09 | 0,296858829 | 0,281 | 0,027 | 0,00018734  | 1,228466766   | 0,814022835     | 10,40740741     |
| CYP27C1                                                                                       | 3,86379E-06 | 0,296799681 | 0,156 | 0,012 | 0,081529835 | 1,228416402   | 0,81405621      | 13              |
| ALYREF                                                                                        | 1,15762E-05 | 0,296669994 | 0,406 | 0,102 | 0,244269533 | 1,228305982   | 0,81412939      | 3,980392157     |
| PPP1R9B                                                                                       | 0,000142816 | 0,296243935 | 0,188 | 0,031 | 1           | 1,22794329    | 0,814369855     | 6,064516129     |
| MRC2                                                                                          | 2,64255E-12 | 0,296193455 | 0,25  | 0,008 | 5,57605E-08 | 1,227900325   | 0,814398351     | 31,25           |

Supplementary Table 1

| Differentially expressed genes_adjacent-skin-XL_comparing SC-Keloid vs. (SC-Myel, SC-Nonmyel) |             |             |       |       |             |               |                 |                 |
|-----------------------------------------------------------------------------------------------|-------------|-------------|-------|-------|-------------|---------------|-----------------|-----------------|
| gene                                                                                          | p_val       | avg_log2FC  | pct.1 | pct.2 | p_val_adj   | Foldchange_UP | Foldchange_DOWN | Ratio_pct1_pct2 |
| RASGEF1C                                                                                      | 0,020165934 | 0,296174683 | 0,344 | 0,148 | 1           | 1,227884348   | 0,814408948     | 2,324324324     |
| FAM184B                                                                                       | 1,96814E-10 | 0,296093666 | 0,156 | 0     | 4,15296E-06 | 1,227815397   | 0,814454683     | #DIV/0!         |
| SPOCD1                                                                                        | 3,21675E-07 | 0,295766059 | 0,156 | 0,008 | 0,006787672 | 1,227536616   | 0,814639651     | 19,5            |
| ANTKMT                                                                                        | 5,76305E-06 | 0,295662429 | 0,5   | 0,133 | 0,12160622  | 1,227448444   | 0,814698169     | 3,759398496     |
| ISY1                                                                                          | 6,27223E-13 | 0,295406501 | 0,438 | 0,043 | 1,3235E-08  | 1,227230719   | 0,814842706     | 10,18604651     |
| ATP6AP2                                                                                       | 0,006998667 | 0,295366006 | 0,844 | 0,473 | 1           | 1,227196273   | 0,814865578     | 1,78435518      |
| FAM104A                                                                                       | 1,75619E-11 | 0,295352115 | 0,281 | 0,016 | 3,70573E-07 | 1,227184457   | 0,814873424     | 17,5625         |
| ATP5ME                                                                                        | 0,003760038 | 0,295293457 | 0,969 | 0,543 | 1           | 1,227134562   | 0,814906556     | 1,784530387     |
| BRCA1                                                                                         | 0,004607686 | 0,295095176 | 0,188 | 0,051 | 1           | 1,226965919   | 0,815018563     | 3,68627451      |
| TIGAR                                                                                         | 5,10479E-14 | 0,294912275 | 0,281 | 0,008 | 1,07716E-09 | 1,226810377   | 0,815121896     | 35,125          |
| PFDN2                                                                                         | 0,001687355 | 0,29488257  | 0,75  | 0,352 | 1           | 1,226785118   | 0,815138679     | 2,130681818     |
| ATIC                                                                                          | 7,43981E-11 | 0,294785865 | 0,344 | 0,031 | 1,56987E-06 | 1,226702887   | 0,81519332      | 11,09677419     |
| RPS27                                                                                         | 0,004104589 | 0,294723188 | 1     | 0,914 | 1           | 1,226649596   | 0,815228736     | 1,094091904     |
| XYLT1                                                                                         | 5,0197E-07  | 0,294614962 | 0,281 | 0,039 | 0,010592072 | 1,22655758    | 0,815289895     | 7,205128205     |
| PCLAF                                                                                         | 9,12354E-07 | 0,29426096  | 0,094 | 0     | 0,019251588 | 1,22625665    | 0,815489971     | #DIV/0!         |
| HGS                                                                                           | 5,70869E-06 | 0,294001122 | 0,375 | 0,082 | 0,120459106 | 1,226035814   | 0,815636859     | 4,573170732     |
| C20orf96                                                                                      | 1,44979E-05 | 0,293867172 | 0,125 | 0,008 | 0,305919948 | 1,225921985   | 0,815712592     | 15,625          |
| MED31                                                                                         | 5,05391E-10 | 0,293732976 | 0,344 | 0,035 | 1,06643E-05 | 1,225807958   | 0,815788471     | 9,828571429     |
| ANKH                                                                                          | 2,41218E-06 | 0,292466638 | 0,25  | 0,035 | 0,050899452 | 1,224732467   | 0,816504851     | 7,142857143     |
| PBRM1                                                                                         | 5,95191E-05 | 0,292398116 | 0,531 | 0,164 | 1           | 1,224674298   | 0,816543632     | 3,237804878     |
| WDR27                                                                                         | 0,031169948 | 0,292277921 | 0,094 | 0,023 | 1           | 1,224572271   | 0,816611664     | 4,086956522     |
| IFT27                                                                                         | 1,04462E-08 | 0,292217949 | 0,406 | 0,062 | 0,000220426 | 1,224521367   | 0,816645611     | 6,548387097     |
| RPE65                                                                                         | 2,66394E-10 | 0,292189097 | 0,188 | 0,004 | 5,62118E-06 | 1,224496879   | 0,816661943     | 47              |
| DUSP14                                                                                        | 8,57488E-08 | 0,291725289 | 0,344 | 0,051 | 0,001809386 | 1,224103282   | 0,816924531     | 6,745098039     |
| CLPTM1L                                                                                       | 1,14064E-09 | 0,291682751 | 0,406 | 0,055 | 2,40686E-05 | 1,22406719    | 0,816948619     | 7,381818182     |
| MLST8                                                                                         | 8,16642E-07 | 0,291585482 | 0,25  | 0,031 | 0,01723197  | 1,223984665   | 0,8170037       | 8,064516129     |
| HNRNPR                                                                                        | 0,000384717 | 0,291440474 | 0,719 | 0,281 | 1           | 1,223861645   | 0,817085823     | 2,558718861     |
| KLHL3                                                                                         | 0,013349129 | 0,291428978 | 0,125 | 0,031 | 1           | 1,223851894   | 0,817092334     | 4,032258065     |
| ESD                                                                                           | 0,000155415 | 0,291270348 | 0,625 | 0,23  | 1           | 1,223717333   | 0,817182182     | 2,717391304     |
| IPO4                                                                                          | 7,82681E-10 | 0,291227918 | 0,25  | 0,016 | 1,65154E-05 | 1,223681344   | 0,817206216     | 15,625          |



Supplementary Table 1

| Differentially expressed genes_adjacent-skin-XL_comparing SC-Keloid vs. (SC-Myel, SC-Nonmyel) |             |             |       |       |             |               |                 |                 |
|-----------------------------------------------------------------------------------------------|-------------|-------------|-------|-------|-------------|---------------|-----------------|-----------------|
| gene                                                                                          | p_val       | avg_log2FC  | pct.1 | pct.2 | p_val_adj   | Foldchange_UP | Foldchange_DOWN | Ratio_pct1_pct2 |
| ECH1                                                                                          | 2,23905E-08 | 0,291133871 | 0,531 | 0,105 | 0,000472461 | 1,223601576   | 0,81725949      | 5,057142857     |
| RSL24D1                                                                                       | 0,002722867 | 0,291081827 | 0,688 | 0,293 | 1           | 1,223557437   | 0,817288972     | 2,348122867     |
| IMMP1L                                                                                        | 1,95325E-11 | 0,291065596 | 0,469 | 0,059 | 4,12155E-07 | 1,223543671   | 0,817298167     | 7,949152542     |
| OAZ1                                                                                          | 0,009661003 | 0,290909844 | 0,969 | 0,668 | 1           | 1,223411586   | 0,817386406     | 1,450598802     |
| SLC39A1                                                                                       | 1,7972E-07  | 0,290858824 | 0,562 | 0,129 | 0,003792262 | 1,223368322   | 0,817415313     | 4,356589147     |
| EEF2                                                                                          | 0,053411174 | 0,290857668 | 0,938 | 0,688 | 1           | 1,223367342   | 0,817415968     | 1,363372093     |
| MZT1                                                                                          | 9,63836E-06 | 0,290820728 | 0,406 | 0,098 | 0,203379102 | 1,223336017   | 0,817436899     | 4,142857143     |
| STX10                                                                                         | 1,97144E-07 | 0,290512959 | 0,438 | 0,086 | 0,004159927 | 1,223075072   | 0,8176113       | 5,093023256     |
| SNX22                                                                                         | 6,3574E-05  | 0,290181868 | 0,062 | 0     | 1           | 1,222794415   | 0,817798959     | #DIV/0!         |
| SDF2                                                                                          | 3,9745E-07  | 0,29010833  | 0,406 | 0,078 | 0,008386593 | 1,222732087   | 0,817840646     | 5,205128205     |
| KCTD15                                                                                        | 1,79804E-05 | 0,290033738 | 0,188 | 0,023 | 0,379403857 | 1,22266887    | 0,817882932     | 8,173913043     |
| LEPROTL1                                                                                      | 1,73305E-06 | 0,289903818 | 0,406 | 0,086 | 0,036569061 | 1,222558769   | 0,817956589     | 4,720930233     |
| MANEA-DT                                                                                      | 0,000451818 | 0,289451339 | 0,094 | 0,008 | 1           | 1,222175393   | 0,818213168     | 11,75           |
| ZGPAT                                                                                         | 0,12647311  | 0,289120809 | 0,094 | 0,035 | 1           | 1,221895417   | 0,818400647     | 2,685714286     |
| ZNF32                                                                                         | 2,47596E-08 | 0,288830983 | 0,438 | 0,074 | 0,000522452 | 1,221649972   | 0,818565074     | 5,918918919     |
| RPA3                                                                                          | 5,02919E-06 | 0,288620476 | 0,344 | 0,07  | 0,106120986 | 1,221471732   | 0,818684521     | 4,914285714     |
| ST8SIA2                                                                                       | 2,86276E-12 | 0,288557244 | 0,188 | 0     | 6,04072E-08 | 1,221418197   | 0,818720404     | #DIV/0!         |
| RALYL                                                                                         | 9,12354E-07 | 0,28848993  | 0,094 | 0     | 0,019251588 | 1,221361209   | 0,818758605     | #DIV/0!         |
| PGM3                                                                                          | 6,24909E-08 | 0,288244749 | 0,562 | 0,125 | 0,00131862  | 1,221153661   | 0,818897762     | 4,496           |
| CSNK1A1                                                                                       | 0,004870538 | 0,288009159 | 0,844 | 0,418 | 1           | 1,220954264   | 0,819031498     | 2,019138756     |
| CDK5                                                                                          | 1,18109E-12 | 0,287967012 | 0,281 | 0,012 | 2,49221E-08 | 1,220918596   | 0,819055426     | 23,41666667     |
| B4GALT7                                                                                       | 1,69471E-11 | 0,287724923 | 0,375 | 0,035 | 3,57601E-07 | 1,220713739   | 0,819192877     | 10,71428571     |
| PPP4R1                                                                                        | 5,31565E-06 | 0,287709839 | 0,406 | 0,094 | 0,11216551  | 1,220700975   | 0,819201443     | 4,319148936     |
| KDM2B                                                                                         | 0,00079237  | 0,287378534 | 0,156 | 0,027 | 1           | 1,220420682   | 0,819389588     | 5,777777778     |
| CCDC106                                                                                       | 2,81727E-07 | 0,287364527 | 0,312 | 0,047 | 0,005944715 | 1,220408833   | 0,819397544     | 6,638297872     |
| NMI                                                                                           | 0,000189737 | 0,287309361 | 0,25  | 0,055 | 1           | 1,220362168   | 0,819428877     | 4,545454545     |
| ANPEP                                                                                         | 2,86276E-12 | 0,287234493 | 0,188 | 0     | 6,04072E-08 | 1,220298839   | 0,819471401     | #DIV/0!         |
| NUDT5                                                                                         | 5,26847E-08 | 0,287189695 | 0,438 | 0,078 | 0,001111699 | 1,220260948   | 0,819496847     | 5,615384615     |
| ATG101                                                                                        | 7,84831E-07 | 0,286797997 | 0,531 | 0,129 | 0,016560709 | 1,219929686   | 0,819719375     | 4,11627907      |
| NSMCE1                                                                                        | 2,11379E-11 | 0,286760938 | 0,406 | 0,043 | 4,46031E-07 | 1,21989835    | 0,819740431     | 9,441860465     |

Supplementary Table 1

| Differentially expressed genes_adjacent-skin-XL_comparing SC-Keloid vs. (SC-Myel, SC-Nonmyel) |             |             |       |       |             |               |                 |                 |
|-----------------------------------------------------------------------------------------------|-------------|-------------|-------|-------|-------------|---------------|-----------------|-----------------|
| gene                                                                                          | p_val       | avg_log2FC  | pct.1 | pct.2 | p_val_adj   | Foldchange_UP | Foldchange_DOWN | Ratio_pct1_pct2 |
| PAK1IP1                                                                                       | 3,88452E-06 | 0,286571592 | 0,281 | 0,047 | 0,081967219 | 1,219738256   | 0,819848025     | 5,978723404     |
| FAM114A2                                                                                      | 9,0771E-08  | 0,285874552 | 0,188 | 0,012 | 0,001915359 | 1,219149079   | 0,820244232     | 15,66666667     |
| DNMT1                                                                                         | 1,07328E-06 | 0,285738571 | 0,531 | 0,129 | 0,022647178 | 1,219034174   | 0,820321547     | 4,11627907      |
| KIF7                                                                                          | 0,039886012 | 0,285622941 | 0,062 | 0,012 | 1           | 1,218936475   | 0,820387297     | 5,166666667     |
| MED16                                                                                         | 7,66065E-05 | 0,285511521 | 0,219 | 0,039 | 1           | 1,218842339   | 0,820450659     | 5,615384615     |
| CDK18                                                                                         | 4,38117E-05 | 0,284591151 | 0,281 | 0,059 | 0,924471165 | 1,218065024   | 0,820974234     | 4,762711864     |
| TXNDC9                                                                                        | 5,01789E-11 | 0,284509308 | 0,312 | 0,023 | 1,05883E-06 | 1,217995927   | 0,821020808     | 13,56521739     |
| HMG20B                                                                                        | 0,000109069 | 0,284260889 | 0,75  | 0,285 | 1           | 1,217786217   | 0,821162193     | 2,631578947     |
| SLC39A13                                                                                      | 7,27202E-05 | 0,284257947 | 0,375 | 0,098 | 1           | 1,217783733   | 0,821163868     | 3,826530612     |
| SPDL1                                                                                         | 5,34526E-05 | 0,284209886 | 0,188 | 0,027 | 1           | 1,217743165   | 0,821191224     | 6,962962963     |
| PCNX2                                                                                         | 1,51098E-05 | 0,284030544 | 0,125 | 0,008 | 0,318831333 | 1,217591796   | 0,821293313     | 15,625          |
| GPX4                                                                                          | 0,010556548 | 0,283811156 | 0,75  | 0,426 | 1           | 1,217406654   | 0,821418215     | 1,76056338      |
| CTXN1                                                                                         | 4,09886E-14 | 0,283517708 | 0,219 | 0     | 8,649E-10   | 1,217159055   | 0,82158531      | #DIV/0!         |
| SLC35A2                                                                                       | 5,25184E-05 | 0,28273047  | 0,281 | 0,059 | 1           | 1,216495067   | 0,822033748     | 4,762711864     |
| DHODH                                                                                         | 9,0771E-08  | 0,282345924 | 0,188 | 0,012 | 0,001915359 | 1,216170857   | 0,822252888     | 15,66666667     |
| FH                                                                                            | 2,99054E-07 | 0,282316069 | 0,375 | 0,066 | 0,006310343 | 1,21614569    | 0,822269904     | 5,681818182     |
| TUBG1                                                                                         | 1,77239E-07 | 0,282312126 | 0,219 | 0,02  | 0,00373992  | 1,216142366   | 0,822272151     | 10,95           |
| POLRMT                                                                                        | 0,060046712 | 0,282235308 | 0,156 | 0,062 | 1           | 1,216077613   | 0,822315935     | 2,516129032     |
| FMOD                                                                                          | 0,034213216 | 0,281937369 | 0,094 | 0,023 | 1           | 1,2158265     | 0,822485774     | 4,086956522     |
| PUF60                                                                                         | 0,000136604 | 0,281648933 | 0,75  | 0,277 | 1           | 1,215583446   | 0,822650229     | 2,707581227     |
| NDUFAF4                                                                                       | 0,004972449 | 0,281638417 | 0,219 | 0,066 | 1           | 1,215574586   | 0,822656225     | 3,318181818     |
| CDC42EP1                                                                                      | 3,35661E-05 | 0,281586525 | 0,75  | 0,281 | 0,708279251 | 1,215530863   | 0,822685816     | 2,669039146     |
| PFDN4                                                                                         | 1,03996E-05 | 0,281501511 | 0,5   | 0,133 | 0,219441092 | 1,215459238   | 0,822734296     | 3,759398496     |
| C15orf61                                                                                      | 3,59137E-08 | 0,281376523 | 0,312 | 0,039 | 0,000757815 | 1,215353941   | 0,822805576     | 8               |
| COX14                                                                                         | 3,25025E-05 | 0,28104458  | 0,531 | 0,164 | 0,68583617  | 1,215074338   | 0,822994914     | 3,237804878     |
| CUL2                                                                                          | 1,31608E-06 | 0,281002536 | 0,344 | 0,062 | 0,027770673 | 1,215038928   | 0,823018899     | 5,548387097     |
| RPS29                                                                                         | 0,006923322 | 0,280933242 | 1     | 0,832 | 1           | 1,21498057    | 0,82305843      | 1,201923077     |
| UBTD1                                                                                         | 1,08519E-08 | 0,280899559 | 0,281 | 0,027 | 0,000228985 | 1,214952203   | 0,823077646     | 10,40740741     |
| RPL15                                                                                         | 0,018541127 | 0,280661666 | 0,969 | 0,832 | 1           | 1,21475188    | 0,823213379     | 1,164663462     |
| ATP11B                                                                                        | 7,53121E-05 | 0,280081691 | 0,344 | 0,086 | 1           | 1,214263639   | 0,823544384     | 4               |

Supplementary Table 1

| Differentially expressed genes_adjacent-skin-XL_comparing SC-Keloid vs. (SC-Myel, SC-Nonmyel) |             |             |       |       |             |               |                 |                 |
|-----------------------------------------------------------------------------------------------|-------------|-------------|-------|-------|-------------|---------------|-----------------|-----------------|
| gene                                                                                          | p_val       | avg_log2FC  | pct.1 | pct.2 | p_val_adj   | Foldchange_UP | Foldchange_DOWN | Ratio_pct1_pct2 |
| TOR3A                                                                                         | 1,68113E-05 | 0,279964702 | 0,25  | 0,043 | 0,354735265 | 1,214165178   | 0,823611168     | 5,813953488     |
| GPI                                                                                           | 6,67693E-07 | 0,27947085  | 0,375 | 0,07  | 0,014088981 | 1,213749625   | 0,823893149     | 5,357142857     |
| TLL1                                                                                          | 4,27234E-12 | 0,279290744 | 0,219 | 0,004 | 9,01506E-08 | 1,21359811    | 0,82399601      | 54,75           |
| TXNDC12                                                                                       | 1,51302E-05 | 0,279136095 | 0,438 | 0,113 | 0,319262325 | 1,213468026   | 0,824084342     | 3,876106195     |
| SLC25A4                                                                                       | 4,8636E-06  | 0,279124532 | 0,438 | 0,105 | 0,102626823 | 1,2134583     | 0,824090947     | 4,171428571     |
| ARF1                                                                                          | 0,007847613 | 0,278966274 | 0,812 | 0,488 | 1           | 1,213325196   | 0,824181352     | 1,663934426     |
| MTA1                                                                                          | 4,97968E-06 | 0,278890288 | 0,469 | 0,117 | 0,105076243 | 1,213261293   | 0,824224762     | 4,008547009     |
| UPF3B                                                                                         | 4,12646E-12 | 0,278867453 | 0,406 | 0,039 | 8,70723E-08 | 1,213242089   | 0,824237808     | 10,41025641     |
| RTF2                                                                                          | 0,000151745 | 0,27885791  | 0,562 | 0,199 | 1           | 1,213234064   | 0,82424326      | 2,824120603     |
| ID3                                                                                           | 0,000169991 | 0,278848981 | 0,75  | 0,293 | 1           | 1,213226555   | 0,824248362     | 2,559726962     |
| EIF3E                                                                                         | 0,000646176 | 0,27872378  | 0,812 | 0,359 | 1           | 1,213121273   | 0,824319895     | 2,26183844      |
| PIP4P2                                                                                        | 7,4957E-05  | 0,278569462 | 0,312 | 0,074 | 1           | 1,212991518   | 0,824408073     | 4,216216216     |
| ITGAE                                                                                         | 6,97568E-07 | 0,278529026 | 0,375 | 0,07  | 0,014719382 | 1,212957521   | 0,82443118      | 5,357142857     |
| C9orf64                                                                                       | 1,86093E-07 | 0,278478276 | 0,25  | 0,027 | 0,003926759 | 1,212914853   | 0,824460182     | 9,259259259     |
| TMTC3                                                                                         | 5,30076E-07 | 0,278194149 | 0,281 | 0,039 | 0,011185134 | 1,212676002   | 0,824622569     | 7,205128205     |
| TOR1A                                                                                         | 4,62713E-14 | 0,277994256 | 0,375 | 0,023 | 9,7637E-10  | 1,212507991   | 0,824736832     | 16,30434783     |
| CYB561A3                                                                                      | 8,24168E-09 | 0,277920551 | 0,344 | 0,043 | 0,000173908 | 1,212446048   | 0,824778968     | 8               |
| BLOC1S4                                                                                       | 2,04525E-07 | 0,27757477  | 0,25  | 0,027 | 0,00431569  | 1,212155487   | 0,824976672     | 9,259259259     |
| NOSIP                                                                                         | 5,54069E-05 | 0,277522241 | 0,344 | 0,082 | 1           | 1,212111353   | 0,82500671      | 4,195121951     |
| UBE4A                                                                                         | 0,000292494 | 0,277355235 | 0,281 | 0,07  | 1           | 1,211971048   | 0,825102218     | 4,014285714     |
| ROGDI                                                                                         | 7,24756E-09 | 0,277213019 | 0,188 | 0,008 | 0,000152931 | 1,211851582   | 0,825183558     | 23,5            |
| TUBA1C                                                                                        | 0,001879994 | 0,277078393 | 0,5   | 0,195 | 1           | 1,211738502   | 0,825260564     | 2,564102564     |
| UBA6-DT                                                                                       | 7,24756E-09 | 0,276619012 | 0,188 | 0,008 | 0,000152931 | 1,211352723   | 0,825523384     | 23,5            |
| FNBP1L                                                                                        | 9,95832E-07 | 0,276577493 | 0,312 | 0,051 | 0,021013058 | 1,211317862   | 0,825547143     | 6,117647059     |
| SIL1                                                                                          | 2,77715E-07 | 0,276221364 | 0,562 | 0,133 | 0,005860059 | 1,211018885   | 0,825750954     | 4,22556391      |
| MDH1                                                                                          | 6,81779E-06 | 0,27619918  | 0,594 | 0,172 | 0,143862188 | 1,211000265   | 0,825763651     | 3,453488372     |
| IMMT                                                                                          | 1,91188E-05 | 0,275945768 | 0,344 | 0,078 | 0,403425253 | 1,210787569   | 0,825908711     | 4,41025641      |
| PDCL                                                                                          | 3,59137E-08 | 0,275640738 | 0,312 | 0,039 | 0,000757815 | 1,210531598   | 0,826083352     | 8               |
| APBB1                                                                                         | 3,48389E-06 | 0,275591028 | 0,219 | 0,027 | 0,073513559 | 1,210489889   | 0,826111816     | 8,111111111     |
| H2AJ                                                                                          | 0,038034675 | 0,275442596 | 0,781 | 0,414 | 1           | 1,210365353   | 0,826196815     | 1,88647343      |

Supplementary Table 1

| Differentially expressed genes_adjacent-skin-XL_comparing SC-Keloid vs. (SC-Myel, SC-Nonmyel) |             |             |       |       |             |               |                 |                 |
|-----------------------------------------------------------------------------------------------|-------------|-------------|-------|-------|-------------|---------------|-----------------|-----------------|
| gene                                                                                          | p_val       | avg_log2FC  | pct.1 | pct.2 | p_val_adj   | Foldchange_UP | Foldchange_DOWN | Ratio_pct1_pct2 |
| NDUFAF1                                                                                       | 2,24215E-10 | 0,275403455 | 0,281 | 0,02  | 4,73116E-06 | 1,210332516   | 0,82621923      | 14,05           |
| HOMER1                                                                                        | 3,91499E-06 | 0,275074046 | 0,219 | 0,027 | 0,082610119 | 1,210056193   | 0,826407902     | 8,111111111     |
| MRPS16                                                                                        | 7,3383E-09  | 0,274774116 | 0,344 | 0,043 | 0,000154846 | 1,209804654   | 0,826579727     | 8               |
| ZBED1                                                                                         | 0,0555007   | 0,274483403 | 0,125 | 0,043 | 1           | 1,209560895   | 0,826746305     | 2,906976744     |
| RALB                                                                                          | 4,27613E-06 | 0,27426051  | 0,281 | 0,047 | 0,090230617 | 1,209374035   | 0,826874045     | 5,978723404     |
| AREG                                                                                          | 0,433572992 | 0,274053582 | 0,062 | 0,035 | 1           | 1,209200585   | 0,826992653     | 1,771428571     |
| RPL22L1                                                                                       | 0,002313981 | 0,273925461 | 0,75  | 0,359 | 1           | 1,209093205   | 0,827066099     | 2,08913649      |
| DDX23                                                                                         | 6,03826E-06 | 0,273819409 | 0,312 | 0,059 | 0,127413405 | 1,209004328   | 0,827126899     | 5,288135593     |
| RAB5C                                                                                         | 5,46517E-06 | 0,273677852 | 0,656 | 0,195 | 0,115320473 | 1,208885706   | 0,82720806      | 3,364102564     |
| OXSM                                                                                          | 8,18806E-07 | 0,273531961 | 0,125 | 0,004 | 0,017277634 | 1,208763465   | 0,827291715     | 31,25           |
| TFPT                                                                                          | 1,88604E-09 | 0,273506394 | 0,312 | 0,031 | 3,97972E-05 | 1,208742045   | 0,827306376     | 10,06451613     |
| TOP1MT                                                                                        | 1,77239E-07 | 0,27340643  | 0,219 | 0,02  | 0,00373992  | 1,208658293   | 0,827363702     | 10,95           |
| MED24                                                                                         | 9,05158E-09 | 0,273249875 | 0,312 | 0,035 | 0,000190997 | 1,208527142   | 0,827453489     | 8,914285714     |
| WLS                                                                                           | 1,25535E-06 | 0,27324912  | 0,625 | 0,172 | 0,026489135 | 1,20852651    | 0,827453921     | 3,63372093      |
| ENDOD1                                                                                        | 0,009341004 | 0,27311313  | 0,531 | 0,242 | 1           | 1,208412598   | 0,827531922     | 2,194214876     |
| RAB11A                                                                                        | 6,43341E-05 | 0,272996324 | 0,656 | 0,223 | 1           | 1,208314765   | 0,827598925     | 2,941704036     |
| EXOSC5                                                                                        | 7,16496E-06 | 0,27281971  | 0,25  | 0,039 | 0,151187773 | 1,208166852   | 0,827700245     | 6,41025641      |
| SULF1                                                                                         | 0,000486824 | 0,272629266 | 0,094 | 0,008 | 1           | 1,208007378   | 0,827809514     | 11,75           |
| SEC24D                                                                                        | 2,00542E-05 | 0,272611436 | 0,406 | 0,102 | 0,423163655 | 1,207992449   | 0,827819744     | 3,980392157     |
| ZNF160                                                                                        | 0,000157414 | 0,272390569 | 0,188 | 0,031 | 1           | 1,207807527   | 0,827946488     | 6,064516129     |
| INTS12                                                                                        | 0,000392856 | 0,272254285 | 0,219 | 0,047 | 1           | 1,207693437   | 0,828024704     | 4,659574468     |
| AGPAT1                                                                                        | 3,32737E-07 | 0,27216029  | 0,469 | 0,098 | 0,007021076 | 1,207614755   | 0,828078653     | 4,785714286     |
| LAGE3                                                                                         | 2,04693E-11 | 0,272158335 | 0,406 | 0,043 | 4,31922E-07 | 1,207613119   | 0,828079775     | 9,441860465     |
| TMEM223                                                                                       | 3,9091E-08  | 0,272017486 | 0,25  | 0,023 | 0,000824859 | 1,207495227   | 0,828160623     | 10,86956522     |
| LPCAT2                                                                                        | 3,72126E-05 | 0,271840125 | 0,469 | 0,129 | 0,785222778 | 1,207346789   | 0,828262442     | 3,635658915     |
| TCF4                                                                                          | 1,41746E-05 | 0,27173235  | 0,719 | 0,246 | 0,299098567 | 1,2072566     | 0,828324318     | 2,922764228     |
| CARM1                                                                                         | 5,65549E-06 | 0,271428454 | 0,312 | 0,059 | 0,11933641  | 1,207002324   | 0,828498819     | 5,288135593     |
| GLRX3                                                                                         | 2,2623E-10  | 0,271422381 | 0,469 | 0,066 | 4,77367E-06 | 1,206997243   | 0,828502306     | 7,106060606     |
| UBR4                                                                                          | 5,72121E-06 | 0,271405399 | 0,406 | 0,094 | 0,120723203 | 1,206983036   | 0,828512059     | 4,319148936     |
| PSMG2                                                                                         | 9,82992E-07 | 0,271265998 | 0,594 | 0,152 | 0,020742108 | 1,206866416   | 0,828592118     | 3,907894737     |

Supplementary Table 1

| Differentially expressed genes_adjacent-skin-XL_ comparing SC-Keloid vs. (SC-Myel, SC-Nonmyel) |             |             |       |       |             |               |                 |                 |
|------------------------------------------------------------------------------------------------|-------------|-------------|-------|-------|-------------|---------------|-----------------|-----------------|
| gene                                                                                           | p_val       | avg_log2FC  | pct.1 | pct.2 | p_val_adj   | Foldchange_UP | Foldchange_DOWN | Ratio_pct1_pct2 |
| DGAT1                                                                                          | 3,25118E-10 | 0,271218619 | 0,312 | 0,027 | 6,86031E-06 | 1,206826782   | 0,82861933      | 11,55555556     |
| TPM1                                                                                           | 3,72621E-07 | 0,270965031 | 0,438 | 0,09  | 0,007862681 | 1,206614673   | 0,828764992     | 4,866666667     |
| EPB41L4A                                                                                       | 4,5807E-05  | 0,270959513 | 0,094 | 0,004 | 0,966573495 | 1,206610058   | 0,828768162     | 23,5            |
| ZNF417                                                                                         | 0,082317662 | 0,270950975 | 0,031 | 0,004 | 1           | 1,206602916   | 0,828773067     | 7,75            |
| PPIL3                                                                                          | 2,72573E-08 | 0,27088498  | 0,344 | 0,047 | 0,000575156 | 1,206547723   | 0,82881098      | 7,319148936     |
| ZWINT                                                                                          | 1,33443E-05 | 0,270766214 | 0,125 | 0,008 | 0,281577496 | 1,206448401   | 0,828879212     | 15,625          |
| TSPAN11                                                                                        | 0,000818349 | 0,270643931 | 0,562 | 0,219 | 1           | 1,206346147   | 0,828949471     | 2,566210046     |
| MAPKAP1                                                                                        | 1,22749E-05 | 0,270434937 | 0,312 | 0,062 | 0,259013251 | 1,206171404   | 0,829069564     | 5,032258065     |
| MAD2L1                                                                                         | 3,44546E-06 | 0,270308526 | 0,156 | 0,012 | 0,072702732 | 1,206065722   | 0,829142211     | 13              |
| PIGT                                                                                           | 3,53787E-05 | 0,270279642 | 0,469 | 0,133 | 0,746526569 | 1,206041576   | 0,829158812     | 3,526315789     |
| ECI1                                                                                           | 5,4927E-06  | 0,270082221 | 0,5   | 0,129 | 0,11590148  | 1,20587655    | 0,829272283     | 3,875968992     |
| SUCLG2                                                                                         | 1,07156E-05 | 0,270054364 | 0,469 | 0,121 | 0,226109558 | 1,205853266   | 0,829288296     | 3,876033058     |
| TMEM161A                                                                                       | 4,64156E-06 | 0,270046971 | 0,312 | 0,059 | 0,097941569 | 1,205847086   | 0,829292546     | 5,288135593     |
| DYRK4                                                                                          | 0,000168807 | 0,269622221 | 0,25  | 0,055 | 1           | 1,205492121   | 0,829536737     | 4,545454545     |
| SPG21                                                                                          | 1,38976E-05 | 0,269095125 | 0,312 | 0,062 | 0,293252516 | 1,205051769   | 0,829839867     | 5,032258065     |
| PCDHB2                                                                                         | 8,61561E-07 | 0,268879659 | 0,125 | 0,004 | 0,018179807 | 1,204871808   | 0,829963813     | 31,25           |
| KDM1A                                                                                          | 1,65075E-06 | 0,268849285 | 0,281 | 0,043 | 0,034832408 | 1,204846441   | 0,829981287     | 6,534883721     |
| C2orf81                                                                                        | 0,00050526  | 0,26884513  | 0,094 | 0,008 | 1           | 1,204842971   | 0,829983678     | 11,75           |
| GSTA4                                                                                          | 2,58449E-06 | 0,26861788  | 0,438 | 0,102 | 0,054535414 | 1,204653202   | 0,830114425     | 4,294117647     |
| TMSB15A                                                                                        | 0,00050526  | 0,26857011  | 0,094 | 0,008 | 1           | 1,204613315   | 0,830141912     | 11,75           |
| CRAT                                                                                           | 3,74455E-07 | 0,268558116 | 0,312 | 0,047 | 0,007901365 | 1,2046033     | 0,830148813     | 6,638297872     |
| TRAF7                                                                                          | 4,68061E-05 | 0,268438336 | 0,312 | 0,07  | 0,987655199 | 1,204503292   | 0,830217739     | 4,457142857     |
| EPRS1                                                                                          | 2,48397E-07 | 0,26821883  | 0,438 | 0,086 | 0,005241431 | 1,204320041   | 0,830344067     | 5,093023256     |
| ENDOG                                                                                          | 0,000183387 | 0,268206058 | 0,281 | 0,066 | 1           | 1,204309379   | 0,830351418     | 4,257575758     |
| CWC15                                                                                          | 6,96722E-05 | 0,268025538 | 0,469 | 0,141 | 1           | 1,204158697   | 0,830455323     | 3,326241135     |
| ULK4                                                                                           | 0,000486824 | 0,267944412 | 0,094 | 0,008 | 1           | 1,204090986   | 0,830502023     | 11,75           |
| METAP2                                                                                         | 0,000197292 | 0,267685415 | 0,594 | 0,211 | 1           | 1,203874843   | 0,830651131     | 2,815165877     |
| NEFM                                                                                           | 3,82664E-06 | 0,267665913 | 0,188 | 0,02  | 0,080745856 | 1,20385857    | 0,830662359     | 9,4             |
| LRP4                                                                                           | 0,64910682  | 0,267568304 | 0,031 | 0,02  | 1           | 1,203777123   | 0,830718562     | 1,55            |
| ARHGDI3                                                                                        | 1,29854E-10 | 0,267390929 | 0,219 | 0,008 | 2,74005E-06 | 1,20362913    | 0,830820703     | 27,375          |

Supplementary Table 1

| Differentially expressed genes_adjacent-skin-XL_comparing SC-Keloid vs. (SC-Myel, SC-Nonmyel) |             |             |       |       |             |               |                 |                 |
|-----------------------------------------------------------------------------------------------|-------------|-------------|-------|-------|-------------|---------------|-----------------|-----------------|
| gene                                                                                          | p_val       | avg_log2FC  | pct.1 | pct.2 | p_val_adj   | Foldchange_UP | Foldchange_DOWN | Ratio_pct1_pct2 |
| DGCR6L                                                                                        | 7,40549E-11 | 0,267383175 | 0,562 | 0,09  | 1,56263E-06 | 1,203622662   | 0,830825168     | 6,244444444     |
| METTL5                                                                                        | 6,46751E-10 | 0,267154376 | 0,531 | 0,09  | 1,36471E-05 | 1,203431793   | 0,83095694      | 5,9             |
| PDE4A                                                                                         | 2,11157E-07 | 0,267104506 | 0,219 | 0,02  | 0,00445563  | 1,203390194   | 0,830985664     | 10,95           |
| CCDC34                                                                                        | 1,99284E-10 | 0,267024776 | 0,281 | 0,02  | 4,2051E-06  | 1,203323691   | 0,83103159      | 14,05           |
| THYN1                                                                                         | 4,70256E-09 | 0,266571938 | 0,469 | 0,078 | 9,92287E-05 | 1,202946047   | 0,831292478     | 6,012820513     |
| BBOX1                                                                                         | 1,33967E-08 | 0,266369685 | 0,125 | 0     | 0,000282684 | 1,202777417   | 0,831409026     | #DIV/0!         |
| PSMC2                                                                                         | 3,33903E-05 | 0,265849577 | 0,406 | 0,105 | 0,704567964 | 1,20234388    | 0,831708812     | 3,866666667     |
| RND3                                                                                          | 0,040432475 | 0,265060083 | 0,75  | 0,445 | 1           | 1,201686094   | 0,832164078     | 1,685393258     |
| AIFM1                                                                                         | 8,22802E-07 | 0,264937418 | 0,188 | 0,016 | 0,01736194  | 1,201583925   | 0,832234835     | 11,75           |
| STK25                                                                                         | 0,00011675  | 0,264928088 | 0,375 | 0,102 | 1           | 1,201576154   | 0,832240217     | 3,676470588     |
| ELMOD1                                                                                        | 6,3574E-05  | 0,264814075 | 0,062 | 0     | 1           | 1,201481201   | 0,83230599      | #DIV/0!         |
| TIMM23B                                                                                       | 0,05712057  | 0,264670353 | 0,094 | 0,027 | 1           | 1,201361514   | 0,832388909     | 3,481481481     |
| AMZ2                                                                                          | 1,69117E-07 | 0,264520606 | 0,344 | 0,055 | 0,003568535 | 1,201236823   | 0,832475312     | 6,254545455     |
| ZC3HC1                                                                                        | 0,000486824 | 0,264506057 | 0,094 | 0,008 | 1           | 1,201224709   | 0,832483708     | 11,75           |
| MCTS1                                                                                         | 7,45803E-08 | 0,264412725 | 0,406 | 0,07  | 0,001573719 | 1,201147002   | 0,832537565     | 5,8             |
| USP14                                                                                         | 9,30016E-08 | 0,264324522 | 0,562 | 0,125 | 0,001962427 | 1,201073568   | 0,832588466     | 4,496           |
| MICALL1                                                                                       | 1,57978E-10 | 0,264098427 | 0,219 | 0,008 | 3,33348E-06 | 1,200885355   | 0,832718957     | 27,375          |
| RPL5                                                                                          | 0,103548686 | 0,26386582  | 0,938 | 0,746 | 1           | 1,20069175    | 0,832853228     | 1,257372654     |
| TSPAN3                                                                                        | 0,001215659 | 0,26376377  | 0,594 | 0,234 | 1           | 1,200606821   | 0,832912143     | 2,538461538     |
| DDX11                                                                                         | 4,36691E-05 | 0,2636901   | 0,094 | 0,004 | 0,921461827 | 1,200545515   | 0,832954676     | 23,5            |
| PSMD9                                                                                         | 9,51361E-07 | 0,263641304 | 0,594 | 0,152 | 0,02007467  | 1,20050491    | 0,832982849     | 3,907894737     |
| MFSD3                                                                                         | 1,96898E-07 | 0,263581921 | 0,219 | 0,02  | 0,00415474  | 1,200455496   | 0,833017136     | 10,95           |
| PAR6A                                                                                         | 1,33967E-08 | 0,263579644 | 0,125 | 0     | 0,000282684 | 1,200453602   | 0,833018451     | #DIV/0!         |
| CLTC                                                                                          | 7,21599E-06 | 0,263566389 | 0,562 | 0,16  | 0,152264664 | 1,200442573   | 0,833026104     | 3,5125          |
| MYEOV                                                                                         | 4,09886E-14 | 0,263547785 | 0,219 | 0     | 8,649E-10   | 1,200427093   | 0,833036846     | #DIV/0!         |
| RPL30                                                                                         | 0,014566126 | 0,263331247 | 1     | 0,883 | 1           | 1,200246931   | 0,833161889     | 1,132502831     |
| ZNF544                                                                                        | 1,02698E-07 | 0,263272101 | 0,188 | 0,012 | 0,002167028 | 1,200197725   | 0,833196047     | 15,66666667     |
| TMX1                                                                                          | 2,43867E-05 | 0,263236879 | 0,438 | 0,117 | 0,51458445  | 1,200168424   | 0,833216389     | 3,743589744     |
| ERVMER34-1                                                                                    | 2,86276E-12 | 0,263126483 | 0,188 | 0     | 6,04072E-08 | 1,20007659    | 0,833280149     | #DIV/0!         |
| CKS2                                                                                          | 5,79556E-08 | 0,263043969 | 0,375 | 0,059 | 0,001222921 | 1,200007954   | 0,83332781      | 6,355932203     |

Supplementary Table 1

| Differentially expressed genes_adjacent-skin-XL_comparing SC-Keloid vs. (SC-Myel, SC-Nonmyel) |             |             |       |       |             |               |                 |                 |
|-----------------------------------------------------------------------------------------------|-------------|-------------|-------|-------|-------------|---------------|-----------------|-----------------|
| gene                                                                                          | p_val       | avg_log2FC  | pct.1 | pct.2 | p_val_adj   | Foldchange_UP | Foldchange_DOWN | Ratio_pct1_pct2 |
| DCTN5                                                                                         | 8,59347E-05 | 0,262782245 | 0,219 | 0,039 | 1           | 1,199790277   | 0,833479        | 5,615384615     |
| IMP4                                                                                          | 1,60198E-07 | 0,262652417 | 0,375 | 0,062 | 0,003380331 | 1,199682312   | 0,833554008     | 6,048387097     |
| REEP6                                                                                         | 0,000452457 | 0,262605308 | 0,125 | 0,016 | 1           | 1,19964314    | 0,833581227     | 7,8125          |
| SEC62                                                                                         | 0,000955886 | 0,262447343 | 0,875 | 0,391 | 1           | 1,199511794   | 0,833672503     | 2,237851662     |
| COQ3                                                                                          | 3,57983E-06 | 0,262426522 | 0,156 | 0,012 | 0,075538003 | 1,199494483   | 0,833684535     | 13              |
| ADAMTS12                                                                                      | 9,12354E-07 | 0,262416048 | 0,094 | 0     | 0,019251588 | 1,199485775   | 0,833690587     | #DIV/0!         |
| ST3GAL2                                                                                       | 5,94561E-05 | 0,262233544 | 0,188 | 0,027 | 1           | 1,199334047   | 0,833796058     | 6,962962963     |
| ARMC10                                                                                        | 3,02618E-05 | 0,262145523 | 0,406 | 0,105 | 0,638555129 | 1,199260876   | 0,83384693      | 3,866666667     |
| AIF1L                                                                                         | 2,86075E-06 | 0,261265994 | 0,312 | 0,055 | 0,060364658 | 1,198529977   | 0,834355435     | 5,672727273     |
| HS3ST1                                                                                        | 1,96814E-10 | 0,261223087 | 0,156 | 0     | 4,15296E-06 | 1,198494332   | 0,834380249     | #DIV/0!         |
| YWHAZ                                                                                         | 0,002852144 | 0,261161745 | 0,875 | 0,453 | 1           | 1,198443375   | 0,834415727     | 1,931567329     |
| LPGAT1                                                                                        | 1,35983E-06 | 0,261004797 | 0,531 | 0,137 | 0,028693682 | 1,198313006   | 0,834506506     | 3,875912409     |
| NDUFB5                                                                                        | 1,05193E-06 | 0,260970888 | 0,469 | 0,105 | 0,022196825 | 1,198284841   | 0,834526121     | 4,466666667     |
| RNF150                                                                                        | 0,002168448 | 0,260965428 | 0,062 | 0,004 | 1           | 1,198280306   | 0,834529279     | 15,5            |
| EIF3G                                                                                         | 0,00029595  | 0,260923282 | 0,781 | 0,309 | 1           | 1,198245301   | 0,834553659     | 2,527508091     |
| HEATR1                                                                                        | 0,001808729 | 0,260670401 | 0,156 | 0,031 | 1           | 1,198035286   | 0,834699955     | 5,032258065     |
| HMGNA4                                                                                        | 6,30011E-07 | 0,260651828 | 0,344 | 0,059 | 0,013293862 | 1,198019863   | 0,834710701     | 5,830508475     |
| MRPS7                                                                                         | 9,80955E-10 | 0,260289879 | 0,5   | 0,082 | 2,06991E-05 | 1,197719337   | 0,834920143     | 6,097560976     |
| GPX8                                                                                          | 1,86296E-06 | 0,260254321 | 0,438 | 0,098 | 0,03931032  | 1,197689817   | 0,834940721     | 4,469387755     |
| LEO1                                                                                          | 1,17927E-11 | 0,26023504  | 0,344 | 0,027 | 2,48837E-07 | 1,197673811   | 0,83495188      | 12,74074074     |
| FBXO21                                                                                        | 3,59278E-05 | 0,260103412 | 0,375 | 0,094 | 0,758112671 | 1,197564542   | 0,835028063     | 3,989361702     |
| CSE1L                                                                                         | 4,70556E-08 | 0,259606028 | 0,438 | 0,078 | 0,00099292  | 1,197151741   | 0,835315997     | 5,615384615     |
| SPATC1L                                                                                       | 1,38853E-07 | 0,259551468 | 0,312 | 0,043 | 0,002929933 | 1,197106468   | 0,835347588     | 7,255813953     |
| CDC37L1                                                                                       | 2,30501E-05 | 0,25936821  | 0,344 | 0,078 | 0,486379331 | 1,196954415   | 0,835453704     | 4,41025641      |
| P4HA3                                                                                         | 1,33967E-08 | 0,25932721  | 0,125 | 0     | 0,000282684 | 1,196920399   | 0,835477447     | #DIV/0!         |
| TMEM250                                                                                       | 9,0771E-08  | 0,25882614  | 0,188 | 0,012 | 0,001915359 | 1,196504763   | 0,835767671     | 15,666666667    |
| DDX18                                                                                         | 0,000130369 | 0,258794396 | 0,75  | 0,281 | 1           | 1,196478436   | 0,835786061     | 2,669039146     |
| GNG7                                                                                          | 5,59696E-07 | 0,258726637 | 0,281 | 0,039 | 0,01181015  | 1,196422243   | 0,835825317     | 7,205128205     |
| GFUS                                                                                          | 2,03458E-08 | 0,25865502  | 0,375 | 0,055 | 0,000429317 | 1,196362852   | 0,835866809     | 6,818181818     |
| FBH1                                                                                          | 0,005194433 | 0,25848939  | 0,219 | 0,066 | 1           | 1,196225511   | 0,835962777     | 3,318181818     |

Supplementary Table 1

| Differentially expressed genes_adjacent-skin-XL_comparing SC-Keloid vs. (SC-Myel, SC-Nonmyel) |             |             |       |       |             |               |                 |                 |
|-----------------------------------------------------------------------------------------------|-------------|-------------|-------|-------|-------------|---------------|-----------------|-----------------|
| gene                                                                                          | p_val       | avg_log2FC  | pct.1 | pct.2 | p_val_adj   | Foldchange_UP | Foldchange_DOWN | Ratio_pct1_pct2 |
| PIGU                                                                                          | 3,64929E-07 | 0,258341514 | 0,312 | 0,047 | 0,007700373 | 1,196102904   | 0,836048467     | 6,638297872     |
| DENR                                                                                          | 6,77744E-08 | 0,258279396 | 0,5   | 0,102 | 0,001430107 | 1,196051405   | 0,836084466     | 4,901960784     |
| POLDIP2                                                                                       | 8,77574E-09 | 0,258045703 | 0,312 | 0,035 | 0,000185177 | 1,195857679   | 0,836219909     | 8,914285714     |
| DOCK2                                                                                         | 2,86276E-12 | 0,257886988 | 0,188 | 0     | 6,04072E-08 | 1,195726127   | 0,836311909     | #DIV/0!         |
| RAI1                                                                                          | 0,000290171 | 0,257581141 | 0,156 | 0,023 | 1           | 1,195472664   | 0,836489223     | 6,782608696     |
| HSPBP1                                                                                        | 6,72473E-09 | 0,25745552  | 0,344 | 0,043 | 0,000141898 | 1,195368574   | 0,836562063     | 8               |
| TMEM14C                                                                                       | 6,1983E-05  | 0,257423463 | 0,531 | 0,164 | 1           | 1,195342013   | 0,836580652     | 3,237804878     |
| IDH1                                                                                          | 5,01789E-11 | 0,257282535 | 0,312 | 0,023 | 1,05883E-06 | 1,195225253   | 0,836662376     | 13,56521739     |
| CACNA2D4                                                                                      | 2,86577E-08 | 0,257042616 | 0,219 | 0,016 | 0,000604707 | 1,195026504   | 0,836801524     | 13,6875         |
| ZNF138                                                                                        | 0,00703765  | 0,256972271 | 0,125 | 0,027 | 1           | 1,194968237   | 0,836842327     | 4,62962963      |
| PDCL3                                                                                         | 3,30101E-08 | 0,256808039 | 0,344 | 0,047 | 0,000696546 | 1,194832213   | 0,836937596     | 7,319148936     |
| BMERB1                                                                                        | 3,79454E-10 | 0,256472865 | 0,375 | 0,043 | 8,00686E-06 | 1,194554656   | 0,83713206      | 8,720930233     |
| INSYN2A                                                                                       | 1,33967E-08 | 0,256324217 | 0,125 | 0     | 0,000282684 | 1,194431582   | 0,837218318     | #DIV/0!         |
| TRMO                                                                                          | 2,86577E-08 | 0,256126905 | 0,219 | 0,016 | 0,000604707 | 1,194268235   | 0,837332829     | 13,6875         |
| SEPTIN2                                                                                       | 0,022059085 | 0,25602693  | 0,75  | 0,512 | 1           | 1,194185478   | 0,837390856     | 1,46484375      |
| MAP4                                                                                          | 0,027371938 | 0,255801834 | 0,906 | 0,52  | 1           | 1,19399917    | 0,83752152      | 1,742307692     |
| KCNC2                                                                                         | 6,3574E-05  | 0,255712355 | 0,062 | 0     | 1           | 1,193925118   | 0,837573466     | #DIV/0!         |
| POLR3H                                                                                        | 1,03471E-06 | 0,255680348 | 0,219 | 0,023 | 0,021833489 | 1,19389863    | 0,837592049     | 9,52173913      |
| CHKB                                                                                          | 0,007888732 | 0,255609121 | 0,312 | 0,117 | 1           | 1,193839689   | 0,837633402     | 2,666666667     |
| PSMB5                                                                                         | 0,000230571 | 0,255355154 | 0,562 | 0,199 | 1           | 1,193629548   | 0,837780869     | 2,824120603     |
| GPATCH1                                                                                       | 0,081392519 | 0,255213129 | 0,062 | 0,016 | 1           | 1,193512048   | 0,837863348     | 3,875           |
| LHFPL6                                                                                        | 2,27444E-08 | 0,255151971 | 0,469 | 0,086 | 0,000479931 | 1,193461454   | 0,837898867     | 5,453488372     |
| TRADD                                                                                         | 1,56846E-09 | 0,254937445 | 0,281 | 0,023 | 3,30962E-05 | 1,193284001   | 0,838023471     | 12,2173913      |
| MAPK3                                                                                         | 1,15611E-08 | 0,254559367 | 0,406 | 0,062 | 0,000243951 | 1,192971326   | 0,838243115     | 6,548387097     |
| POLR2C                                                                                        | 8,75711E-07 | 0,25436887  | 0,406 | 0,082 | 0,018478373 | 1,192813814   | 0,838353806     | 4,951219512     |
| ABHD16A                                                                                       | 9,25608E-07 | 0,254316379 | 0,312 | 0,051 | 0,019531255 | 1,192770415   | 0,838384309     | 6,117647059     |
| ACLY                                                                                          | 2,22056E-06 | 0,253958545 | 0,312 | 0,055 | 0,046856037 | 1,192474607   | 0,83859228      | 5,672727273     |
| CABIN1                                                                                        | 0,000362786 | 0,253932025 | 0,25  | 0,059 | 1           | 1,192452687   | 0,838607696     | 4,237288136     |
| NIP7                                                                                          | 4,33123E-08 | 0,253684773 | 0,25  | 0,023 | 0,000913933 | 1,192248339   | 0,838751431     | 10,86956522     |
| SRSF9                                                                                         | 0,000822741 | 0,253591559 | 0,594 | 0,238 | 1           | 1,192171309   | 0,838805625     | 2,495798319     |



Supplementary Table 1

| Differentially expressed genes_adjacent-skin-XL_comparing SC-Keloid vs. (SC-Myel, SC-Nonmyel) |             |             |       |       |             |               |                 |                 |
|-----------------------------------------------------------------------------------------------|-------------|-------------|-------|-------|-------------|---------------|-----------------|-----------------|
| gene                                                                                          | p_val       | avg_log2FC  | pct.1 | pct.2 | p_val_adj   | Foldchange_UP | Foldchange_DOWN | Ratio_pct1_pct2 |
| ACTR1A                                                                                        | 4,2816E-07  | 0,253591547 | 0,469 | 0,102 | 0,009034597 | 1,1921713     | 0,838805632     | 4,598039216     |
| DIRAS1                                                                                        | 4,09886E-14 | 0,253274426 | 0,219 | 0     | 8,649E-10   | 1,191909275   | 0,838990031     | #DIV/0!         |
| SMIM15                                                                                        | 1,42389E-09 | 0,253227206 | 0,406 | 0,055 | 3,00454E-05 | 1,191870264   | 0,839017492     | 7,381818182     |
| TP53I13                                                                                       | 8,59395E-08 | 0,253146354 | 0,625 | 0,145 | 0,00181341  | 1,191803471   | 0,839064514     | 4,310344828     |
| ATP6VOD1                                                                                      | 5,15424E-07 | 0,253123658 | 0,438 | 0,09  | 0,010875957 | 1,191784722   | 0,839077714     | 4,866666667     |
| MEOX1                                                                                         | 6,3574E-05  | 0,252927537 | 0,062 | 0     | 1           | 1,191622721   | 0,839191786     | #DIV/0!         |
| SNF8                                                                                          | 1,93845E-05 | 0,252516307 | 0,562 | 0,168 | 0,409031717 | 1,191283106   | 0,839431026     | 3,345238095     |
| EI24                                                                                          | 7,10867E-06 | 0,252464496 | 0,562 | 0,16  | 0,150000027 | 1,191240324   | 0,839461173     | 3,5125          |
| MED10                                                                                         | 3,31861E-06 | 0,25228736  | 0,594 | 0,164 | 0,070026036 | 1,191094071   | 0,839564249     | 3,62195122      |
| RBBP4                                                                                         | 1,71496E-06 | 0,252233596 | 0,625 | 0,176 | 0,036187473 | 1,191049684   | 0,839595538     | 3,551136364     |
| TIMM17A                                                                                       | 2,23409E-07 | 0,252185039 | 0,406 | 0,074 | 0,004714163 | 1,191009598   | 0,839623796     | 5,486486486     |
| PRAG1                                                                                         | 3,57983E-06 | 0,251854438 | 0,156 | 0,012 | 0,075538003 | 1,190736703   | 0,839816223     | 13              |
| MOGS                                                                                          | 2,11052E-07 | 0,25165503  | 0,25  | 0,027 | 0,004453418 | 1,190572131   | 0,83993231      | 9,259259259     |
| PSMG3                                                                                         | 6,03985E-05 | 0,251599668 | 0,281 | 0,059 | 1           | 1,190526446   | 0,839964541     | 4,762711864     |
| CSNK1G3                                                                                       | 3,65452E-05 | 0,251563127 | 0,375 | 0,094 | 0,771140872 | 1,190496292   | 0,839985817     | 3,989361702     |
| PDHA1                                                                                         | 0,000182503 | 0,250921218 | 0,25  | 0,055 | 1           | 1,189966713   | 0,840359641     | 4,545454545     |
| ETV4                                                                                          | 1,96814E-10 | 0,250818879 | 0,156 | 0     | 4,15296E-06 | 1,189882305   | 0,840419255     | #DIV/0!         |
| EFCAB2                                                                                        | 2,33183E-10 | 0,250805791 | 0,281 | 0,02  | 4,92039E-06 | 1,18987151    | 0,840426879     | 14,05           |
| MEA1                                                                                          | 1,2796E-07  | 0,250763737 | 0,312 | 0,043 | 0,002700092 | 1,189836826   | 0,840451378     | 7,255813953     |
| KIF13B                                                                                        | 8,4498E-07  | 0,250706395 | 0,438 | 0,094 | 0,017829924 | 1,189789536   | 0,840484783     | 4,659574468     |
| LIMD2                                                                                         | 1,30636E-05 | 0,250647169 | 0,219 | 0,031 | 0,275655185 | 1,189740693   | 0,840519288     | 7,064516129     |
| ITGA5                                                                                         | 4,75304E-07 | 0,250509962 | 0,281 | 0,039 | 0,010029393 | 1,189627549   | 0,840599229     | 7,205128205     |
| WDR46                                                                                         | 9,10679E-05 | 0,250443727 | 0,25  | 0,051 | 1           | 1,189572934   | 0,840637822     | 4,901960784     |
| HOGA1                                                                                         | 4,09886E-14 | 0,250187043 | 0,219 | 0     | 8,649E-10   | 1,189361304   | 0,840787401     | #DIV/0!         |
| RNF128                                                                                        | 4,27234E-12 | 0,250081005 | 0,219 | 0,004 | 9,01506E-08 | 1,189273889   | 0,840849202     | 54,75           |
| MSRB1                                                                                         | 4,03265E-08 | 0,249587858 | 0,312 | 0,039 | 0,000850929 | 1,188867437   | 0,841136673     | 8               |
| RBM3                                                                                          | 0,024130258 | 0,249580873 | 0,719 | 0,438 | 1           | 1,18886168    | 0,841140745     | 1,641552511     |
| ARPIN                                                                                         | 8,59347E-05 | 0,249456085 | 0,219 | 0,039 | 1           | 1,188758853   | 0,841213504     | 5,615384615     |
| CNFN                                                                                          | 0,00737039  | 0,24944426  | 0,094 | 0,016 | 1           | 1,188749109   | 0,841220399     | 5,875           |
| PSMA5                                                                                         | 7,85583E-06 | 0,249397106 | 0,594 | 0,168 | 0,165765954 | 1,188710256   | 0,841247895     | 3,535714286     |

Supplementary Table 1

| Differentially expressed genes_adjacent-skin-XL_comparing SC-Keloid vs. (SC-Myel, SC-Nonmyel) |             |             |       |       |             |               |                 |                 |
|-----------------------------------------------------------------------------------------------|-------------|-------------|-------|-------|-------------|---------------|-----------------|-----------------|
| gene                                                                                          | p_val       | avg_log2FC  | pct.1 | pct.2 | p_val_adj   | Foldchange_UP | Foldchange_DOWN | Ratio_pct1_pct2 |
| BDH2                                                                                          | 0,001492226 | 0,249217879 | 0,406 | 0,141 | 1           | 1,188562591   | 0,84135241      | 2,879432624     |
| HTRA2                                                                                         | 0,001066258 | 0,249014675 | 0,312 | 0,094 | 1           | 1,188395193   | 0,841470923     | 3,319148936     |
| INO80C                                                                                        | 1,01508E-08 | 0,248909881 | 0,281 | 0,027 | 0,000214192 | 1,188308874   | 0,841532048     | 10,40740741     |
| RCAN1                                                                                         | 0,000729331 | 0,248883038 | 0,906 | 0,477 | 1           | 1,188286764   | 0,841547706     | 1,899371069     |
| RPE                                                                                           | 6,40895E-07 | 0,248867643 | 0,281 | 0,039 | 0,013523521 | 1,188274084   | 0,841556686     | 7,205128205     |
| SAMD1                                                                                         | 7,07015E-08 | 0,248864754 | 0,375 | 0,059 | 0,001491872 | 1,188271705   | 0,841558371     | 6,355932203     |
| RNASEH2B                                                                                      | 4,15798E-09 | 0,24846155  | 0,438 | 0,066 | 8,77376E-05 | 1,187939654   | 0,841793602     | 6,636363636     |
| DDX1                                                                                          | 8,95258E-06 | 0,248398591 | 0,469 | 0,121 | 0,188908433 | 1,187887813   | 0,841830339     | 3,876033058     |
| LRP12                                                                                         | 0,001037136 | 0,248346551 | 0,25  | 0,066 | 1           | 1,187844965   | 0,841860705     | 3,787878788     |
| SNX7                                                                                          | 5,39891E-08 | 0,248224149 | 0,5   | 0,098 | 0,001139224 | 1,187744189   | 0,841932134     | 5,102040816     |
| UPRT                                                                                          | 3,5572E-05  | 0,248158573 | 0,219 | 0,035 | 0,75060449  | 1,187690203   | 0,841970404     | 6,257142857     |
| SLC35C2                                                                                       | 1,69331E-06 | 0,248033231 | 0,281 | 0,043 | 0,035730553 | 1,187587021   | 0,842043558     | 6,534883721     |
| C18orf32                                                                                      | 0,000163694 | 0,247875675 | 0,594 | 0,207 | 1           | 1,187457332   | 0,842135522     | 2,869565217     |
| HSD17B11                                                                                      | 1,75258E-09 | 0,247765833 | 0,375 | 0,047 | 3,69813E-05 | 1,187366926   | 0,842199642     | 7,978723404     |
| SH3BGR                                                                                        | 1,71675E-09 | 0,247601459 | 0,469 | 0,074 | 3,62252E-05 | 1,187231651   | 0,842295603     | 6,337837838     |
| COQ8B                                                                                         | 1,58275E-07 | 0,247570514 | 0,281 | 0,035 | 0,00333977  | 1,187206186   | 0,84231367      | 8,028571429     |
| MRTO4                                                                                         | 1,21163E-07 | 0,247534715 | 0,312 | 0,043 | 0,002556662 | 1,187176726   | 0,842334572     | 7,255813953     |
| LMNB2                                                                                         | 0,001625689 | 0,247531888 | 0,156 | 0,031 | 1           | 1,1871744     | 0,842336223     | 5,032258065     |
| FAM229B                                                                                       | 1,3835E-07  | 0,247504606 | 0,469 | 0,094 | 0,002919331 | 1,18715195    | 0,842352152     | 4,989361702     |
| ARSA                                                                                          | 0,001935026 | 0,247359452 | 0,25  | 0,07  | 1           | 1,187032514   | 0,842436907     | 3,571428571     |
| ARHGAP1                                                                                       | 6,15428E-07 | 0,246947461 | 0,344 | 0,059 | 0,012986147 | 1,186693581   | 0,842677517     | 5,830508475     |
| AIFM2                                                                                         | 2,03907E-07 | 0,24692012  | 0,219 | 0,02  | 0,004302644 | 1,186671092   | 0,842693487     | 10,95           |
| UBE2T                                                                                         | 2,81241E-07 | 0,246746664 | 0,156 | 0,008 | 0,005934461 | 1,186528426   | 0,842794811     | 19,5            |
| RAP1GDS1                                                                                      | 0,000874229 | 0,246651578 | 0,375 | 0,121 | 1           | 1,186450226   | 0,84285036      | 3,099173554     |
| COPS4                                                                                         | 1,31496E-07 | 0,246641858 | 0,312 | 0,043 | 0,002774696 | 1,186442233   | 0,842856038     | 7,255813953     |
| NRSN2                                                                                         | 2,37592E-09 | 0,246567239 | 0,312 | 0,031 | 5,01343E-05 | 1,186380869   | 0,842899633     | 10,06451613     |
| UQCRCF1                                                                                       | 3,99577E-07 | 0,246273561 | 0,5   | 0,109 | 0,008431478 | 1,186139392   | 0,843071233     | 4,587155963     |
| THEM4                                                                                         | 1,33352E-05 | 0,246077289 | 0,312 | 0,062 | 0,281386118 | 1,185978034   | 0,843185937     | 5,032258065     |
| GNA11                                                                                         | 9,51595E-05 | 0,246031796 | 0,375 | 0,102 | 1           | 1,185940637   | 0,843212526     | 3,676470588     |
| CNPPD1                                                                                        | 0,004239973 | 0,245974988 | 0,281 | 0,094 | 1           | 1,18589394    | 0,843245729     | 2,989361702     |

Supplementary Table 1

| Differentially expressed genes_adjacent-skin-XL_ comparing SC-Keloid vs. (SC-Myel, SC-Nonmyel) |             |             |       |       |             |               |                 |                 |
|------------------------------------------------------------------------------------------------|-------------|-------------|-------|-------|-------------|---------------|-----------------|-----------------|
| gene                                                                                           | p_val       | avg_log2FC  | pct.1 | pct.2 | p_val_adj   | Foldchange_UP | Foldchange_DOWN | Ratio_pct1_pct2 |
| CCDC91                                                                                         | 2,55882E-05 | 0,245867025 | 0,312 | 0,066 | 0,539936516 | 1,185805198   | 0,843308835     | 4,727272727     |
| HOXB5                                                                                          | 6,3574E-05  | 0,245842191 | 0,062 | 0     | 1           | 1,185784785   | 0,843323352     | #DIV/0!         |
| RRAD                                                                                           | 0,025463646 | 0,245768333 | 0,188 | 0,066 | 1           | 1,185724081   | 0,843366527     | 2,848484848     |
| SARNP                                                                                          | 5,5641E-05  | 0,245523372 | 0,688 | 0,238 | 1           | 1,18552277    | 0,843509737     | 2,890756303     |
| RFC5                                                                                           | 5,90558E-11 | 0,245445872 | 0,25  | 0,012 | 1,24614E-06 | 1,185459086   | 0,843555051     | 20,83333333     |
| GASK1B                                                                                         | 8,23459E-06 | 0,245418044 | 0,406 | 0,094 | 0,173758165 | 1,18543622    | 0,843571323     | 4,319148936     |
| PFDN6                                                                                          | 0,000109253 | 0,245025988 | 0,344 | 0,09  | 1           | 1,185114119   | 0,843800596     | 3,822222222     |
| IFRD2                                                                                          | 5,23791E-05 | 0,244932163 | 0,312 | 0,07  | 1           | 1,185037048   | 0,843855474     | 4,457142857     |
| ARL2BP                                                                                         | 1,17879E-05 | 0,244807781 | 0,594 | 0,18  | 0,248737486 | 1,184934884   | 0,84392823      | 3,3             |
| JOSD2                                                                                          | 4,35448E-06 | 0,244710267 | 0,625 | 0,176 | 0,091883945 | 1,184854796   | 0,843985275     | 3,551136364     |
| METTL26                                                                                        | 0,000184234 | 0,244654248 | 0,594 | 0,207 | 1           | 1,184808789   | 0,844018047     | 2,869565217     |
| DYNC1I2                                                                                        | 0,00124038  | 0,243842782 | 0,781 | 0,359 | 1           | 1,184142563   | 0,844492911     | 2,175487465     |
| GNL2                                                                                           | 0,000102664 | 0,243527895 | 0,281 | 0,062 | 1           | 1,183884136   | 0,844677253     | 4,532258065     |
| VDR                                                                                            | 0,000486824 | 0,24342488  | 0,094 | 0,008 | 1           | 1,183799605   | 0,844737569     | 11,75           |
| PPP2R3C                                                                                        | 2,95926E-08 | 0,243304733 | 0,344 | 0,047 | 0,000624432 | 1,183701022   | 0,844807921     | 7,319148936     |
| HMBS                                                                                           | 1,50434E-10 | 0,243257849 | 0,219 | 0,008 | 3,17431E-06 | 1,183662556   | 0,844835376     | 27,375          |
| SLC49A3                                                                                        | 7,96166E-09 | 0,243177173 | 0,188 | 0,008 | 0,000167999 | 1,183596367   | 0,844882621     | 23,5            |
| PRPF31                                                                                         | 3,63521E-08 | 0,242853588 | 0,406 | 0,066 | 0,000767065 | 1,183330926   | 0,845072142     | 6,151515152     |
| TP53TG1                                                                                        | 0,000182503 | 0,24282753  | 0,25  | 0,055 | 1           | 1,183309552   | 0,845087406     | 4,545454545     |
| TOR1AIP1                                                                                       | 2,23409E-07 | 0,242554661 | 0,406 | 0,074 | 0,004714163 | 1,183085764   | 0,84524726      | 5,486486486     |
| TINF2                                                                                          | 0,000273883 | 0,242306984 | 0,312 | 0,082 | 1           | 1,182882673   | 0,845392381     | 3,804878049     |
| C14orf132                                                                                      | 7,47389E-09 | 0,242165179 | 0,25  | 0,02  | 0,000157707 | 1,182766411   | 0,845475481     | 12,5            |
| LYRM2                                                                                          | 8,93857E-07 | 0,242131553 | 0,406 | 0,082 | 0,018861285 | 1,182738844   | 0,845495187     | 4,951219512     |
| MPND                                                                                           | 2,70596E-09 | 0,24195763  | 0,219 | 0,012 | 5,70985E-05 | 1,182596268   | 0,845597121     | 18,25           |
| NOC2L                                                                                          | 6,59509E-05 | 0,241852302 | 0,375 | 0,098 | 1           | 1,182509933   | 0,845658858     | 3,826530612     |
| SURF2                                                                                          | 2,22228E-07 | 0,241640268 | 0,344 | 0,055 | 0,004689228 | 1,182336151   | 0,845783155     | 6,254545455     |
| XRCC5                                                                                          | 0,000291348 | 0,241409277 | 0,781 | 0,312 | 1           | 1,182146862   | 0,845918585     | 2,503205128     |
| TTC4                                                                                           | 9,7095E-07  | 0,241374925 | 0,219 | 0,023 | 0,020488018 | 1,182118714   | 0,845938727     | 9,52173913      |
| OCEL1                                                                                          | 1,08519E-08 | 0,241235896 | 0,281 | 0,027 | 0,000228985 | 1,182004802   | 0,846020252     | 10,40740741     |
| CCDC90B                                                                                        | 0,000465198 | 0,241051441 | 0,469 | 0,16  | 1           | 1,181853687   | 0,846128426     | 2,93125         |

Supplementary Table 1

| Differentially expressed genes_adjacent-skin-XL_comparing SC-Keloid vs. (SC-Myel, SC-Nonmyel) |             |             |       |       |             |               |                 |                 |
|-----------------------------------------------------------------------------------------------|-------------|-------------|-------|-------|-------------|---------------|-----------------|-----------------|
| gene                                                                                          | p_val       | avg_log2FC  | pct.1 | pct.2 | p_val_adj   | Foldchange_UP | Foldchange_DOWN | Ratio_pct1_pct2 |
| NUDT9                                                                                         | 0,001590978 | 0,240904878 | 0,281 | 0,086 | 1           | 1,181733628   | 0,846214389     | 3,26744186      |
| MRPL12                                                                                        | 3,38123E-08 | 0,240858617 | 0,406 | 0,066 | 0,000713474 | 1,181695736   | 0,846241523     | 6,151515152     |
| EIF2B2                                                                                        | 6,40752E-06 | 0,240799527 | 0,375 | 0,082 | 0,135204977 | 1,181647337   | 0,846276184     | 4,573170732     |
| RANGRF                                                                                        | 3,36842E-06 | 0,240670997 | 0,344 | 0,066 | 0,071077053 | 1,181542068   | 0,846351583     | 5,212121212     |
| CDK1                                                                                          | 6,3574E-05  | 0,240583745 | 0,062 | 0     | 1           | 1,181470613   | 0,84640277      | #DIV/0!         |
| PRKAR2A                                                                                       | 0,00051005  | 0,240518728 | 0,344 | 0,102 | 1           | 1,18141737    | 0,846440915     | 3,37254902      |
| PPOX                                                                                          | 0,036309636 | 0,240476587 | 0,125 | 0,039 | 1           | 1,181382861   | 0,846465641     | 3,205128205     |
| DDRGK1                                                                                        | 1,84398E-06 | 0,240464927 | 0,469 | 0,109 | 0,038909776 | 1,181373313   | 0,846472482     | 4,302752294     |
| RPL18                                                                                         | 0,048110318 | 0,240320619 | 1     | 0,836 | 1           | 1,18125515    | 0,846557156     | 1,196172249     |
| SMC1A                                                                                         | 7,66099E-06 | 0,240258165 | 0,562 | 0,16  | 0,16165448  | 1,181204015   | 0,846593804     | 3,5125          |
| TBC1D22A                                                                                      | 5,94561E-05 | 0,240121294 | 0,188 | 0,027 | 1           | 1,181091957   | 0,846674125     | 6,962962963     |
| CBY1                                                                                          | 0,00030797  | 0,240022309 | 0,281 | 0,07  | 1           | 1,181010923   | 0,846732219     | 4,014285714     |
| USE1                                                                                          | 4,13472E-05 | 0,239862093 | 0,25  | 0,047 | 0,872467404 | 1,180879776   | 0,846826256     | 5,319148936     |
| STING1                                                                                        | 1,4529E-06  | 0,239743679 | 0,281 | 0,043 | 0,030657605 | 1,180782855   | 0,846895766     | 6,534883721     |
| CFAP97                                                                                        | 0,000159854 | 0,239291876 | 0,594 | 0,207 | 1           | 1,180413132   | 0,847161026     | 2,869565217     |
| CPXM1                                                                                         | 2,86276E-12 | 0,238785385 | 0,188 | 0     | 6,04072E-08 | 1,179998794   | 0,847458493     | #DIV/0!         |
| TOMM5                                                                                         | 1,54008E-05 | 0,238653883 | 0,625 | 0,199 | 0,32497171  | 1,179891242   | 0,847535743     | 3,140703518     |
| ANKRD6                                                                                        | 1,17365E-05 | 0,238653329 | 0,219 | 0,031 | 0,247652593 | 1,179890789   | 0,847536068     | 7,064516129     |
| TMEM60                                                                                        | 3,9608E-08  | 0,238511234 | 0,281 | 0,031 | 0,000835768 | 1,179774584   | 0,847619549     | 9,064516129     |
| P4HTM                                                                                         | 0,00037456  | 0,23846655  | 0,406 | 0,125 | 1           | 1,179738043   | 0,847645802     | 3,248           |
| NME3                                                                                          | 0,000697293 | 0,238428184 | 0,719 | 0,289 | 1           | 1,179706671   | 0,847668344     | 2,487889273     |
| GFER                                                                                          | 2,41218E-06 | 0,238356202 | 0,25  | 0,035 | 0,050899452 | 1,179647812   | 0,847710639     | 7,142857143     |
| MUL1                                                                                          | 1,83571E-07 | 0,23806812  | 0,219 | 0,02  | 0,003873533 | 1,17941228    | 0,847879929     | 10,95           |
| ETV5                                                                                          | 4,5807E-05  | 0,238048923 | 0,094 | 0,004 | 0,966573495 | 1,179396586   | 0,847891211     | 23,5            |
| USP45                                                                                         | 0,000778441 | 0,238026504 | 0,188 | 0,039 | 1           | 1,179378259   | 0,847904388     | 4,820512821     |
| GTF2H4                                                                                        | 4,74973E-05 | 0,237978957 | 0,281 | 0,059 | 1           | 1,179339391   | 0,847932332     | 4,762711864     |
| ZNF101                                                                                        | 9,12354E-07 | 0,237917302 | 0,094 | 0     | 0,019251588 | 1,179288992   | 0,84796857      | #DIV/0!         |
| FOCAD                                                                                         | 0,002370322 | 0,237671075 | 0,094 | 0,012 | 1           | 1,179087737   | 0,848113307     | 7,833333333     |
| HSPA8                                                                                         | 0,001881736 | 0,237633338 | 1     | 0,676 | 1           | 1,179056896   | 0,848135492     | 1,479289941     |
| CDR2L                                                                                         | 1,64657E-05 | 0,236829145 | 0,188 | 0,023 | 0,347443783 | 1,178399844   | 0,848608395     | 8,173913043     |

Supplementary Table 1

| Differentially expressed genes_adjacent-skin-XL_comparing SC-Keloid vs. (SC-Myel, SC-Nonmyel) |             |             |       |       |             |               |                 |                 |
|-----------------------------------------------------------------------------------------------|-------------|-------------|-------|-------|-------------|---------------|-----------------|-----------------|
| gene                                                                                          | p_val       | avg_log2FC  | pct.1 | pct.2 | p_val_adj   | Foldchange_UP | Foldchange_DOWN | Ratio_pct1_pct2 |
| ALDOA                                                                                         | 3,66632E-06 | 0,236784676 | 0,344 | 0,066 | 0,077363122 | 1,178363522   | 0,848634552     | 5,212121212     |
| UCHL5                                                                                         | 2,34772E-06 | 0,236661668 | 0,25  | 0,035 | 0,049539231 | 1,178263056   | 0,848706912     | 7,142857143     |
| LDHA                                                                                          | 0,000867274 | 0,236638321 | 0,875 | 0,414 | 1           | 1,178243989   | 0,848720646     | 2,11352657      |
| HSPB3                                                                                         | 2,52232E-10 | 0,236552509 | 0,188 | 0,004 | 5,32235E-06 | 1,178173909   | 0,84877113      | 47              |
| CD81                                                                                          | 0,038034898 | 0,236462312 | 0,969 | 0,84  | 1           | 1,178100251   | 0,848824197     | 1,153571429     |
| NDUFS3                                                                                        | 4,60659E-07 | 0,236410199 | 0,562 | 0,137 | 0,009720359 | 1,178057697   | 0,848854859     | 4,102189781     |
| SPATS2L                                                                                       | 0,000285018 | 0,236248727 | 0,719 | 0,277 | 1           | 1,177925852   | 0,848949871     | 2,59566787      |
| RAB3D                                                                                         | 0,081392519 | 0,235983285 | 0,062 | 0,016 | 1           | 1,177709145   | 0,849106084     | 3,875           |
| GAL3ST4                                                                                       | 2,97902E-08 | 0,235929683 | 0,219 | 0,016 | 0,000628603 | 1,177665389   | 0,849137632     | 13,6875         |
| SDC1                                                                                          | 6,26921E-05 | 0,235709763 | 0,188 | 0,027 | 1           | 1,177485882   | 0,849267082     | 6,962962963     |
| CCT8                                                                                          | 0,000102655 | 0,235702864 | 0,531 | 0,172 | 1           | 1,177480252   | 0,849271143     | 3,087209302     |
| POLR3D                                                                                        | 4,56192E-05 | 0,235637506 | 0,281 | 0,059 | 0,962611179 | 1,17742691    | 0,849309618     | 4,762711864     |
| CEP112                                                                                        | 0,003651243 | 0,235585556 | 0,125 | 0,023 | 1           | 1,177384513   | 0,849340202     | 5,434782609     |
| LAMTOR1                                                                                       | 0,000257417 | 0,235404595 | 0,625 | 0,223 | 1           | 1,17723684    | 0,849446743     | 2,802690583     |
| STK11                                                                                         | 0,001515665 | 0,235291119 | 0,312 | 0,098 | 1           | 1,177144247   | 0,84951356      | 3,183673469     |
| NUCKS1                                                                                        | 0,055411361 | 0,235269069 | 0,969 | 0,684 | 1           | 1,177126256   | 0,849526544     | 1,416666667     |
| JMJD8                                                                                         | 0,000105708 | 0,235023902 | 0,344 | 0,09  | 1           | 1,176926236   | 0,849670922     | 3,822222222     |
| IGBP1                                                                                         | 4,5658E-07  | 0,234985644 | 0,438 | 0,09  | 0,009634302 | 1,176895026   | 0,849693454     | 4,866666667     |
| KLHL9                                                                                         | 1,73693E-06 | 0,234978287 | 0,281 | 0,043 | 0,036650933 | 1,176889024   | 0,849697787     | 6,534883721     |
| RPS27A                                                                                        | 0,032662414 | 0,234960867 | 1     | 0,898 | 1           | 1,176874814   | 0,849708047     | 1,113585746     |
| MACO1                                                                                         | 1,04547E-06 | 0,2349574   | 0,312 | 0,051 | 0,022060425 | 1,176871986   | 0,849710089     | 6,117647059     |
| PTPN14                                                                                        | 1,70371E-07 | 0,234899356 | 0,531 | 0,117 | 0,003594989 | 1,176824638   | 0,849744276     | 4,538461538     |
| PTPA                                                                                          | 3,62649E-11 | 0,234798853 | 0,562 | 0,086 | 7,65225E-07 | 1,176742659   | 0,849803475     | 6,534883721     |
| ULBP2                                                                                         | 2,86276E-12 | 0,234773699 | 0,188 | 0     | 6,04072E-08 | 1,176722142   | 0,849818291     | #DIV/0!         |
| TMEM150A                                                                                      | 0,001444236 | 0,234460645 | 0,125 | 0,02  | 1           | 1,17646683    | 0,850002715     | 6,25            |
| MMP17                                                                                         | 7,86208E-09 | 0,234311855 | 0,562 | 0,113 | 0,000165898 | 1,176345503   | 0,850090384     | 4,973451327     |
| COL9A2                                                                                        | 0,013108072 | 0,234267243 | 0,125 | 0,031 | 1           | 1,176309128   | 0,850116671     | 4,032258065     |
| TBL2                                                                                          | 0,007479227 | 0,234241203 | 0,125 | 0,027 | 1           | 1,176287897   | 0,850132015     | 4,62962963      |
| ZNF420                                                                                        | 0,000466094 | 0,232778715 | 0,125 | 0,016 | 1           | 1,175096075   | 0,850994247     | 7,8125          |
| SRRT                                                                                          | 0,005168596 | 0,232619501 | 0,281 | 0,098 | 1           | 1,1749664     | 0,851088167     | 2,867346939     |

Supplementary Table 1

| Differentially expressed genes_adjacent-skin-XL_comparing SC-Keloid vs. (SC-Myel, SC-Nonmyel) |             |             |       |       |             |               |                 |                 |
|-----------------------------------------------------------------------------------------------|-------------|-------------|-------|-------|-------------|---------------|-----------------|-----------------|
| gene                                                                                          | p_val       | avg_log2FC  | pct.1 | pct.2 | p_val_adj   | Foldchange_UP | Foldchange_DOWN | Ratio_pct1_pct2 |
| CENPM                                                                                         | 9,12354E-07 | 0,232418798 | 0,094 | 0     | 0,019251588 | 1,174802954   | 0,851206576     | #DIV/0!         |
| PCGF2                                                                                         | 0,001066258 | 0,232002471 | 0,312 | 0,094 | 1           | 1,174463983   | 0,851452249     | 3,319148936     |
| GDE1                                                                                          | 8,16984E-11 | 0,231921337 | 0,438 | 0,055 | 1,72392E-06 | 1,174397935   | 0,851500135     | 7,963636364     |
| CLNS1A                                                                                        | 2,28454E-07 | 0,231708623 | 0,594 | 0,141 | 0,004820618 | 1,174224792   | 0,851625691     | 4,212765957     |
| RNF182                                                                                        | 1,96814E-10 | 0,231646752 | 0,156 | 0     | 4,15296E-06 | 1,174174436   | 0,851662214     | #DIV/0!         |
| POLR3K                                                                                        | 0,000297876 | 0,2314477   | 0,156 | 0,023 | 1           | 1,174012443   | 0,851779728     | 6,782608696     |
| CCL28                                                                                         | 0,007186669 | 0,231426748 | 0,094 | 0,016 | 1           | 1,173995394   | 0,851792098     | 5,875           |
| THAP8                                                                                         | 1,96814E-10 | 0,231173265 | 0,156 | 0     | 4,15296E-06 | 1,173789139   | 0,851941773     | #DIV/0!         |
| FAM50B                                                                                        | 2,10199E-05 | 0,231134774 | 0,156 | 0,016 | 0,443540004 | 1,173757824   | 0,851964502     | 9,75            |
| GET3                                                                                          | 5,47524E-07 | 0,230557953 | 0,438 | 0,09  | 0,0115533   | 1,173288624   | 0,852305204     | 4,866666667     |
| TRABD                                                                                         | 2,22437E-05 | 0,230502452 | 0,281 | 0,055 | 0,469363894 | 1,173243487   | 0,852337994     | 5,109090909     |
| SRD5A1                                                                                        | 2,33183E-10 | 0,230414951 | 0,281 | 0,02  | 4,92039E-06 | 1,173172331   | 0,85238969      | 14,05           |
| DENND6B                                                                                       | 0,000755915 | 0,230232963 | 0,156 | 0,027 | 1           | 1,173024351   | 0,852497222     | 5,777777778     |
| NR1H2                                                                                         | 4,34527E-06 | 0,230214401 | 0,469 | 0,117 | 0,091689461 | 1,173009259   | 0,85250819      | 4,008547009     |
| ADA2                                                                                          | 8,22802E-07 | 0,230115891 | 0,188 | 0,016 | 0,01736194  | 1,172929166   | 0,852566403     | 11,75           |
| IGFBP6                                                                                        | 1,07001E-07 | 0,230061611 | 0,188 | 0,012 | 0,002257818 | 1,172885037   | 0,85259848      | 15,666666667    |
| INO80B                                                                                        | 0,003403052 | 0,229986712 | 0,219 | 0,062 | 1           | 1,172824147   | 0,852642745     | 3,532258065     |
| SOX11                                                                                         | 9,12354E-07 | 0,229676854 | 0,094 | 0     | 0,019251588 | 1,172572278   | 0,852825893     | #DIV/0!         |
| TRAK2                                                                                         | 1,11223E-05 | 0,229602188 | 0,219 | 0,031 | 0,234690635 | 1,172511594   | 0,852870032     | 7,064516129     |
| RPF1                                                                                          | 5,2276E-12  | 0,229160032 | 0,406 | 0,039 | 1,10307E-07 | 1,172152298   | 0,853131459     | 10,41025641     |
| TWF1                                                                                          | 1,03141E-06 | 0,228842149 | 0,406 | 0,082 | 0,021763787 | 1,171894055   | 0,853319458     | 4,951219512     |
| PRPF19                                                                                        | 2,54624E-06 | 0,228831989 | 0,25  | 0,035 | 0,053728244 | 1,171885802   | 0,853325468     | 7,142857143     |
| CIAPIN1                                                                                       | 8,24168E-09 | 0,228645209 | 0,344 | 0,043 | 0,000173908 | 1,171734092   | 0,853435952     | 8               |
| EXOSC1                                                                                        | 0,00287441  | 0,228229262 | 0,188 | 0,047 | 1           | 1,171396316   | 0,853682043     | 4               |
| COQ10B                                                                                        | 0,000281007 | 0,228099754 | 0,406 | 0,125 | 1           | 1,171291166   | 0,85375868      | 3,248           |
| ENDOV                                                                                         | 6,8971E-08  | 0,228085727 | 0,375 | 0,059 | 0,001455356 | 1,171279778   | 0,853766981     | 6,355932203     |
| RPS28                                                                                         | 0,045384033 | 0,228027612 | 1     | 0,898 | 1           | 1,171232597   | 0,853801373     | 1,113585746     |
| SH2B3                                                                                         | 9,40504E-07 | 0,228025278 | 0,219 | 0,023 | 0,019845575 | 1,171230703   | 0,853802754     | 9,52173913      |
| MAP9                                                                                          | 1,28694E-06 | 0,228015915 | 0,344 | 0,062 | 0,027155825 | 1,171223102   | 0,853808296     | 5,548387097     |
| PRPF40A                                                                                       | 0,000192736 | 0,227324242 | 0,594 | 0,211 | 1           | 1,170661715   | 0,854217736     | 2,815165877     |

Supplementary Table 1

| Differentially expressed genes_adjacent-skin-XL_comparing SC-Keloid vs. (SC-Myel, SC-Nonmyel) |             |             |       |       |             |               |                 |                 |
|-----------------------------------------------------------------------------------------------|-------------|-------------|-------|-------|-------------|---------------|-----------------|-----------------|
| gene                                                                                          | p_val       | avg_log2FC  | pct.1 | pct.2 | p_val_adj   | Foldchange_UP | Foldchange_DOWN | Ratio_pct1_pct2 |
| ALG6                                                                                          | 1,27946E-05 | 0,227057428 | 0,312 | 0,062 | 0,269978646 | 1,170445231   | 0,854375731     | 5,032258065     |
| TRAM2                                                                                         | 6,78692E-06 | 0,226879125 | 0,375 | 0,082 | 0,143210806 | 1,170300584   | 0,85448133      | 4,573170732     |
| KCTD17                                                                                        | 1,56846E-09 | 0,22664934  | 0,281 | 0,023 | 3,30962E-05 | 1,1701142     | 0,854617438     | 12,2173913      |
| RABIF                                                                                         | 1,36009E-12 | 0,226120353 | 0,281 | 0,012 | 2,86993E-08 | 1,169685238   | 0,854930854     | 23,41666667     |
| SP110                                                                                         | 0,003590182 | 0,225934847 | 0,156 | 0,035 | 1           | 1,169534846   | 0,855040791     | 4,457142857     |
| RAB12                                                                                         | 1,2136E-05  | 0,225815248 | 0,281 | 0,051 | 0,256081924 | 1,169437896   | 0,855111677     | 5,509803922     |
| ACAT2                                                                                         | 2,7063E-07  | 0,225802459 | 0,344 | 0,055 | 0,00571057  | 1,169427529   | 0,855119257     | 6,254545455     |
| RFTN1                                                                                         | 0,002370322 | 0,225794624 | 0,094 | 0,012 | 1           | 1,169421178   | 0,855123901     | 7,833333333     |
| CHST11                                                                                        | 3,57983E-06 | 0,225446016 | 0,156 | 0,012 | 0,075538003 | 1,169138638   | 0,855330555     | 13              |
| RTN2                                                                                          | 1,96814E-10 | 0,225408885 | 0,156 | 0     | 4,15296E-06 | 1,169108548   | 0,855352569     | #DIV/0!         |
| NHLRC3                                                                                        | 0,000205019 | 0,225172248 | 0,25  | 0,055 | 1           | 1,168916801   | 0,85549288      | 4,545454545     |
| PIK3R4                                                                                        | 0,007631848 | 0,225002425 | 0,125 | 0,027 | 1           | 1,168779213   | 0,855593588     | 4,62962963      |
| CDIPT                                                                                         | 1,69566E-06 | 0,224968625 | 0,438 | 0,098 | 0,03578021  | 1,168751831   | 0,855613633     | 4,469387755     |
| OGFOD3                                                                                        | 2,43556E-06 | 0,224873557 | 0,312 | 0,055 | 0,051392661 | 1,168674817   | 0,855670017     | 5,672727273     |
| MRM3                                                                                          | 8,65685E-05 | 0,224760272 | 0,156 | 0,02  | 1           | 1,168583052   | 0,855737209     | 7,8             |
| GLRX2                                                                                         | 0,003712381 | 0,224416387 | 0,25  | 0,078 | 1           | 1,168304539   | 0,855941209     | 3,205128205     |
| TMEM258                                                                                       | 0,02145433  | 0,22437319  | 0,875 | 0,566 | 1           | 1,168269559   | 0,855966838     | 1,545936396     |
| POLE3                                                                                         | 9,13181E-09 | 0,2243661   | 0,438 | 0,07  | 0,00019269  | 1,168263817   | 0,855971045     | 6,257142857     |
| FAM210B                                                                                       | 6,61533E-07 | 0,224180221 | 0,594 | 0,148 | 0,013959011 | 1,168113306   | 0,856081336     | 4,013513514     |
| PRDM10                                                                                        | 0,000112833 | 0,224120272 | 0,125 | 0,012 | 1           | 1,168064768   | 0,85611691      | 10,41666667     |
| SEMA4D                                                                                        | 0,003660239 | 0,224110608 | 0,156 | 0,035 | 1           | 1,168056944   | 0,856122645     | 4,457142857     |
| REXO2                                                                                         | 1,34284E-05 | 0,223984053 | 0,594 | 0,172 | 0,283351994 | 1,167954485   | 0,856197748     | 3,453488372     |
| GRB10                                                                                         | 4,64456E-05 | 0,223909451 | 0,344 | 0,082 | 0,980048497 | 1,167894091   | 0,856242024     | 4,195121951     |
| HOXB8                                                                                         | 2,86276E-12 | 0,22355314  | 0,188 | 0     | 6,04072E-08 | 1,167605684   | 0,856453521     | #DIV/0!         |
| RAD23B                                                                                        | 0,001005729 | 0,223536834 | 0,531 | 0,203 | 1           | 1,167592488   | 0,856463201     | 2,615763547     |
| EFR3B                                                                                         | 0,000169271 | 0,22347887  | 0,188 | 0,031 | 1           | 1,167545578   | 0,856497612     | 6,064516129     |
| ITPK1                                                                                         | 0,00078188  | 0,223434068 | 0,625 | 0,258 | 1           | 1,167509321   | 0,856524211     | 2,42248062      |
| BEX1                                                                                          | 0,169508224 | 0,223340091 | 0,094 | 0,039 | 1           | 1,167433272   | 0,856580007     | 2,41025641      |
| RAB18                                                                                         | 3,22581E-05 | 0,222994297 | 0,562 | 0,176 | 0,680677248 | 1,167153488   | 0,856785342     | 3,193181818     |
| PPP1R37                                                                                       | 2,33183E-10 | 0,222993153 | 0,281 | 0,02  | 4,92039E-06 | 1,167152563   | 0,856786021     | 14,05           |

Supplementary Table 1

| Differentially expressed genes_adjacent-skin-XL_ comparing SC-Keloid vs. (SC-Myel, SC-Nonmyel) |             |             |       |       |             |               |                 |                 |
|------------------------------------------------------------------------------------------------|-------------|-------------|-------|-------|-------------|---------------|-----------------|-----------------|
| gene                                                                                           | p_val       | avg_log2FC  | pct.1 | pct.2 | p_val_adj   | Foldchange_UP | Foldchange_DOWN | Ratio_pct1_pct2 |
| STOML2                                                                                         | 0,000113152 | 0,222915206 | 0,375 | 0,102 | 1           | 1,167089505   | 0,856832313     | 3,676470588     |
| TRAPPC6A                                                                                       | 0,00082778  | 0,222857761 | 0,188 | 0,039 | 1           | 1,167043035   | 0,856866431     | 4,820512821     |
| AC097381.1                                                                                     | 0,079594089 | 0,222807451 | 0,031 | 0,004 | 1           | 1,167002338   | 0,856896312     | 7,75            |
| DDR1                                                                                           | 0,000528986 | 0,222731247 | 0,406 | 0,133 | 1           | 1,166940698   | 0,856941575     | 3,052631579     |
| CSNK1G2                                                                                        | 3,80295E-07 | 0,22253909  | 0,438 | 0,09  | 0,008024611 | 1,166785279   | 0,857055722     | 4,866666667     |
| ZDHHC13                                                                                        | 0,002168448 | 0,222122871 | 0,062 | 0,004 | 1           | 1,166448709   | 0,857303019     | 15,5            |
| TRPV4                                                                                          | 1,33967E-08 | 0,221817429 | 0,125 | 0     | 0,000282684 | 1,166201779   | 0,857484543     | #DIV/0!         |
| STYXL1                                                                                         | 2,41715E-14 | 0,221760791 | 0,312 | 0,012 | 5,10043E-10 | 1,166155997   | 0,857518207     | 26              |
| SMIM12                                                                                         | 8,43723E-08 | 0,221680318 | 0,438 | 0,082 | 0,001780339 | 1,166090951   | 0,857566041     | 5,341463415     |
| PIAS2                                                                                          | 5,30076E-07 | 0,221490985 | 0,281 | 0,039 | 0,011185134 | 1,165937928   | 0,857678591     | 7,205128205     |
| STXBP4                                                                                         | 9,73699E-05 | 0,221344395 | 0,156 | 0,02  | 1           | 1,165819465   | 0,857765743     | 7,8             |
| CLN5                                                                                           | 0,000133984 | 0,221212249 | 0,438 | 0,129 | 1           | 1,165712685   | 0,857844315     | 3,395348837     |
| LMLN                                                                                           | 1,57978E-10 | 0,221039614 | 0,219 | 0,008 | 3,33348E-06 | 1,165573203   | 0,857946972     | 27,375          |
| SP2                                                                                            | 0,010532596 | 0,220943546 | 0,156 | 0,043 | 1           | 1,16549559    | 0,858004104     | 3,627906977     |
| TSNAX                                                                                          | 3,12413E-07 | 0,220657802 | 0,438 | 0,086 | 0,006592226 | 1,165264772   | 0,85817406      | 5,093023256     |
| RAB2A                                                                                          | 0,001297108 | 0,220509468 | 0,875 | 0,395 | 1           | 1,165144969   | 0,858262299     | 2,215189873     |
| RPAP2                                                                                          | 0,010194    | 0,22036533  | 0,156 | 0,043 | 1           | 1,165028566   | 0,858348052     | 3,627906977     |
| ADSS1                                                                                          | 0,000486824 | 0,22027881  | 0,094 | 0,008 | 1           | 1,164958701   | 0,858399529     | 11,75           |
| POP4                                                                                           | 2,33183E-10 | 0,220076655 | 0,281 | 0,02  | 4,92039E-06 | 1,164795474   | 0,85851982      | 14,05           |
| CHD9                                                                                           | 1,31206E-05 | 0,21984917  | 0,844 | 0,297 | 0,276858651 | 1,164611823   | 0,858655202     | 2,841750842     |
| IMPDH1                                                                                         | 6,43857E-09 | 0,219745837 | 0,25  | 0,02  | 0,00013586  | 1,164528411   | 0,858716705     | 12,5            |
| HMCN1                                                                                          | 1,36009E-12 | 0,219634271 | 0,281 | 0,012 | 2,86993E-08 | 1,164438359   | 0,858783114     | 23,41666667     |
| AHNAK2                                                                                         | 7,47389E-09 | 0,219238008 | 0,25  | 0,02  | 0,000157707 | 1,164118569   | 0,859019027     | 12,5            |
| WDR41                                                                                          | 1,67748E-07 | 0,219159063 | 0,281 | 0,035 | 0,00353966  | 1,164054869   | 0,859066034     | 8,028571429     |
| S100A9                                                                                         | 0,00737039  | 0,219081274 | 0,094 | 0,016 | 1           | 1,163992106   | 0,859112355     | 5,875           |
| ALDH7A1                                                                                        | 5,36615E-07 | 0,218568911 | 0,438 | 0,09  | 0,011323121 | 1,163578796   | 0,859417518     | 4,866666667     |
| LRP10                                                                                          | 4,24827E-05 | 0,21852948  | 0,625 | 0,203 | 0,896427428 | 1,163546993   | 0,859441007     | 3,078817734     |
| PTMA                                                                                           | 0,021331787 | 0,218443967 | 1     | 0,965 | 1           | 1,163478029   | 0,85949195      | 1,03626943      |
| ELP4                                                                                           | 0,000774932 | 0,218161481 | 0,219 | 0,051 | 1           | 1,163250237   | 0,859660259     | 4,294117647     |
| NPTN                                                                                           | 2,06076E-07 | 0,21813478  | 0,625 | 0,156 | 0,00434842  | 1,163228708   | 0,85967617      | 4,006410256     |



Supplementary Table 1

| Differentially expressed genes_adjacent-skin-XL_comparing SC-Keloid vs. (SC-Myel, SC-Nonmyel) |             |             |       |       |             |               |                 |                 |
|-----------------------------------------------------------------------------------------------|-------------|-------------|-------|-------|-------------|---------------|-----------------|-----------------|
| gene                                                                                          | p_val       | avg_log2FC  | pct.1 | pct.2 | p_val_adj   | Foldchange_UP | Foldchange_DOWN | Ratio_pct1_pct2 |
| BMS1                                                                                          | 4,56192E-05 | 0,218049594 | 0,281 | 0,059 | 0,962611179 | 1,163160026   | 0,859726932     | 4,762711864     |
| COMMD8                                                                                        | 1,92244E-06 | 0,217996872 | 0,281 | 0,043 | 0,040565506 | 1,16311752    | 0,85975835      | 6,534883721     |
| C4orf3                                                                                        | 0,018070651 | 0,217948691 | 0,812 | 0,422 | 1           | 1,163078676   | 0,859787064     | 1,924170616     |
| FDX2                                                                                          | 1,06047E-05 | 0,217931128 | 0,281 | 0,051 | 0,22377069  | 1,163064517   | 0,859797531     | 5,509803922     |
| MAN1C1                                                                                        | 2,66394E-10 | 0,217888087 | 0,188 | 0,004 | 5,62118E-06 | 1,16302982    | 0,859823182     | 47              |
| ADAM10                                                                                        | 3,28502E-06 | 0,217785489 | 0,625 | 0,176 | 0,069317282 | 1,162947113   | 0,859884331     | 3,551136364     |
| CAPN5                                                                                         | 1,69331E-06 | 0,217656068 | 0,281 | 0,043 | 0,035730553 | 1,162842792   | 0,859961473     | 6,534883721     |
| HSPA13                                                                                        | 0,000127721 | 0,217292496 | 0,5   | 0,156 | 1           | 1,162549782   | 0,860178218     | 3,205128205     |
| IL7R                                                                                          | 1,57978E-10 | 0,217274619 | 0,219 | 0,008 | 3,33348E-06 | 1,162535376   | 0,860188877     | 27,375          |
| FBXL7                                                                                         | 0,171460184 | 0,217203169 | 0,094 | 0,039 | 1           | 1,162477803   | 0,860231479     | 2,41025641      |
| LYAR                                                                                          | 5,25179E-09 | 0,217194888 | 0,375 | 0,051 | 0,000110818 | 1,162471131   | 0,860236417     | 7,352941176     |
| SOAT1                                                                                         | 9,29699E-05 | 0,217159474 | 0,25  | 0,051 | 1           | 1,162442595   | 0,860257534     | 4,901960784     |
| OTUD6B                                                                                        | 6,60944E-05 | 0,217141022 | 0,188 | 0,027 | 1           | 1,162427728   | 0,860268536     | 6,962962963     |
| IL27RA                                                                                        | 1,5116E-08  | 0,217124316 | 0,156 | 0,004 | 0,000318962 | 1,162414267   | 0,860278498     | 39              |
| MRPS18A                                                                                       | 8,40691E-07 | 0,217100123 | 0,25  | 0,031 | 0,017739423 | 1,162394775   | 0,860292924     | 8,064516129     |
| ASB1                                                                                          | 0,000773943 | 0,216968806 | 0,156 | 0,027 | 1           | 1,162288977   | 0,860371233     | 5,777777778     |
| PXN-AS1                                                                                       | 7,65055E-07 | 0,216951864 | 0,188 | 0,016 | 0,016143431 | 1,162275327   | 0,860381337     | 11,75           |
| PEX13                                                                                         | 3,86379E-06 | 0,216689249 | 0,156 | 0,012 | 0,081529835 | 1,162063777   | 0,860537967     | 13              |
| PGAP6                                                                                         | 4,62825E-08 | 0,21659633  | 0,281 | 0,031 | 0,000976607 | 1,161988934   | 0,860593393     | 9,064516129     |
| DRG1                                                                                          | 3,59137E-08 | 0,216434868 | 0,312 | 0,039 | 0,000757815 | 1,161858895   | 0,860689714     | 8               |
| PA2G4                                                                                         | 0,000228794 | 0,216352926 | 0,75  | 0,285 | 1           | 1,161792906   | 0,8607386       | 2,631578947     |
| KNOP1                                                                                         | 0,001003745 | 0,216216519 | 0,25  | 0,066 | 1           | 1,161683064   | 0,860819987     | 3,787878788     |
| CHRNB1                                                                                        | 9,7095E-07  | 0,215895064 | 0,219 | 0,023 | 0,020488018 | 1,161424251   | 0,861011813     | 9,52173913      |
| COPS5                                                                                         | 7,93315E-05 | 0,215845975 | 0,406 | 0,113 | 1           | 1,161384733   | 0,86104111      | 3,592920354     |
| CTCF                                                                                          | 7,44809E-07 | 0,215649168 | 0,375 | 0,07  | 0,015716207 | 1,161226313   | 0,861158578     | 5,357142857     |
| TYMS                                                                                          | 9,12354E-07 | 0,215569093 | 0,094 | 0     | 0,019251588 | 1,161161862   | 0,861206377     | #DIV/0!         |
| ZMAT3                                                                                         | 0,000939929 | 0,215345305 | 0,25  | 0,066 | 1           | 1,160981759   | 0,861339976     | 3,787878788     |
| TMEM184B                                                                                      | 0,045493752 | 0,215277649 | 0,25  | 0,113 | 1           | 1,160927316   | 0,861380369     | 2,212389381     |
| EVA1A                                                                                         | 8,61561E-07 | 0,215233435 | 0,125 | 0,004 | 0,018179807 | 1,160891737   | 0,861406768     | 31,25           |
| DHFR                                                                                          | 9,40504E-07 | 0,215058964 | 0,219 | 0,023 | 0,019845575 | 1,160751354   | 0,861510949     | 9,52173913      |

Supplementary Table 1

| Differentially expressed genes_adjacent-skin-XL_comparing SC-Keloid vs. (SC-Myel, SC-Nonmyel) |             |             |       |       |             |               |                 |                 |
|-----------------------------------------------------------------------------------------------|-------------|-------------|-------|-------|-------------|---------------|-----------------|-----------------|
| gene                                                                                          | p_val       | avg_log2FC  | pct.1 | pct.2 | p_val_adj   | Foldchange_UP | Foldchange_DOWN | Ratio_pct1_pct2 |
| ESYT1                                                                                         | 1,92242E-06 | 0,215027253 | 0,281 | 0,043 | 0,040564886 | 1,160725841   | 0,861529885     | 6,534883721     |
| YTHDF2                                                                                        | 1,06747E-05 | 0,215026959 | 0,438 | 0,109 | 0,225246221 | 1,160725604   | 0,861530061     | 4,018348624     |
| NDUFA2                                                                                        | 2,05856E-05 | 0,214985673 | 0,594 | 0,18  | 0,434377207 | 1,160692388   | 0,861554715     | 3,3             |
| ZNF282                                                                                        | 0,006378008 | 0,214965414 | 0,156 | 0,039 | 1           | 1,160676089   | 0,861566814     | 4               |
| SMYD5                                                                                         | 0,00737039  | 0,214955638 | 0,094 | 0,016 | 1           | 1,160668224   | 0,861572652     | 5,875           |
| ATAD2B                                                                                        | 9,89074E-05 | 0,214837132 | 0,25  | 0,051 | 1           | 1,160572888   | 0,861643426     | 4,901960784     |
| KIAA0232                                                                                      | 4,92519E-05 | 0,214829874 | 0,406 | 0,105 | 1           | 1,16056705    | 0,861647761     | 3,866666667     |
| ABI2                                                                                          | 0,003920049 | 0,214795217 | 0,438 | 0,176 | 1           | 1,16053917    | 0,86166846      | 2,488636364     |
| PIGP                                                                                          | 5,48122E-08 | 0,214744114 | 0,531 | 0,109 | 0,001156592 | 1,160498063   | 0,861698983     | 4,871559633     |
| RBM15B                                                                                        | 0,006378008 | 0,214567033 | 0,156 | 0,039 | 1           | 1,160355628   | 0,861804757     | 4               |
| METTL21A                                                                                      | 9,17361E-07 | 0,214467077 | 0,188 | 0,016 | 0,019357231 | 1,160275237   | 0,861864468     | 11,75           |
| HMG2                                                                                          | 0,010063632 | 0,214394948 | 0,781 | 0,398 | 1           | 1,160217228   | 0,86190756      | 1,962311558     |
| GIGYF2                                                                                        | 2,62475E-05 | 0,214363554 | 0,344 | 0,078 | 0,553847608 | 1,160191982   | 0,861926315     | 4,41025641      |
| NUDT2                                                                                         | 8,90851E-07 | 0,214311283 | 0,25  | 0,031 | 0,018797848 | 1,160149947   | 0,861957545     | 8,064516129     |
| RGS19                                                                                         | 2,66394E-10 | 0,214294585 | 0,188 | 0,004 | 5,62118E-06 | 1,160136519   | 0,861967521     | 47              |
| CCDC47                                                                                        | 0,000543438 | 0,214170299 | 0,594 | 0,223 | 1           | 1,16003658    | 0,862041781     | 2,66367713      |
| CTPS1                                                                                         | 9,48524E-05 | 0,214166051 | 0,125 | 0,012 | 1           | 1,160033164   | 0,86204432      | 10,41666667     |
| ZDHHC4                                                                                        | 7,70517E-07 | 0,214059743 | 0,25  | 0,031 | 0,01625868  | 1,159947688   | 0,862107844     | 8,064516129     |
| OLFML3                                                                                        | 8,91574E-05 | 0,21382213  | 0,156 | 0,02  | 1           | 1,15975666    | 0,862249845     | 7,8             |
| APEX2                                                                                         | 1,59386E-08 | 0,213742197 | 0,156 | 0,004 | 0,000336319 | 1,159692404   | 0,86229762      | 39              |
| COMMD3                                                                                        | 5,80052E-06 | 0,213663448 | 0,438 | 0,105 | 0,122396669 | 1,159629105   | 0,862344689     | 4,171428571     |
| NCAPD3                                                                                        | 9,41597E-05 | 0,213650302 | 0,219 | 0,039 | 1           | 1,159618538   | 0,862352547     | 5,615384615     |
| TMEM127                                                                                       | 0,003453714 | 0,213486533 | 0,156 | 0,035 | 1           | 1,15948691    | 0,862450444     | 4,457142857     |
| BIRC5                                                                                         | 0,004841742 | 0,213453635 | 0,031 | 0     | 1           | 1,159460471   | 0,86247011      | #DIV/0!         |
| SPRYD7                                                                                        | 0,000200254 | 0,213451306 | 0,219 | 0,043 | 1           | 1,159458599   | 0,862471502     | 5,093023256     |
| TMPO                                                                                          | 2,22454E-09 | 0,213277546 | 0,312 | 0,031 | 4,69401E-05 | 1,15931896    | 0,862575386     | 10,06451613     |
| EHD2                                                                                          | 3,76932E-06 | 0,213242409 | 0,375 | 0,078 | 0,079536364 | 1,159290726   | 0,862596394     | 4,807692308     |
| POLR1D                                                                                        | 5,53501E-05 | 0,213174224 | 0,625 | 0,207 | 1           | 1,159235936   | 0,862637164     | 3,019323671     |
| EIF4H                                                                                         | 0,0024417   | 0,212804961 | 0,688 | 0,297 | 1           | 1,158939263   | 0,862857987     | 2,316498316     |
| CFDP1                                                                                         | 2,40826E-05 | 0,212640828 | 0,562 | 0,172 | 0,508167664 | 1,158807421   | 0,862956158     | 3,26744186      |

Supplementary Table 1

| Differentially expressed genes_adjacent-skin-XL_comparing SC-Keloid vs. (SC-Myel, SC-Nonmyel) |             |             |       |       |             |               |                 |                 |
|-----------------------------------------------------------------------------------------------|-------------|-------------|-------|-------|-------------|---------------|-----------------|-----------------|
| gene                                                                                          | p_val       | avg_log2FC  | pct.1 | pct.2 | p_val_adj   | Foldchange_UP | Foldchange_DOWN | Ratio_pct1_pct2 |
| SLC25A24                                                                                      | 1,63458E-09 | 0,212404913 | 0,406 | 0,055 | 3,44913E-05 | 1,158617943   | 0,863097284     | 7,381818182     |
| ARL15                                                                                         | 1,44979E-05 | 0,212310657 | 0,125 | 0,008 | 0,305919948 | 1,158542249   | 0,863153675     | 15,625          |
| PGS1                                                                                          | 0,024054161 | 0,212003231 | 0,125 | 0,035 | 1           | 1,1582954     | 0,863337625     | 3,571428571     |
| QDPR                                                                                          | 0,000153915 | 0,211710123 | 0,5   | 0,16  | 1           | 1,158060097   | 0,863513045     | 3,125           |
| TMEM214                                                                                       | 0,000109604 | 0,211449018 | 0,25  | 0,051 | 1           | 1,157850525   | 0,863669341     | 4,901960784     |
| TUSC2                                                                                         | 4,03182E-13 | 0,211402866 | 0,375 | 0,027 | 8,50753E-09 | 1,157813486   | 0,86369697      | 13,88888889     |
| C22orf39                                                                                      | 0,007863882 | 0,211374498 | 0,219 | 0,07  | 1           | 1,15779072    | 0,863713953     | 3,128571429     |
| PAICS                                                                                         | 1,54041E-05 | 0,211242772 | 0,312 | 0,062 | 0,325042363 | 1,157685012   | 0,863792819     | 5,032258065     |
| GTF2E2                                                                                        | 9,47138E-06 | 0,211187393 | 0,281 | 0,051 | 0,19985553  | 1,157640575   | 0,863825977     | 5,509803922     |
| DCBLD1                                                                                        | 2,92389E-12 | 0,210687041 | 0,25  | 0,008 | 6,1697E-08  | 1,157239154   | 0,864125619     | 31,25           |
| UBE2L6                                                                                        | 0,000205019 | 0,210629726 | 0,25  | 0,055 | 1           | 1,15719318    | 0,864159949     | 4,545454545     |
| MICAL2                                                                                        | 2,33183E-10 | 0,210456666 | 0,281 | 0,02  | 4,92039E-06 | 1,157054376   | 0,864263617     | 14,05           |
| PRIM2                                                                                         | 2,86577E-08 | 0,210447535 | 0,219 | 0,016 | 0,000604707 | 1,157047053   | 0,864269087     | 13,6875         |
| LRRC75A                                                                                       | 6,93747E-09 | 0,210435576 | 0,25  | 0,02  | 0,000146388 | 1,157037462   | 0,864276251     | 12,5            |
| CASP14                                                                                        | 0,004841742 | 0,210432726 | 0,031 | 0     | 1           | 1,157035176   | 0,864277959     | #DIV/0!         |
| GABRA4                                                                                        | 0,004841742 | 0,210432726 | 0,031 | 0     | 1           | 1,157035176   | 0,864277959     | #DIV/0!         |
| ELMOD3                                                                                        | 0,000305772 | 0,210351516 | 0,156 | 0,023 | 1           | 1,156970048   | 0,864326611     | 6,782608696     |
| WRAP73                                                                                        | 8,65685E-05 | 0,210257255 | 0,156 | 0,02  | 1           | 1,156894458   | 0,864383085     | 7,8             |
| ATG7                                                                                          | 0,000760719 | 0,21024659  | 0,219 | 0,051 | 1           | 1,156885906   | 0,864389474     | 4,294117647     |
| NTN1                                                                                          | 6,02104E-12 | 0,210188295 | 0,312 | 0,02  | 1,2705E-07  | 1,15683916    | 0,864424402     | 15,6            |
| FAM136A                                                                                       | 8,55048E-11 | 0,210152441 | 0,344 | 0,031 | 1,80424E-06 | 1,156810411   | 0,864445885     | 11,09677419     |
| ERIB                                                                                          | 4,21482E-06 | 0,21012464  | 0,406 | 0,09  | 0,088937012 | 1,156788119   | 0,864462544     | 4,511111111     |
| CALML4                                                                                        | 0,013054404 | 0,209738751 | 0,062 | 0,008 | 1           | 1,156478745   | 0,864693799     | 7,75            |
| SIVA1                                                                                         | 0,001381319 | 0,209584669 | 0,656 | 0,273 | 1           | 1,156355238   | 0,864786155     | 2,402930403     |
| CROT                                                                                          | 1,58275E-07 | 0,209030607 | 0,281 | 0,035 | 0,00333977  | 1,155911229   | 0,865118337     | 8,028571429     |
| SIPA1                                                                                         | 0,005141746 | 0,208857539 | 0,344 | 0,129 | 1           | 1,155772573   | 0,865222124     | 2,666666667     |
| FXD3                                                                                          | 0,000209017 | 0,208603933 | 0,25  | 0,055 | 1           | 1,155569422   | 0,865374231     | 4,545454545     |
| LARS1                                                                                         | 1,38862E-06 | 0,208551291 | 0,562 | 0,145 | 0,029301308 | 1,155527257   | 0,865405809     | 3,875862069     |
| MEAK7                                                                                         | 1,11477E-07 | 0,208546651 | 0,188 | 0,012 | 0,002352284 | 1,155523541   | 0,865408592     | 15,66666667     |
| RAC1                                                                                          | 0,076956059 | 0,208312388 | 0,938 | 0,656 | 1           | 1,155335924   | 0,865549127     | 1,429878049     |

Supplementary Table 1

| Differentially expressed genes_adjacent-skin-XL_comparing SC-Keloid vs. (SC-Myel, SC-Nonmyel) |             |             |       |       |             |               |                 |                 |
|-----------------------------------------------------------------------------------------------|-------------|-------------|-------|-------|-------------|---------------|-----------------|-----------------|
| gene                                                                                          | p_val       | avg_log2FC  | pct.1 | pct.2 | p_val_adj   | Foldchange_UP | Foldchange_DOWN | Ratio_pct1_pct2 |
| UQCC3                                                                                         | 1,56439E-07 | 0,208295528 | 0,375 | 0,062 | 0,00330101  | 1,155322421   | 0,865559243     | 6,048387097     |
| FARP1                                                                                         | 0,000305772 | 0,208075671 | 0,156 | 0,023 | 1           | 1,155146372   | 0,865691158     | 6,782608696     |
| NAGA                                                                                          | 1,51026E-05 | 0,208065333 | 0,344 | 0,074 | 0,318679081 | 1,155138094   | 0,865697361     | 4,648648649     |
| S100A1                                                                                        | 0,112120623 | 0,208039997 | 0,188 | 0,09  | 1           | 1,155117808   | 0,865712565     | 2,088888889     |
| RUFY1                                                                                         | 2,02073E-05 | 0,207910722 | 0,188 | 0,023 | 0,426394579 | 1,155014307   | 0,865790141     | 8,173913043     |
| LRWD1                                                                                         | 7,59646E-09 | 0,207902758 | 0,188 | 0,008 | 0,000160293 | 1,155007931   | 0,865794921     | 23,5            |
| ZNF362                                                                                        | 9,51212E-08 | 0,207892052 | 0,344 | 0,051 | 0,002007153 | 1,15499936    | 0,865801345     | 6,745098039     |
| ST7-AS1                                                                                       | 1,33967E-08 | 0,20775428  | 0,125 | 0     | 0,000282684 | 1,154889067   | 0,865884031     | #DIV/0!         |
| SLC35E4                                                                                       | 4,79742E-08 | 0,207717011 | 0,25  | 0,023 | 0,001012303 | 1,154859233   | 0,865906399     | 10,86956522     |
| MAPRE1                                                                                        | 0,000531572 | 0,207706327 | 0,625 | 0,23  | 1           | 1,154850681   | 0,865912812     | 2,717391304     |
| PRCP                                                                                          | 0,001606083 | 0,207398282 | 0,375 | 0,129 | 1           | 1,154604123   | 0,866097722     | 2,906976744     |
| FAIM                                                                                          | 5,35812E-05 | 0,207179469 | 0,281 | 0,059 | 1           | 1,154429018   | 0,866229092     | 4,762711864     |
| FBXO8                                                                                         | 9,25608E-07 | 0,207156888 | 0,312 | 0,051 | 0,019531255 | 1,154410949   | 0,866242651     | 6,117647059     |
| SH3KBP1                                                                                       | 5,02394E-07 | 0,207008372 | 0,406 | 0,078 | 0,010601017 | 1,154292116   | 0,866331829     | 5,205128205     |
| SUPV3L1                                                                                       | 1,89132E-05 | 0,206853318 | 0,25  | 0,043 | 0,399087485 | 1,154168065   | 0,866424943     | 5,813953488     |
| RBX1                                                                                          | 0,004016773 | 0,206347158 | 0,875 | 0,449 | 1           | 1,153763203   | 0,866728976     | 1,948775056     |
| RPAIN                                                                                         | 3,92965E-05 | 0,206132795 | 0,5   | 0,148 | 0,829196265 | 1,153591784   | 0,866857769     | 3,378378378     |
| TMEM220                                                                                       | 0,000452457 | 0,205857218 | 0,125 | 0,016 | 1           | 1,153371452   | 0,867023368     | 7,8125          |
| SLC12A4                                                                                       | 6,66992E-05 | 0,205705839 | 0,281 | 0,059 | 1           | 1,153250437   | 0,867114347     | 4,762711864     |
| ADGRA3                                                                                        | 9,82165E-05 | 0,205534408 | 0,125 | 0,012 | 1           | 1,153113408   | 0,86721739      | 10,41666667     |
| CHCHD3                                                                                        | 0,00028292  | 0,205289944 | 0,312 | 0,082 | 1           | 1,15291803    | 0,867364352     | 3,804878049     |
| DOCK8                                                                                         | 0,000112833 | 0,20513752  | 0,125 | 0,012 | 1           | 1,152796228   | 0,867455996     | 10,41666667     |
| KIF3B                                                                                         | 9,48524E-05 | 0,205019892 | 0,125 | 0,012 | 1           | 1,152702241   | 0,867526725     | 10,41666667     |
| CDC5L                                                                                         | 7,23811E-06 | 0,204995125 | 0,5   | 0,129 | 0,152731424 | 1,152682452   | 0,867541618     | 3,875968992     |
| GINS2                                                                                         | 1,39097E-05 | 0,204673929 | 0,125 | 0,008 | 0,293508116 | 1,152425852   | 0,867734786     | 15,625          |
| GPS1                                                                                          | 1,16412E-07 | 0,204573196 | 0,531 | 0,117 | 0,002456417 | 1,152345388   | 0,867795376     | 4,538461538     |
| ABHD6                                                                                         | 1,77239E-07 | 0,204285382 | 0,219 | 0,02  | 0,00373992  | 1,152115522   | 0,867968516     | 10,95           |
| SNRNP40                                                                                       | 0,001177356 | 0,204261175 | 0,312 | 0,094 | 1           | 1,15209619    | 0,86798308      | 3,319148936     |
| RAB11B                                                                                        | 1,26978E-05 | 0,20404627  | 0,625 | 0,188 | 0,267937201 | 1,151924586   | 0,868112385     | 3,324468085     |
| PRKACA                                                                                        | 0,000164053 | 0,204036305 | 0,312 | 0,078 | 1           | 1,15191663    | 0,868118381     | 4               |

Supplementary Table 1

| Differentially expressed genes_adjacent-skin-XL_comparing SC-Keloid vs. (SC-Myel, SC-Nonmyel) |             |             |       |       |             |               |                 |                 |
|-----------------------------------------------------------------------------------------------|-------------|-------------|-------|-------|-------------|---------------|-----------------|-----------------|
| gene                                                                                          | p_val       | avg_log2FC  | pct.1 | pct.2 | p_val_adj   | Foldchange_UP | Foldchange_DOWN | Ratio_pct1_pct2 |
| SNAPC5                                                                                        | 1,73693E-06 | 0,203929225 | 0,281 | 0,043 | 0,036650933 | 1,151831135   | 0,868182818     | 6,534883721     |
| DDX49                                                                                         | 7,11318E-06 | 0,203844897 | 0,344 | 0,07  | 0,150095314 | 1,151763811   | 0,868233566     | 4,914285714     |
| TSSC4                                                                                         | 0,000501385 | 0,203789052 | 0,438 | 0,145 | 1           | 1,151719228   | 0,868267174     | 3,020689655     |
| KLHDC3                                                                                        | 1,25841E-06 | 0,203755428 | 0,344 | 0,062 | 0,026553766 | 1,151692386   | 0,868287411     | 5,548387097     |
| DCAF4                                                                                         | 0,013054404 | 0,203663556 | 0,062 | 0,008 | 1           | 1,151619047   | 0,868342706     | 7,75            |
| MAP7D3                                                                                        | 6,07138E-07 | 0,203622607 | 0,281 | 0,039 | 0,012811221 | 1,151586361   | 0,868367353     | 7,205128205     |
| MRFAP1L1                                                                                      | 9,62117E-08 | 0,2035475   | 0,406 | 0,07  | 0,002030164 | 1,15152641    | 0,868412562     | 5,8             |
| HYOU1                                                                                         | 0,000765876 | 0,203456757 | 0,312 | 0,094 | 1           | 1,151453984   | 0,868467185     | 3,319148936     |
| MBLAC1                                                                                        | 0,01346698  | 0,203453993 | 0,062 | 0,008 | 1           | 1,151451778   | 0,868468849     | 7,75            |
| HACD3                                                                                         | 5,96633E-09 | 0,203368571 | 0,469 | 0,078 | 0,000125895 | 1,151383602   | 0,868520273     | 6,012820513     |
| PRR7                                                                                          | 4,18583E-08 | 0,203337756 | 0,25  | 0,023 | 0,000883252 | 1,15135901    | 0,868538824     | 10,86956522     |
| STAT1                                                                                         | 0,000100965 | 0,202786986 | 0,25  | 0,051 | 1           | 1,150919545   | 0,868870465     | 4,901960784     |
| CDK5RAP3                                                                                      | 4,18627E-05 | 0,202506805 | 0,375 | 0,094 | 0,883345867 | 1,150696051   | 0,869039221     | 3,989361702     |
| ORMDL3                                                                                        | 4,0305E-06  | 0,202250439 | 0,219 | 0,027 | 0,085047498 | 1,150491591   | 0,869193663     | 8,111111111     |
| NOA1                                                                                          | 6,40895E-07 | 0,202233506 | 0,281 | 0,039 | 0,013523521 | 1,150478088   | 0,869203865     | 7,205128205     |
| BCOR                                                                                          | 1,13457E-05 | 0,202183831 | 0,281 | 0,051 | 0,239406468 | 1,150438475   | 0,869233793     | 5,509803922     |
| MRPS35                                                                                        | 1,78163E-06 | 0,202183139 | 0,281 | 0,043 | 0,037594075 | 1,150437924   | 0,86923421      | 6,534883721     |
| GTF2F1                                                                                        | 8,65547E-05 | 0,202145412 | 0,312 | 0,074 | 1           | 1,150407839   | 0,869256942     | 4,216216216     |
| PFKFB4                                                                                        | 7,93423E-07 | 0,202050216 | 0,188 | 0,016 | 0,016742011 | 1,150331932   | 0,869314301     | 11,75           |
| CPSF2                                                                                         | 0,000417537 | 0,201928805 | 0,188 | 0,035 | 1           | 1,15023513    | 0,869387462     | 5,371428571     |
| EMD                                                                                           | 0,000191745 | 0,201849047 | 0,5   | 0,16  | 1           | 1,150171542   | 0,869435526     | 3,125           |
| UNC93B1                                                                                       | 4,48152E-08 | 0,201848571 | 0,25  | 0,023 | 0,000945646 | 1,150171162   | 0,869435813     | 10,86956522     |
| TRPV3                                                                                         | 2,91341E-06 | 0,201777945 | 0,25  | 0,035 | 0,061475767 | 1,150114858   | 0,869478377     | 7,142857143     |
| ANKRD13C                                                                                      | 9,48469E-07 | 0,201677506 | 0,312 | 0,051 | 0,020013643 | 1,150034791   | 0,869538911     | 6,117647059     |
| DPY19L1                                                                                       | 6,17128E-06 | 0,201636407 | 0,312 | 0,059 | 0,130220119 | 1,15000203    | 0,869563683     | 5,288135593     |
| AP3M1                                                                                         | 1,10934E-05 | 0,201594306 | 0,281 | 0,051 | 0,23408214  | 1,14996847    | 0,869589059     | 5,509803922     |
| NDFIP1                                                                                        | 0,005933351 | 0,201542568 | 0,656 | 0,312 | 1           | 1,149927231   | 0,869620245     | 2,102564103     |
| RNF26                                                                                         | 0,000486824 | 0,201334872 | 0,094 | 0,008 | 1           | 1,149761694   | 0,869745448     | 11,75           |
| MDP1                                                                                          | 2,86075E-06 | 0,201184788 | 0,312 | 0,055 | 0,060364658 | 1,149642091   | 0,869835933     | 5,672727273     |
| TNIK                                                                                          | 3,51691E-07 | 0,201112127 | 0,156 | 0,008 | 0,007421029 | 1,149584191   | 0,869879743     | 19,5            |

Supplementary Table 1

| Differentially expressed genes_adjacent-skin-XL_comparing SC-Keloid vs. (SC-Myel, SC-Nonmyel) |             |             |       |       |             |               |                 |                 |
|-----------------------------------------------------------------------------------------------|-------------|-------------|-------|-------|-------------|---------------|-----------------|-----------------|
| gene                                                                                          | p_val       | avg_log2FC  | pct.1 | pct.2 | p_val_adj   | Foldchange_UP | Foldchange_DOWN | Ratio_pct1_pct2 |
| GTSE1                                                                                         | 9,12354E-07 | 0,200993646 | 0,094 | 0     | 0,019251588 | 1,149489785   | 0,869951184     | #DIV/0!         |
| PEBP1                                                                                         | 0,039700085 | 0,200705746 | 0,969 | 0,711 | 1           | 1,149260419   | 0,870124807     | 1,362869198     |
| CCDC50                                                                                        | 1,82828E-06 | 0,200542732 | 0,438 | 0,098 | 0,038578545 | 1,149130568   | 0,87022313      | 4,469387755     |
| POLE4                                                                                         | 9,40178E-08 | 0,200422569 | 0,406 | 0,07  | 0,001983869 | 1,149034861   | 0,870295614     | 5,8             |
| PRKAR1A                                                                                       | 0,012411259 | 0,20037827  | 0,594 | 0,285 | 1           | 1,14899958    | 0,870322337     | 2,084210526     |
| DENND2B                                                                                       | 0,004081618 | 0,200308464 | 0,344 | 0,121 | 1           | 1,148943985   | 0,87036445      | 2,842975207     |
| STT3A                                                                                         | 1,50482E-06 | 0,200280243 | 0,344 | 0,062 | 0,031753276 | 1,148921511   | 0,870381476     | 5,548387097     |
| PRKAG1                                                                                        | 1,2719E-05  | 0,200126569 | 0,219 | 0,031 | 0,268384055 | 1,148799136   | 0,870474192     | 7,064516129     |
| SELENOS                                                                                       | 0,000417809 | 0,200087054 | 0,656 | 0,238 | 1           | 1,148767671   | 0,870498035     | 2,756302521     |
| CLPTM1                                                                                        | 3,09835E-08 | 0,199186929 | 0,594 | 0,129 | 0,000653783 | 1,148051156   | 0,871041325     | 4,604651163     |
| RAD17                                                                                         | 0,000466094 | 0,199099462 | 0,125 | 0,016 | 1           | 1,147981555   | 0,871094135     | 7,8125          |
| TOM1L1                                                                                        | 4,35951E-06 | 0,198800539 | 0,188 | 0,02  | 0,091990018 | 1,147743721   | 0,871274643     | 9,4             |
| PLA2G4A                                                                                       | 5,94561E-05 | 0,198611677 | 0,188 | 0,027 | 1           | 1,14759348    | 0,871388708     | 6,962962963     |
| EXOSC2                                                                                        | 0,003651243 | 0,198559137 | 0,125 | 0,023 | 1           | 1,147551688   | 0,871420443     | 5,434782609     |
| MRPL45                                                                                        | 2,65168E-08 | 0,198417597 | 0,219 | 0,016 | 0,00055953  | 1,14743911    | 0,87150594      | 13,6875         |
| MRPL35                                                                                        | 1,08519E-08 | 0,198237551 | 0,281 | 0,027 | 0,000228985 | 1,14729592    | 0,871614709     | 10,40740741     |
| ALPK3                                                                                         | 0,079594089 | 0,198201531 | 0,031 | 0,004 | 1           | 1,147267275   | 0,871636472     | 7,75            |
| ADCK5                                                                                         | 1,02698E-07 | 0,198161245 | 0,188 | 0,012 | 0,002167028 | 1,147235239   | 0,871660812     | 15,66666667     |
| PTGES2                                                                                        | 5,55781E-06 | 0,197781752 | 0,281 | 0,047 | 0,117275301 | 1,146933505   | 0,871890128     | 5,978723404     |
| MAP3K20                                                                                       | 0,002679274 | 0,197654716 | 0,188 | 0,047 | 1           | 1,146832517   | 0,871966905     | 4               |
| ARL2                                                                                          | 0,001768797 | 0,197567999 | 0,719 | 0,316 | 1           | 1,146763585   | 0,872019318     | 2,275316456     |
| ZW10                                                                                          | 1,2719E-05  | 0,197305424 | 0,219 | 0,031 | 0,268384055 | 1,14655489    | 0,872178043     | 7,064516129     |
| CYSTM1                                                                                        | 0,000354409 | 0,196829619 | 0,719 | 0,281 | 1           | 1,146176816   | 0,872465737     | 2,558718861     |
| RNF181                                                                                        | 5,83159E-07 | 0,196618643 | 0,625 | 0,16  | 0,01230523  | 1,146009214   | 0,872593333     | 3,90625         |
| NREP                                                                                          | 1,34164E-05 | 0,196595995 | 0,375 | 0,086 | 0,283099549 | 1,145991223   | 0,872607032     | 4,360465116     |
| UROS                                                                                          | 8,14044E-08 | 0,196456447 | 0,344 | 0,051 | 0,001717714 | 1,14588038    | 0,872691441     | 6,745098039     |
| ELOVL1                                                                                        | 1,28694E-06 | 0,196204685 | 0,344 | 0,062 | 0,027155825 | 1,145680432   | 0,872843746     | 5,548387097     |
| FBXL4                                                                                         | 0,000738278 | 0,196166287 | 0,156 | 0,027 | 1           | 1,145649939   | 0,872866978     | 5,777777778     |
| NR2F6                                                                                         | 6,07138E-07 | 0,196022733 | 0,281 | 0,039 | 0,012811221 | 1,145535949   | 0,872953835     | 7,205128205     |
| CDC73                                                                                         | 0,005295635 | 0,196001811 | 0,375 | 0,148 | 1           | 1,145519336   | 0,872966496     | 2,533783784     |

Supplementary Table 1

| Differentially expressed genes_adjacent-skin-XL_comparing SC-Keloid vs. (SC-Myel, SC-Nonmyel) |             |             |       |       |             |               |                 |                 |
|-----------------------------------------------------------------------------------------------|-------------|-------------|-------|-------|-------------|---------------|-----------------|-----------------|
| gene                                                                                          | p_val       | avg_log2FC  | pct.1 | pct.2 | p_val_adj   | Foldchange_UP | Foldchange_DOWN | Ratio_pct1_pct2 |
| DRAM2                                                                                         | 4,62825E-08 | 0,195911295 | 0,281 | 0,031 | 0,000976607 | 1,145447468   | 0,873021267     | 9,064516129     |
| TIPIN                                                                                         | 0,000305772 | 0,195809305 | 0,156 | 0,023 | 1           | 1,145366494   | 0,873082987     | 6,782608696     |
| HPF1                                                                                          | 8,67326E-07 | 0,195692643 | 0,375 | 0,07  | 0,018301437 | 1,145273879   | 0,873153591     | 5,357142857     |
| MUS81                                                                                         | 2,38912E-05 | 0,19562638  | 0,25  | 0,043 | 0,50412882  | 1,145221278   | 0,873193696     | 5,813953488     |
| WASL                                                                                          | 2,39175E-05 | 0,195579832 | 0,531 | 0,156 | 0,504682659 | 1,145184328   | 0,87322187      | 3,403846154     |
| ZADH2                                                                                         | 4,33123E-08 | 0,195542209 | 0,25  | 0,023 | 0,000913933 | 1,145154464   | 0,873244642     | 10,86956522     |
| SEMA4F                                                                                        | 4,5807E-05  | 0,195223812 | 0,094 | 0,004 | 0,966573495 | 1,144901761   | 0,873437385     | 23,5            |
| TACC1                                                                                         | 0,000804532 | 0,194984281 | 0,656 | 0,27  | 1           | 1,144711689   | 0,873582414     | 2,42962963      |
| NOL9                                                                                          | 0,000173407 | 0,194923251 | 0,188 | 0,031 | 1           | 1,144663265   | 0,87361937      | 6,064516129     |
| SEPTIN11                                                                                      | 4,19272E-05 | 0,194819008 | 0,406 | 0,105 | 0,884705188 | 1,14458056    | 0,873682496     | 3,866666667     |
| ZNF283                                                                                        | 0,368323117 | 0,194655059 | 0,031 | 0,012 | 1           | 1,144450496   | 0,873781787     | 2,583333333     |
| PSME2                                                                                         | 0,000149073 | 0,194584604 | 0,531 | 0,176 | 1           | 1,144394607   | 0,87382446      | 3,017045455     |
| TRAPPC6B                                                                                      | 4,70541E-06 | 0,194553731 | 0,281 | 0,047 | 0,099288927 | 1,144370118   | 0,87384316      | 5,978723404     |
| CUTC                                                                                          | 0,000417537 | 0,19422848  | 0,188 | 0,035 | 1           | 1,144112152   | 0,874040188     | 5,371428571     |
| REPIN1                                                                                        | 0,000641668 | 0,194138456 | 0,312 | 0,09  | 1           | 1,144040762   | 0,874094729     | 3,466666667     |
| SHROOM2                                                                                       | 3,3636E-07  | 0,194059102 | 0,156 | 0,008 | 0,007097534 | 1,143977837   | 0,874142809     | 19,5            |
| MPHOSPH9                                                                                      | 0,007631848 | 0,193964911 | 0,125 | 0,027 | 1           | 1,143903151   | 0,874199883     | 4,62962963      |
| MYL5                                                                                          | 7,96166E-09 | 0,193853884 | 0,188 | 0,008 | 0,000167999 | 1,143815122   | 0,874267161     | 23,5            |
| SYTL2                                                                                         | 5,78487E-05 | 0,193820099 | 0,375 | 0,098 | 1           | 1,143788336   | 0,874287635     | 3,826530612     |
| CTDNEP1                                                                                       | 5,13089E-07 | 0,193702944 | 0,688 | 0,184 | 0,010826683 | 1,143695458   | 0,874358635     | 3,739130435     |
| RBM42                                                                                         | 0,000499558 | 0,193397517 | 0,5   | 0,18  | 1           | 1,143453356   | 0,874543762     | 2,777777778     |
| ATP2C1                                                                                        | 3,11336E-06 | 0,193394318 | 0,406 | 0,09  | 0,065694924 | 1,143450821   | 0,874545701     | 4,511111111     |
| POU3F2                                                                                        | 1,34171E-05 | 0,19338996  | 0,219 | 0,031 | 0,283114022 | 1,143447367   | 0,874548343     | 7,064516129     |
| FHOD1                                                                                         | 2,8258E-09  | 0,193003147 | 0,219 | 0,012 | 5,96273E-05 | 1,143140829   | 0,874782857     | 18,25           |
| DGKZ                                                                                          | 0,00010081  | 0,192987096 | 0,219 | 0,039 | 1           | 1,143128111   | 0,874792589     | 5,615384615     |
| PPP1R11                                                                                       | 8,37038E-06 | 0,192960756 | 0,375 | 0,082 | 0,176623288 | 1,14310724    | 0,874808561     | 4,573170732     |
| IRF2BP1                                                                                       | 5,90909E-07 | 0,192959416 | 0,281 | 0,039 | 0,012468772 | 1,143106179   | 0,874809374     | 7,205128205     |
| RND2                                                                                          | 3,86379E-06 | 0,192825503 | 0,156 | 0,012 | 0,081529835 | 1,143000079   | 0,874890578     | 13              |
| GAN                                                                                           | 1,39097E-05 | 0,192410945 | 0,125 | 0,008 | 0,293508116 | 1,142671685   | 0,875142014     | 15,625          |
| TRUB1                                                                                         | 0,001770672 | 0,192353929 | 0,156 | 0,031 | 1           | 1,142626527   | 0,875176601     | 5,032258065     |

Supplementary Table 1

| Differentially expressed genes_adjacent-skin-XL_comparing SC-Keloid vs. (SC-Myel, SC-Nonmyel) |             |             |       |       |             |               |                 |                 |
|-----------------------------------------------------------------------------------------------|-------------|-------------|-------|-------|-------------|---------------|-----------------|-----------------|
| gene                                                                                          | p_val       | avg_log2FC  | pct.1 | pct.2 | p_val_adj   | Foldchange_UP | Foldchange_DOWN | Ratio_pct1_pct2 |
| ETFRF1                                                                                        | 3,59126E-05 | 0,19235181  | 0,469 | 0,133 | 0,757792512 | 1,142624849   | 0,875177886     | 3,526315789     |
| MED27                                                                                         | 1,31182E-08 | 0,192280595 | 0,406 | 0,062 | 0,000276808 | 1,142568447   | 0,875221088     | 6,548387097     |
| PTRHD1                                                                                        | 1,68619E-09 | 0,192268179 | 0,281 | 0,023 | 3,55804E-05 | 1,142558614   | 0,875228621     | 12,2173913      |
| ZSCAN12                                                                                       | 0,007750521 | 0,192263924 | 0,094 | 0,016 | 1           | 1,142555245   | 0,875231202     | 5,875           |
| TRAPPC4                                                                                       | 1,31726E-05 | 0,192261948 | 0,375 | 0,086 | 0,277954243 | 1,14255368    | 0,875232401     | 4,360465116     |
| AKT1S1                                                                                        | 1,3161E-06  | 0,192210987 | 0,344 | 0,062 | 0,027771004 | 1,142513322   | 0,875263317     | 5,548387097     |
| NTHL1                                                                                         | 1,28978E-06 | 0,192195457 | 0,469 | 0,105 | 0,027215712 | 1,142501023   | 0,875272739     | 4,466666667     |
| CLN3                                                                                          | 1,31496E-07 | 0,191869719 | 0,312 | 0,043 | 0,002774696 | 1,142243093   | 0,875470385     | 7,255813953     |
| PLCG1                                                                                         | 4,14927E-06 | 0,191805429 | 0,219 | 0,027 | 0,087553714 | 1,142192193   | 0,875509398     | 8,111111111     |
| ARMC5                                                                                         | 0,012262652 | 0,191741842 | 0,062 | 0,008 | 1           | 1,142141852   | 0,875547987     | 7,75            |
| SMIM30                                                                                        | 1,64044E-07 | 0,191735264 | 0,375 | 0,062 | 0,003461494 | 1,142136644   | 0,87555198      | 6,048387097     |
| SYMPK                                                                                         | 7,9257E-05  | 0,191685766 | 0,344 | 0,086 | 1           | 1,142097459   | 0,87558202      | 4               |
| CYP51A1                                                                                       | 3,2565E-07  | 0,191582099 | 0,438 | 0,086 | 0,006871539 | 1,142015395   | 0,875644938     | 5,093023256     |
| RNF208                                                                                        | 0,007945492 | 0,191543252 | 0,125 | 0,027 | 1           | 1,141984644   | 0,875668517     | 4,62962963      |
| ZNF124                                                                                        | 0,039886012 | 0,19153622  | 0,062 | 0,012 | 1           | 1,141979078   | 0,875672785     | 5,166666667     |
| SAR1B                                                                                         | 2,18521E-07 | 0,191203604 | 0,406 | 0,074 | 0,004611011 | 1,141715823   | 0,875874696     | 5,486486486     |
| ZNF45                                                                                         | 0,079594089 | 0,19117576  | 0,031 | 0,004 | 1           | 1,141693788   | 0,875891601     | 7,75            |
| YIF1A                                                                                         | 2,08573E-05 | 0,191148147 | 0,531 | 0,148 | 0,440110734 | 1,141671937   | 0,875908365     | 3,587837838     |
| PAQR4                                                                                         | 1,64044E-07 | 0,190888734 | 0,375 | 0,062 | 0,003461494 | 1,14146667    | 0,876065878     | 6,048387097     |
| PNPLA4                                                                                        | 3,86379E-06 | 0,190869752 | 0,156 | 0,012 | 0,081529835 | 1,141451651   | 0,876077405     | 13              |
| SOCS2                                                                                         | 6,42992E-05 | 0,190792519 | 0,625 | 0,207 | 1           | 1,141390547   | 0,876124306     | 3,019323671     |
| NTAN1                                                                                         | 5,09918E-07 | 0,190765671 | 0,344 | 0,059 | 0,010759779 | 1,141369306   | 0,87614061      | 5,830508475     |
| ANXA8L1                                                                                       | 0,004841742 | 0,190727061 | 0,031 | 0     | 1           | 1,141338761   | 0,876164058     | #DIV/0!         |
| LORICRIN                                                                                      | 0,004841742 | 0,190727061 | 0,031 | 0     | 1           | 1,141338761   | 0,876164058     | #DIV/0!         |
| PTPRH                                                                                         | 0,004841742 | 0,190727061 | 0,031 | 0     | 1           | 1,141338761   | 0,876164058     | #DIV/0!         |
| TENT5C                                                                                        | 0,004841742 | 0,190727061 | 0,031 | 0     | 1           | 1,141338761   | 0,876164058     | #DIV/0!         |
| TLR6                                                                                          | 0,004841742 | 0,190727061 | 0,031 | 0     | 1           | 1,141338761   | 0,876164058     | #DIV/0!         |
| RBM33                                                                                         | 0,019943735 | 0,190718454 | 0,281 | 0,113 | 1           | 1,141331951   | 0,876169286     | 2,486725664     |
| NKAIN4                                                                                        | 0,520968078 | 0,190608619 | 0,031 | 0,016 | 1           | 1,141245063   | 0,876235992     | 1,9375          |
| UGGT2                                                                                         | 1,64044E-07 | 0,190552772 | 0,375 | 0,062 | 0,003461494 | 1,141200886   | 0,876269912     | 6,048387097     |



Supplementary Table 1

| Differentially expressed genes_adjacent-skin-XL_comparing SC-Keloid vs. (SC-Myel, SC-Nonmyel) |             |             |       |       |             |               |                 |                 |
|-----------------------------------------------------------------------------------------------|-------------|-------------|-------|-------|-------------|---------------|-----------------|-----------------|
| gene                                                                                          | p_val       | avg_log2FC  | pct.1 | pct.2 | p_val_adj   | Foldchange_UP | Foldchange_DOWN | Ratio_pct1_pct2 |
| DLD                                                                                           | 7,1112E-09  | 0,190552645 | 0,375 | 0,051 | 0,000150053 | 1,141200786   | 0,876269989     | 7,352941176     |
| PIGC                                                                                          | 2,06459E-05 | 0,190497827 | 0,438 | 0,113 | 0,435650061 | 1,141157424   | 0,876303285     | 3,876106195     |
| PKNOX2                                                                                        | 1,2719E-05  | 0,190472916 | 0,219 | 0,031 | 0,268384055 | 1,14113772    | 0,876318417     | 7,064516129     |
| SMIM10                                                                                        | 0,000200254 | 0,190408439 | 0,219 | 0,043 | 1           | 1,141086721   | 0,876357582     | 5,093023256     |
| FAM167B                                                                                       | 9,12354E-07 | 0,190205375 | 0,094 | 0     | 0,019251588 | 1,140926121   | 0,876480941     | #DIV/0!         |
| TMEM98                                                                                        | 5,9331E-06  | 0,190128705 | 0,375 | 0,082 | 0,125194427 | 1,140865489   | 0,876527522     | 4,573170732     |
| DYM                                                                                           | 5,44692E-07 | 0,190084413 | 0,281 | 0,039 | 0,011493547 | 1,140830464   | 0,876554432     | 7,205128205     |
| TBX3                                                                                          | 0,000105286 | 0,190071864 | 0,125 | 0,012 | 1           | 1,140820541   | 0,876562057     | 10,41666667     |
| FILIP1L                                                                                       | 0,001557595 | 0,189779173 | 0,312 | 0,098 | 1           | 1,140589118   | 0,87673991      | 3,183673469     |
| DYNC1LI2                                                                                      | 0,000991155 | 0,189772957 | 0,719 | 0,285 | 1           | 1,140584203   | 0,876743687     | 2,522807018     |
| LRRC41                                                                                        | 0,000576308 | 0,189255376 | 0,281 | 0,074 | 1           | 1,14017508    | 0,877058284     | 3,797297297     |
| BRD9                                                                                          | 3,29746E-05 | 0,189032532 | 0,469 | 0,129 | 0,695796475 | 1,139998978   | 0,877193769     | 3,635658915     |
| RNASEH1                                                                                       | 2,83613E-06 | 0,188861141 | 0,25  | 0,035 | 0,059845173 | 1,139863556   | 0,877297984     | 7,142857143     |
| CHMP4A                                                                                        | 0,000321385 | 0,18883973  | 0,469 | 0,152 | 1           | 1,139846639   | 0,877311004     | 3,085526316     |
| TRIB1                                                                                         | 0,000916506 | 0,188786584 | 0,188 | 0,039 | 1           | 1,13980465    | 0,877343323     | 4,820512821     |
| DRG2                                                                                          | 1,72688E-07 | 0,188726004 | 0,281 | 0,035 | 0,003643896 | 1,13975679    | 0,877380164     | 8,028571429     |
| SLTM                                                                                          | 9,74729E-06 | 0,188599127 | 0,625 | 0,188 | 0,205677645 | 1,139656559   | 0,877457329     | 3,324468085     |
| MIS18BP1                                                                                      | 0,000390703 | 0,188477508 | 0,188 | 0,035 | 1           | 1,13956049    | 0,877531302     | 5,371428571     |
| HIVEP3                                                                                        | 3,58718E-06 | 0,188430479 | 0,219 | 0,027 | 0,075693187 | 1,139523344   | 0,877559907     | 8,111111111     |
| ZEB1                                                                                          | 1,45331E-05 | 0,188379083 | 0,219 | 0,031 | 0,306663142 | 1,139482749   | 0,877591171     | 7,064516129     |
| EXOC6                                                                                         | 0,007631848 | 0,18835418  | 0,125 | 0,027 | 1           | 1,13946308    | 0,87760632      | 4,62962963      |
| YIPF6                                                                                         | 0,005779495 | 0,188106803 | 0,375 | 0,145 | 1           | 1,139267714   | 0,877756815     | 2,586206897     |
| UBA3                                                                                          | 0,000428394 | 0,188024703 | 0,312 | 0,086 | 1           | 1,139202884   | 0,877806767     | 3,627906977     |
| ATPAF1                                                                                        | 1,96898E-07 | 0,187734787 | 0,219 | 0,02  | 0,00415474  | 1,138973979   | 0,877983184     | 10,95           |
| PBK                                                                                           | 6,3574E-05  | 0,187723195 | 0,062 | 0     | 1           | 1,138964827   | 0,877990239     | #DIV/0!         |
| DOHH                                                                                          | 0,000408406 | 0,187504123 | 0,188 | 0,035 | 1           | 1,138791889   | 0,87812357      | 5,371428571     |
| ZBED4                                                                                         | 7,93423E-07 | 0,187258939 | 0,188 | 0,016 | 0,016742011 | 1,138598369   | 0,878272819     | 11,75           |
| ERG28                                                                                         | 1,37797E-05 | 0,18715948  | 0,219 | 0,031 | 0,29076515  | 1,138519878   | 0,878333369     | 7,064516129     |
| NEIL2                                                                                         | 2,17326E-05 | 0,187101546 | 0,156 | 0,016 | 0,458580025 | 1,138474159   | 0,878368641     | 9,75            |
| ATF7                                                                                          | 0,011968519 | 0,187062562 | 0,25  | 0,09  | 1           | 1,138443396   | 0,878392376     | 2,777777778     |

Supplementary Table 1

| Differentially expressed genes_adjacent-skin-XL_comparing SC-Keloid vs. (SC-Myel, SC-Nonmyel) |             |             |       |       |             |               |                 |                 |
|-----------------------------------------------------------------------------------------------|-------------|-------------|-------|-------|-------------|---------------|-----------------|-----------------|
| gene                                                                                          | p_val       | avg_log2FC  | pct.1 | pct.2 | p_val_adj   | Foldchange_UP | Foldchange_DOWN | Ratio_pct1_pct2 |
| MAGED1                                                                                        | 1,03141E-06 | 0,187047886 | 0,406 | 0,082 | 0,021763787 | 1,138431816   | 0,878401312     | 4,951219512     |
| GLMP                                                                                          | 2,27357E-09 | 0,186868844 | 0,375 | 0,047 | 4,79746E-05 | 1,138290542   | 0,87851033      | 7,978723404     |
| NKIRAS1                                                                                       | 0,017290773 | 0,186730523 | 0,094 | 0,02  | 1           | 1,138181412   | 0,878594563     | 4,7             |
| TRAPPC3                                                                                       | 3,92226E-06 | 0,186423138 | 0,375 | 0,078 | 0,082763591 | 1,137938933   | 0,878781779     | 4,807692308     |
| MFN1                                                                                          | 4,59733E-07 | 0,186238652 | 0,312 | 0,047 | 0,009700817 | 1,137793427   | 0,878894161     | 6,638297872     |
| PGRMC2                                                                                        | 0,014854014 | 0,186018376 | 0,406 | 0,184 | 1           | 1,137619718   | 0,879028364     | 2,206521739     |
| ARHGAP4                                                                                       | 0,221475664 | 0,185985968 | 0,031 | 0,008 | 1           | 1,137594163   | 0,879048111     | 3,875           |
| MANBAL                                                                                        | 1,03113E-06 | 0,185743859 | 0,375 | 0,07  | 0,021757888 | 1,137403271   | 0,879195642     | 5,357142857     |
| DGUOK-AS1                                                                                     | 3,67695E-07 | 0,185710818 | 0,156 | 0,008 | 0,007758733 | 1,137377222   | 0,879215778     | 19,5            |
| ZNF341                                                                                        | 0,079594089 | 0,185660745 | 0,031 | 0,004 | 1           | 1,137337747   | 0,879246295     | 7,75            |
| PPP1CB                                                                                        | 0,006321051 | 0,185523657 | 0,75  | 0,363 | 1           | 1,13722968    | 0,879329847     | 2,066115702     |
| GPS2                                                                                          | 0,002382773 | 0,185484655 | 0,469 | 0,184 | 1           | 1,137198937   | 0,879353618     | 2,548913043     |
| RFXANK                                                                                        | 7,80539E-08 | 0,185451089 | 0,375 | 0,059 | 0,001647015 | 1,137172479   | 0,879374078     | 6,355932203     |
| TMCC1                                                                                         | 6,4372E-05  | 0,185432097 | 0,188 | 0,027 | 1           | 1,137157508   | 0,879385655     | 6,962962963     |
| WAC-AS1                                                                                       | 2,03294E-05 | 0,185383574 | 0,156 | 0,016 | 0,428970333 | 1,137119263   | 0,879415232     | 9,75            |
| CRTC1                                                                                         | 0,039090354 | 0,185236063 | 0,125 | 0,039 | 1           | 1,137003002   | 0,879505154     | 3,205128205     |
| PET100                                                                                        | 0,00395393  | 0,185149349 | 0,625 | 0,277 | 1           | 1,136934663   | 0,879558019     | 2,25631769      |
| PDE7A                                                                                         | 0,000773943 | 0,185118387 | 0,156 | 0,027 | 1           | 1,136910264   | 0,879576895     | 5,777777778     |
| RGL3                                                                                          | 0,079594089 | 0,184961113 | 0,031 | 0,004 | 1           | 1,136786331   | 0,879672787     | 7,75            |
| GOLIM4                                                                                        | 0,000218057 | 0,184884009 | 0,406 | 0,121 | 1           | 1,136725578   | 0,879719802     | 3,355371901     |
| CKMT2-AS1                                                                                     | 0,082995684 | 0,184820331 | 0,062 | 0,016 | 1           | 1,136675407   | 0,879758631     | 3,875           |
| PNKP                                                                                          | 3,77747E-08 | 0,184733473 | 0,25  | 0,023 | 0,000797083 | 1,136606974   | 0,879811599     | 10,86956522     |
| SS18L2                                                                                        | 0,000248368 | 0,184728328 | 0,312 | 0,082 | 1           | 1,136602921   | 0,879814737     | 3,804878049     |
| SCAMP3                                                                                        | 2,7063E-07  | 0,184546549 | 0,344 | 0,055 | 0,00571057  | 1,136459718   | 0,8799256       | 6,254545455     |
| C19orf73                                                                                      | 3,67695E-07 | 0,184526001 | 0,156 | 0,008 | 0,007758733 | 1,136443532   | 0,879938133     | 19,5            |
| URI1                                                                                          | 8,37081E-05 | 0,184377109 | 0,5   | 0,16  | 1           | 1,136326252   | 0,880028951     | 3,125           |
| ARFGAP3                                                                                       | 1,65634E-05 | 0,18428557  | 0,594 | 0,176 | 0,349505    | 1,136254155   | 0,880084791     | 3,375           |
| AP3D1                                                                                         | 0,000255579 | 0,184077068 | 0,375 | 0,109 | 1           | 1,136089952   | 0,880211992     | 3,440366972     |
| NPRL3                                                                                         | 8,08168E-09 | 0,183725373 | 0,438 | 0,07  | 0,000170532 | 1,135813034   | 0,880426593     | 6,257142857     |
| CD4                                                                                           | 0,000362786 | 0,183622329 | 0,25  | 0,059 | 1           | 1,135731912   | 0,880489479     | 4,237288136     |

Supplementary Table 1

| Differentially expressed genes_adjacent-skin-XL_comparing SC-Keloid vs. (SC-Myel, SC-Nonmyel) |             |             |       |       |             |               |                 |                 |
|-----------------------------------------------------------------------------------------------|-------------|-------------|-------|-------|-------------|---------------|-----------------|-----------------|
| gene                                                                                          | p_val       | avg_log2FC  | pct.1 | pct.2 | p_val_adj   | Foldchange_UP | Foldchange_DOWN | Ratio_pct1_pct2 |
| SMARCC1                                                                                       | 1,79728E-06 | 0,183310097 | 0,344 | 0,062 | 0,037924443 | 1,135486141   | 0,880680058     | 5,548387097     |
| ZNF626                                                                                        | 0,000811202 | 0,18324056  | 0,156 | 0,027 | 1           | 1,135431413   | 0,880722507     | 5,777777778     |
| ACBD6                                                                                         | 5,25917E-07 | 0,183139943 | 0,438 | 0,09  | 0,011097368 | 1,135352227   | 0,880783933     | 4,866666667     |
| MED4                                                                                          | 6,07559E-05 | 0,183118885 | 0,438 | 0,121 | 1           | 1,135335656   | 0,880796789     | 3,619834711     |
| HADHA                                                                                         | 1,47773E-05 | 0,183085683 | 0,625 | 0,188 | 0,311815116 | 1,135309527   | 0,88081706      | 3,324468085     |
| SMYD2                                                                                         | 4,79742E-08 | 0,183013607 | 0,25  | 0,023 | 0,001012303 | 1,135252809   | 0,880861066     | 10,86956522     |
| PMM1                                                                                          | 6,4022E-08  | 0,182998893 | 0,375 | 0,059 | 0,001350927 | 1,135241231   | 0,88087005      | 6,355932203     |
| SDK1                                                                                          | 0,00737039  | 0,182975162 | 0,094 | 0,016 | 1           | 1,135222557   | 0,88088454      | 5,875           |
| PLPBP                                                                                         | 0,001819944 | 0,182966218 | 0,25  | 0,07  | 1           | 1,135215519   | 0,880890001     | 3,571428571     |
| HKDC1                                                                                         | 3,86379E-06 | 0,1827802   | 0,156 | 0,012 | 0,081529835 | 1,135069157   | 0,881003588     | 13              |
| CYC1                                                                                          | 2,07373E-05 | 0,182676971 | 0,656 | 0,207 | 0,437578288 | 1,134987942   | 0,881066629     | 3,169082126     |
| AARS1                                                                                         | 7,34732E-05 | 0,182624903 | 0,406 | 0,113 | 1           | 1,13494698    | 0,881098428     | 3,592920354     |
| ATAD3A                                                                                        | 5,98372E-09 | 0,182574851 | 0,344 | 0,043 | 0,000126263 | 1,134907606   | 0,881128996     | 8               |
| COPB1                                                                                         | 3,85019E-06 | 0,182531488 | 0,531 | 0,137 | 0,081242781 | 1,134873494   | 0,881155481     | 3,875912409     |
| NDUFA5                                                                                        | 0,002685982 | 0,182514868 | 0,562 | 0,23  | 1           | 1,134860421   | 0,881165632     | 2,443478261     |
| INSC                                                                                          | 0,023224909 | 0,182450784 | 0,375 | 0,168 | 1           | 1,134810012   | 0,881204774     | 2,232142857     |
| HNRNPD                                                                                        | 0,014648368 | 0,182401791 | 0,719 | 0,375 | 1           | 1,134771475   | 0,8812347       | 1,917333333     |
| CDC26                                                                                         | 8,41178E-05 | 0,182339799 | 0,375 | 0,098 | 1           | 1,134722716   | 0,881272566     | 3,826530612     |
| MTHFD2L                                                                                       | 9,7095E-07  | 0,182219655 | 0,219 | 0,023 | 0,020488018 | 1,134628223   | 0,88134596      | 9,52173913      |
| BAG2                                                                                          | 1,33967E-08 | 0,182144622 | 0,125 | 0     | 0,000282684 | 1,134569214   | 0,881391799     | #DIV/0!         |
| ARMT1                                                                                         | 1,00234E-06 | 0,181934354 | 0,219 | 0,023 | 0,021150457 | 1,134403865   | 0,881520269     | 9,52173913      |
| SPG11                                                                                         | 0,00082778  | 0,18171337  | 0,188 | 0,039 | 1           | 1,134230117   | 0,881655305     | 4,820512821     |
| SLC35A4                                                                                       | 2,28053E-05 | 0,181397039 | 0,25  | 0,043 | 0,481213619 | 1,133981449   | 0,881848642     | 5,813953488     |
| MSRA                                                                                          | 4,50344E-06 | 0,181301694 | 0,188 | 0,02  | 0,095027166 | 1,133906509   | 0,881906923     | 9,4             |
| PIGM                                                                                          | 0,001520602 | 0,181271603 | 0,125 | 0,02  | 1           | 1,133882859   | 0,881925317     | 6,25            |
| FAAP100                                                                                       | 8,91574E-05 | 0,181202033 | 0,156 | 0,02  | 1           | 1,133828181   | 0,881967847     | 7,8             |
| TMEM161B                                                                                      | 0,000108998 | 0,181189143 | 0,125 | 0,012 | 1           | 1,133818051   | 0,881975727     | 10,41666667     |
| LMAN1                                                                                         | 0,000842458 | 0,181179293 | 0,719 | 0,293 | 1           | 1,13381031    | 0,881981749     | 2,453924915     |
| CC2D2A                                                                                        | 1,37797E-05 | 0,181029653 | 0,219 | 0,031 | 0,29076515  | 1,133692715   | 0,882073235     | 7,064516129     |
| ARMC1                                                                                         | 1,52765E-07 | 0,180997135 | 0,375 | 0,062 | 0,003223491 | 1,133667161   | 0,882093117     | 6,048387097     |

Supplementary Table 1

| Differentially expressed genes_adjacent-skin-XL_comparing SC-Keloid vs. (SC-Myel, SC-Nonmyel) |             |             |       |       |             |               |                 |                 |
|-----------------------------------------------------------------------------------------------|-------------|-------------|-------|-------|-------------|---------------|-----------------|-----------------|
| gene                                                                                          | p_val       | avg_log2FC  | pct.1 | pct.2 | p_val_adj   | Foldchange_UP | Foldchange_DOWN | Ratio_pct1_pct2 |
| ERAP2                                                                                         | 1,53871E-06 | 0,180950282 | 0,344 | 0,062 | 0,032468255 | 1,133630345   | 0,882121764     | 5,548387097     |
| AIMP2                                                                                         | 9,93063E-09 | 0,180922689 | 0,312 | 0,035 | 0,000209546 | 1,133608664   | 0,882138636     | 8,914285714     |
| MRS2                                                                                          | 4,02048E-10 | 0,180814172 | 0,312 | 0,027 | 8,48362E-06 | 1,133523399   | 0,882204991     | 11,55555556     |
| LRRC55                                                                                        | 0,004841742 | 0,180578281 | 0,031 | 0     | 1           | 1,133338074   | 0,88234925      | #DIV/0!         |
| SLFN12                                                                                        | 4,41731E-05 | 0,180545504 | 0,25  | 0,047 | 0,932096561 | 1,133312326   | 0,882369296     | 5,319148936     |
| ARL1                                                                                          | 0,000109835 | 0,180537773 | 0,531 | 0,176 | 1           | 1,133306253   | 0,882374025     | 3,017045455     |
| BLOC1S1                                                                                       | 2,05332E-05 | 0,180337283 | 0,844 | 0,293 | 0,433271519 | 1,13314877    | 0,882496656     | 2,880546075     |
| DARS2                                                                                         | 0,002594281 | 0,180336029 | 0,094 | 0,012 | 1           | 1,133147784   | 0,882497424     | 7,833333333     |
| RCC2                                                                                          | 2,25732E-05 | 0,180302891 | 0,406 | 0,102 | 0,476317656 | 1,133121757   | 0,882517694     | 3,980392157     |
| VDAC3                                                                                         | 4,01187E-05 | 0,180295487 | 0,469 | 0,129 | 0,846544503 | 1,133115942   | 0,882522223     | 3,635658915     |
| TTL                                                                                           | 9,9101E-06  | 0,180290698 | 0,281 | 0,051 | 0,209112923 | 1,133112181   | 0,882525152     | 5,509803922     |
| EEF1A1                                                                                        | 0,008132866 | 0,180147266 | 1     | 0,973 | 1           | 1,132999532   | 0,882612897     | 1,027749229     |
| NAA30                                                                                         | 0,003136549 | 0,18014644  | 0,188 | 0,047 | 1           | 1,132998884   | 0,882613403     | 4               |
| ODF2L                                                                                         | 4,08635E-08 | 0,180124772 | 0,281 | 0,031 | 0,00086226  | 1,132981867   | 0,882626659     | 9,064516129     |
| AIMP1                                                                                         | 5,12068E-06 | 0,179754673 | 0,625 | 0,184 | 0,108051397 | 1,132691258   | 0,882853111     | 3,39673913      |
| GCC1                                                                                          | 4,50344E-06 | 0,179650596 | 0,188 | 0,02  | 0,095027166 | 1,132609547   | 0,882916803     | 9,4             |
| IK                                                                                            | 4,00808E-05 | 0,179593546 | 0,625 | 0,191 | 0,84574561  | 1,13256476    | 0,882951718     | 3,272251309     |
| PYCR3                                                                                         | 2,70596E-09 | 0,179588324 | 0,219 | 0,012 | 5,70985E-05 | 1,13256066    | 0,882954914     | 18,25           |
| ZNF439                                                                                        | 2,24684E-05 | 0,179267171 | 0,156 | 0,016 | 0,474104712 | 1,132308573   | 0,883151487     | 9,75            |
| SACS                                                                                          | 3,91499E-06 | 0,179025169 | 0,219 | 0,027 | 0,082610119 | 1,132118653   | 0,883299641     | 8,111111111     |
| FOXC2                                                                                         | 0,01346698  | 0,17900061  | 0,062 | 0,008 | 1           | 1,132099381   | 0,883314678     | 7,75            |
| RWDD3                                                                                         | 2,55882E-05 | 0,17835821  | 0,312 | 0,066 | 0,539936516 | 1,131595394   | 0,883708086     | 4,727272727     |
| FN3KRP                                                                                        | 2,54624E-06 | 0,178354078 | 0,25  | 0,035 | 0,053728244 | 1,131592154   | 0,883710617     | 7,142857143     |
| NOL3                                                                                          | 2,59108E-09 | 0,17825487  | 0,219 | 0,012 | 5,46744E-05 | 1,131514341   | 0,883771388     | 18,25           |
| THAP4                                                                                         | 2,91341E-06 | 0,178104952 | 0,25  | 0,035 | 0,061475767 | 1,131396766   | 0,88386323      | 7,142857143     |
| KIAA1143                                                                                      | 2,31819E-05 | 0,178095993 | 0,312 | 0,066 | 0,489161611 | 1,13138974    | 0,883868719     | 4,727272727     |
| CISD1                                                                                         | 5,14755E-05 | 0,17806718  | 0,281 | 0,059 | 1           | 1,131367144   | 0,883886372     | 4,762711864     |
| MAF1                                                                                          | 0,000175504 | 0,178006579 | 0,531 | 0,176 | 1           | 1,131319622   | 0,8839235       | 3,017045455     |
| TMEM218                                                                                       | 6,23796E-07 | 0,178000846 | 0,281 | 0,039 | 0,013162728 | 1,131315126   | 0,883927013     | 7,205128205     |
| SURF1                                                                                         | 0,00022545  | 0,177922607 | 0,438 | 0,137 | 1           | 1,131253775   | 0,88397495      | 3,197080292     |

Supplementary Table 1

| Differentially expressed genes_adjacent-skin-XL_comparing SC-Keloid vs. (SC-Myel, SC-Nonmyel) |             |             |       |       |             |               |                 |                 |
|-----------------------------------------------------------------------------------------------|-------------|-------------|-------|-------|-------------|---------------|-----------------|-----------------|
| gene                                                                                          | p_val       | avg_log2FC  | pct.1 | pct.2 | p_val_adj   | Foldchange_UP | Foldchange_DOWN | Ratio_pct1_pct2 |
| G6PD                                                                                          | 6,4372E-05  | 0,177857547 | 0,188 | 0,027 | 1           | 1,131202762   | 0,884014815     | 6,962962963     |
| B3GALT4                                                                                       | 7,20082E-09 | 0,177774612 | 0,25  | 0,02  | 0,000151945 | 1,131137735   | 0,884065635     | 12,5            |
| ALG8                                                                                          | 2,17664E-05 | 0,177768791 | 0,25  | 0,043 | 0,45929188  | 1,131133171   | 0,884069202     | 5,813953488     |
| LACC1                                                                                         | 4,80439E-05 | 0,177643808 | 0,094 | 0,004 | 1           | 1,131035183   | 0,884145794     | 23,5            |
| TMEM203                                                                                       | 4,59438E-06 | 0,177345919 | 0,281 | 0,047 | 0,096945964 | 1,13080167    | 0,884328372     | 5,978723404     |
| TYSND1                                                                                        | 0,001808729 | 0,177183303 | 0,156 | 0,031 | 1           | 1,130674217   | 0,884428056     | 5,032258065     |
| USP5                                                                                          | 4,22524E-05 | 0,177119242 | 0,219 | 0,035 | 0,891567246 | 1,130624012   | 0,884467329     | 6,257142857     |
| XRN2                                                                                          | 2,08946E-06 | 0,176911416 | 0,562 | 0,145 | 0,044089784 | 1,130461152   | 0,88459475      | 3,875862069     |
| MRM2                                                                                          | 4,48152E-08 | 0,176718927 | 0,25  | 0,023 | 0,000945646 | 1,130310333   | 0,884712783     | 10,86956522     |
| HDAC1                                                                                         | 0,000100733 | 0,176605492 | 0,281 | 0,062 | 1           | 1,130221464   | 0,884782348     | 4,532258065     |
| TAF1B                                                                                         | 0,011239937 | 0,176209728 | 0,156 | 0,043 | 1           | 1,12991146    | 0,885025097     | 3,627906977     |
| DEGS1                                                                                         | 0,000482217 | 0,175933142 | 0,719 | 0,293 | 1           | 1,12969486    | 0,885194786     | 2,453924915     |
| SLC50A1                                                                                       | 1,13961E-07 | 0,175777406 | 0,344 | 0,051 | 0,002404685 | 1,129572919   | 0,885290346     | 6,745098039     |
| ANLN                                                                                          | 1,33967E-08 | 0,175737702 | 0,125 | 0     | 0,000282684 | 1,129541832   | 0,88531471      | #DIV/0!         |
| SMIM4                                                                                         | 3,9894E-06  | 0,175725805 | 0,344 | 0,066 | 0,084180249 | 1,129532518   | 0,885322011     | 5,212121212     |
| PCOLCE2                                                                                       | 1,33967E-08 | 0,175662262 | 0,125 | 0     | 0,000282684 | 1,129482769   | 0,885361005     | #DIV/0!         |
| GNB1L                                                                                         | 4,80439E-05 | 0,175311332 | 0,094 | 0,004 | 1           | 1,12920806    | 0,885576392     | 23,5            |
| SEZ6L2                                                                                        | 7,96166E-09 | 0,175261686 | 0,188 | 0,008 | 0,000167999 | 1,129169203   | 0,885606867     | 23,5            |
| TMEM39B                                                                                       | 0,00050526  | 0,175227582 | 0,094 | 0,008 | 1           | 1,12914251    | 0,885627802     | 11,75           |
| CPT2                                                                                          | 4,80439E-05 | 0,175178702 | 0,094 | 0,004 | 1           | 1,129104254   | 0,885657809     | 23,5            |
| BACE1                                                                                         | 0,000209017 | 0,175160099 | 0,25  | 0,055 | 1           | 1,129089695   | 0,885669229     | 4,545454545     |
| DPM1                                                                                          | 3,15362E-05 | 0,174997108 | 0,406 | 0,102 | 0,665445267 | 1,128962142   | 0,885769295     | 3,980392157     |
| EIF4G1                                                                                        | 0,002569616 | 0,17490818  | 0,5   | 0,199 | 1           | 1,128892554   | 0,885823896     | 2,512562814     |
| TMUB1                                                                                         | 2,08505E-09 | 0,174890959 | 0,375 | 0,047 | 4,39966E-05 | 1,128879079   | 0,885834469     | 7,978723404     |
| WDR54                                                                                         | 1,30636E-05 | 0,174872464 | 0,219 | 0,031 | 0,275655185 | 1,128864607   | 0,885845826     | 7,064516129     |
| TRMU                                                                                          | 8,40691E-07 | 0,174817101 | 0,25  | 0,031 | 0,017739423 | 1,128821289   | 0,88587982      | 8,064516129     |
| MAP1LC3A                                                                                      | 0,001178868 | 0,174740357 | 0,656 | 0,266 | 1           | 1,128761243   | 0,885926946     | 2,466165414     |
| KATNB1                                                                                        | 2,66394E-10 | 0,174547215 | 0,188 | 0,004 | 5,62118E-06 | 1,128610139   | 0,886045558     | 47              |
| ANAPC2                                                                                        | 0,006725366 | 0,174463524 | 0,156 | 0,039 | 1           | 1,12854467    | 0,886096959     | 4               |
| MMP11                                                                                         | 2,66394E-10 | 0,174454706 | 0,188 | 0,004 | 5,62118E-06 | 1,128537772   | 0,886102375     | 47              |

Supplementary Table 1

| Differentially expressed genes_adjacent-skin-XL_comparing SC-Keloid vs. (SC-Myel, SC-Nonmyel) |             |             |       |       |             |               |                 |                 |
|-----------------------------------------------------------------------------------------------|-------------|-------------|-------|-------|-------------|---------------|-----------------|-----------------|
| gene                                                                                          | p_val       | avg_log2FC  | pct.1 | pct.2 | p_val_adj   | Foldchange_UP | Foldchange_DOWN | Ratio_pct1_pct2 |
| LTBP2                                                                                         | 1,88366E-07 | 0,174374007 | 0,281 | 0,035 | 0,003974718 | 1,128474647   | 0,886151942     | 8,028571429     |
| ZNF485                                                                                        | 9,12354E-07 | 0,174373288 | 0,094 | 0     | 0,019251588 | 1,128474085   | 0,886152383     | #DIV/0!         |
| NAGK                                                                                          | 1,57893E-06 | 0,174343756 | 0,469 | 0,105 | 0,033317012 | 1,128450986   | 0,886170523     | 4,466666667     |
| HPCAL1                                                                                        | 0,000244445 | 0,174250165 | 0,438 | 0,137 | 1           | 1,128377783   | 0,886228013     | 3,197080292     |
| LYRM4                                                                                         | 0,000922105 | 0,173898905 | 0,281 | 0,078 | 1           | 1,128103084   | 0,886443814     | 3,602564103     |
| PUSL1                                                                                         | 9,17361E-07 | 0,173894749 | 0,188 | 0,016 | 0,019357231 | 1,128099834   | 0,886446367     | 11,75           |
| TRAM2-AS1                                                                                     | 0,003321984 | 0,173795728 | 0,156 | 0,035 | 1           | 1,128022409   | 0,886507211     | 4,457142857     |
| MVB12B                                                                                        | 2,43721E-05 | 0,173779294 | 0,344 | 0,078 | 0,514276546 | 1,12800956    | 0,88651731      | 4,41025641      |
| POGLUT3                                                                                       | 0,000196043 | 0,173711652 | 0,219 | 0,043 | 1           | 1,127956673   | 0,886558876     | 5,093023256     |
| TOR4A                                                                                         | 9,12354E-07 | 0,173644147 | 0,094 | 0     | 0,019251588 | 1,127903896   | 0,88660036      | #DIV/0!         |
| CCDC74B                                                                                       | 7,96166E-09 | 0,173558453 | 0,188 | 0,008 | 0,000167999 | 1,127836902   | 0,886653024     | 23,5            |
| CLP1                                                                                          | 0,082995684 | 0,173481933 | 0,062 | 0,016 | 1           | 1,127777084   | 0,886700053     | 3,875           |
| PHETA2                                                                                        | 1,57978E-10 | 0,173264924 | 0,219 | 0,008 | 3,33348E-06 | 1,127607457   | 0,88683344      | 27,375          |
| MAFG-DT                                                                                       | 0,013054404 | 0,173245809 | 0,062 | 0,008 | 1           | 1,127592517   | 0,88684519      | 7,75            |
| MPV17                                                                                         | 3,55058E-06 | 0,17319955  | 0,375 | 0,078 | 0,074920718 | 1,127556362   | 0,886873627     | 4,807692308     |
| CCDC86                                                                                        | 4,35951E-06 | 0,172919798 | 0,188 | 0,02  | 0,091990018 | 1,12733774    | 0,887045616     | 9,4             |
| DYNC1H1                                                                                       | 0,006256954 | 0,172913679 | 0,812 | 0,402 | 1           | 1,127332958   | 0,887049379     | 2,019900498     |
| SNX8                                                                                          | 4,80509E-06 | 0,172794704 | 0,188 | 0,02  | 0,101392141 | 1,127239994   | 0,887122534     | 9,4             |
| PTRH1                                                                                         | 4,14927E-06 | 0,172595025 | 0,219 | 0,027 | 0,087553714 | 1,127083987   | 0,887245326     | 8,111111111     |
| ROPN1B                                                                                        | 3,31594E-06 | 0,172538325 | 0,156 | 0,012 | 0,069969667 | 1,127039692   | 0,887280197     | 13              |
| CBX1                                                                                          | 6,66882E-07 | 0,172518503 | 0,469 | 0,102 | 0,014071873 | 1,127024207   | 0,887292388     | 4,598039216     |
| C3orf14                                                                                       | 5,26316E-05 | 0,17242834  | 0,25  | 0,047 | 1           | 1,126953774   | 0,887347842     | 5,319148936     |
| HS3ST3A1                                                                                      | 0,005333601 | 0,17233841  | 0,188 | 0,051 | 1           | 1,126883528   | 0,887403157     | 3,68627451      |
| PACC1                                                                                         | 0,000157414 | 0,172316481 | 0,188 | 0,031 | 1           | 1,126866399   | 0,887416645     | 6,064516129     |
| GGCT                                                                                          | 0,000119568 | 0,172080387 | 0,438 | 0,129 | 1           | 1,126682006   | 0,887561881     | 3,395348837     |
| SEC16A                                                                                        | 0,004999094 | 0,171734168 | 0,188 | 0,051 | 1           | 1,126411656   | 0,887774904     | 3,68627451      |
| RRAGB                                                                                         | 0,001793335 | 0,171624443 | 0,188 | 0,043 | 1           | 1,12632599    | 0,887842427     | 4,372093023     |
| AAMDC                                                                                         | 8,13591E-07 | 0,171310169 | 0,562 | 0,137 | 0,017167592 | 1,126080659   | 0,888035854     | 4,102189781     |
| BPHL                                                                                          | 1,37797E-05 | 0,171169197 | 0,219 | 0,031 | 0,29076515  | 1,125970631   | 0,888122632     | 7,064516129     |
| SCT                                                                                           | 9,12354E-07 | 0,171136011 | 0,094 | 0     | 0,019251588 | 1,12594473    | 0,888143062     | #DIV/0!         |

Supplementary Table 1

| Differentially expressed genes_adjacent-skin-XL_comparing SC-Keloid vs. (SC-Myel, SC-Nonmyel) |             |             |       |       |             |               |                 |                 |
|-----------------------------------------------------------------------------------------------|-------------|-------------|-------|-------|-------------|---------------|-----------------|-----------------|
| gene                                                                                          | p_val       | avg_log2FC  | pct.1 | pct.2 | p_val_adj   | Foldchange_UP | Foldchange_DOWN | Ratio_pct1_pct2 |
| ZNHIT3                                                                                        | 1,39804E-06 | 0,17106725  | 0,406 | 0,082 | 0,029500136 | 1,125891067   | 0,888185393     | 4,951219512     |
| SPRY4                                                                                         | 1,51098E-05 | 0,171034276 | 0,125 | 0,008 | 0,318831333 | 1,125865335   | 0,888205693     | 15,625          |
| ITGB5                                                                                         | 0,001481966 | 0,170716707 | 0,125 | 0,02  | 1           | 1,125617534   | 0,888401229     | 6,25            |
| EREG                                                                                          | 0,004841742 | 0,170607404 | 0,031 | 0     | 1           | 1,125532257   | 0,888468539     | #DIV/0!         |
| NRAS                                                                                          | 1,01508E-08 | 0,170424051 | 0,281 | 0,027 | 0,000214192 | 1,125389221   | 0,888581462     | 10,40740741     |
| TRAPPC12                                                                                      | 2,60971E-05 | 0,170368877 | 0,312 | 0,066 | 0,550675877 | 1,125346183   | 0,888615446     | 4,727272727     |
| RABEP2                                                                                        | 1,00234E-06 | 0,170345843 | 0,219 | 0,023 | 0,021150457 | 1,125328216   | 0,888629633     | 9,52173913      |
| MIB1                                                                                          | 0,002509791 | 0,17032331  | 0,344 | 0,121 | 1           | 1,12531064    | 0,888643512     | 2,842975207     |
| GLOD4                                                                                         | 1,42359E-11 | 0,170194827 | 0,5   | 0,066 | 3,00392E-07 | 1,125210427   | 0,888722657     | 7,575757576     |
| CD109                                                                                         | 3,86379E-06 | 0,170057837 | 0,156 | 0,012 | 0,081529835 | 1,125103589   | 0,888807048     | 13              |
| CACNA1D                                                                                       | 9,12354E-07 | 0,170040751 | 0,094 | 0     | 0,019251588 | 1,125090264   | 0,888817575     | #DIV/0!         |
| TPX2                                                                                          | 4,80439E-05 | 0,169987852 | 0,094 | 0,004 | 1           | 1,125049012   | 0,888850165     | 23,5            |
| H1-4                                                                                          | 9,45561E-05 | 0,169726397 | 0,156 | 0,02  | 1           | 1,124845141   | 0,889011264     | 7,8             |
| ELAC2                                                                                         | 4,0305E-06  | 0,169585746 | 0,219 | 0,027 | 0,085047498 | 1,124735483   | 0,889097939     | 8,111111111     |
| NUSAP1                                                                                        | 0,01346698  | 0,169554476 | 0,062 | 0,008 | 1           | 1,124711104   | 0,889117211     | 7,75            |
| UBALD2                                                                                        | 7,16027E-05 | 0,169548093 | 0,688 | 0,23  | 1           | 1,124706129   | 0,889121144     | 2,991304348     |
| TOP2A                                                                                         | 0,079594089 | 0,169367314 | 0,031 | 0,004 | 1           | 1,124565205   | 0,889232563     | 7,75            |
| MYBL1                                                                                         | 0,000466094 | 0,169303358 | 0,125 | 0,016 | 1           | 1,124515353   | 0,889271985     | 7,8125          |
| TSPAN6                                                                                        | 2,33422E-05 | 0,169277103 | 0,25  | 0,043 | 0,492544426 | 1,124494888   | 0,889288169     | 5,813953488     |
| LMO4                                                                                          | 0,003066018 | 0,169236936 | 0,719 | 0,344 | 1           | 1,124463581   | 0,889312929     | 2,090116279     |
| EBAG9                                                                                         | 1,26917E-05 | 0,169069367 | 0,281 | 0,051 | 0,26780859  | 1,124332982   | 0,889416228     | 5,509803922     |
| ORC6                                                                                          | 0,039886012 | 0,168897364 | 0,062 | 0,012 | 1           | 1,124198943   | 0,889522273     | 5,166666667     |
| PMS2                                                                                          | 0,003731537 | 0,168893281 | 0,156 | 0,035 | 1           | 1,124195761   | 0,889524791     | 4,457142857     |
| ARHGAP22                                                                                      | 2,66394E-10 | 0,168851482 | 0,188 | 0,004 | 5,62118E-06 | 1,124163191   | 0,889550563     | 47              |
| TAF9                                                                                          | 7,40997E-10 | 0,168555019 | 0,469 | 0,07  | 1,56358E-05 | 1,123932208   | 0,889733378     | 6,7             |
| SHROOM4                                                                                       | 0,003660239 | 0,168538874 | 0,156 | 0,035 | 1           | 1,12391963    | 0,889743335     | 4,457142857     |
| SLURP1                                                                                        | 0,082317662 | 0,168497362 | 0,031 | 0,004 | 1           | 1,123887291   | 0,889768937     | 7,75            |
| TNFSF12                                                                                       | 0,000107903 | 0,168438089 | 0,562 | 0,18  | 1           | 1,123841117   | 0,889805493     | 3,122222222     |
| FAM8A1                                                                                        | 0,115638666 | 0,168364691 | 0,156 | 0,07  | 1           | 1,123783942   | 0,889850764     | 2,228571429     |
| RABGGTB                                                                                       | 6,4529E-05  | 0,168354255 | 0,438 | 0,121 | 1           | 1,123775814   | 0,889857201     | 3,619834711     |

Supplementary Table 1

| Differentially expressed genes_adjacent-skin-XL_comparing SC-Keloid vs. (SC-Myel, SC-Nonmyel) |             |             |       |       |             |               |                 |                 |
|-----------------------------------------------------------------------------------------------|-------------|-------------|-------|-------|-------------|---------------|-----------------|-----------------|
| gene                                                                                          | p_val       | avg_log2FC  | pct.1 | pct.2 | p_val_adj   | Foldchange_UP | Foldchange_DOWN | Ratio_pct1_pct2 |
| AKR1B1                                                                                        | 7,61677E-06 | 0,16835301  | 0,531 | 0,141 | 0,160721394 | 1,123774844   | 0,889857969     | 3,765957447     |
| TICAM1                                                                                        | 3,57983E-06 | 0,168267263 | 0,156 | 0,012 | 0,075538003 | 1,123708054   | 0,88991086      | 13              |
| TMEM164                                                                                       | 3,67695E-07 | 0,168163232 | 0,156 | 0,008 | 0,007758733 | 1,123627027   | 0,889975033     | 19,5            |
| DNAJC7                                                                                        | 6,43053E-05 | 0,167597685 | 0,531 | 0,168 | 1           | 1,123186643   | 0,890323978     | 3,160714286     |
| ANTXR1                                                                                        | 0,004132388 | 0,167458289 | 0,281 | 0,094 | 1           | 1,123078124   | 0,890410006     | 2,989361702     |
| CENPK                                                                                         | 9,06462E-07 | 0,167111362 | 0,125 | 0,004 | 0,019127258 | 1,122808088   | 0,890624151     | 31,25           |
| NTAQ1                                                                                         | 3,86379E-06 | 0,167069708 | 0,156 | 0,012 | 0,081529835 | 1,122775671   | 0,890649865     | 13              |
| ASL                                                                                           | 0,000689826 | 0,16682173  | 0,25  | 0,062 | 1           | 1,122582699   | 0,890802968     | 4,032258065     |
| CDR2                                                                                          | 1,16035E-05 | 0,166780093 | 0,281 | 0,051 | 0,244846285 | 1,122550301   | 0,890828677     | 5,509803922     |
| ZNF688                                                                                        | 1,74824E-09 | 0,166653105 | 0,281 | 0,023 | 3,68897E-05 | 1,122451497   | 0,890907093     | 12,2173913      |
| STXBP3                                                                                        | 8,37038E-06 | 0,166521833 | 0,375 | 0,082 | 0,176623288 | 1,122349368   | 0,890988161     | 4,573170732     |
| PRECSIT                                                                                       | 4,5807E-05  | 0,166472053 | 0,094 | 0,004 | 0,966573495 | 1,122310643   | 0,891018905     | 23,5            |
| NBL1                                                                                          | 7,96166E-09 | 0,166208745 | 0,188 | 0,008 | 0,000167999 | 1,122105827   | 0,891181541     | 23,5            |
| DDX54                                                                                         | 1,54779E-07 | 0,166166817 | 0,312 | 0,043 | 0,003265999 | 1,122073217   | 0,891207441     | 7,255813953     |
| BOLA1                                                                                         | 2,11157E-07 | 0,166115497 | 0,219 | 0,02  | 0,00445563  | 1,122033303   | 0,891239143     | 10,95           |
| BICC1                                                                                         | 1,51098E-05 | 0,166080344 | 0,125 | 0,008 | 0,318831333 | 1,122005964   | 0,89126086      | 15,625          |
| CCNB1                                                                                         | 9,06462E-07 | 0,166074115 | 0,125 | 0,004 | 0,019127258 | 1,122001119   | 0,891264708     | 31,25           |
| TMEM101                                                                                       | 1,23864E-06 | 0,165772102 | 0,312 | 0,051 | 0,026136469 | 1,121766265   | 0,891451304     | 6,117647059     |
| DSCC1                                                                                         | 1,59386E-08 | 0,165715698 | 0,156 | 0,004 | 0,000336319 | 1,121722409   | 0,891486158     | 39              |
| ALG1                                                                                          | 1,11477E-07 | 0,165493297 | 0,188 | 0,012 | 0,002352284 | 1,121549501   | 0,891623597     | 15,6666667      |
| FBXL5                                                                                         | 1,98911E-06 | 0,165482261 | 0,406 | 0,086 | 0,04197219  | 1,121540922   | 0,891630417     | 4,720930233     |
| ZKSCAN7                                                                                       | 6,3574E-05  | 0,165458835 | 0,062 | 0     | 1           | 1,12152271    | 0,891644896     | #DIV/0!         |
| PHYH                                                                                          | 0,000576308 | 0,165423669 | 0,281 | 0,074 | 1           | 1,121495374   | 0,89166663      | 3,797297297     |
| FMNL3                                                                                         | 1,59772E-07 | 0,165374351 | 0,469 | 0,094 | 0,003371341 | 1,121457036   | 0,891697112     | 4,989361702     |
| PCDHGA12                                                                                      | 9,12354E-07 | 0,165239729 | 0,094 | 0     | 0,019251588 | 1,121352395   | 0,891780322     | #DIV/0!         |
| HAUS4                                                                                         | 0,000263702 | 0,165087304 | 0,281 | 0,07  | 1           | 1,121233927   | 0,891874546     | 4,014285714     |
| BBIP1                                                                                         | 0,00015856  | 0,165043498 | 0,312 | 0,078 | 1           | 1,121199882   | 0,891901628     | 4               |
| SLC39A10                                                                                      | 6,1182E-08  | 0,165038379 | 0,5   | 0,102 | 0,001291001 | 1,121195904   | 0,891904792     | 4,901960784     |
| MSANTD4                                                                                       | 6,93747E-09 | 0,164979603 | 0,25  | 0,02  | 0,000146388 | 1,121150227   | 0,89194113      | 12,5            |
| MRPL50                                                                                        | 1,8738E-08  | 0,164852004 | 0,469 | 0,082 | 0,000395392 | 1,121051071   | 0,892020021     | 5,719512195     |



Supplementary Table 1

| Differentially expressed genes_adjacent-skin-XL_comparing SC-Keloid vs. (SC-Myel, SC-Nonmyel) |             |             |       |       |             |               |                 |                 |
|-----------------------------------------------------------------------------------------------|-------------|-------------|-------|-------|-------------|---------------|-----------------|-----------------|
| gene                                                                                          | p_val       | avg_log2FC  | pct.1 | pct.2 | p_val_adj   | Foldchange_UP | Foldchange_DOWN | Ratio_pct1_pct2 |
| TMEM177                                                                                       | 1,57978E-10 | 0,164661146 | 0,219 | 0,008 | 3,33348E-06 | 1,120902774   | 0,892138036     | 27,375          |
| KLHL4                                                                                         | 9,12354E-07 | 0,164471826 | 0,094 | 0     | 0,019251588 | 1,120755692   | 0,892255116     | #DIV/0!         |
| C19orf48                                                                                      | 1,54041E-05 | 0,164398443 | 0,312 | 0,062 | 0,325042363 | 1,120698686   | 0,892300502     | 5,032258065     |
| NAXE                                                                                          | 0,000540084 | 0,164341931 | 0,281 | 0,074 | 1           | 1,120654788   | 0,892335455     | 3,797297297     |
| MSH2                                                                                          | 1,08924E-08 | 0,164336596 | 0,312 | 0,035 | 0,000229841 | 1,120650643   | 0,892338755     | 8,914285714     |
| NDUFAF2                                                                                       | 3,23417E-06 | 0,164309456 | 0,406 | 0,09  | 0,068244172 | 1,120629562   | 0,892355542     | 4,511111111     |
| MAMDC2                                                                                        | 0,057775912 | 0,16424958  | 0,125 | 0,043 | 1           | 1,120583053   | 0,892392578     | 2,906976744     |
| LNPK                                                                                          | 0,000292494 | 0,164108804 | 0,281 | 0,07  | 1           | 1,120473714   | 0,892479661     | 4,014285714     |
| ZNF444                                                                                        | 0,000301839 | 0,164080606 | 0,312 | 0,082 | 1           | 1,120451814   | 0,892497105     | 3,804878049     |
| METTL1                                                                                        | 3,57983E-06 | 0,164070492 | 0,156 | 0,012 | 0,075538003 | 1,120443959   | 0,892503362     | 13              |
| ARSD                                                                                          | 0,033163773 | 0,163935732 | 0,188 | 0,07  | 1           | 1,120339305   | 0,892586733     | 2,685714286     |
| FBXO32                                                                                        | 0,038934481 | 0,163853079 | 0,062 | 0,012 | 1           | 1,120275122   | 0,892637871     | 5,166666667     |
| HNRNPAB                                                                                       | 2,24349E-06 | 0,163684773 | 0,688 | 0,195 | 0,04733988  | 1,120144437   | 0,892742013     | 3,528205128     |
| PLIN3                                                                                         | 9,68728E-06 | 0,163593051 | 0,531 | 0,145 | 0,204411223 | 1,120073224   | 0,892798773     | 3,662068966     |
| SLC35F5                                                                                       | 5,03836E-05 | 0,163586387 | 0,25  | 0,047 | 1           | 1,120068051   | 0,892802896     | 5,319148936     |
| A2ML1                                                                                         | 0,004841742 | 0,163375166 | 0,031 | 0     | 1           | 1,119904077   | 0,892933619     | #DIV/0!         |
| NCCRP1                                                                                        | 0,004841742 | 0,163375166 | 0,031 | 0     | 1           | 1,119904077   | 0,892933619     | #DIV/0!         |
| WDR72                                                                                         | 0,004841742 | 0,163375166 | 0,031 | 0     | 1           | 1,119904077   | 0,892933619     | #DIV/0!         |
| BABAM2                                                                                        | 0,002478714 | 0,163259629 | 0,219 | 0,059 | 1           | 1,119814394   | 0,893005131     | 3,711864407     |
| INKA1                                                                                         | 9,12354E-07 | 0,163253611 | 0,094 | 0     | 0,019251588 | 1,119809722   | 0,893008857     | #DIV/0!         |
| C2orf72                                                                                       | 1,33967E-08 | 0,163243023 | 0,125 | 0     | 0,000282684 | 1,119801504   | 0,893015411     | #DIV/0!         |
| FBXW5                                                                                         | 5,29769E-05 | 0,163172111 | 0,375 | 0,094 | 1           | 1,119746465   | 0,893059305     | 3,989361702     |
| TECPR2                                                                                        | 0,000417537 | 0,163063608 | 0,188 | 0,035 | 1           | 1,119662253   | 0,893126474     | 5,371428571     |
| IDI1                                                                                          | 1,94445E-07 | 0,162984109 | 0,531 | 0,117 | 0,004102974 | 1,119600556   | 0,893175691     | 4,538461538     |
| ARG2                                                                                          | 1,39097E-05 | 0,162922591 | 0,125 | 0,008 | 0,293508116 | 1,119552817   | 0,893213777     | 15,625          |
| SCGB1B2P                                                                                      | 6,3574E-05  | 0,162917228 | 0,062 | 0     | 1           | 1,119548654   | 0,893217098     | #DIV/0!         |
| PHTF1                                                                                         | 4,50344E-06 | 0,162761762 | 0,188 | 0,02  | 0,095027166 | 1,119428018   | 0,893313356     | 9,4             |
| CUL1                                                                                          | 0,016716716 | 0,162722376 | 0,188 | 0,062 | 1           | 1,119397457   | 0,893337745     | 3,032258065     |
| IKBKG                                                                                         | 0,00019555  | 0,162595444 | 0,188 | 0,031 | 1           | 1,119298975   | 0,893416346     | 6,064516129     |
| FIS1                                                                                          | 0,007532433 | 0,162513062 | 0,75  | 0,355 | 1           | 1,119235061   | 0,893467364     | 2,112676056     |

Supplementary Table 1

| Differentially expressed genes_adjacent-skin-XL_comparing SC-Keloid vs. (SC-Myel, SC-Nonmyel) |             |             |       |       |             |               |                 |                 |
|-----------------------------------------------------------------------------------------------|-------------|-------------|-------|-------|-------------|---------------|-----------------|-----------------|
| gene                                                                                          | p_val       | avg_log2FC  | pct.1 | pct.2 | p_val_adj   | Foldchange_UP | Foldchange_DOWN | Ratio_pct1_pct2 |
| RPP30                                                                                         | 5,14086E-05 | 0,162486727 | 0,312 | 0,07  | 1           | 1,119214631   | 0,893483674     | 4,457142857     |
| LMNB1                                                                                         | 1,44979E-05 | 0,162457644 | 0,125 | 0,008 | 0,305919948 | 1,119192069   | 0,893501685     | 15,625          |
| PCCB                                                                                          | 2,83613E-06 | 0,162416407 | 0,25  | 0,035 | 0,059845173 | 1,119160079   | 0,893527225     | 7,142857143     |
| IPO13                                                                                         | 1,90629E-05 | 0,162039241 | 0,188 | 0,023 | 0,402246146 | 1,118867533   | 0,893760852     | 8,173913043     |
| HSF1                                                                                          | 0,001325703 | 0,161987844 | 0,281 | 0,082 | 1           | 1,118827674   | 0,893792694     | 3,426829268     |
| HDDC2                                                                                         | 9,70761E-05 | 0,161937664 | 0,344 | 0,086 | 1           | 1,11878876    | 0,893823782     | 4               |
| FADD                                                                                          | 1,33967E-08 | 0,161606988 | 0,125 | 0     | 0,000282684 | 1,118532354   | 0,894028676     | #DIV/0!         |
| SAMM50                                                                                        | 2,15242E-09 | 0,16154305  | 0,312 | 0,031 | 4,54182E-05 | 1,118482784   | 0,894068299     | 10,06451613     |
| SLC39A4                                                                                       | 2,9927E-06  | 0,161542022 | 0,25  | 0,035 | 0,063148942 | 1,118481987   | 0,894068936     | 7,142857143     |
| PKMYT1                                                                                        | 9,12354E-07 | 0,16150357  | 0,094 | 0     | 0,019251588 | 1,118452177   | 0,894092766     | #DIV/0!         |
| MTFR1L                                                                                        | 0,000204257 | 0,161445463 | 0,281 | 0,066 | 1           | 1,11840713    | 0,894128778     | 4,257575758     |
| DNAJB5                                                                                        | 0,00292518  | 0,161419866 | 0,188 | 0,047 | 1           | 1,118387286   | 0,894144642     | 4               |
| CFAP36                                                                                        | 1,39438E-05 | 0,161244398 | 0,406 | 0,098 | 0,294228514 | 1,118251271   | 0,894253399     | 4,142857143     |
| POMGNT2                                                                                       | 4,5807E-05  | 0,1611377   | 0,094 | 0,004 | 0,966573495 | 1,118168571   | 0,894319538     | 23,5            |
| RAD50                                                                                         | 2,60711E-07 | 0,160930753 | 0,406 | 0,074 | 0,005501273 | 1,118008187   | 0,894447833     | 5,486486486     |
| RASSF4                                                                                        | 0,001275639 | 0,160766637 | 0,781 | 0,324 | 1           | 1,117881014   | 0,894549588     | 2,410493827     |
| GRID2                                                                                         | 0,079594089 | 0,160569263 | 0,031 | 0,004 | 1           | 1,117728088   | 0,894671979     | 7,75            |
| FUT11                                                                                         | 0,001560165 | 0,160545492 | 0,125 | 0,02  | 1           | 1,117709671   | 0,89468672      | 6,25            |
| SPATA5L1                                                                                      | 1,51098E-05 | 0,160397451 | 0,125 | 0,008 | 0,318831333 | 1,117594984   | 0,894778533     | 15,625          |
| GALNT11                                                                                       | 0,000390215 | 0,160381006 | 0,25  | 0,059 | 1           | 1,117582245   | 0,894788732     | 4,237288136     |
| ZDHC24                                                                                        | 4,92471E-08 | 0,160376322 | 0,281 | 0,031 | 0,001039163 | 1,117578617   | 0,894791637     | 9,064516129     |
| SDSL                                                                                          | 2,86276E-12 | 0,160198119 | 0,188 | 0     | 6,04072E-08 | 1,117440581   | 0,89490217      | #DIV/0!         |
| NFU1                                                                                          | 8,87757E-06 | 0,160186387 | 0,344 | 0,07  | 0,187325628 | 1,117431494   | 0,894909447     | 4,914285714     |
| PHF19                                                                                         | 3,51435E-06 | 0,160038359 | 0,344 | 0,066 | 0,074156248 | 1,117316845   | 0,895001274     | 5,212121212     |
| NFE2L3                                                                                        | 1,51098E-05 | 0,159993995 | 0,125 | 0,008 | 0,318831333 | 1,117282487   | 0,895028797     | 15,625          |
| TRIB2                                                                                         | 7,25857E-06 | 0,159991402 | 0,344 | 0,07  | 0,153163084 | 1,11728048    | 0,895030405     | 4,914285714     |
| ACSL1                                                                                         | 0,032396086 | 0,159969546 | 0,188 | 0,07  | 1           | 1,117263553   | 0,895043964     | 2,685714286     |
| PDIA5                                                                                         | 2,24684E-05 | 0,159928337 | 0,156 | 0,016 | 0,474104712 | 1,11723164    | 0,895069531     | 9,75            |
| PKP1                                                                                          | 4,80509E-06 | 0,159853808 | 0,188 | 0,02  | 0,101392141 | 1,117173926   | 0,895115771     | 9,4             |
| TRAF5                                                                                         | 0,002263143 | 0,159808605 | 0,062 | 0,004 | 1           | 1,117138923   | 0,895143817     | 15,5            |

Supplementary Table 1

| Differentially expressed genes_adjacent-skin-XL_ comparing SC-Keloid vs. (SC-Myel, SC-Nonmyel) |             |             |       |       |             |               |                 |                 |
|------------------------------------------------------------------------------------------------|-------------|-------------|-------|-------|-------------|---------------|-----------------|-----------------|
| gene                                                                                           | p_val       | avg_log2FC  | pct.1 | pct.2 | p_val_adj   | Foldchange_UP | Foldchange_DOWN | Ratio_pct1_pct2 |
| WFS1                                                                                           | 0,000313864 | 0,159736429 | 0,156 | 0,023 | 1           | 1,117083036   | 0,895188601     | 6,782608696     |
| LIG3                                                                                           | 3,71921E-06 | 0,159318357 | 0,156 | 0,012 | 0,078479117 | 1,116759368   | 0,895448051     | 13              |
| HMGB3                                                                                          | 4,82268E-05 | 0,159314912 | 0,25  | 0,047 | 1           | 1,116756701   | 0,89545019      | 5,319148936     |
| EML1                                                                                           | 2,02073E-05 | 0,158794994 | 0,188 | 0,023 | 0,426394579 | 1,116354317   | 0,89577295      | 8,173913043     |
| VPS41                                                                                          | 1,03682E-05 | 0,158784602 | 0,281 | 0,051 | 0,218779044 | 1,116346276   | 0,895779402     | 5,509803922     |
| DNTTIP1                                                                                        | 1,32717E-05 | 0,158595785 | 0,281 | 0,051 | 0,280046571 | 1,116200181   | 0,895896648     | 5,509803922     |
| RPS6KA1                                                                                        | 0,001808729 | 0,158536614 | 0,156 | 0,031 | 1           | 1,116154402   | 0,895933393     | 5,032258065     |
| WDR13                                                                                          | 0,000896083 | 0,158337449 | 0,5   | 0,18  | 1           | 1,116000327   | 0,896057085     | 2,777777778     |
| APEH                                                                                           | 1,99574E-07 | 0,158206873 | 0,281 | 0,035 | 0,004211201 | 1,115899323   | 0,89613819      | 8,028571429     |
| ZNF720                                                                                         | 0,007945492 | 0,158011944 | 0,125 | 0,027 | 1           | 1,115748559   | 0,89625928      | 4,62962963      |
| SMAD7                                                                                          | 8,53227E-07 | 0,157881429 | 0,188 | 0,016 | 0,018003947 | 1,115647627   | 0,896340364     | 11,75           |
| KIF1C                                                                                          | 9,69747E-05 | 0,15780716  | 0,281 | 0,062 | 1           | 1,115590195   | 0,896386509     | 4,532258065     |
| MOCS2                                                                                          | 3,10173E-05 | 0,157638218 | 0,5   | 0,145 | 0,654496234 | 1,115459566   | 0,896491483     | 3,448275862     |
| MEX3A                                                                                          | 4,65192E-06 | 0,157564023 | 0,188 | 0,02  | 0,098160247 | 1,115402201   | 0,896537589     | 9,4             |
| PLA2G15                                                                                        | 7,96166E-09 | 0,157263479 | 0,188 | 0,008 | 0,000167999 | 1,115169863   | 0,896724376     | 23,5            |
| CD58                                                                                           | 1,85164E-05 | 0,15716048  | 0,312 | 0,062 | 0,39071388  | 1,11509025    | 0,896788399     | 5,032258065     |
| GMPPA                                                                                          | 9,73699E-05 | 0,157078866 | 0,156 | 0,02  | 1           | 1,115027171   | 0,896839132     | 7,8             |
| CDK20                                                                                          | 2,10199E-05 | 0,156941949 | 0,156 | 0,016 | 0,443540004 | 1,114921356   | 0,896924249     | 9,75            |
| POMGNT1                                                                                        | 8,00274E-06 | 0,156908193 | 0,312 | 0,059 | 0,168865745 | 1,11489527    | 0,896945235     | 5,288135593     |
| ABCC10                                                                                         | 0,216675772 | 0,15690461  | 0,031 | 0,008 | 1           | 1,1148925     | 0,896947463     | 3,875           |
| YKT6                                                                                           | 1,38976E-05 | 0,15679026  | 0,312 | 0,062 | 0,293252516 | 1,114804136   | 0,897018559     | 5,032258065     |
| AHCY                                                                                           | 2,7748E-05  | 0,156768626 | 0,375 | 0,09  | 0,585509559 | 1,114787419   | 0,897032011     | 4,166666667     |
| ENTR1                                                                                          | 1,41893E-05 | 0,15669152  | 0,281 | 0,051 | 0,29940858  | 1,11472784    | 0,897079955     | 5,509803922     |
| CD164                                                                                          | 0,000524773 | 0,156688862 | 0,625 | 0,242 | 1           | 1,114725786   | 0,897081607     | 2,582644628     |
| STX7                                                                                           | 0,000349957 | 0,156622664 | 0,406 | 0,125 | 1           | 1,114674638   | 0,897122771     | 3,248           |
| SLC31A1                                                                                        | 3,51691E-07 | 0,15658294  | 0,156 | 0,008 | 0,007421029 | 1,114643946   | 0,897147473     | 19,5            |
| LRFN4                                                                                          | 0,000104629 | 0,156105421 | 0,281 | 0,062 | 1           | 1,114275071   | 0,89744447      | 4,532258065     |
| CEP135                                                                                         | 0,001808729 | 0,156067962 | 0,156 | 0,031 | 1           | 1,114246139   | 0,897467772     | 5,032258065     |
| PCNX4                                                                                          | 0,000208933 | 0,156016905 | 0,219 | 0,043 | 1           | 1,114206706   | 0,897499534     | 5,093023256     |
| HDAC2                                                                                          | 0,001051807 | 0,155894533 | 0,344 | 0,109 | 1           | 1,114112202   | 0,897575665     | 3,155963303     |

Supplementary Table 1

| Differentially expressed genes_adjacent-skin-XL_comparing SC-Keloid vs. (SC-Myel, SC-Nonmyel) |             |             |       |       |             |               |                 |                 |
|-----------------------------------------------------------------------------------------------|-------------|-------------|-------|-------|-------------|---------------|-----------------|-----------------|
| gene                                                                                          | p_val       | avg_log2FC  | pct.1 | pct.2 | p_val_adj   | Foldchange_UP | Foldchange_DOWN | Ratio_pct1_pct2 |
| RUVBL1                                                                                        | 4,25761E-07 | 0,155687231 | 0,312 | 0,047 | 0,008983981 | 1,113952125   | 0,897704648     | 6,638297872     |
| E2F5                                                                                          | 5,49744E-05 | 0,155596546 | 0,25  | 0,047 | 1           | 1,113882107   | 0,897761077     | 5,319148936     |
| MRPS15                                                                                        | 6,85015E-05 | 0,155230046 | 0,406 | 0,109 | 1           | 1,113599174   | 0,897989172     | 3,724770642     |
| IFTAP                                                                                         | 7,07015E-08 | 0,15515597  | 0,375 | 0,059 | 0,001491872 | 1,113541997   | 0,898035281     | 6,355932203     |
| KANSL1                                                                                        | 0,000693449 | 0,155065963 | 0,406 | 0,133 | 1           | 1,113472527   | 0,898091309     | 3,052631579     |
| COL9A3                                                                                        | 0,007172229 | 0,15489348  | 0,875 | 0,434 | 1           | 1,113339413   | 0,898198688     | 2,016129032     |
| UTP4                                                                                          | 0,000173407 | 0,154634698 | 0,188 | 0,031 | 1           | 1,113139727   | 0,898359816     | 6,064516129     |
| DCAF15                                                                                        | 1,06809E-06 | 0,154466956 | 0,219 | 0,023 | 0,022537726 | 1,11301031    | 0,898464274     | 9,52173913      |
| AUH                                                                                           | 0,057775912 | 0,154435442 | 0,125 | 0,043 | 1           | 1,112985997   | 0,898483901     | 2,906976744     |
| HPS4                                                                                          | 0,002478699 | 0,154296035 | 0,219 | 0,059 | 1           | 1,112878455   | 0,898570725     | 3,711864407     |
| EIF2AK1                                                                                       | 3,39387E-07 | 0,154246745 | 0,469 | 0,098 | 0,007161415 | 1,112840434   | 0,898601425     | 4,785714286     |
| ANAPC5                                                                                        | 0,000141727 | 0,154214458 | 0,531 | 0,176 | 1           | 1,112815529   | 0,898621536     | 3,017045455     |
| KCND3                                                                                         | 4,5807E-05  | 0,154057899 | 0,094 | 0,004 | 0,966573495 | 1,112694775   | 0,898719058     | 23,5            |
| SLC2A1                                                                                        | 0,024054161 | 0,153870925 | 0,125 | 0,035 | 1           | 1,112550579   | 0,89883554      | 3,571428571     |
| POGLUT2                                                                                       | 9,06462E-07 | 0,15380567  | 0,125 | 0,004 | 0,019127258 | 1,112500258   | 0,898876196     | 31,25           |
| POPDC3                                                                                        | 4,50344E-06 | 0,153713069 | 0,188 | 0,02  | 0,095027166 | 1,112428853   | 0,898933894     | 9,4             |
| MIEN1                                                                                         | 0,00016416  | 0,153711362 | 0,438 | 0,133 | 1           | 1,112427537   | 0,898934957     | 3,293233083     |
| CSDE1                                                                                         | 0,007675956 | 0,15356966  | 0,844 | 0,402 | 1           | 1,112318279   | 0,899023255     | 2,099502488     |
| CZIB                                                                                          | 1,46573E-06 | 0,153372865 | 0,562 | 0,141 | 0,030928364 | 1,11216656    | 0,899145898     | 3,985815603     |
| TUBB6                                                                                         | 4,67306E-06 | 0,153209086 | 0,531 | 0,141 | 0,098606208 | 1,112040311   | 0,899247977     | 3,765957447     |
| STYX                                                                                          | 0,000100263 | 0,153186982 | 0,156 | 0,02  | 1           | 1,112023273   | 0,899261755     | 7,8             |
| C16orf91                                                                                      | 4,70541E-06 | 0,153092748 | 0,281 | 0,047 | 0,099288927 | 1,11195064    | 0,899320495     | 5,978723404     |
| MRPL55                                                                                        | 3,70548E-08 | 0,153092571 | 0,5   | 0,098 | 0,000781893 | 1,111950504   | 0,899320605     | 5,102040816     |
| TMEM199                                                                                       | 0,000100263 | 0,153084072 | 0,156 | 0,02  | 1           | 1,111943953   | 0,899325903     | 7,8             |
| MYCBP                                                                                         | 7,96166E-09 | 0,152971385 | 0,188 | 0,008 | 0,000167999 | 1,111857105   | 0,899396151     | 23,5            |
| ZFYVE9                                                                                        | 0,000811202 | 0,152735414 | 0,156 | 0,027 | 1           | 1,111675261   | 0,899543271     | 5,777777778     |
| PSME1                                                                                         | 0,001777154 | 0,152716424 | 0,812 | 0,348 | 1           | 1,111660628   | 0,899555111     | 2,333333333     |
| SNX9                                                                                          | 0,000205019 | 0,152659593 | 0,25  | 0,055 | 1           | 1,111616839   | 0,899590547     | 4,545454545     |
| TIMELESS                                                                                      | 1,59386E-08 | 0,152596723 | 0,156 | 0,004 | 0,000336319 | 1,111568397   | 0,899629751     | 39              |
| RNASEL                                                                                        | 0,002517564 | 0,15250064  | 0,094 | 0,012 | 1           | 1,11149437    | 0,899689668     | 7,833333333     |

Supplementary Table 1

| Differentially expressed genes_adjacent-skin-XL_comparing SC-Keloid vs. (SC-Myel, SC-Nonmyel) |             |             |       |       |             |               |                 |                 |
|-----------------------------------------------------------------------------------------------|-------------|-------------|-------|-------|-------------|---------------|-----------------|-----------------|
| gene                                                                                          | p_val       | avg_log2FC  | pct.1 | pct.2 | p_val_adj   | Foldchange_UP | Foldchange_DOWN | Ratio_pct1_pct2 |
| PSMD6                                                                                         | 5,67461E-05 | 0,152378167 | 0,5   | 0,145 | 1           | 1,111400017   | 0,899766047     | 3,448275862     |
| FBLIM1                                                                                        | 4,80439E-05 | 0,152333719 | 0,094 | 0,004 | 1           | 1,111365776   | 0,899793768     | 23,5            |
| AAMP                                                                                          | 9,1055E-05  | 0,152333333 | 0,438 | 0,125 | 1           | 1,111365477   | 0,899794011     | 3,504           |
| VPS53                                                                                         | 0,00151347  | 0,152277442 | 0,188 | 0,043 | 1           | 1,111322424   | 0,899828869     | 4,372093023     |
| OSER1-DT                                                                                      | 0,000112833 | 0,152215654 | 0,125 | 0,012 | 1           | 1,111274829   | 0,899867408     | 10,41666667     |
| GLB1L                                                                                         | 6,3574E-05  | 0,152204898 | 0,062 | 0     | 1           | 1,111266544   | 0,899874117     | #DIV/0!         |
| HMOX2                                                                                         | 4,71723E-06 | 0,15220079  | 0,406 | 0,09  | 0,099538323 | 1,11126338    | 0,899876679     | 4,511111111     |
| RAD23A                                                                                        | 0,008100744 | 0,152162964 | 0,562 | 0,25  | 1           | 1,111234244   | 0,899900273     | 2,248           |
| PHKG2                                                                                         | 0,000173407 | 0,152052549 | 0,188 | 0,031 | 1           | 1,111149201   | 0,899969148     | 6,064516129     |
| TBC1D7                                                                                        | 3,51435E-06 | 0,151576108 | 0,344 | 0,066 | 0,074156248 | 1,110782311   | 0,900266407     | 5,212121212     |
| NOP56                                                                                         | 0,000280811 | 0,151519123 | 0,406 | 0,121 | 1           | 1,110738438   | 0,900301967     | 3,355371901     |
| PGM2                                                                                          | 8,84735E-07 | 0,151447326 | 0,188 | 0,016 | 0,018668785 | 1,110683162   | 0,900346773     | 11,75           |
| MRPL22                                                                                        | 2,16766E-06 | 0,151370996 | 0,469 | 0,109 | 0,045739869 | 1,1106244     | 0,900394409     | 4,302752294     |
| ZNF281                                                                                        | 0,006607735 | 0,151355547 | 0,156 | 0,039 | 1           | 1,110612506   | 0,900404051     | 4               |
| RRP7A                                                                                         | 6,73191E-06 | 0,151115715 | 0,312 | 0,059 | 0,142049988 | 1,110427894   | 0,900553746     | 5,288135593     |
| UPK3BL1                                                                                       | 0,00011859  | 0,150981967 | 0,375 | 0,102 | 1           | 1,110324955   | 0,900637237     | 3,676470588     |
| KIF3A                                                                                         | 0,001385681 | 0,150823743 | 0,281 | 0,082 | 1           | 1,110203189   | 0,900736018     | 3,426829268     |
| ODF2                                                                                          | 2,17326E-05 | 0,150705738 | 0,156 | 0,016 | 0,458580025 | 1,110112384   | 0,900809696     | 9,75            |
| SNX4                                                                                          | 9,38646E-05 | 0,150662721 | 0,344 | 0,086 | 1           | 1,110079284   | 0,900836557     | 4               |
| SLC4A3                                                                                        | 0,039886012 | 0,15062022  | 0,062 | 0,012 | 1           | 1,110046583   | 0,900863095     | 5,166666667     |
| ENAH                                                                                          | 0,00079237  | 0,150464385 | 0,156 | 0,027 | 1           | 1,109926686   | 0,900960408     | 5,777777778     |
| TTC1                                                                                          | 2,1104E-05  | 0,150421903 | 0,469 | 0,125 | 0,445315492 | 1,109894003   | 0,900986939     | 3,752           |
| RDH11                                                                                         | 6,07698E-05 | 0,150046627 | 0,375 | 0,098 | 1           | 1,109605334   | 0,901221335     | 3,826530612     |
| ZNF593                                                                                        | 1,82474E-09 | 0,149893332 | 0,406 | 0,055 | 3,85039E-05 | 1,109487437   | 0,9013171       | 7,381818182     |
| CATSPER1                                                                                      | 6,3574E-05  | 0,149861183 | 0,062 | 0     | 1           | 1,109462714   | 0,901337186     | #DIV/0!         |
| DCLK1                                                                                         | 0,216675772 | 0,14981673  | 0,031 | 0,008 | 1           | 1,109428529   | 0,901364959     | 3,875           |
| TMEM9B                                                                                        | 0,000513154 | 0,149808127 | 0,375 | 0,113 | 1           | 1,109421913   | 0,901370333     | 3,318584071     |
| COA8                                                                                          | 9,55566E-06 | 0,149331276 | 0,375 | 0,082 | 0,201634002 | 1,109055279   | 0,901668311     | 4,573170732     |
| POLE                                                                                          | 0,000108998 | 0,149117564 | 0,125 | 0,012 | 1           | 1,108891003   | 0,901801888     | 10,41666667     |
| TOMM40                                                                                        | 0,006373067 | 0,149040876 | 0,312 | 0,117 | 1           | 1,10883206    | 0,901849826     | 2,666666667     |

Supplementary Table 1

| Differentially expressed genes_adjacent-skin-XL_comparing SC-Keloid vs. (SC-Myel, SC-Nonmyel) |             |             |       |       |             |               |                 |                 |
|-----------------------------------------------------------------------------------------------|-------------|-------------|-------|-------|-------------|---------------|-----------------|-----------------|
| gene                                                                                          | p_val       | avg_log2FC  | pct.1 | pct.2 | p_val_adj   | Foldchange_UP | Foldchange_DOWN | Ratio_pct1_pct2 |
| MARK2                                                                                         | 0,01796492  | 0,148926456 | 0,219 | 0,078 | 1           | 1,108744122   | 0,901921354     | 2,807692308     |
| SLC46A3                                                                                       | 9,06462E-07 | 0,148820576 | 0,125 | 0,004 | 0,019127258 | 1,108662754   | 0,901987549     | 31,25           |
| RAB4B                                                                                         | 0,000196043 | 0,148634156 | 0,219 | 0,043 | 1           | 1,108519505   | 0,902104109     | 5,093023256     |
| SEPHS2                                                                                        | 5,82109E-10 | 0,148559094 | 0,375 | 0,043 | 1,22831E-05 | 1,108461832   | 0,902151045     | 8,720930233     |
| MGMT                                                                                          | 1,29375E-05 | 0,148271173 | 0,344 | 0,074 | 0,272994515 | 1,108240636   | 0,902331107     | 4,648648649     |
| SCG5                                                                                          | 1,59386E-08 | 0,148185245 | 0,156 | 0,004 | 0,000336319 | 1,108174631   | 0,902384852     | 39              |
| TRMT12                                                                                        | 0,039886012 | 0,148142418 | 0,062 | 0,012 | 1           | 1,108141734   | 0,90241164      | 5,166666667     |
| SNAPIN                                                                                        | 7,5014E-06  | 0,147972334 | 0,312 | 0,059 | 0,158287075 | 1,1080111     | 0,902518034     | 5,288135593     |
| LINC01137                                                                                     | 7,96166E-09 | 0,147963817 | 0,188 | 0,008 | 0,000167999 | 1,108004559   | 0,902523362     | 23,5            |
| UTP18                                                                                         | 5,26316E-05 | 0,147893312 | 0,25  | 0,047 | 1           | 1,107950412   | 0,90256747      | 5,319148936     |
| TMX4                                                                                          | 2,23171E-05 | 0,147851342 | 0,562 | 0,168 | 0,470913836 | 1,10791818    | 0,902593727     | 3,345238095     |
| ACP2                                                                                          | 2,40115E-05 | 0,147810201 | 0,156 | 0,016 | 0,506667402 | 1,107886586   | 0,902619467     | 9,75            |
| NINJ1                                                                                         | 9,41785E-05 | 0,147373227 | 0,625 | 0,207 | 1           | 1,107551072   | 0,902892901     | 3,019323671     |
| DHPS                                                                                          | 1,99857E-05 | 0,14726964  | 0,438 | 0,113 | 0,421717445 | 1,107471552   | 0,902957732     | 3,876106195     |
| TASOR                                                                                         | 0,000595256 | 0,147106226 | 0,281 | 0,074 | 1           | 1,107346116   | 0,903060015     | 3,797297297     |
| BIN3                                                                                          | 0,000105292 | 0,147095551 | 0,312 | 0,074 | 1           | 1,107337922   | 0,903066697     | 4,216216216     |
| ADGRL4                                                                                        | 3,67695E-07 | 0,146962544 | 0,156 | 0,008 | 0,007758733 | 1,107235838   | 0,903149958     | 19,5            |
| YARS2                                                                                         | 1,07001E-07 | 0,146791351 | 0,188 | 0,012 | 0,002257818 | 1,107104458   | 0,903257134     | 15,66666667     |
| NCAPG                                                                                         | 6,3574E-05  | 0,146750007 | 0,062 | 0     | 1           | 1,107072732   | 0,903283019     | #DIV/0!         |
| GCNT1                                                                                         | 1,59386E-08 | 0,146594399 | 0,156 | 0,004 | 0,000336319 | 1,10695333    | 0,903380452     | 39              |
| UBA5                                                                                          | 0,00022736  | 0,146514849 | 0,219 | 0,043 | 1           | 1,106892295   | 0,903430266     | 5,093023256     |
| KCNE4                                                                                         | 0,004180266 | 0,14651157  | 0,125 | 0,023 | 1           | 1,106889779   | 0,903432319     | 5,434782609     |
| ZFAND3                                                                                        | 0,000253739 | 0,146453388 | 0,5   | 0,16  | 1           | 1,106845141   | 0,903468754     | 3,125           |
| RSBN1                                                                                         | 0,001170364 | 0,146415406 | 0,344 | 0,109 | 1           | 1,106816001   | 0,90349254      | 3,155963303     |
| MVD                                                                                           | 9,25578E-07 | 0,146230351 | 0,375 | 0,07  | 0,019530631 | 1,106674038   | 0,903608439     | 5,357142857     |
| SSC5D                                                                                         | 1,93924E-05 | 0,146229282 | 0,5   | 0,137 | 0,409199075 | 1,106673219   | 0,903609108     | 3,649635036     |
| RIOK1                                                                                         | 0,000446084 | 0,146220563 | 0,188 | 0,035 | 1           | 1,106666531   | 0,903614569     | 5,371428571     |
| DCLRE1C                                                                                       | 2,39232E-07 | 0,145814392 | 0,25  | 0,027 | 0,005048036 | 1,106355008   | 0,903869005     | 9,259259259     |
| PLEKHO1                                                                                       | 0,000314345 | 0,145783033 | 0,562 | 0,195 | 1           | 1,10633096    | 0,903888652     | 2,882051282     |
| USP22                                                                                         | 1,79699E-06 | 0,145758758 | 0,656 | 0,184 | 0,03791833  | 1,106312344   | 0,903903861     | 3,565217391     |

Supplementary Table 1

| Differentially expressed genes_adjacent-skin-XL_comparing SC-Keloid vs. (SC-Myel, SC-Nonmyel) |             |             |       |       |             |               |                 |                 |
|-----------------------------------------------------------------------------------------------|-------------|-------------|-------|-------|-------------|---------------|-----------------|-----------------|
| gene                                                                                          | p_val       | avg_log2FC  | pct.1 | pct.2 | p_val_adj   | Foldchange_UP | Foldchange_DOWN | Ratio_pct1_pct2 |
| FAHD2B                                                                                        | 0,000297876 | 0,145756368 | 0,156 | 0,023 | 1           | 1,106310511   | 0,903905359     | 6,782608696     |
| RAB11B-AS1                                                                                    | 9,06462E-07 | 0,14575451  | 0,125 | 0,004 | 0,019127258 | 1,106309086   | 0,903906523     | 31,25           |
| ZNF576                                                                                        | 0,002370322 | 0,145685028 | 0,094 | 0,012 | 1           | 1,106255807   | 0,903950057     | 7,833333333     |
| ALG3                                                                                          | 9,85458E-05 | 0,145628959 | 0,219 | 0,039 | 1           | 1,106212814   | 0,903985189     | 5,615384615     |
| TSEN2                                                                                         | 0,520968078 | 0,145594814 | 0,031 | 0,016 | 1           | 1,106186633   | 0,904006584     | 1,9375          |
| TRMT1                                                                                         | 0,001503327 | 0,145472984 | 0,219 | 0,055 | 1           | 1,106093224   | 0,904082928     | 3,981818182     |
| COPB2                                                                                         | 0,000902011 | 0,145365203 | 0,406 | 0,137 | 1           | 1,106010593   | 0,904150472     | 2,96350365      |
| CD302                                                                                         | 0,011423236 | 0,145345522 | 0,156 | 0,043 | 1           | 1,105995505   | 0,904162807     | 3,627906977     |
| SUGP1                                                                                         | 0,000439193 | 0,145306611 | 0,125 | 0,016 | 1           | 1,105965675   | 0,904187194     | 7,8125          |
| GINM1                                                                                         | 7,02651E-06 | 0,145294545 | 0,625 | 0,184 | 0,148266402 | 1,105956426   | 0,904194756     | 3,39673913      |
| FKBP2                                                                                         | 0,00858429  | 0,145077524 | 0,281 | 0,102 | 1           | 1,105790072   | 0,904330781     | 2,754901961     |
| SLC35F6                                                                                       | 2,08038E-05 | 0,145050626 | 0,188 | 0,023 | 0,438980454 | 1,105769456   | 0,904347642     | 8,173913043     |
| SLC45A3                                                                                       | 0,37426516  | 0,144956081 | 0,031 | 0,012 | 1           | 1,105696993   | 0,904406909     | 2,583333333     |
| DHCR24                                                                                        | 1,59386E-08 | 0,14491775  | 0,156 | 0,004 | 0,000336319 | 1,105667616   | 0,904430939     | 39              |
| CCDC88A                                                                                       | 4,80509E-06 | 0,144858335 | 0,188 | 0,02  | 0,101392141 | 1,105622082   | 0,904468187     | 9,4             |
| NAE1                                                                                          | 0,000103442 | 0,144784751 | 0,312 | 0,074 | 1           | 1,105565691   | 0,904514321     | 4,216216216     |
| TTC19                                                                                         | 7,10311E-07 | 0,144725551 | 0,438 | 0,09  | 0,014988265 | 1,105520326   | 0,904551437     | 4,866666667     |
| PTPN9                                                                                         | 2,32278E-05 | 0,144517969 | 0,156 | 0,016 | 0,490128791 | 1,10536127    | 0,904681598     | 9,75            |
| TOR1B                                                                                         | 0,000112833 | 0,144497112 | 0,125 | 0,012 | 1           | 1,10534529    | 0,904694677     | 10,41666667     |
| DLK2                                                                                          | 0,004841742 | 0,14437834  | 0,031 | 0     | 1           | 1,105254294   | 0,90476916      | #DIV/0!         |
| KCNH2                                                                                         | 0,004841742 | 0,14437834  | 0,031 | 0     | 1           | 1,105254294   | 0,90476916      | #DIV/0!         |
| SPATA2L                                                                                       | 0,007089636 | 0,144376113 | 0,156 | 0,039 | 1           | 1,105252588   | 0,904770557     | 4               |
| AKAP1                                                                                         | 0,000494525 | 0,144343671 | 0,125 | 0,016 | 1           | 1,105227735   | 0,904790903     | 7,8125          |
| CCNDBP1                                                                                       | 0,000561747 | 0,144285211 | 0,375 | 0,117 | 1           | 1,105182951   | 0,904827567     | 3,205128205     |
| FBXO22                                                                                        | 2,29902E-09 | 0,144111067 | 0,312 | 0,031 | 4,85116E-05 | 1,105049555   | 0,904936793     | 10,06451613     |
| CTPS2                                                                                         | 0,000509339 | 0,144038424 | 0,125 | 0,016 | 1           | 1,104993915   | 0,904982359     | 7,8125          |
| DIRAS3                                                                                        | 0,002168448 | 0,144017939 | 0,062 | 0,004 | 1           | 1,104978224   | 0,90499521      | 15,5            |
| NCBP1                                                                                         | 2,75671E-08 | 0,144015375 | 0,219 | 0,016 | 0,000581693 | 1,104976261   | 0,904996818     | 13,6875         |
| MSTN                                                                                          | 0,002168448 | 0,144013907 | 0,062 | 0,004 | 1           | 1,104975136   | 0,904997739     | 15,5            |
| COMMD5                                                                                        | 4,14985E-07 | 0,143854789 | 0,312 | 0,047 | 0,008756602 | 1,104853273   | 0,905097559     | 6,638297872     |

Supplementary Table 1

| Differentially expressed genes_adjacent-skin-XL_ comparing SC-Keloid vs. (SC-Myel, SC-Nonmyel) |             |             |       |       |             |               |                 |                 |
|------------------------------------------------------------------------------------------------|-------------|-------------|-------|-------|-------------|---------------|-----------------|-----------------|
| gene                                                                                           | p_val       | avg_log2FC  | pct.1 | pct.2 | p_val_adj   | Foldchange_UP | Foldchange_DOWN | Ratio_pct1_pct2 |
| MLLT1                                                                                          | 0,02536082  | 0,143437805 | 0,25  | 0,102 | 1           | 1,104533982   | 0,905359198     | 2,450980392     |
| VPS45                                                                                          | 0,008576675 | 0,143424671 | 0,188 | 0,055 | 1           | 1,104523927   | 0,90536744      | 3,418181818     |
| TAF11                                                                                          | 4,45925E-06 | 0,14300005  | 0,406 | 0,09  | 0,094094732 | 1,104198886   | 0,905633951     | 4,511111111     |
| SRP54                                                                                          | 6,95585E-05 | 0,14295571  | 0,438 | 0,121 | 1           | 1,10416495    | 0,905661786     | 3,619834711     |
| TMOD3                                                                                          | 1,66591E-06 | 0,142648173 | 0,406 | 0,086 | 0,035152316 | 1,103929602   | 0,905854865     | 4,720930233     |
| DZIP1                                                                                          | 0,033585021 | 0,142630313 | 0,094 | 0,023 | 1           | 1,103915935   | 0,905866079     | 4,086956522     |
| SSUH2                                                                                          | 0,00819789  | 0,142615151 | 0,188 | 0,055 | 1           | 1,103904333   | 0,9058756       | 3,418181818     |
| STX18-AS1                                                                                      | 0,216675772 | 0,142412158 | 0,031 | 0,008 | 1           | 1,103749021   | 0,906003069     | 3,875           |
| NAGLU                                                                                          | 0,000789392 | 0,142305506 | 0,219 | 0,051 | 1           | 1,103667428   | 0,906070048     | 4,294117647     |
| NOTCH3                                                                                         | 2,40115E-05 | 0,142207469 | 0,156 | 0,016 | 0,506667402 | 1,103592433   | 0,906131621     | 9,75            |
| TCTN3                                                                                          | 0,001201874 | 0,141868093 | 0,344 | 0,109 | 1           | 1,103332857   | 0,906344802     | 3,155963303     |
| RPL23                                                                                          | 0,070616355 | 0,141659381 | 0,906 | 0,613 | 1           | 1,103173251   | 0,906475931     | 1,477977162     |
| ZDHHC1                                                                                         | 2,24684E-05 | 0,141511136 | 0,156 | 0,016 | 0,474104712 | 1,103059899   | 0,906569082     | 9,75            |
| GMPPB                                                                                          | 5,12603E-06 | 0,141486628 | 0,188 | 0,02  | 0,108164307 | 1,103041162   | 0,906584482     | 9,4             |
| PPIL1                                                                                          | 8,84735E-07 | 0,141459566 | 0,188 | 0,016 | 0,018668785 | 1,103020471   | 0,906601488     | 11,75           |
| LPCAT1                                                                                         | 0,002594281 | 0,141357445 | 0,094 | 0,012 | 1           | 1,102942396   | 0,906665664     | 7,833333333     |
| FURIN                                                                                          | 0,00259611  | 0,141249841 | 0,25  | 0,074 | 1           | 1,102860136   | 0,90673329      | 3,378378378     |
| CAAP1                                                                                          | 2,24684E-05 | 0,141242403 | 0,156 | 0,016 | 0,474104712 | 1,10285445    | 0,906737965     | 9,75            |
| LAPTM4A                                                                                        | 0,073021569 | 0,141156169 | 0,938 | 0,57  | 1           | 1,102788531   | 0,906792165     | 1,645614035     |
| FKBP14                                                                                         | 5,908E-06   | 0,141069091 | 0,312 | 0,059 | 0,124664638 | 1,102721972   | 0,906846899     | 5,288135593     |
| AGA                                                                                            | 2,67934E-05 | 0,140915574 | 0,375 | 0,09  | 0,565368181 | 1,102604637   | 0,906943402     | 4,166666667     |
| USO1                                                                                           | 1,06763E-06 | 0,140598182 | 0,438 | 0,094 | 0,022527994 | 1,102362092   | 0,90714295      | 4,659574468     |
| GPSM3                                                                                          | 2,39232E-07 | 0,140458223 | 0,25  | 0,027 | 0,005048036 | 1,102255154   | 0,907230959     | 9,259259259     |
| TM2D3                                                                                          | 1,64883E-06 | 0,140452808 | 0,5   | 0,117 | 0,034791873 | 1,102251017   | 0,907234364     | 4,273504274     |
| MED8                                                                                           | 5,12603E-06 | 0,140298393 | 0,188 | 0,02  | 0,108164307 | 1,102133047   | 0,907331472     | 9,4             |
| MPHOSPH10                                                                                      | 9,87205E-05 | 0,140225892 | 0,344 | 0,086 | 1           | 1,102077662   | 0,90737707      | 4               |
| SCG2                                                                                           | 0,002263143 | 0,140211556 | 0,062 | 0,004 | 1           | 1,102066711   | 0,907386087     | 15,5            |
| NPDC1                                                                                          | 0,004150422 | 0,140143672 | 0,531 | 0,227 | 1           | 1,102014856   | 0,907428784     | 2,339207048     |
| SCGB1D2                                                                                        | 0,082317662 | 0,140052841 | 0,031 | 0,004 | 1           | 1,101945476   | 0,907485917     | 7,75            |
| TAPBP                                                                                          | 2,98435E-05 | 0,139913467 | 0,688 | 0,223 | 0,629727684 | 1,101839025   | 0,90757359      | 3,085201794     |



Supplementary Table 1

| Differentially expressed genes_adjacent-skin-XL_comparing SC-Keloid vs. (SC-Myel, SC-Nonmyel) |             |             |       |       |             |               |                 |                 |
|-----------------------------------------------------------------------------------------------|-------------|-------------|-------|-------|-------------|---------------|-----------------|-----------------|
| gene                                                                                          | p_val       | avg_log2FC  | pct.1 | pct.2 | p_val_adj   | Foldchange_UP | Foldchange_DOWN | Ratio_pct1_pct2 |
| CLTB                                                                                          | 0,003928859 | 0,139865405 | 0,688 | 0,297 | 1           | 1,101802319   | 0,907603826     | 2,316498316     |
| SLC27A4                                                                                       | 2,33183E-10 | 0,139809569 | 0,281 | 0,02  | 4,92039E-06 | 1,101759678   | 0,907638953     | 14,05           |
| SLC25A1                                                                                       | 0,00010663  | 0,139349039 | 0,281 | 0,062 | 1           | 1,101408035   | 0,907928731     | 4,532258065     |
| HAUS6                                                                                         | 0,000494525 | 0,139303323 | 0,125 | 0,016 | 1           | 1,101373135   | 0,907957502     | 7,8125          |
| RFT1                                                                                          | 0,001696757 | 0,139292125 | 0,156 | 0,031 | 1           | 1,101364586   | 0,907964549     | 5,032258065     |
| MTERF3                                                                                        | 0,000305772 | 0,139244501 | 0,156 | 0,023 | 1           | 1,10132823    | 0,907994522     | 6,782608696     |
| HEXIM2                                                                                        | 3,86379E-06 | 0,139115868 | 0,156 | 0,012 | 0,081529835 | 1,101230038   | 0,908075484     | 13              |
| VPS39                                                                                         | 2,1417E-05  | 0,139110892 | 0,188 | 0,023 | 0,451919526 | 1,10122624    | 0,908078616     | 8,173913043     |
| FAF1                                                                                          | 1,4531E-05  | 0,139064964 | 0,344 | 0,074 | 0,306618748 | 1,101191184   | 0,908107525     | 4,648648649     |
| LRRC23                                                                                        | 0,000789392 | 0,13899374  | 0,219 | 0,051 | 1           | 1,10113682    | 0,908152358     | 4,294117647     |
| KANSL1-AS1                                                                                    | 1,51098E-05 | 0,138664363 | 0,125 | 0,008 | 0,318831333 | 1,100885452   | 0,90835972      | 15,625          |
| E2F7                                                                                          | 9,06462E-07 | 0,138629672 | 0,125 | 0,004 | 0,019127258 | 1,100858981   | 0,908381562     | 31,25           |
| EXOSC7                                                                                        | 3,13462E-07 | 0,138500182 | 0,344 | 0,055 | 0,006614354 | 1,100760176   | 0,908463098     | 6,254545455     |
| RNF126                                                                                        | 0,036468388 | 0,138271182 | 0,312 | 0,141 | 1           | 1,100585466   | 0,908607311     | 2,212765957     |
| FANCF                                                                                         | 3,71921E-06 | 0,138229608 | 0,156 | 0,012 | 0,078479117 | 1,100553751   | 0,908633494     | 13              |
| FOXD2                                                                                         | 0,079594089 | 0,138180242 | 0,031 | 0,004 | 1           | 1,100516093   | 0,908664586     | 7,75            |
| SLC25A34                                                                                      | 0,082317662 | 0,138177072 | 0,031 | 0,004 | 1           | 1,100513675   | 0,908666583     | 7,75            |
| CDC34                                                                                         | 1,05494E-07 | 0,137935822 | 0,406 | 0,07  | 0,00222602  | 1,10032966    | 0,908818544     | 5,8             |
| CCDC113                                                                                       | 0,002263143 | 0,137478428 | 0,062 | 0,004 | 1           | 1,099980866   | 0,909106723     | 15,5            |
| CRYBB2                                                                                        | 1,33967E-08 | 0,137276601 | 0,125 | 0     | 0,000282684 | 1,099826993   | 0,909233912     | #DIV/0!         |
| SCML2                                                                                         | 0,079594089 | 0,137186979 | 0,031 | 0,004 | 1           | 1,099758673   | 0,909290396     | 7,75            |
| HAS2-AS1                                                                                      | 0,088161845 | 0,137164524 | 0,094 | 0,031 | 1           | 1,099741556   | 0,909304549     | 3,032258065     |
| PXYLP1                                                                                        | 0,001560165 | 0,13713671  | 0,125 | 0,02  | 1           | 1,099720354   | 0,90932208      | 6,25            |
| DCPS                                                                                          | 1,60002E-05 | 0,137132218 | 0,344 | 0,074 | 0,337621055 | 1,09971693    | 0,909324912     | 4,648648649     |
| CASP3                                                                                         | 0,000103442 | 0,137114582 | 0,312 | 0,074 | 1           | 1,099703487   | 0,909336028     | 4,216216216     |
| RRP36                                                                                         | 8,54054E-06 | 0,137095415 | 0,25  | 0,039 | 0,18021385  | 1,099688877   | 0,909348109     | 6,41025641      |
| RCC1                                                                                          | 9,17361E-07 | 0,137090132 | 0,188 | 0,016 | 0,019357231 | 1,09968485    | 0,909351438     | 11,75           |
| LIG4                                                                                          | 2,32278E-05 | 0,13694204  | 0,156 | 0,016 | 0,490128791 | 1,099571973   | 0,909444788     | 9,75            |
| B4GALT2                                                                                       | 6,07138E-07 | 0,136882771 | 0,281 | 0,039 | 0,012811221 | 1,099526802   | 0,90948215      | 7,205128205     |
| PALM2AKAP2                                                                                    | 1,21997E-06 | 0,136814313 | 0,875 | 0,277 | 0,025742608 | 1,099474628   | 0,909525308     | 3,158844765     |

Supplementary Table 1

| Differentially expressed genes_adjacent-skin-XL_ comparing SC-Keloid vs. (SC-Myel, SC-Nonmyel) |             |             |       |       |             |               |                 |                 |
|------------------------------------------------------------------------------------------------|-------------|-------------|-------|-------|-------------|---------------|-----------------|-----------------|
| gene                                                                                           | p_val       | avg_log2FC  | pct.1 | pct.2 | p_val_adj   | Foldchange_UP | Foldchange_DOWN | Ratio_pct1_pct2 |
| KIRREL1                                                                                        | 8,54831E-05 | 0,136696775 | 0,375 | 0,098 | 1           | 1,099385057   | 0,909599411     | 3,826530612     |
| RAPH1                                                                                          | 5,74157E-05 | 0,136542142 | 0,25  | 0,047 | 1           | 1,099267227   | 0,90969691      | 5,319148936     |
| CXorf38                                                                                        | 5,74157E-05 | 0,136524772 | 0,25  | 0,047 | 1           | 1,099253992   | 0,909707863     | 5,319148936     |
| ATP7A                                                                                          | 0,006844876 | 0,136458365 | 0,156 | 0,039 | 1           | 1,099203395   | 0,909749737     | 4               |
| LONP1                                                                                          | 9,71531E-07 | 0,136445575 | 0,25  | 0,031 | 0,020500283 | 1,09919365    | 0,909757803     | 8,064516129     |
| CCDC32                                                                                         | 0,000217964 | 0,136420662 | 0,219 | 0,043 | 1           | 1,099174669   | 0,909773513     | 5,093023256     |
| RINL                                                                                           | 6,3574E-05  | 0,136312304 | 0,062 | 0     | 1           | 1,099092116   | 0,909841847     | #DIV/0!         |
| FNTA                                                                                           | 0,004207321 | 0,136298654 | 0,531 | 0,219 | 1           | 1,099081716   | 0,909850456     | 2,424657534     |
| ECSIT                                                                                          | 2,07726E-05 | 0,136292467 | 0,25  | 0,043 | 0,438322831 | 1,099077003   | 0,909854357     | 5,813953488     |
| PTS                                                                                            | 2,22069E-05 | 0,136034231 | 0,344 | 0,078 | 0,468587791 | 1,09888029    | 0,910017232     | 4,41025641      |
| ELOVL6                                                                                         | 9,06462E-07 | 0,135896365 | 0,125 | 0,004 | 0,019127258 | 1,098775285   | 0,910104198     | 31,25           |
| NINL                                                                                           | 0,079594089 | 0,135807863 | 0,031 | 0,004 | 1           | 1,098707882   | 0,910160031     | 7,75            |
| ENTPD6                                                                                         | 1,00234E-06 | 0,135781986 | 0,219 | 0,023 | 0,021150457 | 1,098688176   | 0,910176356     | 9,52173913      |
| GTF2H3                                                                                         | 4,123E-05   | 0,135731579 | 0,219 | 0,035 | 0,869994633 | 1,098649789   | 0,910208158     | 6,257142857     |
| MCRS1                                                                                          | 2,82309E-05 | 0,135723019 | 0,312 | 0,066 | 0,595699315 | 1,098643271   | 0,910213558     | 4,727272727     |
| PCK2                                                                                           | 1,51098E-05 | 0,135673979 | 0,125 | 0,008 | 0,318831333 | 1,098605926   | 0,910244498     | 15,625          |
| OXTR                                                                                           | 9,12354E-07 | 0,135652768 | 0,094 | 0     | 0,019251588 | 1,098589774   | 0,910257881     | #DIV/0!         |
| VPS18                                                                                          | 0,207161335 | 0,135520702 | 0,062 | 0,023 | 1           | 1,098489212   | 0,910341211     | 2,695652174     |
| CDKN2AIPNL                                                                                     | 9,18193E-05 | 0,135498559 | 0,156 | 0,02  | 1           | 1,098472352   | 0,910355184     | 7,8             |
| SIRT2                                                                                          | 0,002824026 | 0,13548169  | 0,5   | 0,203 | 1           | 1,098459508   | 0,910365828     | 2,463054187     |
| PSMC4                                                                                          | 7,09557E-07 | 0,13541173  | 0,562 | 0,137 | 0,014972355 | 1,098406243   | 0,910409975     | 4,102189781     |
| GOLM1                                                                                          | 5,26316E-05 | 0,135328018 | 0,25  | 0,047 | 1           | 1,09834251    | 0,910462803     | 5,319148936     |
| TMEM234                                                                                        | 9,17361E-07 | 0,13528504  | 0,188 | 0,016 | 0,019357231 | 1,098309791   | 0,910489926     | 11,75           |
| SCN1B                                                                                          | 5,03836E-05 | 0,135238421 | 0,25  | 0,047 | 1           | 1,0982743     | 0,910519348     | 5,319148936     |
| NFKBIL1                                                                                        | 4,39767E-08 | 0,135221661 | 0,312 | 0,039 | 0,000927952 | 1,098261542   | 0,910529926     | 8               |
| MTMR14                                                                                         | 1,06809E-06 | 0,13518685  | 0,219 | 0,023 | 0,022537726 | 1,098235042   | 0,910551896     | 9,52173913      |
| EID2B                                                                                          | 0,204327649 | 0,135037023 | 0,062 | 0,023 | 1           | 1,098120994   | 0,910646464     | 2,695652174     |
| ICAM3                                                                                          | 6,466E-11   | 0,13486558  | 0,25  | 0,012 | 1,36439E-06 | 1,097990506   | 0,910754687     | 20,83333333     |
| MACROD1                                                                                        | 9,71531E-07 | 0,134815415 | 0,25  | 0,031 | 0,020500283 | 1,097952328   | 0,910786356     | 8,064516129     |
| ATG9A                                                                                          | 0,000850121 | 0,134766292 | 0,156 | 0,027 | 1           | 1,097914944   | 0,910817368     | 5,777777778     |

Supplementary Table 1

| Differentially expressed genes_adjacent-skin-XL_comparing SC-Keloid vs. (SC-Myel, SC-Nonmyel) |             |             |       |       |             |               |                 |                 |
|-----------------------------------------------------------------------------------------------|-------------|-------------|-------|-------|-------------|---------------|-----------------|-----------------|
| gene                                                                                          | p_val       | avg_log2FC  | pct.1 | pct.2 | p_val_adj   | Foldchange_UP | Foldchange_DOWN | Ratio_pct1_pct2 |
| DHCR7                                                                                         | 1,33967E-08 | 0,134724443 | 0,125 | 0     | 0,000282684 | 1,097883096   | 0,91084379      | #DIV/0!         |
| EDC4                                                                                          | 0,01198915  | 0,134703882 | 0,156 | 0,043 | 1           | 1,09786745    | 0,910856771     | 3,627906977     |
| DBR1                                                                                          | 0,002517564 | 0,13469954  | 0,094 | 0,012 | 1           | 1,097864146   | 0,910859512     | 7,833333333     |
| GALNS                                                                                         | 0,002442928 | 0,134571875 | 0,094 | 0,012 | 1           | 1,097766999   | 0,910940119     | 7,833333333     |
| SNAP29                                                                                        | 0,00819789  | 0,134455233 | 0,188 | 0,055 | 1           | 1,097678248   | 0,911013771     | 3,418181818     |
| NUS1                                                                                          | 2,33422E-05 | 0,134446883 | 0,25  | 0,043 | 0,492544426 | 1,097671895   | 0,911019043     | 5,813953488     |
| ADPRM                                                                                         | 0,000100263 | 0,134255115 | 0,156 | 0,02  | 1           | 1,097525999   | 0,911140147     | 7,8             |
| ATE1                                                                                          | 0,000451131 | 0,134162911 | 0,219 | 0,047 | 1           | 1,097455857   | 0,911198381     | 4,659574468     |
| JAM3                                                                                          | 0,000452944 | 0,134123393 | 0,469 | 0,156 | 1           | 1,097425796   | 0,911223341     | 3,006410256     |
| FES                                                                                           | 0,090719467 | 0,133840868 | 0,094 | 0,031 | 1           | 1,097210906   | 0,911401804     | 3,032258065     |
| NUDT18                                                                                        | 9,12354E-07 | 0,133660172 | 0,094 | 0     | 0,019251588 | 1,09707349    | 0,911515964     | #DIV/0!         |
| SARAF                                                                                         | 0,025723822 | 0,133606175 | 0,812 | 0,434 | 1           | 1,09703243    | 0,911550081     | 1,870967742     |
| ZNF582                                                                                        | 0,079594089 | 0,133546009 | 0,031 | 0,004 | 1           | 1,096986681   | 0,911588096     | 7,75            |
| TAF9B                                                                                         | 8,53227E-07 | 0,133511021 | 0,188 | 0,016 | 0,018003947 | 1,096960077   | 0,911610204     | 11,75           |
| TBCC                                                                                          | 0,024533893 | 0,133440528 | 0,188 | 0,066 | 1           | 1,096906478   | 0,911654749     | 2,848484848     |
| PCYT2                                                                                         | 0,00022736  | 0,133302153 | 0,219 | 0,043 | 1           | 1,096801275   | 0,911742193     | 5,093023256     |
| U2SURP                                                                                        | 0,001102349 | 0,133229161 | 0,656 | 0,262 | 1           | 1,096745784   | 0,911788324     | 2,503816794     |
| REEP2                                                                                         | 1,53257E-05 | 0,133210694 | 0,219 | 0,031 | 0,323387973 | 1,096731746   | 0,911799994     | 7,064516129     |
| SEMA6A                                                                                        | 2,40115E-05 | 0,13314884  | 0,156 | 0,016 | 0,506667402 | 1,096684726   | 0,911839088     | 9,75            |
| DAZAP2                                                                                        | 0,000911191 | 0,133123842 | 0,594 | 0,227 | 1           | 1,096665723   | 0,911854888     | 2,616740088     |
| ATR                                                                                           | 0,014352989 | 0,133099845 | 0,125 | 0,031 | 1           | 1,096647482   | 0,911870055     | 4,032258065     |
| INTS14                                                                                        | 0,017290773 | 0,133041106 | 0,094 | 0,02  | 1           | 1,096602833   | 0,911907183     | 4,7             |
| ACAP2                                                                                         | 0,000482061 | 0,132768019 | 0,5   | 0,172 | 1           | 1,096395277   | 0,912079814     | 2,906976744     |
| ETAA1                                                                                         | 0,00050526  | 0,132611628 | 0,094 | 0,008 | 1           | 1,096276432   | 0,91217869      | 11,75           |
| TTC13                                                                                         | 0,000494525 | 0,132523186 | 0,125 | 0,016 | 1           | 1,096209229   | 0,912234611     | 7,8125          |
| GNS                                                                                           | 0,024931667 | 0,132511349 | 0,219 | 0,082 | 1           | 1,096200235   | 0,912242096     | 2,670731707     |
| COQ5                                                                                          | 9,49112E-05 | 0,132444161 | 0,25  | 0,051 | 1           | 1,096149185   | 0,912284581     | 4,901960784     |
| FAM229A                                                                                       | 0,000850121 | 0,13238774  | 0,156 | 0,027 | 1           | 1,096106317   | 0,91232026      | 5,777777778     |
| MRGBP                                                                                         | 2,03907E-07 | 0,132309028 | 0,219 | 0,02  | 0,004302644 | 1,096046517   | 0,912370036     | 10,95           |
| SMC3                                                                                          | 0,001213208 | 0,132267738 | 0,531 | 0,199 | 1           | 1,096015148   | 0,912396148     | 2,668341709     |

Supplementary Table 1

| Differentially expressed genes_adjacent-skin-XL_comparing SC-Keloid vs. (SC-Myel, SC-Nonmyel) |             |             |       |       |             |               |                 |                 |
|-----------------------------------------------------------------------------------------------|-------------|-------------|-------|-------|-------------|---------------|-----------------|-----------------|
| gene                                                                                          | p_val       | avg_log2FC  | pct.1 | pct.2 | p_val_adj   | Foldchange_UP | Foldchange_DOWN | Ratio_pct1_pct2 |
| UBB                                                                                           | 6,55085E-05 | 0,131906213 | 0,906 | 0,387 | 1           | 1,095740532   | 0,912624815     | 2,341085271     |
| DGKQ                                                                                          | 0,37426516  | 0,131792415 | 0,031 | 0,012 | 1           | 1,095654105   | 0,912696804     | 2,583333333     |
| SFRP2                                                                                         | 0,221475664 | 0,131720028 | 0,031 | 0,008 | 1           | 1,095599132   | 0,9127426       | 3,875           |
| DOK4                                                                                          | 1,51098E-05 | 0,131541168 | 0,125 | 0,008 | 0,318831333 | 1,095463312   | 0,912855765     | 15,625          |
| ANO1                                                                                          | 0,000524345 | 0,131486061 | 0,094 | 0,008 | 1           | 1,095421469   | 0,912890635     | 11,75           |
| SMIM27                                                                                        | 0,000341249 | 0,131400349 | 0,281 | 0,07  | 1           | 1,095356391   | 0,912944872     | 4,014285714     |
| ABHD13                                                                                        | 6,26921E-05 | 0,131310315 | 0,188 | 0,027 | 1           | 1,095288035   | 0,913001848     | 6,962962963     |
| LRTOMT                                                                                        | 0,002168448 | 0,131143897 | 0,062 | 0,004 | 1           | 1,095161698   | 0,913107171     | 15,5            |
| KIF20B                                                                                        | 0,038520178 | 0,131061275 | 0,125 | 0,039 | 1           | 1,095098981   | 0,913159465     | 3,205128205     |
| KAT5                                                                                          | 0,000764302 | 0,130961653 | 0,25  | 0,062 | 1           | 1,095023365   | 0,913222523     | 4,032258065     |
| PEX3                                                                                          | 6,6835E-09  | 0,130905905 | 0,25  | 0,02  | 0,000141028 | 1,094981052   | 0,913257812     | 12,5            |
| CCDC43                                                                                        | 0,000777418 | 0,130706189 | 0,25  | 0,062 | 1           | 1,094829482   | 0,913384245     | 4,032258065     |
| GTF2F2                                                                                        | 3,40485E-06 | 0,13066874  | 0,5   | 0,121 | 0,071845702 | 1,094801063   | 0,913407955     | 4,132231405     |
| ZNF239                                                                                        | 0,079594089 | 0,130631475 | 0,031 | 0,004 | 1           | 1,094772784   | 0,913431549     | 7,75            |
| SV2A                                                                                          | 1,33967E-08 | 0,130552796 | 0,125 | 0     | 0,000282684 | 1,094713081   | 0,913481365     | #DIV/0!         |
| TNFSF13B                                                                                      | 6,3574E-05  | 0,130481427 | 0,062 | 0     | 1           | 1,094658927   | 0,913526556     | #DIV/0!         |
| NDUFAF3                                                                                       | 0,00530393  | 0,130246947 | 0,75  | 0,332 | 1           | 1,094481028   | 0,913675043     | 2,259036145     |
| QSOX1                                                                                         | 8,47889E-08 | 0,130233354 | 0,5   | 0,102 | 0,00178913  | 1,094470716   | 0,913683651     | 4,901960784     |
| METTL6                                                                                        | 1,96272E-05 | 0,130200599 | 0,188 | 0,023 | 0,414152777 | 1,094445868   | 0,913704395     | 8,173913043     |
| RPS6KB2                                                                                       | 5,1496E-05  | 0,130040962 | 0,25  | 0,047 | 1           | 1,094324772   | 0,913805504     | 5,319148936     |
| AARD                                                                                          | 9,12354E-07 | 0,13001606  | 0,094 | 0     | 0,019251588 | 1,094305883   | 0,913821278     | #DIV/0!         |
| PLXNA4                                                                                        | 7,15271E-05 | 0,129994808 | 0,188 | 0,027 | 1           | 1,094289763   | 0,913834739     | 6,962962963     |
| TBRG1                                                                                         | 0,000345222 | 0,129803236 | 0,406 | 0,125 | 1           | 1,094144465   | 0,913956093     | 3,248           |
| NOL8                                                                                          | 0,000213404 | 0,129787729 | 0,219 | 0,043 | 1           | 1,094132704   | 0,913965917     | 5,093023256     |
| RPIA                                                                                          | 9,18193E-05 | 0,129611904 | 0,156 | 0,02  | 1           | 1,093999367   | 0,914077311     | 7,8             |
| VPS26B                                                                                        | 8,75655E-06 | 0,129593143 | 0,25  | 0,039 | 0,184771949 | 1,093985141   | 0,914089198     | 6,41025641      |
| EEFSEC                                                                                        | 7,15271E-05 | 0,129493161 | 0,188 | 0,027 | 1           | 1,093909328   | 0,914152549     | 6,962962963     |
| WDR83                                                                                         | 0,058054176 | 0,129295097 | 0,094 | 0,027 | 1           | 1,093759158   | 0,914278059     | 3,481481481     |
| SCAP                                                                                          | 1,63815E-05 | 0,129250449 | 0,312 | 0,062 | 0,345665807 | 1,093725309   | 0,914306354     | 5,032258065     |
| PSME3IP1                                                                                      | 1,16035E-05 | 0,129168561 | 0,281 | 0,051 | 0,244846285 | 1,093663231   | 0,914358252     | 5,509803922     |

Supplementary Table 1

| Differentially expressed genes_adjacent-skin-XL_comparing SC-Keloid vs. (SC-Myel, SC-Nonmyel) |             |             |       |       |             |               |                 |                 |
|-----------------------------------------------------------------------------------------------|-------------|-------------|-------|-------|-------------|---------------|-----------------|-----------------|
| gene                                                                                          | p_val       | avg_log2FC  | pct.1 | pct.2 | p_val_adj   | Foldchange_UP | Foldchange_DOWN | Ratio_pct1_pct2 |
| FBXW2                                                                                         | 0,008767839 | 0,129147617 | 0,219 | 0,07  | 1           | 1,093647354   | 0,914371526     | 3,128571429     |
| PXMP4                                                                                         | 5,12603E-06 | 0,129079988 | 0,188 | 0,02  | 0,108164307 | 1,093596089   | 0,91441439      | 9,4             |
| AK1                                                                                           | 0,000346284 | 0,129074288 | 0,531 | 0,18  | 1           | 1,093591768   | 0,914418003     | 2,95            |
| PRADC1                                                                                        | 0,000408406 | 0,128942999 | 0,188 | 0,035 | 1           | 1,093492253   | 0,914501221     | 5,371428571     |
| C3orf18                                                                                       | 0,140820961 | 0,128921767 | 0,062 | 0,02  | 1           | 1,09347616    | 0,91451468      | 3,1             |
| CHPF2                                                                                         | 0,003191522 | 0,128910355 | 0,188 | 0,047 | 1           | 1,09346751    | 0,914521914     | 4               |
| CTSH                                                                                          | 0,380266129 | 0,12884451  | 0,031 | 0,012 | 1           | 1,093417605   | 0,914563654     | 2,583333333     |
| IREB2                                                                                         | 0,002438935 | 0,128810376 | 0,219 | 0,059 | 1           | 1,093391736   | 0,914585292     | 3,711864407     |
| SLC35B4                                                                                       | 2,08038E-05 | 0,128720605 | 0,188 | 0,023 | 0,438980454 | 1,093323702   | 0,914642203     | 8,173913043     |
| DSG2                                                                                          | 9,12354E-07 | 0,128575452 | 0,094 | 0     | 0,019251588 | 1,093213706   | 0,914734233     | #DIV/0!         |
| PTBP1                                                                                         | 0,000324159 | 0,128518392 | 0,531 | 0,184 | 1           | 1,093170468   | 0,914770412     | 2,885869565     |
| LIN7B                                                                                         | 0,003731537 | 0,128513712 | 0,156 | 0,035 | 1           | 1,093166922   | 0,91477338      | 4,457142857     |
| TFAP4                                                                                         | 0,000524345 | 0,128486026 | 0,094 | 0,008 | 1           | 1,093145945   | 0,914790934     | 11,75           |
| STK19                                                                                         | 6,58444E-07 | 0,128397875 | 0,281 | 0,039 | 0,013893836 | 1,093079154   | 0,914846831     | 7,205128205     |
| SF3B2                                                                                         | 0,000178536 | 0,128211977 | 0,625 | 0,215 | 1           | 1,092938314   | 0,914964721     | 2,906976744     |
| TRMT61A                                                                                       | 5,1496E-05  | 0,127906342 | 0,25  | 0,047 | 1           | 1,092706799   | 0,915158577     | 5,319148936     |
| TSFM                                                                                          | 9,17361E-07 | 0,127799931 | 0,188 | 0,016 | 0,019357231 | 1,092626206   | 0,91522608      | 11,75           |
| VTI1B                                                                                         | 1,70052E-05 | 0,127734466 | 0,375 | 0,086 | 0,358825913 | 1,092576628   | 0,915267611     | 4,360465116     |
| TEX264                                                                                        | 2,99389E-05 | 0,127709962 | 0,312 | 0,066 | 0,631740799 | 1,09255807    | 0,915283157     | 4,727272727     |
| FNDC4                                                                                         | 1,11477E-07 | 0,127671849 | 0,188 | 0,012 | 0,002352284 | 1,092529207   | 0,915307338     | 15,66666667     |
| BCKDHB                                                                                        | 0,011239937 | 0,127616598 | 0,156 | 0,043 | 1           | 1,092487368   | 0,915342392     | 3,627906977     |
| APOBEC3C                                                                                      | 2,4664E-06  | 0,127499288 | 0,406 | 0,086 | 0,052043428 | 1,092398538   | 0,915416824     | 4,720930233     |
| H4C11                                                                                         | 0,013054404 | 0,127420737 | 0,062 | 0,008 | 1           | 1,092339061   | 0,915466668     | 7,75            |
| NUP188                                                                                        | 0,024247489 | 0,127260017 | 0,25  | 0,098 | 1           | 1,092217378   | 0,915568659     | 2,551020408     |
| ZNF317                                                                                        | 0,000112833 | 0,127215493 | 0,125 | 0,012 | 1           | 1,092183671   | 0,915596915     | 10,41666667     |
| HIVEP1                                                                                        | 0,024371641 | 0,127183443 | 0,219 | 0,082 | 1           | 1,092159408   | 0,915617256     | 2,670731707     |
| LAMA5                                                                                         | 0,000907991 | 0,12700936  | 0,281 | 0,078 | 1           | 1,092027631   | 0,915727745     | 3,602564103     |
| CENPO                                                                                         | 0,079594089 | 0,126987377 | 0,031 | 0,004 | 1           | 1,092010991   | 0,915741699     | 7,75            |
| SUZ12                                                                                         | 0,001221806 | 0,126841495 | 0,375 | 0,121 | 1           | 1,091900575   | 0,915834301     | 3,099173554     |
| ANKRD35                                                                                       | 6,3574E-05  | 0,126784193 | 0,062 | 0     | 1           | 1,091857207   | 0,915870677     | #DIV/0!         |

Supplementary Table 1

| Differentially expressed genes_adjacent-skin-XL_comparing SC-Keloid vs. (SC-Myel, SC-Nonmyel) |             |             |       |       |             |               |                 |                 |
|-----------------------------------------------------------------------------------------------|-------------|-------------|-------|-------|-------------|---------------|-----------------|-----------------|
| gene                                                                                          | p_val       | avg_log2FC  | pct.1 | pct.2 | p_val_adj   | Foldchange_UP | Foldchange_DOWN | Ratio_pct1_pct2 |
| MIER1                                                                                         | 4,01482E-06 | 0,126736689 | 0,469 | 0,113 | 0,084716761 | 1,091821255   | 0,915900835     | 4,150442478     |
| KANK2                                                                                         | 0,00502496  | 0,126725743 | 0,438 | 0,18  | 1           | 1,091812971   | 0,915907785     | 2,433333333     |
| NR2C2AP                                                                                       | 0,000100263 | 0,126629597 | 0,156 | 0,02  | 1           | 1,091740212   | 0,915968826     | 7,8             |
| HSD11B1L                                                                                      | 0,000486824 | 0,1262323   | 0,094 | 0,008 | 1           | 1,091439605   | 0,916221104     | 11,75           |
| ATP5IF1                                                                                       | 0,010876165 | 0,126193117 | 0,812 | 0,387 | 1           | 1,091409962   | 0,916245989     | 2,098191214     |
| MRPL24                                                                                        | 1,82968E-05 | 0,126070868 | 0,344 | 0,074 | 0,38608009  | 1,091317483   | 0,916323632     | 4,648648649     |
| RBM18                                                                                         | 2,02073E-05 | 0,126018966 | 0,188 | 0,023 | 0,426394579 | 1,091278223   | 0,916356598     | 8,173913043     |
| DPH2                                                                                          | 3,71921E-06 | 0,126008886 | 0,156 | 0,012 | 0,078479117 | 1,091270599   | 0,916363        | 13              |
| TRAF4                                                                                         | 2,45533E-09 | 0,125916693 | 0,312 | 0,031 | 5,18099E-05 | 1,091200865   | 0,916421561     | 10,06451613     |
| ATAD2                                                                                         | 1,51098E-05 | 0,125897311 | 0,125 | 0,008 | 0,318831333 | 1,091186205   | 0,916433873     | 15,625          |
| PIGH                                                                                          | 3,1256E-08  | 0,125879635 | 0,344 | 0,047 | 0,000659534 | 1,091172836   | 0,916445101     | 7,319148936     |
| FLYWCH2                                                                                       | 3,45071E-05 | 0,125861291 | 0,469 | 0,129 | 0,728133774 | 1,091158962   | 0,916456754     | 3,635658915     |
| ZNF629                                                                                        | 0,000108998 | 0,125846925 | 0,125 | 0,012 | 1           | 1,091148096   | 0,91646588      | 10,41666667     |
| TSHZ1                                                                                         | 1,45331E-05 | 0,12571442  | 0,219 | 0,031 | 0,306663142 | 1,091047884   | 0,916550057     | 7,064516129     |
| GPATCH4                                                                                       | 0,003453714 | 0,125638886 | 0,156 | 0,035 | 1           | 1,090990762   | 0,916598045     | 4,457142857     |
| CYB561D2                                                                                      | 5,12603E-06 | 0,125341553 | 0,188 | 0,02  | 0,108164307 | 1,090765937   | 0,916786972     | 9,4             |
| ZNF746                                                                                        | 0,002594281 | 0,125259603 | 0,094 | 0,012 | 1           | 1,09070398    | 0,91683905      | 7,833333333     |
| RHNO1                                                                                         | 7,96166E-09 | 0,125201207 | 0,188 | 0,008 | 0,000167999 | 1,090659832   | 0,916876161     | 23,5            |
| ENG                                                                                           | 2,96463E-05 | 0,125171742 | 0,469 | 0,129 | 0,625566052 | 1,090637557   | 0,916894888     | 3,635658915     |
| MTDH                                                                                          | 0,004851532 | 0,125151664 | 0,781 | 0,359 | 1           | 1,090622379   | 0,916907648     | 2,175487465     |
| PAFAH2                                                                                        | 0,00050526  | 0,125073339 | 0,094 | 0,008 | 1           | 1,09056317    | 0,916957429     | 11,75           |
| GCDH                                                                                          | 0,000426857 | 0,125042157 | 0,188 | 0,035 | 1           | 1,090539599   | 0,916977248     | 5,371428571     |
| DYNC2L1                                                                                       | 0,001642148 | 0,124968476 | 0,125 | 0,02  | 1           | 1,090483904   | 0,917024081     | 6,25            |
| ABI3BP                                                                                        | 0,00018472  | 0,124921194 | 0,312 | 0,078 | 1           | 1,090448166   | 0,917054135     | 4               |
| GDAP1                                                                                         | 0,016270711 | 0,12485248  | 0,125 | 0,031 | 1           | 1,090396231   | 0,917097814     | 4,032258065     |
| EXOSC4                                                                                        | 1,96272E-05 | 0,124816343 | 0,188 | 0,023 | 0,414152777 | 1,090368919   | 0,917120786     | 8,173913043     |
| CHRAC1                                                                                        | 1,70052E-05 | 0,124513843 | 0,375 | 0,086 | 0,358825913 | 1,090140317   | 0,917313106     | 4,360465116     |
| C19orf25                                                                                      | 2,1264E-05  | 0,12447344  | 0,25  | 0,043 | 0,448690756 | 1,090109788   | 0,917338796     | 5,813953488     |
| UXT                                                                                           | 0,000237591 | 0,124429328 | 0,5   | 0,164 | 1           | 1,090076457   | 0,917366844     | 3,048780488     |
| RPTN                                                                                          | 0,004841742 | 0,124232911 | 0,031 | 0     | 1           | 1,089928058   | 0,917491749     | #DIV/0!         |

Supplementary Table 1

| Differentially expressed genes_adjacent-skin-XL_comparing SC-Keloid vs. (SC-Myel, SC-Nonmyel) |             |             |       |       |             |               |                 |                 |
|-----------------------------------------------------------------------------------------------|-------------|-------------|-------|-------|-------------|---------------|-----------------|-----------------|
| gene                                                                                          | p_val       | avg_log2FC  | pct.1 | pct.2 | p_val_adj   | Foldchange_UP | Foldchange_DOWN | Ratio_pct1_pct2 |
| EPB41                                                                                         | 0,000313864 | 0,12416382  | 0,156 | 0,023 | 1           | 1,089875862   | 0,917535689     | 6,782608696     |
| PITPNM3                                                                                       | 9,12354E-07 | 0,124137136 | 0,094 | 0     | 0,019251588 | 1,089855704   | 0,91755266      | #DIV/0!         |
| SYF2                                                                                          | 0,001137823 | 0,124127047 | 0,594 | 0,23  | 1           | 1,089848082   | 0,917559077     | 2,582608696     |
| ORMDL2                                                                                        | 1,5064E-07  | 0,124122495 | 0,312 | 0,043 | 0,003178646 | 1,089844644   | 0,917561972     | 7,255813953     |
| FAM218A                                                                                       | 0,002168448 | 0,124111152 | 0,062 | 0,004 | 1           | 1,089836075   | 0,917569186     | 15,5            |
| ZFP14                                                                                         | 0,287158009 | 0,123901153 | 0,062 | 0,027 | 1           | 1,08967745    | 0,917702757     | 2,296296296     |
| ALG9                                                                                          | 9,17361E-07 | 0,123746544 | 0,188 | 0,016 | 0,019357231 | 1,089560679   | 0,91780111      | 11,75           |
| ZNF691                                                                                        | 0,002442928 | 0,123737937 | 0,094 | 0,012 | 1           | 1,089554178   | 0,917806585     | 7,833333333     |
| XRCC4                                                                                         | 4,80509E-06 | 0,123735887 | 0,188 | 0,02  | 0,101392141 | 1,08955263    | 0,917807889     | 9,4             |
| UNC119B                                                                                       | 0,000217964 | 0,123490137 | 0,219 | 0,043 | 1           | 1,089367051   | 0,917964243     | 5,093023256     |
| USP18                                                                                         | 0,886800848 | 0,123399    | 0,031 | 0,027 | 1           | 1,089298237   | 0,918022233     | 1,148148148     |
| IFT74                                                                                         | 6,4372E-05  | 0,123341358 | 0,188 | 0,027 | 1           | 1,089254715   | 0,918058914     | 6,962962963     |
| FAM78B                                                                                        | 9,06462E-07 | 0,123288424 | 0,125 | 0,004 | 0,019127258 | 1,08921475    | 0,918092599     | 31,25           |
| COG2                                                                                          | 0,034851427 | 0,12322727  | 0,094 | 0,023 | 1           | 1,08916858    | 0,918131516     | 4,086956522     |
| TUBB2A                                                                                        | 0,003624359 | 0,123173616 | 0,656 | 0,297 | 1           | 1,089128075   | 0,918165662     | 2,208754209     |
| NDN                                                                                           | 0,000801432 | 0,12306421  | 0,312 | 0,09  | 1           | 1,089045484   | 0,918235294     | 3,466666667     |
| ZFPM1                                                                                         | 0,002686655 | 0,122777762 | 0,219 | 0,059 | 1           | 1,088829275   | 0,918417628     | 3,711864407     |
| SERP2                                                                                         | 0,002517564 | 0,122757996 | 0,094 | 0,012 | 1           | 1,088814358   | 0,918430211     | 7,833333333     |
| LBX2-AS1                                                                                      | 3,86379E-06 | 0,122661215 | 0,156 | 0,012 | 0,081529835 | 1,088741319   | 0,918491824     | 13              |
| EMC9                                                                                          | 0,008322455 | 0,122554235 | 0,188 | 0,055 | 1           | 1,088660588   | 0,918559936     | 3,418181818     |
| SGSM3                                                                                         | 8,00274E-06 | 0,122470828 | 0,312 | 0,059 | 0,168865745 | 1,088597651   | 0,918613043     | 5,288135593     |
| SUB1                                                                                          | 0,010998166 | 0,122435898 | 0,844 | 0,441 | 1           | 1,088571295   | 0,918635283     | 1,9138322       |
| COG4                                                                                          | 1,5064E-07  | 0,122371818 | 0,312 | 0,043 | 0,003178646 | 1,088522944   | 0,918676088     | 7,255813953     |
| ACADS                                                                                         | 5,49744E-05 | 0,122326376 | 0,25  | 0,047 | 1           | 1,088488659   | 0,918705025     | 5,319148936     |
| FGFBP3                                                                                        | 0,00696629  | 0,122325243 | 0,156 | 0,039 | 1           | 1,088487804   | 0,918705746     | 4               |
| MTOR                                                                                          | 2,40115E-05 | 0,122234662 | 0,156 | 0,016 | 0,506667402 | 1,088419465   | 0,918763429     | 9,75            |
| B3GALNT2                                                                                      | 8,19238E-06 | 0,121954831 | 0,344 | 0,07  | 0,172867368 | 1,088208371   | 0,918941654     | 4,914285714     |
| CRLS1                                                                                         | 9,85458E-05 | 0,121598884 | 0,219 | 0,039 | 1           | 1,087939917   | 0,919168407     | 5,615384615     |
| ABCA7                                                                                         | 6,3574E-05  | 0,121587789 | 0,062 | 0     | 1           | 1,08793155    | 0,919175476     | #DIV/0!         |
| AL031590.1                                                                                    | 0,004841742 | 0,121387998 | 0,031 | 0     | 1           | 1,087780899   | 0,919302776     | #DIV/0!         |

Supplementary Table 1

| Differentially expressed genes_adjacent-skin-XL_comparing SC-Keloid vs. (SC-Myel, SC-Nonmyel) |             |             |       |       |             |               |                 |                 |
|-----------------------------------------------------------------------------------------------|-------------|-------------|-------|-------|-------------|---------------|-----------------|-----------------|
| gene                                                                                          | p_val       | avg_log2FC  | pct.1 | pct.2 | p_val_adj   | Foldchange_UP | Foldchange_DOWN | Ratio_pct1_pct2 |
| MOSPD1                                                                                        | 0,000186392 | 0,121250078 | 0,188 | 0,031 | 1           | 1,087676913   | 0,919390665     | 6,064516129     |
| COQ9                                                                                          | 4,14927E-06 | 0,121207397 | 0,219 | 0,027 | 0,087553714 | 1,087644735   | 0,919417865     | 8,111111111     |
| SMARCD2                                                                                       | 0,05712057  | 0,121122073 | 0,094 | 0,027 | 1           | 1,087580412   | 0,919472242     | 3,481481481     |
| PRICKLE2                                                                                      | 4,24942E-06 | 0,121040398 | 0,344 | 0,066 | 0,089667107 | 1,087518843   | 0,919524297     | 5,212121212     |
| TMEM14B                                                                                       | 0,000685336 | 0,120906796 | 0,5   | 0,172 | 1           | 1,087418137   | 0,919609455     | 2,906976744     |
| HENMT1                                                                                        | 0,082317662 | 0,120872276 | 0,031 | 0,004 | 1           | 1,087392118   | 0,919631459     | 7,75            |
| GFOD2                                                                                         | 2,03907E-07 | 0,12086599  | 0,219 | 0,02  | 0,004302644 | 1,08738738    | 0,919635466     | 10,95           |
| CHST7                                                                                         | 0,136324108 | 0,120764855 | 0,062 | 0,02  | 1           | 1,087311155   | 0,919699936     | 3,1             |
| MMGT1                                                                                         | 0,005043469 | 0,120695001 | 0,219 | 0,062 | 1           | 1,08725851    | 0,919744468     | 3,532258065     |
| MRPL21                                                                                        | 5,08352E-06 | 0,120651209 | 0,406 | 0,09  | 0,107267254 | 1,087225508   | 0,919772386     | 4,511111111     |
| COL16A1                                                                                       | 0,002128196 | 0,120636073 | 0,75  | 0,336 | 1           | 1,087214101   | 0,919782037     | 2,232142857     |
| OXLD1                                                                                         | 0,007558313 | 0,120547342 | 0,094 | 0,016 | 1           | 1,087147235   | 0,919838608     | 5,875           |
| FAM214B                                                                                       | 1,12327E-08 | 0,120484652 | 0,312 | 0,035 | 0,000237021 | 1,087099996   | 0,919878579     | 8,914285714     |
| DERA                                                                                          | 6,8795E-06  | 0,120373101 | 0,312 | 0,059 | 0,14516429  | 1,087015944   | 0,919949708     | 5,288135593     |
| REP15                                                                                         | 6,3574E-05  | 0,120335535 | 0,062 | 0     | 1           | 1,086987639   | 0,919973663     | #DIV/0!         |
| SMNDC1                                                                                        | 0,002497467 | 0,120215261 | 0,375 | 0,133 | 1           | 1,086897024   | 0,920050362     | 2,819548872     |
| GPALPP1                                                                                       | 0,123276773 | 0,120199514 | 0,094 | 0,035 | 1           | 1,08688516    | 0,920060404     | 2,685714286     |
| AVEN                                                                                          | 2,24684E-05 | 0,120127094 | 0,156 | 0,016 | 0,474104712 | 1,086830602   | 0,920106591     | 9,75            |
| ATAT1                                                                                         | 0,000862268 | 0,11995858  | 0,188 | 0,039 | 1           | 1,086703663   | 0,92021407      | 4,820512821     |
| ALDH3B1                                                                                       | 2,11157E-07 | 0,119896744 | 0,219 | 0,02  | 0,00445563  | 1,086657086   | 0,920253512     | 10,95           |
| CDT1                                                                                          | 9,12354E-07 | 0,119767952 | 0,094 | 0     | 0,019251588 | 1,086560083   | 0,920335669     | #DIV/0!         |
| EXOC7                                                                                         | 0,001096967 | 0,119720487 | 0,312 | 0,094 | 1           | 1,086524335   | 0,920365948     | 3,319148936     |
| FMNL1                                                                                         | 0,216675772 | 0,119342815 | 0,031 | 0,008 | 1           | 1,08623994    | 0,920606915     | 3,875           |
| GOLGA7B                                                                                       | 1,33967E-08 | 0,119221628 | 0,125 | 0     | 0,000282684 | 1,086148698   | 0,92068425      | #DIV/0!         |
| FNDC10                                                                                        | 9,12354E-07 | 0,119211923 | 0,094 | 0     | 0,019251588 | 1,086141392   | 0,920690443     | #DIV/0!         |
| MAPKAPK3                                                                                      | 9,17361E-07 | 0,119195682 | 0,188 | 0,016 | 0,019357231 | 1,086129165   | 0,920700808     | 11,75           |
| SGO2                                                                                          | 8,53227E-07 | 0,119000006 | 0,188 | 0,016 | 0,018003947 | 1,085981861   | 0,920825693     | 11,75           |
| ATXN7L3                                                                                       | 0,003907631 | 0,118987971 | 0,125 | 0,023 | 1           | 1,085972801   | 0,920833375     | 5,434782609     |
| ARV1                                                                                          | 0,001520602 | 0,118982512 | 0,125 | 0,02  | 1           | 1,085968692   | 0,92083686      | 6,25            |
| DAP3                                                                                          | 0,00019011  | 0,118869071 | 0,281 | 0,066 | 1           | 1,085883305   | 0,920909269     | 4,257575758     |



Supplementary Table 1

| Differentially expressed genes_adjacent-skin-XL_comparing SC-Keloid vs. (SC-Myel, SC-Nonmyel) |             |             |       |       |             |               |                 |                 |
|-----------------------------------------------------------------------------------------------|-------------|-------------|-------|-------|-------------|---------------|-----------------|-----------------|
| gene                                                                                          | p_val       | avg_log2FC  | pct.1 | pct.2 | p_val_adj   | Foldchange_UP | Foldchange_DOWN | Ratio_pct1_pct2 |
| TFB1M                                                                                         | 0,000524345 | 0,11884519  | 0,094 | 0,008 | 1           | 1,08586533    | 0,920924513     | 11,75           |
| BCKDK                                                                                         | 0,000235567 | 0,118808075 | 0,281 | 0,066 | 1           | 1,085837396   | 0,920948205     | 4,257575758     |
| CKAP2L                                                                                        | 6,3574E-05  | 0,118773451 | 0,062 | 0     | 1           | 1,085811336   | 0,920970307     | #DIV/0!         |
| CDCA5                                                                                         | 6,3574E-05  | 0,118750856 | 0,062 | 0     | 1           | 1,085794331   | 0,920984731     | #DIV/0!         |
| POLR1E                                                                                        | 0,039090354 | 0,118702899 | 0,125 | 0,039 | 1           | 1,085758238   | 0,921015347     | 3,205128205     |
| GOPC                                                                                          | 3,20633E-05 | 0,118616773 | 0,406 | 0,102 | 0,676566707 | 1,085693422   | 0,921070331     | 3,980392157     |
| SRPK1                                                                                         | 0,006263449 | 0,118543463 | 0,219 | 0,066 | 1           | 1,085638255   | 0,921117136     | 3,318181818     |
| CTU2                                                                                          | 4,02312E-05 | 0,118472998 | 0,219 | 0,035 | 0,848917917 | 1,085585523   | 0,921162127     | 6,257142857     |
| ADAM15                                                                                        | 9,0753E-05  | 0,118452452 | 0,344 | 0,086 | 1           | 1,085569771   | 0,921175246     | 4               |
| NT5DC1                                                                                        | 3,67695E-07 | 0,118144395 | 0,156 | 0,008 | 0,007758733 | 1,085337995   | 0,921371964     | 19,5            |
| C7orf50                                                                                       | 0,000107103 | 0,118078564 | 0,656 | 0,227 | 1           | 1,085288471   | 0,921414008     | 2,889867841     |
| NXPH3                                                                                         | 9,06462E-07 | 0,118071213 | 0,125 | 0,004 | 0,019127258 | 1,085282941   | 0,921418703     | 31,25           |
| MRPL33                                                                                        | 0,01098539  | 0,118044065 | 0,781 | 0,387 | 1           | 1,085262519   | 0,921436042     | 2,018087855     |
| GDI1                                                                                          | 0,000552365 | 0,118034426 | 0,688 | 0,266 | 1           | 1,085255268   | 0,921442198     | 2,586466165     |
| SYCE1L                                                                                        | 4,80439E-05 | 0,117996409 | 0,094 | 0,004 | 1           | 1,085226671   | 0,92146648      | 23,5            |
| MANEA                                                                                         | 4,15544E-10 | 0,117963814 | 0,344 | 0,035 | 8,7684E-06  | 1,085202152   | 0,921487299     | 9,828571429     |
| TMEM233                                                                                       | 0,004841742 | 0,117956024 | 0,031 | 0     | 1           | 1,085196292   | 0,921492275     | #DIV/0!         |
| TMEM51                                                                                        | 3,51691E-07 | 0,11794196  | 0,156 | 0,008 | 0,007421029 | 1,085185714   | 0,921501257     | 19,5            |
| RHBDD2                                                                                        | 1,28546E-05 | 0,117774086 | 0,469 | 0,117 | 0,271244228 | 1,085059447   | 0,921608491     | 4,008547009     |
| RRM2                                                                                          | 0,004841742 | 0,117755654 | 0,031 | 0     | 1           | 1,085045584   | 0,921620266     | #DIV/0!         |
| RRP1B                                                                                         | 0,004267025 | 0,117598072 | 0,156 | 0,035 | 1           | 1,084927074   | 0,921720938     | 4,457142857     |
| FCGRT                                                                                         | 0,030702441 | 0,117595747 | 0,594 | 0,297 | 1           | 1,084925325   | 0,921722423     | 2               |
| CRELD2                                                                                        | 2,35573E-05 | 0,117545393 | 0,469 | 0,129 | 0,497083296 | 1,084887459   | 0,921754594     | 3,635658915     |
| ARL10                                                                                         | 0,000417537 | 0,117513731 | 0,188 | 0,035 | 1           | 1,08486365    | 0,921774824     | 5,371428571     |
| USP40                                                                                         | 3,64935E-07 | 0,117481367 | 0,312 | 0,047 | 0,007700495 | 1,084839314   | 0,921795502     | 6,638297872     |
| ARL6                                                                                          | 9,06462E-07 | 0,117372197 | 0,125 | 0,004 | 0,019127258 | 1,084757227   | 0,921865257     | 31,25           |
| ACD                                                                                           | 0,000208933 | 0,117242451 | 0,219 | 0,043 | 1           | 1,084659675   | 0,921948168     | 5,093023256     |
| BTN3A3                                                                                        | 1,33967E-08 | 0,117185974 | 0,125 | 0     | 0,000282684 | 1,084617215   | 0,92198426      | #DIV/0!         |
| CPSF3                                                                                         | 6,78604E-05 | 0,11717318  | 0,188 | 0,027 | 1           | 1,084607596   | 0,921992436     | 6,962962963     |
| APLF                                                                                          | 6,3574E-05  | 0,11709406  | 0,062 | 0     | 1           | 1,084548116   | 0,922043001     | #DIV/0!         |

Supplementary Table 1

| Differentially expressed genes_adjacent-skin-XL_comparing SC-Keloid vs. (SC-Myel, SC-Nonmyel) |             |             |       |       |             |               |                 |                 |
|-----------------------------------------------------------------------------------------------|-------------|-------------|-------|-------|-------------|---------------|-----------------|-----------------|
| gene                                                                                          | p_val       | avg_log2FC  | pct.1 | pct.2 | p_val_adj   | Foldchange_UP | Foldchange_DOWN | Ratio_pct1_pct2 |
| TES                                                                                           | 3,92553E-05 | 0,117072978 | 0,219 | 0,035 | 0,828326361 | 1,084532268   | 0,922056475     | 6,257142857     |
| TAF1A                                                                                         | 6,3574E-05  | 0,117006176 | 0,062 | 0     | 1           | 1,084482051   | 0,922099171     | #DIV/0!         |
| C14orf93                                                                                      | 0,000305772 | 0,11680624  | 0,156 | 0,023 | 1           | 1,084331768   | 0,922226969     | 6,782608696     |
| MTG2                                                                                          | 5,30026E-06 | 0,116798737 | 0,281 | 0,047 | 0,111840702 | 1,084326129   | 0,922231765     | 5,978723404     |
| MEIS3                                                                                         | 0,003734954 | 0,116669128 | 0,125 | 0,023 | 1           | 1,08422872    | 0,92231462      | 5,434782609     |
| MECR                                                                                          | 0,000100263 | 0,116664123 | 0,156 | 0,02  | 1           | 1,084224959   | 0,92231782      | 7,8             |
| PDGFB                                                                                         | 4,32037E-12 | 0,116628276 | 0,5   | 0,062 | 9,11641E-08 | 1,084198019   | 0,922340737     | 8,064516129     |
| BCAT1                                                                                         | 1,33967E-08 | 0,116604134 | 0,125 | 0     | 0,000282684 | 1,084179876   | 0,922356172     | #DIV/0!         |
| SPCS3                                                                                         | 0,003180406 | 0,116575868 | 0,438 | 0,168 | 1           | 1,084158635   | 0,922374243     | 2,607142857     |
| TMBIM1                                                                                        | 0,055551272 | 0,116498697 | 0,375 | 0,191 | 1           | 1,084100644   | 0,922423583     | 1,963350785     |
| CFAP298                                                                                       | 3,52995E-09 | 0,11631048  | 0,625 | 0,129 | 7,44854E-05 | 1,083959219   | 0,922543932     | 4,84496124      |
| PLAA                                                                                          | 0,003660239 | 0,116284412 | 0,156 | 0,035 | 1           | 1,083939633   | 0,922560602     | 4,457142857     |
| MNS1                                                                                          | 3,73706E-05 | 0,116243233 | 0,219 | 0,035 | 0,788556861 | 1,083908695   | 0,922586935     | 6,257142857     |
| ERC1                                                                                          | 0,07109236  | 0,116162993 | 0,25  | 0,117 | 1           | 1,083848411   | 0,922638249     | 2,136752137     |
| DNAJC17                                                                                       | 9,91727E-06 | 0,116140099 | 0,25  | 0,039 | 0,209264362 | 1,083831212   | 0,92265289      | 6,41025641      |
| CASD1                                                                                         | 4,43697E-05 | 0,116098957 | 0,219 | 0,035 | 0,936244219 | 1,083800304   | 0,922679202     | 6,257142857     |
| MTHFD1                                                                                        | 0,000419572 | 0,116053371 | 0,25  | 0,059 | 1           | 1,083766059   | 0,922708357     | 4,237288136     |
| SLC1A4                                                                                        | 0,025666014 | 0,115883106 | 0,125 | 0,035 | 1           | 1,083638162   | 0,92281726      | 3,571428571     |
| CHST12                                                                                        | 5,07391E-05 | 0,11581868  | 0,344 | 0,082 | 1           | 1,083589771   | 0,922858472     | 4,195121951     |
| COG8                                                                                          | 0,143111738 | 0,115782068 | 0,062 | 0,02  | 1           | 1,083562273   | 0,922881891     | 3,1             |
| ZNF777                                                                                        | 0,985101745 | 0,115732726 | 0,031 | 0,031 | 1           | 1,083525214   | 0,922913456     | 1               |
| IL15                                                                                          | 0,038520178 | 0,115664469 | 0,125 | 0,039 | 1           | 1,083473951   | 0,922957122     | 3,205128205     |
| HSPB11                                                                                        | 2,56424E-06 | 0,115653286 | 0,406 | 0,086 | 0,054108077 | 1,083465553   | 0,922964276     | 4,720930233     |
| NDUFAF5                                                                                       | 8,53227E-07 | 0,115519218 | 0,188 | 0,016 | 0,018003947 | 1,083364873   | 0,92305005      | 11,75           |
| TAMM41                                                                                        | 0,217761179 | 0,115514607 | 0,094 | 0,043 | 1           | 1,08336141    | 0,923053001     | 2,186046512     |
| IPO11                                                                                         | 0,007558313 | 0,11550652  | 0,094 | 0,016 | 1           | 1,083355337   | 0,923058175     | 5,875           |
| PHKA2                                                                                         | 0,007558313 | 0,115428037 | 0,094 | 0,016 | 1           | 1,083296404   | 0,923108391     | 5,875           |
| OGFOD1                                                                                        | 6,94943E-07 | 0,115374311 | 0,281 | 0,039 | 0,014663999 | 1,083256063   | 0,923142768     | 7,205128205     |
| MASTL                                                                                         | 0,003907631 | 0,115248166 | 0,125 | 0,023 | 1           | 1,08316135    | 0,923223489     | 5,434782609     |
| CYHR1                                                                                         | 8,94972E-05 | 0,115105504 | 0,5   | 0,152 | 1           | 1,083054246   | 0,923314786     | 3,289473684     |

Supplementary Table 1

| Differentially expressed genes_adjacent-skin-XL_comparing SC-Keloid vs. (SC-Myel, SC-Nonmyel) |             |             |       |       |             |               |                 |                 |
|-----------------------------------------------------------------------------------------------|-------------|-------------|-------|-------|-------------|---------------|-----------------|-----------------|
| gene                                                                                          | p_val       | avg_log2FC  | pct.1 | pct.2 | p_val_adj   | Foldchange_UP | Foldchange_DOWN | Ratio_pct1_pct2 |
| MRPS18C                                                                                       | 0,00024412  | 0,1150116   | 0,406 | 0,121 | 1           | 1,082983753   | 0,923374886     | 3,355371901     |
| PIGV                                                                                          | 0,000112833 | 0,114994111 | 0,125 | 0,012 | 1           | 1,082970625   | 0,92338608      | 10,41666667     |
| PINK1                                                                                         | 0,024095672 | 0,114889756 | 0,219 | 0,082 | 1           | 1,082892292   | 0,923452874     | 2,670731707     |
| CCDC25                                                                                        | 0,000751392 | 0,114680291 | 0,25  | 0,062 | 1           | 1,082735079   | 0,92358696      | 4,032258065     |
| KEAP1                                                                                         | 5,49744E-05 | 0,114640011 | 0,25  | 0,047 | 1           | 1,082704849   | 0,923612747     | 5,319148936     |
| CSF3                                                                                          | 0,079594089 | 0,114429281 | 0,031 | 0,004 | 1           | 1,082546714   | 0,923747666     | 7,75            |
| SLC9A5                                                                                        | 0,004841742 | 0,114392539 | 0,031 | 0     | 1           | 1,082519144   | 0,923771192     | #DIV/0!         |
| GP1BB                                                                                         | 6,3574E-05  | 0,114377582 | 0,062 | 0     | 1           | 1,082507922   | 0,923780769     | #DIV/0!         |
| OTUD3                                                                                         | 0,001600673 | 0,11427028  | 0,125 | 0,02  | 1           | 1,082427411   | 0,923849479     | 6,25            |
| CAVIN1                                                                                        | 0,00598963  | 0,114221907 | 0,812 | 0,41  | 1           | 1,082391119   | 0,923880456     | 1,980487805     |
| TIMM50                                                                                        | 3,83019E-05 | 0,114089518 | 0,219 | 0,035 | 0,808209445 | 1,082291798   | 0,92396524      | 6,257142857     |
| STRN3                                                                                         | 0,001160855 | 0,114042607 | 0,312 | 0,094 | 1           | 1,082256607   | 0,923995284     | 3,319148936     |
| LOXL1-AS1                                                                                     | 9,06462E-07 | 0,114033921 | 0,125 | 0,004 | 0,019127258 | 1,082250091   | 0,924000847     | 31,25           |
| SNX6                                                                                          | 0,000164547 | 0,113999626 | 0,625 | 0,215 | 1           | 1,082224364   | 0,924022812     | 2,906976744     |
| SAMD12                                                                                        | 0,00050526  | 0,113914146 | 0,094 | 0,008 | 1           | 1,082160244   | 0,924077562     | 11,75           |
| SLC48A1                                                                                       | 0,163752339 | 0,113616323 | 0,094 | 0,039 | 1           | 1,081936871   | 0,924268344     | 2,41025641      |
| UNG                                                                                           | 6,10538E-05 | 0,113606115 | 0,188 | 0,027 | 1           | 1,081929215   | 0,924274884     | 6,962962963     |
| BMF                                                                                           | 0,64910682  | 0,113374158 | 0,031 | 0,02  | 1           | 1,081755277   | 0,924423501     | 1,55            |
| ZBTB8OS                                                                                       | 1,39237E-10 | 0,113247484 | 0,5   | 0,074 | 2,93803E-06 | 1,081660299   | 0,924504672     | 6,756756757     |
| KIF5B                                                                                         | 0,006594757 | 0,113137968 | 0,781 | 0,379 | 1           | 1,081578192   | 0,924574855     | 2,060686016     |
| SLC25A37                                                                                      | 0,00192833  | 0,113118706 | 0,406 | 0,148 | 1           | 1,081563752   | 0,924587199     | 2,743243243     |
| SLC35A3                                                                                       | 0,001280476 | 0,112962734 | 0,25  | 0,066 | 1           | 1,081446829   | 0,924687163     | 3,787878788     |
| ATP6V1E1                                                                                      | 0,000461786 | 0,112931017 | 0,406 | 0,129 | 1           | 1,081423053   | 0,924707493     | 3,147286822     |
| PPA2                                                                                          | 1,87436E-06 | 0,112857651 | 0,281 | 0,043 | 0,039550805 | 1,081368061   | 0,924754518     | 6,534883721     |
| RMI1                                                                                          | 1,96814E-10 | 0,11277735  | 0,156 | 0     | 4,15296E-06 | 1,081307874   | 0,924805991     | #DIV/0!         |
| ETV1                                                                                          | 1,51098E-05 | 0,112689986 | 0,125 | 0,008 | 0,318831333 | 1,081242395   | 0,924861996     | 15,625          |
| UCN2                                                                                          | 1,33967E-08 | 0,112677366 | 0,125 | 0     | 0,000282684 | 1,081232937   | 0,924870086     | #DIV/0!         |
| AC003102.1                                                                                    | 0,007750521 | 0,112622339 | 0,094 | 0,016 | 1           | 1,081191698   | 0,924905363     | 5,875           |
| FUBP3                                                                                         | 0,065708526 | 0,112552564 | 0,219 | 0,098 | 1           | 1,081139408   | 0,924950097     | 2,234693878     |
| C8orf33                                                                                       | 4,97256E-06 | 0,112536954 | 0,375 | 0,078 | 0,104925968 | 1,08112771    | 0,924960105     | 4,807692308     |

Supplementary Table 1

| Differentially expressed genes_adjacent-skin-XL_comparing SC-Keloid vs. (SC-Myel, SC-Nonmyel) |             |             |       |       |             |               |                 |                 |
|-----------------------------------------------------------------------------------------------|-------------|-------------|-------|-------|-------------|---------------|-----------------|-----------------|
| gene                                                                                          | p_val       | avg_log2FC  | pct.1 | pct.2 | p_val_adj   | Foldchange_UP | Foldchange_DOWN | Ratio_pct1_pct2 |
| RBFOX2                                                                                        | 1,1972E-07  | 0,112525006 | 0,469 | 0,094 | 0,002526204 | 1,081118756   | 0,924967765     | 4,989361702     |
| ACYP1                                                                                         | 5,30026E-06 | 0,112523628 | 0,281 | 0,047 | 0,111840702 | 1,081117724   | 0,924968649     | 5,978723404     |
| CEP41                                                                                         | 0,000105286 | 0,112505023 | 0,125 | 0,012 | 1           | 1,081103782   | 0,924980577     | 10,41666667     |
| LGMN                                                                                          | 2,72358E-05 | 0,112480894 | 0,344 | 0,078 | 0,574702915 | 1,081085701   | 0,924996048     | 4,41025641      |
| ZNF454                                                                                        | 0,079594089 | 0,112471924 | 0,031 | 0,004 | 1           | 1,081078979   | 0,925001799     | 7,75            |
| DUSP4                                                                                         | 0,002370322 | 0,112387178 | 0,094 | 0,012 | 1           | 1,081015477   | 0,925056136     | 7,833333333     |
| ATG4D                                                                                         | 3,71921E-06 | 0,112306504 | 0,156 | 0,012 | 0,078479117 | 1,080955029   | 0,925107866     | 13              |
| SPTLC2                                                                                        | 5,03836E-05 | 0,112282537 | 0,25  | 0,047 | 1           | 1,080937072   | 0,925123234     | 5,319148936     |
| P4HA1                                                                                         | 0,000138718 | 0,112133278 | 0,281 | 0,062 | 1           | 1,080825245   | 0,925218951     | 4,532258065     |
| MED14OS                                                                                       | 0,039886012 | 0,112094855 | 0,062 | 0,012 | 1           | 1,08079646    | 0,925243593     | 5,166666667     |
| P3H4                                                                                          | 9,17361E-07 | 0,112012054 | 0,188 | 0,016 | 0,019357231 | 1,080734431   | 0,925296697     | 11,75           |
| CANT1                                                                                         | 9,17361E-07 | 0,111909746 | 0,188 | 0,016 | 0,019357231 | 1,080657795   | 0,925362316     | 11,75           |
| NXN                                                                                           | 9,06462E-07 | 0,111866676 | 0,125 | 0,004 | 0,019127258 | 1,080625533   | 0,925389942     | 31,25           |
| NAA60                                                                                         | 0,001827205 | 0,111854396 | 0,188 | 0,043 | 1           | 1,080616335   | 0,925397819     | 4,372093023     |
| AATF                                                                                          | 0,000420635 | 0,111462232 | 0,344 | 0,098 | 1           | 1,080322634   | 0,925649402     | 3,510204082     |
| PKN3                                                                                          | 0,039886012 | 0,111386878 | 0,062 | 0,012 | 1           | 1,080266209   | 0,925697751     | 5,166666667     |
| SUSD6                                                                                         | 0,009253741 | 0,110945632 | 0,219 | 0,07  | 1           | 1,079935862   | 0,925980917     | 3,128571429     |
| ZDHHC3                                                                                        | 3,04133E-08 | 0,110923428 | 0,344 | 0,047 | 0,00064175  | 1,079919241   | 0,925995169     | 7,319148936     |
| VSTM2B                                                                                        | 0,226351275 | 0,110779664 | 0,031 | 0,008 | 1           | 1,079811633   | 0,926087449     | 3,875           |
| TERF2                                                                                         | 0,000509339 | 0,110747641 | 0,125 | 0,016 | 1           | 1,079787664   | 0,926108005     | 7,8125          |
| DXO                                                                                           | 0,003361753 | 0,110745596 | 0,188 | 0,047 | 1           | 1,079786134   | 0,926109317     | 4               |
| ZNF18                                                                                         | 0,004841742 | 0,110701721 | 0,031 | 0     | 1           | 1,079753296   | 0,926137483     | #DIV/0!         |
| AC004637.1                                                                                    | 1,33967E-08 | 0,11066474  | 0,125 | 0     | 0,000282684 | 1,079725619   | 0,926161223     | #DIV/0!         |
| POLD2                                                                                         | 0,001464368 | 0,110581213 | 0,344 | 0,109 | 1           | 1,079663109   | 0,926214846     | 3,155963303     |
| DNLZ                                                                                          | 1,44979E-05 | 0,11046168  | 0,125 | 0,008 | 0,305919948 | 1,079573658   | 0,92629159      | 15,625          |
| ACTR1B                                                                                        | 4,50124E-07 | 0,110447212 | 0,375 | 0,066 | 0,009498056 | 1,079562831   | 0,926300879     | 5,681818182     |
| L3HYPDH                                                                                       | 0,000181965 | 0,110390423 | 0,188 | 0,031 | 1           | 1,079520338   | 0,926337342     | 6,064516129     |
| DHX30                                                                                         | 0,000359124 | 0,11037519  | 0,281 | 0,07  | 1           | 1,079508939   | 0,926347123     | 4,014285714     |
| XPO7                                                                                          | 0,01796492  | 0,110369319 | 0,219 | 0,078 | 1           | 1,079504546   | 0,926350893     | 2,807692308     |
| TFAP2A                                                                                        | 0,005023211 | 0,110358083 | 0,562 | 0,238 | 1           | 1,079496139   | 0,926358107     | 2,361344538     |

Supplementary Table 1

| Differentially expressed genes_adjacent-skin-XL_comparing SC-Keloid vs. (SC-Myel, SC-Nonmyel) |             |             |       |       |             |               |                 |                 |
|-----------------------------------------------------------------------------------------------|-------------|-------------|-------|-------|-------------|---------------|-----------------|-----------------|
| gene                                                                                          | p_val       | avg_log2FC  | pct.1 | pct.2 | p_val_adj   | Foldchange_UP | Foldchange_DOWN | Ratio_pct1_pct2 |
| TP53I3                                                                                        | 4,62254E-08 | 0,110352595 | 0,406 | 0,066 | 0,000975403 | 1,079492033   | 0,926361631     | 6,151515152     |
| ASPM                                                                                          | 0,002263143 | 0,110319964 | 0,062 | 0,004 | 1           | 1,079467617   | 0,926382584     | 15,5            |
| C6orf226                                                                                      | 0,009528382 | 0,110309348 | 0,25  | 0,086 | 1           | 1,079459673   | 0,926389401     | 2,906976744     |
| PHTF2                                                                                         | 0,006844876 | 0,110232841 | 0,156 | 0,039 | 1           | 1,07940243    | 0,926438529     | 4               |
| VAMP4                                                                                         | 0,011609182 | 0,110213297 | 0,156 | 0,043 | 1           | 1,079387808   | 0,926451079     | 3,627906977     |
| ANKRD34A                                                                                      | 6,3574E-05  | 0,110081515 | 0,062 | 0     | 1           | 1,079289217   | 0,926535709     | #DIV/0!         |
| SFI1                                                                                          | 0,002442928 | 0,110051396 | 0,094 | 0,012 | 1           | 1,079266685   | 0,926555053     | 7,833333333     |
| PDE4B                                                                                         | 1,11477E-07 | 0,11001538  | 0,188 | 0,012 | 0,002352284 | 1,079239742   | 0,926578184     | 15,66666667     |
| ZNF674                                                                                        | 0,002263143 | 0,109970912 | 0,062 | 0,004 | 1           | 1,079206477   | 0,926606744     | 15,5            |
| FLNB                                                                                          | 9,41286E-05 | 0,109949706 | 0,375 | 0,098 | 1           | 1,079190614   | 0,926620365     | 3,826530612     |
| ARHGEF35                                                                                      | 6,3574E-05  | 0,109890898 | 0,062 | 0     | 1           | 1,079146624   | 0,926658137     | #DIV/0!         |
| ZFP1                                                                                          | 0,034213216 | 0,109884044 | 0,094 | 0,023 | 1           | 1,079141497   | 0,926662539     | 4,086956522     |
| FASN                                                                                          | 5,70421E-07 | 0,109882458 | 0,406 | 0,078 | 0,012036463 | 1,079140311   | 0,926663558     | 5,205128205     |
| TMEM242                                                                                       | 0,004026393 | 0,109836851 | 0,219 | 0,062 | 1           | 1,079106197   | 0,926692852     | 3,532258065     |
| BTN3A1                                                                                        | 9,06462E-07 | 0,109744122 | 0,125 | 0,004 | 0,019127258 | 1,079036841   | 0,926752417     | 31,25           |
| UBTD2                                                                                         | 0,000397528 | 0,109671393 | 0,281 | 0,07  | 1           | 1,078982446   | 0,926799138     | 4,014285714     |
| PSMG3-AS1                                                                                     | 0,040857201 | 0,109575466 | 0,062 | 0,012 | 1           | 1,078910705   | 0,926860764     | 5,166666667     |
| ANP32E                                                                                        | 0,009340743 | 0,109472945 | 0,312 | 0,121 | 1           | 1,078834038   | 0,926926631     | 2,578512397     |
| FBL                                                                                           | 7,10604E-05 | 0,109440585 | 0,5   | 0,148 | 1           | 1,078809839   | 0,926947423     | 3,378378378     |
| MBNL1-AS1                                                                                     | 0,173428922 | 0,109439811 | 0,094 | 0,039 | 1           | 1,078809261   | 0,92694792      | 2,41025641      |
| GPRASP2                                                                                       | 6,3574E-05  | 0,109434084 | 0,062 | 0     | 1           | 1,078804978   | 0,9269516       | #DIV/0!         |
| MYO1F                                                                                         | 0,079594089 | 0,109347569 | 0,031 | 0,004 | 1           | 1,078740287   | 0,927007188     | 7,75            |
| VASP                                                                                          | 0,000278367 | 0,109303506 | 0,312 | 0,082 | 1           | 1,07870734    | 0,927035502     | 3,804878049     |
| BAALC                                                                                         | 6,3574E-05  | 0,109282055 | 0,062 | 0     | 1           | 1,078691301   | 0,927049286     | #DIV/0!         |
| PIN4                                                                                          | 0,002116036 | 0,109256026 | 0,469 | 0,176 | 1           | 1,07867184    | 0,927066011     | 2,664772727     |
| HNRNPA1                                                                                       | 0,132238451 | 0,109194273 | 0,938 | 0,652 | 1           | 1,07862567    | 0,927105694     | 1,438650307     |
| PYGO2                                                                                         | 0,015149007 | 0,109177633 | 0,125 | 0,031 | 1           | 1,078613228   | 0,927116388     | 4,032258065     |
| HIRIP3                                                                                        | 0,017650698 | 0,10916843  | 0,156 | 0,047 | 1           | 1,078606348   | 0,927122301     | 3,319148936     |
| MEPE                                                                                          | 0,004841742 | 0,108944248 | 0,031 | 0     | 1           | 1,078438755   | 0,92726638      | #DIV/0!         |
| CHCHD6                                                                                        | 9,73699E-05 | 0,108890337 | 0,156 | 0,02  | 1           | 1,078398456   | 0,927301031     | 7,8             |

Supplementary Table 1

| Differentially expressed genes_adjacent-skin-XL_comparing SC-Keloid vs. (SC-Myel, SC-Nonmyel) |             |             |       |       |             |               |                 |                 |
|-----------------------------------------------------------------------------------------------|-------------|-------------|-------|-------|-------------|---------------|-----------------|-----------------|
| gene                                                                                          | p_val       | avg_log2FC  | pct.1 | pct.2 | p_val_adj   | Foldchange_UP | Foldchange_DOWN | Ratio_pct1_pct2 |
| BORCS6                                                                                        | 0,000322156 | 0,108679205 | 0,156 | 0,023 | 1           | 1,078240649   | 0,927436747     | 6,782608696     |
| NCKAP1                                                                                        | 0,003444709 | 0,108621101 | 0,5   | 0,207 | 1           | 1,078197225   | 0,927474099     | 2,415458937     |
| PI4KA                                                                                         | 0,000497591 | 0,108520752 | 0,219 | 0,047 | 1           | 1,078122232   | 0,927538614     | 4,659574468     |
| RTKN2                                                                                         | 9,06462E-07 | 0,108418583 | 0,125 | 0,004 | 0,019127258 | 1,078045883   | 0,927604303     | 31,25           |
| GLYCTK                                                                                        | 9,06462E-07 | 0,108367747 | 0,125 | 0,004 | 0,019127258 | 1,078007897   | 0,927636989     | 31,25           |
| UBAC1                                                                                         | 0,002864354 | 0,10832414  | 0,219 | 0,059 | 1           | 1,077975314   | 0,927665028     | 3,711864407     |
| PNPLA6                                                                                        | 0,003804096 | 0,108291151 | 0,156 | 0,035 | 1           | 1,077950664   | 0,927686241     | 4,457142857     |
| CACUL1                                                                                        | 0,000216206 | 0,108275271 | 0,344 | 0,094 | 1           | 1,0779388     | 0,927696452     | 3,659574468     |
| GOLPH3L                                                                                       | 0,000100263 | 0,108230886 | 0,156 | 0,02  | 1           | 1,077905637   | 0,927724993     | 7,8             |
| NMRAL1                                                                                        | 1,41893E-05 | 0,108206587 | 0,281 | 0,051 | 0,29940858  | 1,077887482   | 0,927740619     | 5,509803922     |
| LINC00630                                                                                     | 0,221475664 | 0,10805473  | 0,031 | 0,008 | 1           | 1,077774031   | 0,927838277     | 3,875           |
| ETV2                                                                                          | 9,12354E-07 | 0,107970764 | 0,094 | 0     | 0,019251588 | 1,077711306   | 0,92789228      | #DIV/0!         |
| EEF1AKMT1                                                                                     | 5,12603E-06 | 0,107967066 | 0,188 | 0,02  | 0,108164307 | 1,077708542   | 0,927894659     | 9,4             |
| MSRB3                                                                                         | 7,33388E-07 | 0,107710074 | 0,281 | 0,039 | 0,015475215 | 1,077516584   | 0,928059962     | 7,205128205     |
| BCL2L11                                                                                       | 0,000954402 | 0,10728368  | 0,188 | 0,039 | 1           | 1,077198167   | 0,928334294     | 4,820512821     |
| MED1                                                                                          | 9,91727E-06 | 0,107141059 | 0,25  | 0,039 | 0,209264362 | 1,077091684   | 0,928426071     | 6,41025641      |
| MTIF2                                                                                         | 0,000100263 | 0,10707484  | 0,156 | 0,02  | 1           | 1,077042246   | 0,928468687     | 7,8             |
| ECD                                                                                           | 0,002976767 | 0,107018676 | 0,188 | 0,047 | 1           | 1,077000318   | 0,928504833     | 4               |
| SCLY                                                                                          | 9,73699E-05 | 0,106941755 | 0,156 | 0,02  | 1           | 1,076942897   | 0,92855434      | 7,8             |
| COMMD9                                                                                        | 7,25857E-06 | 0,106775533 | 0,344 | 0,07  | 0,153163084 | 1,076818823   | 0,92866133      | 4,914285714     |
| AK2                                                                                           | 0,000812022 | 0,10676179  | 0,438 | 0,148 | 1           | 1,076808565   | 0,928670176     | 2,959459459     |
| G3BP2                                                                                         | 0,001103208 | 0,106634831 | 0,375 | 0,121 | 1           | 1,076713809   | 0,928751904     | 3,099173554     |
| GPC2                                                                                          | 0,002263143 | 0,106543934 | 0,062 | 0,004 | 1           | 1,076645972   | 0,928810422     | 15,5            |
| PFKP                                                                                          | 0,014273854 | 0,106500737 | 0,25  | 0,09  | 1           | 1,076613736   | 0,928838233     | 2,777777778     |
| EPG5                                                                                          | 0,084624339 | 0,106288606 | 0,062 | 0,016 | 1           | 1,076455445   | 0,928974817     | 3,875           |
| NUP93                                                                                         | 4,14927E-06 | 0,106260555 | 0,219 | 0,027 | 0,087553714 | 1,076434514   | 0,92899288      | 8,111111111     |
| CEP250                                                                                        | 0,000339359 | 0,106199474 | 0,156 | 0,023 | 1           | 1,076388941   | 0,929032213     | 6,782608696     |
| KIAA1614                                                                                      | 0,018047186 | 0,106131484 | 0,094 | 0,02  | 1           | 1,076338216   | 0,929075996     | 4,7             |
| PEX2                                                                                          | 0,000215381 | 0,10612998  | 0,375 | 0,105 | 1           | 1,076337094   | 0,929076965     | 3,571428571     |
| FUCA1                                                                                         | 0,000103236 | 0,106104936 | 0,156 | 0,02  | 1           | 1,076318409   | 0,929093093     | 7,8             |

Supplementary Table 1

| Differentially expressed genes_adjacent-skin-XL_comparing SC-Keloid vs. (SC-Myel, SC-Nonmyel) |             |             |       |       |             |               |                 |                 |
|-----------------------------------------------------------------------------------------------|-------------|-------------|-------|-------|-------------|---------------|-----------------|-----------------|
| gene                                                                                          | p_val       | avg_log2FC  | pct.1 | pct.2 | p_val_adj   | Foldchange_UP | Foldchange_DOWN | Ratio_pct1_pct2 |
| ZNF667-AS1                                                                                    | 0,000187864 | 0,105996536 | 0,312 | 0,078 | 1           | 1,076237541   | 0,929162905     | 4               |
| PPT2                                                                                          | 2,16801E-07 | 0,105625908 | 0,344 | 0,055 | 0,004574713 | 1,075961091   | 0,929401637     | 6,254545455     |
| FOXK2                                                                                         | 2,93017E-05 | 0,105603579 | 0,281 | 0,055 | 0,618294606 | 1,075944438   | 0,929416022     | 5,109090909     |
| ADPRS                                                                                         | 2,44525E-05 | 0,105600241 | 0,25  | 0,043 | 0,515972154 | 1,075941949   | 0,929418173     | 5,813953488     |
| IFT52                                                                                         | 1,50482E-06 | 0,105439404 | 0,344 | 0,062 | 0,031753276 | 1,075822006   | 0,929521793     | 5,548387097     |
| ALDH18A1                                                                                      | 4,02312E-05 | 0,10532534  | 0,219 | 0,035 | 0,848917917 | 1,075736951   | 0,929595287     | 6,257142857     |
| LPP                                                                                           | 0,001531692 | 0,105229596 | 0,531 | 0,203 | 1           | 1,075665562   | 0,929656982     | 2,615763547     |
| STON2                                                                                         | 0,000480113 | 0,105177453 | 0,125 | 0,016 | 1           | 1,075626686   | 0,929690582     | 7,8125          |
| RNPEPL1                                                                                       | 0,000212852 | 0,105115243 | 0,344 | 0,094 | 1           | 1,075580305   | 0,929730673     | 3,659574468     |
| SCP2                                                                                          | 0,00826133  | 0,105016062 | 0,531 | 0,238 | 1           | 1,075506364   | 0,929794591     | 2,231092437     |
| DPH6                                                                                          | 0,000425232 | 0,104892933 | 0,219 | 0,047 | 1           | 1,075414578   | 0,929873949     | 4,659574468     |
| HMG20A                                                                                        | 0,213283768 | 0,10486847  | 0,094 | 0,043 | 1           | 1,075396343   | 0,929889716     | 2,186046512     |
| PTK2                                                                                          | 0,017923128 | 0,10486251  | 0,562 | 0,273 | 1           | 1,0753919     | 0,929893558     | 2,058608059     |
| PMF1                                                                                          | 3,31424E-05 | 0,104859059 | 0,406 | 0,102 | 0,699337059 | 1,075389327   | 0,929895782     | 3,980392157     |
| SUCLA2                                                                                        | 0,00013642  | 0,104747985 | 0,375 | 0,102 | 1           | 1,075306536   | 0,929967378     | 3,676470588     |
| ZNF91                                                                                         | 0,030940914 | 0,104646454 | 0,219 | 0,086 | 1           | 1,075230863   | 0,930032828     | 2,546511628     |
| CHD4                                                                                          | 2,99875E-05 | 0,104607496 | 0,656 | 0,211 | 0,632766515 | 1,075201828   | 0,930057943     | 3,109004739     |
| ASH2L                                                                                         | 0,00083045  | 0,104462878 | 0,156 | 0,027 | 1           | 1,075094053   | 0,930151178     | 5,777777778     |
| DNPEP                                                                                         | 6,58735E-06 | 0,104396568 | 0,312 | 0,059 | 0,138999658 | 1,07504464    | 0,930193931     | 5,288135593     |
| PGAP3                                                                                         | 0,138558481 | 0,104316015 | 0,062 | 0,02  | 1           | 1,074984617   | 0,93024587      | 3,1             |
| TFDP1                                                                                         | 2,82595E-05 | 0,104201703 | 0,344 | 0,078 | 0,596303572 | 1,074899444   | 0,930319581     | 4,41025641      |
| RAC2                                                                                          | 9,12354E-07 | 0,1041945   | 0,094 | 0     | 0,019251588 | 1,074894077   | 0,930324226     | #DIV/0!         |
| CD2AP                                                                                         | 6,41077E-05 | 0,104170164 | 0,281 | 0,059 | 1           | 1,074875946   | 0,930339919     | 4,762711864     |
| PABPC5                                                                                        | 0,000480113 | 0,104081145 | 0,125 | 0,016 | 1           | 1,074809624   | 0,930397325     | 7,8125          |
| FBXW9                                                                                         | 2,97902E-08 | 0,104041033 | 0,219 | 0,016 | 0,000628603 | 1,074779741   | 0,930423194     | 13,6875         |
| USP35                                                                                         | 0,000524345 | 0,104003142 | 0,094 | 0,008 | 1           | 1,074751513   | 0,930447631     | 11,75           |
| TTC23                                                                                         | 0,173428922 | 0,103962474 | 0,094 | 0,039 | 1           | 1,074721218   | 0,93047386      | 2,41025641      |
| GCC2                                                                                          | 0,002247723 | 0,103894994 | 0,469 | 0,18  | 1           | 1,074670951   | 0,930517383     | 2,605555556     |
| PHF5A                                                                                         | 0,000121256 | 0,103888258 | 0,312 | 0,074 | 1           | 1,074665932   | 0,930521728     | 4,216216216     |
| MRPL37                                                                                        | 1,14716E-07 | 0,103879577 | 0,312 | 0,043 | 0,002420617 | 1,074659466   | 0,930527326     | 7,255813953     |

Supplementary Table 1

| Differentially expressed genes_adjacent-skin-XL_comparing SC-Keloid vs. (SC-Myel, SC-Nonmyel) |             |             |       |       |             |               |                 |                 |
|-----------------------------------------------------------------------------------------------|-------------|-------------|-------|-------|-------------|---------------|-----------------|-----------------|
| gene                                                                                          | p_val       | avg_log2FC  | pct.1 | pct.2 | p_val_adj   | Foldchange_UP | Foldchange_DOWN | Ratio_pct1_pct2 |
| MRPS27                                                                                        | 0,000466117 | 0,103878359 | 0,188 | 0,035 | 1           | 1,074658559   | 0,930528112     | 5,371428571     |
| ALKBH6                                                                                        | 0,007750521 | 0,10382845  | 0,094 | 0,016 | 1           | 1,074621383   | 0,930560304     | 5,875           |
| SLC17A9                                                                                       | 4,52605E-06 | 0,103800004 | 0,219 | 0,027 | 0,095504122 | 1,074600195   | 0,930578652     | 8,111111111     |
| SLC25A14                                                                                      | 0,000108998 | 0,103772448 | 0,125 | 0,012 | 1           | 1,074579669   | 0,930596426     | 10,41666667     |
| ZNF662                                                                                        | 0,002263143 | 0,103094638 | 0,062 | 0,004 | 1           | 1,074074927   | 0,931033744     | 15,5            |
| EN1                                                                                           | 0,039886012 | 0,103088692 | 0,062 | 0,012 | 1           | 1,0740705     | 0,931037581     | 5,166666667     |
| MED12                                                                                         | 0,057775912 | 0,103082322 | 0,125 | 0,043 | 1           | 1,074065757   | 0,931041692     | 2,906976744     |
| INTS5                                                                                         | 1,51098E-05 | 0,103022329 | 0,125 | 0,008 | 0,318831333 | 1,074021095   | 0,931080409     | 15,625          |
| KRCC1                                                                                         | 9,55574E-06 | 0,102949692 | 0,375 | 0,082 | 0,201635701 | 1,073967021   | 0,931127288     | 4,573170732     |
| UGGT1                                                                                         | 8,14044E-08 | 0,10293233  | 0,344 | 0,051 | 0,001717714 | 1,073954096   | 0,931138494     | 6,745098039     |
| CIBAR1                                                                                        | 0,000478496 | 0,102895576 | 0,219 | 0,047 | 1           | 1,073926736   | 0,931162216     | 4,659574468     |
| MTG1                                                                                          | 1,05359E-06 | 0,10286096  | 0,375 | 0,07  | 0,022231775 | 1,073900969   | 0,931184559     | 5,357142857     |
| DNAJC5                                                                                        | 0,00094841  | 0,102766722 | 0,219 | 0,051 | 1           | 1,073830824   | 0,931245386     | 4,294117647     |
| ELMOD2                                                                                        | 2,50263E-05 | 0,10275453  | 0,25  | 0,043 | 0,528079884 | 1,073821749   | 0,931253256     | 5,813953488     |
| DHRS4                                                                                         | 0,001625689 | 0,102704894 | 0,156 | 0,031 | 1           | 1,073784805   | 0,931285296     | 5,032258065     |
| ERI1                                                                                          | 0,000524345 | 0,102604335 | 0,094 | 0,008 | 1           | 1,073709962   | 0,931350211     | 11,75           |
| GHDC                                                                                          | 0,01179781  | 0,102298152 | 0,156 | 0,043 | 1           | 1,073482113   | 0,931547893     | 3,627906977     |
| ASF1A                                                                                         | 0,000105488 | 0,102188285 | 0,219 | 0,039 | 1           | 1,073400366   | 0,931618837     | 5,615384615     |
| FMN1                                                                                          | 4,80439E-05 | 0,102183927 | 0,094 | 0,004 | 1           | 1,073397123   | 0,931621651     | 23,5            |
| CYB5RL                                                                                        | 0,082317662 | 0,102131032 | 0,031 | 0,004 | 1           | 1,073357769   | 0,931655808     | 7,75            |
| GOLGA3                                                                                        | 6,15412E-05 | 0,102089666 | 0,375 | 0,094 | 1           | 1,073326993   | 0,931682522     | 3,989361702     |
| ABCB8                                                                                         | 0,000850121 | 0,102015539 | 0,156 | 0,027 | 1           | 1,073271846   | 0,931730394     | 5,777777778     |
| VRK2                                                                                          | 4,96307E-06 | 0,101945568 | 0,188 | 0,02  | 0,104725812 | 1,073219793   | 0,931775584     | 9,4             |
| WIZ                                                                                           | 0,000181963 | 0,101760499 | 0,188 | 0,031 | 1           | 1,07308213    | 0,93189512      | 6,064516129     |
| GOSR2                                                                                         | 0,000114181 | 0,101753126 | 0,25  | 0,051 | 1           | 1,073076646   | 0,931899883     | 4,901960784     |
| RRP1                                                                                          | 0,000466117 | 0,10172953  | 0,188 | 0,035 | 1           | 1,073059095   | 0,931915124     | 5,371428571     |
| LRRC28                                                                                        | 0,015983649 | 0,101605196 | 0,125 | 0,031 | 1           | 1,072966621   | 0,931995442     | 4,032258065     |
| CENPU                                                                                         | 1,51098E-05 | 0,101588928 | 0,125 | 0,008 | 0,318831333 | 1,072954522   | 0,932005951     | 15,625          |
| ECI2                                                                                          | 0,002463233 | 0,101499555 | 0,281 | 0,086 | 1           | 1,072888056   | 0,932063689     | 3,26744186      |
| PPP1R26                                                                                       | 0,082317662 | 0,101493869 | 0,031 | 0,004 | 1           | 1,072883828   | 0,932067363     | 7,75            |



Supplementary Table 1

| Differentially expressed genes_adjacent-skin-XL_comparing SC-Keloid vs. (SC-Myel, SC-Nonmyel) |             |             |       |       |             |               |                 |                 |
|-----------------------------------------------------------------------------------------------|-------------|-------------|-------|-------|-------------|---------------|-----------------|-----------------|
| gene                                                                                          | p_val       | avg_log2FC  | pct.1 | pct.2 | p_val_adj   | Foldchange_UP | Foldchange_DOWN | Ratio_pct1_pct2 |
| BMPER                                                                                         | 6,3574E-05  | 0,101441373 | 0,062 | 0     | 1           | 1,072844789   | 0,932101279     | #DIV/0!         |
| MACROD2                                                                                       | 0,00050526  | 0,101368846 | 0,094 | 0,008 | 1           | 1,072790856   | 0,932148139     | 11,75           |
| GLUD2                                                                                         | 0,002263143 | 0,101345674 | 0,062 | 0,004 | 1           | 1,072773625   | 0,932163111     | 15,5            |
| DPP3                                                                                          | 1,51098E-05 | 0,101337881 | 0,125 | 0,008 | 0,318831333 | 1,072767831   | 0,932168146     | 15,625          |
| HMGCL                                                                                         | 0,000103124 | 0,101250386 | 0,219 | 0,039 | 1           | 1,072702773   | 0,932224681     | 5,615384615     |
| DEPP1                                                                                         | 0,000604947 | 0,101155389 | 0,281 | 0,074 | 1           | 1,072632141   | 0,932286067     | 3,797297297     |
| SUPT20H                                                                                       | 0,000500143 | 0,101152315 | 0,312 | 0,086 | 1           | 1,072629856   | 0,932288053     | 3,627906977     |
| PEMT                                                                                          | 4,61578E-05 | 0,101128946 | 0,25  | 0,047 | 0,973975249 | 1,072612481   | 0,932303155     | 5,319148936     |
| EPHA2                                                                                         | 0,012263219 | 0,101111962 | 0,219 | 0,074 | 1           | 1,072599854   | 0,93231413      | 2,959459459     |
| VPS72                                                                                         | 3,05607E-05 | 0,101092656 | 0,281 | 0,055 | 0,644860382 | 1,0725855     | 0,932326607     | 5,109090909     |
| ABCB7                                                                                         | 9,71531E-07 | 0,101055729 | 0,25  | 0,031 | 0,020500283 | 1,072558047   | 0,932350471     | 8,064516129     |
| DIAPH1                                                                                        | 2,80921E-05 | 0,100903524 | 0,281 | 0,055 | 0,592771218 | 1,072444898   | 0,932448839     | 5,109090909     |
| SH3BP4                                                                                        | 0,000480113 | 0,100838984 | 0,125 | 0,016 | 1           | 1,072396923   | 0,932490554     | 7,8125          |
| TMEM185B                                                                                      | 0,01179781  | 0,100729037 | 0,156 | 0,043 | 1           | 1,072315199   | 0,932561621     | 3,627906977     |
| FARSA                                                                                         | 0,000114181 | 0,100694387 | 0,25  | 0,051 | 1           | 1,072289444   | 0,932584019     | 4,901960784     |
| TPGS2                                                                                         | 1,02794E-07 | 0,100597458 | 0,344 | 0,051 | 0,00216905  | 1,072217404   | 0,932646678     | 6,745098039     |
| RCE1                                                                                          | 2,11157E-07 | 0,100579136 | 0,219 | 0,02  | 0,00445563  | 1,072203787   | 0,932658523     | 10,95           |
| EXO5                                                                                          | 9,12354E-07 | 0,10045556  | 0,094 | 0     | 0,019251588 | 1,07211195    | 0,932738414     | #DIV/0!         |
| DOK3                                                                                          | 0,002263143 | 0,100412207 | 0,062 | 0,004 | 1           | 1,072079733   | 0,932766444     | 15,5            |
| H2AZ1                                                                                         | 0,049504971 | 0,100246533 | 0,812 | 0,469 | 1           | 1,071956627   | 0,932873565     | 1,731343284     |
| AMDHD2                                                                                        | 4,92471E-08 | 0,100216301 | 0,281 | 0,031 | 0,001039163 | 1,071934164   | 0,932893114     | 9,064516129     |
| UBL7                                                                                          | 4,80509E-06 | 0,100202265 | 0,188 | 0,02  | 0,101392141 | 1,071923735   | 0,93290219      | 9,4             |
| METTL13                                                                                       | 0,000108998 | 0,100161609 | 0,125 | 0,012 | 1           | 1,071893528   | 0,93292848      | 10,41666667     |
| NDST2                                                                                         | 0,002263143 | 0,100147438 | 0,062 | 0,004 | 1           | 1,071882999   | 0,932937644     | 15,5            |
| DDX55                                                                                         | 0,000850121 | 0,100035904 | 0,156 | 0,027 | 1           | 1,071800136   | 0,933009772     | 5,777777778     |
| LIN9                                                                                          | 0,000524345 | 0,100005012 | 0,094 | 0,008 | 1           | 1,071777186   | 0,93302975      | 11,75           |
| NPR2                                                                                          | 0,040857201 | 0,09995049  | 0,062 | 0,012 | 1           | 1,071736682   | 0,933065012     | 5,166666667     |
| AC093323.1                                                                                    | 2,44525E-05 | 0,099916492 | 0,25  | 0,043 | 0,515972154 | 1,071711427   | 0,933087        | 5,813953488     |
| ARL6IP6                                                                                       | 4,2156E-05  | 0,099847254 | 0,531 | 0,156 | 0,889534105 | 1,071659994   | 0,933131782     | 3,403846154     |
| IMPA2                                                                                         | 3,67695E-07 | 0,099796531 | 0,156 | 0,008 | 0,007758733 | 1,071622317   | 0,93316459      | 19,5            |

Supplementary Table 1

| Differentially expressed genes_adjacent-skin-XL_comparing SC-Keloid vs. (SC-Myel, SC-Nonmyel) |             |             |       |       |             |               |                 |                 |
|-----------------------------------------------------------------------------------------------|-------------|-------------|-------|-------|-------------|---------------|-----------------|-----------------|
| gene                                                                                          | p_val       | avg_log2FC  | pct.1 | pct.2 | p_val_adj   | Foldchange_UP | Foldchange_DOWN | Ratio_pct1_pct2 |
| ZDHHC21                                                                                       | 3,92553E-05 | 0,099609622 | 0,219 | 0,035 | 0,828326361 | 1,071483491   | 0,933285495     | 6,257142857     |
| ELOF1                                                                                         | 0,001857229 | 0,099524    | 0,312 | 0,098 | 1           | 1,071419902   | 0,933340886     | 3,183673469     |
| TTC26                                                                                         | 4,80439E-05 | 0,099416375 | 0,094 | 0,004 | 1           | 1,071339977   | 0,933410515     | 23,5            |
| ENO2                                                                                          | 0,073365787 | 0,099392255 | 0,156 | 0,062 | 1           | 1,071322066   | 0,933426121     | 2,516129032     |
| PTK7                                                                                          | 0,002594281 | 0,099293143 | 0,094 | 0,012 | 1           | 1,071248469   | 0,933490249     | 7,833333333     |
| ALG1L                                                                                         | 6,3574E-05  | 0,0992758   | 0,062 | 0     | 1           | 1,071235591   | 0,933501471     | #DIV/0!         |
| UPF3A                                                                                         | 0,006484811 | 0,099223372 | 0,375 | 0,145 | 1           | 1,071196663   | 0,933535395     | 2,586206897     |
| TMUB2                                                                                         | 3,2432E-06  | 0,099206015 | 0,25  | 0,035 | 0,068434669 | 1,071183776   | 0,933546626     | 7,142857143     |
| MAP3K3                                                                                        | 0,023284222 | 0,099156349 | 0,219 | 0,082 | 1           | 1,0711469     | 0,933578765     | 2,670731707     |
| SEC61A2                                                                                       | 0,01346698  | 0,098827564 | 0,062 | 0,008 | 1           | 1,070902817   | 0,933791549     | 7,75            |
| GAB2                                                                                          | 0,662254058 | 0,098682556 | 0,031 | 0,02  | 1           | 1,070795185   | 0,93388541      | 1,55            |
| RASL12                                                                                        | 0,011486777 | 0,098664601 | 0,281 | 0,105 | 1           | 1,070781858   | 0,933897033     | 2,676190476     |
| LINC00926                                                                                     | 1,33967E-08 | 0,098663412 | 0,125 | 0     | 0,000282684 | 1,070780976   | 0,933897802     | #DIV/0!         |
| TRIT1                                                                                         | 0,000509339 | 0,098642288 | 0,125 | 0,016 | 1           | 1,070765297   | 0,933911477     | 7,8125          |
| MAP6                                                                                          | 0,003953072 | 0,098626232 | 0,156 | 0,035 | 1           | 1,070753381   | 0,93392187      | 4,457142857     |
| FUT8                                                                                          | 0,000514321 | 0,098391206 | 0,281 | 0,074 | 1           | 1,070578961   | 0,934074026     | 3,797297297     |
| PDCD6                                                                                         | 0,00035569  | 0,098332828 | 0,625 | 0,223 | 1           | 1,070535641   | 0,934111824     | 2,802690583     |
| ST8SIA4                                                                                       | 4,80439E-05 | 0,098230537 | 0,094 | 0,004 | 1           | 1,07045974    | 0,934178057     | 23,5            |
| RBMX                                                                                          | 0,001165359 | 0,098195494 | 0,75  | 0,309 | 1           | 1,070433739   | 0,934200748     | 2,427184466     |
| ZBTB42                                                                                        | 0,37426516  | 0,097890154 | 0,031 | 0,012 | 1           | 1,07020721    | 0,934398489     | 2,583333333     |
| CPSF4                                                                                         | 0,002442928 | 0,097873391 | 0,094 | 0,012 | 1           | 1,070194775   | 0,934409346     | 7,833333333     |
| MPV17L2                                                                                       | 3,86379E-06 | 0,097804254 | 0,156 | 0,012 | 0,081529835 | 1,070143491   | 0,934454126     | 13              |
| PRELID3B                                                                                      | 3,23695E-05 | 0,097790432 | 0,312 | 0,066 | 0,68302947  | 1,070133238   | 0,934463078     | 4,727272727     |
| DPCD                                                                                          | 9,17361E-07 | 0,097713675 | 0,188 | 0,016 | 0,019357231 | 1,070076304   | 0,934512797     | 11,75           |
| LAMA2                                                                                         | 0,000901035 | 0,097701538 | 0,312 | 0,09  | 1           | 1,070067302   | 0,934520659     | 3,466666667     |
| NDE1                                                                                          | 0,036392125 | 0,09765727  | 0,188 | 0,07  | 1           | 1,070034468   | 0,934549334     | 2,685714286     |
| NUDT16L1                                                                                      | 1,97172E-06 | 0,097544598 | 0,281 | 0,043 | 0,041605191 | 1,069950903   | 0,934622324     | 6,534883721     |
| SUMF2                                                                                         | 0,002089818 | 0,097530846 | 0,438 | 0,16  | 1           | 1,069940705   | 0,934631233     | 2,7375          |
| ACAA2                                                                                         | 6,4022E-08  | 0,097505259 | 0,375 | 0,059 | 0,001350927 | 1,069921729   | 0,934647809     | 6,355932203     |
| SFXN3                                                                                         | 2,90967E-07 | 0,09744837  | 0,406 | 0,074 | 0,006139701 | 1,06987954    | 0,934684665     | 5,486486486     |

Supplementary Table 1

| Differentially expressed genes_adjacent-skin-XL_comparing SC-Keloid vs. (SC-Myel, SC-Nonmyel) |             |             |       |       |             |               |                 |                 |
|-----------------------------------------------------------------------------------------------|-------------|-------------|-------|-------|-------------|---------------|-----------------|-----------------|
| gene                                                                                          | p_val       | avg_log2FC  | pct.1 | pct.2 | p_val_adj   | Foldchange_UP | Foldchange_DOWN | Ratio_pct1_pct2 |
| SRPRA                                                                                         | 4,89131E-08 | 0,097396059 | 0,594 | 0,129 | 0,001032116 | 1,069840748   | 0,934718557     | 4,604651163     |
| CD68                                                                                          | 0,000108998 | 0,097392613 | 0,125 | 0,012 | 1           | 1,069838192   | 0,93472079      | 10,41666667     |
| URB1-AS1                                                                                      | 0,034213216 | 0,097385499 | 0,094 | 0,023 | 1           | 1,069832917   | 0,934725399     | 4,086956522     |
| ZNF92                                                                                         | 0,001560165 | 0,097338839 | 0,125 | 0,02  | 1           | 1,069798317   | 0,93475563      | 6,25            |
| MUC12                                                                                         | 0,000105286 | 0,097296445 | 0,125 | 0,012 | 1           | 1,069766881   | 0,934783098     | 10,41666667     |
| CENPS                                                                                         | 0,000112833 | 0,097159993 | 0,125 | 0,012 | 1           | 1,069665706   | 0,934871516     | 10,41666667     |
| VPS4A                                                                                         | 3,5393E-05  | 0,097125459 | 0,375 | 0,09  | 0,746827544 | 1,069640101   | 0,934893895     | 4,166666667     |
| NTPCR                                                                                         | 0,000983579 | 0,097034353 | 0,219 | 0,051 | 1           | 1,069572556   | 0,934952935     | 4,294117647     |
| SLC6A9                                                                                        | 0,084624339 | 0,097031019 | 0,062 | 0,016 | 1           | 1,069570084   | 0,934955095     | 3,875           |
| NCBP2AS2                                                                                      | 3,37262E-07 | 0,097010143 | 0,344 | 0,055 | 0,007116571 | 1,069554607   | 0,934968624     | 6,254545455     |
| TEX12                                                                                         | 6,3574E-05  | 0,096959664 | 0,062 | 0     | 1           | 1,069517185   | 0,935001339     | #DIV/0!         |
| PAM                                                                                           | 3,15754E-06 | 0,096883513 | 0,25  | 0,035 | 0,066627295 | 1,069460734   | 0,935050693     | 7,142857143     |
| LMF1                                                                                          | 0,006087048 | 0,096863185 | 0,219 | 0,066 | 1           | 1,069445664   | 0,935063869     | 3,318181818     |
| TPP1                                                                                          | 0,000745105 | 0,096859323 | 0,375 | 0,117 | 1           | 1,069442801   | 0,935066372     | 3,205128205     |
| SEC31A                                                                                        | 0,000104423 | 0,096815295 | 0,625 | 0,211 | 1           | 1,069410165   | 0,935094908     | 2,962085308     |
| TGFBR1                                                                                        | 0,00011187  | 0,096689186 | 0,25  | 0,051 | 1           | 1,06931669    | 0,93517665      | 4,901960784     |
| CLSTN1                                                                                        | 0,001883587 | 0,096660793 | 0,719 | 0,309 | 1           | 1,069295645   | 0,935195055     | 2,326860841     |
| YY2                                                                                           | 0,002263143 | 0,096611818 | 0,062 | 0,004 | 1           | 1,069259347   | 0,935226803     | 15,5            |
| PCDHGA7                                                                                       | 6,3574E-05  | 0,096607795 | 0,062 | 0     | 1           | 1,069256365   | 0,935229411     | #DIV/0!         |
| KRT23                                                                                         | 0,002263143 | 0,096530603 | 0,062 | 0,004 | 1           | 1,069199155   | 0,935279452     | 15,5            |
| NEK8                                                                                          | 0,221475664 | 0,096464711 | 0,031 | 0,008 | 1           | 1,069150323   | 0,93532217      | 3,875           |
| SLC27A5                                                                                       | 9,12354E-07 | 0,096417983 | 0,094 | 0     | 0,019251588 | 1,069115694   | 0,935352465     | #DIV/0!         |
| EMC3                                                                                          | 0,000149678 | 0,096415769 | 0,375 | 0,102 | 1           | 1,069114054   | 0,9353539       | 3,676470588     |
| R3HDM1                                                                                        | 9,17361E-07 | 0,096399679 | 0,188 | 0,016 | 0,019357231 | 1,06910213    | 0,935364332     | 11,75           |
| ANKRD7                                                                                        | 0,004841742 | 0,096343869 | 0,031 | 0     | 1           | 1,069060773   | 0,935400517     | #DIV/0!         |
| BEX2                                                                                          | 0,004841742 | 0,096343869 | 0,031 | 0     | 1           | 1,069060773   | 0,935400517     | #DIV/0!         |
| C10orf143                                                                                     | 0,01346698  | 0,096317794 | 0,062 | 0,008 | 1           | 1,069041451   | 0,935417423     | 7,75            |
| CLCN7                                                                                         | 0,0028755   | 0,09616958  | 0,25  | 0,074 | 1           | 1,06893163    | 0,935513527     | 3,378378378     |
| COX11                                                                                         | 3,31426E-05 | 0,096166241 | 0,406 | 0,102 | 0,699341562 | 1,068929157   | 0,935515692     | 3,980392157     |
| ERGIC1                                                                                        | 1,08914E-05 | 0,096145316 | 0,469 | 0,121 | 0,2298184   | 1,068913653   | 0,935529261     | 3,876033058     |

Supplementary Table 1

| Differentially expressed genes_adjacent-skin-XL_ comparing SC-Keloid vs. (SC-Myel, SC-Nonmyel) |             |             |       |       |             |               |                 |                 |
|------------------------------------------------------------------------------------------------|-------------|-------------|-------|-------|-------------|---------------|-----------------|-----------------|
| gene                                                                                           | p_val       | avg_log2FC  | pct.1 | pct.2 | p_val_adj   | Foldchange_UP | Foldchange_DOWN | Ratio_pct1_pct2 |
| DHX40                                                                                          | 0,000105201 | 0,096115242 | 0,25  | 0,051 | 1           | 1,068891371   | 0,935548763     | 4,901960784     |
| TMED10                                                                                         | 0,03856194  | 0,096089503 | 0,844 | 0,5   | 1           | 1,0688723     | 0,935565455     | 1,688           |
| SPRYD3                                                                                         | 0,000849771 | 0,095894278 | 0,219 | 0,051 | 1           | 1,068727671   | 0,935692064     | 4,294117647     |
| CHMP7                                                                                          | 0,000103236 | 0,095887536 | 0,156 | 0,02  | 1           | 1,068722677   | 0,935696436     | 7,8             |
| KMT2B                                                                                          | 0,323722708 | 0,095886521 | 0,094 | 0,051 | 1           | 1,068721925   | 0,935697095     | 1,843137255     |
| AKIP1                                                                                          | 7,15271E-05 | 0,09588551  | 0,188 | 0,027 | 1           | 1,068721175   | 0,935697751     | 6,962962963     |
| YEATS4                                                                                         | 1,70654E-05 | 0,095816327 | 0,312 | 0,062 | 0,360097761 | 1,068669928   | 0,935742622     | 5,032258065     |
| NFYB                                                                                           | 0,02256494  | 0,095712453 | 0,281 | 0,117 | 1           | 1,068592986   | 0,935809998     | 2,401709402     |
| SLC66A1                                                                                        | 0,040857201 | 0,095710662 | 0,062 | 0,012 | 1           | 1,06859166    | 0,93581116      | 5,166666667     |
| SYNRG                                                                                          | 0,000677    | 0,095640496 | 0,281 | 0,074 | 1           | 1,06853969    | 0,935856674     | 3,797297297     |
| REST                                                                                           | 7,43798E-05 | 0,095618339 | 0,562 | 0,18  | 1           | 1,068523279   | 0,935871047     | 3,122222222     |
| FAM174A                                                                                        | 0,000253224 | 0,095592625 | 0,25  | 0,055 | 1           | 1,068504234   | 0,935887728     | 4,545454545     |
| UBE3D                                                                                          | 6,3574E-05  | 0,095546511 | 0,062 | 0     | 1           | 1,068470081   | 0,935917643     | #DIV/0!         |
| NPEPL1                                                                                         | 3,56492E-06 | 0,095498962 | 0,438 | 0,098 | 0,075223275 | 1,068434866   | 0,93594849      | 4,469387755     |
| MAT2B                                                                                          | 0,005508322 | 0,095497835 | 0,188 | 0,051 | 1           | 1,068434032   | 0,935949221     | 3,68627451      |
| KIFBP                                                                                          | 0,000112852 | 0,095421737 | 0,281 | 0,062 | 1           | 1,068377677   | 0,935998591     | 4,532258065     |
| ELK1                                                                                           | 0,000870223 | 0,095390615 | 0,156 | 0,027 | 1           | 1,06835463    | 0,936018783     | 5,777777778     |
| DNASE2                                                                                         | 4,6586E-08  | 0,095389311 | 0,312 | 0,039 | 0,000983011 | 1,068353664   | 0,936019629     | 8               |
| DMWD                                                                                           | 0,000313821 | 0,095389218 | 0,406 | 0,121 | 1           | 1,068353596   | 0,936019689     | 3,355371901     |
| TPRKB                                                                                          | 6,44927E-07 | 0,095332924 | 0,344 | 0,059 | 0,013608598 | 1,068311909   | 0,936056213     | 5,830508475     |
| SPATA33                                                                                        | 0,000297876 | 0,095318274 | 0,156 | 0,023 | 1           | 1,068301061   | 0,936065719     | 6,782608696     |
| SYNJ2                                                                                          | 0,000524345 | 0,095302057 | 0,094 | 0,008 | 1           | 1,068289052   | 0,936076241     | 11,75           |
| ZNF559                                                                                         | 0,000870223 | 0,095271027 | 0,156 | 0,027 | 1           | 1,068266075   | 0,936096375     | 5,777777778     |
| DNAJC11                                                                                        | 0,212914042 | 0,095181859 | 0,062 | 0,023 | 1           | 1,068200051   | 0,936154233     | 2,695652174     |
| DENND3                                                                                         | 0,01346698  | 0,095181657 | 0,062 | 0,008 | 1           | 1,068199902   | 0,936154364     | 7,75            |
| GNPNAT1                                                                                        | 4,39695E-06 | 0,095137575 | 0,219 | 0,027 | 0,092780105 | 1,068167264   | 0,936182969     | 8,111111111     |
| SKAP1                                                                                          | 0,002263143 | 0,095116511 | 0,062 | 0,004 | 1           | 1,068151668   | 0,936196638     | 15,5            |
| UCK1                                                                                           | 0,002560056 | 0,095039434 | 0,219 | 0,059 | 1           | 1,068094602   | 0,936246656     | 3,711864407     |
| ARRB2                                                                                          | 2,40115E-05 | 0,094914763 | 0,156 | 0,016 | 0,506667402 | 1,068002307   | 0,936327565     | 9,75            |
| COMT                                                                                           | 0,211033137 | 0,094844819 | 0,969 | 0,652 | 1           | 1,067950529   | 0,936372962     | 1,486196319     |

Supplementary Table 1

| Differentially expressed genes_adjacent-skin-XL_comparing SC-Keloid vs. (SC-Myel, SC-Nonmyel) |             |             |       |       |             |               |                 |                 |
|-----------------------------------------------------------------------------------------------|-------------|-------------|-------|-------|-------------|---------------|-----------------|-----------------|
| gene                                                                                          | p_val       | avg_log2FC  | pct.1 | pct.2 | p_val_adj   | Foldchange_UP | Foldchange_DOWN | Ratio_pct1_pct2 |
| B3GNTL1                                                                                       | 6,3574E-05  | 0,094700907 | 0,062 | 0     | 1           | 1,067844004   | 0,936466371     | #DIV/0!         |
| N6AMT1                                                                                        | 0,000100263 | 0,094646801 | 0,156 | 0,02  | 1           | 1,067803957   | 0,936501493     | 7,8             |
| GLUD1                                                                                         | 0,025397909 | 0,094539312 | 0,281 | 0,117 | 1           | 1,067724403   | 0,93657127      | 2,401709402     |
| TRMT6                                                                                         | 0,001847537 | 0,094527608 | 0,156 | 0,031 | 1           | 1,067715741   | 0,936578868     | 5,032258065     |
| CCHCR1                                                                                        | 1,03471E-06 | 0,094414838 | 0,219 | 0,023 | 0,021833489 | 1,067632285   | 0,93665208      | 9,52173913      |
| NONO                                                                                          | 0,000106876 | 0,094388521 | 0,656 | 0,219 | 1           | 1,06761281    | 0,936669166     | 2,99543379      |
| CNPY4                                                                                         | 0,007342225 | 0,094371676 | 0,156 | 0,039 | 1           | 1,067600344   | 0,936680103     | 4               |
| FSD1                                                                                          | 4,80439E-05 | 0,094298866 | 0,094 | 0,004 | 1           | 1,067546466   | 0,936727376     | 23,5            |
| COA6                                                                                          | 3,67604E-06 | 0,094021253 | 0,312 | 0,055 | 0,077568042 | 1,067341061   | 0,936907645     | 5,672727273     |
| COMMD4                                                                                        | 6,16792E-05 | 0,093968215 | 0,438 | 0,121 | 1           | 1,067301823   | 0,936942089     | 3,619834711     |
| FAM193A                                                                                       | 0,000751392 | 0,093777924 | 0,25  | 0,062 | 1           | 1,067161056   | 0,937065679     | 4,032258065     |
| PANK4                                                                                         | 2,40115E-05 | 0,093579874 | 0,156 | 0,016 | 0,506667402 | 1,067014568   | 0,937194327     | 9,75            |
| MTPAP                                                                                         | 0,008106602 | 0,093563301 | 0,125 | 0,027 | 1           | 1,067002311   | 0,937205093     | 4,62962963      |
| NFIC                                                                                          | 0,067903822 | 0,093532176 | 0,844 | 0,48  | 1           | 1,066979291   | 0,937225313     | 1,758333333     |
| NPM3                                                                                          | 2,40115E-05 | 0,093479623 | 0,156 | 0,016 | 0,506667402 | 1,066940425   | 0,937259454     | 9,75            |
| ARSB                                                                                          | 1,51098E-05 | 0,093442085 | 0,125 | 0,008 | 0,318831333 | 1,066912665   | 0,937283841     | 15,625          |
| ZNF684                                                                                        | 0,000524345 | 0,093440105 | 0,094 | 0,008 | 1           | 1,066911201   | 0,937285127     | 11,75           |
| ECE1                                                                                          | 0,002464759 | 0,093367584 | 0,531 | 0,207 | 1           | 1,066857571   | 0,937332243     | 2,565217391     |
| ECSCR                                                                                         | 6,3574E-05  | 0,093356367 | 0,062 | 0     | 1           | 1,066849276   | 0,937339531     | #DIV/0!         |
| GPR108                                                                                        | 1,41872E-05 | 0,093207268 | 0,312 | 0,062 | 0,299363242 | 1,066739026   | 0,937436408     | 5,032258065     |
| APTX                                                                                          | 2,11424E-07 | 0,09295797  | 0,281 | 0,035 | 0,004461255 | 1,066554708   | 0,937598411     | 8,028571429     |
| ITGB3                                                                                         | 0,002263143 | 0,092929097 | 0,062 | 0,004 | 1           | 1,066533364   | 0,937617176     | 15,5            |
| MFSD4B                                                                                        | 0,040857201 | 0,092922706 | 0,062 | 0,012 | 1           | 1,066528639   | 0,937621329     | 5,166666667     |
| PI4K2B                                                                                        | 0,040857201 | 0,092892834 | 0,062 | 0,012 | 1           | 1,066506556   | 0,937640743     | 5,166666667     |
| FBXL8                                                                                         | 6,3574E-05  | 0,092795047 | 0,062 | 0     | 1           | 1,066434269   | 0,9377043       | #DIV/0!         |
| ATP13A2                                                                                       | 4,96307E-06 | 0,092748169 | 0,188 | 0,02  | 0,104725812 | 1,066399618   | 0,937734769     | 9,4             |
| TTL12                                                                                         | 9,17361E-07 | 0,092698295 | 0,188 | 0,016 | 0,019357231 | 1,066362753   | 0,937767187     | 11,75           |
| BYSL                                                                                          | 0,00083045  | 0,092657262 | 0,156 | 0,027 | 1           | 1,066332424   | 0,93779386      | 5,777777778     |
| DNAJC30                                                                                       | 0,000177637 | 0,092559507 | 0,188 | 0,031 | 1           | 1,066260174   | 0,937857406     | 6,064516129     |
| CLIC6                                                                                         | 0,004841742 | 0,092545383 | 0,031 | 0     | 1           | 1,066249735   | 0,937866587     | #DIV/0!         |

Supplementary Table 1

| Differentially expressed genes_adjacent-skin-XL_comparing SC-Keloid vs. (SC-Myel, SC-Nonmyel) |             |             |       |       |             |               |                 |                 |
|-----------------------------------------------------------------------------------------------|-------------|-------------|-------|-------|-------------|---------------|-----------------|-----------------|
| gene                                                                                          | p_val       | avg_log2FC  | pct.1 | pct.2 | p_val_adj   | Foldchange_UP | Foldchange_DOWN | Ratio_pct1_pct2 |
| CPVL                                                                                          | 0,004841742 | 0,092545383 | 0,031 | 0     | 1           | 1,066249735   | 0,937866587     | #DIV/0!         |
| GDPD2                                                                                         | 0,004841742 | 0,092545383 | 0,031 | 0     | 1           | 1,066249735   | 0,937866587     | #DIV/0!         |
| HSF2BP                                                                                        | 0,004841742 | 0,092545383 | 0,031 | 0     | 1           | 1,066249735   | 0,937866587     | #DIV/0!         |
| PCDHGB3                                                                                       | 0,004841742 | 0,092545383 | 0,031 | 0     | 1           | 1,066249735   | 0,937866587     | #DIV/0!         |
| PPFIA2                                                                                        | 0,004841742 | 0,092545383 | 0,031 | 0     | 1           | 1,066249735   | 0,937866587     | #DIV/0!         |
| ZNF671                                                                                        | 0,004841742 | 0,092545383 | 0,031 | 0     | 1           | 1,066249735   | 0,937866587     | #DIV/0!         |
| MYEF2                                                                                         | 0,035499775 | 0,092507298 | 0,094 | 0,023 | 1           | 1,066221588   | 0,937891346     | 4,086956522     |
| PJA2                                                                                          | 0,024164687 | 0,09247289  | 0,688 | 0,348 | 1           | 1,066196159   | 0,937913715     | 1,977011494     |
| TBC1D20                                                                                       | 0,018732203 | 0,092419814 | 0,156 | 0,047 | 1           | 1,066156935   | 0,937948221     | 3,319148936     |
| BLOC1S2                                                                                       | 1,90086E-05 | 0,092419179 | 0,344 | 0,074 | 0,401099502 | 1,066156466   | 0,937948633     | 4,648648649     |
| ASTE1                                                                                         | 0,002263143 | 0,092416342 | 0,062 | 0,004 | 1           | 1,066154369   | 0,937950478     | 15,5            |
| BTBD10                                                                                        | 0,00019555  | 0,092298396 | 0,188 | 0,031 | 1           | 1,06606721    | 0,938027162     | 6,064516129     |
| WNK1                                                                                          | 0,002024853 | 0,092239781 | 0,5   | 0,191 | 1           | 1,066023898   | 0,938065274     | 2,617801047     |
| PTGES3                                                                                        | 0,098211925 | 0,092159853 | 0,875 | 0,516 | 1           | 1,06596484    | 0,938117246     | 1,695736434     |
| DNAAF5                                                                                        | 1,51098E-05 | 0,092148583 | 0,125 | 0,008 | 0,318831333 | 1,065956513   | 0,938124574     | 15,625          |
| FAM174B                                                                                       | 0,000322156 | 0,092129176 | 0,156 | 0,023 | 1           | 1,065942174   | 0,938137194     | 6,782608696     |
| BORCS8                                                                                        | 1,24109E-05 | 0,092067077 | 0,281 | 0,051 | 0,261882629 | 1,065896293   | 0,938177576     | 5,509803922     |
| COQ4                                                                                          | 0,000199866 | 0,092037461 | 0,375 | 0,105 | 1           | 1,065874412   | 0,938196835     | 3,571428571     |
| CYTH2                                                                                         | 0,00367496  | 0,091973145 | 0,344 | 0,121 | 1           | 1,065826896   | 0,938238661     | 2,842975207     |
| TCHP                                                                                          | 0,000480113 | 0,091957058 | 0,125 | 0,016 | 1           | 1,065815011   | 0,938249123     | 7,8125          |
| MRPS17                                                                                        | 4,81902E-06 | 0,091576314 | 0,281 | 0,047 | 0,101686073 | 1,065533767   | 0,938496771     | 5,978723404     |
| LINC01060                                                                                     | 9,12354E-07 | 0,091558987 | 0,094 | 0     | 0,019251588 | 1,06552097    | 0,938508042     | #DIV/0!         |
| CDK5R1                                                                                        | 9,12354E-07 | 0,091453362 | 0,094 | 0     | 0,019251588 | 1,065442962   | 0,938576757     | #DIV/0!         |
| ATF7IP2                                                                                       | 0,110558038 | 0,091448672 | 0,125 | 0,051 | 1           | 1,065439499   | 0,938579807     | 2,450980392     |
| DECR2                                                                                         | 2,32278E-05 | 0,091339153 | 0,156 | 0,016 | 0,490128791 | 1,065358621   | 0,938651061     | 9,75            |
| ZNF48                                                                                         | 9,12354E-07 | 0,09133164  | 0,094 | 0     | 0,019251588 | 1,065353074   | 0,938655949     | #DIV/0!         |
| MCM10                                                                                         | 6,3574E-05  | 0,091257987 | 0,062 | 0     | 1           | 1,065298686   | 0,93870387      | #DIV/0!         |
| RMI2                                                                                          | 6,3574E-05  | 0,091257987 | 0,062 | 0     | 1           | 1,065298686   | 0,93870387      | #DIV/0!         |
| CHEK1                                                                                         | 6,3574E-05  | 0,091234957 | 0,062 | 0     | 1           | 1,065281681   | 0,938718855     | #DIV/0!         |
| NEFH                                                                                          | 9,12354E-07 | 0,091102152 | 0,094 | 0     | 0,019251588 | 1,065183623   | 0,938805271     | #DIV/0!         |

Supplementary Table 1

| Differentially expressed genes_adjacent-skin-XL_comparing SC-Keloid vs. (SC-Myel, SC-Nonmyel) |             |             |       |       |             |               |                 |                 |
|-----------------------------------------------------------------------------------------------|-------------|-------------|-------|-------|-------------|---------------|-----------------|-----------------|
| gene                                                                                          | p_val       | avg_log2FC  | pct.1 | pct.2 | p_val_adj   | Foldchange_UP | Foldchange_DOWN | Ratio_pct1_pct2 |
| ZNF20                                                                                         | 3,86379E-06 | 0,090947562 | 0,156 | 0,012 | 0,081529835 | 1,06506949    | 0,938905873     | 13              |
| NUP155                                                                                        | 0,017290773 | 0,090820879 | 0,094 | 0,02  | 1           | 1,06497597    | 0,938988323     | 4,7             |
| FAM91A1                                                                                       | 0,001637922 | 0,090820149 | 0,219 | 0,055 | 1           | 1,064975432   | 0,938988797     | 3,981818182     |
| CIPC                                                                                          | 0,287158009 | 0,090817112 | 0,062 | 0,027 | 1           | 1,06497319    | 0,938990774     | 2,296296296     |
| ZNF837                                                                                        | 6,3574E-05  | 0,090813277 | 0,062 | 0     | 1           | 1,064970359   | 0,93899327      | #DIV/0!         |
| AKNAD1                                                                                        | 0,380266129 | 0,090657345 | 0,031 | 0,012 | 1           | 1,064855259   | 0,939094765     | 2,583333333     |
| SNX14                                                                                         | 3,39075E-07 | 0,090508149 | 0,406 | 0,074 | 0,007154826 | 1,064745143   | 0,939191887     | 5,486486486     |
| SETMAR                                                                                        | 0,002263143 | 0,090494244 | 0,062 | 0,004 | 1           | 1,064734881   | 0,939200939     | 15,5            |
| ICAM2                                                                                         | 0,000524345 | 0,090419119 | 0,094 | 0,008 | 1           | 1,064679439   | 0,939249847     | 11,75           |
| PLEKHG4                                                                                       | 0,002517564 | 0,09040814  | 0,094 | 0,012 | 1           | 1,064671337   | 0,939256995     | 7,833333333     |
| ELOC                                                                                          | 0,003199976 | 0,0903436   | 0,719 | 0,312 | 1           | 1,064623709   | 0,939299014     | 2,304487179     |
| KIF15                                                                                         | 6,3574E-05  | 0,090243631 | 0,062 | 0     | 1           | 1,06454994    | 0,939364103     | #DIV/0!         |
| ARHGAP11A                                                                                     | 6,3574E-05  | 0,090220585 | 0,062 | 0     | 1           | 1,064532934   | 0,939379109     | #DIV/0!         |
| RTEL1                                                                                         | 0,01346698  | 0,09017173  | 0,062 | 0,008 | 1           | 1,064496886   | 0,939410921     | 7,75            |
| PLXNB2                                                                                        | 0,000135099 | 0,090113103 | 0,469 | 0,145 | 1           | 1,064453629   | 0,939449097     | 3,234482759     |
| HECTD2                                                                                        | 0,003820406 | 0,090079978 | 0,125 | 0,023 | 1           | 1,064429189   | 0,939470667     | 5,434782609     |
| UROD                                                                                          | 7,33388E-07 | 0,090057297 | 0,281 | 0,039 | 0,015475215 | 1,064412455   | 0,939485437     | 7,205128205     |
| FBXO16                                                                                        | 4,80439E-05 | 0,089977265 | 0,094 | 0,004 | 1           | 1,06435341    | 0,939537555     | 23,5            |
| HP1BP3                                                                                        | 0,023702854 | 0,08995558  | 0,781 | 0,41  | 1           | 1,064337412   | 0,939551677     | 1,904878049     |
| DHX32                                                                                         | 0,00019555  | 0,089881007 | 0,188 | 0,031 | 1           | 1,064282397   | 0,939600244     | 6,064516129     |
| TSPAN31                                                                                       | 0,00038432  | 0,089769215 | 0,281 | 0,07  | 1           | 1,064199931   | 0,939673055     | 4,014285714     |
| APCDD1L                                                                                       | 9,12354E-07 | 0,0897445   | 0,094 | 0     | 0,019251588 | 1,0641817     | 0,939689153     | #DIV/0!         |
| MFSD11                                                                                        | 0,001477662 | 0,089702738 | 0,219 | 0,055 | 1           | 1,064150896   | 0,939716354     | 3,981818182     |
| UFM1                                                                                          | 0,003052977 | 0,089694632 | 0,531 | 0,219 | 1           | 1,064144916   | 0,939721634     | 2,424657534     |
| IFI44                                                                                         | 0,00024217  | 0,08933215  | 0,219 | 0,043 | 1           | 1,06387758    | 0,939957772     | 5,093023256     |
| FBXO28                                                                                        | 0,001637922 | 0,089322968 | 0,219 | 0,055 | 1           | 1,063870809   | 0,939963755     | 3,981818182     |
| KNL1                                                                                          | 0,004841742 | 0,089205499 | 0,031 | 0     | 1           | 1,063784188   | 0,940040293     | #DIV/0!         |
| MKI67                                                                                         | 0,004841742 | 0,089205499 | 0,031 | 0     | 1           | 1,063784188   | 0,940040293     | #DIV/0!         |
| CARD6                                                                                         | 0,00050526  | 0,089123976 | 0,094 | 0,008 | 1           | 1,063724079   | 0,940093413     | 11,75           |
| B9D1                                                                                          | 1,51098E-05 | 0,089029677 | 0,125 | 0,008 | 0,318831333 | 1,063654553   | 0,940154863     | 15,625          |

Supplementary Table 1

| Differentially expressed genes_adjacent-skin-XL_comparing SC-Keloid vs. (SC-Myel, SC-Nonmyel) |             |             |       |       |             |               |                 |                 |
|-----------------------------------------------------------------------------------------------|-------------|-------------|-------|-------|-------------|---------------|-----------------|-----------------|
| gene                                                                                          | p_val       | avg_log2FC  | pct.1 | pct.2 | p_val_adj   | Foldchange_UP | Foldchange_DOWN | Ratio_pct1_pct2 |
| MAML3                                                                                         | 0,000486986 | 0,088914518 | 0,188 | 0,035 | 1           | 1,063569653   | 0,940229911     | 5,371428571     |
| HHLA3                                                                                         | 0,000509339 | 0,088858582 | 0,125 | 0,016 | 1           | 1,063528417   | 0,940266366     | 7,8125          |
| TRNT1                                                                                         | 3,86379E-06 | 0,088808932 | 0,156 | 0,012 | 0,081529835 | 1,063491817   | 0,940298725     | 13              |
| RNF217                                                                                        | 0,00022736  | 0,088679282 | 0,219 | 0,043 | 1           | 1,063396248   | 0,940383231     | 5,093023256     |
| HDDC3                                                                                         | 0,000186392 | 0,088617204 | 0,188 | 0,031 | 1           | 1,063350492   | 0,940423696     | 6,064516129     |
| FAM120A                                                                                       | 5,72167E-05 | 0,088564323 | 0,531 | 0,16  | 1           | 1,063311517   | 0,940458167     | 3,31875         |
| ADI1                                                                                          | 0,002659405 | 0,088476583 | 0,5   | 0,195 | 1           | 1,063246852   | 0,940515364     | 2,564102564     |
| ZNF776                                                                                        | 4,80439E-05 | 0,088468551 | 0,094 | 0,004 | 1           | 1,063240932   | 0,940520601     | 23,5            |
| NSD2                                                                                          | 0,090719467 | 0,088372352 | 0,094 | 0,031 | 1           | 1,063170038   | 0,940583316     | 3,032258065     |
| AP1M1                                                                                         | 1,5064E-07  | 0,088352394 | 0,312 | 0,043 | 0,003178646 | 1,06315533    | 0,940596328     | 7,255813953     |
| B3GALT2                                                                                       | 0,000112833 | 0,08834627  | 0,125 | 0,012 | 1           | 1,063150817   | 0,940600321     | 10,41666667     |
| PYURF                                                                                         | 7,42194E-05 | 0,088337008 | 0,781 | 0,273 | 1           | 1,063143992   | 0,94060636      | 2,860805861     |
| MT-ATP6                                                                                       | 0,852540647 | 0,088279267 | 0,906 | 0,883 | 1           | 1,063101442   | 0,940644007     | 1,026047565     |
| CD200                                                                                         | 0,002818951 | 0,088247279 | 0,219 | 0,059 | 1           | 1,063077871   | 0,940664863     | 3,711864407     |
| XPNPEP1                                                                                       | 0,000181965 | 0,088206291 | 0,188 | 0,031 | 1           | 1,063047669   | 0,940691588     | 6,064516129     |
| LTC4S                                                                                         | 0,000112833 | 0,088167322 | 0,125 | 0,012 | 1           | 1,063018955   | 0,940716998     | 10,41666667     |
| CAPZA1                                                                                        | 0,000119405 | 0,088150474 | 0,562 | 0,18  | 1           | 1,063006541   | 0,940727984     | 3,122222222     |
| ABAT                                                                                          | 0,221475664 | 0,088137597 | 0,031 | 0,008 | 1           | 1,062997052   | 0,940736381     | 3,875           |
| PUS7L                                                                                         | 0,000777418 | 0,088089893 | 0,25  | 0,062 | 1           | 1,062961905   | 0,940767487     | 4,032258065     |
| TUBD1                                                                                         | 0,007750521 | 0,08807864  | 0,094 | 0,016 | 1           | 1,062953614   | 0,940774825     | 5,875           |
| DIAPH3                                                                                        | 0,002263143 | 0,087912849 | 0,062 | 0,004 | 1           | 1,062831469   | 0,940882943     | 15,5            |
| C1orf94                                                                                       | 6,3574E-05  | 0,087870453 | 0,062 | 0     | 1           | 1,062800236   | 0,940910593     | #DIV/0!         |
| DAB2                                                                                          | 4,80439E-05 | 0,087856302 | 0,094 | 0,004 | 1           | 1,062789811   | 0,940919822     | 23,5            |
| FAM120AOS                                                                                     | 0,017756423 | 0,087832461 | 0,25  | 0,094 | 1           | 1,062772248   | 0,940935371     | 2,659574468     |
| DKAKD                                                                                         | 8,90851E-07 | 0,087827704 | 0,25  | 0,031 | 0,018797848 | 1,062768744   | 0,940938474     | 8,064516129     |
| RNF40                                                                                         | 0,00022736  | 0,087768643 | 0,219 | 0,043 | 1           | 1,062725237   | 0,940976995     | 5,093023256     |
| BIN1                                                                                          | 2,37907E-06 | 0,087759048 | 0,5   | 0,121 | 0,050200786 | 1,06271817    | 0,940983253     | 4,132231405     |
| SAMD9L                                                                                        | 0,000916506 | 0,08771029  | 0,188 | 0,039 | 1           | 1,062682254   | 0,941015056     | 4,820512821     |
| UTP23                                                                                         | 4,123E-05   | 0,087666244 | 0,219 | 0,035 | 0,869994633 | 1,06264981    | 0,941043785     | 6,257142857     |
| DUSP28                                                                                        | 0,036158386 | 0,087612455 | 0,094 | 0,023 | 1           | 1,062610191   | 0,941078872     | 4,086956522     |



Supplementary Table 1

| Differentially expressed genes_adjacent-skin-XL_comparing SC-Keloid vs. (SC-Myel, SC-Nonmyel) |             |             |       |       |             |               |                 |                 |
|-----------------------------------------------------------------------------------------------|-------------|-------------|-------|-------|-------------|---------------|-----------------|-----------------|
| gene                                                                                          | p_val       | avg_log2FC  | pct.1 | pct.2 | p_val_adj   | Foldchange_UP | Foldchange_DOWN | Ratio_pct1_pct2 |
| P2RX7                                                                                         | 0,00234362  | 0,087555371 | 0,312 | 0,102 | 1           | 1,062568147   | 0,941116109     | 3,058823529     |
| COX7C                                                                                         | 0,029773256 | 0,08751842  | 0,844 | 0,488 | 1           | 1,062540933   | 0,941140213     | 1,729508197     |
| LEPR                                                                                          | 0,082995684 | 0,087466839 | 0,062 | 0,016 | 1           | 1,062502944   | 0,941173863     | 3,875           |
| CTNNBIP1                                                                                      | 0,000110741 | 0,087441002 | 0,281 | 0,062 | 1           | 1,062483916   | 0,941190718     | 4,532258065     |
| PLBD1                                                                                         | 0,002517564 | 0,087408818 | 0,094 | 0,012 | 1           | 1,062460214   | 0,941211715     | 7,833333333     |
| SARS1                                                                                         | 0,008866644 | 0,087356989 | 0,531 | 0,234 | 1           | 1,062422046   | 0,941245528     | 2,269230769     |
| UBA7                                                                                          | 4,39687E-06 | 0,087155437 | 0,219 | 0,027 | 0,092778258 | 1,06227363    | 0,941377034     | 8,111111111     |
| BST1                                                                                          | 1,51098E-05 | 0,086877226 | 0,125 | 0,008 | 0,318831333 | 1,0620688     | 0,941558588     | 15,625          |
| ELOVL4                                                                                        | 0,01346698  | 0,086791096 | 0,062 | 0,008 | 1           | 1,062005396   | 0,941614802     | 7,75            |
| C10orf67                                                                                      | 3,67695E-07 | 0,086646657 | 0,156 | 0,008 | 0,007758733 | 1,061899076   | 0,941709078     | 19,5            |
| IL3RA                                                                                         | 0,004841742 | 0,086622355 | 0,031 | 0     | 1           | 1,061881188   | 0,941724942     | #DIV/0!         |
| INCENP                                                                                        | 0,004841742 | 0,086622355 | 0,031 | 0     | 1           | 1,061881188   | 0,941724942     | #DIV/0!         |
| IZUMO1                                                                                        | 0,004841742 | 0,086622355 | 0,031 | 0     | 1           | 1,061881188   | 0,941724942     | #DIV/0!         |
| MAGIX                                                                                         | 0,004841742 | 0,086622355 | 0,031 | 0     | 1           | 1,061881188   | 0,941724942     | #DIV/0!         |
| PDGFRA                                                                                        | 0,004841742 | 0,086622355 | 0,031 | 0     | 1           | 1,061881188   | 0,941724942     | #DIV/0!         |
| SLC47A1                                                                                       | 0,004841742 | 0,086622355 | 0,031 | 0     | 1           | 1,061881188   | 0,941724942     | #DIV/0!         |
| TMEM72                                                                                        | 0,004841742 | 0,086622355 | 0,031 | 0     | 1           | 1,061881188   | 0,941724942     | #DIV/0!         |
| ST6GAL2                                                                                       | 9,12354E-07 | 0,086594208 | 0,094 | 0     | 0,019251588 | 1,061860471   | 0,941743315     | #DIV/0!         |
| ZNF827                                                                                        | 0,001444236 | 0,086401968 | 0,125 | 0,02  | 1           | 1,061718987   | 0,941868811     | 6,25            |
| SFT2D3                                                                                        | 0,002442928 | 0,086370963 | 0,094 | 0,012 | 1           | 1,06169617    | 0,941889053     | 7,833333333     |
| TRMT61B                                                                                       | 5,86746E-05 | 0,086296469 | 0,25  | 0,047 | 1           | 1,06164135    | 0,941937689     | 5,319148936     |
| ABCC3                                                                                         | 9,12354E-07 | 0,086263813 | 0,094 | 0     | 0,019251588 | 1,06161732    | 0,94195901      | #DIV/0!         |
| SSR3                                                                                          | 2,27194E-05 | 0,08616409  | 0,844 | 0,312 | 0,479402614 | 1,061543941   | 0,942024123     | 2,705128205     |
| FAM72B                                                                                        | 0,143111738 | 0,086132906 | 0,062 | 0,02  | 1           | 1,061520995   | 0,942044486     | 3,1             |
| DLGAP1-AS1                                                                                    | 0,000524345 | 0,08611526  | 0,094 | 0,008 | 1           | 1,061508012   | 0,942056008     | 11,75           |
| ARMC9                                                                                         | 9,06462E-07 | 0,086099069 | 0,125 | 0,004 | 0,019127258 | 1,061496099   | 0,94206658      | 31,25           |
| POMT2                                                                                         | 9,17E-07    | 0,086057045 | 0,25  | 0,031 | 0,01934961  | 1,061465179   | 0,942094023     | 8,064516129     |
| RTL8C                                                                                         | 0,000710949 | 0,085910595 | 0,531 | 0,191 | 1           | 1,061357434   | 0,942189661     | 2,780104712     |
| LRRC34                                                                                        | 0,013891036 | 0,08569931  | 0,062 | 0,008 | 1           | 1,061202008   | 0,942327655     | 7,75            |
| RAB43                                                                                         | 0,034851427 | 0,085559779 | 0,094 | 0,023 | 1           | 1,061099378   | 0,942418798     | 4,086956522     |

Supplementary Table 1

| Differentially expressed genes_adjacent-skin-XL_ comparing SC-Keloid vs. (SC-Myel, SC-Nonmyel) |             |             |       |       |             |               |                 |                 |
|------------------------------------------------------------------------------------------------|-------------|-------------|-------|-------|-------------|---------------|-----------------|-----------------|
| gene                                                                                           | p_val       | avg_log2FC  | pct.1 | pct.2 | p_val_adj   | Foldchange_UP | Foldchange_DOWN | Ratio_pct1_pct2 |
| GIMAP4                                                                                         | 0,082317662 | 0,085548854 | 0,031 | 0,004 | 1           | 1,061091343   | 0,942425934     | 7,75            |
| DDR2                                                                                           | 7,95124E-07 | 0,085501387 | 0,375 | 0,07  | 0,016777907 | 1,061056431   | 0,942456942     | 5,357142857     |
| MTF1                                                                                           | 0,777381931 | 0,085373644 | 0,031 | 0,023 | 1           | 1,060962485   | 0,942540396     | 1,347826087     |
| TSTD2                                                                                          | 0,005420294 | 0,085351599 | 0,188 | 0,051 | 1           | 1,060946273   | 0,942554798     | 3,68627451      |
| DNAJC16                                                                                        | 0,000509339 | 0,085310309 | 0,125 | 0,016 | 1           | 1,060915909   | 0,942581774     | 7,8125          |
| ACO1                                                                                           | 2,33422E-05 | 0,085308036 | 0,25  | 0,043 | 0,492544426 | 1,060914238   | 0,942583259     | 5,813953488     |
| BDKRB1                                                                                         | 0,079594089 | 0,085300391 | 0,031 | 0,004 | 1           | 1,060908616   | 0,942588254     | 7,75            |
| TIMM17B                                                                                        | 3,18992E-05 | 0,085231482 | 0,375 | 0,09  | 0,673105308 | 1,060857943   | 0,942633277     | 4,166666667     |
| SDHAF3                                                                                         | 7,93488E-09 | 0,085044584 | 0,375 | 0,051 | 0,000167434 | 1,06072052    | 0,942755401     | 7,352941176     |
| ENTPD5                                                                                         | 0,018047186 | 0,085034639 | 0,094 | 0,02  | 1           | 1,060713209   | 0,9427619       | 4,7             |
| WDR3                                                                                           | 0,000100263 | 0,085002427 | 0,156 | 0,02  | 1           | 1,060689526   | 0,94278295      | 7,8             |
| SEC11C                                                                                         | 0,000546674 | 0,084948386 | 0,375 | 0,117 | 1           | 1,060649795   | 0,942818265     | 3,205128205     |
| SLC35B3                                                                                        | 0,000466117 | 0,084802355 | 0,188 | 0,035 | 1           | 1,060542441   | 0,942913703     | 5,371428571     |
| CENPBD1                                                                                        | 0,002263143 | 0,084666168 | 0,062 | 0,004 | 1           | 1,060442332   | 0,943002716     | 15,5            |
| MED14                                                                                          | 0,002113111 | 0,084655178 | 0,281 | 0,086 | 1           | 1,060434254   | 0,9430099       | 3,26744186      |
| TRMT11                                                                                         | 4,48128E-07 | 0,084376957 | 0,312 | 0,047 | 0,009455951 | 1,060229771   | 0,943191775     | 6,638297872     |
| TMEM267                                                                                        | 6,78604E-05 | 0,084237609 | 0,188 | 0,027 | 1           | 1,06012737    | 0,943282881     | 6,962962963     |
| H1-1                                                                                           | 0,002263143 | 0,084099958 | 0,062 | 0,004 | 1           | 1,060026226   | 0,943372886     | 15,5            |
| CEACAM6                                                                                        | 0,004841742 | 0,083998986 | 0,031 | 0     | 1           | 1,059952038   | 0,943438914     | #DIV/0!         |
| LCN2                                                                                           | 0,004841742 | 0,083998986 | 0,031 | 0     | 1           | 1,059952038   | 0,943438914     | #DIV/0!         |
| MYO5B                                                                                          | 0,004841742 | 0,083998986 | 0,031 | 0     | 1           | 1,059952038   | 0,943438914     | #DIV/0!         |
| FAHD1                                                                                          | 0,000509339 | 0,083996656 | 0,125 | 0,016 | 1           | 1,059950326   | 0,943440438     | 7,8125          |
| TMEM119                                                                                        | 6,3574E-05  | 0,083962888 | 0,062 | 0     | 1           | 1,059925518   | 0,94346252      | #DIV/0!         |
| CCDC134                                                                                        | 6,3574E-05  | 0,083817773 | 0,062 | 0     | 1           | 1,059818909   | 0,943557424     | #DIV/0!         |
| KIAA1328                                                                                       | 0,027421825 | 0,083797258 | 0,156 | 0,051 | 1           | 1,059803839   | 0,943570842     | 3,058823529     |
| ABCA3                                                                                          | 0,38835216  | 0,083786527 | 0,094 | 0,055 | 1           | 1,059795956   | 0,94357786      | 1,709090909     |
| F8A1                                                                                           | 0,002096899 | 0,083747867 | 0,156 | 0,031 | 1           | 1,059767557   | 0,943603145     | 5,032258065     |
| CC2D1A                                                                                         | 0,011609182 | 0,083653611 | 0,156 | 0,043 | 1           | 1,059698321   | 0,943664796     | 3,627906977     |
| ANKAR                                                                                          | 0,128095294 | 0,083541693 | 0,094 | 0,035 | 1           | 1,059616117   | 0,943738005     | 2,685714286     |
| CCNG1                                                                                          | 0,000446084 | 0,083516535 | 0,188 | 0,035 | 1           | 1,05959764    | 0,943754461     | 5,371428571     |

Supplementary Table 1

| Differentially expressed genes_adjacent-skin-XL_ comparing SC-Keloid vs. (SC-Myel, SC-Nonmyel) |             |             |       |       |             |               |                 |                 |
|------------------------------------------------------------------------------------------------|-------------|-------------|-------|-------|-------------|---------------|-----------------|-----------------|
| gene                                                                                           | p_val       | avg_log2FC  | pct.1 | pct.2 | p_val_adj   | Foldchange_UP | Foldchange_DOWN | Ratio_pct1_pct2 |
| PSMG1                                                                                          | 0,003540212 | 0,083507449 | 0,188 | 0,047 | 1           | 1,059590966   | 0,943760406     | 4               |
| CAMK1D                                                                                         | 0,000487956 | 0,083484299 | 0,219 | 0,047 | 1           | 1,059573964   | 0,943775549     | 4,659574468     |
| CHCHD10                                                                                        | 0,001490764 | 0,083410007 | 0,562 | 0,219 | 1           | 1,059519402   | 0,943824151     | 2,566210046     |
| RALGPS1                                                                                        | 0,143111738 | 0,083351756 | 0,062 | 0,02  | 1           | 1,059476623   | 0,94386226      | 3,1             |
| MAPKAPK5                                                                                       | 2,63664E-05 | 0,08326555  | 0,281 | 0,055 | 0,556356432 | 1,059413318   | 0,94391866      | 5,109090909     |
| GALK1                                                                                          | 0,001019952 | 0,083226227 | 0,219 | 0,051 | 1           | 1,059384442   | 0,943944389     | 4,294117647     |
| SLC30A5                                                                                        | 3,21209E-07 | 0,083098145 | 0,344 | 0,055 | 0,006777833 | 1,059290395   | 0,944028196     | 6,254545455     |
| EIF3F                                                                                          | 0,033344813 | 0,083007994 | 0,656 | 0,336 | 1           | 1,059224204   | 0,944087188     | 1,952380952     |
| CLCC1                                                                                          | 0,00122005  | 0,082970999 | 0,25  | 0,066 | 1           | 1,059197043   | 0,944111397     | 3,787878788     |
| MIA2                                                                                           | 1,37797E-05 | 0,082880839 | 0,219 | 0,031 | 0,29076515  | 1,059130851   | 0,944170401     | 7,064516129     |
| SEMA3D                                                                                         | 0,229249342 | 0,082836199 | 0,094 | 0,043 | 1           | 1,05909808    | 0,944199615     | 2,186046512     |
| ZNF10                                                                                          | 0,035499775 | 0,082754425 | 0,094 | 0,023 | 1           | 1,05903805    | 0,944253136     | 4,086956522     |
| NAP1L1                                                                                         | 0,22259565  | 0,082723375 | 0,656 | 0,484 | 1           | 1,059015257   | 0,944273459     | 1,355371901     |
| ZNF568                                                                                         | 8,84735E-07 | 0,08270126  | 0,188 | 0,016 | 0,018668785 | 1,058999024   | 0,944287933     | 11,75           |
| CST6                                                                                           | 6,3574E-05  | 0,082694036 | 0,062 | 0     | 1           | 1,058993721   | 0,944292662     | #DIV/0!         |
| UCLH3                                                                                          | 1,21952E-05 | 0,082643239 | 0,375 | 0,082 | 0,257330394 | 1,058956435   | 0,944325911     | 4,573170732     |
| CCDC102A                                                                                       | 0,000509339 | 0,082567796 | 0,125 | 0,016 | 1           | 1,058901061   | 0,944375293     | 7,8125          |
| RHBDD3                                                                                         | 0,000339359 | 0,08253301  | 0,156 | 0,023 | 1           | 1,058875529   | 0,944398064     | 6,782608696     |
| FAM111B                                                                                        | 4,80439E-05 | 0,082500963 | 0,094 | 0,004 | 1           | 1,058852008   | 0,944419043     | 23,5            |
| COG3                                                                                           | 0,01179781  | 0,082471947 | 0,156 | 0,043 | 1           | 1,058830712   | 0,944438038     | 3,627906977     |
| BVES                                                                                           | 0,000524345 | 0,082403257 | 0,094 | 0,008 | 1           | 1,0587803     | 0,944483005     | 11,75           |
| JAGN1                                                                                          | 8,52679E-07 | 0,082377578 | 0,344 | 0,059 | 0,017992372 | 1,058761455   | 0,944499817     | 5,830508475     |
| UBAC2                                                                                          | 0,00025286  | 0,082312709 | 0,281 | 0,066 | 1           | 1,05871385    | 0,944542286     | 4,257575758     |
| PPP3CC                                                                                         | 0,000862411 | 0,082267925 | 0,312 | 0,09  | 1           | 1,058680986   | 0,944571607     | 3,466666667     |
| ZNF641                                                                                         | 0,008437622 | 0,082263291 | 0,125 | 0,027 | 1           | 1,058677585   | 0,944574641     | 4,62962963      |
| FAM47E                                                                                         | 6,3574E-05  | 0,082258265 | 0,062 | 0     | 1           | 1,058673897   | 0,944577932     | #DIV/0!         |
| ST3GAL1                                                                                        | 0,175414505 | 0,082257002 | 0,094 | 0,039 | 1           | 1,05867297    | 0,944578759     | 2,41025641      |
| KLHL18                                                                                         | 0,00083045  | 0,08218628  | 0,156 | 0,027 | 1           | 1,058621075   | 0,944625063     | 5,777777778     |
| IQGAP1                                                                                         | 0,002600504 | 0,082184802 | 0,625 | 0,258 | 1           | 1,05861999    | 0,944626031     | 2,42248062      |
| USP51                                                                                          | 0,179574158 | 0,082139803 | 0,125 | 0,059 | 1           | 1,058586971   | 0,944655496     | 2,118644068     |

Supplementary Table 1

| Differentially expressed genes_adjacent-skin-XL_comparing SC-Keloid vs. (SC-Myel, SC-Nonmyel) |             |             |       |       |             |               |                 |                 |
|-----------------------------------------------------------------------------------------------|-------------|-------------|-------|-------|-------------|---------------|-----------------|-----------------|
| gene                                                                                          | p_val       | avg_log2FC  | pct.1 | pct.2 | p_val_adj   | Foldchange_UP | Foldchange_DOWN | Ratio_pct1_pct2 |
| SEPTIN5                                                                                       | 4,80439E-05 | 0,082052559 | 0,094 | 0,004 | 1           | 1,058522958   | 0,944712623     | 23,5            |
| SFSWAP                                                                                        | 0,0002964   | 0,081951109 | 0,531 | 0,18  | 1           | 1,058448525   | 0,944779058     | 2,95            |
| C9orf40                                                                                       | 1,51098E-05 | 0,081774759 | 0,125 | 0,008 | 0,318831333 | 1,058319151   | 0,944894552     | 15,625          |
| ENTPD4                                                                                        | 0,006536686 | 0,081739009 | 0,219 | 0,066 | 1           | 1,058292927   | 0,944917966     | 3,318181818     |
| CKAP2                                                                                         | 0,000509339 | 0,081724584 | 0,125 | 0,016 | 1           | 1,058282345   | 0,944927414     | 7,8125          |
| CCNB2                                                                                         | 9,12354E-07 | 0,081675527 | 0,094 | 0     | 0,019251588 | 1,058246361   | 0,944959545     | #DIV/0!         |
| SGCE                                                                                          | 0,082320805 | 0,081666166 | 0,719 | 0,438 | 1           | 1,058239494   | 0,944965677     | 1,641552511     |
| RAB22A                                                                                        | 3,87818E-06 | 0,081464538 | 0,469 | 0,113 | 0,081833425 | 1,058091607   | 0,945097753     | 4,150442478     |
| TUT7                                                                                          | 0,003304112 | 0,081435522 | 0,188 | 0,047 | 1           | 1,058070327   | 0,945116761     | 4               |
| POGLUT1                                                                                       | 0,004180266 | 0,081424448 | 0,125 | 0,023 | 1           | 1,058062205   | 0,945124016     | 5,434782609     |
| FASTKD2                                                                                       | 0,038025501 | 0,081326424 | 0,156 | 0,055 | 1           | 1,057990317   | 0,945188235     | 2,836363636     |
| LINC00960                                                                                     | 0,002263143 | 0,081279683 | 0,062 | 0,004 | 1           | 1,05795604    | 0,945218858     | 15,5            |
| ALG12                                                                                         | 0,003820406 | 0,081217731 | 0,125 | 0,023 | 1           | 1,057910611   | 0,945259448     | 5,434782609     |
| CCNC                                                                                          | 0,000242168 | 0,081132742 | 0,219 | 0,043 | 1           | 1,057848291   | 0,945315135     | 5,093023256     |
| FIP1L1                                                                                        | 5,4442E-05  | 0,080980663 | 0,344 | 0,082 | 1           | 1,057736786   | 0,945414789     | 4,195121951     |
| AASDHPPT                                                                                      | 0,000125591 | 0,080977103 | 0,312 | 0,074 | 1           | 1,057734176   | 0,945417121     | 4,216216216     |
| DPF2                                                                                          | 0,167341781 | 0,080902071 | 0,156 | 0,078 | 1           | 1,057679167   | 0,945466292     | 2               |
| AC010976.2                                                                                    | 0,004841742 | 0,080886111 | 0,031 | 0     | 1           | 1,057667466   | 0,945476751     | #DIV/0!         |
| CADPS2                                                                                        | 0,004841742 | 0,080886111 | 0,031 | 0     | 1           | 1,057667466   | 0,945476751     | #DIV/0!         |
| LINC00865                                                                                     | 0,004841742 | 0,080886111 | 0,031 | 0     | 1           | 1,057667466   | 0,945476751     | #DIV/0!         |
| TWNK                                                                                          | 0,004841742 | 0,080886111 | 0,031 | 0     | 1           | 1,057667466   | 0,945476751     | #DIV/0!         |
| WFIKKN1                                                                                       | 0,079594089 | 0,08077911  | 0,031 | 0,004 | 1           | 1,057589025   | 0,945546877     | 7,75            |
| PAPSS1                                                                                        | 0,002435762 | 0,080742375 | 0,438 | 0,16  | 1           | 1,057562096   | 0,945570954     | 2,7375          |
| SPACA9                                                                                        | 0,007750521 | 0,080712923 | 0,094 | 0,016 | 1           | 1,057540506   | 0,945590258     | 5,875           |
| RAB40C                                                                                        | 0,000103236 | 0,080635966 | 0,156 | 0,02  | 1           | 1,057484096   | 0,9456407       | 7,8             |
| FBXO36                                                                                        | 9,06462E-07 | 0,080617243 | 0,125 | 0,004 | 0,019127258 | 1,057470372   | 0,945652972     | 31,25           |
| PAXIP1-AS2                                                                                    | 0,002263143 | 0,080616181 | 0,062 | 0,004 | 1           | 1,057469593   | 0,945653668     | 15,5            |
| SEMA6C                                                                                        | 0,018047186 | 0,080553931 | 0,094 | 0,02  | 1           | 1,057423967   | 0,945694472     | 4,7             |
| CHAMP1                                                                                        | 0,060931358 | 0,080549313 | 0,094 | 0,027 | 1           | 1,057420581   | 0,9456975       | 3,481481481     |
| PAGR1                                                                                         | 4,10016E-08 | 0,080474171 | 0,406 | 0,066 | 0,000865174 | 1,057365508   | 0,945746757     | 6,151515152     |

Supplementary Table 1

| Differentially expressed genes_adjacent-skin-XL_comparing SC-Keloid vs. (SC-Myel, SC-Nonmyel) |             |             |       |       |             |               |                 |                 |
|-----------------------------------------------------------------------------------------------|-------------|-------------|-------|-------|-------------|---------------|-----------------|-----------------|
| gene                                                                                          | p_val       | avg_log2FC  | pct.1 | pct.2 | p_val_adj   | Foldchange_UP | Foldchange_DOWN | Ratio_pct1_pct2 |
| PIK3CD                                                                                        | 0,002594281 | 0,080463818 | 0,094 | 0,012 | 1           | 1,05735792    | 0,945753544     | 7,833333333     |
| ZNF738                                                                                        | 0,000494525 | 0,080366816 | 0,125 | 0,016 | 1           | 1,057286829   | 0,945817135     | 7,8125          |
| CDKL5                                                                                         | 0,29055378  | 0,080311011 | 0,062 | 0,027 | 1           | 1,057245933   | 0,945853721     | 2,296296296     |
| RARS1                                                                                         | 6,94943E-07 | 0,080298719 | 0,281 | 0,039 | 0,014663999 | 1,057236925   | 0,94586178      | 7,205128205     |
| NDUFA10                                                                                       | 3,62687E-05 | 0,080279173 | 0,562 | 0,168 | 0,765305132 | 1,057222602   | 0,945874595     | 3,345238095     |
| LRR8A                                                                                         | 0,000113954 | 0,080164665 | 0,375 | 0,098 | 1           | 1,057138692   | 0,945949673     | 3,826530612     |
| ESS2                                                                                          | 0,002517564 | 0,079813049 | 0,094 | 0,012 | 1           | 1,056881076   | 0,946180249     | 7,833333333     |
| LDOC1                                                                                         | 0,129733608 | 0,079798088 | 0,094 | 0,035 | 1           | 1,056870116   | 0,946190061     | 2,685714286     |
| HSD17B14                                                                                      | 0,039886012 | 0,079780842 | 0,062 | 0,012 | 1           | 1,056857483   | 0,946201372     | 5,166666667     |
| HCG27                                                                                         | 0,226351275 | 0,079619604 | 0,031 | 0,008 | 1           | 1,056739373   | 0,946307127     | 3,875           |
| DDX60                                                                                         | 0,140820961 | 0,07959983  | 0,062 | 0,02  | 1           | 1,056724889   | 0,946320098     | 3,1             |
| FHL2                                                                                          | 5,12603E-06 | 0,079595221 | 0,188 | 0,02  | 0,108164307 | 1,056721513   | 0,946323121     | 9,4             |
| ANO10                                                                                         | 1,26889E-06 | 0,079471638 | 0,312 | 0,051 | 0,026774874 | 1,056630997   | 0,946404187     | 6,117647059     |
| SPAG1                                                                                         | 0,001600673 | 0,079444786 | 0,125 | 0,02  | 1           | 1,056611331   | 0,946421802     | 6,25            |
| GLRB                                                                                          | 4,80439E-05 | 0,07939217  | 0,094 | 0,004 | 1           | 1,056572796   | 0,946456319     | 23,5            |
| CCR1                                                                                          | 6,3574E-05  | 0,079375314 | 0,062 | 0     | 1           | 1,056560451   | 0,946467378     | #DIV/0!         |
| MAPK9                                                                                         | 0,005248131 | 0,079363727 | 0,188 | 0,051 | 1           | 1,056551966   | 0,946474979     | 3,68627451      |
| AC093690.1                                                                                    | 0,082317662 | 0,079314124 | 0,031 | 0,004 | 1           | 1,05651564    | 0,946507522     | 7,75            |
| BRF1                                                                                          | 0,142206469 | 0,079307796 | 0,125 | 0,055 | 1           | 1,056511006   | 0,946511673     | 2,272727273     |
| CEP55                                                                                         | 0,002263143 | 0,07926762  | 0,062 | 0,004 | 1           | 1,056481584   | 0,946538032     | 15,5            |
| H1-3                                                                                          | 0,040857201 | 0,079250415 | 0,062 | 0,012 | 1           | 1,056468985   | 0,946549321     | 5,166666667     |
| DAXX                                                                                          | 0,00083045  | 0,079236421 | 0,156 | 0,027 | 1           | 1,056458738   | 0,946558502     | 5,777777778     |
| UBE3B                                                                                         | 0,035499775 | 0,079231998 | 0,094 | 0,023 | 1           | 1,056455499   | 0,946561404     | 4,086956522     |
| AGFG1                                                                                         | 0,001103204 | 0,079209322 | 0,375 | 0,121 | 1           | 1,056438894   | 0,946576281     | 3,099173554     |
| RBBP9                                                                                         | 4,80439E-05 | 0,078904451 | 0,094 | 0,004 | 1           | 1,05621567    | 0,946776334     | 23,5            |
| USP46                                                                                         | 0,001452401 | 0,078862113 | 0,219 | 0,055 | 1           | 1,056184674   | 0,946804119     | 3,981818182     |
| HSD17B4                                                                                       | 5,07132E-06 | 0,078859274 | 0,375 | 0,078 | 0,107009836 | 1,056182596   | 0,946805982     | 4,807692308     |
| CUL7                                                                                          | 0,082995684 | 0,078667034 | 0,062 | 0,016 | 1           | 1,056041869   | 0,946932152     | 3,875           |
| PPP6R1                                                                                        | 0,025952325 | 0,078637925 | 0,156 | 0,051 | 1           | 1,056020561   | 0,946951259     | 3,058823529     |
| WSB2                                                                                          | 2,00071E-05 | 0,078616604 | 0,375 | 0,086 | 0,42217062  | 1,056004955   | 0,946965254     | 4,360465116     |

Supplementary Table 1

| Differentially expressed genes_adjacent-skin-XL_comparing SC-Keloid vs. (SC-Myel, SC-Nonmyel) |             |             |       |       |             |               |                 |                 |
|-----------------------------------------------------------------------------------------------|-------------|-------------|-------|-------|-------------|---------------|-----------------|-----------------|
| gene                                                                                          | p_val       | avg_log2FC  | pct.1 | pct.2 | p_val_adj   | Foldchange_UP | Foldchange_DOWN | Ratio_pct1_pct2 |
| PRMT5-AS1                                                                                     | 0,002263143 | 0,078607272 | 0,062 | 0,004 | 1           | 1,055998124   | 0,946971379     | 15,5            |
| ADGRE5                                                                                        | 0,000634905 | 0,078581995 | 0,281 | 0,074 | 1           | 1,055979622   | 0,946987971     | 3,797297297     |
| TMEM109                                                                                       | 0,000897631 | 0,078561486 | 0,625 | 0,234 | 1           | 1,055964611   | 0,947001433     | 2,670940171     |
| YIPF2                                                                                         | 0,000432429 | 0,078547723 | 0,281 | 0,07  | 1           | 1,055954537   | 0,947010467     | 4,014285714     |
| AC011484.1                                                                                    | 0,004841742 | 0,078341451 | 0,031 | 0     | 1           | 1,055803571   | 0,947145877     | #DIV/0!         |
| CNTNAP5                                                                                       | 0,004841742 | 0,078341451 | 0,031 | 0     | 1           | 1,055803571   | 0,947145877     | #DIV/0!         |
| GNG3                                                                                          | 0,004841742 | 0,078341451 | 0,031 | 0     | 1           | 1,055803571   | 0,947145877     | #DIV/0!         |
| PSORS1C1                                                                                      | 0,004841742 | 0,078341451 | 0,031 | 0     | 1           | 1,055803571   | 0,947145877     | #DIV/0!         |
| SORL1                                                                                         | 0,004841742 | 0,078341451 | 0,031 | 0     | 1           | 1,055803571   | 0,947145877     | #DIV/0!         |
| GTF2H2C                                                                                       | 0,129733608 | 0,078322752 | 0,094 | 0,035 | 1           | 1,055789887   | 0,947158154     | 2,685714286     |
| BZW1                                                                                          | 0,000853194 | 0,07832207  | 0,719 | 0,281 | 1           | 1,055789388   | 0,947158602     | 2,558718861     |
| GSK3A                                                                                         | 0,010257922 | 0,078278057 | 0,25  | 0,086 | 1           | 1,055757179   | 0,947187497     | 2,906976744     |
| EXOSC9                                                                                        | 1,32717E-05 | 0,078270838 | 0,281 | 0,051 | 0,280046571 | 1,055751896   | 0,947192237     | 5,509803922     |
| ATP9A                                                                                         | 0,002594281 | 0,078161424 | 0,094 | 0,012 | 1           | 1,055671831   | 0,947264075     | 7,833333333     |
| BTN3A2                                                                                        | 3,86379E-06 | 0,078144266 | 0,156 | 0,012 | 0,081529835 | 1,055659276   | 0,947275341     | 13              |
| MTMR4                                                                                         | 0,00019555  | 0,078058032 | 0,188 | 0,031 | 1           | 1,055596178   | 0,947331964     | 6,064516129     |
| MRPS22                                                                                        | 0,000239783 | 0,078043209 | 0,281 | 0,066 | 1           | 1,055585332   | 0,947341697     | 4,257575758     |
| TTL7                                                                                          | 0,00273635  | 0,077981543 | 0,469 | 0,188 | 1           | 1,055540213   | 0,947382191     | 2,494680851     |
| RIN1                                                                                          | 0,000112833 | 0,077889342 | 0,125 | 0,012 | 1           | 1,055472757   | 0,947442739     | 10,41666667     |
| EPS8L1                                                                                        | 6,3574E-05  | 0,077856125 | 0,062 | 0     | 1           | 1,055448456   | 0,947464553     | #DIV/0!         |
| SAYSD1                                                                                        | 0,000200286 | 0,077809269 | 0,188 | 0,031 | 1           | 1,055414177   | 0,947495326     | 6,064516129     |
| ATL2                                                                                          | 0,000897835 | 0,077807877 | 0,219 | 0,051 | 1           | 1,055413159   | 0,94749624      | 4,294117647     |
| NPHP1                                                                                         | 0,000100263 | 0,077780833 | 0,156 | 0,02  | 1           | 1,055393376   | 0,947514001     | 7,8             |
| ZUP1                                                                                          | 0,082317662 | 0,077670021 | 0,031 | 0,004 | 1           | 1,055312315   | 0,947586782     | 7,75            |
| GAREM1                                                                                        | 0,015983649 | 0,07765547  | 0,125 | 0,031 | 1           | 1,055301671   | 0,947596339     | 4,032258065     |
| ZFYVE16                                                                                       | 0,000684407 | 0,077651104 | 0,469 | 0,16  | 1           | 1,055298478   | 0,947599206     | 2,93125         |
| DNAH5                                                                                         | 1,33967E-08 | 0,077628488 | 0,125 | 0     | 0,000282684 | 1,055281934   | 0,947614062     | #DIV/0!         |
| VEGFA                                                                                         | 0,001643475 | 0,077574778 | 0,5   | 0,191 | 1           | 1,055242648   | 0,947649341     | 2,617801047     |
| TCF7                                                                                          | 0,000339359 | 0,07745034  | 0,156 | 0,023 | 1           | 1,055151633   | 0,947731083     | 6,782608696     |
| ALDH1B1                                                                                       | 4,80439E-05 | 0,077447105 | 0,094 | 0,004 | 1           | 1,055149268   | 0,947733208     | 23,5            |

Supplementary Table 1

| Differentially expressed genes_adjacent-skin-XL_ comparing SC-Keloid vs. (SC-Myel, SC-Nonmyel) |             |             |       |       |             |               |                 |                 |
|------------------------------------------------------------------------------------------------|-------------|-------------|-------|-------|-------------|---------------|-----------------|-----------------|
| gene                                                                                           | p_val       | avg_log2FC  | pct.1 | pct.2 | p_val_adj   | Foldchange_UP | Foldchange_DOWN | Ratio_pct1_pct2 |
| CTTN                                                                                           | 0,000485886 | 0,077413546 | 0,75  | 0,277 | 1           | 1,055124723   | 0,947755254     | 2,707581227     |
| SMARCD1                                                                                        | 0,000313264 | 0,077359619 | 0,344 | 0,094 | 1           | 1,055085284   | 0,947790681     | 3,659574468     |
| TIMM8A                                                                                         | 0,007750521 | 0,077256673 | 0,094 | 0,016 | 1           | 1,055009999   | 0,947858315     | 5,875           |
| C15orf48                                                                                       | 0,079594089 | 0,077167581 | 0,031 | 0,004 | 1           | 1,05494485    | 0,947916851     | 7,75            |
| CEBPG                                                                                          | 0,005165859 | 0,077028757 | 0,25  | 0,078 | 1           | 1,054843343   | 0,948008069     | 3,205128205     |
| ZNF616                                                                                         | 0,013891036 | 0,07700614  | 0,062 | 0,008 | 1           | 1,054826806   | 0,948022931     | 7,75            |
| MRPL46                                                                                         | 1,51098E-05 | 0,076992157 | 0,125 | 0,008 | 0,318831333 | 1,054816583   | 0,948032119     | 15,625          |
| DOLPP1                                                                                         | 2,40115E-05 | 0,076963317 | 0,156 | 0,016 | 0,506667402 | 1,054795497   | 0,94805107      | 9,75            |
| SF3A3                                                                                          | 3,5672E-05  | 0,076820082 | 0,312 | 0,066 | 0,752713874 | 1,054690779   | 0,9481452       | 4,727272727     |
| SRPK2                                                                                          | 0,006504289 | 0,076658045 | 0,406 | 0,16  | 1           | 1,054572327   | 0,948251698     | 2,5375          |
| RAP1B                                                                                          | 0,000709604 | 0,076577963 | 0,812 | 0,32  | 1           | 1,054513791   | 0,948304336     | 2,5375          |
| IRAK4                                                                                          | 2,32278E-05 | 0,07649244  | 0,156 | 0,016 | 0,490128791 | 1,054451281   | 0,948360553     | 9,75            |
| PEX11G                                                                                         | 0,002594281 | 0,076375794 | 0,094 | 0,012 | 1           | 1,05436603    | 0,948437233     | 7,833333333     |
| TMEM251                                                                                        | 0,000466117 | 0,076292362 | 0,188 | 0,035 | 1           | 1,054305056   | 0,948492084     | 5,371428571     |
| C15orf65                                                                                       | 4,80439E-05 | 0,076287002 | 0,094 | 0,004 | 1           | 1,05430114    | 0,948495608     | 23,5            |
| COX18                                                                                          | 0,079594089 | 0,076282901 | 0,031 | 0,004 | 1           | 1,054298142   | 0,948498304     | 7,75            |
| MAN1A2                                                                                         | 2,22383E-06 | 0,07614847  | 0,531 | 0,133 | 0,046924959 | 1,054199907   | 0,948586689     | 3,992481203     |
| DPAGT1                                                                                         | 5,12603E-06 | 0,076146897 | 0,188 | 0,02  | 0,108164307 | 1,054198758   | 0,948587724     | 9,4             |
| DOLK                                                                                           | 1,51098E-05 | 0,076144569 | 0,125 | 0,008 | 0,318831333 | 1,054197056   | 0,948589255     | 15,625          |
| IFIT5                                                                                          | 0,283294123 | 0,076092196 | 0,094 | 0,047 | 1           | 1,054158787   | 0,948623691     | 2               |
| RFC1                                                                                           | 0,005718938 | 0,07608101  | 0,375 | 0,145 | 1           | 1,054150614   | 0,948631046     | 2,586206897     |
| E2F1                                                                                           | 6,3574E-05  | 0,076020136 | 0,062 | 0     | 1           | 1,054106135   | 0,948671074     | #DIV/0!         |
| AAGAB                                                                                          | 2,11157E-07 | 0,075971019 | 0,219 | 0,02  | 0,00445563  | 1,054070249   | 0,948703372     | 10,95           |
| TMX3                                                                                           | 9,10554E-05 | 0,075950789 | 0,438 | 0,125 | 1           | 1,054055468   | 0,948716676     | 3,504           |
| FAM83D                                                                                         | 6,3574E-05  | 0,075764323 | 0,062 | 0     | 1           | 1,053919242   | 0,948839304     | #DIV/0!         |
| GIN51                                                                                          | 6,3574E-05  | 0,075764323 | 0,062 | 0     | 1           | 1,053919242   | 0,948839304     | #DIV/0!         |
| SETD6                                                                                          | 1,51098E-05 | 0,075749328 | 0,125 | 0,008 | 0,318831333 | 1,053908288   | 0,948849166     | 15,625          |
| CCDC137                                                                                        | 0,001520602 | 0,075674945 | 0,125 | 0,02  | 1           | 1,053853952   | 0,948898088     | 6,25            |
| CCDC88B                                                                                        | 6,3574E-05  | 0,075621367 | 0,062 | 0     | 1           | 1,053814815   | 0,948933328     | #DIV/0!         |
| ZMYND15                                                                                        | 6,3574E-05  | 0,075621367 | 0,062 | 0     | 1           | 1,053814815   | 0,948933328     | #DIV/0!         |

Supplementary Table 1

| Differentially expressed genes_adjacent-skin-XL_comparing SC-Keloid vs. (SC-Myel, SC-Nonmyel) |             |             |       |       |             |               |                 |                 |
|-----------------------------------------------------------------------------------------------|-------------|-------------|-------|-------|-------------|---------------|-----------------|-----------------|
| gene                                                                                          | p_val       | avg_log2FC  | pct.1 | pct.2 | p_val_adj   | Foldchange_UP | Foldchange_DOWN | Ratio_pct1_pct2 |
| B3GNT7                                                                                        | 0,001642148 | 0,075573381 | 0,125 | 0,02  | 1           | 1,053779764   | 0,948964892     | 6,25            |
| ATRX                                                                                          | 0,000491157 | 0,075548347 | 0,844 | 0,336 | 1           | 1,053761479   | 0,948981358     | 2,511904762     |
| LIPH                                                                                          | 0,079594089 | 0,075449312 | 0,031 | 0,004 | 1           | 1,053689145   | 0,949046504     | 7,75            |
| HCG18                                                                                         | 0,044664395 | 0,075435771 | 0,188 | 0,074 | 1           | 1,053679256   | 0,949055412     | 2,540540541     |
| TFB2M                                                                                         | 0,082995684 | 0,075425312 | 0,062 | 0,016 | 1           | 1,053671617   | 0,949062292     | 3,875           |
| CCNA2                                                                                         | 0,013891036 | 0,075406541 | 0,062 | 0,008 | 1           | 1,053657907   | 0,949074641     | 7,75            |
| ESCO1                                                                                         | 0,003877934 | 0,075373062 | 0,156 | 0,035 | 1           | 1,053633456   | 0,949096666     | 4,457142857     |
| SLC2A6                                                                                        | 9,12354E-07 | 0,075322703 | 0,094 | 0     | 0,019251588 | 1,053596679   | 0,949129795     | #DIV/0!         |
| ULK3                                                                                          | 0,00819789  | 0,075279151 | 0,188 | 0,055 | 1           | 1,053564874   | 0,949158448     | 3,418181818     |
| FAM86C1P                                                                                      | 0,013891036 | 0,075271958 | 0,062 | 0,008 | 1           | 1,053559621   | 0,94916318      | 7,75            |
| ELOVL5                                                                                        | 0,002083508 | 0,075270634 | 0,344 | 0,113 | 1           | 1,053558654   | 0,949164051     | 3,044247788     |
| AMPH                                                                                          | 6,3574E-05  | 0,075202982 | 0,062 | 0     | 1           | 1,05350925    | 0,949208562     | #DIV/0!         |
| C3AR1                                                                                         | 6,3574E-05  | 0,075137816 | 0,062 | 0     | 1           | 1,053461665   | 0,949251438     | #DIV/0!         |
| FAM172A                                                                                       | 0,000199867 | 0,075133993 | 0,375 | 0,105 | 1           | 1,053458873   | 0,949253953     | 3,571428571     |
| SBSN                                                                                          | 0,002263143 | 0,075106396 | 0,062 | 0,004 | 1           | 1,053438723   | 0,949272111     | 15,5            |
| ZNF280C                                                                                       | 0,221475664 | 0,075104247 | 0,031 | 0,008 | 1           | 1,053437153   | 0,949273525     | 3,875           |
| ERGIC3                                                                                        | 0,001313187 | 0,075099587 | 0,5   | 0,188 | 1           | 1,05343375    | 0,949276592     | 2,659574468     |
| TMEM69                                                                                        | 0,001600673 | 0,075094286 | 0,125 | 0,02  | 1           | 1,05342988    | 0,94928008      | 6,25            |
| STARD3NL                                                                                      | 3,90616E-06 | 0,075085114 | 0,344 | 0,066 | 0,082423904 | 1,053423183   | 0,949286115     | 5,212121212     |
| LINC01117                                                                                     | 0,040857201 | 0,075077369 | 0,062 | 0,012 | 1           | 1,053417527   | 0,949291211     | 5,166666667     |
| ZKSCAN1                                                                                       | 0,000119144 | 0,074997475 | 0,312 | 0,074 | 1           | 1,053359193   | 0,949343782     | 4,216216216     |
| LPIN3                                                                                         | 0,036158386 | 0,074865965 | 0,094 | 0,023 | 1           | 1,053263177   | 0,949430324     | 4,086956522     |
| RAB35                                                                                         | 3,35667E-06 | 0,074767321 | 0,312 | 0,055 | 0,070829145 | 1,053191163   | 0,949495244     | 5,672727273     |
| ARID3A                                                                                        | 0,007947097 | 0,074766701 | 0,094 | 0,016 | 1           | 1,05319071    | 0,949495652     | 5,875           |
| RIMS2                                                                                         | 0,004841742 | 0,074736776 | 0,031 | 0     | 1           | 1,053168864   | 0,949515347     | #DIV/0!         |
| EHD4                                                                                          | 1,46747E-07 | 0,074727728 | 0,625 | 0,148 | 0,003096511 | 1,05316226    | 0,949521302     | 4,222972973     |
| CDC20                                                                                         | 0,004841742 | 0,074715715 | 0,031 | 0     | 1           | 1,05315349    | 0,949529208     | #DIV/0!         |
| STC1                                                                                          | 0,133058992 | 0,074707403 | 0,094 | 0,035 | 1           | 1,053147423   | 0,949534679     | 2,685714286     |
| GPR137                                                                                        | 0,00010081  | 0,074654261 | 0,219 | 0,039 | 1           | 1,05310863    | 0,949569656     | 5,615384615     |
| BAG6                                                                                          | 7,067E-05   | 0,074587677 | 0,469 | 0,141 | 1           | 1,053060028   | 0,949613482     | 3,326241135     |



Supplementary Table 1

| Differentially expressed genes_adjacent-skin-XL_comparing SC-Keloid vs. (SC-Myel, SC-Nonmyel) |             |             |       |       |             |               |                 |                 |
|-----------------------------------------------------------------------------------------------|-------------|-------------|-------|-------|-------------|---------------|-----------------|-----------------|
| gene                                                                                          | p_val       | avg_log2FC  | pct.1 | pct.2 | p_val_adj   | Foldchange_UP | Foldchange_DOWN | Ratio_pct1_pct2 |
| SCO2                                                                                          | 5,12603E-06 | 0,07458487  | 0,188 | 0,02  | 0,108164307 | 1,053057979   | 0,94961533      | 9,4             |
| MROH6                                                                                         | 0,002263143 | 0,074560146 | 0,062 | 0,004 | 1           | 1,053039932   | 0,949631604     | 15,5            |
| RUNDC3B                                                                                       | 0,082317662 | 0,074428382 | 0,031 | 0,004 | 1           | 1,052943761   | 0,949718339     | 7,75            |
| LPCAT3                                                                                        | 0,12647311  | 0,074411273 | 0,094 | 0,035 | 1           | 1,052931274   | 0,949729602     | 2,685714286     |
| VPS26C                                                                                        | 0,041443265 | 0,074377882 | 0,125 | 0,039 | 1           | 1,052906905   | 0,949751584     | 3,205128205     |
| UBXN4                                                                                         | 0,024661405 | 0,074360855 | 0,625 | 0,324 | 1           | 1,052894478   | 0,949762793     | 1,929012346     |
| ENKD1                                                                                         | 6,96709E-05 | 0,074269061 | 0,188 | 0,027 | 1           | 1,052827487   | 0,949823225     | 6,962962963     |
| NPTXR                                                                                         | 0,000524345 | 0,074200379 | 0,094 | 0,008 | 1           | 1,052777367   | 0,949868445     | 11,75           |
| NUAK2                                                                                         | 0,002594281 | 0,073973697 | 0,094 | 0,012 | 1           | 1,052611963   | 0,950017704     | 7,833333333     |
| ADPRH                                                                                         | 0,002263143 | 0,073952741 | 0,062 | 0,004 | 1           | 1,052596674   | 0,950031503     | 15,5            |
| MCAT                                                                                          | 9,06462E-07 | 0,07388259  | 0,125 | 0,004 | 0,019127258 | 1,052545493   | 0,950077699     | 31,25           |
| PEX1                                                                                          | 0,129733608 | 0,073789606 | 0,094 | 0,035 | 1           | 1,052477656   | 0,950138935     | 2,685714286     |
| TLCD3A                                                                                        | 1,51098E-05 | 0,073697702 | 0,125 | 0,008 | 0,318831333 | 1,052410612   | 0,950199464     | 15,625          |
| EMC1                                                                                          | 0,000881541 | 0,073658877 | 0,219 | 0,051 | 1           | 1,052382291   | 0,950225036     | 4,294117647     |
| BCL2L12                                                                                       | 0,000103236 | 0,073622846 | 0,156 | 0,02  | 1           | 1,052356008   | 0,950248768     | 7,8             |
| GGPS1                                                                                         | 0,007214939 | 0,073593337 | 0,156 | 0,039 | 1           | 1,052334484   | 0,950268204     | 4               |
| WASHC5                                                                                        | 0,000112833 | 0,073579304 | 0,125 | 0,012 | 1           | 1,052324248   | 0,950277448     | 10,41666667     |
| TCF12                                                                                         | 0,000172259 | 0,07350612  | 0,344 | 0,09  | 1           | 1,052270868   | 0,950325653     | 3,822222222     |
| AP5S1                                                                                         | 3,86379E-06 | 0,073490716 | 0,156 | 0,012 | 0,081529835 | 1,052259633   | 0,9503358       | 13              |
| HES5                                                                                          | 0,082317662 | 0,073457354 | 0,031 | 0,004 | 1           | 1,052235299   | 0,950357777     | 7,75            |
| ZNF714                                                                                        | 0,002263143 | 0,073440709 | 0,062 | 0,004 | 1           | 1,052223159   | 0,950368742     | 15,5            |
| TUBGCP5                                                                                       | 0,000103236 | 0,073381514 | 0,156 | 0,02  | 1           | 1,052179986   | 0,950407737     | 7,8             |
| CWC27                                                                                         | 0,001582806 | 0,073348325 | 0,219 | 0,055 | 1           | 1,052155781   | 0,950429602     | 3,981818182     |
| MYO9B                                                                                         | 0,002990404 | 0,073219252 | 0,531 | 0,211 | 1           | 1,052061653   | 0,950514637     | 2,516587678     |
| NT5C3A                                                                                        | 0,000862006 | 0,07314507  | 0,375 | 0,117 | 1           | 1,052007559   | 0,950563512     | 3,205128205     |
| SVBP                                                                                          | 0,178976513 | 0,073000807 | 0,156 | 0,078 | 1           | 1,051902368   | 0,950658569     | 2               |
| TEP1                                                                                          | 0,040857201 | 0,072870018 | 0,062 | 0,012 | 1           | 1,051807011   | 0,950744756     | 5,166666667     |
| RNF121                                                                                        | 0,000190919 | 0,072865636 | 0,188 | 0,031 | 1           | 1,051803816   | 0,950747644     | 6,064516129     |
| MAP2K5                                                                                        | 0,039090354 | 0,072841761 | 0,125 | 0,039 | 1           | 1,05178641    | 0,950763378     | 3,205128205     |
| FREM1                                                                                         | 6,3574E-05  | 0,072710725 | 0,062 | 0     | 1           | 1,051690884   | 0,950849737     | #DIV/0!         |

Supplementary Table 1

| Differentially expressed genes_adjacent-skin-XL_comparing SC-Keloid vs. (SC-Myel, SC-Nonmyel) |             |             |       |       |             |               |                 |                 |
|-----------------------------------------------------------------------------------------------|-------------|-------------|-------|-------|-------------|---------------|-----------------|-----------------|
| gene                                                                                          | p_val       | avg_log2FC  | pct.1 | pct.2 | p_val_adj   | Foldchange_UP | Foldchange_DOWN | Ratio_pct1_pct2 |
| UNC79                                                                                         | 0,082317662 | 0,07256341  | 0,031 | 0,004 | 1           | 1,051583499   | 0,950946835     | 7,75            |
| GCFC2                                                                                         | 0,000931266 | 0,072535737 | 0,219 | 0,051 | 1           | 1,051563329   | 0,950965075     | 4,294117647     |
| CBL                                                                                           | 0,01641551  | 0,072423629 | 0,25  | 0,094 | 1           | 1,051481618   | 0,951038975     | 2,659574468     |
| CD79B                                                                                         | 0,082317662 | 0,072182032 | 0,031 | 0,004 | 1           | 1,051305549   | 0,951198251     | 7,75            |
| SMU1                                                                                          | 0,007571116 | 0,072145619 | 0,312 | 0,113 | 1           | 1,051279015   | 0,951222259     | 2,761061947     |
| C12orf76                                                                                      | 5,63881E-05 | 0,072040868 | 0,344 | 0,082 | 1           | 1,051202686   | 0,951291328     | 4,195121951     |
| RPGRIP1L                                                                                      | 3,86379E-06 | 0,072032975 | 0,156 | 0,012 | 0,081529835 | 1,051196935   | 0,951296533     | 13              |
| MRPL27                                                                                        | 3,54056E-05 | 0,071889559 | 0,406 | 0,102 | 0,747094241 | 1,051092443   | 0,951391104     | 3,980392157     |
| B3GNT5                                                                                        | 0,000881541 | 0,071858119 | 0,219 | 0,051 | 1           | 1,051069537   | 0,951411838     | 4,294117647     |
| CNOT6L                                                                                        | 0,004569341 | 0,071833157 | 0,25  | 0,078 | 1           | 1,051051351   | 0,9514283       | 3,205128205     |
| PTPRB                                                                                         | 0,082317662 | 0,071687861 | 0,031 | 0,004 | 1           | 1,050945504   | 0,951524124     | 7,75            |
| PSMB8                                                                                         | 0,000342424 | 0,071598492 | 0,469 | 0,152 | 1           | 1,050880404   | 0,951583069     | 3,085526316     |
| GPATCH2                                                                                       | 5,85504E-05 | 0,071514999 | 0,375 | 0,094 | 1           | 1,050819588   | 0,951638141     | 3,989361702     |
| AP4E1                                                                                         | 3,67695E-07 | 0,071475232 | 0,156 | 0,008 | 0,007758733 | 1,050790624   | 0,951664373     | 19,5            |
| HIBADH                                                                                        | 9,43886E-07 | 0,071424193 | 0,25  | 0,031 | 0,019916948 | 1,05075345    | 0,951698041     | 8,064516129     |
| ALDH1L2                                                                                       | 0,000112833 | 0,07140308  | 0,125 | 0,012 | 1           | 1,050738072   | 0,951711969     | 10,41666667     |
| PDE6D                                                                                         | 0,000804279 | 0,071399872 | 0,25  | 0,062 | 1           | 1,050735736   | 0,951714085     | 4,032258065     |
| CCDC28A                                                                                       | 0,211308821 | 0,071316689 | 0,156 | 0,082 | 1           | 1,050675154   | 0,951768961     | 1,902439024     |
| ASAH1                                                                                         | 0,004580593 | 0,071315395 | 0,562 | 0,246 | 1           | 1,050674212   | 0,951769814     | 2,284552846     |
| SP140L                                                                                        | 0,007342225 | 0,071246945 | 0,156 | 0,039 | 1           | 1,050624363   | 0,951814973     | 4               |
| L3MBTL3                                                                                       | 0,177416998 | 0,071214656 | 0,094 | 0,039 | 1           | 1,050600849   | 0,951836276     | 2,41025641      |
| TOR2A                                                                                         | 1,51098E-05 | 0,071161057 | 0,125 | 0,008 | 0,318831333 | 1,050561818   | 0,951871639     | 15,625          |
| UBE2Q1                                                                                        | 0,01390071  | 0,071148305 | 0,188 | 0,059 | 1           | 1,050552532   | 0,951880053     | 3,186440678     |
| EEA1                                                                                          | 0,000610173 | 0,071120748 | 0,562 | 0,207 | 1           | 1,050532466   | 0,951898235     | 2,714975845     |
| ZNF260                                                                                        | 0,001896716 | 0,070920879 | 0,188 | 0,043 | 1           | 1,050386937   | 0,952030119     | 4,372093023     |
| RAB11FIP3                                                                                     | 0,029760483 | 0,070914776 | 0,156 | 0,051 | 1           | 1,050382493   | 0,952034146     | 3,058823529     |
| RRP9                                                                                          | 0,000487956 | 0,070856195 | 0,219 | 0,047 | 1           | 1,050339843   | 0,952072805     | 4,659574468     |
| L3MBTL1                                                                                       | 0,013891036 | 0,070794892 | 0,062 | 0,008 | 1           | 1,050295213   | 0,952113261     | 7,75            |
| GALE                                                                                          | 0,002263143 | 0,070692192 | 0,062 | 0,004 | 1           | 1,050220449   | 0,952181041     | 15,5            |
| FBXO9                                                                                         | 0,000452946 | 0,070684004 | 0,375 | 0,113 | 1           | 1,050214488   | 0,952186445     | 3,318584071     |

Supplementary Table 1

| Differentially expressed genes_adjacent-skin-XL_ comparing SC-Keloid vs. (SC-Myel, SC-Nonmyel) |             |             |       |       |             |               |                 |                 |
|------------------------------------------------------------------------------------------------|-------------|-------------|-------|-------|-------------|---------------|-----------------|-----------------|
| gene                                                                                           | p_val       | avg_log2FC  | pct.1 | pct.2 | p_val_adj   | Foldchange_UP | Foldchange_DOWN | Ratio_pct1_pct2 |
| CRPPA                                                                                          | 0,000494525 | 0,070626647 | 0,125 | 0,016 | 1           | 1,050172736   | 0,952224301     | 7,8125          |
| COL2A1                                                                                         | 0,082317662 | 0,070514376 | 0,031 | 0,004 | 1           | 1,050091015   | 0,952298407     | 7,75            |
| DGKI                                                                                           | 6,3574E-05  | 0,070485611 | 0,062 | 0     | 1           | 1,050070078   | 0,952317394     | #DIV/0!         |
| PPIG                                                                                           | 0,015875905 | 0,070444376 | 0,531 | 0,254 | 1           | 1,050040065   | 0,952344613     | 2,090551181     |
| TMED8                                                                                          | 0,000112833 | 0,070240318 | 0,125 | 0,012 | 1           | 1,049891556   | 0,952479325     | 10,41666667     |
| WDR77                                                                                          | 0,000509339 | 0,070208374 | 0,125 | 0,016 | 1           | 1,049868309   | 0,952500415     | 7,8125          |
| EGFL7                                                                                          | 6,3574E-05  | 0,070183318 | 0,062 | 0     | 1           | 1,049850076   | 0,952516958     | #DIV/0!         |
| CRABP1                                                                                         | 0,002594281 | 0,070141709 | 0,094 | 0,012 | 1           | 1,049819797   | 0,95254443      | 7,833333333     |
| SLC46A1                                                                                        | 6,3574E-05  | 0,07012926  | 0,062 | 0     | 1           | 1,049810738   | 0,952552649     | #DIV/0!         |
| LCMT1                                                                                          | 4,0305E-06  | 0,070063581 | 0,219 | 0,027 | 0,085047498 | 1,049762947   | 0,952596015     | 8,111111111     |
| ZFP37                                                                                          | 0,00050526  | 0,070025094 | 0,094 | 0,008 | 1           | 1,049734942   | 0,952621428     | 11,75           |
| GSDMB                                                                                          | 0,655667102 | 0,069975342 | 0,031 | 0,02  | 1           | 1,049698742   | 0,95265428      | 1,55            |
| FZD6                                                                                           | 4,80439E-05 | 0,069790174 | 0,094 | 0,004 | 1           | 1,049564024   | 0,95277656      | 23,5            |
| MMS19                                                                                          | 9,17361E-07 | 0,069764238 | 0,188 | 0,016 | 0,019357231 | 1,049545155   | 0,952793689     | 11,75           |
| ANKRD13D                                                                                       | 8,70131E-06 | 0,069727582 | 0,344 | 0,07  | 0,183606386 | 1,049518489   | 0,952817897     | 4,914285714     |
| CMIP                                                                                           | 0,008971031 | 0,069724488 | 0,188 | 0,055 | 1           | 1,049516238   | 0,952819941     | 3,418181818     |
| PCMT1                                                                                          | 0,004326724 | 0,069721414 | 0,719 | 0,312 | 1           | 1,049514002   | 0,952821971     | 2,304487179     |
| EIF4ENIF1                                                                                      | 0,041848356 | 0,069704464 | 0,062 | 0,012 | 1           | 1,049501671   | 0,952833166     | 5,166666667     |
| EMB                                                                                            | 9,12354E-07 | 0,069687359 | 0,094 | 0     | 0,019251588 | 1,049489228   | 0,952844463     | #DIV/0!         |
| SLC5A6                                                                                         | 9,06462E-07 | 0,069610833 | 0,125 | 0,004 | 0,019127258 | 1,049433561   | 0,952895007     | 31,25           |
| IMPACT                                                                                         | 6,94943E-07 | 0,069597745 | 0,281 | 0,039 | 0,014663999 | 1,04942404    | 0,952903652     | 7,205128205     |
| DUSP23                                                                                         | 0,000390562 | 0,069578442 | 0,344 | 0,098 | 1           | 1,049409999   | 0,952916401     | 3,510204082     |
| WDTC1                                                                                          | 4,02312E-05 | 0,069551675 | 0,219 | 0,035 | 0,848917917 | 1,049390529   | 0,952934082     | 6,257142857     |
| OCLN                                                                                           | 4,80439E-05 | 0,069504332 | 0,094 | 0,004 | 1           | 1,049356093   | 0,952965353     | 23,5            |
| DNAH14                                                                                         | 6,3574E-05  | 0,069434399 | 0,062 | 0     | 1           | 1,049305228   | 0,953011548     | #DIV/0!         |
| MRPL34                                                                                         | 3,31291E-06 | 0,069377    | 0,438 | 0,098 | 0,069905783 | 1,049263482   | 0,953049465     | 4,469387755     |
| PACS1                                                                                          | 0,000118938 | 0,069369738 | 0,25  | 0,051 | 1           | 1,0492582     | 0,953054262     | 4,901960784     |
| RIDA                                                                                           | 0,002517564 | 0,06935818  | 0,094 | 0,012 | 1           | 1,049249794   | 0,953061898     | 7,833333333     |
| LENG9                                                                                          | 0,53887511  | 0,06932648  | 0,062 | 0,039 | 1           | 1,04922674    | 0,953082839     | 1,58974359      |
| CCDC61                                                                                         | 0,000524345 | 0,069163922 | 0,094 | 0,008 | 1           | 1,049108523   | 0,953190235     | 11,75           |

Supplementary Table 1

| Differentially expressed genes_adjacent-skin-XL_comparing SC-Keloid vs. (SC-Myel, SC-Nonmyel) |             |             |       |       |             |               |                 |                 |
|-----------------------------------------------------------------------------------------------|-------------|-------------|-------|-------|-------------|---------------|-----------------|-----------------|
| gene                                                                                          | p_val       | avg_log2FC  | pct.1 | pct.2 | p_val_adj   | Foldchange_UP | Foldchange_DOWN | Ratio_pct1_pct2 |
| FAM234A                                                                                       | 4,90537E-05 | 0,06916208  | 0,469 | 0,133 | 1           | 1,049107183   | 0,953191453     | 3,526315789     |
| AGPAT5                                                                                        | 1,12327E-08 | 0,069160498 | 0,312 | 0,035 | 0,000237021 | 1,049106033   | 0,953192498     | 8,914285714     |
| EIF2B1                                                                                        | 6,71476E-05 | 0,069116989 | 0,344 | 0,082 | 1           | 1,049074394   | 0,953221245     | 4,195121951     |
| MVK                                                                                           | 0,059959447 | 0,069107877 | 0,094 | 0,027 | 1           | 1,049067768   | 0,953227265     | 3,481481481     |
| RRM1                                                                                          | 9,85458E-05 | 0,068989487 | 0,219 | 0,039 | 1           | 1,048981684   | 0,953305492     | 5,615384615     |
| B3GNT8                                                                                        | 0,002263143 | 0,068988504 | 0,062 | 0,004 | 1           | 1,048980969   | 0,953306142     | 15,5            |
| CALM3                                                                                         | 0,005935912 | 0,06897016  | 0,469 | 0,195 | 1           | 1,048967631   | 0,953318263     | 2,405128205     |
| TBC1D5                                                                                        | 0,000202883 | 0,068828083 | 0,375 | 0,105 | 1           | 1,048864333   | 0,953412151     | 3,571428571     |
| RNF19B                                                                                        | 0,001968597 | 0,068702634 | 0,156 | 0,031 | 1           | 1,048773134   | 0,953495058     | 5,032258065     |
| RAD1                                                                                          | 0,001560165 | 0,068669316 | 0,125 | 0,02  | 1           | 1,048748914   | 0,953517078     | 6,25            |
| FAP                                                                                           | 6,3574E-05  | 0,068605064 | 0,062 | 0     | 1           | 1,048702207   | 0,953559546     | #DIV/0!         |
| STARD4                                                                                        | 4,80439E-05 | 0,068598415 | 0,094 | 0,004 | 1           | 1,048697374   | 0,95356394      | 23,5            |
| VRK1                                                                                          | 0,004087528 | 0,068524129 | 0,125 | 0,023 | 1           | 1,048643377   | 0,953613042     | 5,434782609     |
| IDE                                                                                           | 0,001600673 | 0,068524036 | 0,125 | 0,02  | 1           | 1,04864331    | 0,953613103     | 6,25            |
| MARS1                                                                                         | 2,08038E-05 | 0,068478158 | 0,188 | 0,023 | 0,438980454 | 1,048609963   | 0,953643429     | 8,173913043     |
| MFAP3                                                                                         | 0,040857201 | 0,068475278 | 0,062 | 0,012 | 1           | 1,048607869   | 0,953645332     | 5,166666667     |
| SERPINB1                                                                                      | 0,000634905 | 0,068468501 | 0,281 | 0,074 | 1           | 1,048602944   | 0,953649812     | 3,797297297     |
| CLCN3                                                                                         | 0,001284108 | 0,068448091 | 0,344 | 0,109 | 1           | 1,048588109   | 0,953663303     | 3,155963303     |
| TAF6L                                                                                         | 0,000524345 | 0,068173021 | 0,094 | 0,008 | 1           | 1,0483882     | 0,95384515      | 11,75           |
| RPF2                                                                                          | 0,000174506 | 0,068160596 | 0,375 | 0,102 | 1           | 1,048379171   | 0,953853365     | 3,676470588     |
| UBE2J2                                                                                        | 0,00052751  | 0,068149416 | 0,375 | 0,113 | 1           | 1,048371047   | 0,953860757     | 3,318584071     |
| GMDS                                                                                          | 0,002594281 | 0,068104665 | 0,094 | 0,012 | 1           | 1,048338528   | 0,953890345     | 7,833333333     |
| RNF14                                                                                         | 6,60944E-05 | 0,068092568 | 0,188 | 0,027 | 1           | 1,048329737   | 0,953898344     | 6,962962963     |
| ABHD15                                                                                        | 0,007947097 | 0,06800476  | 0,094 | 0,016 | 1           | 1,048265934   | 0,953956403     | 5,875           |
| AL137026.1                                                                                    | 0,002594281 | 0,067959592 | 0,094 | 0,012 | 1           | 1,048233116   | 0,95398627      | 7,833333333     |
| USP31                                                                                         | 0,008148126 | 0,067959463 | 0,094 | 0,016 | 1           | 1,048233022   | 0,953986356     | 5,875           |
| ABCF2                                                                                         | 0,00010081  | 0,0678413   | 0,219 | 0,039 | 1           | 1,048147171   | 0,954064494     | 5,615384615     |
| SPNS1                                                                                         | 1,48343E-05 | 0,067684603 | 0,281 | 0,051 | 0,313018834 | 1,048033333   | 0,954168125     | 5,509803922     |
| ASMTL                                                                                         | 0,000390872 | 0,067574449 | 0,281 | 0,07  | 1           | 1,047953316   | 0,954240981     | 4,014285714     |
| ZNF384                                                                                        | 1,41516E-05 | 0,067489375 | 0,219 | 0,031 | 0,298613258 | 1,047891521   | 0,954297253     | 7,064516129     |

Supplementary Table 1

| Differentially expressed genes_adjacent-skin-XL_comparing SC-Keloid vs. (SC-Myel, SC-Nonmyel) |             |             |       |       |             |               |                 |                 |
|-----------------------------------------------------------------------------------------------|-------------|-------------|-------|-------|-------------|---------------|-----------------|-----------------|
| gene                                                                                          | p_val       | avg_log2FC  | pct.1 | pct.2 | p_val_adj   | Foldchange_UP | Foldchange_DOWN | Ratio_pct1_pct2 |
| BCO2                                                                                          | 0,082317662 | 0,067467802 | 0,031 | 0,004 | 1           | 1,047875852   | 0,954311523     | 7,75            |
| MARCHF9                                                                                       | 0,000818029 | 0,067393042 | 0,25  | 0,062 | 1           | 1,047821552   | 0,954360976     | 4,032258065     |
| BGLAP                                                                                         | 9,12354E-07 | 0,067291141 | 0,094 | 0     | 0,019251588 | 1,047747545   | 0,954428387     | #DIV/0!         |
| SZRD1                                                                                         | 0,000266861 | 0,067253391 | 0,5   | 0,16  | 1           | 1,04772013    | 0,954453362     | 3,125           |
| RAB6C                                                                                         | 0,002263143 | 0,067131109 | 0,062 | 0,004 | 1           | 1,047631329   | 0,954534264     | 15,5            |
| PTHLH                                                                                         | 0,00050526  | 0,067096974 | 0,094 | 0,008 | 1           | 1,047606542   | 0,95455685      | 11,75           |
| CCT2                                                                                          | 0,003509282 | 0,067009636 | 0,656 | 0,277 | 1           | 1,047543124   | 0,954614638     | 2,368231047     |
| AHCYL2                                                                                        | 0,001560165 | 0,066992871 | 0,125 | 0,02  | 1           | 1,047530951   | 0,954625731     | 6,25            |
| LINC00167                                                                                     | 0,082317662 | 0,066983982 | 0,031 | 0,004 | 1           | 1,047524497   | 0,954631613     | 7,75            |
| UBXN1                                                                                         | 0,038714022 | 0,066969453 | 0,625 | 0,316 | 1           | 1,047513947   | 0,954641227     | 1,977848101     |
| LYSMD1                                                                                        | 4,80439E-05 | 0,066943572 | 0,094 | 0,004 | 1           | 1,047495156   | 0,954658353     | 23,5            |
| CPNE1                                                                                         | 0,001013249 | 0,06692401  | 0,5   | 0,18  | 1           | 1,047480952   | 0,954671298     | 2,777777778     |
| AIDA                                                                                          | 0,025898836 | 0,066865089 | 0,281 | 0,117 | 1           | 1,047438173   | 0,954710288     | 2,401709402     |
| DIPK1A                                                                                        | 0,082317662 | 0,066827166 | 0,031 | 0,004 | 1           | 1,047410641   | 0,954735384     | 7,75            |
| AP1G2                                                                                         | 0,002263143 | 0,066804126 | 0,062 | 0,004 | 1           | 1,047393913   | 0,954750632     | 15,5            |
| KRT6A                                                                                         | 0,018436147 | 0,066752597 | 0,094 | 0,02  | 1           | 1,047356504   | 0,954784733     | 4,7             |
| KLF11                                                                                         | 0,000881541 | 0,066729475 | 0,219 | 0,051 | 1           | 1,047339718   | 0,954800035     | 4,294117647     |
| HOXB6                                                                                         | 9,12354E-07 | 0,066676114 | 0,094 | 0     | 0,019251588 | 1,047300981   | 0,954835351     | #DIV/0!         |
| ACAD8                                                                                         | 0,000339359 | 0,066670202 | 0,156 | 0,023 | 1           | 1,047296689   | 0,954839264     | 6,782608696     |
| RAC3                                                                                          | 3,67695E-07 | 0,066646528 | 0,156 | 0,008 | 0,007758733 | 1,047279503   | 0,954854933     | 19,5            |
| CCDC92                                                                                        | 0,000412046 | 0,066620571 | 0,25  | 0,059 | 1           | 1,047260661   | 0,954872112     | 4,237288136     |
| PROCR                                                                                         | 9,12354E-07 | 0,06660197  | 0,094 | 0     | 0,019251588 | 1,047247159   | 0,954884424     | #DIV/0!         |
| MFAP1                                                                                         | 0,003191522 | 0,066500018 | 0,188 | 0,047 | 1           | 1,047173155   | 0,954951906     | 4               |
| EIF3B                                                                                         | 5,27955E-05 | 0,066495756 | 0,469 | 0,133 | 1           | 1,047170061   | 0,954954727     | 3,526315789     |
| XKR8                                                                                          | 6,3574E-05  | 0,06642765  | 0,062 | 0     | 1           | 1,047120628   | 0,954999809     | #DIV/0!         |
| LKAAEAR1                                                                                      | 6,3574E-05  | 0,066422091 | 0,062 | 0     | 1           | 1,047116594   | 0,955003489     | #DIV/0!         |
| DHRS1                                                                                         | 0,013145712 | 0,066384107 | 0,188 | 0,059 | 1           | 1,047089025   | 0,955028633     | 3,186440678     |
| ZNF577                                                                                        | 5,12603E-06 | 0,066291032 | 0,188 | 0,02  | 0,108164307 | 1,047021474   | 0,955090248     | 9,4             |
| KIF11                                                                                         | 0,002263143 | 0,066272423 | 0,062 | 0,004 | 1           | 1,047007969   | 0,955102568     | 15,5            |
| LRRC20                                                                                        | 1,51098E-05 | 0,066190611 | 0,125 | 0,008 | 0,318831333 | 1,046948597   | 0,955156731     | 15,625          |

Supplementary Table 1

| Differentially expressed genes_adjacent-skin-XL_comparing SC-Keloid vs. (SC-Myel, SC-Nonmyel) |             |             |       |       |             |               |                 |                 |
|-----------------------------------------------------------------------------------------------|-------------|-------------|-------|-------|-------------|---------------|-----------------|-----------------|
| gene                                                                                          | p_val       | avg_log2FC  | pct.1 | pct.2 | p_val_adj   | Foldchange_UP | Foldchange_DOWN | Ratio_pct1_pct2 |
| CNOT11                                                                                        | 0,000509339 | 0,06609672  | 0,125 | 0,016 | 1           | 1,046880464   | 0,955218895     | 7,8125          |
| LINC00839                                                                                     | 9,06462E-07 | 0,066032404 | 0,125 | 0,004 | 0,019127258 | 1,046833794   | 0,95526148      | 31,25           |
| CPE                                                                                           | 0,210023432 | 0,066026129 | 0,062 | 0,023 | 1           | 1,046829241   | 0,955265635     | 2,695652174     |
| POU5F2                                                                                        | 0,082317662 | 0,06597914  | 0,031 | 0,004 | 1           | 1,046795146   | 0,955296749     | 7,75            |
| C5orf63                                                                                       | 6,3574E-05  | 0,065925372 | 0,062 | 0     | 1           | 1,046756134   | 0,955332353     | #DIV/0!         |
| PLAGL1                                                                                        | 0,002594281 | 0,065824889 | 0,094 | 0,012 | 1           | 1,04668323    | 0,955398893     | 7,833333333     |
| RPUSD1                                                                                        | 2,40115E-05 | 0,06581748  | 0,156 | 0,016 | 0,506667402 | 1,046677855   | 0,9554038       | 9,75            |
| STRAP                                                                                         | 0,024641865 | 0,065607803 | 0,562 | 0,277 | 1           | 1,046525745   | 0,955542666     | 2,028880866     |
| MMP1                                                                                          | 0,013891036 | 0,06560159  | 0,062 | 0,008 | 1           | 1,046521238   | 0,95554678      | 7,75            |
| ACP6                                                                                          | 0,000103236 | 0,065576501 | 0,156 | 0,02  | 1           | 1,046503039   | 0,955563398     | 7,8             |
| ACACA                                                                                         | 0,002053304 | 0,065509995 | 0,156 | 0,031 | 1           | 1,046454798   | 0,955607449     | 5,032258065     |
| FICD                                                                                          | 0,001642148 | 0,065436818 | 0,125 | 0,02  | 1           | 1,04640172    | 0,955655921     | 6,25            |
| TMEM154                                                                                       | 0,002263143 | 0,065420396 | 0,062 | 0,004 | 1           | 1,04638981    | 0,955666799     | 15,5            |
| IWS1                                                                                          | 0,000931266 | 0,065386423 | 0,219 | 0,051 | 1           | 1,046365169   | 0,955689304     | 4,294117647     |
| ZNF195                                                                                        | 0,000103236 | 0,065285703 | 0,156 | 0,02  | 1           | 1,046292121   | 0,955756026     | 7,8             |
| DMXL2                                                                                         | 0,00399666  | 0,065197473 | 0,125 | 0,023 | 1           | 1,046228136   | 0,955814479     | 5,434782609     |
| NSUN2                                                                                         | 0,000237136 | 0,065165148 | 0,219 | 0,043 | 1           | 1,046204694   | 0,955835895     | 5,093023256     |
| GRK6                                                                                          | 4,123E-05   | 0,065125819 | 0,219 | 0,035 | 0,869994633 | 1,046176174   | 0,955861952     | 6,257142857     |
| KRT77                                                                                         | 0,082317662 | 0,065059146 | 0,031 | 0,004 | 1           | 1,046127827   | 0,955906127     | 7,75            |
| HYKK                                                                                          | 0,008148126 | 0,064994349 | 0,094 | 0,016 | 1           | 1,046080842   | 0,955949062     | 5,875           |
| SHKBP1                                                                                        | 5,05415E-06 | 0,064991084 | 0,281 | 0,047 | 0,106647708 | 1,046078475   | 0,955951225     | 5,978723404     |
| AGRN                                                                                          | 0,000257484 | 0,064928935 | 0,594 | 0,211 | 1           | 1,046033413   | 0,955992407     | 2,815165877     |
| CHUK                                                                                          | 0,00097389  | 0,06481087  | 0,188 | 0,039 | 1           | 1,045947813   | 0,956070645     | 4,820512821     |
| CASP6                                                                                         | 0,002594281 | 0,064769811 | 0,094 | 0,012 | 1           | 1,045918045   | 0,956097856     | 7,833333333     |
| FZD1                                                                                          | 0,084624339 | 0,064764845 | 0,062 | 0,016 | 1           | 1,045914445   | 0,956101146     | 3,875           |
| ZNF44                                                                                         | 0,002594281 | 0,064730223 | 0,094 | 0,012 | 1           | 1,045889345   | 0,956124092     | 7,833333333     |
| ZNF350                                                                                        | 0,000524345 | 0,06469612  | 0,094 | 0,008 | 1           | 1,045864622   | 0,956146693     | 11,75           |
| ASB7                                                                                          | 0,061916284 | 0,064619463 | 0,094 | 0,027 | 1           | 1,045809052   | 0,956197499     | 3,481481481     |
| B4GALT3                                                                                       | 0,000252542 | 0,064617365 | 0,219 | 0,043 | 1           | 1,045807532   | 0,956198889     | 5,093023256     |
| ZMYND10                                                                                       | 0,082317662 | 0,064376554 | 0,031 | 0,004 | 1           | 1,045632982   | 0,956358509     | 7,75            |

Supplementary Table 1

| Differentially expressed genes_adjacent-skin-XL_comparing SC-Keloid vs. (SC-Myel, SC-Nonmyel) |             |             |       |       |             |               |                 |                 |
|-----------------------------------------------------------------------------------------------|-------------|-------------|-------|-------|-------------|---------------|-----------------|-----------------|
| gene                                                                                          | p_val       | avg_log2FC  | pct.1 | pct.2 | p_val_adj   | Foldchange_UP | Foldchange_DOWN | Ratio_pct1_pct2 |
| AP3B1                                                                                         | 4,24942E-06 | 0,064372342 | 0,344 | 0,066 | 0,089667107 | 1,04562993    | 0,956361301     | 5,212121212     |
| TIAL1                                                                                         | 0,007349966 | 0,064289168 | 0,469 | 0,195 | 1           | 1,045569649   | 0,956416439     | 2,405128205     |
| SLC2A11                                                                                       | 0,00399666  | 0,064196379 | 0,125 | 0,023 | 1           | 1,045502404   | 0,956477954     | 5,434782609     |
| AACS                                                                                          | 0,086278754 | 0,063944878 | 0,062 | 0,016 | 1           | 1,04532016    | 0,956644708     | 3,875           |
| VEGFC                                                                                         | 6,3574E-05  | 0,063886901 | 0,062 | 0     | 1           | 1,045278153   | 0,956683154     | #DIV/0!         |
| ZNF581                                                                                        | 0,00010081  | 0,063852321 | 0,219 | 0,039 | 1           | 1,045253099   | 0,956706085     | 5,615384615     |
| DDI2                                                                                          | 0,041443265 | 0,063784514 | 0,125 | 0,039 | 1           | 1,045203973   | 0,956751051     | 3,205128205     |
| B4GALNT3                                                                                      | 1,11477E-07 | 0,063776781 | 0,188 | 0,012 | 0,002352284 | 1,045198371   | 0,95675618      | 15,66666667     |
| ANKRD40                                                                                       | 0,000124121 | 0,063640943 | 0,531 | 0,168 | 1           | 1,045099964   | 0,956846267     | 3,160714286     |
| BTD                                                                                           | 0,001666138 | 0,0635519   | 0,219 | 0,055 | 1           | 1,045035462   | 0,956905326     | 3,981818182     |
| GTF2IRD2                                                                                      | 0,142206469 | 0,063526599 | 0,125 | 0,055 | 1           | 1,045017136   | 0,956922108     | 2,272727273     |
| MNAT1                                                                                         | 0,000117065 | 0,063378667 | 0,312 | 0,074 | 1           | 1,044909986   | 0,957020234     | 4,216216216     |
| MRPS18B                                                                                       | 0,095443971 | 0,063327331 | 0,219 | 0,105 | 1           | 1,044872806   | 0,957054289     | 2,085714286     |
| PRKRIP1                                                                                       | 0,00950559  | 0,063291407 | 0,219 | 0,07  | 1           | 1,044846788   | 0,95707812      | 3,128571429     |
| NUDC                                                                                          | 0,005706333 | 0,063280148 | 0,594 | 0,266 | 1           | 1,044838634   | 0,95708559      | 2,233082707     |
| ABR                                                                                           | 1,47837E-05 | 0,063270936 | 0,312 | 0,062 | 0,311950941 | 1,044831962   | 0,957091701     | 5,032258065     |
| EXTL1                                                                                         | 0,060931358 | 0,06315322  | 0,094 | 0,027 | 1           | 1,044746714   | 0,957169797     | 3,481481481     |
| TBC1D23                                                                                       | 0,023239872 | 0,063144616 | 0,25  | 0,098 | 1           | 1,044740482   | 0,957175506     | 2,551020408     |
| APOBEC3F                                                                                      | 0,002594281 | 0,063123751 | 0,094 | 0,012 | 1           | 1,044725373   | 0,957189349     | 7,833333333     |
| ALK                                                                                           | 0,226351275 | 0,063007993 | 0,031 | 0,008 | 1           | 1,04464155    | 0,957266155     | 3,875           |
| UFSP2                                                                                         | 2,82528E-05 | 0,062978546 | 0,562 | 0,16  | 0,596163152 | 1,044620228   | 0,957285694     | 3,5125          |
| NDUFV2                                                                                        | 0,000327108 | 0,062937876 | 0,594 | 0,211 | 1           | 1,04459078    | 0,95731268      | 2,815165877     |
| MYD88                                                                                         | 4,80439E-05 | 0,062924503 | 0,094 | 0,004 | 1           | 1,044581098   | 0,957321554     | 23,5            |
| GEMIN2                                                                                        | 7,15271E-05 | 0,062880594 | 0,188 | 0,027 | 1           | 1,044549306   | 0,957350691     | 6,962962963     |
| BCL10                                                                                         | 0,000408355 | 0,062837465 | 0,344 | 0,098 | 1           | 1,04451808    | 0,957379311     | 3,510204082     |
| AC022182.1                                                                                    | 0,004841742 | 0,062737938 | 0,031 | 0     | 1           | 1,044446025   | 0,95744536      | #DIV/0!         |
| CABLES1                                                                                       | 0,004841742 | 0,062737938 | 0,031 | 0     | 1           | 1,044446025   | 0,95744536      | #DIV/0!         |
| CDH4                                                                                          | 0,004841742 | 0,062737938 | 0,031 | 0     | 1           | 1,044446025   | 0,95744536      | #DIV/0!         |
| GABRR2                                                                                        | 0,004841742 | 0,062737938 | 0,031 | 0     | 1           | 1,044446025   | 0,95744536      | #DIV/0!         |
| GASK1A                                                                                        | 0,004841742 | 0,062737938 | 0,031 | 0     | 1           | 1,044446025   | 0,95744536      | #DIV/0!         |

Supplementary Table 1

| Differentially expressed genes_adjacent-skin-XL_comparing SC-Keloid vs. (SC-Myel, SC-Nonmyel) |             |             |       |       |             |               |                 |                 |
|-----------------------------------------------------------------------------------------------|-------------|-------------|-------|-------|-------------|---------------|-----------------|-----------------|
| gene                                                                                          | p_val       | avg_log2FC  | pct.1 | pct.2 | p_val_adj   | Foldchange_UP | Foldchange_DOWN | Ratio_pct1_pct2 |
| KCTD14                                                                                        | 0,004841742 | 0,062737938 | 0,031 | 0     | 1           | 1,044446025   | 0,95744536      | #DIV/0!         |
| LINC00240                                                                                     | 0,004841742 | 0,062737938 | 0,031 | 0     | 1           | 1,044446025   | 0,95744536      | #DIV/0!         |
| SHISA3                                                                                        | 0,004841742 | 0,062737938 | 0,031 | 0     | 1           | 1,044446025   | 0,95744536      | #DIV/0!         |
| ACAA1                                                                                         | 6,599E-05   | 0,062704123 | 0,344 | 0,082 | 1           | 1,044421544   | 0,957467802     | 4,195121951     |
| ZNF493                                                                                        | 0,02693544  | 0,062605901 | 0,125 | 0,035 | 1           | 1,04435044    | 0,95753299      | 3,571428571     |
| TTC3                                                                                          | 0,000329944 | 0,062495723 | 0,781 | 0,293 | 1           | 1,044270686   | 0,95760612      | 2,66552901      |
| MTCL1                                                                                         | 6,3574E-05  | 0,06246842  | 0,062 | 0     | 1           | 1,044250924   | 0,957624242     | #DIV/0!         |
| DGKE                                                                                          | 0,662254058 | 0,062461724 | 0,031 | 0,02  | 1           | 1,044246078   | 0,957628687     | 1,55            |
| TMEM249                                                                                       | 0,082317662 | 0,062404204 | 0,031 | 0,004 | 1           | 1,044204444   | 0,957666868     | 7,75            |
| OSBPL7                                                                                        | 0,226917872 | 0,062344547 | 0,094 | 0,043 | 1           | 1,044161266   | 0,95770647      | 2,186046512     |
| ARCN1                                                                                         | 1,79207E-05 | 0,062193773 | 0,438 | 0,109 | 0,37814398  | 1,044052148   | 0,957806563     | 4,018348624     |
| SLC25A44                                                                                      | 0,886800848 | 0,0621274   | 0,031 | 0,027 | 1           | 1,044004116   | 0,95785063      | 1,148148148     |
| L1TD1                                                                                         | 0,079594089 | 0,062122434 | 0,031 | 0,004 | 1           | 1,044000522   | 0,957853927     | 7,75            |
| INSIG1                                                                                        | 0,00041116  | 0,062085911 | 0,281 | 0,07  | 1           | 1,043974093   | 0,957878176     | 4,014285714     |
| SLC22A18                                                                                      | 3,33107E-06 | 0,062066501 | 0,25  | 0,035 | 0,070289013 | 1,043960047   | 0,957891064     | 7,142857143     |
| ST3GAL6                                                                                       | 0,003034006 | 0,062032908 | 0,312 | 0,105 | 1           | 1,043935739   | 0,957913368     | 2,971428571     |
| DPH5                                                                                          | 0,000100263 | 0,061998175 | 0,156 | 0,02  | 1           | 1,043910607   | 0,95793643      | 7,8             |
| KLHL5                                                                                         | 0,285925963 | 0,061996162 | 0,094 | 0,047 | 1           | 1,04390915    | 0,957937767     | 2               |
| EEF2KMT                                                                                       | 0,001600673 | 0,061959757 | 0,125 | 0,02  | 1           | 1,043882809   | 0,957961939     | 6,25            |
| SNX11                                                                                         | 0,215833268 | 0,061936957 | 0,062 | 0,023 | 1           | 1,043866311   | 0,957977079     | 2,695652174     |
| S100A3                                                                                        | 0,000509339 | 0,061912537 | 0,125 | 0,016 | 1           | 1,043848642   | 0,957993295     | 7,8125          |
| NUDT19                                                                                        | 0,002594281 | 0,061894078 | 0,094 | 0,012 | 1           | 1,043835286   | 0,958005552     | 7,833333333     |
| RAB24                                                                                         | 0,042049888 | 0,061785025 | 0,125 | 0,039 | 1           | 1,043756387   | 0,95807797      | 3,205128205     |
| SMYD3                                                                                         | 0,004107327 | 0,061759761 | 0,156 | 0,035 | 1           | 1,043738109   | 0,958094748     | 4,457142857     |
| PPHLN1                                                                                        | 0,000408355 | 0,061732146 | 0,344 | 0,098 | 1           | 1,04371813    | 0,958113087     | 3,510204082     |
| TMBIM6                                                                                        | 0,127999557 | 0,061714793 | 0,875 | 0,543 | 1           | 1,043705576   | 0,958124612     | 1,611418048     |
| NDFIP2                                                                                        | 3,73485E-05 | 0,061650478 | 0,438 | 0,117 | 0,788091641 | 1,04365905    | 0,958167325     | 3,743589744     |
| MCC                                                                                           | 5,12603E-06 | 0,061587288 | 0,188 | 0,02  | 0,108164307 | 1,043613338   | 0,958209294     | 9,4             |
| NAA40                                                                                         | 0,013891036 | 0,061504046 | 0,062 | 0,008 | 1           | 1,043553124   | 0,958264583     | 7,75            |
| SHISAL1                                                                                       | 6,3574E-05  | 0,061445571 | 0,062 | 0     | 1           | 1,043510828   | 0,958303424     | #DIV/0!         |



Supplementary Table 1

| Differentially expressed genes_adjacent-skin-XL_ comparing SC-Keloid vs. (SC-Myel, SC-Nonmyel) |             |             |       |       |           |               |                 |                 |
|------------------------------------------------------------------------------------------------|-------------|-------------|-------|-------|-----------|---------------|-----------------|-----------------|
| gene                                                                                           | p_val       | avg_log2FC  | pct.1 | pct.2 | p_val_adj | Foldchange_UP | Foldchange_DOWN | Ratio_pct1_pct2 |
| ARNTL                                                                                          | 0,00844871  | 0,061396305 | 0,188 | 0,055 | 1         | 1,043475194   | 0,95833615      | 3,418181818     |
| ISOC2                                                                                          | 0,000851711 | 0,061327711 | 0,375 | 0,121 | 1         | 1,043425583   | 0,958381715     | 3,099173554     |
| MAP3K7CL                                                                                       | 0,084624339 | 0,061324342 | 0,062 | 0,016 | 1         | 1,043423146   | 0,958383954     | 3,875           |
| PARP11                                                                                         | 0,084624339 | 0,061308814 | 0,062 | 0,016 | 1         | 1,043411916   | 0,958394269     | 3,875           |
| SGTA                                                                                           | 0,00862775  | 0,061213664 | 0,25  | 0,086 | 1         | 1,043343102   | 0,95845748      | 2,906976744     |
| DALRD3                                                                                         | 0,004267025 | 0,061203831 | 0,156 | 0,035 | 1         | 1,043335991   | 0,958464012     | 4,457142857     |
| KLHL11                                                                                         | 0,013891036 | 0,0611933   | 0,062 | 0,008 | 1         | 1,043328375   | 0,958471009     | 7,75            |
| MOAP1                                                                                          | 0,003518189 | 0,061154693 | 0,25  | 0,074 | 1         | 1,043300456   | 0,958496658     | 3,378378378     |
| TESK2                                                                                          | 0,145431    | 0,061148153 | 0,062 | 0,02  | 1         | 1,043295726   | 0,958501003     | 3,1             |
| AP1S3                                                                                          | 0,004841742 | 0,061138222 | 0,031 | 0     | 1         | 1,043288544   | 0,958507601     | #DIV/0!         |
| CDC25A                                                                                         | 0,004841742 | 0,061138222 | 0,031 | 0     | 1         | 1,043288544   | 0,958507601     | #DIV/0!         |
| CDC6                                                                                           | 0,004841742 | 0,061138222 | 0,031 | 0     | 1         | 1,043288544   | 0,958507601     | #DIV/0!         |
| KCNH1                                                                                          | 0,004841742 | 0,061138222 | 0,031 | 0     | 1         | 1,043288544   | 0,958507601     | #DIV/0!         |
| LINC00028                                                                                      | 0,004841742 | 0,061138222 | 0,031 | 0     | 1         | 1,043288544   | 0,958507601     | #DIV/0!         |
| LINC01561                                                                                      | 0,004841742 | 0,061138222 | 0,031 | 0     | 1         | 1,043288544   | 0,958507601     | #DIV/0!         |
| LRRC56                                                                                         | 0,004841742 | 0,061138222 | 0,031 | 0     | 1         | 1,043288544   | 0,958507601     | #DIV/0!         |
| NRIP3                                                                                          | 0,004841742 | 0,061138222 | 0,031 | 0     | 1         | 1,043288544   | 0,958507601     | #DIV/0!         |
| POLQ                                                                                           | 0,004841742 | 0,061138222 | 0,031 | 0     | 1         | 1,043288544   | 0,958507601     | #DIV/0!         |
| TMEM171                                                                                        | 0,004841742 | 0,061138222 | 0,031 | 0     | 1         | 1,043288544   | 0,958507601     | #DIV/0!         |
| ZNF730                                                                                         | 0,004841742 | 0,061138222 | 0,031 | 0     | 1         | 1,043288544   | 0,958507601     | #DIV/0!         |
| PALB2                                                                                          | 0,002263143 | 0,061137636 | 0,062 | 0,004 | 1         | 1,043288121   | 0,95850799      | 15,5            |
| SYNGR1                                                                                         | 0,000113517 | 0,061133327 | 0,562 | 0,18  | 1         | 1,043285005   | 0,958510853     | 3,122222222     |
| SPC24                                                                                          | 6,3574E-05  | 0,061114705 | 0,062 | 0     | 1         | 1,043271538   | 0,958523225     | #DIV/0!         |
| EIF2S1                                                                                         | 0,001211009 | 0,061094379 | 0,312 | 0,094 | 1         | 1,04325684    | 0,95853673      | 3,319148936     |
| TTC12                                                                                          | 0,013891036 | 0,061046264 | 0,062 | 0,008 | 1         | 1,043222047   | 0,958568699     | 7,75            |
| STN1                                                                                           | 0,000524345 | 0,061037431 | 0,094 | 0,008 | 1         | 1,043215659   | 0,958574568     | 11,75           |
| ZNF35                                                                                          | 0,082317662 | 0,060955854 | 0,031 | 0,004 | 1         | 1,043156673   | 0,958628772     | 7,75            |
| BNIP2                                                                                          | 0,001210407 | 0,060954397 | 0,438 | 0,152 | 1         | 1,043155619   | 0,95862974      | 2,881578947     |
| PGPEP1                                                                                         | 0,004029529 | 0,060918538 | 0,156 | 0,035 | 1         | 1,043129691   | 0,958653567     | 4,457142857     |
| CDCA2                                                                                          | 0,002263143 | 0,060829829 | 0,062 | 0,004 | 1         | 1,043065553   | 0,958712515     | 15,5            |

Supplementary Table 1

| Differentially expressed genes_adjacent-skin-XL_comparing SC-Keloid vs. (SC-Myel, SC-Nonmyel) |             |             |       |       |             |               |                 |                 |
|-----------------------------------------------------------------------------------------------|-------------|-------------|-------|-------|-------------|---------------|-----------------|-----------------|
| gene                                                                                          | p_val       | avg_log2FC  | pct.1 | pct.2 | p_val_adj   | Foldchange_UP | Foldchange_DOWN | Ratio_pct1_pct2 |
| ZBTB41                                                                                        | 0,004760864 | 0,060781738 | 0,25  | 0,078 | 1           | 1,043030784   | 0,958744474     | 3,205128205     |
| ANKRD39                                                                                       | 2,0222E-06  | 0,060762371 | 0,281 | 0,043 | 0,042670449 | 1,043016782   | 0,958757344     | 6,534883721     |
| GPR89A                                                                                        | 2,1417E-05  | 0,06064783  | 0,188 | 0,023 | 0,451919526 | 1,042933976   | 0,958833467     | 8,173913043     |
| ZNF480                                                                                        | 0,000524345 | 0,060534611 | 0,094 | 0,008 | 1           | 1,042852133   | 0,958908716     | 11,75           |
| SPOP                                                                                          | 0,000198951 | 0,06052186  | 0,406 | 0,117 | 1           | 1,042842916   | 0,958917192     | 3,47008547      |
| GSDME                                                                                         | 0,013891036 | 0,060483107 | 0,062 | 0,008 | 1           | 1,042814904   | 0,95894295      | 7,75            |
| FBXO4                                                                                         | 0,040844069 | 0,060451168 | 0,125 | 0,039 | 1           | 1,042791818   | 0,95896418      | 3,205128205     |
| COMP                                                                                          | 0,226351275 | 0,060440531 | 0,031 | 0,008 | 1           | 1,04278413    | 0,95897125      | 3,875           |
| PLRG1                                                                                         | 0,00023142  | 0,060394276 | 0,281 | 0,066 | 1           | 1,042750696   | 0,959001997     | 4,257575758     |
| PCDHGB6                                                                                       | 0,002442928 | 0,060367215 | 0,094 | 0,012 | 1           | 1,042731138   | 0,959019985     | 7,833333333     |
| BRCA2                                                                                         | 0,002263143 | 0,060233227 | 0,062 | 0,004 | 1           | 1,0426343     | 0,959109057     | 15,5            |
| CENPE                                                                                         | 0,013891036 | 0,060227346 | 0,062 | 0,008 | 1           | 1,04263005    | 0,959112966     | 7,75            |
| TMEM18                                                                                        | 0,023239872 | 0,060221767 | 0,25  | 0,098 | 1           | 1,042626018   | 0,959116676     | 2,551020408     |
| AFAP1                                                                                         | 0,041554521 | 0,060182386 | 0,156 | 0,055 | 1           | 1,042597558   | 0,959142856     | 2,836363636     |
| CSNK1G1                                                                                       | 0,001968597 | 0,060156532 | 0,156 | 0,031 | 1           | 1,042578874   | 0,959160045     | 5,032258065     |
| SLC25A26                                                                                      | 3,2432E-06  | 0,060145205 | 0,25  | 0,035 | 0,068434669 | 1,042570689   | 0,959167575     | 7,142857143     |
| LTK                                                                                           | 0,040857201 | 0,0601251   | 0,062 | 0,012 | 1           | 1,042556159   | 0,959180943     | 5,166666667     |
| NSUN5                                                                                         | 1,53257E-05 | 0,060114336 | 0,219 | 0,031 | 0,323387973 | 1,042548381   | 0,959188099     | 7,064516129     |
| ATP6V1B1                                                                                      | 6,3574E-05  | 0,060090646 | 0,062 | 0     | 1           | 1,042531262   | 0,95920385      | #DIV/0!         |
| LIPT2                                                                                         | 6,3574E-05  | 0,060090646 | 0,062 | 0     | 1           | 1,042531262   | 0,95920385      | #DIV/0!         |
| MAX                                                                                           | 0,025944296 | 0,060083412 | 0,375 | 0,168 | 1           | 1,042526035   | 0,959208659     | 2,232142857     |
| HJURP                                                                                         | 0,004841742 | 0,060078925 | 0,031 | 0     | 1           | 1,042522792   | 0,959211643     | #DIV/0!         |
| RACGAP1                                                                                       | 0,004841742 | 0,060078925 | 0,031 | 0     | 1           | 1,042522792   | 0,959211643     | #DIV/0!         |
| TROAP                                                                                         | 0,004841742 | 0,060078925 | 0,031 | 0     | 1           | 1,042522792   | 0,959211643     | #DIV/0!         |
| DAP                                                                                           | 0,000135123 | 0,059984291 | 0,594 | 0,203 | 1           | 1,04245441    | 0,959274564     | 2,926108374     |
| PCYOX1                                                                                        | 0,000669326 | 0,059883439 | 0,344 | 0,102 | 1           | 1,042381539   | 0,959341625     | 3,37254902      |
| CAMKK1                                                                                        | 0,002263143 | 0,05983702  | 0,062 | 0,004 | 1           | 1,042348001   | 0,959372492     | 15,5            |
| ACOX3                                                                                         | 0,013891036 | 0,059825873 | 0,062 | 0,008 | 1           | 1,042339947   | 0,959379905     | 7,75            |
| CREBBP                                                                                        | 0,075628693 | 0,05980219  | 0,281 | 0,137 | 1           | 1,042322837   | 0,959395654     | 2,051094891     |
| CDHR3                                                                                         | 0,177883766 | 0,059761739 | 0,125 | 0,059 | 1           | 1,042293612   | 0,959422555     | 2,118644068     |

Supplementary Table 1

| Differentially expressed genes_adjacent-skin-XL_comparing SC-Keloid vs. (SC-Myel, SC-Nonmyel) |             |             |       |       |             |               |                 |                 |
|-----------------------------------------------------------------------------------------------|-------------|-------------|-------|-------|-------------|---------------|-----------------|-----------------|
| gene                                                                                          | p_val       | avg_log2FC  | pct.1 | pct.2 | p_val_adj   | Foldchange_UP | Foldchange_DOWN | Ratio_pct1_pct2 |
| UCHL1                                                                                         | 0,004507068 | 0,059731917 | 0,25  | 0,078 | 1           | 1,042272067   | 0,959442387     | 3,205128205     |
| ZSCAN2                                                                                        | 9,12354E-07 | 0,059727462 | 0,094 | 0     | 0,019251588 | 1,042268848   | 0,95944535      | #DIV/0!         |
| MGAT2                                                                                         | 2,11157E-07 | 0,059677474 | 0,219 | 0,02  | 0,00445563  | 1,042232736   | 0,959478594     | 10,95           |
| CCDC189                                                                                       | 4,80439E-05 | 0,059657099 | 0,094 | 0,004 | 1           | 1,042218016   | 0,959492145     | 23,5            |
| BFAR                                                                                          | 0,000967853 | 0,059611786 | 0,344 | 0,105 | 1           | 1,042185282   | 0,959522282     | 3,276190476     |
| TRIM16                                                                                        | 0,000339359 | 0,059596654 | 0,156 | 0,023 | 1           | 1,042174351   | 0,959532346     | 6,782608696     |
| AC009506.1                                                                                    | 0,000524345 | 0,059568273 | 0,094 | 0,008 | 1           | 1,042153849   | 0,959551222     | 11,75           |
| TNFAIP1                                                                                       | 0,000103124 | 0,059514747 | 0,219 | 0,039 | 1           | 1,042115185   | 0,959586824     | 5,615384615     |
| CILK1                                                                                         | 0,000103124 | 0,059470621 | 0,219 | 0,039 | 1           | 1,042083311   | 0,959616174     | 5,615384615     |
| CEP57                                                                                         | 0,000466383 | 0,059418175 | 0,344 | 0,098 | 1           | 1,042045429   | 0,959651059     | 3,510204082     |
| TSR1                                                                                          | 0,000486986 | 0,059365543 | 0,188 | 0,035 | 1           | 1,042007414   | 0,95968607      | 5,371428571     |
| HCG11                                                                                         | 0,059959447 | 0,059357059 | 0,094 | 0,027 | 1           | 1,042001286   | 0,959691713     | 3,481481481     |
| NEMF                                                                                          | 0,001081512 | 0,059345988 | 0,312 | 0,094 | 1           | 1,04199329    | 0,959699078     | 3,319148936     |
| KRBOX1                                                                                        | 0,002594281 | 0,059279442 | 0,094 | 0,012 | 1           | 1,041945228   | 0,959743346     | 7,833333333     |
| PRR14L                                                                                        | 2,1417E-05  | 0,059257507 | 0,188 | 0,023 | 0,451919526 | 1,041929387   | 0,959757938     | 8,173913043     |
| CPNE8                                                                                         | 0,057775912 | 0,059215776 | 0,125 | 0,043 | 1           | 1,041899248   | 0,959785701     | 2,906976744     |
| KRT80                                                                                         | 6,3574E-05  | 0,059152451 | 0,062 | 0     | 1           | 1,041853517   | 0,95982783      | #DIV/0!         |
| FKBP15                                                                                        | 0,000509339 | 0,059121195 | 0,125 | 0,016 | 1           | 1,041830945   | 0,959848625     | 7,8125          |
| GTPBP6                                                                                        | 0,000113241 | 0,059110714 | 0,438 | 0,125 | 1           | 1,041823377   | 0,959855598     | 3,504           |
| TRAF2                                                                                         | 0,004107327 | 0,059046775 | 0,156 | 0,035 | 1           | 1,041777205   | 0,959898139     | 4,457142857     |
| LSM5                                                                                          | 0,002529014 | 0,058834204 | 0,406 | 0,148 | 1           | 1,041623718   | 0,960039583     | 2,743243243     |
| CSRNP3                                                                                        | 0,002168448 | 0,058814111 | 0,062 | 0,004 | 1           | 1,041609211   | 0,960052954     | 15,5            |
| EIF2S3                                                                                        | 2,2573E-05  | 0,058746343 | 0,625 | 0,195 | 0,476312484 | 1,041560284   | 0,960098052     | 3,205128205     |
| MRPL1                                                                                         | 0,001637922 | 0,058578021 | 0,219 | 0,055 | 1           | 1,04143877    | 0,960210075     | 3,981818182     |
| RILPL1                                                                                        | 0,001555893 | 0,05848588  | 0,219 | 0,055 | 1           | 1,041372259   | 0,960271403     | 3,981818182     |
| DARS1                                                                                         | 0,01976798  | 0,058437201 | 0,219 | 0,078 | 1           | 1,041337122   | 0,960303805     | 2,807692308     |
| IFI6                                                                                          | 0,0012511   | 0,05835059  | 0,719 | 0,305 | 1           | 1,041274608   | 0,960361458     | 2,357377049     |
| EDN2                                                                                          | 0,004841742 | 0,058329758 | 0,031 | 0     | 1           | 1,041259572   | 0,960375325     | #DIV/0!         |
| SRGAP2-AS1                                                                                    | 0,004841742 | 0,058329758 | 0,031 | 0     | 1           | 1,041259572   | 0,960375325     | #DIV/0!         |
| LRCH4                                                                                         | 0,089433293 | 0,058328283 | 0,094 | 0,031 | 1           | 1,041258507   | 0,960376307     | 3,032258065     |

Supplementary Table 1

| Differentially expressed genes_adjacent-skin-XL_comparing SC-Keloid vs. (SC-Myel, SC-Nonmyel) |             |             |       |       |             |               |                 |                 |
|-----------------------------------------------------------------------------------------------|-------------|-------------|-------|-------|-------------|---------------|-----------------|-----------------|
| gene                                                                                          | p_val       | avg_log2FC  | pct.1 | pct.2 | p_val_adj   | Foldchange_UP | Foldchange_DOWN | Ratio_pct1_pct2 |
| LETM2                                                                                         | 0,004841742 | 0,058134176 | 0,031 | 0     | 1           | 1,041118421   | 0,960505529     | #DIV/0!         |
| NRG2                                                                                          | 0,004841742 | 0,058134176 | 0,031 | 0     | 1           | 1,041118421   | 0,960505529     | #DIV/0!         |
| OAZ3                                                                                          | 0,004841742 | 0,058134176 | 0,031 | 0     | 1           | 1,041118421   | 0,960505529     | #DIV/0!         |
| RIN3                                                                                          | 0,004841742 | 0,058134176 | 0,031 | 0     | 1           | 1,041118421   | 0,960505529     | #DIV/0!         |
| GRIPAP1                                                                                       | 0,000537931 | 0,05812826  | 0,219 | 0,047 | 1           | 1,041114152   | 0,960509468     | 4,659574468     |
| TCP10L                                                                                        | 0,002263143 | 0,058064566 | 0,062 | 0,004 | 1           | 1,041068188   | 0,960551875     | 15,5            |
| CENATAC                                                                                       | 0,022031631 | 0,058042734 | 0,25  | 0,098 | 1           | 1,041052434   | 0,960566411     | 2,551020408     |
| ZC3HAV1L                                                                                      | 0,013891036 | 0,057915908 | 0,062 | 0,008 | 1           | 1,04096092    | 0,960650857     | 7,75            |
| ADCK1                                                                                         | 9,12354E-07 | 0,057884458 | 0,094 | 0     | 0,019251588 | 1,040938228   | 0,960671799     | #DIV/0!         |
| FUNDC1                                                                                        | 0,019236133 | 0,05771312  | 0,094 | 0,02  | 1           | 1,040814611   | 0,960785897     | 4,7             |
| TPRA1                                                                                         | 0,003191522 | 0,057696601 | 0,188 | 0,047 | 1           | 1,040802694   | 0,960796899     | 4               |
| NCK1                                                                                          | 0,001177356 | 0,05767649  | 0,312 | 0,094 | 1           | 1,040788185   | 0,960810292     | 3,319148936     |
| RFWD3                                                                                         | 0,000494525 | 0,057522753 | 0,125 | 0,016 | 1           | 1,040677282   | 0,960912684     | 7,8125          |
| RNF144B                                                                                       | 0,380266129 | 0,057472266 | 0,031 | 0,012 | 1           | 1,040640864   | 0,960946311     | 2,583333333     |
| ZNF658                                                                                        | 6,3574E-05  | 0,057424925 | 0,062 | 0     | 1           | 1,040606717   | 0,960977844     | #DIV/0!         |
| KRT8                                                                                          | 0,082317662 | 0,057403086 | 0,031 | 0,004 | 1           | 1,040590965   | 0,960992392     | 7,75            |
| TMA16                                                                                         | 4,32987E-05 | 0,057346863 | 0,219 | 0,035 | 0,913646714 | 1,040550413   | 0,961029843     | 6,257142857     |
| RNF170                                                                                        | 0,008780679 | 0,057280975 | 0,125 | 0,027 | 1           | 1,040502892   | 0,961073734     | 4,62962963      |
| ZNF689                                                                                        | 4,80439E-05 | 0,057007297 | 0,094 | 0,004 | 1           | 1,040305528   | 0,961256067     | 23,5            |
| PITPNC1                                                                                       | 0,000509339 | 0,056849224 | 0,125 | 0,016 | 1           | 1,04019155    | 0,961361395     | 7,8125          |
| MAMDC4                                                                                        | 0,002263143 | 0,056826218 | 0,062 | 0,004 | 1           | 1,040174963   | 0,961376726     | 15,5            |
| ABCB6                                                                                         | 0,040857201 | 0,056825331 | 0,062 | 0,012 | 1           | 1,040174324   | 0,961377317     | 5,166666667     |
| DEXI                                                                                          | 7,04762E-05 | 0,056815157 | 0,312 | 0,07  | 1           | 1,040166988   | 0,961384096     | 4,457142857     |
| SAC3D1                                                                                        | 0,000112833 | 0,056756793 | 0,125 | 0,012 | 1           | 1,040124909   | 0,96142299      | 10,41666667     |
| POLD1                                                                                         | 0,013891036 | 0,056706981 | 0,062 | 0,008 | 1           | 1,040088998   | 0,961456185     | 7,75            |
| KLHL2                                                                                         | 0,004087481 | 0,056694826 | 0,125 | 0,023 | 1           | 1,040080234   | 0,961464286     | 5,434782609     |
| SASS6                                                                                         | 0,004029529 | 0,056602159 | 0,156 | 0,035 | 1           | 1,04001343    | 0,961526045     | 4,457142857     |
| ACTR3                                                                                         | 0,005699711 | 0,056589748 | 0,531 | 0,223 | 1           | 1,040004484   | 0,961534316     | 2,381165919     |
| TFCP2                                                                                         | 0,278079807 | 0,05648718  | 0,094 | 0,047 | 1           | 1,039930548   | 0,961602679     | 2               |
| CHAF1A                                                                                        | 3,67695E-07 | 0,056422218 | 0,156 | 0,008 | 0,007758733 | 1,039883723   | 0,961645979     | 19,5            |

Supplementary Table 1

| Differentially expressed genes_adjacent-skin-XL_comparing SC-Keloid vs. (SC-Myel, SC-Nonmyel) |             |             |       |       |             |               |                 |                 |
|-----------------------------------------------------------------------------------------------|-------------|-------------|-------|-------|-------------|---------------|-----------------|-----------------|
| gene                                                                                          | p_val       | avg_log2FC  | pct.1 | pct.2 | p_val_adj   | Foldchange_UP | Foldchange_DOWN | Ratio_pct1_pct2 |
| IL32                                                                                          | 0,000322156 | 0,056361261 | 0,156 | 0,023 | 1           | 1,039839785   | 0,961686612     | 6,782608696     |
| TMEM11                                                                                        | 0,000126424 | 0,056341647 | 0,25  | 0,051 | 1           | 1,039825649   | 0,961699686     | 4,901960784     |
| UTP15                                                                                         | 0,000524345 | 0,056331341 | 0,094 | 0,008 | 1           | 1,03981822    | 0,961706556     | 11,75           |
| ZNF781                                                                                        | 0,000494525 | 0,056315185 | 0,125 | 0,016 | 1           | 1,039806576   | 0,961717326     | 7,8125          |
| PGAP2                                                                                         | 0,000509339 | 0,05630413  | 0,125 | 0,016 | 1           | 1,039798609   | 0,961724695     | 7,8125          |
| ETFB                                                                                          | 0,006569644 | 0,056251614 | 0,406 | 0,16  | 1           | 1,039760759   | 0,961759704     | 2,5375          |
| OSTF1                                                                                         | 0,001267483 | 0,056223697 | 0,531 | 0,191 | 1           | 1,039740639   | 0,961778315     | 2,780104712     |
| GEN1                                                                                          | 0,000112833 | 0,05618019  | 0,125 | 0,012 | 1           | 1,039709285   | 0,961807319     | 10,41666667     |
| TMEM138                                                                                       | 0,000509339 | 0,056151119 | 0,125 | 0,016 | 1           | 1,039688335   | 0,9618267       | 7,8125          |
| PIGB                                                                                          | 0,002594281 | 0,056140658 | 0,094 | 0,012 | 1           | 1,039680795   | 0,961833675     | 7,833333333     |
| CDCA4                                                                                         | 0,013891036 | 0,056116247 | 0,062 | 0,008 | 1           | 1,039663204   | 0,961849949     | 7,75            |
| THAP1                                                                                         | 9,17361E-07 | 0,056109086 | 0,188 | 0,016 | 0,019357231 | 1,039658044   | 0,961854723     | 11,75           |
| THRAP3                                                                                        | 2,5478E-05  | 0,056053079 | 0,562 | 0,164 | 0,537612072 | 1,039617684   | 0,961892064     | 3,426829268     |
| AMT                                                                                           | 0,147778936 | 0,056007027 | 0,062 | 0,02  | 1           | 1,039584499   | 0,961922769     | 3,1             |
| PCGF5                                                                                         | 0,255362483 | 0,055921677 | 0,281 | 0,176 | 1           | 1,039522999   | 0,961979679     | 1,596590909     |
| PTK6                                                                                          | 0,082317662 | 0,055884154 | 0,031 | 0,004 | 1           | 1,039495962   | 0,962004699     | 7,75            |
| SLC2A4RG                                                                                      | 1,96669E-05 | 0,055858202 | 0,531 | 0,148 | 0,414992103 | 1,039477263   | 0,962022004     | 3,587837838     |
| METTL16                                                                                       | 0,020463101 | 0,055842699 | 0,156 | 0,047 | 1           | 1,039466093   | 0,962032342     | 3,319148936     |
| WDR91                                                                                         | 0,145431    | 0,055810735 | 0,062 | 0,02  | 1           | 1,039443063   | 0,962053657     | 3,1             |
| RABGGTA                                                                                       | 0,001968597 | 0,055718533 | 0,156 | 0,031 | 1           | 1,039376635   | 0,962115143     | 5,032258065     |
| RAD51AP1                                                                                      | 1,51098E-05 | 0,055579483 | 0,125 | 0,008 | 0,318831333 | 1,039276463   | 0,962207878     | 15,625          |
| BATF3                                                                                         | 0,002594281 | 0,055549084 | 0,094 | 0,012 | 1           | 1,039254564   | 0,962228153     | 7,833333333     |
| SLC37A1                                                                                       | 0,000524345 | 0,05552371  | 0,094 | 0,008 | 1           | 1,039236286   | 0,962245077     | 11,75           |
| AGBL2                                                                                         | 0,004841742 | 0,055500237 | 0,031 | 0     | 1           | 1,039219378   | 0,962260733     | #DIV/0!         |
| AJM1                                                                                          | 0,004841742 | 0,055500237 | 0,031 | 0     | 1           | 1,039219378   | 0,962260733     | #DIV/0!         |
| ATP13A4                                                                                       | 0,004841742 | 0,055500237 | 0,031 | 0     | 1           | 1,039219378   | 0,962260733     | #DIV/0!         |
| COL5A1-AS1                                                                                    | 0,004841742 | 0,055500237 | 0,031 | 0     | 1           | 1,039219378   | 0,962260733     | #DIV/0!         |
| DCTN1-AS1                                                                                     | 0,004841742 | 0,055500237 | 0,031 | 0     | 1           | 1,039219378   | 0,962260733     | #DIV/0!         |
| LINC00393                                                                                     | 0,004841742 | 0,055500237 | 0,031 | 0     | 1           | 1,039219378   | 0,962260733     | #DIV/0!         |
| LRRC46                                                                                        | 0,004841742 | 0,055500237 | 0,031 | 0     | 1           | 1,039219378   | 0,962260733     | #DIV/0!         |

Supplementary Table 1

| Differentially expressed genes_adjacent-skin-XL_comparing SC-Keloid vs. (SC-Myel, SC-Nonmyel) |             |             |       |       |             |               |                 |                 |
|-----------------------------------------------------------------------------------------------|-------------|-------------|-------|-------|-------------|---------------|-----------------|-----------------|
| gene                                                                                          | p_val       | avg_log2FC  | pct.1 | pct.2 | p_val_adj   | Foldchange_UP | Foldchange_DOWN | Ratio_pct1_pct2 |
| MC5R                                                                                          | 0,004841742 | 0,055500237 | 0,031 | 0     | 1           | 1,039219378   | 0,962260733     | #DIV/0!         |
| MGAT5B                                                                                        | 0,004841742 | 0,055500237 | 0,031 | 0     | 1           | 1,039219378   | 0,962260733     | #DIV/0!         |
| PCDHGA11                                                                                      | 0,004841742 | 0,055500237 | 0,031 | 0     | 1           | 1,039219378   | 0,962260733     | #DIV/0!         |
| RLBP1                                                                                         | 0,004841742 | 0,055500237 | 0,031 | 0     | 1           | 1,039219378   | 0,962260733     | #DIV/0!         |
| SLC1A1                                                                                        | 0,004841742 | 0,055500237 | 0,031 | 0     | 1           | 1,039219378   | 0,962260733     | #DIV/0!         |
| ARHGEF33                                                                                      | 0,004841742 | 0,055445626 | 0,031 | 0     | 1           | 1,03918004    | 0,962297159     | #DIV/0!         |
| CCNO                                                                                          | 0,004841742 | 0,055445626 | 0,031 | 0     | 1           | 1,03918004    | 0,962297159     | #DIV/0!         |
| LINC01549                                                                                     | 0,004841742 | 0,055445626 | 0,031 | 0     | 1           | 1,03918004    | 0,962297159     | #DIV/0!         |
| MMP16                                                                                         | 0,004841742 | 0,055445626 | 0,031 | 0     | 1           | 1,03918004    | 0,962297159     | #DIV/0!         |
| NDST3                                                                                         | 0,004841742 | 0,055445626 | 0,031 | 0     | 1           | 1,03918004    | 0,962297159     | #DIV/0!         |
| NME5                                                                                          | 0,004841742 | 0,055445626 | 0,031 | 0     | 1           | 1,03918004    | 0,962297159     | #DIV/0!         |
| ZBTB3                                                                                         | 0,004841742 | 0,055445626 | 0,031 | 0     | 1           | 1,03918004    | 0,962297159     | #DIV/0!         |
| ZNRF3-AS1                                                                                     | 0,004841742 | 0,055445626 | 0,031 | 0     | 1           | 1,03918004    | 0,962297159     | #DIV/0!         |
| FBXL17                                                                                        | 0,083160445 | 0,05543421  | 0,125 | 0,047 | 1           | 1,039171817   | 0,962304773     | 2,659574468     |
| SLC4A1AP                                                                                      | 0,000107903 | 0,05535192  | 0,219 | 0,039 | 1           | 1,039112546   | 0,962359664     | 5,615384615     |
| OGFR                                                                                          | 0,024369817 | 0,055160042 | 0,344 | 0,152 | 1           | 1,038974353   | 0,962487666     | 2,263157895     |
| GON7                                                                                          | 0,000509339 | 0,055153434 | 0,125 | 0,016 | 1           | 1,038969594   | 0,962492075     | 7,8125          |
| JOSD1                                                                                         | 0,001318433 | 0,055116797 | 0,344 | 0,109 | 1           | 1,03894321    | 0,962516517     | 3,155963303     |
| SEC22C                                                                                        | 0,000509247 | 0,055056727 | 0,344 | 0,098 | 1           | 1,038899952   | 0,962556595     | 3,510204082     |
| SLC19A1                                                                                       | 0,013891036 | 0,0550237   | 0,062 | 0,008 | 1           | 1,038876169   | 0,96257863      | 7,75            |
| AC002454.1                                                                                    | 6,3574E-05  | 0,054999204 | 0,062 | 0     | 1           | 1,03885853    | 0,962594974     | #DIV/0!         |
| AMBRA1                                                                                        | 0,899307354 | 0,054991886 | 0,031 | 0,027 | 1           | 1,03885326    | 0,962599857     | 1,148148148     |
| NCDN                                                                                          | 0,000112833 | 0,054881383 | 0,125 | 0,012 | 1           | 1,038773693   | 0,96267359      | 10,41666667     |
| ABHD4                                                                                         | 0,000339359 | 0,054836758 | 0,156 | 0,023 | 1           | 1,038741563   | 0,962703367     | 6,782608696     |
| SNRPN                                                                                         | 0,000463482 | 0,054783378 | 0,75  | 0,281 | 1           | 1,03870313    | 0,962738988     | 2,669039146     |
| ZNF75A                                                                                        | 0,018832425 | 0,054754571 | 0,094 | 0,02  | 1           | 1,03868239    | 0,962758212     | 4,7             |
| HOXB-AS1                                                                                      | 0,143670631 | 0,054659592 | 0,125 | 0,055 | 1           | 1,03861401    | 0,962821597     | 2,272727273     |
| DDX39B                                                                                        | 0,007060784 | 0,054619009 | 0,719 | 0,328 | 1           | 1,038584794   | 0,962848682     | 2,192073171     |
| SRRD                                                                                          | 0,000486986 | 0,054617963 | 0,188 | 0,035 | 1           | 1,038584042   | 0,962849379     | 5,371428571     |
| PPIE                                                                                          | 9,73764E-06 | 0,054614288 | 0,375 | 0,082 | 0,205473989 | 1,038581396   | 0,962851832     | 4,573170732     |

Supplementary Table 1

| Differentially expressed genes_adjacent-skin-XL_ comparing SC-Keloid vs. (SC-Myel, SC-Nonmyel) |             |             |       |       |             |               |                 |                 |
|------------------------------------------------------------------------------------------------|-------------|-------------|-------|-------|-------------|---------------|-----------------|-----------------|
| gene                                                                                           | p_val       | avg_log2FC  | pct.1 | pct.2 | p_val_adj   | Foldchange_UP | Foldchange_DOWN | Ratio_pct1_pct2 |
| ARSK                                                                                           | 0,226917872 | 0,054605566 | 0,094 | 0,043 | 1           | 1,038575117   | 0,962857653     | 2,186046512     |
| IFT81                                                                                          | 0,001013976 | 0,054572766 | 0,188 | 0,039 | 1           | 1,038551505   | 0,962879544     | 4,820512821     |
| CASTOR2                                                                                        | 0,008956837 | 0,054531657 | 0,125 | 0,027 | 1           | 1,038521913   | 0,962906981     | 4,62962963      |
| KLHL29                                                                                         | 0,000881541 | 0,054527424 | 0,219 | 0,051 | 1           | 1,038518866   | 0,962909807     | 4,294117647     |
| ZNF227                                                                                         | 0,000509339 | 0,054484742 | 0,125 | 0,016 | 1           | 1,038488141   | 0,962938295     | 7,8125          |
| PSMC3IP                                                                                        | 0,147778936 | 0,054414324 | 0,062 | 0,02  | 1           | 1,038437454   | 0,962985297     | 3,1             |
| FKBP11                                                                                         | 0,004186451 | 0,054321068 | 0,156 | 0,035 | 1           | 1,038370331   | 0,963047546     | 4,457142857     |
| SLC35G1                                                                                        | 0,221475664 | 0,054259305 | 0,031 | 0,008 | 1           | 1,038325879   | 0,963088777     | 3,875           |
| DIS3L                                                                                          | 0,000100263 | 0,054216248 | 0,156 | 0,02  | 1           | 1,038294891   | 0,96311752      | 7,8             |
| FAM117A                                                                                        | 0,013891036 | 0,054197933 | 0,062 | 0,008 | 1           | 1,038281709   | 0,963129747     | 7,75            |
| PPIF                                                                                           | 0,287158009 | 0,054186509 | 0,062 | 0,027 | 1           | 1,038273488   | 0,963137374     | 2,296296296     |
| EMILIN2                                                                                        | 0,018436147 | 0,054127289 | 0,094 | 0,02  | 1           | 1,03823087    | 0,963176909     | 4,7             |
| ZNF19                                                                                          | 0,533973819 | 0,054118302 | 0,031 | 0,016 | 1           | 1,038224402   | 0,963182909     | 1,9375          |
| HEATR3                                                                                         | 0,29055378  | 0,05411404  | 0,062 | 0,027 | 1           | 1,038221335   | 0,963185754     | 2,296296296     |
| AGER                                                                                           | 0,002517564 | 0,054084104 | 0,094 | 0,012 | 1           | 1,038199792   | 0,963205741     | 7,833333333     |
| ACSL4                                                                                          | 7,5014E-06  | 0,05407657  | 0,312 | 0,059 | 0,158287075 | 1,038194371   | 0,963210771     | 5,288135593     |
| CAD                                                                                            | 0,001600673 | 0,054064068 | 0,125 | 0,02  | 1           | 1,038185374   | 0,963219118     | 6,25            |
| RESF1                                                                                          | 0,177416998 | 0,053878345 | 0,094 | 0,039 | 1           | 1,038051734   | 0,963343124     | 2,41025641      |
| WNK3                                                                                           | 0,002594281 | 0,053533226 | 0,094 | 0,012 | 1           | 1,037803442   | 0,963573601     | 7,833333333     |
| CTNNB1                                                                                         | 0,006642536 | 0,053517657 | 0,844 | 0,398 | 1           | 1,037792243   | 0,963584        | 2,120603015     |
| CTDP1                                                                                          | 0,002594281 | 0,053459489 | 0,094 | 0,012 | 1           | 1,037750401   | 0,963622851     | 7,833333333     |
| TSR2                                                                                           | 0,061168803 | 0,053366887 | 0,25  | 0,113 | 1           | 1,037683793   | 0,963684705     | 2,212389381     |
| CAND1                                                                                          | 0,000319167 | 0,053366349 | 0,438 | 0,137 | 1           | 1,037683406   | 0,963685065     | 3,197080292     |
| CCDC140                                                                                        | 0,002263143 | 0,053293123 | 0,062 | 0,004 | 1           | 1,037630738   | 0,963733979     | 15,5            |
| THAP9                                                                                          | 0,082317662 | 0,053283164 | 0,031 | 0,004 | 1           | 1,037623576   | 0,963740632     | 7,75            |
| CGRRF1                                                                                         | 0,082895194 | 0,053281019 | 0,188 | 0,082 | 1           | 1,037622033   | 0,963742065     | 2,292682927     |
| SAMD14                                                                                         | 6,3574E-05  | 0,053096923 | 0,062 | 0     | 1           | 1,037489635   | 0,963865051     | #DIV/0!         |
| TLCD1                                                                                          | 6,3574E-05  | 0,053096923 | 0,062 | 0     | 1           | 1,037489635   | 0,963865051     | #DIV/0!         |
| MESP1                                                                                          | 0,002594281 | 0,052982743 | 0,094 | 0,012 | 1           | 1,037407527   | 0,963941338     | 7,833333333     |
| MED20                                                                                          | 4,80439E-05 | 0,052968605 | 0,094 | 0,004 | 1           | 1,037397361   | 0,963950784     | 23,5            |

Supplementary Table 1

| Differentially expressed genes_adjacent-skin-XL_comparing SC-Keloid vs. (SC-Myel, SC-Nonmyel) |             |             |       |       |             |               |                 |                 |
|-----------------------------------------------------------------------------------------------|-------------|-------------|-------|-------|-------------|---------------|-----------------|-----------------|
| gene                                                                                          | p_val       | avg_log2FC  | pct.1 | pct.2 | p_val_adj   | Foldchange_UP | Foldchange_DOWN | Ratio_pct1_pct2 |
| PES1                                                                                          | 7,15271E-05 | 0,052961619 | 0,188 | 0,027 | 1           | 1,037392338   | 0,963955452     | 6,962962963     |
| FAM210A                                                                                       | 0,035499775 | 0,052945104 | 0,094 | 0,023 | 1           | 1,037380462   | 0,963966487     | 4,086956522     |
| RELCH                                                                                         | 0,004180266 | 0,052892803 | 0,125 | 0,023 | 1           | 1,037342856   | 0,964001434     | 5,434782609     |
| THAP12                                                                                        | 6,58444E-07 | 0,052841564 | 0,281 | 0,039 | 0,013893836 | 1,037306014   | 0,964035672     | 7,205128205     |
| C3orf52                                                                                       | 0,01346698  | 0,052790547 | 0,062 | 0,008 | 1           | 1,037269333   | 0,964069763     | 7,75            |
| PPAT                                                                                          | 0,015701049 | 0,052753467 | 0,125 | 0,031 | 1           | 1,037242673   | 0,964094542     | 4,032258065     |
| CELSR1                                                                                        | 0,002263143 | 0,052749084 | 0,062 | 0,004 | 1           | 1,037239523   | 0,964097471     | 15,5            |
| SPATA18                                                                                       | 6,3574E-05  | 0,052715157 | 0,062 | 0     | 1           | 1,03721513    | 0,964120143     | #DIV/0!         |
| ACOT11                                                                                        | 0,007750521 | 0,05258881  | 0,094 | 0,016 | 1           | 1,037124298   | 0,964204582     | 5,875           |
| VARS2                                                                                         | 0,007947097 | 0,052585159 | 0,094 | 0,016 | 1           | 1,037121674   | 0,964207022     | 5,875           |
| RASL10A                                                                                       | 0,079594089 | 0,052486514 | 0,031 | 0,004 | 1           | 1,037050762   | 0,964272952     | 7,75            |
| CCDC80                                                                                        | 2,6901E-06  | 0,052486231 | 0,531 | 0,137 | 0,056763861 | 1,037050559   | 0,964273141     | 3,875912409     |
| XRCC2                                                                                         | 0,082317662 | 0,052460405 | 0,031 | 0,004 | 1           | 1,037031995   | 0,964290403     | 7,75            |
| MPI                                                                                           | 9,06462E-07 | 0,052407319 | 0,125 | 0,004 | 0,019127258 | 1,036993836   | 0,964325886     | 31,25           |
| ZNF587                                                                                        | 0,079594089 | 0,052290932 | 0,031 | 0,004 | 1           | 1,036910182   | 0,964403685     | 7,75            |
| EFNB1                                                                                         | 0,007089636 | 0,052268455 | 0,156 | 0,039 | 1           | 1,036894027   | 0,96441871      | 4               |
| GCLC                                                                                          | 0,373006089 | 0,05212464  | 0,062 | 0,031 | 1           | 1,03679067    | 0,964514853     | 2               |
| ABCE1                                                                                         | 0,005187435 | 0,05210879  | 0,531 | 0,215 | 1           | 1,036779279   | 0,964525449     | 2,469767442     |
| DLG2                                                                                          | 0,937761989 | 0,052020562 | 0,031 | 0,035 | 1           | 1,036715877   | 0,964584437     | 0,885714286     |
| METTL22                                                                                       | 0,000103236 | 0,052002904 | 0,156 | 0,02  | 1           | 1,036703188   | 0,964596243     | 7,8             |
| TRIM35                                                                                        | 0,008148126 | 0,051897612 | 0,094 | 0,016 | 1           | 1,036627529   | 0,964666645     | 5,875           |
| BICD2                                                                                         | 0,000531863 | 0,051824745 | 0,312 | 0,086 | 1           | 1,036575173   | 0,964715369     | 3,627906977     |
| ZNF596                                                                                        | 0,013891036 | 0,051802215 | 0,062 | 0,008 | 1           | 1,036558985   | 0,964730435     | 7,75            |
| CCNQ                                                                                          | 0,007471523 | 0,051801061 | 0,156 | 0,039 | 1           | 1,036558156   | 0,964731206     | 4               |
| PHF14                                                                                         | 1,74332E-05 | 0,051749254 | 0,5   | 0,137 | 0,36785828  | 1,036520934   | 0,96476585      | 3,649635036     |
| WDR31                                                                                         | 0,013891036 | 0,0517387   | 0,062 | 0,008 | 1           | 1,036513352   | 0,964772908     | 7,75            |
| SOX5                                                                                          | 0,003896088 | 0,051723366 | 0,344 | 0,121 | 1           | 1,036502335   | 0,964783162     | 2,842975207     |
| CCZ1                                                                                          | 1,54378E-05 | 0,05167424  | 0,438 | 0,109 | 0,325753636 | 1,03646704    | 0,964816015     | 4,018348624     |
| TMX2                                                                                          | 0,01299974  | 0,05166946  | 0,25  | 0,09  | 1           | 1,036463606   | 0,964819212     | 2,777777778     |
| ZNF365                                                                                        | 6,3574E-05  | 0,051636764 | 0,062 | 0     | 1           | 1,036440117   | 0,964841078     | #DIV/0!         |



Supplementary Table 1

| Differentially expressed genes_adjacent-skin-XL_comparing SC-Keloid vs. (SC-Myel, SC-Nonmyel) |             |             |       |       |             |               |                 |                 |
|-----------------------------------------------------------------------------------------------|-------------|-------------|-------|-------|-------------|---------------|-----------------|-----------------|
| gene                                                                                          | p_val       | avg_log2FC  | pct.1 | pct.2 | p_val_adj   | Foldchange_UP | Foldchange_DOWN | Ratio_pct1_pct2 |
| VAMP3                                                                                         | 0,00023321  | 0,051576142 | 0,594 | 0,203 | 1           | 1,036396567   | 0,964881621     | 2,926108374     |
| ILVBL                                                                                         | 0,058043615 | 0,051534875 | 0,156 | 0,059 | 1           | 1,036366922   | 0,964909221     | 2,644067797     |
| TCIRG1                                                                                        | 0,000114181 | 0,051502367 | 0,25  | 0,051 | 1           | 1,03634357    | 0,964930964     | 4,901960784     |
| SMC6                                                                                          | 5,55781E-06 | 0,051498133 | 0,281 | 0,047 | 0,117275301 | 1,036340529   | 0,964933795     | 5,978723404     |
| ZNF354B                                                                                       | 0,770919596 | 0,051470129 | 0,031 | 0,023 | 1           | 1,036320413   | 0,964952526     | 1,347826087     |
| MSL3                                                                                          | 0,00011037  | 0,051455317 | 0,219 | 0,039 | 1           | 1,036309773   | 0,964962433     | 5,615384615     |
| MAN1B1                                                                                        | 3,60095E-05 | 0,051152358 | 0,375 | 0,09  | 0,759836844 | 1,036092176   | 0,965165092     | 4,166666667     |
| ZNF747                                                                                        | 0,000112833 | 0,051144461 | 0,125 | 0,012 | 1           | 1,036086505   | 0,965170375     | 10,41666667     |
| ZNF598                                                                                        | 0,019329956 | 0,051105223 | 0,188 | 0,062 | 1           | 1,036058326   | 0,965196626     | 3,032258065     |
| FOXS1                                                                                         | 6,3574E-05  | 0,051080942 | 0,062 | 0     | 1           | 1,036040889   | 0,96521287      | #DIV/0!         |
| LINC00629                                                                                     | 6,3574E-05  | 0,051080942 | 0,062 | 0     | 1           | 1,036040889   | 0,96521287      | #DIV/0!         |
| BBS12                                                                                         | 0,212914042 | 0,051017722 | 0,062 | 0,023 | 1           | 1,03599549    | 0,965255168     | 2,695652174     |
| SH3BP1                                                                                        | 0,000494525 | 0,050936579 | 0,125 | 0,016 | 1           | 1,035937223   | 0,965309459     | 7,8125          |
| POU2F3                                                                                        | 0,079594089 | 0,050889184 | 0,031 | 0,004 | 1           | 1,035903191   | 0,965341171     | 7,75            |
| FARS2                                                                                         | 0,058551336 | 0,050799898 | 0,125 | 0,043 | 1           | 1,035839082   | 0,965400917     | 2,906976744     |
| PSEN2                                                                                         | 0,002594281 | 0,050711416 | 0,094 | 0,012 | 1           | 1,035775556   | 0,965460128     | 7,833333333     |
| TSPAN17                                                                                       | 0,000112833 | 0,050704255 | 0,125 | 0,012 | 1           | 1,035770414   | 0,96546492      | 10,41666667     |
| NEK3                                                                                          | 0,212914042 | 0,050630922 | 0,062 | 0,023 | 1           | 1,035717767   | 0,965513996     | 2,695652174     |
| CDKN3                                                                                         | 0,01346698  | 0,050528333 | 0,062 | 0,008 | 1           | 1,03564412    | 0,965582656     | 7,75            |
| ASB16-AS1                                                                                     | 0,145431    | 0,050482593 | 0,062 | 0,02  | 1           | 1,035611286   | 0,965613269     | 3,1             |
| CIP2A                                                                                         | 4,80439E-05 | 0,050474348 | 0,094 | 0,004 | 1           | 1,035605367   | 0,965618788     | 23,5            |
| AAR2                                                                                          | 0,01346698  | 0,050460145 | 0,062 | 0,008 | 1           | 1,035595173   | 0,965628294     | 7,75            |
| UBL7-DT                                                                                       | 0,002263143 | 0,050452879 | 0,062 | 0,004 | 1           | 1,035589957   | 0,965633158     | 15,5            |
| ZNF775                                                                                        | 0,000466117 | 0,050394721 | 0,188 | 0,035 | 1           | 1,035548211   | 0,965672085     | 5,371428571     |
| SNUPN                                                                                         | 0,000390872 | 0,050388593 | 0,281 | 0,07  | 1           | 1,035543812   | 0,965676187     | 4,014285714     |
| TIMM29                                                                                        | 4,123E-05   | 0,050276082 | 0,219 | 0,035 | 0,869994633 | 1,035463057   | 0,9657515       | 6,257142857     |
| HERC6                                                                                         | 0,133058992 | 0,050239392 | 0,094 | 0,035 | 1           | 1,035436724   | 0,965776061     | 2,685714286     |
| TBC1D1                                                                                        | 0,004186485 | 0,050218337 | 0,156 | 0,035 | 1           | 1,035421613   | 0,965790155     | 4,457142857     |
| ARPC5L                                                                                        | 2,18864E-05 | 0,050208398 | 0,375 | 0,086 | 0,461825118 | 1,03541448    | 0,965796809     | 4,360465116     |
| PGBD1                                                                                         | 4,80439E-05 | 0,050185908 | 0,094 | 0,004 | 1           | 1,035398338   | 0,965811865     | 23,5            |

Supplementary Table 1

| Differentially expressed genes_adjacent-skin-XL_comparing SC-Keloid vs. (SC-Myel, SC-Nonmyel) |             |             |       |       |             |               |                 |                 |
|-----------------------------------------------------------------------------------------------|-------------|-------------|-------|-------|-------------|---------------|-----------------|-----------------|
| gene                                                                                          | p_val       | avg_log2FC  | pct.1 | pct.2 | p_val_adj   | Foldchange_UP | Foldchange_DOWN | Ratio_pct1_pct2 |
| CYB561D1                                                                                      | 0,002263143 | 0,050091962 | 0,062 | 0,004 | 1           | 1,035330917   | 0,965874759     | 15,5            |
| NUF2                                                                                          | 0,082317662 | 0,049925751 | 0,031 | 0,004 | 1           | 1,035211645   | 0,965986042     | 7,75            |
| ZNF558                                                                                        | 0,094667448 | 0,049922866 | 0,094 | 0,031 | 1           | 1,035209575   | 0,965987974     | 3,032258065     |
| NSMCE2                                                                                        | 1,67202E-05 | 0,049711432 | 0,312 | 0,062 | 0,352813205 | 1,03505787    | 0,966129555     | 5,032258065     |
| SPATA6L                                                                                       | 0,079594089 | 0,049656993 | 0,031 | 0,004 | 1           | 1,035018814   | 0,966166012     | 7,75            |
| KLKB1                                                                                         | 0,226351275 | 0,049498526 | 0,031 | 0,008 | 1           | 1,034905133   | 0,966272142     | 3,875           |
| ISCA1                                                                                         | 7,63763E-05 | 0,049442505 | 0,406 | 0,109 | 1           | 1,034864948   | 0,966309664     | 3,724770642     |
| TMEM14A                                                                                       | 0,000217056 | 0,04944141  | 0,531 | 0,172 | 1           | 1,034864162   | 0,966310398     | 3,087209302     |
| CDC42SE2                                                                                      | 0,000666239 | 0,049419626 | 0,281 | 0,074 | 1           | 1,034848537   | 0,966324988     | 3,797297297     |
| SLC37A4                                                                                       | 0,008607623 | 0,049347868 | 0,125 | 0,027 | 1           | 1,034797065   | 0,966373054     | 4,62962963      |
| COX10                                                                                         | 0,013891036 | 0,049267327 | 0,062 | 0,008 | 1           | 1,034739297   | 0,966427005     | 7,75            |
| SRSF2                                                                                         | 0,018901273 | 0,04924444  | 0,844 | 0,426 | 1           | 1,034722883   | 0,966442336     | 1,981220657     |
| ZNF326                                                                                        | 0,00344676  | 0,049235561 | 0,375 | 0,133 | 1           | 1,034716515   | 0,966448284     | 2,819548872     |
| MINDY3                                                                                        | 0,084174094 | 0,049186039 | 0,125 | 0,047 | 1           | 1,034680998   | 0,966481459     | 2,659574468     |
| ERCC2                                                                                         | 0,041848356 | 0,049149762 | 0,062 | 0,012 | 1           | 1,03465498    | 0,966505762     | 5,166666667     |
| TOMM40L                                                                                       | 0,000509339 | 0,049103101 | 0,125 | 0,016 | 1           | 1,034621518   | 0,966537022     | 7,8125          |
| PLPP7                                                                                         | 0,000524345 | 0,049095055 | 0,094 | 0,008 | 1           | 1,034615747   | 0,966542412     | 11,75           |
| CHRNE                                                                                         | 0,226351275 | 0,049077684 | 0,031 | 0,008 | 1           | 1,034603289   | 0,96655405      | 3,875           |
| CCDC112                                                                                       | 0,000338057 | 0,049029843 | 0,344 | 0,094 | 1           | 1,034568982   | 0,966586102     | 3,659574468     |
| RTL8B                                                                                         | 0,000993746 | 0,049009445 | 0,188 | 0,039 | 1           | 1,034554355   | 0,966599769     | 4,820512821     |
| ANO7                                                                                          | 0,226351275 | 0,048851154 | 0,031 | 0,008 | 1           | 1,034440851   | 0,966705829     | 3,875           |
| TSPAN9                                                                                        | 0,00094841  | 0,048817685 | 0,219 | 0,051 | 1           | 1,034416853   | 0,966728256     | 4,294117647     |
| MRPL32                                                                                        | 5,38695E-05 | 0,048723706 | 0,375 | 0,094 | 1           | 1,034349472   | 0,966791232     | 3,989361702     |
| S100PBP                                                                                       | 9,91727E-06 | 0,048667873 | 0,25  | 0,039 | 0,209264362 | 1,034309443   | 0,966828648     | 6,41025641      |
| GEMIN6                                                                                        | 0,013891036 | 0,048665501 | 0,062 | 0,008 | 1           | 1,034307742   | 0,966830237     | 7,75            |
| MYPOP                                                                                         | 0,000466094 | 0,048565652 | 0,125 | 0,016 | 1           | 1,03423616    | 0,966897154     | 7,8125          |
| H2AC20                                                                                        | 0,02693544  | 0,048551548 | 0,125 | 0,035 | 1           | 1,034226049   | 0,966906607     | 3,571428571     |
| MDC1                                                                                          | 0,008607623 | 0,048489251 | 0,125 | 0,027 | 1           | 1,034181391   | 0,96694836      | 4,62962963      |
| BBOF1                                                                                         | 0,008148126 | 0,048451875 | 0,094 | 0,016 | 1           | 1,034154599   | 0,966973411     | 5,875           |
| IDS                                                                                           | 0,000311395 | 0,048305345 | 0,625 | 0,223 | 1           | 1,034049569   | 0,967071628     | 2,802690583     |

Supplementary Table 1

| Differentially expressed genes_adjacent-skin-XL_comparing SC-Keloid vs. (SC-Myel, SC-Nonmyel) |             |             |       |       |           |               |                 |                 |
|-----------------------------------------------------------------------------------------------|-------------|-------------|-------|-------|-----------|---------------|-----------------|-----------------|
| gene                                                                                          | p_val       | avg_log2FC  | pct.1 | pct.2 | p_val_adj | Foldchange_UP | Foldchange_DOWN | Ratio_pct1_pct2 |
| MIA3                                                                                          | 0,005262184 | 0,048266064 | 0,281 | 0,094 | 1         | 1,034021414   | 0,96709796      | 2,989361702     |
| MOV10                                                                                         | 0,061916284 | 0,048241166 | 0,094 | 0,027 | 1         | 1,03400357    | 0,96711465      | 3,481481481     |
| CARD19                                                                                        | 0,000812022 | 0,048156263 | 0,438 | 0,148 | 1         | 1,03394272    | 0,967171566     | 2,959459459     |
| SHARPIN                                                                                       | 0,000242575 | 0,048145139 | 0,375 | 0,105 | 1         | 1,033934748   | 0,967179024     | 3,571428571     |
| MAGEF1                                                                                        | 0,000591923 | 0,047994993 | 0,312 | 0,086 | 1         | 1,033827148   | 0,967279687     | 3,627906977     |
| NOL10                                                                                         | 0,000911755 | 0,047979945 | 0,156 | 0,027 | 1         | 1,033816365   | 0,967289776     | 5,777777778     |
| AFG1L                                                                                         | 0,013891036 | 0,047912595 | 0,062 | 0,008 | 1         | 1,033768104   | 0,967334933     | 7,75            |
| SCRN2                                                                                         | 0,006263449 | 0,047733022 | 0,219 | 0,066 | 1         | 1,033639438   | 0,967455346     | 3,318181818     |
| ZWILCH                                                                                        | 0,004087528 | 0,047725022 | 0,125 | 0,023 | 1         | 1,033633707   | 0,96746071      | 5,434782609     |
| FGFR4                                                                                         | 0,004841742 | 0,047706206 | 0,031 | 0     | 1         | 1,033620226   | 0,967473328     | #DIV/0!         |
| STEAP3                                                                                        | 0,004841742 | 0,047706206 | 0,031 | 0     | 1         | 1,033620226   | 0,967473328     | #DIV/0!         |
| PIP4K2C                                                                                       | 0,018436147 | 0,047569063 | 0,094 | 0,02  | 1         | 1,033521974   | 0,967565301     | 4,7             |
| C17orf75                                                                                      | 0,000108998 | 0,047559421 | 0,125 | 0,012 | 1         | 1,033515067   | 0,967571768     | 10,41666667     |
| TAS2R30                                                                                       | 0,082317662 | 0,047503445 | 0,031 | 0,004 | 1         | 1,033474967   | 0,96760931      | 7,75            |
| ZNF71                                                                                         | 0,008148126 | 0,047437658 | 0,094 | 0,016 | 1         | 1,033427842   | 0,967653434     | 5,875           |
| R3HDM2                                                                                        | 0,001092769 | 0,047420108 | 0,469 | 0,168 | 1         | 1,033415271   | 0,967665205     | 2,791666667     |
| ZNF185                                                                                        | 0,082317662 | 0,047391357 | 0,031 | 0,004 | 1         | 1,033394677   | 0,967684489     | 7,75            |
| GABPA                                                                                         | 0,00721637  | 0,047335217 | 0,219 | 0,066 | 1         | 1,033354465   | 0,967722146     | 3,318181818     |
| KIAA1191                                                                                      | 0,001907981 | 0,047313753 | 0,281 | 0,082 | 1         | 1,033339091   | 0,967736544     | 3,426829268     |
| ADCY3                                                                                         | 0,149643094 | 0,047277405 | 0,125 | 0,055 | 1         | 1,033313056   | 0,967760926     | 2,272727273     |
| GEMIN8                                                                                        | 0,143670631 | 0,047277137 | 0,125 | 0,055 | 1         | 1,033312865   | 0,967761105     | 2,272727273     |
| RAB14                                                                                         | 0,000457512 | 0,047255827 | 0,625 | 0,223 | 1         | 1,033297602   | 0,9677754       | 2,802690583     |
| TARS1                                                                                         | 0,001640115 | 0,047169826 | 0,406 | 0,141 | 1         | 1,033236008   | 0,967833092     | 2,879432624     |
| TBC1D9B                                                                                       | 0,012186755 | 0,047136036 | 0,312 | 0,121 | 1         | 1,033211808   | 0,96785576      | 2,578512397     |
| CNOT8                                                                                         | 0,00011289  | 0,047110673 | 0,219 | 0,039 | 1         | 1,033193644   | 0,967872776     | 5,615384615     |
| PLAAT4                                                                                        | 0,060931358 | 0,047099357 | 0,094 | 0,027 | 1         | 1,03318554    | 0,967880367     | 3,481481481     |
| CYREN                                                                                         | 0,000911755 | 0,04708958  | 0,156 | 0,027 | 1         | 1,033178538   | 0,967886927     | 5,777777778     |
| RNF135                                                                                        | 0,008270631 | 0,046942188 | 0,125 | 0,027 | 1         | 1,033072989   | 0,967985815     | 4,62962963      |
| BBS1                                                                                          | 0,45783772  | 0,046936039 | 0,062 | 0,035 | 1         | 1,033068586   | 0,967989941     | 1,771428571     |
| LBX2                                                                                          | 0,002263143 | 0,046923378 | 0,062 | 0,004 | 1         | 1,03305952    | 0,967998436     | 15,5            |

Supplementary Table 1

| Differentially expressed genes_adjacent-skin-XL_comparing SC-Keloid vs. (SC-Myel, SC-Nonmyel) |             |             |       |       |             |               |                 |                 |
|-----------------------------------------------------------------------------------------------|-------------|-------------|-------|-------|-------------|---------------|-----------------|-----------------|
| gene                                                                                          | p_val       | avg_log2FC  | pct.1 | pct.2 | p_val_adj   | Foldchange_UP | Foldchange_DOWN | Ratio_pct1_pct2 |
| CCDC22                                                                                        | 2,62125E-05 | 0,046919969 | 0,25  | 0,043 | 0,553110895 | 1,033057079   | 0,968000724     | 5,813953488     |
| GPR89B                                                                                        | 0,002010541 | 0,046905064 | 0,156 | 0,031 | 1           | 1,033046407   | 0,968010724     | 5,032258065     |
| ADAMTS15                                                                                      | 0,002594281 | 0,046791738 | 0,094 | 0,012 | 1           | 1,032965262   | 0,968086766     | 7,833333333     |
| PECR                                                                                          | 0,082317662 | 0,046780031 | 0,031 | 0,004 | 1           | 1,03295688    | 0,968094622     | 7,75            |
| POMC                                                                                          | 0,000524345 | 0,04668558  | 0,094 | 0,008 | 1           | 1,032889256   | 0,968158004     | 11,75           |
| BRSK1                                                                                         | 0,002881213 | 0,04655946  | 0,312 | 0,102 | 1           | 1,032798965   | 0,968242643     | 3,058823529     |
| IGSF9B                                                                                        | 0,147778936 | 0,046556341 | 0,062 | 0,02  | 1           | 1,032796732   | 0,968244737     | 3,1             |
| COP1                                                                                          | 0,000190919 | 0,046542916 | 0,188 | 0,031 | 1           | 1,032787121   | 0,968253747     | 6,064516129     |
| ZNF212                                                                                        | 0,226351275 | 0,046507869 | 0,031 | 0,008 | 1           | 1,032762033   | 0,968277268     | 3,875           |
| COLGALT1                                                                                      | 0,007861788 | 0,046502478 | 0,25  | 0,082 | 1           | 1,032758173   | 0,968280887     | 3,048780488     |
| ZNF100                                                                                        | 0,041848356 | 0,046392901 | 0,062 | 0,012 | 1           | 1,032679735   | 0,968354434     | 5,166666667     |
| ZMIZ2                                                                                         | 0,02818312  | 0,04634496  | 0,156 | 0,051 | 1           | 1,03264542    | 0,968386613     | 3,058823529     |
| BRIP1                                                                                         | 6,3574E-05  | 0,046338562 | 0,062 | 0     | 1           | 1,03264084    | 0,968390907     | #DIV/0!         |
| MACROH2A2                                                                                     | 6,3574E-05  | 0,046338562 | 0,062 | 0     | 1           | 1,03264084    | 0,968390907     | #DIV/0!         |
| MESP2                                                                                         | 6,3574E-05  | 0,046338562 | 0,062 | 0     | 1           | 1,03264084    | 0,968390907     | #DIV/0!         |
| NPAS1                                                                                         | 6,3574E-05  | 0,046338562 | 0,062 | 0     | 1           | 1,03264084    | 0,968390907     | #DIV/0!         |
| POC1A                                                                                         | 6,3574E-05  | 0,046338562 | 0,062 | 0     | 1           | 1,03264084    | 0,968390907     | #DIV/0!         |
| DNAAF11                                                                                       | 0,082317662 | 0,046318131 | 0,031 | 0,004 | 1           | 1,032626216   | 0,968404622     | 7,75            |
| ABHD11                                                                                        | 2,1417E-05  | 0,04630075  | 0,188 | 0,023 | 0,451919526 | 1,032613776   | 0,968416288     | 8,173913043     |
| TEX10                                                                                         | 0,026506403 | 0,046274974 | 0,125 | 0,035 | 1           | 1,032595327   | 0,968433591     | 3,571428571     |
| RIPOR3                                                                                        | 0,004841742 | 0,046193245 | 0,031 | 0     | 1           | 1,032536832   | 0,968488454     | #DIV/0!         |
| KBTBD4                                                                                        | 0,018436147 | 0,045949204 | 0,094 | 0,02  | 1           | 1,032362186   | 0,968652294     | 4,7             |
| SERPINB6                                                                                      | 0,003311505 | 0,045878196 | 0,594 | 0,238 | 1           | 1,032311376   | 0,968699971     | 2,495798319     |
| RNF8                                                                                          | 7,13916E-07 | 0,045820627 | 0,281 | 0,039 | 0,015064347 | 1,032270184   | 0,968738627     | 7,205128205     |
| KSR2                                                                                          | 6,3574E-05  | 0,045698772 | 0,062 | 0     | 1           | 1,032182998   | 0,968820454     | #DIV/0!         |
| GMNN                                                                                          | 4,96307E-06 | 0,04566867  | 0,188 | 0,02  | 0,104725812 | 1,032161461   | 0,968840668     | 9,4             |
| SPICE1                                                                                        | 0,018436147 | 0,045558458 | 0,094 | 0,02  | 1           | 1,032082615   | 0,968914684     | 4,7             |
| ANKFY1                                                                                        | 0,02857055  | 0,045511208 | 0,156 | 0,051 | 1           | 1,032048813   | 0,968946417     | 3,058823529     |
| FKBP7                                                                                         | 1,9707E-05  | 0,045463456 | 0,406 | 0,098 | 0,41583782  | 1,032014654   | 0,968978489     | 4,142857143     |
| POLR2I                                                                                        | 0,002434679 | 0,045440371 | 0,594 | 0,238 | 1           | 1,03199814    | 0,968993994     | 2,495798319     |

Supplementary Table 1

| Differentially expressed genes_adjacent-skin-XL_comparing SC-Keloid vs. (SC-Myel, SC-Nonmyel) |             |             |       |       |             |               |                 |                 |
|-----------------------------------------------------------------------------------------------|-------------|-------------|-------|-------|-------------|---------------|-----------------|-----------------|
| gene                                                                                          | p_val       | avg_log2FC  | pct.1 | pct.2 | p_val_adj   | Foldchange_UP | Foldchange_DOWN | Ratio_pct1_pct2 |
| ATRIP                                                                                         | 0,527450503 | 0,045430249 | 0,031 | 0,016 | 1           | 1,0319909     | 0,969000793     | 1,9375          |
| PRPF40B                                                                                       | 0,143111738 | 0,045407689 | 0,062 | 0,02  | 1           | 1,031974762   | 0,969015945     | 3,1             |
| CCDC138                                                                                       | 0,002263143 | 0,045404213 | 0,062 | 0,004 | 1           | 1,031972276   | 0,96901828      | 15,5            |
| CFAP20DC                                                                                      | 0,002263143 | 0,045351551 | 0,062 | 0,004 | 1           | 1,031934607   | 0,969053653     | 15,5            |
| CDCA3                                                                                         | 0,004841742 | 0,045292115 | 0,031 | 0     | 1           | 1,031892094   | 0,969093576     | #DIV/0!         |
| DLGAP5                                                                                        | 0,004841742 | 0,045292115 | 0,031 | 0     | 1           | 1,031892094   | 0,969093576     | #DIV/0!         |
| ESCO2                                                                                         | 0,004841742 | 0,045292115 | 0,031 | 0     | 1           | 1,031892094   | 0,969093576     | #DIV/0!         |
| HMMR                                                                                          | 0,004841742 | 0,045292115 | 0,031 | 0     | 1           | 1,031892094   | 0,969093576     | #DIV/0!         |
| KIF14                                                                                         | 0,004841742 | 0,045292115 | 0,031 | 0     | 1           | 1,031892094   | 0,969093576     | #DIV/0!         |
| PIMREG                                                                                        | 0,004841742 | 0,045292115 | 0,031 | 0     | 1           | 1,031892094   | 0,969093576     | #DIV/0!         |
| SPC25                                                                                         | 0,004841742 | 0,045292115 | 0,031 | 0     | 1           | 1,031892094   | 0,969093576     | #DIV/0!         |
| MKS1                                                                                          | 0,01346698  | 0,045282751 | 0,062 | 0,008 | 1           | 1,031885396   | 0,969099867     | 7,75            |
| LINC00847                                                                                     | 0,001642148 | 0,045207468 | 0,125 | 0,02  | 1           | 1,031831552   | 0,969150438     | 6,25            |
| PLEK2                                                                                         | 4,80439E-05 | 0,045149985 | 0,094 | 0,004 | 1           | 1,03179044    | 0,969189053     | 23,5            |
| IFT43                                                                                         | 0,000484576 | 0,045105681 | 0,25  | 0,059 | 1           | 1,031758755   | 0,969218817     | 4,237288136     |
| POLE2                                                                                         | 0,082317662 | 0,044927849 | 0,031 | 0,004 | 1           | 1,031631585   | 0,969338294     | 7,75            |
| TOPBP1                                                                                        | 0,000466117 | 0,044909854 | 0,188 | 0,035 | 1           | 1,031618717   | 0,969350384     | 5,371428571     |
| GPAT4                                                                                         | 0,011239937 | 0,044909568 | 0,156 | 0,043 | 1           | 1,031618512   | 0,969350577     | 3,627906977     |
| GSTCD                                                                                         | 0,041848356 | 0,044762069 | 0,062 | 0,012 | 1           | 1,031513047   | 0,969449686     | 5,166666667     |
| FAM177A1                                                                                      | 0,000778225 | 0,044747397 | 0,719 | 0,273 | 1           | 1,031502557   | 0,969459546     | 2,633699634     |
| BST2                                                                                          | 0,470250215 | 0,044721157 | 0,062 | 0,035 | 1           | 1,031483796   | 0,969477179     | 1,771428571     |
| VPS37D                                                                                        | 0,082317662 | 0,044686866 | 0,031 | 0,004 | 1           | 1,031459279   | 0,969500222     | 7,75            |
| TRIP4                                                                                         | 0,0016948   | 0,044594114 | 0,219 | 0,055 | 1           | 1,031392967   | 0,969562554     | 3,981818182     |
| COG6                                                                                          | 6,10931E-06 | 0,044539974 | 0,281 | 0,047 | 0,128912454 | 1,031354264   | 0,969598939     | 5,978723404     |
| MYBL2                                                                                         | 6,3574E-05  | 0,044530159 | 0,062 | 0     | 1           | 1,031347247   | 0,969605536     | #DIV/0!         |
| PCDHGA8                                                                                       | 0,082317662 | 0,044387311 | 0,031 | 0,004 | 1           | 1,031245134   | 0,969701546     | 7,75            |
| PIK3R2                                                                                        | 0,004029529 | 0,044363202 | 0,156 | 0,035 | 1           | 1,0312279     | 0,969717751     | 4,457142857     |
| GLIPR2                                                                                        | 0,000371827 | 0,044291149 | 0,312 | 0,082 | 1           | 1,031176398   | 0,969766183     | 3,804878049     |
| INHBA                                                                                         | 0,082317662 | 0,04424159  | 0,031 | 0,004 | 1           | 1,031140976   | 0,969799497     | 7,75            |
| LRRC61                                                                                        | 0,003907631 | 0,044234389 | 0,125 | 0,023 | 1           | 1,03113583    | 0,969804337     | 5,434782609     |

Supplementary Table 1

| Differentially expressed genes_adjacent-skin-XL_ comparing SC-Keloid vs. (SC-Myel, SC-Nonmyel) |             |             |       |       |             |               |                 |                 |
|------------------------------------------------------------------------------------------------|-------------|-------------|-------|-------|-------------|---------------|-----------------|-----------------|
| gene                                                                                           | p_val       | avg_log2FC  | pct.1 | pct.2 | p_val_adj   | Foldchange_UP | Foldchange_DOWN | Ratio_pct1_pct2 |
| DNAAF2                                                                                         | 0,000954402 | 0,044223414 | 0,188 | 0,039 | 1           | 1,031127986   | 0,969811715     | 4,820512821     |
| GAK                                                                                            | 0,150636831 | 0,044185597 | 0,156 | 0,074 | 1           | 1,031100957   | 0,969837137     | 2,108108108     |
| GLE1                                                                                           | 0,000509339 | 0,04406156  | 0,125 | 0,016 | 1           | 1,031012311   | 0,969920523     | 7,8125          |
| TWIST1                                                                                         | 0,380266129 | 0,044028391 | 0,031 | 0,012 | 1           | 1,030988607   | 0,969942823     | 2,583333333     |
| PRPH                                                                                           | 0,004841742 | 0,043986939 | 0,031 | 0     | 1           | 1,030958986   | 0,969970691     | #DIV/0!         |
| DAAM1                                                                                          | 0,000659904 | 0,043942762 | 0,344 | 0,102 | 1           | 1,030927417   | 0,970000394     | 3,37254902      |
| RHOD                                                                                           | 6,3574E-05  | 0,043837747 | 0,062 | 0     | 1           | 1,030852377   | 0,970071003     | #DIV/0!         |
| SLC16A2                                                                                        | 0,040857201 | 0,043787902 | 0,062 | 0,012 | 1           | 1,030816762   | 0,97010452      | 5,166666667     |
| BAK1                                                                                           | 0,000436372 | 0,043776486 | 0,188 | 0,035 | 1           | 1,030808605   | 0,970112196     | 5,371428571     |
| ZNF469                                                                                         | 0,004841742 | 0,04368854  | 0,031 | 0     | 1           | 1,030745769   | 0,970171336     | #DIV/0!         |
| PREB                                                                                           | 0,000850121 | 0,043621507 | 0,156 | 0,027 | 1           | 1,030697878   | 0,970216415     | 5,777777778     |
| NPB                                                                                            | 0,380266129 | 0,043436106 | 0,031 | 0,012 | 1           | 1,030565432   | 0,970341105     | 2,583333333     |
| CSNK1D                                                                                         | 0,01231509  | 0,043400133 | 0,312 | 0,121 | 1           | 1,030539736   | 0,9703653       | 2,578512397     |
| FDFT1                                                                                          | 7,61493E-08 | 0,043329024 | 0,375 | 0,059 | 0,001606825 | 1,030488942   | 0,97041313      | 6,355932203     |
| MAP3K10                                                                                        | 0,002594281 | 0,043290304 | 0,094 | 0,012 | 1           | 1,030461286   | 0,970439175     | 7,833333333     |
| B3GNT9                                                                                         | 0,002594281 | 0,043286227 | 0,094 | 0,012 | 1           | 1,030458374   | 0,970441917     | 7,833333333     |
| UPP1                                                                                           | 0,001318364 | 0,043128408 | 0,375 | 0,121 | 1           | 1,030345656   | 0,970548082     | 3,099173554     |
| SPIN3                                                                                          | 0,084624339 | 0,043104303 | 0,062 | 0,016 | 1           | 1,030328441   | 0,970564298     | 3,875           |
| TLE2                                                                                           | 0,004107327 | 0,04306958  | 0,156 | 0,035 | 1           | 1,030303643   | 0,970587658     | 4,457142857     |
| STIMATE                                                                                        | 0,059959447 | 0,043038428 | 0,094 | 0,027 | 1           | 1,030281396   | 0,970608616     | 3,481481481     |
| DDX46                                                                                          | 5,9111E-05  | 0,043023731 | 0,625 | 0,199 | 1           | 1,030270901   | 0,970618504     | 3,140703518     |
| LINC00702                                                                                      | 0,004841742 | 0,043005039 | 0,031 | 0     | 1           | 1,030257552   | 0,970631079     | #DIV/0!         |
| TSHZ3                                                                                          | 0,013891036 | 0,042967315 | 0,062 | 0,008 | 1           | 1,030230613   | 0,97065646      | 7,75            |
| DIRC3                                                                                          | 0,002263143 | 0,042960115 | 0,062 | 0,004 | 1           | 1,030225472   | 0,970661304     | 15,5            |
| PDCD2                                                                                          | 0,000756965 | 0,042940594 | 0,281 | 0,074 | 1           | 1,030211532   | 0,970674438     | 3,797297297     |
| WDR53                                                                                          | 0,002594281 | 0,042882044 | 0,094 | 0,012 | 1           | 1,030169722   | 0,970713833     | 7,833333333     |
| DHX33                                                                                          | 0,003953072 | 0,042760886 | 0,156 | 0,035 | 1           | 1,030083212   | 0,970795357     | 4,457142857     |
| CISD2                                                                                          | 0,001125066 | 0,042724311 | 0,281 | 0,078 | 1           | 1,030057098   | 0,970819969     | 3,602564103     |
| AP1M2                                                                                          | 0,004841742 | 0,042610748 | 0,031 | 0     | 1           | 1,029976019   | 0,970896391     | #DIV/0!         |
| BCL2A1                                                                                         | 0,004841742 | 0,042610748 | 0,031 | 0     | 1           | 1,029976019   | 0,970896391     | #DIV/0!         |

Supplementary Table 1

| Differentially expressed genes_adjacent-skin-XL_comparing SC-Keloid vs. (SC-Myel, SC-Nonmyel) |             |             |       |       |             |               |                 |                 |
|-----------------------------------------------------------------------------------------------|-------------|-------------|-------|-------|-------------|---------------|-----------------|-----------------|
| gene                                                                                          | p_val       | avg_log2FC  | pct.1 | pct.2 | p_val_adj   | Foldchange_UP | Foldchange_DOWN | Ratio_pct1_pct2 |
| BTBD16                                                                                        | 0,004841742 | 0,042610748 | 0,031 | 0     | 1           | 1,029976019   | 0,970896391     | #DIV/0!         |
| CASP8                                                                                         | 0,004841742 | 0,042610748 | 0,031 | 0     | 1           | 1,029976019   | 0,970896391     | #DIV/0!         |
| CD79A                                                                                         | 0,004841742 | 0,042610748 | 0,031 | 0     | 1           | 1,029976019   | 0,970896391     | #DIV/0!         |
| CEACAM5                                                                                       | 0,004841742 | 0,042610748 | 0,031 | 0     | 1           | 1,029976019   | 0,970896391     | #DIV/0!         |
| CKMT1A                                                                                        | 0,004841742 | 0,042610748 | 0,031 | 0     | 1           | 1,029976019   | 0,970896391     | #DIV/0!         |
| EEF1A2                                                                                        | 0,004841742 | 0,042610748 | 0,031 | 0     | 1           | 1,029976019   | 0,970896391     | #DIV/0!         |
| FAM66B                                                                                        | 0,004841742 | 0,042610748 | 0,031 | 0     | 1           | 1,029976019   | 0,970896391     | #DIV/0!         |
| FLG                                                                                           | 0,004841742 | 0,042610748 | 0,031 | 0     | 1           | 1,029976019   | 0,970896391     | #DIV/0!         |
| HSD11B2                                                                                       | 0,004841742 | 0,042610748 | 0,031 | 0     | 1           | 1,029976019   | 0,970896391     | #DIV/0!         |
| LINC00460                                                                                     | 0,004841742 | 0,042610748 | 0,031 | 0     | 1           | 1,029976019   | 0,970896391     | #DIV/0!         |
| NOTUM                                                                                         | 0,004841742 | 0,042610748 | 0,031 | 0     | 1           | 1,029976019   | 0,970896391     | #DIV/0!         |
| PAQR5                                                                                         | 0,004841742 | 0,042610748 | 0,031 | 0     | 1           | 1,029976019   | 0,970896391     | #DIV/0!         |
| SPTSSB                                                                                        | 0,004841742 | 0,042610748 | 0,031 | 0     | 1           | 1,029976019   | 0,970896391     | #DIV/0!         |
| TMPRSS11E                                                                                     | 0,004841742 | 0,042610748 | 0,031 | 0     | 1           | 1,029976019   | 0,970896391     | #DIV/0!         |
| ZBTB8B                                                                                        | 0,004841742 | 0,042610748 | 0,031 | 0     | 1           | 1,029976019   | 0,970896391     | #DIV/0!         |
| EFHD1                                                                                         | 0,041848356 | 0,042587571 | 0,062 | 0,012 | 1           | 1,029959473   | 0,970911989     | 5,166666667     |
| ZNF875                                                                                        | 0,062914349 | 0,042418724 | 0,094 | 0,027 | 1           | 1,029838938   | 0,971025626     | 3,481481481     |
| DCAF13                                                                                        | 0,001144569 | 0,042400085 | 0,312 | 0,094 | 1           | 1,029825633   | 0,971038172     | 3,319148936     |
| POLR1H                                                                                        | 0,028962559 | 0,042257826 | 0,156 | 0,051 | 1           | 1,029724091   | 0,971133927     | 3,058823529     |
| ZNF682                                                                                        | 0,013891036 | 0,042236426 | 0,062 | 0,008 | 1           | 1,029708816   | 0,971148332     | 7,75            |
| ERFE                                                                                          | 0,002263143 | 0,042204433 | 0,062 | 0,004 | 1           | 1,029685982   | 0,971169869     | 15,5            |
| FANCG                                                                                         | 1,51098E-05 | 0,042110654 | 0,125 | 0,008 | 0,318831333 | 1,029619052   | 0,971233        | 15,625          |
| NUP42                                                                                         | 3,33107E-06 | 0,042015232 | 0,25  | 0,035 | 0,070289013 | 1,029550953   | 0,971297241     | 7,142857143     |
| SMPD1                                                                                         | 0,000502235 | 0,042015049 | 0,25  | 0,059 | 1           | 1,029550823   | 0,971297364     | 4,237288136     |
| VPS33A                                                                                        | 0,019236133 | 0,041915117 | 0,094 | 0,02  | 1           | 1,02947951    | 0,971364646     | 4,7             |
| TEAD4                                                                                         | 0,004180266 | 0,041911889 | 0,125 | 0,023 | 1           | 1,029477207   | 0,971366819     | 5,434782609     |
| PIP                                                                                           | 0,082317662 | 0,041820201 | 0,031 | 0,004 | 1           | 1,029411783   | 0,971428554     | 7,75            |
| SLC35E3                                                                                       | 0,012905641 | 0,041818062 | 0,219 | 0,074 | 1           | 1,029410257   | 0,971429995     | 2,959459459     |
| FRAT2                                                                                         | 0,221757959 | 0,041809874 | 0,062 | 0,023 | 1           | 1,029404414   | 0,971435508     | 2,695652174     |
| RGP1                                                                                          | 0,036158386 | 0,041780737 | 0,094 | 0,023 | 1           | 1,029383624   | 0,971455128     | 4,086956522     |

Supplementary Table 1

| Differentially expressed genes_adjacent-skin-XL_comparing SC-Keloid vs. (SC-Myel, SC-Nonmyel) |             |             |       |       |             |               |                 |                 |
|-----------------------------------------------------------------------------------------------|-------------|-------------|-------|-------|-------------|---------------|-----------------|-----------------|
| gene                                                                                          | p_val       | avg_log2FC  | pct.1 | pct.2 | p_val_adj   | Foldchange_UP | Foldchange_DOWN | Ratio_pct1_pct2 |
| ATP6V1A                                                                                       | 0,03766997  | 0,041776056 | 0,188 | 0,07  | 1           | 1,029380284   | 0,97145828      | 2,685714286     |
| DPF1                                                                                          | 6,3574E-05  | 0,041755134 | 0,062 | 0     | 1           | 1,029365356   | 0,971472368     | #DIV/0!         |
| VLDLR                                                                                         | 6,3574E-05  | 0,041755134 | 0,062 | 0     | 1           | 1,029365356   | 0,971472368     | #DIV/0!         |
| TNFAIP8                                                                                       | 9,17361E-07 | 0,041739326 | 0,188 | 0,016 | 0,019357231 | 1,029354077   | 0,971483013     | 11,75           |
| ZFP69B                                                                                        | 0,002263143 | 0,041731076 | 0,062 | 0,004 | 1           | 1,029348191   | 0,971488568     | 15,5            |
| C12orf43                                                                                      | 0,041848356 | 0,041721687 | 0,062 | 0,012 | 1           | 1,029341492   | 0,97149489      | 5,166666667     |
| MDFI                                                                                          | 0,000524345 | 0,04165707  | 0,094 | 0,008 | 1           | 1,029295389   | 0,971538404     | 11,75           |
| ZNF300                                                                                        | 0,041848356 | 0,041650946 | 0,062 | 0,012 | 1           | 1,02929102    | 0,971542528     | 5,166666667     |
| MMAB                                                                                          | 1,93892E-07 | 0,041571307 | 0,281 | 0,035 | 0,004091308 | 1,029234204   | 0,97159616      | 8,028571429     |
| PGD                                                                                           | 0,002601637 | 0,041570409 | 0,219 | 0,059 | 1           | 1,029233563   | 0,971596765     | 3,711864407     |
| ZNF668                                                                                        | 0,002263143 | 0,041569758 | 0,062 | 0,004 | 1           | 1,029233099   | 0,971597203     | 15,5            |
| POLD3                                                                                         | 7,15271E-05 | 0,041539567 | 0,188 | 0,027 | 1           | 1,02921156    | 0,971617536     | 6,962962963     |
| MBLAC2                                                                                        | 0,000509339 | 0,041454213 | 0,125 | 0,016 | 1           | 1,029150671   | 0,971675021     | 7,8125          |
| CFAP69                                                                                        | 0,013891036 | 0,041423561 | 0,062 | 0,008 | 1           | 1,029128806   | 0,971695666     | 7,75            |
| METTL7B                                                                                       | 0,002263143 | 0,041404947 | 0,062 | 0,004 | 1           | 1,029115528   | 0,971708203     | 15,5            |
| APOM                                                                                          | 4,80439E-05 | 0,04130825  | 0,094 | 0,004 | 1           | 1,029046553   | 0,971773334     | 23,5            |
| PEX19                                                                                         | 0,060128123 | 0,041303866 | 0,125 | 0,043 | 1           | 1,029043427   | 0,971776287     | 2,906976744     |
| GPR180                                                                                        | 0,00010081  | 0,041271693 | 0,219 | 0,039 | 1           | 1,029020478   | 0,971797959     | 5,615384615     |
| PRICKLE1                                                                                      | 0,018832425 | 0,04125514  | 0,094 | 0,02  | 1           | 1,029008672   | 0,971809109     | 4,7             |
| NIT2                                                                                          | 5,84452E-05 | 0,041209923 | 0,438 | 0,117 | 1           | 1,028976421   | 0,971839568     | 3,743589744     |
| TRAPPC14                                                                                      | 0,041848356 | 0,04114678  | 0,062 | 0,012 | 1           | 1,028931386   | 0,971882103     | 5,166666667     |
| ZSCAN16                                                                                       | 6,3574E-05  | 0,040995724 | 0,062 | 0     | 1           | 1,028823659   | 0,971983869     | #DIV/0!         |
| CCDC150                                                                                       | 0,082317662 | 0,040986045 | 0,031 | 0,004 | 1           | 1,028816756   | 0,97199039      | 7,75            |
| POLR3C                                                                                        | 0,036827385 | 0,040985195 | 0,094 | 0,023 | 1           | 1,02881615    | 0,971990962     | 4,086956522     |
| MRPL10                                                                                        | 4,52605E-06 | 0,040959454 | 0,219 | 0,027 | 0,095504122 | 1,028797794   | 0,972008305     | 8,111111111     |
| FYTTD1                                                                                        | 0,000308767 | 0,040845197 | 0,531 | 0,176 | 1           | 1,028716319   | 0,972085289     | 3,017045455     |
| ZCCHC24                                                                                       | 2,34925E-05 | 0,040827018 | 0,625 | 0,195 | 0,49571452  | 1,028703357   | 0,972097537     | 3,205128205     |
| ZNF546                                                                                        | 0,082317662 | 0,040743213 | 0,031 | 0,004 | 1           | 1,028643602   | 0,972154007     | 7,75            |
| SPECC1L                                                                                       | 0,006630119 | 0,040726234 | 0,219 | 0,066 | 1           | 1,028631496   | 0,972165449     | 3,318181818     |
| STIL                                                                                          | 0,002263143 | 0,040530203 | 0,062 | 0,004 | 1           | 1,028491737   | 0,972297554     | 15,5            |



Supplementary Table 1

| Differentially expressed genes_adjacent-skin-XL_ comparing SC-Keloid vs. (SC-Myel, SC-Nonmyel) |             |             |       |       |           |               |                 |                 |
|------------------------------------------------------------------------------------------------|-------------|-------------|-------|-------|-----------|---------------|-----------------|-----------------|
| gene                                                                                           | p_val       | avg_log2FC  | pct.1 | pct.2 | p_val_adj | Foldchange_UP | Foldchange_DOWN | Ratio_pct1_pct2 |
| RRP8                                                                                           | 0,007471523 | 0,040402771 | 0,156 | 0,039 | 1         | 1,028400895   | 0,97238344      | 4               |
| BAIAP2L2                                                                                       | 0,004841742 | 0,040399781 | 0,031 | 0     | 1         | 1,028398764   | 0,972385455     | #DIV/0!         |
| CACNG4                                                                                         | 0,004841742 | 0,040399781 | 0,031 | 0     | 1         | 1,028398764   | 0,972385455     | #DIV/0!         |
| CFAP45                                                                                         | 0,004841742 | 0,040399781 | 0,031 | 0     | 1         | 1,028398764   | 0,972385455     | #DIV/0!         |
| EAF1-AS1                                                                                       | 0,004841742 | 0,040399781 | 0,031 | 0     | 1         | 1,028398764   | 0,972385455     | #DIV/0!         |
| GPC6                                                                                           | 0,004841742 | 0,040399781 | 0,031 | 0     | 1         | 1,028398764   | 0,972385455     | #DIV/0!         |
| GPR183                                                                                         | 0,004841742 | 0,040399781 | 0,031 | 0     | 1         | 1,028398764   | 0,972385455     | #DIV/0!         |
| LINC01545                                                                                      | 0,004841742 | 0,040399781 | 0,031 | 0     | 1         | 1,028398764   | 0,972385455     | #DIV/0!         |
| LYPD6                                                                                          | 0,004841742 | 0,040399781 | 0,031 | 0     | 1         | 1,028398764   | 0,972385455     | #DIV/0!         |
| ODAM                                                                                           | 0,004841742 | 0,040399781 | 0,031 | 0     | 1         | 1,028398764   | 0,972385455     | #DIV/0!         |
| LCORL                                                                                          | 0,028438047 | 0,040337379 | 0,188 | 0,066 | 1         | 1,028354283   | 0,972427515     | 2,848484848     |
| KLF16                                                                                          | 0,029498271 | 0,040254371 | 0,219 | 0,082 | 1         | 1,028295116   | 0,972483467     | 2,670731707     |
| SLC26A11                                                                                       | 0,45783772  | 0,040244449 | 0,062 | 0,035 | 1         | 1,028288044   | 0,972490155     | 1,771428571     |
| CIZ1                                                                                           | 0,000478496 | 0,040215388 | 0,219 | 0,047 | 1         | 1,028267331   | 0,972509745     | 4,659574468     |
| MUCL1                                                                                          | 0,013891036 | 0,040206493 | 0,062 | 0,008 | 1         | 1,028260991   | 0,972515741     | 7,75            |
| VIRMA                                                                                          | 0,008607623 | 0,040201835 | 0,125 | 0,027 | 1         | 1,028257672   | 0,972518881     | 4,62962963      |
| MPZL1                                                                                          | 0,037506898 | 0,040196336 | 0,094 | 0,023 | 1         | 1,028253752   | 0,972522588     | 4,086956522     |
| PPP1R42                                                                                        | 0,002263143 | 0,040183789 | 0,062 | 0,004 | 1         | 1,02824481    | 0,972531046     | 15,5            |
| C1orf112                                                                                       | 0,040857201 | 0,040059265 | 0,062 | 0,012 | 1         | 1,028156062   | 0,972614992     | 5,166666667     |
| AFF2                                                                                           | 0,004841742 | 0,040033841 | 0,031 | 0     | 1         | 1,028137943   | 0,972632132     | #DIV/0!         |
| BEAN1                                                                                          | 0,004841742 | 0,040033841 | 0,031 | 0     | 1         | 1,028137943   | 0,972632132     | #DIV/0!         |
| FAM225B                                                                                        | 0,004841742 | 0,040033841 | 0,031 | 0     | 1         | 1,028137943   | 0,972632132     | #DIV/0!         |
| FSCN2                                                                                          | 0,004841742 | 0,040033841 | 0,031 | 0     | 1         | 1,028137943   | 0,972632132     | #DIV/0!         |
| H2AC21                                                                                         | 0,004841742 | 0,040033841 | 0,031 | 0     | 1         | 1,028137943   | 0,972632132     | #DIV/0!         |
| INPP5B                                                                                         | 0,004841742 | 0,040033841 | 0,031 | 0     | 1         | 1,028137943   | 0,972632132     | #DIV/0!         |
| LGALS8-AS1                                                                                     | 0,004841742 | 0,040033841 | 0,031 | 0     | 1         | 1,028137943   | 0,972632132     | #DIV/0!         |
| LINC00954                                                                                      | 0,004841742 | 0,040033841 | 0,031 | 0     | 1         | 1,028137943   | 0,972632132     | #DIV/0!         |
| LRFN3                                                                                          | 0,004841742 | 0,040033841 | 0,031 | 0     | 1         | 1,028137943   | 0,972632132     | #DIV/0!         |
| NCF1                                                                                           | 0,004841742 | 0,040033841 | 0,031 | 0     | 1         | 1,028137943   | 0,972632132     | #DIV/0!         |
| NUDT11                                                                                         | 0,004841742 | 0,040033841 | 0,031 | 0     | 1         | 1,028137943   | 0,972632132     | #DIV/0!         |

Supplementary Table 1

| Differentially expressed genes_adjacent-skin-XL_comparing SC-Keloid vs. (SC-Myel, SC-Nonmyel) |             |             |       |       |             |               |                 |                 |
|-----------------------------------------------------------------------------------------------|-------------|-------------|-------|-------|-------------|---------------|-----------------|-----------------|
| gene                                                                                          | p_val       | avg_log2FC  | pct.1 | pct.2 | p_val_adj   | Foldchange_UP | Foldchange_DOWN | Ratio_pct1_pct2 |
| SOX18                                                                                         | 0,004841742 | 0,040033841 | 0,031 | 0     | 1           | 1,028137943   | 0,972632132     | #DIV/0!         |
| TMEM145                                                                                       | 0,004841742 | 0,040033841 | 0,031 | 0     | 1           | 1,028137943   | 0,972632132     | #DIV/0!         |
| ZNF492                                                                                        | 0,004841742 | 0,040033841 | 0,031 | 0     | 1           | 1,028137943   | 0,972632132     | #DIV/0!         |
| CASP9                                                                                         | 0,02857055  | 0,039967284 | 0,156 | 0,051 | 1           | 1,028090512   | 0,972677005     | 3,058823529     |
| KAT14                                                                                         | 0,086278754 | 0,039959426 | 0,062 | 0,016 | 1           | 1,028084913   | 0,972682302     | 3,875           |
| TTC38                                                                                         | 0,040857201 | 0,039929441 | 0,062 | 0,012 | 1           | 1,028063545   | 0,972702519     | 5,166666667     |
| CEP97                                                                                         | 0,000588759 | 0,039899975 | 0,375 | 0,113 | 1           | 1,028042548   | 0,972722386     | 3,318584071     |
| CD6                                                                                           | 6,3574E-05  | 0,039889012 | 0,062 | 0     | 1           | 1,028034736   | 0,972729778     | #DIV/0!         |
| MILR1                                                                                         | 6,3574E-05  | 0,039889012 | 0,062 | 0     | 1           | 1,028034736   | 0,972729778     | #DIV/0!         |
| GPN2                                                                                          | 0,001642148 | 0,039838624 | 0,125 | 0,02  | 1           | 1,027998831   | 0,972763752     | 6,25            |
| LRRC29                                                                                        | 6,3574E-05  | 0,039739396 | 0,062 | 0     | 1           | 1,027928128   | 0,972830661     | #DIV/0!         |
| ATMIN                                                                                         | 0,007089636 | 0,039707337 | 0,156 | 0,039 | 1           | 1,027905286   | 0,972852279     | 4               |
| KREMEN1                                                                                       | 0,008148126 | 0,039627251 | 0,094 | 0,016 | 1           | 1,027848227   | 0,972906285     | 5,875           |
| ANAPC4                                                                                        | 0,00019555  | 0,039584967 | 0,188 | 0,031 | 1           | 1,027818102   | 0,9729348       | 6,064516129     |
| SUPT7L                                                                                        | 0,000466117 | 0,039561222 | 0,188 | 0,035 | 1           | 1,027801186   | 0,972950814     | 5,371428571     |
| SCRG1                                                                                         | 0,003547823 | 0,039503443 | 0,344 | 0,121 | 1           | 1,027760024   | 0,97298978      | 2,842975207     |
| SEPSECS                                                                                       | 0,002263143 | 0,039443577 | 0,062 | 0,004 | 1           | 1,027717377   | 0,973030156     | 15,5            |
| AGPAT3                                                                                        | 0,000311736 | 0,039418985 | 0,312 | 0,082 | 1           | 1,027699859   | 0,973046743     | 3,804878049     |
| FANCD2                                                                                        | 0,082317662 | 0,039407994 | 0,031 | 0,004 | 1           | 1,027692029   | 0,973054156     | 7,75            |
| CCDC85B                                                                                       | 0,001081065 | 0,039315342 | 0,656 | 0,262 | 1           | 1,027626032   | 0,973116649     | 2,503816794     |
| PXK                                                                                           | 0,065622259 | 0,039264011 | 0,188 | 0,078 | 1           | 1,027589469   | 0,973151273     | 2,41025641      |
| ARID3B                                                                                        | 2,40115E-05 | 0,039232875 | 0,156 | 0,016 | 0,506667402 | 1,027567293   | 0,973172275     | 9,75            |
| MIS18A                                                                                        | 0,000339359 | 0,039225572 | 0,156 | 0,023 | 1           | 1,027562091   | 0,973177202     | 6,782608696     |
| COPS7A                                                                                        | 6,30883E-05 | 0,039212446 | 0,312 | 0,07  | 1           | 1,027552742   | 0,973186056     | 4,457142857     |
| WDHD1                                                                                         | 9,06462E-07 | 0,039211754 | 0,125 | 0,004 | 0,019127258 | 1,027552249   | 0,973186522     | 31,25           |
| SS18                                                                                          | 0,017996779 | 0,039150993 | 0,281 | 0,113 | 1           | 1,027508973   | 0,97322751      | 2,486725664     |
| ABCC8                                                                                         | 0,226351275 | 0,039150171 | 0,031 | 0,008 | 1           | 1,027508388   | 0,973228065     | 3,875           |
| TMEM243                                                                                       | 1,21952E-05 | 0,039105466 | 0,375 | 0,082 | 0,257330394 | 1,027476548   | 0,973258223     | 4,573170732     |
| OSBPL3                                                                                        | 0,221475664 | 0,039104402 | 0,031 | 0,008 | 1           | 1,027475791   | 0,973258941     | 3,875           |
| KIAA0895L                                                                                     | 0,002594281 | 0,039071951 | 0,094 | 0,012 | 1           | 1,02745268    | 0,973280833     | 7,833333333     |

Supplementary Table 1

| Differentially expressed genes_adjacent-skin-XL_ comparing SC-Keloid vs. (SC-Myel, SC-Nonmyel) |             |             |       |       |           |               |                 |                 |
|------------------------------------------------------------------------------------------------|-------------|-------------|-------|-------|-----------|---------------|-----------------|-----------------|
| gene                                                                                           | p_val       | avg_log2FC  | pct.1 | pct.2 | p_val_adj | Foldchange_UP | Foldchange_DOWN | Ratio_pct1_pct2 |
| GSTM4                                                                                          | 0,018436147 | 0,039000142 | 0,094 | 0,02  | 1         | 1,027401541   | 0,973329278     | 4,7             |
| ATG3                                                                                           | 0,001601928 | 0,038965507 | 0,406 | 0,141 | 1         | 1,027376876   | 0,973352645     | 2,879432624     |
| CERK                                                                                           | 0,041848356 | 0,038927375 | 0,062 | 0,012 | 1         | 1,027349722   | 0,973378372     | 5,166666667     |
| SH3GL1                                                                                         | 0,001385781 | 0,038912635 | 0,438 | 0,148 | 1         | 1,027339225   | 0,973388318     | 2,959459459     |
| GMIP                                                                                           | 0,002263143 | 0,038912446 | 0,062 | 0,004 | 1         | 1,027339091   | 0,973388445     | 15,5            |
| FBLL1                                                                                          | 0,002263143 | 0,038880029 | 0,062 | 0,004 | 1         | 1,027316007   | 0,973410317     | 15,5            |
| SLC9B1                                                                                         | 0,082317662 | 0,038812237 | 0,031 | 0,004 | 1         | 1,027267735   | 0,973456059     | 7,75            |
| PAK1                                                                                           | 0,004180266 | 0,03880875  | 0,125 | 0,023 | 1         | 1,027265252   | 0,973458411     | 5,434782609     |
| TMEM104                                                                                        | 4,80439E-05 | 0,038757658 | 0,094 | 0,004 | 1         | 1,027228872   | 0,973492886     | 23,5            |
| PLTP                                                                                           | 0,000291314 | 0,038733219 | 0,375 | 0,109 | 1         | 1,027211471   | 0,973509377     | 3,440366972     |
| SLMAP                                                                                          | 0,000247303 | 0,038728151 | 0,219 | 0,043 | 1         | 1,027207863   | 0,973512797     | 5,093023256     |
| CSTA                                                                                           | 0,041848356 | 0,038633522 | 0,062 | 0,012 | 1         | 1,027140489   | 0,973576654     | 5,166666667     |
| EXOC3-AS1                                                                                      | 0,000524345 | 0,038618982 | 0,094 | 0,008 | 1         | 1,027130137   | 0,973586466     | 11,75           |
| COMMD2                                                                                         | 0,001245548 | 0,038408833 | 0,312 | 0,094 | 1         | 1,026980532   | 0,973728293     | 3,319148936     |
| RELL1                                                                                          | 0,007214939 | 0,03836489  | 0,156 | 0,039 | 1         | 1,026949251   | 0,973757952     | 4               |
| CDCA8                                                                                          | 0,082317662 | 0,038335982 | 0,031 | 0,004 | 1         | 1,026928674   | 0,973777464     | 7,75            |
| GGACT                                                                                          | 6,3574E-05  | 0,038294453 | 0,062 | 0     | 1         | 1,026899114   | 0,973805495     | #DIV/0!         |
| SPA17                                                                                          | 6,3574E-05  | 0,038294453 | 0,062 | 0     | 1         | 1,026899114   | 0,973805495     | #DIV/0!         |
| ALPK2                                                                                          | 6,3574E-05  | 0,038290028 | 0,062 | 0     | 1         | 1,026895964   | 0,973808482     | #DIV/0!         |
| GTPBP8                                                                                         | 6,26098E-05 | 0,038211092 | 0,25  | 0,047 | 1         | 1,02683978    | 0,973861765     | 5,319148936     |
| CREBL2                                                                                         | 0,26859919  | 0,038138865 | 0,125 | 0,066 | 1         | 1,026788373   | 0,973910522     | 1,893939394     |
| RPS11                                                                                          | 0,270238431 | 0,038120052 | 0,938 | 0,793 | 1         | 1,026774984   | 0,973923221     | 1,182849937     |
| CDC37                                                                                          | 0,007884792 | 0,038000916 | 0,656 | 0,293 | 1         | 1,026690197   | 0,97400365      | 2,23890785      |
| KLRG1                                                                                          | 0,082317662 | 0,037996402 | 0,031 | 0,004 | 1         | 1,026686985   | 0,974006698     | 7,75            |
| FECH                                                                                           | 0,008148126 | 0,037872719 | 0,094 | 0,016 | 1         | 1,02659897    | 0,974090204     | 5,875           |
| C21orf62                                                                                       | 0,004841742 | 0,037852288 | 0,031 | 0     | 1         | 1,026584432   | 0,974103998     | #DIV/0!         |
| CDYL2                                                                                          | 0,004841742 | 0,037852288 | 0,031 | 0     | 1         | 1,026584432   | 0,974103998     | #DIV/0!         |
| FAM149A                                                                                        | 0,004841742 | 0,037852288 | 0,031 | 0     | 1         | 1,026584432   | 0,974103998     | #DIV/0!         |
| GALR3                                                                                          | 0,004841742 | 0,037852288 | 0,031 | 0     | 1         | 1,026584432   | 0,974103998     | #DIV/0!         |
| OAS2                                                                                           | 0,004841742 | 0,037852288 | 0,031 | 0     | 1         | 1,026584432   | 0,974103998     | #DIV/0!         |

Supplementary Table 1

| Differentially expressed genes_adjacent-skin-XL_comparing SC-Keloid vs. (SC-Myel, SC-Nonmyel) |             |             |       |       |           |               |                 |                 |
|-----------------------------------------------------------------------------------------------|-------------|-------------|-------|-------|-----------|---------------|-----------------|-----------------|
| gene                                                                                          | p_val       | avg_log2FC  | pct.1 | pct.2 | p_val_adj | Foldchange_UP | Foldchange_DOWN | Ratio_pct1_pct2 |
| RGPD8                                                                                         | 0,004841742 | 0,037852288 | 0,031 | 0     | 1         | 1,026584432   | 0,974103998     | #DIV/0!         |
| RGS4                                                                                          | 0,004841742 | 0,037852288 | 0,031 | 0     | 1         | 1,026584432   | 0,974103998     | #DIV/0!         |
| TMEM72-AS1                                                                                    | 0,004841742 | 0,037852288 | 0,031 | 0     | 1         | 1,026584432   | 0,974103998     | #DIV/0!         |
| WDR5B                                                                                         | 0,004841742 | 0,037852288 | 0,031 | 0     | 1         | 1,026584432   | 0,974103998     | #DIV/0!         |
| ZNF154                                                                                        | 0,004841742 | 0,037852288 | 0,031 | 0     | 1         | 1,026584432   | 0,974103998     | #DIV/0!         |
| ETFBKMT                                                                                       | 0,000524345 | 0,037843382 | 0,094 | 0,008 | 1         | 1,026578095   | 0,974110012     | 11,75           |
| PLD2                                                                                          | 0,002594281 | 0,037784523 | 0,094 | 0,012 | 1         | 1,026536214   | 0,974149754     | 7,833333333     |
| NUP43                                                                                         | 0,084624339 | 0,037733638 | 0,062 | 0,016 | 1         | 1,026500008   | 0,974184113     | 3,875           |
| ZBTB37                                                                                        | 0,00083045  | 0,037724929 | 0,156 | 0,027 | 1         | 1,026493811   | 0,974189995     | 5,777777778     |
| TDP1                                                                                          | 0,018436147 | 0,037698396 | 0,094 | 0,02  | 1         | 1,026474932   | 0,974207912     | 4,7             |
| SHLD3                                                                                         | 0,041848356 | 0,037693435 | 0,062 | 0,012 | 1         | 1,026471403   | 0,974211261     | 5,166666667     |
| THAP7                                                                                         | 0,001622495 | 0,037660809 | 0,312 | 0,098 | 1         | 1,02644819    | 0,974233293     | 3,183673469     |
| EIF5A2                                                                                        | 0,019871239 | 0,03763399  | 0,156 | 0,047 | 1         | 1,026429109   | 0,974251403     | 3,319148936     |
| LINC00973                                                                                     | 0,002263143 | 0,037596526 | 0,062 | 0,004 | 1         | 1,026402455   | 0,974276703     | 15,5            |
| C9orf116                                                                                      | 6,3574E-05  | 0,037528792 | 0,062 | 0     | 1         | 1,026354267   | 0,974322446     | #DIV/0!         |
| VAX2                                                                                          | 6,3574E-05  | 0,037528792 | 0,062 | 0     | 1         | 1,026354267   | 0,974322446     | #DIV/0!         |
| PDCD10                                                                                        | 0,007118477 | 0,037514938 | 0,375 | 0,145 | 1         | 1,026344411   | 0,974331803     | 2,586206897     |
| GAS8                                                                                          | 0,041848356 | 0,037483513 | 0,062 | 0,012 | 1         | 1,026322055   | 0,974353026     | 5,166666667     |
| CCDC181                                                                                       | 0,079594089 | 0,037440311 | 0,031 | 0,004 | 1         | 1,026291322   | 0,974382204     | 7,75            |
| PCSK7                                                                                         | 0,003091583 | 0,037381152 | 0,25  | 0,074 | 1         | 1,026249239   | 0,97442216      | 3,378378378     |
| ACOT8                                                                                         | 0,000339359 | 0,037348865 | 0,156 | 0,023 | 1         | 1,026226272   | 0,974443967     | 6,782608696     |
| FAM110A                                                                                       | 0,000524345 | 0,037301327 | 0,094 | 0,008 | 1         | 1,026192458   | 0,974476077     | 11,75           |
| SMARCAD1                                                                                      | 0,000537931 | 0,037292001 | 0,219 | 0,047 | 1         | 1,026185824   | 0,974482376     | 4,659574468     |
| RAN                                                                                           | 0,009740348 | 0,037269281 | 0,844 | 0,457 | 1         | 1,026169663   | 0,974497723     | 1,846827133     |
| CNOT9                                                                                         | 0,000486115 | 0,037190727 | 0,281 | 0,07  | 1         | 1,026113791   | 0,974550785     | 4,014285714     |
| STARD8                                                                                        | 6,3574E-05  | 0,037185666 | 0,062 | 0     | 1         | 1,026110191   | 0,974554204     | #DIV/0!         |
| YAE1                                                                                          | 0,000103236 | 0,037136797 | 0,156 | 0,02  | 1         | 1,026075434   | 0,974587215     | 7,8             |
| LINC00937                                                                                     | 0,226351275 | 0,037040612 | 0,031 | 0,008 | 1         | 1,026007027   | 0,974652194     | 3,875           |
| KCNN3                                                                                         | 0,226351275 | 0,036981668 | 0,031 | 0,008 | 1         | 1,025965108   | 0,974692016     | 3,875           |
| PRSS27                                                                                        | 0,087959196 | 0,036959839 | 0,062 | 0,016 | 1         | 1,025949585   | 0,974706764     | 3,875           |

Supplementary Table 1

| Differentially expressed genes_adjacent-skin-XL_ comparing SC-Keloid vs. (SC-Myel, SC-Nonmyel) |             |             |       |       |             |               |                 |                 |
|------------------------------------------------------------------------------------------------|-------------|-------------|-------|-------|-------------|---------------|-----------------|-----------------|
| gene                                                                                           | p_val       | avg_log2FC  | pct.1 | pct.2 | p_val_adj   | Foldchange_UP | Foldchange_DOWN | Ratio_pct1_pct2 |
| METTL4                                                                                         | 0,060128123 | 0,036951212 | 0,125 | 0,043 | 1           | 1,02594345    | 0,974712592     | 2,906976744     |
| NUDT16                                                                                         | 8,35459E-06 | 0,036928842 | 0,312 | 0,059 | 0,176290113 | 1,025927542   | 0,974727706     | 5,288135593     |
| KLC2                                                                                           | 0,000200286 | 0,03689435  | 0,188 | 0,031 | 1           | 1,025903014   | 0,974751011     | 6,064516129     |
| ABCF1                                                                                          | 0,006606659 | 0,036858665 | 0,312 | 0,113 | 1           | 1,02587764    | 0,974775121     | 2,761061947     |
| RHEBL1                                                                                         | 0,002594281 | 0,036835483 | 0,094 | 0,012 | 1           | 1,025861155   | 0,974790785     | 7,833333333     |
| PGM1                                                                                           | 0,000112833 | 0,036830086 | 0,125 | 0,012 | 1           | 1,025857318   | 0,974794431     | 10,41666667     |
| FAM168A                                                                                        | 0,0162314   | 0,03682506  | 0,25  | 0,094 | 1           | 1,025853744   | 0,974797827     | 2,659574468     |
| BTF3                                                                                           | 0,453673081 | 0,036824398 | 0,938 | 0,703 | 1           | 1,025853273   | 0,974798274     | 1,33428165      |
| TMOD1                                                                                          | 0,226351275 | 0,036797972 | 0,031 | 0,008 | 1           | 1,025834483   | 0,97481613      | 3,875           |
| ZNF737                                                                                         | 0,221757959 | 0,036717307 | 0,062 | 0,023 | 1           | 1,025777127   | 0,974870636     | 2,695652174     |
| BAG5                                                                                           | 0,000112855 | 0,036712123 | 0,344 | 0,086 | 1           | 1,025773441   | 0,974874139     | 4               |
| CSMD2                                                                                          | 0,002594281 | 0,036624482 | 0,094 | 0,012 | 1           | 1,025711129   | 0,974933362     | 7,833333333     |
| APBA3                                                                                          | 0,790352492 | 0,036624155 | 0,031 | 0,023 | 1           | 1,025710896   | 0,974933584     | 1,347826087     |
| FREM2                                                                                          | 0,01796492  | 0,036608583 | 0,219 | 0,078 | 1           | 1,025699825   | 0,974944107     | 2,807692308     |
| CHFR                                                                                           | 0,000426857 | 0,036464724 | 0,188 | 0,035 | 1           | 1,025597552   | 0,975041328     | 5,371428571     |
| LRRC59                                                                                         | 0,000172863 | 0,036463186 | 0,406 | 0,113 | 1           | 1,025596459   | 0,975042368     | 3,592920354     |
| PAX8                                                                                           | 0,380266129 | 0,036398007 | 0,031 | 0,012 | 1           | 1,025550125   | 0,97508642      | 2,583333333     |
| PEX11B                                                                                         | 0,041848356 | 0,036396746 | 0,062 | 0,012 | 1           | 1,025549229   | 0,975087272     | 5,166666667     |
| PIGW                                                                                           | 4,80439E-05 | 0,036362654 | 0,094 | 0,004 | 1           | 1,025524994   | 0,975110315     | 23,5            |
| COL19A1                                                                                        | 6,3574E-05  | 0,036269439 | 0,062 | 0     | 1           | 1,025458735   | 0,97517332      | #DIV/0!         |
| ZBTB9                                                                                          | 6,3574E-05  | 0,036269439 | 0,062 | 0     | 1           | 1,025458735   | 0,97517332      | #DIV/0!         |
| NIPA1                                                                                          | 5,12603E-06 | 0,036261822 | 0,188 | 0,02  | 0,108164307 | 1,025453322   | 0,975178469     | 9,4             |
| SANBR                                                                                          | 0,002096899 | 0,036255534 | 0,156 | 0,031 | 1           | 1,025448852   | 0,975182719     | 5,032258065     |
| CENPA                                                                                          | 0,082317662 | 0,036238347 | 0,031 | 0,004 | 1           | 1,025436636   | 0,975194337     | 7,75            |
| SATB1                                                                                          | 0,000371522 | 0,036231507 | 0,281 | 0,07  | 1           | 1,025431774   | 0,97519896      | 4,014285714     |
| SCCPDH                                                                                         | 0,009328862 | 0,036226929 | 0,75  | 0,352 | 1           | 1,02542852    | 0,975202055     | 2,130681818     |
| CALML5                                                                                         | 0,221475664 | 0,036172797 | 0,031 | 0,008 | 1           | 1,025390045   | 0,975238647     | 3,875           |
| CYB5D2                                                                                         | 1,49244E-05 | 0,035978404 | 0,219 | 0,031 | 0,314919708 | 1,02525189    | 0,975370062     | 7,064516129     |
| SGPP1                                                                                          | 0,059959447 | 0,035882245 | 0,094 | 0,027 | 1           | 1,025183558   | 0,975435074     | 3,481481481     |
| RPL27A                                                                                         | 0,371142822 | 0,035817396 | 0,969 | 0,734 | 1           | 1,025137477   | 0,975478921     | 1,320163488     |

Supplementary Table 1

| Differentially expressed genes_adjacent-skin-XL_comparing SC-Keloid vs. (SC-Myel, SC-Nonmyel) |             |             |       |       |           |               |                 |                 |
|-----------------------------------------------------------------------------------------------|-------------|-------------|-------|-------|-----------|---------------|-----------------|-----------------|
| gene                                                                                          | p_val       | avg_log2FC  | pct.1 | pct.2 | p_val_adj | Foldchange_UP | Foldchange_DOWN | Ratio_pct1_pct2 |
| SLC7A11                                                                                       | 0,002263143 | 0,035795081 | 0,062 | 0,004 | 1         | 1,02512162    | 0,97549401      | 15,5            |
| NDOR1                                                                                         | 0,002594281 | 0,03579081  | 0,094 | 0,012 | 1         | 1,025118585   | 0,975496898     | 7,833333333     |
| PIFO                                                                                          | 0,004841742 | 0,035779411 | 0,031 | 0     | 1         | 1,025110486   | 0,975504605     | #DIV/0!         |
| AC009228.1                                                                                    | 0,004841742 | 0,035773733 | 0,031 | 0     | 1         | 1,025106451   | 0,975508445     | #DIV/0!         |
| EFNB3                                                                                         | 0,004841742 | 0,035773733 | 0,031 | 0     | 1         | 1,025106451   | 0,975508445     | #DIV/0!         |
| ENO4                                                                                          | 0,004841742 | 0,035773733 | 0,031 | 0     | 1         | 1,025106451   | 0,975508445     | #DIV/0!         |
| IDH1-AS1                                                                                      | 0,004841742 | 0,035773733 | 0,031 | 0     | 1         | 1,025106451   | 0,975508445     | #DIV/0!         |
| LHB                                                                                           | 0,004841742 | 0,035773733 | 0,031 | 0     | 1         | 1,025106451   | 0,975508445     | #DIV/0!         |
| MEDAG                                                                                         | 0,004841742 | 0,035773733 | 0,031 | 0     | 1         | 1,025106451   | 0,975508445     | #DIV/0!         |
| MGST1                                                                                         | 0,004841742 | 0,035773733 | 0,031 | 0     | 1         | 1,025106451   | 0,975508445     | #DIV/0!         |
| PLA2R1                                                                                        | 0,004841742 | 0,035773733 | 0,031 | 0     | 1         | 1,025106451   | 0,975508445     | #DIV/0!         |
| STXBP5L                                                                                       | 0,004841742 | 0,035773733 | 0,031 | 0     | 1         | 1,025106451   | 0,975508445     | #DIV/0!         |
| TLR7                                                                                          | 0,004841742 | 0,035773733 | 0,031 | 0     | 1         | 1,025106451   | 0,975508445     | #DIV/0!         |
| TM6SF2                                                                                        | 0,004841742 | 0,035773733 | 0,031 | 0     | 1         | 1,025106451   | 0,975508445     | #DIV/0!         |
| TRIM7                                                                                         | 0,004841742 | 0,035773733 | 0,031 | 0     | 1         | 1,025106451   | 0,975508445     | #DIV/0!         |
| KPNA2                                                                                         | 0,001701754 | 0,035729131 | 0,375 | 0,125 | 1         | 1,02507476    | 0,975538604     | 3               |
| PGF                                                                                           | 0,040857201 | 0,035720231 | 0,062 | 0,012 | 1         | 1,025068436   | 0,975544622     | 5,166666667     |
| VPS4B                                                                                         | 0,001700084 | 0,035710592 | 0,281 | 0,082 | 1         | 1,025061588   | 0,97555114      | 3,426829268     |
| COPG1                                                                                         | 0,00052757  | 0,035709326 | 0,219 | 0,047 | 1         | 1,025060688   | 0,975551996     | 4,659574468     |
| C7orf25                                                                                       | 0,008148126 | 0,035692271 | 0,094 | 0,016 | 1         | 1,02504857    | 0,975563528     | 5,875           |
| SLC6A6                                                                                        | 0,098751938 | 0,035645528 | 0,094 | 0,031 | 1         | 1,025015359   | 0,975595137     | 3,032258065     |
| NACC1                                                                                         | 0,000112833 | 0,03553901  | 0,125 | 0,012 | 1         | 1,024939683   | 0,97566717      | 10,41666667     |
| MTMR9                                                                                         | 0,013518555 | 0,035504627 | 0,188 | 0,059 | 1         | 1,024915256   | 0,975690423     | 3,186440678     |
| CHCHD4                                                                                        | 0,527450503 | 0,035368155 | 0,031 | 0,016 | 1         | 1,024818308   | 0,975782724     | 1,9375          |
| PEX12                                                                                         | 0,082317662 | 0,03534806  | 0,031 | 0,004 | 1         | 1,024804034   | 0,975796315     | 7,75            |
| TGFB2                                                                                         | 0,015983649 | 0,035319882 | 0,125 | 0,031 | 1         | 1,024784019   | 0,975815374     | 4,032258065     |
| HSF4                                                                                          | 0,082317662 | 0,035276443 | 0,031 | 0,004 | 1         | 1,024753163   | 0,975844755     | 7,75            |
| DAZAP1                                                                                        | 0,00575081  | 0,035273663 | 0,344 | 0,125 | 1         | 1,024751188   | 0,975846636     | 2,752           |
| SENP6                                                                                         | 0,000301561 | 0,035254289 | 0,469 | 0,152 | 1         | 1,024737427   | 0,975859741     | 3,085526316     |
| ZNF724                                                                                        | 0,041848356 | 0,035212942 | 0,062 | 0,012 | 1         | 1,024708059   | 0,975887709     | 5,166666667     |

Supplementary Table 1

| Differentially expressed genes_adjacent-skin-XL_comparing SC-Keloid vs. (SC-Myel, SC-Nonmyel) |             |             |       |       |             |               |                 |                 |
|-----------------------------------------------------------------------------------------------|-------------|-------------|-------|-------|-------------|---------------|-----------------|-----------------|
| gene                                                                                          | p_val       | avg_log2FC  | pct.1 | pct.2 | p_val_adj   | Foldchange_UP | Foldchange_DOWN | Ratio_pct1_pct2 |
| CMTR2                                                                                         | 0,000476445 | 0,03514806  | 0,188 | 0,035 | 1           | 1,024661976   | 0,975931598     | 5,371428571     |
| DTX2                                                                                          | 0,004180266 | 0,035046288 | 0,125 | 0,023 | 1           | 1,024589696   | 0,976000446     | 5,434782609     |
| RAB28                                                                                         | 0,001700084 | 0,035027423 | 0,281 | 0,082 | 1           | 1,024576298   | 0,976013208     | 3,426829268     |
| ATAD5                                                                                         | 0,386325862 | 0,034976422 | 0,031 | 0,012 | 1           | 1,024540079   | 0,976047712     | 2,583333333     |
| EOLA2                                                                                         | 0,001600673 | 0,034794502 | 0,125 | 0,02  | 1           | 1,024410895   | 0,976170797     | 6,25            |
| ETNK2                                                                                         | 0,221475664 | 0,03463651  | 0,031 | 0,008 | 1           | 1,024298716   | 0,976277705     | 3,875           |
| FBP1                                                                                          | 0,082317662 | 0,034592944 | 0,031 | 0,004 | 1           | 1,024267785   | 0,976307187     | 7,75            |
| MAD1L1                                                                                        | 0,02818312  | 0,03456987  | 0,156 | 0,051 | 1           | 1,024251404   | 0,976322802     | 3,058823529     |
| CLSTN3                                                                                        | 0,852091481 | 0,034540518 | 0,031 | 0,039 | 1           | 1,024230565   | 0,976342665     | 0,794871795     |
| GZF1                                                                                          | 0,004180266 | 0,03448242  | 0,125 | 0,023 | 1           | 1,02418932    | 0,976381984     | 5,434782609     |
| CEP78                                                                                         | 0,002053304 | 0,034479183 | 0,156 | 0,031 | 1           | 1,024187022   | 0,976384175     | 5,032258065     |
| BCL9                                                                                          | 0,003304112 | 0,034392505 | 0,188 | 0,047 | 1           | 1,02412549    | 0,976442838     | 4               |
| DNAJC22                                                                                       | 0,082317662 | 0,034348557 | 0,031 | 0,004 | 1           | 1,024094293   | 0,976472584     | 7,75            |
| BAZ1A                                                                                         | 0,000954735 | 0,034266344 | 0,344 | 0,105 | 1           | 1,024035936   | 0,97652823      | 3,276190476     |
| RANBP6                                                                                        | 0,041848356 | 0,033998236 | 0,062 | 0,012 | 1           | 1,023845649   | 0,976709723     | 5,166666667     |
| FAM76A                                                                                        | 0,026750634 | 0,033971318 | 0,188 | 0,066 | 1           | 1,023826545   | 0,976727947     | 2,848484848     |
| C8orf88                                                                                       | 0,000190919 | 0,033967929 | 0,188 | 0,031 | 1           | 1,02382414    | 0,976730242     | 6,064516129     |
| BTN2A2                                                                                        | 0,000112833 | 0,033756642 | 0,125 | 0,012 | 1           | 1,02367421    | 0,976873297     | 10,41666667     |
| HNRNPLL                                                                                       | 0,003601587 | 0,033736382 | 0,188 | 0,047 | 1           | 1,023659834   | 0,976887015     | 4               |
| ST13                                                                                          | 0,046407115 | 0,033646093 | 0,719 | 0,379 | 1           | 1,023595772   | 0,976948154     | 1,897097625     |
| PMPCA                                                                                         | 2,87896E-05 | 0,033549179 | 0,312 | 0,066 | 0,607490199 | 1,023527014   | 0,977013783     | 4,727272727     |
| GCAT                                                                                          | 0,040857201 | 0,033532566 | 0,062 | 0,012 | 1           | 1,023515227   | 0,977025035     | 5,166666667     |
| RHOBTB2                                                                                       | 0,002594281 | 0,033519434 | 0,094 | 0,012 | 1           | 1,023505911   | 0,977033928     | 7,833333333     |
| AC007879.2                                                                                    | 0,004841742 | 0,033490869 | 0,031 | 0     | 1           | 1,023485646   | 0,977053273     | #DIV/0!         |
| BDNF                                                                                          | 0,004841742 | 0,033490869 | 0,031 | 0     | 1           | 1,023485646   | 0,977053273     | #DIV/0!         |
| BNC2                                                                                          | 0,004841742 | 0,033490869 | 0,031 | 0     | 1           | 1,023485646   | 0,977053273     | #DIV/0!         |
| CRYBA2                                                                                        | 0,004841742 | 0,033490869 | 0,031 | 0     | 1           | 1,023485646   | 0,977053273     | #DIV/0!         |
| EPSTI1                                                                                        | 0,004841742 | 0,033490869 | 0,031 | 0     | 1           | 1,023485646   | 0,977053273     | #DIV/0!         |
| IQUB                                                                                          | 0,004841742 | 0,033490869 | 0,031 | 0     | 1           | 1,023485646   | 0,977053273     | #DIV/0!         |
| LINC00871                                                                                     | 0,004841742 | 0,033490869 | 0,031 | 0     | 1           | 1,023485646   | 0,977053273     | #DIV/0!         |

Supplementary Table 1

| Differentially expressed genes_adjacent-skin-XL_comparing SC-Keloid vs. (SC-Myel, SC-Nonmyel) |             |             |       |       |           |               |                 |                 |
|-----------------------------------------------------------------------------------------------|-------------|-------------|-------|-------|-----------|---------------|-----------------|-----------------|
| gene                                                                                          | p_val       | avg_log2FC  | pct.1 | pct.2 | p_val_adj | Foldchange_UP | Foldchange_DOWN | Ratio_pct1_pct2 |
| POU2F2                                                                                        | 0,004841742 | 0,033490869 | 0,031 | 0     | 1         | 1,023485646   | 0,977053273     | #DIV/0!         |
| RAD54B                                                                                        | 0,004841742 | 0,033490869 | 0,031 | 0     | 1         | 1,023485646   | 0,977053273     | #DIV/0!         |
| TLL1                                                                                          | 0,004841742 | 0,033490869 | 0,031 | 0     | 1         | 1,023485646   | 0,977053273     | #DIV/0!         |
| TPRG1                                                                                         | 0,004841742 | 0,033490869 | 0,031 | 0     | 1         | 1,023485646   | 0,977053273     | #DIV/0!         |
| ULBP3                                                                                         | 0,004841742 | 0,033490869 | 0,031 | 0     | 1         | 1,023485646   | 0,977053273     | #DIV/0!         |
| ZNF304                                                                                        | 0,004841742 | 0,033490869 | 0,031 | 0     | 1         | 1,023485646   | 0,977053273     | #DIV/0!         |
| WSCD1                                                                                         | 0,082317662 | 0,033441065 | 0,031 | 0,004 | 1         | 1,023450314   | 0,977087003     | 7,75            |
| MRPS11                                                                                        | 0,000245551 | 0,033342837 | 0,312 | 0,078 | 1         | 1,023380634   | 0,977153531     | 4               |
| MED25                                                                                         | 0,093336433 | 0,033306113 | 0,094 | 0,031 | 1         | 1,023354584   | 0,977178405     | 3,032258065     |
| CDK14                                                                                         | 0,036158386 | 0,033274102 | 0,094 | 0,023 | 1         | 1,023331877   | 0,977200088     | 4,086956522     |
| MED7                                                                                          | 0,001642148 | 0,033267059 | 0,125 | 0,02  | 1         | 1,023326882   | 0,977204858     | 6,25            |
| TTI2                                                                                          | 0,008148126 | 0,033191788 | 0,094 | 0,016 | 1         | 1,023273492   | 0,977255844     | 5,875           |
| FAM66C                                                                                        | 0,221475664 | 0,033191722 | 0,031 | 0,008 | 1         | 1,023273445   | 0,977255889     | 3,875           |
| PIGN                                                                                          | 0,028712073 | 0,033158039 | 0,125 | 0,035 | 1         | 1,023249555   | 0,977278705     | 3,571428571     |
| RIOK2                                                                                         | 0,0057801   | 0,033110993 | 0,188 | 0,051 | 1         | 1,023216188   | 0,977310574     | 3,68627451      |
| PFKM                                                                                          | 0,002010541 | 0,033019398 | 0,156 | 0,031 | 1         | 1,023151226   | 0,977372625     | 5,032258065     |
| SNX12                                                                                         | 0,016562293 | 0,032999425 | 0,125 | 0,031 | 1         | 1,023137062   | 0,977386156     | 4,032258065     |
| ERCC3                                                                                         | 0,002005544 | 0,032865975 | 0,188 | 0,043 | 1         | 1,023042426   | 0,977476569     | 4,372093023     |
| ZNF623                                                                                        | 0,461954663 | 0,032660667 | 0,062 | 0,035 | 1         | 1,022896848   | 0,977615682     | 1,771428571     |
| FGFBP1                                                                                        | 0,777381931 | 0,032645293 | 0,031 | 0,023 | 1         | 1,022885948   | 0,9776261       | 1,347826087     |
| KCTD5                                                                                         | 0,000911755 | 0,032590134 | 0,156 | 0,027 | 1         | 1,02284684    | 0,977663478     | 5,777777778     |
| ORMDL1                                                                                        | 0,179626713 | 0,032573541 | 0,438 | 0,254 | 1         | 1,022835076   | 0,977674723     | 1,724409449     |
| PARN                                                                                          | 0,01390071  | 0,03254649  | 0,188 | 0,059 | 1         | 1,022815898   | 0,977693055     | 3,186440678     |
| SPATS2                                                                                        | 0,043915019 | 0,032522016 | 0,125 | 0,039 | 1         | 1,022798547   | 0,977709641     | 3,205128205     |
| LRRTM2                                                                                        | 0,179436467 | 0,032480803 | 0,094 | 0,039 | 1         | 1,02276933    | 0,977737571     | 2,41025641      |
| AP5B1                                                                                         | 0,150155729 | 0,032436117 | 0,062 | 0,02  | 1         | 1,022737651   | 0,977767856     | 3,1             |
| CDH13                                                                                         | 0,000623439 | 0,032367814 | 0,344 | 0,102 | 1         | 1,022689231   | 0,977814149     | 3,37254902      |
| ZNF395                                                                                        | 0,133058992 | 0,032341835 | 0,094 | 0,035 | 1         | 1,022670816   | 0,977831757     | 2,685714286     |
| GJA4                                                                                          | 0,082317662 | 0,032324022 | 0,031 | 0,004 | 1         | 1,022658189   | 0,97784383      | 7,75            |
| RCVRN                                                                                         | 6,3574E-05  | 0,032299906 | 0,062 | 0     | 1         | 1,022641094   | 0,977860176     | #DIV/0!         |



Supplementary Table 1

| Differentially expressed genes_adjacent-skin-XL_comparing SC-Keloid vs. (SC-Myel, SC-Nonmyel) |             |             |       |       |             |               |                 |                 |
|-----------------------------------------------------------------------------------------------|-------------|-------------|-------|-------|-------------|---------------|-----------------|-----------------|
| gene                                                                                          | p_val       | avg_log2FC  | pct.1 | pct.2 | p_val_adj   | Foldchange_UP | Foldchange_DOWN | Ratio_pct1_pct2 |
| KDM5B                                                                                         | 0,017516805 | 0,032249573 | 0,281 | 0,109 | 1           | 1,022605417   | 0,977894292     | 2,577981651     |
| TOP3B                                                                                         | 0,041848356 | 0,032210366 | 0,062 | 0,012 | 1           | 1,022577626   | 0,977920868     | 5,166666667     |
| NUP54                                                                                         | 0,00014425  | 0,032192337 | 0,344 | 0,09  | 1           | 1,022564847   | 0,977933089     | 3,822222222     |
| SMPD2                                                                                         | 0,041848356 | 0,032093231 | 0,062 | 0,012 | 1           | 1,022494605   | 0,97800027      | 5,166666667     |
| SLC35F2                                                                                       | 0,226351275 | 0,032087443 | 0,031 | 0,008 | 1           | 1,022490503   | 0,978004194     | 3,875           |
| KRBA2                                                                                         | 0,221475664 | 0,032043602 | 0,031 | 0,008 | 1           | 1,022459432   | 0,978033914     | 3,875           |
| GMEB1                                                                                         | 0,226917872 | 0,031964087 | 0,094 | 0,043 | 1           | 1,022403079   | 0,978087821     | 2,186046512     |
| ZNF217                                                                                        | 0,05670394  | 0,031818179 | 0,156 | 0,059 | 1           | 1,022299683   | 0,978186745     | 2,644067797     |
| WDR55                                                                                         | 0,001642148 | 0,031803996 | 0,125 | 0,02  | 1           | 1,022289634   | 0,978196362     | 6,25            |
| GBA2                                                                                          | 1,53257E-05 | 0,031802975 | 0,219 | 0,031 | 0,323387973 | 1,02228891    | 0,978197054     | 7,064516129     |
| FANCA                                                                                         | 0,002263143 | 0,03176711  | 0,062 | 0,004 | 1           | 1,022263496   | 0,978221372     | 15,5            |
| TYW1                                                                                          | 0,087959196 | 0,031697567 | 0,062 | 0,016 | 1           | 1,022214221   | 0,978268527     | 3,875           |
| MARK4                                                                                         | 0,041443265 | 0,031671771 | 0,125 | 0,039 | 1           | 1,022195943   | 0,978286019     | 3,205128205     |
| TRIB3                                                                                         | 0,000524345 | 0,031600241 | 0,094 | 0,008 | 1           | 1,022145264   | 0,978334524     | 11,75           |
| MATN3                                                                                         | 0,000339359 | 0,031535338 | 0,156 | 0,023 | 1           | 1,022099281   | 0,978378538     | 6,782608696     |
| STAU1                                                                                         | 0,004796303 | 0,031481677 | 0,5   | 0,199 | 1           | 1,022061265   | 0,978414929     | 2,512562814     |
| SUFU                                                                                          | 4,80439E-05 | 0,031441994 | 0,094 | 0,004 | 1           | 1,022033152   | 0,978441842     | 23,5            |
| BORA                                                                                          | 0,004841742 | 0,031409513 | 0,031 | 0     | 1           | 1,022010142   | 0,978463871     | #DIV/0!         |
| CDCA7                                                                                         | 0,004841742 | 0,031409513 | 0,031 | 0     | 1           | 1,022010142   | 0,978463871     | #DIV/0!         |
| DDIAS                                                                                         | 0,004841742 | 0,031409513 | 0,031 | 0     | 1           | 1,022010142   | 0,978463871     | #DIV/0!         |
| DSN1                                                                                          | 0,004841742 | 0,031409513 | 0,031 | 0     | 1           | 1,022010142   | 0,978463871     | #DIV/0!         |
| EFCAB13                                                                                       | 0,004841742 | 0,031409513 | 0,031 | 0     | 1           | 1,022010142   | 0,978463871     | #DIV/0!         |
| GALNT15                                                                                       | 0,004841742 | 0,031409513 | 0,031 | 0     | 1           | 1,022010142   | 0,978463871     | #DIV/0!         |
| GINS4                                                                                         | 0,004841742 | 0,031409513 | 0,031 | 0     | 1           | 1,022010142   | 0,978463871     | #DIV/0!         |
| GPR162                                                                                        | 0,004841742 | 0,031409513 | 0,031 | 0     | 1           | 1,022010142   | 0,978463871     | #DIV/0!         |
| H3C1                                                                                          | 0,004841742 | 0,031409513 | 0,031 | 0     | 1           | 1,022010142   | 0,978463871     | #DIV/0!         |
| KHDC1                                                                                         | 0,004841742 | 0,031409513 | 0,031 | 0     | 1           | 1,022010142   | 0,978463871     | #DIV/0!         |
| KIFC1                                                                                         | 0,004841742 | 0,031409513 | 0,031 | 0     | 1           | 1,022010142   | 0,978463871     | #DIV/0!         |
| PROB1                                                                                         | 0,004841742 | 0,031409513 | 0,031 | 0     | 1           | 1,022010142   | 0,978463871     | #DIV/0!         |
| RASSF7                                                                                        | 0,004841742 | 0,031409513 | 0,031 | 0     | 1           | 1,022010142   | 0,978463871     | #DIV/0!         |

Supplementary Table 1

| Differentially expressed genes_adjacent-skin-XL_ comparing SC-Keloid vs. (SC-Myel, SC-Nonmyel) |             |             |       |       |           |               |                 |                 |
|------------------------------------------------------------------------------------------------|-------------|-------------|-------|-------|-----------|---------------|-----------------|-----------------|
| gene                                                                                           | p_val       | avg_log2FC  | pct.1 | pct.2 | p_val_adj | Foldchange_UP | Foldchange_DOWN | Ratio_pct1_pct2 |
| RNF39                                                                                          | 0,004841742 | 0,031409513 | 0,031 | 0     | 1         | 1,022010142   | 0,978463871     | #DIV/0!         |
| SGO1                                                                                           | 0,004841742 | 0,031409513 | 0,031 | 0     | 1         | 1,022010142   | 0,978463871     | #DIV/0!         |
| ZNF257                                                                                         | 0,004841742 | 0,031409513 | 0,031 | 0     | 1         | 1,022010142   | 0,978463871     | #DIV/0!         |
| ZNF488                                                                                         | 0,004841742 | 0,031409513 | 0,031 | 0     | 1         | 1,022010142   | 0,978463871     | #DIV/0!         |
| ZNF7                                                                                           | 0,000911755 | 0,031373381 | 0,156 | 0,027 | 1         | 1,021984546   | 0,978488377     | 5,777777778     |
| LSM12                                                                                          | 0,001801849 | 0,031282566 | 0,344 | 0,109 | 1         | 1,021920216   | 0,978549973     | 3,155963303     |
| HDFGL3                                                                                         | 0,000237136 | 0,031220699 | 0,219 | 0,043 | 1         | 1,021876394   | 0,978591937     | 5,093023256     |
| DLG3                                                                                           | 0,668867248 | 0,031163776 | 0,031 | 0,02  | 1         | 1,021836076   | 0,978630549     | 1,55            |
| SLC39A11                                                                                       | 0,008148126 | 0,03107802  | 0,094 | 0,016 | 1         | 1,021775338   | 0,978688722     | 5,875           |
| MBTPS2                                                                                         | 0,008607623 | 0,031064839 | 0,125 | 0,027 | 1         | 1,021766003   | 0,978697664     | 4,62962963      |
| SLC45A4                                                                                        | 0,002263143 | 0,031049819 | 0,062 | 0,004 | 1         | 1,021755366   | 0,978707853     | 15,5            |
| ALKBH8                                                                                         | 0,086278754 | 0,030954459 | 0,062 | 0,016 | 1         | 1,021687831   | 0,978772546     | 3,875           |
| ABCB9                                                                                          | 0,004841742 | 0,030945964 | 0,031 | 0     | 1         | 1,021681815   | 0,97877831      | #DIV/0!         |
| ADM2                                                                                           | 0,004841742 | 0,030945964 | 0,031 | 0     | 1         | 1,021681815   | 0,97877831      | #DIV/0!         |
| C2CD6                                                                                          | 0,004841742 | 0,030945964 | 0,031 | 0     | 1         | 1,021681815   | 0,97877831      | #DIV/0!         |
| COCH                                                                                           | 0,004841742 | 0,030945964 | 0,031 | 0     | 1         | 1,021681815   | 0,97877831      | #DIV/0!         |
| MAPK12                                                                                         | 0,004841742 | 0,030945964 | 0,031 | 0     | 1         | 1,021681815   | 0,97877831      | #DIV/0!         |
| PLCB2                                                                                          | 0,004841742 | 0,030945964 | 0,031 | 0     | 1         | 1,021681815   | 0,97877831      | #DIV/0!         |
| SNX32                                                                                          | 0,004841742 | 0,030945964 | 0,031 | 0     | 1         | 1,021681815   | 0,97877831      | #DIV/0!         |
| STKLD1                                                                                         | 0,004841742 | 0,030945964 | 0,031 | 0     | 1         | 1,021681815   | 0,97877831      | #DIV/0!         |
| TNN                                                                                            | 0,004841742 | 0,030945964 | 0,031 | 0     | 1         | 1,021681815   | 0,97877831      | #DIV/0!         |
| TNNI3                                                                                          | 0,004841742 | 0,030945964 | 0,031 | 0     | 1         | 1,021681815   | 0,97877831      | #DIV/0!         |
| ZNF174                                                                                         | 0,004841742 | 0,030945964 | 0,031 | 0     | 1         | 1,021681815   | 0,97877831      | #DIV/0!         |
| TBRG4                                                                                          | 0,00347979  | 0,030922577 | 0,188 | 0,047 | 1         | 1,021665253   | 0,978794176     | 4               |
| PRIM1                                                                                          | 0,008148126 | 0,030864319 | 0,094 | 0,016 | 1         | 1,021623998   | 0,978833702     | 5,875           |
| C6orf89                                                                                        | 0,00041116  | 0,03076718  | 0,281 | 0,07  | 1         | 1,021555213   | 0,978899611     | 4,014285714     |
| ZNF628                                                                                         | 0,008607623 | 0,030747605 | 0,125 | 0,027 | 1         | 1,021541352   | 0,978912893     | 4,62962963      |
| MTMR6                                                                                          | 0,002043075 | 0,03067287  | 0,188 | 0,043 | 1         | 1,021488435   | 0,978963605     | 4,372093023     |
| TAF3                                                                                           | 0,002025682 | 0,030660726 | 0,25  | 0,07  | 1         | 1,021479836   | 0,978971845     | 3,571428571     |
| CCNJ                                                                                           | 0,002263143 | 0,030656271 | 0,062 | 0,004 | 1         | 1,021476682   | 0,978974868     | 15,5            |

Supplementary Table 1

| Differentially expressed genes_adjacent-skin-XL_ comparing SC-Keloid vs. (SC-Myel, SC-Nonmyel) |             |             |       |       |           |               |                 |                 |
|------------------------------------------------------------------------------------------------|-------------|-------------|-------|-------|-----------|---------------|-----------------|-----------------|
| gene                                                                                           | p_val       | avg_log2FC  | pct.1 | pct.2 | p_val_adj | Foldchange_UP | Foldchange_DOWN | Ratio_pct1_pct2 |
| OAZ2                                                                                           | 0,003916378 | 0,030607778 | 0,375 | 0,137 | 1         | 1,021442348   | 0,979007774     | 2,737226277     |
| SCAMP4                                                                                         | 6,83245E-05 | 0,030581787 | 0,344 | 0,082 | 1         | 1,021423946   | 0,979025412     | 4,195121951     |
| C9orf78                                                                                        | 0,000581767 | 0,03053573  | 0,438 | 0,141 | 1         | 1,021391339   | 0,979056667     | 3,106382979     |
| NDUFA4L2                                                                                       | 0,041848356 | 0,030371354 | 0,062 | 0,012 | 1         | 1,021274971   | 0,979168224     | 5,166666667     |
| BUB1                                                                                           | 0,004841742 | 0,030352177 | 0,031 | 0     | 1         | 1,021261396   | 0,97918124      | #DIV/0!         |
| BUB1B                                                                                          | 0,004841742 | 0,030352177 | 0,031 | 0     | 1         | 1,021261396   | 0,97918124      | #DIV/0!         |
| CORT                                                                                           | 0,004841742 | 0,030352177 | 0,031 | 0     | 1         | 1,021261396   | 0,97918124      | #DIV/0!         |
| H2AC12                                                                                         | 0,004841742 | 0,030352177 | 0,031 | 0     | 1         | 1,021261396   | 0,97918124      | #DIV/0!         |
| KIF2C                                                                                          | 0,004841742 | 0,030352177 | 0,031 | 0     | 1         | 1,021261396   | 0,97918124      | #DIV/0!         |
| MND1                                                                                           | 0,004841742 | 0,030352177 | 0,031 | 0     | 1         | 1,021261396   | 0,97918124      | #DIV/0!         |
| NEXN                                                                                           | 0,004841742 | 0,030352177 | 0,031 | 0     | 1         | 1,021261396   | 0,97918124      | #DIV/0!         |
| PLK4                                                                                           | 0,004841742 | 0,030352177 | 0,031 | 0     | 1         | 1,021261396   | 0,97918124      | #DIV/0!         |
| RBPMS2                                                                                         | 0,004841742 | 0,030352177 | 0,031 | 0     | 1         | 1,021261396   | 0,97918124      | #DIV/0!         |
| SUV39H1                                                                                        | 0,004841742 | 0,030352177 | 0,031 | 0     | 1         | 1,021261396   | 0,97918124      | #DIV/0!         |
| TBC1D19                                                                                        | 0,000190919 | 0,030341949 | 0,188 | 0,031 | 1         | 1,021254155   | 0,979188182     | 6,064516129     |
| DENND1B                                                                                        | 0,004180266 | 0,030293525 | 0,125 | 0,023 | 1         | 1,021219878   | 0,979221049     | 5,434782609     |
| PANK2                                                                                          | 0,007761791 | 0,030198304 | 0,25  | 0,082 | 1         | 1,021152478   | 0,979285681     | 3,048780488     |
| ZNF697                                                                                         | 0,150155729 | 0,030198133 | 0,062 | 0,02  | 1         | 1,021152357   | 0,979285798     | 3,1             |
| CEP131                                                                                         | 0,065070981 | 0,030184395 | 0,125 | 0,043 | 1         | 1,021142633   | 0,979295123     | 2,906976744     |
| NAP1L5                                                                                         | 0,004180266 | 0,030177881 | 0,125 | 0,023 | 1         | 1,021138022   | 0,979299545     | 5,434782609     |
| FLRT1                                                                                          | 0,039505443 | 0,030081876 | 0,156 | 0,055 | 1         | 1,021070072   | 0,979364715     | 2,836363636     |
| HMSD                                                                                           | 4,80439E-05 | 0,030062219 | 0,094 | 0,004 | 1         | 1,02105616    | 0,979378059     | 23,5            |
| GPBP1L1                                                                                        | 0,000475965 | 0,030041662 | 0,25  | 0,059 | 1         | 1,021041611   | 0,979392014     | 4,237288136     |
| FAM219B                                                                                        | 0,040519001 | 0,02997637  | 0,156 | 0,055 | 1         | 1,020995403   | 0,97943634      | 2,836363636     |
| EHHADH                                                                                         | 0,226351275 | 0,029970161 | 0,031 | 0,008 | 1         | 1,020991009   | 0,979440555     | 3,875           |
| IFT140                                                                                         | 0,380266129 | 0,029918917 | 0,031 | 0,012 | 1         | 1,020954744   | 0,979475345     | 2,583333333     |
| EPN1                                                                                           | 0,001123583 | 0,029915101 | 0,344 | 0,105 | 1         | 1,020952043   | 0,979477936     | 3,276190476     |
| GEMIN7                                                                                         | 0,008607623 | 0,029870744 | 0,125 | 0,027 | 1         | 1,020920654   | 0,979508051     | 4,62962963      |
| SYT17                                                                                          | 0,226351275 | 0,029818755 | 0,031 | 0,008 | 1         | 1,020883864   | 0,97954335      | 3,875           |
| IL4R                                                                                           | 4,80439E-05 | 0,029799497 | 0,094 | 0,004 | 1         | 1,020870237   | 0,979556425     | 23,5            |

Supplementary Table 1

| Differentially expressed genes_adjacent-skin-XL_comparing SC-Keloid vs. (SC-Myel, SC-Nonmyel) |             |             |       |       |             |               |                 |                 |
|-----------------------------------------------------------------------------------------------|-------------|-------------|-------|-------|-------------|---------------|-----------------|-----------------|
| gene                                                                                          | p_val       | avg_log2FC  | pct.1 | pct.2 | p_val_adj   | Foldchange_UP | Foldchange_DOWN | Ratio_pct1_pct2 |
| INTS7                                                                                         | 0,226351275 | 0,029682339 | 0,031 | 0,008 | 1           | 1,020787338   | 0,979635976     | 3,875           |
| EVL                                                                                           | 8,97778E-06 | 0,029613335 | 0,25  | 0,039 | 0,189440096 | 1,020738515   | 0,979682833     | 6,41025641      |
| DEPDC1                                                                                        | 6,3574E-05  | 0,029582288 | 0,062 | 0     | 1           | 1,020716549   | 0,979703916     | #DIV/0!         |
| KLHL23                                                                                        | 0,082317662 | 0,029567451 | 0,031 | 0,004 | 1           | 1,020706051   | 0,979713992     | 7,75            |
| NDC80                                                                                         | 0,082317662 | 0,029466032 | 0,031 | 0,004 | 1           | 1,0206343     | 0,979782866     | 7,75            |
| RNF19A                                                                                        | 0,000163225 | 0,029405246 | 0,438 | 0,129 | 1           | 1,020591298   | 0,979824149     | 3,395348837     |
| POLR2D                                                                                        | 0,00399666  | 0,029349282 | 0,125 | 0,023 | 1           | 1,020551709   | 0,979862158     | 5,434782609     |
| DMAP1                                                                                         | 3,63697E-05 | 0,029329728 | 0,312 | 0,066 | 0,767438061 | 1,020537877   | 0,979875439     | 4,727272727     |
| C6orf223                                                                                      | 0,082317662 | 0,029281811 | 0,031 | 0,004 | 1           | 1,020503981   | 0,979907985     | 7,75            |
| GNA15                                                                                         | 0,082317662 | 0,029280113 | 0,031 | 0,004 | 1           | 1,02050278    | 0,979909138     | 7,75            |
| OGFOD2                                                                                        | 0,002263143 | 0,029272229 | 0,062 | 0,004 | 1           | 1,020497203   | 0,979914493     | 15,5            |
| L3MBTL2                                                                                       | 0,002043075 | 0,029254252 | 0,188 | 0,043 | 1           | 1,020484488   | 0,979926703     | 4,372093023     |
| IPO9                                                                                          | 0,043285695 | 0,029185303 | 0,125 | 0,039 | 1           | 1,020435718   | 0,979973537     | 3,205128205     |
| KIF23                                                                                         | 0,082317662 | 0,029160625 | 0,031 | 0,004 | 1           | 1,020418263   | 0,9799903       | 7,75            |
| TICAM2                                                                                        | 0,037506898 | 0,029073016 | 0,094 | 0,023 | 1           | 1,020356299   | 0,980049813     | 4,086956522     |
| BTBD1                                                                                         | 0,000258097 | 0,029065521 | 0,25  | 0,055 | 1           | 1,020350998   | 0,980054905     | 4,545454545     |
| ZFYVE19                                                                                       | 0,019236133 | 0,029055201 | 0,094 | 0,02  | 1           | 1,020343699   | 0,980061915     | 4,7             |
| ZNF625                                                                                        | 0,002263143 | 0,029013091 | 0,062 | 0,004 | 1           | 1,020313918   | 0,980090522     | 15,5            |
| ECHDC3                                                                                        | 0,041848356 | 0,029006714 | 0,062 | 0,012 | 1           | 1,020309407   | 0,980094854     | 5,166666667     |
| PCDHB10                                                                                       | 0,082317662 | 0,028995705 | 0,031 | 0,004 | 1           | 1,020301622   | 0,980102333     | 7,75            |
| SIRT6                                                                                         | 0,000537931 | 0,028965837 | 0,219 | 0,047 | 1           | 1,020280499   | 0,980122624     | 4,659574468     |
| DHX58                                                                                         | 0,300902654 | 0,028871007 | 0,062 | 0,027 | 1           | 1,020213436   | 0,980187051     | 2,296296296     |
| BNIP1                                                                                         | 0,002096899 | 0,028840053 | 0,156 | 0,031 | 1           | 1,020191548   | 0,980208082     | 5,032258065     |
| PARP3                                                                                         | 0,001600673 | 0,028839136 | 0,125 | 0,02  | 1           | 1,020190899   | 0,980208705     | 6,25            |
| PRMT3                                                                                         | 0,008956837 | 0,028817635 | 0,125 | 0,027 | 1           | 1,020175695   | 0,980223314     | 4,62962963      |
| PDZK1                                                                                         | 0,002263143 | 0,028809947 | 0,062 | 0,004 | 1           | 1,020170258   | 0,980228537     | 15,5            |
| CGREF1                                                                                        | 0,082317662 | 0,02879852  | 0,031 | 0,004 | 1           | 1,020162178   | 0,980236301     | 7,75            |
| NQO1                                                                                          | 0,000103236 | 0,028785752 | 0,156 | 0,02  | 1           | 1,02015315    | 0,980244976     | 7,8             |
| KCNC3                                                                                         | 0,002263143 | 0,028753629 | 0,062 | 0,004 | 1           | 1,020130435   | 0,980266803     | 15,5            |
| RTKN                                                                                          | 0,001887375 | 0,02871455  | 0,406 | 0,141 | 1           | 1,020102803   | 0,980293356     | 2,879432624     |

Supplementary Table 1

| Differentially expressed genes_adjacent-skin-XL_comparing SC-Keloid vs. (SC-Myel, SC-Nonmyel) |             |             |       |       |             |               |                 |                 |
|-----------------------------------------------------------------------------------------------|-------------|-------------|-------|-------|-------------|---------------|-----------------|-----------------|
| gene                                                                                          | p_val       | avg_log2FC  | pct.1 | pct.2 | p_val_adj   | Foldchange_UP | Foldchange_DOWN | Ratio_pct1_pct2 |
| AP4M1                                                                                         | 0,008148126 | 0,028695873 | 0,094 | 0,016 | 1           | 1,020089597   | 0,980306047     | 5,875           |
| ZNF277                                                                                        | 0,000248428 | 0,028683237 | 0,281 | 0,066 | 1           | 1,020080663   | 0,980314633     | 4,257575758     |
| STXBP1                                                                                        | 0,020365114 | 0,028630848 | 0,188 | 0,062 | 1           | 1,020043621   | 0,980350232     | 3,032258065     |
| ITGA4                                                                                         | 0,013891036 | 0,028566227 | 0,062 | 0,008 | 1           | 1,019997932   | 0,980394144     | 7,75            |
| SSH3                                                                                          | 0,036158386 | 0,028459008 | 0,094 | 0,023 | 1           | 1,01992213    | 0,980467009     | 4,086956522     |
| SMIM3                                                                                         | 0,013891036 | 0,028376424 | 0,062 | 0,008 | 1           | 1,019863748   | 0,980523135     | 7,75            |
| ATP6VOA2                                                                                      | 0,003663929 | 0,028331599 | 0,188 | 0,047 | 1           | 1,019832062   | 0,980553601     | 4               |
| RSAD1                                                                                         | 0,007736261 | 0,028284972 | 0,156 | 0,039 | 1           | 1,019799101   | 0,980585293     | 4               |
| NCAPG2                                                                                        | 0,000509339 | 0,02827546  | 0,125 | 0,016 | 1           | 1,019792377   | 0,980591758     | 7,8125          |
| LINC00663                                                                                     | 0,082317662 | 0,028206557 | 0,031 | 0,004 | 1           | 1,019743674   | 0,980638592     | 7,75            |
| RSRC1                                                                                         | 0,010891946 | 0,028146009 | 0,375 | 0,152 | 1           | 1,019700878   | 0,980679748     | 2,467105263     |
| SCAMP2                                                                                        | 0,000231507 | 0,028140662 | 0,438 | 0,133 | 1           | 1,019697098   | 0,980683383     | 3,293233083     |
| GBA                                                                                           | 0,000954402 | 0,028019234 | 0,188 | 0,039 | 1           | 1,019611277   | 0,980765928     | 4,820512821     |
| EIPR1                                                                                         | 0,000890764 | 0,027996737 | 0,156 | 0,027 | 1           | 1,019595377   | 0,980781222     | 5,777777778     |
| SERPINA5                                                                                      | 0,082317662 | 0,027993413 | 0,031 | 0,004 | 1           | 1,019593028   | 0,980783482     | 7,75            |
| TEX2                                                                                          | 0,026679107 | 0,027833923 | 0,219 | 0,082 | 1           | 1,019480318   | 0,980891913     | 2,670731707     |
| RXRB                                                                                          | 0,007020064 | 0,027830472 | 0,281 | 0,098 | 1           | 1,019477879   | 0,98089426      | 2,867346939     |
| MORN4                                                                                         | 2,40115E-05 | 0,027753074 | 0,156 | 0,016 | 0,506667402 | 1,019423188   | 0,980946884     | 9,75            |
| SARS2                                                                                         | 0,018832425 | 0,02773321  | 0,094 | 0,02  | 1           | 1,019409151   | 0,980960391     | 4,7             |
| DNASE1L1                                                                                      | 0,002263143 | 0,027719765 | 0,062 | 0,004 | 1           | 1,019399652   | 0,980969533     | 15,5            |
| SPIN4                                                                                         | 0,041848356 | 0,027619209 | 0,062 | 0,012 | 1           | 1,019328602   | 0,981037909     | 5,166666667     |
| LINC00672                                                                                     | 0,226351275 | 0,027530338 | 0,031 | 0,008 | 1           | 1,019265812   | 0,981098344     | 3,875           |
| TACC2                                                                                         | 0,013145712 | 0,027524983 | 0,188 | 0,059 | 1           | 1,019262029   | 0,981101985     | 3,186440678     |
| SLC25A20                                                                                      | 0,040857201 | 0,027500946 | 0,062 | 0,012 | 1           | 1,019245047   | 0,981118332     | 5,166666667     |
| LRR1                                                                                          | 0,001642148 | 0,02749423  | 0,125 | 0,02  | 1           | 1,019240302   | 0,981122899     | 6,25            |
| CCT4                                                                                          | 0,004661349 | 0,027351489 | 0,688 | 0,301 | 1           | 1,019139463   | 0,981219976     | 2,285714286     |
| NIPSNAP2                                                                                      | 0,000596865 | 0,027263613 | 0,375 | 0,113 | 1           | 1,019077388   | 0,981279745     | 3,318584071     |
| TCN2                                                                                          | 0,002263143 | 0,027237309 | 0,062 | 0,004 | 1           | 1,019058808   | 0,981297637     | 15,5            |
| LIG1                                                                                          | 0,001642148 | 0,027228643 | 0,125 | 0,02  | 1           | 1,019052686   | 0,981303531     | 6,25            |
| RPS6KC1                                                                                       | 0,004087528 | 0,027189657 | 0,125 | 0,023 | 1           | 1,019025149   | 0,98133005      | 5,434782609     |

Supplementary Table 1

| Differentially expressed genes_adjacent-skin-XL_ comparing SC-Keloid vs. (SC-Myel, SC-Nonmyel) |             |             |       |       |             |               |                 |                 |
|------------------------------------------------------------------------------------------------|-------------|-------------|-------|-------|-------------|---------------|-----------------|-----------------|
| gene                                                                                           | p_val       | avg_log2FC  | pct.1 | pct.2 | p_val_adj   | Foldchange_UP | Foldchange_DOWN | Ratio_pct1_pct2 |
| MAP4K4                                                                                         | 0,000524001 | 0,02717899  | 0,594 | 0,215 | 1           | 1,019017614   | 0,981337305     | 2,762790698     |
| PEBP4                                                                                          | 0,082317662 | 0,026964268 | 0,031 | 0,004 | 1           | 1,018865961   | 0,981483373     | 7,75            |
| SPATA5                                                                                         | 0,094667448 | 0,026929822 | 0,094 | 0,031 | 1           | 1,018841635   | 0,981506807     | 3,032258065     |
| TMEM79                                                                                         | 0,013891036 | 0,026918745 | 0,062 | 0,008 | 1           | 1,018833813   | 0,981514343     | 7,75            |
| C11orf24                                                                                       | 0,000910029 | 0,026888669 | 0,5   | 0,176 | 1           | 1,018812573   | 0,981534805     | 2,840909091     |
| CMPK2                                                                                          | 0,013891036 | 0,026843873 | 0,062 | 0,008 | 1           | 1,018780939   | 0,981565282     | 7,75            |
| CCAR1                                                                                          | 1,0872E-05  | 0,026818455 | 0,531 | 0,141 | 0,229410591 | 1,01876299    | 0,981582576     | 3,765957447     |
| FAM89A                                                                                         | 0,016270711 | 0,026802618 | 0,125 | 0,031 | 1           | 1,018751807   | 0,981593351     | 4,032258065     |
| CYRIB                                                                                          | 6,26098E-05 | 0,026771245 | 0,25  | 0,047 | 1           | 1,018729653   | 0,981614697     | 5,319148936     |
| LRRC14                                                                                         | 0,018832425 | 0,026743724 | 0,094 | 0,02  | 1           | 1,01871022    | 0,981633423     | 4,7             |
| ZNF107                                                                                         | 0,226351275 | 0,026731986 | 0,031 | 0,008 | 1           | 1,018701931   | 0,98164141      | 3,875           |
| GAR1                                                                                           | 0,000486986 | 0,026691575 | 0,188 | 0,035 | 1           | 1,018673397   | 0,981668906     | 5,371428571     |
| SERP1                                                                                          | 0,003582014 | 0,026589165 | 0,656 | 0,27  | 1           | 1,018601089   | 0,981738593     | 2,42962963      |
| FAM200A                                                                                        | 0,002263143 | 0,026512233 | 0,062 | 0,004 | 1           | 1,018546774   | 0,981790945     | 15,5            |
| DZIP1L                                                                                         | 0,041848356 | 0,026500854 | 0,062 | 0,012 | 1           | 1,01853874    | 0,981798689     | 5,166666667     |
| ZNF324B                                                                                        | 0,082317662 | 0,026456137 | 0,031 | 0,004 | 1           | 1,01850717    | 0,981829121     | 7,75            |
| BID                                                                                            | 0,018832425 | 0,02641551  | 0,094 | 0,02  | 1           | 1,018478489   | 0,98185677      | 4,7             |
| UBE2J1                                                                                         | 0,000104629 | 0,026411024 | 0,281 | 0,062 | 1           | 1,018475322   | 0,981859823     | 4,532258065     |
| ZSCAN21                                                                                        | 0,002594281 | 0,026391339 | 0,094 | 0,012 | 1           | 1,018461426   | 0,981873221     | 7,833333333     |
| OCIAD1                                                                                         | 0,01039994  | 0,026298279 | 0,688 | 0,32  | 1           | 1,018395733   | 0,981936558     | 2,15            |
| PSMB8-AS1                                                                                      | 4,80439E-05 | 0,026290667 | 0,094 | 0,004 | 1           | 1,018390359   | 0,981941739     | 23,5            |
| ANO8                                                                                           | 0,226351275 | 0,026256371 | 0,031 | 0,008 | 1           | 1,01836615    | 0,981965082     | 3,875           |
| TBC1D10A                                                                                       | 0,000237396 | 0,026254248 | 0,344 | 0,094 | 1           | 1,018364652   | 0,981966527     | 3,659574468     |
| UGDH-AS1                                                                                       | 0,380266129 | 0,026216014 | 0,031 | 0,012 | 1           | 1,018337663   | 0,981992551     | 2,583333333     |
| DLST                                                                                           | 0,000619548 | 0,026186375 | 0,312 | 0,086 | 1           | 1,018316743   | 0,982012725     | 3,627906977     |
| ZFYVE1                                                                                         | 0,001642148 | 0,02602359  | 0,125 | 0,02  | 1           | 1,018201848   | 0,982123536     | 6,25            |
| C12orf60                                                                                       | 0,087959196 | 0,025839118 | 0,062 | 0,016 | 1           | 1,018071663   | 0,982249125     | 3,875           |
| CWC22                                                                                          | 0,010298205 | 0,025780243 | 0,219 | 0,07  | 1           | 1,018030118   | 0,98228921      | 3,128571429     |
| DENND6A                                                                                        | 0,006917668 | 0,025699015 | 0,219 | 0,066 | 1           | 1,017972801   | 0,982344517     | 3,318181818     |
| CDC7                                                                                           | 0,386325862 | 0,025646438 | 0,031 | 0,012 | 1           | 1,017935703   | 0,982380318     | 2,583333333     |

Supplementary Table 1

| Differentially expressed genes_adjacent-skin-XL_comparing SC-Keloid vs. (SC-Myel, SC-Nonmyel) |             |             |       |       |           |               |                 |                 |
|-----------------------------------------------------------------------------------------------|-------------|-------------|-------|-------|-----------|---------------|-----------------|-----------------|
| gene                                                                                          | p_val       | avg_log2FC  | pct.1 | pct.2 | p_val_adj | Foldchange_UP | Foldchange_DOWN | Ratio_pct1_pct2 |
| TKT                                                                                           | 0,002673937 | 0,025636713 | 0,406 | 0,148 | 1         | 1,017928841   | 0,982386941     | 2,743243243     |
| USF3                                                                                          | 0,06592651  | 0,025622529 | 0,125 | 0,043 | 1         | 1,017918833   | 0,982396599     | 2,906976744     |
| RGMB-AS1                                                                                      | 0,082317662 | 0,025566269 | 0,031 | 0,004 | 1         | 1,017879139   | 0,982434909     | 7,75            |
| CMBL                                                                                          | 0,082317662 | 0,025525392 | 0,031 | 0,004 | 1         | 1,017850299   | 0,982462746     | 7,75            |
| TRAP1                                                                                         | 0,005236307 | 0,025517167 | 0,25  | 0,078 | 1         | 1,017844496   | 0,982468348     | 3,205128205     |
| SYNJ1                                                                                         | 0,145431    | 0,025499336 | 0,062 | 0,02  | 1         | 1,017831916   | 0,98248049      | 3,1             |
| ZNF337                                                                                        | 0,177416998 | 0,025474994 | 0,094 | 0,039 | 1         | 1,017814743   | 0,982497067     | 2,41025641      |
| SCFD2                                                                                         | 0,013891036 | 0,025427097 | 0,062 | 0,008 | 1         | 1,017780953   | 0,982529686     | 7,75            |
| ARHGAP42                                                                                      | 0,012579781 | 0,02539949  | 0,156 | 0,043 | 1         | 1,017761477   | 0,982548488     | 3,627906977     |
| PMPCB                                                                                         | 0,000142904 | 0,025351326 | 0,375 | 0,102 | 1         | 1,0177275     | 0,982581291     | 3,676470588     |
| ACO2                                                                                          | 0,000887986 | 0,02528525  | 0,312 | 0,09  | 1         | 1,017680888   | 0,982626294     | 3,466666667     |
| TXNDC11                                                                                       | 0,000911755 | 0,025247328 | 0,156 | 0,027 | 1         | 1,017654138   | 0,982652124     | 5,777777778     |
| RNF157                                                                                        | 0,041848356 | 0,025203045 | 0,062 | 0,012 | 1         | 1,017622903   | 0,982682286     | 5,166666667     |
| NCAPH                                                                                         | 0,082317662 | 0,025181741 | 0,031 | 0,004 | 1         | 1,017607875   | 0,982696797     | 7,75            |
| MRPL58                                                                                        | 0,016270711 | 0,025111478 | 0,125 | 0,031 | 1         | 1,017558316   | 0,982744658     | 4,032258065     |
| CASP2                                                                                         | 0,090719467 | 0,025058147 | 0,094 | 0,031 | 1         | 1,017520702   | 0,982780987     | 3,032258065     |
| FAM27C                                                                                        | 0,013891036 | 0,025052152 | 0,062 | 0,008 | 1         | 1,017516473   | 0,982785071     | 7,75            |
| MTIF3                                                                                         | 0,000336489 | 0,025030412 | 0,375 | 0,109 | 1         | 1,017501141   | 0,982799881     | 3,440366972     |
| MCM9                                                                                          | 0,013891036 | 0,025011871 | 0,062 | 0,008 | 1         | 1,017488064   | 0,982812511     | 7,75            |
| SUPT5H                                                                                        | 0,031534081 | 0,024957269 | 0,344 | 0,156 | 1         | 1,017449556   | 0,982849709     | 2,205128205     |
| GUCD1                                                                                         | 0,01390071  | 0,02491284  | 0,188 | 0,059 | 1         | 1,017418223   | 0,982879977     | 3,186440678     |
| OCRL                                                                                          | 0,013891036 | 0,024880518 | 0,062 | 0,008 | 1         | 1,01739543    | 0,982901998     | 7,75            |
| UHMK1                                                                                         | 0,056043813 | 0,024867717 | 0,156 | 0,059 | 1         | 1,017386402   | 0,982910719     | 2,644067797     |
| MTFP1                                                                                         | 0,013891036 | 0,02485794  | 0,062 | 0,008 | 1         | 1,017379507   | 0,98291738      | 7,75            |
| OSCP1                                                                                         | 0,002263143 | 0,024803662 | 0,062 | 0,004 | 1         | 1,017341232   | 0,982954361     | 15,5            |
| GSS                                                                                           | 0,000173407 | 0,024733452 | 0,188 | 0,031 | 1         | 1,017291723   | 0,983002198     | 6,064516129     |
| SLU7                                                                                          | 0,000657584 | 0,024705989 | 0,406 | 0,129 | 1         | 1,017272358   | 0,983020911     | 3,147286822     |
| ITPR3                                                                                         | 0,001087388 | 0,024640337 | 0,469 | 0,164 | 1         | 1,017226067   | 0,983065646     | 2,859756098     |
| ZBED5                                                                                         | 0,018341076 | 0,024576733 | 0,188 | 0,062 | 1         | 1,017181222   | 0,983108987     | 3,032258065     |
| BOLA3-AS1                                                                                     | 0,084624339 | 0,024561557 | 0,062 | 0,016 | 1         | 1,017170522   | 0,983119328     | 3,875           |

Supplementary Table 1

| Differentially expressed genes_adjacent-skin-XL_comparing SC-Keloid vs. (SC-Myel, SC-Nonmyel) |             |             |       |       |             |               |                 |                 |
|-----------------------------------------------------------------------------------------------|-------------|-------------|-------|-------|-------------|---------------|-----------------|-----------------|
| gene                                                                                          | p_val       | avg_log2FC  | pct.1 | pct.2 | p_val_adj   | Foldchange_UP | Foldchange_DOWN | Ratio_pct1_pct2 |
| ZNF251                                                                                        | 0,019236133 | 0,024548591 | 0,094 | 0,02  | 1           | 1,01716138    | 0,983128164     | 4,7             |
| ZNF468                                                                                        | 0,226351275 | 0,024487481 | 0,031 | 0,008 | 1           | 1,017118296   | 0,983169808     | 3,875           |
| DGKH                                                                                          | 0,013708456 | 0,024450951 | 0,188 | 0,059 | 1           | 1,017092541   | 0,983194704     | 3,186440678     |
| VASH2                                                                                         | 0,002263143 | 0,024377983 | 0,062 | 0,004 | 1           | 1,017041101   | 0,983244433     | 15,5            |
| FOXQ1                                                                                         | 0,082317662 | 0,024316491 | 0,031 | 0,004 | 1           | 1,016997752   | 0,983286342     | 7,75            |
| EHD3                                                                                          | 0,082317662 | 0,024308762 | 0,031 | 0,004 | 1           | 1,016992304   | 0,98329161      | 7,75            |
| ZNF470                                                                                        | 0,041848356 | 0,024257564 | 0,062 | 0,012 | 1           | 1,016956214   | 0,983326505     | 5,166666667     |
| RMC1                                                                                          | 0,018436147 | 0,024172611 | 0,094 | 0,02  | 1           | 1,016896332   | 0,98338441      | 4,7             |
| MTRES1                                                                                        | 0,131388145 | 0,024165947 | 0,094 | 0,035 | 1           | 1,016891635   | 0,983388953     | 2,685714286     |
| APOBEC3H                                                                                      | 0,082317662 | 0,024148678 | 0,031 | 0,004 | 1           | 1,016879463   | 0,983400724     | 7,75            |
| MRPS5                                                                                         | 4,10457E-05 | 0,024112578 | 0,406 | 0,102 | 0,866106149 | 1,016854019   | 0,983425331     | 3,980392157     |
| CANX                                                                                          | 0,044634338 | 0,024112359 | 0,781 | 0,418 | 1           | 1,016853864   | 0,983425481     | 1,868421053     |
| AL133481.1                                                                                    | 0,004841742 | 0,024050284 | 0,031 | 0     | 1           | 1,016810113   | 0,983467795     | #DIV/0!         |
| ATP2A1                                                                                        | 0,004841742 | 0,024050284 | 0,031 | 0     | 1           | 1,016810113   | 0,983467795     | #DIV/0!         |
| CD1D                                                                                          | 0,004841742 | 0,024050284 | 0,031 | 0     | 1           | 1,016810113   | 0,983467795     | #DIV/0!         |
| CMTM8                                                                                         | 0,004841742 | 0,024050284 | 0,031 | 0     | 1           | 1,016810113   | 0,983467795     | #DIV/0!         |
| CORO2A                                                                                        | 0,004841742 | 0,024050284 | 0,031 | 0     | 1           | 1,016810113   | 0,983467795     | #DIV/0!         |
| ELF3                                                                                          | 0,004841742 | 0,024050284 | 0,031 | 0     | 1           | 1,016810113   | 0,983467795     | #DIV/0!         |
| FAAP24                                                                                        | 0,004841742 | 0,024050284 | 0,031 | 0     | 1           | 1,016810113   | 0,983467795     | #DIV/0!         |
| GLB1L2                                                                                        | 0,004841742 | 0,024050284 | 0,031 | 0     | 1           | 1,016810113   | 0,983467795     | #DIV/0!         |
| LINC00265                                                                                     | 0,004841742 | 0,024050284 | 0,031 | 0     | 1           | 1,016810113   | 0,983467795     | #DIV/0!         |
| NOMO2                                                                                         | 0,004841742 | 0,024050284 | 0,031 | 0     | 1           | 1,016810113   | 0,983467795     | #DIV/0!         |
| POLR3B                                                                                        | 0,004841742 | 0,024050284 | 0,031 | 0     | 1           | 1,016810113   | 0,983467795     | #DIV/0!         |
| RNF165                                                                                        | 0,004841742 | 0,024050284 | 0,031 | 0     | 1           | 1,016810113   | 0,983467795     | #DIV/0!         |
| STAMBPL1                                                                                      | 0,004841742 | 0,024050284 | 0,031 | 0     | 1           | 1,016810113   | 0,983467795     | #DIV/0!         |
| WNT10A                                                                                        | 0,004841742 | 0,024050284 | 0,031 | 0     | 1           | 1,016810113   | 0,983467795     | #DIV/0!         |
| SMAD2                                                                                         | 0,00076551  | 0,023959543 | 0,438 | 0,145 | 1           | 1,016746161   | 0,983529654     | 3,020689655     |
| CCNJL                                                                                         | 0,000103236 | 0,023940488 | 0,156 | 0,02  | 1           | 1,016732732   | 0,983542645     | 7,8             |
| DCUN1D2                                                                                       | 0,008148126 | 0,023912472 | 0,094 | 0,016 | 1           | 1,016712988   | 0,983561745     | 5,875           |
| TBCCD1                                                                                        | 0,041848356 | 0,023899039 | 0,062 | 0,012 | 1           | 1,016703521   | 0,983570903     | 5,166666667     |



Supplementary Table 1

| Differentially expressed genes_adjacent-skin-XL_comparing SC-Keloid vs. (SC-Myel, SC-Nonmyel) |             |             |       |       |             |               |                 |                 |
|-----------------------------------------------------------------------------------------------|-------------|-------------|-------|-------|-------------|---------------|-----------------|-----------------|
| gene                                                                                          | p_val       | avg_log2FC  | pct.1 | pct.2 | p_val_adj   | Foldchange_UP | Foldchange_DOWN | Ratio_pct1_pct2 |
| LY6K                                                                                          | 0,226351275 | 0,023891253 | 0,031 | 0,008 | 1           | 1,016698034   | 0,983576211     | 3,875           |
| VCPIP1                                                                                        | 0,019329956 | 0,023872779 | 0,188 | 0,062 | 1           | 1,016685015   | 0,983588806     | 3,032258065     |
| HK1                                                                                           | 0,002012651 | 0,02386129  | 0,312 | 0,098 | 1           | 1,016676918   | 0,983596639     | 3,183673469     |
| IBA57                                                                                         | 0,226351275 | 0,023785765 | 0,031 | 0,008 | 1           | 1,016623697   | 0,983648132     | 3,875           |
| ITGA11                                                                                        | 0,082317662 | 0,023733304 | 0,031 | 0,004 | 1           | 1,01658673    | 0,9836839       | 7,75            |
| KYNU                                                                                          | 0,082317662 | 0,023670908 | 0,031 | 0,004 | 1           | 1,016542764   | 0,983726445     | 7,75            |
| SIKE1                                                                                         | 1,38769E-05 | 0,023663377 | 0,281 | 0,051 | 0,292816941 | 1,016537457   | 0,983731581     | 5,509803922     |
| KNSTRN                                                                                        | 0,000524345 | 0,023638913 | 0,094 | 0,008 | 1           | 1,01652022    | 0,983748262     | 11,75           |
| MIEF2                                                                                         | 0,082317662 | 0,023534485 | 0,031 | 0,004 | 1           | 1,016446643   | 0,983819473     | 7,75            |
| SLC26A2                                                                                       | 0,019580952 | 0,023484581 | 0,156 | 0,047 | 1           | 1,016411484   | 0,983853504     | 3,319148936     |
| TMEM237                                                                                       | 0,001642148 | 0,023433528 | 0,125 | 0,02  | 1           | 1,016375517   | 0,98388832      | 6,25            |
| HCCS                                                                                          | 0,214636476 | 0,023369842 | 0,156 | 0,082 | 1           | 1,016330651   | 0,983931754     | 1,902439024     |
| NIF3L1                                                                                        | 0,008148126 | 0,023342606 | 0,094 | 0,016 | 1           | 1,016311465   | 0,983950329     | 5,875           |
| RNF34                                                                                         | 5,86746E-05 | 0,023311562 | 0,25  | 0,047 | 1           | 1,016289596   | 0,983971502     | 5,319148936     |
| KLHDC4                                                                                        | 0,003420308 | 0,023290562 | 0,188 | 0,047 | 1           | 1,016274802   | 0,983985825     | 4               |
| APOO                                                                                          | 0,008956837 | 0,023282895 | 0,125 | 0,027 | 1           | 1,016269402   | 0,983991054     | 4,62962963      |
| BAIAP3                                                                                        | 0,004841742 | 0,023281496 | 0,031 | 0     | 1           | 1,016268416   | 0,983992009     | #DIV/0!         |
| C17orf97                                                                                      | 0,004841742 | 0,023281496 | 0,031 | 0     | 1           | 1,016268416   | 0,983992009     | #DIV/0!         |
| DLX5                                                                                          | 0,004841742 | 0,023281496 | 0,031 | 0     | 1           | 1,016268416   | 0,983992009     | #DIV/0!         |
| FAM86B1                                                                                       | 0,004841742 | 0,023281496 | 0,031 | 0     | 1           | 1,016268416   | 0,983992009     | #DIV/0!         |
| HOXD4                                                                                         | 0,004841742 | 0,023281496 | 0,031 | 0     | 1           | 1,016268416   | 0,983992009     | #DIV/0!         |
| RHPN1-AS1                                                                                     | 0,004841742 | 0,023281496 | 0,031 | 0     | 1           | 1,016268416   | 0,983992009     | #DIV/0!         |
| SAMD15                                                                                        | 0,004841742 | 0,023281496 | 0,031 | 0     | 1           | 1,016268416   | 0,983992009     | #DIV/0!         |
| SMAGP                                                                                         | 0,004841742 | 0,023281496 | 0,031 | 0     | 1           | 1,016268416   | 0,983992009     | #DIV/0!         |
| TMEM229B                                                                                      | 0,004841742 | 0,023281496 | 0,031 | 0     | 1           | 1,016268416   | 0,983992009     | #DIV/0!         |
| ZNF134                                                                                        | 0,004841742 | 0,023281496 | 0,031 | 0     | 1           | 1,016268416   | 0,983992009     | #DIV/0!         |
| ZNF229                                                                                        | 0,004841742 | 0,023281496 | 0,031 | 0     | 1           | 1,016268416   | 0,983992009     | #DIV/0!         |
| CYP26B1                                                                                       | 0,226351275 | 0,023269257 | 0,031 | 0,008 | 1           | 1,016259795   | 0,984000356     | 3,875           |
| REXO4                                                                                         | 0,000965846 | 0,023124119 | 0,219 | 0,051 | 1           | 1,016157562   | 0,984099354     | 4,294117647     |
| MAK16                                                                                         | 0,037506898 | 0,0231013   | 0,094 | 0,023 | 1           | 1,01614149    | 0,984114919     | 4,086956522     |

Supplementary Table 1

| Differentially expressed genes_adjacent-skin-XL_ comparing SC-Keloid vs. (SC-Myel, SC-Nonmyel) |             |             |       |       |           |               |                 |                 |
|------------------------------------------------------------------------------------------------|-------------|-------------|-------|-------|-----------|---------------|-----------------|-----------------|
| gene                                                                                           | p_val       | avg_log2FC  | pct.1 | pct.2 | p_val_adj | Foldchange_UP | Foldchange_DOWN | Ratio_pct1_pct2 |
| SLC25A22                                                                                       | 0,000509339 | 0,02307094  | 0,125 | 0,016 | 1         | 1,016120106   | 0,984135629     | 7,8125          |
| RAB9B                                                                                          | 4,80439E-05 | 0,023057727 | 0,094 | 0,004 | 1         | 1,0161108     | 0,984144642     | 23,5            |
| RAMP2                                                                                          | 0,082317662 | 0,023016362 | 0,031 | 0,004 | 1         | 1,016081667   | 0,98417286      | 7,75            |
| RARRES1                                                                                        | 0,226351275 | 0,02294984  | 0,031 | 0,008 | 1         | 1,016034816   | 0,984218241     | 3,875           |
| ZFP90                                                                                          | 0,043285695 | 0,022901043 | 0,125 | 0,039 | 1         | 1,016000452   | 0,984251531     | 3,205128205     |
| EAF1                                                                                           | 0,00011037  | 0,022892861 | 0,219 | 0,039 | 1         | 1,015994689   | 0,984257113     | 5,615384615     |
| LINGO1                                                                                         | 0,082317662 | 0,022876991 | 0,031 | 0,004 | 1         | 1,015983513   | 0,98426794      | 7,75            |
| DNAJC21                                                                                        | 0,008685186 | 0,022857272 | 0,406 | 0,164 | 1         | 1,015969627   | 0,984281394     | 2,475609756     |
| MR1                                                                                            | 0,000524345 | 0,022824358 | 0,094 | 0,008 | 1         | 1,015946448   | 0,98430385      | 11,75           |
| VPS11                                                                                          | 0,097375089 | 0,022804161 | 0,094 | 0,031 | 1         | 1,015932226   | 0,984317629     | 3,032258065     |
| FAM151B                                                                                        | 0,082317662 | 0,022745288 | 0,031 | 0,004 | 1         | 1,015890768   | 0,984357798     | 7,75            |
| ZNF800                                                                                         | 0,037823916 | 0,022741254 | 0,25  | 0,105 | 1         | 1,015887928   | 0,98436055      | 2,380952381     |
| MRTFB                                                                                          | 0,183526587 | 0,022695354 | 0,094 | 0,039 | 1         | 1,015855607   | 0,984391869     | 2,41025641      |
| DLG1                                                                                           | 0,000788946 | 0,022691208 | 0,469 | 0,16  | 1         | 1,015852689   | 0,984394697     | 2,93125         |
| POP1                                                                                           | 0,226351275 | 0,022683056 | 0,031 | 0,008 | 1         | 1,015846949   | 0,98440026      | 3,875           |
| TACO1                                                                                          | 0,013891036 | 0,022660246 | 0,062 | 0,008 | 1         | 1,015830887   | 0,984415824     | 7,75            |
| ZNF780B                                                                                        | 0,150155009 | 0,022624616 | 0,062 | 0,02  | 1         | 1,015805799   | 0,984440137     | 3,1             |
| ELP6                                                                                           | 0,000128726 | 0,022584013 | 0,281 | 0,062 | 1         | 1,015777211   | 0,984467843     | 4,532258065     |
| QSER1                                                                                          | 0,011715823 | 0,022566485 | 0,344 | 0,137 | 1         | 1,01576487    | 0,984479804     | 2,510948905     |
| SLX4                                                                                           | 0,082317662 | 0,022524001 | 0,031 | 0,004 | 1         | 1,015734959   | 0,984508794     | 7,75            |
| TP53INP1                                                                                       | 0,087959196 | 0,022484052 | 0,062 | 0,016 | 1         | 1,015706833   | 0,984536057     | 3,875           |
| HMG3-AS1                                                                                       | 0,041848356 | 0,022479899 | 0,062 | 0,012 | 1         | 1,015703909   | 0,984538891     | 5,166666667     |
| TMSB15B                                                                                        | 0,013891036 | 0,022446693 | 0,062 | 0,008 | 1         | 1,015680531   | 0,984561552     | 7,75            |
| PIGG                                                                                           | 0,000126424 | 0,022391951 | 0,25  | 0,051 | 1         | 1,015641993   | 0,984598911     | 4,901960784     |
| NSFL1C                                                                                         | 0,000305244 | 0,02233037  | 0,406 | 0,121 | 1         | 1,015598641   | 0,984640939     | 3,355371901     |
| RBBP7                                                                                          | 0,000350429 | 0,022244977 | 0,531 | 0,18  | 1         | 1,01553853    | 0,984699222     | 2,95            |
| A4GALT                                                                                         | 0,004841742 | 0,022161105 | 0,031 | 0     | 1         | 1,015479493   | 0,984756469     | #DIV/0!         |
| AC140912.1                                                                                     | 0,004841742 | 0,022161105 | 0,031 | 0     | 1         | 1,015479493   | 0,984756469     | #DIV/0!         |
| ANKRD2                                                                                         | 0,004841742 | 0,022161105 | 0,031 | 0     | 1         | 1,015479493   | 0,984756469     | #DIV/0!         |
| ARHGAP28                                                                                       | 0,004841742 | 0,022161105 | 0,031 | 0     | 1         | 1,015479493   | 0,984756469     | #DIV/0!         |

Supplementary Table 1

| Differentially expressed genes_adjacent-skin-XL_comparing SC-Keloid vs. (SC-Myel, SC-Nonmyel) |             |             |       |       |           |               |                 |                 |
|-----------------------------------------------------------------------------------------------|-------------|-------------|-------|-------|-----------|---------------|-----------------|-----------------|
| gene                                                                                          | p_val       | avg_log2FC  | pct.1 | pct.2 | p_val_adj | Foldchange_UP | Foldchange_DOWN | Ratio_pct1_pct2 |
| C1orf53                                                                                       | 0,004841742 | 0,022161105 | 0,031 | 0     | 1         | 1,015479493   | 0,984756469     | #DIV/0!         |
| CRMP1                                                                                         | 0,004841742 | 0,022161105 | 0,031 | 0     | 1         | 1,015479493   | 0,984756469     | #DIV/0!         |
| DDIT4L                                                                                        | 0,004841742 | 0,022161105 | 0,031 | 0     | 1         | 1,015479493   | 0,984756469     | #DIV/0!         |
| FAM182B                                                                                       | 0,004841742 | 0,022161105 | 0,031 | 0     | 1         | 1,015479493   | 0,984756469     | #DIV/0!         |
| FGF22                                                                                         | 0,004841742 | 0,022161105 | 0,031 | 0     | 1         | 1,015479493   | 0,984756469     | #DIV/0!         |
| GAREM2                                                                                        | 0,004841742 | 0,022161105 | 0,031 | 0     | 1         | 1,015479493   | 0,984756469     | #DIV/0!         |
| HOXA11                                                                                        | 0,004841742 | 0,022161105 | 0,031 | 0     | 1         | 1,015479493   | 0,984756469     | #DIV/0!         |
| HOXD1                                                                                         | 0,004841742 | 0,022161105 | 0,031 | 0     | 1         | 1,015479493   | 0,984756469     | #DIV/0!         |
| LINC02872                                                                                     | 0,004841742 | 0,022161105 | 0,031 | 0     | 1         | 1,015479493   | 0,984756469     | #DIV/0!         |
| LINC02901                                                                                     | 0,004841742 | 0,022161105 | 0,031 | 0     | 1         | 1,015479493   | 0,984756469     | #DIV/0!         |
| MCHR1                                                                                         | 0,004841742 | 0,022161105 | 0,031 | 0     | 1         | 1,015479493   | 0,984756469     | #DIV/0!         |
| SHOX2                                                                                         | 0,004841742 | 0,022161105 | 0,031 | 0     | 1         | 1,015479493   | 0,984756469     | #DIV/0!         |
| STK33                                                                                         | 0,004841742 | 0,022161105 | 0,031 | 0     | 1         | 1,015479493   | 0,984756469     | #DIV/0!         |
| SMAP1                                                                                         | 0,001108522 | 0,022013587 | 0,344 | 0,105 | 1         | 1,015375664   | 0,984857167     | 3,276190476     |
| AC092171.2                                                                                    | 0,004841742 | 0,022009639 | 0,031 | 0     | 1         | 1,015372885   | 0,984859863     | #DIV/0!         |
| AP001437.1                                                                                    | 0,004841742 | 0,022009639 | 0,031 | 0     | 1         | 1,015372885   | 0,984859863     | #DIV/0!         |
| APOL4                                                                                         | 0,004841742 | 0,022009639 | 0,031 | 0     | 1         | 1,015372885   | 0,984859863     | #DIV/0!         |
| FCRLB                                                                                         | 0,004841742 | 0,022009639 | 0,031 | 0     | 1         | 1,015372885   | 0,984859863     | #DIV/0!         |
| GPR35                                                                                         | 0,004841742 | 0,022009639 | 0,031 | 0     | 1         | 1,015372885   | 0,984859863     | #DIV/0!         |
| H4C9                                                                                          | 0,004841742 | 0,022009639 | 0,031 | 0     | 1         | 1,015372885   | 0,984859863     | #DIV/0!         |
| IKBKE                                                                                         | 0,004841742 | 0,022009639 | 0,031 | 0     | 1         | 1,015372885   | 0,984859863     | #DIV/0!         |
| JPH2                                                                                          | 0,004841742 | 0,022009639 | 0,031 | 0     | 1         | 1,015372885   | 0,984859863     | #DIV/0!         |
| KLHL35                                                                                        | 0,004841742 | 0,022009639 | 0,031 | 0     | 1         | 1,015372885   | 0,984859863     | #DIV/0!         |
| NANOS3                                                                                        | 0,004841742 | 0,022009639 | 0,031 | 0     | 1         | 1,015372885   | 0,984859863     | #DIV/0!         |
| PHETA1                                                                                        | 0,004841742 | 0,022009639 | 0,031 | 0     | 1         | 1,015372885   | 0,984859863     | #DIV/0!         |
| PNPLA3                                                                                        | 0,004841742 | 0,022009639 | 0,031 | 0     | 1         | 1,015372885   | 0,984859863     | #DIV/0!         |
| PODNL1                                                                                        | 0,004841742 | 0,022009639 | 0,031 | 0     | 1         | 1,015372885   | 0,984859863     | #DIV/0!         |
| PRICKLE4                                                                                      | 0,004841742 | 0,022009639 | 0,031 | 0     | 1         | 1,015372885   | 0,984859863     | #DIV/0!         |
| RGS8                                                                                          | 0,004841742 | 0,022009639 | 0,031 | 0     | 1         | 1,015372885   | 0,984859863     | #DIV/0!         |
| TBC1D2                                                                                        | 0,004841742 | 0,022009639 | 0,031 | 0     | 1         | 1,015372885   | 0,984859863     | #DIV/0!         |

Supplementary Table 1

| Differentially expressed genes_adjacent-skin-XL_comparing SC-Keloid vs. (SC-Myel, SC-Nonmyel) |             |             |       |       |           |               |                 |                 |
|-----------------------------------------------------------------------------------------------|-------------|-------------|-------|-------|-----------|---------------|-----------------|-----------------|
| gene                                                                                          | p_val       | avg_log2FC  | pct.1 | pct.2 | p_val_adj | Foldchange_UP | Foldchange_DOWN | Ratio_pct1_pct2 |
| MAPK8IP3                                                                                      | 0,08132778  | 0,021992152 | 0,188 | 0,082 | 1         | 1,015360577   | 0,9848718       | 2,292682927     |
| EEF1AKMT3                                                                                     | 0,002263143 | 0,02196952  | 0,062 | 0,004 | 1         | 1,01534465    | 0,98488725      | 15,5            |
| HAUS3                                                                                         | 0,027811527 | 0,021963367 | 0,125 | 0,035 | 1         | 1,015340319   | 0,984891451     | 3,571428571     |
| LINC01547                                                                                     | 0,002263143 | 0,021960452 | 0,062 | 0,004 | 1         | 1,015338267   | 0,984893441     | 15,5            |
| CYB5R4                                                                                        | 0,027811527 | 0,021910856 | 0,125 | 0,035 | 1         | 1,015303363   | 0,9849273       | 3,571428571     |
| TMLHE                                                                                         | 0,007947097 | 0,021812442 | 0,094 | 0,016 | 1         | 1,015234107   | 0,984994489     | 5,875           |
| C1QTNF1                                                                                       | 0,001560165 | 0,021808845 | 0,125 | 0,02  | 1         | 1,015231575   | 0,984996945     | 6,25            |
| SFXN4                                                                                         | 0,087959196 | 0,021782659 | 0,062 | 0,016 | 1         | 1,015213148   | 0,985014823     | 3,875           |
| RPA2                                                                                          | 0,000253221 | 0,021779867 | 0,25  | 0,055 | 1         | 1,015211183   | 0,98501673      | 4,545454545     |
| SPRYD4                                                                                        | 0,002263143 | 0,021757143 | 0,062 | 0,004 | 1         | 1,015195193   | 0,985032245     | 15,5            |
| GTF2A2                                                                                        | 0,00023336  | 0,021713112 | 0,531 | 0,176 | 1         | 1,01516421    | 0,985062309     | 3,017045455     |
| HOXB4                                                                                         | 0,002263143 | 0,021673375 | 0,062 | 0,004 | 1         | 1,015136249   | 0,985089441     | 15,5            |
| PASK                                                                                          | 0,386325862 | 0,021657914 | 0,031 | 0,012 | 1         | 1,01512537    | 0,985099998     | 2,583333333     |
| MBD4                                                                                          | 0,000764302 | 0,021419898 | 0,25  | 0,062 | 1         | 1,014957909   | 0,985262533     | 4,032258065     |
| ZNF561                                                                                        | 0,008148126 | 0,021413392 | 0,094 | 0,016 | 1         | 1,014953331   | 0,985266977     | 5,875           |
| XPO5                                                                                          | 0,041848356 | 0,021410167 | 0,062 | 0,012 | 1         | 1,014951062   | 0,985269179     | 5,166666667     |
| NPW                                                                                           | 0,041848356 | 0,021319839 | 0,062 | 0,012 | 1         | 1,014887518   | 0,985330869     | 5,166666667     |
| ZNF710                                                                                        | 0,226351275 | 0,021281723 | 0,031 | 0,008 | 1         | 1,014860704   | 0,985356902     | 3,875           |
| RNASEH1-AS1                                                                                   | 0,002594281 | 0,02126304  | 0,094 | 0,012 | 1         | 1,014847562   | 0,985369663     | 7,833333333     |
| CELSR2                                                                                        | 0,002560056 | 0,021134007 | 0,219 | 0,059 | 1         | 1,0147568     | 0,985457797     | 3,711864407     |
| PRRT3                                                                                         | 0,000509339 | 0,021015026 | 0,125 | 0,016 | 1         | 1,014673115   | 0,985539072     | 7,8125          |
| LYRM1                                                                                         | 0,016270711 | 0,020977211 | 0,125 | 0,031 | 1         | 1,014646519   | 0,985564905     | 4,032258065     |
| COIL                                                                                          | 0,149643094 | 0,020963647 | 0,125 | 0,055 | 1         | 1,014636979   | 0,985574171     | 2,272727273     |
| MRPL39                                                                                        | 0,000517394 | 0,020887045 | 0,219 | 0,047 | 1         | 1,014583107   | 0,985626503     | 4,659574468     |
| MT-ND6                                                                                        | 0,002263143 | 0,020884831 | 0,062 | 0,004 | 1         | 1,01458155    | 0,985628016     | 15,5            |
| POLR3F                                                                                        | 0,226351275 | 0,020788142 | 0,031 | 0,008 | 1         | 1,014513556   | 0,985694074     | 3,875           |
| RAB20                                                                                         | 0,013891036 | 0,020778577 | 0,062 | 0,008 | 1         | 1,014506829   | 0,98570061      | 7,75            |
| NOB1                                                                                          | 0,030583271 | 0,020771122 | 0,188 | 0,066 | 1         | 1,014501587   | 0,985705703     | 2,848484848     |
| MED17                                                                                         | 0,35458226  | 0,02076559  | 0,156 | 0,098 | 1         | 1,014497697   | 0,985709483     | 1,591836735     |
| MCM8                                                                                          | 0,002594281 | 0,020660979 | 0,094 | 0,012 | 1         | 1,014424137   | 0,98578096      | 7,833333333     |

Supplementary Table 1

| Differentially expressed genes_adjacent-skin-XL_comparing SC-Keloid vs. (SC-Myel, SC-Nonmyel) |             |             |       |       |             |               |                 |                 |
|-----------------------------------------------------------------------------------------------|-------------|-------------|-------|-------|-------------|---------------|-----------------|-----------------|
| gene                                                                                          | p_val       | avg_log2FC  | pct.1 | pct.2 | p_val_adj   | Foldchange_UP | Foldchange_DOWN | Ratio_pct1_pct2 |
| NGRN                                                                                          | 0,001462129 | 0,020456155 | 0,594 | 0,23  | 1           | 1,014280127   | 0,985920924     | 2,582608696     |
| TRPS1                                                                                         | 0,013247448 | 0,020439868 | 0,312 | 0,121 | 1           | 1,014268676   | 0,985932055     | 2,578512397     |
| TBC1D9                                                                                        | 0,380266129 | 0,020395678 | 0,031 | 0,012 | 1           | 1,014237609   | 0,985962255     | 2,583333333     |
| ZBED6CL                                                                                       | 0,226351275 | 0,020325758 | 0,031 | 0,008 | 1           | 1,014188456   | 0,98601004      | 3,875           |
| CXCL16                                                                                        | 4,22524E-05 | 0,020320274 | 0,219 | 0,035 | 0,891567246 | 1,014184601   | 0,986013788     | 6,257142857     |
| CDKN2C                                                                                        | 0,000828263 | 0,020303244 | 0,406 | 0,133 | 1           | 1,014172629   | 0,986025427     | 3,052631579     |
| DHRS4L2                                                                                       | 1,63815E-05 | 0,020300066 | 0,312 | 0,062 | 0,345665807 | 1,014170395   | 0,9860276       | 5,032258065     |
| ZFYVE27                                                                                       | 0,040252231 | 0,020215719 | 0,125 | 0,039 | 1           | 1,014111104   | 0,986085249     | 3,205128205     |
| KRR1                                                                                          | 0,037105165 | 0,020183452 | 0,312 | 0,141 | 1           | 1,014088423   | 0,986107304     | 2,212765957     |
| SIRT5                                                                                         | 0,008148126 | 0,020059147 | 0,094 | 0,016 | 1           | 1,01400105    | 0,986192272     | 5,875           |
| MOCS3                                                                                         | 0,082317662 | 0,020055355 | 0,031 | 0,004 | 1           | 1,013998385   | 0,986194864     | 7,75            |
| WWC1                                                                                          | 1,51098E-05 | 0,019918264 | 0,125 | 0,008 | 0,318831333 | 1,013902036   | 0,986288581     | 15,625          |
| DAGLB                                                                                         | 0,013891036 | 0,019897519 | 0,062 | 0,008 | 1           | 1,013887456   | 0,986302763     | 7,75            |
| ZCCHC9                                                                                        | 3,15754E-06 | 0,019880654 | 0,25  | 0,035 | 0,066627295 | 1,013875604   | 0,986314293     | 7,142857143     |
| SUSD5                                                                                         | 0,082317662 | 0,019815825 | 0,031 | 0,004 | 1           | 1,013830046   | 0,986358615     | 7,75            |
| CDC42EP5                                                                                      | 0,033341196 | 0,019740807 | 0,688 | 0,363 | 1           | 1,013777329   | 0,986409906     | 1,895316804     |
| PSAP                                                                                          | 0,147637695 | 0,019667276 | 1     | 0,773 | 1           | 1,01372566    | 0,986460183     | 1,293661061     |
| MYL6B                                                                                         | 0,000597516 | 0,019656488 | 0,344 | 0,098 | 1           | 1,013718081   | 0,986467559     | 3,510204082     |
| ZNF286A                                                                                       | 0,188205529 | 0,019635283 | 0,125 | 0,059 | 1           | 1,013703181   | 0,986482058     | 2,118644068     |
| AC007365.1                                                                                    | 0,082317662 | 0,019619122 | 0,031 | 0,004 | 1           | 1,013691826   | 0,986493108     | 7,75            |
| MCCC2                                                                                         | 0,000983579 | 0,019608882 | 0,219 | 0,051 | 1           | 1,01368463    | 0,986500111     | 4,294117647     |
| DOCK8-AS1                                                                                     | 0,082317662 | 0,019528316 | 0,031 | 0,004 | 1           | 1,013628024   | 0,986555202     | 7,75            |
| RAPGEF4                                                                                       | 0,082317662 | 0,019528316 | 0,031 | 0,004 | 1           | 1,013628024   | 0,986555202     | 7,75            |
| CENPJ                                                                                         | 0,000112833 | 0,019522262 | 0,125 | 0,012 | 1           | 1,01362377    | 0,986559342     | 10,41666667     |
| MEPCE                                                                                         | 0,041554521 | 0,019502173 | 0,156 | 0,055 | 1           | 1,013609656   | 0,98657308      | 2,836363636     |
| DHDDS                                                                                         | 0,008956837 | 0,019395968 | 0,125 | 0,027 | 1           | 1,013535041   | 0,98664571      | 4,62962963      |
| PRRC1                                                                                         | 0,003420308 | 0,019390466 | 0,188 | 0,047 | 1           | 1,013531175   | 0,986649473     | 4               |
| CSNK2A3                                                                                       | 0,082317662 | 0,019390218 | 0,031 | 0,004 | 1           | 1,013531002   | 0,986649642     | 7,75            |
| HAPLN2                                                                                        | 0,226351275 | 0,019336226 | 0,031 | 0,008 | 1           | 1,013493071   | 0,986686568     | 3,875           |
| CABCOC1                                                                                       | 0,013891036 | 0,019304626 | 0,062 | 0,008 | 1           | 1,013470873   | 0,98670818      | 7,75            |

Supplementary Table 1

| Differentially expressed genes_adjacent-skin-XL_ comparing SC-Keloid vs. (SC-Myel, SC-Nonmyel) |             |             |       |       |           |               |                 |                 |
|------------------------------------------------------------------------------------------------|-------------|-------------|-------|-------|-----------|---------------|-----------------|-----------------|
| gene                                                                                           | p_val       | avg_log2FC  | pct.1 | pct.2 | p_val_adj | Foldchange_UP | Foldchange_DOWN | Ratio_pct1_pct2 |
| SNRK-AS1                                                                                       | 0,082317662 | 0,019225457 | 0,031 | 0,004 | 1         | 1,013415259   | 0,986762327     | 7,75            |
| CDC42                                                                                          | 0,18062686  | 0,01919876  | 0,812 | 0,512 | 1         | 1,013396506   | 0,986780588     | 1,5859375       |
| SLC30A7                                                                                        | 0,000905215 | 0,019153457 | 0,25  | 0,062 | 1         | 1,013364684   | 0,986811575     | 4,032258065     |
| PHYHD1                                                                                         | 0,002010541 | 0,019125777 | 0,156 | 0,031 | 1         | 1,013345242   | 0,986830508     | 5,032258065     |
| AMN1                                                                                           | 0,003953072 | 0,019094444 | 0,156 | 0,035 | 1         | 1,013323233   | 0,986851941     | 4,457142857     |
| SPRTN                                                                                          | 0,00011289  | 0,019069918 | 0,219 | 0,039 | 1         | 1,013306007   | 0,986868718     | 5,615384615     |
| MTRNR2L1                                                                                       | 0,062914349 | 0,019062444 | 0,094 | 0,027 | 1         | 1,013300758   | 0,98687383      | 3,481481481     |
| INTS6-AS1                                                                                      | 0,540537634 | 0,01902189  | 0,031 | 0,016 | 1         | 1,013272274   | 0,986901572     | 1,9375          |
| MFSD8                                                                                          | 0,013891036 | 0,018995879 | 0,062 | 0,008 | 1         | 1,013254006   | 0,986919365     | 7,75            |
| AP5M1                                                                                          | 0,003361753 | 0,018925737 | 0,188 | 0,047 | 1         | 1,013204744   | 0,986967349     | 4               |
| TEDC1                                                                                          | 0,139907281 | 0,018924346 | 0,094 | 0,035 | 1         | 1,013203767   | 0,9869683       | 2,685714286     |
| C4orf46                                                                                        | 0,004180266 | 0,018918116 | 0,125 | 0,023 | 1         | 1,013199392   | 0,986972563     | 5,434782609     |
| TRO                                                                                            | 0,013891036 | 0,018904361 | 0,062 | 0,008 | 1         | 1,013189732   | 0,986981972     | 7,75            |
| COQ2                                                                                           | 0,013891036 | 0,018858264 | 0,062 | 0,008 | 1         | 1,013157359   | 0,987013509     | 7,75            |
| BEND6                                                                                          | 0,019236133 | 0,018851453 | 0,094 | 0,02  | 1         | 1,013152576   | 0,987018169     | 4,7             |
| ERGIC2                                                                                         | 0,000596933 | 0,018837637 | 0,562 | 0,207 | 1         | 1,013142873   | 0,987027621     | 2,714975845     |
| PPP2R5A                                                                                        | 0,00208125  | 0,018780702 | 0,188 | 0,043 | 1         | 1,013102891   | 0,987066574     | 4,372093023     |
| FAM120C                                                                                        | 0,015983649 | 0,018732204 | 0,125 | 0,031 | 1         | 1,013068835   | 0,987099756     | 4,032258065     |
| PDCD2L                                                                                         | 0,224763613 | 0,01867947  | 0,062 | 0,023 | 1         | 1,013031806   | 0,987135838     | 2,695652174     |
| LINC00526                                                                                      | 0,145431    | 0,018645379 | 0,062 | 0,02  | 1         | 1,013007868   | 0,987159164     | 3,1             |
| ACYP2                                                                                          | 0,003953072 | 0,018547748 | 0,156 | 0,035 | 1         | 1,012939317   | 0,98722597      | 4,457142857     |
| ARL14EP                                                                                        | 0,131388145 | 0,01853765  | 0,094 | 0,035 | 1         | 1,012932227   | 0,98723288      | 2,685714286     |
| RWDD2A                                                                                         | 0,082317662 | 0,018503508 | 0,031 | 0,004 | 1         | 1,012908256   | 0,987256244     | 7,75            |
| DGLUCY                                                                                         | 0,150155729 | 0,018443501 | 0,062 | 0,02  | 1         | 1,012866126   | 0,987297308     | 3,1             |
| RASAL2-AS1                                                                                     | 0,226351275 | 0,018383336 | 0,031 | 0,008 | 1         | 1,012823887   | 0,987338483     | 3,875           |
| ARMC6                                                                                          | 0,002096899 | 0,018317545 | 0,156 | 0,031 | 1         | 1,0127777     | 0,987383509     | 5,032258065     |
| NOX4                                                                                           | 0,082317662 | 0,018223644 | 0,031 | 0,004 | 1         | 1,012711784   | 0,987447777     | 7,75            |
| B3GALNT1                                                                                       | 0,082317662 | 0,018166163 | 0,031 | 0,004 | 1         | 1,012671436   | 0,987487121     | 7,75            |
| DNM3OS                                                                                         | 0,082317662 | 0,018116502 | 0,031 | 0,004 | 1         | 1,012636577   | 0,987521113     | 7,75            |
| SHQ1                                                                                           | 0,150155729 | 0,018111201 | 0,062 | 0,02  | 1         | 1,012632856   | 0,987524742     | 3,1             |

Supplementary Table 1

| Differentially expressed genes_adjacent-skin-XL_comparing SC-Keloid vs. (SC-Myel, SC-Nonmyel) |             |             |       |       |           |               |                 |                 |
|-----------------------------------------------------------------------------------------------|-------------|-------------|-------|-------|-----------|---------------|-----------------|-----------------|
| gene                                                                                          | p_val       | avg_log2FC  | pct.1 | pct.2 | p_val_adj | Foldchange_UP | Foldchange_DOWN | Ratio_pct1_pct2 |
| ACTR3C                                                                                        | 0,004841742 | 0,018000621 | 0,031 | 0     | 1         | 1,012555243   | 0,987600436     | #DIV/0!         |
| ADTRP                                                                                         | 0,004841742 | 0,018000621 | 0,031 | 0     | 1         | 1,012555243   | 0,987600436     | #DIV/0!         |
| ASB2                                                                                          | 0,004841742 | 0,018000621 | 0,031 | 0     | 1         | 1,012555243   | 0,987600436     | #DIV/0!         |
| AVIL                                                                                          | 0,004841742 | 0,018000621 | 0,031 | 0     | 1         | 1,012555243   | 0,987600436     | #DIV/0!         |
| B3GAT2                                                                                        | 0,004841742 | 0,018000621 | 0,031 | 0     | 1         | 1,012555243   | 0,987600436     | #DIV/0!         |
| C7orf31                                                                                       | 0,004841742 | 0,018000621 | 0,031 | 0     | 1         | 1,012555243   | 0,987600436     | #DIV/0!         |
| C9orf135-DT                                                                                   | 0,004841742 | 0,018000621 | 0,031 | 0     | 1         | 1,012555243   | 0,987600436     | #DIV/0!         |
| CCL26                                                                                         | 0,004841742 | 0,018000621 | 0,031 | 0     | 1         | 1,012555243   | 0,987600436     | #DIV/0!         |
| DEFB124                                                                                       | 0,004841742 | 0,018000621 | 0,031 | 0     | 1         | 1,012555243   | 0,987600436     | #DIV/0!         |
| DPYSL4                                                                                        | 0,004841742 | 0,018000621 | 0,031 | 0     | 1         | 1,012555243   | 0,987600436     | #DIV/0!         |
| EOMES                                                                                         | 0,004841742 | 0,018000621 | 0,031 | 0     | 1         | 1,012555243   | 0,987600436     | #DIV/0!         |
| HOXD3                                                                                         | 0,004841742 | 0,018000621 | 0,031 | 0     | 1         | 1,012555243   | 0,987600436     | #DIV/0!         |
| HRH1                                                                                          | 0,004841742 | 0,018000621 | 0,031 | 0     | 1         | 1,012555243   | 0,987600436     | #DIV/0!         |
| ITGB2                                                                                         | 0,004841742 | 0,018000621 | 0,031 | 0     | 1         | 1,012555243   | 0,987600436     | #DIV/0!         |
| KRT79                                                                                         | 0,004841742 | 0,018000621 | 0,031 | 0     | 1         | 1,012555243   | 0,987600436     | #DIV/0!         |
| LINC00519                                                                                     | 0,004841742 | 0,018000621 | 0,031 | 0     | 1         | 1,012555243   | 0,987600436     | #DIV/0!         |
| LINC00923                                                                                     | 0,004841742 | 0,018000621 | 0,031 | 0     | 1         | 1,012555243   | 0,987600436     | #DIV/0!         |
| LRRC73                                                                                        | 0,004841742 | 0,018000621 | 0,031 | 0     | 1         | 1,012555243   | 0,987600436     | #DIV/0!         |
| METTL27                                                                                       | 0,004841742 | 0,018000621 | 0,031 | 0     | 1         | 1,012555243   | 0,987600436     | #DIV/0!         |
| NAPA-AS1                                                                                      | 0,004841742 | 0,018000621 | 0,031 | 0     | 1         | 1,012555243   | 0,987600436     | #DIV/0!         |
| PITX1-AS1                                                                                     | 0,004841742 | 0,018000621 | 0,031 | 0     | 1         | 1,012555243   | 0,987600436     | #DIV/0!         |
| SNPH                                                                                          | 0,004841742 | 0,018000621 | 0,031 | 0     | 1         | 1,012555243   | 0,987600436     | #DIV/0!         |
| SPRED3                                                                                        | 0,004841742 | 0,018000621 | 0,031 | 0     | 1         | 1,012555243   | 0,987600436     | #DIV/0!         |
| TNFSF4                                                                                        | 0,004841742 | 0,018000621 | 0,031 | 0     | 1         | 1,012555243   | 0,987600436     | #DIV/0!         |
| ZNF772                                                                                        | 0,004841742 | 0,018000621 | 0,031 | 0     | 1         | 1,012555243   | 0,987600436     | #DIV/0!         |
| ZSCAN1                                                                                        | 0,004841742 | 0,018000621 | 0,031 | 0     | 1         | 1,012555243   | 0,987600436     | #DIV/0!         |
| ZNF563                                                                                        | 0,226351275 | 0,017971227 | 0,031 | 0,008 | 1         | 1,012534613   | 0,987620558     | 3,875           |
| RBPM5                                                                                         | 0,140867233 | 0,017969842 | 0,25  | 0,133 | 1         | 1,012533641   | 0,987621507     | 1,879699248     |
| ZFPL1                                                                                         | 0,122440788 | 0,017937062 | 0,156 | 0,07  | 1         | 1,012510635   | 0,987643947     | 2,228571429     |
| LINC00887                                                                                     | 0,226351275 | 0,017936837 | 0,031 | 0,008 | 1         | 1,012510478   | 0,987644101     | 3,875           |

Supplementary Table 1

| Differentially expressed genes_adjacent-skin-XL_comparing SC-Keloid vs. (SC-Myel, SC-Nonmyel) |             |             |       |       |             |               |                 |                 |
|-----------------------------------------------------------------------------------------------|-------------|-------------|-------|-------|-------------|---------------|-----------------|-----------------|
| gene                                                                                          | p_val       | avg_log2FC  | pct.1 | pct.2 | p_val_adj   | Foldchange_UP | Foldchange_DOWN | Ratio_pct1_pct2 |
| C8orf82                                                                                       | 0,003070984 | 0,01787635  | 0,312 | 0,102 | 1           | 1,012468027   | 0,98768551      | 3,058823529     |
| DNAJB14                                                                                       | 9,23407E-05 | 0,01783182  | 0,5   | 0,148 | 1           | 1,012436777   | 0,987715997     | 3,378378378     |
| ZNF586                                                                                        | 0,226351275 | 0,017793413 | 0,031 | 0,008 | 1           | 1,012409825   | 0,987742291     | 3,875           |
| AGAP1                                                                                         | 0,015772854 | 0,017781032 | 0,344 | 0,145 | 1           | 1,012401136   | 0,987750768     | 2,372413793     |
| DDB1                                                                                          | 6,02217E-05 | 0,017765493 | 0,469 | 0,133 | 1           | 1,012390232   | 0,987761407     | 3,526315789     |
| CCDC127                                                                                       | 0,003601563 | 0,017717913 | 0,188 | 0,047 | 1           | 1,012356844   | 0,987793984     | 4               |
| RNF20                                                                                         | 0,000509339 | 0,017679517 | 0,125 | 0,016 | 1           | 1,012329902   | 0,987820273     | 7,8125          |
| RALGAPB                                                                                       | 0,002774205 | 0,017673626 | 0,219 | 0,059 | 1           | 1,012325768   | 0,987824307     | 3,711864407     |
| PSMD6-AS2                                                                                     | 0,386325862 | 0,017647537 | 0,031 | 0,012 | 1           | 1,012307461   | 0,987842171     | 2,583333333     |
| ST7                                                                                           | 0,041848356 | 0,017572588 | 0,062 | 0,012 | 1           | 1,012254873   | 0,987893491     | 5,166666667     |
| ANKRD16                                                                                       | 0,082317662 | 0,017516927 | 0,031 | 0,004 | 1           | 1,01221582    | 0,987931606     | 7,75            |
| ENTPD7                                                                                        | 0,041848356 | 0,01742236  | 0,062 | 0,012 | 1           | 1,012149472   | 0,987996366     | 5,166666667     |
| MIX23                                                                                         | 0,008270631 | 0,017373069 | 0,125 | 0,027 | 1           | 1,012114892   | 0,988030122     | 4,62962963      |
| PHF7                                                                                          | 0,386325862 | 0,017357411 | 0,031 | 0,012 | 1           | 1,012103907   | 0,988040846     | 2,583333333     |
| OSBPL8                                                                                        | 0,000480998 | 0,017354847 | 0,5   | 0,168 | 1           | 1,012102108   | 0,988042601     | 2,976190476     |
| DTL                                                                                           | 0,082317662 | 0,017344618 | 0,031 | 0,004 | 1           | 1,012094932   | 0,988049607     | 7,75            |
| ZNRF1                                                                                         | 4,43697E-05 | 0,017337092 | 0,219 | 0,035 | 0,936244219 | 1,012089652   | 0,988054761     | 6,257142857     |
| CLEC18A                                                                                       | 0,082317662 | 0,017336258 | 0,031 | 0,004 | 1           | 1,012089068   | 0,988055332     | 7,75            |
| MINDY4                                                                                        | 0,082317662 | 0,017336258 | 0,031 | 0,004 | 1           | 1,012089068   | 0,988055332     | 7,75            |
| ZDHHC20                                                                                       | 6,53913E-05 | 0,017281054 | 0,281 | 0,059 | 1           | 1,012050341   | 0,988093141     | 4,762711864     |
| LINC01001                                                                                     | 0,540537634 | 0,017260964 | 0,031 | 0,016 | 1           | 1,012036248   | 0,9881069       | 1,9375          |
| SAMD10                                                                                        | 0,226351275 | 0,017248336 | 0,031 | 0,008 | 1           | 1,01202739    | 0,988115549     | 3,875           |
| MAGT1                                                                                         | 0,001210407 | 0,017238157 | 0,438 | 0,152 | 1           | 1,01202025    | 0,988122521     | 2,881578947     |
| PGBD4                                                                                         | 0,226351275 | 0,017118203 | 0,031 | 0,008 | 1           | 1,011936108   | 0,988204682     | 3,875           |
| SHC1                                                                                          | 1,09993E-06 | 0,017103653 | 0,375 | 0,07  | 0,023209524 | 1,011925902   | 0,988214649     | 5,357142857     |
| ELAPOR2                                                                                       | 0,226351275 | 0,017033132 | 0,031 | 0,008 | 1           | 1,011876439   | 0,988262955     | 3,875           |
| CAMK2A                                                                                        | 0,082317662 | 0,017021542 | 0,031 | 0,004 | 1           | 1,01186831    | 0,988270895     | 7,75            |
| CENPL                                                                                         | 0,29055378  | 0,017008026 | 0,062 | 0,027 | 1           | 1,01185883    | 0,988280153     | 2,296296296     |
| RNF123                                                                                        | 0,212914042 | 0,016974286 | 0,062 | 0,023 | 1           | 1,011835166   | 0,988303267     | 2,695652174     |
| DROSHA                                                                                        | 0,087959196 | 0,016947062 | 0,062 | 0,016 | 1           | 1,011816073   | 0,988321916     | 3,875           |



Supplementary Table 1

| Differentially expressed genes_adjacent-skin-XL_comparing SC-Keloid vs. (SC-Myel, SC-Nonmyel) |             |             |       |       |             |               |                 |                 |
|-----------------------------------------------------------------------------------------------|-------------|-------------|-------|-------|-------------|---------------|-----------------|-----------------|
| gene                                                                                          | p_val       | avg_log2FC  | pct.1 | pct.2 | p_val_adj   | Foldchange_UP | Foldchange_DOWN | Ratio_pct1_pct2 |
| CAMK2N2                                                                                       | 0,082317662 | 0,016943322 | 0,031 | 0,004 | 1           | 1,01181345    | 0,988324478     | 7,75            |
| ZBTB46                                                                                        | 0,226351275 | 0,016938781 | 0,031 | 0,008 | 1           | 1,011810265   | 0,988327589     | 3,875           |
| ZNF396                                                                                        | 0,082317662 | 0,016839202 | 0,031 | 0,004 | 1           | 1,01174043    | 0,988395809     | 7,75            |
| ALKBH4                                                                                        | 0,001642148 | 0,016757972 | 0,125 | 0,02  | 1           | 1,011683466   | 0,988451461     | 6,25            |
| TUBGCP3                                                                                       | 0,000200286 | 0,016755143 | 0,188 | 0,031 | 1           | 1,011681482   | 0,9884534       | 6,064516129     |
| BET1                                                                                          | 0,003791564 | 0,016732164 | 0,188 | 0,047 | 1           | 1,011665368   | 0,988469144     | 4               |
| TTC32                                                                                         | 0,006444438 | 0,016567296 | 0,219 | 0,066 | 1           | 1,011549764   | 0,98858211      | 3,318181818     |
| LAD1                                                                                          | 0,082317662 | 0,016416927 | 0,031 | 0,004 | 1           | 1,011444338   | 0,988685153     | 7,75            |
| FPGT                                                                                          | 0,004087528 | 0,016392873 | 0,125 | 0,023 | 1           | 1,011427474   | 0,988701638     | 5,434782609     |
| PSPN                                                                                          | 0,226351275 | 0,016380541 | 0,031 | 0,008 | 1           | 1,011418829   | 0,988710089     | 3,875           |
| GSK3B                                                                                         | 0,003663003 | 0,016371498 | 0,375 | 0,137 | 1           | 1,011412489   | 0,988716286     | 2,737226277     |
| ST3GAL3                                                                                       | 0,037506898 | 0,016356281 | 0,094 | 0,023 | 1           | 1,011401821   | 0,988726715     | 4,086956522     |
| ZNF569                                                                                        | 0,041848356 | 0,0163221   | 0,062 | 0,012 | 1           | 1,011377859   | 0,988750141     | 5,166666667     |
| ENPEP                                                                                         | 0,082317662 | 0,016317861 | 0,031 | 0,004 | 1           | 1,011374887   | 0,988753046     | 7,75            |
| TRIM41                                                                                        | 0,175414505 | 0,016310858 | 0,094 | 0,039 | 1           | 1,011369977   | 0,988757846     | 2,41025641      |
| BHLHE41                                                                                       | 0,093336433 | 0,016266981 | 0,094 | 0,031 | 1           | 1,011339219   | 0,988787917     | 3,032258065     |
| IPO5                                                                                          | 5,26466E-05 | 0,016232859 | 0,531 | 0,156 | 1           | 1,0113153     | 0,988811304     | 3,403846154     |
| POLH                                                                                          | 0,226351275 | 0,016212755 | 0,031 | 0,008 | 1           | 1,011301207   | 0,988825083     | 3,875           |
| FBXL20                                                                                        | 0,004107327 | 0,016172683 | 0,156 | 0,035 | 1           | 1,011273118   | 0,988852549     | 4,457142857     |
| CORO1B                                                                                        | 6,63363E-07 | 0,0161531   | 0,5   | 0,113 | 0,013997633 | 1,011259391   | 0,988865971     | 4,424778761     |
| ERI2                                                                                          | 0,002263143 | 0,016151528 | 0,062 | 0,004 | 1           | 1,011258289   | 0,988867049     | 15,5            |
| SLC25A40                                                                                      | 0,041848356 | 0,016128685 | 0,062 | 0,012 | 1           | 1,011242277   | 0,988882706     | 5,166666667     |
| SLF1                                                                                          | 2,24716E-07 | 0,01612481  | 0,25  | 0,027 | 0,004741729 | 1,011239561   | 0,988885362     | 9,259259259     |
| ABHD8                                                                                         | 0,036827385 | 0,016074994 | 0,094 | 0,023 | 1           | 1,011204644   | 0,988919509     | 4,086956522     |
| PCMTD2                                                                                        | 0,021796651 | 0,016055779 | 0,25  | 0,098 | 1           | 1,011191176   | 0,98893268      | 2,551020408     |
| RAB27B                                                                                        | 0,082317662 | 0,016036504 | 0,031 | 0,004 | 1           | 1,011177666   | 0,988945893     | 7,75            |
| ZNF213                                                                                        | 0,036827385 | 0,016015187 | 0,094 | 0,023 | 1           | 1,011162725   | 0,988960506     | 4,086956522     |
| ROCK1                                                                                         | 0,000290654 | 0,015990863 | 0,531 | 0,176 | 1           | 1,011145677   | 0,98897718      | 3,017045455     |
| EARS2                                                                                         | 0,002263143 | 0,015966517 | 0,062 | 0,004 | 1           | 1,011128614   | 0,988993869     | 15,5            |
| POLD4                                                                                         | 0,001260548 | 0,015913404 | 0,469 | 0,164 | 1           | 1,011091389   | 0,98903028      | 2,859756098     |

Supplementary Table 1

| Differentially expressed genes_adjacent-skin-XL_comparing SC-Keloid vs. (SC-Myel, SC-Nonmyel) |             |             |       |       |           |               |                 |                 |
|-----------------------------------------------------------------------------------------------|-------------|-------------|-------|-------|-----------|---------------|-----------------|-----------------|
| gene                                                                                          | p_val       | avg_log2FC  | pct.1 | pct.2 | p_val_adj | Foldchange_UP | Foldchange_DOWN | Ratio_pct1_pct2 |
| GPATCH3                                                                                       | 0,000509339 | 0,015864745 | 0,125 | 0,016 | 1         | 1,011057288   | 0,989063639     | 7,8125          |
| C5                                                                                            | 0,380671495 | 0,01585748  | 0,062 | 0,031 | 1         | 1,011052197   | 0,989068619     | 2               |
| ZNF66                                                                                         | 4,80439E-05 | 0,01585307  | 0,094 | 0,004 | 1         | 1,011049106   | 0,989071643     | 23,5            |
| AMMECR1L                                                                                      | 0,016858455 | 0,01579318  | 0,125 | 0,031 | 1         | 1,011007136   | 0,989112702     | 4,032258065     |
| DPY19L4                                                                                       | 0,000211329 | 0,015761575 | 0,312 | 0,078 | 1         | 1,010984988   | 0,989134371     | 4               |
| ADAT1                                                                                         | 0,000911755 | 0,015704286 | 0,156 | 0,027 | 1         | 1,010944843   | 0,98917365      | 5,777777778     |
| INKA2                                                                                         | 0,088329108 | 0,015661099 | 0,125 | 0,047 | 1         | 1,010914581   | 0,989203261     | 2,659574468     |
| FAS                                                                                           | 0,001968597 | 0,015657716 | 0,156 | 0,031 | 1         | 1,01091221    | 0,989205581     | 5,032258065     |
| ZNF814                                                                                        | 0,013891036 | 0,01562841  | 0,062 | 0,008 | 1         | 1,010891675   | 0,989225675     | 7,75            |
| FEZ1                                                                                          | 0,001667472 | 0,01549717  | 0,656 | 0,258 | 1         | 1,01079972    | 0,989315668     | 2,542635659     |
| SF3A1                                                                                         | 0,016972927 | 0,015480644 | 0,281 | 0,109 | 1         | 1,010788142   | 0,989327        | 2,577981651     |
| MIS12                                                                                         | 0,000509339 | 0,015452843 | 0,125 | 0,016 | 1         | 1,010768664   | 0,989346065     | 7,8125          |
| C18orf54                                                                                      | 0,008148126 | 0,015264825 | 0,094 | 0,016 | 1         | 1,010636945   | 0,989475009     | 5,875           |
| NFX1                                                                                          | 0,012579781 | 0,015260482 | 0,156 | 0,043 | 1         | 1,010633902   | 0,989477988     | 3,627906977     |
| HROB                                                                                          | 0,002263143 | 0,015257995 | 0,062 | 0,004 | 1         | 1,01063216    | 0,989479693     | 15,5            |
| ADRA1B                                                                                        | 0,004841742 | 0,015255908 | 0,031 | 0     | 1         | 1,010630698   | 0,989481125     | #DIV/0!         |
| APOBEC3B                                                                                      | 0,004841742 | 0,015255908 | 0,031 | 0     | 1         | 1,010630698   | 0,989481125     | #DIV/0!         |
| ARHGEF39                                                                                      | 0,004841742 | 0,015255908 | 0,031 | 0     | 1         | 1,010630698   | 0,989481125     | #DIV/0!         |
| BTN1A1                                                                                        | 0,004841742 | 0,015255908 | 0,031 | 0     | 1         | 1,010630698   | 0,989481125     | #DIV/0!         |
| C2orf66                                                                                       | 0,004841742 | 0,015255908 | 0,031 | 0     | 1         | 1,010630698   | 0,989481125     | #DIV/0!         |
| CD70                                                                                          | 0,004841742 | 0,015255908 | 0,031 | 0     | 1         | 1,010630698   | 0,989481125     | #DIV/0!         |
| CDC45                                                                                         | 0,004841742 | 0,015255908 | 0,031 | 0     | 1         | 1,010630698   | 0,989481125     | #DIV/0!         |
| CNIH2                                                                                         | 0,004841742 | 0,015255908 | 0,031 | 0     | 1         | 1,010630698   | 0,989481125     | #DIV/0!         |
| E2F8                                                                                          | 0,004841742 | 0,015255908 | 0,031 | 0     | 1         | 1,010630698   | 0,989481125     | #DIV/0!         |
| FBLN7                                                                                         | 0,004841742 | 0,015255908 | 0,031 | 0     | 1         | 1,010630698   | 0,989481125     | #DIV/0!         |
| FSCN3                                                                                         | 0,004841742 | 0,015255908 | 0,031 | 0     | 1         | 1,010630698   | 0,989481125     | #DIV/0!         |
| H3C2                                                                                          | 0,004841742 | 0,015255908 | 0,031 | 0     | 1         | 1,010630698   | 0,989481125     | #DIV/0!         |
| H3C8                                                                                          | 0,004841742 | 0,015255908 | 0,031 | 0     | 1         | 1,010630698   | 0,989481125     | #DIV/0!         |
| IQCH                                                                                          | 0,004841742 | 0,015255908 | 0,031 | 0     | 1         | 1,010630698   | 0,989481125     | #DIV/0!         |
| IQGAP3                                                                                        | 0,004841742 | 0,015255908 | 0,031 | 0     | 1         | 1,010630698   | 0,989481125     | #DIV/0!         |

Supplementary Table 1

| Differentially expressed genes_adjacent-skin-XL_comparing SC-Keloid vs. (SC-Myel, SC-Nonmyel) |             |             |       |       |             |               |                 |                 |
|-----------------------------------------------------------------------------------------------|-------------|-------------|-------|-------|-------------|---------------|-----------------|-----------------|
| gene                                                                                          | p_val       | avg_log2FC  | pct.1 | pct.2 | p_val_adj   | Foldchange_UP | Foldchange_DOWN | Ratio_pct1_pct2 |
| KIF20A                                                                                        | 0,004841742 | 0,015255908 | 0,031 | 0     | 1           | 1,010630698   | 0,989481125     | #DIV/0!         |
| KTN1-AS1                                                                                      | 0,004841742 | 0,015255908 | 0,031 | 0     | 1           | 1,010630698   | 0,989481125     | #DIV/0!         |
| NEK2                                                                                          | 0,004841742 | 0,015255908 | 0,031 | 0     | 1           | 1,010630698   | 0,989481125     | #DIV/0!         |
| PLEKHS1                                                                                       | 0,004841742 | 0,015255908 | 0,031 | 0     | 1           | 1,010630698   | 0,989481125     | #DIV/0!         |
| PRSS36                                                                                        | 0,004841742 | 0,015255908 | 0,031 | 0     | 1           | 1,010630698   | 0,989481125     | #DIV/0!         |
| PSTPIP1                                                                                       | 0,004841742 | 0,015255908 | 0,031 | 0     | 1           | 1,010630698   | 0,989481125     | #DIV/0!         |
| RAB39B                                                                                        | 0,004841742 | 0,015255908 | 0,031 | 0     | 1           | 1,010630698   | 0,989481125     | #DIV/0!         |
| RAD51                                                                                         | 0,004841742 | 0,015255908 | 0,031 | 0     | 1           | 1,010630698   | 0,989481125     | #DIV/0!         |
| SLC24A1                                                                                       | 0,004841742 | 0,015255908 | 0,031 | 0     | 1           | 1,010630698   | 0,989481125     | #DIV/0!         |
| SLC26A4                                                                                       | 0,004841742 | 0,015255908 | 0,031 | 0     | 1           | 1,010630698   | 0,989481125     | #DIV/0!         |
| THBS4                                                                                         | 0,004841742 | 0,015255908 | 0,031 | 0     | 1           | 1,010630698   | 0,989481125     | #DIV/0!         |
| TONSL                                                                                         | 0,004841742 | 0,015255908 | 0,031 | 0     | 1           | 1,010630698   | 0,989481125     | #DIV/0!         |
| TRIM61                                                                                        | 0,004841742 | 0,015255908 | 0,031 | 0     | 1           | 1,010630698   | 0,989481125     | #DIV/0!         |
| TSPAN2                                                                                        | 0,004841742 | 0,015255908 | 0,031 | 0     | 1           | 1,010630698   | 0,989481125     | #DIV/0!         |
| TTK                                                                                           | 0,004841742 | 0,015255908 | 0,031 | 0     | 1           | 1,010630698   | 0,989481125     | #DIV/0!         |
| WNT5B                                                                                         | 0,004841742 | 0,015255908 | 0,031 | 0     | 1           | 1,010630698   | 0,989481125     | #DIV/0!         |
| XPO4                                                                                          | 0,036158386 | 0,015238858 | 0,094 | 0,023 | 1           | 1,010618755   | 0,989492819     | 4,086956522     |
| NDUFV3                                                                                        | 0,000479192 | 0,01521685  | 0,406 | 0,121 | 1           | 1,010603338   | 0,989507913     | 3,355371901     |
| MCM2                                                                                          | 0,082317662 | 0,01517925  | 0,031 | 0,004 | 1           | 1,010576999   | 0,989533703     | 7,75            |
| ZNF584                                                                                        | 0,082317662 | 0,01517925  | 0,031 | 0,004 | 1           | 1,010576999   | 0,989533703     | 7,75            |
| SYT1                                                                                          | 0,082317662 | 0,015168485 | 0,031 | 0,004 | 1           | 1,010569459   | 0,989541086     | 7,75            |
| KCTD13                                                                                        | 0,030992783 | 0,015161683 | 0,156 | 0,051 | 1           | 1,010564694   | 0,989545752     | 3,058823529     |
| GIT2                                                                                          | 0,081162818 | 0,015130939 | 0,125 | 0,047 | 1           | 1,010543159   | 0,989566839     | 2,659574468     |
| FTSJ3                                                                                         | 0,036827385 | 0,015117482 | 0,094 | 0,023 | 1           | 1,010533733   | 0,98957607      | 4,086956522     |
| NPPC                                                                                          | 0,226351275 | 0,015095753 | 0,031 | 0,008 | 1           | 1,010518514   | 0,989590974     | 3,875           |
| PCDHGA9                                                                                       | 0,226351275 | 0,015074692 | 0,031 | 0,008 | 1           | 1,010503762   | 0,98960542      | 3,875           |
| ZNF620                                                                                        | 0,082317662 | 0,015072939 | 0,031 | 0,004 | 1           | 1,010502534   | 0,989606623     | 7,75            |
| ZNF511                                                                                        | 0,013783696 | 0,014934776 | 0,25  | 0,09  | 1           | 1,010405765   | 0,9897014       | 2,777777778     |
| PPP5D1P                                                                                       | 0,082317662 | 0,014928169 | 0,031 | 0,004 | 1           | 1,010401138   | 0,989705932     | 7,75            |
| MEX3B                                                                                         | 5,12603E-06 | 0,014920724 | 0,188 | 0,02  | 0,108164307 | 1,010395923   | 0,98971104      | 9,4             |

Supplementary Table 1

| Differentially expressed genes_adjacent-skin-XL_comparing SC-Keloid vs. (SC-Myel, SC-Nonmyel) |             |             |       |       |           |               |                 |                 |
|-----------------------------------------------------------------------------------------------|-------------|-------------|-------|-------|-----------|---------------|-----------------|-----------------|
| gene                                                                                          | p_val       | avg_log2FC  | pct.1 | pct.2 | p_val_adj | Foldchange_UP | Foldchange_DOWN | Ratio_pct1_pct2 |
| KAZALD1                                                                                       | 0,226351275 | 0,014914435 | 0,031 | 0,008 | 1         | 1,010391519   | 0,989715354     | 3,875           |
| GPATCH11                                                                                      | 0,001034587 | 0,014888593 | 0,188 | 0,039 | 1         | 1,010373421   | 0,989733082     | 4,820512821     |
| PLA2G4E                                                                                       | 0,082317662 | 0,014764647 | 0,031 | 0,004 | 1         | 1,010286621   | 0,989818116     | 7,75            |
| NUP37                                                                                         | 0,026506403 | 0,014710936 | 0,125 | 0,035 | 1         | 1,010249009   | 0,989854968     | 3,571428571     |
| SYS1                                                                                          | 0,003361753 | 0,014656211 | 0,188 | 0,047 | 1         | 1,010210689   | 0,989892516     | 4               |
| AL445989.1                                                                                    | 0,386325862 | 0,014651505 | 0,031 | 0,012 | 1         | 1,010207393   | 0,989895745     | 2,583333333     |
| AURKA                                                                                         | 0,002263143 | 0,014647794 | 0,062 | 0,004 | 1         | 1,010204795   | 0,989898291     | 15,5            |
| PLEKHG1                                                                                       | 0,011423236 | 0,014641634 | 0,156 | 0,043 | 1         | 1,010200481   | 0,989902518     | 3,627906977     |
| BTC                                                                                           | 0,082317662 | 0,014594539 | 0,031 | 0,004 | 1         | 1,010167505   | 0,989934833     | 7,75            |
| DHRS12                                                                                        | 0,003420308 | 0,01453668  | 0,188 | 0,047 | 1         | 1,010126993   | 0,989974535     | 4               |
| ADORA1                                                                                        | 0,004841742 | 0,014477918 | 0,031 | 0     | 1         | 1,010085851   | 0,990014858     | #DIV/0!         |
| ADORA2A                                                                                       | 0,004841742 | 0,014477918 | 0,031 | 0     | 1         | 1,010085851   | 0,990014858     | #DIV/0!         |
| AK7                                                                                           | 0,004841742 | 0,014477918 | 0,031 | 0     | 1         | 1,010085851   | 0,990014858     | #DIV/0!         |
| ARHGAP45                                                                                      | 0,004841742 | 0,014477918 | 0,031 | 0     | 1         | 1,010085851   | 0,990014858     | #DIV/0!         |
| BFSP1                                                                                         | 0,004841742 | 0,014477918 | 0,031 | 0     | 1         | 1,010085851   | 0,990014858     | #DIV/0!         |
| CCDC125                                                                                       | 0,004841742 | 0,014477918 | 0,031 | 0     | 1         | 1,010085851   | 0,990014858     | #DIV/0!         |
| CHRNA5                                                                                        | 0,004841742 | 0,014477918 | 0,031 | 0     | 1         | 1,010085851   | 0,990014858     | #DIV/0!         |
| CSF1R                                                                                         | 0,004841742 | 0,014477918 | 0,031 | 0     | 1         | 1,010085851   | 0,990014858     | #DIV/0!         |
| GRAMD1C                                                                                       | 0,004841742 | 0,014477918 | 0,031 | 0     | 1         | 1,010085851   | 0,990014858     | #DIV/0!         |
| GREM1                                                                                         | 0,004841742 | 0,014477918 | 0,031 | 0     | 1         | 1,010085851   | 0,990014858     | #DIV/0!         |
| H2AC13                                                                                        | 0,004841742 | 0,014477918 | 0,031 | 0     | 1         | 1,010085851   | 0,990014858     | #DIV/0!         |
| ITPRIPL1                                                                                      | 0,004841742 | 0,014477918 | 0,031 | 0     | 1         | 1,010085851   | 0,990014858     | #DIV/0!         |
| PLAC8L1                                                                                       | 0,004841742 | 0,014477918 | 0,031 | 0     | 1         | 1,010085851   | 0,990014858     | #DIV/0!         |
| PSD2                                                                                          | 0,004841742 | 0,014477918 | 0,031 | 0     | 1         | 1,010085851   | 0,990014858     | #DIV/0!         |
| PTGER1                                                                                        | 0,004841742 | 0,014477918 | 0,031 | 0     | 1         | 1,010085851   | 0,990014858     | #DIV/0!         |
| ROBO4                                                                                         | 0,004841742 | 0,014477918 | 0,031 | 0     | 1         | 1,010085851   | 0,990014858     | #DIV/0!         |
| SCG3                                                                                          | 0,004841742 | 0,014477918 | 0,031 | 0     | 1         | 1,010085851   | 0,990014858     | #DIV/0!         |
| TSNAXIP1                                                                                      | 0,004841742 | 0,014477918 | 0,031 | 0     | 1         | 1,010085851   | 0,990014858     | #DIV/0!         |
| WDR89                                                                                         | 0,004841742 | 0,014477918 | 0,031 | 0     | 1         | 1,010085851   | 0,990014858     | #DIV/0!         |
| ZSCAN22                                                                                       | 0,004841742 | 0,014477918 | 0,031 | 0     | 1         | 1,010085851   | 0,990014858     | #DIV/0!         |

Supplementary Table 1

| Differentially expressed genes_adjacent-skin-XL_comparing SC-Keloid vs. (SC-Myel, SC-Nonmyel) |             |             |       |       |             |               |                 |                 |
|-----------------------------------------------------------------------------------------------|-------------|-------------|-------|-------|-------------|---------------|-----------------|-----------------|
| gene                                                                                          | p_val       | avg_log2FC  | pct.1 | pct.2 | p_val_adj   | Foldchange_UP | Foldchange_DOWN | Ratio_pct1_pct2 |
| TEX261                                                                                        | 7,83217E-06 | 0,014467781 | 0,312 | 0,059 | 0,165266588 | 1,010078753   | 0,990021814     | 5,288135593     |
| MRPL18                                                                                        | 0,000139969 | 0,014431979 | 0,469 | 0,141 | 1           | 1,010053687   | 0,990046383     | 3,326241135     |
| CYFIP1                                                                                        | 0,000280812 | 0,014340487 | 0,406 | 0,121 | 1           | 1,009989635   | 0,990109171     | 3,355371901     |
| ACTR3B                                                                                        | 0,041848356 | 0,014326423 | 0,062 | 0,012 | 1           | 1,009979789   | 0,990118823     | 5,166666667     |
| DUSP12                                                                                        | 0,000252542 | 0,014322062 | 0,219 | 0,043 | 1           | 1,009976736   | 0,990121816     | 5,093023256     |
| FGF5                                                                                          | 0,082317662 | 0,014279815 | 0,031 | 0,004 | 1           | 1,009947161   | 0,990150811     | 7,75            |
| ZBTB11-AS1                                                                                    | 0,041848356 | 0,014266383 | 0,062 | 0,012 | 1           | 1,009937758   | 0,990160029     | 5,166666667     |
| MOCS1                                                                                         | 0,150155729 | 0,01423006  | 0,062 | 0,02  | 1           | 1,009912331   | 0,990184959     | 3,1             |
| CDK16                                                                                         | 0,001125066 | 0,014188248 | 0,281 | 0,078 | 1           | 1,009883062   | 0,990213657     | 3,602564103     |
| SMURF2                                                                                        | 0,082895042 | 0,01414728  | 0,188 | 0,082 | 1           | 1,009854385   | 0,990241776     | 2,292682927     |
| CNNM2                                                                                         | 0,036827385 | 0,014076445 | 0,094 | 0,023 | 1           | 1,009804804   | 0,990290397     | 4,086956522     |
| NOC3L                                                                                         | 0,006724752 | 0,014018127 | 0,219 | 0,066 | 1           | 1,009763985   | 0,990330428     | 3,318181818     |
| ZNF3                                                                                          | 0,236345884 | 0,013989971 | 0,094 | 0,043 | 1           | 1,009744278   | 0,990349757     | 2,186046512     |
| GFM2                                                                                          | 0,001642148 | 0,013932472 | 0,125 | 0,02  | 1           | 1,009704036   | 0,990389228     | 6,25            |
| WDPCP                                                                                         | 0,086278754 | 0,0139205   | 0,062 | 0,016 | 1           | 1,009695656   | 0,990397447     | 3,875           |
| PRKAR2B                                                                                       | 0,002517564 | 0,013820927 | 0,094 | 0,012 | 1           | 1,009625971   | 0,990465805     | 7,833333333     |
| TMEM256                                                                                       | 0,010318402 | 0,013789627 | 0,469 | 0,203 | 1           | 1,009604067   | 0,990487294     | 2,310344828     |
| PCDHGA1                                                                                       | 0,226351275 | 0,013729723 | 0,031 | 0,008 | 1           | 1,009562147   | 0,990528422     | 3,875           |
| GAS2L1                                                                                        | 0,000537931 | 0,013677632 | 0,219 | 0,047 | 1           | 1,009525696   | 0,990564187     | 4,659574468     |
| TIGD6                                                                                         | 0,086278754 | 0,013676528 | 0,062 | 0,016 | 1           | 1,009524923   | 0,990564946     | 3,875           |
| FBXL14                                                                                        | 0,082317662 | 0,013590628 | 0,031 | 0,004 | 1           | 1,009464816   | 0,990623927     | 7,75            |
| VWA8                                                                                          | 0,086278754 | 0,013588948 | 0,062 | 0,016 | 1           | 1,009463641   | 0,99062508      | 3,875           |
| EXOC2                                                                                         | 0,008148126 | 0,013573071 | 0,094 | 0,016 | 1           | 1,009452531   | 0,990635982     | 5,875           |
| TRIM6                                                                                         | 0,082317662 | 0,013555002 | 0,031 | 0,004 | 1           | 1,009439888   | 0,99064839      | 7,75            |
| HTRA3                                                                                         | 0,082317662 | 0,013537203 | 0,031 | 0,004 | 1           | 1,009427435   | 0,990660612     | 7,75            |
| DDX10                                                                                         | 0,038302319 | 0,013531797 | 0,219 | 0,086 | 1           | 1,009423652   | 0,990664324     | 2,546511628     |
| ZNF711                                                                                        | 0,036827385 | 0,013340283 | 0,094 | 0,023 | 1           | 1,009289663   | 0,99079584      | 4,086956522     |
| STX5                                                                                          | 0,000103595 | 0,013306358 | 0,375 | 0,098 | 1           | 1,00926593    | 0,990819139     | 3,826530612     |
| HAUS8                                                                                         | 0,019236133 | 0,013297016 | 0,094 | 0,02  | 1           | 1,009259395   | 0,990825555     | 4,7             |
| HHAT                                                                                          | 0,386325862 | 0,013263164 | 0,031 | 0,012 | 1           | 1,009235713   | 0,990848804     | 2,583333333     |

Supplementary Table 1

| Differentially expressed genes_adjacent-skin-XL_comparing SC-Keloid vs. (SC-Myel, SC-Nonmyel) |             |             |       |       |             |               |                 |                 |
|-----------------------------------------------------------------------------------------------|-------------|-------------|-------|-------|-------------|---------------|-----------------|-----------------|
| gene                                                                                          | p_val       | avg_log2FC  | pct.1 | pct.2 | p_val_adj   | Foldchange_UP | Foldchange_DOWN | Ratio_pct1_pct2 |
| ARFRP1                                                                                        | 0,014633666 | 0,013118447 | 0,281 | 0,105 | 1           | 1,009134481   | 0,990948202     | 2,676190476     |
| GYS1                                                                                          | 0,002594281 | 0,013109062 | 0,094 | 0,012 | 1           | 1,009127917   | 0,990954648     | 7,833333333     |
| KCNJ2                                                                                         | 0,082317662 | 0,013050652 | 0,031 | 0,004 | 1           | 1,009087061   | 0,99099477      | 7,75            |
| IMMP2L                                                                                        | 0,019871239 | 0,013021668 | 0,156 | 0,047 | 1           | 1,009066789   | 0,991014679     | 3,319148936     |
| PCDH18                                                                                        | 0,380266129 | 0,013001183 | 0,031 | 0,012 | 1           | 1,009052461   | 0,991028751     | 2,583333333     |
| RDH13                                                                                         | 0,386325862 | 0,012864067 | 0,031 | 0,012 | 1           | 1,008956564   | 0,991122944     | 2,583333333     |
| FDXR                                                                                          | 0,001642148 | 0,012791172 | 0,125 | 0,02  | 1           | 1,008905585   | 0,991173024     | 6,25            |
| TRIM59                                                                                        | 0,002263143 | 0,012772329 | 0,062 | 0,004 | 1           | 1,008892408   | 0,991185969     | 15,5            |
| MED22                                                                                         | 0,003907631 | 0,012753111 | 0,125 | 0,023 | 1           | 1,008878969   | 0,991199173     | 5,434782609     |
| GRK4                                                                                          | 0,008148126 | 0,012731957 | 0,094 | 0,016 | 1           | 1,008864177   | 0,991213707     | 5,875           |
| NCAPH2                                                                                        | 8,72119E-06 | 0,012729278 | 0,312 | 0,059 | 0,184025872 | 1,008862303   | 0,991215547     | 5,288135593     |
| LRMDA                                                                                         | 0,000425228 | 0,012708985 | 0,281 | 0,07  | 1           | 1,008848112   | 0,99122949      | 4,014285714     |
| ZSCAN9                                                                                        | 0,226351275 | 0,012704925 | 0,031 | 0,008 | 1           | 1,008845273   | 0,99123228      | 3,875           |
| GLCE                                                                                          | 0,783859705 | 0,012693488 | 0,031 | 0,023 | 1           | 1,008837276   | 0,991240138     | 1,347826087     |
| RBM34                                                                                         | 0,386325862 | 0,012685954 | 0,031 | 0,012 | 1           | 1,008832007   | 0,991245314     | 2,583333333     |
| CFAP46                                                                                        | 0,082317662 | 0,012656571 | 0,031 | 0,004 | 1           | 1,008811461   | 0,991265503     | 7,75            |
| H3C4                                                                                          | 0,002263143 | 0,012639884 | 0,062 | 0,004 | 1           | 1,008799793   | 0,991276968     | 15,5            |
| C2orf74                                                                                       | 0,036158386 | 0,012607986 | 0,094 | 0,023 | 1           | 1,008777488   | 0,991298886     | 4,086956522     |
| ANKRD37                                                                                       | 0,243500153 | 0,012548714 | 0,188 | 0,105 | 1           | 1,008736044   | 0,991339613     | 1,79047619      |
| KCNAB3                                                                                        | 0,147778936 | 0,012435851 | 0,062 | 0,02  | 1           | 1,008657133   | 0,99141717      | 3,1             |
| ANG                                                                                           | 2,40115E-05 | 0,012411871 | 0,156 | 0,016 | 0,506667402 | 1,008640368   | 0,991433649     | 9,75            |
| BANK1                                                                                         | 0,041848356 | 0,012373436 | 0,062 | 0,012 | 1           | 1,008613497   | 0,991460062     | 5,166666667     |
| ABHD18                                                                                        | 0,668867248 | 0,012363179 | 0,031 | 0,02  | 1           | 1,008606326   | 0,991467111     | 1,55            |
| NUDCD1                                                                                        | 0,057370526 | 0,01230925  | 0,156 | 0,059 | 1           | 1,008568624   | 0,991504174     | 2,644067797     |
| DBF4B                                                                                         | 0,013891036 | 0,012264421 | 0,062 | 0,008 | 1           | 1,008537286   | 0,991534983     | 7,75            |
| TTPA                                                                                          | 0,082317662 | 0,012152548 | 0,031 | 0,004 | 1           | 1,008459082   | 0,991611874     | 7,75            |
| ZNF843                                                                                        | 0,082317662 | 0,0121165   | 0,031 | 0,004 | 1           | 1,008433884   | 0,991636651     | 7,75            |
| PSPH                                                                                          | 0,019236133 | 0,012065513 | 0,094 | 0,02  | 1           | 1,008398246   | 0,991671698     | 4,7             |
| TMEM241                                                                                       | 0,226351275 | 0,012049586 | 0,031 | 0,008 | 1           | 1,008387113   | 0,991682645     | 3,875           |
| STAC3                                                                                         | 0,082317662 | 0,012016854 | 0,031 | 0,004 | 1           | 1,008364235   | 0,991705145     | 7,75            |

Supplementary Table 1

| Differentially expressed genes_adjacent-skin-XL_comparing SC-Keloid vs. (SC-Myel, SC-Nonmyel) |             |             |       |       |             |               |                 |                 |
|-----------------------------------------------------------------------------------------------|-------------|-------------|-------|-------|-------------|---------------|-----------------|-----------------|
| gene                                                                                          | p_val       | avg_log2FC  | pct.1 | pct.2 | p_val_adj   | Foldchange_UP | Foldchange_DOWN | Ratio_pct1_pct2 |
| NF2                                                                                           | 0,027370459 | 0,012013309 | 0,125 | 0,035 | 1           | 1,008361757   | 0,991707582     | 3,571428571     |
| ACOT9                                                                                         | 0,003973246 | 0,011977267 | 0,281 | 0,09  | 1           | 1,008336566   | 0,991732358     | 3,122222222     |
| ANGEL1                                                                                        | 0,380266129 | 0,011952914 | 0,031 | 0,012 | 1           | 1,008319545   | 0,991749098     | 2,583333333     |
| NLE1                                                                                          | 0,000524345 | 0,011914053 | 0,094 | 0,008 | 1           | 1,008292385   | 0,991775813     | 11,75           |
| ZNF358                                                                                        | 0,007341735 | 0,011833461 | 0,375 | 0,145 | 1           | 1,008236062   | 0,991831217     | 2,586206897     |
| MTRNR2L12                                                                                     | 0,008437622 | 0,011815606 | 0,125 | 0,027 | 1           | 1,008223583   | 0,991843493     | 4,62962963      |
| IFT122                                                                                        | 0,229249342 | 0,011782118 | 0,094 | 0,043 | 1           | 1,008200181   | 0,991866515     | 2,186046512     |
| APOC1                                                                                         | 0,082317662 | 0,011772094 | 0,031 | 0,004 | 1           | 1,008193175   | 0,991873407     | 7,75            |
| ADCY1                                                                                         | 0,013891036 | 0,011763564 | 0,062 | 0,008 | 1           | 1,008187215   | 0,991879272     | 7,75            |
| ZNF415                                                                                        | 0,000509339 | 0,011677717 | 0,125 | 0,016 | 1           | 1,008127224   | 0,991938295     | 7,8125          |
| LEMD2                                                                                         | 0,004751692 | 0,0116733   | 0,219 | 0,062 | 1           | 1,008124138   | 0,991941331     | 3,532258065     |
| PEX11A                                                                                        | 0,013891036 | 0,011631084 | 0,062 | 0,008 | 1           | 1,008094639   | 0,991970358     | 7,75            |
| NAP1L4                                                                                        | 0,000273658 | 0,011607468 | 0,5   | 0,16  | 1           | 1,008078137   | 0,991986596     | 3,125           |
| ZNF570                                                                                        | 0,533973819 | 0,011597756 | 0,031 | 0,016 | 1           | 1,008071351   | 0,991993274     | 1,9375          |
| PLEC                                                                                          | 0,036246184 | 0,011587862 | 0,75  | 0,418 | 1           | 1,008064438   | 0,992000077     | 1,794258373     |
| SNTB2                                                                                         | 0,001206362 | 0,011488807 | 0,375 | 0,121 | 1           | 1,007995227   | 0,99206819      | 3,099173554     |
| FZD3                                                                                          | 0,016205151 | 0,011475907 | 0,25  | 0,09  | 1           | 1,007986213   | 0,992077061     | 2,777777778     |
| C9orf135                                                                                      | 0,082317662 | 0,011468582 | 0,031 | 0,004 | 1           | 1,007981096   | 0,992082098     | 7,75            |
| NIPSNAP1                                                                                      | 0,036827385 | 0,011364594 | 0,094 | 0,023 | 1           | 1,007908444   | 0,992153608     | 4,086956522     |
| MCEE                                                                                          | 0,000911755 | 0,011364472 | 0,156 | 0,027 | 1           | 1,007908359   | 0,992153693     | 5,777777778     |
| EPHA3                                                                                         | 0,143111738 | 0,011352707 | 0,062 | 0,02  | 1           | 1,007900139   | 0,992161784     | 3,1             |
| LINC01069                                                                                     | 0,082317662 | 0,011328774 | 0,031 | 0,004 | 1           | 1,00788342    | 0,992178242     | 7,75            |
| MUC5B                                                                                         | 0,082317662 | 0,011287235 | 0,031 | 0,004 | 1           | 1,0078544     | 0,99220681      | 7,75            |
| ZNF805                                                                                        | 0,008148126 | 0,011274868 | 0,094 | 0,016 | 1           | 1,007845761   | 0,992215316     | 5,875           |
| PPIH                                                                                          | 0,000804279 | 0,01118279  | 0,25  | 0,062 | 1           | 1,007781439   | 0,992278644     | 4,032258065     |
| BECN1                                                                                         | 8,86008E-06 | 0,011170429 | 0,375 | 0,082 | 0,186956528 | 1,007772804   | 0,992287146     | 4,573170732     |
| MELTF-AS1                                                                                     | 0,098751938 | 0,011138105 | 0,094 | 0,031 | 1           | 1,007750224   | 0,99230938      | 3,032258065     |
| KIF18A                                                                                        | 0,082317662 | 0,011095212 | 0,031 | 0,004 | 1           | 1,007720263   | 0,992338882     | 7,75            |
| NUDT6                                                                                         | 0,041848356 | 0,01099507  | 0,062 | 0,012 | 1           | 1,007650317   | 0,992407766     | 5,166666667     |
| MCRIP2                                                                                        | 0,007736261 | 0,010948184 | 0,156 | 0,039 | 1           | 1,00761757    | 0,992440018     | 4               |

Supplementary Table 1

| Differentially expressed genes_adjacent-skin-XL_ comparing SC-Keloid vs. (SC-Myel, SC-Nonmyel) |             |              |       |       |           |               |                 |                 |
|------------------------------------------------------------------------------------------------|-------------|--------------|-------|-------|-----------|---------------|-----------------|-----------------|
| gene                                                                                           | p_val       | avg_log2FC   | pct.1 | pct.2 | p_val_adj | Foldchange_UP | Foldchange_DOWN | Ratio_pct1_pct2 |
| PMVK                                                                                           | 0,000580757 | 0,010785553  | 0,375 | 0,113 | 1         | 1,00750399    | 0,9925519       | 3,318584071     |
| FANCI                                                                                          | 0,013891036 | 0,010766958  | 0,062 | 0,008 | 1         | 1,007491005   | 0,992564693     | 7,75            |
| HYAL3                                                                                          | 0,002263143 | 0,010712216  | 0,062 | 0,004 | 1         | 1,007452777   | 0,992602356     | 15,5            |
| ZNF391                                                                                         | 0,082317662 | 0,010677822  | 0,031 | 0,004 | 1         | 1,00742876    | 0,99262602      | 7,75            |
| C19orf54                                                                                       | 0,226351275 | 0,010659924  | 0,031 | 0,008 | 1         | 1,007416262   | 0,992638334     | 3,875           |
| SPON2                                                                                          | 0,187685368 | 0,010656323  | 0,094 | 0,039 | 1         | 1,007413747   | 0,992640812     | 2,41025641      |
| SKA2                                                                                           | 0,000330614 | 0,010584783  | 0,625 | 0,215 | 1         | 1,007363793   | 0,992690036     | 2,906976744     |
| ZNF770                                                                                         | 0,008956837 | 0,010559446  | 0,125 | 0,027 | 1         | 1,007346102   | 0,99270747      | 4,62962963      |
| KRT7                                                                                           | 0,380266129 | 0,010544953  | 0,031 | 0,012 | 1         | 1,007335982   | 0,992717443     | 2,583333333     |
| GOLGA8N                                                                                        | 0,682170546 | 0,010524475  | 0,031 | 0,02  | 1         | 1,007321683   | 0,992731534     | 1,55            |
| PSMD12                                                                                         | 0,004853928 | 0,010482316  | 0,406 | 0,152 | 1         | 1,007292247   | 0,992760545     | 2,671052632     |
| PRUNE2                                                                                         | 0,221475664 | 0,010344969  | 0,031 | 0,008 | 1         | 1,007196356   | 0,992855061     | 3,875           |
| UBE2G2                                                                                         | 0,003530962 | 0,010290612  | 0,406 | 0,152 | 1         | 1,007158409   | 0,99289247      | 2,671052632     |
| VAMP8                                                                                          | 0,019236133 | 0,010130916  | 0,094 | 0,02  | 1         | 1,007046929   | 0,993002382     | 4,7             |
| KXD1                                                                                           | 0,000734952 | 0,010130644  | 0,469 | 0,16  | 1         | 1,007046739   | 0,99300257      | 2,93125         |
| ATP10B                                                                                         | 0,082317662 | 0,010097438  | 0,031 | 0,004 | 1         | 1,007023561   | 0,993025425     | 7,75            |
| SELPLG                                                                                         | 0,013891036 | 0,010086591  | 0,062 | 0,008 | 1         | 1,00701599    | 0,993032891     | 7,75            |
| NKAPD1                                                                                         | 5,86746E-05 | -0,010076384 | 0,25  | 0,047 | 1         | 0,993039917   | 1,007008865     | 5,319148936     |
| ENOX1                                                                                          | 0,082317662 | -0,010086186 | 0,031 | 0,004 | 1         | 0,99303317    | 1,007015707     | 7,75            |
| PWP1                                                                                           | 0,000215327 | -0,010221494 | 0,344 | 0,09  | 1         | 0,99294004    | 1,007110158     | 3,822222222     |
| SCO1                                                                                           | 0,036158129 | -0,010241758 | 0,094 | 0,023 | 1         | 0,992926093   | 1,007124304     | 4,086956522     |
| COPG2                                                                                          | 0,150155729 | -0,010256246 | 0,062 | 0,02  | 1         | 0,992916122   | 1,007134417     | 3,1             |
| SPOCK1                                                                                         | 0,226351275 | -0,010398146 | 0,031 | 0,008 | 1         | 0,992818466   | 1,007233481     | 3,875           |
| FBXW8                                                                                          | 0,226351275 | -0,010399973 | 0,031 | 0,008 | 1         | 0,992817208   | 1,007234758     | 3,875           |
| ZC2HC1A                                                                                        | 0,013247448 | -0,010419954 | 0,312 | 0,121 | 1         | 0,992803459   | 1,007248707     | 2,578512397     |
| CRCP                                                                                           | 0,086231137 | -0,010553997 | 0,125 | 0,047 | 1         | 0,99271122    | 1,007342296     | 2,659574468     |
| PRRG2                                                                                          | 0,226351275 | -0,010569996 | 0,031 | 0,008 | 1         | 0,992700211   | 1,007353468     | 3,875           |
| MRPS25                                                                                         | 0,000537931 | -0,01059715  | 0,219 | 0,047 | 1         | 0,992681527   | 1,007372428     | 4,659574468     |
| METAP1                                                                                         | 0,06222129  | -0,010618064 | 0,156 | 0,059 | 1         | 0,992667137   | 1,007387031     | 2,644067797     |
| CASP1                                                                                          | 0,226351275 | -0,01065939  | 0,031 | 0,008 | 1         | 0,992638702   | 1,007415888     | 3,875           |



Supplementary Table 1

| Differentially expressed genes_adjacent-skin-XL_ comparing SC-Keloid vs. (SC-Myel, SC-Nonmyel) |             |              |       |       |             |               |                 |                 |
|------------------------------------------------------------------------------------------------|-------------|--------------|-------|-------|-------------|---------------|-----------------|-----------------|
| gene                                                                                           | p_val       | avg_log2FC   | pct.1 | pct.2 | p_val_adj   | Foldchange_UP | Foldchange_DOWN | Ratio_pct1_pct2 |
| TCF19                                                                                          | 0,226351275 | -0,010675902 | 0,031 | 0,008 | 1           | 0,992627341   | 1,007427419     | 3,875           |
| BANP                                                                                           | 0,000870223 | -0,010714652 | 0,156 | 0,027 | 1           | 0,99260068    | 1,007454478     | 5,777777778     |
| DEPTOR                                                                                         | 0,150155729 | -0,010784048 | 0,062 | 0,02  | 1           | 0,992552935   | 1,007502939     | 3,1             |
| BEX5                                                                                           | 0,226351275 | -0,010786042 | 0,031 | 0,008 | 1           | 0,992551563   | 1,007504332     | 3,875           |
| UBR1                                                                                           | 0,067638366 | -0,010809034 | 0,188 | 0,078 | 1           | 0,992535745   | 1,007520389     | 2,41025641      |
| HSDL2                                                                                          | 0,019329956 | -0,010846138 | 0,188 | 0,062 | 1           | 0,992510219   | 1,007546301     | 3,032258065     |
| NOL11                                                                                          | 0,009522001 | -0,010881857 | 0,188 | 0,055 | 1           | 0,992485647   | 1,007571247     | 3,418181818     |
| NAPG                                                                                           | 0,002910424 | -0,010918726 | 0,219 | 0,059 | 1           | 0,992460283   | 1,007596996     | 3,711864407     |
| NLRX1                                                                                          | 0,041848356 | -0,010964428 | 0,062 | 0,012 | 1           | 0,992428844   | 1,007628915     | 5,166666667     |
| THEM6                                                                                          | 0,371729093 | -0,010971844 | 0,125 | 0,074 | 1           | 0,992423743   | 1,007634095     | 1,689189189     |
| FXN                                                                                            | 0,000509339 | -0,011004003 | 0,125 | 0,016 | 1           | 0,992401621   | 1,007656556     | 7,8125          |
| RAB9A                                                                                          | 0,000374084 | -0,011132592 | 0,531 | 0,176 | 1           | 0,992313171   | 1,007746374     | 3,017045455     |
| KDM4C                                                                                          | 0,004107327 | -0,011171261 | 0,156 | 0,035 | 1           | 0,992286574   | 1,007773385     | 4,457142857     |
| CBX8                                                                                           | 0,082317662 | -0,01117306  | 0,031 | 0,004 | 1           | 0,992285337   | 1,007774642     | 7,75            |
| SAPCD1                                                                                         | 0,013891036 | -0,011195829 | 0,062 | 0,008 | 1           | 0,992269676   | 1,007790547     | 7,75            |
| FUT10                                                                                          | 0,008148126 | -0,011287361 | 0,094 | 0,016 | 1           | 0,992206724   | 1,007854488     | 5,875           |
| OAS3                                                                                           | 0,087959196 | -0,011288066 | 0,062 | 0,016 | 1           | 0,992206239   | 1,007854981     | 3,875           |
| CASZ1                                                                                          | 0,226351275 | -0,01130198  | 0,031 | 0,008 | 1           | 0,99219667    | 1,007864701     | 3,875           |
| FAM219A                                                                                        | 0,004087528 | -0,011331701 | 0,125 | 0,023 | 1           | 0,99217623    | 1,007885465     | 5,434782609     |
| AKT2                                                                                           | 0,00029018  | -0,011372489 | 0,344 | 0,094 | 1           | 0,992148179   | 1,00791396      | 3,659574468     |
| R3HDM4                                                                                         | 0,000428874 | -0,011449906 | 0,312 | 0,082 | 1           | 0,992094941   | 1,007968047     | 3,804878049     |
| YPEL1                                                                                          | 0,019236133 | -0,011465498 | 0,094 | 0,02  | 1           | 0,992084218   | 1,007978941     | 4,7             |
| RALGPS2                                                                                        | 0,164073652 | -0,011509207 | 0,188 | 0,098 | 1           | 0,992054162   | 1,00800948      | 1,918367347     |
| TIPARP-AS1                                                                                     | 0,226351275 | -0,011543658 | 0,031 | 0,008 | 1           | 0,992030473   | 1,008033551     | 3,875           |
| CAMKK2                                                                                         | 9,37709E-06 | -0,011582949 | 0,375 | 0,082 | 0,197865964 | 0,992003455   | 1,008061005     | 4,573170732     |
| MOSPD3                                                                                         | 0,009242853 | -0,011779843 | 0,188 | 0,055 | 1           | 0,99186808    | 1,008198591     | 3,418181818     |
| TTI1                                                                                           | 0,002594281 | -0,011901865 | 0,094 | 0,012 | 1           | 0,991784191   | 1,008283867     | 7,833333333     |
| CCDC121                                                                                        | 0,087959196 | -0,011936702 | 0,062 | 0,016 | 1           | 0,991760243   | 1,008308215     | 3,875           |
| PRR16                                                                                          | 0,221757959 | -0,011983219 | 0,062 | 0,023 | 1           | 0,991728266   | 1,008340726     | 2,695652174     |
| NRTN                                                                                           | 0,224763613 | -0,012023365 | 0,062 | 0,023 | 1           | 0,991700669   | 1,008368786     | 2,695652174     |

Supplementary Table 1

| Differentially expressed genes_adjacent-skin-XL_ comparing SC-Keloid vs. (SC-Myel, SC-Nonmyel) |             |              |       |       |             |               |                 |                 |
|------------------------------------------------------------------------------------------------|-------------|--------------|-------|-------|-------------|---------------|-----------------|-----------------|
| gene                                                                                           | p_val       | avg_log2FC   | pct.1 | pct.2 | p_val_adj   | Foldchange_UP | Foldchange_DOWN | Ratio_pct1_pct2 |
| BBS4                                                                                           | 0,000476445 | -0,012144065 | 0,188 | 0,035 | 1           | 0,991617705   | 1,008453152     | 5,371428571     |
| BTBD8                                                                                          | 0,226351275 | -0,012156312 | 0,031 | 0,008 | 1           | 0,991609287   | 1,008461713     | 3,875           |
| H2BC5                                                                                          | 0,540537634 | -0,01217688  | 0,031 | 0,016 | 1           | 0,99159515    | 1,00847609      | 1,9375          |
| NNT-AS1                                                                                        | 0,006360213 | -0,012216757 | 0,188 | 0,051 | 1           | 0,991567742   | 1,008503966     | 3,68627451      |
| TTC30A                                                                                         | 0,386325862 | -0,012263753 | 0,031 | 0,012 | 1           | 0,991535442   | 1,008536818     | 2,583333333     |
| GINS3                                                                                          | 0,000339359 | -0,012306205 | 0,156 | 0,023 | 1           | 0,991506266   | 1,008566496     | 6,782608696     |
| MON1A                                                                                          | 0,386325862 | -0,012334632 | 0,031 | 0,012 | 1           | 0,991486729   | 1,008586369     | 2,583333333     |
| MEF2B                                                                                          | 0,386325862 | -0,012336546 | 0,031 | 0,012 | 1           | 0,991485414   | 1,008587707     | 2,583333333     |
| ZNF599                                                                                         | 0,013891036 | -0,012345663 | 0,062 | 0,008 | 1           | 0,991479149   | 1,00859408      | 7,75            |
| CRACR2B                                                                                        | 0,226351275 | -0,012403121 | 0,031 | 0,008 | 1           | 0,991439662   | 1,00863425      | 3,875           |
| DFFA                                                                                           | 0,12647311  | -0,012467064 | 0,094 | 0,035 | 1           | 0,991395721   | 1,008678956     | 2,685714286     |
| CDC23                                                                                          | 0,000931266 | -0,012467451 | 0,219 | 0,051 | 1           | 0,991395454   | 1,008679227     | 4,294117647     |
| ZNF430                                                                                         | 0,098751938 | -0,012503095 | 0,094 | 0,031 | 1           | 0,99137096    | 1,008704148     | 3,032258065     |
| LSG1                                                                                           | 0,000993746 | -0,012633575 | 0,188 | 0,039 | 1           | 0,991281303   | 1,008795381     | 4,820512821     |
| GOLT1B                                                                                         | 1,48183E-06 | -0,012657194 | 0,438 | 0,094 | 0,03126817  | 0,991265075   | 1,008811896     | 4,659574468     |
| LINC01088                                                                                      | 0,013891036 | -0,012676905 | 0,062 | 0,008 | 1           | 0,991251532   | 1,008825679     | 7,75            |
| PAQR7                                                                                          | 0,008956837 | -0,012747842 | 0,125 | 0,027 | 1           | 0,991202793   | 1,008875284     | 4,62962963      |
| ZC4H2                                                                                          | 0,004180266 | -0,013011822 | 0,125 | 0,023 | 1           | 0,991021443   | 1,009059902     | 5,434782609     |
| MRPL30                                                                                         | 0,004823168 | -0,01303788  | 0,219 | 0,062 | 1           | 0,991003543   | 1,009078128     | 3,532258065     |
| NBR1                                                                                           | 3,42564E-05 | -0,013048098 | 0,406 | 0,102 | 0,722843467 | 0,990996524   | 1,009085275     | 3,980392157     |
| PNPT1                                                                                          | 0,003568756 | -0,013124766 | 0,25  | 0,074 | 1           | 0,990943862   | 1,009138901     | 3,378378378     |
| TCF3                                                                                           | 0,000233604 | -0,013273881 | 0,312 | 0,078 | 1           | 0,990841445   | 1,00924321      | 4               |
| SRD5A3                                                                                         | 0,016858455 | -0,01327505  | 0,125 | 0,031 | 1           | 0,990840642   | 1,009244028     | 4,032258065     |
| BTN2A1                                                                                         | 0,004611611 | -0,013340409 | 0,219 | 0,062 | 1           | 0,990795754   | 1,009289751     | 3,532258065     |
| BRF2                                                                                           | 0,041848356 | -0,013390582 | 0,062 | 0,012 | 1           | 0,990761297   | 1,009324852     | 5,166666667     |
| RAP1GAP2                                                                                       | 0,062914349 | -0,013466761 | 0,094 | 0,027 | 1           | 0,990708983   | 1,009378149     | 3,481481481     |
| KIF4A                                                                                          | 0,386325862 | -0,013524062 | 0,031 | 0,012 | 1           | 0,990669635   | 1,009418241     | 2,583333333     |
| SLC38A5                                                                                        | 0,226351275 | -0,013559176 | 0,031 | 0,008 | 1           | 0,990645524   | 1,009442809     | 3,875           |
| GPR107                                                                                         | 0,089393291 | -0,01356442  | 0,125 | 0,047 | 1           | 0,990641922   | 1,009446479     | 2,659574468     |
| PMS1                                                                                           | 0,020165275 | -0,013577778 | 0,156 | 0,047 | 1           | 0,99063275    | 1,009455825     | 3,319148936     |

Supplementary Table 1

| Differentially expressed genes_adjacent-skin-XL_comparing SC-Keloid vs. (SC-Myel, SC-Nonmyel) |             |              |       |       |             |               |                 |                 |
|-----------------------------------------------------------------------------------------------|-------------|--------------|-------|-------|-------------|---------------|-----------------|-----------------|
| gene                                                                                          | p_val       | avg_log2FC   | pct.1 | pct.2 | p_val_adj   | Foldchange_UP | Foldchange_DOWN | Ratio_pct1_pct2 |
| GBP3                                                                                          | 0,000507403 | -0,013618023 | 0,219 | 0,047 | 1           | 0,990605116   | 1,009483985     | 4,659574468     |
| QRICH2                                                                                        | 0,150155729 | -0,013675767 | 0,062 | 0,02  | 1           | 0,990565468   | 1,00952439      | 3,1             |
| BLZF1                                                                                         | 0,014828336 | -0,013798656 | 0,219 | 0,074 | 1           | 0,990481095   | 1,009610386     | 2,959459459     |
| TRAM1                                                                                         | 0,000173589 | -0,013799776 | 0,688 | 0,238 | 1           | 0,990480326   | 1,009611169     | 2,890756303     |
| TBC1D8                                                                                        | 0,540537634 | -0,013881476 | 0,031 | 0,016 | 1           | 0,990424237   | 1,009668345     | 1,9375          |
| DSC2                                                                                          | 0,226351275 | -0,013940207 | 0,031 | 0,008 | 1           | 0,990383918   | 1,009709449     | 3,875           |
| GLTP                                                                                          | 0,319787484 | -0,013953897 | 0,219 | 0,133 | 1           | 0,99037452    | 1,00971903      | 1,646616541     |
| EPS15                                                                                         | 0,018087948 | -0,014010764 | 0,312 | 0,125 | 1           | 0,990335483   | 1,009758831     | 2,496           |
| FAM43A                                                                                        | 0,386325862 | -0,014016329 | 0,031 | 0,012 | 1           | 0,990331663   | 1,009762726     | 2,583333333     |
| PLCB3                                                                                         | 3,86379E-06 | -0,014073559 | 0,156 | 0,012 | 0,081529835 | 0,990292378   | 1,009802783     | 13              |
| MALT1                                                                                         | 0,150155729 | -0,014086795 | 0,062 | 0,02  | 1           | 0,990283293   | 1,009812048     | 3,1             |
| PHGDH                                                                                         | 0,020463101 | -0,014136474 | 0,156 | 0,047 | 1           | 0,990249193   | 1,009846821     | 3,319148936     |
| MLPH                                                                                          | 0,226351275 | -0,014294983 | 0,031 | 0,008 | 1           | 0,9901404     | 1,009957779     | 3,875           |
| CLIC3                                                                                         | 0,540537634 | -0,014302246 | 0,031 | 0,016 | 1           | 0,990135416   | 1,009962864     | 1,9375          |
| BCL7A                                                                                         | 0,037506898 | -0,014329764 | 0,094 | 0,023 | 1           | 0,99011653    | 1,009982128     | 4,086956522     |
| ZNF446                                                                                        | 0,796859864 | -0,014342013 | 0,031 | 0,023 | 1           | 0,990108124   | 1,009990703     | 1,347826087     |
| NDUFAF7                                                                                       | 0,138170297 | -0,014352177 | 0,094 | 0,035 | 1           | 0,990101149   | 1,009997818     | 2,685714286     |
| OXCT2                                                                                         | 0,082317662 | -0,014379587 | 0,031 | 0,004 | 1           | 0,990082337   | 1,010017008     | 7,75            |
| CBWD6                                                                                         | 0,386325862 | -0,014457036 | 0,031 | 0,012 | 1           | 0,990029188   | 1,01007123      | 2,583333333     |
| PCSK5                                                                                         | 0,06592651  | -0,014513571 | 0,125 | 0,043 | 1           | 0,989990392   | 1,010110813     | 2,906976744     |
| C11orf65                                                                                      | 0,386325862 | -0,014561412 | 0,031 | 0,012 | 1           | 0,989957564   | 1,01014431      | 2,583333333     |
| TIGD1                                                                                         | 0,540537634 | -0,014658285 | 0,031 | 0,016 | 1           | 0,989891093   | 1,010212141     | 1,9375          |
| MYO5A                                                                                         | 0,021727091 | -0,014768683 | 0,219 | 0,078 | 1           | 0,989815348   | 1,010289447     | 2,807692308     |
| LANCL2                                                                                        | 0,063925678 | -0,014821852 | 0,094 | 0,027 | 1           | 0,989778869   | 1,010326681     | 3,481481481     |
| STOML1                                                                                        | 0,001055584 | -0,014832108 | 0,188 | 0,039 | 1           | 0,989771833   | 1,010333863     | 4,820512821     |
| MGST2                                                                                         | 0,668867248 | -0,014860835 | 0,031 | 0,02  | 1           | 0,989752125   | 1,010353981     | 1,55            |
| LRCH2                                                                                         | 0,675506228 | -0,014946147 | 0,031 | 0,02  | 1           | 0,989693599   | 1,010413729     | 1,55            |
| PAXIP1                                                                                        | 0,087959196 | -0,014964384 | 0,062 | 0,016 | 1           | 0,989681089   | 1,010426502     | 3,875           |
| SRR                                                                                           | 0,224763613 | -0,015013002 | 0,062 | 0,023 | 1           | 0,989647737   | 1,010460553     | 2,695652174     |
| ROR1                                                                                          | 0,082317662 | -0,015029507 | 0,031 | 0,004 | 1           | 0,989636415   | 1,010472113     | 7,75            |

Supplementary Table 1

| Differentially expressed genes_adjacent-skin-XL_comparing SC-Keloid vs. (SC-Myel, SC-Nonmyel) |             |              |       |       |             |               |                 |                 |
|-----------------------------------------------------------------------------------------------|-------------|--------------|-------|-------|-------------|---------------|-----------------|-----------------|
| gene                                                                                          | p_val       | avg_log2FC   | pct.1 | pct.2 | p_val_adj   | Foldchange_UP | Foldchange_DOWN | Ratio_pct1_pct2 |
| SAAL1                                                                                         | 0,004180266 | -0,015040727 | 0,125 | 0,023 | 1           | 0,989628719   | 1,010479972     | 5,434782609     |
| PROSER1                                                                                       | 0,150155729 | -0,015053865 | 0,062 | 0,02  | 1           | 0,989619707   | 1,010489174     | 3,1             |
| IRX2                                                                                          | 0,386325862 | -0,015097701 | 0,031 | 0,012 | 1           | 0,989589638   | 1,010519878     | 2,583333333     |
| NT5M                                                                                          | 0,041848356 | -0,015137609 | 0,062 | 0,012 | 1           | 0,989562264   | 1,010547831     | 5,166666667     |
| LRP2BP                                                                                        | 0,796859864 | -0,01533443  | 0,031 | 0,023 | 1           | 0,989427271   | 1,010685706     | 1,347826087     |
| DUOX1                                                                                         | 0,675506228 | -0,015348792 | 0,031 | 0,02  | 1           | 0,989417422   | 1,010695767     | 1,55            |
| YPEL4                                                                                         | 0,226351275 | -0,015384842 | 0,031 | 0,008 | 1           | 0,989392698   | 1,010721023     | 3,875           |
| FASTKD5                                                                                       | 0,540537634 | -0,015420756 | 0,031 | 0,016 | 1           | 0,989368069   | 1,010746183     | 1,9375          |
| ZNF653                                                                                        | 0,668867248 | -0,015439251 | 0,031 | 0,02  | 1           | 0,989355386   | 1,010759141     | 1,55            |
| PHKG1                                                                                         | 0,043692883 | -0,015537914 | 0,156 | 0,055 | 1           | 0,989287728   | 1,010828267     | 2,836363636     |
| STRN                                                                                          | 0,007635721 | -0,015549478 | 0,281 | 0,098 | 1           | 0,989279799   | 1,010836369     | 2,867346939     |
| WASHC3                                                                                        | 0,000345651 | -0,015749602 | 0,406 | 0,121 | 1           | 0,98914258    | 1,010976598     | 3,355371901     |
| ZNF22                                                                                         | 6,52388E-06 | -0,015815363 | 0,562 | 0,148 | 0,137660362 | 0,989097494   | 1,011022681     | 3,797297297     |
| MFSD1                                                                                         | 0,01460911  | -0,015837658 | 0,25  | 0,09  | 1           | 0,989082208   | 1,011038306     | 2,777777778     |
| TDRD7                                                                                         | 0,540537634 | -0,015842788 | 0,031 | 0,016 | 1           | 0,989078691   | 1,011041901     | 1,9375          |
| RSPRY1                                                                                        | 0,045949521 | -0,015859814 | 0,219 | 0,09  | 1           | 0,989067019   | 1,011053832     | 2,433333333     |
| LFNG                                                                                          | 0,041848356 | -0,015872172 | 0,062 | 0,012 | 1           | 0,989058547   | 1,011062493     | 5,166666667     |
| TAF2                                                                                          | 0,183526587 | -0,015885307 | 0,094 | 0,039 | 1           | 0,989049542   | 1,011071698     | 2,41025641      |
| DBF4                                                                                          | 0,386325862 | -0,015902769 | 0,031 | 0,012 | 1           | 0,98903757    | 1,011083936     | 2,583333333     |
| ZBTB45                                                                                        | 0,000112833 | -0,015940249 | 0,125 | 0,012 | 1           | 0,989011877   | 1,011110204     | 10,416666667    |
| TCAF1                                                                                         | 4,00575E-05 | -0,016015633 | 0,312 | 0,066 | 0,845253588 | 0,9889602     | 1,011163038     | 4,727272727     |
| JRKL                                                                                          | 0,008956837 | -0,016051335 | 0,125 | 0,027 | 1           | 0,988935726   | 1,011188061     | 4,62962963      |
| MANEAL                                                                                        | 0,226351275 | -0,016083862 | 0,031 | 0,008 | 1           | 0,988913431   | 1,011210859     | 3,875           |
| CRYBG3                                                                                        | 0,127492976 | -0,016099115 | 0,188 | 0,09  | 1           | 0,988902975   | 1,011221551     | 2,088888889     |
| PLXNA1                                                                                        | 0,224763613 | -0,016114919 | 0,062 | 0,023 | 1           | 0,988892142   | 1,011232628     | 2,695652174     |
| KCNC4                                                                                         | 0,675506228 | -0,016160298 | 0,031 | 0,02  | 1           | 0,988861038   | 1,011264436     | 1,55            |
| HCG25                                                                                         | 0,226351275 | -0,016238891 | 0,031 | 0,008 | 1           | 0,988807169   | 1,011319528     | 3,875           |
| ZNF487                                                                                        | 0,039667683 | -0,016297358 | 0,125 | 0,039 | 1           | 0,988767097   | 1,011360514     | 3,205128205     |
| C19orf44                                                                                      | 0,218781208 | -0,016343596 | 0,062 | 0,023 | 1           | 0,988735408   | 1,011392928     | 2,695652174     |
| C12orf73                                                                                      | 0,000466117 | -0,016479213 | 0,188 | 0,035 | 1           | 0,988642469   | 1,011488006     | 5,371428571     |

Supplementary Table 1

| Differentially expressed genes_adjacent-skin-XL_comparing SC-Keloid vs. (SC-Myel, SC-Nonmyel) |             |              |       |       |           |               |                 |                 |
|-----------------------------------------------------------------------------------------------|-------------|--------------|-------|-------|-----------|---------------|-----------------|-----------------|
| gene                                                                                          | p_val       | avg_log2FC   | pct.1 | pct.2 | p_val_adj | Foldchange_UP | Foldchange_DOWN | Ratio_pct1_pct2 |
| VAPB                                                                                          | 0,000605519 | -0,016484063 | 0,406 | 0,125 | 1         | 0,988639146   | 1,011491406     | 3,248           |
| DBP                                                                                           | 0,076632198 | -0,016505438 | 0,156 | 0,062 | 1         | 0,988624498   | 1,011506393     | 2,516129032     |
| ZNF692                                                                                        | 0,001642148 | -0,016511833 | 0,125 | 0,02  | 1         | 0,988620116   | 1,011510876     | 6,25            |
| RNGTT                                                                                         | 0,016562293 | -0,016578162 | 0,125 | 0,031 | 1         | 0,988574664   | 1,011557382     | 4,032258065     |
| SCHIP1                                                                                        | 0,063387391 | -0,016615621 | 0,125 | 0,043 | 1         | 0,988548997   | 1,011583647     | 2,906976744     |
| DHRX                                                                                          | 0,016858455 | -0,016639244 | 0,125 | 0,031 | 1         | 0,98853281    | 1,011600212     | 4,032258065     |
| ATP6VOE2                                                                                      | 0,002538449 | -0,01672599  | 0,406 | 0,145 | 1         | 0,988473374   | 1,011661039     | 2,8             |
| NASP                                                                                          | 0,010412431 | -0,016804844 | 0,594 | 0,27  | 1         | 0,988419348   | 1,011716335     | 2,2             |
| HARS2                                                                                         | 0,019236133 | -0,016819173 | 0,094 | 0,02  | 1         | 0,988409531   | 1,011726384     | 4,7             |
| AC147651.4                                                                                    | 0,014828336 | -0,016832439 | 0,219 | 0,074 | 1         | 0,988400442   | 1,011735687     | 2,959459459     |
| HOMER3                                                                                        | 0,00036468  | -0,016879763 | 0,344 | 0,094 | 1         | 0,988368021   | 1,011768874     | 3,659574468     |
| RAB3IL1                                                                                       | 0,540537634 | -0,016971458 | 0,031 | 0,016 | 1         | 0,988305204   | 1,011833183     | 1,9375          |
| ZNF830                                                                                        | 0,019580952 | -0,017041738 | 0,156 | 0,047 | 1         | 0,98825706    | 1,011882475     | 3,319148936     |
| OPA3                                                                                          | 0,224763613 | -0,017089896 | 0,062 | 0,023 | 1         | 0,988224072   | 1,011916253     | 2,695652174     |
| NUP88                                                                                         | 0,000509339 | -0,017215701 | 0,125 | 0,016 | 1         | 0,988137901   | 1,012004497     | 7,8125          |
| ZNF43                                                                                         | 0,019236133 | -0,01726264  | 0,094 | 0,02  | 1         | 0,988105752   | 1,012037424     | 4,7             |
| KIF2A                                                                                         | 0,018075901 | -0,017273851 | 0,281 | 0,109 | 1         | 0,988098074   | 1,012045288     | 2,577981651     |
| MYOF                                                                                          | 0,041641305 | -0,017344608 | 0,25  | 0,105 | 1         | 0,988049614   | 1,012094925     | 2,380952381     |
| NT5C                                                                                          | 0,001507967 | -0,017390214 | 0,531 | 0,195 | 1         | 0,988018381   | 1,012126919     | 2,723076923     |
| MAOB                                                                                          | 0,386325862 | -0,017402646 | 0,031 | 0,012 | 1         | 0,988009866   | 1,012135642     | 2,583333333     |
| NIT1                                                                                          | 0,000476445 | -0,017428447 | 0,188 | 0,035 | 1         | 0,987992197   | 1,012153743     | 5,371428571     |
| SNAPC1                                                                                        | 0,093336433 | -0,017496298 | 0,094 | 0,031 | 1         | 0,987945732   | 1,012201346     | 3,032258065     |
| FBXO45                                                                                        | 0,141661018 | -0,017528851 | 0,094 | 0,035 | 1         | 0,98792344    | 1,012224186     | 2,685714286     |
| MTA2                                                                                          | 0,291239073 | -0,017529596 | 0,094 | 0,047 | 1         | 0,98792293    | 1,012224708     | 2               |
| P2RY1                                                                                         | 0,145146326 | -0,017629822 | 0,125 | 0,055 | 1         | 0,9878543     | 1,012295032     | 2,272727273     |
| RGMA                                                                                          | 0,540537634 | -0,017748493 | 0,031 | 0,016 | 1         | 0,987773047   | 1,012378302     | 1,9375          |
| RNF25                                                                                         | 0,000911755 | -0,01775522  | 0,156 | 0,027 | 1         | 0,98776844    | 1,012383023     | 5,777777778     |
| PSMD10                                                                                        | 0,184716953 | -0,017824394 | 0,125 | 0,059 | 1         | 0,98772108    | 1,012431566     | 2,118644068     |
| PMM2                                                                                          | 0,297426083 | -0,017838025 | 0,062 | 0,027 | 1         | 0,987711748   | 1,012441131     | 2,296296296     |
| UBL4A                                                                                         | 0,00013166  | -0,017840296 | 0,25  | 0,051 | 1         | 0,987710193   | 1,012442725     | 4,901960784     |

Supplementary Table 1

| Differentially expressed genes_adjacent-skin-XL_ comparing SC-Keloid vs. (SC-Myel, SC-Nonmyel) |             |              |       |       |           |               |                 |                 |
|------------------------------------------------------------------------------------------------|-------------|--------------|-------|-------|-----------|---------------|-----------------|-----------------|
| gene                                                                                           | p_val       | avg_log2FC   | pct.1 | pct.2 | p_val_adj | Foldchange_UP | Foldchange_DOWN | Ratio_pct1_pct2 |
| RBKS                                                                                           | 0,226351275 | -0,017877254 | 0,031 | 0,008 | 1         | 0,987684891   | 1,012468662     | 3,875           |
| MRPL2                                                                                          | 0,000693143 | -0,017879809 | 0,375 | 0,113 | 1         | 0,987683142   | 1,012470455     | 3,318584071     |
| C3                                                                                             | 0,087959196 | -0,017929006 | 0,062 | 0,016 | 1         | 0,987649462   | 1,012504981     | 3,875           |
| PDSS2                                                                                          | 0,386325862 | -0,017958996 | 0,031 | 0,012 | 1         | 0,987628931   | 1,012526029     | 2,583333333     |
| ADAMTS1                                                                                        | 0,000365428 | -0,017962838 | 0,562 | 0,195 | 1         | 0,987626301   | 1,012528726     | 2,882051282     |
| H2AC8                                                                                          | 0,082317662 | -0,018022353 | 0,031 | 0,004 | 1         | 0,987585556   | 1,012570496     | 7,75            |
| USP4                                                                                           | 0,021379715 | -0,018034742 | 0,156 | 0,047 | 1         | 0,987577079   | 1,012579192     | 3,319148936     |
| BCL7B                                                                                          | 0,000189615 | -0,018112209 | 0,344 | 0,09  | 1         | 0,987524052   | 1,012633564     | 3,822222222     |
| C17orf58                                                                                       | 0,540537634 | -0,018141793 | 0,031 | 0,016 | 1         | 0,987503801   | 1,01265433      | 1,9375          |
| ZNF883                                                                                         | 0,041848356 | -0,018212241 | 0,062 | 0,012 | 1         | 0,987455582   | 1,01270378      | 5,166666667     |
| GABPB1                                                                                         | 0,002096899 | -0,018238535 | 0,156 | 0,031 | 1         | 0,987437585   | 1,012722237     | 5,032258065     |
| BTBD19                                                                                         | 0,226351275 | -0,018241341 | 0,031 | 0,008 | 1         | 0,987435665   | 1,012724206     | 3,875           |
| PML                                                                                            | 0,001753489 | -0,018257474 | 0,219 | 0,055 | 1         | 0,987424623   | 1,012735531     | 3,981818182     |
| C19orf47                                                                                       | 0,226351275 | -0,01827382  | 0,031 | 0,008 | 1         | 0,987413435   | 1,012747006     | 3,875           |
| SEC23A                                                                                         | 0,00245484  | -0,01829515  | 0,312 | 0,098 | 1         | 0,987398836   | 1,01276198      | 3,183673469     |
| TXLNA                                                                                          | 0,009633791 | -0,018319478 | 0,219 | 0,07  | 1         | 0,987382186   | 1,012779058     | 3,128571429     |
| KLHDC10                                                                                        | 0,001783529 | -0,018366147 | 0,219 | 0,055 | 1         | 0,987350246   | 1,01281182      | 3,981818182     |
| EIF5AL1                                                                                        | 0,386325862 | -0,01841842  | 0,031 | 0,012 | 1         | 0,987314472   | 1,012848518     | 2,583333333     |
| ACOT4                                                                                          | 0,226351275 | -0,018444783 | 0,031 | 0,008 | 1         | 0,987296431   | 1,012867026     | 3,875           |
| ZNF592                                                                                         | 0,063387391 | -0,018450021 | 0,125 | 0,043 | 1         | 0,987292846   | 1,012870704     | 2,906976744     |
| ZNF624                                                                                         | 0,019236133 | -0,018462274 | 0,094 | 0,02  | 1         | 0,987284461   | 1,012879306     | 4,7             |
| ATXN2L                                                                                         | 0,034171291 | -0,01854361  | 0,312 | 0,137 | 1         | 0,987228802   | 1,012936412     | 2,277372263     |
| R3HCC1L                                                                                        | 0,008148126 | -0,018583155 | 0,094 | 0,016 | 1         | 0,987201742   | 1,012964177     | 5,875           |
| CLK2                                                                                           | 0,226351275 | -0,018685872 | 0,031 | 0,008 | 1         | 0,987131457   | 1,013036301     | 3,875           |
| ZNF484                                                                                         | 0,041848356 | -0,018686167 | 0,062 | 0,012 | 1         | 0,987131256   | 1,013036508     | 5,166666667     |
| CERS2                                                                                          | 0,002500955 | -0,018728283 | 0,594 | 0,234 | 1         | 0,987102439   | 1,013066081     | 2,538461538     |
| NACAD                                                                                          | 0,093753684 | -0,018732479 | 0,125 | 0,047 | 1         | 0,987099568   | 1,013069028     | 2,659574468     |
| TTC37                                                                                          | 0,000193306 | -0,018792453 | 0,406 | 0,117 | 1         | 0,987058534   | 1,013111143     | 3,47008547      |
| ZNF525                                                                                         | 0,087959196 | -0,018824603 | 0,062 | 0,016 | 1         | 0,987036538   | 1,01313372      | 3,875           |
| ZNF513                                                                                         | 0,547500804 | -0,018827346 | 0,062 | 0,039 | 1         | 0,987034662   | 1,013135646     | 1,58974359      |

Supplementary Table 1

| Differentially expressed genes_adjacent-skin-XL_ comparing SC-Keloid vs. (SC-Myel, SC-Nonmyel) |             |              |       |       |           |               |                 |                 |
|------------------------------------------------------------------------------------------------|-------------|--------------|-------|-------|-----------|---------------|-----------------|-----------------|
| gene                                                                                           | p_val       | avg_log2FC   | pct.1 | pct.2 | p_val_adj | Foldchange_UP | Foldchange_DOWN | Ratio_pct1_pct2 |
| SLC38A10                                                                                       | 7,14053E-05 | -0,018939845 | 0,375 | 0,094 | 1         | 0,986957697   | 1,013214652     | 3,989361702     |
| HOTAIRM1                                                                                       | 0,226351275 | -0,018988685 | 0,031 | 0,008 | 1         | 0,986924286   | 1,013248953     | 3,875           |
| RAD52                                                                                          | 0,036827385 | -0,019057911 | 0,094 | 0,023 | 1         | 0,986876931   | 1,013297574     | 4,086956522     |
| DTWD2                                                                                          | 0,226351275 | -0,019096092 | 0,031 | 0,008 | 1         | 0,986850814   | 1,013324391     | 3,875           |
| PPM1L                                                                                          | 0,226351275 | -0,019103358 | 0,031 | 0,008 | 1         | 0,986845844   | 1,013329495     | 3,875           |
| ASCC2                                                                                          | 0,000469207 | -0,019125084 | 0,219 | 0,047 | 1         | 0,986830982   | 1,013344755     | 4,659574468     |
| SPRED2                                                                                         | 0,037506634 | -0,019153038 | 0,094 | 0,023 | 1         | 0,986811861   | 1,01336439      | 4,086956522     |
| RPUSD2                                                                                         | 0,150155729 | -0,019334935 | 0,062 | 0,02  | 1         | 0,986687451   | 1,013492164     | 3,1             |
| AGO1                                                                                           | 0,063925678 | -0,019421439 | 0,094 | 0,027 | 1         | 0,986628291   | 1,013552935     | 3,481481481     |
| UBA1                                                                                           | 0,00307185  | -0,019499438 | 0,5   | 0,191 | 1         | 0,98657495    | 1,013607734     | 2,617801047     |
| MFSD9                                                                                          | 0,082317662 | -0,019555336 | 0,031 | 0,004 | 1         | 0,986536725   | 1,013647008     | 7,75            |
| TLCD5                                                                                          | 0,243596382 | -0,019574795 | 0,094 | 0,043 | 1         | 0,98652342    | 1,01366068      | 2,186046512     |
| PBX4                                                                                           | 0,041848356 | -0,019682401 | 0,062 | 0,012 | 1         | 0,986449841   | 1,013736288     | 5,166666667     |
| SYNGR2                                                                                         | 0,106283856 | -0,019703546 | 0,219 | 0,105 | 1         | 0,986435383   | 1,013751146     | 2,085714286     |
| RBBP8                                                                                          | 0,091552625 | -0,019811194 | 0,125 | 0,047 | 1         | 0,986361782   | 1,013826791     | 2,659574468     |
| PBLD                                                                                           | 0,001642148 | -0,019840416 | 0,125 | 0,02  | 1         | 0,986341803   | 1,013847327     | 6,25            |
| SMAD1                                                                                          | 0,019236133 | -0,019854163 | 0,094 | 0,02  | 1         | 0,986332404   | 1,013856987     | 4,7             |
| OGG1                                                                                           | 0,001034587 | -0,020010958 | 0,188 | 0,039 | 1         | 0,986225214   | 1,013967181     | 4,820512821     |
| INAVA                                                                                          | 0,226351275 | -0,020026264 | 0,031 | 0,008 | 1         | 0,98621475    | 1,013977939     | 3,875           |
| ZSCAN5A                                                                                        | 0,226351275 | -0,020048473 | 0,031 | 0,008 | 1         | 0,986199569   | 1,013993548     | 3,875           |
| PARD6G                                                                                         | 0,918113127 | -0,020139756 | 0,031 | 0,027 | 1         | 0,986137172   | 1,014057708     | 1,148148148     |
| UBE2N                                                                                          | 0,005554076 | -0,020176873 | 0,625 | 0,266 | 1         | 0,986111801   | 1,014083798     | 2,34962406      |
| NARF                                                                                           | 0,000110396 | -0,020480414 | 0,375 | 0,098 | 1         | 0,985904346   | 1,014297182     | 3,826530612     |
| B3GLCT                                                                                         | 0,150155729 | -0,020551564 | 0,062 | 0,02  | 1         | 0,985855725   | 1,014347206     | 3,1             |
| BCDIN3D                                                                                        | 0,002594281 | -0,020559945 | 0,094 | 0,012 | 1         | 0,985849998   | 1,014353099     | 7,833333333     |
| ARL5A                                                                                          | 0,000608099 | -0,020567711 | 0,531 | 0,188 | 1         | 0,985844691   | 1,014358559     | 2,824468085     |
| MFF                                                                                            | 0,005275462 | -0,02057596  | 0,406 | 0,152 | 1         | 0,985839054   | 1,014364359     | 2,671052632     |
| CRYZ                                                                                           | 0,004180266 | -0,020599154 | 0,125 | 0,023 | 1         | 0,985823205   | 1,014380666     | 5,434782609     |
| LINC02897                                                                                      | 0,226351275 | -0,020679021 | 0,031 | 0,008 | 1         | 0,985768632   | 1,014436824     | 3,875           |
| PTPN18                                                                                         | 0,124769281 | -0,020728312 | 0,125 | 0,051 | 1         | 0,985734953   | 1,014471483     | 2,450980392     |

Supplementary Table 1

| Differentially expressed genes_adjacent-skin-XL_comparing SC-Keloid vs. (SC-Myel, SC-Nonmyel) |             |              |       |       |           |               |                 |                 |
|-----------------------------------------------------------------------------------------------|-------------|--------------|-------|-------|-----------|---------------|-----------------|-----------------|
| gene                                                                                          | p_val       | avg_log2FC   | pct.1 | pct.2 | p_val_adj | Foldchange_UP | Foldchange_DOWN | Ratio_pct1_pct2 |
| ZNF254                                                                                        | 0,27733921  | -0,020767838 | 0,125 | 0,066 | 1         | 0,985707947   | 1,014499278     | 1,893939394     |
| UBTF                                                                                          | 4,77841E-05 | -0,020839555 | 0,531 | 0,156 | 1         | 0,985658948   | 1,014549711     | 3,403846154     |
| CCDC157                                                                                       | 0,386325862 | -0,020846462 | 0,031 | 0,012 | 1         | 0,985654229   | 1,014554567     | 2,583333333     |
| FBXO33                                                                                        | 0,041554521 | -0,020856309 | 0,156 | 0,055 | 1         | 0,985647502   | 1,014561492     | 2,836363636     |
| MARCHF7                                                                                       | 0,061210167 | -0,02088253  | 0,281 | 0,133 | 1         | 0,985629587   | 1,014579932     | 2,112781955     |
| LXN                                                                                           | 0,540537634 | -0,021000671 | 0,031 | 0,016 | 1         | 0,985548878   | 1,014663019     | 1,9375          |
| RILP                                                                                          | 0,682170546 | -0,021074335 | 0,031 | 0,02  | 1         | 0,985498558   | 1,014714828     | 1,55            |
| HAPLN3                                                                                        | 0,386325862 | -0,021077014 | 0,031 | 0,012 | 1         | 0,985496728   | 1,014716713     | 2,583333333     |
| PSMG4                                                                                         | 0,010298205 | -0,021145825 | 0,219 | 0,07  | 1         | 0,985449724   | 1,014765112     | 3,128571429     |
| ZNF768                                                                                        | 0,911838915 | -0,021149681 | 0,031 | 0,027 | 1         | 0,98544709    | 1,014767824     | 1,148148148     |
| MOB2                                                                                          | 0,002169795 | -0,021222133 | 0,375 | 0,125 | 1         | 0,985397603   | 1,014818787     | 3               |
| AKAP10                                                                                        | 0,40679988  | -0,021238819 | 0,094 | 0,055 | 1         | 0,985386206   | 1,014830525     | 1,709090909     |
| OSGEPL1                                                                                       | 0,533973819 | -0,021258012 | 0,031 | 0,016 | 1         | 0,985373097   | 1,014844025     | 1,9375          |
| PHKB                                                                                          | 0,150636831 | -0,02136522  | 0,156 | 0,074 | 1         | 0,985299876   | 1,014919442     | 2,108108108     |
| MIPEP                                                                                         | 0,221475664 | -0,021378291 | 0,031 | 0,008 | 1         | 0,985290949   | 1,014928637     | 3,875           |
| POLR2J2                                                                                       | 0,226351275 | -0,021391014 | 0,031 | 0,008 | 1         | 0,985282259   | 1,014937588     | 3,875           |
| ZNF335                                                                                        | 0,185597364 | -0,021397118 | 0,094 | 0,039 | 1         | 0,985278091   | 1,014941882     | 2,41025641      |
| IARS1                                                                                         | 0,019838208 | -0,021418765 | 0,25  | 0,094 | 1         | 0,985263308   | 1,014957111     | 2,659574468     |
| INVS                                                                                          | 0,224763613 | -0,021491219 | 0,062 | 0,023 | 1         | 0,985213827   | 1,015008085     | 2,695652174     |
| SH3BGRL                                                                                       | 0,032224112 | -0,021545287 | 0,656 | 0,32  | 1         | 0,985176905   | 1,015046125     | 2,05            |
| IPCEF1                                                                                        | 0,087959196 | -0,021554847 | 0,062 | 0,016 | 1         | 0,985170377   | 1,015052851     | 3,875           |
| ANKRD26                                                                                       | 0,000235567 | -0,021555419 | 0,281 | 0,066 | 1         | 0,985169986   | 1,015053254     | 4,257575758     |
| PRKD2                                                                                         | 0,38454022  | -0,021562092 | 0,062 | 0,031 | 1         | 0,985165429   | 1,015057949     | 2               |
| AGTPBP1                                                                                       | 0,224763613 | -0,021606116 | 0,062 | 0,023 | 1         | 0,985135367   | 1,015088924     | 2,695652174     |
| TCTA                                                                                          | 0,044241765 | -0,021687165 | 0,156 | 0,055 | 1         | 0,985080025   | 1,015145952     | 2,836363636     |
| STK17B                                                                                        | 0,016858455 | -0,021764276 | 0,125 | 0,031 | 1         | 0,985027375   | 1,015200212     | 4,032258065     |
| DKC1                                                                                          | 0,004681177 | -0,021809519 | 0,219 | 0,062 | 1         | 0,984996485   | 1,01523205      | 3,532258065     |
| LINC00649                                                                                     | 0,533973819 | -0,021847172 | 0,031 | 0,016 | 1         | 0,984970778   | 1,015258546     | 1,9375          |
| AGFG2                                                                                         | 0,540537634 | -0,021947648 | 0,031 | 0,016 | 1         | 0,984902182   | 1,015329256     | 1,9375          |
| IFFO2                                                                                         | 0,003663929 | -0,022001514 | 0,188 | 0,047 | 1         | 0,98486541    | 1,015367166     | 4               |



Supplementary Table 1

| Differentially expressed genes_adjacent-skin-XL_comparing SC-Keloid vs. (SC-Myel, SC-Nonmyel) |             |              |       |       |             |               |                 |                 |
|-----------------------------------------------------------------------------------------------|-------------|--------------|-------|-------|-------------|---------------|-----------------|-----------------|
| gene                                                                                          | p_val       | avg_log2FC   | pct.1 | pct.2 | p_val_adj   | Foldchange_UP | Foldchange_DOWN | Ratio_pct1_pct2 |
| CEP63                                                                                         | 0,063655955 | -0,022023203 | 0,188 | 0,078 | 1           | 0,984850603   | 1,015382431     | 2,41025641      |
| FERMT2                                                                                        | 0,150139851 | -0,022034311 | 0,781 | 0,488 | 1           | 0,98484302    | 1,015390249     | 1,600409836     |
| SERHL2                                                                                        | 0,002594281 | -0,022034882 | 0,094 | 0,012 | 1           | 0,98484263    | 1,015390651     | 7,833333333     |
| BRCC3                                                                                         | 0,000322156 | -0,022073146 | 0,156 | 0,023 | 1           | 0,984816511   | 1,015417582     | 6,782608696     |
| TRIM14                                                                                        | 0,221757959 | -0,022227723 | 0,062 | 0,023 | 1           | 0,984710999   | 1,015526384     | 2,695652174     |
| TUT1                                                                                          | 0,061916284 | -0,022245486 | 0,094 | 0,027 | 1           | 0,984698874   | 1,015538888     | 3,481481481     |
| OTUD5                                                                                         | 0,138170297 | -0,022258846 | 0,094 | 0,035 | 1           | 0,984689756   | 1,015548292     | 2,685714286     |
| FRS3                                                                                          | 0,386325862 | -0,022282548 | 0,031 | 0,012 | 1           | 0,984673578   | 1,015564977     | 2,583333333     |
| PRELID3A                                                                                      | 0,304406192 | -0,022329049 | 0,062 | 0,027 | 1           | 0,984641841   | 1,015597712     | 2,296296296     |
| RHOBTB1                                                                                       | 0,063387391 | -0,022431454 | 0,125 | 0,043 | 1           | 0,984571952   | 1,015669803     | 2,906976744     |
| BDH1                                                                                          | 0,386325862 | -0,022514201 | 0,031 | 0,012 | 1           | 0,984515482   | 1,015728059     | 2,583333333     |
| ORAI3                                                                                         | 0,008148126 | -0,022521089 | 0,094 | 0,016 | 1           | 0,984510782   | 1,015732908     | 5,875           |
| NOCT                                                                                          | 0,396289917 | -0,022569082 | 0,062 | 0,031 | 1           | 0,984478031   | 1,015766699     | 2               |
| GRIK4                                                                                         | 0,226351275 | -0,022695926 | 0,031 | 0,008 | 1           | 0,984391478   | 1,01585601      | 3,875           |
| SMARCAL1                                                                                      | 0,096013629 | -0,022700382 | 0,094 | 0,031 | 1           | 0,984388438   | 1,015859148     | 3,032258065     |
| PTPRS                                                                                         | 0,037506898 | -0,022740259 | 0,094 | 0,023 | 1           | 0,98436123    | 1,015887227     | 4,086956522     |
| SLC16A7                                                                                       | 0,041848356 | -0,022746726 | 0,062 | 0,012 | 1           | 0,984356817   | 1,015891781     | 5,166666667     |
| MTFR1                                                                                         | 0,236345884 | -0,022796482 | 0,094 | 0,043 | 1           | 0,984322869   | 1,015926818     | 2,186046512     |
| KATNAL1                                                                                       | 1,43353E-05 | -0,022799857 | 0,469 | 0,121 | 0,302489408 | 0,984320566   | 1,015929195     | 3,876033058     |
| RHBDD1                                                                                        | 0,38454022  | -0,022830927 | 0,062 | 0,031 | 1           | 0,984299368   | 1,015951074     | 2               |
| SLC8B1                                                                                        | 0,096013629 | -0,022870116 | 0,094 | 0,031 | 1           | 0,984272631   | 1,015978672     | 3,032258065     |
| C11orf71                                                                                      | 0,396289917 | -0,022870803 | 0,062 | 0,031 | 1           | 0,984272162   | 1,015979155     | 2               |
| NDC1                                                                                          | 0,041848356 | -0,022887094 | 0,062 | 0,012 | 1           | 0,984261048   | 1,015990628     | 5,166666667     |
| TMEM53                                                                                        | 0,019236133 | -0,022916906 | 0,094 | 0,02  | 1           | 0,984240709   | 1,016011623     | 4,7             |
| BUB3                                                                                          | 0,000246192 | -0,022953198 | 0,375 | 0,105 | 1           | 0,98421595    | 1,016037181     | 3,571428571     |
| GRWD1                                                                                         | 0,066791287 | -0,022968912 | 0,125 | 0,043 | 1           | 0,98420523    | 1,016048248     | 2,906976744     |
| HEXA                                                                                          | 0,00033983  | -0,023013932 | 0,469 | 0,148 | 1           | 0,984174518   | 1,016079955     | 3,168918919     |
| NOTCH4                                                                                        | 0,564954469 | -0,023022381 | 0,062 | 0,039 | 1           | 0,984168754   | 1,016085906     | 1,58974359      |
| SLC2A13                                                                                       | 0,045949521 | -0,023038323 | 0,219 | 0,09  | 1           | 0,984157879   | 1,016097134     | 2,433333333     |
| POLM                                                                                          | 0,224763613 | -0,023129397 | 0,062 | 0,023 | 1           | 0,984095754   | 1,016161279     | 2,695652174     |

Supplementary Table 1

| Differentially expressed genes_adjacent-skin-XL_comparing SC-Keloid vs. (SC-Myel, SC-Nonmyel) |             |              |       |       |           |               |                 |                 |
|-----------------------------------------------------------------------------------------------|-------------|--------------|-------|-------|-----------|---------------|-----------------|-----------------|
| gene                                                                                          | p_val       | avg_log2FC   | pct.1 | pct.2 | p_val_adj | Foldchange_UP | Foldchange_DOWN | Ratio_pct1_pct2 |
| GOT1                                                                                          | 0,001642148 | -0,0231689   | 0,125 | 0,02  | 1         | 0,984068808   | 1,016189104     | 6,25            |
| METTL8                                                                                        | 0,016270711 | -0,023170377 | 0,125 | 0,031 | 1         | 0,9840678     | 1,016190144     | 4,032258065     |
| RAPGEF6                                                                                       | 0,735890209 | -0,023219984 | 0,094 | 0,074 | 1         | 0,984033964   | 1,016225087     | 1,27027027      |
| TRIM65                                                                                        | 0,087959196 | -0,023242413 | 0,062 | 0,016 | 1         | 0,984018666   | 1,016240885     | 3,875           |
| BRME1                                                                                         | 0,226351275 | -0,023268118 | 0,031 | 0,008 | 1         | 0,984001133   | 1,016258992     | 3,875           |
| NOL12                                                                                         | 0,160548057 | -0,023270376 | 0,125 | 0,055 | 1         | 0,983999593   | 1,016260583     | 2,272727273     |
| KDM5A                                                                                         | 0,000120335 | -0,023282593 | 0,469 | 0,141 | 1         | 0,98399126    | 1,016269189     | 3,326241135     |
| PLXNA2                                                                                        | 0,386325862 | -0,02330183  | 0,031 | 0,012 | 1         | 0,98397814    | 1,01628274      | 2,583333333     |
| ICA1                                                                                          | 0,226351275 | -0,023322818 | 0,031 | 0,008 | 1         | 0,983963825   | 1,016297525     | 3,875           |
| QSOX2                                                                                         | 0,008148126 | -0,023330814 | 0,094 | 0,016 | 1         | 0,983958372   | 1,016303158     | 5,875           |
| FBXO27                                                                                        | 0,386325862 | -0,023340534 | 0,031 | 0,012 | 1         | 0,983951743   | 1,016310005     | 2,583333333     |
| DMAC2                                                                                         | 0,017209641 | -0,02334731  | 0,219 | 0,074 | 1         | 0,983947121   | 1,016314778     | 2,959459459     |
| FGD5                                                                                          | 0,543117005 | -0,023429862 | 0     | 0,012 | 1         | 0,98389082    | 1,016372934     | 0               |
| TCOF1                                                                                         | 0,001814041 | -0,02344259  | 0,219 | 0,055 | 1         | 0,983882141   | 1,016381901     | 3,981818182     |
| TEX30                                                                                         | 0,004180266 | -0,023467371 | 0,125 | 0,023 | 1         | 0,983865241   | 1,016399359     | 5,434782609     |
| FBXL18                                                                                        | 0,062914349 | -0,023472881 | 0,094 | 0,027 | 1         | 0,983861483   | 1,016403241     | 3,481481481     |
| ZKSCAN2                                                                                       | 0,386325862 | -0,023555636 | 0,031 | 0,012 | 1         | 0,983805049   | 1,016461545     | 2,583333333     |
| PPIL6                                                                                         | 0,226351275 | -0,023566395 | 0,031 | 0,008 | 1         | 0,983797712   | 1,016469125     | 3,875           |
| LRR47                                                                                         | 0,064224632 | -0,023568383 | 0,125 | 0,043 | 1         | 0,983796356   | 1,016470526     | 2,906976744     |
| SLC4A7                                                                                        | 6,66992E-05 | -0,023584143 | 0,281 | 0,059 | 1         | 0,98378561    | 1,01648163      | 4,762711864     |
| GLRX                                                                                          | 0,147778936 | -0,023615476 | 0,062 | 0,02  | 1         | 0,983764243   | 1,016503707     | 3,1             |
| SCRN3                                                                                         | 0,016562293 | -0,023627314 | 0,125 | 0,031 | 1         | 0,983756172   | 1,016512047     | 4,032258065     |
| TBC1D4                                                                                        | 0,226351275 | -0,023638074 | 0,031 | 0,008 | 1         | 0,983748834   | 1,016519629     | 3,875           |
| DDX19B                                                                                        | 0,029760483 | -0,023644796 | 0,156 | 0,051 | 1         | 0,983744251   | 1,016524365     | 3,058823529     |
| MAP1S                                                                                         | 0,386325862 | -0,023645108 | 0,031 | 0,012 | 1         | 0,983744038   | 1,016524585     | 2,583333333     |
| SLC22A11                                                                                      | 0,082317662 | -0,023680314 | 0,031 | 0,004 | 1         | 0,983720032   | 1,016549392     | 7,75            |
| TSEN54                                                                                        | 0,224763613 | -0,023709506 | 0,062 | 0,023 | 1         | 0,983700127   | 1,016569961     | 2,695652174     |
| OSBPL6                                                                                        | 0,226351275 | -0,023785674 | 0,031 | 0,008 | 1         | 0,983648193   | 1,016623633     | 3,875           |
| DUS4L                                                                                         | 0,087959196 | -0,023790986 | 0,062 | 0,016 | 1         | 0,983644572   | 1,016627376     | 3,875           |
| ZNF287                                                                                        | 0,000509339 | -0,023807809 | 0,125 | 0,016 | 1         | 0,983633101   | 1,016639231     | 7,8125          |

Supplementary Table 1

| Differentially expressed genes_adjacent-skin-XL_comparing SC-Keloid vs. (SC-Myel, SC-Nonmyel) |             |              |       |       |             |               |                 |                 |
|-----------------------------------------------------------------------------------------------|-------------|--------------|-------|-------|-------------|---------------|-----------------|-----------------|
| gene                                                                                          | p_val       | avg_log2FC   | pct.1 | pct.2 | p_val_adj   | Foldchange_UP | Foldchange_DOWN | Ratio_pct1_pct2 |
| PACRGL                                                                                        | 0,031413167 | -0,02383034  | 0,156 | 0,051 | 1           | 0,98361774    | 1,016655108     | 3,058823529     |
| FAM3A                                                                                         | 6,05286E-05 | -0,023862298 | 0,375 | 0,094 | 1           | 0,983595951   | 1,016677629     | 3,989361702     |
| TRAF3IP1                                                                                      | 0,002096899 | -0,024019207 | 0,156 | 0,031 | 1           | 0,983488981   | 1,01678821      | 5,032258065     |
| TMEM181                                                                                       | 0,00011289  | -0,024140367 | 0,219 | 0,039 | 1           | 0,983406389   | 1,016873605     | 5,615384615     |
| PIM2                                                                                          | 0,082317662 | -0,024167706 | 0,031 | 0,004 | 1           | 0,983387753   | 1,016892875     | 7,75            |
| UMPS                                                                                          | 0,041848356 | -0,024190458 | 0,062 | 0,012 | 1           | 0,983372245   | 1,016908912     | 5,166666667     |
| COG5                                                                                          | 0,080880928 | -0,024209286 | 0,156 | 0,062 | 1           | 0,983359411   | 1,016922184     | 2,516129032     |
| UQCRC2                                                                                        | 0,001131816 | -0,024231405 | 0,375 | 0,121 | 1           | 0,983344335   | 1,016937774     | 3,099173554     |
| RFX7                                                                                          | 0,300902654 | -0,024447372 | 0,062 | 0,027 | 1           | 0,983197143   | 1,017090018     | 2,296296296     |
| FTSJ1                                                                                         | 0,028712073 | -0,024451057 | 0,125 | 0,035 | 1           | 0,983194631   | 1,017092616     | 3,571428571     |
| LARP1                                                                                         | 0,005471065 | -0,024451223 | 0,469 | 0,184 | 1           | 0,983194518   | 1,017092733     | 2,548913043     |
| AMPD2                                                                                         | 0,020764757 | -0,024490161 | 0,156 | 0,047 | 1           | 0,983167982   | 1,017120185     | 3,319148936     |
| NBPF3                                                                                         | 0,386325862 | -0,024563631 | 0,031 | 0,012 | 1           | 0,983117915   | 1,017171983     | 2,583333333     |
| SPECC1                                                                                        | 6,91883E-05 | -0,024593371 | 0,312 | 0,07  | 1           | 0,98309765    | 1,017192952     | 4,457142857     |
| TMEM238                                                                                       | 0,386325862 | -0,024613854 | 0,031 | 0,012 | 1           | 0,983083692   | 1,017207394     | 2,583333333     |
| FAM98B                                                                                        | 0,001055584 | -0,024634465 | 0,188 | 0,039 | 1           | 0,983069647   | 1,017221926     | 4,820512821     |
| EPHB4                                                                                         | 0,087959196 | -0,024648467 | 0,062 | 0,016 | 1           | 0,983060106   | 1,017231799     | 3,875           |
| COL24A1                                                                                       | 0,226351275 | -0,024768892 | 0,031 | 0,008 | 1           | 0,982978051   | 1,017316713     | 3,875           |
| ZDHHC11                                                                                       | 0,221475664 | -0,024813026 | 0,031 | 0,008 | 1           | 0,982947981   | 1,017347835     | 3,875           |
| EID2                                                                                          | 0,006461838 | -0,024927961 | 0,188 | 0,051 | 1           | 0,982869676   | 1,017428887     | 3,68627451      |
| MRFAP1                                                                                        | 0,183520991 | -0,024975968 | 0,875 | 0,488 | 1           | 0,98283697    | 1,017462744     | 1,793032787     |
| ARMCX3                                                                                        | 0,010754958 | -0,02523561  | 0,625 | 0,281 | 1           | 0,982660105   | 1,017645872     | 2,224199288     |
| PDK1                                                                                          | 0,041848356 | -0,025241859 | 0,062 | 0,012 | 1           | 0,982655848   | 1,017650281     | 5,166666667     |
| ZNF274                                                                                        | 0,065070981 | -0,025260531 | 0,125 | 0,043 | 1           | 0,982643131   | 1,017663452     | 2,906976744     |
| PUS3                                                                                          | 0,386325862 | -0,025476346 | 0,031 | 0,012 | 1           | 0,982496146   | 1,017815697     | 2,583333333     |
| C1QTNF6                                                                                       | 3,86379E-06 | -0,025479202 | 0,156 | 0,012 | 0,081529835 | 0,982494202   | 1,017817712     | 13              |
| ROM1                                                                                          | 0,543117005 | -0,025532804 | 0     | 0,012 | 1           | 0,982457698   | 1,017855529     | 0               |
| SLC11A2                                                                                       | 0,511066664 | -0,025619695 | 0,188 | 0,133 | 1           | 0,982398528   | 1,017916834     | 1,413533835     |
| LACTB2                                                                                        | 0,044552052 | -0,025675597 | 0,125 | 0,039 | 1           | 0,982360463   | 1,017956277     | 3,205128205     |
| LRCH1                                                                                         | 0,346466678 | -0,025757304 | 0,094 | 0,051 | 1           | 0,982304829   | 1,018013931     | 1,843137255     |

Supplementary Table 1

| Differentially expressed genes_adjacent-skin-XL_ comparing SC-Keloid vs. (SC-Myel, SC-Nonmyel) |             |              |       |       |           |               |                 |                 |
|------------------------------------------------------------------------------------------------|-------------|--------------|-------|-------|-----------|---------------|-----------------|-----------------|
| gene                                                                                           | p_val       | avg_log2FC   | pct.1 | pct.2 | p_val_adj | Foldchange_UP | Foldchange_DOWN | Ratio_pct1_pct2 |
| TAF5                                                                                           | 0,226351275 | -0,025849521 | 0,031 | 0,008 | 1         | 0,982242041   | 1,018079005     | 3,875           |
| SPOUT1                                                                                         | 0,087959196 | -0,025862549 | 0,062 | 0,016 | 1         | 0,982233172   | 1,018088198     | 3,875           |
| SNRPA1                                                                                         | 0,020683076 | -0,025907323 | 0,281 | 0,109 | 1         | 0,982202689   | 1,018119795     | 2,577981651     |
| DHRS11                                                                                         | 0,041848356 | -0,025961393 | 0,062 | 0,012 | 1         | 0,982165878   | 1,018157953     | 5,166666667     |
| AIP                                                                                            | 0,000403093 | -0,025990024 | 0,562 | 0,191 | 1         | 0,982146387   | 1,018178159     | 2,942408377     |
| TAOK2                                                                                          | 0,281781087 | -0,026102945 | 0,125 | 0,066 | 1         | 0,982069516   | 1,018257856     | 1,893939394     |
| ZNF527                                                                                         | 0,386325862 | -0,026112207 | 0,031 | 0,012 | 1         | 0,982063212   | 1,018264393     | 2,583333333     |
| DCAF7                                                                                          | 0,047830565 | -0,026150905 | 0,219 | 0,09  | 1         | 0,98203687    | 1,018291707     | 2,433333333     |
| MDM1                                                                                           | 0,14813251  | -0,026191123 | 0,125 | 0,055 | 1         | 0,982009494   | 1,018320094     | 2,272727273     |
| CBARP                                                                                          | 0,386325862 | -0,026255404 | 0,031 | 0,012 | 1         | 0,98196574    | 1,018365467     | 2,583333333     |
| TRIM62                                                                                         | 0,226351275 | -0,026284144 | 0,031 | 0,008 | 1         | 0,981946179   | 1,018385755     | 3,875           |
| ELP3                                                                                           | 0,682170546 | -0,026312856 | 0,031 | 0,02  | 1         | 0,981926636   | 1,018406022     | 1,55            |
| ZNF880                                                                                         | 0,224763613 | -0,026345494 | 0,062 | 0,023 | 1         | 0,981904423   | 1,018429062     | 2,695652174     |
| PIGX                                                                                           | 0,000983571 | -0,02636661  | 0,219 | 0,051 | 1         | 0,981890051   | 1,018443969     | 4,294117647     |
| ZNHIT6                                                                                         | 0,416216544 | -0,026507404 | 0,094 | 0,055 | 1         | 0,981794232   | 1,018543364     | 1,709090909     |
| ARMC2                                                                                          | 0,540537634 | -0,026543082 | 0,031 | 0,016 | 1         | 0,981769953   | 1,018568553     | 1,9375          |
| TANGO2                                                                                         | 0,002096899 | -0,026544216 | 0,156 | 0,031 | 1         | 0,981769181   | 1,018569354     | 5,032258065     |
| ZNF169                                                                                         | 0,533973819 | -0,02658708  | 0,031 | 0,016 | 1         | 0,981740012   | 1,018599617     | 1,9375          |
| LARP1B                                                                                         | 0,000343233 | -0,026597281 | 0,344 | 0,094 | 1         | 0,98173307    | 1,01860682      | 3,659574468     |
| C6orf47                                                                                        | 7,15271E-05 | -0,026620796 | 0,188 | 0,027 | 1         | 0,981717068   | 1,018623422     | 6,962962963     |
| KDM4A                                                                                          | 0,147778936 | -0,026653033 | 0,062 | 0,02  | 1         | 0,981695132   | 1,018646184     | 3,1             |
| STX18                                                                                          | 0,007318479 | -0,026682948 | 0,219 | 0,066 | 1         | 0,981674777   | 1,018667306     | 3,318181818     |
| STARD5                                                                                         | 0,918113127 | -0,026703046 | 0,031 | 0,027 | 1         | 0,981661101   | 1,018681497     | 1,148148148     |
| TXNRD3                                                                                         | 0,540537634 | -0,026751519 | 0,031 | 0,016 | 1         | 0,981628119   | 1,018715724     | 1,9375          |
| ZNF839                                                                                         | 0,803381388 | -0,02675545  | 0,031 | 0,023 | 1         | 0,981625444   | 1,0187185       | 1,347826087     |
| FUZ                                                                                            | 0,008956837 | -0,026779347 | 0,125 | 0,027 | 1         | 0,981609185   | 1,018735374     | 4,62962963      |
| CEP126                                                                                         | 0,138170297 | -0,026802408 | 0,094 | 0,035 | 1         | 0,981593494   | 1,018751659     | 2,685714286     |
| ATXN7L3B                                                                                       | 0,000632526 | -0,026817562 | 0,406 | 0,129 | 1         | 0,981583183   | 1,01876236      | 3,147286822     |
| FANCC                                                                                          | 0,082317662 | -0,026817966 | 0,031 | 0,004 | 1         | 0,981582908   | 1,018762645     | 7,75            |
| FAM72A                                                                                         | 0,150155729 | -0,026917248 | 0,062 | 0,02  | 1         | 0,981515361   | 1,018832755     | 3,1             |

Supplementary Table 1

| Differentially expressed genes_adjacent-skin-XL_ comparing SC-Keloid vs. (SC-Myel, SC-Nonmyel) |             |              |       |       |           |               |                 |                 |
|------------------------------------------------------------------------------------------------|-------------|--------------|-------|-------|-----------|---------------|-----------------|-----------------|
| gene                                                                                           | p_val       | avg_log2FC   | pct.1 | pct.2 | p_val_adj | Foldchange_UP | Foldchange_DOWN | Ratio_pct1_pct2 |
| AL592183.1                                                                                     | 0,386325862 | -0,026933826 | 0,031 | 0,012 | 1         | 0,981504083   | 1,018844463     | 2,583333333     |
| MSH5                                                                                           | 0,082317662 | -0,026934478 | 0,031 | 0,004 | 1         | 0,981503639   | 1,018844923     | 7,75            |
| PABPC1L                                                                                        | 0,224763613 | -0,026945633 | 0,062 | 0,023 | 1         | 0,98149605    | 1,018852801     | 2,695652174     |
| MKKS                                                                                           | 0,000252542 | -0,026950157 | 0,219 | 0,043 | 1         | 0,981492973   | 1,018855996     | 5,093023256     |
| ZFP82                                                                                          | 0,386325862 | -0,027021541 | 0,031 | 0,012 | 1         | 0,98144441    | 1,01890641      | 2,583333333     |
| ZBTB48                                                                                         | 0,139907281 | -0,027041071 | 0,094 | 0,035 | 1         | 0,981431124   | 1,018920203     | 2,685714286     |
| F11R                                                                                           | 0,226351275 | -0,027093123 | 0,031 | 0,008 | 1         | 0,981395715   | 1,018956966     | 3,875           |
| PDIK1L                                                                                         | 0,041848356 | -0,027098522 | 0,062 | 0,012 | 1         | 0,981392042   | 1,018960779     | 5,166666667     |
| CHDH                                                                                           | 0,675506228 | -0,027294315 | 0,031 | 0,02  | 1         | 0,981258863   | 1,019099075     | 1,55            |
| DIAPH2                                                                                         | 0,150155729 | -0,027434976 | 0,062 | 0,02  | 1         | 0,981163196   | 1,019198441     | 3,1             |
| EML4                                                                                           | 0,000112855 | -0,027481009 | 0,344 | 0,086 | 1         | 0,98113189    | 1,019230962     | 4               |
| RPAP1                                                                                          | 0,226351275 | -0,027502046 | 0,031 | 0,008 | 1         | 0,981117584   | 1,019245824     | 3,875           |
| CTU1                                                                                           | 0,224763613 | -0,027512971 | 0,062 | 0,023 | 1         | 0,981110154   | 1,019253543     | 2,695652174     |
| ATF2                                                                                           | 0,00145178  | -0,027552134 | 0,406 | 0,137 | 1         | 0,981083521   | 1,019281211     | 2,96350365      |
| CARD8                                                                                          | 0,087959196 | -0,027562406 | 0,062 | 0,016 | 1         | 0,981076536   | 1,019288469     | 3,875           |
| ZNF268                                                                                         | 0,019236133 | -0,0276119   | 0,094 | 0,02  | 1         | 0,981042879   | 1,019323437     | 4,7             |
| PAPPA2                                                                                         | 0,082317662 | -0,027624251 | 0,031 | 0,004 | 1         | 0,98103448    | 1,019332164     | 7,75            |
| RAP2C                                                                                          | 0,019580952 | -0,027700408 | 0,156 | 0,047 | 1         | 0,980982695   | 1,019385974     | 3,319148936     |
| SHISA5                                                                                         | 0,002067673 | -0,02774971  | 0,375 | 0,125 | 1         | 0,980949172   | 1,019420811     | 3               |
| SUSD1                                                                                          | 0,226351275 | -0,027844014 | 0,031 | 0,008 | 1         | 0,980885052   | 1,019487449     | 3,875           |
| NIPA2                                                                                          | 0,001963481 | -0,027889236 | 0,281 | 0,082 | 1         | 0,980854307   | 1,019519405     | 3,426829268     |
| PTDSS1                                                                                         | 0,019236133 | -0,02811176  | 0,094 | 0,02  | 1         | 0,980703029   | 1,019676671     | 4,7             |
| MBIP                                                                                           | 0,01057519  | -0,028119857 | 0,219 | 0,07  | 1         | 0,980697526   | 1,019682393     | 3,128571429     |
| TAFAZZIN                                                                                       | 0,006070525 | -0,028174875 | 0,25  | 0,078 | 1         | 0,980660127   | 1,01972128      | 3,205128205     |
| ACVRL1                                                                                         | 0,543117005 | -0,02828215  | 0     | 0,012 | 1         | 0,980587211   | 1,019797106     | 0               |
| CYP4V2                                                                                         | 0,008956837 | -0,028321333 | 0,125 | 0,027 | 1         | 0,980560578   | 1,019824805     | 4,62962963      |
| YARS1                                                                                          | 0,014643669 | -0,028329774 | 0,219 | 0,074 | 1         | 0,980554841   | 1,019830772     | 2,959459459     |
| UCN                                                                                            | 0,082317662 | -0,028450744 | 0,031 | 0,004 | 1         | 0,980472625   | 1,019916287     | 7,75            |
| PSMC6                                                                                          | 0,000280867 | -0,028457664 | 0,469 | 0,145 | 1         | 0,980467922   | 1,01992118      | 3,234482759     |
| GLIS2                                                                                          | 0,540537634 | -0,028479791 | 0,031 | 0,016 | 1         | 0,980452884   | 1,019936823     | 1,9375          |

Supplementary Table 1

| Differentially expressed genes_adjacent-skin-XL_ comparing SC-Keloid vs. (SC-Myel, SC-Nonmyel) |             |              |       |       |           |               |                 |                 |
|------------------------------------------------------------------------------------------------|-------------|--------------|-------|-------|-----------|---------------|-----------------|-----------------|
| gene                                                                                           | p_val       | avg_log2FC   | pct.1 | pct.2 | p_val_adj | Foldchange_UP | Foldchange_DOWN | Ratio_pct1_pct2 |
| FGF13                                                                                          | 0,226351275 | -0,028483845 | 0,031 | 0,008 | 1         | 0,98045013    | 1,019939688     | 3,875           |
| SHLD2                                                                                          | 0,066791287 | -0,028488497 | 0,125 | 0,043 | 1         | 0,980446968   | 1,019942978     | 2,906976744     |
| STPG1                                                                                          | 0,386325862 | -0,028540535 | 0,031 | 0,012 | 1         | 0,980411604   | 1,019979767     | 2,583333333     |
| CAPN2                                                                                          | 0,003873867 | -0,028547095 | 0,438 | 0,168 | 1         | 0,980407146   | 1,019984405     | 2,607142857     |
| ZNF175                                                                                         | 0,668867248 | -0,028578779 | 0,031 | 0,02  | 1         | 0,980385615   | 1,020006806     | 1,55            |
| ZNF680                                                                                         | 0,016858455 | -0,028672437 | 0,125 | 0,031 | 1         | 0,980321972   | 1,020073026     | 4,032258065     |
| ZNF224                                                                                         | 0,062559189 | -0,028786161 | 0,125 | 0,043 | 1         | 0,980244698   | 1,020153439     | 2,906976744     |
| C21orf58                                                                                       | 0,041848356 | -0,028790222 | 0,062 | 0,012 | 1         | 0,980241939   | 1,020156311     | 5,166666667     |
| ATF6B                                                                                          | 0,004352817 | -0,028790249 | 0,281 | 0,09  | 1         | 0,98024192    | 1,02015633      | 3,122222222     |
| HACD1                                                                                          | 0,150155729 | -0,028798345 | 0,062 | 0,02  | 1         | 0,98023642    | 1,020162055     | 3,1             |
| TRAPPC13                                                                                       | 0,000965846 | -0,028823201 | 0,219 | 0,051 | 1         | 0,980219531   | 1,020179631     | 4,294117647     |
| TMED4                                                                                          | 0,013290145 | -0,028839829 | 0,562 | 0,262 | 1         | 0,980208234   | 1,020191389     | 2,145038168     |
| AASDH                                                                                          | 0,22892808  | -0,028959053 | 0,125 | 0,062 | 1         | 0,980127233   | 1,020275701     | 2,016129032     |
| TET3                                                                                           | 0,087959196 | -0,028961953 | 0,062 | 0,016 | 1         | 0,980125263   | 1,020277752     | 3,875           |
| KCNG1                                                                                          | 0,022581316 | -0,028971071 | 0,188 | 0,062 | 1         | 0,980119069   | 1,0202842       | 3,032258065     |
| ZNF408                                                                                         | 0,019236133 | -0,029117517 | 0,094 | 0,02  | 1         | 0,980019583   | 1,020387773     | 4,7             |
| EIF3J                                                                                          | 0,012558306 | -0,029308493 | 0,562 | 0,254 | 1         | 0,979889862   | 1,020522856     | 2,212598425     |
| L3MBTL4                                                                                        | 0,540537634 | -0,029326479 | 0,031 | 0,016 | 1         | 0,979877646   | 1,020535578     | 1,9375          |
| IRGQ                                                                                           | 0,224763613 | -0,029355656 | 0,062 | 0,023 | 1         | 0,979857829   | 1,020556217     | 2,695652174     |
| LEPROT                                                                                         | 0,012926041 | -0,029398382 | 0,719 | 0,336 | 1         | 0,979828811   | 1,020586442     | 2,139880952     |
| EXOSC6                                                                                         | 0,000460086 | -0,029406842 | 0,219 | 0,047 | 1         | 0,979823065   | 1,020592427     | 4,659574468     |
| IL1RAPL1                                                                                       | 0,318241523 | -0,029406877 | 0,156 | 0,094 | 1         | 0,979823041   | 1,020592452     | 1,659574468     |
| SH3BP5L                                                                                        | 0,911838915 | -0,029449697 | 0,031 | 0,027 | 1         | 0,97979396    | 1,020622744     | 1,148148148     |
| SLC30A6                                                                                        | 0,224763613 | -0,029453335 | 0,062 | 0,023 | 1         | 0,979791489   | 1,020625318     | 2,695652174     |
| GTPBP10                                                                                        | 0,150155729 | -0,029466191 | 0,062 | 0,02  | 1         | 0,979782758   | 1,020634413     | 3,1             |
| CEPT1                                                                                          | 0,063925678 | -0,029492482 | 0,094 | 0,027 | 1         | 0,979764903   | 1,020653012     | 3,481481481     |
| SEC22A                                                                                         | 0,002053304 | -0,029548359 | 0,156 | 0,031 | 1         | 0,979726957   | 1,020692544     | 5,032258065     |
| CA12                                                                                           | 0,543117005 | -0,029565934 | 0     | 0,012 | 1         | 0,979715022   | 1,020704978     | 0               |
| RIC1                                                                                           | 0,224763613 | -0,029573986 | 0,062 | 0,023 | 1         | 0,979709554   | 1,020710675     | 2,695652174     |
| PPP2R5D                                                                                        | 0,001013976 | -0,029580662 | 0,188 | 0,039 | 1         | 0,97970502    | 1,020715399     | 4,820512821     |

Supplementary Table 1

| Differentially expressed genes_adjacent-skin-XL_ comparing SC-Keloid vs. (SC-Myel, SC-Nonmyel) |             |              |       |       |           |               |                 |                 |
|------------------------------------------------------------------------------------------------|-------------|--------------|-------|-------|-----------|---------------|-----------------|-----------------|
| gene                                                                                           | p_val       | avg_log2FC   | pct.1 | pct.2 | p_val_adj | Foldchange_UP | Foldchange_DOWN | Ratio_pct1_pct2 |
| HUWE1                                                                                          | 0,029364342 | -0,029607009 | 0,375 | 0,172 | 1         | 0,979687129   | 1,020734039     | 2,180232558     |
| GK5                                                                                            | 0,087959196 | -0,029668855 | 0,062 | 0,016 | 1         | 0,979645132   | 1,020777797     | 3,875           |
| TNFAIP8L3                                                                                      | 0,041848356 | -0,029676128 | 0,062 | 0,012 | 1         | 0,979640193   | 1,020782943     | 5,166666667     |
| EXPH5                                                                                          | 0,543117005 | -0,029700381 | 0     | 0,012 | 1         | 0,979623725   | 1,020800104     | 0               |
| ZBTB14                                                                                         | 0,087959196 | -0,029702255 | 0,062 | 0,016 | 1         | 0,979622452   | 1,02080143      | 3,875           |
| TNPO1                                                                                          | 0,000728803 | -0,029719992 | 0,438 | 0,145 | 1         | 0,979610408   | 1,02081398      | 3,020689655     |
| PPP1R12C                                                                                       | 0,475301513 | -0,029724765 | 0,156 | 0,105 | 1         | 0,979607168   | 1,020817357     | 1,485714286     |
| KTI12                                                                                          | 0,087959196 | -0,029729641 | 0,062 | 0,016 | 1         | 0,979603857   | 1,020820807     | 3,875           |
| AGAP5                                                                                          | 0,226351275 | -0,029731017 | 0,031 | 0,008 | 1         | 0,979602923   | 1,020821781     | 3,875           |
| KCTD20                                                                                         | 0,024505233 | -0,029767547 | 0,25  | 0,098 | 1         | 0,979578118   | 1,020847629     | 2,551020408     |
| E2F4                                                                                           | 0,003004599 | -0,029773932 | 0,219 | 0,059 | 1         | 0,979573783   | 1,020852147     | 3,711864407     |
| FAM20B                                                                                         | 0,014828336 | -0,029778818 | 0,219 | 0,074 | 1         | 0,979570466   | 1,020855604     | 2,959459459     |
| ZNF93                                                                                          | 0,041848356 | -0,029790355 | 0,062 | 0,012 | 1         | 0,979562632   | 1,020863768     | 5,166666667     |
| ABHD14A                                                                                        | 0,031706938 | -0,029798246 | 0,188 | 0,066 | 1         | 0,979557274   | 1,020869352     | 2,848484848     |
| BAIAP2-DT                                                                                      | 0,141661018 | -0,029805414 | 0,094 | 0,035 | 1         | 0,979552407   | 1,020874424     | 2,685714286     |
| PAXIP1-DT                                                                                      | 0,291239073 | -0,029812576 | 0,094 | 0,047 | 1         | 0,979547544   | 1,020879492     | 2               |
| RAB30                                                                                          | 0,178976513 | -0,029897584 | 0,156 | 0,078 | 1         | 0,979489829   | 1,020939647     | 2               |
| LGALS3BP                                                                                       | 0,018884013 | -0,029932792 | 0,875 | 0,438 | 1         | 0,979465925   | 1,020964563     | 1,997716895     |
| INSYN1                                                                                         | 0,80991663  | -0,02993557  | 0,031 | 0,023 | 1         | 0,979464039   | 1,020966529     | 1,347826087     |
| LINC01140                                                                                      | 0,226351275 | -0,02994528  | 0,031 | 0,008 | 1         | 0,979457447   | 1,0209734       | 3,875           |
| ASNS                                                                                           | 0,002594281 | -0,02996069  | 0,094 | 0,012 | 1         | 0,979446985   | 1,020984306     | 7,833333333     |
| KYAT1                                                                                          | 0,543117005 | -0,029994466 | 0     | 0,012 | 1         | 0,979424054   | 1,021008209     | 0               |
| ZNF548                                                                                         | 0,991060715 | -0,030011146 | 0,031 | 0,031 | 1         | 0,979412731   | 1,021020014     | 1               |
| NEMP2                                                                                          | 0,036827385 | -0,030107272 | 0,094 | 0,023 | 1         | 0,979347475   | 1,021088046     | 4,086956522     |
| PI16                                                                                           | 0,682170546 | -0,030122623 | 0,031 | 0,02  | 1         | 0,979337055   | 1,021098911     | 1,55            |
| DDX60L                                                                                         | 0,150155729 | -0,030164821 | 0,062 | 0,02  | 1         | 0,97930841    | 1,021128778     | 3,1             |
| NAA15                                                                                          | 0,031755723 | -0,030200646 | 0,25  | 0,102 | 1         | 0,979284092   | 1,021154135     | 2,450980392     |
| LRP11                                                                                          | 0,13644998  | -0,030276182 | 0,094 | 0,035 | 1         | 0,979232821   | 1,021207602     | 2,685714286     |
| PAXBP1-AS1                                                                                     | 0,386325862 | -0,030285054 | 0,031 | 0,012 | 1         | 0,979226798   | 1,021213882     | 2,583333333     |
| TMEM17                                                                                         | 0,002096899 | -0,030321024 | 0,156 | 0,031 | 1         | 0,979202384   | 1,021239343     | 5,032258065     |

Supplementary Table 1

| Differentially expressed genes_adjacent-skin-XL_comparing SC-Keloid vs. (SC-Myel, SC-Nonmyel) |             |              |       |       |           |               |                 |                 |
|-----------------------------------------------------------------------------------------------|-------------|--------------|-------|-------|-----------|---------------|-----------------|-----------------|
| gene                                                                                          | p_val       | avg_log2FC   | pct.1 | pct.2 | p_val_adj | Foldchange_UP | Foldchange_DOWN | Ratio_pct1_pct2 |
| CBFB                                                                                          | 0,000103352 | -0,0303993   | 0,531 | 0,16  | 1         | 0,979149258   | 1,021294754     | 3,31875         |
| TENT5B                                                                                        | 0,150155729 | -0,030410668 | 0,062 | 0,02  | 1         | 0,979141542   | 1,021302801     | 3,1             |
| RNF180                                                                                        | 0,150155729 | -0,030430883 | 0,062 | 0,02  | 1         | 0,979127822   | 1,021317112     | 3,1             |
| ANGPTL1                                                                                       | 0,478627389 | -0,030439435 | 0,062 | 0,035 | 1         | 0,979122018   | 1,021323166     | 1,771428571     |
| IL17RE                                                                                        | 0,002096899 | -0,030448199 | 0,156 | 0,031 | 1         | 0,979116071   | 1,02132937      | 5,032258065     |
| LAT                                                                                           | 0,533973819 | -0,030474654 | 0,031 | 0,016 | 1         | 0,979098117   | 1,021348099     | 1,9375          |
| SNAPC4                                                                                        | 0,540537634 | -0,030476525 | 0,031 | 0,016 | 1         | 0,979096847   | 1,021349424     | 1,9375          |
| RCC1L                                                                                         | 0,092647906 | -0,030567058 | 0,125 | 0,047 | 1         | 0,979035408   | 1,021413518     | 2,659574468     |
| RXYLT1                                                                                        | 7,44701E-05 | -0,03057176  | 0,312 | 0,07  | 1         | 0,979032217   | 1,021416847     | 4,457142857     |
| APOL2                                                                                         | 0,128344705 | -0,030574964 | 0,156 | 0,07  | 1         | 0,979030043   | 1,021419115     | 2,228571429     |
| MIR181A1HG                                                                                    | 0,098751938 | -0,030588303 | 0,094 | 0,031 | 1         | 0,979020991   | 1,021428559     | 3,032258065     |
| RCBTB2                                                                                        | 0,037506898 | -0,030657234 | 0,094 | 0,023 | 1         | 0,978974215   | 1,021477364     | 4,086956522     |
| RPA4                                                                                          | 0,082317662 | -0,030670581 | 0,031 | 0,004 | 1         | 0,978965158   | 1,021486814     | 7,75            |
| TIAM1                                                                                         | 0,543117005 | -0,030858141 | 0     | 0,012 | 1         | 0,978837894   | 1,021619623     | 0               |
| SPSB1                                                                                         | 0,021070281 | -0,030858826 | 0,156 | 0,047 | 1         | 0,978837429   | 1,021620108     | 3,319148936     |
| GPER1                                                                                         | 0,150155729 | -0,030875445 | 0,062 | 0,02  | 1         | 0,978826153   | 1,021631877     | 3,1             |
| AIG1                                                                                          | 0,013467327 | -0,030915427 | 0,344 | 0,137 | 1         | 0,978799027   | 1,02166019      | 2,510948905     |
| TEFM                                                                                          | 0,396289917 | -0,03092546  | 0,062 | 0,031 | 1         | 0,978792221   | 1,021667294     | 2               |
| MANSC1                                                                                        | 0,543117005 | -0,030970626 | 0     | 0,012 | 1         | 0,978761579   | 1,02169928      | 0               |
| RTL6                                                                                          | 0,224763613 | -0,030971436 | 0,062 | 0,023 | 1         | 0,978761028   | 1,021699854     | 2,695652174     |
| RHBDF2                                                                                        | 0,062914349 | -0,030981738 | 0,094 | 0,027 | 1         | 0,97875404    | 1,021707149     | 3,481481481     |
| MIF4GD                                                                                        | 0,00208125  | -0,031008304 | 0,188 | 0,043 | 1         | 0,978736017   | 1,021725964     | 4,372093023     |
| FLOT1                                                                                         | 0,008322664 | -0,031025853 | 0,594 | 0,254 | 1         | 0,978724111   | 1,021738392     | 2,338582677     |
| B4GALT6                                                                                       | 0,000204358 | -0,03104337  | 0,312 | 0,078 | 1         | 0,978712228   | 1,021750798     | 4               |
| ANKRD23                                                                                       | 0,226351275 | -0,031116462 | 0,031 | 0,008 | 1         | 0,978662644   | 1,021802565     | 3,875           |
| CCDC77                                                                                        | 0,019236133 | -0,031126969 | 0,094 | 0,02  | 1         | 0,978655517   | 1,021810006     | 4,7             |
| TMEM131                                                                                       | 0,021727091 | -0,031140664 | 0,219 | 0,078 | 1         | 0,978646227   | 1,021819706     | 2,807692308     |
| DGKG                                                                                          | 0,540537634 | -0,031166014 | 0,031 | 0,016 | 1         | 0,978629031   | 1,021837661     | 1,9375          |
| TNNI3K                                                                                        | 0,543117005 | -0,031200956 | 0     | 0,012 | 1         | 0,978605329   | 1,02186241      | 0               |
| C1orf50                                                                                       | 0,133058992 | -0,031211083 | 0,094 | 0,035 | 1         | 0,97859846    | 1,021869583     | 2,685714286     |



Supplementary Table 1

| Differentially expressed genes_adjacent-skin-XL_comparing SC-Keloid vs. (SC-Myel, SC-Nonmyel) |             |              |       |       |           |               |                 |                 |
|-----------------------------------------------------------------------------------------------|-------------|--------------|-------|-------|-----------|---------------|-----------------|-----------------|
| gene                                                                                          | p_val       | avg_log2FC   | pct.1 | pct.2 | p_val_adj | Foldchange_UP | Foldchange_DOWN | Ratio_pct1_pct2 |
| ZBTB1                                                                                         | 0,3182413   | -0,031321138 | 0,156 | 0,094 | 1         | 0,978523811   | 1,021947539     | 1,659574468     |
| WDR19                                                                                         | 0,098751938 | -0,03139988  | 0,094 | 0,031 | 1         | 0,978470405   | 1,022003318     | 3,032258065     |
| ZNF749                                                                                        | 0,028258709 | -0,031537007 | 0,125 | 0,035 | 1         | 0,978377406   | 1,022100463     | 3,571428571     |
| TBL3                                                                                          | 0,183526587 | -0,031546148 | 0,094 | 0,039 | 1         | 0,978371207   | 1,022106939     | 2,41025641      |
| HUNK                                                                                          | 0,004180266 | -0,031568462 | 0,125 | 0,023 | 1         | 0,978356075   | 1,022122748     | 5,434782609     |
| RETREG3                                                                                       | 0,010405093 | -0,031619202 | 0,188 | 0,055 | 1         | 0,978321666   | 1,022158697     | 3,418181818     |
| EPB41L1                                                                                       | 0,000339359 | -0,031631226 | 0,156 | 0,023 | 1         | 0,978313513   | 1,022167216     | 6,782608696     |
| OR7A5                                                                                         | 0,386325862 | -0,031650863 | 0,031 | 0,012 | 1         | 0,978300197   | 1,022181129     | 2,583333333     |
| INTS4                                                                                         | 0,002043075 | -0,031682508 | 0,188 | 0,043 | 1         | 0,978278738   | 1,022203551     | 4,372093023     |
| AP4B1                                                                                         | 0,087959196 | -0,031712739 | 0,062 | 0,016 | 1         | 0,978258239   | 1,022224971     | 3,875           |
| MPP2                                                                                          | 0,087959196 | -0,031720931 | 0,062 | 0,016 | 1         | 0,978252685   | 1,022230775     | 3,875           |
| ATG16L1                                                                                       | 0,028712073 | -0,031766452 | 0,125 | 0,035 | 1         | 0,978221818   | 1,02226303      | 3,571428571     |
| C1orf216                                                                                      | 0,918113127 | -0,031769825 | 0,031 | 0,027 | 1         | 0,978219531   | 1,02226542      | 1,148148148     |
| TM9SF4                                                                                        | 0,006260028 | -0,031799    | 0,188 | 0,051 | 1         | 0,978199749   | 1,022286093     | 3,68627451      |
| STX2                                                                                          | 0,001959565 | -0,031829969 | 0,312 | 0,098 | 1         | 0,978178752   | 1,022308038     | 3,183673469     |
| MCU                                                                                           | 0,304406192 | -0,031855648 | 0,062 | 0,027 | 1         | 0,97816134    | 1,022326235     | 2,296296296     |
| URGCP                                                                                         | 0,092647906 | -0,031867459 | 0,125 | 0,047 | 1         | 0,978153333   | 1,022334604     | 2,659574468     |
| CACYBP                                                                                        | 0,000180922 | -0,031899817 | 0,656 | 0,23  | 1         | 0,978131394   | 1,022357534     | 2,852173913     |
| ACSS3                                                                                         | 0,098751938 | -0,031949102 | 0,094 | 0,031 | 1         | 0,97809798    | 1,02239246      | 3,032258065     |
| LIAS                                                                                          | 0,016858455 | -0,032114647 | 0,125 | 0,031 | 1         | 0,977985753   | 1,022509783     | 4,032258065     |
| SKP2                                                                                          | 0,540537634 | -0,032148676 | 0,031 | 0,016 | 1         | 0,977962685   | 1,022533902     | 1,9375          |
| GANAB                                                                                         | 0,046537241 | -0,032153789 | 0,344 | 0,164 | 1         | 0,977959219   | 1,022537526     | 2,097560976     |
| DPP9                                                                                          | 0,080553141 | -0,032155366 | 0,188 | 0,082 | 1         | 0,97795815    | 1,022538643     | 2,292682927     |
| PPID                                                                                          | 0,029760483 | -0,032190446 | 0,156 | 0,051 | 1         | 0,97793437    | 1,022563508     | 3,058823529     |
| CYP2R1                                                                                        | 0,226351275 | -0,032267477 | 0,031 | 0,008 | 1         | 0,977882156   | 1,022618107     | 3,875           |
| UBP1                                                                                          | 0,197139196 | -0,032298975 | 0,125 | 0,059 | 1         | 0,977860807   | 1,022640434     | 2,118644068     |
| ZMYM6                                                                                         | 0,015314414 | -0,032306914 | 0,188 | 0,059 | 1         | 0,977855425   | 1,022646062     | 3,186440678     |
| ZNF771                                                                                        | 0,147778936 | -0,032316288 | 0,062 | 0,02  | 1         | 0,977849072   | 1,022652707     | 3,1             |
| MAST2                                                                                         | 0,016562293 | -0,032347371 | 0,125 | 0,031 | 1         | 0,977828005   | 1,02267474      | 4,032258065     |
| MATN4                                                                                         | 0,386325862 | -0,032358739 | 0,031 | 0,012 | 1         | 0,977820299   | 1,022682798     | 2,583333333     |

Supplementary Table 1

| Differentially expressed genes_adjacent-skin-XL_ comparing SC-Keloid vs. (SC-Myel, SC-Nonmyel) |             |              |       |       |           |               |                 |                 |
|------------------------------------------------------------------------------------------------|-------------|--------------|-------|-------|-----------|---------------|-----------------|-----------------|
| gene                                                                                           | p_val       | avg_log2FC   | pct.1 | pct.2 | p_val_adj | Foldchange_UP | Foldchange_DOWN | Ratio_pct1_pct2 |
| EFS                                                                                            | 0,000712309 | -0,032382453 | 0,531 | 0,184 | 1         | 0,977804227   | 1,022699608     | 2,885869565     |
| ECRG4                                                                                          | 0,082317662 | -0,032388655 | 0,031 | 0,004 | 1         | 0,977800024   | 1,022704005     | 7,75            |
| SLC25A15                                                                                       | 0,226351275 | -0,032430006 | 0,031 | 0,008 | 1         | 0,977771998   | 1,022733319     | 3,875           |
| CPM                                                                                            | 0,662254058 | -0,0324437   | 0,031 | 0,02  | 1         | 0,977762717   | 1,022743026     | 1,55            |
| PET117                                                                                         | 0,008148126 | -0,032448347 | 0,094 | 0,016 | 1         | 0,977759567   | 1,022746321     | 5,875           |
| ACAT1                                                                                          | 0,020057665 | -0,032459623 | 0,25  | 0,094 | 1         | 0,977751925   | 1,022754314     | 2,659574468     |
| ZNF517                                                                                         | 0,386325862 | -0,032491439 | 0,031 | 0,012 | 1         | 0,977730363   | 1,022776869     | 2,583333333     |
| IRAK2                                                                                          | 0,019236133 | -0,032499191 | 0,094 | 0,02  | 1         | 0,977725109   | 1,022782365     | 4,7             |
| SLC7A6OS                                                                                       | 0,008780679 | -0,032510991 | 0,125 | 0,027 | 1         | 0,977717113   | 1,02279073      | 4,62962963      |
| HEBP2                                                                                          | 0,000566964 | -0,032519849 | 0,406 | 0,125 | 1         | 0,97771111    | 1,02279701      | 3,248           |
| SUGP2                                                                                          | 0,000190541 | -0,032552025 | 0,406 | 0,117 | 1         | 0,977689304   | 1,022819822     | 3,47008547      |
| LZTS1                                                                                          | 0,040857201 | -0,032617238 | 0,062 | 0,012 | 1         | 0,977645112   | 1,022866056     | 5,166666667     |
| CCDC6                                                                                          | 0,005195348 | -0,032635905 | 0,219 | 0,062 | 1         | 0,977632462   | 1,022879292     | 3,532258065     |
| BVES-AS1                                                                                       | 0,226351275 | -0,032692346 | 0,031 | 0,008 | 1         | 0,977594216   | 1,02291931      | 3,875           |
| SULT1A1                                                                                        | 0,915203992 | -0,032734531 | 0,031 | 0,035 | 1         | 0,977565631   | 1,022949221     | 0,885714286     |
| LGALS7                                                                                         | 0,543117005 | -0,032881228 | 0     | 0,012 | 1         | 0,977466235   | 1,023053242     | 0               |
| OPTN                                                                                           | 0,025330018 | -0,032891759 | 0,594 | 0,285 | 1         | 0,977459099   | 1,02306071      | 2,084210526     |
| HGSNAT                                                                                         | 0,15375596  | -0,032938244 | 0,219 | 0,113 | 1         | 0,977427606   | 1,023093674     | 1,938053097     |
| WDR24                                                                                          | 0,543117005 | -0,032952293 | 0     | 0,012 | 1         | 0,977418087   | 1,023103637     | 0               |
| ZFAND1                                                                                         | 0,04173482  | -0,032957372 | 0,188 | 0,07  | 1         | 0,977414646   | 1,023107239     | 2,685714286     |
| PCSK1N                                                                                         | 0,540537634 | -0,032977908 | 0,031 | 0,016 | 1         | 0,977400733   | 1,023121803     | 1,9375          |
| PAK4                                                                                           | 0,007871757 | -0,032997431 | 0,156 | 0,039 | 1         | 0,977387507   | 1,023135648     | 4               |
| AMMECR1                                                                                        | 0,226351275 | -0,033045858 | 0,031 | 0,008 | 1         | 0,9773547     | 1,023169992     | 3,875           |
| LARP4                                                                                          | 0,029285816 | -0,033073544 | 0,344 | 0,152 | 1         | 0,977335944   | 1,023189627     | 2,263157895     |
| HUS1B                                                                                          | 0,543117005 | -0,033086127 | 0     | 0,012 | 1         | 0,977327419   | 1,023198552     | 0               |
| RBMS3-AS3                                                                                      | 0,682170546 | -0,033135368 | 0,031 | 0,02  | 1         | 0,977294063   | 1,023233475     | 1,55            |
| ZNF652                                                                                         | 0,133804381 | -0,033196794 | 0,281 | 0,148 | 1         | 0,977252453   | 1,023277043     | 1,898648649     |
| TMEM254                                                                                        | 0,041848356 | -0,03324291  | 0,062 | 0,012 | 1         | 0,977221216   | 1,023309752     | 5,166666667     |
| ICE1                                                                                           | 0,00464375  | -0,033314478 | 0,281 | 0,09  | 1         | 0,977172739   | 1,023360517     | 3,122222222     |
| IFT80                                                                                          | 0,001013976 | -0,033356578 | 0,188 | 0,039 | 1         | 0,977144225   | 1,02339038      | 4,820512821     |

Supplementary Table 1

| Differentially expressed genes_adjacent-skin-XL_comparing SC-Keloid vs. (SC-Myel, SC-Nonmyel) |             |              |       |       |           |               |                 |                 |
|-----------------------------------------------------------------------------------------------|-------------|--------------|-------|-------|-----------|---------------|-----------------|-----------------|
| gene                                                                                          | p_val       | avg_log2FC   | pct.1 | pct.2 | p_val_adj | Foldchange_UP | Foldchange_DOWN | Ratio_pct1_pct2 |
| SLC25A19                                                                                      | 0,386325862 | -0,03337337  | 0,031 | 0,012 | 1         | 0,977132851   | 1,023402292     | 2,583333333     |
| ZNF471                                                                                        | 0,150155729 | -0,033373868 | 0,062 | 0,02  | 1         | 0,977132514   | 1,023402646     | 3,1             |
| ZNF764                                                                                        | 0,540537634 | -0,033388336 | 0,031 | 0,016 | 1         | 0,977122715   | 1,023412909     | 1,9375          |
| NCOA4                                                                                         | 0,007536877 | -0,033417065 | 0,344 | 0,129 | 1         | 0,977103257   | 1,023433289     | 2,666666667     |
| ZFP62                                                                                         | 0,041848356 | -0,033466257 | 0,062 | 0,012 | 1         | 0,977069941   | 1,023468186     | 5,166666667     |
| INPP5F                                                                                        | 0,000651351 | -0,033483985 | 0,438 | 0,141 | 1         | 0,977057935   | 1,023480762     | 3,106382979     |
| KLHL7-DT                                                                                      | 0,543117005 | -0,033532166 | 0     | 0,012 | 1         | 0,977025305   | 1,023514943     | 0               |
| FBXO15                                                                                        | 0,543117005 | -0,033590818 | 0     | 0,012 | 1         | 0,976985585   | 1,023556555     | 0               |
| PIP5K1C                                                                                       | 0,044552052 | -0,033592501 | 0,125 | 0,039 | 1         | 0,976984446   | 1,023557749     | 3,205128205     |
| SPATA6                                                                                        | 0,007993973 | -0,033599449 | 0,656 | 0,297 | 1         | 0,976979741   | 1,023562678     | 2,208754209     |
| FITM2                                                                                         | 0,307936041 | -0,033699415 | 0,062 | 0,027 | 1         | 0,976912047   | 1,023633604     | 2,296296296     |
| TDRD9                                                                                         | 0,013891036 | -0,033712508 | 0,062 | 0,008 | 1         | 0,976903181   | 1,023642895     | 7,75            |
| STIM2                                                                                         | 0,152699481 | -0,033722158 | 0,125 | 0,055 | 1         | 0,976896647   | 1,023649742     | 2,272727273     |
| TSLP                                                                                          | 0,386325862 | -0,033745315 | 0,031 | 0,012 | 1         | 0,976880967   | 1,023666172     | 2,583333333     |
| SNRNP48                                                                                       | 0,13644998  | -0,033777842 | 0,094 | 0,035 | 1         | 0,976858942   | 1,023689252     | 2,685714286     |
| IQCG                                                                                          | 0,044552052 | -0,033788057 | 0,125 | 0,039 | 1         | 0,976852025   | 1,0236965       | 3,205128205     |
| UBXN11                                                                                        | 0,008148126 | -0,033806535 | 0,094 | 0,016 | 1         | 0,976839514   | 1,023709612     | 5,875           |
| PTCD3                                                                                         | 0,001853924 | -0,033877973 | 0,281 | 0,082 | 1         | 0,976791145   | 1,023760305     | 3,426829268     |
| CHST10                                                                                        | 0,682170546 | -0,033947646 | 0,031 | 0,02  | 1         | 0,976743973   | 1,023809747     | 1,55            |
| SEMA6D                                                                                        | 0,030992783 | -0,033967042 | 0,156 | 0,051 | 1         | 0,976730842   | 1,023823512     | 3,058823529     |
| CTF1                                                                                          | 0,392349482 | -0,03406316  | 0,062 | 0,031 | 1         | 0,976665771   | 1,023891724     | 2               |
| PIK3C3                                                                                        | 0,02818312  | -0,034067655 | 0,156 | 0,051 | 1         | 0,976662727   | 1,023894915     | 3,058823529     |
| CBWD3                                                                                         | 0,037506898 | -0,034085612 | 0,094 | 0,023 | 1         | 0,976650571   | 1,023907659     | 4,086956522     |
| USP20                                                                                         | 0,911838915 | -0,03417149  | 0,031 | 0,027 | 1         | 0,976592436   | 1,02396861      | 1,148148148     |
| PDE12                                                                                         | 0,007871757 | -0,034223321 | 0,156 | 0,039 | 1         | 0,976557352   | 1,024005398     | 4               |
| AGAP9                                                                                         | 0,386325862 | -0,034232286 | 0,031 | 0,012 | 1         | 0,976551283   | 1,024011762     | 2,583333333     |
| SLC44A4                                                                                       | 0,543117005 | -0,034264201 | 0     | 0,012 | 1         | 0,976529681   | 1,024034415     | 0               |
| UBFD1                                                                                         | 0,000105488 | -0,034272556 | 0,219 | 0,039 | 1         | 0,976524025   | 1,024040346     | 5,615384615     |
| ZNF112                                                                                        | 0,386325862 | -0,034281774 | 0,031 | 0,012 | 1         | 0,976517786   | 1,024046888     | 2,583333333     |
| PRRT3-AS1                                                                                     | 0,063925678 | -0,034304554 | 0,094 | 0,027 | 1         | 0,976502367   | 1,024063058     | 3,481481481     |

Supplementary Table 1

| Differentially expressed genes_adjacent-skin-XL_comparing SC-Keloid vs. (SC-Myel, SC-Nonmyel) |             |              |       |       |           |               |                 |                 |
|-----------------------------------------------------------------------------------------------|-------------|--------------|-------|-------|-----------|---------------|-----------------|-----------------|
| gene                                                                                          | p_val       | avg_log2FC   | pct.1 | pct.2 | p_val_adj | Foldchange_UP | Foldchange_DOWN | Ratio_pct1_pct2 |
| C3orf38                                                                                       | 0,010253031 | -0,034311936 | 0,188 | 0,055 | 1         | 0,97649737    | 1,024068298     | 3,418181818     |
| THOC6                                                                                         | 0,147986647 | -0,034317778 | 0,156 | 0,074 | 1         | 0,976493416   | 1,024072445     | 2,108108108     |
| MRPL49                                                                                        | 0,029826788 | -0,034319956 | 0,219 | 0,082 | 1         | 0,976491942   | 1,024073991     | 2,670731707     |
| ELAC1                                                                                         | 0,008956837 | -0,03432179  | 0,125 | 0,027 | 1         | 0,976490701   | 1,024075292     | 4,62962963      |
| SNIP1                                                                                         | 0,285925963 | -0,034333456 | 0,094 | 0,047 | 1         | 0,976482805   | 1,024083573     | 2               |
| MED15                                                                                         | 0,024538024 | -0,034376967 | 0,406 | 0,188 | 1         | 0,976453355   | 1,02411446      | 2,159574468     |
| LIPT1                                                                                         | 0,543117005 | -0,034397437 | 0     | 0,012 | 1         | 0,9764395     | 1,024128991     | 0               |
| FNDC1                                                                                         | 0,386325862 | -0,034418365 | 0,031 | 0,012 | 1         | 0,976425336   | 1,024143847     | 2,583333333     |
| PTPRG                                                                                         | 0,543117005 | -0,034477673 | 0     | 0,012 | 1         | 0,976385196   | 1,02418595      | 0               |
| NSUN3                                                                                         | 0,041848356 | -0,034478518 | 0,062 | 0,012 | 1         | 0,976384624   | 1,02418655      | 5,166666667     |
| DCAF11                                                                                        | 0,007471523 | -0,034516384 | 0,156 | 0,039 | 1         | 0,976358998   | 1,024213432     | 4               |
| GRAMD1B                                                                                       | 0,543117005 | -0,034542276 | 0     | 0,012 | 1         | 0,976341476   | 1,024231813     | 0               |
| HIC2                                                                                          | 0,147778936 | -0,034560802 | 0,062 | 0,02  | 1         | 0,976328939   | 1,024244966     | 3,1             |
| SHB                                                                                           | 0,682170546 | -0,034564479 | 0,031 | 0,02  | 1         | 0,97632645    | 1,024247576     | 1,55            |
| SATB2                                                                                         | 0,226351275 | -0,034593768 | 0,031 | 0,008 | 1         | 0,976306629   | 1,02426837      | 3,875           |
| SNX1                                                                                          | 0,003987873 | -0,03460905  | 0,344 | 0,121 | 1         | 0,976296287   | 1,02427922      | 2,842975207     |
| PSTK                                                                                          | 0,224763613 | -0,034685793 | 0,062 | 0,023 | 1         | 0,976244355   | 1,024333707     | 2,695652174     |
| KPNA1                                                                                         | 0,011181716 | -0,03471187  | 0,312 | 0,117 | 1         | 0,97622671    | 1,024352222     | 2,666666667     |
| PFKL                                                                                          | 0,003182741 | -0,034743681 | 0,375 | 0,133 | 1         | 0,976205185   | 1,024374809     | 2,819548872     |
| HOXC-AS1                                                                                      | 0,226351275 | -0,034787949 | 0,031 | 0,008 | 1         | 0,976175231   | 1,024406242     | 3,875           |
| SORD                                                                                          | 0,098751938 | -0,034939365 | 0,094 | 0,031 | 1         | 0,976072783   | 1,024513763     | 3,032258065     |
| ACBD5                                                                                         | 0,000801432 | -0,034964367 | 0,312 | 0,09  | 1         | 0,976055868   | 1,024531518     | 3,466666667     |
| ING4                                                                                          | 0,005967942 | -0,034968883 | 0,188 | 0,051 | 1         | 0,976052813   | 1,024534725     | 3,68627451      |
| MPLKIP                                                                                        | 0,001190114 | -0,035042254 | 0,438 | 0,148 | 1         | 0,976003175   | 1,024586831     | 2,959459459     |
| VMAC                                                                                          | 0,087959196 | -0,035049429 | 0,062 | 0,016 | 1         | 0,975998321   | 1,024591927     | 3,875           |
| GIN1                                                                                          | 0,028712073 | -0,035102009 | 0,125 | 0,035 | 1         | 0,975962751   | 1,024629269     | 3,571428571     |
| GORASP1                                                                                       | 0,094667448 | -0,035121158 | 0,094 | 0,031 | 1         | 0,975949797   | 1,024642869     | 3,032258065     |
| MRPS10                                                                                        | 0,005602602 | -0,035163902 | 0,281 | 0,094 | 1         | 0,975920882   | 1,024673227     | 2,989361702     |
| METTL25                                                                                       | 0,150155729 | -0,035173291 | 0,062 | 0,02  | 1         | 0,975914531   | 1,024679896     | 3,1             |
| FGD1                                                                                          | 0,226351275 | -0,03518143  | 0,031 | 0,008 | 1         | 0,975909025   | 1,024685677     | 3,875           |

Supplementary Table 1

| Differentially expressed genes_adjacent-skin-XL_ comparing SC-Keloid vs. (SC-Myel, SC-Nonmyel) |             |              |       |       |           |               |                 |                 |
|------------------------------------------------------------------------------------------------|-------------|--------------|-------|-------|-----------|---------------|-----------------|-----------------|
| gene                                                                                           | p_val       | avg_log2FC   | pct.1 | pct.2 | p_val_adj | Foldchange_UP | Foldchange_DOWN | Ratio_pct1_pct2 |
| STK16                                                                                          | 0,008956837 | -0,03523651  | 0,125 | 0,027 | 1         | 0,975871767   | 1,024724799     | 4,62962963      |
| H2AC11                                                                                         | 0,543117005 | -0,035253999 | 0     | 0,012 | 1         | 0,975859937   | 1,024737221     | 0               |
| ZNF583                                                                                         | 0,386325862 | -0,035284098 | 0,031 | 0,012 | 1         | 0,975839578   | 1,0247586       | 2,583333333     |
| ASPHD1                                                                                         | 0,682170546 | -0,035330532 | 0,031 | 0,02  | 1         | 0,975808171   | 1,024791583     | 1,55            |
| PCDHB14                                                                                        | 0,540537634 | -0,035351206 | 0,031 | 0,016 | 1         | 0,975794187   | 1,024806269     | 1,9375          |
| SPINT1                                                                                         | 0,543117005 | -0,03537745  | 0     | 0,012 | 1         | 0,975776437   | 1,024824911     | 0               |
| OTUD7A                                                                                         | 0,087959196 | -0,035389228 | 0,062 | 0,016 | 1         | 0,975768471   | 1,024833278     | 3,875           |
| BRD7                                                                                           | 0,002023444 | -0,035417546 | 0,406 | 0,141 | 1         | 0,975749318   | 1,024853394     | 2,879432624     |
| UVRAG                                                                                          | 0,102525773 | -0,035455481 | 0,156 | 0,066 | 1         | 0,975723661   | 1,024880343     | 2,363636364     |
| SPINDOC                                                                                        | 0,123421204 | -0,035462465 | 0,125 | 0,051 | 1         | 0,975718938   | 1,024885304     | 2,450980392     |
| ATG12                                                                                          | 0,02226642  | -0,035479072 | 0,344 | 0,145 | 1         | 0,975707706   | 1,024897102     | 2,372413793     |
| NNAT                                                                                           | 0,543117005 | -0,035517596 | 0     | 0,012 | 1         | 0,975681652   | 1,024924469     | 0               |
| DRD4                                                                                           | 0,386325862 | -0,035532347 | 0,031 | 0,012 | 1         | 0,975671676   | 1,024934949     | 2,583333333     |
| CEP19                                                                                          | 0,226351275 | -0,035627264 | 0,031 | 0,008 | 1         | 0,975607488   | 1,025002383     | 3,875           |
| PSRC1                                                                                          | 0,087959196 | -0,035678367 | 0,062 | 0,016 | 1         | 0,97557293    | 1,025038691     | 3,875           |
| MT1G                                                                                           | 0,041848356 | -0,035710945 | 0,062 | 0,012 | 1         | 0,975550901   | 1,025061838     | 5,166666667     |
| AC093157.1                                                                                     | 0,063925678 | -0,035776033 | 0,094 | 0,027 | 1         | 0,975506889   | 1,025108086     | 3,481481481     |
| GALM                                                                                           | 0,016562293 | -0,035781968 | 0,125 | 0,031 | 1         | 0,975502876   | 1,025112303     | 4,032258065     |
| TARS2                                                                                          | 0,002594281 | -0,035809022 | 0,094 | 0,012 | 1         | 0,975484583   | 1,025131526     | 7,833333333     |
| TFPI                                                                                           | 0,150155729 | -0,035894191 | 0,062 | 0,02  | 1         | 0,975426998   | 1,025192046     | 3,1             |
| CLINT1                                                                                         | 0,584692171 | -0,035923421 | 0,188 | 0,137 | 1         | 0,975407236   | 1,025212817     | 1,372262774     |
| TNNI2                                                                                          | 0,543117005 | -0,035966129 | 0     | 0,012 | 1         | 0,975378361   | 1,025243167     | 0               |
| DLX1                                                                                           | 0,386325862 | -0,036038015 | 0,031 | 0,012 | 1         | 0,975329761   | 1,025294254     | 2,583333333     |
| ZNF385D                                                                                        | 0,226351275 | -0,036111813 | 0,031 | 0,008 | 1         | 0,975279872   | 1,025346702     | 3,875           |
| SMCO4                                                                                          | 0,224763613 | -0,036126166 | 0,062 | 0,023 | 1         | 0,975270169   | 1,025356903     | 2,695652174     |
| COX15                                                                                          | 0,000476445 | -0,036154374 | 0,188 | 0,035 | 1         | 0,9752511     | 1,025376952     | 5,371428571     |
| ZNF354A                                                                                        | 0,246047587 | -0,036221265 | 0,094 | 0,043 | 1         | 0,975205883   | 1,025424495     | 2,186046512     |
| AC144652.1                                                                                     | 0,386325862 | -0,036302291 | 0,031 | 0,012 | 1         | 0,975151115   | 1,025482087     | 2,583333333     |
| WASHC2A                                                                                        | 0,118142322 | -0,036367452 | 0,125 | 0,051 | 1         | 0,975107072   | 1,025528405     | 2,450980392     |
| SLC35E2B                                                                                       | 0,146633603 | -0,036367609 | 0,125 | 0,055 | 1         | 0,975106966   | 1,025528516     | 2,272727273     |

Supplementary Table 1

| Differentially expressed genes_adjacent-skin-XL_comparing SC-Keloid vs. (SC-Myel, SC-Nonmyel) |             |              |       |       |             |               |                 |                 |
|-----------------------------------------------------------------------------------------------|-------------|--------------|-------|-------|-------------|---------------|-----------------|-----------------|
| gene                                                                                          | p_val       | avg_log2FC   | pct.1 | pct.2 | p_val_adj   | Foldchange_UP | Foldchange_DOWN | Ratio_pct1_pct2 |
| AP2B1                                                                                         | 0,000273539 | -0,036402083 | 0,531 | 0,176 | 1           | 0,975083665   | 1,025553022     | 3,017045455     |
| RPS6KL1                                                                                       | 0,386325862 | -0,036491    | 0,031 | 0,012 | 1           | 0,97502357    | 1,025616232     | 2,583333333     |
| ACSS1                                                                                         | 0,077467066 | -0,036527617 | 0,156 | 0,062 | 1           | 0,974998823   | 1,025642264     | 2,516129032     |
| MYO19                                                                                         | 0,098751938 | -0,036639373 | 0,094 | 0,031 | 1           | 0,9749233     | 1,025721716     | 3,032258065     |
| NOMO1                                                                                         | 3,05607E-05 | -0,036667666 | 0,281 | 0,055 | 0,644860382 | 0,97490418    | 1,025741832     | 5,109090909     |
| DMC1                                                                                          | 0,386325862 | -0,036722059 | 0,031 | 0,012 | 1           | 0,974867425   | 1,025780505     | 2,583333333     |
| MED19                                                                                         | 0,000146687 | -0,036756534 | 0,281 | 0,062 | 1           | 0,97484413    | 1,025805018     | 4,532258065     |
| SYNGAP1                                                                                       | 0,087959196 | -0,036769479 | 0,062 | 0,016 | 1           | 0,974835382   | 1,025814223     | 3,875           |
| TGFB3                                                                                         | 0,543117005 | -0,036777127 | 0     | 0,012 | 1           | 0,974830215   | 1,02581966      | 0               |
| C15orf40                                                                                      | 0,015105004 | -0,036927112 | 0,188 | 0,059 | 1           | 0,974728875   | 1,025926312     | 3,186440678     |
| SLC16A8                                                                                       | 0,226351275 | -0,036969422 | 0,031 | 0,008 | 1           | 0,97470029    | 1,0259564       | 3,875           |
| TNS3                                                                                          | 0,019510793 | -0,036972076 | 0,594 | 0,289 | 1           | 0,974698496   | 1,025958287     | 2,055363322     |
| ERBIN                                                                                         | 0,077894802 | -0,036994693 | 0,406 | 0,215 | 1           | 0,974683216   | 1,025974371     | 1,888372093     |
| GEMIN4                                                                                        | 0,386325862 | -0,036995692 | 0,031 | 0,012 | 1           | 0,974682542   | 1,025975081     | 2,583333333     |
| BBS10                                                                                         | 0,221757959 | -0,037013933 | 0,062 | 0,023 | 1           | 0,974670218   | 1,025988054     | 2,695652174     |
| TRIM45                                                                                        | 0,386325862 | -0,037038375 | 0,031 | 0,012 | 1           | 0,974653705   | 1,026005437     | 2,583333333     |
| TGFBRAP1                                                                                      | 0,141661018 | -0,037042244 | 0,094 | 0,035 | 1           | 0,974651091   | 1,026008188     | 2,685714286     |
| MIR181A2HG                                                                                    | 0,226351275 | -0,03706628  | 0,031 | 0,008 | 1           | 0,974634853   | 1,026025282     | 3,875           |
| SLC20A2                                                                                       | 0,012009804 | -0,037095335 | 0,281 | 0,105 | 1           | 0,974615225   | 1,026045946     | 2,676190476     |
| RELA                                                                                          | 0,008282358 | -0,037118992 | 0,312 | 0,113 | 1           | 0,974599244   | 1,02606277      | 2,761061947     |
| RPP25                                                                                         | 0,386325862 | -0,037120994 | 0,031 | 0,012 | 1           | 0,974597891   | 1,026064194     | 2,583333333     |
| NEURL1B                                                                                       | 0,004267025 | -0,037124896 | 0,156 | 0,035 | 1           | 0,974595255   | 1,026066969     | 4,457142857     |
| DNAAF10                                                                                       | 0,224763613 | -0,037163543 | 0,062 | 0,023 | 1           | 0,974569148   | 1,026094456     | 2,695652174     |
| MUC1                                                                                          | 0,543117005 | -0,03721724  | 0     | 0,012 | 1           | 0,974532876   | 1,026132648     | 0               |
| FBXL6                                                                                         | 0,001034587 | -0,03723123  | 0,188 | 0,039 | 1           | 0,974523425   | 1,026142598     | 4,820512821     |
| CORO1A                                                                                        | 0,226351275 | -0,037289131 | 0,031 | 0,008 | 1           | 0,974484315   | 1,026183782     | 3,875           |
| SPATA20                                                                                       | 0,06901054  | -0,037291147 | 0,188 | 0,078 | 1           | 0,974482953   | 1,026185217     | 2,41025641      |
| LDAH                                                                                          | 0,082317662 | -0,037294082 | 0,031 | 0,004 | 1           | 0,974480971   | 1,026187304     | 7,75            |
| RPP40                                                                                         | 0,008148126 | -0,037358742 | 0,094 | 0,016 | 1           | 0,974437296   | 1,026233298     | 5,875           |
| NFXL1                                                                                         | 0,008956837 | -0,037375296 | 0,125 | 0,027 | 1           | 0,974426115   | 1,026245073     | 4,62962963      |

Supplementary Table 1

| Differentially expressed genes_adjacent-skin-XL_ comparing SC-Keloid vs. (SC-Myel, SC-Nonmyel) |             |              |       |       |           |               |                 |                 |
|------------------------------------------------------------------------------------------------|-------------|--------------|-------|-------|-----------|---------------|-----------------|-----------------|
| gene                                                                                           | p_val       | avg_log2FC   | pct.1 | pct.2 | p_val_adj | Foldchange_UP | Foldchange_DOWN | Ratio_pct1_pct2 |
| MIER2                                                                                          | 0,041848356 | -0,037389911 | 0,062 | 0,012 | 1         | 0,974416244   | 1,026255469     | 5,166666667     |
| TP53                                                                                           | 0,004681177 | -0,037412686 | 0,219 | 0,062 | 1         | 0,974400862   | 1,02627167      | 3,532258065     |
| FASTKD3                                                                                        | 0,226351275 | -0,037429898 | 0,031 | 0,008 | 1         | 0,974389237   | 1,026283914     | 3,875           |
| OTUB1                                                                                          | 0,001535057 | -0,037492306 | 0,312 | 0,094 | 1         | 0,974347088   | 1,02632831      | 3,319148936     |
| EDC3                                                                                           | 0,386325862 | -0,037540435 | 0,031 | 0,012 | 1         | 0,974314583   | 1,02636255      | 2,583333333     |
| MEN1                                                                                           | 0,087959196 | -0,037551439 | 0,062 | 0,016 | 1         | 0,974307152   | 1,026370379     | 3,875           |
| MTRR                                                                                           | 0,540537634 | -0,037652238 | 0,031 | 0,016 | 1         | 0,974239081   | 1,026442092     | 1,9375          |
| PCAT6                                                                                          | 0,540537634 | -0,037676253 | 0,031 | 0,016 | 1         | 0,974222863   | 1,026459178     | 1,9375          |
| ASAH2B                                                                                         | 0,082317662 | -0,037719141 | 0,031 | 0,004 | 1         | 0,974193903   | 1,026489693     | 7,75            |
| CDON                                                                                           | 0,543117005 | -0,037729997 | 0     | 0,012 | 1         | 0,974186572   | 1,026497417     | 0               |
| CHD1L                                                                                          | 0,543117005 | -0,038003713 | 0     | 0,012 | 1         | 0,974001762   | 1,026692188     | 0               |
| FAR2                                                                                           | 0,019236133 | -0,038043668 | 0,094 | 0,02  | 1         | 0,973974788   | 1,026720622     | 4,7             |
| KCNK6                                                                                          | 0,386325862 | -0,038076872 | 0,031 | 0,012 | 1         | 0,973952371   | 1,026744253     | 2,583333333     |
| GCHFR                                                                                          | 0,543117005 | -0,03808296  | 0     | 0,012 | 1         | 0,973948262   | 1,026748585     | 0               |
| TNPO3                                                                                          | 0,000257882 | -0,038112285 | 0,219 | 0,043 | 1         | 0,973928465   | 1,026769456     | 5,093023256     |
| CAPS                                                                                           | 0,0501673   | -0,038123163 | 0,281 | 0,129 | 1         | 0,973921122   | 1,026777198     | 2,178294574     |
| EXTL3                                                                                          | 0,392349482 | -0,038132341 | 0,062 | 0,031 | 1         | 0,973914925   | 1,02678373      | 2               |
| HAUS7                                                                                          | 0,009522001 | -0,038141521 | 0,188 | 0,055 | 1         | 0,973908728   | 1,026790264     | 3,418181818     |
| TM2D2                                                                                          | 0,006461838 | -0,03817132  | 0,188 | 0,051 | 1         | 0,973888613   | 1,026811472     | 3,68627451      |
| PPIP5K1                                                                                        | 0,543117005 | -0,038319539 | 0     | 0,012 | 1         | 0,973788562   | 1,02691697      | 0               |
| SRP68                                                                                          | 0,040359751 | -0,038349556 | 0,219 | 0,086 | 1         | 0,973768302   | 1,026938336     | 2,546511628     |
| HSPBAP1                                                                                        | 0,578217897 | -0,038556967 | 0,062 | 0,039 | 1         | 0,973628317   | 1,027085986     | 1,58974359      |
| FCSK                                                                                           | 0,540537634 | -0,038609291 | 0,031 | 0,016 | 1         | 0,973593006   | 1,027123237     | 1,9375          |
| NKAPL                                                                                          | 0,543117005 | -0,038733975 | 0     | 0,012 | 1         | 0,973508867   | 1,02721201      | 0               |
| ING2                                                                                           | 0,000257365 | -0,038787419 | 0,281 | 0,066 | 1         | 0,973472805   | 1,027250063     | 4,257575758     |
| PLEKHH1                                                                                        | 0,139907281 | -0,038828106 | 0,094 | 0,035 | 1         | 0,973445351   | 1,027279034     | 2,685714286     |
| CAMK1                                                                                          | 0,000257882 | -0,038864875 | 0,219 | 0,043 | 1         | 0,973420542   | 1,027305216     | 5,093023256     |
| TYW5                                                                                           | 0,803381388 | -0,038940852 | 0,031 | 0,023 | 1         | 0,97336928    | 1,027359319     | 1,347826087     |
| PLEKHM2                                                                                        | 0,003622253 | -0,038964787 | 0,375 | 0,137 | 1         | 0,973353131   | 1,027376363     | 2,737226277     |
| OPLAH                                                                                          | 0,543117005 | -0,038981611 | 0     | 0,012 | 1         | 0,973341781   | 1,027388344     | 0               |

Supplementary Table 1

| Differentially expressed genes_adjacent-skin-XL_ comparing SC-Keloid vs. (SC-Myel, SC-Nonmyel) |             |              |       |       |           |               |                 |                 |
|------------------------------------------------------------------------------------------------|-------------|--------------|-------|-------|-----------|---------------|-----------------|-----------------|
| gene                                                                                           | p_val       | avg_log2FC   | pct.1 | pct.2 | p_val_adj | Foldchange_UP | Foldchange_DOWN | Ratio_pct1_pct2 |
| NECAB3                                                                                         | 0,037506898 | -0,03903078  | 0,094 | 0,023 | 1         | 0,973308608   | 1,027423359     | 4,086956522     |
| CXADR                                                                                          | 0,540537634 | -0,039075561 | 0,031 | 0,016 | 1         | 0,973278397   | 1,027455251     | 1,9375          |
| LENG1                                                                                          | 0,011446319 | -0,039162042 | 0,219 | 0,07  | 1         | 0,973220057   | 1,027516843     | 3,128571429     |
| PRKCZ                                                                                          | 0,087959196 | -0,039168829 | 0,062 | 0,016 | 1         | 0,973215479   | 1,027521676     | 3,875           |
| PTGES                                                                                          | 0,226351275 | -0,039313277 | 0,031 | 0,008 | 1         | 0,973118041   | 1,027624561     | 3,875           |
| EYA2                                                                                           | 0,480650464 | -0,03939156  | 0     | 0,016 | 1         | 0,97306524    | 1,027680323     | 0               |
| B9D2                                                                                           | 0,008148126 | -0,039470341 | 0,094 | 0,016 | 1         | 0,973012105   | 1,027736443     | 5,875           |
| SENP1                                                                                          | 0,019236133 | -0,039476779 | 0,094 | 0,02  | 1         | 0,973007763   | 1,027741029     | 4,7             |
| TERF2IP                                                                                        | 0,00629843  | -0,039542182 | 0,688 | 0,297 | 1         | 0,972963654   | 1,027787622     | 2,316498316     |
| ADGRG6                                                                                         | 0,000132242 | -0,039567384 | 0,5   | 0,152 | 1         | 0,972946658   | 1,027805576     | 3,289473684     |
| TRIM34                                                                                         | 0,540537634 | -0,039663887 | 0,031 | 0,016 | 1         | 0,972881579   | 1,027874329     | 1,9375          |
| NSDHL                                                                                          | 0,098751938 | -0,039768376 | 0,094 | 0,031 | 1         | 0,972811119   | 1,027948777     | 3,032258065     |
| STRIP1                                                                                         | 0,098751938 | -0,039772713 | 0,094 | 0,031 | 1         | 0,972808195   | 1,027951867     | 3,032258065     |
| CCDC97                                                                                         | 0,540537634 | -0,039793488 | 0,031 | 0,016 | 1         | 0,972794186   | 1,02796667      | 1,9375          |
| SLC17A5                                                                                        | 0,540537634 | -0,039814813 | 0,031 | 0,016 | 1         | 0,972779807   | 1,027981864     | 1,9375          |
| MAP6D1                                                                                         | 0,386325862 | -0,039914836 | 0,031 | 0,012 | 1         | 0,972712366   | 1,028053137     | 2,583333333     |
| CCDC180                                                                                        | 0,226351275 | -0,039948409 | 0,031 | 0,008 | 1         | 0,97268973    | 1,028077062     | 3,875           |
| CCDC3                                                                                          | 0,285925963 | -0,039950524 | 0,094 | 0,047 | 1         | 0,972688305   | 1,028078569     | 2               |
| GPN3                                                                                           | 0,005677526 | -0,039957988 | 0,25  | 0,078 | 1         | 0,972683272   | 1,028083888     | 3,205128205     |
| SETD1B                                                                                         | 0,30793671  | -0,040025988 | 0,062 | 0,027 | 1         | 0,972637427   | 1,028132347     | 2,296296296     |
| ICMT                                                                                           | 0,000484576 | -0,040047873 | 0,25  | 0,059 | 1         | 0,972622672   | 1,028147943     | 4,237288136     |
| HK2                                                                                            | 0,041848356 | -0,040144121 | 0,062 | 0,012 | 1         | 0,972557787   | 1,028216537     | 5,166666667     |
| EXOG                                                                                           | 0,030992783 | -0,040206807 | 0,156 | 0,051 | 1         | 0,97251553    | 1,028261215     | 3,058823529     |
| DUS1L                                                                                          | 0,006917668 | -0,040216614 | 0,219 | 0,066 | 1         | 0,972508918   | 1,028268205     | 3,318181818     |
| ZSCAN31                                                                                        | 0,543117005 | -0,040421726 | 0     | 0,012 | 1         | 0,972370664   | 1,028414407     | 0               |
| SLC35A5                                                                                        | 0,093753684 | -0,040441995 | 0,125 | 0,047 | 1         | 0,972357003   | 1,028428855     | 2,659574468     |
| NMNAT3                                                                                         | 0,543117005 | -0,040462078 | 0     | 0,012 | 1         | 0,972343468   | 1,028443172     | 0               |
| PFAS                                                                                           | 0,226351275 | -0,04053868  | 0,031 | 0,008 | 1         | 0,972291841   | 1,02849778      | 3,875           |
| DUS2                                                                                           | 0,540537634 | -0,040649077 | 0,031 | 0,016 | 1         | 0,972217443   | 1,028576485     | 1,9375          |
| ADCK2                                                                                          | 0,001013976 | -0,040661523 | 0,188 | 0,039 | 1         | 0,972209056   | 1,028585358     | 4,820512821     |



Supplementary Table 1

| Differentially expressed genes_adjacent-skin-XL_ comparing SC-Keloid vs. (SC-Myel, SC-Nonmyel) |             |              |       |       |           |               |                 |                 |
|------------------------------------------------------------------------------------------------|-------------|--------------|-------|-------|-----------|---------------|-----------------|-----------------|
| gene                                                                                           | p_val       | avg_log2FC   | pct.1 | pct.2 | p_val_adj | Foldchange_UP | Foldchange_DOWN | Ratio_pct1_pct2 |
| SGF29                                                                                          | 0,037506898 | -0,04069555  | 0,094 | 0,023 | 1         | 0,972186125   | 1,028609619     | 4,086956522     |
| SNX21                                                                                          | 0,009664375 | -0,040755251 | 0,188 | 0,055 | 1         | 0,972145896   | 1,028652185     | 3,418181818     |
| WDR62                                                                                          | 0,386325862 | -0,04078563  | 0,031 | 0,012 | 1         | 0,972125425   | 1,028673846     | 2,583333333     |
| ACSL3                                                                                          | 0,001076629 | -0,040804881 | 0,406 | 0,133 | 1         | 0,972112454   | 1,028687572     | 3,052631579     |
| HYPK                                                                                           | 0,27733921  | -0,040857569 | 0,125 | 0,066 | 1         | 0,972076952   | 1,028725141     | 1,893939394     |
| PTPN3                                                                                          | 0,540537634 | -0,040883633 | 0,031 | 0,016 | 1         | 0,972059391   | 1,028743727     | 1,9375          |
| NUB1                                                                                           | 0,000314728 | -0,040927402 | 0,469 | 0,148 | 1         | 0,9720299     | 1,028774938     | 3,168918919     |
| EBNA1BP2                                                                                       | 0,00027287  | -0,04093556  | 0,344 | 0,094 | 1         | 0,972024404   | 1,028780755     | 3,659574468     |
| GNG12-AS1                                                                                      | 0,543117005 | -0,04093857  | 0     | 0,012 | 1         | 0,972022376   | 1,028782901     | 0               |
| TRIM3                                                                                          | 0,063387391 | -0,040939097 | 0,125 | 0,043 | 1         | 0,97202202    | 1,028783277     | 2,906976744     |
| ODF3L1                                                                                         | 0,540537634 | -0,040955676 | 0,031 | 0,016 | 1         | 0,972010851   | 1,028795099     | 1,9375          |
| FBXO6                                                                                          | 0,082317662 | -0,040961452 | 0,031 | 0,004 | 1         | 0,972006959   | 1,028799219     | 7,75            |
| TNFRSF10B                                                                                      | 0,18979066  | -0,040972075 | 0,094 | 0,039 | 1         | 0,971999802   | 1,028806794     | 2,41025641      |
| ZBTB5                                                                                          | 0,564954469 | -0,041040839 | 0,062 | 0,039 | 1         | 0,971953474   | 1,028855832     | 1,58974359      |
| PAIP2                                                                                          | 0,016755261 | -0,041086214 | 0,688 | 0,32  | 1         | 0,971922905   | 1,028888191     | 2,15            |
| ASPG                                                                                           | 0,226351275 | -0,041106692 | 0,031 | 0,008 | 1         | 0,971909109   | 1,028902796     | 3,875           |
| ZNRD2                                                                                          | 0,000383854 | -0,041131918 | 0,312 | 0,082 | 1         | 0,971892115   | 1,028920787     | 3,804878049     |
| XRCC3                                                                                          | 0,543117005 | -0,041198083 | 0     | 0,012 | 1         | 0,971847543   | 1,028967976     | 0               |
| ZRANB3                                                                                         | 0,386325862 | -0,041204288 | 0,031 | 0,012 | 1         | 0,971843364   | 1,028972402     | 2,583333333     |
| DRAM1                                                                                          | 0,785705341 | -0,041230349 | 0,062 | 0,051 | 1         | 0,971825808   | 1,028990989     | 1,215686275     |
| NUP85                                                                                          | 0,000257882 | -0,041321635 | 0,219 | 0,043 | 1         | 0,971764318   | 1,029056101     | 5,093023256     |
| FLAD1                                                                                          | 0,002005544 | -0,041325268 | 0,188 | 0,043 | 1         | 0,971761872   | 1,029058692     | 4,372093023     |
| FCRLA                                                                                          | 0,543117005 | -0,041363847 | 0     | 0,012 | 1         | 0,971735886   | 1,02908621      | 0               |
| RNF216                                                                                         | 0,010903421 | -0,041392171 | 0,25  | 0,086 | 1         | 0,971716808   | 1,029106414     | 2,906976744     |
| TEN1                                                                                           | 0,560566066 | -0,041453586 | 0,062 | 0,039 | 1         | 0,971675443   | 1,029150224     | 1,58974359      |
| FBF1                                                                                           | 0,803381388 | -0,041463313 | 0,031 | 0,023 | 1         | 0,971668892   | 1,029157162     | 1,347826087     |
| IL10RB                                                                                         | 0,015394705 | -0,041471178 | 0,219 | 0,074 | 1         | 0,971663595   | 1,029162774     | 2,959459459     |
| TRMT2A                                                                                         | 0,003151082 | -0,041489836 | 0,219 | 0,059 | 1         | 0,971651029   | 1,029176083     | 3,711864407     |
| ZNF615                                                                                         | 0,543117005 | -0,041532933 | 0     | 0,012 | 1         | 0,971622004   | 1,029206827     | 0               |
| SOX17                                                                                          | 0,533973819 | -0,041567046 | 0,031 | 0,016 | 1         | 0,97159903    | 1,029231164     | 1,9375          |

Supplementary Table 1

| Differentially expressed genes_adjacent-skin-XL_ comparing SC-Keloid vs. (SC-Myel, SC-Nonmyel) |             |              |       |       |           |               |                 |                 |
|------------------------------------------------------------------------------------------------|-------------|--------------|-------|-------|-----------|---------------|-----------------|-----------------|
| gene                                                                                           | p_val       | avg_log2FC   | pct.1 | pct.2 | p_val_adj | Foldchange_UP | Foldchange_DOWN | Ratio_pct1_pct2 |
| SYCP2                                                                                          | 0,224763613 | -0,041576793 | 0,062 | 0,023 | 1         | 0,971592465   | 1,029238118     | 2,695652174     |
| PDE7B                                                                                          | 0,682170546 | -0,041581962 | 0,031 | 0,02  | 1         | 0,971588985   | 1,029241805     | 1,55            |
| OMA1                                                                                           | 0,063925678 | -0,041605471 | 0,094 | 0,027 | 1         | 0,971573152   | 1,029258577     | 3,481481481     |
| NUDT14                                                                                         | 0,008956837 | -0,04189755  | 0,125 | 0,027 | 1         | 0,971376473   | 1,029466976     | 4,62962963      |
| EYA3                                                                                           | 0,150155729 | -0,041901633 | 0,062 | 0,02  | 1         | 0,971373724   | 1,029469889     | 3,1             |
| ARAP3                                                                                          | 0,540537634 | -0,041935584 | 0,031 | 0,016 | 1         | 0,971350865   | 1,029494116     | 1,9375          |
| NOD1                                                                                           | 0,682170546 | -0,041936148 | 0,031 | 0,02  | 1         | 0,971350486   | 1,029494518     | 1,55            |
| STRADB                                                                                         | 0,30793671  | -0,041980579 | 0,062 | 0,027 | 1         | 0,971320571   | 1,029526224     | 2,296296296     |
| IL1RAPL2                                                                                       | 0,037506898 | -0,042016715 | 0,094 | 0,023 | 1         | 0,971296242   | 1,029552012     | 4,086956522     |
| FBXL12                                                                                         | 0,000467498 | -0,042024933 | 0,25  | 0,059 | 1         | 0,97129071    | 1,029557876     | 4,237288136     |
| GMPR2                                                                                          | 0,030583271 | -0,04202603  | 0,188 | 0,066 | 1         | 0,97128997    | 1,02955866      | 2,848484848     |
| GTF3C1                                                                                         | 0,000475965 | -0,042035072 | 0,25  | 0,059 | 1         | 0,971283883   | 1,029565112     | 4,237288136     |
| SURF6                                                                                          | 0,004475279 | -0,042047445 | 0,219 | 0,062 | 1         | 0,971275553   | 1,029573942     | 3,532258065     |
| AP001816.1                                                                                     | 0,004107327 | -0,042208395 | 0,156 | 0,035 | 1         | 0,971167202   | 1,02968881      | 4,457142857     |
| ZNF606                                                                                         | 0,013891036 | -0,042223952 | 0,062 | 0,008 | 1         | 0,97115673    | 1,029699913     | 7,75            |
| DHX9                                                                                           | 0,017693233 | -0,042255474 | 0,406 | 0,176 | 1         | 0,971135511   | 1,029722412     | 2,306818182     |
| WDR20                                                                                          | 0,199149424 | -0,04229383  | 0,156 | 0,078 | 1         | 0,971109692   | 1,029749789     | 2               |
| SPATA22                                                                                        | 0,543117005 | -0,042390587 | 0     | 0,012 | 1         | 0,971044565   | 1,029818853     | 0               |
| MFSD5                                                                                          | 0,386325862 | -0,042484149 | 0,031 | 0,012 | 1         | 0,970981592   | 1,029885641     | 2,583333333     |
| PABPC4                                                                                         | 0,03539645  | -0,042566047 | 0,312 | 0,137 | 1         | 0,970926474   | 1,029944107     | 2,277372263     |
| KATNAL2                                                                                        | 0,386325862 | -0,042580317 | 0,031 | 0,012 | 1         | 0,97091687    | 1,029954294     | 2,583333333     |
| ZNF709                                                                                         | 0,543117005 | -0,042627073 | 0     | 0,012 | 1         | 0,970885405   | 1,029987674     | 0               |
| ZC3H13                                                                                         | 0,019816745 | -0,04267733  | 0,438 | 0,191 | 1         | 0,970851584   | 1,030023555     | 2,293193717     |
| CHP2                                                                                           | 0,480650464 | -0,042717749 | 0     | 0,016 | 1         | 0,970824384   | 1,030052413     | 0               |
| ICA1L                                                                                          | 0,224763613 | -0,042726126 | 0,062 | 0,023 | 1         | 0,970818748   | 1,030058394     | 2,695652174     |
| ADAP1                                                                                          | 0,366622408 | -0,042765195 | 0,125 | 0,074 | 1         | 0,970792458   | 1,030086289     | 1,689189189     |
| SWSAP1                                                                                         | 0,386325862 | -0,042779949 | 0,031 | 0,012 | 1         | 0,97078253    | 1,030096823     | 2,583333333     |
| MAP3K8                                                                                         | 0,236345884 | -0,042814006 | 0,094 | 0,043 | 1         | 0,970759613   | 1,030121141     | 2,186046512     |
| ZBTB34                                                                                         | 0,543117005 | -0,042877985 | 0     | 0,012 | 1         | 0,970716564   | 1,030166824     | 0               |
| OSBPL2                                                                                         | 0,191913299 | -0,042883008 | 0,094 | 0,039 | 1         | 0,970713184   | 1,030170411     | 2,41025641      |

Supplementary Table 1

| Differentially expressed genes_adjacent-skin-XL_comparing SC-Keloid vs. (SC-Myel, SC-Nonmyel) |             |              |       |       |           |               |                 |                 |
|-----------------------------------------------------------------------------------------------|-------------|--------------|-------|-------|-----------|---------------|-----------------|-----------------|
| gene                                                                                          | p_val       | avg_log2FC   | pct.1 | pct.2 | p_val_adj | Foldchange_UP | Foldchange_DOWN | Ratio_pct1_pct2 |
| RAD9A                                                                                         | 0,000920564 | -0,042924336 | 0,25  | 0,062 | 1         | 0,970685377   | 1,030199922     | 4,032258065     |
| RMDN3                                                                                         | 0,044149392 | -0,042950114 | 0,188 | 0,07  | 1         | 0,970668033   | 1,03021833      | 2,685714286     |
| CLEC2D                                                                                        | 0,285925963 | -0,043014878 | 0,094 | 0,047 | 1         | 0,97062446    | 1,030264578     | 2               |
| C6orf120                                                                                      | 0,138170297 | -0,043031942 | 0,094 | 0,035 | 1         | 0,97061298    | 1,030276764     | 2,685714286     |
| TAF15                                                                                         | 0,023441759 | -0,043140456 | 0,281 | 0,113 | 1         | 0,970539977   | 1,030354261     | 2,486725664     |
| SLC27A6                                                                                       | 0,543117005 | -0,043144394 | 0     | 0,012 | 1         | 0,970537327   | 1,030357073     | 0               |
| MEIS1                                                                                         | 0,480650464 | -0,04346028  | 0     | 0,016 | 1         | 0,970324846   | 1,0305827       | 0               |
| TMEM116                                                                                       | 0,087959196 | -0,043483489 | 0,062 | 0,016 | 1         | 0,970309237   | 1,030599279     | 3,875           |
| DUOX2                                                                                         | 0,543117005 | -0,043487924 | 0     | 0,012 | 1         | 0,970306254   | 1,030602447     | 0               |
| ZBED8                                                                                         | 0,540537634 | -0,043548829 | 0,031 | 0,016 | 1         | 0,970265292   | 1,030645957     | 1,9375          |
| SNAI2                                                                                         | 0,087959196 | -0,043596387 | 0,062 | 0,016 | 1         | 0,970233308   | 1,030679932     | 3,875           |
| MMAA                                                                                          | 0,540537634 | -0,043614605 | 0,031 | 0,016 | 1         | 0,970221056   | 1,030692947     | 1,9375          |
| PAFAH1B2                                                                                      | 0,011766264 | -0,043676464 | 0,375 | 0,152 | 1         | 0,970179457   | 1,030737141     | 2,467105263     |
| SMAD9                                                                                         | 0,226351275 | -0,043682798 | 0,031 | 0,008 | 1         | 0,970175197   | 1,030741667     | 3,875           |
| SLC35A1                                                                                       | 0,012380103 | -0,043695313 | 0,156 | 0,043 | 1         | 0,970166781   | 1,030750608     | 3,627906977     |
| PLEKHH2                                                                                       | 0,543117005 | -0,043728283 | 0     | 0,012 | 1         | 0,97014461    | 1,030774165     | 0               |
| SOCS5                                                                                         | 0,028258709 | -0,043736471 | 0,125 | 0,035 | 1         | 0,970139104   | 1,030780014     | 3,571428571     |
| MORF4L1                                                                                       | 0,474416485 | -0,043831464 | 0,875 | 0,668 | 1         | 0,970075228   | 1,030847888     | 1,30988024      |
| ATP7B                                                                                         | 0,543117005 | -0,043883936 | 0     | 0,012 | 1         | 0,970039946   | 1,030885381     | 0               |
| ZNF425                                                                                        | 0,543117005 | -0,043990111 | 0     | 0,012 | 1         | 0,969968559   | 1,030961252     | 0               |
| SUPT16H                                                                                       | 0,004077882 | -0,043992289 | 0,438 | 0,168 | 1         | 0,969967095   | 1,030962808     | 2,607142857     |
| RBL1                                                                                          | 0,045196862 | -0,044125302 | 0,125 | 0,039 | 1         | 0,96987767    | 1,031057865     | 3,205128205     |
| C1orf131                                                                                      | 0,019236133 | -0,044147515 | 0,094 | 0,02  | 1         | 0,969862737   | 1,03107374      | 4,7             |
| ZNF23                                                                                         | 0,036827385 | -0,044172376 | 0,094 | 0,023 | 1         | 0,969846025   | 1,031091508     | 4,086956522     |
| PPARG                                                                                         | 0,386325862 | -0,044199665 | 0,031 | 0,012 | 1         | 0,969827679   | 1,031111012     | 2,583333333     |
| RSPH4A                                                                                        | 0,543117005 | -0,044260118 | 0     | 0,012 | 1         | 0,969787042   | 1,031154219     | 0               |
| TUBGCP6                                                                                       | 0,224763613 | -0,044297071 | 0,062 | 0,023 | 1         | 0,969762202   | 1,031180631     | 2,695652174     |
| HINT3                                                                                         | 0,187685368 | -0,044339477 | 0,094 | 0,039 | 1         | 0,969733698   | 1,031210942     | 2,41025641      |
| BCAN                                                                                          | 0,543117005 | -0,044356709 | 0     | 0,012 | 1         | 0,969722115   | 1,031223259     | 0               |
| CORO6                                                                                         | 0,543117005 | -0,044368515 | 0     | 0,012 | 1         | 0,969714179   | 1,031231698     | 0               |

Supplementary Table 1

| Differentially expressed genes_adjacent-skin-XL_comparing SC-Keloid vs. (SC-Myel, SC-Nonmyel) |             |              |       |       |           |               |                 |                 |
|-----------------------------------------------------------------------------------------------|-------------|--------------|-------|-------|-----------|---------------|-----------------|-----------------|
| gene                                                                                          | p_val       | avg_log2FC   | pct.1 | pct.2 | p_val_adj | Foldchange_UP | Foldchange_DOWN | Ratio_pct1_pct2 |
| DNER                                                                                          | 0,543117005 | -0,044369355 | 0     | 0,012 | 1         | 0,969713615   | 1,031232299     | 0               |
| GMEB2                                                                                         | 0,803381388 | -0,044395312 | 0,031 | 0,023 | 1         | 0,969696168   | 1,031250852     | 1,347826087     |
| PROSER3                                                                                       | 0,540537634 | -0,044427622 | 0,031 | 0,016 | 1         | 0,969674451   | 1,031273948     | 1,9375          |
| MTERF1                                                                                        | 0,540537634 | -0,044542246 | 0,031 | 0,016 | 1         | 0,969597412   | 1,031355888     | 1,9375          |
| KLHL7                                                                                         | 0,004186485 | -0,04459756  | 0,156 | 0,035 | 1         | 0,969560238   | 1,031395431     | 4,457142857     |
| CXXC1                                                                                         | 0,062941189 | -0,044603232 | 0,156 | 0,059 | 1         | 0,969556427   | 1,031399486     | 2,644067797     |
| QRSL1                                                                                         | 0,396289328 | -0,044647824 | 0,062 | 0,031 | 1         | 0,969526459   | 1,031431366     | 2               |
| CLDN15                                                                                        | 0,063925678 | -0,044739892 | 0,094 | 0,027 | 1         | 0,969464589   | 1,031497191     | 3,481481481     |
| KLK11                                                                                         | 0,543117005 | -0,044761309 | 0     | 0,012 | 1         | 0,969450197   | 1,031512503     | 0               |
| YIPF1                                                                                         | 0,000911755 | -0,044843802 | 0,156 | 0,027 | 1         | 0,969394766   | 1,031571487     | 5,777777778     |
| STARD4-AS1                                                                                    | 0,682170546 | -0,044927799 | 0,031 | 0,02  | 1         | 0,969338327   | 1,031631549     | 1,55            |
| ABCG1                                                                                         | 0,682170546 | -0,044978634 | 0,031 | 0,02  | 1         | 0,969304172   | 1,0316679       | 1,55            |
| KMT5C                                                                                         | 0,609434411 | -0,044989651 | 0,094 | 0,066 | 1         | 0,96929677    | 1,031675779     | 1,424242424     |
| VSIG10                                                                                        | 0,019236133 | -0,044990965 | 0,094 | 0,02  | 1         | 0,969295887   | 1,031676719     | 4,7             |
| SKIV2L                                                                                        | 0,063925678 | -0,045123284 | 0,094 | 0,027 | 1         | 0,969206991   | 1,031771345     | 3,481481481     |
| RBM10                                                                                         | 0,014095341 | -0,045169317 | 0,188 | 0,059 | 1         | 0,969176066   | 1,031804267     | 3,186440678     |
| THOC3                                                                                         | 0,028712073 | -0,045199685 | 0,125 | 0,035 | 1         | 0,969155666   | 1,031825985     | 3,571428571     |
| ANKMY1                                                                                        | 0,543117005 | -0,045200121 | 0     | 0,012 | 1         | 0,969155373   | 1,031826297     | 0               |
| IFITM10                                                                                       | 0,386325862 | -0,045204165 | 0,031 | 0,012 | 1         | 0,969152656   | 1,03182919      | 2,583333333     |
| MFHAS1                                                                                        | 0,028712073 | -0,045215422 | 0,125 | 0,035 | 1         | 0,969145094   | 1,031837241     | 3,571428571     |
| C1orf162                                                                                      | 0,480650464 | -0,04521791  | 0     | 0,016 | 1         | 0,969143423   | 1,03183902      | 0               |
| MGAT5                                                                                         | 0,224763613 | -0,04524352  | 0,062 | 0,023 | 1         | 0,969126219   | 1,031857338     | 2,695652174     |
| KIF9-AS1                                                                                      | 0,543117005 | -0,045293207 | 0     | 0,012 | 1         | 0,969092843   | 1,031892875     | 0               |
| AQR                                                                                           | 0,002053304 | -0,045295976 | 0,156 | 0,031 | 1         | 0,969090983   | 1,031894856     | 5,032258065     |
| NOP53                                                                                         | 0,095825261 | -0,045313993 | 0,812 | 0,438 | 1         | 0,96907888    | 1,031907743     | 1,853881279     |
| H4C5                                                                                          | 0,540537634 | -0,04531609  | 0,031 | 0,016 | 1         | 0,969077472   | 1,031909243     | 1,9375          |
| TBCK                                                                                          | 0,185597364 | -0,045351027 | 0,094 | 0,039 | 1         | 0,969054005   | 1,031934232     | 2,41025641      |
| RASL11A                                                                                       | 0,543117005 | -0,045355353 | 0     | 0,012 | 1         | 0,969051098   | 1,031937327     | 0               |
| CASTOR1                                                                                       | 0,037506898 | -0,045505262 | 0,094 | 0,023 | 1         | 0,968950411   | 1,03204456      | 4,086956522     |
| HIP1                                                                                          | 0,34617705  | -0,045527904 | 0,156 | 0,094 | 1         | 0,968935204   | 1,032060757     | 1,659574468     |

Supplementary Table 1

| Differentially expressed genes_adjacent-skin-XL_comparing SC-Keloid vs. (SC-Myel, SC-Nonmyel) |             |              |       |       |           |               |                 |                 |
|-----------------------------------------------------------------------------------------------|-------------|--------------|-------|-------|-----------|---------------|-----------------|-----------------|
| gene                                                                                          | p_val       | avg_log2FC   | pct.1 | pct.2 | p_val_adj | Foldchange_UP | Foldchange_DOWN | Ratio_pct1_pct2 |
| ZDHC14                                                                                        | 0,212914042 | -0,04554269  | 0,062 | 0,023 | 1         | 0,968925273   | 1,032071335     | 2,695652174     |
| SMARCA4                                                                                       | 7,44701E-05 | -0,045587064 | 0,312 | 0,07  | 1         | 0,968895472   | 1,032103079     | 4,457142857     |
| ZNF574                                                                                        | 0,028712073 | -0,045638824 | 0,125 | 0,035 | 1         | 0,968860711   | 1,032140109     | 3,571428571     |
| IL18                                                                                          | 0,543117005 | -0,045647039 | 0     | 0,012 | 1         | 0,968855194   | 1,032145986     | 0               |
| KIAA1549                                                                                      | 0,543117005 | -0,045659374 | 0     | 0,012 | 1         | 0,968846911   | 1,032154811     | 0               |
| SALL2                                                                                         | 0,087959196 | -0,045661542 | 0,062 | 0,016 | 1         | 0,968845455   | 1,032156362     | 3,875           |
| TBP                                                                                           | 0,150155729 | -0,045671491 | 0,062 | 0,02  | 1         | 0,968838774   | 1,03216348      | 3,1             |
| CLN6                                                                                          | 0,682170546 | -0,04570753  | 0,031 | 0,02  | 1         | 0,968814572   | 1,032189264     | 1,55            |
| RNASEH2A                                                                                      | 0,540537634 | -0,045759326 | 0,031 | 0,016 | 1         | 0,96877979    | 1,032226322     | 1,9375          |
| CCDC78                                                                                        | 0,543117005 | -0,045769089 | 0     | 0,012 | 1         | 0,968773234   | 1,032233308     | 0               |
| ACAD10                                                                                        | 0,087959196 | -0,045771286 | 0,062 | 0,016 | 1         | 0,968771759   | 1,03223488      | 3,875           |
| USP13                                                                                         | 0,062914349 | -0,045775507 | 0,094 | 0,027 | 1         | 0,968768924   | 1,0322379       | 3,481481481     |
| BEND5                                                                                         | 0,80991663  | -0,045794572 | 0,031 | 0,023 | 1         | 0,968756122   | 1,032251541     | 1,347826087     |
| FAM204A                                                                                       | 0,096306182 | -0,04579477  | 0,312 | 0,16  | 1         | 0,968755989   | 1,032251683     | 1,95            |
| SAP30L                                                                                        | 0,437565433 | -0,045867883 | 0,156 | 0,102 | 1         | 0,968706896   | 1,032303997     | 1,529411765     |
| TSC22D1                                                                                       | 0,0082127   | -0,045947223 | 0,5   | 0,211 | 1         | 0,968653624   | 1,032360769     | 2,369668246     |
| CLCN5                                                                                         | 0,300902654 | -0,045976749 | 0,062 | 0,027 | 1         | 0,9686338     | 1,032381897     | 2,296296296     |
| MSRB2                                                                                         | 0,028531331 | -0,046143679 | 0,219 | 0,082 | 1         | 0,968521729   | 1,032501358     | 2,670731707     |
| FAM234B                                                                                       | 0,480650464 | -0,046155667 | 0     | 0,016 | 1         | 0,968513681   | 1,032509938     | 0               |
| SYN3                                                                                          | 0,540537634 | -0,046214727 | 0,031 | 0,016 | 1         | 0,968474034   | 1,032552206     | 1,9375          |
| ELAVL1                                                                                        | 0,00181928  | -0,046217547 | 0,406 | 0,137 | 1         | 0,96847214    | 1,032554225     | 2,96350365      |
| ZFP64                                                                                         | 0,386325862 | -0,046220494 | 0,031 | 0,012 | 1         | 0,968470162   | 1,032556334     | 2,583333333     |
| UTP25                                                                                         | 0,543117005 | -0,046282332 | 0     | 0,012 | 1         | 0,968428652   | 1,032600593     | 0               |
| CNBD2                                                                                         | 0,003004599 | -0,046310308 | 0,219 | 0,059 | 1         | 0,968409872   | 1,032620617     | 3,711864407     |
| ACSS2                                                                                         | 0,682170546 | -0,046390142 | 0,031 | 0,02  | 1         | 0,968356285   | 1,03267776      | 1,55            |
| NEU3                                                                                          | 0,682170546 | -0,046408983 | 0,031 | 0,02  | 1         | 0,968343639   | 1,032691247     | 1,55            |
| KLHL8                                                                                         | 0,668126075 | -0,046438757 | 0,062 | 0,043 | 1         | 0,968323655   | 1,032712559     | 1,441860465     |
| API5                                                                                          | 0,005679953 | -0,046489878 | 0,312 | 0,109 | 1         | 0,968289344   | 1,032749153     | 2,862385321     |
| ITPKB                                                                                         | 0,152699481 | -0,046534787 | 0,125 | 0,055 | 1         | 0,968259202   | 1,032781303     | 2,272727273     |
| ONECUT1                                                                                       | 0,226351275 | -0,046550306 | 0,031 | 0,008 | 1         | 0,968248787   | 1,032792412     | 3,875           |

Supplementary Table 1

| Differentially expressed genes_adjacent-skin-XL_ comparing SC-Keloid vs. (SC-Myel, SC-Nonmyel) |             |              |       |       |           |               |                 |                 |
|------------------------------------------------------------------------------------------------|-------------|--------------|-------|-------|-----------|---------------|-----------------|-----------------|
| gene                                                                                           | p_val       | avg_log2FC   | pct.1 | pct.2 | p_val_adj | Foldchange_UP | Foldchange_DOWN | Ratio_pct1_pct2 |
| STK24                                                                                          | 0,112358923 | -0,046612434 | 0,188 | 0,086 | 1         | 0,968207091   | 1,032836889     | 2,186046512     |
| TATDN2                                                                                         | 0,021379715 | -0,046692265 | 0,156 | 0,047 | 1         | 0,968153518   | 1,032894042     | 3,319148936     |
| DNA2                                                                                           | 0,543117005 | -0,046705054 | 0     | 0,012 | 1         | 0,968144935   | 1,032903198     | 0               |
| PANX2                                                                                          | 0,480650464 | -0,046705387 | 0     | 0,016 | 1         | 0,968144712   | 1,032903437     | 0               |
| FKBP1B                                                                                         | 0,001642148 | -0,04684075  | 0,125 | 0,02  | 1         | 0,968053878   | 1,033000355     | 6,25            |
| CNEP1R1                                                                                        | 0,304406192 | -0,046866905 | 0,062 | 0,027 | 1         | 0,968036328   | 1,033019083     | 2,296296296     |
| PSKH1                                                                                          | 0,540537634 | -0,046917804 | 0,031 | 0,016 | 1         | 0,968002176   | 1,033055529     | 1,9375          |
| STAU2                                                                                          | 0,000890115 | -0,047001374 | 0,25  | 0,062 | 1         | 0,967946105   | 1,033115371     | 4,032258065     |
| SLF2                                                                                           | 0,000539834 | -0,047018778 | 0,344 | 0,098 | 1         | 0,967934428   | 1,033127835     | 3,510204082     |
| GNB4                                                                                           | 0,011883017 | -0,047100605 | 0,375 | 0,148 | 1         | 0,967879531   | 1,033186433     | 2,533783784     |
| TRIM32                                                                                         | 0,480650464 | -0,047104851 | 0     | 0,016 | 1         | 0,967876682   | 1,033189474     | 0               |
| FEZ2                                                                                           | 0,009140921 | -0,047120538 | 0,469 | 0,195 | 1         | 0,967866158   | 1,033200708     | 2,405128205     |
| TMEM186                                                                                        | 0,543117005 | -0,047176341 | 0     | 0,012 | 1         | 0,967828722   | 1,033240673     | 0               |
| LIN37                                                                                          | 0,654515658 | -0,04718386  | 0,062 | 0,043 | 1         | 0,967823678   | 1,033246058     | 1,441860465     |
| NRL                                                                                            | 0,543117005 | -0,047216966 | 0     | 0,012 | 1         | 0,967801469   | 1,033269769     | 0               |
| MYRIP                                                                                          | 0,543117005 | -0,047250022 | 0     | 0,012 | 1         | 0,967779294   | 1,033293444     | 0               |
| TOMM34                                                                                         | 0,063925678 | -0,047261667 | 0,094 | 0,027 | 1         | 0,967771483   | 1,033301784     | 3,481481481     |
| ZNF319                                                                                         | 0,150155729 | -0,047308979 | 0,062 | 0,02  | 1         | 0,967739746   | 1,033335671     | 3,1             |
| RAP2C-AS1                                                                                      | 0,150155729 | -0,047374679 | 0,062 | 0,02  | 1         | 0,967695676   | 1,03338273      | 3,1             |
| EPN2                                                                                           | 0,014109694 | -0,047390375 | 0,344 | 0,141 | 1         | 0,967685148   | 1,033393973     | 2,439716312     |
| RAB3B                                                                                          | 0,543117005 | -0,047408355 | 0     | 0,012 | 1         | 0,967673088   | 1,033406852     | 0               |
| HRCT1                                                                                          | 0,480650464 | -0,04741583  | 0     | 0,016 | 1         | 0,967668074   | 1,033412207     | 0               |
| SBF2-AS1                                                                                       | 0,543117005 | -0,047559506 | 0     | 0,012 | 1         | 0,96757171    | 1,033515128     | 0               |
| CCL21                                                                                          | 0,480650464 | -0,047756546 | 0     | 0,016 | 1         | 0,967439571   | 1,033656292     | 0               |
| CRYBG1                                                                                         | 0,386325862 | -0,047799878 | 0,031 | 0,012 | 1         | 0,967410514   | 1,033687339     | 2,583333333     |
| RANBP9                                                                                         | 0,000327928 | -0,047816813 | 0,344 | 0,094 | 1         | 0,967399158   | 1,033699474     | 3,659574468     |
| RPP38                                                                                          | 0,001055584 | -0,047906139 | 0,188 | 0,039 | 1         | 0,967339262   | 1,033763478     | 4,820512821     |
| GCA                                                                                            | 0,007565208 | -0,047926071 | 0,25  | 0,082 | 1         | 0,967325898   | 1,03377776      | 3,048780488     |
| SPIN2A                                                                                         | 0,543117005 | -0,048053777 | 0     | 0,012 | 1         | 0,967240275   | 1,033869273     | 0               |
| GLIS3                                                                                          | 0,012493801 | -0,048084339 | 0,438 | 0,191 | 1         | 0,967219785   | 1,033891175     | 2,293193717     |

Supplementary Table 1

| Differentially expressed genes_adjacent-skin-XL_comparing SC-Keloid vs. (SC-Myel, SC-Nonmyel) |             |              |       |       |           |               |                 |                 |
|-----------------------------------------------------------------------------------------------|-------------|--------------|-------|-------|-----------|---------------|-----------------|-----------------|
| gene                                                                                          | p_val       | avg_log2FC   | pct.1 | pct.2 | p_val_adj | Foldchange_UP | Foldchange_DOWN | Ratio_pct1_pct2 |
| MRRF                                                                                          | 0,065070981 | -0,048112798 | 0,125 | 0,043 | 1         | 0,967200705   | 1,03391157      | 2,906976744     |
| FAM13A                                                                                        | 0,285925963 | -0,048135895 | 0,094 | 0,047 | 1         | 0,967185221   | 1,033928123     | 2               |
| RIOX2                                                                                         | 0,037506898 | -0,048169572 | 0,094 | 0,023 | 1         | 0,967162644   | 1,033952258     | 4,086956522     |
| TAPBPL                                                                                        | 0,062914349 | -0,048185285 | 0,094 | 0,027 | 1         | 0,967152111   | 1,033963519     | 3,481481481     |
| BET1L                                                                                         | 0,238745564 | -0,048210833 | 0,094 | 0,043 | 1         | 0,967134984   | 1,03398183      | 2,186046512     |
| SIN3B                                                                                         | 0,083687879 | -0,048227964 | 0,188 | 0,082 | 1         | 0,9671235     | 1,033994108     | 2,292682927     |
| PTGIR                                                                                         | 0,543117005 | -0,04830998  | 0     | 0,012 | 1         | 0,967068521   | 1,034052891     | 0               |
| REM1                                                                                          | 0,682170546 | -0,048385339 | 0,031 | 0,02  | 1         | 0,967018008   | 1,034106906     | 1,55            |
| RAB11FIP4                                                                                     | 0,480650464 | -0,04848239  | 0     | 0,016 | 1         | 0,966952958   | 1,034176473     | 0               |
| CTSS                                                                                          | 0,543117005 | -0,048490457 | 0     | 0,012 | 1         | 0,966947551   | 1,034182256     | 0               |
| LRRC27                                                                                        | 0,386325862 | -0,048495444 | 0,031 | 0,012 | 1         | 0,966944209   | 1,034185831     | 2,583333333     |
| DPT                                                                                           | 0,543117005 | -0,048499362 | 0     | 0,012 | 1         | 0,966941583   | 1,034188639     | 0               |
| PRR14                                                                                         | 7,07365E-05 | -0,048616227 | 0,344 | 0,082 | 1         | 0,966863259   | 1,034272417     | 4,195121951     |
| LRRN3                                                                                         | 0,543117005 | -0,048673147 | 0     | 0,012 | 1         | 0,966825113   | 1,034313224     | 0               |
| METAP1D                                                                                       | 0,010405093 | -0,048698301 | 0,188 | 0,055 | 1         | 0,966808256   | 1,034331258     | 3,418181818     |
| ATP8B2                                                                                        | 0,191913299 | -0,048736991 | 0,094 | 0,039 | 1         | 0,966782329   | 1,034358997     | 2,41025641      |
| CCDC85C                                                                                       | 0,543117005 | -0,048835499 | 0     | 0,012 | 1         | 0,966716319   | 1,034429626     | 0               |
| NFATC3                                                                                        | 0,043915019 | -0,048849156 | 0,125 | 0,039 | 1         | 0,966707168   | 1,034439418     | 3,205128205     |
| RALBP1                                                                                        | 0,001989868 | -0,04895953  | 0,625 | 0,242 | 1         | 0,966633212   | 1,034518561     | 2,582644628     |
| RAB6B                                                                                         | 0,543117005 | -0,049102461 | 0     | 0,012 | 1         | 0,96653745    | 1,034621058     | 0               |
| SH3BP5-AS1                                                                                    | 0,386325862 | -0,049207004 | 0,031 | 0,012 | 1         | 0,966467414   | 1,034696034     | 2,583333333     |
| DOC2B                                                                                         | 0,543117005 | -0,04924786  | 0     | 0,012 | 1         | 0,966440045   | 1,034725336     | 0               |
| IFT57                                                                                         | 0,014096701 | -0,049284092 | 0,375 | 0,152 | 1         | 0,966415774   | 1,034751322     | 2,467105263     |
| IGFLR1                                                                                        | 0,480650464 | -0,049337915 | 0     | 0,016 | 1         | 0,96637972    | 1,034789927     | 0               |
| NPY1R                                                                                         | 0,543117005 | -0,049376108 | 0     | 0,012 | 1         | 0,966354138   | 1,034817321     | 0               |
| ARMH3                                                                                         | 0,918113127 | -0,049384809 | 0,031 | 0,027 | 1         | 0,966348309   | 1,034823563     | 1,148148148     |
| CAMTA2                                                                                        | 0,224763613 | -0,049413247 | 0,062 | 0,023 | 1         | 0,966329261   | 1,034843961     | 2,695652174     |
| SLX4IP                                                                                        | 0,540537634 | -0,049429123 | 0,031 | 0,016 | 1         | 0,966318627   | 1,034855349     | 1,9375          |
| PICK1                                                                                         | 0,152699481 | -0,049495771 | 0,125 | 0,055 | 1         | 0,966273988   | 1,034903157     | 2,272727273     |
| AC132192.1                                                                                    | 0,087959196 | -0,049501538 | 0,062 | 0,016 | 1         | 0,966270125   | 1,034907294     | 3,875           |

Supplementary Table 1

| Differentially expressed genes_adjacent-skin-XL_comparing SC-Keloid vs. (SC-Myel, SC-Nonmyel) |             |              |       |       |             |               |                 |                 |
|-----------------------------------------------------------------------------------------------|-------------|--------------|-------|-------|-------------|---------------|-----------------|-----------------|
| gene                                                                                          | p_val       | avg_log2FC   | pct.1 | pct.2 | p_val_adj   | Foldchange_UP | Foldchange_DOWN | Ratio_pct1_pct2 |
| NLGN1                                                                                         | 0,540537634 | -0,049524927 | 0,031 | 0,016 | 1           | 0,96625446    | 1,034924072     | 1,9375          |
| RSBN1L                                                                                        | 0,018003408 | -0,049555868 | 0,406 | 0,176 | 1           | 0,966233737   | 1,034946268     | 2,306818182     |
| PCDHB11                                                                                       | 0,540537634 | -0,049557265 | 0,031 | 0,016 | 1           | 0,966232801   | 1,03494727      | 1,9375          |
| IDH3A                                                                                         | 0,002020461 | -0,049576342 | 0,281 | 0,082 | 1           | 0,966220025   | 1,034960956     | 3,426829268     |
| BAP1                                                                                          | 0,178474769 | -0,049608755 | 0,188 | 0,098 | 1           | 0,966198317   | 1,034984208     | 1,918367347     |
| PEX7                                                                                          | 0,191913299 | -0,049738492 | 0,094 | 0,039 | 1           | 0,966111434   | 1,035077285     | 2,41025641      |
| LRIG3                                                                                         | 0,386325862 | -0,04975345  | 0,031 | 0,012 | 1           | 0,966101417   | 1,035088017     | 2,583333333     |
| MFN2                                                                                          | 0,016858455 | -0,049794998 | 0,125 | 0,031 | 1           | 0,966073595   | 1,035117827     | 4,032258065     |
| MGAT4A                                                                                        | 0,543117005 | -0,049823593 | 0     | 0,012 | 1           | 0,966054447   | 1,035138343     | 0               |
| TMEM68                                                                                        | 0,004186485 | -0,049876255 | 0,156 | 0,035 | 1           | 0,966019184   | 1,03517613      | 4,457142857     |
| IRF3                                                                                          | 3,3603E-05  | -0,049964935 | 0,375 | 0,09  | 0,709056871 | 0,965959806   | 1,035239762     | 4,166666667     |
| ANKLE2                                                                                        | 0,000130697 | -0,049964965 | 0,469 | 0,141 | 1           | 0,965959786   | 1,035239783     | 3,326241135     |
| UBE2V2                                                                                        | 0,01375067  | -0,049978631 | 0,406 | 0,168 | 1           | 0,965950636   | 1,03524959      | 2,416666667     |
| ISOC1                                                                                         | 0,065070981 | -0,049980734 | 0,125 | 0,043 | 1           | 0,965949228   | 1,035251099     | 2,906976744     |
| FAM178B                                                                                       | 0,803381388 | -0,050090044 | 0,031 | 0,023 | 1           | 0,965876043   | 1,035329541     | 1,347826087     |
| RPUSD4                                                                                        | 0,191913299 | -0,050172635 | 0,094 | 0,039 | 1           | 0,96582075    | 1,035388813     | 2,41025641      |
| LRRC8D                                                                                        | 0,300902654 | -0,050236239 | 0,062 | 0,027 | 1           | 0,965778171   | 1,035434461     | 2,296296296     |
| LGALS9                                                                                        | 0,543117005 | -0,050330397 | 0     | 0,012 | 1           | 0,965715142   | 1,035502041     | 0               |
| NOP14                                                                                         | 0,098751938 | -0,050337285 | 0,094 | 0,031 | 1           | 0,965710531   | 1,035506985     | 3,032258065     |
| FGF4                                                                                          | 0,543117005 | -0,050405304 | 0     | 0,012 | 1           | 0,965665002   | 1,035555807     | 0               |
| ARHGEF2                                                                                       | 0,013138017 | -0,050621015 | 0,406 | 0,168 | 1           | 0,965520627   | 1,035710654     | 2,416666667     |
| NUP133                                                                                        | 0,65904021  | -0,05066278  | 0,062 | 0,043 | 1           | 0,965492676   | 1,035740638     | 1,441860465     |
| APLP1                                                                                         | 0,141661018 | -0,050691034 | 0,094 | 0,035 | 1           | 0,965473768   | 1,035760922     | 2,685714286     |
| ALDH4A1                                                                                       | 0,087959196 | -0,050700249 | 0,062 | 0,016 | 1           | 0,965467601   | 1,035767538     | 3,875           |
| FOXD1                                                                                         | 0,041848356 | -0,050796522 | 0,062 | 0,012 | 1           | 0,965403176   | 1,035836658     | 5,166666667     |
| SLC8A2                                                                                        | 0,543117005 | -0,050812694 | 0     | 0,012 | 1           | 0,965392354   | 1,03584827      | 0               |
| GUF1                                                                                          | 0,30793671  | -0,050835087 | 0,062 | 0,027 | 1           | 0,96537737    | 1,035864348     | 2,296296296     |
| PAPLN                                                                                         | 0,041848356 | -0,050859144 | 0,062 | 0,012 | 1           | 0,965361272   | 1,035881621     | 5,166666667     |
| PAF1                                                                                          | 0,049390616 | -0,050997124 | 0,25  | 0,109 | 1           | 0,965268949   | 1,035980698     | 2,293577982     |
| LRRC49                                                                                        | 0,002263143 | -0,051116627 | 0,062 | 0,004 | 1           | 0,965188996   | 1,036066516     | 15,5            |



Supplementary Table 1

| Differentially expressed genes_adjacent-skin-XL_comparing SC-Keloid vs. (SC-Myel, SC-Nonmyel) |             |              |       |       |           |               |                 |                 |
|-----------------------------------------------------------------------------------------------|-------------|--------------|-------|-------|-----------|---------------|-----------------|-----------------|
| gene                                                                                          | p_val       | avg_log2FC   | pct.1 | pct.2 | p_val_adj | Foldchange_UP | Foldchange_DOWN | Ratio_pct1_pct2 |
| GRM5-AS1                                                                                      | 0,543117005 | -0,051159411 | 0     | 0,012 | 1         | 0,965160373   | 1,036097241     | 0               |
| PICALM                                                                                        | 9,01646E-05 | -0,051179577 | 0,469 | 0,133 | 1         | 0,965146882   | 1,036111724     | 3,526315789     |
| ZNF266                                                                                        | 0,037506898 | -0,051204759 | 0,094 | 0,023 | 1         | 0,965130036   | 1,036129809     | 4,086956522     |
| F2RL1                                                                                         | 0,543117005 | -0,05120582  | 0     | 0,012 | 1         | 0,965129326   | 1,036130571     | 0               |
| ITGB7                                                                                         | 0,543117005 | -0,051213565 | 0     | 0,012 | 1         | 0,965124145   | 1,036136134     | 0               |
| KIAA1586                                                                                      | 0,682170546 | -0,0513225   | 0,031 | 0,02  | 1         | 0,965051273   | 1,036214373     | 1,55            |
| LINC02875                                                                                     | 0,543117005 | -0,051324605 | 0     | 0,012 | 1         | 0,965049865   | 1,036215885     | 0               |
| CYB561                                                                                        | 0,087959196 | -0,051353454 | 0,062 | 0,016 | 1         | 0,965030567   | 1,036236606     | 3,875           |
| PWWP2A                                                                                        | 0,002873288 | -0,051357617 | 0,344 | 0,117 | 1         | 0,965027783   | 1,036239596     | 2,94017094      |
| HSDL1                                                                                         | 0,540537634 | -0,051371908 | 0,031 | 0,016 | 1         | 0,965018224   | 1,036249861     | 1,9375          |
| CCL20                                                                                         | 0,013891036 | -0,051383083 | 0,062 | 0,008 | 1         | 0,965010749   | 1,036257888     | 7,75            |
| DAPL1                                                                                         | 0,80991663  | -0,051388467 | 0,031 | 0,023 | 1         | 0,965007147   | 1,036261755     | 1,347826087     |
| ERLIN1                                                                                        | 0,185597364 | -0,051404407 | 0,094 | 0,039 | 1         | 0,964996485   | 1,036273204     | 2,41025641      |
| ERMP1                                                                                         | 0,386325862 | -0,051477789 | 0,031 | 0,012 | 1         | 0,964947403   | 1,036325915     | 2,583333333     |
| AGPAT4                                                                                        | 0,236345884 | -0,051501694 | 0,094 | 0,043 | 1         | 0,964931414   | 1,036343087     | 2,186046512     |
| LRRC37A3                                                                                      | 0,543117005 | -0,051546035 | 0     | 0,012 | 1         | 0,964901757   | 1,036374939     | 0               |
| CAPZA2                                                                                        | 0,018429421 | -0,05156467  | 0,562 | 0,258 | 1         | 0,964889294   | 1,036388326     | 2,178294574     |
| MTA3                                                                                          | 0,001753489 | -0,051570896 | 0,219 | 0,055 | 1         | 0,96488513    | 1,036392798     | 3,981818182     |
| ZNF667                                                                                        | 0,480650464 | -0,051578258 | 0     | 0,016 | 1         | 0,964880206   | 1,036398087     | 0               |
| TMEM70                                                                                        | 0,000229745 | -0,051624028 | 0,312 | 0,078 | 1         | 0,964849595   | 1,036430968     | 4               |
| MITD1                                                                                         | 0,000831993 | -0,051653146 | 0,25  | 0,062 | 1         | 0,964830122   | 1,036451886     | 4,032258065     |
| FAH                                                                                           | 0,386325862 | -0,051662486 | 0,031 | 0,012 | 1         | 0,964823875   | 1,036458597     | 2,583333333     |
| RNF167                                                                                        | 0,001091363 | -0,051668285 | 0,281 | 0,078 | 1         | 0,964819997   | 1,036462763     | 3,602564103     |
| IRAK1BP1                                                                                      | 0,304406192 | -0,05167652  | 0,062 | 0,027 | 1         | 0,96481449    | 1,036468679     | 2,296296296     |
| ERMAP                                                                                         | 0,150155729 | -0,051723736 | 0,062 | 0,02  | 1         | 0,964782915   | 1,0365026       | 3,1             |
| SLC35G2                                                                                       | 0,682170546 | -0,051734504 | 0,031 | 0,02  | 1         | 0,964775714   | 1,036510337     | 1,55            |
| ADAM19                                                                                        | 0,000503273 | -0,051750428 | 0,406 | 0,125 | 1         | 0,964765065   | 1,036521777     | 3,248           |
| MATN1                                                                                         | 0,543117005 | -0,051859649 | 0     | 0,012 | 1         | 0,964692029   | 1,036600251     | 0               |
| ZNF607                                                                                        | 0,428872689 | -0,051873282 | 0     | 0,02  | 1         | 0,964682913   | 1,036610047     | 0               |
| HIRA                                                                                          | 0,224763613 | -0,051904717 | 0,062 | 0,023 | 1         | 0,964661894   | 1,036632634     | 2,695652174     |

Supplementary Table 1

| Differentially expressed genes_adjacent-skin-XL_ comparing SC-Keloid vs. (SC-Myel, SC-Nonmyel) |             |              |       |       |           |               |                 |                 |
|------------------------------------------------------------------------------------------------|-------------|--------------|-------|-------|-----------|---------------|-----------------|-----------------|
| gene                                                                                           | p_val       | avg_log2FC   | pct.1 | pct.2 | p_val_adj | Foldchange_UP | Foldchange_DOWN | Ratio_pct1_pct2 |
| JAZF1                                                                                          | 0,000103236 | -0,051957569 | 0,156 | 0,02  | 1         | 0,964626555   | 1,036670611     | 7,8             |
| MRPL14                                                                                         | 0,003593442 | -0,051964312 | 0,438 | 0,164 | 1         | 0,964622046   | 1,036675457     | 2,670731707     |
| ZNF512B                                                                                        | 0,682170546 | -0,051966365 | 0,031 | 0,02  | 1         | 0,964620674   | 1,036676931     | 1,55            |
| PPP1R14A                                                                                       | 0,543117005 | -0,051986436 | 0     | 0,012 | 1         | 0,964607253   | 1,036691354     | 0               |
| LURAP1                                                                                         | 0,478627389 | -0,052018377 | 0,062 | 0,035 | 1         | 0,964585897   | 1,036714307     | 1,771428571     |
| ACSL6                                                                                          | 0,543117005 | -0,052020841 | 0     | 0,012 | 1         | 0,96458425    | 1,036716077     | 0               |
| TMEM135                                                                                        | 0,138170297 | -0,052136131 | 0,094 | 0,035 | 1         | 0,96450717    | 1,036798928     | 2,685714286     |
| ACBD4                                                                                          | 0,002594281 | -0,052154936 | 0,094 | 0,012 | 1         | 0,964494599   | 1,036812442     | 7,833333333     |
| TMEM231                                                                                        | 0,30793671  | -0,052192377 | 0,062 | 0,027 | 1         | 0,964469568   | 1,03683935      | 2,296296296     |
| C2CD4B                                                                                         | 0,543117005 | -0,052261891 | 0     | 0,012 | 1         | 0,964423098   | 1,03688931      | 0               |
| MORC2-AS1                                                                                      | 0,386325862 | -0,052279743 | 0,031 | 0,012 | 1         | 0,964411164   | 1,03690214      | 2,583333333     |
| AC147651.1                                                                                     | 0,480650464 | -0,052291463 | 0     | 0,016 | 1         | 0,964403329   | 1,036910564     | 0               |
| MORN1                                                                                          | 0,543117005 | -0,052357889 | 0     | 0,012 | 1         | 0,964358927   | 1,036958307     | 0               |
| CYP20A1                                                                                        | 0,27733921  | -0,052400047 | 0,125 | 0,066 | 1         | 0,964330747   | 1,036988609     | 1,893939394     |
| CAPRIN1                                                                                        | 0,000170904 | -0,052430139 | 0,531 | 0,168 | 1         | 0,964310633   | 1,037010239     | 3,160714286     |
| TATDN3                                                                                         | 0,543117005 | -0,05246113  | 0     | 0,012 | 1         | 0,964289918   | 1,037032516     | 0               |
| TMEM92                                                                                         | 0,543117005 | -0,052513214 | 0     | 0,012 | 1         | 0,964255106   | 1,037069955     | 0               |
| WWC2-AS2                                                                                       | 0,480650464 | -0,052534043 | 0     | 0,016 | 1         | 0,964241185   | 1,037084928     | 0               |
| RAB36                                                                                          | 0,543117005 | -0,052546035 | 0     | 0,012 | 1         | 0,96423317    | 1,037093549     | 0               |
| CALHM5                                                                                         | 0,041848356 | -0,052569909 | 0,062 | 0,012 | 1         | 0,964217214   | 1,03711071      | 5,166666667     |
| EGLN1                                                                                          | 0,062247505 | -0,052662701 | 0,25  | 0,113 | 1         | 0,964155199   | 1,037177418     | 2,212389381     |
| SMYD4                                                                                          | 0,224763613 | -0,052663116 | 0,062 | 0,023 | 1         | 0,964154921   | 1,037177717     | 2,695652174     |
| FHIT                                                                                           | 0,480650464 | -0,052683377 | 0     | 0,016 | 1         | 0,964141381   | 1,037192283     | 0               |
| ZNF26                                                                                          | 0,087959196 | -0,052685248 | 0,062 | 0,016 | 1         | 0,964140131   | 1,037193628     | 3,875           |
| SHPK                                                                                           | 0,80991663  | -0,052786801 | 0,031 | 0,023 | 1         | 0,964072266   | 1,03726664      | 1,347826087     |
| MROH1                                                                                          | 0,540537634 | -0,052819532 | 0,031 | 0,016 | 1         | 0,964050394   | 1,037290173     | 1,9375          |
| PEG3                                                                                           | 0,682170546 | -0,05282753  | 0,031 | 0,02  | 1         | 0,96404505    | 1,037295923     | 1,55            |
| C2orf42                                                                                        | 0,087959196 | -0,052852698 | 0,062 | 0,016 | 1         | 0,964028232   | 1,03731402      | 3,875           |
| MYCL                                                                                           | 0,480650464 | -0,052852703 | 0     | 0,016 | 1         | 0,964028228   | 1,037314023     | 0               |
| CGGBP1                                                                                         | 0,001121182 | -0,052857904 | 0,625 | 0,238 | 1         | 0,964024753   | 1,037317763     | 2,62605042      |

Supplementary Table 1

| Differentially expressed genes_adjacent-skin-XL_ comparing SC-Keloid vs. (SC-Myel, SC-Nonmyel) |             |              |       |       |           |               |                 |                 |
|------------------------------------------------------------------------------------------------|-------------|--------------|-------|-------|-----------|---------------|-----------------|-----------------|
| gene                                                                                           | p_val       | avg_log2FC   | pct.1 | pct.2 | p_val_adj | Foldchange_UP | Foldchange_DOWN | Ratio_pct1_pct2 |
| CCDC144A                                                                                       | 0,918113127 | -0,052862854 | 0,031 | 0,027 | 1         | 0,964021446   | 1,037321322     | 1,148148148     |
| HBS1L                                                                                          | 0,000278482 | -0,052945593 | 0,25  | 0,055 | 1         | 0,96396616    | 1,037380814     | 4,545454545     |
| ALAS1                                                                                          | 0,037506898 | -0,052953527 | 0,094 | 0,023 | 1         | 0,963960859   | 1,037386519     | 4,086956522     |
| EPS15L1                                                                                        | 0,001019952 | -0,052978333 | 0,219 | 0,051 | 1         | 0,963944285   | 1,037404356     | 4,294117647     |
| ZNF177                                                                                         | 0,543117005 | -0,053036353 | 0     | 0,012 | 1         | 0,963905519   | 1,037446078     | 0               |
| TGDS                                                                                           | 0,000911755 | -0,053077435 | 0,156 | 0,027 | 1         | 0,963878071   | 1,037475621     | 5,777777778     |
| NOM1                                                                                           | 0,04261236  | -0,053083387 | 0,156 | 0,055 | 1         | 0,963874095   | 1,037479901     | 2,836363636     |
| TGOLN2                                                                                         | 0,015503587 | -0,053172246 | 0,625 | 0,277 | 1         | 0,963814729   | 1,037543804     | 2,25631769      |
| DHX57                                                                                          | 0,019236133 | -0,053197795 | 0,094 | 0,02  | 1         | 0,963797661   | 1,037562178     | 4,7             |
| TTN-AS1                                                                                        | 0,063925678 | -0,053198969 | 0,094 | 0,027 | 1         | 0,963796877   | 1,037563022     | 3,481481481     |
| ERCC4                                                                                          | 0,000486986 | -0,053199138 | 0,188 | 0,035 | 1         | 0,963796764   | 1,037563144     | 5,371428571     |
| MMUT                                                                                           | 0,005043469 | -0,053214347 | 0,219 | 0,062 | 1         | 0,963786603   | 1,037574082     | 3,532258065     |
| LIMD1                                                                                          | 0,008148126 | -0,05326443  | 0,094 | 0,016 | 1         | 0,963753147   | 1,037610101     | 5,875           |
| LRFN5                                                                                          | 0,480650464 | -0,053280355 | 0     | 0,016 | 1         | 0,963742508   | 1,037621555     | 0               |
| DRC3                                                                                           | 0,543117005 | -0,053326275 | 0     | 0,012 | 1         | 0,963711833   | 1,037654583     | 0               |
| PLGLB1                                                                                         | 0,543117005 | -0,053351037 | 0     | 0,012 | 1         | 0,963695293   | 1,037672393     | 0               |
| DAGLA                                                                                          | 0,682170546 | -0,05335151  | 0,031 | 0,02  | 1         | 0,963694977   | 1,037672733     | 1,55            |
| PGAM5                                                                                          | 0,224763613 | -0,053400402 | 0,062 | 0,023 | 1         | 0,963662318   | 1,0377079       | 2,695652174     |
| KIN                                                                                            | 0,001845033 | -0,053457403 | 0,219 | 0,055 | 1         | 0,963624244   | 1,0377489       | 3,981818182     |
| AC104532.2                                                                                     | 0,540537634 | -0,053484613 | 0,031 | 0,016 | 1         | 0,96360607    | 1,037768473     | 1,9375          |
| KATNIP                                                                                         | 0,183526587 | -0,0535575   | 0,094 | 0,039 | 1         | 0,963557389   | 1,037820903     | 2,41025641      |
| CEP104                                                                                         | 0,141661018 | -0,053573287 | 0,094 | 0,035 | 1         | 0,963546845   | 1,037832261     | 2,685714286     |
| BCAS2                                                                                          | 0,076019609 | -0,053575024 | 0,25  | 0,117 | 1         | 0,963545684   | 1,03783351      | 2,136752137     |
| CRTAP                                                                                          | 0,000604154 | -0,053608039 | 0,438 | 0,141 | 1         | 0,963523635   | 1,03785726      | 3,106382979     |
| GPKOW                                                                                          | 0,138170297 | -0,05369056  | 0,094 | 0,035 | 1         | 0,963468524   | 1,037916627     | 2,685714286     |
| TIMM23                                                                                         | 0,016858455 | -0,053787522 | 0,125 | 0,031 | 1         | 0,963403772   | 1,037986386     | 4,032258065     |
| HOMEZ                                                                                          | 0,386325862 | -0,053795784 | 0,031 | 0,012 | 1         | 0,963398255   | 1,03799233      | 2,583333333     |
| CEP162                                                                                         | 0,063925678 | -0,053816602 | 0,094 | 0,027 | 1         | 0,963384354   | 1,038007309     | 3,481481481     |
| SNTB1                                                                                          | 0,922888178 | -0,053895507 | 0,062 | 0,066 | 1         | 0,963331665   | 1,038064082     | 0,939393939     |
| LONRF2                                                                                         | 0,543117005 | -0,054053078 | 0     | 0,012 | 1         | 0,963226455   | 1,038177466     | 0               |

Supplementary Table 1

| Differentially expressed genes_adjacent-skin-XL_comparing SC-Keloid vs. (SC-Myel, SC-Nonmyel) |             |              |       |       |            |               |                 |                 |
|-----------------------------------------------------------------------------------------------|-------------|--------------|-------|-------|------------|---------------|-----------------|-----------------|
| gene                                                                                          | p_val       | avg_log2FC   | pct.1 | pct.2 | p_val_adj  | Foldchange_UP | Foldchange_DOWN | Ratio_pct1_pct2 |
| ZNF500                                                                                        | 0,226351275 | -0,054103625 | 0,031 | 0,008 | 1          | 0,963192708   | 1,03821384      | 3,875           |
| PRPSAP2                                                                                       | 0,013518555 | -0,054117563 | 0,188 | 0,059 | 1          | 0,963183403   | 1,03822387      | 3,186440678     |
| JADE2                                                                                         | 0,924392325 | -0,054129756 | 0,031 | 0,027 | 1          | 0,963175262   | 1,038232645     | 1,148148148     |
| TMEM204                                                                                       | 0,480650464 | -0,054132737 | 0     | 0,016 | 1          | 0,963173272   | 1,03823479      | 0               |
| PCDHB6                                                                                        | 0,543117005 | -0,054152118 | 0     | 0,012 | 1          | 0,963160333   | 1,038248738     | 0               |
| MDFIC                                                                                         | 5,82732E-06 | -0,054205229 | 0,281 | 0,047 | 0,12296218 | 0,963124876   | 1,03828696      | 5,978723404     |
| EML2                                                                                          | 0,015105004 | -0,054230081 | 0,188 | 0,059 | 1          | 0,963108285   | 1,038304846     | 3,186440678     |
| TWIST2                                                                                        | 0,540537634 | -0,054431218 | 0,031 | 0,016 | 1          | 0,96297402    | 1,038449614     | 1,9375          |
| SPINK5                                                                                        | 0,682170546 | -0,054469145 | 0,031 | 0,02  | 1          | 0,962948705   | 1,038476914     | 1,55            |
| PFN4                                                                                          | 0,386325862 | -0,054469917 | 0,031 | 0,012 | 1          | 0,96294819    | 1,03847747      | 2,583333333     |
| CCNK                                                                                          | 0,976455087 | -0,05455801  | 0,062 | 0,062 | 1          | 0,962889393   | 1,038540883     | 1               |
| RCHY1                                                                                         | 0,141661018 | -0,054585358 | 0,094 | 0,035 | 1          | 0,96287114    | 1,03856057      | 2,685714286     |
| SLC7A1                                                                                        | 0,470250215 | -0,054614093 | 0,062 | 0,035 | 1          | 0,962851962   | 1,038581256     | 1,771428571     |
| CLDN12                                                                                        | 0,008148126 | -0,054684433 | 0,094 | 0,016 | 1          | 0,962805019   | 1,038631894     | 5,875           |
| AVL9                                                                                          | 0,682170546 | -0,054712771 | 0,031 | 0,02  | 1          | 0,962786107   | 1,038652296     | 1,55            |
| KLHL42                                                                                        | 0,004542982 | -0,054754444 | 0,219 | 0,062 | 1          | 0,962758297   | 1,038682297     | 3,532258065     |
| ZSWIM8-AS1                                                                                    | 0,543117005 | -0,054802909 | 0     | 0,012 | 1          | 0,962725955   | 1,038717191     | 0               |
| BTRC                                                                                          | 0,097375089 | -0,054853931 | 0,094 | 0,031 | 1          | 0,962691908   | 1,038753927     | 3,032258065     |
| FHIP1A                                                                                        | 0,543117005 | -0,05489875  | 0     | 0,012 | 1          | 0,962662001   | 1,038786198     | 0               |
| CDC25B                                                                                        | 0,002053304 | -0,054964677 | 0,156 | 0,031 | 1          | 0,962618012   | 1,038833668     | 5,032258065     |
| CHAC2                                                                                         | 0,226351275 | -0,054974447 | 0,031 | 0,008 | 1          | 0,962611493   | 1,038840703     | 3,875           |
| KDM4A-AS1                                                                                     | 0,543117005 | -0,054994628 | 0     | 0,012 | 1          | 0,962598028   | 1,038855235     | 0               |
| HABP4                                                                                         | 0,027355643 | -0,055008637 | 0,312 | 0,133 | 1          | 0,962588681   | 1,038865322     | 2,345864662     |
| GNAL                                                                                          | 0,924392442 | -0,055034093 | 0,031 | 0,027 | 1          | 0,962571696   | 1,038883654     | 1,148148148     |
| HLA-DQB1                                                                                      | 0,540537634 | -0,055055287 | 0,031 | 0,016 | 1          | 0,962557555   | 1,038898915     | 1,9375          |
| LIPC                                                                                          | 0,480650464 | -0,055109591 | 0     | 0,016 | 1          | 0,962521325   | 1,038938021     | 0               |
| ZBED6                                                                                         | 0,480650464 | -0,055163286 | 0     | 0,016 | 1          | 0,962485502   | 1,038976689     | 0               |
| UBC                                                                                           | 0,056469408 | -0,055216511 | 1     | 0,91  | 1          | 0,962449993   | 1,039015021     | 1,098901099     |
| PPFIA3                                                                                        | 0,543117005 | -0,055260005 | 0     | 0,012 | 1          | 0,962420979   | 1,039046345     | 0               |
| APC                                                                                           | 0,02529276  | -0,055304035 | 0,25  | 0,098 | 1          | 0,962391606   | 1,039078057     | 2,551020408     |

Supplementary Table 1

| Differentially expressed genes_adjacent-skin-XL_comparing SC-Keloid vs. (SC-Myel, SC-Nonmyel) |             |              |       |       |             |               |                 |                 |
|-----------------------------------------------------------------------------------------------|-------------|--------------|-------|-------|-------------|---------------|-----------------|-----------------|
| gene                                                                                          | p_val       | avg_log2FC   | pct.1 | pct.2 | p_val_adj   | Foldchange_UP | Foldchange_DOWN | Ratio_pct1_pct2 |
| WDR36                                                                                         | 0,191913299 | -0,05534114  | 0,094 | 0,039 | 1           | 0,962366855   | 1,039104781     | 2,41025641      |
| NAV2-AS3                                                                                      | 0,480650464 | -0,055345955 | 0     | 0,016 | 1           | 0,962363643   | 1,039108249     | 0               |
| TMCC2                                                                                         | 0,543117005 | -0,055351286 | 0     | 0,012 | 1           | 0,962360087   | 1,039112089     | 0               |
| CYB5R1                                                                                        | 0,097228337 | -0,055390695 | 0,188 | 0,082 | 1           | 0,962333799   | 1,039140474     | 2,292682927     |
| LINC00900                                                                                     | 0,082317662 | -0,055439313 | 0,031 | 0,004 | 1           | 0,96230137    | 1,039175493     | 7,75            |
| FAM72D                                                                                        | 0,226351275 | -0,055454304 | 0,031 | 0,008 | 1           | 0,96229137    | 1,039186291     | 3,875           |
| BMI1                                                                                          | 0,003103243 | -0,055465714 | 0,406 | 0,145 | 1           | 0,96228376    | 1,039194509     | 2,8             |
| PPP1R8                                                                                        | 0,004180266 | -0,055542547 | 0,125 | 0,023 | 1           | 0,962232513   | 1,039249855     | 5,434782609     |
| SDK2                                                                                          | 0,80991663  | -0,055568853 | 0,031 | 0,023 | 1           | 0,962214968   | 1,039268805     | 1,347826087     |
| NIFK-AS1                                                                                      | 0,224763613 | -0,055584998 | 0,062 | 0,023 | 1           | 0,9622042     | 1,039280435     | 2,695652174     |
| TLK1                                                                                          | 1,04156E-05 | -0,055598456 | 0,344 | 0,07  | 0,219780613 | 0,962195224   | 1,03929013      | 4,914285714     |
| FIZ1                                                                                          | 0,543117005 | -0,055608323 | 0     | 0,012 | 1           | 0,962188644   | 1,039297238     | 0               |
| GLI4                                                                                          | 0,098751938 | -0,055638299 | 0,094 | 0,031 | 1           | 0,962168652   | 1,039318833     | 3,032258065     |
| VXN                                                                                           | 0,543117005 | -0,055644863 | 0     | 0,012 | 1           | 0,962164274   | 1,039323562     | 0               |
| DNAJC25                                                                                       | 0,063925678 | -0,055667485 | 0,094 | 0,027 | 1           | 0,962149187   | 1,039339859     | 3,481481481     |
| RAVER1                                                                                        | 0,241162386 | -0,055678589 | 0,094 | 0,043 | 1           | 0,962141781   | 1,039347858     | 2,186046512     |
| FERMT3                                                                                        | 0,30793671  | -0,055691274 | 0,062 | 0,027 | 1           | 0,962133322   | 1,039356997     | 2,296296296     |
| CCDC183                                                                                       | 0,543117005 | -0,05569596  | 0     | 0,012 | 1           | 0,962130197   | 1,039360373     | 0               |
| TMEM183A                                                                                      | 0,037342574 | -0,055769515 | 0,281 | 0,121 | 1           | 0,962081145   | 1,039413365     | 2,32231405      |
| FAM131A                                                                                       | 0,573780511 | -0,055795336 | 0,062 | 0,039 | 1           | 0,962063926   | 1,039431968     | 1,58974359      |
| HPDL                                                                                          | 0,480650464 | -0,055815134 | 0     | 0,016 | 1           | 0,962050724   | 1,039446232     | 0               |
| RTN4IP1                                                                                       | 0,480650464 | -0,055844844 | 0     | 0,016 | 1           | 0,962030912   | 1,039467639     | 0               |
| MORC2                                                                                         | 0,016858455 | -0,055855667 | 0,125 | 0,031 | 1           | 0,962023695   | 1,039475437     | 4,032258065     |
| ENTHD1                                                                                        | 0,543117005 | -0,055863109 | 0     | 0,012 | 1           | 0,962018732   | 1,039480799     | 0               |
| MCF2L2                                                                                        | 0,543117005 | -0,055899918 | 0     | 0,012 | 1           | 0,961994187   | 1,03950732      | 0               |
| TNFAIP8L1                                                                                     | 0,428872689 | -0,055907815 | 0     | 0,02  | 1           | 0,961988921   | 1,039513011     | 0               |
| ITGA2                                                                                         | 0,000492493 | -0,055911723 | 0,312 | 0,086 | 1           | 0,961986316   | 1,039515826     | 3,627906977     |
| EEF1AKMT2                                                                                     | 0,006502031 | -0,05595475  | 0,281 | 0,094 | 1           | 0,961957626   | 1,039546829     | 2,989361702     |
| PCGF6                                                                                         | 0,063925678 | -0,055969627 | 0,094 | 0,027 | 1           | 0,961947706   | 1,039557549     | 3,481481481     |
| UNC119                                                                                        | 0,918113127 | -0,056025795 | 0,031 | 0,027 | 1           | 0,961910256   | 1,039598023     | 1,148148148     |

Supplementary Table 1

| Differentially expressed genes_adjacent-skin-XL_comparing SC-Keloid vs. (SC-Myel, SC-Nonmyel) |             |              |       |       |           |               |                 |                 |
|-----------------------------------------------------------------------------------------------|-------------|--------------|-------|-------|-----------|---------------|-----------------|-----------------|
| gene                                                                                          | p_val       | avg_log2FC   | pct.1 | pct.2 | p_val_adj | Foldchange_UP | Foldchange_DOWN | Ratio_pct1_pct2 |
| NUAK1                                                                                         | 0,386325862 | -0,056117559 | 0,031 | 0,012 | 1         | 0,961849074   | 1,03966415      | 2,583333333     |
| PEX5                                                                                          | 0,183526162 | -0,056159053 | 0,094 | 0,039 | 1         | 0,961821411   | 1,039694052     | 2,41025641      |
| ZNF512                                                                                        | 0,028712073 | -0,056160837 | 0,125 | 0,035 | 1         | 0,961820221   | 1,039695338     | 3,571428571     |
| TESK1                                                                                         | 0,012987709 | -0,056180154 | 0,156 | 0,043 | 1         | 0,961807343   | 1,039709259     | 3,627906977     |
| FBXL2                                                                                         | 0,000911755 | -0,056196205 | 0,156 | 0,027 | 1         | 0,961796642   | 1,039720827     | 5,777777778     |
| DTX3L                                                                                         | 0,123421204 | -0,056318107 | 0,125 | 0,051 | 1         | 0,961715378   | 1,039808683     | 2,450980392     |
| DUSP15                                                                                        | 0,013407295 | -0,056415883 | 0,156 | 0,043 | 1         | 0,961650201   | 1,039879156     | 3,627906977     |
| INPP5K                                                                                        | 0,002042841 | -0,056485727 | 0,375 | 0,125 | 1         | 0,961603647   | 1,0399295       | 3               |
| FYCO1                                                                                         | 0,028712073 | -0,056485957 | 0,125 | 0,035 | 1         | 0,961603494   | 1,039929666     | 3,571428571     |
| YTHDF3-DT                                                                                     | 0,30793671  | -0,056511191 | 0,062 | 0,027 | 1         | 0,961586675   | 1,039947855     | 2,296296296     |
| TRIM73                                                                                        | 0,150155729 | -0,056515333 | 0,062 | 0,02  | 1         | 0,961583914   | 1,039950841     | 3,1             |
| FOLH1                                                                                         | 0,428872689 | -0,056516024 | 0     | 0,02  | 1         | 0,961583454   | 1,039951339     | 0               |
| TMEM86B                                                                                       | 0,543117005 | -0,05652467  | 0     | 0,012 | 1         | 0,961577691   | 1,039957571     | 0               |
| ISCA2                                                                                         | 0,015740914 | -0,056526656 | 0,188 | 0,059 | 1         | 0,961576367   | 1,039959003     | 3,186440678     |
| SFXN2                                                                                         | 0,543117005 | -0,056546469 | 0     | 0,012 | 1         | 0,961563162   | 1,039973285     | 0               |
| HUS1                                                                                          | 0,00208125  | -0,056553426 | 0,188 | 0,043 | 1         | 0,961558525   | 1,0399783       | 4,372093023     |
| ZSWIM9                                                                                        | 0,682170546 | -0,056580203 | 0,031 | 0,02  | 1         | 0,961540678   | 1,039997603     | 1,55            |
| ATP6V1H                                                                                       | 0,001195376 | -0,056626434 | 0,281 | 0,078 | 1         | 0,961509866   | 1,04003093      | 3,602564103     |
| SLFN13                                                                                        | 0,150155729 | -0,056685147 | 0,062 | 0,02  | 1         | 0,961470737   | 1,040073257     | 3,1             |
| VHL                                                                                           | 0,043149764 | -0,056777745 | 0,156 | 0,055 | 1         | 0,961409027   | 1,040140015     | 2,836363636     |
| BCAS4                                                                                         | 0,013891036 | -0,056825199 | 0,062 | 0,008 | 1         | 0,961377404   | 1,040174229     | 7,75            |
| RILPL2                                                                                        | 0,396289917 | -0,056844351 | 0,062 | 0,031 | 1         | 0,961364642   | 1,040188037     | 2               |
| KIF3C                                                                                         | 0,482846351 | -0,056868211 | 0,062 | 0,035 | 1         | 0,961348743   | 1,04020524      | 1,771428571     |
| ZNF250                                                                                        | 0,543117005 | -0,056904569 | 0     | 0,012 | 1         | 0,961324516   | 1,040231455     | 0               |
| PCBD2                                                                                         | 0,082317662 | -0,056914791 | 0,031 | 0,004 | 1         | 0,961317704   | 1,040238826     | 7,75            |
| MAP4K1                                                                                        | 0,480650464 | -0,056915024 | 0     | 0,016 | 1         | 0,961317549   | 1,040238993     | 0               |
| MSTO1                                                                                         | 0,091552625 | -0,056978653 | 0,125 | 0,047 | 1         | 0,961275152   | 1,040284874     | 2,659574468     |
| TRIP13                                                                                        | 0,082317662 | -0,057145942 | 0,031 | 0,004 | 1         | 0,961163693   | 1,040405508     | 7,75            |
| ZNF503-AS1                                                                                    | 0,386325862 | -0,057188332 | 0,031 | 0,012 | 1         | 0,961135452   | 1,040436078     | 2,583333333     |
| DGKA                                                                                          | 0,392349482 | -0,057193014 | 0,062 | 0,031 | 1         | 0,961132332   | 1,040439455     | 2               |

Supplementary Table 1

| Differentially expressed genes_adjacent-skin-XL_comparing SC-Keloid vs. (SC-Myel, SC-Nonmyel) |             |              |       |       |           |               |                 |                 |
|-----------------------------------------------------------------------------------------------|-------------|--------------|-------|-------|-----------|---------------|-----------------|-----------------|
| gene                                                                                          | p_val       | avg_log2FC   | pct.1 | pct.2 | p_val_adj | Foldchange_UP | Foldchange_DOWN | Ratio_pct1_pct2 |
| ERN1                                                                                          | 0,060102361 | -0,057240417 | 0,156 | 0,059 | 1         | 0,961100753   | 1,040473641     | 2,644067797     |
| SLC36A2                                                                                       | 0,480650464 | -0,057252716 | 0     | 0,016 | 1         | 0,96109256    | 1,040482511     | 0               |
| RAB7A                                                                                         | 0,057320859 | -0,057338739 | 0,75  | 0,398 | 1         | 0,961035255   | 1,040544554     | 1,884422111     |
| LANCL1                                                                                        | 0,185597364 | -0,057369985 | 0,094 | 0,039 | 1         | 0,961014441   | 1,04056709      | 2,41025641      |
| PARP6                                                                                         | 0,000511287 | -0,057423294 | 0,25  | 0,059 | 1         | 0,960978931   | 1,040605541     | 4,237288136     |
| TSTD3                                                                                         | 0,098751938 | -0,057445568 | 0,094 | 0,031 | 1         | 0,960964095   | 1,040621606     | 3,032258065     |
| CFB                                                                                           | 0,480650464 | -0,057511273 | 0     | 0,016 | 1         | 0,96092033    | 1,040669001     | 0               |
| ADD1                                                                                          | 0,007483769 | -0,057574855 | 0,656 | 0,281 | 1         | 0,960877982   | 1,040714866     | 2,334519573     |
| APBB1IP                                                                                       | 0,543117005 | -0,057632437 | 0     | 0,012 | 1         | 0,960839631   | 1,040756405     | 0               |
| ZNF571                                                                                        | 0,540537634 | -0,057648098 | 0,031 | 0,016 | 1         | 0,960829201   | 1,040767703     | 1,9375          |
| SMARCA2                                                                                       | 0,000266603 | -0,057685344 | 0,281 | 0,066 | 1         | 0,960804396   | 1,040794572     | 4,257575758     |
| ABITRAM                                                                                       | 0,304406192 | -0,057741148 | 0,062 | 0,027 | 1         | 0,960767232   | 1,040834831     | 2,296296296     |
| LSR                                                                                           | 0,30793671  | -0,057755336 | 0,062 | 0,027 | 1         | 0,960757783   | 1,040845068     | 2,296296296     |
| RNPEP                                                                                         | 0,005379813 | -0,057811759 | 0,25  | 0,078 | 1         | 0,960720209   | 1,040885775     | 3,205128205     |
| GRIK5                                                                                         | 0,480650464 | -0,057844614 | 0     | 0,016 | 1         | 0,960698331   | 1,04090948      | 0               |
| NARS2                                                                                         | 0,30793671  | -0,057855445 | 0,062 | 0,027 | 1         | 0,960691119   | 1,040917295     | 2,296296296     |
| BAG1                                                                                          | 0,038195773 | -0,057912851 | 0,375 | 0,176 | 1         | 0,960652893   | 1,040958714     | 2,130681818     |
| PTCH2                                                                                         | 0,543117005 | -0,057927666 | 0     | 0,012 | 1         | 0,960643027   | 1,040969404     | 0               |
| TCEAL3                                                                                        | 0,105996737 | -0,057977576 | 0,344 | 0,18  | 1         | 0,960609794   | 1,041005417     | 1,911111111     |
| RNF111                                                                                        | 0,009808643 | -0,058045215 | 0,188 | 0,055 | 1         | 0,960564759   | 1,041054224     | 3,418181818     |
| ZNF518B                                                                                       | 0,480650464 | -0,058047957 | 0     | 0,016 | 1         | 0,960562933   | 1,041056203     | 0               |
| SLC27A3                                                                                       | 0,386325862 | -0,058105101 | 0,031 | 0,012 | 1         | 0,960524887   | 1,041097439     | 2,583333333     |
| ZNF407-AS1                                                                                    | 0,224763613 | -0,05820783  | 0,062 | 0,023 | 1         | 0,960456494   | 1,041171575     | 2,695652174     |
| HVCN1                                                                                         | 0,543117005 | -0,058271646 | 0     | 0,012 | 1         | 0,96041401    | 1,041217631     | 0               |
| ZNF490                                                                                        | 0,815054348 | -0,058278305 | 0,031 | 0,039 | 1         | 0,960409577   | 1,041222437     | 0,794871795     |
| MGAT1                                                                                         | 0,009644385 | -0,058291039 | 0,344 | 0,133 | 1         | 0,9604011     | 1,041231627     | 2,586466165     |
| MRPL53                                                                                        | 0,037506898 | -0,058298957 | 0,094 | 0,023 | 1         | 0,960395829   | 1,041237342     | 4,086956522     |
| ARHGEF19                                                                                      | 0,682170546 | -0,05831565  | 0,031 | 0,02  | 1         | 0,960384716   | 1,04124939      | 1,55            |
| ZNF184                                                                                        | 0,087959196 | -0,058352289 | 0,062 | 0,016 | 1         | 0,960360326   | 1,041275834     | 3,875           |
| NPIPA5                                                                                        | 0,480650464 | -0,058400732 | 0     | 0,016 | 1         | 0,96032808    | 1,041310798     | 0               |

Supplementary Table 1

| Differentially expressed genes_adjacent-skin-XL_ comparing SC-Keloid vs. (SC-Myel, SC-Nonmyel) |             |              |       |       |           |               |                 |                 |
|------------------------------------------------------------------------------------------------|-------------|--------------|-------|-------|-----------|---------------|-----------------|-----------------|
| gene                                                                                           | p_val       | avg_log2FC   | pct.1 | pct.2 | p_val_adj | Foldchange_UP | Foldchange_DOWN | Ratio_pct1_pct2 |
| CDKN2B                                                                                         | 0,002594281 | -0,058428798 | 0,094 | 0,012 | 1         | 0,960309398   | 1,041331056     | 7,833333333     |
| ZGRF1                                                                                          | 0,150155729 | -0,058454455 | 0,062 | 0,02  | 1         | 0,96029232    | 1,041349575     | 3,1             |
| TC2N                                                                                           | 0,480650464 | -0,058468976 | 0     | 0,016 | 1         | 0,960282655   | 1,041360057     | 0               |
| ZNF436                                                                                         | 0,543117005 | -0,058476792 | 0     | 0,012 | 1         | 0,960277452   | 1,041365699     | 0               |
| NFS1                                                                                           | 0,06592651  | -0,058490177 | 0,125 | 0,043 | 1         | 0,960268543   | 1,04137536      | 2,906976744     |
| CNGA1                                                                                          | 0,543117005 | -0,058499816 | 0     | 0,012 | 1         | 0,960262127   | 1,041382318     | 0               |
| TBC1D25                                                                                        | 0,291239073 | -0,058515572 | 0,094 | 0,047 | 1         | 0,96025164    | 1,041393691     | 2               |
| LRR4B                                                                                          | 0,480650464 | -0,058531954 | 0     | 0,016 | 1         | 0,960240736   | 1,041405517     | 0               |
| HSPB8                                                                                          | 0,543117005 | -0,058567681 | 0     | 0,012 | 1         | 0,960216957   | 1,041431306     | 0               |
| SUCO                                                                                           | 0,003724448 | -0,058571142 | 0,25  | 0,074 | 1         | 0,960214653   | 1,041433805     | 3,378378378     |
| VPS37A                                                                                         | 0,090467775 | -0,058632211 | 0,125 | 0,047 | 1         | 0,960174009   | 1,04147789      | 2,659574468     |
| MRPL11                                                                                         | 0,005962766 | -0,058632604 | 0,281 | 0,094 | 1         | 0,960173747   | 1,041478173     | 2,989361702     |
| GHR                                                                                            | 0,543117005 | -0,058700759 | 0     | 0,012 | 1         | 0,960128388   | 1,041527375     | 0               |
| CDKL1                                                                                          | 0,924392442 | -0,058717481 | 0,031 | 0,027 | 1         | 0,96011726    | 1,041539447     | 1,148148148     |
| C2orf49                                                                                        | 0,188089808 | -0,058738812 | 0,156 | 0,078 | 1         | 0,960103064   | 1,041554847     | 2               |
| SF3B4                                                                                          | 0,008201485 | -0,058783937 | 0,281 | 0,098 | 1         | 0,960073034   | 1,041587425     | 2,867346939     |
| HAS3                                                                                           | 0,543117005 | -0,058832727 | 0     | 0,012 | 1         | 0,960040566   | 1,041622651     | 0               |
| KCNJ10                                                                                         | 0,543117005 | -0,05886107  | 0     | 0,012 | 1         | 0,960021706   | 1,041643115     | 0               |
| SLC26A6                                                                                        | 0,224763613 | -0,05891201  | 0,062 | 0,023 | 1         | 0,959987809   | 1,041679895     | 2,695652174     |
| AC019117.2                                                                                     | 0,803381388 | -0,058982911 | 0,031 | 0,023 | 1         | 0,959940631   | 1,04173109      | 1,347826087     |
| TLR1                                                                                           | 0,480650464 | -0,058985543 | 0     | 0,016 | 1         | 0,95993888    | 1,04173299      | 0               |
| SLC4A2                                                                                         | 0,002246141 | -0,058998508 | 0,344 | 0,113 | 1         | 0,959930254   | 1,041742352     | 3,044247788     |
| ARFIP2                                                                                         | 0,020165275 | -0,059008133 | 0,156 | 0,047 | 1         | 0,95992385    | 1,041749302     | 3,319148936     |
| PIM1                                                                                           | 0,139907281 | -0,059017972 | 0,094 | 0,035 | 1         | 0,959917303   | 1,041756406     | 2,685714286     |
| SLC33A1                                                                                        | 0,307008662 | -0,059047637 | 0,188 | 0,113 | 1         | 0,959897565   | 1,041777827     | 1,663716814     |
| NOP2                                                                                           | 0,480650464 | -0,059058091 | 0     | 0,016 | 1         | 0,95989061    | 1,041785376     | 0               |
| NME6                                                                                           | 0,80991663  | -0,05907129  | 0,031 | 0,023 | 1         | 0,959881828   | 1,041794907     | 1,347826087     |
| SEMA7A                                                                                         | 0,803381388 | -0,059073631 | 0,031 | 0,023 | 1         | 0,95988027    | 1,041796598     | 1,347826087     |
| CEP43                                                                                          | 0,905570195 | -0,059075826 | 0,031 | 0,027 | 1         | 0,95987881    | 1,041798183     | 1,148148148     |
| GNL3L                                                                                          | 0,080880928 | -0,059122312 | 0,156 | 0,062 | 1         | 0,959847881   | 1,041831752     | 2,516129032     |



Supplementary Table 1

| Differentially expressed genes_adjacent-skin-XL_ comparing SC-Keloid vs. (SC-Myel, SC-Nonmyel) |             |              |       |       |           |               |                 |                 |
|------------------------------------------------------------------------------------------------|-------------|--------------|-------|-------|-----------|---------------|-----------------|-----------------|
| gene                                                                                           | p_val       | avg_log2FC   | pct.1 | pct.2 | p_val_adj | Foldchange_UP | Foldchange_DOWN | Ratio_pct1_pct2 |
| SLC39A9                                                                                        | 0,150155729 | -0,059311745 | 0,062 | 0,02  | 1         | 0,959721857   | 1,041968559     | 3,1             |
| GLT8D2                                                                                         | 0,543117005 | -0,05936573  | 0     | 0,012 | 1         | 0,959685945   | 1,042007549     | 0               |
| CRABP2                                                                                         | 0,150155729 | -0,059477954 | 0,062 | 0,02  | 1         | 0,959611296   | 1,042088608     | 3,1             |
| NELFB                                                                                          | 0,00014443  | -0,059507226 | 0,312 | 0,074 | 1         | 0,959591826   | 1,042109752     | 4,216216216     |
| AIFM3                                                                                          | 0,543117005 | -0,059508888 | 0     | 0,012 | 1         | 0,959590721   | 1,042110952     | 0               |
| FRRS1L                                                                                         | 0,543117005 | -0,059557995 | 0     | 0,012 | 1         | 0,959558059   | 1,042146425     | 0               |
| EHBP1L1                                                                                        | 0,013783696 | -0,059706408 | 0,25  | 0,09  | 1         | 0,959459352   | 1,042253638     | 2,777777778     |
| HECTD4                                                                                         | 0,361559695 | -0,05973785  | 0,125 | 0,074 | 1         | 0,959438442   | 1,042276353     | 1,689189189     |
| SPR                                                                                            | 0,543117005 | -0,059745067 | 0     | 0,012 | 1         | 0,959433642   | 1,042281567     | 0               |
| DIABLO                                                                                         | 0,480650464 | -0,059808132 | 0     | 0,016 | 1         | 0,959391703   | 1,04232713      | 0               |
| FSIP1                                                                                          | 0,543117005 | -0,059968013 | 0     | 0,012 | 1         | 0,959285388   | 1,042442648     | 0               |
| PKNOX1                                                                                         | 0,028712073 | -0,06001155  | 0,125 | 0,035 | 1         | 0,959256439   | 1,042474107     | 3,571428571     |
| TDG                                                                                            | 0,038104316 | -0,060018487 | 0,188 | 0,07  | 1         | 0,959251827   | 1,04247912      | 2,685714286     |
| ZNF398                                                                                         | 0,226351275 | -0,060060865 | 0,031 | 0,008 | 1         | 0,95922365    | 1,042509742     | 3,875           |
| GLMN                                                                                           | 0,641019742 | -0,060148712 | 0,062 | 0,043 | 1         | 0,959165244   | 1,042573223     | 1,441860465     |
| ZNF845                                                                                         | 0,543117005 | -0,060154242 | 0     | 0,012 | 1         | 0,959161567   | 1,042577219     | 0               |
| VPS50                                                                                          | 0,008780679 | -0,06017377  | 0,125 | 0,027 | 1         | 0,959148584   | 1,042591332     | 4,62962963      |
| STAG3                                                                                          | 0,543117005 | -0,060224195 | 0     | 0,012 | 1         | 0,959115061   | 1,042627772     | 0               |
| FOXO6                                                                                          | 0,428872689 | -0,060333371 | 0     | 0,02  | 1         | 0,959042483   | 1,042706677     | 0               |
| APOBEC3D                                                                                       | 0,428872689 | -0,060333597 | 0     | 0,02  | 1         | 0,959042332   | 1,04270684      | 0               |
| CD34                                                                                           | 0,428872689 | -0,060341976 | 0     | 0,02  | 1         | 0,959036763   | 1,042712896     | 0               |
| CAP2                                                                                           | 0,480650464 | -0,060406907 | 0     | 0,016 | 1         | 0,9589936     | 1,042759826     | 0               |
| PKIA                                                                                           | 0,044796455 | -0,060469861 | 0,156 | 0,055 | 1         | 0,958951754   | 1,04280533      | 2,836363636     |
| ZNF678                                                                                         | 0,224763613 | -0,060471802 | 0,062 | 0,023 | 1         | 0,958950464   | 1,042806732     | 2,695652174     |
| LINC01106                                                                                      | 0,543117005 | -0,060493189 | 0     | 0,012 | 1         | 0,958936248   | 1,042822192     | 0               |
| WDR11                                                                                          | 0,003791564 | -0,06050717  | 0,188 | 0,047 | 1         | 0,958926956   | 1,042832297     | 4               |
| PRMT7                                                                                          | 0,569359326 | -0,060516615 | 0,062 | 0,039 | 1         | 0,958920678   | 1,042839124     | 1,58974359      |
| FLI1                                                                                           | 0,543117005 | -0,06054749  | 0     | 0,012 | 1         | 0,958900156   | 1,042861443     | 0               |
| ZNF367                                                                                         | 0,682170546 | -0,060605402 | 0,031 | 0,02  | 1         | 0,958861665   | 1,042903305     | 1,55            |
| EPOR                                                                                           | 0,543117005 | -0,060609931 | 0     | 0,012 | 1         | 0,958858655   | 1,042906579     | 0               |

Supplementary Table 1

| Differentially expressed genes_adjacent-skin-XL_comparing SC-Keloid vs. (SC-Myel, SC-Nonmyel) |             |              |       |       |            |               |                 |                 |
|-----------------------------------------------------------------------------------------------|-------------|--------------|-------|-------|------------|---------------|-----------------|-----------------|
| gene                                                                                          | p_val       | avg_log2FC   | pct.1 | pct.2 | p_val_adj  | Foldchange_UP | Foldchange_DOWN | Ratio_pct1_pct2 |
| OLFM2                                                                                         | 0,682170546 | -0,060635804 | 0,031 | 0,02  | 1          | 0,958841459   | 1,042925283     | 1,55            |
| NUDT7                                                                                         | 0,682170546 | -0,060636435 | 0,031 | 0,02  | 1          | 0,95884104    | 1,042925739     | 1,55            |
| RCOR1                                                                                         | 0,06222129  | -0,060669843 | 0,156 | 0,059 | 1          | 0,958818837   | 1,04294989      | 2,644067797     |
| INPP5J                                                                                        | 0,226351275 | -0,060675525 | 0,031 | 0,008 | 1          | 0,95881506    | 1,042953997     | 3,875           |
| CPSF6                                                                                         | 0,004374246 | -0,060678646 | 0,375 | 0,137 | 1          | 0,958812986   | 1,042956253     | 2,737226277     |
| NUP210                                                                                        | 0,480650464 | -0,060694324 | 0     | 0,016 | 1          | 0,958802567   | 1,042967588     | 0               |
| PYCR2                                                                                         | 0,000246494 | -0,060708458 | 0,406 | 0,117 | 1          | 0,958793173   | 1,042977806     | 3,47008547      |
| CHKB-DT                                                                                       | 0,682170546 | -0,060721269 | 0,031 | 0,02  | 1          | 0,958784659   | 1,042987067     | 1,55            |
| LBR                                                                                           | 0,00187651  | -0,060721651 | 0,219 | 0,055 | 1          | 0,958784405   | 1,042987344     | 3,981818182     |
| TRAIP                                                                                         | 0,087959196 | -0,060734486 | 0,062 | 0,016 | 1          | 0,958775876   | 1,042996622     | 3,875           |
| ZDHHC18                                                                                       | 0,682170546 | -0,060806812 | 0,031 | 0,02  | 1          | 0,958727811   | 1,043048912     | 1,55            |
| CHM                                                                                           | 0,045949521 | -0,06098374  | 0,219 | 0,09  | 1          | 0,958610243   | 1,043176836     | 2,433333333     |
| TIMMDC1                                                                                       | 0,020837881 | -0,061022582 | 0,406 | 0,176 | 1          | 0,958584434   | 1,043204923     | 2,306818182     |
| PRRT2                                                                                         | 0,028712073 | -0,061041621 | 0,125 | 0,035 | 1          | 0,958571784   | 1,04321869      | 3,571428571     |
| CD248                                                                                         | 0,428872689 | -0,0610608   | 0     | 0,02  | 1          | 0,958559041   | 1,043232558     | 0               |
| ESRRG                                                                                         | 0,543117005 | -0,061113069 | 0     | 0,012 | 1          | 0,958524312   | 1,043270355     | 0               |
| ZNF180                                                                                        | 0,428872689 | -0,061156329 | 0     | 0,02  | 1          | 0,958495571   | 1,043301639     | 0               |
| ZNF467                                                                                        | 0,543117005 | -0,06118588  | 0     | 0,012 | 1          | 0,958475939   | 1,043323009     | 0               |
| KPNA4                                                                                         | 0,003395537 | -0,061228586 | 0,438 | 0,16  | 1          | 0,958447566   | 1,043353894     | 2,7375          |
| CYB5D1                                                                                        | 0,540537634 | -0,061284864 | 0,031 | 0,016 | 1          | 0,958410179   | 1,043394594     | 1,9375          |
| RNF10                                                                                         | 0,03126913  | -0,061298354 | 0,406 | 0,184 | 1          | 0,958401217   | 1,043404351     | 2,206521739     |
| RPA1                                                                                          | 1,51672E-05 | -0,061299968 | 0,281 | 0,051 | 0,32004324 | 0,958400145   | 1,043405518     | 5,509803922     |
| ATPAF2                                                                                        | 0,30793671  | -0,061337282 | 0,062 | 0,027 | 1          | 0,958375358   | 1,043432505     | 2,296296296     |
| BRD3                                                                                          | 0,011655001 | -0,061373034 | 0,375 | 0,148 | 1          | 0,958351608   | 1,043458363     | 2,533783784     |
| MCPH1                                                                                         | 0,299332476 | -0,061384993 | 0,094 | 0,047 | 1          | 0,958343664   | 1,043467013     | 2               |
| ALS2CL                                                                                        | 0,543117005 | -0,061440608 | 0     | 0,012 | 1          | 0,958306721   | 1,043507238     | 0               |
| H2BC9                                                                                         | 0,543117005 | -0,061451861 | 0     | 0,012 | 1          | 0,958299246   | 1,043515378     | 0               |
| DEDD                                                                                          | 0,300902654 | -0,061457487 | 0,062 | 0,027 | 1          | 0,958295509   | 1,043519447     | 2,296296296     |
| MCOLN2                                                                                        | 0,480650464 | -0,061457897 | 0     | 0,016 | 1          | 0,958295237   | 1,043519743     | 0               |
| SLAIN2                                                                                        | 0,006238542 | -0,061470674 | 0,375 | 0,141 | 1          | 0,95828675    | 1,043528985     | 2,659574468     |

Supplementary Table 1

| Differentially expressed genes_adjacent-skin-XL_comparing SC-Keloid vs. (SC-Myel, SC-Nonmyel) |             |              |       |       |           |               |                 |                 |
|-----------------------------------------------------------------------------------------------|-------------|--------------|-------|-------|-----------|---------------|-----------------|-----------------|
| gene                                                                                          | p_val       | avg_log2FC   | pct.1 | pct.2 | p_val_adj | Foldchange_UP | Foldchange_DOWN | Ratio_pct1_pct2 |
| LYPLA2                                                                                        | 0,001896716 | -0,061476578 | 0,188 | 0,043 | 1         | 0,958282829   | 1,043533256     | 4,372093023     |
| AOC3                                                                                          | 0,480650464 | -0,06148889  | 0     | 0,016 | 1         | 0,95827465    | 1,043542162     | 0               |
| KBTBD8                                                                                        | 0,543117005 | -0,061514962 | 0     | 0,012 | 1         | 0,958257333   | 1,04356102      | 0               |
| FANCM                                                                                         | 0,682170546 | -0,06163423  | 0,031 | 0,02  | 1         | 0,958178116   | 1,043647296     | 1,55            |
| RNF41                                                                                         | 0,011149113 | -0,061680605 | 0,219 | 0,07  | 1         | 0,958147317   | 1,043680844     | 3,128571429     |
| GXYLT2                                                                                        | 0,013196028 | -0,061755999 | 0,156 | 0,043 | 1         | 0,958097246   | 1,043735387     | 3,627906977     |
| TNFRSF21                                                                                      | 0,543117005 | -0,061772915 | 0     | 0,012 | 1         | 0,958086012   | 1,043747625     | 0               |
| MTCH1                                                                                         | 0,078203165 | -0,061835411 | 0,656 | 0,352 | 1         | 0,95804451    | 1,04379284      | 1,863636364     |
| SLC16A5                                                                                       | 0,543117005 | -0,061842588 | 0     | 0,012 | 1         | 0,958039744   | 1,043798033     | 0               |
| BRPF1                                                                                         | 0,097375089 | -0,061845319 | 0,094 | 0,031 | 1         | 0,95803793    | 1,043800009     | 3,032258065     |
| OXNAD1                                                                                        | 0,543117005 | -0,061857483 | 0     | 0,012 | 1         | 0,958029853   | 1,043808809     | 0               |
| PNMA1                                                                                         | 0,002052921 | -0,061882529 | 0,469 | 0,172 | 1         | 0,958013221   | 1,043826931     | 2,726744186     |
| PARVA                                                                                         | 0,000869817 | -0,061920896 | 0,5   | 0,176 | 1         | 0,957987744   | 1,04385469      | 2,840909091     |
| KCNIP2                                                                                        | 0,480650464 | -0,061931718 | 0     | 0,016 | 1         | 0,957980558   | 1,043862521     | 0               |
| SMCO3                                                                                         | 0,540537634 | -0,062047933 | 0,031 | 0,016 | 1         | 0,957903392   | 1,043946611     | 1,9375          |
| ALAD                                                                                          | 0,020165275 | -0,062075165 | 0,156 | 0,047 | 1         | 0,957885311   | 1,043966317     | 3,319148936     |
| ARSJ                                                                                          | 0,741950345 | -0,062102326 | 0,062 | 0,047 | 1         | 0,957867277   | 1,043985971     | 1,319148936     |
| LRRC45                                                                                        | 0,224763613 | -0,062142015 | 0,062 | 0,023 | 1         | 0,957840927   | 1,044014692     | 2,695652174     |
| RHOU                                                                                          | 0,480650464 | -0,06215008  | 0     | 0,016 | 1         | 0,957835572   | 1,044020529     | 0               |
| MPC2                                                                                          | 0,000223656 | -0,06220179  | 0,5   | 0,156 | 1         | 0,957801241   | 1,04405795      | 3,205128205     |
| LZTFL1                                                                                        | 0,428872689 | -0,062221724 | 0     | 0,02  | 1         | 0,957788007   | 1,044072376     | 0               |
| PPP1R14C                                                                                      | 0,480650464 | -0,06228652  | 0     | 0,016 | 1         | 0,957744991   | 1,044119269     | 0               |
| TMEM80                                                                                        | 0,026654007 | -0,062406809 | 0,25  | 0,098 | 1         | 0,957665139   | 1,04420633      | 2,551020408     |
| KCNAB2                                                                                        | 0,543117005 | -0,062407139 | 0     | 0,012 | 1         | 0,95766492    | 1,044206569     | 0               |
| KICS2                                                                                         | 0,80991663  | -0,062420694 | 0,031 | 0,023 | 1         | 0,957655922   | 1,04421638      | 1,347826087     |
| ZNF140                                                                                        | 0,682170546 | -0,062479169 | 0,031 | 0,02  | 1         | 0,957617108   | 1,044258704     | 1,55            |
| ZBTB47                                                                                        | 0,18979066  | -0,06252012  | 0,094 | 0,039 | 1         | 0,957589926   | 1,044288346     | 2,41025641      |
| CEP128                                                                                        | 0,540537634 | -0,062560479 | 0,031 | 0,016 | 1         | 0,957563138   | 1,04431756      | 1,9375          |
| PRPF8                                                                                         | 0,000425789 | -0,062580876 | 0,438 | 0,137 | 1         | 0,9575496     | 1,044332325     | 3,197080292     |
| WDCP                                                                                          | 0,543117005 | -0,062600818 | 0     | 0,012 | 1         | 0,957536364   | 1,044346761     | 0               |

Supplementary Table 1

| Differentially expressed genes_adjacent-skin-XL_comparing SC-Keloid vs. (SC-Myel, SC-Nonmyel) |             |              |       |       |           |               |                 |                 |
|-----------------------------------------------------------------------------------------------|-------------|--------------|-------|-------|-----------|---------------|-----------------|-----------------|
| gene                                                                                          | p_val       | avg_log2FC   | pct.1 | pct.2 | p_val_adj | Foldchange_UP | Foldchange_DOWN | Ratio_pct1_pct2 |
| LMO7                                                                                          | 0,275136254 | -0,062684332 | 0,125 | 0,066 | 1         | 0,957480937   | 1,044407217     | 1,893939394     |
| HOMER2                                                                                        | 0,682170546 | -0,062709449 | 0,031 | 0,02  | 1         | 0,957464267   | 1,0444254       | 1,55            |
| CTNBL1                                                                                        | 0,007318479 | -0,062824985 | 0,219 | 0,066 | 1         | 0,957387593   | 1,044509045     | 3,318181818     |
| SRBD1                                                                                         | 0,30757457  | -0,062885089 | 0,094 | 0,047 | 1         | 0,957347708   | 1,04455256      | 2               |
| POLR2F                                                                                        | 0,054996801 | -0,062901256 | 0,688 | 0,359 | 1         | 0,95733698    | 1,044564266     | 1,91643454      |
| AJAP1                                                                                         | 0,480650464 | -0,062904389 | 0     | 0,016 | 1         | 0,957334901   | 1,044566534     | 0               |
| IQSEC2                                                                                        | 0,037506898 | -0,062954001 | 0,094 | 0,023 | 1         | 0,957301981   | 1,044602456     | 4,086956522     |
| CLASP1                                                                                        | 0,000121681 | -0,062975429 | 0,281 | 0,062 | 1         | 0,957287762   | 1,044617972     | 4,532258065     |
| MTMR11                                                                                        | 0,226351275 | -0,063020166 | 0,031 | 0,008 | 1         | 0,957258077   | 1,044650365     | 3,875           |
| ZFP28                                                                                         | 0,428872689 | -0,06303538  | 0     | 0,02  | 1         | 0,957247983   | 1,044661381     | 0               |
| TRIM47                                                                                        | 0,001391765 | -0,063076521 | 0,344 | 0,105 | 1         | 0,957220686   | 1,044691172     | 3,276190476     |
| SMIM1                                                                                         | 0,480650464 | -0,063129285 | 0     | 0,016 | 1         | 0,957185678   | 1,04472938      | 0               |
| CDK3                                                                                          | 0,480650464 | -0,063140402 | 0     | 0,016 | 1         | 0,957178302   | 1,044737431     | 0               |
| TRIM36                                                                                        | 0,428872689 | -0,063142964 | 0     | 0,02  | 1         | 0,957176602   | 1,044739286     | 0               |
| ZSWIM4                                                                                        | 0,815054348 | -0,06322162  | 0,031 | 0,039 | 1         | 0,957124418   | 1,044796247     | 0,794871795     |
| SLC35E2A                                                                                      | 0,386325862 | -0,063229722 | 0,031 | 0,012 | 1         | 0,957119043   | 1,044802115     | 2,583333333     |
| CYP4F11                                                                                       | 0,480650464 | -0,063248577 | 0     | 0,016 | 1         | 0,957106534   | 1,04481577      | 0               |
| NEURL4                                                                                        | 0,480650464 | -0,063368477 | 0     | 0,016 | 1         | 0,957026994   | 1,044902606     | 0               |
| GABRQ                                                                                         | 0,480650464 | -0,063483165 | 0     | 0,016 | 1         | 0,956950917   | 1,044985675     | 0               |
| TRIM16L                                                                                       | 0,386325862 | -0,063524634 | 0,031 | 0,012 | 1         | 0,956923411   | 1,045015712     | 2,583333333     |
| WDR44                                                                                         | 0,045196862 | -0,06353117  | 0,125 | 0,039 | 1         | 0,956919076   | 1,045020447     | 3,205128205     |
| METTL15                                                                                       | 0,126128812 | -0,06364912  | 0,125 | 0,051 | 1         | 0,956840845   | 1,045105887     | 2,450980392     |
| S1PR2                                                                                         | 0,191913299 | -0,063652418 | 0,094 | 0,039 | 1         | 0,956838657   | 1,045108277     | 2,41025641      |
| MBNL3                                                                                         | 0,480650464 | -0,063660533 | 0     | 0,016 | 1         | 0,956833275   | 1,045114155     | 0               |
| UBE2H                                                                                         | 0,015370253 | -0,063676918 | 0,656 | 0,285 | 1         | 0,956822408   | 1,045126025     | 2,301754386     |
| TRIM29                                                                                        | 0,224763613 | -0,063688257 | 0,062 | 0,023 | 1         | 0,956814888   | 1,045134239     | 2,695652174     |
| PDHX                                                                                          | 0,803381388 | -0,063712066 | 0,031 | 0,023 | 1         | 0,956799098   | 1,045151487     | 1,347826087     |
| WBP4                                                                                          | 0,014231146 | -0,063720494 | 0,406 | 0,172 | 1         | 0,956793508   | 1,045157593     | 2,360465116     |
| SDCBP2-AS1                                                                                    | 0,543117005 | -0,063769136 | 0     | 0,012 | 1         | 0,956761249   | 1,045192832     | 0               |
| RBPMS-AS1                                                                                     | 0,543117005 | -0,063790685 | 0     | 0,012 | 1         | 0,956746959   | 1,045208444     | 0               |

Supplementary Table 1

| Differentially expressed genes_adjacent-skin-XL_ comparing SC-Keloid vs. (SC-Myel, SC-Nonmyel) |             |              |       |       |           |               |                 |                 |
|------------------------------------------------------------------------------------------------|-------------|--------------|-------|-------|-----------|---------------|-----------------|-----------------|
| gene                                                                                           | p_val       | avg_log2FC   | pct.1 | pct.2 | p_val_adj | Foldchange_UP | Foldchange_DOWN | Ratio_pct1_pct2 |
| METTL25B                                                                                       | 0,924392442 | -0,063795425 | 0,031 | 0,027 | 1         | 0,956743816   | 1,045211878     | 1,148148148     |
| GULP1                                                                                          | 0,043054743 | -0,063831944 | 0,625 | 0,312 | 1         | 0,956719597   | 1,045238336     | 2,003205128     |
| TMCO4                                                                                          | 0,30793671  | -0,06383515  | 0,062 | 0,027 | 1         | 0,956717471   | 1,045240659     | 2,296296296     |
| ANKRD18B                                                                                       | 0,543117005 | -0,063874763 | 0     | 0,012 | 1         | 0,956691203   | 1,045269359     | 0               |
| BACH1                                                                                          | 0,01094829  | -0,063925676 | 0,656 | 0,316 | 1         | 0,956657441   | 1,045306247     | 2,075949367     |
| SLC25A23                                                                                       | 0,098751938 | -0,063928615 | 0,094 | 0,031 | 1         | 0,956655493   | 1,045308377     | 3,032258065     |
| MSX2                                                                                           | 0,30793671  | -0,064098787 | 0,062 | 0,027 | 1         | 0,956542658   | 1,045431682     | 2,296296296     |
| PCTP                                                                                           | 0,098751938 | -0,064106563 | 0,094 | 0,031 | 1         | 0,956537502   | 1,045437317     | 3,032258065     |
| TRIM17                                                                                         | 0,480650464 | -0,064128702 | 0     | 0,016 | 1         | 0,956522823   | 1,045453361     | 0               |
| EMCN                                                                                           | 0,543117005 | -0,064132712 | 0     | 0,012 | 1         | 0,956520165   | 1,045456266     | 0               |
| TMCC3                                                                                          | 0,918113127 | -0,064248195 | 0,031 | 0,027 | 1         | 0,956443602   | 1,045539955     | 1,148148148     |
| SLC9A8                                                                                         | 0,428872689 | -0,064251441 | 0     | 0,02  | 1         | 0,95644145    | 1,045542307     | 0               |
| USP19                                                                                          | 0,898329073 | -0,064268686 | 0,031 | 0,035 | 1         | 0,956430017   | 1,045554805     | 0,885714286     |
| PAN3-AS1                                                                                       | 0,543117005 | -0,064279676 | 0     | 0,012 | 1         | 0,956422731   | 1,04556277      | 0               |
| AQP8                                                                                           | 0,543117005 | -0,064355084 | 0     | 0,012 | 1         | 0,956372741   | 1,045617422     | 0               |
| EPCAM                                                                                          | 0,480650464 | -0,064449739 | 0     | 0,016 | 1         | 0,956309996   | 1,045686026     | 0               |
| ATAD3C                                                                                         | 0,480650464 | -0,064521136 | 0     | 0,016 | 1         | 0,956262671   | 1,045737777     | 0               |
| CTSL                                                                                           | 0,008090256 | -0,064531528 | 0,5   | 0,207 | 1         | 0,956255783   | 1,04574531      | 2,415458937     |
| CDPF1                                                                                          | 0,480650464 | -0,064531622 | 0     | 0,016 | 1         | 0,95625572    | 1,045745379     | 0               |
| GPD1L                                                                                          | 0,38481627  | -0,064543738 | 0     | 0,023 | 1         | 0,95624769    | 1,045754161     | 0               |
| TCEAL9                                                                                         | 0,011189289 | -0,064559034 | 0,75  | 0,371 | 1         | 0,956237551   | 1,045765248     | 2,021563342     |
| PIGZ                                                                                           | 0,480650464 | -0,064574906 | 0     | 0,016 | 1         | 0,956227031   | 1,045776754     | 0               |
| TMEM131L                                                                                       | 0,682170546 | -0,064628821 | 0,031 | 0,02  | 1         | 0,956191297   | 1,045815836     | 1,55            |
| TECPR1                                                                                         | 0,020764757 | -0,064630207 | 0,156 | 0,047 | 1         | 0,956190378   | 1,04581684      | 3,319148936     |
| DUSP2                                                                                          | 0,985101745 | -0,064650106 | 0,031 | 0,031 | 1         | 0,956177189   | 1,045831266     | 1               |
| FAM102B                                                                                        | 0,304406192 | -0,064665486 | 0,062 | 0,027 | 1         | 0,956166996   | 1,045842415     | 2,296296296     |
| ZMYND19                                                                                        | 0,224763613 | -0,064690974 | 0,062 | 0,023 | 1         | 0,956150103   | 1,045860892     | 2,695652174     |
| DZANK1                                                                                         | 0,543117005 | -0,064736726 | 0     | 0,012 | 1         | 0,956119782   | 1,04589406      | 0               |
| SEC16B                                                                                         | 0,480650464 | -0,064777508 | 0     | 0,016 | 1         | 0,956092755   | 1,045923625     | 0               |
| GRB2                                                                                           | 0,001068223 | -0,065015005 | 0,469 | 0,16  | 1         | 0,955935375   | 1,04609582      | 2,93125         |

Supplementary Table 1

| Differentially expressed genes_adjacent-skin-XL_comparing SC-Keloid vs. (SC-Myel, SC-Nonmyel) |             |              |       |       |            |               |                 |                 |
|-----------------------------------------------------------------------------------------------|-------------|--------------|-------|-------|------------|---------------|-----------------|-----------------|
| gene                                                                                          | p_val       | avg_log2FC   | pct.1 | pct.2 | p_val_adj  | Foldchange_UP | Foldchange_DOWN | Ratio_pct1_pct2 |
| CAPNS2                                                                                        | 0,543117005 | -0,065036815 | 0     | 0,012 | 1          | 0,955920924   | 1,046111635     | 0               |
| RFXAP                                                                                         | 0,063925678 | -0,065037166 | 0,094 | 0,027 | 1          | 0,955920692   | 1,046111889     | 3,481481481     |
| GK                                                                                            | 0,020764757 | -0,065044232 | 0,156 | 0,047 | 1          | 0,95591601    | 1,046117012     | 3,319148936     |
| PLD1                                                                                          | 0,480650464 | -0,065085564 | 0     | 0,016 | 1          | 0,955888624   | 1,046146983     | 0               |
| MGA                                                                                           | 0,007871757 | -0,065092976 | 0,156 | 0,039 | 1          | 0,955883713   | 1,046152358     | 4               |
| TTC7B                                                                                         | 0,097375089 | -0,065107657 | 0,094 | 0,031 | 1          | 0,955873985   | 1,046163004     | 3,032258065     |
| HEPH                                                                                          | 0,428970186 | -0,065232661 | 0,094 | 0,055 | 1          | 0,955791166   | 1,046253654     | 1,709090909     |
| THOC5                                                                                         | 0,016858455 | -0,06523456  | 0,125 | 0,031 | 1          | 0,955789908   | 1,046255031     | 4,032258065     |
| NCAPD2                                                                                        | 0,682170546 | -0,065259784 | 0,031 | 0,02  | 1          | 0,955773197   | 1,046273324     | 1,55            |
| APOBEC3G                                                                                      | 1,66267E-05 | -0,065298491 | 0,344 | 0,074 | 0,35084016 | 0,955747554   | 1,046301396     | 4,648648649     |
| PXMP2                                                                                         | 0,001637922 | -0,065302117 | 0,219 | 0,055 | 1          | 0,955745153   | 1,046304025     | 3,981818182     |
| ZBED5-AS1                                                                                     | 0,480650464 | -0,065418431 | 0     | 0,016 | 1          | 0,955668101   | 1,046388384     | 0               |
| BTBD9                                                                                         | 0,924392442 | -0,065502444 | 0,031 | 0,027 | 1          | 0,955612451   | 1,04644932      | 1,148148148     |
| THBS3                                                                                         | 0,030577237 | -0,065508775 | 0,156 | 0,051 | 1          | 0,955608257   | 1,046453913     | 3,058823529     |
| ANAPC13                                                                                       | 0,020683123 | -0,065595489 | 0,281 | 0,109 | 1          | 0,955550821   | 1,046516813     | 2,577981651     |
| GTPBP3                                                                                        | 0,004180266 | -0,065600809 | 0,125 | 0,023 | 1          | 0,955547298   | 1,046520671     | 5,434782609     |
| CHTF18                                                                                        | 0,008956837 | -0,065619683 | 0,125 | 0,027 | 1          | 0,955534797   | 1,046534362     | 4,62962963      |
| TNFSF10                                                                                       | 0,540537634 | -0,065622376 | 0,031 | 0,016 | 1          | 0,955533013   | 1,046536317     | 1,9375          |
| ZNF696                                                                                        | 0,543117005 | -0,065725352 | 0     | 0,012 | 1          | 0,955464813   | 1,046611018     | 0               |
| TCFL5                                                                                         | 0,008956837 | -0,065747368 | 0,125 | 0,027 | 1          | 0,955450232   | 1,04662699      | 4,62962963      |
| SLC43A1                                                                                       | 0,543117005 | -0,065759341 | 0     | 0,012 | 1          | 0,955442303   | 1,046635676     | 0               |
| TMEM33                                                                                        | 0,002391142 | -0,065777973 | 0,312 | 0,098 | 1          | 0,955429963   | 1,046649193     | 3,183673469     |
| DYNLT2                                                                                        | 0,540537634 | -0,065803702 | 0,031 | 0,016 | 1          | 0,955412924   | 1,046667859     | 1,9375          |
| TAOK3                                                                                         | 0,109417123 | -0,065837403 | 0,188 | 0,086 | 1          | 0,955390606   | 1,04669231      | 2,186046512     |
| EGFR                                                                                          | 0,480650464 | -0,065902967 | 0     | 0,016 | 1          | 0,955347189   | 1,046739878     | 0               |
| PEAR1                                                                                         | 0,543117005 | -0,065987731 | 0     | 0,012 | 1          | 0,95529106    | 1,04680138      | 0               |
| LMOD3                                                                                         | 0,543117005 | -0,066013761 | 0     | 0,012 | 1          | 0,955273824   | 1,046820267     | 0               |
| UEVLD                                                                                         | 0,80991663  | -0,066016284 | 0,031 | 0,023 | 1          | 0,955272154   | 1,046822098     | 1,347826087     |
| SEC24C                                                                                        | 0,236932254 | -0,066045876 | 0,125 | 0,062 | 1          | 0,95525256    | 1,04684357      | 2,016129032     |
| SPIN2B                                                                                        | 0,388432899 | -0,066065875 | 0,062 | 0,031 | 1          | 0,955239318   | 1,046858082     | 2               |

Supplementary Table 1

| Differentially expressed genes_adjacent-skin-XL_ comparing SC-Keloid vs. (SC-Myel, SC-Nonmyel) |             |              |       |       |             |               |                 |                 |
|------------------------------------------------------------------------------------------------|-------------|--------------|-------|-------|-------------|---------------|-----------------|-----------------|
| gene                                                                                           | p_val       | avg_log2FC   | pct.1 | pct.2 | p_val_adj   | Foldchange_UP | Foldchange_DOWN | Ratio_pct1_pct2 |
| SLC25A35                                                                                       | 0,543117005 | -0,066105741 | 0     | 0,012 | 1           | 0,955212923   | 1,046887009     | 0               |
| CASTOR3                                                                                        | 0,540537634 | -0,066122197 | 0,031 | 0,016 | 1           | 0,955202027   | 1,046898951     | 1,9375          |
| RNF146                                                                                         | 0,045240417 | -0,06614559  | 0,438 | 0,207 | 1           | 0,955186539   | 1,046915926     | 2,115942029     |
| APOLD1                                                                                         | 0,013407295 | -0,066166518 | 0,156 | 0,043 | 1           | 0,955172683   | 1,046931113     | 3,627906977     |
| LAMC2                                                                                          | 0,480650464 | -0,066217866 | 0     | 0,016 | 1           | 0,955138687   | 1,046968376     | 0               |
| ZDHHC16                                                                                        | 0,682170546 | -0,066219841 | 0,031 | 0,02  | 1           | 0,955137379   | 1,04696981      | 1,55            |
| INAFM2                                                                                         | 0,767893042 | -0,066365627 | 0,125 | 0,102 | 1           | 0,955040866   | 1,047075612     | 1,225490196     |
| WDR76                                                                                          | 0,543117005 | -0,066368852 | 0     | 0,012 | 1           | 0,955038731   | 1,047077953     | 0               |
| PPARA                                                                                          | 0,80991663  | -0,066396438 | 0,031 | 0,023 | 1           | 0,95502047    | 1,047097975     | 1,347826087     |
| DFFB                                                                                           | 0,543117005 | -0,066475063 | 0     | 0,012 | 1           | 0,954968424   | 1,047155042     | 0               |
| SNAP47                                                                                         | 0,191913299 | -0,066476144 | 0,094 | 0,039 | 1           | 0,954967709   | 1,047155826     | 2,41025641      |
| ZC3H10                                                                                         | 0,300902654 | -0,06649709  | 0,062 | 0,027 | 1           | 0,954953844   | 1,04717103      | 2,296296296     |
| ATAD3B                                                                                         | 0,01071611  | -0,066539088 | 0,219 | 0,07  | 1           | 0,954926045   | 1,047201514     | 3,128571429     |
| CFAP70                                                                                         | 0,480650464 | -0,066568918 | 0     | 0,016 | 1           | 0,9549063     | 1,047223167     | 0               |
| CCDC15                                                                                         | 0,480650464 | -0,066584233 | 0     | 0,016 | 1           | 0,954896164   | 1,047234283     | 0               |
| FDX1                                                                                           | 0,000973816 | -0,066633475 | 0,469 | 0,16  | 1           | 0,954863572   | 1,047270028     | 2,93125         |
| LAMB4                                                                                          | 0,543117005 | -0,066678733 | 0     | 0,012 | 1           | 0,954833618   | 1,047302882     | 0               |
| ALG2                                                                                           | 0,021379715 | -0,066763325 | 0,156 | 0,047 | 1           | 0,954777633   | 1,047364292     | 3,319148936     |
| GEMIN5                                                                                         | 0,041848356 | -0,066763923 | 0,062 | 0,012 | 1           | 0,954777238   | 1,047364726     | 5,166666667     |
| CDIN1                                                                                          | 0,543117005 | -0,066977348 | 0     | 0,012 | 1           | 0,954636003   | 1,04751968      | 0               |
| SINHCAF                                                                                        | 0,300902654 | -0,066981382 | 0,062 | 0,027 | 1           | 0,954633334   | 1,047522609     | 2,296296296     |
| SPAG16                                                                                         | 0,005195348 | -0,06698988  | 0,219 | 0,062 | 1           | 0,954627711   | 1,047528779     | 3,532258065     |
| SLC7A6                                                                                         | 0,30793671  | -0,067008924 | 0,062 | 0,027 | 1           | 0,954615109   | 1,047542607     | 2,296296296     |
| BBS9                                                                                           | 1,49244E-05 | -0,067037365 | 0,219 | 0,031 | 0,314919708 | 0,954596291   | 1,047563258     | 7,064516129     |
| SETD9                                                                                          | 0,150155729 | -0,067041541 | 0,062 | 0,02  | 1           | 0,954593527   | 1,04756629      | 3,1             |
| CSTF2                                                                                          | 0,386325862 | -0,067096438 | 0,031 | 0,012 | 1           | 0,954557204   | 1,047606152     | 2,583333333     |
| DNAH10OS                                                                                       | 0,480650464 | -0,067123258 | 0     | 0,016 | 1           | 0,954539459   | 1,047625628     | 0               |
| MUC20                                                                                          | 0,543117005 | -0,067147725 | 0     | 0,012 | 1           | 0,95452327    | 1,047643395     | 0               |
| KLK7                                                                                           | 0,543117005 | -0,067179926 | 0     | 0,012 | 1           | 0,954501966   | 1,047666779     | 0               |
| TBX19                                                                                          | 0,428872689 | -0,06731182  | 0     | 0,02  | 1           | 0,954414707   | 1,047762563     | 0               |

Supplementary Table 1

| Differentially expressed genes_adjacent-skin-XL_comparing SC-Keloid vs. (SC-Myel, SC-Nonmyel) |             |              |       |       |           |               |                 |                 |
|-----------------------------------------------------------------------------------------------|-------------|--------------|-------|-------|-----------|---------------|-----------------|-----------------|
| gene                                                                                          | p_val       | avg_log2FC   | pct.1 | pct.2 | p_val_adj | Foldchange_UP | Foldchange_DOWN | Ratio_pct1_pct2 |
| CFAP410                                                                                       | 0,009052775 | -0,067355171 | 0,312 | 0,113 | 1         | 0,954386029   | 1,047794047     | 2,761061947     |
| MAMLD1                                                                                        | 0,063925678 | -0,067368052 | 0,094 | 0,027 | 1         | 0,954377508   | 1,047803402     | 3,481481481     |
| ZBTB22                                                                                        | 0,004267025 | -0,067375392 | 0,156 | 0,035 | 1         | 0,954372652   | 1,047808733     | 4,457142857     |
| TTC21A                                                                                        | 0,543117005 | -0,067408874 | 0     | 0,012 | 1         | 0,954350503   | 1,047833051     | 0               |
| LRR3                                                                                          | 0,540537634 | -0,067458098 | 0,031 | 0,016 | 1         | 0,954317942   | 1,047868804     | 1,9375          |
| JHY                                                                                           | 0,001642148 | -0,067507305 | 0,125 | 0,02  | 1         | 0,954285393   | 1,047904544     | 6,25            |
| CCL14                                                                                         | 0,985101745 | -0,067575881 | 0,031 | 0,031 | 1         | 0,954240034   | 1,047954356     | 1               |
| PRDX3                                                                                         | 0,021863554 | -0,067605223 | 0,344 | 0,145 | 1         | 0,954220626   | 1,04797567      | 2,372413793     |
| PHF11                                                                                         | 0,065872266 | -0,067665212 | 0,219 | 0,094 | 1         | 0,95418095    | 1,048019247     | 2,329787234     |
| UAP1L1                                                                                        | 0,045196862 | -0,067722553 | 0,125 | 0,039 | 1         | 0,954143026   | 1,048060902     | 3,205128205     |
| MAP2K4                                                                                        | 0,031413167 | -0,067772147 | 0,156 | 0,051 | 1         | 0,954110226   | 1,048096931     | 3,058823529     |
| GSPT1                                                                                         | 0,009644385 | -0,067835617 | 0,344 | 0,133 | 1         | 0,954068252   | 1,048143042     | 2,586466165     |
| PNMA8B                                                                                        | 0,386325862 | -0,067850066 | 0,031 | 0,012 | 1         | 0,954058697   | 1,048153539     | 2,583333333     |
| SCYL3                                                                                         | 0,803381388 | -0,067868029 | 0,031 | 0,023 | 1         | 0,954046818   | 1,04816659      | 1,347826087     |
| CDKL3                                                                                         | 0,18979066  | -0,067884947 | 0,094 | 0,039 | 1         | 0,954035631   | 1,048178881     | 2,41025641      |
| CCDC146                                                                                       | 0,480650464 | -0,06791121  | 0     | 0,016 | 1         | 0,954018263   | 1,048197963     | 0               |
| FAM24B                                                                                        | 0,226351275 | -0,067917194 | 0,031 | 0,008 | 1         | 0,954014306   | 1,04820231      | 3,875           |
| MGRN1                                                                                         | 0,002818951 | -0,068154739 | 0,219 | 0,059 | 1         | 0,953857237   | 1,048374915     | 3,711864407     |
| KCNK7                                                                                         | 0,543117005 | -0,068156965 | 0     | 0,012 | 1         | 0,953855765   | 1,048376533     | 0               |
| YWHAG                                                                                         | 0,012821205 | -0,06818637  | 0,5   | 0,219 | 1         | 0,953836324   | 1,048397901     | 2,283105023     |
| SHC3                                                                                          | 0,543117005 | -0,068186677 | 0     | 0,012 | 1         | 0,953836121   | 1,048398124     | 0               |
| ZCWPW2                                                                                        | 0,150155729 | -0,068199107 | 0,062 | 0,02  | 1         | 0,953827903   | 1,048407157     | 3,1             |
| TTC5                                                                                          | 0,097375089 | -0,068343067 | 0,094 | 0,031 | 1         | 0,95373273    | 1,048511777     | 3,032258065     |
| SPHK2                                                                                         | 0,089393291 | -0,068439757 | 0,125 | 0,047 | 1         | 0,953668812   | 1,048582052     | 2,659574468     |
| ZFTA                                                                                          | 0,918113127 | -0,06851172  | 0,031 | 0,027 | 1         | 0,953621243   | 1,048634358     | 1,148148148     |
| ESYT3                                                                                         | 0,082317662 | -0,068540426 | 0,031 | 0,004 | 1         | 0,953602269   | 1,048655223     | 7,75            |
| HIF1AN                                                                                        | 0,150155729 | -0,068548882 | 0,062 | 0,02  | 1         | 0,95359668    | 1,048661369     | 3,1             |
| ZNF891                                                                                        | 0,150155729 | -0,068568151 | 0,062 | 0,02  | 1         | 0,953583944   | 1,048675375     | 3,1             |
| LMBR1                                                                                         | 0,682170546 | -0,068611001 | 0,031 | 0,02  | 1         | 0,953555621   | 1,048706523     | 1,55            |
| ERP44                                                                                         | 0,012057574 | -0,068624756 | 0,438 | 0,18  | 1         | 0,95354653    | 1,048716522     | 2,433333333     |



Supplementary Table 1

| Differentially expressed genes_adjacent-skin-XL_comparing SC-Keloid vs. (SC-Myel, SC-Nonmyel) |             |              |       |       |           |               |                 |                 |
|-----------------------------------------------------------------------------------------------|-------------|--------------|-------|-------|-----------|---------------|-----------------|-----------------|
| gene                                                                                          | p_val       | avg_log2FC   | pct.1 | pct.2 | p_val_adj | Foldchange_UP | Foldchange_DOWN | Ratio_pct1_pct2 |
| FLVCR2                                                                                        | 0,543117005 | -0,068652298 | 0     | 0,012 | 1         | 0,953528326   | 1,048736542     | 0               |
| NFYA                                                                                          | 0,480650464 | -0,068681748 | 0     | 0,016 | 1         | 0,953508862   | 1,04875795      | 0               |
| STK4                                                                                          | 0,002865711 | -0,068715045 | 0,281 | 0,086 | 1         | 0,953486855   | 1,048782156     | 3,26744186      |
| SGCB                                                                                          | 0,007191855 | -0,068736084 | 0,688 | 0,289 | 1         | 0,953472951   | 1,048797451     | 2,380622837     |
| CEP76                                                                                         | 0,540537634 | -0,068797544 | 0,031 | 0,016 | 1         | 0,953432333   | 1,048842131     | 1,9375          |
| GABBR1                                                                                        | 0,901189191 | -0,068908627 | 0,125 | 0,113 | 1         | 0,953358924   | 1,048922892     | 1,10619469      |
| CEP83                                                                                         | 0,224763613 | -0,068928379 | 0,062 | 0,023 | 1         | 0,953345872   | 1,048937253     | 2,695652174     |
| C1orf174                                                                                      | 0,246047587 | -0,068964275 | 0,094 | 0,043 | 1         | 0,953322152   | 1,048963352     | 2,186046512     |
| EPOP                                                                                          | 0,543117005 | -0,068993827 | 0     | 0,012 | 1         | 0,953302624   | 1,048984839     | 0               |
| EHMT2                                                                                         | 0,47210696  | -0,069094438 | 0,094 | 0,059 | 1         | 0,953236145   | 1,049057996     | 1,593220339     |
| ANAPC7                                                                                        | 0,01489812  | -0,069102724 | 0,188 | 0,059 | 1         | 0,95323067    | 1,049064021     | 3,186440678     |
| HYLS1                                                                                         | 0,533973819 | -0,0691119   | 0,031 | 0,016 | 1         | 0,953224607   | 1,049070694     | 1,9375          |
| ANXA2R                                                                                        | 0,540537634 | -0,069170149 | 0,031 | 0,016 | 1         | 0,953186121   | 1,049113051     | 1,9375          |
| BLVRA                                                                                         | 0,008594651 | -0,069198112 | 0,25  | 0,082 | 1         | 0,953167646   | 1,049133386     | 3,048780488     |
| TMEM268                                                                                       | 0,150155729 | -0,069205447 | 0,062 | 0,02  | 1         | 0,953162801   | 1,049138719     | 3,1             |
| AQP1                                                                                          | 0,016795238 | -0,06923015  | 0,375 | 0,168 | 1         | 0,95314648    | 1,049156684     | 2,232142857     |
| LY6D                                                                                          | 0,560566066 | -0,069271897 | 0,062 | 0,039 | 1         | 0,953118899   | 1,049187044     | 1,58974359      |
| ZNF579                                                                                        | 0,540537634 | -0,069309264 | 0,031 | 0,016 | 1         | 0,953094213   | 1,049214219     | 1,9375          |
| BHLHE40-AS1                                                                                   | 0,543117005 | -0,069328168 | 0     | 0,012 | 1         | 0,953081724   | 1,049227967     | 0               |
| PYCARD                                                                                        | 0,150155729 | -0,069338944 | 0,062 | 0,02  | 1         | 0,953074606   | 1,049235804     | 3,1             |
| RBM19                                                                                         | 0,091552625 | -0,069359416 | 0,125 | 0,047 | 1         | 0,953061081   | 1,049250693     | 2,659574468     |
| KPTN                                                                                          | 0,019236133 | -0,069478034 | 0,094 | 0,02  | 1         | 0,952982724   | 1,049336965     | 4,7             |
| AGAP4                                                                                         | 0,682170546 | -0,069483624 | 0,031 | 0,02  | 1         | 0,952979031   | 1,049341032     | 1,55            |
| NKIRAS2                                                                                       | 0,080880928 | -0,069581404 | 0,156 | 0,062 | 1         | 0,952914445   | 1,049412154     | 2,516129032     |
| TVP23B                                                                                        | 0,001783529 | -0,069621514 | 0,219 | 0,055 | 1         | 0,952887952   | 1,04944133      | 3,981818182     |
| MPP4                                                                                          | 0,082317662 | -0,069633797 | 0,031 | 0,004 | 1         | 0,95287984    | 1,049450265     | 7,75            |
| YJU2                                                                                          | 0,224763613 | -0,069650439 | 0,062 | 0,023 | 1         | 0,952868848   | 1,049462371     | 2,695652174     |
| ADCY2                                                                                         | 0,543117005 | -0,069664467 | 0     | 0,012 | 1         | 0,952859583   | 1,049472575     | 0               |
| PEA15                                                                                         | 0,010386793 | -0,069671865 | 0,625 | 0,289 | 1         | 0,952854696   | 1,049477957     | 2,162629758     |
| ERAL1                                                                                         | 0,00208125  | -0,069679259 | 0,188 | 0,043 | 1         | 0,952849813   | 1,049483336     | 4,372093023     |

Supplementary Table 1

| Differentially expressed genes_adjacent-skin-XL_comparing SC-Keloid vs. (SC-Myel, SC-Nonmyel) |             |              |       |       |           |               |                 |                 |
|-----------------------------------------------------------------------------------------------|-------------|--------------|-------|-------|-----------|---------------|-----------------|-----------------|
| gene                                                                                          | p_val       | avg_log2FC   | pct.1 | pct.2 | p_val_adj | Foldchange_UP | Foldchange_DOWN | Ratio_pct1_pct2 |
| PRPS1                                                                                         | 0,24262347  | -0,069725201 | 0,156 | 0,082 | 1         | 0,95281947    | 1,049516757     | 1,902439024     |
| TMEM144                                                                                       | 0,480650464 | -0,069799145 | 0     | 0,016 | 1         | 0,952770635   | 1,04957055      | 0               |
| GLI1                                                                                          | 0,428872689 | -0,069813825 | 0     | 0,02  | 1         | 0,952760941   | 1,04958123      | 0               |
| MAST4                                                                                         | 0,041848356 | -0,069821612 | 0,062 | 0,012 | 1         | 0,952755798   | 1,049586895     | 5,166666667     |
| OPN3                                                                                          | 0,012987709 | -0,069919728 | 0,156 | 0,043 | 1         | 0,952691005   | 1,049658279     | 3,627906977     |
| CCDC107                                                                                       | 0,075619507 | -0,069961883 | 0,375 | 0,184 | 1         | 0,952663168   | 1,04968895      | 2,038043478     |
| MYH7B                                                                                         | 0,543117005 | -0,069987451 | 0     | 0,012 | 1         | 0,952646285   | 1,049707553     | 0               |
| BOLA2                                                                                         | 0,010903421 | -0,070034265 | 0,25  | 0,086 | 1         | 0,952615372   | 1,049741616     | 2,906976744     |
| C16orf46                                                                                      | 0,087959196 | -0,070122447 | 0,062 | 0,016 | 1         | 0,952557147   | 1,049805781     | 3,875           |
| ROPN1                                                                                         | 0,38481627  | -0,070167027 | 0     | 0,023 | 1         | 0,952527713   | 1,049838221     | 0               |
| HS3ST2                                                                                        | 0,226351275 | -0,070168561 | 0,031 | 0,008 | 1         | 0,952526701   | 1,049839337     | 3,875           |
| LSP1                                                                                          | 0,480650464 | -0,070170489 | 0     | 0,016 | 1         | 0,952525428   | 1,04984074      | 0               |
| CDR1                                                                                          | 0,543117005 | -0,070243288 | 0     | 0,012 | 1         | 0,952477364   | 1,049893717     | 0               |
| SLC25A42                                                                                      | 0,80991663  | -0,070258562 | 0,031 | 0,023 | 1         | 0,95246728    | 1,049904832     | 1,347826087     |
| ZNF853                                                                                        | 0,191913299 | -0,070268506 | 0,094 | 0,039 | 1         | 0,952460715   | 1,049912069     | 2,41025641      |
| GTF2E1                                                                                        | 0,540537634 | -0,070325016 | 0,031 | 0,016 | 1         | 0,952423408   | 1,049953195     | 1,9375          |
| SLC7A8                                                                                        | 0,543117005 | -0,070329671 | 0     | 0,012 | 1         | 0,952420335   | 1,049956583     | 0               |
| LRRC17                                                                                        | 0,543117005 | -0,070335699 | 0     | 0,012 | 1         | 0,952416356   | 1,049960969     | 0               |
| EMSY                                                                                          | 0,055416701 | -0,070339548 | 0,188 | 0,074 | 1         | 0,952413815   | 1,04996377      | 2,540540541     |
| USP27X                                                                                        | 0,682170546 | -0,070404602 | 0,031 | 0,02  | 1         | 0,952370869   | 1,050011117     | 1,55            |
| PHYHIP                                                                                        | 0,540537634 | -0,070437547 | 0,031 | 0,016 | 1         | 0,952349122   | 1,050035094     | 1,9375          |
| FAHD2A                                                                                        | 0,286270979 | -0,070457742 | 0,125 | 0,066 | 1         | 0,95233579    | 1,050049793     | 1,893939394     |
| DTX4                                                                                          | 0,480650464 | -0,070559408 | 0     | 0,016 | 1         | 0,952268682   | 1,050123792     | 0               |
| BOLA2B                                                                                        | 0,224763613 | -0,070575431 | 0,062 | 0,023 | 1         | 0,952258106   | 1,050135456     | 2,695652174     |
| ZNF77                                                                                         | 0,041848356 | -0,070633056 | 0,062 | 0,012 | 1         | 0,952220071   | 1,050177401     | 5,166666667     |
| MOB1A                                                                                         | 0,000171537 | -0,07064838  | 0,562 | 0,18  | 1         | 0,952209957   | 1,050188556     | 3,122222222     |
| PPP1R1B                                                                                       | 0,480650464 | -0,070713528 | 0     | 0,016 | 1         | 0,952166959   | 1,050235981     | 0               |
| VPS26A                                                                                        | 0,000636209 | -0,070730666 | 0,562 | 0,195 | 1         | 0,952155648   | 1,050248456     | 2,882051282     |
| SCEL                                                                                          | 0,226351275 | -0,070854485 | 0,031 | 0,008 | 1         | 0,952073933   | 1,050338598     | 3,875           |
| SPEG                                                                                          | 0,480650464 | -0,070869017 | 0     | 0,016 | 1         | 0,952064343   | 1,050349178     | 0               |

Supplementary Table 1

| Differentially expressed genes_adjacent-skin-XL_ comparing SC-Keloid vs. (SC-Myel, SC-Nonmyel) |             |              |       |       |           |               |                 |                 |
|------------------------------------------------------------------------------------------------|-------------|--------------|-------|-------|-----------|---------------|-----------------|-----------------|
| gene                                                                                           | p_val       | avg_log2FC   | pct.1 | pct.2 | p_val_adj | Foldchange_UP | Foldchange_DOWN | Ratio_pct1_pct2 |
| IQSEC1                                                                                         | 0,089411268 | -0,070904326 | 0,188 | 0,082 | 1         | 0,952041042   | 1,050374885     | 2,292682927     |
| PIGQ                                                                                           | 0,00187651  | -0,070939018 | 0,219 | 0,055 | 1         | 0,952018149   | 1,050400143     | 3,981818182     |
| TBC1D15                                                                                        | 0,015301152 | -0,070945832 | 0,312 | 0,121 | 1         | 0,952013653   | 1,050405104     | 2,578512397     |
| HMGXB4                                                                                         | 0,015203835 | -0,070958005 | 0,219 | 0,074 | 1         | 0,95200562    | 1,050413967     | 2,959459459     |
| GJC2                                                                                           | 0,310355006 | -0,070982824 | 0,094 | 0,047 | 1         | 0,951989243   | 1,050432038     | 2               |
| TOP3A                                                                                          | 0,150155729 | -0,071067656 | 0,062 | 0,02  | 1         | 0,951933266   | 1,050493807     | 3,1             |
| HPR                                                                                            | 0,543117005 | -0,071157961 | 0     | 0,012 | 1         | 0,951873682   | 1,050559564     | 0               |
| ZNF614                                                                                         | 0,682170546 | -0,071161073 | 0,031 | 0,02  | 1         | 0,951871629   | 1,05056183      | 1,55            |
| ZBTB25                                                                                         | 0,24851603  | -0,071211274 | 0,094 | 0,043 | 1         | 0,951838507   | 1,050598387     | 2,186046512     |
| CLPX                                                                                           | 0,021448302 | -0,071214083 | 0,188 | 0,062 | 1         | 0,951836654   | 1,050600432     | 3,032258065     |
| FAM227B                                                                                        | 0,30793671  | -0,071290421 | 0,062 | 0,027 | 1         | 0,95178629    | 1,050656025     | 2,296296296     |
| DDX59                                                                                          | 0,044552052 | -0,071342942 | 0,125 | 0,039 | 1         | 0,951751642   | 1,050694274     | 3,205128205     |
| NSMCE4A                                                                                        | 0,001308481 | -0,071349005 | 0,281 | 0,078 | 1         | 0,951747642   | 1,05069869      | 3,602564103     |
| GDF10                                                                                          | 0,543117005 | -0,071370064 | 0     | 0,012 | 1         | 0,951733749   | 1,050714027     | 0               |
| CERS5                                                                                          | 0,371729093 | -0,071384392 | 0,125 | 0,074 | 1         | 0,951724297   | 1,050724462     | 1,689189189     |
| KLHL12                                                                                         | 0,386325862 | -0,07143713  | 0,031 | 0,012 | 1         | 0,951689508   | 1,050762872     | 2,583333333     |
| ZNF345                                                                                         | 0,540537634 | -0,071551771 | 0,031 | 0,016 | 1         | 0,951613886   | 1,050846372     | 1,9375          |
| PKDCC                                                                                          | 0,191913299 | -0,071584892 | 0,094 | 0,039 | 1         | 0,95159204    | 1,050870497     | 2,41025641      |
| DDAH1                                                                                          | 0,682170546 | -0,071621604 | 0,031 | 0,02  | 1         | 0,951567824   | 1,05089724      | 1,55            |
| SELENBP1                                                                                       | 0,480650464 | -0,071653565 | 0     | 0,016 | 1         | 0,951546744   | 1,050920521     | 0               |
| ZNF808                                                                                         | 0,224763613 | -0,071857075 | 0,062 | 0,023 | 1         | 0,951412527   | 1,051068776     | 2,695652174     |
| PUS1                                                                                           | 0,487085433 | -0,071893633 | 0,062 | 0,035 | 1         | 0,951388418   | 1,051095411     | 1,771428571     |
| CCND3                                                                                          | 0,00555836  | -0,071932997 | 0,344 | 0,121 | 1         | 0,95136246    | 1,05112409      | 2,842975207     |
| FUOM                                                                                           | 0,046495836 | -0,072115339 | 0,156 | 0,055 | 1         | 0,951242225   | 1,05125695      | 2,836363636     |
| TMEM187                                                                                        | 0,480650464 | -0,072139496 | 0     | 0,016 | 1         | 0,951226297   | 1,051274553     | 0               |
| STRADA                                                                                         | 0,478627389 | -0,072204955 | 0,062 | 0,035 | 1         | 0,951183138   | 1,051322253     | 1,771428571     |
| ANGPT2                                                                                         | 0,540537634 | -0,07221581  | 0,031 | 0,016 | 1         | 0,951175981   | 1,051330164     | 1,9375          |
| SOX3                                                                                           | 0,480650464 | -0,072232964 | 0     | 0,016 | 1         | 0,951164671   | 1,051342664     | 0               |
| MTX1                                                                                           | 0,002826784 | -0,072269391 | 0,281 | 0,086 | 1         | 0,951140655   | 1,051369211     | 3,26744186      |
| GDPD1                                                                                          | 0,386325862 | -0,072309351 | 0,031 | 0,012 | 1         | 0,951114311   | 1,051398332     | 2,583333333     |

Supplementary Table 1

| Differentially expressed genes_adjacent-skin-XL_comparing SC-Keloid vs. (SC-Myel, SC-Nonmyel) |             |              |       |       |           |               |                 |                 |
|-----------------------------------------------------------------------------------------------|-------------|--------------|-------|-------|-----------|---------------|-----------------|-----------------|
| gene                                                                                          | p_val       | avg_log2FC   | pct.1 | pct.2 | p_val_adj | Foldchange_UP | Foldchange_DOWN | Ratio_pct1_pct2 |
| AC011043.1                                                                                    | 0,300902654 | -0,072372122 | 0,062 | 0,027 | 1         | 0,951072929   | 1,051444079     | 2,296296296     |
| EAF2                                                                                          | 0,480650464 | -0,072386142 | 0     | 0,016 | 1         | 0,951063687   | 1,051454296     | 0               |
| TRIM52                                                                                        | 0,150155729 | -0,072467358 | 0,062 | 0,02  | 1         | 0,951010149   | 1,051513489     | 3,1             |
| RNF152                                                                                        | 0,543117005 | -0,072633989 | 0     | 0,012 | 1         | 0,950900314   | 1,051634946     | 0               |
| PROCA1                                                                                        | 0,543117005 | -0,072658916 | 0     | 0,012 | 1         | 0,950883884   | 1,051653116     | 0               |
| ESRRA                                                                                         | 0,083520674 | -0,072765802 | 0,156 | 0,062 | 1         | 0,950813438   | 1,051731034     | 2,516129032     |
| CNOT3                                                                                         | 0,059034985 | -0,072805181 | 0,188 | 0,074 | 1         | 0,950787486   | 1,051759741     | 2,540540541     |
| DUSP18                                                                                        | 0,004107327 | -0,072923462 | 0,156 | 0,035 | 1         | 0,950709537   | 1,051845975     | 4,457142857     |
| HECTD3                                                                                        | 0,087959196 | -0,072945747 | 0,062 | 0,016 | 1         | 0,950694852   | 1,051862223     | 3,875           |
| IRF6                                                                                          | 0,428872689 | -0,072966054 | 0     | 0,02  | 1         | 0,95068147    | 1,051877029     | 0               |
| FBXL19-AS1                                                                                    | 0,543117005 | -0,072990234 | 0     | 0,012 | 1         | 0,950665536   | 1,051894659     | 0               |
| ZNF550                                                                                        | 0,480650464 | -0,073069935 | 0     | 0,016 | 1         | 0,950613019   | 1,051952771     | 0               |
| ELMO2                                                                                         | 0,470250215 | -0,073111979 | 0,062 | 0,035 | 1         | 0,950585316   | 1,051983429     | 1,771428571     |
| TMEM209                                                                                       | 0,098751938 | -0,073287445 | 0,094 | 0,031 | 1         | 0,950469709   | 1,052111383     | 3,032258065     |
| POFUT2                                                                                        | 0,005262184 | -0,073326922 | 0,281 | 0,094 | 1         | 0,950443702   | 1,052140172     | 2,989361702     |
| CTRL                                                                                          | 0,428872689 | -0,07338276  | 0     | 0,02  | 1         | 0,950406916   | 1,052180895     | 0               |
| GPR157                                                                                        | 0,543117005 | -0,073459135 | 0     | 0,012 | 1         | 0,950356604   | 1,052236598     | 0               |
| ZNF823                                                                                        | 0,480650464 | -0,07346258  | 0     | 0,016 | 1         | 0,950354335   | 1,052239111     | 0               |
| CAVIN4                                                                                        | 0,388432899 | -0,073487555 | 0,062 | 0,031 | 1         | 0,950337883   | 1,052257326     | 2               |
| TRAPPC10                                                                                      | 0,090467775 | -0,073530634 | 0,125 | 0,047 | 1         | 0,950309506   | 1,052288748     | 2,659574468     |
| CCAR2                                                                                         | 0,482846351 | -0,07357149  | 0,062 | 0,035 | 1         | 0,950282594   | 1,052318548     | 1,771428571     |
| SPATA2                                                                                        | 0,138170297 | -0,073621668 | 0,094 | 0,035 | 1         | 0,950249544   | 1,052355149     | 2,685714286     |
| ANKRD65                                                                                       | 0,000278482 | -0,073622866 | 0,25  | 0,055 | 1         | 0,950248754   | 1,052356023     | 4,545454545     |
| PTCD2                                                                                         | 0,480650464 | -0,073631436 | 0     | 0,016 | 1         | 0,95024311    | 1,052362274     | 0               |
| PDK2                                                                                          | 0,016562293 | -0,073711539 | 0,125 | 0,031 | 1         | 0,950190351   | 1,052420706     | 4,032258065     |
| CDK5RAP2                                                                                      | 0,00606391  | -0,073736571 | 0,188 | 0,051 | 1         | 0,950173864   | 1,052438967     | 3,68627451      |
| MYOZ1                                                                                         | 0,682170546 | -0,073760117 | 0,031 | 0,02  | 1         | 0,950158356   | 1,052456144     | 1,55            |
| AGGF1                                                                                         | 0,002005544 | -0,073771698 | 0,188 | 0,043 | 1         | 0,950150729   | 1,052464593     | 4,372093023     |
| DACT1                                                                                         | 0,396289917 | -0,073812142 | 0,062 | 0,031 | 1         | 0,950124094   | 1,052494097     | 2               |
| SPTLC3                                                                                        | 0,80991663  | -0,073876028 | 0,031 | 0,023 | 1         | 0,950082021   | 1,052540705     | 1,347826087     |

Supplementary Table 1

| Differentially expressed genes_adjacent-skin-XL_ comparing SC-Keloid vs. (SC-Myel, SC-Nonmyel) |             |              |       |       |           |               |                 |                 |
|------------------------------------------------------------------------------------------------|-------------|--------------|-------|-------|-----------|---------------|-----------------|-----------------|
| gene                                                                                           | p_val       | avg_log2FC   | pct.1 | pct.2 | p_val_adj | Foldchange_UP | Foldchange_DOWN | Ratio_pct1_pct2 |
| ZCWPW1                                                                                         | 0,028712073 | -0,073916577 | 0,125 | 0,035 | 1         | 0,950055318   | 1,052570288     | 3,571428571     |
| MORC3                                                                                          | 0,079867096 | -0,07397743  | 0,281 | 0,137 | 1         | 0,950015245   | 1,052614687     | 2,051094891     |
| CCDC117                                                                                        | 0,006461838 | -0,07404185  | 0,188 | 0,051 | 1         | 0,949972826   | 1,05266169      | 3,68627451      |
| HPGD                                                                                           | 0,543117005 | -0,074152076 | 0     | 0,012 | 1         | 0,949900248   | 1,05274212      | 0               |
| ABCA6                                                                                          | 0,543117005 | -0,074198172 | 0     | 0,012 | 1         | 0,949869898   | 1,052775756     | 0               |
| WDR7                                                                                           | 0,682170546 | -0,074226902 | 0,031 | 0,02  | 1         | 0,949850982   | 1,052796722     | 1,55            |
| EIF2S2                                                                                         | 0,006896051 | -0,074235307 | 0,656 | 0,285 | 1         | 0,949845448   | 1,052802855     | 2,301754386     |
| ZNF783                                                                                         | 0,924392442 | -0,074254255 | 0,031 | 0,027 | 1         | 0,949832973   | 1,052816683     | 1,148148148     |
| WDR25                                                                                          | 0,578217897 | -0,074256686 | 0,062 | 0,039 | 1         | 0,949831373   | 1,052818457     | 1,58974359      |
| PODXL                                                                                          | 0,533973819 | -0,074327026 | 0,031 | 0,016 | 1         | 0,949785064   | 1,052869789     | 1,9375          |
| FAM124A                                                                                        | 0,543117005 | -0,074348159 | 0     | 0,012 | 1         | 0,949771151   | 1,052885212     | 0               |
| GTF2H2                                                                                         | 0,979143607 | -0,074464556 | 0,031 | 0,031 | 1         | 0,949694527   | 1,052970163     | 1               |
| PTPRN2                                                                                         | 0,682170546 | -0,074510572 | 0,031 | 0,02  | 1         | 0,949664236   | 1,053003749     | 1,55            |
| PACSIN2                                                                                        | 0,008489906 | -0,074584895 | 0,406 | 0,16  | 1         | 0,949615313   | 1,053057997     | 2,5375          |
| SUPT6H                                                                                         | 0,01602055  | -0,074688416 | 0,25  | 0,09  | 1         | 0,949547176   | 1,053133563     | 2,777777778     |
| FCHO2                                                                                          | 0,002686655 | -0,07473828  | 0,219 | 0,059 | 1         | 0,949514357   | 1,053169963     | 3,711864407     |
| HEPN1                                                                                          | 0,38481627  | -0,07473907  | 0     | 0,023 | 1         | 0,949513837   | 1,053170539     | 0               |
| DOP1B                                                                                          | 0,224763613 | -0,074745294 | 0,062 | 0,023 | 1         | 0,949509741   | 1,053175083     | 2,695652174     |
| SPAG8                                                                                          | 0,543115367 | -0,074748024 | 0     | 0,012 | 1         | 0,949507944   | 1,053177076     | 0               |
| LMCD1                                                                                          | 0,162153727 | -0,074763343 | 0,125 | 0,055 | 1         | 0,949497862   | 1,053188259     | 2,272727273     |
| MMRN2                                                                                          | 0,480650464 | -0,074796216 | 0     | 0,016 | 1         | 0,949476227   | 1,053212257     | 0               |
| ZC3H3                                                                                          | 0,480650464 | -0,07482932  | 0     | 0,016 | 1         | 0,949454441   | 1,053236424     | 0               |
| ARFIP1                                                                                         | 0,015776025 | -0,074841034 | 0,312 | 0,121 | 1         | 0,949446731   | 1,053244976     | 2,578512397     |
| RNF139-AS1                                                                                     | 0,543117005 | -0,074845528 | 0     | 0,012 | 1         | 0,949443774   | 1,053248257     | 0               |
| OSGEP                                                                                          | 0,008065251 | -0,074881855 | 0,25  | 0,082 | 1         | 0,949419868   | 1,053274778     | 3,048780488     |
| DHFR2                                                                                          | 0,480650464 | -0,074944102 | 0     | 0,016 | 1         | 0,949378905   | 1,053320224     | 0               |
| FUCA2                                                                                          | 0,001578028 | -0,074962198 | 0,312 | 0,094 | 1         | 0,949366996   | 1,053333436     | 3,319148936     |
| ZNF426                                                                                         | 0,392349482 | -0,075000652 | 0,062 | 0,031 | 1         | 0,949341692   | 1,053361512     | 2               |
| IL16                                                                                           | 0,38481627  | -0,075012364 | 0     | 0,023 | 1         | 0,949333985   | 1,053370063     | 0               |
| TADA2A                                                                                         | 0,396289917 | -0,075110347 | 0,062 | 0,031 | 1         | 0,949269512   | 1,053441607     | 2               |

Supplementary Table 1

| Differentially expressed genes_adjacent-skin-XL_comparing SC-Keloid vs. (SC-Myel, SC-Nonmyel) |             |              |       |       |           |               |                 |                 |
|-----------------------------------------------------------------------------------------------|-------------|--------------|-------|-------|-----------|---------------|-----------------|-----------------|
| gene                                                                                          | p_val       | avg_log2FC   | pct.1 | pct.2 | p_val_adj | Foldchange_UP | Foldchange_DOWN | Ratio_pct1_pct2 |
| ZNF567                                                                                        | 0,396289917 | -0,075120593 | 0,062 | 0,031 | 1         | 0,94926277    | 1,053449089     | 2               |
| AEN                                                                                           | 0,045196862 | -0,075161495 | 0,125 | 0,039 | 1         | 0,949235858   | 1,053478956     | 3,205128205     |
| GTF3C3                                                                                        | 0,007871757 | -0,0751851   | 0,156 | 0,039 | 1         | 0,949220327   | 1,053496192     | 4               |
| FZR1                                                                                          | 0,011296848 | -0,075239971 | 0,219 | 0,07  | 1         | 0,949184225   | 1,053536262     | 3,128571429     |
| TP53BP1                                                                                       | 0,023464878 | -0,075297528 | 0,188 | 0,062 | 1         | 0,949146358   | 1,053578294     | 3,032258065     |
| H2BU1                                                                                         | 0,480650464 | -0,075326952 | 0     | 0,016 | 1         | 0,949127      | 1,053599782     | 0               |
| DMPK                                                                                          | 0,249776756 | -0,075339787 | 0,156 | 0,086 | 1         | 0,949118556   | 1,053609155     | 1,813953488     |
| ARHGAP20                                                                                      | 0,480650464 | -0,075339892 | 0     | 0,016 | 1         | 0,949118487   | 1,053609232     | 0               |
| LINC01550                                                                                     | 0,30793671  | -0,075364281 | 0,062 | 0,027 | 1         | 0,949102442   | 1,053627044     | 2,296296296     |
| DNMT3A                                                                                        | 0,044241765 | -0,075379034 | 0,156 | 0,055 | 1         | 0,949092737   | 1,053637818     | 2,836363636     |
| LDHD                                                                                          | 0,396289917 | -0,075455348 | 0,062 | 0,031 | 1         | 0,949042534   | 1,053693553     | 2               |
| RPS6KA4                                                                                       | 0,020165275 | -0,075546966 | 0,156 | 0,047 | 1         | 0,948982267   | 1,05376047      | 3,319148936     |
| LOX                                                                                           | 0,386325862 | -0,075553232 | 0,031 | 0,012 | 1         | 0,948978145   | 1,053765047     | 2,583333333     |
| KIF22                                                                                         | 0,00711554  | -0,075570323 | 0,219 | 0,066 | 1         | 0,948966903   | 1,05377753      | 3,318181818     |
| GOLGA8B                                                                                       | 0,044241765 | -0,075574164 | 0,156 | 0,055 | 1         | 0,948964377   | 1,053780336     | 2,836363636     |
| DNAJC27-AS1                                                                                   | 0,924392442 | -0,075576837 | 0,031 | 0,027 | 1         | 0,948962619   | 1,053782288     | 1,148148148     |
| RSPH9                                                                                         | 0,226351275 | -0,075592436 | 0,031 | 0,008 | 1         | 0,948952358   | 1,053793683     | 3,875           |
| OR2AT4                                                                                        | 0,543117005 | -0,075595061 | 0     | 0,012 | 1         | 0,948950631   | 1,0537956       | 0               |
| ZBTB33                                                                                        | 0,224763613 | -0,075638208 | 0,062 | 0,023 | 1         | 0,948922251   | 1,053827117     | 2,695652174     |
| TRAF3                                                                                         | 0,991060715 | -0,075643078 | 0,031 | 0,031 | 1         | 0,948919048   | 1,053830674     | 1               |
| ZNF763                                                                                        | 0,543117005 | -0,075724524 | 0     | 0,012 | 1         | 0,94886548    | 1,053890168     | 0               |
| RAI14                                                                                         | 0,00052757  | -0,075804705 | 0,219 | 0,047 | 1         | 0,948812746   | 1,053948742     | 4,659574468     |
| DACT3                                                                                         | 0,30757457  | -0,075871076 | 0,094 | 0,047 | 1         | 0,948769096   | 1,053997231     | 2               |
| LINC01011                                                                                     | 0,682170546 | -0,076027354 | 0,031 | 0,02  | 1         | 0,948666328   | 1,054111409     | 1,55            |
| KCTD6                                                                                         | 0,241162386 | -0,076101489 | 0,094 | 0,043 | 1         | 0,94861758    | 1,054165578     | 2,186046512     |
| TMEM9B-AS1                                                                                    | 0,543117005 | -0,076180232 | 0     | 0,012 | 1         | 0,948565806   | 1,054223116     | 0               |
| PLEKHG5                                                                                       | 0,38481627  | -0,076213233 | 0     | 0,023 | 1         | 0,948544108   | 1,054247231     | 0               |
| ACACB                                                                                         | 0,918113127 | -0,076264616 | 0,031 | 0,027 | 1         | 0,948510325   | 1,05428478      | 1,148148148     |
| CD72                                                                                          | 0,226351275 | -0,076272786 | 0,031 | 0,008 | 1         | 0,948504954   | 1,054290751     | 3,875           |
| FAM241B                                                                                       | 0,480650464 | -0,076284875 | 0     | 0,016 | 1         | 0,948497006   | 1,054299585     | 0               |

Supplementary Table 1

| Differentially expressed genes_adjacent-skin-XL_comparing SC-Keloid vs. (SC-Myel, SC-Nonmyel) |             |              |       |       |           |               |                 |                 |
|-----------------------------------------------------------------------------------------------|-------------|--------------|-------|-------|-----------|---------------|-----------------|-----------------|
| gene                                                                                          | p_val       | avg_log2FC   | pct.1 | pct.2 | p_val_adj | Foldchange_UP | Foldchange_DOWN | Ratio_pct1_pct2 |
| VMA21                                                                                         | 0,005322289 | -0,076493833 | 0,375 | 0,137 | 1         | 0,948359637   | 1,054452299     | 2,737226277     |
| MRPS28                                                                                        | 0,000277006 | -0,076524884 | 0,375 | 0,105 | 1         | 0,948339226   | 1,054474994     | 3,571428571     |
| PRPSAP1                                                                                       | 0,002969767 | -0,076549285 | 0,438 | 0,156 | 1         | 0,948323186   | 1,05449283      | 2,807692308     |
| BCAR1                                                                                         | 0,001503035 | -0,076550268 | 0,438 | 0,148 | 1         | 0,94832254    | 1,054493548     | 2,959459459     |
| VSNL1                                                                                         | 0,543117005 | -0,0765554   | 0     | 0,012 | 1         | 0,948319166   | 1,054497299     | 0               |
| MAML1                                                                                         | 0,569359326 | -0,076562807 | 0,062 | 0,039 | 1         | 0,948314298   | 1,054502713     | 1,58974359      |
| PIWIL4                                                                                        | 0,480650464 | -0,076563819 | 0     | 0,016 | 1         | 0,948313632   | 1,054503453     | 0               |
| THUMPD3                                                                                       | 0,001038602 | -0,076750527 | 0,219 | 0,051 | 1         | 0,948190913   | 1,054639932     | 4,294117647     |
| TMEM184C                                                                                      | 0,098751938 | -0,076793511 | 0,094 | 0,031 | 1         | 0,948162663   | 1,054671354     | 3,032258065     |
| EIF2B5                                                                                        | 0,015740914 | -0,076894279 | 0,188 | 0,059 | 1         | 0,948096439   | 1,054745022     | 3,186440678     |
| IRX5                                                                                          | 0,480650464 | -0,076949348 | 0     | 0,016 | 1         | 0,94806025    | 1,054785284     | 0               |
| GDAP2                                                                                         | 0,30793671  | -0,076974792 | 0,062 | 0,027 | 1         | 0,94804353    | 1,054803886     | 2,296296296     |
| CNOT6                                                                                         | 0,106706178 | -0,077033368 | 0,156 | 0,066 | 1         | 0,948005039   | 1,054846714     | 2,363636364     |
| ZNF639                                                                                        | 0,000520492 | -0,077110333 | 0,25  | 0,059 | 1         | 0,947954465   | 1,05490299      | 4,237288136     |
| NLN                                                                                           | 0,020764757 | -0,077183337 | 0,156 | 0,047 | 1         | 0,947906498   | 1,054956372     | 3,319148936     |
| TENT2                                                                                         | 0,154245377 | -0,077222984 | 0,125 | 0,055 | 1         | 0,947880449   | 1,054985364     | 2,272727273     |
| ARHGAP33                                                                                      | 0,682170546 | -0,077375001 | 0,031 | 0,02  | 1         | 0,947780576   | 1,055096534     | 1,55            |
| FBXO5                                                                                         | 0,80991663  | -0,077428218 | 0,031 | 0,023 | 1         | 0,947745616   | 1,055135454     | 1,347826087     |
| FAM83B                                                                                        | 0,480650464 | -0,077469157 | 0     | 0,016 | 1         | 0,947718722   | 1,055165396     | 0               |
| CIITA                                                                                         | 0,543117005 | -0,077561791 | 0     | 0,012 | 1         | 0,947657872   | 1,055233149     | 0               |
| FAXC                                                                                          | 0,226351275 | -0,077563195 | 0,031 | 0,008 | 1         | 0,94765695    | 1,055234176     | 3,875           |
| CTNNA2                                                                                        | 0,543117005 | -0,077775479 | 0     | 0,012 | 1         | 0,947517517   | 1,055389459     | 0               |
| GSR                                                                                           | 0,484885847 | -0,07780696  | 0,125 | 0,082 | 1         | 0,947496842   | 1,055412489     | 1,524390244     |
| TAB3                                                                                          | 0,233963311 | -0,07783604  | 0,094 | 0,043 | 1         | 0,947477744   | 1,055433762     | 2,186046512     |
| SRC                                                                                           | 0,012011479 | -0,077843978 | 0,25  | 0,086 | 1         | 0,947472531   | 1,055439569     | 2,906976744     |
| SOSTDC1                                                                                       | 0,428872689 | -0,077849157 | 0     | 0,02  | 1         | 0,947469129   | 1,055443359     | 0               |
| MICAL1                                                                                        | 0,007871757 | -0,077884068 | 0,156 | 0,039 | 1         | 0,947446202   | 1,055468899     | 4               |
| FKBPL                                                                                         | 0,008956837 | -0,077897014 | 0,125 | 0,027 | 1         | 0,947437701   | 1,05547837      | 4,62962963      |
| AR                                                                                            | 0,480650464 | -0,077938457 | 0     | 0,016 | 1         | 0,947410485   | 1,05550869      | 0               |
| FZD8                                                                                          | 0,150155729 | -0,077958192 | 0,062 | 0,02  | 1         | 0,947397525   | 1,055523129     | 3,1             |

Supplementary Table 1

| Differentially expressed genes_adjacent-skin-XL_comparing SC-Keloid vs. (SC-Myel, SC-Nonmyel) |             |              |       |       |           |               |                 |                 |
|-----------------------------------------------------------------------------------------------|-------------|--------------|-------|-------|-----------|---------------|-----------------|-----------------|
| gene                                                                                          | p_val       | avg_log2FC   | pct.1 | pct.2 | p_val_adj | Foldchange_UP | Foldchange_DOWN | Ratio_pct1_pct2 |
| SELENOK                                                                                       | 0,030598955 | -0,077995816 | 0,812 | 0,395 | 1         | 0,947372818   | 1,055550656     | 2,055696203     |
| FADS2                                                                                         | 0,115570145 | -0,078028671 | 0,125 | 0,051 | 1         | 0,947351243   | 1,055574695     | 2,450980392     |
| CDV3                                                                                          | 0,149055219 | -0,078064725 | 0,438 | 0,25  | 1         | 0,947327569   | 1,055601075     | 1,752           |
| GRIA3                                                                                         | 0,480650464 | -0,078064875 | 0     | 0,016 | 1         | 0,94732747    | 1,055601185     | 0               |
| RPTOR                                                                                         | 0,540537634 | -0,07808398  | 0,031 | 0,016 | 1         | 0,947314925   | 1,055615164     | 1,9375          |
| EIF3C                                                                                         | 0,063925678 | -0,078178748 | 0,094 | 0,027 | 1         | 0,9472527     | 1,055684507     | 3,481481481     |
| ESAM                                                                                          | 0,480650464 | -0,078233433 | 0     | 0,016 | 1         | 0,947216796   | 1,055724523     | 0               |
| CFAP91                                                                                        | 0,480650464 | -0,078237298 | 0     | 0,016 | 1         | 0,947214258   | 1,055727352     | 0               |
| RBM24                                                                                         | 0,38481627  | -0,078276595 | 0     | 0,023 | 1         | 0,947188457   | 1,055756109     | 0               |
| GGNBP2                                                                                        | 0,03177037  | -0,078278619 | 0,406 | 0,184 | 1         | 0,947187129   | 1,05575759      | 2,206521739     |
| H4-16                                                                                         | 0,428872689 | -0,078289227 | 0     | 0,02  | 1         | 0,947180164   | 1,055765353     | 0               |
| BTBD2                                                                                         | 0,002185475 | -0,078298747 | 0,25  | 0,07  | 1         | 0,947173914   | 1,055772319     | 3,571428571     |
| ZNF649                                                                                        | 0,004180266 | -0,078314155 | 0,125 | 0,023 | 1         | 0,947163798   | 1,055783596     | 5,434782609     |
| LSM6                                                                                          | 0,030181651 | -0,078333371 | 0,25  | 0,098 | 1         | 0,947151182   | 1,055797658     | 2,551020408     |
| TOMM7                                                                                         | 0,680787953 | -0,078351234 | 0,781 | 0,625 | 1         | 0,947139455   | 1,055810731     | 1,2496          |
| EOLA1                                                                                         | 0,80991663  | -0,0784409   | 0,031 | 0,023 | 1         | 0,947080591   | 1,055876353     | 1,347826087     |
| SNAPC3                                                                                        | 0,985101745 | -0,078460286 | 0,031 | 0,031 | 1         | 0,947067865   | 1,055890541     | 1               |
| NCSTN                                                                                         | 0,010265241 | -0,078493435 | 0,375 | 0,148 | 1         | 0,947046103   | 1,055914803     | 2,533783784     |
| SLC12A7                                                                                       | 0,480650464 | -0,078503601 | 0     | 0,016 | 1         | 0,94703943    | 1,055922244     | 0               |
| ZKSCAN8                                                                                       | 0,480650464 | -0,078515136 | 0     | 0,016 | 1         | 0,947031859   | 1,055930686     | 0               |
| FANCL                                                                                         | 0,096013629 | -0,078660841 | 0,094 | 0,031 | 1         | 0,946936218   | 1,056037335     | 3,032258065     |
| TRNAU1AP                                                                                      | 0,106706178 | -0,078678404 | 0,156 | 0,066 | 1         | 0,94692469    | 1,056050191     | 2,363636364     |
| CDC42BPG                                                                                      | 0,428872689 | -0,078760864 | 0     | 0,02  | 1         | 0,946870568   | 1,056110554     | 0               |
| RNFT1                                                                                         | 0,224763613 | -0,078768056 | 0,062 | 0,023 | 1         | 0,946865848   | 1,056115818     | 2,695652174     |
| GSTT2B                                                                                        | 0,116850675 | -0,078781046 | 0,125 | 0,051 | 1         | 0,946857323   | 1,056125328     | 2,450980392     |
| ZNF433                                                                                        | 0,019236133 | -0,078825179 | 0,094 | 0,02  | 1         | 0,946828358   | 1,056157636     | 4,7             |
| ADPGK                                                                                         | 0,004475279 | -0,078916111 | 0,219 | 0,062 | 1         | 0,946768682   | 1,056224207     | 3,532258065     |
| CLIP1                                                                                         | 0,00356589  | -0,078995651 | 0,375 | 0,133 | 1         | 0,946716485   | 1,056282441     | 2,819548872     |
| CEP20                                                                                         | 0,093753684 | -0,079002773 | 0,125 | 0,047 | 1         | 0,946711812   | 1,056287655     | 2,659574468     |
| MPHOSPH6                                                                                      | 0,80991663  | -0,079002812 | 0,031 | 0,023 | 1         | 0,946711786   | 1,056287684     | 1,347826087     |



Supplementary Table 1

| Differentially expressed genes_adjacent-skin-XL_comparing SC-Keloid vs. (SC-Myel, SC-Nonmyel) |             |              |       |       |           |               |                 |                 |
|-----------------------------------------------------------------------------------------------|-------------|--------------|-------|-------|-----------|---------------|-----------------|-----------------|
| gene                                                                                          | p_val       | avg_log2FC   | pct.1 | pct.2 | p_val_adj | Foldchange_UP | Foldchange_DOWN | Ratio_pct1_pct2 |
| LYPLAL1                                                                                       | 0,030583271 | -0,079008225 | 0,188 | 0,066 | 1         | 0,946708234   | 1,056291648     | 2,848484848     |
| TMEM62                                                                                        | 0,682170546 | -0,07902164  | 0,031 | 0,02  | 1         | 0,946699431   | 1,056301469     | 1,55            |
| CAMSAP1                                                                                       | 0,953848385 | -0,079035762 | 0,062 | 0,059 | 1         | 0,946690164   | 1,056311809     | 1,050847458     |
| IGF2R                                                                                         | 0,000951976 | -0,079052276 | 0,25  | 0,062 | 1         | 0,946679328   | 1,056323901     | 4,032258065     |
| GALNT4                                                                                        | 0,540537634 | -0,079134263 | 0,031 | 0,016 | 1         | 0,94662553    | 1,056383932     | 1,9375          |
| FAM185A                                                                                       | 0,985101745 | -0,079160514 | 0,031 | 0,031 | 1         | 0,946608306   | 1,056403154     | 1               |
| THADA                                                                                         | 0,540537634 | -0,079266592 | 0,031 | 0,016 | 1         | 0,946538706   | 1,056480832     | 1,9375          |
| WDR6                                                                                          | 0,001195376 | -0,079347365 | 0,281 | 0,078 | 1         | 0,946485714   | 1,056539983     | 3,602564103     |
| S100P                                                                                         | 0,543117005 | -0,079400848 | 0     | 0,012 | 1         | 0,946450626   | 1,056579152     | 0               |
| BTBD3                                                                                         | 0,020165275 | -0,079407656 | 0,156 | 0,047 | 1         | 0,94644616    | 1,056584138     | 3,319148936     |
| NEPRO                                                                                         | 0,009954827 | -0,079431995 | 0,188 | 0,055 | 1         | 0,946430193   | 1,056601963     | 3,418181818     |
| SS18L1                                                                                        | 0,150155729 | -0,079528854 | 0,062 | 0,02  | 1         | 0,946366655   | 1,056672902     | 3,1             |
| LRRC57                                                                                        | 0,379471368 | -0,079534982 | 0,125 | 0,074 | 1         | 0,946362635   | 1,056677391     | 1,689189189     |
| DDX19A                                                                                        | 0,011750536 | -0,079698497 | 0,219 | 0,07  | 1         | 0,94625538    | 1,056797162     | 3,128571429     |
| LASP1                                                                                         | 0,031172497 | -0,079711069 | 0,219 | 0,082 | 1         | 0,946247134   | 1,056806371     | 2,670731707     |
| TCEANC                                                                                        | 0,543117005 | -0,079765501 | 0     | 0,012 | 1         | 0,946211434   | 1,056846244     | 0               |
| ZDBF2                                                                                         | 0,134746241 | -0,079832526 | 0,094 | 0,035 | 1         | 0,946167475   | 1,056895345     | 2,685714286     |
| KLHL15                                                                                        | 0,243596382 | -0,079877346 | 0,094 | 0,043 | 1         | 0,946138081   | 1,05692818      | 2,186046512     |
| SORT1                                                                                         | 0,00732945  | -0,079915763 | 0,312 | 0,109 | 1         | 0,946112887   | 1,056956324     | 2,862385321     |
| NRF1                                                                                          | 0,183526587 | -0,079979931 | 0,094 | 0,039 | 1         | 0,946070807   | 1,057003337     | 2,41025641      |
| SERPINB7                                                                                      | 0,480650464 | -0,080099583 | 0     | 0,016 | 1         | 0,945992347   | 1,057091005     | 0               |
| LCTL                                                                                          | 0,682170546 | -0,080143174 | 0,031 | 0,02  | 1         | 0,945963764   | 1,057122945     | 1,55            |
| CLHC1                                                                                         | 0,013891036 | -0,080152468 | 0,062 | 0,008 | 1         | 0,94595767    | 1,057129755     | 7,75            |
| GM2A                                                                                          | 0,979143607 | -0,080207418 | 0,031 | 0,031 | 1         | 0,945921641   | 1,05717002      | 1               |
| PPME1                                                                                         | 0,361186003 | -0,080227403 | 0,094 | 0,051 | 1         | 0,945908537   | 1,057184665     | 1,843137255     |
| FEN1                                                                                          | 0,063925678 | -0,080318841 | 0,094 | 0,027 | 1         | 0,945848587   | 1,057251671     | 3,481481481     |
| BACE2                                                                                         | 0,000280868 | -0,080350877 | 0,469 | 0,145 | 1         | 0,945827585   | 1,057275148     | 3,234482759     |
| CCDC82                                                                                        | 0,013950247 | -0,080355115 | 0,469 | 0,203 | 1         | 0,945824806   | 1,057278254     | 2,310344828     |
| P2RX4                                                                                         | 0,191913299 | -0,080375959 | 0,094 | 0,039 | 1         | 0,945811141   | 1,05729353      | 2,41025641      |
| GALK2                                                                                         | 0,126128812 | -0,080402607 | 0,125 | 0,051 | 1         | 0,945793671   | 1,057313059     | 2,450980392     |

Supplementary Table 1

| Differentially expressed genes_adjacent-skin-XL_comparing SC-Keloid vs. (SC-Myel, SC-Nonmyel) |             |              |       |       |           |               |                 |                 |
|-----------------------------------------------------------------------------------------------|-------------|--------------|-------|-------|-----------|---------------|-----------------|-----------------|
| gene                                                                                          | p_val       | avg_log2FC   | pct.1 | pct.2 | p_val_adj | Foldchange_UP | Foldchange_DOWN | Ratio_pct1_pct2 |
| ACVR2A                                                                                        | 0,191913299 | -0,080487169 | 0,094 | 0,039 | 1         | 0,945738236   | 1,057375034     | 2,41025641      |
| CRNKL1                                                                                        | 0,233614723 | -0,080498911 | 0,156 | 0,082 | 1         | 0,945730539   | 1,05738364      | 1,902439024     |
| CASKIN1                                                                                       | 0,480650464 | -0,080533101 | 0     | 0,016 | 1         | 0,945708127   | 1,057408699     | 0               |
| IRAK3                                                                                         | 0,480650464 | -0,080627072 | 0     | 0,016 | 1         | 0,945646529   | 1,057477577     | 0               |
| LATS2-AS1                                                                                     | 0,543117005 | -0,080637751 | 0     | 0,012 | 1         | 0,945639529   | 1,057485405     | 0               |
| PITPNB                                                                                        | 0,000238705 | -0,080670847 | 0,562 | 0,18  | 1         | 0,945617836   | 1,057509664     | 3,122222222     |
| ZNF549                                                                                        | 0,543117005 | -0,080737925 | 0     | 0,012 | 1         | 0,945573871   | 1,057558834     | 0               |
| POU6F1                                                                                        | 0,480650464 | -0,080798842 | 0     | 0,016 | 1         | 0,945533945   | 1,05760349      | 0               |
| RMRP                                                                                          | 0,004180266 | -0,080961287 | 0,125 | 0,023 | 1         | 0,945427486   | 1,05772258      | 5,434782609     |
| MDN1                                                                                          | 0,310355006 | -0,080964824 | 0,094 | 0,047 | 1         | 0,945425168   | 1,057725174     | 2               |
| ZNF181                                                                                        | 0,38481627  | -0,080977161 | 0     | 0,023 | 1         | 0,945417083   | 1,057734219     | 0               |
| ALG10B                                                                                        | 0,428872689 | -0,081057902 | 0     | 0,02  | 1         | 0,945364174   | 1,057793417     | 0               |
| PKHD1                                                                                         | 0,480650464 | -0,081142945 | 0     | 0,016 | 1         | 0,945308449   | 1,057855773     | 0               |
| SMIM14                                                                                        | 0,010944771 | -0,081200264 | 0,312 | 0,117 | 1         | 0,945270893   | 1,057897802     | 2,666666667     |
| ERRFI1                                                                                        | 0,015740914 | -0,081217617 | 0,188 | 0,059 | 1         | 0,945259523   | 1,057910527     | 3,186440678     |
| SESN2                                                                                         | 0,428872689 | -0,081271237 | 0     | 0,02  | 1         | 0,945224391   | 1,057949847     | 0               |
| HLF                                                                                           | 0,803381388 | -0,0813058   | 0,031 | 0,023 | 1         | 0,945201746   | 1,057975193     | 1,347826087     |
| TCF20                                                                                         | 0,243596382 | -0,081329725 | 0,094 | 0,043 | 1         | 0,945186072   | 1,057992738     | 2,186046512     |
| BRD3OS                                                                                        | 0,480650464 | -0,081344546 | 0     | 0,016 | 1         | 0,945176362   | 1,058003607     | 0               |
| PPCDC                                                                                         | 0,478627389 | -0,081368067 | 0,062 | 0,035 | 1         | 0,945160952   | 1,058020857     | 1,771428571     |
| RFX5                                                                                          | 0,428872689 | -0,081420591 | 0     | 0,02  | 1         | 0,945126542   | 1,058059376     | 0               |
| GRK5                                                                                          | 0,540537634 | -0,081473632 | 0,031 | 0,016 | 1         | 0,945091795   | 1,058098277     | 1,9375          |
| OXER1                                                                                         | 0,543117005 | -0,081481452 | 0     | 0,012 | 1         | 0,945086672   | 1,058104012     | 0               |
| FKTN                                                                                          | 0,30793671  | -0,081490489 | 0,062 | 0,027 | 1         | 0,945080753   | 1,05811064      | 2,296296296     |
| SLCO3A1                                                                                       | 0,198962585 | -0,081539695 | 0,125 | 0,059 | 1         | 0,945048519   | 1,05814673      | 2,118644068     |
| POLA1                                                                                         | 0,428872689 | -0,081585726 | 0     | 0,02  | 1         | 0,945018367   | 1,058180492     | 0               |
| MMS22L                                                                                        | 0,087959196 | -0,081624302 | 0,062 | 0,016 | 1         | 0,944993098   | 1,058208787     | 3,875           |
| ZNF334                                                                                        | 0,540537634 | -0,081639479 | 0,031 | 0,016 | 1         | 0,944983158   | 1,058219919     | 1,9375          |
| MTFMT                                                                                         | 0,185597364 | -0,081705278 | 0,094 | 0,039 | 1         | 0,944940059   | 1,058268184     | 2,41025641      |
| TRMT44                                                                                        | 0,543117005 | -0,081740757 | 0     | 0,012 | 1         | 0,944916821   | 1,058294209     | 0               |

Supplementary Table 1

| Differentially expressed genes_adjacent-skin-XL_ comparing SC-Keloid vs. (SC-Myel, SC-Nonmyel) |             |              |       |       |           |               |                 |                 |
|------------------------------------------------------------------------------------------------|-------------|--------------|-------|-------|-----------|---------------|-----------------|-----------------|
| gene                                                                                           | p_val       | avg_log2FC   | pct.1 | pct.2 | p_val_adj | Foldchange_UP | Foldchange_DOWN | Ratio_pct1_pct2 |
| DPY19L3                                                                                        | 0,020900593 | -0,08174968  | 0,188 | 0,062 | 1         | 0,944910977   | 1,058300755     | 3,032258065     |
| ZNF189                                                                                         | 0,682170546 | -0,081781172 | 0,031 | 0,02  | 1         | 0,944890351   | 1,058323856     | 1,55            |
| MOB3A                                                                                          | 0,045196862 | -0,081939705 | 0,125 | 0,039 | 1         | 0,944786526   | 1,058440158     | 3,205128205     |
| GYG1                                                                                           | 0,00187651  | -0,081952518 | 0,219 | 0,055 | 1         | 0,944778135   | 1,058449559     | 3,981818182     |
| ZNF223                                                                                         | 0,480650464 | -0,082016355 | 0     | 0,016 | 1         | 0,944736331   | 1,058496394     | 0               |
| MANBA                                                                                          | 0,224763613 | -0,082079205 | 0,062 | 0,023 | 1         | 0,944695175   | 1,058542508     | 2,695652174     |
| PNMA6A                                                                                         | 0,480650464 | -0,082142444 | 0     | 0,016 | 1         | 0,944653766   | 1,058588909     | 0               |
| LIMK2                                                                                          | 0,80991663  | -0,082300516 | 0,031 | 0,023 | 1         | 0,944550269   | 1,058704902     | 1,347826087     |
| C17orf100                                                                                      | 0,386325862 | -0,082318298 | 0,031 | 0,012 | 1         | 0,944538627   | 1,058717951     | 2,583333333     |
| EBF1                                                                                           | 0,428872689 | -0,082329891 | 0     | 0,02  | 1         | 0,944531037   | 1,058726458     | 0               |
| NOP16                                                                                          | 0,924392442 | -0,082414677 | 0,031 | 0,027 | 1         | 0,944475529   | 1,058788681     | 1,148148148     |
| UBE2E1                                                                                         | 0,005526861 | -0,082502431 | 0,25  | 0,078 | 1         | 0,944418082   | 1,058853085     | 3,205128205     |
| ZFAT                                                                                           | 0,480650464 | -0,082527683 | 0     | 0,016 | 1         | 0,944401552   | 1,058871619     | 0               |
| ARVCF                                                                                          | 0,80991663  | -0,082605841 | 0,031 | 0,023 | 1         | 0,94435039    | 1,058928985     | 1,347826087     |
| NUDT17                                                                                         | 0,540537634 | -0,082628438 | 0,031 | 0,016 | 1         | 0,944335599   | 1,058945571     | 1,9375          |
| TCP11L1                                                                                        | 0,141661018 | -0,082630409 | 0,094 | 0,035 | 1         | 0,944334309   | 1,058947018     | 2,685714286     |
| ANKRD46                                                                                        | 0,487085433 | -0,082655742 | 0,062 | 0,035 | 1         | 0,944317727   | 1,058965612     | 1,771428571     |
| FAM111A                                                                                        | 0,000642175 | -0,082664162 | 0,344 | 0,098 | 1         | 0,944312216   | 1,058971793     | 3,510204082     |
| PAX3                                                                                           | 0,12425419  | -0,082774605 | 0,25  | 0,125 | 1         | 0,944239928   | 1,059052864     | 2               |
| ADGRL1                                                                                         | 0,037506898 | -0,08282616  | 0,094 | 0,023 | 1         | 0,944206186   | 1,05909071      | 4,086956522     |
| PCIF1                                                                                          | 0,003101546 | -0,082849894 | 0,219 | 0,059 | 1         | 0,944190653   | 1,059108133     | 3,711864407     |
| MCM3AP                                                                                         | 0,076632198 | -0,082865903 | 0,156 | 0,062 | 1         | 0,944180176   | 1,059119886     | 2,516129032     |
| JMJD4                                                                                          | 0,540537634 | -0,082970065 | 0,031 | 0,016 | 1         | 0,944112009   | 1,059196357     | 1,9375          |
| CTIF                                                                                           | 0,428872689 | -0,083084723 | 0     | 0,02  | 1         | 0,944036978   | 1,05928054      | 0               |
| ACTR5                                                                                          | 0,480650464 | -0,083148476 | 0     | 0,016 | 1         | 0,943995262   | 1,059327351     | 0               |
| STEAP1B                                                                                        | 0,162153727 | -0,083216366 | 0,125 | 0,055 | 1         | 0,943950841   | 1,059377201     | 2,272727273     |
| ZNF343                                                                                         | 0,682170546 | -0,083344822 | 0,031 | 0,02  | 1         | 0,943866796   | 1,059471531     | 1,55            |
| TSPYL5                                                                                         | 0,480650464 | -0,083356736 | 0     | 0,016 | 1         | 0,943859002   | 1,05948028      | 0               |
| KLK1                                                                                           | 0,543117005 | -0,083488116 | 0     | 0,012 | 1         | 0,943773053   | 1,059576767     | 0               |
| ATP2B2                                                                                         | 0,30793671  | -0,083618077 | 0,062 | 0,027 | 1         | 0,943688039   | 1,05967222      | 2,296296296     |

Supplementary Table 1

| Differentially expressed genes_adjacent-skin-XL_comparing SC-Keloid vs. (SC-Myel, SC-Nonmyel) |             |              |       |       |           |               |                 |                 |
|-----------------------------------------------------------------------------------------------|-------------|--------------|-------|-------|-----------|---------------|-----------------|-----------------|
| gene                                                                                          | p_val       | avg_log2FC   | pct.1 | pct.2 | p_val_adj | Foldchange_UP | Foldchange_DOWN | Ratio_pct1_pct2 |
| RBM26-AS1                                                                                     | 0,428872689 | -0,083708673 | 0     | 0,02  | 1         | 0,943628781   | 1,059738766     | 0               |
| ZFAND4                                                                                        | 0,480650464 | -0,08371905  | 0     | 0,016 | 1         | 0,943621994   | 1,059746389     | 0               |
| DNAJC18                                                                                       | 0,141661018 | -0,08379292  | 0,094 | 0,035 | 1         | 0,943573679   | 1,059800652     | 2,685714286     |
| KATNA1                                                                                        | 0,081753212 | -0,083801649 | 0,156 | 0,062 | 1         | 0,94356797    | 1,059807064     | 2,516129032     |
| PIDD1                                                                                         | 0,428872689 | -0,083852868 | 0     | 0,02  | 1         | 0,943534471   | 1,059844691     | 0               |
| SMIM8                                                                                         | 0,031413167 | -0,083895353 | 0,156 | 0,051 | 1         | 0,943506686   | 1,059875902     | 3,058823529     |
| MALSU1                                                                                        | 0,033543351 | -0,084020326 | 0,281 | 0,117 | 1         | 0,943424959   | 1,059967717     | 2,401709402     |
| GRAMD1A                                                                                       | 0,004584175 | -0,084020414 | 0,281 | 0,09  | 1         | 0,943424902   | 1,059967781     | 3,122222222     |
| PDZRN3                                                                                        | 0,793660383 | -0,084035603 | 0,125 | 0,105 | 1         | 0,943414969   | 1,059978941     | 1,19047619      |
| ZNF337-AS1                                                                                    | 0,480650464 | -0,084049874 | 0     | 0,016 | 1         | 0,943405637   | 1,059989426     | 0               |
| GALC                                                                                          | 0,012579781 | -0,084053765 | 0,156 | 0,043 | 1         | 0,943403092   | 1,059992286     | 3,627906977     |
| VTI1A                                                                                         | 0,392349482 | -0,08408197  | 0,062 | 0,031 | 1         | 0,943384649   | 1,060013008     | 2               |
| DDX20                                                                                         | 0,224763613 | -0,084104995 | 0,062 | 0,023 | 1         | 0,943369593   | 1,060029927     | 2,695652174     |
| KLHL20                                                                                        | 0,065070981 | -0,084131252 | 0,125 | 0,043 | 1         | 0,943352424   | 1,060049219     | 2,906976744     |
| MRPS30                                                                                        | 0,191913299 | -0,084166226 | 0,094 | 0,039 | 1         | 0,943329555   | 1,060074917     | 2,41025641      |
| ZNF324                                                                                        | 0,487085433 | -0,08417386  | 0,062 | 0,035 | 1         | 0,943324564   | 1,060080526     | 1,771428571     |
| HMBOX1                                                                                        | 0,004241146 | -0,084180152 | 0,281 | 0,09  | 1         | 0,94332045    | 1,06008515      | 3,122222222     |
| RNF207                                                                                        | 0,543117005 | -0,084194871 | 0     | 0,012 | 1         | 0,943310825   | 1,060095965     | 0               |
| ZNF789                                                                                        | 0,675506228 | -0,08429425  | 0,031 | 0,02  | 1         | 0,943245849   | 1,060168992     | 1,55            |
| WDR5                                                                                          | 0,000237136 | -0,084303444 | 0,219 | 0,043 | 1         | 0,943239837   | 1,060175748     | 5,093023256     |
| NDUFAF6                                                                                       | 0,021379715 | -0,084314367 | 0,156 | 0,047 | 1         | 0,943232695   | 1,060183775     | 3,319148936     |
| ACADVL                                                                                        | 0,032365765 | -0,084344155 | 0,719 | 0,348 | 1         | 0,943213221   | 1,060205665     | 2,066091954     |
| RIPPLY2                                                                                       | 0,543117005 | -0,084344505 | 0     | 0,012 | 1         | 0,943212991   | 1,060205923     | 0               |
| PRICKLE3                                                                                      | 0,924392442 | -0,084345794 | 0,031 | 0,027 | 1         | 0,943212149   | 1,06020687      | 1,148148148     |
| SLC29A4                                                                                       | 0,428872689 | -0,084378854 | 0     | 0,02  | 1         | 0,943190535   | 1,060231165     | 0               |
| PABIR2                                                                                        | 0,299332476 | -0,08452178  | 0,094 | 0,047 | 1         | 0,943097099   | 1,060336206     | 2               |
| TMEM50B                                                                                       | 0,001247106 | -0,084551719 | 0,531 | 0,195 | 1         | 0,943077528   | 1,060358211     | 2,723076923     |
| SEC23IP                                                                                       | 0,241162386 | -0,08458392  | 0,094 | 0,043 | 1         | 0,943056479   | 1,060381878     | 2,186046512     |
| MAGEH1                                                                                        | 0,00455806  | -0,08467241  | 0,406 | 0,152 | 1         | 0,942998637   | 1,06044692      | 2,671052632     |
| CCZ1B                                                                                         | 0,804543977 | -0,084722482 | 0,031 | 0,039 | 1         | 0,942965908   | 1,060483727     | 0,794871795     |

Supplementary Table 1

| Differentially expressed genes_adjacent-skin-XL_comparing SC-Keloid vs. (SC-Myel, SC-Nonmyel) |             |              |       |       |           |               |                 |                 |
|-----------------------------------------------------------------------------------------------|-------------|--------------|-------|-------|-----------|---------------|-----------------|-----------------|
| gene                                                                                          | p_val       | avg_log2FC   | pct.1 | pct.2 | p_val_adj | Foldchange_UP | Foldchange_DOWN | Ratio_pct1_pct2 |
| FRZB                                                                                          | 0,543117005 | -0,084776914 | 0     | 0,012 | 1         | 0,942930331   | 1,060523739     | 0               |
| PRKCD                                                                                         | 0,006461838 | -0,084792083 | 0,188 | 0,051 | 1         | 0,942920417   | 1,060534889     | 3,68627451      |
| POLR1C                                                                                        | 0,141661018 | -0,084796765 | 0,094 | 0,035 | 1         | 0,942917357   | 1,060538331     | 2,685714286     |
| MSH6                                                                                          | 0,869419867 | -0,084824216 | 0,094 | 0,082 | 1         | 0,942899416   | 1,060558511     | 1,146341463     |
| USF1                                                                                          | 0,004180266 | -0,084849624 | 0,125 | 0,023 | 1         | 0,94288281    | 1,060577189     | 5,434782609     |
| PDIA2                                                                                         | 0,428872689 | -0,084920833 | 0     | 0,02  | 1         | 0,942836272   | 1,060629538     | 0               |
| SLC41A3                                                                                       | 0,010102949 | -0,08498892  | 0,188 | 0,055 | 1         | 0,942791776   | 1,060679596     | 3,418181818     |
| IGSF3                                                                                         | 0,30793671  | -0,085029853 | 0,062 | 0,027 | 1         | 0,942765028   | 1,06070969      | 2,296296296     |
| NDRG3                                                                                         | 0,077467066 | -0,085037547 | 0,156 | 0,062 | 1         | 0,94276       | 1,060715347     | 2,516129032     |
| FKRP                                                                                          | 0,094667448 | -0,085072795 | 0,094 | 0,031 | 1         | 0,942736966   | 1,060741263     | 3,032258065     |
| TTC8                                                                                          | 0,181472976 | -0,08513374  | 0,094 | 0,039 | 1         | 0,942697142   | 1,060786073     | 2,41025641      |
| MLH3                                                                                          | 0,004107327 | -0,085139881 | 0,156 | 0,035 | 1         | 0,942693129   | 1,060790589     | 4,457142857     |
| PHAF1                                                                                         | 0,428872689 | -0,085143445 | 0     | 0,02  | 1         | 0,942690801   | 1,060793209     | 0               |
| UBOX5                                                                                         | 0,543117005 | -0,085164594 | 0     | 0,012 | 1         | 0,942676982   | 1,06080876      | 0               |
| SEL1L                                                                                         | 0,013651996 | -0,085276478 | 0,438 | 0,188 | 1         | 0,942603878   | 1,060891031     | 2,329787234     |
| ASB8                                                                                          | 0,030992783 | -0,085298377 | 0,156 | 0,051 | 1         | 0,94258957    | 1,060907134     | 3,058823529     |
| GRIA2                                                                                         | 0,38481627  | -0,085389803 | 0     | 0,023 | 1         | 0,942529839   | 1,060974368     | 0               |
| WASF2                                                                                         | 0,059010151 | -0,085405192 | 0,656 | 0,348 | 1         | 0,942519785   | 1,060985685     | 1,885057471     |
| CCDC173                                                                                       | 0,480650464 | -0,08543414  | 0     | 0,016 | 1         | 0,942500873   | 1,061006975     | 0               |
| TOMM70                                                                                        | 0,044149392 | -0,085436566 | 0,188 | 0,07  | 1         | 0,942499288   | 1,061008759     | 2,685714286     |
| UBE3C                                                                                         | 0,0001347   | -0,085512997 | 0,312 | 0,074 | 1         | 0,942449358   | 1,06106497      | 4,216216216     |
| SYPL1                                                                                         | 0,02802379  | -0,085518241 | 0,656 | 0,324 | 1         | 0,942445932   | 1,061068827     | 2,024691358     |
| SLX1A                                                                                         | 0,386325862 | -0,085531642 | 0,031 | 0,012 | 1         | 0,942437178   | 1,061078683     | 2,583333333     |
| ARL17A                                                                                        | 0,428872689 | -0,085567069 | 0     | 0,02  | 1         | 0,942414036   | 1,061104739     | 0               |
| PRKAA2                                                                                        | 0,38481627  | -0,085596444 | 0     | 0,023 | 1         | 0,942394847   | 1,061126346     | 0               |
| FLNC                                                                                          | 0,062914349 | -0,085704598 | 0,094 | 0,027 | 1         | 0,942324202   | 1,061205897     | 3,481481481     |
| IQCE                                                                                          | 0,221757959 | -0,085731646 | 0,062 | 0,023 | 1         | 0,942306535   | 1,061225794     | 2,695652174     |
| NAGPA                                                                                         | 0,569359326 | -0,085745646 | 0,062 | 0,039 | 1         | 0,942297391   | 1,061236091     | 1,58974359      |
| PAOX                                                                                          | 0,226351275 | -0,085805927 | 0,031 | 0,008 | 1         | 0,942258019   | 1,061280435     | 3,875           |
| NPIP4                                                                                         | 0,346686972 | -0,085825752 | 0     | 0,027 | 1         | 0,942245071   | 1,061295018     | 0               |

Supplementary Table 1

| Differentially expressed genes_adjacent-skin-XL_comparing SC-Keloid vs. (SC-Myel, SC-Nonmyel) |             |              |       |       |           |               |                 |                 |
|-----------------------------------------------------------------------------------------------|-------------|--------------|-------|-------|-----------|---------------|-----------------|-----------------|
| gene                                                                                          | p_val       | avg_log2FC   | pct.1 | pct.2 | p_val_adj | Foldchange_UP | Foldchange_DOWN | Ratio_pct1_pct2 |
| GRAMD2A                                                                                       | 0,540537634 | -0,085825916 | 0,031 | 0,016 | 1         | 0,942244964   | 1,061295139     | 1,9375          |
| LINC01560                                                                                     | 0,428872689 | -0,085844284 | 0     | 0,02  | 1         | 0,942232968   | 1,061308651     | 0               |
| IQCK                                                                                          | 0,30793671  | -0,085931412 | 0,062 | 0,027 | 1         | 0,942176065   | 1,061372749     | 2,296296296     |
| ASNSD1                                                                                        | 0,084415749 | -0,085947287 | 0,156 | 0,062 | 1         | 0,942165698   | 1,061384428     | 2,516129032     |
| KMT2D                                                                                         | 0,979143607 | -0,085983029 | 0,031 | 0,031 | 1         | 0,942142357   | 1,061410723     | 1               |
| PDPN                                                                                          | 0,028712073 | -0,086031405 | 0,125 | 0,035 | 1         | 0,942110766   | 1,061446315     | 3,571428571     |
| LIPA                                                                                          | 0,000478083 | -0,086050276 | 0,281 | 0,07  | 1         | 0,942098443   | 1,061460199     | 4,014285714     |
| CCNE1                                                                                         | 0,540537634 | -0,086331717 | 0,031 | 0,016 | 1         | 0,941914676   | 1,061667289     | 1,9375          |
| FOXP4                                                                                         | 0,803745164 | -0,086415826 | 0,062 | 0,051 | 1         | 0,941859764   | 1,061729186     | 1,215686275     |
| TMEM140                                                                                       | 0,38481627  | -0,086442049 | 0     | 0,023 | 1         | 0,941842644   | 1,061748484     | 0               |
| CPT1B                                                                                         | 0,480650464 | -0,086477401 | 0     | 0,016 | 1         | 0,941819566   | 1,061774502     | 0               |
| LINC01136                                                                                     | 0,543117005 | -0,08655504  | 0     | 0,012 | 1         | 0,941768882   | 1,061831643     | 0               |
| SMARCC2                                                                                       | 0,036658896 | -0,086642284 | 0,312 | 0,137 | 1         | 0,941711933   | 1,061895857     | 2,277372263     |
| ZFHX2                                                                                         | 0,428872689 | -0,086643013 | 0     | 0,02  | 1         | 0,941711457   | 1,061896394     | 0               |
| GTF3C2                                                                                        | 0,016858455 | -0,086685253 | 0,125 | 0,031 | 1         | 0,941683885   | 1,061927485     | 4,032258065     |
| RANBP3                                                                                        | 0,032268627 | -0,086889972 | 0,156 | 0,051 | 1         | 0,94155027    | 1,062078183     | 3,058823529     |
| RARB                                                                                          | 0,480650464 | -0,086950451 | 0     | 0,016 | 1         | 0,9415108     | 1,062122708     | 0               |
| ZNF76                                                                                         | 0,098751938 | -0,086982294 | 0,094 | 0,031 | 1         | 0,941490019   | 1,062146151     | 3,032258065     |
| SYTL4                                                                                         | 0,487085433 | -0,086993877 | 0,062 | 0,035 | 1         | 0,941482461   | 1,062154678     | 1,771428571     |
| RFK                                                                                           | 0,007632632 | -0,08706945  | 0,219 | 0,066 | 1         | 0,941433144   | 1,062210319     | 3,318181818     |
| TMC7                                                                                          | 0,80991663  | -0,08721337  | 0,031 | 0,023 | 1         | 0,941339233   | 1,062316288     | 1,347826087     |
| SOX1-OT                                                                                       | 0,38481627  | -0,087222272 | 0     | 0,023 | 1         | 0,941333425   | 1,062322843     | 0               |
| GON4L                                                                                         | 0,138088965 | -0,087232772 | 0,312 | 0,172 | 1         | 0,941326574   | 1,062330575     | 1,813953488     |
| CFAP44                                                                                        | 0,428872689 | -0,087353156 | 0     | 0,02  | 1         | 0,941248029   | 1,062419223     | 0               |
| DDX31                                                                                         | 0,80991663  | -0,087372351 | 0,031 | 0,023 | 1         | 0,941235506   | 1,062433359     | 1,347826087     |
| GJB1                                                                                          | 0,480650464 | -0,087580032 | 0     | 0,016 | 1         | 0,941100022   | 1,062586311     | 0               |
| PDLIM3                                                                                        | 0,008622858 | -0,087591443 | 0,406 | 0,168 | 1         | 0,941092578   | 1,062594715     | 2,416666667     |
| LPCAT4                                                                                        | 0,141661018 | -0,087593451 | 0,094 | 0,035 | 1         | 0,941091268   | 1,062596194     | 2,685714286     |
| PTBP3                                                                                         | 0,011597498 | -0,08759551  | 0,219 | 0,07  | 1         | 0,941089925   | 1,062597711     | 3,128571429     |
| SIRT3                                                                                         | 0,087959196 | -0,087613135 | 0,062 | 0,016 | 1         | 0,941078428   | 1,062610693     | 3,875           |

Supplementary Table 1

| Differentially expressed genes_adjacent-skin-XL_ comparing SC-Keloid vs. (SC-Myel, SC-Nonmyel) |             |              |       |       |           |               |                 |                 |
|------------------------------------------------------------------------------------------------|-------------|--------------|-------|-------|-----------|---------------|-----------------|-----------------|
| gene                                                                                           | p_val       | avg_log2FC   | pct.1 | pct.2 | p_val_adj | Foldchange_UP | Foldchange_DOWN | Ratio_pct1_pct2 |
| F2RL2                                                                                          | 0,480650464 | -0,08761628  | 0     | 0,016 | 1         | 0,941076376   | 1,062613009     | 0               |
| NGLY1                                                                                          | 0,003791564 | -0,087641626 | 0,188 | 0,047 | 1         | 0,941059844   | 1,062631677     | 4               |
| GCN1                                                                                           | 0,020463101 | -0,087666877 | 0,156 | 0,047 | 1         | 0,941043373   | 1,062650276     | 3,319148936     |
| HDX                                                                                            | 0,682170546 | -0,08767791  | 0,031 | 0,02  | 1         | 0,941036176   | 1,062658403     | 1,55            |
| PHOSPHO2                                                                                       | 0,480650464 | -0,08771295  | 0     | 0,016 | 1         | 0,94101332    | 1,062684213     | 0               |
| EXOSC3                                                                                         | 0,887104347 | -0,087728171 | 0,031 | 0,035 | 1         | 0,941003392   | 1,062695425     | 0,885714286     |
| GCH1                                                                                           | 0,38481627  | -0,087744568 | 0     | 0,023 | 1         | 0,940992697   | 1,062707504     | 0               |
| EFNA3                                                                                          | 0,087959196 | -0,087775833 | 0,062 | 0,016 | 1         | 0,940972305   | 1,062730534     | 3,875           |
| PEX14                                                                                          | 0,063925678 | -0,087839989 | 0,094 | 0,027 | 1         | 0,940930461   | 1,062777794     | 3,481481481     |
| SPTB                                                                                           | 0,543117005 | -0,087883463 | 0     | 0,012 | 1         | 0,940902108   | 1,06280982      | 0               |
| ZNF383                                                                                         | 0,898329199 | -0,087927451 | 0,031 | 0,035 | 1         | 0,94087342    | 1,062842225     | 0,885714286     |
| CDC14A                                                                                         | 0,150155729 | -0,088001893 | 0,062 | 0,02  | 1         | 0,940824873   | 1,062897069     | 3,1             |
| ROBO1                                                                                          | 0,141661018 | -0,088025726 | 0,094 | 0,035 | 1         | 0,940809331   | 1,062914628     | 2,685714286     |
| ZEB2-AS1                                                                                       | 0,985101745 | -0,088053723 | 0,031 | 0,031 | 1         | 0,940791074   | 1,062935255     | 1               |
| MFSD6                                                                                          | 0,019236133 | -0,088116002 | 0,094 | 0,02  | 1         | 0,940750462   | 1,062981142     | 4,7             |
| LAMB3                                                                                          | 0,80991663  | -0,088167298 | 0,031 | 0,023 | 1         | 0,940717013   | 1,063018937     | 1,347826087     |
| AP5Z1                                                                                          | 0,028712073 | -0,088167884 | 0,125 | 0,035 | 1         | 0,940716632   | 1,063019369     | 3,571428571     |
| RWDD2B                                                                                         | 0,682170546 | -0,08825566  | 0,031 | 0,02  | 1         | 0,940659398   | 1,063084047     | 1,55            |
| CDK8                                                                                           | 0,027811527 | -0,088358948 | 0,125 | 0,035 | 1         | 0,940592056   | 1,06316016      | 3,571428571     |
| PRR4                                                                                           | 0,682170546 | -0,088399351 | 0,031 | 0,02  | 1         | 0,940565715   | 1,063189934     | 1,55            |
| YDJC                                                                                           | 0,540537634 | -0,088399776 | 0,031 | 0,016 | 1         | 0,940565437   | 1,063190247     | 1,9375          |
| KCNK1                                                                                          | 0,480650464 | -0,088430319 | 0     | 0,016 | 1         | 0,940545525   | 1,063212756     | 0               |
| BUD13                                                                                          | 7,15271E-05 | -0,088553305 | 0,188 | 0,027 | 1         | 0,940465349   | 1,063303396     | 6,962962963     |
| MIR155HG                                                                                       | 0,480650464 | -0,088553807 | 0     | 0,016 | 1         | 0,940465022   | 1,063303766     | 0               |
| TRIM39                                                                                         | 0,80991663  | -0,088610852 | 0,031 | 0,023 | 1         | 0,940427837   | 1,06334581      | 1,347826087     |
| LARP6                                                                                          | 0,006112579 | -0,088623158 | 0,281 | 0,094 | 1         | 0,940419815   | 1,063354881     | 2,989361702     |
| NHEJ1                                                                                          | 0,682170546 | -0,088639817 | 0,031 | 0,02  | 1         | 0,940408956   | 1,063367159     | 1,55            |
| THNSL2                                                                                         | 0,006360213 | -0,088706209 | 0,188 | 0,051 | 1         | 0,94036568    | 1,063416096     | 3,68627451      |
| FAM161B                                                                                        | 0,682170546 | -0,088746977 | 0,031 | 0,02  | 1         | 0,940339107   | 1,063446147     | 1,55            |
| PRXL2B                                                                                         | 0,020165275 | -0,088784325 | 0,156 | 0,047 | 1         | 0,940314764   | 1,063473677     | 3,319148936     |

Supplementary Table 1

| Differentially expressed genes_adjacent-skin-XL_comparing SC-Keloid vs. (SC-Myel, SC-Nonmyel) |             |              |       |       |           |               |                 |                 |
|-----------------------------------------------------------------------------------------------|-------------|--------------|-------|-------|-----------|---------------|-----------------|-----------------|
| gene                                                                                          | p_val       | avg_log2FC   | pct.1 | pct.2 | p_val_adj | Foldchange_UP | Foldchange_DOWN | Ratio_pct1_pct2 |
| OAF                                                                                           | 0,000191716 | -0,088832959 | 0,469 | 0,145 | 1         | 0,940283066   | 1,063509528     | 3,234482759     |
| LYSMD3                                                                                        | 0,015740914 | -0,088851773 | 0,188 | 0,059 | 1         | 0,940270804   | 1,063523398     | 3,186440678     |
| SDHAF1                                                                                        | 0,056601693 | -0,08907061  | 0,188 | 0,074 | 1         | 0,940128188   | 1,063684732     | 2,540540541     |
| SLC9A1                                                                                        | 0,682170546 | -0,089112702 | 0,031 | 0,02  | 1         | 0,94010076    | 1,063715766     | 1,55            |
| HCFC1                                                                                         | 0,033260329 | -0,089134074 | 0,188 | 0,066 | 1         | 0,940086833   | 1,063731524     | 2,848484848     |
| FGGY                                                                                          | 0,396289917 | -0,089175626 | 0,062 | 0,031 | 1         | 0,940059757   | 1,063762162     | 2               |
| USP21                                                                                         | 0,543117005 | -0,089246895 | 0     | 0,012 | 1         | 0,94001332    | 1,063814712     | 0               |
| PPWD1                                                                                         | 0,06592651  | -0,089296158 | 0,125 | 0,043 | 1         | 0,939981222   | 1,063851039     | 2,906976744     |
| TSNARE1                                                                                       | 0,428872689 | -0,089296648 | 0     | 0,02  | 1         | 0,939980903   | 1,0638514       | 0               |
| GATD3A                                                                                        | 0,924392442 | -0,089504913 | 0,031 | 0,027 | 1         | 0,939845219   | 1,064004987     | 1,148148148     |
| GDF11                                                                                         | 0,031413167 | -0,08953786  | 0,156 | 0,051 | 1         | 0,939823756   | 1,064029286     | 3,058823529     |
| ITIH3                                                                                         | 0,428872689 | -0,089585391 | 0     | 0,02  | 1         | 0,939792793   | 1,064064342     | 0               |
| ZNF436-AS1                                                                                    | 0,887104347 | -0,089604705 | 0,031 | 0,035 | 1         | 0,939780211   | 1,064078588     | 0,885714286     |
| TMEM88                                                                                        | 0,480650464 | -0,089735118 | 0     | 0,016 | 1         | 0,939695263   | 1,06417478      | 0               |
| ZNF8                                                                                          | 0,428872689 | -0,089783436 | 0     | 0,02  | 1         | 0,939663792   | 1,064210421     | 0               |
| SAMD9                                                                                         | 0,30793671  | -0,089816303 | 0,062 | 0,027 | 1         | 0,939642385   | 1,064234666     | 2,296296296     |
| ST6GALNAC5                                                                                    | 0,458984864 | -0,089823187 | 0,031 | 0,066 | 1         | 0,939637902   | 1,064239744     | 0,46969697      |
| MTARC1                                                                                        | 0,480650464 | -0,089857604 | 0     | 0,016 | 1         | 0,939615486   | 1,064265133     | 0               |
| GTPBP4                                                                                        | 0,021727091 | -0,089866282 | 0,219 | 0,078 | 1         | 0,939609834   | 1,064271534     | 2,807692308     |
| TTL9                                                                                          | 0,428872689 | -0,089872461 | 0     | 0,02  | 1         | 0,93960581    | 1,064276093     | 0               |
| SCNM1                                                                                         | 0,163771487 | -0,089901435 | 0,125 | 0,055 | 1         | 0,93958694    | 1,064297467     | 2,272727273     |
| ASAP1                                                                                         | 0,001026737 | -0,089913649 | 0,312 | 0,09  | 1         | 0,939578985   | 1,064306478     | 3,466666667     |
| ZNF595                                                                                        | 0,480650464 | -0,08991465  | 0     | 0,016 | 1         | 0,939578333   | 1,064307216     | 0               |
| CLEC16A                                                                                       | 0,38481627  | -0,089938157 | 0     | 0,023 | 1         | 0,939563024   | 1,064324558     | 0               |
| ZNF57                                                                                         | 0,924392442 | -0,08993937  | 0,031 | 0,027 | 1         | 0,939562234   | 1,064325453     | 1,148148148     |
| NUBPL                                                                                         | 0,682170546 | -0,089969223 | 0,031 | 0,02  | 1         | 0,939542792   | 1,064347477     | 1,55            |
| NUP214                                                                                        | 0,409924554 | -0,090013805 | 0,094 | 0,055 | 1         | 0,939513759   | 1,064380367     | 1,709090909     |
| RRN3                                                                                          | 0,633153567 | -0,09007477  | 0,031 | 0,051 | 1         | 0,939474058   | 1,064425347     | 0,607843137     |
| RSAD2                                                                                         | 0,543117005 | -0,090107958 | 0     | 0,012 | 1         | 0,939452447   | 1,0644449833    | 0               |
| AURKB                                                                                         | 0,979143607 | -0,090113795 | 0,031 | 0,031 | 1         | 0,939448646   | 1,06445414      | 1               |



Supplementary Table 1

| Differentially expressed genes_adjacent-skin-XL_ comparing SC-Keloid vs. (SC-Myel, SC-Nonmyel) |             |              |       |       |           |               |                 |                 |
|------------------------------------------------------------------------------------------------|-------------|--------------|-------|-------|-----------|---------------|-----------------|-----------------|
| gene                                                                                           | p_val       | avg_log2FC   | pct.1 | pct.2 | p_val_adj | Foldchange_UP | Foldchange_DOWN | Ratio_pct1_pct2 |
| NCOA3                                                                                          | 0,073703017 | -0,090129028 | 0,281 | 0,133 | 1         | 0,939438726   | 1,064465379     | 2,112781955     |
| UBE2QL1                                                                                        | 0,543117005 | -0,090154501 | 0     | 0,012 | 1         | 0,939422139   | 1,064484174     | 0               |
| S100A7                                                                                         | 0,428872689 | -0,090178025 | 0     | 0,02  | 1         | 0,939406821   | 1,064501532     | 0               |
| MCM6                                                                                           | 0,480650464 | -0,090337764 | 0     | 0,016 | 1         | 0,939302814   | 1,064619402     | 0               |
| PTPN4                                                                                          | 0,008956837 | -0,090451525 | 0,125 | 0,027 | 1         | 0,93922875    | 1,064703354     | 4,62962963      |
| SERGEF                                                                                         | 0,279554151 | -0,090531115 | 0,125 | 0,066 | 1         | 0,939176936   | 1,064762093     | 1,893939394     |
| ZC3H8                                                                                          | 0,141661018 | -0,090538725 | 0,094 | 0,035 | 1         | 0,939171982   | 1,06476771      | 2,685714286     |
| SETD4                                                                                          | 0,352307957 | -0,09058456  | 0,094 | 0,051 | 1         | 0,939142145   | 1,064801538     | 1,843137255     |
| ABTB1                                                                                          | 0,355251835 | -0,090638781 | 0,094 | 0,051 | 1         | 0,939106849   | 1,064841557     | 1,843137255     |
| GNAZ                                                                                           | 0,480650464 | -0,090639554 | 0     | 0,016 | 1         | 0,939106347   | 1,064842128     | 0               |
| ALG10                                                                                          | 0,80991663  | -0,090697274 | 0,031 | 0,023 | 1         | 0,939068775   | 1,064884731     | 1,347826087     |
| FCF1                                                                                           | 0,044552052 | -0,090721167 | 0,125 | 0,039 | 1         | 0,939053223   | 1,064902367     | 3,205128205     |
| CCT6B                                                                                          | 0,008148126 | -0,090738788 | 0,094 | 0,016 | 1         | 0,939041753   | 1,064915374     | 5,875           |
| RAB5A                                                                                          | 0,009784256 | -0,090774705 | 0,5   | 0,211 | 1         | 0,939018375   | 1,064941887     | 2,369668246     |
| FMC1                                                                                           | 0,001797983 | -0,090804817 | 0,406 | 0,137 | 1         | 0,938998776   | 1,064964114     | 2,96350365      |
| APBA1                                                                                          | 0,30793671  | -0,090885848 | 0,062 | 0,027 | 1         | 0,938946038   | 1,065023931     | 2,296296296     |
| TBC1D22B                                                                                       | 0,540537634 | -0,090904757 | 0,031 | 0,016 | 1         | 0,938933731   | 1,06503789      | 1,9375          |
| CTR9                                                                                           | 0,24851603  | -0,09095277  | 0,094 | 0,043 | 1         | 0,938902484   | 1,065073335     | 2,186046512     |
| RSKR                                                                                           | 0,480650464 | -0,091022171 | 0     | 0,016 | 1         | 0,938857319   | 1,065124572     | 0               |
| PRDX2                                                                                          | 0,015844528 | -0,091070952 | 0,438 | 0,184 | 1         | 0,938825574   | 1,065160587     | 2,380434783     |
| DUS3L                                                                                          | 0,578217897 | -0,091094011 | 0,062 | 0,039 | 1         | 0,938810569   | 1,065177612     | 1,58974359      |
| TEPSIN                                                                                         | 0,80991663  | -0,091193225 | 0,031 | 0,023 | 1         | 0,938746009   | 1,065250867     | 1,347826087     |
| HPS3                                                                                           | 0,191913299 | -0,091206912 | 0,094 | 0,039 | 1         | 0,938737104   | 1,065260972     | 2,41025641      |
| PPP1R1C                                                                                        | 0,346686972 | -0,091272335 | 0     | 0,027 | 1         | 0,938694535   | 1,065309281     | 0               |
| NLRC5                                                                                          | 0,682170546 | -0,091303744 | 0,031 | 0,02  | 1         | 0,938674099   | 1,065332474     | 1,55            |
| PAQR3                                                                                          | 0,198962585 | -0,091309432 | 0,125 | 0,059 | 1         | 0,938670398   | 1,065336674     | 2,118644068     |
| RFNG                                                                                           | 0,019958062 | -0,09131923  | 0,312 | 0,125 | 1         | 0,938664023   | 1,065343909     | 2,496           |
| CORO7                                                                                          | 0,794711529 | -0,091453834 | 0,062 | 0,051 | 1         | 0,93857645    | 1,065443311     | 1,215686275     |
| ZNF646                                                                                         | 0,543117005 | -0,091477233 | 0     | 0,012 | 1         | 0,938561227   | 1,065460592     | 0               |
| SPATA7                                                                                         | 0,150155729 | -0,091491694 | 0,062 | 0,02  | 1         | 0,938551819   | 1,065471271     | 3,1             |

Supplementary Table 1

| Differentially expressed genes_adjacent-skin-XL_ comparing SC-Keloid vs. (SC-Myel, SC-Nonmyel) |             |              |       |       |           |               |                 |                 |
|------------------------------------------------------------------------------------------------|-------------|--------------|-------|-------|-----------|---------------|-----------------|-----------------|
| gene                                                                                           | p_val       | avg_log2FC   | pct.1 | pct.2 | p_val_adj | Foldchange_UP | Foldchange_DOWN | Ratio_pct1_pct2 |
| ARHGEF9                                                                                        | 0,351727998 | -0,091605083 | 0,125 | 0,07  | 1         | 0,938478056   | 1,065555015     | 1,785714286     |
| STRIP2                                                                                         | 0,543117005 | -0,091643178 | 0     | 0,012 | 1         | 0,938453275   | 1,065583153     | 0               |
| CCDC122                                                                                        | 0,979143607 | -0,091678626 | 0,031 | 0,031 | 1         | 0,938430217   | 1,065609335     | 1               |
| MTERF2                                                                                         | 0,191913299 | -0,091701467 | 0,094 | 0,039 | 1         | 0,93841536    | 1,065626206     | 2,41025641      |
| COPS3                                                                                          | 0,006012768 | -0,091756346 | 0,344 | 0,121 | 1         | 0,938379664   | 1,065666742     | 2,842975207     |
| TLCD2                                                                                          | 0,428872689 | -0,091768038 | 0     | 0,02  | 1         | 0,938372059   | 1,065675379     | 0               |
| UBALD1                                                                                         | 0,004895615 | -0,091788751 | 0,219 | 0,062 | 1         | 0,938358587   | 1,065690679     | 3,532258065     |
| PRR3                                                                                           | 0,396289917 | -0,091821295 | 0,062 | 0,031 | 1         | 0,93833742    | 1,065714719     | 2               |
| AZ12                                                                                           | 0,004409647 | -0,091837077 | 0,281 | 0,09  | 1         | 0,938327155   | 1,065726377     | 3,122222222     |
| C2CD2                                                                                          | 0,224763613 | -0,091853008 | 0,062 | 0,023 | 1         | 0,938316794   | 1,065738146     | 2,695652174     |
| MYO1G                                                                                          | 0,543117005 | -0,091872568 | 0     | 0,012 | 1         | 0,938304073   | 1,065752595     | 0               |
| WWC2                                                                                           | 0,01489812  | -0,09189341  | 0,188 | 0,059 | 1         | 0,938290517   | 1,065767992     | 3,186440678     |
| ZBTB18                                                                                         | 0,38481627  | -0,091909267 | 0     | 0,023 | 1         | 0,938280205   | 1,065779705     | 0               |
| LRIF1                                                                                          | 0,141661018 | -0,092044023 | 0,094 | 0,035 | 1         | 0,938192567   | 1,065879261     | 2,685714286     |
| LRRC69                                                                                         | 0,480650464 | -0,09213213  | 0     | 0,016 | 1         | 0,938135273   | 1,065944356     | 0               |
| CHCHD7                                                                                         | 0,007958785 | -0,092164526 | 0,219 | 0,066 | 1         | 0,938114207   | 1,065968293     | 3,318181818     |
| TKFC                                                                                           | 0,80991663  | -0,092203011 | 0,031 | 0,023 | 1         | 0,938089183   | 1,065996729     | 1,347826087     |
| GPRC5B                                                                                         | 0,428872689 | -0,09221424  | 0     | 0,02  | 1         | 0,938081881   | 1,066005026     | 0               |
| CSTF3                                                                                          | 0,012380103 | -0,092346514 | 0,156 | 0,043 | 1         | 0,937995877   | 1,066102767     | 3,627906977     |
| FAM117B                                                                                        | 0,480650464 | -0,092476508 | 0     | 0,016 | 1         | 0,937911363   | 1,066198833     | 0               |
| CLDN1                                                                                          | 0,540537634 | -0,092533613 | 0,031 | 0,016 | 1         | 0,937874239   | 1,066241036     | 1,9375          |
| RTN4RL2                                                                                        | 0,428872689 | -0,092559389 | 0     | 0,02  | 1         | 0,937857482   | 1,066260086     | 0               |
| FRMD1                                                                                          | 0,38481627  | -0,092611593 | 0     | 0,023 | 1         | 0,937823546   | 1,06629867      | 0               |
| MIR22HG                                                                                        | 0,067638227 | -0,092626524 | 0,188 | 0,078 | 1         | 0,937813841   | 1,066309705     | 2,41025641      |
| SCARF2                                                                                         | 0,428872689 | -0,092658212 | 0     | 0,02  | 1         | 0,937793242   | 1,066333126     | 0               |
| GSAP                                                                                           | 0,80991663  | -0,092662484 | 0,031 | 0,023 | 1         | 0,937790465   | 1,066336284     | 1,347826087     |
| QPRT                                                                                           | 0,924392442 | -0,092723612 | 0,031 | 0,027 | 1         | 0,937750731   | 1,066381466     | 1,148148148     |
| PISD                                                                                           | 0,063925678 | -0,092836165 | 0,094 | 0,027 | 1         | 0,937677574   | 1,066464665     | 3,481481481     |
| KLHDC9                                                                                         | 0,480650464 | -0,092853055 | 0     | 0,016 | 1         | 0,937666597   | 1,06647715      | 0               |
| CHST6                                                                                          | 0,682170546 | -0,092998347 | 0,031 | 0,02  | 1         | 0,937572171   | 1,066584559     | 1,55            |

Supplementary Table 1

| Differentially expressed genes_adjacent-skin-XL_comparing SC-Keloid vs. (SC-Myel, SC-Nonmyel) |             |              |       |       |           |               |                 |                 |
|-----------------------------------------------------------------------------------------------|-------------|--------------|-------|-------|-----------|---------------|-----------------|-----------------|
| gene                                                                                          | p_val       | avg_log2FC   | pct.1 | pct.2 | p_val_adj | Foldchange_UP | Foldchange_DOWN | Ratio_pct1_pct2 |
| MIOS                                                                                          | 0,06592651  | -0,093034259 | 0,125 | 0,043 | 1         | 0,937548833   | 1,066611109     | 2,906976744     |
| RAB2B                                                                                         | 0,737388712 | -0,093143075 | 0,062 | 0,047 | 1         | 0,93747812    | 1,066691562     | 1,319148936     |
| ZNF263                                                                                        | 0,641781411 | -0,093169767 | 0,031 | 0,051 | 1         | 0,937460776   | 1,066711297     | 0,607843137     |
| SH3PXD2A                                                                                      | 0,031803489 | -0,093193662 | 0,625 | 0,324 | 1         | 0,937445249   | 1,066728965     | 1,929012346     |
| TTC9C                                                                                         | 0,139907281 | -0,093227828 | 0,094 | 0,035 | 1         | 0,937423048   | 1,066754228     | 2,685714286     |
| TELO2                                                                                         | 0,304406192 | -0,093282365 | 0,062 | 0,027 | 1         | 0,937387613   | 1,066794554     | 2,296296296     |
| TSPAN7                                                                                        | 0,663576959 | -0,093292999 | 0,062 | 0,043 | 1         | 0,937380703   | 1,066802417     | 1,441860465     |
| PRDM4                                                                                         | 0,755689148 | -0,093353578 | 0,062 | 0,047 | 1         | 0,937341343   | 1,066847213     | 1,319148936     |
| NFYC                                                                                          | 0,01158477  | -0,093429521 | 0,25  | 0,086 | 1         | 0,937292003   | 1,066903374     | 2,906976744     |
| PCDHGB7                                                                                       | 0,386325862 | -0,09344237  | 0,031 | 0,012 | 1         | 0,937283655   | 1,066912876     | 2,583333333     |
| RABL2A                                                                                        | 0,478627389 | -0,093443661 | 0,062 | 0,035 | 1         | 0,937282816   | 1,066913831     | 1,771428571     |
| CTDSPL                                                                                        | 0,00660872  | -0,093470655 | 0,312 | 0,109 | 1         | 0,937265279   | 1,066933793     | 2,862385321     |
| FBXO46                                                                                        | 0,428872689 | -0,093470747 | 0     | 0,02  | 1         | 0,93726522    | 1,066933861     | 0               |
| SNRNP35                                                                                       | 0,24851603  | -0,093486859 | 0,094 | 0,043 | 1         | 0,937254753   | 1,066945777     | 2,186046512     |
| CCDC191                                                                                       | 0,80991663  | -0,09354217  | 0,031 | 0,023 | 1         | 0,93721882    | 1,066986683     | 1,347826087     |
| SEC14L5                                                                                       | 0,38481627  | -0,093547657 | 0     | 0,023 | 1         | 0,937215255   | 1,066990741     | 0               |
| ZMAT5                                                                                         | 0,00187651  | -0,093558738 | 0,219 | 0,055 | 1         | 0,937208057   | 1,066998936     | 3,981818182     |
| MAN2A1                                                                                        | 0,021653988 | -0,093587707 | 0,25  | 0,094 | 1         | 0,937189238   | 1,067020362     | 2,659574468     |
| DMTN                                                                                          | 0,480650464 | -0,093588049 | 0     | 0,016 | 1         | 0,937189016   | 1,067020615     | 0               |
| CDHR1                                                                                         | 0,543117005 | -0,093643266 | 0     | 0,012 | 1         | 0,937153147   | 1,067061454     | 0               |
| PLIN2                                                                                         | 0,927044416 | -0,093655869 | 0,062 | 0,066 | 1         | 0,93714496    | 1,067070776     | 0,939393939     |
| THAP7-AS1                                                                                     | 0,30793671  | -0,093657381 | 0,062 | 0,027 | 1         | 0,937143979   | 1,067071894     | 2,296296296     |
| CAVIN2                                                                                        | 0,428872689 | -0,093710049 | 0     | 0,02  | 1         | 0,937109767   | 1,06711085      | 0               |
| TMEM191C                                                                                      | 0,480650464 | -0,093729408 | 0     | 0,016 | 1         | 0,937097193   | 1,067125169     | 0               |
| PELP1                                                                                         | 0,002053304 | -0,093757325 | 0,156 | 0,031 | 1         | 0,937079059   | 1,067145819     | 5,032258065     |
| POLL                                                                                          | 0,236345884 | -0,093800303 | 0,094 | 0,043 | 1         | 0,937051144   | 1,06717761      | 2,186046512     |
| NPFFR1                                                                                        | 0,543117005 | -0,093806819 | 0     | 0,012 | 1         | 0,937046912   | 1,06718243      | 0               |
| FIG4                                                                                          | 0,746521062 | -0,094064933 | 0,062 | 0,047 | 1         | 0,936879279   | 1,067373378     | 1,319148936     |
| CMTM4                                                                                         | 0,480650464 | -0,094075209 | 0     | 0,016 | 1         | 0,936872605   | 1,06738098      | 0               |
| GKAP1                                                                                         | 0,979143607 | -0,094088889 | 0,031 | 0,031 | 1         | 0,936863722   | 1,067391101     | 1               |

Supplementary Table 1

| Differentially expressed genes_adjacent-skin-XL_comparing SC-Keloid vs. (SC-Myel, SC-Nonmyel) |             |              |       |       |           |               |                 |                 |
|-----------------------------------------------------------------------------------------------|-------------|--------------|-------|-------|-----------|---------------|-----------------|-----------------|
| gene                                                                                          | p_val       | avg_log2FC   | pct.1 | pct.2 | p_val_adj | Foldchange_UP | Foldchange_DOWN | Ratio_pct1_pct2 |
| DDX39A                                                                                        | 0,005265092 | -0,09409083  | 0,375 | 0,137 | 1         | 0,936862461   | 1,067392537     | 2,737226277     |
| C2orf92                                                                                       | 0,540537634 | -0,094135877 | 0,031 | 0,016 | 1         | 0,936833209   | 1,067425866     | 1,9375          |
| USP3                                                                                          | 0,654515972 | -0,094258236 | 0,062 | 0,043 | 1         | 0,936753757   | 1,067516402     | 1,441860465     |
| SSX2IP                                                                                        | 0,386325862 | -0,094260903 | 0,031 | 0,012 | 1         | 0,936752025   | 1,067518375     | 2,583333333     |
| IFT172                                                                                        | 0,80991663  | -0,094297407 | 0,031 | 0,023 | 1         | 0,936728323   | 1,067545386     | 1,347826087     |
| RAE1                                                                                          | 0,00372725  | -0,09430568  | 0,188 | 0,047 | 1         | 0,936722952   | 1,067551508     | 4               |
| ZNF14                                                                                         | 0,428872689 | -0,094439563 | 0     | 0,02  | 1         | 0,936636028   | 1,067650582     | 0               |
| SLC38A9                                                                                       | 0,428872689 | -0,094504247 | 0     | 0,02  | 1         | 0,936594034   | 1,067698452     | 0               |
| FAM228B                                                                                       | 0,264732918 | -0,094514961 | 0,156 | 0,086 | 1         | 0,936587079   | 1,067706381     | 1,813953488     |
| ATL3                                                                                          | 0,000702579 | -0,094675863 | 0,375 | 0,113 | 1         | 0,936482627   | 1,067825468     | 3,318584071     |
| KCND1                                                                                         | 0,386325862 | -0,094707134 | 0,031 | 0,012 | 1         | 0,936462329   | 1,067848614     | 2,583333333     |
| LETM1                                                                                         | 0,002540231 | -0,094725431 | 0,25  | 0,07  | 1         | 0,936450453   | 1,067862156     | 3,571428571     |
| TRMT9B                                                                                        | 0,803381388 | -0,094772912 | 0,031 | 0,023 | 1         | 0,936419633   | 1,067897302     | 1,347826087     |
| PPP1R13B                                                                                      | 0,682170546 | -0,094814617 | 0,031 | 0,02  | 1         | 0,936392564   | 1,067928173     | 1,55            |
| SEPTIN3                                                                                       | 0,38481627  | -0,095021196 | 0     | 0,023 | 1         | 0,936258492   | 1,0680811       | 0               |
| HES6                                                                                          | 0,011438702 | -0,095043492 | 0,281 | 0,102 | 1         | 0,936244023   | 1,068097606     | 2,754901961     |
| E2F6                                                                                          | 0,141661018 | -0,095130711 | 0,094 | 0,035 | 1         | 0,936187423   | 1,068162181     | 2,685714286     |
| CDC20B                                                                                        | 0,588139692 | -0,095212991 | 0,094 | 0,066 | 1         | 0,936134032   | 1,068223103     | 1,424242424     |
| C2CD2L                                                                                        | 0,150155729 | -0,095235429 | 0,062 | 0,02  | 1         | 0,936119472   | 1,068239717     | 3,1             |
| ZNF441                                                                                        | 0,30793671  | -0,09523618  | 0,062 | 0,027 | 1         | 0,936118985   | 1,068240272     | 2,296296296     |
| IQCC                                                                                          | 0,543117005 | -0,095240893 | 0     | 0,012 | 1         | 0,936115927   | 1,068243762     | 0               |
| SHC2                                                                                          | 0,38481627  | -0,095285744 | 0     | 0,023 | 1         | 0,936086825   | 1,068276973     | 0               |
| STAT6                                                                                         | 0,841804635 | -0,095321335 | 0,094 | 0,105 | 1         | 0,936063732   | 1,068303327     | 0,895238095     |
| CSTF1                                                                                         | 0,224763613 | -0,09534086  | 0,062 | 0,023 | 1         | 0,936051064   | 1,068317786     | 2,695652174     |
| TMEM120B                                                                                      | 0,346686972 | -0,09542148  | 0     | 0,027 | 1         | 0,935998758   | 1,068377486     | 0               |
| MRAS                                                                                          | 0,246047587 | -0,095445777 | 0,094 | 0,043 | 1         | 0,935982994   | 1,068395479     | 2,186046512     |
| DCAF6                                                                                         | 0,46012646  | -0,095490604 | 0,156 | 0,105 | 1         | 0,935953912   | 1,068428677     | 1,485714286     |
| PYGO1                                                                                         | 0,918113127 | -0,095633022 | 0,031 | 0,027 | 1         | 0,935861522   | 1,068534154     | 1,148148148     |
| IDH3G                                                                                         | 0,000101021 | -0,095636248 | 0,469 | 0,133 | 1         | 0,93585943    | 1,068536543     | 3,526315789     |
| PDE8A                                                                                         | 0,000957468 | -0,095744295 | 0,375 | 0,117 | 1         | 0,935789343   | 1,068616572     | 3,205128205     |

Supplementary Table 1

| Differentially expressed genes_adjacent-skin-XL_ comparing SC-Keloid vs. (SC-Myel, SC-Nonmyel) |             |              |       |       |           |               |                 |                 |
|------------------------------------------------------------------------------------------------|-------------|--------------|-------|-------|-----------|---------------|-----------------|-----------------|
| gene                                                                                           | p_val       | avg_log2FC   | pct.1 | pct.2 | p_val_adj | Foldchange_UP | Foldchange_DOWN | Ratio_pct1_pct2 |
| SRCAP                                                                                          | 0,958239549 | -0,095744882 | 0,062 | 0,059 | 1         | 0,935788963   | 1,068617006     | 1,050847458     |
| FAM83H                                                                                         | 0,428872689 | -0,095822509 | 0     | 0,02  | 1         | 0,935738612   | 1,068674507     | 0               |
| BSDC1                                                                                          | 0,077284458 | -0,095939235 | 0,281 | 0,133 | 1         | 0,935662906   | 1,068760975     | 2,112781955     |
| MPV17L                                                                                         | 0,428872689 | -0,095955689 | 0     | 0,02  | 1         | 0,935652235   | 1,068773164     | 0               |
| NBPF14                                                                                         | 0,428872689 | -0,095966394 | 0     | 0,02  | 1         | 0,935645292   | 1,068781095     | 0               |
| NCOA5                                                                                          | 0,396289917 | -0,095981876 | 0,062 | 0,031 | 1         | 0,935635251   | 1,068792565     | 2               |
| CCDC81                                                                                         | 0,543117005 | -0,096068342 | 0     | 0,012 | 1         | 0,935579178   | 1,068856623     | 0               |
| RTL10                                                                                          | 0,80991663  | -0,096136863 | 0,031 | 0,023 | 1         | 0,935534743   | 1,06890739      | 1,347826087     |
| RINT1                                                                                          | 0,979143607 | -0,096201943 | 0,031 | 0,031 | 1         | 0,935492542   | 1,068955609     | 1               |
| BIVM                                                                                           | 0,307936041 | -0,096260007 | 0,062 | 0,027 | 1         | 0,935454892   | 1,068998632     | 2,296296296     |
| CEP152                                                                                         | 0,808271912 | -0,096405186 | 0,062 | 0,051 | 1         | 0,935360762   | 1,069106211     | 1,215686275     |
| SGPL1                                                                                          | 0,130767324 | -0,096407868 | 0,156 | 0,07  | 1         | 0,935359023   | 1,069108199     | 2,228571429     |
| PHF21A                                                                                         | 0,309574808 | -0,096413362 | 0,156 | 0,09  | 1         | 0,935355461   | 1,06911227      | 1,733333333     |
| HEATR6                                                                                         | 0,979143607 | -0,09641512  | 0,031 | 0,031 | 1         | 0,935354321   | 1,069113573     | 1               |
| CTDSPL2                                                                                        | 0,055416701 | -0,096506899 | 0,188 | 0,074 | 1         | 0,935294819   | 1,069181588     | 2,540540541     |
| CHAC1                                                                                          | 0,428872689 | -0,096749038 | 0     | 0,02  | 1         | 0,935137854   | 1,069361052     | 0               |
| ELOVL7                                                                                         | 0,38481627  | -0,096865349 | 0     | 0,023 | 1         | 0,935062466   | 1,069447268     | 0               |
| ZBTB4                                                                                          | 0,092820674 | -0,096880909 | 0,188 | 0,082 | 1         | 0,935052381   | 1,069458803     | 2,292682927     |
| CA11                                                                                           | 0,090467775 | -0,096918588 | 0,125 | 0,047 | 1         | 0,935027961   | 1,069486734     | 2,659574468     |
| PTPRU                                                                                          | 0,592641159 | -0,096922816 | 0,031 | 0,055 | 1         | 0,93502522    | 1,069489869     | 0,563636364     |
| SMIM13                                                                                         | 0,158804529 | -0,096961398 | 0,156 | 0,074 | 1         | 0,935000215   | 1,069518471     | 2,108108108     |
| MEMO1                                                                                          | 0,924392442 | -0,09697894  | 0,031 | 0,027 | 1         | 0,934988846   | 1,069531475     | 1,148148148     |
| ZBTB7B                                                                                         | 0,578217897 | -0,097053153 | 0,062 | 0,039 | 1         | 0,934940751   | 1,069586494     | 1,58974359      |
| MUTYH                                                                                          | 0,241007682 | -0,097058588 | 0,125 | 0,062 | 1         | 0,934937229   | 1,069590523     | 2,016129032     |
| WWC3                                                                                           | 0,107772109 | -0,097118409 | 0,156 | 0,066 | 1         | 0,934898463   | 1,069634874     | 2,363636364     |
| AGL                                                                                            | 0,478627389 | -0,097149302 | 0,062 | 0,035 | 1         | 0,934878444   | 1,069657779     | 1,771428571     |
| IPP                                                                                            | 0,138170297 | -0,09714986  | 0,094 | 0,035 | 1         | 0,934878082   | 1,069658193     | 2,685714286     |
| ASXL3                                                                                          | 0,543117005 | -0,097194341 | 0     | 0,012 | 1         | 0,934849259   | 1,069691173     | 0               |
| COX7A1                                                                                         | 0,025744792 | -0,097202514 | 0,406 | 0,18  | 1         | 0,934843963   | 1,069697233     | 2,255555556     |
| B3GAT1                                                                                         | 0,979143607 | -0,097257547 | 0,031 | 0,031 | 1         | 0,934808303   | 1,069738038     | 1               |

Supplementary Table 1

| Differentially expressed genes_adjacent-skin-XL_ comparing SC-Keloid vs. (SC-Myel, SC-Nonmyel) |             |              |       |       |           |               |                 |                 |
|------------------------------------------------------------------------------------------------|-------------|--------------|-------|-------|-----------|---------------|-----------------|-----------------|
| gene                                                                                           | p_val       | avg_log2FC   | pct.1 | pct.2 | p_val_adj | Foldchange_UP | Foldchange_DOWN | Ratio_pct1_pct2 |
| KANK3                                                                                          | 0,38481627  | -0,097340841 | 0     | 0,023 | 1         | 0,934754333   | 1,069799801     | 0               |
| LRP5                                                                                           | 0,803381388 | -0,097436912 | 0,031 | 0,023 | 1         | 0,934692089   | 1,069871043     | 1,347826087     |
| HMGGA2                                                                                         | 0,480650464 | -0,097449487 | 0     | 0,016 | 1         | 0,934683942   | 1,069880369     | 0               |
| ZNF28                                                                                          | 0,041848356 | -0,097482259 | 0,062 | 0,012 | 1         | 0,93466271    | 1,069904672     | 5,166666667     |
| HMGCR                                                                                          | 0,246047587 | -0,097504272 | 0,094 | 0,043 | 1         | 0,934648448   | 1,069920997     | 2,186046512     |
| CCL19                                                                                          | 0,543117005 | -0,097522925 | 0     | 0,012 | 1         | 0,934636364   | 1,069934831     | 0               |
| CBFA2T2                                                                                        | 0,482846351 | -0,097563963 | 0,062 | 0,035 | 1         | 0,934609779   | 1,069965265     | 1,771428571     |
| LUM                                                                                            | 0,428872689 | -0,097587648 | 0     | 0,02  | 1         | 0,934594435   | 1,069982832     | 0               |
| RBSN                                                                                           | 0,361186003 | -0,097623204 | 0,094 | 0,051 | 1         | 0,934571402   | 1,070009202     | 1,843137255     |
| H2AC19                                                                                         | 0,428872689 | -0,097640323 | 0     | 0,02  | 1         | 0,934560313   | 1,070021899     | 0               |
| ZC3H14                                                                                         | 0,315872824 | -0,097656675 | 0,156 | 0,09  | 1         | 0,934549719   | 1,070034027     | 1,733333333     |
| C18orf25                                                                                       | 0,425948605 | -0,097674821 | 0,125 | 0,078 | 1         | 0,934537965   | 1,070047486     | 1,602564103     |
| GMCL1                                                                                          | 0,133225265 | -0,097702767 | 0,156 | 0,07  | 1         | 0,934519863   | 1,070068214     | 2,228571429     |
| WASF1                                                                                          | 0,38481627  | -0,097777807 | 0     | 0,023 | 1         | 0,934471256   | 1,070123873     | 0               |
| RABL2B                                                                                         | 0,30206331  | -0,097789066 | 0,094 | 0,047 | 1         | 0,934463963   | 1,070132225     | 2               |
| NXT2                                                                                           | 0,924392442 | -0,097827736 | 0,031 | 0,027 | 1         | 0,934438916   | 1,070160909     | 1,148148148     |
| KRI1                                                                                           | 0,139907281 | -0,097865999 | 0,094 | 0,035 | 1         | 0,934414133   | 1,070189292     | 2,685714286     |
| LINC01588                                                                                      | 0,396289917 | -0,097883059 | 0,062 | 0,031 | 1         | 0,934403084   | 1,070201947     | 2               |
| RGS5                                                                                           | 0,543117005 | -0,097920128 | 0     | 0,012 | 1         | 0,934379075   | 1,070229446     | 0               |
| AKT3                                                                                           | 0,008008107 | -0,097936513 | 0,375 | 0,141 | 1         | 0,934368464   | 1,0702416       | 2,659574468     |
| NKAP                                                                                           | 0,000524333 | -0,097945201 | 0,344 | 0,098 | 1         | 0,934362837   | 1,070248046     | 3,510204082     |
| AP3S2                                                                                          | 0,432193743 | -0,097953156 | 0,094 | 0,055 | 1         | 0,934357685   | 1,070253947     | 1,709090909     |
| MSLN                                                                                           | 0,543117005 | -0,097986561 | 0     | 0,012 | 1         | 0,93433605    | 1,070278729     | 0               |
| BCL9L                                                                                          | 0,335252921 | -0,097990129 | 0,156 | 0,094 | 1         | 0,934333739   | 1,070281376     | 1,659574468     |
| TRIO                                                                                           | 0,028002326 | -0,098009762 | 0,281 | 0,113 | 1         | 0,934321025   | 1,07029594      | 2,486725664     |
| ZHX3                                                                                           | 0,682170546 | -0,098058071 | 0,031 | 0,02  | 1         | 0,93428974    | 1,07033178      | 1,55            |
| CDH15                                                                                          | 0,428872689 | -0,098061755 | 0     | 0,02  | 1         | 0,934287353   | 1,070334514     | 0               |
| FHIP2A                                                                                         | 0,392349482 | -0,098081539 | 0,062 | 0,031 | 1         | 0,934274541   | 1,070349191     | 2               |
| KLHL17                                                                                         | 0,224763613 | -0,098082367 | 0,062 | 0,023 | 1         | 0,934274005   | 1,070349806     | 2,695652174     |
| NFKBIE                                                                                         | 0,031707035 | -0,098101759 | 0,188 | 0,066 | 1         | 0,934261447   | 1,070364193     | 2,848484848     |

Supplementary Table 1

| Differentially expressed genes_adjacent-skin-XL_comparing SC-Keloid vs. (SC-Myel, SC-Nonmyel) |             |              |       |       |           |               |                 |                 |
|-----------------------------------------------------------------------------------------------|-------------|--------------|-------|-------|-----------|---------------|-----------------|-----------------|
| gene                                                                                          | p_val       | avg_log2FC   | pct.1 | pct.2 | p_val_adj | Foldchange_UP | Foldchange_DOWN | Ratio_pct1_pct2 |
| EMG1                                                                                          | 0,012303637 | -0,098147292 | 0,25  | 0,086 | 1         | 0,934231962   | 1,070397975     | 2,906976744     |
| TOM1                                                                                          | 0,251411476 | -0,098186116 | 0,125 | 0,062 | 1         | 0,934206821   | 1,070426781     | 2,016129032     |
| FLOT2                                                                                         | 0,186547601 | -0,098187573 | 0,156 | 0,078 | 1         | 0,934205877   | 1,070427862     | 2               |
| MPP1                                                                                          | 0,80991663  | -0,098196538 | 0,031 | 0,023 | 1         | 0,934200072   | 1,070434514     | 1,347826087     |
| PIGS                                                                                          | 0,054252457 | -0,098220389 | 0,188 | 0,074 | 1         | 0,934184628   | 1,070452211     | 2,540540541     |
| AGK                                                                                           | 0,001055584 | -0,098224954 | 0,188 | 0,039 | 1         | 0,934181672   | 1,070455597     | 4,820512821     |
| NKRF                                                                                          | 0,80991663  | -0,098258483 | 0,031 | 0,023 | 1         | 0,934159962   | 1,070480475     | 1,347826087     |
| NLRP1                                                                                         | 0,045196862 | -0,098269491 | 0,125 | 0,039 | 1         | 0,934152834   | 1,070488644     | 3,205128205     |
| PAPOLG                                                                                        | 0,979143607 | -0,098287011 | 0,031 | 0,031 | 1         | 0,934141489   | 1,070501644     | 1               |
| PARG                                                                                          | 0,098751938 | -0,098308736 | 0,094 | 0,031 | 1         | 0,934127423   | 1,070517764     | 3,032258065     |
| GSN                                                                                           | 0,19131494  | -0,098327394 | 0,938 | 0,766 | 1         | 0,934115342   | 1,070531609     | 1,224543081     |
| STK40                                                                                         | 0,253529282 | -0,098507127 | 0,125 | 0,062 | 1         | 0,933998976   | 1,070664986     | 2,016129032     |
| LMTK2                                                                                         | 0,38481627  | -0,0985773   | 0     | 0,023 | 1         | 0,933953547   | 1,070717065     | 0               |
| KCTD1                                                                                         | 0,797009215 | -0,098580031 | 0,062 | 0,074 | 1         | 0,933951779   | 1,070719091     | 0,837837838     |
| RIPOR1                                                                                        | 0,010903421 | -0,098635022 | 0,25  | 0,086 | 1         | 0,93391618    | 1,070759905     | 2,906976744     |
| MET                                                                                           | 0,487085433 | -0,098640943 | 0,062 | 0,035 | 1         | 0,933912347   | 1,070764299     | 1,771428571     |
| DICER1-AS1                                                                                    | 0,924392442 | -0,098655834 | 0,031 | 0,027 | 1         | 0,933902708   | 1,070775351     | 1,148148148     |
| AARS2                                                                                         | 0,226351275 | -0,098655853 | 0,031 | 0,008 | 1         | 0,933902696   | 1,070775365     | 3,875           |
| LRRC40                                                                                        | 0,045196862 | -0,098694826 | 0,125 | 0,039 | 1         | 0,933877468   | 1,070804291     | 3,205128205     |
| VPS9D1                                                                                        | 0,304810673 | -0,098744663 | 0,094 | 0,047 | 1         | 0,933845208   | 1,070841282     | 2               |
| LSAMP                                                                                         | 0,010737013 | -0,098757551 | 0,438 | 0,184 | 1         | 0,933836866   | 1,070850848     | 2,380434783     |
| PILRB                                                                                         | 0,101501297 | -0,098854057 | 0,156 | 0,066 | 1         | 0,933774401   | 1,070922483     | 2,363636364     |
| KLK6                                                                                          | 0,815054348 | -0,098930938 | 0,031 | 0,039 | 1         | 0,933724641   | 1,070979554     | 0,794871795     |
| TXNDC5                                                                                        | 0,006092904 | -0,098937245 | 0,312 | 0,109 | 1         | 0,933720559   | 1,070984236     | 2,862385321     |
| DOCK11                                                                                        | 0,428872689 | -0,098946656 | 0     | 0,02  | 1         | 0,933714469   | 1,070991222     | 0               |
| PLEKHM1                                                                                       | 0,815054348 | -0,09907121  | 0,031 | 0,039 | 1         | 0,933633861   | 1,071083689     | 0,794871795     |
| PHKA1                                                                                         | 0,543117005 | -0,099253898 | 0     | 0,012 | 1         | 0,933515642   | 1,071219329     | 0               |
| DNHD1                                                                                         | 0,480650464 | -0,099299188 | 0     | 0,016 | 1         | 0,933486337   | 1,071252958     | 0               |
| ANKRD20A1                                                                                     | 0,428872689 | -0,099352317 | 0     | 0,02  | 1         | 0,933451961   | 1,071292409     | 0               |
| AC008914.1                                                                                    | 0,480650464 | -0,099370949 | 0     | 0,016 | 1         | 0,933439906   | 1,071306244     | 0               |

Supplementary Table 1

| Differentially expressed genes_adjacent-skin-XL_comparing SC-Keloid vs. (SC-Myel, SC-Nonmyel) |             |              |       |       |           |               |                 |                 |
|-----------------------------------------------------------------------------------------------|-------------|--------------|-------|-------|-----------|---------------|-----------------|-----------------|
| gene                                                                                          | p_val       | avg_log2FC   | pct.1 | pct.2 | p_val_adj | Foldchange_UP | Foldchange_DOWN | Ratio_pct1_pct2 |
| IL20RB                                                                                        | 0,38481627  | -0,099371378 | 0     | 0,023 | 1         | 0,933439628   | 1,071306563     | 0               |
| AL627171.1                                                                                    | 0,924392442 | -0,099467357 | 0,031 | 0,027 | 1         | 0,933377531   | 1,071377837     | 1,148148148     |
| PPP2R5C                                                                                       | 0,003190249 | -0,099555749 | 0,312 | 0,102 | 1         | 0,933320346   | 1,071443481     | 3,058823529     |
| DHX8                                                                                          | 0,093753684 | -0,099625366 | 0,125 | 0,047 | 1         | 0,93327531    | 1,071495184     | 2,659574468     |
| MED9                                                                                          | 0,480650464 | -0,099654783 | 0     | 0,016 | 1         | 0,93325628    | 1,071517032     | 0               |
| PI4K2A                                                                                        | 0,198962585 | -0,099671604 | 0,125 | 0,059 | 1         | 0,933245399   | 1,071529526     | 2,118644068     |
| SENP7                                                                                         | 0,003256235 | -0,099677127 | 0,375 | 0,133 | 1         | 0,933241826   | 1,071533628     | 2,819548872     |
| CHSY1                                                                                         | 0,062941189 | -0,09977646  | 0,156 | 0,059 | 1         | 0,933177573   | 1,071607408     | 2,644067797     |
| TCEAL1                                                                                        | 0,003190249 | -0,099791564 | 0,312 | 0,102 | 1         | 0,933167803   | 1,071618627     | 3,058823529     |
| WASF3                                                                                         | 0,428872689 | -0,099799038 | 0     | 0,02  | 1         | 0,933162969   | 1,071624179     | 0               |
| RBBP5                                                                                         | 0,804543977 | -0,099821222 | 0,031 | 0,039 | 1         | 0,93314862    | 1,071640657     | 0,794871795     |
| DET1                                                                                          | 0,428872689 | -0,099823143 | 0     | 0,02  | 1         | 0,933147377   | 1,071642084     | 0               |
| HR                                                                                            | 0,257702735 | -0,099842706 | 0,031 | 0,094 | 1         | 0,933134724   | 1,071656615     | 0,329787234     |
| SEMA3E                                                                                        | 0,543117005 | -0,09986564  | 0     | 0,012 | 1         | 0,93311989    | 1,071673652     | 0               |
| FRY                                                                                           | 0,428872689 | -0,099889503 | 0     | 0,02  | 1         | 0,933104456   | 1,071691378     | 0               |
| ZNF790                                                                                        | 0,682170546 | -0,099967989 | 0,031 | 0,02  | 1         | 0,933053694   | 1,071749682     | 1,55            |
| MTM1                                                                                          | 0,663576959 | -0,100079731 | 0,062 | 0,043 | 1         | 0,932981428   | 1,071832696     | 1,441860465     |
| PATJ                                                                                          | 0,313292814 | -0,100080822 | 0     | 0,031 | 1         | 0,932980723   | 1,071833506     | 0               |
| ATP11C                                                                                        | 0,122084526 | -0,100093118 | 0,125 | 0,051 | 1         | 0,932972771   | 1,071842642     | 2,450980392     |
| C1RL-AS1                                                                                      | 0,480650464 | -0,100113062 | 0     | 0,016 | 1         | 0,932959874   | 1,071857459     | 0               |
| NAP1L2                                                                                        | 0,480650464 | -0,100230049 | 0     | 0,016 | 1         | 0,932884224   | 1,071944379     | 0               |
| PHF6                                                                                          | 0,006461838 | -0,100337463 | 0,188 | 0,051 | 1         | 0,93281477    | 1,072024192     | 3,68627451      |
| HDGF                                                                                          | 0,073207175 | -0,100391318 | 0,531 | 0,27  | 1         | 0,932779949   | 1,072064211     | 1,966666667     |
| WDR82                                                                                         | 0,006785527 | -0,100483796 | 0,344 | 0,125 | 1         | 0,932720159   | 1,072132933     | 2,752           |
| PON3                                                                                          | 0,80991663  | -0,100549578 | 0,031 | 0,023 | 1         | 0,932677631   | 1,07218182      | 1,347826087     |
| PARP12                                                                                        | 0,746971464 | -0,100567334 | 0,094 | 0,074 | 1         | 0,932666152   | 1,072195016     | 1,27027027      |
| CEP170B                                                                                       | 0,097375089 | -0,100571186 | 0,094 | 0,031 | 1         | 0,932663662   | 1,072197879     | 3,032258065     |
| TBKBP1                                                                                        | 0,80991663  | -0,100605155 | 0,031 | 0,023 | 1         | 0,932641702   | 1,072223125     | 1,347826087     |
| CARD10                                                                                        | 0,24851603  | -0,100640577 | 0,094 | 0,043 | 1         | 0,932618804   | 1,072249451     | 2,186046512     |
| PPARD                                                                                         | 0,093753684 | -0,100691473 | 0,125 | 0,047 | 1         | 0,932585903   | 1,072287279     | 2,659574468     |



Supplementary Table 1

| Differentially expressed genes_adjacent-skin-XL_comparing SC-Keloid vs. (SC-Myel, SC-Nonmyel) |             |              |       |       |           |               |                 |                 |
|-----------------------------------------------------------------------------------------------|-------------|--------------|-------|-------|-----------|---------------|-----------------|-----------------|
| gene                                                                                          | p_val       | avg_log2FC   | pct.1 | pct.2 | p_val_adj | Foldchange_UP | Foldchange_DOWN | Ratio_pct1_pct2 |
| OPA1                                                                                          | 0,040359751 | -0,100712204 | 0,219 | 0,086 | 1         | 0,932572502   | 1,072302687     | 2,546511628     |
| CPTP                                                                                          | 0,30793671  | -0,100744719 | 0,062 | 0,027 | 1         | 0,932551484   | 1,072326855     | 2,296296296     |
| FLRT3                                                                                         | 0,026365081 | -0,10077786  | 0,312 | 0,133 | 1         | 0,932530062   | 1,072351488     | 2,345864662     |
| XPNPEP3                                                                                       | 0,093753684 | -0,100805151 | 0,125 | 0,047 | 1         | 0,932512422   | 1,072371774     | 2,659574468     |
| ZNF718                                                                                        | 0,480650464 | -0,100807098 | 0     | 0,016 | 1         | 0,932511164   | 1,072373221     | 0               |
| GABARAPL2                                                                                     | 0,595233492 | -0,100821627 | 0,844 | 0,555 | 1         | 0,932501773   | 1,07238402      | 1,520720721     |
| LY96                                                                                          | 0,682170546 | -0,100890057 | 0,031 | 0,02  | 1         | 0,932457543   | 1,072434887     | 1,55            |
| GPRC5A                                                                                        | 0,480650464 | -0,100894682 | 0     | 0,016 | 1         | 0,932454554   | 1,072438325     | 0               |
| LDLRAD2                                                                                       | 0,480650464 | -0,101000507 | 0     | 0,016 | 1         | 0,932386159   | 1,072516994     | 0               |
| DNAJC14                                                                                       | 0,098751938 | -0,101038934 | 0,094 | 0,031 | 1         | 0,932361325   | 1,072545561     | 3,032258065     |
| DTNBP1                                                                                        | 0,560566066 | -0,101058435 | 0,062 | 0,039 | 1         | 0,932348721   | 1,072560059     | 1,58974359      |
| AXL                                                                                           | 0,012799595 | -0,101060863 | 0,469 | 0,199 | 1         | 0,932347153   | 1,072561864     | 2,35678392      |
| PLCD3                                                                                         | 0,396289917 | -0,10109051  | 0,062 | 0,031 | 1         | 0,932327993   | 1,072583905     | 2               |
| ALKBH3                                                                                        | 0,007871757 | -0,101093839 | 0,156 | 0,039 | 1         | 0,932325842   | 1,07258638      | 4               |
| BEGAIN                                                                                        | 0,38481627  | -0,101175657 | 0     | 0,023 | 1         | 0,93227297    | 1,07264721      | 0               |
| TOLLIP                                                                                        | 0,005793368 | -0,101212122 | 0,375 | 0,141 | 1         | 0,932249406   | 1,072674322     | 2,659574468     |
| ZXDB                                                                                          | 0,682170546 | -0,101261964 | 0,031 | 0,02  | 1         | 0,932217199   | 1,072711382     | 1,55            |
| PCNT                                                                                          | 0,003791564 | -0,101297415 | 0,188 | 0,047 | 1         | 0,932194293   | 1,072737741     | 4               |
| TINAGL1                                                                                       | 0,480650464 | -0,101341041 | 0     | 0,016 | 1         | 0,932166104   | 1,072770181     | 0               |
| ADARB2                                                                                        | 0,428872689 | -0,101367098 | 0     | 0,02  | 1         | 0,932149268   | 1,072789557     | 0               |
| ZNF793                                                                                        | 0,226351275 | -0,101373685 | 0,031 | 0,008 | 1         | 0,932145012   | 1,072794455     | 3,875           |
| CRLF3                                                                                         | 0,682170546 | -0,101471518 | 0,031 | 0,02  | 1         | 0,932081803   | 1,072867206     | 1,55            |
| EIF2AK2                                                                                       | 0,014668447 | -0,101501503 | 0,344 | 0,141 | 1         | 0,932062431   | 1,072889505     | 2,439716312     |
| AKNA                                                                                          | 0,224763613 | -0,101526966 | 0,062 | 0,023 | 1         | 0,932045981   | 1,072908441     | 2,695652174     |
| CIAO3                                                                                         | 0,578217897 | -0,101558526 | 0,062 | 0,039 | 1         | 0,932025592   | 1,072931912     | 1,58974359      |
| MAGEE1                                                                                        | 0,428872689 | -0,101597856 | 0     | 0,02  | 1         | 0,932000184   | 1,072961162     | 0               |
| FOXRED2                                                                                       | 0,480650464 | -0,101630761 | 0     | 0,016 | 1         | 0,931978927   | 1,072985634     | 0               |
| PRDM5                                                                                         | 0,141661018 | -0,101743711 | 0,094 | 0,035 | 1         | 0,931905964   | 1,073069643     | 2,685714286     |
| ARRB1                                                                                         | 0,80991663  | -0,101749768 | 0,031 | 0,023 | 1         | 0,931902051   | 1,073074148     | 1,347826087     |
| PRXL2C                                                                                        | 0,007018614 | -0,101825566 | 0,5   | 0,203 | 1         | 0,931853092   | 1,073130528     | 2,463054187     |

Supplementary Table 1

| Differentially expressed genes_adjacent-skin-XL_comparing SC-Keloid vs. (SC-Myel, SC-Nonmyel) |             |              |       |       |           |               |                 |                 |
|-----------------------------------------------------------------------------------------------|-------------|--------------|-------|-------|-----------|---------------|-----------------|-----------------|
| gene                                                                                          | p_val       | avg_log2FC   | pct.1 | pct.2 | p_val_adj | Foldchange_UP | Foldchange_DOWN | Ratio_pct1_pct2 |
| SEH1L                                                                                         | 0,20079827  | -0,101847035 | 0,125 | 0,059 | 1         | 0,931839225   | 1,073146497     | 2,118644068     |
| TTC9                                                                                          | 0,480650464 | -0,101883365 | 0     | 0,016 | 1         | 0,931815759   | 1,073173522     | 0               |
| YRDC                                                                                          | 0,487085433 | -0,101885804 | 0,062 | 0,035 | 1         | 0,931814184   | 1,073175336     | 1,771428571     |
| CERS4                                                                                         | 0,284294126 | -0,101997055 | 0,188 | 0,109 | 1         | 0,931742331   | 1,073258095     | 1,724770642     |
| TNKS1BP1                                                                                      | 0,062941189 | -0,102005222 | 0,156 | 0,059 | 1         | 0,931737056   | 1,073264172     | 2,644067797     |
| CPSF1                                                                                         | 0,076632198 | -0,102006178 | 0,156 | 0,062 | 1         | 0,931736439   | 1,073264882     | 2,516129032     |
| SPSB2                                                                                         | 0,487085433 | -0,102089324 | 0,062 | 0,035 | 1         | 0,931682743   | 1,073326739     | 1,771428571     |
| ZCCHC10                                                                                       | 0,057807698 | -0,10214782  | 0,188 | 0,074 | 1         | 0,931644967   | 1,073370259     | 2,540540541     |
| CLBA1                                                                                         | 0,013891036 | -0,102176741 | 0,062 | 0,008 | 1         | 0,931626291   | 1,073391777     | 7,75            |
| BRMS1L                                                                                        | 0,376291412 | -0,102197413 | 0,094 | 0,051 | 1         | 0,931612942   | 1,073407158     | 1,843137255     |
| ZNF766                                                                                        | 0,80991663  | -0,102217847 | 0,031 | 0,023 | 1         | 0,931599747   | 1,073422361     | 1,347826087     |
| ZNF611                                                                                        | 0,38481627  | -0,102239412 | 0     | 0,023 | 1         | 0,931585822   | 1,073438406     | 0               |
| RNASE1                                                                                        | 0,310355006 | -0,102314649 | 0,094 | 0,047 | 1         | 0,93153724    | 1,073494388     | 2               |
| PPP1R3D                                                                                       | 0,428872689 | -0,10239924  | 0     | 0,02  | 1         | 0,931482623   | 1,073557333     | 0               |
| C16orf87                                                                                      | 0,063895026 | -0,102415705 | 0,25  | 0,113 | 1         | 0,931471992   | 1,073569585     | 2,212389381     |
| CDH3                                                                                          | 0,543117005 | -0,10251885  | 0     | 0,012 | 1         | 0,931405399   | 1,073646342     | 0               |
| APTR                                                                                          | 0,638347525 | -0,102584977 | 0,094 | 0,066 | 1         | 0,931362708   | 1,073695555     | 1,424242424     |
| SEC31B                                                                                        | 0,543117005 | -0,102626908 | 0     | 0,012 | 1         | 0,931335639   | 1,073726762     | 0               |
| PTPRF                                                                                         | 0,000161906 | -0,10265792  | 0,438 | 0,125 | 1         | 0,93131562    | 1,073749842     | 3,504           |
| PPAN                                                                                          | 0,578217897 | -0,102673468 | 0,062 | 0,039 | 1         | 0,931305583   | 1,073761415     | 1,58974359      |
| KLHDC8A                                                                                       | 0,815054348 | -0,10269925  | 0,031 | 0,039 | 1         | 0,93128894    | 1,073780603     | 0,794871795     |
| MTSS1                                                                                         | 0,38481627  | -0,102714085 | 0     | 0,023 | 1         | 0,931279363   | 1,073791646     | 0               |
| MAK                                                                                           | 0,480650464 | -0,102770726 | 0     | 0,016 | 1         | 0,931242802   | 1,073833804     | 0               |
| CARMIL1                                                                                       | 0,543117005 | -0,102806827 | 0     | 0,012 | 1         | 0,9312195     | 1,073860675     | 0               |
| SGMS2                                                                                         | 0,741950345 | -0,102810347 | 0,062 | 0,047 | 1         | 0,931217228   | 1,073863295     | 1,319148936     |
| ZNF582-DT                                                                                     | 0,428872689 | -0,102935304 | 0     | 0,02  | 1         | 0,931136575   | 1,07395631      | 0               |
| POLR1A                                                                                        | 0,540537634 | -0,102973446 | 0,031 | 0,016 | 1         | 0,931111958   | 1,073984704     | 1,9375          |
| LRPPRC                                                                                        | 0,008804476 | -0,103044011 | 0,281 | 0,098 | 1         | 0,931066416   | 1,074037236     | 2,867346939     |
| EVI5L                                                                                         | 0,80991663  | -0,10317868  | 0,031 | 0,023 | 1         | 0,930979509   | 1,074137497     | 1,347826087     |
| ST6GALNAC2                                                                                    | 0,38481627  | -0,103189371 | 0     | 0,023 | 1         | 0,93097261    | 1,074145457     | 0               |

Supplementary Table 1

| Differentially expressed genes_adjacent-skin-XL_ comparing SC-Keloid vs. (SC-Myel, SC-Nonmyel) |             |              |       |       |           |               |                 |                 |
|------------------------------------------------------------------------------------------------|-------------|--------------|-------|-------|-----------|---------------|-----------------|-----------------|
| gene                                                                                           | p_val       | avg_log2FC   | pct.1 | pct.2 | p_val_adj | Foldchange_UP | Foldchange_DOWN | Ratio_pct1_pct2 |
| CR1                                                                                            | 0,428872689 | -0,103304449 | 0     | 0,02  | 1         | 0,930898353   | 1,074231141     | 0               |
| CD14                                                                                           | 0,543117005 | -0,103383263 | 0     | 0,012 | 1         | 0,9308475     | 1,074289827     | 0               |
| RAP1A                                                                                          | 0,040061847 | -0,103439287 | 0,625 | 0,301 | 1         | 0,930811353   | 1,074331546     | 2,07641196      |
| ELP1                                                                                           | 0,482846351 | -0,103458145 | 0,062 | 0,035 | 1         | 0,930799187   | 1,074345589     | 1,771428571     |
| PCDHB15                                                                                        | 0,80991663  | -0,103524077 | 0,031 | 0,023 | 1         | 0,930756649   | 1,074394688     | 1,347826087     |
| DCLK3                                                                                          | 0,38481627  | -0,103589874 | 0     | 0,023 | 1         | 0,930714201   | 1,074443689     | 0               |
| PLEKHF1                                                                                        | 0,246047587 | -0,103619537 | 0,094 | 0,043 | 1         | 0,930695065   | 1,074465781     | 2,186046512     |
| ZNF566                                                                                         | 0,346686972 | -0,103700582 | 0     | 0,027 | 1         | 0,930642784   | 1,074526142     | 0               |
| SLC25A10                                                                                       | 0,018832425 | -0,103711914 | 0,094 | 0,02  | 1         | 0,930635474   | 1,074534582     | 4,7             |
| GSTM2                                                                                          | 0,924392442 | -0,103809563 | 0,031 | 0,027 | 1         | 0,930572486   | 1,074607314     | 1,148148148     |
| BAHD1                                                                                          | 0,907442332 | -0,103838783 | 0,062 | 0,055 | 1         | 0,930553639   | 1,074629079     | 1,127272727     |
| VPS13B                                                                                         | 0,060102361 | -0,103858125 | 0,156 | 0,059 | 1         | 0,930541163   | 1,074643487     | 2,644067797     |
| ANKRD13B                                                                                       | 0,185597364 | -0,103966849 | 0,094 | 0,039 | 1         | 0,930471038   | 1,074724477     | 2,41025641      |
| STK32C                                                                                         | 0,000137099 | -0,104085937 | 0,25  | 0,051 | 1         | 0,930394235   | 1,074813194     | 4,901960784     |
| HEPACAM                                                                                        | 0,346686972 | -0,104090891 | 0     | 0,027 | 1         | 0,93039104    | 1,074816885     | 0               |
| PTPRM                                                                                          | 0,119445142 | -0,104096002 | 0,125 | 0,051 | 1         | 0,930387745   | 1,074820693     | 2,450980392     |
| MST1                                                                                           | 0,38481627  | -0,104245218 | 0     | 0,023 | 1         | 0,930291521   | 1,074931866     | 0               |
| H3-2                                                                                           | 0,388432899 | -0,104298773 | 0,062 | 0,031 | 1         | 0,930256987   | 1,07497177      | 2               |
| TMTC4                                                                                          | 0,80991663  | -0,104373144 | 0,031 | 0,023 | 1         | 0,930209034   | 1,075027186     | 1,347826087     |
| TMEM216                                                                                        | 0,428872689 | -0,104441857 | 0     | 0,02  | 1         | 0,930164731   | 1,075078389     | 0               |
| GALNT12                                                                                        | 0,082317662 | -0,10444613  | 0,031 | 0,004 | 1         | 0,930161976   | 1,075081573     | 7,75            |
| ANKMY2                                                                                         | 0,997020183 | -0,104448704 | 0,031 | 0,031 | 1         | 0,930160316   | 1,075083491     | 1               |
| ZNF197                                                                                         | 0,396289917 | -0,104483761 | 0,062 | 0,031 | 1         | 0,930137714   | 1,075109616     | 2               |
| ZNF672                                                                                         | 0,373239546 | -0,104508661 | 0,094 | 0,051 | 1         | 0,930121661   | 1,075128171     | 1,843137255     |
| TIMM9                                                                                          | 0,01679085  | -0,104579751 | 0,219 | 0,074 | 1         | 0,930075829   | 1,075181151     | 2,959459459     |
| FRA10AC1                                                                                       | 0,064651165 | -0,104601639 | 0,219 | 0,094 | 1         | 0,930061718   | 1,075197463     | 2,329787234     |
| RAB29                                                                                          | 0,008148126 | -0,104752299 | 0,094 | 0,016 | 1         | 0,929964598   | 1,075309751     | 5,875           |
| PRH1                                                                                           | 0,000493332 | -0,10483339  | 0,25  | 0,059 | 1         | 0,929912327   | 1,075370194     | 4,237288136     |
| NAAA                                                                                           | 0,38481627  | -0,10483856  | 0     | 0,023 | 1         | 0,929908995   | 1,075374047     | 0               |
| DDX27                                                                                          | 0,003195191 | -0,104902133 | 0,281 | 0,086 | 1         | 0,929868019   | 1,075421435     | 3,26744186      |

Supplementary Table 1

| Differentially expressed genes_adjacent-skin-XL_ comparing SC-Keloid vs. (SC-Myel, SC-Nonmyel) |             |              |       |       |           |               |                 |                 |
|------------------------------------------------------------------------------------------------|-------------|--------------|-------|-------|-----------|---------------|-----------------|-----------------|
| gene                                                                                           | p_val       | avg_log2FC   | pct.1 | pct.2 | p_val_adj | Foldchange_UP | Foldchange_DOWN | Ratio_pct1_pct2 |
| ERCC5                                                                                          | 0,015958056 | -0,104916212 | 0,188 | 0,059 | 1         | 0,929858945   | 1,07543193      | 3,186440678     |
| RNF220                                                                                         | 0,001968647 | -0,104916954 | 0,188 | 0,043 | 1         | 0,929858467   | 1,075432483     | 4,372093023     |
| ITPK1-AS1                                                                                      | 0,543117005 | -0,104977497 | 0     | 0,012 | 1         | 0,929819446   | 1,075477615     | 0               |
| CATSPER2                                                                                       | 0,543117005 | -0,105004116 | 0     | 0,012 | 1         | 0,929802229   | 1,075497459     | 0               |
| MERTK                                                                                          | 0,313292814 | -0,105101641 | 0     | 0,031 | 1         | 0,929739438   | 1,075570164     | 0               |
| TOLLIP-DT                                                                                      | 0,428872689 | -0,105225845 | 0     | 0,02  | 1         | 0,929659399   | 1,075662766     | 0               |
| DUSP3                                                                                          | 0,656644882 | -0,105296892 | 0,125 | 0,094 | 1         | 0,929613618   | 1,075715739     | 1,329787234     |
| FRMD5                                                                                          | 0,006829528 | -0,105354357 | 0,281 | 0,094 | 1         | 0,92957659    | 1,075758588     | 2,989361702     |
| NHSL1                                                                                          | 0,543117005 | -0,10537675  | 0     | 0,012 | 1         | 0,929562162   | 1,075775285     | 0               |
| KLF8                                                                                           | 0,38481627  | -0,105413913 | 0     | 0,023 | 1         | 0,929538218   | 1,075802997     | 0               |
| ZKSCAN5                                                                                        | 0,540537634 | -0,105516832 | 0,031 | 0,016 | 1         | 0,929471908   | 1,075879745     | 1,9375          |
| MB21D2                                                                                         | 0,881459974 | -0,105529295 | 0,062 | 0,066 | 1         | 0,929463879   | 1,07588904      | 0,939393939     |
| ZZEF1                                                                                          | 0,396289917 | -0,105563746 | 0,062 | 0,031 | 1         | 0,929441684   | 1,075914732     | 2               |
| ZNF449                                                                                         | 0,428872689 | -0,105597414 | 0     | 0,02  | 1         | 0,929419994   | 1,075939841     | 0               |
| KPNA6                                                                                          | 0,006920774 | -0,10564716  | 0,312 | 0,109 | 1         | 0,929387947   | 1,075976941     | 2,862385321     |
| CECR2                                                                                          | 0,085298168 | -0,105673803 | 0,219 | 0,098 | 1         | 0,929370783   | 1,075996812     | 2,234693878     |
| LEAP2                                                                                          | 0,428872689 | -0,105756751 | 0     | 0,02  | 1         | 0,929317351   | 1,076058678     | 0               |
| ATRN                                                                                           | 0,108846454 | -0,105767326 | 0,156 | 0,066 | 1         | 0,929310539   | 1,076066566     | 2,363636364     |
| HNRNPM                                                                                         | 0,025188216 | -0,105916529 | 0,812 | 0,406 | 1         | 0,929214435   | 1,076177858     | 2               |
| LRRK1                                                                                          | 0,480650464 | -0,10594639  | 0     | 0,016 | 1         | 0,929195202   | 1,076200132     | 0               |
| RAB3IP                                                                                         | 0,371729093 | -0,105972365 | 0,125 | 0,074 | 1         | 0,929178473   | 1,076219509     | 1,689189189     |
| TRERF1                                                                                         | 0,543117005 | -0,106065512 | 0     | 0,012 | 1         | 0,929118482   | 1,076288998     | 0               |
| ANAPC10                                                                                        | 0,079159031 | -0,106112724 | 0,156 | 0,062 | 1         | 0,929088078   | 1,076324219     | 2,516129032     |
| HELQ                                                                                           | 0,979143607 | -0,106187055 | 0,031 | 0,031 | 1         | 0,92904021    | 1,076379676     | 1               |
| ZNF81                                                                                          | 0,682170546 | -0,106311632 | 0,031 | 0,02  | 1         | 0,928959991   | 1,076472625     | 1,55            |
| MRPL4                                                                                          | 0,022674894 | -0,106385993 | 0,281 | 0,109 | 1         | 0,928912111   | 1,076528111     | 2,577981651     |
| SULT1A2                                                                                        | 0,480650464 | -0,106416613 | 0     | 0,016 | 1         | 0,928892396   | 1,07655096      | 0               |
| NTMT1                                                                                          | 0,075260589 | -0,106435367 | 0,344 | 0,168 | 1         | 0,928880321   | 1,076564954     | 2,047619048     |
| TRAF3IP2-AS1                                                                                   | 0,512685318 | -0,106455978 | 0,094 | 0,059 | 1         | 0,92886705    | 1,076580335     | 1,593220339     |
| ATP13A1                                                                                        | 0,063925678 | -0,106469124 | 0,094 | 0,027 | 1         | 0,928858587   | 1,076590145     | 3,481481481     |

Supplementary Table 1

| Differentially expressed genes_adjacent-skin-XL_comparing SC-Keloid vs. (SC-Myel, SC-Nonmyel) |             |              |       |       |             |               |                 |                 |
|-----------------------------------------------------------------------------------------------|-------------|--------------|-------|-------|-------------|---------------|-----------------|-----------------|
| gene                                                                                          | p_val       | avg_log2FC   | pct.1 | pct.2 | p_val_adj   | Foldchange_UP | Foldchange_DOWN | Ratio_pct1_pct2 |
| CDC42EP2                                                                                      | 0,540537634 | -0,106517101 | 0,031 | 0,016 | 1           | 0,928827697   | 1,076625948     | 1,9375          |
| LRRN1                                                                                         | 0,979143607 | -0,106574996 | 0,031 | 0,031 | 1           | 0,928790424   | 1,076669154     | 1               |
| PTGER4                                                                                        | 0,543117005 | -0,106595289 | 0     | 0,012 | 1           | 0,92877736    | 1,076684298     | 0               |
| ESF1                                                                                          | 3,06659E-06 | -0,106604796 | 0,531 | 0,137 | 0,064708125 | 0,92877124    | 1,076691393     | 3,875912409     |
| GTF3C5                                                                                        | 0,006461838 | -0,106619986 | 0,188 | 0,051 | 1           | 0,928761461   | 1,076702729     | 3,68627451      |
| ZNF442                                                                                        | 0,428872689 | -0,106638589 | 0     | 0,02  | 1           | 0,928749485   | 1,076716613     | 0               |
| ALDH5A1                                                                                       | 0,543117005 | -0,106696225 | 0     | 0,012 | 1           | 0,928712382   | 1,076759629     | 0               |
| CDK12                                                                                         | 0,003481349 | -0,106705941 | 0,344 | 0,117 | 1           | 0,928706128   | 1,076766881     | 2,94017094      |
| CWF19L2                                                                                       | 0,424410493 | -0,106724856 | 0,344 | 0,23  | 1           | 0,928693952   | 1,076780998     | 1,495652174     |
| ZNF451                                                                                        | 0,083810509 | -0,106931988 | 0,219 | 0,098 | 1           | 0,928560626   | 1,076935606     | 2,234693878     |
| NOTCH2NLA                                                                                     | 0,38481627  | -0,106980178 | 0     | 0,023 | 1           | 0,92852961    | 1,076971579     | 0               |
| MYO1B                                                                                         | 0,487085433 | -0,107029592 | 0,062 | 0,035 | 1           | 0,928497807   | 1,077008467     | 1,771428571     |
| TMEM175                                                                                       | 0,103558458 | -0,107090063 | 0,156 | 0,066 | 1           | 0,928458889   | 1,077053612     | 2,363636364     |
| CXCR4                                                                                         | 0,924392442 | -0,10709078  | 0,031 | 0,027 | 1           | 0,928458428   | 1,077054146     | 1,148148148     |
| PTDSS2                                                                                        | 0,010405093 | -0,107129464 | 0,188 | 0,055 | 1           | 0,928433533   | 1,077083026     | 3,418181818     |
| ST6GALNAC6                                                                                    | 0,049283458 | -0,107179039 | 0,219 | 0,09  | 1           | 0,92840163    | 1,077120039     | 2,433333333     |
| CLUAP1                                                                                        | 0,004823168 | -0,107300681 | 0,219 | 0,062 | 1           | 0,928323354   | 1,077210861     | 3,532258065     |
| TBCD                                                                                          | 0,304810673 | -0,107318971 | 0,094 | 0,047 | 1           | 0,928311586   | 1,077224517     | 2               |
| MAP2                                                                                          | 0,428872689 | -0,107345235 | 0     | 0,02  | 1           | 0,928294686   | 1,077244128     | 0               |
| C2orf69                                                                                       | 0,682170546 | -0,107347435 | 0,031 | 0,02  | 1           | 0,92829327    | 1,077245771     | 1,55            |
| MFSD13A                                                                                       | 0,38481627  | -0,10749824  | 0     | 0,023 | 1           | 0,928196241   | 1,077358381     | 0               |
| MICU3                                                                                         | 0,001478724 | -0,10749905  | 0,25  | 0,066 | 1           | 0,92819572    | 1,077358987     | 3,787878788     |
| EHD1                                                                                          | 0,002010541 | -0,107508104 | 0,156 | 0,031 | 1           | 0,928189895   | 1,077365748     | 5,032258065     |
| GAMT                                                                                          | 0,001328266 | -0,107547442 | 0,281 | 0,078 | 1           | 0,928164586   | 1,077395124     | 3,602564103     |
| PCOLCE                                                                                        | 0,097375089 | -0,107603683 | 0,094 | 0,031 | 1           | 0,928128404   | 1,077437126     | 3,032258065     |
| C1orf109                                                                                      | 0,396289917 | -0,107660133 | 0,062 | 0,031 | 1           | 0,928092089   | 1,077479285     | 2               |
| RMND1                                                                                         | 0,004087528 | -0,107715293 | 0,125 | 0,023 | 1           | 0,928056605   | 1,077520482     | 5,434782609     |
| CUL3                                                                                          | 0,007287546 | -0,107732796 | 0,406 | 0,156 | 1           | 0,928045346   | 1,077533555     | 2,602564103     |
| FRMD4A                                                                                        | 0,022295068 | -0,107821527 | 0,594 | 0,285 | 1           | 0,927988269   | 1,077599829     | 2,084210526     |
| HNRNPUL1                                                                                      | 0,00432798  | -0,107860137 | 0,5   | 0,203 | 1           | 0,927963434   | 1,077628668     | 2,463054187     |

Supplementary Table 1

| Differentially expressed genes_adjacent-skin-XL_comparing SC-Keloid vs. (SC-Myel, SC-Nonmyel) |             |              |       |       |           |               |                 |                 |
|-----------------------------------------------------------------------------------------------|-------------|--------------|-------|-------|-----------|---------------|-----------------|-----------------|
| gene                                                                                          | p_val       | avg_log2FC   | pct.1 | pct.2 | p_val_adj | Foldchange_UP | Foldchange_DOWN | Ratio_pct1_pct2 |
| PHAX                                                                                          | 0,006037254 | -0,107888927 | 0,281 | 0,094 | 1         | 0,927944916   | 1,077650173     | 2,989361702     |
| COL9A1                                                                                        | 0,480650464 | -0,107989157 | 0     | 0,016 | 1         | 0,92788045    | 1,077725045     | 0               |
| TENM4                                                                                         | 0,428872689 | -0,107997281 | 0     | 0,02  | 1         | 0,927875225   | 1,077731114     | 0               |
| PLCG2                                                                                         | 0,80991663  | -0,108012149 | 0,031 | 0,023 | 1         | 0,927865663   | 1,07774222      | 1,347826087     |
| ILDR2                                                                                         | 0,80991663  | -0,108049655 | 0,031 | 0,023 | 1         | 0,927841541   | 1,077770239     | 1,347826087     |
| H2BC11                                                                                        | 0,38481627  | -0,108053628 | 0     | 0,023 | 1         | 0,927838986   | 1,077773207     | 0               |
| HEMK1                                                                                         | 0,396289917 | -0,10808197  | 0,062 | 0,031 | 1         | 0,927820759   | 1,077794381     | 2               |
| HDAC6                                                                                         | 0,246047587 | -0,108108868 | 0,094 | 0,043 | 1         | 0,92780346    | 1,077814476     | 2,186046512     |
| TAF13                                                                                         | 0,011597542 | -0,108161617 | 0,219 | 0,07  | 1         | 0,927769538   | 1,077853884     | 3,128571429     |
| TMEM178B                                                                                      | 0,224763613 | -0,108208094 | 0,062 | 0,023 | 1         | 0,92773965    | 1,077888608     | 2,695652174     |
| VCL                                                                                           | 0,02913176  | -0,108274146 | 0,688 | 0,336 | 1         | 0,927697176   | 1,077937959     | 2,047619048     |
| GATA3                                                                                         | 0,543117005 | -0,10827466  | 0     | 0,012 | 1         | 0,927696845   | 1,077938343     | 0               |
| CUL4A                                                                                         | 0,022242508 | -0,108478428 | 0,219 | 0,078 | 1         | 0,927565825   | 1,078090604     | 2,807692308     |
| PARP9                                                                                         | 0,30757457  | -0,108492743 | 0,094 | 0,047 | 1         | 0,927556622   | 1,0781013       | 2               |
| PEDS1                                                                                         | 0,016381033 | -0,108499148 | 0,219 | 0,074 | 1         | 0,927552504   | 1,078106087     | 2,959459459     |
| RADX                                                                                          | 0,474428645 | -0,108542185 | 0,062 | 0,035 | 1         | 0,927524834   | 1,078138249     | 1,771428571     |
| TMEM19                                                                                        | 0,191913299 | -0,108545306 | 0,094 | 0,039 | 1         | 0,927522828   | 1,078140581     | 2,41025641      |
| SPRING1                                                                                       | 0,244454149 | -0,10855475  | 0,156 | 0,082 | 1         | 0,927516756   | 1,078147639     | 1,902439024     |
| SLC12A9                                                                                       | 0,093753684 | -0,108575246 | 0,125 | 0,047 | 1         | 0,927503579   | 1,078162956     | 2,659574468     |
| TRIM21                                                                                        | 0,30793671  | -0,108610712 | 0,062 | 0,027 | 1         | 0,927480779   | 1,07818946      | 2,296296296     |
| IQCB1                                                                                         | 0,008956837 | -0,108635714 | 0,125 | 0,027 | 1         | 0,927464705   | 1,078208146     | 4,62962963      |
| LMBRD2                                                                                        | 0,65904021  | -0,108647107 | 0,062 | 0,043 | 1         | 0,927457381   | 1,07821666      | 1,441860465     |
| C10orf90                                                                                      | 0,396289917 | -0,108670426 | 0,062 | 0,031 | 1         | 0,92744239    | 1,078234088     | 2               |
| DCP1B                                                                                         | 0,037506898 | -0,108734496 | 0,094 | 0,023 | 1         | 0,927401204   | 1,078281973     | 4,086956522     |
| P2RY11                                                                                        | 0,480650464 | -0,108752395 | 0     | 0,016 | 1         | 0,927389698   | 1,078295352     | 0               |
| DENND4A                                                                                       | 0,663576959 | -0,108793748 | 0,062 | 0,043 | 1         | 0,927363116   | 1,07832626      | 1,441860465     |
| FUNDC2                                                                                        | 0,014652896 | -0,108830597 | 0,531 | 0,234 | 1         | 0,927339429   | 1,078353803     | 2,269230769     |
| LAPTM5                                                                                        | 0,480650464 | -0,108873822 | 0     | 0,016 | 1         | 0,927311645   | 1,078386112     | 0               |
| HACE1                                                                                         | 0,041848356 | -0,108885841 | 0,062 | 0,012 | 1         | 0,92730392    | 1,078395096     | 5,166666667     |
| KCTD10                                                                                        | 0,487085433 | -0,108887332 | 0,062 | 0,035 | 1         | 0,927302962   | 1,07839621      | 1,771428571     |

Supplementary Table 1

| Differentially expressed genes_adjacent-skin-XL_ comparing SC-Keloid vs. (SC-Myel, SC-Nonmyel) |             |              |       |       |           |               |                 |                 |
|------------------------------------------------------------------------------------------------|-------------|--------------|-------|-------|-----------|---------------|-----------------|-----------------|
| gene                                                                                           | p_val       | avg_log2FC   | pct.1 | pct.2 | p_val_adj | Foldchange_UP | Foldchange_DOWN | Ratio_pct1_pct2 |
| SLC2A10                                                                                        | 0,386325862 | -0,108887961 | 0,031 | 0,012 | 1         | 0,927302558   | 1,07839668      | 2,583333333     |
| SIAE                                                                                           | 0,480650464 | -0,108919467 | 0     | 0,016 | 1         | 0,927282307   | 1,078420231     | 0               |
| GLCCI1                                                                                         | 0,30793671  | -0,109043218 | 0,062 | 0,027 | 1         | 0,92720277    | 1,078512739     | 2,296296296     |
| GPD2                                                                                           | 0,241007682 | -0,109084201 | 0,125 | 0,062 | 1         | 0,927176431   | 1,078543378     | 2,016129032     |
| ANKRD29                                                                                        | 0,682170546 | -0,10924564  | 0,031 | 0,02  | 1         | 0,927072685   | 1,078664075     | 1,55            |
| RHOF                                                                                           | 0,65904021  | -0,109248201 | 0,062 | 0,043 | 1         | 0,92707104    | 1,078665989     | 1,441860465     |
| TMEM67                                                                                         | 0,062941189 | -0,109316404 | 0,156 | 0,059 | 1         | 0,927027214   | 1,078716984     | 2,644067797     |
| CES2                                                                                           | 0,396289917 | -0,109505115 | 0,062 | 0,031 | 1         | 0,926905962   | 1,078858095     | 2               |
| EIF4B                                                                                          | 0,082312017 | -0,109522073 | 0,5   | 0,258 | 1         | 0,926895067   | 1,078870776     | 1,937984496     |
| WDR90                                                                                          | 0,428872689 | -0,109786307 | 0     | 0,02  | 1         | 0,926725319   | 1,079068392     | 0               |
| ACOT2                                                                                          | 0,138248252 | -0,109801909 | 0,156 | 0,07  | 1         | 0,926715297   | 1,079080062     | 2,228571429     |
| VPS54                                                                                          | 0,045196862 | -0,110042016 | 0,125 | 0,039 | 1         | 0,926561077   | 1,079259668     | 3,205128205     |
| ZNF555                                                                                         | 0,540537634 | -0,11006842  | 0,031 | 0,016 | 1         | 0,926544119   | 1,07927942      | 1,9375          |
| TBC1D10B                                                                                       | 0,00257846  | -0,11010962  | 0,25  | 0,07  | 1         | 0,92651766    | 1,079310242     | 3,571428571     |
| MAP3K12                                                                                        | 0,011905317 | -0,110163069 | 0,219 | 0,07  | 1         | 0,926483335   | 1,07935023      | 3,128571429     |
| RIPK1                                                                                          | 0,063925678 | -0,110164652 | 0,094 | 0,027 | 1         | 0,926482318   | 1,079351414     | 3,481481481     |
| TBC1D2B                                                                                        | 0,202646283 | -0,110206707 | 0,125 | 0,059 | 1         | 0,926455311   | 1,079382878     | 2,118644068     |
| TRMT5                                                                                          | 0,38481627  | -0,110304966 | 0     | 0,023 | 1         | 0,926392214   | 1,079456395     | 0               |
| FAM193B                                                                                        | 0,022371373 | -0,110416826 | 0,25  | 0,094 | 1         | 0,926320389   | 1,079540094     | 2,659574468     |
| NME7                                                                                           | 0,18979066  | -0,110474039 | 0,094 | 0,039 | 1         | 0,926283654   | 1,079582907     | 2,41025641      |
| PKP4                                                                                           | 0,746521062 | -0,110511809 | 0,062 | 0,047 | 1         | 0,926259405   | 1,07961117      | 1,319148936     |
| TANK                                                                                           | 0,030205778 | -0,110589187 | 0,375 | 0,164 | 1         | 0,926209727   | 1,079669076     | 2,286585366     |
| MED6                                                                                           | 0,204032042 | -0,110611577 | 0,156 | 0,078 | 1         | 0,926195352   | 1,079685833     | 2               |
| SMG8                                                                                           | 0,428872689 | -0,110666028 | 0     | 0,02  | 1         | 0,926160396   | 1,079726583     | 0               |
| MARCHF3                                                                                        | 0,887104347 | -0,110788216 | 0,031 | 0,035 | 1         | 0,926081959   | 1,079818033     | 0,885714286     |
| RGS10                                                                                          | 0,009783331 | -0,110795705 | 0,281 | 0,098 | 1         | 0,926077152   | 1,079823639     | 2,867346939     |
| LINC00342                                                                                      | 0,232905777 | -0,110878989 | 0,125 | 0,062 | 1         | 0,926023693   | 1,079885977     | 2,016129032     |
| FAM189A2                                                                                       | 0,480650464 | -0,110910434 | 0     | 0,016 | 1         | 0,926003509   | 1,079909515     | 0               |
| UBE2O                                                                                          | 0,38481627  | -0,110937698 | 0     | 0,023 | 1         | 0,92598601    | 1,079929923     | 0               |
| ATP10D                                                                                         | 0,013407295 | -0,111144188 | 0,156 | 0,043 | 1         | 0,925853485   | 1,080084502     | 3,627906977     |

Supplementary Table 1

| Differentially expressed genes_adjacent-skin-XL_ comparing SC-Keloid vs. (SC-Myel, SC-Nonmyel) |             |              |       |       |           |               |                 |                 |
|------------------------------------------------------------------------------------------------|-------------|--------------|-------|-------|-----------|---------------|-----------------|-----------------|
| gene                                                                                           | p_val       | avg_log2FC   | pct.1 | pct.2 | p_val_adj | Foldchange_UP | Foldchange_DOWN | Ratio_pct1_pct2 |
| ABTB2                                                                                          | 0,924392442 | -0,111183989 | 0,031 | 0,027 | 1         | 0,925827943   | 1,0801143       | 1,148148148     |
| INSIG2                                                                                         | 0,370203052 | -0,11125504  | 0,094 | 0,051 | 1         | 0,925782348   | 1,080167495     | 1,843137255     |
| TMEM74                                                                                         | 0,38481627  | -0,111274252 | 0     | 0,023 | 1         | 0,92577002    | 1,080181879     | 0               |
| NAIF1                                                                                          | 0,38481627  | -0,111278437 | 0     | 0,023 | 1         | 0,925767334   | 1,080185013     | 0               |
| TRIM25                                                                                         | 0,924392442 | -0,111291207 | 0,031 | 0,027 | 1         | 0,92575914    | 1,080194574     | 1,148148148     |
| TPH1                                                                                           | 0,480650464 | -0,111318151 | 0     | 0,016 | 1         | 0,92574185    | 1,080214748     | 0               |
| SLC29A1                                                                                        | 0,924392442 | -0,111413666 | 0,031 | 0,027 | 1         | 0,925680563   | 1,080286268     | 1,148148148     |
| SPINT2                                                                                         | 0,313292814 | -0,111430399 | 0     | 0,031 | 1         | 0,925669827   | 1,080298797     | 0               |
| ZNF562                                                                                         | 0,569359326 | -0,111438162 | 0,062 | 0,039 | 1         | 0,925664846   | 1,08030461      | 1,58974359      |
| JUP                                                                                            | 0,482008211 | -0,111497447 | 0,125 | 0,082 | 1         | 0,925626808   | 1,080349004     | 1,524390244     |
| EGFLAM                                                                                         | 0,492171826 | -0,111558904 | 0,094 | 0,059 | 1         | 0,925587378   | 1,080395027     | 1,593220339     |
| ZMYM3                                                                                          | 0,141661018 | -0,111591867 | 0,094 | 0,035 | 1         | 0,92556623    | 1,080419712     | 2,685714286     |
| DEFB1                                                                                          | 0,924392442 | -0,111593232 | 0,031 | 0,027 | 1         | 0,925565354   | 1,080420735     | 1,148148148     |
| CPD                                                                                            | 0,241007682 | -0,111596763 | 0,125 | 0,062 | 1         | 0,925563089   | 1,080423378     | 2,016129032     |
| OSR2                                                                                           | 0,226351275 | -0,111613638 | 0,031 | 0,008 | 1         | 0,925552263   | 1,080436016     | 3,875           |
| LINC00842                                                                                      | 0,480650464 | -0,111732801 | 0     | 0,016 | 1         | 0,925475818   | 1,080525261     | 0               |
| ARHGAP6                                                                                        | 0,428872689 | -0,111775822 | 0     | 0,02  | 1         | 0,925448221   | 1,080557483     | 0               |
| ZNF621                                                                                         | 0,422565177 | -0,111777072 | 0,094 | 0,055 | 1         | 0,925447419   | 1,080558419     | 1,709090909     |
| QTRT1                                                                                          | 0,000497147 | -0,111782775 | 0,438 | 0,137 | 1         | 0,92544376    | 1,080562691     | 3,197080292     |
| PEX26                                                                                          | 0,141661018 | -0,11202258  | 0,094 | 0,035 | 1         | 0,925289946   | 1,080742317     | 2,685714286     |
| DCAF12                                                                                         | 0,003101546 | -0,112031313 | 0,219 | 0,059 | 1         | 0,925284345   | 1,080748859     | 3,711864407     |
| HOOK3                                                                                          | 0,060183489 | -0,112034116 | 0,438 | 0,223 | 1         | 0,925282547   | 1,080750959     | 1,964125561     |
| DIS3                                                                                           | 0,000890115 | -0,112165988 | 0,25  | 0,062 | 1         | 0,925197974   | 1,080849751     | 4,032258065     |
| TFDP2                                                                                          | 0,00311028  | -0,112179278 | 0,312 | 0,102 | 1         | 0,925189451   | 1,080859708     | 3,058823529     |
| N4BP2                                                                                          | 0,924392442 | -0,112324516 | 0,031 | 0,027 | 1         | 0,925096316   | 1,080968525     | 1,148148148     |
| DTWD1                                                                                          | 0,001337371 | -0,112379536 | 0,344 | 0,105 | 1         | 0,925061036   | 1,081009751     | 3,276190476     |
| PMAIP1                                                                                         | 0,100484991 | -0,112463706 | 0,156 | 0,066 | 1         | 0,925007068   | 1,081072821     | 2,363636364     |
| GOLGA6L10                                                                                      | 0,80991663  | -0,112656331 | 0,031 | 0,023 | 1         | 0,924883572   | 1,081217172     | 1,347826087     |
| ZNF687                                                                                         | 0,346686972 | -0,112751696 | 0     | 0,027 | 1         | 0,924822437   | 1,081288646     | 0               |
| ARHGAP10                                                                                       | 0,058265316 | -0,112835997 | 0,219 | 0,094 | 1         | 0,924768398   | 1,08135183      | 2,329787234     |



Supplementary Table 1

| Differentially expressed genes_adjacent-skin-XL_comparing SC-Keloid vs. (SC-Myel, SC-Nonmyel) |             |              |       |       |           |               |                 |                 |
|-----------------------------------------------------------------------------------------------|-------------|--------------|-------|-------|-----------|---------------|-----------------|-----------------|
| gene                                                                                          | p_val       | avg_log2FC   | pct.1 | pct.2 | p_val_adj | Foldchange_UP | Foldchange_DOWN | Ratio_pct1_pct2 |
| SLC10A7                                                                                       | 0,313292064 | -0,112934701 | 0     | 0,031 | 1         | 0,924705131   | 1,081425815     | 0               |
| NYNRIN                                                                                        | 0,30793671  | -0,11299012  | 0,062 | 0,027 | 1         | 0,924669611   | 1,081467357     | 2,296296296     |
| EVC2                                                                                          | 0,428872689 | -0,113043131 | 0     | 0,02  | 1         | 0,924635635   | 1,081507096     | 0               |
| SORCS2                                                                                        | 0,191913299 | -0,113064425 | 0,094 | 0,039 | 1         | 0,924621987   | 1,081523059     | 2,41025641      |
| TUFT1                                                                                         | 0,008148126 | -0,113155102 | 0,094 | 0,016 | 1         | 0,924563875   | 1,081591037     | 5,875           |
| FBXO38                                                                                        | 0,141661018 | -0,113176934 | 0,094 | 0,035 | 1         | 0,924549883   | 1,081607405     | 2,685714286     |
| ETV3                                                                                          | 0,820034503 | -0,11321077  | 0,094 | 0,078 | 1         | 0,9245282     | 1,081632773     | 1,205128205     |
| FNIP1                                                                                         | 0,066548207 | -0,113212109 | 0,406 | 0,203 | 1         | 0,924527342   | 1,081633777     | 2               |
| PEX6                                                                                          | 0,304810673 | -0,113219494 | 0,094 | 0,047 | 1         | 0,924522609   | 1,081639313     | 2               |
| HSCB                                                                                          | 0,663576959 | -0,113226405 | 0,062 | 0,043 | 1         | 0,92451818    | 1,081644495     | 1,441860465     |
| GBE1                                                                                          | 0,001119353 | -0,113271321 | 0,312 | 0,09  | 1         | 0,924489397   | 1,081678171     | 3,466666667     |
| RNF185                                                                                        | 0,396289917 | -0,113290512 | 0,062 | 0,031 | 1         | 0,924477099   | 1,08169256      | 2               |
| LYL1                                                                                          | 0,037506898 | -0,113295332 | 0,094 | 0,023 | 1         | 0,924474011   | 1,081696173     | 4,086956522     |
| PRKAA1                                                                                        | 0,005195348 | -0,113317984 | 0,219 | 0,062 | 1         | 0,924459496   | 1,081713157     | 3,532258065     |
| MAPK7                                                                                         | 0,682170546 | -0,113362375 | 0,031 | 0,02  | 1         | 0,924431051   | 1,081746442     | 1,55            |
| SFXN5                                                                                         | 0,160548057 | -0,113457824 | 0,125 | 0,055 | 1         | 0,924369892   | 1,081818013     | 2,272727273     |
| ZNF519                                                                                        | 0,480650464 | -0,113467875 | 0     | 0,016 | 1         | 0,924363452   | 1,08182555      | 0               |
| SHMT1                                                                                         | 0,898459048 | -0,113547934 | 0,062 | 0,055 | 1         | 0,924312159   | 1,081885584     | 1,127272727     |
| NAALADL2                                                                                      | 0,033260329 | -0,113584427 | 0,188 | 0,066 | 1         | 0,924288778   | 1,081912951     | 2,848484848     |
| MTREX                                                                                         | 0,054252457 | -0,113610405 | 0,188 | 0,074 | 1         | 0,924272135   | 1,081932433     | 2,540540541     |
| EFCAB7                                                                                        | 0,396289917 | -0,113729869 | 0,062 | 0,031 | 1         | 0,924195603   | 1,082022027     | 2               |
| ATAD1                                                                                         | 0,047008515 | -0,113749116 | 0,312 | 0,137 | 1         | 0,924183273   | 1,082036463     | 2,277372263     |
| CCDC174                                                                                       | 0,123421204 | -0,113841017 | 0,125 | 0,051 | 1         | 0,924124404   | 1,082105391     | 2,450980392     |
| HPS1                                                                                          | 0,061508217 | -0,113867443 | 0,156 | 0,059 | 1         | 0,924107477   | 1,082125212     | 2,644067797     |
| STK38                                                                                         | 0,663576959 | -0,113873026 | 0,062 | 0,043 | 1         | 0,924103901   | 1,082129401     | 1,441860465     |
| MCOLN3                                                                                        | 0,428872689 | -0,113877658 | 0     | 0,02  | 1         | 0,924100934   | 1,082132875     | 0               |
| HIF3A                                                                                         | 0,38481627  | -0,113999951 | 0     | 0,023 | 1         | 0,924022604   | 1,082224608     | 0               |
| ZNF234                                                                                        | 0,428872689 | -0,114000386 | 0     | 0,02  | 1         | 0,924022325   | 1,082224934     | 0               |
| XPA                                                                                           | 0,008804476 | -0,114011637 | 0,281 | 0,098 | 1         | 0,924015119   | 1,082233374     | 2,867346939     |
| MBTD1                                                                                         | 0,098751938 | -0,114016416 | 0,094 | 0,031 | 1         | 0,924012059   | 1,082236959     | 3,032258065     |

Supplementary Table 1

| Differentially expressed genes_adjacent-skin-XL_ comparing SC-Keloid vs. (SC-Myel, SC-Nonmyel) |             |              |       |       |           |               |                 |                 |
|------------------------------------------------------------------------------------------------|-------------|--------------|-------|-------|-----------|---------------|-----------------|-----------------|
| gene                                                                                           | p_val       | avg_log2FC   | pct.1 | pct.2 | p_val_adj | Foldchange_UP | Foldchange_DOWN | Ratio_pct1_pct2 |
| PCBP2                                                                                          | 0,163555638 | -0,114061227 | 0,781 | 0,438 | 1         | 0,923983358   | 1,082270575     | 1,783105023     |
| CINP                                                                                           | 0,013407295 | -0,114123197 | 0,156 | 0,043 | 1         | 0,92394367    | 1,082317064     | 3,627906977     |
| OSBPL10                                                                                        | 0,016858455 | -0,114205787 | 0,125 | 0,031 | 1         | 0,923890778   | 1,082379025     | 4,032258065     |
| IL17RC                                                                                         | 0,351727998 | -0,114288453 | 0,125 | 0,07  | 1         | 0,923837842   | 1,082441046     | 1,785714286     |
| SLC40A1                                                                                        | 0,346686972 | -0,114314017 | 0     | 0,027 | 1         | 0,923821471   | 1,082460227     | 0               |
| CEACAM1                                                                                        | 0,480650464 | -0,114319549 | 0     | 0,016 | 1         | 0,923817929   | 1,082464378     | 0               |
| C1QTNF2                                                                                        | 0,38481627  | -0,114345307 | 0     | 0,023 | 1         | 0,923801436   | 1,082483704     | 0               |
| MEIS2                                                                                          | 0,480650464 | -0,114525525 | 0     | 0,016 | 1         | 0,923686044   | 1,082618934     | 0               |
| UCP2                                                                                           | 0,80991663  | -0,114577892 | 0,031 | 0,023 | 1         | 0,923652516   | 1,082658232     | 1,347826087     |
| NMRK1                                                                                          | 0,005831886 | -0,11466612  | 0,25  | 0,078 | 1         | 0,923596032   | 1,082724444     | 3,205128205     |
| MAP3K7                                                                                         | 0,016999114 | -0,114709106 | 0,219 | 0,074 | 1         | 0,923568513   | 1,082756705     | 2,959459459     |
| TMEM97                                                                                         | 0,746521062 | -0,114765947 | 0,062 | 0,047 | 1         | 0,923532126   | 1,082799365     | 1,319148936     |
| STXBP6                                                                                         | 0,18979066  | -0,114886925 | 0,094 | 0,039 | 1         | 0,923454686   | 1,082890168     | 2,41025641      |
| ZNF431                                                                                         | 0,060929624 | -0,114939564 | 0,125 | 0,043 | 1         | 0,923420993   | 1,082929679     | 2,906976744     |
| RAB11FIP2                                                                                      | 0,064224632 | -0,114950742 | 0,125 | 0,043 | 1         | 0,923413838   | 1,08293807      | 2,906976744     |
| GATC                                                                                           | 0,735253332 | -0,114968819 | 0,031 | 0,043 | 1         | 0,923402268   | 1,08295164      | 0,720930233     |
| ZNF429                                                                                         | 0,346686972 | -0,11502551  | 0     | 0,027 | 1         | 0,923365983   | 1,082994195     | 0               |
| KRBA1                                                                                          | 0,924392442 | -0,115172721 | 0,031 | 0,027 | 1         | 0,923271769   | 1,083104708     | 1,148148148     |
| CDIP1                                                                                          | 0,681846175 | -0,115355591 | 0,031 | 0,047 | 1         | 0,923154746   | 1,083242007     | 0,659574468     |
| TEPP                                                                                           | 0,543117005 | -0,11535573  | 0     | 0,012 | 1         | 0,923154657   | 1,083242111     | 0               |
| PCCA                                                                                           | 0,098751938 | -0,115413826 | 0,094 | 0,031 | 1         | 0,923117484   | 1,083285733     | 3,032258065     |
| TMEM170B                                                                                       | 0,38481627  | -0,115532948 | 0     | 0,023 | 1         | 0,923041266   | 1,083375183     | 0               |
| PNPO                                                                                           | 0,924392442 | -0,115615215 | 0,031 | 0,027 | 1         | 0,922988632   | 1,083436962     | 1,148148148     |
| ARL6IP1                                                                                        | 0,115222133 | -0,115670187 | 0,625 | 0,352 | 1         | 0,922953464   | 1,083478246     | 1,775568182     |
| ATP2B1-AS1                                                                                     | 0,224763613 | -0,115755251 | 0,062 | 0,023 | 1         | 0,922899046   | 1,083542132     | 2,695652174     |
| OTULIN                                                                                         | 0,085318957 | -0,115780673 | 0,156 | 0,062 | 1         | 0,922882784   | 1,083561225     | 2,516129032     |
| GATD1                                                                                          | 0,552606916 | -0,115782286 | 0,094 | 0,062 | 1         | 0,922881752   | 1,083562436     | 1,516129032     |
| VPS51                                                                                          | 0,022218422 | -0,115782836 | 0,281 | 0,109 | 1         | 0,9228814     | 1,083562849     | 2,577981651     |
| PJKV                                                                                           | 0,540537634 | -0,115787393 | 0,031 | 0,016 | 1         | 0,922878485   | 1,083566272     | 1,9375          |
| MCFD2                                                                                          | 0,006829551 | -0,115799267 | 0,281 | 0,094 | 1         | 0,92287089    | 1,08357519      | 2,989361702     |

Supplementary Table 1

| Differentially expressed genes_adjacent-skin-XL_ comparing SC-Keloid vs. (SC-Myel, SC-Nonmyel) |             |              |       |       |           |               |                 |                 |
|------------------------------------------------------------------------------------------------|-------------|--------------|-------|-------|-----------|---------------|-----------------|-----------------|
| gene                                                                                           | p_val       | avg_log2FC   | pct.1 | pct.2 | p_val_adj | Foldchange_UP | Foldchange_DOWN | Ratio_pct1_pct2 |
| ZNF445                                                                                         | 0,396289917 | -0,115800833 | 0,062 | 0,031 | 1         | 0,922869888   | 1,083576366     | 2               |
| TMEM263                                                                                        | 0,010366655 | -0,115814488 | 0,375 | 0,148 | 1         | 0,922861153   | 1,083586623     | 2,533783784     |
| KIAA0040                                                                                       | 0,979143607 | -0,115837111 | 0,031 | 0,031 | 1         | 0,922846682   | 1,083603614     | 1               |
| DENND5A                                                                                        | 0,001278728 | -0,115847382 | 0,406 | 0,133 | 1         | 0,922840111   | 1,083611329     | 3,052631579     |
| ZNF600                                                                                         | 0,682170546 | -0,1159235   | 0,031 | 0,02  | 1         | 0,922791423   | 1,083668503     | 1,55            |
| PARD6B                                                                                         | 0,573780511 | -0,115972582 | 0,062 | 0,039 | 1         | 0,922760029   | 1,083705371     | 1,58974359      |
| FHIP2B                                                                                         | 0,638347525 | -0,116036213 | 0,094 | 0,066 | 1         | 0,922719332   | 1,083753169     | 1,424242424     |
| DPY19L2                                                                                        | 0,480650464 | -0,11614588  | 0     | 0,016 | 1         | 0,922649193   | 1,083835554     | 0               |
| ABCD1                                                                                          | 0,480650464 | -0,116182648 | 0     | 0,016 | 1         | 0,922625679   | 1,083863177     | 0               |
| FAM81A                                                                                         | 0,428872689 | -0,116191312 | 0     | 0,02  | 1         | 0,922620138   | 1,083869687     | 0               |
| MTBP                                                                                           | 0,543117005 | -0,116229897 | 0     | 0,012 | 1         | 0,922595463   | 1,083898675     | 0               |
| CLYBL                                                                                          | 0,80991663  | -0,116249207 | 0,031 | 0,023 | 1         | 0,922583115   | 1,083913183     | 1,347826087     |
| APPL1                                                                                          | 0,002946987 | -0,116270868 | 0,344 | 0,113 | 1         | 0,922569263   | 1,083929457     | 3,044247788     |
| AHSA1                                                                                          | 0,003069747 | -0,116319462 | 0,656 | 0,266 | 1         | 0,922538188   | 1,083965967     | 2,466165414     |
| ZNF713                                                                                         | 0,682170546 | -0,116334737 | 0,031 | 0,02  | 1         | 0,922528421   | 1,083977445     | 1,55            |
| SMAD3                                                                                          | 0,979143607 | -0,116342302 | 0,031 | 0,031 | 1         | 0,922523583   | 1,083983129     | 1               |
| ZNF521                                                                                         | 0,38481627  | -0,116356707 | 0     | 0,023 | 1         | 0,922514372   | 1,083993952     | 0               |
| ENOX2                                                                                          | 0,428872689 | -0,116474087 | 0     | 0,02  | 1         | 0,922439318   | 1,084082151     | 0               |
| OXSRI                                                                                          | 0,051520095 | -0,116599695 | 0,312 | 0,145 | 1         | 0,92235901    | 1,08417654      | 2,151724138     |
| C4orf33                                                                                        | 0,141661018 | -0,116621122 | 0,094 | 0,035 | 1         | 0,922345311   | 1,084192643     | 2,685714286     |
| SNX27                                                                                          | 0,067298158 | -0,116635156 | 0,25  | 0,113 | 1         | 0,922336339   | 1,084203189     | 2,212389381     |
| KIFC2                                                                                          | 0,985101745 | -0,116673055 | 0,031 | 0,031 | 1         | 0,92231211    | 1,084231671     | 1               |
| GPHN                                                                                           | 0,979143607 | -0,116779107 | 0,031 | 0,031 | 1         | 0,922244313   | 1,084311376     | 1               |
| KIAA1671                                                                                       | 0,578217897 | -0,116883326 | 0,062 | 0,039 | 1         | 0,922177693   | 1,084389708     | 1,58974359      |
| CSNK2A1                                                                                        | 0,006146292 | -0,11689552  | 0,344 | 0,125 | 1         | 0,922169899   | 1,084398874     | 2,752           |
| CKS1B                                                                                          | 0,122113558 | -0,116909038 | 0,344 | 0,184 | 1         | 0,922161259   | 1,084409034     | 1,869565217     |
| E2F3                                                                                           | 0,540537634 | -0,117054468 | 0,031 | 0,016 | 1         | 0,922068305   | 1,084518353     | 1,9375          |
| SH3YL1                                                                                         | 0,016962377 | -0,117138905 | 0,25  | 0,09  | 1         | 0,922014341   | 1,084581829     | 2,777777778     |
| NSG1                                                                                           | 0,480650464 | -0,117144221 | 0     | 0,016 | 1         | 0,922010943   | 1,084585825     | 0               |
| PIK3C2B                                                                                        | 0,38481627  | -0,117215297 | 0     | 0,023 | 1         | 0,921965521   | 1,08463926      | 0               |

Supplementary Table 1

| Differentially expressed genes_adjacent-skin-XL_ comparing SC-Keloid vs. (SC-Myel, SC-Nonmyel) |             |              |       |       |           |               |                 |                 |
|------------------------------------------------------------------------------------------------|-------------|--------------|-------|-------|-----------|---------------|-----------------|-----------------|
| gene                                                                                           | p_val       | avg_log2FC   | pct.1 | pct.2 | p_val_adj | Foldchange_UP | Foldchange_DOWN | Ratio_pct1_pct2 |
| SLC38A7                                                                                        | 0,063925678 | -0,117227272 | 0,094 | 0,027 | 1         | 0,921957868   | 1,084648263     | 3,481481481     |
| GGA2                                                                                           | 0,677260831 | -0,117253508 | 0,031 | 0,047 | 1         | 0,921941102   | 1,084667988     | 0,659574468     |
| P2RX6                                                                                          | 0,082317662 | -0,117292893 | 0,031 | 0,004 | 1         | 0,921915933   | 1,0846976       | 7,75            |
| RBM41                                                                                          | 0,682170546 | -0,117304367 | 0,031 | 0,02  | 1         | 0,921908601   | 1,084706227     | 1,55            |
| PRTG                                                                                           | 0,480650464 | -0,117330467 | 0     | 0,016 | 1         | 0,921891923   | 1,08472585      | 0               |
| HDHD3                                                                                          | 0,346686972 | -0,117371002 | 0     | 0,027 | 1         | 0,921866022   | 1,084756327     | 0               |
| CNTROB                                                                                         | 0,38454022  | -0,117389162 | 0,062 | 0,031 | 1         | 0,921854417   | 1,084769982     | 2               |
| PDCD4                                                                                          | 0,021783242 | -0,117409742 | 0,312 | 0,125 | 1         | 0,921841267   | 1,084785457     | 2,496           |
| C21orf91                                                                                       | 0,80991663  | -0,117463919 | 0,031 | 0,023 | 1         | 0,921806651   | 1,084826194     | 1,347826087     |
| ZNF211                                                                                         | 0,428872689 | -0,117476915 | 0     | 0,02  | 1         | 0,921798346   | 1,084835967     | 0               |
| FBXO31                                                                                         | 0,578217897 | -0,117579607 | 0,062 | 0,039 | 1         | 0,921732734   | 1,084913189     | 1,58974359      |
| BPNT1                                                                                          | 0,30793671  | -0,117583509 | 0,062 | 0,027 | 1         | 0,921730242   | 1,084916122     | 2,296296296     |
| NIM1K                                                                                          | 0,032866024 | -0,117819988 | 0,188 | 0,066 | 1         | 0,921579169   | 1,085093971     | 2,848484848     |
| DCLK2                                                                                          | 0,979143607 | -0,117829145 | 0,031 | 0,031 | 1         | 0,92157332    | 1,085100858     | 1               |
| ZNF22-AS1                                                                                      | 0,543117005 | -0,117849731 | 0     | 0,012 | 1         | 0,92156017    | 1,085116342     | 0               |
| TANGO6                                                                                         | 0,540537634 | -0,117896349 | 0,031 | 0,016 | 1         | 0,921530391   | 1,085151406     | 1,9375          |
| SUGCT                                                                                          | 0,543117005 | -0,117923465 | 0     | 0,012 | 1         | 0,921513071   | 1,085171802     | 0               |
| GNPAT                                                                                          | 0,005452889 | -0,117945466 | 0,25  | 0,078 | 1         | 0,921499018   | 1,085188351     | 3,205128205     |
| MAN2B2                                                                                         | 0,045196862 | -0,118005634 | 0,125 | 0,039 | 1         | 0,921460587   | 1,08523361      | 3,205128205     |
| PPP1R35                                                                                        | 0,010105466 | -0,118111279 | 0,312 | 0,113 | 1         | 0,921393114   | 1,085313082     | 2,761061947     |
| ZNF25                                                                                          | 0,195328071 | -0,11813859  | 0,125 | 0,059 | 1         | 0,921375672   | 1,085333628     | 2,118644068     |
| LOH12CR2                                                                                       | 0,428872689 | -0,118159554 | 0     | 0,02  | 1         | 0,921362283   | 1,085349399     | 0               |
| PHYHIPL                                                                                        | 0,428872689 | -0,11816295  | 0     | 0,02  | 1         | 0,921360114   | 1,085351954     | 0               |
| LIPE                                                                                           | 0,80991663  | -0,11817879  | 0,031 | 0,023 | 1         | 0,921349998   | 1,08536387      | 1,347826087     |
| RRAS2                                                                                          | 0,438682776 | -0,118190735 | 0,094 | 0,055 | 1         | 0,92134237    | 1,085372857     | 1,709090909     |
| SETD7                                                                                          | 0,023853062 | -0,118271408 | 0,219 | 0,078 | 1         | 0,921290852   | 1,08543355      | 2,807692308     |
| TMEM259                                                                                        | 0,107936107 | -0,118284877 | 0,594 | 0,32  | 1         | 0,92128225    | 1,085443684     | 1,85625         |
| MLKL                                                                                           | 0,38481627  | -0,118335107 | 0     | 0,023 | 1         | 0,921250175   | 1,085481476     | 0               |
| LINC01023                                                                                      | 0,38481627  | -0,118336965 | 0     | 0,023 | 1         | 0,921248988   | 1,085482874     | 0               |
| QRICH1                                                                                         | 0,24851603  | -0,118435876 | 0,094 | 0,043 | 1         | 0,92118583    | 1,085557298     | 2,186046512     |

Supplementary Table 1

| Differentially expressed genes_adjacent-skin-XL_comparing SC-Keloid vs. (SC-Myel, SC-Nonmyel) |             |              |       |       |           |               |                 |                 |
|-----------------------------------------------------------------------------------------------|-------------|--------------|-------|-------|-----------|---------------|-----------------|-----------------|
| gene                                                                                          | p_val       | avg_log2FC   | pct.1 | pct.2 | p_val_adj | Foldchange_UP | Foldchange_DOWN | Ratio_pct1_pct2 |
| INTS9                                                                                         | 0,682170546 | -0,118466724 | 0,031 | 0,02  | 1         | 0,921166133   | 1,085580509     | 1,55            |
| NTRK2                                                                                         | 0,985101745 | -0,118482854 | 0,031 | 0,031 | 1         | 0,921155834   | 1,085592647     | 1               |
| HCFC2                                                                                         | 0,011905272 | -0,11851401  | 0,219 | 0,07  | 1         | 0,921135941   | 1,085616091     | 3,128571429     |
| IFITM1                                                                                        | 0,487085433 | -0,118573451 | 0,062 | 0,035 | 1         | 0,92109799    | 1,085660821     | 1,771428571     |
| COA7                                                                                          | 0,543117005 | -0,118580426 | 0     | 0,012 | 1         | 0,921093537   | 1,08566607      | 0               |
| ALG5                                                                                          | 0,000404212 | -0,118864989 | 0,438 | 0,137 | 1         | 0,920911875   | 1,085880232     | 3,197080292     |
| SLC7A5                                                                                        | 0,037506898 | -0,118909748 | 0,094 | 0,023 | 1         | 0,920883304   | 1,085913922     | 4,086956522     |
| ARHGAP31                                                                                      | 0,299332476 | -0,119051797 | 0,094 | 0,047 | 1         | 0,920792637   | 1,086020847     | 2               |
| RSPH3                                                                                         | 0,428872689 | -0,119094643 | 0     | 0,02  | 1         | 0,920765292   | 1,0860531       | 0               |
| CIDEB                                                                                         | 0,80991663  | -0,119105289 | 0,031 | 0,023 | 1         | 0,920758497   | 1,086061115     | 1,347826087     |
| CCDC115                                                                                       | 0,219587526 | -0,11920021  | 0,188 | 0,102 | 1         | 0,920697918   | 1,086132574     | 1,843137255     |
| IRX3                                                                                          | 0,428872689 | -0,119275123 | 0     | 0,02  | 1         | 0,920650112   | 1,086188974     | 0               |
| AC159540.2                                                                                    | 0,543117005 | -0,119280186 | 0     | 0,012 | 1         | 0,920646881   | 1,086192786     | 0               |
| N4BP1                                                                                         | 0,032927619 | -0,119297747 | 0,219 | 0,082 | 1         | 0,920635675   | 1,086206007     | 2,670731707     |
| METRN                                                                                         | 0,040081648 | -0,119354099 | 0,781 | 0,402 | 1         | 0,920599715   | 1,086248435     | 1,94278607      |
| EXD2                                                                                          | 0,098751938 | -0,119395348 | 0,094 | 0,031 | 1         | 0,920573394   | 1,086279494     | 3,032258065     |
| DEPDC5                                                                                        | 0,346686972 | -0,119436121 | 0     | 0,027 | 1         | 0,920547377   | 1,086310194     | 0               |
| LPAR6                                                                                         | 0,441948175 | -0,119458998 | 0,094 | 0,055 | 1         | 0,92053278    | 1,08632742      | 1,709090909     |
| EIF1AD                                                                                        | 0,063925678 | -0,119544771 | 0,094 | 0,027 | 1         | 0,920478053   | 1,086392008     | 3,481481481     |
| C21orf62-AS1                                                                                  | 0,480650464 | -0,119553241 | 0     | 0,016 | 1         | 0,920472649   | 1,086398386     | 0               |
| KCNIP4                                                                                        | 0,480650464 | -0,119598708 | 0     | 0,016 | 1         | 0,92044364    | 1,086432625     | 0               |
| AS3MT                                                                                         | 0,38481627  | -0,119625187 | 0     | 0,023 | 1         | 0,920426747   | 1,086452565     | 0               |
| USPL1                                                                                         | 0,020764757 | -0,119794946 | 0,156 | 0,047 | 1         | 0,920318449   | 1,086580413     | 3,319148936     |
| MON1B                                                                                         | 0,24851603  | -0,119799725 | 0,094 | 0,043 | 1         | 0,9203154     | 1,086584013     | 2,186046512     |
| MCMDC2                                                                                        | 0,543117005 | -0,119920347 | 0     | 0,012 | 1         | 0,920238457   | 1,086674864     | 0               |
| ALKBH1                                                                                        | 0,979143607 | -0,120182729 | 0,031 | 0,031 | 1         | 0,920071109   | 1,086872515     | 1               |
| MYNN                                                                                          | 0,396289917 | -0,120218295 | 0,062 | 0,031 | 1         | 0,920048427   | 1,086899309     | 2               |
| HDAC5                                                                                         | 0,001493165 | -0,120256861 | 0,312 | 0,094 | 1         | 0,920023833   | 1,086928365     | 3,319148936     |
| VAMP7                                                                                         | 0,055416701 | -0,120328398 | 0,188 | 0,074 | 1         | 0,919978214   | 1,086982262     | 2,540540541     |
| RNF138                                                                                        | 0,187685368 | -0,120387777 | 0,094 | 0,039 | 1         | 0,91994035    | 1,087027001     | 2,41025641      |

Supplementary Table 1

| Differentially expressed genes_adjacent-skin-XL_ comparing SC-Keloid vs. (SC-Myel, SC-Nonmyel) |             |              |       |       |           |               |                 |                 |
|------------------------------------------------------------------------------------------------|-------------|--------------|-------|-------|-----------|---------------|-----------------|-----------------|
| gene                                                                                           | p_val       | avg_log2FC   | pct.1 | pct.2 | p_val_adj | Foldchange_UP | Foldchange_DOWN | Ratio_pct1_pct2 |
| THAP9-AS1                                                                                      | 0,230628924 | -0,120422393 | 0,188 | 0,102 | 1         | 0,919918277   | 1,087053084     | 1,843137255     |
| TTC39B                                                                                         | 0,428872689 | -0,120451372 | 0     | 0,02  | 1         | 0,919899799   | 1,087074919     | 0               |
| UBE2B                                                                                          | 0,112897195 | -0,120497157 | 0,688 | 0,395 | 1         | 0,919870606   | 1,087109419     | 1,741772152     |
| PDLIM2                                                                                         | 0,070258445 | -0,12052547  | 0,281 | 0,133 | 1         | 0,919852553   | 1,087130754     | 2,112781955     |
| TMEM59                                                                                         | 0,540894585 | -0,120532358 | 0,75  | 0,52  | 1         | 0,919848162   | 1,087135944     | 1,442307692     |
| PDZD8                                                                                          | 0,111371471 | -0,120552582 | 0,188 | 0,086 | 1         | 0,919835267   | 1,087151184     | 2,186046512     |
| DNAJB12                                                                                        | 0,007848695 | -0,120614144 | 0,219 | 0,066 | 1         | 0,919796017   | 1,087197576     | 3,318181818     |
| CPNE3                                                                                          | 0,001139882 | -0,120643322 | 0,562 | 0,203 | 1         | 0,919777415   | 1,087219564     | 2,768472906     |
| SLC25A32                                                                                       | 0,158954432 | -0,120668874 | 0,125 | 0,055 | 1         | 0,919761125   | 1,08723882      | 2,272727273     |
| ZBTB20-AS2                                                                                     | 0,540537634 | -0,120801605 | 0,031 | 0,016 | 1         | 0,919676508   | 1,087338853     | 1,9375          |
| GAS1                                                                                           | 0,346686972 | -0,120927576 | 0     | 0,027 | 1         | 0,919596209   | 1,0874338       | 0               |
| OSMR                                                                                           | 0,30757457  | -0,121018413 | 0,094 | 0,047 | 1         | 0,91953831    | 1,087502271     | 2               |
| ATF5                                                                                           | 0,013407295 | -0,121100087 | 0,156 | 0,043 | 1         | 0,919486255   | 1,087563838     | 3,627906977     |
| AXIN2                                                                                          | 0,924392442 | -0,12121891  | 0,031 | 0,027 | 1         | 0,919410527   | 1,087653415     | 1,148148148     |
| ALKBH2                                                                                         | 0,00187651  | -0,121294877 | 0,219 | 0,055 | 1         | 0,919362115   | 1,087710689     | 3,981818182     |
| TTLL3                                                                                          | 0,792332287 | -0,121327962 | 0,094 | 0,105 | 1         | 0,919341032   | 1,087735633     | 0,895238095     |
| DSE                                                                                            | 0,560566066 | -0,121343188 | 0,062 | 0,039 | 1         | 0,91933133    | 1,087747113     | 1,58974359      |
| FNTB                                                                                           | 0,013407295 | -0,121354487 | 0,156 | 0,043 | 1         | 0,919324129   | 1,087755633     | 3,627906977     |
| VSIG8                                                                                          | 0,480650464 | -0,121488029 | 0     | 0,016 | 1         | 0,919239037   | 1,087856324     | 0               |
| XPC                                                                                            | 0,00434487  | -0,121529297 | 0,312 | 0,105 | 1         | 0,919212743   | 1,087887443     | 2,971428571     |
| CDC27                                                                                          | 0,004889051 | -0,121569171 | 0,281 | 0,09  | 1         | 0,919187338   | 1,08791751      | 3,122222222     |
| FAM222A                                                                                        | 0,907442332 | -0,121586024 | 0,062 | 0,055 | 1         | 0,9191766     | 1,08793022      | 1,127272727     |
| KAT6B                                                                                          | 0,000123326 | -0,121648937 | 0,375 | 0,098 | 1         | 0,919136517   | 1,087977663     | 3,826530612     |
| ADGRL2                                                                                         | 0,428872689 | -0,121716975 | 0     | 0,02  | 1         | 0,919093172   | 1,088028973     | 0               |
| RTTN                                                                                           | 0,139907281 | -0,121727166 | 0,094 | 0,035 | 1         | 0,91908668    | 1,088036659     | 2,685714286     |
| ZNF654                                                                                         | 0,445305691 | -0,121729969 | 0,125 | 0,078 | 1         | 0,919084894   | 1,088038773     | 1,602564103     |
| MTARC2                                                                                         | 0,663576959 | -0,121736029 | 0,062 | 0,043 | 1         | 0,919081033   | 1,088043344     | 1,441860465     |
| FGFR3                                                                                          | 0,682170546 | -0,121892329 | 0,031 | 0,02  | 1         | 0,918981466   | 1,088161227     | 1,55            |
| AKAP6                                                                                          | 0,283789128 | -0,121932164 | 0     | 0,035 | 1         | 0,918956092   | 1,088191273     | 0               |
| LRSAM1                                                                                         | 0,346686972 | -0,121959139 | 0     | 0,027 | 1         | 0,91893891    | 1,08821162      | 0               |

Supplementary Table 1

| Differentially expressed genes_adjacent-skin-XL_ comparing SC-Keloid vs. (SC-Myel, SC-Nonmyel) |             |              |       |       |           |               |                 |                 |
|------------------------------------------------------------------------------------------------|-------------|--------------|-------|-------|-----------|---------------|-----------------|-----------------|
| gene                                                                                           | p_val       | avg_log2FC   | pct.1 | pct.2 | p_val_adj | Foldchange_UP | Foldchange_DOWN | Ratio_pct1_pct2 |
| NR1D2                                                                                          | 0,013194542 | -0,122094622 | 0,375 | 0,152 | 1         | 0,918852617   | 1,088313818     | 2,467105263     |
| DNAJA3                                                                                         | 0,578217897 | -0,122128611 | 0,062 | 0,039 | 1         | 0,91883097    | 1,088339459     | 1,58974359      |
| DCTN4                                                                                          | 0,232905777 | -0,122154821 | 0,125 | 0,062 | 1         | 0,918814277   | 1,088359232     | 2,016129032     |
| ANAPC1                                                                                         | 0,668126075 | -0,122206162 | 0,062 | 0,043 | 1         | 0,91878158    | 1,088397963     | 1,441860465     |
| ZPR1                                                                                           | 0,195328071 | -0,122226296 | 0,125 | 0,059 | 1         | 0,918768757   | 1,088413153     | 2,118644068     |
| RUNX2                                                                                          | 0,243596382 | -0,122229492 | 0,094 | 0,043 | 1         | 0,918766722   | 1,088415564     | 2,186046512     |
| C16orf74                                                                                       | 0,38481627  | -0,122353188 | 0     | 0,023 | 1         | 0,918687951   | 1,088508888     | 0               |
| TSTD1                                                                                          | 0,740158863 | -0,12236091  | 0,031 | 0,043 | 1         | 0,918683034   | 1,088514715     | 0,720930233     |
| DOP1A                                                                                          | 0,24851603  | -0,122365562 | 0,094 | 0,043 | 1         | 0,918680071   | 1,088518224     | 2,186046512     |
| ZNF674-AS1                                                                                     | 0,428872689 | -0,122383314 | 0     | 0,02  | 1         | 0,918668767   | 1,088531619     | 0               |
| LTO1                                                                                           | 0,569358921 | -0,122424833 | 0,062 | 0,039 | 1         | 0,918642329   | 1,088562946     | 1,58974359      |
| GNPDA1                                                                                         | 0,170843838 | -0,122433197 | 0,188 | 0,094 | 1         | 0,918637004   | 1,088569257     | 2               |
| AC083843.3                                                                                     | 0,346686972 | -0,122479225 | 0     | 0,027 | 1         | 0,918607695   | 1,088603987     | 0               |
| GGA1                                                                                           | 0,005754239 | -0,122535607 | 0,25  | 0,078 | 1         | 0,918571797   | 1,088646531     | 3,205128205     |
| LPXN                                                                                           | 0,543117005 | -0,122584689 | 0     | 0,012 | 1         | 0,918540546   | 1,088683569     | 0               |
| WDR4                                                                                           | 0,543117005 | -0,122645729 | 0     | 0,012 | 1         | 0,918501684   | 1,088729632     | 0               |
| RGS9                                                                                           | 0,428970186 | -0,122754854 | 0,094 | 0,055 | 1         | 0,918432211   | 1,088811987     | 1,709090909     |
| PWWP2B                                                                                         | 0,578217897 | -0,122848245 | 0,062 | 0,039 | 1         | 0,91837276    | 1,088882471     | 1,58974359      |
| GXYLT1                                                                                         | 0,376291412 | -0,122874543 | 0,094 | 0,051 | 1         | 0,918356019   | 1,08890232      | 1,843137255     |
| VRK3                                                                                           | 0,487085433 | -0,122921593 | 0,062 | 0,035 | 1         | 0,91832607    | 1,088937833     | 1,771428571     |
| MMACHC                                                                                         | 0,543117005 | -0,122925928 | 0     | 0,012 | 1         | 0,918323311   | 1,088941104     | 0               |
| TRIM37                                                                                         | 0,139907281 | -0,122939763 | 0,094 | 0,035 | 1         | 0,918314504   | 1,088951547     | 2,685714286     |
| PSMB4                                                                                          | 0,000128916 | -0,122950748 | 0,625 | 0,207 | 1         | 0,918307512   | 1,088959839     | 3,019323671     |
| SGCD                                                                                           | 0,355251835 | -0,123045717 | 0,094 | 0,051 | 1         | 0,918247064   | 1,089031525     | 1,843137255     |
| UNC45A                                                                                         | 0,015105004 | -0,123063978 | 0,188 | 0,059 | 1         | 0,918235441   | 1,08904531      | 3,186440678     |
| TUBGCP2                                                                                        | 0,000207816 | -0,123077586 | 0,312 | 0,078 | 1         | 0,91822678    | 1,089055581     | 4               |
| LRP3                                                                                           | 0,313292814 | -0,123148056 | 0     | 0,031 | 1         | 0,91818193    | 1,089108779     | 0               |
| PLXNB1                                                                                         | 0,892714086 | -0,123167499 | 0,031 | 0,035 | 1         | 0,918169555   | 1,089123457     | 0,885714286     |
| FGF14-AS2                                                                                      | 0,487085433 | -0,123172858 | 0,062 | 0,035 | 1         | 0,918166145   | 1,089127502     | 1,771428571     |
| CHRD1                                                                                          | 0,346686972 | -0,123254519 | 0     | 0,027 | 1         | 0,918114175   | 1,089189152     | 0               |

Supplementary Table 1

| Differentially expressed genes_adjacent-skin-XL_comparing SC-Keloid vs. (SC-Myel, SC-Nonmyel) |             |              |       |       |           |               |                 |                 |
|-----------------------------------------------------------------------------------------------|-------------|--------------|-------|-------|-----------|---------------|-----------------|-----------------|
| gene                                                                                          | p_val       | avg_log2FC   | pct.1 | pct.2 | p_val_adj | Foldchange_UP | Foldchange_DOWN | Ratio_pct1_pct2 |
| ALDH9A1                                                                                       | 0,003355836 | -0,123296513 | 0,312 | 0,102 | 1         | 0,918087451   | 1,089220857     | 3,058823529     |
| C12orf4                                                                                       | 0,06592651  | -0,12337101  | 0,125 | 0,043 | 1         | 0,918040044   | 1,089277103     | 2,906976744     |
| TMEM25                                                                                        | 0,428872689 | -0,123411148 | 0     | 0,02  | 1         | 0,918014504   | 1,089307408     | 0               |
| CEP295                                                                                        | 0,021379715 | -0,123482298 | 0,156 | 0,047 | 1         | 0,917969231   | 1,089361132     | 3,319148936     |
| AC016831.7                                                                                    | 0,257548576 | -0,123489013 | 0     | 0,039 | 1         | 0,917964958   | 1,089366202     | 0               |
| RABEPK                                                                                        | 0,007602859 | -0,123507512 | 0,156 | 0,039 | 1         | 0,917953187   | 1,089380171     | 4               |
| PUDP                                                                                          | 0,346686972 | -0,123512358 | 0     | 0,027 | 1         | 0,917950104   | 1,08938383      | 0               |
| OASL                                                                                          | 0,480650464 | -0,123623289 | 0     | 0,016 | 1         | 0,917879524   | 1,089467598     | 0               |
| AJUBA                                                                                         | 0,428872689 | -0,123646437 | 0     | 0,02  | 1         | 0,917864797   | 1,089485078     | 0               |
| ADK                                                                                           | 0,00397851  | -0,123652699 | 0,531 | 0,219 | 1         | 0,917860813   | 1,089489807     | 2,424657534     |
| MAPK8                                                                                         | 0,400593325 | -0,123721554 | 0,094 | 0,055 | 1         | 0,917817008   | 1,089541806     | 1,709090909     |
| MBOAT1                                                                                        | 0,996386478 | -0,123796124 | 0,094 | 0,09  | 1         | 0,917769569   | 1,089598124     | 1,044444444     |
| ALS2                                                                                          | 0,124769281 | -0,124072416 | 0,125 | 0,051 | 1         | 0,917593822   | 1,089806814     | 2,450980392     |
| RNF4                                                                                          | 0,563155042 | -0,124095825 | 0,094 | 0,062 | 1         | 0,917578934   | 1,089824496     | 1,516129032     |
| SULT1C4                                                                                       | 0,80991663  | -0,124164962 | 0,031 | 0,023 | 1         | 0,917534963   | 1,089876725     | 1,347826087     |
| ZNF669                                                                                        | 0,38481627  | -0,124197263 | 0     | 0,023 | 1         | 0,91751442    | 1,089901127     | 0               |
| TDRP                                                                                          | 0,313292814 | -0,124243662 | 0     | 0,031 | 1         | 0,917484912   | 1,08993618      | 0               |
| FCHSD1                                                                                        | 0,80991663  | -0,12438498  | 0,031 | 0,023 | 1         | 0,917395045   | 1,090042949     | 1,347826087     |
| ZBED3-AS1                                                                                     | 0,38481627  | -0,124402892 | 0     | 0,023 | 1         | 0,917383655   | 1,090056483     | 0               |
| VWC2                                                                                          | 0,38481627  | -0,124423784 | 0     | 0,023 | 1         | 0,91737037    | 1,090072268     | 0               |
| AQP11                                                                                         | 0,346686972 | -0,124620041 | 0     | 0,027 | 1         | 0,917245584   | 1,090220566     | 0               |
| EXOC6B                                                                                        | 0,24851603  | -0,124737822 | 0,094 | 0,043 | 1         | 0,917170703   | 1,090309575     | 2,186046512     |
| RING1                                                                                         | 0,103889562 | -0,124760179 | 0,219 | 0,102 | 1         | 0,91715649    | 1,090326472     | 2,147058824     |
| GOLGA1                                                                                        | 0,578217897 | -0,124782889 | 0,062 | 0,039 | 1         | 0,917142053   | 1,090343635     | 1,58974359      |
| ZNF346                                                                                        | 0,887104347 | -0,12478695  | 0,031 | 0,035 | 1         | 0,917139472   | 1,090346704     | 0,885714286     |
| CLSTN2                                                                                        | 0,346686972 | -0,124971839 | 0     | 0,027 | 1         | 0,917021943   | 1,090486446     | 0               |
| TRAPPC2                                                                                       | 0,924392442 | -0,124981805 | 0,031 | 0,027 | 1         | 0,917015609   | 1,090493979     | 1,148148148     |
| FZD5                                                                                          | 0,681846175 | -0,125032733 | 0,031 | 0,047 | 1         | 0,916983238   | 1,090532475     | 0,659574468     |
| SCNN1D                                                                                        | 0,38481627  | -0,125043051 | 0     | 0,023 | 1         | 0,916976679   | 1,090540275     | 0               |
| MN1                                                                                           | 0,887104347 | -0,125059929 | 0,031 | 0,035 | 1         | 0,916965952   | 1,090553033     | 0,885714286     |



Supplementary Table 1

| Differentially expressed genes_adjacent-skin-XL_comparing SC-Keloid vs. (SC-Myel, SC-Nonmyel) |             |              |       |       |           |               |                 |                 |
|-----------------------------------------------------------------------------------------------|-------------|--------------|-------|-------|-----------|---------------|-----------------|-----------------|
| gene                                                                                          | p_val       | avg_log2FC   | pct.1 | pct.2 | p_val_adj | Foldchange_UP | Foldchange_DOWN | Ratio_pct1_pct2 |
| DNAJC24                                                                                       | 0,171678436 | -0,125093832 | 0,156 | 0,074 | 1         | 0,916944404   | 1,090578661     | 2,108108108     |
| SYTL1                                                                                         | 0,38481627  | -0,12510871  | 0     | 0,023 | 1         | 0,916934947   | 1,090589908     | 0               |
| PINX1                                                                                         | 0,984608494 | -0,125125762 | 0,062 | 0,059 | 1         | 0,91692411    | 1,090602798     | 1,050847458     |
| ANKRD49                                                                                       | 0,046495836 | -0,125143372 | 0,156 | 0,055 | 1         | 0,916912918   | 1,09061611      | 2,836363636     |
| CRTAC1                                                                                        | 0,38481627  | -0,125193202 | 0     | 0,023 | 1         | 0,916881249   | 1,09065378      | 0               |
| CATSPERG                                                                                      | 0,480650464 | -0,125212304 | 0     | 0,016 | 1         | 0,916869109   | 1,090668221     | 0               |
| ISG20L2                                                                                       | 0,191913299 | -0,125222815 | 0,094 | 0,039 | 1         | 0,916862429   | 1,090676167     | 2,41025641      |
| COQ6                                                                                          | 0,021726813 | -0,125223475 | 0,188 | 0,062 | 1         | 0,91686201    | 1,090676666     | 3,032258065     |
| CLIP3                                                                                         | 0,300029356 | -0,125226089 | 0,125 | 0,066 | 1         | 0,916860348   | 1,090678643     | 1,893939394     |
| PHF20                                                                                         | 0,129999673 | -0,125250524 | 0,312 | 0,168 | 1         | 0,91684482    | 1,090697115     | 1,857142857     |
| KDM3B                                                                                         | 0,613016608 | -0,125363705 | 0,094 | 0,066 | 1         | 0,916772895   | 1,090782685     | 1,424242424     |
| SKIL                                                                                          | 0,002392549 | -0,125434022 | 0,531 | 0,207 | 1         | 0,916728212   | 1,090835851     | 2,565217391     |
| C6orf136                                                                                      | 0,224763613 | -0,125545598 | 0,062 | 0,023 | 1         | 0,916657317   | 1,090920218     | 2,695652174     |
| NAP1L3                                                                                        | 0,924392442 | -0,125595269 | 0,031 | 0,027 | 1         | 0,916625757   | 1,090957779     | 1,148148148     |
| ATG10                                                                                         | 0,124769281 | -0,125599803 | 0,125 | 0,051 | 1         | 0,916622876   | 1,090961207     | 2,450980392     |
| MAGI3                                                                                         | 0,730358576 | -0,125673599 | 0,031 | 0,043 | 1         | 0,916575991   | 1,091017013     | 0,720930233     |
| SLC16A12                                                                                      | 0,480650464 | -0,125680562 | 0     | 0,016 | 1         | 0,916571567   | 1,091022279     | 0               |
| SCN5A                                                                                         | 0,38481627  | -0,125691635 | 0     | 0,023 | 1         | 0,916564532   | 1,091030653     | 0               |
| MPPE1                                                                                         | 0,06440165  | -0,12577736  | 0,156 | 0,059 | 1         | 0,916510072   | 1,091095483     | 2,644067797     |
| RP9                                                                                           | 0,031413167 | -0,125823235 | 0,156 | 0,051 | 1         | 0,916480929   | 1,091130179     | 3,058823529     |
| SNX29                                                                                         | 0,016858455 | -0,125853219 | 0,125 | 0,031 | 1         | 0,916461881   | 1,091152857     | 4,032258065     |
| PLAGL2                                                                                        | 0,428872689 | -0,125886662 | 0     | 0,02  | 1         | 0,916440637   | 1,091178151     | 0               |
| APC2                                                                                          | 0,428872689 | -0,125889463 | 0     | 0,02  | 1         | 0,916438858   | 1,091180269     | 0               |
| SNURF                                                                                         | 0,428872689 | -0,12600173  | 0     | 0,02  | 1         | 0,916367546   | 1,091265186     | 0               |
| SLC12A6                                                                                       | 0,979143607 | -0,1260087   | 0,031 | 0,031 | 1         | 0,916363119   | 1,091270458     | 1               |
| PTGR2                                                                                         | 0,578217897 | -0,126013066 | 0,062 | 0,039 | 1         | 0,916360346   | 1,09127376      | 1,58974359      |
| EXOC4                                                                                         | 0,021379715 | -0,12604142  | 0,156 | 0,047 | 1         | 0,916342336   | 1,091295208     | 3,319148936     |
| CCDC102B                                                                                      | 0,924392442 | -0,126117193 | 0,031 | 0,027 | 1         | 0,916294209   | 1,091352526     | 1,148148148     |
| UPF1                                                                                          | 0,138620038 | -0,126159056 | 0,188 | 0,09  | 1         | 0,916267621   | 1,091384195     | 2,088888889     |
| CHEK2                                                                                         | 0,80991663  | -0,126172746 | 0,031 | 0,023 | 1         | 0,916258927   | 1,091394551     | 1,347826087     |

Supplementary Table 1

| Differentially expressed genes_adjacent-skin-XL_ comparing SC-Keloid vs. (SC-Myel, SC-Nonmyel) |             |              |       |       |           |               |                 |                 |
|------------------------------------------------------------------------------------------------|-------------|--------------|-------|-------|-----------|---------------|-----------------|-----------------|
| gene                                                                                           | p_val       | avg_log2FC   | pct.1 | pct.2 | p_val_adj | Foldchange_UP | Foldchange_DOWN | Ratio_pct1_pct2 |
| TNFRSF1A                                                                                       | 0,028631721 | -0,126214334 | 0,406 | 0,184 | 1         | 0,916232515   | 1,091426012     | 2,206521739     |
| ZNF618                                                                                         | 0,38481627  | -0,126299904 | 0     | 0,023 | 1         | 0,916178172   | 1,09149075      | 0               |
| ST8SIA1                                                                                        | 0,428872689 | -0,126304939 | 0     | 0,02  | 1         | 0,916174974   | 1,091494559     | 0               |
| RBM45                                                                                          | 0,313292814 | -0,126353228 | 0     | 0,031 | 1         | 0,916144309   | 1,091531094     | 0               |
| AP4S1                                                                                          | 0,346686972 | -0,126353633 | 0     | 0,027 | 1         | 0,916144052   | 1,0915314       | 0               |
| RBMS2                                                                                          | 0,062854872 | -0,126363231 | 0,219 | 0,094 | 1         | 0,916137958   | 1,091538662     | 2,329787234     |
| S100A8                                                                                         | 0,38481627  | -0,126365021 | 0     | 0,023 | 1         | 0,916136821   | 1,091540016     | 0               |
| MED30                                                                                          | 0,003355836 | -0,126491824 | 0,312 | 0,102 | 1         | 0,916056302   | 1,091635959     | 3,058823529     |
| STAMBP                                                                                         | 0,009014103 | -0,126504182 | 0,281 | 0,098 | 1         | 0,916048455   | 1,091645311     | 2,867346939     |
| BLOC1S6                                                                                        | 0,033217489 | -0,126543343 | 0,469 | 0,219 | 1         | 0,91602359    | 1,091674943     | 2,141552511     |
| PC                                                                                             | 0,672687415 | -0,126563424 | 0,031 | 0,047 | 1         | 0,91601084    | 1,091690138     | 0,659574468     |
| PRKAG2                                                                                         | 0,139907281 | -0,126586711 | 0,094 | 0,035 | 1         | 0,915996054   | 1,091707759     | 2,685714286     |
| PRKN                                                                                           | 0,38481627  | -0,126590155 | 0     | 0,023 | 1         | 0,915993867   | 1,091710366     | 0               |
| SMO                                                                                            | 0,682170546 | -0,126617064 | 0,031 | 0,02  | 1         | 0,915976783   | 1,091730728     | 1,55            |
| DCST2                                                                                          | 0,480650464 | -0,126619382 | 0     | 0,016 | 1         | 0,915975311   | 1,091732482     | 0               |
| HLCS                                                                                           | 0,480650464 | -0,126736319 | 0     | 0,016 | 1         | 0,91590107    | 1,091820976     | 0               |
| NUPR1                                                                                          | 0,123421204 | -0,126909372 | 0,125 | 0,051 | 1         | 0,915791213   | 1,091951949     | 2,450980392     |
| SLC25A45                                                                                       | 0,428872689 | -0,126911191 | 0     | 0,02  | 1         | 0,915790059   | 1,091953325     | 0               |
| ATF6                                                                                           | 0,003827364 | -0,126915235 | 0,344 | 0,117 | 1         | 0,915787491   | 1,091956387     | 2,94017094      |
| TGIF2                                                                                          | 0,605861551 | -0,12694965  | 0,094 | 0,066 | 1         | 0,915765646   | 1,091982435     | 1,424242424     |
| C9orf50                                                                                        | 0,396289917 | -0,126974253 | 0,062 | 0,031 | 1         | 0,915750029   | 1,092001057     | 2               |
| CACNA1A                                                                                        | 0,346686972 | -0,126976992 | 0     | 0,027 | 1         | 0,91574829    | 1,092003131     | 0               |
| RAB11FIP5                                                                                      | 0,310355006 | -0,127005767 | 0,094 | 0,047 | 1         | 0,915730026   | 1,092024911     | 2               |
| PBX3                                                                                           | 0,002617214 | -0,127136755 | 0,25  | 0,07  | 1         | 0,915646887   | 1,092124065     | 3,571428571     |
| COX19                                                                                          | 0,329441973 | -0,127152114 | 0,125 | 0,07  | 1         | 0,915637139   | 1,092135691     | 1,785714286     |
| TPST1                                                                                          | 0,012061903 | -0,127191826 | 0,219 | 0,07  | 1         | 0,915611935   | 1,092165754     | 3,128571429     |
| TLNRD1                                                                                         | 0,02386822  | -0,127243249 | 0,25  | 0,094 | 1         | 0,9155793     | 1,092204684     | 2,659574468     |
| KCTD18                                                                                         | 0,313292814 | -0,127257621 | 0     | 0,031 | 1         | 0,915570179   | 1,092215564     | 0               |
| TOE1                                                                                           | 0,150155729 | -0,127294681 | 0,062 | 0,02  | 1         | 0,91554666    | 1,092243622     | 3,1             |
| GTF2IRD1                                                                                       | 0,06592651  | -0,127367883 | 0,125 | 0,043 | 1         | 0,915500207   | 1,092299043     | 2,906976744     |

Supplementary Table 1

| Differentially expressed genes_adjacent-skin-XL_ comparing SC-Keloid vs. (SC-Myel, SC-Nonmyel) |             |              |       |       |           |               |                 |                 |
|------------------------------------------------------------------------------------------------|-------------|--------------|-------|-------|-----------|---------------|-----------------|-----------------|
| gene                                                                                           | p_val       | avg_log2FC   | pct.1 | pct.2 | p_val_adj | Foldchange_UP | Foldchange_DOWN | Ratio_pct1_pct2 |
| BLOC1S3                                                                                        | 0,887104347 | -0,127406872 | 0,031 | 0,035 | 1         | 0,915475466   | 1,092328563     | 0,885714286     |
| MAD2L1BP                                                                                       | 0,016858455 | -0,127496027 | 0,125 | 0,031 | 1         | 0,915418893   | 1,092396069     | 4,032258065     |
| TCEA3                                                                                          | 0,887104347 | -0,127612222 | 0,031 | 0,035 | 1         | 0,915345168   | 1,092484054     | 0,885714286     |
| SRPK3                                                                                          | 0,682170546 | -0,12771703  | 0,031 | 0,02  | 1         | 0,915278673   | 1,092563423     | 1,55            |
| CRISPLD1                                                                                       | 0,346686972 | -0,127720165 | 0     | 0,027 | 1         | 0,915276684   | 1,092565797     | 0               |
| ATP6VOC                                                                                        | 0,361013281 | -0,127741703 | 0,844 | 0,543 | 1         | 0,91526302    | 1,092582108     | 1,554327808     |
| PWP2                                                                                           | 0,480650464 | -0,127762009 | 0     | 0,016 | 1         | 0,915250138   | 1,092597486     | 0               |
| WWOX                                                                                           | 0,191913299 | -0,12777838  | 0,094 | 0,039 | 1         | 0,915239752   | 1,092609885     | 2,41025641      |
| DVL1                                                                                           | 0,053678031 | -0,127833838 | 0,188 | 0,074 | 1         | 0,91520457    | 1,092651886     | 2,540540541     |
| DIPK2A                                                                                         | 0,122084526 | -0,127860905 | 0,125 | 0,051 | 1         | 0,9151874     | 1,092672386     | 2,450980392     |
| DNMBP                                                                                          | 0,38481627  | -0,127869612 | 0     | 0,023 | 1         | 0,915181876   | 1,092678981     | 0               |
| ARNT                                                                                           | 0,163771487 | -0,127870346 | 0,125 | 0,055 | 1         | 0,915181411   | 1,092679537     | 2,272727273     |
| TANC2                                                                                          | 0,170423334 | -0,127951696 | 0,25  | 0,137 | 1         | 0,915129808   | 1,092741151     | 1,824817518     |
| PTER                                                                                           | 0,346686972 | -0,127984122 | 0     | 0,027 | 1         | 0,91510924    | 1,092765712     | 0               |
| MPP3                                                                                           | 0,38481627  | -0,128000963 | 0     | 0,023 | 1         | 0,915098557   | 1,092778469     | 0               |
| AC123768.4                                                                                     | 0,543117005 | -0,128114352 | 0     | 0,012 | 1         | 0,915026638   | 1,092864359     | 0               |
| RAB5B                                                                                          | 0,059034985 | -0,128122138 | 0,188 | 0,074 | 1         | 0,9150217     | 1,092870257     | 2,540540541     |
| ADAM17                                                                                         | 0,016947037 | -0,128194263 | 0,5   | 0,223 | 1         | 0,914975956   | 1,092924895     | 2,242152466     |
| OSGIN1                                                                                         | 0,38481627  | -0,128278817 | 0     | 0,023 | 1         | 0,914922332   | 1,092988951     | 0               |
| ROBO3                                                                                          | 0,032917376 | -0,128398627 | 0,281 | 0,117 | 1         | 0,914846355   | 1,093079723     | 2,401709402     |
| TRIM27                                                                                         | 0,206379422 | -0,128568646 | 0,125 | 0,059 | 1         | 0,914738548   | 1,093208548     | 2,118644068     |
| AAAS                                                                                           | 0,157372807 | -0,128592373 | 0,125 | 0,055 | 1         | 0,914723504   | 1,093226528     | 2,272727273     |
| IL6                                                                                            | 0,924392442 | -0,128653413 | 0,031 | 0,027 | 1         | 0,914684803   | 1,093272782     | 1,148148148     |
| NOP14-AS1                                                                                      | 0,346686972 | -0,128726882 | 0     | 0,027 | 1         | 0,914638224   | 1,093328459     | 0               |
| RNF115                                                                                         | 0,020832552 | -0,12878678  | 0,344 | 0,141 | 1         | 0,914600251   | 1,093373853     | 2,439716312     |
| EGOT                                                                                           | 0,087959196 | -0,12885948  | 0,062 | 0,016 | 1         | 0,914554164   | 1,093428951     | 3,875           |
| MRPS14                                                                                         | 0,01032863  | -0,128918462 | 0,312 | 0,113 | 1         | 0,914516775   | 1,093473655     | 2,761061947     |
| LIN54                                                                                          | 0,804543977 | -0,129052153 | 0,031 | 0,039 | 1         | 0,914432032   | 1,09357499      | 0,794871795     |
| ZBTB24                                                                                         | 0,150155729 | -0,129162656 | 0,062 | 0,02  | 1         | 0,914361995   | 1,093658754     | 3,1             |
| IPMK                                                                                           | 0,313292814 | -0,129196904 | 0     | 0,031 | 1         | 0,914340289   | 1,093684717     | 0               |

Supplementary Table 1

| Differentially expressed genes_adjacent-skin-XL_comparing SC-Keloid vs. (SC-Myel, SC-Nonmyel) |             |              |       |       |           |               |                 |                 |
|-----------------------------------------------------------------------------------------------|-------------|--------------|-------|-------|-----------|---------------|-----------------|-----------------|
| gene                                                                                          | p_val       | avg_log2FC   | pct.1 | pct.2 | p_val_adj | Foldchange_UP | Foldchange_DOWN | Ratio_pct1_pct2 |
| TAF1C                                                                                         | 0,735253332 | -0,129199503 | 0,031 | 0,043 | 1         | 0,914338641   | 1,093686688     | 0,720930233     |
| NR3C2                                                                                         | 0,38481627  | -0,1292127   | 0     | 0,023 | 1         | 0,914330278   | 1,093696692     | 0               |
| MALRD1                                                                                        | 0,480650464 | -0,129293733 | 0     | 0,016 | 1         | 0,914278923   | 1,093758124     | 0               |
| FTX                                                                                           | 0,400032689 | -0,129297482 | 0,219 | 0,145 | 1         | 0,914276547   | 1,093760967     | 1,510344828     |
| TRRAP                                                                                         | 0,082633113 | -0,129414293 | 0,156 | 0,062 | 1         | 0,914202524   | 1,093849529     | 2,516129032     |
| TRAPPC11                                                                                      | 0,30793671  | -0,129443083 | 0,062 | 0,027 | 1         | 0,914184281   | 1,093871357     | 2,296296296     |
| SLC44A3                                                                                       | 0,682170546 | -0,12947356  | 0,031 | 0,02  | 1         | 0,914164968   | 1,093894466     | 1,55            |
| YJU2B                                                                                         | 0,00036468  | -0,12947428  | 0,344 | 0,094 | 1         | 0,914164512   | 1,093895012     | 3,659574468     |
| TNK1                                                                                          | 0,80991663  | -0,129532077 | 0,031 | 0,023 | 1         | 0,91412789    | 1,093938836     | 1,347826087     |
| RBM12                                                                                         | 0,435431286 | -0,129600026 | 0,094 | 0,055 | 1         | 0,914084837   | 1,09399036      | 1,709090909     |
| CCDC153                                                                                       | 0,480650464 | -0,129604137 | 0     | 0,016 | 1         | 0,914082232   | 1,093993477     | 0               |
| VOPP1                                                                                         | 0,157372807 | -0,129629201 | 0,125 | 0,055 | 1         | 0,914066352   | 1,094012484     | 2,272727273     |
| CCNE2                                                                                         | 0,346686972 | -0,129649233 | 0     | 0,027 | 1         | 0,91405366    | 1,094027674     | 0               |
| SMAD4                                                                                         | 0,046142047 | -0,129686845 | 0,344 | 0,16  | 1         | 0,91402983    | 1,094056197     | 2,15            |
| POMZP3                                                                                        | 0,428872689 | -0,129733519 | 0     | 0,02  | 1         | 0,91400026    | 1,094091592     | 0               |
| TPCN2                                                                                         | 0,123421204 | -0,130053617 | 0,125 | 0,051 | 1         | 0,913797489   | 1,094334371     | 2,450980392     |
| SART1                                                                                         | 0,348388786 | -0,130195639 | 0,156 | 0,094 | 1         | 0,913707537   | 1,094442105     | 1,659574468     |
| MFS10                                                                                         | 0,068218414 | -0,130275713 | 0,469 | 0,238 | 1         | 0,913656825   | 1,094502851     | 1,970588235     |
| TCERG1                                                                                        | 0,062955122 | -0,130385006 | 0,281 | 0,129 | 1         | 0,913587612   | 1,09458577      | 2,178294574     |
| SMARCD3                                                                                       | 0,351727998 | -0,130443503 | 0,125 | 0,07  | 1         | 0,91355057    | 1,094630153     | 1,785714286     |
| RABL3                                                                                         | 0,540537634 | -0,130559647 | 0,031 | 0,016 | 1         | 0,913477027   | 1,09471828      | 1,9375          |
| CCDC7                                                                                         | 0,918113127 | -0,13057358  | 0,031 | 0,027 | 1         | 0,913468205   | 1,094728852     | 1,148148148     |
| TBPL1                                                                                         | 0,032475728 | -0,130621314 | 0,188 | 0,066 | 1         | 0,913437982   | 1,094765074     | 2,848484848     |
| CDC42EP4                                                                                      | 0,023800873 | -0,130641266 | 0,375 | 0,16  | 1         | 0,91342535    | 1,094780214     | 2,34375         |
| AMOT                                                                                          | 0,313292814 | -0,13065278  | 0     | 0,031 | 1         | 0,91341806    | 1,094788952     | 0               |
| OPCML                                                                                         | 0,38481627  | -0,130658331 | 0     | 0,023 | 1         | 0,913414546   | 1,094793164     | 0               |
| MTHFSD                                                                                        | 0,150155729 | -0,130689734 | 0,062 | 0,02  | 1         | 0,913394663   | 1,094816994     | 3,1             |
| CSTF2T                                                                                        | 0,480650464 | -0,130746392 | 0     | 0,016 | 1         | 0,913358793   | 1,094859991     | 0               |
| MOSPD2                                                                                        | 0,395713974 | -0,130758238 | 0,156 | 0,098 | 1         | 0,913351293   | 1,094868981     | 1,591836735     |
| HAS2                                                                                          | 0,014442227 | -0,13078925  | 0,281 | 0,113 | 1         | 0,913331661   | 1,094892516     | 2,486725664     |

Supplementary Table 1

| Differentially expressed genes_adjacent-skin-XL_comparing SC-Keloid vs. (SC-Myel, SC-Nonmyel) |             |              |       |       |           |               |                 |                 |
|-----------------------------------------------------------------------------------------------|-------------|--------------|-------|-------|-----------|---------------|-----------------|-----------------|
| gene                                                                                          | p_val       | avg_log2FC   | pct.1 | pct.2 | p_val_adj | Foldchange_UP | Foldchange_DOWN | Ratio_pct1_pct2 |
| TMEM8B                                                                                        | 0,045653963 | -0,130796574 | 0,188 | 0,07  | 1         | 0,913327024   | 1,094898074     | 2,685714286     |
| PAN2                                                                                          | 0,799224988 | -0,130827064 | 0,062 | 0,051 | 1         | 0,913307722   | 1,094921215     | 1,215686275     |
| PPP1R13L                                                                                      | 0,979143607 | -0,130875551 | 0,031 | 0,031 | 1         | 0,913277027   | 1,094958014     | 1               |
| JAKMIP2                                                                                       | 0,141661018 | -0,130927298 | 0,094 | 0,035 | 1         | 0,91324427    | 1,094997289     | 2,685714286     |
| RECQL5                                                                                        | 0,924392442 | -0,130970895 | 0,031 | 0,027 | 1         | 0,913216673   | 1,09503038      | 1,148148148     |
| PEX5L                                                                                         | 0,38481627  | -0,131102976 | 0     | 0,023 | 1         | 0,91313307    | 1,095130636     | 0               |
| AC002451.1                                                                                    | 0,428872689 | -0,131104058 | 0     | 0,02  | 1         | 0,913132386   | 1,095131457     | 0               |
| CTNS                                                                                          | 0,06592651  | -0,131113075 | 0,125 | 0,043 | 1         | 0,913126679   | 1,095138302     | 2,906976744     |
| PUM2                                                                                          | 0,003195191 | -0,131126896 | 0,281 | 0,086 | 1         | 0,913117931   | 1,095148793     | 3,26744186      |
| CREB3L4                                                                                       | 0,682170546 | -0,131154227 | 0,031 | 0,02  | 1         | 0,913100633   | 1,09516954      | 1,55            |
| RHOG                                                                                          | 0,00640202  | -0,131162115 | 0,438 | 0,168 | 1         | 0,91309564    | 1,095175528     | 2,607142857     |
| DCAF17                                                                                        | 0,346686972 | -0,131332892 | 0     | 0,027 | 1         | 0,91298756    | 1,095305176     | 0               |
| TRPC1                                                                                         | 0,804543977 | -0,131475079 | 0,031 | 0,039 | 1         | 0,912897584   | 1,09541313      | 0,794871795     |
| KPNB1                                                                                         | 0,020415783 | -0,131491575 | 0,531 | 0,242 | 1         | 0,912887145   | 1,095425656     | 2,194214876     |
| ZNF461                                                                                        | 0,540537634 | -0,131540165 | 0,031 | 0,016 | 1         | 0,9128564     | 1,095462551     | 1,9375          |
| ZNF486                                                                                        | 0,38481627  | -0,131577702 | 0     | 0,023 | 1         | 0,912832649   | 1,095491053     | 0               |
| ERCC6                                                                                         | 0,80991663  | -0,131613986 | 0,031 | 0,023 | 1         | 0,912809691   | 1,095518605     | 1,347826087     |
| EPB41L5                                                                                       | 0,924392442 | -0,131622576 | 0,031 | 0,027 | 1         | 0,912804257   | 1,095525128     | 1,148148148     |
| WHRN                                                                                          | 0,482846351 | -0,131709021 | 0,062 | 0,035 | 1         | 0,912749564   | 1,095590773     | 1,771428571     |
| RSL1D1                                                                                        | 0,002393139 | -0,131735371 | 0,438 | 0,152 | 1         | 0,912732893   | 1,095610783     | 2,881578947     |
| EXT2                                                                                          | 0,021654043 | -0,131805892 | 0,25  | 0,094 | 1         | 0,912688278   | 1,09566434      | 2,659574468     |
| NBPF11                                                                                        | 0,80991663  | -0,131810378 | 0,031 | 0,023 | 1         | 0,91268544    | 1,095667747     | 1,347826087     |
| ZNF460                                                                                        | 0,304810673 | -0,131822319 | 0,094 | 0,047 | 1         | 0,912677887   | 1,095676815     | 2               |
| SGSM2                                                                                         | 0,30793671  | -0,13184139  | 0,062 | 0,027 | 1         | 0,912665822   | 1,095691299     | 2,296296296     |
| ACCS                                                                                          | 0,224763613 | -0,131858654 | 0,062 | 0,023 | 1         | 0,9126549     | 1,095704411     | 2,695652174     |
| ANXA3                                                                                         | 0,349205649 | -0,131875587 | 0,125 | 0,07  | 1         | 0,912644188   | 1,095717272     | 1,785714286     |
| ZNF700                                                                                        | 0,924392442 | -0,131965899 | 0,031 | 0,027 | 1         | 0,912587059   | 1,095785865     | 1,148148148     |
| ZNF605                                                                                        | 0,80991663  | -0,132051343 | 0,031 | 0,023 | 1         | 0,912533012   | 1,095850765     | 1,347826087     |
| ATG2A                                                                                         | 0,663576959 | -0,132157974 | 0,062 | 0,043 | 1         | 0,912465569   | 1,095931763     | 1,441860465     |
| DBT                                                                                           | 0,916437471 | -0,132202216 | 0,062 | 0,055 | 1         | 0,912437587   | 1,095965372     | 1,127272727     |

Supplementary Table 1

| Differentially expressed genes_adjacent-skin-XL_ comparing SC-Keloid vs. (SC-Myel, SC-Nonmyel) |             |              |       |       |           |               |                 |                 |
|------------------------------------------------------------------------------------------------|-------------|--------------|-------|-------|-----------|---------------|-----------------|-----------------|
| gene                                                                                           | p_val       | avg_log2FC   | pct.1 | pct.2 | p_val_adj | Foldchange_UP | Foldchange_DOWN | Ratio_pct1_pct2 |
| CDC42BPA                                                                                       | 0,014364265 | -0,132210958 | 0,375 | 0,152 | 1         | 0,912432059   | 1,095972013     | 2,467105263     |
| STK39                                                                                          | 0,730358576 | -0,132284787 | 0,031 | 0,043 | 1         | 0,912385367   | 1,0960281       | 0,720930233     |
| PRC1                                                                                           | 0,304406192 | -0,132334537 | 0,062 | 0,027 | 1         | 0,912353904   | 1,096065896     | 2,296296296     |
| PCDHGA10                                                                                       | 0,396289917 | -0,132358341 | 0,062 | 0,031 | 1         | 0,912338851   | 1,096083981     | 2               |
| ALG11                                                                                          | 0,224763613 | -0,132450958 | 0,062 | 0,023 | 1         | 0,912280283   | 1,096154349     | 2,695652174     |
| NACC2                                                                                          | 0,264732918 | -0,132550395 | 0,156 | 0,086 | 1         | 0,912217407   | 1,096229904     | 1,813953488     |
| ATG4A                                                                                          | 0,396289917 | -0,132559695 | 0,062 | 0,031 | 1         | 0,912211527   | 1,09623697      | 2               |
| UHRF1BP1L                                                                                      | 0,632215601 | -0,132620382 | 0,125 | 0,09  | 1         | 0,912173155   | 1,096283084     | 1,388888889     |
| SACM1L                                                                                         | 0,24851603  | -0,13267781  | 0,094 | 0,043 | 1         | 0,912136846   | 1,096326724     | 2,186046512     |
| TCP11L2                                                                                        | 0,480650464 | -0,132735903 | 0     | 0,016 | 1         | 0,912100118   | 1,096370871     | 0               |
| DHX37                                                                                          | 0,979143607 | -0,132771973 | 0,031 | 0,031 | 1         | 0,912077314   | 1,096398282     | 1               |
| WDR35                                                                                          | 0,487085433 | -0,132793351 | 0,062 | 0,035 | 1         | 0,912063798   | 1,096414529     | 1,771428571     |
| ECT2                                                                                           | 0,089393291 | -0,132889919 | 0,125 | 0,047 | 1         | 0,912002751   | 1,096487921     | 2,659574468     |
| BRWD3                                                                                          | 0,032569978 | -0,132952734 | 0,219 | 0,082 | 1         | 0,911963043   | 1,096535663     | 2,670731707     |
| LGALS1                                                                                         | 0,741950345 | -0,132969683 | 0,062 | 0,047 | 1         | 0,911952329   | 1,096548545     | 1,319148936     |
| MTO1                                                                                           | 0,098751938 | -0,132984308 | 0,094 | 0,031 | 1         | 0,911943084   | 1,096559662     | 3,032258065     |
| PPM1A                                                                                          | 0,008258336 | -0,133205146 | 0,375 | 0,141 | 1         | 0,911803501   | 1,096727528     | 2,659574468     |
| MAN1A1                                                                                         | 0,924392442 | -0,13329325  | 0,031 | 0,027 | 1         | 0,91174782    | 1,096794506     | 1,148148148     |
| HDGFL2                                                                                         | 0,011438702 | -0,133340562 | 0,281 | 0,102 | 1         | 0,911717921   | 1,096830475     | 2,754901961     |
| RGL1                                                                                           | 0,979143607 | -0,133535321 | 0,031 | 0,031 | 1         | 0,91159485    | 1,096978554     | 1               |
| FBXO30                                                                                         | 0,237189349 | -0,133573772 | 0,156 | 0,082 | 1         | 0,911570554   | 1,097007791     | 1,902439024     |
| WDR17                                                                                          | 0,313292814 | -0,13361724  | 0     | 0,031 | 1         | 0,911543089   | 1,097040844     | 0               |
| TULP4                                                                                          | 0,052408043 | -0,133676709 | 0,281 | 0,125 | 1         | 0,911505516   | 1,097086066     | 2,248           |
| MAPK6                                                                                          | 0,016558745 | -0,133762121 | 0,406 | 0,172 | 1         | 0,911451553   | 1,097151019     | 2,360465116     |
| SH2B1                                                                                          | 0,505798338 | -0,133836403 | 0,094 | 0,059 | 1         | 0,911404625   | 1,097207511     | 1,593220339     |
| ZNF318                                                                                         | 0,38481627  | -0,134007957 | 0     | 0,023 | 1         | 0,911296255   | 1,09733799      | 0               |
| CSRNP2                                                                                         | 0,920939129 | -0,134049279 | 0,062 | 0,055 | 1         | 0,911270153   | 1,09736942      | 1,127272727     |
| UBQLN2                                                                                         | 0,016391618 | -0,134049625 | 0,25  | 0,09  | 1         | 0,911269935   | 1,097369684     | 2,777777778     |
| PRRC2C                                                                                         | 0,048544154 | -0,134207047 | 0,75  | 0,387 | 1         | 0,911170505   | 1,097489431     | 1,937984496     |
| NTN4                                                                                           | 0,304810673 | -0,134237386 | 0,094 | 0,047 | 1         | 0,911151344   | 1,097512511     | 2               |

Supplementary Table 1

| Differentially expressed genes_adjacent-skin-XL_ comparing SC-Keloid vs. (SC-Myel, SC-Nonmyel) |             |              |       |       |           |               |                 |                 |
|------------------------------------------------------------------------------------------------|-------------|--------------|-------|-------|-----------|---------------|-----------------|-----------------|
| gene                                                                                           | p_val       | avg_log2FC   | pct.1 | pct.2 | p_val_adj | Foldchange_UP | Foldchange_DOWN | Ratio_pct1_pct2 |
| SLC22A4                                                                                        | 0,682170546 | -0,134240079 | 0,031 | 0,02  | 1         | 0,911149643   | 1,09751456      | 1,55            |
| ETV7                                                                                           | 0,224763613 | -0,134412481 | 0,062 | 0,023 | 1         | 0,911040767   | 1,097645721     | 2,695652174     |
| PAAF1                                                                                          | 0,067739324 | -0,134640749 | 0,219 | 0,094 | 1         | 0,910896631   | 1,097819408     | 2,329787234     |
| RASA4                                                                                          | 0,428872689 | -0,134868658 | 0     | 0,02  | 1         | 0,910752744   | 1,097992848     | 0               |
| MSANTD2                                                                                        | 0,924392442 | -0,134874881 | 0,031 | 0,027 | 1         | 0,910748816   | 1,097997585     | 1,148148148     |
| CHD3                                                                                           | 7,38464E-05 | -0,134901571 | 0,438 | 0,121 | 1         | 0,910731967   | 1,098017898     | 3,619834711     |
| GORASP2                                                                                        | 0,000741516 | -0,134912812 | 0,375 | 0,113 | 1         | 0,910724871   | 1,098026453     | 3,318584071     |
| CDC16                                                                                          | 0,00295717  | -0,134930795 | 0,219 | 0,059 | 1         | 0,910713519   | 1,09804014      | 3,711864407     |
| TAF4                                                                                           | 0,38481627  | -0,134942026 | 0     | 0,023 | 1         | 0,910706429   | 1,098048689     | 0               |
| L2HGDH                                                                                         | 0,38481627  | -0,134956046 | 0     | 0,023 | 1         | 0,910697579   | 1,098059359     | 0               |
| THBD                                                                                           | 0,346686972 | -0,135051233 | 0     | 0,027 | 1         | 0,910637495   | 1,09813181      | 0               |
| ZNF524                                                                                         | 0,017209641 | -0,135087221 | 0,219 | 0,074 | 1         | 0,910614779   | 1,098159203     | 2,959459459     |
| CSNK2A2                                                                                        | 0,015052808 | -0,135173891 | 0,375 | 0,152 | 1         | 0,910560075   | 1,098225177     | 2,467105263     |
| SSTR1                                                                                          | 0,428872689 | -0,135184267 | 0     | 0,02  | 1         | 0,910553526   | 1,098233076     | 0               |
| CFH                                                                                            | 0,428872689 | -0,135199821 | 0     | 0,02  | 1         | 0,91054371    | 1,098244916     | 0               |
| CBLL1                                                                                          | 0,283789128 | -0,135212655 | 0     | 0,035 | 1         | 0,910535609   | 1,098254686     | 0               |
| EPHA10                                                                                         | 0,38481627  | -0,135214403 | 0     | 0,023 | 1         | 0,910534506   | 1,098256017     | 0               |
| NAXD                                                                                           | 0,376291412 | -0,135230142 | 0,094 | 0,051 | 1         | 0,910524573   | 1,098267998     | 1,843137255     |
| UMAD1                                                                                          | 0,13644998  | -0,135242326 | 0,094 | 0,035 | 1         | 0,910516883   | 1,098277273     | 2,685714286     |
| LINC00324                                                                                      | 0,682170546 | -0,135349282 | 0,031 | 0,02  | 1         | 0,910449383   | 1,098358699     | 1,55            |
| CCDC71L                                                                                        | 0,023035563 | -0,135351304 | 0,219 | 0,078 | 1         | 0,910448107   | 1,098360238     | 2,807692308     |
| CUEDC2                                                                                         | 0,002518612 | -0,135355242 | 0,562 | 0,219 | 1         | 0,910445623   | 1,098363236     | 2,566210046     |
| ADNP                                                                                           | 0,042949063 | -0,135364156 | 0,375 | 0,176 | 1         | 0,910439997   | 1,098370022     | 2,130681818     |
| SMN1                                                                                           | 0,979143607 | -0,135368785 | 0,031 | 0,031 | 1         | 0,910437076   | 1,098373547     | 1               |
| ACER3                                                                                          | 0,440039837 | -0,135381358 | 0,156 | 0,102 | 1         | 0,910429141   | 1,098383119     | 1,529411765     |
| ASRGL1                                                                                         | 0,730358576 | -0,135419919 | 0,031 | 0,043 | 1         | 0,910404808   | 1,098412477     | 0,720930233     |
| SPIDR                                                                                          | 0,124769281 | -0,135461389 | 0,125 | 0,051 | 1         | 0,910378638   | 1,098444051     | 2,450980392     |
| SMURF1                                                                                         | 0,943031489 | -0,135692598 | 0,094 | 0,086 | 1         | 0,910232751   | 1,098620104     | 1,093023256     |
| CCDC14                                                                                         | 0,094709571 | -0,135698965 | 0,219 | 0,102 | 1         | 0,910228734   | 1,098624953     | 2,147058824     |
| MKRN2                                                                                          | 0,030493266 | -0,135750505 | 0,219 | 0,082 | 1         | 0,910196217   | 1,098664202     | 2,670731707     |

Supplementary Table 1

| Differentially expressed genes_adjacent-skin-XL_ comparing SC-Keloid vs. (SC-Myel, SC-Nonmyel) |             |              |       |       |           |               |                 |                 |
|------------------------------------------------------------------------------------------------|-------------|--------------|-------|-------|-----------|---------------|-----------------|-----------------|
| gene                                                                                           | p_val       | avg_log2FC   | pct.1 | pct.2 | p_val_adj | Foldchange_UP | Foldchange_DOWN | Ratio_pct1_pct2 |
| RAB33A                                                                                         | 0,313292814 | -0,135827261 | 0     | 0,031 | 1         | 0,910147793   | 1,098722656     | 0               |
| NBEA                                                                                           | 0,283788463 | -0,135941265 | 0     | 0,035 | 1         | 0,910075874   | 1,098809482     | 0               |
| DDX47                                                                                          | 0,257548576 | -0,135989942 | 0     | 0,039 | 1         | 0,910045168   | 1,098846557     | 0               |
| ZNF665                                                                                         | 0,80991663  | -0,136019447 | 0,031 | 0,023 | 1         | 0,910026557   | 1,098869029     | 1,347826087     |
| SYDE1                                                                                          | 0,010405093 | -0,136039455 | 0,188 | 0,055 | 1         | 0,910013937   | 1,09888427      | 3,418181818     |
| RNF139                                                                                         | 0,163012044 | -0,136107453 | 0,156 | 0,074 | 1         | 0,909971046   | 1,098936064     | 2,108108108     |
| H2AW                                                                                           | 0,600062    | -0,136142066 | 0,188 | 0,137 | 1         | 0,909949215   | 1,09896243      | 1,372262774     |
| HIBCH                                                                                          | 0,022445649 | -0,136173301 | 0,281 | 0,109 | 1         | 0,909929514   | 1,098986223     | 2,577981651     |
| MYBBP1A                                                                                        | 0,578217897 | -0,136202536 | 0,062 | 0,039 | 1         | 0,909911075   | 1,099008493     | 1,58974359      |
| RANGAP1                                                                                        | 0,202549436 | -0,136229722 | 0,188 | 0,098 | 1         | 0,909893929   | 1,099029203     | 1,918367347     |
| ANKRD42                                                                                        | 0,668126075 | -0,13626663  | 0,062 | 0,043 | 1         | 0,909870652   | 1,09905732      | 1,441860465     |
| SDHB                                                                                           | 0,000138929 | -0,136313504 | 0,469 | 0,137 | 1         | 0,90984109    | 1,099093029     | 3,423357664     |
| PRKAB2                                                                                         | 0,066791287 | -0,13637147  | 0,125 | 0,043 | 1         | 0,909804534   | 1,099137191     | 2,906976744     |
| LINC00115                                                                                      | 0,804543977 | -0,136444398 | 0,031 | 0,039 | 1         | 0,909758545   | 1,099192754     | 0,794871795     |
| GCX                                                                                            | 0,485433146 | -0,136544553 | 0,094 | 0,059 | 1         | 0,90969539    | 1,099269064     | 1,593220339     |
| KLHL34                                                                                         | 0,313292814 | -0,136554997 | 0     | 0,031 | 1         | 0,909688804   | 1,099277022     | 0               |
| PPP1R21                                                                                        | 0,376291412 | -0,136590687 | 0,094 | 0,051 | 1         | 0,9096663     | 1,099304217     | 1,843137255     |
| PCDHB16                                                                                        | 0,428872689 | -0,136614841 | 0     | 0,02  | 1         | 0,909651071   | 1,099322622     | 0               |
| ISYNA1                                                                                         | 0,434183714 | -0,136641746 | 0,125 | 0,078 | 1         | 0,909634107   | 1,099343123     | 1,602564103     |
| USP28                                                                                          | 0,924392442 | -0,136687298 | 0,031 | 0,027 | 1         | 0,909605386   | 1,099377835     | 1,148148148     |
| TNFRSF6B                                                                                       | 0,428872689 | -0,136718086 | 0     | 0,02  | 1         | 0,909585975   | 1,099401296     | 0               |
| SCLT1                                                                                          | 0,076971853 | -0,136892117 | 0,188 | 0,078 | 1         | 0,909476259   | 1,099533925     | 2,41025641      |
| DCAF1                                                                                          | 0,573780511 | -0,136946972 | 0,062 | 0,039 | 1         | 0,909441679   | 1,099575733     | 1,58974359      |
| TTF1                                                                                           | 0,017422452 | -0,136985323 | 0,219 | 0,074 | 1         | 0,909417503   | 1,099604963     | 2,959459459     |
| TSGA10                                                                                         | 0,38481627  | -0,137038382 | 0     | 0,023 | 1         | 0,909384058   | 1,099645405     | 0               |
| C3orf62                                                                                        | 0,80991663  | -0,137057793 | 0,031 | 0,023 | 1         | 0,909371823   | 1,0996602       | 1,347826087     |
| FBXW4                                                                                          | 0,415867271 | -0,137062877 | 0,031 | 0,07  | 1         | 0,909368618   | 1,099664075     | 0,442857143     |
| FXR2                                                                                           | 0,06440165  | -0,137151973 | 0,156 | 0,059 | 1         | 0,90931246    | 1,099731988     | 2,644067797     |
| C12orf29                                                                                       | 0,017377488 | -0,137159395 | 0,281 | 0,105 | 1         | 0,909307782   | 1,099737646     | 2,676190476     |
| CX3CL1                                                                                         | 0,480650464 | -0,137332848 | 0     | 0,016 | 1         | 0,909198464   | 1,099869874     | 0               |



Supplementary Table 1

| Differentially expressed genes_adjacent-skin-XL_ comparing SC-Keloid vs. (SC-Myel, SC-Nonmyel) |             |              |       |       |           |               |                 |                 |
|------------------------------------------------------------------------------------------------|-------------|--------------|-------|-------|-----------|---------------|-----------------|-----------------|
| gene                                                                                           | p_val       | avg_log2FC   | pct.1 | pct.2 | p_val_adj | Foldchange_UP | Foldchange_DOWN | Ratio_pct1_pct2 |
| TMEM39A                                                                                        | 0,920939129 | -0,137432413 | 0,062 | 0,055 | 1         | 0,909135719   | 1,099945782     | 1,127272727     |
| ARFGF1                                                                                         | 0,086229766 | -0,137435076 | 0,156 | 0,062 | 1         | 0,909134041   | 1,099947812     | 2,516129032     |
| MRPL48                                                                                         | 0,003997708 | -0,137462053 | 0,25  | 0,074 | 1         | 0,909117042   | 1,09996838      | 3,378378378     |
| GOLPH3                                                                                         | 0,013381021 | -0,137507948 | 0,281 | 0,102 | 1         | 0,909088121   | 1,100003373     | 2,754901961     |
| ZNF133                                                                                         | 0,150155729 | -0,137525074 | 0,062 | 0,02  | 1         | 0,909077329   | 1,100016432     | 3,1             |
| METTL3                                                                                         | 0,043169771 | -0,137568034 | 0,188 | 0,07  | 1         | 0,90905026    | 1,100049188     | 2,685714286     |
| UHRF1BP1                                                                                       | 0,979143607 | -0,137599526 | 0,031 | 0,031 | 1         | 0,909030417   | 1,1000732       | 1               |
| TRAF6                                                                                          | 0,755689148 | -0,13766183  | 0,062 | 0,047 | 1         | 0,90899116    | 1,100120709     | 1,319148936     |
| RNF214                                                                                         | 0,578217897 | -0,137687216 | 0,062 | 0,039 | 1         | 0,908975166   | 1,100140067     | 1,58974359      |
| PHF12                                                                                          | 0,158954432 | -0,137751294 | 0,125 | 0,055 | 1         | 0,908934794   | 1,100188932     | 2,272727273     |
| THOC2                                                                                          | 0,073890297 | -0,138016904 | 0,375 | 0,188 | 1         | 0,908767469   | 1,100391502     | 1,994680851     |
| NCOR2                                                                                          | 0,011768519 | -0,138027945 | 0,375 | 0,148 | 1         | 0,908760513   | 1,100399924     | 2,533783784     |
| CISH                                                                                           | 0,480650464 | -0,138106926 | 0     | 0,016 | 1         | 0,908710764   | 1,100460168     | 0               |
| UBE2Q2L                                                                                        | 0,283789128 | -0,138520521 | 0     | 0,035 | 1         | 0,908450291   | 1,100775695     | 0               |
| C11orf91                                                                                       | 0,578217897 | -0,138528449 | 0,062 | 0,039 | 1         | 0,908445298   | 1,100781744     | 1,58974359      |
| AP3M2                                                                                          | 0,045196862 | -0,138616537 | 0,125 | 0,039 | 1         | 0,908389832   | 1,100848958     | 3,205128205     |
| MRPS9                                                                                          | 0,373239546 | -0,138623855 | 0,094 | 0,051 | 1         | 0,908385225   | 1,100854541     | 1,843137255     |
| RABGAP1L                                                                                       | 0,384687297 | -0,138742832 | 0,125 | 0,074 | 1         | 0,908310314   | 1,100945331     | 1,689189189     |
| CALCOCO1                                                                                       | 0,00581471  | -0,138790989 | 0,312 | 0,109 | 1         | 0,908279996   | 1,100982081     | 2,862385321     |
| F10                                                                                            | 0,346686972 | -0,13888985  | 0     | 0,027 | 1         | 0,908217758   | 1,101057529     | 0               |
| NSMF                                                                                           | 0,021379715 | -0,139008386 | 0,156 | 0,047 | 1         | 0,908143139   | 1,101147999     | 3,319148936     |
| NCKIPSD                                                                                        | 0,840130893 | -0,139011404 | 0,062 | 0,051 | 1         | 0,908141239   | 1,101150302     | 1,215686275     |
| TRPM4                                                                                          | 0,38481627  | -0,13903958  | 0     | 0,023 | 1         | 0,908123503   | 1,101171808     | 0               |
| CUBN                                                                                           | 0,191913299 | -0,13907184  | 0,094 | 0,039 | 1         | 0,908103197   | 1,101196431     | 2,41025641      |
| USP2                                                                                           | 0,346686972 | -0,13911642  | 0     | 0,027 | 1         | 0,908075136   | 1,10123046      | 0               |
| SCAF1                                                                                          | 0,086049964 | -0,139254739 | 0,219 | 0,098 | 1         | 0,907988078   | 1,101336046     | 2,234693878     |
| NSL1                                                                                           | 0,003355836 | -0,13931659  | 0,312 | 0,102 | 1         | 0,907949153   | 1,101383263     | 3,058823529     |
| STAM2                                                                                          | 0,367181952 | -0,139322289 | 0,094 | 0,051 | 1         | 0,907945566   | 1,101387614     | 1,843137255     |
| MNT                                                                                            | 0,885008839 | -0,139322535 | 0,062 | 0,055 | 1         | 0,907945411   | 1,101387801     | 1,127272727     |
| BMP4                                                                                           | 0,38481627  | -0,139342593 | 0     | 0,023 | 1         | 0,907932788   | 1,101403114     | 0               |

Supplementary Table 1

| Differentially expressed genes_adjacent-skin-XL_comparing SC-Keloid vs. (SC-Myel, SC-Nonmyel) |             |              |       |       |           |               |                 |                 |
|-----------------------------------------------------------------------------------------------|-------------|--------------|-------|-------|-----------|---------------|-----------------|-----------------|
| gene                                                                                          | p_val       | avg_log2FC   | pct.1 | pct.2 | p_val_adj | Foldchange_UP | Foldchange_DOWN | Ratio_pct1_pct2 |
| TCAIM                                                                                         | 0,551839113 | -0,139348704 | 0,062 | 0,039 | 1         | 0,907928942   | 1,10140778      | 1,58974359      |
| PAPOLA                                                                                        | 0,050044716 | -0,139483803 | 0,625 | 0,312 | 1         | 0,907843924   | 1,101510924     | 2,003205128     |
| BAZ1B                                                                                         | 0,049054766 | -0,139665436 | 0,312 | 0,145 | 1         | 0,907729635   | 1,101649611     | 2,151724138     |
| STXBP5                                                                                        | 0,370203052 | -0,139757714 | 0,094 | 0,051 | 1         | 0,907671577   | 1,101720078     | 1,843137255     |
| EPHA5                                                                                         | 0,480650464 | -0,139763384 | 0     | 0,016 | 1         | 0,90766801    | 1,101724407     | 0               |
| USP1                                                                                          | 0,012712505 | -0,139823977 | 0,375 | 0,148 | 1         | 0,907629888   | 1,101770681     | 2,533783784     |
| CYP2D6                                                                                        | 0,543117005 | -0,139862838 | 0     | 0,012 | 1         | 0,907605441   | 1,101800359     | 0               |
| HPS6                                                                                          | 0,38481627  | -0,139993113 | 0     | 0,023 | 1         | 0,907523487   | 1,101899856     | 0               |
| ZNF205                                                                                        | 0,578217897 | -0,140036007 | 0,062 | 0,039 | 1         | 0,907496506   | 1,101932618     | 1,58974359      |
| IPO8                                                                                          | 0,016179439 | -0,140082093 | 0,219 | 0,074 | 1         | 0,907467517   | 1,101967819     | 2,959459459     |
| GTF3C4                                                                                        | 0,817344545 | -0,140104873 | 0,062 | 0,051 | 1         | 0,907453188   | 1,101985219     | 1,215686275     |
| GATB                                                                                          | 0,346686972 | -0,140171099 | 0     | 0,027 | 1         | 0,907411533   | 1,102035806     | 0               |
| TTC7A                                                                                         | 0,578217897 | -0,140180239 | 0,062 | 0,039 | 1         | 0,907405784   | 1,102042788     | 1,58974359      |
| CETN3                                                                                         | 0,118142322 | -0,140247936 | 0,125 | 0,051 | 1         | 0,907363206   | 1,102094501     | 2,450980392     |
| GGA3                                                                                          | 0,924392325 | -0,140302263 | 0,031 | 0,027 | 1         | 0,907329038   | 1,102136003     | 1,148148148     |
| LIPE-AS1                                                                                      | 0,804543977 | -0,140602637 | 0,031 | 0,039 | 1         | 0,907140149   | 1,102365496     | 0,794871795     |
| LLGL2                                                                                         | 0,924392442 | -0,140674702 | 0,031 | 0,027 | 1         | 0,907094837   | 1,102420562     | 1,148148148     |
| MARF1                                                                                         | 0,428970186 | -0,140807066 | 0,094 | 0,055 | 1         | 0,907011617   | 1,102521711     | 1,709090909     |
| RETREG2                                                                                       | 0,006746293 | -0,140821642 | 0,281 | 0,094 | 1         | 0,907002453   | 1,10253285      | 2,989361702     |
| LONRF3                                                                                        | 0,38481627  | -0,140832853 | 0     | 0,023 | 1         | 0,906995405   | 1,102541418     | 0               |
| ZHX2                                                                                          | 0,979143607 | -0,14087312  | 0,031 | 0,031 | 1         | 0,90697009    | 1,102572192     | 1               |
| ZNF529                                                                                        | 0,979143607 | -0,140881222 | 0,031 | 0,031 | 1         | 0,906964997   | 1,102578383     | 1               |
| CES4A                                                                                         | 0,346686972 | -0,140884469 | 0     | 0,027 | 1         | 0,906962955   | 1,102580865     | 0               |
| RCCD1                                                                                         | 0,573780511 | -0,1409502   | 0,062 | 0,039 | 1         | 0,906921634   | 1,102631101     | 1,58974359      |
| MAPKAPK5-AS1                                                                                  | 0,7917997   | -0,140997518 | 0,094 | 0,074 | 1         | 0,906891889   | 1,102667266     | 1,27027027      |
| ATG5                                                                                          | 0,074729729 | -0,141035981 | 0,188 | 0,078 | 1         | 0,906867711   | 1,102696664     | 2,41025641      |
| MRNIP                                                                                         | 0,580948071 | -0,141076879 | 0,094 | 0,062 | 1         | 0,906842004   | 1,102727924     | 1,516129032     |
| EXT1                                                                                          | 0,346694817 | -0,141091677 | 0,125 | 0,07  | 1         | 0,906832702   | 1,102739235     | 1,785714286     |
| RANBP10                                                                                       | 0,682170546 | -0,141184824 | 0,031 | 0,02  | 1         | 0,906774155   | 1,102810435     | 1,55            |
| FBXL19                                                                                        | 0,480650464 | -0,141258402 | 0     | 0,016 | 1         | 0,90672791    | 1,102866681     | 0               |

Supplementary Table 1

| Differentially expressed genes_adjacent-skin-XL_ comparing SC-Keloid vs. (SC-Myel, SC-Nonmyel) |             |              |       |       |           |               |                 |                 |
|------------------------------------------------------------------------------------------------|-------------|--------------|-------|-------|-----------|---------------|-----------------|-----------------|
| gene                                                                                           | p_val       | avg_log2FC   | pct.1 | pct.2 | p_val_adj | Foldchange_UP | Foldchange_DOWN | Ratio_pct1_pct2 |
| TRPM7                                                                                          | 0,012515483 | -0,14131221  | 0,281 | 0,102 | 1         | 0,906694093   | 1,102907815     | 2,754901961     |
| ZNF836                                                                                         | 0,38481627  | -0,14132407  | 0     | 0,023 | 1         | 0,906686639   | 1,102916881     | 0               |
| PARP10                                                                                         | 0,161825316 | -0,141370182 | 0,219 | 0,113 | 1         | 0,906657659   | 1,102952134     | 1,938053097     |
| RADIL                                                                                          | 0,346686972 | -0,141377328 | 0     | 0,027 | 1         | 0,906653169   | 1,102957597     | 0               |
| RRM2B                                                                                          | 0,191913299 | -0,141411646 | 0,094 | 0,039 | 1         | 0,906631602   | 1,102983834     | 2,41025641      |
| GFPT2                                                                                          | 0,224763613 | -0,141427125 | 0,062 | 0,023 | 1         | 0,906621874   | 1,102995668     | 2,695652174     |
| LAYN                                                                                           | 0,158954432 | -0,141447242 | 0,125 | 0,055 | 1         | 0,906609232   | 1,103011048     | 2,272727273     |
| TRIM5                                                                                          | 0,38481627  | -0,141520996 | 0     | 0,023 | 1         | 0,906562886   | 1,103067438     | 0               |
| ADRB2                                                                                          | 0,887104347 | -0,14152129  | 0,031 | 0,035 | 1         | 0,906562701   | 1,103067664     | 0,885714286     |
| RO60                                                                                           | 0,006717589 | -0,141601809 | 0,562 | 0,242 | 1         | 0,906512105   | 1,103129229     | 2,32231405      |
| H3C10                                                                                          | 0,480650464 | -0,141644836 | 0     | 0,016 | 1         | 0,90648507    | 1,103162129     | 0               |
| RCL1                                                                                           | 0,396289917 | -0,141707146 | 0,062 | 0,031 | 1         | 0,90644592    | 1,103209776     | 2               |
| SPTBN4                                                                                         | 0,38481627  | -0,141763737 | 0     | 0,023 | 1         | 0,906410365   | 1,103253051     | 0               |
| GTDC1                                                                                          | 0,219587526 | -0,141971038 | 0,188 | 0,102 | 1         | 0,906280132   | 1,103411589     | 1,843137255     |
| ARRDC1-AS1                                                                                     | 0,376291412 | -0,142021724 | 0,094 | 0,051 | 1         | 0,906248292   | 1,103450356     | 1,843137255     |
| DYRK1B                                                                                         | 0,428872689 | -0,142035217 | 0     | 0,02  | 1         | 0,906239816   | 1,103460676     | 0               |
| TTC28                                                                                          | 0,955618714 | -0,142048035 | 0,094 | 0,094 | 1         | 0,906231765   | 1,10347048      | 1               |
| NFATC2IP                                                                                       | 0,016391618 | -0,142124323 | 0,25  | 0,09  | 1         | 0,906183845   | 1,103528831     | 2,777777778     |
| EEF2K                                                                                          | 0,668126075 | -0,142208634 | 0,062 | 0,043 | 1         | 0,90613089    | 1,103593323     | 1,441860465     |
| FAM107A                                                                                        | 0,313292814 | -0,142217633 | 0     | 0,031 | 1         | 0,906125237   | 1,103600207     | 0               |
| ARHGEF37                                                                                       | 0,257548576 | -0,142419147 | 0     | 0,039 | 1         | 0,90599868    | 1,103754367     | 0               |
| UNK                                                                                            | 0,12714655  | -0,142427872 | 0,156 | 0,07  | 1         | 0,9059932     | 1,103761043     | 2,228571429     |
| SCAF4                                                                                          | 0,077757581 | -0,142449133 | 0,25  | 0,113 | 1         | 0,905979849   | 1,103777309     | 2,212389381     |
| TMEFF1                                                                                         | 0,663576959 | -0,142471882 | 0,031 | 0,047 | 1         | 0,905965563   | 1,103794714     | 0,659574468     |
| HDHD2                                                                                          | 0,376291412 | -0,14248305  | 0,094 | 0,051 | 1         | 0,90595855    | 1,103803259     | 1,843137255     |
| NAT9                                                                                           | 0,248144547 | -0,142493385 | 0,156 | 0,082 | 1         | 0,90595206    | 1,103811167     | 1,902439024     |
| ABRAXAS1                                                                                       | 0,376291412 | -0,14255711  | 0,094 | 0,051 | 1         | 0,905912045   | 1,103859923     | 1,843137255     |
| USP54                                                                                          | 0,980211723 | -0,142655753 | 0,062 | 0,059 | 1         | 0,905850106   | 1,103935401     | 1,050847458     |
| ATP2A2                                                                                         | 0,130846492 | -0,142715461 | 0,312 | 0,168 | 1         | 0,905812617   | 1,10398109      | 1,857142857     |
| GATAD1                                                                                         | 0,00430374  | -0,142873819 | 0,344 | 0,117 | 1         | 0,905713195   | 1,104102276     | 2,94017094      |

Supplementary Table 1

| Differentially expressed genes_adjacent-skin-XL_comparing SC-Keloid vs. (SC-Myel, SC-Nonmyel) |             |              |       |       |           |               |                 |                 |
|-----------------------------------------------------------------------------------------------|-------------|--------------|-------|-------|-----------|---------------|-----------------|-----------------|
| gene                                                                                          | p_val       | avg_log2FC   | pct.1 | pct.2 | p_val_adj | Foldchange_UP | Foldchange_DOWN | Ratio_pct1_pct2 |
| BOC                                                                                           | 0,313292814 | -0,142921311 | 0     | 0,031 | 1         | 0,905683381   | 1,104138622     | 0               |
| PDP2                                                                                          | 0,313292814 | -0,142932271 | 0     | 0,031 | 1         | 0,9056765     | 1,10414701      | 0               |
| TMEM126B                                                                                      | 0,125283821 | -0,142963146 | 0,375 | 0,199 | 1         | 0,905657118   | 1,10417064      | 1,884422111     |
| UST                                                                                           | 0,578217897 | -0,142996391 | 0,062 | 0,039 | 1         | 0,905636249   | 1,104196085     | 1,58974359      |
| NUDT12                                                                                        | 0,093753684 | -0,143074889 | 0,125 | 0,047 | 1         | 0,905586973   | 1,104256167     | 2,659574468     |
| KIAA1549L                                                                                     | 0,38481627  | -0,143109824 | 0     | 0,023 | 1         | 0,905565045   | 1,104282907     | 0               |
| FGFRL1                                                                                        | 0,804543977 | -0,143157239 | 0,031 | 0,039 | 1         | 0,905535284   | 1,1043192       | 0,794871795     |
| ARSL                                                                                          | 0,141661018 | -0,143174439 | 0,094 | 0,035 | 1         | 0,905524488   | 1,104332366     | 2,685714286     |
| CREB1                                                                                         | 0,013381021 | -0,143227894 | 0,281 | 0,102 | 1         | 0,905490937   | 1,104373285     | 2,754901961     |
| SAMD5                                                                                         | 0,514167295 | -0,143408764 | 0,125 | 0,082 | 1         | 0,905377423   | 1,104511748     | 1,524390244     |
| KTN1                                                                                          | 0,131259472 | -0,143413078 | 0,875 | 0,512 | 1         | 0,905374716   | 1,104515051     | 1,708984375     |
| AADAT                                                                                         | 0,573780511 | -0,143439727 | 0,062 | 0,039 | 1         | 0,905357992   | 1,104535453     | 1,58974359      |
| AMY2B                                                                                         | 0,38481627  | -0,143579008 | 0     | 0,023 | 1         | 0,905270591   | 1,104642093     | 0               |
| ARHGEF1                                                                                       | 0,010405093 | -0,143629674 | 0,188 | 0,055 | 1         | 0,905238799   | 1,104680888     | 3,418181818     |
| KCTD2                                                                                         | 0,487085433 | -0,143923292 | 0,062 | 0,035 | 1         | 0,905054583   | 1,104905736     | 1,771428571     |
| MAFA                                                                                          | 0,428872689 | -0,143940768 | 0     | 0,02  | 1         | 0,90504362    | 1,10491912      | 0               |
| ALMS1                                                                                         | 0,979143607 | -0,143952556 | 0,031 | 0,031 | 1         | 0,905036225   | 1,104928148     | 1               |
| NAA50                                                                                         | 0,05005634  | -0,143975337 | 0,375 | 0,176 | 1         | 0,905021934   | 1,104945595     | 2,130681818     |
| TAB1                                                                                          | 0,032268627 | -0,144014326 | 0,156 | 0,051 | 1         | 0,904997476   | 1,104975457     | 3,058823529     |
| PHLDB3                                                                                        | 0,80991663  | -0,144037575 | 0,031 | 0,023 | 1         | 0,904982892   | 1,104993264     | 1,347826087     |
| PPP6C                                                                                         | 0,000886095 | -0,144141172 | 0,344 | 0,102 | 1         | 0,90491791    | 1,105072614     | 3,37254902      |
| CYFIP2                                                                                        | 0,898329199 | -0,144180116 | 0,031 | 0,035 | 1         | 0,904893483   | 1,105102444     | 0,885714286     |
| SLK                                                                                           | 0,00294808  | -0,144217695 | 0,375 | 0,129 | 1         | 0,904869913   | 1,10513123      | 2,906976744     |
| FSBP                                                                                          | 0,428872689 | -0,144371907 | 0     | 0,02  | 1         | 0,904773195   | 1,105249366     | 0               |
| PDP1                                                                                          | 0,221404772 | -0,144413362 | 0,156 | 0,082 | 1         | 0,904747197   | 1,105281125     | 1,902439024     |
| RBM27                                                                                         | 0,097146104 | -0,144427659 | 0,219 | 0,102 | 1         | 0,904738231   | 1,105292079     | 2,147058824     |
| VPS16                                                                                         | 0,002096899 | -0,144446713 | 0,156 | 0,031 | 1         | 0,904726282   | 1,105306676     | 5,032258065     |
| MLYCD                                                                                         | 0,979143607 | -0,14447092  | 0,031 | 0,031 | 1         | 0,904711102   | 1,105325223     | 1               |
| WWP2                                                                                          | 0,313292814 | -0,144522399 | 0     | 0,031 | 1         | 0,90467882    | 1,105364664     | 0               |
| MIGA2                                                                                         | 0,918113127 | -0,144561467 | 0,031 | 0,027 | 1         | 0,904654322   | 1,105394598     | 1,148148148     |

Supplementary Table 1

| Differentially expressed genes_adjacent-skin-XL_comparing SC-Keloid vs. (SC-Myel, SC-Nonmyel) |             |              |       |       |           |               |                 |                 |
|-----------------------------------------------------------------------------------------------|-------------|--------------|-------|-------|-----------|---------------|-----------------|-----------------|
| gene                                                                                          | p_val       | avg_log2FC   | pct.1 | pct.2 | p_val_adj | Foldchange_UP | Foldchange_DOWN | Ratio_pct1_pct2 |
| TIMM10B                                                                                       | 0,516147046 | -0,144715612 | 0,094 | 0,059 | 1         | 0,904557669   | 1,10551271      | 1,593220339     |
| CRAMP1                                                                                        | 0,668126075 | -0,144963557 | 0,062 | 0,043 | 1         | 0,904402223   | 1,105702722     | 1,441860465     |
| NQO2                                                                                          | 0,011445553 | -0,144978757 | 0,25  | 0,086 | 1         | 0,904392694   | 1,105714372     | 2,906976744     |
| C18orf21                                                                                      | 0,313292814 | -0,144986791 | 0     | 0,031 | 1         | 0,904387658   | 1,10572053      | 0               |
| NECAB1                                                                                        | 0,38481627  | -0,145066915 | 0     | 0,023 | 1         | 0,904337432   | 1,105781941     | 0               |
| EIF3A                                                                                         | 0,147059932 | -0,145135085 | 0,562 | 0,316 | 1         | 0,904294701   | 1,105834192     | 1,778481013     |
| EFCAB5                                                                                        | 0,543117005 | -0,145166348 | 0     | 0,012 | 1         | 0,904275105   | 1,105858156     | 0               |
| NEK4                                                                                          | 0,313292814 | -0,145314349 | 0     | 0,031 | 1         | 0,904182344   | 1,105971607     | 0               |
| DTD2                                                                                          | 0,243596382 | -0,145363755 | 0,094 | 0,043 | 1         | 0,90415138    | 1,106009483     | 2,186046512     |
| PLEKHA8                                                                                       | 0,445227443 | -0,14536454  | 0,094 | 0,055 | 1         | 0,904150888   | 1,106010085     | 1,709090909     |
| SLC25A43                                                                                      | 0,346686972 | -0,145365445 | 0     | 0,027 | 1         | 0,904150321   | 1,106010778     | 0               |
| ZDHC17                                                                                        | 0,009336902 | -0,145370087 | 0,281 | 0,098 | 1         | 0,904147412   | 1,106014337     | 2,867346939     |
| CORO2B                                                                                        | 0,163022941 | -0,145372935 | 0,188 | 0,094 | 1         | 0,904145627   | 1,10601652      | 2               |
| EPC1                                                                                          | 0,073415381 | -0,145392937 | 0,5   | 0,254 | 1         | 0,904133092   | 1,106031855     | 1,968503937     |
| CRADD                                                                                         | 0,445227443 | -0,145411809 | 0,094 | 0,055 | 1         | 0,904121265   | 1,106046323     | 1,709090909     |
| HIF1A                                                                                         | 0,025560092 | -0,14542645  | 0,25  | 0,098 | 1         | 0,904112089   | 1,106057548     | 2,551020408     |
| GPR153                                                                                        | 0,376291412 | -0,145446847 | 0,094 | 0,051 | 1         | 0,904099307   | 1,106073185     | 1,843137255     |
| C14orf28                                                                                      | 0,428872689 | -0,145490669 | 0     | 0,02  | 1         | 0,904071845   | 1,106106782     | 0               |
| CYP1B1                                                                                        | 0,979143607 | -0,145524657 | 0,031 | 0,031 | 1         | 0,904050547   | 1,106132842     | 1               |
| TBCEL                                                                                         | 0,313292814 | -0,145793384 | 0     | 0,031 | 1         | 0,903882167   | 1,106338897     | 0               |
| ZNF33B                                                                                        | 0,480650464 | -0,145820485 | 0     | 0,016 | 1         | 0,903865188   | 1,10635968      | 0               |
| LY6G5B                                                                                        | 0,38481627  | -0,145974963 | 0     | 0,023 | 1         | 0,903768411   | 1,106478151     | 0               |
| HSD17B8                                                                                       | 0,141661018 | -0,146018052 | 0,094 | 0,035 | 1         | 0,903741419   | 1,106511198     | 2,685714286     |
| MAP3K1                                                                                        | 0,238963839 | -0,146069011 | 0,125 | 0,062 | 1         | 0,903709497   | 1,106550283     | 2,016129032     |
| TTC33                                                                                         | 0,293095985 | -0,146096102 | 0,125 | 0,066 | 1         | 0,903692527   | 1,106571062     | 1,893939394     |
| CTH                                                                                           | 0,80991663  | -0,14613524  | 0,031 | 0,023 | 1         | 0,903668012   | 1,106601082     | 1,347826087     |
| NR4A3                                                                                         | 0,880532593 | -0,146137639 | 0,062 | 0,055 | 1         | 0,903666509   | 1,106602922     | 1,127272727     |
| SCFD1                                                                                         | 0,022224283 | -0,146199983 | 0,344 | 0,141 | 1         | 0,90362746    | 1,106650744     | 2,439716312     |
| BRIX1                                                                                         | 0,039525798 | -0,146220707 | 0,219 | 0,086 | 1         | 0,903614479   | 1,106666641     | 2,546511628     |
| PKIB                                                                                          | 0,346686972 | -0,146260839 | 0     | 0,027 | 1         | 0,903589343   | 1,106697426     | 0               |

Supplementary Table 1

| Differentially expressed genes_adjacent-skin-XL_comparing SC-Keloid vs. (SC-Myel, SC-Nonmyel) |             |              |       |       |           |               |                 |                 |
|-----------------------------------------------------------------------------------------------|-------------|--------------|-------|-------|-----------|---------------|-----------------|-----------------|
| gene                                                                                          | p_val       | avg_log2FC   | pct.1 | pct.2 | p_val_adj | Foldchange_UP | Foldchange_DOWN | Ratio_pct1_pct2 |
| ATXN7L1                                                                                       | 0,924392442 | -0,146431473 | 0,031 | 0,027 | 1         | 0,903482478   | 1,106828328     | 1,148148148     |
| MYRF                                                                                          | 0,480650464 | -0,146487143 | 0     | 0,016 | 1         | 0,903447616   | 1,106871038     | 0               |
| AZIN1                                                                                         | 0,034279306 | -0,146569607 | 0,531 | 0,25  | 1         | 0,903395976   | 1,106934308     | 2,124           |
| LINC01006                                                                                     | 0,205678783 | -0,146590678 | 0,156 | 0,078 | 1         | 0,903382782   | 1,106950476     | 2               |
| EPHA7                                                                                         | 0,346686972 | -0,146621925 | 0     | 0,027 | 1         | 0,903363216   | 1,106974451     | 0               |
| EDEM1                                                                                         | 0,191913299 | -0,146669079 | 0,094 | 0,039 | 1         | 0,903333691   | 1,107010632     | 2,41025641      |
| COG1                                                                                          | 0,141661018 | -0,146871658 | 0,094 | 0,035 | 1         | 0,903206855   | 1,107166087     | 2,685714286     |
| EGLN2                                                                                         | 0,033696287 | -0,146893713 | 0,312 | 0,133 | 1         | 0,903193048   | 1,107183013     | 2,345864662     |
| GFOD1                                                                                         | 0,979143607 | -0,146911164 | 0,031 | 0,031 | 1         | 0,903182123   | 1,107196406     | 1               |
| TANC1                                                                                         | 0,038148997 | -0,146932772 | 0,406 | 0,191 | 1         | 0,903168596   | 1,107212989     | 2,12565445      |
| SYNC                                                                                          | 0,695004519 | -0,146964652 | 0,094 | 0,07  | 1         | 0,903148638   | 1,107237455     | 1,342857143     |
| AHRR                                                                                          | 0,346686972 | -0,147138178 | 0     | 0,027 | 1         | 0,903040015   | 1,107370641     | 0               |
| BRD8                                                                                          | 0,086035399 | -0,147149326 | 0,25  | 0,121 | 1         | 0,903033037   | 1,107379198     | 2,066115702     |
| PINLYP                                                                                        | 0,38481627  | -0,147179492 | 0     | 0,023 | 1         | 0,903014155   | 1,107402353     | 0               |
| CAND2                                                                                         | 0,38481627  | -0,147187727 | 0     | 0,023 | 1         | 0,903009001   | 1,107408673     | 0               |
| LINC02693                                                                                     | 0,80991663  | -0,1472351   | 0,031 | 0,023 | 1         | 0,90297935    | 1,107445038     | 1,347826087     |
| PNPLA7                                                                                        | 0,38481627  | -0,147262862 | 0     | 0,023 | 1         | 0,902961973   | 1,107466349     | 0               |
| ABHD3                                                                                         | 0,730358576 | -0,147285954 | 0,031 | 0,043 | 1         | 0,902947521   | 1,107484075     | 0,720930233     |
| PITPNM2                                                                                       | 0,480650464 | -0,147332439 | 0     | 0,016 | 1         | 0,902918428   | 1,10751976      | 0               |
| CNOT7                                                                                         | 0,003573812 | -0,14735065  | 0,312 | 0,102 | 1         | 0,90290703    | 1,10753374      | 3,058823529     |
| PDXDC1                                                                                        | 0,44252225  | -0,147474201 | 0,156 | 0,102 | 1         | 0,902829709   | 1,107628592     | 1,529411765     |
| NAT8L                                                                                         | 0,346686972 | -0,147588449 | 0     | 0,027 | 1         | 0,902758217   | 1,107716309     | 0               |
| POLR3E                                                                                        | 0,663576959 | -0,147623667 | 0,031 | 0,047 | 1         | 0,902736179   | 1,107743351     | 0,659574468     |
| KLHL26                                                                                        | 0,709822531 | -0,147658981 | 0,094 | 0,07  | 1         | 0,902714082   | 1,107770467     | 1,342857143     |
| CNTLN                                                                                         | 0,06366796  | -0,147683189 | 0,156 | 0,059 | 1         | 0,902698935   | 1,107789054     | 2,644067797     |
| ME1                                                                                           | 0,38481627  | -0,147718164 | 0     | 0,023 | 1         | 0,902677051   | 1,107815911     | 0               |
| IL1R1                                                                                         | 0,979143607 | -0,147774757 | 0,031 | 0,031 | 1         | 0,902641643   | 1,107859368     | 1               |
| ZDHHC6                                                                                        | 0,142110321 | -0,147843404 | 0,156 | 0,07  | 1         | 0,902598694   | 1,107912084     | 2,228571429     |
| CCL27                                                                                         | 0,482846351 | -0,147852925 | 0,062 | 0,035 | 1         | 0,902592738   | 1,107919395     | 1,771428571     |
| LYRM7                                                                                         | 0,209000952 | -0,147977703 | 0,156 | 0,078 | 1         | 0,902514676   | 1,108015223     | 2               |

Supplementary Table 1

| Differentially expressed genes_adjacent-skin-XL_comparing SC-Keloid vs. (SC-Myel, SC-Nonmyel) |             |              |       |       |           |               |                 |                 |
|-----------------------------------------------------------------------------------------------|-------------|--------------|-------|-------|-----------|---------------|-----------------|-----------------|
| gene                                                                                          | p_val       | avg_log2FC   | pct.1 | pct.2 | p_val_adj | Foldchange_UP | Foldchange_DOWN | Ratio_pct1_pct2 |
| SEC23B                                                                                        | 0,373239546 | -0,148003411 | 0,094 | 0,051 | 1         | 0,902498594   | 1,108034968     | 1,843137255     |
| UGP2                                                                                          | 0,002500836 | -0,148381038 | 0,312 | 0,102 | 1         | 0,902262395   | 1,108325035     | 3,058823529     |
| AKAP8                                                                                         | 0,042072475 | -0,148410085 | 0,219 | 0,086 | 1         | 0,902244229   | 1,10834735      | 2,546511628     |
| NEO1                                                                                          | 0,80991663  | -0,148462267 | 0,031 | 0,023 | 1         | 0,902211595   | 1,10838744      | 1,347826087     |
| GSTK1                                                                                         | 0,006409259 | -0,148494577 | 0,562 | 0,234 | 1         | 0,90219139    | 1,108412263     | 2,401709402     |
| RANBP2                                                                                        | 0,032749577 | -0,148706157 | 0,375 | 0,168 | 1         | 0,902059088   | 1,10857483      | 2,232142857     |
| CDYL                                                                                          | 0,024125962 | -0,14872558  | 0,25  | 0,094 | 1         | 0,902046943   | 1,108589755     | 2,659574468     |
| MTERF4                                                                                        | 0,031413167 | -0,148774736 | 0,156 | 0,051 | 1         | 0,902016209   | 1,108627528     | 3,058823529     |
| PPIC                                                                                          | 0,887104347 | -0,148877532 | 0,031 | 0,035 | 1         | 0,90195194    | 1,108706524     | 0,885714286     |
| LCLAT1                                                                                        | 0,480650464 | -0,148961193 | 0     | 0,016 | 1         | 0,901899638   | 1,108770818     | 0               |
| UNC50                                                                                         | 0,0332995   | -0,149017936 | 0,344 | 0,152 | 1         | 0,901864166   | 1,108814429     | 2,263157895     |
| PIK3R3                                                                                        | 0,046495836 | -0,14932125  | 0,156 | 0,055 | 1         | 0,901674577   | 1,109047572     | 2,836363636     |
| CTDSP1                                                                                        | 0,001326358 | -0,149356886 | 0,406 | 0,133 | 1         | 0,901652305   | 1,109074966     | 3,052631579     |
| PPP1R12B                                                                                      | 0,087744784 | -0,149365473 | 0,188 | 0,082 | 1         | 0,901646938   | 1,109081568     | 2,292682927     |
| VIPAS39                                                                                       | 0,037506898 | -0,149561481 | 0,094 | 0,023 | 1         | 0,901524446   | 1,109232261     | 4,086956522     |
| CLCN2                                                                                         | 0,487085433 | -0,149600803 | 0,062 | 0,035 | 1         | 0,901499875   | 1,109262494     | 1,771428571     |
| UTP20                                                                                         | 0,093753684 | -0,149603285 | 0,125 | 0,047 | 1         | 0,901498324   | 1,109264402     | 2,659574468     |
| TRIM13                                                                                        | 0,112512668 | -0,14963088  | 0,219 | 0,105 | 1         | 0,901481081   | 1,10928562      | 2,085714286     |
| VPS52                                                                                         | 0,80991663  | -0,149637284 | 0,031 | 0,023 | 1         | 0,901477079   | 1,109290544     | 1,347826087     |
| NPIP15                                                                                        | 0,663576959 | -0,14967522  | 0,031 | 0,047 | 1         | 0,901453375   | 1,109319713     | 0,659574468     |
| GNG2                                                                                          | 0,102932724 | -0,149715565 | 0,781 | 0,434 | 1         | 0,901428166   | 1,109350736     | 1,799539171     |
| TMEM201                                                                                       | 0,979143607 | -0,149785313 | 0,031 | 0,031 | 1         | 0,901384587   | 1,10940437      | 1               |
| MAP4K2                                                                                        | 0,346686972 | -0,149813736 | 0     | 0,027 | 1         | 0,901366829   | 1,109426226     | 0               |
| APOOL                                                                                         | 0,187685368 | -0,149852511 | 0,094 | 0,039 | 1         | 0,901342604   | 1,109456045     | 2,41025641      |
| NTRK3                                                                                         | 0,578217897 | -0,150031789 | 0,062 | 0,039 | 1         | 0,901230605   | 1,109593921     | 1,58974359      |
| ERV3-1                                                                                        | 0,191913299 | -0,150039573 | 0,094 | 0,039 | 1         | 0,901225742   | 1,109599908     | 2,41025641      |
| ZNF84                                                                                         | 0,487085433 | -0,150091869 | 0,062 | 0,035 | 1         | 0,901193074   | 1,10964013      | 1,771428571     |
| NOC4L                                                                                         | 0,170210335 | -0,150397981 | 0,156 | 0,074 | 1         | 0,901001878   | 1,109875599     | 2,108108108     |
| DZIP3                                                                                         | 0,65904021  | -0,15041492  | 0,062 | 0,043 | 1         | 0,9009913     | 1,109888631     | 1,441860465     |
| FBXO34                                                                                        | 0,502372892 | -0,150455117 | 0,094 | 0,059 | 1         | 0,900966196   | 1,109919555     | 1,593220339     |

Supplementary Table 1

| Differentially expressed genes_adjacent-skin-XL_ comparing SC-Keloid vs. (SC-Myel, SC-Nonmyel) |             |              |       |       |           |               |                 |                 |
|------------------------------------------------------------------------------------------------|-------------|--------------|-------|-------|-----------|---------------|-----------------|-----------------|
| gene                                                                                           | p_val       | avg_log2FC   | pct.1 | pct.2 | p_val_adj | Foldchange_UP | Foldchange_DOWN | Ratio_pct1_pct2 |
| BCL2L1                                                                                         | 0,046495836 | -0,150527774 | 0,156 | 0,055 | 1         | 0,900920823   | 1,109975455     | 2,836363636     |
| BCLAF3                                                                                         | 0,122617152 | -0,150622577 | 0,188 | 0,086 | 1         | 0,900861623   | 1,110048396     | 2,186046512     |
| FXVD6                                                                                          | 0,000699188 | -0,150681961 | 0,312 | 0,086 | 1         | 0,900824543   | 1,110094089     | 3,627906977     |
| LMOD1                                                                                          | 0,38481627  | -0,150693261 | 0     | 0,023 | 1         | 0,900817487   | 1,110102783     | 0               |
| MAP3K5                                                                                         | 0,428872689 | -0,150765627 | 0     | 0,02  | 1         | 0,900772303   | 1,110158468     | 0               |
| FAM13A-AS1                                                                                     | 0,428872689 | -0,150769748 | 0     | 0,02  | 1         | 0,90076973    | 1,11016164      | 0               |
| HERC3                                                                                          | 0,283789128 | -0,150820961 | 0     | 0,035 | 1         | 0,900737755   | 1,110201049     | 0               |
| EAPP                                                                                           | 0,028096732 | -0,150846605 | 0,469 | 0,215 | 1         | 0,900721744   | 1,110220783     | 2,181395349     |
| FAN1                                                                                           | 0,552606916 | -0,150890941 | 0,094 | 0,062 | 1         | 0,900694064   | 1,110254902     | 1,516129032     |
| SAP130                                                                                         | 0,487085433 | -0,150895354 | 0,062 | 0,035 | 1         | 0,900691309   | 1,110258298     | 1,771428571     |
| TSPOAP1                                                                                        | 0,38481627  | -0,150991913 | 0     | 0,023 | 1         | 0,900631028   | 1,11033261      | 0               |
| RXRA                                                                                           | 0,028370624 | -0,151219406 | 0,25  | 0,098 | 1         | 0,900489022   | 1,110507708     | 2,551020408     |
| CBLB                                                                                           | 0,820322169 | -0,151286338 | 0,031 | 0,039 | 1         | 0,900447246   | 1,110559229     | 0,794871795     |
| UNC13D                                                                                         | 0,38481627  | -0,15140733  | 0     | 0,023 | 1         | 0,900371734   | 1,11065237      | 0               |
| PCDHB4                                                                                         | 0,346686972 | -0,151463317 | 0     | 0,027 | 1         | 0,900336793   | 1,110695472     | 0               |
| KIF13A                                                                                         | 0,011597542 | -0,151572501 | 0,219 | 0,07  | 1         | 0,900268658   | 1,110779534     | 3,128571429     |
| BRSK2                                                                                          | 0,346686972 | -0,151576909 | 0     | 0,027 | 1         | 0,900265907   | 1,110782928     | 0               |
| PDXK                                                                                           | 0,016831044 | -0,151618943 | 0,281 | 0,105 | 1         | 0,900239677   | 1,110815292     | 2,676190476     |
| NCEH1                                                                                          | 0,682170546 | -0,151640405 | 0,031 | 0,02  | 1         | 0,900226285   | 1,110831817     | 1,55            |
| IZUMO4                                                                                         | 0,313292814 | -0,151676567 | 0     | 0,031 | 1         | 0,900203721   | 1,110859661     | 0               |
| ATF7IP                                                                                         | 0,008555004 | -0,151801261 | 0,375 | 0,145 | 1         | 0,900125918   | 1,110955678     | 2,586206897     |
| INIP                                                                                           | 0,505287368 | -0,151843199 | 0,125 | 0,082 | 1         | 0,900099753   | 1,110987973     | 1,524390244     |
| RNPS1                                                                                          | 0,002880026 | -0,15188956  | 0,594 | 0,234 | 1         | 0,900070829   | 1,111023675     | 2,538461538     |
| USP49                                                                                          | 0,313292814 | -0,151970094 | 0     | 0,031 | 1         | 0,900020586   | 1,111085697     | 0               |
| C1orf35                                                                                        | 0,222039877 | -0,151976151 | 0,219 | 0,121 | 1         | 0,900016807   | 1,111090362     | 1,809917355     |
| C19orf81                                                                                       | 0,30793671  | -0,151978527 | 0,062 | 0,027 | 1         | 0,900015325   | 1,111092191     | 2,296296296     |
| UBLCP1                                                                                         | 0,001348326 | -0,152012696 | 0,281 | 0,078 | 1         | 0,899994009   | 1,111118507     | 3,602564103     |
| PLPP2                                                                                          | 0,346686972 | -0,152063354 | 0     | 0,027 | 1         | 0,899962409   | 1,111157522     | 0               |
| ZNF333                                                                                         | 0,840130893 | -0,1520702   | 0,062 | 0,051 | 1         | 0,899958138   | 1,111162795     | 1,215686275     |
| IFIH1                                                                                          | 0,918113127 | -0,152081082 | 0,031 | 0,027 | 1         | 0,899951349   | 1,111171177     | 1,148148148     |



Supplementary Table 1

| Differentially expressed genes_adjacent-skin-XL_comparing SC-Keloid vs. (SC-Myel, SC-Nonmyel) |             |              |       |       |           |               |                 |                 |
|-----------------------------------------------------------------------------------------------|-------------|--------------|-------|-------|-----------|---------------|-----------------|-----------------|
| gene                                                                                          | p_val       | avg_log2FC   | pct.1 | pct.2 | p_val_adj | Foldchange_UP | Foldchange_DOWN | Ratio_pct1_pct2 |
| MAP3K13                                                                                       | 0,006343661 | -0,152129372 | 0,281 | 0,094 | 1         | 0,899921227   | 1,11120837      | 2,989361702     |
| ZFPM2                                                                                         | 0,428872689 | -0,152143508 | 0     | 0,02  | 1         | 0,899912409   | 1,111219258     | 0               |
| INTS2                                                                                         | 0,487085433 | -0,15220712  | 0,062 | 0,035 | 1         | 0,89987273    | 1,111268256     | 1,771428571     |
| USP36                                                                                         | 0,548211541 | -0,152308245 | 0,156 | 0,109 | 1         | 0,899809656   | 1,111346153     | 1,431192661     |
| MRPL43                                                                                        | 0,00546859  | -0,152584485 | 0,469 | 0,18  | 1         | 0,899637382   | 1,111558968     | 2,605555556     |
| CCDC152                                                                                       | 0,578217897 | -0,152594274 | 0,062 | 0,039 | 1         | 0,899631278   | 1,11156651      | 1,58974359      |
| AFG3L2                                                                                        | 0,030492951 | -0,152662627 | 0,25  | 0,098 | 1         | 0,899588655   | 1,111619176     | 2,551020408     |
| TDP2                                                                                          | 0,668126075 | -0,152721525 | 0,062 | 0,043 | 1         | 0,89955193    | 1,111664559     | 1,441860465     |
| MTRF1L                                                                                        | 0,066791287 | -0,152725242 | 0,125 | 0,043 | 1         | 0,899549613   | 1,111667423     | 2,906976744     |
| NFE2L1                                                                                        | 0,000589142 | -0,152771838 | 0,438 | 0,141 | 1         | 0,89952056    | 1,111703328     | 3,106382979     |
| NIPAL3                                                                                        | 0,887104347 | -0,152785654 | 0,031 | 0,035 | 1         | 0,899511946   | 1,111713974     | 0,885714286     |
| ARHGEF3                                                                                       | 0,924392442 | -0,152797148 | 0,031 | 0,027 | 1         | 0,899504779   | 1,111722831     | 1,148148148     |
| CIART                                                                                         | 0,979143607 | -0,15280955  | 0,031 | 0,031 | 1         | 0,899497047   | 1,111732388     | 1               |
| CA13                                                                                          | 0,668126075 | -0,152921619 | 0,062 | 0,043 | 1         | 0,899427176   | 1,111818751     | 1,441860465     |
| H4C8                                                                                          | 0,543117005 | -0,153068956 | 0     | 0,012 | 1         | 0,899335326   | 1,111932303     | 0               |
| DHX38                                                                                         | 0,012156741 | -0,153166001 | 0,25  | 0,086 | 1         | 0,899274833   | 1,112007101     | 2,906976744     |
| LSMEM2                                                                                        | 0,346686972 | -0,1531949   | 0     | 0,027 | 1         | 0,899256819   | 1,112029377     | 0               |
| INPP5A                                                                                        | 0,510608096 | -0,153313166 | 0,031 | 0,059 | 1         | 0,899183105   | 1,11212054      | 0,525423729     |
| FARP2                                                                                         | 0,242059311 | -0,153413475 | 0,188 | 0,102 | 1         | 0,899120588   | 1,112197867     | 1,843137255     |
| DENND4B                                                                                       | 0,310355006 | -0,153436601 | 0,094 | 0,047 | 1         | 0,899106176   | 1,112215695     | 2               |
| CPPED1                                                                                        | 7,0737E-05  | -0,153458639 | 0,344 | 0,082 | 1         | 0,899092441   | 1,112232685     | 4,195121951     |
| PCNX3                                                                                         | 0,979143607 | -0,153484966 | 0,031 | 0,031 | 1         | 0,899076034   | 1,112252982     | 1               |
| POGK                                                                                          | 0,021726813 | -0,153541295 | 0,188 | 0,062 | 1         | 0,899040931   | 1,112296409     | 3,032258065     |
| KIF16B                                                                                        | 0,580948071 | -0,153558994 | 0,094 | 0,062 | 1         | 0,899029902   | 1,112310055     | 1,516129032     |
| EED                                                                                           | 0,804543977 | -0,153725673 | 0,031 | 0,039 | 1         | 0,898926041   | 1,112438571     | 0,794871795     |
| PAFAH1B1                                                                                      | 0,021721731 | -0,153796329 | 0,625 | 0,289 | 1         | 0,898882017   | 1,112493054     | 2,162629758     |
| ADM                                                                                           | 0,797009215 | -0,153838366 | 0,062 | 0,074 | 1         | 0,898855825   | 1,11252547      | 0,837837838     |
| ABCB4                                                                                         | 0,487085433 | -0,153846437 | 0,062 | 0,035 | 1         | 0,898850797   | 1,112531695     | 1,771428571     |
| ZNF330                                                                                        | 0,376881888 | -0,153912505 | 0,188 | 0,117 | 1         | 0,898809635   | 1,112582644     | 1,606837607     |
| BMP2K                                                                                         | 0,569030388 | -0,153912841 | 0,25  | 0,184 | 1         | 0,898809426   | 1,112582903     | 1,358695652     |

Supplementary Table 1

| Differentially expressed genes_adjacent-skin-XL_ comparing SC-Keloid vs. (SC-Myel, SC-Nonmyel) |             |              |       |       |           |               |                 |                 |
|------------------------------------------------------------------------------------------------|-------------|--------------|-------|-------|-----------|---------------|-----------------|-----------------|
| gene                                                                                           | p_val       | avg_log2FC   | pct.1 | pct.2 | p_val_adj | Foldchange_UP | Foldchange_DOWN | Ratio_pct1_pct2 |
| WRAP53                                                                                         | 0,028712073 | -0,153935545 | 0,125 | 0,035 | 1         | 0,898795281   | 1,112600412     | 3,571428571     |
| ID1                                                                                            | 0,014643669 | -0,153967856 | 0,219 | 0,074 | 1         | 0,898775152   | 1,11262533      | 2,959459459     |
| MGAT3                                                                                          | 0,924392442 | -0,153985373 | 0,031 | 0,027 | 1         | 0,898764239   | 1,11263884      | 1,148148148     |
| SUMO4                                                                                          | 0,924392442 | -0,154087416 | 0,031 | 0,027 | 1         | 0,898700671   | 1,112717541     | 1,148148148     |
| NAALAD2                                                                                        | 0,38481627  | -0,154154033 | 0     | 0,023 | 1         | 0,898659174   | 1,112768922     | 0               |
| SIRT7                                                                                          | 0,001626207 | -0,154223822 | 0,25  | 0,066 | 1         | 0,898615703   | 1,112822752     | 3,787878788     |
| TMEM185A                                                                                       | 0,007848729 | -0,154357422 | 0,219 | 0,066 | 1         | 0,898532491   | 1,112925809     | 3,318181818     |
| LNP1                                                                                           | 0,480650464 | -0,154391066 | 0     | 0,016 | 1         | 0,898511537   | 1,112951764     | 0               |
| TMEM167B                                                                                       | 0,102169822 | -0,154498033 | 0,219 | 0,102 | 1         | 0,898444921   | 1,113034285     | 2,147058824     |
| ATP1B1                                                                                         | 0,004295141 | -0,154528399 | 0,688 | 0,285 | 1         | 0,89842601    | 1,113057713     | 2,414035088     |
| GNA13                                                                                          | 0,030158445 | -0,154556084 | 0,219 | 0,082 | 1         | 0,89840877    | 1,113079072     | 2,670731707     |
| BRPF3                                                                                          | 0,907442332 | -0,154558866 | 0,062 | 0,055 | 1         | 0,898407037   | 1,113081219     | 1,127272727     |
| EMC2                                                                                           | 0,069682133 | -0,154572504 | 0,438 | 0,223 | 1         | 0,898398545   | 1,113091741     | 1,964125561     |
| NPAT                                                                                           | 0,668126075 | -0,154654439 | 0,062 | 0,043 | 1         | 0,898347524   | 1,113154958     | 1,441860465     |
| ZNF407                                                                                         | 0,804543977 | -0,15469663  | 0,031 | 0,039 | 1         | 0,898321252   | 1,113187512     | 0,794871795     |
| ENHO                                                                                           | 0,283789128 | -0,154744865 | 0     | 0,035 | 1         | 0,898291218   | 1,113224732     | 0               |
| PIGL                                                                                           | 0,38481627  | -0,154751967 | 0     | 0,023 | 1         | 0,898286796   | 1,113230211     | 0               |
| GNPTG                                                                                          | 0,033118365 | -0,15478699  | 0,344 | 0,148 | 1         | 0,898264989   | 1,113257237     | 2,324324324     |
| KAZN                                                                                           | 0,085318957 | -0,154840345 | 0,156 | 0,062 | 1         | 0,89823177    | 1,113298409     | 2,516129032     |
| RNF166                                                                                         | 0,013196028 | -0,154870268 | 0,156 | 0,043 | 1         | 0,898213139   | 1,1133215       | 3,627906977     |
| TMEM63B                                                                                        | 0,302364586 | -0,155011073 | 0,125 | 0,066 | 1         | 0,89812548    | 1,113430164     | 1,893939394     |
| HEY2                                                                                           | 0,313292814 | -0,155022526 | 0     | 0,031 | 1         | 0,89811835    | 1,113439003     | 0               |
| INTS1                                                                                          | 0,082632923 | -0,155053107 | 0,156 | 0,062 | 1         | 0,898099312   | 1,113462605     | 2,516129032     |
| CXCL8                                                                                          | 0,157961013 | -0,15506211  | 0,188 | 0,094 | 1         | 0,898093708   | 1,113469554     | 2               |
| ARID1A                                                                                         | 0,111390099 | -0,15506771  | 0,312 | 0,16  | 1         | 0,898090222   | 1,113473875     | 1,95            |
| NR1H3                                                                                          | 0,746521062 | -0,155192984 | 0,062 | 0,047 | 1         | 0,898012241   | 1,113570567     | 1,319148936     |
| DLX2                                                                                           | 0,668126075 | -0,155360233 | 0,062 | 0,043 | 1         | 0,897908142   | 1,113699668     | 1,441860465     |
| TSN                                                                                            | 0,060916409 | -0,155405416 | 0,188 | 0,074 | 1         | 0,897880022   | 1,113734548     | 2,540540541     |
| PLEKHA2                                                                                        | 0,257548576 | -0,155427722 | 0     | 0,039 | 1         | 0,897866139   | 1,113751768     | 0               |
| TUBGCP4                                                                                        | 0,668126075 | -0,155734098 | 0,062 | 0,043 | 1         | 0,897675485   | 1,113988313     | 1,441860465     |

Supplementary Table 1

| Differentially expressed genes_adjacent-skin-XL_comparing SC-Keloid vs. (SC-Myel, SC-Nonmyel) |             |              |       |       |           |               |                 |                 |
|-----------------------------------------------------------------------------------------------|-------------|--------------|-------|-------|-----------|---------------|-----------------|-----------------|
| gene                                                                                          | p_val       | avg_log2FC   | pct.1 | pct.2 | p_val_adj | Foldchange_UP | Foldchange_DOWN | Ratio_pct1_pct2 |
| CUL9                                                                                          | 0,30793671  | -0,155742801 | 0,062 | 0,027 | 1         | 0,89767007    | 1,113995034     | 2,296296296     |
| RPP25L                                                                                        | 0,578217499 | -0,155891006 | 0,062 | 0,039 | 1         | 0,897577859   | 1,114109478     | 1,58974359      |
| NCOA6                                                                                         | 0,505798338 | -0,155919373 | 0,094 | 0,059 | 1         | 0,89756021    | 1,114131385     | 1,593220339     |
| PHIP                                                                                          | 0,018057075 | -0,155977028 | 0,531 | 0,242 | 1         | 0,897524342   | 1,11417591      | 2,194214876     |
| NFKBID                                                                                        | 0,603353082 | -0,156029614 | 0,031 | 0,051 | 1         | 0,897491628   | 1,114216522     | 0,607843137     |
| MGME1                                                                                         | 0,032268627 | -0,156069742 | 0,156 | 0,051 | 1         | 0,897466665   | 1,114247514     | 3,058823529     |
| DIDO1                                                                                         | 0,032866024 | -0,156090739 | 0,188 | 0,066 | 1         | 0,897453603   | 1,114263731     | 2,848484848     |
| LPIN2                                                                                         | 0,653016738 | -0,156150408 | 0,094 | 0,066 | 1         | 0,897416485   | 1,114309817     | 1,424242424     |
| CEP164                                                                                        | 0,06222129  | -0,156158549 | 0,156 | 0,059 | 1         | 0,897411422   | 1,114316105     | 2,644067797     |
| SLC25A30-AS1                                                                                  | 0,480650464 | -0,156171117 | 0     | 0,016 | 1         | 0,897403571   | 1,114325853     | 0               |
| CCDC59                                                                                        | 0,012153845 | -0,15623965  | 0,469 | 0,199 | 1         | 0,897360975   | 1,114378748     | 2,35678392      |
| RASA2                                                                                         | 0,505798338 | -0,156248858 | 0,094 | 0,059 | 1         | 0,897355248   | 1,114385861     | 1,593220339     |
| ADPRHL1                                                                                       | 0,313292814 | -0,15625778  | 0     | 0,031 | 1         | 0,897349698   | 1,114392752     | 0               |
| GRIN2B                                                                                        | 0,313292814 | -0,1562875   | 0     | 0,031 | 1         | 0,897331213   | 1,114415709     | 0               |
| SOCS1                                                                                         | 0,804543977 | -0,156293695 | 0,031 | 0,039 | 1         | 0,89732736    | 1,114420495     | 0,794871795     |
| MIR4458HG                                                                                     | 0,015526375 | -0,156856978 | 0,188 | 0,059 | 1         | 0,896977078   | 1,114855691     | 3,186440678     |
| TRIP12                                                                                        | 0,005677323 | -0,156857067 | 0,375 | 0,137 | 1         | 0,896977022   | 1,11485576      | 2,737226277     |
| EPHB6                                                                                         | 0,487085433 | -0,15686511  | 0,062 | 0,035 | 1         | 0,896972022   | 1,114861976     | 1,771428571     |
| PSMD5                                                                                         | 0,093753684 | -0,156899122 | 0,125 | 0,047 | 1         | 0,896950875   | 1,11488826      | 2,659574468     |
| SEN3                                                                                          | 0,804543977 | -0,156985213 | 0,031 | 0,039 | 1         | 0,896897353   | 1,114954791     | 0,794871795     |
| GSN-AS1                                                                                       | 0,226351275 | -0,157003175 | 0,031 | 0,008 | 1         | 0,896886186   | 1,114968673     | 3,875           |
| UNKL                                                                                          | 0,967025549 | -0,157007994 | 0,062 | 0,059 | 1         | 0,89688319    | 1,114972397     | 1,050847458     |
| YPEL2                                                                                         | 0,159667137 | -0,15703885  | 0,25  | 0,129 | 1         | 0,896864008   | 1,114996244     | 1,937984496     |
| SGMS1                                                                                         | 0,039103141 | -0,15713771  | 0,25  | 0,102 | 1         | 0,896802553   | 1,115072651     | 2,450980392     |
| CEBPZOS                                                                                       | 0,023853062 | -0,157207477 | 0,219 | 0,078 | 1         | 0,896759186   | 1,115126576     | 2,807692308     |
| MOB4                                                                                          | 0,061583228 | -0,157311186 | 0,438 | 0,215 | 1         | 0,896694724   | 1,115206741     | 2,037209302     |
| XRCC1                                                                                         | 0,202646283 | -0,157382836 | 0,125 | 0,059 | 1         | 0,896650191   | 1,115262128     | 2,118644068     |
| SCRIB                                                                                         | 0,137474745 | -0,157492767 | 0,188 | 0,09  | 1         | 0,896581871   | 1,115347112     | 2,088888889     |
| OGT                                                                                           | 0,879936477 | -0,157655985 | 0,156 | 0,152 | 1         | 0,896480442   | 1,115473303     | 1,026315789     |
| GOLGA6L4                                                                                      | 0,313292814 | -0,157682012 | 0     | 0,031 | 1         | 0,896464269   | 1,115493427     | 0               |

Supplementary Table 1

| Differentially expressed genes_adjacent-skin-XL_comparing SC-Keloid vs. (SC-Myel, SC-Nonmyel) |             |              |       |       |           |               |                 |                 |
|-----------------------------------------------------------------------------------------------|-------------|--------------|-------|-------|-----------|---------------|-----------------|-----------------|
| gene                                                                                          | p_val       | avg_log2FC   | pct.1 | pct.2 | p_val_adj | Foldchange_UP | Foldchange_DOWN | Ratio_pct1_pct2 |
| HEG1                                                                                          | 0,804543977 | -0,157737261 | 0,031 | 0,039 | 1         | 0,89642994    | 1,115536146     | 0,794871795     |
| ACVR1B                                                                                        | 0,487085433 | -0,157756486 | 0,062 | 0,035 | 1         | 0,896417994   | 1,115551012     | 1,771428571     |
| KPNA5                                                                                         | 0,997801078 | -0,157991023 | 0,062 | 0,059 | 1         | 0,896272276   | 1,11573238      | 1,050847458     |
| PPIL4                                                                                         | 0,026160842 | -0,158112835 | 0,594 | 0,281 | 1         | 0,896196604   | 1,115826589     | 2,113879004     |
| PLA2G4B                                                                                       | 0,346686972 | -0,158113626 | 0     | 0,027 | 1         | 0,896196113   | 1,115827201     | 0               |
| FZD4                                                                                          | 0,892714086 | -0,15811692  | 0,031 | 0,035 | 1         | 0,896194067   | 1,115829748     | 0,885714286     |
| SPTY2D1                                                                                       | 0,054396443 | -0,158186082 | 0,219 | 0,09  | 1         | 0,896151105   | 1,115883242     | 2,433333333     |
| MTX3                                                                                          | 0,487085433 | -0,158218679 | 0,062 | 0,035 | 1         | 0,896130857   | 1,115908455     | 1,771428571     |
| FTO                                                                                           | 0,126128812 | -0,158354503 | 0,125 | 0,051 | 1         | 0,896046494   | 1,116013518     | 2,450980392     |
| COPS7B                                                                                        | 0,370203052 | -0,158407051 | 0,094 | 0,051 | 1         | 0,896013857   | 1,116054168     | 1,843137255     |
| EXOC8                                                                                         | 0,887104347 | -0,158424179 | 0,031 | 0,035 | 1         | 0,896003219   | 1,116067419     | 0,885714286     |
| SNX33                                                                                         | 0,887104347 | -0,158444591 | 0,031 | 0,035 | 1         | 0,895990542   | 1,11608321      | 0,885714286     |
| MDM2                                                                                          | 0,238991084 | -0,158497945 | 0,156 | 0,082 | 1         | 0,895957407   | 1,116124485     | 1,902439024     |
| PRPF38B                                                                                       | 0,105080828 | -0,158661366 | 0,375 | 0,195 | 1         | 0,895855924   | 1,116250921     | 1,923076923     |
| ZNF865                                                                                        | 0,141661018 | -0,158865594 | 0,094 | 0,035 | 1         | 0,895729115   | 1,116408949     | 2,685714286     |
| FHIP1B                                                                                        | 0,01489812  | -0,158893202 | 0,188 | 0,059 | 1         | 0,895711974   | 1,116430313     | 3,186440678     |
| ASB6                                                                                          | 0,098751938 | -0,158912205 | 0,094 | 0,031 | 1         | 0,895700176   | 1,116445019     | 3,032258065     |
| ABCB10                                                                                        | 0,428872689 | -0,158982488 | 0     | 0,02  | 1         | 0,895656542   | 1,116499409     | 0               |
| ABHD17B                                                                                       | 0,99780108  | -0,158982863 | 0,062 | 0,059 | 1         | 0,895656309   | 1,116499699     | 1,050847458     |
| ACVR1                                                                                         | 0,892714086 | -0,159101864 | 0,031 | 0,035 | 1         | 0,895582434   | 1,116591798     | 0,885714286     |
| SEPTIN4                                                                                       | 0,313292814 | -0,159136869 | 0     | 0,031 | 1         | 0,895560704   | 1,116618891     | 0               |
| CDCA7L                                                                                        | 0,804543977 | -0,159261401 | 0,031 | 0,039 | 1         | 0,895483404   | 1,11671528      | 0,794871795     |
| PIGK                                                                                          | 0,001591384 | -0,159266922 | 0,375 | 0,121 | 1         | 0,895479976   | 1,116719554     | 3,099173554     |
| PDPK1                                                                                         | 0,17621177  | -0,159290283 | 0,188 | 0,094 | 1         | 0,895465476   | 1,116737637     | 2               |
| DLGAP1-AS2                                                                                    | 0,38481627  | -0,159317677 | 0     | 0,023 | 1         | 0,895448473   | 1,116758842     | 0               |
| DNASE1                                                                                        | 0,283789128 | -0,159347046 | 0     | 0,035 | 1         | 0,895430245   | 1,116781576     | 0               |
| ZFAND2B                                                                                       | 0,023577809 | -0,159662241 | 0,219 | 0,078 | 1         | 0,895234636   | 1,117025593     | 2,807692308     |
| NFKBIB                                                                                        | 0,188205529 | -0,159663885 | 0,125 | 0,059 | 1         | 0,895233615   | 1,117026866     | 2,118644068     |
| STK11IP                                                                                       | 0,840130893 | -0,159695438 | 0,062 | 0,051 | 1         | 0,895214036   | 1,117051297     | 1,215686275     |
| C19orf12                                                                                      | 0,516147046 | -0,159954315 | 0,094 | 0,059 | 1         | 0,895053414   | 1,117251758     | 1,593220339     |

Supplementary Table 1

| Differentially expressed genes_adjacent-skin-XL_comparing SC-Keloid vs. (SC-Myel, SC-Nonmyel) |             |              |       |       |           |               |                 |                 |
|-----------------------------------------------------------------------------------------------|-------------|--------------|-------|-------|-----------|---------------|-----------------|-----------------|
| gene                                                                                          | p_val       | avg_log2FC   | pct.1 | pct.2 | p_val_adj | Foldchange_UP | Foldchange_DOWN | Ratio_pct1_pct2 |
| ANKRD52                                                                                       | 0,016858455 | -0,159989039 | 0,125 | 0,031 | 1         | 0,895031871   | 1,117278649     | 4,032258065     |
| HSPA14                                                                                        | 0,668126075 | -0,160040815 | 0,062 | 0,043 | 1         | 0,89499975    | 1,117318747     | 1,441860465     |
| DOCK10                                                                                        | 0,283789128 | -0,160115752 | 0     | 0,035 | 1         | 0,894953263   | 1,117376785     | 0               |
| NUBP1                                                                                         | 0,046495836 | -0,160129295 | 0,156 | 0,055 | 1         | 0,894944862   | 1,117387274     | 2,836363636     |
| RAVER2                                                                                        | 0,80991663  | -0,160156113 | 0,031 | 0,023 | 1         | 0,894928226   | 1,117408045     | 1,347826087     |
| SLC12A2                                                                                       | 0,035794044 | -0,160160733 | 0,25  | 0,102 | 1         | 0,89492536    | 1,117411624     | 2,450980392     |
| ZNF394                                                                                        | 0,005195348 | -0,160196977 | 0,219 | 0,062 | 1         | 0,894902878   | 1,117439696     | 3,532258065     |
| GPR137B                                                                                       | 0,016314912 | -0,160239672 | 0,406 | 0,168 | 1         | 0,894876395   | 1,117472766     | 2,416666667     |
| CCSER2                                                                                        | 0,047107985 | -0,16024164  | 0,531 | 0,262 | 1         | 0,894875174   | 1,11747429      | 2,026717557     |
| ADAMTSL4                                                                                      | 0,38481627  | -0,160245637 | 0     | 0,023 | 1         | 0,894872695   | 1,117477386     | 0               |
| KCTD7                                                                                         | 0,224763613 | -0,160249456 | 0,062 | 0,023 | 1         | 0,894870326   | 1,117480345     | 2,695652174     |
| ZNF117                                                                                        | 0,428872689 | -0,160320894 | 0     | 0,02  | 1         | 0,894826016   | 1,11753568      | 0               |
| HEXD                                                                                          | 0,045356999 | -0,16044754  | 0,156 | 0,055 | 1         | 0,894747467   | 1,117633787     | 2,836363636     |
| MALINC1                                                                                       | 0,428872689 | -0,160524117 | 0     | 0,02  | 1         | 0,894699976   | 1,117693111     | 0               |
| NECTIN3                                                                                       | 0,202646283 | -0,160673866 | 0,125 | 0,059 | 1         | 0,894607113   | 1,117809132     | 2,118644068     |
| NSRP1                                                                                         | 0,001571041 | -0,160721782 | 0,406 | 0,133 | 1         | 0,894577401   | 1,117846258     | 3,052631579     |
| GAS7                                                                                          | 0,598297014 | -0,16084176  | 0,938 | 0,629 | 1         | 0,894503009   | 1,117939224     | 1,491255962     |
| MME                                                                                           | 0,313292814 | -0,160890103 | 0     | 0,031 | 1         | 0,894473036   | 1,117976686     | 0               |
| NUP35                                                                                         | 0,283789128 | -0,161094434 | 0     | 0,035 | 1         | 0,894346359   | 1,118135038     | 0               |
| LLGL1                                                                                         | 0,682170546 | -0,161177817 | 0,031 | 0,02  | 1         | 0,89429467    | 1,118199665     | 1,55            |
| TFIP11                                                                                        | 0,979143607 | -0,161210633 | 0,031 | 0,031 | 1         | 0,894274329   | 1,118225099     | 1               |
| UBE2V1                                                                                        | 0,061399135 | -0,161222166 | 0,594 | 0,301 | 1         | 0,89426718    | 1,118234038     | 1,973421927     |
| MAP3K6                                                                                        | 0,093753684 | -0,161294993 | 0,125 | 0,047 | 1         | 0,894222038   | 1,118290488     | 2,659574468     |
| KLHDC1                                                                                        | 0,38481627  | -0,161338815 | 0     | 0,023 | 1         | 0,894194876   | 1,118324457     | 0               |
| XRR1                                                                                          | 0,175031227 | -0,161513583 | 0,281 | 0,152 | 1         | 0,894086561   | 1,118459939     | 1,848684211     |
| RREB1                                                                                         | 0,204506657 | -0,161633785 | 0,125 | 0,059 | 1         | 0,894012071   | 1,11855313      | 2,118644068     |
| TM7SF3                                                                                        | 0,017987005 | -0,16168237  | 0,312 | 0,121 | 1         | 0,893981963   | 1,1185908       | 2,578512397     |
| SUOX                                                                                          | 0,428872689 | -0,161685015 | 0     | 0,02  | 1         | 0,893980325   | 1,118592851     | 0               |
| PRKD1                                                                                         | 0,32461626  | -0,161721677 | 0,125 | 0,07  | 1         | 0,893957607   | 1,118621277     | 1,785714286     |
| DONSON                                                                                        | 0,037506898 | -0,161725945 | 0,094 | 0,023 | 1         | 0,893954962   | 1,118624587     | 4,086956522     |

Supplementary Table 1

| Differentially expressed genes_adjacent-skin-XL_ comparing SC-Keloid vs. (SC-Myel, SC-Nonmyel) |             |              |       |       |           |               |                 |                 |
|------------------------------------------------------------------------------------------------|-------------|--------------|-------|-------|-----------|---------------|-----------------|-----------------|
| gene                                                                                           | p_val       | avg_log2FC   | pct.1 | pct.2 | p_val_adj | Foldchange_UP | Foldchange_DOWN | Ratio_pct1_pct2 |
| GPM6A                                                                                          | 0,283789128 | -0,16172718  | 0     | 0,035 | 1         | 0,893954197   | 1,118625544     | 0               |
| SLC22A5                                                                                        | 0,428872689 | -0,161780374 | 0     | 0,02  | 1         | 0,893921236   | 1,11866679      | 0               |
| GBP4                                                                                           | 0,616047684 | -0,161818676 | 0,031 | 0,051 | 1         | 0,893897504   | 1,11869649      | 0,607843137     |
| AKAP8L                                                                                         | 0,057218654 | -0,162061333 | 0,312 | 0,145 | 1         | 0,893747166   | 1,118884667     | 2,151724138     |
| NTNG2                                                                                          | 0,313292814 | -0,162097327 | 0     | 0,031 | 1         | 0,893724868   | 1,118912582     | 0               |
| HOXC4                                                                                          | 0,979143607 | -0,162230665 | 0,031 | 0,031 | 1         | 0,893642271   | 1,119016        | 1               |
| KLHL22                                                                                         | 0,428872689 | -0,162241267 | 0     | 0,02  | 1         | 0,893635704   | 1,119024224     | 0               |
| B4GALT4                                                                                        | 0,663576959 | -0,162343955 | 0,031 | 0,047 | 1         | 0,893572099   | 1,119103876     | 0,659574468     |
| IGIP                                                                                           | 0,80991663  | -0,16235158  | 0,031 | 0,023 | 1         | 0,893567377   | 1,119109791     | 1,347826087     |
| C5orf24                                                                                        | 0,033637365 | -0,162408052 | 0,531 | 0,258 | 1         | 0,8935324     | 1,119153598     | 2,058139535     |
| AK4                                                                                            | 0,38481627  | -0,162512409 | 0     | 0,023 | 1         | 0,893467769   | 1,119234554     | 0               |
| ZNF585A                                                                                        | 0,187685368 | -0,162530215 | 0,094 | 0,039 | 1         | 0,893456741   | 1,119248368     | 2,41025641      |
| GABRB3                                                                                         | 0,283789128 | -0,162604613 | 0     | 0,035 | 1         | 0,893410668   | 1,119306088     | 0               |
| PLCL1                                                                                          | 0,313292814 | -0,162657516 | 0     | 0,031 | 1         | 0,893377908   | 1,119347133     | 0               |
| LDLR                                                                                           | 0,106706178 | -0,162678983 | 0,156 | 0,066 | 1         | 0,893364615   | 1,119363789     | 2,363636364     |
| MIPOL1                                                                                         | 0,668126075 | -0,162712848 | 0,062 | 0,043 | 1         | 0,893343644   | 1,119390065     | 1,441860465     |
| DCUN1D1                                                                                        | 0,023853062 | -0,162726401 | 0,219 | 0,078 | 1         | 0,893335253   | 1,11940058      | 2,807692308     |
| SLC22A23                                                                                       | 0,668126075 | -0,162729505 | 0,062 | 0,043 | 1         | 0,893333333   | 1,119402989     | 1,441860465     |
| DNAJC2                                                                                         | 0,001963472 | -0,162750811 | 0,281 | 0,082 | 1         | 0,893320137   | 1,119419521     | 3,426829268     |
| PLAG1                                                                                          | 0,346686972 | -0,162778271 | 0     | 0,027 | 1         | 0,893303135   | 1,119440827     | 0               |
| ZNF660                                                                                         | 0,226351275 | -0,162779288 | 0,031 | 0,008 | 1         | 0,893302505   | 1,119441617     | 3,875           |
| POT1                                                                                           | 0,607571545 | -0,162794894 | 0,031 | 0,051 | 1         | 0,893292841   | 1,119453726     | 0,607843137     |
| SARM1                                                                                          | 0,578217897 | -0,162937865 | 0,062 | 0,039 | 1         | 0,893204321   | 1,119564669     | 1,58974359      |
| PRKCE                                                                                          | 0,257548576 | -0,162976757 | 0     | 0,039 | 1         | 0,893180242   | 1,119594851     | 0               |
| SIAH2                                                                                          | 0,055470426 | -0,163028894 | 0,219 | 0,09  | 1         | 0,893147964   | 1,119635313     | 2,433333333     |
| H2AZ2                                                                                          | 0,036060551 | -0,163068937 | 0,688 | 0,336 | 1         | 0,893123175   | 1,119666389     | 2,047619048     |
| CHIC1                                                                                          | 0,346686972 | -0,163070292 | 0     | 0,027 | 1         | 0,893122336   | 1,11966744      | 0               |
| FAT1                                                                                           | 0,031984901 | -0,163145979 | 0,406 | 0,188 | 1         | 0,893075482   | 1,119726183     | 2,159574468     |
| HSPA1L                                                                                         | 0,887104347 | -0,163154063 | 0,031 | 0,035 | 1         | 0,893070478   | 1,119732457     | 0,885714286     |
| PPP5C                                                                                          | 0,191913299 | -0,163190774 | 0,094 | 0,039 | 1         | 0,893047753   | 1,119760949     | 2,41025641      |

Supplementary Table 1

| Differentially expressed genes_adjacent-skin-XL_comparing SC-Keloid vs. (SC-Myel, SC-Nonmyel) |             |              |       |       |           |               |                 |                 |
|-----------------------------------------------------------------------------------------------|-------------|--------------|-------|-------|-----------|---------------|-----------------|-----------------|
| gene                                                                                          | p_val       | avg_log2FC   | pct.1 | pct.2 | p_val_adj | Foldchange_UP | Foldchange_DOWN | Ratio_pct1_pct2 |
| NR2C2                                                                                         | 0,046495836 | -0,163207541 | 0,156 | 0,055 | 1         | 0,893037374   | 1,119773964     | 2,836363636     |
| NBPF9                                                                                         | 0,540537634 | -0,163384894 | 0,031 | 0,016 | 1         | 0,892927598   | 1,119911628     | 1,9375          |
| CEACAM19                                                                                      | 0,924392442 | -0,163393507 | 0,031 | 0,027 | 1         | 0,892922267   | 1,119918314     | 1,148148148     |
| ARHGAP5-AS1                                                                                   | 0,804543977 | -0,163757023 | 0,031 | 0,039 | 1         | 0,892697306   | 1,120200535     | 0,794871795     |
| KCNIP3                                                                                        | 0,480650464 | -0,163790304 | 0     | 0,016 | 1         | 0,892676713   | 1,120226377     | 0               |
| SIPA1L3                                                                                       | 0,019236133 | -0,163843751 | 0,094 | 0,02  | 1         | 0,892643643   | 1,120267879     | 4,7             |
| NEDD4                                                                                         | 0,441948175 | -0,163881637 | 0,094 | 0,055 | 1         | 0,892620202   | 1,120297298     | 1,709090909     |
| ANKS3                                                                                         | 0,007871757 | -0,163884545 | 0,156 | 0,039 | 1         | 0,892618402   | 1,120299556     | 4               |
| ZSCAN32                                                                                       | 0,428872689 | -0,164031049 | 0     | 0,02  | 1         | 0,892527763   | 1,120413327     | 0               |
| CPOX                                                                                          | 0,283789128 | -0,164100614 | 0     | 0,035 | 1         | 0,892484727   | 1,120467354     | 0               |
| SART3                                                                                         | 0,010405093 | -0,164125287 | 0,188 | 0,055 | 1         | 0,892469464   | 1,120486516     | 3,418181818     |
| PPP2R5E                                                                                       | 0,026679107 | -0,164199765 | 0,219 | 0,082 | 1         | 0,892423392   | 1,120544361     | 2,670731707     |
| TADA2B                                                                                        | 0,682170546 | -0,164203656 | 0,031 | 0,02  | 1         | 0,892420985   | 1,120547383     | 1,55            |
| U2AF1L4                                                                                       | 0,062941189 | -0,164320916 | 0,156 | 0,059 | 1         | 0,892348453   | 1,120638464     | 2,644067797     |
| TPBG                                                                                          | 0,38481627  | -0,164351293 | 0     | 0,023 | 1         | 0,892329665   | 1,12066206      | 0               |
| GDNF                                                                                          | 0,887104347 | -0,164406642 | 0,031 | 0,035 | 1         | 0,892295431   | 1,120705055     | 0,885714286     |
| COG7                                                                                          | 0,924392442 | -0,164614553 | 0,031 | 0,027 | 1         | 0,892166849   | 1,120866574     | 1,148148148     |
| ARMCX5                                                                                        | 0,396289917 | -0,164696548 | 0,062 | 0,031 | 1         | 0,892116145   | 1,12093028      | 2               |
| FAM120B                                                                                       | 0,835562242 | -0,164699623 | 0,062 | 0,051 | 1         | 0,892114243   | 1,120932669     | 1,215686275     |
| SLC25A13                                                                                      | 0,000137099 | -0,164723594 | 0,25  | 0,051 | 1         | 0,89209942    | 1,120951294     | 4,901960784     |
| ZMYM1                                                                                         | 0,38481627  | -0,164755374 | 0     | 0,023 | 1         | 0,892079769   | 1,120975987     | 0               |
| ZBTB17                                                                                        | 0,163771186 | -0,164833405 | 0,125 | 0,055 | 1         | 0,89203152    | 1,121036619     | 2,272727273     |
| XRN1                                                                                          | 0,219379907 | -0,164840199 | 0,25  | 0,141 | 1         | 0,89202732    | 1,121041898     | 1,773049645     |
| TMEM91                                                                                        | 0,162153727 | -0,164850008 | 0,125 | 0,055 | 1         | 0,892021255   | 1,121049521     | 2,272727273     |
| CNR1                                                                                          | 0,428872689 | -0,165011912 | 0     | 0,02  | 1         | 0,891921155   | 1,121175335     | 0               |
| KIF27                                                                                         | 0,735253332 | -0,165038547 | 0,031 | 0,043 | 1         | 0,891904688   | 1,121196035     | 0,720930233     |
| TEX41                                                                                         | 0,428872689 | -0,165226028 | 0     | 0,02  | 1         | 0,891788791   | 1,121341746     | 0               |
| AHCYL1                                                                                        | 0,019312158 | -0,1653081   | 0,469 | 0,199 | 1         | 0,891738061   | 1,121405538     | 2,35678392      |
| INPP4B                                                                                        | 0,38481627  | -0,165319257 | 0     | 0,023 | 1         | 0,891731164   | 1,121414211     | 0               |
| LRP1                                                                                          | 0,012154915 | -0,165410174 | 0,75  | 0,344 | 1         | 0,89167497    | 1,121484883     | 2,180232558     |

Supplementary Table 1

| Differentially expressed genes_adjacent-skin-XL_ comparing SC-Keloid vs. (SC-Myel, SC-Nonmyel) |             |              |       |       |           |               |                 |                 |
|------------------------------------------------------------------------------------------------|-------------|--------------|-------|-------|-----------|---------------|-----------------|-----------------|
| gene                                                                                           | p_val       | avg_log2FC   | pct.1 | pct.2 | p_val_adj | Foldchange_UP | Foldchange_DOWN | Ratio_pct1_pct2 |
| RMND5B                                                                                         | 0,755689148 | -0,16567891  | 0,062 | 0,047 | 1         | 0,89150889    | 1,121693806     | 1,319148936     |
| ANKRD20A4P                                                                                     | 0,283789128 | -0,165723901 | 0     | 0,035 | 1         | 0,891481089   | 1,121728786     | 0               |
| HECTD1                                                                                         | 0,008160896 | -0,165744814 | 0,469 | 0,191 | 1         | 0,891468166   | 1,121745047     | 2,455497382     |
| SMG5                                                                                           | 0,24851603  | -0,165787264 | 0,094 | 0,043 | 1         | 0,891441936   | 1,121778054     | 2,186046512     |
| FILIP1                                                                                         | 0,257548576 | -0,16578785  | 0     | 0,039 | 1         | 0,891441574   | 1,12177851      | 0               |
| MOB3C                                                                                          | 0,283789128 | -0,165940436 | 0     | 0,035 | 1         | 0,891347296   | 1,12189716      | 0               |
| UBE2E2                                                                                         | 0,13446757  | -0,166064997 | 0,156 | 0,07  | 1         | 0,891270341   | 1,121994028     | 2,228571429     |
| SLC25A27                                                                                       | 0,346686972 | -0,166111048 | 0     | 0,027 | 1         | 0,891241892   | 1,122029842     | 0               |
| SPRY2                                                                                          | 0,002659034 | -0,166184834 | 0,625 | 0,25  | 1         | 0,891196311   | 1,12208723      | 2,5             |
| IKZF2                                                                                          | 0,480650464 | -0,166214992 | 0     | 0,016 | 1         | 0,891177682   | 1,122110686     | 0               |
| FRMD4B                                                                                         | 0,283788463 | -0,166376772 | 0     | 0,035 | 1         | 0,891077753   | 1,122236524     | 0               |
| TPR                                                                                            | 0,015662533 | -0,16647999  | 0,469 | 0,211 | 1         | 0,891014003   | 1,122316818     | 2,222748815     |
| WRNIP1                                                                                         | 0,045147709 | -0,166532346 | 0,188 | 0,07  | 1         | 0,890981668   | 1,122357547     | 2,685714286     |
| RASSF8-AS1                                                                                     | 0,050259834 | -0,166537924 | 0,25  | 0,105 | 1         | 0,890978224   | 1,122361887     | 2,380952381     |
| NTM                                                                                            | 0,193723669 | -0,166590707 | 0,938 | 0,574 | 1         | 0,890945627   | 1,122402951     | 1,634146341     |
| YTHDF1                                                                                         | 0,846196088 | -0,166658577 | 0,094 | 0,078 | 1         | 0,890903714   | 1,122455754     | 1,205128205     |
| BOD1                                                                                           | 0,024242212 | -0,166683314 | 0,312 | 0,129 | 1         | 0,890888438   | 1,122475        | 2,418604651     |
| POLR2B                                                                                         | 0,00211817  | -0,166697179 | 0,375 | 0,125 | 1         | 0,890879876   | 1,122485788     | 3               |
| CYRIA                                                                                          | 0,578217897 | -0,166726114 | 0,062 | 0,039 | 1         | 0,890862009   | 1,122508301     | 1,58974359      |
| SNX25                                                                                          | 0,428872689 | -0,166880278 | 0     | 0,02  | 1         | 0,890766818   | 1,122628257     | 0               |
| ANKRD30B                                                                                       | 0,38481627  | -0,166912946 | 0     | 0,023 | 1         | 0,890746648   | 1,122653678     | 0               |
| ZNF740                                                                                         | 0,487085433 | -0,166973351 | 0,062 | 0,035 | 1         | 0,890709354   | 1,122700683     | 1,771428571     |
| LDAF1                                                                                          | 0,516147046 | -0,167053813 | 0,094 | 0,059 | 1         | 0,890659678   | 1,122763301     | 1,593220339     |
| CTBP1-DT                                                                                       | 0,346686972 | -0,167205739 | 0     | 0,027 | 1         | 0,89056589    | 1,122881542     | 0               |
| PER2                                                                                           | 0,310355006 | -0,167296722 | 0,094 | 0,047 | 1         | 0,890509729   | 1,122952358     | 2               |
| PIR                                                                                            | 0,313292814 | -0,167316197 | 0     | 0,031 | 1         | 0,890497708   | 1,122967517     | 0               |
| C9orf72                                                                                        | 0,38481627  | -0,167323261 | 0     | 0,023 | 1         | 0,890493348   | 1,122973016     | 0               |
| SETD1A                                                                                         | 0,032268627 | -0,167349113 | 0,156 | 0,051 | 1         | 0,890477391   | 1,122993139     | 3,058823529     |
| NSUN4                                                                                          | 0,428872689 | -0,16741049  | 0     | 0,02  | 1         | 0,890439508   | 1,123040915     | 0               |
| TMEM178A                                                                                       | 0,38481627  | -0,167484637 | 0     | 0,023 | 1         | 0,890393745   | 1,123098635     | 0               |



Supplementary Table 1

| Differentially expressed genes_adjacent-skin-XL_comparing SC-Keloid vs. (SC-Myel, SC-Nonmyel) |             |              |       |       |           |               |                 |                 |
|-----------------------------------------------------------------------------------------------|-------------|--------------|-------|-------|-----------|---------------|-----------------|-----------------|
| gene                                                                                          | p_val       | avg_log2FC   | pct.1 | pct.2 | p_val_adj | Foldchange_UP | Foldchange_DOWN | Ratio_pct1_pct2 |
| KLC1                                                                                          | 0,174462513 | -0,167494792 | 0,531 | 0,309 | 1         | 0,890387478   | 1,123106541     | 1,718446602     |
| METTL17                                                                                       | 0,157372807 | -0,167495336 | 0,125 | 0,055 | 1         | 0,890387142   | 1,123106964     | 2,272727273     |
| DVL2                                                                                          | 0,516147046 | -0,167724775 | 0,094 | 0,059 | 1         | 0,890245551   | 1,123285592     | 1,593220339     |
| DSG3                                                                                          | 0,428872689 | -0,167963448 | 0     | 0,02  | 1         | 0,890098284   | 1,123471439     | 0               |
| RRAGD                                                                                         | 0,234088337 | -0,168108845 | 0     | 0,043 | 1         | 0,890008583   | 1,12358467      | 0               |
| DNALI1                                                                                        | 0,191913299 | -0,168149277 | 0,094 | 0,039 | 1         | 0,889983641   | 1,123616159     | 2,41025641      |
| GABPB2                                                                                        | 0,141661018 | -0,168158351 | 0,094 | 0,035 | 1         | 0,889978043   | 1,123623226     | 2,685714286     |
| GJB6                                                                                          | 0,283789128 | -0,168271206 | 0     | 0,035 | 1         | 0,889908428   | 1,123711124     | 0               |
| PHLPP2                                                                                        | 0,979143607 | -0,16828917  | 0,031 | 0,031 | 1         | 0,889897347   | 1,123725117     | 1               |
| ABT1                                                                                          | 0,396289917 | -0,168297998 | 0,062 | 0,031 | 1         | 0,889891902   | 1,123731993     | 2               |
| MCCC1                                                                                         | 0,668126075 | -0,16851801  | 0,062 | 0,043 | 1         | 0,889756202   | 1,123903376     | 1,441860465     |
| DGKD                                                                                          | 0,396289917 | -0,168553864 | 0,062 | 0,031 | 1         | 0,88973409    | 1,123931308     | 2               |
| PHC3                                                                                          | 0,22427219  | -0,168679    | 0,188 | 0,102 | 1         | 0,88965692    | 1,1240288       | 1,843137255     |
| DHTKD1                                                                                        | 0,257548576 | -0,16920993  | 0     | 0,039 | 1         | 0,889329576   | 1,124442532     | 0               |
| ING3                                                                                          | 0,247212967 | -0,169263554 | 0,125 | 0,062 | 1         | 0,88929652    | 1,124484328     | 2,016129032     |
| DPH7                                                                                          | 0,300029356 | -0,169310927 | 0,125 | 0,066 | 1         | 0,88926732    | 1,124521252     | 1,893939394     |
| XYLT2                                                                                         | 0,577368489 | -0,169425365 | 0,094 | 0,062 | 1         | 0,889196784   | 1,124610455     | 1,516129032     |
| EBF4                                                                                          | 0,569359326 | -0,169465332 | 0,062 | 0,039 | 1         | 0,889172151   | 1,124641611     | 1,58974359      |
| TMEM158                                                                                       | 0,141661018 | -0,169529925 | 0,094 | 0,035 | 1         | 0,889132341   | 1,124691965     | 2,685714286     |
| WDR37                                                                                         | 0,924392442 | -0,169700259 | 0,031 | 0,027 | 1         | 0,88902737    | 1,124824762     | 1,148148148     |
| POLG                                                                                          | 0,249306044 | -0,169722603 | 0,125 | 0,062 | 1         | 0,889013602   | 1,124842183     | 2,016129032     |
| UVSSA                                                                                         | 0,141661018 | -0,169722965 | 0,094 | 0,035 | 1         | 0,889013379   | 1,124842465     | 2,685714286     |
| PTPN13                                                                                        | 0,171744666 | -0,169736909 | 0,281 | 0,152 | 1         | 0,889004786   | 1,124853337     | 1,848684211     |
| TBCE                                                                                          | 0,373239546 | -0,169969064 | 0,094 | 0,051 | 1         | 0,888861741   | 1,12503436      | 1,843137255     |
| SLC16A1                                                                                       | 0,123421204 | -0,170094044 | 0,125 | 0,051 | 1         | 0,888784743   | 1,125131825     | 2,450980392     |
| BIRC7                                                                                         | 0,346686972 | -0,170101978 | 0     | 0,027 | 1         | 0,888779855   | 1,125138013     | 0               |
| TNPO2                                                                                         | 0,012061903 | -0,170297682 | 0,219 | 0,07  | 1         | 0,888659299   | 1,12529065      | 3,128571429     |
| PYROXD2                                                                                       | 0,480650464 | -0,170396888 | 0     | 0,016 | 1         | 0,888598192   | 1,125368033     | 0               |
| RNF44                                                                                         | 0,668126075 | -0,170404332 | 0,062 | 0,043 | 1         | 0,888593608   | 1,125373839     | 1,441860465     |
| XPO6                                                                                          | 0,074729729 | -0,170406574 | 0,188 | 0,078 | 1         | 0,888592227   | 1,125375588     | 2,41025641      |

Supplementary Table 1

| Differentially expressed genes_adjacent-skin-XL_comparing SC-Keloid vs. (SC-Myel, SC-Nonmyel) |             |              |       |       |           |               |                 |                 |
|-----------------------------------------------------------------------------------------------|-------------|--------------|-------|-------|-----------|---------------|-----------------|-----------------|
| gene                                                                                          | p_val       | avg_log2FC   | pct.1 | pct.2 | p_val_adj | Foldchange_UP | Foldchange_DOWN | Ratio_pct1_pct2 |
| DSG1                                                                                          | 0,573780511 | -0,170558201 | 0,062 | 0,039 | 1         | 0,888498841   | 1,125493871     | 1,58974359      |
| GIGYF1                                                                                        | 0,192364395 | -0,170635549 | 0,188 | 0,098 | 1         | 0,888451206   | 1,125554215     | 1,918367347     |
| DENND1A                                                                                       | 0,924392442 | -0,170659681 | 0,031 | 0,027 | 1         | 0,888436345   | 1,125573042     | 1,148148148     |
| TFPI2                                                                                         | 0,016858455 | -0,170685143 | 0,125 | 0,031 | 1         | 0,888420666   | 1,125592907     | 4,032258065     |
| LTA4H                                                                                         | 0,916437471 | -0,170689839 | 0,062 | 0,055 | 1         | 0,888417773   | 1,125596572     | 1,127272727     |
| ENSA                                                                                          | 0,006587322 | -0,170730285 | 0,5   | 0,199 | 1         | 0,888392867   | 1,125628128     | 2,512562814     |
| TVP23C                                                                                        | 0,482846351 | -0,171004423 | 0,062 | 0,035 | 1         | 0,888224073   | 1,125842038     | 1,771428571     |
| ERMN                                                                                          | 0,428872689 | -0,17107929  | 0     | 0,02  | 1         | 0,888177981   | 1,125900463     | 0               |
| FLRT2                                                                                         | 0,346686972 | -0,171111144 | 0     | 0,027 | 1         | 0,888158371   | 1,125925323     | 0               |
| LINC00461                                                                                     | 0,257548576 | -0,171135512 | 0     | 0,039 | 1         | 0,888143369   | 1,125944341     | 0               |
| TTPAL                                                                                         | 0,428872689 | -0,17115666  | 0     | 0,02  | 1         | 0,88813035    | 1,125960846     | 0               |
| ZNF34                                                                                         | 0,376291412 | -0,171276945 | 0,094 | 0,051 | 1         | 0,888056305   | 1,126054727     | 1,843137255     |
| PAIP2B                                                                                        | 0,313292814 | -0,171340435 | 0     | 0,031 | 1         | 0,888017224   | 1,126104284     | 0               |
| CEP44                                                                                         | 0,933712959 | -0,171513693 | 0,062 | 0,062 | 1         | 0,887910586   | 1,126239529     | 1               |
| LTN1                                                                                          | 0,003618924 | -0,171541534 | 0,312 | 0,102 | 1         | 0,887893451   | 1,126261263     | 3,058823529     |
| GRPEL1                                                                                        | 0,014142285 | -0,171649964 | 0,281 | 0,102 | 1         | 0,887826721   | 1,126345914     | 2,754901961     |
| SH3BP5                                                                                        | 0,050263346 | -0,171655405 | 0,469 | 0,227 | 1         | 0,887823373   | 1,126350162     | 2,066079295     |
| ASIC3                                                                                         | 0,480650464 | -0,171658059 | 0     | 0,016 | 1         | 0,88782174    | 1,126352234     | 0               |
| CRISPLD2                                                                                      | 0,021983485 | -0,171699364 | 0,219 | 0,078 | 1         | 0,887796321   | 1,126384482     | 2,807692308     |
| SERAC1                                                                                        | 0,804543977 | -0,171778168 | 0,031 | 0,039 | 1         | 0,887747829   | 1,12644601      | 0,794871795     |
| AREL1                                                                                         | 0,283789128 | -0,171954895 | 0     | 0,035 | 1         | 0,887639088   | 1,126584006     | 0               |
| TTC17                                                                                         | 0,169441886 | -0,172080879 | 0,281 | 0,156 | 1         | 0,887561578   | 1,12668239      | 1,801282051     |
| TSPOAP1-AS1                                                                                   | 0,428872689 | -0,172135821 | 0     | 0,02  | 1         | 0,887527778   | 1,126725298     | 0               |
| OFD1                                                                                          | 0,08709749  | -0,172137964 | 0,344 | 0,176 | 1         | 0,887526459   | 1,126726972     | 1,954545455     |
| MSMO1                                                                                         | 0,004241146 | -0,172323303 | 0,281 | 0,09  | 1         | 0,887412449   | 1,126871729     | 3,122222222     |
| PKP2                                                                                          | 0,257548576 | -0,172460356 | 0     | 0,039 | 1         | 0,887328151   | 1,126978783     | 0               |
| CLK3                                                                                          | 0,12985323  | -0,17275061  | 0,219 | 0,105 | 1         | 0,887149648   | 1,127205542     | 2,085714286     |
| FAM221A                                                                                       | 0,573799329 | -0,172879246 | 0,094 | 0,062 | 1         | 0,88707055    | 1,127306052     | 1,516129032     |
| WIPI2                                                                                         | 0,001193685 | -0,172917717 | 0,375 | 0,117 | 1         | 0,887046896   | 1,127336114     | 3,205128205     |
| TASOR2                                                                                        | 0,078496688 | -0,172969033 | 0,188 | 0,078 | 1         | 0,887015344   | 1,127376213     | 2,41025641      |

Supplementary Table 1

| Differentially expressed genes_adjacent-skin-XL_comparing SC-Keloid vs. (SC-Myel, SC-Nonmyel) |             |              |       |       |           |               |                 |                 |
|-----------------------------------------------------------------------------------------------|-------------|--------------|-------|-------|-----------|---------------|-----------------|-----------------|
| gene                                                                                          | p_val       | avg_log2FC   | pct.1 | pct.2 | p_val_adj | Foldchange_UP | Foldchange_DOWN | Ratio_pct1_pct2 |
| ASMTL-AS1                                                                                     | 0,480650464 | -0,172985753 | 0     | 0,016 | 1         | 0,887005065   | 1,127389279     | 0               |
| CLPB                                                                                          | 0,924392442 | -0,173110746 | 0,031 | 0,027 | 1         | 0,886928219   | 1,127486959     | 1,148148148     |
| VANGL2                                                                                        | 0,556776127 | -0,17320077  | 0,031 | 0,055 | 1         | 0,886872876   | 1,127557316     | 0,563636364     |
| COL11A2                                                                                       | 0,38481627  | -0,173202405 | 0     | 0,023 | 1         | 0,886871871   | 1,127558594     | 0               |
| DTX3                                                                                          | 0,134082625 | -0,17322414  | 0,188 | 0,09  | 1         | 0,88685851    | 1,127575581     | 2,088888889     |
| POLR2M                                                                                        | 0,069649574 | -0,173226835 | 0,219 | 0,094 | 1         | 0,886856854   | 1,127577687     | 2,329787234     |
| KIF5C                                                                                         | 0,835562242 | -0,173234228 | 0,062 | 0,051 | 1         | 0,886852309   | 1,127583466     | 1,215686275     |
| HLA-DMA                                                                                       | 0,38481627  | -0,173256698 | 0     | 0,023 | 1         | 0,886838496   | 1,127601028     | 0               |
| GPNMB                                                                                         | 0,288533951 | -0,173339468 | 0,125 | 0,066 | 1         | 0,886787618   | 1,127665722     | 1,893939394     |
| SRGAP3                                                                                        | 0,887104347 | -0,173373336 | 0,031 | 0,035 | 1         | 0,886766801   | 1,127692195     | 0,885714286     |
| RSF1                                                                                          | 0,219892848 | -0,173435704 | 0,469 | 0,277 | 1         | 0,886728467   | 1,127740946     | 1,693140794     |
| FOXP1                                                                                         | 0,008087959 | -0,173509075 | 0,625 | 0,273 | 1         | 0,886683371   | 1,127798301     | 2,289377289     |
| DVL3                                                                                          | 0,071823511 | -0,173567009 | 0,188 | 0,078 | 1         | 0,886647766   | 1,127843591     | 2,41025641      |
| RERG                                                                                          | 0,213026321 | -0,173696708 | 0     | 0,047 | 1         | 0,886568059   | 1,127944989     | 0               |
| SLC9A6                                                                                        | 0,578217897 | -0,173755428 | 0,062 | 0,039 | 1         | 0,886531975   | 1,1279909       | 1,58974359      |
| GLYR1                                                                                         | 0,001644566 | -0,173811659 | 0,312 | 0,094 | 1         | 0,886497422   | 1,128034865     | 3,319148936     |
| KIAA2026                                                                                      | 0,014142248 | -0,173842994 | 0,281 | 0,102 | 1         | 0,886478168   | 1,128059366     | 2,754901961     |
| LDB1                                                                                          | 0,578217897 | -0,173966665 | 0,062 | 0,039 | 1         | 0,88640218    | 1,12815607      | 1,58974359      |
| ACAP1                                                                                         | 0,213026321 | -0,173981707 | 0     | 0,047 | 1         | 0,886392938   | 1,128167832     | 0               |
| CDH1                                                                                          | 0,283789128 | -0,174183199 | 0     | 0,035 | 1         | 0,88626915    | 1,128325407     | 0               |
| FAM135A                                                                                       | 0,663576959 | -0,17422209  | 0,031 | 0,047 | 1         | 0,886245259   | 1,128355824     | 0,659574468     |
| LRRC42                                                                                        | 0,917697681 | -0,174223513 | 0,094 | 0,082 | 1         | 0,886244385   | 1,128356937     | 1,146341463     |
| RAD54L2                                                                                       | 0,060283688 | -0,17429408  | 0,188 | 0,074 | 1         | 0,886201037   | 1,12841213      | 2,540540541     |
| SLC30A9                                                                                       | 0,003201338 | -0,17436827  | 0,219 | 0,059 | 1         | 0,886155465   | 1,12847016      | 3,711864407     |
| ADGRB1                                                                                        | 0,80991663  | -0,174413557 | 0,031 | 0,023 | 1         | 0,886127649   | 1,128505584     | 1,347826087     |
| POLR3A                                                                                        | 0,283789128 | -0,174561834 | 0     | 0,035 | 1         | 0,886036579   | 1,128621575     | 0               |
| LRRC24                                                                                        | 0,979143607 | -0,174572115 | 0,031 | 0,031 | 1         | 0,886030265   | 1,128629618     | 1               |
| THSD7B                                                                                        | 0,38481627  | -0,174622645 | 0     | 0,023 | 1         | 0,885999233   | 1,128669149     | 0               |
| CS                                                                                            | 0,656705388 | -0,174689453 | 0,094 | 0,066 | 1         | 0,885958206   | 1,128721416     | 1,424242424     |
| NBPF20                                                                                        | 0,480650464 | -0,174714217 | 0     | 0,016 | 1         | 0,885942998   | 1,128740791     | 0               |

Supplementary Table 1

| Differentially expressed genes_adjacent-skin-XL_ comparing SC-Keloid vs. (SC-Myel, SC-Nonmyel) |             |              |       |       |           |               |                 |                 |
|------------------------------------------------------------------------------------------------|-------------|--------------|-------|-------|-----------|---------------|-----------------|-----------------|
| gene                                                                                           | p_val       | avg_log2FC   | pct.1 | pct.2 | p_val_adj | Foldchange_UP | Foldchange_DOWN | Ratio_pct1_pct2 |
| KIF5A                                                                                          | 0,38481627  | -0,174759166 | 0     | 0,023 | 1         | 0,885915396   | 1,128775959     | 0               |
| ZNF721                                                                                         | 0,024411868 | -0,174766289 | 0,219 | 0,078 | 1         | 0,885911021   | 1,128781532     | 2,807692308     |
| EXOC5                                                                                          | 0,144457051 | -0,174849057 | 0,188 | 0,09  | 1         | 0,885860198   | 1,128846292     | 2,088888889     |
| STK38L                                                                                         | 0,283789128 | -0,174924615 | 0     | 0,035 | 1         | 0,885813804   | 1,128905414     | 0               |
| ORC2                                                                                           | 0,482846351 | -0,175031935 | 0,062 | 0,035 | 1         | 0,885747912   | 1,128989395     | 1,771428571     |
| FAM53C                                                                                         | 0,085298168 | -0,175120977 | 0,219 | 0,098 | 1         | 0,885693246   | 1,129059078     | 2,234693878     |
| CLN8                                                                                           | 0,615516182 | -0,175195641 | 0,156 | 0,113 | 1         | 0,88564741    | 1,129117512     | 1,380530973     |
| NUFIP1                                                                                         | 0,663576959 | -0,175198325 | 0,031 | 0,047 | 1         | 0,885645762   | 1,129119612     | 0,659574468     |
| MYH14                                                                                          | 0,681846175 | -0,175361012 | 0,031 | 0,047 | 1         | 0,885545897   | 1,129246946     | 0,659574468     |
| WDSUB1                                                                                         | 0,603353082 | -0,175369884 | 0,031 | 0,051 | 1         | 0,885540451   | 1,129253891     | 0,607843137     |
| TMEM192                                                                                        | 0,840130893 | -0,175429198 | 0,062 | 0,051 | 1         | 0,885504045   | 1,129300319     | 1,215686275     |
| S100A14                                                                                        | 0,911938491 | -0,175444676 | 0,062 | 0,055 | 1         | 0,885494545   | 1,129312435     | 1,127272727     |
| FOXC1                                                                                          | 0,150155729 | -0,175475059 | 0,062 | 0,02  | 1         | 0,885475896   | 1,129336218     | 3,1             |
| SETD2                                                                                          | 0,020351656 | -0,175481014 | 0,312 | 0,125 | 1         | 0,885472241   | 1,12934088      | 2,496           |
| PSMF1                                                                                          | 0,00354177  | -0,175508642 | 0,438 | 0,16  | 1         | 0,885455284   | 1,129362507     | 2,7375          |
| TBX2                                                                                           | 0,395250692 | -0,175535722 | 0,125 | 0,074 | 1         | 0,885438665   | 1,129383706     | 1,689189189     |
| EIF4G3                                                                                         | 0,019190685 | -0,175662471 | 0,312 | 0,125 | 1         | 0,885360877   | 1,129482933     | 2,496           |
| C17orf67                                                                                       | 0,283789128 | -0,175849005 | 0     | 0,035 | 1         | 0,885246411   | 1,12962898      | 0               |
| SLC4A5                                                                                         | 0,924392442 | -0,175872135 | 0,031 | 0,027 | 1         | 0,885232219   | 1,12964709      | 1,148148148     |
| BDNF-AS                                                                                        | 0,80991663  | -0,175927405 | 0,031 | 0,023 | 1         | 0,885198306   | 1,129690368     | 1,347826087     |
| ZNF496                                                                                         | 0,163771487 | -0,175989456 | 0,125 | 0,055 | 1         | 0,885160234   | 1,129738958     | 2,272727273     |
| CYP46A1                                                                                        | 0,234087804 | -0,176147836 | 0     | 0,043 | 1         | 0,885063066   | 1,129862988     | 0               |
| BCCIP                                                                                          | 0,045356999 | -0,17616643  | 0,156 | 0,055 | 1         | 0,885051659   | 1,12987755      | 2,836363636     |
| BCAR3                                                                                          | 0,037171106 | -0,176175657 | 0,281 | 0,117 | 1         | 0,885045998   | 1,129884776     | 2,401709402     |
| CEBPZ                                                                                          | 0,00891214  | -0,176187314 | 0,406 | 0,16  | 1         | 0,885038847   | 1,129893906     | 2,5375          |
| CTBP2                                                                                          | 0,053220599 | -0,176208736 | 0,312 | 0,145 | 1         | 0,885025706   | 1,129910683     | 2,151724138     |
| COQ8A                                                                                          | 0,804543977 | -0,176252488 | 0,031 | 0,039 | 1         | 0,884998866   | 1,12994495      | 0,794871795     |
| MRI1                                                                                           | 0,243596382 | -0,176273751 | 0,094 | 0,043 | 1         | 0,884985823   | 1,129961604     | 2,186046512     |
| SETDB1                                                                                         | 0,428872689 | -0,176332868 | 0     | 0,02  | 1         | 0,884949559   | 1,130007908     | 0               |
| MAOA                                                                                           | 0,540537634 | -0,176397133 | 0,031 | 0,016 | 1         | 0,88491014    | 1,130058245     | 1,9375          |

Supplementary Table 1

| Differentially expressed genes_adjacent-skin-XL_ comparing SC-Keloid vs. (SC-Myel, SC-Nonmyel) |             |              |       |       |           |               |                 |                 |
|------------------------------------------------------------------------------------------------|-------------|--------------|-------|-------|-----------|---------------|-----------------|-----------------|
| gene                                                                                           | p_val       | avg_log2FC   | pct.1 | pct.2 | p_val_adj | Foldchange_UP | Foldchange_DOWN | Ratio_pct1_pct2 |
| UBE4B                                                                                          | 0,588138226 | -0,176425072 | 0,094 | 0,062 | 1         | 0,884893003   | 1,13008013      | 1,516129032     |
| HACL1                                                                                          | 0,864972765 | -0,176434905 | 0,062 | 0,066 | 1         | 0,884886973   | 1,130087831     | 0,939393939     |
| HAUS2                                                                                          | 0,663576959 | -0,176461018 | 0,031 | 0,047 | 1         | 0,884870956   | 1,130108286     | 0,659574468     |
| ERO1A                                                                                          | 0,112120373 | -0,176529256 | 0,156 | 0,066 | 1         | 0,884829103   | 1,130161741     | 2,363636364     |
| LARP7                                                                                          | 0,00377279  | -0,176634062 | 0,375 | 0,133 | 1         | 0,884764827   | 1,130243845     | 2,819548872     |
| FLII                                                                                           | 0,011699892 | -0,176655266 | 0,281 | 0,102 | 1         | 0,884751823   | 1,130260458     | 2,754901961     |
| RNASSET2                                                                                       | 0,804543977 | -0,176748697 | 0,031 | 0,039 | 1         | 0,884694527   | 1,130333657     | 0,794871795     |
| MICA                                                                                           | 0,0600426   | -0,176945785 | 0,281 | 0,125 | 1         | 0,884573676   | 1,130488084     | 2,248           |
| PLA2G6                                                                                         | 0,346686972 | -0,177113963 | 0     | 0,027 | 1         | 0,884470565   | 1,130619875     | 0               |
| NSMAF                                                                                          | 0,234088337 | -0,177307269 | 0     | 0,043 | 1         | 0,884352064   | 1,130771376     | 0               |
| TIFA                                                                                           | 0,65904021  | -0,177338617 | 0,062 | 0,043 | 1         | 0,884332848   | 1,130795947     | 1,441860465     |
| LSM14B                                                                                         | 0,253529282 | -0,177350365 | 0,125 | 0,062 | 1         | 0,884325647   | 1,130805155     | 2,016129032     |
| PCYOX1L                                                                                        | 0,487085433 | -0,177388618 | 0,062 | 0,035 | 1         | 0,884302199   | 1,130835138     | 1,771428571     |
| KBTBD7                                                                                         | 0,755689148 | -0,177501886 | 0,062 | 0,047 | 1         | 0,884232774   | 1,130923925     | 1,319148936     |
| CNDP2                                                                                          | 0,046495687 | -0,177597126 | 0,156 | 0,055 | 1         | 0,884174403   | 1,130998587     | 2,836363636     |
| MCM7                                                                                           | 0,293095687 | -0,177774378 | 0,125 | 0,066 | 1         | 0,884065778   | 1,131137552     | 1,893939394     |
| SOGA3                                                                                          | 0,668126075 | -0,177844141 | 0,062 | 0,043 | 1         | 0,88402303    | 1,13119225      | 1,441860465     |
| SV2C                                                                                           | 0,313292814 | -0,177968611 | 0     | 0,031 | 1         | 0,883946763   | 1,131289849     | 0               |
| SMIM43                                                                                         | 0,38481627  | -0,177988427 | 0     | 0,023 | 1         | 0,883934622   | 1,131305388     | 0               |
| LINC01003                                                                                      | 0,465191913 | -0,177997012 | 0,031 | 0,062 | 1         | 0,883929362   | 1,13131212      | 0,5             |
| ANKS1B                                                                                         | 0,283789128 | -0,17799979  | 0     | 0,035 | 1         | 0,88392766    | 1,131314298     | 0               |
| BRAT1                                                                                          | 0,512685318 | -0,178114482 | 0,094 | 0,059 | 1         | 0,883857391   | 1,13140424      | 1,593220339     |
| ZNF432                                                                                         | 0,30793671  | -0,178157023 | 0,062 | 0,027 | 1         | 0,88383133    | 1,131437602     | 2,296296296     |
| ARHGAP29                                                                                       | 0,191913299 | -0,17826219  | 0,094 | 0,039 | 1         | 0,883766904   | 1,131520082     | 2,41025641      |
| C1QTNF4                                                                                        | 0,804543977 | -0,178283182 | 0,031 | 0,039 | 1         | 0,883754045   | 1,131536547     | 0,794871795     |
| PIP4P1                                                                                         | 0,294412282 | -0,178285251 | 0,156 | 0,086 | 1         | 0,883752778   | 1,131538169     | 1,813953488     |
| TMEM65                                                                                         | 0,04735424  | -0,178386769 | 0,219 | 0,09  | 1         | 0,883690593   | 1,131617795     | 2,433333333     |
| KLHL13                                                                                         | 0,346686972 | -0,178399648 | 0     | 0,027 | 1         | 0,883682704   | 1,131627897     | 0               |
| C3orf33                                                                                        | 0,396289917 | -0,178498212 | 0,062 | 0,031 | 1         | 0,883622333   | 1,131705212     | 2               |
| KDM4B                                                                                          | 0,045923444 | -0,178625042 | 0,156 | 0,055 | 1         | 0,883544656   | 1,131804707     | 2,836363636     |

Supplementary Table 1

| Differentially expressed genes_adjacent-skin-XL_comparing SC-Keloid vs. (SC-Myel, SC-Nonmyel) |             |              |       |       |           |               |                 |                 |
|-----------------------------------------------------------------------------------------------|-------------|--------------|-------|-------|-----------|---------------|-----------------|-----------------|
| gene                                                                                          | p_val       | avg_log2FC   | pct.1 | pct.2 | p_val_adj | Foldchange_UP | Foldchange_DOWN | Ratio_pct1_pct2 |
| TIAM2                                                                                         | 0,313292814 | -0,178684619 | 0     | 0,031 | 1         | 0,88350817    | 1,131851446     | 0               |
| PIK3CA                                                                                        | 0,078068641 | -0,178717805 | 0,219 | 0,098 | 1         | 0,883487847   | 1,131877482     | 2,234693878     |
| CAMK2G                                                                                        | 0,126128812 | -0,178788456 | 0,125 | 0,051 | 1         | 0,883444582   | 1,131932914     | 2,450980392     |
| TRIM44                                                                                        | 0,017176388 | -0,178803257 | 0,344 | 0,137 | 1         | 0,883435519   | 1,131944526     | 2,510948905     |
| FBXO48                                                                                        | 0,313292814 | -0,178839607 | 0     | 0,031 | 1         | 0,883413261   | 1,131973047     | 0               |
| PRMT5                                                                                         | 0,920939129 | -0,178903984 | 0,062 | 0,055 | 1         | 0,883373841   | 1,13202356      | 1,127272727     |
| DBNDD2                                                                                        | 0,143778766 | -0,178909509 | 0,219 | 0,109 | 1         | 0,883370458   | 1,132027895     | 2,009174312     |
| MYO6                                                                                          | 0,575944473 | -0,17897855  | 0,125 | 0,086 | 1         | 0,883328185   | 1,13208207      | 1,453488372     |
| COQ7                                                                                          | 0,924392442 | -0,179028111 | 0,031 | 0,027 | 1         | 0,88329784    | 1,132120962     | 1,148148148     |
| DENND10                                                                                       | 0,06222129  | -0,179068764 | 0,156 | 0,059 | 1         | 0,88327295    | 1,132152864     | 2,644067797     |
| ZNF253                                                                                        | 0,730358576 | -0,179154895 | 0,031 | 0,043 | 1         | 0,883220219   | 1,132220457     | 0,720930233     |
| NAB1                                                                                          | 0,032927619 | -0,179196263 | 0,219 | 0,082 | 1         | 0,883194894   | 1,132252923     | 2,670731707     |
| GAS2                                                                                          | 0,313292814 | -0,179288137 | 0     | 0,031 | 1         | 0,883138652   | 1,132325029     | 0               |
| MATN1-AS1                                                                                     | 0,543117005 | -0,179362448 | 0     | 0,012 | 1         | 0,883093164   | 1,132383355     | 0               |
| NEK6                                                                                          | 0,106706178 | -0,179470356 | 0,156 | 0,066 | 1         | 0,883027115   | 1,132468056     | 2,363636364     |
| LDLRAD3                                                                                       | 0,38481627  | -0,179732882 | 0     | 0,023 | 1         | 0,882866446   | 1,132674149     | 0               |
| H6PD                                                                                          | 0,084415941 | -0,179882274 | 0,156 | 0,062 | 1         | 0,882775029   | 1,132791444     | 2,516129032     |
| OXA1L                                                                                         | 0,013247139 | -0,179884062 | 0,312 | 0,117 | 1         | 0,882773935   | 1,132792848     | 2,666666667     |
| IRF8                                                                                          | 0,730358576 | -0,179951615 | 0,031 | 0,043 | 1         | 0,882732601   | 1,132845891     | 0,720930233     |
| C5orf51                                                                                       | 0,887104347 | -0,179981649 | 0,031 | 0,035 | 1         | 0,882714224   | 1,132869475     | 0,885714286     |
| TUBB4A                                                                                        | 0,257548576 | -0,180063197 | 0     | 0,039 | 1         | 0,88266433    | 1,132933512     | 0               |
| CCNB1IP1                                                                                      | 0,228559925 | -0,180101555 | 0,281 | 0,16  | 1         | 0,882640863   | 1,132963634     | 1,75625         |
| IL17RA                                                                                        | 0,924392442 | -0,18031164  | 0,031 | 0,027 | 1         | 0,882512342   | 1,133128629     | 1,148148148     |
| ARSG                                                                                          | 0,428872689 | -0,180332304 | 0     | 0,02  | 1         | 0,882499702   | 1,133144859     | 0               |
| MYH10                                                                                         | 0,840130893 | -0,180341168 | 0,062 | 0,051 | 1         | 0,882494279   | 1,133151821     | 1,215686275     |
| RNF43                                                                                         | 0,38481627  | -0,180416621 | 0     | 0,023 | 1         | 0,882448126   | 1,133211087     | 0               |
| PYROXD1                                                                                       | 0,668126075 | -0,180459555 | 0,062 | 0,043 | 1         | 0,882421866   | 1,133244811     | 1,441860465     |
| CENPC                                                                                         | 0,317829628 | -0,180634029 | 0,25  | 0,152 | 1         | 0,882315155   | 1,13338187      | 1,644736842     |
| ASCC3                                                                                         | 0,093923791 | -0,180815673 | 0,25  | 0,121 | 1         | 0,882204073   | 1,133524578     | 2,066115702     |
| KRT6B                                                                                         | 0,487085433 | -0,180858113 | 0,062 | 0,035 | 1         | 0,882178122   | 1,133557923     | 1,771428571     |

Supplementary Table 1

| Differentially expressed genes_adjacent-skin-XL_ comparing SC-Keloid vs. (SC-Myel, SC-Nonmyel) |             |              |       |       |           |               |                 |                 |
|------------------------------------------------------------------------------------------------|-------------|--------------|-------|-------|-----------|---------------|-----------------|-----------------|
| gene                                                                                           | p_val       | avg_log2FC   | pct.1 | pct.2 | p_val_adj | Foldchange_UP | Foldchange_DOWN | Ratio_pct1_pct2 |
| U2AF1                                                                                          | 0,804543977 | -0,181099099 | 0,031 | 0,039 | 1         | 0,882030776   | 1,133747288     | 0,794871795     |
| ACAP3                                                                                          | 0,566708997 | -0,18137443  | 0,125 | 0,086 | 1         | 0,881862461   | 1,133963678     | 1,453488372     |
| FRAS1                                                                                          | 0,38481627  | -0,181404095 | 0     | 0,023 | 1         | 0,881844328   | 1,133986995     | 0               |
| PCMTD1                                                                                         | 0,043619105 | -0,181487115 | 0,375 | 0,176 | 1         | 0,881793584   | 1,134052252     | 2,130681818     |
| HEYL                                                                                           | 0,234088337 | -0,181492433 | 0     | 0,043 | 1         | 0,881790333   | 1,134056433     | 0               |
| FCGR2A                                                                                         | 0,283789128 | -0,181547638 | 0     | 0,035 | 1         | 0,881756593   | 1,134099828     | 0               |
| SLC10A3                                                                                        | 0,668126075 | -0,181801192 | 0,031 | 0,047 | 1         | 0,881601637   | 1,134299164     | 0,659574468     |
| KIAA0753                                                                                       | 0,887104347 | -0,181822686 | 0,031 | 0,035 | 1         | 0,881588503   | 1,134316063     | 0,885714286     |
| OPHN1                                                                                          | 0,135718813 | -0,181932279 | 0,156 | 0,07  | 1         | 0,881521536   | 1,134402234     | 2,228571429     |
| LRP1B                                                                                          | 0,887104347 | -0,181964025 | 0,031 | 0,035 | 1         | 0,881502139   | 1,134427197     | 0,885714286     |
| RETSAT                                                                                         | 0,668126075 | -0,182120841 | 0,062 | 0,043 | 1         | 0,881406328   | 1,134550512     | 1,441860465     |
| IDH3B                                                                                          | 0,051511579 | -0,182157346 | 0,281 | 0,121 | 1         | 0,881384026   | 1,13457922      | 2,32231405      |
| SYBU                                                                                           | 0,283789128 | -0,182200569 | 0     | 0,035 | 1         | 0,88135762    | 1,134613212     | 0               |
| ARHGAP17                                                                                       | 0,045356999 | -0,182232107 | 0,156 | 0,055 | 1         | 0,881338353   | 1,134638016     | 2,836363636     |
| RFFL                                                                                           | 0,234088337 | -0,182234267 | 0     | 0,043 | 1         | 0,881337033   | 1,134639714     | 0               |
| ARMCX2                                                                                         | 0,817344545 | -0,182249026 | 0,062 | 0,051 | 1         | 0,881328017   | 1,134651322     | 1,215686275     |
| ME3                                                                                            | 0,286287755 | -0,182372802 | 0,156 | 0,086 | 1         | 0,881252407   | 1,134748674     | 1,813953488     |
| DELE1                                                                                          | 0,702399386 | -0,182378487 | 0,094 | 0,07  | 1         | 0,881248935   | 1,134753145     | 1,342857143     |
| ARRDC1                                                                                         | 0,741950345 | -0,182382444 | 0,062 | 0,047 | 1         | 0,881246517   | 1,134756258     | 1,319148936     |
| TSPAN13                                                                                        | 0,548952158 | -0,182393063 | 0,031 | 0,055 | 1         | 0,881240031   | 1,13476461      | 0,563636364     |
| CYP19A1                                                                                        | 0,38481627  | -0,182415736 | 0     | 0,023 | 1         | 0,881226182   | 1,134782444     | 0               |
| SENP2                                                                                          | 0,552857355 | -0,18242172  | 0,031 | 0,055 | 1         | 0,881222527   | 1,13478715      | 0,563636364     |
| CMTR1                                                                                          | 0,24851603  | -0,182423664 | 0,094 | 0,043 | 1         | 0,881221339   | 1,134788679     | 2,186046512     |
| BLVRB                                                                                          | 0,000478633 | -0,18246427  | 0,562 | 0,191 | 1         | 0,881196537   | 1,13482062      | 2,942408377     |
| COL15A1                                                                                        | 0,225044228 | -0,182574184 | 0,5   | 0,301 | 1         | 0,881129404   | 1,134907081     | 1,661129568     |
| ZNF142                                                                                         | 0,346686972 | -0,182690968 | 0     | 0,027 | 1         | 0,881058081   | 1,134998954     | 0               |
| DUSP22                                                                                         | 0,584538006 | -0,182894638 | 0,094 | 0,062 | 1         | 0,880933707   | 1,135159197     | 1,516129032     |
| CDK19                                                                                          | 0,237112684 | -0,183038119 | 0,188 | 0,102 | 1         | 0,8808461     | 1,135272098     | 1,843137255     |
| CSGALNACT1                                                                                     | 0,234088337 | -0,183110684 | 0     | 0,043 | 1         | 0,880801796   | 1,135329201     | 0               |
| THAP5                                                                                          | 0,079734103 | -0,183171613 | 0,25  | 0,113 | 1         | 0,880764598   | 1,135377151     | 2,212389381     |

Supplementary Table 1

| Differentially expressed genes_adjacent-skin-XL_comparing SC-Keloid vs. (SC-Myel, SC-Nonmyel) |             |              |       |       |           |               |                 |                 |
|-----------------------------------------------------------------------------------------------|-------------|--------------|-------|-------|-----------|---------------|-----------------|-----------------|
| gene                                                                                          | p_val       | avg_log2FC   | pct.1 | pct.2 | p_val_adj | Foldchange_UP | Foldchange_DOWN | Ratio_pct1_pct2 |
| TP53RK                                                                                        | 0,002502521 | -0,183216639 | 0,25  | 0,07  | 1         | 0,88073711    | 1,135412586     | 3,571428571     |
| NCKAP5L                                                                                       | 0,920939129 | -0,183256754 | 0,062 | 0,055 | 1         | 0,880712621   | 1,135444157     | 1,127272727     |
| UNC13B                                                                                        | 0,804543977 | -0,18333224  | 0,031 | 0,039 | 1         | 0,880666541   | 1,135503568     | 0,794871795     |
| ZBED3                                                                                         | 0,887104347 | -0,183348337 | 0,031 | 0,035 | 1         | 0,880656715   | 1,135516238     | 0,885714286     |
| ADHFE1                                                                                        | 0,283789128 | -0,183463323 | 0     | 0,035 | 1         | 0,880586528   | 1,135606745     | 0               |
| LMCD1-AS1                                                                                     | 0,257548576 | -0,183490355 | 0     | 0,039 | 1         | 0,880570028   | 1,135628023     | 0               |
| SZT2                                                                                          | 0,804543977 | -0,183524629 | 0,031 | 0,039 | 1         | 0,880549108   | 1,135655003     | 0,794871795     |
| PHF3                                                                                          | 0,103229209 | -0,183841558 | 0,344 | 0,18  | 1         | 0,880355692   | 1,135904509     | 1,911111111     |
| NXT1                                                                                          | 0,166191736 | -0,183901172 | 0,25  | 0,133 | 1         | 0,880319316   | 1,135951447     | 1,879699248     |
| STARD10                                                                                       | 0,730358576 | -0,183902303 | 0,031 | 0,043 | 1         | 0,880318625   | 1,135952338     | 0,720930233     |
| EPM2AIP1                                                                                      | 0,102169822 | -0,183925213 | 0,219 | 0,102 | 1         | 0,880304646   | 1,135970377     | 2,147058824     |
| LINC00639                                                                                     | 0,38481627  | -0,183952938 | 0     | 0,023 | 1         | 0,880287729   | 1,135992207     | 0               |
| BICD1                                                                                         | 0,639978691 | -0,183976642 | 0,25  | 0,184 | 1         | 0,880273265   | 1,136010872     | 1,358695652     |
| SLC25A46                                                                                      | 0,505798338 | -0,184003317 | 0,094 | 0,059 | 1         | 0,880256989   | 1,136031877     | 1,593220339     |
| OARD1                                                                                         | 0,653016738 | -0,184090906 | 0,094 | 0,066 | 1         | 0,880203549   | 1,13610085      | 1,424242424     |
| HERC5                                                                                         | 0,730358576 | -0,18426141  | 0,031 | 0,043 | 1         | 0,880099529   | 1,136235127     | 0,720930233     |
| DNM2                                                                                          | 0,000588939 | -0,184340877 | 0,344 | 0,098 | 1         | 0,880051052   | 1,136297715     | 3,510204082     |
| MAPK14                                                                                        | 0,093753684 | -0,184345498 | 0,125 | 0,047 | 1         | 0,880048233   | 1,136301355     | 2,659574468     |
| DGCR2                                                                                         | 0,140813864 | -0,184368801 | 0,156 | 0,07  | 1         | 0,880034018   | 1,136319709     | 2,228571429     |
| HSPA4                                                                                         | 0,043081122 | -0,184496541 | 0,25  | 0,102 | 1         | 0,879956102   | 1,136420326     | 2,450980392     |
| ANO3                                                                                          | 0,313292814 | -0,184561658 | 0     | 0,031 | 1         | 0,879916385   | 1,13647162      | 0               |
| CACNA2D2                                                                                      | 0,887104347 | -0,184598696 | 0,031 | 0,035 | 1         | 0,879893796   | 1,136500797     | 0,885714286     |
| SNX18                                                                                         | 0,251411476 | -0,184625681 | 0,125 | 0,062 | 1         | 0,879877338   | 1,136522055     | 2,016129032     |
| TYK2                                                                                          | 0,020728744 | -0,184697717 | 0,25  | 0,094 | 1         | 0,879833405   | 1,136578805     | 2,659574468     |
| AC087239.1                                                                                    | 0,578217897 | -0,184815892 | 0,062 | 0,039 | 1         | 0,879761339   | 1,136671909     | 1,58974359      |
| DLG5                                                                                          | 0,021379617 | -0,184843843 | 0,156 | 0,047 | 1         | 0,879744294   | 1,136693931     | 3,319148936     |
| PIKFYVE                                                                                       | 0,660402423 | -0,184883975 | 0,094 | 0,066 | 1         | 0,879719822   | 1,136725551     | 1,424242424     |
| ZSCAN18                                                                                       | 0,504051677 | -0,18496647  | 0,188 | 0,129 | 1         | 0,87966952    | 1,136790552     | 1,457364341     |
| CHST15                                                                                        | 0,313292814 | -0,18498441  | 0     | 0,031 | 1         | 0,879658582   | 1,136804689     | 0               |
| RNF13                                                                                         | 0,027793664 | -0,184998682 | 0,594 | 0,27  | 1         | 0,879649879   | 1,136815935     | 2,2             |



Supplementary Table 1

| Differentially expressed genes_adjacent-skin-XL_comparing SC-Keloid vs. (SC-Myel, SC-Nonmyel) |             |              |       |       |           |               |                 |                 |
|-----------------------------------------------------------------------------------------------|-------------|--------------|-------|-------|-----------|---------------|-----------------|-----------------|
| gene                                                                                          | p_val       | avg_log2FC   | pct.1 | pct.2 | p_val_adj | Foldchange_UP | Foldchange_DOWN | Ratio_pct1_pct2 |
| PRKCI                                                                                         | 0,24262347  | -0,185029585 | 0,156 | 0,082 | 1         | 0,879631037   | 1,136840286     | 1,902439024     |
| EBLN2                                                                                         | 0,804543977 | -0,185058464 | 0,031 | 0,039 | 1         | 0,87961343    | 1,136863043     | 0,794871795     |
| G2E3                                                                                          | 0,445227443 | -0,185083032 | 0,094 | 0,055 | 1         | 0,879598451   | 1,136882402     | 1,709090909     |
| CCDC93                                                                                        | 0,840130893 | -0,185290802 | 0,062 | 0,051 | 1         | 0,879471784   | 1,137046143     | 1,215686275     |
| TWSG1                                                                                         | 0,003131851 | -0,185341192 | 0,344 | 0,113 | 1         | 0,879441067   | 1,137085858     | 3,044247788     |
| RABEP1                                                                                        | 0,017377488 | -0,185350686 | 0,281 | 0,105 | 1         | 0,87943528    | 1,137093341     | 2,676190476     |
| WNT2B                                                                                         | 0,38481627  | -0,185424917 | 0     | 0,023 | 1         | 0,879390031   | 1,137151849     | 0               |
| TOP2B                                                                                         | 0,075667481 | -0,18548136  | 0,312 | 0,152 | 1         | 0,879355627   | 1,137196339     | 2,052631579     |
| CNN3                                                                                          | 0,924341381 | -0,18549705  | 0,938 | 0,777 | 1         | 0,879346064   | 1,137208707     | 1,207207207     |
| TAX1BP1                                                                                       | 0,102973716 | -0,185501675 | 0,5   | 0,266 | 1         | 0,879343245   | 1,137212352     | 1,879699248     |
| PI4KB                                                                                         | 0,017422395 | -0,185722211 | 0,219 | 0,074 | 1         | 0,879208835   | 1,137386205     | 2,959459459     |
| IMP3                                                                                          | 0,059405355 | -0,185927776 | 0,281 | 0,129 | 1         | 0,879083568   | 1,137548279     | 2,178294574     |
| PRPF38A                                                                                       | 0,011905317 | -0,185954595 | 0,219 | 0,07  | 1         | 0,879067227   | 1,137569426     | 3,128571429     |
| CD40                                                                                          | 0,584537751 | -0,185977937 | 0,094 | 0,062 | 1         | 0,879053004   | 1,137587831     | 1,516129032     |
| CRBN                                                                                          | 0,041373501 | -0,186093554 | 0,344 | 0,152 | 1         | 0,87898256    | 1,137679        | 2,263157895     |
| TBC1D13                                                                                       | 0,098751938 | -0,186103499 | 0,094 | 0,031 | 1         | 0,878976501   | 1,137686843     | 3,032258065     |
| GPRASP1                                                                                       | 0,730358576 | -0,186190699 | 0,031 | 0,043 | 1         | 0,878923375   | 1,137755609     | 0,720930233     |
| ZNF627                                                                                        | 0,682170546 | -0,186195097 | 0,031 | 0,02  | 1         | 0,878920695   | 1,137759078     | 1,55            |
| DDB2                                                                                          | 0,012061903 | -0,186314788 | 0,219 | 0,07  | 1         | 0,878847781   | 1,137853474     | 3,128571429     |
| PNPLA8                                                                                        | 0,100519352 | -0,186381577 | 0,344 | 0,18  | 1         | 0,878807096   | 1,137906151     | 1,911111111     |
| TPD52                                                                                         | 0,194053346 | -0,186429171 | 0     | 0,051 | 1         | 0,878778105   | 1,137943691     | 0               |
| NPHP4                                                                                         | 0,887104347 | -0,186544812 | 0,031 | 0,035 | 1         | 0,878707667   | 1,138034909     | 0,885714286     |
| STX4                                                                                          | 0,163003711 | -0,186572611 | 0,219 | 0,113 | 1         | 0,878690736   | 1,138056838     | 1,938053097     |
| RBM48                                                                                         | 0,755689148 | -0,186665333 | 0,062 | 0,047 | 1         | 0,878634264   | 1,138129983     | 1,319148936     |
| CCDC142                                                                                       | 0,804543977 | -0,186768222 | 0,031 | 0,039 | 1         | 0,878571605   | 1,138211154     | 0,794871795     |
| SUMF1                                                                                         | 0,108846454 | -0,186793413 | 0,156 | 0,066 | 1         | 0,878556264   | 1,138231028     | 2,363636364     |
| ELOA                                                                                          | 0,993403306 | -0,186881565 | 0,062 | 0,059 | 1         | 0,878502584   | 1,138300579     | 1,050847458     |
| GPAM                                                                                          | 0,187685368 | -0,186902301 | 0,094 | 0,039 | 1         | 0,878489957   | 1,13831694      | 2,41025641      |
| HERC4                                                                                         | 0,222039877 | -0,186922761 | 0,219 | 0,121 | 1         | 0,878477499   | 1,138333084     | 1,809917355     |
| HCN1                                                                                          | 0,313292814 | -0,186929537 | 0     | 0,031 | 1         | 0,878473373   | 1,13833843      | 0               |

Supplementary Table 1

| Differentially expressed genes_adjacent-skin-XL_comparing SC-Keloid vs. (SC-Myel, SC-Nonmyel) |             |              |       |       |           |               |                 |                 |
|-----------------------------------------------------------------------------------------------|-------------|--------------|-------|-------|-----------|---------------|-----------------|-----------------|
| gene                                                                                          | p_val       | avg_log2FC   | pct.1 | pct.2 | p_val_adj | Foldchange_UP | Foldchange_DOWN | Ratio_pct1_pct2 |
| RIN2                                                                                          | 0,023464878 | -0,187224626 | 0,188 | 0,062 | 1         | 0,878293708   | 1,138571289     | 3,032258065     |
| RBAK                                                                                          | 0,313292814 | -0,187262659 | 0     | 0,031 | 1         | 0,878270554   | 1,138601306     | 0               |
| SCAI                                                                                          | 0,663576959 | -0,187288418 | 0,062 | 0,043 | 1         | 0,878254873   | 1,138621635     | 1,441860465     |
| ZNF12                                                                                         | 0,755689148 | -0,187311825 | 0,062 | 0,047 | 1         | 0,878240625   | 1,138640108     | 1,319148936     |
| SLC25A16                                                                                      | 0,310355006 | -0,187374773 | 0,094 | 0,047 | 1         | 0,878202305   | 1,138689791     | 2               |
| UQCC1                                                                                         | 0,578217897 | -0,187494602 | 0,062 | 0,039 | 1         | 0,878129366   | 1,138784374     | 1,58974359      |
| GNL1                                                                                          | 0,024125962 | -0,187522118 | 0,25  | 0,094 | 1         | 0,878112618   | 1,138806094     | 2,659574468     |
| HFE                                                                                           | 0,428872689 | -0,187593711 | 0     | 0,02  | 1         | 0,878069043   | 1,138862608     | 0               |
| PREP                                                                                          | 0,066791287 | -0,187606236 | 0,125 | 0,043 | 1         | 0,87806142    | 1,138872495     | 2,906976744     |
| GPR37L1                                                                                       | 0,234088337 | -0,187611493 | 0     | 0,043 | 1         | 0,87805822    | 1,138876645     | 0               |
| PTRH2                                                                                         | 0,435431286 | -0,187690274 | 0,094 | 0,055 | 1         | 0,878010274   | 1,138938837     | 1,709090909     |
| STAT5A                                                                                        | 0,663576959 | -0,18770521  | 0,031 | 0,047 | 1         | 0,878001184   | 1,138950629     | 0,659574468     |
| TRMT1L                                                                                        | 0,283789128 | -0,187845584 | 0     | 0,035 | 1         | 0,877915758   | 1,139061454     | 0               |
| SPEF2                                                                                         | 0,487085433 | -0,188028112 | 0,062 | 0,035 | 1         | 0,877804693   | 1,139205575     | 1,771428571     |
| MAEA                                                                                          | 0,086049964 | -0,188117401 | 0,219 | 0,098 | 1         | 0,877750367   | 1,139276083     | 2,234693878     |
| SDCBP                                                                                         | 0,007292486 | -0,18817866  | 0,594 | 0,246 | 1         | 0,877713097   | 1,13932446      | 2,414634146     |
| NEMP1                                                                                         | 0,979143607 | -0,188364326 | 0,031 | 0,031 | 1         | 0,877600148   | 1,139471094     | 1               |
| TMEM215                                                                                       | 0,346686972 | -0,188399944 | 0     | 0,027 | 1         | 0,877578482   | 1,139499225     | 0               |
| CAPN3                                                                                         | 0,283789128 | -0,188409356 | 0     | 0,035 | 1         | 0,877572756   | 1,139506659     | 0               |
| DUBR                                                                                          | 0,30793671  | -0,18846772  | 0,062 | 0,027 | 1         | 0,877537255   | 1,139552759     | 2,296296296     |
| ZNF275                                                                                        | 0,809794875 | -0,188501271 | 0,031 | 0,039 | 1         | 0,877516847   | 1,13957926      | 0,794871795     |
| SLC24A4                                                                                       | 0,346686972 | -0,188600215 | 0     | 0,027 | 1         | 0,877456667   | 1,139657418     | 0               |
| TBXA2R                                                                                        | 0,578217897 | -0,188712859 | 0,062 | 0,039 | 1         | 0,877388159   | 1,139746405     | 1,58974359      |
| AK9                                                                                           | 0,933712959 | -0,189016633 | 0,062 | 0,062 | 1         | 0,877203435   | 1,139986416     | 1               |
| ERMARD                                                                                        | 0,578217897 | -0,189054287 | 0,062 | 0,039 | 1         | 0,877180541   | 1,14001617      | 1,58974359      |
| CPED1                                                                                         | 0,257548576 | -0,189083263 | 0     | 0,039 | 1         | 0,877162923   | 1,140039067     | 0               |
| AL035681.1                                                                                    | 0,283789128 | -0,189085913 | 0     | 0,035 | 1         | 0,877161312   | 1,14004116      | 0               |
| CNNM4                                                                                         | 0,730358576 | -0,189125944 | 0,031 | 0,043 | 1         | 0,877136974   | 1,140072794     | 0,720930233     |
| CNTNAP3B                                                                                      | 0,38481627  | -0,189171712 | 0     | 0,023 | 1         | 0,877109148   | 1,140108962     | 0               |
| PTGFRN                                                                                        | 0,313292814 | -0,189181487 | 0     | 0,031 | 1         | 0,877103205   | 1,140116687     | 0               |

Supplementary Table 1

| Differentially expressed genes_adjacent-skin-XL_comparing SC-Keloid vs. (SC-Myel, SC-Nonmyel) |             |              |       |       |           |               |                 |                 |
|-----------------------------------------------------------------------------------------------|-------------|--------------|-------|-------|-----------|---------------|-----------------|-----------------|
| gene                                                                                          | p_val       | avg_log2FC   | pct.1 | pct.2 | p_val_adj | Foldchange_UP | Foldchange_DOWN | Ratio_pct1_pct2 |
| SLC35E1                                                                                       | 0,108846454 | -0,189197994 | 0,156 | 0,066 | 1         | 0,877093169   | 1,140129732     | 2,363636364     |
| FBXO17                                                                                        | 0,05263413  | -0,189202744 | 0,25  | 0,105 | 1         | 0,877090281   | 1,140133486     | 2,380952381     |
| DEK                                                                                           | 0,103213032 | -0,189233539 | 0,656 | 0,363 | 1         | 0,87707156    | 1,140157823     | 1,807162534     |
| PTPN1                                                                                         | 0,046647979 | -0,189277258 | 0,25  | 0,105 | 1         | 0,877044981   | 1,140192375     | 2,380952381     |
| SCYL2                                                                                         | 0,112120373 | -0,189338224 | 0,156 | 0,066 | 1         | 0,87700792    | 1,140240558     | 2,363636364     |
| NHS                                                                                           | 0,428872689 | -0,189413633 | 0     | 0,02  | 1         | 0,87696208    | 1,14030016      | 0               |
| COQ10A                                                                                        | 0,396289917 | -0,189443508 | 0,062 | 0,031 | 1         | 0,87694392    | 1,140323773     | 2               |
| LTV1                                                                                          | 0,082633113 | -0,189443645 | 0,156 | 0,062 | 1         | 0,876943837   | 1,140323882     | 2,516129032     |
| MARCHF8                                                                                       | 0,257548576 | -0,189478207 | 0     | 0,039 | 1         | 0,876922829   | 1,1403512       | 0               |
| ZNF106                                                                                        | 0,829394279 | -0,189580928 | 0,312 | 0,25  | 1         | 0,876860394   | 1,140432396     | 1,248           |
| SECISBP2                                                                                      | 0,072066314 | -0,189608136 | 0,25  | 0,113 | 1         | 0,876843857   | 1,140453905     | 2,212389381     |
| EFNB2                                                                                         | 0,603353082 | -0,189610886 | 0,031 | 0,051 | 1         | 0,876842186   | 1,140456078     | 0,607843137     |
| LRRTM4                                                                                        | 0,234088337 | -0,189666118 | 0     | 0,043 | 1         | 0,876808617   | 1,14049974      | 0               |
| ARHGAP35                                                                                      | 0,012941817 | -0,189727331 | 0,281 | 0,102 | 1         | 0,876771415   | 1,140548132     | 2,754901961     |
| PAQR8                                                                                         | 0,084415941 | -0,189750277 | 0,156 | 0,062 | 1         | 0,87675747    | 1,140566273     | 2,516129032     |
| PRDM8                                                                                         | 0,313292814 | -0,189977756 | 0     | 0,031 | 1         | 0,876619238   | 1,140746127     | 0               |
| CYP2J2                                                                                        | 0,313292814 | -0,190029124 | 0     | 0,031 | 1         | 0,876588025   | 1,140786745     | 0               |
| TRIM11                                                                                        | 0,804543977 | -0,190066343 | 0,031 | 0,039 | 1         | 0,876565411   | 1,140816175     | 0,794871795     |
| CNOT10                                                                                        | 0,009808643 | -0,19012574  | 0,188 | 0,055 | 1         | 0,876529323   | 1,140863145     | 3,418181818     |
| SNX19                                                                                         | 0,24851603  | -0,190188739 | 0,094 | 0,043 | 1         | 0,876491048   | 1,140912965     | 2,186046512     |
| LIME1                                                                                         | 0,924392442 | -0,190236081 | 0,031 | 0,027 | 1         | 0,876462286   | 1,140950404     | 1,148148148     |
| ULK2                                                                                          | 0,093753684 | -0,190247623 | 0,125 | 0,047 | 1         | 0,876455274   | 1,140959533     | 2,659574468     |
| GRK3                                                                                          | 0,283789128 | -0,190267332 | 0     | 0,035 | 1         | 0,876443301   | 1,140975119     | 0               |
| MSANTD3                                                                                       | 0,001998184 | -0,190336661 | 0,406 | 0,137 | 1         | 0,876401184   | 1,141029951     | 2,96350365      |
| NEIL1                                                                                         | 0,603353082 | -0,190364619 | 0,031 | 0,051 | 1         | 0,876384201   | 1,141052063     | 0,607843137     |
| SPTBN5                                                                                        | 0,668126075 | -0,190462026 | 0,031 | 0,047 | 1         | 0,876325031   | 1,141129107     | 0,659574468     |
| YES1                                                                                          | 0,126128812 | -0,190571512 | 0,125 | 0,051 | 1         | 0,87625853    | 1,14121571      | 2,450980392     |
| SYNPO                                                                                         | 0,037601582 | -0,190708477 | 0,25  | 0,102 | 1         | 0,876175345   | 1,141324058     | 2,450980392     |
| RBM22                                                                                         | 0,017193636 | -0,191216885 | 0,281 | 0,105 | 1         | 0,875866634   | 1,141726333     | 2,676190476     |
| ZNF701                                                                                        | 0,924392442 | -0,191295976 | 0,031 | 0,027 | 1         | 0,875818618   | 1,141788927     | 1,148148148     |

Supplementary Table 1

| Differentially expressed genes_adjacent-skin-XL_comparing SC-Keloid vs. (SC-Myel, SC-Nonmyel) |             |              |       |       |           |               |                 |                 |
|-----------------------------------------------------------------------------------------------|-------------|--------------|-------|-------|-----------|---------------|-----------------|-----------------|
| gene                                                                                          | p_val       | avg_log2FC   | pct.1 | pct.2 | p_val_adj | Foldchange_UP | Foldchange_DOWN | Ratio_pct1_pct2 |
| SYT10                                                                                         | 0,603353082 | -0,1913098   | 0,031 | 0,051 | 1         | 0,875810226   | 1,141799868     | 0,607843137     |
| WEE1                                                                                          | 0,901760626 | -0,191330632 | 0,125 | 0,125 | 1         | 0,87579758    | 1,141816355     | 1               |
| CEP170                                                                                        | 0,008124757 | -0,191335708 | 0,438 | 0,18  | 1         | 0,875794498   | 1,141820372     | 2,433333333     |
| DDX56                                                                                         | 0,015958056 | -0,191372125 | 0,188 | 0,059 | 1         | 0,875772392   | 1,141849195     | 3,186440678     |
| USP6NL                                                                                        | 0,147069022 | -0,191384602 | 0,219 | 0,109 | 1         | 0,875764818   | 1,14185907      | 2,009174312     |
| CNTN4                                                                                         | 0,804543977 | -0,191438613 | 0,031 | 0,039 | 1         | 0,875732032   | 1,141901819     | 0,794871795     |
| CLCN6                                                                                         | 0,920939129 | -0,19150916  | 0,062 | 0,055 | 1         | 0,87568921    | 1,141957659     | 1,127272727     |
| PARD3                                                                                         | 0,346694817 | -0,191601472 | 0,125 | 0,07  | 1         | 0,87563318    | 1,14203073      | 1,785714286     |
| RUFY3                                                                                         | 0,099952249 | -0,191625953 | 0,188 | 0,082 | 1         | 0,875618321   | 1,14205011      | 2,292682927     |
| TBK1                                                                                          | 0,536449576 | -0,191693451 | 0,031 | 0,059 | 1         | 0,875577356   | 1,142103543     | 0,525423729     |
| JAK1                                                                                          | 0,278206222 | -0,191905037 | 0,281 | 0,172 | 1         | 0,875448953   | 1,142271056     | 1,63372093      |
| ICE2                                                                                          | 0,754388196 | -0,191917446 | 0,094 | 0,074 | 1         | 0,875441423   | 1,142280881     | 1,27027027      |
| HS1BP3                                                                                        | 0,033260329 | -0,192147391 | 0,188 | 0,066 | 1         | 0,875301901   | 1,142462959     | 2,848484848     |
| ABCA5                                                                                         | 0,668126075 | -0,19216295  | 0,062 | 0,043 | 1         | 0,875292461   | 1,142475281     | 1,441860465     |
| ZBTB49                                                                                        | 0,150155729 | -0,192281512 | 0,062 | 0,02  | 1         | 0,875220532   | 1,142569174     | 3,1             |
| LRBA                                                                                          | 0,107772109 | -0,192372125 | 0,156 | 0,066 | 1         | 0,875165562   | 1,142640939     | 2,363636364     |
| USP15                                                                                         | 0,383262858 | -0,19249852  | 0,188 | 0,117 | 1         | 0,875088892   | 1,14274105      | 1,606837607     |
| SREK1IP1                                                                                      | 0,000334896 | -0,192539575 | 0,375 | 0,105 | 1         | 0,87506399    | 1,14277357      | 3,571428571     |
| VPS35L                                                                                        | 0,045196862 | -0,192546629 | 0,125 | 0,039 | 1         | 0,875059712   | 1,142779158     | 3,205128205     |
| SREBF2                                                                                        | 0,175145722 | -0,192559372 | 0,219 | 0,113 | 1         | 0,875051983   | 1,142789251     | 1,938053097     |
| BLOC1S5                                                                                       | 0,313292814 | -0,192805563 | 0     | 0,031 | 1         | 0,87490267    | 1,142984281     | 0               |
| ZSCAN30                                                                                       | 0,663576959 | -0,192957045 | 0,062 | 0,043 | 1         | 0,874810812   | 1,1431043       | 1,441860465     |
| QTRT2                                                                                         | 0,887104347 | -0,193053754 | 0,031 | 0,035 | 1         | 0,874752171   | 1,143180929     | 0,885714286     |
| DAPK3                                                                                         | 0,551476222 | -0,193079234 | 0,125 | 0,086 | 1         | 0,874736722   | 1,143201119     | 1,453488372     |
| HS6ST1                                                                                        | 0,840130759 | -0,193230142 | 0,062 | 0,051 | 1         | 0,874645228   | 1,143320706     | 1,215686275     |
| VPS35                                                                                         | 0,017012333 | -0,193562198 | 0,344 | 0,137 | 1         | 0,87444394    | 1,143583888     | 2,510948905     |
| SPP1                                                                                          | 0,682170546 | -0,193569131 | 0,031 | 0,02  | 1         | 0,874439738   | 1,143589383     | 1,55            |
| IKZF4                                                                                         | 0,346686972 | -0,193580551 | 0     | 0,027 | 1         | 0,874432816   | 1,143598436     | 0               |
| FAM199X                                                                                       | 0,288304724 | -0,193608904 | 0,156 | 0,086 | 1         | 0,874415631   | 1,14362091      | 1,813953488     |
| KBTBD6                                                                                        | 0,746521062 | -0,193734205 | 0,062 | 0,047 | 1         | 0,87433969    | 1,143720241     | 1,319148936     |

Supplementary Table 1

| Differentially expressed genes_adjacent-skin-XL_comparing SC-Keloid vs. (SC-Myel, SC-Nonmyel) |             |              |       |       |           |               |                 |                 |
|-----------------------------------------------------------------------------------------------|-------------|--------------|-------|-------|-----------|---------------|-----------------|-----------------|
| gene                                                                                          | p_val       | avg_log2FC   | pct.1 | pct.2 | p_val_adj | Foldchange_UP | Foldchange_DOWN | Ratio_pct1_pct2 |
| AC144831.1                                                                                    | 0,428872689 | -0,193784897 | 0     | 0,02  | 1         | 0,874308969   | 1,143760428     | 0               |
| HDAC10                                                                                        | 0,310355006 | -0,193847023 | 0,094 | 0,047 | 1         | 0,874271319   | 1,143809683     | 2               |
| ERO1B                                                                                         | 0,109929252 | -0,193883366 | 0,156 | 0,066 | 1         | 0,874249296   | 1,143838496     | 2,363636364     |
| METTL14                                                                                       | 0,730358576 | -0,1938957   | 0,031 | 0,043 | 1         | 0,874241822   | 1,143848275     | 0,720930233     |
| CLIP2                                                                                         | 0,788035309 | -0,193930005 | 0,094 | 0,074 | 1         | 0,874221034   | 1,143875475     | 1,27027027      |
| ZCCHC3                                                                                        | 0,093753684 | -0,193944235 | 0,125 | 0,047 | 1         | 0,874212411   | 1,143886758     | 2,659574468     |
| MFSD14C                                                                                       | 0,057671435 | -0,194005136 | 0,219 | 0,09  | 1         | 0,874175508   | 1,143935046     | 2,433333333     |
| CHD8                                                                                          | 0,000845623 | -0,194127509 | 0,281 | 0,074 | 1         | 0,874101362   | 1,144032081     | 3,797297297     |
| HLTF                                                                                          | 0,024411938 | -0,194190901 | 0,219 | 0,078 | 1         | 0,874062955   | 1,144082351     | 2,807692308     |
| MEGF10                                                                                        | 0,346686972 | -0,194192775 | 0     | 0,027 | 1         | 0,874061819   | 1,144083837     | 0               |
| ST3GAL6-AS1                                                                                   | 0,99780108  | -0,194195844 | 0,062 | 0,059 | 1         | 0,87405996    | 1,144086271     | 1,050847458     |
| PTP4A2                                                                                        | 0,12899053  | -0,194221637 | 0,531 | 0,293 | 1         | 0,874044333   | 1,144106725     | 1,812286689     |
| HSD17B7                                                                                       | 0,730358576 | -0,194455458 | 0,031 | 0,043 | 1         | 0,873902686   | 1,144292169     | 0,720930233     |
| KCNA2                                                                                         | 0,741950345 | -0,194523924 | 0,062 | 0,047 | 1         | 0,873861214   | 1,144346475     | 1,319148936     |
| PTPN2                                                                                         | 0,830197375 | -0,194548277 | 0,125 | 0,102 | 1         | 0,873846464   | 1,144365791     | 1,225490196     |
| LRATD2                                                                                        | 0,313292814 | -0,194622135 | 0     | 0,031 | 1         | 0,873801728   | 1,144424379     | 0               |
| UTP6                                                                                          | 0,003327396 | -0,194623398 | 0,281 | 0,086 | 1         | 0,873800964   | 1,14442538      | 3,26744186      |
| BMP2                                                                                          | 0,376291412 | -0,194633393 | 0,094 | 0,051 | 1         | 0,87379491    | 1,144433309     | 1,843137255     |
| ZNF143                                                                                        | 0,532167601 | -0,194687427 | 0,125 | 0,082 | 1         | 0,873762184   | 1,144476172     | 1,524390244     |
| RIC8B                                                                                         | 0,499735776 | -0,194758869 | 0,031 | 0,059 | 1         | 0,873718917   | 1,144532848     | 0,525423729     |
| SNX15                                                                                         | 0,006461838 | -0,194773744 | 0,188 | 0,051 | 1         | 0,873709908   | 1,144544649     | 3,68627451      |
| KIAA0586                                                                                      | 0,441948175 | -0,194774889 | 0,094 | 0,055 | 1         | 0,873709214   | 1,144545558     | 1,709090909     |
| TRMT10C                                                                                       | 0,140813864 | -0,194986829 | 0,156 | 0,07  | 1         | 0,873580871   | 1,14471371      | 2,228571429     |
| ZC3H7A                                                                                        | 0,064653778 | -0,195073296 | 0,25  | 0,109 | 1         | 0,873528515   | 1,14478232      | 2,293577982     |
| HAT1                                                                                          | 0,006622186 | -0,195157886 | 0,469 | 0,184 | 1         | 0,873477299   | 1,144849444     | 2,548913043     |
| ADAMTS10                                                                                      | 0,346686972 | -0,19537241  | 0     | 0,027 | 1         | 0,873347425   | 1,145019692     | 0               |
| ADO                                                                                           | 0,663576959 | -0,195563109 | 0,031 | 0,047 | 1         | 0,873231992   | 1,145171053     | 0,659574468     |
| EIF2B4                                                                                        | 0,032569978 | -0,195621339 | 0,219 | 0,082 | 1         | 0,873196747   | 1,145217276     | 2,670731707     |
| ENTPD1                                                                                        | 0,283789128 | -0,195837819 | 0     | 0,035 | 1         | 0,873065732   | 1,145389131     | 0               |
| LRP6                                                                                          | 0,012798323 | -0,196085038 | 0,281 | 0,102 | 1         | 0,872916137   | 1,145585421     | 2,754901961     |

Supplementary Table 1

| Differentially expressed genes_adjacent-skin-XL_comparing SC-Keloid vs. (SC-Myel, SC-Nonmyel) |             |              |       |       |           |               |                 |                 |
|-----------------------------------------------------------------------------------------------|-------------|--------------|-------|-------|-----------|---------------|-----------------|-----------------|
| gene                                                                                          | p_val       | avg_log2FC   | pct.1 | pct.2 | p_val_adj | Foldchange_UP | Foldchange_DOWN | Ratio_pct1_pct2 |
| AP1B1                                                                                         | 0,902949137 | -0,196262801 | 0,062 | 0,055 | 1         | 0,872808586   | 1,145726584     | 1,127272727     |
| HAUS5                                                                                         | 0,38481627  | -0,196318891 | 0     | 0,023 | 1         | 0,872774653   | 1,145771129     | 0               |
| CACTIN                                                                                        | 0,24851603  | -0,196364143 | 0,094 | 0,043 | 1         | 0,872747278   | 1,145807068     | 2,186046512     |
| HMCES                                                                                         | 0,887104347 | -0,196382928 | 0,031 | 0,035 | 1         | 0,872735914   | 1,145821988     | 0,885714286     |
| FAM200B                                                                                       | 0,109275924 | -0,19639625  | 0,312 | 0,156 | 1         | 0,872727855   | 1,145832569     | 2               |
| RDH14                                                                                         | 0,097803604 | -0,196414932 | 0,25  | 0,117 | 1         | 0,872716554   | 1,145847407     | 2,136752137     |
| EIF4E3                                                                                        | 0,603353082 | -0,196519826 | 0,031 | 0,051 | 1         | 0,872653104   | 1,145930721     | 0,607843137     |
| APOA1                                                                                         | 0,283789128 | -0,196537351 | 0     | 0,035 | 1         | 0,872642503   | 1,145944641     | 0               |
| KIAA1522                                                                                      | 0,804543977 | -0,196733958 | 0,031 | 0,039 | 1         | 0,87252359    | 1,146100818     | 0,794871795     |
| RNF5                                                                                          | 0,21844902  | -0,197110371 | 0,344 | 0,195 | 1         | 0,87229597    | 1,146399886     | 1,764102564     |
| HLA-DPB1                                                                                      | 0,130767324 | -0,197195092 | 0,156 | 0,07  | 1         | 0,872244746   | 1,146467209     | 2,228571429     |
| SCAF8                                                                                         | 0,963619739 | -0,19731346  | 0,062 | 0,062 | 1         | 0,872173185   | 1,146561276     | 1               |
| CHML                                                                                          | 0,38731203  | -0,197348138 | 0,125 | 0,074 | 1         | 0,872152221   | 1,146588836     | 1,689189189     |
| CHMP4B                                                                                        | 0,116434951 | -0,197498637 | 0,438 | 0,234 | 1         | 0,872061244   | 1,146708453     | 1,871794872     |
| TNS4                                                                                          | 0,38481627  | -0,197511537 | 0     | 0,023 | 1         | 0,872053447   | 1,146718706     | 0               |
| NUP160                                                                                        | 0,632215601 | -0,197570113 | 0,125 | 0,09  | 1         | 0,872018041   | 1,146765266     | 1,388888889     |
| ACY1                                                                                          | 0,989005733 | -0,197859198 | 0,062 | 0,059 | 1         | 0,871843324   | 1,146995076     | 1,050847458     |
| DDHD1                                                                                         | 0,274387967 | -0,197949585 | 0,156 | 0,086 | 1         | 0,871788704   | 1,147066939     | 1,813953488     |
| NOXA1                                                                                         | 0,887104347 | -0,197996393 | 0,031 | 0,035 | 1         | 0,871760419   | 1,147104156     | 0,885714286     |
| CEP120                                                                                        | 0,924392442 | -0,198114662 | 0,031 | 0,027 | 1         | 0,871688957   | 1,147198197     | 1,148148148     |
| TMEM129                                                                                       | 0,18309726  | -0,198175558 | 0,188 | 0,094 | 1         | 0,871652164   | 1,147246621     | 2               |
| DSC3                                                                                          | 0,313292814 | -0,198183182 | 0     | 0,031 | 1         | 0,871647558   | 1,147252684     | 0               |
| CAPN15                                                                                        | 0,213026321 | -0,198218824 | 0     | 0,047 | 1         | 0,871626024   | 1,147281028     | 0               |
| PHLPP1                                                                                        | 0,730358576 | -0,198350957 | 0,031 | 0,043 | 1         | 0,871546197   | 1,147386109     | 0,720930233     |
| PFKFB2                                                                                        | 0,887104347 | -0,198427426 | 0,031 | 0,035 | 1         | 0,871500003   | 1,147446927     | 0,885714286     |
| CAPN7                                                                                         | 0,204730373 | -0,198479125 | 0,219 | 0,117 | 1         | 0,871468773   | 1,147488046     | 1,871794872     |
| MAU2                                                                                          | 0,438682776 | -0,198597335 | 0,094 | 0,055 | 1         | 0,871397371   | 1,147582072     | 1,709090909     |
| ZFR                                                                                           | 0,002789771 | -0,198607534 | 0,594 | 0,227 | 1         | 0,871391211   | 1,147590184     | 2,616740088     |
| CACNB1                                                                                        | 0,887104347 | -0,198712576 | 0,031 | 0,035 | 1         | 0,871327767   | 1,147673743     | 0,885714286     |
| SFT2D1                                                                                        | 0,248412105 | -0,198877291 | 0,438 | 0,262 | 1         | 0,871228292   | 1,147804782     | 1,671755725     |

Supplementary Table 1

| Differentially expressed genes_adjacent-skin-XL_comparing SC-Keloid vs. (SC-Myel, SC-Nonmyel) |             |              |       |       |           |               |                 |                 |
|-----------------------------------------------------------------------------------------------|-------------|--------------|-------|-------|-----------|---------------|-----------------|-----------------|
| gene                                                                                          | p_val       | avg_log2FC   | pct.1 | pct.2 | p_val_adj | Foldchange_UP | Foldchange_DOWN | Ratio_pct1_pct2 |
| TRIM24                                                                                        | 0,709822531 | -0,198996706 | 0,094 | 0,07  | 1         | 0,871156181   | 1,147899793     | 1,342857143     |
| ZNF17                                                                                         | 0,313292814 | -0,198998704 | 0     | 0,031 | 1         | 0,871154975   | 1,147901382     | 0               |
| METTL2B                                                                                       | 0,505798338 | -0,199107221 | 0,094 | 0,059 | 1         | 0,871089451   | 1,147987729     | 1,593220339     |
| NUP107                                                                                        | 0,022581316 | -0,199169317 | 0,188 | 0,062 | 1         | 0,871051958   | 1,148037142     | 3,032258065     |
| ATXN2                                                                                         | 0,055924511 | -0,199206574 | 0,312 | 0,141 | 1         | 0,871029464   | 1,148066789     | 2,212765957     |
| LNPEP                                                                                         | 0,054236211 | -0,199218728 | 0,281 | 0,125 | 1         | 0,871022126   | 1,148076461     | 2,248           |
| TRIOBP                                                                                        | 0,021783242 | -0,199278147 | 0,312 | 0,125 | 1         | 0,870986252   | 1,148123747     | 2,496           |
| MTF2                                                                                          | 0,079268503 | -0,199298826 | 0,188 | 0,078 | 1         | 0,870973768   | 1,148140204     | 2,41025641      |
| ZNF33A                                                                                        | 0,299332476 | -0,199328182 | 0,094 | 0,047 | 1         | 0,870956046   | 1,148163567     | 2               |
| NCLN                                                                                          | 0,010253031 | -0,199331143 | 0,188 | 0,055 | 1         | 0,870954259   | 1,148165923     | 3,418181818     |
| RENBP                                                                                         | 0,735253332 | -0,199360869 | 0,031 | 0,043 | 1         | 0,870936313   | 1,148189581     | 0,720930233     |
| CDRT4                                                                                         | 0,38481627  | -0,199389403 | 0     | 0,023 | 1         | 0,870919087   | 1,14821229      | 0               |
| IDUA                                                                                          | 0,730358576 | -0,199437586 | 0,031 | 0,043 | 1         | 0,870890001   | 1,148250638     | 0,720930233     |
| LONP2                                                                                         | 0,163022941 | -0,199471884 | 0,188 | 0,094 | 1         | 0,870869297   | 1,148277937     | 2               |
| DMAC2L                                                                                        | 0,022218422 | -0,199553243 | 0,281 | 0,109 | 1         | 0,870820187   | 1,148342694     | 2,577981651     |
| ATP6AP1L                                                                                      | 0,480650464 | -0,199563183 | 0     | 0,016 | 1         | 0,870814187   | 1,148350607     | 0               |
| ANGPTL4                                                                                       | 0,796888971 | -0,199586383 | 0,094 | 0,109 | 1         | 0,870800184   | 1,148369073     | 0,862385321     |
| CHPT1                                                                                         | 0,210631511 | -0,199587814 | 0,281 | 0,16  | 1         | 0,87079932    | 1,148370213     | 1,75625         |
| UBE3A                                                                                         | 0,0160657   | -0,19970405  | 0,375 | 0,152 | 1         | 0,870729164   | 1,148462738     | 2,467105263     |
| MAP2K1                                                                                        | 0,302364288 | -0,199715821 | 0,125 | 0,066 | 1         | 0,870722059   | 1,148472109     | 1,893939394     |
| PORCN                                                                                         | 0,979143607 | -0,199717413 | 0,031 | 0,031 | 1         | 0,870721099   | 1,148473376     | 1               |
| CTBP1                                                                                         | 0,007912882 | -0,199756861 | 0,469 | 0,184 | 1         | 0,870697291   | 1,14850478      | 2,548913043     |
| SELENOI                                                                                       | 0,085310408 | -0,199843106 | 0,25  | 0,117 | 1         | 0,870645241   | 1,148573441     | 2,136752137     |
| KLHL28                                                                                        | 0,512685017 | -0,199909846 | 0,094 | 0,059 | 1         | 0,870604966   | 1,148626575     | 1,593220339     |
| COASY                                                                                         | 0,085318957 | -0,200051442 | 0,156 | 0,062 | 1         | 0,870519523   | 1,148739315     | 2,516129032     |
| IL13RA1                                                                                       | 0,441948175 | -0,200084297 | 0,094 | 0,055 | 1         | 0,870499699   | 1,148765475     | 1,709090909     |
| ENTPD3-AS1                                                                                    | 0,445227443 | -0,20018271  | 0,094 | 0,055 | 1         | 0,870440319   | 1,148843841     | 1,709090909     |
| KRTDAP                                                                                        | 0,755688935 | -0,200253121 | 0,062 | 0,047 | 1         | 0,870397839   | 1,148899912     | 1,319148936     |
| SUDS3                                                                                         | 0,013247171 | -0,200390293 | 0,312 | 0,117 | 1         | 0,870315085   | 1,149009155     | 2,666666667     |
| ACVR2B                                                                                        | 0,755689148 | -0,200557436 | 0,062 | 0,047 | 1         | 0,870214261   | 1,149142281     | 1,319148936     |

Supplementary Table 1

| Differentially expressed genes_adjacent-skin-XL_comparing SC-Keloid vs. (SC-Myel, SC-Nonmyel) |             |              |       |       |           |               |                 |                 |
|-----------------------------------------------------------------------------------------------|-------------|--------------|-------|-------|-----------|---------------|-----------------|-----------------|
| gene                                                                                          | p_val       | avg_log2FC   | pct.1 | pct.2 | p_val_adj | Foldchange_UP | Foldchange_DOWN | Ratio_pct1_pct2 |
| KANK1                                                                                         | 0,821890137 | -0,200588521 | 0,062 | 0,051 | 1         | 0,870195511   | 1,149167041     | 1,215686275     |
| PXN                                                                                           | 0,048878828 | -0,200597808 | 0,25  | 0,105 | 1         | 0,870189909   | 1,149174439     | 2,380952381     |
| MIER3                                                                                         | 0,730358576 | -0,200779329 | 0,031 | 0,043 | 1         | 0,870080428   | 1,149319038     | 0,720930233     |
| CRIP1                                                                                         | 0,048249119 | -0,200834825 | 0,312 | 0,141 | 1         | 0,870046959   | 1,149363249     | 2,212765957     |
| SP1                                                                                           | 0,165863407 | -0,200972039 | 0,156 | 0,074 | 1         | 0,869964213   | 1,14947257      | 2,108108108     |
| TMEM41B                                                                                       | 0,296467269 | -0,201029125 | 0,156 | 0,086 | 1         | 0,86992979    | 1,149518054     | 1,813953488     |
| MIB2                                                                                          | 0,162153727 | -0,201163185 | 0,125 | 0,055 | 1         | 0,869848958   | 1,149624876     | 2,272727273     |
| TTF2                                                                                          | 0,063925678 | -0,201193339 | 0,094 | 0,027 | 1         | 0,869830777   | 1,149648905     | 3,481481481     |
| CDK11A                                                                                        | 0,176138873 | -0,201291977 | 0,156 | 0,074 | 1         | 0,869771308   | 1,14972751      | 2,108108108     |
| FBLN1                                                                                         | 0,165863407 | -0,201582561 | 0,156 | 0,074 | 1         | 0,869596138   | 1,149959108     | 2,108108108     |
| RB1                                                                                           | 0,000761729 | -0,201601172 | 0,375 | 0,113 | 1         | 0,869584921   | 1,149973943     | 3,318584071     |
| ENPP4                                                                                         | 0,487085433 | -0,201754191 | 0,062 | 0,035 | 1         | 0,869492693   | 1,150095921     | 1,771428571     |
| SNORC                                                                                         | 0,38481627  | -0,201779972 | 0     | 0,023 | 1         | 0,869477155   | 1,150116474     | 0               |
| OSMR-DT                                                                                       | 0,234088337 | -0,201835314 | 0     | 0,043 | 1         | 0,869443803   | 1,150160593     | 0               |
| DNAJB2                                                                                        | 0,021766407 | -0,202278155 | 0,562 | 0,25  | 1         | 0,869176965   | 1,150513693     | 2,248           |
| NELFA                                                                                         | 0,021379715 | -0,202363521 | 0,156 | 0,047 | 1         | 0,869125536   | 1,150581773     | 3,319148936     |
| MZF1                                                                                          | 0,445227443 | -0,202391518 | 0,094 | 0,055 | 1         | 0,86910867    | 1,150604101     | 1,709090909     |
| BORCS7                                                                                        | 0,171556582 | -0,202417697 | 0,312 | 0,172 | 1         | 0,869092899   | 1,15062498      | 1,813953488     |
| MAN2B1                                                                                        | 0,020727365 | -0,20249627  | 0,219 | 0,078 | 1         | 0,869045567   | 1,150687648     | 2,807692308     |
| TIMM44                                                                                        | 0,010665855 | -0,202541698 | 0,344 | 0,129 | 1         | 0,869018203   | 1,150723882     | 2,666666667     |
| BRD1                                                                                          | 0,003804594 | -0,202611239 | 0,312 | 0,102 | 1         | 0,868976316   | 1,15077935      | 3,058823529     |
| BCR                                                                                           | 0,376291412 | -0,202652087 | 0,094 | 0,051 | 1         | 0,868951712   | 1,150811934     | 1,843137255     |
| ARRDC4                                                                                        | 0,965065266 | -0,20266582  | 0,094 | 0,086 | 1         | 0,868943441   | 1,150822888     | 1,093023256     |
| KNTC1                                                                                         | 0,396289917 | -0,202695218 | 0,062 | 0,031 | 1         | 0,868925734   | 1,150846339     | 2               |
| LIFR                                                                                          | 0,804543977 | -0,202853636 | 0,031 | 0,039 | 1         | 0,868830325   | 1,150972717     | 0,794871795     |
| MTR                                                                                           | 0,109465145 | -0,202868617 | 0,344 | 0,184 | 1         | 0,868821303   | 1,150984669     | 1,869565217     |
| TCF25                                                                                         | 0,138316184 | -0,202919656 | 0,656 | 0,371 | 1         | 0,868790567   | 1,151025388     | 1,76819407      |
| OXR1                                                                                          | 0,023564102 | -0,202984566 | 0,312 | 0,129 | 1         | 0,868751479   | 1,151077177     | 2,418604651     |
| ALDH16A1                                                                                      | 0,663576959 | -0,202986556 | 0,031 | 0,047 | 1         | 0,868750281   | 1,151078765     | 0,659574468     |
| IL17D                                                                                         | 0,234088337 | -0,203031345 | 0     | 0,043 | 1         | 0,86872331    | 1,151114501     | 0               |



Supplementary Table 1

| Differentially expressed genes_adjacent-skin-XL_comparing SC-Keloid vs. (SC-Myel, SC-Nonmyel) |             |              |       |       |           |               |                 |                 |
|-----------------------------------------------------------------------------------------------|-------------|--------------|-------|-------|-----------|---------------|-----------------|-----------------|
| gene                                                                                          | p_val       | avg_log2FC   | pct.1 | pct.2 | p_val_adj | Foldchange_UP | Foldchange_DOWN | Ratio_pct1_pct2 |
| EXOSC8                                                                                        | 0,015596966 | -0,203257751 | 0,344 | 0,137 | 1         | 0,86858699    | 1,151295163     | 2,510948905     |
| GET1                                                                                          | 0,042510141 | -0,203390111 | 0,219 | 0,086 | 1         | 0,868507305   | 1,151400793     | 2,546511628     |
| NMB                                                                                           | 0,438682776 | -0,203423654 | 0,094 | 0,055 | 1         | 0,868487112   | 1,151427564     | 1,709090909     |
| ZNF414                                                                                        | 0,354261856 | -0,203594341 | 0,125 | 0,07  | 1         | 0,868384367   | 1,151563799     | 1,785714286     |
| SFMBT1                                                                                        | 0,257548576 | -0,203612371 | 0     | 0,039 | 1         | 0,868373514   | 1,15157819      | 0               |
| PCDH7                                                                                         | 0,310355006 | -0,203813648 | 0,094 | 0,047 | 1         | 0,868252372   | 1,151738863     | 2               |
| GMFB                                                                                          | 0,294914241 | -0,203872081 | 0,281 | 0,168 | 1         | 0,868217206   | 1,151785512     | 1,672619048     |
| SMAD5                                                                                         | 0,133024088 | -0,203885554 | 0,312 | 0,164 | 1         | 0,868209098   | 1,151796269     | 1,902439024     |
| CDK17                                                                                         | 0,66298871  | -0,203907785 | 0,125 | 0,094 | 1         | 0,86819572    | 1,151814017     | 1,329787234     |
| SGSH                                                                                          | 0,804543977 | -0,203980116 | 0,031 | 0,039 | 1         | 0,868152193   | 1,151871767     | 0,794871795     |
| COL14A1                                                                                       | 0,059009985 | -0,204252804 | 0,656 | 0,348 | 1         | 0,867988116   | 1,152089506     | 1,885057471     |
| ZNF670                                                                                        | 0,663576959 | -0,204351571 | 0,031 | 0,047 | 1         | 0,867928696   | 1,152168381     | 0,659574468     |
| TNFSF13                                                                                       | 0,840130893 | -0,204363144 | 0,062 | 0,051 | 1         | 0,867921733   | 1,152177623     | 1,215686275     |
| XPR1                                                                                          | 0,668126075 | -0,204443299 | 0,062 | 0,043 | 1         | 0,867873514   | 1,152241639     | 1,441860465     |
| FCHSD2                                                                                        | 0,346686972 | -0,204512596 | 0     | 0,027 | 1         | 0,867831828   | 1,152296986     | 0               |
| SLC15A4                                                                                       | 0,359363779 | -0,204613283 | 0,125 | 0,07  | 1         | 0,867771264   | 1,152377409     | 1,785714286     |
| NCL                                                                                           | 0,491718361 | -0,204810227 | 0,719 | 0,5   | 1         | 0,867652812   | 1,152534731     | 1,438           |
| ZNF146                                                                                        | 0,015980029 | -0,205032064 | 0,219 | 0,074 | 1         | 0,867519406   | 1,152711966     | 2,959459459     |
| DCUN1D4                                                                                       | 0,204506657 | -0,205099194 | 0,125 | 0,059 | 1         | 0,86747904    | 1,152765604     | 2,118644068     |
| DNAAF9                                                                                        | 0,49382256  | -0,205162781 | 0,156 | 0,102 | 1         | 0,867440807   | 1,152816413     | 1,529411765     |
| VCPKMT                                                                                        | 0,730358576 | -0,205163449 | 0,031 | 0,043 | 1         | 0,867440406   | 1,152816947     | 0,720930233     |
| BMPR2                                                                                         | 0,000564972 | -0,205183424 | 0,438 | 0,137 | 1         | 0,867428396   | 1,152832908     | 3,197080292     |
| CADM1                                                                                         | 0,60167888  | -0,205424724 | 0,844 | 0,605 | 1         | 0,867283324   | 1,153025744     | 1,395041322     |
| CHURC1                                                                                        | 0,048262835 | -0,205653959 | 0,594 | 0,289 | 1         | 0,86714553    | 1,153208966     | 2,055363322     |
| CYP27A1                                                                                       | 0,132721028 | -0,205795786 | 0,25  | 0,125 | 1         | 0,867060287   | 1,15332234      | 2               |
| RUSF1                                                                                         | 0,121559505 | -0,205839888 | 0,188 | 0,086 | 1         | 0,867033783   | 1,153357597     | 2,186046512     |
| KIDINS220                                                                                     | 0,051676732 | -0,205877201 | 0,562 | 0,277 | 1         | 0,867011358   | 1,153387427     | 2,028880866     |
| USP44                                                                                         | 0,194053346 | -0,205877563 | 0     | 0,051 | 1         | 0,867011141   | 1,153387717     | 0               |
| SEPTIN8                                                                                       | 0,478106391 | -0,205907613 | 0,156 | 0,102 | 1         | 0,866993082   | 1,153411741     | 1,529411765     |
| INPP1                                                                                         | 0,467546197 | -0,205946805 | 0,219 | 0,145 | 1         | 0,86696953    | 1,153443075     | 1,510344828     |

Supplementary Table 1

| Differentially expressed genes_adjacent-skin-XL_ comparing SC-Keloid vs. (SC-Myel, SC-Nonmyel) |             |              |       |       |           |               |                 |                 |
|------------------------------------------------------------------------------------------------|-------------|--------------|-------|-------|-----------|---------------|-----------------|-----------------|
| gene                                                                                           | p_val       | avg_log2FC   | pct.1 | pct.2 | p_val_adj | Foldchange_UP | Foldchange_DOWN | Ratio_pct1_pct2 |
| ZRSR2                                                                                          | 0,131179297 | -0,205985523 | 0,219 | 0,109 | 1         | 0,866946263   | 1,15347403      | 2,009174312     |
| MARVELD1                                                                                       | 0,015008421 | -0,206011735 | 0,531 | 0,234 | 1         | 0,866930512   | 1,153494987     | 2,269230769     |
| BCL2L2                                                                                         | 0,376291412 | -0,206022511 | 0,094 | 0,051 | 1         | 0,866924036   | 1,153503604     | 1,843137255     |
| RAPGEFL1                                                                                       | 0,346686972 | -0,206251501 | 0     | 0,027 | 1         | 0,866786446   | 1,153686706     | 0               |
| PCDH1                                                                                          | 0,176138873 | -0,206270303 | 0,156 | 0,074 | 1         | 0,866775149   | 1,153701742     | 2,108108108     |
| TTL5                                                                                           | 0,045196862 | -0,206316666 | 0,125 | 0,039 | 1         | 0,866747295   | 1,153738818     | 3,205128205     |
| SCAPER                                                                                         | 0,910865542 | -0,206530655 | 0,125 | 0,113 | 1         | 0,866618743   | 1,153909961     | 1,10619469      |
| GID4                                                                                           | 0,755689148 | -0,206745397 | 0,062 | 0,047 | 1         | 0,866489759   | 1,15408173      | 1,319148936     |
| ME2                                                                                            | 0,008636262 | -0,206765112 | 0,438 | 0,168 | 1         | 0,866477918   | 1,154097501     | 2,607142857     |
| DENND4C                                                                                        | 0,031838434 | -0,20684689  | 0,156 | 0,051 | 1         | 0,866428804   | 1,154162922     | 3,058823529     |
| TFRC                                                                                           | 0,755689148 | -0,206889868 | 0,062 | 0,047 | 1         | 0,866402993   | 1,154197306     | 1,319148936     |
| SLC30A1                                                                                        | 0,023464878 | -0,207020007 | 0,188 | 0,062 | 1         | 0,866324842   | 1,154301425     | 3,032258065     |
| SRXN1                                                                                          | 0,755689148 | -0,207109677 | 0,062 | 0,047 | 1         | 0,866270998   | 1,154373172     | 1,319148936     |
| PRDX1                                                                                          | 0,267197802 | -0,207141403 | 0,781 | 0,465 | 1         | 0,866251948   | 1,154398558     | 1,679569892     |
| ZNF514                                                                                         | 0,804543977 | -0,207300579 | 0,031 | 0,039 | 1         | 0,866156378   | 1,154525933     | 0,794871795     |
| MCOLN1                                                                                         | 0,920939129 | -0,207391782 | 0,062 | 0,055 | 1         | 0,866101624   | 1,154598921     | 1,127272727     |
| SLC16A1-AS1                                                                                    | 0,730358576 | -0,207423991 | 0,031 | 0,043 | 1         | 0,866082287   | 1,154624699     | 0,720930233     |
| MSN                                                                                            | 0,022864713 | -0,207601197 | 0,719 | 0,348 | 1         | 0,865975914   | 1,154766529     | 2,066091954     |
| RUSC1                                                                                          | 0,111020545 | -0,207620177 | 0,156 | 0,066 | 1         | 0,865964521   | 1,154781722     | 2,363636364     |
| GTF2A1                                                                                         | 0,096333668 | -0,207681774 | 0,188 | 0,082 | 1         | 0,865927548   | 1,154831027     | 2,292682927     |
| DMKN                                                                                           | 0,449278612 | -0,207684796 | 0,031 | 0,066 | 1         | 0,865925735   | 1,154833446     | 0,46969697      |
| NAPB                                                                                           | 0,234088337 | -0,207753395 | 0     | 0,043 | 1         | 0,865884561   | 1,154888359     | 0               |
| SGK3                                                                                           | 0,663576959 | -0,207776965 | 0,031 | 0,047 | 1         | 0,865870416   | 1,154907226     | 0,659574468     |
| APBB3                                                                                          | 0,840130893 | -0,207781312 | 0,062 | 0,051 | 1         | 0,865867807   | 1,154910706     | 1,215686275     |
| H4C3                                                                                           | 0,48019894  | -0,207934658 | 0,188 | 0,129 | 1         | 0,865775777   | 1,15503347      | 1,457364341     |
| ARMCX6                                                                                         | 0,118408245 | -0,208385587 | 0,25  | 0,121 | 1         | 0,865505212   | 1,155394544     | 2,066115702     |
| ALDOC                                                                                          | 0,573799329 | -0,20844463  | 0,094 | 0,062 | 1         | 0,865469792   | 1,15544183      | 1,516129032     |
| HOOK2                                                                                          | 0,721008876 | -0,208568957 | 0,094 | 0,07  | 1         | 0,865395211   | 1,155541407     | 1,342857143     |
| RNF2                                                                                           | 0,033260329 | -0,208697798 | 0,188 | 0,066 | 1         | 0,86531793    | 1,155644608     | 2,848484848     |
| RHOT1                                                                                          | 0,403286918 | -0,208861659 | 0,125 | 0,074 | 1         | 0,865219653   | 1,155775873     | 1,689189189     |

Supplementary Table 1

| Differentially expressed genes_adjacent-skin-XL_comparing SC-Keloid vs. (SC-Myel, SC-Nonmyel) |             |              |       |       |           |               |                 |                 |
|-----------------------------------------------------------------------------------------------|-------------|--------------|-------|-------|-----------|---------------|-----------------|-----------------|
| gene                                                                                          | p_val       | avg_log2FC   | pct.1 | pct.2 | p_val_adj | Foldchange_UP | Foldchange_DOWN | Ratio_pct1_pct2 |
| PROX1                                                                                         | 0,313292814 | -0,208879038 | 0     | 0,031 | 1         | 0,86520923    | 1,155789796     | 0               |
| MIIP                                                                                          | 0,211587583 | -0,208926328 | 0,188 | 0,098 | 1         | 0,86518087    | 1,155827682     | 1,918367347     |
| CACNA2D1                                                                                      | 0,924392442 | -0,209013645 | 0,031 | 0,027 | 1         | 0,865128508   | 1,155897639     | 1,148148148     |
| STAT5B                                                                                        | 0,603353082 | -0,209064128 | 0,031 | 0,051 | 1         | 0,865098236   | 1,155938087     | 0,607843137     |
| AKTIP                                                                                         | 0,588138226 | -0,209164511 | 0,094 | 0,062 | 1         | 0,865038044   | 1,15601852      | 1,516129032     |
| ELF1                                                                                          | 0,023456761 | -0,209335633 | 0,406 | 0,176 | 1         | 0,864935446   | 1,156155647     | 2,306818182     |
| C2CD3                                                                                         | 0,603353082 | -0,209423675 | 0,031 | 0,051 | 1         | 0,864882664   | 1,156226205     | 0,607843137     |
| PIBF1                                                                                         | 0,1480486   | -0,209460751 | 0,188 | 0,09  | 1         | 0,864860437   | 1,156255919     | 2,088888889     |
| TUBE1                                                                                         | 0,30757457  | -0,209650855 | 0,094 | 0,047 | 1         | 0,864746483   | 1,156408289     | 2               |
| HSD17B12                                                                                      | 0,001785675 | -0,209807734 | 0,438 | 0,148 | 1         | 0,864652455   | 1,156534044     | 2,959459459     |
| SSPN                                                                                          | 0,008602824 | -0,210004206 | 0,375 | 0,141 | 1         | 0,864534711   | 1,156691556     | 2,659574468     |
| NT5C2                                                                                         | 0,30793671  | -0,210051746 | 0,062 | 0,027 | 1         | 0,864506223   | 1,156729672     | 2,296296296     |
| ARL4D                                                                                         | 0,007632599 | -0,210119638 | 0,219 | 0,066 | 1         | 0,864465541   | 1,156784108     | 3,318181818     |
| UBAP2L                                                                                        | 0,095516294 | -0,210185432 | 0,219 | 0,102 | 1         | 0,864426118   | 1,156836864     | 2,147058824     |
| KYAT3                                                                                         | 0,120509006 | -0,21038703  | 0,188 | 0,086 | 1         | 0,864305334   | 1,156998529     | 2,186046512     |
| ACOX1                                                                                         | 0,126128812 | -0,210507862 | 0,125 | 0,051 | 1         | 0,864232948   | 1,157095436     | 2,450980392     |
| ASPCR1                                                                                        | 0,011905317 | -0,210533541 | 0,219 | 0,07  | 1         | 0,864217565   | 1,157116032     | 3,128571429     |
| RNF122                                                                                        | 0,313292814 | -0,210551113 | 0     | 0,031 | 1         | 0,864207039   | 1,157130126     | 0               |
| GOLGA7                                                                                        | 0,102160818 | -0,210619399 | 0,406 | 0,211 | 1         | 0,864166135   | 1,157184897     | 1,924170616     |
| UBXN7                                                                                         | 0,477649336 | -0,210633187 | 0,188 | 0,125 | 1         | 0,864157876   | 1,157195956     | 1,504           |
| FOXK1                                                                                         | 0,470914834 | -0,210752114 | 0,125 | 0,078 | 1         | 0,864086643   | 1,157291353     | 1,602564103     |
| BOD1L1                                                                                        | 0,016618948 | -0,211010874 | 0,562 | 0,246 | 1         | 0,863931676   | 1,157498941     | 2,284552846     |
| TXNL4B                                                                                        | 0,257548576 | -0,211115235 | 0     | 0,039 | 1         | 0,863869183   | 1,157582675     | 0               |
| HNRNPUL2                                                                                      | 0,006343661 | -0,211380775 | 0,281 | 0,094 | 1         | 0,863710196   | 1,157795757     | 2,989361702     |
| HEBP1                                                                                         | 0,755689148 | -0,211449735 | 0,062 | 0,047 | 1         | 0,863668912   | 1,1578511       | 1,319148936     |
| SDHD                                                                                          | 0,076126362 | -0,211524609 | 0,438 | 0,211 | 1         | 0,86362409    | 1,157911193     | 2,075829384     |
| RPS6KA2                                                                                       | 0,194053346 | -0,211565218 | 0     | 0,051 | 1         | 0,863599781   | 1,157943786     | 0               |
| BMT2                                                                                          | 0,804543977 | -0,211566813 | 0,031 | 0,039 | 1         | 0,863598826   | 1,157945067     | 0,794871795     |
| DYNC1L1                                                                                       | 0,048731044 | -0,211824153 | 0,344 | 0,156 | 1         | 0,863444795   | 1,158151633     | 2,205128205     |
| WBP1                                                                                          | 0,077107676 | -0,211905101 | 0,25  | 0,113 | 1         | 0,86339635    | 1,158216617     | 2,212389381     |

Supplementary Table 1

| Differentially expressed genes_adjacent-skin-XL_comparing SC-Keloid vs. (SC-Myel, SC-Nonmyel) |             |              |       |       |           |               |                 |                 |
|-----------------------------------------------------------------------------------------------|-------------|--------------|-------|-------|-----------|---------------|-----------------|-----------------|
| gene                                                                                          | p_val       | avg_log2FC   | pct.1 | pct.2 | p_val_adj | Foldchange_UP | Foldchange_DOWN | Ratio_pct1_pct2 |
| HNRNPF                                                                                        | 0,20307892  | -0,2119921   | 0,688 | 0,398 | 1         | 0,863344286   | 1,158286464     | 1,728643216     |
| FN3K                                                                                          | 0,213026321 | -0,212117729 | 0     | 0,047 | 1         | 0,86326911    | 1,158387331     | 0               |
| PRRX2                                                                                         | 0,887104347 | -0,212124568 | 0,031 | 0,035 | 1         | 0,863265018   | 1,158392822     | 0,885714286     |
| ANKRD44                                                                                       | 0,300029356 | -0,212329744 | 0,125 | 0,066 | 1         | 0,863142255   | 1,158557577     | 1,893939394     |
| DTNA                                                                                          | 0,920939129 | -0,212358421 | 0,062 | 0,055 | 1         | 0,863125098   | 1,158580607     | 1,127272727     |
| NBPF15                                                                                        | 0,283789128 | -0,21246245  | 0     | 0,035 | 1         | 0,863062863   | 1,158664151     | 0               |
| ZFHX4                                                                                         | 0,809794875 | -0,212579815 | 0,031 | 0,039 | 1         | 0,862992654   | 1,158758415     | 0,794871795     |
| TTC31                                                                                         | 0,815054348 | -0,212780253 | 0,031 | 0,039 | 1         | 0,862872765   | 1,158919415     | 0,794871795     |
| CDK2AP2                                                                                       | 0,010493526 | -0,212898172 | 0,625 | 0,27  | 1         | 0,86280224    | 1,159014144     | 2,314814815     |
| AFDN                                                                                          | 0,499735776 | -0,212899205 | 0,031 | 0,059 | 1         | 0,862801623   | 1,159014973     | 0,525423729     |
| IKZF5                                                                                         | 0,173155757 | -0,212952193 | 0,156 | 0,074 | 1         | 0,862769934   | 1,159057543     | 2,108108108     |
| CEP350                                                                                        | 0,129906113 | -0,212968678 | 0,281 | 0,145 | 1         | 0,862760075   | 1,159070787     | 1,937931034     |
| ACIN1                                                                                         | 0,021818636 | -0,213145951 | 0,344 | 0,141 | 1         | 0,862654069   | 1,159213219     | 2,439716312     |
| PLEKHF2                                                                                       | 0,035154895 | -0,21321565  | 0,344 | 0,148 | 1         | 0,862612394   | 1,159269224     | 2,324324324     |
| MEX3C                                                                                         | 0,01270143  | -0,213262419 | 0,312 | 0,117 | 1         | 0,86258443    | 1,159306805     | 2,666666667     |
| TMEM117                                                                                       | 0,213026321 | -0,213279205 | 0     | 0,047 | 1         | 0,862574394   | 1,159320294     | 0               |
| RYK                                                                                           | 0,031443381 | -0,213315569 | 0,25  | 0,098 | 1         | 0,862552653   | 1,159349515     | 2,551020408     |
| RBM4                                                                                          | 0,071728066 | -0,213579132 | 0,5   | 0,25  | 1         | 0,862395089   | 1,159561334     | 2               |
| STX17                                                                                         | 0,098798214 | -0,213584157 | 0,219 | 0,102 | 1         | 0,862392085   | 1,159565373     | 2,147058824     |
| CCNYL1                                                                                        | 0,283789128 | -0,213621203 | 0     | 0,035 | 1         | 0,862369941   | 1,159595149     | 0               |
| JPX                                                                                           | 0,209711856 | -0,21363768  | 0,375 | 0,215 | 1         | 0,862360092   | 1,159608393     | 1,744186047     |
| COL8A2                                                                                        | 0,283789128 | -0,213674184 | 0     | 0,035 | 1         | 0,862338272   | 1,159637734     | 0               |
| NDST1                                                                                         | 0,344129332 | -0,21372712  | 0,156 | 0,09  | 1         | 0,862306631   | 1,159680285     | 1,733333333     |
| PPP2R5B                                                                                       | 0,293095985 | -0,213755635 | 0,125 | 0,066 | 1         | 0,862289588   | 1,159703207     | 1,893939394     |
| EFNA5                                                                                         | 0,253529282 | -0,21377924  | 0,125 | 0,062 | 1         | 0,86227548    | 1,159722181     | 2,016129032     |
| ZNF236                                                                                        | 0,394496075 | -0,213872366 | 0,156 | 0,094 | 1         | 0,862219821   | 1,159797044     | 1,659574468     |
| SNHG18                                                                                        | 0,416896114 | -0,21393677  | 0,125 | 0,074 | 1         | 0,862181332   | 1,15984882      | 1,689189189     |
| PDPR                                                                                          | 0,751100713 | -0,213990763 | 0,062 | 0,047 | 1         | 0,862149065   | 1,159892228     | 1,319148936     |
| CRTC3                                                                                         | 0,007165916 | -0,214042943 | 0,344 | 0,125 | 1         | 0,862117883   | 1,159934181     | 2,752           |
| ZNF736                                                                                        | 0,80991663  | -0,214096977 | 0,031 | 0,023 | 1         | 0,862085594   | 1,159977625     | 1,347826087     |

Supplementary Table 1

| Differentially expressed genes_adjacent-skin-XL_ comparing SC-Keloid vs. (SC-Myel, SC-Nonmyel) |             |              |       |       |           |               |                 |                 |
|------------------------------------------------------------------------------------------------|-------------|--------------|-------|-------|-----------|---------------|-----------------|-----------------|
| gene                                                                                           | p_val       | avg_log2FC   | pct.1 | pct.2 | p_val_adj | Foldchange_UP | Foldchange_DOWN | Ratio_pct1_pct2 |
| IVD                                                                                            | 0,004170278 | -0,214345833 | 0,25  | 0,074 | 1         | 0,861936903   | 1,160177731     | 3,378378378     |
| CAV2                                                                                           | 0,10309818  | -0,214363751 | 0,438 | 0,227 | 1         | 0,861926198   | 1,16019214      | 1,929515419     |
| FAM83F                                                                                         | 0,346686972 | -0,214373054 | 0     | 0,027 | 1         | 0,86192064    | 1,160199621     | 0               |
| RAD51D                                                                                         | 0,376291412 | -0,214400384 | 0,094 | 0,051 | 1         | 0,861904312   | 1,1602216       | 1,843137255     |
| DCP2                                                                                           | 0,937980621 | -0,2144033   | 0,062 | 0,062 | 1         | 0,86190257    | 1,160223945     | 1               |
| PPP6R3                                                                                         | 0,001193685 | -0,214482772 | 0,375 | 0,117 | 1         | 0,861855093   | 1,160287859     | 3,205128205     |
| GANC                                                                                           | 0,993403301 | -0,214593812 | 0,062 | 0,059 | 1         | 0,861788761   | 1,160377166     | 1,050847458     |
| SYT8                                                                                           | 0,313292814 | -0,214661504 | 0     | 0,031 | 1         | 0,861748326   | 1,160431613     | 0               |
| SLC25A51                                                                                       | 0,804543977 | -0,214949782 | 0,031 | 0,039 | 1         | 0,861576149   | 1,160663513     | 0,794871795     |
| SLC2A8                                                                                         | 0,382636471 | -0,214986948 | 0,156 | 0,094 | 1         | 0,861553954   | 1,160693413     | 1,659574468     |
| NUP58                                                                                          | 0,197902332 | -0,215016706 | 0,219 | 0,117 | 1         | 0,861536183   | 1,160717355     | 1,871794872     |
| TMTC2                                                                                          | 0,234088337 | -0,215017882 | 0     | 0,043 | 1         | 0,861535481   | 1,160718301     | 0               |
| OGDH                                                                                           | 0,022768525 | -0,215073506 | 0,219 | 0,078 | 1         | 0,861502265   | 1,160763054     | 2,807692308     |
| SRCIN1                                                                                         | 0,695157794 | -0,215139552 | 0,156 | 0,121 | 1         | 0,861462827   | 1,160816195     | 1,289256198     |
| MTAP                                                                                           | 0,296467032 | -0,215166108 | 0,156 | 0,086 | 1         | 0,861446969   | 1,160837562     | 1,813953488     |
| MCM5                                                                                           | 0,376291412 | -0,215318185 | 0,094 | 0,051 | 1         | 0,861356167   | 1,160959935     | 1,843137255     |
| HHIPL1                                                                                         | 0,283789128 | -0,215410196 | 0     | 0,035 | 1         | 0,861301234   | 1,16103398      | 0               |
| MMP28                                                                                          | 0,857462101 | -0,215657685 | 0,094 | 0,078 | 1         | 0,861153494   | 1,161233168     | 1,205128205     |
| LUZP1                                                                                          | 0,110090245 | -0,215701182 | 0,219 | 0,102 | 1         | 0,861127531   | 1,16126818      | 2,147058824     |
| PDRG1                                                                                          | 0,06440165  | -0,215938401 | 0,156 | 0,059 | 1         | 0,860985949   | 1,16145914      | 2,644067797     |
| TFAP2B                                                                                         | 0,150480606 | -0,215970126 | 0,188 | 0,09  | 1         | 0,860967016   | 1,161484681     | 2,088888889     |
| RPP14                                                                                          | 0,191913299 | -0,216032796 | 0,094 | 0,039 | 1         | 0,860929617   | 1,161535136     | 2,41025641      |
| NISCH                                                                                          | 0,323961112 | -0,216140043 | 0,188 | 0,109 | 1         | 0,86086562    | 1,161621485     | 1,724770642     |
| USP8                                                                                           | 0,039103141 | -0,216151283 | 0,25  | 0,102 | 1         | 0,860858913   | 1,161630536     | 2,450980392     |
| MADD                                                                                           | 0,24851603  | -0,21639385  | 0,094 | 0,043 | 1         | 0,860714185   | 1,161825862     | 2,186046512     |
| DSP                                                                                            | 0,563155042 | -0,216435686 | 0,094 | 0,062 | 1         | 0,860689225   | 1,161859554     | 1,516129032     |
| KRT15                                                                                          | 0,887940756 | -0,2165191   | 0,094 | 0,082 | 1         | 0,860639464   | 1,161926733     | 1,146341463     |
| CPEB3                                                                                          | 0,677260831 | -0,216814541 | 0,031 | 0,047 | 1         | 0,860463236   | 1,162164701     | 0,659574468     |
| CNTF                                                                                           | 0,283789128 | -0,216867825 | 0     | 0,035 | 1         | 0,860431457   | 1,162207625     | 0               |
| LGALS7B                                                                                        | 0,989005733 | -0,21695859  | 0,062 | 0,059 | 1         | 0,860377326   | 1,162280746     | 1,050847458     |

Supplementary Table 1

| Differentially expressed genes_adjacent-skin-XL_comparing SC-Keloid vs. (SC-Myel, SC-Nonmyel) |             |              |       |       |           |               |                 |                 |
|-----------------------------------------------------------------------------------------------|-------------|--------------|-------|-------|-----------|---------------|-----------------|-----------------|
| gene                                                                                          | p_val       | avg_log2FC   | pct.1 | pct.2 | p_val_adj | Foldchange_UP | Foldchange_DOWN | Ratio_pct1_pct2 |
| CAMK2B                                                                                        | 0,257548576 | -0,2170577   | 0     | 0,039 | 1         | 0,860318222   | 1,162360595     | 0               |
| BASP1                                                                                         | 0,663576959 | -0,217065274 | 0,031 | 0,047 | 1         | 0,860313706   | 1,162366697     | 0,659574468     |
| ZNF267                                                                                        | 0,015958056 | -0,217218318 | 0,188 | 0,059 | 1         | 0,860222446   | 1,16249001      | 3,186440678     |
| SFR1                                                                                          | 0,836825729 | -0,217345128 | 0,125 | 0,102 | 1         | 0,860146838   | 1,162592195     | 1,225490196     |
| KRAS                                                                                          | 0,105466572 | -0,217357027 | 0,438 | 0,23  | 1         | 0,860139744   | 1,162601783     | 1,904347826     |
| CDK2                                                                                          | 0,204035935 | -0,217411823 | 0,188 | 0,098 | 1         | 0,860107074   | 1,162645942     | 1,918367347     |
| AFMID                                                                                         | 0,660402423 | -0,217487008 | 0,094 | 0,066 | 1         | 0,860062252   | 1,162706534     | 1,424242424     |
| THOC1                                                                                         | 0,024131097 | -0,217516121 | 0,219 | 0,078 | 1         | 0,860044896   | 1,162729998     | 2,807692308     |
| KMT5B                                                                                         | 0,094564098 | -0,217578584 | 0,188 | 0,082 | 1         | 0,860007661   | 1,16278034      | 2,292682927     |
| ARFGAP1                                                                                       | 0,12985323  | -0,217997863 | 0,219 | 0,105 | 1         | 0,85975776    | 1,163118319     | 2,085714286     |
| TEF                                                                                           | 0,548952158 | -0,218172047 | 0,031 | 0,055 | 1         | 0,859653963   | 1,163258757     | 0,563636364     |
| SOX13                                                                                         | 0,286287991 | -0,218251633 | 0,156 | 0,086 | 1         | 0,859606542   | 1,163322929     | 1,813953488     |
| LYNX1                                                                                         | 0,420869875 | -0,218436533 | 0,031 | 0,066 | 1         | 0,859496379   | 1,163472034     | 0,46969697      |
| SNRPA                                                                                         | 0,00587965  | -0,218528783 | 0,344 | 0,121 | 1         | 0,859441422   | 1,163546431     | 2,842975207     |
| NRIP2                                                                                         | 0,414703427 | -0,218567005 | 0,031 | 0,066 | 1         | 0,859418653   | 1,163577258     | 0,46969697      |
| RARG                                                                                          | 0,660402423 | -0,218569235 | 0,094 | 0,066 | 1         | 0,859417324   | 1,163579057     | 1,424242424     |
| OBSCN                                                                                         | 0,346686972 | -0,21872714  | 0     | 0,027 | 1         | 0,859323265   | 1,163706419     | 0               |
| CDC42BPB                                                                                      | 0,470352044 | -0,21876635  | 0,156 | 0,102 | 1         | 0,859299911   | 1,163738047     | 1,529411765     |
| RHOB                                                                                          | 0,162099104 | -0,218784526 | 1     | 0,676 | 1         | 0,859289084   | 1,163752709     | 1,479289941     |
| PAPPA                                                                                         | 0,80991663  | -0,218899718 | 0,031 | 0,023 | 1         | 0,859220477   | 1,163845632     | 1,347826087     |
| ALPK1                                                                                         | 0,804543977 | -0,218902562 | 0,031 | 0,039 | 1         | 0,859218784   | 1,163847927     | 0,794871795     |
| ACSF3                                                                                         | 0,376291412 | -0,218959944 | 0,094 | 0,051 | 1         | 0,85918461    | 1,163894218     | 1,843137255     |
| CIAO1                                                                                         | 0,055641998 | -0,218976323 | 0,281 | 0,125 | 1         | 0,859174855   | 1,163907433     | 2,248           |
| TBL1XR1                                                                                       | 0,101791565 | -0,219030981 | 0,344 | 0,172 | 1         | 0,859142305   | 1,163951529     | 2               |
| LZTS3                                                                                         | 0,663576959 | -0,219053707 | 0,031 | 0,047 | 1         | 0,859128771   | 1,163969865     | 0,659574468     |
| CNTNAP1                                                                                       | 0,234088337 | -0,219229517 | 0     | 0,043 | 1         | 0,859024083   | 1,164111717     | 0               |
| CARS1                                                                                         | 0,025727869 | -0,219287853 | 0,344 | 0,145 | 1         | 0,858989349   | 1,164158789     | 2,372413793     |
| TARBP1                                                                                        | 0,197541013 | -0,219288877 | 0,156 | 0,078 | 1         | 0,858988739   | 1,164159615     | 2               |
| TXNDC16                                                                                       | 0,354261856 | -0,219439576 | 0,125 | 0,07  | 1         | 0,858899017   | 1,164281226     | 1,785714286     |
| LYPD3                                                                                         | 0,607571545 | -0,219456068 | 0,031 | 0,051 | 1         | 0,858889198   | 1,164294535     | 0,607843137     |

Supplementary Table 1

| Differentially expressed genes_adjacent-skin-XL_ comparing SC-Keloid vs. (SC-Myel, SC-Nonmyel) |             |              |       |       |           |               |                 |                 |
|------------------------------------------------------------------------------------------------|-------------|--------------|-------|-------|-----------|---------------|-----------------|-----------------|
| gene                                                                                           | p_val       | avg_log2FC   | pct.1 | pct.2 | p_val_adj | Foldchange_UP | Foldchange_DOWN | Ratio_pct1_pct2 |
| NSD3                                                                                           | 0,111217613 | -0,219607102 | 0,562 | 0,301 | 1         | 0,858799287   | 1,16441643      | 1,867109635     |
| ASAP3                                                                                          | 0,804543977 | -0,219621225 | 0,031 | 0,039 | 1         | 0,858790879   | 1,16442783      | 0,794871795     |
| FAM149B1                                                                                       | 0,283789128 | -0,219823241 | 0     | 0,035 | 1         | 0,858670634   | 1,164590892     | 0               |
| SIPA1L1                                                                                        | 0,635386876 | -0,220044913 | 0,125 | 0,09  | 1         | 0,858538708   | 1,164769847     | 1,388888889     |
| FSD1L                                                                                          | 0,234088337 | -0,220057572 | 0     | 0,043 | 1         | 0,858531175   | 1,164780067     | 0               |
| TGIF1                                                                                          | 0,042403887 | -0,220171483 | 0,344 | 0,152 | 1         | 0,858463391   | 1,164872038     | 2,263157895     |
| C1RL                                                                                           | 0,979143607 | -0,220413832 | 0,031 | 0,031 | 1         | 0,858319195   | 1,165067734     | 1               |
| EVC                                                                                            | 0,313292814 | -0,220676592 | 0     | 0,031 | 1         | 0,858162882   | 1,165279949     | 0               |
| DENND2C                                                                                        | 0,38481627  | -0,220701679 | 0     | 0,023 | 1         | 0,85814796    | 1,165300212     | 0               |
| ZMYM4                                                                                          | 0,233614723 | -0,220820482 | 0,156 | 0,082 | 1         | 0,858077296   | 1,165396176     | 1,902439024     |
| MFSD14A                                                                                        | 0,462289318 | -0,220822061 | 0,125 | 0,078 | 1         | 0,858076357   | 1,165397452     | 1,602564103     |
| NUDCD3                                                                                         | 0,010248684 | -0,220936034 | 0,281 | 0,098 | 1         | 0,858008572   | 1,165489522     | 2,867346939     |
| RAD21                                                                                          | 0,023981535 | -0,220977583 | 0,688 | 0,309 | 1         | 0,857983862   | 1,165523087     | 2,226537217     |
| TBC1D17                                                                                        | 0,193795898 | -0,221001031 | 0,188 | 0,098 | 1         | 0,857969917   | 1,165542031     | 1,918367347     |
| NPRL2                                                                                          | 0,668126075 | -0,221163294 | 0,062 | 0,043 | 1         | 0,857873425   | 1,16567313      | 1,441860465     |
| SLC30A4                                                                                        | 0,730358576 | -0,221233715 | 0,031 | 0,043 | 1         | 0,857831552   | 1,16573003      | 0,720930233     |
| PIK3CB                                                                                         | 0,176914647 | -0,221455068 | 0     | 0,055 | 1         | 0,857699944   | 1,165908902     | 0               |
| NGDN                                                                                           | 0,691830399 | -0,221557142 | 0,125 | 0,094 | 1         | 0,857639262   | 1,165991396     | 1,329787234     |
| KHSRP                                                                                          | 0,093171637 | -0,221638115 | 0,344 | 0,172 | 1         | 0,857591128   | 1,16605684      | 2               |
| ZNF24                                                                                          | 0,039672007 | -0,221646441 | 0,438 | 0,207 | 1         | 0,857586178   | 1,166063569     | 2,115942029     |
| INPP4A                                                                                         | 0,979143607 | -0,221666979 | 0,031 | 0,031 | 1         | 0,85757397    | 1,166080169     | 1               |
| ERLIN2                                                                                         | 0,180319513 | -0,221705943 | 0,188 | 0,094 | 1         | 0,857550809   | 1,166111663     | 2               |
| B3GNT2                                                                                         | 0,603353082 | -0,221823518 | 0,031 | 0,051 | 1         | 0,857480924   | 1,166206702     | 0,607843137     |
| NBEAL2                                                                                         | 0,313292814 | -0,221898354 | 0     | 0,031 | 1         | 0,857436445   | 1,166267197     | 0               |
| ITGA6                                                                                          | 0,566482884 | -0,221907918 | 0,75  | 0,551 | 1         | 0,857430761   | 1,166274929     | 1,361161525     |
| MAF                                                                                            | 0,037284913 | -0,22195374  | 0,625 | 0,297 | 1         | 0,857403529   | 1,166311971     | 2,104377104     |
| ELP2                                                                                           | 0,002806326 | -0,222024696 | 0,344 | 0,113 | 1         | 0,85736136    | 1,166369336     | 3,044247788     |
| NUMB                                                                                           | 0,034609483 | -0,222123285 | 0,312 | 0,133 | 1         | 0,857302773   | 1,166449044     | 2,345864662     |
| RNF144A                                                                                        | 0,730358576 | -0,222125836 | 0,031 | 0,043 | 1         | 0,857301257   | 1,166451107     | 0,720930233     |
| SAFB                                                                                           | 0,082278968 | -0,222240485 | 0,281 | 0,133 | 1         | 0,857233131   | 1,166543806     | 2,112781955     |

Supplementary Table 1

| Differentially expressed genes_adjacent-skin-XL_ comparing SC-Keloid vs. (SC-Myel, SC-Nonmyel) |             |              |       |       |           |               |                 |                 |
|------------------------------------------------------------------------------------------------|-------------|--------------|-------|-------|-----------|---------------|-----------------|-----------------|
| gene                                                                                           | p_val       | avg_log2FC   | pct.1 | pct.2 | p_val_adj | Foldchange_UP | Foldchange_DOWN | Ratio_pct1_pct2 |
| HOXC6                                                                                          | 0,044299501 | -0,222276815 | 0,219 | 0,086 | 1         | 0,857211545   | 1,166573183     | 2,546511628     |
| HDAC3                                                                                          | 0,205678783 | -0,222377106 | 0,156 | 0,078 | 1         | 0,857151956   | 1,166654282     | 2               |
| YJEFN3                                                                                         | 0,346686972 | -0,222428501 | 0     | 0,027 | 1         | 0,857121421   | 1,166695844     | 0               |
| OSBPL11                                                                                        | 0,588138226 | -0,222583456 | 0,094 | 0,062 | 1         | 0,857029366   | 1,166821162     | 1,516129032     |
| C2CD5                                                                                          | 0,191913299 | -0,22271049  | 0,094 | 0,039 | 1         | 0,856953905   | 1,166923908     | 2,41025641      |
| CDK10                                                                                          | 0,045653963 | -0,222919122 | 0,188 | 0,07  | 1         | 0,856829987   | 1,167092673     | 2,685714286     |
| ZYG11B                                                                                         | 0,060916409 | -0,223021354 | 0,188 | 0,074 | 1         | 0,856769273   | 1,167175378     | 2,540540541     |
| TRIM28                                                                                         | 0,186249045 | -0,223168053 | 0,438 | 0,258 | 1         | 0,856682158   | 1,167294067     | 1,697674419     |
| EDEM3                                                                                          | 0,001195376 | -0,223241384 | 0,281 | 0,078 | 1         | 0,856638615   | 1,1673534       | 3,602564103     |
| RAB4A                                                                                          | 0,052320766 | -0,223504938 | 0,344 | 0,156 | 1         | 0,856482137   | 1,167566674     | 2,205128205     |
| FAM3C                                                                                          | 0,056829833 | -0,223537294 | 0,688 | 0,336 | 1         | 0,856462928   | 1,16759286      | 2,047619048     |
| CD47                                                                                           | 0,047527418 | -0,223688223 | 0,562 | 0,277 | 1         | 0,856373333   | 1,167715015     | 2,028880866     |
| KRIT1                                                                                          | 0,341900128 | -0,223705389 | 0,156 | 0,09  | 1         | 0,856363143   | 1,16772891      | 1,733333333     |
| PACRG                                                                                          | 0,979143607 | -0,223714477 | 0,031 | 0,031 | 1         | 0,856357749   | 1,167736266     | 1               |
| PPIL2                                                                                          | 0,40869837  | -0,223811756 | 0,125 | 0,074 | 1         | 0,856300008   | 1,167815007     | 1,689189189     |
| SNHG32                                                                                         | 0,314485574 | -0,223882849 | 0,594 | 0,359 | 1         | 0,856257812   | 1,167872556     | 1,6545961       |
| ZNF410                                                                                         | 0,05263413  | -0,224063163 | 0,25  | 0,105 | 1         | 0,856150801   | 1,168018531     | 2,380952381     |
| CSKMT                                                                                          | 0,128167284 | -0,224307351 | 0,219 | 0,109 | 1         | 0,856005902   | 1,168216245     | 2,009174312     |
| PREX2                                                                                          | 0,283789128 | -0,224314923 | 0     | 0,035 | 1         | 0,856001409   | 1,168222376     | 0               |
| DDX50                                                                                          | 0,007259728 | -0,224326181 | 0,281 | 0,094 | 1         | 0,85599473    | 1,168231492     | 2,989361702     |
| CTDSP2                                                                                         | 0,23387633  | -0,22438456  | 0,281 | 0,16  | 1         | 0,855960092   | 1,168278766     | 1,75625         |
| MINDY1                                                                                         | 0,161397126 | -0,224402847 | 0     | 0,059 | 1         | 0,855949242   | 1,168293575     | 0               |
| FBRS                                                                                           | 0,098129635 | -0,224633209 | 0,188 | 0,082 | 1         | 0,85581258    | 1,168480136     | 2,292682927     |
| UHRF2                                                                                          | 0,057671435 | -0,224939595 | 0,219 | 0,09  | 1         | 0,85563085    | 1,168728314     | 2,433333333     |
| PIP5K1A                                                                                        | 0,828111391 | -0,225017613 | 0,062 | 0,07  | 1         | 0,85558458    | 1,168791518     | 0,885714286     |
| LAMTOR3                                                                                        | 0,144457051 | -0,225051322 | 0,188 | 0,09  | 1         | 0,855564589   | 1,168818827     | 2,088888889     |
| WDR48                                                                                          | 0,499735776 | -0,225061947 | 0,031 | 0,059 | 1         | 0,855558289   | 1,168827435     | 0,525423729     |
| GABARAPL1                                                                                      | 0,649827026 | -0,225073081 | 0,156 | 0,113 | 1         | 0,855551686   | 1,168836456     | 1,380530973     |
| FBXO42                                                                                         | 0,556776127 | -0,225114577 | 0,031 | 0,055 | 1         | 0,855527078   | 1,168870075     | 0,563636364     |
| WAPL                                                                                           | 0,017764736 | -0,225291315 | 0,344 | 0,141 | 1         | 0,855422278   | 1,169013277     | 2,439716312     |



Supplementary Table 1

| Differentially expressed genes_adjacent-skin-XL_comparing SC-Keloid vs. (SC-Myel, SC-Nonmyel) |             |              |       |       |           |               |                 |                 |
|-----------------------------------------------------------------------------------------------|-------------|--------------|-------|-------|-----------|---------------|-----------------|-----------------|
| gene                                                                                          | p_val       | avg_log2FC   | pct.1 | pct.2 | p_val_adj | Foldchange_UP | Foldchange_DOWN | Ratio_pct1_pct2 |
| TOX4                                                                                          | 0,021818636 | -0,225539038 | 0,344 | 0,141 | 1         | 0,855275407   | 1,169214023     | 2,439716312     |
| SHROOM3                                                                                       | 0,257548576 | -0,225581101 | 0     | 0,039 | 1         | 0,855250471   | 1,169248113     | 0               |
| TLCD4                                                                                         | 0,668126075 | -0,22570905  | 0,031 | 0,047 | 1         | 0,855174624   | 1,169351816     | 0,659574468     |
| LAS1L                                                                                         | 0,400597364 | -0,225712875 | 0,125 | 0,074 | 1         | 0,855172357   | 1,169354916     | 1,689189189     |
| NAPEPLD                                                                                       | 0,560708386 | -0,225794628 | 0,031 | 0,055 | 1         | 0,855123898   | 1,169421182     | 0,563636364     |
| SLC41A2                                                                                       | 0,942250066 | -0,225977909 | 0,062 | 0,062 | 1         | 0,85501527    | 1,169569755     | 1               |
| DNAJC3                                                                                        | 0,12924202  | -0,225993997 | 0,469 | 0,254 | 1         | 0,855005736   | 1,169582797     | 1,846456693     |
| AC011752.1                                                                                    | 0,213026321 | -0,226185068 | 0     | 0,047 | 1         | 0,854892506   | 1,169737708     | 0               |
| ABRAXAS2                                                                                      | 0,30793671  | -0,22618964  | 0,062 | 0,027 | 1         | 0,854889797   | 1,169741414     | 2,296296296     |
| PLEKHH3                                                                                       | 0,511198329 | -0,226261539 | 0,125 | 0,082 | 1         | 0,854847193   | 1,169799712     | 1,524390244     |
| PARP8                                                                                         | 0,726697784 | -0,226327937 | 0,062 | 0,078 | 1         | 0,854807851   | 1,169853552     | 0,794871795     |
| GOSR1                                                                                         | 0,000315631 | -0,226448238 | 0,469 | 0,145 | 1         | 0,854736574   | 1,169951105     | 3,234482759     |
| RALGAPA2                                                                                      | 0,283789128 | -0,226552323 | 0     | 0,035 | 1         | 0,854674911   | 1,170035516     | 0               |
| ADAT2                                                                                         | 0,603353082 | -0,226660502 | 0,031 | 0,051 | 1         | 0,854610826   | 1,170123253     | 0,607843137     |
| PRKX                                                                                          | 0,99780108  | -0,226669989 | 0,062 | 0,059 | 1         | 0,854605206   | 1,170130948     | 1,050847458     |
| PLAU                                                                                          | 0,310355006 | -0,226682862 | 0,094 | 0,047 | 1         | 0,854597581   | 1,170141389     | 2               |
| CXCL2                                                                                         | 0,283789128 | -0,226832665 | 0     | 0,035 | 1         | 0,854508848   | 1,170262897     | 0               |
| CROCC                                                                                         | 0,588138226 | -0,227010687 | 0,094 | 0,062 | 1         | 0,854403412   | 1,170407311     | 1,516129032     |
| LZTR1                                                                                         | 0,031838434 | -0,227070584 | 0,156 | 0,051 | 1         | 0,85436794    | 1,170455905     | 3,058823529     |
| FEM1A                                                                                         | 0,840130893 | -0,227273751 | 0,062 | 0,051 | 1         | 0,854247632   | 1,170620745     | 1,215686275     |
| CCP110                                                                                        | 0,202394917 | -0,227342898 | 0,156 | 0,078 | 1         | 0,85420669    | 1,170676854     | 2               |
| ARL17B                                                                                        | 0,234088337 | -0,227420608 | 0     | 0,043 | 1         | 0,85416068    | 1,170739913     | 0               |
| SPIRE1                                                                                        | 0,984065256 | -0,227622955 | 0,156 | 0,148 | 1         | 0,854040887   | 1,170904128     | 1,054054054     |
| ADAMTS7                                                                                       | 0,037113331 | -0,227897469 | 0,438 | 0,207 | 1         | 0,853878396   | 1,171126948     | 2,115942029     |
| DSTYK                                                                                         | 0,145646739 | -0,228134935 | 0,188 | 0,09  | 1         | 0,853737861   | 1,171319729     | 2,088888889     |
| LIN7C                                                                                         | 0,076677794 | -0,228152666 | 0,281 | 0,133 | 1         | 0,853727368   | 1,171334125     | 2,112781955     |
| ARTN                                                                                          | 0,963619739 | -0,228273456 | 0,062 | 0,062 | 1         | 0,853655893   | 1,1714322       | 1               |
| SLC25A48                                                                                      | 0,234088337 | -0,228523503 | 0     | 0,043 | 1         | 0,85350795    | 1,171635249     | 0               |
| TOGARAM1                                                                                      | 0,031451095 | -0,228566892 | 0,281 | 0,113 | 1         | 0,853482282   | 1,171670486     | 2,486725664     |
| STEEP1                                                                                        | 0,804543977 | -0,228627438 | 0,031 | 0,039 | 1         | 0,853446464   | 1,17171966      | 0,794871795     |

Supplementary Table 1

| Differentially expressed genes_adjacent-skin-XL_comparing SC-Keloid vs. (SC-Myel, SC-Nonmyel) |             |              |       |       |           |               |                 |                 |
|-----------------------------------------------------------------------------------------------|-------------|--------------|-------|-------|-----------|---------------|-----------------|-----------------|
| gene                                                                                          | p_val       | avg_log2FC   | pct.1 | pct.2 | p_val_adj | Foldchange_UP | Foldchange_DOWN | Ratio_pct1_pct2 |
| ALKBH5                                                                                        | 0,081948379 | -0,228695142 | 0,312 | 0,148 | 1         | 0,853406414   | 1,171774648     | 2,108108108     |
| PRRG3                                                                                         | 0,257548576 | -0,228894429 | 0     | 0,039 | 1         | 0,853288537   | 1,171936522     | 0               |
| JMY                                                                                           | 0,400599564 | -0,229034383 | 0,188 | 0,117 | 1         | 0,853205764   | 1,172050217     | 1,606837607     |
| MLF1                                                                                          | 0,004528707 | -0,229310338 | 0,344 | 0,121 | 1         | 0,853042581   | 1,172274424     | 2,842975207     |
| WFDC2                                                                                         | 0,213026321 | -0,229444967 | 0     | 0,047 | 1         | 0,85296298    | 1,172383824     | 0               |
| PDZD4                                                                                         | 0,836825729 | -0,22946239  | 0,125 | 0,102 | 1         | 0,85295268    | 1,172397982     | 1,225490196     |
| FLCN                                                                                          | 0,920205922 | -0,229554844 | 0,094 | 0,094 | 1         | 0,85289802    | 1,172473117     | 1               |
| GALT                                                                                          | 0,212362312 | -0,229602397 | 0,156 | 0,078 | 1         | 0,852869908   | 1,172511763     | 2               |
| CCM2                                                                                          | 0,003196702 | -0,229642135 | 0,375 | 0,129 | 1         | 0,852846417   | 1,17254406      | 2,906976744     |
| ATG14                                                                                         | 0,240402432 | -0,229773425 | 0,188 | 0,102 | 1         | 0,852768808   | 1,17265077      | 1,843137255     |
| GNE                                                                                           | 0,887104347 | -0,229832453 | 0,031 | 0,035 | 1         | 0,852733918   | 1,172698751     | 0,885714286     |
| ARHGAP39                                                                                      | 0,401035597 | -0,229978427 | 0,031 | 0,07  | 1         | 0,852647642   | 1,172817412     | 0,442857143     |
| CA2                                                                                           | 0,887104347 | -0,230010595 | 0,031 | 0,035 | 1         | 0,85262863    | 1,172843562     | 0,885714286     |
| HOPX                                                                                          | 0,428872689 | -0,230012647 | 0     | 0,02  | 1         | 0,852627417   | 1,172845231     | 0               |
| LGALS8                                                                                        | 0,445227443 | -0,230225172 | 0,094 | 0,055 | 1         | 0,852501825   | 1,173018016     | 1,709090909     |
| SCAMP1                                                                                        | 0,050620571 | -0,230242995 | 0,281 | 0,121 | 1         | 0,852491293   | 1,173032508     | 2,32231405      |
| LYRM9                                                                                         | 0,597765819 | -0,230306772 | 0,125 | 0,086 | 1         | 0,852453609   | 1,173084365     | 1,453488372     |
| XPOT                                                                                          | 0,050727376 | -0,230313855 | 0,25  | 0,105 | 1         | 0,852449423   | 1,173090124     | 2,380952381     |
| MBOAT7                                                                                        | 0,804306744 | -0,23038847  | 0,062 | 0,07  | 1         | 0,852405336   | 1,173150797     | 0,885714286     |
| TAPT1                                                                                         | 0,457583888 | -0,23043634  | 0,156 | 0,102 | 1         | 0,852377053   | 1,173189725     | 1,529411765     |
| PLEKHM3                                                                                       | 0,257548576 | -0,230480053 | 0     | 0,039 | 1         | 0,852351227   | 1,173225272     | 0               |
| UBR7                                                                                          | 0,097228337 | -0,230634286 | 0,188 | 0,082 | 1         | 0,85226011    | 1,173350704     | 2,292682927     |
| GFM1                                                                                          | 0,556776127 | -0,230906405 | 0,031 | 0,055 | 1         | 0,852099373   | 1,17357204      | 0,563636364     |
| CAMTA1                                                                                        | 0,165926701 | -0,231082089 | 0,594 | 0,348 | 1         | 0,851995615   | 1,17371496      | 1,706896552     |
| MAP7D1                                                                                        | 0,270700266 | -0,231185356 | 0,344 | 0,207 | 1         | 0,851934632   | 1,173798977     | 1,661835749     |
| WDR75                                                                                         | 0,302364586 | -0,231211609 | 0,125 | 0,066 | 1         | 0,851919129   | 1,173820337     | 1,893939394     |
| TLE3                                                                                          | 0,080620365 | -0,231329941 | 0,5   | 0,262 | 1         | 0,851849257   | 1,17391662      | 1,908396947     |
| TBC1D32                                                                                       | 0,887104347 | -0,231347509 | 0,031 | 0,035 | 1         | 0,851838884   | 1,173930914     | 0,885714286     |
| STX12                                                                                         | 0,202385763 | -0,23147405  | 0,344 | 0,195 | 1         | 0,851764171   | 1,174033886     | 1,764102564     |
| C16orf72                                                                                      | 0,229370318 | -0,231658427 | 0,219 | 0,121 | 1         | 0,851655322   | 1,174183938     | 1,809917355     |

Supplementary Table 1

| Differentially expressed genes_adjacent-skin-XL_comparing SC-Keloid vs. (SC-Myel, SC-Nonmyel) |             |              |       |       |           |               |                 |                 |
|-----------------------------------------------------------------------------------------------|-------------|--------------|-------|-------|-----------|---------------|-----------------|-----------------|
| gene                                                                                          | p_val       | avg_log2FC   | pct.1 | pct.2 | p_val_adj | Foldchange_UP | Foldchange_DOWN | Ratio_pct1_pct2 |
| ADRA2A                                                                                        | 0,283789128 | -0,231843482 | 0     | 0,035 | 1         | 0,851546087   | 1,174334561     | 0               |
| DCAF16                                                                                        | 0,458482361 | -0,231972634 | 0,031 | 0,062 | 1         | 0,851469859   | 1,174439693     | 0,5             |
| PRPF4B                                                                                        | 0,263115464 | -0,232064759 | 0,656 | 0,387 | 1         | 0,851415489   | 1,174514691     | 1,695090439     |
| CC2D1B                                                                                        | 0,548952158 | -0,232093061 | 0,031 | 0,055 | 1         | 0,851398786   | 1,174537732     | 0,563636364     |
| ARHGDIG                                                                                       | 0,234088337 | -0,232157791 | 0     | 0,043 | 1         | 0,851360587   | 1,174590432     | 0               |
| CBX4                                                                                          | 0,176138873 | -0,232162004 | 0,156 | 0,074 | 1         | 0,851358101   | 1,174593862     | 2,108108108     |
| TTLL4                                                                                         | 0,30793671  | -0,232328919 | 0,062 | 0,027 | 1         | 0,851259607   | 1,174729767     | 2,296296296     |
| PDLIM5                                                                                        | 0,048024678 | -0,232412412 | 0,281 | 0,121 | 1         | 0,851210344   | 1,174797754     | 2,32231405      |
| UQCR10                                                                                        | 0,101636686 | -0,232653114 | 0,625 | 0,352 | 1         | 0,851068339   | 1,174993775     | 1,775568182     |
| ARHGFE25                                                                                      | 0,730358576 | -0,232666801 | 0,031 | 0,043 | 1         | 0,851060264   | 1,175004923     | 0,720930233     |
| MAP3K2                                                                                        | 0,008215074 | -0,232705046 | 0,375 | 0,145 | 1         | 0,851037703   | 1,175036072     | 2,586206897     |
| ITM2A                                                                                         | 0,503346174 | -0,232813571 | 0,031 | 0,059 | 1         | 0,850973687   | 1,175124466     | 0,525423729     |
| FBXW7                                                                                         | 0,278218567 | -0,232819945 | 0,281 | 0,168 | 1         | 0,850969928   | 1,175129658     | 1,672619048     |
| RIPK2                                                                                         | 0,185335556 | -0,232852903 | 0,219 | 0,113 | 1         | 0,850950488   | 1,175156503     | 1,938053097     |
| MOSMO                                                                                         | 0,598076973 | -0,233022229 | 0,156 | 0,109 | 1         | 0,850850584   | 1,175294487     | 1,431192661     |
| CWF19L1                                                                                       | 0,38481627  | -0,233050242 | 0     | 0,023 | 1         | 0,850834098   | 1,175317259     | 0               |
| FMN2                                                                                          | 0,234088337 | -0,23332413  | 0     | 0,043 | 1         | 0,850672588   | 1,175540407     | 0               |
| TMC6                                                                                          | 0,283789128 | -0,233388001 | 0     | 0,035 | 1         | 0,850634928   | 1,175592452     | 0               |
| PSPC1                                                                                         | 0,795568952 | -0,233485046 | 0,094 | 0,074 | 1         | 0,85057771    | 1,175671532     | 1,27027027      |
| RAP2B                                                                                         | 0,40598726  | -0,233523208 | 0,125 | 0,074 | 1         | 0,850555211   | 1,175702631     | 1,689189189     |
| RNMT                                                                                          | 0,061685881 | -0,233704949 | 0,406 | 0,203 | 1         | 0,850448071   | 1,175850748     | 2               |
| TRIP11                                                                                        | 0,03715015  | -0,233710965 | 0,344 | 0,152 | 1         | 0,850444524   | 1,175855651     | 2,263157895     |
| MOK                                                                                           | 0,007740005 | -0,233713234 | 0,219 | 0,066 | 1         | 0,850443187   | 1,175857501     | 3,318181818     |
| ENOSF1                                                                                        | 0,093753684 | -0,233797405 | 0,125 | 0,047 | 1         | 0,850393571   | 1,175926105     | 2,659574468     |
| PSD3                                                                                          | 0,144822002 | -0,233816656 | 0,25  | 0,129 | 1         | 0,850382224   | 1,175941797     | 1,937984496     |
| RAB33B                                                                                        | 0,538237415 | -0,233828246 | 0,125 | 0,082 | 1         | 0,850375392   | 1,175951244     | 1,524390244     |
| UBR2                                                                                          | 0,142100035 | -0,233892662 | 0,188 | 0,09  | 1         | 0,850337424   | 1,176003751     | 2,088888889     |
| NLGN2                                                                                         | 0,906381059 | -0,233930318 | 0,125 | 0,109 | 1         | 0,850315229   | 1,176034447     | 1,146788991     |
| CAPS2                                                                                         | 0,543117005 | -0,234179658 | 0     | 0,012 | 1         | 0,850168282   | 1,176237718     | 0               |
| NPC1                                                                                          | 0,998160744 | -0,234250889 | 0,094 | 0,086 | 1         | 0,850126308   | 1,176295794     | 1,093023256     |

Supplementary Table 1

| Differentially expressed genes_adjacent-skin-XL_comparing SC-Keloid vs. (SC-Myel, SC-Nonmyel) |             |              |       |       |           |               |                 |                 |
|-----------------------------------------------------------------------------------------------|-------------|--------------|-------|-------|-----------|---------------|-----------------|-----------------|
| gene                                                                                          | p_val       | avg_log2FC   | pct.1 | pct.2 | p_val_adj | Foldchange_UP | Foldchange_DOWN | Ratio_pct1_pct2 |
| YTHDC1                                                                                        | 0,642293611 | -0,234291644 | 0,438 | 0,316 | 1         | 0,850102293   | 1,176329024     | 1,386075949     |
| CCDC171                                                                                       | 0,283789128 | -0,234658493 | 0     | 0,035 | 1         | 0,849886156   | 1,176628179     | 0               |
| ANOS1                                                                                         | 0,194053346 | -0,234692799 | 0     | 0,051 | 1         | 0,849865947   | 1,176656158     | 0               |
| NDUFS1                                                                                        | 0,093751344 | -0,234732765 | 0,281 | 0,137 | 1         | 0,849842403   | 1,176688755     | 2,051094891     |
| ENGASE                                                                                        | 0,213026321 | -0,235109133 | 0     | 0,047 | 1         | 0,849620727   | 1,176995768     | 0               |
| EIF4A3                                                                                        | 0,097562195 | -0,235195707 | 0,5   | 0,254 | 1         | 0,849569744   | 1,1770664       | 1,968503937     |
| IQGAP2                                                                                        | 0,692420524 | -0,235230296 | 0,5   | 0,387 | 1         | 0,849549375   | 1,177094621     | 1,291989664     |
| EID3                                                                                          | 0,548952158 | -0,235494711 | 0,031 | 0,055 | 1         | 0,849393686   | 1,177310377     | 0,563636364     |
| IBTK                                                                                          | 0,060245342 | -0,235542009 | 0,25  | 0,109 | 1         | 0,849365839   | 1,177348975     | 2,293577982     |
| SHFL                                                                                          | 0,123752934 | -0,235770008 | 0,312 | 0,164 | 1         | 0,849231619   | 1,177535054     | 1,902439024     |
| BMP1A                                                                                         | 0,553563879 | -0,235819504 | 0,062 | 0,09  | 1         | 0,849202484   | 1,177575454     | 0,688888889     |
| PRPF18                                                                                        | 0,300605972 | -0,235941709 | 0,156 | 0,086 | 1         | 0,849130554   | 1,177675206     | 1,813953488     |
| C7orf26                                                                                       | 0,396289917 | -0,236011881 | 0,062 | 0,031 | 1         | 0,849089254   | 1,177732488     | 2               |
| UBN1                                                                                          | 0,588138226 | -0,236346678 | 0,094 | 0,062 | 1         | 0,848892234   | 1,178005829     | 1,516129032     |
| USP11                                                                                         | 0,170623218 | -0,236349942 | 0,344 | 0,191 | 1         | 0,848890314   | 1,178008494     | 1,80104712      |
| H2BC15                                                                                        | 0,751100713 | -0,236392039 | 0,062 | 0,047 | 1         | 0,848865544   | 1,178042868     | 1,319148936     |
| UCKL1                                                                                         | 0,036178394 | -0,23640022  | 0,312 | 0,133 | 1         | 0,84886073    | 1,178049548     | 2,345864662     |
| SMG6                                                                                          | 0,163771487 | -0,236712692 | 0,125 | 0,055 | 1         | 0,848676896   | 1,178304729     | 2,272727273     |
| ODR4                                                                                          | 0,060916409 | -0,236750168 | 0,188 | 0,074 | 1         | 0,848654851   | 1,178335337     | 2,540540541     |
| ST7L                                                                                          | 0,173155757 | -0,236852517 | 0,156 | 0,074 | 1         | 0,848594647   | 1,178418935     | 2,108108108     |
| SNTA1                                                                                         | 0,255641859 | -0,236882928 | 0,156 | 0,082 | 1         | 0,84857676    | 1,178443775     | 1,902439024     |
| HMGCS1                                                                                        | 0,033860139 | -0,236943591 | 0,281 | 0,117 | 1         | 0,848541079   | 1,178493328     | 2,401709402     |
| TOB2                                                                                          | 0,635380935 | -0,236983595 | 0,25  | 0,188 | 1         | 0,84851755    | 1,178526006     | 1,329787234     |
| TMEM74B                                                                                       | 0,38481627  | -0,237231486 | 0     | 0,023 | 1         | 0,848371766   | 1,178728524     | 0               |
| DDX42                                                                                         | 0,176396095 | -0,237562018 | 0,219 | 0,113 | 1         | 0,848177421   | 1,17899861      | 1,938053097     |
| CFL2                                                                                          | 0,059539815 | -0,237597075 | 0,281 | 0,125 | 1         | 0,84815681    | 1,17902726      | 2,248           |
| SDE2                                                                                          | 0,535198384 | -0,237760429 | 0,125 | 0,082 | 1         | 0,84806078    | 1,179160767     | 1,524390244     |
| RPRD2                                                                                         | 0,516147046 | -0,23780467  | 0,094 | 0,059 | 1         | 0,848034775   | 1,179196927     | 1,593220339     |
| TFG                                                                                           | 0,033363079 | -0,237882042 | 0,625 | 0,289 | 1         | 0,847989295   | 1,179260169     | 2,162629758     |
| KIAA0408                                                                                      | 0,804543977 | -0,237956252 | 0,031 | 0,039 | 1         | 0,847945677   | 1,17932083      | 0,794871795     |

Supplementary Table 1

| Differentially expressed genes_adjacent-skin-XL_ comparing SC-Keloid vs. (SC-Myel, SC-Nonmyel) |             |              |       |       |           |               |                 |                 |
|------------------------------------------------------------------------------------------------|-------------|--------------|-------|-------|-----------|---------------|-----------------|-----------------|
| gene                                                                                           | p_val       | avg_log2FC   | pct.1 | pct.2 | p_val_adj | Foldchange_UP | Foldchange_DOWN | Ratio_pct1_pct2 |
| RGS1                                                                                           | 0,346686972 | -0,238267084 | 0     | 0,027 | 1         | 0,847763005   | 1,179574945     | 0               |
| PPP1CC                                                                                         | 0,015859624 | -0,238615415 | 0,438 | 0,18  | 1         | 0,847558342   | 1,179859782     | 2,433333333     |
| MPRIIP-AS1                                                                                     | 0,799342981 | -0,238743692 | 0,094 | 0,074 | 1         | 0,847482984   | 1,179964694     | 1,27027027      |
| MED21                                                                                          | 0,28927089  | -0,238772536 | 0,219 | 0,129 | 1         | 0,847466041   | 1,179988285     | 1,697674419     |
| ABHD10                                                                                         | 0,376291412 | -0,238881316 | 0,094 | 0,051 | 1         | 0,847402144   | 1,18007726      | 1,843137255     |
| KANTR                                                                                          | 0,313292814 | -0,238977729 | 0     | 0,031 | 1         | 0,847345515   | 1,180156125     | 0               |
| SDR42E2                                                                                        | 0,603353082 | -0,238996926 | 0,031 | 0,051 | 1         | 0,84733424    | 1,180171829     | 0,607843137     |
| TAP2                                                                                           | 0,054931246 | -0,239023378 | 0,219 | 0,09  | 1         | 0,847318705   | 1,180193467     | 2,433333333     |
| RBM11                                                                                          | 0,497163605 | -0,239051446 | 0,062 | 0,098 | 1         | 0,84730222    | 1,180216428     | 0,632653061     |
| SYDE2                                                                                          | 0,603353082 | -0,239057768 | 0,031 | 0,051 | 1         | 0,847298507   | 1,1802216       | 0,607843137     |
| NADK2                                                                                          | 0,578217897 | -0,239103788 | 0,062 | 0,039 | 1         | 0,84727148    | 1,180259248     | 1,58974359      |
| RFC3                                                                                           | 0,06440165  | -0,239526914 | 0,156 | 0,059 | 1         | 0,847023021   | 1,180605456     | 2,644067797     |
| LAMA3                                                                                          | 0,283789128 | -0,239792653 | 0     | 0,035 | 1         | 0,846867017   | 1,180822939     | 0               |
| USP33                                                                                          | 0,081640693 | -0,239983815 | 0,281 | 0,133 | 1         | 0,846754812   | 1,180979412     | 2,112781955     |
| PRPF6                                                                                          | 0,072310646 | -0,240064427 | 0,281 | 0,129 | 1         | 0,8467075     | 1,181045403     | 2,178294574     |
| FNBP1                                                                                          | 0,235357578 | -0,240087898 | 0,219 | 0,121 | 1         | 0,846693725   | 1,181064617     | 1,809917355     |
| HEATR5B                                                                                        | 0,079268503 | -0,240091307 | 0,188 | 0,078 | 1         | 0,846691724   | 1,181067408     | 2,41025641      |
| SYVN1                                                                                          | 0,548952158 | -0,240277964 | 0,031 | 0,055 | 1         | 0,846582186   | 1,181220225     | 0,563636364     |
| XPO1                                                                                           | 0,058127092 | -0,240441978 | 0,406 | 0,191 | 1         | 0,846485947   | 1,181354521     | 2,12565445      |
| NBEAL1                                                                                         | 0,195356281 | -0,240634466 | 0,281 | 0,156 | 1         | 0,846373014   | 1,18151215      | 1,801282051     |
| SLC25A38                                                                                       | 0,516147046 | -0,240857124 | 0,094 | 0,059 | 1         | 0,846242399   | 1,181694513     | 1,593220339     |
| C2orf76                                                                                        | 0,204506657 | -0,240927017 | 0,125 | 0,059 | 1         | 0,846201403   | 1,181751763     | 2,118644068     |
| DGCR6                                                                                          | 0,283789128 | -0,241457852 | 0     | 0,035 | 1         | 0,845890104   | 1,182186665     | 0               |
| MKNK1                                                                                          | 0,253529282 | -0,241730639 | 0,125 | 0,062 | 1         | 0,845730177   | 1,182410215     | 2,016129032     |
| SRFBP1                                                                                         | 0,279787851 | -0,241759961 | 0,188 | 0,105 | 1         | 0,845712987   | 1,182434248     | 1,79047619      |
| FAM20C                                                                                         | 0,035482716 | -0,241801191 | 0,281 | 0,117 | 1         | 0,845688818   | 1,18246804      | 2,401709402     |
| UBQLN1                                                                                         | 0,039640256 | -0,241920456 | 0,312 | 0,137 | 1         | 0,84561891    | 1,182565797     | 2,277372263     |
| SLC44A2                                                                                        | 0,597547605 | -0,242012688 | 0,375 | 0,277 | 1         | 0,845564851   | 1,182641401     | 1,353790614     |
| CNTRL                                                                                          | 0,429615562 | -0,242036508 | 0,156 | 0,098 | 1         | 0,84555089    | 1,182660928     | 1,591836735     |
| LARP4B                                                                                         | 0,579038679 | -0,242166807 | 0,125 | 0,086 | 1         | 0,845474526   | 1,182767746     | 1,453488372     |

Supplementary Table 1

| Differentially expressed genes_adjacent-skin-XL_ comparing SC-Keloid vs. (SC-Myel, SC-Nonmyel) |             |              |       |       |           |               |                 |                 |
|------------------------------------------------------------------------------------------------|-------------|--------------|-------|-------|-----------|---------------|-----------------|-----------------|
| gene                                                                                           | p_val       | avg_log2FC   | pct.1 | pct.2 | p_val_adj | Foldchange_UP | Foldchange_DOWN | Ratio_pct1_pct2 |
| PDK3                                                                                           | 0,213026321 | -0,242196377 | 0     | 0,047 | 1         | 0,845457198   | 1,182791989     | 0               |
| SCGB2A2                                                                                        | 0,804543977 | -0,242213467 | 0,031 | 0,039 | 1         | 0,845447182   | 1,182806        | 0,794871795     |
| PNP                                                                                            | 0,933712959 | -0,24232062  | 0,062 | 0,062 | 1         | 0,845384391   | 1,182893854     | 1               |
| POC5                                                                                           | 0,887104347 | -0,242511579 | 0,031 | 0,035 | 1         | 0,845272501   | 1,183050435     | 0,885714286     |
| LINC00667                                                                                      | 0,730213605 | -0,242636612 | 0,156 | 0,121 | 1         | 0,845199248   | 1,18315297      | 1,289256198     |
| LSS                                                                                            | 0,359364064 | -0,242762006 | 0,125 | 0,07  | 1         | 0,845125789   | 1,18325581      | 1,785714286     |
| CDC40                                                                                          | 0,086229766 | -0,243043822 | 0,156 | 0,062 | 1         | 0,844960718   | 1,18348697      | 2,516129032     |
| MLLT10                                                                                         | 0,387353854 | -0,243070425 | 0,156 | 0,094 | 1         | 0,844945137   | 1,183508794     | 1,659574468     |
| RNF11                                                                                          | 0,493233094 | -0,243158319 | 0,25  | 0,168 | 1         | 0,844893662   | 1,183580899     | 1,488095238     |
| EXD3                                                                                           | 0,887104347 | -0,243429878 | 0,031 | 0,035 | 1         | 0,844734643   | 1,183803705     | 0,885714286     |
| C1D                                                                                            | 0,045258158 | -0,243514278 | 0,344 | 0,152 | 1         | 0,844685226   | 1,183872962     | 2,263157895     |
| NRARP                                                                                          | 0,436520656 | -0,243542813 | 0,031 | 0,066 | 1         | 0,844668518   | 1,183896378     | 0,46969697      |
| FLT3LG                                                                                         | 0,887104347 | -0,243542924 | 0,031 | 0,035 | 1         | 0,844668454   | 1,183896469     | 0,885714286     |
| PEAK1                                                                                          | 0,95305118  | -0,243698514 | 0,094 | 0,09  | 1         | 0,844577364   | 1,184024155     | 1,044444444     |
| SERPINB5                                                                                       | 0,313292814 | -0,243787266 | 0     | 0,031 | 1         | 0,844525409   | 1,184096996     | 0               |
| POLDIP3                                                                                        | 0,496843677 | -0,24394137  | 0,188 | 0,125 | 1         | 0,844435204   | 1,184223485     | 1,504           |
| MSH3                                                                                           | 0,653016738 | -0,243945977 | 0,094 | 0,066 | 1         | 0,844432507   | 1,184227267     | 1,424242424     |
| DNAJC19                                                                                        | 0,007902696 | -0,24417978  | 0,5   | 0,199 | 1         | 0,84429567    | 1,184419198     | 2,512562814     |
| RHOT2                                                                                          | 0,308425288 | -0,244438399 | 0,219 | 0,129 | 1         | 0,844144334   | 1,184631537     | 1,697674419     |
| ZBTB11                                                                                         | 0,217580187 | -0,244458511 | 0,281 | 0,156 | 1         | 0,844132566   | 1,184648052     | 1,801282051     |
| CMTM7                                                                                          | 0,142110321 | -0,244509884 | 0,156 | 0,07  | 1         | 0,844102508   | 1,184690236     | 2,228571429     |
| LURAP1L                                                                                        | 0,804543977 | -0,244525565 | 0,031 | 0,039 | 1         | 0,844093333   | 1,184703114     | 0,794871795     |
| SHISA9                                                                                         | 0,663576959 | -0,244648465 | 0,062 | 0,043 | 1         | 0,84402143    | 1,18480404      | 1,441860465     |
| TK2                                                                                            | 0,214664135 | -0,244704952 | 0,188 | 0,098 | 1         | 0,843988384   | 1,184850431     | 1,918367347     |
| MEG8                                                                                           | 0,627437373 | -0,244739813 | 0,094 | 0,066 | 1         | 0,84396799    | 1,184879061     | 1,424242424     |
| CPQ                                                                                            | 0,178680175 | -0,244802926 | 0,344 | 0,191 | 1         | 0,84393107    | 1,184930897     | 1,80104712      |
| USP10                                                                                          | 0,138196896 | -0,244993767 | 0,219 | 0,105 | 1         | 0,843819442   | 1,185087651     | 2,085714286     |
| ZC3H12A                                                                                        | 0,711312846 | -0,245088637 | 0,125 | 0,094 | 1         | 0,843763955   | 1,185165584     | 1,329787234     |
| NET1                                                                                           | 0,038216718 | -0,24512949  | 0,281 | 0,117 | 1         | 0,843740062   | 1,185199144     | 2,401709402     |
| HSPA4L                                                                                         | 0,176914647 | -0,245284787 | 0     | 0,055 | 1         | 0,843649244   | 1,18532673      | 0               |

Supplementary Table 1

| Differentially expressed genes_adjacent-skin-XL_comparing SC-Keloid vs. (SC-Myel, SC-Nonmyel) |             |              |       |       |           |               |                 |                 |
|-----------------------------------------------------------------------------------------------|-------------|--------------|-------|-------|-----------|---------------|-----------------|-----------------|
| gene                                                                                          | p_val       | avg_log2FC   | pct.1 | pct.2 | p_val_adj | Foldchange_UP | Foldchange_DOWN | Ratio_pct1_pct2 |
| DDX51                                                                                         | 0,804543977 | -0,245442824 | 0,031 | 0,039 | 1         | 0,843556833   | 1,185456582     | 0,794871795     |
| TMEM71                                                                                        | 0,933712959 | -0,245521893 | 0,062 | 0,062 | 1         | 0,843510602   | 1,185521554     | 1               |
| CTSO                                                                                          | 0,933712959 | -0,245613675 | 0,062 | 0,062 | 1         | 0,843456941   | 1,185596978     | 1               |
| CAT                                                                                           | 0,236009066 | -0,245776508 | 0,25  | 0,141 | 1         | 0,843361748   | 1,1857308       | 1,773049645     |
| PELI2                                                                                         | 0,234088337 | -0,245870837 | 0     | 0,043 | 1         | 0,843306607   | 1,18580833      | 0               |
| SMPD4                                                                                         | 0,34004375  | -0,245884487 | 0,188 | 0,113 | 1         | 0,843298628   | 1,18581955      | 1,663716814     |
| RBM15                                                                                         | 0,548952158 | -0,246030632 | 0,031 | 0,055 | 1         | 0,843213206   | 1,18593968      | 0,563636364     |
| GNPDA2                                                                                        | 0,445227443 | -0,246059202 | 0,094 | 0,055 | 1         | 0,843196509   | 1,185963165     | 1,709090909     |
| SOCS7                                                                                         | 0,603353082 | -0,246115323 | 0,031 | 0,051 | 1         | 0,843163708   | 1,186009301     | 0,607843137     |
| LMO7DN                                                                                        | 0,428872689 | -0,246266362 | 0     | 0,02  | 1         | 0,843075441   | 1,186133473     | 0               |
| WWP1                                                                                          | 0,965906126 | -0,246320615 | 0,125 | 0,113 | 1         | 0,843043737   | 1,186178079     | 1,10619469      |
| HLA-DQA1                                                                                      | 0,480650464 | -0,246352464 | 0     | 0,016 | 1         | 0,843025126   | 1,186204265     | 0               |
| AC116407.2                                                                                    | 0,663576959 | -0,246459195 | 0,031 | 0,047 | 1         | 0,842962761   | 1,186292024     | 0,659574468     |
| PGM5                                                                                          | 0,38481627  | -0,246467332 | 0     | 0,023 | 1         | 0,842958007   | 1,186298715     | 0               |
| HNRNPK                                                                                        | 0,906160641 | -0,246478263 | 0,875 | 0,656 | 1         | 0,84295162    | 1,186307703     | 1,333841463     |
| NSUN6                                                                                         | 0,168752127 | -0,246510655 | 0,156 | 0,074 | 1         | 0,842932694   | 1,186334339     | 2,108108108     |
| TADA1                                                                                         | 0,194053346 | -0,246591235 | 0     | 0,051 | 1         | 0,842885614   | 1,186400602     | 0               |
| IFIT1                                                                                         | 0,739785061 | -0,246918669 | 0,062 | 0,074 | 1         | 0,842694334   | 1,186669898     | 0,837837838     |
| ATG4B                                                                                         | 0,074729729 | -0,247093985 | 0,188 | 0,078 | 1         | 0,842591937   | 1,186814111     | 2,41025641      |
| HMGXB3                                                                                        | 0,028002326 | -0,247150017 | 0,281 | 0,113 | 1         | 0,842559212   | 1,186860205     | 2,486725664     |
| GTF2I                                                                                         | 0,090030079 | -0,247161946 | 0,75  | 0,387 | 1         | 0,842552246   | 1,186870019     | 1,937984496     |
| FGD4                                                                                          | 0,31227644  | -0,247260901 | 0,188 | 0,109 | 1         | 0,842494457   | 1,18695143      | 1,724770642     |
| AP1AR                                                                                         | 0,403286918 | -0,247318208 | 0,125 | 0,074 | 1         | 0,842460992   | 1,186998579     | 1,689189189     |
| ANKRD17                                                                                       | 0,058657759 | -0,247378104 | 0,25  | 0,109 | 1         | 0,842426016   | 1,187047861     | 2,293577982     |
| URB1                                                                                          | 0,99780108  | -0,247481336 | 0,062 | 0,059 | 1         | 0,842365738   | 1,187132803     | 1,050847458     |
| XAF1                                                                                          | 0,062941189 | -0,247495757 | 0,156 | 0,059 | 1         | 0,842357318   | 1,187144669     | 2,644067797     |
| PTPN11                                                                                        | 0,010105466 | -0,247619964 | 0,312 | 0,113 | 1         | 0,8422848     | 1,18724688      | 2,761061947     |
| TNS2                                                                                          | 0,618344889 | -0,247999292 | 0,156 | 0,113 | 1         | 0,842063367   | 1,187559083     | 1,380530973     |
| ARRDC2                                                                                        | 0,396289917 | -0,248052135 | 0,062 | 0,031 | 1         | 0,842032524   | 1,187602582     | 2               |
| MBD1                                                                                          | 0,043657261 | -0,248199477 | 0,188 | 0,07  | 1         | 0,841946532   | 1,187723877     | 2,685714286     |

Supplementary Table 1

| Differentially expressed genes_adjacent-skin-XL_comparing SC-Keloid vs. (SC-Myel, SC-Nonmyel) |             |              |       |       |           |               |                 |                 |
|-----------------------------------------------------------------------------------------------|-------------|--------------|-------|-------|-----------|---------------|-----------------|-----------------|
| gene                                                                                          | p_val       | avg_log2FC   | pct.1 | pct.2 | p_val_adj | Foldchange_UP | Foldchange_DOWN | Ratio_pct1_pct2 |
| ANKRA2                                                                                        | 0,304711877 | -0,248215107 | 0,125 | 0,066 | 1         | 0,841937411   | 1,187736745     | 1,893939394     |
| WDFY1                                                                                         | 0,445227443 | -0,248250235 | 0,094 | 0,055 | 1         | 0,841916911   | 1,187765666     | 1,709090909     |
| DUSP5                                                                                         | 0,724751104 | -0,248275594 | 0,094 | 0,07  | 1         | 0,841902112   | 1,187786544     | 1,342857143     |
| NVL                                                                                           | 0,213026321 | -0,248292136 | 0     | 0,047 | 1         | 0,841892459   | 1,187800164     | 0               |
| SCMH1                                                                                         | 0,99780108  | -0,248431581 | 0,062 | 0,059 | 1         | 0,841811089   | 1,187914977     | 1,050847458     |
| KCTD4                                                                                         | 0,257548576 | -0,248461754 | 0     | 0,039 | 1         | 0,841793483   | 1,187939821     | 0               |
| LZIC                                                                                          | 0,018167812 | -0,248490028 | 0,312 | 0,121 | 1         | 0,841776986   | 1,187963103     | 2,578512397     |
| RHEB                                                                                          | 0,327964386 | -0,248742928 | 0,688 | 0,414 | 1         | 0,841629438   | 1,188171368     | 1,661835749     |
| ATXN1                                                                                         | 0,00243148  | -0,248859852 | 0,406 | 0,141 | 1         | 0,84156123    | 1,188267667     | 2,879432624     |
| SDAD1                                                                                         | 0,516147046 | -0,248920952 | 0,094 | 0,059 | 1         | 0,84152559    | 1,188317993     | 1,593220339     |
| CSPP1                                                                                         | 0,961390661 | -0,248968793 | 0,094 | 0,086 | 1         | 0,841497685   | 1,188357399     | 1,093023256     |
| SLC25A12                                                                                      | 0,663576959 | -0,248987762 | 0,031 | 0,047 | 1         | 0,84148662    | 1,188373024     | 0,659574468     |
| EPHX1                                                                                         | 0,588138226 | -0,249166245 | 0,094 | 0,062 | 1         | 0,841382522   | 1,188520053     | 1,516129032     |
| GTF2H1                                                                                        | 0,517145205 | -0,249167357 | 0,125 | 0,082 | 1         | 0,841381874   | 1,188520969     | 1,524390244     |
| UGDH                                                                                          | 0,113147688 | -0,249263811 | 0,25  | 0,121 | 1         | 0,841325624   | 1,188600432     | 2,066115702     |
| ERCC6L2                                                                                       | 0,074729729 | -0,24929154  | 0,188 | 0,078 | 1         | 0,841309453   | 1,188623278     | 2,41025641      |
| MLLT3                                                                                         | 0,887104347 | -0,249403919 | 0,031 | 0,035 | 1         | 0,841243922   | 1,188715869     | 0,885714286     |
| DNAL1                                                                                         | 0,663576959 | -0,249638333 | 0,031 | 0,047 | 1         | 0,841107245   | 1,188909032     | 0,659574468     |
| CCDC159                                                                                       | 0,902554286 | -0,249686305 | 0,094 | 0,094 | 1         | 0,841079277   | 1,188948565     | 1               |
| PBX1                                                                                          | 0,773969012 | -0,249722239 | 0,062 | 0,074 | 1         | 0,841058328   | 1,18897818      | 0,837837838     |
| EIF4EBP2                                                                                      | 0,86908937  | -0,249780646 | 0,062 | 0,066 | 1         | 0,841024279   | 1,189026316     | 0,939393939     |
| USP25                                                                                         | 0,588138226 | -0,249866304 | 0,094 | 0,062 | 1         | 0,840974346   | 1,189096915     | 1,516129032     |
| BAMBI                                                                                         | 0,234088337 | -0,249967754 | 0     | 0,043 | 1         | 0,840915211   | 1,189180535     | 0               |
| SWT1                                                                                          | 0,979143607 | -0,249979184 | 0,031 | 0,031 | 1         | 0,840908548   | 1,189189957     | 1               |
| TRIM4                                                                                         | 0,603353082 | -0,250017549 | 0,031 | 0,051 | 1         | 0,840886186   | 1,189221581     | 0,607843137     |
| FER                                                                                           | 0,998397162 | -0,25009856  | 0,125 | 0,117 | 1         | 0,84083897    | 1,18928836      | 1,068376068     |
| LINS1                                                                                         | 0,191913299 | -0,250159632 | 0,094 | 0,039 | 1         | 0,840803377   | 1,189338706     | 2,41025641      |
| SEPTIN1                                                                                       | 0,933712959 | -0,250219988 | 0,062 | 0,062 | 1         | 0,840768202   | 1,189388464     | 1               |
| DGCR8                                                                                         | 0,603353082 | -0,25028894  | 0,031 | 0,051 | 1         | 0,840728019   | 1,189445311     | 0,607843137     |
| UBXN2A                                                                                        | 0,141002056 | -0,250334217 | 0,312 | 0,164 | 1         | 0,840701634   | 1,189482641     | 1,902439024     |



Supplementary Table 1

| Differentially expressed genes_adjacent-skin-XL_comparing SC-Keloid vs. (SC-Myel, SC-Nonmyel) |             |              |       |       |           |               |                 |                 |
|-----------------------------------------------------------------------------------------------|-------------|--------------|-------|-------|-----------|---------------|-----------------|-----------------|
| gene                                                                                          | p_val       | avg_log2FC   | pct.1 | pct.2 | p_val_adj | Foldchange_UP | Foldchange_DOWN | Ratio_pct1_pct2 |
| LARGE1                                                                                        | 0,339977961 | -0,250391107 | 0,188 | 0,109 | 1         | 0,840668484   | 1,189529546     | 1,724770642     |
| KAT7                                                                                          | 0,057671435 | -0,250482835 | 0,219 | 0,09  | 1         | 0,840615035   | 1,18960518      | 2,433333333     |
| ZNF136                                                                                        | 0,176914255 | -0,25067062  | 0     | 0,055 | 1         | 0,840505625   | 1,189760033     | 0               |
| YPEL3                                                                                         | 0,065290575 | -0,250715054 | 0,375 | 0,18  | 1         | 0,840479739   | 1,189796677     | 2,083333333     |
| SF3B3                                                                                         | 0,25187375  | -0,250974458 | 0,156 | 0,082 | 1         | 0,84032863    | 1,190010628     | 1,902439024     |
| GGT7                                                                                          | 0,997801078 | -0,251027965 | 0,062 | 0,059 | 1         | 0,840297464   | 1,190054764     | 1,050847458     |
| CHST9                                                                                         | 0,933712959 | -0,251029573 | 0,062 | 0,062 | 1         | 0,840296527   | 1,190056091     | 1               |
| TMEM87A                                                                                       | 0,012740243 | -0,251053086 | 0,562 | 0,242 | 1         | 0,840282832   | 1,190075486     | 2,32231405      |
| THAP6                                                                                         | 0,283789128 | -0,251105431 | 0     | 0,035 | 1         | 0,840252345   | 1,190118666     | 0               |
| SLC39A14                                                                                      | 0,253529282 | -0,251114274 | 0,125 | 0,062 | 1         | 0,840247195   | 1,190125961     | 2,016129032     |
| COL23A1                                                                                       | 0,213026321 | -0,251216308 | 0     | 0,047 | 1         | 0,840187771   | 1,190210135     | 0               |
| CASK                                                                                          | 0,230628924 | -0,25126976  | 0,188 | 0,102 | 1         | 0,840156642   | 1,190254233     | 1,843137255     |
| RBM26                                                                                         | 0,01480364  | -0,251428186 | 0,375 | 0,148 | 1         | 0,840064388   | 1,190384945     | 2,533783784     |
| PNPLA2                                                                                        | 0,113235914 | -0,25181352  | 0,344 | 0,176 | 1         | 0,839840042   | 1,190702932     | 1,954545455     |
| MPST                                                                                          | 0,05964868  | -0,25219357  | 0,312 | 0,141 | 1         | 0,839618832   | 1,19101664      | 2,212765957     |
| ATF1                                                                                          | 0,864972765 | -0,252248277 | 0,062 | 0,066 | 1         | 0,839586994   | 1,191061804     | 0,939393939     |
| CNST                                                                                          | 0,720482167 | -0,252537782 | 0,094 | 0,109 | 1         | 0,839418531   | 1,191300838     | 0,862385321     |
| CBR3                                                                                          | 0,538237843 | -0,252626722 | 0,125 | 0,082 | 1         | 0,839366784   | 1,191374283     | 1,524390244     |
| UBN2                                                                                          | 0,48331453  | -0,252754245 | 0,156 | 0,102 | 1         | 0,839292594   | 1,191479595     | 1,529411765     |
| HELB                                                                                          | 0,194053346 | -0,252801449 | 0     | 0,051 | 1         | 0,839265133   | 1,19151858      | 0               |
| BIRC6                                                                                         | 0,096332388 | -0,252848375 | 0,312 | 0,152 | 1         | 0,839237835   | 1,191557337     | 2,052631579     |
| ITFG1                                                                                         | 0,077209699 | -0,253020772 | 0,375 | 0,184 | 1         | 0,839137555   | 1,191699733     | 2,038043478     |
| PRR12                                                                                         | 0,732255237 | -0,253136601 | 0,094 | 0,07  | 1         | 0,839070187   | 1,191795414     | 1,342857143     |
| ZNRF3                                                                                         | 0,663576959 | -0,253183946 | 0,031 | 0,047 | 1         | 0,839042651   | 1,191834526     | 0,659574468     |
| ZNFX1                                                                                         | 0,638302587 | -0,253355458 | 0,156 | 0,113 | 1         | 0,838942909   | 1,191976223     | 1,380530973     |
| D2HGDH                                                                                        | 0,803121702 | -0,253394143 | 0,094 | 0,074 | 1         | 0,838920414   | 1,192008186     | 1,27027027      |
| SHOC2                                                                                         | 0,125272136 | -0,253657177 | 0,375 | 0,195 | 1         | 0,838767474   | 1,192225534     | 1,923076923     |
| LRRC4                                                                                         | 0,234088337 | -0,254083588 | 0     | 0,043 | 1         | 0,8385196     | 1,192577967     | 0               |
| PPP6R2                                                                                        | 0,321994138 | -0,254117234 | 0,188 | 0,109 | 1         | 0,838500045   | 1,19260578      | 1,724770642     |
| SYT14                                                                                         | 0,161397126 | -0,2544985   | 0     | 0,059 | 1         | 0,838278481   | 1,192920996     | 0               |

Supplementary Table 1

| Differentially expressed genes_adjacent-skin-XL_comparing SC-Keloid vs. (SC-Myel, SC-Nonmyel) |             |              |       |       |           |               |                 |                 |
|-----------------------------------------------------------------------------------------------|-------------|--------------|-------|-------|-----------|---------------|-----------------|-----------------|
| gene                                                                                          | p_val       | avg_log2FC   | pct.1 | pct.2 | p_val_adj | Foldchange_UP | Foldchange_DOWN | Ratio_pct1_pct2 |
| CYS1                                                                                          | 0,213026321 | -0,254688508 | 0     | 0,047 | 1         | 0,838168084   | 1,193078118     | 0               |
| FAM168B                                                                                       | 0,134661836 | -0,254794025 | 0,25  | 0,125 | 1         | 0,838106784   | 1,193165381     | 2               |
| U2AF2                                                                                         | 0,07974974  | -0,254809024 | 0,281 | 0,133 | 1         | 0,83809807    | 1,193177787     | 2,112781955     |
| PPP2CA                                                                                        | 0,089906165 | -0,254815171 | 0,594 | 0,309 | 1         | 0,838094499   | 1,19318287      | 1,922330097     |
| CRY2                                                                                          | 0,607571545 | -0,254826714 | 0,031 | 0,051 | 1         | 0,838087794   | 1,193192417     | 0,607843137     |
| CBX6                                                                                          | 0,414229703 | -0,254940301 | 0,375 | 0,242 | 1         | 0,838021812   | 1,193286363     | 1,549586777     |
| STAT2                                                                                         | 0,616461443 | -0,255086838 | 0,125 | 0,09  | 1         | 0,837936697   | 1,193407574     | 1,388888889     |
| POR                                                                                           | 0,219339222 | -0,255321765 | 0,188 | 0,098 | 1         | 0,837800259   | 1,193601923     | 1,918367347     |
| BORCS5                                                                                        | 0,124754001 | -0,255441767 | 0,188 | 0,086 | 1         | 0,837730574   | 1,19370121      | 2,186046512     |
| DPM3                                                                                          | 0,02809504  | -0,255494946 | 0,438 | 0,191 | 1         | 0,837699695   | 1,193745212     | 2,293193717     |
| SORCS3                                                                                        | 0,257548576 | -0,255589621 | 0     | 0,039 | 1         | 0,837644724   | 1,193823552     | 0               |
| POLB                                                                                          | 0,788035309 | -0,255604245 | 0,094 | 0,074 | 1         | 0,837636234   | 1,193835653     | 1,27027027      |
| TBL1X                                                                                         | 0,990803913 | -0,255681667 | 0,094 | 0,086 | 1         | 0,837591283   | 1,193899722     | 1,093023256     |
| FXR1                                                                                          | 0,279034725 | -0,25577955  | 0,625 | 0,367 | 1         | 0,837534457   | 1,193980727     | 1,702997275     |
| STS                                                                                           | 0,257548576 | -0,255878895 | 0     | 0,039 | 1         | 0,837476786   | 1,194062949     | 0               |
| TMF1                                                                                          | 0,276733609 | -0,255921991 | 0,281 | 0,168 | 1         | 0,837451769   | 1,194098619     | 1,672619048     |
| CLEC2B                                                                                        | 0,864972765 | -0,255954539 | 0,062 | 0,066 | 1         | 0,837432876   | 1,194125558     | 0,939393939     |
| PAXX                                                                                          | 0,262322083 | -0,256004498 | 0,469 | 0,281 | 1         | 0,837403876   | 1,19416691      | 1,669039146     |
| CTNNA3                                                                                        | 0,257548576 | -0,256139466 | 0     | 0,039 | 1         | 0,837325539   | 1,194278633     | 0               |
| IFI35                                                                                         | 0,287162697 | -0,256312145 | 0,25  | 0,148 | 1         | 0,837225324   | 1,194421587     | 1,689189189     |
| TRPV1                                                                                         | 0,603353082 | -0,256483632 | 0,031 | 0,051 | 1         | 0,837125813   | 1,194563571     | 0,607843137     |
| INTS13                                                                                        | 0,516147046 | -0,256521368 | 0,094 | 0,059 | 1         | 0,837103916   | 1,194594818     | 1,593220339     |
| FBXL3                                                                                         | 0,01453664  | -0,25672929  | 0,469 | 0,195 | 1         | 0,836983281   | 1,194766995     | 2,405128205     |
| TSPAN8                                                                                        | 0,346686972 | -0,256793539 | 0     | 0,027 | 1         | 0,836946007   | 1,194820205     | 0               |
| RCOR3                                                                                         | 0,569779589 | -0,25687327  | 0,125 | 0,086 | 1         | 0,836899755   | 1,194886238     | 1,453488372     |
| LYST                                                                                          | 0,002547096 | -0,256900377 | 0,5   | 0,184 | 1         | 0,83688403    | 1,19490869      | 2,717391304     |
| RORA                                                                                          | 0,730358576 | -0,256903326 | 0,031 | 0,043 | 1         | 0,83688232    | 1,194911132     | 0,720930233     |
| RDH5                                                                                          | 0,323924664 | -0,2569246   | 0,031 | 0,078 | 1         | 0,836869979   | 1,194928753     | 0,397435897     |
| CPLANE1                                                                                       | 0,310355006 | -0,257190123 | 0,094 | 0,047 | 1         | 0,83671597    | 1,195148695     | 2               |
| SDHA                                                                                          | 0,024139484 | -0,257327671 | 0,438 | 0,184 | 1         | 0,836636201   | 1,195262647     | 2,380434783     |

Supplementary Table 1

| Differentially expressed genes_adjacent-skin-XL_comparing SC-Keloid vs. (SC-Myel, SC-Nonmyel) |             |              |       |       |           |               |                 |                 |
|-----------------------------------------------------------------------------------------------|-------------|--------------|-------|-------|-----------|---------------|-----------------|-----------------|
| gene                                                                                          | p_val       | avg_log2FC   | pct.1 | pct.2 | p_val_adj | Foldchange_UP | Foldchange_DOWN | Ratio_pct1_pct2 |
| ETV6                                                                                          | 0,208543031 | -0,257397753 | 0,188 | 0,098 | 1         | 0,83659556    | 1,195320711     | 1,918367347     |
| LHFPL2                                                                                        | 0,163771487 | -0,257599195 | 0,125 | 0,055 | 1         | 0,836478755   | 1,195487624     | 2,272727273     |
| ITPRIP                                                                                        | 0,455148041 | -0,257641475 | 0,031 | 0,062 | 1         | 0,836454242   | 1,19552266      | 0,5             |
| CHTOP                                                                                         | 0,025504336 | -0,257736042 | 0,375 | 0,16  | 1         | 0,836399415   | 1,195601027     | 2,34375         |
| LSMEM1                                                                                        | 0,161397126 | -0,257854616 | 0     | 0,059 | 1         | 0,836330675   | 1,195699297     | 0               |
| ANKRD13A                                                                                      | 0,603353082 | -0,258041953 | 0,031 | 0,051 | 1         | 0,836222083   | 1,195854571     | 0,607843137     |
| PATL1                                                                                         | 0,512685318 | -0,258275853 | 0,094 | 0,059 | 1         | 0,836086519   | 1,196048468     | 1,593220339     |
| SSBP2                                                                                         | 0,59146562  | -0,258362678 | 0,312 | 0,223 | 1         | 0,836036203   | 1,19612045      | 1,399103139     |
| MFSD2A                                                                                        | 0,603353082 | -0,258647586 | 0,031 | 0,051 | 1         | 0,835871116   | 1,196356688     | 0,607843137     |
| APAF1                                                                                         | 0,755689148 | -0,258795096 | 0,062 | 0,047 | 1         | 0,835785656   | 1,196479017     | 1,319148936     |
| TEAD3                                                                                         | 0,250004291 | -0,259043024 | 0,156 | 0,082 | 1         | 0,835642038   | 1,19668465      | 1,902439024     |
| ARFGF2                                                                                        | 0,887104347 | -0,259049327 | 0,031 | 0,035 | 1         | 0,835638387   | 1,196689878     | 0,885714286     |
| ATPCKMT                                                                                       | 0,751100713 | -0,259183325 | 0,062 | 0,047 | 1         | 0,835560777   | 1,196801032     | 1,319148936     |
| NR2C1                                                                                         | 0,152942762 | -0,259218161 | 0,188 | 0,09  | 1         | 0,835540601   | 1,196829932     | 2,088888889     |
| ARPP19                                                                                        | 0,091991809 | -0,259515271 | 0,688 | 0,352 | 1         | 0,835368547   | 1,197076433     | 1,954545455     |
| NECTIN1                                                                                       | 0,257548576 | -0,259646122 | 0     | 0,039 | 1         | 0,835292783   | 1,197185012     | 0               |
| RPS6KB1                                                                                       | 0,206379422 | -0,259715261 | 0,125 | 0,059 | 1         | 0,835252753   | 1,197242387     | 2,118644068     |
| SAP25                                                                                         | 0,979143607 | -0,259889117 | 0,031 | 0,031 | 1         | 0,835152105   | 1,197386672     | 1               |
| FAM13B                                                                                        | 0,294412282 | -0,260086982 | 0,156 | 0,086 | 1         | 0,835037573   | 1,197550904     | 1,813953488     |
| PODN                                                                                          | 0,346686972 | -0,260201168 | 0     | 0,027 | 1         | 0,834971484   | 1,197645692     | 0               |
| TST                                                                                           | 0,872528346 | -0,260297367 | 0,094 | 0,078 | 1         | 0,83491581    | 1,197725553     | 1,205128205     |
| FHL1                                                                                          | 0,064712409 | -0,260386604 | 0,344 | 0,164 | 1         | 0,834864168   | 1,19779964      | 2,097560976     |
| PIAS1                                                                                         | 0,983447865 | -0,260568929 | 0,094 | 0,086 | 1         | 0,834758666   | 1,197951025     | 1,093023256     |
| OSBPL9                                                                                        | 0,081388664 | -0,260821158 | 0,438 | 0,219 | 1         | 0,834612736   | 1,198160484     | 2               |
| ING1                                                                                          | 0,005703422 | -0,260845496 | 0,531 | 0,207 | 1         | 0,834598657   | 1,198180697     | 2,565217391     |
| CBWD5                                                                                         | 0,356807214 | -0,260866258 | 0,125 | 0,07  | 1         | 0,834586646   | 1,19819794      | 1,785714286     |
| STX11                                                                                         | 0,771038875 | -0,261080112 | 0,094 | 0,102 | 1         | 0,834462943   | 1,198375565     | 0,921568627     |
| ARHGAP36                                                                                      | 0,257548576 | -0,261213193 | 0     | 0,039 | 1         | 0,834385972   | 1,198486113     | 0               |
| MTRFR                                                                                         | 0,40869837  | -0,261214988 | 0,125 | 0,074 | 1         | 0,834384933   | 1,198487605     | 1,689189189     |
| STAM                                                                                          | 0,474951714 | -0,261258311 | 0,188 | 0,121 | 1         | 0,834359877   | 1,198523595     | 1,553719008     |

Supplementary Table 1

| Differentially expressed genes_adjacent-skin-XL_comparing SC-Keloid vs. (SC-Myel, SC-Nonmyel) |             |              |       |       |           |               |                 |                 |
|-----------------------------------------------------------------------------------------------|-------------|--------------|-------|-------|-----------|---------------|-----------------|-----------------|
| gene                                                                                          | p_val       | avg_log2FC   | pct.1 | pct.2 | p_val_adj | Foldchange_UP | Foldchange_DOWN | Ratio_pct1_pct2 |
| CREG1                                                                                         | 0,100873626 | -0,261418775 | 0,188 | 0,082 | 1         | 0,834267081   | 1,198656908     | 2,292682927     |
| SMIM29                                                                                        | 0,098415875 | -0,261556962 | 0,312 | 0,152 | 1         | 0,834187175   | 1,198771726     | 2,052631579     |
| ZNF821                                                                                        | 0,499735776 | -0,261612553 | 0,031 | 0,059 | 1         | 0,834155032   | 1,198817919     | 0,525423729     |
| PPP1R3B                                                                                       | 0,234088337 | -0,261650894 | 0     | 0,043 | 1         | 0,834132864   | 1,198849779     | 0               |
| SELENOO                                                                                       | 0,213026321 | -0,261843597 | 0     | 0,047 | 1         | 0,834021455   | 1,199009922     | 0               |
| GRK2                                                                                          | 0,066489731 | -0,261893534 | 0,219 | 0,094 | 1         | 0,833992587   | 1,199051424     | 2,329787234     |
| ZNF121                                                                                        | 0,257548576 | -0,261925418 | 0     | 0,039 | 1         | 0,833974156   | 1,199077924     | 0               |
| KHDRBS1                                                                                       | 0,045833886 | -0,26204295  | 0,594 | 0,285 | 1         | 0,833906218   | 1,199175614     | 2,084210526     |
| TNFAIP3                                                                                       | 0,015819636 | -0,2620588   | 0,438 | 0,188 | 1         | 0,833897056   | 1,199188788     | 2,329787234     |
| DOCK4                                                                                         | 0,234088337 | -0,262101807 | 0     | 0,043 | 1         | 0,833872198   | 1,199224536     | 0               |
| CUL4B                                                                                         | 0,011149113 | -0,262113572 | 0,219 | 0,07  | 1         | 0,833865397   | 1,199234317     | 3,128571429     |
| BEX4                                                                                          | 0,113552381 | -0,262135614 | 0,281 | 0,137 | 1         | 0,833852657   | 1,199252639     | 2,051094891     |
| SNN                                                                                           | 0,908376542 | -0,262484208 | 0,125 | 0,105 | 1         | 0,833651201   | 1,199542445     | 1,19047619      |
| PDS5A                                                                                         | 0,514412332 | -0,262680866 | 0,156 | 0,105 | 1         | 0,833537571   | 1,19970597      | 1,485714286     |
| CEP290                                                                                        | 0,030583271 | -0,262753182 | 0,188 | 0,066 | 1         | 0,833495791   | 1,199766107     | 2,848484848     |
| ARHGAP32                                                                                      | 0,603353082 | -0,262926793 | 0,031 | 0,051 | 1         | 0,833395495   | 1,199910494     | 0,607843137     |
| POLI                                                                                          | 0,933712959 | -0,263086418 | 0,062 | 0,062 | 1         | 0,833303291   | 1,200043263     | 1               |
| RFLNA                                                                                         | 0,234088337 | -0,263186788 | 0     | 0,043 | 1         | 0,833245319   | 1,200126754     | 0               |
| DNAJA4                                                                                        | 0,1480486   | -0,263353878 | 0,188 | 0,09  | 1         | 0,833148819   | 1,200265759     | 2,088888889     |
| RALGAPA1                                                                                      | 0,260995138 | -0,263544322 | 0,25  | 0,145 | 1         | 0,833038846   | 1,200424211     | 1,724137931     |
| BCORL1                                                                                        | 0,234088337 | -0,263802308 | 0     | 0,043 | 1         | 0,832889894   | 1,200638893     | 0               |
| NRCAM                                                                                         | 0,377976391 | -0,26380554  | 0,031 | 0,07  | 1         | 0,832888028   | 1,200641583     | 0,442857143     |
| BTBD7                                                                                         | 0,323405291 | -0,263862909 | 0,219 | 0,133 | 1         | 0,832854909   | 1,200689327     | 1,646616541     |
| FLYWCH1                                                                                       | 0,920939129 | -0,264168071 | 0,062 | 0,055 | 1         | 0,83267876    | 1,200943327     | 1,127272727     |
| PLD6                                                                                          | 0,344592621 | -0,264203493 | 0,031 | 0,074 | 1         | 0,832658316   | 1,200972813     | 0,418918919     |
| TNFRSF1B                                                                                      | 0,234088337 | -0,264299106 | 0     | 0,043 | 1         | 0,832603134   | 1,201052409     | 0               |
| WIPI1                                                                                         | 0,159627915 | -0,26468513  | 0,219 | 0,109 | 1         | 0,832380383   | 1,20137382      | 2,009174312     |
| POMT1                                                                                         | 0,730358576 | -0,264715698 | 0,031 | 0,043 | 1         | 0,832362747   | 1,201399274     | 0,720930233     |
| NFRKB                                                                                         | 0,672687415 | -0,264857912 | 0,031 | 0,047 | 1         | 0,8322807     | 1,201517709     | 0,659574468     |
| ORC4                                                                                          | 0,728499918 | -0,264883432 | 0,094 | 0,07  | 1         | 0,832265978   | 1,201538962     | 1,342857143     |

Supplementary Table 1

| Differentially expressed genes_adjacent-skin-XL_comparing SC-Keloid vs. (SC-Myel, SC-Nonmyel) |             |              |       |       |           |               |                 |                 |
|-----------------------------------------------------------------------------------------------|-------------|--------------|-------|-------|-----------|---------------|-----------------|-----------------|
| gene                                                                                          | p_val       | avg_log2FC   | pct.1 | pct.2 | p_val_adj | Foldchange_UP | Foldchange_DOWN | Ratio_pct1_pct2 |
| INO80                                                                                         | 0,033288532 | -0,265001845 | 0,219 | 0,082 | 1         | 0,83219767    | 1,201637586     | 2,670731707     |
| ANKS1A                                                                                        | 0,257548576 | -0,265016501 | 0     | 0,039 | 1         | 0,832189216   | 1,201649794     | 0               |
| FARSB                                                                                         | 0,603353082 | -0,265064602 | 0,031 | 0,051 | 1         | 0,832161471   | 1,201689858     | 0,607843137     |
| CLUH                                                                                          | 0,660402423 | -0,265261643 | 0,094 | 0,066 | 1         | 0,832047823   | 1,201853994     | 1,424242424     |
| TFAP2C                                                                                        | 0,173512292 | -0,265375141 | 0,188 | 0,094 | 1         | 0,831982368   | 1,201948549     | 2               |
| SNX2                                                                                          | 0,422212218 | -0,265472549 | 0,156 | 0,098 | 1         | 0,831926196   | 1,202029705     | 1,591836735     |
| PRDM11                                                                                        | 0,283789128 | -0,265520301 | 0     | 0,035 | 1         | 0,83189866    | 1,202069492     | 0               |
| CHMP2B                                                                                        | 0,00368802  | -0,265581127 | 0,625 | 0,25  | 1         | 0,831863587   | 1,202120174     | 2,5             |
| PARP2                                                                                         | 0,112120373 | -0,265668801 | 0,156 | 0,066 | 1         | 0,831813036   | 1,20219323      | 2,363636364     |
| TOMM20                                                                                        | 0,926891423 | -0,265696369 | 0,688 | 0,504 | 1         | 0,831797141   | 1,202216203     | 1,365079365     |
| CARF                                                                                          | 0,376291412 | -0,265740446 | 0,094 | 0,051 | 1         | 0,831771728   | 1,202252933     | 1,843137255     |
| LCOR                                                                                          | 0,598664857 | -0,265804172 | 0,156 | 0,113 | 1         | 0,831734988   | 1,20230604      | 1,380530973     |
| CLASP2                                                                                        | 0,404264282 | -0,26604443  | 0,25  | 0,16  | 1         | 0,831596488   | 1,202506281     | 1,5625          |
| ATP6V1C1                                                                                      | 0,663284905 | -0,266079639 | 0,188 | 0,137 | 1         | 0,831576193   | 1,202535629     | 1,372262774     |
| BICRA                                                                                         | 0,505798338 | -0,266108944 | 0,094 | 0,059 | 1         | 0,831559302   | 1,202560056     | 1,593220339     |
| AKIRIN1                                                                                       | 0,047804972 | -0,266199187 | 0,312 | 0,137 | 1         | 0,831507288   | 1,20263528      | 2,277372263     |
| ADNP2                                                                                         | 0,99780108  | -0,266237731 | 0,062 | 0,059 | 1         | 0,831485073   | 1,202667411     | 1,050847458     |
| CAST                                                                                          | 0,156386684 | -0,26637252  | 0,562 | 0,324 | 1         | 0,831407392   | 1,20277978      | 1,734567901     |
| MAP3K11                                                                                       | 0,05488416  | -0,266435738 | 0,406 | 0,191 | 1         | 0,831370961   | 1,202832487     | 2,12565445      |
| ELK4                                                                                          | 0,076071543 | -0,266456052 | 0,344 | 0,164 | 1         | 0,831359255   | 1,202849423     | 2,097560976     |
| PHACTR2                                                                                       | 0,67254982  | -0,266865086 | 0,125 | 0,094 | 1         | 0,83112358    | 1,203190504     | 1,329787234     |
| RTL8A                                                                                         | 0,005851444 | -0,266946951 | 0,469 | 0,18  | 1         | 0,831076421   | 1,20325878      | 2,605555556     |
| UBE2E3                                                                                        | 0,34115731  | -0,266979613 | 0,469 | 0,281 | 1         | 0,831057605   | 1,203286022     | 1,669039146     |
| SESN1                                                                                         | 0,109929252 | -0,267448185 | 0,156 | 0,066 | 1         | 0,830787731   | 1,2036769       | 2,363636364     |
| ITPR2                                                                                         | 0,40598726  | -0,267455671 | 0,125 | 0,074 | 1         | 0,83078342    | 1,203683146     | 1,689189189     |
| CSGALNACT2                                                                                    | 0,469579464 | -0,267472469 | 0,281 | 0,191 | 1         | 0,830773746   | 1,203697161     | 1,471204188     |
| PARL                                                                                          | 0,60658408  | -0,267533003 | 0,156 | 0,109 | 1         | 0,830738889   | 1,203747668     | 1,431192661     |
| TMEM44-AS1                                                                                    | 0,730358576 | -0,267582772 | 0,031 | 0,043 | 1         | 0,830710231   | 1,203789194     | 0,720930233     |
| NAIP                                                                                          | 0,730358576 | -0,267859368 | 0,031 | 0,043 | 1         | 0,830550981   | 1,204020009     | 0,720930233     |
| WWTR1                                                                                         | 0,001438879 | -0,267914075 | 0,594 | 0,215 | 1         | 0,830519487   | 1,204065667     | 2,762790698     |

Supplementary Table 1

| Differentially expressed genes_adjacent-skin-XL_comparing SC-Keloid vs. (SC-Myel, SC-Nonmyel) |             |              |       |       |           |               |                 |                 |
|-----------------------------------------------------------------------------------------------|-------------|--------------|-------|-------|-----------|---------------|-----------------|-----------------|
| gene                                                                                          | p_val       | avg_log2FC   | pct.1 | pct.2 | p_val_adj | Foldchange_UP | Foldchange_DOWN | Ratio_pct1_pct2 |
| RBM28                                                                                         | 0,142694599 | -0,267977677 | 0,219 | 0,109 | 1         | 0,830482874   | 1,20411875      | 2,009174312     |
| USP12                                                                                         | 0,337948547 | -0,268084028 | 0,188 | 0,109 | 1         | 0,830421656   | 1,204207517     | 1,724770642     |
| SLC43A2                                                                                       | 0,99780108  | -0,268145836 | 0,062 | 0,059 | 1         | 0,830386079   | 1,204259109     | 1,050847458     |
| DPYD                                                                                          | 0,762521971 | -0,268459949 | 0,062 | 0,074 | 1         | 0,830205302   | 1,204521337     | 0,837837838     |
| KLF5                                                                                          | 0,18833141  | -0,268576185 | 0,281 | 0,156 | 1         | 0,830138416   | 1,204618387     | 1,801282051     |
| FAT4                                                                                          | 0,194053346 | -0,268686256 | 0     | 0,051 | 1         | 0,830075083   | 1,204710297     | 0               |
| LEMD3                                                                                         | 0,47380962  | -0,268748325 | 0,125 | 0,078 | 1         | 0,830039372   | 1,204762128     | 1,602564103     |
| NTNG1                                                                                         | 0,840130893 | -0,268851051 | 0,062 | 0,051 | 1         | 0,829980272   | 1,204847915     | 1,215686275     |
| PATZ1                                                                                         | 0,499735776 | -0,269016836 | 0,031 | 0,059 | 1         | 0,829884901   | 1,204986377     | 0,525423729     |
| NABP1                                                                                         | 0,414703427 | -0,269068523 | 0,031 | 0,066 | 1         | 0,829855169   | 1,205029548     | 0,46969697      |
| TOPORS                                                                                        | 0,428423523 | -0,269114477 | 0,188 | 0,121 | 1         | 0,829828737   | 1,205067932     | 1,553719008     |
| FAM161A                                                                                       | 0,213026321 | -0,269205205 | 0     | 0,047 | 1         | 0,829776552   | 1,205143719     | 0               |
| PPFIBP2                                                                                       | 0,867816547 | -0,269255788 | 0,094 | 0,098 | 1         | 0,829747459   | 1,205185974     | 0,959183673     |
| EML3                                                                                          | 0,516147046 | -0,269446567 | 0,094 | 0,059 | 1         | 0,829637743   | 1,205345356     | 1,593220339     |
| ZFP91                                                                                         | 0,10042554  | -0,269490837 | 0,344 | 0,172 | 1         | 0,829612285   | 1,205382344     | 2               |
| LMNA                                                                                          | 0,549394686 | -0,269508029 | 1     | 0,836 | 1         | 0,829602399   | 1,205396707     | 1,196172249     |
| WDR86                                                                                         | 0,176914647 | -0,26974256  | 0     | 0,055 | 1         | 0,829467546   | 1,205592678     | 0               |
| PTPN23                                                                                        | 0,202646283 | -0,269770245 | 0,125 | 0,059 | 1         | 0,829451629   | 1,205615813     | 2,118644068     |
| ITPKC                                                                                         | 0,840130893 | -0,269795631 | 0,062 | 0,051 | 1         | 0,829437034   | 1,205637027     | 1,215686275     |
| MFAP3L                                                                                        | 0,230078455 | -0,269926499 | 0,031 | 0,098 | 1         | 0,829361798   | 1,205746397     | 0,316326531     |
| PRXL2A                                                                                        | 0,314221703 | -0,270014482 | 0,031 | 0,078 | 1         | 0,829311221   | 1,205819932     | 0,397435897     |
| CDK11B                                                                                        | 0,073994318 | -0,270106137 | 0,188 | 0,078 | 1         | 0,829258536   | 1,205896541     | 2,41025641      |
| HNRNPA3                                                                                       | 0,86445071  | -0,27046883  | 0,844 | 0,578 | 1         | 0,829050087   | 1,206199741     | 1,460207612     |
| YEATS2                                                                                        | 0,213026321 | -0,270514859 | 0     | 0,047 | 1         | 0,829023637   | 1,206238225     | 0               |
| LUC7L                                                                                         | 0,0527427   | -0,270718194 | 0,344 | 0,16  | 1         | 0,828906801   | 1,206408246     | 2,15            |
| PPP1R3E                                                                                       | 0,234088337 | -0,270751661 | 0     | 0,043 | 1         | 0,828887573   | 1,206436232     | 0               |
| RBM12B                                                                                        | 0,512685318 | -0,270757673 | 0,094 | 0,059 | 1         | 0,828884119   | 1,206441258     | 1,593220339     |
| UBE2Z                                                                                         | 0,032277048 | -0,270767141 | 0,344 | 0,148 | 1         | 0,828878679   | 1,206449177     | 2,324324324     |
| TGS1                                                                                          | 0,982137358 | -0,270878136 | 0,125 | 0,113 | 1         | 0,828814911   | 1,206541999     | 1,10619469      |
| RP2                                                                                           | 0,949444396 | -0,27101554  | 0,094 | 0,09  | 1         | 0,828735978   | 1,206656917     | 1,044444444     |

Supplementary Table 1

| Differentially expressed genes_adjacent-skin-XL_ comparing SC-Keloid vs. (SC-Myel, SC-Nonmyel) |             |              |       |       |           |               |                 |                 |
|------------------------------------------------------------------------------------------------|-------------|--------------|-------|-------|-----------|---------------|-----------------|-----------------|
| gene                                                                                           | p_val       | avg_log2FC   | pct.1 | pct.2 | p_val_adj | Foldchange_UP | Foldchange_DOWN | Ratio_pct1_pct2 |
| PLXNA3                                                                                         | 0,03107935  | -0,271133647 | 0,312 | 0,133 | 1         | 0,828668135   | 1,206755705     | 2,345864662     |
| TRIM23                                                                                         | 0,933712959 | -0,271386513 | 0,062 | 0,062 | 1         | 0,828522905   | 1,206967236     | 1               |
| TTBK2                                                                                          | 0,804306744 | -0,271408043 | 0,062 | 0,07  | 1         | 0,82851054    | 1,206985248     | 0,885714286     |
| RHAG                                                                                           | 0,161397126 | -0,271430259 | 0     | 0,059 | 1         | 0,828497782   | 1,207003834     | 0               |
| DNAJC13                                                                                        | 0,588138226 | -0,271733586 | 0,094 | 0,062 | 1         | 0,828323609   | 1,207257634     | 1,516129032     |
| MIGA1                                                                                          | 0,02361287  | -0,271749692 | 0,25  | 0,094 | 1         | 0,828314362   | 1,207271111     | 2,659574468     |
| KIAA0319L                                                                                      | 0,441948175 | -0,271877391 | 0,094 | 0,055 | 1         | 0,828241047   | 1,207377977     | 1,709090909     |
| SOX4                                                                                           | 0,010984362 | -0,272104306 | 0,906 | 0,543 | 1         | 0,828110787   | 1,207567895     | 1,668508287     |
| PNN                                                                                            | 0,060413072 | -0,272382817 | 0,594 | 0,293 | 1         | 0,827950937   | 1,207801037     | 2,027303754     |
| BIRC2                                                                                          | 0,023091141 | -0,272420408 | 0,719 | 0,34  | 1         | 0,827929364   | 1,207832508     | 2,114705882     |
| NUP50                                                                                          | 0,086229766 | -0,272670497 | 0,156 | 0,062 | 1         | 0,827785856   | 1,208041902     | 2,516129032     |
| VPS8                                                                                           | 0,445227443 | -0,272733055 | 0,094 | 0,055 | 1         | 0,827749962   | 1,208094286     | 1,709090909     |
| ABL1                                                                                           | 0,790895329 | -0,272739635 | 0,125 | 0,098 | 1         | 0,827746187   | 1,208099796     | 1,275510204     |
| RSRP1                                                                                          | 0,042956774 | -0,272824139 | 0,656 | 0,324 | 1         | 0,827697705   | 1,208170561     | 2,024691358     |
| NMT2                                                                                           | 0,563646362 | -0,272953141 | 0,125 | 0,086 | 1         | 0,827623697   | 1,208278598     | 1,453488372     |
| ZSCAN16-AS1                                                                                    | 0,01059166  | -0,272990789 | 0,406 | 0,16  | 1         | 0,8276021     | 1,208310129     | 2,5375          |
| TUBA4A                                                                                         | 0,234088337 | -0,27308296  | 0     | 0,043 | 1         | 0,827549228   | 1,208387328     | 0               |
| RPAP3                                                                                          | 0,482846351 | -0,273231661 | 0,062 | 0,035 | 1         | 0,827463935   | 1,208511885     | 1,771428571     |
| PDCD11                                                                                         | 0,304711877 | -0,273421246 | 0,125 | 0,066 | 1         | 0,827355205   | 1,208670706     | 1,893939394     |
| SSBP3                                                                                          | 0,561023118 | -0,27376423  | 0,25  | 0,176 | 1         | 0,827158534   | 1,208958088     | 1,420454545     |
| DDX41                                                                                          | 0,830999134 | -0,273988642 | 0,062 | 0,051 | 1         | 0,827029879   | 1,209146157     | 1,215686275     |
| AKAP17A                                                                                        | 0,598076973 | -0,274019469 | 0,156 | 0,109 | 1         | 0,827012208   | 1,209171993     | 1,431192661     |
| GARNL3                                                                                         | 0,257548576 | -0,274197436 | 0     | 0,039 | 1         | 0,826910196   | 1,209321163     | 0               |
| ZNF438                                                                                         | 0,38481627  | -0,274218734 | 0     | 0,023 | 1         | 0,826897989   | 1,209339016     | 0               |
| TBC1D16                                                                                        | 0,211587385 | -0,274260134 | 0,188 | 0,098 | 1         | 0,82687426    | 1,20937372      | 1,918367347     |
| GPR161                                                                                         | 0,804543977 | -0,274360869 | 0,031 | 0,039 | 1         | 0,826816527   | 1,209458166     | 0,794871795     |
| ARIH2                                                                                          | 0,074669904 | -0,274765252 | 0,281 | 0,129 | 1         | 0,826584805   | 1,209797221     | 2,178294574     |
| KANSL2                                                                                         | 0,084415941 | -0,274813837 | 0,156 | 0,062 | 1         | 0,826556969   | 1,209837963     | 2,516129032     |
| ARHGEF11                                                                                       | 0,084505016 | -0,275250691 | 0,25  | 0,113 | 1         | 0,826306722   | 1,210204363     | 2,212389381     |
| PIP4K2B                                                                                        | 0,877333124 | -0,275329516 | 0,062 | 0,066 | 1         | 0,826261576   | 1,210270487     | 0,939393939     |

Supplementary Table 1

| Differentially expressed genes_adjacent-skin-XL_comparing SC-Keloid vs. (SC-Myel, SC-Nonmyel) |             |              |       |       |           |               |                 |                 |
|-----------------------------------------------------------------------------------------------|-------------|--------------|-------|-------|-----------|---------------|-----------------|-----------------|
| gene                                                                                          | p_val       | avg_log2FC   | pct.1 | pct.2 | p_val_adj | Foldchange_UP | Foldchange_DOWN | Ratio_pct1_pct2 |
| ZER1                                                                                          | 0,194053346 | -0,275461865 | 0     | 0,051 | 1         | 0,82618578    | 1,210381519     | 0               |
| EPS8L2                                                                                        | 0,663576959 | -0,275530939 | 0,031 | 0,047 | 1         | 0,826146225   | 1,210439472     | 0,659574468     |
| ATL1                                                                                          | 0,043846305 | -0,27567134  | 0,219 | 0,086 | 1         | 0,826065829   | 1,210557276     | 2,546511628     |
| SNHG10                                                                                        | 0,336324902 | -0,27581154  | 0,031 | 0,078 | 1         | 0,825985557   | 1,210674923     | 0,397435897     |
| AC018742.1                                                                                    | 0,176914647 | -0,275947168 | 0     | 0,055 | 1         | 0,825907909   | 1,210788744     | 0               |
| MED28                                                                                         | 0,375273435 | -0,276183945 | 0,188 | 0,113 | 1         | 0,825772371   | 1,210987476     | 1,663716814     |
| ZFAND2A                                                                                       | 0,37314069  | -0,276427294 | 0,188 | 0,113 | 1         | 0,825633095   | 1,211191758     | 1,663716814     |
| RRP12                                                                                         | 0,346686972 | -0,276648164 | 0     | 0,027 | 1         | 0,825506703   | 1,211377201     | 0               |
| ATXN7                                                                                         | 0,131758782 | -0,276757743 | 0,25  | 0,125 | 1         | 0,825444005   | 1,211469214     | 2               |
| ATG2B                                                                                         | 0,368897772 | -0,276770569 | 0,188 | 0,113 | 1         | 0,825436667   | 1,211479984     | 1,663716814     |
| AOPEP                                                                                         | 0,256694147 | -0,276807297 | 0,75  | 0,434 | 1         | 0,825415653   | 1,211510826     | 1,728110599     |
| SMG9                                                                                          | 0,023464878 | -0,277003724 | 0,188 | 0,062 | 1         | 0,825303278   | 1,211675788     | 3,032258065     |
| SLC19A2                                                                                       | 0,376291412 | -0,277023653 | 0,094 | 0,051 | 1         | 0,825291878   | 1,211692526     | 1,843137255     |
| POU2F1                                                                                        | 0,377954466 | -0,277068586 | 0,156 | 0,094 | 1         | 0,825266174   | 1,211730265     | 1,659574468     |
| CREB5                                                                                         | 0,003714914 | -0,277085281 | 0,688 | 0,285 | 1         | 0,825256624   | 1,211744287     | 2,414035088     |
| TET2                                                                                          | 0,449025168 | -0,277194629 | 0,188 | 0,121 | 1         | 0,825194077   | 1,211836134     | 1,553719008     |
| H2AX                                                                                          | 0,134277149 | -0,277470928 | 0,312 | 0,168 | 1         | 0,825036054   | 1,212068242     | 1,857142857     |
| DENND5B                                                                                       | 0,897998875 | -0,27751157  | 0,062 | 0,066 | 1         | 0,825012813   | 1,212102387     | 0,939393939     |
| NUMBL                                                                                         | 0,701170822 | -0,277603626 | 0,062 | 0,078 | 1         | 0,824960172   | 1,212179732     | 0,794871795     |
| SLC35D2                                                                                       | 0,485930104 | -0,277846578 | 0,156 | 0,102 | 1         | 0,824821259   | 1,212383882     | 1,529411765     |
| ZC3H15                                                                                        | 0,106737226 | -0,277974234 | 0,531 | 0,281 | 1         | 0,824748278   | 1,212491165     | 1,889679715     |
| NUP205                                                                                        | 0,603353082 | -0,278210877 | 0,031 | 0,051 | 1         | 0,824613007   | 1,212690063     | 0,607843137     |
| ANKZF1                                                                                        | 0,257548576 | -0,27837366  | 0     | 0,039 | 1         | 0,824519969   | 1,212826902     | 0               |
| NOL4L                                                                                         | 0,864972765 | -0,278488594 | 0,062 | 0,066 | 1         | 0,824454285   | 1,212923528     | 0,939393939     |
| PCID2                                                                                         | 0,072798397 | -0,278534483 | 0,438 | 0,215 | 1         | 0,824428062   | 1,212962109     | 2,037209302     |
| GTPBP1                                                                                        | 0,683139498 | -0,278567028 | 0,062 | 0,078 | 1         | 0,824409464   | 1,212989471     | 0,794871795     |
| ZDHHC7                                                                                        | 0,006461838 | -0,278614779 | 0,188 | 0,051 | 1         | 0,824382178   | 1,21302962      | 3,68627451      |
| CEP68                                                                                         | 0,176914647 | -0,278729117 | 0     | 0,055 | 1         | 0,824316845   | 1,21312576      | 0               |
| STX6                                                                                          | 0,552857355 | -0,279027093 | 0,031 | 0,055 | 1         | 0,824146608   | 1,213376346     | 0,563636364     |
| FBXO25                                                                                        | 0,048024678 | -0,279114088 | 0,281 | 0,121 | 1         | 0,824096913   | 1,213449516     | 2,32231405      |



Supplementary Table 1

| Differentially expressed genes_adjacent-skin-XL_ comparing SC-Keloid vs. (SC-Myel, SC-Nonmyel) |             |              |       |       |           |               |                 |                 |
|------------------------------------------------------------------------------------------------|-------------|--------------|-------|-------|-----------|---------------|-----------------|-----------------|
| gene                                                                                           | p_val       | avg_log2FC   | pct.1 | pct.2 | p_val_adj | Foldchange_UP | Foldchange_DOWN | Ratio_pct1_pct2 |
| TERF1                                                                                          | 0,159450688 | -0,279116138 | 0,469 | 0,258 | 1         | 0,824095742   | 1,21345124      | 1,817829457     |
| NBAS                                                                                           | 0,282283175 | -0,279515027 | 0,156 | 0,086 | 1         | 0,82386792    | 1,213786792     | 1,813953488     |
| CYB5R2                                                                                         | 0,480026373 | -0,27956719  | 0,188 | 0,125 | 1         | 0,823838132   | 1,21383068      | 1,504           |
| SHC4                                                                                           | 0,00093582  | -0,279621296 | 0,5   | 0,168 | 1         | 0,823807236   | 1,213876203     | 2,976190476     |
| ANKRD36                                                                                        | 0,0323681   | -0,279873301 | 0,281 | 0,113 | 1         | 0,823663349   | 1,214088257     | 2,486725664     |
| PABPN1                                                                                         | 0,084307738 | -0,279914454 | 0,562 | 0,289 | 1         | 0,823639854   | 1,21412289      | 1,944636678     |
| SLC41A1                                                                                        | 0,897998807 | -0,279957339 | 0,062 | 0,066 | 1         | 0,823615372   | 1,21415898      | 0,939393939     |
| A2M                                                                                            | 0,641749481 | -0,2799818   | 0,125 | 0,09  | 1         | 0,823601407   | 1,214179567     | 1,388888889     |
| USP38                                                                                          | 0,965440085 | -0,280016667 | 0,125 | 0,109 | 1         | 0,823581503   | 1,214208912     | 1,146788991     |
| PREPL                                                                                          | 0,219339222 | -0,280235943 | 0,188 | 0,098 | 1         | 0,823456336   | 1,214393474     | 1,918367347     |
| RND1                                                                                           | 0,213026321 | -0,280358977 | 0     | 0,047 | 1         | 0,823386114   | 1,214497043     | 0               |
| PITPNM1                                                                                        | 0,92888861  | -0,280403123 | 0,094 | 0,082 | 1         | 0,823360919   | 1,214534206     | 1,146341463     |
| CTBS                                                                                           | 0,532167601 | -0,280413144 | 0,125 | 0,082 | 1         | 0,8233552     | 1,214542643     | 1,524390244     |
| CPEB2                                                                                          | 0,620208736 | -0,280474136 | 0,094 | 0,066 | 1         | 0,823320392   | 1,21459399      | 1,424242424     |
| NBN                                                                                            | 0,039498851 | -0,280587725 | 0,312 | 0,133 | 1         | 0,823255571   | 1,214689623     | 2,345864662     |
| VAMP2                                                                                          | 0,57400339  | -0,280771532 | 0,656 | 0,434 | 1         | 0,823150691   | 1,214844392     | 1,511520737     |
| EHMT1                                                                                          | 0,445227443 | -0,280825788 | 0,094 | 0,055 | 1         | 0,823119735   | 1,214890079     | 1,709090909     |
| TYMP                                                                                           | 0,755689148 | -0,280844671 | 0,062 | 0,047 | 1         | 0,823108961   | 1,214905981     | 1,319148936     |
| DNAJA2                                                                                         | 0,083274923 | -0,280934956 | 0,375 | 0,184 | 1         | 0,823057452   | 1,214982013     | 2,038043478     |
| ANKDD1A                                                                                        | 0,057114487 | -0,281058921 | 0,219 | 0,09  | 1         | 0,822986733   | 1,215086416     | 2,433333333     |
| SLC23A2                                                                                        | 0,585250398 | -0,281063156 | 0,125 | 0,086 | 1         | 0,822984317   | 1,215089983     | 1,453488372     |
| PDE1C                                                                                          | 0,296467269 | -0,281356327 | 0,156 | 0,086 | 1         | 0,822817095   | 1,215336927     | 1,813953488     |
| PODXL2                                                                                         | 0,176914647 | -0,281420756 | 0     | 0,055 | 1         | 0,82278035    | 1,215391204     | 0               |
| PITRM1                                                                                         | 0,416896114 | -0,281463094 | 0,125 | 0,074 | 1         | 0,822756205   | 1,215426872     | 1,689189189     |
| MAST3                                                                                          | 0,257548576 | -0,281573534 | 0     | 0,039 | 1         | 0,822693224   | 1,215519918     | 0               |
| HIPK1                                                                                          | 0,162173229 | -0,281670546 | 0,281 | 0,148 | 1         | 0,822637905   | 1,215601656     | 1,898648649     |
| OSER1                                                                                          | 0,869020862 | -0,281712439 | 0,219 | 0,18  | 1         | 0,822614018   | 1,215636956     | 1,216666667     |
| NFKB1                                                                                          | 0,018778522 | -0,281719196 | 0,375 | 0,152 | 1         | 0,822610165   | 1,215642649     | 2,467105263     |
| ITM2B                                                                                          | 0,38991927  | -0,281787516 | 0,938 | 0,82  | 1         | 0,82257121    | 1,215700218     | 1,143902439     |
| DAB2IP                                                                                         | 0,877924569 | -0,28197572  | 0,094 | 0,094 | 1         | 0,822463911   | 1,21585882      | 1               |

Supplementary Table 1

| Differentially expressed genes_adjacent-skin-XL_comparing SC-Keloid vs. (SC-Myel, SC-Nonmyel) |             |              |       |       |           |               |                 |                 |
|-----------------------------------------------------------------------------------------------|-------------|--------------|-------|-------|-----------|---------------|-----------------|-----------------|
| gene                                                                                          | p_val       | avg_log2FC   | pct.1 | pct.2 | p_val_adj | Foldchange_UP | Foldchange_DOWN | Ratio_pct1_pct2 |
| GNRH1                                                                                         | 0,442873529 | -0,282120151 | 0,031 | 0,066 | 1         | 0,822381576   | 1,215980548     | 0,46969697      |
| NADK                                                                                          | 0,588138226 | -0,282301702 | 0,094 | 0,062 | 1         | 0,822278093   | 1,216133579     | 1,516129032     |
| CLCF1                                                                                         | 0,548952158 | -0,282596534 | 0,031 | 0,055 | 1         | 0,822110067   | 1,216382136     | 0,563636364     |
| HDAC4                                                                                         | 0,455148041 | -0,28265252  | 0,031 | 0,062 | 1         | 0,822078165   | 1,216429341     | 0,5             |
| TMEM205                                                                                       | 0,042345745 | -0,282705788 | 0,375 | 0,168 | 1         | 0,822047812   | 1,216474255     | 2,232142857     |
| CDC14B                                                                                        | 0,185335556 | -0,282882734 | 0,219 | 0,113 | 1         | 0,821946995   | 1,216623464     | 1,938053097     |
| RNF145                                                                                        | 0,107553188 | -0,282979438 | 0,438 | 0,227 | 1         | 0,821891901   | 1,216705017     | 1,929515419     |
| WDR43                                                                                         | 0,279787851 | -0,283097789 | 0,188 | 0,105 | 1         | 0,821824481   | 1,216804833     | 1,79047619      |
| CBX7                                                                                          | 0,566708997 | -0,283277798 | 0,125 | 0,086 | 1         | 0,821721946   | 1,216956667     | 1,453488372     |
| DMTF1                                                                                         | 0,933712959 | -0,283356386 | 0,062 | 0,062 | 1         | 0,821677185   | 1,21702296      | 1               |
| TMEM94                                                                                        | 0,99780108  | -0,28385413  | 0,062 | 0,059 | 1         | 0,821393747   | 1,217442918     | 1,050847458     |
| CREB3L2                                                                                       | 0,135673048 | -0,283865476 | 0,531 | 0,289 | 1         | 0,821387288   | 1,217452492     | 1,837370242     |
| CENPT                                                                                         | 0,073603171 | -0,283969089 | 0,219 | 0,094 | 1         | 0,821328298   | 1,217539931     | 2,329787234     |
| KMT2E-AS1                                                                                     | 0,720482167 | -0,283972282 | 0,094 | 0,109 | 1         | 0,821326481   | 1,217542626     | 0,862385321     |
| RNPC3                                                                                         | 0,901654262 | -0,284054822 | 0,156 | 0,137 | 1         | 0,821279492   | 1,217612286     | 1,138686131     |
| EIF3J-DT                                                                                      | 0,99780108  | -0,284056863 | 0,062 | 0,059 | 1         | 0,82127833    | 1,217614009     | 1,050847458     |
| CALCOCO2                                                                                      | 0,095645788 | -0,284107883 | 0,312 | 0,152 | 1         | 0,821249287   | 1,21765707      | 2,052631579     |
| H1-0                                                                                          | 0,006188545 | -0,284267015 | 0,594 | 0,238 | 1         | 0,821158706   | 1,217791388     | 2,495798319     |
| DIS3L2                                                                                        | 0,445227443 | -0,284403198 | 0,094 | 0,055 | 1         | 0,821081196   | 1,217906347     | 1,709090909     |
| SF3A2                                                                                         | 0,081340621 | -0,284736001 | 0,312 | 0,148 | 1         | 0,82089181    | 1,218187327     | 2,108108108     |
| MPP7                                                                                          | 0,176914647 | -0,284893021 | 0     | 0,055 | 1         | 0,820802471   | 1,218319919     | 0               |
| PURA                                                                                          | 0,294977518 | -0,285009472 | 0,562 | 0,355 | 1         | 0,82073622    | 1,218418263     | 1,583098592     |
| TJAP1                                                                                         | 0,337469503 | -0,28537279  | 0,156 | 0,09  | 1         | 0,820529558   | 1,21872514      | 1,733333333     |
| TAF4B                                                                                         | 0,730358576 | -0,285463916 | 0,031 | 0,043 | 1         | 0,820477732   | 1,218802121     | 0,720930233     |
| TRABD2B                                                                                       | 0,685922766 | -0,285583975 | 0,094 | 0,113 | 1         | 0,820409456   | 1,218903552     | 0,831858407     |
| INPP5E                                                                                        | 0,139907281 | -0,285600967 | 0,094 | 0,035 | 1         | 0,820399793   | 1,218917909     | 2,685714286     |
| FEM1C                                                                                         | 0,004000281 | -0,28566122  | 0,469 | 0,172 | 1         | 0,820365531   | 1,218968816     | 2,726744186     |
| WDR47                                                                                         | 0,189793134 | -0,285744032 | 0,25  | 0,133 | 1         | 0,820318442   | 1,219038789     | 1,879699248     |
| MAP2K7                                                                                        | 0,940093621 | -0,285871345 | 0,094 | 0,082 | 1         | 0,820246055   | 1,21914637      | 1,146341463     |
| ARAF                                                                                          | 0,905060272 | -0,286071261 | 0,125 | 0,105 | 1         | 0,8201324     | 1,21931532      | 1,19047619      |

Supplementary Table 1

| Differentially expressed genes_adjacent-skin-XL_comparing SC-Keloid vs. (SC-Myel, SC-Nonmyel) |             |              |       |       |           |               |                 |                 |
|-----------------------------------------------------------------------------------------------|-------------|--------------|-------|-------|-----------|---------------|-----------------|-----------------|
| gene                                                                                          | p_val       | avg_log2FC   | pct.1 | pct.2 | p_val_adj | Foldchange_UP | Foldchange_DOWN | Ratio_pct1_pct2 |
| PIAS4                                                                                         | 0,840130893 | -0,286262267 | 0,062 | 0,051 | 1         | 0,820023826   | 1,219476762     | 1,215686275     |
| PIGA                                                                                          | 0,176914647 | -0,286487653 | 0     | 0,055 | 1         | 0,819895727   | 1,219667291     | 0               |
| METTL7A                                                                                       | 0,283789128 | -0,286519672 | 0     | 0,035 | 1         | 0,81987753    | 1,21969436      | 0               |
| FUS                                                                                           | 0,582606868 | -0,286521935 | 0,844 | 0,566 | 1         | 0,819876244   | 1,219696274     | 1,491166078     |
| EDA                                                                                           | 0,283789128 | -0,287315603 | 0     | 0,035 | 1         | 0,819425331   | 1,220367448     | 0               |
| UFL1                                                                                          | 0,644568418 | -0,287595142 | 0,219 | 0,16  | 1         | 0,819266573   | 1,220603931     | 1,36875         |
| ARMC8                                                                                         | 0,544122042 | -0,287652705 | 0,156 | 0,105 | 1         | 0,819233885   | 1,220652634     | 1,485714286     |
| RHOJ                                                                                          | 0,217772806 | -0,287879815 | 0,188 | 0,098 | 1         | 0,819104931   | 1,220844805     | 1,918367347     |
| WIPF2                                                                                         | 0,163189943 | -0,287940224 | 0,219 | 0,109 | 1         | 0,819070634   | 1,220895925     | 2,009174312     |
| CCDC30                                                                                        | 0,346686972 | -0,287993501 | 0     | 0,027 | 1         | 0,819040387   | 1,220941013     | 0               |
| FBXO2                                                                                         | 0,194053346 | -0,28828185  | 0     | 0,051 | 1         | 0,818876704   | 1,221185064     | 0               |
| ADCY6                                                                                         | 0,416896114 | -0,288302181 | 0,125 | 0,074 | 1         | 0,818865164   | 1,221202274     | 1,689189189     |
| LRRTM1                                                                                        | 0,161397126 | -0,288504252 | 0     | 0,059 | 1         | 0,818750478   | 1,221373333     | 0               |
| SRSF1                                                                                         | 0,061665482 | -0,288807348 | 0,469 | 0,234 | 1         | 0,818578484   | 1,221629959     | 2,004273504     |
| TMEM38B                                                                                       | 0,826887692 | -0,288863318 | 0,125 | 0,102 | 1         | 0,818546728   | 1,221677354     | 1,225490196     |
| BBS2                                                                                          | 0,466259327 | -0,289030156 | 0,219 | 0,148 | 1         | 0,818452073   | 1,221818641     | 1,47972973      |
| NUMA1                                                                                         | 0,183857413 | -0,289271509 | 0,344 | 0,191 | 1         | 0,818315163   | 1,22202306      | 1,80104712      |
| ATP6VOA1                                                                                      | 0,864371301 | -0,289391173 | 0,094 | 0,098 | 1         | 0,818247292   | 1,222124424     | 0,959183673     |
| MIR4500HG                                                                                     | 0,257548576 | -0,289398679 | 0     | 0,039 | 1         | 0,818243034   | 1,222130782     | 0               |
| MPHOSPH8                                                                                      | 0,06072671  | -0,289526405 | 0,594 | 0,297 | 1         | 0,818170596   | 1,222238986     | 2               |
| RPRD1B                                                                                        | 0,194053346 | -0,289846344 | 0     | 0,051 | 1         | 0,817989175   | 1,222510066     | 0               |
| ST6GALNAC3                                                                                    | 0,455148041 | -0,289848138 | 0,031 | 0,062 | 1         | 0,817988158   | 1,222511586     | 0,5             |
| TMCO3                                                                                         | 0,538237843 | -0,289914906 | 0,125 | 0,082 | 1         | 0,817950302   | 1,222568166     | 1,524390244     |
| WASHC4                                                                                        | 0,006677744 | -0,290011453 | 0,406 | 0,152 | 1         | 0,817895566   | 1,222649984     | 2,671052632     |
| HILPDA                                                                                        | 0,588367824 | -0,290023743 | 0,125 | 0,086 | 1         | 0,817888598   | 1,2226604       | 1,453488372     |
| TJP1                                                                                          | 0,261947676 | -0,290154748 | 0,406 | 0,242 | 1         | 0,817814332   | 1,222771429     | 1,67768595      |
| RPGR                                                                                          | 0,33089308  | -0,29077809  | 0,156 | 0,09  | 1         | 0,817461058   | 1,223299863     | 1,733333333     |
| IFNAR2                                                                                        | 0,067002187 | -0,290992886 | 0,312 | 0,145 | 1         | 0,817339359   | 1,223482008     | 2,151724138     |
| RNF6                                                                                          | 0,160548057 | -0,291015556 | 0,125 | 0,055 | 1         | 0,817326516   | 1,223501233     | 2,272727273     |
| NUP62                                                                                         | 0,045653963 | -0,291094179 | 0,188 | 0,07  | 1         | 0,817281975   | 1,223567913     | 2,685714286     |

Supplementary Table 1

| Differentially expressed genes_adjacent-skin-XL_comparing SC-Keloid vs. (SC-Myel, SC-Nonmyel) |             |              |       |       |           |               |                 |                 |
|-----------------------------------------------------------------------------------------------|-------------|--------------|-------|-------|-----------|---------------|-----------------|-----------------|
| gene                                                                                          | p_val       | avg_log2FC   | pct.1 | pct.2 | p_val_adj | Foldchange_UP | Foldchange_DOWN | Ratio_pct1_pct2 |
| ZDHHC2                                                                                        | 0,945716537 | -0,291292777 | 0,125 | 0,109 | 1         | 0,817169477   | 1,223736358     | 1,146788991     |
| KLHDC2                                                                                        | 0,142790542 | -0,291351916 | 0,25  | 0,129 | 1         | 0,81713598    | 1,223786523     | 1,937984496     |
| FBXO44                                                                                        | 0,359364064 | -0,291369279 | 0,125 | 0,07  | 1         | 0,817126146   | 1,223801251     | 1,785714286     |
| BEST1                                                                                         | 0,864972765 | -0,291469217 | 0,062 | 0,066 | 1         | 0,817069545   | 1,223886028     | 0,939393939     |
| YOD1                                                                                          | 0,723616565 | -0,291763865 | 0,094 | 0,109 | 1         | 0,816902688   | 1,224136014     | 0,862385321     |
| MXD4                                                                                          | 0,224684614 | -0,291796482 | 0,375 | 0,219 | 1         | 0,816884219   | 1,22416369      | 1,712328767     |
| KCNK5                                                                                         | 0,176914647 | -0,292280714 | 0     | 0,055 | 1         | 0,816610083   | 1,224574642     | 0               |
| ZFYVE26                                                                                       | 0,283789128 | -0,292332706 | 0     | 0,035 | 1         | 0,816580654   | 1,224618775     | 0               |
| ALDH3A1                                                                                       | 0,283789128 | -0,292337122 | 0     | 0,035 | 1         | 0,816578155   | 1,224622523     | 0               |
| GBF1                                                                                          | 0,253529282 | -0,292454796 | 0,125 | 0,062 | 1         | 0,816511553   | 1,224722414     | 2,016129032     |
| RPRD1A                                                                                        | 0,571446987 | -0,292467526 | 0,188 | 0,129 | 1         | 0,816504348   | 1,22473322      | 1,457364341     |
| SLC16A4                                                                                       | 0,780949248 | -0,292561244 | 0,125 | 0,098 | 1         | 0,816451309   | 1,224812783     | 1,275510204     |
| APPBP2                                                                                        | 0,045653963 | -0,292979021 | 0,188 | 0,07  | 1         | 0,816214915   | 1,225167516     | 2,685714286     |
| VPS36                                                                                         | 0,280295079 | -0,293142812 | 0,156 | 0,086 | 1         | 0,816122254   | 1,225306619     | 1,813953488     |
| TMEM43                                                                                        | 0,488339982 | -0,293250453 | 0,219 | 0,148 | 1         | 0,816061365   | 1,225398044     | 1,47972973      |
| SOX15                                                                                         | 0,194053346 | -0,293308227 | 0     | 0,051 | 1         | 0,816028686   | 1,225447117     | 0               |
| PACSIN3                                                                                       | 0,94223401  | -0,293328573 | 0,094 | 0,09  | 1         | 0,816017178   | 1,225464399     | 1,044444444     |
| GOLM2                                                                                         | 0,111559249 | -0,293597755 | 0,312 | 0,156 | 1         | 0,815864937   | 1,225693071     | 2               |
| IL6R                                                                                          | 0,314221703 | -0,293707076 | 0,031 | 0,078 | 1         | 0,815803117   | 1,225785952     | 0,397435897     |
| FBXO3                                                                                         | 0,425400508 | -0,293893702 | 0,219 | 0,141 | 1         | 0,815697592   | 1,225944529     | 1,553191489     |
| ILF3-DT                                                                                       | 0,411420229 | -0,294031617 | 0,125 | 0,074 | 1         | 0,815619619   | 1,226061729     | 1,689189189     |
| ZNF37A                                                                                        | 0,06440165  | -0,294070495 | 0,156 | 0,059 | 1         | 0,815597639   | 1,22609477      | 2,644067797     |
| VSIR                                                                                          | 0,820932332 | -0,294094027 | 0,094 | 0,102 | 1         | 0,815584336   | 1,226114769     | 0,921568627     |
| RBP7                                                                                          | 0,161397126 | -0,294122474 | 0     | 0,059 | 1         | 0,815568255   | 1,226138945     | 0               |
| AGAP3                                                                                         | 0,585250398 | -0,294307032 | 0,125 | 0,086 | 1         | 0,815463929   | 1,22629581      | 1,453488372     |
| CKAP5                                                                                         | 0,017422452 | -0,294419634 | 0,219 | 0,074 | 1         | 0,815400285   | 1,226391527     | 2,959459459     |
| ELK3                                                                                          | 0,045138424 | -0,294519762 | 0,281 | 0,121 | 1         | 0,815343695   | 1,226476645     | 2,32231405      |
| ZNF248                                                                                        | 0,499735776 | -0,294766097 | 0,031 | 0,059 | 1         | 0,81520449    | 1,226686079     | 0,525423729     |
| PCED1A                                                                                        | 0,214057198 | -0,294824684 | 0,156 | 0,078 | 1         | 0,815171386   | 1,226735895     | 2               |
| TRPM3                                                                                         | 0,234088337 | -0,294903322 | 0     | 0,043 | 1         | 0,815126954   | 1,226802764     | 0               |

Supplementary Table 1

| Differentially expressed genes_adjacent-skin-XL_comparing SC-Keloid vs. (SC-Myel, SC-Nonmyel) |             |              |       |       |           |               |                 |                 |
|-----------------------------------------------------------------------------------------------|-------------|--------------|-------|-------|-----------|---------------|-----------------|-----------------|
| gene                                                                                          | p_val       | avg_log2FC   | pct.1 | pct.2 | p_val_adj | Foldchange_UP | Foldchange_DOWN | Ratio_pct1_pct2 |
| CCNG2                                                                                         | 0,344592621 | -0,2949236   | 0,031 | 0,074 | 1         | 0,815115497   | 1,226820008     | 0,418918919     |
| TBC1D14                                                                                       | 0,414703427 | -0,294984103 | 0,031 | 0,066 | 1         | 0,815081314   | 1,226871459     | 0,46969697      |
| NAF1                                                                                          | 0,286570971 | -0,295006806 | 0,031 | 0,082 | 1         | 0,815068487   | 1,226890765     | 0,37804878      |
| INTS6L                                                                                        | 0,283789128 | -0,295148968 | 0     | 0,035 | 1         | 0,814988175   | 1,227011668     | 0               |
| ARHGAP26                                                                                      | 0,414703427 | -0,295203953 | 0,031 | 0,066 | 1         | 0,814957114   | 1,227058433     | 0,46969697      |
| SLC27A1                                                                                       | 0,080736527 | -0,295221748 | 0,312 | 0,148 | 1         | 0,814947062   | 1,227073569     | 2,108108108     |
| NR1D1                                                                                         | 0,69506376  | -0,295221864 | 0,125 | 0,094 | 1         | 0,814946997   | 1,227073667     | 1,329787234     |
| PHF8                                                                                          | 0,499735776 | -0,295226733 | 0,031 | 0,059 | 1         | 0,814944246   | 1,227077809     | 0,525423729     |
| DOCK9                                                                                         | 0,603353082 | -0,295447292 | 0,031 | 0,051 | 1         | 0,814819667   | 1,227265419     | 0,607843137     |
| FST                                                                                           | 0,089395838 | -0,295498689 | 0,344 | 0,172 | 1         | 0,814790639   | 1,227309142     | 2               |
| GOLGB1                                                                                        | 0,043864058 | -0,295504457 | 0,406 | 0,188 | 1         | 0,814787382   | 1,227314048     | 2,159574468     |
| ABCD4                                                                                         | 0,952287961 | -0,295981833 | 0,125 | 0,109 | 1         | 0,81451782    | 1,227720224     | 1,146788991     |
| EPHB3                                                                                         | 0,933712959 | -0,296006501 | 0,062 | 0,062 | 1         | 0,814503893   | 1,227741217     | 1               |
| NPR3                                                                                          | 0,38481627  | -0,296009064 | 0     | 0,023 | 1         | 0,814502446   | 1,227743397     | 0               |
| ISCU                                                                                          | 0,014540929 | -0,296119381 | 0,625 | 0,27  | 1         | 0,814440166   | 1,227837282     | 2,314814815     |
| CPSF7                                                                                         | 0,139772668 | -0,296788436 | 0,188 | 0,09  | 1         | 0,814062555   | 1,228406827     | 2,088888889     |
| OGFRL1                                                                                        | 0,933712959 | -0,297022164 | 0,062 | 0,062 | 1         | 0,813930681   | 1,228605855     | 1               |
| PPRC1                                                                                         | 0,864972765 | -0,297182548 | 0,062 | 0,066 | 1         | 0,813840201   | 1,228742447     | 0,939393939     |
| OTUD4                                                                                         | 0,50170566  | -0,297385524 | 0,188 | 0,125 | 1         | 0,813725708   | 1,228915334     | 1,504           |
| TJP2                                                                                          | 0,548952158 | -0,29757679  | 0,031 | 0,055 | 1         | 0,813617836   | 1,229078268     | 0,563636364     |
| SOCS6                                                                                         | 0,253529282 | -0,297680582 | 0,125 | 0,062 | 1         | 0,813559303   | 1,229166695     | 2,016129032     |
| MOB1B                                                                                         | 0,310355006 | -0,297912725 | 0,094 | 0,047 | 1         | 0,813428404   | 1,229364495     | 2               |
| MBD6                                                                                          | 0,898658481 | -0,298121437 | 0,125 | 0,125 | 1         | 0,813310736   | 1,229542358     | 1               |
| PIAS3                                                                                         | 1           | -0,298175801 | 0,094 | 0,086 | 1         | 0,813280089   | 1,229588691     | 1,093023256     |
| TLK2                                                                                          | 0,233850664 | -0,298205202 | 0,219 | 0,121 | 1         | 0,813263515   | 1,229613749     | 1,809917355     |
| GSE1                                                                                          | 0,588138226 | -0,29822074  | 0,094 | 0,062 | 1         | 0,813254756   | 1,229626993     | 1,516129032     |
| KIAA0100                                                                                      | 0,109929252 | -0,298410073 | 0,156 | 0,066 | 1         | 0,813148035   | 1,229788374     | 2,363636364     |
| EIF2AK3                                                                                       | 0,998160744 | -0,298593609 | 0,094 | 0,086 | 1         | 0,813044595   | 1,229944834     | 1,093023256     |
| HTT                                                                                           | 0,442120615 | -0,298595926 | 0,156 | 0,098 | 1         | 0,813043289   | 1,22994681      | 1,591836735     |
| CPT1A                                                                                         | 0,499735776 | -0,298860255 | 0,031 | 0,059 | 1         | 0,812894338   | 1,23017218      | 0,525423729     |

Supplementary Table 1

| Differentially expressed genes_adjacent-skin-XL_comparing SC-Keloid vs. (SC-Myel, SC-Nonmyel) |             |              |       |       |           |               |                 |                 |
|-----------------------------------------------------------------------------------------------|-------------|--------------|-------|-------|-----------|---------------|-----------------|-----------------|
| gene                                                                                          | p_val       | avg_log2FC   | pct.1 | pct.2 | p_val_adj | Foldchange_UP | Foldchange_DOWN | Ratio_pct1_pct2 |
| MORC4                                                                                         | 0,455148041 | -0,298883322 | 0,031 | 0,062 | 1         | 0,812881341   | 1,230191849     | 0,5             |
| TNKS                                                                                          | 0,304070194 | -0,299025523 | 0,219 | 0,125 | 1         | 0,812801223   | 1,23031311      | 1,752           |
| THUMPD2                                                                                       | 0,755689148 | -0,299162593 | 0,062 | 0,047 | 1         | 0,812724002   | 1,230430008     | 1,319148936     |
| MSX1                                                                                          | 0,468029835 | -0,299210479 | 0,125 | 0,078 | 1         | 0,812697027   | 1,230470848     | 1,602564103     |
| SETDB2                                                                                        | 0,234088337 | -0,299586818 | 0     | 0,043 | 1         | 0,812485056   | 1,230791869     | 0               |
| CHD7                                                                                          | 0,094284344 | -0,299687664 | 0,312 | 0,152 | 1         | 0,812428264   | 1,230877906     | 2,052631579     |
| CLIP4                                                                                         | 0,499735776 | -0,299780397 | 0,031 | 0,059 | 1         | 0,812376044   | 1,230957027     | 0,525423729     |
| ATG13                                                                                         | 0,872528346 | -0,299882398 | 0,094 | 0,078 | 1         | 0,81231861    | 1,23104406      | 1,205128205     |
| TRAPPC8                                                                                       | 0,445227443 | -0,299915951 | 0,094 | 0,055 | 1         | 0,812299718   | 1,231072691     | 1,709090909     |
| ORC3                                                                                          | 0,170210568 | -0,300158404 | 0,156 | 0,074 | 1         | 0,812163218   | 1,231279597     | 2,108108108     |
| TFE3                                                                                          | 0,92142629  | -0,30029037  | 0,094 | 0,082 | 1         | 0,812088932   | 1,231392229     | 1,146341463     |
| KAT2A                                                                                         | 0,377976391 | -0,300887327 | 0,031 | 0,07  | 1         | 0,811752976   | 1,231901859     | 0,442857143     |
| ZNF264                                                                                        | 0,663576959 | -0,300906887 | 0,031 | 0,047 | 1         | 0,81174197    | 1,231918562     | 0,659574468     |
| NEGR1                                                                                         | 0,740472812 | -0,300937937 | 0,094 | 0,105 | 1         | 0,8117245     | 1,231945076     | 0,895238095     |
| HMGNS                                                                                         | 0,653016738 | -0,300958741 | 0,094 | 0,066 | 1         | 0,811712794   | 1,231962841     | 1,424242424     |
| RPL38                                                                                         | 0,721966631 | -0,301022549 | 0,938 | 0,793 | 1         | 0,811676895   | 1,232017329     | 1,182849937     |
| CGAS                                                                                          | 0,399301517 | -0,301084511 | 0,156 | 0,094 | 1         | 0,811642035   | 1,232070244     | 1,659574468     |
| DCP1A                                                                                         | 0,455618878 | -0,301113693 | 0,25  | 0,168 | 1         | 0,811625618   | 1,232095166     | 1,488095238     |
| SLC7A2                                                                                        | 0,720482167 | -0,30137924  | 0,094 | 0,109 | 1         | 0,811476241   | 1,23232197      | 0,862385321     |
| TIMP3                                                                                         | 0,611112677 | -0,301403221 | 0,875 | 0,637 | 1         | 0,811462752   | 1,232342454     | 1,373626374     |
| PTAR1                                                                                         | 0,079303382 | -0,301414206 | 0,406 | 0,203 | 1         | 0,811456574   | 1,232351838     | 2               |
| NPIP5                                                                                         | 0,891985815 | -0,301435717 | 0,094 | 0,094 | 1         | 0,811444475   | 1,232370212     | 1               |
| CHKA                                                                                          | 0,932622158 | -0,301490433 | 0,094 | 0,082 | 1         | 0,811413701   | 1,232416952     | 1,146341463     |
| OSGIN2                                                                                        | 0,949001794 | -0,301512955 | 0,125 | 0,109 | 1         | 0,811401033   | 1,232436192     | 1,146788991     |
| H1-2                                                                                          | 0,508238341 | -0,301635615 | 0,125 | 0,082 | 1         | 0,81133205    | 1,232540981     | 1,524390244     |
| PHRF1                                                                                         | 0,499735776 | -0,3016683   | 0,031 | 0,059 | 1         | 0,811313669   | 1,232568904     | 0,525423729     |
| ZNF528                                                                                        | 0,755689148 | -0,30183696  | 0,062 | 0,047 | 1         | 0,811218827   | 1,232713008     | 1,319148936     |
| PDGFRB                                                                                        | 0,799342981 | -0,301986262 | 0,094 | 0,074 | 1         | 0,81113488    | 1,232840585     | 1,27027027      |
| UBE2K                                                                                         | 0,062546936 | -0,302261069 | 0,375 | 0,176 | 1         | 0,810980388   | 1,233075442     | 2,130681818     |
| CCNH                                                                                          | 0,664350968 | -0,302268787 | 0,156 | 0,113 | 1         | 0,810976049   | 1,233082039     | 1,380530973     |

Supplementary Table 1

| Differentially expressed genes_adjacent-skin-XL_comparing SC-Keloid vs. (SC-Myel, SC-Nonmyel) |             |              |       |       |           |               |                 |                 |
|-----------------------------------------------------------------------------------------------|-------------|--------------|-------|-------|-----------|---------------|-----------------|-----------------|
| gene                                                                                          | p_val       | avg_log2FC   | pct.1 | pct.2 | p_val_adj | Foldchange_UP | Foldchange_DOWN | Ratio_pct1_pct2 |
| SOX12                                                                                         | 0,134529645 | -0,302429463 | 0     | 0,066 | 1         | 0,810885734   | 1,233219377     | 0               |
| LINC00844                                                                                     | 0,377976391 | -0,302522531 | 0,031 | 0,07  | 1         | 0,810833426   | 1,233298934     | 0,442857143     |
| SIRPA                                                                                         | 0,257548576 | -0,302805703 | 0     | 0,039 | 1         | 0,810674291   | 1,23354103      | 0               |
| AC012368.1                                                                                    | 0,147320294 | -0,302915012 | 0     | 0,062 | 1         | 0,810612871   | 1,233634495     | 0               |
| MTMR12                                                                                        | 0,99780108  | -0,302940342 | 0,062 | 0,059 | 1         | 0,810598639   | 1,233656155     | 1,050847458     |
| LINC00327                                                                                     | 0,603353082 | -0,30296186  | 0,031 | 0,051 | 1         | 0,810586549   | 1,233674555     | 0,607843137     |
| FOSL1                                                                                         | 0,499122068 | -0,303167445 | 0,156 | 0,102 | 1         | 0,810471048   | 1,233850367     | 1,529411765     |
| SP3                                                                                           | 0,084416338 | -0,303234715 | 0,312 | 0,148 | 1         | 0,810433258   | 1,2339079       | 2,108108108     |
| HSPA5                                                                                         | 0,000295098 | -0,303264739 | 0,875 | 0,496 | 1         | 0,810416393   | 1,233933579     | 1,764112903     |
| ARFGAP2                                                                                       | 0,040655239 | -0,303366061 | 0,25  | 0,102 | 1         | 0,810359478   | 1,234020244     | 2,450980392     |
| NF1                                                                                           | 0,001574074 | -0,30350795  | 0,438 | 0,148 | 1         | 0,810279783   | 1,234141615     | 2,959459459     |
| PSME4                                                                                         | 0,607026308 | -0,30362658  | 0,062 | 0,086 | 1         | 0,810213158   | 1,2342431       | 0,720930233     |
| THAP3                                                                                         | 0,732255237 | -0,303627877 | 0,094 | 0,07  | 1         | 0,81021243    | 1,234244209     | 1,342857143     |
| MGP                                                                                           | 0,528999683 | -0,303860123 | 0,031 | 0,059 | 1         | 0,810082012   | 1,234442915     | 0,525423729     |
| TMEM170A                                                                                      | 0,501783108 | -0,304506667 | 0,156 | 0,102 | 1         | 0,809719054   | 1,234996255     | 1,529411765     |
| CLDND1                                                                                        | 0,980897822 | -0,304538853 | 0,531 | 0,398 | 1         | 0,80970099    | 1,235023808     | 1,334170854     |
| PLEKHB1                                                                                       | 0,77263384  | -0,304989747 | 0,25  | 0,199 | 1         | 0,809447969   | 1,235409857     | 1,256281407     |
| DNM1L                                                                                         | 0,041853306 | -0,305172128 | 0,25  | 0,102 | 1         | 0,809345648   | 1,235566044     | 2,450980392     |
| ATP1B3                                                                                        | 0,055021025 | -0,305221565 | 0,469 | 0,223 | 1         | 0,809317914   | 1,235608384     | 2,103139013     |
| PPP2R3B                                                                                       | 1           | -0,305296267 | 0,094 | 0,086 | 1         | 0,809276009   | 1,235672365     | 1,093023256     |
| MID1IP1                                                                                       | 0,025583591 | -0,305501027 | 0,5   | 0,227 | 1         | 0,809161158   | 1,235847754     | 2,202643172     |
| DYRK3                                                                                         | 0,739785061 | -0,305731461 | 0,062 | 0,074 | 1         | 0,809031925   | 1,236045166     | 0,837837838     |
| NLK                                                                                           | 0,234088337 | -0,305746574 | 0     | 0,043 | 1         | 0,80902345    | 1,236058114     | 0               |
| SPTAN1                                                                                        | 0,103586669 | -0,305783288 | 0,75  | 0,398 | 1         | 0,809002862   | 1,23608957      | 1,884422111     |
| ZFX                                                                                           | 0,606634787 | -0,305897787 | 0,188 | 0,133 | 1         | 0,808938658   | 1,236187676     | 1,413533835     |
| TMEM64                                                                                        | 0,810386495 | -0,306051129 | 0,125 | 0,102 | 1         | 0,808852682   | 1,236319076     | 1,225490196     |
| DPP8                                                                                          | 0,296411886 | -0,30609491  | 0,188 | 0,105 | 1         | 0,808828136   | 1,236356594     | 1,79047619      |
| AXIN1                                                                                         | 0,933712959 | -0,306309848 | 0,062 | 0,062 | 1         | 0,808707644   | 1,236540804     | 1               |
| CCDC9                                                                                         | 0,433914664 | -0,306368552 | 0,062 | 0,105 | 1         | 0,808674738   | 1,236591121     | 0,59047619      |
| WTIP                                                                                          | 0,606583785 | -0,306505758 | 0,094 | 0,117 | 1         | 0,808597833   | 1,236708732     | 0,803418803     |

Supplementary Table 1

| Differentially expressed genes_adjacent-skin-XL_comparing SC-Keloid vs. (SC-Myel, SC-Nonmyel) |             |              |       |       |           |               |                 |                 |
|-----------------------------------------------------------------------------------------------|-------------|--------------|-------|-------|-----------|---------------|-----------------|-----------------|
| gene                                                                                          | p_val       | avg_log2FC   | pct.1 | pct.2 | p_val_adj | Foldchange_UP | Foldchange_DOWN | Ratio_pct1_pct2 |
| AGO4                                                                                          | 0,283789128 | -0,306695436 | 0     | 0,035 | 1         | 0,80849153    | 1,236871338     | 0               |
| KHNYN                                                                                         | 0,739785061 | -0,306900086 | 0,062 | 0,074 | 1         | 0,808376851   | 1,237046804     | 0,837837838     |
| BARD1                                                                                         | 0,099037596 | -0,306994194 | 0,188 | 0,082 | 1         | 0,808324122   | 1,2371275       | 2,292682927     |
| CCDC9B                                                                                        | 0,110090391 | -0,307078272 | 0,219 | 0,102 | 1         | 0,808277015   | 1,2371996       | 2,147058824     |
| PAK2                                                                                          | 0,140661932 | -0,307394949 | 0,594 | 0,316 | 1         | 0,808099615   | 1,237471199     | 1,879746835     |
| PTGS2                                                                                         | 0,607571545 | -0,307496758 | 0,031 | 0,051 | 1         | 0,80804259    | 1,23755853      | 0,607843137     |
| KBTBD2                                                                                        | 0,427470791 | -0,307982747 | 0,188 | 0,117 | 1         | 0,807770438   | 1,237975486     | 1,606837607     |
| KANSL3                                                                                        | 0,499735776 | -0,30807434  | 0,031 | 0,059 | 1         | 0,807719156   | 1,238054084     | 0,525423729     |
| WDR59                                                                                         | 0,414152817 | -0,308101154 | 0,125 | 0,074 | 1         | 0,807704144   | 1,238077095     | 1,689189189     |
| ZNF708                                                                                        | 0,291015131 | -0,308176854 | 0,031 | 0,082 | 1         | 0,807661764   | 1,23814206      | 0,37804878      |
| LRRC75B                                                                                       | 0,176914647 | -0,308190555 | 0     | 0,055 | 1         | 0,807654094   | 1,238153819     | 0               |
| IKBKB                                                                                         | 0,803121702 | -0,30825914  | 0,094 | 0,074 | 1         | 0,807615699   | 1,238212681     | 1,27027027      |
| MARCHF1                                                                                       | 0,325559719 | -0,308291666 | 0,062 | 0,121 | 1         | 0,807597491   | 1,238240597     | 0,512396694     |
| MED29                                                                                         | 0,165597712 | -0,308293441 | 0,219 | 0,109 | 1         | 0,807596498   | 1,238242121     | 2,009174312     |
| PAPSS2                                                                                        | 0,213026321 | -0,308314917 | 0     | 0,047 | 1         | 0,807584476   | 1,238260554     | 0               |
| ZBTB2                                                                                         | 0,690331157 | -0,308447767 | 0,062 | 0,078 | 1         | 0,807510113   | 1,238374583     | 0,794871795     |
| NIN                                                                                           | 0,732255237 | -0,30888782  | 0,094 | 0,07  | 1         | 0,807263842   | 1,238752372     | 1,342857143     |
| HEY1                                                                                          | 0,079268503 | -0,309148561 | 0,188 | 0,078 | 1         | 0,807117958   | 1,238976274     | 2,41025641      |
| MOXD1                                                                                         | 0,597765632 | -0,309511723 | 0,125 | 0,086 | 1         | 0,806914812   | 1,239288194     | 1,453488372     |
| BCAM                                                                                          | 0,800356249 | -0,309892708 | 0,062 | 0,07  | 1         | 0,806701751   | 1,239615507     | 0,885714286     |
| TNXB                                                                                          | 0,346686972 | -0,310322464 | 0     | 0,027 | 1         | 0,806461483   | 1,239984824     | 0               |
| DNAJC3-DT                                                                                     | 0,993403306 | -0,310383958 | 0,062 | 0,059 | 1         | 0,806427108   | 1,240037679     | 1,050847458     |
| HSF2                                                                                          | 0,908376542 | -0,310442421 | 0,125 | 0,105 | 1         | 0,80639443    | 1,24008793      | 1,19047619      |
| GLS                                                                                           | 0,155491455 | -0,310497684 | 0,438 | 0,234 | 1         | 0,806363542   | 1,240135433     | 1,871794872     |
| PRRT1                                                                                         | 0,864989089 | -0,31054911  | 0,094 | 0,078 | 1         | 0,806334798   | 1,24017964      | 1,205128205     |
| FHOD3                                                                                         | 0,39210653  | -0,310567299 | 0,156 | 0,094 | 1         | 0,806324633   | 1,240195275     | 1,659574468     |
| NAPA                                                                                          | 0,166915939 | -0,310570692 | 0,406 | 0,223 | 1         | 0,806322736   | 1,240198193     | 1,820627803     |
| CMTM6                                                                                         | 0,403541193 | -0,310774884 | 0,531 | 0,34  | 1         | 0,806208621   | 1,240373737     | 1,561764706     |
| ATG16L2                                                                                       | 0,81222265  | -0,310826763 | 0,062 | 0,07  | 1         | 0,80617963    | 1,240418341     | 0,885714286     |
| PVR                                                                                           | 0,916437471 | -0,310847982 | 0,062 | 0,055 | 1         | 0,806167774   | 1,240436585     | 1,127272727     |



Supplementary Table 1

| Differentially expressed genes_adjacent-skin-XL_comparing SC-Keloid vs. (SC-Myel, SC-Nonmyel) |             |              |       |       |           |               |                 |                 |
|-----------------------------------------------------------------------------------------------|-------------|--------------|-------|-------|-----------|---------------|-----------------|-----------------|
| gene                                                                                          | p_val       | avg_log2FC   | pct.1 | pct.2 | p_val_adj | Foldchange_UP | Foldchange_DOWN | Ratio_pct1_pct2 |
| ERAP1                                                                                         | 0,304711877 | -0,310886063 | 0,125 | 0,066 | 1         | 0,806146495   | 1,240469328     | 1,893939394     |
| RIMKLB                                                                                        | 0,380539324 | -0,310965573 | 0,062 | 0,109 | 1         | 0,806102068   | 1,240537694     | 0,568807339     |
| TM4SF1                                                                                        | 0,131958685 | -0,311071792 | 0,344 | 0,18  | 1         | 0,80604272    | 1,240629033     | 1,911111111     |
| FRS2                                                                                          | 0,088230697 | -0,311163563 | 0,312 | 0,148 | 1         | 0,805991448   | 1,240707953     | 2,108108108     |
| SH3PXD2B                                                                                      | 0,405092563 | -0,311180564 | 0,219 | 0,137 | 1         | 0,805981951   | 1,240722573     | 1,598540146     |
| CCDC184                                                                                       | 0,352472909 | -0,311262209 | 0,031 | 0,074 | 1         | 0,805936339   | 1,240792791     | 0,418918919     |
| FAM171A1                                                                                      | 0,660402423 | -0,311621886 | 0,094 | 0,066 | 1         | 0,805735437   | 1,24110217      | 1,424242424     |
| STARD7                                                                                        | 0,165597712 | -0,311704122 | 0,219 | 0,109 | 1         | 0,80568951    | 1,241172917     | 2,009174312     |
| CERT1                                                                                         | 0,396866202 | -0,311721794 | 0,219 | 0,137 | 1         | 0,805679642   | 1,241188121     | 1,598540146     |
| ADAR                                                                                          | 0,409657741 | -0,311800426 | 0,281 | 0,184 | 1         | 0,80563573    | 1,241255772     | 1,527173913     |
| CD99L2                                                                                        | 0,22275641  | -0,311870722 | 0,281 | 0,156 | 1         | 0,805596476   | 1,241316254     | 1,801282051     |
| E4F1                                                                                          | 0,603353082 | -0,311955191 | 0,031 | 0,051 | 1         | 0,80554931    | 1,241388934     | 0,607843137     |
| FBRSL1                                                                                        | 0,799342981 | -0,312116822 | 0,094 | 0,074 | 1         | 0,805459067   | 1,24152802      | 1,27027027      |
| C2orf68                                                                                       | 0,864972765 | -0,312486566 | 0,062 | 0,066 | 1         | 0,805252664   | 1,241846249     | 0,939393939     |
| GAPVD1                                                                                        | 0,210314935 | -0,313027747 | 0,219 | 0,117 | 1         | 0,804950656   | 1,242312174     | 1,871794872     |
| ACKR1                                                                                         | 0,134529645 | -0,313174185 | 0     | 0,066 | 1         | 0,804868955   | 1,24243828      | 0               |
| ZBTB8A                                                                                        | 0,283789128 | -0,313673972 | 0     | 0,035 | 1         | 0,804590176   | 1,242868767     | 0               |
| RBM23                                                                                         | 0,382714865 | -0,313689998 | 0,219 | 0,137 | 1         | 0,804581239   | 1,242882573     | 1,598540146     |
| ADCY9                                                                                         | 0,548952158 | -0,313756796 | 0,031 | 0,055 | 1         | 0,804543986   | 1,242940121     | 0,563636364     |
| RFX3                                                                                          | 0,664688786 | -0,313867484 | 0,062 | 0,082 | 1         | 0,804482262   | 1,243035487     | 0,756097561     |
| FANCB                                                                                         | 0,603353082 | -0,313972726 | 0,031 | 0,051 | 1         | 0,804423578   | 1,243126167     | 0,607843137     |
| USP7                                                                                          | 0,015076029 | -0,314019571 | 0,406 | 0,164 | 1         | 0,804397459   | 1,243166533     | 2,475609756     |
| TMEM41A                                                                                       | 0,420870206 | -0,31409743  | 0,031 | 0,066 | 1         | 0,804354048   | 1,243233626     | 0,46969697      |
| CASP4                                                                                         | 0,165379896 | -0,314204922 | 0,219 | 0,113 | 1         | 0,80429412    | 1,24332626      | 1,938053097     |
| SAMD8                                                                                         | 0,420656361 | -0,314301828 | 0,188 | 0,117 | 1         | 0,804240097   | 1,243409777     | 1,606837607     |
| NCALD                                                                                         | 0,213026321 | -0,315458379 | 0     | 0,047 | 1         | 0,803595628   | 1,244406969     | 0               |
| WIPF1                                                                                         | 0,031021044 | -0,315629607 | 0,406 | 0,184 | 1         | 0,803500258   | 1,244554672     | 2,206521739     |
| MFS14B                                                                                        | 0,701547097 | -0,315672969 | 0,125 | 0,094 | 1         | 0,803476109   | 1,244592078     | 1,329787234     |
| AHDC1                                                                                         | 0,682891358 | -0,315763295 | 0,094 | 0,113 | 1         | 0,803425805   | 1,244670004     | 0,831858407     |
| KIAA0930                                                                                      | 0,561197551 | -0,315903172 | 0,188 | 0,129 | 1         | 0,803347912   | 1,244790687     | 1,457364341     |

Supplementary Table 1

| Differentially expressed genes_adjacent-skin-XL_comparing SC-Keloid vs. (SC-Myel, SC-Nonmyel) |             |              |       |       |           |               |                 |                 |
|-----------------------------------------------------------------------------------------------|-------------|--------------|-------|-------|-----------|---------------|-----------------|-----------------|
| gene                                                                                          | p_val       | avg_log2FC   | pct.1 | pct.2 | p_val_adj | Foldchange_UP | Foldchange_DOWN | Ratio_pct1_pct2 |
| BLCAP                                                                                         | 0,535198384 | -0,316237291 | 0,062 | 0,09  | 1         | 0,803161884   | 1,245079006     | 0,688888889     |
| LAMP5                                                                                         | 0,194053346 | -0,316241673 | 0     | 0,051 | 1         | 0,803159444   | 1,245082788     | 0               |
| MAP1LC3B                                                                                      | 0,079580072 | -0,316486763 | 0,656 | 0,34  | 1         | 0,803023013   | 1,245294324     | 1,929411765     |
| SMG7                                                                                          | 0,688602647 | -0,316921737 | 0,125 | 0,094 | 1         | 0,802780937   | 1,245669839     | 1,329787234     |
| ABCD3                                                                                         | 0,096829815 | -0,317058486 | 0,375 | 0,188 | 1         | 0,802704847   | 1,245787918     | 1,994680851     |
| MKRN1                                                                                         | 0,331907101 | -0,317308537 | 0,188 | 0,109 | 1         | 0,802565733   | 1,246003859     | 1,724770642     |
| SCAF11                                                                                        | 0,02508472  | -0,317504263 | 0,594 | 0,273 | 1         | 0,802456858   | 1,246172912     | 2,175824176     |
| VAV2                                                                                          | 0,194053346 | -0,317532104 | 0     | 0,051 | 1         | 0,802441373   | 1,246196961     | 0               |
| CNKS2                                                                                         | 0,932622158 | -0,317579323 | 0,094 | 0,082 | 1         | 0,80241511    | 1,246237749     | 1,146341463     |
| PRMT2                                                                                         | 0,124591345 | -0,317759264 | 0,531 | 0,289 | 1         | 0,802315034   | 1,246393197     | 1,837370242     |
| PHYKPL                                                                                        | 0,830197375 | -0,317896702 | 0,125 | 0,102 | 1         | 0,802238605   | 1,246511194     | 1,225490196     |
| NXF1                                                                                          | 0,899089282 | -0,318223756 | 0,156 | 0,133 | 1         | 0,802056761   | 1,246794552     | 1,172932331     |
| SH3RF3                                                                                        | 0,535198384 | -0,318529765 | 0,125 | 0,082 | 1         | 0,801886655   | 1,247059037     | 1,524390244     |
| REPS1                                                                                         | 0,721126199 | -0,31856039  | 0,125 | 0,094 | 1         | 0,801869633   | 1,247085509     | 1,329787234     |
| CITED4                                                                                        | 0,283789128 | -0,318903323 | 0     | 0,035 | 1         | 0,801679049   | 1,24738198      | 0               |
| MSL2                                                                                          | 0,377976391 | -0,319022515 | 0,031 | 0,07  | 1         | 0,801612819   | 1,24748504      | 0,442857143     |
| TRDMT1                                                                                        | 0,800356249 | -0,319030447 | 0,062 | 0,07  | 1         | 0,801608412   | 1,247491899     | 0,885714286     |
| ARID1B                                                                                        | 0,068226873 | -0,319148875 | 0,469 | 0,23  | 1         | 0,801542612   | 1,247594308     | 2,039130435     |
| MXD1                                                                                          | 0,529145535 | -0,319619714 | 0,125 | 0,082 | 1         | 0,801281063   | 1,248001539     | 1,524390244     |
| ZNF302                                                                                        | 0,573799329 | -0,319798505 | 0,094 | 0,062 | 1         | 0,801181768   | 1,248156212     | 1,516129032     |
| NUDT3                                                                                         | 0,870756587 | -0,320166622 | 0,188 | 0,16  | 1         | 0,800977365   | 1,248474731     | 1,175           |
| ARHGEF17                                                                                      | 0,60091357  | -0,320255247 | 0,125 | 0,086 | 1         | 0,800928162   | 1,248551427     | 1,453488372     |
| FXD7                                                                                          | 0,176914647 | -0,320396276 | 0     | 0,055 | 1         | 0,800849872   | 1,248673484     | 0               |
| PPP2R2D                                                                                       | 0,594827904 | -0,320407802 | 0,188 | 0,129 | 1         | 0,800843474   | 1,24868346      | 1,457364341     |
| SLC66A3                                                                                       | 0,49213523  | -0,320426781 | 0,219 | 0,145 | 1         | 0,800832938   | 1,248699887     | 1,510344828     |
| ETF1                                                                                          | 0,223362355 | -0,320661569 | 0,406 | 0,223 | 1         | 0,800702619   | 1,248903121     | 1,820627803     |
| ZHX1                                                                                          | 0,739069785 | -0,320763724 | 0,156 | 0,121 | 1         | 0,800645925   | 1,248991556     | 1,289256198     |
| CUEDC1                                                                                        | 0,351104367 | -0,320765127 | 0,25  | 0,152 | 1         | 0,800645146   | 1,248992771     | 1,644736842     |
| TRIM33                                                                                        | 0,049795909 | -0,32100782  | 0,25  | 0,105 | 1         | 0,800510472   | 1,249202896     | 2,380952381     |
| BICRAL                                                                                        | 0,176914647 | -0,321051518 | 0     | 0,055 | 1         | 0,800486225   | 1,249240735     | 0               |

Supplementary Table 1

| Differentially expressed genes_adjacent-skin-XL_comparing SC-Keloid vs. (SC-Myel, SC-Nonmyel) |             |              |       |       |           |               |                 |                 |
|-----------------------------------------------------------------------------------------------|-------------|--------------|-------|-------|-----------|---------------|-----------------|-----------------|
| gene                                                                                          | p_val       | avg_log2FC   | pct.1 | pct.2 | p_val_adj | Foldchange_UP | Foldchange_DOWN | Ratio_pct1_pct2 |
| SLFN11                                                                                        | 0,341900128 | -0,321069861 | 0,156 | 0,09  | 1         | 0,800476047   | 1,249256618     | 1,733333333     |
| CNN1                                                                                          | 0,348136214 | -0,321277544 | 0,188 | 0,113 | 1         | 0,800360824   | 1,249436467     | 1,663716814     |
| PTPN21                                                                                        | 0,864989089 | -0,321671643 | 0,094 | 0,078 | 1         | 0,80014222    | 1,249777821     | 1,205128205     |
| SPSB3                                                                                         | 0,759572792 | -0,321736991 | 0,281 | 0,219 | 1         | 0,800105977   | 1,249834432     | 1,283105023     |
| SQOR                                                                                          | 0,377976391 | -0,321906001 | 0,031 | 0,07  | 1         | 0,800012251   | 1,249980858     | 0,442857143     |
| CDH7                                                                                          | 0,194053346 | -0,321968351 | 0     | 0,051 | 1         | 0,799977678   | 1,25003488      | 0               |
| SYP                                                                                           | 0,937980621 | -0,322199738 | 0,062 | 0,062 | 1         | 0,799849383   | 1,250235383     | 1               |
| SNHG7                                                                                         | 0,600018946 | -0,322823136 | 0,406 | 0,277 | 1         | 0,799503838   | 1,250775734     | 1,465703971     |
| RAPGEF1                                                                                       | 0,377976391 | -0,322921665 | 0,031 | 0,07  | 1         | 0,799449238   | 1,250861159     | 0,442857143     |
| DDAH2                                                                                         | 0,115401198 | -0,322923695 | 0,625 | 0,324 | 1         | 0,799448112   | 1,25086292      | 1,929012346     |
| EDRF1                                                                                         | 0,161397126 | -0,323210061 | 0     | 0,059 | 1         | 0,799289443   | 1,251111233     | 0               |
| TSPAN5                                                                                        | 0,06801158  | -0,323312756 | 0,469 | 0,234 | 1         | 0,799232549   | 1,251200293     | 2,004273504     |
| TRIM9                                                                                         | 0,499735776 | -0,323328475 | 0,031 | 0,059 | 1         | 0,799223841   | 1,251213926     | 0,525423729     |
| BEND7                                                                                         | 0,804543977 | -0,323451726 | 0,031 | 0,039 | 1         | 0,799155566   | 1,251320823     | 0,794871795     |
| ASXL2                                                                                         | 0,940093621 | -0,323541532 | 0,094 | 0,082 | 1         | 0,799105821   | 1,251398718     | 1,146341463     |
| C1GALT1                                                                                       | 0,482162603 | -0,323855828 | 0,188 | 0,121 | 1         | 0,798931752   | 1,25167137      | 1,553719008     |
| SSH1                                                                                          | 0,29527654  | -0,323923732 | 0,188 | 0,109 | 1         | 0,798894149   | 1,251730284     | 1,724770642     |
| APOL6                                                                                         | 0,683139676 | -0,32413139  | 0,062 | 0,078 | 1         | 0,798779166   | 1,251910468     | 0,794871795     |
| APIP                                                                                          | 0,138196896 | -0,324205279 | 0,219 | 0,105 | 1         | 0,798738257   | 1,251974587     | 2,085714286     |
| LYSMD2                                                                                        | 0,588138226 | -0,32422229  | 0,094 | 0,062 | 1         | 0,798728839   | 1,25198935      | 1,516129032     |
| MCMBP                                                                                         | 0,331907101 | -0,324308978 | 0,188 | 0,109 | 1         | 0,798680847   | 1,252064581     | 1,724770642     |
| STAG1                                                                                         | 0,477497952 | -0,32471006  | 0,281 | 0,188 | 1         | 0,798458838   | 1,252412714     | 1,494680851     |
| RBM17                                                                                         | 0,056992281 | -0,324799199 | 0,406 | 0,195 | 1         | 0,798409505   | 1,252490099     | 2,082051282     |
| FOXO4                                                                                         | 0,414703427 | -0,32516878  | 0,031 | 0,066 | 1         | 0,798204999   | 1,252810996     | 0,46969697      |
| LETMD1                                                                                        | 0,739785061 | -0,325238922 | 0,062 | 0,074 | 1         | 0,798166193   | 1,252871907     | 0,837837838     |
| POM121                                                                                        | 0,739785061 | -0,325257074 | 0,062 | 0,074 | 1         | 0,79815615    | 1,252887671     | 0,837837838     |
| TAF8                                                                                          | 0,516147046 | -0,325384107 | 0,094 | 0,059 | 1         | 0,798085874   | 1,252997996     | 1,593220339     |
| RC3H2                                                                                         | 0,935028354 | -0,325591464 | 0,094 | 0,09  | 1         | 0,797971174   | 1,253178101     | 1,044444444     |
| YIPF4                                                                                         | 0,270384651 | -0,32561845  | 0,438 | 0,258 | 1         | 0,797956248   | 1,253201542     | 1,697674419     |
| PCGF3                                                                                         | 0,054396443 | -0,325793385 | 0,219 | 0,09  | 1         | 0,797859497   | 1,253353509     | 2,433333333     |

Supplementary Table 1

| Differentially expressed genes_adjacent-skin-XL_comparing SC-Keloid vs. (SC-Myel, SC-Nonmyel) |             |              |       |       |           |               |                 |                 |
|-----------------------------------------------------------------------------------------------|-------------|--------------|-------|-------|-----------|---------------|-----------------|-----------------|
| gene                                                                                          | p_val       | avg_log2FC   | pct.1 | pct.2 | p_val_adj | Foldchange_UP | Foldchange_DOWN | Ratio_pct1_pct2 |
| EPS8                                                                                          | 0,067162899 | -0,325889825 | 0,344 | 0,164 | 1         | 0,797806164   | 1,253437295     | 2,097560976     |
| CUL5                                                                                          | 0,529145535 | -0,325960051 | 0,125 | 0,082 | 1         | 0,79776733    | 1,25349831      | 1,524390244     |
| USP42                                                                                         | 0,25962289  | -0,326387726 | 0,031 | 0,09  | 1         | 0,797530873   | 1,253869954     | 0,344444444     |
| GABRE                                                                                         | 0,147320294 | -0,326701463 | 0     | 0,062 | 1         | 0,797357457   | 1,254142658     | 0               |
| SUN1                                                                                          | 0,64075889  | -0,326811063 | 0,281 | 0,207 | 1         | 0,797296885   | 1,254237937     | 1,357487923     |
| SF3B1                                                                                         | 0,307065968 | -0,327150444 | 0,656 | 0,406 | 1         | 0,79710935    | 1,25453302      | 1,615763547     |
| GNPTAB                                                                                        | 0,660402423 | -0,327247746 | 0,094 | 0,066 | 1         | 0,797055591   | 1,254617634     | 1,424242424     |
| TACSTD2                                                                                       | 0,122891724 | -0,327309943 | 0     | 0,07  | 1         | 0,797021229   | 1,254671724     | 0               |
| PLEKHA3                                                                                       | 0,070297141 | -0,327389976 | 0,406 | 0,195 | 1         | 0,796977016   | 1,254741328     | 2,082051282     |
| ZCCHC8                                                                                        | 0,803121702 | -0,327399464 | 0,094 | 0,074 | 1         | 0,796971774   | 1,254749581     | 1,27027027      |
| CYCS                                                                                          | 0,025025245 | -0,32759758  | 0,719 | 0,34  | 1         | 0,796862339   | 1,254921899     | 2,114705882     |
| LRIG2                                                                                         | 0,804543977 | -0,327674231 | 0,031 | 0,039 | 1         | 0,796820003   | 1,254988576     | 0,794871795     |
| ELL2                                                                                          | 0,270497466 | -0,328062152 | 0,156 | 0,086 | 1         | 0,796605777   | 1,25532607      | 1,813953488     |
| MGAT4C                                                                                        | 0,283789128 | -0,328296141 | 0     | 0,035 | 1         | 0,796476587   | 1,255529687     | 0               |
| YTHDF3                                                                                        | 0,054103199 | -0,328440523 | 0,25  | 0,105 | 1         | 0,796396882   | 1,255655343     | 2,380952381     |
| ZNF507                                                                                        | 0,630272476 | -0,3284866   | 0,062 | 0,082 | 1         | 0,796371446   | 1,255695448     | 0,756097561     |
| MARK3                                                                                         | 0,089247978 | -0,328493932 | 0,406 | 0,203 | 1         | 0,796367399   | 1,25570183      | 2               |
| PGAP1                                                                                         | 0,99448227  | -0,328533188 | 0,094 | 0,086 | 1         | 0,79634573    | 1,255735998     | 1,093023256     |
| SSH2                                                                                          | 0,429756478 | -0,328869765 | 0,188 | 0,117 | 1         | 0,796159967   | 1,256028991     | 1,606837607     |
| SBF2                                                                                          | 0,943946826 | -0,329056771 | 0,125 | 0,117 | 1         | 0,796056773   | 1,256191812     | 1,068376068     |
| UBAP2                                                                                         | 0,731875997 | -0,329177407 | 0,125 | 0,141 | 1         | 0,795990211   | 1,256296857     | 0,886524823     |
| TULP3                                                                                         | 0,060233739 | -0,329367441 | 0,406 | 0,191 | 1         | 0,795885368   | 1,25646235      | 2,12565445      |
| EXOC3                                                                                         | 0,135027649 | -0,329497213 | 0,281 | 0,141 | 1         | 0,795813781   | 1,256575375     | 1,992907801     |
| COL17A1                                                                                       | 0,313292814 | -0,32953394  | 0     | 0,031 | 1         | 0,795793522   | 1,256607364     | 0               |
| AKR1C2                                                                                        | 0,147320294 | -0,329586671 | 0     | 0,062 | 1         | 0,795764436   | 1,256653294     | 0               |
| ARID5B                                                                                        | 0,037162106 | -0,329633471 | 0,594 | 0,285 | 1         | 0,795738622   | 1,25669406      | 2,084210526     |
| MARCKS                                                                                        | 0,444380808 | -0,329665638 | 1     | 0,879 | 1         | 0,79572088    | 1,25672208      | 1,137656428     |
| PBX2                                                                                          | 0,048449315 | -0,329954653 | 0,281 | 0,121 | 1         | 0,79556149    | 1,256973865     | 2,32231405      |
| CEP192                                                                                        | 0,257548576 | -0,330533997 | 0     | 0,039 | 1         | 0,795242079   | 1,25747873      | 0               |
| PKIG                                                                                          | 0,000606525 | -0,330824021 | 0,688 | 0,25  | 1         | 0,795082229   | 1,257731545     | 2,752           |

Supplementary Table 1

| Differentially expressed genes_adjacent-skin-XL_comparing SC-Keloid vs. (SC-Myel, SC-Nonmyel) |             |              |       |       |           |               |                 |                 |
|-----------------------------------------------------------------------------------------------|-------------|--------------|-------|-------|-----------|---------------|-----------------|-----------------|
| gene                                                                                          | p_val       | avg_log2FC   | pct.1 | pct.2 | p_val_adj | Foldchange_UP | Foldchange_DOWN | Ratio_pct1_pct2 |
| GALNT18                                                                                       | 0,234088337 | -0,330866184 | 0     | 0,043 | 1         | 0,795058993   | 1,257768303     | 0               |
| AMIGO2                                                                                        | 0,213026321 | -0,330882513 | 0     | 0,047 | 1         | 0,795049994   | 1,257782539     | 0               |
| FAM76B                                                                                        | 0,563799113 | -0,331056741 | 0,094 | 0,125 | 1         | 0,794953985   | 1,257934445     | 0,752           |
| AP2A2                                                                                         | 0,255577342 | -0,331282077 | 0,219 | 0,121 | 1         | 0,79482983    | 1,258130938     | 1,809917355     |
| SERINC3                                                                                       | 0,427421679 | -0,331396468 | 0,406 | 0,266 | 1         | 0,794766811   | 1,258230699     | 1,526315789     |
| PALLD                                                                                         | 0,131096381 | -0,331407513 | 0,594 | 0,32  | 1         | 0,794760726   | 1,258240332     | 1,85625         |
| WNK2                                                                                          | 0,234088337 | -0,331565353 | 0     | 0,043 | 1         | 0,794673779   | 1,258377999     | 0               |
| SPTLC1                                                                                        | 0,753434371 | -0,331731155 | 0,188 | 0,145 | 1         | 0,794582456   | 1,258522627     | 1,296551724     |
| CDS2                                                                                          | 0,683139676 | -0,331895938 | 0,062 | 0,078 | 1         | 0,794491705   | 1,258666382     | 0,794871795     |
| HLA-F                                                                                         | 0,134099711 | -0,331963606 | 0,281 | 0,141 | 1         | 0,794454441   | 1,25872542      | 1,992907801     |
| GRINA                                                                                         | 0,225377528 | -0,332025233 | 0,281 | 0,156 | 1         | 0,794420505   | 1,258779189     | 1,801282051     |
| NR6A1                                                                                         | 0,093802134 | -0,332154424 | 0     | 0,082 | 1         | 0,79434937    | 1,258891916     | 0               |
| KLF7                                                                                          | 0,229370488 | -0,332383057 | 0,219 | 0,121 | 1         | 0,794223494   | 1,259091436     | 1,809917355     |
| MITF                                                                                          | 0,428872689 | -0,332412745 | 0     | 0,02  | 1         | 0,79420715    | 1,259117347     | 0               |
| ZNF83                                                                                         | 0,036984609 | -0,332496365 | 0,344 | 0,148 | 1         | 0,794161119   | 1,259190328     | 2,324324324     |
| WDR45B                                                                                        | 0,182101208 | -0,332792336 | 0,406 | 0,223 | 1         | 0,793998212   | 1,25944868      | 1,820627803     |
| CD83                                                                                          | 0,06440165  | -0,332844822 | 0,156 | 0,059 | 1         | 0,793969326   | 1,2594945       | 2,644067797     |
| DIP2C                                                                                         | 0,389095675 | -0,333029236 | 0,094 | 0,145 | 1         | 0,793867843   | 1,259655506     | 0,648275862     |
| MDGA1                                                                                         | 0,176914647 | -0,333119946 | 0     | 0,055 | 1         | 0,79381793    | 1,25973471      | 0               |
| PRKD3                                                                                         | 0,358820944 | -0,333200825 | 0,312 | 0,188 | 1         | 0,793773429   | 1,259805334     | 1,659574468     |
| STAG2                                                                                         | 0,110573964 | -0,333523115 | 0,531 | 0,277 | 1         | 0,793596124   | 1,260086799     | 1,916967509     |
| RBM5                                                                                          | 0,268932309 | -0,333678043 | 0,344 | 0,199 | 1         | 0,793510906   | 1,260222125     | 1,728643216     |
| PPP3R1                                                                                        | 0,093052434 | -0,334076831 | 0,281 | 0,133 | 1         | 0,793291595   | 1,260570522     | 2,112781955     |
| TMEM9                                                                                         | 0,482260664 | -0,334138953 | 0,219 | 0,141 | 1         | 0,793257437   | 1,260624803     | 1,553191489     |
| CXCL14                                                                                        | 0,942250066 | -0,3345764   | 0,062 | 0,062 | 1         | 0,793016946   | 1,261007101     | 1               |
| KDM3A                                                                                         | 0,960267559 | -0,334899116 | 0,094 | 0,09  | 1         | 0,792839576   | 1,261289207     | 1,044444444     |
| KDM6A                                                                                         | 0,683139676 | -0,334984451 | 0,062 | 0,078 | 1         | 0,792792681   | 1,261363814     | 0,794871795     |
| XIAP                                                                                          | 0,480873217 | -0,335036512 | 0,219 | 0,145 | 1         | 0,792764073   | 1,261409333     | 1,510344828     |
| TFEB                                                                                          | 0,872528346 | -0,335041851 | 0,094 | 0,078 | 1         | 0,792761139   | 1,261414        | 1,205128205     |
| PLA2G4C                                                                                       | 0,176914647 | -0,335147634 | 0     | 0,055 | 1         | 0,792703013   | 1,261506495     | 0               |

Supplementary Table 1

| Differentially expressed genes_adjacent-skin-XL_comparing SC-Keloid vs. (SC-Myel, SC-Nonmyel) |             |              |       |       |           |               |                 |                 |
|-----------------------------------------------------------------------------------------------|-------------|--------------|-------|-------|-----------|---------------|-----------------|-----------------|
| gene                                                                                          | p_val       | avg_log2FC   | pct.1 | pct.2 | p_val_adj | Foldchange_UP | Foldchange_DOWN | Ratio_pct1_pct2 |
| VPS13C                                                                                        | 0,146718253 | -0,335187009 | 0,562 | 0,309 | 1         | 0,792681379   | 1,261540925     | 1,818770227     |
| PLEKHG2                                                                                       | 0,414703427 | -0,335883446 | 0,031 | 0,066 | 1         | 0,792298818   | 1,26215006      | 0,46969697      |
| ANKIB1                                                                                        | 0,002108779 | -0,335886548 | 0,281 | 0,082 | 1         | 0,792297114   | 1,262152773     | 3,426829268     |
| ECPAS                                                                                         | 0,37099797  | -0,335943214 | 0,156 | 0,094 | 1         | 0,792265995   | 1,262202349     | 1,659574468     |
| DDX6                                                                                          | 0,0321176   | -0,336367955 | 0,5   | 0,23  | 1         | 0,792032779   | 1,262574007     | 2,173913043     |
| PHF20L1                                                                                       | 0,046151963 | -0,336584035 | 0,375 | 0,168 | 1         | 0,791914161   | 1,262763124     | 2,232142857     |
| PANK3                                                                                         | 0,028002326 | -0,33669142  | 0,281 | 0,113 | 1         | 0,791855219   | 1,262857119     | 2,486725664     |
| RGS12                                                                                         | 0,517145205 | -0,336986559 | 0,125 | 0,082 | 1         | 0,791693242   | 1,263115494     | 1,524390244     |
| ITM2C                                                                                         | 0,030109085 | -0,337089418 | 0,75  | 0,355 | 1         | 0,791636799   | 1,263205553     | 2,112676056     |
| MAPK1IP1L                                                                                     | 0,273549367 | -0,337260844 | 0,281 | 0,16  | 1         | 0,791542739   | 1,26335566      | 1,75625         |
| CAV1                                                                                          | 0,067594417 | -0,337545783 | 0,531 | 0,27  | 1         | 0,791386421   | 1,263605204     | 1,966666667     |
| VTA1                                                                                          | 0,800356249 | -0,337548293 | 0,062 | 0,07  | 1         | 0,791385044   | 1,263607402     | 0,885714286     |
| KCMF1                                                                                         | 0,178842486 | -0,337618854 | 0,375 | 0,203 | 1         | 0,79134634    | 1,263669205     | 1,84729064      |
| ILF3                                                                                          | 0,273697301 | -0,337643559 | 0,438 | 0,262 | 1         | 0,791332788   | 1,263690845     | 1,671755725     |
| ZNF207                                                                                        | 0,016864748 | -0,338062861 | 0,594 | 0,262 | 1         | 0,79110283    | 1,264058175     | 2,267175573     |
| HACD2                                                                                         | 0,538657453 | -0,338080089 | 0,156 | 0,105 | 1         | 0,791093384   | 1,264073269     | 1,485714286     |
| ZNF655                                                                                        | 0,163189943 | -0,338443026 | 0,219 | 0,109 | 1         | 0,790894394   | 1,264391311     | 2,009174312     |
| HLA-DPA1                                                                                      | 0,924392442 | -0,338443242 | 0,031 | 0,027 | 1         | 0,790894276   | 1,2643915       | 1,148148148     |
| CNNM3                                                                                         | 0,161397126 | -0,33855003  | 0     | 0,059 | 1         | 0,790835736   | 1,264485094     | 0               |
| SAP18                                                                                         | 0,944368866 | -0,33867764  | 0,719 | 0,523 | 1         | 0,790765788   | 1,264596945     | 1,374760994     |
| YPEL5                                                                                         | 0,086900572 | -0,338686543 | 0,5   | 0,258 | 1         | 0,790760908   | 1,26460475      | 1,937984496     |
| OLFML2B                                                                                       | 0,416896114 | -0,338790556 | 0,125 | 0,074 | 1         | 0,790703899   | 1,264695927     | 1,689189189     |
| LGR4                                                                                          | 0,960267559 | -0,338813364 | 0,094 | 0,09  | 1         | 0,790691399   | 1,26471592      | 1,044444444     |
| TCP1                                                                                          | 0,333101677 | -0,339198482 | 0,469 | 0,297 | 1         | 0,790480357   | 1,265053573     | 1,579124579     |
| SHF                                                                                           | 0,607571545 | -0,339290314 | 0,031 | 0,051 | 1         | 0,790430042   | 1,2651341       | 0,607843137     |
| RABGAP1                                                                                       | 0,620881389 | -0,3393152   | 0,156 | 0,109 | 1         | 0,790416407   | 1,265155924     | 1,431192661     |
| SLC25A33                                                                                      | 0,76088146  | -0,339576569 | 0,125 | 0,133 | 1         | 0,790273223   | 1,265385149     | 0,939849624     |
| TPRG1L                                                                                        | 0,660402423 | -0,339651954 | 0,094 | 0,066 | 1         | 0,79023193    | 1,265451271     | 1,424242424     |
| LRRK2                                                                                         | 0,316283338 | -0,339728343 | 0,031 | 0,082 | 1         | 0,790190089   | 1,265518277     | 0,37804878      |
| ZMYND11                                                                                       | 0,320338862 | -0,339857426 | 0,25  | 0,148 | 1         | 0,790119391   | 1,265631512     | 1,689189189     |

Supplementary Table 1

| Differentially expressed genes_adjacent-skin-XL_comparing SC-Keloid vs. (SC-Myel, SC-Nonmyel) |             |              |       |       |           |               |                 |                 |
|-----------------------------------------------------------------------------------------------|-------------|--------------|-------|-------|-----------|---------------|-----------------|-----------------|
| gene                                                                                          | p_val       | avg_log2FC   | pct.1 | pct.2 | p_val_adj | Foldchange_UP | Foldchange_DOWN | Ratio_pct1_pct2 |
| UIMC1                                                                                         | 1           | -0,340179261 | 0,094 | 0,086 | 1         | 0,789943152   | 1,26591388      | 1,093023256     |
| MAPKBP1                                                                                       | 0,920939129 | -0,340219827 | 0,062 | 0,055 | 1         | 0,78992094    | 1,265949475     | 1,127272727     |
| PALS1                                                                                         | 0,16495238  | -0,340633975 | 0,031 | 0,113 | 1         | 0,789694214   | 1,266312938     | 0,274336283     |
| SIX5                                                                                          | 0,730358576 | -0,340803655 | 0,031 | 0,043 | 1         | 0,789601341   | 1,266461881     | 0,720930233     |
| USP16                                                                                         | 0,177046306 | -0,341045202 | 0,344 | 0,184 | 1         | 0,789469151   | 1,26667394      | 1,869565217     |
| EP300                                                                                         | 0,657456412 | -0,341153397 | 0,219 | 0,168 | 1         | 0,789409947   | 1,266768938     | 1,303571429     |
| ALG13                                                                                         | 0,97109805  | -0,341238252 | 0,094 | 0,09  | 1         | 0,789363518   | 1,266843447     | 1,044444444     |
| CCDC149                                                                                       | 0,10262374  | -0,341253052 | 0     | 0,078 | 1         | 0,78935542    | 1,266856444     | 0               |
| GTF2IRD2B                                                                                     | 0,213026321 | -0,341317179 | 0     | 0,047 | 1         | 0,789320334   | 1,266912756     | 0               |
| SEMA4A                                                                                        | 0,492632793 | -0,341453589 | 0,062 | 0,094 | 1         | 0,789245706   | 1,267032551     | 0,659574468     |
| DENND2A                                                                                       | 0,344592621 | -0,341493728 | 0,031 | 0,074 | 1         | 0,789223748   | 1,267067803     | 0,418918919     |
| AP1G1                                                                                         | 0,860276283 | -0,341723729 | 0,156 | 0,133 | 1         | 0,789097936   | 1,267269821     | 1,172932331     |
| THBS1                                                                                         | 0,056235689 | -0,341786107 | 0,5   | 0,25  | 1         | 0,789063818   | 1,267324616     | 2               |
| PIEZO2                                                                                        | 0,10262374  | -0,34188031  | 0     | 0,078 | 1         | 0,789012297   | 1,26740737      | 0               |
| PEG10                                                                                         | 0,001612855 | -0,342053761 | 0,531 | 0,203 | 1         | 0,788917442   | 1,267559755     | 2,615763547     |
| WHAMM                                                                                         | 0,940093621 | -0,342195974 | 0,094 | 0,082 | 1         | 0,788839679   | 1,267684711     | 1,146341463     |
| REXO1                                                                                         | 0,032569978 | -0,342229179 | 0,219 | 0,082 | 1         | 0,788821523   | 1,267713889     | 2,670731707     |
| ACADSB                                                                                        | 0,499735776 | -0,342334271 | 0,031 | 0,059 | 1         | 0,788764064   | 1,267806238     | 0,525423729     |
| INTU                                                                                          | 0,800356249 | -0,342373975 | 0,062 | 0,07  | 1         | 0,788742357   | 1,267841129     | 0,885714286     |
| PPFIA1                                                                                        | 0,434592747 | -0,342533767 | 0,156 | 0,098 | 1         | 0,788655001   | 1,267981562     | 1,591836735     |
| ARHGEF10L                                                                                     | 0,100873626 | -0,342735311 | 0,188 | 0,082 | 1         | 0,788544834   | 1,268158711     | 2,292682927     |
| ZNF131                                                                                        | 0,976274084 | -0,342889223 | 0,188 | 0,16  | 1         | 0,788460713   | 1,26829401      | 1,175           |
| GNL3                                                                                          | 0,004661673 | -0,342918378 | 0,5   | 0,199 | 1         | 0,78844478    | 1,268319641     | 2,512562814     |
| ZNF677                                                                                        | 0,377976391 | -0,342974586 | 0,031 | 0,07  | 1         | 0,788414062   | 1,268369056     | 0,442857143     |
| TMEM165                                                                                       | 0,022157242 | -0,343098941 | 0,531 | 0,234 | 1         | 0,788346107   | 1,26847839      | 2,269230769     |
| MPRIP                                                                                         | 0,069948044 | -0,343272852 | 0,5   | 0,25  | 1         | 0,788251081   | 1,268631308     | 2               |
| WBP11                                                                                         | 0,133974042 | -0,34356338  | 0,469 | 0,242 | 1         | 0,78809236    | 1,268886809     | 1,938016529     |
| MAPK10                                                                                        | 0,28878729  | -0,343685246 | 0,031 | 0,082 | 1         | 0,788025792   | 1,268993998     | 0,37804878      |
| ZNF397                                                                                        | 0,682891358 | -0,34385333  | 0,094 | 0,113 | 1         | 0,787933987   | 1,269141853     | 0,831858407     |
| SPPL3                                                                                         | 0,138730892 | -0,34398926  | 0,344 | 0,18  | 1         | 0,787859751   | 1,269261438     | 1,911111111     |

Supplementary Table 1

| Differentially expressed genes_adjacent-skin-XL_comparing SC-Keloid vs. (SC-Myel, SC-Nonmyel) |             |              |       |       |           |               |                 |                 |
|-----------------------------------------------------------------------------------------------|-------------|--------------|-------|-------|-----------|---------------|-----------------|-----------------|
| gene                                                                                          | p_val       | avg_log2FC   | pct.1 | pct.2 | p_val_adj | Foldchange_UP | Foldchange_DOWN | Ratio_pct1_pct2 |
| ZNF704                                                                                        | 0,396895993 | -0,34401813  | 0,062 | 0,109 | 1         | 0,787843985   | 1,269286837     | 0,568807339     |
| TSC1                                                                                          | 0,711312846 | -0,344248605 | 0,125 | 0,094 | 1         | 0,787718135   | 1,269489625     | 1,329787234     |
| SNX24                                                                                         | 0,10262374  | -0,344518341 | 0     | 0,078 | 1         | 0,787570872   | 1,269727        | 0               |
| NBPF12                                                                                        | 0,383663233 | -0,344656598 | 0,031 | 0,07  | 1         | 0,7874954     | 1,269848687     | 0,442857143     |
| NKX6-2                                                                                        | 0,257548576 | -0,344716273 | 0     | 0,039 | 1         | 0,787462827   | 1,269901214     | 0               |
| TUSC1                                                                                         | 0,090849937 | -0,34478198  | 0,312 | 0,148 | 1         | 0,787426963   | 1,269959052     | 2,108108108     |
| TCEA2                                                                                         | 0,845147782 | -0,344885163 | 0,281 | 0,219 | 1         | 0,787370648   | 1,270049884     | 1,283105023     |
| EZH2                                                                                          | 0,630272476 | -0,344931086 | 0,062 | 0,082 | 1         | 0,787345585   | 1,270090312     | 0,756097561     |
| ZCCHC14                                                                                       | 0,1480486   | -0,34495006  | 0,188 | 0,09  | 1         | 0,78733523    | 1,270107016     | 2,088888889     |
| MAPKAPK2                                                                                      | 0,38681383  | -0,345837969 | 0,25  | 0,156 | 1         | 0,786850813   | 1,270888946     | 1,602564103     |
| TIA1                                                                                          | 0,26655819  | -0,346051781 | 0,219 | 0,125 | 1         | 0,786734208   | 1,271077309     | 1,752           |
| NOTCH1                                                                                        | 0,0620791   | -0,346245359 | 0,312 | 0,141 | 1         | 0,786628652   | 1,271247872     | 2,212765957     |
| IRF9                                                                                          | 0,309367063 | -0,346414333 | 0,344 | 0,211 | 1         | 0,786536525   | 1,271396774     | 1,630331754     |
| ETS2                                                                                          | 0,212362312 | -0,346710527 | 0,156 | 0,078 | 1         | 0,78637506    | 1,271657826     | 2               |
| FEM1B                                                                                         | 0,864989089 | -0,346745058 | 0,094 | 0,078 | 1         | 0,786356239   | 1,271688264     | 1,205128205     |
| KLF15                                                                                         | 0,134529645 | -0,347184497 | 0     | 0,066 | 1         | 0,786116755   | 1,272075674     | 0               |
| PANX1                                                                                         | 0,630272281 | -0,347311388 | 0,062 | 0,082 | 1         | 0,786047615   | 1,272187563     | 0,756097561     |
| CYB5A                                                                                         | 0,216844992 | -0,347339189 | 0,312 | 0,172 | 1         | 0,786032468   | 1,272212079     | 1,813953488     |
| MTMR10                                                                                        | 0,314221703 | -0,347421523 | 0,031 | 0,078 | 1         | 0,785987611   | 1,272284685     | 0,397435897     |
| TSC2                                                                                          | 0,621083681 | -0,347805948 | 0,25  | 0,18  | 1         | 0,785778202   | 1,272623748     | 1,388888889     |
| OTUD1                                                                                         | 0,704796968 | -0,347914755 | 0,125 | 0,094 | 1         | 0,785718942   | 1,272719731     | 1,329787234     |
| RNF130                                                                                        | 0,300504859 | -0,347996279 | 0,5   | 0,309 | 1         | 0,785674543   | 1,272791653     | 1,618122977     |
| INTS3                                                                                         | 0,165597712 | -0,348183729 | 0,219 | 0,109 | 1         | 0,785572467   | 1,272957038     | 2,009174312     |
| ZNF141                                                                                        | 0,864989089 | -0,34824401  | 0,094 | 0,078 | 1         | 0,785539643   | 1,273010228     | 1,205128205     |
| ZNF532                                                                                        | 0,264110461 | -0,348737978 | 0,062 | 0,129 | 1         | 0,785270726   | 1,273446172     | 0,480620155     |
| RASGRF1                                                                                       | 0,283789128 | -0,348878848 | 0     | 0,035 | 1         | 0,785194053   | 1,273570521     | 0               |
| TENT4B                                                                                        | 0,217772806 | -0,349154219 | 0,188 | 0,098 | 1         | 0,785044196   | 1,273813634     | 1,918367347     |
| FBLN5                                                                                         | 0,10262374  | -0,349372604 | 0     | 0,078 | 1         | 0,78492537    | 1,27400647      | 0               |
| RBM14                                                                                         | 0,790895329 | -0,349493042 | 0,125 | 0,098 | 1         | 0,784859846   | 1,27411283      | 1,275510204     |
| RUFY2                                                                                         | 0,790895329 | -0,349727368 | 0,125 | 0,098 | 1         | 0,784732378   | 1,274319791     | 1,275510204     |



Supplementary Table 1

| Differentially expressed genes_adjacent-skin-XL_comparing SC-Keloid vs. (SC-Myel, SC-Nonmyel) |             |              |       |       |           |               |                 |                 |
|-----------------------------------------------------------------------------------------------|-------------|--------------|-------|-------|-----------|---------------|-----------------|-----------------|
| gene                                                                                          | p_val       | avg_log2FC   | pct.1 | pct.2 | p_val_adj | Foldchange_UP | Foldchange_DOWN | Ratio_pct1_pct2 |
| SPIN1                                                                                         | 0,526388413 | -0,350650381 | 0,188 | 0,125 | 1         | 0,784230479   | 1,275135341     | 1,504           |
| PKD1                                                                                          | 0,291985575 | -0,350717475 | 0,25  | 0,148 | 1         | 0,784194009   | 1,275194644     | 1,689189189     |
| C1orf52                                                                                       | 0,139693288 | -0,350974183 | 0,312 | 0,16  | 1         | 0,784054485   | 1,275421568     | 1,95            |
| KIF1B                                                                                         | 0,276655885 | -0,351291408 | 0,344 | 0,203 | 1         | 0,783882103   | 1,275702043     | 1,694581281     |
| PCBP1                                                                                         | 0,188666329 | -0,351373128 | 0,781 | 0,414 | 1         | 0,783837702   | 1,275774306     | 1,88647343      |
| RIPK4                                                                                         | 0,603353082 | -0,351376336 | 0,031 | 0,051 | 1         | 0,783835959   | 1,275777143     | 0,607843137     |
| ZNF622                                                                                        | 0,780949248 | -0,351395402 | 0,094 | 0,102 | 1         | 0,7838256     | 1,275794002     | 0,921568627     |
| IFT88                                                                                         | 0,853446312 | -0,35163611  | 0,125 | 0,102 | 1         | 0,783694833   | 1,276006882     | 1,225490196     |
| MGLL                                                                                          | 0,344592621 | -0,351999655 | 0,031 | 0,074 | 1         | 0,783497374   | 1,276328464     | 0,418918919     |
| SNAI1                                                                                         | 0,392106312 | -0,352599694 | 0,156 | 0,094 | 1         | 0,783171573   | 1,276859419     | 1,659574468     |
| NAA25                                                                                         | 0,587470736 | -0,35273478  | 0,062 | 0,086 | 1         | 0,783098245   | 1,276978983     | 0,720930233     |
| RBP1                                                                                          | 0,194053346 | -0,352812299 | 0     | 0,051 | 1         | 0,783056169   | 1,277047599     | 0               |
| NT5DC2                                                                                        | 0,050014543 | -0,353579    | 0,438 | 0,207 | 1         | 0,782640135   | 1,277726449     | 2,115942029     |
| SNRNP70                                                                                       | 0,148541101 | -0,353646516 | 0,719 | 0,387 | 1         | 0,782603509   | 1,277786247     | 1,857881137     |
| CCNT1                                                                                         | 0,932622158 | -0,353803198 | 0,094 | 0,082 | 1         | 0,78251852    | 1,277925026     | 1,146341463     |
| REV1                                                                                          | 0,362589924 | -0,353970207 | 0,188 | 0,113 | 1         | 0,782427939   | 1,27807297      | 1,663716814     |
| TXLNG                                                                                         | 0,432049072 | -0,354004535 | 0,188 | 0,117 | 1         | 0,782409322   | 1,278103381     | 1,606837607     |
| KIF19                                                                                         | 0,176914647 | -0,354010842 | 0     | 0,055 | 1         | 0,782405902   | 1,278108968     | 0               |
| ZC3HAV1                                                                                       | 0,180187128 | -0,354048619 | 0,219 | 0,113 | 1         | 0,782385415   | 1,278142436     | 1,938053097     |
| KDM5C                                                                                         | 0,507127635 | -0,354099972 | 0,156 | 0,102 | 1         | 0,782357566   | 1,278187933     | 1,529411765     |
| CRKL                                                                                          | 0,935028354 | -0,354106346 | 0,094 | 0,09  | 1         | 0,782354109   | 1,27819358      | 1,044444444     |
| PLK3                                                                                          | 0,790895329 | -0,354164791 | 0,094 | 0,102 | 1         | 0,782322416   | 1,278245362     | 0,921568627     |
| NPIP11                                                                                        | 0,455148041 | -0,354331288 | 0,031 | 0,062 | 1         | 0,782232136   | 1,278392888     | 0,5             |
| ANKRD50                                                                                       | 0,798617831 | -0,354392778 | 0,219 | 0,176 | 1         | 0,782198797   | 1,278447377     | 1,244318182     |
| ATP6V1E2                                                                                      | 0,548952158 | -0,354398445 | 0,031 | 0,055 | 1         | 0,782195724   | 1,278452399     | 0,563636364     |
| TRHDE                                                                                         | 0,176914647 | -0,354561136 | 0     | 0,055 | 1         | 0,782107522   | 1,278596576     | 0               |
| KHDRBS3                                                                                       | 0,154902655 | -0,354652241 | 0,75  | 0,391 | 1         | 0,782058134   | 1,278677322     | 1,918158568     |
| FMR1                                                                                          | 0,573788361 | -0,354694715 | 0,094 | 0,121 | 1         | 0,78203511    | 1,278714967     | 0,776859504     |
| APBB2                                                                                         | 0,310355006 | -0,354899229 | 0,094 | 0,047 | 1         | 0,781924258   | 1,278896249     | 2               |
| VEZT                                                                                          | 0,209609348 | -0,35498805  | 0,25  | 0,137 | 1         | 0,78187612    | 1,278974987     | 1,824817518     |

Supplementary Table 1

| Differentially expressed genes_adjacent-skin-XL_ comparing SC-Keloid vs. (SC-Myel, SC-Nonmyel) |             |              |       |       |           |               |                 |                 |
|------------------------------------------------------------------------------------------------|-------------|--------------|-------|-------|-----------|---------------|-----------------|-----------------|
| gene                                                                                           | p_val       | avg_log2FC   | pct.1 | pct.2 | p_val_adj | Foldchange_UP | Foldchange_DOWN | Ratio_pct1_pct2 |
| PCNX1                                                                                          | 0,874415164 | -0,355485726 | 0,094 | 0,094 | 1         | 0,781606448   | 1,279416262     | 1               |
| RNF38                                                                                          | 0,736944569 | -0,355752906 | 0,188 | 0,145 | 1         | 0,781461712   | 1,279653226     | 1,296551724     |
| CRTC2                                                                                          | 0,764452551 | -0,355851249 | 0,125 | 0,098 | 1         | 0,781408444   | 1,279740458     | 1,275510204     |
| SLC39A6                                                                                        | 0,296464763 | -0,356048425 | 0,281 | 0,168 | 1         | 0,781301655   | 1,279915374     | 1,672619048     |
| POU3F1                                                                                         | 0,000310707 | -0,356145474 | 0,562 | 0,195 | 1         | 0,781249099   | 1,280001476     | 2,882051282     |
| MAT2A                                                                                          | 0,95305118  | -0,356472828 | 0,094 | 0,09  | 1         | 0,78107185    | 1,280291947     | 1,044444444     |
| RASSF1                                                                                         | 0,250657258 | -0,356775754 | 0,312 | 0,18  | 1         | 0,780907864   | 1,280560801     | 1,733333333     |
| LINC00685                                                                                      | 0,194053346 | -0,356806824 | 0     | 0,051 | 1         | 0,780891047   | 1,28058838      | 0               |
| RBPJ                                                                                           | 0,037267708 | -0,357053545 | 0,625 | 0,293 | 1         | 0,780757515   | 1,280807397     | 2,133105802     |
| EIF1AX                                                                                         | 0,663103381 | -0,357187524 | 0,719 | 0,473 | 1         | 0,780685011   | 1,280926348     | 1,520084567     |
| KRT17                                                                                          | 0,177248199 | -0,357211934 | 0,281 | 0,152 | 1         | 0,780671803   | 1,28094802      | 1,848684211     |
| ANGEL2                                                                                         | 0,359364064 | -0,357805675 | 0,125 | 0,07  | 1         | 0,780350583   | 1,281475303     | 1,785714286     |
| IRF7                                                                                           | 0,127829684 | -0,35781879  | 0,219 | 0,105 | 1         | 0,780343489   | 1,281486952     | 2,085714286     |
| ZNF703                                                                                         | 0,99780108  | -0,357851196 | 0,062 | 0,059 | 1         | 0,780325961   | 1,281515738     | 1,050847458     |
| TUBG2                                                                                          | 0,908376542 | -0,358108498 | 0,125 | 0,105 | 1         | 0,780186804   | 1,281744314     | 1,19047619      |
| AAK1                                                                                           | 0,070620647 | -0,358155075 | 0,375 | 0,18  | 1         | 0,780161616   | 1,281785695     | 2,083333333     |
| ULK1                                                                                           | 0,288304724 | -0,358317555 | 0,156 | 0,086 | 1         | 0,780073758   | 1,281930061     | 1,813953488     |
| SIRT1                                                                                          | 0,810386495 | -0,358903275 | 0,125 | 0,102 | 1         | 0,779757119   | 1,282450619     | 1,225490196     |
| ATXN1L                                                                                         | 0,314221703 | -0,35912495  | 0,031 | 0,078 | 1         | 0,779637317   | 1,282647686     | 0,397435897     |
| SAFB2                                                                                          | 0,171841867 | -0,359156659 | 0,281 | 0,148 | 1         | 0,779620181   | 1,282675878     | 1,898648649     |
| SEC63                                                                                          | 0,235403752 | -0,359233241 | 0,312 | 0,176 | 1         | 0,779578798   | 1,282743967     | 1,772727273     |
| CREM                                                                                           | 0,288320579 | -0,359371025 | 0,219 | 0,125 | 1         | 0,779504348   | 1,282866482     | 1,752           |
| RICTOR                                                                                         | 0,824651962 | -0,359671592 | 0,219 | 0,176 | 1         | 0,779341965   | 1,283133778     | 1,244318182     |
| NAB2                                                                                           | 0,250004291 | -0,359753338 | 0,156 | 0,082 | 1         | 0,779297807   | 1,283206485     | 1,902439024     |
| NECTIN2                                                                                        | 0,195175128 | -0,359813682 | 0,406 | 0,223 | 1         | 0,779265212   | 1,28326016      | 1,820627803     |
| CTNNA1                                                                                         | 0,801026191 | -0,36011053  | 0,938 | 0,613 | 1         | 0,779104887   | 1,283524229     | 1,530179445     |
| GARRE1                                                                                         | 0,50638112  | -0,360201528 | 0,094 | 0,125 | 1         | 0,779055747   | 1,28360519      | 0,752           |
| DDX24                                                                                          | 0,085816921 | -0,361429578 | 0,75  | 0,363 | 1         | 0,778392882   | 1,284698284     | 2,066115702     |
| ZFYVE28                                                                                        | 0,455148041 | -0,361518575 | 0,031 | 0,062 | 1         | 0,778344865   | 1,284777538     | 0,5             |
| SOS2                                                                                           | 0,11621502  | -0,361526786 | 0,25  | 0,125 | 1         | 0,778340436   | 1,28478485      | 2               |

Supplementary Table 1

| Differentially expressed genes_adjacent-skin-XL_ comparing SC-Keloid vs. (SC-Myel, SC-Nonmyel) |             |              |       |       |           |               |                 |                 |
|------------------------------------------------------------------------------------------------|-------------|--------------|-------|-------|-----------|---------------|-----------------|-----------------|
| gene                                                                                           | p_val       | avg_log2FC   | pct.1 | pct.2 | p_val_adj | Foldchange_UP | Foldchange_DOWN | Ratio_pct1_pct2 |
| AK3                                                                                            | 0,422250029 | -0,361696205 | 0,281 | 0,18  | 1         | 0,778249039   | 1,284935734     | 1,561111111     |
| PPP3CA                                                                                         | 0,095565969 | -0,361928682 | 0,5   | 0,258 | 1         | 0,778123641   | 1,285142807     | 1,937984496     |
| BRWD1                                                                                          | 0,144843861 | -0,362696052 | 0,281 | 0,145 | 1         | 0,777709867   | 1,285826556     | 1,937931034     |
| PPM1D                                                                                          | 0,538237843 | -0,362726666 | 0,062 | 0,09  | 1         | 0,777693364   | 1,285853841     | 0,688888889     |
| AFF4                                                                                           | 0,036152742 | -0,362752213 | 0,531 | 0,242 | 1         | 0,777679593   | 1,285876611     | 2,194214876     |
| KIAA1109                                                                                       | 0,739069785 | -0,362954393 | 0,156 | 0,121 | 1         | 0,777570616   | 1,286056827     | 1,289256198     |
| GPR173                                                                                         | 0,147320294 | -0,36296622  | 0     | 0,062 | 1         | 0,777564242   | 1,28606737      | 0               |
| POM121C                                                                                        | 0,738281619 | -0,363268898 | 0,125 | 0,098 | 1         | 0,777401126   | 1,286337216     | 1,275510204     |
| DOK5                                                                                           | 0,414703427 | -0,363491861 | 0,031 | 0,066 | 1         | 0,777280991   | 1,28653603      | 0,46969697      |
| DISP1                                                                                          | 0,499735776 | -0,363527551 | 0,031 | 0,059 | 1         | 0,777261762   | 1,286567857     | 0,525423729     |
| ADGRA2                                                                                         | 0,1480486   | -0,36365711  | 0,188 | 0,09  | 1         | 0,777191964   | 1,286683401     | 2,088888889     |
| GRAMD4                                                                                         | 0,499735776 | -0,363704631 | 0,031 | 0,059 | 1         | 0,777166365   | 1,286725784     | 0,525423729     |
| GOS2                                                                                           | 0,10262374  | -0,363921188 | 0     | 0,078 | 1         | 0,777049716   | 1,286918943     | 0               |
| RBM38                                                                                          | 0,512685318 | -0,364154878 | 0,094 | 0,059 | 1         | 0,776923859   | 1,287127417     | 1,593220339     |
| CEP95                                                                                          | 0,637094964 | -0,364206034 | 0,062 | 0,082 | 1         | 0,776896311   | 1,287173058     | 0,756097561     |
| OSBPL5                                                                                         | 0,377976391 | -0,36420965  | 0,031 | 0,07  | 1         | 0,776894363   | 1,287176284     | 0,442857143     |
| PHLDB2                                                                                         | 0,120847574 | -0,364463725 | 0,344 | 0,176 | 1         | 0,776757556   | 1,28740299      | 1,954545455     |
| TNIP2                                                                                          | 0,194605586 | -0,364527125 | 0,219 | 0,113 | 1         | 0,776723422   | 1,287459567     | 1,938053097     |
| HELZ2                                                                                          | 0,833510073 | -0,364972823 | 0,125 | 0,102 | 1         | 0,776483502   | 1,287857369     | 1,225490196     |
| RNF31                                                                                          | 0,99780108  | -0,365457366 | 0,062 | 0,059 | 1         | 0,776222756   | 1,288289981     | 1,050847458     |
| EFR3A                                                                                          | 0,783849734 | -0,365514939 | 0,156 | 0,121 | 1         | 0,776191781   | 1,288341393     | 1,289256198     |
| CDKAL1                                                                                         | 0,176914647 | -0,365876901 | 0     | 0,055 | 1         | 0,775997064   | 1,28866467      | 0               |
| USP9X                                                                                          | 0,449929502 | -0,365953967 | 0,25  | 0,164 | 1         | 0,775955613   | 1,288733509     | 1,524390244     |
| MMP19                                                                                          | 0,191913299 | -0,365975083 | 0,094 | 0,039 | 1         | 0,775944256   | 1,288752372     | 2,41025641      |
| ITSN2                                                                                          | 0,589624457 | -0,366096596 | 0,094 | 0,117 | 1         | 0,775878903   | 1,288860924     | 0,803418803     |
| H2AC6                                                                                          | 0,377976391 | -0,366416699 | 0,031 | 0,07  | 1         | 0,775706772   | 1,289146926     | 0,442857143     |
| IL17B                                                                                          | 0,147320294 | -0,366418648 | 0     | 0,062 | 1         | 0,775705724   | 1,289148668     | 0               |
| DNAJB9                                                                                         | 0,27817043  | -0,36678656  | 0,281 | 0,164 | 1         | 0,775507931   | 1,289477464     | 1,713414634     |
| THY1                                                                                           | 0,014401184 | -0,366885719 | 0,312 | 0,117 | 1         | 0,775454631   | 1,289566095     | 2,666666667     |
| HERPUD2                                                                                        | 0,347206802 | -0,367191169 | 0,031 | 0,074 | 1         | 0,775290467   | 1,289839153     | 0,418918919     |

Supplementary Table 1

| Differentially expressed genes_adjacent-skin-XL_comparing SC-Keloid vs. (SC-Myel, SC-Nonmyel) |             |              |       |       |           |               |                 |                 |
|-----------------------------------------------------------------------------------------------|-------------|--------------|-------|-------|-----------|---------------|-----------------|-----------------|
| gene                                                                                          | p_val       | avg_log2FC   | pct.1 | pct.2 | p_val_adj | Foldchange_UP | Foldchange_DOWN | Ratio_pct1_pct2 |
| KDM7A                                                                                         | 0,112290358 | -0,367660838 | 0     | 0,074 | 1         | 0,775038113   | 1,290259129     | 0               |
| STX3                                                                                          | 0,935028321 | -0,367726816 | 0,094 | 0,09  | 1         | 0,775002669   | 1,290318137     | 1,044444444     |
| EPAS1                                                                                         | 0,840330301 | -0,367732127 | 0,094 | 0,098 | 1         | 0,774999816   | 1,290322887     | 0,959183673     |
| ZXDC                                                                                          | 0,147320294 | -0,367758472 | 0     | 0,062 | 1         | 0,774985664   | 1,29034645      | 0               |
| PDZD2                                                                                         | 0,134529645 | -0,368089398 | 0     | 0,066 | 1         | 0,774807918   | 1,290642464     | 0               |
| ARID2                                                                                         | 0,528890372 | -0,368184877 | 0,188 | 0,125 | 1         | 0,774756642   | 1,290727883     | 1,504           |
| ZNF148                                                                                        | 0,274790708 | -0,368310879 | 0,219 | 0,125 | 1         | 0,774688979   | 1,290840617     | 1,752           |
| MTHFR                                                                                         | 0,633679827 | -0,368564689 | 0,062 | 0,082 | 1         | 0,774552702   | 1,291067731     | 0,756097561     |
| NCOA2                                                                                         | 0,587470736 | -0,368846503 | 0,062 | 0,086 | 1         | 0,774401417   | 1,291319951     | 0,720930233     |
| SNX30                                                                                         | 0,739785061 | -0,368849372 | 0,062 | 0,074 | 1         | 0,774399877   | 1,29132252      | 0,837837838     |
| ARAP1                                                                                         | 0,99780108  | -0,368963064 | 0,062 | 0,059 | 1         | 0,774338852   | 1,291424287     | 1,050847458     |
| PPP2R3A                                                                                       | 0,756564831 | -0,369167995 | 0,094 | 0,105 | 1         | 0,774228868   | 1,291607743     | 0,895238095     |
| ZRANB1                                                                                        | 0,853446377 | -0,36930997  | 0,125 | 0,102 | 1         | 0,774152679   | 1,291734856     | 1,225490196     |
| ZC3H7B                                                                                        | 0,185335556 | -0,369506052 | 0,219 | 0,113 | 1         | 0,774047469   | 1,291910432     | 1,938053097     |
| IFIT3                                                                                         | 0,847430516 | -0,369670094 | 0,188 | 0,156 | 1         | 0,77395946    | 1,292057338     | 1,205128205     |
| ADIPOR2                                                                                       | 0,908376542 | -0,369707553 | 0,125 | 0,105 | 1         | 0,773939365   | 1,292090885     | 1,19047619      |
| EPB41L4B                                                                                      | 0,112290358 | -0,369733414 | 0     | 0,074 | 1         | 0,773925492   | 1,292114047     | 0               |
| DHX36                                                                                         | 0,244023195 | -0,370953155 | 0,531 | 0,312 | 1         | 0,773271445   | 1,29320694      | 1,701923077     |
| POLR2A                                                                                        | 0,639262178 | -0,371051513 | 0,188 | 0,137 | 1         | 0,773218728   | 1,29329511      | 1,372262774     |
| POLR2J3                                                                                       | 0,165239067 | -0,371141238 | 0,25  | 0,129 | 1         | 0,773170641   | 1,293375546     | 1,937984496     |
| RASEF                                                                                         | 0,194053346 | -0,371170142 | 0     | 0,051 | 1         | 0,773155151   | 1,293401458     | 0               |
| RYR1                                                                                          | 0,122891457 | -0,371247744 | 0     | 0,07  | 1         | 0,773113565   | 1,293471031     | 0               |
| USP39                                                                                         | 0,872528346 | -0,371512161 | 0,094 | 0,078 | 1         | 0,772971881   | 1,293708121     | 1,205128205     |
| OBSL1                                                                                         | 0,633679827 | -0,371519107 | 0,062 | 0,082 | 1         | 0,77296816    | 1,29371435      | 0,756097561     |
| MAPK8IP1                                                                                      | 0,906837565 | -0,372180508 | 0,125 | 0,121 | 1         | 0,772613875   | 1,294307587     | 1,033057851     |
| ARL8B                                                                                         | 0,784946494 | -0,372359412 | 0,219 | 0,168 | 1         | 0,772518072   | 1,294468099     | 1,303571429     |
| REL                                                                                           | 0,344060173 | -0,372455095 | 0,188 | 0,109 | 1         | 0,772466838   | 1,294553954     | 1,724770642     |
| PURB                                                                                          | 0,158735078 | -0,372939197 | 0,344 | 0,18  | 1         | 0,772207677   | 1,29498842      | 1,911111111     |
| SP4                                                                                           | 0,183854736 | -0,373094562 | 0,031 | 0,102 | 1         | 0,772124522   | 1,295127886     | 0,303921569     |
| PRRC2A                                                                                        | 0,230685397 | -0,37310719  | 0,281 | 0,156 | 1         | 0,772117764   | 1,295139222     | 1,801282051     |

Supplementary Table 1

| Differentially expressed genes_adjacent-skin-XL_comparing SC-Keloid vs. (SC-Myel, SC-Nonmyel) |             |              |       |       |           |               |                 |                 |
|-----------------------------------------------------------------------------------------------|-------------|--------------|-------|-------|-----------|---------------|-----------------|-----------------|
| gene                                                                                          | p_val       | avg_log2FC   | pct.1 | pct.2 | p_val_adj | Foldchange_UP | Foldchange_DOWN | Ratio_pct1_pct2 |
| LIN7A                                                                                         | 0,933712959 | -0,373461385 | 0,062 | 0,062 | 1         | 0,771928225   | 1,29545723      | 1               |
| XAB2                                                                                          | 0,633679827 | -0,373511527 | 0,062 | 0,082 | 1         | 0,771901397   | 1,295502255     | 0,756097561     |
| SERTAD3                                                                                       | 0,540099312 | -0,373848467 | 0,25  | 0,172 | 1         | 0,771721141   | 1,295804854     | 1,453488372     |
| MAP1A                                                                                         | 0,581227435 | -0,373966631 | 0,094 | 0,117 | 1         | 0,771657935   | 1,295910991     | 0,803418803     |
| TENT4A                                                                                        | 0,122891724 | -0,374065272 | 0     | 0,07  | 1         | 0,771605177   | 1,295999599     | 0               |
| TRMT13                                                                                        | 0,840130893 | -0,374185327 | 0,062 | 0,051 | 1         | 0,77154097    | 1,296107452     | 1,215686275     |
| UBL3                                                                                          | 0,149799379 | -0,37440934  | 0,375 | 0,203 | 1         | 0,771421179   | 1,296308719     | 1,84729064      |
| REC8                                                                                          | 0,581017609 | -0,374476953 | 0,062 | 0,086 | 1         | 0,771385027   | 1,296369472     | 0,720930233     |
| BAG4                                                                                          | 0,997012247 | -0,374926695 | 0,156 | 0,137 | 1         | 0,771144595   | 1,296773662     | 1,138686131     |
| PRRG1                                                                                         | 0,416531335 | -0,375038102 | 0,062 | 0,102 | 1         | 0,771085048   | 1,296873805     | 0,607843137     |
| CDC42EP3                                                                                      | 0,00823539  | -0,375069413 | 0,5   | 0,207 | 1         | 0,771068313   | 1,296901952     | 2,415458937     |
| KANK4                                                                                         | 0,134529645 | -0,375392477 | 0     | 0,066 | 1         | 0,770895666   | 1,297192401     | 0               |
| SELE                                                                                          | 0,314221703 | -0,375604919 | 0,031 | 0,078 | 1         | 0,770782157   | 1,297383431     | 0,397435897     |
| PCM1                                                                                          | 0,211486392 | -0,375712882 | 0,656 | 0,375 | 1         | 0,770724479   | 1,297480523     | 1,749333333     |
| GLA                                                                                           | 0,956227111 | -0,375934279 | 0,156 | 0,133 | 1         | 0,770606212   | 1,297679651     | 1,172932331     |
| ARMH4                                                                                         | 0,176914647 | -0,376040936 | 0     | 0,055 | 1         | 0,770549244   | 1,29777559      | 0               |
| TTC39C                                                                                        | 0,795919922 | -0,376070881 | 0,156 | 0,121 | 1         | 0,77053325    | 1,297802528     | 1,289256198     |
| KAT8                                                                                          | 0,783849734 | -0,376736072 | 0,156 | 0,121 | 1         | 0,770178058   | 1,29840105      | 1,289256198     |
| G3BP1                                                                                         | 0,195794938 | -0,376748989 | 0,438 | 0,242 | 1         | 0,770171163   | 1,298412675     | 1,809917355     |
| VPS13A                                                                                        | 0,255603817 | -0,377006568 | 0,188 | 0,102 | 1         | 0,770033668   | 1,298644515     | 1,843137255     |
| CDKN2D                                                                                        | 0,127028438 | -0,377081817 | 0,25  | 0,125 | 1         | 0,769993506   | 1,298712253     | 2               |
| HECA                                                                                          | 0,767743616 | -0,37726334  | 0,094 | 0,102 | 1         | 0,769896629   | 1,29887567      | 0,921568627     |
| AQP3                                                                                          | 0,99780108  | -0,377291161 | 0,062 | 0,059 | 1         | 0,769881783   | 1,298900717     | 1,050847458     |
| FRMD6                                                                                         | 0,089637552 | -0,377296988 | 0,531 | 0,273 | 1         | 0,769878674   | 1,298905963     | 1,945054945     |
| EVA1C                                                                                         | 0,271686462 | -0,377384598 | 0,031 | 0,086 | 1         | 0,769831923   | 1,298984844     | 0,360465116     |
| SPG7                                                                                          | 0,051511579 | -0,377429748 | 0,281 | 0,121 | 1         | 0,769807831   | 1,299025497     | 2,32231405      |
| SETD3                                                                                         | 0,983740563 | -0,377625284 | 0,156 | 0,141 | 1         | 0,769703502   | 1,299201573     | 1,106382979     |
| SWAP70                                                                                        | 0,147320294 | -0,37793041  | 0     | 0,062 | 1         | 0,769540729   | 1,299476379     | 0               |
| EP400                                                                                         | 0,836907453 | -0,378210491 | 0,094 | 0,098 | 1         | 0,769391347   | 1,299728681     | 0,959183673     |
| RAB3GAP1                                                                                      | 0,453327517 | -0,378305129 | 0,219 | 0,141 | 1         | 0,769340878   | 1,299813943     | 1,553191489     |

Supplementary Table 1

| Differentially expressed genes_adjacent-skin-XL_comparing SC-Keloid vs. (SC-Myel, SC-Nonmyel) |             |              |       |       |           |               |                 |                 |
|-----------------------------------------------------------------------------------------------|-------------|--------------|-------|-------|-----------|---------------|-----------------|-----------------|
| gene                                                                                          | p_val       | avg_log2FC   | pct.1 | pct.2 | p_val_adj | Foldchange_UP | Foldchange_DOWN | Ratio_pct1_pct2 |
| ENPP2                                                                                         | 0,683139676 | -0,378463707 | 0,062 | 0,078 | 1         | 0,769256318   | 1,29956824      | 0,794871795     |
| KLF3                                                                                          | 0,115202665 | -0,378514944 | 0,281 | 0,137 | 1         | 0,769228998   | 1,30002993      | 2,051094891     |
| CCDC186                                                                                       | 0,891985815 | -0,378753946 | 0,094 | 0,094 | 1         | 0,769101576   | 1,300218373     | 1               |
| CIC                                                                                           | 0,122912861 | -0,378806771 | 0,375 | 0,191 | 1         | 0,769073415   | 1,300265983     | 1,963350785     |
| JDP2                                                                                          | 0,322941334 | -0,379060125 | 0,25  | 0,152 | 1         | 0,768938369   | 1,300494344     | 1,644736842     |
| OTUD6B-AS1                                                                                    | 0,000584485 | -0,379112368 | 0,469 | 0,152 | 1         | 0,768910525   | 1,300541439     | 3,085526316     |
| RAF1                                                                                          | 0,551561351 | -0,379369141 | 0,281 | 0,195 | 1         | 0,768773685   | 1,300772931     | 1,441025641     |
| RHBDF1                                                                                        | 0,067686507 | -0,379474048 | 0,625 | 0,312 | 1         | 0,768717785   | 1,300867522     | 2,003205128     |
| TCF7L1                                                                                        | 0,093802134 | -0,379631856 | 0     | 0,082 | 1         | 0,768633704   | 1,301009824     | 0               |
| ZMYM2                                                                                         | 0,705829061 | -0,379718021 | 0,281 | 0,215 | 1         | 0,768587799   | 1,301087529     | 1,306976744     |
| TTC14                                                                                         | 0,090673844 | -0,3797747   | 0,219 | 0,098 | 1         | 0,768557604   | 1,301138646     | 2,234693878     |
| GLI3                                                                                          | 0,62870361  | -0,379789085 | 0,188 | 0,137 | 1         | 0,768549941   | 1,30115162      | 1,372262774     |
| SLC2A3                                                                                        | 0,535935517 | -0,37992026  | 0,156 | 0,105 | 1         | 0,768480065   | 1,30126993      | 1,485714286     |
| HSBP1L1                                                                                       | 0,263419653 | -0,379932761 | 0,031 | 0,086 | 1         | 0,768473406   | 1,301281206     | 0,360465116     |
| PALM                                                                                          | 0,147320294 | -0,380288295 | 0     | 0,062 | 1         | 0,768284048   | 1,30160193      | 0               |
| CHD6                                                                                          | 0,191924078 | -0,380516124 | 0,344 | 0,184 | 1         | 0,768162731   | 1,301807494     | 1,869565217     |
| SNX13                                                                                         | 0,378844198 | -0,380610423 | 0,219 | 0,133 | 1         | 0,768112524   | 1,301892586     | 1,646616541     |
| GNG12                                                                                         | 0,661090749 | -0,381071549 | 0,562 | 0,371 | 1         | 0,767867052   | 1,302308775     | 1,514824798     |
| ARHGEF12                                                                                      | 0,104361714 | -0,381248288 | 0,531 | 0,266 | 1         | 0,767772989   | 1,302468326     | 1,996240602     |
| GTF2B                                                                                         | 0,150581114 | -0,381388029 | 0,312 | 0,168 | 1         | 0,767698626   | 1,30259449      | 1,857142857     |
| TMEM106B                                                                                      | 0,048773235 | -0,381404446 | 0,594 | 0,273 | 1         | 0,76768989    | 1,302609313     | 2,175824176     |
| AVPI1                                                                                         | 0,724493459 | -0,381423245 | 0,094 | 0,105 | 1         | 0,767679887   | 1,302626286     | 0,895238095     |
| KCNMB4                                                                                        | 0,059738382 | -0,381494884 | 0,562 | 0,273 | 1         | 0,767641767   | 1,302690972     | 2,058608059     |
| SH3RF1                                                                                        | 0,047008515 | -0,381618181 | 0,312 | 0,137 | 1         | 0,767576165   | 1,302802308     | 2,277372263     |
| SSU72                                                                                         | 0,084485451 | -0,381665225 | 0,438 | 0,211 | 1         | 0,767551137   | 1,302844791     | 2,075829384     |
| BCAS3                                                                                         | 0,864972765 | -0,381852601 | 0,062 | 0,066 | 1         | 0,767451454   | 1,303014015     | 0,939393939     |
| SIN3A                                                                                         | 0,940300606 | -0,381870679 | 0,156 | 0,137 | 1         | 0,767441837   | 1,303030342     | 1,138686131     |
| DIP2A                                                                                         | 0,421195014 | -0,38212146  | 0,219 | 0,141 | 1         | 0,767308446   | 1,303256866     | 1,553191489     |
| CNRIP1                                                                                        | 0,761165734 | -0,382521404 | 0,094 | 0,102 | 1         | 0,767095762   | 1,303618204     | 0,921568627     |
| SRSF10                                                                                        | 0,254882297 | -0,382560888 | 0,5   | 0,297 | 1         | 0,767074768   | 1,303653882     | 1,683501684     |

Supplementary Table 1

| Differentially expressed genes_adjacent-skin-XL_comparing SC-Keloid vs. (SC-Myel, SC-Nonmyel) |             |              |       |       |           |               |                 |                 |
|-----------------------------------------------------------------------------------------------|-------------|--------------|-------|-------|-----------|---------------|-----------------|-----------------|
| gene                                                                                          | p_val       | avg_log2FC   | pct.1 | pct.2 | p_val_adj | Foldchange_UP | Foldchange_DOWN | Ratio_pct1_pct2 |
| CYP2U1                                                                                        | 0,499735776 | -0,382952313 | 0,031 | 0,059 | 1         | 0,766866678   | 1,304007632     | 0,525423729     |
| MYO1C                                                                                         | 0,582442201 | -0,383064913 | 0,438 | 0,312 | 1         | 0,766806827   | 1,304109411     | 1,403846154     |
| SERINC1                                                                                       | 0,824329963 | -0,38313766  | 0,75  | 0,477 | 1         | 0,766768162   | 1,304175172     | 1,572327044     |
| CA5B                                                                                          | 0,286570971 | -0,383307374 | 0,031 | 0,082 | 1         | 0,766677967   | 1,3043286       | 0,37804878      |
| PLEKHB2                                                                                       | 0,127653578 | -0,383361099 | 0,438 | 0,227 | 1         | 0,766649417   | 1,304377173     | 1,929515419     |
| RAB30-DT                                                                                      | 0,764452551 | -0,38343445  | 0,094 | 0,102 | 1         | 0,76661044    | 1,304443493     | 0,921568627     |
| PIP4K2A                                                                                       | 0,759867431 | -0,383481991 | 0,156 | 0,121 | 1         | 0,766585178   | 1,30448648      | 1,289256198     |
| TSPYL1                                                                                        | 0,381130252 | -0,38355032  | 0,25  | 0,156 | 1         | 0,766548872   | 1,304548264     | 1,602564103     |
| PSEN1                                                                                         | 0,739785061 | -0,383644146 | 0,062 | 0,074 | 1         | 0,766499021   | 1,304633108     | 0,837837838     |
| SOS1                                                                                          | 0,92888861  | -0,383685358 | 0,094 | 0,082 | 1         | 0,766477125   | 1,304670377     | 1,146341463     |
| DDX21                                                                                         | 0,180917725 | -0,383784361 | 0,531 | 0,297 | 1         | 0,766424529   | 1,304759911     | 1,787878788     |
| FAM126B                                                                                       | 0,932622158 | -0,383848129 | 0,094 | 0,082 | 1         | 0,766390653   | 1,304817583     | 1,146341463     |
| RGPD5                                                                                         | 0,147320294 | -0,384027494 | 0     | 0,062 | 1         | 0,766295376   | 1,304979817     | 0               |
| JADE1                                                                                         | 0,795919846 | -0,384083593 | 0,156 | 0,121 | 1         | 0,76626558    | 1,305030562     | 1,289256198     |
| PRDM2                                                                                         | 0,460709201 | -0,384295919 | 0,188 | 0,121 | 1         | 0,766152814   | 1,305222641     | 1,553719008     |
| ZNF844                                                                                        | 0,194053346 | -0,384419166 | 0     | 0,051 | 1         | 0,766087366   | 1,305334149     | 0               |
| SLC6A8                                                                                        | 0,476871703 | -0,384476235 | 0,125 | 0,164 | 1         | 0,766057062   | 1,305385785     | 0,762195122     |
| GLG1                                                                                          | 0,143447781 | -0,384561148 | 0,656 | 0,344 | 1         | 0,766011975   | 1,30546262      | 1,906976744     |
| NAV3                                                                                          | 0,739785061 | -0,384563799 | 0,062 | 0,074 | 1         | 0,766010568   | 1,305465018     | 0,837837838     |
| GATAD2B                                                                                       | 0,846196797 | -0,384676923 | 0,125 | 0,125 | 1         | 0,765950506   | 1,305567385     | 1               |
| TOX                                                                                           | 0,180934293 | -0,384822233 | 0,031 | 0,102 | 1         | 0,765873362   | 1,305698891     | 0,303921569     |
| PM20D2                                                                                        | 0,122891724 | -0,384856489 | 0     | 0,07  | 1         | 0,765855178   | 1,305729894     | 0               |
| REV3L                                                                                         | 0,354261856 | -0,38500438  | 0,125 | 0,07  | 1         | 0,765776674   | 1,305863751     | 1,785714286     |
| ZCCHC2                                                                                        | 0,093802134 | -0,385383139 | 0     | 0,082 | 1         | 0,765575656   | 1,306206633     | 0               |
| SDR39U1                                                                                       | 0,430375867 | -0,385590142 | 0,219 | 0,137 | 1         | 0,765465816   | 1,306394066     | 1,598540146     |
| STOX2                                                                                         | 0,590709689 | -0,385652518 | 0,062 | 0,086 | 1         | 0,765432722   | 1,306450549     | 0,720930233     |
| EIF5B                                                                                         | 0,454104776 | -0,385915974 | 0,5   | 0,328 | 1         | 0,765292956   | 1,306689147     | 1,524390244     |
| WBP2                                                                                          | 0,357140161 | -0,386249496 | 0,312 | 0,188 | 1         | 0,765116056   | 1,306991263     | 1,659574468     |
| RECK                                                                                          | 0,344592621 | -0,386750382 | 0,031 | 0,074 | 1         | 0,764850463   | 1,307445112     | 0,418918919     |
| MEF2D                                                                                         | 0,829082683 | -0,38690827  | 0,219 | 0,211 | 1         | 0,764766763   | 1,307588206     | 1,037914692     |

Supplementary Table 1

| Differentially expressed genes_adjacent-skin-XL_comparing SC-Keloid vs. (SC-Myel, SC-Nonmyel) |             |              |       |       |           |               |                 |                 |
|-----------------------------------------------------------------------------------------------|-------------|--------------|-------|-------|-----------|---------------|-----------------|-----------------|
| gene                                                                                          | p_val       | avg_log2FC   | pct.1 | pct.2 | p_val_adj | Foldchange_UP | Foldchange_DOWN | Ratio_pct1_pct2 |
| COPS2                                                                                         | 0,097309644 | -0,387365941 | 0,625 | 0,32  | 1         | 0,764524192   | 1,308003082     | 1,953125        |
| PHF23                                                                                         | 0,727694156 | -0,387566821 | 0,125 | 0,094 | 1         | 0,764417747   | 1,308185221     | 1,329787234     |
| MAPRE2                                                                                        | 0,606764606 | -0,38766631  | 0,438 | 0,312 | 1         | 0,764365035   | 1,308275437     | 1,403846154     |
| ZNF276                                                                                        | 0,784260716 | -0,387781212 | 0,094 | 0,102 | 1         | 0,76430416    | 1,308379638     | 0,921568627     |
| PSAT1                                                                                         | 0,65562104  | -0,387934543 | 0,156 | 0,113 | 1         | 0,764222933   | 1,308518701     | 1,380530973     |
| FGFR1OP2                                                                                      | 0,216855361 | -0,388094742 | 0,375 | 0,207 | 1         | 0,764138078   | 1,308664009     | 1,811594203     |
| ZCCHC7                                                                                        | 0,630272476 | -0,388142597 | 0,062 | 0,082 | 1         | 0,764112731   | 1,308707419     | 0,756097561     |
| ING5                                                                                          | 0,784260716 | -0,388470501 | 0,125 | 0,098 | 1         | 0,763939079   | 1,309004903     | 1,275510204     |
| PDE4D                                                                                         | 0,830197375 | -0,388884479 | 0,125 | 0,102 | 1         | 0,7637199     | 1,309380572     | 1,225490196     |
| TMEM100                                                                                       | 0,933712959 | -0,388955555 | 0,062 | 0,062 | 1         | 0,763682275   | 1,309445082     | 1               |
| CNTFR                                                                                         | 0,112290358 | -0,389265965 | 0     | 0,074 | 1         | 0,763517979   | 1,309726853     | 0               |
| ZFYVE21                                                                                       | 0,399428356 | -0,389566081 | 0,438 | 0,273 | 1         | 0,763359165   | 1,309999336     | 1,604395604     |
| ASTN2                                                                                         | 0,335280915 | -0,389707779 | 0,062 | 0,117 | 1         | 0,763284194   | 1,310128008     | 0,52991453      |
| TM2D1                                                                                         | 0,518918986 | -0,390002754 | 0,188 | 0,125 | 1         | 0,763128148   | 1,310395905     | 1,504           |
| FAM53B                                                                                        | 0,371015466 | -0,390272093 | 0,188 | 0,113 | 1         | 0,762985691   | 1,310640568     | 1,663716814     |
| PROS1                                                                                         | 0,275671339 | -0,390301899 | 0,312 | 0,18  | 1         | 0,762969928   | 1,310667646     | 1,733333333     |
| LRIG1                                                                                         | 0,929115609 | -0,390348955 | 0,156 | 0,133 | 1         | 0,762945043   | 1,310710396     | 1,172932331     |
| DUSP8                                                                                         | 0,168918316 | -0,390644616 | 0,469 | 0,258 | 1         | 0,762788704   | 1,310979037     | 1,817829457     |
| MYADM                                                                                         | 0,275690751 | -0,391387705 | 0,656 | 0,383 | 1         | 0,762395916   | 1,311654456     | 1,712793734     |
| DUSP7                                                                                         | 0,633679827 | -0,391762618 | 0,062 | 0,082 | 1         | 0,762197817   | 1,311995361     | 0,756097561     |
| SRGAP2                                                                                        | 0,351736754 | -0,391822237 | 0,375 | 0,234 | 1         | 0,76216632    | 1,312049579     | 1,602564103     |
| SREK1                                                                                         | 0,120415954 | -0,392645615 | 0,438 | 0,227 | 1         | 0,761731459   | 1,312798609     | 1,929515419     |
| ZNF292                                                                                        | 0,34004375  | -0,393158794 | 0,188 | 0,113 | 1         | 0,761460553   | 1,313265665     | 1,663716814     |
| ANKRD11                                                                                       | 0,271175856 | -0,393301566 | 0,531 | 0,309 | 1         | 0,761385201   | 1,313395635     | 1,718446602     |
| MAN2C1                                                                                        | 0,294412282 | -0,394044779 | 0,156 | 0,086 | 1         | 0,76099307    | 1,314072413     | 1,813953488     |
| CAB39                                                                                         | 0,484579232 | -0,394158046 | 0,188 | 0,121 | 1         | 0,760933326   | 1,314175586     | 1,553719008     |
| CNOT1                                                                                         | 0,256016384 | -0,394401251 | 0,281 | 0,16  | 1         | 0,760805061   | 1,314397144     | 1,75625         |
| AKIRIN2                                                                                       | 0,483515905 | -0,394602374 | 0,281 | 0,184 | 1         | 0,760699007   | 1,314580394     | 1,527173913     |
| ALDH2                                                                                         | 0,761165734 | -0,395054583 | 0,094 | 0,102 | 1         | 0,760460605   | 1,314992511     | 0,921568627     |
| RAP1GAP                                                                                       | 0,286570971 | -0,395245249 | 0,031 | 0,082 | 1         | 0,760360109   | 1,315166311     | 0,37804878      |



Supplementary Table 1

| Differentially expressed genes_adjacent-skin-XL_comparing SC-Keloid vs. (SC-Myel, SC-Nonmyel) |             |              |       |       |           |               |                 |                 |
|-----------------------------------------------------------------------------------------------|-------------|--------------|-------|-------|-----------|---------------|-----------------|-----------------|
| gene                                                                                          | p_val       | avg_log2FC   | pct.1 | pct.2 | p_val_adj | Foldchange_UP | Foldchange_DOWN | Ratio_pct1_pct2 |
| SNAP23                                                                                        | 0,721126199 | -0,395393294 | 0,125 | 0,094 | 1         | 0,760282088   | 1,315301276     | 1,329787234     |
| CLDN11                                                                                        | 0,54128594  | -0,395413868 | 0,062 | 0,09  | 1         | 0,760271245   | 1,315320034     | 0,688888889     |
| FAM107B                                                                                       | 0,643001647 | -0,395425086 | 0,281 | 0,207 | 1         | 0,760265334   | 1,315330261     | 1,357487923     |
| WDR70                                                                                         | 0,679002061 | -0,395551319 | 0,156 | 0,113 | 1         | 0,760198815   | 1,315445355     | 1,380530973     |
| UGT8                                                                                          | 0,344592621 | -0,39580923  | 0,031 | 0,074 | 1         | 0,760062926   | 1,315680539     | 0,418918919     |
| FNDC3A                                                                                        | 0,103443287 | -0,395960007 | 0,406 | 0,211 | 1         | 0,759983496   | 1,315818048     | 1,924170616     |
| ARHGEF28                                                                                      | 0,286570971 | -0,39599998  | 0,031 | 0,082 | 1         | 0,759962439   | 1,315854507     | 0,37804878      |
| WDFY2                                                                                         | 0,161996001 | -0,396320018 | 0,219 | 0,109 | 1         | 0,759793872   | 1,31614644      | 2,009174312     |
| PKN2                                                                                          | 0,625841939 | -0,396536187 | 0,344 | 0,242 | 1         | 0,759680036   | 1,316343662     | 1,421487603     |
| SYNPO2                                                                                        | 0,377976391 | -0,396627776 | 0,031 | 0,07  | 1         | 0,759631809   | 1,316427232     | 0,442857143     |
| C1orf56                                                                                       | 0,533757264 | -0,396868558 | 0,344 | 0,23  | 1         | 0,759505039   | 1,316646959     | 1,495652174     |
| GALNT17                                                                                       | 0,111920774 | -0,397196193 | 0,281 | 0,137 | 1         | 0,759332576   | 1,316946002     | 2,051094891     |
| PDE4DIP                                                                                       | 0,99198594  | -0,397408394 | 0,125 | 0,117 | 1         | 0,759220897   | 1,317139721     | 1,068376068     |
| PLEKHO2                                                                                       | 0,629239656 | -0,397882067 | 0,094 | 0,113 | 1         | 0,758971666   | 1,317572242     | 0,831858407     |
| ZBTB21                                                                                        | 0,91311971  | -0,39795255  | 0,188 | 0,18  | 1         | 0,758934587   | 1,317636614     | 1,044444444     |
| LTBR                                                                                          | 0,425192201 | -0,397970118 | 0,188 | 0,117 | 1         | 0,758925346   | 1,317652659     | 1,606837607     |
| COPA                                                                                          | 0,104921292 | -0,398154804 | 0,375 | 0,191 | 1         | 0,758828198   | 1,317821349     | 1,963350785     |
| NSD1                                                                                          | 0,041354995 | -0,398180596 | 0,375 | 0,168 | 1         | 0,758814632   | 1,317844909     | 2,232142857     |
| RIT1                                                                                          | 0,09828181  | -0,398284501 | 0,406 | 0,203 | 1         | 0,758759984   | 1,317939825     | 2               |
| SEC24B                                                                                        | 0,314221703 | -0,398526689 | 0,031 | 0,078 | 1         | 0,75863262    | 1,318161089     | 0,397435897     |
| ZNRF2                                                                                         | 0,157750115 | -0,398618587 | 0,438 | 0,23  | 1         | 0,758584297   | 1,318245057     | 1,904347826     |
| TNFSF9                                                                                        | 0,176914647 | -0,398659316 | 0     | 0,055 | 1         | 0,758562882   | 1,318282273     | 0               |
| ZFC3H1                                                                                        | 0,518918986 | -0,399140658 | 0,188 | 0,125 | 1         | 0,758309836   | 1,318722179     | 1,504           |
| BMP8B                                                                                         | 0,102705832 | -0,399463229 | 0,375 | 0,188 | 1         | 0,758140305   | 1,319017064     | 1,994680851     |
| RAB1A                                                                                         | 0,209331887 | -0,399961081 | 0,5   | 0,27  | 1         | 0,757878728   | 1,319472315     | 1,851851852     |
| UTRN                                                                                          | 0,599452816 | -0,400239199 | 0,625 | 0,414 | 1         | 0,757732641   | 1,319726703     | 1,509661836     |
| CDADC1                                                                                        | 0,622425736 | -0,400354329 | 0,125 | 0,141 | 1         | 0,757672175   | 1,319832024     | 0,886524823     |
| NANOS1                                                                                        | 0,134529645 | -0,400567682 | 0     | 0,066 | 1         | 0,757560134   | 1,320027222     | 0               |
| BRAF                                                                                          | 0,748489035 | -0,400821312 | 0,219 | 0,168 | 1         | 0,757426965   | 1,320259307     | 1,303571429     |
| NOTCH2                                                                                        | 0,933712959 | -0,401079988 | 0,062 | 0,062 | 1         | 0,75729117    | 1,320496052     | 1               |

Supplementary Table 1

| Differentially expressed genes_adjacent-skin-XL_comparing SC-Keloid vs. (SC-Myel, SC-Nonmyel) |             |              |       |       |           |               |                 |                 |
|-----------------------------------------------------------------------------------------------|-------------|--------------|-------|-------|-----------|---------------|-----------------|-----------------|
| gene                                                                                          | p_val       | avg_log2FC   | pct.1 | pct.2 | p_val_adj | Foldchange_UP | Foldchange_DOWN | Ratio_pct1_pct2 |
| ODC1                                                                                          | 0,320929119 | -0,401274979 | 0,375 | 0,23  | 1         | 0,757188823   | 1,320674539     | 1,630434783     |
| NRIP1                                                                                         | 0,743682421 | -0,401441333 | 0,094 | 0,105 | 1         | 0,757101519   | 1,320826832     | 0,895238095     |
| TSIX                                                                                          | 0,161397126 | -0,401786432 | 0     | 0,059 | 1         | 0,756920438   | 1,321142817     | 0               |
| DOT1L                                                                                         | 0,888467101 | -0,40248506  | 0,094 | 0,094 | 1         | 0,756553987   | 1,321782738     | 1               |
| SUN2                                                                                          | 0,139091795 | -0,402575333 | 0,5   | 0,266 | 1         | 0,756506649   | 1,321865447     | 1,879699248     |
| PYGL                                                                                          | 0,676061779 | -0,402751615 | 0,156 | 0,113 | 1         | 0,756414217   | 1,322026975     | 1,380530973     |
| DYNLL2                                                                                        | 0,074070998 | -0,403613168 | 0,312 | 0,145 | 1         | 0,755962634   | 1,322816703     | 2,151724138     |
| LMBR1L                                                                                        | 0,804306744 | -0,403689936 | 0,062 | 0,07  | 1         | 0,75592241    | 1,322887094     | 0,885714286     |
| RELB                                                                                          | 0,73148486  | -0,403766453 | 0,156 | 0,117 | 1         | 0,755882318   | 1,322957259     | 1,333333333     |
| SHROOM1                                                                                       | 0,499735776 | -0,404189492 | 0,031 | 0,059 | 1         | 0,755660705   | 1,323345245     | 0,525423729     |
| PLEKHA5                                                                                       | 0,093064088 | -0,404590816 | 0,375 | 0,188 | 1         | 0,755450527   | 1,323713419     | 1,994680851     |
| ALDH3A2                                                                                       | 0,369291357 | -0,404664497 | 0,281 | 0,172 | 1         | 0,755411946   | 1,323781026     | 1,63372093      |
| PIK3IP1                                                                                       | 0,894553025 | -0,404683527 | 0,156 | 0,148 | 1         | 0,755401982   | 1,323798487     | 1,054054054     |
| PHF2                                                                                          | 0,891985815 | -0,405071603 | 0,094 | 0,094 | 1         | 0,75519881    | 1,324154628     | 1               |
| TNFRSF25                                                                                      | 0,637094964 | -0,405600709 | 0,062 | 0,082 | 1         | 0,754921893   | 1,324640349     | 0,756097561     |
| YTHDC2                                                                                        | 0,780840172 | -0,405891356 | 0,156 | 0,121 | 1         | 0,754769821   | 1,324907239     | 1,289256198     |
| CSNK1E                                                                                        | 0,212322827 | -0,405916742 | 0,594 | 0,34  | 1         | 0,75475654    | 1,324930553     | 1,747058824     |
| IGFBP4                                                                                        | 0,177714422 | -0,406468494 | 0,5   | 0,273 | 1         | 0,754467942   | 1,325437363     | 1,831501832     |
| BTG1                                                                                          | 0,259697423 | -0,406623955 | 0,906 | 0,559 | 1         | 0,754386647   | 1,325580196     | 1,620751342     |
| AKR1C3                                                                                        | 0,730358576 | -0,40732641  | 0,031 | 0,043 | 1         | 0,754019422   | 1,326225785     | 0,720930233     |
| ITCH                                                                                          | 0,516441398 | -0,407410343 | 0,188 | 0,125 | 1         | 0,753975556   | 1,326302944     | 1,504           |
| ATF4                                                                                          | 0,997181982 | -0,407691393 | 0,781 | 0,531 | 1         | 0,753828689   | 1,326561346     | 1,470809793     |
| NT5DC3                                                                                        | 0,998160744 | -0,40804922  | 0,094 | 0,086 | 1         | 0,753641743   | 1,326890409     | 1,093023256     |
| RNF168                                                                                        | 0,795919922 | -0,408265417 | 0,156 | 0,121 | 1         | 0,753528813   | 1,327089266     | 1,289256198     |
| LCAT                                                                                          | 0,796107586 | -0,408270939 | 0,125 | 0,133 | 1         | 0,753525929   | 1,327094346     | 0,939849624     |
| MT-ND5                                                                                        | 0,581668786 | -0,40870256  | 0,844 | 0,531 | 1         | 0,753300525   | 1,327491442     | 1,589453861     |
| LRRC8C                                                                                        | 0,180934293 | -0,408729587 | 0,031 | 0,102 | 1         | 0,753286413   | 1,327516311     | 0,303921569     |
| PDE5A                                                                                         | 0,935028354 | -0,40889686  | 0,094 | 0,09  | 1         | 0,753199078   | 1,327670238     | 1,044444444     |
| SYNJ2BP                                                                                       | 0,376840213 | -0,409229048 | 0,219 | 0,133 | 1         | 0,75302567    | 1,327975977     | 1,646616541     |
| THUMPD1                                                                                       | 0,563751658 | -0,409510799 | 0,188 | 0,129 | 1         | 0,752878623   | 1,328235349     | 1,457364341     |

Supplementary Table 1

| Differentially expressed genes_adjacent-skin-XL_comparing SC-Keloid vs. (SC-Myel, SC-Nonmyel) |             |              |       |       |           |               |                 |                 |
|-----------------------------------------------------------------------------------------------|-------------|--------------|-------|-------|-----------|---------------|-----------------|-----------------|
| gene                                                                                          | p_val       | avg_log2FC   | pct.1 | pct.2 | p_val_adj | Foldchange_UP | Foldchange_DOWN | Ratio_pct1_pct2 |
| DNAJC27                                                                                       | 0,874415164 | -0,409517929 | 0,094 | 0,094 | 1         | 0,752874902   | 1,328241913     | 1               |
| EFCAB14                                                                                       | 0,778379363 | -0,409638904 | 0,188 | 0,145 | 1         | 0,752811773   | 1,328353295     | 1,296551724     |
| WARS1                                                                                         | 0,081948379 | -0,409667034 | 0,312 | 0,148 | 1         | 0,752797095   | 1,328379196     | 2,108108108     |
| PPA1                                                                                          | 0,109648938 | -0,409810317 | 0,469 | 0,242 | 1         | 0,752722334   | 1,328511132     | 1,938016529     |
| SASH1                                                                                         | 0,039155566 | -0,410009077 | 0,312 | 0,133 | 1         | 0,752618638   | 1,328694174     | 2,345864662     |
| SLC25A28                                                                                      | 0,684934253 | -0,410018456 | 0,188 | 0,137 | 1         | 0,752613746   | 1,328702811     | 1,372262774     |
| BNIP3                                                                                         | 0,814811285 | -0,410031488 | 0,188 | 0,145 | 1         | 0,752606947   | 1,328714814     | 1,296551724     |
| NEDD1                                                                                         | 0,998160744 | -0,41030938  | 0,094 | 0,086 | 1         | 0,752461994   | 1,328970776     | 1,093023256     |
| LRRC1                                                                                         | 0,309789541 | -0,410351206 | 0,062 | 0,121 | 1         | 0,752440179   | 1,329009305     | 0,512396694     |
| PGGHG                                                                                         | 0,161397126 | -0,41040295  | 0     | 0,059 | 1         | 0,752413193   | 1,329056973     | 0               |
| PPP4R3A                                                                                       | 0,704239657 | -0,410504699 | 0,188 | 0,141 | 1         | 0,752360129   | 1,32915071      | 1,333333333     |
| EIF1                                                                                          | 0,05695683  | -0,410921704 | 1     | 0,945 | 1         | 0,752142694   | 1,329534951     | 1,058201058     |
| ARIH1                                                                                         | 0,046571605 | -0,411076757 | 0,406 | 0,188 | 1         | 0,752061862   | 1,32967785      | 2,159574468     |
| ARL4A                                                                                         | 0,793909321 | -0,411498652 | 0,156 | 0,16  | 1         | 0,751841965   | 1,330066752     | 0,975           |
| MT-ND4                                                                                        | 0,246764884 | -0,41159891  | 0,875 | 0,879 | 1         | 0,751789718   | 1,330159187     | 0,995449374     |
| ZDHHC8                                                                                        | 0,723273635 | -0,411866991 | 0,125 | 0,133 | 1         | 0,751650034   | 1,330406379     | 0,939849624     |
| COBLL1                                                                                        | 0,378729131 | -0,411965752 | 0,219 | 0,137 | 1         | 0,751598581   | 1,330497456     | 1,598540146     |
| MYO18A                                                                                        | 0,935028354 | -0,411992275 | 0,094 | 0,09  | 1         | 0,751584763   | 1,330521917     | 1,044444444     |
| OSBPL1A                                                                                       | 0,494404353 | -0,412292101 | 0,219 | 0,145 | 1         | 0,751428583   | 1,330798459     | 1,510344828     |
| FGF1                                                                                          | 0,377976391 | -0,412571552 | 0,031 | 0,07  | 1         | 0,751283045   | 1,331056261     | 0,442857143     |
| PLEKHA7                                                                                       | 0,112290358 | -0,412690604 | 0     | 0,074 | 1         | 0,751221051   | 1,331166104     | 0               |
| CNOT2                                                                                         | 0,169219927 | -0,412839914 | 0,312 | 0,164 | 1         | 0,751143308   | 1,331303879     | 1,902439024     |
| POLK                                                                                          | 0,54829256  | -0,413439175 | 0,219 | 0,148 | 1         | 0,750831366   | 1,331856986     | 1,47972973      |
| TMEM176B                                                                                      | 0,74527186  | -0,414554835 | 0,562 | 0,465 | 1         | 0,75025096    | 1,332887332     | 1,208602151     |
| ILKAP                                                                                         | 0,879520665 | -0,415169295 | 0,219 | 0,18  | 1         | 0,749931488   | 1,333455144     | 1,216666667     |
| INTS11                                                                                        | 0,125718416 | -0,416106408 | 0,25  | 0,121 | 1         | 0,749444523   | 1,334321581     | 2,066115702     |
| KDM2A                                                                                         | 0,162595876 | -0,416308706 | 0,344 | 0,18  | 1         | 0,749339441   | 1,334508695     | 1,911111111     |
| H1-10                                                                                         | 0,246397264 | -0,41634369  | 0,594 | 0,355 | 1         | 0,749321271   | 1,334541056     | 1,673239437     |
| C11orf68                                                                                      | 0,471015282 | -0,416369652 | 0,219 | 0,141 | 1         | 0,749307786   | 1,334565072     | 1,553191489     |
| ROCK2                                                                                         | 0,199197135 | -0,416456983 | 0,5   | 0,273 | 1         | 0,74926243    | 1,33464586      | 1,831501832     |

Supplementary Table 1

| Differentially expressed genes_adjacent-skin-XL_comparing SC-Keloid vs. (SC-Myel, SC-Nonmyel) |             |              |       |       |           |               |                 |                 |
|-----------------------------------------------------------------------------------------------|-------------|--------------|-------|-------|-----------|---------------|-----------------|-----------------|
| gene                                                                                          | p_val       | avg_log2FC   | pct.1 | pct.2 | p_val_adj | Foldchange_UP | Foldchange_DOWN | Ratio_pct1_pct2 |
| FZD7                                                                                          | 0,112290358 | -0,416512015 | 0     | 0,074 | 1         | 0,749233849   | 1,334696772     | 0               |
| BMP1B                                                                                         | 0,286570971 | -0,416515351 | 0,031 | 0,082 | 1         | 0,749232117   | 1,334699858     | 0,37804878      |
| PTTG1                                                                                         | 0,099632778 | -0,416711854 | 0,219 | 0,102 | 1         | 0,749130074   | 1,334881664     | 2,147058824     |
| CCSAP                                                                                         | 0,122891724 | -0,41712194  | 0     | 0,07  | 1         | 0,748917165   | 1,335261158     | 0               |
| CRNDE                                                                                         | 0,800356249 | -0,417142928 | 0,062 | 0,07  | 1         | 0,748906269   | 1,335280583     | 0,885714286     |
| MFAP4                                                                                         | 0,078384714 | -0,417516202 | 0     | 0,09  | 1         | 0,748712527   | 1,33562611      | 0               |
| AKAP11                                                                                        | 0,914087118 | -0,417587877 | 0,156 | 0,133 | 1         | 0,748675331   | 1,335692467     | 1,172932331     |
| PARD3B                                                                                        | 0,122891724 | -0,418081539 | 0     | 0,07  | 1         | 0,748419193   | 1,336149593     | 0               |
| RTL5                                                                                          | 0,147319971 | -0,41811755  | 0     | 0,062 | 1         | 0,748400512   | 1,336182945     | 0               |
| IGF1R                                                                                         | 0,983447865 | -0,418235321 | 0,094 | 0,086 | 1         | 0,74833942    | 1,336292026     | 1,093023256     |
| KITLG                                                                                         | 0,10262374  | -0,418714743 | 0     | 0,078 | 1         | 0,748090781   | 1,336736163     | 0               |
| SENP5                                                                                         | 0,79289767  | -0,41912952  | 0,156 | 0,121 | 1         | 0,747875735   | 1,337120532     | 1,289256198     |
| STK3                                                                                          | 0,775937953 | -0,419156019 | 0,125 | 0,129 | 1         | 0,747861998   | 1,337145092     | 0,968992248     |
| EVI5                                                                                          | 0,113010074 | -0,419650898 | 0,438 | 0,223 | 1         | 0,747605508   | 1,337603843     | 1,964125561     |
| SDC4                                                                                          | 0,386049732 | -0,41969156  | 0,188 | 0,113 | 1         | 0,747584437   | 1,337641544     | 1,663716814     |
| GPATCH2L                                                                                      | 0,501783108 | -0,419976389 | 0,156 | 0,102 | 1         | 0,747436857   | 1,337905659     | 1,529411765     |
| PPM1B                                                                                         | 0,249959309 | -0,420097764 | 0,312 | 0,176 | 1         | 0,747373977   | 1,338018223     | 1,772727273     |
| LAMP1                                                                                         | 0,944623414 | -0,420210294 | 0,812 | 0,527 | 1         | 0,747315684   | 1,338122591     | 1,540796964     |
| NFATC4                                                                                        | 0,26138036  | -0,420265368 | 0,031 | 0,086 | 1         | 0,747287156   | 1,338173674     | 0,360465116     |
| RHOQ                                                                                          | 0,430724357 | -0,420739487 | 0,438 | 0,293 | 1         | 0,747041612   | 1,338613517     | 1,494880546     |
| CERS1                                                                                         | 0,71496263  | -0,420845954 | 0,094 | 0,105 | 1         | 0,746986485   | 1,338712306     | 0,895238095     |
| TNKS2                                                                                         | 0,709693094 | -0,421023298 | 0,188 | 0,141 | 1         | 0,746894667   | 1,338876878     | 1,333333333     |
| PCNP                                                                                          | 0,443094633 | -0,421049259 | 0,625 | 0,371 | 1         | 0,746881227   | 1,338900972     | 1,684636119     |
| RBL2                                                                                          | 0,416531335 | -0,421556509 | 0,062 | 0,102 | 1         | 0,74661867    | 1,33937181      | 0,607843137     |
| ZNF280D                                                                                       | 0,250807401 | -0,421810974 | 0,219 | 0,121 | 1         | 0,746486992   | 1,339608071     | 1,809917355     |
| CXCL3                                                                                         | 0,213026321 | -0,421867788 | 0     | 0,047 | 1         | 0,746457596   | 1,339660827     | 0               |
| FGD5-AS1                                                                                      | 0,150020598 | -0,422075694 | 0,406 | 0,215 | 1         | 0,746350032   | 1,339853898     | 1,888372093     |
| TP53INP2                                                                                      | 0,868757226 | -0,422174142 | 0,094 | 0,078 | 1         | 0,746299103   | 1,339945332     | 1,205128205     |
| ASPA                                                                                          | 0,235102422 | -0,422306925 | 0,594 | 0,34  | 1         | 0,746230418   | 1,340068664     | 1,747058824     |
| DYNLRB1                                                                                       | 0,982173576 | -0,423250542 | 0,812 | 0,531 | 1         | 0,745742495   | 1,340945443     | 1,529190207     |

Supplementary Table 1

| Differentially expressed genes_adjacent-skin-XL_comparing SC-Keloid vs. (SC-Myel, SC-Nonmyel) |             |              |       |       |           |               |                 |                 |
|-----------------------------------------------------------------------------------------------|-------------|--------------|-------|-------|-----------|---------------|-----------------|-----------------|
| gene                                                                                          | p_val       | avg_log2FC   | pct.1 | pct.2 | p_val_adj | Foldchange_UP | Foldchange_DOWN | Ratio_pct1_pct2 |
| AL627171.2                                                                                    | 0,504146063 | -0,424877964 | 0,188 | 0,125 | 1         | 0,744901739   | 1,342458941     | 1,504           |
| CHIC2                                                                                         | 0,676784237 | -0,42489987  | 0,188 | 0,137 | 1         | 0,744890429   | 1,342479325     | 1,372262774     |
| TNRC6C                                                                                        | 0,89455306  | -0,424965244 | 0,156 | 0,148 | 1         | 0,744856676   | 1,342540159     | 1,054054054     |
| SH3GLB2                                                                                       | 0,773567054 | -0,425039359 | 0,344 | 0,262 | 1         | 0,744818411   | 1,342609131     | 1,312977099     |
| ZC3H4                                                                                         | 0,507127635 | -0,425318396 | 0,156 | 0,102 | 1         | 0,744674367   | 1,342868835     | 1,529411765     |
| YLPM1                                                                                         | 0,881436494 | -0,425336698 | 0,094 | 0,094 | 1         | 0,74466492    | 1,342885871     | 1               |
| ADAM33                                                                                        | 0,161397126 | -0,42534141  | 0     | 0,059 | 1         | 0,744662488   | 1,342890257     | 0               |
| NPHP3                                                                                         | 0,452272907 | -0,425390504 | 0,156 | 0,098 | 1         | 0,744637148   | 1,342935955     | 1,591836735     |
| MYCBP2                                                                                        | 0,320338862 | -0,425396886 | 0,25  | 0,148 | 1         | 0,744633854   | 1,342941896     | 1,689189189     |
| NR2F2-AS1                                                                                     | 0,686731872 | -0,425578409 | 0,062 | 0,078 | 1         | 0,744540169   | 1,343110879     | 0,794871795     |
| WDR26                                                                                         | 0,358918639 | -0,42560648  | 0,094 | 0,145 | 1         | 0,744525682   | 1,343137012     | 0,648275862     |
| ZNF516                                                                                        | 0,786862533 | -0,426616887 | 0,156 | 0,121 | 1         | 0,744004428   | 1,344078022     | 1,289256198     |
| RBMXL1                                                                                        | 0,66795303  | -0,426621209 | 0,094 | 0,109 | 1         | 0,744002199   | 1,344082049     | 0,862385321     |
| EZH1                                                                                          | 0,884950692 | -0,426884046 | 0,094 | 0,094 | 1         | 0,743866666   | 1,344326942     | 1               |
| KCNH8                                                                                         | 0,286570971 | -0,42692071  | 0,031 | 0,082 | 1         | 0,743847762   | 1,344361106     | 0,37804878      |
| RUSC2                                                                                         | 0,614662208 | -0,426987766 | 0,094 | 0,113 | 1         | 0,743813189   | 1,344423593     | 0,831858407     |
| CRIM1                                                                                         | 0,677114428 | -0,427804879 | 0,094 | 0,109 | 1         | 0,743392027   | 1,345185263     | 0,862385321     |
| ANKRD12                                                                                       | 0,214766065 | -0,427806266 | 0,594 | 0,324 | 1         | 0,743391312   | 1,345186557     | 1,833333333     |
| RHPN1                                                                                         | 0,498361807 | -0,427942865 | 0,062 | 0,094 | 1         | 0,743320929   | 1,345313929     | 0,659574468     |
| DMXL1                                                                                         | 0,89512162  | -0,427991389 | 0,125 | 0,105 | 1         | 0,743295929   | 1,345359178     | 1,19047619      |
| TRIM69                                                                                        | 0,788750462 | -0,42809388  | 0,188 | 0,148 | 1         | 0,743243126   | 1,345454758     | 1,27027027      |
| PALMD                                                                                         | 0,176914647 | -0,428161517 | 0     | 0,055 | 1         | 0,743208282   | 1,345517837     | 0               |
| TXNRD2                                                                                        | 0,679002061 | -0,428295828 | 0,156 | 0,113 | 1         | 0,743139094   | 1,345643108     | 1,380530973     |
| PAN3                                                                                          | 0,220157452 | -0,428451574 | 0,281 | 0,156 | 1         | 0,743058873   | 1,345788384     | 1,801282051     |
| HNRNPL                                                                                        | 0,313250979 | -0,428459085 | 0,531 | 0,305 | 1         | 0,743055004   | 1,345795391     | 1,740983607     |
| NCAM2                                                                                         | 0,869232693 | -0,428649774 | 0,125 | 0,121 | 1         | 0,742956797   | 1,345973284     | 1,033057851     |
| C11orf96                                                                                      | 0,269438702 | -0,428671372 | 0,281 | 0,176 | 1         | 0,742945675   | 1,345993433     | 1,596590909     |
| GPSM1                                                                                         | 0,372854694 | -0,428736469 | 0,281 | 0,172 | 1         | 0,742912152   | 1,346054169     | 1,63372093      |
| PDCD6IP                                                                                       | 0,127653578 | -0,428808009 | 0,438 | 0,227 | 1         | 0,742875314   | 1,346120918     | 1,929515419     |
| ESPN                                                                                          | 0,059869253 | -0,42895401  | 0     | 0,102 | 1         | 0,742800139   | 1,346257153     | 0               |

Supplementary Table 1

| Differentially expressed genes_adjacent-skin-XL_comparing SC-Keloid vs. (SC-Myel, SC-Nonmyel) |             |              |       |       |           |               |                 |                 |
|-----------------------------------------------------------------------------------------------|-------------|--------------|-------|-------|-----------|---------------|-----------------|-----------------|
| gene                                                                                          | p_val       | avg_log2FC   | pct.1 | pct.2 | p_val_adj | Foldchange_UP | Foldchange_DOWN | Ratio_pct1_pct2 |
| USP24                                                                                         | 0,935028354 | -0,43023345  | 0,094 | 0,09  | 1         | 0,742141686   | 1,347451598     | 1,044444444     |
| PHLDA3                                                                                        | 0,08577078  | -0,430256092 | 0,5   | 0,25  | 1         | 0,742130039   | 1,347472745     | 2               |
| KIAA1217                                                                                      | 0,864647308 | -0,430538359 | 0,125 | 0,125 | 1         | 0,741984853   | 1,347736407     | 1               |
| SLITRK2                                                                                       | 0,199956022 | -0,430992092 | 0,031 | 0,098 | 1         | 0,741751533   | 1,348160341     | 0,316326531     |
| ALDH1A1                                                                                       | 0,112290358 | -0,431867663 | 0     | 0,074 | 1         | 0,7413015     | 1,348978789     | 0               |
| YAP1                                                                                          | 0,278057939 | -0,432118361 | 0,281 | 0,16  | 1         | 0,741172695   | 1,349213221     | 1,75625         |
| CLDND2                                                                                        | 0,08574604  | -0,43240253  | 0     | 0,086 | 1         | 0,74102672    | 1,349479003     | 0               |
| BTG3                                                                                          | 0,370524765 | -0,432861211 | 0,625 | 0,383 | 1         | 0,740791161   | 1,349908116     | 1,631853786     |
| IP6K1                                                                                         | 0,975643601 | -0,433473042 | 0,125 | 0,113 | 1         | 0,740477066   | 1,350480718     | 1,10619469      |
| DAB1                                                                                          | 0,112290358 | -0,433692097 | 0     | 0,074 | 1         | 0,740364643   | 1,350685787     | 0               |
| MAGI2                                                                                         | 0,257984542 | -0,43373008  | 0,25  | 0,145 | 1         | 0,74034515    | 1,350721349     | 1,724137931     |
| ARHGAP23                                                                                      | 0,764452445 | -0,433881429 | 0,094 | 0,102 | 1         | 0,740267487   | 1,350863056     | 0,921568627     |
| ITFG2                                                                                         | 0,516147046 | -0,433980812 | 0,094 | 0,059 | 1         | 0,740216494   | 1,350956117     | 1,593220339     |
| MT-ATP8                                                                                       | 0,38996635  | -0,434663964 | 0,281 | 0,176 | 1         | 0,739866066   | 1,351595979     | 1,596590909     |
| NKAIN2                                                                                        | 0,112290358 | -0,434792322 | 0     | 0,074 | 1         | 0,739800242   | 1,351716238     | 0               |
| JMJD6                                                                                         | 0,821728391 | -0,434841644 | 0,125 | 0,125 | 1         | 0,739774951   | 1,35176245      | 1               |
| TNFRSF14                                                                                      | 0,474951714 | -0,434914272 | 0,188 | 0,121 | 1         | 0,739737771   | 1,351830502     | 1,553719008     |
| ATP11A                                                                                        | 0,584240026 | -0,434990455 | 0,062 | 0,086 | 1         | 0,739698649   | 1,351901889     | 0,720930233     |
| TET1                                                                                          | 0,826816092 | -0,435020798 | 0,156 | 0,125 | 1         | 0,739683091   | 1,351930323     | 1,248           |
| TOX2                                                                                          | 0,630272476 | -0,435109377 | 0,062 | 0,082 | 1         | 0,739637678   | 1,352013331     | 0,756097561     |
| RARA                                                                                          | 0,137266353 | -0,435241402 | 0,344 | 0,176 | 1         | 0,739569994   | 1,352137063     | 1,954545455     |
| TMEM35B                                                                                       | 0,092805973 | -0,435441052 | 0,469 | 0,227 | 1         | 0,739467654   | 1,352324195     | 2,066079295     |
| TNRC6A                                                                                        | 0,18989486  | -0,435761515 | 0,312 | 0,168 | 1         | 0,739303416   | 1,352624617     | 1,857142857     |
| MBD5                                                                                          | 0,419048035 | -0,436011966 | 0,062 | 0,102 | 1         | 0,739175085   | 1,352859452     | 0,607843137     |
| FUBP1                                                                                         | 0,381855801 | -0,436074659 | 0,281 | 0,172 | 1         | 0,739142964   | 1,352918242     | 1,63372093      |
| AFF1                                                                                          | 0,453137599 | -0,43638319  | 0,062 | 0,098 | 1         | 0,73898491    | 1,353207605     | 0,632653061     |
| AHCTF1                                                                                        | 0,768835141 | -0,436441276 | 0,156 | 0,121 | 1         | 0,738955158   | 1,353262089     | 1,289256198     |
| CYTH1                                                                                         | 0,593956834 | -0,436807533 | 0,062 | 0,086 | 1         | 0,738767583   | 1,353605685     | 0,720930233     |
| NRG1                                                                                          | 0,134529645 | -0,436909803 | 0     | 0,066 | 1         | 0,738715215   | 1,353701644     | 0               |
| HERPUD1                                                                                       | 0,121574842 | -0,437861637 | 0,531 | 0,285 | 1         | 0,738228      | 1,354595058     | 1,863157895     |

Supplementary Table 1

| Differentially expressed genes_adjacent-skin-XL_comparing SC-Keloid vs. (SC-Myel, SC-Nonmyel) |             |              |       |       |           |               |                 |                 |
|-----------------------------------------------------------------------------------------------|-------------|--------------|-------|-------|-----------|---------------|-----------------|-----------------|
| gene                                                                                          | p_val       | avg_log2FC   | pct.1 | pct.2 | p_val_adj | Foldchange_UP | Foldchange_DOWN | Ratio_pct1_pct2 |
| MRE11                                                                                         | 0,935028354 | -0,437870324 | 0,094 | 0,09  | 1         | 0,738223555   | 1,354603214     | 1,044444444     |
| HMG1A1                                                                                        | 0,120752413 | -0,437882713 | 0,375 | 0,203 | 1         | 0,738217216   | 1,354614846     | 1,84729064      |
| SFN                                                                                           | 0,263449854 | -0,438690232 | 0,281 | 0,164 | 1         | 0,737804129   | 1,355373277     | 1,713414634     |
| PKD2                                                                                          | 0,826565871 | -0,438902172 | 0,156 | 0,156 | 1         | 0,737695749   | 1,355572404     | 1               |
| LRRC58                                                                                        | 0,285844171 | -0,438943133 | 0,312 | 0,18  | 1         | 0,737674805   | 1,355610891     | 1,733333333     |
| CCNT2                                                                                         | 0,611764646 | -0,43940387  | 0,094 | 0,113 | 1         | 0,73743926    | 1,356043886     | 0,831858407     |
| TDRD3                                                                                         | 0,623390898 | -0,4395783   | 0,094 | 0,113 | 1         | 0,737350105   | 1,356207849     | 0,831858407     |
| SCD5                                                                                          | 0,134529645 | -0,439745505 | 0     | 0,066 | 1         | 0,737264652   | 1,35636504      | 0               |
| RFX2                                                                                          | 0,134529645 | -0,439798946 | 0     | 0,066 | 1         | 0,737237343   | 1,356415284     | 0               |
| TMEM255A                                                                                      | 0,093802134 | -0,439831932 | 0     | 0,082 | 1         | 0,737220487   | 1,356446298     | 0               |
| PON2                                                                                          | 0,319403387 | -0,44026021  | 0,656 | 0,359 | 1         | 0,737001668   | 1,356849032     | 1,82729805      |
| FKBP5                                                                                         | 0,220913711 | -0,440346433 | 0,188 | 0,098 | 1         | 0,736957622   | 1,356930127     | 1,918367347     |
| AKAP13                                                                                        | 0,328814009 | -0,44040983  | 0,812 | 0,453 | 1         | 0,736925239   | 1,356989756     | 1,792494481     |
| CIT                                                                                           | 0,42035466  | -0,440756858 | 0,281 | 0,18  | 1         | 0,736747999   | 1,357316208     | 1,561111111     |
| SESTD1                                                                                        | 0,684934253 | -0,441490117 | 0,188 | 0,137 | 1         | 0,736373637   | 1,358006247     | 1,372262774     |
| CRYZL1                                                                                        | 0,194605756 | -0,441664167 | 0,219 | 0,113 | 1         | 0,736284805   | 1,35817009      | 1,938053097     |
| AGO3                                                                                          | 0,516587316 | -0,441814229 | 0,094 | 0,125 | 1         | 0,736208224   | 1,358311369     | 0,752           |
| CPXM2                                                                                         | 0,238418073 | -0,441998599 | 0,031 | 0,09  | 1         | 0,736114146   | 1,358484966     | 0,344444444     |
| RASAL2                                                                                        | 0,855412171 | -0,442355507 | 0,125 | 0,125 | 1         | 0,735932061   | 1,358821082     | 1               |
| PARP4                                                                                         | 0,253529282 | -0,442778356 | 0,125 | 0,062 | 1         | 0,735716394   | 1,359219406     | 2,016129032     |
| TUT4                                                                                          | 0,122552691 | -0,442896304 | 0,438 | 0,227 | 1         | 0,735656248   | 1,359330534     | 1,929515419     |
| RCAN3                                                                                         | 0,720644445 | -0,44300868  | 0,188 | 0,141 | 1         | 0,735598947   | 1,359436421     | 1,333333333     |
| SAV1                                                                                          | 0,306674893 | -0,444058787 | 0,125 | 0,188 | 1         | 0,735063715   | 1,360426286     | 0,664893617     |
| RLIM                                                                                          | 0,560183087 | -0,444472276 | 0,094 | 0,121 | 1         | 0,73485307    | 1,360816252     | 0,776859504     |
| CCDC12                                                                                        | 0,245928411 | -0,444479522 | 0,312 | 0,176 | 1         | 0,734849379   | 1,360823086     | 1,772727273     |
| ST3GAL5                                                                                       | 0,112290358 | -0,444920686 | 0     | 0,074 | 1         | 0,734624702   | 1,361239279     | 0               |
| ABHD5                                                                                         | 0,676061901 | -0,445401533 | 0,156 | 0,113 | 1         | 0,734379895   | 1,361693052     | 1,380530973     |
| GPX3                                                                                          | 0,924392442 | -0,44669574  | 0,031 | 0,027 | 1         | 0,733721395   | 1,362915143     | 1,148148148     |
| CSF1                                                                                          | 0,220935523 | -0,447264127 | 0,031 | 0,094 | 1         | 0,733432384   | 1,363452204     | 0,329787234     |
| TAF7                                                                                          | 0,445024927 | -0,447627997 | 0,625 | 0,367 | 1         | 0,733247424   | 1,363796131     | 1,702997275     |

Supplementary Table 1

| Differentially expressed genes_adjacent-skin-XL_comparing SC-Keloid vs. (SC-Myel, SC-Nonmyel) |             |              |       |       |           |               |                 |                 |
|-----------------------------------------------------------------------------------------------|-------------|--------------|-------|-------|-----------|---------------|-----------------|-----------------|
| gene                                                                                          | p_val       | avg_log2FC   | pct.1 | pct.2 | p_val_adj | Foldchange_UP | Foldchange_DOWN | Ratio_pct1_pct2 |
| ARHGEF6                                                                                       | 0,285257317 | -0,448132288 | 0,062 | 0,121 | 1         | 0,732991164   | 1,364272926     | 0,512396694     |
| HADH                                                                                          | 0,799342981 | -0,448536035 | 0,094 | 0,074 | 1         | 0,73278606    | 1,36465478      | 1,27027027      |
| FA2H                                                                                          | 0,180934293 | -0,448828243 | 0,031 | 0,102 | 1         | 0,732637655   | 1,364931209     | 0,303921569     |
| GSTM3                                                                                         | 0,464378621 | -0,449192994 | 0,25  | 0,164 | 1         | 0,732452448   | 1,365276344     | 1,524390244     |
| SF1                                                                                           | 0,334357247 | -0,449321814 | 0,812 | 0,457 | 1         | 0,73238705    | 1,365398255     | 1,776805252     |
| RELT                                                                                          | 0,220935523 | -0,449613112 | 0,031 | 0,094 | 1         | 0,732239186   | 1,365673975     | 0,329787234     |
| SPOPL                                                                                         | 0,683139498 | -0,449745548 | 0,062 | 0,078 | 1         | 0,732171972   | 1,365799346     | 0,794871795     |
| MICAL3                                                                                        | 0,787831811 | -0,450016119 | 0,156 | 0,125 | 1         | 0,732034669   | 1,366055519     | 1,248           |
| FBXW11                                                                                        | 0,400977729 | -0,450529334 | 0,312 | 0,199 | 1         | 0,731774306   | 1,366541558     | 1,567839196     |
| CIRBP                                                                                         | 0,393323828 | -0,450893246 | 0,812 | 0,656 | 1         | 0,731589743   | 1,366886304     | 1,237804878     |
| ARHGEF40                                                                                      | 0,4750123   | -0,451862074 | 0,312 | 0,207 | 1         | 0,731098616   | 1,367804531     | 1,507246377     |
| CLASRP                                                                                        | 0,453137599 | -0,452058224 | 0,062 | 0,098 | 1         | 0,730999222   | 1,367990512     | 0,632653061     |
| DCXR                                                                                          | 0,858704938 | -0,45211266  | 0,188 | 0,148 | 1         | 0,73097164    | 1,36804213      | 1,27027027      |
| NLGN3                                                                                         | 0,352472909 | -0,45268757  | 0,031 | 0,074 | 1         | 0,730680408   | 1,3685874       | 0,418918919     |
| IER3                                                                                          | 0,651974317 | -0,453657966 | 0,75  | 0,574 | 1         | 0,730189098   | 1,369508258     | 1,306620209     |
| DYNC2I1                                                                                       | 0,792338755 | -0,453702042 | 0,188 | 0,145 | 1         | 0,73016679    | 1,3695501       | 1,296551724     |
| CBR4                                                                                          | 0,683139676 | -0,453708312 | 0,062 | 0,078 | 1         | 0,730163617   | 1,369556052     | 0,794871795     |
| TUBB4B                                                                                        | 0,547771204 | -0,453801434 | 0,594 | 0,391 | 1         | 0,730116488   | 1,369644455     | 1,519181586     |
| AFTPH                                                                                         | 0,70409276  | -0,454119052 | 0,188 | 0,137 | 1         | 0,729955767   | 1,369946024     | 1,372262774     |
| ZNF608                                                                                        | 0,388962014 | -0,454192732 | 0,219 | 0,133 | 1         | 0,729918488   | 1,37001599      | 1,646616541     |
| LTBP3                                                                                         | 0,505862177 | -0,454541794 | 0,656 | 0,422 | 1         | 0,729741904   | 1,370347508     | 1,55450237      |
| FAXDC2                                                                                        | 0,093802134 | -0,45486224  | 0     | 0,082 | 1         | 0,729579835   | 1,370651918     | 0               |
| METRNL                                                                                        | 0,92470606  | -0,455025384 | 0,219 | 0,191 | 1         | 0,729497337   | 1,370806924     | 1,146596859     |
| DCN                                                                                           | 0,714264918 | -0,455605766 | 0,031 | 0,047 | 1         | 0,729203926   | 1,371358497     | 0,659574468     |
| RFX1                                                                                          | 0,936503132 | -0,455767353 | 0,156 | 0,141 | 1         | 0,729122257   | 1,371512103     | 1,106382979     |
| C1orf21                                                                                       | 0,458526501 | -0,456419087 | 0,438 | 0,285 | 1         | 0,728792952   | 1,37213182      | 1,536842105     |
| C10orf82                                                                                      | 0,217476928 | -0,457696387 | 0,031 | 0,094 | 1         | 0,728147996   | 1,373347185     | 0,329787234     |
| CNP                                                                                           | 0,8930962   | -0,457955171 | 0,656 | 0,488 | 1         | 0,728017396   | 1,373593551     | 1,344262295     |
| CWC25                                                                                         | 0,567357939 | -0,458352271 | 0,094 | 0,117 | 1         | 0,727817038   | 1,373971683     | 0,803418803     |
| NGF                                                                                           | 0,933712959 | -0,458359587 | 0,062 | 0,062 | 1         | 0,727813347   | 1,373978651     | 1               |



Supplementary Table 1

| Differentially expressed genes_adjacent-skin-XL_comparing SC-Keloid vs. (SC-Myel, SC-Nonmyel) |             |              |       |       |           |               |                 |                 |
|-----------------------------------------------------------------------------------------------|-------------|--------------|-------|-------|-----------|---------------|-----------------|-----------------|
| gene                                                                                          | p_val       | avg_log2FC   | pct.1 | pct.2 | p_val_adj | Foldchange_UP | Foldchange_DOWN | Ratio_pct1_pct2 |
| DDHD2                                                                                         | 0,752148714 | -0,458750419 | 0,125 | 0,133 | 1         | 0,727616206   | 1,374350918     | 0,939849624     |
| TNK2                                                                                          | 0,724407642 | -0,459139707 | 0,125 | 0,094 | 1         | 0,727419897   | 1,374721814     | 1,329787234     |
| TRAK1                                                                                         | 0,311875867 | -0,460210986 | 0,312 | 0,184 | 1         | 0,726879949   | 1,375742998     | 1,695652174     |
| NFASC                                                                                         | 0,147320294 | -0,460611415 | 0     | 0,062 | 1         | 0,726678227   | 1,376124897     | 0               |
| FAM241A                                                                                       | 0,238418073 | -0,46103909  | 0,031 | 0,09  | 1         | 0,726462841   | 1,376532899     | 0,344444444     |
| MT-CYB                                                                                        | 0,568438123 | -0,46118783  | 0,875 | 0,805 | 1         | 0,726387947   | 1,376674825     | 1,086956522     |
| CASC3                                                                                         | 0,646129172 | -0,461501455 | 0,156 | 0,172 | 1         | 0,726230057   | 1,37697413      | 0,906976744     |
| CD9                                                                                           | 0,040744367 | -0,462007176 | 1     | 0,898 | 1         | 0,725975529   | 1,377456898     | 1,113585746     |
| IFFO1                                                                                         | 0,238418073 | -0,462453829 | 0,031 | 0,09  | 1         | 0,725750804   | 1,37788342      | 0,344444444     |
| CERS6                                                                                         | 0,409017449 | -0,462659117 | 0,062 | 0,105 | 1         | 0,725647541   | 1,378079499     | 0,59047619      |
| ATXN3                                                                                         | 0,838902498 | -0,463093105 | 0,156 | 0,125 | 1         | 0,725429287   | 1,378494112     | 1,248           |
| AMFR                                                                                          | 0,260324649 | -0,46384477  | 0,281 | 0,16  | 1         | 0,725051426   | 1,379212514     | 1,75625         |
| MPDZ                                                                                          | 0,295716939 | -0,463915174 | 0,25  | 0,145 | 1         | 0,725016044   | 1,379279822     | 1,724137931     |
| SPART                                                                                         | 0,158963941 | -0,463977892 | 0,281 | 0,145 | 1         | 0,724984526   | 1,379339784     | 1,937931034     |
| CELF2                                                                                         | 0,533456153 | -0,464594736 | 0,594 | 0,363 | 1         | 0,724674615   | 1,379929667     | 1,636363636     |
| PTPRJ                                                                                         | 0,915013818 | -0,46576293  | 0,125 | 0,105 | 1         | 0,724088062   | 1,38104749      | 1,19047619      |
| SRSF6                                                                                         | 0,058975014 | -0,465976612 | 0,438 | 0,203 | 1         | 0,723980823   | 1,381252056     | 2,157635468     |
| EIF4E                                                                                         | 0,053592746 | -0,465986373 | 0,531 | 0,258 | 1         | 0,723975925   | 1,381261401     | 2,058139535     |
| MAVS                                                                                          | 0,660994176 | -0,466076306 | 0,125 | 0,09  | 1         | 0,723930795   | 1,381347508     | 1,388888889     |
| POGZ                                                                                          | 0,834073421 | -0,466255719 | 0,25  | 0,227 | 1         | 0,723840773   | 1,381519302     | 1,101321586     |
| CSAD                                                                                          | 0,166418547 | -0,466890784 | 0,281 | 0,148 | 1         | 0,723522213   | 1,382127572     | 1,898648649     |
| YY1AP1                                                                                        | 0,73994668  | -0,467248096 | 0,188 | 0,141 | 1         | 0,723343041   | 1,382469925     | 1,333333333     |
| ATP6V1B2                                                                                      | 0,28568409  | -0,467291243 | 0,281 | 0,16  | 1         | 0,723321408   | 1,382511272     | 1,75625         |
| TRPC4AP                                                                                       | 0,975310564 | -0,467685547 | 0,125 | 0,109 | 1         | 0,723123744   | 1,382889178     | 1,146788991     |
| LRRC8B                                                                                        | 0,19837126  | -0,468173253 | 0,031 | 0,098 | 1         | 0,722879332   | 1,383356746     | 0,316326531     |
| EHBP1                                                                                         | 0,699930189 | -0,468285302 | 0,656 | 0,434 | 1         | 0,72282319    | 1,383464191     | 1,511520737     |
| SERPINA3                                                                                      | 0,548952158 | -0,468313234 | 0,031 | 0,055 | 1         | 0,722809196   | 1,383490976     | 0,563636364     |
| FSTL5                                                                                         | 0,134529645 | -0,468484207 | 0     | 0,066 | 1         | 0,722723541   | 1,383654943     | 0               |
| EPC2                                                                                          | 0,905539169 | -0,468542054 | 0,156 | 0,129 | 1         | 0,722694563   | 1,383710424     | 1,209302326     |
| NPC2                                                                                          | 0,392955531 | -0,469042835 | 0,625 | 0,355 | 1         | 0,722443748   | 1,384190814     | 1,76056338      |

Supplementary Table 1

| Differentially expressed genes_adjacent-skin-XL_comparing SC-Keloid vs. (SC-Myel, SC-Nonmyel) |             |              |       |       |           |               |                 |                 |
|-----------------------------------------------------------------------------------------------|-------------|--------------|-------|-------|-----------|---------------|-----------------|-----------------|
| gene                                                                                          | p_val       | avg_log2FC   | pct.1 | pct.2 | p_val_adj | Foldchange_UP | Foldchange_DOWN | Ratio_pct1_pct2 |
| MRPS31                                                                                        | 0,416896114 | -0,469113725 | 0,125 | 0,074 | 1         | 0,72240825    | 1,384258831     | 1,689189189     |
| HERC1                                                                                         | 0,945716537 | -0,469221319 | 0,125 | 0,109 | 1         | 0,722354376   | 1,38436207      | 1,146788991     |
| C7orf61                                                                                       | 0,08574604  | -0,469485428 | 0     | 0,086 | 1         | 0,72222215    | 1,384615524     | 0               |
| MEG3                                                                                          | 0,00329525  | -0,469570095 | 0,719 | 0,285 | 1         | 0,722179766   | 1,384696785     | 2,522807018     |
| CKAP4                                                                                         | 0,122936942 | -0,469828232 | 0,25  | 0,121 | 1         | 0,72205056    | 1,384944566     | 2,066115702     |
| RBM25                                                                                         | 0,455553576 | -0,470020781 | 0,688 | 0,406 | 1         | 0,721954199   | 1,385129419     | 1,694581281     |
| PLK2                                                                                          | 0,527444083 | -0,470167464 | 0,219 | 0,152 | 1         | 0,721880799   | 1,385270257     | 1,440789474     |
| ANKRD18A                                                                                      | 0,213026321 | -0,47065802  | 0     | 0,047 | 1         | 0,721635381   | 1,385741367     | 0               |
| BROX                                                                                          | 0,811460203 | -0,471280338 | 0,219 | 0,172 | 1         | 0,721324165   | 1,386339247     | 1,273255814     |
| GATAD2A                                                                                       | 0,536573979 | -0,472089773 | 0,125 | 0,148 | 1         | 0,720919574   | 1,387117281     | 0,844594595     |
| ELL                                                                                           | 0,314221703 | -0,472229915 | 0,031 | 0,078 | 1         | 0,720849549   | 1,387252031     | 0,397435897     |
| TMEM161B-DT                                                                                   | 0,455148041 | -0,472365625 | 0,031 | 0,062 | 1         | 0,720781743   | 1,387382532     | 0,5             |
| ADAMTS9                                                                                       | 0,790538584 | -0,472612344 | 0,219 | 0,172 | 1         | 0,720658491   | 1,387619812     | 1,273255814     |
| TMEM128                                                                                       | 0,353479652 | -0,472644135 | 0,062 | 0,109 | 1         | 0,720642611   | 1,38765039      | 0,568807339     |
| PHF1                                                                                          | 0,63133634  | -0,472845302 | 0,125 | 0,145 | 1         | 0,720542133   | 1,387843895     | 0,862068966     |
| WBP1L                                                                                         | 0,322870955 | -0,47435123  | 0,219 | 0,129 | 1         | 0,719790402   | 1,389293323     | 1,697674419     |
| ZNF219                                                                                        | 0,726144259 | -0,47504178  | 0,125 | 0,133 | 1         | 0,719445955   | 1,389958472     | 0,939849624     |
| ZC3H6                                                                                         | 0,475495989 | -0,475365201 | 0,219 | 0,141 | 1         | 0,719284688   | 1,390270106     | 1,553191489     |
| SMOX                                                                                          | 0,270831373 | -0,476224113 | 0,062 | 0,121 | 1         | 0,718856588   | 1,391098053     | 0,512396694     |
| RBM7                                                                                          | 0,616094331 | -0,476301027 | 0,281 | 0,191 | 1         | 0,718818265   | 1,391172218     | 1,471204188     |
| NRDE2                                                                                         | 0,837002351 | -0,477986737 | 0,125 | 0,125 | 1         | 0,717978856   | 1,392798676     | 1               |
| TYRO3                                                                                         | 0,08574604  | -0,478859637 | 0     | 0,086 | 1         | 0,717544575   | 1,393641642     | 0               |
| PRRC2B                                                                                        | 0,520874723 | -0,479281136 | 0,312 | 0,211 | 1         | 0,717334968   | 1,394048868     | 1,478672986     |
| EGFL8                                                                                         | 0,458755675 | -0,480093362 | 0,844 | 0,656 | 1         | 0,716931228   | 1,394833928     | 1,286585366     |
| KRT1                                                                                          | 0,09097562  | -0,480374208 | 0,031 | 0,141 | 1         | 0,716791677   | 1,395105484     | 0,219858156     |
| FAM133B                                                                                       | 0,521406761 | -0,48037692  | 0,469 | 0,305 | 1         | 0,71679033    | 1,395108106     | 1,537704918     |
| SRSF4                                                                                         | 0,263679024 | -0,480934036 | 0,375 | 0,211 | 1         | 0,716513585   | 1,39564695      | 1,777251185     |
| RAB10                                                                                         | 0,939107348 | -0,481521264 | 0,5   | 0,359 | 1         | 0,716221999   | 1,396215143     | 1,39275766      |
| IL11RA                                                                                        | 0,73624035  | -0,482343514 | 0,281 | 0,262 | 1         | 0,715813911   | 1,397011129     | 1,072519084     |
| CCNL2                                                                                         | 0,191876676 | -0,482550462 | 0,406 | 0,227 | 1         | 0,715711238   | 1,397211539     | 1,788546256     |

Supplementary Table 1

| Differentially expressed genes_adjacent-skin-XL_comparing SC-Keloid vs. (SC-Myel, SC-Nonmyel) |             |              |       |       |           |               |                 |                 |
|-----------------------------------------------------------------------------------------------|-------------|--------------|-------|-------|-----------|---------------|-----------------|-----------------|
| gene                                                                                          | p_val       | avg_log2FC   | pct.1 | pct.2 | p_val_adj | Foldchange_UP | Foldchange_DOWN | Ratio_pct1_pct2 |
| SEC14L1                                                                                       | 0,530052754 | -0,48323046  | 0,312 | 0,203 | 1         | 0,715373975   | 1,397870253     | 1,536945813     |
| SBNO2                                                                                         | 0,560003828 | -0,483325964 | 0,125 | 0,152 | 1         | 0,71532662    | 1,397962794     | 0,822368421     |
| ANAPC16                                                                                       | 0,135648283 | -0,483341138 | 0,594 | 0,301 | 1         | 0,715319096   | 1,397977497     | 1,973421927     |
| FKBP4                                                                                         | 0,203993033 | -0,483941055 | 0,406 | 0,23  | 1         | 0,715021707   | 1,39855894      | 1,765217391     |
| NCOR1                                                                                         | 0,044672041 | -0,484114443 | 0,406 | 0,184 | 1         | 0,714935778   | 1,398727033     | 2,206521739     |
| MARCHF6                                                                                       | 0,937963083 | -0,484218342 | 0,406 | 0,324 | 1         | 0,714884292   | 1,39882777      | 1,25308642      |
| MICALL2                                                                                       | 0,449453483 | -0,484587281 | 0,469 | 0,301 | 1         | 0,714701499   | 1,399185537     | 1,558139535     |
| SORBS2                                                                                        | 0,47756212  | -0,484656375 | 0,5   | 0,316 | 1         | 0,714667271   | 1,399252548     | 1,582278481     |
| SPRY1                                                                                         | 0,015693314 | -0,485401731 | 0,344 | 0,141 | 1         | 0,71429814    | 1,399975646     | 2,439716312     |
| PLEKHG3                                                                                       | 0,059869253 | -0,486227612 | 0     | 0,102 | 1         | 0,713889352   | 1,400777302     | 0               |
| CLOCK                                                                                         | 0,721126199 | -0,486531796 | 0,125 | 0,094 | 1         | 0,713738848   | 1,401072679     | 1,329787234     |
| PABPC1                                                                                        | 0,908444375 | -0,486846082 | 0,719 | 0,516 | 1         | 0,71358338    | 1,401377931     | 1,393410853     |
| MTSS2                                                                                         | 0,675735117 | -0,487132761 | 0,125 | 0,137 | 1         | 0,713441597   | 1,401656427     | 0,912408759     |
| MON2                                                                                          | 0,799775352 | -0,487235336 | 0,125 | 0,129 | 1         | 0,713390873   | 1,401756088     | 0,968992248     |
| CDK9                                                                                          | 0,964894825 | -0,488092115 | 0,156 | 0,145 | 1         | 0,712967335   | 1,402588802     | 1,075862069     |
| MED13                                                                                         | 0,722343574 | -0,488188281 | 0,312 | 0,227 | 1         | 0,712919812   | 1,402682298     | 1,374449339     |
| SOX7                                                                                          | 0,26138036  | -0,488989207 | 0,031 | 0,086 | 1         | 0,712524138   | 1,403461226     | 0,360465116     |
| TFAM                                                                                          | 0,379561462 | -0,489102993 | 0,188 | 0,113 | 1         | 0,712467943   | 1,403571923     | 1,663716814     |
| CREBZF                                                                                        | 0,922361175 | -0,489274594 | 0,25  | 0,219 | 1         | 0,712383204   | 1,40373888      | 1,141552511     |
| DHX15                                                                                         | 0,890525449 | -0,489535371 | 0,219 | 0,176 | 1         | 0,712254447   | 1,403992638     | 1,244318182     |
| MID1                                                                                          | 0,180934293 | -0,489672144 | 0,031 | 0,102 | 1         | 0,712186926   | 1,404125748     | 0,303921569     |
| GRAMD2B                                                                                       | 0,140747594 | -0,489689422 | 0,344 | 0,176 | 1         | 0,712178396   | 1,404142564     | 1,954545455     |
| TMEM168                                                                                       | 0,586985538 | -0,489752827 | 0,188 | 0,129 | 1         | 0,712147098   | 1,404204277     | 1,457364341     |
| NRDC                                                                                          | 0,532574125 | -0,490537173 | 0,312 | 0,207 | 1         | 0,711760032   | 1,404967904     | 1,507246377     |
| KIAA1755                                                                                      | 0,982137358 | -0,49057596  | 0,125 | 0,113 | 1         | 0,711740896   | 1,405005677     | 1,10619469      |
| CUX1                                                                                          | 0,314654322 | -0,491058403 | 0,375 | 0,219 | 1         | 0,711502927   | 1,405475595     | 1,712328767     |
| JMJD1C                                                                                        | 0,530326632 | -0,491257104 | 0,531 | 0,348 | 1         | 0,711404939   | 1,405669183     | 1,525862069     |
| PSIP1                                                                                         | 0,258883021 | -0,491318491 | 0,281 | 0,16  | 1         | 0,711374669   | 1,405728996     | 1,75625         |
| NPIPA1                                                                                        | 0,630272476 | -0,491860392 | 0,062 | 0,082 | 1         | 0,711107515   | 1,406257111     | 0,756097561     |
| PDE9A                                                                                         | 0,071654957 | -0,492199329 | 0     | 0,094 | 1         | 0,710940472   | 1,406587527     | 0               |

Supplementary Table 1

| Differentially expressed genes_adjacent-skin-XL_comparing SC-Keloid vs. (SC-Myel, SC-Nonmyel) |             |              |       |       |           |               |                 |                 |
|-----------------------------------------------------------------------------------------------|-------------|--------------|-------|-------|-----------|---------------|-----------------|-----------------|
| gene                                                                                          | p_val       | avg_log2FC   | pct.1 | pct.2 | p_val_adj | Foldchange_UP | Foldchange_DOWN | Ratio_pct1_pct2 |
| SIK2                                                                                          | 0,198371032 | -0,492706286 | 0,031 | 0,098 | 1         | 0,710690694   | 1,407081882     | 0,316326531     |
| TNS1                                                                                          | 0,99584873  | -0,493364752 | 0,188 | 0,164 | 1         | 0,710366399   | 1,407724241     | 1,146341463     |
| WNT6                                                                                          | 0,180934079 | -0,493457    | 0,031 | 0,102 | 1         | 0,710320979   | 1,407814256     | 0,303921569     |
| KHDC4                                                                                         | 0,594827904 | -0,493963368 | 0,188 | 0,129 | 1         | 0,710071709   | 1,408308467     | 1,457364341     |
| EZR                                                                                           | 0,526054298 | -0,493964304 | 0,562 | 0,355 | 1         | 0,710071248   | 1,408309381     | 1,583098592     |
| NOLC1                                                                                         | 0,188904652 | -0,494058615 | 0,281 | 0,148 | 1         | 0,710024831   | 1,408401447     | 1,898648649     |
| CAPRIN2                                                                                       | 0,239501047 | -0,494457995 | 0,062 | 0,129 | 1         | 0,709828303   | 1,408791388     | 0,480620155     |
| ANKHD1                                                                                        | 0,847556267 | -0,494547602 | 0,25  | 0,223 | 1         | 0,709784216   | 1,408878892     | 1,121076233     |
| CRY1                                                                                          | 0,259540252 | -0,494722713 | 0,25  | 0,141 | 1         | 0,709698069   | 1,409049909     | 1,773049645     |
| TNFAIP2                                                                                       | 0,507127635 | -0,494779574 | 0,156 | 0,102 | 1         | 0,709670099   | 1,409105444     | 1,529411765     |
| TOP1                                                                                          | 0,510974938 | -0,494813994 | 0,406 | 0,266 | 1         | 0,709653167   | 1,409139064     | 1,526315789     |
| ZFHX3                                                                                         | 0,496193648 | -0,494876265 | 0,25  | 0,164 | 1         | 0,709622538   | 1,409199887     | 1,524390244     |
| LMBRD1                                                                                        | 0,197426112 | -0,495557504 | 0,5   | 0,27  | 1         | 0,709287533   | 1,409865468     | 1,851851852     |
| FRMD8                                                                                         | 0,213436227 | -0,496063998 | 0,062 | 0,133 | 1         | 0,709038564   | 1,410360523     | 0,466165414     |
| TMED5                                                                                         | 0,307253547 | -0,496312389 | 0,312 | 0,184 | 1         | 0,708916499   | 1,410603367     | 1,695652174     |
| RNF114                                                                                        | 0,736411986 | -0,496829516 | 0,406 | 0,285 | 1         | 0,708662436   | 1,411109082     | 1,424561404     |
| DIXDC1                                                                                        | 0,45890811  | -0,496851086 | 0,156 | 0,191 | 1         | 0,708651841   | 1,41113018      | 0,816753927     |
| NRP1                                                                                          | 0,084505016 | -0,496868178 | 0,25  | 0,113 | 1         | 0,708643445   | 1,411146898     | 2,212389381     |
| SCD                                                                                           | 0,43153954  | -0,497253318 | 0,438 | 0,273 | 1         | 0,708454292   | 1,411523666     | 1,604395604     |
| GALNT2                                                                                        | 0,114455439 | -0,497927216 | 0,625 | 0,316 | 1         | 0,708123443   | 1,412183158     | 1,977848101     |
| C12orf57                                                                                      | 0,419427842 | -0,499063149 | 0,656 | 0,406 | 1         | 0,707566108   | 1,413295505     | 1,615763547     |
| RASGEF1A                                                                                      | 0,492632793 | -0,499164784 | 0,062 | 0,094 | 1         | 0,707516263   | 1,413395072     | 0,659574468     |
| KCTD3                                                                                         | 0,977829359 | -0,499530028 | 0,156 | 0,141 | 1         | 0,707337166   | 1,413752943     | 1,106382979     |
| TARS3                                                                                         | 0,926839124 | -0,499788131 | 0,25  | 0,215 | 1         | 0,707210632   | 1,414005892     | 1,162790698     |
| ARL8A                                                                                         | 0,883675864 | -0,499847725 | 0,406 | 0,293 | 1         | 0,70718142    | 1,414064301     | 1,385665529     |
| AEBP2                                                                                         | 0,192462217 | -0,500743745 | 0,281 | 0,148 | 1         | 0,706742344   | 1,414942812     | 1,898648649     |
| SAP30BP                                                                                       | 0,205385164 | -0,502817831 | 0,406 | 0,227 | 1         | 0,705727028   | 1,416978463     | 1,788546256     |
| HELZ                                                                                          | 0,139465797 | -0,503534625 | 0,031 | 0,113 | 1         | 0,705376479   | 1,417682655     | 0,274336283     |
| AFAP1L2                                                                                       | 0,397154955 | -0,504443339 | 0,469 | 0,293 | 1         | 0,704932322   | 1,418575896     | 1,600682594     |
| CDKN1C                                                                                        | 0,773665643 | -0,505579211 | 0,312 | 0,262 | 1         | 0,704377529   | 1,419693218     | 1,190839695     |

Supplementary Table 1

| Differentially expressed genes_adjacent-skin-XL_comparing SC-Keloid vs. (SC-Myel, SC-Nonmyel) |             |               |       |       |           |               |                 |                 |
|-----------------------------------------------------------------------------------------------|-------------|---------------|-------|-------|-----------|---------------|-----------------|-----------------|
| gene                                                                                          | p_val       | avg_log2FC    | pct.1 | pct.2 | p_val_adj | Foldchange_UP | Foldchange_DOWN | Ratio_pct1_pct2 |
| BACH2                                                                                         | 0,19837126  | -0,505596422  | 0,031 | 0,098 | 1         | 0,704369125   | 1,419710155     | 0,316326531     |
| BAZ2B                                                                                         | 0,626135927 | -0,506218528  | 0,219 | 0,152 | 1         | 0,704065459   | 1,420322482     | 1,440789474     |
| B4GALT5                                                                                       | 0,674055279 | -0,506600999  | 0,094 | 0,109 | 1         | 0,70387883    | 1,420699071     | 0,862385321     |
| AHI1                                                                                          | 0,454428691 | -0,507313266  | 0,406 | 0,254 | 1         | 0,703531406   | 1,421400652     | 1,598425197     |
| MTMR3                                                                                         | 0,968729744 | -0,507322197  | 0,125 | 0,109 | 1         | 0,703527052   | 1,421409451     | 1,146788991     |
| NHLRC2                                                                                        | 0,708633239 | -0,507624275  | 0,094 | 0,105 | 1         | 0,703379759   | 1,421707103     | 0,895238095     |
| MEF2A                                                                                         | 0,399497935 | -0,507906762  | 0,406 | 0,25  | 1         | 0,703242048   | 1,421985508     | 1,624           |
| TMEM248                                                                                       | 0,589223109 | -0,508246519  | 0,281 | 0,191 | 1         | 0,703076452   | 1,422320428     | 1,471204188     |
| GAL3ST1                                                                                       | 0,351280945 | -0,508540799  | 0,062 | 0,109 | 1         | 0,702933054   | 1,42261058      | 0,568807339     |
| RFTN2                                                                                         | 0,549412664 | -0,509037876  | 0,094 | 0,121 | 1         | 0,702690901   | 1,423100823     | 0,776859504     |
| RNF24                                                                                         | 0,682167253 | -0,509326913  | 0,156 | 0,16  | 1         | 0,702550135   | 1,423385962     | 0,975           |
| BMP7                                                                                          | 0,078384714 | -0,509579542  | 0     | 0,09  | 1         | 0,702427123   | 1,423635232     | 0               |
| WDFY3                                                                                         | 0,611764646 | -0,510180374  | 0,094 | 0,113 | 1         | 0,702134648   | 1,424228249     | 0,831858407     |
| DISC1                                                                                         | 0,91169441  | -0,51059941   | 0,125 | 0,105 | 1         | 0,701930739   | 1,424641982     | 1,19047619      |
| SIAH1                                                                                         | 0,807013741 | -0,510825841  | 0,281 | 0,207 | 1         | 0,70182058    | 1,424865597     | 1,357487923     |
| NXPE3                                                                                         | 0,616164234 | -0,511000843  | 0,219 | 0,152 | 1         | 0,701735453   | 1,425038447     | 1,440789474     |
| PTPDC1                                                                                        | 0,256488161 | -0,5111167713 | 0,094 | 0,164 | 1         | 0,701654291   | 1,425203284     | 0,573170732     |
| TSPAN14                                                                                       | 0,723273635 | -0,512033513  | 0,125 | 0,133 | 1         | 0,701233336   | 1,426058843     | 0,939849624     |
| NKD1                                                                                          | 0,122891724 | -0,512461801  | 0     | 0,07  | 1         | 0,701025194   | 1,426482255     | 0               |
| TPCN1                                                                                         | 0,26138036  | -0,512703426  | 0,031 | 0,086 | 1         | 0,700907795   | 1,426721185     | 0,360465116     |
| CEMIP2                                                                                        | 0,674055279 | -0,512808677  | 0,094 | 0,109 | 1         | 0,700856662   | 1,426825275     | 0,862385321     |
| SELENOW                                                                                       | 0,14489921  | -0,513326399  | 0,719 | 0,582 | 1         | 0,7006052     | 1,427337394     | 1,235395189     |
| GRB14                                                                                         | 0,220935523 | -0,51335968   | 0,031 | 0,094 | 1         | 0,700589038   | 1,427370321     | 0,329787234     |
| TPP2                                                                                          | 0,761165734 | -0,513781244  | 0,094 | 0,102 | 1         | 0,700384352   | 1,427787468     | 0,921568627     |
| ETFDH                                                                                         | 0,491272981 | -0,513808505  | 0,094 | 0,125 | 1         | 0,700371117   | 1,427814448     | 0,752           |
| RAB11FIP1                                                                                     | 0,19837126  | -0,514040898  | 0,031 | 0,098 | 1         | 0,700258309   | 1,428044462     | 0,316326531     |
| CD46                                                                                          | 0,181261718 | -0,514838642  | 0,656 | 0,348 | 1         | 0,699871205   | 1,428834323     | 1,885057471     |
| HLA-DRA                                                                                       | 0,530494223 | -0,515798861  | 0,062 | 0,094 | 1         | 0,699405545   | 1,429785633     | 0,659574468     |
| HDAC11                                                                                        | 0,150480606 | -0,516554389  | 0,031 | 0,109 | 1         | 0,699039368   | 1,430534597     | 0,28440367      |
| ZNF791                                                                                        | 0,81643733  | -0,516851424  | 0,094 | 0,098 | 1         | 0,698895458   | 1,430829159     | 0,959183673     |

Supplementary Table 1

| Differentially expressed genes_adjacent-skin-XL_comparing SC-Keloid vs. (SC-Myel, SC-Nonmyel) |             |              |       |       |           |               |                 |                 |
|-----------------------------------------------------------------------------------------------|-------------|--------------|-------|-------|-----------|---------------|-----------------|-----------------|
| gene                                                                                          | p_val       | avg_log2FC   | pct.1 | pct.2 | p_val_adj | Foldchange_UP | Foldchange_DOWN | Ratio_pct1_pct2 |
| YME1L1                                                                                        | 0,17903325  | -0,517507161 | 0,406 | 0,227 | 1         | 0,698577867   | 1,43147965      | 1,788546256     |
| RPS6KA3                                                                                       | 0,270831373 | -0,517709791 | 0,062 | 0,121 | 1         | 0,698479757   | 1,431680719     | 0,512396694     |
| IGF2BP2                                                                                       | 0,835877214 | -0,517847892 | 0,156 | 0,125 | 1         | 0,698412898   | 1,431817772     | 1,248           |
| DNAJC6                                                                                        | 0,054716441 | -0,518457537 | 0     | 0,105 | 1         | 0,69811783    | 1,432422948     | 0               |
| RTF1                                                                                          | 0,06208619  | -0,518982438 | 0,5   | 0,238 | 1         | 0,697863877   | 1,432944207     | 2,100840336     |
| SYNM                                                                                          | 0,309093028 | -0,519512505 | 0,094 | 0,148 | 1         | 0,697607519   | 1,433470788     | 0,635135135     |
| SOX6                                                                                          | 0,656036246 | -0,520698081 | 0,375 | 0,262 | 1         | 0,697034476   | 1,434649268     | 1,43129771      |
| ERBB3                                                                                         | 0,294659479 | -0,521225682 | 0,875 | 0,5   | 1         | 0,696779613   | 1,435174022     | 1,75            |
| C11orf54                                                                                      | 0,078384714 | -0,52175605  | 0     | 0,09  | 1         | 0,696523508   | 1,435701723     | 0               |
| SFT2D2                                                                                        | 0,248051582 | -0,521934131 | 0,062 | 0,125 | 1         | 0,696437537   | 1,435878951     | 0,496           |
| ARGLU1                                                                                        | 0,909089059 | -0,52310997  | 0,656 | 0,457 | 1         | 0,695870151   | 1,437049712     | 1,435448578     |
| LRRC7                                                                                         | 0,093802134 | -0,523158157 | 0     | 0,082 | 1         | 0,695846909   | 1,437097711     | 0               |
| EWSR1                                                                                         | 0,114855681 | -0,523233948 | 0,562 | 0,285 | 1         | 0,695810354   | 1,43717321      | 1,971929825     |
| KANSL1L                                                                                       | 0,23950123  | -0,523979934 | 0,062 | 0,129 | 1         | 0,695450659   | 1,437916533     | 0,480620155     |
| HNRNPA2B1                                                                                     | 0,07943437  | -0,524347548 | 0,938 | 0,797 | 1         | 0,695273473   | 1,438282977     | 1,176913425     |
| PRPF39                                                                                        | 0,217476686 | -0,524698026 | 0,031 | 0,094 | 1         | 0,695104589   | 1,438632425     | 0,329787234     |
| STX16                                                                                         | 0,393622993 | -0,525264403 | 0,281 | 0,176 | 1         | 0,694831756   | 1,439197318     | 1,596590909     |
| PDS5B                                                                                         | 0,714048186 | -0,525353187 | 0,312 | 0,223 | 1         | 0,694788997   | 1,439285889     | 1,399103139     |
| PIK3C2A                                                                                       | 0,907819917 | -0,525449799 | 0,188 | 0,152 | 1         | 0,694742471   | 1,439382276     | 1,236842105     |
| MINDY2                                                                                        | 0,961283601 | -0,525869348 | 0,25  | 0,211 | 1         | 0,694540464   | 1,439800922     | 1,184834123     |
| RNF103                                                                                        | 0,723273635 | -0,526655012 | 0,125 | 0,133 | 1         | 0,694162333   | 1,440585224     | 0,939849624     |
| TMEM176A                                                                                      | 0,31715205  | -0,526914793 | 0,312 | 0,352 | 1         | 0,694037349   | 1,440844649     | 0,886363636     |
| NFATC1                                                                                        | 0,389076766 | -0,527352501 | 0,094 | 0,137 | 1         | 0,693826812   | 1,441281862     | 0,686131387     |
| SBDS                                                                                          | 0,491042257 | -0,527518578 | 0,781 | 0,586 | 1         | 0,693746947   | 1,441447786     | 1,332764505     |
| PLXDC2                                                                                        | 0,901090659 | -0,527658711 | 0,375 | 0,285 | 1         | 0,693679565   | 1,441587804     | 1,315789474     |
| TAF1                                                                                          | 0,112290358 | -0,52768383  | 0     | 0,074 | 1         | 0,693667487   | 1,441612904     | 0               |
| TAOK1                                                                                         | 0,492895148 | -0,527867284 | 0,5   | 0,312 | 1         | 0,693579285   | 1,441796232     | 1,602564103     |
| ZNF331                                                                                        | 0,249700501 | -0,527933782 | 0,062 | 0,125 | 1         | 0,693547317   | 1,441862691     | 0,496           |
| TLN2                                                                                          | 0,472561141 | -0,528011835 | 0,188 | 0,121 | 1         | 0,693509796   | 1,4419407       | 1,553719008     |
| MYO1E                                                                                         | 0,899476288 | -0,52841952  | 0,156 | 0,129 | 1         | 0,693313847   | 1,44234823      | 1,209302326     |

Supplementary Table 1

| Differentially expressed genes_adjacent-skin-XL_comparing SC-Keloid vs. (SC-Myel, SC-Nonmyel) |             |              |       |       |           |               |                 |                 |
|-----------------------------------------------------------------------------------------------|-------------|--------------|-------|-------|-----------|---------------|-----------------|-----------------|
| gene                                                                                          | p_val       | avg_log2FC   | pct.1 | pct.2 | p_val_adj | Foldchange_UP | Foldchange_DOWN | Ratio_pct1_pct2 |
| SNHG12                                                                                        | 0,829851616 | -0,529682165 | 0,219 | 0,168 | 1         | 0,692707325   | 1,443611123     | 1,303571429     |
| ANKRD36C                                                                                      | 0,708251698 | -0,530876499 | 0,156 | 0,16  | 1         | 0,692134105   | 1,444806711     | 0,975           |
| SLC9A3R1                                                                                      | 0,230125064 | -0,53143839  | 0,062 | 0,129 | 1         | 0,69186459    | 1,445369534     | 0,480620155     |
| NKTR                                                                                          | 0,421783651 | -0,531746314 | 0,469 | 0,285 | 1         | 0,691716937   | 1,445678061     | 1,645614035     |
| KCNQ1OT1                                                                                      | 0,600062    | -0,531756457 | 0,125 | 0,145 | 1         | 0,691712073   | 1,445688226     | 0,862068966     |
| ZMYND8                                                                                        | 0,507127635 | -0,532553274 | 0,156 | 0,102 | 1         | 0,691330138   | 1,446486916     | 1,529411765     |
| RASGEF1B                                                                                      | 0,345353593 | -0,532922153 | 0,094 | 0,145 | 1         | 0,691153397   | 1,446856812     | 0,648275862     |
| EXOC1                                                                                         | 0,048449393 | -0,532935518 | 0,281 | 0,121 | 1         | 0,691146994   | 1,446870216     | 2,32231405      |
| SVIP                                                                                          | 0,088519719 | -0,533138986 | 0,375 | 0,184 | 1         | 0,691049526   | 1,447074287     | 2,038043478     |
| ADAM23                                                                                        | 0,78856501  | -0,533448581 | 0,188 | 0,184 | 1         | 0,690901246   | 1,447384855     | 1,02173913      |
| UBAP1                                                                                         | 0,284187836 | -0,533669979 | 0,094 | 0,152 | 1         | 0,690795227   | 1,44760699      | 0,618421053     |
| IL34                                                                                          | 0,071654957 | -0,53371672  | 0     | 0,094 | 1         | 0,690772847   | 1,447653891     | 0               |
| RNF149                                                                                        | 0,270831373 | -0,533949889 | 0,062 | 0,121 | 1         | 0,690661213   | 1,44788788      | 0,512396694     |
| RLF                                                                                           | 0,882939173 | -0,534805909 | 0,219 | 0,195 | 1         | 0,690251532   | 1,448747236     | 1,123076923     |
| HES4                                                                                          | 0,897119629 | -0,535813453 | 0,25  | 0,199 | 1         | 0,689769646   | 1,44975936      | 1,256281407     |
| AKAP7                                                                                         | 0,324349291 | -0,536482012 | 0,062 | 0,113 | 1         | 0,689450074   | 1,450431349     | 0,548672566     |
| MECP2                                                                                         | 0,647779378 | -0,537074249 | 0,375 | 0,262 | 1         | 0,689167107   | 1,451026883     | 1,43129771      |
| USP47                                                                                         | 0,367937279 | -0,537188462 | 0,344 | 0,207 | 1         | 0,68911255    | 1,451141761     | 1,661835749     |
| AGO2                                                                                          | 0,947872509 | -0,537396366 | 0,281 | 0,227 | 1         | 0,689013251   | 1,451350897     | 1,237885463     |
| LINC00632                                                                                     | 0,943740324 | -0,537686942 | 0,219 | 0,188 | 1         | 0,688874489   | 1,451643246     | 1,164893617     |
| TRIM56                                                                                        | 0,059869253 | -0,538285398 | 0     | 0,102 | 1         | 0,688588791   | 1,452245539     | 0               |
| IFNGR1                                                                                        | 0,250980166 | -0,539107299 | 0,219 | 0,277 | 1         | 0,688196615   | 1,453073117     | 0,790613718     |
| APOE                                                                                          | 0,26138036  | -0,540723225 | 0,031 | 0,086 | 1         | 0,687426215   | 1,454701578     | 0,360465116     |
| SOD1                                                                                          | 0,468461826 | -0,541604548 | 0,844 | 0,645 | 1         | 0,687006404   | 1,455590507     | 1,308527132     |
| GPATCH8                                                                                       | 0,338687844 | -0,541842176 | 0,281 | 0,168 | 1         | 0,686893256   | 1,455830279     | 1,672619048     |
| TMEM132A                                                                                      | 0,667452977 | -0,542410162 | 0,125 | 0,137 | 1         | 0,68662288    | 1,456403549     | 0,912408759     |
| PARP14                                                                                        | 0,841792297 | -0,543097163 | 0,188 | 0,148 | 1         | 0,686295993   | 1,457097243     | 1,27027027      |
| KIF1A                                                                                         | 0,10262374  | -0,543204179 | 0     | 0,078 | 1         | 0,686245087   | 1,457205332     | 0               |
| LUC7L2                                                                                        | 0,745097108 | -0,543924422 | 0,375 | 0,27  | 1         | 0,685902576   | 1,457933        | 1,388888889     |
| CIR1                                                                                          | 0,567878517 | -0,544150158 | 0,281 | 0,188 | 1         | 0,685795262   | 1,458161138     | 1,494680851     |

Supplementary Table 1

| Differentially expressed genes_adjacent-skin-XL_comparing SC-Keloid vs. (SC-Myel, SC-Nonmyel) |             |              |       |       |           |               |                 |                 |
|-----------------------------------------------------------------------------------------------|-------------|--------------|-------|-------|-----------|---------------|-----------------|-----------------|
| gene                                                                                          | p_val       | avg_log2FC   | pct.1 | pct.2 | p_val_adj | Foldchange_UP | Foldchange_DOWN | Ratio_pct1_pct2 |
| USP32                                                                                         | 0,803488864 | -0,544227525 | 0,125 | 0,125 | 1         | 0,685758486   | 1,458239337     | 1               |
| RBBP6                                                                                         | 0,836660523 | -0,544590524 | 0,344 | 0,254 | 1         | 0,685585963   | 1,458606294     | 1,354330709     |
| MT-CO1                                                                                        | 0,649932755 | -0,545046839 | 0,781 | 0,719 | 1         | 0,685369151   | 1,459067714     | 1,086230876     |
| SERINC5                                                                                       | 0,930493752 | -0,545299108 | 0,25  | 0,203 | 1         | 0,685249318   | 1,459322868     | 1,231527094     |
| PHC1                                                                                          | 0,611764646 | -0,545460366 | 0,094 | 0,113 | 1         | 0,685172728   | 1,459485994     | 0,831858407     |
| ADAMTS4                                                                                       | 0,966010928 | -0,546128274 | 0,156 | 0,141 | 1         | 0,684855595   | 1,460161832     | 1,106382979     |
| MYSM1                                                                                         | 0,574023156 | -0,547108897 | 0,188 | 0,129 | 1         | 0,684390246   | 1,461154664     | 1,457364341     |
| SNRNP27                                                                                       | 0,172612804 | -0,548242942 | 0,406 | 0,215 | 1         | 0,683852485   | 1,462303671     | 1,888372093     |
| JAM2                                                                                          | 0,19837126  | -0,548425518 | 0,031 | 0,098 | 1         | 0,683765948   | 1,462488741     | 0,316326531     |
| MEGF6                                                                                         | 0,612285359 | -0,54864432  | 0,156 | 0,109 | 1         | 0,683662254   | 1,462710562     | 1,431192661     |
| SLC35F1                                                                                       | 0,172513176 | -0,548769625 | 0,5   | 0,262 | 1         | 0,683602877   | 1,462837611     | 1,908396947     |
| NEDD4L                                                                                        | 0,536573979 | -0,549668448 | 0,125 | 0,148 | 1         | 0,683177114   | 1,463749266     | 0,844594595     |
| CLK4                                                                                          | 0,328400266 | -0,549773897 | 0,094 | 0,145 | 1         | 0,683127182   | 1,463856258     | 0,648275862     |
| RIF1                                                                                          | 0,691490388 | -0,551747041 | 0,312 | 0,223 | 1         | 0,682193521   | 1,465859714     | 1,399103139     |
| WRN                                                                                           | 0,730871257 | -0,55222762  | 0,094 | 0,105 | 1         | 0,681966312   | 1,46634809      | 0,895238095     |
| HEXIM1                                                                                        | 0,09580422  | -0,553027975 | 0,406 | 0,203 | 1         | 0,681588087   | 1,467161793     | 2               |
| CTNND1                                                                                        | 0,573208462 | -0,553260432 | 0,312 | 0,297 | 1         | 0,681478274   | 1,467398212     | 1,050505051     |
| ECHDC2                                                                                        | 0,426651606 | -0,553825732 | 0,062 | 0,102 | 1         | 0,681211298   | 1,467973304     | 0,607843137     |
| PRNP                                                                                          | 0,418711318 | -0,554108034 | 1     | 0,824 | 1         | 0,681078014   | 1,468260581     | 1,213592233     |
| NEK7                                                                                          | 0,167651587 | -0,554355896 | 0,062 | 0,145 | 1         | 0,680961011   | 1,468512857     | 0,427586207     |
| SLC25A29                                                                                      | 0,486291268 | -0,554829145 | 0,094 | 0,125 | 1         | 0,680737672   | 1,468994653     | 0,752           |
| PLCE1                                                                                         | 0,082922884 | -0,555489336 | 0,344 | 0,164 | 1         | 0,680426231   | 1,469667033     | 2,097560976     |
| BBX                                                                                           | 0,838249419 | -0,556658535 | 0,375 | 0,277 | 1         | 0,679875018   | 1,470858574     | 1,353790614     |
| ARMCX4                                                                                        | 0,611764646 | -0,557528782 | 0,094 | 0,113 | 1         | 0,679465035   | 1,471746077     | 0,831858407     |
| CYBRD1                                                                                        | 0,987437888 | -0,558050254 | 0,188 | 0,16  | 1         | 0,679219482   | 1,472278146     | 1,175           |
| DUSP16                                                                                        | 0,915013818 | -0,558155445 | 0,125 | 0,105 | 1         | 0,67916996    | 1,472385498     | 1,19047619      |
| ALDH6A1                                                                                       | 0,803488864 | -0,558994262 | 0,125 | 0,125 | 1         | 0,678775189   | 1,473241827     | 1               |
| JARID2                                                                                        | 0,435228895 | -0,559230904 | 0,094 | 0,133 | 1         | 0,678663861   | 1,473483498     | 0,706766917     |
| IST1                                                                                          | 0,144091573 | -0,559382185 | 0,375 | 0,191 | 1         | 0,6785927     | 1,473638016     | 1,963350785     |
| MAP4K3                                                                                        | 0,486291098 | -0,560742111 | 0,094 | 0,125 | 1         | 0,67795334    | 1,475027765     | 0,752           |



Supplementary Table 1

| Differentially expressed genes_adjacent-skin-XL_comparing SC-Keloid vs. (SC-Myel, SC-Nonmyel) |             |              |       |       |           |               |                 |                 |
|-----------------------------------------------------------------------------------------------|-------------|--------------|-------|-------|-----------|---------------|-----------------|-----------------|
| gene                                                                                          | p_val       | avg_log2FC   | pct.1 | pct.2 | p_val_adj | Foldchange_UP | Foldchange_DOWN | Ratio_pct1_pct2 |
| PAQR6                                                                                         | 0,883363513 | -0,561140385 | 0,156 | 0,145 | 1         | 0,677766208   | 1,475435021     | 1,075862069     |
| INAFM1                                                                                        | 0,227058461 | -0,561285407 | 0,062 | 0,129 | 1         | 0,677698082   | 1,475583341     | 0,480620155     |
| SREBF1                                                                                        | 0,801438557 | -0,561439648 | 0,312 | 0,238 | 1         | 0,677625632   | 1,475741107     | 1,31092437      |
| NUP98                                                                                         | 0,069020595 | -0,562060078 | 0,031 | 0,145 | 1         | 0,677334282   | 1,476375885     | 0,213793103     |
| PGM2L1                                                                                        | 0,035646772 | -0,562645373 | 0,531 | 0,242 | 1         | 0,677059546   | 1,476974965     | 2,194214876     |
| SMCHD1                                                                                        | 0,35121699  | -0,562762504 | 0,344 | 0,203 | 1         | 0,677004579   | 1,477094885     | 1,694581281     |
| NDEL1                                                                                         | 0,60483255  | -0,56381453  | 0,281 | 0,191 | 1         | 0,676511081   | 1,478172388     | 1,471204188     |
| USP34                                                                                         | 0,822879814 | -0,564246293 | 0,375 | 0,277 | 1         | 0,676308648   | 1,478614835     | 1,353790614     |
| HERC2                                                                                         | 0,213440672 | -0,564299033 | 0,375 | 0,207 | 1         | 0,676283925   | 1,478668889     | 1,811594203     |
| HNRNPA0                                                                                       | 0,644251391 | -0,565373495 | 0,75  | 0,508 | 1         | 0,675780443   | 1,479770553     | 1,476377953     |
| NUTM2A-AS1                                                                                    | 0,598458377 | -0,565534769 | 0,375 | 0,246 | 1         | 0,675704904   | 1,479935981     | 1,524390244     |
| PPP1R16A                                                                                      | 0,908273548 | -0,56618434  | 0,188 | 0,168 | 1         | 0,675400737   | 1,48060247      | 1,119047619     |
| RMND5A                                                                                        | 0,103889562 | -0,567001408 | 0,031 | 0,125 | 1         | 0,675018334   | 1,481441244     | 0,248           |
| CNKSR3                                                                                        | 0,629352429 | -0,567276418 | 0,344 | 0,238 | 1         | 0,674889672   | 1,481723667     | 1,445378151     |
| CPEB4                                                                                         | 0,600062    | -0,567430653 | 0,125 | 0,145 | 1         | 0,674817525   | 1,481882083     | 0,862068966     |
| BTA1F1                                                                                        | 0,345353761 | -0,567667061 | 0,094 | 0,145 | 1         | 0,674706955   | 1,482124932     | 0,648275862     |
| ERICH1                                                                                        | 0,783849734 | -0,567744406 | 0,156 | 0,121 | 1         | 0,674670784   | 1,482204393     | 1,289256198     |
| CLDN19                                                                                        | 0,078384714 | -0,567938558 | 0     | 0,09  | 1         | 0,674579996   | 1,482403875     | 0               |
| RBMS1                                                                                         | 0,142817233 | -0,56977545  | 0,594 | 0,316 | 1         | 0,673721643   | 1,484292528     | 1,879746835     |
| FAM214A                                                                                       | 0,535198384 | -0,569878454 | 0,062 | 0,09  | 1         | 0,673673542   | 1,484398506     | 0,688888889     |
| MEX3D                                                                                         | 0,950738707 | -0,569926681 | 0,188 | 0,156 | 1         | 0,673651023   | 1,484448128     | 1,205128205     |
| ZC3H12C                                                                                       | 0,295532937 | -0,569962529 | 0,062 | 0,117 | 1         | 0,673634284   | 1,484485014     | 0,52991453      |
| KDSR                                                                                          | 0,669580018 | -0,570252191 | 0,469 | 0,316 | 1         | 0,673499047   | 1,484783096     | 1,484177215     |
| BDP1                                                                                          | 0,404521581 | -0,572167702 | 0,312 | 0,199 | 1         | 0,672605414   | 1,486755798     | 1,567839196     |
| SLC37A3                                                                                       | 0,449469411 | -0,572481299 | 0,094 | 0,129 | 1         | 0,672459227   | 1,487079008     | 0,728682171     |
| PCDH17                                                                                        | 0,071654957 | -0,57289112  | 0     | 0,094 | 1         | 0,672268231   | 1,487501496     | 0               |
| RDX                                                                                           | 0,303707374 | -0,573054763 | 0,844 | 0,68  | 1         | 0,672191981   | 1,487670232     | 1,241176471     |
| SPRED1                                                                                        | 0,975124463 | -0,57439476  | 0,219 | 0,188 | 1         | 0,671567929   | 1,489052644     | 1,164893617     |
| FCGR2B                                                                                        | 0,314221703 | -0,574438402 | 0,031 | 0,078 | 1         | 0,671547614   | 1,489097689     | 0,397435897     |
| FRMD3                                                                                         | 0,54873037  | -0,57529378  | 0,125 | 0,148 | 1         | 0,671149569   | 1,489980841     | 0,844594595     |

Supplementary Table 1

| Differentially expressed genes_adjacent-skin-XL_ comparing SC-Keloid vs. (SC-Myel, SC-Nonmyel) |             |              |       |       |           |               |                 |                 |
|------------------------------------------------------------------------------------------------|-------------|--------------|-------|-------|-----------|---------------|-----------------|-----------------|
| gene                                                                                           | p_val       | avg_log2FC   | pct.1 | pct.2 | p_val_adj | Foldchange_UP | Foldchange_DOWN | Ratio_pct1_pct2 |
| FAR1                                                                                           | 0,428423523 | -0,575390696 | 0,094 | 0,133 | 1         | 0,671104485   | 1,490080937     | 0,706766917     |
| CYP7B1                                                                                         | 0,327050001 | -0,576092861 | 0,094 | 0,148 | 1         | 0,670777936   | 1,490806341     | 0,635135135     |
| LSM14A                                                                                         | 0,598509491 | -0,576576214 | 0,344 | 0,23  | 1         | 0,670553239   | 1,491305897     | 1,495652174     |
| ARID4A                                                                                         | 0,733675065 | -0,577789633 | 0,156 | 0,156 | 1         | 0,669989489   | 1,492560729     | 1               |
| KMT2A                                                                                          | 0,367014331 | -0,577980978 | 0,562 | 0,332 | 1         | 0,669900634   | 1,492758701     | 1,692771084     |
| TARDBP                                                                                         | 0,576684612 | -0,578071989 | 0,188 | 0,199 | 1         | 0,669858375   | 1,492852873     | 0,944723618     |
| H2BC21                                                                                         | 0,19837126  | -0,578215754 | 0,031 | 0,098 | 1         | 0,669791627   | 1,493001644     | 0,316326531     |
| INTS10                                                                                         | 0,511429095 | -0,579573211 | 0,25  | 0,164 | 1         | 0,669161705   | 1,494407096     | 1,524390244     |
| VPS37B                                                                                         | 0,70704765  | -0,580075693 | 0,25  | 0,184 | 1         | 0,66892868    | 1,49492768      | 1,358695652     |
| CDKN1B                                                                                         | 0,583331073 | -0,580181352 | 0,188 | 0,199 | 1         | 0,668879692   | 1,495037168     | 0,944723618     |
| IFIT2                                                                                          | 0,771038875 | -0,580533583 | 0,094 | 0,102 | 1         | 0,668716406   | 1,495402223     | 0,921568627     |
| RUBCN                                                                                          | 0,189930437 | -0,580549439 | 0,062 | 0,137 | 1         | 0,668709056   | 1,495418659     | 0,452554745     |
| MAPK1                                                                                          | 0,414206269 | -0,581247271 | 0,344 | 0,215 | 1         | 0,66838568    | 1,496142168     | 1,6             |
| ZNF644                                                                                         | 0,798298705 | -0,582018994 | 0,344 | 0,289 | 1         | 0,668028244   | 1,496942695     | 1,190311419     |
| PTPRA                                                                                          | 0,236011314 | -0,582278011 | 0,375 | 0,211 | 1         | 0,667908319   | 1,497211475     | 1,777251185     |
| KSR1                                                                                           | 0,078384714 | -0,583256424 | 0     | 0,09  | 1         | 0,667455508   | 1,498227205     | 0               |
| HIPK3                                                                                          | 0,302084682 | -0,583938836 | 0,469 | 0,273 | 1         | 0,667139868   | 1,498936052     | 1,717948718     |
| TUBB2B                                                                                         | 0,9102215   | -0,584124541 | 0,531 | 0,43  | 1         | 0,667053999   | 1,499129009     | 1,234883721     |
| DOCK7                                                                                          | 0,088935428 | -0,584308377 | 0,438 | 0,211 | 1         | 0,666969005   | 1,499320048     | 2,075829384     |
| PAG1                                                                                           | 0,087669454 | -0,584331879 | 0,031 | 0,133 | 1         | 0,66695814    | 1,499344473     | 0,233082707     |
| NEU1                                                                                           | 0,309264374 | -0,584426243 | 0,281 | 0,164 | 1         | 0,666914516   | 1,499442546     | 1,713414634     |
| FYN                                                                                            | 0,80210583  | -0,584671583 | 0,312 | 0,27  | 1         | 0,666801113   | 1,499697557     | 1,155555556     |
| NAV2                                                                                           | 0,848801983 | -0,58472823  | 0,156 | 0,148 | 1         | 0,666774932   | 1,499756443     | 1,054054054     |
| PCDH10                                                                                         | 0,337841113 | -0,584850179 | 0,125 | 0,188 | 1         | 0,666718572   | 1,499883222     | 0,664893617     |
| USP53                                                                                          | 0,899977466 | -0,584926999 | 0,469 | 0,348 | 1         | 0,666683072   | 1,499963089     | 1,347701149     |
| CFD                                                                                            | 0,344592621 | -0,587517065 | 0,031 | 0,074 | 1         | 0,665487252   | 1,502658386     | 0,418918919     |
| ATOH8                                                                                          | 0,054716322 | -0,588400034 | 0     | 0,105 | 1         | 0,66508008    | 1,503578336     | 0               |
| NUDT4                                                                                          | 0,014587152 | -0,588683509 | 0,562 | 0,242 | 1         | 0,664949411   | 1,503873804     | 2,32231405      |
| ARF6                                                                                           | 0,461326013 | -0,588837869 | 0,531 | 0,324 | 1         | 0,664878269   | 1,504034717     | 1,638888889     |
| STIP1                                                                                          | 0,874412152 | -0,58892577  | 0,438 | 0,312 | 1         | 0,664837761   | 1,504126359     | 1,403846154     |

Supplementary Table 1

| Differentially expressed genes_adjacent-skin-XL_comparing SC-Keloid vs. (SC-Myel, SC-Nonmyel) |             |              |       |       |           |               |                 |                 |
|-----------------------------------------------------------------------------------------------|-------------|--------------|-------|-------|-----------|---------------|-----------------|-----------------|
| gene                                                                                          | p_val       | avg_log2FC   | pct.1 | pct.2 | p_val_adj | Foldchange_UP | Foldchange_DOWN | Ratio_pct1_pct2 |
| LITAF                                                                                         | 0,764312379 | -0,589833405 | 0,438 | 0,352 | 1         | 0,664419626   | 1,50507294      | 1,244318182     |
| MRGPRF                                                                                        | 0,031765882 | -0,590077649 | 0     | 0,129 | 1         | 0,664307152   | 1,505327765     | 0               |
| TTC21B                                                                                        | 0,276181391 | -0,590894074 | 0,062 | 0,121 | 1         | 0,663931325   | 1,506179875     | 0,512396694     |
| NEK1                                                                                          | 0,189930437 | -0,591067119 | 0,062 | 0,137 | 1         | 0,663851694   | 1,506360546     | 0,452554745     |
| SP100                                                                                         | 0,331669544 | -0,591690921 | 0,406 | 0,234 | 1         | 0,663564715   | 1,507012017     | 1,735042735     |
| IRF2BPL                                                                                       | 0,389151804 | -0,591970919 | 0,281 | 0,172 | 1         | 0,663435943   | 1,507304526     | 1,63372093      |
| HTRA1                                                                                         | 0,424065451 | -0,592165699 | 0,562 | 0,328 | 1         | 0,663346378   | 1,507508042     | 1,713414634     |
| PCF11                                                                                         | 0,61519101  | -0,594079329 | 0,281 | 0,273 | 1         | 0,662467081   | 1,509508969     | 1,029304029     |
| ARHGEF16                                                                                      | 0,045682874 | -0,594206032 | 0     | 0,113 | 1         | 0,662408903   | 1,509641546     | 0               |
| BNIP3L                                                                                        | 0,558819534 | -0,595434137 | 0,281 | 0,277 | 1         | 0,661845262   | 1,510927186     | 1,014440433     |
| MBNL1                                                                                         | 0,676253127 | -0,596176508 | 0,625 | 0,484 | 1         | 0,661504782   | 1,511704868     | 1,291322314     |
| NAA16                                                                                         | 0,065500116 | -0,596347307 | 0     | 0,098 | 1         | 0,661426472   | 1,511883848     | 0               |
| PLSCR1                                                                                        | 0,346885347 | -0,596483148 | 0,125 | 0,176 | 1         | 0,661364197   | 1,51202621      | 0,710227273     |
| BAZ2A                                                                                         | 0,227194215 | -0,597226691 | 0,125 | 0,191 | 1         | 0,661023427   | 1,512805686     | 0,654450262     |
| SHPRH                                                                                         | 0,927665952 | -0,600003022 | 0,156 | 0,141 | 1         | 0,659752574   | 1,515719741     | 1,106382979     |
| ATP2B4                                                                                        | 0,822100351 | -0,600004106 | 0,312 | 0,27  | 1         | 0,659752078   | 1,515720881     | 1,155555556     |
| STON1                                                                                         | 0,312631271 | -0,600806957 | 0,094 | 0,148 | 1         | 0,659385032   | 1,516564604     | 0,635135135     |
| IFNGR2                                                                                        | 0,84684372  | -0,601658471 | 0,688 | 0,453 | 1         | 0,658995962   | 1,517459982     | 1,518763797     |
| AC007952.4                                                                                    | 0,915013818 | -0,601881079 | 0,125 | 0,105 | 1         | 0,658894286   | 1,517694145     | 1,19047619      |
| NOP58                                                                                         | 0,911607561 | -0,601938177 | 0,156 | 0,129 | 1         | 0,658868209   | 1,517754212     | 1,209302326     |
| ATM                                                                                           | 0,118585846 | -0,60222515  | 0,344 | 0,172 | 1         | 0,658737164   | 1,518056145     | 2               |
| SESN3                                                                                         | 0,642128591 | -0,602464987 | 0,25  | 0,176 | 1         | 0,658627663   | 1,518308532     | 1,420454545     |
| MX1                                                                                           | 0,177040152 | -0,603458725 | 0,094 | 0,18  | 1         | 0,658174152   | 1,519354713     | 0,522222222     |
| COL27A1                                                                                       | 0,862675664 | -0,60347826  | 0,281 | 0,254 | 1         | 0,65816524    | 1,519375287     | 1,106299213     |
| DYRK1A                                                                                        | 0,556088893 | -0,604185129 | 0,125 | 0,148 | 1         | 0,657842842   | 1,520119908     | 0,844594595     |
| MAGI1                                                                                         | 0,325081758 | -0,604293276 | 0,125 | 0,18  | 1         | 0,657793531   | 1,520233863     | 0,694444444     |
| SH3D19                                                                                        | 0,699543015 | -0,605518328 | 0,312 | 0,281 | 1         | 0,657235208   | 1,521525305     | 1,110320285     |
| THRA                                                                                          | 0,768954653 | -0,606004941 | 0,188 | 0,18  | 1         | 0,657013563   | 1,522038594     | 1,044444444     |
| ELF2                                                                                          | 0,698599064 | -0,606255138 | 0,188 | 0,137 | 1         | 0,656899632   | 1,522302574     | 1,372262774     |
| IRF2                                                                                          | 0,427947953 | -0,606299326 | 0,125 | 0,16  | 1         | 0,656879512   | 1,522349201     | 0,78125         |

Supplementary Table 1

| Differentially expressed genes_adjacent-skin-XL_comparing SC-Keloid vs. (SC-Myel, SC-Nonmyel) |             |              |       |       |           |               |                 |                 |
|-----------------------------------------------------------------------------------------------|-------------|--------------|-------|-------|-----------|---------------|-----------------|-----------------|
| gene                                                                                          | p_val       | avg_log2FC   | pct.1 | pct.2 | p_val_adj | Foldchange_UP | Foldchange_DOWN | Ratio_pct1_pct2 |
| AKR1C1                                                                                        | 0,755689148 | -0,606666017 | 0,062 | 0,047 | 1         | 0,656712574   | 1,522736186     | 1,319148936     |
| CD59                                                                                          | 0,370177778 | -0,607045986 | 0,969 | 0,809 | 1         | 0,656539635   | 1,523137289     | 1,197775031     |
| SPAG9                                                                                         | 0,543313878 | -0,607067088 | 0,625 | 0,375 | 1         | 0,656530032   | 1,523159568     | 1,666666667     |
| L1CAM                                                                                         | 0,37324344  | -0,607681497 | 0,906 | 0,652 | 1         | 0,656250492   | 1,523808382     | 1,389570552     |
| KLHL21                                                                                        | 0,71468524  | -0,608737828 | 0,125 | 0,133 | 1         | 0,655770165   | 1,524924513     | 0,939849624     |
| CADM4                                                                                         | 0,200355408 | -0,609534304 | 0,438 | 0,469 | 1         | 0,655408231   | 1,525766619     | 0,933901919     |
| TMEM123                                                                                       | 0,921931644 | -0,610217151 | 0,375 | 0,297 | 1         | 0,655098091   | 1,526488955     | 1,262626263     |
| SEPTIN10                                                                                      | 0,741468474 | -0,610860974 | 0,5   | 0,328 | 1         | 0,654805809   | 1,527170324     | 1,524390244     |
| CNBP                                                                                          | 0,624285586 | -0,611778833 | 0,688 | 0,477 | 1         | 0,654389347   | 1,528142237     | 1,442348008     |
| DIP2B                                                                                         | 0,775368776 | -0,612640385 | 0,375 | 0,27  | 1         | 0,653998674   | 1,529055089     | 1,388888889     |
| WDR74                                                                                         | 0,507127635 | -0,612771256 | 0,156 | 0,102 | 1         | 0,65393935    | 1,5291938       | 1,529411765     |
| MYO15B                                                                                        | 0,243695697 | -0,612913253 | 0,062 | 0,133 | 1         | 0,65387499    | 1,529344318     | 0,466165414     |
| ATP9B                                                                                         | 0,10388942  | -0,612913949 | 0,031 | 0,125 | 1         | 0,653874674   | 1,529345056     | 0,248           |
| ERBB2                                                                                         | 0,155166548 | -0,613425793 | 0,438 | 0,23  | 1         | 0,653642732   | 1,529887738     | 1,904347826     |
| AUTS2                                                                                         | 0,659211148 | -0,613680057 | 0,125 | 0,137 | 1         | 0,653527542   | 1,530157393     | 0,912408759     |
| SPHK1                                                                                         | 0,838254212 | -0,61427677  | 0,5   | 0,336 | 1         | 0,653257293   | 1,530790412     | 1,488095238     |
| EIF1B                                                                                         | 0,892198632 | -0,6143419   | 0,625 | 0,449 | 1         | 0,653227802   | 1,53085952      | 1,391982183     |
| ZFAS1                                                                                         | 0,602714118 | -0,614466488 | 0,969 | 0,605 | 1         | 0,653171393   | 1,530991728     | 1,601652893     |
| SLC25A36                                                                                      | 0,69409843  | -0,614979978 | 0,219 | 0,207 | 1         | 0,652938955   | 1,531536742     | 1,057971014     |
| PHF10                                                                                         | 0,938454639 | -0,615872687 | 0,219 | 0,176 | 1         | 0,652535055   | 1,532484718     | 1,244318182     |
| KLHL24                                                                                        | 0,918500285 | -0,616555988 | 0,188 | 0,164 | 1         | 0,65222607    | 1,533210717     | 1,146341463     |
| RB1CC1                                                                                        | 0,658940148 | -0,618850235 | 0,312 | 0,215 | 1         | 0,651189691   | 1,535650847     | 1,451162791     |
| DHH                                                                                           | 0,189930437 | -0,618922623 | 0,062 | 0,137 | 1         | 0,651157018   | 1,535727901     | 0,452554745     |
| SH3BP2                                                                                        | 0,353309248 | -0,6194439   | 0,344 | 0,207 | 1         | 0,650921783   | 1,536282892     | 1,661835749     |
| LZTS2                                                                                         | 0,541420238 | -0,620113591 | 0,125 | 0,148 | 1         | 0,650619699   | 1,536996192     | 0,844594595     |
| GPCPD1                                                                                        | 0,138332372 | -0,620155959 | 0,031 | 0,113 | 1         | 0,650600592   | 1,53704133      | 0,274336283     |
| ITGAV                                                                                         | 0,438290863 | -0,620272615 | 0,594 | 0,344 | 1         | 0,650547987   | 1,53716562      | 1,726744186     |
| GPC4                                                                                          | 0,078384714 | -0,620537934 | 0     | 0,09  | 1         | 0,650428359   | 1,537448339     | 0               |
| THUMPD3-AS1                                                                                   | 0,984779541 | -0,621012858 | 0,188 | 0,164 | 1         | 0,650214278   | 1,537954538     | 1,146341463     |
| STOM                                                                                          | 0,789751879 | -0,621818635 | 0,312 | 0,273 | 1         | 0,649851221   | 1,53881376      | 1,142857143     |

Supplementary Table 1

| Differentially expressed genes_adjacent-skin-XL_comparing SC-Keloid vs. (SC-Myel, SC-Nonmyel) |             |              |       |       |           |               |                 |                 |
|-----------------------------------------------------------------------------------------------|-------------|--------------|-------|-------|-----------|---------------|-----------------|-----------------|
| gene                                                                                          | p_val       | avg_log2FC   | pct.1 | pct.2 | p_val_adj | Foldchange_UP | Foldchange_DOWN | Ratio_pct1_pct2 |
| HDAC7                                                                                         | 0,382784766 | -0,622568964 | 0,094 | 0,137 | 1         | 0,649513328   | 1,539614287     | 0,686131387     |
| TMED7                                                                                         | 0,154809432 | -0,623044315 | 0,438 | 0,227 | 1         | 0,649299357   | 1,540121655     | 1,929515419     |
| RAB40B                                                                                        | 0,382784766 | -0,62511509  | 0,094 | 0,137 | 1         | 0,648368052   | 1,54233386      | 0,686131387     |
| ZNF638                                                                                        | 0,75124878  | -0,626299991 | 0,406 | 0,281 | 1         | 0,647835759   | 1,543601115     | 1,444839858     |
| FBXO11                                                                                        | 0,521878142 | -0,627299262 | 0,312 | 0,203 | 1         | 0,647387196   | 1,544670648     | 1,536945813     |
| CRK                                                                                           | 0,81875474  | -0,627905672 | 0,25  | 0,223 | 1         | 0,647115136   | 1,545320058     | 1,121076233     |
| DNTTIP2                                                                                       | 0,177396377 | -0,627994307 | 0,094 | 0,172 | 1         | 0,647075381   | 1,545415001     | 0,546511628     |
| EGR3                                                                                          | 0,865226568 | -0,628629065 | 0,25  | 0,227 | 1         | 0,646790742   | 1,546095104     | 1,101321586     |
| INSR                                                                                          | 0,137206058 | -0,629160402 | 0,031 | 0,113 | 1         | 0,646552577   | 1,546664626     | 0,274336283     |
| CLEC14A                                                                                       | 0,065500116 | -0,630091878 | 0     | 0,098 | 1         | 0,646135265   | 1,547663553     | 0               |
| RORB                                                                                          | 0,078496882 | -0,630995184 | 0,031 | 0,137 | 1         | 0,645730831   | 1,548632886     | 0,226277372     |
| NIPBL                                                                                         | 0,707188953 | -0,631019904 | 0,344 | 0,242 | 1         | 0,645719766   | 1,548659422     | 1,421487603     |
| CKB                                                                                           | 0,859329737 | -0,631054206 | 0,5   | 0,383 | 1         | 0,645704414   | 1,548696243     | 1,305483029     |
| HMGB2                                                                                         | 0,566311275 | -0,63111964  | 0,25  | 0,266 | 1         | 0,645675128   | 1,548766487     | 0,939849624     |
| LPIN1                                                                                         | 0,806521651 | -0,631687122 | 0,125 | 0,125 | 1         | 0,645421203   | 1,549375812     | 1               |
| KMT2C                                                                                         | 0,671602961 | -0,632350026 | 0,281 | 0,262 | 1         | 0,645124706   | 1,550087898     | 1,072519084     |
| GCLM                                                                                          | 0,32791849  | -0,632563009 | 0,188 | 0,109 | 1         | 0,645029474   | 1,550316753     | 1,724770642     |
| GIT1                                                                                          | 0,983758836 | -0,632646566 | 0,25  | 0,211 | 1         | 0,644992117   | 1,550406545     | 1,184834123     |
| HLA-DRB1                                                                                      | 0,314221703 | -0,63323962  | 0,031 | 0,078 | 1         | 0,644727033   | 1,551044007     | 0,397435897     |
| NPEPPS                                                                                        | 0,638567716 | -0,634045134 | 0,344 | 0,23  | 1         | 0,644367156   | 1,551910258     | 1,495652174     |
| NR3C1                                                                                         | 0,957983132 | -0,634247681 | 0,625 | 0,441 | 1         | 0,644276697   | 1,552128154     | 1,41723356      |
| RNF169                                                                                        | 0,775527841 | -0,635700183 | 0,25  | 0,188 | 1         | 0,643628367   | 1,55369162      | 1,329787234     |
| BBS5                                                                                          | 0,19837126  | -0,63613824  | 0,031 | 0,098 | 1         | 0,643432967   | 1,554163451     | 0,316326531     |
| AK5                                                                                           | 0,041730427 | -0,636607201 | 0     | 0,117 | 1         | 0,643223847   | 1,554668728     | 0               |
| NMT1                                                                                          | 0,541417165 | -0,636715326 | 0,281 | 0,191 | 1         | 0,643175641   | 1,554785249     | 1,471204188     |
| MAG                                                                                           | 0,08574604  | -0,636964282 | 0     | 0,086 | 1         | 0,643064662   | 1,555053572     | 0               |
| KAT2B                                                                                         | 0,355687038 | -0,637666258 | 0,062 | 0,109 | 1         | 0,642751841   | 1,555810402     | 0,568807339     |
| MBD2                                                                                          | 0,429427742 | -0,63842768  | 0,375 | 0,23  | 1         | 0,642412701   | 1,55663174      | 1,630434783     |
| ATP8A1                                                                                        | 0,050000177 | -0,639263575 | 0     | 0,109 | 1         | 0,642040595   | 1,557533912     | 0               |
| LACTB                                                                                         | 0,251919686 | -0,639943849 | 0,094 | 0,156 | 1         | 0,641737925   | 1,558268509     | 0,602564103     |

Supplementary Table 1

| Differentially expressed genes_adjacent-skin-XL_comparing SC-Keloid vs. (SC-Myel, SC-Nonmyel) |             |              |       |       |           |               |                 |                 |
|-----------------------------------------------------------------------------------------------|-------------|--------------|-------|-------|-----------|---------------|-----------------|-----------------|
| gene                                                                                          | p_val       | avg_log2FC   | pct.1 | pct.2 | p_val_adj | Foldchange_UP | Foldchange_DOWN | Ratio_pct1_pct2 |
| MLXIP                                                                                         | 0,405500634 | -0,640278854 | 0,375 | 0,23  | 1         | 0,641588926   | 1,558630393     | 1,630434783     |
| PPP2CB                                                                                        | 0,828245535 | -0,640562494 | 0,656 | 0,449 | 1         | 0,6414628     | 1,558936856     | 1,461024499     |
| DCAF8                                                                                         | 0,82197282  | -0,641265112 | 0,188 | 0,176 | 1         | 0,641150472   | 1,559696271     | 1,068181818     |
| CELF1                                                                                         | 0,915192996 | -0,643126872 | 0,312 | 0,254 | 1         | 0,640323618   | 1,561710317     | 1,228346457     |
| RAB8B                                                                                         | 0,444667251 | -0,643687085 | 0,344 | 0,211 | 1         | 0,640075022   | 1,562316863     | 1,630331754     |
| ICAM1                                                                                         | 0,238418073 | -0,646909102 | 0,031 | 0,09  | 1         | 0,638647117   | 1,565809934     | 0,344444444     |
| ANKRD28                                                                                       | 0,427947953 | -0,64730192  | 0,125 | 0,16  | 1         | 0,638473249   | 1,566236333     | 0,78125         |
| HIPK2                                                                                         | 0,413936113 | -0,647737815 | 0,125 | 0,168 | 1         | 0,63828037    | 1,566709626     | 0,744047619     |
| FOXN2                                                                                         | 0,384875137 | -0,647905873 | 0,094 | 0,137 | 1         | 0,638206022   | 1,566892141     | 0,686131387     |
| AKAP9                                                                                         | 0,814480554 | -0,647962802 | 0,406 | 0,293 | 1         | 0,638180839   | 1,566953971     | 1,385665529     |
| CHD1                                                                                          | 0,666879428 | -0,648571809 | 0,312 | 0,289 | 1         | 0,6379115     | 1,567615571     | 1,079584775     |
| COBL                                                                                          | 0,75872397  | -0,648678237 | 0,438 | 0,301 | 1         | 0,637864442   | 1,567731219     | 1,455149502     |
| CAHM                                                                                          | 0,2285881   | -0,649804366 | 0,062 | 0,129 | 1         | 0,637366737   | 1,568955426     | 0,480620155     |
| SRGN                                                                                          | 0,150480606 | -0,651122972 | 0,031 | 0,109 | 1         | 0,636784457   | 1,570390088     | 0,28440367      |
| ZSWIM8                                                                                        | 0,453137599 | -0,651835338 | 0,062 | 0,098 | 1         | 0,636470107   | 1,571165698     | 0,632653061     |
| KLF6                                                                                          | 0,31355846  | -0,65189151  | 0,906 | 0,773 | 1         | 0,636445326   | 1,571226873     | 1,172056921     |
| ANTXR2                                                                                        | 0,307333706 | -0,653236786 | 0,094 | 0,148 | 1         | 0,635852134   | 1,572692685     | 0,635135135     |
| MRPS24                                                                                        | 0,072634989 | -0,653441702 | 0,656 | 0,328 | 1         | 0,635761826   | 1,572916081     | 2               |
| LINC00472                                                                                     | 0,145730596 | -0,653462839 | 0,062 | 0,148 | 1         | 0,635752511   | 1,572939127     | 0,418918919     |
| LENG8                                                                                         | 0,989447626 | -0,653846414 | 0,219 | 0,184 | 1         | 0,635583504   | 1,573357385     | 1,190217391     |
| ARMCX1                                                                                        | 0,074893791 | -0,653953485 | 0,062 | 0,18  | 1         | 0,635536335   | 1,573474158     | 0,344444444     |
| VEZF1                                                                                         | 0,372432709 | -0,653976849 | 0,5   | 0,289 | 1         | 0,635526043   | 1,573499641     | 1,730103806     |
| MDM4                                                                                          | 0,998932805 | -0,65399363  | 0,438 | 0,324 | 1         | 0,635518651   | 1,573517943     | 1,351851852     |
| EIF5                                                                                          | 0,496471528 | -0,654965407 | 0,531 | 0,441 | 1         | 0,635090719   | 1,574578197     | 1,204081633     |
| HNRNPC                                                                                        | 0,322341005 | -0,656095244 | 0,844 | 0,594 | 1         | 0,634593547   | 1,5758118       | 1,420875421     |
| TTYH2                                                                                         | 0,086206764 | -0,656369403 | 0,031 | 0,133 | 1         | 0,634472965   | 1,576111285     | 0,233082707     |
| APLP2                                                                                         | 0,54519988  | -0,657275921 | 0,688 | 0,5   | 1         | 0,634074419   | 1,577101946     | 1,376           |
| BPTF                                                                                          | 0,877091832 | -0,657684195 | 0,469 | 0,324 | 1         | 0,633895005   | 1,57754832      | 1,447530864     |
| TMPRSS5                                                                                       | 0,045682874 | -0,657965484 | 0     | 0,113 | 1         | 0,633771424   | 1,577855931     | 0               |
| EGR2                                                                                          | 0,790895329 | -0,658880671 | 0,094 | 0,102 | 1         | 0,633369512   | 1,578857177     | 0,921568627     |

Supplementary Table 1

| Differentially expressed genes_adjacent-skin-XL_comparing SC-Keloid vs. (SC-Myel, SC-Nonmyel) |             |              |       |       |           |               |                 |                 |
|-----------------------------------------------------------------------------------------------|-------------|--------------|-------|-------|-----------|---------------|-----------------|-----------------|
| gene                                                                                          | p_val       | avg_log2FC   | pct.1 | pct.2 | p_val_adj | Foldchange_UP | Foldchange_DOWN | Ratio_pct1_pct2 |
| CASKIN2                                                                                       | 0,248051582 | -0,658896719 | 0,062 | 0,125 | 1         | 0,633362467   | 1,578874739     | 0,496           |
| SDC2                                                                                          | 0,564559422 | -0,658898343 | 0,156 | 0,172 | 1         | 0,633361754   | 1,578876516     | 0,906976744     |
| HEATR5A                                                                                       | 0,512526612 | -0,660116303 | 0,156 | 0,176 | 1         | 0,632827279   | 1,580210007     | 0,886363636     |
| NFAT5                                                                                         | 0,495477494 | -0,661826145 | 0,188 | 0,207 | 1         | 0,632077715   | 1,582083938     | 0,90821256      |
| HSPA9                                                                                         | 0,914697862 | -0,662354063 | 0,594 | 0,391 | 1         | 0,631846464   | 1,582662969     | 1,519181586     |
| MTUS1                                                                                         | 0,673955066 | -0,663589018 | 0,219 | 0,211 | 1         | 0,631305831   | 1,584018317     | 1,037914692     |
| CCDC126                                                                                       | 0,861530298 | -0,664164166 | 0,188 | 0,148 | 1         | 0,631054203   | 1,584649931     | 1,27027027      |
| UPF2                                                                                          | 0,728981998 | -0,664651336 | 0,312 | 0,273 | 1         | 0,630841145   | 1,585185126     | 1,142857143     |
| CORO1C                                                                                        | 0,683925113 | -0,664956322 | 0,375 | 0,258 | 1         | 0,630707799   | 1,585520271     | 1,453488372     |
| AMOTL2                                                                                        | 0,356657717 | -0,665457381 | 0,094 | 0,141 | 1         | 0,630488787   | 1,586071029     | 0,666666667     |
| FOXJ3                                                                                         | 0,779766547 | -0,665799352 | 0,219 | 0,199 | 1         | 0,630339357   | 1,58644703      | 1,100502513     |
| FGF2                                                                                          | 0,506319067 | -0,667138344 | 0,406 | 0,277 | 1         | 0,629754598   | 1,587920125     | 1,465703971     |
| PPP2R2B                                                                                       | 0,116282551 | -0,667524993 | 0,062 | 0,16  | 1         | 0,629585844   | 1,588345752     | 0,3875          |
| ZBTB7A                                                                                        | 0,863911019 | -0,668117625 | 0,406 | 0,309 | 1         | 0,629327275   | 1,588998348     | 1,313915858     |
| MKNK2                                                                                         | 0,227823267 | -0,668157166 | 0,094 | 0,164 | 1         | 0,629310026   | 1,5890419       | 0,573170732     |
| SRGAP1                                                                                        | 0,254938178 | -0,66815773  | 0,094 | 0,156 | 1         | 0,62930978    | 1,589042521     | 0,602564103     |
| FOXN3                                                                                         | 0,277642838 | -0,668539038 | 0,094 | 0,152 | 1         | 0,629143474   | 1,589462564     | 0,618421053     |
| FRYL                                                                                          | 0,643920142 | -0,669188782 | 0,219 | 0,219 | 1         | 0,628860192   | 1,590178569     | 1               |
| ITSN1                                                                                         | 0,158518263 | -0,669316484 | 0,062 | 0,145 | 1         | 0,62880453    | 1,590319333     | 0,427586207     |
| EMP1                                                                                          | 0,121368453 | -0,669614165 | 0,875 | 0,461 | 1         | 0,628674798   | 1,590647508     | 1,898047722     |
| CFLAR                                                                                         | 0,142451599 | -0,669750051 | 0,094 | 0,184 | 1         | 0,628615587   | 1,590797335     | 0,510869565     |
| INO80D                                                                                        | 0,106159347 | -0,670422104 | 0,062 | 0,168 | 1         | 0,628322825   | 1,591538552     | 0,369047619     |
| RASD1                                                                                         | 0,970129378 | -0,671208699 | 0,156 | 0,137 | 1         | 0,627980341   | 1,592406537     | 1,138686131     |
| HNRNPH2                                                                                       | 0,561120066 | -0,671941916 | 0,281 | 0,27  | 1         | 0,627661265   | 1,593216047     | 1,040740741     |
| RBM43                                                                                         | 0,454181181 | -0,67239534  | 0,094 | 0,129 | 1         | 0,627464029   | 1,593716857     | 0,728682171     |
| PROSER2                                                                                       | 0,021993198 | -0,672932255 | 0     | 0,145 | 1         | 0,627230555   | 1,594310087     | 0               |
| S100A2                                                                                        | 0,236273078 | -0,673158726 | 0,156 | 0,227 | 1         | 0,627132101   | 1,594560378     | 0,68722467      |
| DOK6                                                                                          | 0,024121703 | -0,67347707  | 0     | 0,141 | 1         | 0,626993734   | 1,594912271     | 0               |
| RAB21                                                                                         | 0,791451263 | -0,673986559 | 0,375 | 0,305 | 1         | 0,62677235    | 1,595475615     | 1,229508197     |
| SMIM5                                                                                         | 0,323879795 | -0,674113092 | 0,344 | 0,199 | 1         | 0,62671738    | 1,595615554     | 1,728643216     |

Supplementary Table 1

| Differentially expressed genes_adjacent-skin-XL_ comparing SC-Keloid vs. (SC-Myel, SC-Nonmyel) |             |              |       |       |           |               |                 |                 |
|------------------------------------------------------------------------------------------------|-------------|--------------|-------|-------|-----------|---------------|-----------------|-----------------|
| gene                                                                                           | p_val       | avg_log2FC   | pct.1 | pct.2 | p_val_adj | Foldchange_UP | Foldchange_DOWN | Ratio_pct1_pct2 |
| UACA                                                                                           | 0,64821776  | -0,674156111 | 0,25  | 0,242 | 1         | 0,626698693   | 1,595663134     | 1,033057851     |
| SORBS3                                                                                         | 0,347958339 | -0,675175179 | 0,156 | 0,199 | 1         | 0,626256172   | 1,596790651     | 0,783919598     |
| IGSF11                                                                                         | 0,021993198 | -0,675330931 | 0     | 0,145 | 1         | 0,626188565   | 1,596963049     | 0               |
| H3-3B                                                                                          | 0,001377561 | -0,678473223 | 0,969 | 0,957 | 1         | 0,624826166   | 1,600445138     | 1,012539185     |
| GAS6                                                                                           | 0,173563398 | -0,679422758 | 0,062 | 0,141 | 1         | 0,624415062   | 1,601498845     | 0,439716312     |
| RBM6                                                                                           | 0,119127359 | -0,679425676 | 0,5   | 0,25  | 1         | 0,624413799   | 1,601502085     | 2               |
| CTSF                                                                                           | 0,792249622 | -0,679956056 | 0,281 | 0,242 | 1         | 0,624184287   | 1,602090955     | 1,161157025     |
| SELENOM                                                                                        | 0,142710778 | -0,680589626 | 0,812 | 0,645 | 1         | 0,623910232   | 1,602794679     | 1,258914729     |
| CTTNBP2NL                                                                                      | 0,360215275 | -0,681070558 | 0,125 | 0,168 | 1         | 0,623702282   | 1,603329071     | 0,744047619     |
| ATP1A1                                                                                         | 0,859703745 | -0,681728919 | 0,5   | 0,344 | 1         | 0,623417726   | 1,604060903     | 1,453488372     |
| TOB1                                                                                           | 0,529583804 | -0,683643445 | 0,375 | 0,34  | 1         | 0,622590969   | 1,606190982     | 1,102941176     |
| MSL1                                                                                           | 0,722930988 | -0,684164033 | 0,281 | 0,203 | 1         | 0,622366351   | 1,606770672     | 1,384236453     |
| LRCH3                                                                                          | 0,353488187 | -0,686265181 | 0,125 | 0,172 | 1         | 0,621460594   | 1,609112485     | 0,726744186     |
| ATP13A3                                                                                        | 0,515145183 | -0,686666131 | 0,188 | 0,203 | 1         | 0,621287903   | 1,609559747     | 0,926108374     |
| KCNK12                                                                                         | 0,071654957 | -0,687005229 | 0     | 0,094 | 1         | 0,621141889   | 1,609938111     | 0               |
| TRIM8                                                                                          | 0,739656961 | -0,687570278 | 0,375 | 0,258 | 1         | 0,62089866    | 1,610568786     | 1,453488372     |
| HNRNPDL                                                                                        | 0,045348966 | -0,689481507 | 0,906 | 0,73  | 1         | 0,62007666    | 1,612703822     | 1,24109589      |
| VWA1                                                                                           | 0,157721486 | -0,689515302 | 0,812 | 0,707 | 1         | 0,620062136   | 1,612741599     | 1,148514851     |
| UBE2R2                                                                                         | 0,856979723 | -0,68978983  | 0,562 | 0,371 | 1         | 0,619944156   | 1,613048514     | 1,514824798     |
| TP53BP2                                                                                        | 0,298637683 | -0,690635031 | 0,094 | 0,148 | 1         | 0,619581069   | 1,613993793     | 0,635135135     |
| ZBTB38                                                                                         | 0,316848011 | -0,691161345 | 0,469 | 0,266 | 1         | 0,619355079   | 1,614582707     | 1,763157895     |
| NPTX2                                                                                          | 0,764452551 | -0,692309592 | 0,094 | 0,102 | 1         | 0,618862328   | 1,615868272     | 0,921568627     |
| GRIK2                                                                                          | 0,840275242 | -0,692490398 | 0,156 | 0,148 | 1         | 0,618784773   | 1,616070794     | 1,054054054     |
| ASPH                                                                                           | 0,794573296 | -0,692579354 | 0,531 | 0,348 | 1         | 0,618746621   | 1,616170443     | 1,525862069     |
| SFPQ                                                                                           | 0,294095328 | -0,692755358 | 0,688 | 0,559 | 1         | 0,61867114    | 1,616367622     | 1,230769231     |
| PPP1R9A                                                                                        | 0,384590169 | -0,694817551 | 0,125 | 0,168 | 1         | 0,617787442   | 1,618679715     | 0,744047619     |
| ZBTB10                                                                                         | 0,464267129 | -0,69517441  | 0,156 | 0,184 | 1         | 0,617634647   | 1,619080154     | 0,847826087     |
| MYLIP                                                                                          | 0,086206887 | -0,695439067 | 0,031 | 0,133 | 1         | 0,617521355   | 1,619377196     | 0,233082707     |
| SAP30                                                                                          | 0,622996508 | -0,695583773 | 0,281 | 0,258 | 1         | 0,617459419   | 1,619539632     | 1,089147287     |
| ZBTB43                                                                                         | 0,13585239  | -0,69626128  | 0,062 | 0,152 | 1         | 0,617169521   | 1,620300365     | 0,407894737     |



Supplementary Table 1

| Differentially expressed genes_adjacent-skin-XL_comparing SC-Keloid vs. (SC-Myel, SC-Nonmyel) |             |              |       |       |           |               |                 |                 |
|-----------------------------------------------------------------------------------------------|-------------|--------------|-------|-------|-----------|---------------|-----------------|-----------------|
| gene                                                                                          | p_val       | avg_log2FC   | pct.1 | pct.2 | p_val_adj | Foldchange_UP | Foldchange_DOWN | Ratio_pct1_pct2 |
| ARID4B                                                                                        | 0,66771677  | -0,696497658 | 0,406 | 0,336 | 1         | 0,617068409   | 1,620565866     | 1,208333333     |
| RPS6KA5                                                                                       | 0,057628491 | -0,696867074 | 0,031 | 0,152 | 1         | 0,616910423   | 1,62098088      | 0,203947368     |
| GNAI1                                                                                         | 0,013784176 | -0,697124659 | 0     | 0,164 | 1         | 0,616800287   | 1,621270323     | 0               |
| GADD45G                                                                                       | 0,436655983 | -0,697355872 | 0,188 | 0,117 | 1         | 0,616701443   | 1,621530176     | 1,606837607     |
| MAP2K3                                                                                        | 0,201268578 | -0,698193304 | 0,125 | 0,195 | 1         | 0,616343574   | 1,622471689     | 0,641025641     |
| NCOA1                                                                                         | 0,493774078 | -0,698460307 | 0,094 | 0,125 | 1         | 0,616229517   | 1,622771991     | 0,752           |
| LAMC1                                                                                         | 0,812864729 | -0,698606698 | 0,531 | 0,391 | 1         | 0,616166991   | 1,622936663     | 1,358056266     |
| HIVEP2                                                                                        | 0,464246717 | -0,699162279 | 0,125 | 0,156 | 1         | 0,615929751   | 1,623561776     | 0,801282051     |
| RBM39                                                                                         | 0,074220177 | -0,699173846 | 0,781 | 0,664 | 1         | 0,615924813   | 1,623574792     | 1,176204819     |
| PGRMC1                                                                                        | 0,828309537 | -0,699369922 | 0,719 | 0,484 | 1         | 0,615841108   | 1,623795467     | 1,48553719      |
| RNF213                                                                                        | 0,520207072 | -0,70107434  | 0,406 | 0,258 | 1         | 0,615113976   | 1,625714973     | 1,573643411     |
| TNRC18                                                                                        | 0,611764646 | -0,702935    | 0,094 | 0,113 | 1         | 0,614321168   | 1,627813028     | 0,831858407     |
| DAAM2                                                                                         | 0,21437948  | -0,70379198  | 0,094 | 0,164 | 1         | 0,613956361   | 1,628780258     | 0,573170732     |
| CDC42SE1                                                                                      | 0,924457555 | -0,704127246 | 0,469 | 0,34  | 1         | 0,613813701   | 1,629158811     | 1,379411765     |
| MYO9A                                                                                         | 0,414999889 | -0,704936126 | 0,094 | 0,133 | 1         | 0,613469649   | 1,630072493     | 0,706766917     |
| DEDD2                                                                                         | 0,231069397 | -0,705409241 | 0,094 | 0,16  | 1         | 0,613268502   | 1,630607144     | 0,5875          |
| YY1                                                                                           | 0,863516207 | -0,706375767 | 0,625 | 0,422 | 1         | 0,612857783   | 1,631699927     | 1,481042654     |
| EFNA1                                                                                         | 0,054716441 | -0,706565848 | 0     | 0,105 | 1         | 0,612777042   | 1,631914924     | 0               |
| SERPINB2                                                                                      | 0,314221703 | -0,706692827 | 0,031 | 0,078 | 1         | 0,612723111   | 1,632058564     | 0,397435897     |
| TRIM2                                                                                         | 0,104758015 | -0,708667913 | 0,031 | 0,125 | 1         | 0,611884851   | 1,634294423     | 0,248           |
| IP6K2                                                                                         | 0,069302474 | -0,708851041 | 0,406 | 0,191 | 1         | 0,611807187   | 1,634501886     | 2,12565445      |
| PELI1                                                                                         | 0,58497922  | -0,710024716 | 0,25  | 0,246 | 1         | 0,611309666   | 1,635832142     | 1,016260163     |
| INF2                                                                                          | 0,754571239 | -0,710078442 | 0,375 | 0,309 | 1         | 0,611286901   | 1,635893061     | 1,213592233     |
| LRRFIP2                                                                                       | 0,567778851 | -0,711692142 | 0,469 | 0,301 | 1         | 0,61060354    | 1,637723883     | 1,558139535     |
| RNASE4                                                                                        | 0,112311725 | -0,712173324 | 0,094 | 0,191 | 1         | 0,610399919   | 1,638270204     | 0,492146597     |
| HSPB1                                                                                         | 0,418452272 | -0,712188668 | 0,969 | 0,758 | 1         | 0,610393427   | 1,638287628     | 1,278364116     |
| PTBP2                                                                                         | 0,396332035 | -0,712287728 | 0,188 | 0,223 | 1         | 0,610351517   | 1,638400122     | 0,843049327     |
| OAT                                                                                           | 0,400891593 | -0,713109602 | 0,344 | 0,332 | 1         | 0,610003911   | 1,639333752     | 1,036144578     |
| DICER1                                                                                        | 0,872732285 | -0,713870742 | 0,219 | 0,195 | 1         | 0,609682169   | 1,640198863     | 1,123076923     |
| SAMD4B                                                                                        | 0,381980579 | -0,714166779 | 0,281 | 0,289 | 1         | 0,609557077   | 1,640535461     | 0,972318339     |

Supplementary Table 1

| Differentially expressed genes_adjacent-skin-XL_ comparing SC-Keloid vs. (SC-Myel, SC-Nonmyel) |             |              |       |       |             |               |                 |                 |
|------------------------------------------------------------------------------------------------|-------------|--------------|-------|-------|-------------|---------------|-----------------|-----------------|
| gene                                                                                           | p_val       | avg_log2FC   | pct.1 | pct.2 | p_val_adj   | Foldchange_UP | Foldchange_DOWN | Ratio_pct1_pct2 |
| IRF2BP2                                                                                        | 0,799941487 | -0,714374707 | 0,5   | 0,34  | 1           | 0,609469231   | 1,64077192      | 1,470588235     |
| FGF7                                                                                           | 0,028989337 | -0,714474518 | 0     | 0,133 | 1           | 0,609427067   | 1,640885439     | 0               |
| MALAT1                                                                                         | 3,06731E-05 | -0,715658378 | 1     | 0,996 | 0,647232879 | 0,608927183   | 1,642232485     | 1,004016064     |
| PLCB1                                                                                          | 0,828430167 | -0,716472777 | 0,25  | 0,188 | 1           | 0,608583541   | 1,643159783     | 1,329787234     |
| DEPDC7                                                                                         | 0,132006288 | -0,718113963 | 0,062 | 0,152 | 1           | 0,60789162    | 1,645030078     | 0,407894737     |
| EIF4A2                                                                                         | 0,312636926 | -0,718874341 | 0,875 | 0,594 | 1           | 0,607571313   | 1,645897326     | 1,473063973     |
| SOX10                                                                                          | 0,465907978 | -0,720438295 | 0,812 | 0,457 | 1           | 0,606913032   | 1,647682529     | 1,776805252     |
| ARHGEF26                                                                                       | 0,910986121 | -0,72101166  | 0,312 | 0,258 | 1           | 0,606671877   | 1,648337492     | 1,209302326     |
| PTX3                                                                                           | 0,009120578 | -0,721587665 | 0,281 | 0,098 | 1           | 0,606429708   | 1,648995732     | 2,867346939     |
| SLC22A17                                                                                       | 0,960889512 | -0,722067331 | 0,562 | 0,398 | 1           | 0,606228116   | 1,64954408      | 1,412060302     |
| KLF13                                                                                          | 0,787534153 | -0,724227738 | 0,344 | 0,289 | 1           | 0,605320981   | 1,65201609      | 1,190311419     |
| DIO2                                                                                           | 0,065500116 | -0,724660181 | 0     | 0,098 | 1           | 0,605139565   | 1,652511351     | 0               |
| SERTAD1                                                                                        | 0,767122349 | -0,726879488 | 0,531 | 0,398 | 1           | 0,604209391   | 1,655055376     | 1,334170854     |
| TMEM245                                                                                        | 0,353796011 | -0,727897276 | 0,156 | 0,195 | 1           | 0,603783285   | 1,656223391     | 0,8             |
| PHF13                                                                                          | 0,434202776 | -0,729279923 | 0,125 | 0,16  | 1           | 0,60320491    | 1,65781144      | 0,78125         |
| GPM6B                                                                                          | 0,000330269 | -0,729874982 | 1     | 0,926 | 1           | 0,602956161   | 1,658495367     | 1,079913607     |
| MIDEAS                                                                                         | 0,535149581 | -0,730388075 | 0,25  | 0,254 | 1           | 0,602741759   | 1,659085314     | 0,984251969     |
| BAIAP2                                                                                         | 0,520630523 | -0,731268152 | 0,188 | 0,199 | 1           | 0,602374185   | 1,660097703     | 0,944723618     |
| PFKFB3                                                                                         | 0,12036165  | -0,73204648  | 0,062 | 0,156 | 1           | 0,602049294   | 1,66099356      | 0,397435897     |
| NUFIP2                                                                                         | 0,867579695 | -0,733335643 | 0,438 | 0,309 | 1           | 0,601511555   | 1,662478454     | 1,417475728     |
| GNAQ                                                                                           | 0,963076802 | -0,734248146 | 0,25  | 0,199 | 1           | 0,60113122    | 1,663530303     | 1,256281407     |
| FOXD3                                                                                          | 0,920892644 | -0,734739517 | 0,688 | 0,492 | 1           | 0,600926514   | 1,664096985     | 1,398373984     |
| STK32A                                                                                         | 0,030461633 | -0,735017267 | 0,031 | 0,176 | 1           | 0,600810834   | 1,66441739      | 0,176136364     |
| SRSF5                                                                                          | 0,965010947 | -0,735171219 | 0,781 | 0,508 | 1           | 0,600746724   | 1,664595012     | 1,537401575     |
| HNRNPH3                                                                                        | 0,414440417 | -0,735297116 | 0,594 | 0,473 | 1           | 0,600694302   | 1,664740279     | 1,255813953     |
| SPEN                                                                                           | 0,383902296 | -0,736466222 | 0,219 | 0,242 | 1           | 0,600207719   | 1,66608987      | 0,904958678     |
| IPO7                                                                                           | 0,998818743 | -0,736595828 | 0,312 | 0,242 | 1           | 0,600153801   | 1,666239551     | 1,289256198     |
| PTGDS                                                                                          | 0,19837126  | -0,738444586 | 0,031 | 0,098 | 1           | 0,59938522    | 1,668376141     | 0,316326531     |
| CNTN1                                                                                          | 0,041730427 | -0,739328293 | 0     | 0,117 | 1           | 0,599018185   | 1,6693984       | 0               |
| UBE2D3                                                                                         | 0,503682383 | -0,740228312 | 0,656 | 0,473 | 1           | 0,598644607   | 1,670440172     | 1,386892178     |

Supplementary Table 1

| Differentially expressed genes_adjacent-skin-XL_ comparing SC-Keloid vs. (SC-Myel, SC-Nonmyel) |             |              |       |       |           |               |                 |                 |
|------------------------------------------------------------------------------------------------|-------------|--------------|-------|-------|-----------|---------------|-----------------|-----------------|
| gene                                                                                           | p_val       | avg_log2FC   | pct.1 | pct.2 | p_val_adj | Foldchange_UP | Foldchange_DOWN | Ratio_pct1_pct2 |
| ADAMTS9-AS2                                                                                    | 0,038111671 | -0,742139877 | 0     | 0,121 | 1         | 0,597851931   | 1,672654964     | 0               |
| ZMAT1                                                                                          | 0,684759296 | -0,742950327 | 0,156 | 0,16  | 1         | 0,597516175   | 1,673594861     | 0,975           |
| ATN1                                                                                           | 0,109401783 | -0,74384166  | 0,25  | 0,344 | 1         | 0,597147129   | 1,674629169     | 0,726744186     |
| SGK1                                                                                           | 0,749244773 | -0,743991424 | 0,125 | 0,133 | 1         | 0,597085143   | 1,67480302      | 0,939849624     |
| PLAAT3                                                                                         | 0,863015651 | -0,7444272   | 0,375 | 0,297 | 1         | 0,596904816   | 1,675308982     | 1,262626263     |
| ZNF462                                                                                         | 0,921952026 | -0,744555914 | 0,188 | 0,152 | 1         | 0,596851564   | 1,675458455     | 1,236842105     |
| PPP1R18                                                                                        | 0,964067721 | -0,745613446 | 0,406 | 0,305 | 1         | 0,596414217   | 1,67668706      | 1,331147541     |
| CAMK2D                                                                                         | 0,664432664 | -0,745714666 | 0,344 | 0,23  | 1         | 0,596372374   | 1,6768047       | 1,495652174     |
| HSP90AB1                                                                                       | 0,119655413 | -0,745793838 | 0,969 | 0,832 | 1         | 0,596339647   | 1,676896723     | 1,164663462     |
| GFRA3                                                                                          | 0,897038612 | -0,745913366 | 0,75  | 0,48  | 1         | 0,596290242   | 1,67703566      | 1,5625          |
| HLA-E                                                                                          | 0,402826691 | -0,746785888 | 0,719 | 0,531 | 1         | 0,595929724   | 1,678050214     | 1,354048964     |
| PACS2                                                                                          | 0,491361021 | -0,747849678 | 0,125 | 0,152 | 1         | 0,595490469   | 1,679288003     | 0,822368421     |
| UGCG                                                                                           | 0,412460131 | -0,748906237 | 0,344 | 0,215 | 1         | 0,595054521   | 1,680518281     | 1,6             |
| PPTC7                                                                                          | 0,092299385 | -0,750119735 | 0,062 | 0,168 | 1         | 0,594554211   | 1,681932415     | 0,369047619     |
| DUSP6                                                                                          | 0,523236119 | -0,750447049 | 0,125 | 0,156 | 1         | 0,594419336   | 1,682314049     | 0,801282051     |
| GJC3                                                                                           | 0,078384714 | -0,750997386 | 0     | 0,09  | 1         | 0,594192629   | 1,682955915     | 0               |
| TAB2                                                                                           | 0,200105361 | -0,752379498 | 0,125 | 0,195 | 1         | 0,593623661   | 1,684568971     | 0,641025641     |
| ZMYM5                                                                                          | 0,297710641 | -0,753238449 | 0,156 | 0,207 | 1         | 0,593270335   | 1,685572227     | 0,753623188     |
| PLPP3                                                                                          | 0,428736122 | -0,753855192 | 0,188 | 0,211 | 1         | 0,59301677    | 1,686292953     | 0,890995261     |
| MKLN1                                                                                          | 0,876663892 | -0,754791241 | 0,188 | 0,172 | 1         | 0,592632134   | 1,687387408     | 1,093023256     |
| PHLDB1                                                                                         | 0,73708174  | -0,755505632 | 0,469 | 0,32  | 1         | 0,592338748   | 1,688223173     | 1,465625        |
| XBP1                                                                                           | 0,461846537 | -0,756621939 | 0,438 | 0,281 | 1         | 0,591880594   | 1,689529966     | 1,558718861     |
| FNBP4                                                                                          | 0,738086752 | -0,75671973  | 0,281 | 0,25  | 1         | 0,591840476   | 1,689644492     | 1,124           |
| GBP1                                                                                           | 0,144763586 | -0,757370593 | 0,438 | 0,227 | 1         | 0,591573531   | 1,690406937     | 1,929515419     |
| BGN                                                                                            | 0,137205524 | -0,757491973 | 0,125 | 0,23  | 1         | 0,591523761   | 1,690549164     | 0,543478261     |
| MAN2A2                                                                                         | 0,07228439  | -0,758286037 | 0,156 | 0,289 | 1         | 0,591198274   | 1,691479904     | 0,539792388     |
| PPP4R2                                                                                         | 0,937976735 | -0,759300876 | 0,406 | 0,305 | 1         | 0,590782552   | 1,692670165     | 1,331147541     |
| PREX1                                                                                          | 0,054716441 | -0,759729349 | 0     | 0,105 | 1         | 0,590607119   | 1,693172954     | 0               |
| NR2F1                                                                                          | 0,731305749 | -0,760686839 | 0,219 | 0,16  | 1         | 0,590215274   | 1,694297054     | 1,36875         |
| FGFBP2                                                                                         | 0,054716441 | -0,761031404 | 0     | 0,105 | 1         | 0,590074327   | 1,694701759     | 0               |

Supplementary Table 1

| Differentially expressed genes_adjacent-skin-XL_comparing SC-Keloid vs. (SC-Myel, SC-Nonmyel) |             |              |       |       |           |               |                 |                 |
|-----------------------------------------------------------------------------------------------|-------------|--------------|-------|-------|-----------|---------------|-----------------|-----------------|
| gene                                                                                          | p_val       | avg_log2FC   | pct.1 | pct.2 | p_val_adj | Foldchange_UP | Foldchange_DOWN | Ratio_pct1_pct2 |
| GOLGA8A                                                                                       | 0,529345739 | -0,764237638 | 0,125 | 0,148 | 1         | 0,588764407   | 1,698472239     | 0,844594595     |
| ZRANB2                                                                                        | 0,747475225 | -0,764443571 | 0,375 | 0,305 | 1         | 0,588680371   | 1,698714699     | 1,229508197     |
| KMT2E                                                                                         | 0,831376578 | -0,764663642 | 0,625 | 0,457 | 1         | 0,58859058    | 1,698973844     | 1,36761488      |
| TMEM132B                                                                                      | 0,038111838 | -0,768787417 | 0     | 0,121 | 1         | 0,586910565   | 1,703837109     | 0               |
| UBR3                                                                                          | 0,078496882 | -0,769741454 | 0,031 | 0,137 | 1         | 0,586522576   | 1,704964208     | 0,226277372     |
| PRDM16                                                                                        | 0,109682674 | -0,771412611 | 0,062 | 0,16  | 1         | 0,585843567   | 1,706940311     | 0,3875          |
| ARL13B                                                                                        | 0,622936899 | -0,771461171 | 0,219 | 0,215 | 1         | 0,585823848   | 1,706997767     | 1,018604651     |
| NORAD                                                                                         | 0,733068525 | -0,771637315 | 0,562 | 0,41  | 1         | 0,585752327   | 1,707206193     | 1,370731707     |
| GAB1                                                                                          | 0,609762878 | -0,771643207 | 0,25  | 0,246 | 1         | 0,585749934   | 1,707213166     | 1,016260163     |
| ADGRL3                                                                                        | 0,016635187 | -0,772160576 | 0     | 0,156 | 1         | 0,585539915   | 1,707825504     | 0               |
| ATP1B2                                                                                        | 0,095797588 | -0,773229897 | 0,062 | 0,168 | 1         | 0,585106075   | 1,709091808     | 0,369047619     |
| SRSF11                                                                                        | 0,099550522 | -0,77512838  | 0,656 | 0,562 | 1         | 0,584336624   | 1,71134233      | 1,167259786     |
| OGA                                                                                           | 0,60416098  | -0,775286529 | 0,344 | 0,305 | 1         | 0,584272572   | 1,711529939     | 1,127868852     |
| TSPAN15                                                                                       | 0,637426397 | -0,775635118 | 0,438 | 0,355 | 1         | 0,584131415   | 1,711943535     | 1,233802817     |
| NPNT                                                                                          | 0,026447767 | -0,776966053 | 0     | 0,137 | 1         | 0,583592783   | 1,713523589     | 0               |
| ARHGEF7                                                                                       | 0,764260824 | -0,778267793 | 0,25  | 0,223 | 1         | 0,583066446   | 1,715070395     | 1,121076233     |
| SETD5                                                                                         | 0,35496866  | -0,779286367 | 0,25  | 0,273 | 1         | 0,582654934   | 1,7162817       | 0,915750916     |
| RSRC2                                                                                         | 0,709651769 | -0,779373944 | 0,781 | 0,445 | 1         | 0,582619566   | 1,716385887     | 1,75505618      |
| PNRC2                                                                                         | 0,562656319 | -0,780134142 | 0,25  | 0,242 | 1         | 0,582312647   | 1,717290539     | 1,033057851     |
| SMC5                                                                                          | 0,800582307 | -0,782624987 | 0,375 | 0,297 | 1         | 0,581308139   | 1,720258041     | 1,262626263     |
| SRSF3                                                                                         | 0,06174927  | -0,782787617 | 0,781 | 0,676 | 1         | 0,581242614   | 1,720451971     | 1,155325444     |
| PLEKHA4                                                                                       | 0,585766432 | -0,783589661 | 0,719 | 0,426 | 1         | 0,580919571   | 1,721408695     | 1,687793427     |
| RIOK3                                                                                         | 0,409820795 | -0,786503157 | 0,25  | 0,262 | 1         | 0,579747598   | 1,724888561     | 0,954198473     |
| VGLL4                                                                                         | 0,995246059 | -0,787365868 | 0,75  | 0,496 | 1         | 0,579401021   | 1,725920327     | 1,512096774     |
| CITED2                                                                                        | 0,557828792 | -0,787733523 | 0,219 | 0,148 | 1         | 0,579253386   | 1,726360216     | 1,47972973      |
| TXN                                                                                           | 0,637446779 | -0,790432079 | 0,688 | 0,578 | 1         | 0,578170907   | 1,729592388     | 1,190311419     |
| CCN1                                                                                          | 0,755531983 | -0,790498168 | 0,844 | 0,613 | 1         | 0,578144422   | 1,729671621     | 1,376835237     |
| RYBP                                                                                          | 0,540963733 | -0,790532099 | 0,344 | 0,32  | 1         | 0,578130825   | 1,729712303     | 1,075           |
| SRRM1                                                                                         | 0,285112879 | -0,790613073 | 0,656 | 0,508 | 1         | 0,578098377   | 1,729809388     | 1,291338583     |
| CDKN2AIP                                                                                      | 0,189930272 | -0,790781995 | 0,062 | 0,137 | 1         | 0,578030692   | 1,730011941     | 0,452554745     |

Supplementary Table 1

| Differentially expressed genes_adjacent-skin-XL_comparing SC-Keloid vs. (SC-Myel, SC-Nonmyel) |             |              |       |       |           |               |                 |                 |
|-----------------------------------------------------------------------------------------------|-------------|--------------|-------|-------|-----------|---------------|-----------------|-----------------|
| gene                                                                                          | p_val       | avg_log2FC   | pct.1 | pct.2 | p_val_adj | Foldchange_UP | Foldchange_DOWN | Ratio_pct1_pct2 |
| DCUN1D3                                                                                       | 0,305722739 | -0,791408264 | 0,156 | 0,203 | 1         | 0,577779826   | 1,730763096     | 0,768472906     |
| MYOT                                                                                          | 0,61252846  | -0,79176852  | 0,438 | 0,301 | 1         | 0,577635566   | 1,73119534      | 1,455149502     |
| HNRNPU                                                                                        | 0,219334289 | -0,792570328 | 0,781 | 0,605 | 1         | 0,577314622   | 1,732157755     | 1,290909091     |
| PPP2R2A                                                                                       | 0,26710439  | -0,796517608 | 0,281 | 0,309 | 1         | 0,575737222   | 1,736903507     | 0,909385113     |
| CRYL1                                                                                         | 0,11399702  | -0,797767517 | 0,125 | 0,223 | 1         | 0,575238636   | 1,738408961     | 0,560538117     |
| ELMO1                                                                                         | 0,034798894 | -0,79834708  | 0     | 0,125 | 1         | 0,575007596   | 1,73910746      | 0               |
| NFKB2                                                                                         | 0,099894919 | -0,798636471 | 0,062 | 0,164 | 1         | 0,574892267   | 1,739456344     | 0,37804878      |
| CNOT4                                                                                         | 0,708770049 | -0,799509815 | 0,344 | 0,234 | 1         | 0,574544357   | 1,740509653     | 1,47008547      |
| CAMSAP2                                                                                       | 0,228167587 | -0,800927637 | 0,188 | 0,242 | 1         | 0,573979996   | 1,742220996     | 0,776859504     |
| RXRG                                                                                          | 0,086802846 | -0,803470986 | 0,125 | 0,234 | 1         | 0,572969009   | 1,745295092     | 0,534188034     |
| GEM                                                                                           | 0,836432406 | -0,805342248 | 0,188 | 0,18  | 1         | 0,572226316   | 1,747560314     | 1,044444444     |
| MLLT6                                                                                         | 0,018098341 | -0,805846913 | 0,031 | 0,203 | 1         | 0,572026182   | 1,74817173      | 0,15270936      |
| PER3                                                                                          | 0,986081827 | -0,806107319 | 0,25  | 0,203 | 1         | 0,571922941   | 1,748487302     | 1,231527094     |
| S1PR3                                                                                         | 0,78964859  | -0,806872476 | 0,219 | 0,199 | 1         | 0,571619693   | 1,749414887     | 1,100502513     |
| APCDD1                                                                                        | 0,324707387 | -0,809622019 | 0,094 | 0,145 | 1         | 0,570531315   | 1,752752168     | 0,648275862     |
| LHPP                                                                                          | 0,068343209 | -0,809979368 | 0,062 | 0,18  | 1         | 0,570390015   | 1,75318637      | 0,344444444     |
| RALGDS                                                                                        | 0,725641486 | -0,811144679 | 0,156 | 0,156 | 1         | 0,569929479   | 1,754603047     | 1               |
| KIF21A                                                                                        | 0,06206671  | -0,811201494 | 0,062 | 0,184 | 1         | 0,569907035   | 1,754672147     | 0,336956522     |
| ARHGAP15                                                                                      | 0,053282509 | -0,812766637 | 0,062 | 0,203 | 1         | 0,569289092   | 1,756576779     | 0,305418719     |
| KAT6A                                                                                         | 0,164165532 | -0,814013683 | 0,156 | 0,242 | 1         | 0,568797219   | 1,758095796     | 0,644628099     |
| MAFG                                                                                          | 0,575103826 | -0,81436969  | 0,438 | 0,281 | 1         | 0,568656877   | 1,758529687     | 1,558718861     |
| TAMALIN                                                                                       | 0,553211263 | -0,814539524 | 0,219 | 0,219 | 1         | 0,568589939   | 1,758736712     | 1               |
| MAP3K4                                                                                        | 0,090929152 | -0,817446937 | 0,062 | 0,168 | 1         | 0,567445233   | 1,762284607     | 0,369047619     |
| HPS5                                                                                          | 0,075210866 | -0,817937764 | 0,062 | 0,176 | 1         | 0,567252213   | 1,762884265     | 0,352272727     |
| MBOAT2                                                                                        | 0,293579025 | -0,819693493 | 0,219 | 0,258 | 1         | 0,566562298   | 1,765030965     | 0,848837209     |
| NKAIN3                                                                                        | 0,01254006  | -0,819820349 | 0     | 0,168 | 1         | 0,566512483   | 1,76518617      | 0               |
| DDX5                                                                                          | 0,03640077  | -0,821682086 | 1     | 0,793 | 1         | 0,565781894   | 1,767465538     | 1,261034048     |
| FAM181B                                                                                       | 0,324707219 | -0,822716265 | 0,094 | 0,145 | 1         | 0,565376465   | 1,768732979     | 0,648275862     |
| ASH1L                                                                                         | 0,82986017  | -0,824137786 | 0,344 | 0,277 | 1         | 0,564819661   | 1,770476612     | 1,241877256     |
| PHACTR4                                                                                       | 0,870309538 | -0,824215552 | 0,344 | 0,273 | 1         | 0,564789216   | 1,770572049     | 1,26007326      |

Supplementary Table 1

| Differentially expressed genes_adjacent-skin-XL_ comparing SC-Keloid vs. (SC-Myel, SC-Nonmyel) |             |              |       |       |           |               |                 |                 |
|------------------------------------------------------------------------------------------------|-------------|--------------|-------|-------|-----------|---------------|-----------------|-----------------|
| gene                                                                                           | p_val       | avg_log2FC   | pct.1 | pct.2 | p_val_adj | Foldchange_UP | Foldchange_DOWN | Ratio_pct1_pct2 |
| FNDC3B                                                                                         | 0,996777288 | -0,825773059 | 0,438 | 0,316 | 1         | 0,564179809   | 1,772484559     | 1,386075949     |
| KCTD11                                                                                         | 0,096946527 | -0,828675597 | 0,094 | 0,199 | 1         | 0,563045885   | 1,776054185     | 0,472361809     |
| NCOA7                                                                                          | 0,090929152 | -0,828946522 | 0,062 | 0,168 | 1         | 0,56294016    | 1,776387743     | 0,369047619     |
| FAM126A                                                                                        | 0,879492191 | -0,836432596 | 0,375 | 0,289 | 1         | 0,560026656   | 1,785629289     | 1,297577855     |
| SCML1                                                                                          | 0,163572054 | -0,83763844  | 0,125 | 0,207 | 1         | 0,559558766   | 1,78712239      | 0,603864734     |
| MAFK                                                                                           | 0,05293496  | -0,837719659 | 0,094 | 0,23  | 1         | 0,559527266   | 1,787223002     | 0,408695652     |
| MT-CO3                                                                                         | 0,035466145 | -0,838894846 | 0,844 | 0,82  | 1         | 0,559071673   | 1,788679427     | 1,029268293     |
| ARHGAP19                                                                                       | 0,024121756 | -0,840443404 | 0     | 0,141 | 1         | 0,558471899   | 1,790600389     | 0               |
| SMG1                                                                                           | 0,707944663 | -0,841628962 | 0,25  | 0,227 | 1         | 0,558013155   | 1,792072448     | 1,101321586     |
| SON                                                                                            | 0,007338614 | -0,841732343 | 0,938 | 0,754 | 1         | 0,55797317    | 1,792200869     | 1,24403183      |
| SECISBP2L                                                                                      | 0,951390724 | -0,842528899 | 0,594 | 0,414 | 1         | 0,557665181   | 1,793190671     | 1,434782609     |
| ZSWIM6                                                                                         | 0,159148124 | -0,843936745 | 0,188 | 0,258 | 1         | 0,557121252   | 1,7949414       | 0,728682171     |
| CHORDC1                                                                                        | 0,531153812 | -0,845908041 | 0,25  | 0,25  | 1         | 0,556360522   | 1,797395682     | 1               |
| DRP2                                                                                           | 0,078384714 | -0,848819576 | 0     | 0,09  | 1         | 0,555238851   | 1,801026709     | 0               |
| SNHG9                                                                                          | 0,572382114 | -0,849264806 | 0,375 | 0,246 | 1         | 0,555067525   | 1,801582608     | 1,524390244     |
| ZBTB16                                                                                         | 0,045682874 | -0,849290444 | 0     | 0,113 | 1         | 0,555057661   | 1,801614625     | 0               |
| NUP153                                                                                         | 0,052320766 | -0,849661428 | 0,062 | 0,191 | 1         | 0,554914949   | 1,802077963     | 0,32460733      |
| DNAJB6                                                                                         | 0,931529644 | -0,84971339  | 0,656 | 0,434 | 1         | 0,554894962   | 1,80214287      | 1,511520737     |
| GOLGA4                                                                                         | 0,811215417 | -0,850741624 | 0,469 | 0,316 | 1         | 0,55449962    | 1,803427747     | 1,484177215     |
| IVNS1ABP                                                                                       | 0,06213286  | -0,851109865 | 0,125 | 0,258 | 1         | 0,554358104   | 1,803888122     | 0,484496124     |
| CLK1                                                                                           | 0,222595783 | -0,852677657 | 0,562 | 0,496 | 1         | 0,553756005   | 1,805849492     | 1,133064516     |
| VASN                                                                                           | 0,150052517 | -0,853323052 | 0,094 | 0,18  | 1         | 0,553508335   | 1,806657526     | 0,522222222     |
| MARCHF5                                                                                        | 0,520630631 | -0,855937383 | 0,188 | 0,199 | 1         | 0,552506222   | 1,809934368     | 0,944723618     |
| JUND                                                                                           | 0,002323049 | -0,856443444 | 1     | 0,922 | 1         | 0,552312451   | 1,810569358     | 1,084598698     |
| SCRN1                                                                                          | 0,281853519 | -0,856851345 | 0,125 | 0,18  | 1         | 0,552156315   | 1,811081343     | 0,694444444     |
| ABLIM1                                                                                         | 0,358606521 | -0,857303649 | 0,281 | 0,301 | 1         | 0,551983234   | 1,81164923      | 0,933554817     |
| MTCO2P12                                                                                       | 0,077128877 | -0,859298936 | 0,812 | 0,777 | 1         | 0,551220353   | 1,814156524     | 1,045045045     |
| NRBP2                                                                                          | 0,715557304 | -0,861395174 | 0,344 | 0,297 | 1         | 0,550420011   | 1,816794412     | 1,158249158     |
| GFRA1                                                                                          | 0,636959502 | -0,862316997 | 0,312 | 0,273 | 1         | 0,550068427   | 1,81795564      | 1,142857143     |
| NID2                                                                                           | 0,020369679 | -0,862818049 | 0,031 | 0,191 | 1         | 0,54987742    | 1,818587131     | 0,162303665     |

Supplementary Table 1

| Differentially expressed genes_adjacent-skin-XL_comparing SC-Keloid vs. (SC-Myel, SC-Nonmyel) |             |              |       |       |           |               |                 |                 |
|-----------------------------------------------------------------------------------------------|-------------|--------------|-------|-------|-----------|---------------|-----------------|-----------------|
| gene                                                                                          | p_val       | avg_log2FC   | pct.1 | pct.2 | p_val_adj | Foldchange_UP | Foldchange_DOWN | Ratio_pct1_pct2 |
| PAXBP1                                                                                        | 0,107695716 | -0,862872318 | 0,219 | 0,312 | 1         | 0,549856736   | 1,818655541     | 0,701923077     |
| ADAMTS8                                                                                       | 0,01514567  | -0,864095441 | 0     | 0,16  | 1         | 0,549390763   | 1,820198059     | 0               |
| BAG3                                                                                          | 0,186594105 | -0,865313606 | 0,188 | 0,266 | 1         | 0,548927071   | 1,821735624     | 0,706766917     |
| THSD7A                                                                                        | 0,110135177 | -0,866214645 | 0,156 | 0,254 | 1         | 0,548584344   | 1,82287375      | 0,614173228     |
| GJC1                                                                                          | 0,8258646   | -0,8665337   | 0,188 | 0,172 | 1         | 0,548463037   | 1,823276926     | 1,093023256     |
| AASS                                                                                          | 0,337299246 | -0,867424409 | 0,156 | 0,203 | 1         | 0,548124524   | 1,824402951     | 0,768472906     |
| MT-ND1                                                                                        | 0,005740828 | -0,868101962 | 0,844 | 0,82  | 1         | 0,547867162   | 1,825259972     | 1,029268293     |
| TOM1L2                                                                                        | 0,065525443 | -0,871120959 | 0,094 | 0,215 | 1         | 0,546721888   | 1,829083527     | 0,437209302     |
| DPYSL2                                                                                        | 0,690228765 | -0,871327665 | 0,375 | 0,328 | 1         | 0,546643561   | 1,829345613     | 1,143292683     |
| HNRNPH1                                                                                       | 0,031020966 | -0,872653356 | 0,875 | 0,723 | 1         | 0,546141481   | 1,83102737      | 1,210235131     |
| B4GALNT1                                                                                      | 0,21834609  | -0,875895603 | 0,125 | 0,191 | 1         | 0,544915486   | 1,835146964     | 0,654450262     |
| ZMIZ1                                                                                         | 0,244740217 | -0,876316363 | 0,125 | 0,188 | 1         | 0,544756585   | 1,83568226      | 0,664893617     |
| EDIL3                                                                                         | 0,016384074 | -0,877047155 | 0,031 | 0,203 | 1         | 0,544480711   | 1,836612354     | 0,15270936      |
| SLITRK5                                                                                       | 0,038111838 | -0,878646695 | 0     | 0,121 | 1         | 0,54387737    | 1,838649766     | 0               |
| GJA1                                                                                          | 0,0301917   | -0,880297571 | 0,031 | 0,176 | 1         | 0,543255368   | 1,840754937     | 0,176136364     |
| AZGP1                                                                                         | 0,137205883 | -0,880596837 | 0,031 | 0,113 | 1         | 0,543142689   | 1,841136815     | 0,274336283     |
| WTAP                                                                                          | 0,867699789 | -0,881020012 | 0,531 | 0,359 | 1         | 0,542983396   | 1,84167694      | 1,479108635     |
| MIDN                                                                                          | 0,267041892 | -0,88277714  | 0,219 | 0,281 | 1         | 0,542322473   | 1,843921374     | 0,779359431     |
| MX2                                                                                           | 0,029129106 | -0,883355961 | 0,031 | 0,184 | 1         | 0,542104932   | 1,84466132      | 0,168478261     |
| TXNRD1                                                                                        | 0,724070658 | -0,884432305 | 0,156 | 0,16  | 1         | 0,541700638   | 1,846038069     | 0,975           |
| BCAS1                                                                                         | 0,071654957 | -0,88601864  | 0     | 0,094 | 1         | 0,541105331   | 1,848069022     | 0               |
| HSPE1                                                                                         | 0,085349783 | -0,886122652 | 0,75  | 0,629 | 1         | 0,541066321   | 1,848202264     | 1,192368839     |
| SLC3A2                                                                                        | 0,797175401 | -0,888084896 | 0,625 | 0,434 | 1         | 0,540330904   | 1,850717759     | 1,440092166     |
| CHD2                                                                                          | 0,839210831 | -0,888511098 | 0,375 | 0,297 | 1         | 0,540171303   | 1,851264581     | 1,262626263     |
| MIR99AHG                                                                                      | 0,048905975 | -0,889928468 | 0,031 | 0,156 | 1         | 0,539640874   | 1,853084241     | 0,198717949     |
| TAF5                                                                                          | 0,010365668 | -0,892244857 | 0     | 0,176 | 1         | 0,538775123   | 1,856061941     | 0               |
| CLMN                                                                                          | 0,07764459  | -0,893045156 | 0,094 | 0,215 | 1         | 0,538476334   | 1,85709183      | 0,437209302     |
| C1R                                                                                           | 0,606308094 | -0,893640113 | 0,312 | 0,277 | 1         | 0,538254316   | 1,857857839     | 1,126353791     |
| SEMA4B                                                                                        | 0,048906052 | -0,893738159 | 0,031 | 0,156 | 1         | 0,538217737   | 1,857984104     | 0,198717949     |
| ETNK1                                                                                         | 0,170586877 | -0,895771767 | 0,25  | 0,309 | 1         | 0,537459605   | 1,860604946     | 0,809061489     |

Supplementary Table 1

| Differentially expressed genes_adjacent-skin-XL_ comparing SC-Keloid vs. (SC-Myel, SC-Nonmyel) |             |              |       |       |           |               |                 |                 |
|------------------------------------------------------------------------------------------------|-------------|--------------|-------|-------|-----------|---------------|-----------------|-----------------|
| gene                                                                                           | p_val       | avg_log2FC   | pct.1 | pct.2 | p_val_adj | Foldchange_UP | Foldchange_DOWN | Ratio_pct1_pct2 |
| HSPD1                                                                                          | 0,764102597 | -0,895849695 | 0,688 | 0,473 | 1         | 0,537430575   | 1,86070545      | 1,454545455     |
| ID4                                                                                            | 0,220694814 | -0,896269413 | 0,25  | 0,301 | 1         | 0,537274245   | 1,861246857     | 0,830564784     |
| DNAJA1                                                                                         | 0,142311415 | -0,897186956 | 0,906 | 0,652 | 1         | 0,536932651   | 1,862430973     | 1,389570552     |
| SLC25A25                                                                                       | 0,162901689 | -0,897725073 | 0,156 | 0,23  | 1         | 0,536732416   | 1,863125779     | 0,67826087      |
| TLE1                                                                                           | 0,696643418 | -0,900236064 | 0,594 | 0,418 | 1         | 0,535799053   | 1,866371347     | 1,421052632     |
| BRD4                                                                                           | 0,313957844 | -0,901322553 | 0,344 | 0,348 | 1         | 0,535395696   | 1,867777434     | 0,988505747     |
| LPAR1                                                                                          | 0,124515681 | -0,904227541 | 0,188 | 0,27  | 1         | 0,534318716   | 1,871542151     | 0,696296296     |
| CEP85L                                                                                         | 0,400977845 | -0,904907111 | 0,188 | 0,215 | 1         | 0,534067089   | 1,872423934     | 0,874418605     |
| RERE                                                                                           | 0,154166227 | -0,905653409 | 0,219 | 0,281 | 1         | 0,533790891   | 1,873392779     | 0,779359431     |
| BCLAF1                                                                                         | 0,309930687 | -0,907246767 | 0,375 | 0,352 | 1         | 0,533201681   | 1,875462955     | 1,065340909     |
| ARHGAP5                                                                                        | 0,242222017 | -0,907575883 | 0,344 | 0,355 | 1         | 0,533080057   | 1,875890846     | 0,969014085     |
| FBLN2                                                                                          | 0,204440837 | -0,907833386 | 0,219 | 0,285 | 1         | 0,532984918   | 1,876225699     | 0,768421053     |
| PIK3R1                                                                                         | 0,407099813 | -0,909390564 | 0,562 | 0,457 | 1         | 0,532409949   | 1,878251903     | 1,2297593       |
| UBR5                                                                                           | 0,442734228 | -0,909655902 | 0,219 | 0,23  | 1         | 0,532312038   | 1,87859738      | 0,952173913     |
| EPB41L4A-AS1                                                                                   | 0,374462559 | -0,91039405  | 0,312 | 0,301 | 1         | 0,532039753   | 1,879558801     | 1,03654485      |
| MXI1                                                                                           | 0,102252102 | -0,912394872 | 0,094 | 0,195 | 1         | 0,531302398   | 1,882167302     | 0,482051282     |
| HTATIP2                                                                                        | 0,062957523 | -0,913334549 | 0,125 | 0,246 | 1         | 0,530956455   | 1,883393621     | 0,508130081     |
| CD44                                                                                           | 0,533400398 | -0,914920062 | 0,75  | 0,438 | 1         | 0,530373257   | 1,885464598     | 1,712328767     |
| N4BP2L1                                                                                        | 0,028814689 | -0,916277998 | 0,062 | 0,215 | 1         | 0,529874279   | 1,887240126     | 0,288372093     |
| KCTD12                                                                                         | 0,576894575 | -0,918451629 | 0,375 | 0,32  | 1         | 0,529076547   | 1,890085672     | 1,171875        |
| PPM1K                                                                                          | 0,00941818  | -0,923732529 | 0     | 0,18  | 1         | 0,527143433   | 1,897016897     | 0               |
| ERF                                                                                            | 0,245298456 | -0,924588188 | 0,406 | 0,391 | 1         | 0,526830878   | 1,898142347     | 1,038363171     |
| LIMS2                                                                                          | 0,562237259 | -0,929937203 | 0,156 | 0,172 | 1         | 0,524881188   | 1,905193066     | 0,906976744     |
| SOX8                                                                                           | 0,045413282 | -0,933212528 | 0,094 | 0,242 | 1         | 0,523690911   | 1,909523306     | 0,388429752     |
| STARD9                                                                                         | 0,038357172 | -0,933784861 | 0,062 | 0,211 | 1         | 0,523483199   | 1,910280985     | 0,293838863     |
| SERPINB9                                                                                       | 0,038111671 | -0,935392227 | 0     | 0,121 | 1         | 0,522900289   | 1,912410493     | 0               |
| GATM                                                                                           | 0,408165217 | -0,935441332 | 0,406 | 0,242 | 1         | 0,522882492   | 1,912475587     | 1,67768595      |
| PLEKHA1                                                                                        | 0,963412599 | -0,936614842 | 0,281 | 0,223 | 1         | 0,522457344   | 1,914031857     | 1,260089686     |
| SNHG8                                                                                          | 0,632765497 | -0,939362768 | 0,594 | 0,445 | 1         | 0,521463158   | 1,91768102      | 1,334831461     |
| ANK2                                                                                           | 0,936472656 | -0,940607031 | 0,281 | 0,234 | 1         | 0,521013612   | 1,919335652     | 1,200854701     |



Supplementary Table 1

| Differentially expressed genes_adjacent-skin-XL_comparing SC-Keloid vs. (SC-Myel, SC-Nonmyel) |             |              |       |       |           |               |                 |                 |
|-----------------------------------------------------------------------------------------------|-------------|--------------|-------|-------|-----------|---------------|-----------------|-----------------|
| gene                                                                                          | p_val       | avg_log2FC   | pct.1 | pct.2 | p_val_adj | Foldchange_UP | Foldchange_DOWN | Ratio_pct1_pct2 |
| GRIK3                                                                                         | 0,016635187 | -0,940711794 | 0     | 0,156 | 1         | 0,520975779   | 1,919475032     | 0               |
| MAP4K5                                                                                        | 0,61398632  | -0,941568246 | 0,438 | 0,344 | 1         | 0,520666595   | 1,920614861     | 1,273255814     |
| FADS3                                                                                         | 0,141874315 | -0,944433876 | 0,531 | 0,484 | 1         | 0,51963342    | 1,924433576     | 1,097107438     |
| FOXO3                                                                                         | 0,178072433 | -0,944567851 | 0,188 | 0,254 | 1         | 0,519585166   | 1,924612297     | 0,74015748      |
| PRKCA                                                                                         | 0,542212256 | -0,945340482 | 0,406 | 0,34  | 1         | 0,519306979   | 1,925643292     | 1,194117647     |
| TTYH1                                                                                         | 0,059703471 | -0,945374593 | 0,188 | 0,305 | 1         | 0,5192947     | 1,925688823     | 0,616393443     |
| NFKBIZ                                                                                        | 0,735053311 | -0,945764023 | 0,375 | 0,305 | 1         | 0,519154545   | 1,926208698     | 1,229508197     |
| SYNE1                                                                                         | 0,770265309 | -0,948835192 | 0,312 | 0,266 | 1         | 0,518050559   | 1,930313525     | 1,172932331     |
| RGS11                                                                                         | 0,09743441  | -0,95021914  | 0,156 | 0,254 | 1         | 0,517553841   | 1,932166125     | 0,614173228     |
| DDX3X                                                                                         | 0,223783767 | -0,951247665 | 0,781 | 0,602 | 1         | 0,517184999   | 1,933544093     | 1,297342193     |
| PTPN12                                                                                        | 0,238436492 | -0,951336671 | 0,375 | 0,363 | 1         | 0,517153093   | 1,933663386     | 1,033057851     |
| SFRP1                                                                                         | 0,132959812 | -0,951661851 | 0,062 | 0,152 | 1         | 0,517036541   | 1,934099278     | 0,407894737     |
| PUM1                                                                                          | 0,168691752 | -0,954753053 | 0,156 | 0,234 | 1         | 0,515929894   | 1,938247834     | 0,666666667     |
| TRIP10                                                                                        | 0,044250233 | -0,956013706 | 0,156 | 0,297 | 1         | 0,515479262   | 1,93994225      | 0,525252525     |
| OTUD7B                                                                                        | 0,363446048 | -0,956888033 | 0,25  | 0,262 | 1         | 0,515166957   | 1,941118284     | 0,954198473     |
| LUC7L3                                                                                        | 0,617147851 | -0,958201067 | 0,594 | 0,43  | 1         | 0,514698304   | 1,94288575      | 1,381395349     |
| KLF10                                                                                         | 0,243091552 | -0,959596463 | 0,312 | 0,332 | 1         | 0,51420072    | 1,944765848     | 0,939759036     |
| VAPA                                                                                          | 0,092311085 | -0,960805395 | 0,688 | 0,59  | 1         | 0,513770017   | 1,946396182     | 1,166101695     |
| ASXL1                                                                                         | 0,076945647 | -0,961531566 | 0,281 | 0,359 | 1         | 0,51351148    | 1,947376133     | 0,782729805     |
| DCD                                                                                           | 0,454084099 | -0,961759465 | 0,156 | 0,184 | 1         | 0,513430368   | 1,94768378      | 0,847826087     |
| TCF7L2                                                                                        | 0,059560843 | -0,966681081 | 0,094 | 0,223 | 1         | 0,511681834   | 1,954339463     | 0,421524664     |
| SYNE3                                                                                         | 0,039766082 | -0,96735423  | 0,094 | 0,242 | 1         | 0,511443143   | 1,955251554     | 0,388429752     |
| EMP2                                                                                          | 0,117368323 | -0,970250043 | 0,656 | 0,555 | 1         | 0,510417591   | 1,959180125     | 1,181981982     |
| INTS6                                                                                         | 0,435006104 | -0,970533097 | 0,375 | 0,348 | 1         | 0,510317458   | 1,959564549     | 1,077586207     |
| HBP1                                                                                          | 0,552798543 | -0,976961991 | 0,406 | 0,34  | 1         | 0,508048456   | 1,968316186     | 1,194117647     |
| LRRC4C                                                                                        | 0,056128986 | -0,978862885 | 0,062 | 0,191 | 1         | 0,507379493   | 1,970911347     | 0,32460733      |
| SBSPON                                                                                        | 0,031103374 | -0,980804897 | 0,062 | 0,211 | 1         | 0,506696969   | 1,973566179     | 0,293838863     |
| QKI                                                                                           | 0,000761518 | -0,981209971 | 0,875 | 0,781 | 1         | 0,50655472    | 1,974120386     | 1,120358515     |
| FTH1                                                                                          | 0,055805446 | -0,982930643 | 1     | 0,973 | 1         | 0,505950923   | 1,976476282     | 1,027749229     |
| GPBP1                                                                                         | 0,158601771 | -0,98431859  | 0,75  | 0,594 | 1         | 0,505464407   | 1,978378669     | 1,262626263     |

Supplementary Table 1

| Differentially expressed genes_adjacent-skin-XL_comparing SC-Keloid vs. (SC-Myel, SC-Nonmyel) |             |              |       |       |           |               |                 |                 |
|-----------------------------------------------------------------------------------------------|-------------|--------------|-------|-------|-----------|---------------|-----------------|-----------------|
| gene                                                                                          | p_val       | avg_log2FC   | pct.1 | pct.2 | p_val_adj | Foldchange_UP | Foldchange_DOWN | Ratio_pct1_pct2 |
| VPS13D                                                                                        | 0,090929152 | -0,986725848 | 0,062 | 0,168 | 1         | 0,5046217     | 1,981682516     | 0,369047619     |
| ARHGAP24                                                                                      | 0,159966334 | -0,98835152  | 0,312 | 0,359 | 1         | 0,504053397   | 1,983916794     | 0,86908078      |
| IER2                                                                                          | 0,714654675 | -0,990343107 | 0,719 | 0,512 | 1         | 0,50335805    | 1,986657409     | 1,404296875     |
| DLC1                                                                                          | 0,143224237 | -0,990745315 | 0,469 | 0,469 | 1         | 0,503217739   | 1,987211346     | 1               |
| PCDH9                                                                                         | 0,096496694 | -0,993572037 | 0,125 | 0,242 | 1         | 0,502232733   | 1,991108773     | 0,516528926     |
| ARL5B                                                                                         | 0,14495731  | -0,994768154 | 0,125 | 0,211 | 1         | 0,501816511   | 1,992760256     | 0,592417062     |
| SOX2                                                                                          | 0,891269757 | -0,995097849 | 0,5   | 0,352 | 1         | 0,501701846   | 1,993215708     | 1,420454545     |
| ISG20                                                                                         | 0,011403548 | -0,99512006  | 0     | 0,172 | 1         | 0,501694122   | 1,993246395     | 0               |
| ZNF536                                                                                        | 0,212510708 | -0,996378709 | 0,188 | 0,246 | 1         | 0,50125662    | 1,99498612      | 0,764227642     |
| GADD45A                                                                                       | 0,366304996 | -0,99654937  | 0,406 | 0,254 | 1         | 0,501197329   | 1,995222127     | 1,598425197     |
| C1S                                                                                           | 0,036660749 | -0,99833483  | 0,031 | 0,168 | 1         | 0,500577437   | 1,997692916     | 0,18452381      |
| RHOBTB3                                                                                       | 0,285941193 | -1,002547159 | 0,156 | 0,207 | 1         | 0,499118001   | 2,003534231     | 0,753623188     |
| C1orf198                                                                                      | 0,134977634 | -1,005250662 | 0,562 | 0,512 | 1         | 0,498183567   | 2,007292224     | 1,09765625      |
| ARRDC3                                                                                        | 0,380496983 | -1,006758152 | 0,219 | 0,238 | 1         | 0,49766328    | 2,009390766     | 0,920168067     |
| ANKRD33B                                                                                      | 0,02004569  | -1,007961717 | 0     | 0,148 | 1         | 0,497248279   | 2,011067795     | 0               |
| ABCA8                                                                                         | 0,8414712   | -1,007982159 | 0,281 | 0,234 | 1         | 0,497241233   | 2,011096291     | 1,200854701     |
| PPP1R15B                                                                                      | 0,098189816 | -1,009676039 | 0,25  | 0,32  | 1         | 0,496657761   | 2,013458921     | 0,78125         |
| SERTAD2                                                                                       | 0,164353323 | -1,012212815 | 0,312 | 0,344 | 1         | 0,495785226   | 2,01700242      | 0,906976744     |
| SLC44A1                                                                                       | 0,546832311 | -1,013601003 | 0,375 | 0,328 | 1         | 0,495308401   | 2,018944152     | 1,143292683     |
| RAPGEF2                                                                                       | 0,025604089 | -1,015340595 | 0,062 | 0,219 | 1         | 0,494711522   | 2,021380049     | 0,283105023     |
| FOXO1                                                                                         | 0,027571015 | -1,019276323 | 0,188 | 0,344 | 1         | 0,493363769   | 2,02690198      | 0,546511628     |
| F3                                                                                            | 0,027165086 | -1,021435583 | 0,062 | 0,227 | 1         | 0,492625911   | 2,029937886     | 0,273127753     |
| CTSC                                                                                          | 0,086604386 | -1,022195281 | 0,312 | 0,387 | 1         | 0,492366571   | 2,031007097     | 0,80620155      |
| CD74                                                                                          | 0,248051582 | -1,022495197 | 0,062 | 0,125 | 1         | 0,492264226   | 2,031429359     | 0,496           |
| MAL                                                                                           | 0,006578194 | -1,023737823 | 0,625 | 0,656 | 1         | 0,49184041    | 2,033179829     | 0,952743902     |
| MT-ND4L                                                                                       | 0,446962539 | -1,027545372 | 0,656 | 0,477 | 1         | 0,49054406    | 2,038552868     | 1,375262055     |
| BRD2                                                                                          | 0,155623357 | -1,030808362 | 0,594 | 0,512 | 1         | 0,489435834   | 2,043168747     | 1,16015625      |
| NRP2                                                                                          | 0,201371388 | -1,031591511 | 0,219 | 0,27  | 1         | 0,489170222   | 2,044278156     | 0,811111111     |
| NCMAP                                                                                         | 0,078384714 | -1,032904756 | 0     | 0,09  | 1         | 0,488725147   | 2,046139853     | 0               |
| CMTM5                                                                                         | 0,102731791 | -1,034945603 | 0,281 | 0,34  | 1         | 0,488034282   | 2,049036385     | 0,826470588     |

Supplementary Table 1

| Differentially expressed genes_adjacent-skin-XL_ comparing SC-Keloid vs. (SC-Myel, SC-Nonmyel) |             |              |       |       |           |               |                 |                 |
|------------------------------------------------------------------------------------------------|-------------|--------------|-------|-------|-----------|---------------|-----------------|-----------------|
| gene                                                                                           | p_val       | avg_log2FC   | pct.1 | pct.2 | p_val_adj | Foldchange_UP | Foldchange_DOWN | Ratio_pct1_pct2 |
| NNMT                                                                                           | 0,051387074 | -1,035659866 | 0,031 | 0,164 | 1         | 0,487792721   | 2,050051093     | 0,18902439      |
| SRSF7                                                                                          | 0,495427991 | -1,036374176 | 0,625 | 0,469 | 1         | 0,487551264   | 2,051066369     | 1,332622601     |
| ID2                                                                                            | 0,3148935   | -1,03638128  | 0,188 | 0,238 | 1         | 0,487548863   | 2,051076469     | 0,789915966     |
| FAM102A                                                                                        | 0,013608429 | -1,039137284 | 0,062 | 0,242 | 1         | 0,486618379   | 2,054998419     | 0,256198347     |
| CYLD                                                                                           | 0,279143582 | -1,040045434 | 0,281 | 0,297 | 1         | 0,486312158   | 2,056292411     | 0,946127946     |
| DDX17                                                                                          | 0,140775248 | -1,046570034 | 0,906 | 0,637 | 1         | 0,484117773   | 2,065613069     | 1,422291994     |
| IER5                                                                                           | 0,072729672 | -1,046601132 | 0,469 | 0,238 | 1         | 0,484107338   | 2,065657596     | 1,970588235     |
| TGFBR3                                                                                         | 0,00406764  | -1,048238319 | 0,031 | 0,262 | 1         | 0,483558279   | 2,068003058     | 0,118320611     |
| TRA2B                                                                                          | 0,047453112 | -1,052194555 | 0,594 | 0,535 | 1         | 0,482234056   | 2,07368183      | 1,110280374     |
| KCTD9                                                                                          | 0,093861404 | -1,058286007 | 0,156 | 0,254 | 1         | 0,480202225   | 2,082455992     | 0,614173228     |
| IFITM2                                                                                         | 0,15311344  | -1,062029733 | 0,625 | 0,527 | 1         | 0,478957738   | 2,087866885     | 1,185958254     |
| SLC5A3                                                                                         | 0,022046343 | -1,062604376 | 0,062 | 0,23  | 1         | 0,478767001   | 2,088698672     | 0,269565217     |
| BCL3                                                                                           | 0,087194206 | -1,063780986 | 0,125 | 0,23  | 1         | 0,478376695   | 2,090402835     | 0,543478261     |
| FGFR1                                                                                          | 0,057032565 | -1,063922309 | 0,094 | 0,223 | 1         | 0,478329837   | 2,090607615     | 0,421524664     |
| MLIP                                                                                           | 0,028989337 | -1,065686702 | 0     | 0,133 | 1         | 0,477745205   | 2,093165959     | 0               |
| ZBTB44                                                                                         | 0,056948738 | -1,070464336 | 0,156 | 0,273 | 1         | 0,476165719   | 2,100109185     | 0,571428571     |
| LONRF1                                                                                         | 0,063837771 | -1,071885851 | 0,094 | 0,219 | 1         | 0,475696775   | 2,102179483     | 0,429223744     |
| ARC                                                                                            | 0,78981908  | -1,072871237 | 0,219 | 0,164 | 1         | 0,475371977   | 2,103615798     | 1,335365854     |
| TRA2A                                                                                          | 0,130099628 | -1,080589986 | 0,469 | 0,441 | 1         | 0,472835419   | 2,114900787     | 1,063492063     |
| FOSL2                                                                                          | 0,17416129  | -1,081266539 | 0,25  | 0,305 | 1         | 0,472613734   | 2,115892805     | 0,819672131     |
| PNISR                                                                                          | 0,006151966 | -1,08613737  | 0,75  | 0,676 | 1         | 0,471020785   | 2,123048559     | 1,109467456     |
| ENTPD2                                                                                         | 0,05661993  | -1,087601625 | 0,094 | 0,223 | 1         | 0,470542968   | 2,12520443      | 0,421524664     |
| CYTH3                                                                                          | 0,049701594 | -1,094258858 | 0,125 | 0,254 | 1         | 0,468376677   | 2,135033723     | 0,492125984     |
| PIM3                                                                                           | 0,194372735 | -1,100072699 | 0,25  | 0,305 | 1         | 0,466492988   | 2,143654944     | 0,819672131     |
| PPP1R10                                                                                        | 0,180063683 | -1,100740546 | 0,312 | 0,336 | 1         | 0,466277091   | 2,144647506     | 0,928571429     |
| NEAT1                                                                                          | 0,000105444 | -1,103530347 | 0,906 | 0,898 | 1         | 0,465376302   | 2,148798714     | 1,008908686     |
| SRRM2                                                                                          | 0,043994388 | -1,105846523 | 0,656 | 0,578 | 1         | 0,464629763   | 2,152251276     | 1,134948097     |
| DDIT3                                                                                          | 0,052490891 | -1,106985316 | 0,25  | 0,355 | 1         | 0,464263152   | 2,153950828     | 0,704225352     |
| WAC                                                                                            | 0,145418195 | -1,107180743 | 0,344 | 0,363 | 1         | 0,464200267   | 2,154242622     | 0,947658402     |
| FMNL2                                                                                          | 0,001802033 | -1,10810015  | 0,062 | 0,324 | 1         | 0,463904533   | 2,155615925     | 0,191358025     |

Supplementary Table 1

| Differentially expressed genes_adjacent-skin-XL_comparing SC-Keloid vs. (SC-Myel, SC-Nonmyel) |             |               |       |       |           |               |                 |                 |
|-----------------------------------------------------------------------------------------------|-------------|---------------|-------|-------|-----------|---------------|-----------------|-----------------|
| gene                                                                                          | p_val       | avg_log2FC    | pct.1 | pct.2 | p_val_adj | Foldchange_UP | Foldchange_DOWN | Ratio_pct1_pct2 |
| SKI                                                                                           | 0,20422078  | -1,109882183  | 0,312 | 0,332 | 1         | 0,463331867   | 2,15828021      | 0,939759036     |
| SEMA4C                                                                                        | 0,109682674 | -1,110977736  | 0,062 | 0,16  | 1         | 0,462980156   | 2,159919787     | 0,3875          |
| SAMD4A                                                                                        | 0,083372458 | -1,1111045109 | 0,188 | 0,285 | 1         | 0,462958535   | 2,160020657     | 0,659649123     |
| TEAD1                                                                                         | 0,080248942 | -1,111958987  | 0,312 | 0,383 | 1         | 0,462665366   | 2,161389359     | 0,81462141      |
| RTN4                                                                                          | 0,153276844 | -1,115067617  | 0,688 | 0,543 | 1         | 0,461669517   | 2,166051608     | 1,267034991     |
| TNRC6B                                                                                        | 0,276339621 | -1,116010457  | 0,5   | 0,426 | 1         | 0,461367902   | 2,167467644     | 1,17370892      |
| FNIP2                                                                                         | 0,267786202 | -1,116379257  | 0,219 | 0,262 | 1         | 0,461249976   | 2,168021791     | 0,835877863     |
| HSPG2                                                                                         | 0,023485799 | -1,117591325  | 0,906 | 0,738 | 1         | 0,460862624   | 2,169844001     | 1,227642276     |
| ACKR3                                                                                         | 0,020369679 | -1,118546279  | 0,031 | 0,191 | 1         | 0,460557669   | 2,171280748     | 0,162303665     |
| IRS2                                                                                          | 0,012451411 | -1,1218215    | 0,062 | 0,246 | 1         | 0,459513292   | 2,17621561      | 0,25203252      |
| LGI4                                                                                          | 0,07565944  | -1,12297205   | 0,438 | 0,473 | 1         | 0,459146976   | 2,177951835     | 0,926004228     |
| SIPA1L2                                                                                       | 0,124344223 | -1,127071993  | 0,5   | 0,473 | 1         | 0,457843995   | 2,184150081     | 1,057082452     |
| TLE4                                                                                          | 0,367743962 | -1,127464561  | 0,281 | 0,297 | 1         | 0,45771943    | 2,184744486     | 0,946127946     |
| C2orf88                                                                                       | 0,015254011 | -1,134285278  | 0,062 | 0,238 | 1         | 0,455560549   | 2,195097891     | 0,260504202     |
| PRDM16-DT                                                                                     | 0,00389118  | -1,13573219   | 0,031 | 0,254 | 1         | 0,455103886   | 2,197300509     | 0,122047244     |
| ITGB4                                                                                         | 0,07574701  | -1,13670966   | 0,5   | 0,488 | 1         | 0,454795644   | 2,198789751     | 1,024590164     |
| KDM6B                                                                                         | 0,091319012 | -1,139317901  | 0,188 | 0,285 | 1         | 0,453974164   | 2,202768528     | 0,659649123     |
| ARID5A                                                                                        | 0,344662082 | -1,14040283   | 0,281 | 0,293 | 1         | 0,453632897   | 2,204425666     | 0,959044369     |
| PRELP                                                                                         | 0,014940017 | -1,140691216  | 0,031 | 0,211 | 1         | 0,453542227   | 2,204866361     | 0,146919431     |
| IFITM3                                                                                        | 6,36237E-05 | -1,143757265  | 1     | 0,895 | 1         | 0,452579372   | 2,209557179     | 1,117318436     |
| RBMS3                                                                                         | 0,013639666 | -1,144812181  | 0,031 | 0,207 | 1         | 0,452248562   | 2,211173423     | 0,149758454     |
| SIK3                                                                                          | 0,032087103 | -1,147561441  | 0,125 | 0,27  | 1         | 0,451387558   | 2,215391146     | 0,462962963     |
| LATS2                                                                                         | 0,103995267 | -1,148442933  | 0,188 | 0,277 | 1         | 0,451111843   | 2,216745172     | 0,678700361     |
| SCN9A                                                                                         | 0,096620596 | -1,148931904  | 0,312 | 0,367 | 1         | 0,450958974   | 2,217496617     | 0,85013624      |
| OLFM1                                                                                         | 0,018871851 | -1,151117954  | 0,094 | 0,27  | 1         | 0,450276174   | 2,220859236     | 0,348148148     |
| LAMA4                                                                                         | 0,095104602 | -1,153862809  | 0,531 | 0,5   | 1         | 0,449420298   | 2,22508864      | 1,062           |
| ARAP2                                                                                         | 0,01723139  | -1,158942509  | 0,062 | 0,234 | 1         | 0,447840681   | 2,23293694      | 0,264957265     |
| N4BP2L2                                                                                       | 0,032281593 | -1,16731779   | 0,531 | 0,543 | 1         | 0,445248362   | 2,245937514     | 0,977900552     |
| PLSCR4                                                                                        | 0,019595462 | -1,174044394  | 0,156 | 0,316 | 1         | 0,443177212   | 2,256433708     | 0,493670886     |
| MYC                                                                                           | 0,116778581 | -1,178137555  | 0,125 | 0,219 | 1         | 0,441921628   | 2,262844668     | 0,570776256     |

Supplementary Table 1

| Differentially expressed genes_adjacent-skin-XL_comparing SC-Keloid vs. (SC-Myel, SC-Nonmyel) |             |              |       |       |           |               |                 |                 |
|-----------------------------------------------------------------------------------------------|-------------|--------------|-------|-------|-----------|---------------|-----------------|-----------------|
| gene                                                                                          | p_val       | avg_log2FC   | pct.1 | pct.2 | p_val_adj | Foldchange_UP | Foldchange_DOWN | Ratio_pct1_pct2 |
| IGFBP7                                                                                        | 0,052065573 | -1,181206889 | 0,75  | 0,742 | 1         | 0,440982439   | 2,267663995     | 1,010781671     |
| ITPRID2                                                                                       | 0,032617871 | -1,186040599 | 0,375 | 0,445 | 1         | 0,439507412   | 2,275274484     | 0,842696629     |
| FIGN                                                                                          | 0,247448622 | -1,186113165 | 0,406 | 0,379 | 1         | 0,439485306   | 2,27538893      | 1,071240106     |
| ZNF503                                                                                        | 0,023291609 | -1,187262756 | 0,188 | 0,348 | 1         | 0,439135248   | 2,277202764     | 0,540229885     |
| SORBS1                                                                                        | 0,022850965 | -1,19242944  | 0,219 | 0,367 | 1         | 0,437565397   | 2,285372669     | 0,596730245     |
| PHLDA1                                                                                        | 0,530059383 | -1,194340596 | 0,625 | 0,48  | 1         | 0,436986133   | 2,288402135     | 1,302083333     |
| FSTL1                                                                                         | 0,040955199 | -1,195926994 | 0,438 | 0,477 | 1         | 0,436505884   | 2,290919863     | 0,918238994     |
| SFRP5                                                                                         | 0,024121703 | -1,19824523  | 0     | 0,141 | 1         | 0,435805035   | 2,294604053     | 0               |
| OLFML2A                                                                                       | 0,701078703 | -1,198366988 | 0,719 | 0,449 | 1         | 0,435768256   | 2,294797718     | 1,601336303     |
| MRPS6                                                                                         | 0,039020606 | -1,204985923 | 0,125 | 0,262 | 1         | 0,433773576   | 2,305350199     | 0,477099237     |
| ITPR1                                                                                         | 0,008167187 | -1,209893608 | 0,031 | 0,227 | 1         | 0,432300495   | 2,313205774     | 0,136563877     |
| NLGN4X                                                                                        | 0,03387328  | -1,210057222 | 0,156 | 0,305 | 1         | 0,432251471   | 2,313468126     | 0,51147541      |
| CHADL                                                                                         | 0,044630182 | -1,210938075 | 0,219 | 0,328 | 1         | 0,431987635   | 2,314881071     | 0,667682927     |
| STAT3                                                                                         | 0,050088233 | -1,211235076 | 0,406 | 0,441 | 1         | 0,431898713   | 2,315357673     | 0,920634921     |
| AC009041.2                                                                                    | 0,011487017 | -1,212215971 | 0,062 | 0,25  | 1         | 0,431605163   | 2,31693243      | 0,248           |
| PMP2                                                                                          | 0,154061402 | -1,214355133 | 0,406 | 0,441 | 1         | 0,430965673   | 2,32037042      | 0,920634921     |
| MCL1                                                                                          | 0,174101789 | -1,215667914 | 0,594 | 0,48  | 1         | 0,430573694   | 2,322482802     | 1,2375          |
| ARHGEF10                                                                                      | 0,006744192 | -1,215766412 | 0,188 | 0,391 | 1         | 0,430544298   | 2,322641373     | 0,480818414     |
| SMTN                                                                                          | 0,029264113 | -1,220783077 | 0,156 | 0,301 | 1         | 0,429049772   | 2,330731921     | 0,518272425     |
| CNTN2                                                                                         | 0,003891944 | -1,221690884 | 0     | 0,215 | 1         | 0,42877988    | 2,332198982     | 0               |
| SEMA5A                                                                                        | 0,03161618  | -1,235083747 | 0,062 | 0,211 | 1         | 0,424817838   | 2,353950116     | 0,293838863     |
| CREBRF                                                                                        | 0,026925757 | -1,239773293 | 0,188 | 0,324 | 1         | 0,423439191   | 2,361614187     | 0,580246914     |
| GFRA2                                                                                         | 0,155566833 | -1,241150347 | 0,219 | 0,285 | 1         | 0,42303521    | 2,363869426     | 0,768421053     |
| DNAJB4                                                                                        | 0,189382021 | -1,241517187 | 0,375 | 0,383 | 1         | 0,422927657   | 2,364470573     | 0,979112272     |
| NEDD9                                                                                         | 0,26704199  | -1,251783001 | 0,25  | 0,277 | 1         | 0,419928904   | 2,381355486     | 0,902527076     |
| ZBTB20                                                                                        | 0,049601691 | -1,252737111 | 0,594 | 0,527 | 1         | 0,419651281   | 2,38293089      | 1,127134725     |
| PTEN                                                                                          | 0,028740164 | -1,254499412 | 0,375 | 0,449 | 1         | 0,419138975   | 2,3858435       | 0,83518931      |
| HSPA2                                                                                         | 0,078442739 | -1,25798428  | 0,094 | 0,207 | 1         | 0,418127756   | 2,391613534     | 0,45410628      |
| DDIT4                                                                                         | 0,575177068 | -1,261618946 | 0,344 | 0,316 | 1         | 0,417075668   | 2,397646462     | 1,088607595     |
| NFE2L2                                                                                        | 0,053452746 | -1,262818711 | 0,781 | 0,586 | 1         | 0,416728967   | 2,399641206     | 1,332764505     |

Supplementary Table 1

| Differentially expressed genes_adjacent-skin-XL_comparing SC-Keloid vs. (SC-Myel, SC-Nonmyel) |             |              |       |       |             |               |                 |                 |
|-----------------------------------------------------------------------------------------------|-------------|--------------|-------|-------|-------------|---------------|-----------------|-----------------|
| gene                                                                                          | p_val       | avg_log2FC   | pct.1 | pct.2 | p_val_adj   | Foldchange_UP | Foldchange_DOWN | Ratio_pct1_pct2 |
| SLIT2                                                                                         | 0,001808419 | -1,26312705  | 0,062 | 0,312 | 1           | 0,416639911   | 2,400154123     | 0,198717949     |
| IER5L                                                                                         | 0,881276048 | -1,264300909 | 0,594 | 0,43  | 1           | 0,416301047   | 2,402107821     | 1,381395349     |
| NR2F2                                                                                         | 0,168957526 | -1,265022582 | 0,406 | 0,418 | 1           | 0,416092854   | 2,403309717     | 0,971291866     |
| B4GALNT4                                                                                      | 0,006627143 | -1,266002865 | 0,031 | 0,234 | 1           | 0,415810223   | 2,404943274     | 0,132478632     |
| SPTBN1                                                                                        | 7,6514E-06  | -1,266905703 | 0,812 | 0,844 | 0,161452129 | 0,415550091   | 2,406448757     | 0,962085308     |
| MEGF9                                                                                         | 0,009125872 | -1,268348499 | 0,281 | 0,43  | 1           | 0,41513472    | 2,408856578     | 0,653488372     |
| ART3                                                                                          | 0,000521148 | -1,269305391 | 0     | 0,289 | 1           | 0,414859466   | 2,410454824     | 0               |
| MED13L                                                                                        | 0,059760021 | -1,271281558 | 0,219 | 0,32  | 1           | 0,414291591   | 2,413758866     | 0,684375        |
| GLDN                                                                                          | 0,038111838 | -1,277667763 | 0     | 0,121 | 1           | 0,412461749   | 2,424467246     | 0               |
| ADGRB3                                                                                        | 0,00233989  | -1,27964665  | 0     | 0,234 | 1           | 0,41189638    | 2,427795071     | 0               |
| LAMB1                                                                                         | 0,151754339 | -1,280968331 | 0,656 | 0,523 | 1           | 0,411519206   | 2,430020241     | 1,254302103     |
| CTNNAL1                                                                                       | 0,013141583 | -1,281829675 | 0,25  | 0,414 | 1           | 0,411273586   | 2,43147149      | 0,603864734     |
| MT1X                                                                                          | 0,117391427 | -1,292645948 | 0,594 | 0,297 | 1           | 0,408201688   | 2,449769391     | 2               |
| KLF4                                                                                          | 0,411365317 | -1,295299521 | 0,594 | 0,457 | 1           | 0,407451566   | 2,454279439     | 1,299781182     |
| NR4A1                                                                                         | 0,099814455 | -1,299962306 | 0,875 | 0,672 | 1           | 0,406136809   | 2,462224494     | 1,302083333     |
| FOS                                                                                           | 0,062805775 | -1,302091138 | 0,938 | 0,82  | 1           | 0,405537958   | 2,465860419     | 1,143902439     |
| NDRG1                                                                                         | 0,006894276 | -1,304635019 | 0,344 | 0,484 | 1           | 0,40482351    | 2,470212267     | 0,710743802     |
| ZEB2                                                                                          | 0,000190608 | -1,30491606  | 0,906 | 0,797 | 1           | 0,404744657   | 2,470693518     | 1,136762861     |
| SPATA13                                                                                       | 0,004074523 | -1,305154021 | 0,062 | 0,285 | 1           | 0,404677903   | 2,471101074     | 0,21754386      |
| SERPING1                                                                                      | 0,001607793 | -1,306982411 | 0,031 | 0,285 | 1           | 0,404165362   | 2,474234792     | 0,10877193      |
| TSPYL2                                                                                        | 0,037320683 | -1,313955585 | 0,094 | 0,238 | 1           | 0,402216568   | 2,486222795     | 0,394957983     |
| COL3A1                                                                                        | 0,40492022  | -1,31716832  | 0,594 | 0,48  | 1           | 0,401321869   | 2,49176553      | 1,2375          |
| GPR155                                                                                        | 0,014158204 | -1,321101176 | 0,344 | 0,469 | 1           | 0,400229336   | 2,498567469     | 0,73347548      |
| PRIMA1                                                                                        | 0,006627129 | -1,322066328 | 0,031 | 0,234 | 1           | 0,399961676   | 2,500239551     | 0,132478632     |
| SEMA3G                                                                                        | 0,001387247 | -1,323905225 | 0     | 0,254 | 1           | 0,399452199   | 2,503428453     | 0               |
| BHLHE40                                                                                       | 0,038478302 | -1,33625316  | 0,406 | 0,457 | 1           | 0,396047902   | 2,524947097     | 0,888402626     |
| RDH10                                                                                         | 0,006553384 | -1,34469807  | 0,062 | 0,27  | 1           | 0,393736381   | 2,539770382     | 0,22962963      |
| LPL                                                                                           | 0,003180406 | -1,348440459 | 0     | 0,223 | 1           | 0,392716343   | 2,546367165     | 0               |
| TIPARP                                                                                        | 0,067184942 | -1,349931289 | 0,219 | 0,324 | 1           | 0,392310733   | 2,548999851     | 0,675925926     |
| PNRC1                                                                                         | 0,001040003 | -1,350580056 | 0,719 | 0,68  | 1           | 0,392134354   | 2,550146371     | 1,057352941     |

Supplementary Table 1

| Differentially expressed genes_adjacent-skin-XL_comparing SC-Keloid vs. (SC-Myel, SC-Nonmyel) |             |              |       |       |             |               |                 |                 |
|-----------------------------------------------------------------------------------------------|-------------|--------------|-------|-------|-------------|---------------|-----------------|-----------------|
| gene                                                                                          | p_val       | avg_log2FC   | pct.1 | pct.2 | p_val_adj   | Foldchange_UP | Foldchange_DOWN | Ratio_pct1_pct2 |
| ETS1                                                                                          | 0,143852793 | -1,354460401 | 0,562 | 0,48  | 1           | 0,391081067   | 2,557014605     | 1,170833333     |
| TMOD2                                                                                         | 0,022143304 | -1,358307161 | 0,281 | 0,398 | 1           | 0,390039689   | 2,563841652     | 0,706030151     |
| CADM3                                                                                         | 0,005697043 | -1,363502494 | 0,188 | 0,402 | 1           | 0,388637631   | 2,573091024     | 0,467661692     |
| NIBAN1                                                                                        | 0,009452591 | -1,365385148 | 0,156 | 0,355 | 1           | 0,388130807   | 2,576450987     | 0,43943662      |
| SORCS1                                                                                        | 0,009361352 | -1,368022607 | 0,188 | 0,379 | 1           | 0,387421894   | 2,581165428     | 0,496042216     |
| IFRD1                                                                                         | 0,013620574 | -1,376982811 | 0,312 | 0,445 | 1           | 0,385023174   | 2,59724626      | 0,701123596     |
| GAS2L3                                                                                        | 0,0092796   | -1,377421201 | 0,125 | 0,316 | 1           | 0,384906196   | 2,598035603     | 0,39556962      |
| SLC38A2                                                                                       | 0,003055286 | -1,377620205 | 0,375 | 0,547 | 1           | 0,384853106   | 2,598393998     | 0,685557587     |
| HSPH1                                                                                         | 0,845159753 | -1,377733377 | 0,594 | 0,402 | 1           | 0,384822917   | 2,598597837     | 1,47761194      |
| IGSF1                                                                                         | 0,002110019 | -1,381828568 | 0     | 0,238 | 1           | 0,383732119   | 2,605984617     | 0               |
| SNHG15                                                                                        | 0,08051557  | -1,384312628 | 0,281 | 0,352 | 1           | 0,383071971   | 2,610475516     | 0,798295455     |
| CSRNP1                                                                                        | 0,033492656 | -1,393769119 | 0,406 | 0,461 | 1           | 0,380569245   | 2,627642707     | 0,880694143     |
| CLIC4                                                                                         | 0,000104241 | -1,396858265 | 0,906 | 0,77  | 1           | 0,379755229   | 2,63327513      | 1,176623377     |
| GBP2                                                                                          | 0,057556704 | -1,399907448 | 0,156 | 0,277 | 1           | 0,378953452   | 2,638846528     | 0,563176895     |
| FTL                                                                                           | 0,006179769 | -1,400975581 | 1     | 0,883 | 1           | 0,378672988   | 2,640800983     | 1,132502831     |
| TSC22D2                                                                                       | 0,014197513 | -1,404046352 | 0,25  | 0,395 | 1           | 0,377867841   | 2,646427905     | 0,632911392     |
| GLUL                                                                                          | 0,028188895 | -1,411896583 | 0,188 | 0,34  | 1           | 0,375817308   | 2,660867336     | 0,552941176     |
| ABCA1                                                                                         | 0,003082907 | -1,414825929 | 0,094 | 0,332 | 1           | 0,375054998   | 2,66627563      | 0,28313253      |
| RC3H1                                                                                         | 0,016577215 | -1,423093774 | 0,125 | 0,293 | 1           | 0,372911767   | 2,68159948      | 0,42662116      |
| HMOX1                                                                                         | 0,431765035 | -1,425767617 | 0,062 | 0,102 | 1           | 0,372221265   | 2,686574075     | 0,607843137     |
| ATP1A2                                                                                        | 0,000888905 | -1,428226816 | 0,031 | 0,312 | 1           | 0,371587322   | 2,691157479     | 0,099358974     |
| TAF1D                                                                                         | 0,098619939 | -1,436709593 | 0,531 | 0,48  | 1           | 0,369408869   | 2,707027592     | 1,10625         |
| AHNAK                                                                                         | 4,63416E-06 | -1,438159544 | 0,969 | 0,832 | 0,097785484 | 0,369037788   | 2,709749603     | 1,164663462     |
| KRT5                                                                                          | 0,003929166 | -1,439396388 | 0,031 | 0,254 | 1           | 0,368721542   | 2,712073709     | 0,122047244     |
| IL6ST                                                                                         | 0,01282952  | -1,441824678 | 0,5   | 0,531 | 1           | 0,368101446   | 2,716642412     | 0,941619586     |
| SYNE2                                                                                         | 0,032916555 | -1,445331948 | 0,281 | 0,383 | 1           | 0,367207658   | 2,723254752     | 0,733681462     |
| EPB41L2                                                                                       | 0,010436886 | -1,447561858 | 0,281 | 0,422 | 1           | 0,36664052    | 2,72746722      | 0,665876777     |
| PRRG4                                                                                         | 0,000805979 | -1,451344223 | 0,031 | 0,309 | 1           | 0,365680544   | 2,7346273       | 0,100323625     |
| SNCA                                                                                          | 0,001108266 | -1,452606805 | 0,156 | 0,426 | 1           | 0,365360657   | 2,737021571     | 0,366197183     |
| BPGM                                                                                          | 0,550310174 | -1,45288584  | 0,406 | 0,332 | 1           | 0,365289999   | 2,737550996     | 1,222891566     |

Supplementary Table 1

| Differentially expressed genes_adjacent-skin-XL_comparing SC-Keloid vs. (SC-Myel, SC-Nonmyel) |             |              |       |       |             |               |                 |                 |
|-----------------------------------------------------------------------------------------------|-------------|--------------|-------|-------|-------------|---------------|-----------------|-----------------|
| gene                                                                                          | p_val       | avg_log2FC   | pct.1 | pct.2 | p_val_adj   | Foldchange_UP | Foldchange_DOWN | Ratio_pct1_pct2 |
| NR4A2                                                                                         | 0,023665888 | -1,45728209  | 0,594 | 0,574 | 1           | 0,364178564   | 2,745905716     | 1,034843206     |
| AMD1                                                                                          | 0,001894494 | -1,463046037 | 0,156 | 0,395 | 1           | 0,362726477   | 2,756898279     | 0,394936709     |
| NRN1                                                                                          | 0,043454745 | -1,465940521 | 0,531 | 0,496 | 1           | 0,361999467   | 2,762435004     | 1,070564516     |
| COL21A1                                                                                       | 0,001541938 | -1,46973062  | 0     | 0,25  | 1           | 0,361049708   | 2,76970173      | 0               |
| KRT14                                                                                         | 0,113824728 | -1,471931522 | 0,281 | 0,348 | 1           | 0,360499329   | 2,77393027      | 0,807471264     |
| MT-ND2                                                                                        | 2,09488E-05 | -1,472645502 | 0,844 | 0,82  | 0,442041378 | 0,360320964   | 2,775303409     | 1,029268293     |
| CCND2                                                                                         | 0,002446203 | -1,474457763 | 0,062 | 0,305 | 1           | 0,359868626   | 2,778791835     | 0,203278689     |
| TENT5A                                                                                        | 0,08880514  | -1,490600538 | 0,25  | 0,328 | 1           | 0,355864385   | 2,810059228     | 0,762195122     |
| ABCA2                                                                                         | 0,002572903 | -1,493278288 | 0,062 | 0,301 | 1           | 0,355204487   | 2,81527975      | 0,205980066     |
| JUN                                                                                           | 6,45673E-05 | -1,499359024 | 1     | 0,934 | 1           | 0,353710506   | 2,827170759     | 1,070663812     |
| DHRS3                                                                                         | 0,000465946 | -1,500857715 | 0     | 0,293 | 1           | 0,353343257   | 2,830109189     | 0               |
| LIMCH1                                                                                        | 0,009059078 | -1,510090553 | 0,031 | 0,223 | 1           | 0,351089182   | 2,848279162     | 0,139013453     |
| ABL2                                                                                          | 0,20096991  | -1,527151597 | 0,406 | 0,387 | 1           | 0,346961719   | 2,882162337     | 1,049095607     |
| MT1E                                                                                          | 0,559141209 | -1,531640436 | 0,469 | 0,383 | 1           | 0,345883851   | 2,891143937     | 1,224543081     |
| SOCS3                                                                                         | 0,063316032 | -1,532406171 | 0,531 | 0,512 | 1           | 0,345700316   | 2,892678868     | 1,037109375     |
| IFI16                                                                                         | 0,045498933 | -1,539194415 | 0,625 | 0,543 | 1           | 0,34407753    | 2,906321723     | 1,151012891     |
| TSC22D3                                                                                       | 0,902579767 | -1,541950208 | 0,406 | 0,285 | 1           | 0,343420911   | 2,911878598     | 1,424561404     |
| CEBPB                                                                                         | 0,136626421 | -1,555146378 | 0,781 | 0,566 | 1           | 0,340294001   | 2,93863541      | 1,379858657     |
| XIST                                                                                          | 7,51886E-06 | -1,561103938 | 0,781 | 0,832 | 0,158655511 | 0,338891666   | 2,950795495     | 0,938701923     |
| DKK3                                                                                          | 0,000137148 | -1,56559708  | 0,156 | 0,492 | 1           | 0,33783786    | 2,959999803     | 0,317073171     |
| TGFBR2                                                                                        | 0,008409367 | -1,569874703 | 0,438 | 0,512 | 1           | 0,336837647   | 2,968789294     | 0,85546875      |
| SQSTM1                                                                                        | 0,034044879 | -1,571731933 | 0,562 | 0,523 | 1           | 0,336404304   | 2,972613576     | 1,07456979      |
| NFKBIA                                                                                        | 0,001808384 | -1,574392428 | 0,656 | 0,738 | 1           | 0,335784507   | 2,978100475     | 0,888888889     |
| CRYAB                                                                                         | 1,97264E-07 | -1,57472901  | 1     | 0,961 | 0,004162477 | 0,335706178   | 2,978795348     | 1,040582726     |
| HSP90AA1                                                                                      | 0,005788735 | -1,57701408  | 1     | 0,922 | 1           | 0,335174877   | 2,983517171     | 1,084598698     |
| CCNL1                                                                                         | 0,000159697 | -1,578639547 | 0,656 | 0,68  | 1           | 0,334797452   | 2,986880557     | 0,964705882     |
| NRXN3                                                                                         | 0,031717738 | -1,587949556 | 0,219 | 0,34  | 1           | 0,332643891   | 3,006217842     | 0,644117647     |
| HSPA12A                                                                                       | 0,002259963 | -1,589792636 | 0,406 | 0,543 | 1           | 0,332219201   | 3,010060816     | 0,747697974     |
| SOD3                                                                                          | 0,009874943 | -1,603375158 | 0,062 | 0,254 | 1           | 0,329106139   | 3,038533417     | 0,244094488     |
| NAMPT                                                                                         | 0,039410979 | -1,604535339 | 0,25  | 0,352 | 1           | 0,328841586   | 3,040977915     | 0,710227273     |



Supplementary Table 1

| Differentially expressed genes_adjacent-skin-XL_comparing SC-Keloid vs. (SC-Myel, SC-Nonmyel) |             |              |       |       |             |               |                 |                 |
|-----------------------------------------------------------------------------------------------|-------------|--------------|-------|-------|-------------|---------------|-----------------|-----------------|
| gene                                                                                          | p_val       | avg_log2FC   | pct.1 | pct.2 | p_val_adj   | Foldchange_UP | Foldchange_DOWN | Ratio_pct1_pct2 |
| CAB39L                                                                                        | 0,000761101 | -1,605552592 | 0,094 | 0,367 | 1           | 0,328609799   | 3,043122883     | 0,25613079      |
| RETREG1                                                                                       | 0,001149229 | -1,607363473 | 0,25  | 0,477 | 1           | 0,328197585   | 3,04694503      | 0,524109015     |
| VGLL3                                                                                         | 0,00037172  | -1,607404633 | 0     | 0,301 | 1           | 0,328188221   | 3,047031962     | 0               |
| NFIA                                                                                          | 0,000994878 | -1,609824742 | 0,156 | 0,41  | 1           | 0,32763815    | 3,052147621     | 0,380487805     |
| PMP22                                                                                         | 6,09945E-09 | -1,613049936 | 1     | 0,922 | 0,000128704 | 0,326906522   | 3,058978434     | 1,084598698     |
| RAPGEF5                                                                                       | 0,000146496 | -1,613168503 | 0     | 0,332 | 1           | 0,326879656   | 3,059229844     | 0               |
| SOWAHC                                                                                        | 0,002513995 | -1,619482706 | 0,031 | 0,27  | 1           | 0,325452137   | 3,072648434     | 0,114814815     |
| TXNIP                                                                                         | 0,011911683 | -1,622226571 | 0,312 | 0,441 | 1           | 0,324833747   | 3,078497871     | 0,707482993     |
| MT-ND3                                                                                        | 1,02546E-05 | -1,630133347 | 0,844 | 0,875 | 0,216382902 | 0,323058346   | 3,095416081     | 0,964571429     |
| MAFF                                                                                          | 0,002033328 | -1,650080538 | 0,25  | 0,461 | 1           | 0,318622369   | 3,138511593     | 0,542299349     |
| MT1A                                                                                          | 0,033276355 | -1,655692691 | 0,031 | 0,176 | 1           | 0,317385321   | 3,15074433      | 0,176136364     |
| ALCAM                                                                                         | 0,001254174 | -1,656223648 | 0,156 | 0,398 | 1           | 0,317268534   | 3,151904118     | 0,391959799     |
| ADD3                                                                                          | 0,002628605 | -1,663840289 | 0,219 | 0,422 | 1           | 0,315597944   | 3,168588451     | 0,518957346     |
| CD55                                                                                          | 0,000805983 | -1,672426669 | 0,031 | 0,309 | 1           | 0,313725202   | 3,187502932     | 0,100323625     |
| SOD2                                                                                          | 0,642995769 | -1,679068911 | 0,531 | 0,336 | 1           | 0,312284115   | 3,202212193     | 1,580357143     |
| BCL6                                                                                          | 0,003096624 | -1,680673201 | 0,312 | 0,469 | 1           | 0,311937045   | 3,205775064     | 0,665245203     |
| GADD45B                                                                                       | 0,313831708 | -1,682982858 | 0,812 | 0,672 | 1           | 0,311438054   | 3,210911404     | 1,208333333     |
| NRXN1                                                                                         | 1,30342E-05 | -1,684621321 | 0,844 | 0,809 | 0,275034574 | 0,311084556   | 3,214560094     | 1,043263288     |
| RELN                                                                                          | 0,000654925 | -1,688762978 | 0,094 | 0,371 | 1           | 0,310192782   | 3,223801641     | 0,253369272     |
| HSPA1A                                                                                        | 0,018784067 | -1,69450398  | 0,969 | 0,879 | 1           | 0,308960866   | 3,236655863     | 1,102389078     |
| FOSB                                                                                          | 0,072783521 | -1,698077637 | 0,812 | 0,652 | 1           | 0,308196496   | 3,244683226     | 1,245398773     |
| NFIB                                                                                          | 0,000112077 | -1,701386428 | 0,094 | 0,422 | 1           | 0,307490463   | 3,25213338      | 0,222748815     |
| MBNL2                                                                                         | 0,00057158  | -1,702101991 | 0,375 | 0,535 | 1           | 0,307337989   | 3,253746807     | 0,700934579     |
| STARD13                                                                                       | 0,002436583 | -1,708931013 | 0,375 | 0,512 | 1           | 0,305886637   | 3,269184983     | 0,732421875     |
| BTG2                                                                                          | 0,176353344 | -1,720731278 | 0,406 | 0,398 | 1           | 0,303394896   | 3,29603435      | 1,020100503     |
| SELENOP                                                                                       | 2,24418E-05 | -1,727633043 | 0,031 | 0,418 | 0,473545264 | 0,30194694    | 3,311840153     | 0,074162679     |
| NFATC2                                                                                        | 0,00810324  | -1,745194952 | 0,094 | 0,305 | 1           | 0,298293625   | 3,352401519     | 0,308196721     |
| PLLP                                                                                          | 0,000365502 | -1,751173215 | 0,062 | 0,363 | 1           | 0,297060108   | 3,366322078     | 0,170798898     |
| TSC22D4                                                                                       | 0,002725343 | -1,756689144 | 0,156 | 0,375 | 1           | 0,295926512   | 3,379217343     | 0,416           |
| RGCC                                                                                          | 0,004618309 | -1,75803476  | 0,344 | 0,508 | 1           | 0,295650627   | 3,382370643     | 0,677165354     |

Supplementary Table 1

| Differentially expressed genes_adjacent-skin-XL_comparing SC-Keloid vs. (SC-Myel, SC-Nonmyel) |             |              |       |       |             |               |                 |                 |
|-----------------------------------------------------------------------------------------------|-------------|--------------|-------|-------|-------------|---------------|-----------------|-----------------|
| gene                                                                                          | p_val       | avg_log2FC   | pct.1 | pct.2 | p_val_adj   | Foldchange_UP | Foldchange_DOWN | Ratio_pct1_pct2 |
| PER1                                                                                          | 0,000850035 | -1,782753536 | 0,094 | 0,363 | 1           | 0,290628172   | 3,440822656     | 0,258953168     |
| HES1                                                                                          | 0,000194163 | -1,785515348 | 0,594 | 0,73  | 1           | 0,290072343   | 3,447415876     | 0,81369863      |
| YBX3                                                                                          | 0,00357947  | -1,795772801 | 0,469 | 0,543 | 1           | 0,288017265   | 3,472014086     | 0,863720074     |
| DNAJB1                                                                                        | 0,008924643 | -1,802144402 | 0,812 | 0,699 | 1           | 0,286748054   | 3,487381998     | 1,161659514     |
| IRF1                                                                                          | 0,009089875 | -1,814850041 | 0,156 | 0,355 | 1           | 0,284233786   | 3,518230588     | 0,43943662      |
| HSPA6                                                                                         | 0,297875812 | -1,832245392 | 0,219 | 0,129 | 1           | 0,280827205   | 3,560908567     | 1,697674419     |
| LTBP4                                                                                         | 1,0953E-05  | -1,836550542 | 0,312 | 0,652 | 0,231119174 | 0,279990437   | 3,571550552     | 0,478527607     |
| SAMHD1                                                                                        | 0,000827252 | -1,83689586  | 0,219 | 0,457 | 1           | 0,279923428   | 3,572405528     | 0,479212254     |
| WSB1                                                                                          | 5,21784E-06 | -1,858434816 | 0,562 | 0,715 | 0,110101556 | 0,275775306   | 3,626140476     | 0,786013986     |
| MTURN                                                                                         | 0,005261806 | -1,865240339 | 0,219 | 0,398 | 1           | 0,274477474   | 3,643286219     | 0,550251256     |
| TCIM                                                                                          | 0,208448506 | -1,869798269 | 0,688 | 0,559 | 1           | 0,273611682   | 3,654814715     | 1,230769231     |
| EGR1                                                                                          | 0,231347142 | -1,88571504  | 0,781 | 0,57  | 1           | 0,270609606   | 3,695360313     | 1,370175439     |
| ZFAND5                                                                                        | 0,001416688 | -1,891698474 | 0,438 | 0,555 | 1           | 0,269489604   | 3,710718277     | 0,789189189     |
| DMD                                                                                           | 1,50201E-05 | -1,899757876 | 0,125 | 0,508 | 0,316938305 | 0,267988338   | 3,731505665     | 0,246062992     |
| PPP1R15A                                                                                      | 3,91578E-08 | -1,932853556 | 0,812 | 0,855 | 0,000826268 | 0,261910616   | 3,818096473     | 0,949707602     |
| AHR                                                                                           | 2,15528E-05 | -1,948399263 | 0,719 | 0,75  | 0,454784973 | 0,259103559   | 3,859460689     | 0,958666667     |
| PLP1                                                                                          | 1,68409E-08 | -1,953748789 | 0,75  | 0,828 | 0,000355359 | 0,25814458    | 3,873798169     | 0,905797101     |
| ITGB8                                                                                         | 0,021634511 | -1,956565317 | 0,625 | 0,555 | 1           | 0,257641104   | 3,881368249     | 1,126126126     |
| FXYD1                                                                                         | 2,20406E-07 | -1,990188155 | 0,594 | 0,781 | 0,004650794 | 0,251706058   | 3,97288809      | 0,76056338      |
| HSPA1B                                                                                        | 0,020498363 | -1,994620708 | 1     | 0,805 | 1           | 0,2509339     | 3,985113207     | 1,242236025     |
| NDRG2                                                                                         | 8,62269E-07 | -2,005298642 | 0,406 | 0,695 | 0,018194742 | 0,249083499   | 4,014717967     | 0,584172662     |
| DOCK5                                                                                         | 5,03745E-05 | -2,01956677  | 0,219 | 0,52  | 1           | 0,246632227   | 4,054620164     | 0,421153846     |
| NCAM1                                                                                         | 3,15288E-05 | -2,024930487 | 0,156 | 0,508 | 0,665288904 | 0,245716989   | 4,069722672     | 0,307086614     |
| PRX                                                                                           | 0,137206058 | -2,031403162 | 0,031 | 0,113 | 1           | 0,244617045   | 4,088022573     | 0,274336283     |
| RARRES2                                                                                       | 3,22499E-06 | -2,050922346 | 0,094 | 0,52  | 0,068050569 | 0,241329746   | 4,143708011     | 0,180769231     |
| JUNB                                                                                          | 8,88571E-05 | -2,061404409 | 0,938 | 0,816 | 1           | 0,239582692   | 4,173924224     | 1,149509804     |
| BCL2                                                                                          | 1,70476E-05 | -2,068597401 | 0,062 | 0,449 | 0,359722259 | 0,238391153   | 4,194786547     | 0,138084633     |
| MT2A                                                                                          | 0,125004246 | -2,078061558 | 0,906 | 0,738 | 1           | 0,236832412   | 4,222395032     | 1,227642276     |
| CCN5                                                                                          | 0,018264327 | -2,093454803 | 0     | 0,152 | 1           | 0,234318895   | 4,26768828      | 0               |
| MATN2                                                                                         | 0,000240492 | -2,094002224 | 0,5   | 0,641 | 1           | 0,234230001   | 4,269307933     | 0,780031201     |

Supplementary Table 1

| Differentially expressed genes_adjacent-skin-XL_comparing SC-Keloid vs. (SC-Myel, SC-Nonmyel) |             |              |       |       |             |               |                 |                 |
|-----------------------------------------------------------------------------------------------|-------------|--------------|-------|-------|-------------|---------------|-----------------|-----------------|
| gene                                                                                          | p_val       | avg_log2FC   | pct.1 | pct.2 | p_val_adj   | Foldchange_UP | Foldchange_DOWN | Ratio_pct1_pct2 |
| CDH19                                                                                         | 7,49304E-10 | -2,098682395 | 1     | 0,918 | 1,58111E-05 | 0,233471379   | 4,283180259     | 1,089324619     |
| CDKN1A                                                                                        | 4,46741E-05 | -2,105185751 | 0,188 | 0,508 | 0,942668022 | 0,232421309   | 4,30253149      | 0,37007874      |
| ZFP36L2                                                                                       | 0,053704432 | -2,128795911 | 0,656 | 0,559 | 1           | 0,228648615   | 4,373523093     | 1,17352415      |
| CHL1                                                                                          | 7,19449E-07 | -2,146949616 | 0,031 | 0,516 | 0,015181093 | 0,225789513   | 4,428903662     | 0,060077519     |
| MT3                                                                                           | 0,00124733  | -2,168135319 | 0     | 0,258 | 1           | 0,222498063   | 4,494421151     | 0               |
| ZFP36L1                                                                                       | 1,48319E-06 | -2,249186985 | 0,625 | 0,746 | 0,031296798 | 0,210342607   | 4,754148557     | 0,837801609     |
| ADIRF                                                                                         | 1,19435E-06 | -2,287653243 | 0,25  | 0,641 | 0,025202079 | 0,204808395   | 4,882612356     | 0,390015601     |
| DST                                                                                           | 1,6753E-09  | -2,313876176 | 0,875 | 0,863 | 3,53504E-05 | 0,201119354   | 4,972171903     | 1,013904983     |
| CADM2                                                                                         | 1,75525E-07 | -2,320422696 | 0,031 | 0,543 | 0,003703747 | 0,200208801   | 4,994785407     | 0,057090239     |
| SCN7A                                                                                         | 2,61179E-06 | -2,330290234 | 0,656 | 0,746 | 0,055111356 | 0,198844114   | 5,029065118     | 0,879356568     |
| XKR4                                                                                          | 1,05817E-06 | -2,333336095 | 0,062 | 0,527 | 0,022328418 | 0,198424752   | 5,039693848     | 0,117647059     |
| PCSK2                                                                                         | 7,47954E-07 | -2,361331633 | 0,125 | 0,594 | 0,015782577 | 0,194611432   | 5,138444275     | 0,21043771      |
| KLF9                                                                                          | 4,40649E-07 | -2,411156826 | 0,25  | 0,652 | 0,009298126 | 0,188005031   | 5,319006596     | 0,383435583     |
| AATK                                                                                          | 5,15953E-05 | -2,496597927 | 0,156 | 0,488 | 1           | 0,177194051   | 5,643530327     | 0,319672131     |
| SAT1                                                                                          | 5,01889E-06 | -2,499737087 | 0,531 | 0,688 | 0,105903628 | 0,176808914   | 5,655823453     | 0,771802326     |
| ATF3                                                                                          | 6,06014E-08 | -2,524379074 | 0,625 | 0,777 | 0,001278751 | 0,17381457    | 5,753257623     | 0,804375804     |
| VMP1                                                                                          | 3,17903E-05 | -2,726511972 | 0,625 | 0,684 | 0,670806983 | 0,151090832   | 6,618535262     | 0,91374269      |
| ANK3                                                                                          | 1,23746E-08 | -2,7411253   | 0,125 | 0,645 | 0,000261117 | 0,14956813    | 6,685916329     | 0,19379845      |
| CLU                                                                                           | 8,26174E-10 | -2,783778854 | 0,438 | 0,797 | 1,74331E-05 | 0,145210849   | 6,886537809     | 0,549560853     |
| MT1M                                                                                          | 0,045648135 | -2,849449353 | 0,156 | 0,281 | 1           | 0,138749132   | 7,207252315     | 0,555160142     |
| ZFP36                                                                                         | 6,83522E-07 | -3,060017338 | 0,531 | 0,746 | 0,014422992 | 0,119906574   | 8,339826314     | 0,711796247     |
| BIRC3                                                                                         | 0,000109392 | -3,075533987 | 0,156 | 0,473 | 1           | 0,118623851   | 8,430007921     | 0,329809725     |
| MBP                                                                                           | 0,004823334 | -3,131080632 | 0,031 | 0,246 | 1           | 0,114143402   | 8,760909396     | 0,12601626      |
| CEBPD                                                                                         | 0,000650306 | -3,133043865 | 0,281 | 0,512 | 1           | 0,11398818    | 8,77283944      | 0,548828125     |
| FGL2                                                                                          | 2,59668E-07 | -3,268276216 | 0,031 | 0,535 | 0,005479256 | 0,10378888    | 9,634943564     | 0,057943925     |
| COL28A1                                                                                       | 1,13234E-12 | -3,342514488 | 0,031 | 0,77  | 2,38935E-08 | 0,098583192   | 10,14371694     | 0,04025974      |
| PDK4                                                                                          | 2,17807E-07 | -3,346423805 | 0     | 0,516 | 0,004595936 | 0,09831642    | 10,17124097     | 0               |
| MPZ                                                                                           | 2,65263E-07 | -3,703191866 | 0,312 | 0,703 | 0,005597309 | 0,076776475   | 13,02482303     | 0,443812233     |
| CCL2                                                                                          | 0,000262071 | -4,072429784 | 0,156 | 0,441 | 1           | 0,059439682   | 16,82377767     | 0,353741497     |

Supplementary Table 2

| Differentially expressed genes_keloid-XL_comparing SC-Keloid vs. (SC-Myel, SC-Nonmyel, SC-Nonmyel2) |             |             |       |       |             |               |                 |                 |
|-----------------------------------------------------------------------------------------------------|-------------|-------------|-------|-------|-------------|---------------|-----------------|-----------------|
| gene                                                                                                | p_val       | avg_log2FC  | pct.1 | pct.2 | p_val_adj   | Foldchange_UP | Foldchange_DOWN | Ratio_pct1_pct2 |
| TGFBI                                                                                               | 1,62559E-63 | 4,114407312 | 0,939 | 0,049 | 3,43016E-59 | 17,32048367   | 0,057735108     | 19,16326531     |
| IBSP                                                                                                | 1,76098E-49 | 4,02492376  | 0,744 | 0,025 | 3,71584E-45 | 16,27881479   | 0,061429534     | 29,76           |
| IGFBP3                                                                                              | 2,56146E-59 | 3,882741596 | 0,902 | 0,042 | 5,40493E-55 | 14,75100757   | 0,067791979     | 21,47619048     |
| SPARCL1                                                                                             | 1,80626E-38 | 3,198701767 | 0,951 | 0,281 | 3,81138E-34 | 9,181321159   | 0,108916787     | 3,384341637     |
| ELN                                                                                                 | 1,45092E-46 | 3,00729267  | 0,915 | 0,126 | 3,06158E-42 | 8,040541529   | 0,124369733     | 7,261904762     |
| TAGLN                                                                                               | 2,86713E-39 | 2,872219187 | 0,768 | 0,088 | 6,04993E-35 | 7,321905671   | 0,136576466     | 8,727272727     |
| COL7A1                                                                                              | 3,01719E-45 | 2,7498591   | 0,902 | 0,126 | 6,36657E-41 | 6,726514348   | 0,148665408     | 7,158730159     |
| MMP15                                                                                               | 9,57764E-48 | 2,51027746  | 0,829 | 0,07  | 2,02098E-43 | 5,697296385   | 0,17552185      | 11,84285714     |
| COL1A1                                                                                              | 1,86368E-30 | 2,492821807 | 0,988 | 0,656 | 3,93254E-26 | 5,628778225   | 0,177658447     | 1,506097561     |
| IGFBP5                                                                                              | 6,04209E-33 | 2,463500531 | 1     | 0,702 | 1,27494E-28 | 5,515533849   | 0,181306112     | 1,424501425     |
| FN1                                                                                                 | 3,93038E-29 | 2,438870099 | 0,963 | 0,488 | 8,29349E-25 | 5,422169072   | 0,184428037     | 1,973360656     |
| CCN3                                                                                                | 3,09733E-32 | 2,417916588 | 0,793 | 0,137 | 6,53567E-28 | 5,343987333   | 0,187126192     | 5,788321168     |
| ITGB1                                                                                               | 4,92765E-35 | 2,248125    | 1     | 0,765 | 1,03978E-30 | 4,750650259   | 0,210497499     | 1,307189542     |
| PCDH20                                                                                              | 1,48287E-30 | 2,235276058 | 0,841 | 0,193 | 3,12901E-26 | 4,708527835   | 0,212380607     | 4,357512953     |
| APOD                                                                                                | 8,17119E-31 | 2,16544267  | 0,854 | 0,204 | 1,7242E-26  | 4,486040577   | 0,222913722     | 4,18627451      |
| COL6A2                                                                                              | 8,30144E-29 | 2,148125105 | 0,951 | 0,502 | 1,75169E-24 | 4,432513745   | 0,225605617     | 1,894422311     |
| LOXL2                                                                                               | 2,83567E-49 | 2,073879796 | 0,817 | 0,049 | 5,98355E-45 | 4,210173817   | 0,237519885     | 16,67346939     |
| NES                                                                                                 | 1,81968E-29 | 2,06620237  | 0,902 | 0,288 | 3,83971E-25 | 4,187828523   | 0,238787237     | 3,131944444     |
| COL8A1                                                                                              | 6,91195E-32 | 2,01267362  | 0,866 | 0,214 | 1,45849E-27 | 4,035293531   | 0,247813447     | 4,046728972     |
| S100A16                                                                                             | 4,14099E-31 | 2,004861574 | 0,829 | 0,2   | 8,73791E-27 | 4,013501882   | 0,249158971     | 4,145           |
| COL1A2                                                                                              | 2,89243E-25 | 1,978320612 | 0,976 | 0,723 | 6,10332E-21 | 3,940341342   | 0,25378512      | 1,349930844     |
| MYL9                                                                                                | 4,53715E-27 | 1,956163331 | 0,927 | 0,354 | 9,57385E-23 | 3,880286913   | 0,257712902     | 2,618644068     |
| TNFAIP6                                                                                             | 8,63425E-23 | 1,944135252 | 0,89  | 0,442 | 1,82191E-18 | 3,848070556   | 0,259870495     | 2,013574661     |
| TNC                                                                                                 | 6,21347E-25 | 1,943263571 | 0,927 | 0,365 | 1,3111E-20  | 3,845746242   | 0,260027557     | 2,539726027     |
| S100A6                                                                                              | 4,10404E-33 | 1,939016777 | 1     | 0,954 | 8,65993E-29 | 3,834442343   | 0,260794116     | 1,048218029     |
| COL6A1                                                                                              | 1,67035E-25 | 1,92907186  | 0,976 | 0,565 | 3,52461E-21 | 3,808101309   | 0,262598056     | 1,727433628     |
| PTN                                                                                                 | 1,35095E-27 | 1,900107448 | 1     | 0,596 | 2,85065E-23 | 3,732409936   | 0,267923411     | 1,677852349     |
| ACTB                                                                                                | 7,55083E-25 | 1,893136081 | 1     | 0,853 | 1,5933E-20  | 3,714417753   | 0,269221199     | 1,172332943     |
| S100A11                                                                                             | 4,39506E-23 | 1,873087428 | 0,976 | 0,695 | 9,27401E-19 | 3,663156728   | 0,272988593     | 1,404316547     |
| GPC1                                                                                                | 3,17181E-29 | 1,850565564 | 0,927 | 0,298 | 6,69284E-25 | 3,606415357   | 0,277283646     | 3,110738255     |

Supplementary Table 2

| Differentially expressed genes_keloid-XL_comparing SC-Keloid vs. (SC-Myel, SC-Nonmyel, SC-Nonmyel2) |             |             |       |       |             |               |                 |                 |
|-----------------------------------------------------------------------------------------------------|-------------|-------------|-------|-------|-------------|---------------|-----------------|-----------------|
| gene                                                                                                | p_val       | avg_log2FC  | pct.1 | pct.2 | p_val_adj   | Foldchange_UP | Foldchange_DOWN | Ratio_pct1_pct2 |
| TNFRSF12A                                                                                           | 4,81504E-23 | 1,813453931 | 0,854 | 0,309 | 1,01602E-18 | 3,514827609   | 0,284508975     | 2,763754045     |
| POSTN                                                                                               | 1,64269E-10 | 1,767518868 | 0,415 | 0,109 | 3,46623E-06 | 3,404679197   | 0,293713429     | 3,80733945      |
| COL5A1                                                                                              | 2,20943E-31 | 1,757190004 | 0,878 | 0,189 | 4,66211E-27 | 3,380390709   | 0,295823793     | 4,645502646     |
| MMP2                                                                                                | 4,2307E-27  | 1,753113296 | 0,707 | 0,119 | 8,92719E-23 | 3,370852024   | 0,296660901     | 5,941176471     |
| SH3BGR13                                                                                            | 2,26043E-23 | 1,750267321 | 0,878 | 0,323 | 4,76973E-19 | 3,364208967   | 0,297246696     | 2,718266254     |
| SCARA3                                                                                              | 1,22164E-31 | 1,734678751 | 0,732 | 0,105 | 2,57779E-27 | 3,328053788   | 0,300475913     | 6,971428571     |
| COL12A1                                                                                             | 1,59351E-21 | 1,72302214  | 0,756 | 0,214 | 3,36246E-17 | 3,301272295   | 0,302913517     | 3,53271028      |
| CCN2                                                                                                | 8,73775E-19 | 1,718610944 | 0,659 | 0,154 | 1,84375E-14 | 3,291193716   | 0,303841125     | 4,279220779     |
| TPM2                                                                                                | 5,2851E-27  | 1,703018669 | 0,622 | 0,077 | 1,11521E-22 | 3,255814872   | 0,307142771     | 8,077922078     |
| S100A13                                                                                             | 3,97585E-26 | 1,690629594 | 0,915 | 0,33  | 8,38945E-22 | 3,227975421   | 0,309791702     | 2,772727273     |
| PDLIM7                                                                                              | 1,10251E-28 | 1,681052191 | 0,805 | 0,175 | 2,32642E-24 | 3,206617318   | 0,311855111     | 4,6             |
| HMCN2                                                                                               | 5,90033E-45 | 1,646631677 | 0,695 | 0,021 | 1,24503E-40 | 3,131017727   | 0,319384969     | 33,0952381      |
| MYL6                                                                                                | 1,48839E-27 | 1,636808819 | 0,976 | 0,758 | 3,14064E-23 | 3,10977202    | 0,321566981     | 1,287598945     |
| CD151                                                                                               | 1,21178E-24 | 1,630034051 | 0,89  | 0,309 | 2,55697E-20 | 3,09520304    | 0,323080582     | 2,8802589       |
| S100A4                                                                                              | 6,69157E-09 | 1,56417428  | 0,817 | 0,596 | 0,000141199 | 2,957082062   | 0,338171204     | 1,370805369     |
| CDH2                                                                                                | 7,17837E-39 | 1,559836326 | 0,744 | 0,063 | 1,51471E-34 | 2,948203941   | 0,339189561     | 11,80952381     |
| TMSB10                                                                                              | 5,12584E-23 | 1,537081364 | 1     | 0,923 | 1,0816E-18  | 2,90206808    | 0,344581854     | 1,083423619     |
| PMEPA1                                                                                              | 8,79212E-18 | 1,531498495 | 0,902 | 0,604 | 1,85523E-13 | 2,890859503   | 0,345917883     | 1,493377483     |
| CALR                                                                                                | 9,47057E-19 | 1,517175727 | 0,878 | 0,456 | 1,99838E-14 | 2,86230166    | 0,349369186     | 1,925438596     |
| PPP1R14B                                                                                            | 4,432E-21   | 1,512759122 | 0,89  | 0,379 | 9,35197E-17 | 2,853552532   | 0,350440368     | 2,34828496      |
| TUBB3                                                                                               | 9,55507E-27 | 1,497262433 | 0,598 | 0,074 | 2,01622E-22 | 2,823065169   | 0,354224908     | 8,081081081     |
| COL5A2                                                                                              | 3,05732E-25 | 1,488710361 | 0,927 | 0,326 | 6,45124E-21 | 2,806379981   | 0,356330934     | 2,843558282     |
| MMP14                                                                                               | 1,2458E-20  | 1,479955532 | 0,89  | 0,316 | 2,62876E-16 | 2,789401355   | 0,358499862     | 2,816455696     |
| CSRP2                                                                                               | 5,96579E-21 | 1,479317957 | 0,549 | 0,091 | 1,25884E-16 | 2,788168897   | 0,35865833      | 6,032967033     |
| ENC1                                                                                                | 1,06132E-32 | 1,458627118 | 0,622 | 0,046 | 2,23949E-28 | 2,748466925   | 0,363839197     | 13,52173913     |
| CCND1                                                                                               | 3,18616E-15 | 1,455715169 | 0,744 | 0,305 | 6,72313E-11 | 2,742924989   | 0,364574315     | 2,439344262     |
| SLC15A3                                                                                             | 2,22243E-26 | 1,448380917 | 0,707 | 0,119 | 4,68954E-22 | 2,729016122   | 0,366432427     | 5,941176471     |
| CDKN2A                                                                                              | 1,76597E-22 | 1,437972217 | 0,427 | 0,028 | 3,72636E-18 | 2,709397779   | 0,369085709     | 15,25           |
| PPIB                                                                                                | 3,62907E-23 | 1,435850422 | 0,939 | 0,551 | 7,65771E-19 | 2,705415952   | 0,369628929     | 1,704174229     |
| CFL1                                                                                                | 6,82296E-24 | 1,433647643 | 0,988 | 0,709 | 1,43971E-19 | 2,701288339   | 0,370193728     | 1,393511989     |

Supplementary Table 2

| Differentially expressed genes_keloid-XL_comparing SC-Keloid vs. (SC-Myel, SC-Nonmyel, SC-Nonmyel2) |             |             |       |       |             |               |                 |                 |
|-----------------------------------------------------------------------------------------------------|-------------|-------------|-------|-------|-------------|---------------|-----------------|-----------------|
| gene                                                                                                | p_val       | avg_log2FC  | pct.1 | pct.2 | p_val_adj   | Foldchange_UP | Foldchange_DOWN | Ratio_pct1_pct2 |
| ISLR                                                                                                | 1,88969E-37 | 1,427952535 | 0,512 | 0     | 3,98742E-33 | 2,690645893   | 0,371657974     | #DIV/0!         |
| ATOX1                                                                                               | 2,77868E-25 | 1,426045969 | 0,768 | 0,193 | 5,86329E-21 | 2,68709247    | 0,372149456     | 3,979274611     |
| ATP5F1E                                                                                             | 2,55495E-21 | 1,416318029 | 0,963 | 0,635 | 5,39121E-17 | 2,66903464    | 0,374667299     | 1,516535433     |
| MYL12A                                                                                              | 1,01094E-16 | 1,397384056 | 0,866 | 0,582 | 2,13319E-12 | 2,634235003   | 0,379616852     | 1,487972509     |
| LYPD1                                                                                               | 4,35129E-32 | 1,389825846 | 0,646 | 0,056 | 9,18165E-28 | 2,620470461   | 0,381610865     | 11,53571429     |
| CALB2                                                                                               | 2,94856E-25 | 1,385608713 | 0,366 | 0,004 | 6,22175E-21 | 2,612821764   | 0,382727982     | 91,5            |
| ACTG1                                                                                               | 2,10965E-19 | 1,360547517 | 0,939 | 0,888 | 4,45157E-15 | 2,567826125   | 0,389434468     | 1,057432432     |
| MYH9                                                                                                | 9,80578E-19 | 1,359781339 | 0,72  | 0,204 | 2,06912E-14 | 2,566462782   | 0,389641341     | 3,529411765     |
| S100A10                                                                                             | 8,75227E-24 | 1,34296843  | 1     | 0,891 | 1,84682E-19 | 2,536727288   | 0,394208713     | 1,122334456     |
| UQCR11                                                                                              | 1,14514E-19 | 1,317434553 | 0,841 | 0,326 | 2,41637E-15 | 2,492225399   | 0,401247817     | 2,579754601     |
| PHLDA2                                                                                              | 1,18899E-25 | 1,313456336 | 0,72  | 0,13  | 2,50889E-21 | 2,485362579   | 0,40235578      | 5,538461538     |
| COL4A2                                                                                              | 1,18968E-17 | 1,303975734 | 0,976 | 0,719 | 2,51034E-13 | 2,469083683   | 0,405008549     | 1,35744089      |
| TMED9                                                                                               | 6,44674E-23 | 1,293342579 | 0,793 | 0,232 | 1,36033E-18 | 2,450952593   | 0,408004628     | 3,418103448     |
| OST4                                                                                                | 2,0745E-16  | 1,287697766 | 0,902 | 0,47  | 4,3774E-12  | 2,441381521   | 0,409604149     | 1,919148936     |
| ADAMTSL1                                                                                            | 5,12554E-28 | 1,281280043 | 0,732 | 0,112 | 1,08154E-23 | 2,430545333   | 0,411430302     | 6,535714286     |
| RGS16                                                                                               | 4,81023E-17 | 1,277923538 | 0,78  | 0,284 | 1,01501E-12 | 2,424897117   | 0,41238863      | 2,746478873     |
| CDK2AP1                                                                                             | 3,21289E-16 | 1,254193557 | 0,805 | 0,33  | 6,77952E-12 | 2,385337749   | 0,419227843     | 2,439393939     |
| PRRX1                                                                                               | 9,43329E-27 | 1,253395425 | 0,598 | 0,063 | 1,99052E-22 | 2,38401849    | 0,419459834     | 9,492063492     |
| BSG                                                                                                 | 3,59957E-20 | 1,250317609 | 0,963 | 0,421 | 7,59545E-16 | 2,378937895   | 0,420355656     | 2,287410926     |
| PFN1                                                                                                | 2,12696E-17 | 1,249913788 | 0,89  | 0,561 | 4,4881E-13  | 2,378272106   | 0,420473333     | 1,586452763     |
| COL4A1                                                                                              | 1,37339E-14 | 1,242931285 | 0,951 | 0,635 | 2,89799E-10 | 2,366789312   | 0,422513316     | 1,497637795     |
| COL6A3                                                                                              | 8,11708E-18 | 1,24174266  | 0,354 | 0,028 | 1,71279E-13 | 2,364840136   | 0,422861565     | 12,64285714     |
| CDH6                                                                                                | 8,03257E-19 | 1,239794178 | 0,683 | 0,168 | 1,69495E-14 | 2,361648375   | 0,423433061     | 4,06547619      |
| EMP3                                                                                                | 1,23338E-16 | 1,23844335  | 0,915 | 0,47  | 2,60256E-12 | 2,359438144   | 0,423829717     | 1,946808511     |
| ADAMTS16                                                                                            | 1,03115E-34 | 1,234480386 | 0,573 | 0,025 | 2,17583E-30 | 2,352965856   | 0,424995542     | 22,92           |
| TIMP4                                                                                               | 4,83669E-23 | 1,22783714  | 0,659 | 0,112 | 1,02059E-18 | 2,34215595    | 0,426957052     | 5,883928571     |
| NGFR                                                                                                | 6,22554E-16 | 1,226256474 | 0,902 | 0,446 | 1,31365E-11 | 2,339591211   | 0,427425097     | 2,022421525     |
| THBS2                                                                                               | 2,33723E-20 | 1,220693936 | 0,646 | 0,13  | 4,93178E-16 | 2,330587916   | 0,429076283     | 4,969230769     |
| TENM3                                                                                               | 3,80701E-19 | 1,202970271 | 0,72  | 0,196 | 8,03316E-15 | 2,302131543   | 0,434380044     | 3,673469388     |
| LOXL3                                                                                               | 1,8427E-28  | 1,19256383  | 0,646 | 0,07  | 3,88828E-24 | 2,285585566   | 0,437524639     | 9,228571429     |

Supplementary Table 2

| Differentially expressed genes_keloid-XL_comparing SC-Keloid vs. (SC-Myel, SC-Nonmyel, SC-Nonmyel2) |             |             |       |       |             |               |                 |                 |
|-----------------------------------------------------------------------------------------------------|-------------|-------------|-------|-------|-------------|---------------|-----------------|-----------------|
| gene                                                                                                | p_val       | avg_log2FC  | pct.1 | pct.2 | p_val_adj   | Foldchange_UP | Foldchange_DOWN | Ratio_pct1_pct2 |
| P3H2                                                                                                | 4,94023E-34 | 1,188752101 | 0,598 | 0,035 | 1,04244E-29 | 2,279554814   | 0,438682147     | 17,08571429     |
| TPST2                                                                                               | 1,56728E-31 | 1,183237268 | 0,585 | 0,042 | 3,30711E-27 | 2,270857642   | 0,440362258     | 13,92857143     |
| CD276                                                                                               | 2,14028E-25 | 1,181847037 | 0,634 | 0,095 | 4,5162E-21  | 2,26867042    | 0,440786811     | 6,673684211     |
| FLNA                                                                                                | 1,07565E-13 | 1,178181262 | 0,866 | 0,53  | 2,26974E-09 | 2,262913224   | 0,44190824      | 1,633962264     |
| COL5A3                                                                                              | 1,41652E-11 | 1,175518208 | 0,683 | 0,263 | 2,989E-07   | 2,258739991   | 0,442724707     | 2,596958175     |
| DSEL                                                                                                | 4,70947E-24 | 1,173977256 | 0,598 | 0,081 | 9,93745E-20 | 2,256328704   | 0,443197837     | 7,382716049     |
| STMP1                                                                                               | 1,16258E-20 | 1,168524364 | 0,78  | 0,211 | 2,45315E-16 | 2,247816653   | 0,444876142     | 3,696682464     |
| ANGPTL2                                                                                             | 1,33042E-19 | 1,16814382  | 0,707 | 0,168 | 2,80733E-15 | 2,247223818   | 0,444993504     | 4,208333333     |
| RCAN1                                                                                               | 8,01016E-08 | 1,167599034 | 0,793 | 0,512 | 0,001690224 | 2,246375387   | 0,445161573     | 1,548828125     |
| PDIA4                                                                                               | 3,35776E-21 | 1,162338444 | 0,72  | 0,158 | 7,08521E-17 | 2,238199204   | 0,446787756     | 4,556962025     |
| PPFIBP1                                                                                             | 1,01044E-14 | 1,160154914 | 0,805 | 0,326 | 2,13214E-10 | 2,234814234   | 0,447464485     | 2,469325153     |
| TAGLN2                                                                                              | 1,3442E-18  | 1,157733351 | 0,951 | 0,667 | 2,83641E-14 | 2,231066245   | 0,448216185     | 1,425787106     |
| P4HB                                                                                                | 3,08161E-17 | 1,15324973  | 0,805 | 0,316 | 6,50249E-13 | 2,224143281   | 0,449611322     | 2,547468354     |
| CYTOR                                                                                               | 2,73679E-18 | 1,152021859 | 0,598 | 0,13  | 5,7749E-14  | 2,222251128   | 0,449994147     | 4,6             |
| CRIP2                                                                                               | 5,09393E-16 | 1,1352815   | 0,878 | 0,407 | 1,07487E-11 | 2,196614192   | 0,45524608      | 2,157248157     |
| GAPDH                                                                                               | 9,14084E-13 | 1,129295436 | 0,963 | 0,761 | 1,92881E-08 | 2,18751883    | 0,457138922     | 1,26544021      |
| FKBP10                                                                                              | 4,16567E-24 | 1,128440052 | 0,695 | 0,123 | 8,78997E-20 | 2,18622222    | 0,457410043     | 5,650406504     |
| GRN                                                                                                 | 9,37728E-25 | 1,126470611 | 0,744 | 0,137 | 1,9787E-20  | 2,183239817   | 0,458034886     | 5,430656934     |
| ABHD2                                                                                               | 1,82113E-19 | 1,121888852 | 0,646 | 0,14  | 3,84277E-15 | 2,176317209   | 0,459491841     | 4,614285714     |
| KIRREL3                                                                                             | 9,38378E-22 | 1,120760419 | 0,61  | 0,098 | 1,98007E-17 | 2,174615625   | 0,459851382     | 6,224489796     |
| PLOD1                                                                                               | 2,72906E-23 | 1,113425352 | 0,646 | 0,105 | 5,75859E-19 | 2,163587327   | 0,462195349     | 6,152380952     |
| BBLN                                                                                                | 7,83839E-16 | 1,112231867 | 0,78  | 0,26  | 1,65398E-11 | 2,161798217   | 0,462577863     | 3               |
| APOC2                                                                                               | 4,44145E-22 | 1,111506396 | 0,5   | 0,056 | 9,37191E-18 | 2,160711411   | 0,462810533     | 8,928571429     |
| ANXA5                                                                                               | 8,65981E-17 | 1,110886539 | 0,976 | 0,649 | 1,82731E-12 | 2,159783257   | 0,463009423     | 1,50385208      |
| ELOB                                                                                                | 1,75296E-14 | 1,110757793 | 0,854 | 0,432 | 3,69893E-10 | 2,159590526   | 0,463050744     | 1,976851852     |
| CAP1                                                                                                | 6,03086E-14 | 1,109323682 | 0,768 | 0,337 | 1,27257E-09 | 2,157444852   | 0,463511269     | 2,278931751     |
| LGALS1                                                                                              | 5,92638E-12 | 1,106029625 | 0,988 | 0,898 | 1,25053E-07 | 2,15252445    | 0,464570797     | 1,100222717     |
| BMP1                                                                                                | 1,70077E-23 | 1,104707308 | 0,659 | 0,109 | 3,5888E-19  | 2,150552436   | 0,4649968       | 6,04587156      |
| APRT                                                                                                | 3,49156E-21 | 1,095907891 | 0,732 | 0,172 | 7,36755E-17 | 2,137475511   | 0,467841617     | 4,255813953     |
| LSM7                                                                                                | 2,70165E-19 | 1,091575216 | 0,805 | 0,277 | 5,70076E-15 | 2,131065913   | 0,469248742     | 2,906137184     |

Supplementary Table 2

| Differentially expressed genes_keloid-XL_comparing SC-Keloid vs. (SC-Myel, SC-Nonmyel, SC-Nonmyel2) |             |             |       |       |             |               |                 |                 |
|-----------------------------------------------------------------------------------------------------|-------------|-------------|-------|-------|-------------|---------------|-----------------|-----------------|
| gene                                                                                                | p_val       | avg_log2FC  | pct.1 | pct.2 | p_val_adj   | Foldchange_UP | Foldchange_DOWN | Ratio_pct1_pct2 |
| CRLF1                                                                                               | 7,62731E-11 | 1,086386213 | 0,378 | 0,084 | 1,60944E-06 | 2,123414786   | 0,470939548     | 4,5             |
| DBNDD1                                                                                              | 1,67922E-32 | 1,085994828 | 0,463 | 0,004 | 3,54332E-28 | 2,122838807   | 0,471067326     | 115,75          |
| SERF2                                                                                               | 1,57319E-15 | 1,080888041 | 0,988 | 0,856 | 3,31959E-11 | 2,115337763   | 0,472737743     | 1,154205607     |
| PLS3                                                                                                | 1,2554E-19  | 1,080113085 | 0,768 | 0,214 | 2,64902E-15 | 2,114201796   | 0,472991747     | 3,588785047     |
| VAMP5                                                                                               | 2,77017E-18 | 1,079660022 | 0,72  | 0,218 | 5,84533E-14 | 2,113537956   | 0,473140308     | 3,302752294     |
| TRAF1                                                                                               | 4,57707E-26 | 1,074681264 | 0,5   | 0,035 | 9,65808E-22 | 2,106256683   | 0,474775942     | 14,28571429     |
| NDUFA4                                                                                              | 1,01263E-14 | 1,073128757 | 0,878 | 0,502 | 2,13674E-10 | 2,103991326   | 0,47528713      | 1,749003984     |
| TIMP1                                                                                               | 3,42035E-15 | 1,072740781 | 0,976 | 0,653 | 7,21729E-11 | 2,103425587   | 0,475414964     | 1,494640123     |
| CYTL1                                                                                               | 6,40469E-25 | 1,069086869 | 0,573 | 0,067 | 1,35145E-20 | 2,098104984   | 0,476620573     | 8,552238806     |
| SPARC                                                                                               | 4,64894E-17 | 1,066926586 | 1     | 0,926 | 9,80973E-13 | 2,094965645   | 0,477334797     | 1,079913607     |
| PDIA6                                                                                               | 1,4584E-14  | 1,066890247 | 0,793 | 0,316 | 3,07737E-10 | 2,094912877   | 0,47734682      | 2,509493671     |
| ARHGDI1                                                                                             | 2,07492E-18 | 1,064881859 | 0,817 | 0,26  | 4,37829E-14 | 2,091998561   | 0,478011801     | 3,142307692     |
| ECM1                                                                                                | 5,26123E-18 | 1,058558764 | 0,646 | 0,144 | 1,11017E-13 | 2,082849739   | 0,480111446     | 4,486111111     |
| NDUFB2                                                                                              | 1,40457E-16 | 1,058438247 | 0,817 | 0,277 | 2,96377E-12 | 2,082675753   | 0,480151554     | 2,949458484     |
| TXNDC17                                                                                             | 1,76196E-21 | 1,050111493 | 0,683 | 0,137 | 3,71791E-17 | 2,070689867   | 0,482930842     | 4,98540146      |
| CAPNS1                                                                                              | 1,38345E-19 | 1,046388391 | 0,829 | 0,232 | 2,91922E-15 | 2,065353014   | 0,48417873      | 3,573275862     |
| POLR2L                                                                                              | 2,31601E-17 | 1,043107339 | 0,866 | 0,358 | 4,887E-13   | 2,060661219   | 0,485281128     | 2,418994413     |
| PDLIM1                                                                                              | 1,61542E-19 | 1,037855495 | 0,573 | 0,102 | 3,40869E-15 | 2,053173428   | 0,487050917     | 5,617647059     |
| LAMB2                                                                                               | 6,99846E-18 | 1,035362193 | 0,732 | 0,196 | 1,47675E-13 | 2,049628147   | 0,487893378     | 3,734693878     |
| SCRG1                                                                                               | 5,98067E-07 | 1,035312396 | 0,366 | 0,126 | 0,012619813 | 2,049557402   | 0,487910219     | 2,904761905     |
| SEM1                                                                                                | 1,33093E-15 | 1,033872991 | 0,829 | 0,365 | 2,80839E-11 | 2,047513538   | 0,488397259     | 2,271232877     |
| HSBP1                                                                                               | 9,92472E-15 | 1,028784106 | 0,915 | 0,432 | 2,09422E-10 | 2,040303972   | 0,490123047     | 2,118055556     |
| TPM4                                                                                                | 4,15742E-14 | 1,025928253 | 0,866 | 0,495 | 8,77258E-10 | 2,036269131   | 0,49109422      | 1,749494949     |
| NCS1                                                                                                | 8,47452E-24 | 1,024926172 | 0,537 | 0,06  | 1,78821E-19 | 2,034855251   | 0,491435447     | 8,95            |
| CYBA                                                                                                | 3,14133E-17 | 1,018306593 | 0,768 | 0,235 | 6,62852E-13 | 2,025540025   | 0,493695502     | 3,268085106     |
| SSR4                                                                                                | 1,6312E-15  | 1,017204361 | 0,89  | 0,386 | 3,44199E-11 | 2,023993085   | 0,494072834     | 2,305699482     |
| FRMD4A                                                                                              | 3,26816E-16 | 1,01454576  | 0,695 | 0,193 | 6,89614E-12 | 2,020266701   | 0,494984152     | 3,601036269     |
| UQCRCQ                                                                                              | 6,8204E-15  | 1,010868812 | 0,768 | 0,274 | 1,43917E-10 | 2,015124272   | 0,49624731      | 2,802919708     |
| VCAN                                                                                                | 4,00491E-18 | 1,00951676  | 0,5   | 0,077 | 8,45076E-14 | 2,013236641   | 0,496712597     | 6,493506494     |
| ANXA2                                                                                               | 1,99468E-12 | 1,009063799 | 0,963 | 0,832 | 4,20898E-08 | 2,012604646   | 0,496868574     | 1,157451923     |



Supplementary Table 2

| Differentially expressed genes_keloid-XL_comparing SC-Keloid vs. (SC-Myel, SC-Nonmyel, SC-Nonmyel2) |             |             |       |       |             |               |                 |                 |
|-----------------------------------------------------------------------------------------------------|-------------|-------------|-------|-------|-------------|---------------|-----------------|-----------------|
| gene                                                                                                | p_val       | avg_log2FC  | pct.1 | pct.2 | p_val_adj   | Foldchange_UP | Foldchange_DOWN | Ratio_pct1_pct2 |
| SCX                                                                                                 | 6,24715E-16 | 1,007808137 | 0,293 | 0,018 | 1,31821E-11 | 2,010853721   | 0,497301216     | 16,27777778     |
| DYNLT1                                                                                              | 2,4264E-20  | 1,00406928  | 0,683 | 0,151 | 5,11994E-16 | 2,005649183   | 0,498591682     | 4,523178808     |
| MAGED2                                                                                              | 1,99518E-12 | 1,004029625 | 0,72  | 0,312 | 4,21003E-08 | 2,005594055   | 0,498605387     | 2,307692308     |
| RAB13                                                                                               | 1,00729E-14 | 1,001607342 | 0,817 | 0,337 | 2,12548E-10 | 2,002229492   | 0,499443248     | 2,424332344     |
| ATP5MF                                                                                              | 2,03747E-14 | 0,99891078  | 0,78  | 0,312 | 4,29927E-10 | 1,998490591   | 0,500377637     | 2,5             |
| STX8                                                                                                | 3,63073E-19 | 0,996126176 | 0,561 | 0,102 | 7,66121E-15 | 1,994636943   | 0,501344369     | 5,5             |
| NDUFS5                                                                                              | 7,91025E-13 | 0,991379512 | 0,829 | 0,428 | 1,66914E-08 | 1,988085099   | 0,502996577     | 1,936915888     |
| APP                                                                                                 | 2,407E-13   | 0,990634012 | 0,951 | 0,54  | 5,07901E-09 | 1,987058039   | 0,503256563     | 1,761111111     |
| FXVD5                                                                                               | 4,36389E-18 | 0,986372999 | 0,695 | 0,172 | 9,20825E-14 | 1,981197903   | 0,504745134     | 4,040697674     |
| MFGE8                                                                                               | 6,3249E-14  | 0,98105308  | 0,72  | 0,235 | 1,33462E-09 | 1,973905715   | 0,50660981      | 3,063829787     |
| PLAT                                                                                                | 1,21971E-11 | 0,977582849 | 0,915 | 0,495 | 2,5737E-07  | 1,969163426   | 0,507829867     | 1,848484848     |
| RHOC                                                                                                | 3,56084E-13 | 0,973215112 | 0,829 | 0,389 | 7,51374E-09 | 1,963210829   | 0,509369643     | 2,131105398     |
| BEX3                                                                                                | 2,37171E-13 | 0,972839403 | 0,854 | 0,396 | 5,00455E-09 | 1,962699633   | 0,509502312     | 2,156565657     |
| PERP                                                                                                | 3,77597E-22 | 0,971764878 | 0,622 | 0,098 | 7,96768E-18 | 1,96123835    | 0,509881932     | 6,346938776     |
| PTMS                                                                                                | 8,4227E-12  | 0,9716285   | 0,927 | 0,632 | 1,77727E-07 | 1,961052964   | 0,509930134     | 1,466772152     |
| PKM                                                                                                 | 3,06907E-12 | 0,971155154 | 0,744 | 0,344 | 6,47605E-08 | 1,96040965    | 0,510097469     | 2,162790698     |
| CAMK2N1                                                                                             | 2,55643E-13 | 0,966619342 | 0,671 | 0,221 | 5,39431E-09 | 1,954255831   | 0,511703731     | 3,036199095     |
| PHPT1                                                                                               | 1,36833E-14 | 0,961893377 | 0,744 | 0,256 | 2,88731E-10 | 1,947864575   | 0,513382713     | 2,90625         |
| KCNMA1                                                                                              | 6,30954E-21 | 0,960681885 | 0,72  | 0,151 | 1,33138E-16 | 1,946229557   | 0,513814003     | 4,768211921     |
| SERPINE2                                                                                            | 2,58298E-13 | 0,958848978 | 0,695 | 0,218 | 5,45035E-09 | 1,943758491   | 0,514467206     | 3,188073394     |
| CD63                                                                                                | 1,8822E-12  | 0,958002214 | 0,963 | 0,768 | 3,97162E-08 | 1,942617972   | 0,514769252     | 1,25390625      |
| SDCCAG8                                                                                             | 1,53642E-17 | 0,957897798 | 0,585 | 0,116 | 3,242E-13   | 1,94247738    | 0,51480651      | 5,043103448     |
| GPR17                                                                                               | 5,91491E-30 | 0,948342481 | 0,524 | 0,025 | 1,2481E-25  | 1,929654394   | 0,518227514     | 20,96           |
| EMC10                                                                                               | 9,49018E-16 | 0,945390446 | 0,793 | 0,277 | 2,00252E-11 | 1,925709983   | 0,519288994     | 2,862815884     |
| CYB5R3                                                                                              | 1,2062E-12  | 0,941679138 | 0,744 | 0,277 | 2,5452E-08  | 1,920762495   | 0,520626576     | 2,685920578     |
| HLA-A                                                                                               | 7,74157E-10 | 0,941426965 | 0,951 | 0,621 | 1,63355E-05 | 1,920426787   | 0,520717586     | 1,531400966     |
| CTSB                                                                                                | 5,99762E-17 | 0,93725039  | 0,537 | 0,102 | 1,26556E-12 | 1,914875227   | 0,522227237     | 5,264705882     |
| PDIA3                                                                                               | 7,06661E-13 | 0,933322318 | 0,866 | 0,449 | 1,49113E-08 | 1,909668626   | 0,52365106      | 1,928730512     |
| ANXA6                                                                                               | 2,31451E-16 | 0,932048543 | 0,512 | 0,095 | 4,88384E-12 | 1,907983299   | 0,524113602     | 5,389473684     |
| ANAPC11                                                                                             | 8,98081E-19 | 0,930209237 | 0,732 | 0,189 | 1,89504E-14 | 1,905552342   | 0,524782226     | 3,873015873     |

Supplementary Table 2

| Differentially expressed genes_keloid-XL_comparing SC-Keloid vs. (SC-Myel, SC-Nonmyel, SC-Nonmyel2) |             |             |       |       |             |               |                 |                 |
|-----------------------------------------------------------------------------------------------------|-------------|-------------|-------|-------|-------------|---------------|-----------------|-----------------|
| gene                                                                                                | p_val       | avg_log2FC  | pct.1 | pct.2 | p_val_adj   | Foldchange_UP | Foldchange_DOWN | Ratio_pct1_pct2 |
| COTL1                                                                                               | 7,51593E-10 | 0,927957889 | 0,659 | 0,253 | 1,58594E-05 | 1,902581018   | 0,525601796     | 2,604743083     |
| IL1RAP                                                                                              | 9,08427E-16 | 0,925825804 | 0,61  | 0,147 | 1,91687E-11 | 1,899771366   | 0,526379131     | 4,149659864     |
| ZYX                                                                                                 | 1,03062E-19 | 0,925783839 | 0,549 | 0,095 | 2,17471E-15 | 1,899716107   | 0,526394442     | 5,778947368     |
| RPS26                                                                                               | 2,58818E-10 | 0,911434282 | 0,805 | 0,446 | 5,46132E-06 | 1,880914515   | 0,531656273     | 1,804932735     |
| PET100                                                                                              | 8,35814E-17 | 0,910132754 | 0,744 | 0,218 | 1,76365E-12 | 1,879218412   | 0,532136123     | 3,412844037     |
| PLOD3                                                                                               | 1,74388E-19 | 0,908933624 | 0,695 | 0,154 | 3,67976E-15 | 1,877657105   | 0,532578604     | 4,512987013     |
| CHPF                                                                                                | 5,33508E-16 | 0,908081844 | 0,561 | 0,116 | 1,12575E-11 | 1,876548847   | 0,532893136     | 4,836206897     |
| ZNF385A                                                                                             | 2,03398E-24 | 0,906735798 | 0,439 | 0,025 | 4,29191E-20 | 1,874798828   | 0,533390562     | 17,56           |
| EVA1B                                                                                               | 3,40075E-23 | 0,903360178 | 0,61  | 0,084 | 7,17593E-19 | 1,870417299   | 0,534640051     | 7,261904762     |
| SLIRP                                                                                               | 1,17962E-13 | 0,900426541 | 0,561 | 0,151 | 2,48912E-09 | 1,866617777   | 0,535728317     | 3,715231788     |
| ARF5                                                                                                | 2,44054E-16 | 0,899238362 | 0,78  | 0,242 | 5,14979E-12 | 1,865081096   | 0,536169715     | 3,223140496     |
| SHISA4                                                                                              | 8,82195E-18 | 0,897446618 | 0,634 | 0,144 | 1,86152E-13 | 1,862766211   | 0,536836021     | 4,402777778     |
| P4HA2                                                                                               | 1,82312E-13 | 0,896586485 | 0,768 | 0,288 | 3,84697E-09 | 1,861655963   | 0,537156177     | 2,666666667     |
| SEPTIN9                                                                                             | 1,27153E-16 | 0,893258661 | 0,671 | 0,179 | 2,68305E-12 | 1,857366682   | 0,53839665      | 3,748603352     |
| CD82                                                                                                | 1,34986E-13 | 0,891355268 | 0,598 | 0,161 | 2,84833E-09 | 1,854917816   | 0,539107443     | 3,714285714     |
| PDGFB                                                                                               | 5,50193E-19 | 0,889679957 | 0,561 | 0,091 | 1,16096E-14 | 1,852765067   | 0,539733838     | 6,164835165     |
| MYLK                                                                                                | 3,63074E-26 | 0,887974269 | 0,476 | 0,028 | 7,66121E-22 | 1,850575851   | 0,540372339     | 17              |
| TLE5                                                                                                | 9,24541E-10 | 0,887629328 | 0,878 | 0,46  | 1,95087E-05 | 1,85013344    | 0,540501554     | 1,908695652     |
| TMSB4X                                                                                              | 3,99536E-13 | 0,870784216 | 1     | 0,912 | 8,43061E-09 | 1,828656646   | 0,546849515     | 1,096491228     |
| MICOS13                                                                                             | 7,2432E-13  | 0,870502663 | 0,61  | 0,186 | 1,52839E-08 | 1,828299804   | 0,546956247     | 3,279569892     |
| TMCO1                                                                                               | 1,17643E-15 | 0,869918559 | 0,695 | 0,207 | 2,48239E-11 | 1,827559731   | 0,547177738     | 3,357487923     |
| FIBIN                                                                                               | 1,20587E-12 | 0,865798401 | 0,561 | 0,158 | 2,54451E-08 | 1,822347892   | 0,548742644     | 3,550632911     |
| PDLIM4                                                                                              | 2,35977E-09 | 0,864493834 | 0,793 | 0,463 | 4,97935E-05 | 1,820700767   | 0,549239072     | 1,712742981     |
| ARPC2                                                                                               | 1,2248E-12  | 0,863781288 | 0,805 | 0,375 | 2,58446E-08 | 1,819801746   | 0,549510408     | 2,146666667     |
| GUK1                                                                                                | 3,37041E-12 | 0,861464405 | 0,78  | 0,351 | 7,11191E-08 | 1,816881598   | 0,550393598     | 2,222222222     |
| RPN2                                                                                                | 2,27221E-12 | 0,859516775 | 0,732 | 0,27  | 4,7946E-08  | 1,814430473   | 0,551137128     | 2,711111111     |
| RSU1                                                                                                | 8,13371E-19 | 0,858515075 | 0,573 | 0,102 | 1,71629E-14 | 1,813171105   | 0,55151993      | 5,617647059     |
| ARL4C                                                                                               | 3,56791E-22 | 0,858290988 | 0,598 | 0,084 | 7,52864E-18 | 1,812889495   | 0,551605601     | 7,119047619     |
| CTSA                                                                                                | 3,42944E-18 | 0,857684885 | 0,573 | 0,105 | 7,23646E-14 | 1,812128027   | 0,55183739      | 5,457142857     |
| URM1                                                                                                | 3,08305E-19 | 0,856940313 | 0,549 | 0,091 | 6,50555E-15 | 1,811193032   | 0,552122265     | 6,032967033     |

Supplementary Table 2

| Differentially expressed genes_keloid-XL_comparing SC-Keloid vs. (SC-Myel, SC-Nonmyel, SC-Nonmyel2) |             |             |       |       |             |               |                 |                 |
|-----------------------------------------------------------------------------------------------------|-------------|-------------|-------|-------|-------------|---------------|-----------------|-----------------|
| gene                                                                                                | p_val       | avg_log2FC  | pct.1 | pct.2 | p_val_adj   | Foldchange_UP | Foldchange_DOWN | Ratio_pct1_pct2 |
| DRAXIN                                                                                              | 9,20887E-18 | 0,854681362 | 0,415 | 0,049 | 1,94316E-13 | 1,808359311   | 0,552987448     | 8,469387755     |
| FSCN1                                                                                               | 7,43725E-14 | 0,846966148 | 0,622 | 0,175 | 1,56933E-09 | 1,798714418   | 0,555952624     | 3,554285714     |
| AP2S1                                                                                               | 3,94473E-17 | 0,844919414 | 0,683 | 0,179 | 8,32378E-13 | 1,796164413   | 0,556741907     | 3,815642458     |
| ATP5F1D                                                                                             | 2,64692E-14 | 0,843742567 | 0,793 | 0,291 | 5,58527E-10 | 1,794699828   | 0,557196242     | 2,725085911     |
| AQP1                                                                                                | 2,18541E-12 | 0,841925839 | 0,561 | 0,158 | 4,61144E-08 | 1,792441257   | 0,557898339     | 3,550632911     |
| HSP90B1                                                                                             | 3,20682E-09 | 0,841652819 | 0,927 | 0,628 | 6,76672E-05 | 1,792102083   | 0,558003927     | 1,47611465      |
| DNPH1                                                                                               | 2,00334E-16 | 0,841029495 | 0,512 | 0,095 | 4,22725E-12 | 1,791327963   | 0,558245068     | 5,389473684     |
| HLA-B                                                                                               | 2,55208E-07 | 0,840464841 | 0,963 | 0,786 | 0,00538515  | 1,790626994   | 0,558463601     | 1,22519084      |
| PLAC9                                                                                               | 4,34098E-09 | 0,837939222 | 0,598 | 0,232 | 9,15989E-05 | 1,787495019   | 0,559442118     | 2,577586207     |
| GSN                                                                                                 | 4,73998E-12 | 0,836296674 | 0,976 | 0,709 | 1,00018E-07 | 1,785461065   | 0,560079421     | 1,376586742     |
| OS9                                                                                                 | 1,22853E-11 | 0,832599471 | 0,683 | 0,232 | 2,59231E-07 | 1,780891312   | 0,561516581     | 2,943965517     |
| TIMM8B                                                                                              | 4,53808E-15 | 0,831204055 | 0,585 | 0,137 | 9,5758E-11  | 1,779169615   | 0,562059958     | 4,270072993     |
| CSPG4                                                                                               | 2,05286E-14 | 0,830909508 | 0,439 | 0,077 | 4,33173E-10 | 1,778806409   | 0,562174723     | 5,701298701     |
| SELENON                                                                                             | 5,36583E-22 | 0,830107698 | 0,622 | 0,102 | 1,13224E-17 | 1,777818073   | 0,562487251     | 6,098039216     |
| PLN                                                                                                 | 1,48819E-14 | 0,828904962 | 0,232 | 0,007 | 3,14022E-10 | 1,776336571   | 0,562956377     | 33,14285714     |
| CLIC1                                                                                               | 1,08167E-11 | 0,82736821  | 0,854 | 0,509 | 2,28244E-07 | 1,774445433   | 0,563556355     | 1,677799607     |
| TIMP2                                                                                               | 1,882E-08   | 0,826709309 | 0,963 | 0,635 | 0,000397121 | 1,773635202   | 0,563813798     | 1,516535433     |
| GNG5                                                                                                | 3,88886E-11 | 0,826677453 | 0,878 | 0,491 | 8,20589E-07 | 1,773596039   | 0,563826248     | 1,788187373     |
| DDOST                                                                                               | 1,3336E-16  | 0,82657897  | 0,61  | 0,137 | 2,81403E-12 | 1,773474971   | 0,563864738     | 4,452554745     |
| RABAC1                                                                                              | 1,35267E-13 | 0,82629854  | 0,866 | 0,365 | 2,85427E-09 | 1,773130278   | 0,563974352     | 2,37260274      |
| TSPAN3                                                                                              | 2,86913E-12 | 0,825928032 | 0,683 | 0,232 | 6,05415E-08 | 1,772674967   | 0,564119209     | 2,943965517     |
| DAP                                                                                                 | 7,61574E-14 | 0,825857676 | 0,622 | 0,168 | 1,607E-09   | 1,772588521   | 0,56414672      | 3,702380952     |
| TMEM54                                                                                              | 1,29734E-21 | 0,821362452 | 0,378 | 0,018 | 2,73751E-17 | 1,767073993   | 0,565907259     | 21              |
| ERGIC1                                                                                              | 4,48645E-19 | 0,820169183 | 0,524 | 0,081 | 9,46686E-15 | 1,765613032   | 0,566375521     | 6,469135802     |
| CHCHD2                                                                                              | 3,72429E-10 | 0,819493382 | 0,793 | 0,456 | 7,85863E-06 | 1,76478616    | 0,56664089      | 1,739035088     |
| FHDC1                                                                                               | 2,31128E-17 | 0,818784223 | 0,476 | 0,07  | 4,87703E-13 | 1,763918889   | 0,566919492     | 6,8             |
| NME2                                                                                                | 1,9937E-09  | 0,816974836 | 0,915 | 0,593 | 4,20691E-05 | 1,76170802    | 0,567630952     | 1,543001686     |
| RTN1                                                                                                | 1,38412E-20 | 0,816559361 | 0,317 | 0,007 | 2,92063E-16 | 1,761200746   | 0,567794445     | 45,28571429     |
| SERPINE1                                                                                            | 3,47646E-14 | 0,815271163 | 0,451 | 0,084 | 7,33568E-10 | 1,759628853   | 0,568301661     | 5,369047619     |
| RPL28                                                                                               | 7,02416E-13 | 0,812978946 | 0,988 | 0,933 | 1,48217E-08 | 1,756835297   | 0,569205321     | 1,058949625     |

Supplementary Table 2

| Differentially expressed genes_keloid-XL_comparing SC-Keloid vs. (SC-Myel, SC-Nonmyel, SC-Nonmyel2) |             |             |       |       |             |               |                 |                 |
|-----------------------------------------------------------------------------------------------------|-------------|-------------|-------|-------|-------------|---------------|-----------------|-----------------|
| gene                                                                                                | p_val       | avg_log2FC  | pct.1 | pct.2 | p_val_adj   | Foldchange_UP | Foldchange_DOWN | Ratio_pct1_pct2 |
| ATP5PF                                                                                              | 8,01045E-11 | 0,811054529 | 0,805 | 0,389 | 1,69028E-06 | 1,75449341    | 0,569965093     | 2,06940874      |
| TMEM160                                                                                             | 4,88517E-16 | 0,810074029 | 0,573 | 0,126 | 1,03082E-11 | 1,753301408   | 0,570352591     | 4,547619048     |
| OSTC                                                                                                | 1,24774E-13 | 0,809768479 | 0,61  | 0,179 | 2,63285E-09 | 1,752930113   | 0,570473399     | 3,407821229     |
| RBM3                                                                                                | 6,25709E-10 | 0,809521901 | 0,854 | 0,463 | 1,32031E-05 | 1,752630537   | 0,57057091      | 1,844492441     |
| CHST3                                                                                               | 9,08483E-15 | 0,808531958 | 0,585 | 0,14  | 1,91699E-10 | 1,751428336   | 0,570962556     | 4,178571429     |
| CALU                                                                                                | 2,28741E-10 | 0,801247308 | 0,841 | 0,432 | 4,82667E-06 | 1,742607078   | 0,573852828     | 1,946759259     |
| FKBP1A                                                                                              | 2,9835E-11  | 0,801152354 | 0,732 | 0,291 | 6,29549E-07 | 1,742492388   | 0,573890599     | 2,515463918     |
| CAVIN3                                                                                              | 3,9452E-09  | 0,797370779 | 0,878 | 0,572 | 8,32476E-05 | 1,737930969   | 0,575396847     | 1,534965035     |
| BCL7C                                                                                               | 1,76738E-14 | 0,792981077 | 0,634 | 0,165 | 3,72935E-10 | 1,732650986   | 0,577150279     | 3,842424242     |
| PRTFDC1                                                                                             | 1,77489E-21 | 0,792809286 | 0,329 | 0,007 | 3,7452E-17  | 1,732444681   | 0,577219008     | 47              |
| HLA-C                                                                                               | 4,8583E-06  | 0,790147963 | 0,951 | 0,67  | 0,102515065 | 1,729251806   | 0,57828478      | 1,419402985     |
| FAAP20                                                                                              | 1,73767E-17 | 0,7859519   | 0,622 | 0,133 | 3,66665E-13 | 1,724229603   | 0,579969163     | 4,676691729     |
| BRK1                                                                                                | 5,13362E-10 | 0,784857987 | 0,793 | 0,389 | 1,08324E-05 | 1,722922714   | 0,580409087     | 2,038560411     |
| NID1                                                                                                | 4,45846E-12 | 0,784413547 | 0,549 | 0,154 | 9,40779E-08 | 1,722392028   | 0,580587917     | 3,564935065     |
| CALD1                                                                                               | 3,58349E-09 | 0,781451222 | 0,78  | 0,453 | 7,56152E-05 | 1,718859022   | 0,581781279     | 1,721854305     |
| DHRS7                                                                                               | 9,03911E-15 | 0,781309239 | 0,549 | 0,126 | 1,90734E-10 | 1,718689868   | 0,581838538     | 4,357142857     |
| C4orf48                                                                                             | 1,16306E-12 | 0,781189928 | 0,573 | 0,161 | 2,45418E-08 | 1,718547739   | 0,581886658     | 3,559006211     |
| CMTM3                                                                                               | 4,18412E-15 | 0,778870831 | 0,683 | 0,196 | 8,82892E-11 | 1,715787435   | 0,582822779     | 3,484693878     |
| PPP1CA                                                                                              | 6,90533E-27 | 0,776780167 | 0,561 | 0,049 | 1,45709E-22 | 1,713302822   | 0,583667982     | 11,44897959     |
| RCN2                                                                                                | 3,09253E-14 | 0,775512401 | 0,707 | 0,211 | 6,52554E-10 | 1,711797921   | 0,584181104     | 3,3507109       |
| GNAI2                                                                                               | 2,56256E-10 | 0,774735853 | 0,902 | 0,509 | 5,40726E-06 | 1,710876773   | 0,584495631     | 1,772102161     |
| ABLIM3                                                                                              | 2,55859E-22 | 0,774450886 | 0,488 | 0,046 | 5,39889E-18 | 1,710538867   | 0,584611095     | 10,60869565     |
| NDUFB3                                                                                              | 1,1447E-14  | 0,772620519 | 0,61  | 0,154 | 2,41543E-10 | 1,708370059   | 0,58535327      | 3,961038961     |
| DCTN2                                                                                               | 7,82173E-17 | 0,771340457 | 0,671 | 0,168 | 1,65046E-12 | 1,706854944   | 0,585872867     | 3,994047619     |
| PPIA                                                                                                | 1,76878E-13 | 0,770271176 | 0,963 | 0,779 | 3,73229E-09 | 1,705590344   | 0,586307259     | 1,236200257     |
| CTSD                                                                                                | 2,25293E-09 | 0,770112053 | 0,841 | 0,418 | 4,75391E-05 | 1,705402236   | 0,58637193      | 2,011961722     |
| GSTP1                                                                                               | 6,14185E-10 | 0,769461295 | 0,793 | 0,358 | 1,29599E-05 | 1,704633152   | 0,586636485     | 2,215083799     |
| ARPC3                                                                                               | 9,65905E-12 | 0,769407    | 0,78  | 0,337 | 2,03816E-07 | 1,704569      | 0,586658563     | 2,314540059     |
| RGS3                                                                                                | 4,67365E-11 | 0,768462201 | 0,646 | 0,221 | 9,86186E-07 | 1,703453069   | 0,587042883     | 2,923076923     |
| TPPP3                                                                                               | 6,18389E-09 | 0,767412206 | 0,585 | 0,214 | 0,000130486 | 1,702213745   | 0,587470289     | 2,73364486      |

Supplementary Table 2

| Differentially expressed genes_keloid-XL_comparing SC-Keloid vs. (SC-Myel, SC-Nonmyel, SC-Nonmyel2) |             |             |       |       |             |               |                 |                 |
|-----------------------------------------------------------------------------------------------------|-------------|-------------|-------|-------|-------------|---------------|-----------------|-----------------|
| gene                                                                                                | p_val       | avg_log2FC  | pct.1 | pct.2 | p_val_adj   | Foldchange_UP | Foldchange_DOWN | Ratio_pct1_pct2 |
| FABP5                                                                                               | 9,54174E-10 | 0,764334671 | 0,622 | 0,228 | 2,0134E-05  | 1,698586479   | 0,588724809     | 2,728070175     |
| SLN                                                                                                 | 1,82136E-07 | 0,764042252 | 0,11  | 0,004 | 0,003843249 | 1,698242229   | 0,588844149     | 27,5            |
| NDUFA13                                                                                             | 3,93307E-10 | 0,763491016 | 0,805 | 0,414 | 8,29917E-06 | 1,697593475   | 0,589069182     | 1,944444444     |
| C1QL1                                                                                               | 8,43349E-13 | 0,761280353 | 0,634 | 0,186 | 1,77955E-08 | 1,694994219   | 0,589972514     | 3,408602151     |
| RPL36A                                                                                              | 5,76965E-09 | 0,757560189 | 0,951 | 0,8   | 0,000121745 | 1,690629102   | 0,591495792     | 1,18875         |
| SRM                                                                                                 | 3,5492E-09  | 0,755832786 | 0,5   | 0,158 | 7,48918E-05 | 1,688606047   | 0,592204441     | 3,164556962     |
| LTBP2                                                                                               | 4,5483E-17  | 0,754699597 | 0,451 | 0,06  | 9,59737E-13 | 1,687280225   | 0,59266978      | 7,516666667     |
| QPCT                                                                                                | 5,55105E-24 | 0,75190268  | 0,427 | 0,021 | 1,17133E-19 | 1,684012305   | 0,593819889     | 20,33333333     |
| C12orf75                                                                                            | 1,80795E-17 | 0,751259386 | 0,39  | 0,039 | 3,81495E-13 | 1,683261575   | 0,594084731     | 10              |
| PSMB3                                                                                               | 9,33162E-15 | 0,750991957 | 0,695 | 0,204 | 1,96907E-10 | 1,682949582   | 0,594194865     | 3,406862745     |
| MCRIP1                                                                                              | 3,44343E-15 | 0,748278747 | 0,732 | 0,232 | 7,26598E-11 | 1,679787511   | 0,595313391     | 3,155172414     |
| OPRD1                                                                                               | 6,12815E-23 | 0,74769693  | 0,366 | 0,011 | 1,2931E-18  | 1,679110214   | 0,595553521     | 33,27272727     |
| ZNHIT1                                                                                              | 1,78906E-10 | 0,747668856 | 0,659 | 0,242 | 3,7751E-06  | 1,679077541   | 0,59556511      | 2,723140496     |
| MLEC                                                                                                | 5,78727E-12 | 0,746779001 | 0,561 | 0,154 | 1,22117E-07 | 1,678042204   | 0,595932568     | 3,642857143     |
| RPL36                                                                                               | 6,84888E-09 | 0,746646571 | 0,976 | 0,849 | 0,000144518 | 1,677888177   | 0,595987274     | 1,14958775      |
| PXDN                                                                                                | 1,57083E-11 | 0,745987824 | 0,476 | 0,116 | 3,3146E-07  | 1,677122214   | 0,596259468     | 4,103448276     |
| EFEMP2                                                                                              | 2,25925E-19 | 0,745515884 | 0,573 | 0,095 | 4,76725E-15 | 1,676573678   | 0,596454551     | 6,031578947     |
| RPS2                                                                                                | 9,85872E-08 | 0,74529298  | 1     | 0,916 | 0,002080288 | 1,676314658   | 0,596546713     | 1,091703057     |
| SSR2                                                                                                | 7,03046E-10 | 0,744582334 | 0,756 | 0,34  | 1,4835E-05  | 1,675489139   | 0,596840634     | 2,223529412     |
| UBTD1                                                                                               | 3,77206E-18 | 0,744136435 | 0,463 | 0,063 | 7,95942E-14 | 1,674971369   | 0,597025131     | 7,349206349     |
| TPGS1                                                                                               | 3,44593E-22 | 0,743632729 | 0,61  | 0,091 | 7,27126E-18 | 1,674386668   | 0,597233613     | 6,703296703     |
| NDUFAF8                                                                                             | 1,67423E-17 | 0,743469769 | 0,573 | 0,112 | 3,53279E-13 | 1,674197547   | 0,597301078     | 5,116071429     |
| LINC00623                                                                                           | 1,5587E-19  | 0,743216027 | 0,573 | 0,091 | 3,28902E-15 | 1,673903115   | 0,597406141     | 6,296703297     |
| ANXA1                                                                                               | 9,19237E-12 | 0,742604441 | 0,951 | 0,667 | 1,93968E-07 | 1,673193665   | 0,597659447     | 1,425787106     |
| PGM3                                                                                                | 2,66793E-12 | 0,741968513 | 0,5   | 0,13  | 5,62961E-08 | 1,672456298   | 0,597922948     | 3,846153846     |
| NEDD8                                                                                               | 4,99914E-12 | 0,740999285 | 0,817 | 0,361 | 1,05487E-07 | 1,67133309    | 0,598324778     | 2,263157895     |
| MARCKSL1                                                                                            | 1,58504E-12 | 0,739251417 | 0,695 | 0,221 | 3,34459E-08 | 1,669309446   | 0,599050106     | 3,14479638      |
| LAMTOR2                                                                                             | 2,48739E-17 | 0,739014799 | 0,585 | 0,119 | 5,24863E-13 | 1,669035682   | 0,599148365     | 4,915966387     |
| NIBAN2                                                                                              | 1,28044E-08 | 0,73678107  | 0,829 | 0,439 | 0,000270186 | 1,66645351    | 0,600076746     | 1,888382688     |
| TAF10                                                                                               | 2,82578E-17 | 0,736655101 | 0,537 | 0,098 | 5,96268E-13 | 1,666308009   | 0,600129144     | 5,479591837     |

Supplementary Table 2

| Differentially expressed genes_keloid-XL_comparing SC-Keloid vs. (SC-Myel, SC-Nonmyel, SC-Nonmyel2) |             |             |       |       |             |               |                 |                 |
|-----------------------------------------------------------------------------------------------------|-------------|-------------|-------|-------|-------------|---------------|-----------------|-----------------|
| gene                                                                                                | p_val       | avg_log2FC  | pct.1 | pct.2 | p_val_adj   | Foldchange_UP | Foldchange_DOWN | Ratio_pct1_pct2 |
| SELENOF                                                                                             | 4,9864E-08  | 0,734854223 | 0,756 | 0,361 | 0,001052181 | 1,664229299   | 0,600878737     | 2,094182825     |
| COPE                                                                                                | 1,1654E-12  | 0,733691473 | 0,732 | 0,253 | 2,45911E-08 | 1,662888543   | 0,601363215     | 2,893280632     |
| QSOX1                                                                                               | 1,22983E-18 | 0,73038779  | 0,476 | 0,06  | 2,59507E-14 | 1,659084986   | 0,602741878     | 7,933333333     |
| COX8A                                                                                               | 3,82673E-10 | 0,730365782 | 0,805 | 0,354 | 8,07479E-06 | 1,659059677   | 0,602751073     | 2,274011299     |
| ACTG2                                                                                               | 1,25399E-12 | 0,728176638 | 0,171 | 0     | 2,64605E-08 | 1,656544131   | 0,603666381     | #DIV/0!         |
| TECR                                                                                                | 4,4026E-10  | 0,725601991 | 0,768 | 0,347 | 9,28993E-06 | 1,653590483   | 0,604744651     | 2,213256484     |
| HM13                                                                                                | 7,45032E-14 | 0,721961638 | 0,524 | 0,123 | 1,57209E-09 | 1,649423237   | 0,606272531     | 4,260162602     |
| TMEM47                                                                                              | 1,54587E-13 | 0,721035453 | 0,634 | 0,175 | 3,26194E-09 | 1,648364677   | 0,606661872     | 3,622857143     |
| MGAT4B                                                                                              | 5,19197E-12 | 0,719608199 | 0,537 | 0,14  | 1,09556E-07 | 1,646734761   | 0,607262337     | 3,835714286     |
| HOXB2                                                                                               | 2,93499E-17 | 0,718050187 | 0,439 | 0,06  | 6,19313E-13 | 1,64495736    | 0,607918493     | 7,316666667     |
| TRUB2                                                                                               | 1,76436E-26 | 0,716123514 | 0,476 | 0,025 | 3,72298E-22 | 1,642762038   | 0,608730891     | 19,04           |
| COX7A2                                                                                              | 2,02429E-09 | 0,715442361 | 0,744 | 0,358 | 4,27145E-05 | 1,641986609   | 0,609018365     | 2,078212291     |
| PRDX5                                                                                               | 1,00769E-11 | 0,715429537 | 0,707 | 0,274 | 2,12632E-07 | 1,641972014   | 0,609023779     | 2,580291971     |
| IFI27L2                                                                                             | 7,21906E-13 | 0,715147727 | 0,683 | 0,225 | 1,52329E-08 | 1,641651308   | 0,609142755     | 3,035555556     |
| COX6A1                                                                                              | 2,40012E-09 | 0,714043948 | 0,841 | 0,439 | 5,06449E-05 | 1,640395792   | 0,609608976     | 1,91571754      |
| PFKFB4                                                                                              | 8,10509E-25 | 0,710157351 | 0,439 | 0,021 | 1,71026E-20 | 1,63598254    | 0,611253467     | 20,9047619      |
| CTSZ                                                                                                | 4,66042E-13 | 0,709265443 | 0,671 | 0,214 | 9,83395E-09 | 1,63497145    | 0,611631475     | 3,135514019     |
| MYDGF                                                                                               | 1,96692E-11 | 0,707284519 | 0,634 | 0,225 | 4,1504E-07  | 1,632728056   | 0,612471866     | 2,817777778     |
| MICOS10                                                                                             | 3,76744E-12 | 0,70609852  | 0,695 | 0,232 | 7,94968E-08 | 1,631386389   | 0,612975569     | 2,995689655     |
| CTDNEP1                                                                                             | 8,74844E-16 | 0,705950632 | 0,671 | 0,175 | 1,84601E-11 | 1,631219166   | 0,613038408     | 3,834285714     |
| ECE1                                                                                                | 2,66522E-10 | 0,704791082 | 0,695 | 0,26  | 5,62388E-06 | 1,629908619   | 0,613531328     | 2,673076923     |
| ACTN1                                                                                               | 3,08625E-14 | 0,703331291 | 0,744 | 0,228 | 6,51229E-10 | 1,628260231   | 0,614152444     | 3,263157895     |
| NDUFA1                                                                                              | 5,86662E-09 | 0,70247871  | 0,78  | 0,393 | 0,000123792 | 1,627298272   | 0,614515493     | 1,984732824     |
| NDUFA7                                                                                              | 2,19295E-15 | 0,700904691 | 0,537 | 0,109 | 4,62735E-11 | 1,625523813   | 0,615186312     | 4,926605505     |
| MAZ                                                                                                 | 1,66128E-11 | 0,700585583 | 0,671 | 0,232 | 3,50546E-07 | 1,625164305   | 0,6153224       | 2,892241379     |
| PGAM1                                                                                               | 1,76128E-11 | 0,699630518 | 0,634 | 0,214 | 3,71648E-07 | 1,624088802   | 0,615729878     | 2,962616822     |
| NDUFA11                                                                                             | 2,98651E-11 | 0,697102675 | 0,768 | 0,302 | 6,30184E-07 | 1,621245618   | 0,616809686     | 2,543046358     |
| AGRN                                                                                                | 7,7145E-14  | 0,696062482 | 0,695 | 0,196 | 1,62784E-09 | 1,62007711    | 0,61725457      | 3,545918367     |
| RPLP2                                                                                               | 3,8604E-08  | 0,695895001 | 0,988 | 0,877 | 0,000814583 | 1,619889048   | 0,617326231     | 1,126567845     |
| RPL37A                                                                                              | 5,21782E-10 | 0,69498839  | 0,988 | 0,919 | 1,10101E-05 | 1,618871405   | 0,61771429      | 1,07508161      |

Supplementary Table 2

| Differentially expressed genes_keloid-XL_comparing SC-Keloid vs. (SC-Myel, SC-Nonmyel, SC-Nonmyel2) |             |             |       |       |             |               |                 |                 |
|-----------------------------------------------------------------------------------------------------|-------------|-------------|-------|-------|-------------|---------------|-----------------|-----------------|
| gene                                                                                                | p_val       | avg_log2FC  | pct.1 | pct.2 | p_val_adj   | Foldchange_UP | Foldchange_DOWN | Ratio_pct1_pct2 |
| LOXL1                                                                                               | 1,24125E-21 | 0,694176253 | 0,378 | 0,018 | 2,61916E-17 | 1,617960349   | 0,618062118     | 21              |
| C2orf27A                                                                                            | 6,70436E-23 | 0,692020473 | 0,488 | 0,042 | 1,41469E-18 | 1,615544481   | 0,618986362     | 11,61904762     |
| SDC3                                                                                                | 7,10678E-08 | 0,690675708 | 0,878 | 0,484 | 0,001499601 | 1,614039302   | 0,6195636       | 1,814049587     |
| COX6B1                                                                                              | 1,20668E-07 | 0,690071063 | 0,829 | 0,498 | 0,002546219 | 1,613362986   | 0,619823319     | 1,664658635     |
| KRT10                                                                                               | 2,41436E-07 | 0,687743629 | 0,793 | 0,481 | 0,005094545 | 1,61076232    | 0,620824058     | 1,648648649     |
| PSMD13                                                                                              | 4,30261E-16 | 0,687443265 | 0,537 | 0,102 | 9,07893E-12 | 1,610426999   | 0,620953325     | 5,264705882     |
| PLPP4                                                                                               | 1,1595E-20  | 0,687034782 | 0,305 | 0,004 | 2,44667E-16 | 1,60997109    | 0,621129166     | 76,25           |
| YWHAB                                                                                               | 4,15882E-10 | 0,685737104 | 0,817 | 0,393 | 8,77552E-06 | 1,608523601   | 0,621688112     | 2,078880407     |
| PLP2                                                                                                | 5,98914E-07 | 0,684790116 | 0,524 | 0,228 | 0,01263768  | 1,607468109   | 0,622096323     | 2,298245614     |
| CLDN4                                                                                               | 1,23006E-16 | 0,683947094 | 0,293 | 0,014 | 2,59555E-12 | 1,606529078   | 0,622459944     | 20,92857143     |
| HMGN1                                                                                               | 6,28396E-09 | 0,683648011 | 0,817 | 0,404 | 0,000132598 | 1,606196065   | 0,622588999     | 2,022277228     |
| MTPN                                                                                                | 3,83693E-14 | 0,683417485 | 0,683 | 0,186 | 8,0963E-10  | 1,605939435   | 0,622688489     | 3,672043011     |
| MFAP2                                                                                               | 4,39331E-19 | 0,682666618 | 0,354 | 0,021 | 9,27032E-15 | 1,605103823   | 0,623012659     | 16,85714286     |
| NUCB2                                                                                               | 2,21931E-10 | 0,68230636  | 0,549 | 0,172 | 4,68297E-06 | 1,604703059   | 0,623168252     | 3,191860465     |
| COX6C                                                                                               | 6,66007E-10 | 0,681769539 | 0,829 | 0,425 | 1,40534E-05 | 1,604106067   | 0,623400173     | 1,950588235     |
| NDUFB7                                                                                              | 5,21249E-13 | 0,67985351  | 0,732 | 0,256 | 1,09989E-08 | 1,601977084   | 0,624228655     | 2,859375        |
| RPLP1                                                                                               | 8,6321E-08  | 0,679813629 | 1     | 0,975 | 0,001821459 | 1,6019328     | 0,624245911     | 1,025641026     |
| GLRX2                                                                                               | 1,21776E-20 | 0,678821286 | 0,476 | 0,053 | 2,5696E-16  | 1,600831306   | 0,62467544      | 8,981132075     |
| SLC9A3R2                                                                                            | 2,55941E-14 | 0,678474295 | 0,683 | 0,2   | 5,40062E-10 | 1,600446327   | 0,624825702     | 3,415           |
| ADAM19                                                                                              | 5,80179E-18 | 0,676353387 | 0,512 | 0,077 | 1,22424E-13 | 1,598095238   | 0,625744935     | 6,649350649     |
| PDGFC                                                                                               | 1,59628E-17 | 0,673229864 | 0,537 | 0,088 | 3,36831E-13 | 1,594639006   | 0,627101178     | 6,102272727     |
| MRC2                                                                                                | 4,68471E-21 | 0,673226914 | 0,341 | 0,011 | 9,88521E-17 | 1,594635745   | 0,627102461     | 31              |
| CD81                                                                                                | 5,66536E-10 | 0,67300548  | 0,976 | 0,775 | 1,19545E-05 | 1,594391009   | 0,62719872      | 1,259354839     |
| REEP3                                                                                               | 1,70628E-10 | 0,672365952 | 0,707 | 0,27  | 3,60043E-06 | 1,593684393   | 0,62747681      | 2,618518519     |
| NRXN2                                                                                               | 5,82173E-09 | 0,671158209 | 0,476 | 0,147 | 0,000122844 | 1,592350809   | 0,628002319     | 3,238095238     |
| ATP5MJ                                                                                              | 4,89408E-10 | 0,667816745 | 0,707 | 0,284 | 1,0327E-05  | 1,588666991   | 0,629458537     | 2,48943662      |
| LAMTOR4                                                                                             | 7,56379E-11 | 0,66534076  | 0,72  | 0,277 | 1,59604E-06 | 1,585942824   | 0,630539755     | 2,599277978     |
| GLIPR1                                                                                              | 1,02223E-22 | 0,665007624 | 0,378 | 0,014 | 2,15701E-18 | 1,585576653   | 0,630685371     | 27              |
| ST8SIA2                                                                                             | 1,51419E-20 | 0,66462616  | 0,378 | 0,021 | 3,19509E-16 | 1,585157464   | 0,630852154     | 18              |
| TXNDC5                                                                                              | 8,78383E-13 | 0,664167008 | 0,439 | 0,088 | 1,85348E-08 | 1,584653052   | 0,631052961     | 4,988636364     |

Supplementary Table 2

| Differentially expressed genes_keloid-XL_comparing SC-Keloid vs. (SC-Myel, SC-Nonmyel, SC-Nonmyel2) |             |             |       |       |             |               |                 |                 |
|-----------------------------------------------------------------------------------------------------|-------------|-------------|-------|-------|-------------|---------------|-----------------|-----------------|
| gene                                                                                                | p_val       | avg_log2FC  | pct.1 | pct.2 | p_val_adj   | Foldchange_UP | Foldchange_DOWN | Ratio_pct1_pct2 |
| ERH                                                                                                 | 1,57148E-10 | 0,661121992 | 0,768 | 0,316 | 3,31597E-06 | 1,581311941   | 0,632386295     | 2,430379747     |
| CD99                                                                                                | 3,17303E-10 | 0,659632697 | 0,902 | 0,488 | 6,69541E-06 | 1,579680394   | 0,633039445     | 1,848360656     |
| PRDX4                                                                                               | 4,5924E-15  | 0,659054066 | 0,598 | 0,144 | 9,69043E-11 | 1,579046948   | 0,633293394     | 4,152777778     |
| ATP5MK                                                                                              | 1,77669E-08 | 0,659034752 | 0,866 | 0,491 | 0,0003749   | 1,579025808   | 0,633301872     | 1,763747454     |
| NDUFA3                                                                                              | 4,58528E-10 | 0,658654651 | 0,561 | 0,186 | 9,67539E-06 | 1,578609844   | 0,633468747     | 3,016129032     |
| RHOA                                                                                                | 9,45889E-09 | 0,658515825 | 0,939 | 0,66  | 0,000199592 | 1,578457947   | 0,633529707     | 1,422727273     |
| TAX1BP3                                                                                             | 1,09569E-09 | 0,658142951 | 0,89  | 0,421 | 2,31201E-05 | 1,578050037   | 0,633693468     | 2,114014252     |
| GABARAP                                                                                             | 1,62862E-07 | 0,657588498 | 0,854 | 0,551 | 0,003436543 | 1,577443681   | 0,633937054     | 1,549909256     |
| SHC1                                                                                                | 2,09903E-12 | 0,656252886 | 0,463 | 0,098 | 4,42916E-08 | 1,575983998   | 0,634524209     | 4,724489796     |
| CIAO2B                                                                                              | 6,0758E-10  | 0,65527897  | 0,756 | 0,337 | 1,28205E-05 | 1,574920461   | 0,634952701     | 2,243323442     |
| SEC61G                                                                                              | 2,21687E-10 | 0,654176115 | 0,756 | 0,326 | 4,67782E-06 | 1,573716988   | 0,63543827      | 2,319018405     |
| LAMTOR1                                                                                             | 1,09888E-12 | 0,653664536 | 0,659 | 0,196 | 2,31875E-08 | 1,573159048   | 0,635663636     | 3,362244898     |
| TMA7                                                                                                | 6,65353E-09 | 0,653082031 | 0,976 | 0,695 | 0,000140396 | 1,572523995   | 0,635920344     | 1,404316547     |
| IFI44                                                                                               | 2,56014E-13 | 0,652545731 | 0,476 | 0,098 | 5,40215E-09 | 1,571939542   | 0,636156782     | 4,857142857     |
| CAPG                                                                                                | 6,048E-17   | 0,651020069 | 0,28  | 0,011 | 1,27619E-12 | 1,570278081   | 0,636829879     | 25,45454545     |
| RAB34                                                                                               | 2,4802E-13  | 0,649847427 | 0,537 | 0,13  | 5,23348E-09 | 1,569002257   | 0,637347713     | 4,130769231     |
| COX7A1                                                                                              | 3,80433E-12 | 0,648069477 | 0,622 | 0,186 | 8,02751E-08 | 1,567069839   | 0,638133653     | 3,344086022     |
| DSTN                                                                                                | 3,41124E-11 | 0,647443803 | 0,805 | 0,33  | 7,19806E-07 | 1,566390372   | 0,638410461     | 2,439393939     |
| ITGA3                                                                                               | 4,11197E-12 | 0,644977425 | 0,585 | 0,165 | 8,67666E-08 | 1,563714818   | 0,639502797     | 3,545454545     |
| C7orf50                                                                                             | 2,76136E-14 | 0,643543487 | 0,622 | 0,154 | 5,82675E-10 | 1,562161366   | 0,640138735     | 4,038961039     |
| PRKCSH                                                                                              | 5,18498E-13 | 0,643104678 | 0,549 | 0,14  | 1,09408E-08 | 1,561686293   | 0,640333468     | 3,921428571     |
| RPN1                                                                                                | 1,91564E-09 | 0,642417881 | 0,549 | 0,186 | 4,04219E-05 | 1,560943027   | 0,640638372     | 2,951612903     |
| LMAN2                                                                                               | 2,69601E-10 | 0,642235518 | 0,573 | 0,186 | 5,68885E-06 | 1,560745729   | 0,640719357     | 3,080645161     |
| TGFB1I1                                                                                             | 3,13671E-12 | 0,641895307 | 0,585 | 0,168 | 6,61877E-08 | 1,560377723   | 0,640870467     | 3,482142857     |
| ALDH1A3                                                                                             | 1,00185E-15 | 0,641535618 | 0,561 | 0,109 | 2,11399E-11 | 1,559988742   | 0,641030267     | 5,146788991     |
| ATP5MG                                                                                              | 5,8368E-10  | 0,641301443 | 0,841 | 0,446 | 1,23162E-05 | 1,559735549   | 0,641134326     | 1,885650224     |
| MXRA8                                                                                               | 2,47648E-10 | 0,637009955 | 0,841 | 0,365 | 5,22563E-06 | 1,555102802   | 0,643044305     | 2,304109589     |
| LGALS3BP                                                                                            | 5,58853E-09 | 0,635770536 | 0,744 | 0,319 | 0,000117924 | 1,553767387   | 0,643596981     | 2,332288401     |
| SEC11A                                                                                              | 2,62115E-08 | 0,633959726 | 0,744 | 0,354 | 0,000553088 | 1,551818387   | 0,644405304     | 2,101694915     |
| COX5B                                                                                               | 4,70758E-10 | 0,632851814 | 0,756 | 0,33  | 9,93347E-06 | 1,550627132   | 0,644900363     | 2,290909091     |



Supplementary Table 2

| Differentially expressed genes_keloid-XL_comparing SC-Keloid vs. (SC-Myel, SC-Nonmyel, SC-Nonmyel2) |             |             |       |       |             |               |                 |                 |
|-----------------------------------------------------------------------------------------------------|-------------|-------------|-------|-------|-------------|---------------|-----------------|-----------------|
| gene                                                                                                | p_val       | avg_log2FC  | pct.1 | pct.2 | p_val_adj   | Foldchange_UP | Foldchange_DOWN | Ratio_pct1_pct2 |
| NDUFS8                                                                                              | 7,94916E-13 | 0,632420476 | 0,537 | 0,144 | 1,67735E-08 | 1,550163594   | 0,645093204     | 3,729166667     |
| ATP5MC3                                                                                             | 6,06014E-11 | 0,632368137 | 0,78  | 0,323 | 1,27875E-06 | 1,550107358   | 0,645116608     | 2,414860681     |
| DRAP1                                                                                               | 5,59097E-10 | 0,632183877 | 0,768 | 0,323 | 1,17975E-05 | 1,549909392   | 0,645199007     | 2,377708978     |
| PLEC                                                                                                | 5,20583E-07 | 0,629341868 | 0,793 | 0,432 | 0,010984831 | 1,546859183   | 0,646471257     | 1,835648148     |
| MMP24OS                                                                                             | 2,95866E-14 | 0,629279813 | 0,561 | 0,126 | 6,24307E-10 | 1,546792649   | 0,646499064     | 4,452380952     |
| PKN1                                                                                                | 7,82344E-11 | 0,628912401 | 0,561 | 0,168 | 1,65082E-06 | 1,546398776   | 0,64666373      | 3,339285714     |
| CSRP1                                                                                               | 1,891E-06   | 0,628316862 | 0,744 | 0,425 | 0,039902018 | 1,545760561   | 0,646930725     | 1,750588235     |
| CALM1                                                                                               | 7,45862E-07 | 0,627729464 | 0,89  | 0,782 | 0,015738442 | 1,545131327   | 0,647194178     | 1,138107417     |
| GDI1                                                                                                | 3,37058E-11 | 0,627670362 | 0,646 | 0,214 | 7,11226E-07 | 1,54506803    | 0,647220692     | 3,018691589     |
| C17orf49                                                                                            | 2,50602E-12 | 0,626356652 | 0,598 | 0,179 | 5,28796E-08 | 1,54366174    | 0,647810316     | 3,340782123     |
| SPCS1                                                                                               | 6,43093E-09 | 0,626120255 | 0,756 | 0,337 | 0,000135699 | 1,54340882    | 0,647916474     | 2,243323442     |
| COL20A1                                                                                             | 1,30395E-06 | 0,625612827 | 0,232 | 0,053 | 0,027514561 | 1,542866064   | 0,648144401     | 4,377358491     |
| UQCC2                                                                                               | 2,3792E-15  | 0,623959699 | 0,5   | 0,095 | 5,02035E-11 | 1,541099167   | 0,648887509     | 5,263157895     |
| RPL4                                                                                                | 7,95406E-08 | 0,623938165 | 0,927 | 0,653 | 0,001678386 | 1,541076164   | 0,648897195     | 1,419601838     |
| SEMA3C                                                                                              | 6,16035E-09 | 0,623877264 | 0,854 | 0,407 | 0,00012999  | 1,541011111   | 0,648924588     | 2,098280098     |
| MIA                                                                                                 | 2,41272E-08 | 0,623496229 | 0,927 | 0,575 | 0,000509108 | 1,540604163   | 0,649096        | 1,612173913     |
| COL18A1                                                                                             | 1,15303E-09 | 0,623479402 | 1     | 0,832 | 2,433E-05   | 1,540586194   | 0,649103571     | 1,201923077     |
| MANF                                                                                                | 3,53666E-12 | 0,62344384  | 0,561 | 0,161 | 7,46271E-08 | 1,54054822    | 0,649119571     | 3,48447205      |
| SFXN3                                                                                               | 5,09478E-19 | 0,623383868 | 0,415 | 0,039 | 1,07505E-14 | 1,540484182   | 0,649146555     | 10,64102564     |
| HEXB                                                                                                | 7,66309E-13 | 0,623132179 | 0,402 | 0,074 | 1,61699E-08 | 1,540215456   | 0,649259814     | 5,432432432     |
| ACTA2                                                                                               | 6,88075E-06 | 0,619089125 | 0,122 | 0,014 | 0,145190748 | 1,53590515    | 0,651081872     | 8,714285714     |
| EDF1                                                                                                | 1,08409E-07 | 0,619060769 | 0,78  | 0,463 | 0,002287539 | 1,535874962   | 0,651094669     | 1,684665227     |
| TMEM14C                                                                                             | 6,83141E-14 | 0,618581828 | 0,659 | 0,175 | 1,4415E-09  | 1,535365172   | 0,651310853     | 3,765714286     |
| PSMB1                                                                                               | 7,77843E-09 | 0,617594884 | 0,683 | 0,284 | 0,000164133 | 1,534315192   | 0,651756565     | 2,404929577     |
| MED4                                                                                                | 2,33849E-18 | 0,6171626   | 0,585 | 0,105 | 4,93444E-14 | 1,533855525   | 0,651951885     | 5,571428571     |
| CXXC5                                                                                               | 5,89814E-08 | 0,616132372 | 0,829 | 0,421 | 0,001244567 | 1,532760589   | 0,65241761      | 1,96912114      |
| ANKH                                                                                                | 1,18414E-11 | 0,615473508 | 0,415 | 0,088 | 2,49866E-07 | 1,532060753   | 0,65271563      | 4,715909091     |
| AP2M1                                                                                               | 9,66228E-09 | 0,613954279 | 0,671 | 0,291 | 0,000203884 | 1,530448267   | 0,653403334     | 2,305841924     |
| NME4                                                                                                | 3,16137E-11 | 0,613485638 | 0,451 | 0,112 | 6,6708E-07  | 1,529951201   | 0,653615618     | 4,026785714     |
| AURKAIP1                                                                                            | 6,60256E-15 | 0,611955161 | 0,61  | 0,147 | 1,39321E-10 | 1,528329019   | 0,654309371     | 4,149659864     |

Supplementary Table 2

| Differentially expressed genes_keloid-XL_comparing SC-Keloid vs. (SC-Myel, SC-Nonmyel, SC-Nonmyel2) |             |             |       |       |             |               |                 |                 |
|-----------------------------------------------------------------------------------------------------|-------------|-------------|-------|-------|-------------|---------------|-----------------|-----------------|
| gene                                                                                                | p_val       | avg_log2FC  | pct.1 | pct.2 | p_val_adj   | Foldchange_UP | Foldchange_DOWN | Ratio_pct1_pct2 |
| LIMK1                                                                                               | 2,10212E-11 | 0,611177085 | 0,28  | 0,035 | 4,43569E-07 | 1,527504981   | 0,65466235      | 8               |
| SRPX                                                                                                | 1,60128E-11 | 0,611127358 | 0,451 | 0,102 | 3,37886E-07 | 1,527452332   | 0,654684915     | 4,421568627     |
| KCNN4                                                                                               | 2,3339E-17  | 0,609376803 | 0,354 | 0,028 | 4,92477E-13 | 1,525600058   | 0,655479786     | 12,64285714     |
| NAT14                                                                                               | 2,51244E-13 | 0,609140083 | 0,549 | 0,13  | 5,30151E-09 | 1,525349755   | 0,655587347     | 4,223076923     |
| SLC39A3                                                                                             | 1,54109E-18 | 0,607905844 | 0,402 | 0,039 | 3,25186E-14 | 1,524045362   | 0,656148449     | 10,30769231     |
| PPDPF                                                                                               | 3,2218E-07  | 0,607466333 | 0,951 | 0,733 | 0,006798328 | 1,523581138   | 0,656348372     | 1,297407913     |
| SSC5D                                                                                               | 3,17917E-11 | 0,606635796 | 0,512 | 0,137 | 6,70837E-07 | 1,522704289   | 0,65672633      | 3,737226277     |
| ITGB5                                                                                               | 2,92623E-14 | 0,6063728   | 0,366 | 0,049 | 6,17464E-10 | 1,522426733   | 0,656846059     | 7,469387755     |
| MRPL41                                                                                              | 1,87039E-12 | 0,605410815 | 0,622 | 0,186 | 3,94672E-08 | 1,521411922   | 0,657284188     | 3,344086022     |
| RPS27L                                                                                              | 4,03838E-07 | 0,605221051 | 0,744 | 0,379 | 0,008521381 | 1,521211817   | 0,657370649     | 1,963060686     |
| COX5A                                                                                               | 4,89633E-13 | 0,605197367 | 0,598 | 0,168 | 1,03318E-08 | 1,521186844   | 0,657381441     | 3,55952381      |
| SCG2                                                                                                | 1,16201E-17 | 0,604043249 | 0,244 | 0     | 2,45196E-13 | 1,519970421   | 0,65790754      | #DIV/0!         |
| ILK                                                                                                 | 4,36213E-14 | 0,603988443 | 0,646 | 0,175 | 9,20452E-10 | 1,519912681   | 0,657932533     | 3,691428571     |
| HOXC9                                                                                               | 2,04999E-15 | 0,603300802 | 0,402 | 0,053 | 4,32569E-11 | 1,519188407   | 0,658246202     | 7,58490566      |
| CAPS                                                                                                | 1,5959E-08  | 0,602172809 | 0,451 | 0,14  | 0,00033675  | 1,518001071   | 0,658761064     | 3,221428571     |
| PRSS23                                                                                              | 4,28476E-08 | 0,602124329 | 0,659 | 0,298 | 0,000904126 | 1,517950062   | 0,658783201     | 2,211409396     |
| TMEM59L                                                                                             | 6,50115E-11 | 0,601262226 | 0,439 | 0,102 | 1,37181E-06 | 1,51704326    | 0,659176984     | 4,303921569     |
| KDELR2                                                                                              | 6,6943E-08  | 0,601248568 | 0,659 | 0,295 | 0,001412563 | 1,517028898   | 0,659183224     | 2,233898305     |
| FKBP3                                                                                               | 1,12791E-15 | 0,601026892 | 0,537 | 0,109 | 2,38E-11    | 1,516795819   | 0,659284518     | 4,926605505     |
| PYGB                                                                                                | 5,08566E-13 | 0,600752988 | 0,439 | 0,084 | 1,07313E-08 | 1,516507873   | 0,659409699     | 5,226190476     |
| TADA3                                                                                               | 1,31552E-18 | 0,600520615 | 0,476 | 0,06  | 2,77588E-14 | 1,516263631   | 0,659515918     | 7,933333333     |
| VDAC1                                                                                               | 1,95241E-12 | 0,598651222 | 0,646 | 0,204 | 4,11979E-08 | 1,514300183   | 0,660371049     | 3,166666667     |
| COX4I1                                                                                              | 4,68408E-08 | 0,598528892 | 0,829 | 0,477 | 0,000988389 | 1,514171787   | 0,660427046     | 1,737945493     |
| PRELID1                                                                                             | 7,57197E-12 | 0,597286315 | 0,598 | 0,175 | 1,59776E-07 | 1,512868209   | 0,660996109     | 3,417142857     |
| PSMD8                                                                                               | 7,1826E-10  | 0,597058394 | 0,61  | 0,232 | 1,5156E-05  | 1,51262922    | 0,661100544     | 2,629310345     |
| PPP2R1A                                                                                             | 3,75869E-13 | 0,597011754 | 0,573 | 0,144 | 7,93121E-09 | 1,51258032    | 0,661121916     | 3,979166667     |
| ADARB1                                                                                              | 1,76294E-20 | 0,594217688 | 0,451 | 0,042 | 3,71998E-16 | 1,509653742   | 0,662403551     | 10,73809524     |
| SDF4                                                                                                | 2,12483E-12 | 0,59411538  | 0,695 | 0,214 | 4,4836E-08  | 1,50954669    | 0,662450527     | 3,247663551     |
| UQCRH                                                                                               | 1,50106E-08 | 0,593497304 | 0,805 | 0,393 | 0,000316738 | 1,508900112   | 0,662734393     | 2,048346056     |
| GLDC                                                                                                | 9,28997E-16 | 0,592446609 | 0,305 | 0,021 | 1,96028E-11 | 1,507801601   | 0,663217229     | 14,52380952     |

Supplementary Table 2

| Differentially expressed genes_keloid-XL_comparing SC-Keloid vs. (SC-Myel, SC-Nonmyel, SC-Nonmyel2) |             |             |       |       |             |               |                 |                 |
|-----------------------------------------------------------------------------------------------------|-------------|-------------|-------|-------|-------------|---------------|-----------------|-----------------|
| gene                                                                                                | p_val       | avg_log2FC  | pct.1 | pct.2 | p_val_adj   | Foldchange_UP | Foldchange_DOWN | Ratio_pct1_pct2 |
| TM9SF2                                                                                              | 9,73185E-11 | 0,592295806 | 0,5   | 0,133 | 2,05352E-06 | 1,507644001   | 0,663286558     | 3,759398496     |
| PSMD1                                                                                               | 2,10772E-14 | 0,592049845 | 0,476 | 0,091 | 4,4475E-10  | 1,507386988   | 0,66339965      | 5,230769231     |
| ATP5PD                                                                                              | 1,8292E-08  | 0,592022382 | 0,683 | 0,281 | 0,00038598  | 1,507358294   | 0,663412278     | 2,430604982     |
| NME1                                                                                                | 7,64002E-12 | 0,591762774 | 0,573 | 0,158 | 1,61212E-07 | 1,507087075   | 0,663531667     | 3,626582278     |
| KIFC3                                                                                               | 1,15306E-15 | 0,590936208 | 0,488 | 0,084 | 2,43308E-11 | 1,506223865   | 0,663911935     | 5,80952381      |
| HMCN1                                                                                               | 3,62547E-14 | 0,590319239 | 0,329 | 0,035 | 7,6501E-10  | 1,505579865   | 0,664195918     | 9,4             |
| PIGT                                                                                                | 1,3102E-14  | 0,588925597 | 0,451 | 0,077 | 2,76464E-10 | 1,504126178   | 0,664837841     | 5,857142857     |
| DNAJC15                                                                                             | 3,26664E-16 | 0,588425527 | 0,585 | 0,116 | 6,89294E-12 | 1,503604905   | 0,665068328     | 5,043103448     |
| RPLP0                                                                                               | 3,09259E-07 | 0,588292266 | 0,988 | 0,779 | 0,00652568  | 1,503466025   | 0,665129763     | 1,268292683     |
| PRKAR1B                                                                                             | 1,36386E-15 | 0,587339942 | 0,402 | 0,053 | 2,87788E-11 | 1,502473913   | 0,66556896      | 7,58490566      |
| C19orf53                                                                                            | 3,8239E-07  | 0,587223689 | 0,695 | 0,326 | 0,008068812 | 1,502352848   | 0,665622594     | 2,13190184      |
| SUMO2                                                                                               | 5,01602E-09 | 0,587136752 | 0,951 | 0,628 | 0,000105843 | 1,502262318   | 0,665662706     | 1,51433121      |
| MIF                                                                                                 | 5,70801E-05 | 0,586233174 | 0,878 | 0,618 | 1           | 1,501321727   | 0,666079749     | 1,420711974     |
| SNRPF                                                                                               | 1,58147E-07 | 0,585352045 | 0,622 | 0,267 | 0,003337053 | 1,500405072   | 0,666486683     | 2,329588015     |
| UBA52                                                                                               | 5,83903E-09 | 0,584225052 | 0,963 | 0,758 | 0,000123209 | 1,499233455   | 0,667007527     | 1,270448549     |
| NAA10                                                                                               | 8,16659E-10 | 0,583463941 | 0,598 | 0,2   | 1,72323E-05 | 1,498442725   | 0,667359508     | 2,99            |
| NAA38                                                                                               | 3,93773E-09 | 0,583450892 | 0,598 | 0,218 | 8,309E-05   | 1,498429173   | 0,667365544     | 2,743119266     |
| SNF8                                                                                                | 1,40908E-13 | 0,58251623  | 0,5   | 0,109 | 2,97329E-09 | 1,497458717   | 0,667798043     | 4,587155963     |
| NENF                                                                                                | 4,31259E-10 | 0,581915889 | 0,72  | 0,263 | 9,09999E-06 | 1,496835716   | 0,668075988     | 2,737642586     |
| LIMA1                                                                                               | 7,06874E-10 | 0,581696612 | 0,659 | 0,246 | 1,49157E-05 | 1,496608228   | 0,668177537     | 2,678861789     |
| DYRK2                                                                                               | 5,24121E-12 | 0,581535269 | 0,476 | 0,109 | 1,10595E-07 | 1,496440866   | 0,668252266     | 4,366972477     |
| TUSC3                                                                                               | 1,30657E-18 | 0,580786709 | 0,329 | 0,018 | 2,75699E-14 | 1,49566462    | 0,668599087     | 18,27777778     |
| MPG                                                                                                 | 1,46254E-12 | 0,579328281 | 0,634 | 0,182 | 3,08612E-08 | 1,494153408   | 0,66927532      | 3,483516484     |
| EIF4EBP1                                                                                            | 2,23711E-15 | 0,578808085 | 0,341 | 0,035 | 4,72053E-11 | 1,493614755   | 0,669516685     | 9,742857143     |
| TGFB1                                                                                               | 1,77711E-10 | 0,578753592 | 0,634 | 0,218 | 3,74988E-06 | 1,49355834    | 0,669541974     | 2,908256881     |
| SPTSSA                                                                                              | 1,15662E-06 | 0,576209363 | 0,78  | 0,428 | 0,024405822 | 1,490926733   | 0,670723771     | 1,822429907     |
| PLPP1                                                                                               | 1,34246E-07 | 0,573718198 | 0,841 | 0,54  | 0,002832731 | 1,488354506   | 0,671882939     | 1,557407407     |
| RPL35                                                                                               | 8,40074E-06 | 0,572877449 | 0,963 | 0,842 | 0,177264096 | 1,487487401   | 0,672274602     | 1,143705463     |
| POMP                                                                                                | 1,63041E-08 | 0,570398594 | 0,768 | 0,344 | 0,000344034 | 1,484933778   | 0,673430704     | 2,23255814      |
| SPNS1                                                                                               | 4,00112E-18 | 0,570180456 | 0,378 | 0,032 | 8,44275E-14 | 1,48470927    | 0,673532536     | 11,8125         |

Supplementary Table 2

| Differentially expressed genes_keloid-XL_comparing SC-Keloid vs. (SC-Myel, SC-Nonmyel, SC-Nonmyel2) |             |             |       |       |             |               |                 |                 |
|-----------------------------------------------------------------------------------------------------|-------------|-------------|-------|-------|-------------|---------------|-----------------|-----------------|
| gene                                                                                                | p_val       | avg_log2FC  | pct.1 | pct.2 | p_val_adj   | Foldchange_UP | Foldchange_DOWN | Ratio_pct1_pct2 |
| DBN1                                                                                                | 5,36999E-19 | 0,569670562 | 0,524 | 0,074 | 1,13312E-14 | 1,48418462    | 0,673770626     | 7,081081081     |
| MRPS21                                                                                              | 2,31946E-10 | 0,567806416 | 0,732 | 0,256 | 4,89429E-06 | 1,482268103   | 0,674641786     | 2,859375        |
| PSMC3                                                                                               | 4,33351E-10 | 0,567671291 | 0,585 | 0,186 | 9,14413E-06 | 1,482129278   | 0,674704977     | 3,14516129      |
| BLOC1S1                                                                                             | 1,94053E-10 | 0,566786287 | 0,695 | 0,246 | 4,0947E-06  | 1,481220362   | 0,675118993     | 2,825203252     |
| SEC61B                                                                                              | 7,2489E-07  | 0,566614247 | 0,793 | 0,463 | 0,0152959   | 1,481043738   | 0,675199506     | 1,712742981     |
| ACTR2                                                                                               | 1,33841E-08 | 0,566468035 | 0,573 | 0,207 | 0,000282418 | 1,480893648   | 0,675267938     | 2,768115942     |
| C14orf132                                                                                           | 4,14014E-14 | 0,566234181 | 0,268 | 0,018 | 8,7361E-10  | 1,480653621   | 0,675377405     | 14,88888889     |
| CHMP2A                                                                                              | 8,50003E-12 | 0,565795532 | 0,695 | 0,225 | 1,79359E-07 | 1,480203499   | 0,675582783     | 3,088888889     |
| PSMC5                                                                                               | 1,12901E-11 | 0,565472684 | 0,512 | 0,133 | 2,38233E-07 | 1,479872295   | 0,675733983     | 3,84962406      |
| SEPTIN2                                                                                             | 5,46167E-08 | 0,564795001 | 0,878 | 0,46  | 0,001152467 | 1,479177311   | 0,676051473     | 1,908695652     |
| DGUOK                                                                                               | 1,95944E-12 | 0,564249296 | 0,646 | 0,2   | 4,13461E-08 | 1,478617913   | 0,67630724      | 3,23            |
| NDUFS2                                                                                              | 1,55212E-13 | 0,563904528 | 0,5   | 0,105 | 3,27512E-09 | 1,478264602   | 0,67646888      | 4,761904762     |
| PFDN5                                                                                               | 1,50806E-06 | 0,563828111 | 0,963 | 0,698 | 0,031821487 | 1,478186303   | 0,676504712     | 1,37965616      |
| PEA15                                                                                               | 4,02477E-08 | 0,562401094 | 0,78  | 0,351 | 0,000849267 | 1,476724904   | 0,677174197     | 2,22222222      |
| CNIH3                                                                                               | 6,0734E-21  | 0,562194378 | 0,354 | 0,014 | 1,28155E-16 | 1,476513326   | 0,677271232     | 25,28571429     |
| DDR1                                                                                                | 3,18849E-11 | 0,56209293  | 0,561 | 0,154 | 6,72803E-07 | 1,476409504   | 0,677318859     | 3,642857143     |
| TXNL4A                                                                                              | 1,17528E-14 | 0,561104405 | 0,598 | 0,144 | 2,47995E-10 | 1,475398225   | 0,677783112     | 4,152777778     |
| TMEM219                                                                                             | 1,26521E-12 | 0,560437557 | 0,683 | 0,211 | 2,66971E-08 | 1,474716419   | 0,678096472     | 3,236966825     |
| ADGRL4                                                                                              | 6,63347E-15 | 0,559663864 | 0,305 | 0,025 | 1,39973E-10 | 1,473925765   | 0,678460221     | 12,2            |
| DNM3                                                                                                | 6,65258E-14 | 0,559565065 | 0,415 | 0,067 | 1,40376E-09 | 1,47382483    | 0,678506685     | 6,194029851     |
| MRPL52                                                                                              | 3,68533E-11 | 0,559452275 | 0,585 | 0,175 | 7,7764E-07  | 1,473709611   | 0,678559733     | 3,342857143     |
| PARK7                                                                                               | 3,2398E-09  | 0,558950233 | 0,756 | 0,337 | 6,83631E-05 | 1,473196866   | 0,678795905     | 2,243323442     |
| CCDC124                                                                                             | 7,85015E-14 | 0,55805039  | 0,573 | 0,137 | 1,65646E-09 | 1,472278284   | 0,679219418     | 4,182481752     |
| EIF6                                                                                                | 7,2983E-13  | 0,557257994 | 0,512 | 0,116 | 1,54001E-08 | 1,471469862   | 0,67959258      | 4,413793103     |
| KRTCAP2                                                                                             | 2,52608E-09 | 0,557078073 | 0,854 | 0,428 | 5,33028E-05 | 1,471286364   | 0,679677338     | 1,995327103     |
| NINJ1                                                                                               | 2,51037E-10 | 0,557063868 | 0,5   | 0,14  | 5,29712E-06 | 1,471271878   | 0,679684031     | 3,571428571     |
| TSPO                                                                                                | 6,55783E-09 | 0,556103814 | 0,805 | 0,379 | 0,000138377 | 1,470293133   | 0,680136483     | 2,124010554     |
| WDR1                                                                                                | 1,36259E-08 | 0,556001928 | 0,598 | 0,246 | 0,00028752  | 1,470189302   | 0,680184517     | 2,430894309     |
| SCAND1                                                                                              | 5,15558E-12 | 0,555741299 | 0,646 | 0,204 | 1,08788E-07 | 1,469923729   | 0,680307407     | 3,166666667     |
| NDUFA6                                                                                              | 8,83242E-12 | 0,55512959  | 0,634 | 0,196 | 1,86373E-07 | 1,469300607   | 0,680595921     | 3,234693878     |

Supplementary Table 2

| Differentially expressed genes_keloid-XL_comparing SC-Keloid vs. (SC-Myel, SC-Nonmyel, SC-Nonmyel2) |             |             |       |       |             |               |                 |                 |
|-----------------------------------------------------------------------------------------------------|-------------|-------------|-------|-------|-------------|---------------|-----------------|-----------------|
| gene                                                                                                | p_val       | avg_log2FC  | pct.1 | pct.2 | p_val_adj   | Foldchange_UP | Foldchange_DOWN | Ratio_pct1_pct2 |
| EIF4E2                                                                                              | 2,90186E-13 | 0,555109523 | 0,39  | 0,063 | 6,12322E-09 | 1,46928017    | 0,680605388     | 6,19047619      |
| GIPC1                                                                                               | 8,75995E-16 | 0,553270001 | 0,549 | 0,105 | 1,84844E-11 | 1,467407945   | 0,681473754     | 5,228571429     |
| CAPZB                                                                                               | 5,42221E-09 | 0,552870988 | 0,744 | 0,291 | 0,000114414 | 1,467002153   | 0,681662258     | 2,556701031     |
| PSAP                                                                                                | 6,77522E-06 | 0,551263405 | 0,976 | 0,779 | 0,142963907 | 1,465368395   | 0,682422252     | 1,252888318     |
| TCEA2                                                                                               | 6,69401E-15 | 0,550362822 | 0,549 | 0,116 | 1,4125E-10  | 1,464453944   | 0,682848378     | 4,732758621     |
| MRPL51                                                                                              | 1,4604E-08  | 0,549571103 | 0,695 | 0,291 | 0,00030816  | 1,463650505   | 0,683223213     | 2,388316151     |
| AEBP1                                                                                               | 0,000177795 | 0,549231504 | 0,707 | 0,425 | 1           | 1,463306013   | 0,683384057     | 1,663529412     |
| FHL3                                                                                                | 4,44758E-13 | 0,549088198 | 0,39  | 0,067 | 9,38484E-09 | 1,463160668   | 0,683451942     | 5,820895522     |
| PDAP1                                                                                               | 1,59756E-12 | 0,547798307 | 0,646 | 0,186 | 3,37102E-08 | 1,461853062   | 0,684063279     | 3,47311828      |
| KCNS3                                                                                               | 1,81086E-11 | 0,545829592 | 0,561 | 0,154 | 3,82109E-07 | 1,459859565   | 0,684997396     | 3,642857143     |
| PDCD5                                                                                               | 2,16792E-08 | 0,545788808 | 0,634 | 0,256 | 0,000457452 | 1,459818296   | 0,68501676      | 2,4765625       |
| S100A1                                                                                              | 8,21747E-05 | 0,544803532 | 0,28  | 0,102 | 1           | 1,458821666   | 0,685484746     | 2,745098039     |
| CARD19                                                                                              | 1,68739E-11 | 0,544734633 | 0,512 | 0,137 | 3,56056E-07 | 1,458751999   | 0,685517484     | 3,737226277     |
| PEX10                                                                                               | 8,88557E-14 | 0,54331072  | 0,378 | 0,056 | 1,87494E-09 | 1,457312949   | 0,686194411     | 6,75            |
| GNG10                                                                                               | 1,20301E-09 | 0,542845859 | 0,695 | 0,267 | 2,53847E-05 | 1,456843453   | 0,68641555      | 2,602996255     |
| BANF1                                                                                               | 1,42807E-07 | 0,542657408 | 0,671 | 0,323 | 0,003013378 | 1,456653167   | 0,686505218     | 2,077399381     |
| C5orf15                                                                                             | 3,67048E-12 | 0,541973436 | 0,561 | 0,14  | 7,74507E-08 | 1,45596274    | 0,686830763     | 4,007142857     |
| RPS19BP1                                                                                            | 5,7424E-13  | 0,541144569 | 0,659 | 0,186 | 1,2117E-08  | 1,455126491   | 0,687225479     | 3,543010753     |
| COL9A3                                                                                              | 7,17009E-08 | 0,540357469 | 0,793 | 0,396 | 0,001512961 | 1,454332825   | 0,687600515     | 2,002525253     |
| FAM89B                                                                                              | 1,62682E-12 | 0,539214835 | 0,488 | 0,112 | 3,43276E-08 | 1,45318143    | 0,68814532      | 4,357142857     |
| COPS9                                                                                               | 5,84179E-08 | 0,53807447  | 0,707 | 0,33  | 0,001232676 | 1,45203323    | 0,688689473     | 2,142424242     |
| ARPC4                                                                                               | 1,32333E-11 | 0,53775392  | 0,585 | 0,165 | 2,79236E-07 | 1,451710641   | 0,688842509     | 3,545454545     |
| DIRC3                                                                                               | 3,96988E-15 | 0,536960528 | 0,207 | 0     | 8,37685E-11 | 1,450912511   | 0,689221433     | #DIV/0!         |
| PIN1                                                                                                | 1,1891E-11  | 0,535894176 | 0,561 | 0,154 | 2,50911E-07 | 1,449840481   | 0,689731052     | 3,642857143     |
| TSC22D1                                                                                             | 2,25E-07    | 0,535824541 | 0,622 | 0,267 | 0,00474772  | 1,449770503   | 0,689764344     | 2,329588015     |
| LRRFIP1                                                                                             | 5,76942E-11 | 0,535149428 | 0,488 | 0,126 | 1,2174E-06  | 1,449092238   | 0,690087197     | 3,873015873     |
| UBL5                                                                                                | 7,89652E-09 | 0,534778672 | 0,878 | 0,456 | 0,000166624 | 1,448719886   | 0,690264564     | 1,925438596     |
| MEF2C                                                                                               | 4,58428E-11 | 0,534583574 | 0,744 | 0,263 | 9,67329E-07 | 1,448523986   | 0,690357916     | 2,828897338     |
| GASK1B                                                                                              | 1,0418E-11  | 0,534554815 | 0,415 | 0,088 | 2,1983E-07  | 1,448495111   | 0,690371678     | 4,715909091     |
| ARPC1B                                                                                              | 1,88313E-06 | 0,533513502 | 0,817 | 0,484 | 0,039735942 | 1,447449989   | 0,690870156     | 1,688016529     |

Supplementary Table 2

| Differentially expressed genes_keloid-XL_comparing SC-Keloid vs. (SC-Myel, SC-Nonmyel, SC-Nonmyel2) |             |             |       |       |             |               |                 |                 |
|-----------------------------------------------------------------------------------------------------|-------------|-------------|-------|-------|-------------|---------------|-----------------|-----------------|
| gene                                                                                                | p_val       | avg_log2FC  | pct.1 | pct.2 | p_val_adj   | Foldchange_UP | Foldchange_DOWN | Ratio_pct1_pct2 |
| RRAS                                                                                                | 1,60952E-13 | 0,533220557 | 0,634 | 0,165 | 3,39625E-09 | 1,447156108   | 0,691010455     | 3,842424242     |
| TMEM167A                                                                                            | 1,16397E-11 | 0,532650466 | 0,573 | 0,158 | 2,4561E-07  | 1,446584367   | 0,691283566     | 3,626582278     |
| KRT1                                                                                                | 0,111172911 | 0,532346008 | 0,159 | 0,095 | 1           | 1,44627912    | 0,691429466     | 1,673684211     |
| SRP9                                                                                                | 7,91235E-08 | 0,532301309 | 0,683 | 0,277 | 0,001669584 | 1,446234311   | 0,691450889     | 2,465703971     |
| COL9A2                                                                                              | 4,83658E-15 | 0,532033927 | 0,329 | 0,032 | 1,02057E-10 | 1,445966299   | 0,691579051     | 10,28125        |
| ARPC5                                                                                               | 1,07224E-07 | 0,529745995 | 0,841 | 0,463 | 0,002262542 | 1,443674996   | 0,692676678     | 1,816414687     |
| BUD23                                                                                               | 7,95141E-13 | 0,529397277 | 0,512 | 0,116 | 1,67783E-08 | 1,443326083   | 0,692844127     | 4,413793103     |
| COX7A2L                                                                                             | 7,92649E-10 | 0,529375538 | 0,524 | 0,168 | 1,67257E-05 | 1,443304335   | 0,692854567     | 3,119047619     |
| ARHGAP21                                                                                            | 1,56178E-13 | 0,528267294 | 0,512 | 0,112 | 3,2955E-09  | 1,442196048   | 0,693387006     | 4,571428571     |
| HINT2                                                                                               | 4,56861E-15 | 0,528042076 | 0,573 | 0,123 | 9,64023E-11 | 1,441970926   | 0,693495258     | 4,658536585     |
| CSTB                                                                                                | 3,28345E-10 | 0,526738906 | 0,683 | 0,242 | 6,9284E-06  | 1,440668998   | 0,694121968     | 2,82231405      |
| MRPL20                                                                                              | 1,23115E-10 | 0,526575908 | 0,549 | 0,161 | 2,59785E-06 | 1,440506238   | 0,694200395     | 3,409937888     |
| PSMB7                                                                                               | 1,29376E-09 | 0,525895094 | 0,512 | 0,161 | 2,72996E-05 | 1,439826617   | 0,694528069     | 3,180124224     |
| CTXN1                                                                                               | 4,26618E-21 | 0,525026139 | 0,293 | 0     | 9,00206E-17 | 1,438959651   | 0,694946519     | #DIV/0!         |
| SIL1                                                                                                | 2,14463E-13 | 0,524462775 | 0,463 | 0,091 | 4,52538E-09 | 1,438397855   | 0,695217944     | 5,087912088     |
| GPAA1                                                                                               | 6,10336E-11 | 0,524438082 | 0,512 | 0,137 | 1,28787E-06 | 1,438373237   | 0,695229843     | 3,737226277     |
| DNASE2                                                                                              | 3,24039E-05 | 0,524174559 | 0,159 | 0,032 | 0,683754475 | 1,438110526   | 0,695356846     | 4,96875         |
| MZT2B                                                                                               | 2,9296E-07  | 0,524061988 | 0,829 | 0,442 | 0,006181748 | 1,437998318   | 0,695411106     | 1,875565611     |
| TRAPPC1                                                                                             | 6,49233E-17 | 0,522679097 | 0,5   | 0,081 | 1,36995E-12 | 1,436620589   | 0,69607801      | 6,172839506     |
| SELENOS                                                                                             | 6,28427E-10 | 0,521886388 | 0,598 | 0,196 | 1,32604E-05 | 1,435831435   | 0,696460584     | 3,051020408     |
| SEC61A1                                                                                             | 3,29148E-10 | 0,520830034 | 0,451 | 0,119 | 6,94535E-06 | 1,434780491   | 0,696970726     | 3,789915966     |
| CNPY2                                                                                               | 5,56976E-08 | 0,520229637 | 0,756 | 0,358 | 0,001175274 | 1,434183512   | 0,69726084      | 2,111731844     |
| RNF128                                                                                              | 2,28785E-19 | 0,518887085 | 0,317 | 0,011 | 4,82759E-15 | 1,432849502   | 0,697910003     | 28,81818182     |
| COX17                                                                                               | 2,82427E-08 | 0,518748309 | 0,549 | 0,207 | 0,000595949 | 1,432711679   | 0,69797714      | 2,652173913     |
| CRIP1                                                                                               | 1,45302E-05 | 0,518731267 | 0,707 | 0,372 | 0,306600939 | 1,432694755   | 0,697985385     | 1,900537634     |
| EVA1A                                                                                               | 2,88804E-17 | 0,518590616 | 0,256 | 0,004 | 6,09406E-13 | 1,432555086   | 0,698053436     | 64              |
| CHID1                                                                                               | 1,22162E-10 | 0,517729989 | 0,427 | 0,098 | 2,57775E-06 | 1,431700763   | 0,698469978     | 4,357142857     |
| RPS19                                                                                               | 0,001260254 | 0,517402633 | 0,976 | 0,888 | 1           | 1,431375938   | 0,698628483     | 1,099099099     |
| FAM20C                                                                                              | 1,72842E-10 | 0,515518518 | 0,439 | 0,109 | 3,64714E-06 | 1,429507825   | 0,699541466     | 4,027522936     |
| CTNNB1                                                                                              | 3,90452E-07 | 0,515492099 | 0,744 | 0,368 | 0,008238918 | 1,429481649   | 0,699554276     | 2,02173913      |

Supplementary Table 2

| Differentially expressed genes_keloid-XL_comparing SC-Keloid vs. (SC-Myel, SC-Nonmyel, SC-Nonmyel2) |             |             |       |       |             |               |                 |                 |
|-----------------------------------------------------------------------------------------------------|-------------|-------------|-------|-------|-------------|---------------|-----------------|-----------------|
| gene                                                                                                | p_val       | avg_log2FC  | pct.1 | pct.2 | p_val_adj   | Foldchange_UP | Foldchange_DOWN | Ratio_pct1_pct2 |
| TAPBP                                                                                               | 8,09367E-07 | 0,515351845 | 0,671 | 0,288 | 0,017078443 | 1,429342686   | 0,699622288     | 2,329861111     |
| COMMD7                                                                                              | 2,67117E-13 | 0,514751182 | 0,402 | 0,07  | 5,63643E-09 | 1,428747706   | 0,699913635     | 5,742857143     |
| PSMA7                                                                                               | 2,44056E-08 | 0,514630208 | 0,768 | 0,368 | 0,000514983 | 1,428627906   | 0,699972327     | 2,086956522     |
| UBE2D1                                                                                              | 1,91763E-14 | 0,514229348 | 0,39  | 0,056 | 4,04639E-10 | 1,42823101    | 0,700166845     | 6,964285714     |
| DCTN3                                                                                               | 5,59295E-11 | 0,513982177 | 0,537 | 0,151 | 1,18017E-06 | 1,427986338   | 0,700286812     | 3,556291391     |
| ERP29                                                                                               | 1,88922E-09 | 0,513632517 | 0,537 | 0,168 | 3,98645E-05 | 1,427640285   | 0,700456558     | 3,196428571     |
| POLR2G                                                                                              | 3,74787E-13 | 0,513626076 | 0,573 | 0,137 | 7,90838E-09 | 1,427633912   | 0,700459685     | 4,182481752     |
| CTTN                                                                                                | 1,14731E-10 | 0,513599237 | 0,744 | 0,263 | 2,42093E-06 | 1,427607353   | 0,700472716     | 2,828897338     |
| HIGD1A                                                                                              | 2,80706E-10 | 0,513149312 | 0,512 | 0,144 | 5,92317E-06 | 1,427162203   | 0,700691203     | 3,555555556     |
| NRBF2                                                                                               | 1,36426E-11 | 0,513097178 | 0,402 | 0,081 | 2,87872E-07 | 1,42711063    | 0,700716524     | 4,962962963     |
| ARPC1A                                                                                              | 8,37722E-13 | 0,512503631 | 0,549 | 0,14  | 1,76768E-08 | 1,426523616   | 0,701004869     | 3,921428571     |
| SCUBE3                                                                                              | 7,88467E-10 | 0,512503073 | 0,146 | 0,004 | 1,66374E-05 | 1,426523064   | 0,70100514      | 36,5            |
| ESD                                                                                                 | 4,86998E-10 | 0,512318209 | 0,622 | 0,211 | 1,02762E-05 | 1,426340284   | 0,701094971     | 2,947867299     |
| MXRA5                                                                                               | 1,75288E-13 | 0,511887929 | 0,293 | 0,028 | 3,69875E-09 | 1,425914945   | 0,701304102     | 10,46428571     |
| HOXB7                                                                                               | 1,1487E-16  | 0,511868809 | 0,39  | 0,042 | 2,42388E-12 | 1,425896048   | 0,701313396     | 9,285714286     |
| MLF2                                                                                                | 2,21824E-07 | 0,511733047 | 0,549 | 0,221 | 0,004680706 | 1,425761874   | 0,701379395     | 2,484162896     |
| SCARB2                                                                                              | 6,33607E-06 | 0,511254722 | 0,793 | 0,435 | 0,133697317 | 1,425289241   | 0,701611976     | 1,822988506     |
| NPL                                                                                                 | 1,65879E-21 | 0,511222474 | 0,366 | 0,014 | 3,50022E-17 | 1,425257382   | 0,701627659     | 26,14285714     |
| MRPL16                                                                                              | 9,74773E-13 | 0,510150787 | 0,366 | 0,06  | 2,05687E-08 | 1,424199042   | 0,702149047     | 6,1             |
| GTF3A                                                                                               | 4,61872E-15 | 0,509432268 | 0,537 | 0,105 | 9,74597E-11 | 1,423489911   | 0,702498832     | 5,114285714     |
| ATP5MC2                                                                                             | 1,41291E-07 | 0,509371033 | 0,878 | 0,481 | 0,002981378 | 1,423429492   | 0,70252865      | 1,825363825     |
| MORN2                                                                                               | 1,05522E-16 | 0,509190716 | 0,439 | 0,06  | 2,22662E-12 | 1,423251594   | 0,702616462     | 7,316666667     |
| NDUFB10                                                                                             | 4,81236E-09 | 0,50915747  | 0,671 | 0,26  | 0,000101546 | 1,423218797   | 0,702632654     | 2,580769231     |
| GNG7                                                                                                | 1,32712E-14 | 0,508798875 | 0,402 | 0,056 | 2,80036E-10 | 1,422865087   | 0,702807321     | 7,178571429     |
| BCAP31                                                                                              | 1,87259E-09 | 0,508581298 | 0,524 | 0,168 | 3,95136E-05 | 1,422650517   | 0,702913321     | 3,119047619     |
| CHMP5                                                                                               | 4,24196E-07 | 0,50794282  | 0,61  | 0,256 | 0,008950961 | 1,422021049   | 0,703224471     | 2,3828125       |
| NDUFB11                                                                                             | 2,73624E-09 | 0,507910742 | 0,72  | 0,284 | 5,77373E-05 | 1,421989431   | 0,703240107     | 2,535211268     |
| PSMB10                                                                                              | 3,60856E-09 | 0,507713646 | 0,293 | 0,056 | 7,61441E-05 | 1,421795177   | 0,703336188     | 5,232142857     |
| VKORC1                                                                                              | 6,55493E-11 | 0,507087317 | 0,683 | 0,239 | 1,38316E-06 | 1,421178055   | 0,7036416       | 2,857740586     |
| HYAL2                                                                                               | 3,64835E-15 | 0,502980417 | 0,354 | 0,039 | 7,69837E-11 | 1,417138161   | 0,7056475       | 9,076923077     |

Supplementary Table 2

| Differentially expressed genes_keloid-XL_comparing SC-Keloid vs. (SC-Myel, SC-Nonmyel, SC-Nonmyel2) |             |             |       |       |             |               |                 |                 |
|-----------------------------------------------------------------------------------------------------|-------------|-------------|-------|-------|-------------|---------------|-----------------|-----------------|
| gene                                                                                                | p_val       | avg_log2FC  | pct.1 | pct.2 | p_val_adj   | Foldchange_UP | Foldchange_DOWN | Ratio_pct1_pct2 |
| B4GALT2                                                                                             | 1,60536E-12 | 0,502390205 | 0,329 | 0,046 | 3,38747E-08 | 1,416558522   | 0,705936242     | 7,152173913     |
| PSMA6                                                                                               | 3,59759E-10 | 0,502359379 | 0,598 | 0,189 | 7,59128E-06 | 1,416528256   | 0,705951326     | 3,164021164     |
| ITGA1                                                                                               | 1,4869E-11  | 0,501848865 | 0,72  | 0,235 | 3,13751E-07 | 1,41602709    | 0,706201179     | 3,063829787     |
| VAT1                                                                                                | 6,75237E-06 | 0,501749817 | 0,561 | 0,232 | 0,142481733 | 1,415929875   | 0,706249665     | 2,418103448     |
| CLU                                                                                                 | 0,002328052 | 0,501705561 | 0,671 | 0,421 | 1           | 1,415886441   | 0,70627133      | 1,593824228     |
| GUSB                                                                                                | 2,15211E-11 | 0,500982571 | 0,415 | 0,088 | 4,54117E-07 | 1,415177064   | 0,706625358     | 4,715909091     |
| MXRA7                                                                                               | 3,35389E-12 | 0,500472244 | 0,622 | 0,175 | 7,07704E-08 | 1,414676559   | 0,706875358     | 3,554285714     |
| SHFL                                                                                                | 1,83956E-08 | 0,500157593 | 0,427 | 0,123 | 0,000388165 | 1,414368053   | 0,707029545     | 3,471544715     |
| MFSD10                                                                                              | 4,02367E-12 | 0,49968058  | 0,598 | 0,161 | 8,49034E-08 | 1,413900483   | 0,707263356     | 3,714285714     |
| MYL6B                                                                                               | 1,92335E-13 | 0,499471484 | 0,451 | 0,088 | 4,05846E-09 | 1,413695575   | 0,70736587      | 5,125           |
| TCEAL4                                                                                              | 2,71236E-09 | 0,49943068  | 0,707 | 0,284 | 5,72335E-05 | 1,413655592   | 0,707385877     | 2,48943662      |
| KCNMB1                                                                                              | 3,1272E-20  | 0,498971382 | 0,28  | 0     | 6,59871E-16 | 1,413205611   | 0,707611116     | #DIV/0!         |
| P3H1                                                                                                | 6,67394E-13 | 0,498516988 | 0,476 | 0,098 | 1,40827E-08 | 1,412760575   | 0,707834022     | 4,857142857     |
| MYL12B                                                                                              | 9,41296E-07 | 0,498133152 | 0,878 | 0,635 | 0,019862295 | 1,412384753   | 0,70802237      | 1,382677165     |
| ANO6                                                                                                | 1,42026E-08 | 0,498104305 | 0,39  | 0,105 | 0,000299689 | 1,412356512   | 0,708036527     | 3,714285714     |
| EEF1G                                                                                               | 1,30791E-05 | 0,49808317  | 0,89  | 0,656 | 0,275982128 | 1,412335822   | 0,7080469       | 1,356707317     |
| RAB31                                                                                               | 8,97243E-09 | 0,497561939 | 0,463 | 0,14  | 0,000189327 | 1,411825651   | 0,708302756     | 3,307142857     |
| A1BG                                                                                                | 1,08688E-12 | 0,496386875 | 0,561 | 0,144 | 2,29343E-08 | 1,410676198   | 0,708879898     | 3,895833333     |
| NAP1L4                                                                                              | 5,27423E-13 | 0,49350294  | 0,585 | 0,147 | 1,11292E-08 | 1,407859086   | 0,71029836      | 3,979591837     |
| LSM3                                                                                                | 1,83954E-09 | 0,493362954 | 0,524 | 0,158 | 3,88161E-05 | 1,407722487   | 0,710367284     | 3,316455696     |
| SNU13                                                                                               | 8,71124E-08 | 0,492874326 | 0,78  | 0,351 | 0,001838159 | 1,407245784   | 0,71060792      | 2,222222222     |
| GNAS                                                                                                | 4,74842E-06 | 0,491775787 | 0,988 | 0,839 | 0,100196424 | 1,406174646   | 0,711149218     | 1,177592372     |
| MARVELD1                                                                                            | 1,47809E-09 | 0,491036866 | 0,659 | 0,225 | 3,11892E-05 | 1,405454614   | 0,711513549     | 2,928888889     |
| PSMB8                                                                                               | 1,48167E-10 | 0,49062524  | 0,463 | 0,119 | 3,12648E-06 | 1,405053671   | 0,711716585     | 3,890756303     |
| ACP1                                                                                                | 1,70738E-13 | 0,489525501 | 0,5   | 0,109 | 3,60275E-09 | 1,403983033   | 0,71225932      | 4,587155963     |
| YIF1A                                                                                               | 5,47486E-12 | 0,489076557 | 0,488 | 0,116 | 1,15525E-07 | 1,403546204   | 0,712480998     | 4,206896552     |
| RAB1B                                                                                               | 2,25502E-11 | 0,487202974 | 0,512 | 0,137 | 4,75832E-07 | 1,401724645   | 0,713406876     | 3,737226277     |
| SNRPE                                                                                               | 8,93909E-09 | 0,486812393 | 0,585 | 0,207 | 0,000188624 | 1,401345207   | 0,713600043     | 2,826086957     |
| LMF2                                                                                                | 7,37157E-11 | 0,486741682 | 0,488 | 0,126 | 1,55547E-06 | 1,401276524   | 0,71363502      | 3,873015873     |
| EMC7                                                                                                | 6,7997E-10  | 0,486226881 | 0,671 | 0,232 | 1,4348E-05  | 1,400776593   | 0,713889713     | 2,892241379     |



Supplementary Table 2

| Differentially expressed genes_keloid-XL_comparing SC-Keloid vs. (SC-Myel, SC-Nonmyel, SC-Nonmyel2) |             |             |       |       |             |               |                 |                 |
|-----------------------------------------------------------------------------------------------------|-------------|-------------|-------|-------|-------------|---------------|-----------------|-----------------|
| gene                                                                                                | p_val       | avg_log2FC  | pct.1 | pct.2 | p_val_adj   | Foldchange_UP | Foldchange_DOWN | Ratio_pct1_pct2 |
| CHPF2                                                                                               | 4,74931E-15 | 0,485190225 | 0,329 | 0,032 | 1,00215E-10 | 1,399770419   | 0,714402867     | 10,28125        |
| PSMB9                                                                                               | 3,97203E-10 | 0,484264461 | 0,439 | 0,112 | 8,38137E-06 | 1,398872487   | 0,71486144      | 3,919642857     |
| SSBP1                                                                                               | 8,78868E-09 | 0,484042822 | 0,561 | 0,196 | 0,00018545  | 1,398657597   | 0,714971271     | 2,862244898     |
| GNA11                                                                                               | 5,93049E-08 | 0,483464345 | 0,427 | 0,126 | 0,001251394 | 1,39809689    | 0,715258011     | 3,388888889     |
| HDAC9                                                                                               | 2,80761E-13 | 0,482129352 | 0,256 | 0,018 | 5,92433E-09 | 1,396803764   | 0,715920178     | 14,22222222     |
| PRKACB                                                                                              | 1,17895E-16 | 0,481978327 | 0,402 | 0,046 | 2,48769E-12 | 1,396657551   | 0,715995126     | 8,739130435     |
| GET3                                                                                                | 3,20665E-13 | 0,481968101 | 0,427 | 0,081 | 6,76635E-09 | 1,396647651   | 0,716000202     | 5,271604938     |
| PTPRK                                                                                               | 4,85419E-10 | 0,481777671 | 0,439 | 0,112 | 1,02428E-05 | 1,396463311   | 0,716094717     | 3,919642857     |
| HOXC8                                                                                               | 1,10755E-10 | 0,481544929 | 0,268 | 0,035 | 2,33705E-06 | 1,396238046   | 0,71621025      | 7,657142857     |
| PLD3                                                                                                | 2,74054E-07 | 0,481226655 | 0,537 | 0,2   | 0,005782814 | 1,395930054   | 0,716368271     | 2,685           |
| MIR4435-2HG                                                                                         | 4,1431E-13  | 0,480454277 | 0,378 | 0,06  | 8,74236E-09 | 1,395182914   | 0,716751897     | 6,3             |
| COQ4                                                                                                | 9,12065E-14 | 0,480104191 | 0,476 | 0,091 | 1,92455E-09 | 1,394844398   | 0,716925846     | 5,230769231     |
| TOMM22                                                                                              | 8,88293E-13 | 0,479663843 | 0,415 | 0,077 | 1,87439E-08 | 1,39441872    | 0,717144704     | 5,38961039      |
| SMARCB1                                                                                             | 1,67148E-13 | 0,479056253 | 0,488 | 0,102 | 3,52698E-09 | 1,393831585   | 0,717446793     | 4,784313725     |
| ITGA2                                                                                               | 3,48186E-07 | 0,478728959 | 0,415 | 0,133 | 0,007347078 | 1,393515412   | 0,717609573     | 3,120300752     |
| APEX1                                                                                               | 1,12247E-09 | 0,476706152 | 0,622 | 0,2   | 2,36852E-05 | 1,39156293    | 0,718616441     | 3,11            |
| PSMB6                                                                                               | 2,99536E-09 | 0,476420689 | 0,549 | 0,189 | 6,32051E-05 | 1,391287611   | 0,718758646     | 2,904761905     |
| PPP4C                                                                                               | 2,12934E-12 | 0,476260049 | 0,488 | 0,112 | 4,49312E-08 | 1,391132704   | 0,718838682     | 4,357142857     |
| MMP11                                                                                               | 1,15746E-13 | 0,475709118 | 0,22  | 0,007 | 2,44235E-09 | 1,390601564   | 0,719113242     | 31,42857143     |
| KDEL3                                                                                               | 1,44822E-21 | 0,475577837 | 0,366 | 0,014 | 3,05588E-17 | 1,39047503    | 0,719178682     | 26,14285714     |
| GTF2A2                                                                                              | 7,62807E-09 | 0,475050924 | 0,61  | 0,218 | 0,00016096  | 1,389967282   | 0,719441395     | 2,798165138     |
| SH3GL1                                                                                              | 6,10057E-11 | 0,47468022  | 0,488 | 0,126 | 1,28728E-06 | 1,389610172   | 0,719626281     | 3,873015873     |
| LIMD2                                                                                               | 2,03339E-16 | 0,474013489 | 0,354 | 0,032 | 4,29067E-12 | 1,388968122   | 0,719958928     | 11,0625         |
| RCN3                                                                                                | 8,04841E-10 | 0,472955871 | 0,354 | 0,074 | 1,6983E-05  | 1,387950264   | 0,720486912     | 4,783783784     |
| ATP6AP1                                                                                             | 3,58416E-09 | 0,472679843 | 0,537 | 0,172 | 7,56294E-05 | 1,387684736   | 0,720624775     | 3,122093023     |
| RPS18                                                                                               | 0,000107073 | 0,472495927 | 0,988 | 0,954 | 1           | 1,387507843   | 0,720716647     | 1,035639413     |
| NOP10                                                                                               | 5,08831E-10 | 0,472136269 | 0,598 | 0,207 | 1,07368E-05 | 1,387161986   | 0,720896341     | 2,888888889     |
| CCDC167                                                                                             | 1,4636E-13  | 0,47199398  | 0,366 | 0,053 | 3,08835E-09 | 1,387025181   | 0,720967444     | 6,905660377     |
| SDF2L1                                                                                              | 3,36549E-11 | 0,471706117 | 0,402 | 0,088 | 7,10152E-07 | 1,386748454   | 0,721111314     | 4,568181818     |
| ATP5F1C                                                                                             | 2,52329E-07 | 0,471339984 | 0,646 | 0,288 | 0,005324396 | 1,386396564   | 0,721294344     | 2,243055556     |

Supplementary Table 2

| Differentially expressed genes_keloid-XL_comparing SC-Keloid vs. (SC-Myel, SC-Nonmyel, SC-Nonmyel2) |             |             |       |       |             |               |                 |                 |
|-----------------------------------------------------------------------------------------------------|-------------|-------------|-------|-------|-------------|---------------|-----------------|-----------------|
| gene                                                                                                | p_val       | avg_log2FC  | pct.1 | pct.2 | p_val_adj   | Foldchange_UP | Foldchange_DOWN | Ratio_pct1_pct2 |
| PFDN4                                                                                               | 1,53368E-07 | 0,470721765 | 0,439 | 0,144 | 0,003236208 | 1,385802597   | 0,721603497     | 3,048611111     |
| STRAP                                                                                               | 7,6657E-07  | 0,470126616 | 0,549 | 0,204 | 0,016175385 | 1,385231036   | 0,721901238     | 2,691176471     |
| COL16A1                                                                                             | 1,80022E-07 | 0,469954967 | 0,793 | 0,351 | 0,003798634 | 1,385066234   | 0,721987134     | 2,259259259     |
| NDUFB8                                                                                              | 6,52455E-06 | 0,469948881 | 0,671 | 0,309 | 0,137674618 | 1,38506039    | 0,72199018      | 2,171521036     |
| WLS                                                                                                 | 7,09532E-10 | 0,469878731 | 0,512 | 0,144 | 1,49718E-05 | 1,384993044   | 0,722025287     | 3,555555556     |
| GANAB                                                                                               | 1,30973E-10 | 0,469837342 | 0,598 | 0,179 | 2,76367E-06 | 1,384953312   | 0,722046001     | 3,340782123     |
| GADD45GIP1                                                                                          | 7,91896E-09 | 0,469557075 | 0,549 | 0,196 | 0,000167098 | 1,384684288   | 0,722186284     | 2,801020408     |
| HSPB2                                                                                               | 1,40215E-05 | 0,468906552 | 0,488 | 0,211 | 0,29586708  | 1,384060063   | 0,722511997     | 2,312796209     |
| WDR45                                                                                               | 4,64998E-11 | 0,468661173 | 0,476 | 0,119 | 9,81192E-07 | 1,383824677   | 0,722634895     | 4               |
| VPS28                                                                                               | 1,89631E-09 | 0,468520142 | 0,707 | 0,274 | 4,00141E-05 | 1,383689408   | 0,722705539     | 2,580291971     |
| RUNX1                                                                                               | 1,9465E-11  | 0,468505575 | 0,61  | 0,175 | 4,1073E-07  | 1,383675437   | 0,722712837     | 3,485714286     |
| PARVB                                                                                               | 2,12765E-15 | 0,468498515 | 0,366 | 0,042 | 4,48956E-11 | 1,383668665   | 0,722716374     | 8,714285714     |
| RCN1                                                                                                | 1,78926E-07 | 0,46825288  | 0,512 | 0,189 | 0,003775523 | 1,383433101   | 0,722839434     | 2,708994709     |
| CCDC50                                                                                              | 2,87881E-12 | 0,467735225 | 0,451 | 0,098 | 6,07457E-08 | 1,382936798   | 0,723098844     | 4,602040816     |
| SNX3                                                                                                | 5,26077E-06 | 0,467466605 | 0,793 | 0,411 | 0,111007561 | 1,382679328   | 0,723233493     | 1,929440389     |
| RPL7L1                                                                                              | 2,43653E-14 | 0,467389772 | 0,5   | 0,095 | 5,14133E-10 | 1,382605694   | 0,72327201      | 5,263157895     |
| MELTF                                                                                               | 6,08531E-16 | 0,467369931 | 0,28  | 0,014 | 1,28406E-11 | 1,38258668    | 0,723281957     | 20              |
| SYT11                                                                                               | 9,01994E-06 | 0,467122785 | 0,573 | 0,263 | 0,190329858 | 1,382349851   | 0,723405873     | 2,178707224     |
| C1orf122                                                                                            | 2,89591E-11 | 0,467036979 | 0,646 | 0,196 | 6,11066E-07 | 1,382267636   | 0,7234489       | 3,295918367     |
| RPL39L                                                                                              | 1,23196E-15 | 0,466863294 | 0,366 | 0,039 | 2,59955E-11 | 1,382101236   | 0,723536        | 9,384615385     |
| TRAPPC2L                                                                                            | 1,43344E-12 | 0,465858572 | 0,402 | 0,074 | 3,02471E-08 | 1,381139047   | 0,724040061     | 5,432432432     |
| MDH2                                                                                                | 2,31743E-08 | 0,465642415 | 0,512 | 0,175 | 0,000489001 | 1,380932129   | 0,724148551     | 2,925714286     |
| ENG                                                                                                 | 3,7574E-11  | 0,465315481 | 0,476 | 0,112 | 7,92848E-07 | 1,380619227   | 0,724312671     | 4,25            |
| COPS6                                                                                               | 1,90267E-11 | 0,464688314 | 0,598 | 0,172 | 4,01483E-07 | 1,380019176   | 0,724627612     | 3,476744186     |
| VPS35                                                                                               | 4,99319E-08 | 0,463576121 | 0,415 | 0,119 | 0,001053613 | 1,37895571    | 0,725186453     | 3,487394958     |
| SHTN1                                                                                               | 3,10104E-08 | 0,463564268 | 0,268 | 0,053 | 0,00065435  | 1,378944381   | 0,725192411     | 5,056603774     |
| SHISA5                                                                                              | 3,92488E-09 | 0,462790644 | 0,427 | 0,116 | 8,28189E-05 | 1,378205141   | 0,725581389     | 3,681034483     |
| TRAPPC5                                                                                             | 7,30031E-13 | 0,46258145  | 0,573 | 0,14  | 1,54044E-08 | 1,378005312   | 0,725686607     | 4,092857143     |
| LARP7                                                                                               | 3,36178E-15 | 0,462287063 | 0,512 | 0,098 | 7,0937E-11  | 1,377724155   | 0,725834701     | 5,224489796     |
| UAP1                                                                                                | 3,53724E-11 | 0,462189739 | 0,439 | 0,102 | 7,46394E-07 | 1,377631217   | 0,725883667     | 4,303921569     |

Supplementary Table 2

| Differentially expressed genes_keloid-XL_comparing SC-Keloid vs. (SC-Myel, SC-Nonmyel, SC-Nonmyel2) |             |             |       |       |             |               |                 |                 |
|-----------------------------------------------------------------------------------------------------|-------------|-------------|-------|-------|-------------|---------------|-----------------|-----------------|
| gene                                                                                                | p_val       | avg_log2FC  | pct.1 | pct.2 | p_val_adj   | Foldchange_UP | Foldchange_DOWN | Ratio_pct1_pct2 |
| PFN2                                                                                                | 1,04185E-15 | 0,461896063 | 0,476 | 0,081 | 2,19841E-11 | 1,377350814   | 0,726031444     | 5,87654321      |
| BOLA3                                                                                               | 8,66745E-14 | 0,461825172 | 0,415 | 0,067 | 1,82892E-09 | 1,377283135   | 0,72606712      | 6,194029851     |
| RBX1                                                                                                | 9,65093E-07 | 0,461705977 | 0,854 | 0,481 | 0,020364437 | 1,377169349   | 0,726127111     | 1,775467775     |
| ZNF428                                                                                              | 3,02824E-09 | 0,460721245 | 0,793 | 0,316 | 6,38988E-05 | 1,376229664   | 0,726622908     | 2,509493671     |
| FHL2                                                                                                | 3,71441E-17 | 0,460678932 | 0,354 | 0,028 | 7,83778E-13 | 1,3761893     | 0,72664422      | 12,64285714     |
| SUMO1                                                                                               | 1,12111E-09 | 0,46043722  | 0,634 | 0,221 | 2,36566E-05 | 1,37595875    | 0,726765973     | 2,868778281     |
| HS3ST1                                                                                              | 1,85484E-13 | 0,460371668 | 0,268 | 0,021 | 3,9139E-09  | 1,375896231   | 0,726798996     | 12,76190476     |
| LRPAP1                                                                                              | 3,25121E-05 | 0,459875186 | 0,549 | 0,253 | 0,686036843 | 1,375422819   | 0,727049156     | 2,169960474     |
| FAM114A1                                                                                            | 2,42405E-10 | 0,459262412 | 0,585 | 0,175 | 5,11499E-06 | 1,374838743   | 0,72735803      | 3,342857143     |
| SURF4                                                                                               | 2,13827E-09 | 0,459046472 | 0,573 | 0,186 | 4,51196E-05 | 1,374632974   | 0,727466909     | 3,080645161     |
| AP1S1                                                                                               | 3,06104E-15 | 0,459010293 | 0,378 | 0,046 | 6,45909E-11 | 1,374598503   | 0,727485151     | 8,217391304     |
| GSDMD                                                                                               | 1,29724E-13 | 0,45895517  | 0,39  | 0,06  | 2,73731E-09 | 1,374545982   | 0,727512948     | 6,5             |
| JTB                                                                                                 | 1,37655E-08 | 0,458916897 | 0,622 | 0,242 | 0,000290466 | 1,374509518   | 0,727532249     | 2,570247934     |
| ACTN4                                                                                               | 0,000101416 | 0,457687249 | 0,732 | 0,46  | 1           | 1,373338485   | 0,728152608     | 1,591304348     |
| ATP5PB                                                                                              | 5,48016E-12 | 0,457484416 | 0,512 | 0,13  | 1,15637E-07 | 1,373145417   | 0,728254989     | 3,938461538     |
| EMC3                                                                                                | 5,65978E-16 | 0,45726671  | 0,451 | 0,067 | 1,19427E-11 | 1,372938222   | 0,728364892     | 6,731343284     |
| CANX                                                                                                | 9,72965E-06 | 0,457139145 | 0,829 | 0,516 | 0,205305412 | 1,37281683    | 0,728429298     | 1,606589147     |
| CUTA                                                                                                | 5,9655E-07  | 0,456476296 | 0,646 | 0,302 | 0,012587796 | 1,372186232   | 0,728764053     | 2,139072848     |
| SRI                                                                                                 | 2,93807E-11 | 0,456459151 | 0,622 | 0,189 | 6,19961E-07 | 1,372169925   | 0,728772714     | 3,291005291     |
| MAP2K2                                                                                              | 2,25452E-08 | 0,45624651  | 0,585 | 0,218 | 0,000475725 | 1,371967694   | 0,728880137     | 2,683486239     |
| MRPL34                                                                                              | 8,00009E-13 | 0,456121987 | 0,524 | 0,119 | 1,6881E-08  | 1,37184928    | 0,728943051     | 4,403361345     |
| MMP17                                                                                               | 2,60465E-08 | 0,455370927 | 0,561 | 0,2   | 0,000549607 | 1,371135288   | 0,729322634     | 2,805           |
| COL11A1                                                                                             | 1,31883E-09 | 0,454988657 | 0,268 | 0,042 | 2,78287E-05 | 1,370772028   | 0,729515908     | 6,380952381     |
| ELOF1                                                                                               | 2,77951E-12 | 0,454771559 | 0,439 | 0,091 | 5,86505E-08 | 1,370565768   | 0,729625694     | 4,824175824     |
| PHC2                                                                                                | 1,01133E-11 | 0,454018035 | 0,61  | 0,175 | 2,13401E-07 | 1,369850105   | 0,730006879     | 3,485714286     |
| RPS10                                                                                               | 0,001221381 | 0,453424021 | 0,939 | 0,747 | 1           | 1,369286199   | 0,730307514     | 1,257028112     |
| PSMB4                                                                                               | 7,37789E-09 | 0,45305206  | 0,671 | 0,256 | 0,000155681 | 1,368933211   | 0,730495829     | 2,62109375      |
| PGAP6                                                                                               | 3,36806E-11 | 0,452908326 | 0,341 | 0,06  | 7,10694E-07 | 1,368796833   | 0,730568611     | 5,683333333     |
| SNRPC                                                                                               | 6,14175E-15 | 0,452074773 | 0,415 | 0,06  | 1,29597E-10 | 1,368006204   | 0,730990837     | 6,916666667     |
| ADH5                                                                                                | 1,47209E-11 | 0,451314528 | 0,463 | 0,109 | 3,10626E-07 | 1,367285507   | 0,731376143     | 4,247706422     |

Supplementary Table 2

| Differentially expressed genes_keloid-XL_comparing SC-Keloid vs. (SC-Myel, SC-Nonmyel, SC-Nonmyel2) |             |             |       |       |             |               |                 |                 |
|-----------------------------------------------------------------------------------------------------|-------------|-------------|-------|-------|-------------|---------------|-----------------|-----------------|
| gene                                                                                                | p_val       | avg_log2FC  | pct.1 | pct.2 | p_val_adj   | Foldchange_UP | Foldchange_DOWN | Ratio_pct1_pct2 |
| LYRM4                                                                                               | 1,83667E-11 | 0,451271357 | 0,39  | 0,077 | 3,87556E-07 | 1,367244593   | 0,731398029     | 5,064935065     |
| SH3BGR                                                                                              | 3,12104E-12 | 0,450848719 | 0,415 | 0,081 | 6,5857E-08  | 1,366844117   | 0,731612323     | 5,12345679      |
| FABP7                                                                                               | 2,12165E-13 | 0,449140099 | 0,268 | 0,021 | 4,4769E-09  | 1,365226287   | 0,732479304     | 12,76190476     |
| DPM2                                                                                                | 3,74157E-11 | 0,448980231 | 0,415 | 0,091 | 7,89509E-07 | 1,365075013   | 0,732560475     | 4,56043956      |
| NOTCH3                                                                                              | 1,15746E-13 | 0,448775385 | 0,22  | 0,007 | 2,44235E-09 | 1,364881201   | 0,732664498     | 31,42857143     |
| ECHS1                                                                                               | 9,22507E-09 | 0,447854471 | 0,427 | 0,116 | 0,000194658 | 1,364010236   | 0,733132328     | 3,681034483     |
| AUP1                                                                                                | 1,08097E-12 | 0,446410053 | 0,537 | 0,13  | 2,28096E-08 | 1,36264528    | 0,733866704     | 4,130769231     |
| MVP                                                                                                 | 2,60569E-10 | 0,446140408 | 0,439 | 0,109 | 5,49826E-06 | 1,362390621   | 0,734003879     | 4,027522936     |
| HYI                                                                                                 | 8,5149E-11  | 0,445765339 | 0,488 | 0,126 | 1,79673E-06 | 1,362036475   | 0,734194728     | 3,873015873     |
| ST3GAL4                                                                                             | 9,2128E-11  | 0,443649763 | 0,463 | 0,112 | 1,94399E-06 | 1,360040641   | 0,735272145     | 4,133928571     |
| AGPAT2                                                                                              | 1,9604E-15  | 0,443438303 | 0,451 | 0,07  | 4,13665E-11 | 1,35984131    | 0,735379924     | 6,442857143     |
| FKBP8                                                                                               | 5,29979E-07 | 0,443303523 | 0,683 | 0,302 | 0,011183078 | 1,359714277   | 0,735448628     | 2,261589404     |
| SLC35B2                                                                                             | 2,38506E-13 | 0,442573205 | 0,439 | 0,081 | 5,03271E-09 | 1,359026139   | 0,73582102      | 5,419753086     |
| SNX17                                                                                               | 2,63969E-12 | 0,44251757  | 0,439 | 0,091 | 5,57001E-08 | 1,358973732   | 0,735849396     | 4,824175824     |
| ADAMTS2                                                                                             | 1,15969E-12 | 0,441834206 | 0,28  | 0,028 | 2,44707E-08 | 1,358330177   | 0,73619803      | 10              |
| POLR2I                                                                                              | 6,58955E-11 | 0,441796882 | 0,561 | 0,158 | 1,39046E-06 | 1,358295035   | 0,736217077     | 3,550632911     |
| UCN2                                                                                                | 2,91183E-16 | 0,441723624 | 0,256 | 0,007 | 6,14425E-12 | 1,358226066   | 0,736254461     | 36,57142857     |
| NDUFS6                                                                                              | 1,87151E-08 | 0,440870441 | 0,622 | 0,232 | 0,000394907 | 1,357423073   | 0,736689997     | 2,681034483     |
| CDIPT                                                                                               | 2,99691E-09 | 0,440800981 | 0,415 | 0,105 | 6,32379E-05 | 1,35735772    | 0,736725467     | 3,952380952     |
| FAM204A                                                                                             | 3,80022E-09 | 0,4406657   | 0,488 | 0,147 | 8,01884E-05 | 1,357230447   | 0,736794552     | 3,319727891     |
| SNRPD2                                                                                              | 4,24574E-07 | 0,439530258 | 0,671 | 0,302 | 0,008958941 | 1,356162689   | 0,737374659     | 2,221854305     |
| PRAF2                                                                                               | 1,48875E-11 | 0,439255672 | 0,378 | 0,074 | 3,14141E-07 | 1,355904596   | 0,737515016     | 5,108108108     |
| DAZAP2                                                                                              | 3,50249E-09 | 0,43883576  | 0,61  | 0,204 | 7,39059E-05 | 1,355510003   | 0,737729709     | 2,990196078     |
| CAPN2                                                                                               | 1,9946E-08  | 0,438320019 | 0,463 | 0,144 | 0,000420881 | 1,355025516   | 0,737993483     | 3,215277778     |
| SRP19                                                                                               | 6,57128E-08 | 0,438061599 | 0,476 | 0,158 | 0,001386606 | 1,354782821   | 0,738125686     | 3,012658228     |
| PLEKHG1                                                                                             | 8,18343E-10 | 0,437534974 | 0,451 | 0,119 | 1,72679E-05 | 1,354288378   | 0,738395172     | 3,789915966     |
| PIN4                                                                                                | 6,82474E-10 | 0,437479301 | 0,5   | 0,14  | 1,44009E-05 | 1,354236117   | 0,738423667     | 3,571428571     |
| MSRB2                                                                                               | 3,29211E-09 | 0,436318546 | 0,305 | 0,06  | 6,94669E-05 | 1,353146972   | 0,739018023     | 5,083333333     |
| UQCRC1                                                                                              | 7,13739E-16 | 0,436193106 | 0,5   | 0,084 | 1,50606E-11 | 1,353029323   | 0,739082282     | 5,952380952     |
| RPS17                                                                                               | 0,000289034 | 0,436019825 | 0,902 | 0,611 | 1           | 1,352866821   | 0,739171058     | 1,476268412     |

Supplementary Table 2

| Differentially expressed genes_keloid-XL_comparing SC-Keloid vs. (SC-Myel, SC-Nonmyel, SC-Nonmyel2) |             |             |       |       |             |               |                 |                 |
|-----------------------------------------------------------------------------------------------------|-------------|-------------|-------|-------|-------------|---------------|-----------------|-----------------|
| gene                                                                                                | p_val       | avg_log2FC  | pct.1 | pct.2 | p_val_adj   | Foldchange_UP | Foldchange_DOWN | Ratio_pct1_pct2 |
| RPS6                                                                                                | 3,30444E-05 | 0,435780557 | 0,976 | 0,874 | 0,697270777 | 1,35264247    | 0,739293658     | 1,116704805     |
| DNM1                                                                                                | 1,74966E-16 | 0,435566309 | 0,305 | 0,018 | 3,69196E-12 | 1,35244161    | 0,739403455     | 16,94444444     |
| RRAGA                                                                                               | 3,37443E-12 | 0,435124413 | 0,476 | 0,105 | 7,12039E-08 | 1,352027422   | 0,739629969     | 4,533333333     |
| CCDC90B                                                                                             | 1,36575E-11 | 0,434734563 | 0,463 | 0,105 | 2,88187E-07 | 1,351662122   | 0,739829861     | 4,40952381      |
| HSPB11                                                                                              | 1,05417E-11 | 0,434528562 | 0,439 | 0,095 | 2,2244E-07  | 1,351469133   | 0,739935508     | 4,621052632     |
| HIGD2A                                                                                              | 1,76145E-11 | 0,434134229 | 0,549 | 0,147 | 3,71684E-07 | 1,351099786   | 0,740137783     | 3,734693878     |
| SELENOH                                                                                             | 1,47518E-08 | 0,434028872 | 0,61  | 0,214 | 0,000311278 | 1,351001122   | 0,740191836     | 2,85046729      |
| SPPL2A                                                                                              | 2,73852E-06 | 0,433780108 | 0,829 | 0,439 | 0,057785494 | 1,350768188   | 0,740319478     | 1,888382688     |
| MRPL17                                                                                              | 2,26948E-17 | 0,433306182 | 0,512 | 0,081 | 4,78883E-13 | 1,350324533   | 0,740562713     | 6,320987654     |
| DERL2                                                                                               | 1,9255E-12  | 0,433240678 | 0,378 | 0,063 | 4,063E-08   | 1,350263224   | 0,740596338     | 6               |
| RTRAF                                                                                               | 4,31432E-06 | 0,43255821  | 0,695 | 0,333 | 0,091036566 | 1,349624632   | 0,740946761     | 2,087087087     |
| IFI27L1                                                                                             | 1,56982E-12 | 0,432017271 | 0,341 | 0,049 | 3,31247E-08 | 1,349118685   | 0,741224631     | 6,959183673     |
| ZNF827                                                                                              | 7,1255E-13  | 0,431751502 | 0,329 | 0,042 | 1,50355E-08 | 1,348870177   | 0,74136119      | 7,833333333     |
| GPI                                                                                                 | 4,47709E-09 | 0,43144558  | 0,39  | 0,098 | 9,44711E-05 | 1,348584181   | 0,741518412     | 3,979591837     |
| FBN1                                                                                                | 1,56845E-09 | 0,431440275 | 0,415 | 0,105 | 3,30959E-05 | 1,348579222   | 0,741521139     | 3,952380952     |
| DAD1                                                                                                | 7,36312E-05 | 0,431134524 | 0,841 | 0,582 | 1           | 1,348293448   | 0,741678306     | 1,445017182     |
| CCPG1                                                                                               | 6,05575E-08 | 0,431128156 | 0,5   | 0,175 | 0,001277824 | 1,348287496   | 0,74168158      | 2,857142857     |
| TTYH3                                                                                               | 1,64454E-10 | 0,430725413 | 0,329 | 0,06  | 3,47014E-06 | 1,34791116    | 0,741888657     | 5,483333333     |
| CCNDBP1                                                                                             | 4,59782E-11 | 0,429062471 | 0,378 | 0,074 | 9,70185E-07 | 1,346358368   | 0,742744298     | 5,108108108     |
| TGOLN2                                                                                              | 1,42776E-09 | 0,427954498 | 0,72  | 0,256 | 3,01271E-05 | 1,345324776   | 0,743314936     | 2,8125          |
| CCDC25                                                                                              | 2,83078E-11 | 0,427573383 | 0,366 | 0,067 | 5,97323E-07 | 1,344969431   | 0,743511322     | 5,462686567     |
| DTYMK                                                                                               | 2,90131E-13 | 0,427339273 | 0,354 | 0,049 | 6,12205E-09 | 1,344751197   | 0,743631984     | 7,224489796     |
| FNBP1L                                                                                              | 7,34197E-15 | 0,427256783 | 0,329 | 0,032 | 1,54923E-10 | 1,34467431    | 0,743674504     | 10,28125        |
| PLXNA4                                                                                              | 1,37047E-13 | 0,427142653 | 0,341 | 0,042 | 2,89183E-09 | 1,344567938   | 0,743733337     | 8,119047619     |
| MRPL54                                                                                              | 2,22194E-13 | 0,426881743 | 0,476 | 0,095 | 4,68851E-09 | 1,344324796   | 0,743867853     | 5,010526316     |
| RASSF8-AS1                                                                                          | 1,43596E-10 | 0,42675849  | 0,463 | 0,116 | 3,03001E-06 | 1,344209952   | 0,743931406     | 3,99137931      |
| CKAP5                                                                                               | 5,19236E-08 | 0,426502704 | 0,305 | 0,07  | 0,00109564  | 1,343971648   | 0,744063315     | 4,357142857     |
| ITFG1                                                                                               | 4,58697E-10 | 0,426288589 | 0,427 | 0,105 | 9,67897E-06 | 1,3437722     | 0,744173752     | 4,066666667     |
| RPL27                                                                                               | 3,54524E-05 | 0,426011171 | 0,915 | 0,768 | 0,74808191  | 1,343513829   | 0,744316864     | 1,19140625      |
| TUBB                                                                                                | 0,000201891 | 0,425772536 | 0,829 | 0,625 | 1           | 1,343291617   | 0,744439991     | 1,3264          |

Supplementary Table 2

| Differentially expressed genes_keloid-XL_comparing SC-Keloid vs. (SC-Myel, SC-Nonmyel, SC-Nonmyel2) |             |             |       |       |             |               |                 |                 |
|-----------------------------------------------------------------------------------------------------|-------------|-------------|-------|-------|-------------|---------------|-----------------|-----------------|
| gene                                                                                                | p_val       | avg_log2FC  | pct.1 | pct.2 | p_val_adj   | Foldchange_UP | Foldchange_DOWN | Ratio_pct1_pct2 |
| RAB5C                                                                                               | 9,51635E-10 | 0,425577442 | 0,622 | 0,204 | 2,00805E-05 | 1,343109978   | 0,744540668     | 3,049019608     |
| COPS8                                                                                               | 1,60824E-09 | 0,425399507 | 0,476 | 0,137 | 3,39356E-05 | 1,342944336   | 0,744632501     | 3,474452555     |
| TWF2                                                                                                | 3,955E-14   | 0,424988683 | 0,329 | 0,035 | 8,34544E-10 | 1,342561971   | 0,744844575     | 9,4             |
| SAE1                                                                                                | 1,8276E-12  | 0,424229871 | 0,39  | 0,07  | 3,85641E-08 | 1,341856012   | 0,745236442     | 5,571428571     |
| AKAP12                                                                                              | 5,83516E-08 | 0,424224412 | 0,451 | 0,144 | 0,001231278 | 1,341850934   | 0,745239262     | 3,131944444     |
| NT5DC2                                                                                              | 6,57128E-08 | 0,424204377 | 0,488 | 0,154 | 0,001386606 | 1,3418323     | 0,745249611     | 3,168831169     |
| HPCAL1                                                                                              | 2,03487E-05 | 0,424162191 | 0,39  | 0,154 | 0,429377418 | 1,341793064   | 0,745271403     | 2,532467532     |
| GTF3C6                                                                                              | 4,31819E-15 | 0,424063878 | 0,439 | 0,07  | 9,11181E-11 | 1,34170163    | 0,745322192     | 6,271428571     |
| TMEM147                                                                                             | 6,7852E-11  | 0,423982874 | 0,573 | 0,161 | 1,43174E-06 | 1,341626299   | 0,745364041     | 3,559006211     |
| NT5E                                                                                                | 8,96003E-09 | 0,423361056 | 0,195 | 0,021 | 0,000189066 | 1,341048167   | 0,745685371     | 9,285714286     |
| TBCA                                                                                                | 0,000111951 | 0,423296044 | 0,78  | 0,46  | 1           | 1,340987737   | 0,745718975     | 1,695652174     |
| PLAUR                                                                                               | 3,26819E-09 | 0,423228537 | 0,476 | 0,137 | 6,89621E-05 | 1,34092499    | 0,745753869     | 3,474452555     |
| PGK1                                                                                                | 1,48163E-08 | 0,422896128 | 0,5   | 0,158 | 0,000312639 | 1,340616066   | 0,745925717     | 3,164556962     |
| DNAJC2                                                                                              | 4,14681E-10 | 0,42289475  | 0,305 | 0,053 | 8,75017E-06 | 1,340614785   | 0,745926429     | 5,754716981     |
| RAB5IF                                                                                              | 9,94582E-11 | 0,422572601 | 0,5   | 0,133 | 2,09867E-06 | 1,340315463   | 0,746093011     | 3,759398496     |
| MCAM                                                                                                | 0,00017561  | 0,422434868 | 0,805 | 0,533 | 1           | 1,340187511   | 0,746164243     | 1,510318949     |
| KDELR1                                                                                              | 7,28297E-08 | 0,422330173 | 0,634 | 0,256 | 0,00153678  | 1,340090259   | 0,746218393     | 2,4765625       |
| H2AJ                                                                                                | 2,81543E-07 | 0,421410184 | 0,78  | 0,354 | 0,005940846 | 1,339235971   | 0,7466944       | 2,203389831     |
| COX16                                                                                               | 3,03105E-08 | 0,421330279 | 0,463 | 0,147 | 0,000639581 | 1,339161799   | 0,746735757     | 3,149659864     |
| RBIS                                                                                                | 3,34362E-08 | 0,420691274 | 0,744 | 0,333 | 0,000705537 | 1,338568783   | 0,747066578     | 2,234234234     |
| LZIC                                                                                                | 1,25072E-06 | 0,42059427  | 0,354 | 0,109 | 0,026391379 | 1,338478783   | 0,747116811     | 3,247706422     |
| EIF3M                                                                                               | 1,00468E-06 | 0,420311282 | 0,415 | 0,147 | 0,021199806 | 1,338216263   | 0,747263374     | 2,823129252     |
| ELAVL1                                                                                              | 1,65211E-09 | 0,420104748 | 0,439 | 0,119 | 3,48611E-05 | 1,3380247     | 0,747370359     | 3,68907563      |
| AGA                                                                                                 | 6,96776E-14 | 0,419779408 | 0,366 | 0,049 | 1,47027E-09 | 1,337722997   | 0,747538917     | 7,469387755     |
| CMSS1                                                                                               | 1,13686E-13 | 0,419619793 | 0,415 | 0,07  | 2,39889E-09 | 1,337575005   | 0,747621626     | 5,928571429     |
| SYTL2                                                                                               | 3,51225E-17 | 0,419245032 | 0,402 | 0,042 | 7,41121E-13 | 1,337227595   | 0,747815857     | 9,571428571     |
| MYOF                                                                                                | 1,24034E-10 | 0,419220631 | 0,354 | 0,07  | 2,61724E-06 | 1,337204978   | 0,747828505     | 5,057142857     |
| CERCAM                                                                                              | 5,92658E-12 | 0,418946423 | 0,402 | 0,074 | 1,25057E-07 | 1,336950844   | 0,747970656     | 5,432432432     |
| NDUFA2                                                                                              | 7,99594E-07 | 0,418887261 | 0,463 | 0,175 | 0,016872231 | 1,33689602    | 0,748001329     | 2,645714286     |
| PCBP4                                                                                               | 7,23097E-07 | 0,41887374  | 0,671 | 0,302 | 0,015258069 | 1,33688349    | 0,74800834      | 2,221854305     |

Supplementary Table 2

| Differentially expressed genes_keloid-XL_comparing SC-Keloid vs. (SC-Myel, SC-Nonmyel, SC-Nonmyel2) |             |             |       |       |             |               |                 |                 |
|-----------------------------------------------------------------------------------------------------|-------------|-------------|-------|-------|-------------|---------------|-----------------|-----------------|
| gene                                                                                                | p_val       | avg_log2FC  | pct.1 | pct.2 | p_val_adj   | Foldchange_UP | Foldchange_DOWN | Ratio_pct1_pct2 |
| DCBLD2                                                                                              | 3,44721E-09 | 0,418668638 | 0,561 | 0,179 | 7,27396E-05 | 1,336693445   | 0,748114689     | 3,134078212     |
| PYURF                                                                                               | 4,70625E-08 | 0,417882147 | 0,646 | 0,249 | 0,000993065 | 1,33596494    | 0,748522637     | 2,59437751      |
| METAP2                                                                                              | 4,1807E-07  | 0,416958547 | 0,549 | 0,211 | 0,008821686 | 1,335109941   | 0,749001988     | 2,601895735     |
| UBE2Q2                                                                                              | 2,63542E-10 | 0,416870969 | 0,439 | 0,109 | 5,561E-06   | 1,335028896   | 0,749047457     | 4,027522936     |
| HMOX2                                                                                               | 1,98654E-09 | 0,416592017 | 0,39  | 0,095 | 4,19179E-05 | 1,334770788   | 0,749192303     | 4,105263158     |
| PSMD14                                                                                              | 4,85505E-14 | 0,415694397 | 0,451 | 0,081 | 1,02446E-09 | 1,333940574   | 0,749658583     | 5,567901235     |
| AP3S1                                                                                               | 6,34682E-11 | 0,414632618 | 0,463 | 0,112 | 1,33924E-06 | 1,332959196   | 0,750210511     | 4,133928571     |
| TCF3                                                                                                | 5,03755E-12 | 0,414464402 | 0,463 | 0,102 | 1,06297E-07 | 1,332803784   | 0,75029799      | 4,539215686     |
| PSME2                                                                                               | 1,46499E-08 | 0,414351195 | 0,524 | 0,172 | 0,000309128 | 1,332699204   | 0,750356868     | 3,046511628     |
| RPL3                                                                                                | 0,000873564 | 0,414325357 | 0,976 | 0,905 | 1           | 1,332675336   | 0,750370306     | 1,078453039     |
| RPE65                                                                                               | 6,01275E-14 | 0,414016633 | 0,207 | 0,004 | 1,26875E-09 | 1,332390186   | 0,750530896     | 51,75           |
| PBXIP1                                                                                              | 1,30274E-09 | 0,413216717 | 0,305 | 0,056 | 2,74892E-05 | 1,331651635   | 0,75094715      | 5,446428571     |
| ABCF2                                                                                               | 4,29588E-10 | 0,412507104 | 0,268 | 0,039 | 9,06473E-06 | 1,330996802   | 0,751316606     | 6,871794872     |
| PSENEN                                                                                              | 1,31809E-11 | 0,412423833 | 0,451 | 0,102 | 2,7813E-07  | 1,330919979   | 0,751359973     | 4,421568627     |
| RPL22L1                                                                                             | 0,001021646 | 0,412339146 | 0,695 | 0,396 | 1           | 1,330841857   | 0,751404079     | 1,755050505     |
| ERI3                                                                                                | 1,32346E-09 | 0,412209075 | 0,329 | 0,063 | 2,79262E-05 | 1,330721875   | 0,751471828     | 5,222222222     |
| PEMT                                                                                                | 9,08828E-11 | 0,411420485 | 0,305 | 0,049 | 1,91772E-06 | 1,32999469    | 0,751882701     | 6,224489796     |
| ERCC1                                                                                               | 1,2443E-13  | 0,411399406 | 0,537 | 0,119 | 2,62559E-09 | 1,329975257   | 0,751893687     | 4,512605042     |
| TRAPPC4                                                                                             | 3,34596E-11 | 0,411375839 | 0,354 | 0,063 | 7,06031E-07 | 1,329953532   | 0,75190597      | 5,619047619     |
| FAM32A                                                                                              | 4,34691E-12 | 0,411303255 | 0,463 | 0,098 | 9,17242E-08 | 1,329886621   | 0,7519438       | 4,724489796     |
| TCF12                                                                                               | 1,41726E-11 | 0,4111948   | 0,415 | 0,084 | 2,99056E-07 | 1,329786651   | 0,75200033      | 4,94047619      |
| COMMD3                                                                                              | 9,93322E-12 | 0,410460809 | 0,439 | 0,091 | 2,09601E-07 | 1,329110275   | 0,752383018     | 4,824175824     |
| ARL2                                                                                                | 1,36908E-05 | 0,410445115 | 0,622 | 0,277 | 0,288889373 | 1,329095818   | 0,752391202     | 2,245487365     |
| ERGIC3                                                                                              | 2,16614E-08 | 0,41013125  | 0,561 | 0,2   | 0,000457078 | 1,328806697   | 0,752554907     | 2,805           |
| ARL2BP                                                                                              | 3,72516E-10 | 0,409993036 | 0,524 | 0,151 | 7,86046E-06 | 1,3286794     | 0,752627007     | 3,470198675     |
| PLEKHG4                                                                                             | 5,06939E-14 | 0,409080452 | 0,28  | 0,021 | 1,06969E-09 | 1,327839203   | 0,753103235     | 13,33333333     |
| RANBP1                                                                                              | 6,1262E-10  | 0,408968856 | 0,646 | 0,214 | 1,29269E-05 | 1,327736496   | 0,753161492     | 3,018691589     |
| TCTN1                                                                                               | 2,13666E-11 | 0,408637767 | 0,28  | 0,035 | 4,50856E-07 | 1,327431824   | 0,753334357     | 8               |
| OCIAD2                                                                                              | 9,50765E-13 | 0,408510498 | 0,268 | 0,025 | 2,00621E-08 | 1,327314728   | 0,753400817     | 10,72           |
| ABI3BP                                                                                              | 6,04745E-07 | 0,408063869 | 0,256 | 0,06  | 0,012760715 | 1,326903882   | 0,75363409      | 4,266666667     |

Supplementary Table 2

| Differentially expressed genes_keloid-XL_comparing SC-Keloid vs. (SC-Myel, SC-Nonmyel, SC-Nonmyel2) |             |             |       |       |             |               |                 |                 |
|-----------------------------------------------------------------------------------------------------|-------------|-------------|-------|-------|-------------|---------------|-----------------|-----------------|
| gene                                                                                                | p_val       | avg_log2FC  | pct.1 | pct.2 | p_val_adj   | Foldchange_UP | Foldchange_DOWN | Ratio_pct1_pct2 |
| ERLIN2                                                                                              | 6,20937E-05 | 0,407484102 | 0,183 | 0,046 | 1           | 1,326370755   | 0,753937009     | 3,97826087      |
| GLOD4                                                                                               | 4,01678E-16 | 0,407360537 | 0,402 | 0,049 | 8,4758E-12  | 1,326257157   | 0,754001586     | 8,204081633     |
| ADGRG1                                                                                              | 7,46884E-13 | 0,407176135 | 0,5   | 0,109 | 1,576E-08   | 1,326087649   | 0,754097967     | 4,587155963     |
| SH3BGRL                                                                                             | 2,19172E-07 | 0,406753328 | 0,732 | 0,316 | 0,004624747 | 1,325699073   | 0,754319001     | 2,316455696     |
| LBH                                                                                                 | 5,24774E-13 | 0,406745478 | 0,451 | 0,091 | 1,10733E-08 | 1,325691859   | 0,754323105     | 4,956043956     |
| STK32B                                                                                              | 1,36E-12    | 0,406377401 | 0,256 | 0,021 | 2,86973E-08 | 1,325353677   | 0,754515581     | 12,19047619     |
| PGLS                                                                                                | 6,35293E-09 | 0,406376251 | 0,476 | 0,14  | 0,000134053 | 1,32535262    | 0,754516183     | 3,4             |
| IER3IP1                                                                                             | 2,21851E-10 | 0,405628739 | 0,585 | 0,175 | 4,68127E-06 | 1,324666085   | 0,754907226     | 3,342857143     |
| SSB                                                                                                 | 9,0389E-08  | 0,405300296 | 0,695 | 0,291 | 0,001907299 | 1,324364547   | 0,755079107     | 2,388316151     |
| PARP3                                                                                               | 1,90671E-10 | 0,405193845 | 0,171 | 0,007 | 4,02334E-06 | 1,324266831   | 0,755134824     | 24,42857143     |
| POLR2J                                                                                              | 2,70664E-08 | 0,405085572 | 0,561 | 0,204 | 0,000571129 | 1,32416745    | 0,755191498     | 2,75            |
| HMG3                                                                                                | 2,56982E-05 | 0,404929962 | 0,707 | 0,368 | 0,542257973 | 1,324024632   | 0,755272958     | 1,921195652     |
| CAND1                                                                                               | 1,20762E-07 | 0,404715253 | 0,488 | 0,165 | 0,002548191 | 1,323827599   | 0,75538537      | 2,957575758     |
| SWI5                                                                                                | 1,61658E-12 | 0,404619505 | 0,451 | 0,091 | 3,41115E-08 | 1,323739743   | 0,755435504     | 4,956043956     |
| THOC7                                                                                               | 3,20723E-08 | 0,404592345 | 0,451 | 0,133 | 0,000676758 | 1,323714822   | 0,755449726     | 3,390977444     |
| HYOU1                                                                                               | 3,41916E-07 | 0,403417886 | 0,366 | 0,105 | 0,007214765 | 1,322637661   | 0,756064968     | 3,485714286     |
| TPGS2                                                                                               | 5,28081E-14 | 0,402373246 | 0,305 | 0,028 | 1,1143E-09  | 1,3216803     | 0,756612624     | 10,89285714     |
| TUBB6                                                                                               | 1,02945E-08 | 0,40178214  | 0,476 | 0,151 | 0,000217225 | 1,321138886   | 0,75692269      | 3,152317881     |
| TMEM14B                                                                                             | 2,75157E-10 | 0,401039368 | 0,549 | 0,158 | 5,80608E-06 | 1,320458873   | 0,757312492     | 3,474683544     |
| UFC1                                                                                                | 2,94865E-10 | 0,400953526 | 0,561 | 0,168 | 6,22195E-06 | 1,320380307   | 0,757357554     | 3,339285714     |
| TOMM5                                                                                               | 1,16748E-07 | 0,400559093 | 0,549 | 0,204 | 0,002463489 | 1,320019363   | 0,757564645     | 2,691176471     |
| NTN1                                                                                                | 1,09013E-06 | 0,400506585 | 0,195 | 0,035 | 0,023002751 | 1,319971321   | 0,757592217     | 5,571428571     |
| TCEAL8                                                                                              | 9,40622E-11 | 0,400199986 | 0,488 | 0,126 | 1,98481E-06 | 1,319690833   | 0,757753236     | 3,873015873     |
| ATP6AP2                                                                                             | 2,68794E-05 | 0,399990279 | 0,805 | 0,46  | 0,567181546 | 1,31949902    | 0,75786339      | 1,75            |
| ZFAND2B                                                                                             | 4,76008E-09 | 0,39892871  | 0,293 | 0,056 | 0,000100442 | 1,318528458   | 0,758421249     | 5,232142857     |
| NPM3                                                                                                | 1,15033E-06 | 0,398589853 | 0,195 | 0,035 | 0,024273087 | 1,318218802   | 0,758599406     | 5,571428571     |
| ABRACL                                                                                              | 3,52113E-12 | 0,398033395 | 0,293 | 0,035 | 7,42995E-08 | 1,317710453   | 0,75889206      | 8,371428571     |
| NDUFB4                                                                                              | 1,45658E-07 | 0,397499848 | 0,732 | 0,33  | 0,003073524 | 1,317223219   | 0,75917277      | 2,218181818     |
| ITGAE                                                                                               | 1,07491E-12 | 0,397150668 | 0,451 | 0,088 | 2,26817E-08 | 1,316904446   | 0,759356537     | 5,125           |
| C3orf14                                                                                             | 7,14958E-12 | 0,396678151 | 0,28  | 0,032 | 1,50863E-07 | 1,316473199   | 0,759605286     | 8,75            |



Supplementary Table 2

| Differentially expressed genes_keloid-XL_comparing SC-Keloid vs. (SC-Myel, SC-Nonmyel, SC-Nonmyel2) |             |             |       |       |             |               |                 |                 |
|-----------------------------------------------------------------------------------------------------|-------------|-------------|-------|-------|-------------|---------------|-----------------|-----------------|
| gene                                                                                                | p_val       | avg_log2FC  | pct.1 | pct.2 | p_val_adj   | Foldchange_UP | Foldchange_DOWN | Ratio_pct1_pct2 |
| ST3GAL2                                                                                             | 1,41131E-09 | 0,396611277 | 0,22  | 0,025 | 2,978E-05   | 1,316412177   | 0,759640497     | 8,8             |
| TMEM59                                                                                              | 0,003044102 | 0,396274846 | 0,817 | 0,565 | 1           | 1,316105231   | 0,759817663     | 1,446017699     |
| POLR2E                                                                                              | 2,22008E-08 | 0,39623364  | 0,524 | 0,175 | 0,00046846  | 1,316067641   | 0,759839365     | 2,994285714     |
| CLNS1A                                                                                              | 1,20086E-08 | 0,395931098 | 0,427 | 0,119 | 0,000253394 | 1,315791682   | 0,759998724     | 3,588235294     |
| CHN1                                                                                                | 9,89953E-08 | 0,395876192 | 0,341 | 0,091 | 0,0020889   | 1,315741607   | 0,760027649     | 3,747252747     |
| ATRAID                                                                                              | 4,09648E-08 | 0,395626919 | 0,524 | 0,182 | 0,000864399 | 1,315514289   | 0,76015898      | 2,879120879     |
| TALDO1                                                                                              | 4,05758E-08 | 0,394451178 | 0,671 | 0,274 | 0,000856189 | 1,314442632   | 0,760778733     | 2,448905109     |
| GARS1                                                                                               | 2,54344E-10 | 0,394255976 | 0,329 | 0,06  | 5,36691E-06 | 1,314264796   | 0,760881676     | 5,483333333     |
| RPL41                                                                                               | 0,000563398 | 0,393398645 | 1     | 0,968 | 1           | 1,313484016   | 0,761333969     | 1,033057851     |
| CCT3                                                                                                | 1,19047E-07 | 0,393341    | 0,622 | 0,232 | 0,002512002 | 1,313431535   | 0,76136439      | 2,681034483     |
| ZNF365                                                                                              | 2,72638E-14 | 0,393202558 | 0,195 | 0     | 5,75293E-10 | 1,313305503   | 0,761437455     | #DIV/0!         |
| MRPL23                                                                                              | 6,8254E-08  | 0,392922214 | 0,451 | 0,144 | 0,001440228 | 1,313050327   | 0,761585431     | 3,131944444     |
| JMJD8                                                                                               | 2,36857E-12 | 0,392800117 | 0,415 | 0,077 | 4,99792E-08 | 1,312939207   | 0,761649888     | 5,38961039      |
| CXCL12                                                                                              | 2,79416E-09 | 0,392185976 | 0,585 | 0,182 | 5,89595E-05 | 1,312380421   | 0,761974184     | 3,214285714     |
| ACSBG1                                                                                              | 4,73042E-11 | 0,391835881 | 0,366 | 0,067 | 9,98165E-07 | 1,312061988   | 0,762159112     | 5,462686567     |
| NUDT1                                                                                               | 6,5086E-10  | 0,391168288 | 0,39  | 0,088 | 1,37338E-05 | 1,311454984   | 0,762511876     | 4,431818182     |
| SGCE                                                                                                | 5,29058E-05 | 0,390730033 | 0,756 | 0,421 | 1           | 1,311056658   | 0,762743543     | 1,795724466     |
| DNAJB12                                                                                             | 1,33823E-09 | 0,39048736  | 0,305 | 0,056 | 2,8238E-05  | 1,310836146   | 0,762871853     | 5,446428571     |
| DEAF1                                                                                               | 4,00323E-11 | 0,389139158 | 0,244 | 0,025 | 8,44722E-07 | 1,309611738   | 0,763585092     | 9,76            |
| ANP32B                                                                                              | 3,61754E-06 | 0,38909956  | 0,695 | 0,33  | 0,076333779 | 1,309575793   | 0,763606051     | 2,106060606     |
| ADAM15                                                                                              | 2,79652E-08 | 0,389024482 | 0,268 | 0,053 | 0,000590093 | 1,309507645   | 0,76364579      | 5,056603774     |
| ETS2                                                                                                | 7,315E-07   | 0,388866338 | 0,329 | 0,095 | 0,01543538  | 1,309364109   | 0,763729503     | 3,463157895     |
| SRP14                                                                                               | 3,14544E-05 | 0,388803283 | 0,951 | 0,73  | 0,663718538 | 1,309306882   | 0,763762884     | 1,302739726     |
| NABP2                                                                                               | 3,33825E-09 | 0,388073387 | 0,232 | 0,032 | 7,04404E-05 | 1,308644638   | 0,764149388     | 7,25            |
| NDUFC2                                                                                              | 6,00762E-08 | 0,387812777 | 0,756 | 0,337 | 0,001267667 | 1,308408264   | 0,764287438     | 2,243323442     |
| VPS25                                                                                               | 1,57423E-15 | 0,387710106 | 0,366 | 0,039 | 3,32178E-11 | 1,308315153   | 0,764341831     | 9,384615385     |
| EIF4G1                                                                                              | 3,95711E-07 | 0,387525789 | 0,524 | 0,193 | 0,008349907 | 1,308148015   | 0,764439489     | 2,715025907     |
| CDC123                                                                                              | 2,99894E-13 | 0,38740944  | 0,402 | 0,067 | 6,32805E-09 | 1,308042522   | 0,764501141     | 6               |
| FAM136A                                                                                             | 7,09342E-12 | 0,386528939 | 0,268 | 0,028 | 1,49678E-07 | 1,307244444   | 0,764967871     | 9,571428571     |
| SHMT2                                                                                               | 2,39317E-12 | 0,386083736 | 0,305 | 0,039 | 5,04982E-08 | 1,306841103   | 0,76520397      | 7,820512821     |

Supplementary Table 2

| Differentially expressed genes_keloid-XL_comparing SC-Keloid vs. (SC-Myel, SC-Nonmyel, SC-Nonmyel2) |             |             |       |       |             |               |                 |                 |
|-----------------------------------------------------------------------------------------------------|-------------|-------------|-------|-------|-------------|---------------|-----------------|-----------------|
| gene                                                                                                | p_val       | avg_log2FC  | pct.1 | pct.2 | p_val_adj   | Foldchange_UP | Foldchange_DOWN | Ratio_pct1_pct2 |
| HOXB-AS1                                                                                            | 6,82833E-06 | 0,385559444 | 0,134 | 0,018 | 0,144084492 | 1,306366268   | 0,765482105     | 7,444444444     |
| RPL10A                                                                                              | 0,000954574 | 0,385475844 | 0,939 | 0,832 | 1           | 1,30629057    | 0,765526463     | 1,128605769     |
| R3HDM4                                                                                              | 5,57388E-15 | 0,385171623 | 0,439 | 0,07  | 1,17614E-10 | 1,306015141   | 0,765687907     | 6,271428571     |
| CST3                                                                                                | 0,000154861 | 0,384992321 | 0,976 | 0,811 | 1           | 1,305852836   | 0,765783075     | 1,203452528     |
| MACF1                                                                                               | 2,76528E-06 | 0,38476674  | 0,61  | 0,263 | 0,058350086 | 1,305648668   | 0,765902823     | 2,319391635     |
| RPL12                                                                                               | 0,001213796 | 0,384761203 | 0,976 | 0,905 | 1           | 1,305643657   | 0,765905762     | 1,078453039     |
| MDP1                                                                                                | 1,9252E-13  | 0,384601558 | 0,354 | 0,049 | 4,06237E-09 | 1,305499186   | 0,76599052      | 7,224489796     |
| SLC52A2                                                                                             | 5,59403E-15 | 0,384504307 | 0,329 | 0,032 | 1,1804E-10  | 1,305411186   | 0,766042156     | 10,28125        |
| JOSD2                                                                                               | 6,72195E-11 | 0,384207875 | 0,634 | 0,182 | 1,4184E-06  | 1,30514299    | 0,766199572     | 3,483516484     |
| ATP5F1A                                                                                             | 2,39405E-07 | 0,383958217 | 0,598 | 0,235 | 0,005051683 | 1,304917155   | 0,766332174     | 2,544680851     |
| MACIR                                                                                               | 4,58367E-10 | 0,383625474 | 0,341 | 0,067 | 9,672E-06   | 1,304616224   | 0,766508941     | 5,089552239     |
| NELFE                                                                                               | 2,77699E-14 | 0,383501528 | 0,476 | 0,088 | 5,85973E-10 | 1,304504144   | 0,766574797     | 5,409090909     |
| RP9                                                                                                 | 5,41276E-08 | 0,382412014 | 0,28  | 0,06  | 0,001142147 | 1,303519364   | 0,767153928     | 4,666666667     |
| CKAP4                                                                                               | 3,2372E-07  | 0,382272219 | 0,329 | 0,091 | 0,006830817 | 1,303393061   | 0,767228268     | 3,615384615     |
| CNN2                                                                                                | 6,51136E-16 | 0,382017158 | 0,293 | 0,018 | 1,37396E-11 | 1,303162648   | 0,767363922     | 16,27777778     |
| PEBP1                                                                                               | 5,93422E-05 | 0,381994581 | 0,951 | 0,702 | 1           | 1,303142254   | 0,767375931     | 1,354700855     |
| COPZ1                                                                                               | 1,75771E-15 | 0,381645909 | 0,427 | 0,063 | 3,70895E-11 | 1,302827348   | 0,767561413     | 6,777777778     |
| YIF1B                                                                                               | 9,15077E-13 | 0,381348918 | 0,293 | 0,032 | 1,9309E-08  | 1,302559177   | 0,767719439     | 9,15625         |
| NPTN                                                                                                | 3,51221E-10 | 0,381141909 | 0,622 | 0,2   | 7,41111E-06 | 1,30237229    | 0,767829604     | 3,11            |
| NSMCE1                                                                                              | 3,28035E-12 | 0,380329698 | 0,366 | 0,06  | 6,92187E-08 | 1,301639284   | 0,768262        | 6,1             |
| KCTD13                                                                                              | 1,77717E-09 | 0,380015825 | 0,256 | 0,039 | 3,75001E-05 | 1,30135613    | 0,768429162     | 6,564102564     |
| COMMD6                                                                                              | 2,94713E-06 | 0,37983626  | 0,841 | 0,414 | 0,062187406 | 1,301194167   | 0,76852481      | 2,031400966     |
| SLC39A7                                                                                             | 1,82427E-09 | 0,379767491 | 0,573 | 0,182 | 3,84939E-05 | 1,301132145   | 0,768561444     | 3,148351648     |
| NDUFAF2                                                                                             | 3,10031E-08 | 0,379563759 | 0,427 | 0,126 | 0,000654197 | 1,300948416   | 0,768669985     | 3,388888889     |
| TMEM230                                                                                             | 1,25809E-09 | 0,379540779 | 0,561 | 0,172 | 2,6547E-05  | 1,300927694   | 0,768682229     | 3,261627907     |
| CFAP36                                                                                              | 1,00353E-08 | 0,379508298 | 0,378 | 0,098 | 0,000211755 | 1,300898406   | 0,768699535     | 3,857142857     |
| CNIH1                                                                                               | 2,37849E-10 | 0,379198245 | 0,5   | 0,133 | 5,01886E-06 | 1,300618856   | 0,768864756     | 3,759398496     |
| RNF7                                                                                                | 2,57269E-08 | 0,378691679 | 0,561 | 0,193 | 0,000542863 | 1,300162257   | 0,769134771     | 2,906735751     |
| IMPDH2                                                                                              | 2,16186E-10 | 0,378559863 | 0,524 | 0,147 | 4,56174E-06 | 1,300043469   | 0,769205049     | 3,56462585      |
| PPP1CB                                                                                              | 2,65256E-05 | 0,378552255 | 0,659 | 0,326 | 0,559715858 | 1,300036614   | 0,769209105     | 2,021472393     |

Supplementary Table 2

| Differentially expressed genes_keloid-XL_comparing SC-Keloid vs. (SC-Myel, SC-Nonmyel, SC-Nonmyel2) |             |             |       |       |             |               |                 |                 |
|-----------------------------------------------------------------------------------------------------|-------------|-------------|-------|-------|-------------|---------------|-----------------|-----------------|
| gene                                                                                                | p_val       | avg_log2FC  | pct.1 | pct.2 | p_val_adj   | Foldchange_UP | Foldchange_DOWN | Ratio_pct1_pct2 |
| MGST3                                                                                               | 2,54898E-07 | 0,378535275 | 0,671 | 0,302 | 0,005378609 | 1,300021312   | 0,769218159     | 2,221854305     |
| SLC12A4                                                                                             | 2,37306E-11 | 0,3781434   | 0,427 | 0,091 | 5,00739E-07 | 1,29966824    | 0,769427127     | 4,692307692     |
| ANGPTL7                                                                                             | 0,01184833  | 0,37780228  | 0,183 | 0,081 | 1           | 1,299360974   | 0,769609077     | 2,259259259     |
| CPNE2                                                                                               | 1,24048E-10 | 0,377739159 | 0,354 | 0,067 | 2,61754E-06 | 1,299304125   | 0,76964275      | 5,28358209      |
| ATP5ME                                                                                              | 0,001006057 | 0,377593464 | 0,866 | 0,604 | 1           | 1,299172918   | 0,769720478     | 1,433774834     |
| CDC42EP1                                                                                            | 3,34521E-08 | 0,377383205 | 0,61  | 0,225 | 0,000705874 | 1,29898359    | 0,769832666     | 2,711111111     |
| PTPA                                                                                                | 1,07931E-10 | 0,376888534 | 0,439 | 0,102 | 2,27744E-06 | 1,298538271   | 0,770096672     | 4,303921569     |
| ACAP3                                                                                               | 2,27189E-08 | 0,376215718 | 0,341 | 0,084 | 0,000479392 | 1,297932825   | 0,770455898     | 4,05952381      |
| PSMG2                                                                                               | 3,62589E-10 | 0,375770359 | 0,476 | 0,123 | 7,65099E-06 | 1,297532215   | 0,770693774     | 3,869918699     |
| GFUS                                                                                                | 2,11938E-08 | 0,3757419   | 0,305 | 0,067 | 0,000447211 | 1,29750662    | 0,770708977     | 4,552238806     |
| MYO10                                                                                               | 1,9211E-07  | 0,37546675  | 0,439 | 0,14  | 0,004053716 | 1,297259184   | 0,77085598      | 3,135714286     |
| EID1                                                                                                | 0,00021199  | 0,375317486 | 0,768 | 0,523 | 1           | 1,297124975   | 0,770935738     | 1,468451243     |
| RND2                                                                                                | 1,59334E-09 | 0,375295121 | 0,171 | 0,011 | 3,36211E-05 | 1,297104866   | 0,77094769      | 15,54545455     |
| TEN1                                                                                                | 2,93496E-14 | 0,375208699 | 0,293 | 0,025 | 6,19306E-10 | 1,297027168   | 0,770993873     | 11,72           |
| MTX2                                                                                                | 3,59032E-13 | 0,375131377 | 0,366 | 0,053 | 7,57593E-09 | 1,296957655   | 0,771035196     | 6,905660377     |
| SEC23A                                                                                              | 3,10586E-08 | 0,37493207  | 0,341 | 0,084 | 0,000655367 | 1,296778493   | 0,771141722     | 4,05952381      |
| HSPA5                                                                                               | 0,000238584 | 0,374360041 | 0,89  | 0,614 | 1           | 1,296264422   | 0,77144754      | 1,449511401     |
| ANO4                                                                                                | 1,03632E-16 | 0,374061925 | 0,28  | 0,011 | 2,18674E-12 | 1,295996592   | 0,771606967     | 25,45454545     |
| KCND3                                                                                               | 5,77944E-14 | 0,374059298 | 0,293 | 0,025 | 1,21952E-09 | 1,295994233   | 0,771608372     | 11,72           |
| TMEM43                                                                                              | 1,07915E-07 | 0,373772868 | 0,415 | 0,126 | 0,002277108 | 1,295736954   | 0,771761581     | 3,293650794     |
| PSMB5                                                                                               | 3,42032E-09 | 0,37345806  | 0,561 | 0,175 | 7,21722E-05 | 1,295454244   | 0,771930004     | 3,205714286     |
| HOMER3                                                                                              | 1,19365E-08 | 0,373321545 | 0,366 | 0,091 | 0,000251872 | 1,295331667   | 0,772003052     | 4,021978022     |
| GORASP2                                                                                             | 7,97067E-08 | 0,373315966 | 0,317 | 0,077 | 0,001681892 | 1,295326658   | 0,772006037     | 4,116883117     |
| NAA20                                                                                               | 3,25453E-15 | 0,373295359 | 0,488 | 0,084 | 6,86738E-11 | 1,295308157   | 0,772017064     | 5,80952381      |
| PWP1                                                                                                | 5,03921E-11 | 0,373250528 | 0,378 | 0,074 | 1,06332E-06 | 1,295267906   | 0,772041055     | 5,108108108     |
| NDUFAB1                                                                                             | 7,03012E-08 | 0,37315536  | 0,549 | 0,196 | 0,001483426 | 1,295182466   | 0,772091984     | 2,801020408     |
| RRP36                                                                                               | 1,45879E-09 | 0,372696536 | 0,329 | 0,067 | 3,07819E-05 | 1,294770621   | 0,772337574     | 4,910447761     |
| CSNK2B                                                                                              | 6,15555E-06 | 0,372488431 | 0,622 | 0,291 | 0,12988822  | 1,294583867   | 0,772448989     | 2,137457045     |
| SPPL3                                                                                               | 2,80165E-11 | 0,371765266 | 0,5   | 0,126 | 5,91175E-07 | 1,293935108   | 0,772836284     | 3,968253968     |
| PPCS                                                                                                | 7,76554E-10 | 0,371708111 | 0,366 | 0,081 | 1,63861E-05 | 1,293883846   | 0,772866902     | 4,518518519     |

Supplementary Table 2

| Differentially expressed genes_keloid-XL_comparing SC-Keloid vs. (SC-Myel, SC-Nonmyel, SC-Nonmyel2) |             |             |       |       |             |               |                 |                 |
|-----------------------------------------------------------------------------------------------------|-------------|-------------|-------|-------|-------------|---------------|-----------------|-----------------|
| gene                                                                                                | p_val       | avg_log2FC  | pct.1 | pct.2 | p_val_adj   | Foldchange_UP | Foldchange_DOWN | Ratio_pct1_pct2 |
| PSMB2                                                                                               | 1,95991E-08 | 0,371643866 | 0,537 | 0,179 | 0,000413561 | 1,29382623    | 0,772901319     | 3               |
| DBI                                                                                                 | 1,1564E-05  | 0,371577674 | 0,78  | 0,425 | 0,244012856 | 1,293766869   | 0,772936781     | 1,835294118     |
| SUN2                                                                                                | 9,64356E-06 | 0,371576565 | 0,561 | 0,253 | 0,203488708 | 1,293765875   | 0,772937376     | 2,217391304     |
| SNRPG                                                                                               | 1,22603E-05 | 0,370857411 | 0,634 | 0,319 | 0,258704685 | 1,293121119   | 0,773322765     | 1,987460815     |
| TNIK                                                                                                | 1,27282E-12 | 0,370759302 | 0,22  | 0,011 | 2,68577E-08 | 1,293033185   | 0,773375356     | 20              |
| H3-3A                                                                                               | 0,000124538 | 0,370684905 | 0,988 | 0,902 | 1           | 1,292966508   | 0,773415238     | 1,095343681     |
| CYTH2                                                                                               | 2,04829E-10 | 0,370478738 | 0,5   | 0,133 | 4,32211E-06 | 1,292781751   | 0,773525771     | 3,759398496     |
| RER1                                                                                                | 2,16313E-09 | 0,370346025 | 0,598 | 0,189 | 4,56442E-05 | 1,292662834   | 0,77359693      | 3,164021164     |
| ANXA11                                                                                              | 1,94158E-10 | 0,3703024   | 0,5   | 0,133 | 4,09693E-06 | 1,292623746   | 0,773620323     | 3,759398496     |
| SNRPD3                                                                                              | 1,97484E-05 | 0,370000246 | 0,561 | 0,246 | 0,416710651 | 1,292353051   | 0,773782365     | 2,280487805     |
| BLOC1S2                                                                                             | 9,63074E-15 | 0,369910442 | 0,415 | 0,06  | 2,03218E-10 | 1,292272608   | 0,773830532     | 6,916666667     |
| RNF34                                                                                               | 1,52946E-13 | 0,369908644 | 0,329 | 0,039 | 3,22731E-09 | 1,292270998   | 0,773831497     | 8,435897436     |
| SF3A3                                                                                               | 1,5558E-10  | 0,368483833 | 0,451 | 0,109 | 3,28289E-06 | 1,290995376   | 0,774596113     | 4,137614679     |
| DGCR6L                                                                                              | 9,8889E-14  | 0,36838477  | 0,415 | 0,067 | 2,08666E-09 | 1,290906733   | 0,774649303     | 6,194029851     |
| SLC35A4                                                                                             | 9,06611E-09 | 0,3683794   | 0,232 | 0,035 | 0,000191304 | 1,290901927   | 0,774652186     | 6,628571429     |
| RRBP1                                                                                               | 3,69864E-05 | 0,368339505 | 0,573 | 0,277 | 0,780450311 | 1,29086623    | 0,774673608     | 2,068592058     |
| IGFBP6                                                                                              | 1,73673E-12 | 0,36829483  | 0,256 | 0,021 | 3,66467E-08 | 1,290826257   | 0,774697597     | 12,19047619     |
| IFT20                                                                                               | 1,40427E-08 | 0,368013757 | 0,378 | 0,098 | 0,000296316 | 1,290574797   | 0,774848542     | 3,857142857     |
| ANAPC15                                                                                             | 1,18829E-13 | 0,36765755  | 0,329 | 0,039 | 2,50741E-09 | 1,290256188   | 0,775039879     | 8,435897436     |
| RPL26                                                                                               | 0,000641429 | 0,367457492 | 0,963 | 0,94  | 1           | 1,290077282   | 0,775147361     | 1,024468085     |
| KHDRBS1                                                                                             | 5,94858E-07 | 0,3670908   | 0,646 | 0,274 | 0,012552104 | 1,289749422   | 0,775344406     | 2,357664234     |
| C3orf70                                                                                             | 2,28809E-10 | 0,367065849 | 0,39  | 0,084 | 4,82811E-06 | 1,289727116   | 0,775357816     | 4,642857143     |
| ETFA                                                                                                | 8,6709E-08  | 0,367046105 | 0,427 | 0,13  | 0,001829646 | 1,289709466   | 0,775368427     | 3,284615385     |
| CTHRC1                                                                                              | 2,2064E-12  | 0,366321144 | 0,341 | 0,053 | 4,65572E-08 | 1,289061543   | 0,775758151     | 6,433962264     |
| ABHD14B                                                                                             | 1,25282E-08 | 0,366303377 | 0,329 | 0,074 | 0,000264357 | 1,289045669   | 0,775767705     | 4,445945946     |
| PFDN1                                                                                               | 2,13321E-08 | 0,366177287 | 0,659 | 0,249 | 0,000450128 | 1,288933013   | 0,775835509     | 2,646586345     |
| ELAC2                                                                                               | 1,60381E-05 | 0,365379997 | 0,171 | 0,035 | 0,338420451 | 1,288220895   | 0,776264385     | 4,885714286     |
| ACTR10                                                                                              | 7,53068E-11 | 0,365236345 | 0,634 | 0,186 | 1,58905E-06 | 1,28809263    | 0,776341683     | 3,408602151     |
| IGSF8                                                                                               | 7,16569E-07 | 0,365176335 | 0,439 | 0,151 | 0,015120312 | 1,288039052   | 0,776373976     | 2,907284768     |
| SLC38A10                                                                                            | 1,70793E-07 | 0,36513569  | 0,366 | 0,102 | 0,0036039   | 1,288002764   | 0,776395849     | 3,588235294     |

Supplementary Table 2

| Differentially expressed genes_keloid-XL_comparing SC-Keloid vs. (SC-Myel, SC-Nonmyel, SC-Nonmyel2) |             |             |       |       |             |               |                 |                 |
|-----------------------------------------------------------------------------------------------------|-------------|-------------|-------|-------|-------------|---------------|-----------------|-----------------|
| gene                                                                                                | p_val       | avg_log2FC  | pct.1 | pct.2 | p_val_adj   | Foldchange_UP | Foldchange_DOWN | Ratio_pct1_pct2 |
| ARL6IP4                                                                                             | 1,30814E-05 | 0,364367204 | 0,683 | 0,34  | 0,276030552 | 1,287316862   | 0,776809525     | 2,008823529     |
| DLX5                                                                                                | 1,85659E-13 | 0,36434265  | 0,183 | 0     | 3,91758E-09 | 1,287294952   | 0,776822746     | #DIV/0!         |
| TSEN15                                                                                              | 1,86004E-10 | 0,364290103 | 0,232 | 0,025 | 3,92487E-06 | 1,287248067   | 0,776851041     | 9,28            |
| TMED3                                                                                               | 2,25714E-13 | 0,364274124 | 0,439 | 0,081 | 4,76278E-09 | 1,287233809   | 0,776859645     | 5,419753086     |
| MED10                                                                                               | 1,76336E-10 | 0,364088119 | 0,488 | 0,123 | 3,72086E-06 | 1,287067858   | 0,776959811     | 3,967479675     |
| MRPL57                                                                                              | 2,95931E-10 | 0,363609275 | 0,512 | 0,14  | 6,24445E-06 | 1,286640739   | 0,777217734     | 3,657142857     |
| RPL32                                                                                               | 0,001980261 | 0,363573035 | 0,988 | 0,951 | 1           | 1,28660842    | 0,777237258     | 1,038906414     |
| GSTO1                                                                                               | 1,57445E-08 | 0,36312392  | 0,512 | 0,165 | 0,000332226 | 1,286207957   | 0,777479252     | 3,103030303     |
| LIF                                                                                                 | 1,57118E-07 | 0,362877024 | 0,183 | 0,025 | 0,003315355 | 1,285987861   | 0,777612317     | 7,32            |
| RPL13                                                                                               | 0,003599224 | 0,362055281 | 0,988 | 0,944 | 1           | 1,285255584   | 0,778055363     | 1,046610169     |
| DNTTIP1                                                                                             | 4,51798E-12 | 0,361286237 | 0,293 | 0,035 | 9,5334E-08  | 1,284570648   | 0,778470224     | 8,371428571     |
| NDUFS3                                                                                              | 2,35169E-10 | 0,360612767 | 0,549 | 0,158 | 4,96231E-06 | 1,283971132   | 0,77883371      | 3,474683544     |
| CPNE1                                                                                               | 9,08402E-08 | 0,360412848 | 0,488 | 0,158 | 0,001916818 | 1,283793221   | 0,778941642     | 3,088607595     |
| THYN1                                                                                               | 4,45665E-11 | 0,360165638 | 0,341 | 0,06  | 9,40397E-07 | 1,283573258   | 0,779075128     | 5,683333333     |
| MRPL55                                                                                              | 2,96501E-12 | 0,360037479 | 0,476 | 0,105 | 6,25646E-08 | 1,28345924    | 0,779144338     | 4,533333333     |
| SSRP1                                                                                               | 1,38408E-07 | 0,359195233 | 0,378 | 0,109 | 0,002920538 | 1,282710174   | 0,779599336     | 3,467889908     |
| TMEM208                                                                                             | 9,33396E-09 | 0,359152215 | 0,402 | 0,109 | 0,000196956 | 1,282671927   | 0,779622582     | 3,688073394     |
| PSMA1                                                                                               | 7,15815E-08 | 0,358938919 | 0,598 | 0,214 | 0,00151044  | 1,282482303   | 0,779737855     | 2,794392523     |
| DYNLT2B                                                                                             | 8,03643E-15 | 0,358763594 | 0,329 | 0,032 | 1,69577E-10 | 1,282326458   | 0,779832619     | 10,28125        |
| THOP1                                                                                               | 3,08453E-10 | 0,35840444  | 0,22  | 0,021 | 6,50866E-06 | 1,282007267   | 0,78002678      | 10,47619048     |
| LY6E                                                                                                | 1,68362E-10 | 0,358182753 | 0,524 | 0,147 | 3,55261E-06 | 1,281810287   | 0,780146649     | 3,56462585      |
| R3HCC1                                                                                              | 1,12983E-12 | 0,358134998 | 0,354 | 0,053 | 2,38405E-08 | 1,281767858   | 0,780172473     | 6,679245283     |
| CIBAR1                                                                                              | 1,6417E-13  | 0,357959443 | 0,341 | 0,042 | 3,46415E-09 | 1,281611895   | 0,780267415     | 8,119047619     |
| ZSCAN16-AS1                                                                                         | 8,78222E-10 | 0,357951596 | 0,354 | 0,074 | 1,85314E-05 | 1,281604924   | 0,780271659     | 4,783783784     |
| VEGFB                                                                                               | 8,76533E-08 | 0,357705636 | 0,463 | 0,151 | 0,001849572 | 1,281386447   | 0,780404696     | 3,066225166     |
| GLIPR2                                                                                              | 1,89974E-15 | 0,357597028 | 0,305 | 0,021 | 4,00863E-11 | 1,281289986   | 0,780463448     | 14,52380952     |
| DCTD                                                                                                | 4,81332E-06 | 0,357592344 | 0,305 | 0,091 | 0,101565811 | 1,281285826   | 0,780465982     | 3,351648352     |
| RPSA                                                                                                | 0,016428521 | 0,357442625 | 0,878 | 0,705 | 1           | 1,281152865   | 0,780546981     | 1,245390071     |
| UQCRB                                                                                               | 6,5046E-05  | 0,357247659 | 0,841 | 0,519 | 1           | 1,280979741   | 0,780652471     | 1,620423892     |
| BRSK1                                                                                               | 3,63881E-07 | 0,357085739 | 0,293 | 0,074 | 0,00767826  | 1,280835979   | 0,780740092     | 3,959459459     |

Supplementary Table 2

| Differentially expressed genes_keloid-XL_comparing SC-Keloid vs. (SC-Myel, SC-Nonmyel, SC-Nonmyel2) |             |             |       |       |             |               |                 |                 |
|-----------------------------------------------------------------------------------------------------|-------------|-------------|-------|-------|-------------|---------------|-----------------|-----------------|
| gene                                                                                                | p_val       | avg_log2FC  | pct.1 | pct.2 | p_val_adj   | Foldchange_UP | Foldchange_DOWN | Ratio_pct1_pct2 |
| INTS1                                                                                               | 7,73359E-05 | 0,356838676 | 0,268 | 0,091 | 1           | 1,280616653   | 0,780873806     | 2,945054945     |
| CENPB                                                                                               | 2,4019E-08  | 0,356637739 | 0,439 | 0,13  | 0,000506824 | 1,280438303   | 0,780982573     | 3,376923077     |
| PDGFA                                                                                               | 0,000450537 | 0,356603664 | 0,72  | 0,432 | 1           | 1,280408061   | 0,781001019     | 1,666666667     |
| COMT                                                                                                | 0,000436018 | 0,35655876  | 0,768 | 0,526 | 1           | 1,280368208   | 0,781025328     | 1,460076046     |
| LTBP1                                                                                               | 1,73695E-12 | 0,356550956 | 0,268 | 0,025 | 3,66514E-08 | 1,280361282   | 0,781029553     | 10,72           |
| KARS1                                                                                               | 1,74912E-09 | 0,356490944 | 0,305 | 0,056 | 3,69082E-05 | 1,280308024   | 0,781062042     | 5,446428571     |
| AGAP2-AS1                                                                                           | 3,32985E-08 | 0,356284937 | 0,232 | 0,039 | 0,000702632 | 1,280125218   | 0,781173581     | 5,948717949     |
| SMARCE1                                                                                             | 3,67792E-10 | 0,355807542 | 0,598 | 0,179 | 7,76077E-06 | 1,279701688   | 0,781432118     | 3,340782123     |
| NAXE                                                                                                | 3,07379E-10 | 0,35565217  | 0,329 | 0,06  | 6,486E-06   | 1,279563877   | 0,781516279     | 5,483333333     |
| DARS1                                                                                               | 9,90557E-14 | 0,35559294  | 0,354 | 0,046 | 2,09017E-09 | 1,279511345   | 0,781548365     | 7,695652174     |
| COPS7A                                                                                              | 3,44523E-11 | 0,35551578  | 0,317 | 0,049 | 7,26978E-07 | 1,279442915   | 0,781590166     | 6,469387755     |
| NTPCR                                                                                               | 1,59785E-07 | 0,355508361 | 0,28  | 0,063 | 0,003371631 | 1,279436336   | 0,781594185     | 4,444444444     |
| WIPF1                                                                                               | 1,59969E-07 | 0,355485846 | 0,573 | 0,218 | 0,003375505 | 1,279416368   | 0,781606383     | 2,628440367     |
| ZSWIM7                                                                                              | 3,4598E-13  | 0,355318434 | 0,427 | 0,074 | 7,30052E-09 | 1,279267912   | 0,781697087     | 5,77027027      |
| EMILIN1                                                                                             | 6,62118E-08 | 0,35523456  | 0,28  | 0,06  | 0,001397136 | 1,279193542   | 0,781742533     | 4,666666667     |
| ATP6V1F                                                                                             | 1,89993E-09 | 0,355101287 | 0,659 | 0,225 | 4,00904E-05 | 1,279075378   | 0,781814752     | 2,928888889     |
| CRISPLD1                                                                                            | 1,36536E-06 | 0,354608144 | 0,098 | 0,004 | 0,028810488 | 1,278638238   | 0,782082039     | 24,5            |
| TUBA1B                                                                                              | 0,000209396 | 0,354127447 | 0,89  | 0,814 | 1           | 1,278212275   | 0,782342667     | 1,093366093     |
| BTBD10                                                                                              | 3,20102E-10 | 0,35402138  | 0,28  | 0,042 | 6,75447E-06 | 1,278118304   | 0,782400187     | 6,666666667     |
| LTBR                                                                                                | 1,8675E-09  | 0,353347152 | 0,439 | 0,116 | 3,94061E-05 | 1,277521129   | 0,782765919     | 3,784482759     |
| CDK5RAP3                                                                                            | 6,72492E-09 | 0,353087275 | 0,39  | 0,098 | 0,000141902 | 1,277291026   | 0,782906933     | 3,979591837     |
| MANBAL                                                                                              | 3,86464E-11 | 0,352986457 | 0,39  | 0,077 | 8,15478E-07 | 1,277201769   | 0,782961646     | 5,064935065     |
| CLTA                                                                                                | 8,00289E-07 | 0,352633968 | 0,768 | 0,361 | 0,016886902 | 1,276889753   | 0,783152968     | 2,127423823     |
| CHCHD1                                                                                              | 4,20672E-15 | 0,352543266 | 0,378 | 0,046 | 8,87661E-11 | 1,276809478   | 0,783202206     | 8,217391304     |
| UBE2L3                                                                                              | 8,1892E-07  | 0,352257398 | 0,598 | 0,246 | 0,017280035 | 1,276556505   | 0,783357412     | 2,430894309     |
| SERPINH1                                                                                            | 0,000235943 | 0,352250937 | 0,793 | 0,467 | 1           | 1,276550788   | 0,78336092      | 1,698072805     |
| CCT8                                                                                                | 4,62102E-09 | 0,352211872 | 0,598 | 0,196 | 9,75081E-05 | 1,276516223   | 0,783382132     | 3,051020408     |
| EPN1                                                                                                | 2,43227E-09 | 0,352063508 | 0,463 | 0,126 | 5,13233E-05 | 1,276384955   | 0,783462698     | 3,674603175     |
| TBCB                                                                                                | 1,03624E-06 | 0,351504042 | 0,683 | 0,291 | 0,021865802 | 1,275890078   | 0,783766578     | 2,347079038     |
| RPL7A                                                                                               | 0,002877129 | 0,35148519  | 0,963 | 0,867 | 1           | 1,275873406   | 0,783776819     | 1,110726644     |

Supplementary Table 2

| Differentially expressed genes_keloid-XL_comparing SC-Keloid vs. (SC-Myel, SC-Nonmyel, SC-Nonmyel2) |             |             |       |       |             |               |                 |                 |
|-----------------------------------------------------------------------------------------------------|-------------|-------------|-------|-------|-------------|---------------|-----------------|-----------------|
| gene                                                                                                | p_val       | avg_log2FC  | pct.1 | pct.2 | p_val_adj   | Foldchange_UP | Foldchange_DOWN | Ratio_pct1_pct2 |
| PPWD1                                                                                               | 1,0077E-05  | 0,351297048 | 0,244 | 0,067 | 0,212634949 | 1,27570703    | 0,783879038     | 3,641791045     |
| EIF3I                                                                                               | 6,41173E-09 | 0,350958952 | 0,598 | 0,207 | 0,000135294 | 1,275408103   | 0,784062762     | 2,888888889     |
| ATP6V1E1                                                                                            | 1,94871E-08 | 0,350739739 | 0,476 | 0,144 | 0,000411198 | 1,275214323   | 0,784181907     | 3,305555556     |
| MRPL21                                                                                              | 6,8079E-10  | 0,350628462 | 0,427 | 0,105 | 1,43653E-05 | 1,275115968   | 0,784242394     | 4,066666667     |
| MRPL24                                                                                              | 2,07162E-16 | 0,350149098 | 0,354 | 0,032 | 4,37133E-12 | 1,274692356   | 0,784503018     | 11,0625         |
| ARHGAP1                                                                                             | 3,07194E-11 | 0,349996009 | 0,378 | 0,07  | 6,48211E-07 | 1,274557101   | 0,784586268     | 5,4             |
| CORO1B                                                                                              | 9,42556E-11 | 0,349680528 | 0,463 | 0,112 | 1,98889E-06 | 1,274278419   | 0,784757856     | 4,133928571     |
| PSMC2                                                                                               | 8,56761E-09 | 0,349374633 | 0,329 | 0,074 | 0,000180785 | 1,274008261   | 0,784924267     | 4,445945946     |
| TXNDC15                                                                                             | 8,53187E-08 | 0,349083208 | 0,463 | 0,151 | 0,001800311 | 1,273750937   | 0,785082837     | 3,066225166     |
| RNF8                                                                                                | 0,005817772 | 0,348913117 | 0,134 | 0,046 | 1           | 1,273600774   | 0,785175402     | 2,913043478     |
| PTPRZ1                                                                                              | 1,06389E-05 | 0,348730915 | 0,829 | 0,446 | 0,224491855 | 1,273439937   | 0,785274571     | 1,858744395     |
| HACD3                                                                                               | 3,04026E-08 | 0,348685782 | 0,329 | 0,077 | 0,000641526 | 1,2734001     | 0,785299137     | 4,272727273     |
| RPS25                                                                                               | 8,93741E-05 | 0,348682267 | 0,976 | 0,912 | 1           | 1,273396997   | 0,785301051     | 1,070175439     |
| SLC2A4RG                                                                                            | 4,64222E-08 | 0,347886906 | 0,439 | 0,133 | 0,000979555 | 1,272695164   | 0,785734108     | 3,30075188      |
| EMC4                                                                                                | 8,63294E-10 | 0,347884855 | 0,561 | 0,168 | 1,82164E-05 | 1,272693355   | 0,785735225     | 3,339285714     |
| BTF3L4                                                                                              | 8,68784E-10 | 0,347705338 | 0,463 | 0,123 | 1,83322E-05 | 1,272535001   | 0,785833002     | 3,764227642     |
| LPGAT1                                                                                              | 9,9121E-08  | 0,347582893 | 0,5   | 0,175 | 0,002091552 | 1,272427002   | 0,7858997       | 2,857142857     |
| G6PC3                                                                                               | 5,12172E-11 | 0,347580208 | 0,354 | 0,067 | 1,08073E-06 | 1,272424634   | 0,785901163     | 5,28358209      |
| SURF2                                                                                               | 3,61383E-13 | 0,347552823 | 0,354 | 0,049 | 7,62555E-09 | 1,272400481   | 0,785916081     | 7,224489796     |
| COPA                                                                                                | 4,28447E-08 | 0,347539339 | 0,451 | 0,137 | 0,000904066 | 1,272388589   | 0,785923427     | 3,291970803     |
| RSRC1                                                                                               | 0,00164994  | 0,346865549 | 0,293 | 0,126 | 1           | 1,271794477   | 0,786290567     | 2,325396825     |
| NDUFB1                                                                                              | 6,01926E-06 | 0,346843056 | 0,695 | 0,319 | 0,127012314 | 1,271774649   | 0,786302825     | 2,178683386     |
| MRPS34                                                                                              | 2,66702E-07 | 0,346524592 | 0,439 | 0,144 | 0,005627687 | 1,271493945   | 0,786476415     | 3,048611111     |
| RPS24                                                                                               | 8,69121E-05 | 0,345934594 | 0,988 | 0,926 | 1           | 1,270974068   | 0,786798115     | 1,066954644     |
| TXNDC12                                                                                             | 1,25316E-07 | 0,345864997 | 0,39  | 0,116 | 0,002644288 | 1,270912756   | 0,786836072     | 3,362068966     |
| CTDSP1                                                                                              | 3,30747E-11 | 0,345793013 | 0,476 | 0,112 | 6,97909E-07 | 1,270849344   | 0,786875332     | 4,25            |
| IFNGR2                                                                                              | 1,22842E-05 | 0,345510714 | 0,585 | 0,26  | 0,259209833 | 1,270600696   | 0,787029319     | 2,25            |
| PLTP                                                                                                | 6,64447E-07 | 0,345225247 | 0,415 | 0,14  | 0,014020496 | 1,270349306   | 0,787185064     | 2,964285714     |
| AGTRAP                                                                                              | 1,88551E-10 | 0,345215827 | 0,329 | 0,06  | 3,97862E-06 | 1,270341011   | 0,787190204     | 5,483333333     |
| GPX7                                                                                                | 1,38675E-13 | 0,344980721 | 0,256 | 0,018 | 2,92619E-09 | 1,270134009   | 0,787318498     | 14,22222222     |

Supplementary Table 2

| Differentially expressed genes_keloid-XL_comparing SC-Keloid vs. (SC-Myel, SC-Nonmyel, SC-Nonmyel2) |             |             |       |       |             |               |                 |                 |
|-----------------------------------------------------------------------------------------------------|-------------|-------------|-------|-------|-------------|---------------|-----------------|-----------------|
| gene                                                                                                | p_val       | avg_log2FC  | pct.1 | pct.2 | p_val_adj   | Foldchange_UP | Foldchange_DOWN | Ratio_pct1_pct2 |
| SF3B6                                                                                               | 2,70482E-06 | 0,34456436  | 0,646 | 0,305 | 0,057074369 | 1,269767502   | 0,78754575      | 2,118032787     |
| YBX1                                                                                                | 0,012922442 | 0,344554142 | 0,866 | 0,66  | 1           | 1,269758509   | 0,787551328     | 1,312121212     |
| SNW1                                                                                                | 1,83542E-07 | 0,344501554 | 0,439 | 0,144 | 0,003872911 | 1,269712225   | 0,787580036     | 3,048611111     |
| ZCCHC17                                                                                             | 5,70089E-10 | 0,344076741 | 0,451 | 0,116 | 1,20295E-05 | 1,269338404   | 0,787811979     | 3,887931034     |
| TNS3                                                                                                | 2,63506E-05 | 0,344011354 | 0,646 | 0,316 | 0,556024936 | 1,269280876   | 0,787847685     | 2,044303797     |
| C20orf27                                                                                            | 3,57903E-11 | 0,343893681 | 0,305 | 0,046 | 7,55211E-07 | 1,269177351   | 0,787911949     | 6,630434783     |
| SMARCD1                                                                                             | 6,27562E-09 | 0,343882453 | 0,415 | 0,109 | 0,000132422 | 1,269167474   | 0,787918081     | 3,80733945      |
| MT1F                                                                                                | 2,11449E-10 | 0,343799655 | 0,341 | 0,063 | 4,46179E-06 | 1,269094636   | 0,787963302     | 5,412698413     |
| PTOV1                                                                                               | 1,96304E-07 | 0,343679354 | 0,561 | 0,211 | 0,004142206 | 1,268988816   | 0,78802901      | 2,658767773     |
| WDR83OS                                                                                             | 3,18087E-06 | 0,343432617 | 0,744 | 0,368 | 0,067119594 | 1,268771806   | 0,788163794     | 2,02173913      |
| MARS1                                                                                               | 2,37167E-08 | 0,343378108 | 0,244 | 0,042 | 0,000500446 | 1,268723868   | 0,788193574     | 5,80952381      |
| GGCT                                                                                                | 1,33067E-09 | 0,343050063 | 0,402 | 0,102 | 2,80785E-05 | 1,268435415   | 0,788372816     | 3,941176471     |
| TMEM179B                                                                                            | 8,53737E-11 | 0,342997184 | 0,537 | 0,144 | 1,80147E-06 | 1,268388923   | 0,788401713     | 3,729166667     |
| SETD4                                                                                               | 8,15897E-07 | 0,342683476 | 0,171 | 0,025 | 0,017216233 | 1,268113148   | 0,788573166     | 6,84            |
| RNASEH2B                                                                                            | 4,20731E-13 | 0,342665799 | 0,415 | 0,074 | 8,87784E-09 | 1,26809761    | 0,788582829     | 5,608108108     |
| CDC5L                                                                                               | 4,30994E-10 | 0,342651598 | 0,476 | 0,123 | 9,09441E-06 | 1,268085128   | 0,788590591     | 3,869918699     |
| PLEKHO1                                                                                             | 8,82356E-10 | 0,342584574 | 0,61  | 0,2   | 1,86186E-05 | 1,268026217   | 0,788627228     | 3,05            |
| P2RX4                                                                                               | 2,13829E-13 | 0,342536689 | 0,293 | 0,028 | 4,512E-09   | 1,26798413    | 0,788653404     | 10,46428571     |
| HDLBP                                                                                               | 1,89319E-05 | 0,342435917 | 0,646 | 0,298 | 0,399482045 | 1,267895564   | 0,788708493     | 2,167785235     |
| LAMTOR3                                                                                             | 1,24737E-05 | 0,342429043 | 0,244 | 0,067 | 0,263207229 | 1,267889524   | 0,788712251     | 3,641791045     |
| TIMM13                                                                                              | 3,10733E-07 | 0,342156505 | 0,549 | 0,211 | 0,006556776 | 1,26765003    | 0,78886126      | 2,601895735     |
| KCNC2                                                                                               | 3,30148E-08 | 0,342089245 | 0,122 | 0,004 | 0,000696645 | 1,267590933   | 0,788898038     | 30,5            |
| NDUFC1                                                                                              | 3,29936E-05 | 0,34205641  | 0,768 | 0,407 | 0,696197413 | 1,267562084   | 0,788915993     | 1,886977887     |
| DCAF11                                                                                              | 6,00386E-07 | 0,341770987 | 0,22  | 0,042 | 0,012668742 | 1,267311333   | 0,789072088     | 5,238095238     |
| USP22                                                                                               | 5,98669E-07 | 0,341767864 | 0,622 | 0,256 | 0,012632513 | 1,26730859    | 0,789073796     | 2,4296875       |
| OXA1L                                                                                               | 1,55701E-10 | 0,341763481 | 0,439 | 0,105 | 3,28544E-06 | 1,26730474    | 0,789076193     | 4,180952381     |
| SMIM15                                                                                              | 2,95982E-15 | 0,341519038 | 0,476 | 0,077 | 6,24551E-11 | 1,267090032   | 0,789209902     | 6,181818182     |
| ARL14EP                                                                                             | 1,14768E-07 | 0,34141999  | 0,22  | 0,039 | 0,002421718 | 1,267003043   | 0,789264087     | 5,641025641     |
| ASAH1                                                                                               | 3,75959E-05 | 0,341395084 | 0,598 | 0,267 | 0,79331062  | 1,266981171   | 0,789277712     | 2,239700375     |
| ROMO1                                                                                               | 3,22129E-06 | 0,341303993 | 0,622 | 0,267 | 0,067972476 | 1,266901176   | 0,789327549     | 2,329588015     |



Supplementary Table 2

| Differentially expressed genes_keloid-XL_comparing SC-Keloid vs. (SC-Myel, SC-Nonmyel, SC-Nonmyel2) |             |             |       |       |             |               |                 |                 |
|-----------------------------------------------------------------------------------------------------|-------------|-------------|-------|-------|-------------|---------------|-----------------|-----------------|
| gene                                                                                                | p_val       | avg_log2FC  | pct.1 | pct.2 | p_val_adj   | Foldchange_UP | Foldchange_DOWN | Ratio_pct1_pct2 |
| PRR16                                                                                               | 3,10908E-17 | 0,341102469 | 0,256 | 0,004 | 6,56046E-13 | 1,266724221   | 0,789437814     | 64              |
| DPCD                                                                                                | 2,65887E-14 | 0,340776697 | 0,268 | 0,018 | 5,61048E-10 | 1,266438217   | 0,789616096     | 14,88888889     |
| SMG9                                                                                                | 1,52838E-06 | 0,340704588 | 0,256 | 0,063 | 0,032250266 | 1,266374919   | 0,789655563     | 4,063492063     |
| GPX8                                                                                                | 2,44473E-11 | 0,340076996 | 0,439 | 0,095 | 5,15862E-07 | 1,265824149   | 0,789999149     | 4,621052632     |
| HDGFL3                                                                                              | 3,35472E-06 | 0,33946123  | 0,256 | 0,067 | 0,070788009 | 1,265283989   | 0,790336406     | 3,820895522     |
| MAGOH                                                                                               | 7,67515E-11 | 0,339392298 | 0,402 | 0,088 | 1,61953E-06 | 1,265223536   | 0,790374168     | 4,568181818     |
| FAM234A                                                                                             | 3,46272E-10 | 0,339194481 | 0,549 | 0,161 | 7,30668E-06 | 1,265050065   | 0,790482549     | 3,409937888     |
| AP2B1                                                                                               | 1,312E-08   | 0,338687174 | 0,488 | 0,147 | 0,000276844 | 1,264605303   | 0,790760562     | 3,319727891     |
| PSMA3                                                                                               | 4,82285E-06 | 0,338305409 | 0,561 | 0,232 | 0,101766859 | 1,264270708   | 0,79096984      | 2,418103448     |
| CLTC                                                                                                | 6,71575E-07 | 0,338028354 | 0,524 | 0,2   | 0,014170896 | 1,264027941   | 0,791121753     | 2,62            |
| PSMA4                                                                                               | 4,68324E-09 | 0,337914124 | 0,585 | 0,2   | 9,88211E-05 | 1,263927861   | 0,791184395     | 2,925           |
| B4GALT7                                                                                             | 8,18246E-15 | 0,337661569 | 0,305 | 0,025 | 1,72658E-10 | 1,26370662    | 0,79132291      | 12,2            |
| POLDIP2                                                                                             | 7,73736E-12 | 0,337606963 | 0,268 | 0,028 | 1,63266E-07 | 1,263658789   | 0,791352862     | 9,571428571     |
| SLC35G1                                                                                             | 8,07006E-10 | 0,337166121 | 0,146 | 0,004 | 1,70286E-05 | 1,263272714   | 0,791594712     | 36,5            |
| LGMN                                                                                                | 4,04008E-10 | 0,336979366 | 0,354 | 0,07  | 8,52497E-06 | 1,263109196   | 0,791697189     | 5,057142857     |
| MYG1                                                                                                | 9,04102E-09 | 0,336972498 | 0,366 | 0,088 | 0,000190775 | 1,263103183   | 0,791700958     | 4,159090909     |
| NDUFAF3                                                                                             | 8,40927E-08 | 0,336965557 | 0,707 | 0,284 | 0,00177444  | 1,263097106   | 0,791704767     | 2,48943662      |
| ANAPC16                                                                                             | 2,09508E-08 | 0,336765746 | 0,598 | 0,207 | 0,000442082 | 1,262922182   | 0,791814424     | 2,888888889     |
| UBXN6                                                                                               | 3,41235E-07 | 0,336342199 | 0,341 | 0,095 | 0,00720041  | 1,262551467   | 0,79204692      | 3,589473684     |
| OSTM1                                                                                               | 2,01659E-07 | 0,336301718 | 0,366 | 0,105 | 0,004255213 | 1,262516041   | 0,792069144     | 3,485714286     |
| FLNC                                                                                                | 1,76167E-13 | 0,33624664  | 0,232 | 0,011 | 3,7173E-09  | 1,262467843   | 0,792099384     | 21,09090909     |
| DIRAS1                                                                                              | 1,03738E-15 | 0,335878643 | 0,28  | 0,014 | 2,18897E-11 | 1,262145858   | 0,792301455     | 20              |
| TAF15                                                                                               | 2,10502E-10 | 0,335561668 | 0,5   | 0,13  | 4,4418E-06  | 1,261868582   | 0,792475551     | 3,846153846     |
| ST3GAL5                                                                                             | 1,42955E-10 | 0,335407947 | 0,329 | 0,056 | 3,01649E-06 | 1,261734136   | 0,792559995     | 5,875           |
| LNPEP                                                                                               | 2,6882E-07  | 0,335177203 | 0,354 | 0,098 | 0,005672372 | 1,261532351   | 0,792686767     | 3,612244898     |
| MRPL37                                                                                              | 1,84289E-11 | 0,334236828 | 0,341 | 0,056 | 3,88867E-07 | 1,260710329   | 0,793203623     | 6,089285714     |
| UCK2                                                                                                | 3,04255E-12 | 0,333986776 | 0,317 | 0,042 | 6,4201E-08  | 1,260491838   | 0,793341115     | 7,547619048     |
| ENO1                                                                                                | 0,00016186  | 0,333905064 | 0,756 | 0,411 | 1           | 1,260420447   | 0,79338605      | 1,839416058     |
| TUFM                                                                                                | 2,08268E-07 | 0,333760597 | 0,585 | 0,225 | 0,00439467  | 1,260294239   | 0,793465501     | 2,6             |
| AXL                                                                                                 | 4,79221E-08 | 0,333632285 | 0,476 | 0,147 | 0,001011204 | 1,260182155   | 0,793536074     | 3,238095238     |

Supplementary Table 2

| Differentially expressed genes_keloid-XL_comparing SC-Keloid vs. (SC-Myel, SC-Nonmyel, SC-Nonmyel2) |             |             |       |       |             |               |                 |                 |
|-----------------------------------------------------------------------------------------------------|-------------|-------------|-------|-------|-------------|---------------|-----------------|-----------------|
| gene                                                                                                | p_val       | avg_log2FC  | pct.1 | pct.2 | p_val_adj   | Foldchange_UP | Foldchange_DOWN | Ratio_pct1_pct2 |
| LIMS1                                                                                               | 1,21835E-06 | 0,333532017 | 0,768 | 0,365 | 0,025708501 | 1,260094574   | 0,793591228     | 2,104109589     |
| RNF181                                                                                              | 6,48082E-09 | 0,333353179 | 0,585 | 0,196 | 0,000136752 | 1,259938381   | 0,793689608     | 2,984693878     |
| UBE2D4                                                                                              | 1,45089E-10 | 0,33332011  | 0,268 | 0,035 | 3,06152E-06 | 1,259909502   | 0,793707801     | 7,657142857     |
| GRINA                                                                                               | 5,22494E-09 | 0,333082158 | 0,39  | 0,098 | 0,000110251 | 1,259701715   | 0,793838722     | 3,979591837     |
| RNPEPL1                                                                                             | 2,50396E-11 | 0,333054065 | 0,451 | 0,102 | 5,2836E-07  | 1,259677186   | 0,79385418      | 4,421568627     |
| COPZ2                                                                                               | 1,07195E-07 | 0,332756089 | 0,524 | 0,172 | 0,002261917 | 1,259417037   | 0,794018161     | 3,046511628     |
| MAP3K13                                                                                             | 2,92492E-07 | 0,332655003 | 0,329 | 0,088 | 0,006171877 | 1,259328796   | 0,794073798     | 3,738636364     |
| MSRB3                                                                                               | 0,000153059 | 0,332484061 | 0,159 | 0,039 | 1           | 1,25917959    | 0,794167892     | 4,076923077     |
| ZDHHC1                                                                                              | 3,86345E-11 | 0,332034306 | 0,268 | 0,032 | 8,15226E-07 | 1,258787106   | 0,794415509     | 8,375           |
| TTL7                                                                                                | 1,033E-08   | 0,331841012 | 0,427 | 0,116 | 0,000217973 | 1,258618463   | 0,794521953     | 3,681034483     |
| MTLN                                                                                                | 4,19262E-12 | 0,331534121 | 0,439 | 0,091 | 8,84686E-08 | 1,258350758   | 0,794690982     | 4,824175824     |
| TRIM16                                                                                              | 7,01137E-09 | 0,331452941 | 0,171 | 0,014 | 0,000147947 | 1,258279953   | 0,794735701     | 12,21428571     |
| SHKBP1                                                                                              | 1,18356E-09 | 0,330875831 | 0,28  | 0,046 | 2,49742E-05 | 1,257776714   | 0,795053676     | 6,086956522     |
| COA6                                                                                                | 7,56045E-13 | 0,330575493 | 0,293 | 0,032 | 1,59533E-08 | 1,257514899   | 0,795219206     | 9,15625         |
| NHP2                                                                                                | 5,42179E-10 | 0,330420369 | 0,463 | 0,123 | 1,14405E-05 | 1,257379694   | 0,795304716     | 3,764227642     |
| IDS                                                                                                 | 3,43545E-06 | 0,330103095 | 0,585 | 0,242 | 0,072491469 | 1,257103204   | 0,795479637     | 2,417355372     |
| MAGOHB                                                                                              | 6,88854E-08 | 0,330083386 | 0,268 | 0,056 | 0,001453355 | 1,25708603    | 0,795490504     | 4,785714286     |
| EEF1D                                                                                               | 0,001127966 | 0,329958508 | 0,902 | 0,646 | 1           | 1,256977223   | 0,795559364     | 1,39628483      |
| MESD                                                                                                | 7,9925E-10  | 0,329951962 | 0,476 | 0,126 | 1,6865E-05  | 1,25697152    | 0,795562973     | 3,777777778     |
| CFAP410                                                                                             | 1,12546E-09 | 0,329807242 | 0,415 | 0,102 | 2,37483E-05 | 1,256845437   | 0,795642782     | 4,068627451     |
| CERS2                                                                                               | 9,71046E-06 | 0,329368167 | 0,488 | 0,193 | 0,204900375 | 1,256462982   | 0,795884968     | 2,528497409     |
| SNAPIN                                                                                              | 1,90747E-09 | 0,329279876 | 0,293 | 0,053 | 4,02494E-05 | 1,256386091   | 0,795933676     | 5,528301887     |
| C9orf78                                                                                             | 2,91172E-13 | 0,329261861 | 0,549 | 0,123 | 6,14402E-09 | 1,256370402   | 0,795943615     | 4,463414634     |
| CIB1                                                                                                | 1,1727E-07  | 0,328740817 | 0,537 | 0,193 | 0,002474519 | 1,255916733   | 0,796231131     | 2,78238342      |
| MACROD1                                                                                             | 2,41166E-08 | 0,328575207 | 0,207 | 0,028 | 0,000508885 | 1,255772572   | 0,796322537     | 7,392857143     |
| TMEM9B                                                                                              | 1,89715E-10 | 0,328541726 | 0,488 | 0,126 | 4,00318E-06 | 1,25574343    | 0,796341017     | 3,873015873     |
| CDK4                                                                                                | 3,93477E-10 | 0,328440879 | 0,402 | 0,091 | 8,30275E-06 | 1,255655653   | 0,796396685     | 4,417582418     |
| FLOT1                                                                                               | 1,00104E-08 | 0,328320198 | 0,61  | 0,207 | 0,000211229 | 1,255550623   | 0,796463306     | 2,946859903     |
| GLT8D1                                                                                              | 1,68611E-08 | 0,328236755 | 0,378 | 0,098 | 0,000355785 | 1,255478006   | 0,796509373     | 3,857142857     |
| PSMD4                                                                                               | 1,05803E-08 | 0,328232326 | 0,476 | 0,144 | 0,000223255 | 1,255474152   | 0,796511819     | 3,305555556     |

Supplementary Table 2

| Differentially expressed genes_keloid-XL_comparing SC-Keloid vs. (SC-Myel, SC-Nonmyel, SC-Nonmyel2) |             |             |       |       |             |               |                 |                 |
|-----------------------------------------------------------------------------------------------------|-------------|-------------|-------|-------|-------------|---------------|-----------------|-----------------|
| gene                                                                                                | p_val       | avg_log2FC  | pct.1 | pct.2 | p_val_adj   | Foldchange_UP | Foldchange_DOWN | Ratio_pct1_pct2 |
| ZCRB1                                                                                               | 2,62658E-10 | 0,328143016 | 0,415 | 0,095 | 5,54235E-06 | 1,255396434   | 0,796561128     | 4,368421053     |
| SMARCA1                                                                                             | 5,39766E-06 | 0,32801307  | 0,28  | 0,081 | 0,113895985 | 1,255283363   | 0,796632879     | 3,456790123     |
| ZNF593                                                                                              | 5,78906E-10 | 0,327858286 | 0,293 | 0,049 | 1,22155E-05 | 1,255148693   | 0,796718353     | 5,979591837     |
| RPL37                                                                                               | 0,00309164  | 0,327553031 | 0,988 | 0,958 | 1           | 1,254883149   | 0,796886946     | 1,03131524      |
| SMS                                                                                                 | 4,84298E-07 | 0,327482294 | 0,451 | 0,154 | 0,010219176 | 1,254821622   | 0,796926019     | 2,928571429     |
| SLC39A1                                                                                             | 8,13211E-07 | 0,326864288 | 0,439 | 0,151 | 0,017159564 | 1,25428421    | 0,797267471     | 2,907284768     |
| NUCB1                                                                                               | 2,30657E-05 | 0,326835734 | 0,598 | 0,281 | 0,486708321 | 1,254259386   | 0,79728325      | 2,128113879     |
| IQSEC1                                                                                              | 2,94435E-07 | 0,326805413 | 0,305 | 0,077 | 0,006212871 | 1,254233025   | 0,797300007     | 3,961038961     |
| ABHD17A                                                                                             | 5,01626E-07 | 0,32653794  | 0,537 | 0,207 | 0,010584813 | 1,254014295   | 0,797439076     | 2,594202899     |
| BOLA2B                                                                                              | 1,48591E-12 | 0,326055905 | 0,28  | 0,028 | 3,13541E-08 | 1,253581596   | 0,797714327     | 10              |
| GOLGA2                                                                                              | 2,16194E-07 | 0,326010364 | 0,524 | 0,186 | 0,004561916 | 1,253542025   | 0,797739509     | 2,817204301     |
| POLE4                                                                                               | 8,23737E-05 | 0,325794416 | 0,317 | 0,116 | 1           | 1,253354405   | 0,797858927     | 2,732758621     |
| RALB                                                                                                | 6,48827E-12 | 0,325582942 | 0,341 | 0,053 | 1,36909E-07 | 1,253170699   | 0,797975887     | 6,433962264     |
| UBE2V1                                                                                              | 7,64765E-05 | 0,325438643 | 0,524 | 0,253 | 1           | 1,253045362   | 0,798055705     | 2,071146245     |
| KLHL12                                                                                              | 0,170152369 | 0,325411185 | 0,049 | 0,021 | 1           | 1,253021514   | 0,798070894     | 2,333333333     |
| CD320                                                                                               | 3,43946E-11 | 0,325320865 | 0,354 | 0,063 | 7,2576E-07  | 1,252943071   | 0,798120859     | 5,619047619     |
| SUCLG1                                                                                              | 5,51237E-09 | 0,325206927 | 0,329 | 0,07  | 0,000116317 | 1,252844122   | 0,798183894     | 4,7             |
| SKP1                                                                                                | 0,002054185 | 0,32509735  | 0,89  | 0,646 | 1           | 1,252748969   | 0,798244521     | 1,377708978     |
| PKP1                                                                                                | 1,46644E-12 | 0,324612504 | 0,256 | 0,021 | 3,09434E-08 | 1,252328028   | 0,798512832     | 12,19047619     |
| MIEN1                                                                                               | 5,03402E-10 | 0,324553436 | 0,537 | 0,154 | 1,06223E-05 | 1,252276756   | 0,798545526     | 3,487012987     |
| MEGF8                                                                                               | 1,84502E-07 | 0,323401632 | 0,366 | 0,105 | 0,003893167 | 1,251277375   | 0,799183315     | 3,485714286     |
| SHROOM2                                                                                             | 6,01275E-14 | 0,323250443 | 0,207 | 0,004 | 1,26875E-09 | 1,251146253   | 0,79926707      | 51,75           |
| ANKRD54                                                                                             | 1,2439E-09  | 0,323246981 | 0,268 | 0,042 | 2,62476E-05 | 1,251143251   | 0,799268988     | 6,380952381     |
| CRELD1                                                                                              | 2,902E-11   | 0,32295416  | 0,329 | 0,053 | 6,12352E-07 | 1,250889334   | 0,799431231     | 6,20754717      |
| CCT6A                                                                                               | 5,54824E-07 | 0,322517787 | 0,537 | 0,196 | 0,011707349 | 1,250511034   | 0,799673072     | 2,739795918     |
| RASSF4                                                                                              | 3,18559E-07 | 0,322385811 | 0,598 | 0,239 | 0,006721905 | 1,250396644   | 0,799746228     | 2,50209205      |
| HGSNAT                                                                                              | 2,28084E-09 | 0,322077978 | 0,415 | 0,105 | 4,8128E-05  | 1,250129871   | 0,799916891     | 3,952380952     |
| HOXB6                                                                                               | 1,32627E-12 | 0,321784508 | 0,232 | 0,014 | 2,79856E-08 | 1,249875598   | 0,800079625     | 16,57142857     |
| MRPL3                                                                                               | 3,49803E-10 | 0,32175111  | 0,293 | 0,046 | 7,3812E-06  | 1,249846664   | 0,800098147     | 6,369565217     |
| DYNLT3                                                                                              | 1,2777E-06  | 0,321712657 | 0,476 | 0,168 | 0,026960836 | 1,249813351   | 0,800119473     | 2,833333333     |

Supplementary Table 2

| Differentially expressed genes_keloid-XL_comparing SC-Keloid vs. (SC-Myel, SC-Nonmyel, SC-Nonmyel2) |             |             |       |       |             |               |                 |                 |
|-----------------------------------------------------------------------------------------------------|-------------|-------------|-------|-------|-------------|---------------|-----------------|-----------------|
| gene                                                                                                | p_val       | avg_log2FC  | pct.1 | pct.2 | p_val_adj   | Foldchange_UP | Foldchange_DOWN | Ratio_pct1_pct2 |
| B3GALT6                                                                                             | 1,00057E-14 | 0,321433009 | 0,22  | 0,004 | 2,11131E-10 | 1,249571114   | 0,800274581     | 55              |
| SEPTIN7                                                                                             | 0,000329591 | 0,321377484 | 0,878 | 0,551 | 1           | 1,249523023   | 0,800305382     | 1,593466425     |
| SDF2                                                                                                | 1,89747E-13 | 0,32130244  | 0,463 | 0,084 | 4,00384E-09 | 1,249458028   | 0,800347012     | 5,511904762     |
| MRPL4                                                                                               | 4,19221E-06 | 0,321214974 | 0,341 | 0,112 | 0,088459877 | 1,249382281   | 0,800395536     | 3,044642857     |
| SLC35E2B                                                                                            | 1,59293E-05 | 0,321143901 | 0,22  | 0,056 | 0,336125017 | 1,249320732   | 0,800434968     | 3,928571429     |
| CHCHD5                                                                                              | 1,18681E-09 | 0,320918997 | 0,366 | 0,081 | 2,50428E-05 | 1,249125989   | 0,800559758     | 4,518518519     |
| FSTL3                                                                                               | 8,58766E-09 | 0,320746024 | 0,72  | 0,288 | 0,000181208 | 1,248976233   | 0,800655748     | 2,5             |
| NPEPL1                                                                                              | 2,27654E-07 | 0,320640584 | 0,341 | 0,095 | 0,004803722 | 1,248884955   | 0,800714266     | 3,589473684     |
| ZNRD2                                                                                               | 1,81511E-11 | 0,3203608   | 0,28  | 0,035 | 3,83007E-07 | 1,24864278    | 0,800869565     | 8               |
| RAD23A                                                                                              | 9,74322E-07 | 0,320188239 | 0,598 | 0,232 | 0,020559168 | 1,248493438   | 0,800965363     | 2,577586207     |
| UXT                                                                                                 | 4,23879E-07 | 0,31999639  | 0,537 | 0,2   | 0,008944265 | 1,248327426   | 0,801071882     | 2,685           |
| GDE1                                                                                                | 4,81925E-09 | 0,319951799 | 0,329 | 0,07  | 0,000101691 | 1,248288843   | 0,801096642     | 4,7             |
| PRPF31                                                                                              | 1,54785E-08 | 0,319589308 | 0,39  | 0,102 | 0,000326611 | 1,247975237   | 0,801297951     | 3,823529412     |
| MCTS1                                                                                               | 5,1942E-08  | 0,319188087 | 0,366 | 0,098 | 0,001096028 | 1,247628217   | 0,801520827     | 3,734693878     |
| TMOD3                                                                                               | 2,5471E-07  | 0,318924151 | 0,39  | 0,116 | 0,005374625 | 1,247399989   | 0,801667476     | 3,362068966     |
| NPTXR                                                                                               | 1,0745E-11  | 0,318150872 | 0,232 | 0,018 | 2,2673E-07  | 1,246731566   | 0,802097282     | 12,88888889     |
| BAD                                                                                                 | 3,31435E-07 | 0,318147547 | 0,427 | 0,137 | 0,006993611 | 1,246728693   | 0,80209913      | 3,116788321     |
| SLC15A4                                                                                             | 5,39465E-10 | 0,317739383 | 0,268 | 0,039 | 1,13833E-05 | 1,246376021   | 0,80232609      | 6,871794872     |
| VCL                                                                                                 | 0,000381883 | 0,317725627 | 0,707 | 0,407 | 1           | 1,246364137   | 0,80233374      | 1,737100737     |
| SMDT1                                                                                               | 7,28726E-07 | 0,317562964 | 0,5   | 0,189 | 0,015376853 | 1,246223618   | 0,802424208     | 2,645502646     |
| SVBP                                                                                                | 3,4886E-10  | 0,317233007 | 0,317 | 0,056 | 7,36129E-06 | 1,245938629   | 0,80260775      | 5,660714286     |
| SNRPD1                                                                                              | 1,03963E-08 | 0,317215363 | 0,549 | 0,186 | 0,000219372 | 1,245923391   | 0,802617566     | 2,951612903     |
| CRLS1                                                                                               | 1,86955E-11 | 0,317184266 | 0,341 | 0,056 | 3,94493E-07 | 1,245896536   | 0,802634867     | 6,089285714     |
| CANT1                                                                                               | 3,43575E-11 | 0,316879356 | 0,183 | 0,007 | 7,24977E-07 | 1,245633247   | 0,802804519     | 26,14285714     |
| DOK1                                                                                                | 1,36269E-09 | 0,316388713 | 0,232 | 0,028 | 2,87541E-05 | 1,245209694   | 0,80307759      | 8,285714286     |
| CZIB                                                                                                | 7,65047E-10 | 0,316377788 | 0,488 | 0,133 | 1,61432E-05 | 1,245200264   | 0,803083672     | 3,669172932     |
| TIMM17B                                                                                             | 7,94638E-10 | 0,31632693  | 0,341 | 0,07  | 1,67677E-05 | 1,245156369   | 0,803111982     | 4,871428571     |
| PCDHGC3                                                                                             | 1,45398E-09 | 0,316279882 | 0,232 | 0,028 | 3,06804E-05 | 1,245115763   | 0,803138174     | 8,285714286     |
| MAD2L2                                                                                              | 7,67373E-08 | 0,316077676 | 0,439 | 0,137 | 0,001619234 | 1,244941263   | 0,803250748     | 3,204379562     |
| HK1                                                                                                 | 2,494E-11   | 0,31593493  | 0,427 | 0,091 | 5,26259E-07 | 1,244818089   | 0,803330229     | 4,692307692     |

Supplementary Table 2

| Differentially expressed genes_keloid-XL_comparing SC-Keloid vs. (SC-Myel, SC-Nonmyel, SC-Nonmyel2) |             |             |       |       |             |               |                 |                 |
|-----------------------------------------------------------------------------------------------------|-------------|-------------|-------|-------|-------------|---------------|-----------------|-----------------|
| gene                                                                                                | p_val       | avg_log2FC  | pct.1 | pct.2 | p_val_adj   | Foldchange_UP | Foldchange_DOWN | Ratio_pct1_pct2 |
| STX12                                                                                               | 7,72211E-10 | 0,315419353 | 0,439 | 0,112 | 1,62944E-05 | 1,244373307   | 0,803617366     | 3,919642857     |
| AKR1B1                                                                                              | 1,1557E-09  | 0,315400692 | 0,415 | 0,098 | 2,43864E-05 | 1,244357211   | 0,803627761     | 4,234693878     |
| UFD1                                                                                                | 1,15129E-12 | 0,315246689 | 0,439 | 0,084 | 2,42933E-08 | 1,244224387   | 0,803713551     | 5,226190476     |
| UBLCP1                                                                                              | 9,54135E-18 | 0,315245378 | 0,402 | 0,039 | 2,01332E-13 | 1,244223257   | 0,803714281     | 10,30769231     |
| NCK2                                                                                                | 2,41934E-11 | 0,314969676 | 0,341 | 0,056 | 5,10506E-07 | 1,243985506   | 0,803867887     | 6,089285714     |
| NDUFB6                                                                                              | 7,16941E-08 | 0,31488651  | 0,585 | 0,211 | 0,001512818 | 1,243913796   | 0,803914229     | 2,772511848     |
| MAN1B1                                                                                              | 4,58338E-09 | 0,314855035 | 0,439 | 0,116 | 9,67139E-05 | 1,243886659   | 0,803931767     | 3,784482759     |
| TMCO3                                                                                               | 5,92941E-08 | 0,314794119 | 0,329 | 0,081 | 0,001251166 | 1,243834139   | 0,803965713     | 4,061728395     |
| SARAF                                                                                               | 0,000180637 | 0,314671013 | 0,805 | 0,449 | 1           | 1,243728005   | 0,804034319     | 1,792873051     |
| TIMM10                                                                                              | 8,56761E-09 | 0,314665091 | 0,329 | 0,074 | 0,000180785 | 1,2437229     | 0,804037619     | 4,445945946     |
| ARAP3                                                                                               | 2,19475E-07 | 0,314559241 | 0,244 | 0,049 | 0,004631148 | 1,243631652   | 0,804096614     | 4,979591837     |
| KPNA3                                                                                               | 1,31109E-05 | 0,31453579  | 0,268 | 0,077 | 0,276653936 | 1,243611437   | 0,804109684     | 3,480519481     |
| RFLNB                                                                                               | 2,12562E-10 | 0,314431009 | 0,171 | 0,007 | 4,48528E-06 | 1,243521118   | 0,804168088     | 24,42857143     |
| SPATS2L                                                                                             | 1,21625E-07 | 0,314116745 | 0,646 | 0,253 | 0,002566403 | 1,24325027    | 0,80434328      | 2,553359684     |
| IFT22                                                                                               | 6,97121E-18 | 0,313845066 | 0,39  | 0,035 | 1,47099E-13 | 1,243016172   | 0,804494763     | 11,14285714     |
| TMEM178B                                                                                            | 9,83782E-08 | 0,313843506 | 0,195 | 0,028 | 0,002075879 | 1,243014827   | 0,804495633     | 6,964285714     |
| LRRC59                                                                                              | 9,76123E-07 | 0,313671986 | 0,39  | 0,13  | 0,020597179 | 1,242867056   | 0,804591284     | 3               |
| CCNI                                                                                                | 0,003572266 | 0,313490013 | 0,78  | 0,516 | 1           | 1,242710298   | 0,804692776     | 1,511627907     |
| NDUFA8                                                                                              | 1,39338E-08 | 0,313101559 | 0,366 | 0,091 | 0,000294018 | 1,242375736   | 0,804909474     | 4,021978022     |
| MRPS33                                                                                              | 6,73125E-14 | 0,312945395 | 0,402 | 0,06  | 1,42036E-09 | 1,242241263   | 0,804996606     | 6,7             |
| MTCO2P12                                                                                            | 0,425842823 | 0,312859144 | 0,805 | 0,677 | 1           | 1,242166998   | 0,805044733     | 1,189069424     |
| ABCD4                                                                                               | 5,74357E-09 | 0,312437635 | 0,378 | 0,095 | 0,000121195 | 1,24180413    | 0,805279976     | 3,978947368     |
| C18orf32                                                                                            | 0,000102387 | 0,312067856 | 0,622 | 0,326 | 1           | 1,241485882   | 0,805486405     | 1,90797546      |
| PSMC4                                                                                               | 1,34814E-09 | 0,311988396 | 0,402 | 0,098 | 2,84472E-05 | 1,241417506   | 0,80553077      | 4,102040816     |
| MRPS16                                                                                              | 1,19163E-15 | 0,31131519  | 0,378 | 0,042 | 2,51446E-11 | 1,240838358   | 0,805906743     | 9               |
| CAMK1D                                                                                              | 1,87865E-10 | 0,311230384 | 0,256 | 0,032 | 3,96413E-06 | 1,24076542    | 0,805954119     | 8               |
| FHOD1                                                                                               | 5,84024E-12 | 0,311186781 | 0,354 | 0,056 | 1,23235E-07 | 1,240727921   | 0,805978477     | 6,321428571     |
| PHB                                                                                                 | 4,90476E-08 | 0,310918567 | 0,5   | 0,161 | 0,001034954 | 1,240497276   | 0,806128332     | 3,105590062     |
| XRCC6                                                                                               | 1,70997E-05 | 0,310225926 | 0,537 | 0,228 | 0,360820705 | 1,239901854   | 0,806515449     | 2,355263158     |
| RAB23                                                                                               | 6,16607E-11 | 0,309962509 | 0,232 | 0,021 | 1,3011E-06  | 1,239675485   | 0,80662721      | 11,04761905     |

Supplementary Table 2

| Differentially expressed genes_keloid-XL_comparing SC-Keloid vs. (SC-Myel, SC-Nonmyel, SC-Nonmyel2) |             |             |       |       |             |               |                 |                 |
|-----------------------------------------------------------------------------------------------------|-------------|-------------|-------|-------|-------------|---------------|-----------------|-----------------|
| gene                                                                                                | p_val       | avg_log2FC  | pct.1 | pct.2 | p_val_adj   | Foldchange_UP | Foldchange_DOWN | Ratio_pct1_pct2 |
| CMAS                                                                                                | 8,24922E-07 | 0,309187133 | 0,256 | 0,06  | 0,017406682 | 1,2390094     | 0,807096379     | 4,266666667     |
| ATG13                                                                                               | 1,1603E-08  | 0,309146004 | 0,244 | 0,039 | 0,000244834 | 1,238974079   | 0,807119388     | 6,256410256     |
| EMC6                                                                                                | 1,1633E-10  | 0,308790796 | 0,39  | 0,081 | 2,45468E-06 | 1,238669066   | 0,807318135     | 4,814814815     |
| CTNNBIP1                                                                                            | 1,70489E-12 | 0,308480112 | 0,366 | 0,06  | 3,5975E-08  | 1,238402348   | 0,807492009     | 6,1             |
| ZNF480                                                                                              | 8,2597E-10  | 0,308302714 | 0,146 | 0,004 | 1,74288E-05 | 1,23825008    | 0,807591307     | 36,5            |
| IMMP1L                                                                                              | 3,67004E-12 | 0,308022519 | 0,329 | 0,046 | 7,74416E-08 | 1,238009615   | 0,807748169     | 7,152173913     |
| METTL23                                                                                             | 6,2874E-12  | 0,307690812 | 0,293 | 0,035 | 1,3267E-07  | 1,237725002   | 0,80793391      | 8,371428571     |
| TNFRSF6B                                                                                            | 8,26544E-06 | 0,307338398 | 0,122 | 0,014 | 0,174409102 | 1,237422694   | 0,808131291     | 8,714285714     |
| PEPD                                                                                                | 2,53429E-05 | 0,307251756 | 0,488 | 0,2   | 0,534761166 | 1,237348382   | 0,808179826     | 2,44            |
| TUBGCP2                                                                                             | 1,18895E-07 | 0,307226457 | 0,305 | 0,074 | 0,002508802 | 1,237326684   | 0,808193998     | 4,121621622     |
| PDZD11                                                                                              | 3,94721E-08 | 0,3068534   | 0,293 | 0,063 | 0,000832901 | 1,237006773   | 0,808403011     | 4,650793651     |
| TMED10                                                                                              | 0,012557722 | 0,306653592 | 0,829 | 0,537 | 1           | 1,236835464   | 0,80851498      | 1,543761639     |
| DNAJC19                                                                                             | 2,35197E-09 | 0,306623961 | 0,512 | 0,151 | 4,96288E-05 | 1,236810062   | 0,808531586     | 3,390728477     |
| VIRMA                                                                                               | 0,000197025 | 0,306594596 | 0,171 | 0,046 | 1           | 1,236784887   | 0,808548043     | 3,717391304     |
| ERG28                                                                                               | 9,73562E-10 | 0,306363097 | 0,22  | 0,025 | 2,05431E-05 | 1,236586445   | 0,808677795     | 8,8             |
| ATXN10                                                                                              | 3,07543E-08 | 0,306130001 | 0,451 | 0,137 | 0,000648947 | 1,236386666   | 0,808808464     | 3,291970803     |
| PSMC1                                                                                               | 5,80406E-07 | 0,306097719 | 0,451 | 0,158 | 0,012247149 | 1,236359001   | 0,808826562     | 2,85443038      |
| GSTT2B                                                                                              | 3,58104E-07 | 0,306038249 | 0,232 | 0,046 | 0,007556354 | 1,236308038   | 0,808859903     | 5,043478261     |
| JKAMP                                                                                               | 8,37966E-08 | 0,305997575 | 0,39  | 0,109 | 0,001768191 | 1,236273183   | 0,808882708     | 3,577981651     |
| PDCD6                                                                                               | 3,66692E-07 | 0,305854475 | 0,659 | 0,263 | 0,007737576 | 1,236150564   | 0,808962945     | 2,505703422     |
| CFAP298                                                                                             | 9,29465E-08 | 0,305851721 | 0,341 | 0,088 | 0,001961263 | 1,236148204   | 0,808964489     | 3,875           |
| POMGNT1                                                                                             | 5,47919E-10 | 0,305753828 | 0,305 | 0,053 | 1,15616E-05 | 1,236064329   | 0,809019382     | 5,754716981     |
| LDLRAP1                                                                                             | 3,63748E-08 | 0,305229281 | 0,244 | 0,042 | 0,000767544 | 1,235614992   | 0,809313586     | 5,80952381      |
| GPX4                                                                                                | 0,000437663 | 0,305119793 | 0,841 | 0,526 | 1           | 1,235521223   | 0,809375008     | 1,598859316     |
| RAPH1                                                                                               | 8,35573E-09 | 0,304631647 | 0,366 | 0,088 | 0,000176314 | 1,235103247   | 0,809648912     | 4,159090909     |
| EHD2                                                                                                | 1,7404E-13  | 0,30435659  | 0,354 | 0,046 | 3,67243E-09 | 1,234867791   | 0,80980329      | 7,695652174     |
| ORMDL2                                                                                              | 4,81548E-07 | 0,304347426 | 0,244 | 0,053 | 0,010161135 | 1,234859947   | 0,809808434     | 4,603773585     |
| SPSB3                                                                                               | 1,94322E-08 | 0,303949977 | 0,512 | 0,161 | 0,000410039 | 1,234519801   | 0,81003156      | 3,180124224     |
| ATP2C1                                                                                              | 1,33137E-05 | 0,303808823 | 0,366 | 0,13  | 0,280932307 | 1,234399022   | 0,810110817     | 2,815384615     |
| ACTR3                                                                                               | 2,10268E-09 | 0,303802723 | 0,549 | 0,168 | 4,43687E-05 | 1,234393802   | 0,810114243     | 3,267857143     |

Supplementary Table 2

| Differentially expressed genes_keloid-XL_comparing SC-Keloid vs. (SC-Myel, SC-Nonmyel, SC-Nonmyel2) |             |             |       |       |             |               |                 |                 |
|-----------------------------------------------------------------------------------------------------|-------------|-------------|-------|-------|-------------|---------------|-----------------|-----------------|
| gene                                                                                                | p_val       | avg_log2FC  | pct.1 | pct.2 | p_val_adj   | Foldchange_UP | Foldchange_DOWN | Ratio_pct1_pct2 |
| RNF187                                                                                              | 1,70078E-08 | 0,303779316 | 0,524 | 0,168 | 0,000358882 | 1,234373774   | 0,810127387     | 3,119047619     |
| FAM177A1                                                                                            | 3,39525E-07 | 0,303633149 | 0,573 | 0,211 | 0,007164324 | 1,23424872    | 0,810209469     | 2,71563981      |
| TRPV2                                                                                               | 5,73029E-16 | 0,303407043 | 0,22  | 0     | 1,20915E-11 | 1,234055298   | 0,810336459     | #DIV/0!         |
| SRPX2                                                                                               | 1,8561E-11  | 0,302984084 | 0,305 | 0,042 | 3,91657E-07 | 1,233693559   | 0,810574062     | 7,261904762     |
| MRPS7                                                                                               | 8,17685E-11 | 0,302918396 | 0,329 | 0,056 | 1,7254E-06  | 1,233637389   | 0,810610969     | 5,875           |
| CCDC28B                                                                                             | 1,2997E-09  | 0,30284312  | 0,268 | 0,042 | 2,74249E-05 | 1,233573023   | 0,810653266     | 6,380952381     |
| GRSF1                                                                                               | 5,16897E-09 | 0,302493971 | 0,317 | 0,067 | 0,00010907  | 1,233274519   | 0,810849478     | 4,731343284     |
| FEZ2                                                                                                | 2,71224E-06 | 0,302328771 | 0,524 | 0,2   | 0,057231036 | 1,233133308   | 0,810942331     | 2,62            |
| TMX1                                                                                                | 3,87537E-08 | 0,302208738 | 0,463 | 0,14  | 0,000817741 | 1,233030715   | 0,811009805     | 3,307142857     |
| BCHE                                                                                                | 1,69521E-05 | 0,30218974  | 0,195 | 0,046 | 0,357706445 | 1,233014478   | 0,811020485     | 4,239130435     |
| LSM4                                                                                                | 3,54349E-08 | 0,301894607 | 0,415 | 0,116 | 0,000747712 | 1,232762265   | 0,811186413     | 3,577586207     |
| FBXL6                                                                                               | 4,4767E-08  | 0,301665011 | 0,232 | 0,039 | 0,000944628 | 1,232566094   | 0,811315519     | 5,948717949     |
| NSMCE4A                                                                                             | 9,91294E-10 | 0,301610767 | 0,256 | 0,035 | 2,09173E-05 | 1,232519752   | 0,811346024     | 7,314285714     |
| PLGRKT                                                                                              | 6,26286E-09 | 0,301607898 | 0,28  | 0,053 | 0,000132153 | 1,232517301   | 0,811347637     | 5,283018868     |
| MRPL47                                                                                              | 4,30624E-10 | 0,301535115 | 0,366 | 0,077 | 9,0866E-06  | 1,232455123   | 0,81138857      | 4,753246753     |
| CEP89                                                                                               | 4,11479E-08 | 0,301194521 | 0,232 | 0,039 | 0,000868262 | 1,232164197   | 0,811580147     | 5,948717949     |
| MRPS14                                                                                              | 5,21434E-11 | 0,301073794 | 0,305 | 0,046 | 1,10028E-06 | 1,232061092   | 0,811648064     | 6,630434783     |
| SH2B3                                                                                               | 2,77734E-07 | 0,30075775  | 0,329 | 0,088 | 0,005860474 | 1,23179122    | 0,811825887     | 3,738636364     |
| ANKRD44                                                                                             | 9,84372E-07 | 0,300493689 | 0,293 | 0,077 | 0,02077124  | 1,231565782   | 0,811974492     | 3,805194805     |
| TPRKB                                                                                               | 8,0679E-10  | 0,300356009 | 0,305 | 0,053 | 1,70241E-05 | 1,231448256   | 0,812051985     | 5,754716981     |
| PAWR                                                                                                | 1,22894E-08 | 0,299906718 | 0,244 | 0,039 | 0,000259318 | 1,231064812   | 0,812304917     | 6,256410256     |
| CCL14                                                                                               | 0,0103374   | 0,299449512 | 0,159 | 0,063 | 1           | 1,230674736   | 0,812562386     | 2,523809524     |
| MFN1                                                                                                | 4,22033E-11 | 0,29901085  | 0,244 | 0,025 | 8,90531E-07 | 1,230300597   | 0,812809489     | 9,76            |
| IFITM10                                                                                             | 1,64161E-12 | 0,298926212 | 0,256 | 0,021 | 3,46396E-08 | 1,230228422   | 0,812857175     | 12,19047619     |
| SUMF2                                                                                               | 6,09665E-05 | 0,298803499 | 0,378 | 0,151 | 1           | 1,230123786   | 0,812926318     | 2,503311258     |
| RAB14                                                                                               | 5,29106E-06 | 0,298783311 | 0,622 | 0,274 | 0,111646684 | 1,230106572   | 0,812937694     | 2,270072993     |
| PYCR1                                                                                               | 1,45951E-09 | 0,298639118 | 0,22  | 0,025 | 3,07971E-05 | 1,229983633   | 0,813018949     | 8,8             |
| DEC1                                                                                                | 2,60628E-07 | 0,297885803 | 0,451 | 0,147 | 0,005499514 | 1,229341555   | 0,813443584     | 3,068027211     |
| BEX1                                                                                                | 5,73002E-06 | 0,297707166 | 0,207 | 0,046 | 0,120909104 | 1,229189345   | 0,813544312     | 4,5             |
| DALRD3                                                                                              | 1,00176E-10 | 0,297699555 | 0,28  | 0,039 | 2,11382E-06 | 1,22918286    | 0,813548604     | 7,179487179     |

Supplementary Table 2

| Differentially expressed genes_keloid-XL_comparing SC-Keloid vs. (SC-Myel, SC-Nonmyel, SC-Nonmyel2) |             |             |       |       |             |               |                 |                 |
|-----------------------------------------------------------------------------------------------------|-------------|-------------|-------|-------|-------------|---------------|-----------------|-----------------|
| gene                                                                                                | p_val       | avg_log2FC  | pct.1 | pct.2 | p_val_adj   | Foldchange_UP | Foldchange_DOWN | Ratio_pct1_pct2 |
| PTRHD1                                                                                              | 7,37514E-10 | 0,297560059 | 0,329 | 0,063 | 1,55623E-05 | 1,229064014   | 0,813627271     | 5,222222222     |
| EEF2                                                                                                | 0,005169813 | 0,297500053 | 0,939 | 0,772 | 1           | 1,229012895   | 0,813661113     | 1,216321244     |
| CIAPIN1                                                                                             | 4,9772E-15  | 0,297468142 | 0,305 | 0,025 | 1,05024E-10 | 1,228985711   | 0,813679111     | 12,2            |
| HMGB1                                                                                               | 0,005698602 | 0,297357959 | 0,951 | 0,849 | 1           | 1,228891853   | 0,813741256     | 1,120141343     |
| ATAD1                                                                                               | 3,86389E-09 | 0,297354205 | 0,39  | 0,095 | 8,1532E-05  | 1,228888655   | 0,813743374     | 4,105263158     |
| FIS1                                                                                                | 4,07396E-07 | 0,297184712 | 0,732 | 0,309 | 0,008596459 | 1,22874429    | 0,81383898      | 2,368932039     |
| RPS4X                                                                                               | 0,004252664 | 0,296849708 | 0,976 | 0,902 | 1           | 1,228459      | 0,814027981     | 1,082039911     |
| RALA                                                                                                | 5,94843E-10 | 0,29661811  | 0,427 | 0,105 | 1,25518E-05 | 1,228261809   | 0,814158669     | 4,066666667     |
| CAMLG                                                                                               | 7,79464E-06 | 0,296617486 | 0,622 | 0,256 | 0,164474797 | 1,228261278   | 0,814159021     | 2,4296875       |
| GNB2                                                                                                | 0,000102149 | 0,296073769 | 0,744 | 0,379 | 1           | 1,227798463   | 0,814465916     | 1,963060686     |
| REX1BD                                                                                              | 1,3949E-07  | 0,295987624 | 0,598 | 0,228 | 0,002943375 | 1,227725152   | 0,81451455      | 2,622807018     |
| SSBP4                                                                                               | 6,96116E-09 | 0,29590277  | 0,439 | 0,119 | 0,000146887 | 1,227652944   | 0,814562459     | 3,68907563      |
| PFDN6                                                                                               | 1,30225E-11 | 0,295894092 | 0,402 | 0,077 | 2,74788E-07 | 1,227645559   | 0,814567358     | 5,220779221     |
| KRR1                                                                                                | 1,61217E-08 | 0,295201715 | 0,378 | 0,095 | 0,000340184 | 1,22705653    | 0,814958378     | 3,978947368     |
| STK11                                                                                               | 1,92674E-05 | 0,294682401 | 0,366 | 0,133 | 0,406561383 | 1,226614917   | 0,815251785     | 2,751879699     |
| TMEM258                                                                                             | 0,000125006 | 0,293943539 | 0,89  | 0,561 | 1           | 1,225986879   | 0,815669414     | 1,586452763     |
| SOCS2                                                                                               | 2,69111E-05 | 0,293525193 | 0,634 | 0,291 | 0,567850574 | 1,225631424   | 0,815905973     | 2,178694158     |
| SURF1                                                                                               | 1,01713E-09 | 0,293491556 | 0,415 | 0,102 | 2,14624E-05 | 1,225602849   | 0,815924997     | 4,068627451     |
| CRTAP                                                                                               | 1,42152E-05 | 0,292875143 | 0,488 | 0,204 | 0,29995459  | 1,225079304   | 0,816273687     | 2,392156863     |
| GSPT1                                                                                               | 1,71513E-06 | 0,292267949 | 0,415 | 0,14  | 0,036191023 | 1,224563807   | 0,816617308     | 2,964285714     |
| GNS                                                                                                 | 0,000198924 | 0,292171568 | 0,207 | 0,063 | 1           | 1,224482002   | 0,816671865     | 3,285714286     |
| PTPRE                                                                                               | 8,61929E-08 | 0,29207589  | 0,512 | 0,175 | 0,001818755 | 1,224400798   | 0,816726028     | 2,925714286     |
| BCL2L1                                                                                              | 6,81442E-11 | 0,291887908 | 0,354 | 0,063 | 1,43791E-06 | 1,22424127    | 0,816832454     | 5,619047619     |
| RARS1                                                                                               | 5,66777E-09 | 0,291874419 | 0,268 | 0,046 | 0,000119596 | 1,224229823   | 0,816840091     | 5,826086957     |
| AGPAT1                                                                                              | 1,87975E-08 | 0,291283979 | 0,402 | 0,109 | 0,000396647 | 1,223728895   | 0,817174461     | 3,688073394     |
| EIF2AK1                                                                                             | 2,93233E-08 | 0,291223834 | 0,305 | 0,067 | 0,00061875  | 1,22367788    | 0,817208529     | 4,552238806     |
| PXYLP1                                                                                              | 6,01716E-05 | 0,291188983 | 0,085 | 0,007 | 1           | 1,22364832    | 0,81722827      | 12,14285714     |
| UQCC3                                                                                               | 2,279E-10   | 0,29109728  | 0,402 | 0,088 | 4,80892E-06 | 1,223570543   | 0,817280218     | 4,568181818     |
| AAR2                                                                                                | 8,65211E-10 | 0,290279683 | 0,146 | 0,004 | 1,82568E-05 | 1,222877324   | 0,817743514     | 36,5            |
| IL11                                                                                                | 9,98574E-09 | 0,290263887 | 0,159 | 0,011 | 0,000210709 | 1,222863935   | 0,817752468     | 14,45454545     |



Supplementary Table 2

| Differentially expressed genes_keloid-XL_comparing SC-Keloid vs. (SC-Myel, SC-Nonmyel, SC-Nonmyel2) |             |             |       |       |             |               |                 |                 |
|-----------------------------------------------------------------------------------------------------|-------------|-------------|-------|-------|-------------|---------------|-----------------|-----------------|
| gene                                                                                                | p_val       | avg_log2FC  | pct.1 | pct.2 | p_val_adj   | Foldchange_UP | Foldchange_DOWN | Ratio_pct1_pct2 |
| FKBP9                                                                                               | 4,32263E-08 | 0,29002264  | 0,439 | 0,133 | 0,000912118 | 1,222659465   | 0,817889223     | 3,30075188      |
| IFT57                                                                                               | 1,16197E-07 | 0,289789572 | 0,39  | 0,112 | 0,00245188  | 1,222461959   | 0,818021364     | 3,482142857     |
| PMPCA                                                                                               | 5,68688E-07 | 0,289754491 | 0,268 | 0,063 | 0,01199989  | 1,222432234   | 0,818041256     | 4,253968254     |
| CHST11                                                                                              | 7,12258E-09 | 0,289623519 | 0,183 | 0,018 | 0,000150293 | 1,222321263   | 0,818115523     | 10,16666667     |
| VPS45                                                                                               | 7,26135E-07 | 0,289003704 | 0,207 | 0,039 | 0,015322168 | 1,221796239   | 0,81846708      | 5,307692308     |
| LRP1                                                                                                | 0,001259814 | 0,288685788 | 0,585 | 0,337 | 1           | 1,22152703    | 0,818647459     | 1,735905045     |
| TMEM51                                                                                              | 5,15386E-08 | 0,288682172 | 0,159 | 0,014 | 0,001087517 | 1,221523968   | 0,818649511     | 11,35714286     |
| TMX2                                                                                                | 3,63456E-07 | 0,288612627 | 0,28  | 0,067 | 0,007669294 | 1,221465086   | 0,818688975     | 4,179104478     |
| SLC41A3                                                                                             | 1,56249E-06 | 0,288427396 | 0,256 | 0,063 | 0,032970135 | 1,22130827    | 0,818794095     | 4,063492063     |
| NCOR2                                                                                               | 3,01136E-06 | 0,288219849 | 0,585 | 0,242 | 0,063542715 | 1,221132584   | 0,818911896     | 2,417355372     |
| TSPAN9                                                                                              | 6,42925E-12 | 0,287891552 | 0,305 | 0,039 | 1,35664E-07 | 1,220854737   | 0,819098268     | 7,820512821     |
| C19orf25                                                                                            | 8,04034E-08 | 0,287865893 | 0,28  | 0,06  | 0,001696593 | 1,220833023   | 0,819112836     | 4,666666667     |
| LENG1                                                                                               | 9,5155E-05  | 0,287827238 | 0,171 | 0,042 | 1           | 1,220800313   | 0,819134783     | 4,071428571     |
| TWF1                                                                                                | 2,92147E-09 | 0,287377051 | 0,354 | 0,077 | 6,1646E-05  | 1,220419428   | 0,81939043      | 4,597402597     |
| DIAPH1                                                                                              | 2,60756E-09 | 0,286941585 | 0,39  | 0,095 | 5,50221E-05 | 1,220051109   | 0,819637794     | 4,105263158     |
| TASP1                                                                                               | 5,55324E-11 | 0,286736247 | 0,329 | 0,053 | 1,17179E-06 | 1,219877472   | 0,819754461     | 6,20754717      |
| HAGH                                                                                                | 6,76335E-07 | 0,28670315  | 0,427 | 0,14  | 0,01427134  | 1,219849487   | 0,819773267     | 3,05            |
| PINK1                                                                                               | 2,40937E-08 | 0,286620238 | 0,354 | 0,088 | 0,000508401 | 1,219779384   | 0,819820381     | 4,022727273     |
| ATP13A1                                                                                             | 1,41131E-09 | 0,286551659 | 0,22  | 0,025 | 2,978E-05   | 1,219721403   | 0,819859353     | 8,8             |
| RAC1                                                                                                | 0,000685981 | 0,286504953 | 0,89  | 0,726 | 1           | 1,219681916   | 0,819885896     | 1,225895317     |
| PTDSS2                                                                                              | 1,16562E-12 | 0,286035639 | 0,293 | 0,032 | 2,45957E-08 | 1,219285214   | 0,820152651     | 9,15625         |
| SSR1                                                                                                | 1,73394E-08 | 0,285965548 | 0,585 | 0,2   | 0,000365878 | 1,219225978   | 0,820192498     | 2,925           |
| RPL29                                                                                               | 0,007320851 | 0,285961005 | 0,976 | 0,888 | 1           | 1,219222139   | 0,82019508      | 1,099099099     |
| SNHG9                                                                                               | 4,05114E-07 | 0,285909988 | 0,5   | 0,179 | 0,008548309 | 1,219179025   | 0,820224085     | 2,793296089     |
| ATP1B1                                                                                              | 4,86399E-05 | 0,285707035 | 0,695 | 0,351 | 1           | 1,219007528   | 0,820339479     | 1,98005698      |
| NADK                                                                                                | 1,2467E-08  | 0,285694715 | 0,244 | 0,039 | 0,000263067 | 1,218997118   | 0,820346484     | 6,256410256     |
| RWDD1                                                                                               | 5,5758E-06  | 0,285561627 | 0,598 | 0,26  | 0,117655055 | 1,218884671   | 0,820422165     | 2,3             |
| MED24                                                                                               | 0,000637069 | 0,285489477 | 0,171 | 0,053 | 1           | 1,218823716   | 0,820463195     | 3,226415094     |
| IFT52                                                                                               | 4,83465E-11 | 0,285275887 | 0,317 | 0,049 | 1,02016E-06 | 1,218643283   | 0,820584673     | 6,469387755     |
| BTC                                                                                                 | 3,35288E-07 | 0,285241719 | 0,134 | 0,011 | 0,00707491  | 1,218614422   | 0,820604108     | 12,18181818     |

Supplementary Table 2

| Differentially expressed genes_keloid-XL_comparing SC-Keloid vs. (SC-Myel, SC-Nonmyel, SC-Nonmyel2) |             |             |       |       |             |               |                 |                 |
|-----------------------------------------------------------------------------------------------------|-------------|-------------|-------|-------|-------------|---------------|-----------------|-----------------|
| gene                                                                                                | p_val       | avg_log2FC  | pct.1 | pct.2 | p_val_adj   | Foldchange_UP | Foldchange_DOWN | Ratio_pct1_pct2 |
| MMADHC                                                                                              | 7,78968E-10 | 0,285204186 | 0,293 | 0,049 | 1,6437E-05  | 1,218582719   | 0,820625457     | 5,979591837     |
| TSG101                                                                                              | 2,47394E-09 | 0,285052337 | 0,402 | 0,098 | 5,22026E-05 | 1,218454465   | 0,820711835     | 4,102040816     |
| AZI2                                                                                                | 1,80608E-07 | 0,284913725 | 0,341 | 0,088 | 0,003811004 | 1,218337403   | 0,820790692     | 3,875           |
| ABHD14A                                                                                             | 1,47881E-08 | 0,284574481 | 0,232 | 0,035 | 0,000312045 | 1,21805095    | 0,82098372      | 6,628571429     |
| GOLT1B                                                                                              | 1,55549E-07 | 0,28454097  | 0,402 | 0,123 | 0,003282246 | 1,218022657   | 0,82100279      | 3,268292683     |
| MMP28                                                                                               | 3,42792E-05 | 0,284512363 | 0,232 | 0,067 | 0,723324825 | 1,217998505   | 0,82101907      | 3,462686567     |
| NFIX                                                                                                | 3,47856E-05 | 0,284348026 | 0,732 | 0,368 | 0,734010428 | 1,217859771   | 0,821112597     | 1,989130435     |
| ZNF22                                                                                               | 3,79794E-07 | 0,284304981 | 0,463 | 0,151 | 0,008014026 | 1,217823436   | 0,821137097     | 3,066225166     |
| AFAP1L1                                                                                             | 1,0923E-11  | 0,284101498 | 0,305 | 0,042 | 2,30485E-07 | 1,217651681   | 0,821252921     | 7,261904762     |
| EIF2S2                                                                                              | 3,96782E-05 | 0,283974273 | 0,622 | 0,312 | 0,837249287 | 1,217544307   | 0,821325347     | 1,993589744     |
| CADM1                                                                                               | 0,00496992  | 0,283442885 | 0,878 | 0,656 | 1           | 1,217095931   | 0,821627922     | 1,338414634     |
| GAP43                                                                                               | 1,33009E-07 | 0,283297106 | 0,305 | 0,074 | 0,002806627 | 1,216972954   | 0,821710948     | 4,121621622     |
| LARP6                                                                                               | 7,40022E-05 | 0,283277719 | 0,22  | 0,063 | 1           | 1,2169566     | 0,82172199      | 3,492063492     |
| PMPCB                                                                                               | 5,07535E-08 | 0,283271991 | 0,329 | 0,081 | 0,001070949 | 1,216951769   | 0,821725253     | 4,061728395     |
| RAB11B                                                                                              | 3,70878E-07 | 0,283095481 | 0,585 | 0,228 | 0,007825896 | 1,216802887   | 0,821825795     | 2,565789474     |
| SLC22A18                                                                                            | 1,69222E-09 | 0,283013322 | 0,171 | 0,011 | 3,57076E-05 | 1,216733594   | 0,821872598     | 15,54545455     |
| MFS1                                                                                                | 3,98217E-09 | 0,28249107  | 0,28  | 0,049 | 8,40279E-05 | 1,216293219   | 0,822170168     | 5,714285714     |
| LONP1                                                                                               | 4,5734E-10  | 0,281573164 | 0,28  | 0,042 | 9,65032E-06 | 1,215519606   | 0,822693435     | 6,666666667     |
| SART1                                                                                               | 3,37602E-10 | 0,281411307 | 0,354 | 0,07  | 7,12373E-06 | 1,215383244   | 0,822785738     | 5,057142857     |
| NOL7                                                                                                | 3,17706E-07 | 0,281257467 | 0,646 | 0,256 | 0,006703911 | 1,21525365    | 0,82287348      | 2,5234375       |
| FAM210B                                                                                             | 4,35363E-07 | 0,28106763  | 0,537 | 0,193 | 0,009186595 | 1,215093752   | 0,822981765     | 2,78238342      |
| SPOCK1                                                                                              | 3,71719E-10 | 0,280529279 | 0,195 | 0,014 | 7,84365E-06 | 1,214640415   | 0,823288924     | 13,92857143     |
| RAB18                                                                                               | 7,49454E-07 | 0,280504998 | 0,463 | 0,158 | 0,015814224 | 1,214619973   | 0,823302779     | 2,930379747     |
| HDDC2                                                                                               | 1,56882E-09 | 0,280363368 | 0,341 | 0,07  | 3,31037E-05 | 1,214500739   | 0,823383608     | 4,871428571     |
| ZBTB8OS                                                                                             | 2,05217E-09 | 0,28036154  | 0,305 | 0,056 | 4,33028E-05 | 1,2144992     | 0,823384651     | 5,446428571     |
| ATG4B                                                                                               | 3,97798E-07 | 0,28022555  | 0,305 | 0,077 | 0,008393938 | 1,214384726   | 0,823462268     | 3,961038961     |
| MRPL2                                                                                               | 1,01953E-08 | 0,28015077  | 0,305 | 0,063 | 0,000215131 | 1,214321781   | 0,823504952     | 4,841269841     |
| POLR2C                                                                                              | 1,11771E-06 | 0,279977891 | 0,305 | 0,084 | 0,023584828 | 1,214176277   | 0,823603639     | 3,630952381     |
| CLEC11A                                                                                             | 1,32817E-07 | 0,279912391 | 0,39  | 0,116 | 0,002802565 | 1,214121154   | 0,823641032     | 3,362068966     |
| PBDC1                                                                                               | 2,98878E-11 | 0,279761359 | 0,366 | 0,067 | 6,30663E-07 | 1,213994057   | 0,823727262     | 5,462686567     |

Supplementary Table 2

| Differentially expressed genes_keloid-XL_comparing SC-Keloid vs. (SC-Myel, SC-Nonmyel, SC-Nonmyel2) |             |             |       |       |             |               |                 |                 |
|-----------------------------------------------------------------------------------------------------|-------------|-------------|-------|-------|-------------|---------------|-----------------|-----------------|
| gene                                                                                                | p_val       | avg_log2FC  | pct.1 | pct.2 | p_val_adj   | Foldchange_UP | Foldchange_DOWN | Ratio_pct1_pct2 |
| TSHZ3                                                                                               | 4,86028E-08 | 0,279310698 | 0,171 | 0,018 | 0,001025568 | 1,213614895   | 0,823984613     | 9,5             |
| RPS5                                                                                                | 0,02774199  | 0,279180291 | 0,854 | 0,709 | 1           | 1,2135052     | 0,824059098     | 1,204513399     |
| GTF2H2                                                                                              | 5,5067E-05  | 0,278733834 | 0,098 | 0,011 | 1           | 1,213129727   | 0,82431415      | 8,909090909     |
| COX7C                                                                                               | 0,003361054 | 0,278447224 | 0,854 | 0,572 | 1           | 1,212888747   | 0,824477927     | 1,493006993     |
| HMGN4                                                                                               | 2,38503E-11 | 0,278413848 | 0,341 | 0,056 | 5,03265E-07 | 1,212860688   | 0,824497001     | 6,089285714     |
| P4HTM                                                                                               | 7,44811E-06 | 0,278302939 | 0,354 | 0,119 | 0,157162491 | 1,212767451   | 0,824560388     | 2,974789916     |
| PPHLN1                                                                                              | 5,27282E-08 | 0,278246042 | 0,341 | 0,084 | 0,001112618 | 1,212719623   | 0,824592908     | 4,05952381      |
| CSK                                                                                                 | 2,8562E-11  | 0,278185051 | 0,293 | 0,039 | 6,02687E-07 | 1,212668355   | 0,824627769     | 7,512820513     |
| KCTD5                                                                                               | 2,22375E-07 | 0,277982764 | 0,268 | 0,06  | 0,004692332 | 1,212498333   | 0,824743402     | 4,466666667     |
| SLC25A11                                                                                            | 5,96944E-08 | 0,277749576 | 0,305 | 0,07  | 0,001259611 | 1,212302368   | 0,824876719     | 4,357142857     |
| UBALD1                                                                                              | 5,56778E-08 | 0,277553657 | 0,305 | 0,07  | 0,001174857 | 1,212137748   | 0,824988745     | 4,357142857     |
| PAK1IP1                                                                                             | 6,39267E-10 | 0,277500461 | 0,293 | 0,049 | 1,34892E-05 | 1,212093054   | 0,825019165     | 5,979591837     |
| PPP1R7                                                                                              | 2,00108E-08 | 0,277260312 | 0,378 | 0,098 | 0,000422248 | 1,211891308   | 0,825156508     | 3,857142857     |
| PMS1                                                                                                | 7,85877E-07 | 0,277231602 | 0,207 | 0,039 | 0,01658279  | 1,211867191   | 0,825172929     | 5,307692308     |
| ATP6V0B                                                                                             | 1,12934E-05 | 0,277131136 | 0,634 | 0,291 | 0,238301132 | 1,211782803   | 0,825230394     | 2,178694158     |
| THUMPD3                                                                                             | 1,10294E-09 | 0,277083548 | 0,232 | 0,028 | 2,32731E-05 | 1,211742831   | 0,825257616     | 8,285714286     |
| RDH11                                                                                               | 1,84116E-06 | 0,27707633  | 0,39  | 0,133 | 0,038850284 | 1,211736769   | 0,825261745     | 2,932330827     |
| RPS15A                                                                                              | 0,002945226 | 0,277007134 | 0,976 | 0,881 | 1           | 1,211678652   | 0,825301328     | 1,107832009     |
| HS2ST1                                                                                              | 3,2095E-08  | 0,276932646 | 0,28  | 0,056 | 0,000677237 | 1,211616093   | 0,82534394      | 5               |
| USE1                                                                                                | 3,09073E-07 | 0,276922947 | 0,317 | 0,084 | 0,006521747 | 1,211607948   | 0,825349488     | 3,773809524     |
| KRT10-AS1                                                                                           | 1,21581E-07 | 0,276645054 | 0,195 | 0,028 | 0,002565474 | 1,21137459    | 0,825508483     | 6,964285714     |
| COLGALT1                                                                                            | 1,58854E-07 | 0,276379353 | 0,28  | 0,063 | 0,003351972 | 1,211151511   | 0,825660531     | 4,444444444     |
| PCYOX1                                                                                              | 1,21174E-06 | 0,276189513 | 0,305 | 0,084 | 0,025568919 | 1,21099215    | 0,825769184     | 3,630952381     |
| DNAJB11                                                                                             | 5,30193E-09 | 0,276127848 | 0,5   | 0,147 | 0,000111876 | 1,21094039    | 0,825804481     | 3,401360544     |
| SSR3                                                                                                | 0,000766378 | 0,276013976 | 0,561 | 0,298 | 1           | 1,210844814   | 0,825869664     | 1,882550336     |
| XRCC5                                                                                               | 2,09367E-06 | 0,275953453 | 0,61  | 0,26  | 0,044178433 | 1,210794018   | 0,825904311     | 2,346153846     |
| UCHL5                                                                                               | 1,95169E-07 | 0,275951885 | 0,268 | 0,06  | 0,004118266 | 1,210792703   | 0,825905209     | 4,466666667     |
| ITGB1BP1                                                                                            | 4,85426E-06 | 0,275935705 | 0,549 | 0,225 | 0,102429787 | 1,210779123   | 0,825914472     | 2,44            |
| CLASP1                                                                                              | 0,000348582 | 0,275758744 | 0,207 | 0,067 | 1           | 1,210630618   | 0,826015785     | 3,089552239     |
| ITGA5                                                                                               | 6,53581E-10 | 0,275648219 | 0,256 | 0,035 | 1,37912E-05 | 1,210537875   | 0,826079068     | 7,314285714     |

Supplementary Table 2

| Differentially expressed genes_keloid-XL_comparing SC-Keloid vs. (SC-Myel, SC-Nonmyel, SC-Nonmyel2) |             |             |       |       |             |               |                 |                 |
|-----------------------------------------------------------------------------------------------------|-------------|-------------|-------|-------|-------------|---------------|-----------------|-----------------|
| gene                                                                                                | p_val       | avg_log2FC  | pct.1 | pct.2 | p_val_adj   | Foldchange_UP | Foldchange_DOWN | Ratio_pct1_pct2 |
| PDCD6IP                                                                                             | 8,5331E-08  | 0,275443114 | 0,524 | 0,182 | 0,001800569 | 1,210365788   | 0,826196518     | 2,879120879     |
| NUTF2                                                                                               | 7,7476E-12  | 0,275203861 | 0,463 | 0,102 | 1,63482E-07 | 1,21016508    | 0,826333544     | 4,539215686     |
| DAGLA                                                                                               | 0,00174268  | 0,274848315 | 0,134 | 0,039 | 1           | 1,209866877   | 0,826537216     | 3,435897436     |
| OTUB1                                                                                               | 1,86918E-07 | 0,274778652 | 0,39  | 0,116 | 0,003944153 | 1,209808458   | 0,826577128     | 3,362068966     |
| CCDC43                                                                                              | 6,56905E-07 | 0,27462587  | 0,22  | 0,042 | 0,013861358 | 1,209680345   | 0,826664667     | 5,238095238     |
| ARNTL                                                                                               | 0,000105356 | 0,274403186 | 0,268 | 0,091 | 1           | 1,209493642   | 0,826792275     | 2,945054945     |
| C1QBP                                                                                               | 4,47854E-07 | 0,273990468 | 0,451 | 0,151 | 0,009450175 | 1,209147687   | 0,827028832     | 2,986754967     |
| FAM168A                                                                                             | 6,7829E-08  | 0,273925642 | 0,354 | 0,091 | 0,00143126  | 1,209093356   | 0,827065995     | 3,89010989      |
| PEX16                                                                                               | 6,6848E-05  | 0,273873728 | 0,159 | 0,035 | 1           | 1,209049849   | 0,827095757     | 4,542857143     |
| NTAN1                                                                                               | 1,52639E-06 | 0,273627731 | 0,305 | 0,084 | 0,032208425 | 1,208843709   | 0,827236799     | 3,630952381     |
| NFE2L3                                                                                              | 0,002795762 | 0,273510213 | 0,122 | 0,035 | 1           | 1,208745244   | 0,827304186     | 3,485714286     |
| ADAM12                                                                                              | 8,45368E-10 | 0,273281903 | 0,146 | 0,004 | 1,78381E-05 | 1,208553972   | 0,827435119     | 36,5            |
| B3GAT3                                                                                              | 2,00309E-07 | 0,27294831  | 0,366 | 0,102 | 0,004226728 | 1,208274552   | 0,827626468     | 3,588235294     |
| RPS29                                                                                               | 0,029862512 | 0,272929351 | 0,976 | 0,933 | 1           | 1,208258673   | 0,827637345     | 1,046087889     |
| PSMG3                                                                                               | 1,24543E-08 | 0,272835555 | 0,329 | 0,074 | 0,000262798 | 1,208180122   | 0,827691154     | 4,445945946     |
| TOMM7                                                                                               | 0,001045251 | 0,272460172 | 0,915 | 0,649 | 1           | 1,207865799   | 0,827906545     | 1,409861325     |
| GOLIM4                                                                                              | 6,10303E-07 | 0,272427855 | 0,488 | 0,172 | 0,012878006 | 1,207838743   | 0,82792509      | 2,837209302     |
| CWC15                                                                                               | 2,77981E-07 | 0,272349903 | 0,402 | 0,123 | 0,005865672 | 1,207773482   | 0,827969826     | 3,268292683     |
| ZDHHC12                                                                                             | 5,94697E-11 | 0,272279027 | 0,232 | 0,021 | 1,25487E-06 | 1,207714149   | 0,828010503     | 11,04761905     |
| SPAG7                                                                                               | 2,2262E-08  | 0,271959461 | 0,378 | 0,098 | 0,00046975  | 1,207446663   | 0,828193933     | 3,857142857     |
| MPC2                                                                                                | 4,9959E-09  | 0,271900997 | 0,524 | 0,158 | 0,000105419 | 1,207397733   | 0,828227495     | 3,316455696     |
| PSMA2                                                                                               | 3,68663E-06 | 0,271805464 | 0,634 | 0,267 | 0,077791682 | 1,207317783   | 0,828282341     | 2,374531835     |
| COPB1                                                                                               | 1,454E-07   | 0,271649321 | 0,39  | 0,112 | 0,003068085 | 1,207187122   | 0,828371991     | 3,482142857     |
| PITPNM3                                                                                             | 5,5905E-11  | 0,271522248 | 0,146 | 0     | 1,17965E-06 | 1,207080797   | 0,828444958     | #DIV/0!         |
| HTRA2                                                                                               | 1,18209E-06 | 0,271487386 | 0,268 | 0,067 | 0,024943384 | 1,207051629   | 0,828464977     | 4               |
| XPO6                                                                                                | 1,84816E-05 | 0,271330488 | 0,268 | 0,081 | 0,389981025 | 1,206920366   | 0,82855508      | 3,308641975     |
| PCMTD2                                                                                              | 5,9403E-06  | 0,27123039  | 0,341 | 0,109 | 0,125346349 | 1,206836629   | 0,82861257      | 3,128440367     |
| CETN2                                                                                               | 9,93147E-13 | 0,27088177  | 0,427 | 0,077 | 2,09564E-08 | 1,206545038   | 0,828812824     | 5,545454545     |
| SGPL1                                                                                               | 0,003210374 | 0,270829431 | 0,134 | 0,042 | 1           | 1,206501268   | 0,828842892     | 3,19047619      |
| SPCS3                                                                                               | 1,40989E-05 | 0,270820271 | 0,5   | 0,204 | 0,297500221 | 1,206493607   | 0,828848155     | 2,450980392     |

Supplementary Table 2

| Differentially expressed genes_keloid-XL_comparing SC-Keloid vs. (SC-Myel, SC-Nonmyel, SC-Nonmyel2) |             |             |       |       |             |               |                 |                 |
|-----------------------------------------------------------------------------------------------------|-------------|-------------|-------|-------|-------------|---------------|-----------------|-----------------|
| gene                                                                                                | p_val       | avg_log2FC  | pct.1 | pct.2 | p_val_adj   | Foldchange_UP | Foldchange_DOWN | Ratio_pct1_pct2 |
| LDHB                                                                                                | 0,000202357 | 0,270671537 | 0,561 | 0,281 | 1           | 1,206369231   | 0,828933609     | 1,996441281     |
| PRRC2B                                                                                              | 1,05217E-05 | 0,270644365 | 0,488 | 0,196 | 0,222018888 | 1,206346509   | 0,828949222     | 2,489795918     |
| TMEM141                                                                                             | 1,7624E-07  | 0,270587302 | 0,354 | 0,098 | 0,003718836 | 1,206298796   | 0,82898201      | 3,612244898     |
| LAMA2                                                                                               | 0,000219066 | 0,270489539 | 0,402 | 0,175 | 1           | 1,206217055   | 0,829038187     | 2,297142857     |
| ABHD11                                                                                              | 9,6391E-09  | 0,270470622 | 0,183 | 0,018 | 0,000203395 | 1,206201239   | 0,829049057     | 10,16666667     |
| MRPL19                                                                                              | 4,14669E-07 | 0,270248307 | 0,378 | 0,112 | 0,008749923 | 1,206015381   | 0,829176821     | 3,375           |
| ERAP2                                                                                               | 1,71287E-08 | 0,270127929 | 0,232 | 0,035 | 0,000361434 | 1,205914756   | 0,82924601      | 6,628571429     |
| LIX1L                                                                                               | 6,70227E-08 | 0,270097623 | 0,28  | 0,06  | 0,001414246 | 1,205889424   | 0,82926343      | 4,666666667     |
| AP1M1                                                                                               | 2,36321E-11 | 0,269913806 | 0,293 | 0,039 | 4,98662E-07 | 1,205735789   | 0,829369095     | 7,512820513     |
| PRR14                                                                                               | 2,0035E-05  | 0,269645386 | 0,366 | 0,133 | 0,422759089 | 1,205511477   | 0,829523417     | 2,751879699     |
| IFRD2                                                                                               | 1,33166E-11 | 0,269311104 | 0,317 | 0,046 | 2,80994E-07 | 1,205232184   | 0,829715646     | 6,891304348     |
| TRIAP1                                                                                              | 1,16175E-10 | 0,269271645 | 0,268 | 0,035 | 2,4514E-06  | 1,205199221   | 0,829738339     | 7,657142857     |
| WDR61                                                                                               | 5,3475E-08  | 0,269204062 | 0,415 | 0,119 | 0,001128375 | 1,205142764   | 0,829777209     | 3,487394958     |
| DYNC2I2                                                                                             | 4,90851E-08 | 0,269123337 | 0,329 | 0,081 | 0,001035744 | 1,205075333   | 0,829823641     | 4,061728395     |
| DHX30                                                                                               | 1,59245E-07 | 0,269109011 | 0,366 | 0,102 | 0,003360224 | 1,205063367   | 0,829831881     | 3,588235294     |
| USB1                                                                                                | 1,3444E-10  | 0,269066769 | 0,28  | 0,039 | 2,83682E-06 | 1,205028083   | 0,829856178     | 7,179487179     |
| LRRC28                                                                                              | 4,41502E-09 | 0,268773396 | 0,232 | 0,032 | 9,31613E-05 | 1,204783065   | 0,830024948     | 7,25            |
| SNX7                                                                                                | 1,09012E-09 | 0,268755677 | 0,329 | 0,063 | 2,30026E-05 | 1,204768268   | 0,830035141     | 5,222222222     |
| ALDH18A1                                                                                            | 1,76146E-12 | 0,268645124 | 0,244 | 0,018 | 3,71687E-08 | 1,204675951   | 0,830098749     | 13,55555556     |
| TELO2                                                                                               | 1,54556E-08 | 0,268537339 | 0,232 | 0,035 | 0,000326128 | 1,204585952   | 0,830160769     | 6,628571429     |
| GAS8                                                                                                | 1,02456E-11 | 0,268181369 | 0,22  | 0,014 | 2,16192E-07 | 1,204288769   | 0,830365628     | 15,71428571     |
| UBE2C                                                                                               | 0,043000486 | 0,268109399 | 0,037 | 0,007 | 1           | 1,204228694   | 0,830407052     | 5,285714286     |
| RGS19                                                                                               | 5,25198E-12 | 0,268108253 | 0,195 | 0,007 | 1,10822E-07 | 1,204227737   | 0,830407712     | 27,85714286     |
| SEC14L2                                                                                             | 9,67084E-10 | 0,268032508 | 0,244 | 0,032 | 2,04064E-05 | 1,204164514   | 0,830451311     | 7,625           |
| LIG4                                                                                                | 1,30526E-10 | 0,267775377 | 0,159 | 0,004 | 2,75423E-06 | 1,203949916   | 0,830599336     | 39,75           |
| VTI1B                                                                                               | 4,14827E-07 | 0,267717226 | 0,341 | 0,095 | 0,00875327  | 1,203901388   | 0,830632816     | 3,589473684     |
| GTF3C3                                                                                              | 1,82755E-05 | 0,266820085 | 0,171 | 0,035 | 0,385631777 | 1,203152974   | 0,831149506     | 4,885714286     |
| PPP2R3C                                                                                             | 6,29382E-10 | 0,266612138 | 0,305 | 0,053 | 1,32806E-05 | 1,202979567   | 0,831269315     | 5,754716981     |
| ERP44                                                                                               | 9,26112E-05 | 0,266606705 | 0,39  | 0,158 | 1           | 1,202975037   | 0,831272445     | 2,46835443      |
| FURIN                                                                                               | 4,50205E-10 | 0,266333754 | 0,415 | 0,095 | 9,49978E-06 | 1,202747461   | 0,831429732     | 4,368421053     |

Supplementary Table 2

| Differentially expressed genes_keloid-XL_comparing SC-Keloid vs. (SC-Myel, SC-Nonmyel, SC-Nonmyel2) |             |             |       |       |             |               |                 |                 |
|-----------------------------------------------------------------------------------------------------|-------------|-------------|-------|-------|-------------|---------------|-----------------|-----------------|
| gene                                                                                                | p_val       | avg_log2FC  | pct.1 | pct.2 | p_val_adj   | Foldchange_UP | Foldchange_DOWN | Ratio_pct1_pct2 |
| UQCRC2                                                                                              | 3,14186E-06 | 0,265752554 | 0,329 | 0,102 | 0,066296306 | 1,202263023   | 0,831764748     | 3,225490196     |
| RPF1                                                                                                | 1,1539E-09  | 0,265554087 | 0,354 | 0,074 | 2,43484E-05 | 1,202097644   | 0,831879178     | 4,783783784     |
| FOXRED2                                                                                             | 2,80682E-05 | 0,265543219 | 0,061 | 0     | 0,592266086 | 1,202088587   | 0,831885446     | #DIV/0!         |
| B4GALNT3                                                                                            | 2,0388E-08  | 0,265520187 | 0,268 | 0,049 | 0,000430207 | 1,202069397   | 0,831898726     | 5,469387755     |
| MLPH                                                                                                | 1,58349E-08 | 0,265467545 | 0,11  | 0     | 0,000334132 | 1,202025536   | 0,831929082     | #DIV/0!         |
| AKT1                                                                                                | 2,12321E-07 | 0,265441792 | 0,476 | 0,158 | 0,004480194 | 1,20200408    | 0,831943932     | 3,012658228     |
| STK16                                                                                               | 1,31086E-07 | 0,265399158 | 0,195 | 0,028 | 0,002766052 | 1,201968558   | 0,831968518     | 6,964285714     |
| LSM2                                                                                                | 1,04563E-08 | 0,265332076 | 0,524 | 0,161 | 0,000220639 | 1,201912671   | 0,832007203     | 3,254658385     |
| EIF3D                                                                                               | 1,48308E-06 | 0,26517444  | 0,512 | 0,204 | 0,031294491 | 1,201781351   | 0,832098117     | 2,509803922     |
| TMED1                                                                                               | 3,61895E-08 | 0,265153498 | 0,268 | 0,053 | 0,000763635 | 1,201763907   | 0,832110196     | 5,056603774     |
| MDFIC                                                                                               | 1,1603E-08  | 0,265142041 | 0,244 | 0,039 | 0,000244834 | 1,201754362   | 0,832116805     | 6,256410256     |
| GOPC                                                                                                | 2,54803E-09 | 0,265104376 | 0,366 | 0,081 | 5,37659E-05 | 1,201722988   | 0,832138529     | 4,518518519     |
| TMEM250                                                                                             | 2,09267E-07 | 0,2649446   | 0,159 | 0,018 | 0,004415741 | 1,201589907   | 0,832230692     | 8,833333333     |
| SCG5                                                                                                | 1,99881E-07 | 0,26491202  | 0,171 | 0,021 | 0,004217683 | 1,201562772   | 0,832249486     | 8,142857143     |
| ZMAT3                                                                                               | 3,46453E-05 | 0,264896289 | 0,293 | 0,098 | 0,7310502   | 1,20154967    | 0,832258561     | 2,989795918     |
| PRCP                                                                                                | 9,57539E-08 | 0,264700115 | 0,378 | 0,105 | 0,002020502 | 1,201386298   | 0,832371737     | 3,6             |
| TUSC2                                                                                               | 4,60404E-08 | 0,264516489 | 0,232 | 0,039 | 0,000971499 | 1,201233396   | 0,832477688     | 5,948717949     |
| GLG1                                                                                                | 0,000255757 | 0,264393661 | 0,671 | 0,361 | 1           | 1,20113113    | 0,832548566     | 1,858725762     |
| PTS                                                                                                 | 4,10921E-08 | 0,264212819 | 0,366 | 0,095 | 0,000867085 | 1,200980577   | 0,832652933     | 3,852631579     |
| HAUS3                                                                                               | 1,6798E-05  | 0,264211834 | 0,22  | 0,056 | 0,354453774 | 1,200979757   | 0,832653502     | 3,928571429     |
| SMIM19                                                                                              | 3,5297E-06  | 0,264124352 | 0,5   | 0,196 | 0,074480095 | 1,200906935   | 0,832703993     | 2,551020408     |
| APMAP                                                                                               | 1,37151E-09 | 0,264063059 | 0,354 | 0,074 | 2,89402E-05 | 1,200855915   | 0,832739372     | 4,783783784     |
| FAM174C                                                                                             | 4,48201E-09 | 0,26384589  | 0,366 | 0,084 | 9,4575E-05  | 1,200675164   | 0,832864733     | 4,357142857     |
| PTPMT1                                                                                              | 2,54344E-10 | 0,263768274 | 0,329 | 0,06  | 5,36691E-06 | 1,200610569   | 0,832909542     | 5,483333333     |
| IARS2                                                                                               | 4,2636E-09  | 0,263626641 | 0,28  | 0,049 | 8,99661E-05 | 1,200492708   | 0,832991315     | 5,714285714     |
| ISOC2                                                                                               | 5,52108E-08 | 0,263440922 | 0,439 | 0,13  | 0,001165003 | 1,200338178   | 0,833098554     | 3,376923077     |
| SNRNP25                                                                                             | 4,91815E-08 | 0,263241271 | 0,268 | 0,053 | 0,001037778 | 1,200172078   | 0,833213852     | 5,056603774     |
| NDUFV2                                                                                              | 1,70923E-07 | 0,262991113 | 0,598 | 0,228 | 0,003606655 | 1,199963991   | 0,833358341     | 2,622807018     |
| NNT                                                                                                 | 5,31341E-09 | 0,262629148 | 0,232 | 0,032 | 0,000112118 | 1,199662963   | 0,833567453     | 7,25            |
| THAP11                                                                                              | 2,22401E-09 | 0,262423148 | 0,268 | 0,042 | 4,69289E-05 | 1,199491677   | 0,833686485     | 6,380952381     |

Supplementary Table 2

| Differentially expressed genes_keloid-XL_comparing SC-Keloid vs. (SC-Myel, SC-Nonmyel, SC-Nonmyel2) |             |             |       |       |             |               |                 |                 |
|-----------------------------------------------------------------------------------------------------|-------------|-------------|-------|-------|-------------|---------------|-----------------|-----------------|
| gene                                                                                                | p_val       | avg_log2FC  | pct.1 | pct.2 | p_val_adj   | Foldchange_UP | Foldchange_DOWN | Ratio_pct1_pct2 |
| FASTK                                                                                               | 5,47672E-09 | 0,262147604 | 0,402 | 0,102 | 0,000115564 | 1,199262606   | 0,833845727     | 3,941176471     |
| PRKRA                                                                                               | 3,90973E-07 | 0,261975349 | 0,402 | 0,123 | 0,00824993  | 1,199119425   | 0,833945293     | 3,268292683     |
| EIF3G                                                                                               | 9,8552E-06  | 0,261840479 | 0,634 | 0,288 | 0,207954591 | 1,19900733    | 0,834023258     | 2,201388889     |
| ITM2C                                                                                               | 5,14375E-05 | 0,261790312 | 0,646 | 0,312 | 1           | 1,198965638   | 0,83405226      | 2,070512821     |
| ELOVL1                                                                                              | 1,39668E-13 | 0,261667091 | 0,366 | 0,053 | 2,94714E-09 | 1,198863238   | 0,8341235       | 6,905660377     |
| WDR46                                                                                               | 1,15731E-07 | 0,261639606 | 0,232 | 0,042 | 0,002442033 | 1,198840399   | 0,834139391     | 5,523809524     |
| MSRA                                                                                                | 2,39174E-09 | 0,261081208 | 0,256 | 0,039 | 5,0468E-05  | 1,198376475   | 0,834462309     | 6,564102564     |
| NDUFA12                                                                                             | 2,90595E-09 | 0,261022463 | 0,659 | 0,235 | 6,13184E-05 | 1,198327679   | 0,834496288     | 2,804255319     |
| UCHL1                                                                                               | 1,14068E-05 | 0,260889753 | 0,183 | 0,039 | 0,240695295 | 1,198217454   | 0,834573054     | 4,692307692     |
| MGAT2                                                                                               | 6,47862E-13 | 0,260610287 | 0,207 | 0,007 | 1,36705E-08 | 1,197985367   | 0,834734737     | 29,57142857     |
| OLA1                                                                                                | 3,83964E-06 | 0,260535538 | 0,366 | 0,123 | 0,081020327 | 1,197923299   | 0,834777987     | 2,975609756     |
| MAD1L1                                                                                              | 6,39229E-15 | 0,260516311 | 0,268 | 0,014 | 1,34884E-10 | 1,197907334   | 0,834789112     | 19,14285714     |
| LSM5                                                                                                | 4,80345E-09 | 0,260504832 | 0,366 | 0,084 | 0,000101358 | 1,197897803   | 0,834795754     | 4,357142857     |
| NSMF                                                                                                | 8,23642E-06 | 0,260393769 | 0,195 | 0,042 | 0,173796802 | 1,197805589   | 0,834860022     | 4,642857143     |
| CBY1                                                                                                | 1,45455E-07 | 0,259930546 | 0,305 | 0,074 | 0,003069244 | 1,197421057   | 0,835128123     | 4,121621622     |
| RNF20                                                                                               | 2,45763E-07 | 0,259893574 | 0,244 | 0,049 | 0,005185847 | 1,197390371   | 0,835149525     | 4,979591837     |
| PHB2                                                                                                | 1,5997E-06  | 0,259803326 | 0,585 | 0,235 | 0,033755317 | 1,197315471   | 0,83520177      | 2,489361702     |
| HGS                                                                                                 | 1,29115E-07 | 0,259694344 | 0,341 | 0,088 | 0,002724452 | 1,197225028   | 0,835264864     | 3,875           |
| KATNAL1                                                                                             | 1,77302E-05 | 0,259557418 | 0,305 | 0,098 | 0,374125844 | 1,197111405   | 0,835344142     | 3,112244898     |
| TRAP1                                                                                               | 3,7569E-06  | 0,259047581 | 0,232 | 0,056 | 0,079274306 | 1,196688431   | 0,835639398     | 4,142857143     |
| PAM16                                                                                               | 5,32974E-08 | 0,259039947 | 0,378 | 0,102 | 0,001124629 | 1,196682098   | 0,835643821     | 3,705882353     |
| MRPL15                                                                                              | 1,07496E-11 | 0,258898679 | 0,268 | 0,028 | 2,26827E-07 | 1,196564926   | 0,83572565      | 9,571428571     |
| FAM207A                                                                                             | 7,51442E-09 | 0,258806607 | 0,207 | 0,025 | 0,000158562 | 1,196488564   | 0,835778987     | 8,28            |
| ANTKMT                                                                                              | 2,31989E-09 | 0,258728964 | 0,5   | 0,144 | 4,8952E-05  | 1,196424173   | 0,835823969     | 3,472222222     |
| USP11                                                                                               | 2,66205E-05 | 0,258413902 | 0,476 | 0,2   | 0,561718121 | 1,196162921   | 0,836006519     | 2,38            |
| MTCH2                                                                                               | 2,89322E-08 | 0,258208659 | 0,317 | 0,07  | 0,000610499 | 1,195992762   | 0,836125461     | 4,528571429     |
| NELFB                                                                                               | 5,43568E-06 | 0,257997077 | 0,305 | 0,091 | 0,11469838  | 1,195817374   | 0,836248094     | 3,351648352     |
| MRPS10                                                                                              | 2,52304E-07 | 0,257940301 | 0,293 | 0,07  | 0,005323857 | 1,195770314   | 0,836281005     | 4,185714286     |
| WDR11                                                                                               | 8,34326E-09 | 0,257882052 | 0,268 | 0,046 | 0,000176051 | 1,195722036   | 0,83631477      | 5,826086957     |
| TNIP1                                                                                               | 2,39981E-08 | 0,257865364 | 0,463 | 0,137 | 0,000506384 | 1,195708205   | 0,836324444     | 3,379562044     |

Supplementary Table 2

| Differentially expressed genes_keloid-XL_comparing SC-Keloid vs. (SC-Myel, SC-Nonmyel, SC-Nonmyel2) |             |             |       |       |             |               |                 |                 |
|-----------------------------------------------------------------------------------------------------|-------------|-------------|-------|-------|-------------|---------------|-----------------|-----------------|
| gene                                                                                                | p_val       | avg_log2FC  | pct.1 | pct.2 | p_val_adj   | Foldchange_UP | Foldchange_DOWN | Ratio_pct1_pct2 |
| CHD8                                                                                                | 0,000396649 | 0,257814053 | 0,244 | 0,088 | 1           | 1,195665679   | 0,836354189     | 2,772727273     |
| ZNF205                                                                                              | 8,69795E-08 | 0,257767633 | 0,22  | 0,035 | 0,001835353 | 1,195627208   | 0,8363811       | 6,285714286     |
| COX14                                                                                               | 1,98687E-06 | 0,257759912 | 0,524 | 0,2   | 0,041925018 | 1,195620809   | 0,836385577     | 2,62            |
| LY6D                                                                                                | 0,034389558 | 0,257729777 | 0,073 | 0,025 | 1           | 1,195595836   | 0,836403047     | 2,92            |
| RPS9                                                                                                | 0,01482614  | 0,257712467 | 0,976 | 0,891 | 1           | 1,195581491   | 0,836413082     | 1,095398429     |
| SPCS2                                                                                               | 6,68613E-05 | 0,257239817 | 0,768 | 0,396 | 1           | 1,195189863   | 0,83668715      | 1,939393939     |
| NKIRAS2                                                                                             | 3,25629E-09 | 0,256265053 | 0,317 | 0,063 | 6,87111E-05 | 1,1943826     | 0,837252652     | 5,031746032     |
| NDUFB5                                                                                              | 8,30963E-07 | 0,25603467  | 0,476 | 0,168 | 0,017534159 | 1,194191885   | 0,837386363     | 2,833333333     |
| MTHFD1L                                                                                             | 7,60717E-11 | 0,255983862 | 0,293 | 0,042 | 1,60519E-06 | 1,194149829   | 0,837415855     | 6,976190476     |
| PPT1                                                                                                | 5,58195E-06 | 0,255939866 | 0,378 | 0,126 | 0,117784784 | 1,194113413   | 0,837441393     | 3               |
| TM9SF1                                                                                              | 9,01084E-10 | 0,255800109 | 0,402 | 0,095 | 1,90138E-05 | 1,193997743   | 0,837522521     | 4,231578947     |
| DPY30                                                                                               | 4,03438E-10 | 0,255649014 | 0,463 | 0,116 | 8,51294E-06 | 1,1938727     | 0,837610241     | 3,99137931      |
| KCTD15                                                                                              | 1,86304E-06 | 0,255584306 | 0,256 | 0,063 | 0,039312064 | 1,193819154   | 0,83764781      | 4,063492063     |
| ZNF32                                                                                               | 2,20768E-07 | 0,255544481 | 0,341 | 0,091 | 0,004658418 | 1,193786199   | 0,837670933     | 3,747252747     |
| HKDC1                                                                                               | 2,8576E-10  | 0,255517331 | 0,207 | 0,018 | 6,02982E-06 | 1,193763734   | 0,837686698     | 11,5            |
| UBE2J2                                                                                              | 1,81484E-07 | 0,255435159 | 0,341 | 0,091 | 0,0038295   | 1,193695743   | 0,837734411     | 3,747252747     |
| ST6GAL1                                                                                             | 1,35285E-05 | 0,255320214 | 0,366 | 0,13  | 0,285464448 | 1,19360064    | 0,837801159     | 2,815384615     |
| CBX3                                                                                                | 0,000194481 | 0,254953263 | 0,634 | 0,344 | 1           | 1,193297085   | 0,838014282     | 1,843023256     |
| ADI1                                                                                                | 6,18412E-06 | 0,254814264 | 0,451 | 0,175 | 0,1304911   | 1,19318212    | 0,838095026     | 2,577142857     |
| ABCA3                                                                                               | 0,000177614 | 0,253979989 | 0,171 | 0,046 | 1           | 1,192492332   | 0,838579816     | 3,717391304     |
| GALNT11                                                                                             | 2,55606E-07 | 0,253946721 | 0,329 | 0,088 | 0,005393547 | 1,192464833   | 0,838599154     | 3,738636364     |
| HSPBP1                                                                                              | 1,68863E-09 | 0,253914296 | 0,28  | 0,046 | 3,56318E-05 | 1,192438033   | 0,838618001     | 6,086956522     |
| F8A1                                                                                                | 4,91932E-09 | 0,253802009 | 0,232 | 0,032 | 0,000103803 | 1,192345228   | 0,838683275     | 7,25            |
| TMEM50A                                                                                             | 6,78376E-05 | 0,253731102 | 0,756 | 0,389 | 1           | 1,192286626   | 0,838724496     | 1,94344473      |
| NUDT9                                                                                               | 1,32939E-08 | 0,253615287 | 0,28  | 0,053 | 0,000280515 | 1,192190917   | 0,838791829     | 5,283018868     |
| SPATC1L                                                                                             | 1,18545E-11 | 0,25360906  | 0,329 | 0,049 | 2,50142E-07 | 1,192185771   | 0,838795449     | 6,714285714     |
| RAB2A                                                                                               | 8,0578E-06  | 0,253493085 | 0,756 | 0,372 | 0,170027667 | 1,192089938   | 0,838862881     | 2,032258065     |
| EIF5A                                                                                               | 0,000928199 | 0,253199401 | 0,695 | 0,411 | 1           | 1,191847293   | 0,839033663     | 1,690997567     |
| UBXN1                                                                                               | 0,00032027  | 0,253100817 | 0,598 | 0,312 | 1           | 1,191765853   | 0,839090999     | 1,916666667     |
| SLC27A4                                                                                             | 1,30012E-12 | 0,252951334 | 0,22  | 0,011 | 2,74338E-08 | 1,191642377   | 0,839177944     | 20              |



Supplementary Table 2

| Differentially expressed genes_keloid-XL_comparing SC-Keloid vs. (SC-Myel, SC-Nonmyel, SC-Nonmyel2) |             |             |       |       |             |               |                 |                 |
|-----------------------------------------------------------------------------------------------------|-------------|-------------|-------|-------|-------------|---------------|-----------------|-----------------|
| gene                                                                                                | p_val       | avg_log2FC  | pct.1 | pct.2 | p_val_adj   | Foldchange_UP | Foldchange_DOWN | Ratio_pct1_pct2 |
| ZFAND3                                                                                              | 4,55581E-07 | 0,252910766 | 0,451 | 0,151 | 0,00961321  | 1,191608868   | 0,839201542     | 2,986754967     |
| HES6                                                                                                | 1,79015E-06 | 0,252801142 | 0,305 | 0,084 | 0,03777386  | 1,191518327   | 0,839265311     | 3,630952381     |
| FAM174B                                                                                             | 1,00204E-07 | 0,252723238 | 0,22  | 0,035 | 0,002114405 | 1,191453988   | 0,839310632     | 6,285714286     |
| ACOT7                                                                                               | 1,09934E-12 | 0,252477849 | 0,415 | 0,074 | 2,31971E-08 | 1,19125135    | 0,839453403     | 5,608108108     |
| ECI1                                                                                                | 4,13192E-08 | 0,252377065 | 0,463 | 0,144 | 0,000871877 | 1,191168134   | 0,839512048     | 3,215277778     |
| FIBP                                                                                                | 1,93996E-08 | 0,252332087 | 0,366 | 0,095 | 0,000409351 | 1,191130998   | 0,839538222     | 3,852631579     |
| CHRN1                                                                                               | 0,002631406 | 0,252122781 | 0,085 | 0,018 | 1           | 1,190958202   | 0,83966003      | 4,722222222     |
| DDX54                                                                                               | 3,37847E-06 | 0,252089066 | 0,28  | 0,077 | 0,071289034 | 1,190930371   | 0,839679653     | 3,636363636     |
| CYC1                                                                                                | 2,68356E-05 | 0,251826581 | 0,488 | 0,2   | 0,566258295 | 1,190713711   | 0,839832439     | 2,44            |
| RIC8A                                                                                               | 4,65274E-10 | 0,251638517 | 0,329 | 0,063 | 9,81774E-06 | 1,190558505   | 0,839941923     | 5,222222222     |
| HIVEP3                                                                                              | 6,60534E-06 | 0,251413406 | 0,171 | 0,032 | 0,139379264 | 1,19037275    | 0,840072994     | 5,34375         |
| RPL23                                                                                               | 0,005692361 | 0,251327931 | 0,915 | 0,667 | 1           | 1,190302226   | 0,840122767     | 1,371814093     |
| MRPS11                                                                                              | 6,79963E-10 | 0,251095913 | 0,341 | 0,067 | 1,43479E-05 | 1,190110815   | 0,840257888     | 5,089552239     |
| TOR1A                                                                                               | 4,45779E-09 | 0,250847356 | 0,244 | 0,035 | 9,40638E-05 | 1,189905792   | 0,840402666     | 6,971428571     |
| YIPF3                                                                                               | 3,96615E-08 | 0,250818627 | 0,5   | 0,165 | 0,000836897 | 1,189882097   | 0,840419402     | 3,03030303      |
| TRIM27                                                                                              | 0,001146878 | 0,250789347 | 0,183 | 0,063 | 1           | 1,189857948   | 0,840436458     | 2,904761905     |
| VPS16                                                                                               | 6,80875E-07 | 0,25063896  | 0,171 | 0,025 | 0,01436714  | 1,189733924   | 0,84052407      | 6,84            |
| HSD17B10                                                                                            | 2,90327E-07 | 0,250607927 | 0,476 | 0,158 | 0,006126187 | 1,189708332   | 0,840542151     | 3,012658228     |
| NME3                                                                                                | 2,11061E-05 | 0,250550191 | 0,646 | 0,295 | 0,445360491 | 1,189660721   | 0,84057579      | 2,189830508     |
| MRPL9                                                                                               | 1,47593E-06 | 0,250518427 | 0,244 | 0,056 | 0,031143703 | 1,189634529   | 0,840594297     | 4,357142857     |
| IFT43                                                                                               | 9,08244E-09 | 0,250491178 | 0,28  | 0,053 | 0,000191649 | 1,18961206    | 0,840610174     | 5,283018868     |
| PPP3CB                                                                                              | 8,64303E-09 | 0,250443931 | 0,366 | 0,088 | 0,000182377 | 1,189573102   | 0,840637703     | 4,159090909     |
| COMMD10                                                                                             | 1,68794E-08 | 0,250435876 | 0,232 | 0,035 | 0,000356172 | 1,18956646    | 0,840642397     | 6,628571429     |
| PDCD2                                                                                               | 3,81283E-11 | 0,250298818 | 0,341 | 0,056 | 8,04545E-07 | 1,189453455   | 0,840722263     | 6,089285714     |
| FEZ1                                                                                                | 3,5617E-05  | 0,250018648 | 0,524 | 0,228 | 0,751554721 | 1,189222486   | 0,840885546     | 2,298245614     |
| S100B                                                                                               | 0,02040716  | 0,250001068 | 1     | 0,87  | 1           | 1,189207995   | 0,840895793     | 1,149425287     |
| DDA1                                                                                                | 6,11497E-09 | 0,249855956 | 0,366 | 0,084 | 0,000129032 | 1,189088386   | 0,840980378     | 4,357142857     |
| RPAIN                                                                                               | 2,35718E-06 | 0,249489366 | 0,524 | 0,2   | 0,049738895 | 1,188786276   | 0,841194099     | 2,62            |
| REXO2                                                                                               | 1,10359E-08 | 0,24904416  | 0,463 | 0,137 | 0,000232868 | 1,188419481   | 0,841453725     | 3,379562044     |
| NNT-AS1                                                                                             | 0,00010162  | 0,24901587  | 0,171 | 0,042 | 1           | 1,188396177   | 0,841470226     | 4,071428571     |

Supplementary Table 2

| Differentially expressed genes_keloid-XL_comparing SC-Keloid vs. (SC-Myel, SC-Nonmyel, SC-Nonmyel2) |             |             |       |       |             |               |                 |                 |
|-----------------------------------------------------------------------------------------------------|-------------|-------------|-------|-------|-------------|---------------|-----------------|-----------------|
| gene                                                                                                | p_val       | avg_log2FC  | pct.1 | pct.2 | p_val_adj   | Foldchange_UP | Foldchange_DOWN | Ratio_pct1_pct2 |
| RPL19                                                                                               | 0,009043395 | 0,24883965  | 0,976 | 0,916 | 1           | 1,188251028   | 0,841573015     | 1,065502183     |
| TAX1BP1                                                                                             | 1,74044E-06 | 0,248715059 | 0,634 | 0,263 | 0,036725011 | 1,188148416   | 0,841645696     | 2,410646388     |
| GOSR2                                                                                               | 3,03746E-05 | 0,248314313 | 0,195 | 0,049 | 0,640934995 | 1,187818423   | 0,841879517     | 3,979591837     |
| BCL7B                                                                                               | 5,89042E-07 | 0,24829507  | 0,415 | 0,133 | 0,012429366 | 1,187802579   | 0,841890747     | 3,120300752     |
| ANKRD13D                                                                                            | 6,67722E-07 | 0,24810963  | 0,317 | 0,088 | 0,014089604 | 1,187649912   | 0,841998968     | 3,602272727     |
| CNPY4                                                                                               | 7,2721E-09  | 0,247950665 | 0,207 | 0,025 | 0,000153449 | 1,187519056   | 0,84209175      | 8,28            |
| POP7                                                                                                | 7,70775E-08 | 0,247749466 | 0,317 | 0,077 | 0,001626412 | 1,187353456   | 0,842209196     | 4,116883117     |
| NDFIP1                                                                                              | 0,000343944 | 0,247620323 | 0,61  | 0,323 | 1           | 1,187247175   | 0,84228459      | 1,888544892     |
| RTCA                                                                                                | 2,16672E-07 | 0,247474999 | 0,171 | 0,021 | 0,004571988 | 1,187127588   | 0,842369438     | 8,142857143     |
| ZNF280D                                                                                             | 0,0001721   | 0,24733175  | 0,28  | 0,102 | 1           | 1,187009721   | 0,842453084     | 2,745098039     |
| IRF9                                                                                                | 1,42215E-06 | 0,246907486 | 0,39  | 0,13  | 0,030008763 | 1,1866607     | 0,842700867     | 3               |
| CILK1                                                                                               | 1,26827E-08 | 0,246862688 | 0,317 | 0,067 | 0,000267618 | 1,186623852   | 0,842727034     | 4,731343284     |
| PCYT1A                                                                                              | 9,74502E-11 | 0,246698707 | 0,305 | 0,046 | 2,0563E-06  | 1,186488985   | 0,842822826     | 6,630434783     |
| PREB                                                                                                | 4,14983E-09 | 0,246620437 | 0,232 | 0,032 | 8,75655E-05 | 1,186424616   | 0,842868553     | 7,25            |
| ALYREF                                                                                              | 6,58939E-09 | 0,24651196  | 0,366 | 0,088 | 0,000139043 | 1,186335412   | 0,842931931     | 4,159090909     |
| IKBIP                                                                                               | 5,35595E-06 | 0,246323019 | 0,22  | 0,053 | 0,11301595  | 1,186180055   | 0,843042332     | 4,150943396     |
| PGGT1B                                                                                              | 2,53936E-05 | 0,246061343 | 0,207 | 0,053 | 0,535831396 | 1,185964925   | 0,843195257     | 3,905660377     |
| SPATA7                                                                                              | 9,75345E-06 | 0,245934426 | 0,11  | 0,011 | 0,205807544 | 1,185860598   | 0,843269438     | 10              |
| KATNB1                                                                                              | 7,64681E-12 | 0,245731789 | 0,207 | 0,011 | 1,61355E-07 | 1,185694047   | 0,84338789      | 18,81818182     |
| AGK                                                                                                 | 5,3647E-11  | 0,245730714 | 0,256 | 0,028 | 1,13201E-06 | 1,185693164   | 0,843388518     | 9,142857143     |
| LAPTM4B                                                                                             | 7,53627E-07 | 0,245578604 | 0,28  | 0,07  | 0,015902288 | 1,185568157   | 0,843477445     | 4               |
| DHX57                                                                                               | 0,037317289 | 0,245296358 | 0,073 | 0,025 | 1           | 1,185336237   | 0,843642477     | 2,92            |
| OGT                                                                                                 | 0,000121938 | 0,245097364 | 0,329 | 0,126 | 1           | 1,185172753   | 0,843758851     | 2,611111111     |
| GPATCH8                                                                                             | 4,74119E-05 | 0,244902449 | 0,39  | 0,147 | 1           | 1,185012641   | 0,843872855     | 2,653061224     |
| EI24                                                                                                | 1,705E-07   | 0,244722375 | 0,463 | 0,147 | 0,003597712 | 1,18486474    | 0,843978191     | 3,149659864     |
| CNOT3                                                                                               | 1,31579E-06 | 0,244501878 | 0,244 | 0,056 | 0,027764392 | 1,184683662   | 0,844107192     | 4,357142857     |
| FARSB                                                                                               | 4,12755E-11 | 0,244069536 | 0,268 | 0,032 | 8,70954E-07 | 1,184328694   | 0,844360189     | 8,375           |
| SNRNP40                                                                                             | 6,07476E-09 | 0,243922218 | 0,268 | 0,046 | 0,000128183 | 1,184207765   | 0,844446414     | 5,826086957     |
| C5orf51                                                                                             | 9,41876E-06 | 0,243859838 | 0,171 | 0,032 | 0,198745195 | 1,184156562   | 0,844482927     | 5,34375         |
| MON2                                                                                                | 6,33638E-08 | 0,243794103 | 0,256 | 0,049 | 0,00133704  | 1,184102608   | 0,844521407     | 5,224489796     |

Supplementary Table 2

| Differentially expressed genes_keloid-XL_comparing SC-Keloid vs. (SC-Myel, SC-Nonmyel, SC-Nonmyel2) |             |             |       |       |             |               |                 |                 |
|-----------------------------------------------------------------------------------------------------|-------------|-------------|-------|-------|-------------|---------------|-----------------|-----------------|
| gene                                                                                                | p_val       | avg_log2FC  | pct.1 | pct.2 | p_val_adj   | Foldchange_UP | Foldchange_DOWN | Ratio_pct1_pct2 |
| RAI14                                                                                               | 8,69881E-05 | 0,243609234 | 0,268 | 0,091 | 1           | 1,183950886   | 0,844629631     | 2,945054945     |
| PRAG1                                                                                               | 4,279E-08   | 0,243416451 | 0,195 | 0,025 | 0,000902911 | 1,183792688   | 0,844742504     | 7,8             |
| ACADVL                                                                                              | 4,52618E-06 | 0,243333365 | 0,756 | 0,354 | 0,09550683  | 1,183724514   | 0,844791155     | 2,13559322      |
| AGPS                                                                                                | 1,4818E-10  | 0,243331718 | 0,317 | 0,053 | 3,12675E-06 | 1,183723163   | 0,844792119     | 5,981132075     |
| PSMD2                                                                                               | 1,22103E-06 | 0,243315135 | 0,463 | 0,168 | 0,025765029 | 1,183709557   | 0,84480183      | 2,755952381     |
| AIMP1                                                                                               | 3,346E-07   | 0,24318266  | 0,476 | 0,161 | 0,007060403 | 1,183600869   | 0,844879407     | 2,956521739     |
| EEF1E1                                                                                              | 2,49987E-12 | 0,24275793  | 0,415 | 0,077 | 5,27498E-08 | 1,183252467   | 0,845128177     | 5,38961039      |
| GPS1                                                                                                | 1,07345E-08 | 0,24262779  | 0,415 | 0,112 | 0,000226508 | 1,183145735   | 0,845204416     | 3,705357143     |
| GCSH                                                                                                | 1,5444E-05  | 0,242421268 | 0,549 | 0,232 | 0,325884619 | 1,18297638    | 0,845325416     | 2,36637931      |
| DESI1                                                                                               | 2,37451E-09 | 0,242393449 | 0,305 | 0,056 | 5,01045E-05 | 1,182953569   | 0,845341716     | 5,446428571     |
| OGFOD3                                                                                              | 4,86934E-08 | 0,242269276 | 0,232 | 0,039 | 0,00102748  | 1,182851757   | 0,845414478     | 5,948717949     |
| FAF1                                                                                                | 2,71759E-07 | 0,242264238 | 0,268 | 0,06  | 0,005734397 | 1,182847626   | 0,84541743      | 4,466666667     |
| KXD1                                                                                                | 1,48565E-08 | 0,242166011 | 0,427 | 0,119 | 0,000313487 | 1,182767094   | 0,845474993     | 3,588235294     |
| NDN                                                                                                 | 1,38887E-07 | 0,24148909  | 0,268 | 0,056 | 0,002930647 | 1,182212262   | 0,845871788     | 4,785714286     |
| CYP27A1                                                                                             | 1,87107E-05 | 0,241481273 | 0,232 | 0,063 | 0,39481551  | 1,182205857   | 0,845876371     | 3,682539683     |
| HACD2                                                                                               | 3,15221E-05 | 0,241299946 | 0,232 | 0,063 | 0,665147428 | 1,182057279   | 0,845982693     | 3,682539683     |
| SIPA1L3                                                                                             | 3,36918E-06 | 0,241264319 | 0,159 | 0,025 | 0,071092969 | 1,182028089   | 0,846003584     | 6,36            |
| CTBP1                                                                                               | 1,68966E-06 | 0,241131899 | 0,439 | 0,154 | 0,035653436 | 1,1819196     | 0,846081239     | 2,850649351     |
| ERLIN1                                                                                              | 3,50888E-05 | 0,241078156 | 0,207 | 0,053 | 0,740408865 | 1,181875572   | 0,846112758     | 3,905660377     |
| WSB2                                                                                                | 1,39021E-08 | 0,240924851 | 0,415 | 0,112 | 0,000293348 | 1,181749989   | 0,846202673     | 3,705357143     |
| MAN2B2                                                                                              | 7,55582E-06 | 0,240856189 | 0,256 | 0,07  | 0,159435276 | 1,181693747   | 0,846242948     | 3,657142857     |
| TACO1                                                                                               | 6,18103E-08 | 0,24085447  | 0,159 | 0,014 | 0,00130426  | 1,18169234    | 0,846243956     | 11,35714286     |
| SRA1                                                                                                | 8,78189E-09 | 0,240756164 | 0,293 | 0,056 | 0,000185307 | 1,181611821   | 0,846301622     | 5,232142857     |
| EFHD2                                                                                               | 6,51225E-09 | 0,240687297 | 0,402 | 0,102 | 0,000137415 | 1,181555418   | 0,84634202      | 3,941176471     |
| TFG                                                                                                 | 0,000658476 | 0,240484136 | 0,488 | 0,242 | 1           | 1,181389042   | 0,846461211     | 2,016528926     |
| C1QTNF1                                                                                             | 0,000129099 | 0,240447575 | 0,11  | 0,018 | 1           | 1,181359104   | 0,846482663     | 6,111111111     |
| SDC1                                                                                                | 5,30439E-09 | 0,240166099 | 0,134 | 0,004 | 0,000111928 | 1,181128638   | 0,846647831     | 33,5            |
| OGDH                                                                                                | 5,25076E-05 | 0,240155735 | 0,256 | 0,081 | 1           | 1,181120153   | 0,846653913     | 3,160493827     |
| ESS2                                                                                                | 7,4007E-05  | 0,240130886 | 0,134 | 0,025 | 1           | 1,18109981    | 0,846668496     | 5,36            |
| KCTD10                                                                                              | 2,77201E-06 | 0,239937232 | 0,171 | 0,028 | 0,058492215 | 1,180941281   | 0,846782153     | 6,107142857     |

Supplementary Table 2

| Differentially expressed genes_keloid-XL_comparing SC-Keloid vs. (SC-Myel, SC-Nonmyel, SC-Nonmyel2) |             |             |       |       |             |               |                 |                 |
|-----------------------------------------------------------------------------------------------------|-------------|-------------|-------|-------|-------------|---------------|-----------------|-----------------|
| gene                                                                                                | p_val       | avg_log2FC  | pct.1 | pct.2 | p_val_adj   | Foldchange_UP | Foldchange_DOWN | Ratio_pct1_pct2 |
| PAIP1                                                                                               | 4,67089E-07 | 0,239810707 | 0,439 | 0,144 | 0,009856035 | 1,180837716   | 0,84685642      | 3,048611111     |
| ATP5MC1                                                                                             | 8,00609E-05 | 0,239467992 | 0,537 | 0,246 | 1           | 1,180557239   | 0,847057615     | 2,182926829     |
| RTCB                                                                                                | 1,07084E-09 | 0,239296888 | 0,28  | 0,046 | 2,25957E-05 | 1,180417233   | 0,847158083     | 6,086956522     |
| KLHDC2                                                                                              | 1,05184E-06 | 0,239247116 | 0,305 | 0,084 | 0,022194871 | 1,18037651    | 0,84718731      | 3,630952381     |
| CAPN5                                                                                               | 1,01265E-06 | 0,239125124 | 0,256 | 0,06  | 0,021367881 | 1,180276704   | 0,847258949     | 4,266666667     |
| ARL8A                                                                                               | 2,0662E-06  | 0,238979394 | 0,61  | 0,242 | 0,04359881  | 1,180157487   | 0,847344537     | 2,520661157     |
| STIM1                                                                                               | 1,77642E-08 | 0,238855208 | 0,341 | 0,081 | 0,000374842 | 1,180055904   | 0,847417479     | 4,209876543     |
| COPS4                                                                                               | 6,03701E-12 | 0,238788168 | 0,28  | 0,032 | 1,27387E-07 | 1,18000107    | 0,847456859     | 8,75            |
| DGAT1                                                                                               | 2,5942E-05  | 0,23877113  | 0,207 | 0,053 | 0,547402383 | 1,179987135   | 0,847466867     | 3,905660377     |
| MSI2                                                                                                | 1,38251E-08 | 0,238597926 | 0,28  | 0,053 | 0,000291722 | 1,179845479   | 0,847568616     | 5,283018868     |
| NSDHL                                                                                               | 2,92786E-07 | 0,238472996 | 0,122 | 0,007 | 0,006178086 | 1,179743315   | 0,847642015     | 17,42857143     |
| CDC26                                                                                               | 1,16283E-07 | 0,238315082 | 0,317 | 0,077 | 0,00245368  | 1,17961419    | 0,847734801     | 4,116883117     |
| USP18                                                                                               | 2,18116E-07 | 0,238196639 | 0,11  | 0,004 | 0,004602468 | 1,17951735    | 0,847804401     | 27,5            |
| EFCAB11                                                                                             | 5,47929E-05 | 0,237936349 | 0,085 | 0,007 | 1           | 1,179304561   | 0,847957375     | 12,14285714     |
| TRIM26                                                                                              | 2,65511E-07 | 0,237769362 | 0,207 | 0,035 | 0,005602541 | 1,179168068   | 0,848055529     | 5,914285714     |
| TRADD                                                                                               | 7,1242E-11  | 0,237737286 | 0,232 | 0,021 | 1,50328E-06 | 1,179141852   | 0,848074384     | 11,04761905     |
| BTBD1                                                                                               | 1,50549E-06 | 0,23766171  | 0,28  | 0,074 | 0,031767255 | 1,179080083   | 0,848118813     | 3,783783784     |
| JAGN1                                                                                               | 6,40582E-09 | 0,237649142 | 0,28  | 0,049 | 0,000135169 | 1,179069812   | 0,8481262       | 5,714285714     |
| HDHD2                                                                                               | 4,24684E-10 | 0,236964399 | 0,28  | 0,042 | 8,96126E-06 | 1,178510326   | 0,84852884      | 6,666666667     |
| MMGT1                                                                                               | 2,72034E-07 | 0,236920916 | 0,329 | 0,088 | 0,005740184 | 1,178474806   | 0,848554416     | 3,738636364     |
| GOLGA5                                                                                              | 2,85515E-09 | 0,236888042 | 0,256 | 0,039 | 6,02466E-05 | 1,178447953   | 0,848573751     | 6,564102564     |
| RHOQ                                                                                                | 1,93718E-06 | 0,236785055 | 0,646 | 0,27  | 0,040876361 | 1,178363832   | 0,848634329     | 2,392592593     |
| SCRIB                                                                                               | 2,43784E-05 | 0,236726216 | 0,305 | 0,102 | 0,514407964 | 1,178315775   | 0,84866894      | 2,990196078     |
| MTHFD2                                                                                              | 2,82336E-06 | 0,236633913 | 0,268 | 0,07  | 0,059575721 | 1,178240389   | 0,84872324      | 3,828571429     |
| FLOT2                                                                                               | 1,42781E-05 | 0,236515233 | 0,195 | 0,046 | 0,30128174  | 1,178143468   | 0,848793061     | 4,239130435     |
| SLC39A10                                                                                            | 2,02994E-11 | 0,236256593 | 0,427 | 0,088 | 4,28338E-07 | 1,177932274   | 0,848945243     | 4,852272727     |
| TCHP                                                                                                | 1,01816E-07 | 0,236100915 | 0,207 | 0,032 | 0,002148429 | 1,177805173   | 0,849036855     | 6,46875         |
| CYP1B1                                                                                              | 0,043000486 | 0,236001253 | 0,037 | 0,007 | 1           | 1,177723812   | 0,849095509     | 5,285714286     |
| EXOSC8                                                                                              | 2,13127E-06 | 0,23593156  | 0,317 | 0,091 | 0,044971967 | 1,177666921   | 0,849136528     | 3,483516484     |
| ABCC3                                                                                               | 2,26856E-10 | 0,235867904 | 0,171 | 0,007 | 4,78689E-06 | 1,17761496    | 0,849173995     | 24,42857143     |

Supplementary Table 2

| Differentially expressed genes_keloid-XL_comparing SC-Keloid vs. (SC-Myel, SC-Nonmyel, SC-Nonmyel2) |             |             |       |       |             |               |                 |                 |
|-----------------------------------------------------------------------------------------------------|-------------|-------------|-------|-------|-------------|---------------|-----------------|-----------------|
| gene                                                                                                | p_val       | avg_log2FC  | pct.1 | pct.2 | p_val_adj   | Foldchange_UP | Foldchange_DOWN | Ratio_pct1_pct2 |
| DGCR2                                                                                               | 2,45791E-05 | 0,235628835 | 0,28  | 0,088 | 0,518643421 | 1,177419833   | 0,849314723     | 3,181818182     |
| CYBC1                                                                                               | 3,4708E-07  | 0,235620391 | 0,256 | 0,056 | 0,007323729 | 1,177412942   | 0,849319694     | 4,571428571     |
| LIG3                                                                                                | 2,1468E-05  | 0,235553426 | 0,134 | 0,021 | 0,452995664 | 1,177358292   | 0,849359118     | 6,380952381     |
| MTDH                                                                                                | 0,000109705 | 0,235508097 | 0,732 | 0,382 | 1           | 1,1773213     | 0,849385805     | 1,916230366     |
| SSNA1                                                                                               | 2,46646E-08 | 0,235422811 | 0,427 | 0,123 | 0,000520448 | 1,177251704   | 0,849436019     | 3,471544715     |
| RARS2                                                                                               | 1,27595E-08 | 0,235183287 | 0,232 | 0,035 | 0,000269237 | 1,177056267   | 0,849577058     | 6,628571429     |
| IFNAR2                                                                                              | 2,57425E-07 | 0,235099253 | 0,329 | 0,084 | 0,005431932 | 1,176987708   | 0,849626545     | 3,916666667     |
| PMVK                                                                                                | 1,60401E-07 | 0,234898496 | 0,378 | 0,109 | 0,003384618 | 1,176823936   | 0,849744783     | 3,467889908     |
| NIFK-AS1                                                                                            | 3,22222E-07 | 0,234568143 | 0,146 | 0,014 | 0,006799216 | 1,176554494   | 0,849939382     | 10,42857143     |
| MSC                                                                                                 | 4,23876E-13 | 0,234544791 | 0,195 | 0,004 | 8,9442E-09  | 1,17653545    | 0,84995314      | 48,75           |
| PCDHGA3                                                                                             | 0,000183568 | 0,234481354 | 0,049 | 0     | 1           | 1,176483718   | 0,849990514     | #DIV/0!         |
| C14orf119                                                                                           | 2,07731E-10 | 0,234469556 | 0,305 | 0,049 | 4,38333E-06 | 1,176474097   | 0,849997465     | 6,224489796     |
| STOML2                                                                                              | 3,92798E-08 | 0,234457064 | 0,378 | 0,102 | 0,000828843 | 1,17646391    | 0,850004825     | 3,705882353     |
| YWHAZ                                                                                               | 0,015878117 | 0,23425189  | 0,829 | 0,582 | 1           | 1,17629661    | 0,850125718     | 1,424398625     |
| ANAPC13                                                                                             | 1,46236E-08 | 0,234155128 | 0,378 | 0,095 | 0,000308573 | 1,176217718   | 0,850182738     | 3,978947368     |
| METTL25B                                                                                            | 1,02952E-07 | 0,233840865 | 0,098 | 0     | 0,002172399 | 1,17596153    | 0,850367954     | #DIV/0!         |
| EBP                                                                                                 | 1,06374E-07 | 0,233796068 | 0,207 | 0,032 | 0,002244596 | 1,175925016   | 0,850394359     | 6,46875         |
| PDHA1                                                                                               | 1,84634E-08 | 0,233777833 | 0,317 | 0,07  | 0,000389597 | 1,175910153   | 0,850405108     | 4,528571429     |
| OTUD5                                                                                               | 2,14719E-06 | 0,233556805 | 0,329 | 0,095 | 0,045307852 | 1,175730011   | 0,850535404     | 3,463157895     |
| POLR2F                                                                                              | 2,11437E-06 | 0,233538127 | 0,72  | 0,309 | 0,044615222 | 1,17571479    | 0,850546415     | 2,330097087     |
| PHTF2                                                                                               | 3,51943E-06 | 0,233429809 | 0,159 | 0,025 | 0,074263512 | 1,17562652    | 0,850610277     | 6,36            |
| C1orf131                                                                                            | 2,8975E-09  | 0,233267282 | 0,256 | 0,039 | 6,11401E-05 | 1,175494087   | 0,850706108     | 6,564102564     |
| PPP1R8                                                                                              | 1,61686E-07 | 0,233251702 | 0,195 | 0,028 | 0,003411727 | 1,175481392   | 0,850715295     | 6,964285714     |
| RPL31                                                                                               | 0,018651435 | 0,233223933 | 0,866 | 0,681 | 1           | 1,175458768   | 0,85073167      | 1,271659325     |
| MRPL12                                                                                              | 4,15604E-09 | 0,233171938 | 0,305 | 0,06  | 8,76965E-05 | 1,175416404   | 0,850762331     | 5,083333333     |
| TRAPPC6A                                                                                            | 0,000145935 | 0,232970259 | 0,183 | 0,049 | 1           | 1,175252101   | 0,85088127      | 3,734693878     |
| CUL4A                                                                                               | 1,83332E-06 | 0,232866251 | 0,244 | 0,056 | 0,038684881 | 1,175167376   | 0,850942615     | 4,357142857     |
| PON2                                                                                                | 7,53218E-05 | 0,232783731 | 0,598 | 0,27  | 1           | 1,17510016    | 0,850991289     | 2,214814815     |
| C11orf58                                                                                            | 0,000677693 | 0,2327322   | 0,671 | 0,365 | 1           | 1,175058188   | 0,851021686     | 1,838356164     |
| ITPR3                                                                                               | 2,70578E-06 | 0,232710928 | 0,524 | 0,207 | 0,057094629 | 1,175040863   | 0,851034233     | 2,531400966     |

Supplementary Table 2

| Differentially expressed genes_keloid-XL_comparing SC-Keloid vs. (SC-Myel, SC-Nonmyel, SC-Nonmyel2) |             |             |       |       |             |               |                 |                 |
|-----------------------------------------------------------------------------------------------------|-------------|-------------|-------|-------|-------------|---------------|-----------------|-----------------|
| gene                                                                                                | p_val       | avg_log2FC  | pct.1 | pct.2 | p_val_adj   | Foldchange_UP | Foldchange_DOWN | Ratio_pct1_pct2 |
| STX5                                                                                                | 1,11067E-07 | 0,232598371 | 0,293 | 0,067 | 0,002343632 | 1,174949191   | 0,851100633     | 4,373134328     |
| LINC00667                                                                                           | 3,62981E-06 | 0,232327204 | 0,341 | 0,105 | 0,076592544 | 1,17472837    | 0,85126062      | 3,247619048     |
| HP1BP3                                                                                              | 0,00345878  | 0,232321698 | 0,72  | 0,414 | 1           | 1,174723887   | 0,851263868     | 1,739130435     |
| ITPK1                                                                                               | 0,000104007 | 0,232245583 | 0,707 | 0,354 | 1           | 1,174661911   | 0,851308781     | 1,997175141     |
| WDR27                                                                                               | 0,000915822 | 0,231968301 | 0,085 | 0,014 | 1           | 1,174436166   | 0,851472416     | 6,071428571     |
| LSM1                                                                                                | 1,55679E-08 | 0,231909974 | 0,415 | 0,112 | 0,000328499 | 1,174388686   | 0,851506841     | 3,705357143     |
| ARL6IP6                                                                                             | 2,59526E-06 | 0,231431217 | 0,427 | 0,151 | 0,05476258  | 1,17399903    | 0,85178946      | 2,82781457      |
| STUB1                                                                                               | 2,23119E-06 | 0,231319765 | 0,463 | 0,165 | 0,047080442 | 1,173908339   | 0,851855265     | 2,806060606     |
| CIT                                                                                                 | 0,001187461 | 0,231310787 | 0,463 | 0,228 | 1           | 1,173901034   | 0,851860566     | 2,030701754     |
| APH1A                                                                                               | 5,24385E-08 | 0,231271742 | 0,415 | 0,119 | 0,001106505 | 1,173869264   | 0,851883622     | 3,487394958     |
| SRPRB                                                                                               | 1,44041E-10 | 0,231241633 | 0,317 | 0,053 | 3,03941E-06 | 1,173844766   | 0,8519014       | 5,981132075     |
| NANS                                                                                                | 4,17549E-07 | 0,231033769 | 0,329 | 0,091 | 0,008810694 | 1,17367565    | 0,852024152     | 3,615384615     |
| POLR2K                                                                                              | 8,10671E-06 | 0,230948255 | 0,61  | 0,263 | 0,171059792 | 1,173606084   | 0,852074656     | 2,319391635     |
| RPL18A                                                                                              | 0,048687854 | 0,230785146 | 0,988 | 0,874 | 1           | 1,173473405   | 0,852170996     | 1,130434783     |
| ENDOD1                                                                                              | 1,59252E-07 | 0,230782608 | 0,61  | 0,221 | 0,003360382 | 1,173471341   | 0,852172495     | 2,760180995     |
| DUSP10                                                                                              | 1,66557E-13 | 0,230729147 | 0,305 | 0,032 | 3,51453E-09 | 1,173427857   | 0,852204074     | 9,53125         |
| GLRX3                                                                                               | 8,81576E-07 | 0,23067076  | 0,329 | 0,095 | 0,018602126 | 1,173380368   | 0,852238564     | 3,463157895     |
| POLR1A                                                                                              | 3,22222E-07 | 0,230616231 | 0,146 | 0,014 | 0,006799216 | 1,17333602    | 0,852270776     | 10,42857143     |
| PRPF19                                                                                              | 4,23218E-08 | 0,230598831 | 0,232 | 0,039 | 0,000893032 | 1,173321868   | 0,852281055     | 5,948717949     |
| PPP1R11                                                                                             | 3,44039E-06 | 0,230487948 | 0,244 | 0,06  | 0,072595679 | 1,173231693   | 0,852346562     | 4,066666667     |
| SLITRK6                                                                                             | 2,7748E-06  | 0,230428059 | 0,573 | 0,228 | 0,058551153 | 1,17318299    | 0,852381946     | 2,513157895     |
| TCF4                                                                                                | 2,05906E-05 | 0,23024687  | 0,72  | 0,337 | 0,434481595 | 1,173035659   | 0,852489004     | 2,136498516     |
| TBC1D19                                                                                             | 1,6416E-05  | 0,230185954 | 0,146 | 0,025 | 0,346394762 | 1,172986129   | 0,852525        | 5,84            |
| KIFAP3                                                                                              | 6,16527E-08 | 0,230152903 | 0,39  | 0,105 | 0,001300933 | 1,172959258   | 0,852544531     | 3,714285714     |
| MORN4                                                                                               | 1,33474E-06 | 0,229635389 | 0,146 | 0,018 | 0,028164367 | 1,172538578   | 0,852850404     | 8,111111111     |
| GNL1                                                                                                | 5,86151E-07 | 0,229392615 | 0,366 | 0,109 | 0,012368368 | 1,172341281   | 0,852993933     | 3,357798165     |
| DCTN1                                                                                               | 1,49822E-06 | 0,2292438   | 0,402 | 0,13  | 0,031614038 | 1,17222036    | 0,853081924     | 3,092307692     |
| ZNF226                                                                                              | 5,21699E-11 | 0,228994584 | 0,207 | 0,014 | 1,10084E-06 | 1,172017884   | 0,853229301     | 14,78571429     |
| EAPP                                                                                                | 6,069E-06   | 0,228942479 | 0,39  | 0,137 | 0,128061934 | 1,171975555   | 0,853260117     | 2,846715328     |
| ACYP2                                                                                               | 8,1914E-06  | 0,228904034 | 0,256 | 0,07  | 0,17284666  | 1,171944325   | 0,853282855     | 3,657142857     |

Supplementary Table 2

| Differentially expressed genes_keloid-XL_comparing SC-Keloid vs. (SC-Myel, SC-Nonmyel, SC-Nonmyel2) |             |             |       |       |             |               |                 |                 |
|-----------------------------------------------------------------------------------------------------|-------------|-------------|-------|-------|-------------|---------------|-----------------|-----------------|
| gene                                                                                                | p_val       | avg_log2FC  | pct.1 | pct.2 | p_val_adj   | Foldchange_UP | Foldchange_DOWN | Ratio_pct1_pct2 |
| RPF2                                                                                                | 4,41936E-08 | 0,228886634 | 0,28  | 0,06  | 0,00093253  | 1,17193019    | 0,853293147     | 4,666666667     |
| IQGAP1                                                                                              | 6,51352E-05 | 0,228886588 | 0,634 | 0,302 | 1           | 1,171930153   | 0,853293174     | 2,099337748     |
| COA4                                                                                                | 5,01244E-08 | 0,228804909 | 0,427 | 0,126 | 0,001057676 | 1,171863806   | 0,853341485     | 3,388888889     |
| NRP1                                                                                                | 6,23082E-08 | 0,228453759 | 0,354 | 0,091 | 0,001314765 | 1,17157861    | 0,853549212     | 3,89010989      |
| NT5C3B                                                                                              | 1,02014E-05 | 0,228414945 | 0,28  | 0,084 | 0,215259219 | 1,171547091   | 0,853572176     | 3,333333333     |
| TRMT112                                                                                             | 0,003021431 | 0,228327805 | 0,732 | 0,467 | 1           | 1,17147633    | 0,853623735     | 1,56745182      |
| GAR1                                                                                                | 4,45121E-11 | 0,22799367  | 0,256 | 0,028 | 9,39249E-07 | 1,171205043   | 0,85382146      | 9,142857143     |
| SDHAF3                                                                                              | 1,09597E-08 | 0,227945296 | 0,317 | 0,067 | 0,000231262 | 1,171165772   | 0,85385009      | 4,731343284     |
| NAV1                                                                                                | 4,77528E-07 | 0,22793059  | 0,378 | 0,112 | 0,010076326 | 1,171153834   | 0,853858794     | 3,375           |
| MYO19                                                                                               | 1,08035E-06 | 0,227910111 | 0,159 | 0,021 | 0,022796397 | 1,17113721    | 0,853870914     | 7,571428571     |
| GAA                                                                                                 | 8,67253E-05 | 0,227901481 | 0,427 | 0,175 | 1           | 1,171130204   | 0,853876022     | 2,44            |
| MFS12                                                                                               | 7,05026E-06 | 0,227646202 | 0,463 | 0,175 | 0,148767611 | 1,170922996   | 0,854027125     | 2,645714286     |
| ARF3                                                                                                | 1,69606E-07 | 0,227486516 | 0,402 | 0,119 | 0,003578854 | 1,170793398   | 0,854121659     | 3,378151261     |
| ANXA4                                                                                               | 3,12549E-05 | 0,227339944 | 0,415 | 0,165 | 0,659509823 | 1,170674456   | 0,854208439     | 2,515151515     |
| RTL8C                                                                                               | 1,05257E-05 | 0,227252784 | 0,549 | 0,228 | 0,222102989 | 1,170603733   | 0,854260047     | 2,407894737     |
| DDB1                                                                                                | 3,03493E-06 | 0,227110604 | 0,427 | 0,147 | 0,064040084 | 1,170488373   | 0,85434424      | 2,904761905     |
| HSPB3                                                                                               | 0,000183568 | 0,226858092 | 0,049 | 0     | 1           | 1,170283523   | 0,854493787     | #DIV/0!         |
| SCN1B                                                                                               | 0,000150458 | 0,226789564 | 0,183 | 0,049 | 1           | 1,170227936   | 0,854534377     | 3,734693878     |
| DMAC1                                                                                               | 1,60803E-07 | 0,22655544  | 0,305 | 0,074 | 0,003393111 | 1,170038044   | 0,854673064     | 4,121621622     |
| PARL                                                                                                | 6,69648E-09 | 0,226516823 | 0,329 | 0,07  | 0,000141302 | 1,170006726   | 0,854695941     | 4,7             |
| SNAI2                                                                                               | 4,66435E-13 | 0,226507134 | 0,195 | 0,004 | 9,84225E-09 | 1,169998868   | 0,854701681     | 48,75           |
| KCTD17                                                                                              | 3,82684E-10 | 0,226468355 | 0,232 | 0,025 | 8,07502E-06 | 1,169967419   | 0,854724656     | 9,28            |
| NDUFB9                                                                                              | 2,30981E-10 | 0,22639909  | 0,561 | 0,161 | 4,87392E-06 | 1,16991125    | 0,854765693     | 3,48447205      |
| ZFPM1                                                                                               | 2,83891E-08 | 0,226221398 | 0,329 | 0,077 | 0,000599039 | 1,169767165   | 0,854870978     | 4,272727273     |
| BAX                                                                                                 | 9,96265E-08 | 0,226189277 | 0,537 | 0,189 | 0,002102219 | 1,16974112    | 0,854890012     | 2,841269841     |
| SLC9A7                                                                                              | 8,40386E-12 | 0,226160731 | 0,159 | 0     | 1,7733E-07  | 1,169717975   | 0,854906927     | #DIV/0!         |
| GCFC2                                                                                               | 1,44381E-06 | 0,226141344 | 0,195 | 0,035 | 0,030465921 | 1,169702257   | 0,854918415     | 5,571428571     |
| HADHB                                                                                               | 1,90575E-05 | 0,226043047 | 0,476 | 0,193 | 0,40213175  | 1,169622562   | 0,854976667     | 2,466321244     |
| KCNG1                                                                                               | 1,17656E-05 | 0,226027309 | 0,232 | 0,06  | 0,248265924 | 1,169609803   | 0,854985994     | 3,866666667     |
| ARNT2                                                                                               | 5,03918E-07 | 0,225999878 | 0,183 | 0,028 | 0,01063317  | 1,169587566   | 0,85500225      | 6,535714286     |

Supplementary Table 2

| Differentially expressed genes_keloid-XL_comparing SC-Keloid vs. (SC-Myel, SC-Nonmyel, SC-Nonmyel2) |             |             |       |       |             |               |                 |                 |
|-----------------------------------------------------------------------------------------------------|-------------|-------------|-------|-------|-------------|---------------|-----------------|-----------------|
| gene                                                                                                | p_val       | avg_log2FC  | pct.1 | pct.2 | p_val_adj   | Foldchange_UP | Foldchange_DOWN | Ratio_pct1_pct2 |
| ATF6                                                                                                | 3,09191E-07 | 0,225922128 | 0,268 | 0,06  | 0,00652424  | 1,169524535   | 0,85504833      | 4,466666667     |
| COMMD4                                                                                              | 9,64312E-11 | 0,225868231 | 0,463 | 0,112 | 2,03479E-06 | 1,169480844   | 0,855080273     | 4,133928571     |
| HAX1                                                                                                | 5,53789E-07 | 0,225822245 | 0,329 | 0,091 | 0,011685504 | 1,169443568   | 0,855107529     | 3,615384615     |
| CDK5RAP2                                                                                            | 2,47738E-06 | 0,225348154 | 0,232 | 0,053 | 0,052275269 | 1,169059334   | 0,855388577     | 4,377358491     |
| DGKI                                                                                                | 5,5905E-11  | 0,225327266 | 0,146 | 0     | 1,17965E-06 | 1,169042408   | 0,855400961     | #DIV/0!         |
| NR2C2AP                                                                                             | 4,23186E-07 | 0,22519752  | 0,22  | 0,042 | 0,008929644 | 1,168937277   | 0,855477894     | 5,238095238     |
| RPL10                                                                                               | 0,009883443 | 0,225126923 | 1     | 0,954 | 1           | 1,168880078   | 0,855519757     | 1,048218029     |
| EPHA3                                                                                               | 1,02952E-07 | 0,225102176 | 0,098 | 0     | 0,002172399 | 1,168860028   | 0,855534432     | #DIV/0!         |
| IAH1                                                                                                | 0,000383552 | 0,225046224 | 0,585 | 0,298 | 1           | 1,168814697   | 0,855567613     | 1,963087248     |
| GPR153                                                                                              | 0,001789861 | 0,224786213 | 0,195 | 0,07  | 1           | 1,168604065   | 0,855721822     | 2,785714286     |
| RO60                                                                                                | 5,52939E-07 | 0,224719964 | 0,573 | 0,214 | 0,011667575 | 1,168550404   | 0,855761118     | 2,677570093     |
| EMCN                                                                                                | 0,00032041  | 0,224718299 | 0,073 | 0,007 | 1           | 1,168549055   | 0,855762106     | 10,42857143     |
| PRKAB2                                                                                              | 0,002984434 | 0,224657821 | 0,134 | 0,042 | 1           | 1,168500071   | 0,85579798      | 3,19047619      |
| ABHD12                                                                                              | 1,62836E-06 | 0,224458137 | 0,415 | 0,137 | 0,034360006 | 1,168338349   | 0,85591644      | 3,02919708      |
| RPL6                                                                                                | 0,015686261 | 0,224413711 | 0,951 | 0,87  | 1           | 1,168302372   | 0,855942797     | 1,093103448     |
| DR1                                                                                                 | 4,09471E-05 | 0,224345985 | 0,329 | 0,119 | 0,864024304 | 1,168247528   | 0,855982979     | 2,764705882     |
| HSD17B11                                                                                            | 2,68582E-07 | 0,22428466  | 0,268 | 0,06  | 0,005667358 | 1,168197871   | 0,856019366     | 4,466666667     |
| ITPA                                                                                                | 1,32141E-06 | 0,224228133 | 0,427 | 0,144 | 0,027883002 | 1,1681521     | 0,856052906     | 2,965277778     |
| ADAMTS6                                                                                             | 6,67422E-07 | 0,224217685 | 0,085 | 0     | 0,014083281 | 1,16814364    | 0,856059106     | #DIV/0!         |
| RAB5B                                                                                               | 0,01756438  | 0,224129122 | 0,183 | 0,088 | 1           | 1,168071933   | 0,856111659     | 2,079545455     |
| ZNF783                                                                                              | 0,000640402 | 0,223945747 | 0,098 | 0,018 | 1           | 1,167923473   | 0,856220483     | 5,444444444     |
| XRCC4                                                                                               | 3,3975E-07  | 0,223919723 | 0,146 | 0,014 | 0,007169057 | 1,167902406   | 0,856235928     | 10,42857143     |
| SARS1                                                                                               | 5,7489E-05  | 0,223804621 | 0,549 | 0,239 | 1           | 1,167809231   | 0,856304243     | 2,29707113      |
| CAV2                                                                                                | 7,59676E-05 | 0,223794649 | 0,439 | 0,179 | 1           | 1,16780116    | 0,856310162     | 2,452513966     |
| NRAS                                                                                                | 1,36458E-08 | 0,223733803 | 0,28  | 0,053 | 0,000287939 | 1,167751908   | 0,856346278     | 5,283018868     |
| CYRIB                                                                                               | 2,41327E-06 | 0,223732768 | 0,268 | 0,07  | 0,050922305 | 1,167751071   | 0,856346892     | 3,828571429     |
| LBX2-AS1                                                                                            | 1,86382E-06 | 0,223087671 | 0,122 | 0,011 | 0,039328534 | 1,167229031   | 0,85672989      | 11,09090909     |
| TMEM14A                                                                                             | 5,64889E-07 | 0,222918946 | 0,439 | 0,144 | 0,011919723 | 1,16709253    | 0,856830092     | 3,048611111     |
| NDUFV3                                                                                              | 2,70723E-05 | 0,222818846 | 0,317 | 0,109 | 0,571252879 | 1,167011555   | 0,856889545     | 2,908256881     |
| BOP1                                                                                                | 2,14886E-10 | 0,222727966 | 0,244 | 0,028 | 4,53431E-06 | 1,166938044   | 0,856943525     | 8,714285714     |



Supplementary Table 2

| Differentially expressed genes_keloid-XL_comparing SC-Keloid vs. (SC-Myel, SC-Nonmyel, SC-Nonmyel2) |             |             |       |       |             |               |                 |                 |
|-----------------------------------------------------------------------------------------------------|-------------|-------------|-------|-------|-------------|---------------|-----------------|-----------------|
| gene                                                                                                | p_val       | avg_log2FC  | pct.1 | pct.2 | p_val_adj   | Foldchange_UP | Foldchange_DOWN | Ratio_pct1_pct2 |
| CKLF                                                                                                | 3,92935E-08 | 0,222717173 | 0,439 | 0,126 | 0,000829133 | 1,166929313   | 0,856949936     | 3,484126984     |
| TATDN1                                                                                              | 2,26578E-07 | 0,222405284 | 0,256 | 0,053 | 0,004781017 | 1,166677068   | 0,857135215     | 4,830188679     |
| SPOCD1                                                                                              | 6,10551E-11 | 0,222399642 | 0,207 | 0,014 | 1,28832E-06 | 1,166672505   | 0,857138567     | 14,78571429     |
| C3orf38                                                                                             | 0,000325846 | 0,222274567 | 0,183 | 0,053 | 1           | 1,166571365   | 0,857212881     | 3,452830189     |
| NAA60                                                                                               | 7,7401E-07  | 0,222059709 | 0,293 | 0,074 | 0,016332389 | 1,166397642   | 0,857340553     | 3,959459459     |
| UBA1                                                                                                | 4,08995E-06 | 0,221915647 | 0,537 | 0,207 | 0,086302106 | 1,166281177   | 0,857426168     | 2,594202899     |
| PIGS                                                                                                | 1,03424E-05 | 0,221830333 | 0,22  | 0,053 | 0,218233962 | 1,16621221    | 0,857476874     | 4,150943396     |
| LAMTOR5                                                                                             | 0,000163737 | 0,221825942 | 0,732 | 0,407 | 1           | 1,16620866    | 0,857479484     | 1,798525799     |
| GPSM3                                                                                               | 9,76427E-12 | 0,221551779 | 0,232 | 0,018 | 2,06036E-07 | 1,165987061   | 0,85764245      | 12,88888889     |
| TP53I3                                                                                              | 1,85115E-08 | 0,221503589 | 0,293 | 0,06  | 0,000390611 | 1,165948115   | 0,857671098     | 4,883333333     |
| STN1                                                                                                | 4,91932E-09 | 0,221398757 | 0,232 | 0,032 | 0,000103803 | 1,165863395   | 0,857733423     | 7,25            |
| RNF14                                                                                               | 8,10174E-08 | 0,22139646  | 0,22  | 0,035 | 0,001709548 | 1,165861539   | 0,857734788     | 6,285714286     |
| BAG6                                                                                                | 9,41071E-08 | 0,221298763 | 0,5   | 0,165 | 0,001985753 | 1,165782591   | 0,857792875     | 3,03030303      |
| CPSF2                                                                                               | 9,83374E-05 | 0,220853667 | 0,171 | 0,042 | 1           | 1,165422983   | 0,858057559     | 4,071428571     |
| VAMP7                                                                                               | 3,32918E-06 | 0,220811401 | 0,244 | 0,06  | 0,070248972 | 1,16538884    | 0,858082698     | 4,066666667     |
| BIN3                                                                                                | 3,1358E-11  | 0,220685342 | 0,305 | 0,042 | 6,61686E-07 | 1,165287016   | 0,858157678     | 7,261904762     |
| PTTG1IP                                                                                             | 1,90618E-05 | 0,22063493  | 0,671 | 0,316 | 0,40222353  | 1,165246298   | 0,858187665     | 2,123417722     |
| TMEM134                                                                                             | 3,92734E-07 | 0,220593074 | 0,354 | 0,102 | 0,008287076 | 1,165212492   | 0,858212563     | 3,470588235     |
| MAPKAPK5-AS1                                                                                        | 2,09583E-07 | 0,220533955 | 0,268 | 0,06  | 0,004422404 | 1,165164745   | 0,858247732     | 4,466666667     |
| TOMM40                                                                                              | 8,70092E-11 | 0,220470561 | 0,378 | 0,074 | 1,83598E-06 | 1,165113547   | 0,858285446     | 5,108108108     |
| SNRPB2                                                                                              | 2,05636E-06 | 0,220436115 | 0,622 | 0,253 | 0,043391198 | 1,16508573    | 0,858305938     | 2,458498024     |
| CDK5                                                                                                | 3,61835E-10 | 0,220314631 | 0,22  | 0,021 | 7,63508E-06 | 1,164987626   | 0,858378216     | 10,47619048     |
| FPGS                                                                                                | 1,35362E-08 | 0,220314116 | 0,232 | 0,035 | 0,000285628 | 1,16498721    | 0,858378523     | 6,628571429     |
| TIMM29                                                                                              | 0,002239651 | 0,220272768 | 0,159 | 0,053 | 1           | 1,164953822   | 0,858403124     | 3               |
| ZMAT2                                                                                               | 8,92651E-09 | 0,220033177 | 0,39  | 0,098 | 0,000188358 | 1,164760372   | 0,858545693     | 3,979591837     |
| TXNL1                                                                                               | 1,76866E-06 | 0,219955148 | 0,537 | 0,207 | 0,037320419 | 1,164697376   | 0,858592129     | 2,594202899     |
| IFT74                                                                                               | 0,001085403 | 0,219864447 | 0,159 | 0,049 | 1           | 1,164624155   | 0,858646109     | 3,244897959     |
| ACBD6                                                                                               | 2,86433E-05 | 0,219725206 | 0,329 | 0,112 | 0,604401632 | 1,164511758   | 0,858728985     | 2,9375          |
| MPV17L2                                                                                             | 3,36921E-06 | 0,219693754 | 0,159 | 0,025 | 0,071093597 | 1,164486371   | 0,858747706     | 6,36            |
| CAPZA1                                                                                              | 6,50826E-08 | 0,219398125 | 0,512 | 0,165 | 0,001373308 | 1,164247775   | 0,858923694     | 3,103030303     |

Supplementary Table 2

| Differentially expressed genes_keloid-XL_comparing SC-Keloid vs. (SC-Myel, SC-Nonmyel, SC-Nonmyel2) |             |             |       |       |             |               |                 |                 |
|-----------------------------------------------------------------------------------------------------|-------------|-------------|-------|-------|-------------|---------------|-----------------|-----------------|
| gene                                                                                                | p_val       | avg_log2FC  | pct.1 | pct.2 | p_val_adj   | Foldchange_UP | Foldchange_DOWN | Ratio_pct1_pct2 |
| C6orf47                                                                                             | 2,31636E-07 | 0,219379875 | 0,159 | 0,018 | 0,004887745 | 1,164233047   | 0,85893456      | 8,833333333     |
| CRAT                                                                                                | 2,97058E-10 | 0,2192031   | 0,28  | 0,042 | 6,26822E-06 | 1,164090401   | 0,859039812     | 6,666666667     |
| TIMM22                                                                                              | 4,68278E-07 | 0,219080257 | 0,183 | 0,028 | 0,009881124 | 1,163991286   | 0,859112961     | 6,535714286     |
| DAPK3                                                                                               | 2,1731E-08  | 0,218936313 | 0,329 | 0,074 | 0,000458546 | 1,163875154   | 0,859198683     | 4,445945946     |
| NIFK                                                                                                | 1,37162E-07 | 0,21871903  | 0,39  | 0,112 | 0,002894247 | 1,163699878   | 0,859328096     | 3,482142857     |
| DNAJC5                                                                                              | 2,74168E-06 | 0,218696102 | 0,207 | 0,042 | 0,057852276 | 1,163681384   | 0,859341753     | 4,928571429     |
| PIH1D1                                                                                              | 1,65299E-09 | 0,218641262 | 0,268 | 0,042 | 3,48798E-05 | 1,16363715    | 0,859374419     | 6,380952381     |
| PMF1                                                                                                | 2,19361E-06 | 0,218622796 | 0,317 | 0,091 | 0,046287366 | 1,163622256   | 0,859385419     | 3,483516484     |
| TUT7                                                                                                | 0,011292245 | 0,218490172 | 0,159 | 0,067 | 1           | 1,163515292   | 0,859464424     | 2,373134328     |
| RPAP3                                                                                               | 0,000203227 | 0,21844169  | 0,171 | 0,046 | 1           | 1,163476192   | 0,859493307     | 3,717391304     |
| TES                                                                                                 | 2,32149E-08 | 0,218399402 | 0,22  | 0,032 | 0,000489857 | 1,163442089   | 0,859518501     | 6,875           |
| CCNT2                                                                                               | 3,15003E-05 | 0,218236525 | 0,256 | 0,077 | 0,664688396 | 1,163310747   | 0,859615544     | 3,324675325     |
| HEATR3                                                                                              | 5,60121E-05 | 0,21821122  | 0,098 | 0,011 | 1           | 1,163290342   | 0,859630622     | 8,909090909     |
| AGAP5                                                                                               | 0,001876622 | 0,21816731  | 0,049 | 0,004 | 1           | 1,163254937   | 0,859656786     | 12,25           |
| ATG7                                                                                                | 7,34252E-09 | 0,218058217 | 0,22  | 0,028 | 0,000154935 | 1,163166978   | 0,859721793     | 7,857142857     |
| TMEM185B                                                                                            | 3,77042E-10 | 0,217856725 | 0,207 | 0,018 | 7,95596E-06 | 1,163004537   | 0,859841874     | 11,5            |
| ZNF771                                                                                              | 2,12559E-07 | 0,217702946 | 0,22  | 0,039 | 0,004485207 | 1,162880577   | 0,85993353      | 5,641025641     |
| GNB1                                                                                                | 0,000385961 | 0,217622543 | 0,707 | 0,432 | 1           | 1,162815771   | 0,859981457     | 1,636574074     |
| ANXA7                                                                                               | 5,34295E-07 | 0,217496685 | 0,585 | 0,211 | 0,011274163 | 1,162714333   | 0,860056483     | 2,772511848     |
| FKBP11                                                                                              | 3,24801E-06 | 0,217383159 | 0,195 | 0,039 | 0,068536275 | 1,162622843   | 0,860124164     | 5               |
| AFAP1                                                                                               | 8,92419E-08 | 0,217045929 | 0,354 | 0,091 | 0,001883093 | 1,162351111   | 0,860325242     | 3,89010989      |
| INKA2                                                                                               | 6,11901E-07 | 0,216963993 | 0,293 | 0,074 | 0,012911733 | 1,162285098   | 0,860374104     | 3,959459459     |
| SV2A                                                                                                | 1,8347E-06  | 0,216928299 | 0,11  | 0,007 | 0,038713925 | 1,162256343   | 0,860395391     | 15,71428571     |
| RPS23                                                                                               | 0,039800247 | 0,216839312 | 0,915 | 0,895 | 1           | 1,162184656   | 0,860448462     | 1,022346369     |
| TBC1D9B                                                                                             | 4,50613E-06 | 0,216658659 | 0,427 | 0,151 | 0,095083938 | 1,162039137   | 0,860556214     | 2,82781457      |
| ANKRD10                                                                                             | 0,011744583 | 0,216645236 | 0,878 | 0,667 | 1           | 1,162028326   | 0,86056422      | 1,316341829     |
| VPS29                                                                                               | 7,74748E-07 | 0,216508098 | 0,5   | 0,172 | 0,016347966 | 1,161917872   | 0,860646027     | 2,906976744     |
| DGKZ                                                                                                | 4,20027E-06 | 0,216497322 | 0,232 | 0,056 | 0,088629973 | 1,161909193   | 0,860652455     | 4,142857143     |
| COMMD9                                                                                              | 7,99158E-10 | 0,21633925  | 0,256 | 0,035 | 1,6863E-05  | 1,161781893   | 0,86074676      | 7,314285714     |
| QDPR                                                                                                | 3,53319E-06 | 0,216266819 | 0,341 | 0,105 | 0,074553904 | 1,161723567   | 0,860789975     | 3,247619048     |

Supplementary Table 2

| Differentially expressed genes_keloid-XL_comparing SC-Keloid vs. (SC-Myel, SC-Nonmyel, SC-Nonmyel2) |             |             |       |       |             |               |                 |                 |
|-----------------------------------------------------------------------------------------------------|-------------|-------------|-------|-------|-------------|---------------|-----------------|-----------------|
| gene                                                                                                | p_val       | avg_log2FC  | pct.1 | pct.2 | p_val_adj   | Foldchange_UP | Foldchange_DOWN | Ratio_pct1_pct2 |
| CCDC112                                                                                             | 7,98662E-08 | 0,216212702 | 0,329 | 0,081 | 0,001685256 | 1,16167999    | 0,860822265     | 4,061728395     |
| ALG13                                                                                               | 3,10407E-09 | 0,216207285 | 0,293 | 0,053 | 6,54989E-05 | 1,161675629   | 0,860825497     | 5,528301887     |
| CCDC66                                                                                              | 0,000208146 | 0,2160298   | 0,256 | 0,091 | 1           | 1,161532724   | 0,860931405     | 2,813186813     |
| POLR3K                                                                                              | 1,31916E-09 | 0,21587368  | 0,232 | 0,028 | 2,78356E-05 | 1,161407036   | 0,861024575     | 8,285714286     |
| SH3GLB1                                                                                             | 2,1743E-07  | 0,215735732 | 0,646 | 0,256 | 0,004587986 | 1,161295991   | 0,861106908     | 2,5234375       |
| NECAB3                                                                                              | 9,92806E-06 | 0,215730434 | 0,11  | 0,011 | 0,209492051 | 1,161291726   | 0,861110071     | 10              |
| CHMP1A                                                                                              | 1,15223E-06 | 0,215589281 | 0,329 | 0,091 | 0,024313194 | 1,16117811    | 0,861194326     | 3,615384615     |
| GDI2                                                                                                | 1,05392E-06 | 0,2154851   | 0,61  | 0,249 | 0,022238787 | 1,161094262   | 0,861256517     | 2,449799197     |
| SLC35A3                                                                                             | 0,00039981  | 0,215391123 | 0,171 | 0,049 | 1           | 1,161018631   | 0,861312621     | 3,489795918     |
| CREM                                                                                                | 7,49796E-06 | 0,215333914 | 0,293 | 0,088 | 0,158214551 | 1,160972592   | 0,861346777     | 3,329545455     |
| BPNT2                                                                                               | 2,87861E-07 | 0,215154526 | 0,476 | 0,158 | 0,006074163 | 1,160828243   | 0,861453885     | 3,012658228     |
| UGGT2                                                                                               | 4,03486E-06 | 0,215032405 | 0,317 | 0,095 | 0,085139556 | 1,160729986   | 0,861526808     | 3,336842105     |
| SH3KBP1                                                                                             | 4,78358E-08 | 0,214645332 | 0,329 | 0,077 | 0,001009383 | 1,160418605   | 0,861757986     | 4,272727273     |
| GTF3C1                                                                                              | 5,08847E-08 | 0,214622049 | 0,354 | 0,091 | 0,001073718 | 1,160399878   | 0,861771894     | 3,89010989      |
| DNAJC4                                                                                              | 1,46971E-07 | 0,214490958 | 0,366 | 0,102 | 0,00310123  | 1,160294443   | 0,861850202     | 3,588235294     |
| RMDN3                                                                                               | 3,47825E-06 | 0,214383948 | 0,244 | 0,06  | 0,073394486 | 1,160208382   | 0,861914131     | 4,066666667     |
| PDIA5                                                                                               | 1,61236E-06 | 0,214209599 | 0,134 | 0,014 | 0,034022396 | 1,160068181   | 0,862018299     | 9,571428571     |
| NEK3                                                                                                | 4,35326E-08 | 0,214192469 | 0,183 | 0,021 | 0,000918581 | 1,160054406   | 0,862028535     | 8,714285714     |
| L3HYPDH                                                                                             | 5,33878E-06 | 0,214037733 | 0,171 | 0,032 | 0,112653644 | 1,159929992   | 0,862120996     | 5,34375         |
| CPTP                                                                                                | 1,06622E-11 | 0,214034019 | 0,22  | 0,014 | 2,24984E-07 | 1,159927005   | 0,862123216     | 15,71428571     |
| ABR                                                                                                 | 8,89414E-13 | 0,213752949 | 0,354 | 0,049 | 1,87675E-08 | 1,159701047   | 0,862291193     | 7,224489796     |
| VAC14                                                                                               | 5,20852E-08 | 0,21365429  | 0,171 | 0,018 | 0,00109905  | 1,159621743   | 0,862350164     | 9,5             |
| TMEM115                                                                                             | 1,05024E-09 | 0,213476269 | 0,232 | 0,028 | 2,2161E-05  | 1,159478661   | 0,862456579     | 8,285714286     |
| CELSR1                                                                                              | 3,08328E-08 | 0,21315021  | 0,122 | 0,004 | 0,000650604 | 1,15921664    | 0,862651523     | 30,5            |
| TMED4                                                                                               | 1,4775E-06  | 0,213137207 | 0,573 | 0,221 | 0,03117672  | 1,159206192   | 0,862659298     | 2,592760181     |
| MBD3                                                                                                | 1,80137E-06 | 0,212967535 | 0,329 | 0,095 | 0,038010805 | 1,159069869   | 0,862760759     | 3,463157895     |
| DNAJC11                                                                                             | 8,63999E-06 | 0,212662258 | 0,195 | 0,042 | 0,182312455 | 1,158824633   | 0,86294334      | 4,642857143     |
| POGLUT2                                                                                             | 3,05139E-07 | 0,212611111 | 0,134 | 0,011 | 0,006438732 | 1,158783551   | 0,862973934     | 12,18181818     |
| IK                                                                                                  | 5,59693E-06 | 0,212489509 | 0,463 | 0,175 | 0,118100874 | 1,158685884   | 0,863046675     | 2,645714286     |
| AZIN2                                                                                               | 1,69291E-06 | 0,212443724 | 0,22  | 0,046 | 0,035722153 | 1,158649113   | 0,863074065     | 4,782608696     |

Supplementary Table 2

| Differentially expressed genes_keloid-XL_comparing SC-Keloid vs. (SC-Myel, SC-Nonmyel, SC-Nonmyel2) |             |             |       |       |             |               |                 |                 |
|-----------------------------------------------------------------------------------------------------|-------------|-------------|-------|-------|-------------|---------------|-----------------|-----------------|
| gene                                                                                                | p_val       | avg_log2FC  | pct.1 | pct.2 | p_val_adj   | Foldchange_UP | Foldchange_DOWN | Ratio_pct1_pct2 |
| CHP1                                                                                                | 0,001496408 | 0,212269446 | 0,378 | 0,175 | 1           | 1,158509156   | 0,863178331     | 2,16            |
| CDR2L                                                                                               | 2,03597E-09 | 0,21203193  | 0,207 | 0,021 | 4,2961E-05  | 1,158318442   | 0,863320451     | 9,857142857     |
| MLX                                                                                                 | 3,23409E-10 | 0,212028509 | 0,354 | 0,067 | 6,82426E-06 | 1,158315696   | 0,863322498     | 5,28358209      |
| EFR3A                                                                                               | 7,70873E-07 | 0,212026184 | 0,268 | 0,063 | 0,016266189 | 1,158313829   | 0,863323889     | 4,253968254     |
| KIF9                                                                                                | 1,38557E-05 | 0,212017573 | 0,183 | 0,039 | 0,292368974 | 1,158306915   | 0,863329043     | 4,692307692     |
| ENOPH1                                                                                              | 5,0539E-07  | 0,211973477 | 0,415 | 0,13  | 0,01066424  | 1,158271512   | 0,86335543      | 3,192307692     |
| GAS7                                                                                                | 0,054637783 | 0,211903623 | 0,854 | 0,635 | 1           | 1,158215431   | 0,863397235     | 1,34488189      |
| NAGK                                                                                                | 9,01088E-06 | 0,211902488 | 0,366 | 0,126 | 0,190138555 | 1,158214519   | 0,863397914     | 2,904761905     |
| SLC35B1                                                                                             | 3,2832E-08  | 0,211774755 | 0,341 | 0,084 | 0,000692788 | 1,158111979   | 0,86347436      | 4,05952381      |
| MEA1                                                                                                | 2,63114E-08 | 0,211721858 | 0,354 | 0,088 | 0,000555196 | 1,158069516   | 0,863506021     | 4,022727273     |
| ISG15                                                                                               | 8,45557E-08 | 0,211504029 | 0,61  | 0,228 | 0,001784209 | 1,157894676   | 0,863636409     | 2,675438596     |
| L3MBTL2                                                                                             | 5,05208E-06 | 0,211463866 | 0,183 | 0,035 | 0,106604025 | 1,157862442   | 0,863660452     | 5,228571429     |
| MAST4                                                                                               | 0,002714415 | 0,211442896 | 0,122 | 0,035 | 1           | 1,157845612   | 0,863673006     | 3,485714286     |
| PIK3C3                                                                                              | 1,48049E-07 | 0,211319569 | 0,244 | 0,046 | 0,003123987 | 1,157746639   | 0,863746839     | 5,304347826     |
| RPS3                                                                                                | 0,010742368 | 0,211303987 | 0,976 | 0,825 | 1           | 1,157734135   | 0,863756168     | 1,183030303     |
| NSRP1                                                                                               | 9,54854E-07 | 0,211183324 | 0,354 | 0,105 | 0,020148373 | 1,157637309   | 0,863828413     | 3,371428571     |
| SLC16A3                                                                                             | 5,5905E-11  | 0,211024983 | 0,146 | 0     | 1,17965E-06 | 1,157510261   | 0,863923227     | #DIV/0!         |
| DPH3                                                                                                | 1,60049E-07 | 0,210970287 | 0,329 | 0,084 | 0,003377185 | 1,157466378   | 0,863955981     | 3,916666667     |
| BET1L                                                                                               | 4,1982E-09  | 0,210947329 | 0,244 | 0,035 | 8,85863E-05 | 1,157447959   | 0,863969729     | 6,971428571     |
| ODF2L                                                                                               | 2,46803E-08 | 0,210796504 | 0,341 | 0,081 | 0,00052078  | 1,157326961   | 0,864060057     | 4,209876543     |
| TMEM126A                                                                                            | 1,22402E-06 | 0,210669007 | 0,305 | 0,084 | 0,025827941 | 1,157224688   | 0,86413642      | 3,630952381     |
| HOXD-AS2                                                                                            | 2,96175E-10 | 0,210583202 | 0,232 | 0,025 | 6,24958E-06 | 1,157155864   | 0,864187817     | 9,28            |
| GID8                                                                                                | 2,21466E-06 | 0,210498838 | 0,354 | 0,109 | 0,046731624 | 1,157088199   | 0,864238354     | 3,247706422     |
| OCIAD1                                                                                              | 0,000128162 | 0,210437444 | 0,598 | 0,288 | 1           | 1,15703896    | 0,864275132     | 2,076388889     |
| FARSA                                                                                               | 7,96284E-07 | 0,210402124 | 0,207 | 0,039 | 0,01680238  | 1,157010634   | 0,864296291     | 5,307692308     |
| MRPL40                                                                                              | 1,1465E-10  | 0,210258746 | 0,439 | 0,098 | 2,41922E-06 | 1,156895653   | 0,864382191     | 4,479591837     |
| VPS9D1                                                                                              | 5,13587E-08 | 0,210186889 | 0,183 | 0,021 | 0,00108372  | 1,156838033   | 0,864425245     | 8,714285714     |
| FUCA2                                                                                               | 1,28965E-06 | 0,21018004  | 0,293 | 0,077 | 0,027212834 | 1,156832541   | 0,864429349     | 3,805194805     |
| CCDC34                                                                                              | 5,00259E-05 | 0,210059658 | 0,171 | 0,039 | 1           | 1,156736016   | 0,864501482     | 4,384615385     |
| ITGA7                                                                                               | 0,00216227  | 0,210009061 | 0,329 | 0,144 | 1           | 1,156695449   | 0,864531801     | 2,284722222     |

Supplementary Table 2

| Differentially expressed genes_keloid-XL_comparing SC-Keloid vs. (SC-Myel, SC-Nonmyel, SC-Nonmyel2) |             |             |       |       |             |               |                 |                 |
|-----------------------------------------------------------------------------------------------------|-------------|-------------|-------|-------|-------------|---------------|-----------------|-----------------|
| gene                                                                                                | p_val       | avg_log2FC  | pct.1 | pct.2 | p_val_adj   | Foldchange_UP | Foldchange_DOWN | Ratio_pct1_pct2 |
| GGA2                                                                                                | 4,61553E-06 | 0,209990146 | 0,183 | 0,035 | 0,097392261 | 1,156680283   | 0,864543136     | 5,228571429     |
| GNPAT                                                                                               | 6,04746E-06 | 0,209961284 | 0,232 | 0,056 | 0,127607439 | 1,156657144   | 0,864560432     | 4,142857143     |
| NDUFA9                                                                                              | 1,58854E-07 | 0,20995171  | 0,28  | 0,063 | 0,003351972 | 1,156649467   | 0,86456617      | 4,444444444     |
| TMEM60                                                                                              | 2,23108E-08 | 0,209823209 | 0,207 | 0,028 | 0,000470781 | 1,156546449   | 0,86464318      | 7,392857143     |
| PPP1R9B                                                                                             | 6,0984E-06  | 0,209666142 | 0,268 | 0,074 | 0,128682266 | 1,156420543   | 0,864737319     | 3,621621622     |
| BBS12                                                                                               | 5,47929E-05 | 0,20966609  | 0,085 | 0,007 | 1           | 1,156420501   | 0,864737351     | 12,14285714     |
| C11orf68                                                                                            | 2,4143E-06  | 0,209535249 | 0,317 | 0,091 | 0,050944168 | 1,156315628   | 0,864815779     | 3,483516484     |
| ZER1                                                                                                | 9,81975E-07 | 0,209507925 | 0,207 | 0,039 | 0,020720645 | 1,156293727   | 0,864832158     | 5,307692308     |
| PLCB3                                                                                               | 1,13299E-05 | 0,2094815   | 0,159 | 0,028 | 0,239071246 | 1,156272548   | 0,864847999     | 5,678571429     |
| MTRF1L                                                                                              | 3,51938E-05 | 0,209434417 | 0,256 | 0,077 | 0,742624535 | 1,156234813   | 0,864876224     | 3,324675325     |
| MRPL38                                                                                              | 5,3308E-08  | 0,209379055 | 0,341 | 0,084 | 0,001124852 | 1,156190445   | 0,864909414     | 4,05952381      |
| NFKBIB                                                                                              | 7,24379E-07 | 0,209169093 | 0,244 | 0,053 | 0,015285114 | 1,156022192   | 0,865035297     | 4,603773585     |
| GOLM2                                                                                               | 4,64152E-05 | 0,209147101 | 0,415 | 0,165 | 0,979406552 | 1,15600457    | 0,865048484     | 2,515151515     |
| MKRN2                                                                                               | 5,23929E-05 | 0,209022013 | 0,171 | 0,039 | 1           | 1,155904343   | 0,86512349      | 4,384615385     |
| GMFG                                                                                                | 5,21474E-05 | 0,208763942 | 0,073 | 0,004 | 1           | 1,155697592   | 0,865278258     | 18,25           |
| AKT2                                                                                                | 2,83974E-07 | 0,208745935 | 0,354 | 0,098 | 0,005992126 | 1,155683168   | 0,865289058     | 3,612244898     |
| MAP3K10                                                                                             | 0,000180605 | 0,208552726 | 0,159 | 0,039 | 1           | 1,155528406   | 0,865404948     | 4,076923077     |
| CTBS                                                                                                | 7,81632E-09 | 0,208458587 | 0,293 | 0,056 | 0,000164932 | 1,155453008   | 0,865461419     | 5,232142857     |
| MACO1                                                                                               | 4,27945E-05 | 0,208250741 | 0,305 | 0,105 | 0,903006819 | 1,155286556   | 0,865586113     | 2,904761905     |
| TNFRSF19                                                                                            | 1,39205E-05 | 0,208206962 | 0,524 | 0,211 | 0,293735503 | 1,1552515     | 0,86561238      | 2,483412322     |
| SLC39A13                                                                                            | 1,2755E-06  | 0,20801473  | 0,329 | 0,095 | 0,026914284 | 1,155097578   | 0,865727726     | 3,463157895     |
| PEX26                                                                                               | 2,49998E-07 | 0,207849529 | 0,22  | 0,039 | 0,005275213 | 1,154965317   | 0,865826865     | 5,641025641     |
| FYCO1                                                                                               | 0,000648131 | 0,207846349 | 0,122 | 0,028 | 1           | 1,154962771   | 0,865828774     | 4,357142857     |
| HPS1                                                                                                | 0,001467056 | 0,207755476 | 0,171 | 0,056 | 1           | 1,154890024   | 0,865883313     | 3,053571429     |
| FOCAD                                                                                               | 0,000204598 | 0,207740233 | 0,098 | 0,014 | 1           | 1,154877822   | 0,865892461     | 7               |
| MTX1                                                                                                | 3,09191E-07 | 0,207700032 | 0,268 | 0,06  | 0,00652424  | 1,154845642   | 0,86591659      | 4,466666667     |
| HOXD8                                                                                               | 1,23009E-06 | 0,207646821 | 0,146 | 0,018 | 0,02595621  | 1,154803048   | 0,865948528     | 8,111111111     |
| EIF2D                                                                                               | 9,82182E-06 | 0,207621508 | 0,268 | 0,077 | 0,207250257 | 1,154782787   | 0,865963722     | 3,480519481     |
| LINC00926                                                                                           | 1,58349E-08 | 0,207544329 | 0,11  | 0     | 0,000334132 | 1,154721012   | 0,866010049     | #DIV/0!         |
| KMT5A                                                                                               | 1,08254E-07 | 0,207254179 | 0,415 | 0,123 | 0,00228426  | 1,154488801   | 0,866184236     | 3,37398374      |

Supplementary Table 2

| Differentially expressed genes_keloid-XL_comparing SC-Keloid vs. (SC-Myel, SC-Nonmyel, SC-Nonmyel2) |             |             |       |       |             |               |                 |                 |
|-----------------------------------------------------------------------------------------------------|-------------|-------------|-------|-------|-------------|---------------|-----------------|-----------------|
| gene                                                                                                | p_val       | avg_log2FC  | pct.1 | pct.2 | p_val_adj   | Foldchange_UP | Foldchange_DOWN | Ratio_pct1_pct2 |
| RPA1                                                                                                | 1,10663E-08 | 0,207219518 | 0,28  | 0,053 | 0,00023351  | 1,154461065   | 0,866205046     | 5,283018868     |
| RAB4B                                                                                               | 5,53955E-05 | 0,207112363 | 0,256 | 0,081 | 1           | 1,154375322   | 0,866269385     | 3,160493827     |
| NFE2L1                                                                                              | 3,39312E-05 | 0,207112069 | 0,354 | 0,133 | 0,715983286 | 1,154375086   | 0,866269562     | 2,661654135     |
| BBS7                                                                                                | 0,000507286 | 0,207068194 | 0,146 | 0,039 | 1           | 1,15433998    | 0,866295907     | 3,743589744     |
| CLPTM1L                                                                                             | 8,55595E-07 | 0,207029456 | 0,305 | 0,081 | 0,018053905 | 1,154308985   | 0,866319168     | 3,765432099     |
| MRPS18C                                                                                             | 1,20723E-05 | 0,206918991 | 0,305 | 0,095 | 0,254738633 | 1,154220605   | 0,866385503     | 3,210526316     |
| KLHL29                                                                                              | 1,95495E-05 | 0,206649292 | 0,293 | 0,091 | 0,412514008 | 1,154004854   | 0,866547482     | 3,21978022      |
| AARSD1                                                                                              | 1,3747E-06  | 0,206626503 | 0,22  | 0,046 | 0,029007469 | 1,153986625   | 0,86656117      | 4,782608696     |
| RGS20                                                                                               | 3,54737E-07 | 0,206491398 | 0,134 | 0,011 | 0,007485302 | 1,153878562   | 0,866642325     | 12,18181818     |
| HSD11B1L                                                                                            | 5,23216E-05 | 0,206369551 | 0,098 | 0,011 | 1           | 1,153781112   | 0,866715523     | 8,909090909     |
| PCCB                                                                                                | 1,27699E-09 | 0,206228013 | 0,232 | 0,028 | 2,69458E-05 | 1,153667924   | 0,866800558     | 8,285714286     |
| GSTZ1                                                                                               | 2,77227E-09 | 0,206156077 | 0,256 | 0,039 | 5,84976E-05 | 1,153610401   | 0,866843779     | 6,564102564     |
| FUBP1                                                                                               | 7,37791E-05 | 0,205987057 | 0,366 | 0,14  | 1           | 1,153475257   | 0,866945341     | 2,614285714     |
| SPRY4                                                                                               | 0,006606071 | 0,205562928 | 0,098 | 0,028 | 1           | 1,153136204   | 0,867200246     | 3,5             |
| DPP7                                                                                                | 3,58629E-05 | 0,205545835 | 0,439 | 0,179 | 0,756742776 | 1,153122541   | 0,867210521     | 2,452513966     |
| ST6GAL2                                                                                             | 3,69345E-10 | 0,205528056 | 0,134 | 0     | 7,79355E-06 | 1,153108331   | 0,867221208     | #DIV/0!         |
| MRPS36                                                                                              | 3,73965E-06 | 0,205459477 | 0,463 | 0,172 | 0,078910337 | 1,153053519   | 0,867262433     | 2,691860465     |
| TINF2                                                                                               | 1,042E-07   | 0,20544714  | 0,244 | 0,046 | 0,002198723 | 1,153043658   | 0,86726985      | 5,304347826     |
| SLC49A3                                                                                             | 0,000189633 | 0,205439864 | 0,098 | 0,014 | 1           | 1,153037844   | 0,867274223     | 7               |
| ATP13A2                                                                                             | 6,01581E-08 | 0,205404995 | 0,146 | 0,011 | 0,001269396 | 1,153009975   | 0,867295185     | 13,27272727     |
| KLHL4                                                                                               | 7,70344E-10 | 0,205305539 | 0,146 | 0,004 | 1,6255E-05  | 1,152930493   | 0,867354976     | 36,5            |
| EIF2AK4                                                                                             | 3,22E-06    | 0,205301568 | 0,305 | 0,088 | 0,067945183 | 1,152927319   | 0,867357364     | 3,465909091     |
| ZNF706                                                                                              | 0,003218054 | 0,205001881 | 0,793 | 0,446 | 1           | 1,15268785    | 0,867537556     | 1,778026906     |
| VPS26A                                                                                              | 2,68547E-05 | 0,20497741  | 0,463 | 0,186 | 0,566661979 | 1,152668298   | 0,867552272     | 2,489247312     |
| CEP162                                                                                              | 0,000214102 | 0,204936025 | 0,098 | 0,014 | 1           | 1,152635233   | 0,867577158     | 7               |
| ZNF362                                                                                              | 3,67813E-08 | 0,204889286 | 0,305 | 0,067 | 0,000776123 | 1,152597892   | 0,867605266     | 4,552238806     |
| ELP5                                                                                                | 7,0129E-09  | 0,204834837 | 0,378 | 0,091 | 0,000147979 | 1,152554393   | 0,86763801      | 4,153846154     |
| VIM                                                                                                 | 0,018650911 | 0,204783045 | 1     | 0,993 | 1           | 1,152513017   | 0,867669159     | 1,007049345     |
| TTL1                                                                                                | 0,000105335 | 0,204779658 | 0,122 | 0,021 | 1           | 1,152510311   | 0,867671196     | 5,80952381      |
| SERBP1                                                                                              | 0,002056492 | 0,204705615 | 0,744 | 0,432 | 1           | 1,152451162   | 0,867715729     | 1,722222222     |

Supplementary Table 2

| Differentially expressed genes_keloid-XL_comparing SC-Keloid vs. (SC-Myel, SC-Nonmyel, SC-Nonmyel2) |             |             |       |       |             |               |                 |                 |
|-----------------------------------------------------------------------------------------------------|-------------|-------------|-------|-------|-------------|---------------|-----------------|-----------------|
| gene                                                                                                | p_val       | avg_log2FC  | pct.1 | pct.2 | p_val_adj   | Foldchange_UP | Foldchange_DOWN | Ratio_pct1_pct2 |
| TTC1                                                                                                | 9,93213E-08 | 0,204579496 | 0,39  | 0,112 | 0,002095778 | 1,152350421   | 0,867791587     | 3,482142857     |
| IFNAR1                                                                                              | 1,97851E-05 | 0,204569914 | 0,463 | 0,182 | 0,417484455 | 1,152342768   | 0,86779735      | 2,543956044     |
| CDC42BPB                                                                                            | 1,68283E-09 | 0,20454549  | 0,415 | 0,102 | 3,55095E-05 | 1,152323259   | 0,867812042     | 4,068627451     |
| LAMP1                                                                                               | 0,007559161 | 0,204361229 | 0,756 | 0,474 | 1           | 1,152176094   | 0,867922886     | 1,594936709     |
| TAF9                                                                                                | 1,04123E-06 | 0,204031021 | 0,305 | 0,084 | 0,021971013 | 1,151912411   | 0,868121561     | 3,630952381     |
| RASGEF1C                                                                                            | 1,21191E-05 | 0,203650975 | 0,39  | 0,14  | 0,255724915 | 1,151609005   | 0,868350279     | 2,785714286     |
| ZMPSTE24                                                                                            | 3,01009E-06 | 0,203617783 | 0,305 | 0,088 | 0,063515875 | 1,15158251    | 0,868370257     | 3,465909091     |
| ANKRD52                                                                                             | 1,5202E-06  | 0,203601659 | 0,146 | 0,018 | 0,0320778   | 1,15156964    | 0,868379962     | 8,111111111     |
| SAR1B                                                                                               | 1,11852E-06 | 0,203469931 | 0,341 | 0,102 | 0,023601851 | 1,151464498   | 0,868459255     | 3,343137255     |
| WBP1                                                                                                | 0,000493127 | 0,203402358 | 0,305 | 0,123 | 1           | 1,151410568   | 0,868499932     | 2,479674797     |
| POLD4                                                                                               | 3,32561E-05 | 0,20324575  | 0,317 | 0,109 | 0,701736723 | 1,151285586   | 0,868594215     | 2,908256881     |
| COX20                                                                                               | 6,34055E-07 | 0,203002567 | 0,61  | 0,239 | 0,013379203 | 1,15109154    | 0,868740639     | 2,552301255     |
| ZNF720                                                                                              | 0,000181872 | 0,202928082 | 0,195 | 0,056 | 1           | 1,151032111   | 0,868785493     | 3,482142857     |
| PRR13                                                                                               | 9,11153E-08 | 0,202735002 | 0,293 | 0,063 | 0,001922624 | 1,150878075   | 0,868901773     | 4,650793651     |
| PDZRN4                                                                                              | 0,000183568 | 0,202726164 | 0,049 | 0     | 1           | 1,150871026   | 0,868907095     | #DIV/0!         |
| UQCR10                                                                                              | 1,01644E-05 | 0,202622111 | 0,598 | 0,27  | 0,21447991  | 1,150788023   | 0,868969767     | 2,214814815     |
| SLC35E1                                                                                             | 0,000261614 | 0,202449608 | 0,122 | 0,025 | 1           | 1,150650431   | 0,869073676     | 4,88            |
| ACTL6A                                                                                              | 1,89091E-08 | 0,202429394 | 0,305 | 0,063 | 0,000399001 | 1,15063431    | 0,869085852     | 4,841269841     |
| OXLD1                                                                                               | 3,84049E-10 | 0,202340576 | 0,207 | 0,018 | 8,10383E-06 | 1,150563474   | 0,869139359     | 11,5            |
| IDH3B                                                                                               | 2,95473E-10 | 0,202316098 | 0,415 | 0,095 | 6,23478E-06 | 1,150543953   | 0,869154105     | 4,368421053     |
| PAM                                                                                                 | 1,02845E-07 | 0,202131818 | 0,244 | 0,046 | 0,002170139 | 1,150397      | 0,869265132     | 5,304347826     |
| RPL23A                                                                                              | 0,035594651 | 0,201733128 | 0,963 | 0,898 | 1           | 1,15007913    | 0,869505388     | 1,072383073     |
| UNC119                                                                                              | 1,02173E-05 | 0,201646471 | 0,098 | 0,007 | 0,215595665 | 1,150010051   | 0,869557617     | 14              |
| EIF2S1                                                                                              | 7,08191E-06 | 0,201458822 | 0,305 | 0,095 | 0,149435441 | 1,149860481   | 0,869670726     | 3,210526316     |
| LIME1                                                                                               | 0,001278637 | 0,201411732 | 0,073 | 0,011 | 1           | 1,14982295    | 0,869699113     | 6,636363636     |
| ILVBL                                                                                               | 5,31902E-06 | 0,201357922 | 0,183 | 0,035 | 0,112236587 | 1,149780065   | 0,869731552     | 5,228571429     |
| BRCC3                                                                                               | 1,08035E-06 | 0,201306629 | 0,159 | 0,021 | 0,022796397 | 1,149739186   | 0,869762475     | 7,571428571     |
| NCAPH2                                                                                              | 0,000187187 | 0,201275876 | 0,195 | 0,056 | 1           | 1,149714679   | 0,869781015     | 3,482142857     |
| LTBP3                                                                                               | 0,040689728 | 0,201091914 | 0,598 | 0,393 | 1           | 1,149568085   | 0,86989193      | 1,521628499     |
| TOM1                                                                                                | 8,40872E-07 | 0,200680392 | 0,159 | 0,021 | 0,017743232 | 1,149240222   | 0,870140098     | 7,571428571     |

Supplementary Table 2

| Differentially expressed genes_keloid-XL_comparing SC-Keloid vs. (SC-Myel, SC-Nonmyel, SC-Nonmyel2) |             |             |       |       |             |               |                 |                 |
|-----------------------------------------------------------------------------------------------------|-------------|-------------|-------|-------|-------------|---------------|-----------------|-----------------|
| gene                                                                                                | p_val       | avg_log2FC  | pct.1 | pct.2 | p_val_adj   | Foldchange_UP | Foldchange_DOWN | Ratio_pct1_pct2 |
| UNC93B1                                                                                             | 6,44539E-06 | 0,199903871 | 0,183 | 0,035 | 0,136004184 | 1,148621818   | 0,870608571     | 5,228571429     |
| EFS                                                                                                 | 6,63905E-06 | 0,19966269  | 0,463 | 0,172 | 0,140090583 | 1,148429815   | 0,870754126     | 2,691860465     |
| MYEF2                                                                                               | 2,61613E-05 | 0,199585491 | 0,244 | 0,07  | 0,55202967  | 1,148368363   | 0,870800722     | 3,485714286     |
| ZNF260                                                                                              | 0,000420675 | 0,19953811  | 0,159 | 0,042 | 1           | 1,148330649   | 0,870829321     | 3,785714286     |
| MRPL11                                                                                              | 2,13808E-10 | 0,199484106 | 0,317 | 0,053 | 4,51156E-06 | 1,148287665   | 0,87086192      | 5,981132075     |
| AQP7                                                                                                | 1,047E-05   | 0,199378478 | 0,11  | 0,011 | 0,220927383 | 1,148203595   | 0,870925683     | 10              |
| POLR3B                                                                                              | 1,02952E-07 | 0,199264872 | 0,098 | 0     | 0,002172399 | 1,148113183   | 0,870994267     | #DIV/0!         |
| TFDP1                                                                                               | 4,13102E-08 | 0,199150769 | 0,341 | 0,081 | 0,000871686 | 1,148022382   | 0,871063157     | 4,209876543     |
| PHAX                                                                                                | 4,53829E-09 | 0,199138    | 0,354 | 0,077 | 9,57625E-05 | 1,148012221   | 0,871070866     | 4,597402597     |
| ADIPOR1                                                                                             | 1,32567E-06 | 0,199111745 | 0,329 | 0,095 | 0,027973041 | 1,147991329   | 0,871086719     | 3,463157895     |
| ATIC                                                                                                | 1,80693E-07 | 0,199107603 | 0,183 | 0,025 | 0,003812806 | 1,147988033   | 0,87108922      | 7,32            |
| TSEN34                                                                                              | 3,33003E-08 | 0,199047437 | 0,317 | 0,07  | 0,00070267  | 1,147940159   | 0,871125548     | 4,528571429     |
| ESCO1                                                                                               | 9,47787E-07 | 0,198902958 | 0,171 | 0,025 | 0,019999248 | 1,147825203   | 0,871212792     | 6,84            |
| STING1                                                                                              | 0,000119672 | 0,19874891  | 0,22  | 0,067 | 1           | 1,147702648   | 0,871305823     | 3,28358209      |
| RHBDF2                                                                                              | 2,9671E-05  | 0,198621957 | 0,159 | 0,032 | 0,626087906 | 1,147601658   | 0,871382499     | 4,96875         |
| FLYWCH2                                                                                             | 2,38462E-09 | 0,198473444 | 0,39  | 0,091 | 5,03179E-05 | 1,147483528   | 0,871472205     | 4,285714286     |
| TXNDC9                                                                                              | 5,32006E-10 | 0,198471996 | 0,293 | 0,046 | 1,12259E-05 | 1,147482376   | 0,87147308      | 6,369565217     |
| LAMP2                                                                                               | 0,016993087 | 0,198455043 | 0,817 | 0,54  | 1           | 1,147468892   | 0,87148332      | 1,512962963     |
| CHURC1                                                                                              | 1,15906E-05 | 0,198434634 | 0,659 | 0,302 | 0,244573686 | 1,14745266    | 0,871495649     | 2,182119205     |
| MVB12A                                                                                              | 4,85608E-09 | 0,198402902 | 0,402 | 0,098 | 0,000102468 | 1,147427422   | 0,871514817     | 4,102040816     |
| COA3                                                                                                | 2,34093E-11 | 0,19839499  | 0,305 | 0,042 | 4,9396E-07  | 1,147421129   | 0,871519597     | 7,261904762     |
| LINC00920                                                                                           | 5,29929E-08 | 0,198377034 | 0,171 | 0,018 | 0,001118203 | 1,147406849   | 0,871530444     | 9,5             |
| DPM3                                                                                                | 3,39548E-07 | 0,198295302 | 0,439 | 0,14  | 0,007164809 | 1,147341847   | 0,87157982      | 3,135714286     |
| STK40                                                                                               | 5,46195E-06 | 0,198094467 | 0,268 | 0,074 | 0,115252604 | 1,147182139   | 0,871701159     | 3,621621622     |
| GRB10                                                                                               | 1,41456E-06 | 0,197790602 | 0,402 | 0,133 | 0,029848528 | 1,146940541   | 0,871884779     | 3,022556391     |
| CDK16                                                                                               | 5,01014E-08 | 0,19767576  | 0,378 | 0,102 | 0,00105719  | 1,146849246   | 0,871954186     | 3,705882353     |
| SRR                                                                                                 | 1,44656E-09 | 0,197575044 | 0,159 | 0,007 | 3,05239E-05 | 1,146769186   | 0,87201506      | 22,71428571     |
| CRK                                                                                                 | 4,05398E-07 | 0,197286843 | 0,488 | 0,168 | 0,008554308 | 1,146540123   | 0,872189276     | 2,904761905     |
| FAM219A                                                                                             | 0,000230198 | 0,1972785   | 0,183 | 0,053 | 1           | 1,146533493   | 0,87219432      | 3,452830189     |
| CD58                                                                                                | 5,22271E-10 | 0,197219699 | 0,39  | 0,084 | 1,10204E-05 | 1,146486764   | 0,872229869     | 4,642857143     |



Supplementary Table 2

| Differentially expressed genes_keloid-XL_comparing SC-Keloid vs. (SC-Myel, SC-Nonmyel, SC-Nonmyel2) |             |             |       |       |             |               |                 |                 |
|-----------------------------------------------------------------------------------------------------|-------------|-------------|-------|-------|-------------|---------------|-----------------|-----------------|
| gene                                                                                                | p_val       | avg_log2FC  | pct.1 | pct.2 | p_val_adj   | Foldchange_UP | Foldchange_DOWN | Ratio_pct1_pct2 |
| DSC3                                                                                                | 0,059627559 | 0,197189476 | 0,061 | 0,021 | 1           | 1,146462746   | 0,872248142     | 2,904761905     |
| MACROH2A1                                                                                           | 3,05228E-08 | 0,197149943 | 0,537 | 0,175 | 0,000644061 | 1,146431331   | 0,872272044     | 3,068571429     |
| ZNHIT2                                                                                              | 5,79627E-05 | 0,197099523 | 0,085 | 0,007 | 1           | 1,146391266   | 0,872302529     | 12,14285714     |
| FKBP15                                                                                              | 3,95199E-06 | 0,196963339 | 0,159 | 0,025 | 0,083391026 | 1,146283057   | 0,872384874     | 6,36            |
| LRRC45                                                                                              | 1,80693E-07 | 0,196956531 | 0,183 | 0,025 | 0,003812806 | 1,146277648   | 0,872388991     | 7,32            |
| CDC37                                                                                               | 0,000202826 | 0,196865502 | 0,659 | 0,337 | 1           | 1,146205323   | 0,872444038     | 1,955489614     |
| CDIN1                                                                                               | 8,1138E-06  | 0,196850241 | 0,085 | 0,004 | 0,171209209 | 1,146193199   | 0,872453266     | 21,25           |
| PCNX2                                                                                               | 3,95284E-10 | 0,196795348 | 0,22  | 0,021 | 8,34089E-06 | 1,146149588   | 0,872486463     | 10,47619048     |
| CNOT7                                                                                               | 0,006569046 | 0,196791855 | 0,183 | 0,074 | 1           | 1,146146814   | 0,872488575     | 2,472972973     |
| HOXB8                                                                                               | 1,35664E-09 | 0,196757961 | 0,159 | 0,007 | 2,86265E-05 | 1,146119887   | 0,872509073     | 22,71428571     |
| B4GALT6                                                                                             | 8,93582E-09 | 0,19672582  | 0,268 | 0,046 | 0,000188555 | 1,146094353   | 0,872528511     | 5,826086957     |
| OSR1                                                                                                | 5,30286E-08 | 0,196637898 | 0,134 | 0,007 | 0,001118956 | 1,146024509   | 0,872581687     | 19,14285714     |
| RAD50                                                                                               | 7,20148E-09 | 0,196594433 | 0,329 | 0,07  | 0,000151958 | 1,145989983   | 0,872607977     | 4,7             |
| NUBP2                                                                                               | 5,07562E-06 | 0,196507479 | 0,39  | 0,133 | 0,107100642 | 1,145920913   | 0,872660572     | 2,932330827     |
| PSMD7                                                                                               | 4,44657E-05 | 0,196486006 | 0,427 | 0,168 | 0,938269864 | 1,145903858   | 0,872673561     | 2,541666667     |
| IFI6                                                                                                | 1,28153E-07 | 0,196407951 | 0,573 | 0,225 | 0,002704153 | 1,145841862   | 0,872720777     | 2,546666667     |
| SGSH                                                                                                | 5,69725E-05 | 0,196354139 | 0,098 | 0,011 | 1           | 1,145799123   | 0,87275333      | 8,909090909     |
| ANKRD6                                                                                              | 1,95401E-08 | 0,196226181 | 0,232 | 0,035 | 0,000412315 | 1,145697503   | 0,872830741     | 6,628571429     |
| IMMT                                                                                                | 2,60919E-09 | 0,19617645  | 0,341 | 0,07  | 5,50565E-05 | 1,14565801    | 0,872860829     | 4,871428571     |
| DPM1                                                                                                | 3,52125E-07 | 0,196172536 | 0,293 | 0,07  | 0,007430198 | 1,145654902   | 0,872863197     | 4,185714286     |
| DDX10                                                                                               | 1,89218E-06 | 0,195988209 | 0,183 | 0,032 | 0,039926833 | 1,145508536   | 0,872974726     | 5,71875         |
| CISD1                                                                                               | 3,66571E-08 | 0,195809004 | 0,268 | 0,053 | 0,000773502 | 1,145366255   | 0,87308317      | 5,056603774     |
| TMEM201                                                                                             | 0,013668311 | 0,195798212 | 0,134 | 0,053 | 1           | 1,145357687   | 0,873089701     | 2,528301887     |
| FBLIM1                                                                                              | 4,16452E-05 | 0,195784841 | 0,11  | 0,014 | 0,878756316 | 1,145347071   | 0,873097793     | 7,857142857     |
| DNAJC10                                                                                             | 2,01923E-06 | 0,195642254 | 0,341 | 0,102 | 0,042607711 | 1,145233878   | 0,873184088     | 3,343137255     |
| TMEM63B                                                                                             | 4,66646E-05 | 0,19557091  | 0,171 | 0,039 | 0,984669334 | 1,145177246   | 0,87322727      | 4,384615385     |
| DYRK1B                                                                                              | 3,04946E-07 | 0,195441499 | 0,122 | 0,007 | 0,006434672 | 1,145074527   | 0,873305603     | 17,42857143     |
| OSBPL8                                                                                              | 0,000457116 | 0,195358693 | 0,402 | 0,182 | 1           | 1,145008806   | 0,873355729     | 2,208791209     |
| SLC1A5                                                                                              | 4,23165E-06 | 0,195209858 | 0,293 | 0,084 | 0,089292063 | 1,144890687   | 0,873445833     | 3,488095238     |
| ARHGAP22                                                                                            | 8,29253E-06 | 0,195197764 | 0,085 | 0,004 | 0,174980583 | 1,14488109    | 0,873453155     | 21,25           |

Supplementary Table 2

| Differentially expressed genes_keloid-XL_comparing SC-Keloid vs. (SC-Myel, SC-Nonmyel, SC-Nonmyel2) |             |             |       |       |             |               |                 |                 |
|-----------------------------------------------------------------------------------------------------|-------------|-------------|-------|-------|-------------|---------------|-----------------|-----------------|
| gene                                                                                                | p_val       | avg_log2FC  | pct.1 | pct.2 | p_val_adj   | Foldchange_UP | Foldchange_DOWN | Ratio_pct1_pct2 |
| EFCAB7                                                                                              | 3,32276E-05 | 0,195170178 | 0,159 | 0,032 | 0,701135887 | 1,144859199   | 0,873469856     | 4,96875         |
| SETDB1                                                                                              | 0,000285723 | 0,195161436 | 0,122 | 0,025 | 1           | 1,144852261   | 0,87347515      | 4,88            |
| DHRS1                                                                                               | 1,17194E-07 | 0,195157725 | 0,244 | 0,046 | 0,002472921 | 1,144849316   | 0,873477396     | 5,304347826     |
| RALYL                                                                                               | 2,26856E-10 | 0,195061086 | 0,171 | 0,007 | 4,78689E-06 | 1,144772631   | 0,873535908     | 24,42857143     |
| BBS4                                                                                                | 4,88779E-08 | 0,195038844 | 0,183 | 0,021 | 0,001031372 | 1,144754982   | 0,873549376     | 8,714285714     |
| RABIF                                                                                               | 1,96537E-06 | 0,194974874 | 0,232 | 0,053 | 0,041471269 | 1,144704224   | 0,87358811      | 4,377358491     |
| ERLEC1                                                                                              | 3,0295E-07  | 0,194940491 | 0,354 | 0,098 | 0,006392545 | 1,144676944   | 0,87360893      | 3,612244898     |
| ENTPD6                                                                                              | 6,36417E-07 | 0,194830016 | 0,183 | 0,028 | 0,013429045 | 1,144589293   | 0,87367583      | 6,535714286     |
| UBE2I                                                                                               | 3,08436E-05 | 0,194662668 | 0,646 | 0,295 | 0,650831393 | 1,144456531   | 0,873777179     | 2,189830508     |
| NKX6-1                                                                                              | 1,89824E-06 | 0,194553316 | 0,122 | 0,011 | 0,040054753 | 1,144369788   | 0,873843412     | 11,09090909     |
| NAE1                                                                                                | 1,42969E-09 | 0,194348384 | 0,317 | 0,06  | 3,01678E-05 | 1,144207245   | 0,873967548     | 5,283333333     |
| CPSF1                                                                                               | 0,013396864 | 0,194283139 | 0,122 | 0,046 | 1           | 1,1441555     | 0,874007074     | 2,652173913     |
| PRDX2                                                                                               | 5,0436E-05  | 0,194178512 | 0,451 | 0,179 | 1           | 1,144072526   | 0,87407046      | 2,519553073     |
| TMEM259                                                                                             | 0,00018375  | 0,194141208 | 0,659 | 0,323 | 1           | 1,144042944   | 0,874093062     | 2,040247678     |
| SH3BP1                                                                                              | 3,35288E-07 | 0,194099877 | 0,134 | 0,011 | 0,00707491  | 1,14401017    | 0,874118103     | 12,18181818     |
| PIEZO1                                                                                              | 9,09958E-08 | 0,194048526 | 0,439 | 0,13  | 0,001920103 | 1,143969451   | 0,874149217     | 3,376923077     |
| TENT2                                                                                               | 9,66716E-06 | 0,193880779 | 0,244 | 0,063 | 0,203986677 | 1,143836445   | 0,874250863     | 3,873015873     |
| MRPS23                                                                                              | 7,53784E-07 | 0,19384105  | 0,268 | 0,063 | 0,0159056   | 1,143804946   | 0,874274939     | 4,253968254     |
| DAG1                                                                                                | 0,001758994 | 0,193756124 | 0,817 | 0,463 | 1           | 1,143737617   | 0,874326406     | 1,764578834     |
| UROD                                                                                                | 7,64015E-08 | 0,193578059 | 0,256 | 0,049 | 0,001612148 | 1,14359646    | 0,874434327     | 5,224489796     |
| TBX3                                                                                                | 0,011324043 | 0,193321204 | 0,085 | 0,025 | 1           | 1,143392874   | 0,874590023     | 3,4             |
| NXPH3                                                                                               | 2,42495E-09 | 0,193120886 | 0,122 | 0     | 5,11688E-05 | 1,143234125   | 0,874711468     | #DIV/0!         |
| PEX11B                                                                                              | 7,27037E-06 | 0,193116523 | 0,134 | 0,018 | 0,153412017 | 1,143230667   | 0,874714114     | 7,444444444     |
| FNTB                                                                                                | 1,20154E-05 | 0,193108641 | 0,232 | 0,06  | 0,253537089 | 1,143224422   | 0,874718892     | 3,866666667     |
| ACAD9                                                                                               | 3,62311E-06 | 0,19276626  | 0,159 | 0,025 | 0,076451158 | 1,142953144   | 0,874926506     | 6,36            |
| GGA1                                                                                                | 3,09185E-05 | 0,1927365   | 0,22  | 0,06  | 0,652412253 | 1,142929567   | 0,874944554     | 3,666666667     |
| NACC1                                                                                               | 1,57118E-07 | 0,192675251 | 0,183 | 0,025 | 0,003315355 | 1,142881045   | 0,8749817       | 7,32            |
| IL27RA                                                                                              | 3,35857E-05 | 0,192516454 | 0,122 | 0,018 | 0,708691935 | 1,142755256   | 0,875078014     | 6,777777778     |
| SUMF1                                                                                               | 6,59742E-06 | 0,192474647 | 0,207 | 0,046 | 0,13921213  | 1,14272214    | 0,875103373     | 4,5             |
| ZCCHC9                                                                                              | 5,10936E-08 | 0,192471029 | 0,268 | 0,053 | 0,001078126 | 1,142719275   | 0,875105568     | 5,056603774     |

Supplementary Table 2

| Differentially expressed genes_keloid-XL_comparing SC-Keloid vs. (SC-Myel, SC-Nonmyel, SC-Nonmyel2) |             |             |       |       |             |               |                 |                 |
|-----------------------------------------------------------------------------------------------------|-------------|-------------|-------|-------|-------------|---------------|-----------------|-----------------|
| gene                                                                                                | p_val       | avg_log2FC  | pct.1 | pct.2 | p_val_adj   | Foldchange_UP | Foldchange_DOWN | Ratio_pct1_pct2 |
| RHOBTB2                                                                                             | 1,06202E-05 | 0,192310162 | 0,098 | 0,007 | 0,224096034 | 1,142591864   | 0,875203151     | 14              |
| ADK                                                                                                 | 0,000662137 | 0,192263229 | 0,488 | 0,228 | 1           | 1,142554694   | 0,875231624     | 2,140350877     |
| SLC25A3                                                                                             | 0,007505446 | 0,192203049 | 0,793 | 0,572 | 1           | 1,142507035   | 0,875268133     | 1,386363636     |
| OSBPL10                                                                                             | 5,23929E-05 | 0,19200114  | 0,171 | 0,039 | 1           | 1,142347149   | 0,875390638     | 4,384615385     |
| ACLY                                                                                                | 2,08426E-07 | 0,191878864 | 0,366 | 0,102 | 0,004397995 | 1,142250334   | 0,875464835     | 3,588235294     |
| RDX                                                                                                 | 0,01453352  | 0,191744442 | 0,707 | 0,477 | 1           | 1,142143911   | 0,875546409     | 1,482180294     |
| ETFRF1                                                                                              | 0,039502926 | 0,191438042 | 0,305 | 0,168 | 1           | 1,141901368   | 0,875732378     | 1,81547619      |
| MRPL33                                                                                              | 0,000547206 | 0,191371461 | 0,646 | 0,361 | 1           | 1,141848669   | 0,875772795     | 1,789473684     |
| TBRG1                                                                                               | 0,001040606 | 0,19122383  | 0,305 | 0,13  | 1           | 1,14173183    | 0,875862417     | 2,346153846     |
| TSPAN31                                                                                             | 2,93846E-08 | 0,191137496 | 0,28  | 0,056 | 0,000620044 | 1,141663508   | 0,875914832     | 5               |
| ACSL4                                                                                               | 3,77007E-07 | 0,19108781  | 0,268 | 0,06  | 0,007955225 | 1,14162419    | 0,875944999     | 4,466666667     |
| EXOSC1                                                                                              | 8,51851E-10 | 0,19100957  | 0,244 | 0,032 | 1,79749E-05 | 1,14156228    | 0,875992504     | 7,625           |
| TCOF1                                                                                               | 2,70805E-06 | 0,190979186 | 0,207 | 0,042 | 0,057142629 | 1,141538238   | 0,876010954     | 4,928571429     |
| MFSD5                                                                                               | 8,93956E-06 | 0,190833714 | 0,171 | 0,032 | 0,188633563 | 1,141423138   | 0,876099289     | 5,34375         |
| SDHB                                                                                                | 4,63908E-06 | 0,190771892 | 0,439 | 0,161 | 0,097889147 | 1,141374227   | 0,876136832     | 2,726708075     |
| HEBP2                                                                                               | 2,32358E-06 | 0,190487553 | 0,317 | 0,091 | 0,04902987  | 1,141149298   | 0,876309526     | 3,483516484     |
| AK2                                                                                                 | 3,59359E-09 | 0,190462039 | 0,463 | 0,126 | 7,58283E-05 | 1,141129117   | 0,876325023     | 3,674603175     |
| KRCC1                                                                                               | 6,61008E-08 | 0,190457408 | 0,439 | 0,13  | 0,001394793 | 1,141125454   | 0,876327836     | 3,376923077     |
| PSMD6                                                                                               | 5,16215E-06 | 0,190398392 | 0,415 | 0,144 | 0,108926617 | 1,141078774   | 0,876363685     | 2,881944444     |
| USP5                                                                                                | 6,27593E-07 | 0,190380273 | 0,244 | 0,053 | 0,01324283  | 1,141064444   | 0,876374691     | 4,603773585     |
| LIMD1                                                                                               | 2,49785E-05 | 0,190343342 | 0,134 | 0,021 | 0,527071154 | 1,141035235   | 0,876397126     | 6,380952381     |
| AC147651.4                                                                                          | 4,20685E-09 | 0,190291097 | 0,22  | 0,028 | 8,87686E-05 | 1,140993915   | 0,876428864     | 7,857142857     |
| APTX                                                                                                | 2,27685E-06 | 0,19006452  | 0,207 | 0,042 | 0,048043722 | 1,140814734   | 0,876566519     | 4,928571429     |
| DUS1L                                                                                               | 6,95698E-07 | 0,18999998  | 0,305 | 0,081 | 0,014679919 | 1,1407637     | 0,876605734     | 3,765432099     |
| PSMA5                                                                                               | 3,60687E-06 | 0,189961611 | 0,439 | 0,165 | 0,076108533 | 1,140733361   | 0,876629048     | 2,660606061     |
| GBP3                                                                                                | 1,33284E-06 | 0,189856333 | 0,195 | 0,035 | 0,028124213 | 1,140650121   | 0,87669302      | 5,571428571     |
| MORC2                                                                                               | 0,001602565 | 0,189851902 | 0,098 | 0,021 | 1           | 1,140646619   | 0,876695713     | 4,666666667     |
| SLC50A1                                                                                             | 0,00123424  | 0,189803635 | 0,171 | 0,056 | 1           | 1,140608457   | 0,876725044     | 3,053571429     |
| MGMT                                                                                                | 1,15167E-06 | 0,189721647 | 0,354 | 0,105 | 0,024301363 | 1,140543638   | 0,87677487      | 3,371428571     |
| ZDHHC4                                                                                              | 1,41434E-07 | 0,189689871 | 0,232 | 0,042 | 0,002984409 | 1,140518518   | 0,876794181     | 5,523809524     |

Supplementary Table 2

| Differentially expressed genes_keloid-XL_comparing SC-Keloid vs. (SC-Myel, SC-Nonmyel, SC-Nonmyel2) |             |             |       |       |             |               |                 |                 |
|-----------------------------------------------------------------------------------------------------|-------------|-------------|-------|-------|-------------|---------------|-----------------|-----------------|
| gene                                                                                                | p_val       | avg_log2FC  | pct.1 | pct.2 | p_val_adj   | Foldchange_UP | Foldchange_DOWN | Ratio_pct1_pct2 |
| CRABP1                                                                                              | 1,39592E-06 | 0,189655271 | 0,098 | 0,004 | 0,029455268 | 1,140491165   | 0,87681521      | 24,5            |
| SUMO3                                                                                               | 1,01769E-08 | 0,189630207 | 0,5   | 0,147 | 0,000214742 | 1,140471352   | 0,876830442     | 3,401360544     |
| DDX23                                                                                               | 8,0798E-05  | 0,189626189 | 0,195 | 0,053 | 1           | 1,140468175   | 0,876832885     | 3,679245283     |
| RUSC1                                                                                               | 0,001185897 | 0,189620609 | 0,183 | 0,063 | 1           | 1,140463764   | 0,876836276     | 2,904761905     |
| DHCR7                                                                                               | 1,02952E-07 | 0,189599648 | 0,098 | 0     | 0,002172399 | 1,140447195   | 0,876849016     | #DIV/0!         |
| SEMA4F                                                                                              | 0,000317802 | 0,189498134 | 0,061 | 0,004 | 1           | 1,140366951   | 0,876910717     | 15,25           |
| RASA1                                                                                               | 8,04146E-06 | 0,189480677 | 0,195 | 0,042 | 0,169682876 | 1,140353152   | 0,876921327     | 4,642857143     |
| IGFBP2                                                                                              | 0,074868323 | 0,18936746  | 0,22  | 0,133 | 1           | 1,140263665   | 0,876990148     | 1,654135338     |
| RWDD4                                                                                               | 9,14205E-08 | 0,189208925 | 0,305 | 0,07  | 0,001929064 | 1,140138371   | 0,877086523     | 4,357142857     |
| PIF1                                                                                                | 6,01716E-05 | 0,189110718 | 0,085 | 0,007 | 1           | 1,140060762   | 0,87714623      | 12,14285714     |
| MZT1                                                                                                | 1,83774E-05 | 0,18901611  | 0,329 | 0,112 | 0,387782228 | 1,139986002   | 0,877203753     | 2,9375          |
| MRPS15                                                                                              | 6,41683E-10 | 0,188954899 | 0,341 | 0,067 | 1,35402E-05 | 1,139937636   | 0,877240973     | 5,089552239     |
| NIPSNAP3A                                                                                           | 1,09747E-09 | 0,188770436 | 0,244 | 0,032 | 2,31577E-05 | 1,139791892   | 0,877353144     | 7,625           |
| RTKN2                                                                                               | 1,01057E-05 | 0,188155147 | 0,11  | 0,011 | 0,21323951  | 1,139305891   | 0,877727402     | 10              |
| PCLAF                                                                                               | 0,303137231 | 0,188117633 | 0,037 | 0,018 | 1           | 1,139276267   | 0,877750226     | 2,055555556     |
| EPRS1                                                                                               | 4,49256E-07 | 0,188024494 | 0,341 | 0,095 | 0,00947976  | 1,139202718   | 0,877806894     | 3,589473684     |
| NF1                                                                                                 | 6,65788E-06 | 0,187770265 | 0,439 | 0,161 | 0,140488022 | 1,139001988   | 0,877961593     | 2,726708075     |
| DCBLD1                                                                                              | 2,1468E-05  | 0,187716025 | 0,134 | 0,021 | 0,452995664 | 1,138959167   | 0,877994602     | 6,380952381     |
| ADPGK                                                                                               | 0,000115143 | 0,187676898 | 0,244 | 0,077 | 1           | 1,138928278   | 0,878018414     | 3,168831169     |
| SAMM50                                                                                              | 5,65719E-06 | 0,187633586 | 0,268 | 0,074 | 0,119372465 | 1,138894086   | 0,878044774     | 3,621621622     |
| MZT2A                                                                                               | 2,18447E-06 | 0,187540198 | 0,402 | 0,133 | 0,046094477 | 1,138820365   | 0,878101613     | 3,022556391     |
| PTDSS1                                                                                              | 9,5155E-05  | 0,187536258 | 0,171 | 0,042 | 1           | 1,138817255   | 0,878104011     | 4,071428571     |
| RABL6                                                                                               | 4,41673E-07 | 0,187154739 | 0,39  | 0,119 | 0,00931974  | 1,138516136   | 0,878336256     | 3,277310924     |
| ARHGEF11                                                                                            | 2,09545E-06 | 0,186941603 | 0,341 | 0,102 | 0,044215994 | 1,13834795    | 0,878466026     | 3,343137255     |
| CCDC74A                                                                                             | 8,29253E-06 | 0,186936592 | 0,085 | 0,004 | 0,174980583 | 1,138343997   | 0,878469077     | 21,25           |
| RPL26L1                                                                                             | 3,67678E-07 | 0,186741496 | 0,39  | 0,116 | 0,007758375 | 1,138190069   | 0,87858788      | 3,362068966     |
| GGH                                                                                                 | 3,3376E-08  | 0,186741142 | 0,207 | 0,028 | 0,000704268 | 1,138189789   | 0,878588096     | 7,392857143     |
| GSTK1                                                                                               | 7,21159E-05 | 0,186707597 | 0,561 | 0,253 | 1           | 1,138163325   | 0,878608525     | 2,217391304     |
| NEDD4                                                                                               | 1,93327E-06 | 0,18666972  | 0,122 | 0,011 | 0,040793846 | 1,138133444   | 0,878631593     | 11,09090909     |
| CPSF6                                                                                               | 4,33869E-07 | 0,186602057 | 0,341 | 0,095 | 0,009155073 | 1,138080066   | 0,878672802     | 3,589473684     |

Supplementary Table 2

| Differentially expressed genes_keloid-XL_comparing SC-Keloid vs. (SC-Myel, SC-Nonmyel, SC-Nonmyel2) |             |             |       |       |             |               |                 |                 |
|-----------------------------------------------------------------------------------------------------|-------------|-------------|-------|-------|-------------|---------------|-----------------|-----------------|
| gene                                                                                                | p_val       | avg_log2FC  | pct.1 | pct.2 | p_val_adj   | Foldchange_UP | Foldchange_DOWN | Ratio_pct1_pct2 |
| TTF1                                                                                                | 6,20327E-06 | 0,186371112 | 0,183 | 0,035 | 0,13089519  | 1,137897897   | 0,87881347      | 5,228571429     |
| C12orf73                                                                                            | 5,13587E-08 | 0,186370726 | 0,183 | 0,021 | 0,00108372  | 1,137897593   | 0,878813705     | 8,714285714     |
| TRIT1                                                                                               | 0,000198484 | 0,186370446 | 0,098 | 0,014 | 1           | 1,137897373   | 0,878813876     | 7               |
| LRWD1                                                                                               | 5,97624E-09 | 0,186365736 | 0,22  | 0,028 | 0,000126105 | 1,137893658   | 0,878816745     | 7,857142857     |
| UGGT1                                                                                               | 1,44381E-06 | 0,18634078  | 0,195 | 0,035 | 0,030465921 | 1,137873974   | 0,878831947     | 5,571428571     |
| TPRN                                                                                                | 0,001602574 | 0,186325047 | 0,098 | 0,021 | 1           | 1,137861566   | 0,878841531     | 4,666666667     |
| GTF2H5                                                                                              | 9,9754E-09  | 0,18623289  | 0,573 | 0,189 | 0,000210491 | 1,137788883   | 0,878897672     | 3,031746032     |
| SATB1                                                                                               | 7,86018E-05 | 0,18615457  | 0,305 | 0,109 | 1           | 1,137727117   | 0,878945386     | 2,798165138     |
| PDHX                                                                                                | 3,24738E-10 | 0,186150723 | 0,195 | 0,014 | 6,85231E-06 | 1,137724084   | 0,878947729     | 13,92857143     |
| UBE2M                                                                                               | 0,000146365 | 0,185930978 | 0,439 | 0,189 | 1           | 1,137550803   | 0,879081618     | 2,322751323     |
| DPP3                                                                                                | 1,66973E-09 | 0,185853565 | 0,183 | 0,014 | 3,52329E-05 | 1,137489766   | 0,879128789     | 13,07142857     |
| HMG2                                                                                                | 0,001113718 | 0,185778081 | 0,671 | 0,372 | 1           | 1,137430252   | 0,879174787     | 1,803763441     |
| MAPRE3                                                                                              | 1,56288E-06 | 0,185581271 | 0,244 | 0,056 | 0,032978351 | 1,137275096   | 0,879294731     | 4,357142857     |
| KLHL2                                                                                               | 0,001526092 | 0,185528473 | 0,098 | 0,021 | 1           | 1,137233476   | 0,879326911     | 4,666666667     |
| DYNLRB1                                                                                             | 0,007253273 | 0,185521472 | 0,805 | 0,509 | 1           | 1,137227958   | 0,879331178     | 1,581532417     |
| CRYZ                                                                                                | 2,17226E-10 | 0,185514639 | 0,171 | 0,007 | 4,58369E-06 | 1,137222571   | 0,879335343     | 24,42857143     |
| PTRH1                                                                                               | 6,8349E-05  | 0,185451697 | 0,134 | 0,025 | 1           | 1,137172958   | 0,879373707     | 5,36            |
| TSPAN17                                                                                             | 4,58906E-08 | 0,185440732 | 0,146 | 0,011 | 0,000968339 | 1,137164315   | 0,879380391     | 13,27272727     |
| CDK18                                                                                               | 1,04809E-07 | 0,185438673 | 0,28  | 0,06  | 0,002211585 | 1,137162692   | 0,879381646     | 4,666666667     |
| TSR3                                                                                                | 1,96302E-09 | 0,185360775 | 0,341 | 0,07  | 4,14217E-05 | 1,137101293   | 0,87942913      | 4,871428571     |
| TOP3B                                                                                               | 0,000109756 | 0,185316628 | 0,122 | 0,021 | 1           | 1,137066498   | 0,87945604      | 5,80952381      |
| ERO1B                                                                                               | 0,00017668  | 0,185300392 | 0,159 | 0,039 | 1           | 1,137053701   | 0,879465938     | 4,076923077     |
| YEATS4                                                                                              | 2,47065E-09 | 0,185099412 | 0,305 | 0,056 | 5,21333E-05 | 1,136895311   | 0,879588464     | 5,446428571     |
| NCLN                                                                                                | 7,79976E-09 | 0,184938087 | 0,256 | 0,042 | 0,000164583 | 1,136768188   | 0,879686827     | 6,095238095     |
| RPL11                                                                                               | 0,013163286 | 0,184858663 | 0,976 | 0,912 | 1           | 1,136705607   | 0,879735257     | 1,070175439     |
| TMBIM4                                                                                              | 0,00015338  | 0,184350253 | 0,683 | 0,34  | 1           | 1,1363051     | 0,880045333     | 2,008823529     |
| STXBP6                                                                                              | 1,44077E-09 | 0,184313873 | 0,293 | 0,049 | 3,04016E-05 | 1,136276446   | 0,880067525     | 5,979591837     |
| BAK1                                                                                                | 1,90824E-09 | 0,184279172 | 0,171 | 0,011 | 4,02658E-05 | 1,136249116   | 0,880088694     | 15,54545455     |
| SHISAL1                                                                                             | 4,32324E-06 | 0,184257888 | 0,073 | 0     | 0,09122464  | 1,136232353   | 0,880101678     | #DIV/0!         |
| EIF3J                                                                                               | 1,66729E-05 | 0,18404421  | 0,512 | 0,218 | 0,35181423  | 1,136064078   | 0,880232039     | 2,348623853     |

Supplementary Table 2

| Differentially expressed genes_keloid-XL_ comparing SC-Keloid vs. (SC-Myel, SC-Nonmyel, SC-Nonmyel2) |             |             |       |       |             |               |                 |                 |
|------------------------------------------------------------------------------------------------------|-------------|-------------|-------|-------|-------------|---------------|-----------------|-----------------|
| gene                                                                                                 | p_val       | avg_log2FC  | pct.1 | pct.2 | p_val_adj   | Foldchange_UP | Foldchange_DOWN | Ratio_pct1_pct2 |
| ARIH2                                                                                                | 6,79308E-05 | 0,184002828 | 0,305 | 0,105 | 1           | 1,136031492   | 0,880257288     | 2,904761905     |
| DPY19L3                                                                                              | 1,17398E-05 | 0,183884512 | 0,256 | 0,07  | 0,247722026 | 1,135938329   | 0,880329481     | 3,657142857     |
| SYNGR1                                                                                               | 2,33208E-06 | 0,183797206 | 0,366 | 0,116 | 0,049209204 | 1,135869589   | 0,880382757     | 3,155172414     |
| IRF7                                                                                                 | 2,00956E-05 | 0,183768096 | 0,268 | 0,081 | 0,424036398 | 1,13584667    | 0,880400521     | 3,308641975     |
| MTREX                                                                                                | 0,000883159 | 0,183755184 | 0,183 | 0,06  | 1           | 1,135836504   | 0,880408401     | 3,05            |
| RALY                                                                                                 | 1,01974E-08 | 0,183717515 | 0,524 | 0,158 | 0,000215176 | 1,135806848   | 0,880431389     | 3,316455696     |
| ABCF1                                                                                                | 4,50019E-05 | 0,183548833 | 0,293 | 0,098 | 0,949584281 | 1,135674055   | 0,880534336     | 2,989795918     |
| ALKBH7                                                                                               | 0,00011244  | 0,183311667 | 0,463 | 0,2   | 1           | 1,135487376   | 0,8806791       | 2,315           |
| PAPSS1                                                                                               | 0,000730684 | 0,183302002 | 0,366 | 0,161 | 1           | 1,135479769   | 0,880684999     | 2,273291925     |
| MORF4L2                                                                                              | 0,005090405 | 0,183251116 | 0,707 | 0,439 | 1           | 1,13543972    | 0,880716063     | 1,61047836      |
| ENTR1                                                                                                | 0,002273841 | 0,183093339 | 0,183 | 0,067 | 1           | 1,135315552   | 0,880812386     | 2,731343284     |
| SMPD1                                                                                                | 4,23152E-06 | 0,183027949 | 0,195 | 0,039 | 0,089289314 | 1,135264095   | 0,880852309     | 5               |
| AP3M2                                                                                                | 0,037517008 | 0,183017033 | 0,11  | 0,046 | 1           | 1,135255505   | 0,880858974     | 2,391304348     |
| RTL8A                                                                                                | 4,36499E-07 | 0,182990777 | 0,451 | 0,151 | 0,009210571 | 1,135234845   | 0,880875005     | 2,986754967     |
| PHLDA3                                                                                               | 0,000125988 | 0,182715794 | 0,415 | 0,175 | 1           | 1,135018485   | 0,88104292      | 2,371428571     |
| SMARCD2                                                                                              | 8,96112E-07 | 0,18248936  | 0,207 | 0,039 | 0,018908861 | 1,134840355   | 0,881181212     | 5,307692308     |
| FMNL3                                                                                                | 1,94017E-06 | 0,182484097 | 0,329 | 0,098 | 0,040939605 | 1,134836216   | 0,881184426     | 3,357142857     |
| GNAI3                                                                                                | 2,55251E-07 | 0,182378246 | 0,512 | 0,172 | 0,005386043 | 1,134752955   | 0,881249082     | 2,976744186     |
| COPG1                                                                                                | 1,56288E-06 | 0,182362381 | 0,244 | 0,056 | 0,032978351 | 1,134740477   | 0,881258773     | 4,357142857     |
| PML                                                                                                  | 6,2277E-05  | 0,182329505 | 0,207 | 0,056 | 1           | 1,134714619   | 0,881278855     | 3,696428571     |
| SRRD                                                                                                 | 5,90231E-05 | 0,182320027 | 0,134 | 0,025 | 1           | 1,134707164   | 0,881284645     | 5,36            |
| AHNAK2                                                                                               | 6,37324E-08 | 0,18230617  | 0,146 | 0,011 | 0,001344817 | 1,134696266   | 0,881293109     | 13,27272727     |
| C9orf64                                                                                              | 0,000614877 | 0,182222966 | 0,098 | 0,018 | 1           | 1,134630827   | 0,881343937     | 5,444444444     |
| PRMT9                                                                                                | 0,001428181 | 0,181790442 | 0,122 | 0,032 | 1           | 1,134290712   | 0,881608206     | 3,8125          |
| RNH1                                                                                                 | 4,05527E-05 | 0,181744993 | 0,695 | 0,34  | 0,855702222 | 1,134254979   | 0,88163598      | 2,044117647     |
| MTRNR2L1                                                                                             | 0,008167365 | 0,18163895  | 0,134 | 0,049 | 1           | 1,134171611   | 0,881700786     | 2,734693878     |
| PEF1                                                                                                 | 2,49456E-07 | 0,181599131 | 0,329 | 0,084 | 0,005263767 | 1,134140307   | 0,881725121     | 3,916666667     |
| IFT27                                                                                                | 4,72583E-07 | 0,181578578 | 0,256 | 0,056 | 0,009971983 | 1,134124151   | 0,881737682     | 4,571428571     |
| SRP14-DT                                                                                             | 0,513508152 | 0,181537085 | 0,024 | 0,014 | 1           | 1,134091533   | 0,881763042     | 1,714285714     |
| POLD2                                                                                                | 1,79149E-06 | 0,181522729 | 0,317 | 0,091 | 0,037802275 | 1,134080248   | 0,881771816     | 3,483516484     |

Supplementary Table 2

| Differentially expressed genes_keloid-XL_comparing SC-Keloid vs. (SC-Myel, SC-Nonmyel, SC-Nonmyel2) |             |             |       |       |             |               |                 |                 |
|-----------------------------------------------------------------------------------------------------|-------------|-------------|-------|-------|-------------|---------------|-----------------|-----------------|
| gene                                                                                                | p_val       | avg_log2FC  | pct.1 | pct.2 | p_val_adj   | Foldchange_UP | Foldchange_DOWN | Ratio_pct1_pct2 |
| GNPDA2                                                                                              | 4,00328E-08 | 0,181512663 | 0,244 | 0,042 | 0,000844731 | 1,134072335   | 0,881777969     | 5,80952381      |
| IRAK1                                                                                               | 1,29829E-06 | 0,18135719  | 0,256 | 0,06  | 0,027395138 | 1,133950128   | 0,881872999     | 4,266666667     |
| NDUFA10                                                                                             | 4,07505E-05 | 0,181321279 | 0,476 | 0,193 | 0,859876183 | 1,133921902   | 0,881894951     | 2,466321244     |
| C8orf33                                                                                             | 7,6302E-08  | 0,181311532 | 0,293 | 0,063 | 0,001610048 | 1,133914241   | 0,881900909     | 4,650793651     |
| SMIM30                                                                                              | 2,87705E-06 | 0,181290853 | 0,256 | 0,063 | 0,060708706 | 1,133897988   | 0,88191355      | 4,063492063     |
| B3GALT4                                                                                             | 2,34822E-07 | 0,181228414 | 0,171 | 0,021 | 0,004954974 | 1,133848915   | 0,88195172      | 8,142857143     |
| EVL                                                                                                 | 3,73156E-08 | 0,181205807 | 0,28  | 0,056 | 0,000787397 | 1,133831148   | 0,88196554      | 5               |
| WDR41                                                                                               | 3,47772E-07 | 0,181189499 | 0,207 | 0,035 | 0,007338339 | 1,133818331   | 0,881975509     | 5,914285714     |
| SNRNP200                                                                                            | 1,52554E-05 | 0,181160837 | 0,366 | 0,126 | 0,321903617 | 1,133795806   | 0,881993032     | 2,904761905     |
| CRCP                                                                                                | 0,000380805 | 0,180845057 | 0,171 | 0,049 | 1           | 1,133547665   | 0,882186106     | 3,489795918     |
| PPP1R35                                                                                             | 2,77004E-07 | 0,180772842 | 0,317 | 0,081 | 0,005845069 | 1,133490926   | 0,882230265     | 3,913580247     |
| CACNA1D                                                                                             | 0,000210889 | 0,180662128 | 0,098 | 0,014 | 1           | 1,133403944   | 0,882297971     | 7               |
| LMNA                                                                                                | 0,024908882 | 0,180583124 | 0,951 | 0,821 | 1           | 1,133341879   | 0,882346288     | 1,158343484     |
| DLGAP4                                                                                              | 0,000149751 | 0,180576247 | 0,683 | 0,354 | 1           | 1,133336476   | 0,882350494     | 1,929378531     |
| FUT8                                                                                                | 6,87072E-05 | 0,180408768 | 0,305 | 0,109 | 1           | 1,133204918   | 0,88245293      | 2,798165138     |
| CREB3                                                                                               | 4,77161E-08 | 0,180401589 | 0,317 | 0,074 | 0,001006857 | 1,133199279   | 0,882457321     | 4,283783784     |
| TRIQQ                                                                                               | 1,55242E-07 | 0,180195951 | 0,232 | 0,042 | 0,003275771 | 1,133037767   | 0,882583113     | 5,523809524     |
| SDHC                                                                                                | 7,38549E-10 | 0,180178465 | 0,488 | 0,126 | 1,55841E-05 | 1,133024034   | 0,882593811     | 3,873015873     |
| LTF                                                                                                 | 0,011128779 | 0,180173378 | 0,037 | 0,004 | 1           | 1,13302004    | 0,882596922     | 9,25            |
| TFPT                                                                                                | 2,77308E-08 | 0,18011305  | 0,207 | 0,028 | 0,000585148 | 1,132972662   | 0,88263383      | 7,392857143     |
| RBM4B                                                                                               | 2,01765E-05 | 0,180055283 | 0,171 | 0,035 | 0,425744527 | 1,132927297   | 0,882669172     | 4,885714286     |
| EIF3H                                                                                               | 0,001321454 | 0,180047991 | 0,622 | 0,333 | 1           | 1,132921571   | 0,882673634     | 1,867867868     |
| NMI                                                                                                 | 7,28917E-09 | 0,17997415  | 0,329 | 0,07  | 0,000153809 | 1,132863587   | 0,882718812     | 4,7             |
| CASD1                                                                                               | 0,000174788 | 0,179936803 | 0,268 | 0,091 | 1           | 1,132834261   | 0,882741664     | 2,945054945     |
| DLG4                                                                                                | 1,16779E-06 | 0,17989347  | 0,159 | 0,021 | 0,02464156  | 1,132800235   | 0,882768178     | 7,571428571     |
| SMAP2                                                                                               | 2,71249E-10 | 0,179875262 | 0,244 | 0,028 | 5,72363E-06 | 1,132785938   | 0,88277932      | 8,714285714     |
| FAM229A                                                                                             | 1,25037E-06 | 0,179608747 | 0,146 | 0,018 | 0,026384074 | 1,132576694   | 0,882942414     | 8,111111111     |
| TMED2                                                                                               | 4,58849E-06 | 0,179381673 | 0,524 | 0,207 | 0,096821662 | 1,132398445   | 0,883081397     | 2,531400966     |
| CNIH4                                                                                               | 2,93871E-07 | 0,179343989 | 0,402 | 0,123 | 0,006200974 | 1,132368866   | 0,883104463     | 3,268292683     |
| KRT80                                                                                               | 3,41654E-07 | 0,179114449 | 0,134 | 0,011 | 0,007209233 | 1,132188715   | 0,883244981     | 12,18181818     |

Supplementary Table 2

| Differentially expressed genes_keloid-XL_comparing SC-Keloid vs. (SC-Myel, SC-Nonmyel, SC-Nonmyel2) |             |             |       |       |             |               |                 |                 |
|-----------------------------------------------------------------------------------------------------|-------------|-------------|-------|-------|-------------|---------------|-----------------|-----------------|
| gene                                                                                                | p_val       | avg_log2FC  | pct.1 | pct.2 | p_val_adj   | Foldchange_UP | Foldchange_DOWN | Ratio_pct1_pct2 |
| TRAPPC3                                                                                             | 1,84426E-06 | 0,179112417 | 0,317 | 0,091 | 0,038915657 | 1,13218712    | 0,883246225     | 3,483516484     |
| RHBDF1                                                                                              | 0,000386187 | 0,179072183 | 0,585 | 0,288 | 1           | 1,132155546   | 0,883270858     | 2,03125         |
| S1PR2                                                                                               | 3,15996E-05 | 0,179015407 | 0,159 | 0,032 | 0,666782936 | 1,132110992   | 0,883305619     | 4,96875         |
| PMM1                                                                                                | 3,76659E-08 | 0,17900629  | 0,305 | 0,067 | 0,000794787 | 1,132103838   | 0,8833112       | 4,552238806     |
| MAP3K7                                                                                              | 2,2314E-08  | 0,179001545 | 0,256 | 0,046 | 0,000470848 | 1,132100115   | 0,883314105     | 5,565217391     |
| OSGEP                                                                                               | 3,79244E-09 | 0,178933112 | 0,317 | 0,063 | 8,00244E-05 | 1,132046415   | 0,883356006     | 5,031746032     |
| EFTUD2                                                                                              | 3,34992E-08 | 0,17886556  | 0,244 | 0,042 | 0,000706866 | 1,131993411   | 0,883397368     | 5,80952381      |
| CCS                                                                                                 | 9,72975E-07 | 0,178610622 | 0,354 | 0,105 | 0,02053075  | 1,131793394   | 0,883553487     | 3,371428571     |
| NDUFV1                                                                                              | 1,45148E-05 | 0,178499133 | 0,402 | 0,147 | 0,306275918 | 1,131705934   | 0,883621769     | 2,734693878     |
| DTWD1                                                                                               | 3,47822E-05 | 0,178492068 | 0,329 | 0,112 | 0,733938611 | 1,131700393   | 0,883626096     | 2,9375          |
| PFDN2                                                                                               | 0,007580823 | 0,178281603 | 0,671 | 0,389 | 1           | 1,131535308   | 0,883755012     | 1,724935733     |
| OCEL1                                                                                               | 6,44461E-06 | 0,178215189 | 0,207 | 0,046 | 0,135987778 | 1,131483219   | 0,883795697     | 4,5             |
| NDFIP2                                                                                              | 7,31031E-06 | 0,178035624 | 0,329 | 0,105 | 0,154254858 | 1,131342399   | 0,883905705     | 3,133333333     |
| GFM2                                                                                                | 1,36536E-06 | 0,177990353 | 0,098 | 0,004 | 0,028810488 | 1,131306898   | 0,883933441     | 24,5            |
| SUPT4H1                                                                                             | 2,39168E-05 | 0,177957556 | 0,39  | 0,147 | 0,504667401 | 1,13128118    | 0,883953537     | 2,653061224     |
| MARCHF7                                                                                             | 0,000102144 | 0,177931821 | 0,256 | 0,084 | 1           | 1,131261      | 0,883969305     | 3,047619048     |
| RAP1B                                                                                               | 8,34361E-05 | 0,177822654 | 0,695 | 0,344 | 1           | 1,131175402   | 0,884036196     | 2,020348837     |
| PSMD11                                                                                              | 0,000205624 | 0,177671052 | 0,427 | 0,182 | 1           | 1,131056542   | 0,884129098     | 2,346153846     |
| CARM1                                                                                               | 0,000406709 | 0,177525103 | 0,232 | 0,081 | 1           | 1,130942125   | 0,884218545     | 2,864197531     |
| BECN1                                                                                               | 0,000104049 | 0,177513357 | 0,207 | 0,06  | 1           | 1,130932918   | 0,884225743     | 3,45            |
| RGL2                                                                                                | 1,60803E-07 | 0,177396966 | 0,305 | 0,074 | 0,003393111 | 1,130841682   | 0,884297082     | 4,121621622     |
| SAAL1                                                                                               | 5,4137E-05  | 0,177390362 | 0,098 | 0,011 | 1           | 1,130836505   | 0,884301131     | 8,909090909     |
| METTL3                                                                                              | 2,97214E-05 | 0,177359615 | 0,183 | 0,042 | 0,627150464 | 1,130812405   | 0,884319977     | 4,357142857     |
| PRKAR1A                                                                                             | 0,000254871 | 0,177266536 | 0,659 | 0,326 | 1           | 1,130739451   | 0,884377033     | 2,021472393     |
| UBE2A                                                                                               | 2,51891E-06 | 0,177207778 | 0,524 | 0,189 | 0,053151473 | 1,130693399   | 0,884413052     | 2,772486772     |
| CASP6                                                                                               | 6,93636E-06 | 0,177164546 | 0,134 | 0,018 | 0,146364163 | 1,130659516   | 0,884439555     | 7,444444444     |
| TMEM161B                                                                                            | 1,37895E-06 | 0,177101748 | 0,146 | 0,018 | 0,029097295 | 1,130610302   | 0,884478054     | 8,111111111     |
| MAP2                                                                                                | 1,047E-05   | 0,177094022 | 0,11  | 0,011 | 0,220927383 | 1,130604247   | 0,884482791     | 10              |
| SLC10A3                                                                                             | 1,17809E-06 | 0,17708029  | 0,207 | 0,039 | 0,024858914 | 1,130593486   | 0,88449121      | 5,307692308     |
| LASP1                                                                                               | 1,02768E-05 | 0,176948474 | 0,427 | 0,158 | 0,21685103  | 1,13049019    | 0,884572028     | 2,702531646     |



Supplementary Table 2

| Differentially expressed genes_keloid-XL_comparing SC-Keloid vs. (SC-Myel, SC-Nonmyel, SC-Nonmyel2) |             |             |       |       |             |               |                 |                 |
|-----------------------------------------------------------------------------------------------------|-------------|-------------|-------|-------|-------------|---------------|-----------------|-----------------|
| gene                                                                                                | p_val       | avg_log2FC  | pct.1 | pct.2 | p_val_adj   | Foldchange_UP | Foldchange_DOWN | Ratio_pct1_pct2 |
| MRPS25                                                                                              | 3,86364E-07 | 0,17694784  | 0,256 | 0,056 | 0,008152673 | 1,130489694   | 0,884572416     | 4,571428571     |
| KCTD20                                                                                              | 1,32748E-06 | 0,176709097 | 0,402 | 0,13  | 0,028011242 | 1,130302631   | 0,884718811     | 3,092307692     |
| VASP                                                                                                | 5,10767E-06 | 0,176677129 | 0,329 | 0,102 | 0,107776959 | 1,130277586   | 0,884738415     | 3,225490196     |
| HEXA                                                                                                | 1,13354E-06 | 0,176620245 | 0,39  | 0,123 | 0,023918817 | 1,130233021   | 0,8847733       | 3,170731707     |
| ACO2                                                                                                | 0,000689538 | 0,176587795 | 0,28  | 0,112 | 1           | 1,130207599   | 0,884793201     | 2,5             |
| POLR2D                                                                                              | 0,000153426 | 0,176535882 | 0,11  | 0,018 | 1           | 1,130166932   | 0,88482504      | 6,111111111     |
| SUGT1                                                                                               | 1,84178E-07 | 0,176473224 | 0,5   | 0,172 | 0,003886336 | 1,130117848   | 0,884863469     | 2,906976744     |
| C6orf89                                                                                             | 9,74531E-05 | 0,176462733 | 0,244 | 0,077 | 1           | 1,13010963    | 0,884869904     | 3,168831169     |
| HOXB5                                                                                               | 1,02952E-07 | 0,176396119 | 0,098 | 0     | 0,002172399 | 1,130057451   | 0,884910762     | #DIV/0!         |
| DDX39B                                                                                              | 0,000973817 | 0,176356598 | 0,659 | 0,354 | 1           | 1,130026494   | 0,884935004     | 1,861581921     |
| AAMDC                                                                                               | 2,39131E-06 | 0,176291921 | 0,317 | 0,091 | 0,050458975 | 1,129975836   | 0,884974677     | 3,483516484     |
| EIF3F                                                                                               | 5,98473E-05 | 0,176201116 | 0,646 | 0,295 | 1           | 1,129904716   | 0,88503038      | 2,189830508     |
| GLO1                                                                                                | 2,00813E-07 | 0,176186826 | 0,439 | 0,137 | 0,004237346 | 1,129893524   | 0,885039147     | 3,204379562     |
| SYNJ2                                                                                               | 0,000275125 | 0,175940307 | 0,085 | 0,011 | 1           | 1,129700471   | 0,885190389     | 7,727272727     |
| PRH1                                                                                                | 0,000289263 | 0,175728761 | 0,146 | 0,035 | 1           | 1,129534832   | 0,885320197     | 4,171428571     |
| MRPL27                                                                                              | 1,0336E-08  | 0,175675283 | 0,329 | 0,07  | 0,000218099 | 1,129492963   | 0,885353015     | 4,7             |
| IL7R                                                                                                | 3,53478E-08 | 0,175550328 | 0,122 | 0,004 | 0,000745874 | 1,12939514    | 0,8854297       | 30,5            |
| SNRNP35                                                                                             | 8,28943E-09 | 0,175532559 | 0,207 | 0,025 | 0,000174915 | 1,129381229   | 0,885440606     | 8,28            |
| TMEM30A                                                                                             | 1,65227E-06 | 0,175507571 | 0,646 | 0,26  | 0,0348645   | 1,129361668   | 0,885455942     | 2,484615385     |
| CSMD2                                                                                               | 2,00519E-06 | 0,175414031 | 0,122 | 0,011 | 0,042311532 | 1,129288447   | 0,885513354     | 11,09090909     |
| ZNF146                                                                                              | 5,66206E-06 | 0,175347365 | 0,232 | 0,056 | 0,119475056 | 1,129236264   | 0,885554274     | 4,142857143     |
| RIOK2                                                                                               | 1,42472E-06 | 0,175333893 | 0,195 | 0,035 | 0,030063027 | 1,129225719   | 0,885562544     | 5,571428571     |
| UFSP2                                                                                               | 1,43452E-10 | 0,175272738 | 0,415 | 0,091 | 3,02699E-06 | 1,129177853   | 0,885600083     | 4,56043956      |
| NDUFS1                                                                                              | 4,56806E-08 | 0,174894297 | 0,366 | 0,095 | 0,000963906 | 1,128881691   | 0,88583242      | 3,852631579     |
| MRPL22                                                                                              | 1,33265E-05 | 0,174889464 | 0,439 | 0,165 | 0,281203077 | 1,128877909   | 0,885835387     | 2,660606061     |
| GNPTG                                                                                               | 0,003010501 | 0,174823811 | 0,28  | 0,126 | 1           | 1,128826539   | 0,8858757       | 2,222222222     |
| MCRS1                                                                                               | 3,36919E-08 | 0,174787621 | 0,317 | 0,07  | 0,000710933 | 1,128798222   | 0,885897923     | 4,528571429     |
| SND1                                                                                                | 5,45188E-06 | 0,174785552 | 0,439 | 0,158 | 0,115040123 | 1,128796604   | 0,885899193     | 2,778481013     |
| PTPN14                                                                                              | 4,0895E-06  | 0,174721771 | 0,354 | 0,116 | 0,086292601 | 1,128746701   | 0,885938359     | 3,051724138     |
| GINM1                                                                                               | 0,000258071 | 0,174697788 | 0,39  | 0,168 | 1           | 1,128727937   | 0,885953087     | 2,321428571     |

Supplementary Table 2

| Differentially expressed genes_keloid-XL_comparing SC-Keloid vs. (SC-Myel, SC-Nonmyel, SC-Nonmyel2) |             |             |       |       |             |               |                 |                 |
|-----------------------------------------------------------------------------------------------------|-------------|-------------|-------|-------|-------------|---------------|-----------------|-----------------|
| gene                                                                                                | p_val       | avg_log2FC  | pct.1 | pct.2 | p_val_adj   | Foldchange_UP | Foldchange_DOWN | Ratio_pct1_pct2 |
| PIP5K1C                                                                                             | 3,90887E-07 | 0,174616174 | 0,207 | 0,035 | 0,008248112 | 1,128664086   | 0,886003207     | 5,914285714     |
| ILF3                                                                                                | 1,98236E-05 | 0,174531659 | 0,646 | 0,281 | 0,418297139 | 1,128597969   | 0,886055112     | 2,298932384     |
| MRPL13                                                                                              | 1,75178E-06 | 0,174507714 | 0,244 | 0,056 | 0,036964228 | 1,128579238   | 0,886069818     | 4,357142857     |
| RPL34                                                                                               | 0,055476334 | 0,174271223 | 0,988 | 0,912 | 1           | 1,128394253   | 0,886215077     | 1,083333333     |
| CRELD2                                                                                              | 5,54229E-08 | 0,17425207  | 0,354 | 0,091 | 0,001169479 | 1,128379273   | 0,886226842     | 3,89010989      |
| SAR1A                                                                                               | 3,88948E-06 | 0,174149835 | 0,634 | 0,267 | 0,082072011 | 1,128299314   | 0,886289646     | 2,374531835     |
| SLC25A1                                                                                             | 1,82206E-06 | 0,17393981  | 0,268 | 0,067 | 0,038447379 | 1,12813507    | 0,88641868      | 4               |
| TRAPPC6B                                                                                            | 2,84621E-06 | 0,173888156 | 0,256 | 0,063 | 0,060057957 | 1,128094679   | 0,886450418     | 4,063492063     |
| DDX1                                                                                                | 1,64054E-07 | 0,173768022 | 0,415 | 0,123 | 0,003461697 | 1,128000746   | 0,886524237     | 3,37398374      |
| GMPPB                                                                                               | 3,06022E-10 | 0,173751557 | 0,183 | 0,011 | 6,45737E-06 | 1,127987873   | 0,886534354     | 16,63636364     |
| SREBF2                                                                                              | 6,69901E-06 | 0,173718531 | 0,305 | 0,091 | 0,141355793 | 1,127962051   | 0,886554649     | 3,351648352     |
| DOCK6                                                                                               | 4,17761E-06 | 0,173517979 | 0,22  | 0,049 | 0,08815171  | 1,127805262   | 0,886677899     | 4,489795918     |
| SLC17A9                                                                                             | 8,92738E-07 | 0,173496396 | 0,171 | 0,025 | 0,018837654 | 1,12778839    | 0,886691164     | 6,84            |
| RMDN1                                                                                               | 3,2095E-08  | 0,173479382 | 0,28  | 0,056 | 0,000677237 | 1,12777509    | 0,886701621     | 5               |
| DCAF13                                                                                              | 1,13955E-05 | 0,173380829 | 0,256 | 0,07  | 0,240455983 | 1,127698052   | 0,886762195     | 3,657142857     |
| RNF167                                                                                              | 0,0004083   | 0,173335317 | 0,268 | 0,102 | 1           | 1,127662477   | 0,88679017      | 2,62745098      |
| C19orf48                                                                                            | 8,25615E-07 | 0,173240338 | 0,244 | 0,053 | 0,017421299 | 1,127588241   | 0,886848553     | 4,603773585     |
| PGD                                                                                                 | 2,69541E-08 | 0,173150831 | 0,256 | 0,046 | 0,000568759 | 1,127518286   | 0,886903576     | 5,565217391     |
| HIKESHI                                                                                             | 1,22172E-07 | 0,173077894 | 0,451 | 0,137 | 0,002577949 | 1,127461284   | 0,886948416     | 3,291970803     |
| ANKRA2                                                                                              | 6,61706E-06 | 0,173016761 | 0,134 | 0,018 | 0,139626629 | 1,12741351    | 0,886986        | 7,444444444     |
| PNKP                                                                                                | 3,50403E-06 | 0,172992996 | 0,195 | 0,039 | 0,073938602 | 1,127394939   | 0,887000611     | 5               |
| COG8                                                                                                | 5,60121E-05 | 0,172879146 | 0,098 | 0,011 | 1           | 1,127305974   | 0,887070612     | 8,909090909     |
| LAS1L                                                                                               | 0,020196758 | 0,172816444 | 0,134 | 0,056 | 1           | 1,127256981   | 0,887109166     | 2,392857143     |
| DDT                                                                                                 | 5,20716E-06 | 0,172796789 | 0,537 | 0,214 | 0,109876208 | 1,127241624   | 0,887121252     | 2,509345794     |
| DBNL                                                                                                | 5,17893E-06 | 0,17277703  | 0,317 | 0,095 | 0,109280678 | 1,127226185   | 0,887133402     | 3,336842105     |
| FDPS                                                                                                | 1,52027E-05 | 0,172537053 | 0,451 | 0,179 | 0,320791962 | 1,127038698   | 0,88728098      | 2,519553073     |
| FUT11                                                                                               | 0,000216184 | 0,172528556 | 0,171 | 0,046 | 1           | 1,127032061   | 0,887286205     | 3,717391304     |
| ZDHC16                                                                                              | 1,11454E-06 | 0,172508316 | 0,159 | 0,021 | 0,023517921 | 1,127016249   | 0,887298653     | 7,571428571     |
| POMGNT2                                                                                             | 1,7018E-09  | 0,17246279  | 0,183 | 0,014 | 3,59096E-05 | 1,126980685   | 0,887326654     | 13,07142857     |
| MAP7D3                                                                                              | 3,52827E-07 | 0,172446076 | 0,244 | 0,049 | 0,007444996 | 1,126967629   | 0,887336933     | 4,979591837     |

Supplementary Table 2

| Differentially expressed genes_keloid-XL_comparing SC-Keloid vs. (SC-Myel, SC-Nonmyel, SC-Nonmyel2) |             |             |       |       |             |               |                 |                 |
|-----------------------------------------------------------------------------------------------------|-------------|-------------|-------|-------|-------------|---------------|-----------------|-----------------|
| gene                                                                                                | p_val       | avg_log2FC  | pct.1 | pct.2 | p_val_adj   | Foldchange_UP | Foldchange_DOWN | Ratio_pct1_pct2 |
| FADD                                                                                                | 4,7289E-08  | 0,172403089 | 0,183 | 0,021 | 0,000997844 | 1,12693405    | 0,887363373     | 8,714285714     |
| FDX2                                                                                                | 2,06593E-08 | 0,172350919 | 0,268 | 0,049 | 0,000435932 | 1,126893299   | 0,887395462     | 5,469387755     |
| RPP21                                                                                               | 1,72558E-05 | 0,172348093 | 0,402 | 0,151 | 0,36411532  | 1,126891091   | 0,887397201     | 2,662251656     |
| RUVBL1                                                                                              | 9,60448E-08 | 0,172217779 | 0,22  | 0,035 | 0,002026641 | 1,126789307   | 0,88747736      | 6,285714286     |
| DNAJC13                                                                                             | 2,11962E-05 | 0,172193991 | 0,171 | 0,035 | 0,44726133  | 1,126770729   | 0,887491993     | 4,885714286     |
| SCAP                                                                                                | 0,000160436 | 0,172110282 | 0,195 | 0,056 | 1           | 1,126705352   | 0,887543489     | 3,482142857     |
| TIMM17A                                                                                             | 3,92746E-06 | 0,172101484 | 0,366 | 0,119 | 0,08287335  | 1,126698482   | 0,887548902     | 3,075630252     |
| RWDD2A                                                                                              | 8,68705E-06 | 0,172037344 | 0,122 | 0,014 | 0,183305486 | 1,126648391   | 0,887588362     | 8,714285714     |
| MIOS                                                                                                | 0,001049213 | 0,171678162 | 0,11  | 0,025 | 1           | 1,126367929   | 0,887809369     | 4,4             |
| APPL2                                                                                               | 2,28182E-05 | 0,171652307 | 0,171 | 0,035 | 0,481487455 | 1,126347743   | 0,88782528      | 4,885714286     |
| SZRD1                                                                                               | 8,87214E-05 | 0,171630047 | 0,415 | 0,168 | 1           | 1,126330365   | 0,887838978     | 2,470238095     |
| EIF2B1                                                                                              | 2,68515E-11 | 0,171602599 | 0,354 | 0,06  | 5,66594E-07 | 1,126308936   | 0,88785587      | 5,9             |
| GDPD5                                                                                               | 0,001876622 | 0,171577587 | 0,049 | 0,004 | 1           | 1,126289409   | 0,887871263     | 12,25           |
| NRDE2                                                                                               | 0,000174671 | 0,171545962 | 0,244 | 0,081 | 1           | 1,12626472    | 0,887890726     | 3,012345679     |
| CTNBL1                                                                                              | 6,56905E-07 | 0,171498755 | 0,22  | 0,042 | 0,013861358 | 1,126227868   | 0,887919779     | 5,238095238     |
| ARSA                                                                                                | 0,000141395 | 0,171356682 | 0,195 | 0,056 | 1           | 1,126116965   | 0,888007224     | 3,482142857     |
| HS3ST3B1                                                                                            | 0,001952737 | 0,171296221 | 0,049 | 0,004 | 1           | 1,126069772   | 0,88804444      | 12,25           |
| MRPS18A                                                                                             | 1,82755E-05 | 0,171290647 | 0,171 | 0,035 | 0,385631777 | 1,126065422   | 0,888047871     | 4,885714286     |
| MYEOV                                                                                               | 5,5905E-11  | 0,171180616 | 0,146 | 0     | 1,17965E-06 | 1,125979543   | 0,888115602     | #DIV/0!         |
| IKBKG                                                                                               | 7,97812E-05 | 0,171123942 | 0,159 | 0,035 | 1           | 1,125935311   | 0,888150492     | 4,542857143     |
| TCIRG1                                                                                              | 6,36417E-07 | 0,171088933 | 0,183 | 0,028 | 0,013429045 | 1,125907989   | 0,888172044     | 6,535714286     |
| PLXND1                                                                                              | 0,000106922 | 0,170838932 | 0,463 | 0,2   | 1           | 1,125712901   | 0,888325966     | 2,315           |
| MTG2                                                                                                | 0,000223551 | 0,170666483 | 0,183 | 0,053 | 1           | 1,125578349   | 0,888432157     | 3,452830189     |
| UBFD1                                                                                               | 2,82044E-07 | 0,170611772 | 0,244 | 0,049 | 0,005951411 | 1,125535664   | 0,888465849     | 4,979591837     |
| CMTR2                                                                                               | 5,3728E-09  | 0,170490052 | 0,28  | 0,049 | 0,000113372 | 1,125440708   | 0,888540812     | 5,714285714     |
| NAT10                                                                                               | 0,002321451 | 0,170463093 | 0,11  | 0,028 | 1           | 1,125419677   | 0,888557416     | 3,928571429     |
| WAC-AS1                                                                                             | 7,14685E-07 | 0,170434125 | 0,183 | 0,028 | 0,015080561 | 1,12539708    | 0,888575258     | 6,535714286     |
| HPRT1                                                                                               | 8,62361E-05 | 0,170425604 | 0,232 | 0,07  | 1           | 1,125390433   | 0,888580506     | 3,314285714     |
| MSL3                                                                                                | 1,23359E-05 | 0,17029836  | 0,256 | 0,07  | 0,260299981 | 1,125291179   | 0,888658881     | 3,657142857     |
| CAMK2N2                                                                                             | 1,58349E-08 | 0,170161385 | 0,11  | 0     | 0,000334132 | 1,125184345   | 0,888743258     | #DIV/0!         |

Supplementary Table 2

| Differentially expressed genes_keloid-XL_comparing SC-Keloid vs. (SC-Myel, SC-Nonmyel, SC-Nonmyel2) |             |             |       |       |             |               |                 |                 |
|-----------------------------------------------------------------------------------------------------|-------------|-------------|-------|-------|-------------|---------------|-----------------|-----------------|
| gene                                                                                                | p_val       | avg_log2FC  | pct.1 | pct.2 | p_val_adj   | Foldchange_UP | Foldchange_DOWN | Ratio_pct1_pct2 |
| RALBP1                                                                                              | 0,000398295 | 0,17014664  | 0,561 | 0,26  | 1           | 1,125172845   | 0,888752341     | 2,157692308     |
| SGCB                                                                                                | 1,18547E-05 | 0,169991182 | 0,671 | 0,305 | 0,250145686 | 1,125051608   | 0,888848114     | 2,2             |
| ZNF3                                                                                                | 2,82921E-07 | 0,169947257 | 0,134 | 0,011 | 0,005969912 | 1,125017354   | 0,888875177     | 12,18181818     |
| RGS8                                                                                                | 6,67422E-07 | 0,169931495 | 0,085 | 0     | 0,014083281 | 1,125005064   | 0,888884888     | #DIV/0!         |
| TTC8                                                                                                | 7,86343E-06 | 0,169872685 | 0,122 | 0,014 | 0,165926312 | 1,124959205   | 0,888921123     | 8,714285714     |
| GLTP                                                                                                | 9,10158E-05 | 0,16969389  | 0,317 | 0,116 | 1           | 1,124819796   | 0,889031295     | 2,732758621     |
| SIRT7                                                                                               | 1,54086E-05 | 0,169609704 | 0,244 | 0,067 | 0,325135945 | 1,124754161   | 0,889083175     | 3,641791045     |
| UNC5B                                                                                               | 0,000276795 | 0,16959874  | 0,183 | 0,053 | 1           | 1,124745613   | 0,889089931     | 3,452830189     |
| PACC1                                                                                               | 3,62311E-06 | 0,169433207 | 0,159 | 0,025 | 0,076451158 | 1,124616569   | 0,88919195      | 6,36            |
| BBIP1                                                                                               | 1,80554E-06 | 0,169429759 | 0,354 | 0,109 | 0,038098798 | 1,124613881   | 0,889194076     | 3,247706422     |
| TRAM2-AS1                                                                                           | 0,000685342 | 0,16937977  | 0,159 | 0,046 | 1           | 1,124574914   | 0,889224886     | 3,456521739     |
| DNMT3A                                                                                              | 1,74547E-06 | 0,169376948 | 0,268 | 0,067 | 0,036831262 | 1,124572714   | 0,889226626     | 4               |
| PGP                                                                                                 | 1,64229E-07 | 0,169342577 | 0,427 | 0,126 | 0,003465402 | 1,124545922   | 0,889247811     | 3,388888889     |
| INSYN2A                                                                                             | 1,33545E-06 | 0,169268125 | 0,098 | 0,004 | 0,028179294 | 1,12448789    | 0,889293703     | 24,5            |
| ZNRF1                                                                                               | 0,00097948  | 0,16913588  | 0,183 | 0,06  | 1           | 1,124384819   | 0,889375224     | 3,05            |
| VIPAS39                                                                                             | 0,00109994  | 0,169113168 | 0,11  | 0,025 | 1           | 1,124367118   | 0,889389225     | 4,4             |
| NGDN                                                                                                | 3,39554E-05 | 0,169111451 | 0,268 | 0,084 | 0,716492954 | 1,12436578    | 0,889390284     | 3,19047619      |
| F2R                                                                                                 | 0,0016151   | 0,169110456 | 0,22  | 0,084 | 1           | 1,124365005   | 0,889390897     | 2,619047619     |
| C1QTNF6                                                                                             | 0,000685342 | 0,168896844 | 0,159 | 0,046 | 1           | 1,124198538   | 0,889522594     | 3,456521739     |
| CBFB                                                                                                | 5,54468E-06 | 0,168781999 | 0,512 | 0,196 | 0,116998267 | 1,12410905    | 0,889593407     | 2,612244898     |
| SPG21                                                                                               | 2,01615E-06 | 0,168700515 | 0,305 | 0,084 | 0,042542862 | 1,124045562   | 0,889643653     | 3,630952381     |
| HS3ST3A1                                                                                            | 1,5822E-05  | 0,168617795 | 0,183 | 0,039 | 0,333859568 | 1,123981114   | 0,889694664     | 4,692307692     |
| NSD2                                                                                                | 0,001366307 | 0,168539003 | 0,146 | 0,042 | 1           | 1,12391973    | 0,889743256     | 3,476190476     |
| P3H4                                                                                                | 5,38783E-06 | 0,168475064 | 0,183 | 0,035 | 0,113688628 | 1,12386992    | 0,889782689     | 5,228571429     |
| TPD52L2                                                                                             | 2,51654E-07 | 0,168460872 | 0,39  | 0,112 | 0,00531015  | 1,123858865   | 0,889791442     | 3,482142857     |
| CERS5                                                                                               | 9,87009E-08 | 0,168104547 | 0,28  | 0,06  | 0,002082687 | 1,123581322   | 0,890011235     | 4,666666667     |
| LCTL                                                                                                | 5,08758E-08 | 0,168030007 | 0,134 | 0,007 | 0,001073531 | 1,123523271   | 0,890057221     | 19,14285714     |
| RNASEH1-AS1                                                                                         | 3,16576E-07 | 0,167879383 | 0,146 | 0,014 | 0,006680081 | 1,123405976   | 0,890150152     | 10,42857143     |
| POLR3F                                                                                              | 0,004199164 | 0,167828288 | 0,073 | 0,014 | 1           | 1,12336619    | 0,890181678     | 5,214285714     |
| TMED7                                                                                               | 4,81185E-05 | 0,167776951 | 0,476 | 0,2   | 1           | 1,123326217   | 0,890213355     | 2,38            |

Supplementary Table 2

| Differentially expressed genes_keloid-XL_comparing SC-Keloid vs. (SC-Myel, SC-Nonmyel, SC-Nonmyel2) |             |             |       |       |             |               |                 |                 |
|-----------------------------------------------------------------------------------------------------|-------------|-------------|-------|-------|-------------|---------------|-----------------|-----------------|
| gene                                                                                                | p_val       | avg_log2FC  | pct.1 | pct.2 | p_val_adj   | Foldchange_UP | Foldchange_DOWN | Ratio_pct1_pct2 |
| AK1                                                                                                 | 1,89511E-06 | 0,167720021 | 0,415 | 0,137 | 0,039988737 | 1,12328189    | 0,890248484     | 3,02919708      |
| HTATSF1                                                                                             | 6,6303E-07  | 0,167680518 | 0,329 | 0,091 | 0,013990596 | 1,123251134   | 0,890272861     | 3,615384615     |
| SMARCA4                                                                                             | 6,67316E-05 | 0,167670817 | 0,268 | 0,088 | 1           | 1,123243581   | 0,890278847     | 3,045454545     |
| CLPP                                                                                                | 1,9583E-08  | 0,167639645 | 0,317 | 0,067 | 0,000413222 | 1,123219311   | 0,890298083     | 4,731343284     |
| PARP1                                                                                               | 1,56982E-08 | 0,167538508 | 0,427 | 0,116 | 0,000331248 | 1,123140573   | 0,890360498     | 3,681034483     |
| CENPW                                                                                               | 4,95036E-09 | 0,167500748 | 0,134 | 0,004 | 0,000104458 | 1,123111177   | 0,890383802     | 33,5            |
| TAOK2                                                                                               | 0,000314739 | 0,16747038  | 0,22  | 0,074 | 1           | 1,123087537   | 0,890402544     | 2,972972973     |
| FARP1                                                                                               | 1,78419E-05 | 0,167468024 | 0,146 | 0,025 | 0,376480972 | 1,123085703   | 0,890403998     | 5,84            |
| SEZ6L2                                                                                              | 9,20529E-08 | 0,167352276 | 0,22  | 0,035 | 0,001942408 | 1,122995601   | 0,890475438     | 6,285714286     |
| ZNF251                                                                                              | 1,02863E-05 | 0,167305686 | 0,11  | 0,011 | 0,217050943 | 1,122959336   | 0,890504196     | 10              |
| MRPS2                                                                                               | 1,30385E-07 | 0,167272542 | 0,207 | 0,032 | 0,002751254 | 1,122933538   | 0,890524654     | 6,46875         |
| RNF139                                                                                              | 7,61401E-05 | 0,167138931 | 0,256 | 0,081 | 1           | 1,122829545   | 0,890607131     | 3,160493827     |
| RNF40                                                                                               | 1,60931E-05 | 0,167001524 | 0,28  | 0,084 | 0,339580086 | 1,122722608   | 0,89069196      | 3,333333333     |
| CCNY                                                                                                | 6,40156E-09 | 0,166976157 | 0,366 | 0,084 | 0,000135079 | 1,122702867   | 0,890707621     | 4,357142857     |
| UBE2L6                                                                                              | 8,92496E-08 | 0,166877262 | 0,207 | 0,032 | 0,001883256 | 1,12262591    | 0,89076868      | 6,46875         |
| SNX6                                                                                                | 0,00020312  | 0,166817975 | 0,512 | 0,239 | 1           | 1,122579777   | 0,890805286     | 2,142259414     |
| STAMPB                                                                                              | 9,94033E-08 | 0,166810023 | 0,329 | 0,081 | 0,002097509 | 1,12257359    | 0,890810197     | 4,061728395     |
| YPEL3                                                                                               | 0,00252273  | 0,166762379 | 0,415 | 0,211 | 1           | 1,122536518   | 0,890839616     | 1,966824645     |
| RRP15                                                                                               | 9,21927E-06 | 0,16672122  | 0,305 | 0,095 | 0,19453582  | 1,122504493   | 0,890865031     | 3,210526316     |
| GIT2                                                                                                | 0,002296533 | 0,166666848 | 0,11  | 0,028 | 1           | 1,122462189   | 0,890898606     | 3,928571429     |
| SEC31A                                                                                              | 5,57713E-07 | 0,166625202 | 0,598 | 0,225 | 0,011768307 | 1,122429788   | 0,890924324     | 2,657777778     |
| NUDT19                                                                                              | 0,006076786 | 0,166569506 | 0,061 | 0,011 | 1           | 1,122386457   | 0,890958719     | 5,545454545     |
| VBP1                                                                                                | 1,5347E-06  | 0,166540566 | 0,415 | 0,137 | 0,032383681 | 1,122363942   | 0,890976592     | 3,02919708      |
| BEND6                                                                                               | 3,89526E-06 | 0,1665109   | 0,159 | 0,025 | 0,08219389  | 1,122340863   | 0,890994913     | 6,36            |
| RNF157                                                                                              | 3,16224E-05 | 0,166467498 | 0,122 | 0,018 | 0,667263526 | 1,1223071     | 0,891021718     | 6,777777778     |
| TAF11                                                                                               | 4,27361E-08 | 0,166377379 | 0,329 | 0,077 | 0,000901775 | 1,122236996   | 0,891077378     | 4,272727273     |
| CLSTN1                                                                                              | 2,57351E-05 | 0,16637594  | 0,659 | 0,305 | 0,543035814 | 1,122235877   | 0,891078267     | 2,160655738     |
| ZNF655                                                                                              | 2,47738E-06 | 0,166329821 | 0,232 | 0,053 | 0,052275269 | 1,122200003   | 0,891106753     | 4,377358491     |
| LRRC23                                                                                              | 7,35655E-07 | 0,16607509  | 0,183 | 0,028 | 0,015523062 | 1,122001877   | 0,891264106     | 6,535714286     |
| NOC2L                                                                                               | 6,00108E-05 | 0,166052346 | 0,256 | 0,081 | 1           | 1,12198419    | 0,891278156     | 3,160493827     |

Supplementary Table 2

| Differentially expressed genes_keloid-XL_comparing SC-Keloid vs. (SC-Myel, SC-Nonmyel, SC-Nonmyel2) |             |             |       |       |             |               |                 |                 |
|-----------------------------------------------------------------------------------------------------|-------------|-------------|-------|-------|-------------|---------------|-----------------|-----------------|
| gene                                                                                                | p_val       | avg_log2FC  | pct.1 | pct.2 | p_val_adj   | Foldchange_UP | Foldchange_DOWN | Ratio_pct1_pct2 |
| SCFD1                                                                                               | 1,27407E-05 | 0,16603644  | 0,329 | 0,105 | 0,268840694 | 1,121971819   | 0,891287983     | 3,133333333     |
| ROGDI                                                                                               | 0,000590302 | 0,165930214 | 0,098 | 0,018 | 1           | 1,121889211   | 0,891353611     | 5,444444444     |
| TRIM14                                                                                              | 2,04948E-09 | 0,165886384 | 0,195 | 0,018 | 4,3246E-05  | 1,121855128   | 0,891380691     | 10,83333333     |
| ZNF524                                                                                              | 2,47712E-06 | 0,165550751 | 0,28  | 0,074 | 0,052269763 | 1,121594166   | 0,89158809      | 3,783783784     |
| F8                                                                                                  | 0,008614542 | 0,165433119 | 0,049 | 0,007 | 1           | 1,121502719   | 0,891660789     | 7               |
| PCBD1                                                                                               | 9,46653E-07 | 0,165426068 | 0,293 | 0,074 | 0,019975331 | 1,121497238   | 0,891665147     | 3,959459459     |
| PMAIP1                                                                                              | 4,69377E-05 | 0,165371203 | 0,146 | 0,028 | 0,990433334 | 1,121454589   | 0,891699057     | 5,214285714     |
| HDAC1                                                                                               | 6,73816E-07 | 0,165338724 | 0,293 | 0,074 | 0,014218182 | 1,121429342   | 0,891719132     | 3,959459459     |
| RIDA                                                                                                | 0,00037988  | 0,165297044 | 0,11  | 0,021 | 1           | 1,121396944   | 0,891744895     | 5,238095238     |
| PRDX6                                                                                               | 6,43711E-05 | 0,165292985 | 0,671 | 0,312 | 1           | 1,12139379    | 0,891747403     | 2,150641026     |
| DPYSL3                                                                                              | 4,31746E-10 | 0,165276732 | 0,22  | 0,021 | 9,11026E-06 | 1,121381156   | 0,89175745      | 10,47619048     |
| ENSA                                                                                                | 6,57335E-05 | 0,165211101 | 0,476 | 0,2   | 1           | 1,121330143   | 0,891798019     | 2,38            |
| NUBP1                                                                                               | 3,90887E-07 | 0,165192203 | 0,207 | 0,035 | 0,008248112 | 1,121315455   | 0,8918097       | 5,914285714     |
| GPATCH2                                                                                             | 1,54134E-05 | 0,165092303 | 0,329 | 0,109 | 0,325239048 | 1,121237812   | 0,891871456     | 3,018348624     |
| PTGR1                                                                                               | 4,24453E-10 | 0,164996375 | 0,329 | 0,06  | 8,95639E-06 | 1,121163261   | 0,891930761     | 5,483333333     |
| BLOC1S4                                                                                             | 7,65346E-08 | 0,164963465 | 0,22  | 0,035 | 0,001614956 | 1,121137686   | 0,891951107     | 6,285714286     |
| TTC17                                                                                               | 0,000613079 | 0,164899501 | 0,305 | 0,123 | 1           | 1,121087979   | 0,891990654     | 2,479674797     |
| FKBP1B                                                                                              | 0,000444147 | 0,164651923 | 0,11  | 0,021 | 1           | 1,120895608   | 0,89214374      | 5,238095238     |
| TRPV4                                                                                               | 5,55398E-09 | 0,164537207 | 0,134 | 0,004 | 0,000117194 | 1,120806484   | 0,892214682     | 33,5            |
| SLC25A45                                                                                            | 0,00380062  | 0,164512106 | 0,098 | 0,025 | 1           | 1,120786984   | 0,892230205     | 3,92            |
| MAP2K5                                                                                              | 0,009081904 | 0,164394662 | 0,11  | 0,035 | 1           | 1,120695749   | 0,89230284      | 3,142857143     |
| YIPF5                                                                                               | 3,85E-07    | 0,164330105 | 0,317 | 0,084 | 0,00812389  | 1,120645602   | 0,89234277      | 3,773809524     |
| CYB561D2                                                                                            | 1,7192E-06  | 0,164312984 | 0,183 | 0,032 | 0,036276865 | 1,120632302   | 0,89235336      | 5,71875         |
| APOBEC3C                                                                                            | 7,55226E-06 | 0,16423543  | 0,305 | 0,091 | 0,159360183 | 1,120572063   | 0,892401331     | 3,351648352     |
| MYCBP                                                                                               | 1,37895E-06 | 0,164081086 | 0,146 | 0,018 | 0,029097295 | 1,120452187   | 0,892496808     | 8,111111111     |
| ACY1                                                                                                | 1,24261E-06 | 0,164068454 | 0,159 | 0,021 | 0,02622034  | 1,120442376   | 0,892504622     | 7,571428571     |
| CEP63                                                                                               | 3,853E-06   | 0,164007679 | 0,268 | 0,07  | 0,081302136 | 1,120395178   | 0,892542221     | 3,828571429     |
| MAN2B1                                                                                              | 1,18479E-05 | 0,163949106 | 0,329 | 0,109 | 0,250001937 | 1,120349691   | 0,892578458     | 3,018348624     |
| TMEM199                                                                                             | 7,36862E-09 | 0,163911272 | 0,146 | 0,007 | 0,000155485 | 1,12032031    | 0,892601866     | 20,85714286     |
| EIF3B                                                                                               | 8,89321E-05 | 0,163821846 | 0,366 | 0,14  | 1           | 1,120250869   | 0,892657196     | 2,614285714     |

Supplementary Table 2

| Differentially expressed genes_keloid-XL_comparing SC-Keloid vs. (SC-Myel, SC-Nonmyel, SC-Nonmyel2) |             |             |       |       |             |               |                 |                 |
|-----------------------------------------------------------------------------------------------------|-------------|-------------|-------|-------|-------------|---------------|-----------------|-----------------|
| gene                                                                                                | p_val       | avg_log2FC  | pct.1 | pct.2 | p_val_adj   | Foldchange_UP | Foldchange_DOWN | Ratio_pct1_pct2 |
| COA5                                                                                                | 7,99092E-07 | 0,163671398 | 0,293 | 0,074 | 0,016861648 | 1,120134052   | 0,89275029      | 3,959459459     |
| TMEM8B                                                                                              | 0,001428181 | 0,163604326 | 0,122 | 0,032 | 1           | 1,120081978   | 0,892791795     | 3,8125          |
| ANAPC5                                                                                              | 1,92922E-07 | 0,163559772 | 0,512 | 0,168 | 0,004070853 | 1,120047388   | 0,892819367     | 3,047619048     |
| C2orf74                                                                                             | 0,001024669 | 0,163489049 | 0,11  | 0,025 | 1           | 1,119992483   | 0,892863136     | 4,4             |
| DUT                                                                                                 | 0,004183708 | 0,163244477 | 0,488 | 0,253 | 1           | 1,119802633   | 0,89301451      | 1,928853755     |
| UQCRFS1                                                                                             | 1,88117E-07 | 0,162758552 | 0,378 | 0,105 | 0,003969465 | 1,119425527   | 0,893315344     | 3,6             |
| TMEM42                                                                                              | 1,45421E-05 | 0,162703115 | 0,183 | 0,039 | 0,306852515 | 1,119382513   | 0,893349672     | 4,692307692     |
| SIKE1                                                                                               | 5,83999E-07 | 0,162624052 | 0,244 | 0,053 | 0,012322958 | 1,11932117    | 0,89339863      | 4,603773585     |
| RPP38                                                                                               | 0,000194727 | 0,162520298 | 0,134 | 0,028 | 1           | 1,119240675   | 0,893462883     | 4,785714286     |
| PLOD2                                                                                               | 7,09401E-07 | 0,162496773 | 0,22  | 0,042 | 0,014969078 | 1,119222424   | 0,893477452     | 5,238095238     |
| RNPS1                                                                                               | 4,85095E-05 | 0,16243191  | 0,524 | 0,225 | 1           | 1,119172106   | 0,893517623     | 2,328888889     |
| RPL22                                                                                               | 0,054032787 | 0,162339417 | 0,951 | 0,877 | 1           | 1,119100356   | 0,89357491      | 1,084378563     |
| MAD2L1BP                                                                                            | 1,47187E-05 | 0,162252996 | 0,183 | 0,039 | 0,310578899 | 1,119033321   | 0,893628439     | 4,692307692     |
| MICALL1                                                                                             | 8,65211E-10 | 0,162181154 | 0,146 | 0,004 | 1,82568E-05 | 1,118977598   | 0,89367294      | 36,5            |
| RBMS2                                                                                               | 1,8284E-06  | 0,162144776 | 0,293 | 0,077 | 0,038581109 | 1,118949383   | 0,893695474     | 3,805194805     |
| UBALD2                                                                                              | 0,003541359 | 0,162098302 | 0,585 | 0,326 | 1           | 1,118913339   | 0,893724264     | 1,794478528     |
| PDHB                                                                                                | 6,26271E-08 | 0,162072236 | 0,366 | 0,095 | 0,001321495 | 1,118893123   | 0,893740412     | 3,852631579     |
| ANGEL2                                                                                              | 0,000164834 | 0,162053956 | 0,183 | 0,049 | 1           | 1,118878946   | 0,893751736     | 3,734693878     |
| BAP1                                                                                                | 4,1788E-06  | 0,162049615 | 0,195 | 0,039 | 0,088176872 | 1,118875579   | 0,893754425     | 5               |
| ZNF775                                                                                              | 2,11962E-05 | 0,162010378 | 0,171 | 0,035 | 0,44726133  | 1,118845149   | 0,893778733     | 4,885714286     |
| SH3YL1                                                                                              | 4,63516E-05 | 0,161970453 | 0,268 | 0,084 | 0,978065431 | 1,118814187   | 0,893803468     | 3,19047619      |
| COPS5                                                                                               | 2,20468E-06 | 0,161790347 | 0,354 | 0,109 | 0,046520996 | 1,118674523   | 0,893915057     | 3,247706422     |
| ZDHHC5                                                                                              | 4,28183E-08 | 0,161633426 | 0,28  | 0,056 | 0,000903509 | 1,118552852   | 0,894012293     | 5               |
| CEP78                                                                                               | 5,60121E-05 | 0,161548759 | 0,098 | 0,011 | 1           | 1,11848721    | 0,894064761     | 8,909090909     |
| CCDC24                                                                                              | 8,1138E-06  | 0,161541999 | 0,085 | 0,004 | 0,171209209 | 1,118481969   | 0,894068951     | 21,25           |
| TLN1                                                                                                | 0,000353318 | 0,16151746  | 0,695 | 0,354 | 1           | 1,118462945   | 0,894084158     | 1,963276836     |
| UBAC2                                                                                               | 5,62892E-06 | 0,161331661 | 0,268 | 0,074 | 0,118775827 | 1,118318912   | 0,894199311     | 3,621621622     |
| GLMP                                                                                                | 7,44051E-06 | 0,16127959  | 0,232 | 0,056 | 0,157002258 | 1,118278549   | 0,894231585     | 4,142857143     |
| TMEM45A                                                                                             | 3,52728E-05 | 0,161059134 | 0,183 | 0,042 | 0,744292094 | 1,11810768    | 0,894368242     | 4,357142857     |
| DYNC2H1                                                                                             | 0,000839097 | 0,161043444 | 0,171 | 0,053 | 1           | 1,11809552    | 0,894377969     | 3,226415094     |

Supplementary Table 2

| Differentially expressed genes_keloid-XL_comparing SC-Keloid vs. (SC-Myel, SC-Nonmyel, SC-Nonmyel2) |             |             |       |       |             |               |                 |                 |
|-----------------------------------------------------------------------------------------------------|-------------|-------------|-------|-------|-------------|---------------|-----------------|-----------------|
| gene                                                                                                | p_val       | avg_log2FC  | pct.1 | pct.2 | p_val_adj   | Foldchange_UP | Foldchange_DOWN | Ratio_pct1_pct2 |
| KLHL36                                                                                              | 0,006415308 | 0,160965159 | 0,207 | 0,088 | 1           | 1,11803485    | 0,894426502     | 2,352272727     |
| CLDN5                                                                                               | 0,003759144 | 0,160936126 | 0,098 | 0,025 | 1           | 1,118012351   | 0,894444502     | 3,92            |
| COASY                                                                                               | 0,00020114  | 0,160844287 | 0,171 | 0,046 | 1           | 1,117941183   | 0,894501442     | 3,717391304     |
| POLR3G                                                                                              | 4,42145E-07 | 0,160835013 | 0,207 | 0,035 | 0,009329705 | 1,117933996   | 0,894507192     | 5,914285714     |
| SLC25A39                                                                                            | 6,7035E-07  | 0,160717832 | 0,341 | 0,095 | 0,014145062 | 1,117843198   | 0,89457985      | 3,589473684     |
| TIA1                                                                                                | 5,81883E-06 | 0,160665921 | 0,378 | 0,126 | 0,122783037 | 1,117802976   | 0,894612039     | 3               |
| ROPN1                                                                                               | 2,31826E-10 | 0,160398162 | 0,171 | 0,007 | 4,89176E-06 | 1,117595535   | 0,894778092     | 24,42857143     |
| TNK2                                                                                                | 4,21083E-05 | 0,160340755 | 0,317 | 0,109 | 0,888528264 | 1,117551065   | 0,894813697     | 2,908256881     |
| C6orf226                                                                                            | 1,22548E-06 | 0,160327351 | 0,232 | 0,049 | 0,025858797 | 1,117540682   | 0,894822011     | 4,734693878     |
| COMMD1                                                                                              | 1,75605E-07 | 0,160112792 | 0,378 | 0,105 | 0,003705448 | 1,117374493   | 0,894955099     | 3,6             |
| MPV17                                                                                               | 1,01178E-07 | 0,160094998 | 0,39  | 0,109 | 0,00213495  | 1,117360711   | 0,894966137     | 3,577981651     |
| C1orf56                                                                                             | 0,000332001 | 0,160094862 | 0,366 | 0,158 | 1           | 1,117360606   | 0,894966222     | 2,316455696     |
| SHARPIN                                                                                             | 2,69483E-05 | 0,160046242 | 0,317 | 0,105 | 0,568635509 | 1,117322951   | 0,894996384     | 3,019047619     |
| CCT5                                                                                                | 4,45417E-05 | 0,160035122 | 0,463 | 0,189 | 0,939873909 | 1,117314338   | 0,895003282     | 2,44973545      |
| MVK                                                                                                 | 2,2307E-07  | 0,15999355  | 0,11  | 0,004 | 0,004706999 | 1,117282143   | 0,895029073     | 27,5            |
| TTL                                                                                                 | 2,47712E-06 | 0,159986464 | 0,28  | 0,074 | 0,052269763 | 1,117276655   | 0,895033468     | 3,783783784     |
| XPNPEP1                                                                                             | 4,05203E-06 | 0,159922194 | 0,244 | 0,06  | 0,085501984 | 1,117226884   | 0,895073342     | 4,066666667     |
| CCT7                                                                                                | 1,02028E-05 | 0,159782764 | 0,488 | 0,186 | 0,215290172 | 1,117118914   | 0,895159851     | 2,623655914     |
| RPA2                                                                                                | 3,9635E-05  | 0,159657986 | 0,171 | 0,039 | 0,836337258 | 1,117022298   | 0,895237276     | 4,384615385     |
| NBPF1                                                                                               | 8,26781E-07 | 0,159234711 | 0,22  | 0,042 | 0,017445897 | 1,116694621   | 0,89549997      | 5,238095238     |
| ZNF84                                                                                               | 1,84929E-06 | 0,159233283 | 0,134 | 0,014 | 0,039021837 | 1,116693516   | 0,895500856     | 9,571428571     |
| ADAM10                                                                                              | 0,000264134 | 0,159218736 | 0,598 | 0,284 | 1           | 1,116682256   | 0,895509886     | 2,105633803     |
| TMEM121                                                                                             | 2,90594E-08 | 0,159176521 | 0,22  | 0,032 | 0,000613182 | 1,116649582   | 0,89553609      | 6,875           |
| METTL5                                                                                              | 6,88037E-08 | 0,159089219 | 0,366 | 0,095 | 0,001451826 | 1,116582011   | 0,895590283     | 3,852631579     |
| ZNF133                                                                                              | 0,037995958 | 0,158882646 | 0,073 | 0,025 | 1           | 1,116422145   | 0,895718528     | 2,92            |
| FBXO22                                                                                              | 1,65209E-06 | 0,158868601 | 0,22  | 0,046 | 0,034860754 | 1,116411276   | 0,895727248     | 4,782608696     |
| RECQL                                                                                               | 0,000312434 | 0,158790149 | 0,28  | 0,105 | 1           | 1,116350568   | 0,895775958     | 2,666666667     |
| PKIA                                                                                                | 3,44186E-07 | 0,158742426 | 0,244 | 0,049 | 0,007262675 | 1,116313642   | 0,89580559      | 4,979591837     |
| NDUFAF5                                                                                             | 6,18181E-07 | 0,158715844 | 0,183 | 0,028 | 0,013044241 | 1,116293073   | 0,895822096     | 6,535714286     |
| GLCE                                                                                                | 2,30998E-05 | 0,158545439 | 0,171 | 0,035 | 0,487428804 | 1,116161229   | 0,895927912     | 4,885714286     |



Supplementary Table 2

| Differentially expressed genes_keloid-XL_comparing SC-Keloid vs. (SC-Myel, SC-Nonmyel, SC-Nonmyel2) |             |             |       |       |             |               |                 |                 |
|-----------------------------------------------------------------------------------------------------|-------------|-------------|-------|-------|-------------|---------------|-----------------|-----------------|
| gene                                                                                                | p_val       | avg_log2FC  | pct.1 | pct.2 | p_val_adj   | Foldchange_UP | Foldchange_DOWN | Ratio_pct1_pct2 |
| ZADH2                                                                                               | 3,71682E-08 | 0,158453665 | 0,207 | 0,028 | 0,000784286 | 1,116090229   | 0,895984907     | 7,392857143     |
| NFS1                                                                                                | 0,000210889 | 0,158405399 | 0,098 | 0,014 | 1           | 1,11605289    | 0,896014883     | 7               |
| RPL30                                                                                               | 0,261451897 | 0,158375036 | 0,963 | 0,919 | 1           | 1,116029402   | 0,896033741     | 1,047878128     |
| PRPF38A                                                                                             | 3,13385E-06 | 0,158358015 | 0,28  | 0,074 | 0,066127404 | 1,116016235   | 0,896044312     | 3,783783784     |
| CARF                                                                                                | 0,00174496  | 0,158348685 | 0,098 | 0,021 | 1           | 1,116009018   | 0,896050107     | 4,666666667     |
| YBEY                                                                                                | 5,7507E-09  | 0,158312817 | 0,341 | 0,074 | 0,000121346 | 1,115981272   | 0,896072385     | 4,608108108     |
| TMEM248                                                                                             | 1,19347E-05 | 0,158246299 | 0,366 | 0,126 | 0,251834589 | 1,115929819   | 0,896113701     | 2,904761905     |
| DPH2                                                                                                | 0,001703135 | 0,158214896 | 0,098 | 0,021 | 1           | 1,115905529   | 0,896133207     | 4,666666667     |
| CDC42SE2                                                                                            | 1,90706E-05 | 0,158193965 | 0,22  | 0,056 | 0,402407918 | 1,115889339   | 0,896146208     | 3,928571429     |
| DDX49                                                                                               | 6,87095E-08 | 0,158162992 | 0,317 | 0,074 | 0,001449839 | 1,115865383   | 0,896165447     | 4,283783784     |
| DRG1                                                                                                | 3,3093E-06  | 0,158003602 | 0,22  | 0,049 | 0,069829535 | 1,115742108   | 0,896264462     | 4,489795918     |
| CDC16                                                                                               | 4,72583E-07 | 0,157943486 | 0,256 | 0,056 | 0,009971983 | 1,115695617   | 0,896301809     | 4,571428571     |
| MED7                                                                                                | 3,64556E-07 | 0,15787622  | 0,146 | 0,014 | 0,007692497 | 1,115643599   | 0,8963436       | 10,42857143     |
| SLC35F6                                                                                             | 6,55188E-11 | 0,157849239 | 0,22  | 0,018 | 1,38251E-06 | 1,115622734   | 0,896360364     | 12,22222222     |
| ALDH16A1                                                                                            | 1,27887E-05 | 0,157772899 | 0,159 | 0,028 | 0,26985512  | 1,115563703   | 0,896407796     | 5,678571429     |
| API5                                                                                                | 7,86753E-06 | 0,157257121 | 0,256 | 0,067 | 0,166012805 | 1,115164949   | 0,896728328     | 3,820895522     |
| BCL10                                                                                               | 3,18917E-06 | 0,157149869 | 0,305 | 0,088 | 0,067294762 | 1,115082049   | 0,896794994     | 3,465909091     |
| PAFAH1B3                                                                                            | 2,29032E-05 | 0,157138136 | 0,232 | 0,063 | 0,483279746 | 1,11507298    | 0,896802288     | 3,682539683     |
| COX7B                                                                                               | 0,013370272 | 0,157137745 | 0,659 | 0,428 | 1           | 1,115072678   | 0,896802531     | 1,539719626     |
| LZTR1                                                                                               | 2,12429E-06 | 0,157127435 | 0,244 | 0,056 | 0,044824715 | 1,11506471    | 0,89680894      | 4,357142857     |
| TRAF7                                                                                               | 0,00012023  | 0,157106802 | 0,268 | 0,091 | 1           | 1,115048762   | 0,896821766     | 2,945054945     |
| GRHPR                                                                                               | 2,60469E-06 | 0,157068128 | 0,451 | 0,161 | 0,054961627 | 1,115018872   | 0,896845807     | 2,801242236     |
| DCTN6                                                                                               | 1,68627E-05 | 0,156929891 | 0,561 | 0,232 | 0,355819959 | 1,114912037   | 0,896931746     | 2,418103448     |
| PTBP1                                                                                               | 0,000228288 | 0,156898773 | 0,598 | 0,284 | 1           | 1,11488799    | 0,896951092     | 2,105633803     |
| MTIF3                                                                                               | 1,17297E-06 | 0,156864355 | 0,366 | 0,112 | 0,024750878 | 1,114861392   | 0,896972491     | 3,267857143     |
| ILRUN                                                                                               | 0,002077581 | 0,156682764 | 0,232 | 0,091 | 1           | 1,114721074   | 0,897085399     | 2,549450549     |
| ADAMTS12                                                                                            | 5,25571E-08 | 0,156639922 | 0,146 | 0,011 | 0,001109008 | 1,114687972   | 0,897112039     | 13,27272727     |
| PSMD9                                                                                               | 8,14288E-07 | 0,156592204 | 0,476 | 0,168 | 0,017182298 | 1,114651104   | 0,897141712     | 2,833333333     |
| SNAI3-AS1                                                                                           | 0,008751649 | 0,156506303 | 0,049 | 0,007 | 1           | 1,114584737   | 0,897195132     | 7               |
| ADA2                                                                                                | 1,33545E-06 | 0,156492944 | 0,098 | 0,004 | 0,028179294 | 1,114574417   | 0,897203439     | 24,5            |

Supplementary Table 2

| Differentially expressed genes_keloid-XL_comparing SC-Keloid vs. (SC-Myel, SC-Nonmyel, SC-Nonmyel2) |             |             |       |       |             |               |                 |                 |
|-----------------------------------------------------------------------------------------------------|-------------|-------------|-------|-------|-------------|---------------|-----------------|-----------------|
| gene                                                                                                | p_val       | avg_log2FC  | pct.1 | pct.2 | p_val_adj   | Foldchange_UP | Foldchange_DOWN | Ratio_pct1_pct2 |
| AMPH                                                                                                | 3,53478E-08 | 0,156414853 | 0,122 | 0,004 | 0,000745874 | 1,114514088   | 0,897252005     | 30,5            |
| CBX5                                                                                                | 0,000636146 | 0,156392372 | 0,561 | 0,291 | 1           | 1,114496721   | 0,897265987     | 1,927835052     |
| CALHM2                                                                                              | 0,00017875  | 0,156318683 | 0,134 | 0,028 | 1           | 1,114439797   | 0,897311818     | 4,785714286     |
| ZNF766                                                                                              | 0,00010679  | 0,156309081 | 0,122 | 0,021 | 1           | 1,114432379   | 0,89731779      | 5,80952381      |
| SANBR                                                                                               | 0,001474456 | 0,156187671 | 0,122 | 0,032 | 1           | 1,114338598   | 0,897393307     | 3,8125          |
| YWHAH                                                                                               | 0,00026985  | 0,156112283 | 0,659 | 0,326 | 1           | 1,114280371   | 0,897440201     | 2,021472393     |
| SRSF9                                                                                               | 2,01206E-05 | 0,156056562 | 0,537 | 0,221 | 0,424565537 | 1,114237335   | 0,897474864     | 2,429864253     |
| CYP20A1                                                                                             | 6,40582E-09 | 0,156043397 | 0,28  | 0,049 | 0,000135169 | 1,114227167   | 0,897483054     | 5,714285714     |
| ATP2B2                                                                                              | 0,001003155 | 0,155960639 | 0,134 | 0,035 | 1           | 1,114163253   | 0,897534538     | 3,828571429     |
| LEF1                                                                                                | 2,3778E-06  | 0,155850443 | 0,244 | 0,056 | 0,050173887 | 1,114078154   | 0,897603096     | 4,357142857     |
| CNOT8                                                                                               | 1,03076E-06 | 0,155821415 | 0,28  | 0,07  | 0,021750085 | 1,114055738   | 0,897621156     | 4               |
| EXOC4                                                                                               | 1,25713E-08 | 0,155682536 | 0,256 | 0,042 | 0,000265267 | 1,1139485     | 0,897707569     | 6,095238095     |
| UCK1                                                                                                | 3,10799E-05 | 0,155677239 | 0,207 | 0,053 | 0,655817737 | 1,11394441    | 0,897710865     | 3,905660377     |
| MAP1LC3A                                                                                            | 0,001122356 | 0,15559704  | 0,622 | 0,337 | 1           | 1,113882488   | 0,89776077      | 1,845697329     |
| LCMT1                                                                                               | 4,01294E-08 | 0,155577368 | 0,207 | 0,028 | 0,00084677  | 1,1138673     | 0,897773012     | 7,392857143     |
| CTNNA1                                                                                              | 0,005856707 | 0,155549299 | 0,854 | 0,649 | 1           | 1,113845629   | 0,897790479     | 1,31587057      |
| CUEDC1                                                                                              | 6,2031E-07  | 0,155455897 | 0,39  | 0,119 | 0,013089169 | 1,113773519   | 0,897848605     | 3,277310924     |
| CLDN7                                                                                               | 0,001839595 | 0,155442353 | 0,049 | 0,004 | 1           | 1,113763063   | 0,897857034     | 12,25           |
| UBA6                                                                                                | 7,37793E-05 | 0,155293421 | 0,366 | 0,14  | 1           | 1,113648093   | 0,897949726     | 2,614285714     |
| SYCE1L                                                                                              | 4,78823E-05 | 0,155219305 | 0,073 | 0,004 | 1           | 1,113590883   | 0,897995858     | 18,25           |
| H2AZ2                                                                                               | 0,002248882 | 0,155218005 | 0,634 | 0,34  | 1           | 1,11358988    | 0,897996667     | 1,864705882     |
| CEP55                                                                                               | 0,009031726 | 0,155182325 | 0,049 | 0,007 | 1           | 1,113562339   | 0,898018876     | 7               |
| ANAPC10                                                                                             | 9,03745E-05 | 0,155100923 | 0,195 | 0,053 | 1           | 1,113499509   | 0,898069547     | 3,679245283     |
| FBXO38                                                                                              | 0,02175178  | 0,155091666 | 0,073 | 0,021 | 1           | 1,113492365   | 0,898075309     | 3,476190476     |
| UBL4A                                                                                               | 2,92313E-09 | 0,155031517 | 0,244 | 0,035 | 6,1681E-05  | 1,113445942   | 0,898112752     | 6,971428571     |
| CBARP                                                                                               | 0,009329829 | 0,154742167 | 0,11  | 0,035 | 1           | 1,11322265    | 0,898292898     | 3,142857143     |
| EXOC7                                                                                               | 0,000446164 | 0,154715133 | 0,28  | 0,109 | 1           | 1,113201789   | 0,898309731     | 2,568807339     |
| DNAL4                                                                                               | 2,98523E-07 | 0,154502735 | 0,171 | 0,021 | 0,006299136 | 1,113037913   | 0,898441992     | 8,142857143     |
| PPIL1                                                                                               | 3,29037E-07 | 0,154484324 | 0,134 | 0,011 | 0,006943005 | 1,113023709   | 0,898453458     | 12,18181818     |
| APLNR                                                                                               | 9,45499E-06 | 0,154469586 | 0,098 | 0,007 | 0,199509675 | 1,113012338   | 0,898462637     | 14              |

Supplementary Table 2

| Differentially expressed genes_keloid-XL_comparing SC-Keloid vs. (SC-Myel, SC-Nonmyel, SC-Nonmyel2) |             |             |       |       |             |               |                 |                 |
|-----------------------------------------------------------------------------------------------------|-------------|-------------|-------|-------|-------------|---------------|-----------------|-----------------|
| gene                                                                                                | p_val       | avg_log2FC  | pct.1 | pct.2 | p_val_adj   | Foldchange_UP | Foldchange_DOWN | Ratio_pct1_pct2 |
| PHF11                                                                                               | 0,003846395 | 0,154458327 | 0,22  | 0,091 | 1           | 1,113003653   | 0,898469648     | 2,417582418     |
| INO80E                                                                                              | 0,000336578 | 0,154455975 | 0,207 | 0,067 | 1           | 1,113001838   | 0,898471113     | 3,089552239     |
| SGO2                                                                                                | 0,001803241 | 0,154346171 | 0,049 | 0,004 | 1           | 1,11291713    | 0,898539498     | 12,25           |
| MMS19                                                                                               | 1,65923E-08 | 0,154193082 | 0,244 | 0,039 | 0,000350114 | 1,112799041   | 0,89863485      | 6,256410256     |
| SEC22A                                                                                              | 1,90824E-09 | 0,154165206 | 0,171 | 0,011 | 4,02658E-05 | 1,112777539   | 0,898652214     | 15,54545455     |
| ATP6V0E2-AS1                                                                                        | 0,008401736 | 0,154088921 | 0,024 | 0     | 1           | 1,112718701   | 0,898699733     | #DIV/0!         |
| HIRA                                                                                                | 0,001474456 | 0,154081802 | 0,122 | 0,032 | 1           | 1,112713211   | 0,898704168     | 3,8125          |
| SPACA9                                                                                              | 1,6403E-06  | 0,153972629 | 0,134 | 0,014 | 0,034611876 | 1,112629011   | 0,898772178     | 9,571428571     |
| ZNF211                                                                                              | 0,001126146 | 0,153819296 | 0,11  | 0,025 | 1           | 1,112510765   | 0,898867707     | 4,4             |
| BMERB1                                                                                              | 1,06086E-05 | 0,153798227 | 0,244 | 0,063 | 0,223852694 | 1,112494518   | 0,898880834     | 3,873015873     |
| ZNF585B                                                                                             | 0,000332109 | 0,153740684 | 0,073 | 0,007 | 1           | 1,112450146   | 0,898916687     | 10,42857143     |
| RFNG                                                                                                | 0,000421287 | 0,153526475 | 0,305 | 0,119 | 1           | 1,112284984   | 0,899050167     | 2,56302521      |
| CCNB1IP1                                                                                            | 4,99173E-06 | 0,153402119 | 0,317 | 0,095 | 0,105330494 | 1,112189112   | 0,899127666     | 3,336842105     |
| RPS6KB2                                                                                             | 0,011312565 | 0,153374927 | 0,171 | 0,07  | 1           | 1,112168149   | 0,899144613     | 2,442857143     |
| DUSP23                                                                                              | 6,51755E-08 | 0,153118665 | 0,39  | 0,105 | 0,001375268 | 1,111970616   | 0,899304339     | 3,714285714     |
| SLC35C2                                                                                             | 6,4873E-09  | 0,153057075 | 0,232 | 0,032 | 0,000136889 | 1,111923146   | 0,899342732     | 7,25            |
| NUDT2                                                                                               | 4,97361E-07 | 0,152876475 | 0,28  | 0,067 | 0,010494812 | 1,111783961   | 0,899455321     | 4,179104478     |
| FBXL17                                                                                              | 2,68861E-05 | 0,152869374 | 0,232 | 0,063 | 0,567322603 | 1,11177849    | 0,899459748     | 3,682539683     |
| GPR108                                                                                              | 0,00390695  | 0,152709392 | 0,207 | 0,084 | 1           | 1,111655209   | 0,899559496     | 2,464285714     |
| SF3B5                                                                                               | 6,48146E-06 | 0,152622331 | 0,561 | 0,232 | 0,136765335 | 1,111588128   | 0,899613782     | 2,418103448     |
| MICU1                                                                                               | 1,32108E-05 | 0,152593733 | 0,378 | 0,133 | 0,278761391 | 1,111566093   | 0,899631615     | 2,842105263     |
| TM2D1                                                                                               | 0,009487909 | 0,152522592 | 0,171 | 0,07  | 1           | 1,111511282   | 0,899675978     | 2,442857143     |
| MAN1A2                                                                                              | 1,02768E-05 | 0,152477202 | 0,451 | 0,165 | 0,216851261 | 1,111476312   | 0,899704284     | 2,733333333     |
| ATG3                                                                                                | 9,93562E-05 | 0,152457527 | 0,354 | 0,14  | 1           | 1,111461155   | 0,899716554     | 2,528571429     |
| TMEM33                                                                                              | 3,28733E-05 | 0,152194599 | 0,329 | 0,112 | 0,693659897 | 1,111258612   | 0,89988054      | 2,9375          |
| CAMTA2                                                                                              | 3,36584E-06 | 0,152084562 | 0,244 | 0,06  | 0,07102265  | 1,111173857   | 0,899949179     | 4,066666667     |
| TNFAIP1                                                                                             | 6,3637E-06  | 0,15183991  | 0,183 | 0,035 | 0,13428035  | 1,11098544    | 0,900101805     | 5,228571429     |
| UMPS                                                                                                | 5,08758E-08 | 0,151740767 | 0,134 | 0,007 | 0,001073531 | 1,110909095   | 0,900163662     | 19,14285714     |
| ZBTB17                                                                                              | 0,001659385 | 0,151709866 | 0,134 | 0,039 | 1           | 1,110885301   | 0,900182943     | 3,435897436     |
| NDRG4                                                                                               | 6,67422E-07 | 0,151657049 | 0,085 | 0     | 0,014083281 | 1,110844632   | 0,9002159       | #DIV/0!         |

Supplementary Table 2

| Differentially expressed genes_keloid-XL_comparing SC-Keloid vs. (SC-Myel, SC-Nonmyel, SC-Nonmyel2) |             |             |       |       |             |               |                 |                 |
|-----------------------------------------------------------------------------------------------------|-------------|-------------|-------|-------|-------------|---------------|-----------------|-----------------|
| gene                                                                                                | p_val       | avg_log2FC  | pct.1 | pct.2 | p_val_adj   | Foldchange_UP | Foldchange_DOWN | Ratio_pct1_pct2 |
| NLRX1                                                                                               | 0,026685693 | 0,151622185 | 0,049 | 0,011 | 1           | 1,110817788   | 0,900237654     | 4,454545455     |
| AIMP2                                                                                               | 8,40774E-07 | 0,151591028 | 0,171 | 0,025 | 0,017741166 | 1,110793798   | 0,900257097     | 6,84            |
| BRD3OS                                                                                              | 2,47998E-05 | 0,151471804 | 0,134 | 0,021 | 0,523300999 | 1,110702006   | 0,900331497     | 6,380952381     |
| CDKN2B                                                                                              | 0,000412162 | 0,151402768 | 0,159 | 0,042 | 1           | 1,110648859   | 0,90037458      | 3,785714286     |
| WDR13                                                                                               | 7,23726E-05 | 0,151306914 | 0,451 | 0,182 | 1           | 1,110575069   | 0,900434404     | 2,478021978     |
| CUL4B                                                                                               | 6,83314E-06 | 0,15124506  | 0,207 | 0,046 | 0,144186145 | 1,110527454   | 0,90047301      | 4,5             |
| TMEM267                                                                                             | 8,07227E-05 | 0,151061669 | 0,159 | 0,035 | 1           | 1,110386297   | 0,900587483     | 4,542857143     |
| GBA                                                                                                 | 9,41154E-05 | 0,151035475 | 0,195 | 0,053 | 1           | 1,110366136   | 0,900603834     | 3,679245283     |
| GTF2E1                                                                                              | 6,67422E-07 | 0,150930807 | 0,085 | 0     | 0,014083281 | 1,110285582   | 0,900669175     | #DIV/0!         |
| BEND5                                                                                               | 1,83428E-05 | 0,150791314 | 0,146 | 0,025 | 0,387051502 | 1,110178235   | 0,900756265     | 5,84            |
| MUL1                                                                                                | 1,90655E-09 | 0,150561256 | 0,195 | 0,018 | 4,02302E-05 | 1,110001215   | 0,900899915     | 10,83333333     |
| ARFRP1                                                                                              | 7,26295E-05 | 0,150552404 | 0,305 | 0,109 | 1           | 1,109994404   | 0,900905442     | 2,798165138     |
| NT5C3A                                                                                              | 2,43477E-06 | 0,150364242 | 0,354 | 0,109 | 0,051376124 | 1,109849644   | 0,90102295      | 3,247706422     |
| RPS12                                                                                               | 0,026100466 | 0,150126059 | 0,976 | 0,912 | 1           | 1,109666428   | 0,901171717     | 1,070175439     |
| ZNF576                                                                                              | 0,000702674 | 0,15004971  | 0,122 | 0,028 | 1           | 1,109607704   | 0,901219409     | 4,357142857     |
| C4orf3                                                                                              | 0,002130089 | 0,150038138 | 0,683 | 0,404 | 1           | 1,109598804   | 0,901226638     | 1,690594059     |
| ARL4D                                                                                               | 8,25251E-08 | 0,14998468  | 0,256 | 0,049 | 0,001741362 | 1,10955769    | 0,901260033     | 5,224489796     |
| IPO4                                                                                                | 1,81794E-06 | 0,149907736 | 0,134 | 0,014 | 0,038360322 | 1,109498514   | 0,901308102     | 9,571428571     |
| LINC00665                                                                                           | 3,12046E-05 | 0,149804473 | 0,159 | 0,032 | 0,658448012 | 1,109419103   | 0,901372617     | 4,96875         |
| LTA4H                                                                                               | 0,000705559 | 0,149745177 | 0,159 | 0,046 | 1           | 1,109373506   | 0,901409664     | 3,456521739     |
| DRG2                                                                                                | 0,000290452 | 0,149567018 | 0,183 | 0,053 | 1           | 1,109236518   | 0,901520987     | 3,452830189     |
| CFAP20                                                                                              | 2,2086E-05  | 0,149396633 | 0,573 | 0,249 | 0,466036878 | 1,109105523   | 0,901627464     | 2,301204819     |
| CHMP6                                                                                               | 1,0926E-05  | 0,149389822 | 0,22  | 0,053 | 0,230548859 | 1,109100286   | 0,901631721     | 4,150943396     |
| FMNL1                                                                                               | 0,006076786 | 0,149368023 | 0,061 | 0,011 | 1           | 1,109083528   | 0,901645345     | 5,545454545     |
| MED8                                                                                                | 2,63838E-07 | 0,149304996 | 0,22  | 0,039 | 0,00556724  | 1,109035077   | 0,901684736     | 5,641025641     |
| BMP8B                                                                                               | 1,72676E-05 | 0,149249429 | 0,415 | 0,154 | 0,364363962 | 1,108992362   | 0,901719466     | 2,694805195     |
| TIMM23                                                                                              | 9,11343E-09 | 0,149233707 | 0,195 | 0,021 | 0,000192303 | 1,108980277   | 0,901729292     | 9,285714286     |
| SLC25A24                                                                                            | 1,912E-06   | 0,149194211 | 0,22  | 0,046 | 0,040345126 | 1,108949917   | 0,901753979     | 4,782608696     |
| FAT1                                                                                                | 1,46962E-07 | 0,149179019 | 0,415 | 0,119 | 0,003101049 | 1,108938239   | 0,901763475     | 3,487394958     |
| IL17RA                                                                                              | 7,4007E-05  | 0,149070531 | 0,134 | 0,025 | 1           | 1,108854852   | 0,901831288     | 5,36            |

Supplementary Table 2

| Differentially expressed genes_keloid-XL_comparing SC-Keloid vs. (SC-Myel, SC-Nonmyel, SC-Nonmyel2) |             |             |       |       |             |               |                 |                 |
|-----------------------------------------------------------------------------------------------------|-------------|-------------|-------|-------|-------------|---------------|-----------------|-----------------|
| gene                                                                                                | p_val       | avg_log2FC  | pct.1 | pct.2 | p_val_adj   | Foldchange_UP | Foldchange_DOWN | Ratio_pct1_pct2 |
| PCDHGA10                                                                                            | 0,000284208 | 0,149030537 | 0,085 | 0,011 | 1           | 1,108824113   | 0,901856289     | 7,727272727     |
| DNAJC17                                                                                             | 7,14685E-07 | 0,148963369 | 0,183 | 0,028 | 0,015080561 | 1,108772491   | 0,901898278     | 6,535714286     |
| SCAMP3                                                                                              | 5,85622E-06 | 0,148819669 | 0,305 | 0,091 | 0,123572035 | 1,108662057   | 0,901988116     | 3,351648352     |
| TMEM184B                                                                                            | 0,000359592 | 0,148777439 | 0,329 | 0,133 | 1           | 1,108629605   | 0,902014519     | 2,473684211     |
| PABIR2                                                                                              | 4,9418E-05  | 0,148679777 | 0,146 | 0,028 | 1           | 1,10855456    | 0,902075582     | 5,214285714     |
| MKNK1                                                                                               | 1,55729E-05 | 0,14858204  | 0,207 | 0,049 | 0,328603271 | 1,108479462   | 0,902136696     | 4,224489796     |
| VCP                                                                                                 | 1,22724E-05 | 0,148475522 | 0,524 | 0,211 | 0,258959273 | 1,108397623   | 0,902203306     | 2,483412322     |
| RETREG2                                                                                             | 4,49189E-05 | 0,148452138 | 0,317 | 0,109 | 0,947833764 | 1,108379658   | 0,90221793      | 2,908256881     |
| RBMX2                                                                                               | 1,66436E-05 | 0,14827628  | 0,207 | 0,049 | 0,351196556 | 1,108244559   | 0,902327913     | 4,224489796     |
| MTFMT                                                                                               | 3,53748E-05 | 0,148271977 | 0,159 | 0,032 | 0,746444206 | 1,108241254   | 0,902330604     | 4,96875         |
| SLC2A8                                                                                              | 1,22606E-05 | 0,148037383 | 0,268 | 0,077 | 0,25871057  | 1,108061059   | 0,902477343     | 3,480519481     |
| DNAJC1                                                                                              | 4,95818E-06 | 0,147915954 | 0,427 | 0,154 | 0,104622475 | 1,1079678     | 0,902553306     | 2,772727273     |
| TPCN2                                                                                               | 0,00046173  | 0,147657673 | 0,11  | 0,021 | 1           | 1,107769462   | 0,902714901     | 5,238095238     |
| MRGBP                                                                                               | 5,79791E-06 | 0,147635494 | 0,207 | 0,046 | 0,122341755 | 1,107752432   | 0,902728779     | 4,5             |
| TBC1D16                                                                                             | 0,001545113 | 0,147436968 | 0,183 | 0,063 | 1           | 1,107600007   | 0,90285301      | 2,904761905     |
| RILPL1                                                                                              | 5,94946E-06 | 0,147411362 | 0,28  | 0,077 | 0,125539597 | 1,107580348   | 0,902869035     | 3,636363636     |
| REXO4                                                                                               | 1,86648E-06 | 0,147372297 | 0,183 | 0,032 | 0,039384609 | 1,107550359   | 0,902893482     | 5,71875         |
| ITGA11                                                                                              | 0,000344207 | 0,147341932 | 0,073 | 0,007 | 1           | 1,107527048   | 0,902912486     | 10,42857143     |
| RPL39                                                                                               | 0,176132979 | 0,147182579 | 0,963 | 0,919 | 1           | 1,107404722   | 0,903012223     | 1,047878128     |
| ATP6VOA1                                                                                            | 0,000167444 | 0,147116085 | 0,244 | 0,081 | 1           | 1,107353683   | 0,903053844     | 3,012345679     |
| CNPPD1                                                                                              | 6,99759E-08 | 0,147109558 | 0,329 | 0,077 | 0,001476561 | 1,107348673   | 0,90305793      | 4,272727273     |
| PPM1M                                                                                               | 9,76523E-07 | 0,146911776 | 0,171 | 0,025 | 0,020605606 | 1,107196875   | 0,90318174      | 6,84            |
| PABPC1L                                                                                             | 0,000316068 | 0,146658191 | 0,146 | 0,035 | 1           | 1,107002278   | 0,903340508     | 4,171428571     |
| ARID3B                                                                                              | 4,18695E-06 | 0,146628843 | 0,159 | 0,025 | 0,088348819 | 1,106979759   | 0,903358884     | 6,36            |
| LYPLA1                                                                                              | 1,0229E-06  | 0,146608217 | 0,232 | 0,049 | 0,021584237 | 1,106963933   | 0,9033718       | 4,734693878     |
| LNPBK                                                                                               | 3,15192E-06 | 0,146539233 | 0,232 | 0,053 | 0,06650873  | 1,106911004   | 0,903414996     | 4,377358491     |
| ZNF346                                                                                              | 0,000204598 | 0,14651093  | 0,098 | 0,014 | 1           | 1,106889289   | 0,903432719     | 7               |
| FBXW4                                                                                               | 0,046537539 | 0,146411118 | 0,122 | 0,056 | 1           | 1,106812711   | 0,903495226     | 2,178571429     |
| MRPS35                                                                                              | 3,53006E-11 | 0,146352207 | 0,28  | 0,035 | 7,44877E-07 | 1,106767517   | 0,903532119     | 8               |
| PLAGL1                                                                                              | 2,13269E-07 | 0,14629833  | 0,11  | 0,004 | 0,004500182 | 1,106726186   | 0,903565862     | 27,5            |

Supplementary Table 2

| Differentially expressed genes_keloid-XL_comparing SC-Keloid vs. (SC-Myel, SC-Nonmyel, SC-Nonmyel2) |             |             |       |       |             |               |                 |                 |
|-----------------------------------------------------------------------------------------------------|-------------|-------------|-------|-------|-------------|---------------|-----------------|-----------------|
| gene                                                                                                | p_val       | avg_log2FC  | pct.1 | pct.2 | p_val_adj   | Foldchange_UP | Foldchange_DOWN | Ratio_pct1_pct2 |
| DCUN1D5                                                                                             | 2,66021E-06 | 0,146292223 | 0,244 | 0,056 | 0,056133048 | 1,106721501   | 0,903569687     | 4,357142857     |
| NUDT5                                                                                               | 1,39884E-06 | 0,146265585 | 0,317 | 0,088 | 0,029516935 | 1,106701066   | 0,903586371     | 3,602272727     |
| C1orf159                                                                                            | 0,097164846 | 0,146131412 | 0,085 | 0,039 | 1           | 1,106598146   | 0,903670409     | 2,179487179     |
| DIRAS3                                                                                              | 5,55398E-09 | 0,146053854 | 0,134 | 0,004 | 0,000117194 | 1,106538658   | 0,903718992     | 33,5            |
| CTSO                                                                                                | 8,72937E-07 | 0,146026708 | 0,207 | 0,039 | 0,018419843 | 1,106517837   | 0,903735996     | 5,307692308     |
| ETV5                                                                                                | 1,02292E-05 | 0,145989817 | 0,22  | 0,053 | 0,215846465 | 1,106489543   | 0,903759106     | 4,150943396     |
| NCBP2                                                                                               | 6,07784E-07 | 0,145951408 | 0,354 | 0,102 | 0,012824844 | 1,106460085   | 0,903783167     | 3,470588235     |
| RAD51C                                                                                              | 1,69089E-07 | 0,145907095 | 0,195 | 0,028 | 0,003567937 | 1,1064261     | 0,903810927     | 6,964285714     |
| PLBD2                                                                                               | 6,04672E-06 | 0,145724092 | 0,183 | 0,035 | 0,127591781 | 1,106285762   | 0,903925581     | 5,228571429     |
| ADSL                                                                                                | 2,16855E-06 | 0,145693171 | 0,183 | 0,032 | 0,045758632 | 1,10626205    | 0,903944956     | 5,71875         |
| TEDC1                                                                                               | 2,21914E-08 | 0,145640944 | 0,22  | 0,032 | 0,00046826  | 1,106222004   | 0,90397768      | 6,875           |
| ARRB2                                                                                               | 0,012780645 | 0,145567961 | 0,085 | 0,025 | 1           | 1,106166043   | 0,904023411     | 3,4             |
| GALK1                                                                                               | 3,21999E-05 | 0,145499944 | 0,183 | 0,042 | 0,679450306 | 1,106113894   | 0,904066033     | 4,357142857     |
| HAUS1                                                                                               | 0,000132233 | 0,145495287 | 0,146 | 0,032 | 1           | 1,106110323   | 0,904068951     | 4,5625          |
| BASP1                                                                                               | 0,304816249 | 0,145421001 | 0,061 | 0,035 | 1           | 1,10605337    | 0,904115504     | 1,742857143     |
| SERP2                                                                                               | 1,93327E-06 | 0,145393646 | 0,122 | 0,011 | 0,040793846 | 1,106032398   | 0,904132647     | 11,09090909     |
| RBM23                                                                                               | 0,000172682 | 0,145286847 | 0,317 | 0,119 | 1           | 1,105950524   | 0,904199581     | 2,663865546     |
| BCL2L13                                                                                             | 2,08677E-06 | 0,145177045 | 0,207 | 0,042 | 0,044033036 | 1,105866355   | 0,904268401     | 4,928571429     |
| DERL1                                                                                               | 3,7347E-06  | 0,14511337  | 0,28  | 0,077 | 0,078805884 | 1,105817548   | 0,904308312     | 3,636363636     |
| SNX16                                                                                               | 0,001777061 | 0,145056008 | 0,134 | 0,039 | 1           | 1,105773581   | 0,904344269     | 3,435897436     |
| MED6                                                                                                | 5,40733E-06 | 0,145017209 | 0,268 | 0,074 | 0,114100115 | 1,105743843   | 0,90436859      | 3,621621622     |
| SIVA1                                                                                               | 0,000158074 | 0,144945615 | 0,549 | 0,253 | 1           | 1,105688972   | 0,90441347      | 2,169960474     |
| HTRA1                                                                                               | 9,54858E-06 | 0,144829612 | 0,585 | 0,246 | 0,201484516 | 1,10560007    | 0,904486195     | 2,37804878      |
| DXO                                                                                                 | 4,06927E-05 | 0,144530614 | 0,195 | 0,049 | 0,858655708 | 1,105370958   | 0,904673669     | 3,979591837     |
| MRPL14                                                                                              | 1,70731E-07 | 0,144419794 | 0,476 | 0,154 | 0,003602598 | 1,105286053   | 0,904743163     | 3,090909091     |
| ERFE                                                                                                | 4,32324E-06 | 0,144418899 | 0,073 | 0     | 0,09122464  | 1,105285367   | 0,904743725     | #DIV/0!         |
| PRPS2                                                                                               | 1,01061E-06 | 0,14431953  | 0,232 | 0,049 | 0,021324863 | 1,105209241   | 0,904806043     | 4,734693878     |
| TUBGCP3                                                                                             | 3,3707E-06  | 0,144280128 | 0,171 | 0,028 | 0,071125139 | 1,105179057   | 0,904830755     | 6,107142857     |
| CCDC22                                                                                              | 4,30939E-06 | 0,144278831 | 0,159 | 0,025 | 0,09093244  | 1,105178063   | 0,904831569     | 6,36            |
| PRKAG1                                                                                              | 1,11655E-08 | 0,144140023 | 0,195 | 0,021 | 0,000235604 | 1,105071734   | 0,90491863      | 9,285714286     |

Supplementary Table 2

| Differentially expressed genes_keloid-XL_comparing SC-Keloid vs. (SC-Myel, SC-Nonmyel, SC-Nonmyel2) |             |             |       |       |             |               |                 |                 |
|-----------------------------------------------------------------------------------------------------|-------------|-------------|-------|-------|-------------|---------------|-----------------|-----------------|
| gene                                                                                                | p_val       | avg_log2FC  | pct.1 | pct.2 | p_val_adj   | Foldchange_UP | Foldchange_DOWN | Ratio_pct1_pct2 |
| BABAM1                                                                                              | 3,72895E-06 | 0,144099408 | 0,341 | 0,105 | 0,07868457  | 1,105040624   | 0,904944106     | 3,247619048     |
| ISYNA1                                                                                              | 1,75178E-06 | 0,143979194 | 0,244 | 0,056 | 0,036964228 | 1,10494855    | 0,905019514     | 4,357142857     |
| ANKIB1                                                                                              | 2,2405E-06  | 0,143938179 | 0,329 | 0,095 | 0,047276696 | 1,104917137   | 0,905045244     | 3,463157895     |
| CASP3                                                                                               | 7,19892E-09 | 0,143820404 | 0,317 | 0,063 | 0,000151904 | 1,10482694    | 0,905119131     | 5,031746032     |
| AASDHPPT                                                                                            | 5,96711E-05 | 0,143814001 | 0,244 | 0,074 | 1           | 1,104822037   | 0,905123148     | 3,297297297     |
| RBCK1                                                                                               | 4,72109E-07 | 0,143756032 | 0,463 | 0,154 | 0,009961982 | 1,104777645   | 0,905159518     | 3,006493506     |
| RUFY3                                                                                               | 0,02014484  | 0,143704776 | 0,207 | 0,102 | 1           | 1,104738395   | 0,905191676     | 2,029411765     |
| ARHGAP23                                                                                            | 6,64427E-05 | 0,143692587 | 0,28  | 0,095 | 1           | 1,104729061   | 0,905199324     | 2,947368421     |
| GOLGA8B                                                                                             | 0,009645779 | 0,143680927 | 0,134 | 0,049 | 1           | 1,104720133   | 0,90520664      | 2,734693878     |
| TRAM2                                                                                               | 0,000130745 | 0,143560258 | 0,293 | 0,102 | 1           | 1,104627736   | 0,905282357     | 2,87254902      |
| FAF2                                                                                                | 0,000267571 | 0,143516052 | 0,146 | 0,035 | 1           | 1,10459389    | 0,905310096     | 4,171428571     |
| GSS                                                                                                 | 4,01294E-08 | 0,143425408 | 0,207 | 0,028 | 0,00084677  | 1,104524491   | 0,905366978     | 7,392857143     |
| COA8                                                                                                | 1,08166E-07 | 0,143376062 | 0,366 | 0,098 | 0,002282419 | 1,104486712   | 0,905397945     | 3,734693878     |
| ZNF263                                                                                              | 0,004566226 | 0,143327637 | 0,11  | 0,032 | 1           | 1,10444964    | 0,905428336     | 3,4375          |
| SUSD4                                                                                               | 0,000983548 | 0,14319995  | 0,085 | 0,014 | 1           | 1,104351894   | 0,905508475     | 6,071428571     |
| METTL27                                                                                             | 6,67422E-07 | 0,143131114 | 0,085 | 0     | 0,014083281 | 1,104299203   | 0,905551681     | #DIV/0!         |
| CCM2                                                                                                | 4,85913E-05 | 0,143089227 | 0,329 | 0,116 | 1           | 1,104267141   | 0,905577974     | 2,836206897     |
| RPL18                                                                                               | 0,043644107 | 0,14306101  | 0,976 | 0,874 | 1           | 1,104245544   | 0,905595685     | 1,116704805     |
| BSDC1                                                                                               | 0,000380385 | 0,1430551   | 0,28  | 0,109 | 1           | 1,10424102    | 0,905599395     | 2,568807339     |
| POFUT1                                                                                              | 0,001182686 | 0,142853201 | 0,146 | 0,042 | 1           | 1,104086497   | 0,905726139     | 3,476190476     |
| SSU72                                                                                               | 2,73649E-06 | 0,14279025  | 0,512 | 0,189 | 0,057742693 | 1,104038322   | 0,90576566      | 2,708994709     |
| BRMS1                                                                                               | 3,60614E-08 | 0,142747328 | 0,329 | 0,077 | 0,000760932 | 1,104005476   | 0,905792609     | 4,272727273     |
| LRRC61                                                                                              | 1,59595E-06 | 0,142746617 | 0,146 | 0,018 | 0,033676041 | 1,104004931   | 0,905793055     | 8,111111111     |
| CYHR1                                                                                               | 0,000605906 | 0,142738468 | 0,354 | 0,151 | 1           | 1,103998696   | 0,905798171     | 2,344370861     |
| AARD                                                                                                | 4,32324E-06 | 0,142703171 | 0,073 | 0     | 0,09122464  | 1,103971686   | 0,905820333     | #DIV/0!         |
| MAPKAPK5                                                                                            | 7,3023E-05  | 0,142593494 | 0,183 | 0,046 | 1           | 1,103887763   | 0,905889198     | 3,97826087      |
| LRRC75A                                                                                             | 1,18512E-05 | 0,142475604 | 0,28  | 0,084 | 0,250071219 | 1,103797562   | 0,905963226     | 3,333333333     |
| DDRGK1                                                                                              | 2,52402E-06 | 0,142452312 | 0,354 | 0,109 | 0,053259401 | 1,103779741   | 0,905977853     | 3,247706422     |
| WWC1                                                                                                | 1,02952E-07 | 0,142420208 | 0,098 | 0     | 0,002172399 | 1,103755179   | 0,905998014     | #DIV/0!         |
| RAMP1                                                                                               | 1,80697E-08 | 0,142334234 | 0,244 | 0,039 | 0,00038129  | 1,103689406   | 0,906052006     | 6,256410256     |

Supplementary Table 2

| Differentially expressed genes_keloid-XL_comparing SC-Keloid vs. (SC-Myel, SC-Nonmyel, SC-Nonmyel2) |             |             |       |       |             |               |                 |                 |
|-----------------------------------------------------------------------------------------------------|-------------|-------------|-------|-------|-------------|---------------|-----------------|-----------------|
| gene                                                                                                | p_val       | avg_log2FC  | pct.1 | pct.2 | p_val_adj   | Foldchange_UP | Foldchange_DOWN | Ratio_pct1_pct2 |
| PUS7L                                                                                               | 1,09579E-05 | 0,14232457  | 0,195 | 0,042 | 0,231222427 | 1,103682013   | 0,906058075     | 4,642857143     |
| RAE1                                                                                                | 4,34375E-05 | 0,142264002 | 0,146 | 0,028 | 0,916575713 | 1,103635679   | 0,906096114     | 5,214285714     |
| SMIM29                                                                                              | 4,0422E-06  | 0,141986822 | 0,341 | 0,105 | 0,085294427 | 1,103423661   | 0,906270216     | 3,247619048     |
| MCUR1                                                                                               | 2,13049E-05 | 0,141984755 | 0,354 | 0,123 | 0,449554349 | 1,10342208    | 0,906271515     | 2,87804878      |
| SCO1                                                                                                | 1,02863E-05 | 0,141947657 | 0,11  | 0,011 | 0,217050943 | 1,103393706   | 0,90629482      | 10              |
| EIF2B3                                                                                              | 3,73206E-06 | 0,141931219 | 0,195 | 0,039 | 0,078750233 | 1,103381135   | 0,906305145     | 5               |
| PEX2                                                                                                | 5,50109E-07 | 0,141834765 | 0,305 | 0,077 | 0,011607854 | 1,103307368   | 0,90636574      | 3,961038961     |
| DHRXS                                                                                               | 7,61186E-11 | 0,141794248 | 0,22  | 0,018 | 1,60618E-06 | 1,103276383   | 0,906391196     | 12,22222222     |
| ESYT1                                                                                               | 4,91433E-07 | 0,14174702  | 0,232 | 0,046 | 0,010369724 | 1,103240267   | 0,906420867     | 5,043478261     |
| PPID                                                                                                | 6,1337E-06  | 0,141651862 | 0,146 | 0,021 | 0,129427162 | 1,103167501   | 0,906480656     | 6,952380952     |
| MDK                                                                                                 | 2,19759E-05 | 0,141597183 | 0,463 | 0,186 | 0,463713113 | 1,103125692   | 0,906515012     | 2,489247312     |
| FAM104B                                                                                             | 0,000491694 | 0,14159376  | 0,183 | 0,056 | 1           | 1,103123075   | 0,906517163     | 3,267857143     |
| PHKG1                                                                                               | 5,61434E-05 | 0,141511226 | 0,171 | 0,039 | 1           | 1,103059968   | 0,906569025     | 4,384615385     |
| FAM50A                                                                                              | 3,81697E-06 | 0,141475865 | 0,402 | 0,14  | 0,080541829 | 1,103032932   | 0,906591246     | 2,871428571     |
| OAZ1                                                                                                | 0,080810863 | 0,141411007 | 0,951 | 0,786 | 1           | 1,102983345   | 0,906632003     | 1,209923664     |
| HOXB4                                                                                               | 7,59943E-06 | 0,141369536 | 0,085 | 0,004 | 0,160355666 | 1,10295164    | 0,906658065     | 21,25           |
| PSKH1                                                                                               | 2,1468E-05  | 0,141258651 | 0,134 | 0,021 | 0,452995664 | 1,102866871   | 0,906727753     | 6,380952381     |
| RAB8A                                                                                               | 1,2913E-08  | 0,141227321 | 0,293 | 0,056 | 0,000272478 | 1,102842921   | 0,906747444     | 5,232142857     |
| HNRNPUL2                                                                                            | 0,000114968 | 0,14122507  | 0,354 | 0,137 | 1           | 1,1028412     | 0,906748859     | 2,583941606     |
| ICAM2                                                                                               | 0,016071749 | 0,141063367 | 0,061 | 0,014 | 1           | 1,102717597   | 0,906850497     | 4,357142857     |
| CAPZA2                                                                                              | 8,45131E-06 | 0,141032861 | 0,561 | 0,235 | 0,178331074 | 1,10269428    | 0,906869672     | 2,387234043     |
| C15orf61                                                                                            | 2,5872E-07  | 0,140996388 | 0,28  | 0,063 | 0,005459252 | 1,102666403   | 0,906892599     | 4,444444444     |
| MRPL28                                                                                              | 5,47239E-06 | 0,140975394 | 0,317 | 0,095 | 0,115473007 | 1,102650357   | 0,906905797     | 3,336842105     |
| ZFYVE27                                                                                             | 0,000110887 | 0,14091582  | 0,171 | 0,042 | 1           | 1,102604825   | 0,906943247     | 4,071428571     |
| TMEM101                                                                                             | 7,90708E-07 | 0,140783435 | 0,183 | 0,028 | 0,016684724 | 1,102503652   | 0,907026474     | 6,535714286     |
| ECHDC1                                                                                              | 0,000336448 | 0,140763239 | 0,305 | 0,119 | 1           | 1,102488219   | 0,907039171     | 2,56302521      |
| BCAT2                                                                                               | 3,3465E-05  | 0,140612449 | 0,207 | 0,053 | 0,706144696 | 1,102372993   | 0,907133979     | 3,905660377     |
| RPS27                                                                                               | 0,125047335 | 0,140480163 | 0,988 | 0,94  | 1           | 1,102271917   | 0,907217162     | 1,05106383      |
| STX18                                                                                               | 0,000745181 | 0,140377502 | 0,171 | 0,053 | 1           | 1,102193483   | 0,907281721     | 3,226415094     |
| RPS28                                                                                               | 0,063518306 | 0,140349235 | 0,976 | 0,909 | 1           | 1,102171888   | 0,907299497     | 1,073707371     |



Supplementary Table 2

| Differentially expressed genes_keloid-XL_comparing SC-Keloid vs. (SC-Myel, SC-Nonmyel, SC-Nonmyel2) |             |             |       |       |             |               |                 |                 |
|-----------------------------------------------------------------------------------------------------|-------------|-------------|-------|-------|-------------|---------------|-----------------|-----------------|
| gene                                                                                                | p_val       | avg_log2FC  | pct.1 | pct.2 | p_val_adj   | Foldchange_UP | Foldchange_DOWN | Ratio_pct1_pct2 |
| KIAA0753                                                                                            | 8,29253E-06 | 0,140288753 | 0,085 | 0,004 | 0,174980583 | 1,102125683   | 0,907337535     | 21,25           |
| TMEM41B                                                                                             | 3,57942E-05 | 0,140242264 | 0,317 | 0,109 | 0,755292466 | 1,102090168   | 0,907366773     | 2,908256881     |
| IMPACT                                                                                              | 7,28732E-05 | 0,140160667 | 0,256 | 0,081 | 1           | 1,102027837   | 0,907418094     | 3,160493827     |
| PPM1G                                                                                               | 1,5112E-06  | 0,140029329 | 0,402 | 0,13  | 0,031887762 | 1,101927517   | 0,907500706     | 3,092307692     |
| NARF                                                                                                | 7,31286E-06 | 0,139987544 | 0,305 | 0,091 | 0,15430866  | 1,101895602   | 0,907526991     | 3,351648352     |
| ANPEP                                                                                               | 1,10381E-05 | 0,139862061 | 0,098 | 0,007 | 0,232915863 | 1,101799766   | 0,907605929     | 14              |
| GAMT                                                                                                | 1,86156E-06 | 0,139843451 | 0,268 | 0,067 | 0,039280779 | 1,101785553   | 0,907617637     | 4               |
| C22orf39                                                                                            | 3,19473E-07 | 0,139814343 | 0,244 | 0,049 | 0,006741204 | 1,101763323   | 0,90763595      | 4,979591837     |
| PJA1                                                                                                | 0,000505741 | 0,139730132 | 0,268 | 0,102 | 1           | 1,101699015   | 0,90768893      | 2,62745098      |
| SMC6                                                                                                | 2,17282E-06 | 0,139589669 | 0,244 | 0,056 | 0,04584871  | 1,101591756   | 0,907777309     | 4,357142857     |
| TFAM                                                                                                | 1,05306E-05 | 0,139414272 | 0,28  | 0,081 | 0,22220625  | 1,101457838   | 0,907887679     | 3,456790123     |
| TMEM127                                                                                             | 4,14509E-08 | 0,139407313 | 0,195 | 0,025 | 0,000874655 | 1,101452525   | 0,907892059     | 7,8             |
| ATMIN                                                                                               | 2,62381E-08 | 0,139405784 | 0,256 | 0,046 | 0,00055365  | 1,101451357   | 0,907893021     | 5,565217391     |
| SCP2                                                                                                | 2,87412E-06 | 0,139223899 | 0,585 | 0,232 | 0,060646839 | 1,101312503   | 0,908007489     | 2,521551724     |
| METTL26                                                                                             | 1,83242E-05 | 0,13919871  | 0,537 | 0,228 | 0,38665924  | 1,101293275   | 0,908023342     | 2,355263158     |
| PRPF4                                                                                               | 0,000271704 | 0,13914175  | 0,122 | 0,025 | 1           | 1,101249794   | 0,908059194     | 4,88            |
| CCNC                                                                                                | 2,81634E-08 | 0,139054028 | 0,207 | 0,028 | 0,000594277 | 1,101182836   | 0,908114409     | 7,392857143     |
| MRPS26                                                                                              | 1,35748E-05 | 0,139047757 | 0,415 | 0,151 | 0,286440893 | 1,10117805    | 0,908118356     | 2,748344371     |
| STOML1                                                                                              | 1,19159E-08 | 0,139039831 | 0,183 | 0,018 | 0,000251436 | 1,101171999   | 0,908123345     | 10,16666667     |
| ARMC9                                                                                               | 2,04211E-06 | 0,138949945 | 0,122 | 0,011 | 0,043090571 | 1,101103394   | 0,908179927     | 11,09090909     |
| PPP1R16A                                                                                            | 0,034527937 | 0,138854796 | 0,207 | 0,109 | 1           | 1,101030776   | 0,908239825     | 1,899082569     |
| ZNF384                                                                                              | 1,02116E-06 | 0,138828284 | 0,207 | 0,039 | 0,021547494 | 1,101010543   | 0,908256516     | 5,307692308     |
| CPSF4                                                                                               | 0,001338917 | 0,13880066  | 0,073 | 0,011 | 1           | 1,100989462   | 0,908273907     | 6,636363636     |
| CHMP3                                                                                               | 0,000225716 | 0,138500184 | 0,585 | 0,281 | 1           | 1,100760178   | 0,908463097     | 2,081850534     |
| NAF1                                                                                                | 7,68252E-07 | 0,138464026 | 0,171 | 0,025 | 0,016210885 | 1,10073259    | 0,908485865     | 6,84            |
| PRNP                                                                                                | 0,232700802 | 0,138435514 | 0,89  | 0,818 | 1           | 1,100710836   | 0,90850382      | 1,08801956      |
| NAGPA                                                                                               | 3,04946E-07 | 0,13839089  | 0,122 | 0,007 | 0,006434672 | 1,100676791   | 0,908531921     | 17,42857143     |
| PPP2R1B                                                                                             | 0,001052504 | 0,138248389 | 0,146 | 0,042 | 1           | 1,100568078   | 0,908621665     | 3,476190476     |
| ZNF579                                                                                              | 6,09253E-07 | 0,138240334 | 0,183 | 0,028 | 0,012855847 | 1,100561933   | 0,908626739     | 6,535714286     |
| SIT1                                                                                                | 0,063203483 | 0,138207475 | 0,012 | 0     | 1           | 1,100536867   | 0,908647434     | #DIV/0!         |

Supplementary Table 2

| Differentially expressed genes_keloid-XL_comparing SC-Keloid vs. (SC-Myel, SC-Nonmyel, SC-Nonmyel2) |             |             |       |       |             |               |                 |                 |
|-----------------------------------------------------------------------------------------------------|-------------|-------------|-------|-------|-------------|---------------|-----------------|-----------------|
| gene                                                                                                | p_val       | avg_log2FC  | pct.1 | pct.2 | p_val_adj   | Foldchange_UP | Foldchange_DOWN | Ratio_pct1_pct2 |
| TRAPPC13                                                                                            | 3,37031E-05 | 0,138173049 | 0,183 | 0,042 | 0,711169579 | 1,100510606   | 0,908669117     | 4,357142857     |
| TTC4                                                                                                | 0,000569058 | 0,138169842 | 0,146 | 0,039 | 1           | 1,100508159   | 0,908671137     | 3,743589744     |
| ATAT1                                                                                               | 0,001074299 | 0,138139534 | 0,11  | 0,025 | 1           | 1,10048504    | 0,908690226     | 4,4             |
| CCNQ                                                                                                | 2,88302E-07 | 0,138122452 | 0,159 | 0,018 | 0,006083471 | 1,100472011   | 0,908700985     | 8,833333333     |
| PHETA2                                                                                              | 0,000201519 | 0,138118123 | 0,098 | 0,014 | 1           | 1,100468708   | 0,908703712     | 7               |
| COQ9                                                                                                | 1,07752E-08 | 0,137885312 | 0,171 | 0,014 | 0,000227368 | 1,100291137   | 0,908850363     | 12,21428571     |
| ASPSCR1                                                                                             | 2,70805E-06 | 0,137719694 | 0,207 | 0,042 | 0,057142629 | 1,100164834   | 0,908954703     | 4,928571429     |
| HOMER1                                                                                              | 0,001268404 | 0,137696374 | 0,159 | 0,049 | 1           | 1,100147051   | 0,908969396     | 3,244897959     |
| ADRM1                                                                                               | 1,37545E-05 | 0,137688598 | 0,463 | 0,179 | 0,290232906 | 1,100141121   | 0,908974295     | 2,586592179     |
| MTERF3                                                                                              | 8,93956E-06 | 0,137668028 | 0,171 | 0,032 | 0,188633563 | 1,100125436   | 0,908987255     | 5,34375         |
| C1GALT1C1                                                                                           | 6,83314E-06 | 0,137654534 | 0,207 | 0,046 | 0,144186145 | 1,100115145   | 0,908995758     | 4,5             |
| TIPRL                                                                                               | 2,26301E-06 | 0,137643912 | 0,293 | 0,077 | 0,047751839 | 1,100107046   | 0,90900245      | 3,805194805     |
| DCTPP1                                                                                              | 1,3407E-06  | 0,137628717 | 0,207 | 0,039 | 0,028290029 | 1,100095459   | 0,909012024     | 5,307692308     |
| PXDC1                                                                                               | 0,00243811  | 0,137592574 | 0,451 | 0,232 | 1           | 1,1000679     | 0,909034797     | 1,943965517     |
| AC093323.1                                                                                          | 1,21195E-05 | 0,137529778 | 0,159 | 0,028 | 0,255733306 | 1,100020018   | 0,909074366     | 5,678571429     |
| SLX4IP                                                                                              | 0,008751649 | 0,137421022 | 0,049 | 0,007 | 1           | 1,099937097   | 0,909142898     | 7               |
| CDC37L1                                                                                             | 0,003902084 | 0,137399765 | 0,171 | 0,063 | 1           | 1,099920891   | 0,909156293     | 2,714285714     |
| GALNT2                                                                                              | 0,000131491 | 0,137332918 | 0,634 | 0,295 | 1           | 1,099869927   | 0,90919842      | 2,149152542     |
| TRMT5                                                                                               | 0,000151245 | 0,137152721 | 0,11  | 0,018 | 1           | 1,099732559   | 0,909311989     | 6,111111111     |
| B3GNT7                                                                                              | 6,40456E-08 | 0,137058239 | 0,171 | 0,018 | 0,001351425 | 1,09966054    | 0,909371541     | 9,5             |
| MRPL43                                                                                              | 7,91168E-10 | 0,137017849 | 0,573 | 0,165 | 1,66944E-05 | 1,099629754   | 0,909397        | 3,472727273     |
| NSA2                                                                                                | 7,8591E-06  | 0,136952331 | 0,622 | 0,267 | 0,165834882 | 1,099579817   | 0,909438301     | 2,329588015     |
| NCSTN                                                                                               | 2,92707E-06 | 0,136893789 | 0,39  | 0,126 | 0,061764055 | 1,099535199   | 0,909475205     | 3,095238095     |
| RUNX2                                                                                               | 1,20154E-05 | 0,136875829 | 0,232 | 0,06  | 0,253537089 | 1,09952151    | 0,909486527     | 3,866666667     |
| NMRAL1                                                                                              | 2,7334E-06  | 0,136873896 | 0,171 | 0,028 | 0,057677459 | 1,099520037   | 0,909487746     | 6,107142857     |
| GOLM1                                                                                               | 2,57745E-06 | 0,136834368 | 0,207 | 0,042 | 0,054386685 | 1,099489913   | 0,909512664     | 4,928571429     |
| HLTF                                                                                                | 1,72088E-05 | 0,136766215 | 0,183 | 0,039 | 0,363123284 | 1,099437974   | 0,909555631     | 4,692307692     |
| APOBEC3G                                                                                            | 2,68848E-08 | 0,136482518 | 0,207 | 0,028 | 0,000567297 | 1,099221797   | 0,909734507     | 7,392857143     |
| AGPAT4                                                                                              | 3,00544E-06 | 0,136406133 | 0,268 | 0,07  | 0,063417838 | 1,0991636     | 0,909782675     | 3,828571429     |
| ATG5                                                                                                | 1,31687E-06 | 0,136100017 | 0,232 | 0,049 | 0,027787357 | 1,0989304     | 0,909975737     | 4,734693878     |

Supplementary Table 2

| Differentially expressed genes_keloid-XL_comparing SC-Keloid vs. (SC-Myel, SC-Nonmyel, SC-Nonmyel2) |             |             |       |       |             |               |                 |                 |
|-----------------------------------------------------------------------------------------------------|-------------|-------------|-------|-------|-------------|---------------|-----------------|-----------------|
| gene                                                                                                | p_val       | avg_log2FC  | pct.1 | pct.2 | p_val_adj   | Foldchange_UP | Foldchange_DOWN | Ratio_pct1_pct2 |
| MSH5                                                                                                | 0,10804138  | 0,136010177 | 0,049 | 0,018 | 1           | 1,098861969   | 0,910032405     | 2,722222222     |
| RPS6KA4                                                                                             | 3,29598E-07 | 0,135940561 | 0,159 | 0,018 | 0,006954841 | 1,098808946   | 0,910076318     | 8,833333333     |
| GOT2                                                                                                | 0,000190779 | 0,135825085 | 0,159 | 0,039 | 1           | 1,098720998   | 0,910149166     | 4,076923077     |
| ARSB                                                                                                | 0,001013666 | 0,135686582 | 0,134 | 0,035 | 1           | 1,098615523   | 0,910236547     | 3,828571429     |
| MVD                                                                                                 | 1,25745E-05 | 0,135652223 | 0,183 | 0,039 | 0,265334346 | 1,098589359   | 0,910258225     | 4,692307692     |
| VTA1                                                                                                | 0,000306151 | 0,135615078 | 0,195 | 0,06  | 1           | 1,098561074   | 0,910281662     | 3,25            |
| ESYT2                                                                                               | 5,63527E-06 | 0,135603247 | 0,488 | 0,182 | 0,118909792 | 1,098552065   | 0,910289127     | 2,681318681     |
| TAB1                                                                                                | 2,7563E-07  | 0,135416947 | 0,171 | 0,021 | 0,005816066 | 1,098410215   | 0,910406683     | 8,142857143     |
| CLN6                                                                                                | 0,001662234 | 0,135296085 | 0,098 | 0,021 | 1           | 1,098318199   | 0,910482956     | 4,666666667     |
| METTL21A                                                                                            | 6,84305E-07 | 0,135180772 | 0,183 | 0,028 | 0,01443952  | 1,098230415   | 0,910555733     | 6,535714286     |
| NDOR1                                                                                               | 0,025678378 | 0,135178163 | 0,049 | 0,011 | 1           | 1,098228429   | 0,910557379     | 4,454545455     |
| BLMH                                                                                                | 6,91886E-05 | 0,134981422 | 0,22  | 0,063 | 1           | 1,098078674   | 0,91068156      | 3,492063492     |
| AARS1                                                                                               | 1,90351E-07 | 0,134952466 | 0,317 | 0,077 | 0,004016601 | 1,098056634   | 0,910699839     | 4,116883117     |
| XPOT                                                                                                | 0,000233466 | 0,134847187 | 0,268 | 0,095 | 1           | 1,097976508   | 0,910766298     | 2,821052632     |
| TRIM66                                                                                              | 0,000344207 | 0,134837937 | 0,073 | 0,007 | 1           | 1,097969468   | 0,910772138     | 10,42857143     |
| MAGED1                                                                                              | 1,15167E-06 | 0,134821375 | 0,354 | 0,105 | 0,024301363 | 1,097956863   | 0,910782594     | 3,371428571     |
| MED16                                                                                               | 4,65134E-08 | 0,134791825 | 0,183 | 0,021 | 0,000981479 | 1,097934375   | 0,910801249     | 8,714285714     |
| SIGIRR                                                                                              | 3,71162E-05 | 0,134759063 | 0,537 | 0,232 | 0,78318991  | 1,097909442   | 0,910821933     | 2,314655172     |
| RILP                                                                                                | 3,0502E-07  | 0,134617222 | 0,207 | 0,035 | 0,006436236 | 1,097801505   | 0,910911486     | 5,914285714     |
| H1-O                                                                                                | 0,000194108 | 0,134565194 | 0,598 | 0,288 | 1           | 1,097761915   | 0,910944337     | 2,076388889     |
| PHGDH                                                                                               | 3,13577E-07 | 0,134498388 | 0,207 | 0,035 | 0,006616784 | 1,097711084   | 0,91098652      | 5,914285714     |
| LFNG                                                                                                | 7,50152E-06 | 0,13433582  | 0,134 | 0,018 | 0,158289655 | 1,097587396   | 0,911089179     | 7,444444444     |
| MARVELD2                                                                                            | 0,000183568 | 0,134276659 | 0,049 | 0     | 1           | 1,097542388   | 0,911126541     | #DIV/0!         |
| NDUFA5                                                                                              | 5,4526E-06  | 0,134251001 | 0,476 | 0,179 | 0,115055224 | 1,097522868   | 0,911142746     | 2,659217877     |
| LPCAT2                                                                                              | 4,75231E-05 | 0,134179737 | 0,317 | 0,109 | 1           | 1,097468657   | 0,911187754     | 2,908256881     |
| NTMT1                                                                                               | 0,001774933 | 0,134170898 | 0,293 | 0,13  | 1           | 1,097461932   | 0,911193337     | 2,253846154     |
| FDFT1                                                                                               | 1,15209E-05 | 0,134167161 | 0,232 | 0,06  | 0,243101689 | 1,09745909    | 0,911195697     | 3,866666667     |
| SLC36A4                                                                                             | 0,001826896 | 0,134131198 | 0,146 | 0,046 | 1           | 1,097431733   | 0,911218411     | 3,173913043     |
| ERCC8                                                                                               | 3,16224E-05 | 0,134051065 | 0,122 | 0,018 | 0,667263526 | 1,097370779   | 0,911269025     | 6,777777778     |
| CILP2                                                                                               | 0,063203483 | 0,133891976 | 0,012 | 0     | 1           | 1,097249776   | 0,911369518     | #DIV/0!         |

Supplementary Table 2

| Differentially expressed genes_keloid-XL_comparing SC-Keloid vs. (SC-Myel, SC-Nonmyel, SC-Nonmyel2) |             |             |       |       |             |               |                 |                 |
|-----------------------------------------------------------------------------------------------------|-------------|-------------|-------|-------|-------------|---------------|-----------------|-----------------|
| gene                                                                                                | p_val       | avg_log2FC  | pct.1 | pct.2 | p_val_adj   | Foldchange_UP | Foldchange_DOWN | Ratio_pct1_pct2 |
| GLB1L2                                                                                              | 0,063203483 | 0,133891976 | 0,012 | 0     | 1           | 1,097249776   | 0,911369518     | #DIV/0!         |
| LYZ                                                                                                 | 0,063203483 | 0,133891976 | 0,012 | 0     | 1           | 1,097249776   | 0,911369518     | #DIV/0!         |
| PLCXD3                                                                                              | 0,063203483 | 0,133891976 | 0,012 | 0     | 1           | 1,097249776   | 0,911369518     | #DIV/0!         |
| TAP2                                                                                                | 0,000406709 | 0,133878576 | 0,232 | 0,081 | 1           | 1,097239585   | 0,911377983     | 2,864197531     |
| PIGP                                                                                                | 7,62776E-06 | 0,133842608 | 0,402 | 0,14  | 0,160953443 | 1,09721223    | 0,911400705     | 2,871428571     |
| MAN2C1                                                                                              | 0,002132794 | 0,133756721 | 0,256 | 0,109 | 1           | 1,097146912   | 0,911454965     | 2,348623853     |
| HMGB3                                                                                               | 0,013862815 | 0,133713735 | 0,146 | 0,06  | 1           | 1,097114223   | 0,911482122     | 2,433333333     |
| PLCG1                                                                                               | 0,000593207 | 0,133648888 | 0,146 | 0,039 | 1           | 1,09706491    | 0,911523093     | 3,743589744     |
| SMAP1                                                                                               | 2,02559E-05 | 0,13363906  | 0,293 | 0,091 | 0,427420187 | 1,097057437   | 0,911529302     | 3,21978022      |
| ZNF853                                                                                              | 3,61459E-07 | 0,133612873 | 0,134 | 0,011 | 0,007627136 | 1,097037523   | 0,911545848     | 12,18181818     |
| SCAMP4                                                                                              | 5,33977E-05 | 0,133610518 | 0,232 | 0,067 | 1           | 1,097035733   | 0,911547336     | 3,462686567     |
| DHX29                                                                                               | 7,67868E-05 | 0,133499582 | 0,341 | 0,126 | 1           | 1,096951379   | 0,911617433     | 2,706349206     |
| DNAJC8                                                                                              | 0,000843558 | 0,133323371 | 0,524 | 0,26  | 1           | 1,096817406   | 0,911728784     | 2,015384615     |
| ASMTL                                                                                               | 0,000166509 | 0,133079073 | 0,183 | 0,049 | 1           | 1,096631693   | 0,911883184     | 3,734693878     |
| GHITM                                                                                               | 3,68861E-05 | 0,133011023 | 0,451 | 0,179 | 0,778332658 | 1,096579967   | 0,911926198     | 2,519553073     |
| RHOT2                                                                                               | 1,35563E-05 | 0,132905139 | 0,39  | 0,137 | 0,286050813 | 1,096499489   | 0,911993129     | 2,846715328     |
| COX18                                                                                               | 0,000151245 | 0,132665491 | 0,11  | 0,018 | 1           | 1,096317363   | 0,912144635     | 6,111111111     |
| ALG3                                                                                                | 1,30411E-05 | 0,132584872 | 0,183 | 0,039 | 0,275180202 | 1,096256101   | 0,912195607     | 4,692307692     |
| HSDL1                                                                                               | 0,000983548 | 0,132578399 | 0,085 | 0,014 | 1           | 1,096251183   | 0,9121997       | 6,071428571     |
| NOC4L                                                                                               | 9,17106E-06 | 0,132578039 | 0,195 | 0,042 | 0,193518607 | 1,096250909   | 0,912199927     | 4,642857143     |
| SDAD1                                                                                               | 4,37693E-05 | 0,132555876 | 0,244 | 0,07  | 0,923575029 | 1,096234068   | 0,912213942     | 3,485714286     |
| HSDL2                                                                                               | 0,000133291 | 0,132393648 | 0,171 | 0,042 | 1           | 1,096110806   | 0,912316524     | 4,071428571     |
| ATP2B1-AS1                                                                                          | 0,000200163 | 0,132271834 | 0,195 | 0,056 | 1           | 1,09601826    | 0,912393558     | 3,482142857     |
| RNF123                                                                                              | 0,040095269 | 0,132191683 | 0,073 | 0,025 | 1           | 1,095957371   | 0,912444249     | 2,92            |
| EDEM3                                                                                               | 0,000433156 | 0,131989658 | 0,207 | 0,067 | 1           | 1,095803911   | 0,91257203      | 3,089552239     |
| CXADR                                                                                               | 1,39592E-06 | 0,131929379 | 0,098 | 0,004 | 0,029455268 | 1,095758127   | 0,91261016      | 24,5            |
| GMPR2                                                                                               | 4,88116E-05 | 0,131854357 | 0,195 | 0,049 | 1           | 1,095701148   | 0,912657618     | 3,979591837     |
| NAGLU                                                                                               | 3,28023E-06 | 0,131683301 | 0,232 | 0,053 | 0,069216199 | 1,095571241   | 0,912765836     | 4,377358491     |
| ACAD10                                                                                              | 1,87147E-06 | 0,131582059 | 0,11  | 0,007 | 0,039489991 | 1,095494362   | 0,912829892     | 15,71428571     |
| APIP                                                                                                | 1,28715E-05 | 0,131548713 | 0,22  | 0,053 | 0,271600545 | 1,095469041   | 0,912850992     | 4,150943396     |

Supplementary Table 2

| Differentially expressed genes_keloid-XL_comparing SC-Keloid vs. (SC-Myel, SC-Nonmyel, SC-Nonmyel2) |             |             |       |       |             |               |                 |                 |
|-----------------------------------------------------------------------------------------------------|-------------|-------------|-------|-------|-------------|---------------|-----------------|-----------------|
| gene                                                                                                | p_val       | avg_log2FC  | pct.1 | pct.2 | p_val_adj   | Foldchange_UP | Foldchange_DOWN | Ratio_pct1_pct2 |
| LARP1B                                                                                              | 0,001280533 | 0,131520096 | 0,293 | 0,126 | 1           | 1,095447312   | 0,912869098     | 2,325396825     |
| EMC1                                                                                                | 9,74291E-07 | 0,131484715 | 0,244 | 0,053 | 0,02055852  | 1,095420447   | 0,912891486     | 4,603773585     |
| MALSU1                                                                                              | 1,11633E-06 | 0,131418753 | 0,341 | 0,098 | 0,023555745 | 1,095370364   | 0,912933226     | 3,479591837     |
| RB1                                                                                                 | 7,54588E-05 | 0,131416982 | 0,293 | 0,102 | 1           | 1,095369019   | 0,912934347     | 2,87254902      |
| DNALI1                                                                                              | 4,43815E-05 | 0,13135687  | 0,11  | 0,014 | 0,936495011 | 1,09532338    | 0,912972386     | 7,857142857     |
| NRSN2                                                                                               | 0,001182686 | 0,131340431 | 0,146 | 0,042 | 1           | 1,0953109     | 0,912982789     | 3,476190476     |
| EIF4G2                                                                                              | 0,024824017 | 0,131276473 | 0,793 | 0,589 | 1           | 1,095262343   | 0,913023265     | 1,346349745     |
| SCRN2                                                                                               | 1,02065E-05 | 0,13081346  | 0,195 | 0,042 | 0,215368013 | 1,09491089    | 0,913316334     | 4,642857143     |
| SPATA20                                                                                             | 0,00036744  | 0,13080301  | 0,195 | 0,06  | 1           | 1,094902959   | 0,913322949     | 3,25            |
| DDX52                                                                                               | 1,25521E-06 | 0,130792394 | 0,256 | 0,06  | 0,026486091 | 1,094894902   | 0,91332967      | 4,266666667     |
| SYAP1                                                                                               | 4,69788E-05 | 0,130714373 | 0,39  | 0,151 | 0,99130034  | 1,094835692   | 0,913379064     | 2,582781457     |
| LYPLAL1                                                                                             | 1,02116E-06 | 0,130669338 | 0,207 | 0,039 | 0,021547494 | 1,094801517   | 0,913407576     | 5,307692308     |
| FBXO32                                                                                              | 0,014152931 | 0,130662781 | 0,122 | 0,046 | 1           | 1,09479654    | 0,913411728     | 2,652173913     |
| COG6                                                                                                | 8,70878E-06 | 0,130491617 | 0,171 | 0,032 | 0,183763963 | 1,09466666    | 0,913520103     | 5,34375         |
| LARP1                                                                                               | 5,26E-05    | 0,130440742 | 0,5   | 0,207 | 1           | 1,094628058   | 0,913552318     | 2,415458937     |
| PIGQ                                                                                                | 5,16791E-07 | 0,130440368 | 0,232 | 0,046 | 0,010904805 | 1,094627775   | 0,913552555     | 5,043478261     |
| MRPS27                                                                                              | 0,000444781 | 0,130404367 | 0,171 | 0,049 | 1           | 1,094600459   | 0,913575352     | 3,489795918     |
| AP1G2                                                                                               | 0,008401736 | 0,130386372 | 0,024 | 0     | 1           | 1,094586806   | 0,913586748     | #DIV/0!         |
| RABEPK                                                                                              | 3,18768E-07 | 0,130374011 | 0,159 | 0,018 | 0,006726334 | 1,094577428   | 0,913594575     | 8,833333333     |
| CARD8                                                                                               | 4,37189E-06 | 0,130350663 | 0,159 | 0,025 | 0,092251246 | 1,094559713   | 0,913609361     | 6,36            |
| CHST1                                                                                               | 2,98807E-07 | 0,130142228 | 0,122 | 0,007 | 0,006305119 | 1,094401588   | 0,913741365     | 17,42857143     |
| SPRED2                                                                                              | 0,003835983 | 0,130117845 | 0,159 | 0,056 | 1           | 1,094383091   | 0,913756808     | 2,839285714     |
| JAM3                                                                                                | 1,43301E-05 | 0,129999297 | 0,61  | 0,256 | 0,30237855  | 1,094293168   | 0,913831896     | 2,3828125       |
| WASHC2A                                                                                             | 0,014512383 | 0,129953573 | 0,171 | 0,074 | 1           | 1,094258487   | 0,913860858     | 2,310810811     |
| KLHL42                                                                                              | 0,000100509 | 0,129949701 | 0,317 | 0,116 | 1           | 1,094255549   | 0,913863311     | 2,732758621     |
| OGG1                                                                                                | 1,06184E-06 | 0,129891623 | 0,207 | 0,039 | 0,022405895 | 1,0942115     | 0,913900101     | 5,307692308     |
| APBB3                                                                                               | 1,94649E-06 | 0,129723555 | 0,134 | 0,014 | 0,041072798 | 1,094084036   | 0,914006573     | 9,571428571     |
| U2SURP                                                                                              | 4,81362E-06 | 0,129691929 | 0,5   | 0,193 | 0,10157209  | 1,094060052   | 0,914026609     | 2,590673575     |
| MGAT5                                                                                               | 0,131674021 | 0,129650363 | 0,085 | 0,042 | 1           | 1,094028531   | 0,914052944     | 2,023809524     |
| OAF                                                                                                 | 0,001001916 | 0,129543095 | 0,39  | 0,182 | 1           | 1,093947191   | 0,914120909     | 2,142857143     |

Supplementary Table 2

| Differentially expressed genes_keloid-XL_comparing SC-Keloid vs. (SC-Myel, SC-Nonmyel, SC-Nonmyel2) |             |             |       |       |             |               |                 |                 |
|-----------------------------------------------------------------------------------------------------|-------------|-------------|-------|-------|-------------|---------------|-----------------|-----------------|
| gene                                                                                                | p_val       | avg_log2FC  | pct.1 | pct.2 | p_val_adj   | Foldchange_UP | Foldchange_DOWN | Ratio_pct1_pct2 |
| CPXM1                                                                                               | 0,005768901 | 0,129434381 | 0,134 | 0,046 | 1           | 1,093864759   | 0,914189795     | 2,913043478     |
| RBM27                                                                                               | 0,019027132 | 0,129432991 | 0,28  | 0,147 | 1           | 1,093863706   | 0,914190675     | 1,904761905     |
| ATP6V0D1                                                                                            | 2,72241E-07 | 0,129307381 | 0,439 | 0,133 | 0,005744549 | 1,093768471   | 0,914270274     | 3,30075188      |
| MED31                                                                                               | 0,000558164 | 0,129227251 | 0,195 | 0,063 | 1           | 1,093707723   | 0,914321056     | 3,095238095     |
| POLR3E                                                                                              | 1,51036E-05 | 0,129219642 | 0,22  | 0,056 | 0,318701911 | 1,093701954   | 0,914325878     | 3,928571429     |
| USP25                                                                                               | 0,082545931 | 0,129137749 | 0,122 | 0,063 | 1           | 1,093639874   | 0,91437778      | 1,936507937     |
| SNAP29                                                                                              | 1,40587E-06 | 0,129101761 | 0,195 | 0,035 | 0,02966526  | 1,093612593   | 0,91440059      | 5,571428571     |
| AP4M1                                                                                               | 2,51728E-06 | 0,129097114 | 0,183 | 0,032 | 0,053117118 | 1,093609071   | 0,914403535     | 5,71875         |
| MBD4                                                                                                | 0,000220788 | 0,129013179 | 0,22  | 0,07  | 1           | 1,093545447   | 0,914456736     | 3,142857143     |
| C1QTNF3                                                                                             | 5,23216E-05 | 0,1290029   | 0,098 | 0,011 | 1           | 1,093537655   | 0,914463251     | 8,909090909     |
| RETREG3                                                                                             | 5,68695E-05 | 0,128953066 | 0,207 | 0,056 | 1           | 1,093499883   | 0,914494839     | 3,696428571     |
| PSMG1                                                                                               | 7,2721E-09  | 0,128800246 | 0,207 | 0,025 | 0,000153449 | 1,093384058   | 0,914591714     | 8,28            |
| TMEM120B                                                                                            | 1,88116E-06 | 0,128774713 | 0,134 | 0,014 | 0,039694305 | 1,093364708   | 0,914607901     | 9,571428571     |
| LEO1                                                                                                | 2,28962E-06 | 0,128694893 | 0,183 | 0,032 | 0,048313355 | 1,093304217   | 0,914658505     | 5,71875         |
| ARHGAP18                                                                                            | 1,11851E-06 | 0,128650906 | 0,207 | 0,039 | 0,023601757 | 1,093270883   | 0,914686392     | 5,307692308     |
| NLRP1                                                                                               | 0,000167584 | 0,128644294 | 0,232 | 0,074 | 1           | 1,093265872   | 0,914690585     | 3,135135135     |
| RNF215                                                                                              | 0,000719024 | 0,128600555 | 0,122 | 0,028 | 1           | 1,093232728   | 0,914718316     | 4,357142857     |
| CRIP1                                                                                               | 0,001650073 | 0,128572638 | 0,268 | 0,112 | 1           | 1,093211573   | 0,914736017     | 2,392857143     |
| NAPG                                                                                                | 4,22631E-06 | 0,12852886  | 0,22  | 0,049 | 0,089179439 | 1,093178401   | 0,914763775     | 4,489795918     |
| DTX3L                                                                                               | 0,003470627 | 0,128520986 | 0,146 | 0,049 | 1           | 1,093172434   | 0,914768767     | 2,979591837     |
| SLC35C1                                                                                             | 8,2597E-10  | 0,128227875 | 0,146 | 0,004 | 1,74288E-05 | 1,092950358   | 0,914954639     | 36,5            |
| GOLGA7B                                                                                             | 1,93327E-06 | 0,12817178  | 0,122 | 0,011 | 0,040793846 | 1,092907863   | 0,914990215     | 11,09090909     |
| LAGE3                                                                                               | 1,44627E-06 | 0,128140635 | 0,354 | 0,105 | 0,030517746 | 1,092884269   | 0,915009968     | 3,371428571     |
| EXD2                                                                                                | 2,2307E-07  | 0,128126216 | 0,11  | 0,004 | 0,004706999 | 1,092873347   | 0,915019113     | 27,5            |
| FRG1                                                                                                | 4,89835E-07 | 0,128033374 | 0,415 | 0,13  | 0,010336005 | 1,092803019   | 0,915077999     | 3,192307692     |
| STYXL1                                                                                              | 3,51943E-06 | 0,127997511 | 0,159 | 0,025 | 0,074263512 | 1,092775854   | 0,915100747     | 6,36            |
| NGRN                                                                                                | 0,00014153  | 0,127966456 | 0,622 | 0,291 | 1           | 1,092752332   | 0,915120445     | 2,137457045     |
| ARSK                                                                                                | 0,000119644 | 0,127885222 | 0,171 | 0,042 | 1           | 1,092690803   | 0,915171975     | 4,071428571     |
| TBL2                                                                                                | 1,42819E-06 | 0,127726629 | 0,159 | 0,021 | 0,030136228 | 1,092570692   | 0,915272583     | 7,571428571     |
| EXTL1                                                                                               | 4,9862E-05  | 0,127605395 | 0,195 | 0,049 | 1           | 1,092478884   | 0,9153495       | 3,979591837     |

Supplementary Table 2

| Differentially expressed genes_keloid-XL_ comparing SC-Keloid vs. (SC-Myel, SC-Nonmyel, SC-Nonmyel2) |             |             |       |       |             |               |                 |                 |
|------------------------------------------------------------------------------------------------------|-------------|-------------|-------|-------|-------------|---------------|-----------------|-----------------|
| gene                                                                                                 | p_val       | avg_log2FC  | pct.1 | pct.2 | p_val_adj   | Foldchange_UP | Foldchange_DOWN | Ratio_pct1_pct2 |
| HAUS4                                                                                                | 0,00100048  | 0,127549125 | 0,195 | 0,067 | 1           | 1,092436275   | 0,915385202     | 2,910447761     |
| CRKL                                                                                                 | 6,0016E-06  | 0,127545856 | 0,329 | 0,102 | 0,126639684 | 1,092433799   | 0,915387276     | 3,225490196     |
| CCDC6                                                                                                | 0,000719084 | 0,127533653 | 0,207 | 0,07  | 1           | 1,092424559   | 0,915395019     | 2,957142857     |
| NACA                                                                                                 | 0,06414866  | 0,127523013 | 0,976 | 0,888 | 1           | 1,092416502   | 0,91540177      | 1,099099099     |
| RNF208                                                                                               | 0,015603254 | 0,127495678 | 0,098 | 0,032 | 1           | 1,092395804   | 0,915419115     | 3,0625          |
| PLEKHO2                                                                                              | 1,01121E-05 | 0,127434211 | 0,256 | 0,07  | 0,213375452 | 1,092349263   | 0,915458117     | 3,657142857     |
| RAB20                                                                                                | 0,000220667 | 0,127418677 | 0,098 | 0,014 | 1           | 1,092337502   | 0,915467974     | 7               |
| RGMB                                                                                                 | 8,1517E-05  | 0,12720836  | 0,549 | 0,242 | 1           | 1,092178271   | 0,915601442     | 2,268595041     |
| BCKDK                                                                                                | 4,00328E-08 | 0,127105635 | 0,244 | 0,042 | 0,000844731 | 1,092100507   | 0,915666638     | 5,80952381      |
| PNKD                                                                                                 | 3,69522E-05 | 0,127102274 | 0,402 | 0,154 | 0,779729001 | 1,092097963   | 0,915668772     | 2,61038961      |
| ALG5                                                                                                 | 6,43106E-05 | 0,127005733 | 0,293 | 0,098 | 1           | 1,092024885   | 0,915730048     | 2,989795918     |
| DHRS4                                                                                                | 1,56328E-05 | 0,126931897 | 0,183 | 0,039 | 0,329867241 | 1,091968998   | 0,915776915     | 4,692307692     |
| FANCI                                                                                                | 0,065143806 | 0,126874475 | 0,024 | 0,004 | 1           | 1,091925536   | 0,915813366     | 6               |
| SEPHS1                                                                                               | 0,111382367 | 0,126778035 | 0,098 | 0,049 | 1           | 1,091852546   | 0,915874587     | 2               |
| S100A3                                                                                               | 3,24105E-07 | 0,126734753 | 0,122 | 0,007 | 0,00683894  | 1,09181979    | 0,915902065     | 17,42857143     |
| SHQ1                                                                                                 | 0,00590611  | 0,126701855 | 0,061 | 0,011 | 1           | 1,091794894   | 0,91592295      | 5,545454545     |
| TPM1                                                                                                 | 8,21019E-07 | 0,126406435 | 0,305 | 0,081 | 0,017324322 | 1,09157135    | 0,916110523     | 3,765432099     |
| SYNCRIP                                                                                              | 0,001174271 | 0,12635034  | 0,5   | 0,249 | 1           | 1,091528909   | 0,916146143     | 2,008032129     |
| FGFR4                                                                                                | 0,011128779 | 0,126304061 | 0,037 | 0,004 | 1           | 1,091493895   | 0,916175532     | 9,25            |
| TECPR2                                                                                               | 0,060753558 | 0,126280155 | 0,098 | 0,042 | 1           | 1,091475809   | 0,916190713     | 2,333333333     |
| ITGA6                                                                                                | 0,003028132 | 0,126212109 | 0,744 | 0,46  | 1           | 1,091424329   | 0,916233928     | 1,617391304     |
| FIP1L1                                                                                               | 0,000298895 | 0,126212107 | 0,268 | 0,098 | 1           | 1,091424328   | 0,916233929     | 2,734693878     |
| PPP1R37                                                                                              | 1,30173E-06 | 0,126158616 | 0,159 | 0,021 | 0,027467822 | 1,091383862   | 0,916267901     | 7,571428571     |
| TMEM128                                                                                              | 1,01173E-05 | 0,126155751 | 0,22  | 0,053 | 0,213486071 | 1,091381695   | 0,91626972      | 4,150943396     |
| TTC33                                                                                                | 0,002780459 | 0,126155443 | 0,159 | 0,053 | 1           | 1,091381462   | 0,916269916     | 3               |
| FBXO17                                                                                               | 2,41758E-05 | 0,126073186 | 0,268 | 0,081 | 0,510133599 | 1,091319237   | 0,91632216      | 3,308641975     |
| PPP5C                                                                                                | 5,67761E-08 | 0,125953174 | 0,232 | 0,039 | 0,001198033 | 1,091228458   | 0,916398388     | 5,948717949     |
| DPY19L1                                                                                              | 1,22144E-05 | 0,125896721 | 0,256 | 0,07  | 0,257736615 | 1,091185759   | 0,916434247     | 3,657142857     |
| RPS6KC1                                                                                              | 0,000174748 | 0,125771318 | 0,159 | 0,039 | 1           | 1,091090914   | 0,91651391      | 4,076923077     |
| PWP2                                                                                                 | 0,001220269 | 0,125692926 | 0,037 | 0     | 1           | 1,091031629   | 0,916563712     | #DIV/0!         |

Supplementary Table 2

| Differentially expressed genes_keloid-XL_comparing SC-Keloid vs. (SC-Myel, SC-Nonmyel, SC-Nonmyel2) |             |             |       |       |             |               |                 |                 |
|-----------------------------------------------------------------------------------------------------|-------------|-------------|-------|-------|-------------|---------------|-----------------|-----------------|
| gene                                                                                                | p_val       | avg_log2FC  | pct.1 | pct.2 | p_val_adj   | Foldchange_UP | Foldchange_DOWN | Ratio_pct1_pct2 |
| CAAP1                                                                                               | 5,48545E-08 | 0,125571446 | 0,171 | 0,018 | 0,001157484 | 1,090939764   | 0,916640894     | 9,5             |
| DHRS12                                                                                              | 6,36887E-05 | 0,125562128 | 0,171 | 0,039 | 1           | 1,090932718   | 0,916646814     | 4,384615385     |
| DNAJC21                                                                                             | 0,002391845 | 0,125457872 | 0,39  | 0,189 | 1           | 1,090853885   | 0,916713057     | 2,063492063     |
| RBFA                                                                                                | 0,002952442 | 0,125360744 | 0,22  | 0,088 | 1           | 1,090780447   | 0,916774776     | 2,5             |
| ISY1                                                                                                | 2,27685E-06 | 0,125197222 | 0,207 | 0,042 | 0,048043722 | 1,090656819   | 0,916878694     | 4,928571429     |
| RPL8                                                                                                | 0,05578835  | 0,125162157 | 0,915 | 0,811 | 1           | 1,090630311   | 0,916900979     | 1,128236745     |
| KIN                                                                                                 | 0,001300227 | 0,125030969 | 0,171 | 0,056 | 1           | 1,090531142   | 0,916984359     | 3,053571429     |
| TMEM41A                                                                                             | 0,00237203  | 0,125026819 | 0,11  | 0,028 | 1           | 1,090528005   | 0,916986997     | 3,928571429     |
| RPL14                                                                                               | 0,282383378 | 0,125011722 | 0,939 | 0,881 | 1           | 1,090516593   | 0,916996592     | 1,065834279     |
| TMEM53                                                                                              | 1,58349E-08 | 0,124931698 | 0,11  | 0     | 0,000334132 | 1,090456105   | 0,917047459     | #DIV/0!         |
| PRLR                                                                                                | 0,00621443  | 0,124852215 | 0,183 | 0,074 | 1           | 1,09039603    | 0,917097983     | 2,472972973     |
| THOC5                                                                                               | 4,72873E-05 | 0,124747414 | 0,11  | 0,014 | 0,997809544 | 1,090316824   | 0,917164606     | 7,857142857     |
| ECD                                                                                                 | 6,52415E-08 | 0,124744893 | 0,232 | 0,039 | 0,001376661 | 1,090314919   | 0,917166209     | 5,948717949     |
| CMC4                                                                                                | 1,63503E-05 | 0,124617236 | 0,317 | 0,102 | 0,345007624 | 1,090218447   | 0,917247367     | 3,107843137     |
| RAPGEF3                                                                                             | 0,00590611  | 0,124516305 | 0,061 | 0,011 | 1           | 1,090142177   | 0,91731154      | 5,545454545     |
| VSTM4                                                                                               | 1,02952E-07 | 0,124367173 | 0,098 | 0     | 0,002172399 | 1,090029495   | 0,917406368     | #DIV/0!         |
| CYFIP1                                                                                              | 0,001460731 | 0,124243846 | 0,268 | 0,112 | 1           | 1,089936319   | 0,917484795     | 2,392857143     |
| SECISBP2                                                                                            | 7,71811E-06 | 0,124208622 | 0,354 | 0,116 | 0,162859933 | 1,089909708   | 0,917507196     | 3,051724138     |
| UCLH3                                                                                               | 5,00285E-08 | 0,124174256 | 0,305 | 0,067 | 0,001055652 | 1,089883746   | 0,917529052     | 4,552238806     |
| AP4B1                                                                                               | 0,038685095 | 0,124152228 | 0,073 | 0,025 | 1           | 1,089867105   | 0,917543061     | 2,92            |
| UTP4                                                                                                | 5,83288E-06 | 0,12406372  | 0,134 | 0,018 | 0,123079618 | 1,089800245   | 0,917599354     | 7,444444444     |
| PRMT1                                                                                               | 0,001172696 | 0,124031655 | 0,561 | 0,288 | 1           | 1,089776023   | 0,917619748     | 1,947916667     |
| RNF126                                                                                              | 0,005984451 | 0,124026095 | 0,341 | 0,175 | 1           | 1,089771823   | 0,917623285     | 1,948571429     |
| BRI3                                                                                                | 0,000113745 | 0,123890583 | 0,646 | 0,305 | 1           | 1,089669467   | 0,91770948      | 2,118032787     |
| IFI44L                                                                                              | 2,62336E-07 | 0,123675252 | 0,268 | 0,06  | 0,005535545 | 1,089506838   | 0,917846465     | 4,466666667     |
| TRIM24                                                                                              | 0,000266511 | 0,123614451 | 0,256 | 0,091 | 1           | 1,089460923   | 0,917885147     | 2,813186813     |
| FANCG                                                                                               | 0,001602574 | 0,123610233 | 0,098 | 0,021 | 1           | 1,089457738   | 0,917887831     | 4,666666667     |
| BRD3                                                                                                | 0,00041513  | 0,123529682 | 0,402 | 0,182 | 1           | 1,089396911   | 0,917939081     | 2,208791209     |
| AL441883.1                                                                                          | 0,001772311 | 0,12350292  | 0,061 | 0,007 | 1           | 1,089376703   | 0,917956109     | 8,714285714     |
| MAP4K4                                                                                              | 0,000958553 | 0,123466632 | 0,622 | 0,33  | 1           | 1,089349303   | 0,917979199     | 1,884848485     |



Supplementary Table 2

| Differentially expressed genes_keloid-XL_comparing SC-Keloid vs. (SC-Myel, SC-Nonmyel, SC-Nonmyel2) |             |             |       |       |             |               |                 |                 |
|-----------------------------------------------------------------------------------------------------|-------------|-------------|-------|-------|-------------|---------------|-----------------|-----------------|
| gene                                                                                                | p_val       | avg_log2FC  | pct.1 | pct.2 | p_val_adj   | Foldchange_UP | Foldchange_DOWN | Ratio_pct1_pct2 |
| ALG1                                                                                                | 8,91037E-09 | 0,123432183 | 0,146 | 0,007 | 0,000188018 | 1,089323292   | 0,918001118     | 20,85714286     |
| RPL17                                                                                               | 0,170560756 | 0,123395173 | 0,902 | 0,867 | 1           | 1,089295347   | 0,918024669     | 1,040369089     |
| OXTR                                                                                                | 4,32324E-06 | 0,123306755 | 0,073 | 0     | 0,09122464  | 1,089228589   | 0,918080933     | #DIV/0!         |
| DNAJC14                                                                                             | 3,30843E-05 | 0,123306743 | 0,122 | 0,018 | 0,698111591 | 1,08922858    | 0,918080941     | 6,777777778     |
| DPAGT1                                                                                              | 7,53788E-06 | 0,123276928 | 0,171 | 0,032 | 0,159056749 | 1,08920607    | 0,918099914     | 5,34375         |
| NUDT22                                                                                              | 1,59263E-06 | 0,12318764  | 0,22  | 0,046 | 0,033605986 | 1,089138662   | 0,918156737     | 4,782608696     |
| ITGB3                                                                                               | 2,80682E-05 | 0,123146525 | 0,061 | 0     | 0,592266086 | 1,089107623   | 0,918182904     | #DIV/0!         |
| LEPROTL1                                                                                            | 2,56035E-07 | 0,122918697 | 0,427 | 0,13  | 0,005402594 | 1,088935646   | 0,918327913     | 3,284615385     |
| LMLN                                                                                                | 3,67491E-05 | 0,122698209 | 0,122 | 0,018 | 0,77544318  | 1,088769237   | 0,918468272     | 6,777777778     |
| TRIP4                                                                                               | 6,74467E-05 | 0,122659479 | 0,134 | 0,025 | 1           | 1,088740009   | 0,918492929     | 5,36            |
| LRRC40                                                                                              | 3,0557E-07  | 0,122550406 | 0,146 | 0,014 | 0,006447828 | 1,088657699   | 0,918562374     | 10,42857143     |
| RCC2                                                                                                | 1,741E-05   | 0,12251975  | 0,5   | 0,2   | 0,367367805 | 1,088634566   | 0,918581893     | 2,5             |
| PTGES2                                                                                              | 6,11409E-06 | 0,12236037  | 0,232 | 0,056 | 0,129013334 | 1,088514307   | 0,918683378     | 4,142857143     |
| MOXD1                                                                                               | 3,58198E-05 | 0,122338612 | 0,159 | 0,032 | 0,755833467 | 1,088497891   | 0,918697232     | 4,96875         |
| YES1                                                                                                | 0,000138689 | 0,122268532 | 0,207 | 0,06  | 1           | 1,088445017   | 0,91874186      | 3,45            |
| SEC13                                                                                               | 7,54963E-08 | 0,122260558 | 0,378 | 0,102 | 0,001593048 | 1,088439001   | 0,918746938     | 3,705882353     |
| ANO8                                                                                                | 0,002094809 | 0,122259326 | 0,146 | 0,046 | 1           | 1,088438072   | 0,918747723     | 3,173913043     |
| UTP11                                                                                               | 9,42612E-06 | 0,122231935 | 0,366 | 0,123 | 0,198900636 | 1,088417407   | 0,918765166     | 2,975609756     |
| ZPR1                                                                                                | 6,84492E-05 | 0,122224625 | 0,183 | 0,046 | 1           | 1,088411892   | 0,918769822     | 3,97826087      |
| DPP9                                                                                                | 0,002535781 | 0,122126759 | 0,183 | 0,067 | 1           | 1,088338061   | 0,918832149     | 2,731343284     |
| RNASEH2C                                                                                            | 1,7212E-05  | 0,122107719 | 0,39  | 0,144 | 0,363190693 | 1,088323699   | 0,918844275     | 2,708333333     |
| NKAPD1                                                                                              | 6,73808E-06 | 0,12206928  | 0,268 | 0,074 | 0,142180123 | 1,088294702   | 0,918868757     | 3,621621622     |
| NTAQ1                                                                                               | 0,000338108 | 0,122010174 | 0,073 | 0,007 | 1           | 1,088250116   | 0,918906403     | 10,42857143     |
| POMT2                                                                                               | 2,16342E-05 | 0,121834409 | 0,22  | 0,056 | 0,456502346 | 1,088117541   | 0,919018361     | 3,928571429     |
| IBTK                                                                                                | 3,41158E-05 | 0,121807021 | 0,232 | 0,063 | 0,719876608 | 1,088096885   | 0,919035808     | 3,682539683     |
| DCSTAMP                                                                                             | 1,02952E-07 | 0,121664086 | 0,098 | 0     | 0,002172399 | 1,087989087   | 0,919126866     | #DIV/0!         |
| TPP1                                                                                                | 0,000941213 | 0,121492932 | 0,317 | 0,133 | 1           | 1,087860021   | 0,919235913     | 2,383458647     |
| CSTF1                                                                                               | 4,80414E-05 | 0,121484006 | 0,11  | 0,014 | 1           | 1,08785329    | 0,919241601     | 7,857142857     |
| RCE1                                                                                                | 2,1468E-05  | 0,121435471 | 0,134 | 0,021 | 0,452995664 | 1,087816694   | 0,919272526     | 6,380952381     |
| VPS26C                                                                                              | 0,001245481 | 0,121422241 | 0,159 | 0,049 | 1           | 1,087806718   | 0,919280956     | 3,244897959     |

Supplementary Table 2

| Differentially expressed genes_keloid-XL_comparing SC-Keloid vs. (SC-Myel, SC-Nonmyel, SC-Nonmyel2) |             |             |       |       |             |               |                 |                 |
|-----------------------------------------------------------------------------------------------------|-------------|-------------|-------|-------|-------------|---------------|-----------------|-----------------|
| gene                                                                                                | p_val       | avg_log2FC  | pct.1 | pct.2 | p_val_adj   | Foldchange_UP | Foldchange_DOWN | Ratio_pct1_pct2 |
| ORAI2                                                                                               | 3,64556E-07 | 0,121229018 | 0,146 | 0,014 | 0,007692497 | 1,087661036   | 0,919404086     | 10,42857143     |
| PLEKHJ1                                                                                             | 1,42388E-07 | 0,121190659 | 0,305 | 0,07  | 0,003004531 | 1,087632117   | 0,919428531     | 4,357142857     |
| FUCA1                                                                                               | 2,80682E-05 | 0,121162941 | 0,061 | 0     | 0,592266086 | 1,087611221   | 0,919446196     | #DIV/0!         |
| TMEM222                                                                                             | 1,37664E-05 | 0,121128572 | 0,232 | 0,06  | 0,290485377 | 1,087585312   | 0,9194681       | 3,866666667     |
| PPIL3                                                                                               | 0,001201942 | 0,121069719 | 0,183 | 0,06  | 1           | 1,087540946   | 0,91950561      | 3,05            |
| EPB41L3                                                                                             | 2,33385E-05 | 0,121054015 | 0,402 | 0,147 | 0,492466511 | 1,087529107   | 0,919515619     | 2,734693878     |
| SNX4                                                                                                | 0,00045166  | 0,121053788 | 0,22  | 0,074 | 1           | 1,087528936   | 0,919515763     | 2,972972973     |
| TSTD3                                                                                               | 0,009726554 | 0,121004428 | 0,122 | 0,042 | 1           | 1,087491729   | 0,919547224     | 2,904761905     |
| WDR81                                                                                               | 0,00140181  | 0,12099922  | 0,073 | 0,011 | 1           | 1,087488332   | 0,919550096     | 6,636363636     |
| POC1A                                                                                               | 2,80682E-05 | 0,120975517 | 0,061 | 0     | 0,592266086 | 1,087469936   | 0,919565651     | #DIV/0!         |
| SAMD5                                                                                               | 0,000199303 | 0,12097257  | 0,159 | 0,039 | 1           | 1,087467715   | 0,919567529     | 4,076923077     |
| SLC7A5                                                                                              | 0,003970716 | 0,120953061 | 0,098 | 0,025 | 1           | 1,087453009   | 0,919579965     | 3,92            |
| IL4R                                                                                                | 7,01879E-05 | 0,120901627 | 0,134 | 0,025 | 1           | 1,087414241   | 0,919612749     | 5,36            |
| ZBTB14                                                                                              | 6,13057E-05 | 0,120811614 | 0,085 | 0,007 | 1           | 1,087346397   | 0,919670128     | 12,14285714     |
| MIEF1                                                                                               | 1,8347E-06  | 0,120754372 | 0,11  | 0,007 | 0,038713925 | 1,087303255   | 0,919706619     | 15,71428571     |
| FNDC4                                                                                               | 0,00019003  | 0,12063536  | 0,134 | 0,028 | 1           | 1,087213564   | 0,919782491     | 4,785714286     |
| MRS2                                                                                                | 0,000105335 | 0,120601095 | 0,122 | 0,021 | 1           | 1,087187742   | 0,919804337     | 5,80952381      |
| TIMM9                                                                                               | 1,19155E-05 | 0,120545879 | 0,293 | 0,088 | 0,251429383 | 1,087146133   | 0,919839541     | 3,329545455     |
| PRPF6                                                                                               | 4,10982E-05 | 0,120544886 | 0,317 | 0,109 | 0,867213402 | 1,087145385   | 0,919840174     | 2,908256881     |
| SLC30A5                                                                                             | 6,21382E-06 | 0,120508801 | 0,256 | 0,067 | 0,131117733 | 1,087118193   | 0,919863182     | 3,820895522     |
| TBC1D2B                                                                                             | 0,003546515 | 0,120484225 | 0,134 | 0,042 | 1           | 1,087099675   | 0,919878851     | 3,19047619      |
| PTK7                                                                                                | 4,65444E-05 | 0,120415443 | 0,11  | 0,014 | 0,9821336   | 1,087047847   | 0,919922709     | 7,857142857     |
| TMEM209                                                                                             | 5,20222E-05 | 0,120405439 | 0,146 | 0,028 | 1           | 1,087040309   | 0,919929088     | 5,214285714     |
| ARHGEF18                                                                                            | 0,040202307 | 0,120398834 | 0,085 | 0,032 | 1           | 1,087035332   | 0,9199333       | 2,65625         |
| CIB2                                                                                                | 3,33807E-07 | 0,120291231 | 0,146 | 0,014 | 0,00704367  | 1,086954259   | 0,920001915     | 10,42857143     |
| SLC3A1                                                                                              | 0,008401736 | 0,12014902  | 0,024 | 0     | 1           | 1,08684712    | 0,920092607     | #DIV/0!         |
| OPN3                                                                                                | 0,006222372 | 0,120140515 | 0,134 | 0,046 | 1           | 1,086840713   | 0,920098031     | 2,913043478     |
| GEMIN7                                                                                              | 3,17593E-07 | 0,120007748 | 0,122 | 0,007 | 0,006701534 | 1,086740699   | 0,920182709     | 17,42857143     |
| THOC6                                                                                               | 3,90076E-05 | 0,11998291  | 0,22  | 0,06  | 0,82309976  | 1,086721989   | 0,920198551     | 3,666666667     |
| MSRB1                                                                                               | 2,27392E-07 | 0,119972624 | 0,171 | 0,021 | 0,004798199 | 1,086714241   | 0,920205112     | 8,142857143     |

Supplementary Table 2

| Differentially expressed genes_keloid-XL_comparing SC-Keloid vs. (SC-Myel, SC-Nonmyel, SC-Nonmyel2) |             |             |       |       |             |               |                 |                 |
|-----------------------------------------------------------------------------------------------------|-------------|-------------|-------|-------|-------------|---------------|-----------------|-----------------|
| gene                                                                                                | p_val       | avg_log2FC  | pct.1 | pct.2 | p_val_adj   | Foldchange_UP | Foldchange_DOWN | Ratio_pct1_pct2 |
| KLHL9                                                                                               | 2,32089E-06 | 0,119894613 | 0,183 | 0,032 | 0,048973121 | 1,086655481   | 0,920254872     | 5,71875         |
| SLC6A6                                                                                              | 2,11962E-05 | 0,11985184  | 0,171 | 0,035 | 0,44726133  | 1,086623264   | 0,920282155     | 4,885714286     |
| ARHGAP35                                                                                            | 0,000554509 | 0,119842727 | 0,317 | 0,13  | 1           | 1,086616401   | 0,920287969     | 2,438461538     |
| MIR4458HG                                                                                           | 0,002552281 | 0,119826421 | 0,195 | 0,074 | 1           | 1,086604119   | 0,92029837      | 2,635135135     |
| ZNF286A                                                                                             | 0,002115747 | 0,119694904 | 0,134 | 0,039 | 1           | 1,086505068   | 0,920382269     | 3,435897436     |
| ADCY1                                                                                               | 6,67422E-07 | 0,119690988 | 0,085 | 0     | 0,014083281 | 1,086502119   | 0,920384768     | #DIV/0!         |
| SRP72                                                                                               | 5,6999E-05  | 0,119664265 | 0,439 | 0,179 | 1           | 1,086481994   | 0,920401816     | 2,452513966     |
| PCDH1                                                                                               | 0,000411811 | 0,119661013 | 0,341 | 0,14  | 1           | 1,086479545   | 0,92040389      | 2,435714286     |
| ZSWIM1                                                                                              | 0,063203483 | 0,11953145  | 0,012 | 0     | 1           | 1,086398314   | 0,92047271      | #DIV/0!         |
| ARHGEF33                                                                                            | 0,063203483 | 0,119512516 | 0,012 | 0     | 1           | 1,086367719   | 0,920498633     | #DIV/0!         |
| SNX2                                                                                                | 7,58018E-07 | 0,119503327 | 0,268 | 0,063 | 0,015994934 | 1,0863608     | 0,920504496     | 4,253968254     |
| EEF1AKMT1                                                                                           | 0,005916634 | 0,119481622 | 0,134 | 0,046 | 1           | 1,086344456   | 0,920518345     | 2,913043478     |
| PENK                                                                                                | 0,000183568 | 0,119449402 | 0,049 | 0     | 1           | 1,086320194   | 0,920538903     | #DIV/0!         |
| PCGF1                                                                                               | 0,000190779 | 0,119424325 | 0,159 | 0,039 | 1           | 1,086301312   | 0,920554904     | 4,076923077     |
| PRDX3                                                                                               | 1,15564E-05 | 0,11941109  | 0,427 | 0,154 | 0,243850634 | 1,086291346   | 0,920563349     | 2,772727273     |
| HARS2                                                                                               | 0,004014306 | 0,119403264 | 0,098 | 0,025 | 1           | 1,086285454   | 0,920568343     | 3,92            |
| CDC42EP3                                                                                            | 1,20119E-05 | 0,119384624 | 0,622 | 0,263 | 0,253463883 | 1,086271419   | 0,920580237     | 2,365019011     |
| CCDC191                                                                                             | 9,64031E-06 | 0,119352065 | 0,098 | 0,007 | 0,20342014  | 1,086246904   | 0,920601013     | 14              |
| SMIM12                                                                                              | 5,85172E-06 | 0,119294254 | 0,232 | 0,056 | 0,123477184 | 1,086203377   | 0,920637904     | 4,142857143     |
| AKR1A1                                                                                              | 1,09701E-05 | 0,119292703 | 0,293 | 0,088 | 0,231479565 | 1,08620221    | 0,920638893     | 3,329545455     |
| ARPC5L                                                                                              | 2,69182E-05 | 0,119248163 | 0,378 | 0,137 | 0,568000084 | 1,086168676   | 0,920667317     | 2,759124088     |
| PDE6D                                                                                               | 1,14837E-05 | 0,119124625 | 0,159 | 0,028 | 0,242318466 | 1,086075671   | 0,920746156     | 5,678571429     |
| DYNC1LI2                                                                                            | 0,022439685 | 0,118749472 | 0,659 | 0,432 | 1           | 1,085793289   | 0,920985615     | 1,525462963     |
| LETMD1                                                                                              | 7,54346E-05 | 0,118746592 | 0,22  | 0,063 | 1           | 1,085791121   | 0,920987454     | 3,492063492     |
| ANAPC4                                                                                              | 0,035965312 | 0,118725483 | 0,11  | 0,046 | 1           | 1,085775235   | 0,921000929     | 2,391304348     |
| GCNT1                                                                                               | 5,23216E-05 | 0,118625708 | 0,098 | 0,011 | 1           | 1,085700146   | 0,921064627     | 8,909090909     |
| PGAP3                                                                                               | 0,002664794 | 0,118621072 | 0,085 | 0,018 | 1           | 1,085696658   | 0,921067586     | 4,722222222     |
| EGLN1                                                                                               | 1,77675E-05 | 0,118615508 | 0,268 | 0,077 | 0,374912466 | 1,085692471   | 0,921071139     | 3,480519481     |
| TRIM23                                                                                              | 4,07113E-05 | 0,118610543 | 0,146 | 0,028 | 0,859049315 | 1,085688734   | 0,921074309     | 5,214285714     |
| CSNK2A2                                                                                             | 9,19588E-05 | 0,118563188 | 0,39  | 0,151 | 1           | 1,085653098   | 0,921104543     | 2,582781457     |

Supplementary Table 2

| Differentially expressed genes_keloid-XL_comparing SC-Keloid vs. (SC-Myel, SC-Nonmyel, SC-Nonmyel2) |             |             |       |       |             |               |                 |                 |
|-----------------------------------------------------------------------------------------------------|-------------|-------------|-------|-------|-------------|---------------|-----------------|-----------------|
| gene                                                                                                | p_val       | avg_log2FC  | pct.1 | pct.2 | p_val_adj   | Foldchange_UP | Foldchange_DOWN | Ratio_pct1_pct2 |
| SHLD1                                                                                               | 4,23142E-05 | 0,11838989  | 0,11  | 0,014 | 0,892872791 | 1,085522696   | 0,921215193     | 7,857142857     |
| HCFC1R1                                                                                             | 0,002875634 | 0,118170483 | 0,646 | 0,361 | 1           | 1,085357621   | 0,921355303     | 1,789473684     |
| FAM3A                                                                                               | 2,49928E-07 | 0,118000817 | 0,28  | 0,063 | 0,00527372  | 1,085229986   | 0,921463665     | 4,444444444     |
| DCXR                                                                                                | 0,000103853 | 0,117993104 | 0,341 | 0,13  | 1           | 1,085224185   | 0,92146859      | 2,623076923     |
| KCNA2                                                                                               | 0,000103074 | 0,117979473 | 0,195 | 0,053 | 1           | 1,085213931   | 0,921477297     | 3,679245283     |
| PEX13                                                                                               | 7,52278E-05 | 0,11797573  | 0,159 | 0,035 | 1           | 1,085211116   | 0,921479688     | 4,542857143     |
| TSSC4                                                                                               | 5,09271E-09 | 0,117752257 | 0,378 | 0,088 | 0,000107461 | 1,08504303    | 0,921622436     | 4,295454545     |
| SMURF2                                                                                              | 3,11595E-06 | 0,117716414 | 0,415 | 0,14  | 0,065749715 | 1,085016073   | 0,921645333     | 2,964285714     |
| ZNF558                                                                                              | 0,002767295 | 0,117704687 | 0,085 | 0,018 | 1           | 1,085007253   | 0,921652825     | 4,722222222     |
| FBXW5                                                                                               | 1,38207E-06 | 0,117625259 | 0,366 | 0,112 | 0,029162994 | 1,084947519   | 0,921703568     | 3,267857143     |
| SHROOM4                                                                                             | 2,05285E-05 | 0,117616051 | 0,22  | 0,056 | 0,433171245 | 1,084940595   | 0,921709451     | 3,928571429     |
| FKBP7                                                                                               | 1,71213E-08 | 0,117580116 | 0,415 | 0,109 | 0,000361277 | 1,084913572   | 0,921732409     | 3,80733945      |
| SCFD2                                                                                               | 8,66134E-06 | 0,117574876 | 0,085 | 0,004 | 0,1827629   | 1,084909631   | 0,921735757     | 21,25           |
| ZNF677                                                                                              | 1,64028E-05 | 0,117481427 | 0,183 | 0,039 | 0,346114767 | 1,084839359   | 0,921795463     | 4,692307692     |
| SPSB1                                                                                               | 0,003961102 | 0,117182051 | 0,159 | 0,056 | 1           | 1,084614266   | 0,921986767     | 2,839285714     |
| CCDC77                                                                                              | 0,001600233 | 0,117140136 | 0,061 | 0,007 | 1           | 1,084582755   | 0,922013554     | 8,714285714     |
| C2orf49                                                                                             | 4,61419E-07 | 0,117096966 | 0,232 | 0,046 | 0,009736407 | 1,084550301   | 0,922041144     | 5,043478261     |
| BMPER                                                                                               | 4,32324E-06 | 0,117050114 | 0,073 | 0     | 0,09122464  | 1,08451508    | 0,922071088     | #DIV/0!         |
| TXNDC16                                                                                             | 0,002397697 | 0,116770231 | 0,11  | 0,028 | 1           | 1,084304705   | 0,922249987     | 3,928571429     |
| YJU2                                                                                                | 0,000444147 | 0,116712881 | 0,11  | 0,021 | 1           | 1,084261602   | 0,922286649     | 5,238095238     |
| RPS21                                                                                               | 0,077152328 | 0,116501619 | 0,915 | 0,814 | 1           | 1,084102839   | 0,922421715     | 1,124078624     |
| LAMC1                                                                                               | 0,018821254 | 0,116428784 | 0,573 | 0,358 | 1           | 1,084048109   | 0,922468285     | 1,600558659     |
| AAGAB                                                                                               | 2,66449E-05 | 0,11639077  | 0,134 | 0,021 | 0,562233009 | 1,084019546   | 0,922492592     | 6,380952381     |
| PTPRA                                                                                               | 2,03205E-05 | 0,116363513 | 0,463 | 0,179 | 0,428783269 | 1,083999066   | 0,92251002      | 2,586592179     |
| LINC01063                                                                                           | 0,347088417 | 0,1163223   | 0,012 | 0,004 | 1           | 1,0839681     | 0,922536374     | 3               |
| PCSK7                                                                                               | 0,000224892 | 0,116262659 | 0,256 | 0,088 | 1           | 1,083923289   | 0,922574512     | 2,909090909     |
| TCEAL3                                                                                              | 4,26468E-05 | 0,116240515 | 0,463 | 0,189 | 0,899889921 | 1,083906652   | 0,922588673     | 2,44973545      |
| MRPL58                                                                                              | 2,08681E-09 | 0,116207939 | 0,195 | 0,018 | 4,40337E-05 | 1,083882178   | 0,922609505     | 10,83333333     |
| DPYSL2                                                                                              | 0,003527906 | 0,116177719 | 0,427 | 0,225 | 1           | 1,083859474   | 0,922628831     | 1,897777778     |
| TMEM39A                                                                                             | 0,003026608 | 0,116174853 | 0,183 | 0,067 | 1           | 1,083857321   | 0,922630664     | 2,731343284     |

Supplementary Table 2

| Differentially expressed genes_keloid-XL_comparing SC-Keloid vs. (SC-Myel, SC-Nonmyel, SC-Nonmyel2) |             |             |       |       |             |               |                 |                 |
|-----------------------------------------------------------------------------------------------------|-------------|-------------|-------|-------|-------------|---------------|-----------------|-----------------|
| gene                                                                                                | p_val       | avg_log2FC  | pct.1 | pct.2 | p_val_adj   | Foldchange_UP | Foldchange_DOWN | Ratio_pct1_pct2 |
| AP5M1                                                                                               | 1,98272E-07 | 0,116151167 | 0,183 | 0,025 | 0,004183744 | 1,083839527   | 0,922645812     | 7,32            |
| ARNTL2                                                                                              | 5,55398E-09 | 0,116027167 | 0,134 | 0,004 | 0,000117194 | 1,083746374   | 0,922725117     | 33,5            |
| SUPT16H                                                                                             | 0,000166809 | 0,115998386 | 0,366 | 0,147 | 1           | 1,083724755   | 0,922743525     | 2,489795918     |
| MRPS17                                                                                              | 0,000127665 | 0,115990268 | 0,171 | 0,042 | 1           | 1,083718657   | 0,922748717     | 4,071428571     |
| DNM1L                                                                                               | 3,82735E-06 | 0,115972812 | 0,366 | 0,119 | 0,080761017 | 1,083705544   | 0,922759882     | 3,075630252     |
| NECAP2                                                                                              | 8,06384E-06 | 0,115938617 | 0,28  | 0,081 | 0,170155105 | 1,083679858   | 0,922781754     | 3,456790123     |
| ATPAF2                                                                                              | 0,000194727 | 0,115856092 | 0,134 | 0,028 | 1           | 1,083617871   | 0,922834541     | 4,785714286     |
| GNA12                                                                                               | 1,648E-08   | 0,115851301 | 0,39  | 0,098 | 0,000347744 | 1,083614273   | 0,922837605     | 3,979591837     |
| ZNF599                                                                                              | 0,00059839  | 0,115845901 | 0,098 | 0,018 | 1           | 1,083610217   | 0,922841059     | 5,444444444     |
| TMUB1                                                                                               | 6,21769E-05 | 0,115782362 | 0,256 | 0,081 | 1           | 1,083562493   | 0,922881704     | 3,160493827     |
| PRRC2A                                                                                              | 0,03492659  | 0,115775674 | 0,415 | 0,246 | 1           | 1,083557471   | 0,922885982     | 1,68699187      |
| TRMT6                                                                                               | 2,51588E-05 | 0,115769328 | 0,134 | 0,021 | 0,530876209 | 1,083552704   | 0,922890041     | 6,380952381     |
| EDC3                                                                                                | 0,001011915 | 0,115620815 | 0,085 | 0,014 | 1           | 1,083441168   | 0,92298505      | 6,071428571     |
| DYNC1I1                                                                                             | 0,513508152 | 0,115599886 | 0,024 | 0,014 | 1           | 1,08342545    | 0,922998439     | 1,714285714     |
| TUBG1                                                                                               | 0,000557329 | 0,115567698 | 0,146 | 0,039 | 1           | 1,083401278   | 0,923019033     | 3,743589744     |
| ANAPC2                                                                                              | 0,013301771 | 0,115508283 | 0,085 | 0,025 | 1           | 1,083356661   | 0,923057046     | 3,4             |
| ERI1                                                                                                | 9,30589E-05 | 0,11546882  | 0,122 | 0,021 | 1           | 1,083327027   | 0,923082296     | 5,80952381      |
| TRIB3                                                                                               | 0,010425992 | 0,115457856 | 0,073 | 0,018 | 1           | 1,083318794   | 0,923089311     | 4,055555556     |
| HELZ2                                                                                               | 0,010031179 | 0,11538871  | 0,134 | 0,049 | 1           | 1,083266874   | 0,923133555     | 2,734693878     |
| PIGO                                                                                                | 0,000210889 | 0,115264752 | 0,098 | 0,014 | 1           | 1,083173803   | 0,923212874     | 7               |
| CDKAL1                                                                                              | 5,20222E-05 | 0,115263649 | 0,146 | 0,028 | 1           | 1,083172975   | 0,92321358      | 5,214285714     |
| TEAD3                                                                                               | 3,14105E-05 | 0,115207098 | 0,207 | 0,053 | 0,66279258  | 1,083130517   | 0,923249769     | 3,905660377     |
| ADGRE5                                                                                              | 2,24366E-05 | 0,1151996   | 0,366 | 0,13  | 0,473434236 | 1,083124888   | 0,923254568     | 2,815384615     |
| WDR18                                                                                               | 4,15926E-07 | 0,115177591 | 0,28  | 0,067 | 0,00877646  | 1,083108364   | 0,923268652     | 4,179104478     |
| MAP3K6                                                                                              | 0,001474456 | 0,115142145 | 0,122 | 0,032 | 1           | 1,083081753   | 0,923291337     | 3,8125          |
| MDH1                                                                                                | 0,000107854 | 0,115044317 | 0,5   | 0,214 | 1           | 1,083008313   | 0,923353946     | 2,336448598     |
| SOX18                                                                                               | 0,065834577 | 0,115022425 | 0,061 | 0,021 | 1           | 1,082991879   | 0,923367958     | 2,904761905     |
| RACK1                                                                                               | 0,035150541 | 0,114961016 | 0,927 | 0,811 | 1           | 1,082945782   | 0,923407262     | 1,143033292     |
| MRI1                                                                                                | 0,000164012 | 0,114911445 | 0,134 | 0,028 | 1           | 1,082908572   | 0,923438991     | 4,785714286     |
| KNL1                                                                                                | 0,001220269 | 0,114892056 | 0,037 | 0     | 1           | 1,082894019   | 0,923451402     | #DIV/0!         |

Supplementary Table 2

| Differentially expressed genes_keloid-XL_comparing SC-Keloid vs. (SC-Myel, SC-Nonmyel, SC-Nonmyel2) |             |             |       |       |             |               |                 |                 |
|-----------------------------------------------------------------------------------------------------|-------------|-------------|-------|-------|-------------|---------------|-----------------|-----------------|
| gene                                                                                                | p_val       | avg_log2FC  | pct.1 | pct.2 | p_val_adj   | Foldchange_UP | Foldchange_DOWN | Ratio_pct1_pct2 |
| ELAVL4                                                                                              | 6,67422E-07 | 0,114881508 | 0,085 | 0     | 0,014083281 | 1,082886102   | 0,923458153     | #DIV/0!         |
| BET1                                                                                                | 1,01629E-07 | 0,114880475 | 0,22  | 0,035 | 0,002144469 | 1,082885327   | 0,923458815     | 6,285714286     |
| NUDT8                                                                                               | 0,000942376 | 0,114829751 | 0,085 | 0,014 | 1           | 1,082847253   | 0,923491284     | 6,071428571     |
| ORMDL3                                                                                              | 1,07355E-05 | 0,114682109 | 0,256 | 0,07  | 0,226529633 | 1,082736444   | 0,923585796     | 3,657142857     |
| EYA3                                                                                                | 0,000685144 | 0,114588463 | 0,098 | 0,018 | 1           | 1,082666165   | 0,923645748     | 5,444444444     |
| RNASET2                                                                                             | 0,016071749 | 0,114564177 | 0,061 | 0,014 | 1           | 1,082647939   | 0,923661297     | 4,357142857     |
| PKD1                                                                                                | 0,000236006 | 0,114546765 | 0,378 | 0,154 | 1           | 1,082634873   | 0,923672445     | 2,454545455     |
| CAMK1                                                                                               | 4,33882E-06 | 0,114475995 | 0,195 | 0,039 | 0,091553477 | 1,082581767   | 0,923717756     | 5               |
| TMEM181                                                                                             | 0,000184612 | 0,114403703 | 0,159 | 0,039 | 1           | 1,082527521   | 0,923764044     | 4,076923077     |
| TRMT61B                                                                                             | 0,00067597  | 0,114388507 | 0,098 | 0,018 | 1           | 1,082516119   | 0,923773773     | 5,444444444     |
| SCPEP1                                                                                              | 9,32723E-05 | 0,114346068 | 0,28  | 0,095 | 1           | 1,082484275   | 0,923800948     | 2,947368421     |
| PRDM1                                                                                               | 0,510048238 | 0,114343433 | 0,024 | 0,014 | 1           | 1,082482298   | 0,923802635     | 1,714285714     |
| TMUB2                                                                                               | 5,7449E-05  | 0,114337216 | 0,171 | 0,039 | 1           | 1,082477634   | 0,923806616     | 4,384615385     |
| APEX2                                                                                               | 0,000186767 | 0,114298639 | 0,098 | 0,014 | 1           | 1,082448689   | 0,923831319     | 7               |
| SEPTIN6                                                                                             | 0,008751649 | 0,114288192 | 0,049 | 0,007 | 1           | 1,082440851   | 0,923838008     | 7               |
| MRPL46                                                                                              | 4,63364E-05 | 0,114236289 | 0,146 | 0,028 | 0,977743891 | 1,082401909   | 0,923871245     | 5,214285714     |
| ARMC5                                                                                               | 0,002631406 | 0,11409975  | 0,085 | 0,018 | 1           | 1,082299474   | 0,923958686     | 4,722222222     |
| PPA2                                                                                                | 6,99475E-06 | 0,113996838 | 0,207 | 0,046 | 0,147596116 | 1,082222273   | 0,924024598     | 4,5             |
| TMEM185A                                                                                            | 0,000129749 | 0,113936792 | 0,207 | 0,06  | 1           | 1,082177231   | 0,924063057     | 3,45            |
| ZNF469                                                                                              | 8,66134E-06 | 0,113907744 | 0,085 | 0,004 | 0,1827629   | 1,082155442   | 0,924081663     | 21,25           |
| CIAO2A                                                                                              | 2,02929E-05 | 0,113825404 | 0,207 | 0,049 | 0,42819948  | 1,082093681   | 0,924134405     | 4,224489796     |
| CSDE1                                                                                               | 0,025663028 | 0,113769898 | 0,72  | 0,442 | 1           | 1,082052049   | 0,924169961     | 1,628959276     |
| CACNA1C                                                                                             | 5,32686E-05 | 0,113712413 | 0,073 | 0,004 | 1           | 1,082008935   | 0,924206785     | 18,25           |
| PSMD3                                                                                               | 2,2595E-06  | 0,113667315 | 0,402 | 0,133 | 0,047677729 | 1,081975113   | 0,924235676     | 3,022556391     |
| ZBTB8A                                                                                              | 3,19993E-05 | 0,113620394 | 0,159 | 0,032 | 0,675218046 | 1,081939924   | 0,924265736     | 4,96875         |
| SLC30A9                                                                                             | 6,3387E-07  | 0,113536529 | 0,256 | 0,056 | 0,013375287 | 1,081877032   | 0,924319466     | 4,571428571     |
| SCOC                                                                                                | 4,15086E-07 | 0,113473129 | 0,537 | 0,189 | 0,008758723 | 1,081829489   | 0,924360086     | 2,841269841     |
| TMEM203                                                                                             | 2,95204E-06 | 0,113314457 | 0,207 | 0,042 | 0,062291075 | 1,081710513   | 0,924461756     | 4,928571429     |
| SACM1L                                                                                              | 6,2277E-05  | 0,113203944 | 0,207 | 0,056 | 1           | 1,081627655   | 0,924532574     | 3,696428571     |
| NACC2                                                                                               | 6,88723E-06 | 0,113184999 | 0,256 | 0,067 | 0,145327362 | 1,081613451   | 0,924544715     | 3,820895522     |

Supplementary Table 2

| Differentially expressed genes_keloid-XL_comparing SC-Keloid vs. (SC-Myel, SC-Nonmyel, SC-Nonmyel2) |             |             |       |       |             |               |                 |                 |
|-----------------------------------------------------------------------------------------------------|-------------|-------------|-------|-------|-------------|---------------|-----------------|-----------------|
| gene                                                                                                | p_val       | avg_log2FC  | pct.1 | pct.2 | p_val_adj   | Foldchange_UP | Foldchange_DOWN | Ratio_pct1_pct2 |
| EXT2                                                                                                | 1,70226E-06 | 0,113171719 | 0,293 | 0,077 | 0,035919458 | 1,081603495   | 0,924553226     | 3,805194805     |
| RMDN2                                                                                               | 1,49573E-06 | 0,113151239 | 0,146 | 0,018 | 0,03156145  | 1,081588141   | 0,92456635      | 8,111111111     |
| ZNF525                                                                                              | 0,011553628 | 0,113148962 | 0,037 | 0,004 | 1           | 1,081586434   | 0,924567809     | 9,25            |
| ZNF880                                                                                              | 0,006170448 | 0,113134788 | 0,134 | 0,046 | 1           | 1,081575808   | 0,924576893     | 2,913043478     |
| PPP6C                                                                                               | 3,07307E-06 | 0,113074467 | 0,305 | 0,084 | 0,064844951 | 1,081530587   | 0,924615551     | 3,630952381     |
| AMACR                                                                                               | 9,56641E-05 | 0,113073335 | 0,122 | 0,021 | 1           | 1,081529739   | 0,924616277     | 5,80952381      |
| DYRK4                                                                                               | 9,64033E-06 | 0,112937735 | 0,293 | 0,088 | 0,203420635 | 1,08142809    | 0,924703186     | 3,329545455     |
| AP5Z1                                                                                               | 9,62051E-07 | 0,11281244  | 0,171 | 0,025 | 0,020300248 | 1,081334173   | 0,924783499     | 6,84            |
| RPS3A                                                                                               | 0,08781488  | 0,112773781 | 0,976 | 0,884 | 1           | 1,081305199   | 0,924808279     | 1,104072398     |
| ORC4                                                                                                | 1,23461E-07 | 0,112748603 | 0,244 | 0,046 | 0,002605148 | 1,081286327   | 0,924824419     | 5,304347826     |
| MNAT1                                                                                               | 1,65927E-06 | 0,112739949 | 0,293 | 0,077 | 0,035012201 | 1,081279841   | 0,924829967     | 3,805194805     |
| ZFPL1                                                                                               | 6,78231E-06 | 0,112686345 | 0,183 | 0,035 | 0,143113616 | 1,081239667   | 0,92486433      | 5,228571429     |
| CPD                                                                                                 | 0,002886858 | 0,112667259 | 0,207 | 0,081 | 1           | 1,081225363   | 0,924876565     | 2,555555556     |
| EEF1B2                                                                                              | 0,02317115  | 0,112651522 | 0,78  | 0,561 | 1           | 1,081213568   | 0,924886655     | 1,390374332     |
| MOB3A                                                                                               | 3,64556E-07 | 0,112602326 | 0,146 | 0,014 | 0,007692497 | 1,0811767     | 0,924918194     | 10,42857143     |
| CFDP1                                                                                               | 0,001912292 | 0,112472864 | 0,39  | 0,189 | 1           | 1,081079684   | 0,925001196     | 2,063492063     |
| SLF1                                                                                                | 2,05364E-06 | 0,112459087 | 0,183 | 0,032 | 0,043333918 | 1,081069359   | 0,925010029     | 5,71875         |
| WIZ                                                                                                 | 1,54009E-05 | 0,112431959 | 0,207 | 0,049 | 0,324975096 | 1,081049031   | 0,925027423     | 4,224489796     |
| ENPP4                                                                                               | 0,011128779 | 0,112393058 | 0,037 | 0,004 | 1           | 1,081019882   | 0,925052366     | 9,25            |
| IVD                                                                                                 | 7,78762E-06 | 0,11237548  | 0,256 | 0,067 | 0,164326581 | 1,081006711   | 0,925063637     | 3,820895522     |
| CD2BP2                                                                                              | 1,55636E-05 | 0,112273276 | 0,244 | 0,067 | 0,328407081 | 1,080930133   | 0,925129173     | 3,641791045     |
| LRIF1                                                                                               | 2,51588E-05 | 0,112221063 | 0,134 | 0,021 | 0,530876209 | 1,080891013   | 0,925162656     | 6,380952381     |
| C12orf43                                                                                            | 3,17593E-07 | 0,112168019 | 0,122 | 0,007 | 0,006701534 | 1,080851273   | 0,925196672     | 17,42857143     |
| SCO2                                                                                                | 7,05689E-06 | 0,112149252 | 0,171 | 0,032 | 0,148907436 | 1,080837212   | 0,925208707     | 5,34375         |
| FBXO4                                                                                               | 0,000120189 | 0,112143178 | 0,146 | 0,032 | 1           | 1,080832662   | 0,925212602     | 4,5625          |
| MPND                                                                                                | 7,7397E-06  | 0,112132784 | 0,134 | 0,018 | 0,163315378 | 1,080824875   | 0,925219268     | 7,444444444     |
| TSFM                                                                                                | 8,37326E-06 | 0,112042662 | 0,171 | 0,032 | 0,176684187 | 1,080757361   | 0,925277066     | 5,34375         |
| PAR6A                                                                                               | 0,000214102 | 0,111987539 | 0,098 | 0,014 | 1           | 1,080716067   | 0,92531242      | 7               |
| TBC1D7                                                                                              | 7,65928E-07 | 0,111915132 | 0,22  | 0,042 | 0,016161843 | 1,080661829   | 0,925358861     | 5,238095238     |
| PDE4B                                                                                               | 0,000198484 | 0,111845289 | 0,098 | 0,014 | 1           | 1,080609514   | 0,925403661     | 7               |

Supplementary Table 2

| Differentially expressed genes_keloid-XL_comparing SC-Keloid vs. (SC-Myel, SC-Nonmyel, SC-Nonmyel2) |             |             |       |       |             |               |                 |                 |
|-----------------------------------------------------------------------------------------------------|-------------|-------------|-------|-------|-------------|---------------|-----------------|-----------------|
| gene                                                                                                | p_val       | avg_log2FC  | pct.1 | pct.2 | p_val_adj   | Foldchange_UP | Foldchange_DOWN | Ratio_pct1_pct2 |
| BCAP29                                                                                              | 0,00112445  | 0,111805393 | 0,463 | 0,225 | 1           | 1,080579632   | 0,925429252     | 2,057777778     |
| ELOA                                                                                                | 0,003560464 | 0,11178269  | 0,146 | 0,049 | 1           | 1,080562627   | 0,925443815     | 2,979591837     |
| NLE1                                                                                                | 2,18116E-07 | 0,111651268 | 0,11  | 0,004 | 0,004602468 | 1,080464198   | 0,925528122     | 27,5            |
| VPS37D                                                                                              | 0,10804138  | 0,111638237 | 0,049 | 0,018 | 1           | 1,080454439   | 0,925536482     | 2,722222222     |
| CBR1                                                                                                | 0,000130744 | 0,11163075  | 0,512 | 0,228 | 1           | 1,080448831   | 0,925541285     | 2,245614035     |
| YIPF2                                                                                               | 9,87009E-08 | 0,111465311 | 0,28  | 0,06  | 0,002082687 | 1,08032494    | 0,925647426     | 4,666666667     |
| B4GALT1                                                                                             | 6,04502E-06 | 0,111445004 | 0,341 | 0,109 | 0,127555985 | 1,080309733   | 0,925660456     | 3,128440367     |
| ALG14                                                                                               | 0,00018342  | 0,111408844 | 0,268 | 0,091 | 1           | 1,080282656   | 0,925683657     | 2,945054945     |
| ELK3                                                                                                | 1,35049E-05 | 0,111376828 | 0,463 | 0,175 | 0,284966246 | 1,080258684   | 0,925704199     | 2,645714286     |
| NADSYN1                                                                                             | 0,009407308 | 0,111259615 | 0,122 | 0,042 | 1           | 1,08017092    | 0,925779412     | 2,904761905     |
| GMDS                                                                                                | 5,77801E-06 | 0,111240486 | 0,146 | 0,021 | 0,121921893 | 1,080156599   | 0,925791687     | 6,952380952     |
| INTS12                                                                                              | 3,45006E-05 | 0,111172744 | 0,159 | 0,032 | 0,727996941 | 1,080105881   | 0,925835159     | 4,96875         |
| GIN1                                                                                                | 0,000432775 | 0,111091262 | 0,11  | 0,021 | 1           | 1,080044879   | 0,925887451     | 5,238095238     |
| ZNF557                                                                                              | 5,90574E-05 | 0,111084465 | 0,085 | 0,007 | 1           | 1,080039791   | 0,925891813     | 12,14285714     |
| ALKBH6                                                                                              | 0,000421675 | 0,111069215 | 0,11  | 0,021 | 1           | 1,080028374   | 0,9259016       | 5,238095238     |
| MCM6                                                                                                | 0,000332109 | 0,111031036 | 0,073 | 0,007 | 1           | 1,079999793   | 0,925926103     | 10,42857143     |
| KRI1                                                                                                | 0,014817086 | 0,110914591 | 0,11  | 0,039 | 1           | 1,079912626   | 0,926000841     | 2,820512821     |
| ARFIP2                                                                                              | 2,45218E-08 | 0,110883762 | 0,268 | 0,049 | 0,000517435 | 1,07988955    | 0,926020629     | 5,469387755     |
| SLC39A4                                                                                             | 0,000425319 | 0,11087101  | 0,134 | 0,032 | 1           | 1,079880005   | 0,926028814     | 4,1875          |
| ZNF662                                                                                              | 0,001914332 | 0,110668924 | 0,049 | 0,004 | 1           | 1,07972875    | 0,926158537     | 12,25           |
| RHNO1                                                                                               | 1,08469E-05 | 0,110651932 | 0,11  | 0,011 | 0,228879507 | 1,079716034   | 0,926169445     | 10              |
| YARS1                                                                                               | 0,000113219 | 0,11056737  | 0,22  | 0,067 | 1           | 1,079652749   | 0,926223734     | 3,28358209      |
| CHST14                                                                                              | 3,49528E-07 | 0,110553801 | 0,22  | 0,039 | 0,007375398 | 1,079642595   | 0,926232445     | 5,641025641     |
| IQCK                                                                                                | 1,61892E-05 | 0,11055214  | 0,146 | 0,025 | 0,341608689 | 1,079641352   | 0,926233511     | 5,84            |
| POLR3GL                                                                                             | 2,75993E-05 | 0,110423508 | 0,28  | 0,088 | 0,582372342 | 1,079545094   | 0,926316099     | 3,181818182     |
| CLPTM1                                                                                              | 0,000292146 | 0,110401317 | 0,415 | 0,179 | 1           | 1,079528489   | 0,926330347     | 2,318435754     |
| ABAT                                                                                                | 0,186442875 | 0,110375661 | 0,037 | 0,014 | 1           | 1,079509291   | 0,926346821     | 2,642857143     |
| FAIM                                                                                                | 0,005867015 | 0,110213294 | 0,134 | 0,046 | 1           | 1,079387806   | 0,926451081     | 2,913043478     |
| ECH1                                                                                                | 3,40124E-06 | 0,110110365 | 0,463 | 0,165 | 0,071769648 | 1,0793108     | 0,926517181     | 2,806060606     |
| PTGER1                                                                                              | 0,000298645 | 0,110073403 | 0,061 | 0,004 | 1           | 1,079283148   | 0,926540919     | 15,25           |



Supplementary Table 2

| Differentially expressed genes_keloid-XL_comparing SC-Keloid vs. (SC-Myel, SC-Nonmyel, SC-Nonmyel2) |             |             |       |       |             |               |                 |                 |
|-----------------------------------------------------------------------------------------------------|-------------|-------------|-------|-------|-------------|---------------|-----------------|-----------------|
| gene                                                                                                | p_val       | avg_log2FC  | pct.1 | pct.2 | p_val_adj   | Foldchange_UP | Foldchange_DOWN | Ratio_pct1_pct2 |
| SULF1                                                                                               | 9,28126E-06 | 0,110040333 | 0,122 | 0,014 | 0,195843832 | 1,079258408   | 0,926562158     | 8,714285714     |
| RAD1                                                                                                | 0,009021414 | 0,110035559 | 0,122 | 0,042 | 1           | 1,079254837   | 0,926565224     | 2,904761905     |
| WASHC5                                                                                              | 0,001139464 | 0,110010052 | 0,11  | 0,025 | 1           | 1,079235756   | 0,926581606     | 4,4             |
| LRRC27                                                                                              | 1,08469E-05 | 0,109985959 | 0,11  | 0,011 | 0,228879507 | 1,079217733   | 0,92659708      | 10              |
| SDK1                                                                                                | 0,004564654 | 0,109931612 | 0,122 | 0,039 | 1           | 1,079177079   | 0,926631986     | 3,128205128     |
| ADSS2                                                                                               | 0,000787841 | 0,109852583 | 0,256 | 0,098 | 1           | 1,079117965   | 0,926682747     | 2,612244898     |
| INPP5K                                                                                              | 7,9173E-05  | 0,109851348 | 0,317 | 0,112 | 1           | 1,079117041   | 0,92668354      | 2,830357143     |
| AKTIP                                                                                               | 2,27964E-05 | 0,109838627 | 0,22  | 0,056 | 0,481026575 | 1,079107526   | 0,926691711     | 3,928571429     |
| CXXC1                                                                                               | 0,000188991 | 0,109827362 | 0,195 | 0,056 | 1           | 1,0790991     | 0,926698947     | 3,482142857     |
| LSM6                                                                                                | 6,26294E-07 | 0,109794002 | 0,354 | 0,098 | 0,013215423 | 1,079074148   | 0,926720376     | 3,612244898     |
| TFAP2A-AS1                                                                                          | 0,001713147 | 0,10977414  | 0,061 | 0,007 | 1           | 1,079059292   | 0,926733134     | 8,714285714     |
| MRPL32                                                                                              | 0,000434918 | 0,109735807 | 0,402 | 0,179 | 1           | 1,079030622   | 0,926757758     | 2,245810056     |
| ZBED5                                                                                               | 0,000448556 | 0,109719146 | 0,183 | 0,056 | 1           | 1,07901816    | 0,926768461     | 3,267857143     |
| UBA5                                                                                                | 0,000801747 | 0,109669229 | 0,171 | 0,053 | 1           | 1,078980827   | 0,926800528     | 3,226415094     |
| GLRX5                                                                                               | 0,000346043 | 0,109520766 | 0,39  | 0,165 | 1           | 1,078869799   | 0,926895906     | 2,363636364     |
| EPSTI1                                                                                              | 6,67422E-07 | 0,10940105  | 0,085 | 0     | 0,014083281 | 1,078780277   | 0,926972824     | #DIV/0!         |
| MTHFD1                                                                                              | 0,000148936 | 0,10936457  | 0,183 | 0,049 | 1           | 1,078752999   | 0,926996265     | 3,734693878     |
| POLD1                                                                                               | 0,057650786 | 0,109352764 | 0,049 | 0,014 | 1           | 1,078744171   | 0,92700385      | 3,5             |
| JMJD4                                                                                               | 3,73031E-05 | 0,109229318 | 0,122 | 0,018 | 0,787133093 | 1,078651871   | 0,927083174     | 6,777777778     |
| FIG4                                                                                                | 3,24105E-07 | 0,109193183 | 0,122 | 0,007 | 0,00683894  | 1,078624854   | 0,927106395     | 17,42857143     |
| TIMM21                                                                                              | 0,000458752 | 0,109007606 | 0,11  | 0,021 | 1           | 1,078486118   | 0,927225658     | 5,238095238     |
| LYRM2                                                                                               | 7,60802E-09 | 0,108948129 | 0,354 | 0,081 | 0,000160537 | 1,078441656   | 0,927263885     | 4,37037037      |
| OXER1                                                                                               | 0,063203483 | 0,108926143 | 0,012 | 0     | 1           | 1,078425222   | 0,927278016     | #DIV/0!         |
| MRPL30                                                                                              | 8,4837E-06  | 0,108889721 | 0,171 | 0,032 | 0,179014635 | 1,078397996   | 0,927301427     | 5,34375         |
| ADPRM                                                                                               | 0,001239853 | 0,108867053 | 0,073 | 0,011 | 1           | 1,078381052   | 0,927315997     | 6,636363636     |
| KANK2                                                                                               | 0,002711112 | 0,108864763 | 0,488 | 0,253 | 1           | 1,07837934    | 0,927317469     | 1,928853755     |
| SH3BP4                                                                                              | 9,91694E-09 | 0,10864503  | 0,207 | 0,025 | 0,000209257 | 1,078215108   | 0,927458716     | 8,28            |
| ULBP2                                                                                               | 2,2307E-07  | 0,108633974 | 0,11  | 0,004 | 0,004706999 | 1,078206845   | 0,927465824     | 27,5            |
| OSBPL6                                                                                              | 0,001952737 | 0,108622768 | 0,049 | 0,004 | 1           | 1,078198471   | 0,927473028     | 12,25           |
| SH3BGRL2                                                                                            | 0,510048238 | 0,108611192 | 0,024 | 0,014 | 1           | 1,078189819   | 0,92748047      | 1,714285714     |

Supplementary Table 2

| Differentially expressed genes_keloid-XL_comparing SC-Keloid vs. (SC-Myel, SC-Nonmyel, SC-Nonmyel2) |             |             |       |       |             |               |                 |                 |
|-----------------------------------------------------------------------------------------------------|-------------|-------------|-------|-------|-------------|---------------|-----------------|-----------------|
| gene                                                                                                | p_val       | avg_log2FC  | pct.1 | pct.2 | p_val_adj   | Foldchange_UP | Foldchange_DOWN | Ratio_pct1_pct2 |
| AP001816.1                                                                                          | 0,001126735 | 0,108519814 | 0,146 | 0,042 | 1           | 1,07812153    | 0,927539217     | 3,476190476     |
| MRFAP1                                                                                              | 0,004565065 | 0,108509046 | 0,768 | 0,477 | 1           | 1,078113483   | 0,92754614      | 1,610062893     |
| ZNF195                                                                                              | 5,13592E-05 | 0,108410338 | 0,146 | 0,028 | 1           | 1,078039722   | 0,927609604     | 5,214285714     |
| FAM219B                                                                                             | 0,000952436 | 0,108408885 | 0,171 | 0,053 | 1           | 1,078038637   | 0,927610538     | 3,226415094     |
| HNRNPH2                                                                                             | 0,000212919 | 0,108290194 | 0,402 | 0,165 | 1           | 1,077949949   | 0,927686856     | 2,436363636     |
| CHMP4A                                                                                              | 3,80998E-07 | 0,108270034 | 0,402 | 0,119 | 0,00803944  | 1,077934887   | 0,92769982      | 3,378151261     |
| BDH2                                                                                                | 0,035247036 | 0,108255846 | 0,28  | 0,161 | 1           | 1,077924286   | 0,927708943     | 1,739130435     |
| NPHP1                                                                                               | 5,69725E-05 | 0,108253433 | 0,098 | 0,011 | 1           | 1,077922483   | 0,927710495     | 8,909090909     |
| RAB35                                                                                               | 4,48757E-05 | 0,108203544 | 0,22  | 0,06  | 0,946921188 | 1,077885209   | 0,927742576     | 3,666666667     |
| CYREN                                                                                               | 3,68303E-07 | 0,108174411 | 0,134 | 0,011 | 0,007771562 | 1,077863442   | 0,927761311     | 12,18181818     |
| CENPN                                                                                               | 0,292304842 | 0,108111823 | 0,037 | 0,018 | 1           | 1,077816683   | 0,92780156      | 2,055555556     |
| DACT1                                                                                               | 5,40601E-05 | 0,108105985 | 0,146 | 0,028 | 1           | 1,077812322   | 0,927805314     | 5,214285714     |
| NARS1                                                                                               | 6,34443E-06 | 0,108055482 | 0,415 | 0,147 | 0,133873818 | 1,077774592   | 0,927837794     | 2,823129252     |
| RTTN                                                                                                | 2,93176E-06 | 0,108054893 | 0,171 | 0,028 | 0,061863053 | 1,077774153   | 0,927838172     | 6,107142857     |
| XRCC1                                                                                               | 0,00475002  | 0,108043441 | 0,11  | 0,032 | 1           | 1,077765597   | 0,927845538     | 3,4375          |
| ABCC10                                                                                              | 0,006556321 | 0,107898233 | 0,085 | 0,021 | 1           | 1,077657125   | 0,927938931     | 4,047619048     |
| HID1                                                                                                | 0,05889129  | 0,107734102 | 0,049 | 0,014 | 1           | 1,077534531   | 0,928044505     | 3,5             |
| SEMA6D                                                                                              | 1,71092E-05 | 0,107711467 | 0,268 | 0,077 | 0,361021405 | 1,077517624   | 0,928059066     | 3,480519481     |
| STK36                                                                                               | 0,179467859 | 0,107693801 | 0,049 | 0,021 | 1           | 1,07750443    | 0,92807043      | 2,333333333     |
| CAMKK2                                                                                              | 1,46543E-05 | 0,107609525 | 0,232 | 0,06  | 0,309220926 | 1,077441489   | 0,928124646     | 3,866666667     |
| PAICS                                                                                               | 6,60988E-06 | 0,107573143 | 0,256 | 0,067 | 0,139475168 | 1,077414318   | 0,928148051     | 3,820895522     |
| TCTA                                                                                                | 1,7849E-06  | 0,107457585 | 0,195 | 0,035 | 0,037663249 | 1,077328022   | 0,928222398     | 5,571428571     |
| ZBTB22                                                                                              | 8,76126E-05 | 0,107432986 | 0,159 | 0,035 | 1           | 1,077309653   | 0,928238225     | 4,542857143     |
| MRPS12                                                                                              | 5,15784E-12 | 0,107400334 | 0,293 | 0,035 | 1,08836E-07 | 1,077285271   | 0,928259233     | 8,371428571     |
| ECSCR                                                                                               | 0,020887559 | 0,107395376 | 0,073 | 0,021 | 1           | 1,077281569   | 0,928262424     | 3,476190476     |
| ZFAND6                                                                                              | 0,000292546 | 0,107321333 | 0,5   | 0,228 | 1           | 1,077226281   | 0,928310066     | 2,192982456     |
| POLM                                                                                                | 9,30589E-05 | 0,107310031 | 0,122 | 0,021 | 1           | 1,077217842   | 0,928317338     | 5,80952381      |
| CISD3                                                                                               | 4,87689E-10 | 0,107190009 | 0,305 | 0,049 | 1,02907E-05 | 1,07712823    | 0,92839457      | 6,224489796     |
| UVRAG                                                                                               | 0,002505089 | 0,107103327 | 0,195 | 0,074 | 1           | 1,077063514   | 0,928450353     | 2,635135135     |
| YIPF1                                                                                               | 1,42457E-06 | 0,107084929 | 0,146 | 0,018 | 0,030059903 | 1,077049778   | 0,928462194     | 8,111111111     |

Supplementary Table 2

| Differentially expressed genes_keloid-XL_comparing SC-Keloid vs. (SC-Myel, SC-Nonmyel, SC-Nonmyel2) |             |             |       |       |             |               |                 |                 |
|-----------------------------------------------------------------------------------------------------|-------------|-------------|-------|-------|-------------|---------------|-----------------|-----------------|
| gene                                                                                                | p_val       | avg_log2FC  | pct.1 | pct.2 | p_val_adj   | Foldchange_UP | Foldchange_DOWN | Ratio_pct1_pct2 |
| DCAF17                                                                                              | 0,000467734 | 0,107049345 | 0,11  | 0,021 | 1           | 1,077023214   | 0,928485094     | 5,238095238     |
| MICAL2                                                                                              | 1,44656E-09 | 0,106968451 | 0,159 | 0,007 | 3,05239E-05 | 1,076962825   | 0,928537158     | 22,71428571     |
| COMMD2                                                                                              | 0,001799836 | 0,106965433 | 0,232 | 0,091 | 1           | 1,076960572   | 0,9285391       | 2,549450549     |
| CHFR                                                                                                | 1,43675E-05 | 0,106913475 | 0,183 | 0,039 | 0,303168791 | 1,076921787   | 0,928572541     | 4,692307692     |
| SDR39U1                                                                                             | 0,000517403 | 0,106897815 | 0,232 | 0,081 | 1           | 1,076910097   | 0,928582621     | 2,864197531     |
| POP5                                                                                                | 0,000114365 | 0,106821458 | 0,293 | 0,102 | 1           | 1,076853101   | 0,928631769     | 2,87254902      |
| YKT6                                                                                                | 8,02218E-06 | 0,106786811 | 0,293 | 0,084 | 0,169276077 | 1,07682724    | 0,928654071     | 3,488095238     |
| MAPK3                                                                                               | 4,1086E-07  | 0,106724979 | 0,293 | 0,07  | 0,008669559 | 1,07678109    | 0,928693873     | 4,185714286     |
| FKBP2                                                                                               | 0,000170208 | 0,106717808 | 0,28  | 0,098 | 1           | 1,076775737   | 0,928698489     | 2,857142857     |
| PYROXD1                                                                                             | 3,40712E-05 | 0,106715325 | 0,159 | 0,032 | 0,718936484 | 1,076773885   | 0,928700087     | 4,96875         |
| CCDC71                                                                                              | 1,06202E-05 | 0,106601929 | 0,098 | 0,007 | 0,224096034 | 1,076689253   | 0,928773086     | 14              |
| ACAD8                                                                                               | 1,52268E-06 | 0,106545817 | 0,195 | 0,035 | 0,032130029 | 1,076647378   | 0,92880921      | 5,571428571     |
| CYP27C1                                                                                             | 5,93202E-07 | 0,106407312 | 0,232 | 0,046 | 0,012517148 | 1,07654402    | 0,928898384     | 5,043478261     |
| UTP20                                                                                               | 0,000972222 | 0,106263789 | 0,134 | 0,035 | 1           | 1,076436928   | 0,928990798     | 3,828571429     |
| AIP                                                                                                 | 0,000321509 | 0,10622722  | 0,463 | 0,207 | 1           | 1,076409642   | 0,929014346     | 2,236714976     |
| C2orf92                                                                                             | 0,183494953 | 0,106184855 | 0,024 | 0,007 | 1           | 1,076378034   | 0,929041627     | 3,428571429     |
| HELQ                                                                                                | 0,006340275 | 0,106164367 | 0,085 | 0,021 | 1           | 1,076362748   | 0,929054821     | 4,047619048     |
| CD52                                                                                                | 0,063203483 | 0,10610024  | 0,012 | 0     | 1           | 1,076314906   | 0,929096117     | #DIV/0!         |
| FAM110D                                                                                             | 0,063203483 | 0,10610024  | 0,012 | 0     | 1           | 1,076314906   | 0,929096117     | #DIV/0!         |
| TMEM241                                                                                             | 0,004035611 | 0,106091706 | 0,073 | 0,014 | 1           | 1,076308539   | 0,929101613     | 5,214285714     |
| SFT2D1                                                                                              | 2,21056E-05 | 0,106065095 | 0,463 | 0,179 | 0,46644981  | 1,076288687   | 0,929118751     | 2,586592179     |
| MTMR6                                                                                               | 0,003026098 | 0,105972854 | 0,195 | 0,074 | 1           | 1,076219875   | 0,929178157     | 2,635135135     |
| EIF3L                                                                                               | 0,001686373 | 0,105897773 | 0,549 | 0,288 | 1           | 1,076163867   | 0,929226516     | 1,90625         |
| POLR3H                                                                                              | 3,14724E-05 | 0,105887448 | 0,183 | 0,042 | 0,66409926  | 1,076156165   | 0,929233166     | 4,357142857     |
| NUDCD2                                                                                              | 5,36697E-05 | 0,105869616 | 0,451 | 0,182 | 1           | 1,076142864   | 0,929244651     | 2,478021978     |
| RRP7A                                                                                               | 2,05375E-07 | 0,105808259 | 0,256 | 0,053 | 0,004333616 | 1,076097097   | 0,929284172     | 4,830188679     |
| FADS2                                                                                               | 0,001041902 | 0,105808229 | 0,171 | 0,053 | 1           | 1,076097074   | 0,929284192     | 3,226415094     |
| WDR5B                                                                                               | 5,69725E-05 | 0,105801171 | 0,098 | 0,011 | 1           | 1,07609181    | 0,929288738     | 8,909090909     |
| BLVRA                                                                                               | 7,32957E-05 | 0,105710022 | 0,22  | 0,063 | 1           | 1,076023825   | 0,929347452     | 3,492063492     |
| SFI1                                                                                                | 0,001380549 | 0,105680681 | 0,073 | 0,011 | 1           | 1,076001941   | 0,929366353     | 6,636363636     |

Supplementary Table 2

| Differentially expressed genes_keloid-XL_comparing SC-Keloid vs. (SC-Myel, SC-Nonmyel, SC-Nonmyel2) |             |             |       |       |             |               |                 |                 |
|-----------------------------------------------------------------------------------------------------|-------------|-------------|-------|-------|-------------|---------------|-----------------|-----------------|
| gene                                                                                                | p_val       | avg_log2FC  | pct.1 | pct.2 | p_val_adj   | Foldchange_UP | Foldchange_DOWN | Ratio_pct1_pct2 |
| GXYLT2                                                                                              | 7,01531E-08 | 0,105603761 | 0,159 | 0,014 | 0,0014803   | 1,075944574   | 0,929415905     | 11,35714286     |
| FAM50B                                                                                              | 6,04286E-06 | 0,105586921 | 0,146 | 0,021 | 0,127510438 | 1,075932015   | 0,929426754     | 6,952380952     |
| CCDC32                                                                                              | 0,0001121   | 0,105573457 | 0,171 | 0,042 | 1           | 1,075921974   | 0,929435428     | 4,071428571     |
| IL31RA                                                                                              | 0,001220269 | 0,105548763 | 0,037 | 0     | 1           | 1,075903558   | 0,929451337     | #DIV/0!         |
| ZNF446                                                                                              | 8,47501E-06 | 0,105523433 | 0,085 | 0,004 | 0,178831285 | 1,075884668   | 0,929467656     | 21,25           |
| CALML5                                                                                              | 0,347088417 | 0,105466828 | 0,012 | 0,004 | 1           | 1,075842456   | 0,929504125     | 3               |
| CHKB                                                                                                | 1,07595E-06 | 0,105466464 | 0,28  | 0,07  | 0,02270366  | 1,075842185   | 0,929504359     | 4               |
| PHC3                                                                                                | 0,002866349 | 0,105412289 | 0,207 | 0,081 | 1           | 1,075801786   | 0,929539264     | 2,555555556     |
| BTBD6                                                                                               | 3,80729E-05 | 0,105349689 | 0,305 | 0,102 | 0,803375267 | 1,075755107   | 0,929579598     | 2,990196078     |
| FAM120A                                                                                             | 0,001411781 | 0,105277316 | 0,366 | 0,165 | 1           | 1,075701143   | 0,929626232     | 2,218181818     |
| CDK1                                                                                                | 0,510048238 | 0,105169714 | 0,024 | 0,014 | 1           | 1,075620916   | 0,92969557      | 1,714285714     |
| SLC35A2                                                                                             | 0,009572322 | 0,105090808 | 0,183 | 0,077 | 1           | 1,075562087   | 0,92974642      | 2,376623377     |
| EIF2B2                                                                                              | 1,75178E-06 | 0,104955213 | 0,244 | 0,056 | 0,036964228 | 1,075461003   | 0,929833808     | 4,357142857     |
| PTCD3                                                                                               | 0,001847472 | 0,104798707 | 0,207 | 0,077 | 1           | 1,075344342   | 0,929934683     | 2,688311688     |
| ASF1A                                                                                               | 0,00055155  | 0,104722031 | 0,146 | 0,039 | 1           | 1,075287191   | 0,929984109     | 3,743589744     |
| MRPL10                                                                                              | 3,95199E-06 | 0,104589316 | 0,159 | 0,025 | 0,083391026 | 1,075188279   | 0,930069662     | 6,36            |
| MINPP1                                                                                              | 5,60121E-05 | 0,104414153 | 0,098 | 0,011 | 1           | 1,075057744   | 0,930182593     | 8,909090909     |
| TYMS                                                                                                | 0,000314706 | 0,104270953 | 0,073 | 0,007 | 1           | 1,074951041   | 0,930274926     | 10,42857143     |
| RNF182                                                                                              | 0,065143806 | 0,104246125 | 0,024 | 0,004 | 1           | 1,074932542   | 0,930290935     | 6               |
| SUCO                                                                                                | 0,002635829 | 0,104234487 | 0,183 | 0,067 | 1           | 1,07492387    | 0,930298441     | 2,731343284     |
| CBX1                                                                                                | 1,44332E-05 | 0,104149205 | 0,293 | 0,088 | 0,304555555 | 1,07486033    | 0,930353435     | 3,329545455     |
| COIL                                                                                                | 9,66747E-06 | 0,104034624 | 0,171 | 0,032 | 0,203993199 | 1,074774967   | 0,930427327     | 5,34375         |
| AMBRA1                                                                                              | 0,014921301 | 0,10390492  | 0,098 | 0,032 | 1           | 1,074678345   | 0,93051098      | 3,0625          |
| GPATCH3                                                                                             | 0,000275125 | 0,103859186 | 0,085 | 0,011 | 1           | 1,074644277   | 0,930540479     | 7,727272727     |
| PPP2R5C                                                                                             | 0,000900049 | 0,103848365 | 0,317 | 0,133 | 1           | 1,074636217   | 0,930547458     | 2,383458647     |
| PHAF1                                                                                               | 0,000114351 | 0,103757469 | 0,122 | 0,021 | 1           | 1,074568512   | 0,930606088     | 5,80952381      |
| NOL12                                                                                               | 4,72753E-05 | 0,103667266 | 0,195 | 0,049 | 0,997556556 | 1,074501328   | 0,930664276     | 3,979591837     |
| FANCE                                                                                               | 0,001359586 | 0,103504478 | 0,073 | 0,011 | 1           | 1,074380093   | 0,930769294     | 6,636363636     |
| ATF6B                                                                                               | 5,94173E-05 | 0,103355512 | 0,268 | 0,088 | 1           | 1,074269163   | 0,930865406     | 3,045454545     |
| CMC1                                                                                                | 2,21943E-06 | 0,103341307 | 0,329 | 0,095 | 0,046832239 | 1,074258585   | 0,930874571     | 3,463157895     |

Supplementary Table 2

| Differentially expressed genes_keloid-XL_comparing SC-Keloid vs. (SC-Myel, SC-Nonmyel, SC-Nonmyel2) |             |             |       |       |             |               |                 |                 |
|-----------------------------------------------------------------------------------------------------|-------------|-------------|-------|-------|-------------|---------------|-----------------|-----------------|
| gene                                                                                                | p_val       | avg_log2FC  | pct.1 | pct.2 | p_val_adj   | Foldchange_UP | Foldchange_DOWN | Ratio_pct1_pct2 |
| TOE1                                                                                                | 5,32686E-05 | 0,103207023 | 0,073 | 0,004 | 1           | 1,0741586     | 0,93096122      | 18,25           |
| PCED1A                                                                                              | 0,002231776 | 0,103183837 | 0,146 | 0,046 | 1           | 1,074141337   | 0,930976182     | 3,173913043     |
| MRPL45                                                                                              | 2,8218E-07  | 0,103076163 | 0,22  | 0,039 | 0,005954283 | 1,074061172   | 0,931045667     | 5,641025641     |
| RPS27A                                                                                              | 0,150848743 | 0,103070784 | 0,988 | 0,926 | 1           | 1,074057167   | 0,931049138     | 1,066954644     |
| MYD88                                                                                               | 1,12366E-05 | 0,102993361 | 0,11  | 0,011 | 0,23710448  | 1,073999529   | 0,931099105     | 10              |
| GMPPA                                                                                               | 1,1086E-08  | 0,102936697 | 0,256 | 0,042 | 0,000233926 | 1,073957347   | 0,931135676     | 6,095238095     |
| IDH2                                                                                                | 4,23152E-06 | 0,102933882 | 0,195 | 0,039 | 0,089289314 | 1,073955252   | 0,931137492     | 5               |
| CCNH                                                                                                | 1,86156E-06 | 0,102913494 | 0,268 | 0,067 | 0,039280779 | 1,073940074   | 0,931150652     | 4               |
| MRPL36                                                                                              | 3,06976E-05 | 0,102876384 | 0,28  | 0,088 | 0,64775032  | 1,07391245    | 0,931174603     | 3,181818182     |
| TRPM8                                                                                               | 4,32324E-06 | 0,102860598 | 0,073 | 0     | 0,09122464  | 1,0739007     | 0,931184792     | #DIV/0!         |
| KCTD14                                                                                              | 2,80682E-05 | 0,102840102 | 0,061 | 0     | 0,592266086 | 1,073885443   | 0,931198022     | #DIV/0!         |
| LRRC47                                                                                              | 8,76126E-05 | 0,102742318 | 0,159 | 0,035 | 1           | 1,073812659   | 0,931261139     | 4,542857143     |
| LINC00592                                                                                           | 2,80682E-05 | 0,102644022 | 0,061 | 0     | 0,592266086 | 1,073739499   | 0,931324591     | #DIV/0!         |
| PSMD12                                                                                              | 2,8323E-05  | 0,102619739 | 0,366 | 0,13  | 0,597643657 | 1,073721426   | 0,931340267     | 2,815384615     |
| OGFR                                                                                                | 0,000422705 | 0,102612705 | 0,329 | 0,133 | 1           | 1,073716191   | 0,931344808     | 2,473684211     |
| TMLHE                                                                                               | 3,46103E-05 | 0,102518945 | 0,122 | 0,018 | 0,730311277 | 1,073646414   | 0,931405337     | 6,777777778     |
| MED25                                                                                               | 2,57378E-05 | 0,102484879 | 0,195 | 0,046 | 0,543093082 | 1,073621062   | 0,931427331     | 4,239130435     |
| EHD3                                                                                                | 0,026685693 | 0,10227232  | 0,049 | 0,011 | 1           | 1,073462892   | 0,931564573     | 4,454545455     |
| LONP2                                                                                               | 0,012157541 | 0,102184475 | 0,22  | 0,102 | 1           | 1,073397532   | 0,931621297     | 2,156862745     |
| PIGL                                                                                                | 0,02110076  | 0,102165306 | 0,073 | 0,021 | 1           | 1,073383269   | 0,931633675     | 3,476190476     |
| MPDU1                                                                                               | 1,82813E-08 | 0,102158956 | 0,293 | 0,06  | 0,000385753 | 1,073378545   | 0,931637776     | 4,883333333     |
| CCDC86                                                                                              | 2,3412E-05  | 0,102108677 | 0,134 | 0,021 | 0,494016028 | 1,073341137   | 0,931670245     | 6,380952381     |
| HUWE1                                                                                               | 0,000294847 | 0,102078697 | 0,366 | 0,147 | 1           | 1,073318833   | 0,931689605     | 2,489795918     |
| RABGGTB                                                                                             | 4,47684E-05 | 0,1020578   | 0,439 | 0,168 | 0,944657555 | 1,073303286   | 0,931703101     | 2,613095238     |
| PDS5A                                                                                               | 1,54166E-05 | 0,101963654 | 0,268 | 0,077 | 0,325305094 | 1,073233248   | 0,931763903     | 3,480519481     |
| ZNF540                                                                                              | 0,011553628 | 0,101939729 | 0,037 | 0,004 | 1           | 1,07321545    | 0,931779355     | 9,25            |
| IFT122                                                                                              | 0,000719024 | 0,101865251 | 0,122 | 0,028 | 1           | 1,073160047   | 0,931827459     | 4,357142857     |
| UBASH3B                                                                                             | 0,000344207 | 0,101821882 | 0,073 | 0,007 | 1           | 1,073127787   | 0,931855471     | 10,42857143     |
| NFYB                                                                                                | 0,007429969 | 0,101782479 | 0,293 | 0,14  | 1           | 1,073098478   | 0,931880923     | 2,092857143     |
| CTU2                                                                                                | 5,54605E-05 | 0,101782461 | 0,146 | 0,028 | 1           | 1,073098465   | 0,931880934     | 5,214285714     |

Supplementary Table 2

| Differentially expressed genes_keloid-XL_comparing SC-Keloid vs. (SC-Myel, SC-Nonmyel, SC-Nonmyel2) |             |             |       |       |             |               |                 |                 |
|-----------------------------------------------------------------------------------------------------|-------------|-------------|-------|-------|-------------|---------------|-----------------|-----------------|
| gene                                                                                                | p_val       | avg_log2FC  | pct.1 | pct.2 | p_val_adj   | Foldchange_UP | Foldchange_DOWN | Ratio_pct1_pct2 |
| FCRLA                                                                                               | 0,000253594 | 0,10174606  | 0,085 | 0,011 | 1           | 1,07307139    | 0,931904447     | 7,727272727     |
| HACD1                                                                                               | 0,000309097 | 0,10170431  | 0,073 | 0,007 | 1           | 1,073040337   | 0,931931415     | 10,42857143     |
| CHSY1                                                                                               | 0,001557806 | 0,101670457 | 0,183 | 0,063 | 1           | 1,073015158   | 0,931953283     | 2,904761905     |
| HDHD3                                                                                               | 0,02110076  | 0,101555966 | 0,073 | 0,021 | 1           | 1,072930008   | 0,932027245     | 3,476190476     |
| TXN2                                                                                                | 4,92227E-07 | 0,101487409 | 0,305 | 0,077 | 0,010386484 | 1,072879023   | 0,932071537     | 3,961038961     |
| IDH3G                                                                                               | 7,11085E-05 | 0,101431189 | 0,341 | 0,123 | 1           | 1,072837216   | 0,932107858     | 2,772357724     |
| PIGM                                                                                                | 0,00072733  | 0,101319291 | 0,122 | 0,028 | 1           | 1,072754008   | 0,932180158     | 4,357142857     |
| NOL6                                                                                                | 1,10401E-05 | 0,101208281 | 0,11  | 0,011 | 0,23295734  | 1,072671467   | 0,932251888     | 10              |
| CLCN7                                                                                               | 0,002755295 | 0,101201047 | 0,22  | 0,088 | 1           | 1,072666088   | 0,932256563     | 2,5             |
| ABHD8                                                                                               | 5,5067E-05  | 0,101059554 | 0,098 | 0,011 | 1           | 1,072560891   | 0,932347999     | 8,909090909     |
| RHBDD2                                                                                              | 1,90987E-06 | 0,10105782  | 0,341 | 0,102 | 0,040300207 | 1,072559602   | 0,932349119     | 3,343137255     |
| NUP43                                                                                               | 0,006251893 | 0,101031159 | 0,061 | 0,011 | 1           | 1,072539781   | 0,932366349     | 5,545454545     |
| RAB11FIP3                                                                                           | 8,33671E-07 | 0,100957221 | 0,268 | 0,063 | 0,017591299 | 1,072484815   | 0,932414134     | 4,253968254     |
| PLCXD1                                                                                              | 0,011339437 | 0,100922881 | 0,037 | 0,004 | 1           | 1,072459287   | 0,932436328     | 9,25            |
| NRM                                                                                                 | 0,000322117 | 0,100782486 | 0,207 | 0,067 | 1           | 1,072354926   | 0,932527072     | 3,089552239     |
| PIGB                                                                                                | 0,001772311 | 0,100712099 | 0,061 | 0,007 | 1           | 1,072302609   | 0,93257257      | 8,714285714     |
| REEP5                                                                                               | 0,00021556  | 0,100406978 | 0,524 | 0,242 | 1           | 1,072075848   | 0,932769824     | 2,165289256     |
| SMIM20                                                                                              | 4,40464E-08 | 0,100136335 | 0,244 | 0,042 | 0,000929423 | 1,07187475    | 0,932944824     | 5,80952381      |
| FPGT                                                                                                | 0,000115923 | 0,100116854 | 0,122 | 0,021 | 1           | 1,071860276   | 0,932957422     | 5,80952381      |
| MAP3K1                                                                                              | 4,20589E-05 | 0,100104121 | 0,305 | 0,102 | 0,887485753 | 1,071850816   | 0,932965656     | 2,990196078     |
| MAP9                                                                                                | 2,60923E-05 | 0,100030475 | 0,232 | 0,063 | 0,55057388  | 1,071796103   | 0,933013283     | 3,682539683     |
| FBLN7                                                                                               | 0,009031726 | 0,100016544 | 0,049 | 0,007 | 1           | 1,071785753   | 0,933022292     | 7               |
| ITGB3BP                                                                                             | 7,76016E-06 | 0,099936488 | 0,28  | 0,081 | 0,163747111 | 1,071726281   | 0,933074067     | 3,456790123     |
| BAALC                                                                                               | 0,000915822 | 0,099915045 | 0,085 | 0,014 | 1           | 1,071710352   | 0,933087936     | 6,071428571     |
| GTPBP2                                                                                              | 0,00296515  | 0,099896614 | 0,122 | 0,035 | 1           | 1,07169666    | 0,933099857     | 3,485714286     |
| PDZD8                                                                                               | 0,039805415 | 0,09989588  | 0,244 | 0,13  | 1           | 1,071696115   | 0,933100331     | 1,876923077     |
| WNT16                                                                                               | 8,66134E-06 | 0,099840903 | 0,085 | 0,004 | 0,1827629   | 1,071655276   | 0,93313589      | 21,25           |
| TTC37                                                                                               | 7,09608E-07 | 0,099761227 | 0,378 | 0,112 | 0,014973446 | 1,071596093   | 0,933187426     | 3,375           |
| ZBTB42                                                                                              | 2,04211E-06 | 0,099730234 | 0,122 | 0,011 | 0,043090571 | 1,071573073   | 0,933207473     | 11,09090909     |
| ENKD1                                                                                               | 0,001531269 | 0,099596147 | 0,171 | 0,056 | 1           | 1,071473484   | 0,933294211     | 3,053571429     |

Supplementary Table 2

| Differentially expressed genes_keloid-XL_comparing SC-Keloid vs. (SC-Myel, SC-Nonmyel, SC-Nonmyel2) |             |             |       |       |             |               |                 |                 |
|-----------------------------------------------------------------------------------------------------|-------------|-------------|-------|-------|-------------|---------------|-----------------|-----------------|
| gene                                                                                                | p_val       | avg_log2FC  | pct.1 | pct.2 | p_val_adj   | Foldchange_UP | Foldchange_DOWN | Ratio_pct1_pct2 |
| ATP6V1H                                                                                             | 3,09036E-05 | 0,099578093 | 0,232 | 0,063 | 0,652096183 | 1,071460075   | 0,933305891     | 3,682539683     |
| PTP4A3                                                                                              | 0,008751649 | 0,099566479 | 0,049 | 0,007 | 1           | 1,07145145    | 0,933313404     | 7               |
| NCBP2AS2                                                                                            | 0,000128817 | 0,099462468 | 0,22  | 0,067 | 1           | 1,071374206   | 0,933380694     | 3,28358209      |
| EHMT1                                                                                               | 0,002790291 | 0,099365238 | 0,195 | 0,074 | 1           | 1,071302004   | 0,933443601     | 2,635135135     |
| HRAS                                                                                                | 0,002380183 | 0,099310095 | 0,341 | 0,161 | 1           | 1,071261057   | 0,93347928      | 2,118012422     |
| PCDHB2                                                                                              | 0,347088417 | 0,099292373 | 0,012 | 0,004 | 1           | 1,071247898   | 0,933490747     | 3               |
| SLC27A5                                                                                             | 0,039238167 | 0,099207921 | 0,085 | 0,032 | 1           | 1,071185191   | 0,933545393     | 2,65625         |
| CCDC74B                                                                                             | 4,80414E-05 | 0,099156148 | 0,11  | 0,014 | 1           | 1,071146751   | 0,933578895     | 7,857142857     |
| C17orf58                                                                                            | 4,80414E-05 | 0,099137759 | 0,11  | 0,014 | 1           | 1,071133098   | 0,933590794     | 7,857142857     |
| HSD17B1                                                                                             | 0,008890703 | 0,099124202 | 0,049 | 0,007 | 1           | 1,071123033   | 0,933599568     | 7               |
| TPR                                                                                                 | 0,000406003 | 0,099069985 | 0,427 | 0,186 | 1           | 1,07108278    | 0,933634653     | 2,295698925     |
| CLN3                                                                                                | 2,57871E-05 | 0,098980952 | 0,171 | 0,035 | 0,544132901 | 1,071016682   | 0,933692273     | 4,885714286     |
| DCAF12                                                                                              | 0,000579236 | 0,098947202 | 0,183 | 0,056 | 1           | 1,070991627   | 0,933714115     | 3,267857143     |
| STEAP3                                                                                              | 4,32324E-06 | 0,098759258 | 0,073 | 0     | 0,09122464  | 1,070852115   | 0,933835761     | #DIV/0!         |
| TMEM243                                                                                             | 6,41967E-05 | 0,098751684 | 0,244 | 0,074 | 1           | 1,070846493   | 0,933840664     | 3,297297297     |
| PRADC1                                                                                              | 7,91729E-07 | 0,098745603 | 0,171 | 0,025 | 0,016706276 | 1,07084198    | 0,9338446       | 6,84            |
| RGS1                                                                                                | 0,347088417 | 0,09874312  | 0,012 | 0,004 | 1           | 1,070840137   | 0,933846207     | 3               |
| IFTAP                                                                                               | 1,62791E-05 | 0,098734181 | 0,207 | 0,049 | 0,343505831 | 1,070833502   | 0,933851993     | 4,224489796     |
| MRM2                                                                                                | 0,009163884 | 0,098680534 | 0,11  | 0,035 | 1           | 1,070793684   | 0,933886719     | 3,142857143     |
| LAP3                                                                                                | 1,70575E-05 | 0,098655466 | 0,256 | 0,07  | 0,359930495 | 1,070775078   | 0,933902946     | 3,657142857     |
| CHD9                                                                                                | 0,001155777 | 0,098638222 | 0,671 | 0,361 | 1           | 1,07076228    | 0,933914109     | 1,858725762     |
| IL32                                                                                                | 0,01375973  | 0,098613452 | 0,098 | 0,032 | 1           | 1,070743895   | 0,933930144     | 3,0625          |
| ARNT                                                                                                | 0,773305148 | 0,098580512 | 0,073 | 0,063 | 1           | 1,070719448   | 0,933951468     | 1,158730159     |
| RPL21                                                                                               | 0,093891472 | 0,098532733 | 0,976 | 0,835 | 1           | 1,070683989   | 0,933982398     | 1,168862275     |
| AIFM1                                                                                               | 4,18695E-06 | 0,098484419 | 0,159 | 0,025 | 0,088348819 | 1,070648134   | 0,934013677     | 6,36            |
| SIDT2                                                                                               | 5,61434E-05 | 0,098294276 | 0,171 | 0,039 | 1           | 1,070507035   | 0,934136785     | 4,384615385     |
| SEMA4D                                                                                              | 1,45516E-05 | 0,098289639 | 0,305 | 0,095 | 0,307053931 | 1,070503593   | 0,934139788     | 3,210526316     |
| SERPINB8                                                                                            | 0,000894103 | 0,098255004 | 0,171 | 0,053 | 1           | 1,070477894   | 0,934162214     | 3,226415094     |
| METRN                                                                                               | 0,01669849  | 0,098178354 | 0,744 | 0,449 | 1           | 1,070421021   | 0,934211847     | 1,65701559      |
| VASH1                                                                                               | 4,08921E-07 | 0,098178093 | 0,268 | 0,06  | 0,008628642 | 1,070420828   | 0,934212016     | 4,466666667     |

Supplementary Table 2

| Differentially expressed genes_keloid-XL_comparing SC-Keloid vs. (SC-Myel, SC-Nonmyel, SC-Nonmyel2) |             |             |       |       |             |               |                 |                 |
|-----------------------------------------------------------------------------------------------------|-------------|-------------|-------|-------|-------------|---------------|-----------------|-----------------|
| gene                                                                                                | p_val       | avg_log2FC  | pct.1 | pct.2 | p_val_adj   | Foldchange_UP | Foldchange_DOWN | Ratio_pct1_pct2 |
| VPS51                                                                                               | 0,002375385 | 0,098165752 | 0,341 | 0,154 | 1           | 1,070411671   | 0,934220008     | 2,214285714     |
| TMEM205                                                                                             | 0,005827726 | 0,098160392 | 0,341 | 0,165 | 1           | 1,070407695   | 0,934223478     | 2,066666667     |
| SLC5A6                                                                                              | 0,006341138 | 0,098075998 | 0,061 | 0,011 | 1           | 1,07034508    | 0,93427813      | 5,545454545     |
| IDE                                                                                                 | 0,000162451 | 0,098040482 | 0,11  | 0,018 | 1           | 1,070318731   | 0,93430113      | 6,111111111     |
| DMAC2                                                                                               | 1,51927E-07 | 0,098038521 | 0,244 | 0,046 | 0,00320582  | 1,070317276   | 0,9343024       | 5,304347826     |
| PAGR1                                                                                               | 5,58393E-08 | 0,097974986 | 0,268 | 0,053 | 0,001178264 | 1,070270141   | 0,934343547     | 5,056603774     |
| TMEM18                                                                                              | 0,000162836 | 0,097959632 | 0,317 | 0,119 | 1           | 1,070258751   | 0,934353491     | 2,663865546     |
| DNAAF10                                                                                             | 0,023331282 | 0,097958115 | 0,098 | 0,035 | 1           | 1,070257626   | 0,934354473     | 2,8             |
| MAPKAPK3                                                                                            | 1,36536E-06 | 0,097798912 | 0,098 | 0,004 | 0,028810488 | 1,070139528   | 0,934457586     | 24,5            |
| CDK5R1                                                                                              | 1,10381E-05 | 0,097755833 | 0,098 | 0,007 | 0,232915863 | 1,070107574   | 0,934485489     | 14              |
| NIPSNAP2                                                                                            | 8,77377E-06 | 0,09773508  | 0,341 | 0,109 | 0,185135409 | 1,070092181   | 0,934498932     | 3,128440367     |
| SMU1                                                                                                | 0,000183673 | 0,097699452 | 0,305 | 0,112 | 1           | 1,070065755   | 0,93452201      | 2,723214286     |
| MRPL35                                                                                              | 4,67659E-06 | 0,097684073 | 0,195 | 0,039 | 0,098680786 | 1,070054348   | 0,934531972     | 5               |
| EPDR1                                                                                               | 0,000963552 | 0,097673867 | 0,268 | 0,105 | 1           | 1,070046779   | 0,934538583     | 2,552380952     |
| SIRT6                                                                                               | 0,003174574 | 0,097654926 | 0,122 | 0,035 | 1           | 1,07003273    | 0,934550853     | 3,485714286     |
| ADTRP                                                                                               | 0,065143806 | 0,097622098 | 0,024 | 0,004 | 1           | 1,070008382   | 0,934572119     | 6               |
| ZNF287                                                                                              | 8,47501E-06 | 0,097604583 | 0,085 | 0,004 | 0,178831285 | 1,069995391   | 0,934583465     | 21,25           |
| UBE2D2                                                                                              | 0,001099284 | 0,097566652 | 0,659 | 0,354 | 1           | 1,06996726    | 0,934608037     | 1,861581921     |
| HOGA1                                                                                               | 0,000183568 | 0,097534135 | 0,049 | 0     | 1           | 1,069943144   | 0,934629102     | #DIV/0!         |
| MMAB                                                                                                | 3,12046E-05 | 0,097527023 | 0,159 | 0,032 | 0,658448012 | 1,069937869   | 0,93463371      | 4,96875         |
| VCPKMT                                                                                              | 0,005577099 | 0,09752378  | 0,134 | 0,046 | 1           | 1,069935465   | 0,93463581      | 2,913043478     |
| CARD10                                                                                              | 0,006062183 | 0,097489184 | 0,085 | 0,021 | 1           | 1,069909808   | 0,934658223     | 4,047619048     |
| CPEB1                                                                                               | 0,060153875 | 0,097468153 | 0,049 | 0,014 | 1           | 1,069894211   | 0,934671849     | 3,5             |
| GPALPP1                                                                                             | 2,74168E-06 | 0,097439549 | 0,207 | 0,042 | 0,057852276 | 1,069872999   | 0,93469038      | 4,928571429     |
| XYLT2                                                                                               | 0,000752789 | 0,097367841 | 0,122 | 0,028 | 1           | 1,069819823   | 0,934736839     | 4,357142857     |
| EDC4                                                                                                | 4,0245E-06  | 0,097339347 | 0,195 | 0,039 | 0,084920902 | 1,069798694   | 0,934755301     | 5               |
| MOSPD1                                                                                              | 3,62029E-05 | 0,097316653 | 0,122 | 0,018 | 0,763918221 | 1,069781866   | 0,934770005     | 6,777777778     |
| ZNF605                                                                                              | 6,62286E-08 | 0,097303566 | 0,146 | 0,011 | 0,001397491 | 1,069772161   | 0,934778485     | 13,27272727     |
| PLPP6                                                                                               | 0,000311292 | 0,097214845 | 0,061 | 0,004 | 1           | 1,069706376   | 0,934835973     | 15,25           |
| UBXN2B                                                                                              | 0,009031726 | 0,097152766 | 0,049 | 0,007 | 1           | 1,069660348   | 0,934876199     | 7               |



Supplementary Table 2

| Differentially expressed genes_keloid-XL_comparing SC-Keloid vs. (SC-Myel, SC-Nonmyel, SC-Nonmyel2) |             |             |       |       |             |               |                 |                 |
|-----------------------------------------------------------------------------------------------------|-------------|-------------|-------|-------|-------------|---------------|-----------------|-----------------|
| gene                                                                                                | p_val       | avg_log2FC  | pct.1 | pct.2 | p_val_adj   | Foldchange_UP | Foldchange_DOWN | Ratio_pct1_pct2 |
| C19orf54                                                                                            | 0,001423372 | 0,097122719 | 0,073 | 0,011 | 1           | 1,06963807    | 0,93489567      | 6,636363636     |
| BTN3A1                                                                                              | 5,69725E-05 | 0,097107645 | 0,098 | 0,011 | 1           | 1,069626894   | 0,934905438     | 8,909090909     |
| RITA1                                                                                               | 6,13057E-05 | 0,097074128 | 0,085 | 0,007 | 1           | 1,069602045   | 0,934927158     | 12,14285714     |
| ZNF451                                                                                              | 2,06984E-05 | 0,097041205 | 0,28  | 0,084 | 0,436756518 | 1,069577636   | 0,934948494     | 3,333333333     |
| C1orf216                                                                                            | 0,010188387 | 0,096899061 | 0,073 | 0,018 | 1           | 1,069472259   | 0,935040616     | 4,055555556     |
| CCDC9B                                                                                              | 8,02431E-05 | 0,096893909 | 0,256 | 0,081 | 1           | 1,06946844    | 0,935043955     | 3,160493827     |
| VANGL1                                                                                              | 1,39592E-06 | 0,096845627 | 0,098 | 0,004 | 0,029455268 | 1,069432649   | 0,935075248     | 24,5            |
| SETMAR                                                                                              | 0,00140181  | 0,096717332 | 0,073 | 0,011 | 1           | 1,069337552   | 0,935158406     | 6,636363636     |
| MOSPD3                                                                                              | 8,71822E-08 | 0,09663519  | 0,232 | 0,039 | 0,001839631 | 1,069276669   | 0,935211652     | 5,948717949     |
| C3orf18                                                                                             | 0,000230869 | 0,096469829 | 0,098 | 0,014 | 1           | 1,069154116   | 0,935318851     | 7               |
| NAB1                                                                                                | 8,62361E-05 | 0,096350843 | 0,232 | 0,07  | 1           | 1,069065941   | 0,935395995     | 3,314285714     |
| STK31                                                                                               | 0,347088417 | 0,096313548 | 0,012 | 0,004 | 1           | 1,069038306   | 0,935420176     | 3               |
| GEMIN8                                                                                              | 6,54879E-05 | 0,096287539 | 0,207 | 0,056 | 1           | 1,069019033   | 0,93543704      | 3,696428571     |
| TFPI2                                                                                               | 0,006269696 | 0,096219439 | 0,085 | 0,021 | 1           | 1,068968573   | 0,935481197     | 4,047619048     |
| GSTA4                                                                                               | 0,000121331 | 0,096108042 | 0,244 | 0,077 | 1           | 1,068886036   | 0,935553433     | 3,168831169     |
| EFNA4                                                                                               | 0,000649127 | 0,096052843 | 0,098 | 0,018 | 1           | 1,06884514    | 0,935589229     | 5,444444444     |
| TEDC2                                                                                               | 0,008401736 | 0,095910805 | 0,024 | 0     | 1           | 1,068739914   | 0,935681345     | #DIV/0!         |
| SPTLC1                                                                                              | 6,96677E-05 | 0,095897375 | 0,354 | 0,13  | 1           | 1,068729965   | 0,935690055     | 2,723076923     |
| TEX261                                                                                              | 6,0173E-08  | 0,095779779 | 0,244 | 0,042 | 0,00126971  | 1,068642856   | 0,935766327     | 5,80952381      |
| VPS35L                                                                                              | 0,000153426 | 0,095740859 | 0,11  | 0,018 | 1           | 1,068614027   | 0,935791572     | 6,111111111     |
| SEC24D                                                                                              | 3,96744E-06 | 0,09571381  | 0,329 | 0,098 | 0,083716951 | 1,068593991   | 0,935809118     | 3,357142857     |
| ZCCHC7                                                                                              | 7,05328E-05 | 0,095658127 | 0,22  | 0,063 | 1           | 1,068552748   | 0,935845237     | 3,492063492     |
| STK3                                                                                                | 0,014373075 | 0,095557993 | 0,171 | 0,074 | 1           | 1,068478585   | 0,935910195     | 2,310810811     |
| MRPS28                                                                                              | 0,000395663 | 0,095445918 | 0,268 | 0,098 | 1           | 1,068395584   | 0,935982903     | 2,734693878     |
| TRIM37                                                                                              | 0,009930926 | 0,095434153 | 0,122 | 0,042 | 1           | 1,068386871   | 0,935990536     | 2,904761905     |
| MNS1                                                                                                | 0,002449793 | 0,095400676 | 0,11  | 0,028 | 1           | 1,06836208    | 0,936012255     | 3,928571429     |
| CEBPZOS                                                                                             | 4,33053E-06 | 0,095386747 | 0,305 | 0,088 | 0,091378607 | 1,068351766   | 0,936021292     | 3,465909091     |
| CD164                                                                                               | 0,000110095 | 0,095324272 | 0,646 | 0,302 | 1           | 1,068305502   | 0,936061827     | 2,139072848     |
| PLRG1                                                                                               | 3,41358E-06 | 0,095299602 | 0,232 | 0,053 | 0,072029977 | 1,068287234   | 0,936077833     | 4,377358491     |
| CREB3L1                                                                                             | 3,17593E-07 | 0,095293315 | 0,122 | 0,007 | 0,006701534 | 1,068282579   | 0,936081913     | 17,42857143     |

Supplementary Table 2

| Differentially expressed genes_keloid-XL_comparing SC-Keloid vs. (SC-Myel, SC-Nonmyel, SC-Nonmyel2) |             |             |       |       |             |               |                 |                 |
|-----------------------------------------------------------------------------------------------------|-------------|-------------|-------|-------|-------------|---------------|-----------------|-----------------|
| gene                                                                                                | p_val       | avg_log2FC  | pct.1 | pct.2 | p_val_adj   | Foldchange_UP | Foldchange_DOWN | Ratio_pct1_pct2 |
| PUSL1                                                                                               | 3,53478E-08 | 0,09527563  | 0,122 | 0,004 | 0,000745874 | 1,068269484   | 0,936093387     | 30,5            |
| ZNF136                                                                                              | 6,246E-05   | 0,095246414 | 0,085 | 0,007 | 1           | 1,068247851   | 0,936112345     | 12,14285714     |
| DOK5                                                                                                | 0,001217477 | 0,095159387 | 0,146 | 0,042 | 1           | 1,068183413   | 0,936168815     | 3,476190476     |
| ACAA2                                                                                               | 2,35206E-06 | 0,094976415 | 0,232 | 0,053 | 0,049630756 | 1,068047948   | 0,936287553     | 4,377358491     |
| MEIS3                                                                                               | 0,163217468 | 0,094956426 | 0,061 | 0,028 | 1           | 1,06803315    | 0,936300526     | 2,178571429     |
| EIF2B4                                                                                              | 8,53692E-07 | 0,09493231  | 0,256 | 0,06  | 0,018013746 | 1,068015297   | 0,936316177     | 4,266666667     |
| LAMA5                                                                                               | 1,63503E-05 | 0,09490994  | 0,317 | 0,102 | 0,345007624 | 1,067998737   | 0,936330696     | 3,107843137     |
| APCDD1L                                                                                             | 4,32324E-06 | 0,094822749 | 0,073 | 0     | 0,09122464  | 1,067934193   | 0,936387286     | #DIV/0!         |
| PIDD1                                                                                               | 0,000288855 | 0,094811112 | 0,085 | 0,011 | 1           | 1,067925579   | 0,936394839     | 7,727272727     |
| THUMPD2                                                                                             | 4,99665E-06 | 0,094759249 | 0,22  | 0,049 | 0,105434212 | 1,067887189   | 0,936428502     | 4,489795918     |
| TMEM63A                                                                                             | 0,009972289 | 0,094729128 | 0,122 | 0,042 | 1           | 1,067864893   | 0,936448053     | 2,904761905     |
| ADAMTS10                                                                                            | 0,644071107 | 0,09472358  | 0,012 | 0,007 | 1           | 1,067860787   | 0,936451654     | 1,714285714     |
| ENOSF1                                                                                              | 0,000470825 | 0,094691161 | 0,134 | 0,032 | 1           | 1,067836791   | 0,936472697     | 4,1875          |
| ZNF138                                                                                              | 0,001703135 | 0,094517076 | 0,098 | 0,021 | 1           | 1,067707946   | 0,936585705     | 4,666666667     |
| SLC25A20                                                                                            | 0,333178656 | 0,094507932 | 0,024 | 0,011 | 1           | 1,06770118    | 0,936591641     | 2,181818182     |
| DHX34                                                                                               | 0,011339437 | 0,094366121 | 0,037 | 0,004 | 1           | 1,067596234   | 0,936683709     | 9,25            |
| WDPCP                                                                                               | 0,01030658  | 0,094356043 | 0,073 | 0,018 | 1           | 1,067588776   | 0,936690253     | 4,055555556     |
| GINS2                                                                                               | 2,80682E-05 | 0,094320512 | 0,061 | 0     | 0,592266086 | 1,067562484   | 0,936713322     | #DIV/0!         |
| FOXM1                                                                                               | 0,001772311 | 0,09431152  | 0,061 | 0,007 | 1           | 1,06755583    | 0,93671916      | 8,714285714     |
| ZNF268                                                                                              | 0,000969643 | 0,094212345 | 0,085 | 0,014 | 1           | 1,067482445   | 0,936783555     | 6,071428571     |
| NTRK3                                                                                               | 0,169837703 | 0,094205831 | 0,11  | 0,063 | 1           | 1,067477626   | 0,936787784     | 1,746031746     |
| INPPL1                                                                                              | 3,36272E-06 | 0,094078591 | 0,329 | 0,098 | 0,070956689 | 1,067383483   | 0,936870409     | 3,357142857     |
| GALNS                                                                                               | 0,000432069 | 0,094072609 | 0,171 | 0,049 | 1           | 1,067379056   | 0,936874294     | 3,489795918     |
| RTN3                                                                                                | 0,000147144 | 0,094004261 | 0,476 | 0,211 | 1           | 1,06732849    | 0,93691868      | 2,255924171     |
| URB1                                                                                                | 0,000169117 | 0,093983046 | 0,207 | 0,06  | 1           | 1,067312795   | 0,936932457     | 3,45            |
| C11orf49                                                                                            | 2,18601E-08 | 0,093889325 | 0,22  | 0,032 | 0,000461269 | 1,067243462   | 0,936993325     | 6,875           |
| NXN                                                                                                 | 0,016071749 | 0,093785165 | 0,061 | 0,014 | 1           | 1,067166412   | 0,937060976     | 4,357142857     |
| EBAG9                                                                                               | 0,000266143 | 0,093764332 | 0,207 | 0,063 | 1           | 1,067151002   | 0,937074508     | 3,285714286     |
| NME6                                                                                                | 3,68303E-07 | 0,093748872 | 0,134 | 0,011 | 0,007771562 | 1,067139567   | 0,937084549     | 12,18181818     |
| LMAN2L                                                                                              | 0,000877287 | 0,093710205 | 0,085 | 0,014 | 1           | 1,067110965   | 0,937109666     | 6,071428571     |

Supplementary Table 2

| Differentially expressed genes_keloid-XL_comparing SC-Keloid vs. (SC-Myel, SC-Nonmyel, SC-Nonmyel2) |             |             |       |       |             |               |                 |                 |
|-----------------------------------------------------------------------------------------------------|-------------|-------------|-------|-------|-------------|---------------|-----------------|-----------------|
| gene                                                                                                | p_val       | avg_log2FC  | pct.1 | pct.2 | p_val_adj   | Foldchange_UP | Foldchange_DOWN | Ratio_pct1_pct2 |
| AP1B1                                                                                               | 6,44461E-06 | 0,093701016 | 0,207 | 0,046 | 0,135987778 | 1,067104169   | 0,937115635     | 4,5             |
| TBRG4                                                                                               | 0,001353292 | 0,093675583 | 0,146 | 0,042 | 1           | 1,067085357   | 0,937132155     | 3,476190476     |
| SPOP                                                                                                | 1,95723E-05 | 0,093674264 | 0,317 | 0,102 | 0,412994159 | 1,067084382   | 0,937133011     | 3,107843137     |
| ARF1                                                                                                | 0,048464513 | 0,093658351 | 0,805 | 0,572 | 1           | 1,067072611   | 0,937143348     | 1,407342657     |
| HLCS                                                                                                | 0,000109756 | 0,093656972 | 0,122 | 0,021 | 1           | 1,067071592   | 0,937144244     | 5,80952381      |
| AAAS                                                                                                | 0,000335451 | 0,093611582 | 0,159 | 0,042 | 1           | 1,06703802    | 0,937173729     | 3,785714286     |
| EFCAB13                                                                                             | 0,001952737 | 0,093594471 | 0,049 | 0,004 | 1           | 1,067025364   | 0,937184844     | 12,25           |
| NFKBIL1                                                                                             | 0,000752789 | 0,093590232 | 0,122 | 0,028 | 1           | 1,067022229   | 0,937187598     | 4,357142857     |
| CHST8                                                                                               | 4,32324E-06 | 0,093586191 | 0,073 | 0     | 0,09122464  | 1,06701924    | 0,937190223     | #DIV/0!         |
| ARMC8                                                                                               | 0,000896751 | 0,093581019 | 0,256 | 0,098 | 1           | 1,067015415   | 0,937193583     | 2,612244898     |
| CRYBG1                                                                                              | 0,004255004 | 0,093565786 | 0,073 | 0,014 | 1           | 1,067004149   | 0,937203478     | 5,214285714     |
| GTPBP3                                                                                              | 5,69725E-05 | 0,093545829 | 0,098 | 0,011 | 1           | 1,066989389   | 0,937216443     | 8,909090909     |
| GABRB1                                                                                              | 5,32686E-05 | 0,093538976 | 0,073 | 0,004 | 1           | 1,066984321   | 0,937220895     | 18,25           |
| NDP                                                                                                 | 0,001703135 | 0,093513453 | 0,098 | 0,021 | 1           | 1,066965445   | 0,937237476     | 4,666666667     |
| MANEA                                                                                               | 1,38141E-06 | 0,093454421 | 0,232 | 0,049 | 0,029149134 | 1,066921787   | 0,937275826     | 4,734693878     |
| USP14                                                                                               | 7,43082E-06 | 0,093415442 | 0,415 | 0,144 | 0,156797671 | 1,066892961   | 0,93730115      | 2,881944444     |
| SMAD1                                                                                               | 3,90623E-05 | 0,093315774 | 0,183 | 0,042 | 0,824254035 | 1,066819258   | 0,937365905     | 4,357142857     |
| BLCAP                                                                                               | 0,00038684  | 0,093287417 | 0,268 | 0,098 | 1           | 1,06679829    | 0,93738433      | 2,734693878     |
| ZNF154                                                                                              | 0,011339437 | 0,093251975 | 0,037 | 0,004 | 1           | 1,066772082   | 0,937407359     | 9,25            |
| EGFL8                                                                                               | 0,08742224  | 0,093032588 | 0,902 | 0,688 | 1           | 1,066609873   | 0,937549919     | 1,311046512     |
| PPIG                                                                                                | 5,53349E-05 | 0,093010008 | 0,549 | 0,235 | 1           | 1,06659318    | 0,937564593     | 2,336170213     |
| DONSON                                                                                              | 0,002016171 | 0,093001428 | 0,134 | 0,039 | 1           | 1,066586837   | 0,937570168     | 3,435897436     |
| SLC35G2                                                                                             | 7,99531E-06 | 0,092999123 | 0,122 | 0,014 | 0,1687091   | 1,066585133   | 0,937571666     | 8,714285714     |
| TRIM5                                                                                               | 0,008346075 | 0,092969925 | 0,049 | 0,007 | 1           | 1,066563547   | 0,937590642     | 7               |
| MYT1                                                                                                | 0,000183568 | 0,092755209 | 0,049 | 0     | 1           | 1,066404822   | 0,937730193     | #DIV/0!         |
| TOLLIP                                                                                              | 4,61669E-05 | 0,092717694 | 0,378 | 0,14  | 0,9741677   | 1,066377092   | 0,937754578     | 2,7             |
| DTNA                                                                                                | 0,00102428  | 0,092702743 | 0,134 | 0,035 | 1           | 1,066366041   | 0,937764296     | 3,828571429     |
| ATP6AP1L                                                                                            | 0,00032444  | 0,092696703 | 0,061 | 0,004 | 1           | 1,066361577   | 0,937768222     | 15,25           |
| INTS4                                                                                               | 0,009972289 | 0,092670161 | 0,122 | 0,042 | 1           | 1,066341959   | 0,937785475     | 2,904761905     |
| PTPRM                                                                                               | 0,000918685 | 0,092637236 | 0,171 | 0,053 | 1           | 1,066317623   | 0,937806877     | 3,226415094     |

Supplementary Table 2

| Differentially expressed genes_keloid-XL_comparing SC-Keloid vs. (SC-Myel, SC-Nonmyel, SC-Nonmyel2) |             |             |       |       |             |               |                 |                 |
|-----------------------------------------------------------------------------------------------------|-------------|-------------|-------|-------|-------------|---------------|-----------------|-----------------|
| gene                                                                                                | p_val       | avg_log2FC  | pct.1 | pct.2 | p_val_adj   | Foldchange_UP | Foldchange_DOWN | Ratio_pct1_pct2 |
| TVP23B                                                                                              | 0,015183551 | 0,092532892 | 0,146 | 0,06  | 1           | 1,066240503   | 0,937874707     | 2,433333333     |
| VHL                                                                                                 | 3,75113E-07 | 0,092515173 | 0,207 | 0,035 | 0,007915261 | 1,066227408   | 0,937886226     | 5,914285714     |
| DNAJC9                                                                                              | 3,03887E-08 | 0,092475045 | 0,22  | 0,032 | 0,000641233 | 1,066197752   | 0,937912313     | 6,875           |
| AC004637.1                                                                                          | 4,32324E-06 | 0,092443476 | 0,073 | 0     | 0,09122464  | 1,066174422   | 0,937932837     | #DIV/0!         |
| CDCA4                                                                                               | 2,80682E-05 | 0,092427267 | 0,061 | 0     | 0,592266086 | 1,066162443   | 0,937943375     | #DIV/0!         |
| SLC10A7                                                                                             | 0,016266828 | 0,092362991 | 0,061 | 0,014 | 1           | 1,066114943   | 0,937985164     | 4,357142857     |
| ABHD18                                                                                              | 0,001772311 | 0,092258976 | 0,061 | 0,007 | 1           | 1,066038082   | 0,938052793     | 8,714285714     |
| TRAPPC9                                                                                             | 2,07968E-06 | 0,09222943  | 0,122 | 0,011 | 0,043883378 | 1,06601625    | 0,938072005     | 11,09090909     |
| ABCE1                                                                                               | 0,000489294 | 0,092008356 | 0,293 | 0,116 | 1           | 1,065852909   | 0,938215762     | 2,525862069     |
| PRELID3B                                                                                            | 0,000397613 | 0,091937774 | 0,244 | 0,084 | 1           | 1,065800766   | 0,938261664     | 2,904761905     |
| PILRB                                                                                               | 0,282277357 | 0,091925148 | 0,085 | 0,053 | 1           | 1,065791437   | 0,938269876     | 1,603773585     |
| MOGS                                                                                                | 4,38829E-07 | 0,0919021   | 0,293 | 0,07  | 0,009259729 | 1,065774411   | 0,938284865     | 4,185714286     |
| TRIM41                                                                                              | 0,005234552 | 0,091874433 | 0,122 | 0,039 | 1           | 1,065753973   | 0,938302859     | 3,128205128     |
| RPS8                                                                                                | 0,239145891 | 0,091840365 | 1     | 0,958 | 1           | 1,065728806   | 0,938325017     | 1,043841336     |
| ZNF781                                                                                              | 0,000631786 | 0,091810707 | 0,098 | 0,018 | 1           | 1,065706898   | 0,938344306     | 5,444444444     |
| PTRH2                                                                                               | 7,97812E-05 | 0,091735729 | 0,159 | 0,035 | 1           | 1,065651513   | 0,938393075     | 4,542857143     |
| GTF2H2C                                                                                             | 0,000217361 | 0,091629372 | 0,098 | 0,014 | 1           | 1,065572956   | 0,938462256     | 7               |
| CEP290                                                                                              | 0,009040853 | 0,09154953  | 0,195 | 0,084 | 1           | 1,065513986   | 0,938514195     | 2,321428571     |
| PHETA1                                                                                              | 0,00032621  | 0,091504127 | 0,073 | 0,007 | 1           | 1,065480454   | 0,93854373      | 10,42857143     |
| H2BC9                                                                                               | 0,000703841 | 0,091475489 | 0,098 | 0,018 | 1           | 1,065459304   | 0,938562361     | 5,444444444     |
| LINC01554                                                                                           | 0,342070304 | 0,091472502 | 0,024 | 0,011 | 1           | 1,065457098   | 0,938564304     | 2,181818182     |
| P2RY1                                                                                               | 0,000173945 | 0,091396076 | 0,207 | 0,06  | 1           | 1,065400657   | 0,938614026     | 3,45            |
| LCLAT1                                                                                              | 4,8807E-05  | 0,091355768 | 0,11  | 0,014 | 1           | 1,065370891   | 0,938640251     | 7,857142857     |
| OIP5                                                                                                | 0,008401736 | 0,091203629 | 0,024 | 0     | 1           | 1,065258549   | 0,93873924      | #DIV/0!         |
| NIPA2                                                                                               | 0,000203192 | 0,091194722 | 0,244 | 0,081 | 1           | 1,065251972   | 0,938745036     | 3,012345679     |
| COQ10B                                                                                              | 0,000133905 | 0,091145633 | 0,317 | 0,116 | 1           | 1,065215726   | 0,938776978     | 2,732758621     |
| SGSM3                                                                                               | 1,2511E-06  | 0,091102675 | 0,329 | 0,095 | 0,026399467 | 1,065184008   | 0,938804931     | 3,463157895     |
| KIAA0895L                                                                                           | 1,08469E-05 | 0,090990327 | 0,11  | 0,011 | 0,228879507 | 1,065101062   | 0,938878042     | 10              |
| TICAM2                                                                                              | 0,04287207  | 0,090937565 | 0,085 | 0,032 | 1           | 1,06506211    | 0,938912379     | 2,65625         |
| TAPBPL                                                                                              | 0,001538307 | 0,090857568 | 0,122 | 0,032 | 1           | 1,065003054   | 0,938964444     | 3,8125          |

Supplementary Table 2

| Differentially expressed genes_keloid-XL_comparing SC-Keloid vs. (SC-Myel, SC-Nonmyel, SC-Nonmyel2) |             |             |       |       |             |               |                 |                 |
|-----------------------------------------------------------------------------------------------------|-------------|-------------|-------|-------|-------------|---------------|-----------------|-----------------|
| gene                                                                                                | p_val       | avg_log2FC  | pct.1 | pct.2 | p_val_adj   | Foldchange_UP | Foldchange_DOWN | Ratio_pct1_pct2 |
| SLC33A1                                                                                             | 0,00011679  | 0,09077887  | 0,207 | 0,06  | 1           | 1,064944961   | 0,939015664     | 3,45            |
| BCAS2                                                                                               | 4,50067E-06 | 0,090759662 | 0,293 | 0,081 | 0,094968624 | 1,064930782   | 0,939028166     | 3,617283951     |
| VAPB                                                                                                | 0,000121815 | 0,090737605 | 0,329 | 0,119 | 1           | 1,064914501   | 0,939042523     | 2,764705882     |
| PPP4R3B                                                                                             | 0,031343802 | 0,090680076 | 0,256 | 0,137 | 1           | 1,064872037   | 0,939079969     | 1,868613139     |
| COMMD5                                                                                              | 0,000127665 | 0,090656868 | 0,171 | 0,042 | 1           | 1,064854907   | 0,939095076     | 4,071428571     |
| ALG2                                                                                                | 0,008760492 | 0,090540717 | 0,11  | 0,035 | 1           | 1,06476918    | 0,939170685     | 3,142857143     |
| RAB12                                                                                               | 0,000238764 | 0,090484499 | 0,207 | 0,063 | 1           | 1,064727689   | 0,939207283     | 3,285714286     |
| TSN                                                                                                 | 2,80628E-07 | 0,090417146 | 0,378 | 0,105 | 0,005921541 | 1,064677982   | 0,939251132     | 3,6             |
| PITPNA                                                                                              | 1,34032E-05 | 0,090406665 | 0,317 | 0,102 | 0,282821059 | 1,064670248   | 0,939257955     | 3,107843137     |
| SNRK                                                                                                | 0,037995958 | 0,09024946  | 0,073 | 0,025 | 1           | 1,064554241   | 0,939360308     | 2,92            |
| CCAR2                                                                                               | 0,000470825 | 0,090166246 | 0,134 | 0,032 | 1           | 1,06449284    | 0,939414491     | 4,1875          |
| KEAP1                                                                                               | 9,19469E-05 | 0,09014618  | 0,232 | 0,07  | 1           | 1,064478034   | 0,939427558     | 3,314285714     |
| GEMIN5                                                                                              | 1,7871E-06  | 0,090112762 | 0,134 | 0,014 | 0,03770959  | 1,064453378   | 0,939449318     | 9,571428571     |
| TMEM106C                                                                                            | 5,90121E-06 | 0,090046916 | 0,256 | 0,067 | 0,124521343 | 1,064404796   | 0,939492197     | 3,820895522     |
| CROT                                                                                                | 2,55228E-05 | 0,090045198 | 0,134 | 0,021 | 0,538555655 | 1,064403528   | 0,939493316     | 6,380952381     |
| TRIP11                                                                                              | 0,000171728 | 0,089974491 | 0,305 | 0,112 | 1           | 1,064351363   | 0,939539362     | 2,723214286     |
| STAM2                                                                                               | 0,00683044  | 0,089930856 | 0,146 | 0,053 | 1           | 1,064319172   | 0,939567779     | 2,754716981     |
| ZNF468                                                                                              | 5,32686E-05 | 0,089910538 | 0,073 | 0,004 | 1           | 1,064304182   | 0,939581011     | 18,25           |
| MCAT                                                                                                | 4,95841E-05 | 0,089895776 | 0,11  | 0,014 | 1           | 1,064293292   | 0,939590625     | 7,857142857     |
| MIB2                                                                                                | 0,04045173  | 0,089858676 | 0,159 | 0,077 | 1           | 1,064265924   | 0,939614788     | 2,064935065     |
| THADA                                                                                               | 0,001241194 | 0,089793105 | 0,146 | 0,042 | 1           | 1,064217553   | 0,939657495     | 3,476190476     |
| IGFLR1                                                                                              | 0,001220269 | 0,08976894  | 0,037 | 0     | 1           | 1,064199728   | 0,939673234     | #DIV/0!         |
| ARAF                                                                                                | 2,3522E-05  | 0,089756555 | 0,22  | 0,056 | 0,496337612 | 1,064190592   | 0,939681301     | 3,928571429     |
| CHUK                                                                                                | 0,001571179 | 0,089735169 | 0,122 | 0,032 | 1           | 1,064174817   | 0,93969523      | 3,8125          |
| RSPRY1                                                                                              | 0,000276176 | 0,089642472 | 0,171 | 0,046 | 1           | 1,064106443   | 0,93975561      | 3,717391304     |
| RUFY2                                                                                               | 0,000107105 | 0,089602165 | 0,207 | 0,06  | 1           | 1,064076714   | 0,939781866     | 3,45            |
| CCZ1                                                                                                | 4,29376E-05 | 0,089560209 | 0,305 | 0,102 | 0,906027166 | 1,064045769   | 0,939809197     | 2,990196078     |
| UBE2V2                                                                                              | 4,10545E-05 | 0,089517663 | 0,427 | 0,161 | 0,866291261 | 1,064014391   | 0,939836913     | 2,652173913     |
| NUP93                                                                                               | 0,001861343 | 0,08951708  | 0,171 | 0,056 | 1           | 1,064013961   | 0,939837293     | 3,053571429     |
| BCAT1                                                                                               | 1,02952E-07 | 0,089503631 | 0,098 | 0     | 0,002172399 | 1,064004042   | 0,939846054     | #DIV/0!         |

Supplementary Table 2

| Differentially expressed genes_keloid-XL_comparing SC-Keloid vs. (SC-Myel, SC-Nonmyel, SC-Nonmyel2) |             |             |       |       |             |               |                 |                 |
|-----------------------------------------------------------------------------------------------------|-------------|-------------|-------|-------|-------------|---------------|-----------------|-----------------|
| gene                                                                                                | p_val       | avg_log2FC  | pct.1 | pct.2 | p_val_adj   | Foldchange_UP | Foldchange_DOWN | Ratio_pct1_pct2 |
| ARCN1                                                                                               | 2,09384E-05 | 0,089397643 | 0,415 | 0,154 | 0,441821824 | 1,063925877   | 0,939915102     | 2,694805195     |
| MFSD9                                                                                               | 0,000183568 | 0,089354333 | 0,049 | 0     | 1           | 1,063893938   | 0,93994332      | #DIV/0!         |
| EXOSC4                                                                                              | 1,28715E-05 | 0,089337172 | 0,22  | 0,053 | 0,271600545 | 1,063881283   | 0,9399545       | 4,150943396     |
| SMO                                                                                                 | 0,060153875 | 0,089325474 | 0,049 | 0,014 | 1           | 1,063872657   | 0,939962122     | 3,5             |
| CYFIP2                                                                                              | 0,000315825 | 0,089297935 | 0,122 | 0,025 | 1           | 1,063852349   | 0,939980065     | 4,88            |
| GTF2H1                                                                                              | 0,002016171 | 0,089211878 | 0,134 | 0,039 | 1           | 1,063788893   | 0,940036136     | 3,435897436     |
| AIF1L                                                                                               | 0,000576852 | 0,0892046   | 0,305 | 0,123 | 1           | 1,063783526   | 0,940040878     | 2,479674797     |
| MTMR14                                                                                              | 7,4992E-05  | 0,089036397 | 0,134 | 0,025 | 1           | 1,063659507   | 0,940150484     | 5,36            |
| FKRP                                                                                                | 0,025343006 | 0,089011371 | 0,11  | 0,042 | 1           | 1,063641056   | 0,940166792     | 2,619047619     |
| NEK7                                                                                                | 0,036903994 | 0,088977166 | 0,232 | 0,126 | 1           | 1,063615839   | 0,940189083     | 1,841269841     |
| SNX9                                                                                                | 0,000384038 | 0,088954076 | 0,232 | 0,077 | 1           | 1,063598816   | 0,94020413      | 3,012987013     |
| LRR8E                                                                                               | 0,008401736 | 0,088949122 | 0,024 | 0     | 1           | 1,063595163   | 0,94020736      | #DIV/0!         |
| CEP41                                                                                               | 0,004102792 | 0,088892066 | 0,098 | 0,025 | 1           | 1,063553101   | 0,940244544     | 3,92            |
| LRR41                                                                                               | 0,000651262 | 0,08859858  | 0,183 | 0,056 | 1           | 1,063336766   | 0,940435836     | 3,267857143     |
| NUDT16L1                                                                                            | 0,000127297 | 0,088584422 | 0,207 | 0,06  | 1           | 1,06332633    | 0,940445065     | 3,45            |
| ARF4                                                                                                | 0,05206881  | 0,088583011 | 0,634 | 0,446 | 1           | 1,06332529    | 0,940445985     | 1,421524664     |
| WIPF2                                                                                               | 0,00096313  | 0,088450752 | 0,256 | 0,098 | 1           | 1,063227815   | 0,940532204     | 2,612244898     |
| GSPT2                                                                                               | 4,88624E-05 | 0,088440522 | 0,098 | 0,011 | 1           | 1,063220275   | 0,940538874     | 8,909090909     |
| ARMC6                                                                                               | 0,000651072 | 0,088404776 | 0,146 | 0,039 | 1           | 1,063193932   | 0,940562177     | 3,743589744     |
| APOM                                                                                                | 0,00031979  | 0,088285413 | 0,122 | 0,025 | 1           | 1,063105972   | 0,940639999     | 4,88            |
| FBXO16                                                                                              | 0,008401736 | 0,088250447 | 0,024 | 0     | 1           | 1,063080206   | 0,940662797     | #DIV/0!         |
| EEF2KMT                                                                                             | 5,58308E-05 | 0,088137468 | 0,085 | 0,007 | 1           | 1,062996958   | 0,940736465     | 12,14285714     |
| EIF3K                                                                                               | 0,000584763 | 0,088122796 | 0,671 | 0,347 | 1           | 1,062986147   | 0,940746032     | 1,933717579     |
| ARL8B                                                                                               | 3,99546E-05 | 0,08803661  | 0,354 | 0,126 | 0,843080964 | 1,062922647   | 0,940802233     | 2,80952381      |
| GAL3ST4                                                                                             | 0,000298361 | 0,087961514 | 0,085 | 0,011 | 1           | 1,062867321   | 0,940851206     | 7,727272727     |
| GPAT4                                                                                               | 0,000262066 | 0,087946861 | 0,232 | 0,077 | 1           | 1,062856525   | 0,940860762     | 3,012987013     |
| ZNF33A                                                                                              | 0,014137725 | 0,087930785 | 0,098 | 0,032 | 1           | 1,062844682   | 0,940871246     | 3,0625          |
| LBR                                                                                                 | 1,96144E-06 | 0,087910916 | 0,256 | 0,06  | 0,041388341 | 1,062830044   | 0,940884204     | 4,266666667     |
| ANO1                                                                                                | 0,00032444  | 0,087872925 | 0,061 | 0,004 | 1           | 1,062802057   | 0,940908981     | 15,25           |
| LPAR4                                                                                               | 0,000332109 | 0,087848842 | 0,073 | 0,007 | 1           | 1,062784316   | 0,940924687     | 10,42857143     |

Supplementary Table 2

| Differentially expressed genes_keloid-XL_comparing SC-Keloid vs. (SC-Myel, SC-Nonmyel, SC-Nonmyel2) |             |             |       |       |             |               |                 |                 |
|-----------------------------------------------------------------------------------------------------|-------------|-------------|-------|-------|-------------|---------------|-----------------|-----------------|
| gene                                                                                                | p_val       | avg_log2FC  | pct.1 | pct.2 | p_val_adj   | Foldchange_UP | Foldchange_DOWN | Ratio_pct1_pct2 |
| BAG4                                                                                                | 0,01352207  | 0,087650617 | 0,183 | 0,081 | 1           | 1,0626383     | 0,941053979     | 2,259259259     |
| DHX16                                                                                               | 0,003053309 | 0,087583875 | 0,122 | 0,035 | 1           | 1,062589141   | 0,941097515     | 3,485714286     |
| TTL12                                                                                               | 0,010188387 | 0,087536958 | 0,073 | 0,018 | 1           | 1,062554586   | 0,94112812      | 4,055555556     |
| TFAZZIN                                                                                             | 0,033702567 | 0,087519228 | 0,134 | 0,06  | 1           | 1,062541528   | 0,941139686     | 2,233333333     |
| SAP30L                                                                                              | 0,00079604  | 0,087499274 | 0,305 | 0,126 | 1           | 1,062526832   | 0,941152703     | 2,420634921     |
| TIMELESS                                                                                            | 0,011339437 | 0,087427468 | 0,037 | 0,004 | 1           | 1,062473949   | 0,941199547     | 9,25            |
| CNTRL                                                                                               | 0,015153743 | 0,087422601 | 0,134 | 0,053 | 1           | 1,062470365   | 0,941202723     | 2,528301887     |
| FAM174A                                                                                             | 0,00017554  | 0,087349199 | 0,22  | 0,067 | 1           | 1,062416309   | 0,941250611     | 3,28358209      |
| JADE3                                                                                               | 0,001802592 | 0,087265128 | 0,061 | 0,007 | 1           | 1,0623544     | 0,941305462     | 8,714285714     |
| SLFN5                                                                                               | 1,98732E-05 | 0,087078619 | 0,195 | 0,046 | 0,419345238 | 1,06221707    | 0,94142716      | 4,239130435     |
| SNCG                                                                                                | 0,060153875 | 0,087053432 | 0,049 | 0,014 | 1           | 1,062198525   | 0,941443597     | 3,5             |
| NATD1                                                                                               | 5,32686E-05 | 0,087044118 | 0,073 | 0,004 | 1           | 1,062191668   | 0,941449675     | 18,25           |
| UBXN11                                                                                              | 0,002631406 | 0,087024709 | 0,085 | 0,018 | 1           | 1,062177378   | 0,94146234      | 4,722222222     |
| GRK5                                                                                                | 0,058268295 | 0,087009218 | 0,049 | 0,014 | 1           | 1,062165973   | 0,941472449     | 3,5             |
| ANKRD49                                                                                             | 0,014394785 | 0,086934126 | 0,098 | 0,032 | 1           | 1,062110689   | 0,941521454     | 3,0625          |
| TPI1                                                                                                | 0,004808897 | 0,086929107 | 0,805 | 0,484 | 1           | 1,062106994   | 0,941524729     | 1,66322314      |
| RFX5                                                                                                | 0,006340275 | 0,086864029 | 0,085 | 0,021 | 1           | 1,062059085   | 0,941567201     | 4,047619048     |
| CHMP7                                                                                               | 0,00050647  | 0,086821497 | 0,134 | 0,032 | 1           | 1,062027775   | 0,94159496      | 4,1875          |
| CASTOR1                                                                                             | 8,66134E-06 | 0,08680606  | 0,085 | 0,004 | 0,1827629   | 1,062016411   | 0,941605035     | 21,25           |
| RANGRF                                                                                              | 6,36949E-06 | 0,086788176 | 0,207 | 0,046 | 0,134402518 | 1,062003246   | 0,941616707     | 4,5             |
| RALGAPA2                                                                                            | 0,00296515  | 0,08674472  | 0,122 | 0,035 | 1           | 1,061971257   | 0,941645071     | 3,485714286     |
| VRK1                                                                                                | 0,002767295 | 0,086690636 | 0,085 | 0,018 | 1           | 1,061931447   | 0,941680372     | 4,722222222     |
| AHCY                                                                                                | 1,37509E-08 | 0,086654578 | 0,341 | 0,077 | 0,000290159 | 1,061904906   | 0,941703908     | 4,428571429     |
| UBE2F                                                                                               | 0,000372541 | 0,086626724 | 0,268 | 0,098 | 1           | 1,061884404   | 0,94172209      | 2,734693878     |
| YJU2B                                                                                               | 6,03301E-05 | 0,086494955 | 0,305 | 0,102 | 1           | 1,061787421   | 0,941808106     | 2,990196078     |
| OGFRL1                                                                                              | 0,002698569 | 0,086494379 | 0,085 | 0,018 | 1           | 1,061786997   | 0,941808482     | 4,722222222     |
| RRP8                                                                                                | 0,000212764 | 0,086464057 | 0,159 | 0,039 | 1           | 1,061764681   | 0,941828277     | 4,076923077     |
| SLC22A18AS                                                                                          | 0,001876622 | 0,086438627 | 0,049 | 0,004 | 1           | 1,061745965   | 0,941844879     | 12,25           |
| TMEM129                                                                                             | 0,00024535  | 0,086407429 | 0,207 | 0,063 | 1           | 1,061723006   | 0,941865246     | 3,285714286     |
| CNFN                                                                                                | 1,02173E-05 | 0,086396663 | 0,098 | 0,007 | 0,215595665 | 1,061715083   | 0,941872274     | 14              |

Supplementary Table 2

| Differentially expressed genes_keloid-XL_comparing SC-Keloid vs. (SC-Myel, SC-Nonmyel, SC-Nonmyel2) |             |             |       |       |             |               |                 |                 |
|-----------------------------------------------------------------------------------------------------|-------------|-------------|-------|-------|-------------|---------------|-----------------|-----------------|
| gene                                                                                                | p_val       | avg_log2FC  | pct.1 | pct.2 | p_val_adj   | Foldchange_UP | Foldchange_DOWN | Ratio_pct1_pct2 |
| VPS52                                                                                               | 0,002095478 | 0,086375987 | 0,134 | 0,039 | 1           | 1,061699867   | 0,941885773     | 3,435897436     |
| WRAP53                                                                                              | 5,89403E-05 | 0,086177551 | 0,098 | 0,011 | 1           | 1,061553846   | 0,942015334     | 8,909090909     |
| DTX2                                                                                                | 3,64556E-07 | 0,086136105 | 0,146 | 0,014 | 0,007692497 | 1,061523349   | 0,942042397     | 10,42857143     |
| UTP14A                                                                                              | 0,00405833  | 0,086128825 | 0,098 | 0,025 | 1           | 1,061517993   | 0,94204715      | 3,92            |
| DMTF1                                                                                               | 0,001547529 | 0,086112147 | 0,159 | 0,049 | 1           | 1,061505721   | 0,942058041     | 3,244897959     |
| ZNF391                                                                                              | 0,011128779 | 0,086004666 | 0,037 | 0,004 | 1           | 1,061426642   | 0,942128227     | 9,25            |
| OSBP2                                                                                               | 0,043000486 | 0,085971375 | 0,037 | 0,007 | 1           | 1,061402149   | 0,942149967     | 5,285714286     |
| DYSF                                                                                                | 5,90574E-05 | 0,085965946 | 0,085 | 0,007 | 1           | 1,061398155   | 0,942153513     | 12,14285714     |
| PHF5A                                                                                               | 0,000635621 | 0,085796188 | 0,195 | 0,063 | 1           | 1,06127327    | 0,94226438      | 3,095238095     |
| PCDHGB7                                                                                             | 0,099301202 | 0,085786411 | 0,037 | 0,011 | 1           | 1,061266078   | 0,942270766     | 3,363636364     |
| KCNMB3                                                                                              | 0,00032444  | 0,085769146 | 0,061 | 0,004 | 1           | 1,061253378   | 0,942282042     | 15,25           |
| PXN-AS1                                                                                             | 2,62657E-05 | 0,085739126 | 0,134 | 0,021 | 0,554232678 | 1,061231295   | 0,94230165      | 6,380952381     |
| CFAP97                                                                                              | 1,86553E-05 | 0,085572637 | 0,622 | 0,263 | 0,393644434 | 1,061108835   | 0,942410399     | 2,365019011     |
| LRPPRC                                                                                              | 0,000641617 | 0,085541291 | 0,28  | 0,109 | 1           | 1,06108578    | 0,942430875     | 2,568807339     |
| PPIL6                                                                                               | 0,000284208 | 0,085515218 | 0,085 | 0,011 | 1           | 1,061066604   | 0,942447907     | 7,727272727     |
| TMEM87B                                                                                             | 4,90412E-06 | 0,08548928  | 0,159 | 0,025 | 0,103481741 | 1,061047527   | 0,942464852     | 6,36            |
| PSMG4                                                                                               | 0,000228156 | 0,08539568  | 0,207 | 0,063 | 1           | 1,060978691   | 0,942525999     | 3,285714286     |
| ZNF2                                                                                                | 0,065143806 | 0,08534444  | 0,024 | 0,004 | 1           | 1,060941008   | 0,942559476     | 6               |
| HDDC3                                                                                               | 4,3682E-05  | 0,085319624 | 0,11  | 0,014 | 0,921734445 | 1,060922759   | 0,942575689     | 7,857142857     |
| TMX4                                                                                                | 5,2807E-07  | 0,085315025 | 0,439 | 0,14  | 0,011142803 | 1,060919377   | 0,942578693     | 3,135714286     |
| NUP88                                                                                               | 2,74188E-05 | 0,085308737 | 0,134 | 0,021 | 0,578564323 | 1,060914753   | 0,942582802     | 6,380952381     |
| ITPRIPL2                                                                                            | 2,58919E-07 | 0,085298141 | 0,415 | 0,123 | 0,005463454 | 1,060906961   | 0,942589725     | 3,37398374      |
| THY1                                                                                                | 0,049682602 | 0,085243088 | 0,11  | 0,049 | 1           | 1,060866478   | 0,942625694     | 2,244897959     |
| C5orf34                                                                                             | 2,80682E-05 | 0,085218497 | 0,061 | 0     | 0,592266086 | 1,060848395   | 0,942641762     | #DIV/0!         |
| SLC29A1                                                                                             | 6,246E-05   | 0,085196532 | 0,085 | 0,007 | 1           | 1,060832244   | 0,942656114     | 12,14285714     |
| MAPKAP1                                                                                             | 0,000410787 | 0,085154968 | 0,268 | 0,098 | 1           | 1,060801682   | 0,942683271     | 2,734693878     |
| PLA2G4A                                                                                             | 0,000103093 | 0,08509707  | 0,159 | 0,035 | 1           | 1,060759111   | 0,942721104     | 4,542857143     |
| EPN2                                                                                                | 0,001757527 | 0,085052616 | 0,305 | 0,133 | 1           | 1,060726426   | 0,942750152     | 2,293233083     |
| IQCE                                                                                                | 1,42345E-05 | 0,085050452 | 0,159 | 0,028 | 0,300362154 | 1,060724835   | 0,942751567     | 5,678571429     |
| OR7C1                                                                                               | 5,21474E-05 | 0,085030594 | 0,073 | 0,004 | 1           | 1,060710235   | 0,942764543     | 18,25           |



Supplementary Table 2

| Differentially expressed genes_keloid-XL_comparing SC-Keloid vs. (SC-Myel, SC-Nonmyel, SC-Nonmyel2) |             |             |       |       |             |               |                 |                 |
|-----------------------------------------------------------------------------------------------------|-------------|-------------|-------|-------|-------------|---------------|-----------------|-----------------|
| gene                                                                                                | p_val       | avg_log2FC  | pct.1 | pct.2 | p_val_adj   | Foldchange_UP | Foldchange_DOWN | Ratio_pct1_pct2 |
| DDX56                                                                                               | 0,023818859 | 0,084976838 | 0,134 | 0,056 | 1           | 1,060670713   | 0,942799672     | 2,392857143     |
| YDJC                                                                                                | 1,08272E-05 | 0,084966759 | 0,098 | 0,007 | 0,228465315 | 1,060663303   | 0,942806259     | 14              |
| MAST2                                                                                               | 0,05064237  | 0,084764232 | 0,134 | 0,063 | 1           | 1,060514416   | 0,94293862      | 2,126984127     |
| ARFGAP2                                                                                             | 4,81779E-06 | 0,084660279 | 0,293 | 0,081 | 0,101660119 | 1,060438004   | 0,943006566     | 3,617283951     |
| NOL8                                                                                                | 0,00244171  | 0,084572848 | 0,146 | 0,046 | 1           | 1,06037374    | 0,943063716     | 3,173913043     |
| TBC1D22A                                                                                            | 0,003759144 | 0,084565427 | 0,098 | 0,025 | 1           | 1,060368286   | 0,943068567     | 3,92            |
| MAEA                                                                                                | 0,000496265 | 0,084483945 | 0,256 | 0,095 | 1           | 1,060308399   | 0,943121832     | 2,694736842     |
| ARFGAP1                                                                                             | 0,000901737 | 0,084452595 | 0,28  | 0,112 | 1           | 1,060285358   | 0,943142327     | 2,5             |
| ELP6                                                                                                | 0,000148395 | 0,084363856 | 0,171 | 0,042 | 1           | 1,060220143   | 0,943200341     | 4,071428571     |
| PLEKHH3                                                                                             | 0,02311933  | 0,0843572   | 0,232 | 0,119 | 1           | 1,060215252   | 0,943204692     | 1,949579832     |
| SNX21                                                                                               | 1,33137E-05 | 0,084336228 | 0,159 | 0,028 | 0,280931553 | 1,06019984    | 0,943218403     | 5,678571429     |
| KNSTRN                                                                                              | 0,000332109 | 0,084311223 | 0,073 | 0,007 | 1           | 1,060181465   | 0,943234751     | 10,42857143     |
| MAGEF1                                                                                              | 1,01637E-05 | 0,084307247 | 0,305 | 0,091 | 0,214465091 | 1,060178543   | 0,943237351     | 3,351648352     |
| FLRT1                                                                                               | 0,052459136 | 0,084292139 | 0,134 | 0,063 | 1           | 1,060167441   | 0,943247228     | 2,126984127     |
| NOP9                                                                                                | 0,016864604 | 0,084247881 | 0,061 | 0,014 | 1           | 1,060134918   | 0,943276165     | 4,357142857     |
| PEX6                                                                                                | 0,000304206 | 0,08423239  | 0,122 | 0,025 | 1           | 1,060123535   | 0,943286294     | 4,88            |
| BORCS8                                                                                              | 2,42595E-05 | 0,084115476 | 0,171 | 0,035 | 0,511899209 | 1,060037627   | 0,94336274      | 4,885714286     |
| DEF8                                                                                                | 5,03394E-08 | 0,084084957 | 0,28  | 0,056 | 0,001062213 | 1,060015203   | 0,943382696     | 5               |
| UBL7                                                                                                | 7,30342E-05 | 0,084082436 | 0,134 | 0,025 | 1           | 1,060013351   | 0,943384344     | 5,36            |
| HYKK                                                                                                | 1,06202E-05 | 0,084024289 | 0,098 | 0,007 | 0,224096034 | 1,059970629   | 0,943422367     | 14              |
| MUC12                                                                                               | 0,000304206 | 0,083997818 | 0,122 | 0,025 | 1           | 1,059951181   | 0,943439678     | 4,88            |
| NSMCE3                                                                                              | 7,12794E-09 | 0,083995576 | 0,341 | 0,074 | 0,000150407 | 1,059949533   | 0,943441144     | 4,608108108     |
| EXTL2                                                                                               | 3,62294E-05 | 0,083981513 | 0,244 | 0,07  | 0,764475716 | 1,059939201   | 0,943450341     | 3,485714286     |
| ETV4                                                                                                | 8,66134E-06 | 0,08393237  | 0,085 | 0,004 | 0,1827629   | 1,059903097   | 0,943482478     | 21,25           |
| GSK3A                                                                                               | 1,60713E-05 | 0,083917492 | 0,317 | 0,102 | 0,339120865 | 1,059892167   | 0,943492208     | 3,107843137     |
| MORN3                                                                                               | 0,00032444  | 0,083901013 | 0,061 | 0,004 | 1           | 1,05988006    | 0,943502985     | 15,25           |
| POLA2                                                                                               | 0,003982392 | 0,083879785 | 0,073 | 0,014 | 1           | 1,059864465   | 0,943516868     | 5,214285714     |
| PFAS                                                                                                | 1,12366E-05 | 0,083879362 | 0,11  | 0,011 | 0,23710448  | 1,059864154   | 0,943517144     | 10              |
| HEATR1                                                                                              | 5,55011E-05 | 0,08385753  | 0,171 | 0,039 | 1           | 1,059848115   | 0,943531423     | 4,384615385     |
| DDX60L                                                                                              | 6,13057E-05 | 0,083851795 | 0,085 | 0,007 | 1           | 1,059843902   | 0,943535173     | 12,14285714     |

Supplementary Table 2

| Differentially expressed genes_keloid-XL_comparing SC-Keloid vs. (SC-Myel, SC-Nonmyel, SC-Nonmyel2) |             |             |       |       |             |               |                 |                 |
|-----------------------------------------------------------------------------------------------------|-------------|-------------|-------|-------|-------------|---------------|-----------------|-----------------|
| gene                                                                                                | p_val       | avg_log2FC  | pct.1 | pct.2 | p_val_adj   | Foldchange_UP | Foldchange_DOWN | Ratio_pct1_pct2 |
| PIGW                                                                                                | 8,66134E-06 | 0,083794073 | 0,085 | 0,004 | 0,1827629   | 1,059801499   | 0,943572925     | 21,25           |
| BCAS4                                                                                               | 0,00012579  | 0,083751767 | 0,122 | 0,021 | 1           | 1,059770422   | 0,943600595     | 5,80952381      |
| CERK                                                                                                | 0,001673714 | 0,083738606 | 0,122 | 0,032 | 1           | 1,059760754   | 0,943609203     | 3,8125          |
| ADAMTS13                                                                                            | 0,008401736 | 0,083717816 | 0,024 | 0     | 1           | 1,059745482   | 0,943622801     | #DIV/0!         |
| GON7                                                                                                | 0,000111268 | 0,08368296  | 0,122 | 0,021 | 1           | 1,059719879   | 0,943645599     | 5,80952381      |
| DOP1A                                                                                               | 0,006411568 | 0,083672549 | 0,085 | 0,021 | 1           | 1,059712231   | 0,943652409     | 4,047619048     |
| CA11                                                                                                | 0,001492907 | 0,083671066 | 0,159 | 0,049 | 1           | 1,059711142   | 0,943653379     | 3,244897959     |
| CINP                                                                                                | 4,4995E-06  | 0,083650044 | 0,159 | 0,025 | 0,094944043 | 1,0596957     | 0,94366713      | 6,36            |
| ARMC7                                                                                               | 5,32686E-05 | 0,083589497 | 0,073 | 0,004 | 1           | 1,059651228   | 0,943706734     | 18,25           |
| SERPINB5                                                                                            | 0,016463985 | 0,083552598 | 0,061 | 0,014 | 1           | 1,059624127   | 0,943730871     | 4,357142857     |
| CASP4                                                                                               | 0,000938221 | 0,083548087 | 0,183 | 0,06  | 1           | 1,059620813   | 0,943733822     | 3,05            |
| RASL11B                                                                                             | 4,3682E-05  | 0,083540276 | 0,11  | 0,014 | 0,921734445 | 1,059615076   | 0,943738932     | 7,857142857     |
| PHF6                                                                                                | 0,009816935 | 0,08345436  | 0,171 | 0,07  | 1           | 1,059551976   | 0,943795135     | 2,442857143     |
| ICA1                                                                                                | 0,006163779 | 0,083414271 | 0,061 | 0,011 | 1           | 1,059522534   | 0,943821361     | 5,545454545     |
| ZNF711                                                                                              | 0,041525285 | 0,083393737 | 0,098 | 0,039 | 1           | 1,059507453   | 0,943834795     | 2,512820513     |
| ZNF277                                                                                              | 0,010863732 | 0,083304118 | 0,146 | 0,056 | 1           | 1,05944164    | 0,943893427     | 2,607142857     |
| FAM222B                                                                                             | 0,516980245 | 0,08321746  | 0,024 | 0,014 | 1           | 1,059378005   | 0,943950125     | 1,714285714     |
| VPS37C                                                                                              | 1,17619E-05 | 0,083158235 | 0,195 | 0,042 | 0,24818749  | 1,059334517   | 0,943988876     | 4,642857143     |
| MAN2A1                                                                                              | 1,5947E-05  | 0,082977469 | 0,293 | 0,088 | 0,336497046 | 1,059201793   | 0,944107163     | 3,329545455     |
| CREBL2                                                                                              | 0,000641125 | 0,082862466 | 0,195 | 0,063 | 1           | 1,059117363   | 0,944182425     | 3,095238095     |
| SLC30A7                                                                                             | 8,57134E-05 | 0,082841057 | 0,207 | 0,056 | 1           | 1,059101646   | 0,944196436     | 3,696428571     |
| ER12                                                                                                | 0,004311516 | 0,082837246 | 0,073 | 0,014 | 1           | 1,059098848   | 0,944198931     | 5,214285714     |
| PCDHB14                                                                                             | 0,0059273   | 0,082795032 | 0,085 | 0,021 | 1           | 1,059067859   | 0,944226559     | 4,047619048     |
| C14orf28                                                                                            | 0,001798559 | 0,082784912 | 0,098 | 0,021 | 1           | 1,05906043    | 0,944233182     | 4,666666667     |
| PCOLCE2                                                                                             | 1,39592E-06 | 0,082752421 | 0,098 | 0,004 | 0,029455268 | 1,059036579   | 0,944254448     | 24,5            |
| TMEM150A                                                                                            | 0,000649127 | 0,082670422 | 0,098 | 0,018 | 1           | 1,058976388   | 0,944308118     | 5,444444444     |
| COQ2                                                                                                | 1,36536E-06 | 0,082597894 | 0,098 | 0,004 | 0,028810488 | 1,058923152   | 0,944355592     | 24,5            |
| TBL3                                                                                                | 0,00018544  | 0,082561739 | 0,134 | 0,028 | 1           | 1,058896615   | 0,944379258     | 4,785714286     |
| HAUS2                                                                                               | 0,058461383 | 0,0825279   | 0,122 | 0,056 | 1           | 1,058871779   | 0,944401409     | 2,178571429     |
| AKIP1                                                                                               | 0,000465553 | 0,082506695 | 0,134 | 0,032 | 1           | 1,058856215   | 0,944415291     | 4,1875          |

Supplementary Table 2

| Differentially expressed genes_keloid-XL_comparing SC-Keloid vs. (SC-Myel, SC-Nonmyel, SC-Nonmyel2) |             |             |       |       |             |               |                 |                 |
|-----------------------------------------------------------------------------------------------------|-------------|-------------|-------|-------|-------------|---------------|-----------------|-----------------|
| gene                                                                                                | p_val       | avg_log2FC  | pct.1 | pct.2 | p_val_adj   | Foldchange_UP | Foldchange_DOWN | Ratio_pct1_pct2 |
| PDCD2L                                                                                              | 5,32686E-05 | 0,082461195 | 0,073 | 0,004 | 1           | 1,058822821   | 0,944445076     | 18,25           |
| FAHD1                                                                                               | 0,000264599 | 0,082449858 | 0,146 | 0,035 | 1           | 1,0588145     | 0,944452498     | 4,171428571     |
| ZC3H13                                                                                              | 4,24249E-07 | 0,082406403 | 0,439 | 0,137 | 0,008952082 | 1,058782609   | 0,944480946     | 3,204379562     |
| CCDC113                                                                                             | 6,01716E-05 | 0,082361674 | 0,085 | 0,007 | 1           | 1,058749783   | 0,944510229     | 12,14285714     |
| RIOK1                                                                                               | 0,000815224 | 0,082268547 | 0,159 | 0,046 | 1           | 1,058681442   | 0,9445712       | 3,456521739     |
| RPL13A                                                                                              | 0,427836809 | 0,082207958 | 0,988 | 0,888 | 1           | 1,058636982   | 0,94461087      | 1,112612613     |
| ARMT1                                                                                               | 0,000220667 | 0,082180633 | 0,098 | 0,014 | 1           | 1,058616931   | 0,944628761     | 7               |
| REP15                                                                                               | 0,000332109 | 0,082152225 | 0,073 | 0,007 | 1           | 1,058596086   | 0,944647362     | 10,42857143     |
| CDK10                                                                                               | 0,001694829 | 0,082148016 | 0,195 | 0,07  | 1           | 1,058592998   | 0,944650118     | 2,785714286     |
| SPDL1                                                                                               | 0,008145887 | 0,082012618 | 0,098 | 0,028 | 1           | 1,058493653   | 0,944738778     | 3,5             |
| GPR39                                                                                               | 0,000183568 | 0,081965974 | 0,049 | 0     | 1           | 1,058459431   | 0,944769323     | #DIV/0!         |
| ACSL3                                                                                               | 0,004152316 | 0,08187636  | 0,329 | 0,154 | 1           | 1,058393686   | 0,94482801      | 2,136363636     |
| PDPK1                                                                                               | 0,002668862 | 0,0817809   | 0,195 | 0,074 | 1           | 1,058323657   | 0,944890529     | 2,635135135     |
| AP4S1                                                                                               | 0,040095269 | 0,081776165 | 0,073 | 0,025 | 1           | 1,058320183   | 0,94489363      | 2,92            |
| EML1                                                                                                | 6,01472E-05 | 0,081737379 | 0,171 | 0,039 | 1           | 1,058291731   | 0,944919034     | 4,384615385     |
| DZIP1L                                                                                              | 0,010071401 | 0,081714763 | 0,073 | 0,018 | 1           | 1,058275141   | 0,944933847     | 4,055555556     |
| GATD3A                                                                                              | 9,64031E-06 | 0,081671093 | 0,098 | 0,007 | 0,20342014  | 1,058243108   | 0,94496245      | 14              |
| PUF60                                                                                               | 0,001723599 | 0,081594219 | 0,585 | 0,295 | 1           | 1,058186721   | 0,945012803     | 1,983050847     |
| ARSI                                                                                                | 4,72873E-05 | 0,081585291 | 0,11  | 0,014 | 0,997809544 | 1,058180173   | 0,945018651     | 7,857142857     |
| ZKSCAN4                                                                                             | 2,80682E-05 | 0,081547507 | 0,061 | 0     | 0,592266086 | 1,058152459   | 0,945043402     | #DIV/0!         |
| NSUN5                                                                                               | 9,07324E-05 | 0,081538191 | 0,159 | 0,035 | 1           | 1,058145627   | 0,945049504     | 4,542857143     |
| GM2A                                                                                                | 0,001194179 | 0,081476558 | 0,146 | 0,042 | 1           | 1,058100422   | 0,945089879     | 3,476190476     |
| GATC                                                                                                | 2,51588E-05 | 0,0814403   | 0,134 | 0,021 | 0,530876209 | 1,05807383    | 0,945113631     | 6,380952381     |
| KLHDC10                                                                                             | 0,000749037 | 0,081436033 | 0,244 | 0,091 | 1           | 1,058070701   | 0,945116426     | 2,681318681     |
| CIRBP                                                                                               | 0,107517407 | 0,081433256 | 0,902 | 0,656 | 1           | 1,058068664   | 0,945118246     | 1,375           |
| UMAD1                                                                                               | 0,000336119 | 0,08141429  | 0,122 | 0,025 | 1           | 1,058054755   | 0,94513067      | 4,88            |
| MICAL3                                                                                              | 0,003951254 | 0,081408337 | 0,329 | 0,158 | 1           | 1,05805039    | 0,94513457      | 2,082278481     |
| NDUFAF1                                                                                             | 5,68952E-05 | 0,081372518 | 0,146 | 0,028 | 1           | 1,058024121   | 0,945158036     | 5,214285714     |
| TAOK3                                                                                               | 0,000179872 | 0,0813141   | 0,354 | 0,14  | 1           | 1,057981279   | 0,945196309     | 2,528571429     |
| SEMA6A                                                                                              | 0,000124579 | 0,081287248 | 0,146 | 0,032 | 1           | 1,057961588   | 0,945213901     | 4,5625          |

Supplementary Table 2

| Differentially expressed genes_keloid-XL_comparing SC-Keloid vs. (SC-Myel, SC-Nonmyel, SC-Nonmyel2) |             |             |       |       |             |               |                 |                 |
|-----------------------------------------------------------------------------------------------------|-------------|-------------|-------|-------|-------------|---------------|-----------------|-----------------|
| gene                                                                                                | p_val       | avg_log2FC  | pct.1 | pct.2 | p_val_adj   | Foldchange_UP | Foldchange_DOWN | Ratio_pct1_pct2 |
| RAD18                                                                                               | 0,346572919 | 0,081273407 | 0,049 | 0,028 | 1           | 1,057951438   | 0,945222969     | 1,75            |
| RRM2B                                                                                               | 0,015078158 | 0,081240693 | 0,146 | 0,06  | 1           | 1,057927449   | 0,945244403     | 2,433333333     |
| PEX7                                                                                                | 0,000742666 | 0,081234895 | 0,098 | 0,018 | 1           | 1,057923197   | 0,945248202     | 5,444444444     |
| AP1AR                                                                                               | 0,009423296 | 0,081184854 | 0,171 | 0,07  | 1           | 1,057886503   | 0,945280989     | 2,442857143     |
| DNAAF3                                                                                              | 0,000183568 | 0,081181805 | 0,049 | 0     | 1           | 1,057884267   | 0,945282987     | #DIV/0!         |
| NXT2                                                                                                | 0,000157878 | 0,081043717 | 0,11  | 0,018 | 1           | 1,057783016   | 0,945373469     | 6,111111111     |
| GPR180                                                                                              | 0,000839209 | 0,081030087 | 0,134 | 0,035 | 1           | 1,057773023   | 0,945382401     | 3,828571429     |
| INTS7                                                                                               | 4,65444E-05 | 0,080962033 | 0,11  | 0,014 | 0,9821336   | 1,057723127   | 0,945426997     | 7,857142857     |
| ABCB6                                                                                               | 0,001713147 | 0,080891827 | 0,061 | 0,007 | 1           | 1,057671657   | 0,945473005     | 8,714285714     |
| DYNC2LI1                                                                                            | 1,48158E-05 | 0,080726923 | 0,159 | 0,028 | 0,312628803 | 1,057550769   | 0,945581082     | 5,678571429     |
| BMS1                                                                                                | 3,1659E-06  | 0,080649862 | 0,28  | 0,074 | 0,06680361  | 1,057494282   | 0,945631591     | 3,783783784     |
| EIF2AK2                                                                                             | 1,97578E-07 | 0,080600395 | 0,378 | 0,105 | 0,004169088 | 1,057458023   | 0,945664015     | 3,6             |
| GUF1                                                                                                | 1,91355E-06 | 0,080578177 | 0,134 | 0,014 | 0,0403779   | 1,057441738   | 0,945678579     | 9,571428571     |
| JPT1                                                                                                | 6,47486E-06 | 0,080570543 | 0,268 | 0,074 | 0,136625959 | 1,057436142   | 0,945683583     | 3,621621622     |
| NVL                                                                                                 | 8,26419E-06 | 0,080556011 | 0,171 | 0,032 | 0,174382754 | 1,057425491   | 0,945693108     | 5,34375         |
| RET                                                                                                 | 0,063203483 | 0,080469133 | 0,012 | 0     | 1           | 1,057361815   | 0,94575006      | #DIV/0!         |
| AMOT                                                                                                | 0,107332601 | 0,080399549 | 0,061 | 0,025 | 1           | 1,057310818   | 0,945795676     | 2,44            |
| LYPLA2                                                                                              | 5,72295E-05 | 0,080269915 | 0,195 | 0,049 | 1           | 1,057215817   | 0,945880665     | 3,979591837     |
| ZNF511                                                                                              | 1,26621E-05 | 0,080251184 | 0,232 | 0,06  | 0,267183289 | 1,057202091   | 0,945892946     | 3,866666667     |
| CD6                                                                                                 | 0,000183568 | 0,080226535 | 0,049 | 0     | 1           | 1,057184029   | 0,945909107     | #DIV/0!         |
| TPBG                                                                                                | 0,009031726 | 0,080218909 | 0,049 | 0,007 | 1           | 1,05717844    | 0,945914107     | 7               |
| LIPA                                                                                                | 7,35158E-05 | 0,080216533 | 0,256 | 0,081 | 1           | 1,057176699   | 0,945915664     | 3,160493827     |
| DCUN1D1                                                                                             | 0,001047006 | 0,080198281 | 0,268 | 0,105 | 1           | 1,057163325   | 0,945927631     | 2,552380952     |
| MPI                                                                                                 | 0,000160149 | 0,080191123 | 0,11  | 0,018 | 1           | 1,05715808    | 0,945932325     | 6,111111111     |
| SNUPN                                                                                               | 0,002401544 | 0,080167668 | 0,183 | 0,067 | 1           | 1,057140893   | 0,945947704     | 2,731343284     |
| DCUN1D2                                                                                             | 0,006431528 | 0,080149737 | 0,061 | 0,011 | 1           | 1,057127754   | 0,94595946      | 5,545454545     |
| XRN2                                                                                                | 0,004264256 | 0,080139718 | 0,341 | 0,165 | 1           | 1,057120412   | 0,94596603      | 2,066666667     |
| NEIL2                                                                                               | 0,001772311 | 0,080129911 | 0,061 | 0,007 | 1           | 1,057113227   | 0,94597246      | 8,714285714     |
| PPFIA1                                                                                              | 2,70394E-05 | 0,080127997 | 0,366 | 0,13  | 0,570557601 | 1,057111824   | 0,945973716     | 2,815384615     |
| CCDC57                                                                                              | 0,005992082 | 0,080107756 | 0,122 | 0,039 | 1           | 1,057096993   | 0,945986988     | 3,128205128     |

Supplementary Table 2

| Differentially expressed genes_keloid-XL_comparing SC-Keloid vs. (SC-Myel, SC-Nonmyel, SC-Nonmyel2) |             |             |       |       |              |               |                 |                 |
|-----------------------------------------------------------------------------------------------------|-------------|-------------|-------|-------|--------------|---------------|-----------------|-----------------|
| gene                                                                                                | p_val       | avg_log2FC  | pct.1 | pct.2 | p_val_adj    | Foldchange_UP | Foldchange_DOWN | Ratio_pct1_pct2 |
| HERPUD2                                                                                             | 1,95737E-06 | 0,080078179 | 0,195 | 0,035 | 0,041302386  | 1,057075321   | 0,946006382     | 5,571428571     |
| ECRG4                                                                                               | 4,32324E-06 | 0,080074149 | 0,073 | 0     | 0,09122464   | 1,057072368   | 0,946009025     | #DIV/0!         |
| TPX2                                                                                                | 0,059519563 | 0,080036468 | 0,049 | 0,014 | 1            | 1,05704476    | 0,946033733     | 3,5             |
| TNFRSF1A                                                                                            | 6,70333E-06 | 0,079999279 | 0,415 | 0,147 | 0,1414446985 | 1,057017512   | 0,94605812      | 2,823129252     |
| TNFAIP8                                                                                             | 0,000308034 | 0,079965102 | 0,122 | 0,025 | 1            | 1,056992472   | 0,946080532     | 4,88            |
| ENTPD5                                                                                              | 0,005342271 | 0,079964639 | 0,11  | 0,032 | 1            | 1,056992133   | 0,946080835     | 3,4375          |
| TRIP6                                                                                               | 3,33782E-06 | 0,079910368 | 0,39  | 0,126 | 0,070431359  | 1,056952372   | 0,946116425     | 3,095238095     |
| KCNRG                                                                                               | 0,001220269 | 0,079908489 | 0,037 | 0     | 1            | 1,056950995   | 0,946117658     | #DIV/0!         |
| DDX39A                                                                                              | 0,000711065 | 0,079894695 | 0,341 | 0,144 | 1            | 1,05694089    | 0,946126703     | 2,368055556     |
| RNF4                                                                                                | 0,000189302 | 0,079892084 | 0,232 | 0,074 | 1            | 1,056938977   | 0,946128416     | 3,135135135     |
| SCCPDH                                                                                              | 0,000955702 | 0,079870331 | 0,659 | 0,326 | 1            | 1,05692304    | 0,946142682     | 2,021472393     |
| BEAN1                                                                                               | 0,000317802 | 0,079843234 | 0,061 | 0,004 | 1            | 1,056903189   | 0,946160453     | 15,25           |
| MINDY3                                                                                              | 7,13605E-06 | 0,079839811 | 0,183 | 0,035 | 0,150577744  | 1,056900681   | 0,946162698     | 5,228571429     |
| STK25                                                                                               | 2,31592E-07 | 0,079795549 | 0,354 | 0,095 | 0,004886813  | 1,056868256   | 0,946191726     | 3,726315789     |
| FAM118B                                                                                             | 1,36355E-06 | 0,079783638 | 0,159 | 0,021 | 0,028772289  | 1,05685953    | 0,946199539     | 7,571428571     |
| TOR4A                                                                                               | 2,80682E-05 | 0,079753708 | 0,061 | 0     | 0,592266086  | 1,056837605   | 0,946219168     | #DIV/0!         |
| NAP1L5                                                                                              | 0,00140181  | 0,079747227 | 0,073 | 0,011 | 1            | 1,056832858   | 0,946223419     | 6,636363636     |
| PRRC1                                                                                               | 0,000190951 | 0,079668961 | 0,232 | 0,074 | 1            | 1,056775526   | 0,946274753     | 3,135135135     |
| USP35                                                                                               | 0,060793535 | 0,079661361 | 0,049 | 0,014 | 1            | 1,056769959   | 0,946279738     | 3,5             |
| NCKAP5L                                                                                             | 8,8541E-05  | 0,079642824 | 0,183 | 0,046 | 1            | 1,056756381   | 0,946291896     | 3,97826087      |
| DIP2A                                                                                               | 0,004375273 | 0,079639466 | 0,28  | 0,13  | 1            | 1,056753921   | 0,946294099     | 2,153846154     |
| POU5F2                                                                                              | 0,009102897 | 0,079494947 | 0,049 | 0,007 | 1            | 1,056648068   | 0,946388897     | 7               |
| FAM229B                                                                                             | 0,00035282  | 0,079453714 | 0,244 | 0,084 | 1            | 1,056617869   | 0,946415946     | 2,904761905     |
| RNFT1                                                                                               | 5,69725E-05 | 0,079371335 | 0,098 | 0,011 | 1            | 1,056557537   | 0,946469988     | 8,909090909     |
| STX2                                                                                                | 0,000367621 | 0,079316928 | 0,354 | 0,144 | 1            | 1,056517693   | 0,946505682     | 2,458333333     |
| SLC66A1                                                                                             | 0,002983177 | 0,079310979 | 0,085 | 0,018 | 1            | 1,056513337   | 0,946509585     | 4,722222222     |
| CLCN6                                                                                               | 0,009413802 | 0,079285616 | 0,11  | 0,035 | 1            | 1,056494763   | 0,946526225     | 3,142857143     |
| FAHD2B                                                                                              | 0,00140181  | 0,079244406 | 0,073 | 0,011 | 1            | 1,056464585   | 0,946553263     | 6,636363636     |
| HRCT1                                                                                               | 8,66134E-06 | 0,079213517 | 0,085 | 0,004 | 0,1827629    | 1,056441966   | 0,946573529     | 21,25           |
| DRAM2                                                                                               | 1,77191E-05 | 0,079181982 | 0,244 | 0,067 | 0,373891544  | 1,056418874   | 0,94659422      | 3,641791045     |

Supplementary Table 2

| Differentially expressed genes_keloid-XL_comparing SC-Keloid vs. (SC-Myel, SC-Nonmyel, SC-Nonmyel2) |             |             |       |       |             |               |                 |                 |
|-----------------------------------------------------------------------------------------------------|-------------|-------------|-------|-------|-------------|---------------|-----------------|-----------------|
| gene                                                                                                | p_val       | avg_log2FC  | pct.1 | pct.2 | p_val_adj   | Foldchange_UP | Foldchange_DOWN | Ratio_pct1_pct2 |
| NELFCD                                                                                              | 1,45285E-05 | 0,079167962 | 0,329 | 0,109 | 0,3065655   | 1,056408608   | 0,946603419     | 3,018348624     |
| ZNF627                                                                                              | 0,00032444  | 0,07914894  | 0,061 | 0,004 | 1           | 1,056394679   | 0,9466159       | 15,25           |
| PPP2CB                                                                                              | 0,014076621 | 0,07911044  | 0,683 | 0,414 | 1           | 1,056366488   | 0,946641162     | 1,649758454     |
| COMMD8                                                                                              | 7,83921E-08 | 0,078991013 | 0,256 | 0,049 | 0,001654152 | 1,056279045   | 0,946719529     | 5,224489796     |
| LEKR1                                                                                               | 0,008401736 | 0,078942628 | 0,024 | 0     | 1           | 1,05624362    | 0,94675128      | #DIV/0!         |
| TBC1D13                                                                                             | 0,004147695 | 0,078846596 | 0,098 | 0,025 | 1           | 1,056173315   | 0,946814302     | 3,92            |
| SLX1A                                                                                               | 0,001952737 | 0,078832034 | 0,049 | 0,004 | 1           | 1,056162654   | 0,946823859     | 12,25           |
| RAPGEF6                                                                                             | 0,004750396 | 0,078805159 | 0,22  | 0,091 | 1           | 1,05614298    | 0,946841497     | 2,417582418     |
| PRKD2                                                                                               | 7,24402E-06 | 0,078737872 | 0,207 | 0,046 | 0,152856065 | 1,056093723   | 0,946885658     | 4,5             |
| PHACTR2                                                                                             | 0,018791522 | 0,078737845 | 0,183 | 0,084 | 1           | 1,056093703   | 0,946885676     | 2,178571429     |
| UNC13B                                                                                              | 0,001003155 | 0,078736296 | 0,134 | 0,035 | 1           | 1,056092569   | 0,946886693     | 3,828571429     |
| RPS13                                                                                               | 0,16109071  | 0,078657872 | 0,963 | 0,898 | 1           | 1,056035162   | 0,946938166     | 1,072383073     |
| RCBTB2                                                                                              | 0,065834577 | 0,07862391  | 0,061 | 0,021 | 1           | 1,056010303   | 0,946960458     | 2,904761905     |
| TARBP2                                                                                              | 5,79485E-05 | 0,078535985 | 0,098 | 0,011 | 1           | 1,055945946   | 0,947018173     | 8,909090909     |
| AGBL4                                                                                               | 0,001220269 | 0,078512859 | 0,037 | 0     | 1           | 1,05592902    | 0,947033353     | #DIV/0!         |
| FANCC                                                                                               | 0,001833348 | 0,078443312 | 0,061 | 0,007 | 1           | 1,055878119   | 0,947079007     | 8,714285714     |
| ST7L                                                                                                | 0,023657379 | 0,078416202 | 0,134 | 0,056 | 1           | 1,055858278   | 0,947096804     | 2,392857143     |
| NAPEPLD                                                                                             | 0,000276176 | 0,078308253 | 0,171 | 0,046 | 1           | 1,055779276   | 0,947167673     | 3,717391304     |
| EDEM2                                                                                               | 0,000182598 | 0,078270261 | 0,159 | 0,039 | 1           | 1,055751473   | 0,947192616     | 4,076923077     |
| LIAS                                                                                                | 0,006067769 | 0,078175387 | 0,134 | 0,046 | 1           | 1,055682048   | 0,947254906     | 2,913043478     |
| KIF4A                                                                                               | 0,064667995 | 0,078166336 | 0,061 | 0,021 | 1           | 1,055675425   | 0,947260849     | 2,904761905     |
| IFIT5                                                                                               | 0,100834226 | 0,078124689 | 0,073 | 0,032 | 1           | 1,055644951   | 0,947288195     | 2,28125         |
| ZNF611                                                                                              | 0,001914332 | 0,078124641 | 0,049 | 0,004 | 1           | 1,055644915   | 0,947288227     | 12,25           |
| GINS3                                                                                               | 4,17072E-05 | 0,078076542 | 0,207 | 0,053 | 0,880063939 | 1,055609721   | 0,947319809     | 3,905660377     |
| SPATA2L                                                                                             | 9,91418E-06 | 0,078057957 | 0,122 | 0,014 | 0,209199094 | 1,055596123   | 0,947332013     | 8,714285714     |
| INTS9                                                                                               | 0,008401736 | 0,078050991 | 0,024 | 0     | 1           | 1,055591026   | 0,947336587     | #DIV/0!         |
| BIRC5                                                                                               | 0,001914332 | 0,078035576 | 0,049 | 0,004 | 1           | 1,055579748   | 0,947346709     | 12,25           |
| AC007952.4                                                                                          | 0,002474156 | 0,077990644 | 0,207 | 0,081 | 1           | 1,055546873   | 0,947376214     | 2,555555556     |
| PLEKHS1                                                                                             | 0,000338108 | 0,077972706 | 0,073 | 0,007 | 1           | 1,055533748   | 0,947387994     | 10,42857143     |
| AC002454.1                                                                                          | 2,80682E-05 | 0,077917977 | 0,061 | 0     | 0,592266086 | 1,055493707   | 0,947423934     | #DIV/0!         |

Supplementary Table 2

| Differentially expressed genes_keloid-XL_comparing SC-Keloid vs. (SC-Myel, SC-Nonmyel, SC-Nonmyel2) |             |             |       |       |             |               |                 |                 |
|-----------------------------------------------------------------------------------------------------|-------------|-------------|-------|-------|-------------|---------------|-----------------|-----------------|
| gene                                                                                                | p_val       | avg_log2FC  | pct.1 | pct.2 | p_val_adj   | Foldchange_UP | Foldchange_DOWN | Ratio_pct1_pct2 |
| TXNRD2                                                                                              | 0,007277368 | 0,077895415 | 0,159 | 0,06  | 1           | 1,0554772     | 0,947438751     | 2,65            |
| ACTR8                                                                                               | 0,000201519 | 0,077884953 | 0,098 | 0,014 | 1           | 1,055469546   | 0,947445621     | 7               |
| CFAP20DC                                                                                            | 4,32324E-06 | 0,077795993 | 0,073 | 0     | 0,09122464  | 1,055404466   | 0,947504044     | #DIV/0!         |
| PGM2                                                                                                | 0,000988848 | 0,077782707 | 0,11  | 0,025 | 1           | 1,055394746   | 0,94751277      | 4,4             |
| PYCR2                                                                                               | 0,000143162 | 0,077765196 | 0,329 | 0,126 | 1           | 1,055381937   | 0,947524271     | 2,611111111     |
| CAMKMT                                                                                              | 0,024538047 | 0,077755896 | 0,085 | 0,028 | 1           | 1,055375133   | 0,947530379     | 3,035714286     |
| EFHB                                                                                                | 0,063203483 | 0,077730952 | 0,012 | 0     | 1           | 1,055356886   | 0,947546762     | #DIV/0!         |
| KEL                                                                                                 | 0,063203483 | 0,077730952 | 0,012 | 0     | 1           | 1,055356886   | 0,947546762     | #DIV/0!         |
| LGALS2                                                                                              | 0,063203483 | 0,077730952 | 0,012 | 0     | 1           | 1,055356886   | 0,947546762     | #DIV/0!         |
| STAB1                                                                                               | 0,063203483 | 0,077730952 | 0,012 | 0     | 1           | 1,055356886   | 0,947546762     | #DIV/0!         |
| UBQLNL                                                                                              | 0,063203483 | 0,077730952 | 0,012 | 0     | 1           | 1,055356886   | 0,947546762     | #DIV/0!         |
| ZFP82                                                                                               | 0,063203483 | 0,077730952 | 0,012 | 0     | 1           | 1,055356886   | 0,947546762     | #DIV/0!         |
| GBF1                                                                                                | 1,18313E-05 | 0,077726898 | 0,195 | 0,042 | 0,249652213 | 1,055353921   | 0,947549424     | 4,642857143     |
| UBB                                                                                                 | 3,62718E-10 | 0,077690997 | 0,854 | 0,4   | 7,65371E-06 | 1,055327658   | 0,947573005     | 2,135           |
| CBX2                                                                                                | 0,05889129  | 0,077667811 | 0,049 | 0,014 | 1           | 1,055310698   | 0,947588233     | 3,5             |
| DHX33                                                                                               | 0,002095478 | 0,077508163 | 0,134 | 0,039 | 1           | 1,055193924   | 0,947693099     | 3,435897436     |
| PDCD10                                                                                              | 0,000753737 | 0,077466405 | 0,415 | 0,182 | 1           | 1,055163383   | 0,947720529     | 2,28021978      |
| AMH                                                                                                 | 0,010921605 | 0,077337814 | 0,037 | 0,004 | 1           | 1,055069338   | 0,947805006     | 9,25            |
| STT3A                                                                                               | 0,000118625 | 0,077295316 | 0,195 | 0,053 | 1           | 1,055038259   | 0,947832926     | 3,679245283     |
| GLI3                                                                                                | 0,000790232 | 0,07728549  | 0,439 | 0,2   | 1           | 1,055031073   | 0,947839382     | 2,195           |
| FOXC2                                                                                               | 0,00140181  | 0,077214616 | 0,073 | 0,011 | 1           | 1,054979244   | 0,947885947     | 6,636363636     |
| NFU1                                                                                                | 2,2882E-05  | 0,077209258 | 0,341 | 0,112 | 0,482833656 | 1,054975327   | 0,947889467     | 3,044642857     |
| SLC25A35                                                                                            | 0,059519805 | 0,077177486 | 0,049 | 0,014 | 1           | 1,054952094   | 0,947910342     | 3,5             |
| SMG6                                                                                                | 0,02622152  | 0,077134693 | 0,183 | 0,088 | 1           | 1,054920802   | 0,94793846      | 2,079545455     |
| FZR1                                                                                                | 0,001557671 | 0,077132351 | 0,171 | 0,056 | 1           | 1,054919089   | 0,947939999     | 3,053571429     |
| SLC31A2                                                                                             | 1,00787E-05 | 0,077052926 | 0,122 | 0,014 | 0,212671388 | 1,054861014   | 0,947992187     | 8,714285714     |
| ULK4                                                                                                | 0,000332109 | 0,077045337 | 0,073 | 0,007 | 1           | 1,054855465   | 0,947997174     | 10,42857143     |
| MCM2                                                                                                | 0,183494953 | 0,077025727 | 0,024 | 0,007 | 1           | 1,054841128   | 0,948010059     | 3,428571429     |
| MCM4                                                                                                | 0,006556321 | 0,077000502 | 0,085 | 0,021 | 1           | 1,054822684   | 0,948026635     | 4,047619048     |
| DCAF7                                                                                               | 0,005194404 | 0,076980579 | 0,28  | 0,13  | 1           | 1,054808117   | 0,948039727     | 2,153846154     |

Supplementary Table 2

| Differentially expressed genes_keloid-XL_comparing SC-Keloid vs. (SC-Myel, SC-Nonmyel, SC-Nonmyel2) |             |             |       |       |             |               |                 |                 |
|-----------------------------------------------------------------------------------------------------|-------------|-------------|-------|-------|-------------|---------------|-----------------|-----------------|
| gene                                                                                                | p_val       | avg_log2FC  | pct.1 | pct.2 | p_val_adj   | Foldchange_UP | Foldchange_DOWN | Ratio_pct1_pct2 |
| LSS                                                                                                 | 0,003269243 | 0,076878078 | 0,134 | 0,042 | 1           | 1,054733178   | 0,948107086     | 3,19047619      |
| CCNB2                                                                                               | 0,065143806 | 0,076873227 | 0,024 | 0,004 | 1           | 1,054729632   | 0,948110274     | 6               |
| ELMOD1                                                                                              | 0,001220269 | 0,076790454 | 0,037 | 0     | 1           | 1,054669119   | 0,948164672     | #DIV/0!         |
| SRRM3                                                                                               | 0,008401736 | 0,076771039 | 0,024 | 0     | 1           | 1,054654926   | 0,948177433     | #DIV/0!         |
| NKAP                                                                                                | 0,000777309 | 0,076691501 | 0,232 | 0,084 | 1           | 1,054596783   | 0,948229708     | 2,761904762     |
| LZTFL1                                                                                              | 0,000445012 | 0,076688079 | 0,134 | 0,032 | 1           | 1,054594281   | 0,948231958     | 4,1875          |
| GNG11                                                                                               | 3,69832E-08 | 0,076627377 | 0,598 | 0,2   | 0,000780383 | 1,05454991    | 0,948271855     | 2,99            |
| TEX9                                                                                                | 0,00140181  | 0,076545573 | 0,073 | 0,011 | 1           | 1,054490116   | 0,948325627     | 6,636363636     |
| BBOF1                                                                                               | 0,00047996  | 0,07653513  | 0,11  | 0,021 | 1           | 1,054482484   | 0,948332491     | 5,238095238     |
| BPNT1                                                                                               | 0,001236845 | 0,07653109  | 0,11  | 0,025 | 1           | 1,05447953    | 0,948335147     | 4,4             |
| ZFP62                                                                                               | 0,002640395 | 0,07650774  | 0,11  | 0,028 | 1           | 1,054462464   | 0,948350495     | 3,928571429     |
| INTS3                                                                                               | 0,004480116 | 0,076492281 | 0,232 | 0,098 | 1           | 1,054451165   | 0,948360657     | 2,367346939     |
| TIGAR                                                                                               | 0,000292988 | 0,076447285 | 0,122 | 0,025 | 1           | 1,054418278   | 0,948390236     | 4,88            |
| ARHGEF40                                                                                            | 0,000928531 | 0,076445335 | 0,5   | 0,235 | 1           | 1,054416853   | 0,948391518     | 2,127659574     |
| PRPF8                                                                                               | 0,000433914 | 0,076443813 | 0,366 | 0,154 | 1           | 1,054415741   | 0,948392518     | 2,376623377     |
| CAPN1                                                                                               | 3,75508E-05 | 0,076433686 | 0,415 | 0,158 | 0,792359671 | 1,05440834    | 0,948399175     | 2,626582278     |
| BRMS1L                                                                                              | 0,00031979  | 0,076401105 | 0,122 | 0,025 | 1           | 1,054384528   | 0,948420594     | 4,88            |
| TMEM184C                                                                                            | 0,041519021 | 0,07637243  | 0,085 | 0,032 | 1           | 1,054363571   | 0,948439445     | 2,65625         |
| FSD1                                                                                                | 6,13057E-05 | 0,07633643  | 0,085 | 0,007 | 1           | 1,054337262   | 0,948463112     | 12,14285714     |
| CCDC186                                                                                             | 0,020615501 | 0,07630044  | 0,22  | 0,109 | 1           | 1,05431096    | 0,948486773     | 2,018348624     |
| DEGS1                                                                                               | 0,003397095 | 0,076298206 | 0,537 | 0,274 | 1           | 1,054309327   | 0,948488242     | 1,959854015     |
| DHRS7B                                                                                              | 4,13314E-05 | 0,076180579 | 0,183 | 0,042 | 0,872133784 | 1,05422337    | 0,948565578     | 4,357142857     |
| RHBDD3                                                                                              | 0,000685139 | 0,076172099 | 0,098 | 0,018 | 1           | 1,054217173   | 0,948571154     | 5,444444444     |
| RAB30-DT                                                                                            | 0,000504006 | 0,076135103 | 0,171 | 0,049 | 1           | 1,054190139   | 0,948595479     | 3,489795918     |
| SMIM10                                                                                              | 0,000354997 | 0,076129502 | 0,183 | 0,053 | 1           | 1,054186047   | 0,948599161     | 3,452830189     |
| NCAPD2                                                                                              | 0,000197116 | 0,076075469 | 0,134 | 0,028 | 1           | 1,054146566   | 0,948634689     | 4,785714286     |
| FGF5                                                                                                | 0,000183568 | 0,075956209 | 0,049 | 0     | 1           | 1,054059428   | 0,948713112     | #DIV/0!         |
| EDRF1                                                                                               | 0,036803449 | 0,075759821 | 0,061 | 0,018 | 1           | 1,053915953   | 0,948842265     | 3,388888889     |
| MTRF1                                                                                               | 0,065249136 | 0,075747673 | 0,061 | 0,021 | 1           | 1,053907079   | 0,948850254     | 2,904761905     |
| GLB1                                                                                                | 8,58922E-07 | 0,075697844 | 0,22  | 0,042 | 0,018124104 | 1,053870679   | 0,948883027     | 5,238095238     |



Supplementary Table 2

| Differentially expressed genes_keloid-XL_comparing SC-Keloid vs. (SC-Myel, SC-Nonmyel, SC-Nonmyel2) |             |             |       |       |             |               |                 |                 |
|-----------------------------------------------------------------------------------------------------|-------------|-------------|-------|-------|-------------|---------------|-----------------|-----------------|
| gene                                                                                                | p_val       | avg_log2FC  | pct.1 | pct.2 | p_val_adj   | Foldchange_UP | Foldchange_DOWN | Ratio_pct1_pct2 |
| NSUN2                                                                                               | 0,000770218 | 0,075684483 | 0,122 | 0,028 | 1           | 1,053860919   | 0,948891815     | 4,357142857     |
| SLC25A23                                                                                            | 9,91418E-06 | 0,075648424 | 0,122 | 0,014 | 0,209199094 | 1,053834579   | 0,948915532     | 8,714285714     |
| ALDH3B1                                                                                             | 0,000744212 | 0,075645478 | 0,122 | 0,028 | 1           | 1,053832427   | 0,948917469     | 4,357142857     |
| IFI35                                                                                               | 0,000635621 | 0,075627955 | 0,195 | 0,063 | 1           | 1,053819627   | 0,948928995     | 3,095238095     |
| CLPB                                                                                                | 0,065834577 | 0,07560988  | 0,061 | 0,021 | 1           | 1,053806425   | 0,948940884     | 2,904761905     |
| FZD6                                                                                                | 0,000204598 | 0,075557919 | 0,098 | 0,014 | 1           | 1,053768471   | 0,948975062     | 7               |
| ZNF407-AS1                                                                                          | 0,003268385 | 0,075547813 | 0,122 | 0,035 | 1           | 1,053761089   | 0,94898171      | 3,485714286     |
| POLR1E                                                                                              | 7,68227E-07 | 0,075444679 | 0,183 | 0,028 | 0,016210348 | 1,053685761   | 0,949049552     | 6,535714286     |
| ZNF721                                                                                              | 0,16838416  | 0,075415669 | 0,134 | 0,081 | 1           | 1,053664574   | 0,949068636     | 1,654320988     |
| HAT1                                                                                                | 0,001091792 | 0,075366474 | 0,305 | 0,13  | 1           | 1,053628646   | 0,949100999     | 2,346153846     |
| SELENOO                                                                                             | 0,000932352 | 0,075323878 | 0,134 | 0,035 | 1           | 1,053597537   | 0,949129022     | 3,828571429     |
| ZNF69                                                                                               | 0,000183568 | 0,075310036 | 0,049 | 0     | 1           | 1,053587429   | 0,949138128     | #DIV/0!         |
| TRPM4                                                                                               | 0,004255004 | 0,075297292 | 0,073 | 0,014 | 1           | 1,053578121   | 0,949146513     | 5,214285714     |
| SH2B1                                                                                               | 0,005482257 | 0,075265256 | 0,22  | 0,095 | 1           | 1,053554727   | 0,949167589     | 2,315789474     |
| ATF1                                                                                                | 0,002949192 | 0,075209992 | 0,207 | 0,081 | 1           | 1,05351437    | 0,949203949     | 2,555555556     |
| ADGRE2                                                                                              | 2,80682E-05 | 0,075207706 | 0,061 | 0     | 0,592266086 | 1,0535127     | 0,949205453     | #DIV/0!         |
| DOCK7                                                                                               | 0,001315659 | 0,07511636  | 0,354 | 0,161 | 1           | 1,053445998   | 0,949265555     | 2,198757764     |
| WDR3                                                                                                | 0,000217361 | 0,075048092 | 0,098 | 0,014 | 1           | 1,05339615    | 0,949310476     | 7               |
| BBS1                                                                                                | 0,111964825 | 0,075015922 | 0,049 | 0,018 | 1           | 1,053372661   | 0,949331644     | 2,722222222     |
| ZNF548                                                                                              | 0,016463985 | 0,074987408 | 0,061 | 0,014 | 1           | 1,053351842   | 0,949350407     | 4,357142857     |
| SEC23IP                                                                                             | 0,002296533 | 0,074974517 | 0,11  | 0,028 | 1           | 1,05334243    | 0,94935889      | 3,928571429     |
| PI4K2B                                                                                              | 0,00095592  | 0,074947643 | 0,085 | 0,014 | 1           | 1,053322809   | 0,949376574     | 6,071428571     |
| CBR4                                                                                                | 0,003102112 | 0,074927289 | 0,171 | 0,06  | 1           | 1,053307949   | 0,949389968     | 2,85            |
| ATR                                                                                                 | 0,000713367 | 0,074894318 | 0,098 | 0,018 | 1           | 1,053283877   | 0,949411666     | 5,444444444     |
| AP2A2                                                                                               | 2,16516E-06 | 0,0748195   | 0,354 | 0,109 | 0,045686941 | 1,053229255   | 0,949460903     | 3,247706422     |
| OXCT1                                                                                               | 0,016651717 | 0,074793006 | 0,122 | 0,046 | 1           | 1,053209913   | 0,94947834      | 2,652173913     |
| ATP6V1D                                                                                             | 2,63989E-05 | 0,074739981 | 0,39  | 0,14  | 0,557043007 | 1,053171204   | 0,949513238     | 2,785714286     |
| ST8SIA4                                                                                             | 0,000183568 | 0,074707357 | 0,049 | 0     | 1           | 1,053147389   | 0,949534709     | #DIV/0!         |
| BCS1L                                                                                               | 0,000199533 | 0,074682037 | 0,134 | 0,028 | 1           | 1,053128906   | 0,949551374     | 4,785714286     |
| HSD17B4                                                                                             | 6,64597E-05 | 0,074665246 | 0,293 | 0,098 | 1           | 1,053116649   | 0,949562426     | 2,989795918     |

Supplementary Table 2

| Differentially expressed genes_keloid-XL_comparing SC-Keloid vs. (SC-Myel, SC-Nonmyel, SC-Nonmyel2) |             |             |       |       |             |               |                 |                 |
|-----------------------------------------------------------------------------------------------------|-------------|-------------|-------|-------|-------------|---------------|-----------------|-----------------|
| gene                                                                                                | p_val       | avg_log2FC  | pct.1 | pct.2 | p_val_adj   | Foldchange_UP | Foldchange_DOWN | Ratio_pct1_pct2 |
| HS1BP3                                                                                              | 9,44252E-07 | 0,074548265 | 0,207 | 0,039 | 0,019924668 | 1,05303126    | 0,949639425     | 5,307692308     |
| HOXC5                                                                                               | 0,001898897 | 0,074522259 | 0,098 | 0,021 | 1           | 1,053012278   | 0,949656543     | 4,666666667     |
| SFT2D3                                                                                              | 2,04211E-06 | 0,074508895 | 0,122 | 0,011 | 0,043090571 | 1,053002524   | 0,94966534      | 11,09090909     |
| ZNF81                                                                                               | 0,000997638 | 0,074506894 | 0,085 | 0,014 | 1           | 1,053001064   | 0,949666657     | 6,071428571     |
| NF2                                                                                                 | 0,000905476 | 0,074495626 | 0,159 | 0,046 | 1           | 1,05299284    | 0,949674074     | 3,456521739     |
| PIM1                                                                                                | 0,035683499 | 0,074491653 | 0,134 | 0,06  | 1           | 1,05298994    | 0,949676689     | 2,233333333     |
| SRBD1                                                                                               | 0,00405833  | 0,074441489 | 0,098 | 0,025 | 1           | 1,052953327   | 0,949709711     | 3,92            |
| YTHDF3-DT                                                                                           | 2,07968E-06 | 0,07439743  | 0,122 | 0,011 | 0,043883378 | 1,052921171   | 0,949738715     | 11,09090909     |
| PEDS1                                                                                               | 4,12502E-05 | 0,074355609 | 0,293 | 0,095 | 0,870421401 | 1,052890649   | 0,949766247     | 3,084210526     |
| AKR7A2                                                                                              | 2,55312E-06 | 0,074296716 | 0,305 | 0,084 | 0,05387347  | 1,052847669   | 0,949805019     | 3,630952381     |
| TRAM1L1                                                                                             | 0,000338108 | 0,074274604 | 0,073 | 0,007 | 1           | 1,052831533   | 0,949819576     | 10,42857143     |
| RBM42                                                                                               | 0,000351959 | 0,074263106 | 0,415 | 0,182 | 1           | 1,052823142   | 0,949827146     | 2,28021978      |
| ZNF414                                                                                              | 3,21999E-05 | 0,074189613 | 0,183 | 0,042 | 0,679450306 | 1,052769511   | 0,949875533     | 4,357142857     |
| SLC43A1                                                                                             | 0,008401736 | 0,074140943 | 0,024 | 0     | 1           | 1,052733996   | 0,949907578     | #DIV/0!         |
| KLHL17                                                                                              | 0,000167149 | 0,074070497 | 0,11  | 0,018 | 1           | 1,052682593   | 0,949953962     | 6,111111111     |
| GCDH                                                                                                | 0,006115259 | 0,074069136 | 0,146 | 0,053 | 1           | 1,0526816     | 0,949954858     | 2,754716981     |
| MEN1                                                                                                | 0,026163616 | 0,074062207 | 0,098 | 0,035 | 1           | 1,052676544   | 0,949959421     | 2,8             |
| BRPF1                                                                                               | 0,003205568 | 0,074012735 | 0,122 | 0,035 | 1           | 1,052640446   | 0,949991997     | 3,485714286     |
| DRD2                                                                                                | 5,21474E-05 | 0,073937733 | 0,073 | 0,004 | 1           | 1,052585724   | 0,950041386     | 18,25           |
| NFYA                                                                                                | 0,485575622 | 0,073889612 | 0,061 | 0,042 | 1           | 1,052550616   | 0,950073075     | 1,452380952     |
| CFAP251                                                                                             | 0,001772311 | 0,073888168 | 0,061 | 0,007 | 1           | 1,052549562   | 0,950074026     | 8,714285714     |
| KIAA2013                                                                                            | 2,8305E-07  | 0,073853373 | 0,366 | 0,102 | 0,005972641 | 1,052524177   | 0,95009694      | 3,588235294     |
| ZNF175                                                                                              | 0,103792275 | 0,073770869 | 0,037 | 0,011 | 1           | 1,052463988   | 0,950151275     | 3,363636364     |
| C11orf1                                                                                             | 0,000624735 | 0,073756121 | 0,146 | 0,039 | 1           | 1,052453229   | 0,950160988     | 3,743589744     |
| FAM162A                                                                                             | 5,43281E-07 | 0,073694982 | 0,378 | 0,109 | 0,011463774 | 1,052408628   | 0,950201256     | 3,467889908     |
| BAG2                                                                                                | 0,000214102 | 0,073690639 | 0,098 | 0,014 | 1           | 1,052405461   | 0,950204116     | 7               |
| DSCC1                                                                                               | 0,006251893 | 0,073571313 | 0,061 | 0,011 | 1           | 1,052318419   | 0,950282711     | 5,545454545     |
| RBM18                                                                                               | 0,000133816 | 0,073568672 | 0,146 | 0,032 | 1           | 1,052316492   | 0,950284451     | 4,5625          |
| TF                                                                                                  | 0,066254792 | 0,073554499 | 0,024 | 0,004 | 1           | 1,052306154   | 0,950293786     | 6               |
| TMEM223                                                                                             | 8,68688E-08 | 0,073553405 | 0,256 | 0,049 | 0,001833018 | 1,052305357   | 0,950294507     | 5,224489796     |

Supplementary Table 2

| Differentially expressed genes_keloid-XL_comparing SC-Keloid vs. (SC-Myel, SC-Nonmyel, SC-Nonmyel2) |             |             |       |       |             |               |                 |                 |
|-----------------------------------------------------------------------------------------------------|-------------|-------------|-------|-------|-------------|---------------|-----------------|-----------------|
| gene                                                                                                | p_val       | avg_log2FC  | pct.1 | pct.2 | p_val_adj   | Foldchange_UP | Foldchange_DOWN | Ratio_pct1_pct2 |
| ZKSCAN1                                                                                             | 0,0001082   | 0,073544923 | 0,293 | 0,102 | 1           | 1,05229917    | 0,950300094     | 2,87254902      |
| POU3F2                                                                                              | 0,016274784 | 0,073516318 | 0,183 | 0,081 | 1           | 1,052278305   | 0,950318936     | 2,259259259     |
| SUPT3H                                                                                              | 1,72088E-05 | 0,07349788  | 0,183 | 0,039 | 0,363123284 | 1,052264858   | 0,950331081     | 4,692307692     |
| DNAJC18                                                                                             | 0,001194205 | 0,073410497 | 0,11  | 0,025 | 1           | 1,052201124   | 0,950388644     | 4,4             |
| PSORS1C1                                                                                            | 0,000338108 | 0,073369196 | 0,073 | 0,007 | 1           | 1,052171003   | 0,950415852     | 10,42857143     |
| CC2D2A                                                                                              | 0,014921301 | 0,07335729  | 0,098 | 0,032 | 1           | 1,05216232    | 0,950423695     | 3,0625          |
| DROSHA                                                                                              | 2,10551E-05 | 0,073349221 | 0,146 | 0,025 | 0,44428446  | 1,052156435   | 0,950429011     | 5,84            |
| BNIP3                                                                                               | 0,005276004 | 0,073205143 | 0,22  | 0,095 | 1           | 1,052051364   | 0,950523933     | 2,315789474     |
| ZNF660                                                                                              | 0,067018449 | 0,073202026 | 0,061 | 0,021 | 1           | 1,052049091   | 0,950525986     | 2,904761905     |
| DLD                                                                                                 | 1,06888E-05 | 0,073149014 | 0,22  | 0,053 | 0,225545313 | 1,052010435   | 0,950560914     | 4,150943396     |
| JAK2                                                                                                | 0,000183568 | 0,073142581 | 0,049 | 0     | 1           | 1,052005743   | 0,950565153     | #DIV/0!         |
| GPS2                                                                                                | 3,69029E-05 | 0,073131363 | 0,476 | 0,189 | 0,778688535 | 1,051997563   | 0,950572544     | 2,518518519     |
| SEL1L                                                                                               | 1,1546E-05  | 0,073124286 | 0,354 | 0,116 | 0,243632596 | 1,051992403   | 0,950577207     | 3,051724138     |
| CBWD1                                                                                               | 9,06518E-06 | 0,073079214 | 0,268 | 0,074 | 0,191284269 | 1,051959538   | 0,950606905     | 3,621621622     |
| HSPA4                                                                                               | 1,83347E-05 | 0,073005209 | 0,341 | 0,116 | 0,386880192 | 1,051905577   | 0,950655669     | 2,939655172     |
| RPUSD1                                                                                              | 0,000710805 | 0,072862484 | 0,122 | 0,028 | 1           | 1,051801518   | 0,950749722     | 4,357142857     |
| CNEP1R1                                                                                             | 0,013704854 | 0,072848636 | 0,085 | 0,025 | 1           | 1,051791422   | 0,950758847     | 3,4             |
| CYYR1                                                                                               | 0,183494953 | 0,072814515 | 0,024 | 0,007 | 1           | 1,051766547   | 0,950781334     | 3,428571429     |
| C5orf58                                                                                             | 0,008401736 | 0,072778581 | 0,024 | 0     | 1           | 1,05174035    | 0,950805016     | #DIV/0!         |
| DHDDS                                                                                               | 0,001101503 | 0,072692882 | 0,134 | 0,035 | 1           | 1,051677877   | 0,950861497     | 3,828571429     |
| NEMP2                                                                                               | 8,66134E-06 | 0,072622762 | 0,085 | 0,004 | 0,1827629   | 1,051626762   | 0,950907714     | 21,25           |
| MTHFD2L                                                                                             | 5,55011E-05 | 0,072573131 | 0,171 | 0,039 | 1           | 1,051590585   | 0,950940427     | 4,384615385     |
| TIRAP                                                                                               | 0,00032444  | 0,072510994 | 0,061 | 0,004 | 1           | 1,051545295   | 0,950981384     | 15,25           |
| CDK7                                                                                                | 0,001831458 | 0,07245849  | 0,098 | 0,021 | 1           | 1,051507026   | 0,951015995     | 4,666666667     |
| SPRING1                                                                                             | 0,000166278 | 0,07239646  | 0,22  | 0,067 | 1           | 1,051461817   | 0,951056885     | 3,28358209      |
| MCUB                                                                                                | 0,00371808  | 0,072369614 | 0,098 | 0,025 | 1           | 1,051442251   | 0,951074583     | 3,92            |
| PRCC                                                                                                | 0,000436709 | 0,072367667 | 0,28  | 0,105 | 1           | 1,051440832   | 0,951075866     | 2,666666667     |
| ENAH                                                                                                | 6,2249E-05  | 0,072334376 | 0,171 | 0,039 | 1           | 1,051416569   | 0,951097813     | 4,384615385     |
| SF3B2                                                                                               | 0,004845864 | 0,072286496 | 0,463 | 0,242 | 1           | 1,051381675   | 0,951129379     | 1,91322314      |
| C1orf50                                                                                             | 5,81126E-05 | 0,072238356 | 0,171 | 0,039 | 1           | 1,051346594   | 0,951161117     | 4,384615385     |

Supplementary Table 2

| Differentially expressed genes_keloid-XL_comparing SC-Keloid vs. (SC-Myel, SC-Nonmyel, SC-Nonmyel2) |             |             |       |       |             |               |                 |                 |
|-----------------------------------------------------------------------------------------------------|-------------|-------------|-------|-------|-------------|---------------|-----------------|-----------------|
| gene                                                                                                | p_val       | avg_log2FC  | pct.1 | pct.2 | p_val_adj   | Foldchange_UP | Foldchange_DOWN | Ratio_pct1_pct2 |
| ENO4                                                                                                | 0,001220269 | 0,072180807 | 0,037 | 0     | 1           | 1,051304657   | 0,951199059     | #DIV/0!         |
| ZNF319                                                                                              | 0,006431528 | 0,072146432 | 0,061 | 0,011 | 1           | 1,051279607   | 0,951221724     | 5,545454545     |
| RSPH9                                                                                               | 0,00095592  | 0,072143147 | 0,085 | 0,014 | 1           | 1,051277214   | 0,951223889     | 6,071428571     |
| HDAC6                                                                                               | 0,069914007 | 0,072120469 | 0,122 | 0,06  | 1           | 1,051260689   | 0,951238842     | 2,033333333     |
| CEP68                                                                                               | 0,003205568 | 0,07208467  | 0,122 | 0,035 | 1           | 1,051234603   | 0,951262446     | 3,485714286     |
| TMEM9                                                                                               | 5,95845E-05 | 0,072069878 | 0,28  | 0,091 | 1           | 1,051223825   | 0,9512722       | 3,076923077     |
| TCEAL7                                                                                              | 2,19535E-06 | 0,072047178 | 0,293 | 0,077 | 0,046324103 | 1,051207285   | 0,951287167     | 3,805194805     |
| GEMIN6                                                                                              | 3,24105E-07 | 0,072028388 | 0,122 | 0,007 | 0,00683894  | 1,051193593   | 0,951299557     | 17,42857143     |
| SPIN2A                                                                                              | 0,008401736 | 0,07201636  | 0,024 | 0     | 1           | 1,051184829   | 0,951307489     | #DIV/0!         |
| PFKP                                                                                                | 0,000360636 | 0,071860025 | 0,159 | 0,042 | 1           | 1,051070926   | 0,951410581     | 3,785714286     |
| SPHK2                                                                                               | 0,016147858 | 0,071756342 | 0,122 | 0,046 | 1           | 1,05099539    | 0,951478959     | 2,652173913     |
| MRPL48                                                                                              | 5,30011E-05 | 0,071723186 | 0,171 | 0,039 | 1           | 1,050971237   | 0,951500826     | 4,384615385     |
| PLIN3                                                                                               | 0,000192241 | 0,07171709  | 0,366 | 0,144 | 1           | 1,050966796   | 0,951504847     | 2,541666667     |
| TBCK                                                                                                | 0,000713367 | 0,071690093 | 0,098 | 0,018 | 1           | 1,05094713    | 0,951522652     | 5,444444444     |
| ZCWPW2                                                                                              | 0,00414399  | 0,071610946 | 0,073 | 0,014 | 1           | 1,050889475   | 0,951574855     | 5,214285714     |
| CMTR1                                                                                               | 0,002508126 | 0,071539956 | 0,146 | 0,046 | 1           | 1,050837767   | 0,951621679     | 3,173913043     |
| EPS15L1                                                                                             | 1,08291E-05 | 0,071437593 | 0,195 | 0,042 | 0,228504817 | 1,050763209   | 0,951689202     | 4,642857143     |
| SPIRE2                                                                                              | 0,347088417 | 0,071418194 | 0,012 | 0,004 | 1           | 1,05074908    | 0,951701999     | 3               |
| HOXC-AS1                                                                                            | 0,013704854 | 0,071408351 | 0,085 | 0,025 | 1           | 1,050741912   | 0,951708492     | 3,4             |
| RPA3                                                                                                | 0,000115675 | 0,071367659 | 0,207 | 0,06  | 1           | 1,050712275   | 0,951735336     | 3,45            |
| MEDAG                                                                                               | 0,006341138 | 0,071366267 | 0,061 | 0,011 | 1           | 1,050711261   | 0,951736254     | 5,545454545     |
| FAM98A                                                                                              | 0,000762572 | 0,071316646 | 0,22  | 0,077 | 1           | 1,050675123   | 0,951768989     | 2,857142857     |
| CIAO3                                                                                               | 0,000311907 | 0,0712919   | 0,122 | 0,025 | 1           | 1,050657102   | 0,951785315     | 4,88            |
| UBR1                                                                                                | 0,000642543 | 0,071258327 | 0,183 | 0,056 | 1           | 1,050632652   | 0,951807464     | 3,267857143     |
| PPARD                                                                                               | 0,040310506 | 0,071223077 | 0,098 | 0,039 | 1           | 1,050606982   | 0,95183072      | 2,512820513     |
| DUSP4                                                                                               | 0,001229283 | 0,071221296 | 0,146 | 0,042 | 1           | 1,050605685   | 0,951831895     | 3,476190476     |
| PRKAR2B                                                                                             | 4,32324E-06 | 0,071192187 | 0,073 | 0     | 0,09122464  | 1,050584487   | 0,9518511       | #DIV/0!         |
| DNPEP                                                                                               | 0,000761642 | 0,07115754  | 0,207 | 0,07  | 1           | 1,050559257   | 0,95187396      | 2,957142857     |
| RAP1GDS1                                                                                            | 6,25578E-05 | 0,071139838 | 0,488 | 0,204 | 1           | 1,050546367   | 0,951885639     | 2,392156863     |
| STARD3NL                                                                                            | 0,002817764 | 0,071137663 | 0,232 | 0,095 | 1           | 1,050544783   | 0,951887074     | 2,442105263     |

Supplementary Table 2

| Differentially expressed genes_keloid-XL_comparing SC-Keloid vs. (SC-Myel, SC-Nonmyel, SC-Nonmyel2) |             |             |       |       |             |               |                 |                 |
|-----------------------------------------------------------------------------------------------------|-------------|-------------|-------|-------|-------------|---------------|-----------------|-----------------|
| gene                                                                                                | p_val       | avg_log2FC  | pct.1 | pct.2 | p_val_adj   | Foldchange_UP | Foldchange_DOWN | Ratio_pct1_pct2 |
| ZWILCH                                                                                              | 0,000685144 | 0,071105051 | 0,098 | 0,018 | 1           | 1,050521036   | 0,951908592     | 5,444444444     |
| MIER2                                                                                               | 0,041181302 | 0,071100601 | 0,073 | 0,025 | 1           | 1,050517795   | 0,951911528     | 2,92            |
| ABCG1                                                                                               | 0,260282533 | 0,071098352 | 0,049 | 0,025 | 1           | 1,050516158   | 0,951913012     | 1,96            |
| PES1                                                                                                | 6,20327E-06 | 0,071098089 | 0,183 | 0,035 | 0,13089519  | 1,050515966   | 0,951913186     | 5,228571429     |
| RUVBL2                                                                                              | 0,000138689 | 0,071055572 | 0,207 | 0,06  | 1           | 1,050485007   | 0,95194124      | 3,45            |
| ZNF598                                                                                              | 0,009423296 | 0,071014384 | 0,171 | 0,07  | 1           | 1,050455017   | 0,951968417     | 2,442857143     |
| ZNF578                                                                                              | 0,008401736 | 0,070991474 | 0,024 | 0     | 1           | 1,050438336   | 0,951983534     | #DIV/0!         |
| FMN1                                                                                                | 0,028081741 | 0,070946897 | 0,049 | 0,011 | 1           | 1,05040588    | 0,95201295      | 4,454545455     |
| PABIR3                                                                                              | 0,016864604 | 0,070928964 | 0,061 | 0,014 | 1           | 1,050392823   | 0,952024783     | 4,357142857     |
| EPB41L4A                                                                                            | 0,040202307 | 0,070858343 | 0,085 | 0,032 | 1           | 1,050341407   | 0,952071387     | 2,65625         |
| ROPN1B                                                                                              | 0,004199164 | 0,070854227 | 0,073 | 0,014 | 1           | 1,05033841    | 0,952074103     | 5,214285714     |
| TRAPPC12                                                                                            | 6,25295E-06 | 0,07082339  | 0,268 | 0,07  | 0,131943405 | 1,05031596    | 0,952094453     | 3,828571429     |
| RNF180                                                                                              | 5,32686E-05 | 0,070812039 | 0,073 | 0,004 | 1           | 1,050307696   | 0,952101945     | 18,25           |
| WDR12                                                                                               | 0,00095592  | 0,070801828 | 0,085 | 0,014 | 1           | 1,050300262   | 0,952108684     | 6,071428571     |
| MMP16                                                                                               | 5,32686E-05 | 0,070779384 | 0,073 | 0,004 | 1           | 1,050283923   | 0,952123496     | 18,25           |
| LZTS1                                                                                               | 0,000124092 | 0,07070669  | 0,122 | 0,021 | 1           | 1,050231003   | 0,952171472     | 5,80952381      |
| DNAI4                                                                                               | 0,347088417 | 0,070649652 | 0,012 | 0,004 | 1           | 1,050189482   | 0,952209117     | 3               |
| FADS1                                                                                               | 0,002570239 | 0,070639732 | 0,22  | 0,088 | 1           | 1,050182261   | 0,952215665     | 2,5             |
| TMEM254                                                                                             | 0,000279632 | 0,070400342 | 0,085 | 0,011 | 1           | 1,050008016   | 0,952373682     | 7,727272727     |
| RAMAC                                                                                               | 4,4719E-05  | 0,070222867 | 0,183 | 0,042 | 0,943616019 | 1,049878856   | 0,952490846     | 4,357142857     |
| CHDH                                                                                                | 0,911002271 | 0,070201288 | 0,012 | 0,014 | 1           | 1,049863153   | 0,952505093     | 0,857142857     |
| POGLUT3                                                                                             | 6,27412E-05 | 0,070188312 | 0,232 | 0,067 | 1           | 1,04985371    | 0,95251366      | 3,462686567     |
| HDAC8                                                                                               | 3,90623E-05 | 0,070181214 | 0,183 | 0,042 | 0,824254035 | 1,049848545   | 0,952518347     | 4,357142857     |
| YY2                                                                                                 | 0,001742498 | 0,070174826 | 0,061 | 0,007 | 1           | 1,049843896   | 0,952522564     | 8,714285714     |
| ZNF584                                                                                              | 0,004368707 | 0,070134047 | 0,073 | 0,014 | 1           | 1,049814222   | 0,952549489     | 5,214285714     |
| ZNF439                                                                                              | 0,001003155 | 0,070070696 | 0,134 | 0,035 | 1           | 1,049768124   | 0,952591317     | 3,828571429     |
| CUL2                                                                                                | 1,13313E-06 | 0,07005325  | 0,207 | 0,039 | 0,023910185 | 1,049755429   | 0,952602837     | 5,307692308     |
| AL162431.1                                                                                          | 0,649511996 | 0,070036385 | 0,012 | 0,007 | 1           | 1,049743158   | 0,952613972     | 1,714285714     |
| PRDM10                                                                                              | 0,191478184 | 0,070013132 | 0,037 | 0,014 | 1           | 1,049726239   | 0,952629326     | 2,642857143     |
| RINL                                                                                                | 0,103792275 | 0,06999066  | 0,037 | 0,011 | 1           | 1,049709888   | 0,952644165     | 3,363636364     |

Supplementary Table 2

| Differentially expressed genes_keloid-XL_comparing SC-Keloid vs. (SC-Myel, SC-Nonmyel, SC-Nonmyel2) |             |             |       |       |             |               |                 |                 |
|-----------------------------------------------------------------------------------------------------|-------------|-------------|-------|-------|-------------|---------------|-----------------|-----------------|
| gene                                                                                                | p_val       | avg_log2FC  | pct.1 | pct.2 | p_val_adj   | Foldchange_UP | Foldchange_DOWN | Ratio_pct1_pct2 |
| NPIPA5                                                                                              | 0,188110324 | 0,069956847 | 0,037 | 0,014 | 1           | 1,049685286   | 0,952666493     | 2,642857143     |
| FAM98C                                                                                              | 0,000247417 | 0,069912232 | 0,22  | 0,07  | 1           | 1,049652825   | 0,952695954     | 3,142857143     |
| CYB5R4                                                                                              | 1,11779E-05 | 0,069887028 | 0,159 | 0,028 | 0,235865591 | 1,049634487   | 0,952712599     | 5,678571429     |
| TMEM154                                                                                             | 0,000997638 | 0,069881537 | 0,085 | 0,014 | 1           | 1,049630492   | 0,952716225     | 6,071428571     |
| SNAPC2                                                                                              | 6,37734E-07 | 0,069869939 | 0,354 | 0,102 | 0,013456825 | 1,049622054   | 0,952723884     | 3,470588235     |
| ATP6V1G1                                                                                            | 0,000186641 | 0,069846734 | 0,695 | 0,344 | 1           | 1,049605172   | 0,952739208     | 2,020348837     |
| KLHDC3                                                                                              | 0,000161996 | 0,069835838 | 0,195 | 0,056 | 1           | 1,049597245   | 0,952746403     | 3,482142857     |
| ZNF555                                                                                              | 0,065143806 | 0,069834632 | 0,024 | 0,004 | 1           | 1,049596367   | 0,9527472       | 6               |
| ACOT9                                                                                               | 9,89053E-06 | 0,069824319 | 0,305 | 0,091 | 0,208699979 | 1,049588864   | 0,952754011     | 3,351648352     |
| FAM110B                                                                                             | 0,513508152 | 0,069823408 | 0,024 | 0,014 | 1           | 1,049588202   | 0,952754612     | 1,714285714     |
| BVES                                                                                                | 0,003268385 | 0,069786802 | 0,122 | 0,035 | 1           | 1,04956157    | 0,952778787     | 3,485714286     |
| ZNF510                                                                                              | 0,040816555 | 0,069766328 | 0,073 | 0,025 | 1           | 1,049546676   | 0,952792308     | 2,92            |
| PREP                                                                                                | 0,009955614 | 0,069765896 | 0,073 | 0,018 | 1           | 1,049546361   | 0,952792594     | 4,055555556     |
| BIVM                                                                                                | 0,01356931  | 0,069757804 | 0,085 | 0,025 | 1           | 1,049540475   | 0,952797938     | 3,4             |
| DOLK                                                                                                | 6,13057E-05 | 0,069736512 | 0,085 | 0,007 | 1           | 1,049524985   | 0,952812        | 12,14285714     |
| HEPH                                                                                                | 0,015316495 | 0,069685485 | 0,11  | 0,039 | 1           | 1,049487865   | 0,952845701     | 2,820512821     |
| AL592183.1                                                                                          | 0,178114335 | 0,069677629 | 0,049 | 0,021 | 1           | 1,04948215    | 0,952850889     | 2,333333333     |
| PDCL3                                                                                               | 3,40892E-05 | 0,069637904 | 0,183 | 0,042 | 0,719316414 | 1,049453253   | 0,952877127     | 4,357142857     |
| NAPA                                                                                                | 5,81918E-05 | 0,069627124 | 0,476 | 0,193 | 1           | 1,049445411   | 0,952884247     | 2,466321244     |
| SEMA3E                                                                                              | 0,001220269 | 0,069594061 | 0,037 | 0     | 1           | 1,049421361   | 0,952906084     | #DIV/0!         |
| SCNM1                                                                                               | 7,22352E-06 | 0,069584929 | 0,268 | 0,074 | 0,152423491 | 1,049414718   | 0,952912117     | 3,621621622     |
| ZNF100                                                                                              | 0,001055888 | 0,06952009  | 0,085 | 0,014 | 1           | 1,049367555   | 0,952954944     | 6,071428571     |
| LINC00526                                                                                           | 6,246E-05   | 0,069517065 | 0,085 | 0,007 | 1           | 1,049365355   | 0,952956942     | 12,14285714     |
| INTS14                                                                                              | 9,91418E-06 | 0,069509678 | 0,122 | 0,014 | 0,209199094 | 1,049359982   | 0,952961822     | 8,714285714     |
| CASTOR3                                                                                             | 0,000234367 | 0,0695016   | 0,098 | 0,014 | 1           | 1,049354106   | 0,952967158     | 7               |
| TPMT                                                                                                | 0,00032897  | 0,069443075 | 0,183 | 0,053 | 1           | 1,049311539   | 0,953005817     | 3,452830189     |
| MYPOP                                                                                               | 0,060793535 | 0,069427994 | 0,049 | 0,014 | 1           | 1,04930057    | 0,953015779     | 3,5             |
| ZNF668                                                                                              | 0,002802255 | 0,069364155 | 0,085 | 0,018 | 1           | 1,049254139   | 0,953057951     | 4,722222222     |
| HHAT                                                                                                | 0,000332109 | 0,069362794 | 0,073 | 0,007 | 1           | 1,04925315    | 0,95305885      | 10,42857143     |
| H2BC3                                                                                               | 0,063203483 | 0,069349355 | 0,012 | 0     | 1           | 1,049243376   | 0,953067728     | #DIV/0!         |

Supplementary Table 2

| Differentially expressed genes_keloid-XL_comparing SC-Keloid vs. (SC-Myel, SC-Nonmyel, SC-Nonmyel2) |             |             |       |       |             |               |                 |                 |
|-----------------------------------------------------------------------------------------------------|-------------|-------------|-------|-------|-------------|---------------|-----------------|-----------------|
| gene                                                                                                | p_val       | avg_log2FC  | pct.1 | pct.2 | p_val_adj   | Foldchange_UP | Foldchange_DOWN | Ratio_pct1_pct2 |
| TMEM109                                                                                             | 1,56722E-05 | 0,069287448 | 0,524 | 0,211 | 0,330699952 | 1,049198353   | 0,953108625     | 2,483412322     |
| GPR176                                                                                              | 0,009329829 | 0,069231064 | 0,11  | 0,035 | 1           | 1,049157349   | 0,953145876     | 3,142857143     |
| FANCA                                                                                               | 0,006163779 | 0,069227734 | 0,061 | 0,011 | 1           | 1,049154927   | 0,953148076     | 5,545454545     |
| FANCL                                                                                               | 0,001112971 | 0,069185424 | 0,11  | 0,025 | 1           | 1,049124159   | 0,953176029     | 4,4             |
| CASP7                                                                                               | 5,81663E-05 | 0,069182094 | 0,232 | 0,067 | 1           | 1,049121738   | 0,953178229     | 3,462686567     |
| CACNB4                                                                                              | 0,064048232 | 0,069057788 | 0,024 | 0,004 | 1           | 1,049031346   | 0,953260361     | 6               |
| CDKL5                                                                                               | 0,015883623 | 0,069043504 | 0,098 | 0,032 | 1           | 1,04902096    | 0,9532698       | 3,0625          |
| KIAA1614                                                                                            | 0,193178656 | 0,069017333 | 0,037 | 0,014 | 1           | 1,049001931   | 0,953287092     | 2,642857143     |
| STK19                                                                                               | 0,000165969 | 0,069015712 | 0,207 | 0,06  | 1           | 1,049000752   | 0,953288163     | 3,45            |
| TP53                                                                                                | 0,000926625 | 0,069005677 | 0,28  | 0,112 | 1           | 1,048993455   | 0,953294794     | 2,5             |
| THAP7                                                                                               | 0,000176699 | 0,068952778 | 0,195 | 0,056 | 1           | 1,048954993   | 0,953329749     | 3,482142857     |
| UBE2G2                                                                                              | 0,000432529 | 0,068926095 | 0,402 | 0,172 | 1           | 1,048935592   | 0,953347381     | 2,337209302     |
| DELE1                                                                                               | 3,72758E-05 | 0,068844632 | 0,244 | 0,07  | 0,786557383 | 1,048876365   | 0,953401214     | 3,485714286     |
| MEIG1                                                                                               | 0,008401736 | 0,068737237 | 0,024 | 0     | 1           | 1,048798289   | 0,953472188     | #DIV/0!         |
| PROCR                                                                                               | 0,000287585 | 0,068703326 | 0,073 | 0,007 | 1           | 1,048773637   | 0,9534946       | 10,42857143     |
| HSD17B8                                                                                             | 4,58126E-05 | 0,068689455 | 0,11  | 0,014 | 0,966691375 | 1,048763553   | 0,953503768     | 7,857142857     |
| GPRASP2                                                                                             | 2,80682E-05 | 0,068686294 | 0,061 | 0     | 0,592266086 | 1,048761256   | 0,953505857     | #DIV/0!         |
| IRF3                                                                                                | 0,00022786  | 0,068616128 | 0,354 | 0,14  | 1           | 1,04871025    | 0,953552232     | 2,528571429     |
| C18orf21                                                                                            | 0,101551261 | 0,068561357 | 0,073 | 0,032 | 1           | 1,048670437   | 0,953588434     | 2,28125         |
| TRAPPC8                                                                                             | 0,003974717 | 0,068505013 | 0,146 | 0,049 | 1           | 1,048629482   | 0,953625677     | 2,979591837     |
| PRC1                                                                                                | 0,110292725 | 0,068493968 | 0,061 | 0,025 | 1           | 1,048621454   | 0,953632978     | 2,44            |
| OSBPL3                                                                                              | 0,000194727 | 0,068485623 | 0,134 | 0,028 | 1           | 1,048615389   | 0,953638494     | 4,785714286     |
| ZNF219                                                                                              | 0,210417192 | 0,068450043 | 0,244 | 0,168 | 1           | 1,048589528   | 0,953662013     | 1,452380952     |
| ALG12                                                                                               | 2,51654E-05 | 0,068405424 | 0,171 | 0,035 | 0,531014339 | 1,048557098   | 0,953691508     | 4,885714286     |
| ZNF580                                                                                              | 6,81628E-06 | 0,068387303 | 0,476 | 0,175 | 0,143830269 | 1,048543928   | 0,953703487     | 2,72            |
| CENPQ                                                                                               | 1,87659E-07 | 0,068326442 | 0,195 | 0,028 | 0,003959786 | 1,048499696   | 0,95374372      | 6,964285714     |
| COQ5                                                                                                | 1,62791E-05 | 0,068220155 | 0,207 | 0,049 | 0,343505831 | 1,048422453   | 0,953813987     | 4,224489796     |
| HFE                                                                                                 | 0,036427227 | 0,068210071 | 0,061 | 0,018 | 1           | 1,048415125   | 0,953820654     | 3,388888889     |
| ALDH9A1                                                                                             | 0,000914102 | 0,06817569  | 0,28  | 0,112 | 1           | 1,04839014    | 0,953843385     | 2,5             |
| CRMP1                                                                                               | 0,063203483 | 0,06817349  | 0,012 | 0     | 1           | 1,048388541   | 0,95384484      | #DIV/0!         |

Supplementary Table 2

| Differentially expressed genes_keloid-XL_comparing SC-Keloid vs. (SC-Myel, SC-Nonmyel, SC-Nonmyel2) |             |             |       |       |             |               |                 |                 |
|-----------------------------------------------------------------------------------------------------|-------------|-------------|-------|-------|-------------|---------------|-----------------|-----------------|
| gene                                                                                                | p_val       | avg_log2FC  | pct.1 | pct.2 | p_val_adj   | Foldchange_UP | Foldchange_DOWN | Ratio_pct1_pct2 |
| IWS1                                                                                                | 0,005294521 | 0,068172452 | 0,183 | 0,07  | 1           | 1,048387786   | 0,953845526     | 2,614285714     |
| CDPF1                                                                                               | 0,000288855 | 0,068171756 | 0,085 | 0,011 | 1           | 1,048387281   | 0,953845986     | 7,727272727     |
| GEMIN2                                                                                              | 0,004102792 | 0,068167429 | 0,098 | 0,025 | 1           | 1,048384136   | 0,953848847     | 3,92            |
| FAM200A                                                                                             | 0,000338108 | 0,068059508 | 0,073 | 0,007 | 1           | 1,048305715   | 0,953920203     | 10,42857143     |
| PDCL                                                                                                | 0,000710721 | 0,068010334 | 0,195 | 0,063 | 1           | 1,048269984   | 0,953952718     | 3,095238095     |
| EMC8                                                                                                | 1,88294E-07 | 0,067968044 | 0,317 | 0,077 | 0,003973196 | 1,048239257   | 0,953980681     | 4,116883117     |
| AC040977.1                                                                                          | 0,347088417 | 0,06794392  | 0,012 | 0,004 | 1           | 1,048221728   | 0,953996633     | 3               |
| DPH6                                                                                                | 0,010139169 | 0,067912742 | 0,122 | 0,042 | 1           | 1,048199076   | 0,95401725      | 2,904761905     |
| STMN3                                                                                               | 4,31504E-09 | 0,067905829 | 0,439 | 0,112 | 9,10516E-05 | 1,048194053   | 0,954021822     | 3,919642857     |
| ELOVL4                                                                                              | 0,004147695 | 0,06784227  | 0,098 | 0,025 | 1           | 1,048147875   | 0,954063853     | 3,92            |
| TWINK                                                                                               | 8,66134E-06 | 0,067800155 | 0,085 | 0,004 | 0,1827629   | 1,048117278   | 0,954091704     | 21,25           |
| RNF135                                                                                              | 0,00021046  | 0,067742753 | 0,159 | 0,039 | 1           | 1,048075577   | 0,954129666     | 4,076923077     |
| PAPPA2                                                                                              | 0,008401736 | 0,067619211 | 0,024 | 0     | 1           | 1,047985831   | 0,954211374     | #DIV/0!         |
| WRAP73                                                                                              | 9,23892E-05 | 0,067576274 | 0,183 | 0,046 | 1           | 1,047954641   | 0,954239774     | 3,97826087      |
| KLHL23                                                                                              | 0,006523076 | 0,067567051 | 0,061 | 0,011 | 1           | 1,047947942   | 0,954245875     | 5,545454545     |
| CEP250                                                                                              | 0,010188387 | 0,067483328 | 0,073 | 0,018 | 1           | 1,047887129   | 0,954301253     | 4,055555556     |
| ARMCX6                                                                                              | 0,002539974 | 0,067437525 | 0,28  | 0,123 | 1           | 1,047853861   | 0,954331551     | 2,276422764     |
| PDRG1                                                                                               | 5,33977E-05 | 0,067414339 | 0,232 | 0,067 | 1           | 1,047837021   | 0,954346888     | 3,462686567     |
| RSL24D1                                                                                             | 8,27571E-05 | 0,067353194 | 0,61  | 0,281 | 1           | 1,047792612   | 0,954387337     | 2,170818505     |
| RANBP3                                                                                              | 0,001171783 | 0,067311877 | 0,183 | 0,06  | 1           | 1,047762605   | 0,954414669     | 3,05            |
| AFF2                                                                                                | 0,001220269 | 0,067288505 | 0,037 | 0     | 1           | 1,04774563    | 0,954430132     | #DIV/0!         |
| CCDC121                                                                                             | 0,043000486 | 0,067222413 | 0,037 | 0,007 | 1           | 1,047697633   | 0,954473856     | 5,285714286     |
| ASB13                                                                                               | 2,80682E-05 | 0,067198387 | 0,061 | 0     | 0,592266086 | 1,047680185   | 0,954489752     | #DIV/0!         |
| NUDT15                                                                                              | 0,005038283 | 0,067186609 | 0,11  | 0,032 | 1           | 1,047671632   | 0,954497544     | 3,4375          |
| PHOSPHO2                                                                                            | 5,32686E-05 | 0,067162534 | 0,073 | 0,004 | 1           | 1,047654149   | 0,954513473     | 18,25           |
| ABT1                                                                                                | 5,5243E-06  | 0,067162295 | 0,146 | 0,021 | 0,11656823  | 1,047653976   | 0,954513631     | 6,952380952     |
| ST3GAL3                                                                                             | 0,002498171 | 0,067135842 | 0,171 | 0,06  | 1           | 1,047634766   | 0,954531133     | 2,85            |
| GPRIN1                                                                                              | 0,000183568 | 0,067105498 | 0,049 | 0     | 1           | 1,047612732   | 0,954551209     | #DIV/0!         |
| MED19                                                                                               | 0,01915118  | 0,067103315 | 0,171 | 0,077 | 1           | 1,047611146   | 0,954552654     | 2,220779221     |
| C19orf44                                                                                            | 1,25621E-08 | 0,067082837 | 0,183 | 0,018 | 0,000265072 | 1,047596277   | 0,954566203     | 10,16666667     |



Supplementary Table 2

| Differentially expressed genes_keloid-XL_comparing SC-Keloid vs. (SC-Myel, SC-Nonmyel, SC-Nonmyel2) |             |             |       |       |             |               |                 |                 |
|-----------------------------------------------------------------------------------------------------|-------------|-------------|-------|-------|-------------|---------------|-----------------|-----------------|
| gene                                                                                                | p_val       | avg_log2FC  | pct.1 | pct.2 | p_val_adj   | Foldchange_UP | Foldchange_DOWN | Ratio_pct1_pct2 |
| NGEF                                                                                                | 0,000183568 | 0,067082223 | 0,049 | 0     | 1           | 1,047595831   | 0,954566609     | #DIV/0!         |
| NFATC2IP                                                                                            | 1,46979E-05 | 0,067054267 | 0,293 | 0,088 | 0,310139365 | 1,047575531   | 0,954585107     | 3,329545455     |
| BOLA3-AS1                                                                                           | 0,001445239 | 0,067017453 | 0,073 | 0,011 | 1           | 1,0475488     | 0,954609466     | 6,636363636     |
| MFHAS1                                                                                              | 0,002565774 | 0,066927024 | 0,085 | 0,018 | 1           | 1,047483141   | 0,954669303     | 4,722222222     |
| RCOR1                                                                                               | 0,006941731 | 0,066926455 | 0,183 | 0,074 | 1           | 1,047482727   | 0,95466968      | 2,472972973     |
| FICD                                                                                                | 9,43577E-06 | 0,066863893 | 0,122 | 0,014 | 0,199104144 | 1,047437305   | 0,954711079     | 8,714285714     |
| NDC80                                                                                               | 0,000183568 | 0,066862169 | 0,049 | 0     | 1           | 1,047436053   | 0,95471222      | #DIV/0!         |
| INTS13                                                                                              | 0,000120762 | 0,066860504 | 0,122 | 0,021 | 1           | 1,047434845   | 0,954713322     | 5,80952381      |
| MECR                                                                                                | 2,40964E-05 | 0,066823598 | 0,134 | 0,021 | 0,508457956 | 1,04740805    | 0,954737745     | 6,380952381     |
| S100A9                                                                                              | 0,347088417 | 0,066794536 | 0,012 | 0,004 | 1           | 1,047386951   | 0,954756978     | 3               |
| RMI1                                                                                                | 0,001742498 | 0,06671608  | 0,061 | 0,007 | 1           | 1,047329994   | 0,9548089       | 8,714285714     |
| TONSL                                                                                               | 0,008401736 | 0,066715801 | 0,024 | 0     | 1           | 1,047329791   | 0,954809085     | #DIV/0!         |
| CNOT10                                                                                              | 0,02702556  | 0,066698144 | 0,098 | 0,035 | 1           | 1,047316973   | 0,954820771     | 2,8             |
| RAB3GAP2                                                                                            | 0,020471455 | 0,066650813 | 0,195 | 0,091 | 1           | 1,047282614   | 0,954852096     | 2,142857143     |
| HDAC10                                                                                              | 0,000187722 | 0,066625157 | 0,134 | 0,028 | 1           | 1,04726399    | 0,954869077     | 4,785714286     |
| HTRA3                                                                                               | 0,347088417 | 0,066590953 | 0,012 | 0,004 | 1           | 1,047239161   | 0,954891716     | 3               |
| PRPSAP2                                                                                             | 0,001725089 | 0,066577649 | 0,171 | 0,056 | 1           | 1,047229504   | 0,954900522     | 3,053571429     |
| CCR1                                                                                                | 0,011128779 | 0,066456583 | 0,037 | 0,004 | 1           | 1,047141628   | 0,954980657     | 9,25            |
| BNIP1                                                                                               | 0,000575008 | 0,066453752 | 0,146 | 0,039 | 1           | 1,047139573   | 0,954982531     | 3,743589744     |
| TRMU                                                                                                | 0,000140328 | 0,066453101 | 0,146 | 0,032 | 1           | 1,047139101   | 0,954982962     | 4,5625          |
| RIN3                                                                                                | 0,001298447 | 0,066392697 | 0,073 | 0,011 | 1           | 1,04709526    | 0,955022946     | 6,636363636     |
| ZNHIT3                                                                                              | 2,24762E-06 | 0,066344896 | 0,244 | 0,056 | 0,047426935 | 1,047060566   | 0,95505459      | 4,357142857     |
| SCAMP1                                                                                              | 0,000797971 | 0,066323633 | 0,293 | 0,116 | 1           | 1,047045134   | 0,955068666     | 2,525862069     |
| NT5C                                                                                                | 0,000213484 | 0,06629673  | 0,439 | 0,189 | 1           | 1,047025609   | 0,955086477     | 2,322751323     |
| ZDHHC3                                                                                              | 0,001059744 | 0,066270575 | 0,195 | 0,067 | 1           | 1,047006628   | 0,955103791     | 2,910447761     |
| ZNF865                                                                                              | 0,087380487 | 0,066252528 | 0,098 | 0,046 | 1           | 1,046993531   | 0,955115739     | 2,130434783     |
| STARD4                                                                                              | 0,008751649 | 0,066168329 | 0,049 | 0,007 | 1           | 1,046932428   | 0,955171483     | 7               |
| BCDIN3D                                                                                             | 0,001772311 | 0,066131191 | 0,061 | 0,007 | 1           | 1,046905478   | 0,955196072     | 8,714285714     |
| HYPK                                                                                                | 0,260460861 | 0,066082262 | 0,073 | 0,042 | 1           | 1,046869972   | 0,955228468     | 1,738095238     |
| WDR77                                                                                               | 0,000265199 | 0,066062141 | 0,171 | 0,046 | 1           | 1,046855372   | 0,955241791     | 3,717391304     |

Supplementary Table 2

| Differentially expressed genes_keloid-XL_comparing SC-Keloid vs. (SC-Myel, SC-Nonmyel, SC-Nonmyel2) |             |             |       |       |             |               |                 |                 |
|-----------------------------------------------------------------------------------------------------|-------------|-------------|-------|-------|-------------|---------------|-----------------|-----------------|
| gene                                                                                                | p_val       | avg_log2FC  | pct.1 | pct.2 | p_val_adj   | Foldchange_UP | Foldchange_DOWN | Ratio_pct1_pct2 |
| RWDD3                                                                                               | 1,43623E-06 | 0,066007311 | 0,256 | 0,06  | 0,030305912 | 1,046815587   | 0,955278096     | 4,266666667     |
| SEC16A                                                                                              | 6,36887E-05 | 0,065960544 | 0,171 | 0,039 | 1           | 1,046781653   | 0,955309063     | 4,384615385     |
| CABLES1                                                                                             | 0,147332039 | 0,065908435 | 0,073 | 0,035 | 1           | 1,046743845   | 0,955343569     | 2,085714286     |
| METTL14                                                                                             | 0,063551963 | 0,065814648 | 0,085 | 0,035 | 1           | 1,0466758     | 0,955405675     | 2,428571429     |
| PLAAT1                                                                                              | 0,001220269 | 0,065771599 | 0,037 | 0     | 1           | 1,046644569   | 0,955434184     | #DIV/0!         |
| CIAO1                                                                                               | 0,000126344 | 0,065758659 | 0,341 | 0,13  | 1           | 1,046635181   | 0,955442754     | 2,623076923     |
| KIF27                                                                                               | 0,001772311 | 0,06557642  | 0,061 | 0,007 | 1           | 1,04650298    | 0,955563452     | 8,714285714     |
| ATE1                                                                                                | 0,000587352 | 0,065568252 | 0,232 | 0,081 | 1           | 1,046497055   | 0,955568862     | 2,864197531     |
| KIF9-AS1                                                                                            | 0,001713147 | 0,065529207 | 0,061 | 0,007 | 1           | 1,046468733   | 0,955594723     | 8,714285714     |
| NPLOC4                                                                                              | 0,001564553 | 0,065520466 | 0,256 | 0,105 | 1           | 1,046462393   | 0,955600513     | 2,438095238     |
| GRK6                                                                                                | 0,000486977 | 0,065469849 | 0,134 | 0,032 | 1           | 1,046425679   | 0,955634041     | 4,1875          |
| MEOX1                                                                                               | 0,02175178  | 0,065382872 | 0,073 | 0,021 | 1           | 1,046362593   | 0,955691656     | 3,476190476     |
| POP4                                                                                                | 3,76534E-05 | 0,065335286 | 0,159 | 0,032 | 0,794523918 | 1,046328081   | 0,955723179     | 4,96875         |
| PDIK1L                                                                                              | 0,036427227 | 0,065256253 | 0,061 | 0,018 | 1           | 1,046270763   | 0,955775537     | 3,388888889     |
| DTWD2                                                                                               | 0,016864604 | 0,065235206 | 0,061 | 0,014 | 1           | 1,046255499   | 0,95578948      | 4,357142857     |
| DHX37                                                                                               | 0,111964825 | 0,065115329 | 0,049 | 0,018 | 1           | 1,046168567   | 0,955868902     | 2,722222222     |
| TPRA1                                                                                               | 0,006884292 | 0,065102372 | 0,146 | 0,053 | 1           | 1,046159171   | 0,955877487     | 2,754716981     |
| ZNF487                                                                                              | 0,004485159 | 0,065078814 | 0,073 | 0,014 | 1           | 1,046142089   | 0,955893096     | 5,214285714     |
| KIF3B                                                                                               | 2,75193E-05 | 0,065050019 | 0,195 | 0,046 | 0,580684188 | 1,046121209   | 0,955912175     | 4,239130435     |
| TSPAN14                                                                                             | 0,016613854 | 0,065021256 | 0,146 | 0,06  | 1           | 1,046100353   | 0,955931233     | 2,433333333     |
| MALT1                                                                                               | 0,014394785 | 0,064993981 | 0,098 | 0,032 | 1           | 1,046080575   | 0,955949306     | 3,0625          |
| LRRCC1                                                                                              | 5,02314E-05 | 0,064894397 | 0,39  | 0,147 | 1           | 1,046008371   | 0,956015294     | 2,653061224     |
| NOP58                                                                                               | 0,001281628 | 0,06488209  | 0,256 | 0,102 | 1           | 1,045999448   | 0,956023449     | 2,509803922     |
| CRACR2B                                                                                             | 0,008401736 | 0,06485022  | 0,024 | 0     | 1           | 1,045976342   | 0,956044568     | #DIV/0!         |
| IKZF2                                                                                               | 0,001802592 | 0,064843396 | 0,061 | 0,007 | 1           | 1,045971394   | 0,956049091     | 8,714285714     |
| LPCAT1                                                                                              | 0,000214626 | 0,064842512 | 0,134 | 0,028 | 1           | 1,045970753   | 0,956049677     | 4,785714286     |
| NIT2                                                                                                | 9,29125E-06 | 0,064667959 | 0,354 | 0,116 | 0,196054616 | 1,045844208   | 0,956165357     | 3,051724138     |
| MTIF2                                                                                               | 0,001194205 | 0,064587566 | 0,11  | 0,025 | 1           | 1,045785931   | 0,95621864      | 4,4             |
| ZNF12                                                                                               | 0,040011563 | 0,06456268  | 0,098 | 0,039 | 1           | 1,045767891   | 0,956235134     | 2,512820513     |
| C2orf68                                                                                             | 0,002376906 | 0,064557279 | 0,146 | 0,046 | 1           | 1,045763976   | 0,956238714     | 3,173913043     |

Supplementary Table 2

| Differentially expressed genes_keloid-XL_comparing SC-Keloid vs. (SC-Myel, SC-Nonmyel, SC-Nonmyel2) |             |             |       |       |             |               |                 |                 |
|-----------------------------------------------------------------------------------------------------|-------------|-------------|-------|-------|-------------|---------------|-----------------|-----------------|
| gene                                                                                                | p_val       | avg_log2FC  | pct.1 | pct.2 | p_val_adj   | Foldchange_UP | Foldchange_DOWN | Ratio_pct1_pct2 |
| ACOX3                                                                                               | 1,10381E-05 | 0,064507142 | 0,098 | 0,007 | 0,232915863 | 1,045727634   | 0,956271946     | 14              |
| YTHDC2                                                                                              | 0,000190951 | 0,064471572 | 0,232 | 0,074 | 1           | 1,045701851   | 0,956295524     | 3,135135135     |
| EVI5L                                                                                               | 0,183574298 | 0,06445767  | 0,049 | 0,021 | 1           | 1,045691775   | 0,956304739     | 2,333333333     |
| MCCC1                                                                                               | 0,040856169 | 0,064411433 | 0,085 | 0,032 | 1           | 1,045658262   | 0,956335388     | 2,65625         |
| TTC7A                                                                                               | 0,006341138 | 0,064411335 | 0,061 | 0,011 | 1           | 1,045658192   | 0,956335453     | 5,545454545     |
| CCDC97                                                                                              | 0,00019003  | 0,064408832 | 0,134 | 0,028 | 1           | 1,045656377   | 0,956337112     | 4,785714286     |
| SLC43A3                                                                                             | 0,005685201 | 0,064397492 | 0,256 | 0,116 | 1           | 1,045648158   | 0,956344629     | 2,206896552     |
| CCAR1                                                                                               | 0,000165246 | 0,064391865 | 0,317 | 0,119 | 1           | 1,04564408    | 0,956348359     | 2,663865546     |
| ANKRD17                                                                                             | 0,018313621 | 0,064391    | 0,305 | 0,161 | 1           | 1,045643453   | 0,956348933     | 1,894409938     |
| GTF3C2                                                                                              | 0,001149257 | 0,064364399 | 0,171 | 0,053 | 1           | 1,045624173   | 0,956366566     | 3,226415094     |
| KLK6                                                                                                | 0,18492249  | 0,064286207 | 0,11  | 0,063 | 1           | 1,045567503   | 0,956418402     | 1,746031746     |
| CMPK1                                                                                               | 0,017117784 | 0,064273224 | 0,451 | 0,256 | 1           | 1,045558094   | 0,956427009     | 1,76171875      |
| ZXDC                                                                                                | 0,010223539 | 0,064243995 | 0,122 | 0,042 | 1           | 1,045536911   | 0,956446386     | 2,904761905     |
| CETN3                                                                                               | 0,002470351 | 0,064238481 | 0,159 | 0,053 | 1           | 1,045532915   | 0,956450042     | 3               |
| WNT10A                                                                                              | 0,001220269 | 0,064230591 | 0,037 | 0     | 1           | 1,045527197   | 0,956455272     | #DIV/0!         |
| TRMT2A                                                                                              | 0,000126076 | 0,06421894  | 0,146 | 0,032 | 1           | 1,045518754   | 0,956462997     | 4,5625          |
| CALM2                                                                                               | 0,33202586  | 0,064042231 | 0,854 | 0,835 | 1           | 1,045390701   | 0,956580156     | 1,022754491     |
| CATSPER2                                                                                            | 0,183494953 | 0,064013145 | 0,024 | 0,007 | 1           | 1,045369625   | 0,956599442     | 3,428571429     |
| TBC1D8B                                                                                             | 3,90131E-05 | 0,063897539 | 0,122 | 0,018 | 0,823214902 | 1,045285861   | 0,956676099     | 6,777777778     |
| PLXNA1                                                                                              | 0,005342271 | 0,063858053 | 0,11  | 0,032 | 1           | 1,045257252   | 0,956702283     | 3,4375          |
| DHX36                                                                                               | 0,000287151 | 0,063832946 | 0,488 | 0,214 | 1           | 1,045239062   | 0,956718933     | 2,280373832     |
| HUS1                                                                                                | 0,004892231 | 0,063682989 | 0,11  | 0,032 | 1           | 1,045130423   | 0,956818382     | 3,4375          |
| OXSM                                                                                                | 0,000300423 | 0,063548785 | 0,122 | 0,025 | 1           | 1,045033206   | 0,956907392     | 4,88            |
| TTC26                                                                                               | 0,004311516 | 0,063455471 | 0,073 | 0,014 | 1           | 1,044965615   | 0,956969287     | 5,214285714     |
| PSPH                                                                                                | 0,067616925 | 0,063379501 | 0,061 | 0,021 | 1           | 1,044910591   | 0,957019681     | 2,904761905     |
| DENND2C                                                                                             | 0,024758179 | 0,063364212 | 0,085 | 0,028 | 1           | 1,044899517   | 0,957029823     | 3,035714286     |
| TEPSIN                                                                                              | 3,8435E-05  | 0,063343724 | 0,122 | 0,018 | 0,811016692 | 1,044884679   | 0,957043414     | 6,777777778     |
| TACC2                                                                                               | 0,00479282  | 0,063271658 | 0,159 | 0,056 | 1           | 1,044832485   | 0,957091222     | 2,839285714     |
| RPS6KL1                                                                                             | 0,181340493 | 0,063242441 | 0,024 | 0,007 | 1           | 1,044811326   | 0,957110605     | 3,428571429     |
| PROSER3                                                                                             | 0,016864604 | 0,063191207 | 0,061 | 0,014 | 1           | 1,044774223   | 0,957144595     | 4,357142857     |

Supplementary Table 2

| Differentially expressed genes_keloid-XL_comparing SC-Keloid vs. (SC-Myel, SC-Nonmyel, SC-Nonmyel2) |             |             |       |       |             |               |                 |                 |
|-----------------------------------------------------------------------------------------------------|-------------|-------------|-------|-------|-------------|---------------|-----------------|-----------------|
| gene                                                                                                | p_val       | avg_log2FC  | pct.1 | pct.2 | p_val_adj   | Foldchange_UP | Foldchange_DOWN | Ratio_pct1_pct2 |
| DMPK                                                                                                | 0,003291251 | 0,063027668 | 0,207 | 0,081 | 1           | 1,044655797   | 0,9572531       | 2,555555556     |
| TOP3A                                                                                               | 0,041186466 | 0,0630238   | 0,085 | 0,032 | 1           | 1,044652996   | 0,957255666     | 2,65625         |
| SAYSD1                                                                                              | 0,001265337 | 0,063018859 | 0,146 | 0,042 | 1           | 1,044649419   | 0,957258945     | 3,476190476     |
| TDG                                                                                                 | 5,08305E-05 | 0,062994677 | 0,305 | 0,102 | 1           | 1,044631909   | 0,95727499      | 2,990196078     |
| GID4                                                                                                | 0,18978875  | 0,062974843 | 0,037 | 0,014 | 1           | 1,044617547   | 0,957288151     | 2,642857143     |
| MAML3                                                                                               | 0,003073142 | 0,062949298 | 0,183 | 0,067 | 1           | 1,044599051   | 0,957305101     | 2,731343284     |
| DDX19B                                                                                              | 2,30545E-07 | 0,062915883 | 0,22  | 0,039 | 0,004864739 | 1,044574857   | 0,957327274     | 5,641025641     |
| TMEM237                                                                                             | 2,41717E-06 | 0,062912679 | 0,183 | 0,032 | 0,05100473  | 1,044572537   | 0,9573294       | 5,71875         |
| NEK8                                                                                                | 0,001952737 | 0,062877638 | 0,049 | 0,004 | 1           | 1,044547166   | 0,957352652     | 12,25           |
| SEPTIN1                                                                                             | 0,014257957 | 0,062803424 | 0,146 | 0,06  | 1           | 1,044493435   | 0,957401901     | 2,433333333     |
| TMEM233                                                                                             | 0,00032621  | 0,062784076 | 0,073 | 0,007 | 1           | 1,044479427   | 0,957414741     | 10,42857143     |
| ICAM3                                                                                               | 3,35145E-07 | 0,06277737  | 0,159 | 0,018 | 0,007071888 | 1,044474572   | 0,957419192     | 8,833333333     |
| ZFYVE19                                                                                             | 0,001078907 | 0,06271986  | 0,134 | 0,035 | 1           | 1,044432937   | 0,957457358     | 3,828571429     |
| ST6GALNAC4                                                                                          | 1,32203E-06 | 0,062686002 | 0,159 | 0,021 | 0,027896192 | 1,044408426   | 0,957479828     | 7,571428571     |
| TRAF3IP2-AS1                                                                                        | 0,00380062  | 0,062659785 | 0,098 | 0,025 | 1           | 1,044389447   | 0,957497228     | 3,92            |
| ZSCAN21                                                                                             | 0,010071401 | 0,062568208 | 0,073 | 0,018 | 1           | 1,044323155   | 0,957558008     | 4,055555556     |
| FXD3                                                                                                | 0,02349685  | 0,062525699 | 0,134 | 0,056 | 1           | 1,044292385   | 0,957586223     | 2,392857143     |
| ZMAT5                                                                                               | 2,83299E-08 | 0,062413359 | 0,268 | 0,049 | 0,000597789 | 1,04421107    | 0,957660791     | 5,469387755     |
| TRIB1                                                                                               | 0,065238659 | 0,06238735  | 0,159 | 0,081 | 1           | 1,044192245   | 0,957678056     | 1,962962963     |
| AC023590.1                                                                                          | 0,036803449 | 0,062238669 | 0,061 | 0,018 | 1           | 1,044084639   | 0,957776757     | 3,388888889     |
| LANCL1                                                                                              | 5,16791E-07 | 0,062209738 | 0,232 | 0,046 | 0,010904805 | 1,044063702   | 0,957795964     | 5,043478261     |
| NOVA1                                                                                               | 0,000240966 | 0,062193021 | 0,402 | 0,172 | 1           | 1,044051604   | 0,957807063     | 2,337209302     |
| TRPM7                                                                                               | 0,011511464 | 0,062158658 | 0,305 | 0,158 | 1           | 1,044026736   | 0,957829876     | 1,930379747     |
| HECTD2                                                                                              | 0,015178235 | 0,062105137 | 0,171 | 0,074 | 1           | 1,043988005   | 0,957865411     | 2,310810811     |
| SYNC                                                                                                | 0,000149616 | 0,062102192 | 0,207 | 0,06  | 1           | 1,043985874   | 0,957867366     | 3,45            |
| CSTF2                                                                                               | 0,001952737 | 0,062075871 | 0,049 | 0,004 | 1           | 1,043966828   | 0,957884842     | 12,25           |
| NBEAL2                                                                                              | 0,109440534 | 0,061976565 | 0,061 | 0,025 | 1           | 1,04389497    | 0,957950779     | 2,44            |
| IRAK3                                                                                               | 0,017481575 | 0,061941608 | 0,061 | 0,014 | 1           | 1,043869677   | 0,957973991     | 4,357142857     |
| SMCO4                                                                                               | 0,000171975 | 0,061908276 | 0,11  | 0,018 | 1           | 1,043845559   | 0,957996124     | 6,111111111     |
| RNF144B                                                                                             | 0,111964825 | 0,061823685 | 0,049 | 0,018 | 1           | 1,043784356   | 0,958052297     | 2,722222222     |

Supplementary Table 2

| Differentially expressed genes_keloid-XL_comparing SC-Keloid vs. (SC-Myel, SC-Nonmyel, SC-Nonmyel2) |             |             |       |       |             |               |                 |                 |
|-----------------------------------------------------------------------------------------------------|-------------|-------------|-------|-------|-------------|---------------|-----------------|-----------------|
| gene                                                                                                | p_val       | avg_log2FC  | pct.1 | pct.2 | p_val_adj   | Foldchange_UP | Foldchange_DOWN | Ratio_pct1_pct2 |
| PIK3CD                                                                                              | 0,103792275 | 0,06182201  | 0,037 | 0,011 | 1           | 1,043783145   | 0,958053409     | 3,363636364     |
| IFI27                                                                                               | 0,000765513 | 0,06182065  | 0,415 | 0,2   | 1           | 1,04378216    | 0,958054312     | 2,075           |
| REM1                                                                                                | 0,006523076 | 0,061818053 | 0,061 | 0,011 | 1           | 1,043780282   | 0,958056037     | 5,545454545     |
| ADAMTS15                                                                                            | 0,001208265 | 0,06178108  | 0,11  | 0,025 | 1           | 1,043753533   | 0,95808059      | 4,4             |
| ASB3                                                                                                | 0,001745559 | 0,061737915 | 0,293 | 0,126 | 1           | 1,043722304   | 0,958109256     | 2,325396825     |
| NOL11                                                                                               | 0,030285543 | 0,061703634 | 0,146 | 0,067 | 1           | 1,043697504   | 0,958132022     | 2,179104478     |
| HOXB3                                                                                               | 0,042398422 | 0,061688856 | 0,037 | 0,007 | 1           | 1,043686812   | 0,958141837     | 5,285714286     |
| ABHD16A                                                                                             | 0,000770252 | 0,061677755 | 0,28  | 0,112 | 1           | 1,043678782   | 0,958149209     | 2,5             |
| DUSP14                                                                                              | 0,000347218 | 0,061659461 | 0,244 | 0,084 | 1           | 1,043665548   | 0,958161359     | 2,904761905     |
| RTL10                                                                                               | 0,026010433 | 0,061618102 | 0,049 | 0,011 | 1           | 1,043635628   | 0,958188828     | 4,454545455     |
| RANBP6                                                                                              | 0,015190866 | 0,061611653 | 0,098 | 0,032 | 1           | 1,043630963   | 0,958193112     | 3,0625          |
| VEPH1                                                                                               | 0,063203483 | 0,061548305 | 0,012 | 0     | 1           | 1,043585139   | 0,958235186     | #DIV/0!         |
| PYGL                                                                                                | 0,078768491 | 0,061510696 | 0,146 | 0,077 | 1           | 1,043557935   | 0,958260166     | 1,896103896     |
| CERS1                                                                                               | 0,016343264 | 0,061503071 | 0,244 | 0,119 | 1           | 1,043552419   | 0,958265231     | 2,050420168     |
| TTC13                                                                                               | 0,001423372 | 0,061419858 | 0,073 | 0,011 | 1           | 1,04349223    | 0,958320504     | 6,636363636     |
| SMPDL3A                                                                                             | 0,004089475 | 0,061338503 | 0,073 | 0,014 | 1           | 1,043433388   | 0,958374546     | 5,214285714     |
| CDRT4                                                                                               | 0,00032444  | 0,061334774 | 0,061 | 0,004 | 1           | 1,043430691   | 0,958377024     | 15,25           |
| AGAP1                                                                                               | 0,048744367 | 0,061317478 | 0,354 | 0,211 | 1           | 1,043418181   | 0,958388514     | 1,677725118     |
| FBXO8                                                                                               | 0,000188702 | 0,061256633 | 0,159 | 0,039 | 1           | 1,043374177   | 0,958428934     | 4,076923077     |
| ZNF639                                                                                              | 0,000398607 | 0,061254132 | 0,195 | 0,06  | 1           | 1,043372368   | 0,958430595     | 3,25            |
| SMYD2                                                                                               | 2,80801E-05 | 0,061125915 | 0,171 | 0,035 | 0,592517408 | 1,043279644   | 0,958515778     | 4,885714286     |
| MMP21                                                                                               | 0,063203483 | 0,061014609 | 0,012 | 0     | 1           | 1,043199157   | 0,958589732     | #DIV/0!         |
| MAP3K7CL                                                                                            | 0,001041037 | 0,061008982 | 0,085 | 0,014 | 1           | 1,043195088   | 0,958593471     | 6,071428571     |
| THUMPD3-AS1                                                                                         | 3,6929E-05  | 0,06100452  | 0,293 | 0,095 | 0,779239858 | 1,043191862   | 0,958596435     | 3,084210526     |
| HARS1                                                                                               | 1,57119E-05 | 0,060979226 | 0,268 | 0,077 | 0,331537855 | 1,043173572   | 0,958613242     | 3,480519481     |
| TANGO2                                                                                              | 6,13057E-05 | 0,060972372 | 0,085 | 0,007 | 1           | 1,043168616   | 0,958617796     | 12,14285714     |
| TAF6L                                                                                               | 6,13057E-05 | 0,060892938 | 0,085 | 0,007 | 1           | 1,043111182   | 0,958670578     | 12,14285714     |
| TRIM32                                                                                              | 0,017068103 | 0,060854152 | 0,061 | 0,014 | 1           | 1,043083139   | 0,958696352     | 4,357142857     |
| PPIP5K2                                                                                             | 0,000116217 | 0,060852885 | 0,28  | 0,095 | 1           | 1,043082222   | 0,958697194     | 2,947368421     |
| SLC30A6                                                                                             | 0,004311516 | 0,060850182 | 0,073 | 0,014 | 1           | 1,043080268   | 0,95869899      | 5,214285714     |

Supplementary Table 2

| Differentially expressed genes_keloid-XL_comparing SC-Keloid vs. (SC-Myel, SC-Nonmyel, SC-Nonmyel2) |             |             |       |       |             |               |                 |                 |
|-----------------------------------------------------------------------------------------------------|-------------|-------------|-------|-------|-------------|---------------|-----------------|-----------------|
| gene                                                                                                | p_val       | avg_log2FC  | pct.1 | pct.2 | p_val_adj   | Foldchange_UP | Foldchange_DOWN | Ratio_pct1_pct2 |
| USP3                                                                                                | 0,077011555 | 0,060827565 | 0,11  | 0,053 | 1           | 1,043063916   | 0,95871402      | 2,075471698     |
| DHRS4-AS1                                                                                           | 3,75273E-07 | 0,060815128 | 0,134 | 0,011 | 0,007918625 | 1,043054925   | 0,958722284     | 12,18181818     |
| TRMT1L                                                                                              | 0,001055888 | 0,06080287  | 0,085 | 0,014 | 1           | 1,043046062   | 0,95873043      | 6,071428571     |
| RTP4                                                                                                | 0,009031726 | 0,06073788  | 0,049 | 0,007 | 1           | 1,042999076   | 0,95877362      | 7               |
| TMEM102                                                                                             | 4,89164E-05 | 0,060686576 | 0,073 | 0,004 | 1           | 1,042961986   | 0,958807716     | 18,25           |
| PLAA                                                                                                | 0,005447223 | 0,060679851 | 0,11  | 0,032 | 1           | 1,042957125   | 0,958812185     | 3,4375          |
| NDUFAF6                                                                                             | 0,001692235 | 0,06067329  | 0,159 | 0,049 | 1           | 1,042952382   | 0,958816545     | 3,244897959     |
| PLGLB2                                                                                              | 0,001952737 | 0,060607005 | 0,049 | 0,004 | 1           | 1,042904464   | 0,9588606       | 12,25           |
| TMEM182                                                                                             | 0,065143806 | 0,060507337 | 0,024 | 0,004 | 1           | 1,042832418   | 0,958926845     | 6               |
| RASSF1                                                                                              | 0,00486739  | 0,060501855 | 0,341 | 0,161 | 1           | 1,042828455   | 0,958930489     | 2,118012422     |
| SMIM26                                                                                              | 0,001592539 | 0,060485709 | 0,439 | 0,214 | 1           | 1,042816785   | 0,95894122      | 2,051401869     |
| ADCY4                                                                                               | 0,011128779 | 0,060466295 | 0,037 | 0,004 | 1           | 1,042802752   | 0,958954124     | 9,25            |
| FOLR1                                                                                               | 0,001220269 | 0,060445913 | 0,037 | 0     | 1           | 1,04278802    | 0,958967672     | #DIV/0!         |
| TMEM17                                                                                              | 0,008145887 | 0,060410136 | 0,098 | 0,028 | 1           | 1,04276216    | 0,958991454     | 3,5             |
| MT-ND6                                                                                              | 0,043000486 | 0,0603199   | 0,037 | 0,007 | 1           | 1,04269694    | 0,959051438     | 5,285714286     |
| PITPNB                                                                                              | 0,001354578 | 0,060318554 | 0,5   | 0,242 | 1           | 1,042695968   | 0,959052332     | 2,066115702     |
| IFT140                                                                                              | 0,009174744 | 0,060226897 | 0,049 | 0,007 | 1           | 1,042629726   | 0,959113265     | 7               |
| VAR51                                                                                               | 0,000291801 | 0,060203273 | 0,22  | 0,07  | 1           | 1,042612653   | 0,95912897      | 3,142857143     |
| MLH3                                                                                                | 0,002075387 | 0,060198982 | 0,134 | 0,039 | 1           | 1,042609551   | 0,959131823     | 3,435897436     |
| GORAB                                                                                               | 8,9681E-05  | 0,060176025 | 0,159 | 0,035 | 1           | 1,042592961   | 0,959147085     | 4,542857143     |
| SYT10                                                                                               | 6,246E-05   | 0,060121441 | 0,085 | 0,007 | 1           | 1,042553516   | 0,959183375     | 12,14285714     |
| ZNF19                                                                                               | 0,001220269 | 0,060108052 | 0,037 | 0     | 1           | 1,04254384    | 0,959192277     | #DIV/0!         |
| CDK6                                                                                                | 0,002062384 | 0,060096019 | 0,5   | 0,246 | 1           | 1,042535145   | 0,959200277     | 2,032520325     |
| TBC1D2                                                                                              | 0,065143806 | 0,059994795 | 0,024 | 0,004 | 1           | 1,042462      | 0,95926758      | 6               |
| CDKN3                                                                                               | 0,001802592 | 0,059988734 | 0,061 | 0,007 | 1           | 1,04245762    | 0,95927161      | 8,714285714     |
| MRPL44                                                                                              | 0,002284574 | 0,059970622 | 0,171 | 0,06  | 1           | 1,042444533   | 0,959283653     | 2,85            |
| STAU2                                                                                               | 0,015064968 | 0,059890875 | 0,11  | 0,039 | 1           | 1,042386912   | 0,95933668      | 2,820512821     |
| TGS1                                                                                                | 0,000381936 | 0,059871397 | 0,256 | 0,091 | 1           | 1,042372838   | 0,959349633     | 2,813186813     |
| ENGASE                                                                                              | 0,202985042 | 0,059852552 | 0,073 | 0,039 | 1           | 1,042359223   | 0,959362164     | 1,871794872     |
| COP1                                                                                                | 0,02471232  | 0,059826794 | 0,098 | 0,035 | 1           | 1,042340613   | 0,959379293     | 2,8             |

Supplementary Table 2

| Differentially expressed genes_keloid-XL_comparing SC-Keloid vs. (SC-Myel, SC-Nonmyel, SC-Nonmyel2) |             |             |       |       |             |               |                 |                 |
|-----------------------------------------------------------------------------------------------------|-------------|-------------|-------|-------|-------------|---------------|-----------------|-----------------|
| gene                                                                                                | p_val       | avg_log2FC  | pct.1 | pct.2 | p_val_adj   | Foldchange_UP | Foldchange_DOWN | Ratio_pct1_pct2 |
| EMP1                                                                                                | 0,00052017  | 0,059816088 | 0,829 | 0,467 | 1           | 1,042332878   | 0,959386412     | 1,7751606       |
| MYO5A                                                                                               | 1,08253E-06 | 0,059750365 | 0,378 | 0,112 | 0,022842468 | 1,042285395   | 0,959430119     | 3,375           |
| PCNA                                                                                                | 0,000298566 | 0,059643166 | 0,28  | 0,102 | 1           | 1,042207951   | 0,959501411     | 2,745098039     |
| FZD2                                                                                                | 0,010546634 | 0,05961817  | 0,073 | 0,018 | 1           | 1,042189894   | 0,959518036     | 4,055555556     |
| DPF1                                                                                                | 2,80682E-05 | 0,059562567 | 0,061 | 0     | 0,592266086 | 1,042149727   | 0,959555018     | #DIV/0!         |
| TGFBRAP1                                                                                            | 0,000124579 | 0,059545279 | 0,146 | 0,032 | 1           | 1,042137239   | 0,959566516     | 4,5625          |
| SUV39H2                                                                                             | 0,001742498 | 0,059525151 | 0,061 | 0,007 | 1           | 1,0421227     | 0,959579904     | 8,714285714     |
| FRMPD4                                                                                              | 0,000183568 | 0,059488243 | 0,049 | 0     | 1           | 1,04209604    | 0,959604453     | #DIV/0!         |
| CYB5D1                                                                                              | 0,02737604  | 0,059482172 | 0,049 | 0,011 | 1           | 1,042091655   | 0,959608491     | 4,454545455     |
| UBR4                                                                                                | 2,78974E-08 | 0,059468618 | 0,39  | 0,102 | 0,000588662 | 1,042081864   | 0,959617506     | 3,823529412     |
| LYSMD4                                                                                              | 0,00032444  | 0,059430864 | 0,061 | 0,004 | 1           | 1,042054595   | 0,959642619     | 15,25           |
| FZD1                                                                                                | 0,008226643 | 0,059389554 | 0,098 | 0,028 | 1           | 1,042024757   | 0,959670098     | 3,5             |
| SNAPC5                                                                                              | 6,48528E-07 | 0,059247405 | 0,22  | 0,042 | 0,013684591 | 1,041922091   | 0,959764659     | 5,238095238     |
| MRPL39                                                                                              | 3,4874E-05  | 0,059198391 | 0,183 | 0,042 | 0,73587676  | 1,041886694   | 0,959797266     | 4,357142857     |
| ODF3B                                                                                               | 0,008890703 | 0,059192781 | 0,049 | 0,007 | 1           | 1,041882642   | 0,959800999     | 7               |
| MSANTD2                                                                                             | 0,036993563 | 0,059144572 | 0,11  | 0,046 | 1           | 1,041847827   | 0,959833072     | 2,391304348     |
| C1QTNF4                                                                                             | 0,02595188  | 0,059140655 | 0,098 | 0,035 | 1           | 1,041844998   | 0,959835678     | 2,8             |
| PINK1-AS                                                                                            | 0,001220269 | 0,059099052 | 0,037 | 0     | 1           | 1,041814955   | 0,959863357     | #DIV/0!         |
| ARL6                                                                                                | 0,00032444  | 0,059076152 | 0,061 | 0,004 | 1           | 1,041798418   | 0,959878593     | 15,25           |
| PAXIP1                                                                                              | 0,567510207 | 0,059054449 | 0,037 | 0,025 | 1           | 1,041782746   | 0,959893033     | 1,48            |
| LIN7B                                                                                               | 0,008308113 | 0,059027412 | 0,098 | 0,028 | 1           | 1,041763223   | 0,959911022     | 3,5             |
| DDX41                                                                                               | 0,000807603 | 0,059012367 | 0,232 | 0,084 | 1           | 1,041752359   | 0,959921033     | 2,761904762     |
| TCERG1                                                                                              | 0,002606467 | 0,058996141 | 0,256 | 0,109 | 1           | 1,041740643   | 0,959931829     | 2,348623853     |
| HMGCL                                                                                               | 2,67471E-05 | 0,058992998 | 0,171 | 0,035 | 0,564390132 | 1,041738373   | 0,95993392      | 4,885714286     |
| GAS2L1                                                                                              | 2,30359E-05 | 0,058957982 | 0,22  | 0,056 | 0,486079608 | 1,041713089   | 0,959957219     | 3,928571429     |
| FNDC10                                                                                              | 0,011339437 | 0,05889478  | 0,037 | 0,004 | 1           | 1,041667455   | 0,959999274     | 9,25            |
| DBR1                                                                                                | 0,193178656 | 0,058880876 | 0,037 | 0,014 | 1           | 1,041657415   | 0,960008526     | 2,642857143     |
| SCT                                                                                                 | 0,008401736 | 0,058782538 | 0,024 | 0     | 1           | 1,041586415   | 0,960073965     | #DIV/0!         |
| REEP4                                                                                               | 0,001003155 | 0,058700629 | 0,134 | 0,035 | 1           | 1,041527281   | 0,960128475     | 3,828571429     |
| PGPEP1                                                                                              | 0,040856169 | 0,058664887 | 0,085 | 0,032 | 1           | 1,041501478   | 0,960152262     | 2,65625         |

Supplementary Table 2

| Differentially expressed genes_keloid-XL_comparing SC-Keloid vs. (SC-Myel, SC-Nonmyel, SC-Nonmyel2) |             |             |       |       |             |               |                 |                 |
|-----------------------------------------------------------------------------------------------------|-------------|-------------|-------|-------|-------------|---------------|-----------------|-----------------|
| gene                                                                                                | p_val       | avg_log2FC  | pct.1 | pct.2 | p_val_adj   | Foldchange_UP | Foldchange_DOWN | Ratio_pct1_pct2 |
| DSG2                                                                                                | 5,32686E-05 | 0,058652775 | 0,073 | 0,004 | 1           | 1,041492734   | 0,960160323     | 18,25           |
| TSPAN5                                                                                              | 2,42558E-05 | 0,058647965 | 0,415 | 0,154 | 0,511822217 | 1,041489262   | 0,960163524     | 2,694805195     |
| GDF15                                                                                               | 0,065143806 | 0,058497213 | 0,024 | 0,004 | 1           | 1,041380439   | 0,96026386      | 6               |
| RPUSD3                                                                                              | 0,001638871 | 0,058465627 | 0,122 | 0,032 | 1           | 1,041357639   | 0,960284884     | 3,8125          |
| ANKMY1                                                                                              | 0,892889287 | 0,058457675 | 0,012 | 0,011 | 1           | 1,041351899   | 0,960290177     | 1,090909091     |
| GTF2IRD1                                                                                            | 0,208267874 | 0,058424353 | 0,098 | 0,056 | 1           | 1,041327848   | 0,960312357     | 1,75            |
| TMEM68                                                                                              | 0,000432775 | 0,058409823 | 0,11  | 0,021 | 1           | 1,04131736    | 0,960322029     | 5,238095238     |
| ZFHX2                                                                                               | 0,065143806 | 0,058295018 | 0,024 | 0,004 | 1           | 1,041234499   | 0,960398451     | 6               |
| NOL9                                                                                                | 0,005729257 | 0,058274341 | 0,122 | 0,039 | 1           | 1,041219576   | 0,960412216     | 3,128205128     |
| DMWD                                                                                                | 0,002048849 | 0,058272004 | 0,232 | 0,091 | 1           | 1,041217889   | 0,960413772     | 2,549450549     |
| RNASEH2B-AS1                                                                                        | 0,000183568 | 0,05820823  | 0,049 | 0     | 1           | 1,041171864   | 0,960456227     | #DIV/0!         |
| RAB15                                                                                               | 0,000183568 | 0,058190731 | 0,049 | 0     | 1           | 1,041159234   | 0,960467877     | #DIV/0!         |
| LRRC14                                                                                              | 0,016663237 | 0,058145356 | 0,061 | 0,014 | 1           | 1,041126489   | 0,960498086     | 4,357142857     |
| GSKIP                                                                                               | 0,001013666 | 0,058125293 | 0,134 | 0,035 | 1           | 1,041112011   | 0,960511443     | 3,828571429     |
| MANEAL                                                                                              | 0,001220269 | 0,05811781  | 0,037 | 0     | 1           | 1,041106611   | 0,960516425     | #DIV/0!         |
| GOLGA1                                                                                              | 0,003743072 | 0,058078094 | 0,134 | 0,042 | 1           | 1,04107795    | 0,960542868     | 3,19047619      |
| CDH24                                                                                               | 0,025349996 | 0,058057116 | 0,049 | 0,011 | 1           | 1,041062813   | 0,960556835     | 4,454545455     |
| SH3TC2                                                                                              | 0,113968254 | 0,058048557 | 0,049 | 0,018 | 1           | 1,041056636   | 0,960562533     | 2,722222222     |
| PRPF40B                                                                                             | 0,00140181  | 0,058026163 | 0,073 | 0,011 | 1           | 1,041040476   | 0,960577444     | 6,636363636     |
| MED15                                                                                               | 0,000998569 | 0,058017638 | 0,524 | 0,249 | 1           | 1,041034325   | 0,96058312      | 2,104417671     |
| SPA17                                                                                               | 0,00022402  | 0,05795228  | 0,098 | 0,014 | 1           | 1,040987165   | 0,960626638     | 7               |
| GATA3                                                                                               | 0,065143806 | 0,057924446 | 0,024 | 0,004 | 1           | 1,040967081   | 0,960645172     | 6               |
| LDAF1                                                                                               | 0,003205568 | 0,057911506 | 0,122 | 0,035 | 1           | 1,040957744   | 0,960653788     | 3,485714286     |
| NUDT21                                                                                              | 0,000655292 | 0,05790767  | 0,28  | 0,109 | 1           | 1,040954976   | 0,960656342     | 2,568807339     |
| ALK                                                                                                 | 0,00032444  | 0,057865787 | 0,061 | 0,004 | 1           | 1,040924756   | 0,960684232     | 15,25           |
| CASC3                                                                                               | 0,003065232 | 0,057821082 | 0,39  | 0,189 | 1           | 1,040892502   | 0,960714001     | 2,063492063     |
| LRFN3                                                                                               | 0,067584209 | 0,057815812 | 0,073 | 0,028 | 1           | 1,0408887     | 0,96071751      | 2,607142857     |
| THOC3                                                                                               | 2,33847E-05 | 0,057728705 | 0,171 | 0,035 | 0,493439878 | 1,040825855   | 0,960775518     | 4,885714286     |
| WDR54                                                                                               | 1,40243E-05 | 0,057715767 | 0,183 | 0,039 | 0,295927476 | 1,040816521   | 0,960784134     | 4,692307692     |
| ZNF449                                                                                              | 0,05889129  | 0,057694637 | 0,049 | 0,014 | 1           | 1,040801277   | 0,960798206     | 3,5             |



Supplementary Table 2

| Differentially expressed genes_keloid-XL_comparing SC-Keloid vs. (SC-Myel, SC-Nonmyel, SC-Nonmyel2) |             |             |       |       |             |               |                 |                 |
|-----------------------------------------------------------------------------------------------------|-------------|-------------|-------|-------|-------------|---------------|-----------------|-----------------|
| gene                                                                                                | p_val       | avg_log2FC  | pct.1 | pct.2 | p_val_adj   | Foldchange_UP | Foldchange_DOWN | Ratio_pct1_pct2 |
| PAX8                                                                                                | 0,000183568 | 0,057679644 | 0,049 | 0     | 1           | 1,04079046    | 0,960808191     | #DIV/0!         |
| RAB28                                                                                               | 0,000146815 | 0,057566913 | 0,171 | 0,042 | 1           | 1,040709137   | 0,960883271     | 4,071428571     |
| AKR1C3                                                                                              | 0,422305786 | 0,05753448  | 0,037 | 0,021 | 1           | 1,040685742   | 0,960904873     | 1,761904762     |
| SDSL                                                                                                | 8,66134E-06 | 0,057456121 | 0,085 | 0,004 | 0,1827629   | 1,040629219   | 0,960957065     | 21,25           |
| TMEM104                                                                                             | 0,000234367 | 0,0574417   | 0,098 | 0,014 | 1           | 1,040618817   | 0,960966671     | 7               |
| DUSP12                                                                                              | 1,08068E-05 | 0,057440302 | 0,22  | 0,053 | 0,228033983 | 1,040617809   | 0,960967602     | 4,150943396     |
| IHO1                                                                                                | 0,001220269 | 0,057435753 | 0,037 | 0     | 1           | 1,040614527   | 0,960970632     | #DIV/0!         |
| SMARCA1                                                                                             | 0,001041037 | 0,05741864  | 0,085 | 0,014 | 1           | 1,040602184   | 0,960982031     | 6,071428571     |
| CSNK2A1                                                                                             | 0,00042088  | 0,057407951 | 0,402 | 0,175 | 1           | 1,040594474   | 0,960989151     | 2,297142857     |
| NME5                                                                                                | 0,183494953 | 0,05734545  | 0,024 | 0,007 | 1           | 1,040549394   | 0,961030784     | 3,428571429     |
| CLBA1                                                                                               | 0,001802592 | 0,05728319  | 0,061 | 0,007 | 1           | 1,040504489   | 0,961072259     | 8,714285714     |
| TMEM218                                                                                             | 0,000175126 | 0,057250115 | 0,183 | 0,049 | 1           | 1,040480635   | 0,961094293     | 3,734693878     |
| LCA5L                                                                                               | 0,009031726 | 0,057150128 | 0,049 | 0,007 | 1           | 1,040408526   | 0,961160904     | 7               |
| ZSCAN9                                                                                              | 0,006163779 | 0,057033434 | 0,061 | 0,011 | 1           | 1,040324375   | 0,961238652     | 5,545454545     |
| LAMC3                                                                                               | 0,008401736 | 0,057030501 | 0,024 | 0     | 1           | 1,04032226    | 0,961240606     | #DIV/0!         |
| PPP1R26                                                                                             | 0,041853847 | 0,056892743 | 0,085 | 0,032 | 1           | 1,040222929   | 0,961332396     | 2,65625         |
| LINC01561                                                                                           | 0,001220269 | 0,056868076 | 0,037 | 0     | 1           | 1,040205143   | 0,961348833     | #DIV/0!         |
| HMBS                                                                                                | 0,001853689 | 0,056801571 | 0,098 | 0,021 | 1           | 1,040157193   | 0,961393149     | 4,666666667     |
| LACTB2                                                                                              | 0,002584599 | 0,056782467 | 0,11  | 0,028 | 1           | 1,040143419   | 0,96140588      | 3,928571429     |
| PROCA1                                                                                              | 0,066254792 | 0,056771908 | 0,024 | 0,004 | 1           | 1,040135807   | 0,961412917     | 6               |
| LRRC20                                                                                              | 0,00032444  | 0,056762824 | 0,061 | 0,004 | 1           | 1,040129257   | 0,961418971     | 15,25           |
| PFN4                                                                                                | 0,066254792 | 0,056731786 | 0,024 | 0,004 | 1           | 1,040106881   | 0,961439655     | 6               |
| HDAC2                                                                                               | 0,001919235 | 0,056629083 | 0,439 | 0,214 | 1           | 1,04003284    | 0,9615081       | 2,051401869     |
| TBCCD1                                                                                              | 0,000234367 | 0,056551886 | 0,098 | 0,014 | 1           | 1,03997719    | 0,961559551     | 7               |
| RPL9                                                                                                | 0,247038789 | 0,056519107 | 0,927 | 0,86  | 1           | 1,039953561   | 0,961581399     | 1,077906977     |
| PPP2R5B                                                                                             | 1,03455E-06 | 0,056441517 | 0,207 | 0,039 | 0,021830049 | 1,039897633   | 0,961633115     | 5,307692308     |
| MYO1D                                                                                               | 0,042398422 | 0,056437092 | 0,037 | 0,007 | 1           | 1,039894443   | 0,961636065     | 5,285714286     |
| LMAN1                                                                                               | 0,000453761 | 0,056419154 | 0,598 | 0,288 | 1           | 1,039881514   | 0,961648021     | 2,076388889     |
| CCDC125                                                                                             | 0,008401736 | 0,056389206 | 0,024 | 0     | 1           | 1,039859928   | 0,961667984     | #DIV/0!         |
| PPFIBP2                                                                                             | 0,072365958 | 0,056291726 | 0,122 | 0,06  | 1           | 1,039789669   | 0,961732964     | 2,033333333     |

Supplementary Table 2

| Differentially expressed genes_keloid-XL_comparing SC-Keloid vs. (SC-Myel, SC-Nonmyel, SC-Nonmyel2) |             |             |       |       |             |               |                 |                 |
|-----------------------------------------------------------------------------------------------------|-------------|-------------|-------|-------|-------------|---------------|-----------------|-----------------|
| gene                                                                                                | p_val       | avg_log2FC  | pct.1 | pct.2 | p_val_adj   | Foldchange_UP | Foldchange_DOWN | Ratio_pct1_pct2 |
| PAIP2                                                                                               | 0,000820553 | 0,05622242  | 0,585 | 0,284 | 1           | 1,03973972    | 0,961779166     | 2,059859155     |
| FAM210A                                                                                             | 0,025532849 | 0,056201013 | 0,098 | 0,035 | 1           | 1,039724291   | 0,961793437     | 2,8             |
| USP7                                                                                                | 0,000232722 | 0,056114717 | 0,354 | 0,137 | 1           | 1,039662101   | 0,961850969     | 2,583941606     |
| MINDY4                                                                                              | 0,001952737 | 0,056011847 | 0,049 | 0,004 | 1           | 1,039587972   | 0,961919555     | 12,25           |
| DENR                                                                                                | 0,000214813 | 0,055962984 | 0,293 | 0,109 | 1           | 1,039552762   | 0,961952136     | 2,688073394     |
| B3GALT2                                                                                             | 4,95841E-05 | 0,055868289 | 0,11  | 0,014 | 1           | 1,039484531   | 0,962015278     | 7,857142857     |
| TSPAN6                                                                                              | 0,000961052 | 0,055859442 | 0,171 | 0,053 | 1           | 1,039478157   | 0,962021177     | 3,226415094     |
| FAM47E                                                                                              | 0,001833348 | 0,055772953 | 0,061 | 0,007 | 1           | 1,039415842   | 0,962078852     | 8,714285714     |
| SNAP47                                                                                              | 0,000302387 | 0,055730396 | 0,146 | 0,035 | 1           | 1,039385181   | 0,962107232     | 4,171428571     |
| KIRREL3-AS3                                                                                         | 0,001220269 | 0,055726279 | 0,037 | 0     | 1           | 1,039382215   | 0,962109978     | #DIV/0!         |
| DHRS11                                                                                              | 0,000174436 | 0,05572134  | 0,11  | 0,018 | 1           | 1,039378657   | 0,962113271     | 6,111111111     |
| DIMT1                                                                                               | 0,000614042 | 0,055668113 | 0,195 | 0,063 | 1           | 1,039340311   | 0,962148768     | 3,095238095     |
| OSTF1                                                                                               | 0,002758267 | 0,055591452 | 0,341 | 0,158 | 1           | 1,039285085   | 0,962199895     | 2,158227848     |
| NCBP1                                                                                               | 0,036803449 | 0,055536038 | 0,061 | 0,018 | 1           | 1,039245166   | 0,962236855     | 3,388888889     |
| SPOUT1                                                                                              | 0,001621701 | 0,055486221 | 0,122 | 0,032 | 1           | 1,039209281   | 0,962270082     | 3,8125          |
| DENND6B                                                                                             | 3,8435E-05  | 0,055473022 | 0,122 | 0,018 | 0,811016692 | 1,039199774   | 0,962278885     | 6,777777778     |
| RSPH14                                                                                              | 0,011553628 | 0,055323655 | 0,037 | 0,004 | 1           | 1,039092187   | 0,962378519     | 9,25            |
| PPP1R13L                                                                                            | 0,112963039 | 0,055295287 | 0,049 | 0,018 | 1           | 1,039071756   | 0,962397442     | 2,722222222     |
| SACS                                                                                                | 0,000863362 | 0,055275275 | 0,159 | 0,046 | 1           | 1,039057343   | 0,962410792     | 3,456521739     |
| SNX19                                                                                               | 0,000225277 | 0,055197323 | 0,134 | 0,028 | 1           | 1,039001202   | 0,962462794     | 4,785714286     |
| TRPT1                                                                                               | 3,1659E-06  | 0,055192546 | 0,28  | 0,074 | 0,06680361  | 1,038997761   | 0,962465981     | 3,783783784     |
| LRP1B                                                                                               | 0,043000486 | 0,055192094 | 0,037 | 0,007 | 1           | 1,038997436   | 0,962466282     | 5,285714286     |
| KSR2                                                                                                | 0,001952737 | 0,055169369 | 0,049 | 0,004 | 1           | 1,03898107    | 0,962481443     | 12,25           |
| ZCWPW1                                                                                              | 0,103792275 | 0,055165818 | 0,037 | 0,011 | 1           | 1,038978513   | 0,962483812     | 3,363636364     |
| EGFL7                                                                                               | 0,001026381 | 0,055112645 | 0,085 | 0,014 | 1           | 1,03894022    | 0,962519287     | 6,071428571     |
| CUL5                                                                                                | 0,001168951 | 0,055086664 | 0,195 | 0,067 | 1           | 1,03892151    | 0,962536621     | 2,910447761     |
| STRN4                                                                                               | 0,040113022 | 0,055072297 | 0,232 | 0,126 | 1           | 1,038911165   | 0,962546206     | 1,841269841     |
| PRPF18                                                                                              | 2,24871E-06 | 0,055069906 | 0,207 | 0,042 | 0,047450017 | 1,038909443   | 0,962547801     | 4,928571429     |
| FGF10-AS1                                                                                           | 0,008401736 | 0,054999492 | 0,024 | 0     | 1           | 1,038858737   | 0,962594782     | #DIV/0!         |
| P2RX6                                                                                               | 0,065143806 | 0,054987829 | 0,024 | 0,004 | 1           | 1,038850339   | 0,962602564     | 6               |

Supplementary Table 2

| Differentially expressed genes_keloid-XL_comparing SC-Keloid vs. (SC-Myel, SC-Nonmyel, SC-Nonmyel2) |             |             |       |       |             |               |                 |                 |
|-----------------------------------------------------------------------------------------------------|-------------|-------------|-------|-------|-------------|---------------|-----------------|-----------------|
| gene                                                                                                | p_val       | avg_log2FC  | pct.1 | pct.2 | p_val_adj   | Foldchange_UP | Foldchange_DOWN | Ratio_pct1_pct2 |
| DCPS                                                                                                | 4,27E-06    | 0,054926131 | 0,268 | 0,07  | 0,090101259 | 1,038805913   | 0,962643731     | 3,828571429     |
| GLT8D2                                                                                              | 0,063203483 | 0,054919165 | 0,012 | 0     | 1           | 1,038800897   | 0,962648379     | #DIV/0!         |
| VAR52                                                                                               | 0,002755303 | 0,054854262 | 0,11  | 0,028 | 1           | 1,038754165   | 0,962691687     | 3,928571429     |
| AAMP                                                                                                | 9,03059E-05 | 0,054841052 | 0,317 | 0,112 | 1           | 1,038744654   | 0,962700502     | 2,830357143     |
| CHCHD7                                                                                              | 0,000606013 | 0,054830535 | 0,183 | 0,056 | 1           | 1,038737082   | 0,96270752      | 3,267857143     |
| ZFP37                                                                                               | 5,32686E-05 | 0,054819067 | 0,073 | 0,004 | 1           | 1,038728825   | 0,962715173     | 18,25           |
| PHC1                                                                                                | 0,003853665 | 0,054788358 | 0,207 | 0,084 | 1           | 1,038706715   | 0,962735665     | 2,464285714     |
| PIK3R4                                                                                              | 0,036427227 | 0,054765172 | 0,061 | 0,018 | 1           | 1,038690022   | 0,962751137     | 3,388888889     |
| UROS                                                                                                | 7,72204E-10 | 0,05474109  | 0,329 | 0,06  | 1,62943E-05 | 1,038672684   | 0,962767208     | 5,483333333     |
| TIMM44                                                                                              | 0,000715732 | 0,054714328 | 0,293 | 0,116 | 1           | 1,038653416   | 0,962785068     | 2,525862069     |
| ZMYND15                                                                                             | 0,347088417 | 0,054713515 | 0,012 | 0,004 | 1           | 1,038652831   | 0,96278561      | 3               |
| TMEM169                                                                                             | 4,32324E-06 | 0,054652371 | 0,073 | 0     | 0,09122464  | 1,038608812   | 0,962826416     | #DIV/0!         |
| AVEN                                                                                                | 0,008065843 | 0,054623427 | 0,098 | 0,028 | 1           | 1,038587975   | 0,962845733     | 3,5             |
| IPO13                                                                                               | 2,74919E-05 | 0,054564657 | 0,22  | 0,056 | 0,580107244 | 1,038545668   | 0,962884956     | 3,928571429     |
| SH2D3C                                                                                              | 0,347088417 | 0,054485014 | 0,012 | 0,004 | 1           | 1,038488337   | 0,962938113     | 3               |
| PKD1L1                                                                                              | 0,008401736 | 0,054446437 | 0,024 | 0     | 1           | 1,038460569   | 0,962963862     | #DIV/0!         |
| IFT80                                                                                               | 0,000302452 | 0,054392861 | 0,171 | 0,046 | 1           | 1,038422005   | 0,962999623     | 3,717391304     |
| DNAJA3                                                                                              | 0,000631225 | 0,054370083 | 0,146 | 0,039 | 1           | 1,03840561    | 0,963014828     | 3,743589744     |
| PHKB                                                                                                | 0,009669783 | 0,054358803 | 0,11  | 0,035 | 1           | 1,038397491   | 0,963022358     | 3,142857143     |
| PPCDC                                                                                               | 1,10381E-05 | 0,054272379 | 0,098 | 0,007 | 0,232915863 | 1,038335288   | 0,963080049     | 14              |
| PRUNE1                                                                                              | 0,035684609 | 0,054244659 | 0,061 | 0,018 | 1           | 1,038315338   | 0,963098553     | 3,388888889     |
| ZC2HC1A                                                                                             | 0,000998742 | 0,054097502 | 0,244 | 0,091 | 1           | 1,038209434   | 0,963196796     | 2,681318681     |
| MORF4L1                                                                                             | 0,027723624 | 0,054065296 | 0,841 | 0,677 | 1           | 1,038186257   | 0,963218298     | 1,242245199     |
| SIN3B                                                                                               | 0,010007568 | 0,05406241  | 0,195 | 0,084 | 1           | 1,038184181   | 0,963220225     | 2,321428571     |
| SLC41A2                                                                                             | 0,001041037 | 0,054049992 | 0,085 | 0,014 | 1           | 1,038175245   | 0,963228516     | 6,071428571     |
| CCDC40                                                                                              | 0,001220269 | 0,054034368 | 0,037 | 0     | 1           | 1,038164002   | 0,963238947     | #DIV/0!         |
| AGPAT3                                                                                              | 0,000138689 | 0,054020901 | 0,207 | 0,06  | 1           | 1,038154311   | 0,963247939     | 3,45            |
| CCDC47                                                                                              | 0,00081557  | 0,054005234 | 0,561 | 0,263 | 1           | 1,038143037   | 0,963258399     | 2,133079848     |
| SCAMP2                                                                                              | 0,000575761 | 0,053833416 | 0,244 | 0,088 | 1           | 1,038019406   | 0,963373126     | 2,772727273     |
| PITPNC1                                                                                             | 0,261979564 | 0,053814521 | 0,049 | 0,025 | 1           | 1,038005812   | 0,963385743     | 1,96            |

Supplementary Table 2

| Differentially expressed genes_keloid-XL_comparing SC-Keloid vs. (SC-Myel, SC-Nonmyel, SC-Nonmyel2) |             |             |       |       |             |               |                 |                 |
|-----------------------------------------------------------------------------------------------------|-------------|-------------|-------|-------|-------------|---------------|-----------------|-----------------|
| gene                                                                                                | p_val       | avg_log2FC  | pct.1 | pct.2 | p_val_adj   | Foldchange_UP | Foldchange_DOWN | Ratio_pct1_pct2 |
| ZNF471                                                                                              | 0,911002271 | 0,053742739 | 0,012 | 0,014 | 1           | 1,037954167   | 0,963433678     | 0,857142857     |
| ZNF292                                                                                              | 0,00315705  | 0,053710698 | 0,329 | 0,154 | 1           | 1,037931114   | 0,963455075     | 2,136363636     |
| PTCD2                                                                                               | 2,80682E-05 | 0,053691173 | 0,061 | 0     | 0,592266086 | 1,037917067   | 0,963468115     | #DIV/0!         |
| DDR2                                                                                                | 4,05831E-05 | 0,053671223 | 0,366 | 0,133 | 0,856344048 | 1,037902715   | 0,963481438     | 2,751879699     |
| TMEM50B                                                                                             | 0,000150077 | 0,05361887  | 0,402 | 0,161 | 1           | 1,037865052   | 0,963516402     | 2,49689441      |
| FBXL5                                                                                               | 0,000853855 | 0,053600412 | 0,207 | 0,07  | 1           | 1,037851773   | 0,963528729     | 2,957142857     |
| H2BC13                                                                                              | 0,063203483 | 0,053589144 | 0,012 | 0     | 1           | 1,037843668   | 0,963536254     | #DIV/0!         |
| GALC                                                                                                | 0,000472068 | 0,053558804 | 0,207 | 0,067 | 1           | 1,037821842   | 0,963556518     | 3,089552239     |
| PCDH18                                                                                              | 0,066254792 | 0,053553495 | 0,024 | 0,004 | 1           | 1,037818023   | 0,963560063     | 6               |
| ZNF770                                                                                              | 3,64035E-05 | 0,053533855 | 0,207 | 0,053 | 0,768150495 | 1,037803895   | 0,963573181     | 3,905660377     |
| GPN3                                                                                                | 0,000271022 | 0,05352675  | 0,232 | 0,077 | 1           | 1,037798784   | 0,963577926     | 3,012987013     |
| ZNF30                                                                                               | 0,342070304 | 0,053456863 | 0,024 | 0,011 | 1           | 1,037748512   | 0,963624605     | 2,181818182     |
| MRTFB                                                                                               | 0,000197116 | 0,053448845 | 0,134 | 0,028 | 1           | 1,037742745   | 0,963629961     | 4,785714286     |
| SIRT5                                                                                               | 0,016864604 | 0,053353694 | 0,061 | 0,014 | 1           | 1,037674304   | 0,963693518     | 4,357142857     |
| TRNP1                                                                                               | 1,25823E-05 | 0,053289272 | 0,256 | 0,07  | 0,265499884 | 1,037627969   | 0,963736551     | 3,657142857     |
| RPE                                                                                                 | 0,000453449 | 0,053274656 | 0,171 | 0,049 | 1           | 1,037617456   | 0,963746315     | 3,489795918     |
| ARHGDI                                                                                              | 0,911002271 | 0,053254281 | 0,012 | 0,014 | 1           | 1,037602802   | 0,963759926     | 0,857142857     |
| OGFOD1                                                                                              | 0,025535806 | 0,053243743 | 0,11  | 0,042 | 1           | 1,037595223   | 0,963766966     | 2,619047619     |
| ANAPC1                                                                                              | 0,042518051 | 0,053103544 | 0,11  | 0,046 | 1           | 1,037494396   | 0,963860628     | 2,391304348     |
| PJA2                                                                                                | 0,174519833 | 0,053081687 | 0,732 | 0,491 | 1           | 1,037478678   | 0,963875231     | 1,490835031     |
| METTL6                                                                                              | 0,112963039 | 0,053028431 | 0,049 | 0,018 | 1           | 1,037440381   | 0,963910812     | 2,722222222     |
| TMEM254-AS1                                                                                         | 0,011553628 | 0,052967804 | 0,037 | 0,004 | 1           | 1,037396785   | 0,963951319     | 9,25            |
| ZNF782                                                                                              | 0,025678378 | 0,052816539 | 0,049 | 0,011 | 1           | 1,037288021   | 0,964052394     | 4,454545455     |
| TPRG1L                                                                                              | 0,00381076  | 0,052813933 | 0,134 | 0,042 | 1           | 1,037286148   | 0,964054135     | 3,19047619      |
| FAM153CP                                                                                            | 0,0059909   | 0,052793614 | 0,061 | 0,011 | 1           | 1,037271538   | 0,964067713     | 5,545454545     |
| MIGA1                                                                                               | 0,054199044 | 0,052792363 | 0,195 | 0,105 | 1           | 1,037270638   | 0,96406855      | 1,857142857     |
| ABHD4                                                                                               | 0,025343006 | 0,052785739 | 0,11  | 0,042 | 1           | 1,037265876   | 0,964072976     | 2,619047619     |
| FRA10AC1                                                                                            | 0,004409658 | 0,052764147 | 0,195 | 0,077 | 1           | 1,037250352   | 0,964087404     | 2,532467532     |
| ARHGAP29                                                                                            | 0,50438121  | 0,052656304 | 0,073 | 0,053 | 1           | 1,03717282    | 0,964159474     | 1,377358491     |
| FBXL18                                                                                              | 0,000344207 | 0,052628385 | 0,073 | 0,007 | 1           | 1,037152748   | 0,964178132     | 10,42857143     |

Supplementary Table 2

| Differentially expressed genes_keloid-XL_comparing SC-Keloid vs. (SC-Myel, SC-Nonmyel, SC-Nonmyel2) |             |             |       |       |             |               |                 |                 |
|-----------------------------------------------------------------------------------------------------|-------------|-------------|-------|-------|-------------|---------------|-----------------|-----------------|
| gene                                                                                                | p_val       | avg_log2FC  | pct.1 | pct.2 | p_val_adj   | Foldchange_UP | Foldchange_DOWN | Ratio_pct1_pct2 |
| EIPR1                                                                                               | 0,001222478 | 0,052625911 | 0,11  | 0,025 | 1           | 1,03715097    | 0,964179786     | 4,4             |
| EHHADH                                                                                              | 0,001220269 | 0,052589281 | 0,037 | 0     | 1           | 1,037124637   | 0,964204267     | #DIV/0!         |
| IFT81                                                                                               | 0,000678439 | 0,052587673 | 0,146 | 0,039 | 1           | 1,037123481   | 0,964205342     | 3,743589744     |
| IQCJ-SCHIP1                                                                                         | 0,000770218 | 0,052582201 | 0,122 | 0,028 | 1           | 1,037119547   | 0,964208999     | 4,357142857     |
| HOXC6                                                                                               | 0,00620106  | 0,052581301 | 0,268 | 0,123 | 1           | 1,0371189     | 0,9642096       | 2,178861789     |
| COLQ                                                                                                | 0,644071107 | 0,052563638 | 0,012 | 0,007 | 1           | 1,037106203   | 0,964221405     | 1,714285714     |
| B9D1                                                                                                | 5,60121E-05 | 0,05255628  | 0,098 | 0,011 | 1           | 1,037100913   | 0,964226323     | 8,909090909     |
| DUSP18                                                                                              | 0,00032786  | 0,05251096  | 0,122 | 0,025 | 1           | 1,037068335   | 0,964256613     | 4,88            |
| GK5                                                                                                 | 0,036365456 | 0,05247597  | 0,134 | 0,06  | 1           | 1,037043183   | 0,96428         | 2,233333333     |
| PIGX                                                                                                | 0,002075387 | 0,052460629 | 0,134 | 0,039 | 1           | 1,037032156   | 0,964290253     | 3,435897436     |
| PBK                                                                                                 | 0,001220269 | 0,05239805  | 0,037 | 0     | 1           | 1,036987174   | 0,964332082     | #DIV/0!         |
| PLD2                                                                                                | 0,000685144 | 0,052390664 | 0,098 | 0,018 | 1           | 1,036981865   | 0,964337019     | 5,444444444     |
| MCRIP2                                                                                              | 0,002502924 | 0,052349547 | 0,11  | 0,028 | 1           | 1,036952311   | 0,964364503     | 3,928571429     |
| AMZ2                                                                                                | 7,29081E-05 | 0,05231211  | 0,244 | 0,074 | 1           | 1,036925403   | 0,964389528     | 3,297297297     |
| GDPD1                                                                                               | 0,104939896 | 0,052309182 | 0,037 | 0,011 | 1           | 1,036923299   | 0,964391485     | 3,363636364     |
| TMEM80                                                                                              | 0,054965454 | 0,052165788 | 0,159 | 0,081 | 1           | 1,036820241   | 0,964487344     | 1,962962963     |
| MTHFS                                                                                               | 0,000140652 | 0,051970192 | 0,171 | 0,042 | 1           | 1,036679681   | 0,964618115     | 4,071428571     |
| AFG1L                                                                                               | 0,065143806 | 0,051926872 | 0,024 | 0,004 | 1           | 1,036648554   | 0,96464708      | 6               |
| WDR83                                                                                               | 0,006704008 | 0,051907699 | 0,085 | 0,021 | 1           | 1,036634777   | 0,9646599       | 4,047619048     |
| LYPD6                                                                                               | 0,001833348 | 0,05190249  | 0,061 | 0,007 | 1           | 1,036631034   | 0,964663383     | 8,714285714     |
| NOB1                                                                                                | 0,000967641 | 0,051883913 | 0,159 | 0,046 | 1           | 1,036617686   | 0,964675805     | 3,456521739     |
| MOB2                                                                                                | 0,005161375 | 0,051800376 | 0,354 | 0,175 | 1           | 1,036557664   | 0,964731664     | 2,022857143     |
| KRT17                                                                                               | 0,003643588 | 0,051756714 | 0,134 | 0,042 | 1           | 1,036526294   | 0,964760861     | 3,19047619      |
| MRPS30                                                                                              | 2,27964E-05 | 0,051663812 | 0,22  | 0,056 | 0,481026575 | 1,036459549   | 0,964822989     | 3,928571429     |
| SYT1                                                                                                | 0,000344207 | 0,051650073 | 0,073 | 0,007 | 1           | 1,036449679   | 0,964832177     | 10,42857143     |
| MAD2L1                                                                                              | 0,000344207 | 0,051631317 | 0,073 | 0,007 | 1           | 1,036436204   | 0,964844721     | 10,42857143     |
| RAD17                                                                                               | 0,00049803  | 0,05152928  | 0,134 | 0,032 | 1           | 1,036362903   | 0,964912964     | 4,1875          |
| CARD6                                                                                               | 0,001220269 | 0,051506133 | 0,037 | 0     | 1           | 1,036346276   | 0,964928445     | #DIV/0!         |
| VSTM2L                                                                                              | 0,063203483 | 0,051429746 | 0,012 | 0     | 1           | 1,036291405   | 0,964979536     | #DIV/0!         |
| TM2D3                                                                                               | 0,000508002 | 0,05130902  | 0,305 | 0,119 | 1           | 1,036204691   | 0,965060291     | 2,56302521      |

Supplementary Table 2

| Differentially expressed genes_keloid-XL_comparing SC-Keloid vs. (SC-Myel, SC-Nonmyel, SC-Nonmyel2) |             |             |       |       |             |               |                 |                 |
|-----------------------------------------------------------------------------------------------------|-------------|-------------|-------|-------|-------------|---------------|-----------------|-----------------|
| gene                                                                                                | p_val       | avg_log2FC  | pct.1 | pct.2 | p_val_adj   | Foldchange_UP | Foldchange_DOWN | Ratio_pct1_pct2 |
| PIP5KL1                                                                                             | 0,001220269 | 0,051290788 | 0,037 | 0     | 1           | 1,036191596   | 0,965072487     | #DIV/0!         |
| ZNF317                                                                                              | 0,000298361 | 0,051240971 | 0,085 | 0,011 | 1           | 1,036155817   | 0,965105811     | 7,727272727     |
| ZNF302                                                                                              | 0,000617042 | 0,051175551 | 0,183 | 0,056 | 1           | 1,036108832   | 0,965149576     | 3,267857143     |
| RAC2                                                                                                | 0,001220269 | 0,051175192 | 0,037 | 0     | 1           | 1,036108575   | 0,965149816     | #DIV/0!         |
| ZNF438                                                                                              | 0,194890196 | 0,051169251 | 0,037 | 0,014 | 1           | 1,036104308   | 0,965153791     | 2,642857143     |
| STX10                                                                                               | 2,66046E-05 | 0,05114729  | 0,354 | 0,123 | 0,561384403 | 1,036088536   | 0,965168482     | 2,87804878      |
| TOMM6                                                                                               | 0,000499064 | 0,051056113 | 0,634 | 0,319 | 1           | 1,036023058   | 0,965229482     | 1,987460815     |
| POLR1D                                                                                              | 0,023921081 | 0,050988138 | 0,549 | 0,323 | 1           | 1,035974245   | 0,965274962     | 1,699690402     |
| NOP2                                                                                                | 0,000420675 | 0,050976099 | 0,159 | 0,042 | 1           | 1,0359656     | 0,965283017     | 3,785714286     |
| MITD1                                                                                               | 0,009992675 | 0,05094139  | 0,207 | 0,091 | 1           | 1,035940677   | 0,96530624      | 2,274725275     |
| ZNF181                                                                                              | 0,001338917 | 0,050897652 | 0,073 | 0,011 | 1           | 1,035909271   | 0,965335505     | 6,636363636     |
| ANKRD13C                                                                                            | 0,001351989 | 0,050867109 | 0,207 | 0,074 | 1           | 1,03588734    | 0,965355943     | 2,797297297     |
| STX6                                                                                                | 0,001085451 | 0,050839802 | 0,183 | 0,06  | 1           | 1,035867734   | 0,965374215     | 3,05            |
| BDKRB2                                                                                              | 0,008401736 | 0,050789637 | 0,024 | 0     | 1           | 1,035831716   | 0,965407783     | #DIV/0!         |
| LPAR6                                                                                               | 0,008526144 | 0,050769665 | 0,11  | 0,035 | 1           | 1,035817376   | 0,965421148     | 3,142857143     |
| USP28                                                                                               | 0,017068103 | 0,050767927 | 0,061 | 0,014 | 1           | 1,035816128   | 0,965422311     | 4,357142857     |
| FCF1                                                                                                | 0,001647567 | 0,050728752 | 0,159 | 0,049 | 1           | 1,035788002   | 0,965448526     | 3,244897959     |
| ZNF101                                                                                              | 0,104364397 | 0,050603569 | 0,037 | 0,011 | 1           | 1,03569813    | 0,965532302     | 3,363636364     |
| TNNI2                                                                                               | 0,347088417 | 0,050574358 | 0,012 | 0,004 | 1           | 1,03567716    | 0,965551852     | 3               |
| NT5M                                                                                                | 0,183494953 | 0,050456817 | 0,024 | 0,007 | 1           | 1,035592784   | 0,965630522     | 3,428571429     |
| PTPN9                                                                                               | 0,010505641 | 0,050448441 | 0,171 | 0,07  | 1           | 1,035586771   | 0,965636128     | 2,442857143     |
| RPS15                                                                                               | 0,237450556 | 0,050443289 | 0,976 | 0,926 | 1           | 1,035583073   | 0,965639576     | 1,05399568      |
| TOP2A                                                                                               | 0,041803504 | 0,050430589 | 0,037 | 0,007 | 1           | 1,035573957   | 0,965648077     | 5,285714286     |
| HOXD9                                                                                               | 0,347088417 | 0,050389257 | 0,012 | 0,004 | 1           | 1,035544289   | 0,965675742     | 3               |
| KBTBD3                                                                                              | 0,24086264  | 0,050386238 | 0,061 | 0,032 | 1           | 1,035542121   | 0,965677764     | 1,90625         |
| FAM41C                                                                                              | 0,001220269 | 0,050364398 | 0,037 | 0     | 1           | 1,035526445   | 0,965692382     | #DIV/0!         |
| EMB                                                                                                 | 0,00032444  | 0,050317169 | 0,061 | 0,004 | 1           | 1,035492546   | 0,965723996     | 15,25           |
| CLUAP1                                                                                              | 6,01472E-05 | 0,050302238 | 0,171 | 0,039 | 1           | 1,03548183    | 0,965733991     | 4,384615385     |
| CCDC102A                                                                                            | 0,001876168 | 0,050200941 | 0,098 | 0,021 | 1           | 1,035409128   | 0,965801801     | 4,666666667     |
| RWDD2B                                                                                              | 0,000340322 | 0,050138526 | 0,122 | 0,025 | 1           | 1,035364333   | 0,965843585     | 4,88            |

Supplementary Table 2

| Differentially expressed genes_keloid-XL_comparing SC-Keloid vs. (SC-Myel, SC-Nonmyel, SC-Nonmyel2) |             |             |       |       |             |               |                 |                 |
|-----------------------------------------------------------------------------------------------------|-------------|-------------|-------|-------|-------------|---------------|-----------------|-----------------|
| gene                                                                                                | p_val       | avg_log2FC  | pct.1 | pct.2 | p_val_adj   | Foldchange_UP | Foldchange_DOWN | Ratio_pct1_pct2 |
| CCDC142                                                                                             | 0,184958462 | 0,050130119 | 0,049 | 0,021 | 1           | 1,0353583     | 0,965849214     | 2,333333333     |
| CDKN2AIPNL                                                                                          | 0,015190866 | 0,050128812 | 0,098 | 0,032 | 1           | 1,035357362   | 0,965850089     | 3,0625          |
| QSOX2                                                                                               | 0,000288855 | 0,05010457  | 0,085 | 0,011 | 1           | 1,035339965   | 0,965866318     | 7,727272727     |
| BOLA1                                                                                               | 0,002177637 | 0,050087831 | 0,134 | 0,039 | 1           | 1,035327953   | 0,965877525     | 3,435897436     |
| MKI67                                                                                               | 0,043000486 | 0,050060463 | 0,037 | 0,007 | 1           | 1,035308313   | 0,965895847     | 5,285714286     |
| LLPH                                                                                                | 3,35418E-06 | 0,04994458  | 0,293 | 0,081 | 0,070776525 | 1,035225156   | 0,965973435     | 3,617283951     |
| GABPB1                                                                                              | 0,039738699 | 0,049821203 | 0,073 | 0,025 | 1           | 1,035136629   | 0,966056047     | 2,92            |
| ERVMER34-1                                                                                          | 4,32324E-06 | 0,049753402 | 0,073 | 0     | 0,09122464  | 1,035087982   | 0,966101449     | #DIV/0!         |
| VPS41                                                                                               | 9,09477E-05 | 0,049710297 | 0,207 | 0,056 | 1           | 1,035057057   | 0,966130315     | 3,696428571     |
| SELENBP1                                                                                            | 0,001220269 | 0,04969998  | 0,037 | 0     | 1           | 1,035049655   | 0,966137224     | #DIV/0!         |
| CDYL2                                                                                               | 0,181340493 | 0,049698925 | 0,024 | 0,007 | 1           | 1,035048898   | 0,96613793      | 3,428571429     |
| SMYD5                                                                                               | 0,017068103 | 0,049691856 | 0,061 | 0,014 | 1           | 1,035043826   | 0,966142665     | 4,357142857     |
| PIGC                                                                                                | 1,31736E-08 | 0,049654207 | 0,378 | 0,091 | 0,000277975 | 1,035016815   | 0,966167878     | 4,153846154     |
| ABCC1                                                                                               | 0,564675598 | 0,049625617 | 0,037 | 0,025 | 1           | 1,034996305   | 0,966187025     | 1,48            |
| SRD5A3                                                                                              | 0,010916043 | 0,049598528 | 0,073 | 0,018 | 1           | 1,034976871   | 0,966205166     | 4,055555556     |
| SEC31B                                                                                              | 0,00931978  | 0,049594478 | 0,049 | 0,007 | 1           | 1,034973966   | 0,966207879     | 7               |
| TFAP2B                                                                                              | 0,010268947 | 0,049577058 | 0,134 | 0,049 | 1           | 1,034961469   | 0,966219545     | 2,734693878     |
| TRIM25                                                                                              | 0,003497178 | 0,049544877 | 0,122 | 0,035 | 1           | 1,034938383   | 0,966241098     | 3,485714286     |
| GBA2                                                                                                | 0,014910424 | 0,049543681 | 0,159 | 0,067 | 1           | 1,034937525   | 0,966241899     | 2,373134328     |
| ZNF45                                                                                               | 0,001914332 | 0,049393164 | 0,049 | 0,004 | 1           | 1,034829556   | 0,966342713     | 12,25           |
| METTL22                                                                                             | 0,00032444  | 0,049366867 | 0,061 | 0,004 | 1           | 1,034810693   | 0,966360327     | 15,25           |
| ZNF382                                                                                              | 0,043000486 | 0,049363381 | 0,037 | 0,007 | 1           | 1,034808192   | 0,966362663     | 5,285714286     |
| MYNN                                                                                                | 0,097309365 | 0,049268793 | 0,073 | 0,032 | 1           | 1,034740349   | 0,966426022     | 2,28125         |
| HIF1AN                                                                                              | 0,000723012 | 0,049240048 | 0,098 | 0,018 | 1           | 1,034719733   | 0,966445278     | 5,444444444     |
| HPS6                                                                                                | 0,011553628 | 0,049226023 | 0,037 | 0,004 | 1           | 1,034709674   | 0,966454674     | 9,25            |
| NUBPL                                                                                               | 0,027028964 | 0,049222518 | 0,049 | 0,011 | 1           | 1,03470716    | 0,966457021     | 4,454545455     |
| SLCO2A1                                                                                             | 0,064048232 | 0,049172583 | 0,024 | 0,004 | 1           | 1,034671347   | 0,966490473     | 6               |
| CENPM                                                                                               | 0,065143806 | 0,049141847 | 0,024 | 0,004 | 1           | 1,034649304   | 0,966511064     | 6               |
| GOLGA8R                                                                                             | 0,008401736 | 0,049127892 | 0,024 | 0     | 1           | 1,034639296   | 0,966520413     | #DIV/0!         |
| NTF3                                                                                                | 0,028081741 | 0,049092536 | 0,049 | 0,011 | 1           | 1,034613941   | 0,9665441       | 4,454545455     |

Supplementary Table 2

| Differentially expressed genes_keloid-XL_comparing SC-Keloid vs. (SC-Myel, SC-Nonmyel, SC-Nonmyel2) |             |             |       |       |             |               |                 |                 |
|-----------------------------------------------------------------------------------------------------|-------------|-------------|-------|-------|-------------|---------------|-----------------|-----------------|
| gene                                                                                                | p_val       | avg_log2FC  | pct.1 | pct.2 | p_val_adj   | Foldchange_UP | Foldchange_DOWN | Ratio_pct1_pct2 |
| LBX2                                                                                                | 0,00931978  | 0,049087082 | 0,049 | 0,007 | 1           | 1,034610029   | 0,966547754     | 7               |
| ACSF3                                                                                               | 0,001180297 | 0,049085391 | 0,11  | 0,025 | 1           | 1,034608817   | 0,966548886     | 4,4             |
| SPRYD7                                                                                              | 0,000230242 | 0,049085231 | 0,207 | 0,063 | 1           | 1,034608702   | 0,966548994     | 3,285714286     |
| SEC61A2                                                                                             | 0,010425992 | 0,049071967 | 0,073 | 0,018 | 1           | 1,03459919    | 0,96655788      | 4,055555556     |
| ARMC1                                                                                               | 0,000496956 | 0,049063717 | 0,207 | 0,067 | 1           | 1,034593273   | 0,966563408     | 3,089552239     |
| APBA3                                                                                               | 2,51588E-05 | 0,049026964 | 0,134 | 0,021 | 0,530876209 | 1,034566917   | 0,966588031     | 6,380952381     |
| RAB29                                                                                               | 0,06642434  | 0,049016623 | 0,061 | 0,021 | 1           | 1,034559502   | 0,966594959     | 2,904761905     |
| LINC01137                                                                                           | 0,000183568 | 0,049014199 | 0,049 | 0     | 1           | 1,034557764   | 0,966596584     | #DIV/0!         |
| TRIOBP                                                                                              | 0,002173845 | 0,0489616   | 0,293 | 0,13  | 1           | 1,034520045   | 0,966631826     | 2,253846154     |
| PPT2                                                                                                | 3,29775E-05 | 0,048957337 | 0,268 | 0,081 | 0,695859044 | 1,034516988   | 0,966634682     | 3,308641975     |
| ALG9                                                                                                | 0,003927556 | 0,048938222 | 0,098 | 0,025 | 1           | 1,034503282   | 0,966647489     | 3,92            |
| TNFSF13B                                                                                            | 0,008401736 | 0,048928981 | 0,024 | 0     | 1           | 1,034496655   | 0,966653681     | #DIV/0!         |
| BVES-AS1                                                                                            | 0,001220269 | 0,048917019 | 0,037 | 0     | 1           | 1,034488078   | 0,966661696     | #DIV/0!         |
| NPRL3                                                                                               | 0,000322749 | 0,048914904 | 0,183 | 0,053 | 1           | 1,034486561   | 0,966663113     | 3,452830189     |
| BRD9                                                                                                | 5,31671E-05 | 0,048852701 | 0,317 | 0,109 | 1           | 1,03444196    | 0,966704792     | 2,908256881     |
| TAF2                                                                                                | 0,347088417 | 0,04885063  | 0,012 | 0,004 | 1           | 1,034440475   | 0,96670618      | 3               |
| RCC1L                                                                                               | 4,22736E-05 | 0,048809199 | 0,183 | 0,042 | 0,892014976 | 1,034410768   | 0,966733942     | 4,357142857     |
| C1RL                                                                                                | 0,013704854 | 0,048803365 | 0,085 | 0,025 | 1           | 1,034406585   | 0,966737852     | 3,4             |
| RASSF8                                                                                              | 0,000282912 | 0,048730541 | 0,524 | 0,239 | 1           | 1,034354372   | 0,966786651     | 2,192468619     |
| ZNF790                                                                                              | 0,006615795 | 0,048720183 | 0,061 | 0,011 | 1           | 1,034346946   | 0,966793593     | 5,545454545     |
| PELP1                                                                                               | 0,003026608 | 0,048610976 | 0,183 | 0,067 | 1           | 1,034268653   | 0,966866778     | 2,731343284     |
| PRICKLE3                                                                                            | 0,012780645 | 0,048561516 | 0,085 | 0,025 | 1           | 1,034233195   | 0,966899926     | 3,4             |
| RRP12                                                                                               | 0,008145887 | 0,048517384 | 0,098 | 0,028 | 1           | 1,034201558   | 0,966929504     | 3,5             |
| USP31                                                                                               | 0,686285647 | 0,048511524 | 0,037 | 0,028 | 1           | 1,034197358   | 0,966933432     | 1,321428571     |
| SLC39A11                                                                                            | 0,179204865 | 0,048482892 | 0,024 | 0,007 | 1           | 1,034176833   | 0,966952622     | 3,428571429     |
| LPP                                                                                                 | 2,8894E-05  | 0,048395387 | 0,524 | 0,214 | 0,609691488 | 1,034114109   | 0,967011273     | 2,448598131     |
| CAPN10                                                                                              | 0,00020149  | 0,048369528 | 0,159 | 0,039 | 1           | 1,034095573   | 0,967028606     | 4,076923077     |
| LINC00839                                                                                           | 0,000169546 | 0,048358592 | 0,11  | 0,018 | 1           | 1,034087734   | 0,967035936     | 6,111111111     |
| C2CD2L                                                                                              | 0,004368707 | 0,04834472  | 0,073 | 0,014 | 1           | 1,034077791   | 0,967045235     | 5,214285714     |
| DTD1                                                                                                | 3,32776E-06 | 0,048299182 | 0,39  | 0,123 | 0,070219133 | 1,034045151   | 0,967075759     | 3,170731707     |



Supplementary Table 2

| Differentially expressed genes_keloid-XL_comparing SC-Keloid vs. (SC-Myel, SC-Nonmyel, SC-Nonmyel2) |             |             |       |       |             |               |                 |                 |
|-----------------------------------------------------------------------------------------------------|-------------|-------------|-------|-------|-------------|---------------|-----------------|-----------------|
| gene                                                                                                | p_val       | avg_log2FC  | pct.1 | pct.2 | p_val_adj   | Foldchange_UP | Foldchange_DOWN | Ratio_pct1_pct2 |
| CDC42SE1                                                                                            | 0,001448225 | 0,048294124 | 0,476 | 0,235 | 1           | 1,034041526   | 0,96707915      | 2,025531915     |
| USP8                                                                                                | 0,004876141 | 0,048266042 | 0,293 | 0,133 | 1           | 1,034021399   | 0,967097974     | 2,203007519     |
| GREB1                                                                                               | 0,106097567 | 0,048249884 | 0,037 | 0,011 | 1           | 1,034009818   | 0,967108806     | 3,363636364     |
| ZNF23                                                                                               | 0,000230869 | 0,048209095 | 0,098 | 0,014 | 1           | 1,033980584   | 0,967136149     | 7               |
| FAAP100                                                                                             | 0,001099251 | 0,048202706 | 0,171 | 0,053 | 1           | 1,033976005   | 0,967140432     | 3,226415094     |
| NDUFS7                                                                                              | 0,000139668 | 0,048138658 | 0,488 | 0,204 | 1           | 1,033930103   | 0,967183369     | 2,392156863     |
| KIF13B                                                                                              | 0,000143959 | 0,048114925 | 0,427 | 0,172 | 1           | 1,033913094   | 0,967199279     | 2,48255814      |
| ABCF3                                                                                               | 0,000713367 | 0,047861432 | 0,098 | 0,018 | 1           | 1,033731444   | 0,967369239     | 5,444444444     |
| RPP25L                                                                                              | 0,00380062  | 0,04783273  | 0,098 | 0,025 | 1           | 1,033710878   | 0,967388485     | 3,92            |
| ZNF823                                                                                              | 0,011553628 | 0,047826593 | 0,037 | 0,004 | 1           | 1,033706481   | 0,9673926       | 9,25            |
| GNB1L                                                                                               | 0,006062183 | 0,047818434 | 0,085 | 0,021 | 1           | 1,033700635   | 0,967398071     | 4,047619048     |
| ZNF174                                                                                              | 0,001318539 | 0,047790494 | 0,073 | 0,011 | 1           | 1,033680615   | 0,967416807     | 6,636363636     |
| SURF6                                                                                               | 1,79815E-05 | 0,047765458 | 0,207 | 0,049 | 0,379426863 | 1,033662678   | 0,967433594     | 4,224489796     |
| ZNF749                                                                                              | 4,65444E-05 | 0,047517477 | 0,11  | 0,014 | 0,9821336   | 1,03348502    | 0,967599898     | 7,857142857     |
| RPL36AL                                                                                             | 0,052472184 | 0,047486986 | 0,841 | 0,596 | 1           | 1,033463178   | 0,967620348     | 1,411073826     |
| TOPBP1                                                                                              | 9,07324E-05 | 0,047411045 | 0,159 | 0,035 | 1           | 1,033408779   | 0,967671284     | 4,542857143     |
| ST7                                                                                                 | 0,026685693 | 0,047352866 | 0,049 | 0,011 | 1           | 1,033367106   | 0,967710307     | 4,454545455     |
| NHLRC2                                                                                              | 0,002512624 | 0,04733999  | 0,159 | 0,053 | 1           | 1,033357883   | 0,967718944     | 3               |
| HRH1                                                                                                | 0,001802592 | 0,047300001 | 0,061 | 0,007 | 1           | 1,033329241   | 0,967745768     | 8,714285714     |
| GRPEL2                                                                                              | 0,43516567  | 0,047294906 | 0,037 | 0,021 | 1           | 1,033325591   | 0,967749186     | 1,761904762     |
| DLGAP5                                                                                              | 0,347088417 | 0,047290972 | 0,012 | 0,004 | 1           | 1,033322774   | 0,967751825     | 3               |
| TMEM217                                                                                             | 2,80682E-05 | 0,047284951 | 0,061 | 0     | 0,592266086 | 1,033318461   | 0,967755864     | #DIV/0!         |
| C2orf81                                                                                             | 0,000983548 | 0,047205057 | 0,085 | 0,014 | 1           | 1,03326124    | 0,967809458     | 6,071428571     |
| ALKBH2                                                                                              | 9,95727E-05 | 0,047179735 | 0,159 | 0,035 | 1           | 1,033243104   | 0,967826445     | 4,542857143     |
| SMAD4                                                                                               | 0,043184756 | 0,047153523 | 0,378 | 0,225 | 1           | 1,033224332   | 0,967844029     | 1,68            |
| OGN                                                                                                 | 0,691844906 | 0,047140927 | 0,024 | 0,018 | 1           | 1,03321531    | 0,967852479     | 1,333333333     |
| DDX42                                                                                               | 0,001047991 | 0,047120097 | 0,354 | 0,151 | 1           | 1,033200393   | 0,967866454     | 2,344370861     |
| LRFN4                                                                                               | 1,7171E-06  | 0,047078339 | 0,28  | 0,07  | 0,036232561 | 1,033170488   | 0,967894468     | 4               |
| ZNF85                                                                                               | 5,32686E-05 | 0,047044991 | 0,073 | 0,004 | 1           | 1,033146606   | 0,967916841     | 18,25           |
| PLA2G15                                                                                             | 0,002726155 | 0,047033113 | 0,11  | 0,028 | 1           | 1,0331381     | 0,967924811     | 3,928571429     |

Supplementary Table 2

| Differentially expressed genes_keloid-XL_comparing SC-Keloid vs. (SC-Myel, SC-Nonmyel, SC-Nonmyel2) |             |             |       |       |             |               |                 |                 |
|-----------------------------------------------------------------------------------------------------|-------------|-------------|-------|-------|-------------|---------------|-----------------|-----------------|
| gene                                                                                                | p_val       | avg_log2FC  | pct.1 | pct.2 | p_val_adj   | Foldchange_UP | Foldchange_DOWN | Ratio_pct1_pct2 |
| PDCD7                                                                                               | 0,004945257 | 0,046923474 | 0,256 | 0,112 | 1           | 1,033059589   | 0,967998372     | 2,285714286     |
| ZBED5-AS1                                                                                           | 0,024758179 | 0,04691703  | 0,085 | 0,028 | 1           | 1,033054975   | 0,968002695     | 3,035714286     |
| C2orf72                                                                                             | 0,066254792 | 0,046807232 | 0,024 | 0,004 | 1           | 1,032976355   | 0,96807637      | 6               |
| CYP2R1                                                                                              | 0,001423372 | 0,046787839 | 0,073 | 0,011 | 1           | 1,032962471   | 0,968089382     | 6,636363636     |
| CENPP                                                                                               | 0,001952737 | 0,046751059 | 0,049 | 0,004 | 1           | 1,032936136   | 0,968114064     | 12,25           |
| ACOT4                                                                                               | 0,043000486 | 0,046748325 | 0,037 | 0,007 | 1           | 1,032934179   | 0,968115898     | 5,285714286     |
| IKBKE                                                                                               | 5,32686E-05 | 0,046723659 | 0,073 | 0,004 | 1           | 1,032916519   | 0,96813245      | 18,25           |
| C20orf96                                                                                            | 0,001723931 | 0,046704752 | 0,098 | 0,021 | 1           | 1,032902982   | 0,968145138     | 4,666666667     |
| FERMT3                                                                                              | 0,010916043 | 0,046682944 | 0,073 | 0,018 | 1           | 1,032887368   | 0,968159773     | 4,055555556     |
| GPR137                                                                                              | 0,002585356 | 0,046682521 | 0,183 | 0,067 | 1           | 1,032887066   | 0,968160057     | 2,731343284     |
| CYB5B                                                                                               | 0,000232459 | 0,046667977 | 0,305 | 0,116 | 1           | 1,032876654   | 0,968169816     | 2,629310345     |
| B3GLCT                                                                                              | 0,001898897 | 0,046618692 | 0,098 | 0,021 | 1           | 1,032841369   | 0,968202892     | 4,666666667     |
| ZNF48                                                                                               | 0,017068103 | 0,046590289 | 0,061 | 0,014 | 1           | 1,032821035   | 0,968221953     | 4,357142857     |
| NOL3                                                                                                | 0,000723012 | 0,046587558 | 0,098 | 0,018 | 1           | 1,03281908    | 0,968223786     | 5,444444444     |
| BRF2                                                                                                | 0,000338108 | 0,046574241 | 0,073 | 0,007 | 1           | 1,032809547   | 0,968232723     | 10,42857143     |
| GBE1                                                                                                | 0,000871637 | 0,046554372 | 0,159 | 0,046 | 1           | 1,032795323   | 0,968246058     | 3,456521739     |
| SLC25A15                                                                                            | 0,00032444  | 0,046541808 | 0,061 | 0,004 | 1           | 1,032786328   | 0,968254491     | 15,25           |
| MIEF2                                                                                               | 0,043609761 | 0,04649121  | 0,037 | 0,007 | 1           | 1,032750107   | 0,968288449     | 5,285714286     |
| MYLPF                                                                                               | 0,001952737 | 0,046479014 | 0,049 | 0,004 | 1           | 1,032741377   | 0,968296635     | 12,25           |
| PRMT6                                                                                               | 2,80682E-05 | 0,046415238 | 0,061 | 0     | 0,592266086 | 1,032695724   | 0,968339441     | #DIV/0!         |
| KCNH1                                                                                               | 0,001220269 | 0,046391602 | 0,037 | 0     | 1           | 1,032678806   | 0,968355305     | #DIV/0!         |
| EIF1AD                                                                                              | 0,000234367 | 0,046375017 | 0,098 | 0,014 | 1           | 1,032666934   | 0,968366437     | 7               |
| WBP11                                                                                               | 0,001717164 | 0,046232738 | 0,451 | 0,218 | 1           | 1,032565097   | 0,968461942     | 2,068807339     |
| NOSIP                                                                                               | 4,34026E-05 | 0,046202504 | 0,293 | 0,095 | 0,915839002 | 1,032543458   | 0,968482239     | 3,084210526     |
| CDC27                                                                                               | 7,13199E-06 | 0,046194992 | 0,341 | 0,109 | 0,150492048 | 1,032538082   | 0,968487282     | 3,128440367     |
| ZNF160                                                                                              | 0,138914913 | 0,046158892 | 0,085 | 0,042 | 1           | 1,032512246   | 0,968511516     | 2,023809524     |
| LRBA                                                                                                | 0,007608639 | 0,046082606 | 0,159 | 0,06  | 1           | 1,032457651   | 0,968562729     | 2,65            |
| KCNK6                                                                                               | 0,008401736 | 0,046070715 | 0,024 | 0     | 1           | 1,032449141   | 0,968570713     | #DIV/0!         |
| SAMD13                                                                                              | 0,008401736 | 0,046070715 | 0,024 | 0     | 1           | 1,032449141   | 0,968570713     | #DIV/0!         |
| RRS1                                                                                                | 0,000713367 | 0,046063995 | 0,098 | 0,018 | 1           | 1,032444332   | 0,968575224     | 5,444444444     |

Supplementary Table 2

| Differentially expressed genes_keloid-XL_comparing SC-Keloid vs. (SC-Myel, SC-Nonmyel, SC-Nonmyel2) |             |             |       |       |             |               |                 |                 |
|-----------------------------------------------------------------------------------------------------|-------------|-------------|-------|-------|-------------|---------------|-----------------|-----------------|
| gene                                                                                                | p_val       | avg_log2FC  | pct.1 | pct.2 | p_val_adj   | Foldchange_UP | Foldchange_DOWN | Ratio_pct1_pct2 |
| LINC01060                                                                                           | 0,00032444  | 0,046047838 | 0,061 | 0,004 | 1           | 1,032432769   | 0,968586072     | 15,25           |
| ELAC1                                                                                               | 0,010668516 | 0,045957302 | 0,073 | 0,018 | 1           | 1,032367981   | 0,968646857     | 4,055555556     |
| NFYC-AS1                                                                                            | 0,008401736 | 0,045925197 | 0,024 | 0     | 1           | 1,032345008   | 0,968668413     | #DIV/0!         |
| TMCO4                                                                                               | 0,002502924 | 0,045924921 | 0,11  | 0,028 | 1           | 1,03234481    | 0,968668598     | 3,928571429     |
| COG4                                                                                                | 3,9586E-05  | 0,045865885 | 0,207 | 0,053 | 0,835303213 | 1,032302567   | 0,968708237     | 3,905660377     |
| GGT7                                                                                                | 0,025838473 | 0,045825533 | 0,122 | 0,049 | 1           | 1,032273694   | 0,968735332     | 2,489795918     |
| AP000462.3                                                                                          | 0,342070304 | 0,045779201 | 0,024 | 0,011 | 1           | 1,032240543   | 0,968766444     | 2,181818182     |
| DMAP1                                                                                               | 0,000914715 | 0,045727363 | 0,244 | 0,091 | 1           | 1,032203454   | 0,968801253     | 2,681318681     |
| SNX25                                                                                               | 0,00931978  | 0,045691147 | 0,049 | 0,007 | 1           | 1,032177543   | 0,968825574     | 7               |
| GTF2H3                                                                                              | 3,2263E-07  | 0,045685894 | 0,22  | 0,039 | 0,00680781  | 1,032173785   | 0,968829101     | 5,641025641     |
| MPST                                                                                                | 0,003048205 | 0,045667382 | 0,268 | 0,116 | 1           | 1,03216054    | 0,968841533     | 2,310344828     |
| UNG                                                                                                 | 0,000694434 | 0,04563873  | 0,098 | 0,018 | 1           | 1,032140042   | 0,968860774     | 5,444444444     |
| CHKB-DT                                                                                             | 0,001220269 | 0,045636393 | 0,037 | 0     | 1           | 1,03213837    | 0,968862344     | #DIV/0!         |
| TMTC3                                                                                               | 0,023592192 | 0,045632721 | 0,146 | 0,063 | 1           | 1,032135743   | 0,96886481      | 2,317460317     |
| IPO9                                                                                                | 0,001919241 | 0,045595967 | 0,195 | 0,07  | 1           | 1,032109449   | 0,968889493     | 2,785714286     |
| PRR7                                                                                                | 0,001739762 | 0,045591544 | 0,171 | 0,056 | 1           | 1,032106284   | 0,968892463     | 3,053571429     |
| ARHGAP31                                                                                            | 0,054343153 | 0,045589224 | 0,122 | 0,056 | 1           | 1,032104624   | 0,968894021     | 2,178571429     |
| RPS20                                                                                               | 0,432409985 | 0,045576327 | 0,927 | 0,765 | 1           | 1,032095398   | 0,968902683     | 1,211764706     |
| ALDH3B2                                                                                             | 0,063203483 | 0,045560371 | 0,012 | 0     | 1           | 1,032083983   | 0,968913399     | #DIV/0!         |
| DPYS                                                                                                | 0,063203483 | 0,045560371 | 0,012 | 0     | 1           | 1,032083983   | 0,968913399     | #DIV/0!         |
| DSC2                                                                                                | 0,063203483 | 0,045560371 | 0,012 | 0     | 1           | 1,032083983   | 0,968913399     | #DIV/0!         |
| GPR21                                                                                               | 0,063203483 | 0,045560371 | 0,012 | 0     | 1           | 1,032083983   | 0,968913399     | #DIV/0!         |
| RTN4RL1                                                                                             | 0,063203483 | 0,045560371 | 0,012 | 0     | 1           | 1,032083983   | 0,968913399     | #DIV/0!         |
| WNK4                                                                                                | 0,063203483 | 0,045560371 | 0,012 | 0     | 1           | 1,032083983   | 0,968913399     | #DIV/0!         |
| CYP3A5                                                                                              | 0,065143806 | 0,045549533 | 0,024 | 0,004 | 1           | 1,03207623    | 0,968920678     | 6               |
| CCDC30                                                                                              | 0,010668516 | 0,0455225   | 0,073 | 0,018 | 1           | 1,032056891   | 0,968938833     | 4,055555556     |
| LRR1                                                                                                | 0,000969643 | 0,045497182 | 0,085 | 0,014 | 1           | 1,03203878    | 0,968955838     | 6,071428571     |
| B9D2                                                                                                | 0,006431528 | 0,04549432  | 0,061 | 0,011 | 1           | 1,032036732   | 0,96895776      | 5,545454545     |
| ZNF573                                                                                              | 0,036427227 | 0,045437181 | 0,061 | 0,018 | 1           | 1,031995858   | 0,968996137     | 3,388888889     |
| BTBD2                                                                                               | 0,003073868 | 0,045389561 | 0,232 | 0,095 | 1           | 1,031961795   | 0,969028122     | 2,442105263     |

Supplementary Table 2

| Differentially expressed genes_keloid-XL_comparing SC-Keloid vs. (SC-Myel, SC-Nonmyel, SC-Nonmyel2) |             |             |       |       |             |               |                 |                 |
|-----------------------------------------------------------------------------------------------------|-------------|-------------|-------|-------|-------------|---------------|-----------------|-----------------|
| gene                                                                                                | p_val       | avg_log2FC  | pct.1 | pct.2 | p_val_adj   | Foldchange_UP | Foldchange_DOWN | Ratio_pct1_pct2 |
| CHTF18                                                                                              | 0,068827069 | 0,045367855 | 0,061 | 0,021 | 1           | 1,031946269   | 0,969042701     | 2,904761905     |
| TMEM25                                                                                              | 0,644071107 | 0,045357852 | 0,012 | 0,007 | 1           | 1,031939114   | 0,96904942      | 1,714285714     |
| MED14                                                                                               | 0,011360658 | 0,045333977 | 0,207 | 0,095 | 1           | 1,031922037   | 0,969065457     | 2,178947368     |
| CNPY3                                                                                               | 1,09513E-05 | 0,04529415  | 0,256 | 0,07  | 0,231083882 | 1,03189355    | 0,969092209     | 3,657142857     |
| PTPN1                                                                                               | 0,008280952 | 0,045267838 | 0,256 | 0,119 | 1           | 1,03187473    | 0,969109884     | 2,151260504     |
| GOLPH3                                                                                              | 0,037649564 | 0,045252617 | 0,28  | 0,158 | 1           | 1,031863844   | 0,969120108     | 1,772151899     |
| FAM124A                                                                                             | 0,347088417 | 0,045124732 | 0,012 | 0,004 | 1           | 1,03177238    | 0,969206018     | 3               |
| C11orf80                                                                                            | 0,004426608 | 0,045113715 | 0,098 | 0,025 | 1           | 1,031764501   | 0,969213419     | 3,92            |
| UBIAD1                                                                                              | 0,003949482 | 0,045096369 | 0,134 | 0,042 | 1           | 1,031752096   | 0,969225072     | 3,19047619      |
| RRAS2                                                                                               | 1,10008E-06 | 0,045028486 | 0,171 | 0,025 | 0,023212815 | 1,03170355    | 0,969270679     | 6,84            |
| PLCL1                                                                                               | 0,649511996 | 0,044989646 | 0,012 | 0,007 | 1           | 1,031675775   | 0,969296773     | 1,714285714     |
| PRSS36                                                                                              | 0,339089703 | 0,044953613 | 0,024 | 0,011 | 1           | 1,031650008   | 0,969320983     | 2,181818182     |
| CLN5                                                                                                | 0,001118483 | 0,04481277  | 0,378 | 0,165 | 1           | 1,031549298   | 0,969415618     | 2,290909091     |
| ZMYND19                                                                                             | 1,38478E-06 | 0,04477582  | 0,159 | 0,021 | 0,029220202 | 1,031522879   | 0,969440446     | 7,571428571     |
| ESF1                                                                                                | 4,60262E-08 | 0,044725596 | 0,451 | 0,133 | 0,000971199 | 1,031486969   | 0,969474196     | 3,390977444     |
| GRB7                                                                                                | 0,179204865 | 0,044694465 | 0,024 | 0,007 | 1           | 1,031464712   | 0,969495115     | 3,428571429     |
| RMI2                                                                                                | 0,001220269 | 0,044693377 | 0,037 | 0     | 1           | 1,031463934   | 0,969495847     | #DIV/0!         |
| FAM102B                                                                                             | 0,002485806 | 0,044687926 | 0,146 | 0,046 | 1           | 1,031460037   | 0,96949951      | 3,173913043     |
| XYLB                                                                                                | 0,008401736 | 0,04465032  | 0,024 | 0     | 1           | 1,031433151   | 0,969524782     | #DIV/0!         |
| DYNC1I2                                                                                             | 0,001361616 | 0,04464829  | 0,646 | 0,358 | 1           | 1,0314317     | 0,969526146     | 1,804469274     |
| UBE2Q1                                                                                              | 0,000136423 | 0,044632493 | 0,28  | 0,098 | 1           | 1,031420406   | 0,969536762     | 2,857142857     |
| DDI2                                                                                                | 0,014940574 | 0,044618356 | 0,11  | 0,039 | 1           | 1,031410299   | 0,969546262     | 2,820512821     |
| KRBOX4                                                                                              | 0,023887799 | 0,044615158 | 0,085 | 0,028 | 1           | 1,031408012   | 0,969548412     | 3,035714286     |
| DNMBP                                                                                               | 0,106083716 | 0,044569505 | 0,061 | 0,025 | 1           | 1,031375375   | 0,969579093     | 2,44            |
| ASB7                                                                                                | 0,113968254 | 0,044543638 | 0,049 | 0,018 | 1           | 1,031356883   | 0,969596477     | 2,722222222     |
| ABHD17C                                                                                             | 0,001713147 | 0,044518573 | 0,061 | 0,007 | 1           | 1,031338964   | 0,969613323     | 8,714285714     |
| UBE3B                                                                                               | 0,00020948  | 0,044514091 | 0,134 | 0,028 | 1           | 1,03133576    | 0,969616335     | 4,785714286     |
| TBC1D10A                                                                                            | 3,09476E-05 | 0,044508586 | 0,268 | 0,081 | 0,653024352 | 1,031331825   | 0,969620035     | 3,308641975     |
| PDCD1LG2                                                                                            | 0,000183568 | 0,044383871 | 0,049 | 0     | 1           | 1,031242675   | 0,969703858     | #DIV/0!         |
| LRRC49                                                                                              | 0,009031726 | 0,044376653 | 0,049 | 0,007 | 1           | 1,031237515   | 0,969708709     | 7               |

Supplementary Table 2

| Differentially expressed genes_keloid-XL_comparing SC-Keloid vs. (SC-Myel, SC-Nonmyel, SC-Nonmyel2) |             |             |       |       |             |               |                 |                 |
|-----------------------------------------------------------------------------------------------------|-------------|-------------|-------|-------|-------------|---------------|-----------------|-----------------|
| gene                                                                                                | p_val       | avg_log2FC  | pct.1 | pct.2 | p_val_adj   | Foldchange_UP | Foldchange_DOWN | Ratio_pct1_pct2 |
| CASC2                                                                                               | 0,063203483 | 0,044343083 | 0,012 | 0     | 1           | 1,031213519   | 0,969731274     | #DIV/0!         |
| CCDC181                                                                                             | 0,011553628 | 0,044300354 | 0,037 | 0,004 | 1           | 1,031182978   | 0,969759995     | 9,25            |
| MTRES1                                                                                              | 0,001041037 | 0,0442986   | 0,085 | 0,014 | 1           | 1,031181725   | 0,969761174     | 6,071428571     |
| IRAK4                                                                                               | 0,003974717 | 0,044205796 | 0,146 | 0,049 | 1           | 1,031115394   | 0,969823558     | 2,979591837     |
| ZNF565                                                                                              | 0,689228839 | 0,044205733 | 0,037 | 0,028 | 1           | 1,031115349   | 0,969823601     | 1,321428571     |
| TTC5                                                                                                | 0,025428865 | 0,044187331 | 0,085 | 0,028 | 1           | 1,031102197   | 0,969835971     | 3,035714286     |
| SNURF                                                                                               | 0,000183568 | 0,044177346 | 0,049 | 0     | 1           | 1,03109506    | 0,969842683     | #DIV/0!         |
| THAP7-AS1                                                                                           | 0,006629795 | 0,044173769 | 0,085 | 0,021 | 1           | 1,031092504   | 0,969845088     | 4,047619048     |
| NIF3L1                                                                                              | 5,89403E-05 | 0,04414444  | 0,098 | 0,011 | 1           | 1,031071543   | 0,969864804     | 8,909090909     |
| RPRD1B                                                                                              | 4,08678E-05 | 0,044131349 | 0,183 | 0,042 | 0,862351563 | 1,031062187   | 0,969873605     | 4,357142857     |
| IRX3                                                                                                | 0,183494953 | 0,044121658 | 0,024 | 0,007 | 1           | 1,031055261   | 0,96988012      | 3,428571429     |
| ANO5                                                                                                | 0,063203483 | 0,044070927 | 0,012 | 0     | 1           | 1,031019005   | 0,969914225     | #DIV/0!         |
| PAQR4                                                                                               | 0,001949134 | 0,044047765 | 0,195 | 0,07  | 1           | 1,031002453   | 0,969929797     | 2,785714286     |
| THEMIS2                                                                                             | 0,000183568 | 0,044042316 | 0,049 | 0     | 1           | 1,030998559   | 0,969933461     | #DIV/0!         |
| CPPED1                                                                                              | 0,001314487 | 0,044034683 | 0,22  | 0,081 | 1           | 1,030993104   | 0,969938592     | 2,716049383     |
| MFSD3                                                                                               | 3,56336E-06 | 0,044028206 | 0,171 | 0,028 | 0,075190555 | 1,030988475   | 0,969942947     | 6,107142857     |
| NIP7                                                                                                | 0,000227074 | 0,044025321 | 0,159 | 0,039 | 1           | 1,030986414   | 0,969944886     | 4,076923077     |
| CDON                                                                                                | 0,180829015 | 0,043971415 | 0,049 | 0,021 | 1           | 1,030947892   | 0,969981129     | 2,333333333     |
| DDX60                                                                                               | 0,001921879 | 0,043831246 | 0,098 | 0,021 | 1           | 1,030847732   | 0,970075375     | 4,666666667     |
| SLC37A4                                                                                             | 0,001055888 | 0,043829073 | 0,085 | 0,014 | 1           | 1,030846179   | 0,970076836     | 6,071428571     |
| EBPL                                                                                                | 0,000819022 | 0,043783099 | 0,28  | 0,109 | 1           | 1,03081333    | 0,970107749     | 2,568807339     |
| GNB4                                                                                                | 0,000122962 | 0,043760124 | 0,268 | 0,088 | 1           | 1,030796915   | 0,970123198     | 3,045454545     |
| KIF2A                                                                                               | 0,033649462 | 0,043685314 | 0,256 | 0,137 | 1           | 1,030743465   | 0,970173505     | 1,868613139     |
| RCBTB1                                                                                              | 0,026685693 | 0,043679555 | 0,049 | 0,011 | 1           | 1,03073935    | 0,970177378     | 4,454545455     |
| FAM89A                                                                                              | 0,00685582  | 0,043644773 | 0,159 | 0,06  | 1           | 1,030714501   | 0,970200768     | 2,65            |
| PRKAG2                                                                                              | 0,998241088 | 0,043644284 | 0,024 | 0,025 | 1           | 1,030714151   | 0,970201097     | 0,96            |
| CROCC                                                                                               | 0,001256896 | 0,043600364 | 0,159 | 0,049 | 1           | 1,030682774   | 0,970230633     | 3,244897959     |
| OGFOD2                                                                                              | 0,001833348 | 0,04355317  | 0,061 | 0,007 | 1           | 1,030649058   | 0,970262373     | 8,714285714     |
| LSM11                                                                                               | 0,065143806 | 0,043528857 | 0,024 | 0,004 | 1           | 1,030631689   | 0,970278724     | 6               |
| ZNHIT6                                                                                              | 0,145204976 | 0,043452259 | 0,11  | 0,06  | 1           | 1,03057697    | 0,970330241     | 1,833333333     |

Supplementary Table 2

| Differentially expressed genes_keloid-XL_comparing SC-Keloid vs. (SC-Myel, SC-Nonmyel, SC-Nonmyel2) |             |             |       |       |             |               |                 |                 |
|-----------------------------------------------------------------------------------------------------|-------------|-------------|-------|-------|-------------|---------------|-----------------|-----------------|
| gene                                                                                                | p_val       | avg_log2FC  | pct.1 | pct.2 | p_val_adj   | Foldchange_UP | Foldchange_DOWN | Ratio_pct1_pct2 |
| EXOC3-AS1                                                                                           | 1,10381E-05 | 0,04343251  | 0,098 | 0,007 | 0,232915863 | 1,030562863   | 0,970343524     | 14              |
| RRP1B                                                                                               | 0,001124536 | 0,043412573 | 0,134 | 0,035 | 1           | 1,030548621   | 0,970356934     | 3,828571429     |
| ALPK3                                                                                               | 0,00931978  | 0,043381275 | 0,049 | 0,007 | 1           | 1,030526264   | 0,970377985     | 7               |
| XXYLT1                                                                                              | 0,000212038 | 0,043362689 | 0,134 | 0,028 | 1           | 1,030512989   | 0,970390486     | 4,785714286     |
| KRBA1                                                                                               | 0,024758179 | 0,043349048 | 0,085 | 0,028 | 1           | 1,030503245   | 0,970399661     | 3,035714286     |
| PGS1                                                                                                | 0,402953631 | 0,043317012 | 0,061 | 0,039 | 1           | 1,030480363   | 0,97042121      | 1,564102564     |
| SAP30BP                                                                                             | 0,000260089 | 0,043281404 | 0,476 | 0,214 | 1           | 1,030454929   | 0,970445162     | 2,224299065     |
| DLGAP1-AS2                                                                                          | 0,022420212 | 0,043184062 | 0,073 | 0,021 | 1           | 1,030385404   | 0,970510642     | 3,476190476     |
| OLFML3                                                                                              | 0,004426586 | 0,043180153 | 0,073 | 0,014 | 1           | 1,030382612   | 0,970513272     | 5,214285714     |
| PPIF                                                                                                | 0,001853678 | 0,043155185 | 0,098 | 0,021 | 1           | 1,03036478    | 0,970530068     | 4,666666667     |
| SUSD1                                                                                               | 0,00931978  | 0,043090047 | 0,049 | 0,007 | 1           | 1,030318259   | 0,970573889     | 7               |
| TTC38                                                                                               | 0,007676086 | 0,043038022 | 0,098 | 0,028 | 1           | 1,030281106   | 0,970608889     | 3,5             |
| PLPBP                                                                                               | 0,055866845 | 0,043036878 | 0,11  | 0,049 | 1           | 1,030280289   | 0,970609659     | 2,244897959     |
| RIPK1                                                                                               | 0,001045816 | 0,04301766  | 0,134 | 0,035 | 1           | 1,030266565   | 0,970622589     | 3,828571429     |
| NBPF20                                                                                              | 0,011553628 | 0,042999874 | 0,037 | 0,004 | 1           | 1,030253864   | 0,970634554     | 9,25            |
| AGL                                                                                                 | 0,064483381 | 0,042996357 | 0,085 | 0,035 | 1           | 1,030251352   | 0,970636921     | 2,428571429     |
| TMEM167B                                                                                            | 1,87827E-05 | 0,042957008 | 0,232 | 0,06  | 0,396334767 | 1,030223252   | 0,970663395     | 3,866666667     |
| ADGRG6                                                                                              | 0,000453615 | 0,042939833 | 0,366 | 0,154 | 1           | 1,030210988   | 0,970674951     | 2,376623377     |
| NQO1                                                                                                | 0,166583455 | 0,04291708  | 0,061 | 0,028 | 1           | 1,030194741   | 0,970690259     | 2,178571429     |
| THNSL2                                                                                              | 0,208798809 | 0,042886516 | 0,073 | 0,039 | 1           | 1,030172916   | 0,970710824     | 1,871794872     |
| ITPRIPL1                                                                                            | 0,043609761 | 0,042874875 | 0,037 | 0,007 | 1           | 1,030164604   | 0,970718657     | 5,285714286     |
| ZFP69                                                                                               | 0,011553628 | 0,042855853 | 0,037 | 0,004 | 1           | 1,030151021   | 0,970731456     | 9,25            |
| SLC2A6                                                                                              | 0,001220269 | 0,042849233 | 0,037 | 0     | 1           | 1,030146294   | 0,97073591      | #DIV/0!         |
| ARL5A                                                                                               | 0,002174808 | 0,042829999 | 0,427 | 0,207 | 1           | 1,03013256    | 0,970748852     | 2,062801932     |
| SRD5A1                                                                                              | 5,89403E-05 | 0,042826259 | 0,098 | 0,011 | 1           | 1,03012989    | 0,970751368     | 8,909090909     |
| ABITRAM                                                                                             | 0,000162451 | 0,042793996 | 0,11  | 0,018 | 1           | 1,030106853   | 0,970773077     | 6,111111111     |
| USP40                                                                                               | 0,000513745 | 0,042766187 | 0,171 | 0,049 | 1           | 1,030086997   | 0,97079179      | 3,489795918     |
| MECOM                                                                                               | 0,347088417 | 0,042749949 | 0,012 | 0,004 | 1           | 1,030075404   | 0,970802717     | 3               |
| CREG1                                                                                               | 0,001013666 | 0,042684627 | 0,134 | 0,035 | 1           | 1,030028765   | 0,970846674     | 3,828571429     |
| ZNF75D                                                                                              | 0,017068103 | 0,042676329 | 0,061 | 0,014 | 1           | 1,030022841   | 0,970852257     | 4,357142857     |

Supplementary Table 2

| Differentially expressed genes_keloid-XL_comparing SC-Keloid vs. (SC-Myel, SC-Nonmyel, SC-Nonmyel2) |             |             |       |       |             |               |                 |                 |
|-----------------------------------------------------------------------------------------------------|-------------|-------------|-------|-------|-------------|---------------|-----------------|-----------------|
| gene                                                                                                | p_val       | avg_log2FC  | pct.1 | pct.2 | p_val_adj   | Foldchange_UP | Foldchange_DOWN | Ratio_pct1_pct2 |
| MTAP                                                                                                | 5,5269E-05  | 0,042628319 | 0,22  | 0,06  | 1           | 1,029988564   | 0,970884566     | 3,666666667     |
| ANKRD27                                                                                             | 0,168856267 | 0,042622856 | 0,061 | 0,028 | 1           | 1,029984664   | 0,970888243     | 2,178571429     |
| ZSCAN31                                                                                             | 0,193178656 | 0,04262085  | 0,037 | 0,014 | 1           | 1,029983232   | 0,970889592     | 2,642857143     |
| PARP2                                                                                               | 0,023439606 | 0,042611058 | 0,146 | 0,063 | 1           | 1,029976241   | 0,970896182     | 2,317460317     |
| NPFF                                                                                                | 0,02737604  | 0,042608001 | 0,049 | 0,011 | 1           | 1,029974059   | 0,970898239     | 4,454545455     |
| ZNF107                                                                                              | 0,001380549 | 0,042586761 | 0,073 | 0,011 | 1           | 1,029958894   | 0,970912534     | 6,636363636     |
| CACNA2D4                                                                                            | 3,24139E-07 | 0,042570644 | 0,159 | 0,018 | 0,006839666 | 1,029947389   | 0,97092338      | 8,833333333     |
| MT-CYB                                                                                              | 0,3565742   | 0,042504699 | 0,841 | 0,846 | 1           | 1,029900311   | 0,970967762     | 0,994089835     |
| LINC00345                                                                                           | 0,008401736 | 0,042504685 | 0,024 | 0     | 1           | 1,029900301   | 0,970967771     | #DIV/0!         |
| INAVA                                                                                               | 0,008401736 | 0,042504003 | 0,024 | 0     | 1           | 1,029899815   | 0,97096823      | #DIV/0!         |
| BACE1                                                                                               | 0,000252448 | 0,04249817  | 0,268 | 0,095 | 1           | 1,02989565    | 0,970972156     | 2,821052632     |
| KPTN                                                                                                | 0,016864604 | 0,042454004 | 0,061 | 0,014 | 1           | 1,029864122   | 0,971001881     | 4,357142857     |
| NUP133                                                                                              | 0,068219791 | 0,042429808 | 0,061 | 0,021 | 1           | 1,02984685    | 0,971018167     | 2,904761905     |
| ABCD1                                                                                               | 0,002909566 | 0,042395843 | 0,085 | 0,018 | 1           | 1,029822605   | 0,971041027     | 4,722222222     |
| TEX264                                                                                              | 0,000602812 | 0,042365431 | 0,256 | 0,095 | 1           | 1,029800896   | 0,971061497     | 2,694736842     |
| C5orf63                                                                                             | 5,32686E-05 | 0,042326006 | 0,073 | 0,004 | 1           | 1,029772755   | 0,971088034     | 18,25           |
| USO1                                                                                                | 6,48505E-05 | 0,042308833 | 0,329 | 0,116 | 1           | 1,029760497   | 0,971099593     | 2,836206897     |
| STK38                                                                                               | 0,017038619 | 0,042292435 | 0,122 | 0,046 | 1           | 1,029748793   | 0,971110631     | 2,652173913     |
| AC003102.1                                                                                          | 0,825514901 | 0,0422256   | 0,037 | 0,032 | 1           | 1,029701089   | 0,97115562      | 1,15625         |
| CHD1L                                                                                               | 0,000288855 | 0,042202897 | 0,085 | 0,011 | 1           | 1,029684885   | 0,971170903     | 7,727272727     |
| TIMM50                                                                                              | 8,33671E-07 | 0,042181332 | 0,268 | 0,063 | 0,017591299 | 1,029669494   | 0,97118542      | 4,253968254     |
| FBXW8                                                                                               | 0,001445239 | 0,042087408 | 0,073 | 0,011 | 1           | 1,029602462   | 0,971248649     | 6,636363636     |
| ASPHD2                                                                                              | 0,000183568 | 0,042077391 | 0,049 | 0     | 1           | 1,029595313   | 0,971255393     | #DIV/0!         |
| CCDC138                                                                                             | 0,011553628 | 0,041977107 | 0,037 | 0,004 | 1           | 1,029523747   | 0,971322909     | 9,25            |
| NAB2                                                                                                | 0,000322775 | 0,041963885 | 0,293 | 0,109 | 1           | 1,029514311   | 0,971331811     | 2,688073394     |
| HECTD3                                                                                              | 0,185668317 | 0,041928701 | 0,024 | 0,007 | 1           | 1,029489204   | 0,971355499     | 3,428571429     |
| C6orf47-AS1                                                                                         | 0,063203483 | 0,041923236 | 0,012 | 0     | 1           | 1,029485305   | 0,971359179     | #DIV/0!         |
| CDK15                                                                                               | 0,063203483 | 0,041923236 | 0,012 | 0     | 1           | 1,029485305   | 0,971359179     | #DIV/0!         |
| CFAP52                                                                                              | 0,063203483 | 0,041923236 | 0,012 | 0     | 1           | 1,029485305   | 0,971359179     | #DIV/0!         |
| KCTD8                                                                                               | 0,063203483 | 0,041923236 | 0,012 | 0     | 1           | 1,029485305   | 0,971359179     | #DIV/0!         |

Supplementary Table 2

| Differentially expressed genes_keloid-XL_comparing SC-Keloid vs. (SC-Myel, SC-Nonmyel, SC-Nonmyel2) |             |             |       |       |             |               |                 |                 |
|-----------------------------------------------------------------------------------------------------|-------------|-------------|-------|-------|-------------|---------------|-----------------|-----------------|
| gene                                                                                                | p_val       | avg_log2FC  | pct.1 | pct.2 | p_val_adj   | Foldchange_UP | Foldchange_DOWN | Ratio_pct1_pct2 |
| WNT3                                                                                                | 0,063203483 | 0,041923236 | 0,012 | 0     | 1           | 1,029485305   | 0,971359179     | #DIV/0!         |
| SIAE                                                                                                | 0,060153875 | 0,04191092  | 0,049 | 0,014 | 1           | 1,029476516   | 0,971367471     | 3,5             |
| UBE2T                                                                                               | 0,009174744 | 0,041900237 | 0,049 | 0,007 | 1           | 1,029468892   | 0,971374664     | 7               |
| ZNF747                                                                                              | 0,00931978  | 0,04187359  | 0,049 | 0,007 | 1           | 1,029449878   | 0,971392606     | 7               |
| DHRS13                                                                                              | 0,066254792 | 0,041832728 | 0,024 | 0,004 | 1           | 1,029420721   | 0,971420119     | 6               |
| OAZ3                                                                                                | 0,001220269 | 0,0418239   | 0,037 | 0     | 1           | 1,029414422   | 0,971426064     | #DIV/0!         |
| COPB2                                                                                               | 1,75588E-07 | 0,041800165 | 0,378 | 0,102 | 0,00370509  | 1,029397487   | 0,971442045     | 3,705882353     |
| DAAM1                                                                                               | 0,000764781 | 0,041770957 | 0,329 | 0,137 | 1           | 1,029376646   | 0,971461713     | 2,401459854     |
| PRELID2                                                                                             | 0,013301771 | 0,041730953 | 0,085 | 0,025 | 1           | 1,029348103   | 0,971488651     | 3,4             |
| PPP6R1                                                                                              | 1,89992E-05 | 0,041661186 | 0,207 | 0,049 | 0,400901198 | 1,029298327   | 0,971535632     | 4,224489796     |
| RBMS3-AS3                                                                                           | 0,00032444  | 0,041646081 | 0,061 | 0,004 | 1           | 1,02928755    | 0,971545804     | 15,25           |
| RGP1                                                                                                | 0,003927556 | 0,041628773 | 0,098 | 0,025 | 1           | 1,029275201   | 0,97155746      | 3,92            |
| CGREF1                                                                                              | 0,001220269 | 0,041616332 | 0,037 | 0     | 1           | 1,029266325   | 0,971565838     | #DIV/0!         |
| ZNF341                                                                                              | 0,183494953 | 0,041609256 | 0,024 | 0,007 | 1           | 1,029261277   | 0,971570603     | 3,428571429     |
| SAC3D1                                                                                              | 0,002055474 | 0,041565665 | 0,134 | 0,039 | 1           | 1,029230179   | 0,97159996      | 3,435897436     |
| CRYBB1                                                                                              | 0,008401736 | 0,041553481 | 0,024 | 0     | 1           | 1,029221487   | 0,971608165     | #DIV/0!         |
| H4-16                                                                                               | 0,105939109 | 0,041463587 | 0,073 | 0,032 | 1           | 1,029157358   | 0,971668708     | 2,28125         |
| SMYD4                                                                                               | 0,461793215 | 0,041440395 | 0,049 | 0,032 | 1           | 1,029140814   | 0,971684328     | 1,53125         |
| KICS2                                                                                               | 0,027028964 | 0,041432836 | 0,049 | 0,011 | 1           | 1,029135422   | 0,971689419     | 4,454545455     |
| TMEM67                                                                                              | 0,006707687 | 0,041389673 | 0,134 | 0,046 | 1           | 1,029104632   | 0,971718491     | 2,913043478     |
| MRPL53                                                                                              | 0,024102868 | 0,041377094 | 0,085 | 0,028 | 1           | 1,029095659   | 0,971726963     | 3,035714286     |
| HOXD1                                                                                               | 0,011553628 | 0,041338695 | 0,037 | 0,004 | 1           | 1,029068269   | 0,971752827     | 9,25            |
| MT-CO3                                                                                              | 0,807222086 | 0,041324009 | 0,841 | 0,765 | 1           | 1,029057794   | 0,971762719     | 1,099346405     |
| NPW                                                                                                 | 0,831491253 | 0,041320438 | 0,037 | 0,032 | 1           | 1,029055246   | 0,971765125     | 1,15625         |
| FXN                                                                                                 | 0,010071401 | 0,041310548 | 0,073 | 0,018 | 1           | 1,029048193   | 0,971771786     | 4,055555556     |
| AREG                                                                                                | 0,02737604  | 0,04130612  | 0,049 | 0,011 | 1           | 1,029045034   | 0,971774769     | 4,454545455     |
| BICRAL                                                                                              | 0,112012827 | 0,041302471 | 0,061 | 0,025 | 1           | 1,029042431   | 0,971777227     | 2,44            |
| TNFRSF4                                                                                             | 0,347088417 | 0,041298701 | 0,012 | 0,004 | 1           | 1,029039742   | 0,971779766     | 3               |
| ICA1L                                                                                               | 0,113968254 | 0,041252561 | 0,049 | 0,018 | 1           | 1,029006832   | 0,971810846     | 2,722222222     |
| HNRNPUL1                                                                                            | 0,000739049 | 0,041207432 | 0,549 | 0,27  | 1           | 1,028974644   | 0,971841246     | 2,033333333     |



Supplementary Table 2

| Differentially expressed genes_keloid-XL_comparing SC-Keloid vs. (SC-Myel, SC-Nonmyel, SC-Nonmyel2) |             |             |       |       |             |               |                 |                 |
|-----------------------------------------------------------------------------------------------------|-------------|-------------|-------|-------|-------------|---------------|-----------------|-----------------|
| gene                                                                                                | p_val       | avg_log2FC  | pct.1 | pct.2 | p_val_adj   | Foldchange_UP | Foldchange_DOWN | Ratio_pct1_pct2 |
| LOXL4                                                                                               | 0,001952737 | 0,041183852 | 0,049 | 0,004 | 1           | 1,028957826   | 0,97185713      | 12,25           |
| ZSCAN25                                                                                             | 0,017481575 | 0,041151044 | 0,061 | 0,014 | 1           | 1,028934427   | 0,971879231     | 4,357142857     |
| FAM167B                                                                                             | 0,000183568 | 0,041141525 | 0,049 | 0     | 1           | 1,028927638   | 0,971885643     | #DIV/0!         |
| TYW5                                                                                                | 0,010546634 | 0,041113296 | 0,073 | 0,018 | 1           | 1,028907506   | 0,971904661     | 4,055555556     |
| CFI                                                                                                 | 0,103792275 | 0,041106273 | 0,037 | 0,011 | 1           | 1,028902497   | 0,971909392     | 3,363636364     |
| CC2D1A                                                                                              | 0,002018358 | 0,041094067 | 0,183 | 0,063 | 1           | 1,028893792   | 0,971917615     | 2,904761905     |
| SLC26A2                                                                                             | 0,109353288 | 0,0410867   | 0,11  | 0,056 | 1           | 1,028888538   | 0,971922578     | 1,964285714     |
| MRPS9                                                                                               | 8,36103E-05 | 0,041078013 | 0,159 | 0,035 | 1           | 1,028882343   | 0,97192843      | 4,542857143     |
| LLGL1                                                                                               | 0,001833348 | 0,041077113 | 0,061 | 0,007 | 1           | 1,028881701   | 0,971929036     | 8,714285714     |
| CCHCR1                                                                                              | 0,000470501 | 0,041067242 | 0,159 | 0,042 | 1           | 1,028874661   | 0,971935686     | 3,785714286     |
| MCM8                                                                                                | 0,191478184 | 0,041052868 | 0,037 | 0,014 | 1           | 1,02886441    | 0,97194537      | 2,642857143     |
| PCAT6                                                                                               | 0,00032621  | 0,04097313  | 0,073 | 0,007 | 1           | 1,028807546   | 0,971999091     | 10,42857143     |
| ARHGDI1                                                                                             | 0,010425992 | 0,040972099 | 0,073 | 0,018 | 1           | 1,028806811   | 0,971999786     | 4,055555556     |
| XPNPEP3                                                                                             | 0,002612361 | 0,040950711 | 0,11  | 0,028 | 1           | 1,028791559   | 0,972014196     | 3,928571429     |
| GGPS1                                                                                               | 0,014934204 | 0,040928194 | 0,183 | 0,081 | 1           | 1,028775503   | 0,972029367     | 2,259259259     |
| APOC1                                                                                               | 0,011553628 | 0,040853036 | 0,037 | 0,004 | 1           | 1,028721909   | 0,972080007     | 9,25            |
| MAP1S                                                                                               | 8,6678E-05  | 0,040846095 | 0,134 | 0,025 | 1           | 1,02871696    | 0,972084683     | 5,36            |
| DOCK8                                                                                               | 0,010916043 | 0,040644446 | 0,073 | 0,018 | 1           | 1,028573184   | 0,972220563     | 4,055555556     |
| RNF6                                                                                                | 2,29157E-05 | 0,040635174 | 0,22  | 0,056 | 0,483544625 | 1,028566573   | 0,972226812     | 3,928571429     |
| INSIG2                                                                                              | 0,000599391 | 0,040599614 | 0,146 | 0,039 | 1           | 1,028541221   | 0,972250776     | 3,743589744     |
| UPRT                                                                                                | 0,00414399  | 0,040536833 | 0,073 | 0,014 | 1           | 1,028496464   | 0,972293086     | 5,214285714     |
| YARS2                                                                                               | 7,15736E-06 | 0,040503578 | 0,134 | 0,018 | 0,151027427 | 1,028472756   | 0,972315498     | 7,444444444     |
| BCAS3                                                                                               | 0,000735726 | 0,040470716 | 0,122 | 0,028 | 1           | 1,028449329   | 0,972337646     | 4,357142857     |
| SBF2-AS1                                                                                            | 0,185668317 | 0,040427465 | 0,024 | 0,007 | 1           | 1,028418498   | 0,972366796     | 3,428571429     |
| EHD4                                                                                                | 6,24531E-06 | 0,040397965 | 0,415 | 0,147 | 0,13178233  | 1,028397469   | 0,972386679     | 2,823129252     |
| TMEM198                                                                                             | 0,011553628 | 0,04035737  | 0,037 | 0,004 | 1           | 1,028368533   | 0,972414041     | 9,25            |
| MACROH2A2                                                                                           | 0,001220269 | 0,040291135 | 0,037 | 0     | 1           | 1,02832132    | 0,972458686     | #DIV/0!         |
| ASAP1                                                                                               | 0,055255667 | 0,040252286 | 0,159 | 0,081 | 1           | 1,02829363    | 0,972484873     | 1,962962963     |
| C14orf93                                                                                            | 0,181340493 | 0,040208538 | 0,024 | 0,007 | 1           | 1,028262449   | 0,972514362     | 3,428571429     |
| LZTS3                                                                                               | 0,001787728 | 0,040200767 | 0,098 | 0,021 | 1           | 1,02825691    | 0,972519601     | 4,666666667     |

Supplementary Table 2

| Differentially expressed genes_keloid-XL_comparing SC-Keloid vs. (SC-Myel, SC-Nonmyel, SC-Nonmyel2) |             |             |       |       |             |               |                 |                 |
|-----------------------------------------------------------------------------------------------------|-------------|-------------|-------|-------|-------------|---------------|-----------------|-----------------|
| gene                                                                                                | p_val       | avg_log2FC  | pct.1 | pct.2 | p_val_adj   | Foldchange_UP | Foldchange_DOWN | Ratio_pct1_pct2 |
| GPN2                                                                                                | 0,017068103 | 0,040187822 | 0,061 | 0,014 | 1           | 1,028247683   | 0,972528328     | 4,357142857     |
| MFAP3                                                                                               | 0,001876168 | 0,040169194 | 0,098 | 0,021 | 1           | 1,028234407   | 0,972540885     | 4,666666667     |
| ABCB8                                                                                               | 0,000109686 | 0,04013976  | 0,171 | 0,042 | 1           | 1,028213429   | 0,972560727     | 4,071428571     |
| GNPDA1                                                                                              | 0,001440066 | 0,040054594 | 0,159 | 0,049 | 1           | 1,028152733   | 0,972618141     | 3,244897959     |
| SDE2                                                                                                | 0,017271324 | 0,040029946 | 0,134 | 0,053 | 1           | 1,028135167   | 0,972634758     | 2,528301887     |
| BHMT2                                                                                               | 0,008401736 | 0,039927388 | 0,024 | 0     | 1           | 1,028062082   | 0,972703903     | #DIV/0!         |
| TSNAX                                                                                               | 8,80969E-05 | 0,039918237 | 0,244 | 0,074 | 1           | 1,028055561   | 0,972710073     | 3,297297297     |
| GIT1                                                                                                | 0,12027408  | 0,039916059 | 0,378 | 0,246 | 1           | 1,028054009   | 0,972711542     | 1,536585366     |
| ACOT8                                                                                               | 0,000214626 | 0,039764718 | 0,134 | 0,028 | 1           | 1,02794617    | 0,972813586     | 4,785714286     |
| NAIF1                                                                                               | 0,001220269 | 0,039728772 | 0,037 | 0     | 1           | 1,027920559   | 0,972837824     | #DIV/0!         |
| STAT2                                                                                               | 0,000407186 | 0,03967239  | 0,244 | 0,084 | 1           | 1,027880387   | 0,972875845     | 2,904761905     |
| PTGS1                                                                                               | 0,008401736 | 0,039661023 | 0,024 | 0     | 1           | 1,027872288   | 0,97288351      | #DIV/0!         |
| UXS1                                                                                                | 0,005641411 | 0,03958929  | 0,293 | 0,137 | 1           | 1,027821182   | 0,972931885     | 2,138686131     |
| KDM8                                                                                                | 0,347088417 | 0,039547779 | 0,012 | 0,004 | 1           | 1,027791609   | 0,972959879     | 3               |
| TRPC4AP                                                                                             | 2,44026E-05 | 0,039541532 | 0,317 | 0,102 | 0,514918259 | 1,027787158   | 0,972964093     | 3,107843137     |
| ZNF70                                                                                               | 0,043609761 | 0,039483084 | 0,037 | 0,007 | 1           | 1,027745521   | 0,973003511     | 5,285714286     |
| ASB6                                                                                                | 0,003430365 | 0,039391331 | 0,122 | 0,035 | 1           | 1,02768016    | 0,973065395     | 3,485714286     |
| AMMECR1                                                                                             | 0,198346594 | 0,039372708 | 0,037 | 0,014 | 1           | 1,027666894   | 0,973077955     | 2,642857143     |
| AATF                                                                                                | 2,61027E-05 | 0,039361667 | 0,22  | 0,056 | 0,550793183 | 1,027659029   | 0,973085402     | 3,928571429     |
| OARD1                                                                                               | 2,91165E-05 | 0,039354732 | 0,232 | 0,063 | 0,614386888 | 1,027654089   | 0,97309008      | 3,682539683     |
| RNF166                                                                                              | 0,025884674 | 0,039348224 | 0,085 | 0,028 | 1           | 1,027649453   | 0,97309447      | 3,035714286     |
| KCNA3                                                                                               | 0,063203483 | 0,039344876 | 0,012 | 0     | 1           | 1,027647069   | 0,973096728     | #DIV/0!         |
| LSM10                                                                                               | 5,26643E-08 | 0,039341319 | 0,415 | 0,116 | 0,001111269 | 1,027644535   | 0,973099127     | 3,577586207     |
| MSANTD4                                                                                             | 1,52159E-05 | 0,03933704  | 0,159 | 0,028 | 0,321070382 | 1,027641487   | 0,973102013     | 5,678571429     |
| ADGRG2                                                                                              | 0,008401736 | 0,039288114 | 0,024 | 0     | 1           | 1,027606638   | 0,973135014     | #DIV/0!         |
| FAM131A                                                                                             | 0,000295757 | 0,039251377 | 0,146 | 0,035 | 1           | 1,027580471   | 0,973159795     | 4,171428571     |
| OR7A5                                                                                               | 0,065143806 | 0,039241571 | 0,024 | 0,004 | 1           | 1,027573486   | 0,973166409     | 6               |
| CAVIN1                                                                                              | 0,148262174 | 0,039238277 | 0,744 | 0,523 | 1           | 1,02757114    | 0,973168631     | 1,422562141     |
| ZNF750                                                                                              | 0,008401736 | 0,039164055 | 0,024 | 0     | 1           | 1,027518276   | 0,973218699     | #DIV/0!         |
| PRR19                                                                                               | 0,001952737 | 0,03912495  | 0,049 | 0,004 | 1           | 1,027490425   | 0,973245079     | 12,25           |

Supplementary Table 2

| Differentially expressed genes_keloid-XL_comparing SC-Keloid vs. (SC-Myel, SC-Nonmyel, SC-Nonmyel2) |             |             |       |       |            |               |                 |                 |
|-----------------------------------------------------------------------------------------------------|-------------|-------------|-------|-------|------------|---------------|-----------------|-----------------|
| gene                                                                                                | p_val       | avg_log2FC  | pct.1 | pct.2 | p_val_adj  | Foldchange_UP | Foldchange_DOWN | Ratio_pct1_pct2 |
| RINT1                                                                                               | 0,561847818 | 0,039057942 | 0,037 | 0,025 | 1          | 1,027442703   | 0,973290284     | 1,48            |
| MFNG                                                                                                | 0,065143806 | 0,039041986 | 0,024 | 0,004 | 1          | 1,02743134    | 0,973301048     | 6               |
| MYL5                                                                                                | 0,001809471 | 0,038970264 | 0,098 | 0,021 | 1          | 1,027380263   | 0,973349436     | 4,666666667     |
| ZCCHC24                                                                                             | 0,000665196 | 0,038945422 | 0,573 | 0,277 | 1          | 1,027362573   | 0,973366196     | 2,068592058     |
| KRBOX1                                                                                              | 0,006615795 | 0,038784079 | 0,061 | 0,011 | 1          | 1,027247685   | 0,973475058     | 5,545454545     |
| GALE                                                                                                | 0,001604696 | 0,038762694 | 0,122 | 0,032 | 1          | 1,027232458   | 0,973489488     | 3,8125          |
| INHBB                                                                                               | 0,179204865 | 0,038757057 | 0,024 | 0,007 | 1          | 1,027228444   | 0,973493292     | 3,428571429     |
| ZCCHC10                                                                                             | 3,47519E-06 | 0,038706555 | 0,268 | 0,07  | 0,07333007 | 1,027192487   | 0,97352737      | 3,828571429     |
| CACNG4                                                                                              | 0,008401736 | 0,038653922 | 0,024 | 0     | 1          | 1,027155013   | 0,973562887     | #DIV/0!         |
| BUD31                                                                                               | 0,001024593 | 0,038593903 | 0,537 | 0,253 | 1          | 1,027112282   | 0,97360339      | 2,122529644     |
| KPNA5                                                                                               | 0,017043378 | 0,038544118 | 0,11  | 0,039 | 1          | 1,027076838   | 0,973636989     | 2,820512821     |
| RUBCNL                                                                                              | 0,001952737 | 0,038483901 | 0,049 | 0,004 | 1          | 1,02703397    | 0,973677628     | 12,25           |
| ZNF784                                                                                              | 0,001220269 | 0,03847057  | 0,037 | 0     | 1          | 1,02702448    | 0,973686625     | #DIV/0!         |
| OPRL1                                                                                               | 0,001220269 | 0,038458751 | 0,037 | 0     | 1          | 1,027016066   | 0,973694602     | #DIV/0!         |
| MAP3K12                                                                                             | 0,001099251 | 0,038449809 | 0,171 | 0,053 | 1          | 1,027009701   | 0,973700637     | 3,226415094     |
| ACAT2                                                                                               | 0,005476874 | 0,038444641 | 0,122 | 0,039 | 1          | 1,027006022   | 0,973704125     | 3,128205128     |
| OLFM2                                                                                               | 0,005447223 | 0,038418526 | 0,11  | 0,032 | 1          | 1,026987432   | 0,973721751     | 3,4375          |
| AMN1                                                                                                | 0,003970716 | 0,038399967 | 0,098 | 0,025 | 1          | 1,02697422    | 0,973734277     | 3,92            |
| TUBE1                                                                                               | 0,025838473 | 0,038389112 | 0,122 | 0,049 | 1          | 1,026966494   | 0,973741603     | 2,489795918     |
| TIGD1                                                                                               | 0,027726954 | 0,038388471 | 0,049 | 0,011 | 1          | 1,026966037   | 0,973742036     | 4,454545455     |
| CALML4                                                                                              | 0,006431528 | 0,038298556 | 0,061 | 0,011 | 1          | 1,026902034   | 0,973802726     | 5,545454545     |
| TJAP1                                                                                               | 0,021765621 | 0,038290332 | 0,183 | 0,084 | 1          | 1,02689618    | 0,973808277     | 2,178571429     |
| DDX50                                                                                               | 0,002342756 | 0,038271129 | 0,195 | 0,07  | 1          | 1,026882512   | 0,973821239     | 2,785714286     |
| ZNF746                                                                                              | 0,006778966 | 0,038222022 | 0,085 | 0,021 | 1          | 1,026847559   | 0,973854387     | 4,047619048     |
| TBC1D31                                                                                             | 0,066254792 | 0,038180385 | 0,024 | 0,004 | 1          | 1,026817924   | 0,973882493     | 6               |
| SLC7A6OS                                                                                            | 0,000444147 | 0,038165432 | 0,11  | 0,021 | 1          | 1,026807282   | 0,973892587     | 5,238095238     |
| BEX5                                                                                                | 0,009174744 | 0,038147295 | 0,049 | 0,007 | 1          | 1,026794373   | 0,973904831     | 7               |
| TOP2B                                                                                               | 0,000258631 | 0,038127731 | 0,39  | 0,161 | 1          | 1,026780449   | 0,973918037     | 2,422360248     |
| THAP5                                                                                               | 0,000606723 | 0,038084208 | 0,268 | 0,102 | 1          | 1,026749474   | 0,973947419     | 2,62745098      |
| BEST4                                                                                               | 0,008401736 | 0,038077768 | 0,024 | 0     | 1          | 1,02674489    | 0,973951767     | #DIV/0!         |

Supplementary Table 2

| Differentially expressed genes_keloid-XL_comparing SC-Keloid vs. (SC-Myel, SC-Nonmyel, SC-Nonmyel2) |             |             |       |       |             |               |                 |                 |
|-----------------------------------------------------------------------------------------------------|-------------|-------------|-------|-------|-------------|---------------|-----------------|-----------------|
| gene                                                                                                | p_val       | avg_log2FC  | pct.1 | pct.2 | p_val_adj   | Foldchange_UP | Foldchange_DOWN | Ratio_pct1_pct2 |
| HECW2                                                                                               | 0,044226311 | 0,038063786 | 0,037 | 0,007 | 1           | 1,02673494    | 0,973961206     | 5,285714286     |
| ZNF547                                                                                              | 0,065143806 | 0,038062303 | 0,024 | 0,004 | 1           | 1,026733885   | 0,973962207     | 6               |
| METTL13                                                                                             | 0,01030658  | 0,038049638 | 0,073 | 0,018 | 1           | 1,026724871   | 0,973970757     | 4,055555556     |
| NR1H2                                                                                               | 1,07319E-05 | 0,038030448 | 0,305 | 0,091 | 0,226454834 | 1,026711214   | 0,973983713     | 3,351648352     |
| ASS1                                                                                                | 0,058268295 | 0,038027374 | 0,049 | 0,014 | 1           | 1,026709026   | 0,973985788     | 3,5             |
| GYG1                                                                                                | 1,68287E-05 | 0,038018485 | 0,207 | 0,049 | 0,355103187 | 1,026702701   | 0,973991789     | 4,224489796     |
| OSBPL7                                                                                              | 0,02175178  | 0,038005593 | 0,073 | 0,021 | 1           | 1,026693526   | 0,974000493     | 3,476190476     |
| GLIPR1L2                                                                                            | 0,520464457 | 0,037990512 | 0,024 | 0,014 | 1           | 1,026682794   | 0,974010674     | 1,714285714     |
| CALCOCO1                                                                                            | 0,004395453 | 0,037985783 | 0,146 | 0,049 | 1           | 1,026679429   | 0,974013867     | 2,979591837     |
| NSUN3                                                                                               | 0,004426608 | 0,037980727 | 0,098 | 0,025 | 1           | 1,02667583    | 0,97401728      | 3,92            |
| RPS11                                                                                               | 0,946283832 | 0,037960306 | 0,939 | 0,877 | 1           | 1,026661298   | 0,974031068     | 1,070695553     |
| MTERF1                                                                                              | 0,00032444  | 0,037957407 | 0,061 | 0,004 | 1           | 1,026659235   | 0,974033025     | 15,25           |
| MEAF6                                                                                               | 1,62781E-05 | 0,037940472 | 0,5   | 0,193 | 0,34348333  | 1,026647184   | 0,974044458     | 2,590673575     |
| CWF19L1                                                                                             | 0,017481575 | 0,037767519 | 0,061 | 0,014 | 1           | 1,026524115   | 0,974161236     | 4,357142857     |
| AGBL1                                                                                               | 0,063203483 | 0,037716905 | 0,012 | 0     | 1           | 1,026488102   | 0,974195413     | #DIV/0!         |
| P4HA3                                                                                               | 0,00140181  | 0,037703002 | 0,073 | 0,011 | 1           | 1,02647821    | 0,974204801     | 6,636363636     |
| SELENOT                                                                                             | 0,00813047  | 0,037674636 | 0,488 | 0,263 | 1           | 1,026458028   | 0,974223956     | 1,855513308     |
| MYLK-AS1                                                                                            | 0,036427227 | 0,037658732 | 0,061 | 0,018 | 1           | 1,026446712   | 0,974234696     | 3,388888889     |
| TFAP4                                                                                               | 0,060793535 | 0,037618835 | 0,049 | 0,014 | 1           | 1,026418326   | 0,974261638     | 3,5             |
| LTC4S                                                                                               | 0,010071401 | 0,037614165 | 0,073 | 0,018 | 1           | 1,026415004   | 0,974264792     | 4,055555556     |
| ZNF830                                                                                              | 0,003546515 | 0,037605795 | 0,134 | 0,042 | 1           | 1,02640905    | 0,974270444     | 3,19047619      |
| DHRS4L2                                                                                             | 0,000657816 | 0,037605005 | 0,146 | 0,039 | 1           | 1,026408487   | 0,974270978     | 3,743589744     |
| SUPT20H                                                                                             | 0,001504284 | 0,037594159 | 0,268 | 0,109 | 1           | 1,026400771   | 0,974278302     | 2,458715596     |
| ZC3HAV1L                                                                                            | 0,011553628 | 0,037581571 | 0,037 | 0,004 | 1           | 1,026391815   | 0,974286803     | 9,25            |
| C6orf52                                                                                             | 0,008401736 | 0,037519703 | 0,024 | 0     | 1           | 1,026347801   | 0,974328585     | #DIV/0!         |
| FOXS1                                                                                               | 0,00032444  | 0,037517499 | 0,061 | 0,004 | 1           | 1,026346232   | 0,974330073     | 15,25           |
| TRIM58                                                                                              | 0,000503644 | 0,037509194 | 0,134 | 0,032 | 1           | 1,026340324   | 0,974335682     | 4,1875          |
| PACSIN2                                                                                             | 0,002472188 | 0,03750589  | 0,39  | 0,182 | 1           | 1,026337974   | 0,974337913     | 2,142857143     |
| KCTD7                                                                                               | 0,001831458 | 0,037468535 | 0,098 | 0,021 | 1           | 1,0263114     | 0,974363142     | 4,666666667     |
| SLC35B3                                                                                             | 0,000108174 | 0,037462067 | 0,22  | 0,063 | 1           | 1,026306798   | 0,97436751      | 3,492063492     |

Supplementary Table 2

| Differentially expressed genes_keloid-XL_comparing SC-Keloid vs. (SC-Myel, SC-Nonmyel, SC-Nonmyel2) |             |             |       |       |             |               |                 |                 |
|-----------------------------------------------------------------------------------------------------|-------------|-------------|-------|-------|-------------|---------------|-----------------|-----------------|
| gene                                                                                                | p_val       | avg_log2FC  | pct.1 | pct.2 | p_val_adj   | Foldchange_UP | Foldchange_DOWN | Ratio_pct1_pct2 |
| CHST10                                                                                              | 0,007986503 | 0,037414845 | 0,098 | 0,028 | 1           | 1,026273207   | 0,974399403     | 3,5             |
| NKAIN4                                                                                              | 0,000174436 | 0,037369453 | 0,11  | 0,018 | 1           | 1,026240917   | 0,974430062     | 6,111111111     |
| ABL1                                                                                                | 0,002631923 | 0,037326102 | 0,28  | 0,119 | 1           | 1,02621008    | 0,974459342     | 2,352941176     |
| LSM12                                                                                               | 4,24587E-05 | 0,03730063  | 0,366 | 0,133 | 0,895921905 | 1,026191962   | 0,974476547     | 2,751879699     |
| SELENOK                                                                                             | 0,028614003 | 0,037289525 | 0,768 | 0,502 | 1           | 1,026184063   | 0,974484049     | 1,529880478     |
| PYCR3                                                                                               | 0,000983548 | 0,037279512 | 0,085 | 0,014 | 1           | 1,026176941   | 0,974490812     | 6,071428571     |
| RHOT1                                                                                               | 0,000279292 | 0,037230157 | 0,268 | 0,095 | 1           | 1,026141835   | 0,97452415      | 2,821052632     |
| DUS4L                                                                                               | 0,001220269 | 0,037199765 | 0,037 | 0     | 1           | 1,026120219   | 0,97454468      | #DIV/0!         |
| CA3                                                                                                 | 0,063203483 | 0,037123965 | 0,012 | 0     | 1           | 1,026066307   | 0,974595884     | #DIV/0!         |
| FOXB1                                                                                               | 0,063203483 | 0,037123965 | 0,012 | 0     | 1           | 1,026066307   | 0,974595884     | #DIV/0!         |
| C2orf69                                                                                             | 0,103792275 | 0,037115656 | 0,037 | 0,011 | 1           | 1,026060398   | 0,974601497     | 3,363636364     |
| CD34                                                                                                | 0,307543976 | 0,037099328 | 0,037 | 0,018 | 1           | 1,026048785   | 0,974612528     | 2,055555556     |
| ICE1                                                                                                | 0,000360591 | 0,037039174 | 0,305 | 0,116 | 1           | 1,026006005   | 0,974653165     | 2,629310345     |
| PPAN                                                                                                | 0,003268385 | 0,037035204 | 0,122 | 0,035 | 1           | 1,026003181   | 0,974655847     | 3,485714286     |
| RNF220                                                                                              | 0,000379338 | 0,037009083 | 0,183 | 0,053 | 1           | 1,025984605   | 0,974673494     | 3,452830189     |
| ENTPD3-AS1                                                                                          | 0,000111268 | 0,03700768  | 0,122 | 0,021 | 1           | 1,025983607   | 0,974674442     | 5,80952381      |
| IQSEC2                                                                                              | 0,00032444  | 0,036977146 | 0,061 | 0,004 | 1           | 1,025961893   | 0,974695071     | 15,25           |
| ERMAP                                                                                               | 0,061438821 | 0,036922292 | 0,049 | 0,014 | 1           | 1,025922884   | 0,974732132     | 3,5             |
| MEAK7                                                                                               | 0,004485159 | 0,036872878 | 0,073 | 0,014 | 1           | 1,025887746   | 0,974765518     | 5,214285714     |
| WDR73                                                                                               | 0,001379438 | 0,036872484 | 0,146 | 0,042 | 1           | 1,025887466   | 0,974765784     | 3,476190476     |
| UHRF1BP1                                                                                            | 0,00931978  | 0,036843666 | 0,049 | 0,007 | 1           | 1,025866974   | 0,974785255     | 7               |
| TMEM163                                                                                             | 0,000183568 | 0,036823047 | 0,049 | 0     | 1           | 1,025852312   | 0,974799187     | #DIV/0!         |
| GLRB                                                                                                | 0,00032444  | 0,036801217 | 0,061 | 0,004 | 1           | 1,025836789   | 0,974813938     | 15,25           |
| GATD1                                                                                               | 1,14878E-05 | 0,03675555  | 0,195 | 0,042 | 0,242404618 | 1,025804319   | 0,974844794     | 4,642857143     |
| ZNF227                                                                                              | 0,961674519 | 0,036735337 | 0,037 | 0,039 | 1           | 1,025789947   | 0,974858452     | 0,948717949     |
| EXOSC3                                                                                              | 1,45037E-05 | 0,036714985 | 0,22  | 0,053 | 0,306043147 | 1,025775476   | 0,974872205     | 4,150943396     |
| POLR3C                                                                                              | 0,001055888 | 0,036621824 | 0,085 | 0,014 | 1           | 1,025709239   | 0,974935159     | 6,071428571     |
| BTN2A2                                                                                              | 0,001222478 | 0,036600423 | 0,11  | 0,025 | 1           | 1,025694024   | 0,974949621     | 4,4             |
| MTERF2                                                                                              | 0,002387752 | 0,036552553 | 0,159 | 0,053 | 1           | 1,025659991   | 0,974981971     | 3               |
| CABCOC1                                                                                             | 0,183494953 | 0,036550391 | 0,024 | 0,007 | 1           | 1,025658454   | 0,974983433     | 3,428571429     |

Supplementary Table 2

| Differentially expressed genes_keloid-XL_comparing SC-Keloid vs. (SC-Myel, SC-Nonmyel, SC-Nonmyel2) |             |             |       |       |             |               |                 |                 |
|-----------------------------------------------------------------------------------------------------|-------------|-------------|-------|-------|-------------|---------------|-----------------|-----------------|
| gene                                                                                                | p_val       | avg_log2FC  | pct.1 | pct.2 | p_val_adj   | Foldchange_UP | Foldchange_DOWN | Ratio_pct1_pct2 |
| EFCAB2                                                                                              | 0,069914007 | 0,036506484 | 0,122 | 0,06  | 1           | 1,025627239   | 0,975013106     | 2,033333333     |
| PUS10                                                                                               | 0,044226311 | 0,036504659 | 0,037 | 0,007 | 1           | 1,025625942   | 0,975014339     | 5,285714286     |
| RIN1                                                                                                | 5,32686E-05 | 0,036456156 | 0,073 | 0,004 | 1           | 1,025591462   | 0,975047119     | 18,25           |
| CNIH2                                                                                               | 0,066254792 | 0,036415257 | 0,024 | 0,004 | 1           | 1,025562387   | 0,975074761     | 6               |
| ZNF586                                                                                              | 0,35185965  | 0,036343888 | 0,012 | 0,004 | 1           | 1,025511655   | 0,975122999     | 3               |
| HNRNPA1L2                                                                                           | 0,194890196 | 0,036332971 | 0,037 | 0,014 | 1           | 1,025503895   | 0,975130377     | 2,642857143     |
| ZNF780B                                                                                             | 0,004368707 | 0,036246136 | 0,073 | 0,014 | 1           | 1,025442172   | 0,975189072     | 5,214285714     |
| VAX2                                                                                                | 0,001952737 | 0,036239668 | 0,049 | 0,004 | 1           | 1,025437575   | 0,975193444     | 12,25           |
| NUP37                                                                                               | 0,002909566 | 0,036192211 | 0,085 | 0,018 | 1           | 1,025403844   | 0,975225523     | 4,722222222     |
| SLC25A6                                                                                             | 0,109098021 | 0,036081162 | 0,756 | 0,477 | 1           | 1,025324918   | 0,975300592     | 1,58490566      |
| ANKS3                                                                                               | 0,005188266 | 0,036067187 | 0,11  | 0,032 | 1           | 1,025314986   | 0,97531004      | 3,4375          |
| ERICH3                                                                                              | 0,063203483 | 0,036003362 | 0,012 | 0     | 1           | 1,025269627   | 0,975353189     | #DIV/0!         |
| SNRK-AS1                                                                                            | 0,063203483 | 0,036003362 | 0,012 | 0     | 1           | 1,025269627   | 0,975353189     | #DIV/0!         |
| SHB                                                                                                 | 0,146677521 | 0,035969907 | 0,11  | 0,06  | 1           | 1,025245852   | 0,975375806     | 1,833333333     |
| RFXANK                                                                                              | 5,25695E-05 | 0,035928007 | 0,256 | 0,077 | 1           | 1,025216076   | 0,975404135     | 3,324675325     |
| ASB2                                                                                                | 0,001220269 | 0,035920483 | 0,037 | 0     | 1           | 1,02521073    | 0,975409222     | #DIV/0!         |
| VPS72                                                                                               | 2,40727E-06 | 0,035894411 | 0,305 | 0,084 | 0,050795843 | 1,025192202   | 0,975426849     | 3,630952381     |
| MED14OS                                                                                             | 0,004485159 | 0,035871883 | 0,073 | 0,014 | 1           | 1,025176194   | 0,975442081     | 5,214285714     |
| MTSS1                                                                                               | 0,008401736 | 0,035861645 | 0,024 | 0     | 1           | 1,025168919   | 0,975449003     | #DIV/0!         |
| PHF7                                                                                                | 0,00931978  | 0,035854973 | 0,049 | 0,007 | 1           | 1,025164178   | 0,975453514     | 7               |
| COL22A1                                                                                             | 0,000344207 | 0,035849756 | 0,073 | 0,007 | 1           | 1,025160471   | 0,975457042     | 10,42857143     |
| TYK2                                                                                                | 2,18131E-05 | 0,035809994 | 0,244 | 0,067 | 0,460278759 | 1,025132217   | 0,975483926     | 3,641791045     |
| ZNF589                                                                                              | 0,183494953 | 0,035807576 | 0,024 | 0,007 | 1           | 1,025130498   | 0,975485562     | 3,428571429     |
| PDE1C                                                                                               | 0,001419533 | 0,035796974 | 0,146 | 0,042 | 1           | 1,025122965   | 0,97549273      | 3,476190476     |
| ZC3H8                                                                                               | 0,006483581 | 0,035774897 | 0,085 | 0,021 | 1           | 1,025107278   | 0,975507658     | 4,047619048     |
| GLB1L                                                                                               | 0,187860656 | 0,035755664 | 0,024 | 0,007 | 1           | 1,025093612   | 0,975520663     | 3,428571429     |
| KLHL22                                                                                              | 6,3637E-06  | 0,03570113  | 0,183 | 0,035 | 0,13428035  | 1,025054865   | 0,975557538     | 5,228571429     |
| LINC00893                                                                                           | 0,008401736 | 0,03569867  | 0,024 | 0     | 1           | 1,025053117   | 0,975559201     | #DIV/0!         |
| GPC2                                                                                                | 0,027726954 | 0,035626637 | 0,049 | 0,011 | 1           | 1,025001938   | 0,975607912     | 4,454545455     |
| BGLAP                                                                                               | 0,001055888 | 0,035589085 | 0,085 | 0,014 | 1           | 1,024975258   | 0,975633306     | 6,071428571     |

Supplementary Table 2

| Differentially expressed genes_keloid-XL_comparing SC-Keloid vs. (SC-Myel, SC-Nonmyel, SC-Nonmyel2) |             |             |       |       |             |               |                 |                 |
|-----------------------------------------------------------------------------------------------------|-------------|-------------|-------|-------|-------------|---------------|-----------------|-----------------|
| gene                                                                                                | p_val       | avg_log2FC  | pct.1 | pct.2 | p_val_adj   | Foldchange_UP | Foldchange_DOWN | Ratio_pct1_pct2 |
| WWC3                                                                                                | 0,336979217 | 0,03556159  | 0,171 | 0,123 | 1           | 1,024955725   | 0,9756519       | 1,390243902     |
| LMBR1                                                                                               | 0,025203577 | 0,035440548 | 0,085 | 0,028 | 1           | 1,024869734   | 0,975733761     | 3,035714286     |
| RASSF7                                                                                              | 0,001802592 | 0,035372114 | 0,061 | 0,007 | 1           | 1,024821121   | 0,975780046     | 8,714285714     |
| ASPRV1                                                                                              | 0,181340493 | 0,035363426 | 0,024 | 0,007 | 1           | 1,024814949   | 0,975785922     | 3,428571429     |
| LINC00460                                                                                           | 0,008401736 | 0,035356417 | 0,024 | 0     | 1           | 1,024809971   | 0,975790662     | #DIV/0!         |
| LRATD1                                                                                              | 0,066254792 | 0,035336543 | 0,024 | 0,004 | 1           | 1,024795853   | 0,975804105     | 6               |
| ZNF688                                                                                              | 4,30313E-05 | 0,035305162 | 0,207 | 0,053 | 0,908002961 | 1,024773562   | 0,97582533      | 3,905660377     |
| CYP4V2                                                                                              | 0,001876168 | 0,035265712 | 0,098 | 0,021 | 1           | 1,024745541   | 0,975852014     | 4,666666667     |
| TLCD1                                                                                               | 0,000183568 | 0,035249059 | 0,049 | 0     | 1           | 1,024733712   | 0,975863278     | #DIV/0!         |
| GBGT1                                                                                               | 0,008401736 | 0,035214695 | 0,024 | 0     | 1           | 1,024709304   | 0,975886523     | #DIV/0!         |
| FGF12                                                                                               | 0,063203483 | 0,035091334 | 0,012 | 0     | 1           | 1,024621688   | 0,975969972     | #DIV/0!         |
| H3C7                                                                                                | 0,063203483 | 0,035091334 | 0,012 | 0     | 1           | 1,024621688   | 0,975969972     | #DIV/0!         |
| HPCAL4                                                                                              | 0,063203483 | 0,035091334 | 0,012 | 0     | 1           | 1,024621688   | 0,975969972     | #DIV/0!         |
| IL7                                                                                                 | 0,063203483 | 0,035091334 | 0,012 | 0     | 1           | 1,024621688   | 0,975969972     | #DIV/0!         |
| OR7D2                                                                                               | 0,063203483 | 0,035091334 | 0,012 | 0     | 1           | 1,024621688   | 0,975969972     | #DIV/0!         |
| PFKFB1                                                                                              | 0,063203483 | 0,035091334 | 0,012 | 0     | 1           | 1,024621688   | 0,975969972     | #DIV/0!         |
| TAF3                                                                                                | 0,063203483 | 0,035091334 | 0,012 | 0     | 1           | 1,024621688   | 0,975969972     | #DIV/0!         |
| TNPO2                                                                                               | 0,00013292  | 0,03506139  | 0,244 | 0,077 | 1           | 1,024600421   | 0,975990229     | 3,168831169     |
| SERF1A                                                                                              | 0,043609761 | 0,034981343 | 0,037 | 0,007 | 1           | 1,024543574   | 0,976044383     | 5,285714286     |
| CKMT1A                                                                                              | 0,063203483 | 0,03493802  | 0,012 | 0     | 1           | 1,024512808   | 0,976073693     | #DIV/0!         |
| KRT79                                                                                               | 0,063203483 | 0,03493802  | 0,012 | 0     | 1           | 1,024512808   | 0,976073693     | #DIV/0!         |
| MGAT5B                                                                                              | 0,063203483 | 0,03493802  | 0,012 | 0     | 1           | 1,024512808   | 0,976073693     | #DIV/0!         |
| NPM2                                                                                                | 0,063203483 | 0,03493802  | 0,012 | 0     | 1           | 1,024512808   | 0,976073693     | #DIV/0!         |
| RPL24                                                                                               | 0,481746482 | 0,034889716 | 0,939 | 0,821 | 1           | 1,024478506   | 0,976106374     | 1,143727162     |
| BRME1                                                                                               | 0,748990771 | 0,03485526  | 0,012 | 0,018 | 1           | 1,024454039   | 0,976129687     | 0,666666667     |
| TDRKH                                                                                               | 0,347088417 | 0,034841937 | 0,012 | 0,004 | 1           | 1,024444578   | 0,976138702     | 3               |
| ETNK2                                                                                               | 0,037565828 | 0,034826168 | 0,061 | 0,018 | 1           | 1,02443338    | 0,976149371     | 3,388888889     |
| NCKAP1                                                                                              | 1,28469E-06 | 0,034789918 | 0,463 | 0,154 | 0,027108267 | 1,02440764    | 0,976173899     | 3,006493506     |
| ZNF839                                                                                              | 0,427422808 | 0,034752988 | 0,037 | 0,021 | 1           | 1,024381418   | 0,976198887     | 1,761904762     |
| SKAP1                                                                                               | 2,80682E-05 | 0,034577632 | 0,061 | 0     | 0,592266086 | 1,024256914   | 0,976317549     | #DIV/0!         |

Supplementary Table 2

| Differentially expressed genes_keloid-XL_comparing SC-Keloid vs. (SC-Myel, SC-Nonmyel, SC-Nonmyel2) |             |             |       |       |             |               |                 |                 |
|-----------------------------------------------------------------------------------------------------|-------------|-------------|-------|-------|-------------|---------------|-----------------|-----------------|
| gene                                                                                                | p_val       | avg_log2FC  | pct.1 | pct.2 | p_val_adj   | Foldchange_UP | Foldchange_DOWN | Ratio_pct1_pct2 |
| XKR8                                                                                                | 0,001833348 | 0,034569253 | 0,061 | 0,007 | 1           | 1,024250966   | 0,976323219     | 8,714285714     |
| PRR5L                                                                                               | 0,183494953 | 0,034567754 | 0,024 | 0,007 | 1           | 1,024249902   | 0,976324233     | 3,428571429     |
| SCD                                                                                                 | 0,032306429 | 0,034482611 | 0,573 | 0,34  | 1           | 1,024189456   | 0,976381854     | 1,685294118     |
| KCNJ2                                                                                               | 0,339089703 | 0,034448406 | 0,024 | 0,011 | 1           | 1,024165173   | 0,976405004     | 2,181818182     |
| ACACA                                                                                               | 0,000114351 | 0,034426258 | 0,122 | 0,021 | 1           | 1,024149451   | 0,976419994     | 5,80952381      |
| ISG20L2                                                                                             | 3,13909E-06 | 0,034423669 | 0,207 | 0,042 | 0,066237957 | 1,024147613   | 0,976421746     | 4,928571429     |
| CES2                                                                                                | 0,182936607 | 0,034401188 | 0,085 | 0,046 | 1           | 1,024131653   | 0,976436962     | 1,847826087     |
| FAM151B                                                                                             | 0,008401736 | 0,034398347 | 0,024 | 0     | 1           | 1,024129637   | 0,976438884     | #DIV/0!         |
| SLC4A5                                                                                              | 0,107265343 | 0,034383425 | 0,037 | 0,011 | 1           | 1,024119045   | 0,976448983     | 3,363636364     |
| TCN2                                                                                                | 0,186442875 | 0,034340663 | 0,037 | 0,014 | 1           | 1,02408869    | 0,976477926     | 2,642857143     |
| DNAH14                                                                                              | 0,001220269 | 0,034338487 | 0,037 | 0     | 1           | 1,024087145   | 0,9764794       | #DIV/0!         |
| CDCA7L                                                                                              | 0,108593558 | 0,034291395 | 0,061 | 0,025 | 1           | 1,024053718   | 0,976511274     | 2,44            |
| NSFL1C                                                                                              | 8,68606E-05 | 0,034285733 | 0,378 | 0,147 | 1           | 1,024049699   | 0,976515106     | 2,571428571     |
| KIAA0319L                                                                                           | 0,000868198 | 0,034273776 | 0,232 | 0,084 | 1           | 1,024041211   | 0,976523199     | 2,761904762     |
| SLC6A9                                                                                              | 0,001220269 | 0,034273113 | 0,037 | 0     | 1           | 1,024040741   | 0,976523648     | #DIV/0!         |
| CBLB                                                                                                | 0,024309048 | 0,034260764 | 0,134 | 0,056 | 1           | 1,024031975   | 0,976532007     | 2,392857143     |
| ARL16                                                                                               | 1,8075E-05  | 0,03424968  | 0,244 | 0,067 | 0,381401007 | 1,024024108   | 0,976539509     | 3,641791045     |
| RAD54L2                                                                                             | 0,000594027 | 0,034226952 | 0,207 | 0,067 | 1           | 1,024007975   | 0,976554894     | 3,089552239     |
| BAIAP2L2                                                                                            | 0,065143806 | 0,034150788 | 0,024 | 0,004 | 1           | 1,023953917   | 0,976606451     | 6               |
| ZNF544                                                                                              | 0,010791649 | 0,034137659 | 0,073 | 0,018 | 1           | 1,023944599   | 0,976615338     | 4,055555556     |
| EXO5                                                                                                | 0,001952737 | 0,034137069 | 0,049 | 0,004 | 1           | 1,02394418    | 0,976615737     | 12,25           |
| GCAT                                                                                                | 0,00414399  | 0,034132757 | 0,073 | 0,014 | 1           | 1,023941119   | 0,976618656     | 5,214285714     |
| ATAD3A                                                                                              | 0,000259864 | 0,034119638 | 0,171 | 0,046 | 1           | 1,023931808   | 0,976627537     | 3,717391304     |
| SLC9A5                                                                                              | 0,00931978  | 0,034106408 | 0,049 | 0,007 | 1           | 1,023922419   | 0,976636493     | 7               |
| CUL7                                                                                                | 4,31662E-05 | 0,034083164 | 0,159 | 0,032 | 0,910850685 | 1,023905922   | 0,976652228     | 4,96875         |
| ZNF626                                                                                              | 0,10265465  | 0,034071234 | 0,037 | 0,011 | 1           | 1,023897455   | 0,976660305     | 3,363636364     |
| GABRA2                                                                                              | 6,05627E-05 | 0,034041547 | 0,561 | 0,235 | 1           | 1,023876386   | 0,976680402     | 2,387234043     |
| GNB5                                                                                                | 0,003143853 | 0,034031411 | 0,122 | 0,035 | 1           | 1,023869192   | 0,976687264     | 3,485714286     |
| LKAAEAR1                                                                                            | 0,008401736 | 0,034025905 | 0,024 | 0     | 1           | 1,023865284   | 0,976690992     | #DIV/0!         |
| NUP50                                                                                               | 0,011065297 | 0,034008114 | 0,195 | 0,084 | 1           | 1,023852659   | 0,976703036     | 2,321428571     |



Supplementary Table 2

| Differentially expressed genes_keloid-XL_comparing SC-Keloid vs. (SC-Myel, SC-Nonmyel, SC-Nonmyel2) |             |             |       |       |           |               |                 |                 |
|-----------------------------------------------------------------------------------------------------|-------------|-------------|-------|-------|-----------|---------------|-----------------|-----------------|
| gene                                                                                                | p_val       | avg_log2FC  | pct.1 | pct.2 | p_val_adj | Foldchange_UP | Foldchange_DOWN | Ratio_pct1_pct2 |
| BTBD16                                                                                              | 0,008401736 | 0,033997374 | 0,024 | 0     | 1         | 1,023845037   | 0,976710307     | #DIV/0!         |
| TRIM38                                                                                              | 0,009578684 | 0,033964026 | 0,146 | 0,056 | 1         | 1,023821371   | 0,976732884     | 2,607142857     |
| LOXL1-AS1                                                                                           | 0,000183568 | 0,033867629 | 0,049 | 0     | 1         | 1,023752964   | 0,976798148     | #DIV/0!         |
| LACC1                                                                                               | 0,042398422 | 0,033816279 | 0,037 | 0,007 | 1         | 1,023716526   | 0,976832916     | 5,285714286     |
| LAPTM4A                                                                                             | 0,153658175 | 0,033780769 | 0,878 | 0,646 | 1         | 1,023691329   | 0,976856961     | 1,359133127     |
| ZNF582-DT                                                                                           | 0,347088417 | 0,033713784 | 0,012 | 0,004 | 1         | 1,0236438     | 0,976902317     | 3               |
| RPAP1                                                                                               | 0,000511843 | 0,033693784 | 0,11  | 0,021 | 1         | 1,023629609   | 0,97691586      | 5,238095238     |
| BFAR                                                                                                | 6,7885E-05  | 0,033684335 | 0,268 | 0,088 | 1         | 1,023622905   | 0,976922258     | 3,045454545     |
| B3GNTL1                                                                                             | 5,32686E-05 | 0,033632945 | 0,073 | 0,004 | 1         | 1,023586443   | 0,976957058     | 18,25           |
| AKNA                                                                                                | 0,061438821 | 0,033628348 | 0,049 | 0,014 | 1         | 1,023583182   | 0,976960171     | 3,5             |
| BCL2L15                                                                                             | 0,063203483 | 0,033520128 | 0,012 | 0     | 1         | 1,023506403   | 0,977033458     | #DIV/0!         |
| CYSRT1                                                                                              | 0,063203483 | 0,033520128 | 0,012 | 0     | 1         | 1,023506403   | 0,977033458     | #DIV/0!         |
| SLC16A8                                                                                             | 0,063203483 | 0,033520128 | 0,012 | 0     | 1         | 1,023506403   | 0,977033458     | #DIV/0!         |
| RAD23B                                                                                              | 0,006735904 | 0,033496919 | 0,329 | 0,161 | 1         | 1,023489938   | 0,977049175     | 2,043478261     |
| SFN                                                                                                 | 0,069455719 | 0,0334513   | 0,159 | 0,084 | 1         | 1,023457575   | 0,977080071     | 1,892857143     |
| GPAT2                                                                                               | 0,059519805 | 0,033433745 | 0,049 | 0,014 | 1         | 1,023445121   | 0,977091961     | 3,5             |
| VPS4A                                                                                               | 0,001609618 | 0,033397696 | 0,293 | 0,123 | 1         | 1,023419549   | 0,977116375     | 2,382113821     |
| AANAT                                                                                               | 0,063203483 | 0,033392881 | 0,012 | 0     | 1         | 1,023416133   | 0,977119637     | #DIV/0!         |
| C1QL4                                                                                               | 0,063203483 | 0,033392881 | 0,012 | 0     | 1         | 1,023416133   | 0,977119637     | #DIV/0!         |
| PCDH15                                                                                              | 0,063203483 | 0,033392881 | 0,012 | 0     | 1         | 1,023416133   | 0,977119637     | #DIV/0!         |
| ZNF132                                                                                              | 0,063203483 | 0,033392881 | 0,012 | 0     | 1         | 1,023416133   | 0,977119637     | #DIV/0!         |
| SPR                                                                                                 | 0,042398422 | 0,033364419 | 0,037 | 0,007 | 1         | 1,023395942   | 0,977138914     | 5,285714286     |
| RTN2                                                                                                | 0,006431528 | 0,033287672 | 0,061 | 0,011 | 1         | 1,023341503   | 0,977190896     | 5,545454545     |
| VAMP3                                                                                               | 0,017562356 | 0,033275342 | 0,427 | 0,232 | 1         | 1,023332757   | 0,977199247     | 1,840517241     |
| CTPS2                                                                                               | 0,106097567 | 0,033228518 | 0,037 | 0,011 | 1         | 1,023299544   | 0,977230964     | 3,363636364     |
| ZNF564                                                                                              | 0,011553628 | 0,033225577 | 0,037 | 0,004 | 1         | 1,023297458   | 0,977232956     | 9,25            |
| ZNF250                                                                                              | 0,022195444 | 0,033192427 | 0,073 | 0,021 | 1         | 1,023273945   | 0,977255411     | 3,476190476     |
| MTARC2                                                                                              | 0,001898897 | 0,033148312 | 0,098 | 0,021 | 1         | 1,023242656   | 0,977285294     | 4,666666667     |
| CNOT9                                                                                               | 0,000329164 | 0,033139896 | 0,22  | 0,07  | 1         | 1,023236687   | 0,977290995     | 3,142857143     |
| MR1                                                                                                 | 0,004368707 | 0,033107141 | 0,073 | 0,014 | 1         | 1,023213455   | 0,977313184     | 5,214285714     |

Supplementary Table 2

| Differentially expressed genes_keloid-XL_comparing SC-Keloid vs. (SC-Myel, SC-Nonmyel, SC-Nonmyel2) |             |             |       |       |             |               |                 |                 |
|-----------------------------------------------------------------------------------------------------|-------------|-------------|-------|-------|-------------|---------------|-----------------|-----------------|
| gene                                                                                                | p_val       | avg_log2FC  | pct.1 | pct.2 | p_val_adj   | Foldchange_UP | Foldchange_DOWN | Ratio_pct1_pct2 |
| CCNJL                                                                                               | 0,001423372 | 0,032987717 | 0,073 | 0,011 | 1           | 1,023128759   | 0,977394088     | 6,636363636     |
| PGBD1                                                                                               | 0,060153875 | 0,032987432 | 0,049 | 0,014 | 1           | 1,023128557   | 0,977394281     | 3,5             |
| AL590714.1                                                                                          | 0,063203483 | 0,032976644 | 0,012 | 0     | 1           | 1,023120906   | 0,97740159      | #DIV/0!         |
| FAM149B1                                                                                            | 0,000124092 | 0,032973026 | 0,122 | 0,021 | 1           | 1,023118341   | 0,977404041     | 5,80952381      |
| JMJD7                                                                                               | 0,043609761 | 0,032968032 | 0,037 | 0,007 | 1           | 1,023114798   | 0,977407424     | 5,285714286     |
| ACOT2                                                                                               | 2,46117E-05 | 0,032940837 | 0,195 | 0,046 | 0,519330851 | 1,023095513   | 0,977425849     | 4,239130435     |
| TUSC1                                                                                               | 5,17434E-06 | 0,032903417 | 0,354 | 0,109 | 0,109183652 | 1,023068977   | 0,977451201     | 3,247706422     |
| HMGXB4                                                                                              | 0,004823017 | 0,032894958 | 0,207 | 0,084 | 1           | 1,023062978   | 0,977456932     | 2,464285714     |
| PCK2                                                                                                | 0,000234367 | 0,03286654  | 0,098 | 0,014 | 1           | 1,023042826   | 0,977476186     | 7               |
| TKFC                                                                                                | 0,001853689 | 0,032866417 | 0,098 | 0,021 | 1           | 1,023042739   | 0,97747627      | 4,666666667     |
| NUF2                                                                                                | 0,103792275 | 0,032847013 | 0,037 | 0,011 | 1           | 1,023028979   | 0,977489417     | 3,363636364     |
| ZNF595                                                                                              | 0,027726954 | 0,03279711  | 0,049 | 0,011 | 1           | 1,022993593   | 0,977523229     | 4,454545455     |
| PXMP2                                                                                               | 0,003364716 | 0,032767341 | 0,122 | 0,035 | 1           | 1,022972485   | 0,977543399     | 3,485714286     |
| WWP2                                                                                                | 9,39569E-05 | 0,032748275 | 0,159 | 0,035 | 1           | 1,022958965   | 0,977556318     | 4,542857143     |
| NCDN                                                                                                | 0,037565828 | 0,032748032 | 0,061 | 0,018 | 1           | 1,022958793   | 0,977556483     | 3,388888889     |
| LDOC1                                                                                               | 0,242293287 | 0,032704802 | 0,061 | 0,032 | 1           | 1,022928141   | 0,977585775     | 1,90625         |
| CDC42EP5                                                                                            | 0,026068228 | 0,032701855 | 0,634 | 0,393 | 1           | 1,022926051   | 0,977587773     | 1,613231552     |
| EPHB2                                                                                               | 0,644071107 | 0,03267285  | 0,012 | 0,007 | 1           | 1,022905486   | 0,977607427     | 1,714285714     |
| GTSE1                                                                                               | 0,044226311 | 0,032650733 | 0,037 | 0,007 | 1           | 1,022889805   | 0,977622413     | 5,285714286     |
| DCLRE1B                                                                                             | 0,00931978  | 0,032613425 | 0,049 | 0,007 | 1           | 1,022863353   | 0,977647695     | 7               |
| IMP4                                                                                                | 0,000319433 | 0,032612592 | 0,28  | 0,102 | 1           | 1,022862763   | 0,97764826      | 2,745098039     |
| SPAAR                                                                                               | 0,008401736 | 0,032603552 | 0,024 | 0     | 1           | 1,022856354   | 0,977654386     | #DIV/0!         |
| CHCHD6                                                                                              | 0,000685144 | 0,032536439 | 0,098 | 0,018 | 1           | 1,022808772   | 0,977699866     | 5,444444444     |
| BAIAP2-DT                                                                                           | 0,005885676 | 0,032527617 | 0,122 | 0,039 | 1           | 1,022802518   | 0,977705845     | 3,128205128     |
| LPCAT4                                                                                              | 0,005137829 | 0,032512628 | 0,11  | 0,032 | 1           | 1,022791891   | 0,977716003     | 3,4375          |
| CORO2A                                                                                              | 0,006341138 | 0,032488165 | 0,061 | 0,011 | 1           | 1,022774549   | 0,977732582     | 5,545454545     |
| ENTPD1-AS1                                                                                          | 0,00031979  | 0,032416982 | 0,122 | 0,025 | 1           | 1,022724086   | 0,977780825     | 4,88            |
| AC092687.3                                                                                          | 0,342070304 | 0,032409848 | 0,024 | 0,011 | 1           | 1,022719029   | 0,97778566      | 2,181818182     |
| FH                                                                                                  | 0,001639094 | 0,032359793 | 0,207 | 0,074 | 1           | 1,022683545   | 0,977819585     | 2,797297297     |
| ZBTB5                                                                                               | 0,015603254 | 0,03235902  | 0,098 | 0,032 | 1           | 1,022682997   | 0,977820109     | 3,0625          |

Supplementary Table 2

| Differentially expressed genes_keloid-XL_comparing SC-Keloid vs. (SC-Myel, SC-Nonmyel, SC-Nonmyel2) |             |             |       |       |             |               |                 |                 |
|-----------------------------------------------------------------------------------------------------|-------------|-------------|-------|-------|-------------|---------------|-----------------|-----------------|
| gene                                                                                                | p_val       | avg_log2FC  | pct.1 | pct.2 | p_val_adj   | Foldchange_UP | Foldchange_DOWN | Ratio_pct1_pct2 |
| DDN                                                                                                 | 0,008401736 | 0,032340073 | 0,024 | 0     | 1           | 1,022669567   | 0,977832951     | #DIV/0!         |
| ZNF765                                                                                              | 0,104939896 | 0,032329086 | 0,037 | 0,011 | 1           | 1,022661778   | 0,977840398     | 3,363636364     |
| GPN1                                                                                                | 6,21985E-05 | 0,032257303 | 0,146 | 0,028 | 1           | 1,022610896   | 0,977889052     | 5,214285714     |
| FASTKD2                                                                                             | 0,008390305 | 0,032239668 | 0,098 | 0,028 | 1           | 1,022598396   | 0,977901006     | 3,5             |
| ANGEL1                                                                                              | 0,516980245 | 0,032193918 | 0,024 | 0,014 | 1           | 1,022565968   | 0,977932017     | 1,714285714     |
| CCDC96                                                                                              | 0,103792275 | 0,032179072 | 0,037 | 0,011 | 1           | 1,022555446   | 0,977942081     | 3,363636364     |
| LANCL2                                                                                              | 0,067018449 | 0,032154487 | 0,061 | 0,021 | 1           | 1,02253802    | 0,977958746     | 2,904761905     |
| THBS3                                                                                               | 0,006876865 | 0,032120856 | 0,134 | 0,046 | 1           | 1,022514184   | 0,977981544     | 2,913043478     |
| TDP1                                                                                                | 0,111964825 | 0,032092094 | 0,049 | 0,018 | 1           | 1,022493799   | 0,978001041     | 2,722222222     |
| DUSP7                                                                                               | 0,018467596 | 0,032091796 | 0,244 | 0,119 | 1           | 1,022493588   | 0,978001243     | 2,050420168     |
| RNF19B                                                                                              | 0,000261384 | 0,032090017 | 0,207 | 0,063 | 1           | 1,022492327   | 0,978002449     | 3,285714286     |
| YWHAQ                                                                                               | 0,044966845 | 0,032086969 | 0,744 | 0,512 | 1           | 1,022490167   | 0,978004516     | 1,453125        |
| RIMS2                                                                                               | 0,008401736 | 0,032079133 | 0,024 | 0     | 1           | 1,022484613   | 0,978009827     | #DIV/0!         |
| KIFBP                                                                                               | 3,20938E-05 | 0,032063045 | 0,22  | 0,056 | 0,677210702 | 1,022473211   | 0,978020734     | 3,928571429     |
| ZNF135                                                                                              | 0,066254792 | 0,032003785 | 0,024 | 0,004 | 1           | 1,022431213   | 0,978060908     | 6               |
| TRIM39                                                                                              | 0,011553628 | 0,031994382 | 0,037 | 0,004 | 1           | 1,022424549   | 0,978067282     | 9,25            |
| PBLD                                                                                                | 0,027726954 | 0,03197589  | 0,049 | 0,011 | 1           | 1,022411444   | 0,978079819     | 4,454545455     |
| SNRPB                                                                                               | 0,03364801  | 0,031943494 | 0,659 | 0,393 | 1           | 1,022388486   | 0,978101782     | 1,676844784     |
| RNF44                                                                                               | 0,13485524  | 0,031882431 | 0,085 | 0,042 | 1           | 1,022345213   | 0,978143182     | 2,023809524     |
| MAK16                                                                                               | 0,006854678 | 0,031880996 | 0,085 | 0,021 | 1           | 1,022344197   | 0,978144154     | 4,047619048     |
| PPP2R5D                                                                                             | 0,062847269 | 0,031828658 | 0,098 | 0,042 | 1           | 1,022307109   | 0,97817964      | 2,333333333     |
| ZNF71                                                                                               | 0,004102792 | 0,031778874 | 0,098 | 0,025 | 1           | 1,022271832   | 0,978213396     | 3,92            |
| NEDD1                                                                                               | 0,004286645 | 0,031777399 | 0,146 | 0,049 | 1           | 1,022270787   | 0,978214395     | 2,979591837     |
| ALS2                                                                                                | 0,459043308 | 0,031768496 | 0,122 | 0,091 | 1           | 1,022264478   | 0,978220432     | 1,340659341     |
| CCZ1B                                                                                               | 0,00124327  | 0,031731763 | 0,183 | 0,06  | 1           | 1,022238451   | 0,978245339     | 3,05            |
| CFAP53                                                                                              | 0,008401736 | 0,031722184 | 0,024 | 0     | 1           | 1,022231663   | 0,978251835     | #DIV/0!         |
| CIP2A                                                                                               | 0,008401736 | 0,031719362 | 0,024 | 0     | 1           | 1,022229663   | 0,978253748     | #DIV/0!         |
| PLCD4                                                                                               | 0,064048232 | 0,03169915  | 0,024 | 0,004 | 1           | 1,022215343   | 0,978267453     | 6               |
| ARHGEF10L                                                                                           | 0,015517806 | 0,031667322 | 0,159 | 0,067 | 1           | 1,022192791   | 0,978289036     | 2,373134328     |
| RABGGTA                                                                                             | 0,000931651 | 0,031655584 | 0,159 | 0,046 | 1           | 1,022184474   | 0,978296996     | 3,456521739     |

Supplementary Table 2

| Differentially expressed genes_keloid-XL_comparing SC-Keloid vs. (SC-Myel, SC-Nonmyel, SC-Nonmyel2) |             |             |       |       |           |               |                 |                 |
|-----------------------------------------------------------------------------------------------------|-------------|-------------|-------|-------|-----------|---------------|-----------------|-----------------|
| gene                                                                                                | p_val       | avg_log2FC  | pct.1 | pct.2 | p_val_adj | Foldchange_UP | Foldchange_DOWN | Ratio_pct1_pct2 |
| GRHL3                                                                                               | 0,063203483 | 0,031645008 | 0,012 | 0     | 1         | 1,022176981   | 0,978304167     | #DIV/0!         |
| PRKCI                                                                                               | 0,002166012 | 0,031628218 | 0,232 | 0,091 | 1         | 1,022165085   | 0,978315552     | 2,549450549     |
| ZFP92                                                                                               | 0,008401736 | 0,031606611 | 0,024 | 0     | 1         | 1,022149777   | 0,978330204     | #DIV/0!         |
| MUTYH                                                                                               | 0,004102792 | 0,031597558 | 0,098 | 0,025 | 1         | 1,022143362   | 0,978336344     | 3,92            |
| CCN4                                                                                                | 0,008401736 | 0,031583891 | 0,024 | 0     | 1         | 1,022133679   | 0,978345612     | #DIV/0!         |
| AKAP11                                                                                              | 0,001574491 | 0,031532672 | 0,232 | 0,088 | 1         | 1,022097392   | 0,978380346     | 2,636363636     |
| TEP1                                                                                                | 0,112963039 | 0,031494966 | 0,049 | 0,018 | 1         | 1,022070679   | 0,978405917     | 2,722222222     |
| CDC42BPG                                                                                            | 0,193178656 | 0,03148236  | 0,037 | 0,014 | 1         | 1,022061749   | 0,978414466     | 2,642857143     |
| ACADS                                                                                               | 0,007159314 | 0,031466488 | 0,146 | 0,053 | 1         | 1,022050504   | 0,978425231     | 2,754716981     |
| EEF1AKMT3                                                                                           | 0,011553628 | 0,031447894 | 0,037 | 0,004 | 1         | 1,022037331   | 0,978437841     | 9,25            |
| CENPS                                                                                               | 0,000298361 | 0,031409156 | 0,085 | 0,011 | 1         | 1,022009889   | 0,978464114     | 7,727272727     |
| CST6                                                                                                | 0,001220269 | 0,031399704 | 0,037 | 0     | 1         | 1,022003193   | 0,978470524     | #DIV/0!         |
| REPS1                                                                                               | 0,008308113 | 0,031329203 | 0,098 | 0,028 | 1         | 1,021953252   | 0,97851834      | 3,5             |
| CAST                                                                                                | 0,001336086 | 0,0313289   | 0,561 | 0,274 | 1         | 1,021953037   | 0,978518546     | 2,047445255     |
| VPS33A                                                                                              | 0,00931978  | 0,031269868 | 0,049 | 0,007 | 1         | 1,021911222   | 0,978558586     | 7               |
| VILL                                                                                                | 0,011553628 | 0,031239514 | 0,037 | 0,004 | 1         | 1,021889721   | 0,978579175     | 9,25            |
| TMEM44                                                                                              | 0,00032444  | 0,031176619 | 0,061 | 0,004 | 1         | 1,021845173   | 0,978621837     | 15,25           |
| TADA2B                                                                                              | 0,006615795 | 0,031129223 | 0,061 | 0,011 | 1         | 1,021811603   | 0,978653988     | 5,545454545     |
| IQGAP3                                                                                              | 0,347088417 | 0,031117492 | 0,012 | 0,004 | 1         | 1,021803294   | 0,978661946     | 3               |
| AQP10                                                                                               | 0,347088417 | 0,031105166 | 0,012 | 0,004 | 1         | 1,021794564   | 0,978670307     | 3               |
| TMEM132A                                                                                            | 0,000956293 | 0,031089673 | 0,256 | 0,098 | 1         | 1,021783591   | 0,978680817     | 2,612244898     |
| FBN3                                                                                                | 0,008401736 | 0,031067037 | 0,024 | 0     | 1         | 1,021767559   | 0,978696173     | #DIV/0!         |
| FBXO46                                                                                              | 0,042668024 | 0,031014537 | 0,073 | 0,025 | 1         | 1,021730378   | 0,978731789     | 2,92            |
| ATRNL1                                                                                              | 0,008401736 | 0,031005519 | 0,024 | 0     | 1         | 1,021723991   | 0,978737907     | #DIV/0!         |
| TRIM62                                                                                              | 0,000293572 | 0,030932059 | 0,085 | 0,011 | 1         | 1,021671968   | 0,978787743     | 7,727272727     |
| ZDHHC2                                                                                              | 0,695998291 | 0,030924571 | 0,061 | 0,049 | 1         | 1,021666665   | 0,978792824     | 1,244897959     |
| ANO9                                                                                                | 0,008401736 | 0,030912599 | 0,024 | 0     | 1         | 1,021658187   | 0,978800946     | #DIV/0!         |
| MOG                                                                                                 | 0,066254792 | 0,030906688 | 0,024 | 0,004 | 1         | 1,021654001   | 0,978804957     | 6               |
| RHBDL1                                                                                              | 0,001220269 | 0,030903223 | 0,037 | 0     | 1         | 1,021651547   | 0,978807307     | #DIV/0!         |
| ZNF304                                                                                              | 0,027726954 | 0,030872289 | 0,049 | 0,011 | 1         | 1,021629641   | 0,978828295     | 4,454545455     |

Supplementary Table 2

| Differentially expressed genes_keloid-XL_comparing SC-Keloid vs. (SC-Myel, SC-Nonmyel, SC-Nonmyel2) |             |             |       |       |             |               |                 |                 |
|-----------------------------------------------------------------------------------------------------|-------------|-------------|-------|-------|-------------|---------------|-----------------|-----------------|
| gene                                                                                                | p_val       | avg_log2FC  | pct.1 | pct.2 | p_val_adj   | Foldchange_UP | Foldchange_DOWN | Ratio_pct1_pct2 |
| ZNF543                                                                                              | 0,044226311 | 0,030864233 | 0,037 | 0,007 | 1           | 1,021623936   | 0,978833761     | 5,285714286     |
| ZNF214                                                                                              | 0,001220269 | 0,030842773 | 0,037 | 0     | 1           | 1,02160874    | 0,978848321     | #DIV/0!         |
| GPATCH11                                                                                            | 0,001589697 | 0,030825629 | 0,159 | 0,049 | 1           | 1,0215966     | 0,978859953     | 3,244897959     |
| PTBP3                                                                                               | 0,001743633 | 0,03081531  | 0,232 | 0,091 | 1           | 1,021589293   | 0,978866955     | 2,549450549     |
| ANKRD16                                                                                             | 0,000344207 | 0,030773288 | 0,073 | 0,007 | 1           | 1,021559537   | 0,978895467     | 10,42857143     |
| ITPRIP                                                                                              | 0,068052562 | 0,030725597 | 0,146 | 0,074 | 1           | 1,021525768   | 0,978927826     | 1,972972973     |
| TOR2A                                                                                               | 0,011553628 | 0,030722786 | 0,037 | 0,004 | 1           | 1,021523778   | 0,978929734     | 9,25            |
| SLC2A13                                                                                             | 0,302095643 | 0,030669783 | 0,122 | 0,081 | 1           | 1,021486249   | 0,978965699     | 1,50617284      |
| SNRPA                                                                                               | 0,00060856  | 0,030663435 | 0,317 | 0,13  | 1           | 1,021481755   | 0,978970006     | 2,438461538     |
| KRIT1                                                                                               | 0,00212947  | 0,030632724 | 0,195 | 0,07  | 1           | 1,02146001    | 0,978990847     | 2,785714286     |
| ZNF93                                                                                               | 0,00931978  | 0,03062312  | 0,049 | 0,007 | 1           | 1,02145321    | 0,978997364     | 7               |
| CATSPER1                                                                                            | 0,000183568 | 0,030590875 | 0,049 | 0     | 1           | 1,021430381   | 0,979019245     | #DIV/0!         |
| TATDN2                                                                                              | 0,14913678  | 0,030525866 | 0,134 | 0,077 | 1           | 1,021384355   | 0,979063361     | 1,74025974      |
| TOMM34                                                                                              | 8,57548E-05 | 0,030509526 | 0,183 | 0,046 | 1           | 1,021372787   | 0,97907445      | 3,97826087      |
| NIPA1                                                                                               | 0,000732778 | 0,030445555 | 0,098 | 0,018 | 1           | 1,021327499   | 0,979117865     | 5,444444444     |
| CYGB                                                                                                | 0,043609761 | 0,030422992 | 0,037 | 0,007 | 1           | 1,021311526   | 0,979133178     | 5,285714286     |
| TRMT61A                                                                                             | 7,99666E-05 | 0,030415174 | 0,207 | 0,056 | 1           | 1,021305991   | 0,979138484     | 3,696428571     |
| RUFY1                                                                                               | 0,002595385 | 0,030414779 | 0,183 | 0,067 | 1           | 1,021305712   | 0,979138752     | 2,731343284     |
| SH3D21                                                                                              | 0,10265465  | 0,030400127 | 0,037 | 0,011 | 1           | 1,021295339   | 0,979148696     | 3,363636364     |
| SOS1                                                                                                | 0,014889645 | 0,030362297 | 0,171 | 0,074 | 1           | 1,02126856    | 0,979174371     | 2,310810811     |
| PNPLA4                                                                                              | 0,000142807 | 0,030350265 | 0,11  | 0,018 | 1           | 1,021260042   | 0,979182538     | 6,111111111     |
| ORC5                                                                                                | 0,00196861  | 0,030251951 | 0,098 | 0,021 | 1           | 1,02119045    | 0,979249267     | 4,666666667     |
| MZF1                                                                                                | 0,003842512 | 0,030221766 | 0,098 | 0,025 | 1           | 1,021169084   | 0,979269756     | 3,92            |
| WDR55                                                                                               | 6,41411E-06 | 0,030210245 | 0,146 | 0,021 | 0,135344167 | 1,021160929   | 0,979277576     | 6,952380952     |
| ZNF813                                                                                              | 0,008401736 | 0,030198611 | 0,024 | 0     | 1           | 1,021152695   | 0,979285473     | #DIV/0!         |
| UPK3BL1                                                                                             | 0,000240941 | 0,030197205 | 0,207 | 0,063 | 1           | 1,0211517     | 0,979286428     | 3,285714286     |
| LINC02584                                                                                           | 0,001220269 | 0,030044468 | 0,037 | 0     | 1           | 1,021043597   | 0,97939011      | #DIV/0!         |
| AR                                                                                                  | 0,194890196 | 0,030037797 | 0,037 | 0,014 | 1           | 1,021038875   | 0,979394638     | 2,642857143     |
| SLC35F2                                                                                             | 0,058268295 | 0,029998538 | 0,049 | 0,014 | 1           | 1,021011091   | 0,97942129      | 3,5             |
| IRAK1BP1                                                                                            | 0,004199164 | 0,029952466 | 0,073 | 0,014 | 1           | 1,020978486   | 0,979452568     | 5,214285714     |

Supplementary Table 2

| Differentially expressed genes_keloid-XL_comparing SC-Keloid vs. (SC-Myel, SC-Nonmyel, SC-Nonmyel2) |             |             |       |       |           |               |                 |                 |
|-----------------------------------------------------------------------------------------------------|-------------|-------------|-------|-------|-----------|---------------|-----------------|-----------------|
| gene                                                                                                | p_val       | avg_log2FC  | pct.1 | pct.2 | p_val_adj | Foldchange_UP | Foldchange_DOWN | Ratio_pct1_pct2 |
| IZUMO4                                                                                              | 0,008401736 | 0,029904443 | 0,024 | 0     | 1         | 1,020944501   | 0,979485172     | #DIV/0!         |
| MICAL1                                                                                              | 0,00716736  | 0,029895859 | 0,134 | 0,046 | 1         | 1,020938427   | 0,979490999     | 2,913043478     |
| SAMD10                                                                                              | 0,185668317 | 0,029883894 | 0,024 | 0,007 | 1         | 1,020929959   | 0,979499123     | 3,428571429     |
| ST8SIA1                                                                                             | 0,345067611 | 0,029882299 | 0,024 | 0,011 | 1         | 1,020928831   | 0,979500206     | 2,181818182     |
| WDR37                                                                                               | 0,027726954 | 0,029881989 | 0,049 | 0,011 | 1         | 1,020928611   | 0,979500416     | 4,454545455     |
| DNAJC28                                                                                             | 0,066254792 | 0,029852238 | 0,024 | 0,004 | 1         | 1,020907558   | 0,979520616     | 6               |
| METTL1                                                                                              | 0,000344207 | 0,029796807 | 0,073 | 0,007 | 1         | 1,020868334   | 0,979558252     | 10,42857143     |
| MAFG-DT                                                                                             | 0,004485159 | 0,029795866 | 0,073 | 0,014 | 1         | 1,020867668   | 0,979558891     | 5,214285714     |
| CDCP1                                                                                               | 0,008401736 | 0,029762772 | 0,024 | 0     | 1         | 1,020844251   | 0,979581361     | #DIV/0!         |
| MN1                                                                                                 | 0,564675598 | 0,029726786 | 0,037 | 0,025 | 1         | 1,020818788   | 0,979605795     | 1,48            |
| EML2                                                                                                | 0,043216097 | 0,029674108 | 0,085 | 0,032 | 1         | 1,020781514   | 0,979641565     | 2,65625         |
| TMEM255A                                                                                            | 0,270579294 | 0,029665209 | 0,049 | 0,025 | 1         | 1,020775218   | 0,979647608     | 1,96            |
| DSG3                                                                                                | 0,183494953 | 0,029659291 | 0,024 | 0,007 | 1         | 1,02077103    | 0,979651626     | 3,428571429     |
| ABHD6                                                                                               | 0,001112971 | 0,029647731 | 0,11  | 0,025 | 1         | 1,020762852   | 0,979659476     | 4,4             |
| CCDC180                                                                                             | 0,345067611 | 0,029613241 | 0,024 | 0,011 | 1         | 1,020738448   | 0,979682897     | 2,181818182     |
| CLIC5                                                                                               | 0,347088417 | 0,029610942 | 0,012 | 0,004 | 1         | 1,020736822   | 0,979684458     | 3               |
| LRRC73                                                                                              | 0,347088417 | 0,029605803 | 0,012 | 0,004 | 1         | 1,020733186   | 0,979687947     | 3               |
| RFC5                                                                                                | 4,95841E-05 | 0,029591327 | 0,11  | 0,014 | 1         | 1,020722944   | 0,979697778     | 7,857142857     |
| ZFYVE9                                                                                              | 0,053680889 | 0,029553662 | 0,122 | 0,056 | 1         | 1,020696296   | 0,979723356     | 2,178571429     |
| RNASEH1                                                                                             | 0,004684683 | 0,029528772 | 0,183 | 0,07  | 1         | 1,020678687   | 0,979740258     | 2,614285714     |
| TNFSF4                                                                                              | 0,011553628 | 0,02952416  | 0,037 | 0,004 | 1         | 1,020675424   | 0,97974339      | 9,25            |
| CNNM2                                                                                               | 0,748990771 | 0,029497635 | 0,012 | 0,018 | 1         | 1,020656658   | 0,979761404     | 0,666666667     |
| PHYHIP                                                                                              | 0,001952737 | 0,029489983 | 0,049 | 0,004 | 1         | 1,020651244   | 0,979766601     | 12,25           |
| TRMT12                                                                                              | 0,001952737 | 0,029468322 | 0,049 | 0,004 | 1         | 1,02063592    | 0,979781311     | 12,25           |
| CABIN1                                                                                              | 0,09581901  | 0,029455232 | 0,134 | 0,07  | 1         | 1,02062666    | 0,979790201     | 1,914285714     |
| KLHL13                                                                                              | 0,196612832 | 0,029405545 | 0,037 | 0,014 | 1         | 1,02059151    | 0,979823946     | 2,642857143     |
| CAMKK1                                                                                              | 0,00931978  | 0,029385913 | 0,049 | 0,007 | 1         | 1,020577622   | 0,979837279     | 7               |
| TMSB15B                                                                                             | 0,044226311 | 0,029384925 | 0,037 | 0,007 | 1         | 1,020576923   | 0,97983795      | 5,285714286     |
| RBM15B                                                                                              | 0,002734083 | 0,02932145  | 0,159 | 0,053 | 1         | 1,020532021   | 0,979881062     | 3               |
| UBAC2-AS1                                                                                           | 0,008401736 | 0,029305663 | 0,024 | 0     | 1         | 1,020520853   | 0,979891784     | #DIV/0!         |

Supplementary Table 2

| Differentially expressed genes_keloid-XL_comparing SC-Keloid vs. (SC-Myel, SC-Nonmyel, SC-Nonmyel2) |             |             |       |       |           |               |                 |                 |
|-----------------------------------------------------------------------------------------------------|-------------|-------------|-------|-------|-----------|---------------|-----------------|-----------------|
| gene                                                                                                | p_val       | avg_log2FC  | pct.1 | pct.2 | p_val_adj | Foldchange_UP | Foldchange_DOWN | Ratio_pct1_pct2 |
| TESK1                                                                                               | 0,006969362 | 0,029283555 | 0,171 | 0,067 | 1         | 1,020505215   | 0,9799068       | 2,552238806     |
| TTI2                                                                                                | 0,010546634 | 0,029279126 | 0,073 | 0,018 | 1         | 1,020502082   | 0,979909809     | 4,055555556     |
| FKTN                                                                                                | 0,268844049 | 0,029266317 | 0,049 | 0,025 | 1         | 1,020493022   | 0,979918509     | 1,96            |
| CDK20                                                                                               | 0,112963039 | 0,029263613 | 0,049 | 0,018 | 1         | 1,020491109   | 0,979920346     | 2,722222222     |
| LINC00393                                                                                           | 0,008401736 | 0,029252475 | 0,024 | 0     | 1         | 1,02048323    | 0,979927911     | #DIV/0!         |
| DBT                                                                                                 | 0,138095537 | 0,029251038 | 0,085 | 0,042 | 1         | 1,020482214   | 0,979928887     | 2,023809524     |
| SLC12A9                                                                                             | 0,041519021 | 0,02920182  | 0,085 | 0,032 | 1         | 1,020447401   | 0,979962318     | 2,65625         |
| TMEM145                                                                                             | 0,066254792 | 0,029201387 | 0,024 | 0,004 | 1         | 1,020447095   | 0,979962612     | 6               |
| LRCH2                                                                                               | 0,008401736 | 0,029200742 | 0,024 | 0     | 1         | 1,020446638   | 0,97996305      | #DIV/0!         |
| ZNF433                                                                                              | 0,000344207 | 0,029102164 | 0,073 | 0,007 | 1         | 1,020376914   | 0,980030013     | 10,42857143     |
| TOM1L1                                                                                              | 0,000713367 | 0,029074793 | 0,098 | 0,018 | 1         | 1,020357556   | 0,980048606     | 5,444444444     |
| TEF                                                                                                 | 0,016767057 | 0,029049073 | 0,11  | 0,039 | 1         | 1,020339366   | 0,980066078     | 2,820512821     |
| CERS3                                                                                               | 0,063203483 | 0,029048221 | 0,012 | 0     | 1         | 1,020338762   | 0,980066657     | #DIV/0!         |
| CLCA4                                                                                               | 0,063203483 | 0,029048221 | 0,012 | 0     | 1         | 1,020338762   | 0,980066657     | #DIV/0!         |
| DQX1                                                                                                | 0,063203483 | 0,029048221 | 0,012 | 0     | 1         | 1,020338762   | 0,980066657     | #DIV/0!         |
| EPN3                                                                                                | 0,063203483 | 0,029048221 | 0,012 | 0     | 1         | 1,020338762   | 0,980066657     | #DIV/0!         |
| HCAR2                                                                                               | 0,063203483 | 0,029048221 | 0,012 | 0     | 1         | 1,020338762   | 0,980066657     | #DIV/0!         |
| PPARGC1B                                                                                            | 0,063203483 | 0,029048221 | 0,012 | 0     | 1         | 1,020338762   | 0,980066657     | #DIV/0!         |
| SGPP2                                                                                               | 0,063203483 | 0,029048221 | 0,012 | 0     | 1         | 1,020338762   | 0,980066657     | #DIV/0!         |
| ZNF257                                                                                              | 0,063203483 | 0,029048221 | 0,012 | 0     | 1         | 1,020338762   | 0,980066657     | #DIV/0!         |
| NPAS3                                                                                               | 0,066254792 | 0,029042259 | 0,024 | 0,004 | 1         | 1,020334546   | 0,980070707     | 6               |
| RMND1                                                                                               | 0,000147137 | 0,028998654 | 0,146 | 0,032 | 1         | 1,020303707   | 0,98010033      | 4,5625          |
| TGDS                                                                                                | 0,000742666 | 0,028968762 | 0,098 | 0,018 | 1         | 1,020282568   | 0,980120637     | 5,444444444     |
| RASIP1                                                                                              | 0,101526965 | 0,028963956 | 0,037 | 0,011 | 1         | 1,020279168   | 0,980123902     | 3,363636364     |
| RNASEL                                                                                              | 0,000162451 | 0,02895091  | 0,11  | 0,018 | 1         | 1,020269942   | 0,980132766     | 6,111111111     |
| RPP40                                                                                               | 0,004426586 | 0,02889057  | 0,073 | 0,014 | 1         | 1,020227271   | 0,98017376      | 5,214285714     |
| SPATA22                                                                                             | 0,106097567 | 0,028878375 | 0,037 | 0,011 | 1         | 1,020218647   | 0,980182045     | 3,363636364     |
| URGCP                                                                                               | 0,039702859 | 0,02884048  | 0,122 | 0,053 | 1         | 1,02019185    | 0,980207792     | 2,301886792     |
| CPNE8                                                                                               | 0,005780975 | 0,028765056 | 0,122 | 0,039 | 1         | 1,020138515   | 0,980259038     | 3,128205128     |
| ALG6                                                                                                | 0,003268385 | 0,028722013 | 0,122 | 0,035 | 1         | 1,02010808    | 0,980288285     | 3,485714286     |

Supplementary Table 2

| Differentially expressed genes_keloid-XL_comparing SC-Keloid vs. (SC-Myel, SC-Nonmyel, SC-Nonmyel2) |             |             |       |       |             |               |                 |                 |
|-----------------------------------------------------------------------------------------------------|-------------|-------------|-------|-------|-------------|---------------|-----------------|-----------------|
| gene                                                                                                | p_val       | avg_log2FC  | pct.1 | pct.2 | p_val_adj   | Foldchange_UP | Foldchange_DOWN | Ratio_pct1_pct2 |
| LINC00685                                                                                           | 0,005677957 | 0,028704596 | 0,122 | 0,039 | 1           | 1,020095764   | 0,98030012      | 3,128205128     |
| H3C10                                                                                               | 0,065143806 | 0,028676058 | 0,024 | 0,004 | 1           | 1,020075586   | 0,980319511     | 6               |
| AFP                                                                                                 | 0,063203483 | 0,028636864 | 0,012 | 0     | 1           | 1,020047874   | 0,980346144     | #DIV/0!         |
| IRX1                                                                                                | 0,063203483 | 0,028636864 | 0,012 | 0     | 1           | 1,020047874   | 0,980346144     | #DIV/0!         |
| BUB1B                                                                                               | 0,063203483 | 0,028633369 | 0,012 | 0     | 1           | 1,020045403   | 0,980348519     | #DIV/0!         |
| DIAPH3                                                                                              | 0,063203483 | 0,028633369 | 0,012 | 0     | 1           | 1,020045403   | 0,980348519     | #DIV/0!         |
| STAP2                                                                                               | 0,011553628 | 0,028627578 | 0,037 | 0,004 | 1           | 1,020041308   | 0,980352454     | 9,25            |
| PCDHGB6                                                                                             | 0,00931978  | 0,028592703 | 0,049 | 0,007 | 1           | 1,020016651   | 0,980376153     | 7               |
| MRM1                                                                                                | 0,006523076 | 0,028554316 | 0,061 | 0,011 | 1           | 1,019989511   | 0,980402239     | 5,545454545     |
| B3GNT9                                                                                              | 0,017068103 | 0,028498111 | 0,061 | 0,014 | 1           | 1,019949774   | 0,980440435     | 4,357142857     |
| C16orf95                                                                                            | 0,00931978  | 0,028446328 | 0,049 | 0,007 | 1           | 1,019913166   | 0,980475627     | 7               |
| CEMIP                                                                                               | 0,065143806 | 0,02842968  | 0,024 | 0,004 | 1           | 1,019901397   | 0,980486941     | 6               |
| ADAMTS14                                                                                            | 0,063203483 | 0,028327928 | 0,012 | 0     | 1           | 1,019829467   | 0,980556096     | #DIV/0!         |
| COL4A6                                                                                              | 0,063203483 | 0,028327928 | 0,012 | 0     | 1           | 1,019829467   | 0,980556096     | #DIV/0!         |
| RN7SL832P                                                                                           | 0,063203483 | 0,028327928 | 0,012 | 0     | 1           | 1,019829467   | 0,980556096     | #DIV/0!         |
| WAS                                                                                                 | 0,063203483 | 0,028327928 | 0,012 | 0     | 1           | 1,019829467   | 0,980556096     | #DIV/0!         |
| XIRP1                                                                                               | 0,063203483 | 0,028327928 | 0,012 | 0     | 1           | 1,019829467   | 0,980556096     | #DIV/0!         |
| SPC24                                                                                               | 0,008401736 | 0,028308392 | 0,024 | 0     | 1           | 1,019815657   | 0,980569374     | #DIV/0!         |
| CMTM1                                                                                               | 0,066254792 | 0,028289244 | 0,024 | 0,004 | 1           | 1,019802121   | 0,980582389     | 6               |
| KRTAP2-2                                                                                            | 0,347088417 | 0,028246026 | 0,012 | 0,004 | 1           | 1,019771572   | 0,980611764     | 3               |
| GPATCH4                                                                                             | 7,57218E-07 | 0,028201351 | 0,183 | 0,028 | 0,015978058 | 1,019739994   | 0,98064213      | 6,535714286     |
| MFSD14B                                                                                             | 0,001574353 | 0,028184997 | 0,244 | 0,095 | 1           | 1,019728434   | 0,980653247     | 2,568421053     |
| PEX19                                                                                               | 0,138914913 | 0,028174309 | 0,085 | 0,042 | 1           | 1,01972088    | 0,980660512     | 2,023809524     |
| C1orf112                                                                                            | 0,017481575 | 0,028172162 | 0,061 | 0,014 | 1           | 1,019719362   | 0,980661971     | 4,357142857     |
| BMP8A                                                                                               | 0,347088417 | 0,028158238 | 0,012 | 0,004 | 1           | 1,019709521   | 0,980671436     | 3               |
| ME1                                                                                                 | 0,001952737 | 0,028150401 | 0,049 | 0,004 | 1           | 1,019703982   | 0,980676763     | 12,25           |
| TPM3                                                                                                | 0,027602734 | 0,028142021 | 0,683 | 0,404 | 1           | 1,019698058   | 0,98068246      | 1,690594059     |
| MAPK13                                                                                              | 0,065143806 | 0,028136456 | 0,024 | 0,004 | 1           | 1,019694125   | 0,980686242     | 6               |
| THAP4                                                                                               | 0,00014217  | 0,028128942 | 0,171 | 0,042 | 1           | 1,019688814   | 0,98069135      | 4,071428571     |
| MRPS22                                                                                              | 0,000280656 | 0,028111655 | 0,244 | 0,081 | 1           | 1,019676596   | 0,980703101     | 3,012345679     |



Supplementary Table 2

| Differentially expressed genes_keloid-XL_comparing SC-Keloid vs. (SC-Myel, SC-Nonmyel, SC-Nonmyel2) |             |             |       |       |             |               |                 |                 |
|-----------------------------------------------------------------------------------------------------|-------------|-------------|-------|-------|-------------|---------------|-----------------|-----------------|
| gene                                                                                                | p_val       | avg_log2FC  | pct.1 | pct.2 | p_val_adj   | Foldchange_UP | Foldchange_DOWN | Ratio_pct1_pct2 |
| DAB2                                                                                                | 0,010546634 | 0,028088805 | 0,073 | 0,018 | 1           | 1,019660446   | 0,980718634     | 4,055555556     |
| ZSCAN2                                                                                              | 0,011339437 | 0,028030737 | 0,037 | 0,004 | 1           | 1,019619406   | 0,980758109     | 9,25            |
| MAST3                                                                                               | 0,739733711 | 0,027952899 | 0,037 | 0,046 | 1           | 1,019564396   | 0,980811025     | 0,804347826     |
| TCTN2                                                                                               | 0,017691584 | 0,027909794 | 0,061 | 0,014 | 1           | 1,019533934   | 0,98084033      | 4,357142857     |
| USP39                                                                                               | 0,000449575 | 0,027885186 | 0,244 | 0,088 | 1           | 1,019516543   | 0,980857061     | 2,772727273     |
| TICAM1                                                                                              | 0,038046743 | 0,027823434 | 0,11  | 0,046 | 1           | 1,019472906   | 0,980899045     | 2,391304348     |
| ST7-AS1                                                                                             | 0,044226311 | 0,02779716  | 0,037 | 0,007 | 1           | 1,01945434    | 0,980916909     | 5,285714286     |
| KRT86                                                                                               | 0,008401736 | 0,02777981  | 0,024 | 0     | 1           | 1,01944208    | 0,980928706     | #DIV/0!         |
| TXNDC11                                                                                             | 0,105099631 | 0,027767473 | 0,122 | 0,063 | 1           | 1,019433362   | 0,980937094     | 1,936507937     |
| RPGRIP1L                                                                                            | 0,006615795 | 0,027740827 | 0,061 | 0,011 | 1           | 1,019414534   | 0,980955212     | 5,545454545     |
| ARPP19                                                                                              | 0,006012214 | 0,027726583 | 0,659 | 0,354 | 1           | 1,019404469   | 0,980964897     | 1,861581921     |
| NXT1                                                                                                | 0,002167609 | 0,027656035 | 0,39  | 0,179 | 1           | 1,019354621   | 0,981012868     | 2,17877095      |
| ATP6VOC                                                                                             | 0,223927175 | 0,027650725 | 0,841 | 0,6   | 1           | 1,019350869   | 0,981016478     | 1,401666667     |
| IGFL4                                                                                               | 0,008401736 | 0,027568461 | 0,024 | 0     | 1           | 1,019292746   | 0,981072419     | #DIV/0!         |
| SUSD5                                                                                               | 0,008401736 | 0,027568461 | 0,024 | 0     | 1           | 1,019292746   | 0,981072419     | #DIV/0!         |
| FXVD2                                                                                               | 0,008401736 | 0,02756167  | 0,024 | 0     | 1           | 1,019287948   | 0,981077037     | #DIV/0!         |
| POLR2B                                                                                              | 0,000131858 | 0,0275507   | 0,378 | 0,147 | 1           | 1,019280198   | 0,981084497     | 2,571428571     |
| CCDC88A                                                                                             | 0,000194502 | 0,027544769 | 0,195 | 0,056 | 1           | 1,019276008   | 0,98108853      | 3,482142857     |
| SENP8                                                                                               | 0,001220269 | 0,027541144 | 0,037 | 0     | 1           | 1,019273446   | 0,981090995     | #DIV/0!         |
| GMIP                                                                                                | 0,008401736 | 0,027518198 | 0,024 | 0     | 1           | 1,019257235   | 0,981106599     | #DIV/0!         |
| LRRN3                                                                                               | 0,644071107 | 0,027503277 | 0,012 | 0,007 | 1           | 1,019246693   | 0,981116747     | 1,714285714     |
| RFT1                                                                                                | 0,011168661 | 0,027499537 | 0,073 | 0,018 | 1           | 1,019244051   | 0,98111929      | 4,055555556     |
| ZNF862                                                                                              | 0,025203577 | 0,027475941 | 0,085 | 0,028 | 1           | 1,019227381   | 0,981135337     | 3,035714286     |
| UBE3C                                                                                               | 5,91048E-06 | 0,027454281 | 0,244 | 0,06  | 0,124717129 | 1,019212079   | 0,981150067     | 4,066666667     |
| NDST3                                                                                               | 0,011553628 | 0,027453357 | 0,037 | 0,004 | 1           | 1,019211426   | 0,981150696     | 9,25            |
| ARMCX5                                                                                              | 0,002909566 | 0,027450829 | 0,085 | 0,018 | 1           | 1,019209641   | 0,981152415     | 4,722222222     |
| PEX12                                                                                               | 0,043609761 | 0,027432528 | 0,037 | 0,007 | 1           | 1,019196712   | 0,981164861     | 5,285714286     |
| FAM161B                                                                                             | 0,026685693 | 0,02741823  | 0,049 | 0,011 | 1           | 1,019186611   | 0,981174585     | 4,454545455     |
| FDX1                                                                                                | 0,000102459 | 0,02737596  | 0,415 | 0,161 | 1           | 1,01915675    | 0,981203333     | 2,577639752     |
| KLF12                                                                                               | 0,036803449 | 0,027347445 | 0,061 | 0,018 | 1           | 1,019136606   | 0,981222727     | 3,388888889     |

Supplementary Table 2

| Differentially expressed genes_keloid-XL_comparing SC-Keloid vs. (SC-Myel, SC-Nonmyel, SC-Nonmyel2) |             |             |       |       |           |               |                 |                 |
|-----------------------------------------------------------------------------------------------------|-------------|-------------|-------|-------|-----------|---------------|-----------------|-----------------|
| gene                                                                                                | p_val       | avg_log2FC  | pct.1 | pct.2 | p_val_adj | Foldchange_UP | Foldchange_DOWN | Ratio_pct1_pct2 |
| RAD51AP1                                                                                            | 0,183494953 | 0,027339638 | 0,024 | 0,007 | 1         | 1,019131091   | 0,981228037     | 3,428571429     |
| SEC24B                                                                                              | 0,129105122 | 0,027328584 | 0,122 | 0,067 | 1         | 1,019123283   | 0,981235555     | 1,820895522     |
| COL2A1                                                                                              | 0,063203483 | 0,027326916 | 0,012 | 0     | 1         | 1,019122104   | 0,98123669      | #DIV/0!         |
| ARPP21                                                                                              | 0,063203483 | 0,027307828 | 0,012 | 0     | 1         | 1,019108621   | 0,981249672     | #DIV/0!         |
| TMEM89                                                                                              | 0,063203483 | 0,027307828 | 0,012 | 0     | 1         | 1,019108621   | 0,981249672     | #DIV/0!         |
| ZFP69B                                                                                              | 0,065143806 | 0,027300075 | 0,024 | 0,004 | 1         | 1,019103144   | 0,981254946     | 6               |
| CCNB1                                                                                               | 0,027726954 | 0,027274284 | 0,049 | 0,011 | 1         | 1,019084926   | 0,981272488     | 4,454545455     |
| GNPNAT1                                                                                             | 0,011803785 | 0,027240185 | 0,134 | 0,049 | 1         | 1,01906084    | 0,98129568      | 2,734693878     |
| SH3PXD2A                                                                                            | 0,005151743 | 0,027239497 | 0,756 | 0,446 | 1         | 1,019060353   | 0,981296149     | 1,695067265     |
| PRMT3                                                                                               | 0,03795203  | 0,027215108 | 0,061 | 0,018 | 1         | 1,019043126   | 0,981312738     | 3,388888889     |
| TIAM1                                                                                               | 0,026685693 | 0,027112222 | 0,049 | 0,011 | 1         | 1,018970456   | 0,981382723     | 4,454545455     |
| ZNF74                                                                                               | 0,067616925 | 0,027082204 | 0,061 | 0,021 | 1         | 1,018949254   | 0,981403142     | 2,904761905     |
| REEP6                                                                                               | 0,000486185 | 0,027070943 | 0,11  | 0,021 | 1         | 1,0189413     | 0,981410803     | 5,238095238     |
| ANKRD20A3P                                                                                          | 0,063203483 | 0,02704338  | 0,012 | 0     | 1         | 1,018921834   | 0,981429553     | #DIV/0!         |
| ARMC12                                                                                              | 0,063203483 | 0,02704338  | 0,012 | 0     | 1         | 1,018921834   | 0,981429553     | #DIV/0!         |
| CRCT1                                                                                               | 0,063203483 | 0,02704338  | 0,012 | 0     | 1         | 1,018921834   | 0,981429553     | #DIV/0!         |
| DERL3                                                                                               | 0,063203483 | 0,02704338  | 0,012 | 0     | 1         | 1,018921834   | 0,981429553     | #DIV/0!         |
| NTS                                                                                                 | 0,063203483 | 0,02704338  | 0,012 | 0     | 1         | 1,018921834   | 0,981429553     | #DIV/0!         |
| TDRD3                                                                                               | 0,004165279 | 0,027020556 | 0,22  | 0,091 | 1         | 1,018905714   | 0,98144508      | 2,417582418     |
| ISM1                                                                                                | 0,347088417 | 0,027002603 | 0,012 | 0,004 | 1         | 1,018893035   | 0,981457293     | 3               |
| RANBP17                                                                                             | 0,001833348 | 0,027000821 | 0,061 | 0,007 | 1         | 1,018891777   | 0,981458505     | 8,714285714     |
| GRIPAP1                                                                                             | 0,077011555 | 0,026901393 | 0,11  | 0,053 | 1         | 1,018821559   | 0,981526148     | 2,075471698     |
| LRIT3                                                                                               | 0,063203483 | 0,026894554 | 0,012 | 0     | 1         | 1,018816729   | 0,981530801     | #DIV/0!         |
| TMEM97                                                                                              | 0,105197534 | 0,026890543 | 0,073 | 0,032 | 1         | 1,018813897   | 0,98153353      | 2,28125         |
| GMEB2                                                                                               | 0,009031726 | 0,026888266 | 0,049 | 0,007 | 1         | 1,018812288   | 0,981535079     | 7               |
| TTC30B                                                                                              | 0,185668317 | 0,026864614 | 0,024 | 0,007 | 1         | 1,018795586   | 0,981551171     | 3,428571429     |
| SHC2                                                                                                | 0,649511996 | 0,026862587 | 0,012 | 0,007 | 1         | 1,018794155   | 0,981552549     | 1,714285714     |
| ARL17A                                                                                              | 0,180829015 | 0,026854223 | 0,049 | 0,021 | 1         | 1,018788248   | 0,98155824      | 2,333333333     |
| RSL1D1                                                                                              | 0,024899155 | 0,026828792 | 0,463 | 0,263 | 1         | 1,01877029    | 0,981575543     | 1,760456274     |
| ZNF674-AS1                                                                                          | 0,00931978  | 0,026791377 | 0,049 | 0,007 | 1         | 1,018743869   | 0,981600999     | 7               |

Supplementary Table 2

| Differentially expressed genes_keloid-XL_comparing SC-Keloid vs. (SC-Myel, SC-Nonmyel, SC-Nonmyel2) |             |             |       |       |             |               |                 |                 |
|-----------------------------------------------------------------------------------------------------|-------------|-------------|-------|-------|-------------|---------------|-----------------|-----------------|
| gene                                                                                                | p_val       | avg_log2FC  | pct.1 | pct.2 | p_val_adj   | Foldchange_UP | Foldchange_DOWN | Ratio_pct1_pct2 |
| PAOX                                                                                                | 0,044226311 | 0,026786515 | 0,037 | 0,007 | 1           | 1,018740436   | 0,981604307     | 5,285714286     |
| NDUFA4L2                                                                                            | 0,345067611 | 0,026754505 | 0,024 | 0,011 | 1           | 1,018717832   | 0,981626087     | 2,181818182     |
| CCSER1                                                                                              | 0,008401736 | 0,026731939 | 0,024 | 0     | 1           | 1,018701898   | 0,981641442     | #DIV/0!         |
| CCDC92                                                                                              | 0,000181982 | 0,026713498 | 0,22  | 0,067 | 1           | 1,018688877   | 0,981653399     | 3,28358209      |
| NECAB1                                                                                              | 0,348081613 | 0,026677695 | 0,024 | 0,011 | 1           | 1,018663597   | 0,981678351     | 2,181818182     |
| EFHC1                                                                                               | 0,001013979 | 0,026676625 | 0,341 | 0,147 | 1           | 1,018662842   | 0,981679079     | 2,319727891     |
| MEPE                                                                                                | 0,001952737 | 0,026633653 | 0,049 | 0,004 | 1           | 1,0186325     | 0,98170832      | 12,25           |
| ZNF583                                                                                              | 0,02737604  | 0,026621083 | 0,049 | 0,011 | 1           | 1,018623625   | 0,981716873     | 4,454545455     |
| DOCK8-AS1                                                                                           | 0,008401736 | 0,02661115  | 0,024 | 0     | 1           | 1,018616612   | 0,981723632     | #DIV/0!         |
| HOTAIRM1                                                                                            | 0,695525935 | 0,026595485 | 0,024 | 0,018 | 1           | 1,018605551   | 0,981734292     | 1,333333333     |
| FAP                                                                                                 | 0,103792275 | 0,026580417 | 0,037 | 0,011 | 1           | 1,018594913   | 0,981744546     | 3,363636364     |
| MAN1C1                                                                                              | 0,002612361 | 0,026535486 | 0,11  | 0,028 | 1           | 1,01856319    | 0,981775122     | 3,928571429     |
| ZNF430                                                                                              | 0,008726393 | 0,026504031 | 0,098 | 0,028 | 1           | 1,018540983   | 0,981796527     | 3,5             |
| MDFI                                                                                                | 0,006993141 | 0,026436051 | 0,146 | 0,053 | 1           | 1,01849299    | 0,981842791     | 2,754716981     |
| CPOX                                                                                                | 0,001055888 | 0,026421182 | 0,085 | 0,014 | 1           | 1,018482494   | 0,98185291      | 6,071428571     |
| FKBP14                                                                                              | 0,011604277 | 0,026413577 | 0,146 | 0,056 | 1           | 1,018477125   | 0,981858086     | 2,607142857     |
| RAB11B-AS1                                                                                          | 0,06274641  | 0,026390561 | 0,049 | 0,014 | 1           | 1,018460876   | 0,98187375      | 3,5             |
| ADAMTS5                                                                                             | 0,196612832 | 0,026383983 | 0,037 | 0,014 | 1           | 1,018456232   | 0,981878227     | 2,642857143     |
| PIFO                                                                                                | 0,000183568 | 0,026335743 | 0,049 | 0     | 1           | 1,018422178   | 0,981911059     | #DIV/0!         |
| SLC38A7                                                                                             | 0,179467859 | 0,026259976 | 0,049 | 0,021 | 1           | 1,018368695   | 0,981962628     | 2,333333333     |
| KYAT1                                                                                               | 0,066254792 | 0,026213944 | 0,024 | 0,004 | 1           | 1,018336202   | 0,98199396      | 6               |
| FZD3                                                                                                | 0,178775462 | 0,026186129 | 0,134 | 0,081 | 1           | 1,018316569   | 0,982012893     | 1,654320988     |
| MAPK11P1L                                                                                           | 1,36192E-05 | 0,026133702 | 0,378 | 0,13  | 0,287378965 | 1,018279564   | 0,98204858      | 2,907692308     |
| PKP3                                                                                                | 0,008401736 | 0,026129797 | 0,024 | 0     | 1           | 1,018276808   | 0,982051238     | #DIV/0!         |
| FAM85B                                                                                              | 0,347088417 | 0,026111951 | 0,012 | 0,004 | 1           | 1,018264212   | 0,982063386     | 3               |
| CYCS                                                                                                | 0,00093246  | 0,026102731 | 0,634 | 0,33  | 1           | 1,018257705   | 0,982069662     | 1,921212121     |
| COX15                                                                                               | 0,015327249 | 0,026098815 | 0,098 | 0,032 | 1           | 1,018254941   | 0,982072327     | 3,0625          |
| SUPT6H                                                                                              | 0,004954407 | 0,026083814 | 0,207 | 0,084 | 1           | 1,018244353   | 0,982082539     | 2,464285714     |
| TUB                                                                                                 | 0,011553628 | 0,026062703 | 0,037 | 0,004 | 1           | 1,018229454   | 0,98209691      | 9,25            |
| SP2                                                                                                 | 0,018247048 | 0,026030879 | 0,122 | 0,046 | 1           | 1,018206993   | 0,982118574     | 2,652173913     |

Supplementary Table 2

| Differentially expressed genes_keloid-XL_comparing SC-Keloid vs. (SC-Myel, SC-Nonmyel, SC-Nonmyel2) |             |             |       |       |            |               |                 |                 |
|-----------------------------------------------------------------------------------------------------|-------------|-------------|-------|-------|------------|---------------|-----------------|-----------------|
| gene                                                                                                | p_val       | avg_log2FC  | pct.1 | pct.2 | p_val_adj  | Foldchange_UP | Foldchange_DOWN | Ratio_pct1_pct2 |
| TSPYL5                                                                                              | 0,005290483 | 0,025976648 | 0,11  | 0,032 | 1          | 1,018168719   | 0,982155493     | 3,4375          |
| FAM228A                                                                                             | 0,008401736 | 0,025958225 | 0,024 | 0     | 1          | 1,018155718   | 0,982168034     | #DIV/0!         |
| AC026202.3                                                                                          | 0,066254792 | 0,025941132 | 0,024 | 0,004 | 1          | 1,018143654   | 0,982179671     | 6               |
| TNNT2                                                                                               | 0,063203483 | 0,025895029 | 0,012 | 0     | 1          | 1,018111119   | 0,982211059     | #DIV/0!         |
| HAPLN2                                                                                              | 0,066254792 | 0,025845776 | 0,024 | 0,004 | 1          | 1,018076362   | 0,982244592     | 6               |
| CKB                                                                                                 | 0,088467486 | 0,02583006  | 0,451 | 0,309 | 1          | 1,018065271   | 0,982255292     | 1,459546926     |
| RTKN                                                                                                | 0,000148287 | 0,025825613 | 0,402 | 0,158 | 1          | 1,018062133   | 0,98225832      | 2,544303797     |
| RGMB-AS1                                                                                            | 0,104939896 | 0,025811966 | 0,037 | 0,011 | 1          | 1,018052503   | 0,982267611     | 3,363636364     |
| SLCO2B1                                                                                             | 0,065143806 | 0,025748477 | 0,024 | 0,004 | 1          | 1,018007702   | 0,982310839     | 6               |
| EVC2                                                                                                | 0,348081613 | 0,025747329 | 0,024 | 0,011 | 1          | 1,018006892   | 0,982311621     | 2,181818182     |
| TMEM216                                                                                             | 0,002449793 | 0,025745222 | 0,11  | 0,028 | 1          | 1,018005406   | 0,982313055     | 3,928571429     |
| TLR6                                                                                                | 0,044226311 | 0,025740033 | 0,037 | 0,007 | 1          | 1,018001744   | 0,982316588     | 5,285714286     |
| SNX14                                                                                               | 0,003256641 | 0,025732566 | 0,207 | 0,081 | 1          | 1,017996475   | 0,982321672     | 2,555555556     |
| SETX                                                                                                | 0,00297168  | 0,025578406 | 0,293 | 0,13  | 1          | 1,017887702   | 0,982426645     | 2,253846154     |
| ME3                                                                                                 | 0,000608755 | 0,025577135 | 0,195 | 0,063 | 1          | 1,017886805   | 0,98242751      | 3,095238095     |
| RNF170                                                                                              | 0,000230869 | 0,025494703 | 0,098 | 0,014 | 1          | 1,017828648   | 0,982483645     | 7               |
| SLC8A2                                                                                              | 0,347088417 | 0,025484484 | 0,012 | 0,004 | 1          | 1,017821438   | 0,982490604     | 3               |
| DNAJC3                                                                                              | 0,004853657 | 0,025441937 | 0,476 | 0,253 | 1          | 1,017791421   | 0,98251958      | 1,881422925     |
| TCF19                                                                                               | 0,339089703 | 0,025385099 | 0,024 | 0,011 | 1          | 1,017751325   | 0,982558289     | 2,181818182     |
| RDH8                                                                                                | 0,008401736 | 0,0253683   | 0,024 | 0     | 1          | 1,017739473   | 0,98256973      | #DIV/0!         |
| C4orf47                                                                                             | 0,011553628 | 0,025300307 | 0,037 | 0,004 | 1          | 1,01769151    | 0,982616039     | 9,25            |
| ZNF180                                                                                              | 0,066254792 | 0,025290566 | 0,024 | 0,004 | 1          | 1,017684638   | 0,982622673     | 6               |
| NBPF9                                                                                               | 0,001445239 | 0,025233914 | 0,073 | 0,011 | 1          | 1,017644676   | 0,98266126      | 6,636363636     |
| MAPK11                                                                                              | 0,065143806 | 0,02511084  | 0,024 | 0,004 | 1          | 1,017557866   | 0,982745093     | 6               |
| BAG1                                                                                                | 0,014569513 | 0,02506365  | 0,378 | 0,204 | 1          | 1,017524583   | 0,982777239     | 1,852941176     |
| SMYD3                                                                                               | 8,11676E-05 | 0,025056673 | 0,134 | 0,025 | 1          | 1,017519662   | 0,982781991     | 5,36            |
| FAM104A                                                                                             | 0,001696084 | 0,025054749 | 0,171 | 0,056 | 1          | 1,017518305   | 0,982783302     | 3,053571429     |
| FUNDC1                                                                                              | 1,40255E-05 | 0,025054677 | 0,195 | 0,042 | 0,29595285 | 1,017518254   | 0,982783351     | 4,642857143     |
| RAB22A                                                                                              | 0,00035081  | 0,025029653 | 0,341 | 0,137 | 1          | 1,017500606   | 0,982800398     | 2,489051095     |
| DENND1A                                                                                             | 0,03795203  | 0,024998333 | 0,061 | 0,018 | 1          | 1,017478517   | 0,982821734     | 3,388888889     |

Supplementary Table 2

| Differentially expressed genes_keloid-XL_comparing SC-Keloid vs. (SC-Myel, SC-Nonmyel, SC-Nonmyel2) |             |             |       |       |             |               |                 |                 |
|-----------------------------------------------------------------------------------------------------|-------------|-------------|-------|-------|-------------|---------------|-----------------|-----------------|
| gene                                                                                                | p_val       | avg_log2FC  | pct.1 | pct.2 | p_val_adj   | Foldchange_UP | Foldchange_DOWN | Ratio_pct1_pct2 |
| SLC36A1                                                                                             | 0,06274641  | 0,024995648 | 0,049 | 0,014 | 1           | 1,017476623   | 0,982823563     | 3,5             |
| FDXACB1                                                                                             | 0,044226311 | 0,024963065 | 0,037 | 0,007 | 1           | 1,017453644   | 0,98284576      | 5,285714286     |
| ETAA1                                                                                               | 0,001833348 | 0,024920521 | 0,061 | 0,007 | 1           | 1,01742364    | 0,982874744     | 8,714285714     |
| RELL2                                                                                               | 0,011553628 | 0,024918505 | 0,037 | 0,004 | 1           | 1,017422218   | 0,982876118     | 9,25            |
| SLC25A10                                                                                            | 0,184958462 | 0,024898113 | 0,049 | 0,021 | 1           | 1,017407837   | 0,982890011     | 2,333333333     |
| NCAPG2                                                                                              | 0,063408785 | 0,024864428 | 0,049 | 0,014 | 1           | 1,017384083   | 0,98291296      | 3,5             |
| PITHD1                                                                                              | 2,9328E-05  | 0,024849685 | 0,476 | 0,189 | 0,618850375 | 1,017373686   | 0,982923004     | 2,518518519     |
| SNAPC1                                                                                              | 0,000207953 | 0,024831011 | 0,195 | 0,056 | 1           | 1,017360517   | 0,982935727     | 3,482142857     |
| LINC00654                                                                                           | 0,011553628 | 0,024762228 | 0,037 | 0,004 | 1           | 1,017312014   | 0,982982592     | 9,25            |
| FIBCD1                                                                                              | 0,063203483 | 0,02475112  | 0,012 | 0     | 1           | 1,017304182   | 0,98299016      | #DIV/0!         |
| FOXD2-AS1                                                                                           | 0,107265343 | 0,02472348  | 0,037 | 0,011 | 1           | 1,017284692   | 0,983008993     | 3,363636364     |
| SIRT4                                                                                               | 0,008401736 | 0,024723027 | 0,024 | 0     | 1           | 1,017284372   | 0,983009302     | #DIV/0!         |
| ANKRD22                                                                                             | 0,063203483 | 0,024676481 | 0,012 | 0     | 1           | 1,017251552   | 0,983041017     | #DIV/0!         |
| VTN                                                                                                 | 0,063203483 | 0,024676481 | 0,012 | 0     | 1           | 1,017251552   | 0,983041017     | #DIV/0!         |
| ZNF222                                                                                              | 0,183494953 | 0,024670583 | 0,024 | 0,007 | 1           | 1,017247393   | 0,983045036     | 3,428571429     |
| SLC25A14                                                                                            | 0,002983177 | 0,024616485 | 0,085 | 0,018 | 1           | 1,017209249   | 0,983081899     | 4,722222222     |
| ZNF805                                                                                              | 0,000225277 | 0,02461221  | 0,134 | 0,028 | 1           | 1,017206235   | 0,983084812     | 4,785714286     |
| PRSS12                                                                                              | 0,008401736 | 0,024595058 | 0,024 | 0     | 1           | 1,017194142   | 0,9830965       | #DIV/0!         |
| PCDHGA4                                                                                             | 0,066254792 | 0,024577716 | 0,024 | 0,004 | 1           | 1,017181915   | 0,983108317     | 6               |
| CCDC88B                                                                                             | 0,001952737 | 0,024558485 | 0,049 | 0,004 | 1           | 1,017168355   | 0,983121422     | 12,25           |
| TRDMT1                                                                                              | 0,004092775 | 0,024555792 | 0,134 | 0,042 | 1           | 1,017166457   | 0,983123257     | 3,19047619      |
| CYB5R1                                                                                              | 5,96828E-06 | 0,024548998 | 0,22  | 0,049 | 0,125936664 | 1,017161667   | 0,983127887     | 4,489795918     |
| NCOA5                                                                                               | 0,067616925 | 0,024523203 | 0,061 | 0,021 | 1           | 1,01714348    | 0,983145465     | 2,904761905     |
| ENPP1                                                                                               | 0,028081741 | 0,02449238  | 0,049 | 0,011 | 1           | 1,017121749   | 0,98316647      | 4,454545455     |
| ASB9                                                                                                | 0,008401736 | 0,024473567 | 0,024 | 0     | 1           | 1,017108486   | 0,983179291     | #DIV/0!         |
| APOL2                                                                                               | 0,010480408 | 0,024465557 | 0,122 | 0,042 | 1           | 1,017102839   | 0,983184749     | 2,904761905     |
| PAN3-AS1                                                                                            | 0,347088417 | 0,024443438 | 0,012 | 0,004 | 1           | 1,017087245   | 0,983199824     | 3               |
| ETV2                                                                                                | 0,001952737 | 0,024422971 | 0,049 | 0,004 | 1           | 1,017072816   | 0,983213772     | 12,25           |
| GGACT                                                                                               | 0,011553628 | 0,024418925 | 0,037 | 0,004 | 1           | 1,017069964   | 0,983216529     | 9,25            |
| FIZ1                                                                                                | 0,001723931 | 0,024390689 | 0,098 | 0,021 | 1           | 1,017050058   | 0,983235773     | 4,666666667     |

Supplementary Table 2

| Differentially expressed genes_keloid-XL_comparing SC-Keloid vs. (SC-Myel, SC-Nonmyel, SC-Nonmyel2) |             |             |       |       |             |               |                 |                 |
|-----------------------------------------------------------------------------------------------------|-------------|-------------|-------|-------|-------------|---------------|-----------------|-----------------|
| gene                                                                                                | p_val       | avg_log2FC  | pct.1 | pct.2 | p_val_adj   | Foldchange_UP | Foldchange_DOWN | Ratio_pct1_pct2 |
| LGALS4                                                                                              | 0,066254792 | 0,024337744 | 0,024 | 0,004 | 1           | 1,017012735   | 0,983271857     | 6               |
| BTBD9                                                                                               | 0,069438782 | 0,024335933 | 0,061 | 0,021 | 1           | 1,017011458   | 0,983273091     | 2,904761905     |
| DNAAF5                                                                                              | 0,006596991 | 0,024325066 | 0,134 | 0,046 | 1           | 1,017003797   | 0,983280498     | 2,913043478     |
| KIAA1522                                                                                            | 0,117026191 | 0,024318209 | 0,049 | 0,018 | 1           | 1,016998963   | 0,983285171     | 2,722222222     |
| SNAP23                                                                                              | 7,10704E-05 | 0,024303258 | 0,268 | 0,084 | 1           | 1,016988424   | 0,983295361     | 3,19047619      |
| CLINT1                                                                                              | 0,004010237 | 0,024280289 | 0,244 | 0,105 | 1           | 1,016972233   | 0,983311016     | 2,323809524     |
| DUSP19                                                                                              | 0,011553628 | 0,024277616 | 0,037 | 0,004 | 1           | 1,016970349   | 0,983312838     | 9,25            |
| DLL3                                                                                                | 0,35185965  | 0,0242157   | 0,012 | 0,004 | 1           | 1,016926704   | 0,98335504      | 3               |
| SLC25A38                                                                                            | 0,027124406 | 0,024178004 | 0,11  | 0,042 | 1           | 1,016900133   | 0,983380734     | 2,619047619     |
| MLLT11                                                                                              | 2,31391E-05 | 0,02414686  | 0,244 | 0,067 | 0,488258256 | 1,016878181   | 0,983401963     | 3,641791045     |
| FANK1                                                                                               | 0,008401736 | 0,024132663 | 0,024 | 0     | 1           | 1,016868175   | 0,98341164      | #DIV/0!         |
| ALKAL2                                                                                              | 0,063203483 | 0,024111704 | 0,012 | 0     | 1           | 1,016853402   | 0,983425927     | #DIV/0!         |
| ZNF431                                                                                              | 0,001492437 | 0,024099302 | 0,171 | 0,056 | 1           | 1,016844661   | 0,983434381     | 3,053571429     |
| ARHGAP20                                                                                            | 0,066254792 | 0,024098433 | 0,024 | 0,004 | 1           | 1,016844049   | 0,983434973     | 6               |
| CAPN15                                                                                              | 0,010349311 | 0,024073552 | 0,134 | 0,049 | 1           | 1,016826512   | 0,983451934     | 2,734693878     |
| FAM184B                                                                                             | 0,001026381 | 0,024068951 | 0,085 | 0,014 | 1           | 1,01682327    | 0,98345507      | 6,071428571     |
| ATL1                                                                                                | 0,002751905 | 0,024058765 | 0,171 | 0,06  | 1           | 1,01681609    | 0,983462014     | 2,85            |
| RARRES1                                                                                             | 0,044226311 | 0,024053089 | 0,037 | 0,007 | 1           | 1,01681209    | 0,983465883     | 5,285714286     |
| DKC1                                                                                                | 0,002957421 | 0,02398755  | 0,171 | 0,06  | 1           | 1,016765899   | 0,983510562     | 2,85            |
| IDNK                                                                                                | 0,112963039 | 0,023949266 | 0,049 | 0,018 | 1           | 1,016738918   | 0,98353666      | 2,722222222     |
| ZBTB45                                                                                              | 0,060793535 | 0,023948054 | 0,049 | 0,014 | 1           | 1,016738064   | 0,983537487     | 3,5             |
| DAPL1                                                                                               | 0,006523076 | 0,023920596 | 0,061 | 0,011 | 1           | 1,016718713   | 0,983556206     | 5,545454545     |
| PABIR1                                                                                              | 0,011168661 | 0,023912455 | 0,073 | 0,018 | 1           | 1,016712976   | 0,983561756     | 4,055555556     |
| ZNF90                                                                                               | 0,106097567 | 0,023911741 | 0,037 | 0,011 | 1           | 1,016712472   | 0,983562243     | 3,363636364     |
| CHCHD4                                                                                              | 0,006483581 | 0,023909242 | 0,085 | 0,021 | 1           | 1,016710712   | 0,983563946     | 4,047619048     |
| ZNF614                                                                                              | 0,187860656 | 0,02390213  | 0,024 | 0,007 | 1           | 1,016705699   | 0,983568796     | 3,428571429     |
| HDAC5                                                                                               | 0,036746792 | 0,02387422  | 0,195 | 0,098 | 1           | 1,01668603    | 0,983587824     | 1,989795918     |
| RAP2C-AS1                                                                                           | 0,006615795 | 0,023830544 | 0,061 | 0,011 | 1           | 1,016655252   | 0,983617601     | 5,545454545     |
| ALG8                                                                                                | 5,96828E-06 | 0,023730302 | 0,22  | 0,049 | 0,125936664 | 1,016584615   | 0,983685947     | 4,489795918     |
| STX1A                                                                                               | 0,026685693 | 0,023702773 | 0,049 | 0,011 | 1           | 1,016565217   | 0,983704718     | 4,454545455     |

Supplementary Table 2

| Differentially expressed genes_keloid-XL_comparing SC-Keloid vs. (SC-Myel, SC-Nonmyel, SC-Nonmyel2) |             |             |       |       |           |               |                 |                 |
|-----------------------------------------------------------------------------------------------------|-------------|-------------|-------|-------|-----------|---------------|-----------------|-----------------|
| gene                                                                                                | p_val       | avg_log2FC  | pct.1 | pct.2 | p_val_adj | Foldchange_UP | Foldchange_DOWN | Ratio_pct1_pct2 |
| PTGR2                                                                                               | 0,105197534 | 0,023690033 | 0,073 | 0,032 | 1         | 1,01655624    | 0,983713405     | 2,28125         |
| PSTK                                                                                                | 0,006704008 | 0,023682635 | 0,085 | 0,021 | 1         | 1,016551027   | 0,983718449     | 4,047619048     |
| TNKS2                                                                                               | 9,88338E-05 | 0,023604482 | 0,341 | 0,123 | 1         | 1,01649596    | 0,98377174      | 2,772357724     |
| KLC2                                                                                                | 0,001236845 | 0,023598343 | 0,11  | 0,025 | 1         | 1,016491635   | 0,983775926     | 4,4             |
| AFAP1-AS1                                                                                           | 0,063203483 | 0,023597494 | 0,012 | 0     | 1         | 1,016491037   | 0,983776505     | #DIV/0!         |
| C8G                                                                                                 | 0,063203483 | 0,023597494 | 0,012 | 0     | 1         | 1,016491037   | 0,983776505     | #DIV/0!         |
| CD200R1                                                                                             | 0,063203483 | 0,023597494 | 0,012 | 0     | 1         | 1,016491037   | 0,983776505     | #DIV/0!         |
| CFP                                                                                                 | 0,063203483 | 0,023597494 | 0,012 | 0     | 1         | 1,016491037   | 0,983776505     | #DIV/0!         |
| F5                                                                                                  | 0,063203483 | 0,023597494 | 0,012 | 0     | 1         | 1,016491037   | 0,983776505     | #DIV/0!         |
| IL15RA                                                                                              | 0,063203483 | 0,023597494 | 0,012 | 0     | 1         | 1,016491037   | 0,983776505     | #DIV/0!         |
| LCN10                                                                                               | 0,063203483 | 0,023597494 | 0,012 | 0     | 1         | 1,016491037   | 0,983776505     | #DIV/0!         |
| OSM                                                                                                 | 0,063203483 | 0,023597494 | 0,012 | 0     | 1         | 1,016491037   | 0,983776505     | #DIV/0!         |
| PCDH19                                                                                              | 0,063203483 | 0,023597494 | 0,012 | 0     | 1         | 1,016491037   | 0,983776505     | #DIV/0!         |
| PLSCR2                                                                                              | 0,063203483 | 0,023597494 | 0,012 | 0     | 1         | 1,016491037   | 0,983776505     | #DIV/0!         |
| RAB3B                                                                                               | 0,063203483 | 0,023597494 | 0,012 | 0     | 1         | 1,016491037   | 0,983776505     | #DIV/0!         |
| RIPOR2                                                                                              | 0,063203483 | 0,023597494 | 0,012 | 0     | 1         | 1,016491037   | 0,983776505     | #DIV/0!         |
| SEC24B-AS1                                                                                          | 0,063203483 | 0,023597494 | 0,012 | 0     | 1         | 1,016491037   | 0,983776505     | #DIV/0!         |
| SLC1A1                                                                                              | 0,063203483 | 0,023597494 | 0,012 | 0     | 1         | 1,016491037   | 0,983776505     | #DIV/0!         |
| LINC00303                                                                                           | 0,008401736 | 0,023564339 | 0,024 | 0     | 1         | 1,016467677   | 0,983799114     | #DIV/0!         |
| SRXN1                                                                                               | 0,021972638 | 0,023541609 | 0,073 | 0,021 | 1         | 1,016451662   | 0,983814614     | 3,476190476     |
| PARG                                                                                                | 0,06642434  | 0,023540044 | 0,061 | 0,021 | 1         | 1,01645056    | 0,983815681     | 2,904761905     |
| CCDC122                                                                                             | 0,113968254 | 0,023535626 | 0,049 | 0,018 | 1         | 1,016447447   | 0,983818694     | 2,722222222     |
| ACP2                                                                                                | 7,20735E-05 | 0,0234654   | 0,134 | 0,025 | 1         | 1,016397971   | 0,983866585     | 5,36            |
| RNF121                                                                                              | 0,015742889 | 0,02344621  | 0,098 | 0,032 | 1         | 1,016384451   | 0,983879672     | 3,0625          |
| PHEX                                                                                                | 0,001220269 | 0,023436116 | 0,037 | 0     | 1         | 1,01637734    | 0,983886555     | #DIV/0!         |
| FAM131B                                                                                             | 0,063203483 | 0,023435612 | 0,012 | 0     | 1         | 1,016376985   | 0,983886899     | #DIV/0!         |
| FBXO24                                                                                              | 0,063203483 | 0,023435612 | 0,012 | 0     | 1         | 1,016376985   | 0,983886899     | #DIV/0!         |
| RIPOR3                                                                                              | 0,106097567 | 0,023417132 | 0,037 | 0,011 | 1         | 1,016363966   | 0,983899502     | 3,363636364     |
| SKA3                                                                                                | 0,008401736 | 0,023361174 | 0,024 | 0     | 1         | 1,016324545   | 0,983937666     | #DIV/0!         |
| ZNF613                                                                                              | 0,008401736 | 0,023361174 | 0,024 | 0     | 1         | 1,016324545   | 0,983937666     | #DIV/0!         |

Supplementary Table 2

| Differentially expressed genes_keloid-XL_comparing SC-Keloid vs. (SC-Myel, SC-Nonmyel, SC-Nonmyel2) |             |             |       |       |             |               |                 |                 |
|-----------------------------------------------------------------------------------------------------|-------------|-------------|-------|-------|-------------|---------------|-----------------|-----------------|
| gene                                                                                                | p_val       | avg_log2FC  | pct.1 | pct.2 | p_val_adj   | Foldchange_UP | Foldchange_DOWN | Ratio_pct1_pct2 |
| CCDC189                                                                                             | 0,009174744 | 0,023323924 | 0,049 | 0,007 | 1           | 1,016298304   | 0,983963071     | 7               |
| CHTOP                                                                                               | 7,02824E-05 | 0,023314518 | 0,415 | 0,165 | 1           | 1,016291678   | 0,983969486     | 2,515151515     |
| CNDP2                                                                                               | 0,000838973 | 0,02330031  | 0,159 | 0,046 | 1           | 1,016281669   | 0,983979176     | 3,456521739     |
| TNPO3                                                                                               | 0,008146582 | 0,023245542 | 0,171 | 0,067 | 1           | 1,016243089   | 0,984016531     | 2,552238806     |
| PPL                                                                                                 | 0,008401736 | 0,023234162 | 0,024 | 0     | 1           | 1,016235073   | 0,984024294     | #DIV/0!         |
| AC011043.1                                                                                          | 0,067051517 | 0,023226678 | 0,073 | 0,028 | 1           | 1,016229802   | 0,984029398     | 2,607142857     |
| TFR2                                                                                                | 0,066254792 | 0,023184823 | 0,024 | 0,004 | 1           | 1,016200319   | 0,984057947     | 6               |
| TMEM161A                                                                                            | 0,001474664 | 0,023141308 | 0,146 | 0,042 | 1           | 1,016169669   | 0,984087629     | 3,476190476     |
| GUCD1                                                                                               | 0,000195581 | 0,023128265 | 0,183 | 0,049 | 1           | 1,016160482   | 0,984096526     | 3,734693878     |
| FAM66B                                                                                              | 0,008401736 | 0,023105716 | 0,024 | 0     | 1           | 1,0161446     | 0,984111907     | #DIV/0!         |
| MFF                                                                                                 | 5,13464E-05 | 0,023094746 | 0,402 | 0,154 | 1           | 1,016136874   | 0,98411939      | 2,61038961      |
| C1RL-AS1                                                                                            | 0,044226311 | 0,023001959 | 0,037 | 0,007 | 1           | 1,016071523   | 0,984182686     | 5,285714286     |
| ALKBH3                                                                                              | 0,000323801 | 0,022996106 | 0,122 | 0,025 | 1           | 1,0160674     | 0,984186679     | 4,88            |
| SLC16A5                                                                                             | 0,011553628 | 0,022907365 | 0,037 | 0,004 | 1           | 1,016004903   | 0,984247218     | 9,25            |
| RADX                                                                                                | 0,027465648 | 0,022904982 | 0,098 | 0,035 | 1           | 1,016003225   | 0,984248844     | 2,8             |
| PEX11G                                                                                              | 0,004311516 | 0,022844933 | 0,073 | 0,014 | 1           | 1,015960937   | 0,984289812     | 5,214285714     |
| VGFB                                                                                                | 0,066254792 | 0,022836531 | 0,024 | 0,004 | 1           | 1,015955021   | 0,984295544     | 6               |
| ZNF785                                                                                              | 0,044226311 | 0,02283318  | 0,037 | 0,007 | 1           | 1,015952661   | 0,98429783      | 5,285714286     |
| PSMB8-AS1                                                                                           | 0,011553628 | 0,022819881 | 0,037 | 0,004 | 1           | 1,015943296   | 0,984306904     | 9,25            |
| BORCS7                                                                                              | 5,14053E-06 | 0,022792542 | 0,341 | 0,105 | 0,108470277 | 1,015924043   | 0,984325557     | 3,247619048     |
| ASCC2                                                                                               | 0,000313622 | 0,022753593 | 0,183 | 0,053 | 1           | 1,015896617   | 0,984352132     | 3,452830189     |
| GPR137B                                                                                             | 0,002551837 | 0,022753038 | 0,402 | 0,193 | 1           | 1,015896226   | 0,98435251      | 2,082901554     |
| NAGS                                                                                                | 0,065143806 | 0,022743378 | 0,024 | 0,004 | 1           | 1,015889424   | 0,984359101     | 6               |
| PHYHD1                                                                                              | 0,066380027 | 0,022628843 | 0,085 | 0,035 | 1           | 1,015808776   | 0,984437252     | 2,428571429     |
| ERCC3                                                                                               | 0,004475867 | 0,022592389 | 0,171 | 0,063 | 1           | 1,015783109   | 0,984462127     | 2,714285714     |
| FAM71E1                                                                                             | 0,065143806 | 0,022558884 | 0,024 | 0,004 | 1           | 1,015759519   | 0,98448499      | 6               |
| ALKBH4                                                                                              | 0,021972638 | 0,022553894 | 0,073 | 0,021 | 1           | 1,015756005   | 0,984488396     | 3,476190476     |
| PPP1R3B                                                                                             | 0,183574298 | 0,022526525 | 0,049 | 0,021 | 1           | 1,015736736   | 0,984507072     | 2,333333333     |
| ZFP90                                                                                               | 0,003236838 | 0,022522918 | 0,122 | 0,035 | 1           | 1,015734196   | 0,984509534     | 3,485714286     |
| PCDH12                                                                                              | 0,065143806 | 0,022509272 | 0,024 | 0,004 | 1           | 1,015724589   | 0,984518846     | 6               |



Supplementary Table 2

| Differentially expressed genes_keloid-XL_comparing SC-Keloid vs. (SC-Myel, SC-Nonmyel, SC-Nonmyel2) |             |             |       |       |             |               |                 |                 |
|-----------------------------------------------------------------------------------------------------|-------------|-------------|-------|-------|-------------|---------------|-----------------|-----------------|
| gene                                                                                                | p_val       | avg_log2FC  | pct.1 | pct.2 | p_val_adj   | Foldchange_UP | Foldchange_DOWN | Ratio_pct1_pct2 |
| SFXN1                                                                                               | 0,003332322 | 0,022497023 | 0,122 | 0,035 | 1           | 1,015715965   | 0,984527205     | 3,485714286     |
| LRRC17                                                                                              | 0,001220269 | 0,02249574  | 0,037 | 0     | 1           | 1,015715061   | 0,984528081     | #DIV/0!         |
| AURKC                                                                                               | 0,187860656 | 0,022492344 | 0,024 | 0,007 | 1           | 1,015712671   | 0,984530398     | 3,428571429     |
| IBA57                                                                                               | 0,567510207 | 0,022487232 | 0,037 | 0,025 | 1           | 1,015709072   | 0,984533887     | 1,48            |
| TUBA4A                                                                                              | 0,68014566  | 0,022471293 | 0,061 | 0,049 | 1           | 1,01569785    | 0,984544764     | 1,244897959     |
| SLC25A13                                                                                            | 0,000133512 | 0,022459125 | 0,207 | 0,06  | 1           | 1,015689283   | 0,984553068     | 3,45            |
| DMGDH                                                                                               | 0,347088417 | 0,022451147 | 0,012 | 0,004 | 1           | 1,015683667   | 0,984558512     | 3               |
| RAVER1                                                                                              | 0,174061207 | 0,022417967 | 0,134 | 0,077 | 1           | 1,015660308   | 0,984581156     | 1,74025974      |
| ZDHHC13                                                                                             | 0,006615795 | 0,02238784  | 0,061 | 0,011 | 1           | 1,015639099   | 0,984601716     | 5,545454545     |
| KIF22                                                                                               | 0,015687817 | 0,022384258 | 0,183 | 0,081 | 1           | 1,015636577   | 0,984604161     | 2,259259259     |
| MAPK12                                                                                              | 0,183494953 | 0,022358118 | 0,024 | 0,007 | 1           | 1,015618175   | 0,984622002     | 3,428571429     |
| FAM220A                                                                                             | 0,063203483 | 0,022341902 | 0,012 | 0     | 1           | 1,01560676    | 0,984633068     | #DIV/0!         |
| LRRC63                                                                                              | 0,063203483 | 0,022341902 | 0,012 | 0     | 1           | 1,01560676    | 0,984633068     | #DIV/0!         |
| SORL1                                                                                               | 0,063203483 | 0,022341902 | 0,012 | 0     | 1           | 1,01560676    | 0,984633068     | #DIV/0!         |
| WWTR1-AS1                                                                                           | 0,063203483 | 0,022341902 | 0,012 | 0     | 1           | 1,01560676    | 0,984633068     | #DIV/0!         |
| NEK11                                                                                               | 0,000298361 | 0,022320905 | 0,085 | 0,011 | 1           | 1,015591978   | 0,984647399     | 7,727272727     |
| C15orf65                                                                                            | 0,906339215 | 0,022318433 | 0,012 | 0,014 | 1           | 1,015590238   | 0,984649086     | 0,857142857     |
| AP2A1                                                                                               | 8,91065E-05 | 0,022311206 | 0,293 | 0,098 | 1           | 1,01558515    | 0,984654019     | 2,989795918     |
| WIPI2                                                                                               | 0,00044542  | 0,022303242 | 0,305 | 0,119 | 1           | 1,015579544   | 0,984659454     | 2,56302521      |
| CLOCK                                                                                               | 0,000201128 | 0,022295382 | 0,232 | 0,074 | 1           | 1,015574012   | 0,984664819     | 3,135135135     |
| ZNF117                                                                                              | 0,013434952 | 0,02229479  | 0,085 | 0,025 | 1           | 1,015573595   | 0,984665223     | 3,4             |
| ATG10                                                                                               | 0,00269729  | 0,022257465 | 0,11  | 0,028 | 1           | 1,015547321   | 0,984690698     | 3,928571429     |
| GDPGP1                                                                                              | 0,066254792 | 0,022236406 | 0,024 | 0,004 | 1           | 1,015532496   | 0,984705072     | 6               |
| KCNJ2-AS1                                                                                           | 0,063203483 | 0,02220374  | 0,012 | 0     | 1           | 1,015509503   | 0,984727368     | #DIV/0!         |
| LUCAT1                                                                                              | 0,063203483 | 0,02220374  | 0,012 | 0     | 1           | 1,015509503   | 0,984727368     | #DIV/0!         |
| NEK5                                                                                                | 0,063203483 | 0,02220374  | 0,012 | 0     | 1           | 1,015509503   | 0,984727368     | #DIV/0!         |
| POT1-AS1                                                                                            | 0,063203483 | 0,02220374  | 0,012 | 0     | 1           | 1,015509503   | 0,984727368     | #DIV/0!         |
| TMEM38A                                                                                             | 0,063203483 | 0,02220374  | 0,012 | 0     | 1           | 1,015509503   | 0,984727368     | #DIV/0!         |
| CEP131                                                                                              | 0,13246382  | 0,022184897 | 0,085 | 0,042 | 1           | 1,01549624    | 0,984740229     | 2,023809524     |
| CMYA5                                                                                               | 8,94415E-06 | 0,022147078 | 0,427 | 0,151 | 0,188730414 | 1,015469619   | 0,984766044     | 2,82781457      |

Supplementary Table 2

| Differentially expressed genes_keloid-XL_comparing SC-Keloid vs. (SC-Myel, SC-Nonmyel, SC-Nonmyel2) |             |             |       |       |             |               |                 |                 |
|-----------------------------------------------------------------------------------------------------|-------------|-------------|-------|-------|-------------|---------------|-----------------|-----------------|
| gene                                                                                                | p_val       | avg_log2FC  | pct.1 | pct.2 | p_val_adj   | Foldchange_UP | Foldchange_DOWN | Ratio_pct1_pct2 |
| EXTL3                                                                                               | 0,001691389 | 0,022116866 | 0,122 | 0,032 | 1           | 1,015448354   | 0,984786667     | 3,8125          |
| UTRN                                                                                                | 0,010777728 | 0,022100724 | 0,671 | 0,375 | 1           | 1,015436993   | 0,984797685     | 1,789333333     |
| ZNF696                                                                                              | 0,008401736 | 0,022073443 | 0,024 | 0     | 1           | 1,015417791   | 0,984816308     | #DIV/0!         |
| GRAMD1C                                                                                             | 0,35185965  | 0,022059888 | 0,012 | 0,004 | 1           | 1,015408251   | 0,98482556      | 3               |
| DVL1                                                                                                | 0,002020829 | 0,022039762 | 0,366 | 0,168 | 1           | 1,015394085   | 0,9848393       | 2,178571429     |
| PCGF6                                                                                               | 0,007226764 | 0,022020067 | 0,134 | 0,046 | 1           | 1,015380224   | 0,984852744     | 2,913043478     |
| USP13                                                                                               | 0,011168661 | 0,021983083 | 0,073 | 0,018 | 1           | 1,015354195   | 0,984877992     | 4,055555556     |
| LENG8-AS1                                                                                           | 0,695525935 | 0,021977264 | 0,024 | 0,018 | 1           | 1,0153501     | 0,984881964     | 1,333333333     |
| FAXC                                                                                                | 0,106097567 | 0,021885674 | 0,037 | 0,011 | 1           | 1,015285642   | 0,984944491     | 3,363636364     |
| DLX3                                                                                                | 0,063203483 | 0,021867055 | 0,012 | 0     | 1           | 1,015272538   | 0,984957203     | #DIV/0!         |
| COLGALT2                                                                                            | 0,063203483 | 0,021829071 | 0,012 | 0     | 1           | 1,015245808   | 0,984983136     | #DIV/0!         |
| FAM180A                                                                                             | 0,063203483 | 0,021829071 | 0,012 | 0     | 1           | 1,015245808   | 0,984983136     | #DIV/0!         |
| MYB                                                                                                 | 0,063203483 | 0,021829071 | 0,012 | 0     | 1           | 1,015245808   | 0,984983136     | #DIV/0!         |
| OSCP1                                                                                               | 0,063203483 | 0,021829071 | 0,012 | 0     | 1           | 1,015245808   | 0,984983136     | #DIV/0!         |
| PLEKHN1                                                                                             | 0,063203483 | 0,021829071 | 0,012 | 0     | 1           | 1,015245808   | 0,984983136     | #DIV/0!         |
| GPER1                                                                                               | 0,00931978  | 0,021814016 | 0,049 | 0,007 | 1           | 1,015235214   | 0,984993414     | 7               |
| UBE4A                                                                                               | 0,034701433 | 0,021810161 | 0,207 | 0,105 | 1           | 1,015232501   | 0,984996047     | 1,971428571     |
| LSR                                                                                                 | 0,008473224 | 0,021759408 | 0,098 | 0,028 | 1           | 1,015196787   | 0,985030698     | 3,5             |
| RASA4                                                                                               | 0,345067611 | 0,021702186 | 0,024 | 0,011 | 1           | 1,015156521   | 0,985069769     | 2,181818182     |
| DNLZ                                                                                                | 0,002645942 | 0,02168586  | 0,146 | 0,046 | 1           | 1,015145034   | 0,985080916     | 3,173913043     |
| SH3RF2                                                                                              | 0,011553628 | 0,021635992 | 0,037 | 0,004 | 1           | 1,015109945   | 0,985114967     | 9,25            |
| NUDT18                                                                                              | 0,066254792 | 0,021623778 | 0,024 | 0,004 | 1           | 1,015101351   | 0,985123307     | 6               |
| ABC9                                                                                                | 0,004485159 | 0,02161251  | 0,073 | 0,014 | 1           | 1,015093423   | 0,985131001     | 5,214285714     |
| NDUFAF7                                                                                             | 0,064483381 | 0,021494532 | 0,085 | 0,035 | 1           | 1,015010416   | 0,985211565     | 2,428571429     |
| RNGTT                                                                                               | 0,000225277 | 0,021484722 | 0,134 | 0,028 | 1           | 1,015003514   | 0,985218264     | 4,785714286     |
| ORAI1                                                                                               | 0,000369356 | 0,021459859 | 0,341 | 0,133 | 1           | 1,014986022   | 0,985235243     | 2,563909774     |
| ZSWIM4                                                                                              | 0,000657963 | 0,021440008 | 0,098 | 0,018 | 1           | 1,014972056   | 0,9852488       | 5,444444444     |
| TMEM107                                                                                             | 4,41829E-05 | 0,02143104  | 0,244 | 0,07  | 0,932302481 | 1,014965747   | 0,985254924     | 3,485714286     |
| SLC49A4                                                                                             | 0,01104171  | 0,02142412  | 0,073 | 0,018 | 1           | 1,014960878   | 0,98525965      | 4,055555556     |
| TMEM225B                                                                                            | 0,063203483 | 0,021414578 | 0,012 | 0     | 1           | 1,014954165   | 0,985266167     | #DIV/0!         |

Supplementary Table 2

| Differentially expressed genes_keloid-XL_comparing SC-Keloid vs. (SC-Myel, SC-Nonmyel, SC-Nonmyel2) |             |             |       |       |             |               |                 |                 |
|-----------------------------------------------------------------------------------------------------|-------------|-------------|-------|-------|-------------|---------------|-----------------|-----------------|
| gene                                                                                                | p_val       | avg_log2FC  | pct.1 | pct.2 | p_val_adj   | Foldchange_UP | Foldchange_DOWN | Ratio_pct1_pct2 |
| DOCK3                                                                                               | 0,649511996 | 0,021232494 | 0,012 | 0,007 | 1           | 1,014826075   | 0,985390526     | 1,714285714     |
| TSTD2                                                                                               | 0,13405442  | 0,021213522 | 0,085 | 0,042 | 1           | 1,01481273    | 0,985403484     | 2,023809524     |
| SPAG16                                                                                              | 0,035868595 | 0,021203716 | 0,159 | 0,074 | 1           | 1,014805832   | 0,985410182     | 2,148648649     |
| CCDC136                                                                                             | 0,066254792 | 0,021119749 | 0,024 | 0,004 | 1           | 1,014746771   | 0,985467536     | 6               |
| BRWD3                                                                                               | 0,085377891 | 0,021117623 | 0,146 | 0,077 | 1           | 1,014745275   | 0,985468988     | 1,896103896     |
| ABCB4                                                                                               | 0,004426586 | 0,021110252 | 0,073 | 0,014 | 1           | 1,014740091   | 0,985474023     | 5,214285714     |
| CYB561                                                                                              | 0,06642434  | 0,021105307 | 0,061 | 0,021 | 1           | 1,014736613   | 0,985477401     | 2,904761905     |
| H4C11                                                                                               | 0,044226311 | 0,021101964 | 0,037 | 0,007 | 1           | 1,014734262   | 0,985479684     | 5,285714286     |
| TMEM214                                                                                             | 0,002803916 | 0,021080115 | 0,159 | 0,053 | 1           | 1,014718894   | 0,985494609     | 3               |
| PIGH                                                                                                | 5,66281E-05 | 0,021063738 | 0,195 | 0,049 | 1           | 1,014707375   | 0,985505797     | 3,979591837     |
| DOCK2                                                                                               | 0,00931978  | 0,021054475 | 0,049 | 0,007 | 1           | 1,01470086    | 0,985512124     | 7               |
| BCL2L12                                                                                             | 6,86914E-06 | 0,021051614 | 0,183 | 0,035 | 0,144945752 | 1,014698848   | 0,985514078     | 5,228571429     |
| BLZF1                                                                                               | 1,04518E-05 | 0,020977978 | 0,171 | 0,032 | 0,220543226 | 1,014647058   | 0,985564381     | 5,34375         |
| ADORA1                                                                                              | 0,008401736 | 0,020871824 | 0,024 | 0     | 1           | 1,014572403   | 0,985636902     | #DIV/0!         |
| GSTM4                                                                                               | 0,005447223 | 0,02086631  | 0,11  | 0,032 | 1           | 1,014568526   | 0,985640669     | 3,4375          |
| TMEM11                                                                                              | 0,000151129 | 0,020855644 | 0,268 | 0,091 | 1           | 1,014561025   | 0,985647956     | 2,945054945     |
| ZNF239                                                                                              | 0,00032444  | 0,02082548  | 0,061 | 0,004 | 1           | 1,014539813   | 0,985668564     | 15,25           |
| CACNA1C-AS2                                                                                         | 0,063203483 | 0,020809223 | 0,012 | 0     | 1           | 1,01452838    | 0,985679671     | #DIV/0!         |
| DEGS2                                                                                               | 0,063203483 | 0,020809223 | 0,012 | 0     | 1           | 1,01452838    | 0,985679671     | #DIV/0!         |
| MBL2                                                                                                | 0,063203483 | 0,020809223 | 0,012 | 0     | 1           | 1,01452838    | 0,985679671     | #DIV/0!         |
| SIGLEC10                                                                                            | 0,063203483 | 0,020809223 | 0,012 | 0     | 1           | 1,01452838    | 0,985679671     | #DIV/0!         |
| ETV1                                                                                                | 0,125592074 | 0,020799295 | 0,098 | 0,049 | 1           | 1,014521398   | 0,985686454     | 2               |
| FASTKD3                                                                                             | 0,061438821 | 0,020791073 | 0,049 | 0,014 | 1           | 1,014515617   | 0,985692071     | 3,5             |
| MICU3                                                                                               | 0,00370964  | 0,020785767 | 0,134 | 0,042 | 1           | 1,014511886   | 0,985695697     | 3,19047619      |
| DYNLT5                                                                                              | 0,065143806 | 0,020785027 | 0,024 | 0,004 | 1           | 1,014511365   | 0,985696202     | 6               |
| ZSCAN32                                                                                             | 0,042398422 | 0,020780622 | 0,037 | 0,007 | 1           | 1,014508267   | 0,985699212     | 5,285714286     |
| MED9                                                                                                | 0,036803449 | 0,020767762 | 0,061 | 0,018 | 1           | 1,014499224   | 0,985707999     | 3,388888889     |
| KIAA1549                                                                                            | 0,906339215 | 0,020759076 | 0,012 | 0,014 | 1           | 1,014493116   | 0,985713934     | 0,857142857     |
| ZNF441                                                                                              | 0,114980497 | 0,020751184 | 0,049 | 0,018 | 1           | 1,014487567   | 0,985719326     | 2,722222222     |
| HINT3                                                                                               | 0,001662334 | 0,020738937 | 0,159 | 0,049 | 1           | 1,014478955   | 0,985727693     | 3,244897959     |

Supplementary Table 2

| Differentially expressed genes_keloid-XL_comparing SC-Keloid vs. (SC-Myel, SC-Nonmyel, SC-Nonmyel2) |             |             |       |       |           |               |                 |                 |
|-----------------------------------------------------------------------------------------------------|-------------|-------------|-------|-------|-----------|---------------|-----------------|-----------------|
| gene                                                                                                | p_val       | avg_log2FC  | pct.1 | pct.2 | p_val_adj | Foldchange_UP | Foldchange_DOWN | Ratio_pct1_pct2 |
| MSS51                                                                                               | 0,649511996 | 0,020730782 | 0,012 | 0,007 | 1         | 1,01447322    | 0,985733265     | 1,714285714     |
| CLIP3                                                                                               | 0,025659188 | 0,020723477 | 0,134 | 0,056 | 1         | 1,014468084   | 0,985738256     | 2,392857143     |
| INAFM1                                                                                              | 0,010288979 | 0,020644227 | 0,22  | 0,098 | 1         | 1,014412358   | 0,985792407     | 2,244897959     |
| FGGY                                                                                                | 0,014118687 | 0,020629396 | 0,085 | 0,025 | 1         | 1,01440193    | 0,98580254      | 3,4             |
| RTEL1                                                                                               | 0,066254792 | 0,020574472 | 0,024 | 0,004 | 1         | 1,014363312   | 0,985840071     | 6               |
| STK33                                                                                               | 0,063203483 | 0,020568378 | 0,012 | 0     | 1         | 1,014359027   | 0,985844236     | #DIV/0!         |
| LG1                                                                                                 | 0,000894757 | 0,020546348 | 0,244 | 0,091 | 1         | 1,014343539   | 0,985859289     | 2,681318681     |
| BTRC                                                                                                | 0,017481575 | 0,020519282 | 0,061 | 0,014 | 1         | 1,014324509   | 0,985877785     | 4,357142857     |
| ADAL                                                                                                | 0,18978875  | 0,020513693 | 0,037 | 0,014 | 1         | 1,01432058    | 0,985881604     | 2,642857143     |
| ITGB2                                                                                               | 0,008401736 | 0,02051255  | 0,024 | 0     | 1         | 1,014319776   | 0,985882385     | #DIV/0!         |
| PRXL2B                                                                                              | 0,001289912 | 0,020464937 | 0,146 | 0,042 | 1         | 1,014286301   | 0,985914923     | 3,476190476     |
| DNAJC22                                                                                             | 0,008401736 | 0,020461905 | 0,024 | 0     | 1         | 1,014284169   | 0,985916995     | #DIV/0!         |
| FAAP24                                                                                              | 0,008401736 | 0,020447444 | 0,024 | 0     | 1         | 1,014274003   | 0,985926877     | #DIV/0!         |
| SNHG10                                                                                              | 0,104067166 | 0,020336983 | 0,11  | 0,056 | 1         | 1,014196347   | 0,986002368     | 1,964285714     |
| ARHGEF35                                                                                            | 0,187860656 | 0,020297478 | 0,024 | 0,007 | 1         | 1,014168576   | 0,986029368     | 3,428571429     |
| SUFU                                                                                                | 0,069203207 | 0,020270869 | 0,073 | 0,028 | 1         | 1,014149871   | 0,986047554     | 2,607142857     |
| ASTE1                                                                                               | 0,113968254 | 0,020240535 | 0,049 | 0,018 | 1         | 1,014128548   | 0,986068287     | 2,722222222     |
| NUP85                                                                                               | 0,003879558 | 0,02023511  | 0,134 | 0,042 | 1         | 1,014124734   | 0,986071995     | 3,19047619      |
| AL592528.1                                                                                          | 0,063203483 | 0,020188386 | 0,012 | 0     | 1         | 1,01409189    | 0,986103931     | #DIV/0!         |
| ALG1L                                                                                               | 0,063203483 | 0,020188386 | 0,012 | 0     | 1         | 1,01409189    | 0,986103931     | #DIV/0!         |
| LAT2                                                                                                | 0,063203483 | 0,020188386 | 0,012 | 0     | 1         | 1,01409189    | 0,986103931     | #DIV/0!         |
| NLGN1-AS1                                                                                           | 0,063203483 | 0,020188386 | 0,012 | 0     | 1         | 1,01409189    | 0,986103931     | #DIV/0!         |
| SFXN2                                                                                               | 0,063203483 | 0,020188386 | 0,012 | 0     | 1         | 1,01409189    | 0,986103931     | #DIV/0!         |
| SPATA21                                                                                             | 0,063203483 | 0,020188386 | 0,012 | 0     | 1         | 1,01409189    | 0,986103931     | #DIV/0!         |
| BEX2                                                                                                | 0,008401736 | 0,020132191 | 0,024 | 0     | 1         | 1,014052391   | 0,986142343     | #DIV/0!         |
| UBA6-DT                                                                                             | 0,000761457 | 0,020099409 | 0,122 | 0,028 | 1         | 1,014029349   | 0,98616475      | 4,357142857     |
| AC019171.1                                                                                          | 0,066254792 | 0,020083251 | 0,024 | 0,004 | 1         | 1,014017992   | 0,986175796     | 6               |
| TMEM229B                                                                                            | 0,04253036  | 0,020055221 | 0,085 | 0,032 | 1         | 1,013998291   | 0,986194956     | 2,65625         |
| KHDC1                                                                                               | 0,649511996 | 0,020044489 | 0,012 | 0,007 | 1         | 1,013990748   | 0,986202292     | 1,714285714     |
| RNF11                                                                                               | 0,000794756 | 0,02003924  | 0,463 | 0,218 | 1         | 1,013987059   | 0,98620588      | 2,123853211     |

Supplementary Table 2

| Differentially expressed genes_keloid-XL_ comparing SC-Keloid vs. (SC-Myel, SC-Nonmyel, SC-Nonmyel2) |             |             |       |       |           |               |                 |                 |
|------------------------------------------------------------------------------------------------------|-------------|-------------|-------|-------|-----------|---------------|-----------------|-----------------|
| gene                                                                                                 | p_val       | avg_log2FC  | pct.1 | pct.2 | p_val_adj | Foldchange_UP | Foldchange_DOWN | Ratio_pct1_pct2 |
| CS                                                                                                   | 0,003501912 | 0,020002529 | 0,195 | 0,074 | 1         | 1,013961257   | 0,986230976     | 2,635135135     |
| FAM172A                                                                                              | 0,003344358 | 0,019985203 | 0,305 | 0,137 | 1         | 1,01394908    | 0,98624282      | 2,226277372     |
| MTRF1L                                                                                               | 0,03501243  | 0,019943127 | 0,134 | 0,06  | 1         | 1,013919509   | 0,986271584     | 2,233333333     |
| ATP5F1B                                                                                              | 0,041866742 | 0,019846829 | 0,756 | 0,491 | 1         | 1,013851833   | 0,986337419     | 1,539714868     |
| ZNF773                                                                                               | 0,066254792 | 0,019821043 | 0,024 | 0,004 | 1         | 1,013833712   | 0,986355048     | 6               |
| HES2                                                                                                 | 0,35185965  | 0,019810033 | 0,012 | 0,004 | 1         | 1,013825976   | 0,986362575     | 3               |
| RPP30                                                                                                | 7,65035E-08 | 0,019796392 | 0,317 | 0,074 | 0,0016143 | 1,01381639    | 0,986371901     | 4,283783784     |
| ABCA7                                                                                                | 0,011553628 | 0,019752349 | 0,037 | 0,004 | 1         | 1,01378544    | 0,986402015     | 9,25            |
| LTO1                                                                                                 | 0,001236845 | 0,019741098 | 0,11  | 0,025 | 1         | 1,013777534   | 0,986409707     | 4,4             |
| LIN7A                                                                                                | 0,06274641  | 0,019727092 | 0,049 | 0,014 | 1         | 1,013767692   | 0,986419283     | 3,5             |
| ANAPC7                                                                                               | 0,002018358 | 0,019713254 | 0,183 | 0,063 | 1         | 1,013757968   | 0,986428745     | 2,904761905     |
| ADAM22                                                                                               | 0,008401736 | 0,019698339 | 0,024 | 0     | 1         | 1,013747487   | 0,986438943     | #DIV/0!         |
| LINC01551                                                                                            | 0,347088417 | 0,019613624 | 0,012 | 0,004 | 1         | 1,013687962   | 0,986496868     | 3               |
| GMNN                                                                                                 | 0,001302365 | 0,0195976   | 0,146 | 0,042 | 1         | 1,013676703   | 0,986507825     | 3,476190476     |
| LDLRAD4                                                                                              | 0,342070304 | 0,019516709 | 0,024 | 0,011 | 1         | 1,013619869   | 0,98656314      | 2,181818182     |
| ARHGAP12                                                                                             | 0,002270124 | 0,019482775 | 0,39  | 0,182 | 1         | 1,013596027   | 0,986586345     | 2,142857143     |
| DNAJB5                                                                                               | 0,009669783 | 0,019452049 | 0,11  | 0,035 | 1         | 1,01357444    | 0,986607357     | 3,142857143     |
| TNFRSF10D                                                                                            | 0,022646956 | 0,01941812  | 0,073 | 0,021 | 1         | 1,013550604   | 0,98663056      | 3,476190476     |
| BMF                                                                                                  | 0,585233179 | 0,019416688 | 0,085 | 0,067 | 1         | 1,013549598   | 0,98663154      | 1,268656716     |
| CTU1                                                                                                 | 0,001673714 | 0,019342352 | 0,122 | 0,032 | 1         | 1,013497375   | 0,986682378     | 3,8125          |
| PCMTD1                                                                                               | 0,005338226 | 0,019318479 | 0,329 | 0,161 | 1         | 1,013480604   | 0,986698706     | 2,043478261     |
| LINC01556                                                                                            | 0,008401736 | 0,019315898 | 0,024 | 0     | 1         | 1,013478791   | 0,986700471     | #DIV/0!         |
| GCNT2                                                                                                | 0,898084959 | 0,019302441 | 0,012 | 0,011 | 1         | 1,013469338   | 0,986709674     | 1,090909091     |
| PYROXD2                                                                                              | 0,006523076 | 0,019291336 | 0,061 | 0,011 | 1         | 1,013461537   | 0,986717269     | 5,545454545     |
| MT-ND5                                                                                               | 0,478097036 | 0,019280901 | 0,659 | 0,509 | 1         | 1,013454206   | 0,986724406     | 1,294695481     |
| LIG1                                                                                                 | 0,008751649 | 0,019255991 | 0,049 | 0,007 | 1         | 1,013436708   | 0,986741443     | 7               |
| POC1B                                                                                                | 0,039951184 | 0,019213207 | 0,11  | 0,046 | 1         | 1,013406655   | 0,986770706     | 2,391304348     |
| EXOSC9                                                                                               | 0,000197139 | 0,019162529 | 0,159 | 0,039 | 1         | 1,013371056   | 0,98680537      | 4,076923077     |
| PLGLB1                                                                                               | 0,35185965  | 0,019138222 | 0,012 | 0,004 | 1         | 1,013353983   | 0,986821995     | 3               |
| MATN4                                                                                                | 0,011553628 | 0,019133226 | 0,037 | 0,004 | 1         | 1,013350474   | 0,986825413     | 9,25            |

Supplementary Table 2

| Differentially expressed genes_keloid-XL_comparing SC-Keloid vs. (SC-Myel, SC-Nonmyel, SC-Nonmyel2) |             |             |       |       |             |               |                 |                 |
|-----------------------------------------------------------------------------------------------------|-------------|-------------|-------|-------|-------------|---------------|-----------------|-----------------|
| gene                                                                                                | p_val       | avg_log2FC  | pct.1 | pct.2 | p_val_adj   | Foldchange_UP | Foldchange_DOWN | Ratio_pct1_pct2 |
| DNMT3B                                                                                              | 0,044226311 | 0,019130326 | 0,037 | 0,007 | 1           | 1,013348437   | 0,986827397     | 5,285714286     |
| AGBL5                                                                                               | 0,006523076 | 0,019102672 | 0,061 | 0,011 | 1           | 1,013329013   | 0,986846313     | 5,545454545     |
| SDHAF1                                                                                              | 0,000397671 | 0,019095035 | 0,183 | 0,053 | 1           | 1,013323649   | 0,986851537     | 3,452830189     |
| KLHL7                                                                                               | 0,002096749 | 0,019049436 | 0,207 | 0,077 | 1           | 1,013291621   | 0,986882729     | 2,688311688     |
| SHLD3                                                                                               | 0,066254792 | 0,018984877 | 0,024 | 0,004 | 1           | 1,013246279   | 0,986926891     | 6               |
| EVI2A                                                                                               | 0,063203483 | 0,018981705 | 0,012 | 0     | 1           | 1,013244051   | 0,986929061     | #DIV/0!         |
| FOXL1                                                                                               | 0,063203483 | 0,018981705 | 0,012 | 0     | 1           | 1,013244051   | 0,986929061     | #DIV/0!         |
| FPR1                                                                                                | 0,063203483 | 0,018981705 | 0,012 | 0     | 1           | 1,013244051   | 0,986929061     | #DIV/0!         |
| JARID2-AS1                                                                                          | 0,063203483 | 0,018981705 | 0,012 | 0     | 1           | 1,013244051   | 0,986929061     | #DIV/0!         |
| KCNJ6                                                                                               | 0,063203483 | 0,018981705 | 0,012 | 0     | 1           | 1,013244051   | 0,986929061     | #DIV/0!         |
| MED18                                                                                               | 0,063203483 | 0,018981705 | 0,012 | 0     | 1           | 1,013244051   | 0,986929061     | #DIV/0!         |
| RNF125                                                                                              | 0,063203483 | 0,018981705 | 0,012 | 0     | 1           | 1,013244051   | 0,986929061     | #DIV/0!         |
| TNFRSF10A                                                                                           | 0,063203483 | 0,018981705 | 0,012 | 0     | 1           | 1,013244051   | 0,986929061     | #DIV/0!         |
| DDX19A                                                                                              | 4,46557E-05 | 0,0188787   | 0,256 | 0,077 | 0,942279781 | 1,01317171    | 0,986999528     | 3,324675325     |
| SMG5                                                                                                | 0,059191799 | 0,018844459 | 0,11  | 0,049 | 1           | 1,013147664   | 0,987022954     | 2,244897959     |
| ATG4D                                                                                               | 0,000732778 | 0,018825871 | 0,098 | 0,018 | 1           | 1,01313461    | 0,987035671     | 5,444444444     |
| HCN3                                                                                                | 0,35185965  | 0,018798789 | 0,012 | 0,004 | 1           | 1,013115592   | 0,9870542       | 3               |
| ZNF419                                                                                              | 0,185668317 | 0,018797652 | 0,024 | 0,007 | 1           | 1,013114794   | 0,987054977     | 3,428571429     |
| CCDC51                                                                                              | 0,001423372 | 0,018773501 | 0,073 | 0,011 | 1           | 1,013097834   | 0,987071501     | 6,636363636     |
| ZNF282                                                                                              | 0,000234367 | 0,018739644 | 0,098 | 0,014 | 1           | 1,013074059   | 0,987094666     | 7               |
| FBXW9                                                                                               | 0,010916043 | 0,018710487 | 0,073 | 0,018 | 1           | 1,013053585   | 0,987114615     | 4,055555556     |
| CORT                                                                                                | 0,066254792 | 0,018700896 | 0,024 | 0,004 | 1           | 1,01304685    | 0,987121178     | 6               |
| AC005597.1                                                                                          | 0,063203483 | 0,01868139  | 0,012 | 0     | 1           | 1,013033154   | 0,987134524     | #DIV/0!         |
| ACOT11                                                                                              | 0,063203483 | 0,01868139  | 0,012 | 0     | 1           | 1,013033154   | 0,987134524     | #DIV/0!         |
| GPC6                                                                                                | 0,063203483 | 0,01868139  | 0,012 | 0     | 1           | 1,013033154   | 0,987134524     | #DIV/0!         |
| PCDHGB1                                                                                             | 0,063203483 | 0,01868139  | 0,012 | 0     | 1           | 1,013033154   | 0,987134524     | #DIV/0!         |
| SFTPD                                                                                               | 0,063203483 | 0,01868139  | 0,012 | 0     | 1           | 1,013033154   | 0,987134524     | #DIV/0!         |
| TNNI3                                                                                               | 0,063203483 | 0,01868139  | 0,012 | 0     | 1           | 1,013033154   | 0,987134524     | #DIV/0!         |
| ZNF658                                                                                              | 0,063203483 | 0,01868139  | 0,012 | 0     | 1           | 1,013033154   | 0,987134524     | #DIV/0!         |
| CCDC91                                                                                              | 6,88939E-06 | 0,018660196 | 0,28  | 0,077 | 0,145373117 | 1,013018271   | 0,987149026     | 3,636363636     |

Supplementary Table 2

| Differentially expressed genes_keloid-XL_comparing SC-Keloid vs. (SC-Myel, SC-Nonmyel, SC-Nonmyel2) |             |             |       |       |             |               |                 |                 |
|-----------------------------------------------------------------------------------------------------|-------------|-------------|-------|-------|-------------|---------------|-----------------|-----------------|
| gene                                                                                                | p_val       | avg_log2FC  | pct.1 | pct.2 | p_val_adj   | Foldchange_UP | Foldchange_DOWN | Ratio_pct1_pct2 |
| TTL3                                                                                                | 0,017600145 | 0,018597044 | 0,22  | 0,105 | 1           | 1,012973929   | 0,987192238     | 2,095238095     |
| NAV3                                                                                                | 0,12773253  | 0,018582077 | 0,098 | 0,049 | 1           | 1,01296342    | 0,98720248      | 2               |
| PNPLA6                                                                                              | 0,007103533 | 0,018576404 | 0,146 | 0,053 | 1           | 1,012959437   | 0,987206361     | 2,754716981     |
| PRKAA1                                                                                              | 0,000961052 | 0,01850896  | 0,171 | 0,053 | 1           | 1,012912084   | 0,987252513     | 3,226415094     |
| AC009506.1                                                                                          | 0,027028964 | 0,018429649 | 0,049 | 0,011 | 1           | 1,012856401   | 0,987306788     | 4,454545455     |
| TRIM61                                                                                              | 0,011553628 | 0,018388474 | 0,037 | 0,004 | 1           | 1,012827495   | 0,987334966     | 9,25            |
| PRDM4                                                                                               | 0,095840528 | 0,018382917 | 0,098 | 0,046 | 1           | 1,012823593   | 0,98733877      | 2,130434783     |
| PLEKHH1                                                                                             | 0,006556321 | 0,018377362 | 0,085 | 0,021 | 1           | 1,012819693   | 0,987342571     | 4,047619048     |
| C2                                                                                                  | 0,654971645 | 0,018371161 | 0,012 | 0,007 | 1           | 1,01281534    | 0,987346815     | 1,714285714     |
| CFAP45                                                                                              | 0,348081613 | 0,018368805 | 0,024 | 0,011 | 1           | 1,012813686   | 0,987348427     | 2,181818182     |
| RPS14                                                                                               | 0,539771885 | 0,018361967 | 0,927 | 0,853 | 1           | 1,012808886   | 0,987353107     | 1,086752638     |
| TNFAIP8L3                                                                                           | 0,008401736 | 0,018353999 | 0,024 | 0     | 1           | 1,012803292   | 0,98735856      | #DIV/0!         |
| CUBN                                                                                                | 0,148735876 | 0,018319506 | 0,073 | 0,035 | 1           | 1,012779077   | 0,987382167     | 2,085714286     |
| CD68                                                                                                | 0,008556874 | 0,018275198 | 0,098 | 0,028 | 1           | 1,012747973   | 0,987412492     | 3,5             |
| CCDC174                                                                                             | 0,000128556 | 0,018248475 | 0,232 | 0,07  | 1           | 1,012729214   | 0,987430782     | 3,314285714     |
| SIRT2                                                                                               | 0,001176662 | 0,018234885 | 0,427 | 0,2   | 1           | 1,012719675   | 0,987440083     | 2,135           |
| ZBTB49                                                                                              | 0,006615795 | 0,018199252 | 0,061 | 0,011 | 1           | 1,012694662   | 0,987464473     | 5,545454545     |
| MIF4GD                                                                                              | 2,45237E-05 | 0,018167012 | 0,22  | 0,056 | 0,517474845 | 1,012672031   | 0,98748654      | 3,928571429     |
| ACTL10                                                                                              | 0,185668317 | 0,018115371 | 0,024 | 0,007 | 1           | 1,012635783   | 0,987521887     | 3,428571429     |
| YAE1                                                                                                | 0,00427852  | 0,018109263 | 0,134 | 0,042 | 1           | 1,012631496   | 0,987526068     | 3,19047619      |
| ANP32A                                                                                              | 0,000555069 | 0,018085698 | 0,463 | 0,207 | 1           | 1,012614956   | 0,987542199     | 2,236714976     |
| KRT5                                                                                                | 0,877744654 | 0,01807632  | 0,098 | 0,091 | 1           | 1,012608374   | 0,987548617     | 1,076923077     |
| STIL                                                                                                | 0,183494953 | 0,018062202 | 0,024 | 0,007 | 1           | 1,012598464   | 0,987558282     | 3,428571429     |
| MCOLN2                                                                                              | 0,649511996 | 0,018045849 | 0,012 | 0,007 | 1           | 1,012586987   | 0,987569476     | 1,714285714     |
| ADPRS                                                                                               | 0,000324488 | 0,017945175 | 0,171 | 0,046 | 1           | 1,012516329   | 0,987638393     | 3,717391304     |
| MBLAC1                                                                                              | 0,001952737 | 0,017846339 | 0,049 | 0,004 | 1           | 1,012446966   | 0,987706056     | 12,25           |
| BRI3BP                                                                                              | 0,025655894 | 0,017832815 | 0,085 | 0,028 | 1           | 1,012437476   | 0,987715315     | 3,035714286     |
| ARHGEF5                                                                                             | 0,347088417 | 0,017823811 | 0,012 | 0,004 | 1           | 1,012431157   | 0,98772148      | 3               |
| DDX11-AS1                                                                                           | 0,063203483 | 0,017822234 | 0,012 | 0     | 1           | 1,01243005    | 0,987722559     | #DIV/0!         |
| POGLUT1                                                                                             | 0,004222519 | 0,017817646 | 0,159 | 0,056 | 1           | 1,01242683    | 0,987725701     | 2,839285714     |

Supplementary Table 2

| Differentially expressed genes_keloid-XL_comparing SC-Keloid vs. (SC-Myel, SC-Nonmyel, SC-Nonmyel2) |             |             |       |       |           |               |                 |                 |
|-----------------------------------------------------------------------------------------------------|-------------|-------------|-------|-------|-----------|---------------|-----------------|-----------------|
| gene                                                                                                | p_val       | avg_log2FC  | pct.1 | pct.2 | p_val_adj | Foldchange_UP | Foldchange_DOWN | Ratio_pct1_pct2 |
| MELK                                                                                                | 0,345067611 | 0,017797704 | 0,024 | 0,011 | 1         | 1,012412836   | 0,987739354     | 2,181818182     |
| RILPL2                                                                                              | 0,00381076  | 0,017781063 | 0,134 | 0,042 | 1         | 1,012401158   | 0,987750747     | 3,19047619      |
| NTM                                                                                                 | 0,037578658 | 0,017765323 | 0,829 | 0,572 | 1         | 1,012390113   | 0,987761523     | 1,449300699     |
| ZNF285                                                                                              | 0,35185965  | 0,01776123  | 0,012 | 0,004 | 1         | 1,01238724    | 0,987764326     | 3               |
| LINC00847                                                                                           | 0,042292152 | 0,01776023  | 0,073 | 0,025 | 1         | 1,012386539   | 0,98776501      | 2,92            |
| DYNLRB2                                                                                             | 0,063203483 | 0,017716349 | 0,012 | 0     | 1         | 1,012355747   | 0,987795055     | #DIV/0!         |
| HBA1                                                                                                | 0,063203483 | 0,017716349 | 0,012 | 0     | 1         | 1,012355747   | 0,987795055     | #DIV/0!         |
| MUC7                                                                                                | 0,063203483 | 0,017716349 | 0,012 | 0     | 1         | 1,012355747   | 0,987795055     | #DIV/0!         |
| PPP1R27                                                                                             | 0,063203483 | 0,017716349 | 0,012 | 0     | 1         | 1,012355747   | 0,987795055     | #DIV/0!         |
| SLCO5A1                                                                                             | 0,063203483 | 0,017716349 | 0,012 | 0     | 1         | 1,012355747   | 0,987795055     | #DIV/0!         |
| TNFRSF8                                                                                             | 0,063203483 | 0,017716349 | 0,012 | 0     | 1         | 1,012355747   | 0,987795055     | #DIV/0!         |
| MIER1                                                                                               | 0,007877352 | 0,017707912 | 0,293 | 0,14  | 1         | 1,012349826   | 0,987800831     | 2,092857143     |
| ABCC4                                                                                               | 0,063203483 | 0,017671861 | 0,012 | 0     | 1         | 1,01232453    | 0,987825515     | #DIV/0!         |
| GPR158                                                                                              | 0,063203483 | 0,017671861 | 0,012 | 0     | 1         | 1,01232453    | 0,987825515     | #DIV/0!         |
| NBPF10                                                                                              | 0,063203483 | 0,017671861 | 0,012 | 0     | 1         | 1,01232453    | 0,987825515     | #DIV/0!         |
| PCDHB12                                                                                             | 0,35185965  | 0,017669166 | 0,012 | 0,004 | 1         | 1,012322638   | 0,987827361     | 3               |
| COPG2                                                                                               | 0,006431528 | 0,017621225 | 0,061 | 0,011 | 1         | 1,012288999   | 0,987860187     | 5,545454545     |
| DESI2                                                                                               | 0,010226639 | 0,017599015 | 0,28  | 0,137 | 1         | 1,012273415   | 0,987875395     | 2,04379562      |
| EDA2R                                                                                               | 0,063203483 | 0,017583553 | 0,012 | 0     | 1         | 1,012262566   | 0,987885983     | #DIV/0!         |
| SACS-AS1                                                                                            | 0,063203483 | 0,017583553 | 0,012 | 0     | 1         | 1,012262566   | 0,987885983     | #DIV/0!         |
| SPON2                                                                                               | 0,015327249 | 0,017571321 | 0,098 | 0,032 | 1         | 1,012253984   | 0,987894359     | 3,0625          |
| KIF25                                                                                               | 0,066254792 | 0,017529434 | 0,024 | 0,004 | 1         | 1,012224595   | 0,987923041     | 6               |
| ACSF2                                                                                               | 0,008401736 | 0,017504302 | 0,024 | 0     | 1         | 1,012206962   | 0,987940251     | #DIV/0!         |
| VDR                                                                                                 | 0,060793535 | 0,017485632 | 0,049 | 0,014 | 1         | 1,012193863   | 0,987953036     | 3,5             |
| WDR72                                                                                               | 0,008401736 | 0,017481358 | 0,024 | 0     | 1         | 1,012190864   | 0,987955963     | #DIV/0!         |
| TSHZ2                                                                                               | 0,106097567 | 0,017478674 | 0,037 | 0,011 | 1         | 1,012188981   | 0,987957801     | 3,363636364     |
| HDHD5                                                                                               | 0,015190866 | 0,017474317 | 0,098 | 0,032 | 1         | 1,012185924   | 0,987960785     | 3,0625          |
| SH2B2                                                                                               | 0,106097567 | 0,017471164 | 0,037 | 0,011 | 1         | 1,012183712   | 0,987962944     | 3,363636364     |
| ZDHC18                                                                                              | 0,006321781 | 0,017455705 | 0,122 | 0,039 | 1         | 1,012172866   | 0,987973531     | 3,128205128     |
| ETHE1                                                                                               | 0,000396972 | 0,017436983 | 0,256 | 0,091 | 1         | 1,012159731   | 0,987986351     | 2,813186813     |



Supplementary Table 2

| Differentially expressed genes_keloid-XL_comparing SC-Keloid vs. (SC-Myel, SC-Nonmyel, SC-Nonmyel2) |             |             |       |       |             |               |                 |                 |
|-----------------------------------------------------------------------------------------------------|-------------|-------------|-------|-------|-------------|---------------|-----------------|-----------------|
| gene                                                                                                | p_val       | avg_log2FC  | pct.1 | pct.2 | p_val_adj   | Foldchange_UP | Foldchange_DOWN | Ratio_pct1_pct2 |
| TBC1D22B                                                                                            | 0,062089768 | 0,017418931 | 0,049 | 0,014 | 1           | 1,012147066   | 0,987998714     | 3,5             |
| NEURL4                                                                                              | 0,067616925 | 0,017408954 | 0,061 | 0,021 | 1           | 1,012140067   | 0,988005546     | 2,904761905     |
| RAP2B                                                                                               | 0,030600753 | 0,017404526 | 0,22  | 0,112 | 1           | 1,01213696    | 0,988008579     | 1,964285714     |
| NDNF                                                                                                | 0,649511996 | 0,017393627 | 0,012 | 0,007 | 1           | 1,012129314   | 0,988016043     | 1,714285714     |
| TSNAXIP1                                                                                            | 0,35185965  | 0,017376495 | 0,012 | 0,004 | 1           | 1,012117295   | 0,988027776     | 3               |
| ACRBP                                                                                               | 0,063203483 | 0,017347758 | 0,012 | 0     | 1           | 1,012097135   | 0,988047456     | #DIV/0!         |
| ADRA1B                                                                                              | 0,063203483 | 0,017347758 | 0,012 | 0     | 1           | 1,012097135   | 0,988047456     | #DIV/0!         |
| AP001412.1                                                                                          | 0,063203483 | 0,017347758 | 0,012 | 0     | 1           | 1,012097135   | 0,988047456     | #DIV/0!         |
| TRIM67                                                                                              | 0,063203483 | 0,017347758 | 0,012 | 0     | 1           | 1,012097135   | 0,988047456     | #DIV/0!         |
| ZNF556                                                                                              | 0,063203483 | 0,017347758 | 0,012 | 0     | 1           | 1,012097135   | 0,988047456     | #DIV/0!         |
| ZNF610                                                                                              | 0,063203483 | 0,017347758 | 0,012 | 0     | 1           | 1,012097135   | 0,988047456     | #DIV/0!         |
| AMPD3                                                                                               | 0,063203483 | 0,017340919 | 0,012 | 0     | 1           | 1,012092337   | 0,98805214      | #DIV/0!         |
| CD248                                                                                               | 0,063203483 | 0,017340919 | 0,012 | 0     | 1           | 1,012092337   | 0,98805214      | #DIV/0!         |
| LINC00853                                                                                           | 0,063203483 | 0,017340919 | 0,012 | 0     | 1           | 1,012092337   | 0,98805214      | #DIV/0!         |
| TLDC2                                                                                               | 0,063203483 | 0,017340919 | 0,012 | 0     | 1           | 1,012092337   | 0,98805214      | #DIV/0!         |
| TMF1                                                                                                | 0,040933561 | 0,01732498  | 0,256 | 0,14  | 1           | 1,012081155   | 0,988063057     | 1,828571429     |
| TMEM79                                                                                              | 0,066254792 | 0,017317115 | 0,024 | 0,004 | 1           | 1,012075638   | 0,988068443     | 6               |
| EBNA1BP2                                                                                            | 0,000317049 | 0,017313606 | 0,28  | 0,102 | 1           | 1,012073176   | 0,988070846     | 2,745098039     |
| FLT3LG                                                                                              | 0,024405628 | 0,017282133 | 0,122 | 0,049 | 1           | 1,012051098   | 0,988092402     | 2,489795918     |
| ARPIN                                                                                               | 0,009583775 | 0,017264993 | 0,11  | 0,035 | 1           | 1,012039074   | 0,988104141     | 3,142857143     |
| PRPSAP1                                                                                             | 2,48535E-05 | 0,017248315 | 0,39  | 0,14  | 0,524432834 | 1,012027375   | 0,988115564     | 2,785714286     |
| ZFAND2A                                                                                             | 0,000997547 | 0,017244541 | 0,268 | 0,105 | 1           | 1,012024728   | 0,988118148     | 2,552380952     |
| PPP5D1P                                                                                             | 0,345067611 | 0,017216125 | 0,024 | 0,011 | 1           | 1,012004795   | 0,988137611     | 2,181818182     |
| AC159540.2                                                                                          | 0,187860656 | 0,017197729 | 0,024 | 0,007 | 1           | 1,011991891   | 0,988150211     | 3,428571429     |
| MARS2                                                                                               | 0,185668317 | 0,01719359  | 0,024 | 0,007 | 1           | 1,011988987   | 0,988153046     | 3,428571429     |
| RRP1                                                                                                | 0,002035735 | 0,017182569 | 0,134 | 0,039 | 1           | 1,011981256   | 0,988160595     | 3,435897436     |
| XPR1                                                                                                | 0,016494677 | 0,017182504 | 0,11  | 0,039 | 1           | 1,011981211   | 0,988160639     | 2,820512821     |
| PLXNB1                                                                                              | 0,136467966 | 0,017163432 | 0,085 | 0,042 | 1           | 1,011967832   | 0,988173703     | 2,023809524     |
| GPR107                                                                                              | 0,000550497 | 0,017160236 | 0,22  | 0,074 | 1           | 1,011965591   | 0,988175892     | 2,972972973     |
| ABRAXAS2                                                                                            | 0,013841592 | 0,017157519 | 0,085 | 0,025 | 1           | 1,011963685   | 0,988177752     | 3,4             |

Supplementary Table 2

| Differentially expressed genes_keloid-XL_comparing SC-Keloid vs. (SC-Myel, SC-Nonmyel, SC-Nonmyel2) |             |             |       |       |             |               |                 |                 |
|-----------------------------------------------------------------------------------------------------|-------------|-------------|-------|-------|-------------|---------------|-----------------|-----------------|
| gene                                                                                                | p_val       | avg_log2FC  | pct.1 | pct.2 | p_val_adj   | Foldchange_UP | Foldchange_DOWN | Ratio_pct1_pct2 |
| H2BC5                                                                                               | 0,011553628 | 0,017156356 | 0,037 | 0,004 | 1           | 1,011962869   | 0,988178549     | 9,25            |
| LRRC46                                                                                              | 0,001220269 | 0,017155796 | 0,037 | 0     | 1           | 1,011962477   | 0,988178933     | #DIV/0!         |
| ZNF225                                                                                              | 0,008401736 | 0,017151842 | 0,024 | 0     | 1           | 1,011959703   | 0,988181641     | #DIV/0!         |
| PANK3                                                                                               | 3,47866E-06 | 0,017115988 | 0,329 | 0,095 | 0,073403239 | 1,011934554   | 0,988206199     | 3,463157895     |
| CDC42EP2                                                                                            | 0,001423372 | 0,017075187 | 0,073 | 0,011 | 1           | 1,011905935   | 0,988234148     | 6,636363636     |
| SRPK3                                                                                               | 0,516980245 | 0,017047578 | 0,024 | 0,014 | 1           | 1,011886571   | 0,98825306      | 1,714285714     |
| SMUG1                                                                                               | 8,78217E-05 | 0,017046059 | 0,134 | 0,025 | 1           | 1,011885506   | 0,9882541       | 5,36            |
| CDH4                                                                                                | 0,35185965  | 0,017037366 | 0,012 | 0,004 | 1           | 1,011879408   | 0,988260055     | 3               |
| ESRP1                                                                                               | 0,066254792 | 0,016998935 | 0,024 | 0,004 | 1           | 1,011852454   | 0,988286381     | 6               |
| KBTBD6                                                                                              | 0,006704008 | 0,016974167 | 0,085 | 0,021 | 1           | 1,011835083   | 0,988303348     | 4,047619048     |
| ACTR1A                                                                                              | 1,73042E-05 | 0,016972904 | 0,341 | 0,112 | 0,365136826 | 1,011834197   | 0,988304213     | 3,044642857     |
| GEMIN4                                                                                              | 0,028081741 | 0,016964506 | 0,049 | 0,011 | 1           | 1,011828307   | 0,988309966     | 4,454545455     |
| INPP4A                                                                                              | 0,07141129  | 0,016920653 | 0,073 | 0,028 | 1           | 1,011797551   | 0,988340008     | 2,607142857     |
| SUV39H1                                                                                             | 0,009174744 | 0,016917076 | 0,049 | 0,007 | 1           | 1,011795043   | 0,988342458     | 7               |
| FBXL8                                                                                               | 0,066254792 | 0,016896681 | 0,024 | 0,004 | 1           | 1,011780739   | 0,988356431     | 6               |
| DNA2                                                                                                | 0,35185965  | 0,016879613 | 0,012 | 0,004 | 1           | 1,01176877    | 0,988368123     | 3               |
| TBC1D1                                                                                              | 0,01546471  | 0,01687751  | 0,098 | 0,032 | 1           | 1,011767295   | 0,988369564     | 3,0625          |
| PPP1R3F                                                                                             | 0,466295416 | 0,016842939 | 0,049 | 0,032 | 1           | 1,01174305    | 0,988393248     | 1,53125         |
| MIS12                                                                                               | 0,015377159 | 0,016798727 | 0,134 | 0,053 | 1           | 1,011712046   | 0,988423538     | 2,528301887     |
| ZFAT                                                                                                | 0,006523076 | 0,016798532 | 0,061 | 0,011 | 1           | 1,011711909   | 0,988423672     | 5,545454545     |
| CAND2                                                                                               | 0,520464457 | 0,016790022 | 0,024 | 0,014 | 1           | 1,011705941   | 0,988429503     | 1,714285714     |
| ZNF440                                                                                              | 0,011553628 | 0,016761149 | 0,037 | 0,004 | 1           | 1,011685693   | 0,988449285     | 9,25            |
| PTPRF                                                                                               | 1,6524E-05  | 0,016756611 | 0,366 | 0,126 | 0,348673386 | 1,011682511   | 0,988452394     | 2,904761905     |
| EGLN2                                                                                               | 0,006978016 | 0,016730528 | 0,244 | 0,109 | 1           | 1,011664221   | 0,988470265     | 2,23853211      |
| RNF122                                                                                              | 0,035318168 | 0,016646312 | 0,061 | 0,018 | 1           | 1,011605167   | 0,988527967     | 3,388888889     |
| MAPK8IP3                                                                                            | 0,038962044 | 0,016643859 | 0,134 | 0,06  | 1           | 1,011603447   | 0,988529648     | 2,233333333     |
| ZNF124                                                                                              | 0,185668317 | 0,016614349 | 0,024 | 0,007 | 1           | 1,011582756   | 0,988549869     | 3,428571429     |
| DES                                                                                                 | 0,063203483 | 0,016582541 | 0,012 | 0     | 1           | 1,011560453   | 0,988571664     | #DIV/0!         |
| HSF4                                                                                                | 0,063203483 | 0,016582541 | 0,012 | 0     | 1           | 1,011560453   | 0,988571664     | #DIV/0!         |
| P2RY12                                                                                              | 0,063203483 | 0,016582541 | 0,012 | 0     | 1           | 1,011560453   | 0,988571664     | #DIV/0!         |

Supplementary Table 2

| Differentially expressed genes_keloid-XL_comparing SC-Keloid vs. (SC-Myel, SC-Nonmyel, SC-Nonmyel2) |             |             |       |       |           |               |                 |                 |
|-----------------------------------------------------------------------------------------------------|-------------|-------------|-------|-------|-----------|---------------|-----------------|-----------------|
| gene                                                                                                | p_val       | avg_log2FC  | pct.1 | pct.2 | p_val_adj | Foldchange_UP | Foldchange_DOWN | Ratio_pct1_pct2 |
| RGN                                                                                                 | 0,063203483 | 0,016582541 | 0,012 | 0     | 1         | 1,011560453   | 0,988571664     | #DIV/0!         |
| NOA1                                                                                                | 0,00426205  | 0,016571329 | 0,183 | 0,07  | 1         | 1,011552592   | 0,988579346     | 2,614285714     |
| ZNF425                                                                                              | 0,008401736 | 0,016567711 | 0,024 | 0     | 1         | 1,011550055   | 0,988581825     | #DIV/0!         |
| ZNF142                                                                                              | 0,183574298 | 0,01649509  | 0,049 | 0,021 | 1         | 1,011499137   | 0,988631589     | 2,333333333     |
| HEXD                                                                                                | 0,003578608 | 0,016444526 | 0,134 | 0,042 | 1         | 1,011463687   | 0,98866624      | 3,19047619      |
| GLUD2                                                                                               | 0,008401736 | 0,016419697 | 0,024 | 0     | 1         | 1,01144628    | 0,988683255     | #DIV/0!         |
| RGS5                                                                                                | 0,35185965  | 0,016400259 | 0,012 | 0,004 | 1         | 1,011432652   | 0,988696576     | 3               |
| POLR2J3                                                                                             | 0,006668903 | 0,016377499 | 0,207 | 0,088 | 1         | 1,011416696   | 0,988712174     | 2,352272727     |
| XRN1                                                                                                | 0,001912299 | 0,016347461 | 0,341 | 0,154 | 1         | 1,011395637   | 0,98873276      | 2,214285714     |
| NKIRAS1                                                                                             | 0,066254792 | 0,016326413 | 0,024 | 0,004 | 1         | 1,011380882   | 0,988747185     | 6               |
| CDK14                                                                                               | 0,100388468 | 0,01631512  | 0,085 | 0,039 | 1         | 1,011372965   | 0,988754925     | 2,179487179     |
| TMEM186                                                                                             | 0,106097567 | 0,016312013 | 0,037 | 0,011 | 1         | 1,011370787   | 0,988757054     | 3,363636364     |
| BRAP                                                                                                | 0,027294734 | 0,01627571  | 0,085 | 0,028 | 1         | 1,011345338   | 0,988781935     | 3,035714286     |
| MTRNR2L12                                                                                           | 0,511905263 | 0,016255782 | 0,073 | 0,053 | 1         | 1,011331368   | 0,988795593     | 1,377358491     |
| NMD3                                                                                                | 0,045032159 | 0,016241171 | 0,183 | 0,091 | 1         | 1,011321127   | 0,988805607     | 2,010989011     |
| SLC25A46                                                                                            | 0,002957421 | 0,016222312 | 0,171 | 0,06  | 1         | 1,011307907   | 0,988818532     | 2,85            |
| PYGO2                                                                                               | 0,000678439 | 0,016211891 | 0,146 | 0,039 | 1         | 1,011300601   | 0,988825675     | 3,743589744     |
| CDC23                                                                                               | 0,000575959 | 0,016166117 | 0,171 | 0,049 | 1         | 1,011268515   | 0,988857049     | 3,489795918     |
| PIWIL4                                                                                              | 0,107265343 | 0,016162732 | 0,037 | 0,011 | 1         | 1,011266143   | 0,988859369     | 3,363636364     |
| TST                                                                                                 | 0,02175178  | 0,016133319 | 0,073 | 0,021 | 1         | 1,011245525   | 0,98887953      | 3,476190476     |
| ZNF273                                                                                              | 0,017691584 | 0,016131685 | 0,061 | 0,014 | 1         | 1,01124438    | 0,98888065      | 4,357142857     |
| CD36                                                                                                | 0,063203483 | 0,016129998 | 0,012 | 0     | 1         | 1,011243198   | 0,988881806     | #DIV/0!         |
| ZNF112                                                                                              | 0,008401736 | 0,016129137 | 0,024 | 0     | 1         | 1,011242594   | 0,988882397     | #DIV/0!         |
| MBOAT7                                                                                              | 0,242163316 | 0,016114865 | 0,122 | 0,077 | 1         | 1,011232591   | 0,988892179     | 1,584415584     |
| NKX3-1                                                                                              | 0,196612832 | 0,016096735 | 0,037 | 0,014 | 1         | 1,011219883   | 0,988904606     | 2,642857143     |
| CGB7                                                                                                | 0,008401736 | 0,016064561 | 0,024 | 0     | 1         | 1,011197331   | 0,988926661     | #DIV/0!         |
| SERTAD4                                                                                             | 0,35185965  | 0,016057389 | 0,012 | 0,004 | 1         | 1,011192304   | 0,988931577     | 3               |
| NINJ2                                                                                               | 0,011553628 | 0,016043665 | 0,037 | 0,004 | 1         | 1,011182685   | 0,988940984     | 9,25            |
| RPH3AL                                                                                              | 0,008401736 | 0,016040138 | 0,024 | 0     | 1         | 1,011180213   | 0,988943402     | #DIV/0!         |
| RASGRP1                                                                                             | 0,35185965  | 0,015983284 | 0,012 | 0,004 | 1         | 1,011140365   | 0,988982375     | 3               |

Supplementary Table 2

| Differentially expressed genes_keloid-XL_comparing SC-Keloid vs. (SC-Myel, SC-Nonmyel, SC-Nonmyel2) |             |             |       |       |           |               |                 |                 |
|-----------------------------------------------------------------------------------------------------|-------------|-------------|-------|-------|-----------|---------------|-----------------|-----------------|
| gene                                                                                                | p_val       | avg_log2FC  | pct.1 | pct.2 | p_val_adj | Foldchange_UP | Foldchange_DOWN | Ratio_pct1_pct2 |
| ZNF777                                                                                              | 0,016630377 | 0,015969444 | 0,11  | 0,039 | 1         | 1,011130665   | 0,988991863     | 2,820512821     |
| ANTXR1                                                                                              | 0,000328228 | 0,015956683 | 0,341 | 0,133 | 1         | 1,011121721   | 0,989000611     | 2,563909774     |
| CFAP299                                                                                             | 0,008401736 | 0,015904221 | 0,024 | 0     | 1         | 1,011084954   | 0,989036575     | #DIV/0!         |
| ZNF701                                                                                              | 0,026115216 | 0,015890501 | 0,085 | 0,028 | 1         | 1,011075339   | 0,989045981     | 3,035714286     |
| ZDHHC9                                                                                              | 0,040454549 | 0,015843924 | 0,073 | 0,025 | 1         | 1,011042697   | 0,989077913     | 2,92            |
| SOX11                                                                                               | 0,004255004 | 0,015817205 | 0,073 | 0,014 | 1         | 1,011023972   | 0,989096231     | 5,214285714     |
| CCM2L                                                                                               | 0,063203483 | 0,015810619 | 0,012 | 0     | 1         | 1,011019357   | 0,989100746     | #DIV/0!         |
| MC5R                                                                                                | 0,063203483 | 0,015810619 | 0,012 | 0     | 1         | 1,011019357   | 0,989100746     | #DIV/0!         |
| MYOZ2                                                                                               | 0,063203483 | 0,015810619 | 0,012 | 0     | 1         | 1,011019357   | 0,989100746     | #DIV/0!         |
| PDGFD                                                                                               | 0,063203483 | 0,015810619 | 0,012 | 0     | 1         | 1,011019357   | 0,989100746     | #DIV/0!         |
| RAB6C                                                                                               | 0,063203483 | 0,015810619 | 0,012 | 0     | 1         | 1,011019357   | 0,989100746     | #DIV/0!         |
| RNF157-AS1                                                                                          | 0,063203483 | 0,015810619 | 0,012 | 0     | 1         | 1,011019357   | 0,989100746     | #DIV/0!         |
| SALL1                                                                                               | 0,063203483 | 0,015810619 | 0,012 | 0     | 1         | 1,011019357   | 0,989100746     | #DIV/0!         |
| HSCB                                                                                                | 0,004892231 | 0,015785577 | 0,11  | 0,032 | 1         | 1,011001808   | 0,989117915     | 3,4375          |
| SCYL1                                                                                               | 0,000117161 | 0,015700666 | 0,28  | 0,095 | 1         | 1,010942306   | 0,989176132     | 2,947368421     |
| CARD14                                                                                              | 0,063203483 | 0,015619719 | 0,012 | 0     | 1         | 1,010885586   | 0,989231634     | #DIV/0!         |
| PHACTR3                                                                                             | 0,063203483 | 0,015619719 | 0,012 | 0     | 1         | 1,010885586   | 0,989231634     | #DIV/0!         |
| DGUOK-AS1                                                                                           | 0,004426586 | 0,015618762 | 0,073 | 0,014 | 1         | 1,010884915   | 0,989232291     | 5,214285714     |
| ZHX3                                                                                                | 0,005608142 | 0,015615159 | 0,11  | 0,032 | 1         | 1,010882391   | 0,989234761     | 3,4375          |
| GTPBP8                                                                                              | 0,005717791 | 0,015562671 | 0,11  | 0,032 | 1         | 1,010845613   | 0,989270752     | 3,4375          |
| ADCK2                                                                                               | 0,000779072 | 0,015555019 | 0,122 | 0,028 | 1         | 1,010840252   | 0,989275999     | 4,357142857     |
| DDIAS                                                                                               | 0,008401736 | 0,015478533 | 0,024 | 0     | 1         | 1,010786663   | 0,989328448     | #DIV/0!         |
| EPS8L1                                                                                              | 0,001833348 | 0,015474906 | 0,061 | 0,007 | 1         | 1,010784121   | 0,989330935     | 8,714285714     |
| H4C15                                                                                               | 0,649511996 | 0,01546631  | 0,012 | 0,007 | 1         | 1,010778099   | 0,98933683      | 1,714285714     |
| AQP6                                                                                                | 0,348081613 | 0,015450831 | 0,024 | 0,011 | 1         | 1,010767254   | 0,989347445     | 2,181818182     |
| ECM2                                                                                                | 0,35185965  | 0,015431512 | 0,012 | 0,004 | 1         | 1,010753719   | 0,989360693     | 3               |
| HOPX                                                                                                | 0,345067611 | 0,015408698 | 0,024 | 0,011 | 1         | 1,010737736   | 0,989376338     | 2,181818182     |
| LDAH                                                                                                | 0,114980497 | 0,015377176 | 0,049 | 0,018 | 1         | 1,010715652   | 0,989397956     | 2,722222222     |
| NAGA                                                                                                | 0,002645942 | 0,015373327 | 0,146 | 0,046 | 1         | 1,010712955   | 0,989400595     | 3,173913043     |
| MOCS3                                                                                               | 0,066254792 | 0,015348031 | 0,024 | 0,004 | 1         | 1,010695234   | 0,989417943     | 6               |

Supplementary Table 2

| Differentially expressed genes_keloid-XL_comparing SC-Keloid vs. (SC-Myel, SC-Nonmyel, SC-Nonmyel2) |             |             |       |       |           |               |                 |                 |
|-----------------------------------------------------------------------------------------------------|-------------|-------------|-------|-------|-----------|---------------|-----------------|-----------------|
| gene                                                                                                | p_val       | avg_log2FC  | pct.1 | pct.2 | p_val_adj | Foldchange_UP | Foldchange_DOWN | Ratio_pct1_pct2 |
| ERCC6                                                                                               | 0,114980497 | 0,015318353 | 0,049 | 0,018 | 1         | 1,010674443   | 0,989438297     | 2,722222222     |
| C5orf46                                                                                             | 0,063203483 | 0,015269956 | 0,012 | 0     | 1         | 1,010640539   | 0,98947149      | #DIV/0!         |
| GALNT12                                                                                             | 0,063203483 | 0,015269956 | 0,012 | 0     | 1         | 1,010640539   | 0,98947149      | #DIV/0!         |
| TMEM52                                                                                              | 0,063203483 | 0,015269956 | 0,012 | 0     | 1         | 1,010640539   | 0,98947149      | #DIV/0!         |
| ZKSCAN2                                                                                             | 0,066254792 | 0,015266921 | 0,024 | 0,004 | 1         | 1,010638413   | 0,989473572     | 6               |
| LEMD2                                                                                               | 0,010792943 | 0,015256553 | 0,171 | 0,07  | 1         | 1,01063115    | 0,989480683     | 2,442857143     |
| C6orf136                                                                                            | 6,06374E-05 | 0,015249911 | 0,146 | 0,028 | 1         | 1,010626497   | 0,989485238     | 5,214285714     |
| HOXC4                                                                                               | 0,011098146 | 0,015223819 | 0,134 | 0,049 | 1         | 1,01060822    | 0,989503133     | 2,734693878     |
| ARHGAP45                                                                                            | 0,008401736 | 0,015214398 | 0,024 | 0     | 1         | 1,01060162    | 0,989509595     | #DIV/0!         |
| PAK1                                                                                                | 0,011168661 | 0,015209009 | 0,073 | 0,018 | 1         | 1,010597845   | 0,989513291     | 4,055555556     |
| IL3RA                                                                                               | 0,644071107 | 0,01518249  | 0,012 | 0,007 | 1         | 1,010579269   | 0,989531481     | 1,714285714     |
| LAYN                                                                                                | 5,47561E-05 | 0,015177869 | 0,146 | 0,028 | 1         | 1,010576032   | 0,98953465      | 5,214285714     |
| PCYT2                                                                                               | 0,010707948 | 0,015170465 | 0,159 | 0,063 | 1         | 1,010570846   | 0,989539728     | 2,523809524     |
| FMO5                                                                                                | 0,523960732 | 0,015139108 | 0,024 | 0,014 | 1         | 1,010548881   | 0,989561236     | 1,714285714     |
| TRAF3IP2                                                                                            | 0,043000486 | 0,015121943 | 0,037 | 0,007 | 1         | 1,010536858   | 0,98957301      | 5,285714286     |
| ADPGK-AS1                                                                                           | 0,187860656 | 0,015068041 | 0,024 | 0,007 | 1         | 1,010499103   | 0,989609983     | 3,428571429     |
| LINC00240                                                                                           | 0,35185965  | 0,014984782 | 0,012 | 0,004 | 1         | 1,010440788   | 0,989667096     | 3               |
| CTRB1                                                                                               | 0,35185965  | 0,014913167 | 0,012 | 0,004 | 1         | 1,010390631   | 0,989716224     | 3               |
| DLX6                                                                                                | 0,008401736 | 0,014838563 | 0,024 | 0     | 1         | 1,010338383   | 0,989767405     | #DIV/0!         |
| CARMN                                                                                               | 0,649511996 | 0,014792065 | 0,012 | 0,007 | 1         | 1,010305821   | 0,989799306     | 1,714285714     |
| LINC00900                                                                                           | 0,35185965  | 0,014779869 | 0,012 | 0,004 | 1         | 1,01029728    | 0,989807673     | 3               |
| ZFP41                                                                                               | 0,187860656 | 0,014722413 | 0,024 | 0,007 | 1         | 1,010257045   | 0,989847093     | 3,428571429     |
| WDR24                                                                                               | 0,000298361 | 0,014679212 | 0,085 | 0,011 | 1         | 1,010226794   | 0,989876734     | 7,727272727     |
| AC005523.2                                                                                          | 0,898084959 | 0,014661454 | 0,012 | 0,011 | 1         | 1,010214359   | 0,989888919     | 1,090909091     |
| FBXL20                                                                                              | 0,000148395 | 0,014617426 | 0,171 | 0,042 | 1         | 1,01018353    | 0,989919129     | 4,071428571     |
| BRWD1                                                                                               | 0,024336011 | 0,014606818 | 0,256 | 0,133 | 1         | 1,010176103   | 0,989926407     | 1,92481203      |
| STON2                                                                                               | 0,000570518 | 0,014603254 | 0,171 | 0,049 | 1         | 1,010173607   | 0,989928853     | 3,489795918     |
| LYAR                                                                                                | 0,002508126 | 0,014562241 | 0,146 | 0,046 | 1         | 1,01014489    | 0,989956995     | 3,173913043     |
| RAB17                                                                                               | 0,008401736 | 0,014559744 | 0,024 | 0     | 1         | 1,010143142   | 0,989958708     | #DIV/0!         |
| TMC7                                                                                                | 0,028583695 | 0,014520547 | 0,11  | 0,042 | 1         | 1,010115698   | 0,989985605     | 2,619047619     |

Supplementary Table 2

| Differentially expressed genes_keloid-XL_comparing SC-Keloid vs. (SC-Myel, SC-Nonmyel, SC-Nonmyel2) |             |             |       |       |             |               |                 |                 |
|-----------------------------------------------------------------------------------------------------|-------------|-------------|-------|-------|-------------|---------------|-----------------|-----------------|
| gene                                                                                                | p_val       | avg_log2FC  | pct.1 | pct.2 | p_val_adj   | Foldchange_UP | Foldchange_DOWN | Ratio_pct1_pct2 |
| PPP1R2                                                                                              | 0,001277431 | 0,014500427 | 0,366 | 0,161 | 1           | 1,010101611   | 0,989999411     | 2,273291925     |
| ZNF566                                                                                              | 0,270579294 | 0,014492075 | 0,049 | 0,025 | 1           | 1,010095763   | 0,990005143     | 1,96            |
| ADRB1                                                                                               | 0,35185965  | 0,014444819 | 0,012 | 0,004 | 1           | 1,010062677   | 0,990037572     | 3               |
| CSNK1E                                                                                              | 0,004556291 | 0,01440743  | 0,671 | 0,361 | 1           | 1,010036501   | 0,99006323      | 1,858725762     |
| CXorf38                                                                                             | 0,016486475 | 0,014400378 | 0,171 | 0,074 | 1           | 1,010031563   | 0,990068069     | 2,310810811     |
| SDCBP2-AS1                                                                                          | 0,063203483 | 0,01438772  | 0,012 | 0     | 1           | 1,010022701   | 0,990076756     | #DIV/0!         |
| MESP1                                                                                               | 0,345067611 | 0,014350395 | 0,024 | 0,011 | 1           | 1,009996571   | 0,990102371     | 2,181818182     |
| CFAP44                                                                                              | 0,187860656 | 0,014340091 | 0,024 | 0,007 | 1           | 1,009989358   | 0,990109443     | 3,428571429     |
| PPP1R12A                                                                                            | 0,013276955 | 0,014330287 | 0,524 | 0,298 | 1           | 1,009982494   | 0,990116171     | 1,758389262     |
| CBX8                                                                                                | 0,193178656 | 0,014234921 | 0,037 | 0,014 | 1           | 1,009915734   | 0,990181623     | 2,642857143     |
| C19orf47                                                                                            | 0,35185965  | 0,014231417 | 0,012 | 0,004 | 1           | 1,00991328    | 0,990184028     | 3               |
| LINC00392                                                                                           | 0,063203483 | 0,014217389 | 0,012 | 0     | 1           | 1,009903461   | 0,990193656     | #DIV/0!         |
| ZMYND10                                                                                             | 0,066254792 | 0,014192463 | 0,024 | 0,004 | 1           | 1,009886013   | 0,990210764     | 6               |
| DPYSL4                                                                                              | 0,347088417 | 0,014157542 | 0,012 | 0,004 | 1           | 1,009861568   | 0,990234733     | 3               |
| VEGFC                                                                                               | 0,006431528 | 0,014106712 | 0,061 | 0,011 | 1           | 1,009825989   | 0,990269622     | 5,545454545     |
| FLI1                                                                                                | 0,347088417 | 0,014095932 | 0,012 | 0,004 | 1           | 1,009818443   | 0,990277021     | 3               |
| MLST8                                                                                               | 0,000149616 | 0,014093725 | 0,207 | 0,06  | 1           | 1,009816899   | 0,990278536     | 3,45            |
| TP53TG1                                                                                             | 1,60147E-06 | 0,014084276 | 0,268 | 0,067 | 0,033792668 | 1,009810285   | 0,990285022     | 4               |
| LRRC34                                                                                              | 0,044226311 | 0,014080378 | 0,037 | 0,007 | 1           | 1,009807556   | 0,990287698     | 5,285714286     |
| CCER2                                                                                               | 0,649511996 | 0,014073206 | 0,012 | 0,007 | 1           | 1,009802536   | 0,990292621     | 1,714285714     |
| KLHL3                                                                                               | 0,005447223 | 0,014056435 | 0,11  | 0,032 | 1           | 1,009790798   | 0,990304133     | 3,4375          |
| AKR1E2                                                                                              | 0,008401736 | 0,014034497 | 0,024 | 0     | 1           | 1,009775442   | 0,990319192     | #DIV/0!         |
| OLIG2                                                                                               | 0,35185965  | 0,014011934 | 0,012 | 0,004 | 1           | 1,009759651   | 0,99033468      | 3               |
| FBXO21                                                                                              | 0,000108661 | 0,013992954 | 0,256 | 0,081 | 1           | 1,009746366   | 0,990347709     | 3,160493827     |
| GRHL1                                                                                               | 0,649511996 | 0,013987659 | 0,012 | 0,007 | 1           | 1,00974266    | 0,990351344     | 1,714285714     |
| MIPEP                                                                                               | 0,001952737 | 0,013979791 | 0,049 | 0,004 | 1           | 1,009737153   | 0,990356745     | 12,25           |
| TRUB1                                                                                               | 0,039738699 | 0,01392924  | 0,073 | 0,025 | 1           | 1,009701774   | 0,990391446     | 2,92            |
| IQCH                                                                                                | 0,011553628 | 0,013926474 | 0,037 | 0,004 | 1           | 1,009699838   | 0,990393345     | 9,25            |
| MMRN1                                                                                               | 0,347088417 | 0,013904664 | 0,012 | 0,004 | 1           | 1,009684574   | 0,990408318     | 3               |
| CCDC160                                                                                             | 0,35185965  | 0,013900493 | 0,012 | 0,004 | 1           | 1,009681654   | 0,990411181     | 3               |

Supplementary Table 2

| Differentially expressed genes_keloid-XL_comparing SC-Keloid vs. (SC-Myel, SC-Nonmyel, SC-Nonmyel2) |             |             |       |       |           |               |                 |                 |
|-----------------------------------------------------------------------------------------------------|-------------|-------------|-------|-------|-----------|---------------|-----------------|-----------------|
| gene                                                                                                | p_val       | avg_log2FC  | pct.1 | pct.2 | p_val_adj | Foldchange_UP | Foldchange_DOWN | Ratio_pct1_pct2 |
| MMAA                                                                                                | 0,001952737 | 0,013857219 | 0,049 | 0,004 | 1         | 1,009651369   | 0,990440889     | 12,25           |
| SCAF1                                                                                               | 6,37837E-05 | 0,01385657  | 0,293 | 0,098 | 1         | 1,009650915   | 0,990441335     | 2,989795918     |
| RGPD8                                                                                               | 0,898084959 | 0,013836379 | 0,012 | 0,011 | 1         | 1,009636785   | 0,990455197     | 1,090909091     |
| ZNF20                                                                                               | 0,187860656 | 0,013789114 | 0,024 | 0,007 | 1         | 1,009603708   | 0,990487646     | 3,428571429     |
| SPAG5                                                                                               | 0,35185965  | 0,013769577 | 0,012 | 0,004 | 1         | 1,009590036   | 0,990501059     | 3               |
| AC011625.1                                                                                          | 0,063203483 | 0,013728159 | 0,012 | 0     | 1         | 1,009561052   | 0,990529496     | #DIV/0!         |
| MALRD1                                                                                              | 0,063203483 | 0,013728159 | 0,012 | 0     | 1         | 1,009561052   | 0,990529496     | #DIV/0!         |
| MYF6                                                                                                | 0,063203483 | 0,013728159 | 0,012 | 0     | 1         | 1,009561052   | 0,990529496     | #DIV/0!         |
| PDZK1                                                                                               | 0,063203483 | 0,013728159 | 0,012 | 0     | 1         | 1,009561052   | 0,990529496     | #DIV/0!         |
| ZSCAN1                                                                                              | 0,063203483 | 0,013728159 | 0,012 | 0     | 1         | 1,009561052   | 0,990529496     | #DIV/0!         |
| SLC22A11                                                                                            | 0,35185965  | 0,013698152 | 0,012 | 0,004 | 1         | 1,009540055   | 0,990550098     | 3               |
| KIAA0895                                                                                            | 0,187860656 | 0,013696752 | 0,024 | 0,007 | 1         | 1,009539075   | 0,990551059     | 3,428571429     |
| OSMR-DT                                                                                             | 0,699214153 | 0,01367372  | 0,024 | 0,018 | 1         | 1,009522958   | 0,990566873     | 1,333333333     |
| SERINC2                                                                                             | 0,066254792 | 0,013654193 | 0,024 | 0,004 | 1         | 1,009509294   | 0,990580281     | 6               |
| C9orf50                                                                                             | 0,187860656 | 0,013631039 | 0,024 | 0,007 | 1         | 1,009493093   | 0,990596179     | 3,428571429     |
| ZNF530                                                                                              | 0,044226311 | 0,013600182 | 0,037 | 0,007 | 1         | 1,009471502   | 0,990617366     | 5,285714286     |
| TRIP13                                                                                              | 0,066254792 | 0,013584439 | 0,024 | 0,004 | 1         | 1,009460486   | 0,990628176     | 6               |
| HADH                                                                                                | 0,04277092  | 0,013523416 | 0,098 | 0,039 | 1         | 1,009417789   | 0,990670079     | 2,512820513     |
| TEAD2                                                                                               | 0,063408785 | 0,013482501 | 0,049 | 0,014 | 1         | 1,009389162   | 0,990698175     | 3,5             |
| MPP4                                                                                                | 0,008401736 | 0,013472111 | 0,024 | 0     | 1         | 1,009381892   | 0,99070531      | #DIV/0!         |
| SHISA9                                                                                              | 0,044226311 | 0,013467723 | 0,037 | 0,007 | 1         | 1,009378822   | 0,990708323     | 5,285714286     |
| GPR68                                                                                               | 0,345067611 | 0,013458744 | 0,024 | 0,011 | 1         | 1,00937254    | 0,990714489     | 2,181818182     |
| HVCN1                                                                                               | 0,187860656 | 0,013404732 | 0,024 | 0,007 | 1         | 1,009334751   | 0,99075158      | 3,428571429     |
| LYL1                                                                                                | 0,009031726 | 0,013378657 | 0,049 | 0,007 | 1         | 1,009316509   | 0,990769487     | 7               |
| OVOL1                                                                                               | 0,649511996 | 0,013370998 | 0,012 | 0,007 | 1         | 1,009311151   | 0,990774746     | 1,714285714     |
| ERMN                                                                                                | 0,35185965  | 0,013350613 | 0,012 | 0,004 | 1         | 1,00929689    | 0,990788746     | 3               |
| WDR19                                                                                               | 0,000815443 | 0,013332317 | 0,122 | 0,028 | 1         | 1,00928409    | 0,990801311     | 4,357142857     |
| ELAPOR2                                                                                             | 0,654971645 | 0,013297053 | 0,012 | 0,007 | 1         | 1,009259421   | 0,99082553      | 1,714285714     |
| HDAC3                                                                                               | 0,001250737 | 0,013292167 | 0,207 | 0,074 | 1         | 1,009256002   | 0,990828886     | 2,797297297     |
| CDT1                                                                                                | 0,106097567 | 0,013165288 | 0,037 | 0,011 | 1         | 1,009167246   | 0,990916029     | 3,363636364     |

Supplementary Table 2

| Differentially expressed genes_keloid-XL_comparing SC-Keloid vs. (SC-Myel, SC-Nonmyel, SC-Nonmyel2) |             |             |       |       |           |               |                 |                 |
|-----------------------------------------------------------------------------------------------------|-------------|-------------|-------|-------|-----------|---------------|-----------------|-----------------|
| gene                                                                                                | p_val       | avg_log2FC  | pct.1 | pct.2 | p_val_adj | Foldchange_UP | Foldchange_DOWN | Ratio_pct1_pct2 |
| TEFM                                                                                                | 0,000233589 | 0,013160448 | 0,134 | 0,028 | 1         | 1,009163861   | 0,990919353     | 4,785714286     |
| SGF29                                                                                               | 0,015961553 | 0,01315447  | 0,11  | 0,039 | 1         | 1,009159679   | 0,990923459     | 2,820512821     |
| ELFN1                                                                                               | 0,063203483 | 0,013133278 | 0,012 | 0     | 1         | 1,009144855   | 0,990938015     | #DIV/0!         |
| XYLT1                                                                                               | 0,000126726 | 0,01310064  | 0,244 | 0,077 | 1         | 1,009122026   | 0,990960433     | 3,168831169     |
| C9orf135-DT                                                                                         | 0,063203483 | 0,013069376 | 0,012 | 0     | 1         | 1,009100158   | 0,990981908     | #DIV/0!         |
| DDO                                                                                                 | 0,063203483 | 0,013069376 | 0,012 | 0     | 1         | 1,009100158   | 0,990981908     | #DIV/0!         |
| DSCR8                                                                                               | 0,063203483 | 0,013069376 | 0,012 | 0     | 1         | 1,009100158   | 0,990981908     | #DIV/0!         |
| LRP4-AS1                                                                                            | 0,063203483 | 0,013069376 | 0,012 | 0     | 1         | 1,009100158   | 0,990981908     | #DIV/0!         |
| OTC                                                                                                 | 0,063203483 | 0,013069376 | 0,012 | 0     | 1         | 1,009100158   | 0,990981908     | #DIV/0!         |
| MTPAP                                                                                               | 0,028081741 | 0,013047198 | 0,049 | 0,011 | 1         | 1,009084646   | 0,990997142     | 4,454545455     |
| VAV3                                                                                                | 0,044226311 | 0,013046684 | 0,037 | 0,007 | 1         | 1,009084286   | 0,990997495     | 5,285714286     |
| SERF1B                                                                                              | 0,347088417 | 0,013044622 | 0,012 | 0,004 | 1         | 1,009082844   | 0,990998912     | 3               |
| BABAM2                                                                                              | 0,000226532 | 0,013027029 | 0,195 | 0,056 | 1         | 1,009070538   | 0,991010997     | 3,482142857     |
| C10orf143                                                                                           | 0,044226311 | 0,013012222 | 0,037 | 0,007 | 1         | 1,009060182   | 0,991021168     | 5,285714286     |
| C10orf55                                                                                            | 0,063203483 | 0,013005613 | 0,012 | 0     | 1         | 1,009055559   | 0,991025708     | #DIV/0!         |
| CASP14                                                                                              | 0,063203483 | 0,013005613 | 0,012 | 0     | 1         | 1,009055559   | 0,991025708     | #DIV/0!         |
| CHRNA10                                                                                             | 0,063203483 | 0,013005613 | 0,012 | 0     | 1         | 1,009055559   | 0,991025708     | #DIV/0!         |
| LINC00885                                                                                           | 0,063203483 | 0,013005613 | 0,012 | 0     | 1         | 1,009055559   | 0,991025708     | #DIV/0!         |
| PCP2                                                                                                | 0,063203483 | 0,013005613 | 0,012 | 0     | 1         | 1,009055559   | 0,991025708     | #DIV/0!         |
| PLCH2                                                                                               | 0,063203483 | 0,013005613 | 0,012 | 0     | 1         | 1,009055559   | 0,991025708     | #DIV/0!         |
| RDH12                                                                                               | 0,063203483 | 0,013005613 | 0,012 | 0     | 1         | 1,009055559   | 0,991025708     | #DIV/0!         |
| SNX10                                                                                               | 0,063203483 | 0,013005613 | 0,012 | 0     | 1         | 1,009055559   | 0,991025708     | #DIV/0!         |
| STAMBPL1                                                                                            | 0,063203483 | 0,013005613 | 0,012 | 0     | 1         | 1,009055559   | 0,991025708     | #DIV/0!         |
| STX19                                                                                               | 0,063203483 | 0,013005613 | 0,012 | 0     | 1         | 1,009055559   | 0,991025708     | #DIV/0!         |
| ZNF443                                                                                              | 0,063203483 | 0,013005613 | 0,012 | 0     | 1         | 1,009055559   | 0,991025708     | #DIV/0!         |
| ATG2B                                                                                               | 0,119504195 | 0,012998895 | 0,159 | 0,091 | 1         | 1,009050861   | 0,991030323     | 1,747252747     |
| ADPRH                                                                                               | 0,00032444  | 0,012952065 | 0,061 | 0,004 | 1         | 1,009018108   | 0,991062492     | 15,25           |
| LINC00640                                                                                           | 0,35185965  | 0,012938483 | 0,012 | 0,004 | 1         | 1,009008609   | 0,991071822     | 3               |
| SPIN2B                                                                                              | 0,041519021 | 0,012904175 | 0,085 | 0,032 | 1         | 1,008984614   | 0,991095391     | 2,65625         |
| HAS2-AS1                                                                                            | 0,345067611 | 0,012897633 | 0,024 | 0,011 | 1         | 1,008980039   | 0,991099885     | 2,181818182     |



Supplementary Table 2

| Differentially expressed genes_keloid-XL_comparing SC-Keloid vs. (SC-Myel, SC-Nonmyel, SC-Nonmyel2) |             |             |       |       |           |               |                 |                 |
|-----------------------------------------------------------------------------------------------------|-------------|-------------|-------|-------|-----------|---------------|-----------------|-----------------|
| gene                                                                                                | p_val       | avg_log2FC  | pct.1 | pct.2 | p_val_adj | Foldchange_UP | Foldchange_DOWN | Ratio_pct1_pct2 |
| ZNF727                                                                                              | 0,35185965  | 0,012882235 | 0,012 | 0,004 | 1         | 1,00896927    | 0,991110463     | 3               |
| DSC1                                                                                                | 0,35185965  | 0,012863583 | 0,012 | 0,004 | 1         | 1,008956226   | 0,991123276     | 3               |
| DMKN                                                                                                | 0,470821879 | 0,012851384 | 0,049 | 0,032 | 1         | 1,008947694   | 0,991131657     | 1,53125         |
| CTPS1                                                                                               | 0,001295886 | 0,012824342 | 0,11  | 0,025 | 1         | 1,008928782   | 0,991150235     | 4,4             |
| PARP9                                                                                               | 0,017566709 | 0,012813644 | 0,122 | 0,046 | 1         | 1,008921301   | 0,991157585     | 2,652173913     |
| ZNF513                                                                                              | 0,169554003 | 0,01280072  | 0,122 | 0,07  | 1         | 1,008912263   | 0,991166464     | 1,742857143     |
| CKMT2-AS1                                                                                           | 0,066380027 | 0,012800407 | 0,085 | 0,035 | 1         | 1,008912044   | 0,991166679     | 2,428571429     |
| UTP15                                                                                               | 0,000174436 | 0,012782433 | 0,11  | 0,018 | 1         | 1,008899475   | 0,991179027     | 6,111111111     |
| ZNF606                                                                                              | 0,898084959 | 0,012777827 | 0,012 | 0,011 | 1         | 1,008896253   | 0,991182192     | 1,090909091     |
| ZNF521                                                                                              | 0,028081741 | 0,012696061 | 0,049 | 0,011 | 1         | 1,008839075   | 0,99123837      | 4,454545455     |
| ATPAF1                                                                                              | 0,002095478 | 0,012683711 | 0,134 | 0,039 | 1         | 1,008830439   | 0,991246855     | 3,435897436     |
| GIMAP1                                                                                              | 0,644071107 | 0,012640711 | 0,012 | 0,007 | 1         | 1,008800371   | 0,9912764       | 1,714285714     |
| ZNF454                                                                                              | 0,008401736 | 0,012610903 | 0,024 | 0     | 1         | 1,008779528   | 0,991296881     | #DIV/0!         |
| CFAP418                                                                                             | 0,35185965  | 0,012584146 | 0,012 | 0,004 | 1         | 1,008760819   | 0,991315267     | 3               |
| SLC22A3                                                                                             | 0,063203483 | 0,012566009 | 0,012 | 0     | 1         | 1,008748137   | 0,991327729     | #DIV/0!         |
| MFSD8                                                                                               | 0,007008383 | 0,012538008 | 0,085 | 0,021 | 1         | 1,008728559   | 0,99134697      | 4,047619048     |
| PYM1                                                                                                | 6,29219E-05 | 0,012536291 | 0,195 | 0,049 | 1         | 1,008727358   | 0,99134815      | 3,979591837     |
| PPM1N                                                                                               | 0,35185965  | 0,012517902 | 0,012 | 0,004 | 1         | 1,008714501   | 0,991360786     | 3               |
| IRGQ                                                                                                | 0,096530335 | 0,012501133 | 0,085 | 0,039 | 1         | 1,008702776   | 0,991372309     | 2,179487179     |
| CDS2                                                                                                | 0,002417403 | 0,012496884 | 0,22  | 0,084 | 1         | 1,008699805   | 0,991375229     | 2,619047619     |
| MIS18A                                                                                              | 0,152528829 | 0,012448926 | 0,073 | 0,035 | 1         | 1,008666275   | 0,991408184     | 2,085714286     |
| SOCS7                                                                                               | 0,310141781 | 0,012435325 | 0,085 | 0,053 | 1         | 1,008656765   | 0,991417531     | 1,603773585     |
| C1orf53                                                                                             | 0,063203483 | 0,012428639 | 0,012 | 0     | 1         | 1,008652091   | 0,991422126     | #DIV/0!         |
| CENPV                                                                                               | 0,063203483 | 0,012428639 | 0,012 | 0     | 1         | 1,008652091   | 0,991422126     | #DIV/0!         |
| GABRG3                                                                                              | 0,063203483 | 0,012428639 | 0,012 | 0     | 1         | 1,008652091   | 0,991422126     | #DIV/0!         |
| OXT                                                                                                 | 0,063203483 | 0,012428639 | 0,012 | 0     | 1         | 1,008652091   | 0,991422126     | #DIV/0!         |
| USP30-AS1                                                                                           | 0,063203483 | 0,012428639 | 0,012 | 0     | 1         | 1,008652091   | 0,991422126     | #DIV/0!         |
| CTIF                                                                                                | 0,066380027 | 0,012378868 | 0,085 | 0,035 | 1         | 1,008617294   | 0,991456329     | 2,428571429     |
| MYO6                                                                                                | 0,093522856 | 0,012377829 | 0,098 | 0,046 | 1         | 1,008616568   | 0,991457043     | 2,130434783     |
| SLC25A27                                                                                            | 0,898084959 | 0,012377441 | 0,012 | 0,011 | 1         | 1,008616297   | 0,99145731      | 1,090909091     |

Supplementary Table 2

| Differentially expressed genes_keloid-XL_comparing SC-Keloid vs. (SC-Myel, SC-Nonmyel, SC-Nonmyel2) |             |             |       |       |             |               |                 |                 |
|-----------------------------------------------------------------------------------------------------|-------------|-------------|-------|-------|-------------|---------------|-----------------|-----------------|
| gene                                                                                                | p_val       | avg_log2FC  | pct.1 | pct.2 | p_val_adj   | Foldchange_UP | Foldchange_DOWN | Ratio_pct1_pct2 |
| SMPD4                                                                                               | 0,004029607 | 0,012361666 | 0,22  | 0,091 | 1           | 1,008605268   | 0,991468151     | 2,417582418     |
| RASGRP2                                                                                             | 0,008401736 | 0,012358644 | 0,024 | 0     | 1           | 1,008603156   | 0,991470227     | #DIV/0!         |
| GINS4                                                                                               | 0,347088417 | 0,012353653 | 0,012 | 0,004 | 1           | 1,008599666   | 0,991473657     | 3               |
| PCDHGA5                                                                                             | 0,342070304 | 0,01233272  | 0,024 | 0,011 | 1           | 1,008585032   | 0,991488043     | 2,181818182     |
| TRIM16L                                                                                             | 0,193178656 | 0,012295519 | 0,037 | 0,014 | 1           | 1,008559025   | 0,99151361      | 2,642857143     |
| TMTC2                                                                                               | 0,000438194 | 0,012286973 | 0,159 | 0,042 | 1           | 1,008553051   | 0,991519483     | 3,785714286     |
| RBM26                                                                                               | 0,001563773 | 0,012282963 | 0,305 | 0,13  | 1           | 1,008550248   | 0,991522239     | 2,346153846     |
| LPXN                                                                                                | 0,043609761 | 0,012274561 | 0,037 | 0,007 | 1           | 1,008544374   | 0,991528014     | 5,285714286     |
| URI1                                                                                                | 2,38881E-05 | 0,012270224 | 0,5   | 0,193 | 0,504062101 | 1,008541342   | 0,991530994     | 2,590673575     |
| FBXO9                                                                                               | 0,000997868 | 0,012265473 | 0,317 | 0,13  | 1           | 1,008538021   | 0,99153426      | 2,438461538     |
| PPM1L                                                                                               | 0,066254792 | 0,012263377 | 0,024 | 0,004 | 1           | 1,008536556   | 0,9915357       | 6               |
| DDX46                                                                                               | 0,000342981 | 0,012250844 | 0,439 | 0,189 | 1           | 1,008527794   | 0,991544314     | 2,322751323     |
| WASHC3                                                                                              | 4,62107E-06 | 0,012244344 | 0,341 | 0,105 | 0,097509143 | 1,008523251   | 0,991548781     | 3,247619048     |
| FOXRED1                                                                                             | 0,010020735 | 0,012235491 | 0,11  | 0,035 | 1           | 1,008517062   | 0,991554866     | 3,142857143     |
| MRTO4                                                                                               | 0,001109088 | 0,01223505  | 0,171 | 0,053 | 1           | 1,008516753   | 0,991555169     | 3,226415094     |
| ZNF846                                                                                              | 0,040816555 | 0,012206156 | 0,073 | 0,025 | 1           | 1,008496555   | 0,991575028     | 2,92            |
| SMN2                                                                                                | 0,067584209 | 0,012202725 | 0,073 | 0,028 | 1           | 1,008494157   | 0,991577386     | 2,607142857     |
| DENND4B                                                                                             | 0,084177047 | 0,012192446 | 0,11  | 0,053 | 1           | 1,008486971   | 0,991584451     | 2,075471698     |
| PLAGL2                                                                                              | 0,35185965  | 0,012176391 | 0,012 | 0,004 | 1           | 1,008475748   | 0,991595486     | 3               |
| CACNB1                                                                                              | 0,196612832 | 0,012165876 | 0,037 | 0,014 | 1           | 1,008468398   | 0,991602713     | 2,642857143     |
| BCL6B                                                                                               | 0,065143806 | 0,012148401 | 0,024 | 0,004 | 1           | 1,008456183   | 0,991614725     | 6               |
| CNTNAP3                                                                                             | 0,065143806 | 0,012148401 | 0,024 | 0,004 | 1           | 1,008456183   | 0,991614725     | 6               |
| RNASEH2A                                                                                            | 0,011553628 | 0,012124278 | 0,037 | 0,004 | 1           | 1,008439321   | 0,991631305     | 9,25            |
| ZNF619                                                                                              | 0,066254792 | 0,01211711  | 0,024 | 0,004 | 1           | 1,008434311   | 0,991636232     | 6               |
| RNF216                                                                                              | 0,001816412 | 0,012108221 | 0,232 | 0,088 | 1           | 1,008428097   | 0,991642342     | 2,636363636     |
| RETSAT                                                                                              | 0,025838473 | 0,012063525 | 0,122 | 0,049 | 1           | 1,008396856   | 0,991673064     | 2,489795918     |
| METTL7B                                                                                             | 0,066254792 | 0,012018797 | 0,024 | 0,004 | 1           | 1,008365593   | 0,991703809     | 6               |
| MYSM1                                                                                               | 0,003373268 | 0,011906162 | 0,232 | 0,095 | 1           | 1,00828687    | 0,991781238     | 2,442105263     |
| SEPTIN8                                                                                             | 0,00993173  | 0,011892564 | 0,207 | 0,091 | 1           | 1,008277367   | 0,991790586     | 2,274725275     |
| ST20-AS1                                                                                            | 0,001952737 | 0,011885777 | 0,049 | 0,004 | 1           | 1,008272624   | 0,991795251     | 12,25           |

Supplementary Table 2

| Differentially expressed genes_keloid-XL_comparing SC-Keloid vs. (SC-Myel, SC-Nonmyel, SC-Nonmyel2) |             |             |       |       |           |               |                 |                 |
|-----------------------------------------------------------------------------------------------------|-------------|-------------|-------|-------|-----------|---------------|-----------------|-----------------|
| gene                                                                                                | p_val       | avg_log2FC  | pct.1 | pct.2 | p_val_adj | Foldchange_UP | Foldchange_DOWN | Ratio_pct1_pct2 |
| LRR32                                                                                               | 0,185668317 | 0,011848292 | 0,024 | 0,007 | 1         | 1,008246426   | 0,991821021     | 3,428571429     |
| CFAP77                                                                                              | 0,063203483 | 0,011836632 | 0,012 | 0     | 1         | 1,008238277   | 0,991829037     | #DIV/0!         |
| CRYBA4                                                                                              | 0,063203483 | 0,011836632 | 0,012 | 0     | 1         | 1,008238277   | 0,991829037     | #DIV/0!         |
| HYAL3                                                                                               | 0,063203483 | 0,011836632 | 0,012 | 0     | 1         | 1,008238277   | 0,991829037     | #DIV/0!         |
| LINC01143                                                                                           | 0,063203483 | 0,011836632 | 0,012 | 0     | 1         | 1,008238277   | 0,991829037     | #DIV/0!         |
| S100A5                                                                                              | 0,063203483 | 0,011836632 | 0,012 | 0     | 1         | 1,008238277   | 0,991829037     | #DIV/0!         |
| SYT6                                                                                                | 0,063203483 | 0,011836632 | 0,012 | 0     | 1         | 1,008238277   | 0,991829037     | #DIV/0!         |
| TLL13P                                                                                              | 0,063203483 | 0,011836632 | 0,012 | 0     | 1         | 1,008238277   | 0,991829037     | #DIV/0!         |
| UNC79                                                                                               | 0,063203483 | 0,011836632 | 0,012 | 0     | 1         | 1,008238277   | 0,991829037     | #DIV/0!         |
| DIAPH2                                                                                              | 0,01546471  | 0,011811299 | 0,098 | 0,032 | 1         | 1,008220573   | 0,991846453     | 3,0625          |
| AURKA                                                                                               | 0,063203483 | 0,011765393 | 0,012 | 0     | 1         | 1,008188493   | 0,991878014     | #DIV/0!         |
| C6orf163                                                                                            | 0,063203483 | 0,011765393 | 0,012 | 0     | 1         | 1,008188493   | 0,991878014     | #DIV/0!         |
| DMRTA1                                                                                              | 0,063203483 | 0,011765393 | 0,012 | 0     | 1         | 1,008188493   | 0,991878014     | #DIV/0!         |
| LINC00973                                                                                           | 0,063203483 | 0,011765393 | 0,012 | 0     | 1         | 1,008188493   | 0,991878014     | #DIV/0!         |
| RBAKDN                                                                                              | 0,063203483 | 0,011765393 | 0,012 | 0     | 1         | 1,008188493   | 0,991878014     | #DIV/0!         |
| RCSD1                                                                                               | 0,063203483 | 0,011765393 | 0,012 | 0     | 1         | 1,008188493   | 0,991878014     | #DIV/0!         |
| RIPPLY3                                                                                             | 0,063203483 | 0,011765393 | 0,012 | 0     | 1         | 1,008188493   | 0,991878014     | #DIV/0!         |
| STK26                                                                                               | 0,063203483 | 0,011765393 | 0,012 | 0     | 1         | 1,008188493   | 0,991878014     | #DIV/0!         |
| TBX18                                                                                               | 0,063203483 | 0,011765393 | 0,012 | 0     | 1         | 1,008188493   | 0,991878014     | #DIV/0!         |
| TMEM86B                                                                                             | 0,309763172 | 0,011762878 | 0,037 | 0,018 | 1         | 1,008186736   | 0,991879743     | 2,055555556     |
| NLN                                                                                                 | 0,002998177 | 0,011725257 | 0,159 | 0,053 | 1         | 1,008160445   | 0,991905609     | 3               |
| LINC01546                                                                                           | 0,185668317 | 0,011680596 | 0,024 | 0,007 | 1         | 1,008129237   | 0,991936315     | 3,428571429     |
| ADAM9                                                                                               | 0,000588212 | 0,011599835 | 0,293 | 0,112 | 1         | 1,008072804   | 0,991991845     | 2,616071429     |
| ATL3                                                                                                | 0,000186763 | 0,011545327 | 0,329 | 0,123 | 1         | 1,008034717   | 0,992029325     | 2,674796748     |
| DCTN1-AS1                                                                                           | 0,35185965  | 0,011519287 | 0,012 | 0,004 | 1         | 1,008016523   | 0,99204723      | 3               |
| NECAP1                                                                                              | 0,004963269 | 0,011503282 | 0,183 | 0,07  | 1         | 1,00800534    | 0,992058236     | 2,614285714     |
| PCYOX1L                                                                                             | 0,017691584 | 0,011499233 | 0,061 | 0,014 | 1         | 1,008002511   | 0,992061021     | 4,357142857     |
| DPH5                                                                                                | 0,003236838 | 0,011490211 | 0,122 | 0,035 | 1         | 1,007996208   | 0,992067224     | 3,485714286     |
| ZNF202                                                                                              | 0,196612832 | 0,011460521 | 0,037 | 0,014 | 1         | 1,007975464   | 0,992087641     | 2,642857143     |
| CARD9                                                                                               | 0,063203483 | 0,011432817 | 0,012 | 0     | 1         | 1,007956108   | 0,992106692     | #DIV/0!         |

Supplementary Table 2

| Differentially expressed genes_keloid-XL_comparing SC-Keloid vs. (SC-Myel, SC-Nonmyel, SC-Nonmyel2) |             |             |       |       |             |               |                 |                 |
|-----------------------------------------------------------------------------------------------------|-------------|-------------|-------|-------|-------------|---------------|-----------------|-----------------|
| gene                                                                                                | p_val       | avg_log2FC  | pct.1 | pct.2 | p_val_adj   | Foldchange_UP | Foldchange_DOWN | Ratio_pct1_pct2 |
| CREG2                                                                                               | 0,063203483 | 0,011432817 | 0,012 | 0     | 1           | 1,007956108   | 0,992106692     | #DIV/0!         |
| LINC00271                                                                                           | 0,063203483 | 0,011432817 | 0,012 | 0     | 1           | 1,007956108   | 0,992106692     | #DIV/0!         |
| MUC5B                                                                                               | 0,063203483 | 0,011432817 | 0,012 | 0     | 1           | 1,007956108   | 0,992106692     | #DIV/0!         |
| OSBPL10-AS1                                                                                         | 0,063203483 | 0,011432817 | 0,012 | 0     | 1           | 1,007956108   | 0,992106692     | #DIV/0!         |
| PLA2G5                                                                                              | 0,063203483 | 0,011432817 | 0,012 | 0     | 1           | 1,007956108   | 0,992106692     | #DIV/0!         |
| RAET1G                                                                                              | 0,063203483 | 0,011432817 | 0,012 | 0     | 1           | 1,007956108   | 0,992106692     | #DIV/0!         |
| TAS2R14                                                                                             | 0,063203483 | 0,011432817 | 0,012 | 0     | 1           | 1,007956108   | 0,992106692     | #DIV/0!         |
| ADAR                                                                                                | 1,54238E-05 | 0,011383059 | 0,402 | 0,144 | 0,325457677 | 1,007921345   | 0,99214091      | 2,791666667     |
| ZNF675                                                                                              | 0,183574298 | 0,011373078 | 0,049 | 0,021 | 1           | 1,007914371   | 0,992147774     | 2,333333333     |
| ZNF772                                                                                              | 0,35185965  | 0,011372995 | 0,012 | 0,004 | 1           | 1,007914313   | 0,992147831     | 3               |
| ZNF473                                                                                              | 0,183494953 | 0,011354764 | 0,024 | 0,007 | 1           | 1,007901576   | 0,992160369     | 3,428571429     |
| DLL4                                                                                                | 0,193178656 | 0,011334479 | 0,037 | 0,014 | 1           | 1,007887405   | 0,992174319     | 2,642857143     |
| LINC01117                                                                                           | 0,037182975 | 0,011324628 | 0,061 | 0,018 | 1           | 1,007880523   | 0,992181094     | 3,388888889     |
| ZNF264                                                                                              | 0,01144614  | 0,011319968 | 0,134 | 0,049 | 1           | 1,007877267   | 0,992184299     | 2,734693878     |
| MBD1                                                                                                | 0,000879985 | 0,011314154 | 0,159 | 0,046 | 1           | 1,007873206   | 0,992188297     | 3,456521739     |
| SF3A2                                                                                               | 0,000782293 | 0,011275397 | 0,341 | 0,147 | 1           | 1,00784613    | 0,992214952     | 2,319727891     |
| MRPL42                                                                                              | 0,002472188 | 0,011268352 | 0,39  | 0,182 | 1           | 1,007841209   | 0,992219797     | 2,142857143     |
| CSTF2T                                                                                              | 0,000742666 | 0,011231796 | 0,098 | 0,018 | 1           | 1,007815672   | 0,992244939     | 5,444444444     |
| SAPCD2                                                                                              | 0,347088417 | 0,011197503 | 0,012 | 0,004 | 1           | 1,007791716   | 0,992268525     | 3               |
| KLC4                                                                                                | 0,001952737 | 0,011175487 | 0,049 | 0,004 | 1           | 1,007776337   | 0,992283668     | 12,25           |
| FMC1                                                                                                | 3,51311E-05 | 0,011170675 | 0,378 | 0,133 | 0,741301821 | 1,007772976   | 0,992286977     | 2,842105263     |
| FAM43A                                                                                              | 0,008751649 | 0,011128544 | 0,049 | 0,007 | 1           | 1,007743546   | 0,992315955     | 7               |
| GNL3L                                                                                               | 3,27664E-05 | 0,011109374 | 0,207 | 0,053 | 0,691403156 | 1,007730156   | 0,992329141     | 3,905660377     |
| CAMK2A                                                                                              | 0,063203483 | 0,011099587 | 0,012 | 0     | 1           | 1,00772332    | 0,992335873     | #DIV/0!         |
| CHRNA5                                                                                              | 0,063203483 | 0,011099587 | 0,012 | 0     | 1           | 1,00772332    | 0,992335873     | #DIV/0!         |
| GRM5-AS1                                                                                            | 0,063203483 | 0,011099587 | 0,012 | 0     | 1           | 1,00772332    | 0,992335873     | #DIV/0!         |
| KLKB1                                                                                               | 0,063203483 | 0,011099587 | 0,012 | 0     | 1           | 1,00772332    | 0,992335873     | #DIV/0!         |
| MIR210HG                                                                                            | 0,063203483 | 0,011099587 | 0,012 | 0     | 1           | 1,00772332    | 0,992335873     | #DIV/0!         |
| NMUR1                                                                                               | 0,063203483 | 0,011099587 | 0,012 | 0     | 1           | 1,00772332    | 0,992335873     | #DIV/0!         |
| STARD6                                                                                              | 0,063203483 | 0,011099587 | 0,012 | 0     | 1           | 1,00772332    | 0,992335873     | #DIV/0!         |

Supplementary Table 2

| Differentially expressed genes_keloid-XL_comparing SC-Keloid vs. (SC-Myel, SC-Nonmyel, SC-Nonmyel2) |             |             |       |       |             |               |                 |                 |
|-----------------------------------------------------------------------------------------------------|-------------|-------------|-------|-------|-------------|---------------|-----------------|-----------------|
| gene                                                                                                | p_val       | avg_log2FC  | pct.1 | pct.2 | p_val_adj   | Foldchange_UP | Foldchange_DOWN | Ratio_pct1_pct2 |
| GHDC                                                                                                | 0,000219891 | 0,011083376 | 0,134 | 0,028 | 1           | 1,007711996   | 0,992347024     | 4,785714286     |
| NDE1                                                                                                | 0,00122654  | 0,011080505 | 0,207 | 0,074 | 1           | 1,007709991   | 0,992348998     | 2,797297297     |
| CACHD1                                                                                              | 0,644071107 | 0,011063411 | 0,012 | 0,007 | 1           | 1,007698051   | 0,992360756     | 1,714285714     |
| OAS3                                                                                                | 0,111964825 | 0,011008123 | 0,049 | 0,018 | 1           | 1,007659434   | 0,992398787     | 2,722222222     |
| AC112721.2                                                                                          | 0,063203483 | 0,010974957 | 0,012 | 0     | 1           | 1,007636269   | 0,992421601     | #DIV/0!         |
| DNAI3                                                                                               | 0,063203483 | 0,010974957 | 0,012 | 0     | 1           | 1,007636269   | 0,992421601     | #DIV/0!         |
| KCNK9                                                                                               | 0,063203483 | 0,010974957 | 0,012 | 0     | 1           | 1,007636269   | 0,992421601     | #DIV/0!         |
| OGFR-AS1                                                                                            | 0,063203483 | 0,010974957 | 0,012 | 0     | 1           | 1,007636269   | 0,992421601     | #DIV/0!         |
| RFESD                                                                                               | 0,063203483 | 0,010974957 | 0,012 | 0     | 1           | 1,007636269   | 0,992421601     | #DIV/0!         |
| SLC10A4                                                                                             | 0,063203483 | 0,010974957 | 0,012 | 0     | 1           | 1,007636269   | 0,992421601     | #DIV/0!         |
| TIGD3                                                                                               | 0,063203483 | 0,010974957 | 0,012 | 0     | 1           | 1,007636269   | 0,992421601     | #DIV/0!         |
| TREH                                                                                                | 0,063203483 | 0,010974957 | 0,012 | 0     | 1           | 1,007636269   | 0,992421601     | #DIV/0!         |
| TUBA8                                                                                               | 0,063203483 | 0,010974957 | 0,012 | 0     | 1           | 1,007636269   | 0,992421601     | #DIV/0!         |
| WNT2                                                                                                | 0,063203483 | 0,010974957 | 0,012 | 0     | 1           | 1,007636269   | 0,992421601     | #DIV/0!         |
| EED                                                                                                 | 0,028797588 | 0,010954491 | 0,11  | 0,042 | 1           | 1,007621975   | 0,99243568      | 2,619047619     |
| MRPL18                                                                                              | 5,93436E-05 | 0,01095387  | 0,476 | 0,193 | 1           | 1,007621541   | 0,992436108     | 2,466321244     |
| FHIP1A                                                                                              | 0,516980245 | 0,010945544 | 0,024 | 0,014 | 1           | 1,007615727   | 0,992441834     | 1,714285714     |
| BLM                                                                                                 | 0,104939896 | 0,010943275 | 0,037 | 0,011 | 1           | 1,007614141   | 0,992443396     | 3,363636364     |
| SRF                                                                                                 | 0,044956169 | 0,01087432  | 0,159 | 0,077 | 1           | 1,007565983   | 0,992490832     | 2,064935065     |
| CPSF3                                                                                               | 0,001727257 | 0,010826923 | 0,122 | 0,032 | 1           | 1,007532882   | 0,992523438     | 3,8125          |
| EBF3                                                                                                | 0,063203483 | 0,010773345 | 0,012 | 0     | 1           | 1,007495465   | 0,992560299     | #DIV/0!         |
| MGAT4A                                                                                              | 0,063203483 | 0,010773345 | 0,012 | 0     | 1           | 1,007495465   | 0,992560299     | #DIV/0!         |
| MYO5C                                                                                               | 0,063203483 | 0,010773345 | 0,012 | 0     | 1           | 1,007495465   | 0,992560299     | #DIV/0!         |
| TNFRSF11B                                                                                           | 0,063203483 | 0,010773345 | 0,012 | 0     | 1           | 1,007495465   | 0,992560299     | #DIV/0!         |
| VMO1                                                                                                | 0,066254792 | 0,01073053  | 0,024 | 0,004 | 1           | 1,007465566   | 0,992589755     | 6               |
| SLC25A19                                                                                            | 0,47765681  | 0,010679488 | 0,049 | 0,032 | 1           | 1,007429923   | 0,992624873     | 1,53125         |
| FEM1A                                                                                               | 0,028081741 | 0,010667309 | 0,049 | 0,011 | 1           | 1,007421418   | 0,992633253     | 4,454545455     |
| MRPS18B                                                                                             | 8,8608E-07  | 0,010656437 | 0,305 | 0,077 | 0,018697171 | 1,007413826   | 0,992640734     | 3,961038961     |
| MADD                                                                                                | 0,060335976 | 0,010647239 | 0,11  | 0,049 | 1           | 1,007407404   | 0,992647062     | 2,244897959     |
| GRK3                                                                                                | 0,649511996 | 0,010646205 | 0,012 | 0,007 | 1           | 1,007406682   | 0,992647774     | 1,714285714     |

Supplementary Table 2

| Differentially expressed genes_keloid-XL_comparing SC-Keloid vs. (SC-Myel, SC-Nonmyel, SC-Nonmyel2) |             |             |       |       |             |               |                 |                 |
|-----------------------------------------------------------------------------------------------------|-------------|-------------|-------|-------|-------------|---------------|-----------------|-----------------|
| gene                                                                                                | p_val       | avg_log2FC  | pct.1 | pct.2 | p_val_adj   | Foldchange_UP | Foldchange_DOWN | Ratio_pct1_pct2 |
| PKIG                                                                                                | 1,75299E-05 | 0,010629308 | 0,463 | 0,172 | 0,369897667 | 1,007394883   | 0,9926594       | 2,691860465     |
| KRTDAP                                                                                              | 0,063408785 | 0,010614837 | 0,049 | 0,014 | 1           | 1,007384779   | 0,992669357     | 3,5             |
| PCDHA10                                                                                             | 0,35185965  | 0,010590562 | 0,012 | 0,004 | 1           | 1,007367828   | 0,99268606      | 3               |
| CPT2                                                                                                | 0,06274641  | 0,010572495 | 0,049 | 0,014 | 1           | 1,007355213   | 0,992698491     | 3,5             |
| ZKSCAN7                                                                                             | 0,35185965  | 0,010538943 | 0,012 | 0,004 | 1           | 1,007331786   | 0,992721578     | 3               |
| HIC2                                                                                                | 0,015742889 | 0,010530431 | 0,098 | 0,032 | 1           | 1,007325843   | 0,992727435     | 3,0625          |
| C12orf76                                                                                            | 0,00013764  | 0,010521019 | 0,28  | 0,095 | 1           | 1,00731927    | 0,992733912     | 2,947368421     |
| ALDH1B1                                                                                             | 0,043609761 | 0,010476274 | 0,037 | 0,007 | 1           | 1,007288029   | 0,992764702     | 5,285714286     |
| CEP135                                                                                              | 0,002802255 | 0,010462465 | 0,085 | 0,018 | 1           | 1,007278388   | 0,992774204     | 4,722222222     |
| ZNF787                                                                                              | 0,002137652 | 0,010459068 | 0,195 | 0,07  | 1           | 1,007276016   | 0,992776542     | 2,785714286     |
| ZNF587B                                                                                             | 0,187860656 | 0,010449892 | 0,024 | 0,007 | 1           | 1,007269609   | 0,992782857     | 3,428571429     |
| XPO5                                                                                                | 0,041519021 | 0,010449778 | 0,085 | 0,032 | 1           | 1,00726953    | 0,992782935     | 2,65625         |
| NPTX2                                                                                               | 0,360040425 | 0,010445197 | 0,073 | 0,046 | 1           | 1,007266331   | 0,992786087     | 1,586956522     |
| B3GNT8                                                                                              | 0,063203483 | 0,010406307 | 0,012 | 0     | 1           | 1,00723918    | 0,992812849     | #DIV/0!         |
| GNMT                                                                                                | 0,063203483 | 0,010406307 | 0,012 | 0     | 1           | 1,00723918    | 0,992812849     | #DIV/0!         |
| LYG1                                                                                                | 0,063203483 | 0,010406307 | 0,012 | 0     | 1           | 1,00723918    | 0,992812849     | #DIV/0!         |
| RAD54L                                                                                              | 0,063203483 | 0,010406307 | 0,012 | 0     | 1           | 1,00723918    | 0,992812849     | #DIV/0!         |
| SH3RF3-AS1                                                                                          | 0,063203483 | 0,010406307 | 0,012 | 0     | 1           | 1,00723918    | 0,992812849     | #DIV/0!         |
| HEATR6                                                                                              | 9,75219E-06 | 0,010370166 | 0,122 | 0,014 | 0,205780988 | 1,007213947   | 0,992837721     | 8,714285714     |
| BLOC1S3                                                                                             | 0,35185965  | 0,01036571  | 0,012 | 0,004 | 1           | 1,007210837   | 0,992840787     | 3               |
| UNC5C                                                                                               | 0,008401736 | 0,010347875 | 0,024 | 0     | 1           | 1,007198385   | 0,992853061     | #DIV/0!         |
| FBXL2                                                                                               | 0,004485159 | 0,010346865 | 0,073 | 0,014 | 1           | 1,00719768    | 0,992853756     | 5,214285714     |
| A2M-AS1                                                                                             | 0,063203483 | 0,010343902 | 0,012 | 0     | 1           | 1,007195611   | 0,992855796     | #DIV/0!         |
| ASAH2B                                                                                              | 0,063203483 | 0,010343902 | 0,012 | 0     | 1           | 1,007195611   | 0,992855796     | #DIV/0!         |
| ATP6VOA4                                                                                            | 0,063203483 | 0,010343902 | 0,012 | 0     | 1           | 1,007195611   | 0,992855796     | #DIV/0!         |
| CFAP300                                                                                             | 0,063203483 | 0,010343902 | 0,012 | 0     | 1           | 1,007195611   | 0,992855796     | #DIV/0!         |
| CHAC2                                                                                               | 0,063203483 | 0,010343902 | 0,012 | 0     | 1           | 1,007195611   | 0,992855796     | #DIV/0!         |
| FAM225B                                                                                             | 0,063203483 | 0,010343902 | 0,012 | 0     | 1           | 1,007195611   | 0,992855796     | #DIV/0!         |
| LINGO1                                                                                              | 0,063203483 | 0,010343902 | 0,012 | 0     | 1           | 1,007195611   | 0,992855796     | #DIV/0!         |
| LRRC69                                                                                              | 0,063203483 | 0,010343902 | 0,012 | 0     | 1           | 1,007195611   | 0,992855796     | #DIV/0!         |

Supplementary Table 2

| Differentially expressed genes_keloid-XL_comparing SC-Keloid vs. (SC-Myel, SC-Nonmyel, SC-Nonmyel2) |             |              |       |       |           |               |                 |                 |
|-----------------------------------------------------------------------------------------------------|-------------|--------------|-------|-------|-----------|---------------|-----------------|-----------------|
| gene                                                                                                | p_val       | avg_log2FC   | pct.1 | pct.2 | p_val_adj | Foldchange_UP | Foldchange_DOWN | Ratio_pct1_pct2 |
| PLS1                                                                                                | 0,063203483 | 0,010343902  | 0,012 | 0     | 1         | 1,007195611   | 0,992855796     | #DIV/0!         |
| WNT10B                                                                                              | 0,063203483 | 0,010343902  | 0,012 | 0     | 1         | 1,007195611   | 0,992855796     | #DIV/0!         |
| AKR1B10                                                                                             | 0,063203483 | 0,010320844  | 0,012 | 0     | 1         | 1,007179514   | 0,992871664     | #DIV/0!         |
| AMN                                                                                                 | 0,063203483 | 0,010320844  | 0,012 | 0     | 1         | 1,007179514   | 0,992871664     | #DIV/0!         |
| ARHGAP30                                                                                            | 0,063203483 | 0,010320844  | 0,012 | 0     | 1         | 1,007179514   | 0,992871664     | #DIV/0!         |
| BTBD11                                                                                              | 0,063203483 | 0,010320844  | 0,012 | 0     | 1         | 1,007179514   | 0,992871664     | #DIV/0!         |
| DRD4                                                                                                | 0,063203483 | 0,010320844  | 0,012 | 0     | 1         | 1,007179514   | 0,992871664     | #DIV/0!         |
| FAM90A1                                                                                             | 0,063203483 | 0,010320844  | 0,012 | 0     | 1         | 1,007179514   | 0,992871664     | #DIV/0!         |
| MMACHC                                                                                              | 0,063203483 | 0,010320844  | 0,012 | 0     | 1         | 1,007179514   | 0,992871664     | #DIV/0!         |
| NEURL2                                                                                              | 0,063203483 | 0,010320844  | 0,012 | 0     | 1         | 1,007179514   | 0,992871664     | #DIV/0!         |
| OVOL1-AS1                                                                                           | 0,063203483 | 0,010320844  | 0,012 | 0     | 1         | 1,007179514   | 0,992871664     | #DIV/0!         |
| PTGES                                                                                               | 0,063203483 | 0,010320844  | 0,012 | 0     | 1         | 1,007179514   | 0,992871664     | #DIV/0!         |
| SLC16A14                                                                                            | 0,063203483 | 0,010320844  | 0,012 | 0     | 1         | 1,007179514   | 0,992871664     | #DIV/0!         |
| SLC24A3                                                                                             | 0,063203483 | 0,010320844  | 0,012 | 0     | 1         | 1,007179514   | 0,992871664     | #DIV/0!         |
| SLC8A1                                                                                              | 0,063203483 | 0,010320844  | 0,012 | 0     | 1         | 1,007179514   | 0,992871664     | #DIV/0!         |
| TMCO2                                                                                               | 0,063203483 | 0,010320844  | 0,012 | 0     | 1         | 1,007179514   | 0,992871664     | #DIV/0!         |
| CCL27                                                                                               | 0,35185965  | 0,010318172  | 0,012 | 0,004 | 1         | 1,007177648   | 0,992873503     | 3               |
| TATDN3                                                                                              | 0,061438821 | 0,010208821  | 0,049 | 0,014 | 1         | 1,007101311   | 0,992948762     | 3,5             |
| ZNF852                                                                                              | 0,066254792 | 0,010160443  | 0,024 | 0,004 | 1         | 1,00706754    | 0,992982059     | 6               |
| ADGRA3                                                                                              | 0,093522856 | 0,01013408   | 0,098 | 0,046 | 1         | 1,007049138   | 0,993000205     | 2,130434783     |
| HAUS5                                                                                               | 0,066254792 | 0,010106824  | 0,024 | 0,004 | 1         | 1,007030112   | 0,993018965     | 6               |
| FAM182B                                                                                             | 0,187860656 | 0,010105432  | 0,024 | 0,007 | 1         | 1,007029141   | 0,993019923     | 3,428571429     |
| CYB561D1                                                                                            | 0,028081741 | 0,010098168  | 0,049 | 0,011 | 1         | 1,007024071   | 0,993024923     | 4,454545455     |
| PYCARD                                                                                              | 0,04287207  | 0,01005794   | 0,085 | 0,032 | 1         | 1,006995991   | 0,993052613     | 2,65625         |
| ZNF396                                                                                              | 0,35185965  | -0,010011829 | 0,012 | 0,004 | 1         | 0,993084353   | 1,006963806     | 3               |
| TUT1                                                                                                | 0,872003564 | -0,010044767 | 0,024 | 0,021 | 1         | 0,99306168    | 1,006986797     | 1,142857143     |
| FOSL1                                                                                               | 0,233798664 | -0,01005106  | 0,061 | 0,032 | 1         | 0,993057349   | 1,006991189     | 1,90625         |
| GEN1                                                                                                | 0,066254792 | -0,010058799 | 0,024 | 0,004 | 1         | 0,993052021   | 1,006996591     | 6               |
| FBXO28                                                                                              | 0,21713941  | -0,010062586 | 0,073 | 0,039 | 1         | 0,993049414   | 1,006999234     | 1,871794872     |
| CHAMP1                                                                                              | 0,004238843 | -0,010083437 | 0,098 | 0,025 | 1         | 0,993035063   | 1,007013788     | 3,92            |

Supplementary Table 2

| Differentially expressed genes_keloid-XL_comparing SC-Keloid vs. (SC-Myel, SC-Nonmyel, SC-Nonmyel2) |             |              |       |       |             |               |                 |                 |
|-----------------------------------------------------------------------------------------------------|-------------|--------------|-------|-------|-------------|---------------|-----------------|-----------------|
| gene                                                                                                | p_val       | avg_log2FC   | pct.1 | pct.2 | p_val_adj   | Foldchange_UP | Foldchange_DOWN | Ratio_pct1_pct2 |
| TBKBP1                                                                                              | 0,834483111 | -0,010103641 | 0,037 | 0,032 | 1           | 0,993021156   | 1,007027891     | 1,15625         |
| GAK                                                                                                 | 0,000309956 | -0,010121807 | 0,22  | 0,07  | 1           | 0,993008652   | 1,007040571     | 3,142857143     |
| GTF2H4                                                                                              | 0,048994444 | -0,010136694 | 0,146 | 0,07  | 1           | 0,992998405   | 1,007050963     | 2,085714286     |
| POLRMT                                                                                              | 0,006321781 | -0,010149215 | 0,122 | 0,039 | 1           | 0,992989787   | 1,007059703     | 3,128205128     |
| GAL3ST1                                                                                             | 0,236275739 | -0,010156652 | 0,11  | 0,067 | 1           | 0,992984669   | 1,007064894     | 1,641791045     |
| AOC3                                                                                                | 0,89702294  | -0,01017579  | 0,012 | 0,014 | 1           | 0,992971496   | 1,007078254     | 0,857142857     |
| CARNMT1                                                                                             | 0,370654006 | -0,010200169 | 0,049 | 0,028 | 1           | 0,992954717   | 1,007095271     | 1,75            |
| MLYCD                                                                                               | 0,02310643  | -0,010201551 | 0,073 | 0,021 | 1           | 0,992953766   | 1,007096236     | 3,476190476     |
| GET1                                                                                                | 0,002508243 | -0,010208927 | 0,195 | 0,07  | 1           | 0,992948689   | 1,007101385     | 2,785714286     |
| GLYR1                                                                                               | 0,020698327 | -0,010287142 | 0,22  | 0,105 | 1           | 0,992894858   | 1,007155986     | 2,095238095     |
| CLUH                                                                                                | 0,000505313 | -0,010289346 | 0,11  | 0,021 | 1           | 0,992893341   | 1,007157525     | 5,238095238     |
| INTS11                                                                                              | 8,91065E-05 | -0,010301155 | 0,293 | 0,098 | 1           | 0,992885214   | 1,007165769     | 2,989795918     |
| CDIP1                                                                                               | 0,24086264  | -0,010303009 | 0,061 | 0,032 | 1           | 0,992883938   | 1,007167063     | 1,90625         |
| ZNF383                                                                                              | 0,107265343 | -0,0103078   | 0,037 | 0,011 | 1           | 0,992880641   | 1,007170408     | 3,363636364     |
| FAS                                                                                                 | 0,00056312  | -0,010420633 | 0,134 | 0,032 | 1           | 0,992802991   | 1,007249181     | 4,1875          |
| IPO11                                                                                               | 0,070300136 | -0,01043158  | 0,073 | 0,028 | 1           | 0,992795458   | 1,007256824     | 2,607142857     |
| TCEAL1                                                                                              | 0,003066924 | -0,010440335 | 0,268 | 0,112 | 1           | 0,992789433   | 1,007262937     | 2,392857143     |
| LRRC8D                                                                                              | 0,994723299 | -0,010470867 | 0,024 | 0,025 | 1           | 0,992768422   | 1,007284254     | 0,96            |
| KCNF1                                                                                               | 0,35185965  | -0,010484273 | 0,012 | 0,004 | 1           | 0,992759198   | 1,007293614     | 3               |
| ZNF416                                                                                              | 0,35185965  | -0,01049391  | 0,012 | 0,004 | 1           | 0,992752566   | 1,007300342     | 3               |
| ZNF891                                                                                              | 0,527469009 | -0,010511386 | 0,024 | 0,014 | 1           | 0,992740541   | 1,007312544     | 1,714285714     |
| VOPP1                                                                                               | 0,000146153 | -0,010521519 | 0,195 | 0,053 | 1           | 0,992733568   | 1,00731962      | 3,679245283     |
| NME7                                                                                                | 1,64879E-06 | -0,010556739 | 0,195 | 0,035 | 0,034791059 | 0,992709333   | 1,007344211     | 5,571428571     |
| PIGZ                                                                                                | 0,040454549 | -0,010567301 | 0,073 | 0,025 | 1           | 0,992702065   | 1,007351586     | 2,92            |
| ZP3                                                                                                 | 0,35185965  | -0,010596025 | 0,012 | 0,004 | 1           | 0,992682301   | 1,007371643     | 3               |
| HMG20B                                                                                              | 0,027629005 | -0,010608776 | 0,659 | 0,386 | 1           | 0,992673527   | 1,007380546     | 1,707253886     |
| DCTN5                                                                                               | 0,043216097 | -0,010652722 | 0,085 | 0,032 | 1           | 0,99264329    | 1,007411232     | 2,65625         |
| RNPC3                                                                                               | 0,050807004 | -0,01066443  | 0,256 | 0,14  | 1           | 0,992635234   | 1,007419408     | 1,828571429     |
| RFX2                                                                                                | 0,140630018 | -0,010727862 | 0,122 | 0,067 | 1           | 0,992591591   | 1,007463703     | 1,820895522     |
| ALG11                                                                                               | 0,013979533 | -0,010788981 | 0,085 | 0,025 | 1           | 0,992549541   | 1,007506385     | 3,4             |



Supplementary Table 2

| Differentially expressed genes_keloid-XL_comparing SC-Keloid vs. (SC-Myel, SC-Nonmyel, SC-Nonmyel2) |             |              |       |       |           |               |                 |                 |
|-----------------------------------------------------------------------------------------------------|-------------|--------------|-------|-------|-----------|---------------|-----------------|-----------------|
| gene                                                                                                | p_val       | avg_log2FC   | pct.1 | pct.2 | p_val_adj | Foldchange_UP | Foldchange_DOWN | Ratio_pct1_pct2 |
| SKIDA1                                                                                              | 0,187860656 | -0,010805359 | 0,024 | 0,007 | 1         | 0,992538274   | 1,007517822     | 3,428571429     |
| PSMC3IP                                                                                             | 0,311992919 | -0,010805913 | 0,037 | 0,018 | 1         | 0,992537892   | 1,007518209     | 2,055555556     |
| EXOSC7                                                                                              | 0,000554481 | -0,010826094 | 0,171 | 0,049 | 1         | 0,992524009   | 1,007532303     | 3,489795918     |
| IL17RC                                                                                              | 0,000405233 | -0,010836759 | 0,183 | 0,053 | 1         | 0,992516672   | 1,007539751     | 3,452830189     |
| VPS37A                                                                                              | 0,000903748 | -0,010844778 | 0,207 | 0,07  | 1         | 0,992511155   | 1,007545351     | 2,957142857     |
| TPST1                                                                                               | 0,017793293 | -0,010850432 | 0,146 | 0,06  | 1         | 0,992507265   | 1,0075493       | 2,433333333     |
| CLDN15                                                                                              | 0,246621056 | -0,010888174 | 0,061 | 0,032 | 1         | 0,992481301   | 1,007575658     | 1,90625         |
| PDSS2                                                                                               | 0,001171943 | -0,010931596 | 0,134 | 0,035 | 1         | 0,99245143    | 1,007605984     | 3,828571429     |
| TSPAN12                                                                                             | 0,649511996 | -0,010972153 | 0,012 | 0,007 | 1         | 0,99242353    | 1,007634311     | 1,714285714     |
| ZNF184                                                                                              | 0,042292152 | -0,011015927 | 0,073 | 0,025 | 1         | 0,992393419   | 1,007664885     | 2,92            |
| ZNF311                                                                                              | 0,066254792 | -0,011044831 | 0,024 | 0,004 | 1         | 0,992373537   | 1,007685073     | 6               |
| ZNF185                                                                                              | 0,699214153 | -0,011057909 | 0,024 | 0,018 | 1         | 0,992364541   | 1,007694208     | 1,333333333     |
| MEST                                                                                                | 0,903285004 | -0,011066676 | 0,012 | 0,011 | 1         | 0,99235851    | 1,007700332     | 1,090909091     |
| C1orf94                                                                                             | 0,028081741 | -0,011075501 | 0,049 | 0,011 | 1         | 0,992352441   | 1,007706495     | 4,454545455     |
| RABEP2                                                                                              | 0,002219815 | -0,011076237 | 0,134 | 0,039 | 1         | 0,992351934   | 1,00770701      | 3,435897436     |
| OTUD6B                                                                                              | 0,000931651 | -0,011077458 | 0,159 | 0,046 | 1         | 0,992351094   | 1,007707863     | 3,456521739     |
| SLC35A5                                                                                             | 0,028371172 | -0,011122272 | 0,11  | 0,042 | 1         | 0,992320269   | 1,007739166     | 2,619047619     |
| CLCN3                                                                                               | 0,002226392 | -0,011142231 | 0,341 | 0,151 | 1         | 0,992306542   | 1,007753107     | 2,258278146     |
| HGH1                                                                                                | 0,000293572 | -0,011196271 | 0,085 | 0,011 | 1         | 0,992269372   | 1,007790856     | 7,727272727     |
| SERPINI1                                                                                            | 0,351112297 | -0,011204028 | 0,024 | 0,011 | 1         | 0,992264037   | 1,007796275     | 2,181818182     |
| CHEK1                                                                                               | 0,043609761 | -0,011209098 | 0,037 | 0,007 | 1         | 0,99226055    | 1,007799816     | 5,285714286     |
| IQCD                                                                                                | 0,649511996 | -0,011225949 | 0,012 | 0,007 | 1         | 0,992248961   | 1,007811587     | 1,714285714     |
| SSX2IP                                                                                              | 0,189157269 | -0,011236024 | 0,049 | 0,021 | 1         | 0,992242031   | 1,007818626     | 2,333333333     |
| POLL                                                                                                | 0,000556891 | -0,011245947 | 0,134 | 0,032 | 1         | 0,992235207   | 1,007825557     | 4,1875          |
| ATP7A                                                                                               | 0,043702889 | -0,011262325 | 0,11  | 0,046 | 1         | 0,992223943   | 1,007836998     | 2,391304348     |
| ZNF486                                                                                              | 0,351112297 | -0,011310632 | 0,024 | 0,011 | 1         | 0,992190719   | 1,007870746     | 2,181818182     |
| TSPOAP1                                                                                             | 0,903285004 | -0,011393341 | 0,012 | 0,011 | 1         | 0,99213384    | 1,007928528     | 1,090909091     |
| RNF31                                                                                               | 0,042104484 | -0,011450893 | 0,122 | 0,053 | 1         | 0,992094262   | 1,007968737     | 2,301886792     |
| GANC                                                                                                | 0,187860656 | -0,011452061 | 0,024 | 0,007 | 1         | 0,992093459   | 1,007969553     | 3,428571429     |
| PSMD10                                                                                              | 0,001290367 | -0,011459275 | 0,207 | 0,074 | 1         | 0,992088498   | 1,007974593     | 2,797297297     |

Supplementary Table 2

| Differentially expressed genes_keloid-XL_comparing SC-Keloid vs. (SC-Myel, SC-Nonmyel, SC-Nonmyel2) |             |              |       |       |             |               |                 |                 |
|-----------------------------------------------------------------------------------------------------|-------------|--------------|-------|-------|-------------|---------------|-----------------|-----------------|
| gene                                                                                                | p_val       | avg_log2FC   | pct.1 | pct.2 | p_val_adj   | Foldchange_UP | Foldchange_DOWN | Ratio_pct1_pct2 |
| C1orf174                                                                                            | 0,018635701 | -0,011513491 | 0,11  | 0,039 | 1           | 0,992051216   | 1,008012473     | 2,820512821     |
| CASP8                                                                                               | 0,066254792 | -0,011531112 | 0,024 | 0,004 | 1           | 0,992039099   | 1,008024785     | 6               |
| APOA1-AS                                                                                            | 0,908489202 | -0,011561693 | 0,012 | 0,011 | 1           | 0,992018071   | 1,008046152     | 1,090909091     |
| PTK2B                                                                                               | 0,567510207 | -0,011571459 | 0,037 | 0,025 | 1           | 0,992011356   | 1,008052976     | 1,48            |
| ARV1                                                                                                | 0,002502924 | -0,011628861 | 0,11  | 0,028 | 1           | 0,991971887   | 1,008093085     | 3,928571429     |
| EDNRA                                                                                               | 0,011553628 | -0,011630389 | 0,037 | 0,004 | 1           | 0,991970836   | 1,008094153     | 9,25            |
| CACNA2D1                                                                                            | 0,018385843 | -0,011672556 | 0,122 | 0,046 | 1           | 0,991941843   | 1,008123618     | 2,652173913     |
| PTGER3                                                                                              | 0,35185965  | -0,011693598 | 0,012 | 0,004 | 1           | 0,991927376   | 1,008138322     | 3               |
| FCSK                                                                                                | 0,351112297 | -0,011749142 | 0,024 | 0,011 | 1           | 0,991889187   | 1,008177137     | 2,181818182     |
| PGAP2                                                                                               | 0,043428247 | -0,011776955 | 0,073 | 0,025 | 1           | 0,991870065   | 1,008196572     | 2,92            |
| MYCN                                                                                                | 0,20009151  | -0,011794846 | 0,037 | 0,014 | 1           | 0,991857765   | 1,008209075     | 2,642857143     |
| TRAPPC2                                                                                             | 0,000853385 | -0,011853155 | 0,122 | 0,028 | 1           | 0,991817678   | 1,008249825     | 4,357142857     |
| ACAT1                                                                                               | 0,003357668 | -0,011891907 | 0,171 | 0,06  | 1           | 0,991791037   | 1,008276908     | 2,85            |
| DCAF4L1                                                                                             | 0,908489202 | -0,011937134 | 0,012 | 0,011 | 1           | 0,991759946   | 1,008308517     | 1,090909091     |
| BSL                                                                                                 | 0,113968254 | -0,011938552 | 0,049 | 0,018 | 1           | 0,991758971   | 1,008309508     | 2,722222222     |
| ZNF25                                                                                               | 4,15912E-05 | -0,011948162 | 0,159 | 0,032 | 0,877615986 | 0,991752365   | 1,008316224     | 4,96875         |
| PCDHB10                                                                                             | 0,520464457 | -0,011970877 | 0,024 | 0,014 | 1           | 0,99173675    | 1,0083321       | 1,714285714     |
| FSBP                                                                                                | 0,908489202 | -0,012007225 | 0,012 | 0,011 | 1           | 0,991711764   | 1,008357505     | 1,090909091     |
| SETD6                                                                                               | 0,044262208 | -0,012028301 | 0,085 | 0,032 | 1           | 0,991697277   | 1,008372236     | 2,65625         |
| AC011484.1                                                                                          | 0,654971645 | -0,012037689 | 0,012 | 0,007 | 1           | 0,991690823   | 1,008378798     | 1,714285714     |
| TMEM251                                                                                             | 0,006876865 | -0,012058691 | 0,134 | 0,046 | 1           | 0,991676387   | 1,008393477     | 2,913043478     |
| SLIT3                                                                                               | 0,187860656 | -0,012067383 | 0,024 | 0,007 | 1           | 0,991670412   | 1,008399553     | 3,428571429     |
| INCA1                                                                                               | 0,654971645 | -0,01208848  | 0,012 | 0,007 | 1           | 0,991655911   | 1,008414299     | 1,714285714     |
| BSN                                                                                                 | 0,903285004 | -0,012140894 | 0,012 | 0,011 | 1           | 0,991619884   | 1,008450936     | 1,090909091     |
| FAM111A                                                                                             | 0,045305059 | -0,012166377 | 0,195 | 0,102 | 1           | 0,991602369   | 1,008468749     | 1,911764706     |
| ZNF280C                                                                                             | 0,706611845 | -0,01217515  | 0,024 | 0,018 | 1           | 0,991596339   | 1,008474881     | 1,333333333     |
| GCA                                                                                                 | 0,101701491 | -0,012200773 | 0,085 | 0,039 | 1           | 0,991578728   | 1,008492792     | 2,179487179     |
| KATNIP                                                                                              | 0,18774993  | -0,0122198   | 0,049 | 0,021 | 1           | 0,991565651   | 1,008506093     | 2,333333333     |
| GRAMD4                                                                                              | 0,001067771 | -0,012231486 | 0,134 | 0,035 | 1           | 0,991557619   | 1,008514262     | 3,828571429     |
| NCEH1                                                                                               | 0,699214153 | -0,012248268 | 0,024 | 0,018 | 1           | 0,991546085   | 1,008525993     | 1,333333333     |

Supplementary Table 2

| Differentially expressed genes_keloid-XL_comparing SC-Keloid vs. (SC-Myel, SC-Nonmyel, SC-Nonmyel2) |             |              |       |       |             |               |                 |                 |
|-----------------------------------------------------------------------------------------------------|-------------|--------------|-------|-------|-------------|---------------|-----------------|-----------------|
| gene                                                                                                | p_val       | avg_log2FC   | pct.1 | pct.2 | p_val_adj   | Foldchange_UP | Foldchange_DOWN | Ratio_pct1_pct2 |
| KTI12                                                                                               | 0,001445239 | -0,012333117 | 0,073 | 0,011 | 1           | 0,991487771   | 1,00858531      | 6,636363636     |
| PRR4                                                                                                | 0,442988867 | -0,012355069 | 0,037 | 0,021 | 1           | 0,991472684   | 1,008600656     | 1,761904762     |
| ZNF350                                                                                              | 0,307543976 | -0,012380164 | 0,037 | 0,018 | 1           | 0,991455438   | 1,008618201     | 2,055555556     |
| ANKAR                                                                                               | 0,356483051 | -0,012401168 | 0,049 | 0,028 | 1           | 0,991441004   | 1,008632885     | 1,75            |
| VPREB3                                                                                              | 0,35185965  | -0,012407791 | 0,012 | 0,004 | 1           | 0,991436453   | 1,008637515     | 3               |
| PEBP4                                                                                               | 0,901679385 | -0,012426723 | 0,012 | 0,014 | 1           | 0,991423442   | 1,008650751     | 0,857142857     |
| BCL7A                                                                                               | 0,044615627 | -0,012443694 | 0,085 | 0,032 | 1           | 0,99141178    | 1,008662617     | 2,65625         |
| ZNF615                                                                                              | 0,351112297 | -0,012458744 | 0,024 | 0,011 | 1           | 0,991401437   | 1,008673139     | 2,181818182     |
| LINC01004                                                                                           | 0,044226311 | -0,012500046 | 0,037 | 0,007 | 1           | 0,991373056   | 1,008702016     | 5,285714286     |
| RIC8B                                                                                               | 0,004937062 | -0,012546346 | 0,146 | 0,049 | 1           | 0,991341241   | 1,008734388     | 2,979591837     |
| CD93                                                                                                | 0,106097567 | -0,012573621 | 0,037 | 0,011 | 1           | 0,991322498   | 1,00875346      | 3,363636364     |
| PITPNM2                                                                                             | 0,903285004 | -0,012600422 | 0,012 | 0,011 | 1           | 0,991304083   | 1,008772199     | 1,090909091     |
| NUDT16                                                                                              | 3,60232E-05 | -0,012600897 | 0,207 | 0,053 | 0,760126203 | 0,991303757   | 1,008772531     | 3,905660377     |
| RGS17                                                                                               | 0,35185965  | -0,012716448 | 0,012 | 0,004 | 1           | 0,991224362   | 1,008853331     | 3               |
| KLLN                                                                                                | 0,654971645 | -0,012742736 | 0,012 | 0,007 | 1           | 0,991206301   | 1,008871714     | 1,714285714     |
| LIN9                                                                                                | 0,20009151  | -0,012753524 | 0,037 | 0,014 | 1           | 0,991198889   | 1,008879258     | 2,642857143     |
| LMOD3                                                                                               | 0,314233219 | -0,012760568 | 0,037 | 0,018 | 1           | 0,99119405    | 1,008884184     | 2,055555556     |
| MGA                                                                                                 | 0,004659136 | -0,012784102 | 0,146 | 0,049 | 1           | 0,991177881   | 1,008900641     | 2,979591837     |
| SLC35B4                                                                                             | 0,000348875 | -0,012814981 | 0,122 | 0,025 | 1           | 0,991156667   | 1,008922236     | 4,88            |
| TBX1                                                                                                | 0,901679385 | -0,012826233 | 0,012 | 0,014 | 1           | 0,991148936   | 1,008930105     | 0,857142857     |
| MEF2C-AS1                                                                                           | 0,35185965  | -0,012917128 | 0,012 | 0,004 | 1           | 0,991086492   | 1,008993673     | 3               |
| CCDC106                                                                                             | 0,000161624 | -0,01292393  | 0,171 | 0,042 | 1           | 0,991081819   | 1,00899843      | 4,071428571     |
| R3HDM1                                                                                              | 0,000304206 | -0,01298297  | 0,122 | 0,025 | 1           | 0,991041262   | 1,009039723     | 4,88            |
| ZKSCAN3                                                                                             | 0,187860656 | -0,013001099 | 0,024 | 0,007 | 1           | 0,991028809   | 1,009052402     | 3,428571429     |
| ACADSB                                                                                              | 0,704014659 | -0,013014605 | 0,037 | 0,028 | 1           | 0,991019531   | 1,009061849     | 1,321428571     |
| FOXN3-AS1                                                                                           | 0,35185965  | -0,013047237 | 0,012 | 0,004 | 1           | 0,990997115   | 1,009084673     | 3               |
| FZD4                                                                                                | 0,044048002 | -0,013054943 | 0,098 | 0,039 | 1           | 0,990991822   | 1,009090063     | 2,512820513     |
| GJB2                                                                                                | 0,066254792 | -0,013055086 | 0,024 | 0,004 | 1           | 0,990991724   | 1,009090163     | 6               |
| TRMT1                                                                                               | 0,337028145 | -0,0130826   | 0,098 | 0,063 | 1           | 0,990972824   | 1,009109408     | 1,555555556     |
| FITM2                                                                                               | 0,440372242 | -0,013122617 | 0,037 | 0,021 | 1           | 0,990945338   | 1,009137398     | 1,761904762     |

Supplementary Table 2

| Differentially expressed genes_keloid-XL_comparing SC-Keloid vs. (SC-Myel, SC-Nonmyel, SC-Nonmyel2) |             |              |       |       |             |               |                 |                 |
|-----------------------------------------------------------------------------------------------------|-------------|--------------|-------|-------|-------------|---------------|-----------------|-----------------|
| gene                                                                                                | p_val       | avg_log2FC   | pct.1 | pct.2 | p_val_adj   | Foldchange_UP | Foldchange_DOWN | Ratio_pct1_pct2 |
| TMPPE                                                                                               | 0,654971645 | -0,013152359 | 0,012 | 0,007 | 1           | 0,990924909   | 1,009158203     | 1,714285714     |
| HNRNPK                                                                                              | 0,329007786 | -0,013181913 | 0,817 | 0,639 | 1           | 0,99090461    | 1,009178876     | 1,27856025      |
| PCCA                                                                                                | 0,010791649 | -0,013201731 | 0,073 | 0,018 | 1           | 0,990890998   | 1,009192739     | 4,055555556     |
| BCDIN3D-AS1                                                                                         | 0,35185965  | -0,013226829 | 0,012 | 0,004 | 1           | 0,99087376    | 1,009210295     | 3               |
| HMGCR                                                                                               | 0,003634369 | -0,013238191 | 0,122 | 0,035 | 1           | 0,990865956   | 1,009218244     | 3,485714286     |
| CCDC137                                                                                             | 0,005137829 | -0,013243407 | 0,11  | 0,032 | 1           | 0,990862374   | 1,009221892     | 3,4375          |
| SLC37A3                                                                                             | 0,000682544 | -0,013292586 | 0,171 | 0,049 | 1           | 0,990828598   | 1,009256296     | 3,489795918     |
| RXYLT1                                                                                              | 7,16859E-05 | -0,013331179 | 0,268 | 0,084 | 1           | 0,990802093   | 1,009283294     | 3,19047619      |
| TRAF3                                                                                               | 0,01855649  | -0,013374178 | 0,134 | 0,053 | 1           | 0,990772563   | 1,009313376     | 2,528301887     |
| MTMR10                                                                                              | 0,269824943 | -0,013417772 | 0,098 | 0,06  | 1           | 0,990742625   | 1,009343875     | 1,633333333     |
| PDCD11                                                                                              | 0,004856163 | -0,013419394 | 0,146 | 0,049 | 1           | 0,990741511   | 1,00934501      | 2,979591837     |
| ZDHHC11                                                                                             | 0,654971645 | -0,013443748 | 0,012 | 0,007 | 1           | 0,990724787   | 1,009362048     | 1,714285714     |
| STX1B                                                                                               | 0,654971645 | -0,013524736 | 0,012 | 0,007 | 1           | 0,990669172   | 1,009418712     | 1,714285714     |
| LINC00630                                                                                           | 0,044226311 | -0,013543449 | 0,037 | 0,007 | 1           | 0,990656323   | 1,009431805     | 5,285714286     |
| PIGA                                                                                                | 0,172308997 | -0,013544193 | 0,061 | 0,028 | 1           | 0,990655812   | 1,009432326     | 2,178571429     |
| SYNPO                                                                                               | 5,90908E-06 | -0,013583679 | 0,378 | 0,123 | 0,124687586 | 0,990628698   | 1,009459954     | 3,073170732     |
| IL18BP                                                                                              | 0,185668317 | -0,013588492 | 0,024 | 0,007 | 1           | 0,990625394   | 1,009463321     | 3,428571429     |
| DPY19L2                                                                                             | 0,903285004 | -0,013613648 | 0,012 | 0,011 | 1           | 0,99060812    | 1,009480924     | 1,090909091     |
| PTPN18                                                                                              | 9,6395E-05  | -0,013719625 | 0,183 | 0,046 | 1           | 0,990535355   | 1,009555081     | 3,97826087      |
| EIF4H                                                                                               | 0,004687718 | -0,013735915 | 0,695 | 0,361 | 1           | 0,99052417    | 1,00956648      | 1,925207756     |
| DGCR6                                                                                               | 0,214732296 | -0,01374746  | 0,073 | 0,039 | 1           | 0,990516244   | 1,009574559     | 1,871794872     |
| CNRIP1                                                                                              | 0,000821389 | -0,013775075 | 0,195 | 0,063 | 1           | 0,990497284   | 1,009593884     | 3,095238095     |
| CLSPN                                                                                               | 0,654971645 | -0,013801288 | 0,012 | 0,007 | 1           | 0,990479288   | 1,009612227     | 1,714285714     |
| SLC16A2                                                                                             | 0,026163616 | -0,01380654  | 0,098 | 0,035 | 1           | 0,990475682   | 1,009615903     | 2,8             |
| TIGD7                                                                                               | 0,038341604 | -0,013809385 | 0,061 | 0,018 | 1           | 0,990473729   | 1,009617894     | 3,388888889     |
| CELF6                                                                                               | 0,654971645 | -0,013816004 | 0,012 | 0,007 | 1           | 0,990469185   | 1,009622526     | 1,714285714     |
| GHRLOS                                                                                              | 0,654971645 | -0,013816211 | 0,012 | 0,007 | 1           | 0,990469043   | 1,00962267      | 1,714285714     |
| RABGEF1                                                                                             | 0,001667528 | -0,013889349 | 0,171 | 0,056 | 1           | 0,990418831   | 1,009673855     | 3,053571429     |
| ZNF22-AS1                                                                                           | 0,114980497 | -0,013926786 | 0,049 | 0,018 | 1           | 0,990393132   | 1,009700056     | 2,722222222     |
| KIAA0825                                                                                            | 0,187860656 | -0,013937245 | 0,024 | 0,007 | 1           | 0,990385951   | 1,009707376     | 3,428571429     |

Supplementary Table 2

| Differentially expressed genes_keloid-XL_comparing SC-Keloid vs. (SC-Myel, SC-Nonmyel, SC-Nonmyel2) |             |              |       |       |             |               |                 |                 |
|-----------------------------------------------------------------------------------------------------|-------------|--------------|-------|-------|-------------|---------------|-----------------|-----------------|
| gene                                                                                                | p_val       | avg_log2FC   | pct.1 | pct.2 | p_val_adj   | Foldchange_UP | Foldchange_DOWN | Ratio_pct1_pct2 |
| CSTF3                                                                                               | 0,242424104 | -0,013954827 | 0,11  | 0,067 | 1           | 0,990373882   | 1,009719681     | 1,641791045     |
| TAMM41                                                                                              | 0,184958462 | -0,013973348 | 0,049 | 0,021 | 1           | 0,990361168   | 1,009732644     | 2,333333333     |
| ARHGEF1                                                                                             | 0,006929265 | -0,013974636 | 0,256 | 0,116 | 1           | 0,990360283   | 1,009733546     | 2,206896552     |
| MYO1F                                                                                               | 0,654971645 | -0,013991416 | 0,012 | 0,007 | 1           | 0,990348765   | 1,009745289     | 1,714285714     |
| ZFP64                                                                                               | 0,187860656 | -0,01400475  | 0,024 | 0,007 | 1           | 0,990339612   | 1,009754622     | 3,428571429     |
| OCLN                                                                                                | 0,1180597   | -0,014071046 | 0,049 | 0,018 | 1           | 0,990294103   | 1,009801025     | 2,722222222     |
| MYCL                                                                                                | 0,654971645 | -0,014075085 | 0,012 | 0,007 | 1           | 0,990291331   | 1,009803852     | 1,714285714     |
| HOOK1                                                                                               | 0,35185965  | -0,014075767 | 0,012 | 0,004 | 1           | 0,990290863   | 1,009804329     | 3               |
| ATAD3B                                                                                              | 0,007215488 | -0,014081261 | 0,146 | 0,053 | 1           | 0,990287092   | 1,009808174     | 2,754716981     |
| FRMD5                                                                                               | 2,09611E-05 | -0,014086176 | 0,366 | 0,126 | 0,442300086 | 0,990283718   | 1,009811615     | 2,904761905     |
| DDX28                                                                                               | 0,654971645 | -0,014102939 | 0,012 | 0,007 | 1           | 0,990272211   | 1,009823348     | 1,714285714     |
| KANSL1-AS1                                                                                          | 0,028081741 | -0,014127938 | 0,049 | 0,011 | 1           | 0,990255053   | 1,009840846     | 4,454545455     |
| PJKV                                                                                                | 0,530989227 | -0,014187717 | 0,024 | 0,014 | 1           | 0,990214021   | 1,009882691     | 1,714285714     |
| IGF2R                                                                                               | 0,130630474 | -0,014260608 | 0,098 | 0,049 | 1           | 0,990163993   | 1,009933715     | 2               |
| IZUMO1                                                                                              | 0,527469009 | -0,014267864 | 0,024 | 0,014 | 1           | 0,990159013   | 1,009938795     | 1,714285714     |
| ABTB2                                                                                               | 0,174639985 | -0,014357825 | 0,061 | 0,028 | 1           | 0,990097272   | 1,010001773     | 2,178571429     |
| VXN                                                                                                 | 0,654971645 | -0,014375647 | 0,012 | 0,007 | 1           | 0,990085041   | 1,01001425      | 1,714285714     |
| DOK4                                                                                                | 0,174639985 | -0,014386603 | 0,061 | 0,028 | 1           | 0,990077522   | 1,01002192      | 2,178571429     |
| CLMAT3                                                                                              | 0,654971645 | -0,014391584 | 0,012 | 0,007 | 1           | 0,990074104   | 1,010025407     | 1,714285714     |
| PCDHGA11                                                                                            | 0,35185965  | -0,014402571 | 0,012 | 0,004 | 1           | 0,990066564   | 1,010033099     | 3               |
| DUBR                                                                                                | 0,044971423 | -0,014409067 | 0,085 | 0,032 | 1           | 0,990062106   | 1,010037647     | 2,65625         |
| GENE                                                                                                | 0,063408785 | -0,014423152 | 0,049 | 0,014 | 1           | 0,990052441   | 1,010047508     | 3,5             |
| SEC11C                                                                                              | 0,01113311  | -0,014429947 | 0,293 | 0,144 | 1           | 0,990047777   | 1,010052265     | 2,034722222     |
| AGFG2                                                                                               | 0,654971645 | -0,014441556 | 0,012 | 0,007 | 1           | 0,990039811   | 1,010060393     | 1,714285714     |
| ALAS1                                                                                               | 0,125592074 | -0,014461822 | 0,098 | 0,049 | 1           | 0,990025903   | 1,010074582     | 2               |
| PHF2                                                                                                | 0,188346329 | -0,014478543 | 0,183 | 0,116 | 1           | 0,990014429   | 1,010086288     | 1,577586207     |
| SCARB1                                                                                              | 0,311992919 | -0,014482228 | 0,037 | 0,018 | 1           | 0,9900119     | 1,010088868     | 2,055555556     |
| MALL                                                                                                | 0,20009151  | -0,014483158 | 0,037 | 0,014 | 1           | 0,990011262   | 1,01008952      | 2,642857143     |
| AACS                                                                                                | 0,860982214 | -0,014537008 | 0,024 | 0,021 | 1           | 0,989974309   | 1,010127223     | 1,142857143     |
| RBBP5                                                                                               | 0,000174436 | -0,014630149 | 0,11  | 0,018 | 1           | 0,989910399   | 1,010192439     | 6,111111111     |

Supplementary Table 2

| Differentially expressed genes_keloid-XL_comparing SC-Keloid vs. (SC-Myel, SC-Nonmyel, SC-Nonmyel2) |             |              |       |       |             |               |                 |                 |
|-----------------------------------------------------------------------------------------------------|-------------|--------------|-------|-------|-------------|---------------|-----------------|-----------------|
| gene                                                                                                | p_val       | avg_log2FC   | pct.1 | pct.2 | p_val_adj   | Foldchange_UP | Foldchange_DOWN | Ratio_pct1_pct2 |
| TCP11L1                                                                                             | 0,171152267 | -0,014696458 | 0,061 | 0,028 | 1           | 0,989864901   | 1,010238871     | 2,178571429     |
| MASTL                                                                                               | 0,171152267 | -0,014727695 | 0,061 | 0,028 | 1           | 0,989843469   | 1,010260744     | 2,178571429     |
| ABCG2                                                                                               | 0,702909482 | -0,014730541 | 0,024 | 0,018 | 1           | 0,989841516   | 1,010262738     | 1,333333333     |
| ZNF526                                                                                              | 0,187860656 | -0,014760369 | 0,024 | 0,007 | 1           | 0,989821052   | 1,010283625     | 3,428571429     |
| STXBP3                                                                                              | 3,8381E-06  | -0,014776576 | 0,354 | 0,109 | 0,080987722 | 0,989809932   | 1,010294974     | 3,247706422     |
| NBPF15                                                                                              | 0,101701491 | -0,014781542 | 0,085 | 0,039 | 1           | 0,989806525   | 1,010298452     | 2,179487179     |
| SUCLA2                                                                                              | 0,002605658 | -0,014788937 | 0,268 | 0,112 | 1           | 0,989801452   | 1,01030363      | 2,392857143     |
| POLR1H                                                                                              | 0,001044471 | -0,014806194 | 0,232 | 0,084 | 1           | 0,989789612   | 1,010315715     | 2,761904762     |
| TP63                                                                                                | 0,654971645 | -0,014896985 | 0,012 | 0,007 | 1           | 0,989727325   | 1,010379298     | 1,714285714     |
| RHPN2                                                                                               | 0,654971645 | -0,014908875 | 0,012 | 0,007 | 1           | 0,989719168   | 1,010387626     | 1,714285714     |
| BIN1                                                                                                | 8,7828E-05  | -0,014911534 | 0,329 | 0,116 | 1           | 0,989717344   | 1,010389487     | 2,836206897     |
| EML6                                                                                                | 0,908489202 | -0,014930937 | 0,012 | 0,011 | 1           | 0,989704033   | 1,010403076     | 1,090909091     |
| CISD2                                                                                               | 0,000483051 | -0,014941235 | 0,329 | 0,133 | 1           | 0,989696969   | 1,010410289     | 2,473684211     |
| P2RY11                                                                                              | 0,106097567 | -0,015026656 | 0,037 | 0,011 | 1           | 0,989638371   | 1,010470116     | 3,363636364     |
| MAP6                                                                                                | 0,099088993 | -0,015076843 | 0,085 | 0,039 | 1           | 0,989603945   | 1,010505268     | 2,179487179     |
| ZNF41                                                                                               | 0,194890196 | -0,015078435 | 0,037 | 0,014 | 1           | 0,989602853   | 1,010506383     | 2,642857143     |
| SMIM3                                                                                               | 0,114980497 | -0,015123292 | 0,049 | 0,018 | 1           | 0,989572084   | 1,010537803     | 2,722222222     |
| RASL12                                                                                              | 0,014704774 | -0,015147426 | 0,244 | 0,116 | 1           | 0,98955553    | 1,010554708     | 2,103448276     |
| RND3                                                                                                | 0,495064391 | -0,015162542 | 0,744 | 0,565 | 1           | 0,989545163   | 1,010565296     | 1,316814159     |
| YJEFN3                                                                                              | 0,351112297 | -0,015172191 | 0,024 | 0,011 | 1           | 0,989538544   | 1,010572055     | 2,181818182     |
| SMAD5-AS1                                                                                           | 0,654971645 | -0,01517308  | 0,012 | 0,007 | 1           | 0,989537935   | 1,010572677     | 1,714285714     |
| BTBD19                                                                                              | 0,03795203  | -0,015226457 | 0,061 | 0,018 | 1           | 0,989501324   | 1,010610067     | 3,388888889     |
| GASK1A                                                                                              | 0,855427988 | -0,015251476 | 0,024 | 0,028 | 1           | 0,989484165   | 1,010627593     | 0,857142857     |
| TMEM94                                                                                              | 0,007496727 | -0,015341149 | 0,159 | 0,06  | 1           | 0,989422663   | 1,010690413     | 2,65            |
| ZNF234                                                                                              | 0,654971645 | -0,015388686 | 0,012 | 0,007 | 1           | 0,989390063   | 1,010723715     | 1,714285714     |
| LY6G5C                                                                                              | 0,028081741 | -0,015388853 | 0,049 | 0,011 | 1           | 0,989389948   | 1,010723833     | 4,454545455     |
| PPP6R2                                                                                              | 0,001100605 | -0,015390207 | 0,232 | 0,084 | 1           | 0,98938902    | 1,010724781     | 2,761904762     |
| ARRDC1                                                                                              | 0,00286441  | -0,015401835 | 0,171 | 0,06  | 1           | 0,989381045   | 1,010732928     | 2,85            |
| RTN4IP1                                                                                             | 0,654971645 | -0,015403342 | 0,012 | 0,007 | 1           | 0,989380011   | 1,010733983     | 1,714285714     |
| TSPYL1                                                                                              | 0,024598115 | -0,015432539 | 0,207 | 0,102 | 1           | 0,989359989   | 1,010754438     | 2,029411765     |

Supplementary Table 2

| Differentially expressed genes_keloid-XL_comparing SC-Keloid vs. (SC-Myel, SC-Nonmyel, SC-Nonmyel2) |             |              |       |       |           |               |                 |                 |
|-----------------------------------------------------------------------------------------------------|-------------|--------------|-------|-------|-----------|---------------|-----------------|-----------------|
| gene                                                                                                | p_val       | avg_log2FC   | pct.1 | pct.2 | p_val_adj | Foldchange_UP | Foldchange_DOWN | Ratio_pct1_pct2 |
| GPAM                                                                                                | 0,172308997 | -0,015446346 | 0,061 | 0,028 | 1         | 0,98935052    | 1,010764112     | 2,178571429     |
| ZNF875                                                                                              | 0,023887799 | -0,01544698  | 0,085 | 0,028 | 1         | 0,989350085   | 1,010764556     | 3,035714286     |
| FUT1                                                                                                | 0,35185965  | -0,015456349 | 0,012 | 0,004 | 1         | 0,989343661   | 1,01077112      | 3               |
| BBS10                                                                                               | 0,1180597   | -0,015510458 | 0,049 | 0,018 | 1         | 0,989306555   | 1,01080903      | 2,722222222     |
| CSTA                                                                                                | 0,35350329  | -0,015528809 | 0     | 0,011 | 1         | 0,989293972   | 1,010821888     | 0               |
| EFCAB14                                                                                             | 0,000855941 | -0,015540493 | 0,305 | 0,123 | 1         | 0,98928596    | 1,010830074     | 2,479674797     |
| SOX17                                                                                               | 0,263684223 | -0,01555011  | 0,049 | 0,025 | 1         | 0,989279365   | 1,010836812     | 1,96            |
| ABCA5                                                                                               | 0,704014659 | -0,015551331 | 0,037 | 0,028 | 1         | 0,989278528   | 1,010837668     | 1,321428571     |
| INTS5                                                                                               | 0,872003564 | -0,015552881 | 0,024 | 0,021 | 1         | 0,989277465   | 1,010838754     | 1,142857143     |
| CCDC85C                                                                                             | 0,316484073 | -0,015596948 | 0,037 | 0,018 | 1         | 0,989247248   | 1,010869631     | 2,055555556     |
| RHEBL1                                                                                              | 0,736792926 | -0,015659858 | 0,012 | 0,018 | 1         | 0,989204112   | 1,010913711     | 0,666666667     |
| ZNF212                                                                                              | 0,311992919 | -0,015676956 | 0,037 | 0,018 | 1         | 0,989192388   | 1,010925692     | 2,055555556     |
| LINC01006                                                                                           | 0,011472074 | -0,015686234 | 0,122 | 0,042 | 1         | 0,989186027   | 1,010932193     | 2,904761905     |
| RUSC1-AS1                                                                                           | 0,903285004 | -0,01572036  | 0,012 | 0,011 | 1         | 0,989162629   | 1,010956106     | 1,090909091     |
| CCDC153                                                                                             | 0,066254792 | -0,015750789 | 0,024 | 0,004 | 1         | 0,989141766   | 1,01097743      | 6               |
| KCNIP2                                                                                              | 0,898084959 | -0,015812904 | 0,012 | 0,011 | 1         | 0,98909918    | 1,011020958     | 1,090909091     |
| LETM1                                                                                               | 0,008961116 | -0,015826391 | 0,195 | 0,081 | 1         | 0,989089933   | 1,01103041      | 2,407407407     |
| TM6SF2                                                                                              | 0,35185965  | -0,015828711 | 0,012 | 0,004 | 1         | 0,989088342   | 1,011032035     | 3               |
| TNKS                                                                                                | 0,045015119 | -0,01584176  | 0,22  | 0,116 | 1         | 0,989079397   | 1,01104118      | 1,896551724     |
| TRMT44                                                                                              | 0,114980497 | -0,015870877 | 0,049 | 0,018 | 1         | 0,989059435   | 1,011061585     | 2,722222222     |
| CCDC171                                                                                             | 0,424859796 | -0,015873758 | 0,012 | 0,028 | 1         | 0,989057459   | 1,011063605     | 0,428571429     |
| ACVR1                                                                                               | 0,000476922 | -0,015900199 | 0,195 | 0,06  | 1         | 0,989039333   | 1,011082135     | 3,25            |
| EOGT                                                                                                | 0,702909482 | -0,015917166 | 0,024 | 0,018 | 1         | 0,989027701   | 1,011094026     | 1,333333333     |
| AKNAD1                                                                                              | 0,351112297 | -0,015923223 | 0,024 | 0,011 | 1         | 0,989023549   | 1,011098271     | 2,181818182     |
| MOCS1                                                                                               | 0,068827069 | -0,015965108 | 0,061 | 0,021 | 1         | 0,988994835   | 1,011127626     | 2,904761905     |
| VKORC1L1                                                                                            | 0,000247692 | -0,015975625 | 0,256 | 0,088 | 1         | 0,988987626   | 1,011134997     | 2,909090909     |
| HNRNPD                                                                                              | 0,104722394 | -0,015982347 | 0,683 | 0,449 | 1         | 0,988983017   | 1,011139709     | 1,521158129     |
| GON4L                                                                                               | 0,058240835 | -0,015987911 | 0,28  | 0,158 | 1         | 0,988979203   | 1,011143608     | 1,772151899     |
| CCDC140                                                                                             | 0,20009151  | -0,016036581 | 0,037 | 0,014 | 1         | 0,988945841   | 1,01117772      | 2,642857143     |
| GIMAP4                                                                                              | 0,530989227 | -0,01603835  | 0,024 | 0,014 | 1         | 0,988944628   | 1,01117896      | 1,714285714     |

Supplementary Table 2

| Differentially expressed genes_keloid-XL_comparing SC-Keloid vs. (SC-Myel, SC-Nonmyel, SC-Nonmyel2) |             |              |       |       |           |               |                 |                 |
|-----------------------------------------------------------------------------------------------------|-------------|--------------|-------|-------|-----------|---------------|-----------------|-----------------|
| gene                                                                                                | p_val       | avg_log2FC   | pct.1 | pct.2 | p_val_adj | Foldchange_UP | Foldchange_DOWN | Ratio_pct1_pct2 |
| PLEKHM3                                                                                             | 0,319654352 | -0,016040074 | 0,061 | 0,035 | 1         | 0,988943446   | 1,011180168     | 1,742857143     |
| EPHA4                                                                                               | 0,654971645 | -0,016044574 | 0,012 | 0,007 | 1         | 0,988940362   | 1,011183322     | 1,714285714     |
| GPR4                                                                                                | 0,35350329  | -0,016065824 | 0     | 0,011 | 1         | 0,988925795   | 1,011198216     | 0               |
| ERCC6L2                                                                                             | 0,096308262 | -0,016170819 | 0,134 | 0,07  | 1         | 0,988853827   | 1,011271811     | 1,914285714     |
| C19orf81                                                                                            | 0,107265343 | -0,016240788 | 0,037 | 0,011 | 1         | 0,98880587    | 1,011320857     | 3,363636364     |
| NDUFB2-AS1                                                                                          | 0,654971645 | -0,016253364 | 0,012 | 0,007 | 1         | 0,98879725    | 1,011329674     | 1,714285714     |
| DNAH9                                                                                               | 0,35185965  | -0,016344002 | 0,012 | 0,004 | 1         | 0,98873513    | 1,011393213     | 3               |
| METTL9                                                                                              | 0,00053138  | -0,016377361 | 0,39  | 0,168 | 1         | 0,988712268   | 1,0114166       | 2,321428571     |
| PRICKLE1                                                                                            | 0,008308113 | -0,01642512  | 0,098 | 0,028 | 1         | 0,988679538   | 1,011450082     | 3,5             |
| TNXB                                                                                                | 0,044226311 | -0,016432979 | 0,037 | 0,007 | 1         | 0,988674153   | 1,011455591     | 5,285714286     |
| TSEN2                                                                                               | 0,113968254 | -0,016556904 | 0,049 | 0,018 | 1         | 0,988589231   | 1,011542478     | 2,722222222     |
| PAQR7                                                                                               | 0,159342977 | -0,016603421 | 0,073 | 0,035 | 1         | 0,988557357   | 1,011575093     | 2,085714286     |
| AGO4                                                                                                | 0,834483111 | -0,016614899 | 0,037 | 0,032 | 1         | 0,988549491   | 1,011583141     | 1,15625         |
| POMC                                                                                                | 0,187860656 | -0,016618067 | 0,024 | 0,007 | 1         | 0,988547321   | 1,011585363     | 3,428571429     |
| AADAT                                                                                               | 0,043428247 | -0,016749792 | 0,073 | 0,025 | 1         | 0,988457066   | 1,011677729     | 2,92            |
| TMEM187                                                                                             | 0,903285004 | -0,016811241 | 0,012 | 0,011 | 1         | 0,988414965   | 1,011720821     | 1,090909091     |
| SNAPC4                                                                                              | 0,345067611 | -0,016817851 | 0,024 | 0,011 | 1         | 0,988410437   | 1,011725456     | 2,181818182     |
| UBE2Z                                                                                               | 0,001062906 | -0,016839632 | 0,378 | 0,168 | 1         | 0,988395514   | 1,011740731     | 2,25            |
| TMEM273                                                                                             | 0,908489202 | -0,016845475 | 0,012 | 0,011 | 1         | 0,988391511   | 1,011744829     | 1,090909091     |
| TUBGCP5                                                                                             | 0,02310643  | -0,016854344 | 0,073 | 0,021 | 1         | 0,988385435   | 1,011751049     | 3,476190476     |
| SUGP1                                                                                               | 0,014543509 | -0,016869942 | 0,085 | 0,025 | 1         | 0,988374749   | 1,011761987     | 3,4             |
| MPLKIP                                                                                              | 0,007488112 | -0,016892465 | 0,232 | 0,102 | 1         | 0,988359319   | 1,011777782     | 2,274509804     |
| ZNF385C                                                                                             | 0,654971645 | -0,016899431 | 0,012 | 0,007 | 1         | 0,988354546   | 1,011782668     | 1,714285714     |
| TRIM9                                                                                               | 0,158355665 | -0,016935212 | 0,073 | 0,035 | 1         | 0,988330034   | 1,011807762     | 2,085714286     |
| NFXL1                                                                                               | 0,19057237  | -0,01702764  | 0,049 | 0,021 | 1         | 0,988266718   | 1,011872587     | 2,333333333     |
| APOBEC3F                                                                                            | 0,07141129  | -0,017045945 | 0,073 | 0,028 | 1         | 0,988254178   | 1,011885426     | 2,607142857     |
| SASS6                                                                                               | 0,440372242 | -0,017143865 | 0,037 | 0,021 | 1         | 0,988187105   | 1,011954108     | 1,761904762     |
| PDIA2                                                                                               | 0,35185965  | -0,0171531   | 0,012 | 0,004 | 1         | 0,988180779   | 1,011960585     | 3               |
| LINC00115                                                                                           | 0,654971645 | -0,01718385  | 0,012 | 0,007 | 1         | 0,988159717   | 1,011982155     | 1,714285714     |
| CLEC1A                                                                                              | 0,35350329  | -0,017193686 | 0     | 0,011 | 1         | 0,98815298    | 1,011989054     | 0               |



Supplementary Table 2

| Differentially expressed genes_keloid-XL_comparing SC-Keloid vs. (SC-Myel, SC-Nonmyel, SC-Nonmyel2) |             |              |       |       |           |               |                 |                 |
|-----------------------------------------------------------------------------------------------------|-------------|--------------|-------|-------|-----------|---------------|-----------------|-----------------|
| gene                                                                                                | p_val       | avg_log2FC   | pct.1 | pct.2 | p_val_adj | Foldchange_UP | Foldchange_DOWN | Ratio_pct1_pct2 |
| KIF14                                                                                               | 0,908489202 | -0,017228673 | 0,012 | 0,011 | 1         | 0,988129016   | 1,012013597     | 1,090909091     |
| RBM17                                                                                               | 0,001142191 | -0,017237101 | 0,463 | 0,218 | 1         | 0,988123244   | 1,012019509     | 2,123853211     |
| PRELID3A                                                                                            | 0,19057237  | -0,017284724 | 0,049 | 0,021 | 1         | 0,988090627   | 1,012052916     | 2,333333333     |
| KLHDC8B                                                                                             | 0,139738027 | -0,017293971 | 0,085 | 0,042 | 1         | 0,988084294   | 1,012059403     | 2,023809524     |
| EEF1A1                                                                                              | 0,805459215 | -0,017305992 | 1     | 0,996 | 1         | 0,988076061   | 1,012067836     | 1,004016064     |
| FXYP7                                                                                               | 0,570351612 | -0,017306359 | 0,037 | 0,025 | 1         | 0,988075809   | 1,012068093     | 1,48            |
| MTMR1                                                                                               | 0,351112297 | -0,017326562 | 0,024 | 0,011 | 1         | 0,988061973   | 1,012082266     | 2,181818182     |
| MPZL2                                                                                               | 0,57319978  | -0,017327789 | 0,037 | 0,025 | 1         | 0,988061133   | 1,012083126     | 1,48            |
| EGOT                                                                                                | 0,520464457 | -0,017347935 | 0,024 | 0,014 | 1         | 0,988047335   | 1,012097259     | 1,714285714     |
| UBTD2                                                                                               | 0,019313876 | -0,017418441 | 0,232 | 0,112 | 1         | 0,98799905    | 1,012146722     | 2,071428571     |
| TM7SF3                                                                                              | 0,004718714 | -0,017435217 | 0,183 | 0,07  | 1         | 0,987987561   | 1,012158492     | 2,614285714     |
| TSPAN32                                                                                             | 0,35185965  | -0,017450751 | 0,012 | 0,004 | 1         | 0,987976923   | 1,012169391     | 3               |
| B4GALNT4                                                                                            | 0,784581007 | -0,017492618 | 0,28  | 0,232 | 1         | 0,987948252   | 1,012198764     | 1,206896552     |
| TPD52L1                                                                                             | 0,908489202 | -0,017503201 | 0,012 | 0,011 | 1         | 0,987941005   | 1,012206189     | 1,090909091     |
| RUNDC1                                                                                              | 0,442944663 | -0,017565091 | 0,073 | 0,049 | 1         | 0,987898625   | 1,012249613     | 1,489795918     |
| SENP1                                                                                               | 0,107265343 | -0,017630133 | 0,037 | 0,011 | 1         | 0,987854087   | 1,01229525      | 3,363636364     |
| MYBBP1A                                                                                             | 0,008726393 | -0,01767832  | 0,098 | 0,028 | 1         | 0,987821093   | 1,012329062     | 3,5             |
| NSUN4                                                                                               | 0,275831025 | -0,01767973  | 0,049 | 0,025 | 1         | 0,987820127   | 1,012330051     | 1,96            |
| RAB9B                                                                                               | 0,908489202 | -0,017717323 | 0,012 | 0,011 | 1         | 0,987794388   | 1,01235643      | 1,090909091     |
| CACFD1                                                                                              | 0,010916043 | -0,017742796 | 0,073 | 0,018 | 1         | 0,987776947   | 1,012374305     | 4,055555556     |
| LZTS2                                                                                               | 0,000551355 | -0,017743868 | 0,329 | 0,133 | 1         | 0,987776213   | 1,012375057     | 2,473684211     |
| CCDC173                                                                                             | 0,908489202 | -0,017756488 | 0,012 | 0,011 | 1         | 0,987767572   | 1,012383913     | 1,090909091     |
| RIPOR1                                                                                              | 0,00616     | -0,017766432 | 0,244 | 0,109 | 1         | 0,987760764   | 1,012390891     | 2,23853211      |
| ATP5PO                                                                                              | 0,012233358 | -0,017776902 | 0,524 | 0,305 | 1         | 0,987753595   | 1,012398239     | 1,718032787     |
| TMEM164                                                                                             | 0,445614357 | -0,017799065 | 0,037 | 0,021 | 1         | 0,987738421   | 1,012413791     | 1,761904762     |
| FBXO27                                                                                              | 0,530989227 | -0,017914002 | 0,024 | 0,014 | 1         | 0,987659733   | 1,012494452     | 1,714285714     |
| INTS10                                                                                              | 0,001276765 | -0,017974752 | 0,256 | 0,098 | 1         | 0,987618145   | 1,012537087     | 2,612244898     |
| GIMAP6                                                                                              | 0,903285004 | -0,018039112 | 0,012 | 0,011 | 1         | 0,987574088   | 1,012582258     | 1,090909091     |
| GIPC3                                                                                               | 0,107265343 | -0,018064968 | 0,037 | 0,011 | 1         | 0,987556389   | 1,012600406     | 3,363636364     |
| MRM3                                                                                                | 0,117026191 | -0,018090154 | 0,049 | 0,018 | 1         | 0,987539148   | 1,012618084     | 2,722222222     |

Supplementary Table 2

| Differentially expressed genes_keloid-XL_comparing SC-Keloid vs. (SC-Myel, SC-Nonmyel, SC-Nonmyel2) |             |              |       |       |           |               |                 |                 |
|-----------------------------------------------------------------------------------------------------|-------------|--------------|-------|-------|-----------|---------------|-----------------|-----------------|
| gene                                                                                                | p_val       | avg_log2FC   | pct.1 | pct.2 | p_val_adj | Foldchange_UP | Foldchange_DOWN | Ratio_pct1_pct2 |
| FNDC3A                                                                                              | 0,003816767 | -0,018119003 | 0,451 | 0,221 | 1         | 0,987519401   | 1,012638333     | 2,040723982     |
| C12orf57                                                                                            | 0,021293163 | -0,018159025 | 0,659 | 0,389 | 1         | 0,987492006   | 1,012666425     | 1,694087404     |
| PTGS2                                                                                               | 0,991205612 | -0,018189956 | 0,024 | 0,025 | 1         | 0,987470835   | 1,012688136     | 0,96            |
| PEX3                                                                                                | 0,189157269 | -0,018218342 | 0,049 | 0,021 | 1         | 0,987451406   | 1,012708062     | 2,333333333     |
| POLE2                                                                                               | 0,187860656 | -0,018226853 | 0,024 | 0,007 | 1         | 0,987445581   | 1,012714036     | 3,428571429     |
| CDCA5                                                                                               | 0,908489202 | -0,018242955 | 0,012 | 0,011 | 1         | 0,98743456    | 1,012725339     | 1,090909091     |
| FBXO3                                                                                               | 0,039445245 | -0,018258954 | 0,22  | 0,116 | 1         | 0,98742361    | 1,01273657      | 1,896551724     |
| PPP1R14A                                                                                            | 0,35185965  | -0,018265979 | 0,012 | 0,004 | 1         | 0,987418802   | 1,012741502     | 3               |
| PACS1                                                                                               | 0,000155379 | -0,018463395 | 0,207 | 0,06  | 1         | 0,987283694   | 1,012880093     | 3,45            |
| WDR25                                                                                               | 0,002873386 | -0,018484657 | 0,085 | 0,018 | 1         | 0,987269144   | 1,012895021     | 4,722222222     |
| TGFBR1                                                                                              | 0,008656677 | -0,018491121 | 0,207 | 0,088 | 1         | 0,98726472    | 1,012899559     | 2,352272727     |
| UBXN4                                                                                               | 0,008996383 | -0,01851499  | 0,646 | 0,354 | 1         | 0,987248386   | 1,012916318     | 1,824858757     |
| C16orf86                                                                                            | 0,316484073 | -0,018560356 | 0,037 | 0,018 | 1         | 0,987217343   | 1,012948169     | 2,055555556     |
| NRL                                                                                                 | 0,654971645 | -0,018579527 | 0,012 | 0,007 | 1         | 0,987204224   | 1,01296163      | 1,714285714     |
| SLC4A1AP                                                                                            | 0,01189473  | -0,018593784 | 0,134 | 0,049 | 1         | 0,987194468   | 1,01297164      | 2,734693878     |
| GIMAP5                                                                                              | 0,654971645 | -0,018646078 | 0,012 | 0,007 | 1         | 0,987158686   | 1,013008359     | 1,714285714     |
| CD4                                                                                                 | 0,028583695 | -0,018646247 | 0,11  | 0,042 | 1         | 0,987158571   | 1,013008477     | 2,619047619     |
| APOL1                                                                                               | 0,351112297 | -0,01866732  | 0,024 | 0,011 | 1         | 0,987144151   | 1,013023274     | 2,181818182     |
| HAS1                                                                                                | 0,351112297 | -0,018681536 | 0,024 | 0,011 | 1         | 0,987134424   | 1,013033256     | 2,181818182     |
| PEX1                                                                                                | 0,002419035 | -0,018741473 | 0,134 | 0,039 | 1         | 0,987093415   | 1,013075343     | 3,435897436     |
| PPP2R5A                                                                                             | 0,000485496 | -0,018748831 | 0,195 | 0,06  | 1         | 0,98708838    | 1,01308051      | 3,25            |
| DERA                                                                                                | 0,0013411   | -0,01876965  | 0,183 | 0,06  | 1         | 0,987074136   | 1,01309513      | 3,05            |
| DCTN4                                                                                               | 0,235366721 | -0,018778042 | 0,122 | 0,074 | 1         | 0,987068394   | 1,013101023     | 1,648648649     |
| ZNF330                                                                                              | 0,038872504 | -0,018812902 | 0,195 | 0,098 | 1         | 0,987044544   | 1,013125503     | 1,989795918     |
| LINC01140                                                                                           | 0,908489202 | -0,018814064 | 0,012 | 0,011 | 1         | 0,987043749   | 1,013126319     | 1,090909091     |
| SULT1A3                                                                                             | 0,654971645 | -0,018868677 | 0,012 | 0,007 | 1         | 0,987006385   | 1,013164672     | 1,714285714     |
| MTMR4                                                                                               | 0,069809627 | -0,018869617 | 0,085 | 0,035 | 1         | 0,987005742   | 1,013165332     | 2,428571429     |
| SERPINB2                                                                                            | 0,901679385 | -0,018880265 | 0,012 | 0,014 | 1         | 0,986998458   | 1,013172809     | 0,857142857     |
| JPX                                                                                                 | 0,005214115 | -0,018890598 | 0,354 | 0,175 | 1         | 0,986991388   | 1,013180066     | 2,022857143     |
| LINC01011                                                                                           | 0,187860656 | -0,018946048 | 0,024 | 0,007 | 1         | 0,986953454   | 1,013219008     | 3,428571429     |

Supplementary Table 2

| Differentially expressed genes_keloid-XL_comparing SC-Keloid vs. (SC-Myel, SC-Nonmyel, SC-Nonmyel2) |             |              |       |       |           |               |                 |                 |
|-----------------------------------------------------------------------------------------------------|-------------|--------------|-------|-------|-----------|---------------|-----------------|-----------------|
| gene                                                                                                | p_val       | avg_log2FC   | pct.1 | pct.2 | p_val_adj | Foldchange_UP | Foldchange_DOWN | Ratio_pct1_pct2 |
| GALNT10                                                                                             | 0,584809532 | -0,018955923 | 0,049 | 0,035 | 1         | 0,986946698   | 1,013225944     | 1,4             |
| GALNT15                                                                                             | 0,35185965  | -0,018967382 | 0,012 | 0,004 | 1         | 0,986938859   | 1,013233992     | 3               |
| GPR89B                                                                                              | 0,1159998   | -0,019013165 | 0,049 | 0,018 | 1         | 0,98690754    | 1,013266147     | 2,722222222     |
| CRABP2                                                                                              | 0,028371172 | -0,019013301 | 0,11  | 0,042 | 1         | 0,986907447   | 1,013266242     | 2,619047619     |
| ZNF554                                                                                              | 0,901679385 | -0,019038547 | 0,012 | 0,014 | 1         | 0,986890177   | 1,013283973     | 0,857142857     |
| PRKCZ                                                                                               | 0,448248692 | -0,019063058 | 0,037 | 0,021 | 1         | 0,98687341    | 1,013301189     | 1,761904762     |
| SLC1A3                                                                                              | 0,908489202 | -0,019097018 | 0,012 | 0,011 | 1         | 0,98685018    | 1,013325042     | 1,090909091     |
| H2BU1                                                                                               | 0,908489202 | -0,019097398 | 0,012 | 0,011 | 1         | 0,98684992    | 1,013325309     | 1,090909091     |
| ACBD7                                                                                               | 0,654971645 | -0,019143004 | 0,012 | 0,007 | 1         | 0,986818725   | 1,013357342     | 1,714285714     |
| IL15                                                                                                | 0,04253036  | -0,019178708 | 0,085 | 0,032 | 1         | 0,986794303   | 1,013382421     | 2,65625         |
| GLE1                                                                                                | 0,038341604 | -0,019195398 | 0,061 | 0,018 | 1         | 0,986782888   | 1,013394144     | 3,388888889     |
| NUDT12                                                                                              | 0,10104328  | -0,019214867 | 0,085 | 0,039 | 1         | 0,986769571   | 1,013407821     | 2,179487179     |
| PRRT3                                                                                               | 0,20009151  | -0,019226118 | 0,037 | 0,014 | 1         | 0,986761876   | 1,013415723     | 2,642857143     |
| AP3B1                                                                                               | 0,003384251 | -0,01939014  | 0,171 | 0,06  | 1         | 0,986649695   | 1,013530947     | 2,85            |
| F8A3                                                                                                | 0,35185965  | -0,019419402 | 0,012 | 0,004 | 1         | 0,986629683   | 1,013551504     | 3               |
| CTF1                                                                                                | 0,527469009 | -0,019433708 | 0,024 | 0,014 | 1         | 0,9866199     | 1,013561554     | 1,714285714     |
| TYW1                                                                                                | 0,002874762 | -0,019433995 | 0,11  | 0,028 | 1         | 0,986619704   | 1,013561756     | 3,928571429     |
| INTS2                                                                                               | 0,02310643  | -0,01945104  | 0,073 | 0,021 | 1         | 0,986608048   | 1,013573731     | 3,476190476     |
| CCNE2                                                                                               | 0,351112297 | -0,019456841 | 0,024 | 0,011 | 1         | 0,98660408    | 1,013577807     | 2,181818182     |
| ULK3                                                                                                | 0,002221024 | -0,0195269   | 0,195 | 0,07  | 1         | 0,986556171   | 1,013627028     | 2,785714286     |
| TM2D2                                                                                               | 0,000233064 | -0,019536487 | 0,195 | 0,056 | 1         | 0,986549615   | 1,013633764     | 3,482142857     |
| PRSS53                                                                                              | 0,654971645 | -0,019572351 | 0,012 | 0,007 | 1         | 0,986525091   | 1,013658962     | 1,714285714     |
| DENND2B                                                                                             | 0,013868739 | -0,019593387 | 0,402 | 0,225 | 1         | 0,986510706   | 1,013673743     | 1,786666667     |
| ZNF778                                                                                              | 0,908489202 | -0,019607304 | 0,012 | 0,011 | 1         | 0,98650119    | 1,013683522     | 1,090909091     |
| MON1A                                                                                               | 0,1159998   | -0,019628333 | 0,049 | 0,018 | 1         | 0,98648681    | 1,013698298     | 2,722222222     |
| ARMH3                                                                                               | 0,243729901 | -0,019634534 | 0,061 | 0,032 | 1         | 0,986482571   | 1,013702654     | 1,90625         |
| PTPRB                                                                                               | 0,654971645 | -0,01974074  | 0,012 | 0,007 | 1         | 0,986409952   | 1,013777282     | 1,714285714     |
| MIGA2                                                                                               | 0,274072777 | -0,019814336 | 0,049 | 0,025 | 1         | 0,986359633   | 1,013829        | 1,96            |
| TFRC                                                                                                | 0,056582875 | -0,019839245 | 0,134 | 0,063 | 1         | 0,986342603   | 1,013846504     | 2,126984127     |
| GSTCD                                                                                               | 0,025884674 | -0,019861301 | 0,085 | 0,028 | 1         | 0,986327525   | 1,013862003     | 3,035714286     |

Supplementary Table 2

| Differentially expressed genes_keloid-XL_comparing SC-Keloid vs. (SC-Myel, SC-Nonmyel, SC-Nonmyel2) |             |              |       |       |             |               |                 |                 |
|-----------------------------------------------------------------------------------------------------|-------------|--------------|-------|-------|-------------|---------------|-----------------|-----------------|
| gene                                                                                                | p_val       | avg_log2FC   | pct.1 | pct.2 | p_val_adj   | Foldchange_UP | Foldchange_DOWN | Ratio_pct1_pct2 |
| PDE2A                                                                                               | 0,908489202 | -0,01986511  | 0,012 | 0,011 | 1           | 0,98632492    | 1,013864681     | 1,090909091     |
| PIGF                                                                                                | 0,003598714 | -0,019879935 | 0,256 | 0,109 | 1           | 0,986314785   | 1,013875099     | 2,348623853     |
| EIF3C                                                                                               | 0,493813928 | -0,019890732 | 0,049 | 0,032 | 1           | 0,986307404   | 1,013882686     | 1,53125         |
| NOC3L                                                                                               | 0,000305754 | -0,019909288 | 0,146 | 0,035 | 1           | 0,986294717   | 1,013895728     | 4,171428571     |
| TBK1                                                                                                | 0,080139035 | -0,019925789 | 0,159 | 0,084 | 1           | 0,986283437   | 1,013907324     | 1,892857143     |
| PAQR6                                                                                               | 0,043687143 | -0,019952282 | 0,207 | 0,109 | 1           | 0,986265325   | 1,013925943     | 1,899082569     |
| GNA13                                                                                               | 0,027776849 | -0,020004801 | 0,207 | 0,102 | 1           | 0,986229423   | 1,013962854     | 2,029411765     |
| BLOC1S5                                                                                             | 0,002865678 | -0,02002548  | 0,146 | 0,046 | 1           | 0,986215286   | 1,013977388     | 3,173913043     |
| VPS4B                                                                                               | 0,0012271   | -0,020076117 | 0,317 | 0,133 | 1           | 0,986180672   | 1,014012978     | 2,383458647     |
| FES                                                                                                 | 0,00703058  | -0,020107703 | 0,122 | 0,039 | 1           | 0,986159081   | 1,014035179     | 3,128205128     |
| ASGR1                                                                                               | 0,345067611 | -0,020150419 | 0,024 | 0,011 | 1           | 0,986129883   | 1,014065203     | 2,181818182     |
| ZNF329                                                                                              | 0,527469009 | -0,020156098 | 0,024 | 0,014 | 1           | 0,986126001   | 1,014069195     | 1,714285714     |
| ATP10D                                                                                              | 0,261407632 | -0,020191792 | 0,159 | 0,105 | 1           | 0,986101603   | 1,014094285     | 1,514285714     |
| ZNF417                                                                                              | 0,35185965  | -0,020219383 | 0,012 | 0,004 | 1           | 0,986082745   | 1,014113679     | 3               |
| KNOP1                                                                                               | 0,002168758 | -0,020231299 | 0,183 | 0,063 | 1           | 0,9860746     | 1,014122055     | 2,904761905     |
| PLA2R1                                                                                              | 0,187860656 | -0,020237263 | 0,024 | 0,007 | 1           | 0,986070524   | 1,014126248     | 3,428571429     |
| TBC1D20                                                                                             | 0,104108556 | -0,020250002 | 0,159 | 0,088 | 1           | 0,986061817   | 1,014135202     | 1,806818182     |
| AGER                                                                                                | 0,437764503 | -0,020279212 | 0,037 | 0,021 | 1           | 0,986041852   | 1,014155736     | 1,761904762     |
| SKP2                                                                                                | 0,107265343 | -0,020307799 | 0,037 | 0,011 | 1           | 0,986022314   | 1,014175831     | 3,363636364     |
| EML5                                                                                                | 0,903285004 | -0,020363291 | 0,012 | 0,011 | 1           | 0,985984389   | 1,014214841     | 1,090909091     |
| FTSJ3                                                                                               | 6,79157E-05 | -0,020375969 | 0,22  | 0,06  | 1           | 0,985975724   | 1,014223754     | 3,666666667     |
| MORC2-AS1                                                                                           | 0,649511996 | -0,020527734 | 0,012 | 0,007 | 1           | 0,985872009   | 1,014330451     | 1,714285714     |
| PNPT1                                                                                               | 1,74763E-05 | -0,020530351 | 0,232 | 0,06  | 0,368767115 | 0,985870221   | 1,014332291     | 3,866666667     |
| GPT                                                                                                 | 0,35350329  | -0,020561057 | 0     | 0,011 | 1           | 0,985849238   | 1,01435388      | 0               |
| BEND7                                                                                               | 0,060721418 | -0,020596507 | 0,11  | 0,049 | 1           | 0,985825014   | 1,014378805     | 2,244897959     |
| KLHDC1                                                                                              | 0,063408785 | -0,020600662 | 0,049 | 0,014 | 1           | 0,985822175   | 1,014381727     | 3,5             |
| PIGV                                                                                                | 0,20009151  | -0,020606752 | 0,037 | 0,014 | 1           | 0,985818014   | 1,014386009     | 2,642857143     |
| GOLGA6L10                                                                                           | 0,351112297 | -0,020656518 | 0,024 | 0,011 | 1           | 0,985784008   | 1,014421001     | 2,181818182     |
| WDR91                                                                                               | 0,009074461 | -0,020667602 | 0,098 | 0,028 | 1           | 0,985776435   | 1,014428794     | 3,5             |
| PRRT3-AS1                                                                                           | 0,699214153 | -0,020672459 | 0,024 | 0,018 | 1           | 0,985773116   | 1,014432209     | 1,333333333     |

Supplementary Table 2

| Differentially expressed genes_keloid-XL_comparing SC-Keloid vs. (SC-Myel, SC-Nonmyel, SC-Nonmyel2) |             |              |       |       |           |               |                 |                 |
|-----------------------------------------------------------------------------------------------------|-------------|--------------|-------|-------|-----------|---------------|-----------------|-----------------|
| gene                                                                                                | p_val       | avg_log2FC   | pct.1 | pct.2 | p_val_adj | Foldchange_UP | Foldchange_DOWN | Ratio_pct1_pct2 |
| ZC3H10                                                                                              | 0,440372242 | -0,020682718 | 0,037 | 0,021 | 1         | 0,985766106   | 1,014439423     | 1,761904762     |
| ZFP28                                                                                               | 0,198346594 | -0,020732887 | 0,037 | 0,014 | 1         | 0,985731827   | 1,014474701     | 2,642857143     |
| ELOVL7                                                                                              | 0,89237004  | -0,020743972 | 0,012 | 0,014 | 1         | 0,985724253   | 1,014482496     | 0,857142857     |
| RBFOX2                                                                                              | 0,000813913 | -0,020749613 | 0,341 | 0,144 | 1         | 0,985720399   | 1,014486462     | 2,368055556     |
| HSPBAP1                                                                                             | 0,017691584 | -0,020789506 | 0,061 | 0,014 | 1         | 0,985693143   | 1,014514514     | 4,357142857     |
| HMCE5                                                                                               | 0,007048143 | -0,020819878 | 0,146 | 0,053 | 1         | 0,985672391   | 1,014535873     | 2,754716981     |
| MROH8                                                                                               | 0,28294086  | -0,020828784 | 0,049 | 0,025 | 1         | 0,985666307   | 1,014542136     | 1,96            |
| FAM66C                                                                                              | 0,107265343 | -0,020836672 | 0,037 | 0,011 | 1         | 0,985660918   | 1,014547683     | 3,363636364     |
| ELK1                                                                                                | 0,044698521 | -0,020869778 | 0,098 | 0,039 | 1         | 0,9856383     | 1,014570964     | 2,512820513     |
| TMCO6                                                                                               | 0,523960732 | -0,020870792 | 0,024 | 0,014 | 1         | 0,985637607   | 1,014571677     | 1,714285714     |
| DHODH                                                                                               | 0,8646531   | -0,02087164  | 0,024 | 0,021 | 1         | 0,985637028   | 1,014572273     | 1,142857143     |
| NPM1                                                                                                | 0,352668784 | -0,020874874 | 0,793 | 0,625 | 1         | 0,985634818   | 1,014574548     | 1,2688          |
| TMEM131L                                                                                            | 0,654971645 | -0,020879913 | 0,012 | 0,007 | 1         | 0,985631376   | 1,014578091     | 1,714285714     |
| LMCD1-AS1                                                                                           | 0,8646531   | -0,020899318 | 0,024 | 0,021 | 1         | 0,985618118   | 1,014591738     | 1,142857143     |
| CEP128                                                                                              | 0,187860656 | -0,020907815 | 0,024 | 0,007 | 1         | 0,985612313   | 1,014597714     | 3,428571429     |
| SMAD9                                                                                               | 0,351112297 | -0,020968071 | 0,024 | 0,011 | 1         | 0,985571149   | 1,014640091     | 2,181818182     |
| THAP6                                                                                               | 0,113754019 | -0,020988794 | 0,061 | 0,025 | 1         | 0,985556992   | 1,014654665     | 2,44            |
| NEK10                                                                                               | 0,908489202 | -0,021068685 | 0,012 | 0,011 | 1         | 0,985502418   | 1,014710854     | 1,090909091     |
| DGCR5                                                                                               | 0,35350329  | -0,021092998 | 0     | 0,011 | 1         | 0,985485809   | 1,014727955     | 0               |
| ARHGEF19                                                                                            | 0,009163392 | -0,021098469 | 0,098 | 0,028 | 1         | 0,985482072   | 1,014731803     | 3,5             |
| RTF1                                                                                                | 0,000962672 | -0,021101041 | 0,488 | 0,235 | 1         | 0,985480315   | 1,014733612     | 2,076595745     |
| LYRM1                                                                                               | 0,008986301 | -0,021185683 | 0,098 | 0,028 | 1         | 0,9854225     | 1,014793147     | 3,5             |
| PROSER1                                                                                             | 0,026817522 | -0,021214146 | 0,085 | 0,028 | 1         | 0,985403058   | 1,014813169     | 3,035714286     |
| CCNJ                                                                                                | 0,35350329  | -0,021231963 | 0     | 0,011 | 1         | 0,985390889   | 1,014825702     | 0               |
| POLR1G                                                                                              | 0,000298361 | -0,021277628 | 0,085 | 0,011 | 1         | 0,985359699   | 1,014857824     | 7,727272727     |
| ARL3                                                                                                | 0,002235928 | -0,021300905 | 0,463 | 0,221 | 1         | 0,985343801   | 1,014874199     | 2,095022624     |
| DARS2                                                                                               | 0,113968254 | -0,021301932 | 0,049 | 0,018 | 1         | 0,985343099   | 1,014874921     | 2,722222222     |
| ZNF500                                                                                              | 0,908489202 | -0,021309032 | 0,012 | 0,011 | 1         | 0,98533825    | 1,014879916     | 1,090909091     |
| SIGMAR1                                                                                             | 0,002146023 | -0,021310968 | 0,171 | 0,056 | 1         | 0,985336928   | 1,014881277     | 3,053571429     |
| SERPINF2                                                                                            | 0,35185965  | -0,021326565 | 0,012 | 0,004 | 1         | 0,985326275   | 1,014892249     | 3               |

Supplementary Table 2

| Differentially expressed genes_keloid-XL_comparing SC-Keloid vs. (SC-Myel, SC-Nonmyel, SC-Nonmyel2) |             |              |       |       |           |               |                 |                 |
|-----------------------------------------------------------------------------------------------------|-------------|--------------|-------|-------|-----------|---------------|-----------------|-----------------|
| gene                                                                                                | p_val       | avg_log2FC   | pct.1 | pct.2 | p_val_adj | Foldchange_UP | Foldchange_DOWN | Ratio_pct1_pct2 |
| SDCBP2                                                                                              | 0,908489202 | -0,021328282 | 0,012 | 0,011 | 1         | 0,985325103   | 1,014893457     | 1,090909091     |
| UBE2E1                                                                                              | 0,004896994 | -0,021355809 | 0,232 | 0,098 | 1         | 0,985306303   | 1,014912822     | 2,367346939     |
| DLG3                                                                                                | 0,042292152 | -0,021371113 | 0,073 | 0,025 | 1         | 0,985295851   | 1,014923588     | 2,92            |
| ZNF57                                                                                               | 0,35350329  | -0,02137378  | 0     | 0,011 | 1         | 0,985294029   | 1,014925464     | 0               |
| MAPK9                                                                                               | 0,000764801 | -0,021420004 | 0,183 | 0,056 | 1         | 0,985262461   | 1,014957983     | 3,267857143     |
| CCDC85B                                                                                             | 0,003596549 | -0,021420622 | 0,537 | 0,27  | 1         | 0,985262039   | 1,014958417     | 1,988888889     |
| SCYL2                                                                                               | 0,007331665 | -0,021423171 | 0,159 | 0,06  | 1         | 0,985260299   | 1,01496021      | 2,65            |
| JPH1                                                                                                | 0,35350329  | -0,02142733  | 0     | 0,011 | 1         | 0,985257458   | 1,014963137     | 0               |
| NACAD                                                                                               | 0,018032711 | -0,021439785 | 0,134 | 0,053 | 1         | 0,985248952   | 1,014971899     | 2,528301887     |
| FHIP2A                                                                                              | 0,045329609 | -0,021522483 | 0,085 | 0,032 | 1         | 0,985192477   | 1,015030081     | 2,65625         |
| EME2                                                                                                | 0,57319978  | -0,021533983 | 0,037 | 0,025 | 1         | 0,985184625   | 1,015038172     | 1,48            |
| RNASE1                                                                                              | 0,834483111 | -0,021534914 | 0,037 | 0,032 | 1         | 0,985183989   | 1,015038827     | 1,15625         |
| DGKA                                                                                                | 0,065438103 | -0,021592869 | 0,098 | 0,042 | 1         | 0,985144413   | 1,015079603     | 2,333333333     |
| TMEM165                                                                                             | 0,000228305 | -0,021596167 | 0,512 | 0,221 | 1         | 0,985142161   | 1,015081924     | 2,316742081     |
| AL118506.1                                                                                          | 0,187860656 | -0,021612879 | 0,024 | 0,007 | 1         | 0,985130749   | 1,015093682     | 3,428571429     |
| ATP6VOA2                                                                                            | 0,491488002 | -0,021657492 | 0,049 | 0,032 | 1         | 0,985100286   | 1,015125073     | 1,53125         |
| RRN3                                                                                                | 0,14645865  | -0,021673699 | 0,085 | 0,042 | 1         | 0,98508922    | 1,015136477     | 2,023809524     |
| NIT1                                                                                                | 0,323014826 | -0,02171664  | 0,061 | 0,035 | 1         | 0,985059899   | 1,015166693     | 1,742857143     |
| INTS6-AS1                                                                                           | 0,107265343 | -0,021761844 | 0,037 | 0,011 | 1         | 0,985029035   | 1,015198501     | 3,363636364     |
| MATN3                                                                                               | 0,908489202 | -0,021772487 | 0,012 | 0,011 | 1         | 0,985021769   | 1,01520599      | 1,090909091     |
| PRKACA                                                                                              | 0,000519551 | -0,021811212 | 0,28  | 0,105 | 1         | 0,984995329   | 1,015233241     | 2,666666667     |
| NSMCE2                                                                                              | 0,028407989 | -0,02188915  | 0,146 | 0,063 | 1         | 0,984942119   | 1,015288087     | 2,317460317     |
| STX18-AS1                                                                                           | 0,855427988 | -0,021903497 | 0,024 | 0,028 | 1         | 0,984932324   | 1,015298184     | 0,857142857     |
| DCAF4                                                                                               | 0,186350334 | -0,021905479 | 0,049 | 0,021 | 1         | 0,984930971   | 1,015299579     | 2,333333333     |
| ATP7B                                                                                               | 0,351112297 | -0,021913415 | 0,024 | 0,011 | 1         | 0,984925553   | 1,015305164     | 2,181818182     |
| RAI2                                                                                                | 0,35350329  | -0,021932103 | 0     | 0,011 | 1         | 0,984912794   | 1,015318316     | 0               |
| SAP25                                                                                               | 0,908489202 | -0,021981395 | 0,012 | 0,011 | 1         | 0,984879144   | 1,015353007     | 1,090909091     |
| TLCD4                                                                                               | 0,840473976 | -0,021989901 | 0,037 | 0,032 | 1         | 0,984873337   | 1,015358993     | 1,15625         |
| ZNF786                                                                                              | 0,351112297 | -0,021997636 | 0,024 | 0,011 | 1         | 0,984868057   | 1,015364437     | 2,181818182     |
| CACNA1A                                                                                             | 0,941822149 | -0,022011228 | 0,049 | 0,046 | 1         | 0,984858778   | 1,015374003     | 1,065217391     |

Supplementary Table 2

| Differentially expressed genes_keloid-XL_comparing SC-Keloid vs. (SC-Myel, SC-Nonmyel, SC-Nonmyel2) |             |              |       |       |           |               |                 |                 |
|-----------------------------------------------------------------------------------------------------|-------------|--------------|-------|-------|-----------|---------------|-----------------|-----------------|
| gene                                                                                                | p_val       | avg_log2FC   | pct.1 | pct.2 | p_val_adj | Foldchange_UP | Foldchange_DOWN | Ratio_pct1_pct2 |
| H4C8                                                                                                | 0,868326909 | -0,022042726 | 0,024 | 0,021 | 1         | 0,984837276   | 1,015396172     | 1,142857143     |
| OR4F15                                                                                              | 0,654971645 | -0,022069129 | 0,012 | 0,007 | 1         | 0,984819252   | 1,015414755     | 1,714285714     |
| SRSF6                                                                                               | 0,000511568 | -0,02207616  | 0,427 | 0,186 | 1         | 0,984814453   | 1,015419704     | 2,295698925     |
| TRIB2                                                                                               | 0,000551653 | -0,022091156 | 0,305 | 0,119 | 1         | 0,984804217   | 1,015430258     | 2,56302521      |
| CUTC                                                                                                | 0,008012159 | -0,022093594 | 0,159 | 0,06  | 1         | 0,984802553   | 1,015431974     | 2,65            |
| ZNF334                                                                                              | 0,530989227 | -0,02211667  | 0,024 | 0,014 | 1         | 0,984786801   | 1,015448216     | 1,714285714     |
| TLCD5                                                                                               | 0,043911154 | -0,022168674 | 0,085 | 0,032 | 1         | 0,984751303   | 1,01548482      | 2,65625         |
| FAM117A                                                                                             | 0,578916265 | -0,022176417 | 0,037 | 0,025 | 1         | 0,984746018   | 1,01549027      | 1,48            |
| FOXP2                                                                                               | 0,35185965  | -0,022201865 | 0,012 | 0,004 | 1         | 0,984728648   | 1,015508183     | 3               |
| NUPR1                                                                                               | 0,00082307  | -0,022217053 | 0,159 | 0,046 | 1         | 0,984718281   | 1,015518874     | 3,456521739     |
| ZNF829                                                                                              | 0,654971645 | -0,022237365 | 0,012 | 0,007 | 1         | 0,984704417   | 1,015533172     | 1,714285714     |
| ADCK1                                                                                               | 0,028081741 | -0,022248519 | 0,049 | 0,011 | 1         | 0,984696804   | 1,015541023     | 4,454545455     |
| ARSG                                                                                                | 0,908489202 | -0,022320339 | 0,012 | 0,011 | 1         | 0,984647786   | 1,01559158      | 1,090909091     |
| CBS                                                                                                 | 0,35185965  | -0,022344992 | 0,012 | 0,004 | 1         | 0,98463096    | 1,015608935     | 3               |
| SOX1                                                                                                | 0,20009151  | -0,022458889 | 0,037 | 0,014 | 1         | 0,984553229   | 1,015689118     | 2,642857143     |
| ROCK1                                                                                               | 0,013429773 | -0,022477593 | 0,415 | 0,225 | 1         | 0,984540464   | 1,015702286     | 1,844444444     |
| MORF4L2-AS1                                                                                         | 0,654971645 | -0,022485729 | 0,012 | 0,007 | 1         | 0,984534912   | 1,015708013     | 1,714285714     |
| RNF141                                                                                              | 0,000329164 | -0,022529241 | 0,22  | 0,07  | 1         | 0,984505219   | 1,015738648     | 3,142857143     |
| IQCH-AS1                                                                                            | 0,187860656 | -0,02253849  | 0,024 | 0,007 | 1         | 0,984498907   | 1,01574516      | 3,428571429     |
| CDC25B                                                                                              | 0,278246145 | -0,022547936 | 0,073 | 0,042 | 1         | 0,984492461   | 1,01575181      | 1,738095238     |
| G6PD                                                                                                | 0,009486231 | -0,022589542 | 0,122 | 0,042 | 1         | 0,98446407    | 1,015781104     | 2,904761905     |
| PLXDC1                                                                                              | 0,908489202 | -0,022602389 | 0,012 | 0,011 | 1         | 0,984455303   | 1,01579015      | 1,090909091     |
| ANGPT2                                                                                              | 0,702909482 | -0,022604867 | 0,024 | 0,018 | 1         | 0,984453612   | 1,015791895     | 1,333333333     |
| OTX1                                                                                                | 0,35350329  | -0,022613466 | 0     | 0,011 | 1         | 0,984447745   | 1,015797949     | 0               |
| DDAH2                                                                                               | 0,029100841 | -0,022745124 | 0,537 | 0,323 | 1         | 0,98435791    | 1,015890653     | 1,6625387       |
| KANK1                                                                                               | 0,070054953 | -0,02275956  | 0,061 | 0,021 | 1         | 0,98434806    | 1,015900818     | 2,904761905     |
| ADA                                                                                                 | 0,35350329  | -0,022822609 | 0     | 0,011 | 1         | 0,984305043   | 1,015945217     | 0               |
| MIR155HG                                                                                            | 0,736792926 | -0,022850162 | 0,012 | 0,018 | 1         | 0,984286245   | 1,015964619     | 0,666666667     |
| SET                                                                                                 | 0,295164364 | -0,022937443 | 0,817 | 0,649 | 1         | 0,984226699   | 1,016026086     | 1,258859784     |
| AGTPBP1                                                                                             | 0,027911906 | -0,023055665 | 0,098 | 0,035 | 1         | 0,984146049   | 1,016109348     | 2,8             |

Supplementary Table 2

| Differentially expressed genes_keloid-XL_comparing SC-Keloid vs. (SC-Myel, SC-Nonmyel, SC-Nonmyel2) |             |              |       |       |           |               |                 |                 |
|-----------------------------------------------------------------------------------------------------|-------------|--------------|-------|-------|-----------|---------------|-----------------|-----------------|
| gene                                                                                                | p_val       | avg_log2FC   | pct.1 | pct.2 | p_val_adj | Foldchange_UP | Foldchange_DOWN | Ratio_pct1_pct2 |
| EPHB4                                                                                               | 0,370654006 | -0,023057995 | 0,049 | 0,028 | 1         | 0,98414446    | 1,016110989     | 1,75            |
| HLA-DQA2                                                                                            | 0,89702294  | -0,023059616 | 0,012 | 0,014 | 1         | 0,984143354   | 1,01611213      | 0,857142857     |
| ANKZF1                                                                                              | 0,044372256 | -0,023090536 | 0,098 | 0,039 | 1         | 0,984122262   | 1,016133908     | 2,512820513     |
| CD200                                                                                               | 0,01313356  | -0,023116771 | 0,183 | 0,077 | 1         | 0,984104366   | 1,016152387     | 2,376623377     |
| SPATA18                                                                                             | 0,654971645 | -0,023155466 | 0,012 | 0,007 | 1         | 0,984077971   | 1,016179641     | 1,714285714     |
| IL1RN                                                                                               | 0,654971645 | -0,023195545 | 0,012 | 0,007 | 1         | 0,984050634   | 1,016207872     | 1,714285714     |
| CDCA3                                                                                               | 0,35350329  | -0,023279637 | 0     | 0,011 | 1         | 0,983993277   | 1,016267106     | 0               |
| PEAR1                                                                                               | 0,35350329  | -0,023300865 | 0     | 0,011 | 1         | 0,983978798   | 1,01628206      | 0               |
| NUDT17                                                                                              | 0,071300757 | -0,023317391 | 0,061 | 0,021 | 1         | 0,983967527   | 1,016293702     | 2,904761905     |
| FAM24B                                                                                              | 0,908489202 | -0,023512184 | 0,012 | 0,011 | 1         | 0,98383468    | 1,016430931     | 1,090909091     |
| PACRG                                                                                               | 0,187860656 | -0,023526256 | 0,024 | 0,007 | 1         | 0,983825084   | 1,016440846     | 3,428571429     |
| HMGXB3                                                                                              | 0,007722029 | -0,023697467 | 0,159 | 0,06  | 1         | 0,983708336   | 1,016561478     | 2,65            |
| ZBTB48                                                                                              | 0,044048002 | -0,023730746 | 0,098 | 0,039 | 1         | 0,983685645   | 1,016584928     | 2,512820513     |
| BTF3                                                                                                | 0,423049897 | -0,023799057 | 0,854 | 0,712 | 1         | 0,983639069   | 1,016633064     | 1,199438202     |
| C17orf75                                                                                            | 0,017183031 | -0,023807887 | 0,11  | 0,039 | 1         | 0,983633048   | 1,016639286     | 2,820512821     |
| GAREM2                                                                                              | 0,35350329  | -0,023815246 | 0     | 0,011 | 1         | 0,983628031   | 1,016644471     | 0               |
| TUBGCP4                                                                                             | 0,042292152 | -0,023832305 | 0,073 | 0,025 | 1         | 0,9836164     | 1,016656493     | 2,92            |
| USP30                                                                                               | 0,063408785 | -0,023861547 | 0,049 | 0,014 | 1         | 0,983596463   | 1,0166771       | 3,5             |
| AL035681.1                                                                                          | 0,654971645 | -0,023878355 | 0,012 | 0,007 | 1         | 0,983585004   | 1,016688945     | 1,714285714     |
| SLC35E2A                                                                                            | 0,118200281 | -0,023913413 | 0,061 | 0,025 | 1         | 0,983561103   | 1,016713651     | 2,44            |
| LAMA3                                                                                               | 0,908489202 | -0,023933621 | 0,012 | 0,011 | 1         | 0,983547326   | 1,016727892     | 1,090909091     |
| MGARP                                                                                               | 0,654971645 | -0,023950169 | 0,012 | 0,007 | 1         | 0,983536045   | 1,016739555     | 1,714285714     |
| HMG A1                                                                                              | 0,000267795 | -0,023954676 | 0,439 | 0,189 | 1         | 0,983532973   | 1,01674273      | 2,322751323     |
| KRT19                                                                                               | 0,351112297 | -0,023972212 | 0,024 | 0,011 | 1         | 0,983521017   | 1,016755089     | 2,181818182     |
| NETO2                                                                                               | 0,908489202 | -0,02397981  | 0,012 | 0,011 | 1         | 0,983515838   | 1,016760444     | 1,090909091     |
| C16orf74                                                                                            | 0,35350329  | -0,023984342 | 0     | 0,011 | 1         | 0,983512748   | 1,016763638     | 0               |
| TBC1D10B                                                                                            | 0,001620362 | -0,023984543 | 0,232 | 0,088 | 1         | 0,983512612   | 1,016763779     | 2,636363636     |
| HMSD                                                                                                | 0,104939896 | -0,023987715 | 0,037 | 0,011 | 1         | 0,983510449   | 1,016766015     | 3,363636364     |
| WFS1                                                                                                | 0,274072777 | -0,024012575 | 0,049 | 0,025 | 1         | 0,983493501   | 1,016783536     | 1,96            |
| GLRX                                                                                                | 0,314233219 | -0,024061422 | 0,037 | 0,018 | 1         | 0,983460203   | 1,016817963     | 2,055555556     |



Supplementary Table 2

| Differentially expressed genes_keloid-XL_comparing SC-Keloid vs. (SC-Myel, SC-Nonmyel, SC-Nonmyel2) |             |              |       |       |             |               |                 |                 |
|-----------------------------------------------------------------------------------------------------|-------------|--------------|-------|-------|-------------|---------------|-----------------|-----------------|
| gene                                                                                                | p_val       | avg_log2FC   | pct.1 | pct.2 | p_val_adj   | Foldchange_UP | Foldchange_DOWN | Ratio_pct1_pct2 |
| ZNF680                                                                                              | 0,372706606 | -0,024071198 | 0,049 | 0,028 | 1           | 0,983453539   | 1,016824853     | 1,75            |
| SMIM7                                                                                               | 1,24478E-05 | -0,024072766 | 0,488 | 0,189 | 0,262661355 | 0,98345247    | 1,016825958     | 2,582010582     |
| U2AF2                                                                                               | 0,006140385 | -0,024135374 | 0,366 | 0,182 | 1           | 0,983409792   | 1,016870086     | 2,010989011     |
| PLPP7                                                                                               | 0,654971645 | -0,024164429 | 0,012 | 0,007 | 1           | 0,983389987   | 1,016890565     | 1,714285714     |
| ZNF581                                                                                              | 0,012568907 | -0,024187848 | 0,159 | 0,063 | 1           | 0,983374024   | 1,016907073     | 2,523809524     |
| THNSL1                                                                                              | 0,187860656 | -0,024203379 | 0,024 | 0,007 | 1           | 0,983363438   | 1,01691802      | 3,428571429     |
| PPIE                                                                                                | 0,000871408 | -0,024210871 | 0,256 | 0,098 | 1           | 0,983358331   | 1,016923301     | 2,612244898     |
| ILF2                                                                                                | 0,006547994 | -0,024217746 | 0,549 | 0,295 | 1           | 0,983353645   | 1,016928147     | 1,861016949     |
| SYNRG                                                                                               | 0,011911786 | -0,02431095  | 0,207 | 0,091 | 1           | 0,983290118   | 1,016993847     | 2,274725275     |
| PIAS3                                                                                               | 0,046156346 | -0,024312959 | 0,11  | 0,046 | 1           | 0,983288749   | 1,016995263     | 2,391304348     |
| FUT4                                                                                                | 0,523960732 | -0,024325845 | 0,024 | 0,014 | 1           | 0,983279967   | 1,017004346     | 1,714285714     |
| KDM4A-AS1                                                                                           | 0,908489202 | -0,024331144 | 0,012 | 0,011 | 1           | 0,983276355   | 1,017008082     | 1,090909091     |
| ZNF345                                                                                              | 0,710321163 | -0,024342715 | 0,024 | 0,018 | 1           | 0,983268469   | 1,017016239     | 1,333333333     |
| A1BG-AS1                                                                                            | 0,00931978  | -0,024372881 | 0,049 | 0,007 | 1           | 0,983247909   | 1,017037504     | 7               |
| ZNF467                                                                                              | 0,35350329  | -0,024379208 | 0     | 0,011 | 1           | 0,983243597   | 1,017041965     | 0               |
| FYTTD1                                                                                              | 0,000187678 | -0,024382741 | 0,451 | 0,189 | 1           | 0,983241189   | 1,017044455     | 2,386243386     |
| RACGAP1                                                                                             | 0,527469009 | -0,024403071 | 0,024 | 0,014 | 1           | 0,983227334   | 1,017058787     | 1,714285714     |
| POLR1B                                                                                              | 0,1180597   | -0,024423142 | 0,049 | 0,018 | 1           | 0,983213656   | 1,017072936     | 2,722222222     |
| ERAL1                                                                                               | 4,97485E-06 | -0,024448599 | 0,159 | 0,025 | 0,104974353 | 0,983196307   | 1,017090883     | 6,36            |
| TDP2                                                                                                | 0,009669783 | -0,024452502 | 0,11  | 0,035 | 1           | 0,983193647   | 1,017093635     | 3,142857143     |
| ALPK1                                                                                               | 0,043812629 | -0,024462346 | 0,073 | 0,025 | 1           | 0,983186938   | 1,017100576     | 2,92            |
| PRRT2                                                                                               | 0,872003564 | -0,02459263  | 0,024 | 0,021 | 1           | 0,983098154   | 1,017192429     | 1,142857143     |
| MTBP                                                                                                | 0,530989227 | -0,024607331 | 0,024 | 0,014 | 1           | 0,983088137   | 1,017202794     | 1,714285714     |
| COQ10A                                                                                              | 0,070884133 | -0,024618537 | 0,098 | 0,042 | 1           | 0,983080501   | 1,017210696     | 2,333333333     |
| GPR146                                                                                              | 0,89237004  | -0,024645627 | 0,012 | 0,014 | 1           | 0,983062041   | 1,017229797     | 0,857142857     |
| SNX8                                                                                                | 0,026581629 | -0,02469033  | 0,085 | 0,028 | 1           | 0,983031581   | 1,017261317     | 3,035714286     |
| ZNF816                                                                                              | 0,699214153 | -0,024730857 | 0,024 | 0,018 | 1           | 0,983003967   | 1,017289893     | 1,333333333     |
| TLL1                                                                                                | 0,185668317 | -0,024776885 | 0,024 | 0,007 | 1           | 0,982972605   | 1,01732235      | 3,428571429     |
| THAP9                                                                                               | 0,187860656 | -0,024856719 | 0,024 | 0,007 | 1           | 0,982918212   | 1,017378647     | 3,428571429     |
| SLC9A8                                                                                              | 0,115516455 | -0,024862921 | 0,061 | 0,025 | 1           | 0,982913987   | 1,01738302      | 2,44            |

Supplementary Table 2

| Differentially expressed genes_keloid-XL_comparing SC-Keloid vs. (SC-Myel, SC-Nonmyel, SC-Nonmyel2) |             |              |       |       |             |               |                 |                 |
|-----------------------------------------------------------------------------------------------------|-------------|--------------|-------|-------|-------------|---------------|-----------------|-----------------|
| gene                                                                                                | p_val       | avg_log2FC   | pct.1 | pct.2 | p_val_adj   | Foldchange_UP | Foldchange_DOWN | Ratio_pct1_pct2 |
| HEXIM2                                                                                              | 0,004102792 | -0,024876896 | 0,098 | 0,025 | 1           | 0,982904465   | 1,017392875     | 3,92            |
| NUDCD1                                                                                              | 0,011246549 | -0,024878786 | 0,159 | 0,063 | 1           | 0,982903178   | 1,017394208     | 2,523809524     |
| NUDCD3                                                                                              | 4,53211E-05 | -0,024927468 | 0,232 | 0,063 | 0,956319696 | 0,982870011   | 1,017428539     | 3,682539683     |
| VRK3                                                                                                | 0,21713941  | -0,024955833 | 0,073 | 0,039 | 1           | 0,982850687   | 1,017448543     | 1,871794872     |
| KAZALD1                                                                                             | 0,706611845 | -0,024959532 | 0,024 | 0,018 | 1           | 0,982848167   | 1,017451152     | 1,333333333     |
| SF3B3                                                                                               | 0,017793293 | -0,02495972  | 0,146 | 0,06  | 1           | 0,982848039   | 1,017451285     | 2,433333333     |
| RAB11FIP4                                                                                           | 0,35350329  | -0,024991261 | 0     | 0,011 | 1           | 0,982826552   | 1,017473529     | 0               |
| SPX                                                                                                 | 0,654971645 | -0,025020794 | 0,012 | 0,007 | 1           | 0,982806433   | 1,017494357     | 1,714285714     |
| RNF217                                                                                              | 0,000712242 | -0,025021444 | 0,183 | 0,056 | 1           | 0,98280599    | 1,017494816     | 3,267857143     |
| FAM98B                                                                                              | 0,001603987 | -0,025023105 | 0,159 | 0,049 | 1           | 0,982804858   | 1,017495988     | 3,244897959     |
| COMTD1                                                                                              | 7,64252E-05 | -0,025051461 | 0,232 | 0,067 | 1           | 0,982785542   | 1,017515986     | 3,462686567     |
| FAM120C                                                                                             | 0,304698898 | -0,025057229 | 0,085 | 0,053 | 1           | 0,982781613   | 1,017520054     | 1,603773585     |
| PLPP2                                                                                               | 0,89702294  | -0,025070383 | 0,012 | 0,014 | 1           | 0,982772652   | 1,017529332     | 0,857142857     |
| ZNF707                                                                                              | 0,654971645 | -0,025070395 | 0,012 | 0,007 | 1           | 0,982772644   | 1,01752934      | 1,714285714     |
| MAPRE2                                                                                              | 0,244665502 | -0,025071767 | 0,415 | 0,291 | 1           | 0,982771709   | 1,017530308     | 1,426116838     |
| IMPA1                                                                                               | 0,031462257 | -0,025080923 | 0,171 | 0,081 | 1           | 0,982765473   | 1,017536765     | 2,111111111     |
| ZNF669                                                                                              | 0,314233219 | -0,025107994 | 0,037 | 0,018 | 1           | 0,982747031   | 1,017555859     | 2,055555556     |
| INPP5J                                                                                              | 0,187860656 | -0,025149155 | 0,024 | 0,007 | 1           | 0,982718993   | 1,017584891     | 3,428571429     |
| GLI2                                                                                                | 0,351112297 | -0,025155024 | 0,024 | 0,011 | 1           | 0,982714996   | 1,017589031     | 2,181818182     |
| LYPD3                                                                                               | 0,103792275 | -0,025210959 | 0,037 | 0,011 | 1           | 0,982676895   | 1,017628485     | 3,363636364     |
| FAM118A                                                                                             | 0,006707687 | -0,025239589 | 0,134 | 0,046 | 1           | 0,982657395   | 1,017648679     | 2,913043478     |
| DNAAF4                                                                                              | 0,026581629 | -0,025319706 | 0,085 | 0,028 | 1           | 0,982602826   | 1,017705194     | 3,035714286     |
| ASCC3                                                                                               | 0,026358252 | -0,025334134 | 0,134 | 0,056 | 1           | 0,982593      | 1,017715372     | 2,392857143     |
| KIAA0513                                                                                            | 0,89237004  | -0,02534448  | 0,012 | 0,014 | 1           | 0,982585953   | 1,01772267      | 0,857142857     |
| FHIT                                                                                                | 0,28286347  | -0,025374151 | 0     | 0,014 | 1           | 0,982565745   | 1,017743601     | 0               |
| DENND3                                                                                              | 0,107265343 | -0,025398604 | 0,037 | 0,011 | 1           | 0,982549091   | 1,017760852     | 3,363636364     |
| ZNF561                                                                                              | 0,007086391 | -0,025420408 | 0,085 | 0,021 | 1           | 0,982534242   | 1,017776233     | 4,047619048     |
| PUM3                                                                                                | 0,002907821 | -0,025474838 | 0,232 | 0,091 | 1           | 0,982497173   | 1,017814633     | 2,549450549     |
| ECI2                                                                                                | 0,001150056 | -0,025477279 | 0,195 | 0,067 | 1           | 0,982495511   | 1,017816355     | 2,910447761     |
| SOX5                                                                                                | 0,05481976  | -0,025491549 | 0,207 | 0,112 | 1           | 0,982485793   | 1,017826423     | 1,848214286     |

Supplementary Table 2

| Differentially expressed genes_keloid-XL_comparing SC-Keloid vs. (SC-Myel, SC-Nonmyel, SC-Nonmyel2) |             |              |       |       |           |               |                 |                 |
|-----------------------------------------------------------------------------------------------------|-------------|--------------|-------|-------|-----------|---------------|-----------------|-----------------|
| gene                                                                                                | p_val       | avg_log2FC   | pct.1 | pct.2 | p_val_adj | Foldchange_UP | Foldchange_DOWN | Ratio_pct1_pct2 |
| SLC25A43                                                                                            | 0,04308722  | -0,025523269 | 0,098 | 0,039 | 1         | 0,982464192   | 1,017848802     | 2,512820513     |
| NT5DC1                                                                                              | 0,1180597   | -0,025597174 | 0,049 | 0,018 | 1         | 0,982413865   | 1,017900944     | 2,722222222     |
| POLR2M                                                                                              | 0,007850161 | -0,025603295 | 0,207 | 0,088 | 1         | 0,982409696   | 1,017905263     | 2,352272727     |
| MBIP                                                                                                | 0,112588193 | -0,025701537 | 0,146 | 0,081 | 1         | 0,9823428     | 1,01797458      | 1,802469136     |
| NUP155                                                                                              | 0,006163779 | -0,025702477 | 0,061 | 0,011 | 1         | 0,98234216    | 1,017975244     | 5,545454545     |
| CLTB                                                                                                | 0,000160741 | -0,025736684 | 0,524 | 0,221 | 1         | 0,982318868   | 1,017999381     | 2,371040724     |
| OSGIN1                                                                                              | 0,351112297 | -0,025737655 | 0,024 | 0,011 | 1         | 0,982318207   | 1,018000066     | 2,181818182     |
| ULK2                                                                                                | 0,062283647 | -0,025766179 | 0,11  | 0,049 | 1         | 0,982298786   | 1,018020193     | 2,244897959     |
| BBS9                                                                                                | 0,070853927 | -0,025786868 | 0,073 | 0,028 | 1         | 0,982284699   | 1,018034793     | 2,607142857     |
| DEPTOR                                                                                              | 0,986148695 | -0,025815191 | 0,049 | 0,049 | 1         | 0,982265415   | 1,018054779     | 1               |
| E2F1                                                                                                | 0,35350329  | -0,025857021 | 0     | 0,011 | 1         | 0,982236935   | 1,018084297     | 0               |
| SCG3                                                                                                | 0,654971645 | -0,025866225 | 0,012 | 0,007 | 1         | 0,982230669   | 1,018090792     | 1,714285714     |
| AHCYL1                                                                                              | 0,007021084 | -0,025880933 | 0,402 | 0,207 | 1         | 0,982220656   | 1,018101171     | 1,942028986     |
| PCSK6                                                                                               | 0,28286347  | -0,025907191 | 0     | 0,014 | 1         | 0,982202779   | 1,018119701     | 0               |
| SPG11                                                                                               | 0,004737062 | -0,02590835  | 0,146 | 0,049 | 1         | 0,98220199    | 1,018120519     | 2,979591837     |
| MOB3C                                                                                               | 0,06642434  | -0,025912739 | 0,061 | 0,021 | 1         | 0,982199002   | 1,018123617     | 2,904761905     |
| C2CD2                                                                                               | 0,987688096 | -0,025919364 | 0,024 | 0,025 | 1         | 0,982194491   | 1,018128292     | 0,96            |
| UBE2S                                                                                               | 0,018898217 | -0,0259376   | 0,537 | 0,312 | 1         | 0,982182076   | 1,018141162     | 1,721153846     |
| ENTPD7                                                                                              | 0,071300757 | -0,025944157 | 0,061 | 0,021 | 1         | 0,982177612   | 1,018145789     | 2,904761905     |
| H2AC20                                                                                              | 0,001295886 | -0,025959274 | 0,11  | 0,025 | 1         | 0,98216732    | 1,018156458     | 4,4             |
| N4BP2                                                                                               | 0,19199525  | -0,025991876 | 0,049 | 0,021 | 1         | 0,982145126   | 1,018179466     | 2,333333333     |
| MYOM2                                                                                               | 0,044226311 | -0,026020184 | 0,037 | 0,007 | 1         | 0,982125855   | 1,018199445     | 5,285714286     |
| ABCA9                                                                                               | 0,35350329  | -0,026026599 | 0     | 0,011 | 1         | 0,982121488   | 1,018203972     | 0               |
| PDLIM2                                                                                              | 0,000534706 | -0,026052864 | 0,28  | 0,105 | 1         | 0,982103608   | 1,01822251      | 2,666666667     |
| PAIP2B                                                                                              | 0,316484073 | -0,026070567 | 0,037 | 0,018 | 1         | 0,982091557   | 1,018235004     | 2,055555556     |
| ZNF326                                                                                              | 0,01515394  | -0,026207099 | 0,329 | 0,172 | 1         | 0,981998619   | 1,018331371     | 1,912790698     |
| LUC7L                                                                                               | 0,001172796 | -0,02623499  | 0,476 | 0,221 | 1         | 0,981979635   | 1,018351058     | 2,153846154     |
| ZDHHC23                                                                                             | 0,35350329  | -0,026272933 | 0     | 0,011 | 1         | 0,981953809   | 1,018377841     | 0               |
| SS18L2                                                                                              | 0,00013583  | -0,026283825 | 0,244 | 0,077 | 1         | 0,981946396   | 1,018385529     | 3,168831169     |
| B4GALT3                                                                                             | 0,001544418 | -0,026289219 | 0,171 | 0,056 | 1         | 0,981942724   | 1,018389337     | 3,053571429     |

Supplementary Table 2

| Differentially expressed genes_keloid-XL_comparing SC-Keloid vs. (SC-Myel, SC-Nonmyel, SC-Nonmyel2) |             |              |       |       |           |               |                 |                 |
|-----------------------------------------------------------------------------------------------------|-------------|--------------|-------|-------|-----------|---------------|-----------------|-----------------|
| gene                                                                                                | p_val       | avg_log2FC   | pct.1 | pct.2 | p_val_adj | Foldchange_UP | Foldchange_DOWN | Ratio_pct1_pct2 |
| DNASE1L1                                                                                            | 0,006778966 | -0,026315634 | 0,085 | 0,021 | 1         | 0,981924745   | 1,018407984     | 4,047619048     |
| CHD3                                                                                                | 0,055251346 | -0,02632556  | 0,39  | 0,232 | 1         | 0,981917989   | 1,018414991     | 1,681034483     |
| SPATA6L                                                                                             | 0,187860656 | -0,026329502 | 0,024 | 0,007 | 1         | 0,981915307   | 1,018417773     | 3,428571429     |
| ERCC2                                                                                               | 0,062089768 | -0,026372066 | 0,049 | 0,014 | 1         | 0,981886337   | 1,01844782      | 3,5             |
| NRG2                                                                                                | 0,279370565 | -0,026409391 | 0,049 | 0,025 | 1         | 0,981860935   | 1,018474169     | 1,96            |
| SPEF2                                                                                               | 0,1180597   | -0,026473529 | 0,049 | 0,018 | 1         | 0,981817285   | 1,018519449     | 2,722222222     |
| RIC1                                                                                                | 0,014259061 | -0,026474557 | 0,085 | 0,025 | 1         | 0,981816586   | 1,018520174     | 3,4             |
| FGD1                                                                                                | 0,187860656 | -0,026498325 | 0,024 | 0,007 | 1         | 0,981800411   | 1,018536954     | 3,428571429     |
| CKAP2                                                                                               | 0,069028916 | -0,026536135 | 0,098 | 0,042 | 1         | 0,98177468    | 1,018563648     | 2,333333333     |
| CLCA2                                                                                               | 0,903285004 | -0,026565899 | 0,012 | 0,011 | 1         | 0,981754425   | 1,018584663     | 1,090909091     |
| SEMA3D                                                                                              | 0,602048443 | -0,026592568 | 0,049 | 0,035 | 1         | 0,981736277   | 1,018603492     | 1,4             |
| NEPRO                                                                                               | 0,041101744 | -0,026603508 | 0,195 | 0,098 | 1         | 0,981728833   | 1,018611216     | 1,989795918     |
| GRAMD2A                                                                                             | 0,710321163 | -0,026608503 | 0,024 | 0,018 | 1         | 0,981725433   | 1,018614743     | 1,333333333     |
| TANC2                                                                                               | 0,014762953 | -0,026680605 | 0,293 | 0,147 | 1         | 0,981676371   | 1,018665651     | 1,993197279     |
| AC002451.1                                                                                          | 0,35350329  | -0,026681893 | 0     | 0,011 | 1         | 0,981675494   | 1,018666561     | 0               |
| INO80C                                                                                              | 0,044372256 | -0,026686123 | 0,098 | 0,039 | 1         | 0,981672616   | 1,018669548     | 2,512820513     |
| GSDMB                                                                                               | 0,530989227 | -0,026701961 | 0,024 | 0,014 | 1         | 0,981661839   | 1,018680731     | 1,714285714     |
| ZMYM6                                                                                               | 0,000782871 | -0,02671504  | 0,146 | 0,039 | 1         | 0,98165294    | 1,018689966     | 3,743589744     |
| PPP2R5E                                                                                             | 0,002153871 | -0,026760226 | 0,256 | 0,105 | 1         | 0,981622194   | 1,018721873     | 2,438095238     |
| HAAO                                                                                                | 0,35350329  | -0,026775329 | 0     | 0,011 | 1         | 0,981611919   | 1,018732537     | 0               |
| WDSUB1                                                                                              | 0,127015914 | -0,026809417 | 0,098 | 0,049 | 1         | 0,981588725   | 1,018756608     | 2               |
| TMEM238                                                                                             | 0,728697501 | -0,026813544 | 0,012 | 0,018 | 1         | 0,981585917   | 1,018759522     | 0,666666667     |
| MAP4K2                                                                                              | 0,351112297 | -0,026839708 | 0,024 | 0,011 | 1         | 0,981568116   | 1,018777998     | 2,181818182     |
| RDH14                                                                                               | 0,008128304 | -0,026859141 | 0,207 | 0,088 | 1         | 0,981554894   | 1,018791721     | 2,352272727     |
| RANBP9                                                                                              | 0,00090046  | -0,02690324  | 0,354 | 0,151 | 1         | 0,981524891   | 1,018822863     | 2,344370861     |
| ARHGAP8                                                                                             | 0,908489202 | -0,026988699 | 0,012 | 0,011 | 1         | 0,981466752   | 1,018883215     | 1,090909091     |
| CA5B                                                                                                | 0,07286384  | -0,027001172 | 0,085 | 0,035 | 1         | 0,981458266   | 1,018892025     | 2,428571429     |
| TMEM135                                                                                             | 0,239292074 | -0,027015319 | 0,085 | 0,049 | 1         | 0,981448642   | 1,018902016     | 1,734693878     |
| RPS10-NUDT3                                                                                         | 0,35350329  | -0,027028825 | 0     | 0,011 | 1         | 0,981439455   | 1,018911554     | 0               |
| AFG3L2                                                                                              | 0,000458369 | -0,027050299 | 0,244 | 0,084 | 1         | 0,981424846   | 1,018926721     | 2,904761905     |

Supplementary Table 2

| Differentially expressed genes_keloid-XL_comparing SC-Keloid vs. (SC-Myel, SC-Nonmyel, SC-Nonmyel2) |             |              |       |       |           |               |                 |                 |
|-----------------------------------------------------------------------------------------------------|-------------|--------------|-------|-------|-----------|---------------|-----------------|-----------------|
| gene                                                                                                | p_val       | avg_log2FC   | pct.1 | pct.2 | p_val_adj | Foldchange_UP | Foldchange_DOWN | Ratio_pct1_pct2 |
| BEND3                                                                                               | 0,316484073 | -0,027059418 | 0,037 | 0,018 | 1         | 0,981418643   | 1,018933161     | 2,055555556     |
| RPGR                                                                                                | 0,166960942 | -0,027108775 | 0,098 | 0,053 | 1         | 0,981385068   | 1,018968021     | 1,849056604     |
| TRIM7                                                                                               | 0,89702294  | -0,027122506 | 0,012 | 0,014 | 1         | 0,981375727   | 1,018977719     | 0,857142857     |
| SLC12A6                                                                                             | 0,070054953 | -0,027140917 | 0,061 | 0,021 | 1         | 0,981363203   | 1,018990723     | 2,904761905     |
| TWIST2                                                                                              | 0,011553628 | -0,027174482 | 0,037 | 0,004 | 1         | 0,981340372   | 1,01901443      | 9,25            |
| ROBO4                                                                                               | 0,908489202 | -0,027177494 | 0,012 | 0,011 | 1         | 0,981338323   | 1,019016558     | 1,090909091     |
| CEP76                                                                                               | 0,107265343 | -0,027202661 | 0,037 | 0,011 | 1         | 0,981321204   | 1,019034335     | 3,363636364     |
| LSP1                                                                                                | 0,155421519 | -0,027206882 | 0,073 | 0,035 | 1         | 0,981318333   | 1,019037316     | 2,085714286     |
| DIS3L                                                                                               | 0,045357125 | -0,027232035 | 0,098 | 0,039 | 1         | 0,981301224   | 1,019055083     | 2,512820513     |
| OSBPL2                                                                                              | 0,002599252 | -0,027244236 | 0,146 | 0,046 | 1         | 0,981292925   | 1,019063701     | 3,173913043     |
| PRSS22                                                                                              | 0,35185965  | -0,027282809 | 0,012 | 0,004 | 1         | 0,981266689   | 1,019090947     | 3               |
| ABHD15                                                                                              | 0,908489202 | -0,02733148  | 0,012 | 0,011 | 1         | 0,981233585   | 1,019125328     | 1,090909091     |
| VDAC2                                                                                               | 0,020603506 | -0,027352184 | 0,585 | 0,34  | 1         | 0,981219504   | 1,019139954     | 1,720588235     |
| TCF15                                                                                               | 0,35350329  | -0,027366453 | 0     | 0,011 | 1         | 0,981209799   | 1,019150034     | 0               |
| CADPS2                                                                                              | 0,351112297 | -0,027379965 | 0,024 | 0,011 | 1         | 0,981200609   | 1,019159579     | 2,181818182     |
| IGSF10                                                                                              | 0,35350329  | -0,027384969 | 0     | 0,011 | 1         | 0,981197206   | 1,019163114     | 0               |
| CMPK2                                                                                               | 0,654971645 | -0,027422595 | 0,012 | 0,007 | 1         | 0,981171616   | 1,019189695     | 1,714285714     |
| MYCT1                                                                                               | 0,89237004  | -0,027448031 | 0,012 | 0,014 | 1         | 0,981154318   | 1,019207664     | 0,857142857     |
| ZNF333                                                                                              | 0,027465648 | -0,027451071 | 0,098 | 0,035 | 1         | 0,98115225    | 1,019209811     | 2,8             |
| SPRYD4                                                                                              | 0,351112297 | -0,027459589 | 0,024 | 0,011 | 1         | 0,981146457   | 1,019215829     | 2,181818182     |
| MON1B                                                                                               | 0,06242382  | -0,027468159 | 0,098 | 0,042 | 1         | 0,981140629   | 1,019221884     | 2,333333333     |
| SLC44A4                                                                                             | 0,740851684 | -0,027486829 | 0,012 | 0,018 | 1         | 0,981127932   | 1,019235073     | 0,666666667     |
| TXLNA                                                                                               | 0,014589242 | -0,02749006  | 0,207 | 0,095 | 1         | 0,981125735   | 1,019237356     | 2,178947368     |
| LY96                                                                                                | 0,649511996 | -0,027555106 | 0,012 | 0,007 | 1         | 0,9810815     | 1,019283311     | 1,714285714     |
| MXD4                                                                                                | 0,005668936 | -0,027561517 | 0,476 | 0,239 | 1         | 0,981077141   | 1,01928784      | 1,991631799     |
| TEX22                                                                                               | 0,35350329  | -0,027583785 | 0     | 0,011 | 1         | 0,981061998   | 1,019303573     | 0               |
| BANK1                                                                                               | 0,35350329  | -0,027618078 | 0     | 0,011 | 1         | 0,981038678   | 1,019327803     | 0               |
| TM4SF18                                                                                             | 0,89702294  | -0,027654549 | 0,012 | 0,014 | 1         | 0,981013878   | 1,019353571     | 0,857142857     |
| RGR                                                                                                 | 0,35350329  | -0,027723515 | 0     | 0,011 | 1         | 0,980966983   | 1,019402301     | 0               |
| TMCC3                                                                                               | 0,530989227 | -0,02773388  | 0,024 | 0,014 | 1         | 0,980959935   | 1,019409625     | 1,714285714     |

Supplementary Table 2

| Differentially expressed genes_keloid-XL_comparing SC-Keloid vs. (SC-Myel, SC-Nonmyel, SC-Nonmyel2) |             |              |       |       |           |               |                 |                 |
|-----------------------------------------------------------------------------------------------------|-------------|--------------|-------|-------|-----------|---------------|-----------------|-----------------|
| gene                                                                                                | p_val       | avg_log2FC   | pct.1 | pct.2 | p_val_adj | Foldchange_UP | Foldchange_DOWN | Ratio_pct1_pct2 |
| PCNX4                                                                                               | 0,003233748 | -0,027768565 | 0,207 | 0,081 | 1         | 0,980936352   | 1,019434134     | 2,555555556     |
| ADGRF5                                                                                              | 0,89237004  | -0,027770117 | 0,012 | 0,014 | 1         | 0,980935297   | 1,01943523      | 0,857142857     |
| FCHSD2                                                                                              | 0,740851684 | -0,027778618 | 0,012 | 0,018 | 1         | 0,980929516   | 1,019441238     | 0,666666667     |
| CCNE1                                                                                               | 0,872003564 | -0,027781746 | 0,024 | 0,021 | 1         | 0,980927389   | 1,019443448     | 1,142857143     |
| ANKFY1                                                                                              | 0,001494924 | -0,027869192 | 0,207 | 0,074 | 1         | 0,980867934   | 1,019505241     | 2,797297297     |
| PUS3                                                                                                | 0,314233219 | -0,02789109  | 0,037 | 0,018 | 1         | 0,980853047   | 1,019520716     | 2,055555556     |
| FAM227B                                                                                             | 0,110475994 | -0,027918777 | 0,073 | 0,032 | 1         | 0,980834223   | 1,019540282     | 2,28125         |
| ADAMTS3                                                                                             | 0,35185965  | -0,027994694 | 0,012 | 0,004 | 1         | 0,980782611   | 1,019593933     | 3               |
| NIPAL2                                                                                              | 0,736792926 | -0,027995218 | 0,012 | 0,018 | 1         | 0,980782255   | 1,019594304     | 0,666666667     |
| SNX31                                                                                               | 0,35350329  | -0,028022774 | 0     | 0,011 | 1         | 0,980763522   | 1,019613778     | 0               |
| ASF1B                                                                                               | 0,903285004 | -0,028063214 | 0,012 | 0,011 | 1         | 0,980736031   | 1,019642359     | 1,090909091     |
| DDX20                                                                                               | 0,036803449 | -0,02808669  | 0,061 | 0,018 | 1         | 0,980720072   | 1,019658951     | 3,388888889     |
| DCAKD                                                                                               | 0,026817522 | -0,0281031   | 0,085 | 0,028 | 1         | 0,980708917   | 1,01967055      | 3,035714286     |
| PNPO                                                                                                | 0,042668024 | -0,028166327 | 0,073 | 0,025 | 1         | 0,980665937   | 1,019715238     | 2,92            |
| ARMH4                                                                                               | 0,351112297 | -0,028213149 | 0,024 | 0,011 | 1         | 0,980634111   | 1,019748333     | 2,181818182     |
| TEAD4                                                                                               | 0,024980018 | -0,028244639 | 0,085 | 0,028 | 1         | 0,980612706   | 1,019770592     | 3,035714286     |
| CIZ1                                                                                                | 0,000116989 | -0,028250561 | 0,268 | 0,088 | 1         | 0,980608681   | 1,019774778     | 3,045454545     |
| PRIM2                                                                                               | 0,071300757 | -0,028282385 | 0,061 | 0,021 | 1         | 0,980587051   | 1,019797273     | 2,904761905     |
| EGLN3                                                                                               | 0,440372242 | -0,028302091 | 0,037 | 0,021 | 1         | 0,980573656   | 1,019811203     | 1,761904762     |
| ZNF429                                                                                              | 0,736792926 | -0,028357682 | 0,012 | 0,018 | 1         | 0,980535873   | 1,0198505       | 0,666666667     |
| MYOZ3                                                                                               | 0,35350329  | -0,028378844 | 0     | 0,011 | 1         | 0,98052149    | 1,019865459     | 0               |
| PMS2                                                                                                | 0,439382777 | -0,028390589 | 0,073 | 0,049 | 1         | 0,980513508   | 1,019873762     | 1,489795918     |
| DLST                                                                                                | 0,004124706 | -0,028423443 | 0,244 | 0,102 | 1         | 0,98049118    | 1,019896987     | 2,392156863     |
| IL20RB                                                                                              | 0,35350329  | -0,028511185 | 0     | 0,011 | 1         | 0,98043155    | 1,019959017     | 0               |
| AC018742.1                                                                                          | 0,654971645 | -0,028511849 | 0,012 | 0,007 | 1         | 0,980431099   | 1,019959487     | 1,714285714     |
| SAMD4B                                                                                              | 0,000239857 | -0,028530171 | 0,5   | 0,225 | 1         | 0,980418647   | 1,01997244      | 2,222222222     |
| PTCH2                                                                                               | 0,187860656 | -0,028539871 | 0,024 | 0,007 | 1         | 0,980412055   | 1,019979298     | 3,428571429     |
| PARP8                                                                                               | 0,017271324 | -0,028549878 | 0,134 | 0,053 | 1         | 0,980405255   | 1,019986373     | 2,528301887     |
| ZNF281                                                                                              | 0,011534637 | -0,028569497 | 0,134 | 0,049 | 1         | 0,980391923   | 1,020000243     | 2,734693878     |
| NEBL                                                                                                | 0,89237004  | -0,028585192 | 0,012 | 0,014 | 1         | 0,980381257   | 1,020011341     | 0,857142857     |

Supplementary Table 2

| Differentially expressed genes_keloid-XL_comparing SC-Keloid vs. (SC-Myel, SC-Nonmyel, SC-Nonmyel2) |             |              |       |       |           |               |                 |                 |
|-----------------------------------------------------------------------------------------------------|-------------|--------------|-------|-------|-----------|---------------|-----------------|-----------------|
| gene                                                                                                | p_val       | avg_log2FC   | pct.1 | pct.2 | p_val_adj | Foldchange_UP | Foldchange_DOWN | Ratio_pct1_pct2 |
| CEP19                                                                                               | 0,868326909 | -0,028607912 | 0,024 | 0,021 | 1         | 0,980365818   | 1,020027404     | 1,142857143     |
| TK1                                                                                                 | 0,654971645 | -0,028656818 | 0,012 | 0,007 | 1         | 0,980332585   | 1,020061982     | 1,714285714     |
| METTL2A                                                                                             | 0,014259061 | -0,028666145 | 0,085 | 0,025 | 1         | 0,980326247   | 1,020068577     | 3,4             |
| FGD5                                                                                                | 0,35350329  | -0,028707995 | 0     | 0,011 | 1         | 0,98029781    | 1,020098168     | 0               |
| LINS1                                                                                               | 0,002983177 | -0,028714526 | 0,085 | 0,018 | 1         | 0,980293372   | 1,020102786     | 4,722222222     |
| TMEM260                                                                                             | 0,173471565 | -0,028715604 | 0,061 | 0,028 | 1         | 0,98029264    | 1,020103548     | 2,178571429     |
| LRR56                                                                                               | 0,35185965  | -0,028772523 | 0,012 | 0,004 | 1         | 0,980253965   | 1,020143795     | 3               |
| ASNS                                                                                                | 0,351112297 | -0,028790821 | 0,024 | 0,011 | 1         | 0,980241532   | 1,020156734     | 2,181818182     |
| LDLRAD2                                                                                             | 0,35350329  | -0,028792308 | 0     | 0,011 | 1         | 0,980240522   | 1,020157786     | 0               |
| HSPB8                                                                                               | 0,186350334 | -0,028850793 | 0,049 | 0,021 | 1         | 0,980200785   | 1,020199142     | 2,333333333     |
| TRABD2A                                                                                             | 0,106097567 | -0,028939501 | 0,037 | 0,011 | 1         | 0,980140516   | 1,020261874     | 3,363636364     |
| BDH1                                                                                                | 0,445614357 | -0,028949302 | 0,037 | 0,021 | 1         | 0,980133858   | 1,020268805     | 1,761904762     |
| MEG9                                                                                                | 0,35350329  | -0,028961556 | 0     | 0,011 | 1         | 0,980125533   | 1,020277471     | 0               |
| ERGIC2                                                                                              | 0,007395874 | -0,028980354 | 0,354 | 0,175 | 1         | 0,980112762   | 1,020290765     | 2,022857143     |
| UBOX5                                                                                               | 0,654971645 | -0,028989726 | 0,012 | 0,007 | 1         | 0,980106395   | 1,020297393     | 1,714285714     |
| TTPAL                                                                                               | 0,063408785 | -0,029015043 | 0,049 | 0,014 | 1         | 0,980089196   | 1,020315298     | 3,5             |
| MYO7B                                                                                               | 0,35185965  | -0,029019537 | 0,012 | 0,004 | 1         | 0,980086143   | 1,020318477     | 3               |
| EEP1                                                                                                | 0,654971645 | -0,029055849 | 0,012 | 0,007 | 1         | 0,980061475   | 1,020344157     | 1,714285714     |
| ZNF502                                                                                              | 0,35185965  | -0,029066217 | 0,012 | 0,004 | 1         | 0,980054431   | 1,020351491     | 3               |
| BTN3A2                                                                                              | 0,042518051 | -0,0290777   | 0,11  | 0,046 | 1         | 0,980046631   | 1,020359612     | 2,391304348     |
| DIPK1B                                                                                              | 0,35350329  | -0,02910274  | 0     | 0,011 | 1         | 0,980029621   | 1,020377322     | 0               |
| B3GALNT1                                                                                            | 0,187860656 | -0,029222164 | 0,024 | 0,007 | 1         | 0,979948499   | 1,020461791     | 3,428571429     |
| CTSS                                                                                                | 0,351112297 | -0,029227889 | 0,024 | 0,011 | 1         | 0,979944611   | 1,02046584      | 2,181818182     |
| NUP54                                                                                               | 0,010685545 | -0,029290169 | 0,207 | 0,091 | 1         | 0,979902308   | 1,020509893     | 2,274725275     |
| RAB3IP                                                                                              | 0,392656862 | -0,029363304 | 0,085 | 0,056 | 1         | 0,979852635   | 1,020561628     | 1,517857143     |
| CLP1                                                                                                | 0,351112297 | -0,029422193 | 0,024 | 0,011 | 1         | 0,979812639   | 1,020603287     | 2,181818182     |
| SCLY                                                                                                | 0,570351612 | -0,029429473 | 0,037 | 0,025 | 1         | 0,979807695   | 1,020608437     | 1,48            |
| DDX31                                                                                               | 0,028081741 | -0,029467652 | 0,049 | 0,011 | 1         | 0,979781766   | 1,020635447     | 4,454545455     |
| MET                                                                                                 | 0,445614357 | -0,029514932 | 0,037 | 0,021 | 1         | 0,979749657   | 1,020668895     | 1,761904762     |
| AC226118.1                                                                                          | 0,654971645 | -0,029530013 | 0,012 | 0,007 | 1         | 0,979739416   | 1,020679565     | 1,714285714     |

Supplementary Table 2

| Differentially expressed genes_keloid-XL_comparing SC-Keloid vs. (SC-Myel, SC-Nonmyel, SC-Nonmyel2) |             |              |       |       |           |               |                 |                 |
|-----------------------------------------------------------------------------------------------------|-------------|--------------|-------|-------|-----------|---------------|-----------------|-----------------|
| gene                                                                                                | p_val       | avg_log2FC   | pct.1 | pct.2 | p_val_adj | Foldchange_UP | Foldchange_DOWN | Ratio_pct1_pct2 |
| TRNT1                                                                                               | 0,000515049 | -0,029583166 | 0,134 | 0,032 | 1         | 0,97970332    | 1,02071717      | 4,1875          |
| ZNF420                                                                                              | 0,872003564 | -0,029583686 | 0,024 | 0,021 | 1         | 0,979702966   | 1,020717538     | 1,142857143     |
| HOMER2                                                                                              | 0,736792926 | -0,029588218 | 0,012 | 0,018 | 1         | 0,979699889   | 1,020720744     | 0,666666667     |
| N4BP1                                                                                               | 0,011337306 | -0,029612046 | 0,183 | 0,077 | 1         | 0,979683708   | 1,020737603     | 2,376623377     |
| NAALADL2                                                                                            | 0,035868595 | -0,029613287 | 0,159 | 0,074 | 1         | 0,979682865   | 1,020738481     | 2,148648649     |
| H1-1                                                                                                | 0,89702294  | -0,029649599 | 0,012 | 0,014 | 1         | 0,979658208   | 1,020764173     | 0,857142857     |
| WDCP                                                                                                | 0,89237004  | -0,029659877 | 0,012 | 0,014 | 1         | 0,979651228   | 1,020771445     | 0,857142857     |
| ZNF649                                                                                              | 0,018189014 | -0,029661397 | 0,11  | 0,039 | 1         | 0,979650196   | 1,02077252      | 2,820512821     |
| SEL1L3                                                                                              | 0,89237004  | -0,029682335 | 0,012 | 0,014 | 1         | 0,979635978   | 1,020787335     | 0,857142857     |
| CCDC144NL                                                                                           | 0,35350329  | -0,029707704 | 0     | 0,011 | 1         | 0,979618752   | 1,020805286     | 0               |
| CD40                                                                                                | 0,044003418 | -0,029709894 | 0,11  | 0,046 | 1         | 0,979617265   | 1,020806835     | 2,391304348     |
| FLT1                                                                                                | 0,530989227 | -0,029726247 | 0,024 | 0,014 | 1         | 0,979606161   | 1,020818406     | 1,714285714     |
| ZBTB3                                                                                               | 0,654971645 | -0,029730239 | 0,012 | 0,007 | 1         | 0,97960345    | 1,020821231     | 1,714285714     |
| HRH2                                                                                                | 0,35185965  | -0,02977395  | 0,012 | 0,004 | 1         | 0,979573771   | 1,02085216      | 3               |
| WHRN                                                                                                | 0,837477365 | -0,029781305 | 0,037 | 0,032 | 1         | 0,979568777   | 1,020857364     | 1,15625         |
| IRX2                                                                                                | 0,908489202 | -0,029869621 | 0,012 | 0,011 | 1         | 0,979508813   | 1,020919859     | 1,090909091     |
| PSME1                                                                                               | 0,006849845 | -0,029894387 | 0,683 | 0,379 | 1         | 0,979491999   | 1,020937385     | 1,802110818     |
| IPP                                                                                                 | 0,113968254 | -0,029931529 | 0,049 | 0,018 | 1         | 0,979466782   | 1,020963669     | 2,722222222     |
| ZBTB26                                                                                              | 0,187860656 | -0,029937322 | 0,024 | 0,007 | 1         | 0,979462849   | 1,020967769     | 3,428571429     |
| NELFA                                                                                               | 0,010328004 | -0,030014583 | 0,195 | 0,084 | 1         | 0,979410397   | 1,021022447     | 2,321428571     |
| PUS1                                                                                                | 0,010662277 | -0,030022806 | 0,11  | 0,035 | 1         | 0,979404815   | 1,021028266     | 3,142857143     |
| ARHGEF28                                                                                            | 0,103028151 | -0,030084375 | 0,085 | 0,039 | 1         | 0,979363019   | 1,021071841     | 2,179487179     |
| ANKRD26                                                                                             | 0,111297434 | -0,030100601 | 0,122 | 0,063 | 1         | 0,979352004   | 1,021083325     | 1,936507937     |
| WDR31                                                                                               | 0,35350329  | -0,030145575 | 0     | 0,011 | 1         | 0,979321474   | 1,021115156     | 0               |
| SPRED3                                                                                              | 0,348081613 | -0,030168606 | 0,024 | 0,011 | 1         | 0,97930584    | 1,021131457     | 2,181818182     |
| ZNF490                                                                                              | 0,28294086  | -0,030174592 | 0,049 | 0,025 | 1         | 0,979301777   | 1,021135694     | 1,96            |
| SKAP2                                                                                               | 0,903285004 | -0,030187886 | 0,012 | 0,011 | 1         | 0,979292753   | 1,021145103     | 1,090909091     |
| ARHGAP27                                                                                            | 0,35350329  | -0,030218082 | 0     | 0,011 | 1         | 0,979272257   | 1,021166477     | 0               |
| ALMS1                                                                                               | 0,698086519 | -0,030242211 | 0,037 | 0,028 | 1         | 0,979255878   | 1,021183556     | 1,321428571     |
| SAP130                                                                                              | 0,868326909 | -0,030264135 | 0,024 | 0,021 | 1         | 0,979240997   | 1,021199074     | 1,142857143     |



Supplementary Table 2

| Differentially expressed genes_keloid-XL_comparing SC-Keloid vs. (SC-Myel, SC-Nonmyel, SC-Nonmyel2) |             |              |       |       |             |               |                 |                 |
|-----------------------------------------------------------------------------------------------------|-------------|--------------|-------|-------|-------------|---------------|-----------------|-----------------|
| gene                                                                                                | p_val       | avg_log2FC   | pct.1 | pct.2 | p_val_adj   | Foldchange_UP | Foldchange_DOWN | Ratio_pct1_pct2 |
| CWC27                                                                                               | 6,42577E-05 | -0,030269811 | 0,195 | 0,049 | 1           | 0,979237145   | 1,021203092     | 3,979591837     |
| C1GALT1                                                                                             | 0,022834029 | -0,030275981 | 0,171 | 0,077 | 1           | 0,979232957   | 1,021207459     | 2,220779221     |
| SLC44A3                                                                                             | 0,187860656 | -0,030303707 | 0,024 | 0,007 | 1           | 0,979214138   | 1,021227085     | 3,428571429     |
| SLC26A6                                                                                             | 0,187860656 | -0,030315175 | 0,024 | 0,007 | 1           | 0,979206354   | 1,021235203     | 3,428571429     |
| EPS8L2                                                                                              | 0,070675603 | -0,030338357 | 0,061 | 0,021 | 1           | 0,97919062    | 1,021251613     | 2,904761905     |
| RASL11A                                                                                             | 0,649511996 | -0,030366002 | 0,012 | 0,007 | 1           | 0,979171857   | 1,021271183     | 1,714285714     |
| TINCR                                                                                               | 0,35350329  | -0,030503083 | 0     | 0,011 | 1           | 0,979078823   | 1,021368225     | 0               |
| TRIP12                                                                                              | 0,000636844 | -0,030534463 | 0,366 | 0,151 | 1           | 0,979057527   | 1,021390441     | 2,42384106      |
| PRMT5                                                                                               | 0,026893293 | -0,030543174 | 0,134 | 0,056 | 1           | 0,979051616   | 1,021396609     | 2,392857143     |
| C7orf26                                                                                             | 0,027873303 | -0,030548048 | 0,146 | 0,063 | 1           | 0,979048308   | 1,021400059     | 2,317460317     |
| ANO7                                                                                                | 0,348081613 | -0,030579612 | 0,024 | 0,011 | 1           | 0,979026888   | 1,021422406     | 2,181818182     |
| SYCP2                                                                                               | 0,028583695 | -0,030590415 | 0,11  | 0,042 | 1           | 0,979019557   | 1,021430055     | 2,619047619     |
| SLC36A2                                                                                             | 0,28286347  | -0,030598953 | 0     | 0,014 | 1           | 0,979013763   | 1,0214361       | 0               |
| UBAC1                                                                                               | 0,001405402 | -0,030608271 | 0,207 | 0,074 | 1           | 0,97900744    | 1,021442697     | 2,797297297     |
| ZSCAN12                                                                                             | 0,044226311 | -0,030611334 | 0,037 | 0,007 | 1           | 0,979005362   | 1,021444865     | 5,285714286     |
| LSAMP                                                                                               | 2,19651E-06 | -0,030690137 | 0,476 | 0,165 | 0,046348574 | 0,978951888   | 1,02150066      | 2,884848485     |
| SEC24C                                                                                              | 6,70103E-05 | -0,03073733  | 0,195 | 0,049 | 1           | 0,978919865   | 1,021534076     | 3,979591837     |
| GRIK4                                                                                               | 0,107265343 | -0,030746218 | 0,037 | 0,011 | 1           | 0,978913834   | 1,02154037      | 3,363636364     |
| RGPD2                                                                                               | 0,728697501 | -0,03074996  | 0,012 | 0,018 | 1           | 0,978911295   | 1,021543019     | 0,666666667     |
| CDC42BPA                                                                                            | 2,83253E-05 | -0,030769952 | 0,439 | 0,168 | 0,597692996 | 0,97889773    | 1,021557175     | 2,613095238     |
| EP400                                                                                               | 0,01130569  | -0,030780073 | 0,22  | 0,098 | 1           | 0,978890863   | 1,021564342     | 2,244897959     |
| RAP1GAP2                                                                                            | 0,007845558 | -0,03080767  | 0,134 | 0,046 | 1           | 0,978872138   | 1,021583884     | 2,913043478     |
| VAMP1                                                                                               | 0,906339215 | -0,030842056 | 0,012 | 0,014 | 1           | 0,978848807   | 1,021608232     | 0,857142857     |
| BRCA2                                                                                               | 0,35350329  | -0,030867879 | 0     | 0,011 | 1           | 0,978831287   | 1,021626519     | 0               |
| BHLHE22                                                                                             | 0,908489202 | -0,030877674 | 0,012 | 0,011 | 1           | 0,978824642   | 1,021633455     | 1,090909091     |
| THAP12                                                                                              | 0,004927645 | -0,030899563 | 0,183 | 0,07  | 1           | 0,97880979    | 1,021648956     | 2,614285714     |
| BACE2                                                                                               | 0,000644578 | -0,030907321 | 0,378 | 0,161 | 1           | 0,978804527   | 1,021654449     | 2,347826087     |
| SLC46A1                                                                                             | 0,908489202 | -0,030909479 | 0,012 | 0,011 | 1           | 0,978803063   | 1,021655978     | 1,090909091     |
| PALD1                                                                                               | 0,654971645 | -0,030917974 | 0,012 | 0,007 | 1           | 0,9787973     | 1,021661993     | 1,714285714     |
| BCO2                                                                                                | 0,8646531   | -0,03094914  | 0,024 | 0,021 | 1           | 0,978776155   | 1,021684064     | 1,142857143     |

Supplementary Table 2

| Differentially expressed genes_keloid-XL_comparing SC-Keloid vs. (SC-Myel, SC-Nonmyel, SC-Nonmyel2) |             |              |       |       |             |               |                 |                 |
|-----------------------------------------------------------------------------------------------------|-------------|--------------|-------|-------|-------------|---------------|-----------------|-----------------|
| gene                                                                                                | p_val       | avg_log2FC   | pct.1 | pct.2 | p_val_adj   | Foldchange_UP | Foldchange_DOWN | Ratio_pct1_pct2 |
| UBAP2L                                                                                              | 3,37176E-05 | -0,030973841 | 0,305 | 0,098 | 0,711475733 | 0,978759397   | 1,021701557     | 3,112244898     |
| VWA2                                                                                                | 0,35350329  | -0,030984751 | 0     | 0,011 | 1           | 0,978751996   | 1,021709283     | 0               |
| SYDE1                                                                                               | 0,001405402 | -0,031074355 | 0,207 | 0,074 | 1           | 0,978691209   | 1,021772742     | 2,797297297     |
| VAT1L                                                                                               | 0,28286347  | -0,031099722 | 0     | 0,014 | 1           | 0,978674      | 1,021790709     | 0               |
| TSEN54                                                                                              | 0,000314866 | -0,031118662 | 0,171 | 0,046 | 1           | 0,978661152   | 1,021804123     | 3,717391304     |
| PPIH                                                                                                | 0,001934135 | -0,031122428 | 0,195 | 0,07  | 1           | 0,978658597   | 1,02180679      | 2,785714286     |
| NEXN                                                                                                | 0,908489202 | -0,031165105 | 0,012 | 0,011 | 1           | 0,978629648   | 1,021837017     | 1,090909091     |
| MTFR1                                                                                               | 0,002874762 | -0,031166431 | 0,11  | 0,028 | 1           | 0,978628748   | 1,021837956     | 3,928571429     |
| PAFAH1B1                                                                                            | 0,000856389 | -0,031171967 | 0,537 | 0,26  | 1           | 0,978624993   | 1,021841878     | 2,065384615     |
| ZFAND4                                                                                              | 0,351112297 | -0,031184428 | 0,024 | 0,011 | 1           | 0,97861654    | 1,021850703     | 2,181818182     |
| DHCR24                                                                                              | 0,57319978  | -0,031209337 | 0,037 | 0,025 | 1           | 0,978599644   | 1,021868347     | 1,48            |
| SAMD9                                                                                               | 0,026581629 | -0,031211182 | 0,085 | 0,028 | 1           | 0,978598392   | 1,021869653     | 3,035714286     |
| RRM1                                                                                                | 0,011566228 | -0,031219376 | 0,122 | 0,042 | 1           | 0,978592835   | 1,021875457     | 2,904761905     |
| ELP4                                                                                                | 0,006704008 | -0,031261523 | 0,085 | 0,021 | 1           | 0,978564246   | 1,021905311     | 4,047619048     |
| GMDS-DT                                                                                             | 0,728697501 | -0,031290698 | 0,012 | 0,018 | 1           | 0,978544457   | 1,021925977     | 0,666666667     |
| TPD52                                                                                               | 0,89237004  | -0,031304322 | 0,012 | 0,014 | 1           | 0,978535217   | 1,021935627     | 0,857142857     |
| NOVA2                                                                                               | 0,35350329  | -0,03131167  | 0     | 0,011 | 1           | 0,978530232   | 1,021940832     | 0               |
| CA8                                                                                                 | 0,35350329  | -0,031358336 | 0     | 0,011 | 1           | 0,978498581   | 1,021973889     | 0               |
| RC3H2                                                                                               | 0,023766347 | -0,031372966 | 0,244 | 0,123 | 1           | 0,978488658   | 1,021984253     | 1,983739837     |
| FABP4                                                                                               | 0,036427227 | -0,031406534 | 0,061 | 0,018 | 1           | 0,978465891   | 1,022008032     | 3,388888889     |
| TRABD                                                                                               | 0,014934204 | -0,03141816  | 0,183 | 0,081 | 1           | 0,978458007   | 1,022016267     | 2,259259259     |
| ENO3                                                                                                | 0,908489202 | -0,031429348 | 0,012 | 0,011 | 1           | 0,978450419   | 1,022024193     | 1,090909091     |
| APBA1                                                                                               | 0,35350329  | -0,031476281 | 0     | 0,011 | 1           | 0,978418589   | 1,022057442     | 0               |
| RASAL2-AS1                                                                                          | 0,35350329  | -0,031477608 | 0     | 0,011 | 1           | 0,978417689   | 1,022058382     | 0               |
| LRRC37A                                                                                             | 0,35350329  | -0,031479092 | 0     | 0,011 | 1           | 0,978416682   | 1,022059433     | 0               |
| CSNK1G1                                                                                             | 0,011285803 | -0,031534754 | 0,122 | 0,042 | 1           | 0,978378934   | 1,022098867     | 2,904761905     |
| CXCL1                                                                                               | 0,35350329  | -0,031545855 | 0     | 0,011 | 1           | 0,978371406   | 1,022106731     | 0               |
| SGTA                                                                                                | 0,000304975 | -0,031558652 | 0,317 | 0,119 | 1           | 0,978362728   | 1,022115798     | 2,663865546     |
| HYDIN                                                                                               | 0,908489202 | -0,031564106 | 0,012 | 0,011 | 1           | 0,978359029   | 1,022119662     | 1,090909091     |
| TECPR1                                                                                              | 0,026817522 | -0,031593374 | 0,085 | 0,028 | 1           | 0,978339181   | 1,022140398     | 3,035714286     |

Supplementary Table 2

| Differentially expressed genes_keloid-XL_comparing SC-Keloid vs. (SC-Myel, SC-Nonmyel, SC-Nonmyel2) |             |              |       |       |           |               |                 |                 |
|-----------------------------------------------------------------------------------------------------|-------------|--------------|-------|-------|-----------|---------------|-----------------|-----------------|
| gene                                                                                                | p_val       | avg_log2FC   | pct.1 | pct.2 | p_val_adj | Foldchange_UP | Foldchange_DOWN | Ratio_pct1_pct2 |
| RFK                                                                                                 | 0,034046114 | -0,031662825 | 0,171 | 0,081 | 1         | 0,978292085   | 1,022189605     | 2,111111111     |
| IPPK                                                                                                | 0,442988867 | -0,031663445 | 0,037 | 0,021 | 1         | 0,978291665   | 1,022190044     | 1,761904762     |
| CLIC3                                                                                               | 0,654971645 | -0,031670898 | 0,012 | 0,007 | 1         | 0,978286611   | 1,022195324     | 1,714285714     |
| PLXNB3                                                                                              | 0,89237004  | -0,031693342 | 0,012 | 0,014 | 1         | 0,978271392   | 1,022211227     | 0,857142857     |
| FRAT1                                                                                               | 0,35350329  | -0,031709498 | 0     | 0,011 | 1         | 0,978260437   | 1,022222674     | 0               |
| PROX1                                                                                               | 0,611083176 | -0,031713606 | 0,012 | 0,021 | 1         | 0,978257651   | 1,022225585     | 0,571428571     |
| GTF2F2                                                                                              | 0,00129853  | -0,031827661 | 0,354 | 0,154 | 1         | 0,978180317   | 1,022306402     | 2,298701299     |
| LAMB3                                                                                               | 0,004485159 | -0,031857389 | 0,073 | 0,014 | 1         | 0,97816016    | 1,022327468     | 5,214285714     |
| GATB                                                                                                | 0,008986301 | -0,031869814 | 0,098 | 0,028 | 1         | 0,978151736   | 1,022336273     | 3,5             |
| DSN1                                                                                                | 0,908489202 | -0,032091745 | 0,012 | 0,011 | 1         | 0,978001278   | 1,022493552     | 1,090909091     |
| METTL2B                                                                                             | 0,046418627 | -0,032095352 | 0,085 | 0,032 | 1         | 0,977998833   | 1,022496108     | 2,65625         |
| GALR1                                                                                               | 0,00153962  | -0,032096109 | 0,439 | 0,207 | 1         | 0,97799832    | 1,022496644     | 2,120772947     |
| ARHGEF4                                                                                             | 0,732741497 | -0,032121742 | 0,012 | 0,018 | 1         | 0,977980943   | 1,022514812     | 0,666666667     |
| ABCA10                                                                                              | 0,35350329  | -0,032122653 | 0     | 0,011 | 1         | 0,977980325   | 1,022515458     | 0               |
| GCN1                                                                                                | 0,124884834 | -0,032162789 | 0,098 | 0,049 | 1         | 0,977953118   | 1,022543905     | 2               |
| CRY2                                                                                                | 0,587258138 | -0,032165923 | 0,049 | 0,035 | 1         | 0,977950994   | 1,022546126     | 1,4             |
| CCDC163                                                                                             | 0,654971645 | -0,032166942 | 0,012 | 0,007 | 1         | 0,977950303   | 1,022546848     | 1,714285714     |
| BMPR1A                                                                                              | 0,219439044 | -0,032184094 | 0,098 | 0,056 | 1         | 0,977938677   | 1,022559005     | 1,75            |
| MIX23                                                                                               | 0,019825404 | -0,032209771 | 0,122 | 0,046 | 1         | 0,977921271   | 1,022577205     | 2,652173913     |
| NRIP2                                                                                               | 0,351373689 | -0,032218004 | 0,012 | 0,032 | 1         | 0,977915691   | 1,02258304      | 0,375           |
| PARP11                                                                                              | 0,710321163 | -0,032251598 | 0,024 | 0,018 | 1         | 0,977892919   | 1,022606852     | 1,333333333     |
| SMG8                                                                                                | 0,654971645 | -0,032270815 | 0,012 | 0,007 | 1         | 0,977879894   | 1,022620474     | 1,714285714     |
| DECR2                                                                                               | 0,016904722 | -0,032315114 | 0,11  | 0,039 | 1         | 0,977849868   | 1,022651874     | 2,820512821     |
| NUDT11                                                                                              | 0,908489202 | -0,032356803 | 0,012 | 0,011 | 1         | 0,977821612   | 1,022681426     | 1,090909091     |
| MTHFSD                                                                                              | 0,001295886 | -0,03237525  | 0,11  | 0,025 | 1         | 0,977809109   | 1,022694503     | 4,4             |
| FAH                                                                                                 | 0,038341604 | -0,032449397 | 0,061 | 0,018 | 1         | 0,977758856   | 1,022747065     | 3,388888889     |
| CAPN10-DT                                                                                           | 0,654971645 | -0,032502005 | 0,012 | 0,007 | 1         | 0,977723203   | 1,02278436      | 1,714285714     |
| SBF1                                                                                                | 0,000879985 | -0,032504731 | 0,159 | 0,046 | 1         | 0,977721355   | 1,022786293     | 3,456521739     |
| TTL9                                                                                                | 0,89237004  | -0,03250939  | 0,012 | 0,014 | 1         | 0,977718197   | 1,022789596     | 0,857142857     |
| NCAPH                                                                                               | 0,654971645 | -0,032515246 | 0,012 | 0,007 | 1         | 0,977714229   | 1,022793747     | 1,714285714     |

Supplementary Table 2

| Differentially expressed genes_keloid-XL_comparing SC-Keloid vs. (SC-Myel, SC-Nonmyel, SC-Nonmyel2) |             |              |       |       |           |               |                 |                 |
|-----------------------------------------------------------------------------------------------------|-------------|--------------|-------|-------|-----------|---------------|-----------------|-----------------|
| gene                                                                                                | p_val       | avg_log2FC   | pct.1 | pct.2 | p_val_adj | Foldchange_UP | Foldchange_DOWN | Ratio_pct1_pct2 |
| ZNF607                                                                                              | 0,89237004  | -0,032531029 | 0,012 | 0,014 | 1         | 0,977703533   | 1,022804937     | 0,857142857     |
| U2AF1L4                                                                                             | 0,004240771 | -0,032566338 | 0,134 | 0,042 | 1         | 0,977679605   | 1,022829969     | 3,19047619      |
| HSD3B7                                                                                              | 0,702909482 | -0,032573704 | 0,024 | 0,018 | 1         | 0,977674613   | 1,022835192     | 1,333333333     |
| EDA                                                                                                 | 0,20009151  | -0,032610668 | 0,037 | 0,014 | 1         | 0,977649564   | 1,022861398     | 2,642857143     |
| SHC3                                                                                                | 0,654971645 | -0,032642231 | 0,012 | 0,007 | 1         | 0,977628175   | 1,022883777     | 1,714285714     |
| BDNF-AS                                                                                             | 0,584809532 | -0,032642914 | 0,049 | 0,035 | 1         | 0,977627712   | 1,022884261     | 1,4             |
| ASIC3                                                                                               | 0,89237004  | -0,032650343 | 0,012 | 0,014 | 1         | 0,977622678   | 1,022889528     | 0,857142857     |
| GAREM1                                                                                              | 0,027927065 | -0,032661796 | 0,122 | 0,049 | 1         | 0,977614917   | 1,022897649     | 2,489795918     |
| UNC80                                                                                               | 0,35350329  | -0,032732825 | 0     | 0,011 | 1         | 0,977566787   | 1,022948011     | 0               |
| KLHL20                                                                                              | 0,026770472 | -0,032739903 | 0,122 | 0,049 | 1         | 0,977561991   | 1,022953029     | 2,489795918     |
| ZNF549                                                                                              | 0,107265343 | -0,032835936 | 0,037 | 0,011 | 1         | 0,977496922   | 1,023021125     | 3,363636364     |
| ZNF672                                                                                              | 0,011986296 | -0,032840422 | 0,134 | 0,049 | 1         | 0,977493882   | 1,023024305     | 2,734693878     |
| PSD                                                                                                 | 0,654971645 | -0,032858538 | 0,012 | 0,007 | 1         | 0,977481608   | 1,023037152     | 1,714285714     |
| HYLS1                                                                                               | 0,35350329  | -0,032865426 | 0     | 0,011 | 1         | 0,977476941   | 1,023042036     | 0               |
| HES7                                                                                                | 0,316484073 | -0,032903661 | 0,037 | 0,018 | 1         | 0,977451036   | 1,02306915      | 2,055555556     |
| TASOR                                                                                               | 0,019935749 | -0,032916087 | 0,22  | 0,105 | 1         | 0,977442617   | 1,023077962     | 2,095238095     |
| RFLNA                                                                                               | 0,205790003 | -0,032921518 | 0,012 | 0,042 | 1         | 0,977438938   | 1,023081813     | 0,285714286     |
| BLVRB                                                                                               | 0,006261444 | -0,032961518 | 0,293 | 0,137 | 1         | 0,977411837   | 1,023110179     | 2,138686131     |
| TM7SF2                                                                                              | 0,35350329  | -0,032982723 | 0     | 0,011 | 1         | 0,977397471   | 1,023125217     | 0               |
| ORAI3                                                                                               | 0,014400666 | -0,033013164 | 0,085 | 0,025 | 1         | 0,977376848   | 1,023146805     | 3,4             |
| RIMKLB                                                                                              | 0,122059876 | -0,033015435 | 0,134 | 0,074 | 1         | 0,97737531    | 1,023148416     | 1,810810811     |
| OAS1                                                                                                | 0,35185965  | -0,033033706 | 0,012 | 0,004 | 1         | 0,977362932   | 1,023161374     | 3               |
| PPP1R9A                                                                                             | 0,196307728 | -0,03304447  | 0,22  | 0,144 | 1         | 0,97735564    | 1,023169008     | 1,527777778     |
| ARSL                                                                                                | 0,000318043 | -0,033046904 | 0,171 | 0,046 | 1         | 0,97735399    | 1,023170734     | 3,717391304     |
| ZNF493                                                                                              | 0,196418304 | -0,033063799 | 0,11  | 0,063 | 1         | 0,977342545   | 1,023182716     | 1,746031746     |
| PLA2G4B                                                                                             | 0,960978112 | -0,033160489 | 0,049 | 0,049 | 1         | 0,977277046   | 1,023251292     | 1               |
| ZSCAN5A                                                                                             | 0,1180597   | -0,033164368 | 0,049 | 0,018 | 1         | 0,977274418   | 1,023254044     | 2,722222222     |
| SHLD2                                                                                               | 0,002780459 | -0,03319754  | 0,159 | 0,053 | 1         | 0,977251948   | 1,023277572     | 3               |
| ZNF596                                                                                              | 0,20009151  | -0,033204374 | 0,037 | 0,014 | 1         | 0,977247318   | 1,023282419     | 2,642857143     |
| POLA1                                                                                               | 0,987688096 | -0,033232911 | 0,024 | 0,025 | 1         | 0,977227988   | 1,02330266      | 0,96            |

Supplementary Table 2

| Differentially expressed genes_keloid-XL_comparing SC-Keloid vs. (SC-Myel, SC-Nonmyel, SC-Nonmyel2) |             |              |       |       |           |               |                 |                 |
|-----------------------------------------------------------------------------------------------------|-------------|--------------|-------|-------|-----------|---------------|-----------------|-----------------|
| gene                                                                                                | p_val       | avg_log2FC   | pct.1 | pct.2 | p_val_adj | Foldchange_UP | Foldchange_DOWN | Ratio_pct1_pct2 |
| LRFN5                                                                                               | 0,728697501 | -0,033241394 | 0,012 | 0,018 | 1         | 0,977222242   | 1,023308677     | 0,666666667     |
| HCG27                                                                                               | 0,654971645 | -0,033267192 | 0,012 | 0,007 | 1         | 0,977204768   | 1,023326976     | 1,714285714     |
| AP4E1                                                                                               | 0,043046717 | -0,033379105 | 0,073 | 0,025 | 1         | 0,977128967   | 1,02340636      | 2,92            |
| CDK17                                                                                               | 0,105099631 | -0,033398849 | 0,122 | 0,063 | 1         | 0,977115595   | 1,023420367     | 1,936507937     |
| PODXL                                                                                               | 0,903285004 | -0,033419171 | 0,012 | 0,011 | 1         | 0,977101831   | 1,023434783     | 1,090909091     |
| BACH1-IT2                                                                                           | 0,35350329  | -0,03344581  | 0     | 0,011 | 1         | 0,977083789   | 1,023453681     | 0               |
| FAM228B                                                                                             | 0,001368055 | -0,033449772 | 0,244 | 0,095 | 1         | 0,977081106   | 1,023456491     | 2,568421053     |
| JRKL                                                                                                | 0,01855649  | -0,033454662 | 0,134 | 0,053 | 1         | 0,977077794   | 1,02345996      | 2,528301887     |
| ZMYM1                                                                                               | 0,023573977 | -0,033475897 | 0,073 | 0,021 | 1         | 0,977063412   | 1,023475025     | 3,476190476     |
| CDNF                                                                                                | 0,89237004  | -0,033523299 | 0,012 | 0,014 | 1         | 0,97703131    | 1,023508652     | 0,857142857     |
| RRAGB                                                                                               | 0,285301791 | -0,033577845 | 0,073 | 0,042 | 1         | 0,976994371   | 1,023547351     | 1,738095238     |
| PAXBP1-AS1                                                                                          | 0,8646531   | -0,033636939 | 0,024 | 0,021 | 1         | 0,976954353   | 1,023589277     | 1,142857143     |
| CTC1                                                                                                | 0,710321163 | -0,033637448 | 0,024 | 0,018 | 1         | 0,976954008   | 1,023589638     | 1,333333333     |
| GCC2                                                                                                | 0,064290899 | -0,03368388  | 0,402 | 0,246 | 1         | 0,976922567   | 1,023622582     | 1,634146341     |
| LINC01023                                                                                           | 0,063408785 | -0,03371544  | 0,049 | 0,014 | 1         | 0,976901196   | 1,023644975     | 3,5             |
| HCN2                                                                                                | 0,89237004  | -0,033715477 | 0,012 | 0,014 | 1         | 0,976901171   | 1,023645001     | 0,857142857     |
| RCL1                                                                                                | 0,361657411 | -0,033743514 | 0,073 | 0,046 | 1         | 0,976882186   | 1,023664895     | 1,586956522     |
| C10orf67                                                                                            | 0,35350329  | -0,033769918 | 0     | 0,011 | 1         | 0,976864308   | 1,02368363      | 0               |
| SGSM2                                                                                               | 0,442674068 | -0,033788438 | 0,085 | 0,06  | 1         | 0,976851768   | 1,023696771     | 1,416666667     |
| FGF17                                                                                               | 0,35350329  | -0,033806075 | 0     | 0,011 | 1         | 0,976839826   | 1,023709285     | 0               |
| IRX4                                                                                                | 0,35350329  | -0,033809349 | 0     | 0,011 | 1         | 0,976837608   | 1,023711609     | 0               |
| EPHX3                                                                                               | 0,35185965  | -0,033872578 | 0,012 | 0,004 | 1         | 0,976794798   | 1,023756476     | 3               |
| RPS16                                                                                               | 0,751861504 | -0,03389592  | 0,976 | 0,867 | 1         | 0,976778994   | 1,02377304      | 1,125720877     |
| MFSD4B                                                                                              | 0,704014659 | -0,03390929  | 0,037 | 0,028 | 1         | 0,976769942   | 1,023782528     | 1,321428571     |
| PAQR8                                                                                               | 0,000367825 | -0,033928226 | 0,22  | 0,07  | 1         | 0,976757121   | 1,023795965     | 3,142857143     |
| DGKQ                                                                                                | 0,03795203  | -0,033940438 | 0,061 | 0,018 | 1         | 0,976748854   | 1,023804631     | 3,388888889     |
| CDH15                                                                                               | 0,442988867 | -0,034099429 | 0,037 | 0,021 | 1         | 0,976641217   | 1,023917466     | 1,761904762     |
| TIAM2                                                                                               | 0,20009151  | -0,034113833 | 0,037 | 0,014 | 1         | 0,976631467   | 1,023927688     | 2,642857143     |
| SLC7A6                                                                                              | 0,043812629 | -0,034143133 | 0,073 | 0,025 | 1         | 0,976611632   | 1,023948484     | 2,92            |
| IL33                                                                                                | 0,523960732 | -0,034155046 | 0,024 | 0,014 | 1         | 0,976603568   | 1,023956939     | 1,714285714     |

Supplementary Table 2

| Differentially expressed genes_keloid-XL_comparing SC-Keloid vs. (SC-Myel, SC-Nonmyel, SC-Nonmyel2) |             |              |       |       |             |               |                 |                 |
|-----------------------------------------------------------------------------------------------------|-------------|--------------|-------|-------|-------------|---------------|-----------------|-----------------|
| gene                                                                                                | p_val       | avg_log2FC   | pct.1 | pct.2 | p_val_adj   | Foldchange_UP | Foldchange_DOWN | Ratio_pct1_pct2 |
| ANKLE2                                                                                              | 0,009000399 | -0,034179567 | 0,305 | 0,151 | 1           | 0,976586969   | 1,023974343     | 2,01986755      |
| ENHO                                                                                                | 0,60063706  | -0,034199045 | 0,012 | 0,021 | 1           | 0,976573784   | 1,023988168     | 0,571428571     |
| STAT1                                                                                               | 4,48824E-05 | -0,034259721 | 0,232 | 0,063 | 0,947064385 | 0,976532713   | 1,024031235     | 3,682539683     |
| TIMMDC1                                                                                             | 0,017418624 | -0,034265367 | 0,341 | 0,182 | 1           | 0,976528891   | 1,024035243     | 1,873626374     |
| NQO2                                                                                                | 0,001386819 | -0,034270241 | 0,183 | 0,06  | 1           | 0,976525592   | 1,024038702     | 3,05            |
| RPUSD2                                                                                              | 0,316484073 | -0,034287084 | 0,037 | 0,018 | 1           | 0,976514191   | 1,024050658     | 2,055555556     |
| COQ6                                                                                                | 0,001196333 | -0,034323767 | 0,134 | 0,035 | 1           | 0,976489362   | 1,024076696     | 3,828571429     |
| WBP4                                                                                                | 0,000708144 | -0,034337529 | 0,329 | 0,137 | 1           | 0,976480048   | 1,024086465     | 2,401459854     |
| TANGO6                                                                                              | 0,530989227 | -0,034432335 | 0,024 | 0,014 | 1           | 0,976415881   | 1,024153764     | 1,714285714     |
| GLMN                                                                                                | 0,07141129  | -0,03444341  | 0,073 | 0,028 | 1           | 0,976408385   | 1,024161626     | 2,607142857     |
| PAXIP1-DT                                                                                           | 0,328098566 | -0,034499732 | 0,061 | 0,035 | 1           | 0,976370268   | 1,02420161      | 1,742857143     |
| RBM26-AS1                                                                                           | 0,908489202 | -0,034528949 | 0,012 | 0,011 | 1           | 0,976350495   | 1,024222352     | 1,090909091     |
| SCMH1                                                                                               | 0,144755749 | -0,034599029 | 0,085 | 0,042 | 1           | 0,976303069   | 1,024272105     | 2,023809524     |
| CHST15                                                                                              | 0,908489202 | -0,034603025 | 0,012 | 0,011 | 1           | 0,976300365   | 1,024274942     | 1,090909091     |
| RPRD1A                                                                                              | 0,006371516 | -0,034609777 | 0,256 | 0,116 | 1           | 0,976295795   | 1,024279737     | 2,206896552     |
| C8orf58                                                                                             | 0,063408785 | -0,034627458 | 0,049 | 0,014 | 1           | 0,976283831   | 1,024292289     | 3,5             |
| FAM189B                                                                                             | 0,017433388 | -0,034634318 | 0,122 | 0,046 | 1           | 0,976279188   | 1,02429716      | 2,652173913     |
| TCTN3                                                                                               | 0,261769789 | -0,034642611 | 0,183 | 0,123 | 1           | 0,976273576   | 1,024303048     | 1,487804878     |
| NLGN3                                                                                               | 0,026535568 | -0,034726901 | 0,134 | 0,056 | 1           | 0,976216539   | 1,024362895     | 2,392857143     |
| SAMD12                                                                                              | 0,018346076 | -0,034758634 | 0,171 | 0,074 | 1           | 0,976195067   | 1,024385427     | 2,310810811     |
| ATP6V0E2                                                                                            | 0,003359443 | -0,034785412 | 0,256 | 0,109 | 1           | 0,976176948   | 1,024404441     | 2,348623853     |
| MYO1G                                                                                               | 0,654971645 | -0,034787876 | 0,012 | 0,007 | 1           | 0,97617528    | 1,02440619      | 1,714285714     |
| SUOX                                                                                                | 0,440372242 | -0,034795124 | 0,037 | 0,021 | 1           | 0,976170376   | 1,024411337     | 1,761904762     |
| CGN                                                                                                 | 0,066254792 | -0,034829095 | 0,024 | 0,004 | 1           | 0,976147391   | 1,024435459     | 6               |
| PIK3C2A                                                                                             | 0,005786242 | -0,034832662 | 0,256 | 0,116 | 1           | 0,976144977   | 1,024437992     | 2,206896552     |
| MTA1                                                                                                | 0,005880571 | -0,03485008  | 0,28  | 0,13  | 1           | 0,976133192   | 1,02445036      | 2,153846154     |
| OAZ2                                                                                                | 0,011048373 | -0,034857354 | 0,293 | 0,14  | 1           | 0,976128271   | 1,024455525     | 2,092857143     |
| ZNF764                                                                                              | 0,351112297 | -0,034866727 | 0,024 | 0,011 | 1           | 0,976121929   | 1,024462181     | 2,181818182     |
| QRICH1                                                                                              | 0,041290634 | -0,034906425 | 0,122 | 0,053 | 1           | 0,976095069   | 1,024490371     | 2,301886792     |
| PSMD6-AS2                                                                                           | 0,89237004  | -0,034920254 | 0,012 | 0,014 | 1           | 0,976085713   | 1,024500191     | 0,857142857     |

Supplementary Table 2

| Differentially expressed genes_keloid-XL_comparing SC-Keloid vs. (SC-Myel, SC-Nonmyel, SC-Nonmyel2) |             |              |       |       |             |               |                 |                 |
|-----------------------------------------------------------------------------------------------------|-------------|--------------|-------|-------|-------------|---------------|-----------------|-----------------|
| gene                                                                                                | p_val       | avg_log2FC   | pct.1 | pct.2 | p_val_adj   | Foldchange_UP | Foldchange_DOWN | Ratio_pct1_pct2 |
| HTR2A                                                                                               | 0,654971645 | -0,034927512 | 0,012 | 0,007 | 1           | 0,976080803   | 1,024505346     | 1,714285714     |
| LINC00462                                                                                           | 0,228958629 | -0,03493521  | 0     | 0,018 | 1           | 0,976075595   | 1,024510812     | 0               |
| GCNA                                                                                                | 0,60759219  | -0,034956795 | 0,012 | 0,021 | 1           | 0,976060991   | 1,024526141     | 0,571428571     |
| REC8                                                                                                | 0,07900023  | -0,034965443 | 0,134 | 0,067 | 1           | 0,97605514    | 1,024532282     | 2               |
| BCAR1                                                                                               | 0,073477438 | -0,034977873 | 0,317 | 0,189 | 1           | 0,976046731   | 1,024541109     | 1,677248677     |
| S100P                                                                                               | 0,35350329  | -0,035017658 | 0     | 0,011 | 1           | 0,976019815   | 1,024569363     | 0               |
| RALGPS1                                                                                             | 0,314233219 | -0,035026658 | 0,037 | 0,018 | 1           | 0,976013726   | 1,024575755     | 2,055555556     |
| PALM3                                                                                               | 0,654971645 | -0,035039282 | 0,012 | 0,007 | 1           | 0,976005186   | 1,02458472      | 1,714285714     |
| SPATA5L1                                                                                            | 0,60759219  | -0,035077098 | 0,012 | 0,021 | 1           | 0,975979603   | 1,024611577     | 0,571428571     |
| PISD                                                                                                | 0,023573977 | -0,035126469 | 0,073 | 0,021 | 1           | 0,975946204   | 1,024646641     | 3,476190476     |
| HOXD3                                                                                               | 0,228958629 | -0,035204846 | 0     | 0,018 | 1           | 0,975893186   | 1,024702308     | 0               |
| ANO10                                                                                               | 0,00716736  | -0,035286585 | 0,134 | 0,046 | 1           | 0,975837896   | 1,024760367     | 2,913043478     |
| KLHL11                                                                                              | 0,279370565 | -0,035314347 | 0,049 | 0,025 | 1           | 0,975819117   | 1,024780087     | 1,96            |
| GDAP1                                                                                               | 0,014400666 | -0,03531858  | 0,085 | 0,025 | 1           | 0,975816255   | 1,024783093     | 3,4             |
| TMEM81                                                                                              | 0,654971645 | -0,03533095  | 0,012 | 0,007 | 1           | 0,975807887   | 1,02479188      | 1,714285714     |
| TP53RK                                                                                              | 0,029887845 | -0,035341312 | 0,11  | 0,042 | 1           | 0,975800879   | 1,024799241     | 2,619047619     |
| CSNK1A1                                                                                             | 0,159667996 | -0,035386756 | 0,732 | 0,54  | 1           | 0,975770142   | 1,024831522     | 1,355555556     |
| TYSND1                                                                                              | 0,010852162 | -0,035459692 | 0,11  | 0,035 | 1           | 0,975720813   | 1,024883334     | 3,142857143     |
| MCOLN1                                                                                              | 0,136592705 | -0,035493233 | 0,122 | 0,067 | 1           | 0,975698129   | 1,024907161     | 1,820895522     |
| CEPT1                                                                                               | 0,19199525  | -0,035508298 | 0,049 | 0,021 | 1           | 0,975687941   | 1,024917864     | 2,333333333     |
| MKRN1                                                                                               | 0,005188474 | -0,035516827 | 0,268 | 0,119 | 1           | 0,975682173   | 1,024923923     | 2,25210084      |
| ALDH5A1                                                                                             | 0,89237004  | -0,0355211   | 0,012 | 0,014 | 1           | 0,975679283   | 1,024926958     | 0,857142857     |
| NOP14                                                                                               | 0,584659388 | -0,03554699  | 0,037 | 0,025 | 1           | 0,975661774   | 1,024945352     | 1,48            |
| SLC25A44                                                                                            | 0,096427073 | -0,035548135 | 0,098 | 0,046 | 1           | 0,975661      | 1,024946165     | 2,130434783     |
| FBXO10                                                                                              | 0,654971645 | -0,0355533   | 0,012 | 0,007 | 1           | 0,975657506   | 1,024949835     | 1,714285714     |
| RAB3GAP1                                                                                            | 0,016708662 | -0,035577523 | 0,28  | 0,14  | 1           | 0,975641125   | 1,024967044     | 2               |
| LINC00324                                                                                           | 0,706611845 | -0,035610617 | 0,024 | 0,018 | 1           | 0,975618746   | 1,024990556     | 1,333333333     |
| LY6G5B                                                                                              | 0,654971645 | -0,03561155  | 0,012 | 0,007 | 1           | 0,975618114   | 1,024991219     | 1,714285714     |
| MARCHF9                                                                                             | 8,84329E-06 | -0,035611553 | 0,354 | 0,112 | 0,186602248 | 0,975618112   | 1,024991221     | 3,160714286     |
| PURG                                                                                                | 0,35350329  | -0,035704828 | 0     | 0,011 | 1           | 0,975555038   | 1,025057492     | 0               |

Supplementary Table 2

| Differentially expressed genes_keloid-XL_comparing SC-Keloid vs. (SC-Myel, SC-Nonmyel, SC-Nonmyel2) |             |              |       |       |             |               |                 |                 |
|-----------------------------------------------------------------------------------------------------|-------------|--------------|-------|-------|-------------|---------------|-----------------|-----------------|
| gene                                                                                                | p_val       | avg_log2FC   | pct.1 | pct.2 | p_val_adj   | Foldchange_UP | Foldchange_DOWN | Ratio_pct1_pct2 |
| ZNF275                                                                                              | 0,179372449 | -0,035719513 | 0,061 | 0,028 | 1           | 0,975545107   | 1,025067926     | 2,178571429     |
| NTNG1                                                                                               | 0,376832882 | -0,035722504 | 0,049 | 0,028 | 1           | 0,975543085   | 1,025070051     | 1,75            |
| GOLGA8N                                                                                             | 0,35350329  | -0,035728692 | 0     | 0,011 | 1           | 0,975538901   | 1,025074448     | 0               |
| HDAC11                                                                                              | 0,087730248 | -0,03575076  | 0,183 | 0,102 | 1           | 0,975523979   | 1,025090128     | 1,794117647     |
| INHBA                                                                                               | 0,706611845 | -0,035904574 | 0,024 | 0,018 | 1           | 0,975419978   | 1,025199425     | 1,333333333     |
| AMER1                                                                                               | 0,908489202 | -0,035905477 | 0,012 | 0,011 | 1           | 0,975419367   | 1,025200067     | 1,090909091     |
| C15orf39                                                                                            | 0,070054953 | -0,035913776 | 0,061 | 0,021 | 1           | 0,975413756   | 1,025205964     | 2,904761905     |
| STK4                                                                                                | 0,005183201 | -0,03593489  | 0,232 | 0,098 | 1           | 0,975399481   | 1,025220968     | 2,367346939     |
| ABHD10                                                                                              | 0,017465351 | -0,035944538 | 0,11  | 0,039 | 1           | 0,975392958   | 1,025227824     | 2,820512821     |
| KRT16                                                                                               | 0,275831025 | -0,035951666 | 0,049 | 0,025 | 1           | 0,975388139   | 1,025232889     | 1,96            |
| ARRB1                                                                                               | 0,868326909 | -0,035955639 | 0,024 | 0,021 | 1           | 0,975385453   | 1,025235713     | 1,142857143     |
| SLC9B2                                                                                              | 0,026685693 | -0,035958373 | 0,049 | 0,011 | 1           | 0,975383605   | 1,025237656     | 4,454545455     |
| C15orf40                                                                                            | 6,89797E-05 | -0,036019541 | 0,171 | 0,039 | 1           | 0,975342251   | 1,025281125     | 4,384615385     |
| TBXA2R                                                                                              | 0,89237004  | -0,036091121 | 0,012 | 0,014 | 1           | 0,97529386    | 1,025331996     | 0,857142857     |
| CHCHD10                                                                                             | 7,97476E-07 | -0,036096329 | 0,537 | 0,189 | 0,016827536 | 0,975290339   | 1,025335698     | 2,841269841     |
| POLE                                                                                                | 0,189157269 | -0,036101589 | 0,049 | 0,021 | 1           | 0,975286783   | 1,025339436     | 2,333333333     |
| STT3B                                                                                               | 0,001484378 | -0,036105063 | 0,268 | 0,109 | 1           | 0,975284435   | 1,025341905     | 2,458715596     |
| EHF                                                                                                 | 0,654971645 | -0,036135719 | 0,012 | 0,007 | 1           | 0,975263711   | 1,025363693     | 1,714285714     |
| ZNF140                                                                                              | 0,274072777 | -0,036183782 | 0,049 | 0,025 | 1           | 0,975231221   | 1,025397853     | 1,96            |
| CLYBL                                                                                               | 0,908489202 | -0,036206519 | 0,012 | 0,011 | 1           | 0,975215851   | 1,025414013     | 1,090909091     |
| SCYL3                                                                                               | 0,710321163 | -0,036292293 | 0,024 | 0,018 | 1           | 0,975157873   | 1,02547498      | 1,333333333     |
| NLGN1                                                                                               | 0,19057237  | -0,036321807 | 0,049 | 0,021 | 1           | 0,975137924   | 1,025495959     | 2,333333333     |
| TTC39C                                                                                              | 0,159658848 | -0,036342707 | 0,11  | 0,06  | 1           | 0,975123797   | 1,025510815     | 1,833333333     |
| MMRN2                                                                                               | 0,89237004  | -0,036359066 | 0,012 | 0,014 | 1           | 0,97511274    | 1,025522444     | 0,857142857     |
| ZNF718                                                                                              | 0,89237004  | -0,03636636  | 0,012 | 0,014 | 1           | 0,97510781    | 1,025527629     | 0,857142857     |
| ZBTB18                                                                                              | 0,044615627 | -0,036419942 | 0,085 | 0,032 | 1           | 0,975071595   | 1,025565718     | 2,65625         |
| SLCO4A1                                                                                             | 0,35350329  | -0,036437912 | 0     | 0,011 | 1           | 0,975059449   | 1,025578492     | 0               |
| DSG1                                                                                                | 0,872003564 | -0,036441766 | 0,024 | 0,021 | 1           | 0,975056845   | 1,025581232     | 1,142857143     |
| DISP2                                                                                               | 0,35350329  | -0,036450193 | 0     | 0,011 | 1           | 0,975051149   | 1,025587223     | 0               |
| AC027307.3                                                                                          | 0,89237004  | -0,03650326  | 0,012 | 0,014 | 1           | 0,975015284   | 1,025624948     | 0,857142857     |



Supplementary Table 2

| Differentially expressed genes_keloid-XL_comparing SC-Keloid vs. (SC-Myel, SC-Nonmyel, SC-Nonmyel2) |             |              |       |       |           |               |                 |                 |
|-----------------------------------------------------------------------------------------------------|-------------|--------------|-------|-------|-----------|---------------|-----------------|-----------------|
| gene                                                                                                | p_val       | avg_log2FC   | pct.1 | pct.2 | p_val_adj | Foldchange_UP | Foldchange_DOWN | Ratio_pct1_pct2 |
| LRRC37A3                                                                                            | 0,063408785 | -0,036510554 | 0,049 | 0,014 | 1         | 0,975010355   | 1,025630133     | 3,5             |
| FO XK2                                                                                              | 0,232890846 | -0,036527332 | 0,183 | 0,119 | 1         | 0,974999016   | 1,025642061     | 1,537815126     |
| ZNF337-AS1                                                                                          | 0,903285004 | -0,036554713 | 0,012 | 0,011 | 1         | 0,974980511   | 1,025661527     | 1,090909091     |
| FAM86B1                                                                                             | 0,908489202 | -0,036556483 | 0,012 | 0,011 | 1         | 0,974979315   | 1,025662785     | 1,090909091     |
| LINC00958                                                                                           | 0,710321163 | -0,03657826  | 0,024 | 0,018 | 1         | 0,974964598   | 1,025678267     | 1,333333333     |
| ZNF585A                                                                                             | 0,007407637 | -0,036585691 | 0,134 | 0,046 | 1         | 0,974959576   | 1,025683551     | 2,913043478     |
| CDK8                                                                                                | 0,176994433 | -0,036642598 | 0,061 | 0,028 | 1         | 0,97492112    | 1,025724009     | 2,178571429     |
| ADAT3                                                                                               | 0,19199525  | -0,036668685 | 0,049 | 0,021 | 1         | 0,974903492   | 1,025742557     | 2,333333333     |
| ZNF629                                                                                              | 0,028081741 | -0,036743495 | 0,049 | 0,011 | 1         | 0,97485294    | 1,025795747     | 4,454545455     |
| NUFIP1                                                                                              | 0,184958462 | -0,036752374 | 0,049 | 0,021 | 1         | 0,974846941   | 1,02580206      | 2,333333333     |
| TMEM88                                                                                              | 0,35350329  | -0,03680782  | 0     | 0,011 | 1         | 0,974809475   | 1,025841485     | 0               |
| TCAP                                                                                                | 0,35350329  | -0,036852289 | 0     | 0,011 | 1         | 0,974779429   | 1,025873105     | 0               |
| TUBD1                                                                                               | 0,017691584 | -0,036857381 | 0,061 | 0,014 | 1         | 0,974775989   | 1,025876726     | 4,357142857     |
| NARS2                                                                                               | 0,279370565 | -0,036871999 | 0,049 | 0,025 | 1         | 0,974766112   | 1,025887121     | 1,96            |
| SRPRA                                                                                               | 0,001000448 | -0,036892684 | 0,305 | 0,126 | 1         | 0,974752136   | 1,02590183      | 2,420634921     |
| COG3                                                                                                | 0,000939956 | -0,036895663 | 0,195 | 0,063 | 1         | 0,974750123   | 1,025903948     | 3,095238095     |
| SOX3                                                                                                | 0,35350329  | -0,036904353 | 0     | 0,011 | 1         | 0,974744252   | 1,025910128     | 0               |
| AKAP1                                                                                               | 0,275457423 | -0,036922625 | 0,073 | 0,042 | 1         | 0,974731906   | 1,025923122     | 1,738095238     |
| TRIM59                                                                                              | 0,187860656 | -0,036950282 | 0,024 | 0,007 | 1         | 0,97471322    | 1,025942789     | 3,428571429     |
| PTPRG                                                                                               | 0,448248692 | -0,036951593 | 0,037 | 0,021 | 1         | 0,974712335   | 1,025943721     | 1,761904762     |
| ZKSCAN5                                                                                             | 0,316484073 | -0,036971544 | 0,037 | 0,018 | 1         | 0,974698856   | 1,025957909     | 2,055555556     |
| YRDC                                                                                                | 0,043562455 | -0,037003093 | 0,085 | 0,032 | 1         | 0,974677541   | 1,025980345     | 2,65625         |
| ACADM                                                                                               | 0,140795415 | -0,037004693 | 0,146 | 0,084 | 1         | 0,97467646    | 1,025981483     | 1,738095238     |
| ZNF460                                                                                              | 0,310141781 | -0,037059255 | 0,085 | 0,053 | 1         | 0,974639599   | 1,026020286     | 1,603773585     |
| RASGRP3                                                                                             | 0,728697501 | -0,037065847 | 0,012 | 0,018 | 1         | 0,974635146   | 1,026024974     | 0,666666667     |
| KCNC1                                                                                               | 0,35350329  | -0,037073006 | 0     | 0,011 | 1         | 0,97463031    | 1,026030065     | 0               |
| AXIN1                                                                                               | 0,056823405 | -0,037096012 | 0,171 | 0,088 | 1         | 0,974614768   | 1,026046427     | 1,943181818     |
| PARN                                                                                                | 0,000150658 | -0,037107138 | 0,146 | 0,032 | 1         | 0,974607252   | 1,02605434      | 4,5625          |
| PAPOLG                                                                                              | 0,258558337 | -0,037128128 | 0,085 | 0,049 | 1         | 0,974593072   | 1,026069268     | 1,734693878     |
| DEPDC4                                                                                              | 0,35350329  | -0,037159548 | 0     | 0,011 | 1         | 0,974571847   | 1,026091615     | 0               |

Supplementary Table 2

| Differentially expressed genes_keloid-XL_comparing SC-Keloid vs. (SC-Myel, SC-Nonmyel, SC-Nonmyel2) |             |              |       |       |           |               |                 |                 |
|-----------------------------------------------------------------------------------------------------|-------------|--------------|-------|-------|-----------|---------------|-----------------|-----------------|
| gene                                                                                                | p_val       | avg_log2FC   | pct.1 | pct.2 | p_val_adj | Foldchange_UP | Foldchange_DOWN | Ratio_pct1_pct2 |
| WDR7                                                                                                | 0,602048443 | -0,037240707 | 0,049 | 0,035 | 1         | 0,974517024   | 1,026149339     | 1,4             |
| ZNF17                                                                                               | 0,35350329  | -0,037256802 | 0     | 0,011 | 1         | 0,974506152   | 1,026160788     | 0               |
| TNFSF12                                                                                             | 0,000344891 | -0,037307818 | 0,402 | 0,168 | 1         | 0,974471692   | 1,026197075     | 2,392857143     |
| NAAA                                                                                                | 0,248075609 | -0,037316048 | 0,061 | 0,032 | 1         | 0,974466133   | 1,026202929     | 1,90625         |
| ZNF883                                                                                              | 0,908489202 | -0,037342004 | 0,012 | 0,011 | 1         | 0,974448601   | 1,026221392     | 1,090909091     |
| TRIM73                                                                                              | 0,414697944 | -0,037363833 | 0,012 | 0,028 | 1         | 0,974433857   | 1,026236919     | 0,428571429     |
| CCDC120                                                                                             | 0,28286347  | -0,037378768 | 0     | 0,014 | 1         | 0,97442377    | 1,026247543     | 0               |
| VGLL4                                                                                               | 0,00771753  | -0,037456501 | 0,744 | 0,421 | 1         | 0,974371269   | 1,026302839     | 1,767220903     |
| HTT                                                                                                 | 0,18555285  | -0,037505413 | 0,232 | 0,151 | 1         | 0,974338235   | 1,026337635     | 1,536423841     |
| LINC02693                                                                                           | 0,489167971 | -0,037584178 | 0,049 | 0,032 | 1         | 0,974285042   | 1,02639367      | 1,53125         |
| CNN1                                                                                                | 0,100388468 | -0,037709922 | 0,085 | 0,039 | 1         | 0,974200128   | 1,026483134     | 2,179487179     |
| ARL17B                                                                                              | 0,89237004  | -0,037710104 | 0,012 | 0,014 | 1         | 0,974200005   | 1,026483263     | 0,857142857     |
| CBX6                                                                                                | 0,063832704 | -0,037730285 | 0,415 | 0,253 | 1         | 0,974186378   | 1,026497622     | 1,640316206     |
| ANXA2R                                                                                              | 0,710321163 | -0,037748484 | 0,024 | 0,018 | 1         | 0,974174089   | 1,026510571     | 1,333333333     |
| UNC45A                                                                                              | 0,022281318 | -0,037773692 | 0,195 | 0,091 | 1         | 0,974157068   | 1,026528507     | 2,142857143     |
| PIEZO2                                                                                              | 0,35350329  | -0,0377747   | 0     | 0,011 | 1         | 0,974156387   | 1,026529224     | 0               |
| LMNB1                                                                                               | 0,026347531 | -0,037786961 | 0,085 | 0,028 | 1         | 0,974148108   | 1,026537949     | 3,035714286     |
| DIPK2B                                                                                              | 0,442988867 | -0,037796675 | 0,037 | 0,021 | 1         | 0,974141548   | 1,026544861     | 1,761904762     |
| TRIM22                                                                                              | 0,274072777 | -0,037822355 | 0,049 | 0,025 | 1         | 0,974124209   | 1,026563133     | 1,96            |
| ARG2                                                                                                | 0,114372788 | -0,037865834 | 0,073 | 0,032 | 1         | 0,974094852   | 1,026594072     | 2,28125         |
| TSTD1                                                                                               | 0,023573977 | -0,03788767  | 0,073 | 0,021 | 1         | 0,974080109   | 1,026609609     | 3,476190476     |
| DNAJC16                                                                                             | 0,01104171  | -0,0379218   | 0,073 | 0,018 | 1         | 0,974057065   | 1,026633896     | 4,055555556     |
| NEFM                                                                                                | 0,001374324 | -0,037941662 | 0,195 | 0,067 | 1         | 0,974043655   | 1,026648031     | 2,910447761     |
| PLAAT5                                                                                              | 0,35350329  | -0,038082238 | 0     | 0,011 | 1         | 0,973948749   | 1,026748072     | 0               |
| GMEB1                                                                                               | 0,380987214 | -0,038125451 | 0,049 | 0,028 | 1         | 0,973919577   | 1,026778826     | 1,75            |
| BMT2                                                                                                | 0,249536154 | -0,038131887 | 0,061 | 0,032 | 1         | 0,973915232   | 1,026783407     | 1,90625         |
| SMAD6                                                                                               | 0,28286347  | -0,038151319 | 0     | 0,014 | 1         | 0,973902114   | 1,026797237     | 0               |
| ZNF620                                                                                              | 0,908489202 | -0,03816193  | 0,012 | 0,011 | 1         | 0,973894951   | 1,026804789     | 1,090909091     |
| LAMA1                                                                                               | 0,35350329  | -0,038196098 | 0     | 0,011 | 1         | 0,973871886   | 1,026829108     | 0               |
| SLC37A1                                                                                             | 0,530989227 | -0,038281237 | 0,024 | 0,014 | 1         | 0,973814416   | 1,026889707     | 1,714285714     |

Supplementary Table 2

| Differentially expressed genes_keloid-XL_comparing SC-Keloid vs. (SC-Myel, SC-Nonmyel, SC-Nonmyel2) |             |              |       |       |           |               |                 |                 |
|-----------------------------------------------------------------------------------------------------|-------------|--------------|-------|-------|-----------|---------------|-----------------|-----------------|
| gene                                                                                                | p_val       | avg_log2FC   | pct.1 | pct.2 | p_val_adj | Foldchange_UP | Foldchange_DOWN | Ratio_pct1_pct2 |
| ZNF503-AS1                                                                                          | 0,35350329  | -0,03832272  | 0     | 0,011 | 1         | 0,973786415   | 1,026919234     | 0               |
| MARF1                                                                                               | 0,03298261  | -0,038330881 | 0,183 | 0,088 | 1         | 0,973780907   | 1,026925043     | 2,079545455     |
| CNOT11                                                                                              | 0,007086391 | -0,038371478 | 0,085 | 0,021 | 1         | 0,973753505   | 1,026953941     | 4,047619048     |
| TMEM236                                                                                             | 0,35350329  | -0,038390374 | 0     | 0,011 | 1         | 0,973740752   | 1,026967392     | 0               |
| SLC25A30                                                                                            | 0,654971645 | -0,038415442 | 0,012 | 0,007 | 1         | 0,973723833   | 1,026985236     | 1,714285714     |
| MCM3                                                                                                | 0,796613111 | -0,038450729 | 0,073 | 0,063 | 1         | 0,973700016   | 1,027010356     | 1,158730159     |
| MBNL3                                                                                               | 0,279370565 | -0,038491389 | 0,049 | 0,025 | 1         | 0,973672574   | 1,027039301     | 1,96            |
| MANSC1                                                                                              | 0,740851684 | -0,038546982 | 0,012 | 0,018 | 1         | 0,973635055   | 1,027078878     | 0,666666667     |
| ZNF628                                                                                              | 0,071300757 | -0,038549839 | 0,061 | 0,021 | 1         | 0,973633128   | 1,027080911     | 2,904761905     |
| UBTF                                                                                                | 0,00037613  | -0,038553193 | 0,524 | 0,228 | 1         | 0,973630864   | 1,027083299     | 2,298245614     |
| DAXX                                                                                                | 0,026757222 | -0,038581814 | 0,22  | 0,109 | 1         | 0,973611548   | 1,027103676     | 2,018348624     |
| DVL2                                                                                                | 0,018528462 | -0,038617555 | 0,159 | 0,067 | 1         | 0,973587429   | 1,027129121     | 2,373134328     |
| ZNF625                                                                                              | 0,908489202 | -0,038712324 | 0,012 | 0,011 | 1         | 0,973523477   | 1,027196594     | 1,090909091     |
| CDH11                                                                                               | 0,20009151  | -0,038723774 | 0,037 | 0,014 | 1         | 0,973515751   | 1,027204746     | 2,642857143     |
| VIM-AS1                                                                                             | 0,35350329  | -0,038735813 | 0     | 0,011 | 1         | 0,973507627   | 1,027213319     | 0               |
| USF1                                                                                                | 0,380987214 | -0,038744458 | 0,049 | 0,028 | 1         | 0,973501794   | 1,027219474     | 1,75            |
| PPP1R3C                                                                                             | 0,654971645 | -0,038796849 | 0,012 | 0,007 | 1         | 0,973466442   | 1,027256778     | 1,714285714     |
| CD14                                                                                                | 0,20009151  | -0,038818492 | 0,037 | 0,014 | 1         | 0,973451838   | 1,027272188     | 2,642857143     |
| ZBTB40                                                                                              | 0,041022329 | -0,038837118 | 0,122 | 0,053 | 1         | 0,97343927    | 1,027285451     | 2,301886792     |
| H3C4                                                                                                | 0,186763581 | -0,038856057 | 0     | 0,021 | 1         | 0,973426491   | 1,027298937     | 0               |
| TBX21                                                                                               | 0,649511996 | -0,038867617 | 0,012 | 0,007 | 1         | 0,973418692   | 1,027307169     | 1,714285714     |
| DCLK1                                                                                               | 0,908489202 | -0,03894564  | 0,012 | 0,011 | 1         | 0,973366049   | 1,027362728     | 1,090909091     |
| ASH2L                                                                                               | 0,000967641 | -0,039007195 | 0,159 | 0,046 | 1         | 0,97332452    | 1,027406563     | 3,456521739     |
| METTL4                                                                                              | 0,042654557 | -0,039007769 | 0,122 | 0,053 | 1         | 0,973324133   | 1,027406972     | 2,301886792     |
| BSCL2                                                                                               | 0,000255287 | -0,039025293 | 0,317 | 0,119 | 1         | 0,97331231    | 1,027419452     | 2,663865546     |
| SCHIP1                                                                                              | 0,099403001 | -0,039025483 | 0,098 | 0,046 | 1         | 0,973312182   | 1,027419587     | 2,130434783     |
| SLC6A8                                                                                              | 0,226861889 | -0,039059314 | 0,159 | 0,102 | 1         | 0,973289358   | 1,02744368      | 1,558823529     |
| TMEM44-AS1                                                                                          | 0,176661976 | -0,039129483 | 0,098 | 0,053 | 1         | 0,973242021   | 1,027493654     | 1,849056604     |
| DISC1                                                                                               | 0,006577039 | -0,039195298 | 0,244 | 0,109 | 1         | 0,973197623   | 1,027540528     | 2,23853211      |
| HCG17                                                                                               | 0,35185965  | -0,039210475 | 0,012 | 0,004 | 1         | 0,973187386   | 1,027551338     | 3               |

Supplementary Table 2

| Differentially expressed genes_keloid-XL_comparing SC-Keloid vs. (SC-Myel, SC-Nonmyel, SC-Nonmyel2) |             |              |       |       |           |               |                 |                 |
|-----------------------------------------------------------------------------------------------------|-------------|--------------|-------|-------|-----------|---------------|-----------------|-----------------|
| gene                                                                                                | p_val       | avg_log2FC   | pct.1 | pct.2 | p_val_adj | Foldchange_UP | Foldchange_DOWN | Ratio_pct1_pct2 |
| LRP5                                                                                                | 0,980653851 | -0,039289741 | 0,024 | 0,025 | 1         | 0,973133917   | 1,027607796     | 0,96            |
| KIAA0040                                                                                            | 0,728697501 | -0,039327451 | 0,012 | 0,018 | 1         | 0,973108481   | 1,027634657     | 0,666666667     |
| GLUD1                                                                                               | 0,024639187 | -0,039339996 | 0,22  | 0,109 | 1         | 0,973100019   | 1,027643593     | 2,018348624     |
| LDLRAD3                                                                                             | 0,958814021 | -0,039352787 | 0,037 | 0,035 | 1         | 0,973091392   | 1,027652704     | 1,057142857     |
| ATXN7L2                                                                                             | 0,702909482 | -0,039385127 | 0,024 | 0,018 | 1         | 0,973069579   | 1,027675741     | 1,333333333     |
| ABCC5                                                                                               | 0,002998169 | -0,039409801 | 0,159 | 0,053 | 1         | 0,973052937   | 1,027693317     | 3               |
| CHRNE                                                                                               | 0,063408785 | -0,039436496 | 0,049 | 0,014 | 1         | 0,973034932   | 1,027712333     | 3,5             |
| SMC5-DT                                                                                             | 0,351112297 | -0,039446236 | 0,024 | 0,011 | 1         | 0,973028363   | 1,027719271     | 2,181818182     |
| LRR37B                                                                                              | 0,980653851 | -0,039452047 | 0,024 | 0,025 | 1         | 0,973024444   | 1,027723411     | 0,96            |
| LRTOMT                                                                                              | 0,316484073 | -0,039502548 | 0,037 | 0,018 | 1         | 0,972990384   | 1,027759387     | 2,055555556     |
| CSE1L                                                                                               | 0,006168117 | -0,039515329 | 0,207 | 0,084 | 1         | 0,972981764   | 1,027768492     | 2,464285714     |
| BZW1                                                                                                | 0,007797116 | -0,039531554 | 0,598 | 0,326 | 1         | 0,972970822   | 1,02778005      | 1,834355828     |
| SPTBN4                                                                                              | 0,597173043 | -0,039567534 | 0,012 | 0,021 | 1         | 0,972946557   | 1,027805683     | 0,571428571     |
| MCOLN3                                                                                              | 0,89237004  | -0,039638168 | 0,012 | 0,014 | 1         | 0,972898922   | 1,027856005     | 0,857142857     |
| JHY                                                                                                 | 0,017691584 | -0,03971341  | 0,061 | 0,014 | 1         | 0,972848184   | 1,027909613     | 4,357142857     |
| FECH                                                                                                | 0,527469009 | -0,039762014 | 0,024 | 0,014 | 1         | 0,972815409   | 1,027944244     | 1,714285714     |
| CASZ1                                                                                               | 0,35350329  | -0,039770316 | 0     | 0,011 | 1         | 0,972809811   | 1,027950159     | 0               |
| NKAPL                                                                                               | 0,35350329  | -0,039773478 | 0     | 0,011 | 1         | 0,972807679   | 1,027952412     | 0               |
| ADO                                                                                                 | 0,087700887 | -0,039789688 | 0,11  | 0,053 | 1         | 0,972796749   | 1,027963962     | 2,075471698     |
| MARCF2                                                                                              | 0,000392701 | -0,039815253 | 0,268 | 0,098 | 1         | 0,97277951    | 1,027982178     | 2,734693878     |
| MAP7D2                                                                                              | 0,28286347  | -0,03982181  | 0     | 0,014 | 1         | 0,972775089   | 1,02798685      | 0               |
| SPECC1                                                                                              | 0,023236743 | -0,03982434  | 0,293 | 0,154 | 1         | 0,972773384   | 1,027988653     | 1,902597403     |
| CENPT                                                                                               | 0,011689263 | -0,039831945 | 0,146 | 0,056 | 1         | 0,972768256   | 1,027994072     | 2,607142857     |
| DCAF16                                                                                              | 0,015978931 | -0,039870061 | 0,183 | 0,081 | 1         | 0,972742555   | 1,028021232     | 2,259259259     |
| MPZL1                                                                                               | 0,59463228  | -0,039910526 | 0,049 | 0,035 | 1         | 0,972715272   | 1,028050067     | 1,4             |
| MAP3K8                                                                                              | 0,291032689 | -0,039942521 | 0,073 | 0,042 | 1         | 0,9726937     | 1,028072866     | 1,738095238     |
| ATF2                                                                                                | 0,168661063 | -0,039996116 | 0,256 | 0,161 | 1         | 0,972657566   | 1,028111059     | 1,590062112     |
| CMTM8                                                                                               | 0,110292725 | -0,040023801 | 0,061 | 0,025 | 1         | 0,972638901   | 1,028130788     | 2,44            |
| DDX51                                                                                               | 0,069310956 | -0,040046844 | 0,085 | 0,035 | 1         | 0,972623366   | 1,02814721      | 2,428571429     |
| FEM1B                                                                                               | 0,002763496 | -0,040050123 | 0,22  | 0,084 | 1         | 0,972621155   | 1,028149547     | 2,619047619     |

Supplementary Table 2

| Differentially expressed genes_keloid-XL_comparing SC-Keloid vs. (SC-Myel, SC-Nonmyel, SC-Nonmyel2) |             |              |       |       |             |               |                 |                 |
|-----------------------------------------------------------------------------------------------------|-------------|--------------|-------|-------|-------------|---------------|-----------------|-----------------|
| gene                                                                                                | p_val       | avg_log2FC   | pct.1 | pct.2 | p_val_adj   | Foldchange_UP | Foldchange_DOWN | Ratio_pct1_pct2 |
| GFAP                                                                                                | 0,908489202 | -0,040063172 | 0,012 | 0,011 | 1           | 0,972612358   | 1,028158846     | 1,090909091     |
| ATP9A                                                                                               | 0,28286347  | -0,040082045 | 0     | 0,014 | 1           | 0,972599634   | 1,028172297     | 0               |
| TNNI3K                                                                                              | 0,35350329  | -0,040095037 | 0     | 0,011 | 1           | 0,972590876   | 1,028181556     | 0               |
| STRN                                                                                                | 0,015700335 | -0,040121917 | 0,195 | 0,088 | 1           | 0,972572756   | 1,028200712     | 2,215909091     |
| PDE10A                                                                                              | 0,60411013  | -0,040137999 | 0,012 | 0,021 | 1           | 0,972561914   | 1,028212174     | 0,571428571     |
| GART                                                                                                | 0,004324518 | -0,040169528 | 0,159 | 0,056 | 1           | 0,97254066    | 1,028234645     | 2,839285714     |
| CCDC107                                                                                             | 1,84895E-07 | -0,040173326 | 0,5   | 0,161 | 0,003901474 | 0,972538099   | 1,028237352     | 3,105590062     |
| PSME3                                                                                               | 0,003603907 | -0,040263852 | 0,171 | 0,06  | 1           | 0,972477076   | 1,028301874     | 2,85            |
| ALG10B                                                                                              | 0,584659388 | -0,040296512 | 0,037 | 0,025 | 1           | 0,972455061   | 1,028325153     | 1,48            |
| SLC2A11                                                                                             | 0,710321163 | -0,040300166 | 0,024 | 0,018 | 1           | 0,972452598   | 1,028327758     | 1,333333333     |
| GET4                                                                                                | 0,732741497 | -0,040311025 | 0,012 | 0,018 | 1           | 0,972445279   | 1,028335498     | 0,666666667     |
| SMN1                                                                                                | 0,065000281 | -0,040317882 | 0,098 | 0,042 | 1           | 0,972440657   | 1,028340386     | 2,333333333     |
| C3                                                                                                  | 0,89702294  | -0,040322231 | 0,012 | 0,014 | 1           | 0,972437726   | 1,028343485     | 0,857142857     |
| TESK2                                                                                               | 0,60411013  | -0,040325932 | 0,012 | 0,021 | 1           | 0,972435231   | 1,028346123     | 0,571428571     |
| MIA3                                                                                                | 0,001841167 | -0,040416063 | 0,402 | 0,189 | 1           | 0,972374481   | 1,02841037      | 2,126984127     |
| LLGL2                                                                                               | 0,530989227 | -0,040458884 | 0,024 | 0,014 | 1           | 0,972345621   | 1,028440895     | 1,714285714     |
| ELAPOR1                                                                                             | 0,35350329  | -0,0404889   | 0     | 0,011 | 1           | 0,97232539    | 1,028462293     | 0               |
| CRNDE                                                                                               | 0,001241194 | -0,040502793 | 0,146 | 0,042 | 1           | 0,972316027   | 1,028472196     | 3,476190476     |
| KLF8                                                                                                | 0,89237004  | -0,040504309 | 0,012 | 0,014 | 1           | 0,972315006   | 1,028473277     | 0,857142857     |
| ITFG2                                                                                               | 0,015742889 | -0,040521512 | 0,098 | 0,032 | 1           | 0,972303411   | 1,028485541     | 3,0625          |
| ECT2                                                                                                | 0,044615627 | -0,040526492 | 0,085 | 0,032 | 1           | 0,972300055   | 1,028489091     | 2,65625         |
| VWF                                                                                                 | 0,89237004  | -0,040585492 | 0,012 | 0,014 | 1           | 0,972260293   | 1,028531153     | 0,857142857     |
| SRFBP1                                                                                              | 0,021761191 | -0,040789579 | 0,171 | 0,077 | 1           | 0,972122765   | 1,028676661     | 2,220779221     |
| MFSD4A                                                                                              | 0,35350329  | -0,040810081 | 0     | 0,011 | 1           | 0,97210895    | 1,02869128      | 0               |
| ZC3H3                                                                                               | 0,043812629 | -0,04081272  | 0,073 | 0,025 | 1           | 0,972107172   | 1,028693162     | 2,92            |
| PDGFRA                                                                                              | 0,351112297 | -0,040899464 | 0,024 | 0,011 | 1           | 0,972048724   | 1,028755015     | 2,181818182     |
| ZBTB25                                                                                              | 0,711252021 | -0,040900209 | 0,049 | 0,039 | 1           | 0,972048222   | 1,028755546     | 1,256410256     |
| SLC25A16                                                                                            | 0,011168661 | -0,040971874 | 0,073 | 0,018 | 1           | 0,971999937   | 1,028806651     | 4,055555556     |
| SPATA24                                                                                             | 0,35350329  | -0,041026795 | 0     | 0,011 | 1           | 0,971962936   | 1,028845816     | 0               |
| ZW10                                                                                                | 0,85248313  | -0,041035491 | 0,037 | 0,032 | 1           | 0,971957077   | 1,028852018     | 1,15625         |

Supplementary Table 2

| Differentially expressed genes_keloid-XL_comparing SC-Keloid vs. (SC-Myel, SC-Nonmyel, SC-Nonmyel2) |             |              |       |       |           |               |                 |                 |
|-----------------------------------------------------------------------------------------------------|-------------|--------------|-------|-------|-----------|---------------|-----------------|-----------------|
| gene                                                                                                | p_val       | avg_log2FC   | pct.1 | pct.2 | p_val_adj | Foldchange_UP | Foldchange_DOWN | Ratio_pct1_pct2 |
| PRECSIT                                                                                             | 0,070300136 | -0,041129696 | 0,073 | 0,028 | 1         | 0,971893612   | 1,028919202     | 2,607142857     |
| FTO                                                                                                 | 0,003352471 | -0,041141934 | 0,195 | 0,074 | 1         | 0,971885368   | 1,02892793      | 2,635135135     |
| RGS9                                                                                                | 0,486853851 | -0,04115039  | 0,049 | 0,032 | 1         | 0,971879671   | 1,028933961     | 1,53125         |
| C5orf22                                                                                             | 0,268844049 | -0,041177149 | 0,049 | 0,025 | 1         | 0,971861645   | 1,028953046     | 1,96            |
| POLR1C                                                                                              | 0,005608142 | -0,041278869 | 0,11  | 0,032 | 1         | 0,971793125   | 1,029025597     | 3,4375          |
| ACBD5                                                                                               | 0,002224419 | -0,041367805 | 0,207 | 0,077 | 1         | 0,97173322    | 1,029089033     | 2,688311688     |
| CEP20                                                                                               | 0,068571397 | -0,041389458 | 0,098 | 0,042 | 1         | 0,971718636   | 1,029104479     | 2,333333333     |
| METTL16                                                                                             | 0,085672974 | -0,041419623 | 0,11  | 0,053 | 1         | 0,971698318   | 1,029125997     | 2,075471698     |
| KIAA0100                                                                                            | 0,038238737 | -0,041426171 | 0,134 | 0,06  | 1         | 0,971693908   | 1,029130667     | 2,233333333     |
| ZSWIM8-AS1                                                                                          | 0,28286347  | -0,041548807 | 0     | 0,014 | 1         | 0,971611313   | 1,029218152     | 0               |
| ARFGF1                                                                                              | 0,051835217 | -0,041569416 | 0,146 | 0,07  | 1         | 0,971597433   | 1,029232855     | 2,085714286     |
| DHX9                                                                                                | 0,015478908 | -0,041608277 | 0,451 | 0,249 | 1         | 0,971571262   | 1,029260579     | 1,81124498      |
| USP15                                                                                               | 0,030945735 | -0,041652691 | 0,366 | 0,207 | 1         | 0,971541353   | 1,029292266     | 1,768115942     |
| AC073342.1                                                                                          | 0,35350329  | -0,041697438 | 0     | 0,011 | 1         | 0,97151122    | 1,029324191     | 0               |
| RBM11                                                                                               | 0,282047413 | -0,041722024 | 0,11  | 0,07  | 1         | 0,971494663   | 1,029341733     | 1,571428571     |
| ARMC2                                                                                               | 0,448248692 | -0,041747941 | 0,037 | 0,021 | 1         | 0,971477211   | 1,029360224     | 1,761904762     |
| RPL35A                                                                                              | 0,86211655  | -0,041792003 | 0,963 | 0,912 | 1         | 0,971447542   | 1,029391663     | 1,055921053     |
| GPR162                                                                                              | 0,28286347  | -0,041820381 | 0     | 0,014 | 1         | 0,971428433   | 1,029411911     | 0               |
| MARK3                                                                                               | 0,010489187 | -0,041842545 | 0,402 | 0,211 | 1         | 0,971413509   | 1,029427726     | 1,90521327      |
| KCNC4                                                                                               | 0,245172489 | -0,041878901 | 0,061 | 0,032 | 1         | 0,97138903    | 1,029453668     | 1,90625         |
| LOH12CR2                                                                                            | 0,89237004  | -0,041926157 | 0,012 | 0,014 | 1         | 0,971357212   | 1,029487389     | 0,857142857     |
| PDE7B                                                                                               | 0,28286347  | -0,041937763 | 0     | 0,014 | 1         | 0,971349398   | 1,029495671     | 0               |
| SOX1-OT                                                                                             | 0,35350329  | -0,04194333  | 0     | 0,011 | 1         | 0,97134565    | 1,029499643     | 0               |
| EPHX1                                                                                               | 0,245172489 | -0,041943629 | 0,061 | 0,032 | 1         | 0,971345449   | 1,029499856     | 1,90625         |
| PCSK1N                                                                                              | 0,908489202 | -0,041980771 | 0,012 | 0,011 | 1         | 0,971320442   | 1,029526361     | 1,090909091     |
| PCDHB11                                                                                             | 0,35350329  | -0,042110754 | 0     | 0,011 | 1         | 0,971232933   | 1,029619123     | 0               |
| SMARCD3                                                                                             | 0,029666998 | -0,042114241 | 0,11  | 0,042 | 1         | 0,971230585   | 1,029621612     | 2,619047619     |
| ASB16-AS1                                                                                           | 0,908489202 | -0,042141472 | 0,012 | 0,011 | 1         | 0,971212253   | 1,029641046     | 1,090909091     |
| TTL5                                                                                                | 0,245540129 | -0,042160602 | 0,11  | 0,067 | 1         | 0,971199375   | 1,029654699     | 1,641791045     |
| ZNF691                                                                                              | 0,351112297 | -0,042219969 | 0,024 | 0,011 | 1         | 0,97115941    | 1,029697071     | 2,181818182     |

Supplementary Table 2

| Differentially expressed genes_keloid-XL_comparing SC-Keloid vs. (SC-Myel, SC-Nonmyel, SC-Nonmyel2) |             |              |       |       |           |               |                 |                 |
|-----------------------------------------------------------------------------------------------------|-------------|--------------|-------|-------|-----------|---------------|-----------------|-----------------|
| gene                                                                                                | p_val       | avg_log2FC   | pct.1 | pct.2 | p_val_adj | Foldchange_UP | Foldchange_DOWN | Ratio_pct1_pct2 |
| HSD17B14                                                                                            | 0,35350329  | -0,042231219 | 0     | 0,011 | 1         | 0,971151838   | 1,0297051       | 0               |
| SLC26A11                                                                                            | 0,820213566 | -0,042269311 | 0,037 | 0,042 | 1         | 0,971126197   | 1,029732288     | 0,880952381     |
| SLF2                                                                                                | 0,005719079 | -0,042286252 | 0,28  | 0,126 | 1         | 0,971114793   | 1,029744379     | 2,222222222     |
| PHKA2                                                                                               | 0,314233219 | -0,042298944 | 0,037 | 0,018 | 1         | 0,97110625    | 1,029753439     | 2,055555556     |
| PSMD5                                                                                               | 0,274072777 | -0,042313396 | 0,049 | 0,025 | 1         | 0,971096522   | 1,029763754     | 1,96            |
| PIK3C2B                                                                                             | 0,736792926 | -0,042350595 | 0,012 | 0,018 | 1         | 0,971071483   | 1,029790306     | 0,666666667     |
| TUBB4A                                                                                              | 0,28286347  | -0,042424954 | 0     | 0,014 | 1         | 0,971021434   | 1,029843385     | 0               |
| ELOVL3                                                                                              | 0,35350329  | -0,042446917 | 0     | 0,011 | 1         | 0,971006651   | 1,029859063     | 0               |
| C3orf33                                                                                             | 0,872003564 | -0,042454616 | 0,024 | 0,021 | 1         | 0,971001469   | 1,029864559     | 1,142857143     |
| AQP3                                                                                                | 0,017043378 | -0,042460528 | 0,11  | 0,039 | 1         | 0,970997491   | 1,029868779     | 2,820512821     |
| ELOVL5                                                                                              | 0,080562815 | -0,042467234 | 0,22  | 0,126 | 1         | 0,970992977   | 1,029873566     | 1,746031746     |
| RASSF3                                                                                              | 0,002580267 | -0,042472857 | 0,171 | 0,06  | 1         | 0,970989192   | 1,02987758      | 2,85            |
| LDLR                                                                                                | 0,325381265 | -0,042537801 | 0,134 | 0,091 | 1         | 0,970945484   | 1,029923942     | 1,472527473     |
| ANKRD20A1                                                                                           | 0,279370565 | -0,042541001 | 0,049 | 0,025 | 1         | 0,97094333    | 1,029926227     | 1,96            |
| ZNF793                                                                                              | 0,187860656 | -0,042565628 | 0,024 | 0,007 | 1         | 0,970926756   | 1,029943807     | 3,428571429     |
| CCL23                                                                                               | 0,35185965  | -0,04261033  | 0,012 | 0,004 | 1         | 0,970896672   | 1,029975721     | 3               |
| METAP1                                                                                              | 0,064535293 | -0,0426677   | 0,146 | 0,074 | 1         | 0,970858064   | 1,03001668      | 1,972972973     |
| KDM7A                                                                                               | 0,160334939 | -0,042716334 | 0,073 | 0,035 | 1         | 0,970825337   | 1,030051403     | 2,085714286     |
| LIPC                                                                                                | 0,597173043 | -0,042749225 | 0,012 | 0,021 | 1         | 0,970803204   | 1,030074886     | 0,571428571     |
| TRIM34                                                                                              | 0,351112297 | -0,042751979 | 0,024 | 0,011 | 1         | 0,970801351   | 1,030076853     | 2,181818182     |
| PPP2R2D                                                                                             | 0,016267908 | -0,042755656 | 0,195 | 0,088 | 1         | 0,970798876   | 1,030079478     | 2,215909091     |
| TNFRSF21                                                                                            | 0,908489202 | -0,042823705 | 0,012 | 0,011 | 1         | 0,970753087   | 1,030128066     | 1,090909091     |
| SFMBT1                                                                                              | 0,361657411 | -0,042863809 | 0,073 | 0,046 | 1         | 0,970726102   | 1,030156702     | 1,586956522     |
| TMSB15A                                                                                             | 0,846474096 | -0,042888987 | 0,037 | 0,032 | 1         | 0,970709161   | 1,03017468      | 1,15625         |
| GFOD2                                                                                               | 0,017433388 | -0,042899149 | 0,122 | 0,046 | 1         | 0,970702324   | 1,030181936     | 2,652173913     |
| GRK2                                                                                                | 0,001879527 | -0,042924532 | 0,305 | 0,133 | 1         | 0,970685245   | 1,030200062     | 2,293233083     |
| TRAPPC11                                                                                            | 0,045329609 | -0,042938898 | 0,085 | 0,032 | 1         | 0,97067558    | 1,03021032      | 2,65625         |
| FGF10                                                                                               | 0,654971645 | -0,042979908 | 0,012 | 0,007 | 1         | 0,970647988   | 1,030239605     | 1,714285714     |
| CDCA2                                                                                               | 0,35350329  | -0,0430083   | 0     | 0,011 | 1         | 0,970628886   | 1,030259881     | 0               |
| EEF1AKMT2                                                                                           | 0,000157652 | -0,043037668 | 0,28  | 0,095 | 1         | 0,970609128   | 1,030280853     | 2,947368421     |

Supplementary Table 2

| Differentially expressed genes_keloid-XL_comparing SC-Keloid vs. (SC-Myel, SC-Nonmyel, SC-Nonmyel2) |             |              |       |       |           |               |                 |                 |
|-----------------------------------------------------------------------------------------------------|-------------|--------------|-------|-------|-----------|---------------|-----------------|-----------------|
| gene                                                                                                | p_val       | avg_log2FC   | pct.1 | pct.2 | p_val_adj | Foldchange_UP | Foldchange_DOWN | Ratio_pct1_pct2 |
| MTG1                                                                                                | 0,000390241 | -0,043053499 | 0,183 | 0,053 | 1         | 0,970598477   | 1,030292159     | 3,452830189     |
| PCBP3                                                                                               | 0,654971645 | -0,043059255 | 0,012 | 0,007 | 1         | 0,970594604   | 1,03029627      | 1,714285714     |
| ABRAXAS1                                                                                            | 0,208798809 | -0,04315393  | 0,073 | 0,039 | 1         | 0,970530912   | 1,030363884     | 1,871794872     |
| C2CD4A                                                                                              | 0,28286347  | -0,043176767 | 0     | 0,014 | 1         | 0,97051555    | 1,030380194     | 0               |
| PYGO1                                                                                               | 0,530989227 | -0,043192096 | 0,024 | 0,014 | 1         | 0,970505238   | 1,030391142     | 1,714285714     |
| AL137026.1                                                                                          | 0,908489202 | -0,043194456 | 0,012 | 0,011 | 1         | 0,97050365    | 1,030392827     | 1,090909091     |
| PCDH11Y                                                                                             | 0,35185965  | -0,043290644 | 0,012 | 0,004 | 1         | 0,970438946   | 1,030461529     | 3               |
| ETV6                                                                                                | 0,013943705 | -0,043299114 | 0,22  | 0,102 | 1         | 0,970433249   | 1,030467578     | 2,156862745     |
| AC097381.1                                                                                          | 0,35350329  | -0,043323864 | 0     | 0,011 | 1         | 0,970416601   | 1,030485257     | 0               |
| AIFM2                                                                                               | 0,421991908 | -0,043326122 | 0,061 | 0,039 | 1         | 0,970415082   | 1,03048687      | 1,564102564     |
| AC012313.1                                                                                          | 0,35350329  | -0,043348479 | 0     | 0,011 | 1         | 0,970400044   | 1,030502839     | 0               |
| FAM241B                                                                                             | 0,35350329  | -0,043360138 | 0     | 0,011 | 1         | 0,970392202   | 1,030511166     | 0               |
| BOK                                                                                                 | 0,35350329  | -0,043368715 | 0     | 0,011 | 1         | 0,970386433   | 1,030517293     | 0               |
| DHX40                                                                                               | 0,024933105 | -0,043531363 | 0,159 | 0,07  | 1         | 0,970277039   | 1,030633479     | 2,271428571     |
| RBM19                                                                                               | 0,00855684  | -0,043641656 | 0,171 | 0,067 | 1         | 0,970202864   | 1,030712273     | 2,552238806     |
| BRICD5                                                                                              | 0,908489202 | -0,043661837 | 0,012 | 0,011 | 1         | 0,970189293   | 1,030726691     | 1,090909091     |
| GALNT7                                                                                              | 0,000225277 | -0,043663286 | 0,134 | 0,028 | 1         | 0,970188319   | 1,030727726     | 4,785714286     |
| DBP                                                                                                 | 0,310141781 | -0,043696924 | 0,085 | 0,053 | 1         | 0,970165698   | 1,030751759     | 1,603773585     |
| B3GAT2                                                                                              | 0,118200281 | -0,043717786 | 0,061 | 0,025 | 1         | 0,970151669   | 1,030766665     | 2,44            |
| ANLN                                                                                                | 0,038341604 | -0,043721817 | 0,061 | 0,018 | 1         | 0,970148958   | 1,030769545     | 3,388888889     |
| ZNF577                                                                                              | 0,318425758 | -0,04378181  | 0,085 | 0,053 | 1         | 0,970108616   | 1,03081241      | 1,603773585     |
| DNAAF2                                                                                              | 0,005517033 | -0,043785767 | 0,159 | 0,056 | 1         | 0,970105956   | 1,030815236     | 2,839285714     |
| TRPV3                                                                                               | 0,227829404 | -0,043819588 | 0,098 | 0,056 | 1         | 0,970083214   | 1,030839402     | 1,75            |
| ADCK5                                                                                               | 0,20009151  | -0,043843191 | 0,037 | 0,014 | 1         | 0,970067343   | 1,030856267     | 2,642857143     |
| BIRC2                                                                                               | 0,009309098 | -0,043856166 | 0,598 | 0,312 | 1         | 0,970058618   | 1,030865539     | 1,916666667     |
| XPC                                                                                                 | 0,001765454 | -0,043866207 | 0,232 | 0,088 | 1         | 0,970051867   | 1,030872713     | 2,636363636     |
| THUMPD1                                                                                             | 0,001007945 | -0,043885888 | 0,293 | 0,119 | 1         | 0,970038634   | 1,030886776     | 2,462184874     |
| A4GALT                                                                                              | 0,89237004  | -0,043887073 | 0,012 | 0,014 | 1         | 0,970037837   | 1,030887623     | 0,857142857     |
| PBX2                                                                                                | 0,063017389 | -0,043887307 | 0,256 | 0,147 | 1         | 0,970037679   | 1,03088779      | 1,741496599     |
| NPR2                                                                                                | 0,007086391 | -0,043957678 | 0,085 | 0,021 | 1         | 0,969990365   | 1,030938075     | 4,047619048     |



Supplementary Table 2

| Differentially expressed genes_keloid-XL_comparing SC-Keloid vs. (SC-Myel, SC-Nonmyel, SC-Nonmyel2) |             |              |       |       |           |               |                 |                 |
|-----------------------------------------------------------------------------------------------------|-------------|--------------|-------|-------|-----------|---------------|-----------------|-----------------|
| gene                                                                                                | p_val       | avg_log2FC   | pct.1 | pct.2 | p_val_adj | Foldchange_UP | Foldchange_DOWN | Ratio_pct1_pct2 |
| PGM1                                                                                                | 0,617004375 | -0,043989737 | 0,049 | 0,035 | 1         | 0,96996881    | 1,030960985     | 1,4             |
| H3-5                                                                                                | 0,35350329  | -0,044024557 | 0     | 0,011 | 1         | 0,9699454     | 1,030985868     | 0               |
| FBXO33                                                                                              | 0,09533175  | -0,044042673 | 0,134 | 0,07  | 1         | 0,969933221   | 1,030998814     | 1,914285714     |
| PICK1                                                                                               | 0,337028145 | -0,044093878 | 0,098 | 0,063 | 1         | 0,969898796   | 1,031035408     | 1,555555556     |
| STXBP4                                                                                              | 0,042292152 | -0,044119645 | 0,073 | 0,025 | 1         | 0,969881473   | 1,031053822     | 2,92            |
| FAM120B                                                                                             | 0,11730029  | -0,044126942 | 0,061 | 0,025 | 1         | 0,969876567   | 1,031059037     | 2,44            |
| NUDT6                                                                                               | 0,044971423 | -0,044155635 | 0,085 | 0,032 | 1         | 0,969857278   | 1,031079544     | 2,65625         |
| PPP1R13B                                                                                            | 0,727904339 | -0,044155795 | 0,037 | 0,028 | 1         | 0,969857171   | 1,031079658     | 1,321428571     |
| UBE2N                                                                                               | 0,000582776 | -0,044179177 | 0,549 | 0,253 | 1         | 0,969841452   | 1,031096369     | 2,169960474     |
| CCDC61                                                                                              | 0,071972241 | -0,044184301 | 0,073 | 0,028 | 1         | 0,969838008   | 1,031100031     | 2,607142857     |
| BMP6                                                                                                | 0,728697501 | -0,04419809  | 0,012 | 0,018 | 1         | 0,969828738   | 1,031109886     | 0,666666667     |
| USP46                                                                                               | 0,005738298 | -0,044236528 | 0,195 | 0,077 | 1         | 0,969802899   | 1,031137359     | 2,532467532     |
| TTC39B                                                                                              | 0,60063706  | -0,044289035 | 0,012 | 0,021 | 1         | 0,969767604   | 1,031174888     | 0,571428571     |
| ZKSCAN8                                                                                             | 0,246621056 | -0,044290425 | 0,061 | 0,032 | 1         | 0,969766669   | 1,031175881     | 1,90625         |
| SLC7A8                                                                                              | 0,654971645 | -0,044397276 | 0,012 | 0,007 | 1         | 0,969694848   | 1,031252257     | 1,714285714     |
| LGI2                                                                                                | 0,908489202 | -0,044414132 | 0,012 | 0,011 | 1         | 0,969683518   | 1,031264306     | 1,090909091     |
| ITGA4                                                                                               | 0,49683311  | -0,044422509 | 0,012 | 0,025 | 1         | 0,969677888   | 1,031270293     | 0,48            |
| MX1                                                                                                 | 0,101905338 | -0,044429419 | 0,183 | 0,109 | 1         | 0,969673244   | 1,031275233     | 1,678899083     |
| CAD                                                                                                 | 0,016900103 | -0,044559239 | 0,098 | 0,032 | 1         | 0,969585992   | 1,031368036     | 3,0625          |
| SULF2                                                                                               | 0,702909482 | -0,044573538 | 0,024 | 0,018 | 1         | 0,969576382   | 1,031378258     | 1,333333333     |
| PAXIP1-AS2                                                                                          | 0,89702294  | -0,044627906 | 0,012 | 0,014 | 1         | 0,969539844   | 1,031417126     | 0,857142857     |
| FBL                                                                                                 | 0,010119716 | -0,044628353 | 0,366 | 0,182 | 1         | 0,969539544   | 1,031417446     | 2,010989011     |
| ZC3H4                                                                                               | 0,016676713 | -0,044660023 | 0,183 | 0,081 | 1         | 0,969518261   | 1,031440088     | 2,259259259     |
| H4C1                                                                                                | 0,710321163 | -0,044700087 | 0,024 | 0,018 | 1         | 0,969491338   | 1,031468731     | 1,333333333     |
| IMPA2                                                                                               | 0,351112297 | -0,044702327 | 0,024 | 0,011 | 1         | 0,969489832   | 1,031470333     | 2,181818182     |
| MUSTN1                                                                                              | 0,351112297 | -0,044752846 | 0,024 | 0,011 | 1         | 0,969455884   | 1,031506453     | 2,181818182     |
| ZDHHC17                                                                                             | 0,058166831 | -0,044770977 | 0,195 | 0,105 | 1         | 0,969443701   | 1,031519416     | 1,857142857     |
| ITGB7                                                                                               | 0,35350329  | -0,04485293  | 0     | 0,011 | 1         | 0,969388633   | 1,031578014     | 0               |
| UHRF2                                                                                               | 0,114809265 | -0,044936035 | 0,207 | 0,123 | 1         | 0,969332793   | 1,031637439     | 1,682926829     |
| TPPP                                                                                                | 0,35350329  | -0,044937354 | 0     | 0,011 | 1         | 0,969331907   | 1,031638382     | 0               |

Supplementary Table 2

| Differentially expressed genes_keloid-XL_comparing SC-Keloid vs. (SC-Myel, SC-Nonmyel, SC-Nonmyel2) |             |              |       |       |           |               |                 |                 |
|-----------------------------------------------------------------------------------------------------|-------------|--------------|-------|-------|-----------|---------------|-----------------|-----------------|
| gene                                                                                                | p_val       | avg_log2FC   | pct.1 | pct.2 | p_val_adj | Foldchange_UP | Foldchange_DOWN | Ratio_pct1_pct2 |
| CIDEB                                                                                               | 0,879365097 | -0,044973667 | 0,024 | 0,021 | 1         | 0,969307509   | 1,031664349     | 1,142857143     |
| H3C2                                                                                                | 0,28286347  | -0,045018273 | 0     | 0,014 | 1         | 0,96927754    | 1,031696246     | 0               |
| RNF150                                                                                              | 0,071300757 | -0,045052362 | 0,061 | 0,021 | 1         | 0,969254638   | 1,031720624     | 2,904761905     |
| STIMATE                                                                                             | 0,018385843 | -0,04506062  | 0,122 | 0,046 | 1         | 0,969249089   | 1,03172653      | 2,652173913     |
| EFHD1                                                                                               | 0,28286347  | -0,045126371 | 0     | 0,014 | 1         | 0,969204917   | 1,031773552     | 0               |
| LPP-AS2                                                                                             | 0,19199525  | -0,045191199 | 0,049 | 0,021 | 1         | 0,969161367   | 1,031819916     | 2,333333333     |
| FBXO5                                                                                               | 0,581784514 | -0,045234804 | 0,037 | 0,025 | 1         | 0,969132074   | 1,031851103     | 1,48            |
| EBLN2                                                                                               | 0,6276718   | -0,045246579 | 0,024 | 0,035 | 1         | 0,969124165   | 1,031859525     | 0,685714286     |
| CCDC15                                                                                              | 0,35350329  | -0,045335381 | 0     | 0,011 | 1         | 0,969064514   | 1,031923041     | 0               |
| MEX3B                                                                                               | 0,172242316 | -0,045336848 | 0,159 | 0,098 | 1         | 0,969063528   | 1,03192409      | 1,62244898      |
| PIP                                                                                                 | 0,35350329  | -0,045458543 | 0     | 0,011 | 1         | 0,968981789   | 1,032011139     | 0               |
| S100A8                                                                                              | 0,370654006 | -0,04546138  | 0,049 | 0,028 | 1         | 0,968979883   | 1,032013169     | 1,75            |
| MAPK7                                                                                               | 0,002905357 | -0,045508489 | 0,11  | 0,028 | 1         | 0,968948243   | 1,032046868     | 3,928571429     |
| AK9                                                                                                 | 0,60358712  | -0,045510228 | 0,061 | 0,046 | 1         | 0,968947075   | 1,032048112     | 1,326086957     |
| CCDC127                                                                                             | 0,001814863 | -0,045511327 | 0,171 | 0,056 | 1         | 0,968946337   | 1,032048899     | 3,053571429     |
| TCAIM                                                                                               | 0,008898907 | -0,045536949 | 0,098 | 0,028 | 1         | 0,968929129   | 1,032067227     | 3,5             |
| MED22                                                                                               | 0,108946767 | -0,045559065 | 0,073 | 0,032 | 1         | 0,968914276   | 1,032083049     | 2,28125         |
| ZNF713                                                                                              | 0,908489202 | -0,045573309 | 0,012 | 0,011 | 1         | 0,96890471    | 1,032093239     | 1,090909091     |
| ZNF177                                                                                              | 0,186350334 | -0,045588064 | 0,049 | 0,021 | 1         | 0,968894801   | 1,032103794     | 2,333333333     |
| PITRM1                                                                                              | 0,003497178 | -0,045644067 | 0,122 | 0,035 | 1         | 0,96885719    | 1,03214386      | 3,485714286     |
| TUBG2                                                                                               | 0,364032582 | -0,04568082  | 0,122 | 0,084 | 1         | 0,968832509   | 1,032170154     | 1,452380952     |
| R3HCC1L                                                                                             | 0,496145732 | -0,045720557 | 0,049 | 0,032 | 1         | 0,968805824   | 1,032198585     | 1,53125         |
| LSMEM2                                                                                              | 0,89237004  | -0,045759743 | 0,012 | 0,014 | 1         | 0,96877951    | 1,032226621     | 0,857142857     |
| RFTN2                                                                                               | 0,200240235 | -0,045799747 | 0,183 | 0,119 | 1         | 0,968752648   | 1,032255243     | 1,537815126     |
| DDX55                                                                                               | 0,007272057 | -0,045804771 | 0,146 | 0,053 | 1         | 0,968749274   | 1,032258838     | 2,754716981     |
| INCENP                                                                                              | 0,908489202 | -0,045820388 | 0,012 | 0,011 | 1         | 0,968738787   | 1,032270013     | 1,090909091     |
| HIPK4                                                                                               | 0,28286347  | -0,045823188 | 0     | 0,014 | 1         | 0,968736907   | 1,032272016     | 0               |
| GCC1                                                                                                | 0,710321163 | -0,045829893 | 0,024 | 0,018 | 1         | 0,968732405   | 1,032276813     | 1,333333333     |
| ZNF724                                                                                              | 0,875682986 | -0,045841494 | 0,024 | 0,021 | 1         | 0,968724615   | 1,032285114     | 1,142857143     |
| FAM71A                                                                                              | 0,908489202 | -0,045855428 | 0,012 | 0,011 | 1         | 0,968715259   | 1,032295085     | 1,090909091     |

Supplementary Table 2

| Differentially expressed genes_keloid-XL_comparing SC-Keloid vs. (SC-Myel, SC-Nonmyel, SC-Nonmyel2) |             |              |       |       |             |               |                 |                 |
|-----------------------------------------------------------------------------------------------------|-------------|--------------|-------|-------|-------------|---------------|-----------------|-----------------|
| gene                                                                                                | p_val       | avg_log2FC   | pct.1 | pct.2 | p_val_adj   | Foldchange_UP | Foldchange_DOWN | Ratio_pct1_pct2 |
| KCTD2                                                                                               | 0,014543509 | -0,045868508 | 0,085 | 0,025 | 1           | 0,968706476   | 1,032304444     | 3,4             |
| ZNF664                                                                                              | 0,03593624  | -0,045872852 | 0,256 | 0,137 | 1           | 0,96870356    | 1,032307552     | 1,868613139     |
| TFDP2                                                                                               | 0,033497687 | -0,04588638  | 0,207 | 0,105 | 1           | 0,968694476   | 1,032317232     | 1,971428571     |
| UGDH-AS1                                                                                            | 0,35350329  | -0,045909041 | 0     | 0,011 | 1           | 0,968679261   | 1,032333447     | 0               |
| ARHGAP11A                                                                                           | 0,654971645 | -0,045912781 | 0,012 | 0,007 | 1           | 0,968676749   | 1,032336123     | 1,714285714     |
| CLHC1                                                                                               | 0,187860656 | -0,046003772 | 0,024 | 0,007 | 1           | 0,968615657   | 1,032401235     | 3,428571429     |
| MSX2                                                                                                | 0,530989227 | -0,04600763  | 0,024 | 0,014 | 1           | 0,968613066   | 1,032403996     | 1,714285714     |
| LINC00691                                                                                           | 0,28286347  | -0,046025843 | 0     | 0,014 | 1           | 0,968600839   | 1,032417029     | 0               |
| ZBTB41                                                                                              | 0,000516655 | -0,046027825 | 0,195 | 0,06  | 1           | 0,968599508   | 1,032418447     | 3,25            |
| ZNF692                                                                                              | 0,009163392 | -0,046042615 | 0,098 | 0,028 | 1           | 0,968589578   | 1,032429031     | 3,5             |
| FRMD1                                                                                               | 0,228958629 | -0,046047692 | 0     | 0,018 | 1           | 0,96858617    | 1,032432665     | 0               |
| CAP2                                                                                                | 0,654971645 | -0,046072576 | 0,012 | 0,007 | 1           | 0,968569463   | 1,032450472     | 1,714285714     |
| AC011752.1                                                                                          | 0,35350329  | -0,046072686 | 0     | 0,011 | 1           | 0,968569389   | 1,032450551     | 0               |
| TAF1B                                                                                               | 0,222011736 | -0,046089974 | 0,073 | 0,039 | 1           | 0,968557783   | 1,032462923     | 1,871794872     |
| INTS8                                                                                               | 0,113584895 | -0,046142922 | 0,073 | 0,032 | 1           | 0,968522237   | 1,032500816     | 2,28125         |
| ZDHHC7                                                                                              | 0,040391926 | -0,046177017 | 0,171 | 0,084 | 1           | 0,968499348   | 1,032525217     | 2,035714286     |
| TAF12                                                                                               | 1,35569E-05 | -0,046178142 | 0,268 | 0,077 | 0,286063859 | 0,968498593   | 1,032526022     | 3,480519481     |
| AUH                                                                                                 | 0,25505635  | -0,046280639 | 0,11  | 0,067 | 1           | 0,968429788   | 1,032599382     | 1,641791045     |
| LMNB2                                                                                               | 0,019367116 | -0,046312474 | 0,134 | 0,053 | 1           | 0,968408418   | 1,032622167     | 2,528301887     |
| BICC1                                                                                               | 0,043428247 | -0,046320182 | 0,073 | 0,025 | 1           | 0,968403245   | 1,032627684     | 2,92            |
| DCLRE1C                                                                                             | 0,06590161  | -0,046324533 | 0,085 | 0,035 | 1           | 0,968400324   | 1,032630799     | 2,428571429     |
| RNF43                                                                                               | 0,654971645 | -0,046343101 | 0,012 | 0,007 | 1           | 0,96838786    | 1,032644089     | 1,714285714     |
| ZNF687                                                                                              | 0,380987214 | -0,046348416 | 0,049 | 0,028 | 1           | 0,968384293   | 1,032647893     | 1,75            |
| KLRD1                                                                                               | 0,908489202 | -0,046355267 | 0,012 | 0,011 | 1           | 0,968379694   | 1,032652798     | 1,090909091     |
| U2AF1                                                                                               | 0,101701491 | -0,046383716 | 0,085 | 0,039 | 1           | 0,968360598   | 1,032673161     | 2,179487179     |
| UPF3B                                                                                               | 0,017780951 | -0,046411371 | 0,171 | 0,074 | 1           | 0,968342036   | 1,032692957     | 2,310810811     |
| DDX27                                                                                               | 0,004072895 | -0,046457124 | 0,244 | 0,102 | 1           | 0,968311327   | 1,032725707     | 2,392156863     |
| DCAF6                                                                                               | 0,180394985 | -0,046469788 | 0,146 | 0,088 | 1           | 0,968302827   | 1,032734773     | 1,659090909     |
| CD69                                                                                                | 0,35350329  | -0,046482299 | 0     | 0,011 | 1           | 0,96829443    | 1,032743729     | 0               |
| PKP4                                                                                                | 0,322621598 | -0,046506403 | 0,085 | 0,053 | 1           | 0,968278253   | 1,032760983     | 1,603773585     |

Supplementary Table 2

| Differentially expressed genes_keloid-XL_comparing SC-Keloid vs. (SC-Myel, SC-Nonmyel, SC-Nonmyel2) |             |              |       |       |           |               |                 |                 |
|-----------------------------------------------------------------------------------------------------|-------------|--------------|-------|-------|-----------|---------------|-----------------|-----------------|
| gene                                                                                                | p_val       | avg_log2FC   | pct.1 | pct.2 | p_val_adj | Foldchange_UP | Foldchange_DOWN | Ratio_pct1_pct2 |
| RAD51D                                                                                              | 0,022420212 | -0,046509248 | 0,073 | 0,021 | 1         | 0,968276343   | 1,03276302      | 3,476190476     |
| SCGB1B2P                                                                                            | 0,728697501 | -0,046542087 | 0,012 | 0,018 | 1         | 0,968254303   | 1,032786528     | 0,666666667     |
| SEMA4B                                                                                              | 0,090290037 | -0,046559132 | 0,11  | 0,053 | 1         | 0,968242864   | 1,03279873      | 2,075471698     |
| LRCH4                                                                                               | 0,073676783 | -0,046598729 | 0,073 | 0,028 | 1         | 0,968216289   | 1,032827077     | 2,607142857     |
| CFB                                                                                                 | 0,35350329  | -0,046677693 | 0     | 0,011 | 1         | 0,968163297   | 1,032883609     | 0               |
| FAM171A2                                                                                            | 0,35350329  | -0,04674897  | 0     | 0,011 | 1         | 0,968115465   | 1,03293464      | 0               |
| RBM41                                                                                               | 0,484545659 | -0,04675754  | 0,049 | 0,032 | 1         | 0,968109714   | 1,032940777     | 1,53125         |
| WDR35                                                                                               | 0,019529862 | -0,04676993  | 0,122 | 0,046 | 1         | 0,9681014     | 1,032949648     | 2,652173913     |
| GDF10                                                                                               | 0,89237004  | -0,046782997 | 0,012 | 0,014 | 1         | 0,968092632   | 1,032959003     | 0,857142857     |
| TGM2                                                                                                | 0,702909482 | -0,04682745  | 0,024 | 0,018 | 1         | 0,968062803   | 1,032990832     | 1,333333333     |
| EVC                                                                                                 | 0,1643495   | -0,04683165  | 0,073 | 0,035 | 1         | 0,968059985   | 1,032993839     | 2,085714286     |
| PHF20L1                                                                                             | 0,000697341 | -0,046864554 | 0,354 | 0,147 | 1         | 0,968037906   | 1,033017399     | 2,408163265     |
| ZNF442                                                                                              | 0,228958629 | -0,046918357 | 0     | 0,018 | 1         | 0,968001805   | 1,033055925     | 0               |
| ACO1                                                                                                | 0,069310956 | -0,046942076 | 0,085 | 0,035 | 1         | 0,96798589    | 1,033072909     | 2,428571429     |
| TMX3                                                                                                | 0,000200335 | -0,046974098 | 0,427 | 0,172 | 1         | 0,967964406   | 1,033095839     | 2,48255814      |
| FAM13A-AS1                                                                                          | 0,35350329  | -0,046977751 | 0     | 0,011 | 1         | 0,967961955   | 1,033098455     | 0               |
| PPOX                                                                                                | 0,293926973 | -0,047000963 | 0,073 | 0,042 | 1         | 0,967946381   | 1,033115077     | 1,738095238     |
| TBC1D17                                                                                             | 0,050665707 | -0,047060495 | 0,183 | 0,095 | 1         | 0,96790644    | 1,033157709     | 1,926315789     |
| MAMDC2-AS1                                                                                          | 0,654971645 | -0,047063384 | 0,012 | 0,007 | 1         | 0,967904502   | 1,033159778     | 1,714285714     |
| ZNF248                                                                                              | 0,018285233 | -0,047081259 | 0,146 | 0,06  | 1         | 0,967892509   | 1,033172579     | 2,433333333     |
| PHLDB3                                                                                              | 0,28286347  | -0,047112036 | 0     | 0,014 | 1         | 0,967871862   | 1,03319462      | 0               |
| ENTHD1                                                                                              | 0,35350329  | -0,047119399 | 0     | 0,011 | 1         | 0,967866922   | 1,033199893     | 0               |
| SIAH2                                                                                               | 0,009746403 | -0,047147243 | 0,305 | 0,147 | 1         | 0,967848242   | 1,033219834     | 2,074829932     |
| FAM83G                                                                                              | 0,654971645 | -0,047185061 | 0,012 | 0,007 | 1         | 0,967822872   | 1,033246919     | 1,714285714     |
| HOOK2                                                                                               | 0,123479672 | -0,047214028 | 0,098 | 0,049 | 1         | 0,96780344    | 1,033267664     | 2               |
| AKAP8                                                                                               | 0,209373246 | -0,047221712 | 0,134 | 0,081 | 1         | 0,967798285   | 1,033273168     | 1,654320988     |
| EEA1                                                                                                | 0,017995859 | -0,047270423 | 0,415 | 0,232 | 1         | 0,967765609   | 1,033308056     | 1,788793103     |
| NCK1                                                                                                | 0,001354577 | -0,047282103 | 0,366 | 0,158 | 1         | 0,967757774   | 1,033316421     | 2,316455696     |
| FUT10                                                                                               | 0,58754085  | -0,047383768 | 0,037 | 0,025 | 1         | 0,96768958    | 1,033389241     | 1,48            |
| DCAF10                                                                                              | 0,078975369 | -0,047498754 | 0,159 | 0,084 | 1         | 0,967612456   | 1,033471607     | 1,892857143     |

Supplementary Table 2

| Differentially expressed genes_keloid-XL_comparing SC-Keloid vs. (SC-Myel, SC-Nonmyel, SC-Nonmyel2) |             |              |       |       |           |               |                 |                 |
|-----------------------------------------------------------------------------------------------------|-------------|--------------|-------|-------|-----------|---------------|-----------------|-----------------|
| gene                                                                                                | p_val       | avg_log2FC   | pct.1 | pct.2 | p_val_adj | Foldchange_UP | Foldchange_DOWN | Ratio_pct1_pct2 |
| TMEM231                                                                                             | 0,883812109 | -0,047529406 | 0,049 | 0,053 | 1         | 0,967591898   | 1,033493565     | 0,924528302     |
| SMCR8                                                                                               | 0,20009151  | -0,047534174 | 0,037 | 0,014 | 1         | 0,9675887     | 1,033496981     | 2,642857143     |
| APOL3                                                                                               | 0,351112297 | -0,047545026 | 0,024 | 0,011 | 1         | 0,967581422   | 1,033504755     | 2,181818182     |
| MUS81                                                                                               | 7,36184E-05 | -0,047553799 | 0,232 | 0,067 | 1         | 0,967575538   | 1,033511039     | 3,462686567     |
| ASB8                                                                                                | 0,000896904 | -0,047572386 | 0,159 | 0,046 | 1         | 0,967563072   | 1,033524355     | 3,456521739     |
| PPP2R3B                                                                                             | 0,003300213 | -0,047572714 | 0,122 | 0,035 | 1         | 0,967562852   | 1,03352459      | 3,485714286     |
| THG1L                                                                                               | 0,158355665 | -0,047590794 | 0,073 | 0,035 | 1         | 0,967550727   | 1,033537542     | 2,085714286     |
| COG1                                                                                                | 0,043812629 | -0,047643199 | 0,073 | 0,025 | 1         | 0,967515582   | 1,033575086     | 2,92            |
| PAFAH2                                                                                              | 0,316484073 | -0,047643684 | 0,037 | 0,018 | 1         | 0,967515256   | 1,033575433     | 2,055555556     |
| LRSAM1                                                                                              | 0,277596953 | -0,047766917 | 0,049 | 0,025 | 1         | 0,967432617   | 1,033663723     | 1,96            |
| PLXNA2                                                                                              | 0,35350329  | -0,047781279 | 0     | 0,011 | 1         | 0,967422986   | 1,033674013     | 0               |
| WDR6                                                                                                | 0,019242352 | -0,047818858 | 0,207 | 0,098 | 1         | 0,967397786   | 1,033700939     | 2,112244898     |
| C12orf4                                                                                             | 0,178180489 | -0,047901868 | 0,061 | 0,028 | 1         | 0,967342126   | 1,033760418     | 2,178571429     |
| UTP6                                                                                                | 0,057060748 | -0,04791992  | 0,122 | 0,056 | 1         | 0,967330022   | 1,033773353     | 2,178571429     |
| SPIB                                                                                                | 0,35350329  | -0,04799778  | 0     | 0,011 | 1         | 0,967277818   | 1,033829145     | 0               |
| ADSS1                                                                                               | 0,908489202 | -0,04802494  | 0,012 | 0,011 | 1         | 0,967259608   | 1,033848608     | 1,090909091     |
| ALDH1L2                                                                                             | 0,073676783 | -0,048060369 | 0,073 | 0,028 | 1         | 0,967235855   | 1,033873997     | 2,607142857     |
| MAP7D1                                                                                              | 0,010568329 | -0,048073778 | 0,463 | 0,242 | 1         | 0,967226866   | 1,033883606     | 1,91322314      |
| SSBP3                                                                                               | 0,001388538 | -0,048075358 | 0,341 | 0,147 | 1         | 0,967225806   | 1,033884739     | 2,319727891     |
| TIMM23B                                                                                             | 0,173471565 | -0,048111624 | 0,061 | 0,028 | 1         | 0,967201493   | 1,033910729     | 2,178571429     |
| TNF                                                                                                 | 0,654971645 | -0,048159711 | 0,012 | 0,007 | 1         | 0,967169255   | 1,033945191     | 1,714285714     |
| BHLHE41                                                                                             | 0,602048443 | -0,0482135   | 0,049 | 0,035 | 1         | 0,967133196   | 1,033983741     | 1,4             |
| MFSD13A                                                                                             | 0,89237004  | -0,048246877 | 0,012 | 0,014 | 1         | 0,967110821   | 1,034007663     | 0,857142857     |
| ZNF189                                                                                              | 0,1180597   | -0,048250011 | 0,049 | 0,018 | 1         | 0,967108721   | 1,034009909     | 2,722222222     |
| MIR9-1HG                                                                                            | 0,732741497 | -0,048296907 | 0,012 | 0,018 | 1         | 0,967077285   | 1,034043521     | 0,666666667     |
| PPP1R3D                                                                                             | 0,281151866 | -0,048302556 | 0,049 | 0,025 | 1         | 0,967073497   | 1,03404757      | 1,96            |
| BATF3                                                                                               | 0,279370565 | -0,048304388 | 0,049 | 0,025 | 1         | 0,96707227    | 1,034048883     | 1,96            |
| RABL2A                                                                                              | 0,20009151  | -0,048312049 | 0,037 | 0,014 | 1         | 0,967067134   | 1,034054374     | 2,642857143     |
| SWSAP1                                                                                              | 0,044226311 | -0,04840016  | 0,037 | 0,007 | 1         | 0,967008074   | 1,034117529     | 5,285714286     |
| SLC19A1                                                                                             | 0,500826907 | -0,048434934 | 0,049 | 0,032 | 1         | 0,966984765   | 1,034142456     | 1,53125         |

Supplementary Table 2

| Differentially expressed genes_keloid-XL_comparing SC-Keloid vs. (SC-Myel, SC-Nonmyel, SC-Nonmyel2) |             |              |       |       |           |               |                 |                 |
|-----------------------------------------------------------------------------------------------------|-------------|--------------|-------|-------|-----------|---------------|-----------------|-----------------|
| gene                                                                                                | p_val       | avg_log2FC   | pct.1 | pct.2 | p_val_adj | Foldchange_UP | Foldchange_DOWN | Ratio_pct1_pct2 |
| OSER1-DT                                                                                            | 0,324703669 | -0,048484716 | 0,061 | 0,035 | 1         | 0,966951399   | 1,034178141     | 1,742857143     |
| ASB1                                                                                                | 0,000368648 | -0,048508557 | 0,146 | 0,035 | 1         | 0,96693542    | 1,034195231     | 4,171428571     |
| MYH14                                                                                               | 0,171319688 | -0,048575874 | 0,098 | 0,053 | 1         | 0,966890304   | 1,034243488     | 1,849056604     |
| EXOC2                                                                                               | 0,323014826 | -0,048637346 | 0,061 | 0,035 | 1         | 0,966849106   | 1,034287557     | 1,742857143     |
| ETFB                                                                                                | 4,37452E-05 | -0,048642868 | 0,415 | 0,151 | 0,9230668 | 0,966845405   | 1,034291516     | 2,748344371     |
| SVEP1                                                                                               | 0,35350329  | -0,048644535 | 0     | 0,011 | 1         | 0,966844288   | 1,034292711     | 0               |
| PRKDC                                                                                               | 0,006713945 | -0,048653237 | 0,366 | 0,179 | 1         | 0,966838456   | 1,03429895      | 2,044692737     |
| HIP1R                                                                                               | 0,272322201 | -0,048658546 | 0,049 | 0,025 | 1         | 0,966834899   | 1,034302756     | 1,96            |
| NR3C2                                                                                               | 0,728697501 | -0,048757091 | 0,012 | 0,018 | 1         | 0,96676886    | 1,034373407     | 0,666666667     |
| GDAP2                                                                                               | 0,043911154 | -0,048770775 | 0,085 | 0,032 | 1         | 0,96675969    | 1,034383219     | 2,65625         |
| EXOSC10                                                                                             | 0,177010711 | -0,048834165 | 0,244 | 0,158 | 1         | 0,966717213   | 1,034428669     | 1,544303797     |
| KLHL34                                                                                              | 0,875682986 | -0,048867511 | 0,024 | 0,021 | 1         | 0,966694869   | 1,034452579     | 1,142857143     |
| MARK1                                                                                               | 0,973621109 | -0,048911518 | 0,024 | 0,025 | 1         | 0,966665382   | 1,034484134     | 0,96            |
| PRKG1                                                                                               | 0,89237004  | -0,048924737 | 0,012 | 0,014 | 1         | 0,966656524   | 1,034493613     | 0,857142857     |
| BAHD1                                                                                               | 0,134324326 | -0,04903847  | 0,098 | 0,049 | 1         | 0,966580323   | 1,034575168     | 2               |
| DUOX2                                                                                               | 0,28286347  | -0,049064156 | 0     | 0,014 | 1         | 0,966563113   | 1,034593589     | 0               |
| PCDHB15                                                                                             | 0,706611845 | -0,049064194 | 0,024 | 0,018 | 1         | 0,966563088   | 1,034593616     | 1,333333333     |
| BCKDHA                                                                                              | 0,004393604 | -0,049076689 | 0,134 | 0,042 | 1         | 0,966554717   | 1,034602576     | 3,19047619      |
| CELSR2                                                                                              | 0,010452238 | -0,049086619 | 0,256 | 0,119 | 1         | 0,966548064   | 1,034609697     | 2,151260504     |
| YTHDF2                                                                                              | 0,001127216 | -0,04910385  | 0,427 | 0,189 | 1         | 0,96653652    | 1,034622054     | 2,259259259     |
| INSYN1                                                                                              | 0,530989227 | -0,049108493 | 0,024 | 0,014 | 1         | 0,96653341    | 1,034625384     | 1,714285714     |
| MAP1LC3B2                                                                                           | 0,35350329  | -0,049117665 | 0     | 0,011 | 1         | 0,966527265   | 1,034631962     | 0               |
| RECQL5                                                                                              | 0,023573977 | -0,049127437 | 0,073 | 0,021 | 1         | 0,966520718   | 1,03463897      | 3,476190476     |
| ATP6V1G2                                                                                            | 0,35185965  | -0,049172907 | 0,012 | 0,004 | 1         | 0,966490257   | 1,034671579     | 3               |
| COG7                                                                                                | 0,111246846 | -0,049225791 | 0,073 | 0,032 | 1         | 0,966454829   | 1,034709508     | 2,28125         |
| KRTAP5-AS1                                                                                          | 0,228958629 | -0,049230095 | 0     | 0,018 | 1         | 0,966451946   | 1,034712594     | 0               |
| MBTPS1                                                                                              | 0,024410801 | -0,049243505 | 0,378 | 0,207 | 1         | 0,966442962   | 1,034722213     | 1,826086957     |
| TBC1D9                                                                                              | 0,98417082  | -0,049286859 | 0,024 | 0,025 | 1         | 0,966413921   | 1,034753307     | 0,96            |
| WARS2                                                                                               | 0,875682986 | -0,049362348 | 0,024 | 0,021 | 1         | 0,966363354   | 1,034807452     | 1,142857143     |
| TSPAN11                                                                                             | 0,000483249 | -0,049381419 | 0,585 | 0,277 | 1         | 0,96635058    | 1,034821131     | 2,111913357     |

Supplementary Table 2

| Differentially expressed genes_keloid-XL_comparing SC-Keloid vs. (SC-Myel, SC-Nonmyel, SC-Nonmyel2) |             |              |       |       |           |               |                 |                 |
|-----------------------------------------------------------------------------------------------------|-------------|--------------|-------|-------|-----------|---------------|-----------------|-----------------|
| gene                                                                                                | p_val       | avg_log2FC   | pct.1 | pct.2 | p_val_adj | Foldchange_UP | Foldchange_DOWN | Ratio_pct1_pct2 |
| SYTL1                                                                                               | 0,28286347  | -0,049386592 | 0     | 0,014 | 1         | 0,966347115   | 1,034824841     | 0               |
| LRRC3                                                                                               | 0,35350329  | -0,049522614 | 0     | 0,011 | 1         | 0,966256009   | 1,034922413     | 0               |
| PLCB4                                                                                               | 0,35350329  | -0,049619879 | 0     | 0,011 | 1         | 0,966190867   | 1,034992189     | 0               |
| ZNF197                                                                                              | 0,702909482 | -0,04962838  | 0,024 | 0,018 | 1         | 0,966185174   | 1,034998287     | 1,333333333     |
| TENT5B                                                                                              | 0,316484073 | -0,049641366 | 0,037 | 0,018 | 1         | 0,966176477   | 1,035007603     | 2,055555556     |
| ARHGAP32                                                                                            | 0,89237004  | -0,049680611 | 0,012 | 0,014 | 1         | 0,966150195   | 1,035035758     | 0,857142857     |
| MAP2K1                                                                                              | 0,005817321 | -0,049711019 | 0,195 | 0,077 | 1         | 0,966129832   | 1,035057574     | 2,532467532     |
| GAS2                                                                                                | 0,316484073 | -0,049723364 | 0,037 | 0,018 | 1         | 0,966121564   | 1,035066431     | 2,055555556     |
| M6PR                                                                                                | 0,001326623 | -0,04975095  | 0,256 | 0,102 | 1         | 0,966103091   | 1,035086223     | 2,509803922     |
| CSAD                                                                                                | 0,050318214 | -0,049752387 | 0,366 | 0,211 | 1         | 0,966102129   | 1,035087254     | 1,734597156     |
| LSM14B                                                                                              | 0,219565872 | -0,049807613 | 0,073 | 0,039 | 1         | 0,966065147   | 1,035126878     | 1,871794872     |
| POLN                                                                                                | 0,89702294  | -0,049835374 | 0,012 | 0,014 | 1         | 0,966046558   | 1,035146796     | 0,857142857     |
| PSD4                                                                                                | 0,044226311 | -0,04985906  | 0,037 | 0,007 | 1         | 0,966030698   | 1,035163792     | 5,285714286     |
| ANKRD65                                                                                             | 0,004043831 | -0,049876556 | 0,207 | 0,081 | 1         | 0,966018982   | 1,035176346     | 2,555555556     |
| MSL2                                                                                                | 0,057240631 | -0,049889623 | 0,134 | 0,063 | 1         | 0,966010233   | 1,035185722     | 2,126984127     |
| ISCA1                                                                                               | 0,016537688 | -0,049894928 | 0,256 | 0,126 | 1         | 0,966006681   | 1,035189528     | 2,031746032     |
| GLI1                                                                                                | 0,35350329  | -0,049903027 | 0     | 0,011 | 1         | 0,966001258   | 1,035195339     | 0               |
| MCTP1                                                                                               | 0,170001362 | -0,049905688 | 0,061 | 0,028 | 1         | 0,965999476   | 1,035197249     | 2,178571429     |
| LINC00910                                                                                           | 0,654971645 | -0,049997852 | 0,012 | 0,007 | 1         | 0,965937767   | 1,035263382     | 1,714285714     |
| DAGLB                                                                                               | 0,07141129  | -0,050021202 | 0,073 | 0,028 | 1         | 0,965922133   | 1,035280138     | 2,607142857     |
| ZNF92                                                                                               | 0,103691895 | -0,050055268 | 0,098 | 0,046 | 1         | 0,965899326   | 1,035304585     | 2,130434783     |
| ATRN                                                                                                | 0,040443565 | -0,050078871 | 0,134 | 0,06  | 1         | 0,965883524   | 1,035321522     | 2,233333333     |
| SERPINA5                                                                                            | 0,440372242 | -0,050106284 | 0,037 | 0,021 | 1         | 0,965865171   | 1,035341195     | 1,761904762     |
| ZNF436                                                                                              | 0,530989227 | -0,050185811 | 0,024 | 0,014 | 1         | 0,96581193    | 1,035398269     | 1,714285714     |
| ZNF283                                                                                              | 0,706611845 | -0,050187822 | 0,024 | 0,018 | 1         | 0,965810584   | 1,035399712     | 1,333333333     |
| MFAP5                                                                                               | 0,908489202 | -0,050308105 | 0,012 | 0,011 | 1         | 0,965730064   | 1,035486041     | 1,090909091     |
| FBXO36                                                                                              | 0,20009151  | -0,050342793 | 0,037 | 0,014 | 1         | 0,965706844   | 1,035510938     | 2,642857143     |
| ZNF630                                                                                              | 0,35350329  | -0,050359393 | 0     | 0,011 | 1         | 0,965695733   | 1,035522853     | 0               |
| GABARAPL1                                                                                           | 0,144569962 | -0,050389596 | 0,195 | 0,119 | 1         | 0,965675515   | 1,035544532     | 1,638655462     |
| HABP4                                                                                               | 0,004073918 | -0,050511228 | 0,354 | 0,165 | 1         | 0,965594104   | 1,035631842     | 2,145454545     |

Supplementary Table 2

| Differentially expressed genes_keloid-XL_comparing SC-Keloid vs. (SC-Myel, SC-Nonmyel, SC-Nonmyel2) |             |              |       |       |           |               |                 |                 |
|-----------------------------------------------------------------------------------------------------|-------------|--------------|-------|-------|-----------|---------------|-----------------|-----------------|
| gene                                                                                                | p_val       | avg_log2FC   | pct.1 | pct.2 | p_val_adj | Foldchange_UP | Foldchange_DOWN | Ratio_pct1_pct2 |
| TNS4                                                                                                | 0,89237004  | -0,0505366   | 0,012 | 0,014 | 1         | 0,965577123   | 1,035650055     | 0,857142857     |
| SEPTIN4                                                                                             | 0,493879805 | -0,050569443 | 0,012 | 0,025 | 1         | 0,965555141   | 1,035673632     | 0,48            |
| TNRC6A                                                                                              | 0,005304413 | -0,050649564 | 0,39  | 0,186 | 1         | 0,96550152    | 1,03573115      | 2,096774194     |
| SLC24A4                                                                                             | 0,89237004  | -0,050699052 | 0,012 | 0,014 | 1         | 0,965468402   | 1,035766679     | 0,857142857     |
| MDGA1                                                                                               | 0,89237004  | -0,050710132 | 0,012 | 0,014 | 1         | 0,965460987   | 1,035774634     | 0,857142857     |
| MATN1-AS1                                                                                           | 0,35350329  | -0,050768995 | 0     | 0,011 | 1         | 0,965421597   | 1,035816894     | 0               |
| TMEM242                                                                                             | 0,104099123 | -0,050830916 | 0,171 | 0,095 | 1         | 0,965380161   | 1,035861353     | 1,8             |
| GABRB3                                                                                              | 0,186763581 | -0,050838853 | 0     | 0,021 | 1         | 0,96537485    | 1,035867052     | 0               |
| ITPKB-AS1                                                                                           | 0,28286347  | -0,050862647 | 0     | 0,014 | 1         | 0,965358929   | 1,035884136     | 0               |
| CEP120                                                                                              | 0,225717022 | -0,050866288 | 0,073 | 0,039 | 1         | 0,965356492   | 1,035886751     | 1,871794872     |
| LINC00884                                                                                           | 0,35350329  | -0,05089623  | 0     | 0,011 | 1         | 0,965336457   | 1,03590825      | 0               |
| DDX18                                                                                               | 0,000322744 | -0,050939068 | 0,537 | 0,246 | 1         | 0,965307794   | 1,03593901      | 2,182926829     |
| MAMDC2                                                                                              | 0,489167971 | -0,050943882 | 0,049 | 0,032 | 1         | 0,965304573   | 1,035942467     | 1,53125         |
| MCPH1                                                                                               | 0,070311239 | -0,050987074 | 0,085 | 0,035 | 1         | 0,965275673   | 1,035973481     | 2,428571429     |
| C10orf88                                                                                            | 0,19057237  | -0,05102365  | 0,049 | 0,021 | 1         | 0,965251201   | 1,035999747     | 2,333333333     |
| SEC14L5                                                                                             | 0,228958629 | -0,051037516 | 0     | 0,018 | 1         | 0,965241925   | 1,036009703     | 0               |
| GCH1                                                                                                | 0,49683311  | -0,051044838 | 0,012 | 0,025 | 1         | 0,965237025   | 1,036014962     | 0,48            |
| DFFA                                                                                                | 0,019894576 | -0,051063934 | 0,159 | 0,067 | 1         | 0,965224249   | 1,036028675     | 2,373134328     |
| MIER3                                                                                               | 0,226961873 | -0,05111675  | 0,073 | 0,039 | 1         | 0,965188914   | 1,036066604     | 1,871794872     |
| PRKAB1                                                                                              | 0,070675603 | -0,051127976 | 0,061 | 0,021 | 1         | 0,965181403   | 1,036074666     | 2,904761905     |
| GPR85                                                                                               | 0,28286347  | -0,051141337 | 0     | 0,014 | 1         | 0,965172465   | 1,036084261     | 0               |
| ECEL1                                                                                               | 0,35350329  | -0,051143304 | 0     | 0,011 | 1         | 0,965171149   | 1,036085674     | 0               |
| B4GALT5                                                                                             | 0,046889423 | -0,05116958  | 0,195 | 0,102 | 1         | 0,96515357    | 1,036104544     | 1,911764706     |
| TRAM1                                                                                               | 0,012877731 | -0,0512295   | 0,549 | 0,302 | 1         | 0,965113485   | 1,036147578     | 1,817880795     |
| CYB5RL                                                                                              | 0,28286347  | -0,05124696  | 0     | 0,014 | 1         | 0,965101805   | 1,036160118     | 0               |
| IRF6                                                                                                | 0,017273754 | -0,051306322 | 0,061 | 0,014 | 1         | 0,965062095   | 1,036202754     | 4,357142857     |
| PIP4K2B                                                                                             | 0,012628148 | -0,051323782 | 0,22  | 0,098 | 1         | 0,965050415   | 1,036215294     | 2,244897959     |
| ZMIZ2                                                                                               | 0,000448479 | -0,051348762 | 0,232 | 0,077 | 1         | 0,965033706   | 1,036233236     | 3,012987013     |
| HAPLN3                                                                                              | 0,440372242 | -0,051366845 | 0,037 | 0,021 | 1         | 0,96502161    | 1,036246225     | 1,761904762     |
| MB21D2                                                                                              | 0,360040425 | -0,051369918 | 0,073 | 0,046 | 1         | 0,965019555   | 1,036248432     | 1,586956522     |



Supplementary Table 2

| Differentially expressed genes_keloid-XL_comparing SC-Keloid vs. (SC-Myel, SC-Nonmyel, SC-Nonmyel2) |             |              |       |       |           |               |                 |                 |
|-----------------------------------------------------------------------------------------------------|-------------|--------------|-------|-------|-----------|---------------|-----------------|-----------------|
| gene                                                                                                | p_val       | avg_log2FC   | pct.1 | pct.2 | p_val_adj | Foldchange_UP | Foldchange_DOWN | Ratio_pct1_pct2 |
| TBCD                                                                                                | 0,231033985 | -0,051370748 | 0,098 | 0,056 | 1         | 0,965019      | 1,036249028     | 1,75            |
| AAK1                                                                                                | 0,074240186 | -0,051498274 | 0,488 | 0,302 | 1         | 0,964933701   | 1,03634063      | 1,61589404      |
| ATP23                                                                                               | 0,60063706  | -0,051528583 | 0,012 | 0,021 | 1         | 0,96491343    | 1,036362402     | 0,571428571     |
| DGKB                                                                                                | 0,001357418 | -0,051553879 | 0,268 | 0,105 | 1         | 0,964896511   | 1,036380574     | 2,552380952     |
| DHX58                                                                                               | 0,118200281 | -0,051588191 | 0,061 | 0,025 | 1         | 0,964873563   | 1,036405223     | 2,44            |
| FGF14-AS2                                                                                           | 0,611083176 | -0,051694359 | 0,012 | 0,021 | 1         | 0,96480256    | 1,036481495     | 0,571428571     |
| FAM91A1                                                                                             | 0,000520524 | -0,051708455 | 0,159 | 0,042 | 1         | 0,964793134   | 1,036491622     | 3,785714286     |
| DHX35                                                                                               | 0,19199525  | -0,051749103 | 0,049 | 0,021 | 1         | 0,964765951   | 1,036520825     | 2,333333333     |
| COL8A2                                                                                              | 0,186763581 | -0,051760628 | 0     | 0,021 | 1         | 0,964758244   | 1,036529106     | 0               |
| ANKRD30B                                                                                            | 0,28286347  | -0,05183755  | 0     | 0,014 | 1         | 0,964706806   | 1,036584373     | 0               |
| TRMT11                                                                                              | 0,416137067 | -0,051847175 | 0,11  | 0,077 | 1         | 0,96470037    | 1,036591289     | 1,428571429     |
| ZNF155                                                                                              | 0,89237004  | -0,051980648 | 0,012 | 0,014 | 1         | 0,964611123   | 1,036687195     | 0,857142857     |
| CIR1                                                                                                | 0,000270547 | -0,051996993 | 0,39  | 0,158 | 1         | 0,964600195   | 1,03669894      | 2,46835443      |
| EEF2K                                                                                               | 0,32133172  | -0,05200082  | 0,061 | 0,035 | 1         | 0,964597636   | 1,03670169      | 1,742857143     |
| LINC00519                                                                                           | 0,35350329  | -0,05203265  | 0     | 0,011 | 1         | 0,964576355   | 1,036724563     | 0               |
| MAML1                                                                                               | 0,004432274 | -0,052043948 | 0,146 | 0,049 | 1         | 0,964568801   | 1,036732682     | 2,979591837     |
| STARD10                                                                                             | 0,916373198 | -0,052047826 | 0,037 | 0,039 | 1         | 0,964566208   | 1,036735469     | 0,948717949     |
| C11orf65                                                                                            | 0,28286347  | -0,052055451 | 0     | 0,014 | 1         | 0,96456111    | 1,036740948     | 0               |
| CDKL3                                                                                               | 0,118200281 | -0,052078858 | 0,061 | 0,025 | 1         | 0,964545461   | 1,036757769     | 2,44            |
| BOD1                                                                                                | 0,005372829 | -0,052097793 | 0,28  | 0,126 | 1         | 0,964532802   | 1,036771376     | 2,222222222     |
| TSGA10                                                                                              | 0,728697501 | -0,05209939  | 0,012 | 0,018 | 1         | 0,964531734   | 1,036772524     | 0,666666667     |
| VCPIP1                                                                                              | 0,011935711 | -0,052150742 | 0,183 | 0,077 | 1         | 0,964497403   | 1,036809428     | 2,376623377     |
| TSLP                                                                                                | 0,28286347  | -0,052161314 | 0     | 0,014 | 1         | 0,964490335   | 1,036817025     | 0               |
| MAPK10                                                                                              | 0,724120181 | -0,052252138 | 0,049 | 0,039 | 1         | 0,964429618   | 1,0368823       | 1,256410256     |
| ATL2                                                                                                | 0,014100784 | -0,052279633 | 0,195 | 0,088 | 1         | 0,964411238   | 1,036902061     | 2,215909091     |
| GRIA2                                                                                               | 0,728697501 | -0,052304955 | 0,012 | 0,018 | 1         | 0,964394311   | 1,036920261     | 0,666666667     |
| POLR3A                                                                                              | 0,005554032 | -0,052348934 | 0,11  | 0,032 | 1         | 0,964364913   | 1,03695187      | 3,4375          |
| SGMS1                                                                                               | 0,199123266 | -0,052372918 | 0,207 | 0,133 | 1         | 0,964348881   | 1,036969109     | 1,556390977     |
| MYOZ1                                                                                               | 0,228958629 | -0,052386291 | 0     | 0,018 | 1         | 0,964339942   | 1,036978722     | 0               |
| TRIM3                                                                                               | 0,27514316  | -0,052410393 | 0,098 | 0,06  | 1         | 0,964323831   | 1,036996046     | 1,633333333     |

Supplementary Table 2

| Differentially expressed genes_keloid-XL_comparing SC-Keloid vs. (SC-Myel, SC-Nonmyel, SC-Nonmyel2) |             |              |       |       |           |               |                 |                 |
|-----------------------------------------------------------------------------------------------------|-------------|--------------|-------|-------|-----------|---------------|-----------------|-----------------|
| gene                                                                                                | p_val       | avg_log2FC   | pct.1 | pct.2 | p_val_adj | Foldchange_UP | Foldchange_DOWN | Ratio_pct1_pct2 |
| ARL15                                                                                               | 0,715924734 | -0,052413058 | 0,037 | 0,028 | 1         | 0,96432205    | 1,036997962     | 1,321428571     |
| AC073257.1                                                                                          | 0,35350329  | -0,052449356 | 0     | 0,011 | 1         | 0,964297788   | 1,037024053     | 0               |
| TMEM100                                                                                             | 0,579926614 | -0,052481914 | 0,049 | 0,035 | 1         | 0,964276026   | 1,037047456     | 1,4             |
| ITGA10                                                                                              | 0,28286347  | -0,052540237 | 0     | 0,014 | 1         | 0,964237045   | 1,03708938      | 0               |
| GCK                                                                                                 | 0,35350329  | -0,052582887 | 0     | 0,011 | 1         | 0,96420854    | 1,03712004      | 0               |
| TARS2                                                                                               | 0,1180597   | -0,052647861 | 0,049 | 0,018 | 1         | 0,964165117   | 1,03716675      | 2,722222222     |
| PSMF1                                                                                               | 0,002397674 | -0,052671663 | 0,378 | 0,172 | 1         | 0,96414921    | 1,037183861     | 2,197674419     |
| LIPT1                                                                                               | 0,20009151  | -0,052705247 | 0,037 | 0,014 | 1         | 0,964126766   | 1,037208006     | 2,642857143     |
| DUS3L                                                                                               | 0,084177047 | -0,052725795 | 0,11  | 0,053 | 1         | 0,964113034   | 1,037222779     | 2,075471698     |
| CORO6                                                                                               | 0,28286347  | -0,052750703 | 0     | 0,014 | 1         | 0,964096389   | 1,037240687     | 0               |
| MFN2                                                                                                | 0,007665146 | -0,052780815 | 0,159 | 0,06  | 1         | 0,964076266   | 1,037262336     | 2,65            |
| APLF                                                                                                | 0,908489202 | -0,052789427 | 0,012 | 0,011 | 1         | 0,964070511   | 1,037268528     | 1,090909091     |
| NMNAT1                                                                                              | 0,89702294  | -0,052799588 | 0,012 | 0,014 | 1         | 0,964063721   | 1,037275834     | 0,857142857     |
| TMEM138                                                                                             | 0,022646956 | -0,052804392 | 0,073 | 0,021 | 1         | 0,964060511   | 1,037279287     | 3,476190476     |
| RASD2                                                                                               | 0,35350329  | -0,052808891 | 0     | 0,011 | 1         | 0,964057505   | 1,037282522     | 0               |
| ANKS6                                                                                               | 0,710321163 | -0,052898989 | 0,024 | 0,018 | 1         | 0,9639973     | 1,037347304     | 1,333333333     |
| PBX4                                                                                                | 0,448248692 | -0,052944384 | 0,037 | 0,021 | 1         | 0,963966968   | 1,037379944     | 1,761904762     |
| DHX8                                                                                                | 0,012479333 | -0,05296425  | 0,146 | 0,056 | 1         | 0,963953695   | 1,037394229     | 2,607142857     |
| TTC19                                                                                               | 0,009888075 | -0,052992886 | 0,232 | 0,105 | 1         | 0,963934561   | 1,037414821     | 2,20952381      |
| TFB1M                                                                                               | 0,19199525  | -0,053003805 | 0,049 | 0,021 | 1         | 0,963927265   | 1,037422673     | 2,333333333     |
| THAP10                                                                                              | 0,908489202 | -0,053177029 | 0,012 | 0,011 | 1         | 0,963811534   | 1,037547243     | 1,090909091     |
| COQ8B                                                                                               | 0,294659677 | -0,053195606 | 0,11  | 0,07  | 1         | 0,963799123   | 1,037560604     | 1,571428571     |
| ZXDB                                                                                                | 0,710321163 | -0,053204765 | 0,024 | 0,018 | 1         | 0,963793005   | 1,03756719      | 1,333333333     |
| DCAF5                                                                                               | 0,284092314 | -0,053242063 | 0,171 | 0,116 | 1         | 0,963768088   | 1,037594015     | 1,474137931     |
| ZNF8                                                                                                | 0,597173043 | -0,053262249 | 0,012 | 0,021 | 1         | 0,963754603   | 1,037608533     | 0,571428571     |
| KLHDC4                                                                                              | 0,116405688 | -0,053273646 | 0,061 | 0,025 | 1         | 0,96374699    | 1,03761673      | 2,44            |
| H2BC11                                                                                              | 0,28286347  | -0,053316839 | 0     | 0,014 | 1         | 0,963718137   | 1,037647795     | 0               |
| ACVR1B                                                                                              | 0,14139551  | -0,053359743 | 0,085 | 0,042 | 1         | 0,963689477   | 1,037678654     | 2,023809524     |
| PABPC5                                                                                              | 0,19199525  | -0,053361773 | 0,049 | 0,021 | 1         | 0,963688121   | 1,037680115     | 2,333333333     |
| PLAG1                                                                                               | 0,493813928 | -0,053363705 | 0,049 | 0,032 | 1         | 0,96368683    | 1,037681505     | 1,53125         |

Supplementary Table 2

| Differentially expressed genes_keloid-XL_comparing SC-Keloid vs. (SC-Myel, SC-Nonmyel, SC-Nonmyel2) |             |              |       |       |           |               |                 |                 |
|-----------------------------------------------------------------------------------------------------|-------------|--------------|-------|-------|-----------|---------------|-----------------|-----------------|
| gene                                                                                                | p_val       | avg_log2FC   | pct.1 | pct.2 | p_val_adj | Foldchange_UP | Foldchange_DOWN | Ratio_pct1_pct2 |
| CTDP1                                                                                               | 0,130630474 | -0,053449864 | 0,098 | 0,049 | 1         | 0,96362928    | 1,037743477     | 2               |
| FASTKD1                                                                                             | 0,58754085  | -0,053492729 | 0,037 | 0,025 | 1         | 0,96360065    | 1,037774311     | 1,48            |
| CENPO                                                                                               | 0,351112297 | -0,053503572 | 0,024 | 0,011 | 1         | 0,963593408   | 1,03778211      | 2,181818182     |
| ING5                                                                                                | 0,004936693 | -0,053593133 | 0,171 | 0,063 | 1         | 0,96353359    | 1,037846537     | 2,714285714     |
| CA12                                                                                                | 0,89237004  | -0,053616349 | 0,012 | 0,014 | 1         | 0,963518085   | 1,037863239     | 0,857142857     |
| MICU2                                                                                               | 0,003171101 | -0,053635601 | 0,317 | 0,14  | 1         | 0,963505228   | 1,037877088     | 2,264285714     |
| CX3CL1                                                                                              | 0,597173043 | -0,053678616 | 0,012 | 0,021 | 1         | 0,9634765     | 1,037908034     | 0,571428571     |
| NICN1                                                                                               | 0,875682986 | -0,053754489 | 0,024 | 0,021 | 1         | 0,963425831   | 1,03796262      | 1,142857143     |
| SDHAF2                                                                                              | 0,001553513 | -0,053769364 | 0,207 | 0,074 | 1         | 0,963415898   | 1,037973322     | 2,797297297     |
| SERHL2                                                                                              | 0,89702294  | -0,053798481 | 0,012 | 0,014 | 1         | 0,963396454   | 1,037994271     | 0,857142857     |
| PABPC4                                                                                              | 0,022103657 | -0,053811054 | 0,329 | 0,175 | 1         | 0,963388058   | 1,038003317     | 1,88            |
| PODN                                                                                                | 0,35350329  | -0,053928753 | 0     | 0,011 | 1         | 0,963309466   | 1,038088003     | 0               |
| ZNF470                                                                                              | 0,732741497 | -0,053943322 | 0,012 | 0,018 | 1         | 0,963299737   | 1,038098487     | 0,666666667     |
| DDHD2                                                                                               | 0,02256766  | -0,053944055 | 0,207 | 0,098 | 1         | 0,963299248   | 1,038099014     | 2,112244898     |
| MAB21L1                                                                                             | 0,35350329  | -0,054045645 | 0     | 0,011 | 1         | 0,963231418   | 1,038172117     | 0               |
| SLC17A5                                                                                             | 0,043046717 | -0,054048457 | 0,073 | 0,025 | 1         | 0,96322954    | 1,03817414      | 2,92            |
| DLGAP1-AS1                                                                                          | 0,612000968 | -0,054052273 | 0,049 | 0,035 | 1         | 0,963226993   | 1,038176886     | 1,4             |
| CYP19A1                                                                                             | 0,49683311  | -0,054056488 | 0,012 | 0,025 | 1         | 0,963224179   | 1,038179919     | 0,48            |
| JADE2                                                                                               | 0,210267721 | -0,054057633 | 0,098 | 0,056 | 1         | 0,963223414   | 1,038180743     | 1,75            |
| POLE3                                                                                               | 0,000196154 | -0,054180206 | 0,39  | 0,154 | 1         | 0,963141581   | 1,038268952     | 2,532467532     |
| UBE2J1                                                                                              | 0,005512944 | -0,054188508 | 0,207 | 0,084 | 1         | 0,963136039   | 1,038274927     | 2,464285714     |
| ZNF143                                                                                              | 0,00102341  | -0,05420602  | 0,171 | 0,053 | 1         | 0,963124348   | 1,03828753      | 3,226415094     |
| CDC40                                                                                               | 5,5443E-05  | -0,054221799 | 0,195 | 0,049 | 1         | 0,963113814   | 1,038298885     | 3,979591837     |
| CPT1B                                                                                               | 0,702909482 | -0,054225162 | 0,024 | 0,018 | 1         | 0,963111569   | 1,038301306     | 1,333333333     |
| TMPO                                                                                                | 0,196056982 | -0,054250581 | 0,134 | 0,081 | 1         | 0,9630946     | 1,0383196       | 1,654320988     |
| SEC23B                                                                                              | 0,001877835 | -0,054255325 | 0,122 | 0,032 | 1         | 0,963091433   | 1,038323014     | 3,8125          |
| DYNC1L1                                                                                             | 0,002384046 | -0,054301072 | 0,341 | 0,151 | 1         | 0,963060894   | 1,03835594      | 2,258278146     |
| SIRT3                                                                                               | 0,448248692 | -0,054314249 | 0,037 | 0,021 | 1         | 0,963052099   | 1,038365423     | 1,761904762     |
| NOTCH2NLA                                                                                           | 0,944403545 | -0,05433367  | 0,049 | 0,046 | 1         | 0,963039134   | 1,038379401     | 1,065217391     |
| SLC19A2                                                                                             | 0,043911154 | -0,054334051 | 0,085 | 0,032 | 1         | 0,96303888    | 1,038379676     | 2,65625         |

Supplementary Table 2

| Differentially expressed genes_keloid-XL_comparing SC-Keloid vs. (SC-Myel, SC-Nonmyel, SC-Nonmyel2) |             |              |       |       |           |               |                 |                 |
|-----------------------------------------------------------------------------------------------------|-------------|--------------|-------|-------|-----------|---------------|-----------------|-----------------|
| gene                                                                                                | p_val       | avg_log2FC   | pct.1 | pct.2 | p_val_adj | Foldchange_UP | Foldchange_DOWN | Ratio_pct1_pct2 |
| C2CD5                                                                                               | 0,501956412 | -0,054338951 | 0,061 | 0,042 | 1         | 0,963035609   | 1,038383202     | 1,452380952     |
| PCTP                                                                                                | 0,489167971 | -0,054340862 | 0,049 | 0,032 | 1         | 0,963034334   | 1,038384578     | 1,53125         |
| AC068987.1                                                                                          | 0,28286347  | -0,054376826 | 0     | 0,014 | 1         | 0,963010327   | 1,038410464     | 0               |
| TPT1                                                                                                | 0,7484323   | -0,054432751 | 0,988 | 0,979 | 1         | 0,962972997   | 1,038450718     | 1,009193054     |
| IRF2BPL                                                                                             | 0,023151224 | -0,054437339 | 0,366 | 0,204 | 1         | 0,962969935   | 1,03845402      | 1,794117647     |
| SLC24A5                                                                                             | 0,35350329  | -0,054456995 | 0     | 0,011 | 1         | 0,962956815   | 1,038468169     | 0               |
| SLC35E4                                                                                             | 0,003126845 | -0,054492848 | 0,171 | 0,06  | 1         | 0,962932884   | 1,038493976     | 2,85            |
| RGL3                                                                                                | 0,378906544 | -0,054494678 | 0,049 | 0,028 | 1         | 0,962931663   | 1,038495293     | 1,75            |
| HAUS6                                                                                               | 0,003740454 | -0,054515783 | 0,122 | 0,035 | 1         | 0,962917576   | 1,038510486     | 3,485714286     |
| NCKIPSD                                                                                             | 0,116405688 | -0,054529339 | 0,061 | 0,025 | 1         | 0,962908529   | 1,038520244     | 2,44            |
| PARP16                                                                                              | 0,879365097 | -0,054569687 | 0,024 | 0,021 | 1         | 0,962881599   | 1,038549289     | 1,142857143     |
| MSH3                                                                                                | 0,328098566 | -0,054671678 | 0,061 | 0,035 | 1         | 0,962813531   | 1,038622711     | 1,742857143     |
| MOSMO                                                                                               | 0,00869514  | -0,054703338 | 0,22  | 0,095 | 1         | 0,962792402   | 1,038645504     | 2,315789474     |
| CDC6                                                                                                | 0,908489202 | -0,054735607 | 0,012 | 0,011 | 1         | 0,962770868   | 1,038668736     | 1,090909091     |
| PER2                                                                                                | 0,292477426 | -0,054740347 | 0,073 | 0,042 | 1         | 0,962767704   | 1,038672149     | 1,738095238     |
| CR1                                                                                                 | 0,28286347  | -0,054809677 | 0     | 0,014 | 1         | 0,962721438   | 1,038722064     | 0               |
| ATP2B1                                                                                              | 0,000128479 | -0,054810878 | 0,427 | 0,172 | 1         | 0,962720637   | 1,038722929     | 2,48255814      |
| TP53BP1                                                                                             | 0,012885819 | -0,054813368 | 0,183 | 0,077 | 1         | 0,962718975   | 1,038724722     | 2,376623377     |
| TNFRSF1B                                                                                            | 0,404681217 | -0,054880505 | 0,012 | 0,028 | 1         | 0,962674176   | 1,03877306      | 0,428571429     |
| COA7                                                                                                | 0,654971645 | -0,05489031  | 0,012 | 0,007 | 1         | 0,962667633   | 1,038780121     | 1,714285714     |
| ACP6                                                                                                | 0,01938354  | -0,054916194 | 0,122 | 0,046 | 1         | 0,962650362   | 1,038798758     | 2,652173913     |
| RBSN                                                                                                | 0,180291852 | -0,054919366 | 0,098 | 0,053 | 1         | 0,962648245   | 1,038801042     | 1,849056604     |
| NDST2                                                                                               | 0,316484073 | -0,054979459 | 0,037 | 0,018 | 1         | 0,962608149   | 1,038844312     | 2,055555556     |
| COL17A1                                                                                             | 0,8434729   | -0,05502925  | 0,037 | 0,032 | 1         | 0,962574927   | 1,038880166     | 1,15625         |
| RYK                                                                                                 | 0,008289778 | -0,055078006 | 0,195 | 0,081 | 1         | 0,962542397   | 1,038915276     | 2,407407407     |
| TOLLIP-DT                                                                                           | 0,114980497 | -0,055085734 | 0,049 | 0,018 | 1         | 0,962537241   | 1,038920841     | 2,722222222     |
| HAP1                                                                                                | 0,35350329  | -0,055123437 | 0     | 0,011 | 1         | 0,962512087   | 1,038947992     | 0               |
| DBF4B                                                                                               | 0,187860656 | -0,0551536   | 0,024 | 0,007 | 1         | 0,962491964   | 1,038969714     | 3,428571429     |
| HHIPL1                                                                                              | 0,1180597   | -0,055185699 | 0,049 | 0,018 | 1         | 0,962470549   | 1,03899283      | 2,722222222     |
| LRP10                                                                                               | 0,009233066 | -0,055192779 | 0,366 | 0,182 | 1         | 0,962465826   | 1,038997929     | 2,010989011     |

Supplementary Table 2

| Differentially expressed genes_keloid-XL_comparing SC-Keloid vs. (SC-Myel, SC-Nonmyel, SC-Nonmyel2) |             |              |       |       |           |               |                 |                 |
|-----------------------------------------------------------------------------------------------------|-------------|--------------|-------|-------|-----------|---------------|-----------------|-----------------|
| gene                                                                                                | p_val       | avg_log2FC   | pct.1 | pct.2 | p_val_adj | Foldchange_UP | Foldchange_DOWN | Ratio_pct1_pct2 |
| PLEKHM1                                                                                             | 0,444731778 | -0,055219254 | 0,073 | 0,049 | 1         | 0,962448164   | 1,039016996     | 1,489795918     |
| ZNF532                                                                                              | 0,094604985 | -0,055332214 | 0,232 | 0,137 | 1         | 0,962372809   | 1,039098352     | 1,693430657     |
| ZNF665                                                                                              | 0,89237004  | -0,055400606 | 0,012 | 0,014 | 1         | 0,962327188   | 1,039147613     | 0,857142857     |
| PKN3                                                                                                | 0,89237004  | -0,05540135  | 0,012 | 0,014 | 1         | 0,962326692   | 1,039148148     | 0,857142857     |
| WDR36                                                                                               | 0,064689212 | -0,055449591 | 0,11  | 0,049 | 1         | 0,962294514   | 1,039182896     | 2,244897959     |
| TIMM10B                                                                                             | 0,016361462 | -0,055454679 | 0,159 | 0,067 | 1         | 0,96229112    | 1,039186561     | 2,373134328     |
| NUP160                                                                                              | 0,088019283 | -0,055471865 | 0,195 | 0,109 | 1         | 0,962279657   | 1,03919894      | 1,788990826     |
| SLC27A3                                                                                             | 0,245172489 | -0,055484023 | 0,061 | 0,032 | 1         | 0,962271547   | 1,039207698     | 1,90625         |
| GIMAP2                                                                                              | 0,35350329  | -0,055512047 | 0     | 0,011 | 1         | 0,962252856   | 1,039227884     | 0               |
| TMEM31                                                                                              | 0,728697501 | -0,055579775 | 0,012 | 0,018 | 1         | 0,962207683   | 1,039276673     | 0,666666667     |
| RGMA                                                                                                | 0,530989227 | -0,055593338 | 0,024 | 0,014 | 1         | 0,962198638   | 1,039286443     | 1,714285714     |
| CIART                                                                                               | 0,448248692 | -0,055594338 | 0,037 | 0,021 | 1         | 0,962197971   | 1,039287164     | 1,761904762     |
| NPHP4                                                                                               | 0,046053199 | -0,055672682 | 0,085 | 0,032 | 1         | 0,962145721   | 1,039343602     | 2,65625         |
| KLB                                                                                                 | 0,35350329  | -0,055704142 | 0     | 0,011 | 1         | 0,962124741   | 1,039366267     | 0               |
| CSNK1G2                                                                                             | 0,002251108 | -0,055704927 | 0,354 | 0,161 | 1         | 0,962124217   | 1,039366833     | 2,198757764     |
| PKD2L2                                                                                              | 0,35350329  | -0,055730613 | 0     | 0,011 | 1         | 0,962107087   | 1,039385338     | 0               |
| NUDT7                                                                                               | 0,493879805 | -0,055782525 | 0,012 | 0,025 | 1         | 0,962072468   | 1,039422739     | 0,48            |
| ELP3                                                                                                | 0,025428865 | -0,055791168 | 0,085 | 0,028 | 1         | 0,962066705   | 1,039428965     | 3,035714286     |
| DNASE1                                                                                              | 0,872003564 | -0,055818313 | 0,024 | 0,021 | 1         | 0,962048604   | 1,039448523     | 1,142857143     |
| MAGI3                                                                                               | 0,626508508 | -0,055836451 | 0,073 | 0,056 | 1         | 0,962036508   | 1,039461592     | 1,303571429     |
| ASL                                                                                                 | 0,011860894 | -0,055859653 | 0,146 | 0,056 | 1         | 0,962021037   | 1,039478309     | 2,607142857     |
| NUP205                                                                                              | 0,597099695 | -0,055863634 | 0,049 | 0,035 | 1         | 0,962018382   | 1,039481177     | 1,4             |
| BRF1                                                                                                | 0,004129328 | -0,055876023 | 0,134 | 0,042 | 1         | 0,962010121   | 1,039490104     | 3,19047619      |
| HDAC7                                                                                               | 0,010936992 | -0,055902448 | 0,293 | 0,144 | 1         | 0,9619925     | 1,039509144     | 2,034722222     |
| ANKMY2                                                                                              | 0,109709366 | -0,055907358 | 0,073 | 0,032 | 1         | 0,961989226   | 1,039512681     | 2,28125         |
| GTPBP6                                                                                              | 0,001403336 | -0,055986481 | 0,28  | 0,112 | 1         | 0,961936468   | 1,039569694     | 2,5             |
| C1QTNF9                                                                                             | 0,228958629 | -0,055991316 | 0     | 0,018 | 1         | 0,961933245   | 1,039573177     | 0               |
| SERAC1                                                                                              | 0,132098446 | -0,056033428 | 0,098 | 0,049 | 1         | 0,961905167   | 1,039603523     | 2               |
| TIE1                                                                                                | 0,28286347  | -0,056048792 | 0     | 0,014 | 1         | 0,961894922   | 1,039614595     | 0               |
| DCK                                                                                                 | 0,028797588 | -0,056054277 | 0,11  | 0,042 | 1         | 0,961891266   | 1,039618547     | 2,619047619     |

Supplementary Table 2

| Differentially expressed genes_keloid-XL_comparing SC-Keloid vs. (SC-Myel, SC-Nonmyel, SC-Nonmyel2) |             |              |       |       |           |               |                 |                 |
|-----------------------------------------------------------------------------------------------------|-------------|--------------|-------|-------|-----------|---------------|-----------------|-----------------|
| gene                                                                                                | p_val       | avg_log2FC   | pct.1 | pct.2 | p_val_adj | Foldchange_UP | Foldchange_DOWN | Ratio_pct1_pct2 |
| ZNF408                                                                                              | 0,118200281 | -0,056080544 | 0,061 | 0,025 | 1         | 0,961873753   | 1,039637475     | 2,44            |
| DCAF15                                                                                              | 0,012753006 | -0,056100758 | 0,146 | 0,056 | 1         | 0,961860276   | 1,039652042     | 2,607142857     |
| ACYP1                                                                                               | 0,012245275 | -0,056165377 | 0,183 | 0,077 | 1         | 0,961817195   | 1,03969861      | 2,376623377     |
| IKZF4                                                                                               | 0,516525962 | -0,056168513 | 0,061 | 0,042 | 1         | 0,961815104   | 1,039700869     | 1,452380952     |
| CRPPA                                                                                               | 0,228958629 | -0,056174073 | 0     | 0,018 | 1         | 0,961811397   | 1,039704876     | 0               |
| PAQR3                                                                                               | 0,20263543  | -0,056209721 | 0,134 | 0,081 | 1         | 0,961787632   | 1,039730567     | 1,654320988     |
| CRYZL1                                                                                              | 0,092558151 | -0,056269169 | 0,159 | 0,084 | 1         | 0,961748001   | 1,039773412     | 1,892857143     |
| WARS1                                                                                               | 0,000228585 | -0,056282392 | 0,39  | 0,158 | 1         | 0,961739186   | 1,039782942     | 2,46835443      |
| ENDOG                                                                                               | 0,003253229 | -0,056293015 | 0,171 | 0,06  | 1         | 0,961732104   | 1,039790598     | 2,85            |
| ZBED1                                                                                               | 0,18022108  | -0,056311415 | 0,122 | 0,07  | 1         | 0,961719839   | 1,039803859     | 1,742857143     |
| MARCHF10                                                                                            | 0,28286347  | -0,056324254 | 0     | 0,014 | 1         | 0,96171128    | 1,039813113     | 0               |
| ECHDC3                                                                                              | 0,189157269 | -0,056351287 | 0,049 | 0,021 | 1         | 0,96169326    | 1,039832597     | 2,333333333     |
| SIK2                                                                                                | 0,787803369 | -0,056352695 | 0,098 | 0,084 | 1         | 0,961692321   | 1,039833612     | 1,166666667     |
| EIF4G3                                                                                              | 0,095441424 | -0,056386821 | 0,22  | 0,13  | 1         | 0,961669573   | 1,039858209     | 1,692307692     |
| ZNF432                                                                                              | 0,107265343 | -0,056432373 | 0,037 | 0,011 | 1         | 0,96163921    | 1,039891042     | 3,363636364     |
| NOX4                                                                                                | 0,908489202 | -0,0564803   | 0,012 | 0,011 | 1         | 0,961607265   | 1,039925588     | 1,090909091     |
| NAP1L2                                                                                              | 0,732741497 | -0,056617025 | 0,012 | 0,018 | 1         | 0,961516137   | 1,040024147     | 0,666666667     |
| PDE4A                                                                                               | 0,344121021 | -0,056629902 | 0,073 | 0,046 | 1         | 0,961507555   | 1,04003343      | 1,586956522     |
| TXNRD3                                                                                              | 0,60759219  | -0,056674586 | 0,012 | 0,021 | 1         | 0,961477775   | 1,040065643     | 0,571428571     |
| ANXA3                                                                                               | 0,459175933 | -0,056701658 | 0,073 | 0,049 | 1         | 0,961459733   | 1,04008516      | 1,489795918     |
| SMIM1                                                                                               | 0,35350329  | -0,056748895 | 0     | 0,011 | 1         | 0,961428253   | 1,040119215     | 0               |
| DUS2                                                                                                | 0,066254792 | -0,056762584 | 0,024 | 0,004 | 1         | 0,961419131   | 1,040129084     | 6               |
| DGKE                                                                                                | 0,186763581 | -0,056791101 | 0     | 0,021 | 1         | 0,961400127   | 1,040149645     | 0               |
| ARTN                                                                                                | 0,827572132 | -0,056829018 | 0,098 | 0,088 | 1         | 0,961374859   | 1,040176982     | 1,113636364     |
| FAM8A1                                                                                              | 0,246621056 | -0,056835219 | 0,061 | 0,032 | 1         | 0,961370728   | 1,040181453     | 1,90625         |
| CCNG1                                                                                               | 0,89958467  | -0,056837766 | 0,061 | 0,056 | 1         | 0,96136903    | 1,040183289     | 1,089285714     |
| RBL1                                                                                                | 0,908489202 | -0,056849991 | 0,012 | 0,011 | 1         | 0,961360884   | 1,040192103     | 1,090909091     |
| HCFC1                                                                                               | 0,000392705 | -0,056935641 | 0,293 | 0,109 | 1         | 0,961303812   | 1,040253859     | 2,688073394     |
| SNTB1                                                                                               | 0,319820382 | -0,05702727  | 0,085 | 0,053 | 1         | 0,961242758   | 1,040319931     | 1,603773585     |
| VMA21                                                                                               | 0,030887858 | -0,057039167 | 0,28  | 0,151 | 1         | 0,961234832   | 1,040328509     | 1,854304636     |

Supplementary Table 2

| Differentially expressed genes_keloid-XL_comparing SC-Keloid vs. (SC-Myel, SC-Nonmyel, SC-Nonmyel2) |             |              |       |       |           |               |                 |                 |
|-----------------------------------------------------------------------------------------------------|-------------|--------------|-------|-------|-----------|---------------|-----------------|-----------------|
| gene                                                                                                | p_val       | avg_log2FC   | pct.1 | pct.2 | p_val_adj | Foldchange_UP | Foldchange_DOWN | Ratio_pct1_pct2 |
| KIFC2                                                                                               | 0,018247048 | -0,057060314 | 0,122 | 0,046 | 1         | 0,961220742   | 1,040343759     | 2,652173913     |
| PLD1                                                                                                | 0,732741497 | -0,05708564  | 0,012 | 0,018 | 1         | 0,961203868   | 1,040362022     | 0,666666667     |
| DCHS1                                                                                               | 0,903285004 | -0,057117404 | 0,012 | 0,011 | 1         | 0,961182706   | 1,040384928     | 1,090909091     |
| UFL1                                                                                                | 0,002552465 | -0,057126547 | 0,244 | 0,098 | 1         | 0,961176614   | 1,040391521     | 2,489795918     |
| TTC23L                                                                                              | 0,35350329  | -0,057159123 | 0     | 0,011 | 1         | 0,961154911   | 1,040415013     | 0               |
| PCDHGA8                                                                                             | 0,654971645 | -0,057175998 | 0,012 | 0,007 | 1         | 0,961143669   | 1,040427183     | 1,714285714     |
| MIS18BP1                                                                                            | 0,005440017 | -0,057200854 | 0,171 | 0,063 | 1         | 0,96112711    | 1,040445108     | 2,714285714     |
| EDEM1                                                                                               | 0,065353239 | -0,057225169 | 0,171 | 0,088 | 1         | 0,961110911   | 1,040462644     | 1,943181818     |
| ZNF559                                                                                              | 0,028137369 | -0,057313717 | 0,098 | 0,035 | 1         | 0,961051923   | 1,040526507     | 2,8             |
| SPTLC3                                                                                              | 0,490935921 | -0,057401444 | 0,012 | 0,025 | 1         | 0,960993485   | 1,040589781     | 0,48            |
| DNAL1                                                                                               | 0,067693888 | -0,05743391  | 0,146 | 0,074 | 1         | 0,960971859   | 1,040613198     | 1,972972973     |
| CYS1                                                                                                | 0,28286347  | -0,057463937 | 0     | 0,014 | 1         | 0,960951859   | 1,040634857     | 0               |
| ZNF714                                                                                              | 0,721906011 | -0,057480233 | 0,037 | 0,028 | 1         | 0,960941005   | 1,040646611     | 1,321428571     |
| SEMA6B                                                                                              | 0,848859315 | -0,057482964 | 0,024 | 0,028 | 1         | 0,960939185   | 1,040648581     | 0,857142857     |
| DEFB1                                                                                               | 0,28286347  | -0,057506347 | 0     | 0,014 | 1         | 0,960923611   | 1,040665448     | 0               |
| GOLGA6L4                                                                                            | 0,85248313  | -0,057581908 | 0,037 | 0,032 | 1         | 0,960873284   | 1,040719954     | 1,15625         |
| SARS2                                                                                               | 0,718963318 | -0,057585145 | 0,049 | 0,039 | 1         | 0,960871128   | 1,040722289     | 1,256410256     |
| GK                                                                                                  | 0,440372242 | -0,057644301 | 0,037 | 0,021 | 1         | 0,960831729   | 1,040764964     | 1,761904762     |
| RNF25                                                                                               | 0,712940593 | -0,057723617 | 0,037 | 0,028 | 1         | 0,960778907   | 1,040822184     | 1,321428571     |
| KBTBD4                                                                                              | 0,1180597   | -0,057742615 | 0,049 | 0,018 | 1         | 0,960766255   | 1,04083589      | 2,722222222     |
| ABLIM2                                                                                              | 0,649511996 | -0,057748491 | 0,012 | 0,007 | 1         | 0,960762342   | 1,040840129     | 1,714285714     |
| LTK                                                                                                 | 0,351112297 | -0,057784242 | 0,024 | 0,011 | 1         | 0,960738534   | 1,040865922     | 2,181818182     |
| GTF2F1                                                                                              | 0,001411405 | -0,057803302 | 0,244 | 0,091 | 1         | 0,960725841   | 1,040879674     | 2,681318681     |
| RENBP                                                                                               | 0,988227774 | -0,057829266 | 0,037 | 0,035 | 1         | 0,960708551   | 1,040898406     | 1,057142857     |
| C17orf80                                                                                            | 0,60452973  | -0,057862556 | 0,049 | 0,035 | 1         | 0,960686383   | 1,040922425     | 1,4             |
| GRPEL1                                                                                              | 0,003033134 | -0,057871244 | 0,232 | 0,095 | 1         | 0,960680598   | 1,040928694     | 2,442105263     |
| SDHD                                                                                                | 0,002929072 | -0,057907834 | 0,378 | 0,179 | 1         | 0,960656233   | 1,040955094     | 2,111731844     |
| TMCC2                                                                                               | 0,35350329  | -0,057912711 | 0     | 0,011 | 1         | 0,960652985   | 1,040958614     | 0               |
| GPCPD1                                                                                              | 0,009697844 | -0,057955456 | 0,171 | 0,067 | 1         | 0,960624523   | 1,040989456     | 2,552238806     |
| ROM1                                                                                                | 0,49683311  | -0,058025946 | 0,012 | 0,025 | 1         | 0,960577589   | 1,04104032      | 0,48            |

Supplementary Table 2

| Differentially expressed genes_keloid-XL_comparing SC-Keloid vs. (SC-Myel, SC-Nonmyel, SC-Nonmyel2) |             |              |       |       |           |               |                 |                 |
|-----------------------------------------------------------------------------------------------------|-------------|--------------|-------|-------|-----------|---------------|-----------------|-----------------|
| gene                                                                                                | p_val       | avg_log2FC   | pct.1 | pct.2 | p_val_adj | Foldchange_UP | Foldchange_DOWN | Ratio_pct1_pct2 |
| DUSP2                                                                                               | 0,879365097 | -0,058033598 | 0,024 | 0,021 | 1         | 0,960572493   | 1,041045842     | 1,142857143     |
| LGALS9                                                                                              | 0,710321163 | -0,058038408 | 0,024 | 0,018 | 1         | 0,960569291   | 1,041049312     | 1,333333333     |
| S100BPB                                                                                             | 0,07286384  | -0,058046511 | 0,085 | 0,035 | 1         | 0,960563896   | 1,04105516      | 2,428571429     |
| GTPBP10                                                                                             | 0,311992919 | -0,058050636 | 0,037 | 0,018 | 1         | 0,960561149   | 1,041058137     | 2,055555556     |
| ADAMTSL5                                                                                            | 0,35350329  | -0,05812338  | 0     | 0,011 | 1         | 0,960512717   | 1,04111063      | 0               |
| MKKS                                                                                                | 0,109709366 | -0,058155628 | 0,073 | 0,032 | 1         | 0,960491247   | 1,041133902     | 2,28125         |
| RFFL                                                                                                | 0,383074885 | -0,058270927 | 0,049 | 0,028 | 1         | 0,960414489   | 1,041217112     | 1,75            |
| KCNN2                                                                                               | 0,153186787 | -0,058291331 | 0     | 0,025 | 1         | 0,960400906   | 1,041231838     | 0               |
| LRRC15                                                                                              | 0,00931978  | -0,058301299 | 0,049 | 0,007 | 1         | 0,96039427    | 1,041239032     | 7               |
| LINC00052                                                                                           | 0,186763581 | -0,058362955 | 0     | 0,021 | 1         | 0,960353227   | 1,041283532     | 0               |
| MYO9B                                                                                               | 0,010200054 | -0,058371729 | 0,5   | 0,27  | 1         | 0,960347386   | 1,041289865     | 1,851851852     |
| NHEJ1                                                                                               | 0,072536796 | -0,058387085 | 0,073 | 0,028 | 1         | 0,960337164   | 1,041300948     | 2,607142857     |
| NR2F6                                                                                               | 0,001538234 | -0,058409404 | 0,293 | 0,119 | 1         | 0,960322308   | 1,041317058     | 2,462184874     |
| BST2                                                                                                | 0,980653851 | -0,058504319 | 0,024 | 0,025 | 1         | 0,96025913    | 1,041385569     | 0,96            |
| AGAP9                                                                                               | 0,070675603 | -0,058534558 | 0,061 | 0,021 | 1         | 0,960239003   | 1,041407396     | 2,904761905     |
| DTNBP1                                                                                              | 0,008169675 | -0,058543883 | 0,146 | 0,053 | 1         | 0,960232797   | 1,041414127     | 2,754716981     |
| RMC1                                                                                                | 0,7220639   | -0,05855031  | 0,073 | 0,06  | 1         | 0,960228519   | 1,041418767     | 1,216666667     |
| ZNF274                                                                                              | 0,383074885 | -0,058586238 | 0,049 | 0,028 | 1         | 0,960204606   | 1,041444702     | 1,75            |
| MCEE                                                                                                | 0,057571887 | -0,058601451 | 0,134 | 0,063 | 1         | 0,960194481   | 1,041455684     | 2,126984127     |
| ANKRD40                                                                                             | 0,005117806 | -0,058640046 | 0,402 | 0,196 | 1         | 0,960168794   | 1,041483546     | 2,051020408     |
| GOSR1                                                                                               | 0,027439345 | -0,058666572 | 0,268 | 0,14  | 1         | 0,96015114    | 1,041502695     | 1,914285714     |
| ILDR2                                                                                               | 0,510255146 | -0,058683943 | 0,061 | 0,042 | 1         | 0,96013958    | 1,041515235     | 1,452380952     |
| SCAI                                                                                                | 0,044698521 | -0,058707444 | 0,098 | 0,039 | 1         | 0,96012394    | 1,041532201     | 2,512820513     |
| APTR                                                                                                | 0,065920448 | -0,058734228 | 0,11  | 0,049 | 1         | 0,960106115   | 1,041551538     | 2,244897959     |
| IFIH1                                                                                               | 0,04430569  | -0,058749078 | 0,11  | 0,046 | 1         | 0,960096232   | 1,041562259     | 2,391304348     |
| LRRC75B                                                                                             | 0,012753006 | -0,058866702 | 0,146 | 0,056 | 1         | 0,960017958   | 1,041647181     | 2,607142857     |
| ZNF337                                                                                              | 0,069203207 | -0,058893222 | 0,073 | 0,028 | 1         | 0,960000311   | 1,041666329     | 2,607142857     |
| RECK                                                                                                | 0,837311683 | -0,058895988 | 0,049 | 0,042 | 1         | 0,95999847    | 1,041668326     | 1,166666667     |
| FSIP1                                                                                               | 0,728697501 | -0,058954051 | 0,012 | 0,018 | 1         | 0,959959834   | 1,041710251     | 0,666666667     |
| MAU2                                                                                                | 0,117394374 | -0,059036048 | 0,146 | 0,081 | 1         | 0,959905276   | 1,041769459     | 1,802469136     |



Supplementary Table 2

| Differentially expressed genes_keloid-XL_comparing SC-Keloid vs. (SC-Myel, SC-Nonmyel, SC-Nonmyel2) |             |              |       |       |           |               |                 |                 |
|-----------------------------------------------------------------------------------------------------|-------------|--------------|-------|-------|-----------|---------------|-----------------|-----------------|
| gene                                                                                                | p_val       | avg_log2FC   | pct.1 | pct.2 | p_val_adj | Foldchange_UP | Foldchange_DOWN | Ratio_pct1_pct2 |
| ALDOA                                                                                               | 0,002863371 | -0,059058298 | 0,268 | 0,112 | 1         | 0,959890472   | 1,041785526     | 2,392857143     |
| CLSTN2                                                                                              | 0,228958629 | -0,059078557 | 0     | 0,018 | 1         | 0,959876993   | 1,041800155     | 0               |
| KLF15                                                                                               | 0,228958629 | -0,059119832 | 0     | 0,018 | 1         | 0,959849532   | 1,041829961     | 0               |
| PGM5                                                                                                | 0,654971645 | -0,059124795 | 0,012 | 0,007 | 1         | 0,95984623    | 1,041833545     | 1,714285714     |
| ARMC10                                                                                              | 0,004100112 | -0,059131623 | 0,207 | 0,081 | 1         | 0,959841687   | 1,041838476     | 2,555555556     |
| NOXA1                                                                                               | 0,903285004 | -0,05914544  | 0,012 | 0,011 | 1         | 0,959832494   | 1,041848454     | 1,090909091     |
| CERS6                                                                                               | 0,340048767 | -0,059216801 | 0,134 | 0,091 | 1         | 0,959785018   | 1,041899989     | 1,472527473     |
| TAF5                                                                                                | 0,228958629 | -0,05924292  | 0     | 0,018 | 1         | 0,959767642   | 1,041918852     | 0               |
| FOLH1                                                                                               | 0,186763581 | -0,059276163 | 0     | 0,021 | 1         | 0,959745528   | 1,04194286      | 0               |
| HOMEZ                                                                                               | 0,351112297 | -0,059299849 | 0,024 | 0,011 | 1         | 0,95972977    | 1,041959967     | 2,181818182     |
| RAP1A                                                                                               | 0,017424753 | -0,059354048 | 0,634 | 0,368 | 1         | 0,959693716   | 1,041999112     | 1,722826087     |
| CEP70                                                                                               | 0,835753847 | -0,05951214  | 0,024 | 0,028 | 1         | 0,959588558   | 1,042113301     | 0,857142857     |
| PAN2                                                                                                | 0,257323577 | -0,059588995 | 0,085 | 0,049 | 1         | 0,95953744    | 1,042168818     | 1,734693878     |
| DENND11                                                                                             | 0,314233219 | -0,059612562 | 0,037 | 0,018 | 1         | 0,959521766   | 1,042185842     | 2,055555556     |
| TMEM215                                                                                             | 0,186763581 | -0,059619166 | 0     | 0,021 | 1         | 0,959517374   | 1,042190613     | 0               |
| TBC1D8                                                                                              | 0,28286347  | -0,059656685 | 0     | 0,014 | 1         | 0,959492421   | 1,042217717     | 0               |
| FOXJ3                                                                                               | 0,049475513 | -0,059671649 | 0,329 | 0,189 | 1         | 0,959482468   | 1,042228527     | 1,740740741     |
| SEC22C                                                                                              | 0,086796064 | -0,059785449 | 0,207 | 0,116 | 1         | 0,959406787   | 1,042310742     | 1,784482759     |
| PLEKHB1                                                                                             | 0,017071909 | -0,059895229 | 0,341 | 0,179 | 1         | 0,959333785   | 1,042390058     | 1,905027933     |
| SLC25A53                                                                                            | 0,597173043 | -0,059911141 | 0,012 | 0,021 | 1         | 0,959323205   | 1,042401555     | 0,571428571     |
| VPS8                                                                                                | 0,000102238 | -0,059936468 | 0,22  | 0,063 | 1         | 0,959306363   | 1,042419855     | 3,492063492     |
| WTIP                                                                                                | 0,154886254 | -0,059960269 | 0,146 | 0,084 | 1         | 0,959290537   | 1,042437053     | 1,738095238     |
| PAK4                                                                                                | 0,029054986 | -0,060085733 | 0,098 | 0,035 | 1         | 0,959207116   | 1,042527712     | 2,8             |
| SLC25A42                                                                                            | 0,254866345 | -0,060102495 | 0,085 | 0,049 | 1         | 0,959195972   | 1,042539824     | 1,734693878     |
| MAP4                                                                                                | 0,272953165 | -0,060104055 | 0,878 | 0,702 | 1         | 0,959194935   | 1,042540952     | 1,250712251     |
| RALGAPB                                                                                             | 0,257205434 | -0,060141845 | 0,11  | 0,067 | 1         | 0,959169809   | 1,042568261     | 1,641791045     |
| SOBP                                                                                                | 0,228958629 | -0,06014429  | 0     | 0,018 | 1         | 0,959168184   | 1,042570028     | 0               |
| SLFN13                                                                                              | 0,189157269 | -0,060159837 | 0,049 | 0,021 | 1         | 0,959157848   | 1,042581262     | 2,333333333     |
| FAU                                                                                                 | 0,748298158 | -0,060171486 | 0,963 | 0,877 | 1         | 0,959150103   | 1,042589681     | 1,098061574     |
| NINL                                                                                                | 0,1180597   | -0,060199687 | 0,049 | 0,018 | 1         | 0,959131354   | 1,042610061     | 2,722222222     |

Supplementary Table 2

| Differentially expressed genes_keloid-XL_comparing SC-Keloid vs. (SC-Myel, SC-Nonmyel, SC-Nonmyel2) |             |              |       |       |           |               |                 |                 |
|-----------------------------------------------------------------------------------------------------|-------------|--------------|-------|-------|-----------|---------------|-----------------|-----------------|
| gene                                                                                                | p_val       | avg_log2FC   | pct.1 | pct.2 | p_val_adj | Foldchange_UP | Foldchange_DOWN | Ratio_pct1_pct2 |
| SARM1                                                                                               | 0,107265343 | -0,060208238 | 0,037 | 0,011 | 1         | 0,95912567    | 1,042616241     | 3,363636364     |
| MAMSTR                                                                                              | 0,530989227 | -0,060208486 | 0,024 | 0,014 | 1         | 0,959125505   | 1,04261642      | 1,714285714     |
| CYP2U1                                                                                              | 0,228894059 | -0,060213784 | 0,098 | 0,056 | 1         | 0,959121982   | 1,042620249     | 1,75            |
| USP27X                                                                                              | 0,908489202 | -0,060258996 | 0,012 | 0,011 | 1         | 0,959091925   | 1,042652924     | 1,090909091     |
| RPAP2                                                                                               | 0,095256843 | -0,060289251 | 0,098 | 0,046 | 1         | 0,959071812   | 1,042674789     | 2,130434783     |
| MIR181A2HG                                                                                          | 0,58754085  | -0,060307695 | 0,037 | 0,025 | 1         | 0,959059551   | 1,04268812      | 1,48            |
| FHL1                                                                                                | 0,000918969 | -0,060310291 | 0,341 | 0,144 | 1         | 0,959057825   | 1,042689996     | 2,368055556     |
| MGRN1                                                                                               | 0,038346176 | -0,060312224 | 0,207 | 0,105 | 1         | 0,959056541   | 1,042691393     | 1,971428571     |
| PPFIA2                                                                                              | 0,654971645 | -0,06032851  | 0,012 | 0,007 | 1         | 0,959045714   | 1,042703163     | 1,714285714     |
| DENND1B                                                                                             | 0,612000968 | -0,060335908 | 0,049 | 0,035 | 1         | 0,959040797   | 1,04270851      | 1,4             |
| PDXP                                                                                                | 0,002944476 | -0,060412911 | 0,305 | 0,137 | 1         | 0,958989609   | 1,042764166     | 2,226277372     |
| APAF1                                                                                               | 0,042654557 | -0,060419487 | 0,122 | 0,053 | 1         | 0,958985238   | 1,042768919     | 2,301886792     |
| CHD5                                                                                                | 0,35185965  | -0,060480675 | 0,012 | 0,004 | 1         | 0,958944566   | 1,042813146     | 3               |
| FOXC1                                                                                               | 0,471017216 | -0,060704786 | 0,085 | 0,06  | 1         | 0,958795614   | 1,042975151     | 1,416666667     |
| TBC1D14                                                                                             | 0,00328535  | -0,060722484 | 0,159 | 0,053 | 1         | 0,958783852   | 1,042987945     | 3               |
| SLC25A4                                                                                             | 0,00282973  | -0,060802926 | 0,256 | 0,105 | 1         | 0,958730393   | 1,043046102     | 2,438095238     |
| PKHD1                                                                                               | 0,35350329  | -0,060827344 | 0     | 0,011 | 1         | 0,958714167   | 1,043063756     | 0               |
| GNG12-AS1                                                                                           | 0,654971645 | -0,060867096 | 0,012 | 0,007 | 1         | 0,958687751   | 1,043092497     | 1,714285714     |
| MTF1                                                                                                | 0,07286384  | -0,06087384  | 0,085 | 0,035 | 1         | 0,958683269   | 1,043097374     | 2,428571429     |
| KANSL3                                                                                              | 0,039696939 | -0,060885155 | 0,134 | 0,06  | 1         | 0,95867575    | 1,043105555     | 2,233333333     |
| ZNF641                                                                                              | 0,043911154 | -0,060923477 | 0,085 | 0,032 | 1         | 0,958650286   | 1,043133263     | 2,65625         |
| USP16                                                                                               | 0,000660037 | -0,060934494 | 0,439 | 0,2   | 1         | 0,958642965   | 1,043141228     | 2,195           |
| IMPDH1                                                                                              | 0,318425758 | -0,060945542 | 0,085 | 0,053 | 1         | 0,958635624   | 1,043149217     | 1,603773585     |
| FARS2                                                                                               | 0,083350984 | -0,061073073 | 0,122 | 0,06  | 1         | 0,958550886   | 1,043241433     | 2,033333333     |
| COL18A1-AS1                                                                                         | 0,28286347  | -0,061126961 | 0     | 0,014 | 1         | 0,958515083   | 1,043280401     | 0               |
| CEP170B                                                                                             | 0,41814263  | -0,061149242 | 0,061 | 0,039 | 1         | 0,95850028    | 1,043296513     | 1,564102564     |
| APOOL                                                                                               | 0,028583695 | -0,061202832 | 0,11  | 0,042 | 1         | 0,958464676   | 1,043335268     | 2,619047619     |
| PLEKHG2                                                                                             | 0,025986542 | -0,061291306 | 0,146 | 0,063 | 1         | 0,9584059     | 1,043399253     | 2,317460317     |
| TKT                                                                                                 | 0,007915019 | -0,061311992 | 0,439 | 0,225 | 1         | 0,958392158   | 1,043414214     | 1,951111111     |
| DEDD                                                                                                | 0,322621598 | -0,061406476 | 0,085 | 0,053 | 1         | 0,958329393   | 1,043482551     | 1,603773585     |

Supplementary Table 2

| Differentially expressed genes_keloid-XL_comparing SC-Keloid vs. (SC-Myel, SC-Nonmyel, SC-Nonmyel2) |             |              |       |       |           |               |                 |                 |
|-----------------------------------------------------------------------------------------------------|-------------|--------------|-------|-------|-----------|---------------|-----------------|-----------------|
| gene                                                                                                | p_val       | avg_log2FC   | pct.1 | pct.2 | p_val_adj | Foldchange_UP | Foldchange_DOWN | Ratio_pct1_pct2 |
| ZBED6                                                                                               | 0,973621109 | -0,061438063 | 0,024 | 0,025 | 1         | 0,958308411   | 1,043505398     | 0,96            |
| ZNF66                                                                                               | 0,351112297 | -0,061452747 | 0,024 | 0,011 | 1         | 0,958298658   | 1,043516018     | 2,181818182     |
| UBL7-DT                                                                                             | 0,329804619 | -0,061460482 | 0,061 | 0,035 | 1         | 0,95829352    | 1,043521614     | 1,742857143     |
| MSTN                                                                                                | 0,908489202 | -0,061464464 | 0,012 | 0,011 | 1         | 0,958290875   | 1,043524494     | 1,090909091     |
| MAGEH1                                                                                              | 0,000289534 | -0,061531212 | 0,366 | 0,144 | 1         | 0,95824654    | 1,043572775     | 2,541666667     |
| ZNF592                                                                                              | 0,22324196  | -0,061550282 | 0,073 | 0,039 | 1         | 0,958233873   | 1,043586569     | 1,871794872     |
| CENPJ                                                                                               | 0,073676783 | -0,061597361 | 0,073 | 0,028 | 1         | 0,958202604   | 1,043620624     | 2,607142857     |
| RMRP                                                                                                | 0,245172489 | -0,061600424 | 0,061 | 0,032 | 1         | 0,95820057    | 1,04362284      | 1,90625         |
| EGR1                                                                                                | 0,020355192 | -0,061603137 | 0,622 | 0,389 | 1         | 0,958198767   | 1,043624803     | 1,598971722     |
| EIF2B5                                                                                              | 0,04083019  | -0,061603311 | 0,171 | 0,084 | 1         | 0,958198652   | 1,043624929     | 2,035714286     |
| LIN52                                                                                               | 0,17581427  | -0,061612706 | 0,061 | 0,028 | 1         | 0,958192412   | 1,043631725     | 2,178571429     |
| CCL21                                                                                               | 0,706611845 | -0,061657223 | 0,024 | 0,018 | 1         | 0,958162846   | 1,043663929     | 1,333333333     |
| FAM83H                                                                                              | 0,502767844 | -0,061675343 | 0,012 | 0,025 | 1         | 0,958150811   | 1,043677037     | 0,48            |
| WIPI1                                                                                               | 0,620416443 | -0,061690237 | 0,073 | 0,056 | 1         | 0,95814092    | 1,043687812     | 1,303571429     |
| OMA1                                                                                                | 0,727904339 | -0,061691139 | 0,037 | 0,028 | 1         | 0,958140321   | 1,043688464     | 1,321428571     |
| EIF3J-DT                                                                                            | 0,395778183 | -0,061729789 | 0,085 | 0,056 | 1         | 0,958114653   | 1,043716425     | 1,517857143     |
| MOSPD2                                                                                              | 0,074780305 | -0,061730295 | 0,146 | 0,074 | 1         | 0,958114316   | 1,043716791     | 1,972972973     |
| YEATS2                                                                                              | 0,729035687 | -0,061756768 | 0,085 | 0,095 | 1         | 0,958096735   | 1,043735944     | 0,894736842     |
| ERBIN                                                                                               | 0,126733582 | -0,061804931 | 0,402 | 0,256 | 1         | 0,958064751   | 1,043770788     | 1,5703125       |
| C8orf76                                                                                             | 0,005885893 | -0,061808594 | 0,11  | 0,032 | 1         | 0,958062318   | 1,043773438     | 3,4375          |
| LRRTM3                                                                                              | 0,35350329  | -0,061838165 | 0     | 0,011 | 1         | 0,958042681   | 1,043794833     | 0               |
| EXOC8                                                                                               | 0,442988867 | -0,061848251 | 0,037 | 0,021 | 1         | 0,958035984   | 1,04380213      | 1,761904762     |
| AC104695.3                                                                                          | 0,597173043 | -0,061878536 | 0,012 | 0,021 | 1         | 0,958015872   | 1,043824042     | 0,571428571     |
| MED12L                                                                                              | 0,35350329  | -0,061886337 | 0     | 0,011 | 1         | 0,958010693   | 1,043829686     | 0               |
| SENP5                                                                                               | 0,001668365 | -0,061935401 | 0,22  | 0,081 | 1         | 0,957978112   | 1,043865186     | 2,716049383     |
| E4F1                                                                                                | 0,028923554 | -0,062062003 | 0,122 | 0,049 | 1         | 0,95789405    | 1,043956793     | 2,489795918     |
| MAP1B                                                                                               | 0,032352611 | -0,06208621  | 0,744 | 0,512 | 1         | 0,957877977   | 1,04397431      | 1,453125        |
| CCL28                                                                                               | 0,1159998   | -0,062145705 | 0,049 | 0,018 | 1         | 0,957838476   | 1,044017363     | 2,722222222     |
| CDH5                                                                                                | 0,8646531   | -0,062213544 | 0,024 | 0,021 | 1         | 0,957793438   | 1,044066456     | 1,142857143     |
| RAP2C                                                                                               | 0,000360074 | -0,062301019 | 0,22  | 0,07  | 1         | 0,957735366   | 1,044129763     | 3,142857143     |

Supplementary Table 2

| Differentially expressed genes_keloid-XL_comparing SC-Keloid vs. (SC-Myel, SC-Nonmyel, SC-Nonmyel2) |             |              |       |       |           |               |                 |                 |
|-----------------------------------------------------------------------------------------------------|-------------|--------------|-------|-------|-----------|---------------|-----------------|-----------------|
| gene                                                                                                | p_val       | avg_log2FC   | pct.1 | pct.2 | p_val_adj | Foldchange_UP | Foldchange_DOWN | Ratio_pct1_pct2 |
| FBXO7                                                                                               | 0,000794601 | -0,062384606 | 0,39  | 0,161 | 1         | 0,957679878   | 1,044190259     | 2,422360248     |
| RAPGEFL1                                                                                            | 0,28286347  | -0,062411421 | 0     | 0,014 | 1         | 0,957662078   | 1,044209668     | 0               |
| LRP4                                                                                                | 0,728697501 | -0,062445687 | 0,012 | 0,018 | 1         | 0,957639332   | 1,044234469     | 0,666666667     |
| SEPTIN11                                                                                            | 0,003845721 | -0,062464413 | 0,268 | 0,116 | 1         | 0,957626902   | 1,044248024     | 2,310344828     |
| CRNKL1                                                                                              | 0,001561069 | -0,062563194 | 0,146 | 0,042 | 1         | 0,957561336   | 1,044319526     | 3,476190476     |
| FAM221A                                                                                             | 0,011809073 | -0,062605091 | 0,159 | 0,063 | 1         | 0,957533528   | 1,044349854     | 2,523809524     |
| ZNF563                                                                                              | 0,89237004  | -0,062636073 | 0,012 | 0,014 | 1         | 0,957512965   | 1,044372282     | 0,857142857     |
| LYSMD3                                                                                              | 0,03953545  | -0,062636552 | 0,146 | 0,067 | 1         | 0,957512647   | 1,044372629     | 2,179104478     |
| RAD54B                                                                                              | 0,908489202 | -0,062642942 | 0,012 | 0,011 | 1         | 0,957508406   | 1,044377254     | 1,090909091     |
| SMIM27                                                                                              | 0,00093542  | -0,062655297 | 0,171 | 0,053 | 1         | 0,957500206   | 1,044386198     | 3,226415094     |
| NCKAP5                                                                                              | 0,228958629 | -0,062709519 | 0     | 0,018 | 1         | 0,95746422    | 1,044425451     | 0               |
| ZDHHC15                                                                                             | 0,228958629 | -0,062771783 | 0     | 0,018 | 1         | 0,957422899   | 1,044470527     | 0               |
| ISCA2                                                                                               | 0,068571397 | -0,062819808 | 0,098 | 0,042 | 1         | 0,957391029   | 1,044505296     | 2,333333333     |
| HELLS                                                                                               | 0,14306806  | -0,062838427 | 0,085 | 0,042 | 1         | 0,957378672   | 1,044518777     | 2,023809524     |
| TRIM45                                                                                              | 0,530989227 | -0,062907996 | 0,024 | 0,014 | 1         | 0,957332508   | 1,044569146     | 1,714285714     |
| PCDH7                                                                                               | 0,766387365 | -0,062931506 | 0,073 | 0,084 | 1         | 0,957316907   | 1,044586169     | 0,869047619     |
| SASH1                                                                                               | 0,064703286 | -0,062935522 | 0,28  | 0,161 | 1         | 0,957314242   | 1,044589077     | 1,739130435     |
| CLIP2                                                                                               | 0,120935406 | -0,062974509 | 0,183 | 0,105 | 1         | 0,957288373   | 1,044617305     | 1,742857143     |
| PNO1                                                                                                | 0,00362984  | -0,06301302  | 0,183 | 0,067 | 1         | 0,957262819   | 1,044645191     | 2,731343284     |
| RGS14                                                                                               | 0,063408785 | -0,063054169 | 0,049 | 0,014 | 1         | 0,957235516   | 1,044674987     | 3,5             |
| DNAH10OS                                                                                            | 0,89237004  | -0,063090482 | 0,012 | 0,014 | 1         | 0,957211423   | 1,044701281     | 0,857142857     |
| TRAPPC10                                                                                            | 0,174052386 | -0,06312455  | 0,159 | 0,095 | 1         | 0,957188819   | 1,044725952     | 1,673684211     |
| PIP4P1                                                                                              | 0,080598526 | -0,063131222 | 0,122 | 0,06  | 1         | 0,957184393   | 1,044730783     | 2,033333333     |
| GPD1L                                                                                               | 0,872003564 | -0,063138468 | 0,024 | 0,021 | 1         | 0,957179585   | 1,04473603      | 1,142857143     |
| TBC1D4                                                                                              | 0,710321163 | -0,063188326 | 0,024 | 0,018 | 1         | 0,957146506   | 1,044772136     | 1,333333333     |
| PEAK1                                                                                               | 0,029566525 | -0,063202205 | 0,244 | 0,126 | 1         | 0,957137299   | 1,044782187     | 1,936507937     |
| IREB2                                                                                               | 0,041697464 | -0,063214035 | 0,146 | 0,067 | 1         | 0,95712945    | 1,044790754     | 2,179104478     |
| ZMYM4                                                                                               | 0,002111413 | -0,063244182 | 0,22  | 0,084 | 1         | 0,95710945    | 1,044812587     | 2,619047619     |
| TMEM91                                                                                              | 0,10818873  | -0,063289907 | 0,073 | 0,032 | 1         | 0,957079115   | 1,044845702     | 2,28125         |
| MEOX2                                                                                               | 0,901679385 | -0,063330869 | 0,012 | 0,014 | 1         | 0,957051942   | 1,044875368     | 0,857142857     |

Supplementary Table 2

| Differentially expressed genes_keloid-XL_comparing SC-Keloid vs. (SC-Myel, SC-Nonmyel, SC-Nonmyel2) |             |              |       |       |           |               |                 |                 |
|-----------------------------------------------------------------------------------------------------|-------------|--------------|-------|-------|-----------|---------------|-----------------|-----------------|
| gene                                                                                                | p_val       | avg_log2FC   | pct.1 | pct.2 | p_val_adj | Foldchange_UP | Foldchange_DOWN | Ratio_pct1_pct2 |
| NOTCH4                                                                                              | 0,026535568 | -0,063335559 | 0,134 | 0,056 | 1         | 0,95704883    | 1,044878765     | 2,392857143     |
| PRKN                                                                                                | 0,58754085  | -0,063345313 | 0,037 | 0,025 | 1         | 0,95704236    | 1,044885829     | 1,48            |
| BIRC7                                                                                               | 0,153186787 | -0,063350076 | 0     | 0,025 | 1         | 0,9570392     | 1,044889279     | 0               |
| TBC1D24                                                                                             | 0,161331561 | -0,063440437 | 0,073 | 0,035 | 1         | 0,956979259   | 1,044954726     | 2,085714286     |
| TMEM220                                                                                             | 0,28294086  | -0,063455139 | 0,049 | 0,025 | 1         | 0,956969507   | 1,044965375     | 1,96            |
| POLI                                                                                                | 0,45192123  | -0,063511223 | 0,073 | 0,049 | 1         | 0,956932306   | 1,045005998     | 1,489795918     |
| PTPN23                                                                                              | 0,008179811 | -0,063608102 | 0,207 | 0,088 | 1         | 0,95686805    | 1,045076174     | 2,352272727     |
| CERS4                                                                                               | 0,000581823 | -0,063634527 | 0,268 | 0,098 | 1         | 0,956850523   | 1,045095316     | 2,734693878     |
| RFTN1                                                                                               | 0,832484443 | -0,06367658  | 0,024 | 0,028 | 1         | 0,956822633   | 1,04512578      | 0,857142857     |
| FER                                                                                                 | 0,110383272 | -0,0636865   | 0,183 | 0,105 | 1         | 0,956816054   | 1,045132966     | 1,742857143     |
| PSPC1                                                                                               | 0,012634206 | -0,0637241   | 0,256 | 0,119 | 1         | 0,956791116   | 1,045160206     | 2,151260504     |
| HEG1                                                                                                | 0,119915355 | -0,063826766 | 0,11  | 0,056 | 1         | 0,956723031   | 1,045234584     | 1,964285714     |
| SPNS2                                                                                               | 0,001809471 | -0,063851764 | 0,098 | 0,021 | 1         | 0,956706454   | 1,045252696     | 4,666666667     |
| TRIR                                                                                                | 0,083066436 | -0,063891514 | 0,72  | 0,46  | 1         | 0,956680095   | 1,045281495     | 1,565217391     |
| DYM                                                                                                 | 0,090623518 | -0,06389334  | 0,146 | 0,077 | 1         | 0,956678884   | 1,045282819     | 1,896103896     |
| ZNF224                                                                                              | 0,028936102 | -0,063900951 | 0,134 | 0,056 | 1         | 0,956673837   | 1,045288333     | 2,392857143     |
| CARS1                                                                                               | 0,465724189 | -0,063992327 | 0,183 | 0,137 | 1         | 0,956613246   | 1,04535454      | 1,335766423     |
| CARNS1                                                                                              | 0,58754085  | -0,063994401 | 0,037 | 0,025 | 1         | 0,956611871   | 1,045356043     | 1,48            |
| CAB39                                                                                               | 0,133207314 | -0,06403519  | 0,195 | 0,119 | 1         | 0,956584825   | 1,045385599     | 1,638655462     |
| ORMDL1                                                                                              | 0,005533809 | -0,0640533   | 0,451 | 0,228 | 1         | 0,956572817   | 1,045398721     | 1,978070175     |
| ZNF594                                                                                              | 0,872003564 | -0,064122579 | 0,024 | 0,021 | 1         | 0,956526883   | 1,045448923     | 1,142857143     |
| CHST9                                                                                               | 0,85248313  | -0,064198587 | 0,037 | 0,032 | 1         | 0,95647649    | 1,045504004     | 1,15625         |
| COBLL1                                                                                              | 0,300515611 | -0,064220682 | 0,11  | 0,07  | 1         | 0,956461842   | 1,045520016     | 1,571428571     |
| NR3C1                                                                                               | 0,114398513 | -0,064229842 | 0,646 | 0,425 | 1         | 0,956455769   | 1,045526655     | 1,52            |
| ZFYVE16                                                                                             | 0,001075776 | -0,064246307 | 0,39  | 0,175 | 1         | 0,956444853   | 1,045538586     | 2,228571429     |
| DNAJC27-AS1                                                                                         | 0,908489202 | -0,064291451 | 0,012 | 0,011 | 1         | 0,956414925   | 1,045571304     | 1,090909091     |
| ATF5                                                                                                | 0,007909976 | -0,064296389 | 0,134 | 0,046 | 1         | 0,956411651   | 1,045574883     | 2,913043478     |
| PNPLA7                                                                                              | 0,186763581 | -0,064298045 | 0     | 0,021 | 1         | 0,956410554   | 1,045576083     | 0               |
| ZNF736                                                                                              | 0,60411013  | -0,064324412 | 0,012 | 0,021 | 1         | 0,956393075   | 1,045595192     | 0,571428571     |
| GAN                                                                                                 | 0,875682986 | -0,064338699 | 0,024 | 0,021 | 1         | 0,956383603   | 1,045605546     | 1,142857143     |

Supplementary Table 2

| Differentially expressed genes_keloid-XL_comparing SC-Keloid vs. (SC-Myel, SC-Nonmyel, SC-Nonmyel2) |             |              |       |       |             |               |                 |                 |
|-----------------------------------------------------------------------------------------------------|-------------|--------------|-------|-------|-------------|---------------|-----------------|-----------------|
| gene                                                                                                | p_val       | avg_log2FC   | pct.1 | pct.2 | p_val_adj   | Foldchange_UP | Foldchange_DOWN | Ratio_pct1_pct2 |
| IQCB1                                                                                               | 0,194034529 | -0,06435239  | 0,085 | 0,046 | 1           | 0,956374527   | 1,045615469     | 1,847826087     |
| MED12                                                                                               | 0,146677521 | -0,06437595  | 0,11  | 0,06  | 1           | 0,956358909   | 1,045632545     | 1,833333333     |
| ZNF37A                                                                                              | 0,041290634 | -0,064454698 | 0,122 | 0,053 | 1           | 0,956306709   | 1,045689621     | 2,301886792     |
| TMEM62                                                                                              | 0,19199525  | -0,064463066 | 0,049 | 0,021 | 1           | 0,956301162   | 1,045695686     | 2,333333333     |
| EPHA5                                                                                               | 0,228958629 | -0,064497644 | 0     | 0,018 | 1           | 0,956278242   | 1,04572075      | 0               |
| STAC2                                                                                               | 0,228958629 | -0,064627172 | 0     | 0,018 | 1           | 0,956192389   | 1,045814641     | 0               |
| SEMA6C                                                                                              | 0,489167971 | -0,064647946 | 0,049 | 0,032 | 1           | 0,956178621   | 1,0458297       | 1,53125         |
| GPR157                                                                                              | 0,879365097 | -0,064731481 | 0,024 | 0,021 | 1           | 0,956123258   | 1,045890257     | 1,142857143     |
| SLC22A31                                                                                            | 0,28286347  | -0,064737842 | 0     | 0,014 | 1           | 0,956119042   | 1,045894869     | 0               |
| TEX2                                                                                                | 0,016683683 | -0,06478878  | 0,22  | 0,102 | 1           | 0,956085285   | 1,045931797     | 2,156862745     |
| NUP35                                                                                               | 0,333233926 | -0,06490337  | 0,061 | 0,035 | 1           | 0,956009348   | 1,046014876     | 1,742857143     |
| BCL2A1                                                                                              | 0,044226311 | -0,06493864  | 0,037 | 0,007 | 1           | 0,955985976   | 1,046040449     | 5,285714286     |
| AC016831.7                                                                                          | 0,228958629 | -0,064941053 | 0     | 0,018 | 1           | 0,955984377   | 1,046042199     | 0               |
| DDX59                                                                                               | 0,279370565 | -0,064970202 | 0,049 | 0,025 | 1           | 0,955965063   | 1,046063333     | 1,96            |
| NOCT                                                                                                | 0,49683311  | -0,064973423 | 0,012 | 0,025 | 1           | 0,955962928   | 1,04606567      | 0,48            |
| ZNF512B                                                                                             | 0,099403001 | -0,064990436 | 0,098 | 0,046 | 1           | 0,955951655   | 1,046078005     | 2,130434783     |
| STAT5A                                                                                              | 0,724120181 | -0,065007998 | 0,049 | 0,039 | 1           | 0,955940018   | 1,046090739     | 1,256410256     |
| KANTR                                                                                               | 0,444731778 | -0,065058444 | 0,073 | 0,049 | 1           | 0,955906593   | 1,046127318     | 1,489795918     |
| SNX18                                                                                               | 0,047382204 | -0,065112844 | 0,098 | 0,039 | 1           | 0,955870549   | 1,046166765     | 2,512820513     |
| FLRT2                                                                                               | 0,28286347  | -0,065250209 | 0     | 0,014 | 1           | 0,955779541   | 1,04626638      | 0               |
| TNFSF10                                                                                             | 0,868326909 | -0,065267268 | 0,024 | 0,021 | 1           | 0,955768239   | 1,046278752     | 1,142857143     |
| AC092171.4                                                                                          | 0,35350329  | -0,065308617 | 0     | 0,011 | 1           | 0,955740846   | 1,046308739     | 0               |
| ASAP3                                                                                               | 0,228958629 | -0,065347396 | 0     | 0,018 | 1           | 0,955715157   | 1,046336864     | 0               |
| TDRP                                                                                                | 0,994113727 | -0,065409078 | 0,037 | 0,035 | 1           | 0,955674297   | 1,046381601     | 1,057142857     |
| L2HGDH                                                                                              | 0,89237004  | -0,065455431 | 0,012 | 0,014 | 1           | 0,955643592   | 1,046415221     | 0,857142857     |
| PPARG                                                                                               | 0,970105473 | -0,065471468 | 0,024 | 0,025 | 1           | 0,955632969   | 1,046426853     | 0,96            |
| UHMK1                                                                                               | 9,58695E-06 | -0,065493248 | 0,293 | 0,084 | 0,202294308 | 0,955618542   | 1,046442651     | 3,488095238     |
| KCNN3                                                                                               | 0,879365097 | -0,065523868 | 0,024 | 0,021 | 1           | 0,95559826    | 1,046464861     | 1,142857143     |
| FLVCR1-DT                                                                                           | 0,879365097 | -0,065622843 | 0,024 | 0,021 | 1           | 0,955532704   | 1,046536655     | 1,142857143     |
| SOX9                                                                                                | 0,069438782 | -0,065670626 | 0,061 | 0,021 | 1           | 0,955501057   | 1,046571318     | 2,904761905     |

Supplementary Table 2

| Differentially expressed genes_keloid-XL_comparing SC-Keloid vs. (SC-Myel, SC-Nonmyel, SC-Nonmyel2) |             |              |       |       |           |               |                 |                 |
|-----------------------------------------------------------------------------------------------------|-------------|--------------|-------|-------|-----------|---------------|-----------------|-----------------|
| gene                                                                                                | p_val       | avg_log2FC   | pct.1 | pct.2 | p_val_adj | Foldchange_UP | Foldchange_DOWN | Ratio_pct1_pct2 |
| SBNO2                                                                                               | 0,000524966 | -0,065718329 | 0,268 | 0,098 | 1         | 0,955469464   | 1,046605923     | 2,734693878     |
| PLPP5                                                                                               | 0,011558487 | -0,065755638 | 0,195 | 0,084 | 1         | 0,955444755   | 1,046632989     | 2,321428571     |
| SMOX                                                                                                | 0,233674416 | -0,065774899 | 0,183 | 0,119 | 1         | 0,955431999   | 1,046646963     | 1,537815126     |
| ZBTB11-AS1                                                                                          | 0,597173043 | -0,065796287 | 0,012 | 0,021 | 1         | 0,955417835   | 1,04666248      | 0,571428571     |
| ITM2B                                                                                               | 0,80286652  | -0,065898857 | 0,939 | 0,828 | 1         | 0,955349911   | 1,046736896     | 1,134057971     |
| CBLL1                                                                                               | 0,067213776 | -0,065898965 | 0,098 | 0,042 | 1         | 0,955349839   | 1,046736974     | 2,333333333     |
| OPCML                                                                                               | 0,35350329  | -0,065912431 | 0     | 0,011 | 1         | 0,955340922   | 1,046746744     | 0               |
| KANK3                                                                                               | 0,126161321 | -0,065915736 | 0     | 0,028 | 1         | 0,955338734   | 1,046749142     | 0               |
| WASF1                                                                                               | 0,597173043 | -0,065973451 | 0,012 | 0,021 | 1         | 0,955300516   | 1,046791018     | 0,571428571     |
| FBXL12                                                                                              | 0,003437992 | -0,065980735 | 0,171 | 0,06  | 1         | 0,955295693   | 1,046796303     | 2,85            |
| AURKB                                                                                               | 0,710321163 | -0,065982699 | 0,024 | 0,018 | 1         | 0,955294392   | 1,046797729     | 1,333333333     |
| TTC21A                                                                                              | 0,908489202 | -0,066205777 | 0,012 | 0,011 | 1         | 0,95514669    | 1,046959603     | 1,090909091     |
| HCCS                                                                                                | 0,085702429 | -0,066245432 | 0,122 | 0,06  | 1         | 0,955120437   | 1,046988381     | 2,033333333     |
| LDB2                                                                                                | 0,407171737 | -0,066248443 | 0,012 | 0,028 | 1         | 0,955118444   | 1,046990566     | 0,428571429     |
| TRPV1                                                                                               | 0,383074885 | -0,066370775 | 0,049 | 0,028 | 1         | 0,955037458   | 1,047079349     | 1,75            |
| DCST2                                                                                               | 0,35350329  | -0,06639015  | 0     | 0,011 | 1         | 0,955024633   | 1,04709341      | 0               |
| CDH13                                                                                               | 0,002228822 | -0,066407607 | 0,268 | 0,109 | 1         | 0,955013077   | 1,047106081     | 2,458715596     |
| G2E3                                                                                                | 0,374756667 | -0,066436394 | 0,073 | 0,046 | 1         | 0,954994021   | 1,047126974     | 1,586956522     |
| ZNF267                                                                                              | 0,286845168 | -0,06649518  | 0,171 | 0,116 | 1         | 0,954955109   | 1,047169643     | 1,474137931     |
| NAA35                                                                                               | 0,046156346 | -0,066522004 | 0,11  | 0,046 | 1         | 0,954937353   | 1,047189113     | 2,391304348     |
| NAXD                                                                                                | 0,005183771 | -0,066524273 | 0,159 | 0,056 | 1         | 0,954935851   | 1,04719076      | 2,839285714     |
| IMMP2L                                                                                              | 0,913549329 | -0,066573825 | 0,037 | 0,039 | 1         | 0,954903053   | 1,047226728     | 0,948717949     |
| INIP                                                                                                | 0,038650978 | -0,066635525 | 0,159 | 0,074 | 1         | 0,954862215   | 1,047271516     | 2,148648649     |
| ZGRF1                                                                                               | 0,848859315 | -0,066753093 | 0,024 | 0,028 | 1         | 0,954784405   | 1,047356864     | 0,857142857     |
| GSTO2                                                                                               | 0,89702294  | -0,06678996  | 0,012 | 0,014 | 1         | 0,954760007   | 1,047383628     | 0,857142857     |
| H1-4                                                                                                | 0,069488939 | -0,066813431 | 0,098 | 0,042 | 1         | 0,954744474   | 1,047400669     | 2,333333333     |
| FBXL19                                                                                              | 0,253953805 | -0,066820109 | 0,061 | 0,032 | 1         | 0,954740054   | 1,047405517     | 1,90625         |
| IL1RAPL2                                                                                            | 0,095652734 | -0,066897183 | 0,11  | 0,053 | 1         | 0,95468905    | 1,047461475     | 2,075471698     |
| MED27                                                                                               | 0,000764801 | -0,066922144 | 0,183 | 0,056 | 1         | 0,954672533   | 1,047479597     | 3,267857143     |
| SAA1                                                                                                | 0,908489202 | -0,066972379 | 0,012 | 0,011 | 1         | 0,954639291   | 1,047516072     | 1,090909091     |

Supplementary Table 2

| Differentially expressed genes_keloid-XL_comparing SC-Keloid vs. (SC-Myel, SC-Nonmyel, SC-Nonmyel2) |             |              |       |       |           |               |                 |                 |
|-----------------------------------------------------------------------------------------------------|-------------|--------------|-------|-------|-----------|---------------|-----------------|-----------------|
| gene                                                                                                | p_val       | avg_log2FC   | pct.1 | pct.2 | p_val_adj | Foldchange_UP | Foldchange_DOWN | Ratio_pct1_pct2 |
| EPOR                                                                                                | 0,530989227 | -0,067008653 | 0,024 | 0,014 | 1         | 0,954615289   | 1,04754241      | 1,714285714     |
| SULT1C4                                                                                             | 0,351112297 | -0,067062762 | 0,024 | 0,011 | 1         | 0,954579486   | 1,047581699     | 2,181818182     |
| ATAD3C                                                                                              | 0,861512651 | -0,067080795 | 0,037 | 0,032 | 1         | 0,954567554   | 1,047594793     | 1,15625         |
| CBWD3                                                                                               | 0,065097498 | -0,067171941 | 0,11  | 0,049 | 1         | 0,954507249   | 1,04766098      | 2,244897959     |
| SLC35F5                                                                                             | 0,01127095  | -0,06721704  | 0,134 | 0,049 | 1         | 0,954477411   | 1,047693731     | 2,734693878     |
| IDH3A                                                                                               | 0,001803548 | -0,067217473 | 0,232 | 0,088 | 1         | 0,954477125   | 1,047694045     | 2,636363636     |
| AP001437.1                                                                                          | 0,908489202 | -0,067278189 | 0,012 | 0,011 | 1         | 0,954436956   | 1,047738138     | 1,090909091     |
| C18orf54                                                                                            | 0,28294086  | -0,067342038 | 0,049 | 0,025 | 1         | 0,954394717   | 1,047784509     | 1,96            |
| DNM2                                                                                                | 0,004084452 | -0,067352777 | 0,28  | 0,123 | 1         | 0,954387613   | 1,047792308     | 2,276422764     |
| NPIP15                                                                                              | 0,914907082 | -0,067353553 | 0,061 | 0,063 | 1         | 0,954387099   | 1,047792873     | 0,968253968     |
| YPEL1                                                                                               | 0,156394947 | -0,067387724 | 0,073 | 0,035 | 1         | 0,954364494   | 1,04781769      | 2,085714286     |
| GYPC                                                                                                | 0,490935921 | -0,067406981 | 0,012 | 0,025 | 1         | 0,954351756   | 1,047831676     | 0,48            |
| ZBTB46                                                                                              | 0,97057504  | -0,067427849 | 0,037 | 0,035 | 1         | 0,954337951   | 1,047846833     | 1,057142857     |
| FBXL14                                                                                              | 0,107265343 | -0,067472904 | 0,037 | 0,011 | 1         | 0,954308148   | 1,047879557     | 3,363636364     |
| SUMO4                                                                                               | 0,858500739 | -0,067507026 | 0,037 | 0,032 | 1         | 0,954285577   | 1,047904342     | 1,15625         |
| IFT172                                                                                              | 0,71891322  | -0,067511479 | 0,037 | 0,028 | 1         | 0,954282632   | 1,047907576     | 1,321428571     |
| STIM2                                                                                               | 0,384919105 | -0,067548696 | 0,085 | 0,056 | 1         | 0,954258015   | 1,047934609     | 1,517857143     |
| ZFP2                                                                                                | 0,28286347  | -0,067581834 | 0     | 0,014 | 1         | 0,954236096   | 1,04795868      | 0               |
| TTC14                                                                                               | 0,062545503 | -0,067633069 | 0,183 | 0,095 | 1         | 0,954202209   | 1,047995898     | 1,926315789     |
| RNF145                                                                                              | 0,004916735 | -0,067656092 | 0,512 | 0,26  | 1         | 0,954186981   | 1,048012622     | 1,969230769     |
| PIBF1                                                                                               | 0,033103213 | -0,067668358 | 0,171 | 0,081 | 1         | 0,954178869   | 1,048021532     | 2,111111111     |
| POLD3                                                                                               | 0,252475247 | -0,067807839 | 0,061 | 0,032 | 1         | 0,954086623   | 1,048122861     | 1,90625         |
| MICA                                                                                                | 0,008891596 | -0,067814473 | 0,293 | 0,14  | 1         | 0,954082235   | 1,04812768      | 2,092857143     |
| KDM3B                                                                                               | 0,163338831 | -0,067894399 | 0,073 | 0,035 | 1         | 0,95402938    | 1,048185749     | 2,085714286     |
| FASTKD5                                                                                             | 0,872003564 | -0,067984558 | 0,024 | 0,021 | 1         | 0,953969761   | 1,048251255     | 1,142857143     |
| GP1BB                                                                                               | 0,607591802 | -0,068028577 | 0,012 | 0,021 | 1         | 0,953940655   | 1,04828324      | 0,571428571     |
| HES5                                                                                                | 0,89702294  | -0,06813919  | 0,012 | 0,014 | 1         | 0,953867518   | 1,048363616     | 0,857142857     |
| ADM5                                                                                                | 0,699214153 | -0,068145354 | 0,024 | 0,018 | 1         | 0,953863442   | 1,048368095     | 1,333333333     |
| SLC1A4                                                                                              | 0,336686163 | -0,068155763 | 0,061 | 0,035 | 1         | 0,95385656    | 1,048375659     | 1,742857143     |
| MMD                                                                                                 | 0,731878941 | -0,068240757 | 0,049 | 0,039 | 1         | 0,953800367   | 1,048437424     | 1,256410256     |



Supplementary Table 2

| Differentially expressed genes_keloid-XL_comparing SC-Keloid vs. (SC-Myel, SC-Nonmyel, SC-Nonmyel2) |             |              |       |       |           |               |                 |                 |
|-----------------------------------------------------------------------------------------------------|-------------|--------------|-------|-------|-----------|---------------|-----------------|-----------------|
| gene                                                                                                | p_val       | avg_log2FC   | pct.1 | pct.2 | p_val_adj | Foldchange_UP | Foldchange_DOWN | Ratio_pct1_pct2 |
| LINC00857                                                                                           | 0,35350329  | -0,068268228 | 0     | 0,011 | 1         | 0,953782205   | 1,048457388     | 0               |
| ANKRD23                                                                                             | 0,728697501 | -0,068302001 | 0,012 | 0,018 | 1         | 0,953759878   | 1,048481932     | 0,666666667     |
| CLEC2D                                                                                              | 0,718963318 | -0,06837415  | 0,049 | 0,039 | 1         | 0,953712182   | 1,048534368     | 1,256410256     |
| AP5S1                                                                                               | 0,710321163 | -0,068374867 | 0,024 | 0,018 | 1         | 0,953711708   | 1,048534889     | 1,333333333     |
| PCDHB16                                                                                             | 0,728697501 | -0,068421133 | 0,012 | 0,018 | 1         | 0,953681124   | 1,048568515     | 0,666666667     |
| ANKS1B                                                                                              | 0,728697501 | -0,068453888 | 0,012 | 0,018 | 1         | 0,953659472   | 1,048592322     | 0,666666667     |
| PA2G4                                                                                               | 0,015567401 | -0,068478395 | 0,61  | 0,33  | 1         | 0,953643272   | 1,048610135     | 1,848484848     |
| ZXDA                                                                                                | 0,732741497 | -0,068484891 | 0,012 | 0,018 | 1         | 0,953638978   | 1,048614856     | 0,666666667     |
| PDK1                                                                                                | 0,977137258 | -0,068493798 | 0,024 | 0,025 | 1         | 0,95363309    | 1,048621331     | 0,96            |
| KCNB1                                                                                               | 0,908489202 | -0,06849697  | 0,012 | 0,011 | 1         | 0,953630993   | 1,048623636     | 1,090909091     |
| DGKG                                                                                                | 0,728697501 | -0,068502589 | 0,012 | 0,018 | 1         | 0,953627279   | 1,04862772      | 0,666666667     |
| CTNS                                                                                                | 0,071972241 | -0,068508597 | 0,073 | 0,028 | 1         | 0,953623308   | 1,048632088     | 2,607142857     |
| ZNF217                                                                                              | 0,035456067 | -0,068536511 | 0,159 | 0,074 | 1         | 0,953604857   | 1,048652377     | 2,148648649     |
| RAB3IL1                                                                                             | 0,619535667 | -0,068542678 | 0,024 | 0,035 | 1         | 0,953600781   | 1,04865686      | 0,685714286     |
| GJA4                                                                                                | 0,649511996 | -0,068594882 | 0,012 | 0,007 | 1         | 0,953566276   | 1,048694806     | 1,714285714     |
| H2AC16                                                                                              | 0,72040908  | -0,068656796 | 0,024 | 0,032 | 1         | 0,953525353   | 1,048739812     | 0,75            |
| ZNF322                                                                                              | 0,109461223 | -0,068710081 | 0,183 | 0,105 | 1         | 0,953490136   | 1,048778548     | 1,742857143     |
| E2F4                                                                                                | 0,017052678 | -0,06872624  | 0,195 | 0,088 | 1         | 0,953479457   | 1,048790294     | 2,215909091     |
| HEPACAM                                                                                             | 0,35350329  | -0,068734303 | 0     | 0,011 | 1         | 0,953474128   | 1,048796156     | 0               |
| DUSP22                                                                                              | 0,944403545 | -0,068744699 | 0,049 | 0,046 | 1         | 0,953467257   | 1,048803713     | 1,065217391     |
| PGBD5                                                                                               | 0,28286347  | -0,068762085 | 0     | 0,014 | 1         | 0,953455767   | 1,048816353     | 0               |
| ACTR3C                                                                                              | 0,35350329  | -0,068791739 | 0     | 0,011 | 1         | 0,953436169   | 1,048837911     | 0               |
| CDH3                                                                                                | 0,35350329  | -0,068794318 | 0     | 0,011 | 1         | 0,953434465   | 1,048839786     | 0               |
| ITPKC                                                                                               | 0,44116166  | -0,068807435 | 0,073 | 0,049 | 1         | 0,953425796   | 1,048849322     | 1,489795918     |
| AC007364.1                                                                                          | 0,412180116 | -0,068873672 | 0,012 | 0,028 | 1         | 0,953382024   | 1,048897478     | 0,428571429     |
| AARS2                                                                                               | 0,58754085  | -0,068930116 | 0,037 | 0,025 | 1         | 0,953344724   | 1,048938516     | 1,48            |
| VPS11                                                                                               | 0,071833843 | -0,068958662 | 0,085 | 0,035 | 1         | 0,953325861   | 1,048959271     | 2,428571429     |
| ENOX2                                                                                               | 0,875682986 | -0,06898258  | 0,024 | 0,021 | 1         | 0,953310056   | 1,048976661     | 1,142857143     |
| THBS4                                                                                               | 0,977137258 | -0,069033459 | 0,024 | 0,025 | 1         | 0,953276437   | 1,049013656     | 0,96            |
| ZNF789                                                                                              | 0,20009151  | -0,069050676 | 0,037 | 0,014 | 1         | 0,95326506    | 1,049026175     | 2,642857143     |

Supplementary Table 2

| Differentially expressed genes_keloid-XL_comparing SC-Keloid vs. (SC-Myel, SC-Nonmyel, SC-Nonmyel2) |             |              |       |       |           |               |                 |                 |
|-----------------------------------------------------------------------------------------------------|-------------|--------------|-------|-------|-----------|---------------|-----------------|-----------------|
| gene                                                                                                | p_val       | avg_log2FC   | pct.1 | pct.2 | p_val_adj | Foldchange_UP | Foldchange_DOWN | Ratio_pct1_pct2 |
| MLKL                                                                                                | 0,597173043 | -0,069128016 | 0,012 | 0,021 | 1         | 0,953213959   | 1,049082413     | 0,571428571     |
| SLC25A21-AS1                                                                                        | 0,728697501 | -0,069130264 | 0,012 | 0,018 | 1         | 0,953212474   | 1,049084048     | 0,666666667     |
| SNRNP48                                                                                             | 0,298163995 | -0,069195773 | 0,11  | 0,07  | 1         | 0,953169192   | 1,049131685     | 1,571428571     |
| GTPBP1                                                                                              | 0,058838927 | -0,069274465 | 0,159 | 0,081 | 1         | 0,953117203   | 1,049188911     | 1,962962963     |
| SLC28A2                                                                                             | 0,35350329  | -0,069349578 | 0     | 0,011 | 1         | 0,953067581   | 1,049243538     | 0               |
| DDAH1                                                                                               | 0,043725751 | -0,069351478 | 0,098 | 0,039 | 1         | 0,953066325   | 1,04924492      | 2,512820513     |
| ARFIP1                                                                                              | 0,004108559 | -0,06936768  | 0,28  | 0,123 | 1         | 0,953055622   | 1,049256703     | 2,276422764     |
| EFNB1                                                                                               | 0,088213869 | -0,069432489 | 0,11  | 0,053 | 1         | 0,95301281    | 1,049303839     | 2,075471698     |
| KCNJ10                                                                                              | 0,186763581 | -0,069599605 | 0     | 0,021 | 1         | 0,952902423   | 1,049425393     | 0               |
| TAF5L                                                                                               | 0,721540167 | -0,069615804 | 0,049 | 0,039 | 1         | 0,952891724   | 1,049437176     | 1,256410256     |
| PDE4D                                                                                               | 0,156528875 | -0,069641303 | 0,11  | 0,06  | 1         | 0,952874882   | 1,049455725     | 1,833333333     |
| NGLY1                                                                                               | 0,558829003 | -0,069643589 | 0,098 | 0,074 | 1         | 0,952873372   | 1,049457388     | 1,324324324     |
| IKBKB                                                                                               | 0,058274777 | -0,069658791 | 0,171 | 0,088 | 1         | 0,952863331   | 1,049468447     | 1,943181818     |
| MPDZ                                                                                                | 0,035405735 | -0,069680155 | 0,207 | 0,105 | 1         | 0,952849221   | 1,049483988     | 1,971428571     |
| RELCH                                                                                               | 0,218350219 | -0,069680188 | 0,073 | 0,039 | 1         | 0,952849199   | 1,049484012     | 1,871794872     |
| ELP1                                                                                                | 0,607015595 | -0,069752685 | 0,049 | 0,035 | 1         | 0,952801319   | 1,049536751     | 1,4             |
| ULBP3                                                                                               | 0,89237004  | -0,069772793 | 0,012 | 0,014 | 1         | 0,952788039   | 1,049551379     | 0,857142857     |
| PRKCD                                                                                               | 0,1002946   | -0,069780985 | 0,134 | 0,07  | 1         | 0,952782628   | 1,049557339     | 1,914285714     |
| ADAMTSL4                                                                                            | 0,28286347  | -0,069786699 | 0     | 0,014 | 1         | 0,952778855   | 1,049561496     | 0               |
| TIPARP-AS1                                                                                          | 0,35350329  | -0,069895841 | 0     | 0,011 | 1         | 0,952706779   | 1,049640899     | 0               |
| HIRIP3                                                                                              | 0,314265819 | -0,069929826 | 0,085 | 0,053 | 1         | 0,952684336   | 1,049665626     | 1,603773585     |
| PIGG                                                                                                | 0,052360184 | -0,069963465 | 0,159 | 0,077 | 1         | 0,952662123   | 1,049690101     | 2,064935065     |
| ZNF300                                                                                              | 0,374766234 | -0,070095527 | 0,049 | 0,028 | 1         | 0,952574922   | 1,049786192     | 1,75            |
| MRGPRF                                                                                              | 0,35350329  | -0,07012396  | 0     | 0,011 | 1         | 0,952556149   | 1,049806882     | 0               |
| CTH                                                                                                 | 0,500826907 | -0,070125727 | 0,049 | 0,032 | 1         | 0,952554982   | 1,049808168     | 1,53125         |
| TMEM263                                                                                             | 0,012530213 | -0,070139062 | 0,378 | 0,196 | 1         | 0,952546177   | 1,049817871     | 1,928571429     |
| NAA40                                                                                               | 0,017691584 | -0,070139644 | 0,061 | 0,014 | 1         | 0,952545793   | 1,049818295     | 4,357142857     |
| TMCC1                                                                                               | 8,889E-05   | -0,070296281 | 0,244 | 0,074 | 1         | 0,952442378   | 1,049932282     | 3,297297297     |
| ING4                                                                                                | 0,000778492 | -0,070377646 | 0,183 | 0,056 | 1         | 0,952388664   | 1,049991498     | 3,267857143     |
| ZRSR2                                                                                               | 0,096799511 | -0,070410561 | 0,134 | 0,07  | 1         | 0,952366936   | 1,050015453     | 1,914285714     |

Supplementary Table 2

| Differentially expressed genes_keloid-XL_comparing SC-Keloid vs. (SC-Myel, SC-Nonmyel, SC-Nonmyel2) |             |              |       |       |           |               |                 |                 |
|-----------------------------------------------------------------------------------------------------|-------------|--------------|-------|-------|-----------|---------------|-----------------|-----------------|
| gene                                                                                                | p_val       | avg_log2FC   | pct.1 | pct.2 | p_val_adj | Foldchange_UP | Foldchange_DOWN | Ratio_pct1_pct2 |
| RCCD1                                                                                               | 0,723404008 | -0,070434779 | 0,024 | 0,032 | 1         | 0,952350949   | 1,05003308      | 0,75            |
| DENND5A                                                                                             | 0,051903844 | -0,070437399 | 0,354 | 0,204 | 1         | 0,952349219   | 1,050034987     | 1,735294118     |
| ATXN7L1                                                                                             | 0,169332785 | -0,070449779 | 0,11  | 0,06  | 1         | 0,952341047   | 1,050043998     | 1,833333333     |
| DRAM1                                                                                               | 0,224477053 | -0,070469707 | 0,073 | 0,039 | 1         | 0,952327893   | 1,050058502     | 1,871794872     |
| GNL3                                                                                                | 0,022438926 | -0,070505763 | 0,415 | 0,232 | 1         | 0,952304092   | 1,050084746     | 1,788793103     |
| CAMK2G                                                                                              | 0,062283647 | -0,070520797 | 0,11  | 0,049 | 1         | 0,952294169   | 1,050095688     | 2,244897959     |
| PRRT1                                                                                               | 0,796613111 | -0,07052602  | 0,073 | 0,063 | 1         | 0,952290721   | 1,05009949      | 1,158730159     |
| ISOC1                                                                                               | 0,07286384  | -0,070564214 | 0,085 | 0,035 | 1         | 0,95226551    | 1,050127291     | 2,428571429     |
| LTV1                                                                                                | 0,004868806 | -0,070568814 | 0,159 | 0,056 | 1         | 0,952262474   | 1,050130639     | 2,839285714     |
| PLAU                                                                                                | 0,258558337 | -0,070585711 | 0,085 | 0,049 | 1         | 0,952251321   | 1,050142938     | 1,734693878     |
| SYPL2                                                                                               | 0,728697501 | -0,07059779  | 0,012 | 0,018 | 1         | 0,952243348   | 1,05015173      | 0,666666667     |
| USPL1                                                                                               | 0,137322936 | -0,070632589 | 0,134 | 0,074 | 1         | 0,952220379   | 1,050177062     | 1,810810811     |
| SLC4A2                                                                                              | 0,002366009 | -0,070658853 | 0,329 | 0,144 | 1         | 0,952203045   | 1,05019618      | 2,284722222     |
| PIR                                                                                                 | 0,126161321 | -0,070661498 | 0     | 0,028 | 1         | 0,952201299   | 1,050198105     | 0               |
| SLC25A28                                                                                            | 0,029393836 | -0,070715765 | 0,159 | 0,07  | 1         | 0,952165483   | 1,050237609     | 2,271428571     |
| PGF                                                                                                 | 0,07141129  | -0,070834902 | 0,073 | 0,028 | 1         | 0,952086856   | 1,050324341     | 2,607142857     |
| NEMP1                                                                                               | 0,732741497 | -0,070968533 | 0,012 | 0,018 | 1         | 0,951998672   | 1,050421633     | 0,666666667     |
| EFR3B                                                                                               | 0,496145732 | -0,070975803 | 0,049 | 0,032 | 1         | 0,951993876   | 1,050426926     | 1,53125         |
| MAP3K20                                                                                             | 0,346467368 | -0,071087941 | 0,098 | 0,063 | 1         | 0,951919881   | 1,050508577     | 1,555555556     |
| NAPRT                                                                                               | 0,001655568 | -0,071142795 | 0,232 | 0,088 | 1         | 0,951883688   | 1,05054852      | 2,636363636     |
| LYG2                                                                                                | 0,35350329  | -0,071308721 | 0     | 0,011 | 1         | 0,951774218   | 1,050669351     | 0               |
| SNAPC3                                                                                              | 0,832484443 | -0,071361168 | 0,024 | 0,028 | 1         | 0,951739618   | 1,050707548     | 0,857142857     |
| CEP85                                                                                               | 0,597173043 | -0,071446472 | 0,012 | 0,021 | 1         | 0,951683345   | 1,050769676     | 0,571428571     |
| WRN                                                                                                 | 0,541045139 | -0,071547084 | 0,085 | 0,063 | 1         | 0,951616978   | 1,050842958     | 1,349206349     |
| CD22                                                                                                | 0,186763581 | -0,071584562 | 0     | 0,021 | 1         | 0,951592257   | 1,050870257     | 0               |
| PHKG2                                                                                               | 0,029887845 | -0,071678    | 0,11  | 0,042 | 1         | 0,951530628   | 1,050938321     | 2,619047619     |
| GPR161                                                                                              | 0,147315828 | -0,071678523 | 0,085 | 0,042 | 1         | 0,951530283   | 1,050938702     | 2,023809524     |
| AKAP6                                                                                               | 0,85248313  | -0,071779838 | 0,037 | 0,032 | 1         | 0,951463463   | 1,051012508     | 1,15625         |
| TTN-AS1                                                                                             | 0,721540167 | -0,071789412 | 0,049 | 0,039 | 1         | 0,951457149   | 1,051019482     | 1,256410256     |
| PSPN                                                                                                | 0,351112297 | -0,071860135 | 0,024 | 0,011 | 1         | 0,951410509   | 1,051071006     | 2,181818182     |

Supplementary Table 2

| Differentially expressed genes_keloid-XL_comparing SC-Keloid vs. (SC-Myel, SC-Nonmyel, SC-Nonmyel2) |             |              |       |       |           |               |                 |                 |
|-----------------------------------------------------------------------------------------------------|-------------|--------------|-------|-------|-----------|---------------|-----------------|-----------------|
| gene                                                                                                | p_val       | avg_log2FC   | pct.1 | pct.2 | p_val_adj | Foldchange_UP | Foldchange_DOWN | Ratio_pct1_pct2 |
| RNF144A                                                                                             | 0,581784514 | -0,071960636 | 0,037 | 0,025 | 1         | 0,951344233   | 1,051144228     | 1,48            |
| RSAD1                                                                                               | 0,030581591 | -0,072026245 | 0,122 | 0,049 | 1         | 0,951300971   | 1,051192032     | 2,489795918     |
| TWIST1                                                                                              | 0,728697501 | -0,072031181 | 0,012 | 0,018 | 1         | 0,951297715   | 1,051195629     | 0,666666667     |
| SQLE                                                                                                | 0,00919454  | -0,072039789 | 0,341 | 0,172 | 1         | 0,951292039   | 1,051201901     | 1,98255814      |
| RAB43                                                                                               | 0,070815804 | -0,072057351 | 0,085 | 0,035 | 1         | 0,95128046    | 1,051214697     | 2,428571429     |
| TCEANC2                                                                                             | 0,728697501 | -0,072073008 | 0,012 | 0,018 | 1         | 0,951270136   | 1,051226105     | 0,666666667     |
| MIB1                                                                                                | 0,020873098 | -0,072082616 | 0,293 | 0,151 | 1         | 0,951263801   | 1,051233106     | 1,940397351     |
| PPM1F                                                                                               | 0,107481862 | -0,072165413 | 0,159 | 0,088 | 1         | 0,951209209   | 1,051293439     | 1,806818182     |
| RALGAPA1                                                                                            | 0,011744536 | -0,072185215 | 0,293 | 0,14  | 1         | 0,951196153   | 1,051307869     | 2,092857143     |
| AVIL                                                                                                | 0,153186787 | -0,072226555 | 0     | 0,025 | 1         | 0,951168897   | 1,051337994     | 0               |
| PMM2                                                                                                | 0,045690197 | -0,07223096  | 0,085 | 0,032 | 1         | 0,951165993   | 1,051341204     | 2,65625         |
| CEP72                                                                                               | 0,228958629 | -0,072241103 | 0     | 0,018 | 1         | 0,951159305   | 1,051348596     | 0               |
| TTC9                                                                                                | 0,153186787 | -0,072268273 | 0     | 0,025 | 1         | 0,951141393   | 1,051368396     | 0               |
| SSH1                                                                                                | 0,010966931 | -0,072282137 | 0,232 | 0,105 | 1         | 0,951132253   | 1,051378499     | 2,20952381      |
| NOG                                                                                                 | 0,316484073 | -0,072337418 | 0,037 | 0,018 | 1         | 0,951095808   | 1,051418786     | 2,055555556     |
| NUP107                                                                                              | 0,099403001 | -0,072338295 | 0,098 | 0,046 | 1         | 0,95109523    | 1,051419426     | 2,130434783     |
| PEX5L                                                                                               | 0,153186787 | -0,072407908 | 0     | 0,025 | 1         | 0,951049339   | 1,05147016      | 0               |
| PPRC1                                                                                               | 0,178209062 | -0,072426874 | 0,122 | 0,07  | 1         | 0,951036836   | 1,051483983     | 1,742857143     |
| MDC1                                                                                                | 0,28294086  | -0,072460477 | 0,049 | 0,025 | 1         | 0,951014685   | 1,051508474     | 1,96            |
| NTNG2                                                                                               | 0,35350329  | -0,072491673 | 0     | 0,011 | 1         | 0,950994121   | 1,051531212     | 0               |
| INTU                                                                                                | 0,146857221 | -0,072503313 | 0,122 | 0,067 | 1         | 0,950986448   | 1,051539696     | 1,820895522     |
| BCOR                                                                                                | 0,009059385 | -0,072523897 | 0,232 | 0,102 | 1         | 0,950972879   | 1,051554699     | 2,274509804     |
| FAM27C                                                                                              | 0,404681217 | -0,072527358 | 0,012 | 0,028 | 1         | 0,950970598   | 1,051557221     | 0,428571429     |
| JAZF1                                                                                               | 0,070311239 | -0,072570691 | 0,085 | 0,035 | 1         | 0,950942035   | 1,051588807     | 2,428571429     |
| MCCC2                                                                                               | 0,018823337 | -0,072571875 | 0,134 | 0,053 | 1         | 0,950941254   | 1,05158967      | 2,528301887     |
| KANSL1                                                                                              | 0,000286719 | -0,072665746 | 0,427 | 0,179 | 1         | 0,950879382   | 1,051658096     | 2,38547486      |
| COPRS                                                                                               | 0,006360138 | -0,072848122 | 0,366 | 0,179 | 1         | 0,950759186   | 1,051791047     | 2,044692737     |
| ZHX2                                                                                                | 0,71891322  | -0,072881092 | 0,037 | 0,028 | 1         | 0,950737459   | 1,051815084     | 1,321428571     |
| CMTM4                                                                                               | 0,378906544 | -0,072882662 | 0,049 | 0,028 | 1         | 0,950736424   | 1,051816229     | 1,75            |
| TMEM74                                                                                              | 0,879365097 | -0,072933857 | 0,024 | 0,021 | 1         | 0,950702687   | 1,051853554     | 1,142857143     |

Supplementary Table 2

| Differentially expressed genes_keloid-XL_comparing SC-Keloid vs. (SC-Myel, SC-Nonmyel, SC-Nonmyel2) |             |              |       |       |           |               |                 |                 |
|-----------------------------------------------------------------------------------------------------|-------------|--------------|-------|-------|-----------|---------------|-----------------|-----------------|
| gene                                                                                                | p_val       | avg_log2FC   | pct.1 | pct.2 | p_val_adj | Foldchange_UP | Foldchange_DOWN | Ratio_pct1_pct2 |
| L1TD1                                                                                               | 0,228958629 | -0,073022121 | 0     | 0,018 | 1         | 0,950644525   | 1,051917908     | 0               |
| LARS1                                                                                               | 0,013311015 | -0,073062493 | 0,341 | 0,175 | 1         | 0,950617923   | 1,051947345     | 1,948571429     |
| SYTL4                                                                                               | 0,908489202 | -0,073125769 | 0,012 | 0,011 | 1         | 0,95057623    | 1,051993484     | 1,090909091     |
| GLIS3                                                                                               | 0,007261354 | -0,073184205 | 0,512 | 0,263 | 1         | 0,950537727   | 1,052036096     | 1,946768061     |
| DFFB                                                                                                | 0,597173043 | -0,073208822 | 0,012 | 0,021 | 1         | 0,950521509   | 1,052054047     | 0,571428571     |
| ZNF121                                                                                              | 0,214732296 | -0,073228067 | 0,073 | 0,039 | 1         | 0,950508829   | 1,052068081     | 1,871794872     |
| FAM214B                                                                                             | 0,002108499 | -0,07329742  | 0,28  | 0,116 | 1         | 0,950463138   | 1,052118657     | 2,413793103     |
| STRADB                                                                                              | 0,070054953 | -0,073301661 | 0,061 | 0,021 | 1         | 0,950460343   | 1,05212175      | 2,904761905     |
| MCM5                                                                                                | 0,288157633 | -0,073343346 | 0,073 | 0,042 | 1         | 0,950432881   | 1,05215215      | 1,738095238     |
| ILKAP                                                                                               | 0,019994004 | -0,073468188 | 0,256 | 0,13  | 1         | 0,95035064    | 1,052243201     | 1,969230769     |
| OSMR                                                                                                | 0,615139979 | -0,073566373 | 0,037 | 0,049 | 1         | 0,950285965   | 1,052314815     | 0,755102041     |
| NOMO1                                                                                               | 0,067663837 | -0,073570427 | 0,098 | 0,042 | 1         | 0,950283294   | 1,052317773     | 2,333333333     |
| IDUA                                                                                                | 0,620390165 | -0,073597321 | 0,085 | 0,067 | 1         | 0,95026558    | 1,05233739      | 1,268656716     |
| TRMT10B                                                                                             | 0,292477426 | -0,073603541 | 0,073 | 0,042 | 1         | 0,950261483   | 1,052341927     | 1,738095238     |
| FGFRL1                                                                                              | 0,126161321 | -0,073626227 | 0     | 0,028 | 1         | 0,95024654    | 1,052358475     | 0               |
| FAM241A                                                                                             | 0,479556926 | -0,073657985 | 0,098 | 0,07  | 1         | 0,950225623   | 1,05238164      | 1,4             |
| DHX32                                                                                               | 0,069028916 | -0,073662723 | 0,098 | 0,042 | 1         | 0,950222503   | 1,052385096     | 2,333333333     |
| ZNF75A                                                                                              | 0,070311239 | -0,073728858 | 0,085 | 0,035 | 1         | 0,950178944   | 1,05243334      | 2,428571429     |
| CLPX                                                                                                | 0,026830037 | -0,073735065 | 0,146 | 0,063 | 1         | 0,950174856   | 1,052437869     | 2,317460317     |
| TNFAIP8L1                                                                                           | 0,619512782 | -0,073752191 | 0,049 | 0,035 | 1         | 0,950163577   | 1,052450362     | 1,4             |
| EBF4                                                                                                | 0,179372449 | -0,073756327 | 0,061 | 0,028 | 1         | 0,950160852   | 1,052453379     | 2,178571429     |
| RNF185                                                                                              | 0,011986296 | -0,073769733 | 0,134 | 0,049 | 1         | 0,950152024   | 1,052463159     | 2,734693878     |
| UBE2O                                                                                               | 0,253643868 | -0,073854531 | 0,085 | 0,049 | 1         | 0,950096177   | 1,052525022     | 1,734693878     |
| DKK1                                                                                                | 0,35350329  | -0,073907189 | 0     | 0,011 | 1         | 0,9500615     | 1,05256344      | 0               |
| NPB                                                                                                 | 0,584659388 | -0,073961632 | 0,037 | 0,025 | 1         | 0,950025648   | 1,052603161     | 1,48            |
| ARL1                                                                                                | 0,001792189 | -0,074025752 | 0,427 | 0,196 | 1         | 0,949983425   | 1,052649945     | 2,178571429     |
| AMFR                                                                                                | 0,016795796 | -0,074060819 | 0,329 | 0,172 | 1         | 0,949960335   | 1,052675531     | 1,912790698     |
| SLC4A3                                                                                              | 0,735425714 | -0,074112948 | 0,024 | 0,032 | 1         | 0,949926011   | 1,052713568     | 0,75            |
| C9orf85                                                                                             | 0,093477824 | -0,074160069 | 0,11  | 0,053 | 1         | 0,949894985   | 1,052747952     | 2,075471698     |
| PLEKHA2                                                                                             | 0,045532357 | -0,074193275 | 0,11  | 0,046 | 1         | 0,949873122   | 1,052772183     | 2,391304348     |

Supplementary Table 2

| Differentially expressed genes_keloid-XL_comparing SC-Keloid vs. (SC-Myel, SC-Nonmyel, SC-Nonmyel2) |             |              |       |       |           |               |                 |                 |
|-----------------------------------------------------------------------------------------------------|-------------|--------------|-------|-------|-----------|---------------|-----------------|-----------------|
| gene                                                                                                | p_val       | avg_log2FC   | pct.1 | pct.2 | p_val_adj | Foldchange_UP | Foldchange_DOWN | Ratio_pct1_pct2 |
| PRIMPOL                                                                                             | 0,044372256 | -0,074196095 | 0,098 | 0,039 | 1         | 0,949871265   | 1,052774241     | 2,512820513     |
| GAB2                                                                                                | 0,333759426 | -0,074234516 | 0,024 | 0,049 | 1         | 0,949845969   | 1,052802278     | 0,489795918     |
| CCDC159                                                                                             | 0,00063588  | -0,074255638 | 0,244 | 0,088 | 1         | 0,949832063   | 1,052817692     | 2,772727273     |
| SOAT1                                                                                               | 0,005937696 | -0,07432498  | 0,195 | 0,077 | 1         | 0,949786411   | 1,052868296     | 2,532467532     |
| ZNF24                                                                                               | 0,005352765 | -0,074378778 | 0,463 | 0,235 | 1         | 0,949750994   | 1,052907558     | 1,970212766     |
| CCDC12                                                                                              | 0,001146933 | -0,074412903 | 0,354 | 0,151 | 1         | 0,94972853    | 1,052932463     | 2,344370861     |
| CC2D1B                                                                                              | 0,068116374 | -0,074417408 | 0,098 | 0,042 | 1         | 0,949725563   | 1,052935752     | 2,333333333     |
| TMEM170B                                                                                            | 0,490935921 | -0,074446759 | 0,012 | 0,025 | 1         | 0,949706242   | 1,052957173     | 0,48            |
| NAA30                                                                                               | 0,296840498 | -0,074447966 | 0,073 | 0,042 | 1         | 0,949705447   | 1,052958054     | 1,738095238     |
| C21orf58                                                                                            | 0,970105473 | -0,074495258 | 0,024 | 0,025 | 1         | 0,949674317   | 1,052992571     | 0,96            |
| TOR1AIP1                                                                                            | 0,142729351 | -0,074580521 | 0,171 | 0,102 | 1         | 0,949618192   | 1,053054805     | 1,676470588     |
| AKT3                                                                                                | 0,012055232 | -0,074580987 | 0,415 | 0,214 | 1         | 0,949617886   | 1,053055145     | 1,939252336     |
| ZCCHC18                                                                                             | 0,448248692 | -0,074627743 | 0,037 | 0,021 | 1         | 0,949587111   | 1,053089273     | 1,761904762     |
| IL10RB                                                                                              | 0,00118408  | -0,074675097 | 0,134 | 0,035 | 1         | 0,949555942   | 1,05312384      | 3,828571429     |
| ZNF398                                                                                              | 0,977137258 | -0,074692894 | 0,024 | 0,025 | 1         | 0,949544228   | 1,053136832     | 0,96            |
| RAB6B                                                                                               | 0,908489202 | -0,074776677 | 0,012 | 0,011 | 1         | 0,949489087   | 1,053197993     | 1,090909091     |
| GIMAP8                                                                                              | 0,35350329  | -0,074783674 | 0     | 0,011 | 1         | 0,949484481   | 1,053203101     | 0               |
| FBF1                                                                                                | 0,872003564 | -0,07479859  | 0,024 | 0,021 | 1         | 0,949474665   | 1,05321399      | 1,142857143     |
| LRP2BP                                                                                              | 0,490935921 | -0,07480517  | 0,012 | 0,025 | 1         | 0,949470334   | 1,053218794     | 0,48            |
| C6orf62                                                                                             | 0,078889798 | -0,074830027 | 0,341 | 0,214 | 1         | 0,949453975   | 1,05323694      | 1,593457944     |
| CNTF                                                                                                | 0,153186787 | -0,074846883 | 0     | 0,025 | 1         | 0,949442882   | 1,053249246     | 0               |
| WDR17                                                                                               | 0,611445865 | -0,074939507 | 0,024 | 0,035 | 1         | 0,949381928   | 1,053316869     | 0,685714286     |
| SLC12A7                                                                                             | 0,711450166 | -0,074952306 | 0,024 | 0,032 | 1         | 0,949373506   | 1,053326213     | 0,75            |
| MAN1A1                                                                                              | 0,490935921 | -0,074954827 | 0,012 | 0,025 | 1         | 0,949371846   | 1,053328054     | 0,48            |
| MBTPS2                                                                                              | 0,10000689  | -0,07498383  | 0,098 | 0,046 | 1         | 0,949352761   | 1,05334923      | 2,130434783     |
| LAPTM5                                                                                              | 0,864526579 | -0,075007224 | 0,037 | 0,032 | 1         | 0,949337367   | 1,05336631      | 1,15625         |
| MTMR12                                                                                              | 0,276334603 | -0,075102555 | 0,098 | 0,06  | 1         | 0,949274639   | 1,053435917     | 1,633333333     |
| RTN4RL2                                                                                             | 0,728697501 | -0,07512683  | 0,012 | 0,018 | 1         | 0,949258666   | 1,053453643     | 0,666666667     |
| CNNM3                                                                                               | 0,500826907 | -0,075138482 | 0,049 | 0,032 | 1         | 0,949251      | 1,053462151     | 1,53125         |
| MRAP2                                                                                               | 0,35350329  | -0,075139839 | 0     | 0,011 | 1         | 0,949250107   | 1,053463142     | 0               |

Supplementary Table 2

| Differentially expressed genes_keloid-XL_comparing SC-Keloid vs. (SC-Myel, SC-Nonmyel, SC-Nonmyel2) |             |              |       |       |           |               |                 |                 |
|-----------------------------------------------------------------------------------------------------|-------------|--------------|-------|-------|-----------|---------------|-----------------|-----------------|
| gene                                                                                                | p_val       | avg_log2FC   | pct.1 | pct.2 | p_val_adj | Foldchange_UP | Foldchange_DOWN | Ratio_pct1_pct2 |
| CAPN12                                                                                              | 0,908489202 | -0,075143401 | 0,012 | 0,011 | 1         | 0,949247763   | 1,053465743     | 1,090909091     |
| MLLT3                                                                                               | 0,705117411 | -0,075241491 | 0,061 | 0,049 | 1         | 0,949183225   | 1,053537371     | 1,244897959     |
| TSPAN8                                                                                              | 0,186763581 | -0,075322505 | 0     | 0,021 | 1         | 0,949129925   | 1,053596534     | 0               |
| ZNF444                                                                                              | 0,008903372 | -0,075397015 | 0,195 | 0,081 | 1         | 0,949080908   | 1,05365095      | 2,407407407     |
| CDC42                                                                                               | 0,554554466 | -0,075487439 | 0,768 | 0,579 | 1         | 0,949021423   | 1,053716992     | 1,32642487      |
| MRRF                                                                                                | 0,009669783 | -0,075497139 | 0,11  | 0,035 | 1         | 0,949015043   | 1,053724077     | 3,142857143     |
| BCAR3                                                                                               | 0,000102415 | -0,075502381 | 0,354 | 0,13  | 1         | 0,949011595   | 1,053727906     | 2,723076923     |
| RBL2                                                                                                | 0,064573884 | -0,075523795 | 0,159 | 0,081 | 1         | 0,948997509   | 1,053743546     | 1,962962963     |
| RBPMS                                                                                               | 0,007682432 | -0,075527345 | 0,256 | 0,116 | 1         | 0,948995173   | 1,053746139     | 2,206896552     |
| PLXNB2                                                                                              | 0,001597785 | -0,075594642 | 0,402 | 0,182 | 1         | 0,948950907   | 1,053795294     | 2,208791209     |
| ZNF436-AS1                                                                                          | 0,490935921 | -0,075639324 | 0,012 | 0,025 | 1         | 0,948921517   | 1,053827932     | 0,48            |
| PLCG2                                                                                               | 0,005603953 | -0,07564095  | 0,171 | 0,063 | 1         | 0,948920448   | 1,05382912      | 2,714285714     |
| STARD8                                                                                              | 0,228958629 | -0,075661423 | 0     | 0,018 | 1         | 0,948906982   | 1,053844074     | 0               |
| CPE                                                                                                 | 0,153186787 | -0,07569802  | 0     | 0,025 | 1         | 0,948882911   | 1,053870808     | 0               |
| PTPRU                                                                                               | 0,118200281 | -0,075796663 | 0,061 | 0,025 | 1         | 0,948818034   | 1,053942868     | 2,44            |
| BCL2L2                                                                                              | 0,082215438 | -0,075800859 | 0,11  | 0,053 | 1         | 0,948815275   | 1,053945933     | 2,075471698     |
| DCAF8                                                                                               | 0,002297425 | -0,075828355 | 0,341 | 0,151 | 1         | 0,948797192   | 1,05396602      | 2,258278146     |
| RAB24                                                                                               | 0,028923554 | -0,075858361 | 0,122 | 0,049 | 1         | 0,948777459   | 1,053987941     | 2,489795918     |
| UNK                                                                                                 | 0,00281904  | -0,075879614 | 0,244 | 0,098 | 1         | 0,948763482   | 1,054003468     | 2,489795918     |
| C1QTNF2                                                                                             | 0,35185965  | -0,075957861 | 0,012 | 0,004 | 1         | 0,948712025   | 1,054060636     | 3               |
| SEMA3F                                                                                              | 0,153186787 | -0,076000558 | 0     | 0,025 | 1         | 0,948683948   | 1,054091831     | 0               |
| CNTLN                                                                                               | 0,052767166 | -0,076029218 | 0,134 | 0,063 | 1         | 0,948665102   | 1,054112771     | 2,126984127     |
| PRKCE                                                                                               | 0,712178191 | -0,076050721 | 0,037 | 0,046 | 1         | 0,948650963   | 1,054128483     | 0,804347826     |
| CENPE                                                                                               | 0,868326909 | -0,076055056 | 0,024 | 0,021 | 1         | 0,948648112   | 1,05413165      | 1,142857143     |
| MAP1A                                                                                               | 0,01951793  | -0,076063726 | 0,232 | 0,112 | 1         | 0,948642411   | 1,054137985     | 2,071428571     |
| PLA2G2A                                                                                             | 0,28286347  | -0,07608035  | 0     | 0,014 | 1         | 0,94863148    | 1,054150132     | 0               |
| SPICE1                                                                                              | 0,410506395 | -0,076116615 | 0,061 | 0,039 | 1         | 0,948607635   | 1,054176631     | 1,564102564     |
| RNF41                                                                                               | 0,018037795 | -0,07612899  | 0,146 | 0,06  | 1         | 0,948599498   | 1,054185673     | 2,433333333     |
| PELO                                                                                                | 0,019990832 | -0,076157389 | 0,415 | 0,225 | 1         | 0,948580825   | 1,054206424     | 1,844444444     |
| BAZ1B                                                                                               | 0,025607077 | -0,076169182 | 0,354 | 0,193 | 1         | 0,948573071   | 1,054215042     | 1,834196891     |

Supplementary Table 2

| Differentially expressed genes_keloid-XL_comparing SC-Keloid vs. (SC-Myel, SC-Nonmyel, SC-Nonmyel2) |             |              |       |       |           |               |                 |                 |
|-----------------------------------------------------------------------------------------------------|-------------|--------------|-------|-------|-----------|---------------|-----------------|-----------------|
| gene                                                                                                | p_val       | avg_log2FC   | pct.1 | pct.2 | p_val_adj | Foldchange_UP | Foldchange_DOWN | Ratio_pct1_pct2 |
| ZNF131                                                                                              | 0,062969551 | -0,076212052 | 0,22  | 0,119 | 1         | 0,948544884   | 1,054246369     | 1,848739496     |
| LINC00539                                                                                           | 0,28286347  | -0,07625153  | 0     | 0,014 | 1         | 0,948518929   | 1,054275217     | 0               |
| CDC34                                                                                               | 0,000188111 | -0,076256585 | 0,329 | 0,123 | 1         | 0,948515606   | 1,054278911     | 2,674796748     |
| ACAA1                                                                                               | 0,00053598  | -0,076258725 | 0,244 | 0,084 | 1         | 0,948514199   | 1,054280475     | 2,904761905     |
| UCP3                                                                                                | 0,228958629 | -0,07627116  | 0     | 0,018 | 1         | 0,948506023   | 1,054289562     | 0               |
| KAT2A                                                                                               | 0,18710479  | -0,076273156 | 0,146 | 0,088 | 1         | 0,948504711   | 1,054291021     | 1,659090909     |
| MROH1                                                                                               | 0,316484073 | -0,076292794 | 0,037 | 0,018 | 1         | 0,9484918     | 1,054305372     | 2,055555556     |
| GALK2                                                                                               | 0,347829442 | -0,076298825 | 0,098 | 0,063 | 1         | 0,948487835   | 1,054309779     | 1,555555556     |
| INPP4B                                                                                              | 0,617004375 | -0,076309351 | 0,049 | 0,035 | 1         | 0,948480915   | 1,054317472     | 1,4             |
| SERPINB1                                                                                            | 0,005163516 | -0,076310794 | 0,171 | 0,063 | 1         | 0,948479966   | 1,054318526     | 2,714285714     |
| BORCS6                                                                                              | 0,084519998 | -0,076331679 | 0,122 | 0,06  | 1         | 0,948466236   | 1,054333789     | 2,033333333     |
| DZIP1                                                                                               | 0,202410779 | -0,076339908 | 0,085 | 0,046 | 1         | 0,948460826   | 1,054339803     | 1,847826087     |
| SWT1                                                                                                | 0,970105473 | -0,076347714 | 0,024 | 0,025 | 1         | 0,948455693   | 1,054345508     | 0,96            |
| HMG2                                                                                                | 0,28286347  | -0,076348453 | 0     | 0,014 | 1         | 0,948455208   | 1,054346048     | 0               |
| NR2C2                                                                                               | 0,15320432  | -0,076393528 | 0,134 | 0,077 | 1         | 0,948425575   | 1,05437899      | 1,74025974      |
| ZNF841                                                                                              | 0,728697501 | -0,076428098 | 0,012 | 0,018 | 1         | 0,948402849   | 1,054404255     | 0,666666667     |
| VPS13B                                                                                              | 0,183050258 | -0,076477257 | 0,098 | 0,053 | 1         | 0,948370534   | 1,054440184     | 1,849056604     |
| USP21                                                                                               | 0,970105473 | -0,076504525 | 0,024 | 0,025 | 1         | 0,948352609   | 1,054460114     | 0,96            |
| AP3S2                                                                                               | 0,107881987 | -0,076544823 | 0,122 | 0,063 | 1         | 0,94832612    | 1,054489568     | 1,936507937     |
| CA13                                                                                                | 0,109169237 | -0,076549996 | 0,085 | 0,039 | 1         | 0,948322719   | 1,054493349     | 2,179487179     |
| ATG4C                                                                                               | 0,448248692 | -0,07656329  | 0,037 | 0,021 | 1         | 0,94831398    | 1,054503066     | 1,761904762     |
| ZBED3-AS1                                                                                           | 0,228958629 | -0,076564698 | 0     | 0,018 | 1         | 0,948313055   | 1,054504096     | 0               |
| FBRSL1                                                                                              | 0,399199095 | -0,076627791 | 0,146 | 0,105 | 1         | 0,948271583   | 1,054550213     | 1,39047619      |
| SLC25A34                                                                                            | 0,28286347  | -0,07663266  | 0     | 0,014 | 1         | 0,948268383   | 1,054553771     | 0               |
| GDF11                                                                                               | 0,205611206 | -0,076641732 | 0,11  | 0,063 | 1         | 0,94826242    | 1,054560403     | 1,746031746     |
| SS18                                                                                                | 0,07772334  | -0,076660028 | 0,207 | 0,116 | 1         | 0,948250394   | 1,054573777     | 1,784482759     |
| LRCH1                                                                                               | 0,237135501 | -0,076703755 | 0,134 | 0,084 | 1         | 0,948221654   | 1,054605741     | 1,595238095     |
| CALHM5                                                                                              | 0,281151866 | -0,076717668 | 0,049 | 0,025 | 1         | 0,94821251    | 1,054615911     | 1,96            |
| SCARF2                                                                                              | 0,220786375 | -0,076726044 | 0,073 | 0,039 | 1         | 0,948207005   | 1,054622034     | 1,871794872     |
| ARHGEF2                                                                                             | 0,084480639 | -0,076854273 | 0,427 | 0,263 | 1         | 0,948122731   | 1,054715774     | 1,623574144     |



Supplementary Table 2

| Differentially expressed genes_keloid-XL_comparing SC-Keloid vs. (SC-Myel, SC-Nonmyel, SC-Nonmyel2) |             |              |       |       |           |               |                 |                 |
|-----------------------------------------------------------------------------------------------------|-------------|--------------|-------|-------|-----------|---------------|-----------------|-----------------|
| gene                                                                                                | p_val       | avg_log2FC   | pct.1 | pct.2 | p_val_adj | Foldchange_UP | Foldchange_DOWN | Ratio_pct1_pct2 |
| PTPN4                                                                                               | 0,063878978 | -0,076934531 | 0,11  | 0,049 | 1         | 0,948069987   | 1,054774451     | 2,244897959     |
| MYO9A                                                                                               | 0,087527991 | -0,076999471 | 0,207 | 0,116 | 1         | 0,948027313   | 1,05482193      | 1,784482759     |
| P4HA1                                                                                               | 0,061177317 | -0,077027092 | 0,256 | 0,144 | 1         | 0,948009163   | 1,054842125     | 1,777777778     |
| ZNF799                                                                                              | 0,35350329  | -0,077102788 | 0     | 0,011 | 1         | 0,947959423   | 1,054897473     | 0               |
| DDX47                                                                                               | 0,178180489 | -0,07711538  | 0,061 | 0,028 | 1         | 0,94795115    | 1,05490668      | 2,178571429     |
| ERMARD                                                                                              | 0,118200281 | -0,077186925 | 0,061 | 0,025 | 1         | 0,94790414    | 1,054958996     | 2,44            |
| PARP4                                                                                               | 0,008044525 | -0,077193829 | 0,146 | 0,053 | 1         | 0,947899604   | 1,054964044     | 2,754716981     |
| FRZB                                                                                                | 0,89702294  | -0,077245558 | 0,012 | 0,014 | 1         | 0,947865617   | 1,055001872     | 0,857142857     |
| SF3B4                                                                                               | 0,020514288 | -0,077282113 | 0,244 | 0,119 | 1         | 0,9478416     | 1,055028604     | 2,050420168     |
| SLC22A5                                                                                             | 0,835753847 | -0,077296286 | 0,024 | 0,028 | 1         | 0,947832289   | 1,055038968     | 0,857142857     |
| BACH1                                                                                               | 0,008289944 | -0,077463309 | 0,622 | 0,344 | 1         | 0,947722563   | 1,055161119     | 1,808139535     |
| RAB5A                                                                                               | 0,003318262 | -0,077478069 | 0,451 | 0,221 | 1         | 0,947712867   | 1,055171914     | 2,040723982     |
| GFPT1                                                                                               | 0,0258913   | -0,077505881 | 0,195 | 0,091 | 1         | 0,947694597   | 1,055192256     | 2,142857143     |
| NUB1                                                                                                | 0,031719384 | -0,077525008 | 0,28  | 0,151 | 1         | 0,947682034   | 1,055206245     | 1,854304636     |
| LNX2                                                                                                | 0,597173043 | -0,07759233  | 0,012 | 0,021 | 1         | 0,947637812   | 1,055255486     | 0,571428571     |
| ZDHC20                                                                                              | 0,01034404  | -0,077604454 | 0,256 | 0,116 | 1         | 0,947629848   | 1,055264354     | 2,206896552     |
| PLA2G12A                                                                                            | 0,075313546 | -0,077673089 | 0,171 | 0,091 | 1         | 0,947584767   | 1,055314559     | 1,879120879     |
| FRMD4B                                                                                              | 0,973621109 | -0,077711246 | 0,024 | 0,025 | 1         | 0,947559705   | 1,055342471     | 0,96            |
| SETD3                                                                                               | 0,367108148 | -0,077765347 | 0,159 | 0,112 | 1         | 0,947524172   | 1,055382047     | 1,419642857     |
| MAMLD1                                                                                              | 0,071113272 | -0,077902104 | 0,171 | 0,091 | 1         | 0,947434358   | 1,055482094     | 1,879120879     |
| CCR10                                                                                               | 0,908489202 | -0,077917542 | 0,012 | 0,011 | 1         | 0,94742422    | 1,055493389     | 1,090909091     |
| DGCR8                                                                                               | 0,855490884 | -0,078054938 | 0,037 | 0,032 | 1         | 0,947333995   | 1,055593914     | 1,15625         |
| MSN                                                                                                 | 0,055470096 | -0,078058413 | 0,695 | 0,446 | 1         | 0,947331714   | 1,055596456     | 1,558295964     |
| SMIM4                                                                                               | 0,002656201 | -0,078069361 | 0,244 | 0,098 | 1         | 0,947324524   | 1,055604467     | 2,489795918     |
| WRNIP1                                                                                              | 0,186358827 | -0,078078336 | 0,122 | 0,07  | 1         | 0,947318632   | 1,055611034     | 1,742857143     |
| TMEM168                                                                                             | 0,059890456 | -0,078142763 | 0,122 | 0,056 | 1         | 0,947276327   | 1,055658176     | 2,178571429     |
| LRRC7                                                                                               | 0,618391501 | -0,078145694 | 0,073 | 0,056 | 1         | 0,947274403   | 1,05566032      | 1,303571429     |
| TRMT9B                                                                                              | 0,60063706  | -0,078220917 | 0,012 | 0,021 | 1         | 0,947225013   | 1,055715365     | 0,571428571     |
| HMG3-AS1                                                                                            | 0,530989227 | -0,078252314 | 0,024 | 0,014 | 1         | 0,947204399   | 1,05573834      | 1,714285714     |
| ICOSLG                                                                                              | 0,35350329  | -0,078347055 | 0     | 0,011 | 1         | 0,947142199   | 1,055807672     | 0               |

Supplementary Table 2

| Differentially expressed genes_keloid-XL_comparing SC-Keloid vs. (SC-Myel, SC-Nonmyel, SC-Nonmyel2) |             |              |       |       |           |               |                 |                 |
|-----------------------------------------------------------------------------------------------------|-------------|--------------|-------|-------|-----------|---------------|-----------------|-----------------|
| gene                                                                                                | p_val       | avg_log2FC   | pct.1 | pct.2 | p_val_adj | Foldchange_UP | Foldchange_DOWN | Ratio_pct1_pct2 |
| SRP54                                                                                               | 0,281995158 | -0,078375823 | 0,22  | 0,151 | 1         | 0,947123312   | 1,055828726     | 1,456953642     |
| ATG101                                                                                              | 0,002633521 | -0,078382877 | 0,463 | 0,225 | 1         | 0,947118681   | 1,055833888     | 2,057777778     |
| FGFR3                                                                                               | 0,228958629 | -0,078403    | 0     | 0,018 | 1         | 0,947105471   | 1,055848615     | 0               |
| SOCS4                                                                                               | 0,003501912 | -0,078425396 | 0,195 | 0,074 | 1         | 0,947090769   | 1,055865006     | 2,635135135     |
| NMRK1                                                                                               | 0,00282973  | -0,078430876 | 0,256 | 0,105 | 1         | 0,947087171   | 1,055869017     | 2,438095238     |
| GOLGA6L9                                                                                            | 0,728697501 | -0,078443079 | 0,012 | 0,018 | 1         | 0,94707916    | 1,055877948     | 0,666666667     |
| RNF139-AS1                                                                                          | 0,597173043 | -0,078479364 | 0,012 | 0,021 | 1         | 0,94705534    | 1,055904505     | 0,571428571     |
| MORN1                                                                                               | 0,35350329  | -0,078487471 | 0     | 0,011 | 1         | 0,947050019   | 1,055910438     | 0               |
| HDX                                                                                                 | 0,85248313  | -0,078498712 | 0,037 | 0,032 | 1         | 0,94704264    | 1,055918665     | 1,15625         |
| NBPF14                                                                                              | 0,187860656 | -0,078521236 | 0,024 | 0,007 | 1         | 0,947027854   | 1,055935151     | 3,428571429     |
| RNPEP                                                                                               | 0,005768193 | -0,0785388   | 0,22  | 0,091 | 1         | 0,947016324   | 1,055948007     | 2,417582418     |
| FOXJ2                                                                                               | 0,45588886  | -0,078539287 | 0,085 | 0,06  | 1         | 0,947016005   | 1,055948363     | 1,416666667     |
| OCRL                                                                                                | 0,383074885 | -0,078561366 | 0,049 | 0,028 | 1         | 0,947001512   | 1,055964523     | 1,75            |
| AJAP1                                                                                               | 0,28286347  | -0,078564518 | 0     | 0,014 | 1         | 0,946999443   | 1,055966831     | 0               |
| EPB41L5                                                                                             | 0,433663659 | -0,07856925  | 0,061 | 0,039 | 1         | 0,946996337   | 1,055970294     | 1,564102564     |
| EMILIN2                                                                                             | 0,010756847 | -0,078619851 | 0,11  | 0,035 | 1         | 0,946963122   | 1,056007332     | 3,142857143     |
| FZD8                                                                                                | 0,176123531 | -0,078642408 | 0,085 | 0,046 | 1         | 0,946948316   | 1,056023843     | 1,847826087     |
| FAM184A                                                                                             | 0,404681217 | -0,078761835 | 0,012 | 0,028 | 1         | 0,946869931   | 1,056111265     | 0,428571429     |
| PACSIN3                                                                                             | 0,408813133 | -0,078763624 | 0,098 | 0,067 | 1         | 0,946868756   | 1,056112574     | 1,462686567     |
| ATP6V1E2                                                                                            | 0,933634068 | -0,078775811 | 0,085 | 0,084 | 1         | 0,946860758   | 1,056121496     | 1,011904762     |
| SIX5                                                                                                | 0,162037223 | -0,078810636 | 0,11  | 0,06  | 1         | 0,946837902   | 1,05614699      | 1,833333333     |
| ITIH4                                                                                               | 0,153186787 | -0,07884388  | 0     | 0,025 | 1         | 0,946816085   | 1,056171326     | 0               |
| FAHD2A                                                                                              | 0,143910007 | -0,078949471 | 0,085 | 0,042 | 1         | 0,94674679    | 1,05624863      | 2,023809524     |
| ZDHHC24                                                                                             | 0,00271116  | -0,078985045 | 0,159 | 0,053 | 1         | 0,946723445   | 1,056274676     | 3               |
| PVR                                                                                                 | 0,071826962 | -0,079003886 | 0,098 | 0,042 | 1         | 0,946711081   | 1,056288471     | 2,333333333     |
| COQ8A                                                                                               | 0,280260254 | -0,079022893 | 0,012 | 0,035 | 1         | 0,946698608   | 1,056302387     | 0,342857143     |
| CHIC2                                                                                               | 0,013116111 | -0,07902844  | 0,256 | 0,119 | 1         | 0,946694969   | 1,056306448     | 2,151260504     |
| TMTC4                                                                                               | 0,073676783 | -0,079064449 | 0,073 | 0,028 | 1         | 0,94667134    | 1,056332814     | 2,607142857     |
| LRIG3                                                                                               | 0,135824284 | -0,079108403 | 0,098 | 0,049 | 1         | 0,946642499   | 1,056364997     | 2               |
| SS18L1                                                                                              | 0,431705505 | -0,079119058 | 0,061 | 0,039 | 1         | 0,946635507   | 1,056372799     | 1,564102564     |

Supplementary Table 2

| Differentially expressed genes_keloid-XL_comparing SC-Keloid vs. (SC-Myel, SC-Nonmyel, SC-Nonmyel2) |             |              |       |       |           |               |                 |                 |
|-----------------------------------------------------------------------------------------------------|-------------|--------------|-------|-------|-----------|---------------|-----------------|-----------------|
| gene                                                                                                | p_val       | avg_log2FC   | pct.1 | pct.2 | p_val_adj | Foldchange_UP | Foldchange_DOWN | Ratio_pct1_pct2 |
| SPTY2D1                                                                                             | 0,004460268 | -0,079123947 | 0,22  | 0,088 | 1         | 0,946632299   | 1,056376379     | 2,5             |
| ALDH6A1                                                                                             | 0,254245649 | -0,079186896 | 0,159 | 0,102 | 1         | 0,946590996   | 1,056422472     | 1,558823529     |
| SKIV2L                                                                                              | 0,206696385 | -0,079225288 | 0,085 | 0,046 | 1         | 0,946565806   | 1,056450585     | 1,847826087     |
| PDGFRL                                                                                              | 0,35350329  | -0,079245159 | 0     | 0,011 | 1         | 0,946552769   | 1,056465136     | 0               |
| CRTC1                                                                                               | 0,011566228 | -0,079257319 | 0,122 | 0,042 | 1         | 0,94654479    | 1,056474041     | 2,904761905     |
| TNKS1BP1                                                                                            | 0,021948055 | -0,079292233 | 0,22  | 0,105 | 1         | 0,946521884   | 1,056499609     | 2,095238095     |
| GPKOW                                                                                               | 0,249536154 | -0,079319417 | 0,061 | 0,032 | 1         | 0,946504049   | 1,056519516     | 1,90625         |
| PCNT                                                                                                | 0,520004465 | -0,07932135  | 0,11  | 0,081 | 1         | 0,946502781   | 1,056520931     | 1,358024691     |
| CASP2                                                                                               | 0,651809736 | -0,079381829 | 0,098 | 0,077 | 1         | 0,946463103   | 1,056565223     | 1,272727273     |
| CMIP                                                                                                | 0,001936047 | -0,079383244 | 0,232 | 0,088 | 1         | 0,946462175   | 1,056566259     | 2,636363636     |
| APLP1                                                                                               | 0,608759699 | -0,079388949 | 0,024 | 0,035 | 1         | 0,946458433   | 1,056570437     | 0,685714286     |
| SYBU                                                                                                | 0,186763581 | -0,079404274 | 0     | 0,021 | 1         | 0,946448379   | 1,05658166      | 0               |
| C6orf132                                                                                            | 0,28286347  | -0,079501803 | 0     | 0,014 | 1         | 0,946384399   | 1,05665309      | 0               |
| TRAK2                                                                                               | 0,04665711  | -0,079520389 | 0,171 | 0,084 | 1         | 0,946372207   | 1,056666703     | 2,035714286     |
| KLHL25                                                                                              | 0,84947752  | -0,079539545 | 0,037 | 0,032 | 1         | 0,946359641   | 1,056680733     | 1,15625         |
| LRAT                                                                                                | 0,35185965  | -0,079744245 | 0,012 | 0,004 | 1         | 0,946225375   | 1,056830674     | 3               |
| ORC2                                                                                                | 0,070311239 | -0,079775167 | 0,085 | 0,035 | 1         | 0,946205094   | 1,056853325     | 2,428571429     |
| CENPK                                                                                               | 0,20009151  | -0,079788643 | 0,037 | 0,014 | 1         | 0,946196256   | 1,056863197     | 2,642857143     |
| NEO1                                                                                                | 0,404681217 | -0,079838403 | 0,012 | 0,028 | 1         | 0,946163621   | 1,05689965      | 0,428571429     |
| FBXL7                                                                                               | 0,414314106 | -0,079911414 | 0,061 | 0,039 | 1         | 0,946115739   | 1,056953138     | 1,564102564     |
| GSK3B                                                                                               | 0,036896428 | -0,080016575 | 0,329 | 0,182 | 1         | 0,946046777   | 1,057030185     | 1,807692308     |
| MAOB                                                                                                | 0,597173043 | -0,08011179  | 0,012 | 0,021 | 1         | 0,945984342   | 1,057099949     | 0,571428571     |
| PABPN1                                                                                              | 0,149216765 | -0,080116501 | 0,537 | 0,358 | 1         | 0,945981254   | 1,057103401     | 1,5             |
| GDNF                                                                                                | 0,490935921 | -0,080219861 | 0,012 | 0,025 | 1         | 0,945913482   | 1,057179138     | 0,48            |
| KIAA1191                                                                                            | 0,046641131 | -0,080302777 | 0,256 | 0,14  | 1         | 0,945859119   | 1,057239899     | 1,828571429     |
| ZNF814                                                                                              | 0,20009151  | -0,080314341 | 0,037 | 0,014 | 1         | 0,945851538   | 1,057248373     | 2,642857143     |
| AGGF1                                                                                               | 0,012568907 | -0,080324274 | 0,159 | 0,063 | 1         | 0,945845025   | 1,057255653     | 2,523809524     |
| PACS2                                                                                               | 0,002413547 | -0,080348157 | 0,354 | 0,161 | 1         | 0,945829368   | 1,057273155     | 2,198757764     |
| PRDM11                                                                                              | 0,839026091 | -0,08041026  | 0,024 | 0,028 | 1         | 0,945788654   | 1,057318668     | 0,857142857     |
| TBC1D32                                                                                             | 0,10894695  | -0,08042494  | 0,073 | 0,032 | 1         | 0,945779031   | 1,057329427     | 2,28125         |

Supplementary Table 2

| Differentially expressed genes_keloid-XL_comparing SC-Keloid vs. (SC-Myel, SC-Nonmyel, SC-Nonmyel2) |             |              |       |       |           |               |                 |                 |
|-----------------------------------------------------------------------------------------------------|-------------|--------------|-------|-------|-----------|---------------|-----------------|-----------------|
| gene                                                                                                | p_val       | avg_log2FC   | pct.1 | pct.2 | p_val_adj | Foldchange_UP | Foldchange_DOWN | Ratio_pct1_pct2 |
| C1orf43                                                                                             | 0,002658315 | -0,080495967 | 0,415 | 0,196 | 1         | 0,945732469   | 1,057381483     | 2,117346939     |
| WDR90                                                                                               | 0,835753847 | -0,080593849 | 0,024 | 0,028 | 1         | 0,945668306   | 1,057453225     | 0,857142857     |
| ANO3                                                                                                | 0,28286347  | -0,080599776 | 0     | 0,014 | 1         | 0,945664421   | 1,057457569     | 0               |
| IGSF3                                                                                               | 0,28294086  | -0,080615242 | 0,049 | 0,025 | 1         | 0,945654283   | 1,057468906     | 1,96            |
| HBS1L                                                                                               | 0,002075661 | -0,080645035 | 0,171 | 0,056 | 1         | 0,945634755   | 1,057490744     | 3,053571429     |
| PPP4R1                                                                                              | 0,006364818 | -0,080711425 | 0,28  | 0,126 | 1         | 0,945591239   | 1,057539408     | 2,222222222     |
| LPCAT3                                                                                              | 0,030558885 | -0,080736115 | 0,11  | 0,042 | 1         | 0,945575057   | 1,057557507     | 2,619047619     |
| LINC00887                                                                                           | 0,314233219 | -0,080844983 | 0,037 | 0,018 | 1         | 0,945503705   | 1,057637315     | 2,055555556     |
| SLTM                                                                                                | 0,443339622 | -0,080857316 | 0,402 | 0,309 | 1         | 0,945495622   | 1,057646356     | 1,300970874     |
| PIM2                                                                                                | 0,858500739 | -0,08091275  | 0,037 | 0,032 | 1         | 0,945459293   | 1,057686996     | 1,15625         |
| WDR76                                                                                               | 0,490935921 | -0,080936284 | 0,012 | 0,025 | 1         | 0,945443871   | 1,05770425      | 0,48            |
| HLA-F                                                                                               | 0,033626054 | -0,080949393 | 0,195 | 0,095 | 1         | 0,94543528    | 1,05771386      | 2,052631579     |
| UCP2                                                                                                | 0,228958629 | -0,081020713 | 0     | 0,018 | 1         | 0,945388544   | 1,05776615      | 0               |
| S100A7                                                                                              | 0,842301121 | -0,081055819 | 0,024 | 0,028 | 1         | 0,945365539   | 1,05779189      | 0,857142857     |
| AC093690.1                                                                                          | 0,493879805 | -0,081120188 | 0,012 | 0,025 | 1         | 0,94532336    | 1,057839087     | 0,48            |
| ATP8A2                                                                                              | 0,908489202 | -0,081121881 | 0,012 | 0,011 | 1         | 0,945322251   | 1,057840328     | 1,090909091     |
| CRACD                                                                                               | 0,186763581 | -0,08118065  | 0     | 0,021 | 1         | 0,945283744   | 1,05788342      | 0               |
| PLA2G6                                                                                              | 0,500826907 | -0,081247323 | 0,049 | 0,032 | 1         | 0,945240059   | 1,057932311     | 1,53125         |
| NRGN                                                                                                | 0,728697501 | -0,081261161 | 0,012 | 0,018 | 1         | 0,945230992   | 1,057942459     | 0,666666667     |
| MRPL49                                                                                              | 0,183066474 | -0,081284218 | 0,122 | 0,07  | 1         | 0,945215886   | 1,057959366     | 1,742857143     |
| MST1                                                                                                | 0,619512782 | -0,081376189 | 0,049 | 0,035 | 1         | 0,945155631   | 1,058026813     | 1,4             |
| FAM76B                                                                                              | 0,01871177  | -0,081480503 | 0,317 | 0,165 | 1         | 0,945087294   | 1,058103316     | 1,921212121     |
| ATRIP                                                                                               | 0,89237004  | -0,08159373  | 0,012 | 0,014 | 1         | 0,945013124   | 1,058186362     | 0,857142857     |
| VRK2                                                                                                | 0,159342977 | -0,081661114 | 0,073 | 0,035 | 1         | 0,944968986   | 1,058235788     | 2,085714286     |
| SEC16B                                                                                              | 0,186763581 | -0,081711326 | 0     | 0,021 | 1         | 0,944936098   | 1,05827262      | 0               |
| RIT1                                                                                                | 0,097005944 | -0,081719191 | 0,366 | 0,221 | 1         | 0,944930947   | 1,058278389     | 1,656108597     |
| RBM24                                                                                               | 0,228958629 | -0,081768858 | 0     | 0,018 | 1         | 0,944898416   | 1,058314823     | 0               |
| VAMP2                                                                                               | 0,020154486 | -0,081807255 | 0,695 | 0,428 | 1         | 0,944873268   | 1,05834299      | 1,623831776     |
| MBNL1-AS1                                                                                           | 0,252475247 | -0,081814735 | 0,061 | 0,032 | 1         | 0,944868369   | 1,058348477     | 1,90625         |
| WDR82                                                                                               | 0,008631628 | -0,081869825 | 0,341 | 0,172 | 1         | 0,94483229    | 1,058388892     | 1,98255814      |

Supplementary Table 2

| Differentially expressed genes_keloid-XL_comparing SC-Keloid vs. (SC-Myel, SC-Nonmyel, SC-Nonmyel2) |             |              |       |       |           |               |                 |                 |
|-----------------------------------------------------------------------------------------------------|-------------|--------------|-------|-------|-----------|---------------|-----------------|-----------------|
| gene                                                                                                | p_val       | avg_log2FC   | pct.1 | pct.2 | p_val_adj | Foldchange_UP | Foldchange_DOWN | Ratio_pct1_pct2 |
| C7orf31                                                                                             | 0,28286347  | -0,081908173 | 0     | 0,014 | 1         | 0,944807176   | 1,058417025     | 0               |
| LINC00957                                                                                           | 0,728697501 | -0,081967748 | 0,012 | 0,018 | 1         | 0,944768161   | 1,058460732     | 0,666666667     |
| KL                                                                                                  | 0,228958629 | -0,081991905 | 0     | 0,018 | 1         | 0,944752342   | 1,058478455     | 0               |
| RTL8B                                                                                               | 0,000440954 | -0,082021981 | 0,183 | 0,053 | 1         | 0,944732647   | 1,058500522     | 3,452830189     |
| TFPI                                                                                                | 0,811317121 | -0,082027171 | 0,061 | 0,053 | 1         | 0,944729248   | 1,05850433      | 1,150943396     |
| STX7                                                                                                | 0,006728881 | -0,082051004 | 0,232 | 0,098 | 1         | 0,944713642   | 1,058521816     | 2,367346939     |
| WDFY1                                                                                               | 0,333774435 | -0,082140299 | 0,146 | 0,102 | 1         | 0,944655171   | 1,058587335     | 1,431372549     |
| ARSD                                                                                                | 0,019644117 | -0,082196712 | 0,134 | 0,053 | 1         | 0,944618233   | 1,05862873      | 2,528301887     |
| SH3BP5-AS1                                                                                          | 0,351112297 | -0,08219986  | 0,024 | 0,011 | 1         | 0,944616172   | 1,058631039     | 2,181818182     |
| TRIM65                                                                                              | 0,043428247 | -0,082241783 | 0,073 | 0,025 | 1         | 0,944588723   | 1,058661802     | 2,92            |
| UBR7                                                                                                | 0,134046764 | -0,082327012 | 0,11  | 0,056 | 1         | 0,944532922   | 1,058724346     | 1,964285714     |
| CNTROB                                                                                              | 0,89958467  | -0,082406964 | 0,061 | 0,056 | 1         | 0,944480579   | 1,05878302      | 1,089285714     |
| ARRDC1-AS1                                                                                          | 0,070815804 | -0,082413186 | 0,085 | 0,035 | 1         | 0,944476506   | 1,058787587     | 2,428571429     |
| VPS50                                                                                               | 0,071300757 | -0,082424842 | 0,061 | 0,021 | 1         | 0,944468874   | 1,058796141     | 2,904761905     |
| HNRNPA1                                                                                             | 0,853452235 | -0,082438489 | 0,878 | 0,747 | 1         | 0,94445994    | 1,058806157     | 1,175368139     |
| INVS                                                                                                | 0,490935921 | -0,08244359  | 0,012 | 0,025 | 1         | 0,944456601   | 1,058809901     | 0,48            |
| USP49                                                                                               | 0,104227568 | -0,08248126  | 0     | 0,032 | 1         | 0,944431941   | 1,058837548     | 0               |
| STX17                                                                                               | 0,045205668 | -0,082487892 | 0,122 | 0,053 | 1         | 0,9444276     | 1,058842414     | 2,301886792     |
| FHIP2B                                                                                              | 0,0041326   | -0,082558904 | 0,195 | 0,074 | 1         | 0,944381114   | 1,058894534     | 2,635135135     |
| DHFR2                                                                                               | 0,584659388 | -0,0825672   | 0,037 | 0,025 | 1         | 0,944375684   | 1,058900623     | 1,48            |
| FAM218A                                                                                             | 0,89237004  | -0,082582901 | 0,012 | 0,014 | 1         | 0,944365406   | 1,058912147     | 0,857142857     |
| HNRNPLL                                                                                             | 0,046657062 | -0,08268651  | 0,171 | 0,084 | 1         | 0,944297588   | 1,058988197     | 2,035714286     |
| DHTKD1                                                                                              | 0,728697501 | -0,082717916 | 0,012 | 0,018 | 1         | 0,944277031   | 1,059011251     | 0,666666667     |
| TLN2                                                                                                | 0,003557561 | -0,082727811 | 0,256 | 0,105 | 1         | 0,944270555   | 1,059018514     | 2,438095238     |
| TEX10                                                                                               | 0,394215653 | -0,082769898 | 0,085 | 0,056 | 1         | 0,944243009   | 1,059049409     | 1,517857143     |
| CSNK1D                                                                                              | 0,165786088 | -0,082822096 | 0,305 | 0,196 | 1         | 0,944208846   | 1,059087726     | 1,556122449     |
| LYRM7                                                                                               | 0,078804906 | -0,082823342 | 0,122 | 0,06  | 1         | 0,94420803    | 1,059088641     | 2,033333333     |
| ZNF415                                                                                              | 0,448248692 | -0,082888233 | 0,037 | 0,021 | 1         | 0,944165562   | 1,059136279     | 1,761904762     |
| TMEM140                                                                                             | 0,111246846 | -0,082976575 | 0,073 | 0,032 | 1         | 0,944107748   | 1,059201136     | 2,28125         |
| SUSD6                                                                                               | 0,359576043 | -0,083041661 | 0,11  | 0,074 | 1         | 0,944065156   | 1,059248923     | 1,486486486     |

Supplementary Table 2

| Differentially expressed genes_keloid-XL_comparing SC-Keloid vs. (SC-Myel, SC-Nonmyel, SC-Nonmyel2) |             |              |       |       |             |               |                 |                 |
|-----------------------------------------------------------------------------------------------------|-------------|--------------|-------|-------|-------------|---------------|-----------------|-----------------|
| gene                                                                                                | p_val       | avg_log2FC   | pct.1 | pct.2 | p_val_adj   | Foldchange_UP | Foldchange_DOWN | Ratio_pct1_pct2 |
| ACOX1                                                                                               | 0,159658848 | -0,083068335 | 0,11  | 0,06  | 1           | 0,944047702   | 1,059268507     | 1,833333333     |
| DNAJB9                                                                                              | 0,089767182 | -0,083082015 | 0,22  | 0,126 | 1           | 0,94403875    | 1,059278552     | 1,746031746     |
| GRAMD1B                                                                                             | 0,104227568 | -0,083098    | 0     | 0,032 | 1           | 0,944028291   | 1,059290288     | 0               |
| ZNF34                                                                                               | 0,374756667 | -0,083114629 | 0,073 | 0,046 | 1           | 0,94401741    | 1,059302498     | 1,586956522     |
| MIR4500HG                                                                                           | 0,228958629 | -0,083185982 | 0     | 0,018 | 1           | 0,943970721   | 1,05935489      | 0               |
| TLCD2                                                                                               | 0,727904339 | -0,083202713 | 0,037 | 0,028 | 1           | 0,943959774   | 1,059367176     | 1,321428571     |
| CCL20                                                                                               | 0,28286347  | -0,083232775 | 0     | 0,014 | 1           | 0,943940104   | 1,059389251     | 0               |
| EBF1                                                                                                | 0,597173043 | -0,083239789 | 0,012 | 0,021 | 1           | 0,943935516   | 1,059394401     | 0,571428571     |
| CRTAC1                                                                                              | 0,536668541 | -0,083346085 | 0,024 | 0,039 | 1           | 0,94386597    | 1,059472459     | 0,615384615     |
| APOO                                                                                                | 0,062461009 | -0,083353045 | 0,122 | 0,056 | 1           | 0,943861416   | 1,05947757      | 2,178571429     |
| HPS4                                                                                                | 0,029503827 | -0,083364251 | 0,146 | 0,063 | 1           | 0,943854085   | 1,059485799     | 2,317460317     |
| FCGR2A                                                                                              | 0,496145732 | -0,083478407 | 0,049 | 0,032 | 1           | 0,943779404   | 1,059569637     | 1,53125         |
| TM9SF3                                                                                              | 0,11870873  | -0,083479696 | 0,549 | 0,344 | 1           | 0,94377856    | 1,059570584     | 1,595930233     |
| RIOX2                                                                                               | 0,721906011 | -0,083481101 | 0,037 | 0,028 | 1           | 0,94377642    | 1,059571615     | 1,321428571     |
| B3GALNT2                                                                                            | 0,164618812 | -0,083491856 | 0,195 | 0,123 | 1           | 0,943770606   | 1,059579514     | 1,585365854     |
| SOX10                                                                                               | 0,166584348 | -0,083505439 | 0,671 | 0,467 | 1           | 0,94376172    | 1,05958949      | 1,436830835     |
| KNTC1                                                                                               | 0,710321163 | -0,083570884 | 0,024 | 0,018 | 1           | 0,94371891    | 1,059637557     | 1,333333333     |
| NKD1                                                                                                | 0,804187612 | -0,083691426 | 0,037 | 0,042 | 1           | 0,943640062   | 1,059726097     | 0,880952381     |
| LSG1                                                                                                | 0,178470047 | -0,083706946 | 0,098 | 0,053 | 1           | 0,943629911   | 1,059737497     | 1,849056604     |
| LINC01003                                                                                           | 0,009732629 | -0,083772813 | 0,183 | 0,074 | 1           | 0,94358683    | 1,059785881     | 2,472972973     |
| SETDB2                                                                                              | 0,098802025 | -0,083900411 | 0,098 | 0,046 | 1           | 0,943503378   | 1,059879618     | 2,130434783     |
| C8orf82                                                                                             | 6,34829E-06 | -0,08390044  | 0,268 | 0,07  | 0,133955355 | 0,943503359   | 1,059879639     | 3,828571429     |
| RAB40C                                                                                              | 0,146857221 | -0,08393619  | 0,122 | 0,067 | 1           | 0,94347998    | 1,059905903     | 1,820895522     |
| RRM2                                                                                                | 0,970105473 | -0,083986096 | 0,024 | 0,025 | 1           | 0,943447343   | 1,059942568     | 0,96            |
| RSKR                                                                                                | 0,187860656 | -0,084004113 | 0,024 | 0,007 | 1           | 0,943435561   | 1,059955805     | 3,428571429     |
| GPRASP1                                                                                             | 0,879365097 | -0,084055949 | 0,024 | 0,021 | 1           | 0,943401664   | 1,05999389      | 1,142857143     |
| ZNF879                                                                                              | 0,35350329  | -0,084066464 | 0     | 0,011 | 1           | 0,943394788   | 1,060001616     | 0               |
| LIFR                                                                                                | 0,941822149 | -0,084075088 | 0,049 | 0,046 | 1           | 0,943389149   | 1,060007952     | 1,065217391     |
| SNX12                                                                                               | 0,012171305 | -0,084234205 | 0,134 | 0,049 | 1           | 0,943285107   | 1,060124869     | 2,734693878     |
| CXCL16                                                                                              | 0,697385708 | -0,084270871 | 0,085 | 0,07  | 1           | 0,943261134   | 1,060151812     | 1,214285714     |

Supplementary Table 2

| Differentially expressed genes_keloid-XL_comparing SC-Keloid vs. (SC-Myel, SC-Nonmyel, SC-Nonmyel2) |             |              |       |       |           |               |                 |                 |
|-----------------------------------------------------------------------------------------------------|-------------|--------------|-------|-------|-----------|---------------|-----------------|-----------------|
| gene                                                                                                | p_val       | avg_log2FC   | pct.1 | pct.2 | p_val_adj | Foldchange_UP | Foldchange_DOWN | Ratio_pct1_pct2 |
| RNF26                                                                                               | 0,025884674 | -0,084297009 | 0,085 | 0,028 | 1         | 0,943244044   | 1,060171019     | 3,035714286     |
| AMOTL1                                                                                              | 0,039482216 | -0,084394065 | 0,256 | 0,137 | 1         | 0,94318059    | 1,060242344     | 1,868613139     |
| MOCS2                                                                                               | 0,00087382  | -0,084394246 | 0,439 | 0,196 | 1         | 0,943180472   | 1,060242477     | 2,239795918     |
| SLK                                                                                                 | 0,006771898 | -0,084468297 | 0,341 | 0,165 | 1         | 0,943132062   | 1,060296899     | 2,066666667     |
| TMTC1                                                                                               | 0,60063706  | -0,084485762 | 0,012 | 0,021 | 1         | 0,943120644   | 1,060309734     | 0,571428571     |
| MPHOSPH10                                                                                           | 0,070955131 | -0,084562581 | 0,22  | 0,123 | 1         | 0,943070427   | 1,060366194     | 1,788617886     |
| CD46                                                                                                | 0,073824741 | -0,084568779 | 0,585 | 0,354 | 1         | 0,943066376   | 1,06037075      | 1,652542373     |
| SPRTN                                                                                               | 0,069809627 | -0,084590283 | 0,085 | 0,035 | 1         | 0,943052319   | 1,060386555     | 2,428571429     |
| ABHD13                                                                                              | 0,042811684 | -0,084614982 | 0,11  | 0,046 | 1         | 0,943036174   | 1,060404709     | 2,391304348     |
| CELSR3                                                                                              | 0,228958629 | -0,084631288 | 0     | 0,018 | 1         | 0,943025516   | 1,060416694     | 0               |
| YIPF6                                                                                               | 0,000773322 | -0,084648556 | 0,329 | 0,133 | 1         | 0,943014228   | 1,060429387     | 2,473684211     |
| TPK1                                                                                                | 0,316484073 | -0,084728906 | 0,037 | 0,018 | 1         | 0,942961709   | 1,060488448     | 2,055555556     |
| CMBL                                                                                                | 0,153186787 | -0,084731465 | 0     | 0,025 | 1         | 0,942960037   | 1,060490329     | 0               |
| SH3RF1                                                                                              | 0,027537278 | -0,08473565  | 0,244 | 0,123 | 1         | 0,942957301   | 1,060493406     | 1,983739837     |
| ATP11B                                                                                              | 0,024003041 | -0,084756287 | 0,244 | 0,123 | 1         | 0,942943813   | 1,060508576     | 1,983739837     |
| MLF1                                                                                                | 0,001446109 | -0,084758167 | 0,329 | 0,137 | 1         | 0,942942584   | 1,060509958     | 2,401459854     |
| UBA3                                                                                                | 0,005861208 | -0,084776837 | 0,268 | 0,119 | 1         | 0,942930382   | 1,060523682     | 2,25210084      |
| METTL7A                                                                                             | 0,89237004  | -0,084781972 | 0,012 | 0,014 | 1         | 0,942927026   | 1,060527456     | 0,857142857     |
| CEP164                                                                                              | 0,025870211 | -0,084819128 | 0,159 | 0,07  | 1         | 0,942902741   | 1,06055477      | 2,271428571     |
| ZNF213                                                                                              | 0,1180597   | -0,084897059 | 0,049 | 0,018 | 1         | 0,942851809   | 1,06061206      | 2,722222222     |
| ZNF385D                                                                                             | 0,907904897 | -0,084913742 | 0,037 | 0,039 | 1         | 0,942840906   | 1,060624325     | 0,948717949     |
| POLK                                                                                                | 0,01532951  | -0,084923087 | 0,268 | 0,13  | 1         | 0,942834799   | 1,060631195     | 2,061538462     |
| AMT                                                                                                 | 0,111246846 | -0,08493972  | 0,073 | 0,032 | 1         | 0,942823929   | 1,060643424     | 2,28125         |
| TAF3                                                                                                | 0,086167986 | -0,0849569   | 0,159 | 0,084 | 1         | 0,942812702   | 1,060656054     | 1,892857143     |
| OR2A1-AS1                                                                                           | 0,275831025 | -0,084960679 | 0,049 | 0,025 | 1         | 0,942810232   | 1,060658832     | 1,96            |
| AKAP5                                                                                               | 0,35350329  | -0,084998421 | 0     | 0,011 | 1         | 0,942785568   | 1,06068658      | 0               |
| MED17                                                                                               | 0,080231029 | -0,0849988   | 0,22  | 0,126 | 1         | 0,94278532    | 1,060686859     | 1,746031746     |
| DVL3                                                                                                | 0,037136933 | -0,08500961  | 0,183 | 0,088 | 1         | 0,942778256   | 1,060694807     | 2,079545455     |
| FMOD                                                                                                | 0,351112297 | -0,085037583 | 0,024 | 0,011 | 1         | 0,942759976   | 1,060715373     | 2,181818182     |
| BCR                                                                                                 | 0,065878355 | -0,085094562 | 0,098 | 0,042 | 1         | 0,942722743   | 1,060757267     | 2,333333333     |

Supplementary Table 2

| Differentially expressed genes_keloid-XL_comparing SC-Keloid vs. (SC-Myel, SC-Nonmyel, SC-Nonmyel2) |             |              |       |       |           |               |                 |                 |
|-----------------------------------------------------------------------------------------------------|-------------|--------------|-------|-------|-----------|---------------|-----------------|-----------------|
| gene                                                                                                | p_val       | avg_log2FC   | pct.1 | pct.2 | p_val_adj | Foldchange_UP | Foldchange_DOWN | Ratio_pct1_pct2 |
| COPS3                                                                                               | 0,004379216 | -0,085203043 | 0,39  | 0,186 | 1         | 0,942651859   | 1,060837032     | 2,096774194     |
| ARHGAP17                                                                                            | 0,692437662 | -0,085257068 | 0,098 | 0,081 | 1         | 0,94261656    | 1,060876758     | 1,209876543     |
| SPRY2                                                                                               | 0,054141727 | -0,085599352 | 0,378 | 0,221 | 1         | 0,942392948   | 1,061128484     | 1,71040724      |
| PRR14L                                                                                              | 0,168694332 | -0,085611641 | 0,098 | 0,053 | 1         | 0,94238492    | 1,061137523     | 1,849056604     |
| TLL11                                                                                               | 0,89237004  | -0,085650179 | 0,012 | 0,014 | 1         | 0,942359747   | 1,061165869     | 0,857142857     |
| ZNF395                                                                                              | 0,632497817 | -0,085655216 | 0,061 | 0,046 | 1         | 0,942356457   | 1,061169574     | 1,326086957     |
| EXOC6B                                                                                              | 0,520728588 | -0,085745431 | 0,061 | 0,042 | 1         | 0,942297531   | 1,061235933     | 1,452380952     |
| RAB32                                                                                               | 5,37914E-05 | -0,085759876 | 0,341 | 0,119 | 1         | 0,942288097   | 1,061246559     | 2,865546218     |
| ARSJ                                                                                                | 0,839026091 | -0,085829781 | 0,024 | 0,028 | 1         | 0,942242439   | 1,061297983     | 0,857142857     |
| OXCT2                                                                                               | 0,28286347  | -0,085833788 | 0     | 0,014 | 1         | 0,942239823   | 1,06130093      | 0               |
| ADAP1                                                                                               | 0,060625499 | -0,085885553 | 0,134 | 0,063 | 1         | 0,942206015   | 1,061339011     | 2,126984127     |
| UNKL                                                                                                | 0,614137268 | -0,085897078 | 0,024 | 0,035 | 1         | 0,942198488   | 1,06134749      | 0,685714286     |
| PSME3IP1                                                                                            | 0,002940714 | -0,08593959  | 0,256 | 0,105 | 1         | 0,942170724   | 1,061378765     | 2,438095238     |
| ARFGF2                                                                                              | 0,469322726 | -0,085985533 | 0,085 | 0,06  | 1         | 0,942140722   | 1,061412565     | 1,416666667     |
| SLC7A1                                                                                              | 0,148269262 | -0,085988444 | 0,122 | 0,067 | 1         | 0,942138821   | 1,061414707     | 1,820895522     |
| PSEN2                                                                                               | 0,01104171  | -0,086026335 | 0,073 | 0,018 | 1         | 0,942114076   | 1,061442585     | 4,055555556     |
| SNX24                                                                                               | 0,195411123 | -0,086057335 | 0,012 | 0,042 | 1         | 0,942093833   | 1,061465393     | 0,285714286     |
| ASPN                                                                                                | 0,970105473 | -0,086097754 | 0,024 | 0,025 | 1         | 0,942067439   | 1,061495131     | 0,96            |
| MERTK                                                                                               | 0,283838244 | -0,086115816 | 0,012 | 0,035 | 1         | 0,942055645   | 1,061508421     | 0,342857143     |
| ZNF484                                                                                              | 0,023573977 | -0,086140161 | 0,073 | 0,021 | 1         | 0,942039748   | 1,061526333     | 3,476190476     |
| STK38L                                                                                              | 0,982342462 | -0,086154748 | 0,037 | 0,035 | 1         | 0,942030224   | 1,061537066     | 1,057142857     |
| CYP26B1                                                                                             | 0,153186787 | -0,086177917 | 0     | 0,025 | 1         | 0,942015095   | 1,061554115     | 0               |
| WDR89                                                                                               | 0,28286347  | -0,086199074 | 0     | 0,014 | 1         | 0,942001281   | 1,061569682     | 0               |
| CHST6                                                                                               | 0,89237004  | -0,086254544 | 0,012 | 0,014 | 1         | 0,941965062   | 1,061610499     | 0,857142857     |
| AEN                                                                                                 | 0,371454665 | -0,086257857 | 0,073 | 0,046 | 1         | 0,941962899   | 1,061612937     | 1,586956522     |
| PLVAP                                                                                               | 0,219565872 | -0,086292077 | 0,073 | 0,039 | 1         | 0,941940557   | 1,061638118     | 1,871794872     |
| KLF3                                                                                                | 0,000580962 | -0,086309423 | 0,378 | 0,158 | 1         | 0,941929231   | 1,061650883     | 2,392405063     |
| PXMP4                                                                                               | 0,103691765 | -0,086322707 | 0,098 | 0,046 | 1         | 0,941920558   | 1,061660658     | 2,130434783     |
| RPS6KA1                                                                                             | 0,597099695 | -0,086386368 | 0,049 | 0,035 | 1         | 0,941878995   | 1,061707507     | 1,4             |
| CDH23                                                                                               | 0,28286347  | -0,086459066 | 0     | 0,014 | 1         | 0,941831535   | 1,061761008     | 0               |



Supplementary Table 2

| Differentially expressed genes_keloid-XL_comparing SC-Keloid vs. (SC-Myel, SC-Nonmyel, SC-Nonmyel2) |             |              |       |       |             |               |                 |                 |
|-----------------------------------------------------------------------------------------------------|-------------|--------------|-------|-------|-------------|---------------|-----------------|-----------------|
| gene                                                                                                | p_val       | avg_log2FC   | pct.1 | pct.2 | p_val_adj   | Foldchange_UP | Foldchange_DOWN | Ratio_pct1_pct2 |
| DTD2                                                                                                | 0,85248313  | -0,086463476 | 0,037 | 0,032 | 1           | 0,941828656   | 1,061764253     | 1,15625         |
| TNFRSF10B                                                                                           | 0,007655114 | -0,086477307 | 0,134 | 0,046 | 1           | 0,941819627   | 1,061774433     | 2,913043478     |
| COQ7                                                                                                | 0,046698891 | -0,086495146 | 0,098 | 0,039 | 1           | 0,941807982   | 1,061787561     | 2,512820513     |
| TYW3                                                                                                | 0,0088054   | -0,086611371 | 0,183 | 0,074 | 1           | 0,941732111   | 1,061873104     | 2,472972973     |
| FAM72D                                                                                              | 0,490935921 | -0,086614536 | 0,012 | 0,025 | 1           | 0,941730045   | 1,061875433     | 0,48            |
| PSMC6                                                                                               | 0,004947172 | -0,086742133 | 0,341 | 0,158 | 1           | 0,941646759   | 1,061969353     | 2,158227848     |
| ACCS                                                                                                | 0,069438782 | -0,086772761 | 0,061 | 0,021 | 1           | 0,941626769   | 1,061991899     | 2,904761905     |
| STRIP1                                                                                              | 0,057408263 | -0,086774705 | 0,122 | 0,056 | 1           | 0,9416255     | 1,06199333      | 2,178571429     |
| PARP12                                                                                              | 0,290906351 | -0,086787326 | 0,098 | 0,06  | 1           | 0,941617262   | 1,06200262      | 1,633333333     |
| SEH1L                                                                                               | 0,072859145 | -0,086790233 | 0,146 | 0,074 | 1           | 0,941615365   | 1,062004761     | 1,972972973     |
| C8orf88                                                                                             | 0,728697501 | -0,086795882 | 0,012 | 0,018 | 1           | 0,941611678   | 1,062008919     | 0,666666667     |
| SYMPK                                                                                               | 0,052049857 | -0,086798547 | 0,195 | 0,102 | 1           | 0,941609939   | 1,062010881     | 1,911764706     |
| EPM2A                                                                                               | 0,727904339 | -0,086859294 | 0,037 | 0,028 | 1           | 0,941570291   | 1,062055599     | 1,321428571     |
| ERAP1                                                                                               | 0,256129326 | -0,086891342 | 0,11  | 0,067 | 1           | 0,941549376   | 1,062079192     | 1,641791045     |
| ADGRL1                                                                                              | 0,324703669 | -0,086910756 | 0,061 | 0,035 | 1           | 0,941536705   | 1,062093484     | 1,742857143     |
| SNX33                                                                                               | 0,498483398 | -0,087033927 | 0,049 | 0,032 | 1           | 0,941456325   | 1,062184165     | 1,53125         |
| UST                                                                                                 | 0,834704212 | -0,087091749 | 0,049 | 0,042 | 1           | 0,941418593   | 1,062226737     | 1,166666667     |
| RNF138                                                                                              | 0,965073463 | -0,087150103 | 0,049 | 0,046 | 1           | 0,941380515   | 1,062269703     | 1,065217391     |
| SIRPA                                                                                               | 0,490935921 | -0,087190117 | 0,012 | 0,025 | 1           | 0,941354406   | 1,062299166     | 0,48            |
| GRIN2C                                                                                              | 0,89237004  | -0,087199572 | 0,012 | 0,014 | 1           | 0,941348236   | 1,062306128     | 0,857142857     |
| DNAAF9                                                                                              | 5,97865E-07 | -0,08722449  | 0,256 | 0,056 | 0,012615549 | 0,941331977   | 1,062324477     | 4,571428571     |
| LRRC37A2                                                                                            | 0,490935921 | -0,087312324 | 0,012 | 0,025 | 1           | 0,941274669   | 1,062389154     | 0,48            |
| ARL6IP5                                                                                             | 0,025555075 | -0,087318855 | 0,622 | 0,361 | 1           | 0,941270408   | 1,062393964     | 1,72299169      |
| DCLK2                                                                                               | 0,616856942 | -0,087356626 | 0,061 | 0,046 | 1           | 0,941245765   | 1,062421779     | 1,326086957     |
| RARG                                                                                                | 0,316456935 | -0,087397264 | 0,183 | 0,126 | 1           | 0,941219252   | 1,062451706     | 1,452380952     |
| CNKSRI                                                                                              | 0,493879805 | -0,087514491 | 0,012 | 0,025 | 1           | 0,941142776   | 1,062538039     | 0,48            |
| SLC23A2                                                                                             | 0,268371348 | -0,087577937 | 0,22  | 0,151 | 1           | 0,941101388   | 1,062584768     | 1,456953642     |
| STARD5                                                                                              | 0,819098492 | -0,087760163 | 0,049 | 0,042 | 1           | 0,940982526   | 1,062718991     | 1,166666667     |
| LRIG2                                                                                               | 0,757837918 | -0,087764578 | 0,061 | 0,07  | 1           | 0,940979646   | 1,062722243     | 0,871428571     |
| PPP1R21                                                                                             | 0,229466246 | -0,087890608 | 0,073 | 0,039 | 1           | 0,940897448   | 1,062815084     | 1,871794872     |

Supplementary Table 2

| Differentially expressed genes_keloid-XL_comparing SC-Keloid vs. (SC-Myel, SC-Nonmyel, SC-Nonmyel2) |             |              |       |       |           |               |                 |                 |
|-----------------------------------------------------------------------------------------------------|-------------|--------------|-------|-------|-----------|---------------|-----------------|-----------------|
| gene                                                                                                | p_val       | avg_log2FC   | pct.1 | pct.2 | p_val_adj | Foldchange_UP | Foldchange_DOWN | Ratio_pct1_pct2 |
| RBM12                                                                                               | 0,312458686 | -0,088039157 | 0,11  | 0,07  | 1         | 0,940800573   | 1,062924523     | 1,571428571     |
| ADAMTS4                                                                                             | 0,042105158 | -0,088077143 | 0,207 | 0,105 | 1         | 0,940775802   | 1,06295251      | 1,971428571     |
| H6PD                                                                                                | 0,009697844 | -0,088324802 | 0,171 | 0,067 | 1         | 0,940614318   | 1,063134997     | 2,552238806     |
| TUFT1                                                                                               | 0,1180597   | -0,088344488 | 0,049 | 0,018 | 1         | 0,940601483   | 1,063149504     | 2,722222222     |
| FGFBP3                                                                                              | 0,334326668 | -0,088369748 | 0,012 | 0,032 | 1         | 0,940585014   | 1,063168118     | 0,375           |
| USP10                                                                                               | 0,008314813 | -0,088388187 | 0,268 | 0,126 | 1         | 0,940572993   | 1,063181707     | 2,126984127     |
| DICER1                                                                                              | 0,030436313 | -0,088455298 | 0,378 | 0,211 | 1         | 0,940529241   | 1,063231165     | 1,791469194     |
| CEP126                                                                                              | 0,326853336 | -0,088464495 | 0,085 | 0,053 | 1         | 0,940523245   | 1,063237943     | 1,603773585     |
| ACTR1B                                                                                              | 0,000908444 | -0,088513772 | 0,256 | 0,095 | 1         | 0,94049112    | 1,06327426      | 2,694736842     |
| EEFSEC                                                                                              | 0,016025461 | -0,088526563 | 0,098 | 0,032 | 1         | 0,940482782   | 1,063283687     | 3,0625          |
| PPAT                                                                                                | 0,829997838 | -0,088539033 | 0,061 | 0,053 | 1         | 0,940474653   | 1,063292877     | 1,150943396     |
| BTD                                                                                                 | 0,893008282 | -0,088539818 | 0,098 | 0,088 | 1         | 0,940474141   | 1,063293456     | 1,113636364     |
| EIF4E3                                                                                              | 0,224477053 | -0,088555073 | 0,073 | 0,039 | 1         | 0,940464197   | 1,0633047       | 1,871794872     |
| SLC27A6                                                                                             | 0,126161321 | -0,088555984 | 0     | 0,028 | 1         | 0,940463603   | 1,063305371     | 0               |
| WAPL                                                                                                | 0,062706726 | -0,088581185 | 0,268 | 0,151 | 1         | 0,940447175   | 1,063323944     | 1,774834437     |
| EXOC3                                                                                               | 0,130233211 | -0,088678581 | 0,22  | 0,133 | 1         | 0,940383688   | 1,063395732     | 1,654135338     |
| ADAM32                                                                                              | 0,228958629 | -0,088720654 | 0     | 0,018 | 1         | 0,940356264   | 1,063426744     | 0               |
| SENP7                                                                                               | 0,009973586 | -0,088788176 | 0,317 | 0,154 | 1         | 0,940312254   | 1,063476517     | 2,058441558     |
| MCC                                                                                                 | 0,333985977 | -0,088794791 | 0,085 | 0,053 | 1         | 0,940307942   | 1,063481392     | 1,603773585     |
| C16orf91                                                                                            | 0,020788025 | -0,088804724 | 0,146 | 0,06  | 1         | 0,940301469   | 1,063488714     | 2,433333333     |
| NAIP                                                                                                | 0,116405688 | -0,088812217 | 0,061 | 0,025 | 1         | 0,940296584   | 1,063494238     | 2,44            |
| IL17RE                                                                                              | 0,366535625 | -0,0888214   | 0,073 | 0,046 | 1         | 0,9402906     | 1,063501008     | 1,586956522     |
| GPX2                                                                                                | 0,28286347  | -0,088832486 | 0     | 0,014 | 1         | 0,940283374   | 1,06350918      | 0               |
| TRPC1                                                                                               | 0,490935921 | -0,088885271 | 0,012 | 0,025 | 1         | 0,940248972   | 1,063548092     | 0,48            |
| RICTOR                                                                                              | 0,055791932 | -0,088934489 | 0,195 | 0,102 | 1         | 0,940216896   | 1,063584376     | 1,911764706     |
| ZNF587                                                                                              | 0,11730029  | -0,088949935 | 0,061 | 0,025 | 1         | 0,94020683    | 1,063595763     | 2,44            |
| PCGF2                                                                                               | 0,009729014 | -0,088957731 | 0,28  | 0,133 | 1         | 0,940201749   | 1,06360151      | 2,105263158     |
| POLR3D                                                                                              | 0,178470047 | -0,08899102  | 0,098 | 0,053 | 1         | 0,940180055   | 1,063626052     | 1,849056604     |
| MARCHF1                                                                                             | 0,464496034 | -0,089004068 | 0,024 | 0,042 | 1         | 0,940171551   | 1,063635672     | 0,571428571     |
| NOL10                                                                                               | 0,008687927 | -0,089021259 | 0,183 | 0,074 | 1         | 0,940160349   | 1,063648346     | 2,472972973     |

Supplementary Table 2

| Differentially expressed genes_keloid-XL_comparing SC-Keloid vs. (SC-Myel, SC-Nonmyel, SC-Nonmyel2) |             |              |       |       |             |               |                 |                 |
|-----------------------------------------------------------------------------------------------------|-------------|--------------|-------|-------|-------------|---------------|-----------------|-----------------|
| gene                                                                                                | p_val       | avg_log2FC   | pct.1 | pct.2 | p_val_adj   | Foldchange_UP | Foldchange_DOWN | Ratio_pct1_pct2 |
| CCDC3                                                                                               | 0,718963318 | -0,089041999 | 0,049 | 0,039 | 1           | 0,940146833   | 1,063663637     | 1,256410256     |
| KCNE1                                                                                               | 0,89237004  | -0,089149794 | 0,012 | 0,014 | 1           | 0,94007659    | 1,063743115     | 0,857142857     |
| RBM45                                                                                               | 0,500826907 | -0,089161186 | 0,049 | 0,032 | 1           | 0,940069167   | 1,063751515     | 1,53125         |
| ZNF296                                                                                              | 0,126161321 | -0,089206435 | 0     | 0,028 | 1           | 0,940039683   | 1,063784879     | 0               |
| NBL1                                                                                                | 0,185840123 | -0,089228544 | 0,098 | 0,053 | 1           | 0,940025277   | 1,063801181     | 1,849056604     |
| ZNF571                                                                                              | 0,104227568 | -0,089262078 | 0     | 0,032 | 1           | 0,940003427   | 1,063825909     | 0               |
| HPDL                                                                                                | 0,28286347  | -0,089312233 | 0     | 0,014 | 1           | 0,939970749   | 1,063862893     | 0               |
| CTDSPL                                                                                              | 0,029071799 | -0,08933883  | 0,256 | 0,133 | 1           | 0,93995342    | 1,063882506     | 1,92481203      |
| NBN                                                                                                 | 0,035699662 | -0,089347093 | 0,244 | 0,126 | 1           | 0,939948036   | 1,063888599     | 1,936507937     |
| LRP3                                                                                                | 0,153186787 | -0,089370514 | 0     | 0,025 | 1           | 0,939932777   | 1,063905871     | 0               |
| FAM135A                                                                                             | 0,179372449 | -0,089373685 | 0,061 | 0,028 | 1           | 0,939930711   | 1,063908209     | 2,178571429     |
| TEX41                                                                                               | 0,35350329  | -0,089386542 | 0     | 0,011 | 1           | 0,939922335   | 1,063917691     | 0               |
| ZNF609                                                                                              | 0,917262847 | -0,08949211  | 0,11  | 0,102 | 1           | 0,939853559   | 1,063995545     | 1,078431373     |
| ZNF582                                                                                              | 0,186763581 | -0,08951507  | 0     | 0,021 | 1           | 0,939838602   | 1,064012478     | 0               |
| DNMT1                                                                                               | 0,025086969 | -0,089517405 | 0,317 | 0,172 | 1           | 0,939837081   | 1,0640142       | 1,843023256     |
| COL27A1                                                                                             | 0,580160595 | -0,089548609 | 0,317 | 0,263 | 1           | 0,939816753   | 1,064037214     | 1,205323194     |
| SLC44A2                                                                                             | 0,025838761 | -0,089664246 | 0,415 | 0,232 | 1           | 0,939741427   | 1,064122504     | 1,788793103     |
| RHOA                                                                                                | 0,727904339 | -0,089732897 | 0,037 | 0,028 | 1           | 0,93969671    | 1,064173142     | 1,321428571     |
| THOC1                                                                                               | 0,082762428 | -0,089777317 | 0,171 | 0,091 | 1           | 0,939667778   | 1,064205908     | 1,879120879     |
| PGRMC2                                                                                              | 0,000493812 | -0,089896295 | 0,476 | 0,207 | 1           | 0,939590287   | 1,064293675     | 2,299516908     |
| PARVA                                                                                               | 0,016687845 | -0,089922367 | 0,354 | 0,186 | 1           | 0,939573307   | 1,064312909     | 1,903225806     |
| EXOC1                                                                                               | 1,83455E-07 | -0,08992657  | 0,341 | 0,088 | 0,003871083 | 0,93957057    | 1,064316009     | 3,875           |
| C6orf120                                                                                            | 0,387271199 | -0,089980948 | 0,049 | 0,028 | 1           | 0,939535156   | 1,064356127     | 1,75            |
| UTP25                                                                                               | 0,58754085  | -0,090108652 | 0,037 | 0,025 | 1           | 0,939451995   | 1,064450345     | 1,48            |
| CRLF3                                                                                               | 0,597173043 | -0,090116284 | 0,012 | 0,021 | 1           | 0,939447025   | 1,064455976     | 0,571428571     |
| CPSF7                                                                                               | 0,022659537 | -0,090211122 | 0,195 | 0,091 | 1           | 0,939385271   | 1,064525953     | 2,142857143     |
| IL17D                                                                                               | 0,186763581 | -0,090215222 | 0     | 0,021 | 1           | 0,939382601   | 1,064528978     | 0               |
| GPSM2                                                                                               | 0,032464164 | -0,090226381 | 0,268 | 0,144 | 1           | 0,939375335   | 1,064537211     | 1,861111111     |
| BARD1                                                                                               | 0,183354719 | -0,090231914 | 0,146 | 0,088 | 1           | 0,939371733   | 1,064541294     | 1,659090909     |
| MACROD2                                                                                             | 0,599571757 | -0,090233336 | 0,049 | 0,035 | 1           | 0,939370806   | 1,064542344     | 1,4             |

Supplementary Table 2

| Differentially expressed genes_keloid-XL_comparing SC-Keloid vs. (SC-Myel, SC-Nonmyel, SC-Nonmyel2) |             |              |       |       |           |               |                 |                 |
|-----------------------------------------------------------------------------------------------------|-------------|--------------|-------|-------|-----------|---------------|-----------------|-----------------|
| gene                                                                                                | p_val       | avg_log2FC   | pct.1 | pct.2 | p_val_adj | Foldchange_UP | Foldchange_DOWN | Ratio_pct1_pct2 |
| UBA2                                                                                                | 0,006911296 | -0,090234678 | 0,293 | 0,133 | 1         | 0,939369933   | 1,064543334     | 2,203007519     |
| PALM2AKAP2                                                                                          | 0,067791358 | -0,090306241 | 0,683 | 0,432 | 1         | 0,939323338   | 1,06459614      | 1,581018519     |
| TMEFF1                                                                                              | 0,493879805 | -0,090345196 | 0,012 | 0,025 | 1         | 0,939297975   | 1,064624886     | 0,48            |
| GMCL1                                                                                               | 0,048276044 | -0,090347474 | 0,159 | 0,077 | 1         | 0,939296492   | 1,064626568     | 2,064935065     |
| DNAJC24                                                                                             | 0,01178067  | -0,090406059 | 0,256 | 0,119 | 1         | 0,939258349   | 1,064669801     | 2,151260504     |
| RAMP3                                                                                               | 0,490935921 | -0,090449313 | 0,012 | 0,025 | 1         | 0,939230189   | 1,064701722     | 0,48            |
| TRIM36                                                                                              | 0,728697501 | -0,090480502 | 0,012 | 0,018 | 1         | 0,939209885   | 1,064724739     | 0,666666667     |
| BAMBI                                                                                               | 0,171123657 | -0,090491389 | 0,012 | 0,046 | 1         | 0,939202798   | 1,064732774     | 0,260869565     |
| THSD1                                                                                               | 0,60411013  | -0,090498058 | 0,012 | 0,021 | 1         | 0,939198456   | 1,064737696     | 0,571428571     |
| RUSF1                                                                                               | 0,007048143 | -0,090588245 | 0,146 | 0,053 | 1         | 0,939139746   | 1,064804258     | 2,754716981     |
| CSGALNACT1                                                                                          | 0,280260254 | -0,09062006  | 0,012 | 0,035 | 1         | 0,939119036   | 1,064827739     | 0,342857143     |
| SERGEF                                                                                              | 0,119598668 | -0,090648895 | 0,122 | 0,063 | 1         | 0,939100266   | 1,064849023     | 1,936507937     |
| AK4                                                                                                 | 0,732741497 | -0,090835179 | 0,012 | 0,018 | 1         | 0,938979015   | 1,064986527     | 0,666666667     |
| ELMO2                                                                                               | 0,444731778 | -0,09083655  | 0,073 | 0,049 | 1         | 0,938978123   | 1,064987539     | 1,489795918     |
| ZNF518B                                                                                             | 0,845578881 | -0,090853399 | 0,024 | 0,028 | 1         | 0,938967156   | 1,064999977     | 0,857142857     |
| NAPB                                                                                                | 0,597173043 | -0,090890246 | 0,012 | 0,021 | 1         | 0,938943175   | 1,065027178     | 0,571428571     |
| CCL19                                                                                               | 0,35350329  | -0,090936321 | 0     | 0,011 | 1         | 0,938913189   | 1,065061191     | 0               |
| QPRT                                                                                                | 0,229374221 | -0,090991035 | 0,012 | 0,039 | 1         | 0,938877582   | 1,065101585     | 0,307692308     |
| CACNA2D2                                                                                            | 0,728697501 | -0,091023919 | 0,012 | 0,018 | 1         | 0,938856181   | 1,065125863     | 0,666666667     |
| SGK3                                                                                                | 0,731878941 | -0,091178441 | 0,049 | 0,039 | 1         | 0,938755629   | 1,06523995      | 1,256410256     |
| LINC01550                                                                                           | 0,710321163 | -0,091259513 | 0,024 | 0,018 | 1         | 0,938702877   | 1,065299813     | 1,333333333     |
| CD2AP                                                                                               | 0,001075644 | -0,091323459 | 0,22  | 0,077 | 1         | 0,938661272   | 1,065347032     | 2,857142857     |
| DPF2                                                                                                | 0,130937101 | -0,091374987 | 0,183 | 0,109 | 1         | 0,938627747   | 1,065385083     | 1,678899083     |
| CRTC3                                                                                               | 0,003285912 | -0,091488203 | 0,293 | 0,126 | 1         | 0,93855409    | 1,065468694     | 2,325396825     |
| FAM20B                                                                                              | 0,029447556 | -0,091506959 | 0,11  | 0,042 | 1         | 0,938541888   | 1,065482545     | 2,619047619     |
| CHIC1                                                                                               | 0,215933438 | -0,091559417 | 0,073 | 0,039 | 1         | 0,938507763   | 1,065521288     | 1,871794872     |
| DENND5B                                                                                             | 0,257323577 | -0,09157021  | 0,085 | 0,049 | 1         | 0,938500741   | 1,06552926      | 1,734693878     |
| TRMT10A                                                                                             | 0,387271199 | -0,091580268 | 0,049 | 0,028 | 1         | 0,938494199   | 1,065536688     | 1,75            |
| TBC1D23                                                                                             | 0,014588604 | -0,091587159 | 0,22  | 0,102 | 1         | 0,938489716   | 1,065541777     | 2,156862745     |
| CD47                                                                                                | 0,008099644 | -0,091694569 | 0,463 | 0,242 | 1         | 0,938419847   | 1,065621111     | 1,91322314      |

Supplementary Table 2

| Differentially expressed genes_keloid-XL_comparing SC-Keloid vs. (SC-Myel, SC-Nonmyel, SC-Nonmyel2) |             |              |       |       |           |               |                 |                 |
|-----------------------------------------------------------------------------------------------------|-------------|--------------|-------|-------|-----------|---------------|-----------------|-----------------|
| gene                                                                                                | p_val       | avg_log2FC   | pct.1 | pct.2 | p_val_adj | Foldchange_UP | Foldchange_DOWN | Ratio_pct1_pct2 |
| BMPR1B                                                                                              | 0,229374221 | -0,091733064 | 0,012 | 0,039 | 1         | 0,938394808   | 1,065649545     | 0,307692308     |
| RAB11FIP2                                                                                           | 0,79338153  | -0,091735194 | 0,098 | 0,084 | 1         | 0,938393422   | 1,065651119     | 1,166666667     |
| ACSM5                                                                                               | 0,35350329  | -0,091797634 | 0     | 0,011 | 1         | 0,938352809   | 1,065697241     | 0               |
| IPO5                                                                                                | 0,011055497 | -0,091823428 | 0,329 | 0,165 | 1         | 0,938336033   | 1,065716295     | 1,993939394     |
| ADHFE1                                                                                              | 0,228958629 | -0,091861898 | 0     | 0,018 | 1         | 0,938311012   | 1,065744712     | 0               |
| SPAG8                                                                                               | 0,710321163 | -0,091866    | 0,024 | 0,018 | 1         | 0,938308344   | 1,065747743     | 1,333333333     |
| LINC01001                                                                                           | 0,706611845 | -0,091867049 | 0,024 | 0,018 | 1         | 0,938307662   | 1,065748518     | 1,333333333     |
| ITPKB                                                                                               | 0,08973167  | -0,091887085 | 0,146 | 0,077 | 1         | 0,938294631   | 1,065763319     | 1,896103896     |
| ERO1A                                                                                               | 0,130435012 | -0,091899966 | 0,134 | 0,074 | 1         | 0,938286253   | 1,065772835     | 1,810810811     |
| PTHLH                                                                                               | 0,459226901 | -0,091925235 | 0,085 | 0,06  | 1         | 0,93826982    | 1,065791502     | 1,416666667     |
| VPS39                                                                                               | 0,197323814 | -0,091951203 | 0,11  | 0,063 | 1         | 0,938252931   | 1,065810686     | 1,746031746     |
| NOL4L                                                                                               | 0,034844869 | -0,091960763 | 0,159 | 0,074 | 1         | 0,938246714   | 1,065817749     | 2,148648649     |
| CFHR1                                                                                               | 0,35350329  | -0,09199142  | 0     | 0,011 | 1         | 0,938226776   | 1,065840398     | 0               |
| GZF1                                                                                                | 0,498483398 | -0,092095603 | 0,049 | 0,032 | 1         | 0,938159025   | 1,065917369     | 1,53125         |
| CDK3                                                                                                | 0,442988867 | -0,092182045 | 0,037 | 0,021 | 1         | 0,938102816   | 1,065981237     | 1,761904762     |
| FILIP1L                                                                                             | 0,00553128  | -0,092202183 | 0,207 | 0,084 | 1         | 0,938089721   | 1,065996117     | 2,464285714     |
| SYN3                                                                                                | 0,908489202 | -0,092283082 | 0,012 | 0,011 | 1         | 0,938037119   | 1,066055895     | 1,090909091     |
| ZFHX4                                                                                               | 0,52904607  | -0,092284858 | 0,073 | 0,053 | 1         | 0,938035964   | 1,066057207     | 1,377358491     |
| ALAD                                                                                                | 0,116579956 | -0,092287694 | 0,122 | 0,063 | 1         | 0,938034121   | 1,066059302     | 1,936507937     |
| TSPAN7                                                                                              | 0,224904766 | -0,092418389 | 0,122 | 0,074 | 1         | 0,937949147   | 1,066155882     | 1,648648649     |
| CTDSP2                                                                                              | 0,138404798 | -0,092448991 | 0,402 | 0,26  | 1         | 0,937929251   | 1,066178497     | 1,546153846     |
| DNAJC25                                                                                             | 0,073383353 | -0,092454621 | 0,085 | 0,035 | 1         | 0,937925591   | 1,066182658     | 2,428571429     |
| RAB4A                                                                                               | 0,005779094 | -0,092564446 | 0,341 | 0,161 | 1         | 0,937854195   | 1,066263824     | 2,118012422     |
| SFMBT2                                                                                              | 0,522178538 | -0,092621146 | 0,024 | 0,039 | 1         | 0,937817336   | 1,06630573      | 0,615384615     |
| ANKRD29                                                                                             | 0,404681217 | -0,092625803 | 0,012 | 0,028 | 1         | 0,937814309   | 1,066309173     | 0,428571429     |
| PRRX2                                                                                               | 0,597173043 | -0,092758277 | 0,012 | 0,021 | 1         | 0,937728199   | 1,06640709      | 0,571428571     |
| RBAK                                                                                                | 0,336686163 | -0,092832745 | 0,061 | 0,035 | 1         | 0,937679797   | 1,066462136     | 1,742857143     |
| LMO7DN                                                                                              | 0,126161321 | -0,092875838 | 0     | 0,028 | 1         | 0,937651789   | 1,066493992     | 0               |
| POLG2                                                                                               | 0,963493835 | -0,093035838 | 0,049 | 0,049 | 1         | 0,937547807   | 1,066612276     | 1               |
| KDM5C                                                                                               | 0,351265073 | -0,093143879 | 0,183 | 0,13  | 1         | 0,937477598   | 1,066692156     | 1,407692308     |

Supplementary Table 2

| Differentially expressed genes_keloid-XL_comparing SC-Keloid vs. (SC-Myel, SC-Nonmyel, SC-Nonmyel2) |             |              |       |       |           |               |                 |                 |
|-----------------------------------------------------------------------------------------------------|-------------|--------------|-------|-------|-----------|---------------|-----------------|-----------------|
| gene                                                                                                | p_val       | avg_log2FC   | pct.1 | pct.2 | p_val_adj | Foldchange_UP | Foldchange_DOWN | Ratio_pct1_pct2 |
| CNTNAP1                                                                                             | 0,278482798 | -0,093185129 | 0,012 | 0,035 | 1         | 0,937450793   | 1,066722656     | 0,342857143     |
| PARP14                                                                                              | 0,001267337 | -0,093205039 | 0,232 | 0,084 | 1         | 0,937437856   | 1,066737377     | 2,761904762     |
| H2AC12                                                                                              | 0,228958629 | -0,093248072 | 0     | 0,018 | 1         | 0,937409895   | 1,066769196     | 0               |
| PDE12                                                                                               | 0,614636435 | -0,093328425 | 0,061 | 0,046 | 1         | 0,937357686   | 1,066828613     | 1,326086957     |
| PAPLN                                                                                               | 0,60063706  | -0,093361712 | 0,012 | 0,021 | 1         | 0,937336058   | 1,066853229     | 0,571428571     |
| AP3M1                                                                                               | 0,007679309 | -0,093383167 | 0,146 | 0,053 | 1         | 0,937322119   | 1,066869094     | 2,754716981     |
| RFXAP                                                                                               | 0,58754085  | -0,093394951 | 0,037 | 0,025 | 1         | 0,937314463   | 1,066877808     | 1,48            |
| AL627171.2                                                                                          | 0,391045221 | -0,09346502  | 0,268 | 0,204 | 1         | 0,93726894    | 1,066929626     | 1,31372549      |
| BMP7                                                                                                | 0,086314699 | -0,09350401  | 0     | 0,035 | 1         | 0,937243611   | 1,066958461     | 0               |
| CYP46A1                                                                                             | 0,228958629 | -0,093519885 | 0     | 0,018 | 1         | 0,937233297   | 1,066970202     | 0               |
| EYA2                                                                                                | 0,153186787 | -0,093528065 | 0     | 0,025 | 1         | 0,937227983   | 1,066976252     | 0               |
| RHCE                                                                                                | 0,228958629 | -0,093529743 | 0     | 0,018 | 1         | 0,937226893   | 1,066977492     | 0               |
| GTF3C5                                                                                              | 0,333033863 | -0,093561802 | 0,098 | 0,063 | 1         | 0,937206067   | 1,067001202     | 1,555555556     |
| LATS1                                                                                               | 0,412917368 | -0,093583291 | 0,134 | 0,095 | 1         | 0,937192107   | 1,067017096     | 1,410526316     |
| REPIN1                                                                                              | 0,066914956 | -0,093593725 | 0,232 | 0,13  | 1         | 0,937185329   | 1,067024812     | 1,784615385     |
| DBF4                                                                                                | 0,970105473 | -0,09362833  | 0,024 | 0,025 | 1         | 0,937162849   | 1,067050407     | 0,96            |
| PLSCR1                                                                                              | 0,052126725 | -0,093703638 | 0,146 | 0,07  | 1         | 0,937113931   | 1,067106108     | 2,085714286     |
| AFMID                                                                                               | 0,018786715 | -0,093856862 | 0,11  | 0,039 | 1         | 0,937014409   | 1,067219448     | 2,820512821     |
| PKIB                                                                                                | 0,334326668 | -0,09389707  | 0,012 | 0,032 | 1         | 0,936988294   | 1,067249192     | 0,375           |
| MYO15B                                                                                              | 0,018506169 | -0,093897513 | 0,195 | 0,088 | 1         | 0,936988007   | 1,067249519     | 2,215909091     |
| CLCC1                                                                                               | 0,213665947 | -0,09391188  | 0,134 | 0,081 | 1         | 0,936978676   | 1,067260147     | 1,654320988     |
| FUZ                                                                                                 | 0,376414451 | -0,093979287 | 0,073 | 0,046 | 1         | 0,936934899   | 1,067310014     | 1,586956522     |
| CLASRP                                                                                              | 0,055526857 | -0,093987719 | 0,195 | 0,102 | 1         | 0,936929423   | 1,067316252     | 1,911764706     |
| FBXO42                                                                                              | 0,635463215 | -0,094088554 | 0,085 | 0,067 | 1         | 0,936863939   | 1,067390854     | 1,268656716     |
| NAA25                                                                                               | 0,736375474 | -0,094139467 | 0,085 | 0,07  | 1         | 0,936830878   | 1,067428522     | 1,214285714     |
| VPS18                                                                                               | 0,112880777 | -0,094153641 | 0,061 | 0,025 | 1         | 0,936821674   | 1,06743901      | 2,44            |
| C3orf52                                                                                             | 0,970105448 | -0,094260354 | 0,024 | 0,025 | 1         | 0,936752382   | 1,067517969     | 0,96            |
| MTMR9                                                                                               | 0,290906351 | -0,094305028 | 0,098 | 0,06  | 1         | 0,936723375   | 1,067551026     | 1,633333333     |
| IFFO2                                                                                               | 0,118960251 | -0,094408601 | 0,183 | 0,105 | 1         | 0,936656129   | 1,067627669     | 1,742857143     |
| CD302                                                                                               | 0,292477426 | -0,094507037 | 0,073 | 0,042 | 1         | 0,936592223   | 1,067700517     | 1,738095238     |

Supplementary Table 2

| Differentially expressed genes_keloid-XL_comparing SC-Keloid vs. (SC-Myel, SC-Nonmyel, SC-Nonmyel2) |             |              |       |       |           |               |                 |                 |
|-----------------------------------------------------------------------------------------------------|-------------|--------------|-------|-------|-----------|---------------|-----------------|-----------------|
| gene                                                                                                | p_val       | avg_log2FC   | pct.1 | pct.2 | p_val_adj | Foldchange_UP | Foldchange_DOWN | Ratio_pct1_pct2 |
| GPR173                                                                                              | 0,985285018 | -0,094537366 | 0,037 | 0,035 | 1         | 0,936572533   | 1,067722962     | 1,057142857     |
| PRIM1                                                                                               | 0,186763581 | -0,094552381 | 0     | 0,021 | 1         | 0,936562786   | 1,067734075     | 0               |
| GARRE1                                                                                              | 0,504567415 | -0,094630145 | 0,159 | 0,119 | 1         | 0,936512305   | 1,06779163      | 1,336134454     |
| DUOX1                                                                                               | 0,228958629 | -0,094654453 | 0     | 0,018 | 1         | 0,936496525   | 1,067809621     | 0               |
| UHRF1BP1L                                                                                           | 0,716075118 | -0,094659659 | 0,098 | 0,081 | 1         | 0,936493146   | 1,067813474     | 1,209876543     |
| KCNAB2                                                                                              | 0,19199525  | -0,094697402 | 0,049 | 0,021 | 1         | 0,936468647   | 1,06784141      | 2,333333333     |
| SPAST                                                                                               | 0,08333511  | -0,094776254 | 0,134 | 0,067 | 1         | 0,936417464   | 1,067899776     | 2               |
| PIK3CA                                                                                              | 0,159463083 | -0,094801342 | 0,134 | 0,077 | 1         | 0,93640118    | 1,067918347     | 1,74025974      |
| ZFP14                                                                                               | 0,160334939 | -0,094924458 | 0,073 | 0,035 | 1         | 0,936321274   | 1,068009484     | 2,085714286     |
| KIAA0408                                                                                            | 0,166384958 | -0,094951541 | 0,073 | 0,035 | 1         | 0,936303697   | 1,068029533     | 2,085714286     |
| NEU3                                                                                                | 0,228958629 | -0,094964221 | 0     | 0,018 | 1         | 0,936295467   | 1,06803892      | 0               |
| PCBD2                                                                                               | 0,279370565 | -0,09497058  | 0,049 | 0,025 | 1         | 0,936291341   | 1,068043628     | 1,96            |
| TEC                                                                                                 | 0,404681217 | -0,095015262 | 0,012 | 0,028 | 1         | 0,936262343   | 1,068076707     | 0,428571429     |
| LURAP1                                                                                              | 0,105722734 | -0,095108753 | 0,085 | 0,039 | 1         | 0,936201672   | 1,068145924     | 2,179487179     |
| CPED1                                                                                               | 0,153186787 | -0,095205975 | 0     | 0,025 | 1         | 0,936138584   | 1,068217908     | 0               |
| MINDY2                                                                                              | 0,098593397 | -0,095232799 | 0,354 | 0,218 | 1         | 0,936121179   | 1,068237769     | 1,623853211     |
| MSI1                                                                                                | 0,153186787 | -0,095241136 | 0     | 0,025 | 1         | 0,936115769   | 1,068243942     | 0               |
| GABPA                                                                                               | 0,025326474 | -0,09529696  | 0,195 | 0,091 | 1         | 0,936079548   | 1,068285278     | 2,142857143     |
| ASNSD1                                                                                              | 0,084285214 | -0,095299685 | 0,122 | 0,06  | 1         | 0,93607778    | 1,068287296     | 2,033333333     |
| SPATA2                                                                                              | 0,746662794 | -0,095309944 | 0,061 | 0,049 | 1         | 0,936071123   | 1,068294893     | 1,244897959     |
| ZBED4                                                                                               | 0,010831826 | -0,095371899 | 0,122 | 0,042 | 1         | 0,936030925   | 1,068340771     | 2,904761905     |
| CALCRL                                                                                              | 0,385169549 | -0,095374663 | 0,049 | 0,028 | 1         | 0,936029133   | 1,068342817     | 1,75            |
| NBPF3                                                                                               | 0,186763581 | -0,095397444 | 0     | 0,021 | 1         | 0,936014352   | 1,068359687     | 0               |
| RAD9B                                                                                               | 0,35350329  | -0,095421915 | 0     | 0,011 | 1         | 0,935998476   | 1,068377808     | 0               |
| FBXL19-AS1                                                                                          | 0,728697501 | -0,095474093 | 0,012 | 0,018 | 1         | 0,935964624   | 1,068416449     | 0,666666667     |
| MED29                                                                                               | 0,001146514 | -0,095507865 | 0,244 | 0,091 | 1         | 0,935942714   | 1,06844146      | 2,681318681     |
| ATXN1L                                                                                              | 0,372762349 | -0,095564642 | 0,11  | 0,074 | 1         | 0,935905881   | 1,068483509     | 1,486486486     |
| EIF4EBP2                                                                                            | 0,023432742 | -0,095607658 | 0,195 | 0,091 | 1         | 0,935877976   | 1,068515368     | 2,142857143     |
| KANSL2                                                                                              | 0,143372127 | -0,095628999 | 0,122 | 0,067 | 1         | 0,935864132   | 1,068531174     | 1,820895522     |
| EMSY                                                                                                | 0,411780381 | -0,095695033 | 0,098 | 0,067 | 1         | 0,935821297   | 1,068580083     | 1,462686567     |

Supplementary Table 2

| Differentially expressed genes_keloid-XL_comparing SC-Keloid vs. (SC-Myel, SC-Nonmyel, SC-Nonmyel2) |             |              |       |       |           |               |                 |                 |
|-----------------------------------------------------------------------------------------------------|-------------|--------------|-------|-------|-----------|---------------|-----------------|-----------------|
| gene                                                                                                | p_val       | avg_log2FC   | pct.1 | pct.2 | p_val_adj | Foldchange_UP | Foldchange_DOWN | Ratio_pct1_pct2 |
| TDRD7                                                                                               | 0,735042306 | -0,095699607 | 0,061 | 0,049 | 1         | 0,93581833    | 1,068583471     | 1,244897959     |
| PC                                                                                                  | 0,839920942 | -0,095701602 | 0,049 | 0,042 | 1         | 0,935817036   | 1,068584949     | 1,166666667     |
| MYH10                                                                                               | 0,092884275 | -0,095722774 | 0,146 | 0,077 | 1         | 0,935803303   | 1,068600631     | 1,896103896     |
| NPAT                                                                                                | 0,944403545 | -0,095724027 | 0,049 | 0,046 | 1         | 0,93580249    | 1,068601559     | 1,065217391     |
| PTCD1                                                                                               | 0,073104972 | -0,095735527 | 0,073 | 0,028 | 1         | 0,935795031   | 1,068610077     | 2,607142857     |
| AC144652.1                                                                                          | 0,198346594 | -0,095774579 | 0,037 | 0,014 | 1         | 0,9357697     | 1,068639004     | 2,642857143     |
| KRAS                                                                                                | 0,02172359  | -0,095817749 | 0,341 | 0,182 | 1         | 0,9357417     | 1,068670981     | 1,873626374     |
| ZBTB4                                                                                               | 0,038536653 | -0,095936206 | 0,207 | 0,105 | 1         | 0,935664871   | 1,068758731     | 1,971428571     |
| MPHOSPH9                                                                                            | 0,0146876   | -0,095942633 | 0,085 | 0,025 | 1         | 0,935660703   | 1,068763492     | 3,4             |
| KCTD3                                                                                               | 0,031468469 | -0,095981955 | 0,22  | 0,109 | 1         | 0,9356352     | 1,068792623     | 2,018348624     |
| FBXO48                                                                                              | 0,72040908  | -0,096003582 | 0,024 | 0,032 | 1         | 0,935621175   | 1,068808645     | 0,75            |
| BCLAF3                                                                                              | 0,173086844 | -0,096010469 | 0,098 | 0,053 | 1         | 0,935616708   | 1,068813747     | 1,849056604     |
| NDRG3                                                                                               | 0,042654557 | -0,096039365 | 0,122 | 0,053 | 1         | 0,935597969   | 1,068835155     | 2,301886792     |
| ZDHHC14                                                                                             | 0,609506016 | -0,096046324 | 0,049 | 0,035 | 1         | 0,935593456   | 1,06884031      | 1,4             |
| TCFL5                                                                                               | 0,387271199 | -0,096063276 | 0,049 | 0,028 | 1         | 0,935582463   | 1,068852869     | 1,75            |
| ANKRD18A                                                                                            | 0,186763581 | -0,096109773 | 0     | 0,021 | 1         | 0,93555231    | 1,068887318     | 0               |
| KDM2B                                                                                               | 0,731878941 | -0,096136239 | 0,049 | 0,039 | 1         | 0,935535147   | 1,068906928     | 1,256410256     |
| LINC01069                                                                                           | 0,35350329  | -0,096205523 | 0     | 0,011 | 1         | 0,935490221   | 1,068958262     | 0               |
| UBN1                                                                                                | 0,275482984 | -0,096302689 | 0,183 | 0,123 | 1         | 0,935427217   | 1,069030259     | 1,487804878     |
| IQCG                                                                                                | 0,435626938 | -0,09640728  | 0,061 | 0,039 | 1         | 0,935359404   | 1,069107763     | 1,564102564     |
| ACBD4                                                                                               | 0,970105473 | -0,096487792 | 0,024 | 0,025 | 1         | 0,935307206   | 1,069167428     | 0,96            |
| ZBTB33                                                                                              | 0,493813928 | -0,096518299 | 0,049 | 0,032 | 1         | 0,935287428   | 1,069190037     | 1,53125         |
| PHF8                                                                                                | 0,616856942 | -0,096533489 | 0,061 | 0,046 | 1         | 0,935277581   | 1,069201294     | 1,326086957     |
| INPP5B                                                                                              | 0,073676783 | -0,096535274 | 0,073 | 0,028 | 1         | 0,935276423   | 1,069202617     | 2,607142857     |
| TMEM69                                                                                              | 0,070300136 | -0,096576808 | 0,073 | 0,028 | 1         | 0,935249498   | 1,069233399     | 2,607142857     |
| MYRF                                                                                                | 0,28286347  | -0,09659813  | 0     | 0,014 | 1         | 0,935235676   | 1,069249202     | 0               |
| NUAK2                                                                                               | 0,095256843 | -0,096652803 | 0,098 | 0,046 | 1         | 0,935200235   | 1,069289723     | 2,130434783     |
| SELPLG                                                                                              | 0,192877425 | -0,096713588 | 0,012 | 0,042 | 1         | 0,935160833   | 1,069334776     | 0,285714286     |
| ATAD2                                                                                               | 0,711450166 | -0,096723013 | 0,024 | 0,032 | 1         | 0,935154724   | 1,069341762     | 0,75            |
| FBH1                                                                                                | 0,050742004 | -0,09677987  | 0,171 | 0,084 | 1         | 0,935117869   | 1,069383906     | 2,035714286     |



Supplementary Table 2

| Differentially expressed genes_keloid-XL_comparing SC-Keloid vs. (SC-Myel, SC-Nonmyel, SC-Nonmyel2) |             |              |       |       |           |               |                 |                 |
|-----------------------------------------------------------------------------------------------------|-------------|--------------|-------|-------|-----------|---------------|-----------------|-----------------|
| gene                                                                                                | p_val       | avg_log2FC   | pct.1 | pct.2 | p_val_adj | Foldchange_UP | Foldchange_DOWN | Ratio_pct1_pct2 |
| ST3GAL6-AS1                                                                                         | 0,289592758 | -0,096800068 | 0,073 | 0,042 | 1         | 0,935104778   | 1,069398878     | 1,738095238     |
| CBWD2                                                                                               | 0,143518805 | -0,096855698 | 0,098 | 0,049 | 1         | 0,935068721   | 1,069440115     | 2               |
| MTM1                                                                                                | 0,387271199 | -0,096870744 | 0,049 | 0,028 | 1         | 0,935058969   | 1,069451268     | 1,75            |
| FAM200B                                                                                             | 0,004400107 | -0,096873619 | 0,268 | 0,119 | 1         | 0,935057106   | 1,069453399     | 2,25210084      |
| SSUH2                                                                                               | 0,584659388 | -0,09695012  | 0,037 | 0,025 | 1         | 0,935007524   | 1,06951011      | 1,48            |
| ZNF527                                                                                              | 0,104939896 | -0,096954339 | 0,037 | 0,011 | 1         | 0,93500479    | 1,069513237     | 3,363636364     |
| SNTA1                                                                                               | 0,040947903 | -0,096955118 | 0,134 | 0,06  | 1         | 0,935004285   | 1,069513815     | 2,233333333     |
| TMEM175                                                                                             | 0,008537647 | -0,096973968 | 0,22  | 0,095 | 1         | 0,934992069   | 1,069527789     | 2,315789474     |
| PARD6G                                                                                              | 0,611445865 | -0,096986371 | 0,024 | 0,035 | 1         | 0,93498403    | 1,069536984     | 0,685714286     |
| PDXK                                                                                                | 0,037728767 | -0,097024249 | 0,183 | 0,091 | 1         | 0,934959483   | 1,069565065     | 2,010989011     |
| DIP2C                                                                                               | 0,181892554 | -0,097098314 | 0,268 | 0,175 | 1         | 0,934911485   | 1,069619976     | 1,531428571     |
| SMIM8                                                                                               | 0,044915492 | -0,097145748 | 0,11  | 0,046 | 1         | 0,934880747   | 1,069655144     | 2,391304348     |
| NR4A3                                                                                               | 0,200551562 | -0,097158684 | 0,012 | 0,042 | 1         | 0,934872364   | 1,069664735     | 0,285714286     |
| TMEM200B                                                                                            | 0,228958629 | -0,09726599  | 0     | 0,018 | 1         | 0,934802832   | 1,069744299     | 0               |
| THAP2                                                                                               | 0,531311683 | -0,097268463 | 0,061 | 0,042 | 1         | 0,93480123    | 1,069746132     | 1,452380952     |
| EXOSC5                                                                                              | 0,020152191 | -0,097433746 | 0,159 | 0,067 | 1         | 0,93469414    | 1,069868695     | 2,373134328     |
| STAT6                                                                                               | 0,01032964  | -0,097449349 | 0,268 | 0,126 | 1         | 0,934684031   | 1,069880266     | 2,126984127     |
| PDPN                                                                                                | 0,946985525 | -0,097498281 | 0,049 | 0,046 | 1         | 0,93465233    | 1,069916554     | 1,065217391     |
| RANBP10                                                                                             | 0,732741497 | -0,097501443 | 0,012 | 0,018 | 1         | 0,934650281   | 1,069918899     | 0,666666667     |
| MT-ND3                                                                                              | 0,119814824 | -0,097599549 | 0,829 | 0,807 | 1         | 0,934586726   | 1,069991658     | 1,027261462     |
| KIAA1958                                                                                            | 0,186763581 | -0,097603411 | 0     | 0,021 | 1         | 0,934584224   | 1,069994522     | 0               |
| CTSH                                                                                                | 0,58754085  | -0,097645105 | 0,037 | 0,025 | 1         | 0,934557214   | 1,070025446     | 1,48            |
| JAKMIP2                                                                                             | 0,067663837 | -0,097734635 | 0,098 | 0,042 | 1         | 0,93449922    | 1,070091851     | 2,333333333     |
| ZIM2                                                                                                | 0,28286347  | -0,097783931 | 0     | 0,014 | 1         | 0,93446729    | 1,070128416     | 0               |
| B3GNT2                                                                                              | 0,515317252 | -0,097828789 | 0,11  | 0,081 | 1         | 0,934438234   | 1,07016169      | 1,358024691     |
| DCAF1                                                                                               | 0,19199525  | -0,097887128 | 0,049 | 0,021 | 1         | 0,934400449   | 1,070204966     | 2,333333333     |
| USP33                                                                                               | 0,107875203 | -0,097890884 | 0,195 | 0,112 | 1         | 0,934398016   | 1,070207752     | 1,741071429     |
| BROX                                                                                                | 0,008153002 | -0,097952012 | 0,293 | 0,137 | 1         | 0,934358425   | 1,070253099     | 2,138686131     |
| GLI4                                                                                                | 0,027805872 | -0,097953127 | 0,134 | 0,056 | 1         | 0,934357703   | 1,070253926     | 2,392857143     |
| ZBTB47                                                                                              | 0,063812129 | -0,097968111 | 0,134 | 0,063 | 1         | 0,934347999   | 1,070265041     | 2,126984127     |

Supplementary Table 2

| Differentially expressed genes_keloid-XL_comparing SC-Keloid vs. (SC-Myel, SC-Nonmyel, SC-Nonmyel2) |             |              |       |       |           |               |                 |                 |
|-----------------------------------------------------------------------------------------------------|-------------|--------------|-------|-------|-----------|---------------|-----------------|-----------------|
| gene                                                                                                | p_val       | avg_log2FC   | pct.1 | pct.2 | p_val_adj | Foldchange_UP | Foldchange_DOWN | Ratio_pct1_pct2 |
| TMEM178A                                                                                            | 0,970105473 | -0,098097356 | 0,024 | 0,025 | 1         | 0,934264299   | 1,070360926     | 0,96            |
| TRIM29                                                                                              | 0,832484443 | -0,098150131 | 0,024 | 0,028 | 1         | 0,934230123   | 1,070400081     | 0,857142857     |
| JCAD                                                                                                | 0,835753847 | -0,098156629 | 0,024 | 0,028 | 1         | 0,934225916   | 1,070404902     | 0,857142857     |
| PXN                                                                                                 | 0,030497938 | -0,098220134 | 0,293 | 0,158 | 1         | 0,934184793   | 1,070452021     | 1,85443038      |
| TRPS1                                                                                               | 0,002885901 | -0,098257652 | 0,28  | 0,119 | 1         | 0,934160499   | 1,070479859     | 2,352941176     |
| ZNF254                                                                                              | 0,071323335 | -0,098296776 | 0,085 | 0,035 | 1         | 0,934135167   | 1,07050889      | 2,428571429     |
| CORO7                                                                                               | 0,420758451 | -0,09835344  | 0,098 | 0,067 | 1         | 0,934098478   | 1,070550936     | 1,462686567     |
| XPO4                                                                                                | 0,435626938 | -0,098418321 | 0,061 | 0,039 | 1         | 0,934056471   | 1,070599082     | 1,564102564     |
| TMEM126B                                                                                            | 0,001146185 | -0,098421887 | 0,366 | 0,158 | 1         | 0,934054162   | 1,070601728     | 2,316455696     |
| SENP2                                                                                               | 0,002717414 | -0,09845982  | 0,146 | 0,046 | 1         | 0,934029603   | 1,070629879     | 3,173913043     |
| MPC1                                                                                                | 0,001222982 | -0,098469961 | 0,524 | 0,242 | 1         | 0,934023038   | 1,070637404     | 2,165289256     |
| MBD6                                                                                                | 0,007867585 | -0,098503004 | 0,195 | 0,081 | 1         | 0,934001645   | 1,070661926     | 2,407407407     |
| BANP                                                                                                | 0,04430569  | -0,098535719 | 0,11  | 0,046 | 1         | 0,933980465   | 1,070686205     | 2,391304348     |
| ZNF354B                                                                                             | 0,460999751 | -0,09859132  | 0,073 | 0,049 | 1         | 0,933944471   | 1,07072747      | 1,489795918     |
| ZNF836                                                                                              | 0,864526579 | -0,098620854 | 0,037 | 0,032 | 1         | 0,933925352   | 1,070749389     | 1,15625         |
| MINK1                                                                                               | 0,807269295 | -0,098745777 | 0,073 | 0,063 | 1         | 0,933844487   | 1,07084211      | 1,158730159     |
| PRKRIP1                                                                                             | 0,347674265 | -0,098850445 | 0,122 | 0,081 | 1         | 0,933776739   | 1,070919802     | 1,50617284      |
| CDC7                                                                                                | 0,28286347  | -0,098856269 | 0     | 0,014 | 1         | 0,933772969   | 1,070924125     | 0               |
| TBP                                                                                                 | 0,729406546 | -0,098921218 | 0,024 | 0,032 | 1         | 0,933730932   | 1,070972339     | 0,75            |
| LRP11                                                                                               | 0,785594599 | -0,098942526 | 0,037 | 0,042 | 1         | 0,933717142   | 1,070988156     | 0,880952381     |
| FAM199X                                                                                             | 0,055733029 | -0,099207196 | 0,146 | 0,07  | 1         | 0,933545862   | 1,071184653     | 2,085714286     |
| POFUT2                                                                                              | 0,003773432 | -0,099294922 | 0,22  | 0,088 | 1         | 0,933489097   | 1,07124979      | 2,5             |
| PRR11                                                                                               | 0,710321163 | -0,099306747 | 0,024 | 0,018 | 1         | 0,933481446   | 1,071258571     | 1,333333333     |
| ZNF232                                                                                              | 0,316484073 | -0,099327118 | 0,037 | 0,018 | 1         | 0,933468266   | 1,071273697     | 2,055555556     |
| METTL15                                                                                             | 0,042689966 | -0,099379791 | 0,146 | 0,067 | 1         | 0,933434185   | 1,07131281      | 2,179104478     |
| PPP1R1C                                                                                             | 0,186763581 | -0,099389655 | 0     | 0,021 | 1         | 0,933427803   | 1,071320135     | 0               |
| THBD                                                                                                | 0,837311683 | -0,099411667 | 0,049 | 0,042 | 1         | 0,933413561   | 1,071336481     | 1,166666667     |
| EML4                                                                                                | 0,256033247 | -0,099417429 | 0,134 | 0,084 | 1         | 0,933409833   | 1,07134076      | 1,595238095     |
| GULP1                                                                                               | 0,002891027 | -0,09947145  | 0,549 | 0,281 | 1         | 0,933374883   | 1,071380877     | 1,953736655     |
| LEPR                                                                                                | 0,597173043 | -0,09947457  | 0,012 | 0,021 | 1         | 0,933372864   | 1,071383193     | 0,571428571     |

Supplementary Table 2

| Differentially expressed genes_keloid-XL_comparing SC-Keloid vs. (SC-Myel, SC-Nonmyel, SC-Nonmyel2) |             |              |       |       |           |               |                 |                 |
|-----------------------------------------------------------------------------------------------------|-------------|--------------|-------|-------|-----------|---------------|-----------------|-----------------|
| gene                                                                                                | p_val       | avg_log2FC   | pct.1 | pct.2 | p_val_adj | Foldchange_UP | Foldchange_DOWN | Ratio_pct1_pct2 |
| IPCEF1                                                                                              | 0,534239567 | -0,099518131 | 0,024 | 0,039 | 1         | 0,933344682   | 1,071415543     | 0,615384615     |
| ATP9B                                                                                               | 0,043550228 | -0,099554792 | 0,134 | 0,06  | 1         | 0,933320965   | 1,07144277      | 2,233333333     |
| SP110                                                                                               | 0,049606627 | -0,099579246 | 0,159 | 0,077 | 1         | 0,933305145   | 1,071460931     | 2,064935065     |
| TRO                                                                                                 | 0,710321163 | -0,09960188  | 0,024 | 0,018 | 1         | 0,933290503   | 1,071477742     | 1,333333333     |
| AJUBA                                                                                               | 0,788243537 | -0,099692666 | 0,037 | 0,042 | 1         | 0,933231775   | 1,071545169     | 0,880952381     |
| DOCK11                                                                                              | 0,724903065 | -0,099716458 | 0,037 | 0,028 | 1         | 0,933216384   | 1,071562841     | 1,321428571     |
| YAP1                                                                                                | 0,247523767 | -0,099877975 | 0,293 | 0,2   | 1         | 0,933111912   | 1,071682815     | 1,465           |
| PIP4K2C                                                                                             | 0,448248692 | -0,100001858 | 0,037 | 0,021 | 1         | 0,93303179    | 1,071774843     | 1,761904762     |
| FOXO6                                                                                               | 0,126161321 | -0,100032816 | 0     | 0,028 | 1         | 0,933011769   | 1,071797842     | 0               |
| EPHB6                                                                                               | 0,499795801 | -0,100055744 | 0,012 | 0,025 | 1         | 0,932996941   | 1,071814875     | 0,48            |
| RNASEK                                                                                              | 0,460899407 | -0,100182537 | 0,829 | 0,632 | 1         | 0,932914947   | 1,071909077     | 1,311708861     |
| PRICKLE2                                                                                            | 0,023406136 | -0,100317239 | 0,232 | 0,112 | 1         | 0,932827847   | 1,072009164     | 2,071428571     |
| RPS7                                                                                                | 0,47835823  | -0,100526942 | 0,902 | 0,86  | 1         | 0,932692265   | 1,072164997     | 1,048837209     |
| DSTYK                                                                                               | 0,207673772 | -0,100640655 | 0,134 | 0,081 | 1         | 0,932618753   | 1,072249509     | 1,654320988     |
| STRBP                                                                                               | 0,597173043 | -0,100696758 | 0,012 | 0,021 | 1         | 0,932582486   | 1,072291207     | 0,571428571     |
| C1D                                                                                                 | 0,000640665 | -0,100717225 | 0,378 | 0,161 | 1         | 0,932569257   | 1,072306419     | 2,347826087     |
| CFAP91                                                                                              | 0,126161321 | -0,100772615 | 0     | 0,028 | 1         | 0,932533453   | 1,072347589     | 0               |
| CA6                                                                                                 | 0,35350329  | -0,100827072 | 0     | 0,011 | 1         | 0,932498253   | 1,072388068     | 0               |
| RGS7                                                                                                | 0,28286347  | -0,100904485 | 0     | 0,014 | 1         | 0,932448218   | 1,072445612     | 0               |
| STAT5B                                                                                              | 0,838337269 | -0,100981342 | 0,073 | 0,077 | 1         | 0,932398545   | 1,072502746     | 0,948051948     |
| MTRR                                                                                                | 0,727904339 | -0,101029611 | 0,037 | 0,028 | 1         | 0,93236735    | 1,07253863      | 1,321428571     |
| RAB11A                                                                                              | 0,003412279 | -0,101112238 | 0,476 | 0,228 | 1         | 0,932313952   | 1,072600059     | 2,087719298     |
| PEX14                                                                                               | 0,236445882 | -0,101245159 | 0,098 | 0,056 | 1         | 0,932228058   | 1,072698887     | 1,75            |
| AQP11                                                                                               | 0,334326668 | -0,101385502 | 0,012 | 0,032 | 1         | 0,932137377   | 1,072803242     | 0,375           |
| WBP1L                                                                                               | 0,049606627 | -0,101460077 | 0,159 | 0,077 | 1         | 0,932089194   | 1,072858698     | 2,064935065     |
| SCAF8                                                                                               | 0,000445099 | -0,10146423  | 0,183 | 0,053 | 1         | 0,932086511   | 1,072861787     | 3,452830189     |
| RCHY1                                                                                               | 0,115001622 | -0,101477268 | 0,159 | 0,088 | 1         | 0,932078088   | 1,072871482     | 1,806818182     |
| PLEKHH2                                                                                             | 0,186763581 | -0,101487671 | 0     | 0,021 | 1         | 0,932071367   | 1,072879219     | 0               |
| DYNLL1                                                                                              | 0,258229319 | -0,101552384 | 0,841 | 0,737 | 1         | 0,93202956    | 1,072927344     | 1,141112619     |
| CBR3                                                                                                | 0,06391471  | -0,101611865 | 0,159 | 0,081 | 1         | 0,931991134   | 1,072971581     | 1,962962963     |

Supplementary Table 2

| Differentially expressed genes_keloid-XL_comparing SC-Keloid vs. (SC-Myel, SC-Nonmyel, SC-Nonmyel2) |             |              |       |       |           |               |                 |                 |
|-----------------------------------------------------------------------------------------------------|-------------|--------------|-------|-------|-----------|---------------|-----------------|-----------------|
| gene                                                                                                | p_val       | avg_log2FC   | pct.1 | pct.2 | p_val_adj | Foldchange_UP | Foldchange_DOWN | Ratio_pct1_pct2 |
| HSD17B7                                                                                             | 0,114372788 | -0,10164773  | 0,073 | 0,032 | 1         | 0,931967964   | 1,072998255     | 2,28125         |
| LOX                                                                                                 | 0,879365097 | -0,101678239 | 0,024 | 0,021 | 1         | 0,931948256   | 1,073020946     | 1,142857143     |
| NBEA                                                                                                | 0,283838244 | -0,101692357 | 0,012 | 0,035 | 1         | 0,931939136   | 1,073031447     | 0,342857143     |
| SELENOM                                                                                             | 0,095952357 | -0,101713121 | 0,756 | 0,474 | 1         | 0,931925724   | 1,07304689      | 1,594936709     |
| NFATC3                                                                                              | 0,044615627 | -0,101753074 | 0,085 | 0,032 | 1         | 0,931899916   | 1,073076607     | 2,65625         |
| QRSL1                                                                                               | 0,11730029  | -0,101787487 | 0,061 | 0,025 | 1         | 0,931877688   | 1,073102203     | 2,44            |
| GDPD3                                                                                               | 0,407171737 | -0,101808034 | 0,012 | 0,028 | 1         | 0,931864416   | 1,073117487     | 0,428571429     |
| TYMP                                                                                                | 0,476373153 | -0,101808762 | 0,098 | 0,07  | 1         | 0,931863945   | 1,073118029     | 1,4             |
| RABGAP1L                                                                                            | 0,36148315  | -0,101961117 | 0,146 | 0,102 | 1         | 0,931765542   | 1,07323136      | 1,431372549     |
| ZFP3                                                                                                | 0,728697501 | -0,101965122 | 0,012 | 0,018 | 1         | 0,931762955   | 1,07323434      | 0,666666667     |
| NSL1                                                                                                | 6,28277E-05 | -0,101984719 | 0,305 | 0,102 | 1         | 0,931750298   | 1,073248919     | 2,990196078     |
| PLEKHA8                                                                                             | 0,519783239 | -0,102049206 | 0,024 | 0,039 | 1         | 0,931708651   | 1,073296893     | 0,615384615     |
| DZANK1                                                                                              | 0,228958629 | -0,102055525 | 0     | 0,018 | 1         | 0,93170457    | 1,073301594     | 0               |
| GPD2                                                                                                | 0,11362142  | -0,102164534 | 0,122 | 0,063 | 1         | 0,931634174   | 1,073382695     | 1,936507937     |
| GTF2IRD2                                                                                            | 0,017935129 | -0,102250541 | 0,159 | 0,067 | 1         | 0,931578635   | 1,073446687     | 2,373134328     |
| NBPF11                                                                                              | 0,850375302 | -0,102262359 | 0,049 | 0,042 | 1         | 0,931571005   | 1,07345548      | 1,166666667     |
| ZC3H18                                                                                              | 0,274829175 | -0,102264395 | 0,146 | 0,095 | 1         | 0,93156969    | 1,073456995     | 1,536842105     |
| ZNF600                                                                                              | 0,58754085  | -0,102358425 | 0,037 | 0,025 | 1         | 0,931508975   | 1,073526962     | 1,48            |
| PON3                                                                                                | 0,153186787 | -0,102425819 | 0     | 0,025 | 1         | 0,931465462   | 1,073577112     | 0               |
| ATXN2L                                                                                              | 0,010234576 | -0,102498105 | 0,402 | 0,207 | 1         | 0,931418792   | 1,073630904     | 1,942028986     |
| TMED8                                                                                               | 0,14645865  | -0,10258424  | 0,085 | 0,042 | 1         | 0,931363184   | 1,073695007     | 2,023809524     |
| WHAMM                                                                                               | 0,0924286   | -0,10265293  | 0,146 | 0,077 | 1         | 0,931318841   | 1,073746129     | 1,896103896     |
| CLK4                                                                                                | 0,090018287 | -0,102701898 | 0,256 | 0,151 | 1         | 0,93128723    | 1,073782575     | 1,695364238     |
| SGPP1                                                                                               | 0,614500429 | -0,102729554 | 0,049 | 0,035 | 1         | 0,931269378   | 1,073803159     | 1,4             |
| SOGA3                                                                                               | 0,239255165 | -0,102734645 | 0,122 | 0,074 | 1         | 0,931266092   | 1,073806948     | 1,648648649     |
| RAMP2                                                                                               | 0,253953805 | -0,102766858 | 0,061 | 0,032 | 1         | 0,931245299   | 1,073830924     | 1,90625         |
| FAM222A                                                                                             | 0,876531032 | -0,102769469 | 0,049 | 0,053 | 1         | 0,931243613   | 1,073832868     | 0,924528302     |
| PTPN3                                                                                               | 0,710321163 | -0,102775623 | 0,024 | 0,018 | 1         | 0,931239641   | 1,073837449     | 1,333333333     |
| TSC2                                                                                                | 0,000298672 | -0,102919517 | 0,402 | 0,168 | 1         | 0,931146764   | 1,073944559     | 2,392857143     |
| DPH7                                                                                                | 0,029666998 | -0,102920194 | 0,11  | 0,042 | 1         | 0,931146327   | 1,073945062     | 2,619047619     |

Supplementary Table 2

| Differentially expressed genes_keloid-XL_comparing SC-Keloid vs. (SC-Myel, SC-Nonmyel, SC-Nonmyel2) |             |              |       |       |           |               |                 |                 |
|-----------------------------------------------------------------------------------------------------|-------------|--------------|-------|-------|-----------|---------------|-----------------|-----------------|
| gene                                                                                                | p_val       | avg_log2FC   | pct.1 | pct.2 | p_val_adj | Foldchange_UP | Foldchange_DOWN | Ratio_pct1_pct2 |
| EDIL3                                                                                               | 0,994714111 | -0,102923508 | 0,11  | 0,105 | 1         | 0,931144188   | 1,073947529     | 1,047619048     |
| AS3MT                                                                                               | 0,493879805 | -0,102949647 | 0,012 | 0,025 | 1         | 0,931127317   | 1,073966987     | 0,48            |
| STK35                                                                                               | 0,801524407 | -0,102970386 | 0,037 | 0,042 | 1         | 0,931113933   | 1,073982426     | 0,880952381     |
| MKS1                                                                                                | 0,062089768 | -0,102986479 | 0,049 | 0,014 | 1         | 0,931103546   | 1,073994406     | 3,5             |
| SLC39A9                                                                                             | 0,017396195 | -0,103009619 | 0,134 | 0,053 | 1         | 0,931088612   | 1,074011632     | 2,528301887     |
| SUPV3L1                                                                                             | 0,121439079 | -0,103012602 | 0,122 | 0,063 | 1         | 0,931086687   | 1,074013853     | 1,936507937     |
| NEK4                                                                                                | 0,448248692 | -0,103086176 | 0,037 | 0,021 | 1         | 0,931039205   | 1,074068627     | 1,761904762     |
| ZNF91                                                                                               | 0,355091426 | -0,103091703 | 0,146 | 0,098 | 1         | 0,931035638   | 1,074072742     | 1,489795918     |
| PDE7A                                                                                               | 0,299773274 | -0,103118755 | 0,073 | 0,042 | 1         | 0,93101818    | 1,074092882     | 1,738095238     |
| GPRC5A                                                                                              | 0,153186787 | -0,103160682 | 0     | 0,025 | 1         | 0,930991123   | 1,074124097     | 0               |
| FAM171B                                                                                             | 0,404681217 | -0,1032181   | 0,012 | 0,028 | 1         | 0,930954072   | 1,074166847     | 0,428571429     |
| BZW2                                                                                                | 0,009752099 | -0,103221203 | 0,317 | 0,154 | 1         | 0,930952069   | 1,074169157     | 2,058441558     |
| MED30                                                                                               | 0,077532541 | -0,103313511 | 0,22  | 0,123 | 1         | 0,930892506   | 1,074237888     | 1,788617886     |
| TCF25                                                                                               | 0,051031153 | -0,103317119 | 0,695 | 0,418 | 1         | 0,930890178   | 1,074240575     | 1,662679426     |
| NADK2                                                                                               | 0,378076752 | -0,103323398 | 0,073 | 0,046 | 1         | 0,930886126   | 1,07424525      | 1,586956522     |
| SLC9A6                                                                                              | 0,976458111 | -0,103335943 | 0,037 | 0,035 | 1         | 0,930878032   | 1,074254591     | 1,057142857     |
| TRIM47                                                                                              | 0,084036585 | -0,103337375 | 0,28  | 0,161 | 1         | 0,930877108   | 1,074255658     | 1,739130435     |
| TMEM70                                                                                              | 0,029214811 | -0,103356107 | 0,195 | 0,095 | 1         | 0,930865022   | 1,074269606     | 2,052631579     |
| MAP2K4                                                                                              | 0,321218996 | -0,103366736 | 0,085 | 0,053 | 1         | 0,930858163   | 1,074277521     | 1,603773585     |
| ECPAS                                                                                               | 0,110149594 | -0,103377824 | 0,122 | 0,063 | 1         | 0,93085101    | 1,074285777     | 1,936507937     |
| XKR6                                                                                                | 0,28286347  | -0,103410622 | 0     | 0,014 | 1         | 0,930829848   | 1,0743102       | 0               |
| VAMP8                                                                                               | 0,728697501 | -0,103425451 | 0,012 | 0,018 | 1         | 0,93082028    | 1,074321243     | 0,666666667     |
| RNF111                                                                                              | 0,184906747 | -0,10347243  | 0,098 | 0,053 | 1         | 0,93078997    | 1,074356227     | 1,849056604     |
| RAB33A                                                                                              | 0,597173043 | -0,103499655 | 0,012 | 0,021 | 1         | 0,930772405   | 1,074376501     | 0,571428571     |
| GALNT3                                                                                              | 0,35350329  | -0,103624054 | 0     | 0,011 | 1         | 0,930692151   | 1,074469145     | 0               |
| LINC01135                                                                                           | 0,228958629 | -0,103665759 | 0     | 0,018 | 1         | 0,930665248   | 1,074500205     | 0               |
| MED21                                                                                               | 0,008230291 | -0,103699294 | 0,22  | 0,095 | 1         | 0,930643615   | 1,074525182     | 2,315789474     |
| NMT2                                                                                                | 0,728918348 | -0,10377658  | 0,098 | 0,081 | 1         | 0,930593761   | 1,074582747     | 1,209876543     |
| ZZEF1                                                                                               | 0,119031745 | -0,103822486 | 0,146 | 0,081 | 1         | 0,930564151   | 1,07461694      | 1,802469136     |
| USP20                                                                                               | 0,251002698 | -0,103859987 | 0,061 | 0,032 | 1         | 0,930539962   | 1,074644874     | 1,90625         |

Supplementary Table 2

| Differentially expressed genes_keloid-XL_comparing SC-Keloid vs. (SC-Myel, SC-Nonmyel, SC-Nonmyel2) |             |              |       |       |           |               |                 |                 |
|-----------------------------------------------------------------------------------------------------|-------------|--------------|-------|-------|-----------|---------------|-----------------|-----------------|
| gene                                                                                                | p_val       | avg_log2FC   | pct.1 | pct.2 | p_val_adj | Foldchange_UP | Foldchange_DOWN | Ratio_pct1_pct2 |
| TAF4B                                                                                               | 0,989691752 | -0,103916302 | 0,061 | 0,06  | 1         | 0,930503639   | 1,074686823     | 1,016666667     |
| ACBD3                                                                                               | 0,007297708 | -0,103920737 | 0,415 | 0,207 | 1         | 0,930500779   | 1,074690126     | 2,004830918     |
| OTUD1                                                                                               | 0,313405693 | -0,103945004 | 0,171 | 0,116 | 1         | 0,930485127   | 1,074708204     | 1,474137931     |
| TRMT10C                                                                                             | 0,088107197 | -0,103968638 | 0,122 | 0,06  | 1         | 0,930469884   | 1,07472581      | 2,033333333     |
| PRR3                                                                                                | 0,427804608 | -0,103984004 | 0,061 | 0,039 | 1         | 0,930459974   | 1,074737257     | 1,564102564     |
| NEMF                                                                                                | 0,004209604 | -0,103985823 | 0,268 | 0,116 | 1         | 0,930458801   | 1,074738612     | 2,310344828     |
| MC1R                                                                                                | 0,070675603 | -0,104041172 | 0,061 | 0,021 | 1         | 0,930423105   | 1,074779845     | 2,904761905     |
| ARAP1                                                                                               | 0,064352447 | -0,104090271 | 0,122 | 0,056 | 1         | 0,93039144    | 1,074816423     | 2,178571429     |
| ZNF684                                                                                              | 0,448248692 | -0,104099121 | 0,037 | 0,021 | 1         | 0,930385733   | 1,074823017     | 1,761904762     |
| ZNF76                                                                                               | 0,029447556 | -0,104126967 | 0,11  | 0,042 | 1         | 0,930367775   | 1,074843762     | 2,619047619     |
| OSGEPL1                                                                                             | 0,437764503 | -0,104209188 | 0,037 | 0,021 | 1         | 0,930314754   | 1,074905021     | 1,761904762     |
| CDH1                                                                                                | 0,404681217 | -0,10427889  | 0,012 | 0,028 | 1         | 0,930269808   | 1,074956955     | 0,428571429     |
| GALNT4                                                                                              | 0,173471565 | -0,104374125 | 0,061 | 0,028 | 1         | 0,930208401   | 1,075027917     | 2,178571429     |
| E2F5                                                                                                | 0,00531992  | -0,104462625 | 0,171 | 0,063 | 1         | 0,930151341   | 1,075093865     | 2,714285714     |
| MT1X                                                                                                | 9,33853E-05 | -0,104468047 | 0,476 | 0,2   | 1         | 0,930147845   | 1,075097906     | 2,38            |
| FBLN2                                                                                               | 0,021080776 | -0,104480918 | 0,439 | 0,246 | 1         | 0,930139547   | 1,075107497     | 1,784552846     |
| KIAA0586                                                                                            | 0,019044929 | -0,104545561 | 0,171 | 0,074 | 1         | 0,930097871   | 1,075155671     | 2,310810811     |
| GJC2                                                                                                | 0,717418436 | -0,104562172 | 0,024 | 0,032 | 1         | 0,930087162   | 1,07516805      | 0,75            |
| GOLPH3L                                                                                             | 0,276713029 | -0,104591896 | 0,012 | 0,035 | 1         | 0,930067999   | 1,075190202     | 0,342857143     |
| SLC45A3                                                                                             | 0,35350329  | -0,104611627 | 0     | 0,011 | 1         | 0,930055279   | 1,075204907     | 0               |
| EIF2A                                                                                               | 0,009570943 | -0,104627363 | 0,415 | 0,211 | 1         | 0,930045135   | 1,075216635     | 1,966824645     |
| ZNF574                                                                                              | 0,315648476 | -0,104631544 | 0,085 | 0,053 | 1         | 0,93004244    | 1,07521975      | 1,603773585     |
| ST3GAL6                                                                                             | 0,009331102 | -0,104714399 | 0,207 | 0,088 | 1         | 0,929989028   | 1,075281503     | 2,352272727     |
| THAP9-AS1                                                                                           | 0,323019395 | -0,104858894 | 0,207 | 0,147 | 1         | 0,929895889   | 1,075389205     | 1,408163265     |
| NSG1                                                                                                | 0,89702294  | -0,104893964 | 0,012 | 0,014 | 1         | 0,929873284   | 1,075415346     | 0,857142857     |
| CNTFR                                                                                               | 0,228958629 | -0,104897963 | 0     | 0,018 | 1         | 0,929870707   | 1,075418327     | 0               |
| SYNJ1                                                                                               | 0,537713485 | -0,104952183 | 0,061 | 0,042 | 1         | 0,929835761   | 1,075458745     | 1,452380952     |
| FHIP1B                                                                                              | 0,020124844 | -0,105015928 | 0,122 | 0,046 | 1         | 0,929794677   | 1,075506265     | 2,652173913     |
| PAPPA                                                                                               | 0,046380124 | -0,105031169 | 0,122 | 0,053 | 1         | 0,929784854   | 1,075517627     | 2,301886792     |
| C2CD3                                                                                               | 0,047105821 | -0,105154989 | 0,11  | 0,046 | 1         | 0,929705059   | 1,075609937     | 2,391304348     |

Supplementary Table 2

| Differentially expressed genes_keloid-XL_comparing SC-Keloid vs. (SC-Myel, SC-Nonmyel, SC-Nonmyel2) |             |              |       |       |             |               |                 |                 |
|-----------------------------------------------------------------------------------------------------|-------------|--------------|-------|-------|-------------|---------------|-----------------|-----------------|
| gene                                                                                                | p_val       | avg_log2FC   | pct.1 | pct.2 | p_val_adj   | Foldchange_UP | Foldchange_DOWN | Ratio_pct1_pct2 |
| TTC7B                                                                                               | 0,113036871 | -0,105170157 | 0,122 | 0,063 | 1           | 0,929695284   | 1,075621246     | 1,936507937     |
| TRIM13                                                                                              | 0,399645088 | -0,10519971  | 0,171 | 0,123 | 1           | 0,92967624    | 1,07564328      | 1,390243902     |
| VSIG10                                                                                              | 0,489167971 | -0,105251175 | 0,049 | 0,032 | 1           | 0,929643077   | 1,075681652     | 1,53125         |
| IGHMBP2                                                                                             | 0,205618858 | -0,105445716 | 0,085 | 0,046 | 1           | 0,929517727   | 1,075826712     | 1,847826087     |
| AC004448.2                                                                                          | 0,186763581 | -0,105455605 | 0     | 0,021 | 1           | 0,929511355   | 1,075834087     | 0               |
| CLCF1                                                                                               | 0,79620494  | -0,105735758 | 0,037 | 0,042 | 1           | 0,929330874   | 1,07604302      | 0,880952381     |
| HEATR5B                                                                                             | 0,135072696 | -0,105754037 | 0,098 | 0,049 | 1           | 0,929319099   | 1,076056653     | 2               |
| PI4K2A                                                                                              | 0,000928311 | -0,105770797 | 0,256 | 0,095 | 1           | 0,929308303   | 1,076069154     | 2,694736842     |
| RHOJ                                                                                                | 0,015726631 | -0,105772078 | 0,207 | 0,095 | 1           | 0,929307478   | 1,07607011      | 2,178947368     |
| SMARCC1                                                                                             | 0,066471534 | -0,105796455 | 0,244 | 0,137 | 1           | 0,929291775   | 1,076088293     | 1,781021898     |
| HHEX                                                                                                | 0,295381329 | -0,105919903 | 0,073 | 0,042 | 1           | 0,929212262   | 1,076180375     | 1,738095238     |
| ARIH2OS                                                                                             | 0,994113727 | -0,105966023 | 0,037 | 0,035 | 1           | 0,929182557   | 1,076214779     | 1,057142857     |
| EIF4ENIF1                                                                                           | 0,994113727 | -0,106028757 | 0,037 | 0,035 | 1           | 0,929142154   | 1,076261577     | 1,057142857     |
| VEZT                                                                                                | 0,011737335 | -0,106101968 | 0,268 | 0,126 | 1           | 0,929095005   | 1,076316195     | 2,126984127     |
| SPIDR                                                                                               | 0,409777926 | -0,106204984 | 0,037 | 0,06  | 1           | 0,929028665   | 1,076393052     | 0,616666667     |
| KDM1B                                                                                               | 0,864526579 | -0,106311435 | 0,037 | 0,032 | 1           | 0,928960118   | 1,076472478     | 1,15625         |
| FAT4                                                                                                | 0,104227568 | -0,106579997 | 0     | 0,032 | 1           | 0,928787205   | 1,076672886     | 0               |
| CCT2                                                                                                | 0,036736096 | -0,106584904 | 0,622 | 0,354 | 1           | 0,928784046   | 1,076676548     | 1,757062147     |
| SNX30                                                                                               | 0,299773274 | -0,10660978  | 0,073 | 0,042 | 1           | 0,928768032   | 1,076695112     | 1,738095238     |
| ATG9A                                                                                               | 0,119598668 | -0,106640187 | 0,122 | 0,063 | 1           | 0,928748456   | 1,076717806     | 1,936507937     |
| PELI3                                                                                               | 0,879365097 | -0,106687132 | 0,024 | 0,021 | 1           | 0,928718236   | 1,076752842     | 1,142857143     |
| ICMT                                                                                                | 0,000327031 | -0,106768175 | 0,207 | 0,063 | 1           | 0,928666067   | 1,07681333      | 3,285714286     |
| MBD5                                                                                                | 0,215112823 | -0,106769544 | 0,11  | 0,063 | 1           | 0,928665185   | 1,076814352     | 1,746031746     |
| ERMP1                                                                                               | 0,60063706  | -0,106791879 | 0,012 | 0,021 | 1           | 0,928650808   | 1,076831023     | 0,571428571     |
| UBE2E3                                                                                              | 0,006395265 | -0,106925212 | 0,585 | 0,309 | 1           | 0,928564987   | 1,076930548     | 1,893203883     |
| THAP3                                                                                               | 0,323471241 | -0,106925699 | 0,11  | 0,07  | 1           | 0,928564673   | 1,076930911     | 1,571428571     |
| NHSL1                                                                                               | 0,334326668 | -0,107000719 | 0,012 | 0,032 | 1           | 0,92851639    | 1,076986913     | 0,375           |
| SRP68                                                                                               | 0,137629988 | -0,107205067 | 0,146 | 0,081 | 1           | 0,928384881   | 1,077139471     | 1,802469136     |
| PCDHGA6                                                                                             | 0,879365097 | -0,107262221 | 0,024 | 0,021 | 1           | 0,928348103   | 1,077182144     | 1,142857143     |
| C11orf24                                                                                            | 2,99658E-05 | -0,107344534 | 0,415 | 0,154 | 0,632307399 | 0,928295137   | 1,077243605     | 2,694805195     |

Supplementary Table 2

| Differentially expressed genes_keloid-XL_comparing SC-Keloid vs. (SC-Myel, SC-Nonmyel, SC-Nonmyel2) |             |              |       |       |           |               |                 |                 |
|-----------------------------------------------------------------------------------------------------|-------------|--------------|-------|-------|-----------|---------------|-----------------|-----------------|
| gene                                                                                                | p_val       | avg_log2FC   | pct.1 | pct.2 | p_val_adj | Foldchange_UP | Foldchange_DOWN | Ratio_pct1_pct2 |
| PHYKPL                                                                                              | 0,208522254 | -0,10742333  | 0,134 | 0,081 | 1         | 0,928244437   | 1,077302443     | 1,654320988     |
| RBP7                                                                                                | 0,60063706  | -0,107446041 | 0,012 | 0,021 | 1         | 0,928229826   | 1,077319401     | 0,571428571     |
| SOCS6                                                                                               | 0,131260135 | -0,107528885 | 0,11  | 0,056 | 1         | 0,928176525   | 1,077381266     | 1,964285714     |
| ZFP30                                                                                               | 0,490935921 | -0,107544661 | 0,012 | 0,025 | 1         | 0,928166375   | 1,077393048     | 0,48            |
| UQCC1                                                                                               | 0,293926973 | -0,107603219 | 0,073 | 0,042 | 1         | 0,928128702   | 1,077436779     | 1,738095238     |
| LXN                                                                                                 | 0,71891322  | -0,107605271 | 0,037 | 0,028 | 1         | 0,928127382   | 1,077438312     | 1,321428571     |
| CCNYL1                                                                                              | 0,612000968 | -0,107611431 | 0,049 | 0,035 | 1         | 0,928123419   | 1,077442913     | 1,4             |
| LRRC24                                                                                              | 0,404681217 | -0,10770926  | 0,012 | 0,028 | 1         | 0,928060486   | 1,077515976     | 0,428571429     |
| UBE2Q2L                                                                                             | 0,597173043 | -0,107718305 | 0,012 | 0,021 | 1         | 0,928054667   | 1,077522731     | 0,571428571     |
| ST3GAL1                                                                                             | 0,325438769 | -0,107731563 | 0,085 | 0,053 | 1         | 0,928046138   | 1,077532634     | 1,603773585     |
| ZNF653                                                                                              | 0,58754085  | -0,107829934 | 0,037 | 0,025 | 1         | 0,927982861   | 1,077606109     | 1,48            |
| GRIK2                                                                                               | 0,162321749 | -0,107859839 | 0,146 | 0,084 | 1         | 0,927963626   | 1,077628446     | 1,738095238     |
| MOB1B                                                                                               | 0,123828334 | -0,107929198 | 0,11  | 0,056 | 1         | 0,927919014   | 1,077680255     | 1,964285714     |
| MIIP                                                                                                | 0,063127524 | -0,10795671  | 0,171 | 0,088 | 1         | 0,927901319   | 1,077700807     | 1,943181818     |
| NUDT14                                                                                              | 0,295381329 | -0,108051366 | 0,073 | 0,042 | 1         | 0,927840441   | 1,077771518     | 1,738095238     |
| PRRG2                                                                                               | 0,281151866 | -0,108052474 | 0,049 | 0,025 | 1         | 0,927839728   | 1,077772346     | 1,96            |
| H2AC8                                                                                               | 0,28286347  | -0,108060155 | 0     | 0,014 | 1         | 0,927834788   | 1,077778084     | 0               |
| SART3                                                                                               | 0,11812291  | -0,108060774 | 0,159 | 0,088 | 1         | 0,92783439    | 1,077778546     | 1,806818182     |
| LINC00663                                                                                           | 0,18774993  | -0,108085733 | 0,049 | 0,021 | 1         | 0,927818338   | 1,077797192     | 2,333333333     |
| IL13RA1                                                                                             | 0,136050144 | -0,108107217 | 0,134 | 0,074 | 1         | 0,927804522   | 1,077813242     | 1,810810811     |
| FAM81A                                                                                              | 0,228958629 | -0,108224638 | 0     | 0,018 | 1         | 0,927729011   | 1,077900969     | 0               |
| PRDM8                                                                                               | 0,153186787 | -0,108263743 | 0     | 0,025 | 1         | 0,927703865   | 1,077930186     | 0               |
| ZNF445                                                                                              | 0,429752486 | -0,108292427 | 0,061 | 0,039 | 1         | 0,92768542    | 1,077951619     | 1,564102564     |
| SPSB2                                                                                               | 0,018385843 | -0,108331146 | 0,122 | 0,046 | 1         | 0,927660523   | 1,077980549     | 2,652173913     |
| C7orf25                                                                                             | 0,148176835 | -0,108337282 | 0,085 | 0,042 | 1         | 0,927656578   | 1,077985134     | 2,023809524     |
| USP2                                                                                                | 0,153186787 | -0,108348789 | 0     | 0,025 | 1         | 0,927649179   | 1,077993731     | 0               |
| LINC00702                                                                                           | 0,333233926 | -0,108451501 | 0,061 | 0,035 | 1         | 0,927583138   | 1,078070481     | 1,742857143     |
| DICER1-AS1                                                                                          | 0,832484443 | -0,108491223 | 0,024 | 0,028 | 1         | 0,927557599   | 1,078100165     | 0,857142857     |
| PAFAH1B2                                                                                            | 0,001785449 | -0,108499242 | 0,439 | 0,204 | 1         | 0,927552443   | 1,078106157     | 2,151960784     |
| PIKFYVE                                                                                             | 0,462190505 | -0,108603077 | 0,098 | 0,07  | 1         | 0,927485687   | 1,078183755     | 1,4             |



Supplementary Table 2

| Differentially expressed genes_keloid-XL_comparing SC-Keloid vs. (SC-Myel, SC-Nonmyel, SC-Nonmyel2) |             |              |       |       |           |               |                 |                 |
|-----------------------------------------------------------------------------------------------------|-------------|--------------|-------|-------|-----------|---------------|-----------------|-----------------|
| gene                                                                                                | p_val       | avg_log2FC   | pct.1 | pct.2 | p_val_adj | Foldchange_UP | Foldchange_DOWN | Ratio_pct1_pct2 |
| CYB561A3                                                                                            | 0,005143418 | -0,1086889   | 0,159 | 0,056 | 1         | 0,927430514   | 1,078247896     | 2,839285714     |
| PATJ                                                                                                | 0,835753847 | -0,108726952 | 0,024 | 0,028 | 1         | 0,927406053   | 1,078276335     | 0,857142857     |
| STRADA                                                                                              | 0,022971312 | -0,108754937 | 0,171 | 0,077 | 1         | 0,927388064   | 1,078297251     | 2,220779221     |
| CYP4F11                                                                                             | 0,28286347  | -0,108766969 | 0     | 0,014 | 1         | 0,927380329   | 1,078306245     | 0               |
| APPL1                                                                                               | 0,001715399 | -0,108801406 | 0,305 | 0,126 | 1         | 0,927358193   | 1,078331984     | 2,420634921     |
| H1-10                                                                                               | 0,201706846 | -0,108828164 | 0,573 | 0,393 | 1         | 0,927340993   | 1,078351984     | 1,458015267     |
| TFE3                                                                                                | 0,005009521 | -0,108876469 | 0,268 | 0,119 | 1         | 0,927309944   | 1,078388091     | 2,25210084      |
| LMBRD1                                                                                              | 0,006495246 | -0,108879939 | 0,476 | 0,242 | 1         | 0,927307714   | 1,078390684     | 1,966942149     |
| GAPVD1                                                                                              | 0,007903661 | -0,108930071 | 0,354 | 0,172 | 1         | 0,927275491   | 1,078428158     | 2,058139535     |
| MFAP1                                                                                               | 0,205611206 | -0,109019273 | 0,11  | 0,063 | 1         | 0,927218159   | 1,078494839     | 1,746031746     |
| ZNF528                                                                                              | 0,067170932 | -0,109035659 | 0,11  | 0,049 | 1         | 0,927207629   | 1,078507089     | 2,244897959     |
| LINC01116                                                                                           | 0,000127414 | -0,10905956  | 0,427 | 0,168 | 1         | 0,927192268   | 1,078524956     | 2,541666667     |
| MEIS1                                                                                               | 0,338537609 | -0,109109865 | 0,012 | 0,032 | 1         | 0,927159938   | 1,078562564     | 0,375           |
| PDGFRB                                                                                              | 0,817961369 | -0,109123182 | 0,073 | 0,063 | 1         | 0,92715138    | 1,07857252      | 1,158730159     |
| UBQLN4                                                                                              | 0,522928756 | -0,109141788 | 0,159 | 0,119 | 1         | 0,927139423   | 1,07858643      | 1,336134454     |
| DHFR                                                                                                | 0,02705522  | -0,109151837 | 0,085 | 0,028 | 1         | 0,927132965   | 1,078593943     | 3,035714286     |
| TMEM253                                                                                             | 0,861512651 | -0,10917646  | 0,037 | 0,032 | 1         | 0,927117141   | 1,078612352     | 1,15625         |
| PKNOX1                                                                                              | 0,227829404 | -0,109186764 | 0,098 | 0,056 | 1         | 0,92711052    | 1,078620055     | 1,75            |
| TASOR2                                                                                              | 0,150863668 | -0,109203837 | 0,183 | 0,109 | 1         | 0,927099548   | 1,07863282      | 1,678899083     |
| NUTM2A-AS1                                                                                          | 0,030316342 | -0,109231454 | 0,39  | 0,218 | 1         | 0,927081801   | 1,078653468     | 1,788990826     |
| AMDHD2                                                                                              | 0,46282761  | -0,109238057 | 0,073 | 0,049 | 1         | 0,927077558   | 1,078658404     | 1,489795918     |
| SUN1                                                                                                | 0,035149917 | -0,10932366  | 0,329 | 0,182 | 1         | 0,927022551   | 1,078722409     | 1,807692308     |
| ATG16L2                                                                                             | 0,57319978  | -0,109426045 | 0,037 | 0,025 | 1         | 0,926956764   | 1,078798967     | 1,48            |
| CCND3                                                                                               | 0,00480757  | -0,109427741 | 0,354 | 0,168 | 1         | 0,926955675   | 1,078800235     | 2,107142857     |
| UBE2E2                                                                                              | 0,742285865 | -0,109462119 | 0,085 | 0,07  | 1         | 0,926933586   | 1,078825942     | 1,214285714     |
| NOPCHAP1                                                                                            | 5,03769E-05 | -0,109552589 | 0,244 | 0,07  | 1         | 0,926875461   | 1,078893596     | 3,485714286     |
| ITIH3                                                                                               | 0,104227568 | -0,109552932 | 0     | 0,032 | 1         | 0,926875241   | 1,078893853     | 0               |
| PRKX                                                                                                | 0,911209371 | -0,109593844 | 0,061 | 0,056 | 1         | 0,926848957   | 1,078924449     | 1,089285714     |
| PET117                                                                                              | 0,067616925 | -0,109613181 | 0,061 | 0,021 | 1         | 0,926836534   | 1,07893891      | 2,904761905     |
| LYSMD2                                                                                              | 0,086167986 | -0,109678926 | 0,159 | 0,084 | 1         | 0,926794299   | 1,078988079     | 1,892857143     |

Supplementary Table 2

| Differentially expressed genes_keloid-XL_comparing SC-Keloid vs. (SC-Myel, SC-Nonmyel, SC-Nonmyel2) |             |              |       |       |           |               |                 |                 |
|-----------------------------------------------------------------------------------------------------|-------------|--------------|-------|-------|-----------|---------------|-----------------|-----------------|
| gene                                                                                                | p_val       | avg_log2FC   | pct.1 | pct.2 | p_val_adj | Foldchange_UP | Foldchange_DOWN | Ratio_pct1_pct2 |
| EIF4A1                                                                                              | 0,76017838  | -0,109692409 | 0,854 | 0,726 | 1         | 0,926785637   | 1,078998163     | 1,17630854      |
| ETFDH                                                                                               | 0,183218582 | -0,109745164 | 0,159 | 0,095 | 1         | 0,926751748   | 1,07903762      | 1,673684211     |
| ASCC1                                                                                               | 0,122513084 | -0,109760041 | 0,11  | 0,056 | 1         | 0,926742191   | 1,079048747     | 1,964285714     |
| MEX3A                                                                                               | 0,069028916 | -0,109873095 | 0,098 | 0,042 | 1         | 0,926669572   | 1,079133307     | 2,333333333     |
| GPC3                                                                                                | 0,35350329  | -0,109903014 | 0     | 0,011 | 1         | 0,926650354   | 1,079155687     | 0               |
| SGCD                                                                                                | 0,804569351 | -0,109969737 | 0,098 | 0,084 | 1         | 0,926607499   | 1,079205598     | 1,166666667     |
| KHNYN                                                                                               | 0,256129326 | -0,110001696 | 0,11  | 0,067 | 1         | 0,926586973   | 1,079229505     | 1,641791045     |
| USF3                                                                                                | 0,081965385 | -0,110028516 | 0,122 | 0,06  | 1         | 0,926569747   | 1,079249569     | 2,033333333     |
| MARK2                                                                                               | 0,008508159 | -0,110086661 | 0,256 | 0,116 | 1         | 0,926532404   | 1,079293066     | 2,206896552     |
| TOX4                                                                                                | 0,011805568 | -0,110115101 | 0,28  | 0,133 | 1         | 0,92651414    | 1,079314343     | 2,105263158     |
| GRIN2B                                                                                              | 0,228958629 | -0,110317447 | 0     | 0,018 | 1         | 0,9263842     | 1,079465733     | 0               |
| SLC40A1                                                                                             | 0,493879805 | -0,110319335 | 0,012 | 0,025 | 1         | 0,926382988   | 1,079467146     | 0,48            |
| ANOS1                                                                                               | 0,228958629 | -0,110377118 | 0     | 0,018 | 1         | 0,926345885   | 1,079510382     | 0               |
| CSRNP2                                                                                              | 0,623405885 | -0,110447592 | 0,098 | 0,077 | 1         | 0,926300635   | 1,079563116     | 1,272727273     |
| RABGAP1                                                                                             | 0,134108501 | -0,110518483 | 0,183 | 0,109 | 1         | 0,92625512    | 1,079616165     | 1,678899083     |
| PNP                                                                                                 | 0,058575228 | -0,110567532 | 0,134 | 0,063 | 1         | 0,92622363    | 1,07965287      | 2,126984127     |
| FCRLB                                                                                               | 0,710321163 | -0,110664025 | 0,024 | 0,018 | 1         | 0,926161682   | 1,079725084     | 1,333333333     |
| GNG2                                                                                                | 0,038250363 | -0,11083113  | 0,732 | 0,446 | 1         | 0,926054413   | 1,079850154     | 1,641255605     |
| EPHX2                                                                                               | 0,28286347  | -0,11091886  | 0     | 0,014 | 1         | 0,925998101   | 1,079915822     | 0               |
| NUP58                                                                                               | 0,032001089 | -0,110948429 | 0,22  | 0,112 | 1         | 0,925979122   | 1,079937955     | 1,964285714     |
| MTCL1                                                                                               | 0,879365097 | -0,111016367 | 0,024 | 0,021 | 1         | 0,925935518   | 1,079988812     | 1,142857143     |
| SQOR                                                                                                | 0,89944705  | -0,111051861 | 0,037 | 0,039 | 1         | 0,925912738   | 1,080015383     | 0,948717949     |
| CYBRD1                                                                                              | 0,000267494 | -0,111082908 | 0,305 | 0,112 | 1         | 0,925892812   | 1,080038625     | 2,723214286     |
| STX16                                                                                               | 0,162102281 | -0,111083471 | 0,366 | 0,239 | 1         | 0,925892451   | 1,080039047     | 1,531380753     |
| INTS6L                                                                                              | 0,755955868 | -0,111131068 | 0,049 | 0,056 | 1         | 0,925861905   | 1,08007468      | 0,875           |
| NUAK1                                                                                               | 0,711450166 | -0,111221622 | 0,024 | 0,032 | 1         | 0,925803793   | 1,080142475     | 0,75            |
| ZNF670                                                                                              | 0,935846368 | -0,111261661 | 0,049 | 0,049 | 1         | 0,925778099   | 1,080172453     | 1               |
| BCKDHB                                                                                              | 0,008799478 | -0,111291493 | 0,171 | 0,067 | 1         | 0,925758956   | 1,080194789     | 2,552238806     |
| WNT2B                                                                                               | 0,334326668 | -0,111306453 | 0,012 | 0,032 | 1         | 0,925749357   | 1,080205989     | 0,375           |
| TEX30                                                                                               | 0,220786375 | -0,111325024 | 0,073 | 0,039 | 1         | 0,92573744    | 1,080219894     | 1,871794872     |

Supplementary Table 2

| Differentially expressed genes_keloid-XL_comparing SC-Keloid vs. (SC-Myel, SC-Nonmyel, SC-Nonmyel2) |             |              |       |       |           |               |                 |                 |
|-----------------------------------------------------------------------------------------------------|-------------|--------------|-------|-------|-----------|---------------|-----------------|-----------------|
| gene                                                                                                | p_val       | avg_log2FC   | pct.1 | pct.2 | p_val_adj | Foldchange_UP | Foldchange_DOWN | Ratio_pct1_pct2 |
| PSD2                                                                                                | 0,490935921 | -0,111344302 | 0,012 | 0,025 | 1         | 0,92572507    | 1,080234329     | 0,48            |
| VPS26B                                                                                              | 0,000285551 | -0,11140098  | 0,232 | 0,074 | 1         | 0,925688702   | 1,080276769     | 3,135135135     |
| SEMA4G                                                                                              | 0,28286347  | -0,111466288 | 0     | 0,014 | 1         | 0,9256468     | 1,080325671     | 0               |
| ARHGEF25                                                                                            | 0,711450166 | -0,111623    | 0,024 | 0,032 | 1         | 0,925546257   | 1,080443027     | 0,75            |
| CEP83                                                                                               | 0,005019178 | -0,111666598 | 0,146 | 0,049 | 1         | 0,925518288   | 1,080475679     | 2,979591837     |
| MBLAC2                                                                                              | 0,861512651 | -0,11172972  | 0,037 | 0,032 | 1         | 0,925477795   | 1,080522954     | 1,15625         |
| SETD9                                                                                               | 0,302168504 | -0,111763752 | 0,098 | 0,06  | 1         | 0,925455963   | 1,080548443     | 1,633333333     |
| RAD9A                                                                                               | 0,059306292 | -0,111837387 | 0,183 | 0,095 | 1         | 0,925408729   | 1,080603595     | 1,926315789     |
| TENT5C                                                                                              | 0,104227568 | -0,111852293 | 0     | 0,032 | 1         | 0,925399168   | 1,08061476      | 0               |
| FAAH                                                                                                | 0,35350329  | -0,1118533   | 0     | 0,011 | 1         | 0,925398522   | 1,080615514     | 0               |
| EXOSC6                                                                                              | 0,003428638 | -0,111855972 | 0,268 | 0,112 | 1         | 0,925396808   | 1,080617516     | 2,392857143     |
| MAGIX                                                                                               | 0,448248692 | -0,111961296 | 0,037 | 0,021 | 1         | 0,925329252   | 1,080696409     | 1,761904762     |
| SLC38A6                                                                                             | 0,606078799 | -0,1119643   | 0,024 | 0,035 | 1         | 0,925327325   | 1,08069866      | 0,685714286     |
| SLC9A1                                                                                              | 0,105043903 | -0,112002449 | 0,085 | 0,039 | 1         | 0,925302857   | 1,080727237     | 2,179487179     |
| FLII                                                                                                | 0,031303427 | -0,112182404 | 0,244 | 0,126 | 1         | 0,925187447   | 1,08086205      | 1,936507937     |
| PDPR                                                                                                | 0,188930236 | -0,112185932 | 0,085 | 0,046 | 1         | 0,925185184   | 1,080864693     | 1,847826087     |
| IRF8                                                                                                | 0,186763581 | -0,112232126 | 0     | 0,021 | 1         | 0,925155561   | 1,080899302     | 0               |
| SEPSECS                                                                                             | 0,893814763 | -0,112306224 | 0,037 | 0,039 | 1         | 0,925108045   | 1,080954819     | 0,948717949     |
| HELB                                                                                                | 0,825889227 | -0,112308106 | 0,049 | 0,053 | 1         | 0,925106838   | 1,08095623      | 0,924528302     |
| ZNF182                                                                                              | 0,727904339 | -0,112319693 | 0,037 | 0,028 | 1         | 0,925099409   | 1,080964911     | 1,321428571     |
| ATG4A                                                                                               | 0,888187825 | -0,112354057 | 0,037 | 0,039 | 1         | 0,925077374   | 1,080990659     | 0,948717949     |
| FRS3                                                                                                | 0,385169549 | -0,112500754 | 0,049 | 0,028 | 1         | 0,924983314   | 1,081100583     | 1,75            |
| ZNF335                                                                                              | 0,13809843  | -0,112539695 | 0,098 | 0,049 | 1         | 0,924958348   | 1,081129764     | 2               |
| REV3L                                                                                               | 0,629792658 | -0,11255946  | 0,085 | 0,067 | 1         | 0,924945676   | 1,081144575     | 1,268656716     |
| TPP2                                                                                                | 0,013099212 | -0,112568952 | 0,159 | 0,063 | 1         | 0,92493959    | 1,081151689     | 2,523809524     |
| RAB2B                                                                                               | 0,079250239 | -0,112579798 | 0,122 | 0,06  | 1         | 0,924932637   | 1,081159817     | 2,033333333     |
| HECTD1                                                                                              | 0,000410185 | -0,112631106 | 0,354 | 0,14  | 1         | 0,924899743   | 1,081198268     | 2,528571429     |
| SLC25A26                                                                                            | 0,019766849 | -0,112661218 | 0,159 | 0,067 | 1         | 0,924880438   | 1,081220835     | 2,373134328     |
| TARBP1                                                                                              | 0,033706914 | -0,112678272 | 0,183 | 0,088 | 1         | 0,924869505   | 1,081233616     | 2,079545455     |
| LHFPL2                                                                                              | 0,054149356 | -0,112750509 | 0,22  | 0,119 | 1         | 0,924823198   | 1,081287756     | 1,848739496     |

Supplementary Table 2

| Differentially expressed genes_keloid-XL_comparing SC-Keloid vs. (SC-Myel, SC-Nonmyel, SC-Nonmyel2) |             |              |       |       |           |               |                 |                 |
|-----------------------------------------------------------------------------------------------------|-------------|--------------|-------|-------|-----------|---------------|-----------------|-----------------|
| gene                                                                                                | p_val       | avg_log2FC   | pct.1 | pct.2 | p_val_adj | Foldchange_UP | Foldchange_DOWN | Ratio_pct1_pct2 |
| DOCK1                                                                                               | 0,069196594 | -0,112770326 | 0,293 | 0,168 | 1         | 0,924810495   | 1,081302608     | 1,744047619     |
| ATF7                                                                                                | 0,003702756 | -0,112805368 | 0,244 | 0,102 | 1         | 0,924788031   | 1,081328873     | 2,392156863     |
| KIAA1143                                                                                            | 0,000692816 | -0,112828759 | 0,268 | 0,098 | 1         | 0,924773038   | 1,081346405     | 2,734693878     |
| IPO9-AS1                                                                                            | 0,28286347  | -0,113020867 | 0     | 0,014 | 1         | 0,924649904   | 1,081490406     | 0               |
| LMBR1L                                                                                              | 0,618140307 | -0,113028439 | 0,098 | 0,077 | 1         | 0,924645051   | 1,081496082     | 1,272727273     |
| SFRP4                                                                                               | 0,734471344 | -0,113030396 | 0,049 | 0,039 | 1         | 0,924643797   | 1,081497549     | 1,256410256     |
| KLHL18                                                                                              | 0,266053115 | -0,113044742 | 0,085 | 0,049 | 1         | 0,924634602   | 1,081508304     | 1,734693878     |
| ANG                                                                                                 | 0,23235895  | -0,113078705 | 0,012 | 0,039 | 1         | 0,924612835   | 1,081533764     | 0,307692308     |
| CRYBB2                                                                                              | 0,436724529 | -0,113089384 | 0,024 | 0,042 | 1         | 0,924605991   | 1,08154177      | 0,571428571     |
| MYO18A                                                                                              | 0,094560268 | -0,113152724 | 0,11  | 0,053 | 1         | 0,924565398   | 1,081589255     | 2,075471698     |
| ANKRD46                                                                                             | 0,531311683 | -0,113174095 | 0,061 | 0,042 | 1         | 0,924551703   | 1,081605276     | 1,452380952     |
| CEP95                                                                                               | 0,243098006 | -0,113254902 | 0,146 | 0,091 | 1         | 0,924499919   | 1,08166586      | 1,604395604     |
| KAT8                                                                                                | 0,186109561 | -0,113283227 | 0,159 | 0,095 | 1         | 0,924481768   | 1,081687097     | 1,673684211     |
| EAF1                                                                                                | 0,322235281 | -0,113308548 | 0,11  | 0,07  | 1         | 0,924465542   | 1,081706082     | 1,571428571     |
| PHF19                                                                                               | 0,02742303  | -0,113383674 | 0,268 | 0,137 | 1         | 0,924417403   | 1,081762412     | 1,95620438      |
| LINC00672                                                                                           | 0,187860656 | -0,113438956 | 0,024 | 0,007 | 1         | 0,924381982   | 1,081803864     | 3,428571429     |
| UPF3A                                                                                               | 0,002280662 | -0,113461708 | 0,402 | 0,186 | 1         | 0,924367404   | 1,081820925     | 2,161290323     |
| ZNF347                                                                                              | 0,850375302 | -0,113465859 | 0,049 | 0,042 | 1         | 0,924364744   | 1,081824038     | 1,166666667     |
| ZNF10                                                                                               | 0,848859315 | -0,11351028  | 0,024 | 0,028 | 1         | 0,924336284   | 1,081857348     | 0,857142857     |
| HLA-DMB                                                                                             | 0,186763581 | -0,113517351 | 0     | 0,021 | 1         | 0,924331753   | 1,08186265      | 0               |
| RPL27A                                                                                              | 0,619728275 | -0,113618671 | 0,939 | 0,835 | 1         | 0,92426684    | 1,081938632     | 1,124550898     |
| IGSF9B                                                                                              | 0,043210696 | -0,113632938 | 0,122 | 0,053 | 1         | 0,9242577     | 1,081949331     | 2,301886792     |
| PSEN1                                                                                               | 0,063829823 | -0,113654992 | 0,195 | 0,105 | 1         | 0,924243571   | 1,081965871     | 1,857142857     |
| AKAP8L                                                                                              | 0,044089652 | -0,113685326 | 0,366 | 0,207 | 1         | 0,924224138   | 1,08198862      | 1,768115942     |
| GOLGA3                                                                                              | 0,075377287 | -0,113737459 | 0,256 | 0,147 | 1         | 0,924190741   | 1,08202772      | 1,741496599     |
| DYNLT2                                                                                              | 0,28286347  | -0,11381272  | 0     | 0,014 | 1         | 0,92414253    | 1,082084167     | 0               |
| APC2                                                                                                | 0,186763581 | -0,113853017 | 0     | 0,021 | 1         | 0,924116718   | 1,082114392     | 0               |
| EGFR                                                                                                | 0,597173043 | -0,113889282 | 0,012 | 0,021 | 1         | 0,924093488   | 1,082141594     | 0,571428571     |
| VTI1A                                                                                               | 0,263538415 | -0,113934938 | 0,085 | 0,049 | 1         | 0,924064244   | 1,08217584      | 1,734693878     |
| H3C1                                                                                                | 0,89237004  | -0,113940162 | 0,012 | 0,014 | 1         | 0,924060898   | 1,082179759     | 0,857142857     |

Supplementary Table 2

| Differentially expressed genes_keloid-XL_comparing SC-Keloid vs. (SC-Myel, SC-Nonmyel, SC-Nonmyel2) |             |              |       |       |           |               |                 |                 |
|-----------------------------------------------------------------------------------------------------|-------------|--------------|-------|-------|-----------|---------------|-----------------|-----------------|
| gene                                                                                                | p_val       | avg_log2FC   | pct.1 | pct.2 | p_val_adj | Foldchange_UP | Foldchange_DOWN | Ratio_pct1_pct2 |
| UPP1                                                                                                | 0,000859328 | -0,113957402 | 0,439 | 0,196 | 1         | 0,924049856   | 1,08219269      | 2,239795918     |
| DHX15                                                                                               | 0,031518017 | -0,11396697  | 0,378 | 0,207 | 1         | 0,924043728   | 1,082199868     | 1,826086957     |
| DGLUCY                                                                                              | 0,728697501 | -0,11404214  | 0,012 | 0,018 | 1         | 0,923995583   | 1,082256256     | 0,666666667     |
| KPNA6                                                                                               | 0,511711709 | -0,114137935 | 0,134 | 0,102 | 1         | 0,923934232   | 1,08232812      | 1,31372549      |
| ZNF44                                                                                               | 0,070815804 | -0,114217505 | 0,085 | 0,035 | 1         | 0,923883275   | 1,082387816     | 2,428571429     |
| ZC3H14                                                                                              | 0,006223653 | -0,11423048  | 0,28  | 0,126 | 1         | 0,923874966   | 1,082397551     | 2,222222222     |
| MCM9                                                                                                | 0,166384958 | -0,114244102 | 0,073 | 0,035 | 1         | 0,923866242   | 1,082407771     | 2,085714286     |
| ARHGAP42                                                                                            | 0,075560265 | -0,114321792 | 0,146 | 0,074 | 1         | 0,923816493   | 1,082466061     | 1,972972973     |
| NLRC5                                                                                               | 0,107090833 | -0,114464464 | 0,085 | 0,039 | 1         | 0,923725139   | 1,082573114     | 2,179487179     |
| HINT1                                                                                               | 0,117619397 | -0,114476551 | 0,744 | 0,505 | 1         | 0,9237174     | 1,082582184     | 1,473267327     |
| CCDC102B                                                                                            | 0,946985525 | -0,114514544 | 0,049 | 0,046 | 1         | 0,923693074   | 1,082610694     | 1,065217391     |
| AKT1S1                                                                                              | 0,002446433 | -0,114557929 | 0,256 | 0,102 | 1         | 0,923665297   | 1,082643251     | 2,509803922     |
| SULT1A1                                                                                             | 0,153186787 | -0,114585998 | 0     | 0,025 | 1         | 0,923647327   | 1,082664315     | 0               |
| PHTF1                                                                                               | 0,000195581 | -0,114604058 | 0,183 | 0,049 | 1         | 0,923635764   | 1,082677868     | 3,734693878     |
| AQP5                                                                                                | 0,28286347  | -0,114655863 | 0     | 0,014 | 1         | 0,923602598   | 1,082716746     | 0               |
| PCNX3                                                                                               | 0,129199799 | -0,114716644 | 0,11  | 0,056 | 1         | 0,923563687   | 1,082762362     | 1,964285714     |
| ZNF529                                                                                              | 0,222011736 | -0,114717233 | 0,073 | 0,039 | 1         | 0,923563311   | 1,082762804     | 1,871794872     |
| NUP42                                                                                               | 0,003906184 | -0,114746214 | 0,207 | 0,081 | 1         | 0,923544758   | 1,082784555     | 2,555555556     |
| PI16                                                                                                | 0,28286347  | -0,115019178 | 0     | 0,014 | 1         | 0,923370036   | 1,082989442     | 0               |
| CASP9                                                                                               | 0,299773065 | -0,115126934 | 0,073 | 0,042 | 1         | 0,923301072   | 1,083070334     | 1,738095238     |
| SVIL                                                                                                | 0,329804619 | -0,115132766 | 0,061 | 0,035 | 1         | 0,923297339   | 1,083074712     | 1,742857143     |
| DDX11                                                                                               | 0,982342462 | -0,115137255 | 0,037 | 0,035 | 1         | 0,923294466   | 1,083078083     | 1,057142857     |
| NSF                                                                                                 | 0,058461383 | -0,115155667 | 0,122 | 0,056 | 1         | 0,923282683   | 1,083091905     | 2,178571429     |
| CACNG8                                                                                              | 0,654971645 | -0,115166067 | 0,012 | 0,007 | 1         | 0,923276027   | 1,083099713     | 1,714285714     |
| WDR20                                                                                               | 0,019163639 | -0,115171323 | 0,171 | 0,074 | 1         | 0,923272663   | 1,083103659     | 2,310810811     |
| BCAM                                                                                                | 0,621308468 | -0,115181104 | 0,061 | 0,046 | 1         | 0,923266405   | 1,083111001     | 1,326086957     |
| NECTIN3                                                                                             | 0,019403003 | -0,115259247 | 0,171 | 0,074 | 1         | 0,923216397   | 1,08316967      | 2,310810811     |
| NRIP1                                                                                               | 0,047777724 | -0,115316081 | 0,268 | 0,147 | 1         | 0,923180028   | 1,083212341     | 1,823129252     |
| TERF2                                                                                               | 0,045789724 | -0,115451414 | 0,122 | 0,053 | 1         | 0,923093433   | 1,083313958     | 2,301886792     |
| KDM4A                                                                                               | 0,858233476 | -0,115526253 | 0,049 | 0,042 | 1         | 0,923045549   | 1,083370155     | 1,166666667     |

Supplementary Table 2

| Differentially expressed genes_keloid-XL_comparing SC-Keloid vs. (SC-Myel, SC-Nonmyel, SC-Nonmyel2) |             |              |       |       |           |               |                 |                 |
|-----------------------------------------------------------------------------------------------------|-------------|--------------|-------|-------|-----------|---------------|-----------------|-----------------|
| gene                                                                                                | p_val       | avg_log2FC   | pct.1 | pct.2 | p_val_adj | Foldchange_UP | Foldchange_DOWN | Ratio_pct1_pct2 |
| ARMCX2                                                                                              | 0,011472074 | -0,115581726 | 0,122 | 0,042 | 1         | 0,923010058   | 1,083411813     | 2,904761905     |
| TOR1AIP2                                                                                            | 0,027771749 | -0,115747602 | 0,305 | 0,165 | 1         | 0,92290394    | 1,083536387     | 1,848484848     |
| RBBP8                                                                                               | 0,646998113 | -0,115778986 | 0,073 | 0,056 | 1         | 0,922883863   | 1,083559958     | 1,303571429     |
| GNL2                                                                                                | 0,003417584 | -0,115785957 | 0,183 | 0,067 | 1         | 0,922879404   | 1,083565194     | 2,731343284     |
| FAM185A                                                                                             | 0,289262993 | -0,115904637 | 0,012 | 0,035 | 1         | 0,922803489   | 1,083654334     | 0,342857143     |
| PRKD1                                                                                               | 0,970105473 | -0,116014499 | 0,024 | 0,025 | 1         | 0,922733219   | 1,083736858     | 0,96            |
| CENPF                                                                                               | 0,973560112 | -0,116077143 | 0,049 | 0,049 | 1         | 0,922693153   | 1,083783917     | 1               |
| MYO1C                                                                                               | 0,051595471 | -0,11612273  | 0,463 | 0,281 | 1         | 0,922663998   | 1,083818164     | 1,647686833     |
| CSPG5                                                                                               | 0,89237004  | -0,116177309 | 0,012 | 0,014 | 1         | 0,922629093   | 1,083859166     | 0,857142857     |
| ADGRB1                                                                                              | 0,84947752  | -0,116297236 | 0,037 | 0,032 | 1         | 0,922552401   | 1,083949268     | 1,15625         |
| SLC11A2                                                                                             | 0,047152083 | -0,116424684 | 0,171 | 0,084 | 1         | 0,922470906   | 1,084045029     | 2,035714286     |
| QTRT2                                                                                               | 0,253953805 | -0,116564823 | 0,061 | 0,032 | 1         | 0,922381305   | 1,084150335     | 1,90625         |
| DAB1                                                                                                | 0,517393619 | -0,116567638 | 0,024 | 0,039 | 1         | 0,922379505   | 1,08415245      | 0,615384615     |
| LYRM9                                                                                               | 0,79874132  | -0,116568052 | 0,061 | 0,067 | 1         | 0,92237924    | 1,084152761     | 0,910447761     |
| ZNF808                                                                                              | 0,490935921 | -0,116768812 | 0,012 | 0,025 | 1         | 0,922250894   | 1,084303638     | 0,48            |
| ZSWIM9                                                                                              | 0,517393619 | -0,116914621 | 0,024 | 0,039 | 1         | 0,92215769    | 1,084413231     | 0,615384615     |
| SLC35A1                                                                                             | 0,440407945 | -0,116921593 | 0,11  | 0,077 | 1         | 0,922153234   | 1,084418471     | 1,428571429     |
| BUD13                                                                                               | 0,609506016 | -0,116928164 | 0,049 | 0,035 | 1         | 0,922149033   | 1,084423411     | 1,4             |
| SMARCAD1                                                                                            | 0,178470047 | -0,116997883 | 0,098 | 0,053 | 1         | 0,922104471   | 1,084475818     | 1,849056604     |
| RGS12                                                                                               | 0,422293169 | -0,117071771 | 0,146 | 0,105 | 1         | 0,922057246   | 1,084531361     | 1,39047619      |
| MSH2                                                                                                | 0,634745928 | -0,117196029 | 0,061 | 0,046 | 1         | 0,921977834   | 1,084624774     | 1,326086957     |
| ETV7                                                                                                | 0,453700053 | -0,117199055 | 0,024 | 0,042 | 1         | 0,9219759     | 1,084627049     | 0,571428571     |
| BTBD3                                                                                               | 0,31701312  | -0,117202898 | 0,122 | 0,077 | 1         | 0,921973444   | 1,084629939     | 1,584415584     |
| FZD5                                                                                                | 0,597173043 | -0,117211478 | 0,012 | 0,021 | 1         | 0,921967961   | 1,084636389     | 0,571428571     |
| CEP152                                                                                              | 0,780304193 | -0,117235496 | 0,037 | 0,042 | 1         | 0,921952612   | 1,084654446     | 0,880952381     |
| CD99L2                                                                                              | 0,174852161 | -0,117316716 | 0,244 | 0,154 | 1         | 0,92190071    | 1,084715511     | 1,584415584     |
| WDR86                                                                                               | 0,153186787 | -0,117338656 | 0     | 0,025 | 1         | 0,921886691   | 1,084732007     | 0               |
| MRNIP                                                                                               | 0,465996193 | -0,11734684  | 0,122 | 0,088 | 1         | 0,921881461   | 1,084738161     | 1,386363636     |
| AKR1C2                                                                                              | 0,351112297 | -0,117374241 | 0,024 | 0,011 | 1         | 0,921863952   | 1,084758763     | 2,181818182     |
| DOCK9                                                                                               | 0,896630255 | -0,117444231 | 0,037 | 0,039 | 1         | 0,92181923    | 1,08481139      | 0,948717949     |

Supplementary Table 2

| Differentially expressed genes_keloid-XL_comparing SC-Keloid vs. (SC-Myel, SC-Nonmyel, SC-Nonmyel2) |             |              |       |       |           |               |                 |                 |
|-----------------------------------------------------------------------------------------------------|-------------|--------------|-------|-------|-----------|---------------|-----------------|-----------------|
| gene                                                                                                | p_val       | avg_log2FC   | pct.1 | pct.2 | p_val_adj | Foldchange_UP | Foldchange_DOWN | Ratio_pct1_pct2 |
| TMBIM1                                                                                              | 0,002746974 | -0,117587808 | 0,378 | 0,175 | 1         | 0,921727495   | 1,084919356     | 2,16            |
| ACAP1                                                                                               | 0,295381329 | -0,117664865 | 0,073 | 0,042 | 1         | 0,921678265   | 1,084977305     | 1,738095238     |
| C4orf33                                                                                             | 0,128452285 | -0,117715825 | 0,098 | 0,049 | 1         | 0,921645709   | 1,08501563      | 2               |
| METTL8                                                                                              | 0,526986103 | -0,11791114  | 0,024 | 0,039 | 1         | 0,921520944   | 1,085162531     | 0,615384615     |
| ESRRA                                                                                               | 0,040724515 | -0,118168269 | 0,146 | 0,067 | 1         | 0,921356717   | 1,085355955     | 2,179104478     |
| PWWP2B                                                                                              | 0,730504652 | -0,118308268 | 0,073 | 0,06  | 1         | 0,921267313   | 1,085461283     | 1,216666667     |
| NTN4                                                                                                | 0,530989227 | -0,118324911 | 0,024 | 0,014 | 1         | 0,921256686   | 1,085473805     | 1,714285714     |
| EXTL3-AS1                                                                                           | 0,35350329  | -0,118350934 | 0     | 0,011 | 1         | 0,921240068   | 1,085493385     | 0               |
| TNFSF9                                                                                              | 0,717418436 | -0,118397015 | 0,024 | 0,032 | 1         | 0,921210643   | 1,085528057     | 0,75            |
| DPP8                                                                                                | 0,001612533 | -0,118403429 | 0,195 | 0,067 | 1         | 0,921206548   | 1,085532883     | 2,910447761     |
| RIF1                                                                                                | 0,015894266 | -0,118521688 | 0,378 | 0,2   | 1         | 0,921131039   | 1,085621869     | 1,89            |
| OSBPL5                                                                                              | 0,796801528 | -0,118527033 | 0,11  | 0,095 | 1         | 0,921127626   | 1,085625891     | 1,157894737     |
| ZNF700                                                                                              | 0,404681217 | -0,118558928 | 0,012 | 0,028 | 1         | 0,921107262   | 1,085649892     | 0,428571429     |
| CHRD1                                                                                               | 0,104227568 | -0,11865551  | 0     | 0,032 | 1         | 0,9210456     | 1,085722574     | 0               |
| LRR4B                                                                                               | 0,606078799 | -0,118688053 | 0,024 | 0,035 | 1         | 0,921024824   | 1,085747065     | 0,685714286     |
| PIK3R2                                                                                              | 0,013031976 | -0,118696351 | 0,146 | 0,056 | 1         | 0,921019527   | 1,08575331      | 2,607142857     |
| ELOC                                                                                                | 0,065058251 | -0,118792807 | 0,573 | 0,34  | 1         | 0,920957951   | 1,085825904     | 1,685294118     |
| SFR1                                                                                                | 0,1636376   | -0,118890593 | 0,11  | 0,06  | 1         | 0,920895531   | 1,085899504     | 1,833333333     |
| FLVCR1                                                                                              | 0,166384958 | -0,118904963 | 0,073 | 0,035 | 1         | 0,920886358   | 1,08591032      | 2,085714286     |
| HLF                                                                                                 | 0,186763581 | -0,119032926 | 0     | 0,021 | 1         | 0,920804682   | 1,086006641     | 0               |
| SHF                                                                                                 | 0,334326668 | -0,119057222 | 0,012 | 0,032 | 1         | 0,920789175   | 1,086024931     | 0,375           |
| PACRGL                                                                                              | 0,636997413 | -0,119082611 | 0,061 | 0,046 | 1         | 0,920772971   | 1,086044043     | 1,326086957     |
| CCDC149                                                                                             | 0,730504652 | -0,119110299 | 0,073 | 0,06  | 1         | 0,920755299   | 1,086064887     | 1,216666667     |
| SNX27                                                                                               | 0,027822443 | -0,119139171 | 0,268 | 0,14  | 1         | 0,920736873   | 1,086086622     | 1,914285714     |
| SLC2A9                                                                                              | 0,228958629 | -0,119264057 | 0     | 0,018 | 1         | 0,920657173   | 1,086180642     | 0               |
| CEP57                                                                                               | 0,09423498  | -0,119264276 | 0,232 | 0,133 | 1         | 0,920657034   | 1,086180807     | 1,744360902     |
| CREB3L2                                                                                             | 0,049533087 | -0,119329782 | 0,549 | 0,319 | 1         | 0,920615232   | 1,086230127     | 1,721003135     |
| SORCS2                                                                                              | 0,460999751 | -0,119383118 | 0,073 | 0,049 | 1         | 0,920581198   | 1,086270285     | 1,489795918     |
| CHAC1                                                                                               | 0,710321163 | -0,119431527 | 0,024 | 0,018 | 1         | 0,920550309   | 1,086306735     | 1,333333333     |
| NOTCH1                                                                                              | 0,039017339 | -0,119597744 | 0,39  | 0,225 | 1         | 0,920444256   | 1,086431898     | 1,733333333     |

Supplementary Table 2

| Differentially expressed genes_keloid-XL_comparing SC-Keloid vs. (SC-Myel, SC-Nonmyel, SC-Nonmyel2) |             |              |       |       |           |               |                 |                 |
|-----------------------------------------------------------------------------------------------------|-------------|--------------|-------|-------|-----------|---------------|-----------------|-----------------|
| gene                                                                                                | p_val       | avg_log2FC   | pct.1 | pct.2 | p_val_adj | Foldchange_UP | Foldchange_DOWN | Ratio_pct1_pct2 |
| USP47                                                                                               | 0,061539014 | -0,119611649 | 0,402 | 0,239 | 1         | 0,920435384   | 1,08644237      | 1,682008368     |
| SPATA5                                                                                              | 0,126161321 | -0,119619956 | 0     | 0,028 | 1         | 0,920430084   | 1,086448625     | 0               |
| GLA                                                                                                 | 0,215863611 | -0,119668643 | 0,159 | 0,098 | 1         | 0,920399023   | 1,086485291     | 1,62244898      |
| TBC1D15                                                                                             | 0,059936442 | -0,119695503 | 0,256 | 0,144 | 1         | 0,920381887   | 1,086505519     | 1,777777778     |
| PLEKHF1                                                                                             | 0,519783239 | -0,11970011  | 0,024 | 0,039 | 1         | 0,920378948   | 1,086508989     | 0,615384615     |
| PPP1R12C                                                                                            | 0,024213662 | -0,119824096 | 0,207 | 0,098 | 1         | 0,920299854   | 1,086602368     | 2,112244898     |
| MOV10                                                                                               | 0,858233476 | -0,119847855 | 0,049 | 0,042 | 1         | 0,920284698   | 1,086620262     | 1,166666667     |
| TRIM44                                                                                              | 0,002057582 | -0,119855993 | 0,293 | 0,119 | 1         | 0,920279506   | 1,086626392     | 2,462184874     |
| SNRPN                                                                                               | 0,053398035 | -0,119856923 | 0,537 | 0,312 | 1         | 0,920278913   | 1,086627093     | 1,721153846     |
| INPP5A                                                                                              | 0,007739127 | -0,119936248 | 0,146 | 0,053 | 1         | 0,920228314   | 1,086686841     | 2,754716981     |
| SP100                                                                                               | 0,017302038 | -0,120005032 | 0,341 | 0,179 | 1         | 0,920184441   | 1,086738653     | 1,905027933     |
| ZNRF3                                                                                               | 0,864526579 | -0,120265331 | 0,037 | 0,032 | 1         | 0,920018432   | 1,086934746     | 1,15625         |
| FUBP3                                                                                               | 0,151065694 | -0,12028292  | 0,22  | 0,133 | 1         | 0,920007215   | 1,086947998     | 1,654135338     |
| NT5DC3                                                                                              | 0,092572683 | -0,120284746 | 0,122 | 0,06  | 1         | 0,92000605    | 1,086949373     | 2,033333333     |
| RBM12B                                                                                              | 0,060615786 | -0,120358395 | 0,122 | 0,056 | 1         | 0,919959086   | 1,087004863     | 2,178571429     |
| ST6GALNAC6                                                                                          | 0,168105624 | -0,120385686 | 0,22  | 0,137 | 1         | 0,919941683   | 1,087025426     | 1,605839416     |
| DEXI                                                                                                | 0,028477652 | -0,120672031 | 0,183 | 0,084 | 1         | 0,919759112   | 1,087241199     | 2,178571429     |
| DTX3                                                                                                | 0,012449465 | -0,120687524 | 0,195 | 0,084 | 1         | 0,919749235   | 1,087252875     | 2,321428571     |
| XCL1                                                                                                | 0,35350329  | -0,121082916 | 0     | 0,011 | 1         | 0,919497199   | 1,087550894     | 0               |
| MINDY1                                                                                              | 0,837311683 | -0,121108763 | 0,049 | 0,042 | 1         | 0,919480725   | 1,087570379     | 1,166666667     |
| WASHC4                                                                                              | 0,000253736 | -0,121150073 | 0,329 | 0,123 | 1         | 0,919454397   | 1,08760152      | 2,674796748     |
| CGRRF1                                                                                              | 0,646443657 | -0,121237901 | 0,098 | 0,077 | 1         | 0,919398425   | 1,087667733     | 1,272727273     |
| PIP4K2A                                                                                             | 0,152904106 | -0,121247462 | 0,146 | 0,084 | 1         | 0,919392332   | 1,087674941     | 1,738095238     |
| RFC3                                                                                                | 0,105461276 | -0,121252699 | 0,134 | 0,07  | 1         | 0,919388994   | 1,08767889      | 1,914285714     |
| CARS2                                                                                               | 0,006789595 | -0,121264247 | 0,244 | 0,105 | 1         | 0,919381635   | 1,087687596     | 2,323809524     |
| MYO1B                                                                                               | 0,451018793 | -0,121300607 | 0,073 | 0,049 | 1         | 0,919358464   | 1,087715009     | 1,489795918     |
| RBM15                                                                                               | 0,334326668 | -0,121303594 | 0,012 | 0,032 | 1         | 0,919356561   | 1,087717261     | 0,375           |
| CEP112                                                                                              | 0,834704212 | -0,121381854 | 0,049 | 0,042 | 1         | 0,919306691   | 1,087776267     | 1,166666667     |
| PEG3                                                                                                | 0,126161321 | -0,121399933 | 0     | 0,028 | 1         | 0,919295171   | 1,087789898     | 0               |
| RALGDS                                                                                              | 0,017714651 | -0,121408455 | 0,256 | 0,126 | 1         | 0,919289741   | 1,087796323     | 2,031746032     |



Supplementary Table 2

| Differentially expressed genes_keloid-XL_comparing SC-Keloid vs. (SC-Myel, SC-Nonmyel, SC-Nonmyel2) |             |              |       |       |           |               |                 |                 |
|-----------------------------------------------------------------------------------------------------|-------------|--------------|-------|-------|-----------|---------------|-----------------|-----------------|
| gene                                                                                                | p_val       | avg_log2FC   | pct.1 | pct.2 | p_val_adj | Foldchange_UP | Foldchange_DOWN | Ratio_pct1_pct2 |
| TAF1                                                                                                | 0,136050144 | -0,121427681 | 0,134 | 0,074 | 1         | 0,91927749    | 1,08781082      | 1,810810811     |
| SUB1                                                                                                | 0,429210005 | -0,121428287 | 0,695 | 0,488 | 1         | 0,919277104   | 1,087811277     | 1,424180328     |
| NHS                                                                                                 | 0,404681217 | -0,121432859 | 0,012 | 0,028 | 1         | 0,91927419    | 1,087814724     | 0,428571429     |
| POLR2H                                                                                              | 0,036717317 | -0,121509159 | 0,366 | 0,2   | 1         | 0,919225574   | 1,087872257     | 1,83            |
| EXD3                                                                                                | 0,841722995 | -0,121544914 | 0,061 | 0,053 | 1         | 0,919202793   | 1,087899219     | 1,150943396     |
| BCLAF1                                                                                              | 0,012543332 | -0,121649531 | 0,573 | 0,316 | 1         | 0,919136139   | 1,087978111     | 1,813291139     |
| YIPF4                                                                                               | 0,015339363 | -0,121674921 | 0,39  | 0,204 | 1         | 0,919119963   | 1,087997258     | 1,911764706     |
| RGL1                                                                                                | 0,896630255 | -0,12181723  | 0,037 | 0,039 | 1         | 0,919029305   | 1,088104585     | 0,948717949     |
| MGST2                                                                                               | 0,625773897 | -0,121853118 | 0,061 | 0,046 | 1         | 0,919006444   | 1,088131652     | 1,326086957     |
| NBAS                                                                                                | 0,159658848 | -0,121857706 | 0,11  | 0,06  | 1         | 0,919003521   | 1,088135113     | 1,833333333     |
| DCUN1D4                                                                                             | 0,748211493 | -0,12199494  | 0,085 | 0,07  | 1         | 0,918916107   | 1,088238625     | 1,214285714     |
| NRF1                                                                                                | 0,839026091 | -0,122023056 | 0,024 | 0,028 | 1         | 0,918898198   | 1,088259833     | 0,857142857     |
| MNT                                                                                                 | 0,34039096  | -0,122047244 | 0,122 | 0,081 | 1         | 0,918882792   | 1,088278079     | 1,50617284      |
| USP45                                                                                               | 0,404681217 | -0,122079581 | 0,012 | 0,028 | 1         | 0,918862196   | 1,088302472     | 0,428571429     |
| CHST7                                                                                               | 0,37150382  | -0,122095856 | 0,098 | 0,063 | 1         | 0,918851831   | 1,08831475      | 1,555555556     |
| POMZP3                                                                                              | 0,973621109 | -0,122137554 | 0,024 | 0,025 | 1         | 0,918825274   | 1,088346205     | 0,96            |
| SNORC                                                                                               | 0,490935921 | -0,122180648 | 0,012 | 0,025 | 1         | 0,918797829   | 1,088378715     | 0,48            |
| WASF2                                                                                               | 0,159738488 | -0,122325678 | 0,573 | 0,365 | 1         | 0,918705469   | 1,088488132     | 1,569863014     |
| FAM83F                                                                                              | 0,186763581 | -0,122387587 | 0     | 0,021 | 1         | 0,918666046   | 1,088534842     | 0               |
| LINC00309                                                                                           | 0,728697501 | -0,12240568  | 0,012 | 0,018 | 1         | 0,918654525   | 1,088548494     | 0,666666667     |
| NPIP11                                                                                              | 0,41637636  | -0,122434577 | 0,049 | 0,074 | 1         | 0,918636125   | 1,088570298     | 0,662162162     |
| RNF149                                                                                              | 0,418035465 | -0,122569863 | 0,134 | 0,095 | 1         | 0,918549985   | 1,088672381     | 1,410526316     |
| ARHGEF37                                                                                            | 0,159203343 | -0,122578937 | 0,012 | 0,046 | 1         | 0,918544208   | 1,088679228     | 0,260869565     |
| NPDC1                                                                                               | 0,019296128 | -0,122603638 | 0,488 | 0,267 | 1         | 0,918528481   | 1,088697869     | 1,827715356     |
| IPO8                                                                                                | 0,214148526 | -0,122611215 | 0,11  | 0,063 | 1         | 0,918523657   | 1,088703587     | 1,746031746     |
| FBXL4                                                                                               | 0,302725312 | -0,12266739  | 0,073 | 0,042 | 1         | 0,918487893   | 1,088745978     | 1,738095238     |
| WDR5                                                                                                | 0,020237613 | -0,122693778 | 0,146 | 0,06  | 1         | 0,918471094   | 1,088765892     | 2,433333333     |
| ACOX2                                                                                               | 0,864526579 | -0,122974837 | 0,037 | 0,032 | 1         | 0,918292178   | 1,088978022     | 1,15625         |
| FBXO45                                                                                              | 0,000345184 | -0,122992587 | 0,146 | 0,035 | 1         | 0,918280881   | 1,08899142      | 4,171428571     |
| USP44                                                                                               | 0,414697944 | -0,12311232  | 0,012 | 0,028 | 1         | 0,918204673   | 1,089081802     | 0,428571429     |

Supplementary Table 2

| Differentially expressed genes_keloid-XL_comparing SC-Keloid vs. (SC-Myel, SC-Nonmyel, SC-Nonmyel2) |             |              |       |       |           |               |                 |                 |
|-----------------------------------------------------------------------------------------------------|-------------|--------------|-------|-------|-----------|---------------|-----------------|-----------------|
| gene                                                                                                | p_val       | avg_log2FC   | pct.1 | pct.2 | p_val_adj | Foldchange_UP | Foldchange_DOWN | Ratio_pct1_pct2 |
| MANEA-DT                                                                                            | 0,908489202 | -0,123296693 | 0,012 | 0,011 | 1         | 0,918087337   | 1,089220992     | 1,090909091     |
| TUBB2A                                                                                              | 0,026603014 | -0,123302884 | 0,659 | 0,396 | 1         | 0,918083397   | 1,089225667     | 1,664141414     |
| RTL5                                                                                                | 0,440933767 | -0,123343697 | 0,024 | 0,042 | 1         | 0,918057425   | 1,089256481     | 0,571428571     |
| SF3A1                                                                                               | 0,0922667   | -0,123370093 | 0,195 | 0,109 | 1         | 0,918040628   | 1,089276411     | 1,788990826     |
| GNAL                                                                                                | 0,104227568 | -0,123400127 | 0     | 0,032 | 1         | 0,918021516   | 1,089299087     | 0               |
| BTBD7                                                                                               | 0,047987299 | -0,123456735 | 0,232 | 0,123 | 1         | 0,917985496   | 1,089341829     | 1,886178862     |
| RECQL4                                                                                              | 0,153186787 | -0,123522019 | 0     | 0,025 | 1         | 0,917943957   | 1,089391125     | 0               |
| TTC9C                                                                                               | 0,14645865  | -0,123524864 | 0,085 | 0,042 | 1         | 0,917942147   | 1,089393274     | 2,023809524     |
| PTPN11                                                                                              | 0,009653619 | -0,123548661 | 0,378 | 0,193 | 1         | 0,917927006   | 1,089411243     | 1,958549223     |
| CH25H                                                                                               | 0,89237004  | -0,123553572 | 0,012 | 0,014 | 1         | 0,917923881   | 1,089414951     | 0,857142857     |
| H2AC11                                                                                              | 0,126161321 | -0,123588124 | 0     | 0,028 | 1         | 0,917901897   | 1,089441043     | 0               |
| TSNARE1                                                                                             | 0,490935921 | -0,123733988 | 0,012 | 0,025 | 1         | 0,917809097   | 1,089551197     | 0,48            |
| SNX29                                                                                               | 0,769088539 | -0,123759533 | 0,061 | 0,067 | 1         | 0,917792846   | 1,089570489     | 0,910447761     |
| FAM53C                                                                                              | 0,287609915 | -0,123762289 | 0,122 | 0,077 | 1         | 0,917791093   | 1,08957257      | 1,584415584     |
| GJB1                                                                                                | 0,190367951 | -0,123799299 | 0,012 | 0,042 | 1         | 0,917767549   | 1,089600522     | 0,285714286     |
| FAM72A                                                                                              | 0,858233476 | -0,123799398 | 0,049 | 0,042 | 1         | 0,917767486   | 1,089600597     | 1,166666667     |
| OTUD3                                                                                               | 0,825318201 | -0,123860318 | 0,061 | 0,053 | 1         | 0,917728733   | 1,089646607     | 1,150943396     |
| TCP11L2                                                                                             | 0,891000607 | -0,123871178 | 0,037 | 0,039 | 1         | 0,917721824   | 1,08965481      | 0,948717949     |
| CPM                                                                                                 | 0,186763581 | -0,12388663  | 0     | 0,021 | 1         | 0,917711995   | 1,08966648      | 0               |
| EDN1                                                                                                | 0,282045401 | -0,123917441 | 0,012 | 0,035 | 1         | 0,917692396   | 1,089689752     | 0,342857143     |
| NRTN                                                                                                | 0,821694652 | -0,123936513 | 0,049 | 0,042 | 1         | 0,917680265   | 1,089704158     | 1,166666667     |
| SH3GLB2                                                                                             | 0,004038696 | -0,12394624  | 0,463 | 0,228 | 1         | 0,917674078   | 1,089711505     | 2,030701754     |
| LRRTM4                                                                                              | 0,334326668 | -0,123948909 | 0,012 | 0,032 | 1         | 0,91767238    | 1,089713521     | 0,375           |
| NCALD                                                                                               | 0,28286347  | -0,123979871 | 0     | 0,014 | 1         | 0,917652686   | 1,089736908     | 0               |
| GRIK5                                                                                               | 0,35350329  | -0,124207861 | 0     | 0,011 | 1         | 0,91750768    | 1,089909133     | 0               |
| SALL2                                                                                               | 0,879365097 | -0,124207945 | 0,024 | 0,021 | 1         | 0,917507626   | 1,089909197     | 1,142857143     |
| USP48                                                                                               | 0,044266561 | -0,124286494 | 0,232 | 0,119 | 1         | 0,917457673   | 1,089968539     | 1,949579832     |
| CITED4                                                                                              | 0,845144713 | -0,124356184 | 0,049 | 0,042 | 1         | 0,917413356   | 1,090021192     | 1,166666667     |
| ZBTB34                                                                                              | 0,407171737 | -0,12437922  | 0,012 | 0,028 | 1         | 0,917398707   | 1,090038597     | 0,428571429     |
| TPCN1                                                                                               | 0,635463215 | -0,124494524 | 0,085 | 0,067 | 1         | 0,91732539    | 1,090125719     | 1,268656716     |

Supplementary Table 2

| Differentially expressed genes_keloid-XL_comparing SC-Keloid vs. (SC-Myel, SC-Nonmyel, SC-Nonmyel2) |             |              |       |       |           |               |                 |                 |
|-----------------------------------------------------------------------------------------------------|-------------|--------------|-------|-------|-----------|---------------|-----------------|-----------------|
| gene                                                                                                | p_val       | avg_log2FC   | pct.1 | pct.2 | p_val_adj | Foldchange_UP | Foldchange_DOWN | Ratio_pct1_pct2 |
| SHANK3                                                                                              | 0,287447036 | -0,124582764 | 0,012 | 0,035 | 1         | 0,917269284   | 1,090192397     | 0,342857143     |
| RPS6KA2                                                                                             | 0,87168274  | -0,124656751 | 0,049 | 0,053 | 1         | 0,917222245   | 1,090248308     | 0,924528302     |
| RXRA                                                                                                | 0,036132012 | -0,124668956 | 0,341 | 0,189 | 1         | 0,917214485   | 1,090257531     | 1,804232804     |
| ZFYVE1                                                                                              | 0,441860484 | -0,124807823 | 0,11  | 0,077 | 1         | 0,917126203   | 1,090362479     | 1,428571429     |
| EMC9                                                                                                | 0,223161889 | -0,124843541 | 0,159 | 0,098 | 1         | 0,917103497   | 1,090389475     | 1,62244898      |
| RHPN1                                                                                               | 0,09380127  | -0,124891198 | 0,146 | 0,077 | 1         | 0,917073203   | 1,090425494     | 1,896103896     |
| SCN5A                                                                                               | 0,126160962 | -0,12494074  | 0     | 0,028 | 1         | 0,917041711   | 1,09046294      | 0               |
| TSPAN4                                                                                              | 0,01735542  | -0,124967158 | 0,195 | 0,088 | 1         | 0,917024918   | 1,090482909     | 2,215909091     |
| PIGU                                                                                                | 0,15342381  | -0,125015181 | 0,085 | 0,042 | 1         | 0,916994394   | 1,090519207     | 2,023809524     |
| RIN2                                                                                                | 0,514515233 | -0,125082335 | 0,037 | 0,053 | 1         | 0,916951711   | 1,09056997      | 0,698113208     |
| STARD7                                                                                              | 0,040412632 | -0,125086561 | 0,293 | 0,161 | 1         | 0,916949025   | 1,090573164     | 1,819875776     |
| SF3B1                                                                                               | 0,695676215 | -0,12525527  | 0,622 | 0,477 | 1         | 0,916841803   | 1,090700704     | 1,303983229     |
| TMEM139                                                                                             | 0,404681217 | -0,125432121 | 0,012 | 0,028 | 1         | 0,91672942    | 1,090834414     | 0,428571429     |
| WNK2                                                                                                | 0,104227568 | -0,125529797 | 0     | 0,032 | 1         | 0,916667356   | 1,09090827      | 0               |
| SEMA7A                                                                                              | 0,066684329 | -0,125633108 | 0,122 | 0,056 | 1         | 0,916601716   | 1,090986393     | 2,178571429     |
| RNF214                                                                                              | 0,183050409 | -0,125650604 | 0,098 | 0,053 | 1         | 0,9165906     | 1,090999624     | 1,849056604     |
| SDHA                                                                                                | 0,017380053 | -0,125671442 | 0,354 | 0,179 | 1         | 0,916577361   | 1,091015382     | 1,977653631     |
| SPRYD3                                                                                              | 0,062734889 | -0,125677179 | 0,134 | 0,063 | 1         | 0,916573716   | 1,091019721     | 2,126984127     |
| PLBD1                                                                                               | 0,619512782 | -0,125698795 | 0,049 | 0,035 | 1         | 0,916559983   | 1,091036068     | 1,4             |
| ROBO3                                                                                               | 0,257004845 | -0,125805237 | 0,134 | 0,084 | 1         | 0,916492362   | 1,091116567     | 1,595238095     |
| CPEB3                                                                                               | 0,879365097 | -0,125925143 | 0,024 | 0,021 | 1         | 0,916416194   | 1,091207256     | 1,142857143     |
| BLOC1S6                                                                                             | 0,010412955 | -0,125956021 | 0,378 | 0,189 | 1         | 0,91639658    | 1,091230612     | 2               |
| CHST12                                                                                              | 0,004928074 | -0,126051602 | 0,232 | 0,098 | 1         | 0,916335869   | 1,09130291      | 2,367346939     |
| RBM28                                                                                               | 0,318313777 | -0,126088513 | 0,171 | 0,116 | 1         | 0,916312425   | 1,091330831     | 1,474137931     |
| NR2F2-AS1                                                                                           | 0,879312278 | -0,126120884 | 0,061 | 0,063 | 1         | 0,916291865   | 1,091355318     | 0,968253968     |
| TK2                                                                                                 | 0,235232394 | -0,12623625  | 0,171 | 0,109 | 1         | 0,916218596   | 1,091442593     | 1,568807339     |
| ACVR2B                                                                                              | 0,835486331 | -0,126398277 | 0,049 | 0,053 | 1         | 0,916115703   | 1,091565178     | 0,924528302     |
| PIP4P2                                                                                              | 0,022680951 | -0,126659869 | 0,256 | 0,126 | 1         | 0,915949606   | 1,091763121     | 2,031746032     |
| SRCAP                                                                                               | 0,265864423 | -0,126719636 | 0,134 | 0,084 | 1         | 0,915911661   | 1,09180835      | 1,595238095     |
| AIG1                                                                                                | 0,000281411 | -0,126797019 | 0,329 | 0,126 | 1         | 0,915862536   | 1,091866914     | 2,611111111     |

Supplementary Table 2

| Differentially expressed genes_keloid-XL_comparing SC-Keloid vs. (SC-Myel, SC-Nonmyel, SC-Nonmyel2) |             |              |       |       |           |               |                 |                 |
|-----------------------------------------------------------------------------------------------------|-------------|--------------|-------|-------|-----------|---------------|-----------------|-----------------|
| gene                                                                                                | p_val       | avg_log2FC   | pct.1 | pct.2 | p_val_adj | Foldchange_UP | Foldchange_DOWN | Ratio_pct1_pct2 |
| TBCC                                                                                                | 0,001778197 | -0,126833309 | 0,256 | 0,102 | 1         | 0,915839498   | 1,091894379     | 2,509803922     |
| DIP2C-AS1                                                                                           | 0,278482798 | -0,126889489 | 0,012 | 0,035 | 1         | 0,915803835   | 1,0919369       | 0,342857143     |
| RNF152                                                                                              | 0,442988867 | -0,127013613 | 0,037 | 0,021 | 1         | 0,915725046   | 1,09203085      | 1,761904762     |
| CNST                                                                                                | 0,495181583 | -0,127103874 | 0,146 | 0,109 | 1         | 0,915667756   | 1,092099174     | 1,339449541     |
| HSPA13                                                                                              | 0,004829851 | -0,127233186 | 0,354 | 0,165 | 1         | 0,915585686   | 1,092197066     | 2,145454545     |
| SPTBN5                                                                                              | 0,725789242 | -0,127245977 | 0,061 | 0,049 | 1         | 0,915577569   | 1,092206749     | 1,244897959     |
| TBPL1                                                                                               | 0,138988783 | -0,127436561 | 0,159 | 0,091 | 1         | 0,915456626   | 1,092351042     | 1,747252747     |
| MIR503HG                                                                                            | 0,710321163 | -0,127451284 | 0,024 | 0,018 | 1         | 0,915447284   | 1,09236219      | 1,333333333     |
| SOCS5                                                                                               | 0,910529224 | -0,127550743 | 0,085 | 0,077 | 1         | 0,915384175   | 1,0924375       | 1,103896104     |
| PODXL2                                                                                              | 0,739665212 | -0,12760079  | 0,049 | 0,039 | 1         | 0,915352422   | 1,092475397     | 1,256410256     |
| MRFAP1L1                                                                                            | 0,120240558 | -0,12763608  | 0,159 | 0,088 | 1         | 0,915330031   | 1,09250212      | 1,806818182     |
| CA2                                                                                                 | 0,707207002 | -0,127908165 | 0,037 | 0,046 | 1         | 0,915157421   | 1,09270818      | 0,804347826     |
| LRMDA                                                                                               | 0,004072895 | -0,128043179 | 0,244 | 0,102 | 1         | 0,91507178    | 1,092810446     | 2,392156863     |
| MTRFR                                                                                               | 0,824325668 | -0,128061745 | 0,073 | 0,077 | 1         | 0,915060004   | 1,092824509     | 0,948051948     |
| ASXL2                                                                                               | 0,297127771 | -0,128084182 | 0,098 | 0,06  | 1         | 0,915045773   | 1,092841505     | 1,633333333     |
| PRPF3                                                                                               | 0,382168664 | -0,12809608  | 0,11  | 0,074 | 1         | 0,915038227   | 1,092850518     | 1,486486486     |
| KMT2D                                                                                               | 0,643771935 | -0,12813265  | 0,061 | 0,046 | 1         | 0,915015033   | 1,09287822      | 1,326086957     |
| CLCN2                                                                                               | 0,431705505 | -0,128152346 | 0,061 | 0,039 | 1         | 0,915002541   | 1,09289314      | 1,564102564     |
| GABPB2                                                                                              | 0,913549329 | -0,128316492 | 0,037 | 0,039 | 1         | 0,91489844    | 1,093017494     | 0,948717949     |
| GFPT2                                                                                               | 0,739665212 | -0,128385419 | 0,049 | 0,039 | 1         | 0,91485473    | 1,093069716     | 1,256410256     |
| HAUS8                                                                                               | 0,832484443 | -0,128461731 | 0,024 | 0,028 | 1         | 0,91480634    | 1,093127536     | 0,857142857     |
| DISP1                                                                                               | 0,086314699 | -0,128485714 | 0     | 0,035 | 1         | 0,914791132   | 1,093145708     | 0               |
| CSPP1                                                                                               | 0,103639936 | -0,128542356 | 0,171 | 0,095 | 1         | 0,914755217   | 1,093188627     | 1,8             |
| CYTH1                                                                                               | 0,355828945 | -0,128546307 | 0,146 | 0,102 | 1         | 0,914752712   | 1,093191621     | 1,431372549     |
| ZNF230                                                                                              | 0,35350329  | -0,128748493 | 0     | 0,011 | 1         | 0,914624524   | 1,093344836     | 0               |
| SOX13                                                                                               | 0,005005511 | -0,128773575 | 0,293 | 0,13  | 1         | 0,914608622   | 1,093363845     | 2,253846154     |
| VEZF1                                                                                               | 0,010374582 | -0,128831433 | 0,39  | 0,2   | 1         | 0,914571944   | 1,093407694     | 1,95            |
| MPHOSPH6                                                                                            | 0,380829982 | -0,12885736  | 0,024 | 0,046 | 1         | 0,914555508   | 1,093427344     | 0,52173913      |
| TMEM192                                                                                             | 0,285301791 | -0,128862615 | 0,073 | 0,042 | 1         | 0,914552176   | 1,093431327     | 1,738095238     |
| GATA2                                                                                               | 0,277596953 | -0,129016947 | 0,049 | 0,025 | 1         | 0,914454347   | 1,093548303     | 1,96            |

Supplementary Table 2

| Differentially expressed genes_keloid-XL_comparing SC-Keloid vs. (SC-Myel, SC-Nonmyel, SC-Nonmyel2) |             |              |       |       |           |               |                 |                 |
|-----------------------------------------------------------------------------------------------------|-------------|--------------|-------|-------|-----------|---------------|-----------------|-----------------|
| gene                                                                                                | p_val       | avg_log2FC   | pct.1 | pct.2 | p_val_adj | Foldchange_UP | Foldchange_DOWN | Ratio_pct1_pct2 |
| GRK4                                                                                                | 0,166384958 | -0,129061995 | 0,073 | 0,035 | 1         | 0,914425794   | 1,09358245      | 2,085714286     |
| TGFB3                                                                                               | 0,334326668 | -0,12911455  | 0,012 | 0,032 | 1         | 0,914392484   | 1,093622288     | 0,375           |
| GLIS2                                                                                               | 0,276713029 | -0,12919862  | 0,012 | 0,035 | 1         | 0,914339201   | 1,093686018     | 0,342857143     |
| EXOG                                                                                                | 0,173490904 | -0,129359027 | 0,11  | 0,06  | 1         | 0,914237545   | 1,093807627     | 1,833333333     |
| HINFP                                                                                               | 0,249536154 | -0,12939922  | 0,061 | 0,032 | 1         | 0,914212075   | 1,093838101     | 1,90625         |
| EML3                                                                                                | 0,259564043 | -0,129416378 | 0,171 | 0,112 | 1         | 0,914201203   | 1,09385111      | 1,526785714     |
| FOXK1                                                                                               | 0,281681009 | -0,129444387 | 0,146 | 0,095 | 1         | 0,914183454   | 1,093872346     | 1,536842105     |
| MED26                                                                                               | 0,966793203 | -0,129467873 | 0,061 | 0,06  | 1         | 0,914168572   | 1,093890154     | 1,016666667     |
| TRIM35                                                                                              | 0,404681217 | -0,129504167 | 0,012 | 0,028 | 1         | 0,914145575   | 1,093917673     | 0,428571429     |
| FKBP5                                                                                               | 0,957318744 | -0,129555272 | 0,049 | 0,046 | 1         | 0,914113193   | 1,093956424     | 1,065217391     |
| FSTL1                                                                                               | 0,095893144 | -0,129733028 | 0,573 | 0,361 | 1         | 0,914000571   | 1,09409122      | 1,587257618     |
| PPA1                                                                                                | 0,003615733 | -0,129782181 | 0,5   | 0,239 | 1         | 0,913969431   | 1,094128497     | 2,092050209     |
| GSTM2                                                                                               | 0,153186787 | -0,129988148 | 0     | 0,025 | 1         | 0,913838957   | 1,094284712     | 0               |
| C5orf24                                                                                             | 0,01065315  | -0,1300015   | 0,561 | 0,309 | 1         | 0,9138305     | 1,094294839     | 1,815533981     |
| RANGAP1                                                                                             | 0,323342579 | -0,130163496 | 0,134 | 0,088 | 1         | 0,913727894   | 1,094417721     | 1,522727273     |
| FRAT2                                                                                               | 0,832484443 | -0,130235546 | 0,024 | 0,028 | 1         | 0,913682263   | 1,094472379     | 0,857142857     |
| FN3K                                                                                                | 0,404681217 | -0,130281412 | 0,012 | 0,028 | 1         | 0,913653216   | 1,094507175     | 0,428571429     |
| L3MBTL1                                                                                             | 0,717418436 | -0,130361255 | 0,024 | 0,032 | 1         | 0,913602653   | 1,09456775      | 0,75            |
| EMD                                                                                                 | 0,013856081 | -0,13042696  | 0,39  | 0,2   | 1         | 0,913561045   | 1,094617601     | 1,95            |
| VMAC                                                                                                | 0,728697501 | -0,130427374 | 0,012 | 0,018 | 1         | 0,913560783   | 1,094617915     | 0,666666667     |
| KAT7                                                                                                | 0,055733029 | -0,130438038 | 0,146 | 0,07  | 1         | 0,91355403    | 1,094626007     | 2,085714286     |
| NUP62                                                                                               | 0,003632258 | -0,130520511 | 0,171 | 0,06  | 1         | 0,913501808   | 1,094688584     | 2,85            |
| PREX2                                                                                               | 0,126161321 | -0,130523867 | 0     | 0,028 | 1         | 0,913499683   | 1,09469113      | 0               |
| GALM                                                                                                | 0,714432118 | -0,130889674 | 0,024 | 0,032 | 1         | 0,913268087   | 1,094968733     | 0,75            |
| RTN4R                                                                                               | 0,186763581 | -0,130893198 | 0     | 0,021 | 1         | 0,913265856   | 1,094971407     | 0               |
| PRXL2C                                                                                              | 0,008669075 | -0,130904056 | 0,415 | 0,211 | 1         | 0,913258983   | 1,094979649     | 1,966824645     |
| TRIM33                                                                                              | 0,069004219 | -0,131081876 | 0,207 | 0,112 | 1         | 0,913146426   | 1,095114619     | 1,848214286     |
| ZC3H6                                                                                               | 0,071865768 | -0,131148122 | 0,22  | 0,123 | 1         | 0,913104497   | 1,095164906     | 1,788617886     |
| LINC00598                                                                                           | 0,276713029 | -0,131150059 | 0,012 | 0,035 | 1         | 0,91310327    | 1,095166377     | 0,342857143     |
| ZYG11B                                                                                              | 0,148053109 | -0,131207436 | 0,159 | 0,091 | 1         | 0,913066957   | 1,095209933     | 1,747252747     |

Supplementary Table 2

| Differentially expressed genes_keloid-XL_comparing SC-Keloid vs. (SC-Myel, SC-Nonmyel, SC-Nonmyel2) |             |              |       |       |           |               |                 |                 |
|-----------------------------------------------------------------------------------------------------|-------------|--------------|-------|-------|-----------|---------------|-----------------|-----------------|
| gene                                                                                                | p_val       | avg_log2FC   | pct.1 | pct.2 | p_val_adj | Foldchange_UP | Foldchange_DOWN | Ratio_pct1_pct2 |
| IQCN                                                                                                | 0,314233219 | -0,131244668 | 0,037 | 0,018 | 1         | 0,913043393   | 1,095238197     | 2,055555556     |
| AKR1C1                                                                                              | 0,85037523  | -0,131260729 | 0,049 | 0,042 | 1         | 0,913033229   | 1,09525039      | 1,166666667     |
| CPNE3                                                                                               | 0,030571428 | -0,131283478 | 0,439 | 0,246 | 1         | 0,913018832   | 1,095267661     | 1,784552846     |
| CAMSAP1                                                                                             | 0,012804162 | -0,131378309 | 0,183 | 0,077 | 1         | 0,912958819   | 1,095339657     | 2,376623377     |
| RESF1                                                                                               | 0,029515898 | -0,131420956 | 0,134 | 0,056 | 1         | 0,912931832   | 1,095372037     | 2,392857143     |
| HPF1                                                                                                | 0,030982433 | -0,131422007 | 0,207 | 0,102 | 1         | 0,912931167   | 1,095372835     | 2,029411765     |
| HAUS7                                                                                               | 0,028519419 | -0,13145902  | 0,159 | 0,07  | 1         | 0,912907745   | 1,095400938     | 2,271428571     |
| SELENOI                                                                                             | 0,42253913  | -0,131528835 | 0,122 | 0,084 | 1         | 0,912863569   | 1,095453947     | 1,452380952     |
| SUCLG2                                                                                              | 0,003742884 | -0,131529277 | 0,28  | 0,119 | 1         | 0,912863289   | 1,095454283     | 2,352941176     |
| SREK1                                                                                               | 0,009147908 | -0,131729281 | 0,476 | 0,249 | 1         | 0,912736746   | 1,095606159     | 1,911646586     |
| NBEAL1                                                                                              | 0,02838867  | -0,131735925 | 0,366 | 0,2   | 1         | 0,912732542   | 1,095611205     | 1,83            |
| PARP6                                                                                               | 0,039094965 | -0,131764854 | 0,159 | 0,074 | 1         | 0,912714241   | 1,095633173     | 2,148648649     |
| FOXP4                                                                                               | 0,737361654 | -0,131846174 | 0,061 | 0,049 | 1         | 0,912662795   | 1,095694933     | 1,244897959     |
| ITSN2                                                                                               | 0,355133347 | -0,131855715 | 0,134 | 0,091 | 1         | 0,91265676    | 1,095702179     | 1,472527473     |
| ANKDD1A                                                                                             | 0,327294158 | -0,131859171 | 0,122 | 0,081 | 1         | 0,912654573   | 1,095704804     | 1,50617284      |
| RRAGD                                                                                               | 0,162390217 | -0,131978441 | 0,012 | 0,046 | 1         | 0,912579125   | 1,095795392     | 0,260869565     |
| VWA8                                                                                                | 0,409671375 | -0,131978531 | 0,012 | 0,028 | 1         | 0,912579069   | 1,09579546      | 0,428571429     |
| NAA15                                                                                               | 0,38773515  | -0,132014718 | 0,195 | 0,14  | 1         | 0,912556179   | 1,095822946     | 1,392857143     |
| DLG5                                                                                                | 0,741101558 | -0,132016278 | 0,073 | 0,06  | 1         | 0,912555192   | 1,09582413      | 1,216666667     |
| RELL1                                                                                               | 0,45098936  | -0,132096147 | 0,037 | 0,056 | 1         | 0,912504673   | 1,095884798     | 0,660714286     |
| PPP2R3A                                                                                             | 0,293017433 | -0,132167956 | 0,195 | 0,133 | 1         | 0,912459255   | 1,095939347     | 1,466165414     |
| PCSK5                                                                                               | 0,240936007 | -0,132239283 | 0,024 | 0,056 | 1         | 0,912414144   | 1,095993531     | 0,428571429     |
| TRAF6                                                                                               | 0,834683514 | -0,132275219 | 0,061 | 0,053 | 1         | 0,912391418   | 1,096020831     | 1,150943396     |
| SHOC2                                                                                               | 0,104013812 | -0,132771969 | 0,341 | 0,211 | 1         | 0,912077316   | 1,096398279     | 1,616113744     |
| QSER1                                                                                               | 0,156189252 | -0,132787761 | 0,183 | 0,109 | 1         | 0,912067333   | 1,096410281     | 1,678899083     |
| WFDC2                                                                                               | 0,153186787 | -0,132933954 | 0     | 0,025 | 1         | 0,911974914   | 1,096521389     | 0               |
| TOP1MT                                                                                              | 0,535575254 | -0,133012926 | 0,061 | 0,042 | 1         | 0,911924995   | 1,096581413     | 1,452380952     |
| ATP11C                                                                                              | 0,788115278 | -0,133059904 | 0,061 | 0,067 | 1         | 0,911895301   | 1,096617122     | 0,910447761     |
| KCNAB3                                                                                              | 0,431705505 | -0,133119541 | 0,061 | 0,039 | 1         | 0,911857606   | 1,096662454     | 1,564102564     |
| PRKD3                                                                                               | 0,347836074 | -0,133272037 | 0,256 | 0,182 | 1         | 0,911761226   | 1,096778379     | 1,406593407     |

Supplementary Table 2

| Differentially expressed genes_keloid-XL_comparing SC-Keloid vs. (SC-Myel, SC-Nonmyel, SC-Nonmyel2) |             |              |       |       |           |               |                 |                 |
|-----------------------------------------------------------------------------------------------------|-------------|--------------|-------|-------|-----------|---------------|-----------------|-----------------|
| gene                                                                                                | p_val       | avg_log2FC   | pct.1 | pct.2 | p_val_adj | Foldchange_UP | Foldchange_DOWN | Ratio_pct1_pct2 |
| FBXO2                                                                                               | 0,059506563 | -0,133285386 | 0     | 0,042 | 1         | 0,911752789   | 1,096788528     | 0               |
| PDP2                                                                                                | 0,126161321 | -0,133411003 | 0     | 0,028 | 1         | 0,911673406   | 1,096884031     | 0               |
| CDHR3                                                                                               | 0,967659139 | -0,133424483 | 0,049 | 0,046 | 1         | 0,911664887   | 1,09689428      | 1,065217391     |
| DMAC2L                                                                                              | 0,00442256  | -0,133495361 | 0,207 | 0,081 | 1         | 0,9116201     | 1,09694817      | 2,555555556     |
| IDH1                                                                                                | 0,013266733 | -0,133662061 | 0,171 | 0,07  | 1         | 0,91151477    | 1,097074927     | 2,442857143     |
| SLMAP                                                                                               | 0,902426935 | -0,133825294 | 0,098 | 0,088 | 1         | 0,911411643   | 1,097199062     | 1,113636364     |
| GAS1                                                                                                | 0,35350329  | -0,133848333 | 0     | 0,011 | 1         | 0,911397089   | 1,097216584     | 0               |
| WWC2                                                                                                | 0,075632691 | -0,133848961 | 0,183 | 0,098 | 1         | 0,911396692   | 1,097217061     | 1,867346939     |
| C19orf12                                                                                            | 0,535785771 | -0,133994064 | 0,11  | 0,081 | 1         | 0,91130503    | 1,097327422     | 1,358024691     |
| KIF1C                                                                                               | 0,018722423 | -0,134031012 | 0,195 | 0,088 | 1         | 0,911281691   | 1,097355526     | 2,215909091     |
| CIITA                                                                                               | 0,404681217 | -0,134088566 | 0,012 | 0,028 | 1         | 0,911245338   | 1,097399304     | 0,428571429     |
| BUB3                                                                                                | 0,121196865 | -0,134098596 | 0,305 | 0,186 | 1         | 0,911239003   | 1,097406933     | 1,639784946     |
| MTCH1                                                                                               | 0,040589732 | -0,134146217 | 0,585 | 0,347 | 1         | 0,911208925   | 1,097443158     | 1,685878963     |
| SMG7                                                                                                | 0,277464444 | -0,134146647 | 0,195 | 0,133 | 1         | 0,911208653   | 1,097443485     | 1,466165414     |
| TBC1D12                                                                                             | 0,67163798  | -0,134151888 | 0,098 | 0,077 | 1         | 0,911205343   | 1,097447471     | 1,272727273     |
| WDTC1                                                                                               | 0,089084213 | -0,134159034 | 0,122 | 0,06  | 1         | 0,91120083    | 1,097452908     | 2,033333333     |
| PTGER4                                                                                              | 0,728697501 | -0,134346112 | 0,012 | 0,018 | 1         | 0,91108268    | 1,097595226     | 0,666666667     |
| MDM2                                                                                                | 0,125188983 | -0,134401455 | 0,146 | 0,081 | 1         | 0,911047731   | 1,097637331     | 1,802469136     |
| CHML                                                                                                | 0,464579482 | -0,134482496 | 0,122 | 0,088 | 1         | 0,910996556   | 1,097698991     | 1,386363636     |
| CEBPG                                                                                               | 0,100990071 | -0,134573761 | 0,22  | 0,126 | 1         | 0,910938927   | 1,097768434     | 1,746031746     |
| HIP1                                                                                                | 0,144374625 | -0,13466787  | 0,159 | 0,091 | 1         | 0,910879508   | 1,097840045     | 1,747252747     |
| ARHGAP10                                                                                            | 0,469446683 | -0,134829419 | 0,146 | 0,105 | 1         | 0,910777515   | 1,097962986     | 1,39047619      |
| SLC4A7                                                                                              | 0,170158373 | -0,13485903  | 0,11  | 0,06  | 1         | 0,910758822   | 1,097985521     | 1,833333333     |
| TLNRD1                                                                                              | 0,036937212 | -0,134870508 | 0,195 | 0,095 | 1         | 0,910751576   | 1,097994257     | 2,052631579     |
| ZMYND11                                                                                             | 0,012785985 | -0,134883667 | 0,293 | 0,144 | 1         | 0,910743269   | 1,098004272     | 2,034722222     |
| CAPRIN1                                                                                             | 0,162243282 | -0,134952591 | 0,317 | 0,207 | 1         | 0,91069976    | 1,098056729     | 1,531400966     |
| KIRREL1                                                                                             | 0,079181099 | -0,134983031 | 0,28  | 0,161 | 1         | 0,910680545   | 1,098079898     | 1,739130435     |
| NOTCH2                                                                                              | 0,505941352 | -0,135032273 | 0,146 | 0,109 | 1         | 0,910649463   | 1,098117378     | 1,339449541     |
| GTPBP4                                                                                              | 0,026958779 | -0,135037848 | 0,171 | 0,077 | 1         | 0,910645943   | 1,098121622     | 2,220779221     |
| IFT88                                                                                               | 0,570062028 | -0,135070484 | 0,085 | 0,063 | 1         | 0,910625343   | 1,098146463     | 1,349206349     |

Supplementary Table 2

| Differentially expressed genes_keloid-XL_comparing SC-Keloid vs. (SC-Myel, SC-Nonmyel, SC-Nonmyel2) |             |              |       |       |           |               |                 |                 |
|-----------------------------------------------------------------------------------------------------|-------------|--------------|-------|-------|-----------|---------------|-----------------|-----------------|
| gene                                                                                                | p_val       | avg_log2FC   | pct.1 | pct.2 | p_val_adj | Foldchange_UP | Foldchange_DOWN | Ratio_pct1_pct2 |
| CCDC7                                                                                               | 0,712940593 | -0,135169819 | 0,037 | 0,028 | 1         | 0,910562645   | 1,098222077     | 1,321428571     |
| MGAT1                                                                                               | 0,020201391 | -0,135174303 | 0,293 | 0,147 | 1         | 0,910559815   | 1,098225491     | 1,993197279     |
| SLC25A33                                                                                            | 0,074499618 | -0,135202372 | 0,256 | 0,144 | 1         | 0,9105421     | 1,098246858     | 1,777777778     |
| ERBB3                                                                                               | 0,394489568 | -0,135211134 | 0,744 | 0,519 | 1         | 0,910536569   | 1,098253528     | 1,433526012     |
| KDM5A                                                                                               | 0,018119692 | -0,135214563 | 0,293 | 0,147 | 1         | 0,910534406   | 1,098256138     | 1,993197279     |
| TCEA1                                                                                               | 0,043492363 | -0,135279624 | 0,537 | 0,326 | 1         | 0,910493344   | 1,098305668     | 1,647239264     |
| DIO2                                                                                                | 0,153186787 | -0,135404187 | 0     | 0,025 | 1         | 0,910414735   | 1,0984005       | 0               |
| NLK                                                                                                 | 0,202410779 | -0,135434174 | 0,085 | 0,046 | 1         | 0,910395812   | 1,098423331     | 1,847826087     |
| HUS1B                                                                                               | 0,728697501 | -0,13553691  | 0,012 | 0,018 | 1         | 0,910330984   | 1,098501553     | 0,666666667     |
| WWTR1                                                                                               | 0,004061199 | -0,135588229 | 0,561 | 0,281 | 1         | 0,910298603   | 1,098540629     | 1,996441281     |
| ZNF483                                                                                              | 0,334326668 | -0,135629747 | 0,012 | 0,032 | 1         | 0,910272406   | 1,098572244     | 0,375           |
| CDK5RAP1                                                                                            | 0,030785422 | -0,135631885 | 0,11  | 0,042 | 1         | 0,910271057   | 1,098573872     | 2,619047619     |
| FOXJ1                                                                                               | 0,228958629 | -0,135643874 | 0     | 0,018 | 1         | 0,910263493   | 1,098583001     | 0               |
| KIF5A                                                                                               | 0,728697501 | -0,135646782 | 0,012 | 0,018 | 1         | 0,910261658   | 1,098585216     | 0,666666667     |
| ZFPM2                                                                                               | 0,404681217 | -0,135822445 | 0,012 | 0,028 | 1         | 0,910150831   | 1,098718988     | 0,428571429     |
| RASGRF1                                                                                             | 0,186763581 | -0,135829411 | 0     | 0,021 | 1         | 0,910146436   | 1,098724293     | 0               |
| CHCHD3                                                                                              | 0,231486434 | -0,135999394 | 0,183 | 0,116 | 1         | 0,910039206   | 1,098853756     | 1,577586207     |
| C19orf73                                                                                            | 0,908489202 | -0,136035202 | 0,012 | 0,011 | 1         | 0,910016619   | 1,09888103      | 1,090909091     |
| GFOD1                                                                                               | 0,603783162 | -0,136050434 | 0,037 | 0,049 | 1         | 0,910007011   | 1,098892632     | 0,755102041     |
| TTLL4                                                                                               | 0,498483398 | -0,136139901 | 0,049 | 0,032 | 1         | 0,90995058    | 1,098960781     | 1,53125         |
| NFKBID                                                                                              | 0,714432118 | -0,136141422 | 0,024 | 0,032 | 1         | 0,909949621   | 1,098961939     | 0,75            |
| CPXM2                                                                                               | 0,192877425 | -0,136187035 | 0,012 | 0,042 | 1         | 0,909920852   | 1,098996685     | 0,285714286     |
| CEP57L1                                                                                             | 0,097608776 | -0,136293855 | 0,098 | 0,046 | 1         | 0,909853482   | 1,09907806      | 2,130434783     |
| IL1R1                                                                                               | 0,334326668 | -0,136328317 | 0,012 | 0,032 | 1         | 0,909831749   | 1,099104314     | 0,375           |
| TET3                                                                                                | 0,041380153 | -0,13655082  | 0,159 | 0,074 | 1         | 0,909691438   | 1,099273839     | 2,148648649     |
| ARHGEF6                                                                                             | 0,323471241 | -0,136609677 | 0,11  | 0,07  | 1         | 0,909654327   | 1,099318687     | 1,571428571     |
| RRAD                                                                                                | 0,792475529 | -0,136658239 | 0,146 | 0,126 | 1         | 0,909623708   | 1,099355691     | 1,158730159     |
| BRAT1                                                                                               | 0,028769307 | -0,136662373 | 0,146 | 0,063 | 1         | 0,909621101   | 1,099358842     | 2,317460317     |
| FILIP1                                                                                              | 0,334326668 | -0,136693751 | 0,012 | 0,032 | 1         | 0,909601317   | 1,099382753     | 0,375           |
| SHROOM1                                                                                             | 0,608759699 | -0,136767096 | 0,024 | 0,035 | 1         | 0,909555076   | 1,099438645     | 0,685714286     |



Supplementary Table 2

| Differentially expressed genes_keloid-XL_comparing SC-Keloid vs. (SC-Myel, SC-Nonmyel, SC-Nonmyel2) |             |              |       |       |           |               |                 |                 |
|-----------------------------------------------------------------------------------------------------|-------------|--------------|-------|-------|-----------|---------------|-----------------|-----------------|
| gene                                                                                                | p_val       | avg_log2FC   | pct.1 | pct.2 | p_val_adj | Foldchange_UP | Foldchange_DOWN | Ratio_pct1_pct2 |
| TET2                                                                                                | 0,27451065  | -0,13685714  | 0,195 | 0,13  | 1         | 0,909498309   | 1,099507267     | 1,5             |
| PRPF39                                                                                              | 0,295131885 | -0,136911503 | 0,159 | 0,105 | 1         | 0,909464038   | 1,099548699     | 1,514285714     |
| PGGHG                                                                                               | 0,994113727 | -0,136917589 | 0,037 | 0,035 | 1         | 0,909460201   | 1,099553338     | 1,057142857     |
| PRDM5                                                                                               | 0,832484443 | -0,137143861 | 0,024 | 0,028 | 1         | 0,909317573   | 1,099725805     | 0,857142857     |
| SLC16A1-AS1                                                                                         | 0,982342462 | -0,137189985 | 0,037 | 0,035 | 1         | 0,909288502   | 1,099760964     | 1,057142857     |
| SORD                                                                                                | 0,852339514 | -0,137192381 | 0,049 | 0,053 | 1         | 0,909286992   | 1,099762791     | 0,924528302     |
| HEY2                                                                                                | 0,104227568 | -0,137218749 | 0     | 0,032 | 1         | 0,909270373   | 1,099782891     | 0               |
| JUP                                                                                                 | 0,725789242 | -0,137222578 | 0,061 | 0,049 | 1         | 0,90926796    | 1,09978581      | 1,244897959     |
| RSAD2                                                                                               | 0,153186787 | -0,137240201 | 0     | 0,025 | 1         | 0,909256853   | 1,099799245     | 0               |
| HECTD4                                                                                              | 0,304645756 | -0,137258859 | 0,134 | 0,088 | 1         | 0,909245094   | 1,099813468     | 1,522727273     |
| TRERF1                                                                                              | 0,153186787 | -0,137269506 | 0     | 0,025 | 1         | 0,909238384   | 1,099821585     | 0               |
| LNP1                                                                                                | 0,252475247 | -0,137466815 | 0,061 | 0,032 | 1         | 0,909114041   | 1,099972011     | 1,90625         |
| TXNL4B                                                                                              | 0,199239329 | -0,137523849 | 0,085 | 0,046 | 1         | 0,909078101   | 1,100015498     | 1,847826087     |
| DDB2                                                                                                | 0,159658848 | -0,137812478 | 0,11  | 0,06  | 1         | 0,908896247   | 1,100235591     | 1,833333333     |
| CLDN12                                                                                              | 0,440372242 | -0,137918125 | 0,037 | 0,021 | 1         | 0,908829692   | 1,100316163     | 1,761904762     |
| ZUP1                                                                                                | 0,606078799 | -0,137961753 | 0,024 | 0,035 | 1         | 0,908802209   | 1,100349438     | 0,685714286     |
| TRIM4                                                                                               | 0,818708351 | -0,137968369 | 0,049 | 0,053 | 1         | 0,908798042   | 1,100354484     | 0,924528302     |
| FANCM                                                                                               | 0,186763581 | -0,137984375 | 0     | 0,021 | 1         | 0,908787959   | 1,100366691     | 0               |
| AC097532.2                                                                                          | 0,126161321 | -0,137987559 | 0     | 0,028 | 1         | 0,908785953   | 1,100369121     | 0               |
| ZNF236                                                                                              | 0,035661822 | -0,137987793 | 0,159 | 0,074 | 1         | 0,908785806   | 1,100369299     | 2,148648649     |
| FAM13A                                                                                              | 0,141176134 | -0,138166377 | 0,098 | 0,049 | 1         | 0,908673319   | 1,100505516     | 2               |
| ZFAND1                                                                                              | 0,01207846  | -0,138184206 | 0,134 | 0,049 | 1         | 0,908662089   | 1,100519117     | 2,734693878     |
| ATP5IF1                                                                                             | 0,009953713 | -0,138240186 | 0,707 | 0,386 | 1         | 0,908626832   | 1,10056182      | 1,831606218     |
| LGALS7                                                                                              | 0,228958629 | -0,138331564 | 0     | 0,018 | 1         | 0,908569282   | 1,100631531     | 0               |
| PRMT5-AS1                                                                                           | 0,493879805 | -0,138349044 | 0,012 | 0,025 | 1         | 0,908558274   | 1,100644866     | 0,48            |
| DUSP5                                                                                               | 0,181072216 | -0,138444646 | 0,159 | 0,095 | 1         | 0,908498069   | 1,100717804     | 1,673684211     |
| STARD4-AS1                                                                                          | 0,879365097 | -0,138582195 | 0,024 | 0,021 | 1         | 0,908411456   | 1,100822753     | 1,142857143     |
| PQBP1                                                                                               | 0,020133109 | -0,13858911  | 0,305 | 0,154 | 1         | 0,908407102   | 1,10082803      | 1,980519481     |
| RXRБ                                                                                                | 0,127532229 | -0,138612594 | 0,183 | 0,105 | 1         | 0,908392315   | 1,100845949     | 1,742857143     |
| ATP10B                                                                                              | 0,334326668 | -0,138659687 | 0,012 | 0,032 | 1         | 0,908362664   | 1,100881883     | 0,375           |

Supplementary Table 2

| Differentially expressed genes_keloid-XL_comparing SC-Keloid vs. (SC-Myel, SC-Nonmyel, SC-Nonmyel2) |             |              |       |       |           |               |                 |                 |
|-----------------------------------------------------------------------------------------------------|-------------|--------------|-------|-------|-----------|---------------|-----------------|-----------------|
| gene                                                                                                | p_val       | avg_log2FC   | pct.1 | pct.2 | p_val_adj | Foldchange_UP | Foldchange_DOWN | Ratio_pct1_pct2 |
| AGFG1                                                                                               | 0,08461436  | -0,138799503 | 0,268 | 0,154 | 1         | 0,908274636   | 1,100988579     | 1,74025974      |
| OBSCN                                                                                               | 0,728697501 | -0,139125123 | 0,012 | 0,018 | 1         | 0,908069659   | 1,101237103     | 0,666666667     |
| CORO2B                                                                                              | 0,120439228 | -0,139188261 | 0,183 | 0,105 | 1         | 0,908029919   | 1,101285298     | 1,742857143     |
| ABI1                                                                                                | 0,005740991 | -0,13926918  | 0,39  | 0,193 | 1         | 0,90797899    | 1,10134707      | 2,020725389     |
| SMC2                                                                                                | 0,087836139 | -0,139367499 | 0,159 | 0,084 | 1         | 0,907917114   | 1,101422129     | 1,892857143     |
| ZNF616                                                                                              | 0,973516395 | -0,139386338 | 0,037 | 0,035 | 1         | 0,907905258   | 1,101436511     | 1,057142857     |
| C19orf33                                                                                            | 0,228958629 | -0,13954864  | 0     | 0,018 | 1         | 0,907803125   | 1,101560429     | 0               |
| SEPTIN3                                                                                             | 0,338537609 | -0,139644924 | 0,012 | 0,032 | 1         | 0,907742541   | 1,101633948     | 0,375           |
| SIPA1                                                                                               | 0,121737386 | -0,139785867 | 0,22  | 0,13  | 1         | 0,907653864   | 1,101741577     | 1,692307692     |
| VPS36                                                                                               | 0,008642356 | -0,139824416 | 0,22  | 0,095 | 1         | 0,907629612   | 1,101771016     | 2,315789474     |
| MTSS2                                                                                               | 0,096331459 | -0,139835764 | 0,329 | 0,193 | 1         | 0,907622473   | 1,101779683     | 1,704663212     |
| C2orf73                                                                                             | 0,228958629 | -0,139953864 | 0     | 0,018 | 1         | 0,907548177   | 1,101869879     | 0               |
| IGIP                                                                                                | 0,198190291 | -0,139969359 | 0,085 | 0,046 | 1         | 0,90753843    | 1,101881713     | 1,847826087     |
| APH1B                                                                                               | 0,48125471  | -0,140031365 | 0,085 | 0,06  | 1         | 0,907499426   | 1,101929072     | 1,416666667     |
| E2F6                                                                                                | 0,609506016 | -0,14005614  | 0,049 | 0,035 | 1         | 0,907483841   | 1,101947996     | 1,4             |
| THAP1                                                                                               | 0,285301791 | -0,140060719 | 0,073 | 0,042 | 1         | 0,907480961   | 1,101951493     | 1,738095238     |
| LGALS1                                                                                              | 0,447302504 | -0,14009463  | 0,037 | 0,056 | 1         | 0,907459631   | 1,101977395     | 0,660714286     |
| AC007365.1                                                                                          | 0,186763581 | -0,140193537 | 0     | 0,021 | 1         | 0,90739742    | 1,102052946     | 0               |
| NKRF                                                                                                | 0,850233657 | -0,140246184 | 0,073 | 0,063 | 1         | 0,907364308   | 1,102093163     | 1,158730159     |
| FSD1L                                                                                               | 0,377098496 | -0,140280466 | 0,024 | 0,046 | 1         | 0,907342747   | 1,102119351     | 0,52173913      |
| RUSC2                                                                                               | 0,227829404 | -0,140390629 | 0,098 | 0,056 | 1         | 0,907273465   | 1,102203512     | 1,75            |
| NAT9                                                                                                | 0,142682785 | -0,140409002 | 0,122 | 0,067 | 1         | 0,907261912   | 1,102217549     | 1,820895522     |
| UBQLN2                                                                                              | 0,179651712 | -0,14070472  | 0,159 | 0,095 | 1         | 0,907075963   | 1,1024435       | 1,673684211     |
| ALDH2                                                                                               | 0,854977175 | -0,140725247 | 0,061 | 0,063 | 1         | 0,907063057   | 1,102459186     | 0,968253968     |
| TSR2                                                                                                | 0,004577183 | -0,14082982  | 0,256 | 0,109 | 1         | 0,906997312   | 1,1025391       | 2,348623853     |
| LMBRD2                                                                                              | 0,206696385 | -0,140835763 | 0,085 | 0,046 | 1         | 0,906993576   | 1,102543642     | 1,847826087     |
| USP4                                                                                                | 0,013179703 | -0,140928393 | 0,171 | 0,07  | 1         | 0,906935343   | 1,102614434     | 2,442857143     |
| DNAJB2                                                                                              | 0,045452066 | -0,140933313 | 0,439 | 0,249 | 1         | 0,90693225    | 1,102618194     | 1,763052209     |
| SAMD9L                                                                                              | 0,004551412 | -0,141106437 | 0,134 | 0,042 | 1         | 0,906823424   | 1,102750517     | 3,19047619      |
| NIM1K                                                                                               | 0,997024428 | -0,141188998 | 0,085 | 0,081 | 1         | 0,906771531   | 1,102813626     | 1,049382716     |

Supplementary Table 2

| Differentially expressed genes_keloid-XL_comparing SC-Keloid vs. (SC-Myel, SC-Nonmyel, SC-Nonmyel2) |             |              |       |       |           |               |                 |                 |
|-----------------------------------------------------------------------------------------------------|-------------|--------------|-------|-------|-----------|---------------|-----------------|-----------------|
| gene                                                                                                | p_val       | avg_log2FC   | pct.1 | pct.2 | p_val_adj | Foldchange_UP | Foldchange_DOWN | Ratio_pct1_pct2 |
| TMEM143                                                                                             | 0,861512651 | -0,141200063 | 0,037 | 0,032 | 1         | 0,906764576   | 1,102822084     | 1,15625         |
| ZNF704                                                                                              | 0,68009295  | -0,141283045 | 0,037 | 0,046 | 1         | 0,906712422   | 1,102885519     | 0,804347826     |
| METTL17                                                                                             | 0,098694446 | -0,141311711 | 0,171 | 0,095 | 1         | 0,906694406   | 1,102907433     | 1,8             |
| ACSS2                                                                                               | 0,850233608 | -0,141347948 | 0,073 | 0,063 | 1         | 0,906671632   | 1,102935136     | 1,158730159     |
| PGBD4                                                                                               | 0,228958629 | -0,141550122 | 0     | 0,018 | 1         | 0,906544584   | 1,103089708     | 0               |
| BOLA2                                                                                               | 0,00854861  | -0,14174822  | 0,207 | 0,088 | 1         | 0,906420114   | 1,103241185     | 2,352272727     |
| HLA-DRB5                                                                                            | 0,153186787 | -0,141777597 | 0     | 0,025 | 1         | 0,906401657   | 1,10326365      | 0               |
| ACVR2A                                                                                              | 0,782948141 | -0,141958201 | 0,037 | 0,042 | 1         | 0,906288196   | 1,103401771     | 0,880952381     |
| BEX4                                                                                                | 0,049161062 | -0,141990104 | 0,22  | 0,116 | 1         | 0,906268154   | 1,103426172     | 1,896551724     |
| C17orf67                                                                                            | 0,230954904 | -0,14203353  | 0,024 | 0,056 | 1         | 0,906240876   | 1,103459385     | 0,428571429     |
| CDADC1                                                                                              | 0,171564731 | -0,142046677 | 0,183 | 0,112 | 1         | 0,906232617   | 1,103469441     | 1,633928571     |
| FASN                                                                                                | 0,164983606 | -0,14205631  | 0,171 | 0,102 | 1         | 0,906226566   | 1,103476809     | 1,676470588     |
| SLC43A2                                                                                             | 0,992583669 | -0,142329997 | 0,073 | 0,07  | 1         | 0,906054667   | 1,103686165     | 1,042857143     |
| SLC13A3                                                                                             | 0,126160962 | -0,142340033 | 0     | 0,028 | 1         | 0,906048364   | 1,103693842     | 0               |
| STK39                                                                                               | 0,496145732 | -0,142357508 | 0,049 | 0,032 | 1         | 0,906037389   | 1,103707211     | 1,53125         |
| ACSS1                                                                                               | 0,547586968 | -0,142415824 | 0,085 | 0,105 | 1         | 0,906000767   | 1,103751825     | 0,80952381      |
| NPC1                                                                                                | 0,874363148 | -0,142427978 | 0,085 | 0,088 | 1         | 0,905993134   | 1,103761124     | 0,965909091     |
| PCGF3                                                                                               | 0,00116794  | -0,142439427 | 0,28  | 0,109 | 1         | 0,905985944   | 1,103769883     | 2,568807339     |
| TMEM131                                                                                             | 0,012482395 | -0,142463003 | 0,159 | 0,063 | 1         | 0,905971139   | 1,103787921     | 2,523809524     |
| SLC48A1                                                                                             | 0,363278942 | -0,142501643 | 0,073 | 0,046 | 1         | 0,905946875   | 1,103817484     | 1,586956522     |
| CLIC2                                                                                               | 0,104227568 | -0,142509379 | 0     | 0,032 | 1         | 0,905942017   | 1,103823403     | 0               |
| TMEM65                                                                                              | 0,002033018 | -0,142549729 | 0,22  | 0,081 | 1         | 0,905916679   | 1,103854276     | 2,716049383     |
| USP24                                                                                               | 0,071864859 | -0,142597367 | 0,195 | 0,105 | 1         | 0,905886766   | 1,103890726     | 1,857142857     |
| MUC20                                                                                               | 0,153186787 | -0,142711891 | 0     | 0,025 | 1         | 0,905814858   | 1,103978359     | 0               |
| METAP1D                                                                                             | 0,172653234 | -0,142738543 | 0,11  | 0,06  | 1         | 0,905798125   | 1,103998753     | 1,833333333     |
| MCM3AP                                                                                              | 0,043288838 | -0,142761661 | 0,159 | 0,074 | 1         | 0,90578361    | 1,104016444     | 2,148648649     |
| HDGFL2                                                                                              | 0,010281818 | -0,142801554 | 0,256 | 0,119 | 1         | 0,905758563   | 1,104046973     | 2,151260504     |
| GPRC5B                                                                                              | 0,334326668 | -0,14289124  | 0,012 | 0,032 | 1         | 0,905702258   | 1,104115608     | 0,375           |
| ZNF646                                                                                              | 0,276713029 | -0,142908829 | 0,012 | 0,035 | 1         | 0,905691216   | 1,10412907      | 0,342857143     |
| CES1                                                                                                | 0,624954658 | -0,142925926 | 0,024 | 0,035 | 1         | 0,905680484   | 1,104142154     | 0,685714286     |

Supplementary Table 2

| Differentially expressed genes_keloid-XL_comparing SC-Keloid vs. (SC-Myel, SC-Nonmyel, SC-Nonmyel2) |             |              |       |       |           |               |                 |                 |
|-----------------------------------------------------------------------------------------------------|-------------|--------------|-------|-------|-----------|---------------|-----------------|-----------------|
| gene                                                                                                | p_val       | avg_log2FC   | pct.1 | pct.2 | p_val_adj | Foldchange_UP | Foldchange_DOWN | Ratio_pct1_pct2 |
| N4BP2L2                                                                                             | 0,064469493 | -0,142942493 | 0,634 | 0,389 | 1         | 0,905670083   | 1,104154834     | 1,629820051     |
| ING2                                                                                                | 0,068690098 | -0,14314804  | 0,244 | 0,137 | 1         | 0,905541058   | 1,104312158     | 1,781021898     |
| USP54                                                                                               | 0,302725312 | -0,143173374 | 0,073 | 0,042 | 1         | 0,905525156   | 1,104331551     | 1,738095238     |
| MAK                                                                                                 | 0,126161321 | -0,143289294 | 0     | 0,028 | 1         | 0,9054524     | 1,104420287     | 0               |
| SYNGAP1                                                                                             | 0,19414124  | -0,143424705 | 0,012 | 0,042 | 1         | 0,905367419   | 1,104523953     | 0,285714286     |
| SOCS1                                                                                               | 0,53675687  | -0,143462942 | 0,073 | 0,053 | 1         | 0,905343423   | 1,104553227     | 1,377358491     |
| TTC32                                                                                               | 0,027954801 | -0,143548847 | 0,195 | 0,091 | 1         | 0,905289517   | 1,104618999     | 2,142857143     |
| OFD1                                                                                                | 0,062682971 | -0,143600051 | 0,293 | 0,168 | 1         | 0,905257387   | 1,104658205     | 1,744047619     |
| KHDC4                                                                                               | 0,02047416  | -0,143633377 | 0,28  | 0,14  | 1         | 0,905236475   | 1,104683723     | 2               |
| TNRC18                                                                                              | 0,191992699 | -0,143667218 | 0,159 | 0,095 | 1         | 0,905215242   | 1,104709636     | 1,673684211     |
| FBXO44                                                                                              | 0,559094116 | -0,1438016   | 0,085 | 0,063 | 1         | 0,905130928   | 1,10481254      | 1,349206349     |
| AGO1                                                                                                | 0,121557911 | -0,14399314  | 0,171 | 0,098 | 1         | 0,905010766   | 1,104959231     | 1,744897959     |
| HELZ                                                                                                | 0,26266437  | -0,144100692 | 0,232 | 0,154 | 1         | 0,904943301   | 1,105041608     | 1,506493506     |
| SRSF12                                                                                              | 0,312508215 | -0,144299144 | 0,024 | 0,049 | 1         | 0,904818828   | 1,105193624     | 0,489795918     |
| CCDC82                                                                                              | 0,017439388 | -0,144380662 | 0,415 | 0,218 | 1         | 0,904767704   | 1,105256073     | 1,903669725     |
| KIF7                                                                                                | 0,126161321 | -0,144390924 | 0     | 0,028 | 1         | 0,904761268   | 1,105263935     | 0               |
| TMEM64                                                                                              | 0,067749407 | -0,144451234 | 0,195 | 0,105 | 1         | 0,904723447   | 1,10531014      | 1,857142857     |
| PCNX1                                                                                               | 0,057295827 | -0,144500263 | 0,146 | 0,07  | 1         | 0,904692701   | 1,105347704     | 2,085714286     |
| ADCY3                                                                                               | 0,728519207 | -0,144533932 | 0,085 | 0,07  | 1         | 0,904671588   | 1,105373501     | 1,214285714     |
| BTN2A1                                                                                              | 0,031898705 | -0,144585091 | 0,195 | 0,095 | 1         | 0,904639508   | 1,105412699     | 2,052631579     |
| URB1-AS1                                                                                            | 0,253953805 | -0,144585201 | 0,061 | 0,032 | 1         | 0,904639439   | 1,105412783     | 1,90625         |
| KRTAP2-3                                                                                            | 0,530989227 | -0,14464663  | 0,024 | 0,014 | 1         | 0,904600921   | 1,105459851     | 1,714285714     |
| PKDCC                                                                                               | 0,756692961 | -0,144946881 | 0,098 | 0,081 | 1         | 0,904412677   | 1,105689942     | 1,209876543     |
| PURB                                                                                                | 0,000449433 | -0,145000535 | 0,39  | 0,158 | 1         | 0,904379042   | 1,105731063     | 2,46835443      |
| DENND4C                                                                                             | 0,747483503 | -0,145082864 | 0,073 | 0,06  | 1         | 0,904327434   | 1,105794165     | 1,216666667     |
| AHI1                                                                                                | 0,088584026 | -0,145153406 | 0,378 | 0,242 | 1         | 0,904283217   | 1,105848236     | 1,561983471     |
| MCU                                                                                                 | 0,508424566 | -0,145206364 | 0,037 | 0,053 | 1         | 0,904250024   | 1,105888829     | 0,698113208     |
| KRT6B                                                                                               | 0,58754085  | -0,145404111 | 0,037 | 0,025 | 1         | 0,904126089   | 1,106040421     | 1,48            |
| TXLNG                                                                                               | 0,058572154 | -0,145407963 | 0,146 | 0,07  | 1         | 0,904123675   | 1,106043374     | 2,085714286     |
| RNF146                                                                                              | 0,000108019 | -0,145523885 | 0,402 | 0,154 | 1         | 0,90405103    | 1,10613225      | 2,61038961      |

Supplementary Table 2

| Differentially expressed genes_keloid-XL_comparing SC-Keloid vs. (SC-Myel, SC-Nonmyel, SC-Nonmyel2) |             |              |       |       |           |               |                 |                 |
|-----------------------------------------------------------------------------------------------------|-------------|--------------|-------|-------|-----------|---------------|-----------------|-----------------|
| gene                                                                                                | p_val       | avg_log2FC   | pct.1 | pct.2 | p_val_adj | Foldchange_UP | Foldchange_DOWN | Ratio_pct1_pct2 |
| ZNF7                                                                                                | 0,071300757 | -0,145730105 | 0,061 | 0,021 | 1         | 0,903921814   | 1,106290373     | 2,904761905     |
| ATM                                                                                                 | 0,072131727 | -0,145731139 | 0,244 | 0,137 | 1         | 0,903921166   | 1,106291165     | 1,781021898     |
| SRPK1                                                                                               | 0,167896263 | -0,145748323 | 0,146 | 0,084 | 1         | 0,9039104     | 1,106304342     | 1,738095238     |
| COL11A2                                                                                             | 0,071615029 | -0,145783602 | 0     | 0,039 | 1         | 0,903888296   | 1,106331396     | 0               |
| ACER3                                                                                               | 0,560528605 | -0,145887659 | 0,098 | 0,074 | 1         | 0,903823104   | 1,106411195     | 1,324324324     |
| SHMT1                                                                                               | 0,996821535 | -0,145894439 | 0,073 | 0,07  | 1         | 0,903818856   | 1,106416395     | 1,042857143     |
| ARHGAP4                                                                                             | 0,517393619 | -0,145895855 | 0,024 | 0,039 | 1         | 0,903817969   | 1,10641748      | 0,615384615     |
| MAPK6                                                                                               | 0,088137481 | -0,145925738 | 0,268 | 0,158 | 1         | 0,903799248   | 1,106440398     | 1,696202532     |
| PLAAT4                                                                                              | 0,280260254 | -0,146150521 | 0,012 | 0,035 | 1         | 0,90365844    | 1,106612804     | 0,342857143     |
| SDCBP                                                                                               | 5,55496E-05 | -0,146155809 | 0,488 | 0,196 | 1         | 0,903655128   | 1,10661686      | 2,489795918     |
| ABHD3                                                                                               | 0,411643795 | -0,146323054 | 0,134 | 0,095 | 1         | 0,903550377   | 1,106745152     | 1,410526316     |
| LURAP1L                                                                                             | 0,893814763 | -0,146344243 | 0,037 | 0,039 | 1         | 0,903537107   | 1,106761407     | 0,948717949     |
| LRP12                                                                                               | 0,280695142 | -0,146403754 | 0,146 | 0,095 | 1         | 0,903499837   | 1,106807062     | 1,536842105     |
| TMEM183A                                                                                            | 0,288777189 | -0,146411245 | 0,183 | 0,123 | 1         | 0,903495146   | 1,106812809     | 1,487804878     |
| MDM4                                                                                                | 0,031023667 | -0,146411508 | 0,451 | 0,26  | 1         | 0,903494981   | 1,106813011     | 1,734615385     |
| PRRG3                                                                                               | 0,086314699 | -0,146438359 | 0     | 0,035 | 1         | 0,903478166   | 1,10683361      | 0               |
| KIAA1549L                                                                                           | 0,137770742 | -0,146478583 | 0,012 | 0,049 | 1         | 0,903452976   | 1,106864471     | 0,244897959     |
| APPBP2                                                                                              | 0,144374625 | -0,146504448 | 0,159 | 0,091 | 1         | 0,903436779   | 1,106884315     | 1,747252747     |
| ADAM33                                                                                              | 0,126161321 | -0,146566449 | 0     | 0,028 | 1         | 0,903397954   | 1,106931885     | 0               |
| ABCC8                                                                                               | 0,104227568 | -0,146756602 | 0     | 0,032 | 1         | 0,90327889    | 1,107077793     | 0               |
| IFT46                                                                                               | 0,131952545 | -0,146759331 | 0,11  | 0,056 | 1         | 0,903277182   | 1,107079887     | 1,964285714     |
| RABEP1                                                                                              | 0,001023432 | -0,146829194 | 0,39  | 0,165 | 1         | 0,903233441   | 1,107133499     | 2,363636364     |
| ST6GALNAC2                                                                                          | 0,071615029 | -0,14698038  | 0     | 0,039 | 1         | 0,903138792   | 1,107249526     | 0               |
| SCAPER                                                                                              | 0,079425293 | -0,146991628 | 0,134 | 0,067 | 1         | 0,903131751   | 1,107258159     | 2               |
| GLCC1                                                                                               | 0,729289595 | -0,14704414  | 0,049 | 0,039 | 1         | 0,903098879   | 1,107298462     | 1,256410256     |
| TRIM52                                                                                              | 0,756019691 | -0,147064819 | 0,073 | 0,06  | 1         | 0,903085934   | 1,107314334     | 1,216666667     |
| AC116407.2                                                                                          | 0,500826907 | -0,147094032 | 0,049 | 0,032 | 1         | 0,903067648   | 1,107336756     | 1,53125         |
| WASHC2C                                                                                             | 0,378076752 | -0,147131479 | 0,073 | 0,046 | 1         | 0,903044208   | 1,107365499     | 1,586956522     |
| GRB2                                                                                                | 0,024261055 | -0,147195531 | 0,463 | 0,253 | 1         | 0,903004116   | 1,107414664     | 1,830039526     |
| CCP110                                                                                              | 0,46282761  | -0,147195534 | 0,073 | 0,049 | 1         | 0,903004114   | 1,107414667     | 1,489795918     |

Supplementary Table 2

| Differentially expressed genes_keloid-XL_comparing SC-Keloid vs. (SC-Myel, SC-Nonmyel, SC-Nonmyel2) |             |              |       |       |           |               |                 |                 |
|-----------------------------------------------------------------------------------------------------|-------------|--------------|-------|-------|-----------|---------------|-----------------|-----------------|
| gene                                                                                                | p_val       | avg_log2FC   | pct.1 | pct.2 | p_val_adj | Foldchange_UP | Foldchange_DOWN | Ratio_pct1_pct2 |
| TRIM11                                                                                              | 0,162037223 | -0,147218927 | 0,11  | 0,06  | 1         | 0,902989473   | 1,107432623     | 1,833333333     |
| KIF16B                                                                                              | 0,901344687 | -0,147329901 | 0,073 | 0,074 | 1         | 0,902920016   | 1,107517812     | 0,986486486     |
| CREB1                                                                                               | 0,120202116 | -0,147339874 | 0,28  | 0,175 | 1         | 0,902913774   | 1,107525468     | 1,6             |
| KIF5C                                                                                               | 0,049502603 | -0,147362266 | 0     | 0,046 | 1         | 0,90289976    | 1,107542657     | 0               |
| HSPG2                                                                                               | 0,36681924  | -0,147484253 | 0,793 | 0,596 | 1         | 0,902823419   | 1,10763631      | 1,330536913     |
| KDR                                                                                                 | 0,442988867 | -0,147514047 | 0,037 | 0,021 | 1         | 0,902804775   | 1,107659184     | 1,761904762     |
| RNF38                                                                                               | 0,019979242 | -0,147750437 | 0,183 | 0,081 | 1         | 0,902656859   | 1,107840693     | 2,259259259     |
| ZBTB20-AS2                                                                                          | 0,493879805 | -0,147758453 | 0,012 | 0,025 | 1         | 0,902651843   | 1,107846848     | 0,48            |
| MGST1                                                                                               | 0,086314699 | -0,147790932 | 0     | 0,035 | 1         | 0,902631523   | 1,107871789     | 0               |
| TTC23                                                                                               | 0,109744829 | -0,147965106 | 0,134 | 0,07  | 1         | 0,902522556   | 1,108005549     | 1,914285714     |
| OLFML2A                                                                                             | 0,233097436 | -0,148049722 | 0,634 | 0,442 | 1         | 0,902469624   | 1,108070536     | 1,43438914      |
| ORC3                                                                                                | 0,383524207 | -0,148068547 | 0,11  | 0,074 | 1         | 0,902457848   | 1,108084995     | 1,486486486     |
| SLC22A23                                                                                            | 0,253953805 | -0,148099009 | 0,061 | 0,032 | 1         | 0,902438793   | 1,108108393     | 1,90625         |
| ZFTA                                                                                                | 0,592521527 | -0,148106708 | 0,037 | 0,049 | 1         | 0,902433977   | 1,108114306     | 0,755102041     |
| CENPU                                                                                               | 0,407171737 | -0,148112229 | 0,012 | 0,028 | 1         | 0,902430523   | 1,108118547     | 0,428571429     |
| ZNF621                                                                                              | 0,465907558 | -0,148174166 | 0,037 | 0,056 | 1         | 0,902391782   | 1,108166121     | 0,660714286     |
| DNAJC6                                                                                              | 0,041217527 | -0,148176749 | 0     | 0,049 | 1         | 0,902390166   | 1,108168105     | 0               |
| ANGPTL1                                                                                             | 0,938357083 | -0,148205841 | 0,049 | 0,049 | 1         | 0,90237197    | 1,108190451     | 1               |
| PIK3IP1                                                                                             | 0,861739194 | -0,148214602 | 0,134 | 0,119 | 1         | 0,90236649    | 1,108197181     | 1,12605042      |
| OTULIN                                                                                              | 0,012245275 | -0,148313265 | 0,183 | 0,077 | 1         | 0,902304781   | 1,108272971     | 2,376623377     |
| ZNF276                                                                                              | 0,66081788  | -0,148331494 | 0,159 | 0,13  | 1         | 0,90229338    | 1,108286974     | 1,223076923     |
| RPS6KB1                                                                                             | 0,483906048 | -0,14835733  | 0,134 | 0,098 | 1         | 0,902277222   | 1,108306822     | 1,367346939     |
| RPL5                                                                                                | 0,7586358   | -0,14839364  | 0,915 | 0,807 | 1         | 0,902254514   | 1,108334716     | 1,133828996     |
| MLXIP                                                                                               | 0,940967255 | -0,148550941 | 0,244 | 0,214 | 1         | 0,902156144   | 1,108455567     | 1,140186916     |
| NPR3                                                                                                | 0,049502603 | -0,148605322 | 0     | 0,046 | 1         | 0,902122138   | 1,10849735      | 0               |
| ENY2                                                                                                | 0,61136656  | -0,148831411 | 0,585 | 0,428 | 1         | 0,901980775   | 1,10867108      | 1,36682243      |
| AP5B1                                                                                               | 0,739665212 | -0,148923937 | 0,049 | 0,039 | 1         | 0,901922929   | 1,108742186     | 1,256410256     |
| KPNB1                                                                                               | 0,092802272 | -0,148981617 | 0,439 | 0,263 | 1         | 0,90188687    | 1,108786515     | 1,669201521     |
| GIGYF1                                                                                              | 0,468265366 | -0,148982506 | 0,159 | 0,119 | 1         | 0,901886315   | 1,108787198     | 1,336134454     |
| PFKM                                                                                                | 0,727904339 | -0,148997589 | 0,037 | 0,028 | 1         | 0,901876886   | 1,10879879      | 1,321428571     |

Supplementary Table 2

| Differentially expressed genes_keloid-XL_comparing SC-Keloid vs. (SC-Myel, SC-Nonmyel, SC-Nonmyel2) |             |              |       |       |           |               |                 |                 |
|-----------------------------------------------------------------------------------------------------|-------------|--------------|-------|-------|-----------|---------------|-----------------|-----------------|
| gene                                                                                                | p_val       | avg_log2FC   | pct.1 | pct.2 | p_val_adj | Foldchange_UP | Foldchange_DOWN | Ratio_pct1_pct2 |
| MTARC1                                                                                              | 0,104227568 | -0,149092122 | 0     | 0,032 | 1         | 0,901817792   | 1,108871447     | 0               |
| NOM1                                                                                                | 0,516553851 | -0,149114539 | 0,037 | 0,053 | 1         | 0,901803779   | 1,108888678     | 0,698113208     |
| FAM217B                                                                                             | 0,020066105 | -0,149149728 | 0,134 | 0,053 | 1         | 0,901781783   | 1,108915725     | 2,528301887     |
| THEM4                                                                                               | 0,061055436 | -0,149150659 | 0,183 | 0,095 | 1         | 0,901781202   | 1,10891644      | 1,926315789     |
| OBI1                                                                                                | 0,042931865 | -0,149166097 | 0,122 | 0,053 | 1         | 0,901771552   | 1,108928307     | 2,301886792     |
| FAM120AOS                                                                                           | 0,113959747 | -0,149178701 | 0,22  | 0,126 | 1         | 0,901763673   | 1,108937995     | 1,746031746     |
| LHFPL6                                                                                              | 0,610151326 | -0,149266861 | 0,22  | 0,175 | 1         | 0,90170857    | 1,109005762     | 1,257142857     |
| IL16                                                                                                | 0,190367951 | -0,14926752  | 0,012 | 0,042 | 1         | 0,901708158   | 1,109006269     | 0,285714286     |
| PTK2                                                                                                | 0,059142233 | -0,149311088 | 0,463 | 0,274 | 1         | 0,901680928   | 1,10903976      | 1,689781022     |
| LRRC4                                                                                               | 0,126161321 | -0,149341958 | 0     | 0,028 | 1         | 0,901661635   | 1,109063491     | 0               |
| RADIL                                                                                               | 0,994113727 | -0,14946093  | 0,037 | 0,035 | 1         | 0,901587282   | 1,109154954     | 1,057142857     |
| MAPKBP1                                                                                             | 0,472715076 | -0,149561189 | 0,085 | 0,06  | 1         | 0,901524629   | 1,109232036     | 1,416666667     |
| KCTD4                                                                                               | 0,126161321 | -0,14957457  | 0     | 0,028 | 1         | 0,901516267   | 1,109242325     | 0               |
| UAP1L1                                                                                              | 0,736031647 | -0,14975275  | 0,073 | 0,081 | 1         | 0,901404933   | 1,109379329     | 0,901234568     |
| EPOP                                                                                                | 0,614137268 | -0,149817623 | 0,024 | 0,035 | 1         | 0,9013644     | 1,109429216     | 0,685714286     |
| GSAP                                                                                                | 0,721906011 | -0,150183208 | 0,037 | 0,028 | 1         | 0,90113602    | 1,109710385     | 1,321428571     |
| HSPA4L                                                                                              | 0,086314699 | -0,150257284 | 0     | 0,035 | 1         | 0,901089752   | 1,109767365     | 0               |
| LIN37                                                                                               | 0,5245795   | -0,150392533 | 0,024 | 0,039 | 1         | 0,901005281   | 1,109871409     | 0,615384615     |
| NBPF12                                                                                              | 0,855612483 | -0,150542382 | 0,049 | 0,042 | 1         | 0,900911701   | 1,109986693     | 1,166666667     |
| NHLRC3                                                                                              | 0,083817045 | -0,150573772 | 0,122 | 0,06  | 1         | 0,900892099   | 1,110010845     | 2,033333333     |
| AC132192.1                                                                                          | 0,23235895  | -0,150612853 | 0,012 | 0,039 | 1         | 0,900867695   | 1,110040914     | 0,307692308     |
| LRATD2                                                                                              | 0,276713029 | -0,150856804 | 0,012 | 0,035 | 1         | 0,900715377   | 1,110228631     | 0,342857143     |
| H2BC18                                                                                              | 0,277936202 | -0,150971791 | 0,024 | 0,053 | 1         | 0,90064359    | 1,110317124     | 0,452830189     |
| RFX7                                                                                                | 0,069028916 | -0,151062035 | 0,098 | 0,042 | 1         | 0,900587254   | 1,110386579     | 2,333333333     |
| ENTPD1                                                                                              | 0,689907146 | -0,151098805 | 0,037 | 0,046 | 1         | 0,900564301   | 1,110414879     | 0,804347826     |
| STK17B                                                                                              | 0,841722995 | -0,151166229 | 0,061 | 0,053 | 1         | 0,900522214   | 1,110466776     | 1,150943396     |
| VCAM1                                                                                               | 0,879365097 | -0,151357153 | 0,024 | 0,021 | 1         | 0,900403049   | 1,110613743     | 1,142857143     |
| EID2                                                                                                | 0,04269002  | -0,151455787 | 0,146 | 0,067 | 1         | 0,900341492   | 1,110689676     | 2,179104478     |
| FARP2                                                                                               | 0,581362486 | -0,151483987 | 0,159 | 0,123 | 1         | 0,900323894   | 1,110711386     | 1,292682927     |
| HTATIP2                                                                                             | 0,5189655   | -0,151538612 | 0,159 | 0,119 | 1         | 0,900289805   | 1,110753442     | 1,336134454     |

Supplementary Table 2

| Differentially expressed genes_keloid-XL_comparing SC-Keloid vs. (SC-Myel, SC-Nonmyel, SC-Nonmyel2) |             |              |       |       |           |               |                 |                 |
|-----------------------------------------------------------------------------------------------------|-------------|--------------|-------|-------|-----------|---------------|-----------------|-----------------|
| gene                                                                                                | p_val       | avg_log2FC   | pct.1 | pct.2 | p_val_adj | Foldchange_UP | Foldchange_DOWN | Ratio_pct1_pct2 |
| GPT2                                                                                                | 0,796613111 | -0,151601046 | 0,061 | 0,067 | 1         | 0,900250845   | 1,110801512     | 0,910447761     |
| ZNF207                                                                                              | 0,018174512 | -0,151610613 | 0,585 | 0,319 | 1         | 0,900244876   | 1,110808878     | 1,833855799     |
| PTPRS                                                                                               | 0,336786239 | -0,151676396 | 0,122 | 0,081 | 1         | 0,900203828   | 1,110859529     | 1,50617284      |
| NOD1                                                                                                | 0,334326668 | -0,151710238 | 0,012 | 0,032 | 1         | 0,900182712   | 1,110885587     | 0,375           |
| CDK11A                                                                                              | 0,108661259 | -0,151754704 | 0,134 | 0,07  | 1         | 0,900154967   | 1,110919827     | 1,914285714     |
| ZNF43                                                                                               | 0,375241237 | -0,151757915 | 0,024 | 0,046 | 1         | 0,900152963   | 1,1109223       | 0,52173913      |
| ZNF318                                                                                              | 0,965073463 | -0,15176727  | 0,049 | 0,046 | 1         | 0,900147126   | 1,110929503     | 1,065217391     |
| SOX12                                                                                               | 0,531026167 | -0,151888102 | 0,11  | 0,081 | 1         | 0,900071738   | 1,111022552     | 1,358024691     |
| PRMT2                                                                                               | 0,011037521 | -0,151940766 | 0,549 | 0,291 | 1         | 0,900038883   | 1,11106311      | 1,886597938     |
| CDAN1                                                                                               | 0,276713029 | -0,151949364 | 0,012 | 0,035 | 1         | 0,900033519   | 1,111069732     | 0,342857143     |
| PELI2                                                                                               | 0,071615029 | -0,151997044 | 0     | 0,039 | 1         | 0,900003774   | 1,111106452     | 0               |
| FGD6                                                                                                | 0,714432118 | -0,15218774  | 0,024 | 0,032 | 1         | 0,899884819   | 1,111253328     | 0,75            |
| ZNF667                                                                                              | 0,071615029 | -0,15218834  | 0     | 0,039 | 1         | 0,899884444   | 1,111253791     | 0               |
| RAPGEF1                                                                                             | 0,70094195  | -0,152212307 | 0,061 | 0,07  | 1         | 0,899869495   | 1,111272252     | 0,871428571     |
| PLEKHG5                                                                                             | 0,229374221 | -0,152218223 | 0,012 | 0,039 | 1         | 0,899865805   | 1,111276809     | 0,307692308     |
| LMO2                                                                                                | 0,3364279   | -0,152366328 | 0,012 | 0,032 | 1         | 0,899773431   | 1,111390897     | 0,375           |
| RP2                                                                                                 | 0,097599714 | -0,152475869 | 0,232 | 0,133 | 1         | 0,899705115   | 1,111475285     | 1,744360902     |
| KMT2B                                                                                               | 0,120935406 | -0,152540406 | 0,183 | 0,105 | 1         | 0,899664869   | 1,111525007     | 1,742857143     |
| WFIKKN1                                                                                             | 0,126161321 | -0,1525683   | 0     | 0,028 | 1         | 0,899647475   | 1,111546498     | 0               |
| BRD8                                                                                                | 0,041077589 | -0,152600297 | 0,244 | 0,133 | 1         | 0,899627522   | 1,111571151     | 1,834586466     |
| TIFA                                                                                                | 0,445166159 | -0,152715542 | 0,024 | 0,042 | 1         | 0,899555661   | 1,111659949     | 0,571428571     |
| PHF10                                                                                               | 0,0773926   | -0,152836089 | 0,293 | 0,168 | 1         | 0,8994805     | 1,111752839     | 1,744047619     |
| R3HDM2                                                                                              | 0,011434783 | -0,152978053 | 0,378 | 0,193 | 1         | 0,899391994   | 1,111862243     | 1,958549223     |
| DBNDD2                                                                                              | 0,896075523 | -0,153028065 | 0,134 | 0,119 | 1         | 0,899360817   | 1,111900787     | 1,12605042      |
| MYCBP2                                                                                              | 0,058359815 | -0,153149377 | 0,305 | 0,175 | 1         | 0,899285195   | 1,111994288     | 1,742857143     |
| MSTO1                                                                                               | 0,252475247 | -0,15321155  | 0,061 | 0,032 | 1         | 0,899246441   | 1,11204221      | 1,90625         |
| C18orf25                                                                                            | 0,822980697 | -0,153318485 | 0,061 | 0,053 | 1         | 0,89917979    | 1,11212464      | 1,150943396     |
| KIF20B                                                                                              | 0,180291852 | -0,15335504  | 0,098 | 0,053 | 1         | 0,899157007   | 1,112152819     | 1,849056604     |
| ZNF324                                                                                              | 0,436724529 | -0,153618413 | 0,024 | 0,042 | 1         | 0,898992875   | 1,112355868     | 0,571428571     |
| SOX7                                                                                                | 0,615139979 | -0,153650238 | 0,037 | 0,049 | 1         | 0,898973044   | 1,112380406     | 0,755102041     |



Supplementary Table 2

| Differentially expressed genes_keloid-XL_comparing SC-Keloid vs. (SC-Myel, SC-Nonmyel, SC-Nonmyel2) |             |              |       |       |           |               |                 |                 |
|-----------------------------------------------------------------------------------------------------|-------------|--------------|-------|-------|-----------|---------------|-----------------|-----------------|
| gene                                                                                                | p_val       | avg_log2FC   | pct.1 | pct.2 | p_val_adj | Foldchange_UP | Foldchange_DOWN | Ratio_pct1_pct2 |
| TMEM19                                                                                              | 0,159941363 | -0,153671625 | 0,122 | 0,067 | 1         | 0,898959717   | 1,112396897     | 1,820895522     |
| CASKIN1                                                                                             | 0,153186787 | -0,153757441 | 0     | 0,025 | 1         | 0,898906246   | 1,112463068     | 0               |
| SERINC1                                                                                             | 0,467532909 | -0,15391157  | 0,732 | 0,516 | 1         | 0,898810218   | 1,112581922     | 1,418604651     |
| GBP4                                                                                                | 0,401301665 | -0,153983825 | 0,037 | 0,06  | 1         | 0,898765203   | 1,112637646     | 0,616666667     |
| TACC1                                                                                               | 0,005997804 | -0,154040526 | 0,5   | 0,253 | 1         | 0,898729881   | 1,112681376     | 1,976284585     |
| HK2                                                                                                 | 0,163975507 | -0,154301429 | 0,024 | 0,063 | 1         | 0,898567365   | 1,112882616     | 0,380952381     |
| POC5                                                                                                | 0,174639985 | -0,154398402 | 0,061 | 0,028 | 1         | 0,898506969   | 1,112957422     | 2,178571429     |
| MSMO1                                                                                               | 0,008078149 | -0,154465468 | 0,244 | 0,109 | 1         | 0,898465201   | 1,113009162     | 2,23853211      |
| PARP10                                                                                              | 0,006934876 | -0,154593693 | 0,22  | 0,091 | 1         | 0,89838535    | 1,113108089     | 2,417582418     |
| KLHL8                                                                                               | 0,828286125 | -0,15461514  | 0,049 | 0,053 | 1         | 0,898371995   | 1,113124636     | 0,924528302     |
| FREM2                                                                                               | 0,262345472 | -0,154667213 | 0,159 | 0,102 | 1         | 0,89833957    | 1,113164814     | 1,558823529     |
| WDFY2                                                                                               | 0,787888639 | -0,154719497 | 0,134 | 0,116 | 1         | 0,898307014   | 1,113205157     | 1,155172414     |
| PINX1                                                                                               | 0,949322617 | -0,154778442 | 0,073 | 0,067 | 1         | 0,898270312   | 1,113250641     | 1,089552239     |
| XPO7                                                                                                | 0,176871969 | -0,154846031 | 0,11  | 0,06  | 1         | 0,89822823    | 1,113302797     | 1,833333333     |
| STX4                                                                                                | 0,044094753 | -0,154857363 | 0,195 | 0,098 | 1         | 0,898221174   | 1,113311542     | 1,989795918     |
| SETD7                                                                                               | 0,074405682 | -0,154880335 | 0,159 | 0,081 | 1         | 0,898206872   | 1,113329269     | 1,962962963     |
| AMPD2                                                                                               | 0,20703579  | -0,154957628 | 0,122 | 0,07  | 1         | 0,898158751   | 1,113388918     | 1,742857143     |
| GSR                                                                                                 | 0,111297434 | -0,155080051 | 0,122 | 0,063 | 1         | 0,898082539   | 1,113483401     | 1,936507937     |
| TOX2                                                                                                | 0,505140689 | -0,15528436  | 0,122 | 0,088 | 1         | 0,897955365   | 1,113641099     | 1,386363636     |
| FBXO31                                                                                              | 0,668209096 | -0,155318245 | 0,11  | 0,088 | 1         | 0,897934275   | 1,113667256     | 1,25            |
| IARS1                                                                                               | 0,009832645 | -0,15541578  | 0,171 | 0,067 | 1         | 0,897873572   | 1,113742549     | 2,552238806     |
| CFL2                                                                                                | 0,003220105 | -0,155481895 | 0,28  | 0,119 | 1         | 0,897832425   | 1,11379359      | 2,352941176     |
| TULP4                                                                                               | 0,007017583 | -0,155540262 | 0,341 | 0,161 | 1         | 0,897796102   | 1,113838652     | 2,118012422     |
| MARCHF5                                                                                             | 0,332328214 | -0,155543888 | 0,232 | 0,165 | 1         | 0,897793846   | 1,113841451     | 1,406060606     |
| SEC63                                                                                               | 0,038716306 | -0,155667252 | 0,329 | 0,182 | 1         | 0,897717079   | 1,113936699     | 1,807692308     |
| LSM14A                                                                                              | 0,03197738  | -0,155708116 | 0,354 | 0,196 | 1         | 0,897691652   | 1,113968252     | 1,806122449     |
| PTPN2                                                                                               | 0,051835032 | -0,155742703 | 0,207 | 0,109 | 1         | 0,897670131   | 1,113994958     | 1,899082569     |
| AQR                                                                                                 | 0,07900023  | -0,15575045  | 0,134 | 0,067 | 1         | 0,897665311   | 1,11400094      | 2               |
| MEGF6                                                                                               | 0,929957274 | -0,155790244 | 0,073 | 0,067 | 1         | 0,89764055    | 1,114031668     | 1,089552239     |
| VPS53                                                                                               | 0,342676622 | -0,155926908 | 0,085 | 0,053 | 1         | 0,897555523   | 1,114137204     | 1,603773585     |

Supplementary Table 2

| Differentially expressed genes_keloid-XL_comparing SC-Keloid vs. (SC-Myel, SC-Nonmyel, SC-Nonmyel2) |             |              |       |       |             |               |                 |                 |
|-----------------------------------------------------------------------------------------------------|-------------|--------------|-------|-------|-------------|---------------|-----------------|-----------------|
| gene                                                                                                | p_val       | avg_log2FC   | pct.1 | pct.2 | p_val_adj   | Foldchange_UP | Foldchange_DOWN | Ratio_pct1_pct2 |
| TMEM184A                                                                                            | 0,104227568 | -0,155952062 | 0     | 0,032 | 1           | 0,897539874   | 1,114156629     | 0               |
| CSNK1G3                                                                                             | 0,163666349 | -0,156037919 | 0,256 | 0,158 | 1           | 0,897486461   | 1,114222936     | 1,620253165     |
| SNX1                                                                                                | 0,214362594 | -0,15606392  | 0,305 | 0,204 | 1           | 0,897470286   | 1,114243018     | 1,495098039     |
| B3GNT5                                                                                              | 0,287609915 | -0,156392694 | 0,122 | 0,077 | 1           | 0,897265786   | 1,11449697      | 1,584415584     |
| MME                                                                                                 | 0,126161321 | -0,156437957 | 0     | 0,028 | 1           | 0,897237636   | 1,114531936     | 0               |
| ESAM                                                                                                | 0,338537609 | -0,156473879 | 0,012 | 0,032 | 1           | 0,897215296   | 1,114559688     | 0,375           |
| LEAP2                                                                                               | 0,456551761 | -0,156495916 | 0,037 | 0,056 | 1           | 0,897201591   | 1,114576713     | 0,660714286     |
| HCG25                                                                                               | 0,186763581 | -0,156533655 | 0     | 0,021 | 1           | 0,897178122   | 1,114605869     | 0               |
| TLE2                                                                                                | 0,953630501 | -0,15657716  | 0,073 | 0,067 | 1           | 0,897151068   | 1,114639481     | 1,089552239     |
| SMC4                                                                                                | 0,438535869 | -0,156578964 | 0,146 | 0,105 | 1           | 0,897149946   | 1,114640874     | 1,39047619      |
| NOLC1                                                                                               | 0,242487776 | -0,156666409 | 0,244 | 0,161 | 1           | 0,897095569   | 1,114708438     | 1,51552795      |
| DPY19L4                                                                                             | 0,193130266 | -0,156693798 | 0,183 | 0,116 | 1           | 0,897078538   | 1,1147296       | 1,577586207     |
| KAZN                                                                                                | 0,309835704 | -0,156826024 | 0,098 | 0,06  | 1           | 0,896996323   | 1,114831772     | 1,633333333     |
| CUEDC2                                                                                              | 2,55929E-05 | -0,156840227 | 0,427 | 0,165 | 0,540035602 | 0,896987492   | 1,114842747     | 2,587878788     |
| HLA-DOA                                                                                             | 0,153186787 | -0,156954615 | 0     | 0,025 | 1           | 0,896916375   | 1,114931144     | 0               |
| POGK                                                                                                | 0,365845344 | -0,157134136 | 0,098 | 0,063 | 1           | 0,896804774   | 1,115069889     | 1,555555556     |
| MKLN1                                                                                               | 0,27542269  | -0,157226402 | 0,207 | 0,14  | 1           | 0,896747422   | 1,115141204     | 1,478571429     |
| ZNF738                                                                                              | 0,073676783 | -0,157230384 | 0,073 | 0,028 | 1           | 0,896744947   | 1,115144282     | 2,607142857     |
| BCCIP                                                                                               | 0,180946991 | -0,157537793 | 0,134 | 0,077 | 1           | 0,89655389    | 1,115381921     | 1,74025974      |
| ATXN7L3B                                                                                            | 0,04305749  | -0,157567025 | 0,232 | 0,119 | 1           | 0,896535723   | 1,115404522     | 1,949579832     |
| PHACTR1                                                                                             | 6,11008E-05 | -0,157571147 | 0,39  | 0,144 | 1           | 0,896533162   | 1,115407709     | 2,708333333     |
| MRPS5                                                                                               | 0,022693045 | -0,157595891 | 0,28  | 0,144 | 1           | 0,896517785   | 1,11542684      | 1,944444444     |
| ATF7IP                                                                                              | 0,324138511 | -0,157655829 | 0,317 | 0,218 | 1           | 0,89648054    | 1,115473182     | 1,45412844      |
| NOP16                                                                                               | 0,948524099 | -0,157759752 | 0,061 | 0,056 | 1           | 0,896415965   | 1,115553537     | 1,089285714     |
| CEP192                                                                                              | 0,935846368 | -0,157844347 | 0,049 | 0,049 | 1           | 0,896363403   | 1,115618951     | 1               |
| SMAD3                                                                                               | 0,32556944  | -0,157854728 | 0,037 | 0,063 | 1           | 0,896356954   | 1,115626979     | 0,587301587     |
| TRNAU1AP                                                                                            | 0,013985265 | -0,157969404 | 0,207 | 0,091 | 1           | 0,896285707   | 1,11571566      | 2,274725275     |
| SLFN11                                                                                              | 0,08079325  | -0,158068369 | 0,146 | 0,074 | 1           | 0,896224227   | 1,115792198     | 1,972972973     |
| MAFA                                                                                                | 0,46028135  | -0,158096858 | 0,037 | 0,056 | 1           | 0,896206529   | 1,115814232     | 0,660714286     |
| SCLT1                                                                                               | 0,0126815   | -0,158217206 | 0,195 | 0,084 | 1           | 0,896131772   | 1,115907316     | 2,321428571     |

Supplementary Table 2

| Differentially expressed genes_keloid-XL_comparing SC-Keloid vs. (SC-Myel, SC-Nonmyel, SC-Nonmyel2) |             |              |       |       |           |               |                 |                 |
|-----------------------------------------------------------------------------------------------------|-------------|--------------|-------|-------|-----------|---------------|-----------------|-----------------|
| gene                                                                                                | p_val       | avg_log2FC   | pct.1 | pct.2 | p_val_adj | Foldchange_UP | Foldchange_DOWN | Ratio_pct1_pct2 |
| SAP30                                                                                               | 0,918186431 | -0,15878578  | 0,183 | 0,172 | 1         | 0,895778671   | 1,116347188     | 1,063953488     |
| ZNF407                                                                                              | 0,190367951 | -0,158894372 | 0,012 | 0,042 | 1         | 0,895711248   | 1,116431219     | 0,285714286     |
| NFYC                                                                                                | 0,09168476  | -0,158909073 | 0,159 | 0,084 | 1         | 0,895702121   | 1,116442595     | 1,892857143     |
| C11orf54                                                                                            | 0,088107197 | -0,158935774 | 0,122 | 0,06  | 1         | 0,895685544   | 1,116463258     | 2,033333333     |
| LENG8                                                                                               | 0,08602896  | -0,158997104 | 0,28  | 0,168 | 1         | 0,895647468   | 1,116510721     | 1,666666667     |
| BMP4                                                                                                | 0,23235895  | -0,159022342 | 0,012 | 0,039 | 1         | 0,8956318     | 1,116530253     | 0,307692308     |
| LENG9                                                                                               | 0,925810135 | -0,159178164 | 0,049 | 0,049 | 1         | 0,89553507    | 1,116650853     | 1               |
| HILPDA                                                                                              | 0,068015387 | -0,159255969 | 0,11  | 0,049 | 1         | 0,895486775   | 1,116711076     | 2,244897959     |
| KIF13A                                                                                              | 0,056483559 | -0,159303185 | 0,183 | 0,095 | 1         | 0,895457468   | 1,116747624     | 1,926315789     |
| TMC6                                                                                                | 0,49683311  | -0,159394019 | 0,012 | 0,025 | 1         | 0,895401091   | 1,116817938     | 0,48            |
| MCFD2                                                                                               | 0,027257337 | -0,159746309 | 0,232 | 0,112 | 1         | 0,895182471   | 1,117090686     | 2,071428571     |
| TOM1L2                                                                                              | 0,121950216 | -0,15985238  | 0,268 | 0,165 | 1         | 0,895116656   | 1,117172821     | 1,624242424     |
| RAB3D                                                                                               | 0,714432118 | -0,160012197 | 0,024 | 0,032 | 1         | 0,895017504   | 1,117296584     | 0,75            |
| DOCK10                                                                                              | 0,071615029 | -0,160024637 | 0     | 0,039 | 1         | 0,895009786   | 1,117306218     | 0               |
| RHOG                                                                                                | 0,037439507 | -0,160038961 | 0,305 | 0,168 | 1         | 0,8950009     | 1,117317312     | 1,81547619      |
| CCDC28A                                                                                             | 0,234012924 | -0,160072609 | 0,159 | 0,098 | 1         | 0,894980026   | 1,117343371     | 1,62244898      |
| SP1                                                                                                 | 0,365820066 | -0,160246379 | 0,134 | 0,091 | 1         | 0,894872234   | 1,117477962     | 1,472527473     |
| FBXW11                                                                                              | 0,097325553 | -0,160287291 | 0,268 | 0,158 | 1         | 0,894846858   | 1,117509651     | 1,696202532     |
| PARD3B                                                                                              | 0,9345134   | -0,160458287 | 0,061 | 0,056 | 1         | 0,894740802   | 1,117642112     | 1,089285714     |
| CHADL                                                                                               | 0,11768342  | -0,160559412 | 0,329 | 0,204 | 1         | 0,894678088   | 1,117720456     | 1,612745098     |
| DCP2                                                                                                | 0,057031069 | -0,160575056 | 0,159 | 0,077 | 1         | 0,894668386   | 1,117732576     | 2,064935065     |
| JOSD1                                                                                               | 0,036640557 | -0,160656954 | 0,305 | 0,165 | 1         | 0,8946176     | 1,117796028     | 1,848484848     |
| POU6F1                                                                                              | 0,420064678 | -0,160788917 | 0,061 | 0,039 | 1         | 0,894535773   | 1,117898278     | 1,564102564     |
| ATAD2B                                                                                              | 0,268584282 | -0,160822654 | 0,085 | 0,049 | 1         | 0,894514855   | 1,11792442      | 1,734693878     |
| CTR9                                                                                                | 0,284773152 | -0,160892839 | 0,098 | 0,06  | 1         | 0,894471339   | 1,117978806     | 1,633333333     |
| USP19                                                                                               | 0,332551477 | -0,161314863 | 0,085 | 0,053 | 1         | 0,894209722   | 1,118305891     | 1,603773585     |
| UIMC1                                                                                               | 0,344020308 | -0,161455825 | 0,122 | 0,081 | 1         | 0,894122356   | 1,118415162     | 1,50617284      |
| HEBP1                                                                                               | 0,788243537 | -0,161518734 | 0,037 | 0,042 | 1         | 0,894083368   | 1,118463932     | 0,880952381     |
| EXT1                                                                                                | 0,994652556 | -0,161564591 | 0,11  | 0,102 | 1         | 0,89405495    | 1,118499484     | 1,078431373     |
| EIF3E                                                                                               | 0,574237894 | -0,161650346 | 0,61  | 0,428 | 1         | 0,894001808   | 1,11856597      | 1,425233645     |

Supplementary Table 2

| Differentially expressed genes_keloid-XL_comparing SC-Keloid vs. (SC-Myel, SC-Nonmyel, SC-Nonmyel2) |             |              |       |       |           |               |                 |                 |
|-----------------------------------------------------------------------------------------------------|-------------|--------------|-------|-------|-----------|---------------|-----------------|-----------------|
| gene                                                                                                | p_val       | avg_log2FC   | pct.1 | pct.2 | p_val_adj | Foldchange_UP | Foldchange_DOWN | Ratio_pct1_pct2 |
| CTSL                                                                                                | 0,267598614 | -0,161676106 | 0,28  | 0,189 | 1         | 0,893985845   | 1,118585943     | 1,481481481     |
| STK17A                                                                                              | 0,004881585 | -0,161770501 | 0,537 | 0,27  | 1         | 0,893927354   | 1,118659134     | 1,988888889     |
| BICD2                                                                                               | 0,012953865 | -0,161777158 | 0,329 | 0,158 | 1         | 0,893923229   | 1,118664296     | 2,082278481     |
| GPATCH2L                                                                                            | 0,004466332 | -0,161798215 | 0,232 | 0,095 | 1         | 0,893910182   | 1,118680624     | 2,442105263     |
| NRARP                                                                                               | 0,864847936 | -0,161799779 | 0,098 | 0,088 | 1         | 0,893909213   | 1,118681837     | 1,113636364     |
| SPTLC2                                                                                              | 0,085573718 | -0,162070784 | 0,134 | 0,067 | 1         | 0,893741311   | 1,118891997     | 2               |
| KIAA1671                                                                                            | 0,272230099 | -0,162148223 | 0,024 | 0,053 | 1         | 0,893693339   | 1,118952057     | 0,452830189     |
| TRIM21                                                                                              | 0,314233219 | -0,162260791 | 0,037 | 0,018 | 1         | 0,89362361    | 1,119039368     | 2,055555556     |
| ZNF507                                                                                              | 0,472027267 | -0,162277635 | 0,073 | 0,049 | 1         | 0,893613177   | 1,119052433     | 1,489795918     |
| RAB30                                                                                               | 0,118383916 | -0,162423876 | 0,122 | 0,063 | 1         | 0,893522599   | 1,119165873     | 1,936507937     |
| WDR44                                                                                               | 0,582986136 | -0,162501827 | 0,085 | 0,063 | 1         | 0,893474322   | 1,119226345     | 1,349206349     |
| ICE2                                                                                                | 0,036403179 | -0,162765307 | 0,171 | 0,081 | 1         | 0,893311162   | 1,119430768     | 2,111111111     |
| NFIL3                                                                                               | 0,112609717 | -0,16291765  | 0,585 | 0,4   | 1         | 0,893216837   | 1,119548982     | 1,4625          |
| RABL2B                                                                                              | 0,251002698 | -0,163330691 | 0,061 | 0,032 | 1         | 0,892961147   | 1,119869553     | 1,90625         |
| PHRF1                                                                                               | 0,422265891 | -0,163459541 | 0,098 | 0,067 | 1         | 0,892881398   | 1,119969575     | 1,462686567     |
| CCDC71L                                                                                             | 0,001242759 | -0,163534635 | 0,268 | 0,105 | 1         | 0,892834923   | 1,120027873     | 2,552380952     |
| DPT                                                                                                 | 0,908489202 | -0,163579362 | 0,012 | 0,011 | 1         | 0,892807244   | 1,120062596     | 1,090909091     |
| RNF113A                                                                                             | 0,495648547 | -0,163639398 | 0,098 | 0,07  | 1         | 0,892770091   | 1,120109208     | 1,4             |
| ALKBH5                                                                                              | 0,034993025 | -0,163651923 | 0,366 | 0,204 | 1         | 0,892762341   | 1,120118932     | 1,794117647     |
| TERF2IP                                                                                             | 0,093148554 | -0,163739883 | 0,634 | 0,396 | 1         | 0,892707912   | 1,120187227     | 1,601010101     |
| ACAP2                                                                                               | 0,003076372 | -0,163843222 | 0,366 | 0,168 | 1         | 0,89264397    | 1,120267468     | 2,178571429     |
| FAM193A                                                                                             | 0,044315405 | -0,163892678 | 0,195 | 0,098 | 1         | 0,89261337    | 1,120305872     | 1,989795918     |
| STEEP1                                                                                              | 0,5245795   | -0,16419008  | 0,024 | 0,039 | 1         | 0,892429383   | 1,120536839     | 0,615384615     |
| IDO1                                                                                                | 0,597173043 | -0,164653229 | 0,012 | 0,021 | 1         | 0,892142932   | 1,120896623     | 0,571428571     |
| SMAD2                                                                                               | 0,105244736 | -0,164689772 | 0,341 | 0,207 | 1         | 0,892120335   | 1,120925015     | 1,647342995     |
| LTN1                                                                                                | 0,067569559 | -0,164776372 | 0,244 | 0,133 | 1         | 0,892066785   | 1,120992303     | 1,834586466     |
| FANCB                                                                                               | 0,854556904 | -0,164805325 | 0,073 | 0,063 | 1         | 0,892048883   | 1,1210148       | 1,158730159     |
| EHBP1                                                                                               | 0,060917799 | -0,164808188 | 0,573 | 0,344 | 1         | 0,892047113   | 1,121017024     | 1,665697674     |
| MYBL1                                                                                               | 0,64686842  | -0,164866172 | 0,085 | 0,067 | 1         | 0,892011261   | 1,12106208      | 1,268656716     |
| GGCX                                                                                                | 0,013556124 | -0,164874122 | 0,159 | 0,063 | 1         | 0,892006345   | 1,121068258     | 2,523809524     |

Supplementary Table 2

| Differentially expressed genes_keloid-XL_comparing SC-Keloid vs. (SC-Myel, SC-Nonmyel, SC-Nonmyel2) |             |              |       |       |           |               |                 |                 |
|-----------------------------------------------------------------------------------------------------|-------------|--------------|-------|-------|-----------|---------------|-----------------|-----------------|
| gene                                                                                                | p_val       | avg_log2FC   | pct.1 | pct.2 | p_val_adj | Foldchange_UP | Foldchange_DOWN | Ratio_pct1_pct2 |
| SCRN3                                                                                               | 0,858233476 | -0,16489274  | 0,049 | 0,042 | 1         | 0,891994834   | 1,121082726     | 1,166666667     |
| CYP2J2                                                                                              | 0,126161321 | -0,164993816 | 0     | 0,028 | 1         | 0,891932343   | 1,121161272     | 0               |
| CAVIN4                                                                                              | 0,902265112 | -0,165106256 | 0,037 | 0,039 | 1         | 0,89186283    | 1,121248656     | 0,948717949     |
| PPP3CA                                                                                              | 0,030356852 | -0,165114675 | 0,476 | 0,267 | 1         | 0,891857626   | 1,1212552       | 1,782771536     |
| MPPE1                                                                                               | 8,62207E-05 | -0,165188604 | 0,22  | 0,063 | 1         | 0,891811925   | 1,121312658     | 3,492063492     |
| TRMT2B                                                                                              | 0,228958629 | -0,165342716 | 0     | 0,018 | 1         | 0,891716665   | 1,121432445     | 0               |
| MAVS                                                                                                | 0,218024066 | -0,165535556 | 0,11  | 0,063 | 1         | 0,89159748    | 1,121582354     | 1,746031746     |
| MTF2                                                                                                | 0,115127146 | -0,165547414 | 0,195 | 0,112 | 1         | 0,891590152   | 1,121591572     | 1,741071429     |
| ZNF708                                                                                              | 0,881530583 | -0,165595525 | 0,061 | 0,063 | 1         | 0,89156042    | 1,121628975     | 0,968253968     |
| ACSS3                                                                                               | 0,538693364 | -0,165618888 | 0,073 | 0,053 | 1         | 0,891545982   | 1,121647139     | 1,377358491     |
| NAT8L                                                                                               | 0,37338964  | -0,16576458  | 0,024 | 0,046 | 1         | 0,891455953   | 1,121760416     | 0,52173913      |
| CCSER2                                                                                              | 0,04834092  | -0,165805181 | 0,463 | 0,27  | 1         | 0,891430865   | 1,121791986     | 1,714814815     |
| NDST1                                                                                               | 0,016527299 | -0,165830932 | 0,244 | 0,116 | 1         | 0,891414954   | 1,121812009     | 2,103448276     |
| DLL1                                                                                                | 0,606078799 | -0,165923603 | 0,024 | 0,035 | 1         | 0,891357696   | 1,121884071     | 0,685714286     |
| ZNF622                                                                                              | 0,021617883 | -0,166085071 | 0,195 | 0,088 | 1         | 0,89125794    | 1,12200964      | 2,215909091     |
| PLD6                                                                                                | 0,230863158 | -0,166111109 | 0,012 | 0,039 | 1         | 0,891241855   | 1,12202989      | 0,307692308     |
| CFH                                                                                                 | 0,959903237 | -0,166114804 | 0,049 | 0,046 | 1         | 0,891239572   | 1,122032764     | 1,065217391     |
| RCC1                                                                                                | 0,649062338 | -0,166129462 | 0,073 | 0,056 | 1         | 0,891230516   | 1,122044164     | 1,303571429     |
| MEGF10                                                                                              | 0,126161321 | -0,166348131 | 0     | 0,028 | 1         | 0,891095443   | 1,122214245     | 0               |
| ACD                                                                                                 | 0,003384251 | -0,166348739 | 0,171 | 0,06  | 1         | 0,891095068   | 1,122214718     | 2,85            |
| SLC35D2                                                                                             | 0,059252087 | -0,166518148 | 0,134 | 0,063 | 1         | 0,890990437   | 1,122346502     | 2,126984127     |
| KRT7                                                                                                | 0,063408785 | -0,166588123 | 0,049 | 0,014 | 1         | 0,890947222   | 1,122400941     | 3,5             |
| HMG5                                                                                                | 0,065507908 | -0,166590212 | 0,11  | 0,049 | 1         | 0,890945932   | 1,122402566     | 2,244897959     |
| TAF7                                                                                                | 0,070912782 | -0,166595304 | 0,537 | 0,326 | 1         | 0,890942787   | 1,122406527     | 1,647239264     |
| PHLPP1                                                                                              | 0,648777474 | -0,166614924 | 0,085 | 0,067 | 1         | 0,890930671   | 1,122421792     | 1,268656716     |
| MTHFR                                                                                               | 0,919967107 | -0,166818842 | 0,073 | 0,074 | 1         | 0,890804751   | 1,122580452     | 0,986486486     |
| MBOAT1                                                                                              | 0,158151635 | -0,166847359 | 0,012 | 0,046 | 1         | 0,890787143   | 1,122602642     | 0,260869565     |
| SYNGR2                                                                                              | 0,904312358 | -0,166889141 | 0,098 | 0,088 | 1         | 0,890761345   | 1,122635154     | 1,113636364     |
| PDK3                                                                                                | 0,955353009 | -0,166945307 | 0,061 | 0,06  | 1         | 0,890726668   | 1,12267886      | 1,016666667     |
| BBS2                                                                                                | 0,60543617  | -0,167065772 | 0,122 | 0,095 | 1         | 0,890652295   | 1,122772608     | 1,284210526     |

Supplementary Table 2

| Differentially expressed genes_keloid-XL_comparing SC-Keloid vs. (SC-Myel, SC-Nonmyel, SC-Nonmyel2) |             |              |       |       |           |               |                 |                 |
|-----------------------------------------------------------------------------------------------------|-------------|--------------|-------|-------|-----------|---------------|-----------------|-----------------|
| gene                                                                                                | p_val       | avg_log2FC   | pct.1 | pct.2 | p_val_adj | Foldchange_UP | Foldchange_DOWN | Ratio_pct1_pct2 |
| STXBP1                                                                                              | 0,965794897 | -0,167154992 | 0,098 | 0,095 | 1         | 0,890597216   | 1,122842045     | 1,031578947     |
| COG2                                                                                                | 0,436724529 | -0,167378201 | 0,024 | 0,042 | 1         | 0,890459437   | 1,123015781     | 0,571428571     |
| SZT2                                                                                                | 0,027244837 | -0,167552728 | 0,098 | 0,035 | 1         | 0,890351722   | 1,123151643     | 2,8             |
| BMI1                                                                                                | 0,033343733 | -0,167582264 | 0,305 | 0,161 | 1         | 0,890333494   | 1,123174638     | 1,894409938     |
| PNN                                                                                                 | 0,050207461 | -0,167603952 | 0,573 | 0,34  | 1         | 0,89032011    | 1,123191523     | 1,685294118     |
| SLU7                                                                                                | 0,016390288 | -0,167738268 | 0,305 | 0,154 | 1         | 0,890237224   | 1,123296098     | 1,980519481     |
| MPV17L                                                                                              | 0,608759699 | -0,16791586  | 0,024 | 0,035 | 1         | 0,890127645   | 1,123434381     | 0,685714286     |
| LINC00662                                                                                           | 0,009604168 | -0,168122066 | 0,183 | 0,074 | 1         | 0,890000427   | 1,123594966     | 2,472972973     |
| ETF1                                                                                                | 0,169074679 | -0,168256529 | 0,39  | 0,253 | 1         | 0,889917481   | 1,123699693     | 1,541501976     |
| LPIN3                                                                                               | 0,782948141 | -0,168455205 | 0,037 | 0,042 | 1         | 0,889794937   | 1,12385445      | 0,880952381     |
| TJP2                                                                                                | 0,092297305 | -0,168547094 | 0,012 | 0,056 | 1         | 0,889738266   | 1,123926034     | 0,214285714     |
| CRAMP1                                                                                              | 0,45505613  | -0,168573379 | 0,11  | 0,077 | 1         | 0,889722056   | 1,123946511     | 1,428571429     |
| TWSG1                                                                                               | 0,056060742 | -0,168589716 | 0,268 | 0,147 | 1         | 0,889711981   | 1,123959238     | 1,823129252     |
| WDR48                                                                                               | 0,060908009 | -0,168720365 | 0,183 | 0,095 | 1         | 0,889631413   | 1,124061028     | 1,926315789     |
| NUDC                                                                                                | 0,009373662 | -0,169163847 | 0,573 | 0,295 | 1         | 0,889357983   | 1,124406616     | 1,942372881     |
| TVP23C                                                                                              | 0,526986103 | -0,169300001 | 0,024 | 0,039 | 1         | 0,889274054   | 1,124512736     | 0,615384615     |
| BMP2                                                                                                | 0,131490976 | -0,169333397 | 0,012 | 0,049 | 1         | 0,889253469   | 1,124538767     | 0,244897959     |
| SLC2A1                                                                                              | 0,280530349 | -0,169356271 | 0,11  | 0,067 | 1         | 0,88923937    | 1,124556597     | 1,641791045     |
| CCNT1                                                                                               | 0,42253913  | -0,16939121  | 0,122 | 0,084 | 1         | 0,889217835   | 1,124583832     | 1,452380952     |
| ZCCHC4                                                                                              | 0,493813928 | -0,169391846 | 0,049 | 0,032 | 1         | 0,889217443   | 1,124584327     | 1,53125         |
| GMFB                                                                                                | 0,017593116 | -0,169403875 | 0,329 | 0,165 | 1         | 0,889210029   | 1,124593704     | 1,993939394     |
| TRMT13                                                                                              | 0,057904734 | -0,169620414 | 0,134 | 0,063 | 1         | 0,889076574   | 1,124762511     | 2,126984127     |
| ACSL1                                                                                               | 0,762441497 | -0,169703279 | 0,073 | 0,06  | 1         | 0,889025509   | 1,124827117     | 1,216666667     |
| CDYL                                                                                                | 0,22750446  | -0,169707806 | 0,195 | 0,126 | 1         | 0,88902272    | 1,124830646     | 1,547619048     |
| GALT                                                                                                | 0,548428076 | -0,169859932 | 0,073 | 0,053 | 1         | 0,888928981   | 1,12494926      | 1,377358491     |
| PCDHB4                                                                                              | 0,5150097   | -0,16986417  | 0,024 | 0,039 | 1         | 0,88892637    | 1,124952566     | 0,615384615     |
| ARVCF                                                                                               | 0,273649051 | -0,169894114 | 0,024 | 0,053 | 1         | 0,88890792    | 1,124975915     | 0,452830189     |
| SPIN1                                                                                               | 0,285275204 | -0,169990922 | 0,22  | 0,147 | 1         | 0,888848274   | 1,125051406     | 1,496598639     |
| PPP1R3E                                                                                             | 0,739665212 | -0,170209521 | 0,049 | 0,039 | 1         | 0,888713605   | 1,125221888     | 1,256410256     |
| NDC1                                                                                                | 0,517393619 | -0,17021639  | 0,024 | 0,039 | 1         | 0,888709373   | 1,125227245     | 0,615384615     |

Supplementary Table 2

| Differentially expressed genes_keloid-XL_comparing SC-Keloid vs. (SC-Myel, SC-Nonmyel, SC-Nonmyel2) |             |              |       |       |           |               |                 |                 |
|-----------------------------------------------------------------------------------------------------|-------------|--------------|-------|-------|-----------|---------------|-----------------|-----------------|
| gene                                                                                                | p_val       | avg_log2FC   | pct.1 | pct.2 | p_val_adj | Foldchange_UP | Foldchange_DOWN | Ratio_pct1_pct2 |
| PAPSS2                                                                                              | 0,407171737 | -0,170372883 | 0,012 | 0,028 | 1         | 0,888612978   | 1,125349308     | 0,428571429     |
| SPATS2                                                                                              | 0,512204675 | -0,1705431   | 0,11  | 0,081 | 1         | 0,888508141   | 1,125482091     | 1,358024691     |
| CD83                                                                                                | 0,475980054 | -0,170557089 | 0,122 | 0,088 | 1         | 0,888499526   | 1,125493004     | 1,386363636     |
| ARMCX3                                                                                              | 0,005049725 | -0,170614172 | 0,512 | 0,26  | 1         | 0,888464371   | 1,125537537     | 1,969230769     |
| EFNA5                                                                                               | 0,742007514 | -0,170650916 | 0,061 | 0,049 | 1         | 0,888441743   | 1,125566204     | 1,244897959     |
| B3GAT1                                                                                              | 0,191619666 | -0,170671013 | 0,012 | 0,042 | 1         | 0,888429367   | 1,125581883     | 0,285714286     |
| PHF1                                                                                                | 0,451467404 | -0,170786118 | 0,22  | 0,161 | 1         | 0,888358487   | 1,125671691     | 1,366459627     |
| MT1A                                                                                                | 0,687448661 | -0,170907902 | 0,037 | 0,046 | 1         | 0,8882835     | 1,125766718     | 0,804347826     |
| CHD7                                                                                                | 0,064077257 | -0,170941984 | 0,366 | 0,211 | 1         | 0,888262515   | 1,125793313     | 1,734597156     |
| LPIN2                                                                                               | 0,560584886 | -0,171000763 | 0,061 | 0,077 | 1         | 0,888226326   | 1,125839181     | 0,792207792     |
| EIF3A                                                                                               | 0,067477603 | -0,17101997  | 0,646 | 0,393 | 1         | 0,888214501   | 1,12585417      | 1,643765903     |
| MLLT1                                                                                               | 0,311456481 | -0,171185648 | 0,171 | 0,116 | 1         | 0,888112505   | 1,12598347      | 1,474137931     |
| DENND6A                                                                                             | 0,899526474 | -0,171216922 | 0,085 | 0,077 | 1         | 0,888093253   | 1,126007879     | 1,103896104     |
| RBBP4                                                                                               | 0,005818404 | -0,171445696 | 0,378 | 0,186 | 1         | 0,887952436   | 1,126186449     | 2,032258065     |
| EPC2                                                                                                | 0,037479814 | -0,171651203 | 0,28  | 0,147 | 1         | 0,887825959   | 1,126346881     | 1,904761905     |
| TRAF3IP1                                                                                            | 0,158445458 | -0,171719546 | 0,122 | 0,067 | 1         | 0,887783902   | 1,12640024      | 1,820895522     |
| SEC62                                                                                               | 0,41214263  | -0,171751184 | 0,817 | 0,547 | 1         | 0,887764433   | 1,126424942     | 1,493601463     |
| PHLPP2                                                                                              | 0,449143786 | -0,17176118  | 0,037 | 0,056 | 1         | 0,887758282   | 1,126432746     | 0,660714286     |
| UBQLN1                                                                                              | 0,259994588 | -0,171970704 | 0,256 | 0,168 | 1         | 0,887629362   | 1,126596351     | 1,523809524     |
| EHMT2                                                                                               | 0,433488747 | -0,172098935 | 0,122 | 0,084 | 1         | 0,88755047    | 1,12669649      | 1,452380952     |
| ELL2                                                                                                | 0,113046836 | -0,172215254 | 0,134 | 0,07  | 1         | 0,887478913   | 1,126787336     | 1,914285714     |
| NUSAP1                                                                                              | 0,607418359 | -0,172245051 | 0,024 | 0,035 | 1         | 0,887460584   | 1,126810608     | 0,685714286     |
| E2F3                                                                                                | 0,436724529 | -0,172494732 | 0,024 | 0,042 | 1         | 0,887307008   | 1,127005637     | 0,571428571     |
| KRT8                                                                                                | 0,861512651 | -0,172564217 | 0,037 | 0,032 | 1         | 0,887264273   | 1,127059919     | 1,15625         |
| MICALL2                                                                                             | 0,001879043 | -0,172732821 | 0,512 | 0,242 | 1         | 0,887160587   | 1,127191643     | 2,115702479     |
| KAT6B                                                                                               | 0,009973586 | -0,172782104 | 0,317 | 0,154 | 1         | 0,887130282   | 1,127230149     | 2,058441558     |
| FAM117B                                                                                             | 0,628011784 | -0,173158817 | 0,061 | 0,046 | 1         | 0,886898667   | 1,127524527     | 1,326086957     |
| UTP18                                                                                               | 0,915635859 | -0,17327318  | 0,098 | 0,088 | 1         | 0,886828365   | 1,12761391      | 1,113636364     |
| PALMD                                                                                               | 0,92202407  | -0,17336268  | 0,037 | 0,039 | 1         | 0,886773351   | 1,127683866     | 0,948717949     |
| LEMD3                                                                                               | 0,240402893 | -0,173543073 | 0,146 | 0,091 | 1         | 0,886662477   | 1,127824879     | 1,604395604     |

Supplementary Table 2

| Differentially expressed genes_keloid-XL_comparing SC-Keloid vs. (SC-Myel, SC-Nonmyel, SC-Nonmyel2) |             |              |       |       |           |               |                 |                 |
|-----------------------------------------------------------------------------------------------------|-------------|--------------|-------|-------|-----------|---------------|-----------------|-----------------|
| gene                                                                                                | p_val       | avg_log2FC   | pct.1 | pct.2 | p_val_adj | Foldchange_UP | Foldchange_DOWN | Ratio_pct1_pct2 |
| GCLC                                                                                                | 0,132374253 | -0,173555109 | 0,012 | 0,049 | 1         | 0,886655079   | 1,127834288     | 0,244897959     |
| WDR47                                                                                               | 0,466614618 | -0,173577927 | 0,159 | 0,116 | 1         | 0,886641056   | 1,127852126     | 1,370689655     |
| SFRP2                                                                                               | 0,081052074 | -0,173603361 | 0,122 | 0,06  | 1         | 0,886625425   | 1,12787201      | 2,033333333     |
| MAF                                                                                                 | 0,157145149 | -0,173631535 | 0,695 | 0,467 | 1         | 0,88660811    | 1,127894036     | 1,488222698     |
| FBXO34                                                                                              | 0,817961369 | -0,173677064 | 0,073 | 0,063 | 1         | 0,886580131   | 1,127929631     | 1,158730159     |
| AC087239.1                                                                                          | 0,464027923 | -0,173680208 | 0,037 | 0,056 | 1         | 0,886578199   | 1,127932089     | 0,660714286     |
| SHC4                                                                                                | 0,346141973 | -0,173698599 | 0,293 | 0,214 | 1         | 0,886566897   | 1,127946467     | 1,369158879     |
| TAF1C                                                                                               | 0,212229698 | -0,17376137  | 0,11  | 0,063 | 1         | 0,886528324   | 1,127995545     | 1,746031746     |
| UBN2                                                                                                | 0,362399026 | -0,173770002 | 0,159 | 0,109 | 1         | 0,88652302    | 1,128002294     | 1,458715596     |
| PAAF1                                                                                               | 0,152539636 | -0,173802469 | 0,085 | 0,042 | 1         | 0,886503069   | 1,12802768      | 2,023809524     |
| SCNN1D                                                                                              | 0,490935921 | -0,173833686 | 0,012 | 0,025 | 1         | 0,886483887   | 1,128052088     | 0,48            |
| HIPK1                                                                                               | 0,134189186 | -0,173875184 | 0,293 | 0,186 | 1         | 0,886458389   | 1,128084536     | 1,575268817     |
| PTPN21                                                                                              | 0,362535727 | -0,173971438 | 0,122 | 0,081 | 1         | 0,886399248   | 1,128159802     | 1,50617284      |
| GGNBP2                                                                                              | 0,06255033  | -0,17421136  | 0,378 | 0,225 | 1         | 0,88625185    | 1,128347433     | 1,68            |
| ZCCHC14                                                                                             | 0,175750868 | -0,174686563 | 0,22  | 0,137 | 1         | 0,88595998    | 1,128719155     | 1,605839416     |
| SERP1                                                                                               | 0,057352018 | -0,174729341 | 0,561 | 0,337 | 1         | 0,885933711   | 1,128752623     | 1,664688427     |
| NCAPD3                                                                                              | 0,312508215 | -0,174732407 | 0,024 | 0,049 | 1         | 0,885931828   | 1,128755022     | 0,489795918     |
| PIAS4                                                                                               | 0,94211979  | -0,174839592 | 0,11  | 0,102 | 1         | 0,88586601    | 1,128838886     | 1,078431373     |
| ZRANB1                                                                                              | 0,097453441 | -0,174859694 | 0,22  | 0,126 | 1         | 0,885853667   | 1,128854615     | 1,746031746     |
| HERC2                                                                                               | 0,098435253 | -0,175019547 | 0,317 | 0,189 | 1         | 0,885755518   | 1,128979701     | 1,677248677     |
| ARL5B                                                                                               | 0,557021159 | -0,175200577 | 0,207 | 0,158 | 1         | 0,88564438    | 1,129121375     | 1,310126582     |
| CECR2                                                                                               | 0,399910239 | -0,175209732 | 0,085 | 0,116 | 1         | 0,88563876    | 1,12912854      | 0,732758621     |
| FGF1                                                                                                | 0,881530583 | -0,175294447 | 0,061 | 0,063 | 1         | 0,885586757   | 1,129194844     | 0,968253968     |
| ZNF623                                                                                              | 0,967659139 | -0,175349033 | 0,049 | 0,046 | 1         | 0,88555325    | 1,12923757      | 1,065217391     |
| SLC8B1                                                                                              | 0,592521527 | -0,175373046 | 0,037 | 0,049 | 1         | 0,885538511   | 1,129256365     | 0,755102041     |
| NUMBL                                                                                               | 0,026350079 | -0,17543057  | 0,159 | 0,07  | 1         | 0,885503203   | 1,129301392     | 2,271428571     |
| CERT1                                                                                               | 0,81865819  | -0,175521632 | 0,134 | 0,116 | 1         | 0,885447312   | 1,129372676     | 1,155172414     |
| SSH2                                                                                                | 0,787851443 | -0,175642812 | 0,159 | 0,133 | 1         | 0,885372942   | 1,129467542     | 1,195488722     |
| RNF2                                                                                                | 0,581116746 | -0,176024088 | 0,098 | 0,074 | 1         | 0,885138986   | 1,129766078     | 1,324324324     |
| EXOC5                                                                                               | 0,002478714 | -0,176201406 | 0,256 | 0,102 | 1         | 0,885030202   | 1,129904943     | 2,509803922     |



Supplementary Table 2

| Differentially expressed genes_keloid-XL_comparing SC-Keloid vs. (SC-Myel, SC-Nonmyel, SC-Nonmyel2) |             |              |       |       |           |               |                 |                 |
|-----------------------------------------------------------------------------------------------------|-------------|--------------|-------|-------|-----------|---------------|-----------------|-----------------|
| gene                                                                                                | p_val       | avg_log2FC   | pct.1 | pct.2 | p_val_adj | Foldchange_UP | Foldchange_DOWN | Ratio_pct1_pct2 |
| KCTD6                                                                                               | 0,872570963 | -0,176411097 | 0,085 | 0,074 | 1         | 0,884901575   | 1,130069183     | 1,148648649     |
| H2AC19                                                                                              | 0,158151635 | -0,176459325 | 0,012 | 0,046 | 1         | 0,884871994   | 1,130106961     | 0,260869565     |
| ITCH                                                                                                | 0,225486995 | -0,17646248  | 0,22  | 0,14  | 1         | 0,884870059   | 1,130109432     | 1,571428571     |
| AP1S2                                                                                               | 0,338355428 | -0,176615067 | 0,793 | 0,593 | 1         | 0,884776475   | 1,130228965     | 1,337268128     |
| ZSWIM8                                                                                              | 0,178029146 | -0,176646109 | 0,183 | 0,112 | 1         | 0,884757438   | 1,130253284     | 1,633928571     |
| ITPK1-AS1                                                                                           | 0,131490976 | -0,176875405 | 0,012 | 0,049 | 1         | 0,88461683    | 1,130432935     | 0,244897959     |
| ZBED3                                                                                               | 0,280260254 | -0,177147079 | 0,012 | 0,035 | 1         | 0,884450263   | 1,130645828     | 0,342857143     |
| LYST                                                                                                | 0,036585764 | -0,177252982 | 0,354 | 0,196 | 1         | 0,884385342   | 1,130728827     | 1,806122449     |
| TMEM161B-DT                                                                                         | 0,182127436 | -0,177534485 | 0,098 | 0,053 | 1         | 0,884212794   | 1,13094948      | 1,849056604     |
| SFXN5                                                                                               | 0,162821864 | -0,177613894 | 0,207 | 0,13  | 1         | 0,884164127   | 1,131011732     | 1,592307692     |
| SPHK1                                                                                               | 0,300883361 | -0,177757094 | 0,39  | 0,27  | 1         | 0,88407637    | 1,131124        | 1,444444444     |
| RAB7A                                                                                               | 0,035853008 | -0,177974068 | 0,707 | 0,411 | 1         | 0,88394342    | 1,131294128     | 1,720194647     |
| TMEM71                                                                                              | 0,811317121 | -0,178001476 | 0,061 | 0,053 | 1         | 0,883926627   | 1,13131562      | 1,150943396     |
| COMP                                                                                                | 0,490935921 | -0,178059596 | 0,012 | 0,025 | 1         | 0,883891018   | 1,131361197     | 0,48            |
| NAV2-AS3                                                                                            | 0,113139415 | -0,178106873 | 0,012 | 0,053 | 1         | 0,883862053   | 1,131398272     | 0,226415094     |
| NKTR                                                                                                | 0,004462013 | -0,178207924 | 0,61  | 0,319 | 1         | 0,883800147   | 1,131477522     | 1,912225705     |
| SLC12A2                                                                                             | 0,323271938 | -0,178618708 | 0,171 | 0,116 | 1         | 0,883548535   | 1,131799738     | 1,474137931     |
| PCBP2                                                                                               | 0,492893486 | -0,178730506 | 0,707 | 0,505 | 1         | 0,883480069   | 1,131887447     | 1,4             |
| TCF7                                                                                                | 0,553574766 | -0,178823119 | 0,061 | 0,077 | 1         | 0,883423356   | 1,13196011      | 0,792207792     |
| FAM126B                                                                                             | 0,478853974 | -0,178876938 | 0,122 | 0,088 | 1         | 0,883390402   | 1,132002338     | 1,386363636     |
| STAU1                                                                                               | 0,067226207 | -0,178883567 | 0,378 | 0,225 | 1         | 0,883386343   | 1,132007539     | 1,68            |
| MRPL1                                                                                               | 0,055424769 | -0,178964335 | 0,146 | 0,07  | 1         | 0,883336888   | 1,132070916     | 2,085714286     |
| CAMK2B                                                                                              | 0,328774407 | -0,179279076 | 0,024 | 0,049 | 1         | 0,883144199   | 1,132317917     | 0,489795918     |
| RAB6A                                                                                               | 0,003081265 | -0,179411354 | 0,573 | 0,274 | 1         | 0,883063228   | 1,132421743     | 2,091240876     |
| CDC14A                                                                                              | 0,953065998 | -0,179499431 | 0,061 | 0,06  | 1         | 0,883009319   | 1,132490879     | 1,016666667     |
| CXCL8                                                                                               | 0,170158373 | -0,179546159 | 0,11  | 0,06  | 1         | 0,88298072    | 1,13252756      | 1,833333333     |
| ATXN3                                                                                               | 0,40574204  | -0,179572281 | 0,159 | 0,112 | 1         | 0,882964732   | 1,132548067     | 1,419642857     |
| TRPM3                                                                                               | 0,059506563 | -0,17958035  | 0     | 0,042 | 1         | 0,882959794   | 1,132554401     | 0               |
| GTF2A1                                                                                              | 0,027679506 | -0,179649886 | 0,268 | 0,137 | 1         | 0,882917237   | 1,132608989     | 1,95620438      |
| RALGPS2                                                                                             | 0,182501042 | -0,179681468 | 0,159 | 0,095 | 1         | 0,882897909   | 1,132633784     | 1,673684211     |

Supplementary Table 2

| Differentially expressed genes_keloid-XL_comparing SC-Keloid vs. (SC-Myel, SC-Nonmyel, SC-Nonmyel2) |             |              |       |       |           |               |                 |                 |
|-----------------------------------------------------------------------------------------------------|-------------|--------------|-------|-------|-----------|---------------|-----------------|-----------------|
| gene                                                                                                | p_val       | avg_log2FC   | pct.1 | pct.2 | p_val_adj | Foldchange_UP | Foldchange_DOWN | Ratio_pct1_pct2 |
| SLC27A1                                                                                             | 0,432860287 | -0,179725505 | 0,171 | 0,123 | 1         | 0,88287096    | 1,132668357     | 1,390243902     |
| LONRF3                                                                                              | 0,071615029 | -0,179798042 | 0     | 0,039 | 1         | 0,882826571   | 1,132725308     | 0               |
| WDR59                                                                                               | 0,323471241 | -0,179800272 | 0,11  | 0,07  | 1         | 0,882825207   | 1,132727058     | 1,571428571     |
| G3BP2                                                                                               | 0,012168379 | -0,179804154 | 0,293 | 0,14  | 1         | 0,882822831   | 1,132730107     | 2,092857143     |
| OSGIN2                                                                                              | 0,167373049 | -0,179887451 | 0,134 | 0,077 | 1         | 0,882771861   | 1,132795509     | 1,74025974      |
| CEP104                                                                                              | 0,568154413 | -0,179930467 | 0,073 | 0,053 | 1         | 0,882745541   | 1,132829285     | 1,377358491     |
| IFIT1                                                                                               | 0,848754153 | -0,179964735 | 0,085 | 0,088 | 1         | 0,882724573   | 1,132856193     | 0,965909091     |
| CCNL2                                                                                               | 0,011917589 | -0,180296323 | 0,488 | 0,256 | 1         | 0,882521712   | 1,133116598     | 1,90625         |
| NUMB                                                                                                | 0,068676555 | -0,18055811  | 0,293 | 0,168 | 1         | 0,882361587   | 1,133322229     | 1,744047619     |
| TIAL1                                                                                               | 0,031746157 | -0,180654704 | 0,451 | 0,246 | 1         | 0,882302511   | 1,133398112     | 1,833333333     |
| KCNIP4                                                                                              | 0,086314699 | -0,180783643 | 0     | 0,035 | 1         | 0,88222366    | 1,133499412     | 0               |
| CHM                                                                                                 | 0,050113162 | -0,180815588 | 0,183 | 0,091 | 1         | 0,882204125   | 1,133524511     | 2,010989011     |
| TMEM38B                                                                                             | 0,419827259 | -0,180905891 | 0,122 | 0,084 | 1         | 0,882148907   | 1,133595464     | 1,452380952     |
| LIN7C                                                                                               | 0,010718705 | -0,18095689  | 0,317 | 0,151 | 1         | 0,882117724   | 1,133635538     | 2,099337748     |
| C1orf35                                                                                             | 0,033182763 | -0,181033191 | 0,256 | 0,133 | 1         | 0,882071072   | 1,133695495     | 1,92481203      |
| LMTK2                                                                                               | 0,782948141 | -0,181148641 | 0,037 | 0,042 | 1         | 0,882000488   | 1,133786221     | 0,880952381     |
| SOS2                                                                                                | 0,031455796 | -0,181239148 | 0,341 | 0,182 | 1         | 0,881945158   | 1,13385735      | 1,873626374     |
| PHF14                                                                                               | 0,088170879 | -0,181281999 | 0,256 | 0,151 | 1         | 0,881918962   | 1,133891029     | 1,695364238     |
| PPP1R1B                                                                                             | 0,104227568 | -0,181351888 | 0     | 0,032 | 1         | 0,881876241   | 1,13394596      | 0               |
| NCBP3                                                                                               | 0,020306258 | -0,181359505 | 0,244 | 0,119 | 1         | 0,881871584   | 1,133951947     | 2,050420168     |
| RBM10                                                                                               | 0,940249638 | -0,18137837  | 0,134 | 0,123 | 1         | 0,881860053   | 1,133966775     | 1,089430894     |
| WDFY3                                                                                               | 0,464579482 | -0,181475822 | 0,122 | 0,088 | 1         | 0,881800486   | 1,134043376     | 1,386363636     |
| L3MBTL3                                                                                             | 0,235908114 | -0,181568698 | 0,024 | 0,056 | 1         | 0,881743721   | 1,134116384     | 0,428571429     |
| BMPR2                                                                                               | 0,074768945 | -0,181579991 | 0,354 | 0,207 | 1         | 0,881736819   | 1,134125261     | 1,710144928     |
| AC019117.2                                                                                          | 0,233109121 | -0,181615493 | 0,012 | 0,039 | 1         | 0,881715121   | 1,13415317      | 0,307692308     |
| PFKFB2                                                                                              | 0,109391882 | -0,181651272 | 0,012 | 0,053 | 1         | 0,881693255   | 1,134181298     | 0,226415094     |
| SLC66A2                                                                                             | 0,545677043 | -0,182146414 | 0,159 | 0,119 | 1         | 0,881390704   | 1,134570623     | 1,336134454     |
| CHMP4B                                                                                              | 0,029818023 | -0,182270242 | 0,512 | 0,281 | 1         | 0,881315057   | 1,134668008     | 1,822064057     |
| IFIT3                                                                                               | 0,148597029 | -0,182752272 | 0,183 | 0,112 | 1         | 0,881020643   | 1,135047184     | 1,633928571     |
| STRN3                                                                                               | 0,064384436 | -0,182784172 | 0,293 | 0,165 | 1         | 0,881001162   | 1,135072282     | 1,775757576     |

Supplementary Table 2

| Differentially expressed genes_keloid-XL_comparing SC-Keloid vs. (SC-Myel, SC-Nonmyel, SC-Nonmyel2) |             |              |       |       |           |               |                 |                 |
|-----------------------------------------------------------------------------------------------------|-------------|--------------|-------|-------|-----------|---------------|-----------------|-----------------|
| gene                                                                                                | p_val       | avg_log2FC   | pct.1 | pct.2 | p_val_adj | Foldchange_UP | Foldchange_DOWN | Ratio_pct1_pct2 |
| CYB5R2                                                                                              | 0,033805237 | -0,182852884 | 0,207 | 0,102 | 1         | 0,880959203   | 1,135126344     | 2,029411765     |
| MGME1                                                                                               | 0,000372701 | -0,182909501 | 0,146 | 0,035 | 1         | 0,880924632   | 1,135170892     | 4,171428571     |
| RBP1                                                                                                | 0,947169223 | -0,183040383 | 0,073 | 0,067 | 1         | 0,880844718   | 1,13527388      | 1,089552239     |
| ZNF394                                                                                              | 0,730504652 | -0,183206849 | 0,073 | 0,06  | 1         | 0,880743087   | 1,135404881     | 1,216666667     |
| KBTBD7                                                                                              | 0,943851882 | -0,183268102 | 0,061 | 0,056 | 1         | 0,880705694   | 1,135453089     | 1,089285714     |
| TARS3                                                                                               | 0,17373278  | -0,183323561 | 0,268 | 0,168 | 1         | 0,880671839   | 1,135496738     | 1,595238095     |
| CAMK2D                                                                                              | 0,077818116 | -0,183408544 | 0,28  | 0,165 | 1         | 0,880619964   | 1,135563627     | 1,696969697     |
| VSIR                                                                                                | 0,439980449 | -0,183506986 | 0,037 | 0,056 | 1         | 0,880559877   | 1,135641115     | 0,660714286     |
| PRKAR2A                                                                                             | 0,06191058  | -0,183525083 | 0,244 | 0,133 | 1         | 0,880548832   | 1,13565536      | 1,834586466     |
| ZDHHC21                                                                                             | 0,003777074 | -0,183669106 | 0,171 | 0,06  | 1         | 0,880460931   | 1,135768737     | 2,85            |
| SGMS2                                                                                               | 0,504248768 | -0,183737696 | 0,049 | 0,067 | 1         | 0,880419073   | 1,135822736     | 0,731343284     |
| IKZF5                                                                                               | 0,702730963 | -0,183747901 | 0,085 | 0,095 | 1         | 0,880412845   | 1,13583077      | 0,894736842     |
| UVSSA                                                                                               | 0,592521527 | -0,183909979 | 0,037 | 0,049 | 1         | 0,880313942   | 1,135958381     | 0,755102041     |
| ELP2                                                                                                | 0,571728117 | -0,184236982 | 0,159 | 0,123 | 1         | 0,880114431   | 1,136215888     | 1,292682927     |
| SDK2                                                                                                | 0,041217527 | -0,184284994 | 0     | 0,049 | 1         | 0,880085142   | 1,136253701     | 0               |
| FAM72B                                                                                              | 0,716389659 | -0,184294951 | 0,049 | 0,039 | 1         | 0,880079068   | 1,136261544     | 1,256410256     |
| POMT1                                                                                               | 0,044056385 | -0,184876422 | 0,122 | 0,053 | 1         | 0,879724428   | 1,1367196       | 2,301886792     |
| AHCYL2                                                                                              | 0,263822203 | -0,18499305  | 0,024 | 0,053 | 1         | 0,879653313   | 1,136811497     | 0,452830189     |
| HSPA1L                                                                                              | 0,58754085  | -0,185075628 | 0,037 | 0,025 | 1         | 0,879602965   | 1,136876568     | 1,48            |
| PDLIM5                                                                                              | 0,055349599 | -0,185104846 | 0,22  | 0,116 | 1         | 0,879585151   | 1,136899593     | 1,896551724     |
| ZNF570                                                                                              | 0,493879805 | -0,185261235 | 0,012 | 0,025 | 1         | 0,879489809   | 1,13702284      | 0,48            |
| ZNF844                                                                                              | 0,73897817  | -0,185340164 | 0,073 | 0,06  | 1         | 0,879441694   | 1,137085048     | 1,216666667     |
| ATG12                                                                                               | 0,043925296 | -0,185354401 | 0,28  | 0,154 | 1         | 0,879433015   | 1,137096269     | 1,818181818     |
| NOP53                                                                                               | 0,869838522 | -0,185369822 | 0,744 | 0,551 | 1         | 0,879423614   | 1,137108424     | 1,350272232     |
| ENO2                                                                                                | 0,911790399 | -0,185632829 | 0,11  | 0,098 | 1         | 0,879263308   | 1,13731574      | 1,12244898      |
| ADAMTS7                                                                                             | 0,023320626 | -0,185644114 | 0,427 | 0,232 | 1         | 0,87925643    | 1,137324637     | 1,840517241     |
| ZMYM3                                                                                               | 0,920796342 | -0,185705314 | 0,049 | 0,049 | 1         | 0,879219132   | 1,137372884     | 1               |
| ITPR2                                                                                               | 0,394998293 | -0,185769945 | 0,049 | 0,074 | 1         | 0,879179745   | 1,137423838     | 0,662162162     |
| TSPYL4                                                                                              | 0,471481354 | -0,185934429 | 0,11  | 0,077 | 1         | 0,879079515   | 1,137553524     | 1,428571429     |
| CRYBG3                                                                                              | 0,357459095 | -0,18602131  | 0,098 | 0,063 | 1         | 0,879026577   | 1,137622031     | 1,555555556     |

Supplementary Table 2

| Differentially expressed genes_keloid-XL_comparing SC-Keloid vs. (SC-Myel, SC-Nonmyel, SC-Nonmyel2) |             |              |       |       |           |               |                 |                 |
|-----------------------------------------------------------------------------------------------------|-------------|--------------|-------|-------|-----------|---------------|-----------------|-----------------|
| gene                                                                                                | p_val       | avg_log2FC   | pct.1 | pct.2 | p_val_adj | Foldchange_UP | Foldchange_DOWN | Ratio_pct1_pct2 |
| SRRT                                                                                                | 0,146271158 | -0,186221665 | 0,256 | 0,158 | 1         | 0,87890451    | 1,13778003      | 1,620253165     |
| MOB1A                                                                                               | 0,017100825 | -0,186249904 | 0,427 | 0,228 | 1         | 0,878887306   | 1,137802302     | 1,872807018     |
| ADD1                                                                                                | 0,133758972 | -0,18631627  | 0,585 | 0,375 | 1         | 0,878846878   | 1,137854643     | 1,56            |
| CYB5D2                                                                                              | 0,004166177 | -0,186533988 | 0,134 | 0,042 | 1         | 0,87871426    | 1,13802637      | 3,19047619      |
| USP38                                                                                               | 0,882648236 | -0,186582536 | 0,122 | 0,119 | 1         | 0,878684691   | 1,138064667     | 1,025210084     |
| CLCN5                                                                                               | 0,568740001 | -0,186741684 | 0,049 | 0,063 | 1         | 0,878587766   | 1,138190217     | 0,777777778     |
| NPHP3                                                                                               | 0,091215189 | -0,186767421 | 0,171 | 0,091 | 1         | 0,878572093   | 1,138210522     | 1,879120879     |
| PAXX                                                                                                | 0,001477092 | -0,186885162 | 0,463 | 0,211 | 1         | 0,878500394   | 1,138303417     | 2,194312796     |
| PLEKHA3                                                                                             | 0,085896554 | -0,187020661 | 0,293 | 0,172 | 1         | 0,878417888   | 1,138410332     | 1,703488372     |
| GNAZ                                                                                                | 0,879365097 | -0,1870445   | 0,024 | 0,021 | 1         | 0,878403373   | 1,138429144     | 1,142857143     |
| SYT14                                                                                               | 0,086314699 | -0,187151145 | 0     | 0,035 | 1         | 0,878338444   | 1,1385133       | 0               |
| FUOM                                                                                                | 0,173308367 | -0,187259135 | 0,134 | 0,077 | 1         | 0,8782727     | 1,138598525     | 1,74025974      |
| ZNF654                                                                                              | 0,886738719 | -0,187400084 | 0,11  | 0,098 | 1         | 0,878186898   | 1,138709769     | 1,12244898      |
| CITED2                                                                                              | 0,143686642 | -0,187764087 | 0,28  | 0,179 | 1         | 0,877965353   | 1,138997111     | 1,56424581      |
| MRPS31                                                                                              | 0,321002406 | -0,18783996  | 0,11  | 0,07  | 1         | 0,877919181   | 1,139057013     | 1,571428571     |
| SOX15                                                                                               | 0,473879216 | -0,188121357 | 0,073 | 0,049 | 1         | 0,87774796    | 1,139279207     | 1,489795918     |
| LINC00511                                                                                           | 0,02377333  | -0,188278597 | 0,451 | 0,242 | 1         | 0,877652299   | 1,139403384     | 1,863636364     |
| CDC73                                                                                               | 0,015183954 | -0,188343381 | 0,366 | 0,189 | 1         | 0,877612889   | 1,13945455      | 1,936507937     |
| ZSCAN18                                                                                             | 0,144721262 | -0,188352136 | 0,22  | 0,133 | 1         | 0,877607563   | 1,139461465     | 1,654135338     |
| HERC3                                                                                               | 0,059506563 | -0,188396565 | 0     | 0,042 | 1         | 0,877580537   | 1,139496557     | 0               |
| SETD1B                                                                                              | 0,660866937 | -0,188483201 | 0,049 | 0,06  | 1         | 0,877527839   | 1,139564987     | 0,816666667     |
| RPL38                                                                                               | 0,437855746 | -0,188710458 | 0,939 | 0,895 | 1         | 0,877389619   | 1,139744509     | 1,049162011     |
| TP53INP2                                                                                            | 0,764923904 | -0,188780582 | 0,11  | 0,091 | 1         | 0,877346973   | 1,139799909     | 1,208791209     |
| CCSAP                                                                                               | 0,704577198 | -0,18879715  | 0,098 | 0,077 | 1         | 0,877336898   | 1,139812998     | 1,272727273     |
| ZNF514                                                                                              | 0,734471344 | -0,188891913 | 0,049 | 0,039 | 1         | 0,877279272   | 1,139887869     | 1,256410256     |
| TMEM116                                                                                             | 0,588044005 | -0,188969079 | 0,037 | 0,049 | 1         | 0,87723235    | 1,13994884      | 0,755102041     |
| PWWP2A                                                                                              | 0,002346552 | -0,189114993 | 0,268 | 0,109 | 1         | 0,877143631   | 1,140064141     | 2,458715596     |
| EFEMP1                                                                                              | 0,153186787 | -0,189125753 | 0     | 0,025 | 1         | 0,877137089   | 1,140072643     | 0               |
| ZNF141                                                                                              | 0,456222156 | -0,189275633 | 0,098 | 0,067 | 1         | 0,877045969   | 1,14019109      | 1,462686567     |
| SELE                                                                                                | 0,250257255 | -0,189371624 | 0,134 | 0,084 | 1         | 0,876987616   | 1,140266956     | 1,595238095     |

Supplementary Table 2

| Differentially expressed genes_keloid-XL_comparing SC-Keloid vs. (SC-Myel, SC-Nonmyel, SC-Nonmyel2) |             |              |       |       |           |               |                 |                 |
|-----------------------------------------------------------------------------------------------------|-------------|--------------|-------|-------|-----------|---------------|-----------------|-----------------|
| gene                                                                                                | p_val       | avg_log2FC   | pct.1 | pct.2 | p_val_adj | Foldchange_UP | Foldchange_DOWN | Ratio_pct1_pct2 |
| GXYLT1                                                                                              | 0,454646118 | -0,189413713 | 0,098 | 0,067 | 1         | 0,876962032   | 1,140300223     | 1,462686567     |
| DYNC2I1                                                                                             | 0,021794518 | -0,189610135 | 0,268 | 0,133 | 1         | 0,876842642   | 1,140455485     | 2,015037594     |
| USP37                                                                                               | 0,715193444 | -0,189721648 | 0,073 | 0,081 | 1         | 0,876774869   | 1,140543639     | 0,901234568     |
| DENND2A                                                                                             | 0,591541809 | -0,189756975 | 0,098 | 0,074 | 1         | 0,8767534     | 1,140571568     | 1,324324324     |
| PLCE1                                                                                               | 0,704450109 | -0,189770121 | 0,134 | 0,109 | 1         | 0,876745411   | 1,140581961     | 1,229357798     |
| SLC22A17                                                                                            | 0,271078763 | -0,189794458 | 0,61  | 0,404 | 1         | 0,876730621   | 1,140601202     | 1,50990099      |
| TSPAN13                                                                                             | 0,322689403 | -0,189847419 | 0,037 | 0,063 | 1         | 0,876698437   | 1,140643074     | 0,587301587     |
| C21orf91                                                                                            | 0,941822149 | -0,189975491 | 0,049 | 0,046 | 1         | 0,876620614   | 1,140744336     | 1,065217391     |
| GNPTAB                                                                                              | 0,278945307 | -0,19021588  | 0,122 | 0,077 | 1         | 0,876474559   | 1,140934428     | 1,584415584     |
| CCDC146                                                                                             | 0,682541613 | -0,19022559  | 0,037 | 0,046 | 1         | 0,87646866    | 1,140942108     | 0,804347826     |
| ZC4H2                                                                                               | 0,490935921 | -0,190261117 | 0,012 | 0,025 | 1         | 0,876447077   | 1,140970204     | 0,48            |
| WNK3                                                                                                | 0,459175933 | -0,190584346 | 0,073 | 0,049 | 1         | 0,876250735   | 1,141225862     | 1,489795918     |
| FRMD8                                                                                               | 0,1370862   | -0,191047477 | 0,244 | 0,147 | 1         | 0,875969488   | 1,141592275     | 1,659863946     |
| VPS13D                                                                                              | 0,74174951  | -0,19112655  | 0,073 | 0,081 | 1         | 0,875921478   | 1,141654847     | 0,901234568     |
| BRSK2                                                                                               | 0,059506563 | -0,191176263 | 0     | 0,042 | 1         | 0,875891295   | 1,141694186     | 0               |
| RBM22                                                                                               | 0,430921189 | -0,191192541 | 0,244 | 0,172 | 1         | 0,875881413   | 1,141707069     | 1,418604651     |
| ZNRF2                                                                                               | 0,425475815 | -0,191203244 | 0,317 | 0,232 | 1         | 0,875874915   | 1,141715538     | 1,36637931      |
| RASA2                                                                                               | 0,965047968 | -0,191303664 | 0,073 | 0,07  | 1         | 0,875813951   | 1,141795012     | 1,042857143     |
| STXBP5                                                                                              | 0,37150382  | -0,191415663 | 0,098 | 0,063 | 1         | 0,875745963   | 1,141883654     | 1,555555556     |
| RARA                                                                                                | 0,031667474 | -0,191784823 | 0,439 | 0,246 | 1         | 0,875521903   | 1,142175879     | 1,784552846     |
| SP3                                                                                                 | 0,030075753 | -0,191796504 | 0,329 | 0,175 | 1         | 0,875514815   | 1,142185127     | 1,88            |
| TMEM170A                                                                                            | 0,183445963 | -0,192039648 | 0,195 | 0,119 | 1         | 0,875367273   | 1,142377641     | 1,638655462     |
| ABTB1                                                                                               | 0,632497817 | -0,192150547 | 0,061 | 0,046 | 1         | 0,875299986   | 1,142465458     | 1,326086957     |
| CARHSP1                                                                                             | 0,1042565   | -0,192462356 | 0,195 | 0,109 | 1         | 0,875110829   | 1,142712405     | 1,788990826     |
| ARID2                                                                                               | 0,13279458  | -0,192736836 | 0,183 | 0,105 | 1         | 0,87494435    | 1,142929833     | 1,742857143     |
| C11orf91                                                                                            | 0,92831815  | -0,192743437 | 0,049 | 0,049 | 1         | 0,874940347   | 1,142935062     | 1               |
| UBE4B                                                                                               | 0,563318732 | -0,193010484 | 0,122 | 0,091 | 1         | 0,874778408   | 1,143146642     | 1,340659341     |
| NUMA1                                                                                               | 0,182743342 | -0,193191968 | 0,366 | 0,246 | 1         | 0,874668372   | 1,143290454     | 1,487804878     |
| SNTB2                                                                                               | 0,417159168 | -0,193373192 | 0,183 | 0,13  | 1         | 0,874558508   | 1,143434077     | 1,407692308     |
| PSD3                                                                                                | 0,795549473 | -0,193556882 | 0,061 | 0,067 | 1         | 0,874447162   | 1,143579673     | 0,910447761     |

Supplementary Table 2

| Differentially expressed genes_keloid-XL_comparing SC-Keloid vs. (SC-Myel, SC-Nonmyel, SC-Nonmyel2) |             |              |       |       |           |               |                 |                 |
|-----------------------------------------------------------------------------------------------------|-------------|--------------|-------|-------|-----------|---------------|-----------------|-----------------|
| gene                                                                                                | p_val       | avg_log2FC   | pct.1 | pct.2 | p_val_adj | Foldchange_UP | Foldchange_DOWN | Ratio_pct1_pct2 |
| POLG                                                                                                | 0,263382489 | -0,193611795 | 0,134 | 0,084 | 1         | 0,874413879   | 1,143623202     | 1,595238095     |
| PLIN2                                                                                               | 0,256033247 | -0,193790238 | 0,134 | 0,084 | 1         | 0,874305732   | 1,143764663     | 1,595238095     |
| MLLT10                                                                                              | 0,140048898 | -0,193804206 | 0,171 | 0,098 | 1         | 0,874297267   | 1,143775736     | 1,744897959     |
| ATRX                                                                                                | 0,151500557 | -0,193880708 | 0,561 | 0,358 | 1         | 0,874250907   | 1,143836389     | 1,567039106     |
| ADGRA2                                                                                              | 0,157823425 | -0,193893833 | 0,195 | 0,119 | 1         | 0,874242953   | 1,143846795     | 1,638655462     |
| NKX6-2                                                                                              | 0,071615029 | -0,193965071 | 0     | 0,039 | 1         | 0,874199785   | 1,143903278     | 0               |
| DEK                                                                                                 | 0,058579948 | -0,194015286 | 0,585 | 0,354 | 1         | 0,874169358   | 1,143943094     | 1,652542373     |
| MIPOL1                                                                                              | 0,982342462 | -0,194136498 | 0,037 | 0,035 | 1         | 0,874095916   | 1,144039209     | 1,057142857     |
| CMC2                                                                                                | 0,014541435 | -0,19446421  | 0,561 | 0,305 | 1         | 0,873897385   | 1,14429911      | 1,839344262     |
| MFSD14A                                                                                             | 0,380891196 | -0,194585012 | 0,159 | 0,109 | 1         | 0,873824213   | 1,144394931     | 1,458715596     |
| SIPA1L1                                                                                             | 0,453842854 | -0,194664434 | 0,146 | 0,105 | 1         | 0,873776109   | 1,144457933     | 1,39047619      |
| ZBTB37                                                                                              | 0,497273414 | -0,194758857 | 0,098 | 0,07  | 1         | 0,873718924   | 1,144532838     | 1,4             |
| NECTIN1                                                                                             | 0,315718299 | -0,19489959  | 0,024 | 0,049 | 1         | 0,873633698   | 1,144644492     | 0,489795918     |
| EIF4A3                                                                                              | 0,010976332 | -0,194923163 | 0,439 | 0,225 | 1         | 0,873619423   | 1,144663195     | 1,951111111     |
| UFM1                                                                                                | 0,002901898 | -0,194988967 | 0,439 | 0,211 | 1         | 0,873579576   | 1,144715407     | 2,08056872      |
| ATOH8                                                                                               | 0,041217527 | -0,195070924 | 0     | 0,049 | 1         | 0,873529952   | 1,144780437     | 0               |
| TUBA1A                                                                                              | 0,50454474  | -0,195233034 | 0,878 | 0,789 | 1         | 0,873431802   | 1,144909079     | 1,112801014     |
| KIAA0930                                                                                            | 0,872205427 | -0,195311572 | 0,146 | 0,13  | 1         | 0,873384255   | 1,144971408     | 1,123076923     |
| STK24                                                                                               | 0,757859293 | -0,195562487 | 0,11  | 0,091 | 1         | 0,873232368   | 1,14517056      | 1,208791209     |
| TGFB2                                                                                               | 0,136074933 | -0,195898695 | 0,171 | 0,098 | 1         | 0,873028892   | 1,145437464     | 1,744897959     |
| ZDBF2                                                                                               | 0,404681217 | -0,195966728 | 0,012 | 0,028 | 1         | 0,872987724   | 1,14549148      | 0,428571429     |
| NCOR1                                                                                               | 0,021412571 | -0,196045989 | 0,451 | 0,242 | 1         | 0,872939764   | 1,145554415     | 1,863636364     |
| DUSP15                                                                                              | 0,14448804  | -0,196205414 | 0,134 | 0,074 | 1         | 0,872843305   | 1,145681011     | 1,810810811     |
| GFRA2                                                                                               | 0,299182533 | -0,196251242 | 0,207 | 0,14  | 1         | 0,872815579   | 1,145717404     | 1,478571429     |
| SLC25A36                                                                                            | 0,847951473 | -0,196509449 | 0,268 | 0,225 | 1         | 0,87265938    | 1,145922479     | 1,191111111     |
| ATXN1                                                                                               | 0,122922436 | -0,196719394 | 0,256 | 0,154 | 1         | 0,872532398   | 1,146089248     | 1,662337662     |
| UBE2B                                                                                               | 0,131098358 | -0,196991119 | 0,634 | 0,411 | 1         | 0,872368076   | 1,146305129     | 1,542579075     |
| MORC4                                                                                               | 0,5114561   | -0,197020763 | 0,049 | 0,067 | 1         | 0,872350151   | 1,146328683     | 0,731343284     |
| CTNNA3                                                                                              | 0,071615029 | -0,197224972 | 0     | 0,039 | 1         | 0,872226681   | 1,146490954     | 0               |
| UBD                                                                                                 | 0,228958629 | -0,197266091 | 0     | 0,018 | 1         | 0,872201822   | 1,146523632     | 0               |

Supplementary Table 2

| Differentially expressed genes_keloid-XL_comparing SC-Keloid vs. (SC-Myel, SC-Nonmyel, SC-Nonmyel2) |             |              |       |       |           |               |                 |                 |
|-----------------------------------------------------------------------------------------------------|-------------|--------------|-------|-------|-----------|---------------|-----------------|-----------------|
| gene                                                                                                | p_val       | avg_log2FC   | pct.1 | pct.2 | p_val_adj | Foldchange_UP | Foldchange_DOWN | Ratio_pct1_pct2 |
| ISCU                                                                                                | 0,121433155 | -0,197495776 | 0,5   | 0,305 | 1         | 0,872062974   | 1,146706179     | 1,639344262     |
| EHD1                                                                                                | 0,840251839 | -0,197642668 | 0,085 | 0,088 | 1         | 0,871974186   | 1,14682294      | 0,965909091     |
| SORBS2                                                                                              | 0,009570943 | -0,197757413 | 0,415 | 0,211 | 1         | 0,871904837   | 1,146914156     | 1,966824645     |
| NR1H3                                                                                               | 0,5150097   | -0,197925534 | 0,024 | 0,039 | 1         | 0,871803237   | 1,147047817     | 0,615384615     |
| RAB10                                                                                               | 0,054275304 | -0,198127079 | 0,524 | 0,309 | 1         | 0,871681455   | 1,147208071     | 1,69579288      |
| BAZ2B                                                                                               | 0,352403654 | -0,198839596 | 0,268 | 0,189 | 1         | 0,871251056   | 1,147774793     | 1,417989418     |
| EPC1                                                                                                | 0,009578096 | -0,19898746  | 0,463 | 0,239 | 1         | 0,871161765   | 1,147892436     | 1,937238494     |
| MT-ATP8                                                                                             | 0,074560568 | -0,19910738  | 0,232 | 0,13  | 1         | 0,871089354   | 1,147987856     | 1,784615385     |
| DUSP1                                                                                               | 0,141073024 | -0,199196793 | 0,744 | 0,537 | 1         | 0,871035369   | 1,148059006     | 1,38547486      |
| BAZ1A                                                                                               | 0,035945602 | -0,199266393 | 0,378 | 0,214 | 1         | 0,870993349   | 1,148114393     | 1,76635514      |
| CCDC9                                                                                               | 0,332551477 | -0,199380596 | 0,085 | 0,053 | 1         | 0,870924404   | 1,148205281     | 1,603773585     |
| SYPL1                                                                                               | 0,255085653 | -0,199391209 | 0,537 | 0,365 | 1         | 0,870917997   | 1,148213727     | 1,471232877     |
| ERBB2                                                                                               | 0,170533549 | -0,199569022 | 0,378 | 0,246 | 1         | 0,870810663   | 1,148355254     | 1,536585366     |
| PHLDB2                                                                                              | 0,024922567 | -0,199721655 | 0,317 | 0,168 | 1         | 0,870718538   | 1,148476754     | 1,886904762     |
| INPP5E                                                                                              | 0,666061637 | -0,200096875 | 0,085 | 0,067 | 1         | 0,870492109   | 1,148775491     | 1,268656716     |
| SLC35F1                                                                                             | 0,059913261 | -0,200114203 | 0,329 | 0,186 | 1         | 0,870481654   | 1,148789289     | 1,768817204     |
| GOLGA7                                                                                              | 0,281287617 | -0,200219876 | 0,439 | 0,298 | 1         | 0,870417896   | 1,148873438     | 1,473154362     |
| AIDA                                                                                                | 0,002369328 | -0,200366955 | 0,366 | 0,165 | 1         | 0,870329164   | 1,148990568     | 2,218181818     |
| SLAIN2                                                                                              | 0,144366276 | -0,20036797  | 0,341 | 0,218 | 1         | 0,870328551   | 1,148991376     | 1,564220183     |
| MAP4K3                                                                                              | 0,152035006 | -0,20038004  | 0,183 | 0,109 | 1         | 0,87032127    | 1,14900099      | 1,678899083     |
| NPIP4                                                                                               | 0,438160739 | -0,200406444 | 0,037 | 0,056 | 1         | 0,870305342   | 1,149022018     | 0,660714286     |
| TENM4                                                                                               | 0,229374221 | -0,200431463 | 0,012 | 0,039 | 1         | 0,870290249   | 1,149041944     | 0,307692308     |
| TARS1                                                                                               | 0,067610649 | -0,200458438 | 0,341 | 0,196 | 1         | 0,870273977   | 1,149063429     | 1,739795918     |
| RAB33B                                                                                              | 0,478684152 | -0,200671427 | 0,146 | 0,105 | 1         | 0,870145506   | 1,149233081     | 1,39047619      |
| KCTD1                                                                                               | 0,478134504 | -0,200716328 | 0,122 | 0,088 | 1         | 0,870118424   | 1,149268849     | 1,386363636     |
| CDK2AP2                                                                                             | 0,162168886 | -0,201069965 | 0,61  | 0,379 | 1         | 0,869905165   | 1,149550595     | 1,609498681     |
| ZNF710                                                                                              | 0,893814763 | -0,201443461 | 0,037 | 0,039 | 1         | 0,869679986   | 1,149848238     | 0,948717949     |
| MTO1                                                                                                | 0,436724529 | -0,201549366 | 0,024 | 0,042 | 1         | 0,869616147   | 1,149932649     | 0,571428571     |
| IMP3                                                                                                | 0,041455317 | -0,201762153 | 0,256 | 0,137 | 1         | 0,869487895   | 1,150102269     | 1,868613139     |
| ADIPOR2                                                                                             | 0,505941352 | -0,201789568 | 0,146 | 0,109 | 1         | 0,869471372   | 1,150124124     | 1,339449541     |

Supplementary Table 2

| Differentially expressed genes_keloid-XL_comparing SC-Keloid vs. (SC-Myel, SC-Nonmyel, SC-Nonmyel2) |             |              |       |       |           |               |                 |                 |
|-----------------------------------------------------------------------------------------------------|-------------|--------------|-------|-------|-----------|---------------|-----------------|-----------------|
| gene                                                                                                | p_val       | avg_log2FC   | pct.1 | pct.2 | p_val_adj | Foldchange_UP | Foldchange_DOWN | Ratio_pct1_pct2 |
| SRGAP3                                                                                              | 0,049502603 | -0,202111338 | 0     | 0,046 | 1         | 0,869277472   | 1,150380669     | 0               |
| KIAA2026                                                                                            | 0,11728245  | -0,202160093 | 0,305 | 0,186 | 1         | 0,869248096   | 1,150419546     | 1,639784946     |
| KCNE4                                                                                               | 0,879312278 | -0,202461909 | 0,061 | 0,063 | 1         | 0,869066266   | 1,150660242     | 0,968253968     |
| HERC1                                                                                               | 0,484006956 | -0,202480765 | 0,146 | 0,105 | 1         | 0,869054907   | 1,150675282     | 1,39047619      |
| ATP6V1A                                                                                             | 0,457716158 | -0,202499746 | 0,146 | 0,105 | 1         | 0,869043473   | 1,150690421     | 1,39047619      |
| NRCAM                                                                                               | 0,131490976 | -0,202521968 | 0,012 | 0,049 | 1         | 0,869030088   | 1,150708145     | 0,244897959     |
| BCL2L11                                                                                             | 0,713006105 | -0,202683972 | 0,061 | 0,07  | 1         | 0,868932507   | 1,150837369     | 0,871428571     |
| TMEM158                                                                                             | 0,240976075 | -0,202697017 | 0,037 | 0,07  | 1         | 0,86892465    | 1,150847774     | 0,528571429     |
| IP6K1                                                                                               | 0,241868317 | -0,2027459   | 0,183 | 0,116 | 1         | 0,868895209   | 1,150886769     | 1,577586207     |
| TRRAP                                                                                               | 0,616194897 | -0,202800495 | 0,098 | 0,074 | 1         | 0,868862328   | 1,150930323     | 1,324324324     |
| NANOS1                                                                                              | 0,153186787 | -0,20287929  | 0     | 0,025 | 1         | 0,868814876   | 1,150993184     | 0               |
| LRRTM1                                                                                              | 0,126161321 | -0,202949522 | 0     | 0,028 | 1         | 0,868772582   | 1,151049217     | 0               |
| DCLK3                                                                                               | 0,071615029 | -0,202951343 | 0     | 0,039 | 1         | 0,868771485   | 1,15105067      | 0               |
| GPX3                                                                                                | 0,126161321 | -0,203012924 | 0     | 0,028 | 1         | 0,868734403   | 1,151099803     | 0               |
| SPOPL                                                                                               | 0,219000745 | -0,203124275 | 0,11  | 0,063 | 1         | 0,868667354   | 1,151188652     | 1,746031746     |
| KSR1                                                                                                | 0,373389393 | -0,203222888 | 0,024 | 0,046 | 1         | 0,86860798    | 1,151267342     | 0,52173913      |
| CXCL10                                                                                              | 0,908489202 | -0,203296173 | 0,012 | 0,011 | 1         | 0,868563858   | 1,151325825     | 1,090909091     |
| ATP2A2                                                                                              | 0,293430557 | -0,203363398 | 0,39  | 0,27  | 1         | 0,868523387   | 1,151379474     | 1,444444444     |
| MRAS                                                                                                | 0,32556944  | -0,203460681 | 0,037 | 0,063 | 1         | 0,868464823   | 1,151457116     | 0,587301587     |
| NUCKS1                                                                                              | 0,522509188 | -0,203527089 | 0,805 | 0,719 | 1         | 0,868424848   | 1,151510119     | 1,11961057      |
| VAV2                                                                                                | 0,438826248 | -0,203998703 | 0,024 | 0,042 | 1         | 0,868141008   | 1,151886607     | 0,571428571     |
| CYRIA                                                                                               | 0,962216173 | -0,204460542 | 0,061 | 0,06  | 1         | 0,867863141   | 1,15225541      | 1,016666667     |
| ASRGL1                                                                                              | 0,34021951  | -0,204473125 | 0,037 | 0,063 | 1         | 0,867855572   | 1,152265461     | 0,587301587     |
| HCFC2                                                                                               | 0,953198087 | -0,204610675 | 0,061 | 0,056 | 1         | 0,867772832   | 1,152375325     | 1,089285714     |
| DIPK2A                                                                                              | 0,137185497 | -0,204654733 | 0,024 | 0,067 | 1         | 0,867746332   | 1,152410518     | 0,358208955     |
| NXPE3                                                                                               | 0,863816982 | -0,204770065 | 0,183 | 0,158 | 1         | 0,867676965   | 1,152502648     | 1,158227848     |
| RNF169                                                                                              | 0,175108056 | -0,205021372 | 0,195 | 0,119 | 1         | 0,867525835   | 1,152703423     | 1,638655462     |
| BICD1                                                                                               | 0,010585649 | -0,205281173 | 0,549 | 0,291 | 1         | 0,867369625   | 1,152911021     | 1,886597938     |
| CCDC152                                                                                             | 0,342676622 | -0,205359898 | 0,085 | 0,053 | 1         | 0,867322296   | 1,152973934     | 1,603773585     |
| PRXL2A                                                                                              | 0,206281853 | -0,205394182 | 0,037 | 0,074 | 1         | 0,867301685   | 1,153001334     | 0,5             |



Supplementary Table 2

| Differentially expressed genes_keloid-XL_comparing SC-Keloid vs. (SC-Myel, SC-Nonmyel, SC-Nonmyel2) |             |              |       |       |           |               |                 |                 |
|-----------------------------------------------------------------------------------------------------|-------------|--------------|-------|-------|-----------|---------------|-----------------|-----------------|
| gene                                                                                                | p_val       | avg_log2FC   | pct.1 | pct.2 | p_val_adj | Foldchange_UP | Foldchange_DOWN | Ratio_pct1_pct2 |
| LCA5                                                                                                | 0,972831486 | -0,205450522 | 0,049 | 0,046 | 1         | 0,867267816   | 1,153046361     | 1,065217391     |
| TMEM74B                                                                                             | 0,071615029 | -0,205530829 | 0     | 0,039 | 1         | 0,867219541   | 1,153110548     | 0               |
| FCGRT                                                                                               | 0,107919729 | -0,20598356  | 0,402 | 0,253 | 1         | 0,866947443   | 1,153472461     | 1,588932806     |
| CDR2                                                                                                | 0,099510096 | -0,206143354 | 0,232 | 0,133 | 1         | 0,866851424   | 1,153600228     | 1,744360902     |
| NFX1                                                                                                | 0,403646794 | -0,206180523 | 0,085 | 0,056 | 1         | 0,866829091   | 1,153629948     | 1,517857143     |
| ZRANB2                                                                                              | 0,01681735  | -0,206186862 | 0,451 | 0,242 | 1         | 0,866825282   | 1,153635018     | 1,863636364     |
| PATZ1                                                                                               | 0,043491055 | -0,206204571 | 0,122 | 0,053 | 1         | 0,866814642   | 1,153649179     | 2,301886792     |
| DZIP3                                                                                               | 0,296840498 | -0,206534987 | 0,073 | 0,042 | 1         | 0,866616141   | 1,153913425     | 1,738095238     |
| WASL                                                                                                | 0,173665791 | -0,206591123 | 0,439 | 0,284 | 1         | 0,866582421   | 1,153958326     | 1,545774648     |
| PATL1                                                                                               | 0,248684136 | -0,206748767 | 0,049 | 0,084 | 1         | 0,866487735   | 1,154084426     | 0,583333333     |
| FBXO30                                                                                              | 0,413092499 | -0,206980888 | 0,122 | 0,084 | 1         | 0,866348333   | 1,154270127     | 1,452380952     |
| LGALS7B                                                                                             | 0,619535667 | -0,207011327 | 0,024 | 0,035 | 1         | 0,866330054   | 1,15429448      | 0,685714286     |
| ERCC5                                                                                               | 0,20107405  | -0,207119239 | 0,146 | 0,088 | 1         | 0,866265257   | 1,154380823     | 1,659090909     |
| GSTM3                                                                                               | 0,245111138 | -0,207180476 | 0,207 | 0,133 | 1         | 0,866228488   | 1,154429823     | 1,556390977     |
| MOAP1                                                                                               | 0,550192305 | -0,207320524 | 0,11  | 0,081 | 1         | 0,866144403   | 1,154541894     | 1,358024691     |
| PDCD4                                                                                               | 0,339238683 | -0,207569326 | 0,195 | 0,133 | 1         | 0,865995044   | 1,154741019     | 1,466165414     |
| ANKRD42                                                                                             | 0,383085909 | -0,207672201 | 0,049 | 0,074 | 1         | 0,865933295   | 1,154823364     | 0,662162162     |
| SYDE2                                                                                               | 0,118658632 | -0,207684191 | 0,024 | 0,07  | 1         | 0,865926098   | 1,154832962     | 0,342857143     |
| FLCN                                                                                                | 0,863811614 | -0,207771652 | 0,061 | 0,063 | 1         | 0,865873604   | 1,154902973     | 0,968253968     |
| YLPM1                                                                                               | 0,432860287 | -0,207851559 | 0,171 | 0,123 | 1         | 0,865825647   | 1,154966942     | 1,390243902     |
| USP36                                                                                               | 0,965270946 | -0,20804045  | 0,134 | 0,119 | 1         | 0,865712293   | 1,155118171     | 1,12605042      |
| VPS54                                                                                               | 0,548582204 | -0,208112163 | 0,11  | 0,081 | 1         | 0,865669261   | 1,155175591     | 1,358024691     |
| REXO1                                                                                               | 0,17011954  | -0,208127771 | 0,195 | 0,119 | 1         | 0,865659895   | 1,155188089     | 1,638655462     |
| EMC2                                                                                                | 0,00594074  | -0,208445952 | 0,415 | 0,2   | 1         | 0,865468999   | 1,155442889     | 2,075           |
| RPRD2                                                                                               | 0,921304182 | -0,208510736 | 0,098 | 0,088 | 1         | 0,865430136   | 1,155494775     | 1,113636364     |
| CTSF                                                                                                | 0,375352411 | -0,208524841 | 0,207 | 0,144 | 1         | 0,865421675   | 1,155506072     | 1,4375          |
| SLC16A1                                                                                             | 0,34464581  | -0,208544394 | 0,134 | 0,091 | 1         | 0,865409945   | 1,155521733     | 1,472527473     |
| FCHO2                                                                                               | 0,313041889 | -0,208606367 | 0,159 | 0,105 | 1         | 0,865372771   | 1,155571371     | 1,514285714     |
| CXCL3                                                                                               | 0,375757837 | -0,208622677 | 0,085 | 0,056 | 1         | 0,865362988   | 1,155584435     | 1,517857143     |
| PSRC1                                                                                               | 0,832484443 | -0,208703189 | 0,024 | 0,028 | 1         | 0,865314696   | 1,155648927     | 0,857142857     |

Supplementary Table 2

| Differentially expressed genes_keloid-XL_comparing SC-Keloid vs. (SC-Myel, SC-Nonmyel, SC-Nonmyel2) |             |              |       |       |           |               |                 |                 |
|-----------------------------------------------------------------------------------------------------|-------------|--------------|-------|-------|-----------|---------------|-----------------|-----------------|
| gene                                                                                                | p_val       | avg_log2FC   | pct.1 | pct.2 | p_val_adj | Foldchange_UP | Foldchange_DOWN | Ratio_pct1_pct2 |
| IL11RA                                                                                              | 0,31035636  | -0,208704665 | 0,171 | 0,112 | 1         | 0,865313811   | 1,155650109     | 1,526785714     |
| GMPS                                                                                                | 0,113085228 | -0,208897221 | 0,22  | 0,126 | 1         | 0,865198326   | 1,155804363     | 1,746031746     |
| MAGT1                                                                                               | 0,026368489 | -0,208900179 | 0,317 | 0,165 | 1         | 0,865196552   | 1,155806732     | 1,921212121     |
| IRAK2                                                                                               | 0,636997413 | -0,20891479  | 0,061 | 0,046 | 1         | 0,86518779    | 1,155818438     | 1,326086957     |
| ZNF800                                                                                              | 0,057134079 | -0,20897298  | 0,244 | 0,133 | 1         | 0,865152894   | 1,155865058     | 1,834586466     |
| NFKBIE                                                                                              | 0,280695142 | -0,209020809 | 0,146 | 0,095 | 1         | 0,865124212   | 1,155903379     | 1,536842105     |
| PHLDB1                                                                                              | 0,033226178 | -0,209164416 | 0,585 | 0,333 | 1         | 0,865038101   | 1,156018444     | 1,756756757     |
| PALM                                                                                                | 0,383085909 | -0,209164694 | 0,049 | 0,074 | 1         | 0,865037934   | 1,156018667     | 0,662162162     |
| ILF3-DT                                                                                             | 0,215063333 | -0,20918154  | 0,159 | 0,098 | 1         | 0,865027834   | 1,156032166     | 1,62244898      |
| GPM6A                                                                                               | 0,086314699 | -0,209197483 | 0     | 0,035 | 1         | 0,865018275   | 1,156044941     | 0               |
| CACUL1                                                                                              | 0,32627087  | -0,209223896 | 0,171 | 0,116 | 1         | 0,865002438   | 1,156066106     | 1,474137931     |
| HIBCH                                                                                               | 0,060439369 | -0,209329614 | 0,159 | 0,077 | 1         | 0,864939055   | 1,156150823     | 2,064935065     |
| PCOLCE                                                                                              | 0,939352703 | -0,209411652 | 0,061 | 0,06  | 1         | 0,864889872   | 1,156216569     | 1,016666667     |
| IST1                                                                                                | 0,161896512 | -0,209416163 | 0,415 | 0,267 | 1         | 0,864887167   | 1,156220184     | 1,554307116     |
| TMEM35B                                                                                             | 0,328567728 | -0,209516286 | 0,329 | 0,225 | 1         | 0,864827146   | 1,156300429     | 1,462222222     |
| CENPL                                                                                               | 0,37338964  | -0,209609546 | 0,024 | 0,046 | 1         | 0,864771243   | 1,156375177     | 0,52173913      |
| SNRNP27                                                                                             | 0,030763113 | -0,209646686 | 0,329 | 0,172 | 1         | 0,864748981   | 1,156404947     | 1,912790698     |
| ATP8A1                                                                                              | 0,30568197  | -0,209674789 | 0,049 | 0,081 | 1         | 0,864732136   | 1,156427474     | 0,604938272     |
| NRG1                                                                                                | 0,028629337 | -0,209743376 | 0     | 0,056 | 1         | 0,864691027   | 1,156482453     | 0               |
| ATP6V1C1                                                                                            | 0,095667745 | -0,209905889 | 0,159 | 0,084 | 1         | 0,864593629   | 1,156612732     | 1,892857143     |
| LARGE1                                                                                              | 0,15336741  | -0,20997297  | 0,195 | 0,116 | 1         | 0,864553429   | 1,156666512     | 1,681034483     |
| HSPA14                                                                                              | 0,099114272 | -0,210005027 | 0,024 | 0,074 | 1         | 0,864534219   | 1,156692214     | 0,324324324     |
| PURA                                                                                                | 0,199325503 | -0,210118342 | 0,549 | 0,365 | 1         | 0,864466318   | 1,156783069     | 1,504109589     |
| SPINDOC                                                                                             | 0,788562121 | -0,210143271 | 0,073 | 0,077 | 1         | 0,86445138    | 1,156803058     | 0,948051948     |
| RBM14                                                                                               | 0,063646466 | -0,210161042 | 0,293 | 0,165 | 1         | 0,864440732   | 1,156817308     | 1,775757576     |
| NR2C1                                                                                               | 0,8502299   | -0,210220066 | 0,11  | 0,095 | 1         | 0,864405367   | 1,156864636     | 1,157894737     |
| XBP1                                                                                                | 0,026206383 | -0,210240439 | 0,512 | 0,284 | 1         | 0,86439316    | 1,156880973     | 1,802816901     |
| RIPK4                                                                                               | 0,190367951 | -0,210662833 | 0,012 | 0,042 | 1         | 0,864140119   | 1,157219735     | 0,285714286     |
| LDB1                                                                                                | 0,028745028 | -0,210902708 | 0,134 | 0,056 | 1         | 0,863996451   | 1,157412161     | 2,392857143     |
| ID1                                                                                                 | 0,166339305 | -0,210962896 | 0,232 | 0,144 | 1         | 0,863960407   | 1,157460449     | 1,611111111     |

Supplementary Table 2

| Differentially expressed genes_keloid-XL_comparing SC-Keloid vs. (SC-Myel, SC-Nonmyel, SC-Nonmyel2) |             |              |       |       |           |               |                 |                 |
|-----------------------------------------------------------------------------------------------------|-------------|--------------|-------|-------|-----------|---------------|-----------------|-----------------|
| gene                                                                                                | p_val       | avg_log2FC   | pct.1 | pct.2 | p_val_adj | Foldchange_UP | Foldchange_DOWN | Ratio_pct1_pct2 |
| SEC14L1                                                                                             | 0,127335305 | -0,211015279 | 0,22  | 0,13  | 1         | 0,863929038   | 1,157502475     | 1,692307692     |
| WBP2                                                                                                | 0,094271495 | -0,211098307 | 0,354 | 0,214 | 1         | 0,863879319   | 1,157569093     | 1,654205607     |
| WDR70                                                                                               | 0,48057655  | -0,21111586  | 0,11  | 0,077 | 1         | 0,863868809   | 1,157583176     | 1,428571429     |
| AC144831.1                                                                                          | 0,404681217 | -0,211626124 | 0,012 | 0,028 | 1         | 0,863563323   | 1,157992673     | 0,428571429     |
| MCMBP                                                                                               | 0,02085362  | -0,211638998 | 0,256 | 0,126 | 1         | 0,863555617   | 1,158003006     | 2,031746032     |
| HMGCS1                                                                                              | 0,086069086 | -0,211734289 | 0,207 | 0,116 | 1         | 0,86349858    | 1,158079495     | 1,784482759     |
| ABHD17B                                                                                             | 0,338735774 | -0,211760595 | 0,037 | 0,063 | 1         | 0,863482835   | 1,158100612     | 0,587301587     |
| SH3BP2                                                                                              | 0,06664083  | -0,212082867 | 0,293 | 0,165 | 1         | 0,86328997    | 1,15835934      | 1,775757576     |
| PGAP1                                                                                               | 0,380092544 | -0,21214272  | 0,098 | 0,063 | 1         | 0,863254156   | 1,158407397     | 1,555555556     |
| SORT1                                                                                               | 0,221604934 | -0,212165532 | 0,305 | 0,2   | 1         | 0,863240506   | 1,158425714     | 1,525           |
| CLEC16A                                                                                             | 0,680093097 | -0,212431849 | 0,037 | 0,046 | 1         | 0,86308117    | 1,158639575     | 0,804347826     |
| MTA2                                                                                                | 0,964504542 | -0,212493402 | 0,061 | 0,06  | 1         | 0,863044347   | 1,15868901      | 1,016666667     |
| DMXL1                                                                                               | 0,59412207  | -0,212690741 | 0,146 | 0,112 | 1         | 0,862926303   | 1,158847512     | 1,303571429     |
| SAFB                                                                                                | 0,686538599 | -0,212870673 | 0,195 | 0,158 | 1         | 0,862818687   | 1,158992052     | 1,234177215     |
| ZMYND8                                                                                              | 0,125221012 | -0,212906531 | 0,195 | 0,112 | 1         | 0,862797242   | 1,159020859     | 1,741071429     |
| TMEM256                                                                                             | 0,055516108 | -0,212914114 | 0,439 | 0,256 | 1         | 0,862792707   | 1,159026951     | 1,71484375      |
| GTF2IRD2B                                                                                           | 0,446812106 | -0,213155037 | 0,098 | 0,067 | 1         | 0,862648636   | 1,159220519     | 1,462686567     |
| TINAGL1                                                                                             | 0,153186787 | -0,213232028 | 0     | 0,025 | 1         | 0,862602601   | 1,159282384     | 0               |
| SYVN1                                                                                               | 0,164983606 | -0,213258254 | 0,171 | 0,102 | 1         | 0,862586921   | 1,159303458     | 1,676470588     |
| KAT5                                                                                                | 0,013339977 | -0,213439427 | 0,207 | 0,091 | 1         | 0,862478604   | 1,159449052     | 2,274725275     |
| POU3F1                                                                                              | 0,091645249 | -0,213484512 | 0,61  | 0,404 | 1         | 0,862451652   | 1,159485286     | 1,50990099      |
| TBL1XR1                                                                                             | 0,140536364 | -0,213541389 | 0,427 | 0,263 | 1         | 0,862417651   | 1,159530998     | 1,623574144     |
| ARHGAP26                                                                                            | 0,68538792  | -0,21359394  | 0,11  | 0,088 | 1         | 0,862386237   | 1,159573236     | 1,25            |
| CEP44                                                                                               | 0,920796342 | -0,213772461 | 0,049 | 0,049 | 1         | 0,862279531   | 1,159716732     | 1               |
| AKAP10                                                                                              | 0,739683397 | -0,213833667 | 0,061 | 0,049 | 1         | 0,86224295    | 1,159765934     | 1,244897959     |
| C10orf82                                                                                            | 0,131490976 | -0,21388443  | 0,012 | 0,049 | 1         | 0,862212612   | 1,159806742     | 0,244897959     |
| NRBP1                                                                                               | 0,021139736 | -0,214772771 | 0,415 | 0,218 | 1         | 0,861681867   | 1,160521114     | 1,903669725     |
| CBFA2T2                                                                                             | 0,584843536 | -0,214961843 | 0,085 | 0,063 | 1         | 0,861568947   | 1,160673216     | 1,349206349     |
| KLHL15                                                                                              | 0,915536293 | -0,214989839 | 0,085 | 0,077 | 1         | 0,861552228   | 1,16069574      | 1,103896104     |
| SNN                                                                                                 | 0,38545982  | -0,214992314 | 0,159 | 0,109 | 1         | 0,86155075    | 1,160697731     | 1,458715596     |

Supplementary Table 2

| Differentially expressed genes_keloid-XL_comparing SC-Keloid vs. (SC-Myel, SC-Nonmyel, SC-Nonmyel2) |             |              |       |       |           |               |                 |                 |
|-----------------------------------------------------------------------------------------------------|-------------|--------------|-------|-------|-----------|---------------|-----------------|-----------------|
| gene                                                                                                | p_val       | avg_log2FC   | pct.1 | pct.2 | p_val_adj | Foldchange_UP | Foldchange_DOWN | Ratio_pct1_pct2 |
| SKA2                                                                                                | 0,109189133 | -0,215177791 | 0,354 | 0,218 | 1         | 0,861439993   | 1,160846963     | 1,623853211     |
| INO80                                                                                               | 0,778483124 | -0,215355284 | 0,134 | 0,112 | 1         | 0,861334018   | 1,160989789     | 1,196428571     |
| MAP2K7                                                                                              | 0,221949624 | -0,215554316 | 0,11  | 0,063 | 1         | 0,861215198   | 1,161149969     | 1,746031746     |
| PPP2R2B                                                                                             | 0,495315357 | -0,215556498 | 0,049 | 0,067 | 1         | 0,861213895   | 1,161151725     | 0,731343284     |
| BRD7                                                                                                | 0,016555384 | -0,216074469 | 0,317 | 0,161 | 1         | 0,860904749   | 1,161568688     | 1,968944099     |
| DENND4A                                                                                             | 0,441037762 | -0,216131761 | 0,049 | 0,07  | 1         | 0,860870562   | 1,161614817     | 0,7             |
| FAM193B                                                                                             | 0,020661769 | -0,21617345  | 0,268 | 0,133 | 1         | 0,860845686   | 1,161648385     | 2,015037594     |
| PANK2                                                                                               | 0,478684152 | -0,216186661 | 0,146 | 0,105 | 1         | 0,860837803   | 1,161659021     | 1,39047619      |
| SETD1A                                                                                              | 0,550085882 | -0,216195771 | 0,061 | 0,077 | 1         | 0,860832367   | 1,161666357     | 0,792207792     |
| PARD6B                                                                                              | 0,999008141 | -0,216206426 | 0,085 | 0,081 | 1         | 0,86082601    | 1,161674936     | 1,049382716     |
| ZNF496                                                                                              | 0,951476382 | -0,216275917 | 0,073 | 0,067 | 1         | 0,860784547   | 1,161730893     | 1,089552239     |
| SHROOM3                                                                                             | 0,059506563 | -0,216600983 | 0     | 0,042 | 1         | 0,860590618   | 1,161992682     | 0               |
| PKD2                                                                                                | 0,053424836 | -0,216715286 | 0,232 | 0,123 | 1         | 0,860522437   | 1,162084749     | 1,886178862     |
| EID3                                                                                                | 0,950860882 | -0,216780334 | 0,061 | 0,056 | 1         | 0,860483638   | 1,162137146     | 1,089285714     |
| SIRT1                                                                                               | 0,98443496  | -0,216926502 | 0,134 | 0,123 | 1         | 0,860396462   | 1,162254895     | 1,089430894     |
| OBSL1                                                                                               | 0,363001647 | -0,217143332 | 0,195 | 0,133 | 1         | 0,860267159   | 1,162429589     | 1,466165414     |
| PIGK                                                                                                | 0,035773849 | -0,217169754 | 0,256 | 0,13  | 1         | 0,860251404   | 1,162450879     | 1,969230769     |
| RAD21                                                                                               | 0,049654111 | -0,217367589 | 0,488 | 0,281 | 1         | 0,860133447   | 1,162610295     | 1,736654804     |
| DTX4                                                                                                | 0,034342747 | -0,217403908 | 0     | 0,053 | 1         | 0,860111793   | 1,162639563     | 0               |
| COX19                                                                                               | 0,101891292 | -0,217462228 | 0,146 | 0,077 | 1         | 0,860077025   | 1,162686563     | 1,896103896     |
| NSMAF                                                                                               | 0,495648423 | -0,217563181 | 0,098 | 0,07  | 1         | 0,860016843   | 1,162767925     | 1,4             |
| NGF                                                                                                 | 0,845914908 | -0,217688287 | 0,073 | 0,063 | 1         | 0,859942268   | 1,162868761     | 1,158730159     |
| TTC21B                                                                                              | 0,784359671 | -0,21776939  | 0,146 | 0,123 | 1         | 0,859893926   | 1,162934136     | 1,18699187      |
| SLC30A4                                                                                             | 0,109391882 | -0,217872337 | 0,012 | 0,053 | 1         | 0,859832569   | 1,163017122     | 0,226415094     |
| AASDH                                                                                               | 0,788115278 | -0,217940807 | 0,061 | 0,067 | 1         | 0,859791762   | 1,163072321     | 0,910447761     |
| AC012368.1                                                                                          | 0,041217527 | -0,217953988 | 0     | 0,049 | 1         | 0,859783907   | 1,163082947     | 0               |
| DYNC1H1                                                                                             | 0,566794452 | -0,218065844 | 0,598 | 0,449 | 1         | 0,859717248   | 1,163173127     | 1,331848552     |
| ANK2                                                                                                | 0,014197453 | -0,218152158 | 0,415 | 0,214 | 1         | 0,859665814   | 1,16324272      | 1,939252336     |
| SLC20A2                                                                                             | 0,051178694 | -0,218180634 | 0,256 | 0,137 | 1         | 0,859648847   | 1,16326568      | 1,868613139     |
| CCDC115                                                                                             | 0,071927442 | -0,218320722 | 0,232 | 0,126 | 1         | 0,859565377   | 1,163378641     | 1,841269841     |

Supplementary Table 2

| Differentially expressed genes_keloid-XL_comparing SC-Keloid vs. (SC-Myel, SC-Nonmyel, SC-Nonmyel2) |             |              |       |       |           |               |                 |                 |
|-----------------------------------------------------------------------------------------------------|-------------|--------------|-------|-------|-----------|---------------|-----------------|-----------------|
| gene                                                                                                | p_val       | avg_log2FC   | pct.1 | pct.2 | p_val_adj | Foldchange_UP | Foldchange_DOWN | Ratio_pct1_pct2 |
| INPP5F                                                                                              | 0,091011967 | -0,218322149 | 0,39  | 0,232 | 1         | 0,859564527   | 1,163379791     | 1,681034483     |
| CUX1                                                                                                | 0,033984047 | -0,218385008 | 0,451 | 0,253 | 1         | 0,859527076   | 1,163430481     | 1,782608696     |
| CBWD5                                                                                               | 0,663410618 | -0,218585259 | 0,122 | 0,095 | 1         | 0,859407779   | 1,163591981     | 1,284210526     |
| SMIM14                                                                                              | 0,271319052 | -0,218795936 | 0,22  | 0,144 | 1         | 0,859282289   | 1,163761913     | 1,527777778     |
| BCORL1                                                                                              | 0,222465486 | -0,218828327 | 0,024 | 0,056 | 1         | 0,859262997   | 1,163788042     | 0,428571429     |
| MFAP4                                                                                               | 0,73097622  | -0,218861219 | 0,049 | 0,056 | 1         | 0,859243406   | 1,163814575     | 0,875           |
| CDK2                                                                                                | 0,834593836 | -0,21905513  | 0,085 | 0,088 | 1         | 0,859127925   | 1,163971012     | 0,965909091     |
| KPNA1                                                                                               | 0,330186403 | -0,219095768 | 0,256 | 0,179 | 1         | 0,859103725   | 1,1640038       | 1,430167598     |
| MDM1                                                                                                | 0,500333917 | -0,219272712 | 0,085 | 0,06  | 1         | 0,858998363   | 1,164146572     | 1,416666667     |
| FTX                                                                                                 | 0,012823847 | -0,219465742 | 0,244 | 0,112 | 1         | 0,858883439   | 1,164302343     | 2,178571429     |
| TTR                                                                                                 | 0,952151129 | -0,219548183 | 0,049 | 0,046 | 1         | 0,858834361   | 1,164368877     | 1,065217391     |
| LCORL                                                                                               | 0,96642007  | -0,219678196 | 0,134 | 0,123 | 1         | 0,858756967   | 1,164473813     | 1,089430894     |
| STAM                                                                                                | 0,738599401 | -0,219680957 | 0,146 | 0,119 | 1         | 0,858755324   | 1,164476042     | 1,226890756     |
| PHF20                                                                                               | 0,145496801 | -0,219869789 | 0,232 | 0,14  | 1         | 0,85864293    | 1,164628468     | 1,657142857     |
| GPSM1                                                                                               | 0,145321623 | -0,219992106 | 0,354 | 0,225 | 1         | 0,858570134   | 1,164727213     | 1,573333333     |
| PTPRN2                                                                                              | 0,334326668 | -0,220008867 | 0,012 | 0,032 | 1         | 0,85856016    | 1,164740745     | 0,375           |
| LRRC8C                                                                                              | 0,073602823 | -0,220066519 | 0,024 | 0,081 | 1         | 0,858525851   | 1,16478729      | 0,296296296     |
| GPR37L1                                                                                             | 0,039674265 | -0,220121201 | 0,012 | 0,074 | 1         | 0,858493312   | 1,16483144      | 0,162162162     |
| SAMD1                                                                                               | 0,006371308 | -0,220167134 | 0,341 | 0,161 | 1         | 0,858465979   | 1,164868527     | 2,118012422     |
| PAX3                                                                                                | 0,315158665 | -0,220198612 | 0,207 | 0,14  | 1         | 0,858447248   | 1,164893943     | 1,478571429     |
| RPL15                                                                                               | 0,348119055 | -0,220268668 | 0,927 | 0,905 | 1         | 0,858405564   | 1,164950511     | 1,024309392     |
| GCLM                                                                                                | 0,104935289 | -0,220850587 | 0,134 | 0,07  | 1         | 0,858059391   | 1,165420495     | 1,914285714     |
| ATXN7L3                                                                                             | 0,021765621 | -0,220908681 | 0,183 | 0,084 | 1         | 0,858024839   | 1,165467425     | 2,178571429     |
| XIAP                                                                                                | 0,008138967 | -0,220923605 | 0,354 | 0,172 | 1         | 0,858015964   | 1,165479481     | 2,058139535     |
| USF2                                                                                                | 0,022542477 | -0,220933005 | 0,5   | 0,267 | 1         | 0,858010373   | 1,165487074     | 1,872659176     |
| DGKD                                                                                                | 0,441804488 | -0,220968925 | 0,037 | 0,056 | 1         | 0,857989011   | 1,165516093     | 0,660714286     |
| ZNF821                                                                                              | 0,843344982 | -0,221007606 | 0,11  | 0,109 | 1         | 0,857966007   | 1,165547343     | 1,009174312     |
| CFAP70                                                                                              | 0,23235895  | -0,221052515 | 0,012 | 0,039 | 1         | 0,8579393     | 1,165583626     | 0,307692308     |
| CMTM6                                                                                               | 0,072980655 | -0,22150133  | 0,39  | 0,228 | 1         | 0,857672442   | 1,165946288     | 1,710526316     |
| ELL                                                                                                 | 0,367576558 | -0,221566318 | 0,122 | 0,081 | 1         | 0,857633807   | 1,165998811     | 1,50617284      |

Supplementary Table 2

| Differentially expressed genes_keloid-XL_comparing SC-Keloid vs. (SC-Myel, SC-Nonmyel, SC-Nonmyel2) |             |              |       |       |           |               |                 |                 |
|-----------------------------------------------------------------------------------------------------|-------------|--------------|-------|-------|-----------|---------------|-----------------|-----------------|
| gene                                                                                                | p_val       | avg_log2FC   | pct.1 | pct.2 | p_val_adj | Foldchange_UP | Foldchange_DOWN | Ratio_pct1_pct2 |
| PNMA1                                                                                               | 0,002780447 | -0,221861955 | 0,451 | 0,214 | 1         | 0,857458079   | 1,166237772     | 2,107476636     |
| CALM3                                                                                               | 0,004638952 | -0,221943579 | 0,39  | 0,186 | 1         | 0,857409567   | 1,166303757     | 2,096774194     |
| NMB                                                                                                 | 0,507655461 | -0,22197528  | 0,134 | 0,098 | 1         | 0,857390727   | 1,166329385     | 1,367346939     |
| TTC28                                                                                               | 0,650268411 | -0,22204684  | 0,049 | 0,06  | 1         | 0,8573482     | 1,166387239     | 0,816666667     |
| POLB                                                                                                | 0,769673224 | -0,222049208 | 0,085 | 0,091 | 1         | 0,857346794   | 1,166389153     | 0,934065934     |
| NEIL1                                                                                               | 0,325478018 | -0,222106962 | 0,024 | 0,049 | 1         | 0,857312473   | 1,166435846     | 0,489795918     |
| C1orf52                                                                                             | 0,211979881 | -0,222283656 | 0,268 | 0,172 | 1         | 0,85720748    | 1,166578714     | 1,558139535     |
| LIPE                                                                                                | 0,126161321 | -0,222472099 | 0     | 0,028 | 1         | 0,85709552    | 1,166731102     | 0               |
| SLC20A1                                                                                             | 0,083088294 | -0,223228808 | 0,39  | 0,239 | 1         | 0,856646082   | 1,167343225     | 1,631799163     |
| HNRNPF                                                                                              | 0,108721627 | -0,223352981 | 0,585 | 0,351 | 1         | 0,856572354   | 1,167443703     | 1,666666667     |
| CWC22                                                                                               | 0,281093133 | -0,223478605 | 0,134 | 0,084 | 1         | 0,85649777    | 1,167545363     | 1,595238095     |
| MORC3                                                                                               | 0,986565678 | -0,223602767 | 0,146 | 0,133 | 1         | 0,856424061   | 1,16764585      | 1,097744361     |
| NUDT4                                                                                               | 0,013938096 | -0,223672914 | 0,634 | 0,344 | 1         | 0,85638242    | 1,167702625     | 1,843023256     |
| CYP7B1                                                                                              | 0,292363155 | -0,223846834 | 0,22  | 0,147 | 1         | 0,856279188   | 1,167843402     | 1,496598639     |
| KLHDC8A                                                                                             | 0,242106134 | -0,224218211 | 0,037 | 0,07  | 1         | 0,856058794   | 1,168144066     | 0,528571429     |
| XRR1                                                                                                | 0,01995177  | -0,224244434 | 0,195 | 0,088 | 1         | 0,856043234   | 1,168165299     | 2,215909091     |
| GNG12                                                                                               | 0,065538769 | -0,224386643 | 0,61  | 0,344 | 1         | 0,855958856   | 1,168280452     | 1,773255814     |
| CDK11B                                                                                              | 0,074034602 | -0,224649783 | 0,159 | 0,081 | 1         | 0,855802748   | 1,16849356      | 1,962962963     |
| C2CD4B                                                                                              | 0,404681217 | -0,224689153 | 0,012 | 0,028 | 1         | 0,855779394   | 1,168525448     | 0,428571429     |
| PDE4DIP                                                                                             | 0,254116245 | -0,224718465 | 0,159 | 0,098 | 1         | 0,855762007   | 1,16854919      | 1,62244898      |
| GALNT18                                                                                             | 0,086314699 | -0,224763761 | 0     | 0,035 | 1         | 0,85573514    | 1,168585879     | 0               |
| SESN2                                                                                               | 0,345706495 | -0,224922029 | 0,061 | 0,091 | 1         | 0,855641268   | 1,168714083     | 0,67032967      |
| ZC3H7B                                                                                              | 0,226357698 | -0,224966417 | 0,171 | 0,109 | 1         | 0,855614943   | 1,168750042     | 1,568807339     |
| ZC3H12A                                                                                             | 0,562223109 | -0,225044538 | 0,171 | 0,133 | 1         | 0,855568612   | 1,168813331     | 1,285714286     |
| ZNF791                                                                                              | 0,986631918 | -0,225110455 | 0,11  | 0,102 | 1         | 0,855529523   | 1,168866735     | 1,078431373     |
| FLYWCH1                                                                                             | 0,989089885 | -0,225173514 | 0,085 | 0,081 | 1         | 0,855492129   | 1,168917827     | 1,049382716     |
| FOXN2                                                                                               | 0,958486851 | -0,225356803 | 0,146 | 0,137 | 1         | 0,855383449   | 1,169066343     | 1,065693431     |
| SERINC5                                                                                             | 0,25526553  | -0,22558039  | 0,28  | 0,189 | 1         | 0,855250893   | 1,169247537     | 1,481481481     |
| CLIP4                                                                                               | 0,669919364 | -0,225876761 | 0,085 | 0,095 | 1         | 0,855075218   | 1,169487759     | 0,894736842     |
| TYRO3                                                                                               | 0,286150736 | -0,225933029 | 0,037 | 0,067 | 1         | 0,855041869   | 1,169533372     | 0,552238806     |

Supplementary Table 2

| Differentially expressed genes_keloid-XL_comparing SC-Keloid vs. (SC-Myel, SC-Nonmyel, SC-Nonmyel2) |             |              |       |       |           |               |                 |                 |
|-----------------------------------------------------------------------------------------------------|-------------|--------------|-------|-------|-----------|---------------|-----------------|-----------------|
| gene                                                                                                | p_val       | avg_log2FC   | pct.1 | pct.2 | p_val_adj | Foldchange_UP | Foldchange_DOWN | Ratio_pct1_pct2 |
| EIF2S3                                                                                              | 0,178027106 | -0,225938644 | 0,415 | 0,274 | 1         | 0,855038541   | 1,169537924     | 1,51459854      |
| ADCY9                                                                                               | 0,16036767  | -0,225951814 | 0,024 | 0,063 | 1         | 0,855030735   | 1,169548601     | 0,380952381     |
| WDR43                                                                                               | 0,938390228 | -0,226108719 | 0,159 | 0,14  | 1         | 0,854937749   | 1,169675805     | 1,135714286     |
| KRT15                                                                                               | 0,195765721 | -0,226348137 | 0,024 | 0,06  | 1         | 0,854795882   | 1,169869932     | 0,4             |
| FGF18                                                                                               | 0,222465486 | -0,226503824 | 0,024 | 0,056 | 1         | 0,854703643   | 1,169996184     | 0,428571429     |
| TTC3                                                                                                | 0,409849046 | -0,22650717  | 0,573 | 0,404 | 1         | 0,854701661   | 1,169998897     | 1,418316832     |
| RAI1                                                                                                | 0,189034303 | -0,226558656 | 0,159 | 0,095 | 1         | 0,854671159   | 1,170040652     | 1,673684211     |
| SEPTIN10                                                                                            | 0,274055583 | -0,227075252 | 0,524 | 0,354 | 1         | 0,854365176   | 1,170459692     | 1,480225989     |
| DLX1                                                                                                | 0,847517082 | -0,227451227 | 0,049 | 0,053 | 1         | 0,854142552   | 1,17076476      | 0,924528302     |
| CCDC14                                                                                              | 0,017237632 | -0,227501505 | 0,244 | 0,116 | 1         | 0,854112785   | 1,170805562     | 2,103448276     |
| KREMEN1                                                                                             | 0,263822203 | -0,227551975 | 0,024 | 0,053 | 1         | 0,854082907   | 1,170846521     | 0,452830189     |
| UPF1                                                                                                | 0,265084725 | -0,22767836  | 0,159 | 0,102 | 1         | 0,854008089   | 1,170949096     | 1,558823529     |
| SUPT5H                                                                                              | 0,141006546 | -0,227781461 | 0,293 | 0,182 | 1         | 0,853947061   | 1,17103278      | 1,60989011      |
| CREBZF                                                                                              | 0,098293117 | -0,227821384 | 0,329 | 0,193 | 1         | 0,85392343    | 1,171065186     | 1,704663212     |
| XAF1                                                                                                | 0,067592075 | -0,227828292 | 0,11  | 0,049 | 1         | 0,853919341   | 1,171070793     | 2,244897959     |
| SELENOW                                                                                             | 0,40582725  | -0,228073486 | 0,744 | 0,516 | 1         | 0,853774225   | 1,17126984      | 1,441860465     |
| ING3                                                                                                | 0,062461009 | -0,228227044 | 0,122 | 0,056 | 1         | 0,853683356   | 1,171394514     | 2,178571429     |
| SCD5                                                                                                | 0,951476382 | -0,228313322 | 0,073 | 0,067 | 1         | 0,853632304   | 1,171464571     | 1,089552239     |
| NEURL1B                                                                                             | 0,380142558 | -0,228400745 | 0,049 | 0,074 | 1         | 0,853580578   | 1,17153556      | 0,662162162     |
| ACACB                                                                                               | 0,11855504  | -0,228626589 | 0,012 | 0,053 | 1         | 0,853446966   | 1,171718969     | 0,226415094     |
| RYR1                                                                                                | 0,075807536 | -0,228815051 | 0,012 | 0,06  | 1         | 0,853335486   | 1,171872044     | 0,2             |
| WWP1                                                                                                | 0,783554066 | -0,228872551 | 0,098 | 0,102 | 1         | 0,853301476   | 1,17191875      | 0,960784314     |
| SYF2                                                                                                | 0,130751653 | -0,228923669 | 0,476 | 0,295 | 1         | 0,853271243   | 1,171960275     | 1,613559322     |
| CHD6                                                                                                | 0,395891106 | -0,228954353 | 0,256 | 0,182 | 1         | 0,853253094   | 1,171985202     | 1,406593407     |
| FMR1                                                                                                | 0,186069729 | -0,228969411 | 0,195 | 0,119 | 1         | 0,853244189   | 1,171997434     | 1,638655462     |
| ST6GALNAC5                                                                                          | 0,126161321 | -0,229196    | 0     | 0,028 | 1         | 0,85311019    | 1,172181521     | 0               |
| POM121C                                                                                             | 0,979173315 | -0,229263758 | 0,085 | 0,081 | 1         | 0,853070123   | 1,172236576     | 1,049382716     |
| RPP14                                                                                               | 0,229374221 | -0,229322792 | 0,012 | 0,039 | 1         | 0,853035217   | 1,172284544     | 0,307692308     |
| SESTD1                                                                                              | 0,680216669 | -0,2295152   | 0,11  | 0,088 | 1         | 0,852921457   | 1,172440899     | 1,25            |
| IRF2BP1                                                                                             | 0,627234183 | -0,2297131   | 0,11  | 0,084 | 1         | 0,852804467   | 1,172601738     | 1,30952381      |

Supplementary Table 2

| Differentially expressed genes_keloid-XL_comparing SC-Keloid vs. (SC-Myel, SC-Nonmyel, SC-Nonmyel2) |             |              |       |       |           |               |                 |                 |
|-----------------------------------------------------------------------------------------------------|-------------|--------------|-------|-------|-----------|---------------|-----------------|-----------------|
| gene                                                                                                | p_val       | avg_log2FC   | pct.1 | pct.2 | p_val_adj | Foldchange_UP | Foldchange_DOWN | Ratio_pct1_pct2 |
| DLG2                                                                                                | 0,280994397 | -0,230102459 | 0,037 | 0,067 | 1         | 0,85257434    | 1,172918246     | 0,552238806     |
| MARCHF8                                                                                             | 0,888187825 | -0,230519977 | 0,037 | 0,039 | 1         | 0,85232764    | 1,173257739     | 0,948717949     |
| AVPI1                                                                                               | 0,366400629 | -0,230602792 | 0,207 | 0,144 | 1         | 0,852278715   | 1,17332509      | 1,4375          |
| CMTM7                                                                                               | 0,953065998 | -0,230885812 | 0,061 | 0,06  | 1         | 0,852111536   | 1,173555289     | 1,016666667     |
| CNR1                                                                                                | 0,071615029 | -0,231273099 | 0     | 0,039 | 1         | 0,85188282    | 1,173870369     | 0               |
| CPEB2                                                                                               | 0,802965215 | -0,231279835 | 0,122 | 0,126 | 1         | 0,851878843   | 1,173875849     | 0,968253968     |
| ZC3HAV1                                                                                             | 0,880089437 | -0,231295152 | 0,171 | 0,151 | 1         | 0,851869798   | 1,173888313     | 1,132450331     |
| SFT2D2                                                                                              | 0,503420395 | -0,231309689 | 0,134 | 0,098 | 1         | 0,851861215   | 1,173900141     | 1,367346939     |
| AFTPH                                                                                               | 0,323461717 | -0,231372087 | 0,256 | 0,179 | 1         | 0,851824372   | 1,173950914     | 1,430167598     |
| SLITRK5                                                                                             | 0,232809555 | -0,231403738 | 0,049 | 0,088 | 1         | 0,851805684   | 1,17397667      | 0,556818182     |
| CCDC93                                                                                              | 0,638879716 | -0,231433032 | 0,098 | 0,109 | 1         | 0,851788388   | 1,174000507     | 0,899082569     |
| BRPF3                                                                                               | 0,537960754 | -0,231693704 | 0,061 | 0,077 | 1         | 0,851634498   | 1,17421265      | 0,792207792     |
| PDP1                                                                                                | 0,804525185 | -0,231953398 | 0,159 | 0,133 | 1         | 0,851481212   | 1,174424035     | 1,195488722     |
| PCIF1                                                                                               | 0,608784688 | -0,231968426 | 0,11  | 0,084 | 1         | 0,851472342   | 1,174436268     | 1,30952381      |
| TSR1                                                                                                | 0,020124844 | -0,231979127 | 0,122 | 0,046 | 1         | 0,851466026   | 1,17444498      | 2,652173913     |
| AMMECR1L                                                                                            | 0,141196433 | -0,232008437 | 0,134 | 0,074 | 1         | 0,851448728   | 1,17446884      | 1,810810811     |
| YWHAE                                                                                               | 0,532274648 | -0,232315273 | 0,841 | 0,698 | 1         | 0,85126766    | 1,174718655     | 1,20487106      |
| ZNF462                                                                                              | 0,401616079 | -0,23272578  | 0,22  | 0,158 | 1         | 0,851025473   | 1,175052959     | 1,392405063     |
| BDP1                                                                                                | 0,005093907 | -0,232897233 | 0,402 | 0,189 | 1         | 0,850924341   | 1,175192613     | 2,126984127     |
| TMEM95                                                                                              | 0,104227568 | -0,232899221 | 0     | 0,032 | 1         | 0,850923169   | 1,175194232     | 0               |
| CPLANE1                                                                                             | 0,806393286 | -0,232916158 | 0,073 | 0,077 | 1         | 0,850913179   | 1,175208029     | 0,948051948     |
| WNT6                                                                                                | 0,086314699 | -0,233315098 | 0     | 0,035 | 1         | 0,850677913   | 1,175533048     | 0               |
| IPMK                                                                                                | 0,632224672 | -0,233542141 | 0,073 | 0,084 | 1         | 0,850544049   | 1,175718061     | 0,869047619     |
| NECTIN2                                                                                             | 0,030419236 | -0,233575437 | 0,402 | 0,218 | 1         | 0,850524419   | 1,175745196     | 1,844036697     |
| CLIP1                                                                                               | 0,03286294  | -0,233671112 | 0,28  | 0,147 | 1         | 0,850468017   | 1,17582317      | 1,904761905     |
| NP1PB5                                                                                              | 0,627878691 | -0,234005736 | 0,146 | 0,112 | 1         | 0,850270779   | 1,176095927     | 1,303571429     |
| KIF3C                                                                                               | 0,45588886  | -0,234421691 | 0,049 | 0,07  | 1         | 0,850025666   | 1,176435065     | 0,7             |
| DUSP3                                                                                               | 0,165206209 | -0,234502794 | 0,195 | 0,116 | 1         | 0,849977883   | 1,176501201     | 1,681034483     |
| DLG1                                                                                                | 0,087224102 | -0,234541158 | 0,305 | 0,175 | 1         | 0,84995528    | 1,176532488     | 1,742857143     |
| INO80B                                                                                              | 0,231486351 | -0,23471263  | 0,183 | 0,116 | 1         | 0,849854264   | 1,176672333     | 1,577586207     |



Supplementary Table 2

| Differentially expressed genes_keloid-XL_comparing SC-Keloid vs. (SC-Myel, SC-Nonmyel, SC-Nonmyel2) |             |              |       |       |           |               |                 |                 |
|-----------------------------------------------------------------------------------------------------|-------------|--------------|-------|-------|-----------|---------------|-----------------|-----------------|
| gene                                                                                                | p_val       | avg_log2FC   | pct.1 | pct.2 | p_val_adj | Foldchange_UP | Foldchange_DOWN | Ratio_pct1_pct2 |
| YAF2                                                                                                | 0,009068827 | -0,235125232 | 0,28  | 0,13  | 1         | 0,849611246   | 1,177008902     | 2,153846154     |
| CEBPZ                                                                                               | 0,049130463 | -0,235133049 | 0,28  | 0,154 | 1         | 0,849606642   | 1,17701528      | 1,818181818     |
| CCDC144A                                                                                            | 0,773315089 | -0,235339898 | 0,085 | 0,091 | 1         | 0,849484837   | 1,177184048     | 0,934065934     |
| TCF20                                                                                               | 0,543140773 | -0,235429367 | 0,061 | 0,077 | 1         | 0,849432158   | 1,177257054     | 0,792207792     |
| PTPRJ                                                                                               | 0,819347641 | -0,235569017 | 0,171 | 0,161 | 1         | 0,849349939   | 1,177371016     | 1,062111801     |
| RCOR3                                                                                               | 0,560653609 | -0,235611628 | 0,159 | 0,119 | 1         | 0,849324853   | 1,177405791     | 1,336134454     |
| EPS8                                                                                                | 0,013093269 | -0,23561789  | 0,341 | 0,168 | 1         | 0,849321167   | 1,177410901     | 2,029761905     |
| CD9                                                                                                 | 0,310207921 | -0,235676083 | 0,927 | 0,846 | 1         | 0,849286909   | 1,177458395     | 1,095744681     |
| TULP3                                                                                               | 0,015449392 | -0,236177132 | 0,341 | 0,175 | 1         | 0,848992002   | 1,177867397     | 1,948571429     |
| ANP32E                                                                                              | 0,31695448  | -0,236227217 | 0,28  | 0,189 | 1         | 0,848962529   | 1,177908289     | 1,481481481     |
| HERC5                                                                                               | 0,436724529 | -0,236389236 | 0,024 | 0,042 | 1         | 0,848867193   | 1,17804058      | 0,571428571     |
| CYP51A1                                                                                             | 0,98550752  | -0,236507092 | 0,122 | 0,112 | 1         | 0,84879785    | 1,17813682      | 1,089285714     |
| TMEM87A                                                                                             | 0,076834336 | -0,236697687 | 0,366 | 0,214 | 1         | 0,848685723   | 1,178292474     | 1,710280374     |
| PHF21A                                                                                              | 0,999180735 | -0,236733065 | 0,134 | 0,123 | 1         | 0,848664911   | 1,178321369     | 1,089430894     |
| MAPKAPK2                                                                                            | 0,07635082  | -0,236756631 | 0,305 | 0,175 | 1         | 0,848651049   | 1,178340616     | 1,742857143     |
| NFATC4                                                                                              | 0,049502603 | -0,23706272  | 0     | 0,046 | 1         | 0,848471014   | 1,178590645     | 0               |
| CCDC126                                                                                             | 1           | -0,237146241 | 0,122 | 0,112 | 1         | 0,848421896   | 1,178658878     | 1,089285714     |
| AKAP17A                                                                                             | 0,607681281 | -0,237296765 | 0,22  | 0,168 | 1         | 0,84833338    | 1,17878186      | 1,30952381      |
| RFX3                                                                                                | 0,898655888 | -0,237336809 | 0,085 | 0,084 | 1         | 0,848309833   | 1,17881458      | 1,011904762     |
| INO80D                                                                                              | 0,434171543 | -0,237369359 | 0,232 | 0,168 | 1         | 0,848290694   | 1,178841176     | 1,380952381     |
| OSBPL9                                                                                              | 0,024021259 | -0,237574047 | 0,402 | 0,214 | 1         | 0,848170348   | 1,179008441     | 1,878504673     |
| NEDD4L                                                                                              | 0,884545033 | -0,23760715  | 0,11  | 0,109 | 1         | 0,848150887   | 1,179035494     | 1,009174312     |
| HEATR5A                                                                                             | 0,133179063 | -0,237964968 | 0,268 | 0,161 | 1         | 0,847940554   | 1,179327955     | 1,664596273     |
| RAB40B                                                                                              | 0,532002876 | -0,238085613 | 0,134 | 0,098 | 1         | 0,847869649   | 1,17942658      | 1,367346939     |
| FRS2                                                                                                | 0,363353837 | -0,238458467 | 0,256 | 0,179 | 1         | 0,847650551   | 1,179731433     | 1,430167598     |
| ADAMTS9                                                                                             | 0,406498844 | -0,238517123 | 0,207 | 0,151 | 1         | 0,847616089   | 1,1797794       | 1,370860927     |
| SENP6                                                                                               | 0,276590244 | -0,238529601 | 0,268 | 0,182 | 1         | 0,847608758   | 1,179789603     | 1,472527473     |
| GORASP1                                                                                             | 0,381535943 | -0,238537801 | 0,098 | 0,063 | 1         | 0,84760394    | 1,179796309     | 1,555555556     |
| GGA3                                                                                                | 0,131952545 | -0,238601106 | 0,11  | 0,056 | 1         | 0,847566748   | 1,179848079     | 1,964285714     |
| BRD1                                                                                                | 0,18749569  | -0,238647694 | 0,232 | 0,144 | 1         | 0,847539379   | 1,17988618      | 1,611111111     |

Supplementary Table 2

| Differentially expressed genes_keloid-XL_comparing SC-Keloid vs. (SC-Myel, SC-Nonmyel, SC-Nonmyel2) |             |              |       |       |           |               |                 |                 |
|-----------------------------------------------------------------------------------------------------|-------------|--------------|-------|-------|-----------|---------------|-----------------|-----------------|
| gene                                                                                                | p_val       | avg_log2FC   | pct.1 | pct.2 | p_val_adj | Foldchange_UP | Foldchange_DOWN | Ratio_pct1_pct2 |
| MYADM                                                                                               | 0,172554661 | -0,23884475  | 0,573 | 0,361 | 1         | 0,847423622   | 1,180047351     | 1,587257618     |
| UGDH                                                                                                | 0,014538835 | -0,239123448 | 0,268 | 0,126 | 1         | 0,847259934   | 1,180275332     | 2,126984127     |
| ADCY6                                                                                               | 0,867797224 | -0,23928715  | 0,134 | 0,116 | 1         | 0,847163801   | 1,180409265     | 1,155172414     |
| CCDC59                                                                                              | 0,063407661 | -0,239311888 | 0,293 | 0,168 | 1         | 0,847149275   | 1,180429506     | 1,744047619     |
| IL6R                                                                                                | 0,27971523  | -0,239403217 | 0,037 | 0,067 | 1         | 0,847095648   | 1,180504235     | 0,552238806     |
| CIC                                                                                                 | 0,479669194 | -0,239453832 | 0,317 | 0,239 | 1         | 0,84706593    | 1,180545652     | 1,326359833     |
| CAHM                                                                                                | 0,933334242 | -0,239584485 | 0,11  | 0,098 | 1         | 0,846989221   | 1,180652569     | 1,12244898      |
| PIK3R3                                                                                              | 0,623709726 | -0,239688585 | 0,122 | 0,095 | 1         | 0,846928107   | 1,180737764     | 1,284210526     |
| MFSD11                                                                                              | 0,380377587 | -0,239691755 | 0,134 | 0,091 | 1         | 0,846926246   | 1,180740359     | 1,472527473     |
| CRIM1                                                                                               | 0,485888464 | -0,239706591 | 0,183 | 0,137 | 1         | 0,846917537   | 1,180752501     | 1,335766423     |
| CDK9                                                                                                | 0,210969929 | -0,239755744 | 0,207 | 0,13  | 1         | 0,846888683   | 1,18079273      | 1,592307692     |
| SP4                                                                                                 | 0,740028354 | -0,239772169 | 0,049 | 0,056 | 1         | 0,846879041   | 1,180806173     | 0,875           |
| FMN2                                                                                                | 0,02387518  | -0,240026013 | 0     | 0,06  | 1         | 0,846730045   | 1,181013956     | 0               |
| HCN1                                                                                                | 0,034342747 | -0,240151093 | 0     | 0,053 | 1         | 0,846656638   | 1,181116353     | 0               |
| DIS3L2                                                                                              | 0,743226919 | -0,240444903 | 0,073 | 0,06  | 1         | 0,84648423    | 1,181356916     | 1,216666667     |
| NFRKB                                                                                               | 0,788562121 | -0,240620168 | 0,073 | 0,077 | 1         | 0,846381402   | 1,181500441     | 0,948051948     |
| ARRDC4                                                                                              | 0,322841239 | -0,240620595 | 0,244 | 0,172 | 1         | 0,846381152   | 1,181500791     | 1,418604651     |
| DOCK4                                                                                               | 0,45098936  | -0,240797065 | 0,037 | 0,056 | 1         | 0,846277629   | 1,18164532      | 0,660714286     |
| KATNA1                                                                                              | 0,070385086 | -0,240883583 | 0,207 | 0,109 | 1         | 0,84622688    | 1,181716185     | 1,899082569     |
| PDZD2                                                                                               | 0,11267847  | -0,24096881  | 0,024 | 0,07  | 1         | 0,84617689    | 1,181785998     | 0,342857143     |
| LMO7                                                                                                | 0,812050351 | -0,241022962 | 0,085 | 0,088 | 1         | 0,846145129   | 1,181830357     | 0,965909091     |
| RBBP7                                                                                               | 0,111083366 | -0,241303243 | 0,463 | 0,277 | 1         | 0,845980759   | 1,18205998      | 1,671480144     |
| RASGEF1A                                                                                            | 0,782642432 | -0,241468445 | 0,073 | 0,077 | 1         | 0,845883892   | 1,182195345     | 0,948051948     |
| FAM171A1                                                                                            | 0,724640174 | -0,241548528 | 0,073 | 0,081 | 1         | 0,845836939   | 1,182260969     | 0,901234568     |
| RGS10                                                                                               | 0,514671286 | -0,241712295 | 0,232 | 0,175 | 1         | 0,84574093    | 1,182395181     | 1,325714286     |
| CNNM4                                                                                               | 0,967277813 | -0,241729504 | 0,085 | 0,081 | 1         | 0,845730841   | 1,182409286     | 1,049382716     |
| CNBD2                                                                                               | 0,166274556 | -0,242146131 | 0,171 | 0,102 | 1         | 0,845486643   | 1,182750795     | 1,676470588     |
| STC1                                                                                                | 0,464659504 | -0,242368467 | 0,073 | 0,049 | 1         | 0,845356354   | 1,182933085     | 1,489795918     |
| CRYL1                                                                                               | 0,841513456 | -0,242382698 | 0,122 | 0,119 | 1         | 0,845348015   | 1,182944754     | 1,025210084     |
| ARHGEF3                                                                                             | 0,208267874 | -0,242418698 | 0,037 | 0,074 | 1         | 0,845326922   | 1,182974272     | 0,5             |

Supplementary Table 2

| Differentially expressed genes_keloid-XL_comparing SC-Keloid vs. (SC-Myel, SC-Nonmyel, SC-Nonmyel2) |             |              |       |       |           |               |                 |                 |
|-----------------------------------------------------------------------------------------------------|-------------|--------------|-------|-------|-----------|---------------|-----------------|-----------------|
| gene                                                                                                | p_val       | avg_log2FC   | pct.1 | pct.2 | p_val_adj | Foldchange_UP | Foldchange_DOWN | Ratio_pct1_pct2 |
| SC5D                                                                                                | 0,094560268 | -0,242440331 | 0,11  | 0,053 | 1         | 0,845314246   | 1,182992011     | 2,075471698     |
| CCDC150                                                                                             | 0,228958629 | -0,242462391 | 0     | 0,018 | 1         | 0,845301321   | 1,1830101       | 0               |
| SYP                                                                                                 | 0,272411957 | -0,242659481 | 0,085 | 0,049 | 1         | 0,84518585    | 1,183171725     | 1,734693878     |
| DDX6                                                                                                | 0,073113523 | -0,24269869  | 0,415 | 0,239 | 1         | 0,84516288    | 1,183203881     | 1,736401674     |
| ASAP2                                                                                               | 0,186377084 | -0,242814953 | 0,451 | 0,302 | 1         | 0,845094773   | 1,183299237     | 1,493377483     |
| CMTM5                                                                                               | 0,390036639 | -0,242832974 | 0,341 | 0,242 | 1         | 0,845084217   | 1,183314017     | 1,409090909     |
| SRGN                                                                                                | 0,567637723 | -0,2432916   | 0,061 | 0,077 | 1         | 0,844815612   | 1,183690247     | 0,792207792     |
| ATG2A                                                                                               | 0,566794193 | -0,243376151 | 0,049 | 0,063 | 1         | 0,844766102   | 1,18375962      | 0,777777778     |
| FBRS                                                                                                | 0,015577429 | -0,243451018 | 0,293 | 0,144 | 1         | 0,844722264   | 1,183821053     | 2,034722222     |
| MPRIIP-AS1                                                                                          | 0,123621518 | -0,243976441 | 0,037 | 0,084 | 1         | 0,844414677   | 1,184252273     | 0,44047619      |
| MPHOSPH8                                                                                            | 0,187729393 | -0,24450855  | 0,488 | 0,319 | 1         | 0,844103288   | 1,184689141     | 1,529780564     |
| KRT6A                                                                                               | 0,160260334 | -0,244565603 | 0,012 | 0,046 | 1         | 0,844069908   | 1,184735992     | 0,260869565     |
| LRP6                                                                                                | 0,586866912 | -0,244616639 | 0,28  | 0,214 | 1         | 0,844040049   | 1,184777903     | 1,308411215     |
| SGTB                                                                                                | 0,237608205 | -0,244652892 | 0,037 | 0,07  | 1         | 0,84401884    | 1,184807676     | 0,528571429     |
| KDM1A                                                                                               | 0,076322694 | -0,244675587 | 0,207 | 0,112 | 1         | 0,844005563   | 1,184826314     | 1,848214286     |
| AASS                                                                                                | 0,667432254 | -0,244742202 | 0,22  | 0,175 | 1         | 0,843966593   | 1,184881023     | 1,257142857     |
| TBC1D5                                                                                              | 0,048612873 | -0,245130825 | 0,293 | 0,161 | 1         | 0,843739282   | 1,185200241     | 1,819875776     |
| RAB9A                                                                                               | 0,020145904 | -0,245260617 | 0,366 | 0,189 | 1         | 0,843663378   | 1,185306873     | 1,936507937     |
| NPIPA1                                                                                              | 0,794706161 | -0,245277674 | 0,122 | 0,123 | 1         | 0,843653403   | 1,185320886     | 0,991869919     |
| SNX13                                                                                               | 0,677625932 | -0,245319665 | 0,146 | 0,116 | 1         | 0,843628849   | 1,185355387     | 1,25862069      |
| ANKRD20A4P                                                                                          | 0,058317731 | -0,245584081 | 0,012 | 0,067 | 1         | 0,843474243   | 1,185572657     | 0,179104478     |
| CALCOCO2                                                                                            | 0,380575859 | -0,245607155 | 0,22  | 0,154 | 1         | 0,843460753   | 1,18559162      | 1,428571429     |
| PCMT1                                                                                               | 0,057597389 | -0,24561102  | 0,537 | 0,312 | 1         | 0,843458493   | 1,185594795     | 1,721153846     |
| SNIP1                                                                                               | 0,854556904 | -0,246014566 | 0,073 | 0,063 | 1         | 0,843222597   | 1,185926473     | 1,158730159     |
| PI4KB                                                                                               | 0,011983849 | -0,246603119 | 0,293 | 0,137 | 1         | 0,842878671   | 1,186410375     | 2,138686131     |
| EPHA7                                                                                               | 0,059506563 | -0,246917749 | 0     | 0,042 | 1         | 0,842694872   | 1,186669142     | 0               |
| ZNF652                                                                                              | 0,072138639 | -0,246948836 | 0,256 | 0,14  | 1         | 0,842676714   | 1,186694712     | 1,828571429     |
| ELMOD3                                                                                              | 0,955353009 | -0,247044127 | 0,061 | 0,06  | 1         | 0,842621056   | 1,186773096     | 1,016666667     |
| CNBP                                                                                                | 0,619277465 | -0,247125238 | 0,707 | 0,477 | 1         | 0,842573684   | 1,186839821     | 1,482180294     |
| RAP2A                                                                                               | 0,666888474 | -0,247283121 | 0,244 | 0,186 | 1         | 0,842481481   | 1,186969711     | 1,311827957     |

Supplementary Table 2

| Differentially expressed genes_keloid-XL_comparing SC-Keloid vs. (SC-Myel, SC-Nonmyel, SC-Nonmyel2) |             |              |       |       |           |               |                 |                 |
|-----------------------------------------------------------------------------------------------------|-------------|--------------|-------|-------|-----------|---------------|-----------------|-----------------|
| gene                                                                                                | p_val       | avg_log2FC   | pct.1 | pct.2 | p_val_adj | Foldchange_UP | Foldchange_DOWN | Ratio_pct1_pct2 |
| CEP170                                                                                              | 0,039828407 | -0,247370781 | 0,524 | 0,302 | 1         | 0,842430292   | 1,187041835     | 1,735099338     |
| PPM1A                                                                                               | 0,37934313  | -0,247547549 | 0,305 | 0,214 | 1         | 0,842327079   | 1,187187287     | 1,425233645     |
| BNIP2                                                                                               | 0,037633014 | -0,247773995 | 0,366 | 0,196 | 1         | 0,842194877   | 1,187373644     | 1,867346939     |
| UBE2W                                                                                               | 0,312354714 | -0,247974522 | 0,183 | 0,123 | 1         | 0,842077825   | 1,187538694     | 1,487804878     |
| FAM178B                                                                                             | 0,682541613 | -0,248194286 | 0,037 | 0,046 | 1         | 0,841949562   | 1,187719604     | 0,804347826     |
| CACTIN                                                                                              | 0,578873303 | -0,248424867 | 0,122 | 0,091 | 1         | 0,841815006   | 1,187909448     | 1,340659341     |
| KDM6A                                                                                               | 0,983768045 | -0,24876234  | 0,134 | 0,126 | 1         | 0,841618113   | 1,188187355     | 1,063492063     |
| LAMP5                                                                                               | 0,16857089  | -0,248876887 | 0,024 | 0,063 | 1         | 0,841551294   | 1,188281698     | 0,380952381     |
| GABRE                                                                                               | 0,034342747 | -0,248944358 | 0     | 0,053 | 1         | 0,841511937   | 1,188337272     | 0               |
| CNTN4                                                                                               | 0,16857089  | -0,248979092 | 0,024 | 0,063 | 1         | 0,841491677   | 1,188365883     | 0,380952381     |
| RBM4                                                                                                | 0,035812935 | -0,249044116 | 0,524 | 0,291 | 1         | 0,841453751   | 1,188419445     | 1,800687285     |
| JAM2                                                                                                | 0,646443745 | -0,249136671 | 0,073 | 0,084 | 1         | 0,84139977    | 1,188495689     | 0,869047619     |
| ARHGEF7                                                                                             | 0,338530304 | -0,249150645 | 0,305 | 0,214 | 1         | 0,84139162    | 1,188507202     | 1,425233645     |
| PPP2R2A                                                                                             | 0,351609957 | -0,249231023 | 0,378 | 0,263 | 1         | 0,841344744   | 1,18857342      | 1,437262357     |
| CRADD                                                                                               | 0,009797432 | -0,249288511 | 0,183 | 0,074 | 1         | 0,84131122    | 1,188620782     | 2,472972973     |
| ZEB1                                                                                                | 0,009127957 | -0,249372099 | 0,354 | 0,168 | 1         | 0,841262476   | 1,188689652     | 2,107142857     |
| EIF5B                                                                                               | 0,095381304 | -0,249431827 | 0,561 | 0,337 | 1         | 0,841227648   | 1,188738865     | 1,664688427     |
| TOX                                                                                                 | 0,488230216 | -0,249668074 | 0,049 | 0,067 | 1         | 0,841089906   | 1,188933541     | 0,731343284     |
| ELF2                                                                                                | 0,504579495 | -0,249748087 | 0,28  | 0,204 | 1         | 0,841043259   | 1,188999483     | 1,37254902      |
| HSF2                                                                                                | 0,55841193  | -0,249818743 | 0,134 | 0,098 | 1         | 0,84100207    | 1,189057715     | 1,367346939     |
| LYNX1                                                                                               | 0,02387518  | -0,249938675 | 0     | 0,06  | 1         | 0,84093216    | 1,189156566     | 0               |
| STX11                                                                                               | 0,766076528 | -0,25019034  | 0,085 | 0,07  | 1         | 0,84078548    | 1,189364022     | 1,214285714     |
| SYNJ2BP                                                                                             | 0,072945267 | -0,250300943 | 0,22  | 0,119 | 1         | 0,840721024   | 1,189455207     | 1,848739496     |
| UBAP1                                                                                               | 0,215907752 | -0,25033086  | 0,207 | 0,13  | 1         | 0,84070359    | 1,189479873     | 1,592307692     |
| TCF7L1                                                                                              | 0,033012079 | -0,250439988 | 0,024 | 0,098 | 1         | 0,840640001   | 1,18956985      | 0,244897959     |
| C16orf72                                                                                            | 0,962715341 | -0,250548194 | 0,183 | 0,168 | 1         | 0,840576953   | 1,189659075     | 1,089285714     |
| ST6GALNAC3                                                                                          | 0,049502603 | -0,250601025 | 0     | 0,046 | 1         | 0,840546172   | 1,18970264      | 0               |
| RNF10                                                                                               | 0,065846964 | -0,250706719 | 0,378 | 0,221 | 1         | 0,840484594   | 1,189789803     | 1,71040724      |
| TOMM20                                                                                              | 0,631436342 | -0,250718076 | 0,695 | 0,502 | 1         | 0,840477978   | 1,189799169     | 1,384462151     |
| MOK                                                                                                 | 0,496019755 | -0,250755144 | 0,159 | 0,116 | 1         | 0,840456383   | 1,18982974      | 1,370689655     |

Supplementary Table 2

| Differentially expressed genes_keloid-XL_comparing SC-Keloid vs. (SC-Myel, SC-Nonmyel, SC-Nonmyel2) |             |              |       |       |           |               |                 |                 |
|-----------------------------------------------------------------------------------------------------|-------------|--------------|-------|-------|-----------|---------------|-----------------|-----------------|
| gene                                                                                                | p_val       | avg_log2FC   | pct.1 | pct.2 | p_val_adj | Foldchange_UP | Foldchange_DOWN | Ratio_pct1_pct2 |
| SLC39A6                                                                                             | 0,297035206 | -0,251150614 | 0,28  | 0,193 | 1         | 0,84022603    | 1,190155939     | 1,450777202     |
| TRHDE                                                                                               | 0,071615029 | -0,251157023 | 0     | 0,039 | 1         | 0,840222298   | 1,190161226     | 0               |
| ADRB2                                                                                               | 0,157701245 | -0,251601127 | 0,024 | 0,063 | 1         | 0,839963692   | 1,19052765      | 0,380952381     |
| FNTA                                                                                                | 0,111401134 | -0,251626224 | 0,354 | 0,214 | 1         | 0,83994908    | 1,19054836      | 1,654205607     |
| LINC00327                                                                                           | 0,972831486 | -0,251754407 | 0,049 | 0,046 | 1         | 0,839874454   | 1,190654145     | 1,065217391     |
| FAN1                                                                                                | 0,505606105 | -0,251832302 | 0,085 | 0,06  | 1         | 0,839829108   | 1,190718433     | 1,416666667     |
| SDC4                                                                                                | 0,166739683 | -0,251840058 | 0,317 | 0,2   | 1         | 0,839824593   | 1,190724835     | 1,585           |
| SNX15                                                                                               | 0,406820285 | -0,251840429 | 0,085 | 0,056 | 1         | 0,839824377   | 1,190725141     | 1,517857143     |
| CCNK                                                                                                | 0,567990189 | -0,251893116 | 0,098 | 0,112 | 1         | 0,839793708   | 1,190768626     | 0,875           |
| PDLIM3                                                                                              | 0,045791672 | -0,251948955 | 0,378 | 0,221 | 1         | 0,839761205   | 1,190814715     | 1,71040724      |
| REV1                                                                                                | 0,939927521 | -0,252097969 | 0,159 | 0,14  | 1         | 0,839674472   | 1,190937719     | 1,135714286     |
| PKN2                                                                                                | 0,197106178 | -0,252162887 | 0,439 | 0,281 | 1         | 0,839636688   | 1,190991311     | 1,56227758      |
| RUBCN                                                                                               | 0,800038738 | -0,252284709 | 0,146 | 0,123 | 1         | 0,839565792   | 1,191091883     | 1,18699187      |
| MAPRE1                                                                                              | 0,04424633  | -0,252357075 | 0,488 | 0,267 | 1         | 0,83952368    | 1,19115163      | 1,827715356     |
| CDC42EP4                                                                                            | 0,27504443  | -0,252612411 | 0,256 | 0,172 | 1         | 0,83937511    | 1,191362464     | 1,488372093     |
| SH3RF3                                                                                              | 0,560223256 | -0,252728598 | 0,073 | 0,053 | 1         | 0,839307514   | 1,191458414     | 1,377358491     |
| NCOA6                                                                                               | 0,283659783 | -0,253124774 | 0,146 | 0,095 | 1         | 0,839077065   | 1,191785644     | 1,536842105     |
| TAF8                                                                                                | 0,119598668 | -0,253491382 | 0,122 | 0,063 | 1         | 0,838863871   | 1,192088531     | 1,936507937     |
| LRRRC58                                                                                             | 0,174925386 | -0,253634538 | 0,232 | 0,144 | 1         | 0,838780637   | 1,192206825     | 1,611111111     |
| PALLD                                                                                               | 0,033194807 | -0,253801881 | 0,598 | 0,34  | 1         | 0,83868335    | 1,192345121     | 1,758823529     |
| AFF1                                                                                                | 0,788562121 | -0,254124239 | 0,073 | 0,077 | 1         | 0,838495973   | 1,192611571     | 0,948051948     |
| CGGBP1                                                                                              | 0,043785428 | -0,254157151 | 0,488 | 0,27  | 1         | 0,838476845   | 1,192638778     | 1,807407407     |
| SLC39A14                                                                                            | 0,46804143  | -0,254208031 | 0,159 | 0,112 | 1         | 0,838447275   | 1,19268084      | 1,419642857     |
| CCDC184                                                                                             | 0,031916225 | -0,254303384 | 0,012 | 0,077 | 1         | 0,83839186    | 1,192759671     | 0,155844156     |
| RBM33                                                                                               | 0,121480314 | -0,254705707 | 0,329 | 0,204 | 1         | 0,838158092   | 1,193092341     | 1,612745098     |
| CTDSPL2                                                                                             | 0,958244339 | -0,254724788 | 0,122 | 0,112 | 1         | 0,838147006   | 1,193108121     | 1,089285714     |
| INSR                                                                                                | 0,98550752  | -0,254925616 | 0,122 | 0,112 | 1         | 0,838030342   | 1,193274217     | 1,089285714     |
| CASC15                                                                                              | 0,047340024 | -0,255426827 | 0,512 | 0,295 | 1         | 0,837739249   | 1,193688849     | 1,73559322      |
| TOGARAM1                                                                                            | 0,402525681 | -0,255761524 | 0,232 | 0,165 | 1         | 0,837544921   | 1,19396581      | 1,406060606     |
| FOXO4                                                                                               | 0,560975993 | -0,255837661 | 0,049 | 0,063 | 1         | 0,837500722   | 1,194028822     | 0,777777778     |

Supplementary Table 2

| Differentially expressed genes_keloid-XL_comparing SC-Keloid vs. (SC-Myel, SC-Nonmyel, SC-Nonmyel2) |             |              |       |       |           |               |                 |                 |
|-----------------------------------------------------------------------------------------------------|-------------|--------------|-------|-------|-----------|---------------|-----------------|-----------------|
| gene                                                                                                | p_val       | avg_log2FC   | pct.1 | pct.2 | p_val_adj | Foldchange_UP | Foldchange_DOWN | Ratio_pct1_pct2 |
| CXCL2                                                                                               | 0,936408352 | -0,256021385 | 0,073 | 0,067 | 1         | 0,837394075   | 1,194180888     | 1,089552239     |
| VPS37B                                                                                              | 0,032374712 | -0,256078169 | 0,402 | 0,214 | 1         | 0,837361116   | 1,194227892     | 1,878504673     |
| PANX1                                                                                               | 0,971144233 | -0,256136878 | 0,11  | 0,098 | 1         | 0,837327041   | 1,194276491     | 1,12244898      |
| BEST1                                                                                               | 0,063569255 | -0,256234178 | 0,012 | 0,063 | 1         | 0,837270571   | 1,194357039     | 0,19047619      |
| ALDH3A2                                                                                             | 0,651152769 | -0,256257063 | 0,183 | 0,144 | 1         | 0,83725729    | 1,194375985     | 1,270833333     |
| AMY2B                                                                                               | 0,071615029 | -0,256274239 | 0     | 0,039 | 1         | 0,837247322   | 1,194390204     | 0               |
| RNF115                                                                                              | 0,120982343 | -0,256353398 | 0,232 | 0,137 | 1         | 0,837201384   | 1,194455741     | 1,693430657     |
| MSL1                                                                                                | 0,21058334  | -0,256443349 | 0,439 | 0,284 | 1         | 0,837149187   | 1,194530217     | 1,545774648     |
| CRTC2                                                                                               | 0,990057737 | -0,257126633 | 0,159 | 0,144 | 1         | 0,836752793   | 1,1950961       | 1,104166667     |
| SRSF4                                                                                               | 0,124312391 | -0,257135603 | 0,451 | 0,281 | 1         | 0,836747591   | 1,195103531     | 1,604982206     |
| ZNFX1                                                                                               | 0,917335577 | -0,257284929 | 0,11  | 0,105 | 1         | 0,836660988   | 1,195227236     | 1,047619048     |
| BCL9                                                                                                | 0,856427169 | -0,257303331 | 0,085 | 0,074 | 1         | 0,836650316   | 1,195242481     | 1,148648649     |
| ZBTB16                                                                                              | 0,153186787 | -0,257354083 | 0     | 0,025 | 1         | 0,836620884   | 1,195284529     | 0               |
| SFSWAP                                                                                              | 0,131741597 | -0,25748003  | 0,378 | 0,235 | 1         | 0,83654785    | 1,195388882     | 1,608510638     |
| RHOF                                                                                                | 0,45098936  | -0,25757106  | 0,037 | 0,056 | 1         | 0,836495069   | 1,19546431      | 0,660714286     |
| UBE2K                                                                                               | 0,1747954   | -0,257786914 | 0,317 | 0,2   | 1         | 0,836369923   | 1,195643187     | 1,585           |
| FST                                                                                                 | 0,827369918 | -0,257800398 | 0,329 | 0,298 | 1         | 0,836362106   | 1,195654362     | 1,104026846     |
| OTUD6B-AS1                                                                                          | 0,015346047 | -0,257801395 | 0,378 | 0,193 | 1         | 0,836361527   | 1,195655189     | 1,958549223     |
| PRPS1                                                                                               | 0,846763604 | -0,257961602 | 0,11  | 0,109 | 1         | 0,836268657   | 1,19578797      | 1,009174312     |
| LONRF1                                                                                              | 0,956600398 | -0,258249252 | 0,134 | 0,123 | 1         | 0,836101936   | 1,196026414     | 1,089430894     |
| TAF4                                                                                                | 0,637643097 | -0,25830664  | 0,049 | 0,06  | 1         | 0,836068677   | 1,196073991     | 0,816666667     |
| ARHGEF9                                                                                             | 0,560105199 | -0,258443513 | 0,146 | 0,109 | 1         | 0,835989361   | 1,196187472     | 1,339449541     |
| AGAP4                                                                                               | 0,73097622  | -0,258752987 | 0,049 | 0,056 | 1         | 0,835810051   | 1,196444095     | 0,875           |
| JMY                                                                                                 | 0,707626083 | -0,258808397 | 0,134 | 0,109 | 1         | 0,835777951   | 1,196490048     | 1,229357798     |
| TAF13                                                                                               | 0,013107615 | -0,258837172 | 0,244 | 0,112 | 1         | 0,835761281   | 1,196513913     | 2,178571429     |
| AFAP1L2                                                                                             | 0,195619395 | -0,25899295  | 0,549 | 0,344 | 1         | 0,835671042   | 1,196643116     | 1,595930233     |
| DGKH                                                                                                | 0,383524207 | -0,259000115 | 0,061 | 0,088 | 1         | 0,835666892   | 1,196649059     | 0,693181818     |
| KMT5B                                                                                               | 0,010364201 | -0,259111689 | 0,232 | 0,102 | 1         | 0,835602267   | 1,196741608     | 2,274509804     |
| UBE3A                                                                                               | 0,047514643 | -0,259132716 | 0,354 | 0,196 | 1         | 0,835590088   | 1,19675905      | 1,806122449     |
| CATSPERG                                                                                            | 0,115638032 | -0,25931043  | 0,024 | 0,07  | 1         | 0,835487165   | 1,196906478     | 0,342857143     |

Supplementary Table 2

| Differentially expressed genes_keloid-XL_comparing SC-Keloid vs. (SC-Myel, SC-Nonmyel, SC-Nonmyel2) |             |              |       |       |           |               |                 |                 |
|-----------------------------------------------------------------------------------------------------|-------------|--------------|-------|-------|-----------|---------------|-----------------|-----------------|
| gene                                                                                                | p_val       | avg_log2FC   | pct.1 | pct.2 | p_val_adj | Foldchange_UP | Foldchange_DOWN | Ratio_pct1_pct2 |
| SERPINF1                                                                                            | 0,517393619 | -0,259393824 | 0,024 | 0,039 | 1         | 0,835438871   | 1,196975667     | 0,615384615     |
| RNF130                                                                                              | 0,320081633 | -0,259474101 | 0,451 | 0,298 | 1         | 0,835392386   | 1,197042273     | 1,513422819     |
| KIF5B                                                                                               | 0,659310003 | -0,259757106 | 0,707 | 0,512 | 1         | 0,835228528   | 1,197277113     | 1,380859375     |
| ANKS1A                                                                                              | 0,77964259  | -0,259805838 | 0,061 | 0,067 | 1         | 0,835200315   | 1,197317556     | 0,910447761     |
| TNPO1                                                                                               | 0,065662838 | -0,259881112 | 0,341 | 0,193 | 1         | 0,835156739   | 1,197380028     | 1,766839378     |
| DDX21                                                                                               | 0,045288063 | -0,26030093  | 0,5   | 0,284 | 1         | 0,834913748   | 1,197728511     | 1,76056338      |
| CDKN2C                                                                                              | 0,345536943 | -0,260482381 | 0,268 | 0,189 | 1         | 0,834808745   | 1,197879162     | 1,417989418     |
| NONO                                                                                                | 0,071771509 | -0,260573822 | 0,537 | 0,309 | 1         | 0,834755835   | 1,197955089     | 1,737864078     |
| ESPN                                                                                                | 0,091671536 | -0,26088124  | 0,012 | 0,056 | 1         | 0,834577979   | 1,198210383     | 0,214285714     |
| APCDD1                                                                                              | 0,69493781  | -0,261097243 | 0,061 | 0,07  | 1         | 0,834453034   | 1,198389795     | 0,871428571     |
| NSUN6                                                                                               | 0,021104088 | -0,261102885 | 0,256 | 0,123 | 1         | 0,83444977    | 1,198394481     | 2,081300813     |
| RORA                                                                                                | 0,291132007 | -0,261433899 | 0,049 | 0,081 | 1         | 0,834258335   | 1,198669474     | 0,604938272     |
| SAP18                                                                                               | 0,187463814 | -0,261612367 | 0,732 | 0,484 | 1         | 0,83415514    | 1,198817764     | 1,512396694     |
| BBS5                                                                                                | 0,709918735 | -0,261640033 | 0,122 | 0,098 | 1         | 0,834139144   | 1,198840754     | 1,244897959     |
| KCNK5                                                                                               | 0,02387518  | -0,26195588  | 0     | 0,06  | 1         | 0,833956547   | 1,199103242     | 0               |
| RNF19A                                                                                              | 0,147721956 | -0,261994404 | 0,402 | 0,246 | 1         | 0,833934278   | 1,199135263     | 1,634146341     |
| CXCR4                                                                                               | 0,987820396 | -0,262143051 | 0,098 | 0,091 | 1         | 0,833848359   | 1,199258821     | 1,076923077     |
| HDAC4                                                                                               | 0,682987086 | -0,262375787 | 0,061 | 0,07  | 1         | 0,833713853   | 1,199452301     | 0,871428571     |
| LRCH3                                                                                               | 0,165858094 | -0,26240945  | 0,366 | 0,235 | 1         | 0,8336944     | 1,199480289     | 1,557446809     |
| LUM                                                                                                 | 0,666206836 | -0,262516685 | 0,098 | 0,077 | 1         | 0,833632435   | 1,199569449     | 1,272727273     |
| TMBIM6                                                                                              | 0,466362122 | -0,262566936 | 0,793 | 0,635 | 1         | 0,833603398   | 1,199611233     | 1,248818898     |
| RAN                                                                                                 | 0,714331616 | -0,262698428 | 0,646 | 0,498 | 1         | 0,833527424   | 1,199720574     | 1,297188755     |
| RANBP2                                                                                              | 0,760878992 | -0,262722717 | 0,207 | 0,172 | 1         | 0,833513391   | 1,199740772     | 1,203488372     |
| HIVEP1                                                                                              | 0,20638819  | -0,262898416 | 0,268 | 0,172 | 1         | 0,833411888   | 1,199886892     | 1,558139535     |
| GNRH1                                                                                               | 0,075380821 | -0,263444779 | 0,049 | 0,116 | 1         | 0,833096326   | 1,200341388     | 0,422413793     |
| MIR181A1HG                                                                                          | 0,971399867 | -0,263452309 | 0,073 | 0,07  | 1         | 0,833091978   | 1,200347653     | 1,042857143     |
| MBTD1                                                                                               | 0,132591305 | -0,263537665 | 0,024 | 0,067 | 1         | 0,83304269    | 1,200418672     | 0,358208955     |
| OSBP                                                                                                | 0,676217131 | -0,263642321 | 0,159 | 0,126 | 1         | 0,832982262   | 1,200505757     | 1,261904762     |
| PNPLA2                                                                                              | 0,187039482 | -0,26368887  | 0,512 | 0,323 | 1         | 0,832955386   | 1,200544491     | 1,585139319     |
| IP6K2                                                                                               | 0,178141168 | -0,264079392 | 0,427 | 0,274 | 1         | 0,832729944   | 1,20086951      | 1,558394161     |

Supplementary Table 2

| Differentially expressed genes_keloid-XL_comparing SC-Keloid vs. (SC-Myel, SC-Nonmyel, SC-Nonmyel2) |             |              |       |       |           |               |                 |                 |
|-----------------------------------------------------------------------------------------------------|-------------|--------------|-------|-------|-----------|---------------|-----------------|-----------------|
| gene                                                                                                | p_val       | avg_log2FC   | pct.1 | pct.2 | p_val_adj | Foldchange_UP | Foldchange_DOWN | Ratio_pct1_pct2 |
| NABP1                                                                                               | 0,247812336 | -0,264439625 | 0,037 | 0,07  | 1         | 0,832522042   | 1,201169398     | 0,528571429     |
| ATP2B4                                                                                              | 0,175363741 | -0,264522072 | 0,427 | 0,274 | 1         | 0,832474467   | 1,201238044     | 1,558394161     |
| ZFX                                                                                                 | 0,29271541  | -0,26461468  | 0,28  | 0,189 | 1         | 0,832421031   | 1,201315155     | 1,481481481     |
| DHX38                                                                                               | 0,692863907 | -0,264654463 | 0,146 | 0,116 | 1         | 0,832398077   | 1,201348283     | 1,25862069      |
| USP42                                                                                               | 0,4221792   | -0,264816077 | 0,098 | 0,123 | 1         | 0,832304835   | 1,201482868     | 0,796747967     |
| MYO1E                                                                                               | 0,967216715 | -0,265062934 | 0,098 | 0,091 | 1         | 0,832162433   | 1,201688469     | 1,076923077     |
| EHBP1L1                                                                                             | 0,536250939 | -0,265184858 | 0,159 | 0,119 | 1         | 0,832092109   | 1,201790029     | 1,336134454     |
| IQGAP2                                                                                              | 0,351061151 | -0,265389303 | 0,366 | 0,256 | 1         | 0,831974201   | 1,201960348     | 1,4296875       |
| MAML2                                                                                               | 0,28414849  | -0,265585364 | 0,402 | 0,284 | 1         | 0,831861144   | 1,202123705     | 1,415492958     |
| CLK3                                                                                                | 0,276238025 | -0,265724687 | 0,159 | 0,102 | 1         | 0,831780814   | 1,202239801     | 1,558823529     |
| ATF7IP2                                                                                             | 0,951674123 | -0,2659933   | 0,085 | 0,077 | 1         | 0,83162596    | 1,202463665     | 1,103896104     |
| RNMT                                                                                                | 0,046042883 | -0,266078423 | 0,341 | 0,189 | 1         | 0,831576894   | 1,202534615     | 1,804232804     |
| DNHD1                                                                                               | 0,334326668 | -0,266111985 | 0,012 | 0,032 | 1         | 0,831557549   | 1,20256259      | 0,375           |
| TOP1                                                                                                | 0,142978311 | -0,266237921 | 0,378 | 0,235 | 1         | 0,831484963   | 1,20266757      | 1,608510638     |
| H2BC15                                                                                              | 0,58916037  | -0,266255211 | 0,073 | 0,088 | 1         | 0,831474999   | 1,202681983     | 0,829545455     |
| PROS1                                                                                               | 0,186400578 | -0,266917945 | 0,329 | 0,211 | 1         | 0,83109313    | 1,203234589     | 1,559241706     |
| ULK1                                                                                                | 0,057219396 | -0,267019637 | 0,268 | 0,147 | 1         | 0,83103455    | 1,203319404     | 1,823129252     |
| FAM214A                                                                                             | 0,968464025 | -0,267024949 | 0,122 | 0,112 | 1         | 0,83103149    | 1,203323836     | 1,089285714     |
| EDNRB                                                                                               | 0,349295167 | -0,267072353 | 0,476 | 0,337 | 1         | 0,831004185   | 1,203363375     | 1,412462908     |
| CHRAC1                                                                                              | 0,066365979 | -0,2673159   | 0,195 | 0,102 | 1         | 0,830863911   | 1,203566537     | 1,911764706     |
| TENT4A                                                                                              | 0,49611756  | -0,26737605  | 0,122 | 0,144 | 1         | 0,830829271   | 1,203616718     | 0,847222222     |
| EWSR1                                                                                               | 0,252556226 | -0,267508121 | 0,512 | 0,333 | 1         | 0,830753216   | 1,203726907     | 1,537537538     |
| RARB                                                                                                | 0,739665212 | -0,267588909 | 0,049 | 0,039 | 1         | 0,830706697   | 1,203794315     | 1,256410256     |
| TMEM98                                                                                              | 0,16083273  | -0,267736136 | 0,159 | 0,091 | 1         | 0,830621928   | 1,203917169     | 1,747252747     |
| ZC3H15                                                                                              | 0,377919627 | -0,268031291 | 0,378 | 0,274 | 1         | 0,830452012   | 1,204163499     | 1,379562044     |
| UPF2                                                                                                | 0,337931482 | -0,268216207 | 0,341 | 0,239 | 1         | 0,830345577   | 1,204317851     | 1,426778243     |
| HNRNPAB                                                                                             | 0,116733762 | -0,268231973 | 0,524 | 0,33  | 1         | 0,830336502   | 1,204331012     | 1,587878788     |
| POM121                                                                                              | 0,144993687 | -0,268351517 | 0,171 | 0,098 | 1         | 0,830267702   | 1,204430809     | 1,744897959     |
| MX2                                                                                                 | 0,59992337  | -0,268480407 | 0,061 | 0,074 | 1         | 0,83019353    | 1,204538417     | 0,824324324     |
| SESN3                                                                                               | 0,327018399 | -0,268672191 | 0,171 | 0,211 | 1         | 0,830083176   | 1,204698552     | 0,81042654      |



Supplementary Table 2

| Differentially expressed genes_keloid-XL_comparing SC-Keloid vs. (SC-Myel, SC-Nonmyel, SC-Nonmyel2) |             |              |       |       |           |               |                 |                 |
|-----------------------------------------------------------------------------------------------------|-------------|--------------|-------|-------|-----------|---------------|-----------------|-----------------|
| gene                                                                                                | p_val       | avg_log2FC   | pct.1 | pct.2 | p_val_adj | Foldchange_UP | Foldchange_DOWN | Ratio_pct1_pct2 |
| BICRA                                                                                               | 0,688952745 | -0,268958927 | 0,061 | 0,07  | 1         | 0,829918213   | 1,20493801      | 0,871428571     |
| LRRN1                                                                                               | 0,431293    | -0,269066132 | 0,049 | 0,07  | 1         | 0,829856545   | 1,205027551     | 0,7             |
| MPRIP                                                                                               | 0,08609268  | -0,269088744 | 0,488 | 0,291 | 1         | 0,829843538   | 1,205046438     | 1,676975945     |
| TSC1                                                                                                | 0,077532589 | -0,26920837  | 0,22  | 0,123 | 1         | 0,829774732   | 1,205146363     | 1,788617886     |
| YTHDF1                                                                                              | 0,805393996 | -0,269558544 | 0,146 | 0,144 | 1         | 0,829573351   | 1,205438914     | 1,013888889     |
| PBX1                                                                                                | 0,639740157 | -0,269608207 | 0,049 | 0,06  | 1         | 0,829544795   | 1,20548041      | 0,816666667     |
| HEY1                                                                                                | 0,511435466 | -0,269724476 | 0,183 | 0,137 | 1         | 0,829477943   | 1,205577566     | 1,335766423     |
| CEP295                                                                                              | 0,36970345  | -0,269766903 | 0,024 | 0,046 | 1         | 0,82945355    | 1,20561302      | 0,52173913      |
| MDN1                                                                                                | 0,843757259 | -0,269899788 | 0,073 | 0,063 | 1         | 0,829377154   | 1,205724073     | 1,158730159     |
| PUM2                                                                                                | 0,144186613 | -0,270515766 | 0,293 | 0,182 | 1         | 0,829023115   | 1,206238983     | 1,60989011      |
| TMEM117                                                                                             | 0,034342747 | -0,270805884 | 0     | 0,053 | 1         | 0,82885642    | 1,206481576     | 0               |
| ZNF331                                                                                              | 0,481737243 | -0,270854661 | 0,122 | 0,088 | 1         | 0,828828398   | 1,206522367     | 1,386363636     |
| NR6A1                                                                                               | 0,091636508 | -0,271105856 | 0,037 | 0,091 | 1         | 0,828684099   | 1,206732459     | 0,406593407     |
| ARID1B                                                                                              | 0,154840312 | -0,271170858 | 0,5   | 0,312 | 1         | 0,828646762   | 1,206786831     | 1,602564103     |
| CYB5A                                                                                               | 0,150547982 | -0,271797355 | 0,329 | 0,207 | 1         | 0,828286997   | 1,207310997     | 1,589371981     |
| HS6ST1                                                                                              | 0,371396218 | -0,272001392 | 0,049 | 0,074 | 1         | 0,828169862   | 1,207481757     | 0,662162162     |
| CLEC14A                                                                                             | 0,115306319 | -0,272051122 | 0,024 | 0,07  | 1         | 0,828141315   | 1,20752338      | 0,342857143     |
| ZC3H7A                                                                                              | 0,964182033 | -0,272095804 | 0,22  | 0,193 | 1         | 0,828115668   | 1,207560778     | 1,139896373     |
| KLF11                                                                                               | 0,208874096 | -0,272138486 | 0,159 | 0,095 | 1         | 0,828091168   | 1,207596504     | 1,673684211     |
| EPB41L4A-AS1                                                                                        | 0,375246467 | -0,272187466 | 0,39  | 0,267 | 1         | 0,828063055   | 1,207637503     | 1,460674157     |
| RASA3                                                                                               | 0,012629837 | -0,272355094 | 0,317 | 0,154 | 1         | 0,827966847   | 1,207777828     | 2,058441558     |
| DNAJA4                                                                                              | 0,786233187 | -0,27238078  | 0,11  | 0,091 | 1         | 0,827952105   | 1,207799332     | 1,208791209     |
| CAV1                                                                                                | 8,01903E-05 | -0,272386725 | 0,427 | 0,165 | 1         | 0,827948694   | 1,207804309     | 2,587878788     |
| PXK                                                                                                 | 0,837691996 | -0,272885792 | 0,11  | 0,095 | 1         | 0,827662334   | 1,208222193     | 1,157894737     |
| GBP1                                                                                                | 0,042828551 | -0,273163541 | 0,268 | 0,144 | 1         | 0,827503007   | 1,208454824     | 1,861111111     |
| CDH7                                                                                                | 0,049502603 | -0,273234868 | 0     | 0,046 | 1         | 0,827462096   | 1,208514571     | 0               |
| MITF                                                                                                | 0,747570815 | -0,273331477 | 0,061 | 0,07  | 1         | 0,827406687   | 1,208595502     | 0,871428571     |
| AP1G1                                                                                               | 0,02609562  | -0,273541514 | 0,244 | 0,119 | 1         | 0,827286237   | 1,208771469     | 2,050420168     |
| UGP2                                                                                                | 0,111767288 | -0,273576731 | 0,293 | 0,175 | 1         | 0,827266043   | 1,208800976     | 1,674285714     |
| ROCK2                                                                                               | 0,176308116 | -0,273589749 | 0,39  | 0,249 | 1         | 0,827258578   | 1,208811884     | 1,56626506      |

Supplementary Table 2

| Differentially expressed genes_keloid-XL_comparing SC-Keloid vs. (SC-Myel, SC-Nonmyel, SC-Nonmyel2) |             |              |       |       |           |               |                 |                 |
|-----------------------------------------------------------------------------------------------------|-------------|--------------|-------|-------|-----------|---------------|-----------------|-----------------|
| gene                                                                                                | p_val       | avg_log2FC   | pct.1 | pct.2 | p_val_adj | Foldchange_UP | Foldchange_DOWN | Ratio_pct1_pct2 |
| HNRNPM                                                                                              | 0,633133912 | -0,273684469 | 0,659 | 0,467 | 1         | 0,827204266   | 1,208891251     | 1,411134904     |
| H3-2                                                                                                | 0,43777557  | -0,273719701 | 0,049 | 0,07  | 1         | 0,827184065   | 1,208920774     | 0,7             |
| SLC25A29                                                                                            | 0,66103798  | -0,273789148 | 0,146 | 0,151 | 1         | 0,827144248   | 1,208978969     | 0,966887417     |
| ENTPD4                                                                                              | 0,110527212 | -0,274393514 | 0,146 | 0,077 | 1         | 0,826797817   | 1,209485534     | 1,896103896     |
| ALDH7A1                                                                                             | 0,404480665 | -0,274575575 | 0,11  | 0,137 | 1         | 0,826693487   | 1,209638175     | 0,802919708     |
| ZNF410                                                                                              | 0,726620162 | -0,274586833 | 0,122 | 0,098 | 1         | 0,826687035   | 1,209647614     | 1,244897959     |
| NR1D1                                                                                               | 0,828944466 | -0,274659294 | 0,085 | 0,088 | 1         | 0,826645515   | 1,209708371     | 0,965909091     |
| ITM2A                                                                                               | 0,075807536 | -0,274882836 | 0,012 | 0,06  | 1         | 0,826517438   | 1,209895828     | 0,2             |
| ADNP2                                                                                               | 0,265246037 | -0,274962146 | 0,061 | 0,098 | 1         | 0,826472003   | 1,209962341     | 0,62244898      |
| PSIP1                                                                                               | 0,912685943 | -0,275228568 | 0,22  | 0,186 | 1         | 0,826319393   | 1,210185805     | 1,182795699     |
| UBXN2A                                                                                              | 0,034199717 | -0,275371994 | 0,378 | 0,204 | 1         | 0,826237248   | 1,210306123     | 1,852941176     |
| BORCS5                                                                                              | 0,492214423 | -0,275640179 | 0,073 | 0,091 | 1         | 0,826083672   | 1,210531129     | 0,802197802     |
| FAXDC2                                                                                              | 0,158586405 | -0,276293947 | 0,024 | 0,063 | 1         | 0,825709411   | 1,211079814     | 0,380952381     |
| CTBP2                                                                                               | 0,204999332 | -0,27662438  | 0,329 | 0,211 | 1         | 0,825520313   | 1,21135723      | 1,559241706     |
| SLC7A2                                                                                              | 0,224867908 | -0,27667189  | 0,024 | 0,056 | 1         | 0,825493128   | 1,211397123     | 0,428571429     |
| MIR22HG                                                                                             | 0,249646839 | -0,276837318 | 0,159 | 0,098 | 1         | 0,825398477   | 1,211536037     | 1,62244898      |
| MARCHF6                                                                                             | 0,259726063 | -0,276987695 | 0,439 | 0,295 | 1         | 0,825312448   | 1,211662326     | 1,488135593     |
| TNFRSF14                                                                                            | 0,287347275 | -0,277227731 | 0,134 | 0,084 | 1         | 0,825175143   | 1,21186394      | 1,595238095     |
| H4C3                                                                                                | 0,243400004 | -0,277281616 | 0,22  | 0,144 | 1         | 0,825144324   | 1,211909203     | 1,527777778     |
| RPS6KA3                                                                                             | 0,964873587 | -0,277293849 | 0,171 | 0,151 | 1         | 0,825137327   | 1,21191948      | 1,132450331     |
| HUNK                                                                                                | 0,899278687 | -0,27761227  | 0,073 | 0,074 | 1         | 0,824955229   | 1,212186995     | 0,986486486     |
| OSBPL11                                                                                             | 0,009019195 | -0,277624923 | 0,195 | 0,081 | 1         | 0,824947994   | 1,212197626     | 2,407407407     |
| MT-ND4                                                                                              | 0,0700849   | -0,278650046 | 0,89  | 0,842 | 1         | 0,824362026   | 1,213059274     | 1,057007126     |
| TANK                                                                                                | 0,185347145 | -0,278729645 | 0,232 | 0,14  | 1         | 0,824316544   | 1,213126204     | 1,657142857     |
| VPS13A                                                                                              | 0,961650221 | -0,278963031 | 0,122 | 0,112 | 1         | 0,824183204   | 1,213322469     | 1,089285714     |
| PREX1                                                                                               | 0,028629337 | -0,279265987 | 0     | 0,056 | 1         | 0,82401015    | 1,213577285     | 0               |
| PIP5K1A                                                                                             | 0,631794069 | -0,279415392 | 0,098 | 0,109 | 1         | 0,82392482    | 1,213702969     | 0,899082569     |
| AKIRIN2                                                                                             | 0,145418584 | -0,279491299 | 0,305 | 0,189 | 1         | 0,823881471   | 1,213766829     | 1,613756614     |
| TBX2                                                                                                | 0,011563645 | -0,279926974 | 0     | 0,074 | 1         | 0,823632707   | 1,214133426     | 0               |
| C16orf87                                                                                            | 0,184790334 | -0,280824177 | 0,39  | 0,253 | 1         | 0,823120654   | 1,214888723     | 1,541501976     |

Supplementary Table 2

| Differentially expressed genes_keloid-XL_comparing SC-Keloid vs. (SC-Myel, SC-Nonmyel, SC-Nonmyel2) |             |              |       |       |           |               |                 |                 |
|-----------------------------------------------------------------------------------------------------|-------------|--------------|-------|-------|-----------|---------------|-----------------|-----------------|
| gene                                                                                                | p_val       | avg_log2FC   | pct.1 | pct.2 | p_val_adj | Foldchange_UP | Foldchange_DOWN | Ratio_pct1_pct2 |
| RLIM                                                                                                | 0,42238488  | -0,28087454  | 0,171 | 0,123 | 1         | 0,82309192    | 1,214931134     | 1,390243902     |
| LINC01588                                                                                           | 0,016614385 | -0,281154993 | 0     | 0,067 | 1         | 0,82293193    | 1,215167334     | 0               |
| JAK1                                                                                                | 0,141124358 | -0,281242178 | 0,378 | 0,235 | 1         | 0,822882201   | 1,215240771     | 1,608510638     |
| SPP1                                                                                                | 0,517393619 | -0,281316579 | 0,024 | 0,039 | 1         | 0,822839765   | 1,215303443     | 0,615384615     |
| SMNDC1                                                                                              | 0,087703056 | -0,281411575 | 0,232 | 0,13  | 1         | 0,822785586   | 1,21538347      | 1,784615385     |
| CCN5                                                                                                | 0,943380327 | -0,281842701 | 0,049 | 0,049 | 1         | 0,822539747   | 1,215746721     | 1               |
| NAP1L1                                                                                              | 0,883220662 | -0,282182658 | 0,732 | 0,593 | 1         | 0,822345946   | 1,216033234     | 1,234401349     |
| RAB1A                                                                                               | 0,275512712 | -0,282276799 | 0,463 | 0,312 | 1         | 0,822292286   | 1,216112587     | 1,483974359     |
| NKAIN2                                                                                              | 0,006707687 | -0,282320822 | 0     | 0,084 | 1         | 0,822267195   | 1,216149696     | 0               |
| MFAP3L                                                                                              | 0,132591305 | -0,282721824 | 0,024 | 0,067 | 1         | 0,822038675   | 1,216487776     | 0,358208955     |
| PLCB1                                                                                               | 0,996261953 | -0,283241683 | 0,171 | 0,151 | 1         | 0,821742516   | 1,216926203     | 1,132450331     |
| OXSRI                                                                                               | 0,262737921 | -0,283243934 | 0,256 | 0,165 | 1         | 0,821741234   | 1,216928102     | 1,551515152     |
| ANKRD36                                                                                             | 0,592976726 | -0,28373848  | 0,122 | 0,137 | 1         | 0,821459595   | 1,217345328     | 0,890510949     |
| APOA1                                                                                               | 0,02387518  | -0,283909743 | 0     | 0,06  | 1         | 0,821362084   | 1,217489849     | 0               |
| CFLAR                                                                                               | 0,605329347 | -0,283924208 | 0,268 | 0,207 | 1         | 0,82135385    | 1,217502055     | 1,29468599      |
| FYN                                                                                                 | 0,202314796 | -0,283958551 | 0,463 | 0,298 | 1         | 0,821334298   | 1,217531038     | 1,553691275     |
| SLC66A3                                                                                             | 0,61354058  | -0,284003043 | 0,159 | 0,123 | 1         | 0,821308969   | 1,217568587     | 1,292682927     |
| PDE9A                                                                                               | 0,034342747 | -0,28422511  | 0     | 0,053 | 1         | 0,821182558   | 1,217756016     | 0               |
| ZCCHC2                                                                                              | 0,806393286 | -0,284240078 | 0,073 | 0,077 | 1         | 0,821174038   | 1,21776865      | 0,948051948     |
| TCEAL9                                                                                              | 0,043758355 | -0,284478884 | 0,756 | 0,46  | 1         | 0,821038122   | 1,217970241     | 1,643478261     |
| TAP1                                                                                                | 0,442158087 | -0,284785007 | 0,244 | 0,172 | 1         | 0,820863926   | 1,218228708     | 1,418604651     |
| INAFM2                                                                                              | 0,751862434 | -0,28536371  | 0,122 | 0,123 | 1         | 0,820534722   | 1,218717469     | 0,991869919     |
| SLC25A48                                                                                            | 0,059506563 | -0,285407455 | 0     | 0,042 | 1         | 0,820509843   | 1,218754423     | 0               |
| OPHN1                                                                                               | 0,771638258 | -0,285439276 | 0,098 | 0,081 | 1         | 0,820491745   | 1,218781305     | 1,209876543     |
| HDGF                                                                                                | 0,83750707  | -0,285648281 | 0,476 | 0,358 | 1         | 0,820372888   | 1,218957884     | 1,329608939     |
| TTBK2                                                                                               | 0,935131989 | -0,285894402 | 0,11  | 0,098 | 1         | 0,820232946   | 1,219165854     | 1,12244898      |
| ZCCHC3                                                                                              | 0,961600738 | -0,286261455 | 0,098 | 0,091 | 1         | 0,820024287   | 1,219476076     | 1,076923077     |
| PPIL4                                                                                               | 0,270474762 | -0,286300713 | 0,39  | 0,26  | 1         | 0,820001974   | 1,21950926      | 1,5             |
| EVA1C                                                                                               | 0,65905372  | -0,286304816 | 0,098 | 0,105 | 1         | 0,819999641   | 1,219512729     | 0,933333333     |
| PTGES3                                                                                              | 0,857924692 | -0,286380929 | 0,683 | 0,512 | 1         | 0,819956381   | 1,219577069     | 1,333984375     |

Supplementary Table 2

| Differentially expressed genes_keloid-XL_comparing SC-Keloid vs. (SC-Myel, SC-Nonmyel, SC-Nonmyel2) |             |              |       |       |           |               |                 |                 |
|-----------------------------------------------------------------------------------------------------|-------------|--------------|-------|-------|-----------|---------------|-----------------|-----------------|
| gene                                                                                                | p_val       | avg_log2FC   | pct.1 | pct.2 | p_val_adj | Foldchange_UP | Foldchange_DOWN | Ratio_pct1_pct2 |
| ZFHX3                                                                                               | 0,983813269 | -0,286503474 | 0,195 | 0,175 | 1         | 0,819886736   | 1,219680666     | 1,114285714     |
| ERN1                                                                                                | 0,616646356 | -0,286570373 | 0,061 | 0,074 | 1         | 0,819848718   | 1,219737225     | 0,824324324     |
| LRRC1                                                                                               | 0,227416109 | -0,286579224 | 0,049 | 0,088 | 1         | 0,819843688   | 1,219744708     | 0,556818182     |
| ZFYVE21                                                                                             | 0,120404332 | -0,286592161 | 0,293 | 0,172 | 1         | 0,819836336   | 1,219755646     | 1,703488372     |
| BOD1L1                                                                                              | 0,003396495 | -0,286612528 | 0,5   | 0,242 | 1         | 0,819824763   | 1,219772866     | 2,066115702     |
| TRAF4                                                                                               | 0,877220851 | -0,287003048 | 0,11  | 0,095 | 1         | 0,819602876   | 1,220103088     | 1,157894737     |
| SUZ12                                                                                               | 0,243794121 | -0,287214635 | 0,22  | 0,14  | 1         | 0,819482681   | 1,220282043     | 1,571428571     |
| RBMXL1                                                                                              | 0,708256076 | -0,287271994 | 0,098 | 0,105 | 1         | 0,8194501     | 1,22033056      | 0,933333333     |
| ZNF367                                                                                              | 0,02387518  | -0,287299665 | 0     | 0,06  | 1         | 0,819434383   | 1,220353966     | 0               |
| C12orf29                                                                                            | 0,119850974 | -0,2877199   | 0,195 | 0,112 | 1         | 0,819195729   | 1,220709489     | 1,741071429     |
| RSBN1L                                                                                              | 0,305566465 | -0,288579571 | 0,39  | 0,267 | 1         | 0,818707734   | 1,2214371       | 1,460674157     |
| PBRM1                                                                                               | 0,058607681 | -0,288582108 | 0,378 | 0,214 | 1         | 0,818706294   | 1,221439247     | 1,76635514      |
| CKS1B                                                                                               | 0,537092255 | -0,288619966 | 0,28  | 0,281 | 1         | 0,81868481    | 1,2214713       | 0,996441281     |
| GTF2B                                                                                               | 0,489782083 | -0,288668999 | 0,207 | 0,151 | 1         | 0,818656987   | 1,221512815     | 1,370860927     |
| DNAJA2                                                                                              | 0,343436657 | -0,288703375 | 0,329 | 0,225 | 1         | 0,81863748    | 1,221541921     | 1,462222222     |
| GALNT1                                                                                              | 0,324332057 | -0,288983775 | 0,159 | 0,105 | 1         | 0,818478386   | 1,221779361     | 1,514285714     |
| PHF12                                                                                               | 0,680209188 | -0,289265321 | 0,098 | 0,105 | 1         | 0,818318674   | 1,222017818     | 0,933333333     |
| RELB                                                                                                | 0,593821299 | -0,289406229 | 0,098 | 0,109 | 1         | 0,818238753   | 1,222137178     | 0,899082569     |
| PBX3                                                                                                | 0,654820388 | -0,289492453 | 0,171 | 0,133 | 1         | 0,818189851   | 1,222210222     | 1,285714286     |
| CELF1                                                                                               | 0,013954102 | -0,289648148 | 0,451 | 0,239 | 1         | 0,818101557   | 1,22234213      | 1,887029289     |
| LEPROT                                                                                              | 0,297238097 | -0,289763324 | 0,585 | 0,372 | 1         | 0,818036248   | 1,222439718     | 1,572580645     |
| PPP3CC                                                                                              | 0,947169223 | -0,290070425 | 0,073 | 0,067 | 1         | 0,817862134   | 1,222699962     | 1,089552239     |
| KCNMB4                                                                                              | 0,199050592 | -0,290488666 | 0,476 | 0,305 | 1         | 0,817625068   | 1,223054477     | 1,560655738     |
| TCP1                                                                                                | 0,362385901 | -0,290552225 | 0,549 | 0,358 | 1         | 0,817589048   | 1,223108361     | 1,533519553     |
| IFITM3                                                                                              | 0,946694127 | -0,290660553 | 0,951 | 0,818 | 1         | 0,817527659   | 1,223200205     | 1,162591687     |
| YTHDC1                                                                                              | 0,923678458 | -0,29090151  | 0,402 | 0,333 | 1         | 0,817391128   | 1,223404519     | 1,207207207     |
| HERC4                                                                                               | 0,100631993 | -0,291008787 | 0,244 | 0,14  | 1         | 0,81733035    | 1,223495493     | 1,742857143     |
| IGF1R                                                                                               | 0,959720905 | -0,291338842 | 0,085 | 0,077 | 1         | 0,817143385   | 1,223775433     | 1,103896104     |
| YOD1                                                                                                | 0,099897667 | -0,292212484 | 0,061 | 0,123 | 1         | 0,816648704   | 1,224516729     | 0,495934959     |
| RND1                                                                                                | 0,133348619 | -0,292457235 | 0,024 | 0,067 | 1         | 0,816510173   | 1,224724484     | 0,358208955     |

Supplementary Table 2

| Differentially expressed genes_keloid-XL_comparing SC-Keloid vs. (SC-Myel, SC-Nonmyel, SC-Nonmyel2) |             |              |       |       |           |               |                 |                 |
|-----------------------------------------------------------------------------------------------------|-------------|--------------|-------|-------|-----------|---------------|-----------------|-----------------|
| gene                                                                                                | p_val       | avg_log2FC   | pct.1 | pct.2 | p_val_adj | Foldchange_UP | Foldchange_DOWN | Ratio_pct1_pct2 |
| NBR1                                                                                                | 0,017304856 | -0,29271713  | 0,268 | 0,13  | 1         | 0,816363095   | 1,224945133     | 2,061538462     |
| KLF7                                                                                                | 0,434668507 | -0,292755002 | 0,171 | 0,119 | 1         | 0,816341665   | 1,224977289     | 1,43697479      |
| SEC24A                                                                                              | 0,545283472 | -0,292815688 | 0,183 | 0,137 | 1         | 0,816307327   | 1,225028818     | 1,335766423     |
| SRSF1                                                                                               | 0,044515559 | -0,293081829 | 0,415 | 0,235 | 1         | 0,816156753   | 1,225254826     | 1,765957447     |
| HR                                                                                                  | 0,34071835  | -0,293185391 | 0,061 | 0,091 | 1         | 0,816098168   | 1,225342782     | 0,67032967      |
| ARHGEF12                                                                                            | 0,082279963 | -0,293234618 | 0,463 | 0,277 | 1         | 0,816070322   | 1,225384594     | 1,671480144     |
| FBXL3                                                                                               | 0,085252495 | -0,293460592 | 0,402 | 0,235 | 1         | 0,815942509   | 1,225576544     | 1,710638298     |
| PLA2G4C                                                                                             | 0,374297693 | -0,293558373 | 0,049 | 0,074 | 1         | 0,815887209   | 1,225659613     | 0,662162162     |
| HACL1                                                                                               | 0,790538085 | -0,293687244 | 0,073 | 0,077 | 1         | 0,815814331   | 1,225769102     | 0,948051948     |
| STX3                                                                                                | 0,109482163 | -0,294075816 | 0,049 | 0,105 | 1         | 0,815594631   | 1,226099292     | 0,466666667     |
| CAPRIN2                                                                                             | 0,252921063 | -0,294379042 | 0,207 | 0,133 | 1         | 0,815423228   | 1,226357021     | 1,556390977     |
| DHPS                                                                                                | 0,154280452 | -0,294847712 | 0,256 | 0,154 | 1         | 0,815158374   | 1,226755477     | 1,662337662     |
| EPAS1                                                                                               | 0,037828389 | -0,295130911 | 0,049 | 0,13  | 1         | 0,814998376   | 1,22699631      | 0,376923077     |
| EPB41L4B                                                                                            | 0,028629337 | -0,295356886 | 0     | 0,056 | 1         | 0,814870729   | 1,227188515     | 0               |
| AHDC1                                                                                               | 0,513861396 | -0,295715798 | 0,293 | 0,214 | 1         | 0,814668032   | 1,227493851     | 1,369158879     |
| CUL3                                                                                                | 0,350340632 | -0,295754592 | 0,317 | 0,218 | 1         | 0,814646126   | 1,227526859     | 1,45412844      |
| ATP8B2                                                                                              | 0,780074451 | -0,295769031 | 0,146 | 0,144 | 1         | 0,814637973   | 1,227539145     | 1,013888889     |
| CHKA                                                                                                | 0,280057808 | -0,295878495 | 0,195 | 0,126 | 1         | 0,814576165   | 1,227632287     | 1,547619048     |
| USP32                                                                                               | 0,988507754 | -0,295983857 | 0,22  | 0,193 | 1         | 0,814516677   | 1,227721947     | 1,139896373     |
| S100A14                                                                                             | 0,041217527 | -0,296324055 | 0     | 0,049 | 1         | 0,814324631   | 1,228011486     | 0               |
| PCID2                                                                                               | 0,015445933 | -0,296329179 | 0,317 | 0,158 | 1         | 0,814321738   | 1,228015848     | 2,006329114     |
| GOLGA8A                                                                                             | 0,871565803 | -0,296414145 | 0,195 | 0,168 | 1         | 0,814273781   | 1,228088173     | 1,160714286     |
| PIAS2                                                                                               | 0,034325556 | -0,296484843 | 0,207 | 0,102 | 1         | 0,81423388    | 1,228148355     | 2,029411765     |
| HMG20A                                                                                              | 0,397804266 | -0,296523418 | 0,134 | 0,091 | 1         | 0,814212109   | 1,228181194     | 1,472527473     |
| LMCD1                                                                                               | 0,220928258 | -0,296761597 | 0,207 | 0,13  | 1         | 0,814077699   | 1,228383975     | 1,592307692     |
| RPL7                                                                                                | 0,182551169 | -0,297095986 | 0,939 | 0,842 | 1         | 0,813889033   | 1,228668724     | 1,1152019       |
| CAT                                                                                                 | 0,735594692 | -0,29719482  | 0,256 | 0,207 | 1         | 0,813833278   | 1,228752899     | 1,236714976     |
| LIN54                                                                                               | 0,326444926 | -0,297303375 | 0,049 | 0,077 | 1         | 0,813772044   | 1,228845359     | 0,636363636     |
| PPP4R3A                                                                                             | 0,604356545 | -0,297313495 | 0,232 | 0,175 | 1         | 0,813766336   | 1,228853979     | 1,325714286     |
| MTOR                                                                                                | 0,83651665  | -0,297352381 | 0,122 | 0,105 | 1         | 0,813744402   | 1,228887102     | 1,161904762     |

Supplementary Table 2

| Differentially expressed genes_keloid-XL_comparing SC-Keloid vs. (SC-Myel, SC-Nonmyel, SC-Nonmyel2) |             |              |       |       |           |               |                 |                 |
|-----------------------------------------------------------------------------------------------------|-------------|--------------|-------|-------|-----------|---------------|-----------------|-----------------|
| gene                                                                                                | p_val       | avg_log2FC   | pct.1 | pct.2 | p_val_adj | Foldchange_UP | Foldchange_DOWN | Ratio_pct1_pct2 |
| NIN                                                                                                 | 0,511745244 | -0,297775489 | 0,159 | 0,116 | 1         | 0,813505785   | 1,229247558     | 1,370689655     |
| POLR2A                                                                                              | 0,195604483 | -0,297802179 | 0,232 | 0,144 | 1         | 0,813490736   | 1,229270299     | 1,611111111     |
| LUC7L2                                                                                              | 0,432260745 | -0,297907368 | 0,366 | 0,267 | 1         | 0,813431425   | 1,22935993      | 1,370786517     |
| CDK12                                                                                               | 0,226914405 | -0,297978617 | 0,22  | 0,14  | 1         | 0,813391254   | 1,229420645     | 1,571428571     |
| FEM1C                                                                                               | 0,749009857 | -0,298442888 | 0,268 | 0,211 | 1         | 0,81312954    | 1,229816347     | 1,27014218      |
| COBL                                                                                                | 0,597792204 | -0,298797735 | 0,329 | 0,253 | 1         | 0,812929566   | 1,230118871     | 1,300395257     |
| GABARAPL2                                                                                           | 0,790081359 | -0,299015098 | 0,78  | 0,547 | 1         | 0,812807096   | 1,23030422      | 1,425959781     |
| PRPF38B                                                                                             | 0,023748114 | -0,299651331 | 0,476 | 0,256 | 1         | 0,812448725   | 1,230846907     | 1,859375        |
| ZNF703                                                                                              | 0,687879259 | -0,299725611 | 0,134 | 0,105 | 1         | 0,812406895   | 1,230910282     | 1,276190476     |
| IRS1                                                                                                | 0,78445104  | -0,299859246 | 0,11  | 0,091 | 1         | 0,812331646   | 1,231024305     | 1,208791209     |
| TMEM106B                                                                                            | 0,340328374 | -0,300258517 | 0,354 | 0,242 | 1         | 0,812106862   | 1,231365042     | 1,462809917     |
| NISCH                                                                                               | 0,165380311 | -0,300274709 | 0,183 | 0,109 | 1         | 0,812097747   | 1,231378862     | 1,678899083     |
| HLA-DQA1                                                                                            | 0,238727115 | -0,300424418 | 0,037 | 0,07  | 1         | 0,81201348    | 1,23150665      | 0,528571429     |
| MCM7                                                                                                | 0,907700144 | -0,300472076 | 0,159 | 0,14  | 1         | 0,811986656   | 1,231547332     | 1,135714286     |
| MTX3                                                                                                | 0,679020923 | -0,300712103 | 0,061 | 0,07  | 1         | 0,811851574   | 1,231752246     | 0,871428571     |
| SRSF5                                                                                               | 0,583130947 | -0,300934381 | 0,549 | 0,453 | 1         | 0,8117265     | 1,231942039     | 1,21192053      |
| STARD9                                                                                              | 0,162890528 | -0,301089419 | 0,085 | 0,137 | 1         | 0,811639274   | 1,232074436     | 0,620437956     |
| EZH2                                                                                                | 0,943232218 | -0,30118595  | 0,134 | 0,126 | 1         | 0,811584968   | 1,232156877     | 1,063492063     |
| H2BC21                                                                                              | 0,36048127  | -0,301772978 | 0,073 | 0,102 | 1         | 0,811254804   | 1,232658339     | 0,715686275     |
| ZMAT1                                                                                               | 0,618224269 | -0,302213939 | 0,085 | 0,098 | 1         | 0,811006882   | 1,23303516      | 0,867346939     |
| STEAP1B                                                                                             | 0,495262363 | -0,3023838   | 0,073 | 0,091 | 1         | 0,8109114     | 1,233180345     | 0,802197802     |
| IGSF11                                                                                              | 0,164549302 | -0,303016187 | 0,049 | 0,095 | 1         | 0,810556025   | 1,233721012     | 0,515789474     |
| DCP1A                                                                                               | 0,861721728 | -0,303348518 | 0,232 | 0,211 | 1         | 0,810369332   | 1,234005238     | 1,099526066     |
| ZNF536                                                                                              | 0,48523735  | -0,303600656 | 0,232 | 0,168 | 1         | 0,810227717   | 1,234220922     | 1,380952381     |
| BOC                                                                                                 | 0,034342747 | -0,303671025 | 0     | 0,053 | 1         | 0,810188198   | 1,234281124     | 0               |
| SMARCA2                                                                                             | 0,219485363 | -0,303750722 | 0,207 | 0,13  | 1         | 0,810143444   | 1,234349309     | 1,592307692     |
| SMARCC2                                                                                             | 0,912667706 | -0,303783755 | 0,183 | 0,168 | 1         | 0,810124894   | 1,234377573     | 1,089285714     |
| MXD1                                                                                                | 0,734055439 | -0,304185979 | 0,134 | 0,137 | 1         | 0,809899062   | 1,234721765     | 0,97810219      |
| GPBP1L1                                                                                             | 0,838535906 | -0,304355569 | 0,207 | 0,172 | 1         | 0,809803863   | 1,234866917     | 1,203488372     |
| ATP11A                                                                                              | 0,077318447 | -0,304639768 | 0,037 | 0,095 | 1         | 0,809644355   | 1,235110199     | 0,389473684     |

Supplementary Table 2

| Differentially expressed genes_keloid-XL_comparing SC-Keloid vs. (SC-Myel, SC-Nonmyel, SC-Nonmyel2) |             |              |       |       |           |               |                 |                 |
|-----------------------------------------------------------------------------------------------------|-------------|--------------|-------|-------|-----------|---------------|-----------------|-----------------|
| gene                                                                                                | p_val       | avg_log2FC   | pct.1 | pct.2 | p_val_adj | Foldchange_UP | Foldchange_DOWN | Ratio_pct1_pct2 |
| BBC3                                                                                                | 0,941625146 | -0,304712837 | 0,207 | 0,186 | 1         | 0,809603349   | 1,235172756     | 1,112903226     |
| ARHGAP39                                                                                            | 0,309012629 | -0,304926405 | 0,085 | 0,119 | 1         | 0,809483509   | 1,235355617     | 0,714285714     |
| MBD2                                                                                                | 0,557392726 | -0,305002773 | 0,341 | 0,253 | 1         | 0,809440661   | 1,235421012     | 1,347826087     |
| EPHB3                                                                                               | 0,524269717 | -0,305272877 | 0,061 | 0,077 | 1         | 0,80928913    | 1,235652331     | 0,792207792     |
| COPS2                                                                                               | 0,868136354 | -0,305508267 | 0,427 | 0,319 | 1         | 0,809157097   | 1,235853957     | 1,338557994     |
| SH3PXD2B                                                                                            | 0,497320291 | -0,306224958 | 0,159 | 0,116 | 1         | 0,80875523    | 1,236468047     | 1,370689655     |
| EIF4B                                                                                               | 0,259784915 | -0,306335009 | 0,427 | 0,274 | 1         | 0,808693539   | 1,236562371     | 1,558394161     |
| INPP1                                                                                               | 0,494764498 | -0,306346786 | 0,244 | 0,179 | 1         | 0,808686938   | 1,236572465     | 1,363128492     |
| PRRG1                                                                                               | 0,668785183 | -0,306674805 | 0,098 | 0,105 | 1         | 0,808503091   | 1,236853651     | 0,933333333     |
| LRRK2                                                                                               | 0,213293489 | -0,306983305 | 0,037 | 0,074 | 1         | 0,808330223   | 1,237118162     | 0,5             |
| TNS2                                                                                                | 0,315158739 | -0,307452682 | 0,207 | 0,14  | 1         | 0,808067278   | 1,237520721     | 1,478571429     |
| GABBR1                                                                                              | 0,724944006 | -0,307507581 | 0,122 | 0,098 | 1         | 0,808036529   | 1,237567813     | 1,244897959     |
| AGAP3                                                                                               | 0,211665134 | -0,307713342 | 0,195 | 0,119 | 1         | 0,807921293   | 1,237744331     | 1,638655462     |
| SRSF2                                                                                               | 0,724795593 | -0,30790329  | 0,659 | 0,491 | 1         | 0,807814927   | 1,237907306     | 1,342158859     |
| ELK4                                                                                                | 0,006842037 | -0,308211263 | 0,341 | 0,161 | 1         | 0,807642501   | 1,238171591     | 2,118012422     |
| STMN1                                                                                               | 0,423282635 | -0,308286634 | 0,756 | 0,639 | 1         | 0,807600308   | 1,238236279     | 1,183098592     |
| RASEF                                                                                               | 0,01991529  | -0,30860109  | 0     | 0,063 | 1         | 0,807424299   | 1,238506199     | 0               |
| BTAF1                                                                                               | 0,968464025 | -0,308614908 | 0,122 | 0,112 | 1         | 0,807416566   | 1,238518062     | 1,089285714     |
| FA2H                                                                                                | 0,016614385 | -0,30866881  | 0     | 0,067 | 1         | 0,8073864     | 1,238564336     | 0               |
| CNP                                                                                                 | 0,360526527 | -0,309157084 | 0,671 | 0,453 | 1         | 0,807113189   | 1,238983594     | 1,481236203     |
| TBL1X                                                                                               | 0,116982952 | -0,309897081 | 0,049 | 0,102 | 1         | 0,806699306   | 1,239619265     | 0,480392157     |
| ENPP2                                                                                               | 0,614868891 | -0,309940693 | 0,146 | 0,154 | 1         | 0,80667492    | 1,239656739     | 0,948051948     |
| MEF2D                                                                                               | 0,629398956 | -0,310099032 | 0,268 | 0,207 | 1         | 0,80658639    | 1,239792801     | 1,29468599      |
| LAMA4                                                                                               | 0,704256193 | -0,310620105 | 0,549 | 0,411 | 1         | 0,80629512    | 1,240240671     | 1,335766423     |
| TAMALIN                                                                                             | 0,108791287 | -0,311175945 | 0,28  | 0,168 | 1         | 0,805984531   | 1,240718601     | 1,666666667     |
| CSGALNACT2                                                                                          | 0,703102061 | -0,311239469 | 0,305 | 0,242 | 1         | 0,805949043   | 1,240773233     | 1,260330579     |
| KLF5                                                                                                | 0,026074041 | -0,311490933 | 0,439 | 0,239 | 1         | 0,805808577   | 1,24098952      | 1,836820084     |
| TOB2                                                                                                | 0,634287849 | -0,312107904 | 0,232 | 0,225 | 1         | 0,805464045   | 1,241520346     | 1,031111111     |
| CBX7                                                                                                | 0,356073246 | -0,312526811 | 0,049 | 0,077 | 1         | 0,805230201   | 1,241880891     | 0,636363636     |
| FBXO11                                                                                              | 0,817224844 | -0,312594369 | 0,28  | 0,228 | 1         | 0,805192495   | 1,241939047     | 1,228070175     |

Supplementary Table 2

| Differentially expressed genes_keloid-XL_comparing SC-Keloid vs. (SC-Myel, SC-Nonmyel, SC-Nonmyel2) |             |              |       |       |           |               |                 |                 |
|-----------------------------------------------------------------------------------------------------|-------------|--------------|-------|-------|-----------|---------------|-----------------|-----------------|
| gene                                                                                                | p_val       | avg_log2FC   | pct.1 | pct.2 | p_val_adj | Foldchange_UP | Foldchange_DOWN | Ratio_pct1_pct2 |
| ECHDC2                                                                                              | 0,066497956 | -0,312846052 | 0,024 | 0,081 | 1         | 0,805052039   | 1,242155726     | 0,296296296     |
| ADAMTS9-AS2                                                                                         | 0,014001252 | -0,312874366 | 0,012 | 0,095 | 1         | 0,805036239   | 1,242180105     | 0,126315789     |
| ARRDC2                                                                                              | 0,646048576 | -0,312956594 | 0,049 | 0,06  | 1         | 0,804990357   | 1,242250906     | 0,816666667     |
| AGO3                                                                                                | 0,577818657 | -0,313403131 | 0,146 | 0,158 | 1         | 0,804741238   | 1,242635462     | 0,924050633     |
| KHSRP                                                                                               | 0,198335122 | -0,313453978 | 0,341 | 0,221 | 1         | 0,804712876   | 1,242679259     | 1,542986425     |
| USP6NL                                                                                              | 0,292866609 | -0,313643787 | 0,085 | 0,119 | 1         | 0,80460701    | 1,242842763     | 0,714285714     |
| SCAF4                                                                                               | 0,391219989 | -0,313668078 | 0,232 | 0,161 | 1         | 0,804593463   | 1,242863689     | 1,440993789     |
| SLFN12                                                                                              | 0,728297629 | -0,313815171 | 0,122 | 0,098 | 1         | 0,804511433   | 1,242990414     | 1,244897959     |
| PIK3R1                                                                                              | 0,716204917 | -0,313875231 | 0,537 | 0,456 | 1         | 0,804477942   | 1,243042162     | 1,177631579     |
| PPARA                                                                                               | 0,383085909 | -0,313906523 | 0,049 | 0,074 | 1         | 0,804460493   | 1,243069124     | 0,662162162     |
| SAFB2                                                                                               | 0,508806132 | -0,314241385 | 0,171 | 0,182 | 1         | 0,804273792   | 1,243357684     | 0,93956044      |
| PDE8A                                                                                               | 0,332424176 | -0,314495483 | 0,232 | 0,161 | 1         | 0,80413215    | 1,243576693     | 1,440993789     |
| PM20D2                                                                                              | 0,126187576 | -0,314758754 | 0,037 | 0,084 | 1         | 0,803985421   | 1,243803648     | 0,44047619      |
| MRE11                                                                                               | 0,382946636 | -0,314844171 | 0,073 | 0,098 | 1         | 0,803937821   | 1,243877292     | 0,744897959     |
| PAPOLA                                                                                              | 0,631766822 | -0,314887376 | 0,524 | 0,379 | 1         | 0,803913746   | 1,243914543     | 1,382585752     |
| KMT2E-AS1                                                                                           | 0,94590946  | -0,315086868 | 0,098 | 0,088 | 1         | 0,803802591   | 1,24408656      | 1,113636364     |
| MAFB                                                                                                | 0,003848754 | -0,315144164 | 0,512 | 0,263 | 1         | 0,803770668   | 1,24413597      | 1,946768061     |
| SRSF11                                                                                              | 0,9919349   | -0,315748226 | 0,622 | 0,463 | 1         | 0,803434197   | 1,244657003     | 1,343412527     |
| MIR99AHG                                                                                            | 0,686557781 | -0,315919596 | 0,146 | 0,119 | 1         | 0,803338767   | 1,244804859     | 1,226890756     |
| PHYHIPL                                                                                             | 0,02387518  | -0,316102264 | 0     | 0,06  | 1         | 0,803237058   | 1,24496248      | 0               |
| CCNG2                                                                                               | 0,82057298  | -0,316107146 | 0,134 | 0,13  | 1         | 0,80323434    | 1,244966693     | 1,030769231     |
| CAMTA1                                                                                              | 0,887462433 | -0,316239995 | 0,634 | 0,46  | 1         | 0,803160378   | 1,24508134      | 1,37826087      |
| GATAD2A                                                                                             | 0,663810764 | -0,316671861 | 0,329 | 0,249 | 1         | 0,802919991   | 1,245454106     | 1,321285141     |
| KCMF1                                                                                               | 0,864158419 | -0,316959969 | 0,354 | 0,281 | 1         | 0,802759663   | 1,24570285      | 1,259786477     |
| UBR3                                                                                                | 0,809485451 | -0,31704985  | 0,146 | 0,123 | 1         | 0,802709652   | 1,245780461     | 1,18699187      |
| SHPRH                                                                                               | 0,830047064 | -0,318803824 | 0,146 | 0,123 | 1         | 0,801734341   | 1,247295955     | 1,18699187      |
| MAGI2                                                                                               | 0,747916993 | -0,318845288 | 0,146 | 0,119 | 1         | 0,801711299   | 1,247331803     | 1,226890756     |
| UCKL1                                                                                               | 0,194347381 | -0,319062257 | 0,244 | 0,154 | 1         | 0,801590737   | 1,247519405     | 1,584415584     |
| FIGN                                                                                                | 0,906902569 | -0,319334744 | 0,439 | 0,365 | 1         | 0,801439352   | 1,247755051     | 1,202739726     |
| KIAA1755                                                                                            | 0,820963377 | -0,319564401 | 0,134 | 0,112 | 1         | 0,801311784   | 1,247953692     | 1,196428571     |



Supplementary Table 2

| Differentially expressed genes_keloid-XL_comparing SC-Keloid vs. (SC-Myel, SC-Nonmyel, SC-Nonmyel2) |             |              |       |       |           |               |                 |                 |
|-----------------------------------------------------------------------------------------------------|-------------|--------------|-------|-------|-----------|---------------|-----------------|-----------------|
| gene                                                                                                | p_val       | avg_log2FC   | pct.1 | pct.2 | p_val_adj | Foldchange_UP | Foldchange_DOWN | Ratio_pct1_pct2 |
| NCOA2                                                                                               | 0,350740934 | -0,319569293 | 0,061 | 0,091 | 1         | 0,801309067   | 1,247957924     | 0,67032967      |
| GRAMD2B                                                                                             | 0,786664201 | -0,319621718 | 0,256 | 0,207 | 1         | 0,801279949   | 1,248003274     | 1,236714976     |
| ZBTB38                                                                                              | 0,382172752 | -0,32054447  | 0,378 | 0,263 | 1         | 0,800767613   | 1,248801755     | 1,437262357     |
| UBE2G1                                                                                              | 0,386468322 | -0,32058284  | 0,305 | 0,207 | 1         | 0,800746316   | 1,248834969     | 1,473429952     |
| SPG7                                                                                                | 0,492166818 | -0,320793024 | 0,207 | 0,154 | 1         | 0,800629665   | 1,249016923     | 1,344155844     |
| TLK2                                                                                                | 0,280754593 | -0,320870825 | 0,232 | 0,151 | 1         | 0,80058649    | 1,249084281     | 1,536423841     |
| ZNF667-AS1                                                                                          | 0,315291627 | -0,320871297 | 0,061 | 0,091 | 1         | 0,800586228   | 1,24908469      | 0,67032967      |
| TXN                                                                                                 | 0,074537653 | -0,321254108 | 0,683 | 0,477 | 1         | 0,800373825   | 1,249416171     | 1,431865828     |
| RGPD5                                                                                               | 0,083562027 | -0,321500805 | 0,049 | 0,109 | 1         | 0,800236975   | 1,249629837     | 0,449541284     |
| CTCF                                                                                                | 0,43189278  | -0,321687762 | 0,232 | 0,165 | 1         | 0,80013328    | 1,249791785     | 1,406060606     |
| PDS5B                                                                                               | 0,581963366 | -0,321785203 | 0,293 | 0,281 | 1         | 0,80007924    | 1,2498762       | 1,042704626     |
| HSBP1L1                                                                                             | 0,14890772  | -0,321833071 | 0,037 | 0,081 | 1         | 0,800052694   | 1,249917671     | 0,456790123     |
| PHYH                                                                                                | 0,746191175 | -0,322035502 | 0,171 | 0,137 | 1         | 0,799940443   | 1,250093064     | 1,248175182     |
| MGLL                                                                                                | 0,102618063 | -0,322213548 | 0,024 | 0,074 | 1         | 0,799841727   | 1,250247351     | 0,324324324     |
| PLEKHF2                                                                                             | 0,646480971 | -0,322259355 | 0,159 | 0,123 | 1         | 0,799816332   | 1,250287048     | 1,292682927     |
| ATG14                                                                                               | 0,460629334 | -0,32269737  | 0,061 | 0,081 | 1         | 0,799573537   | 1,250666704     | 0,75308642      |
| PGM2L1                                                                                              | 0,06826956  | -0,323114052 | 0,573 | 0,344 | 1         | 0,799342636   | 1,251027976     | 1,665697674     |
| MFSD14C                                                                                             | 0,623320606 | -0,32313503  | 0,098 | 0,074 | 1         | 0,799331013   | 1,251046167     | 1,324324324     |
| EVI5                                                                                                | 0,262552602 | -0,323178469 | 0,476 | 0,309 | 1         | 0,799306946   | 1,251083837     | 1,540453074     |
| CGAS                                                                                                | 0,446912758 | -0,323337871 | 0,073 | 0,095 | 1         | 0,799218636   | 1,251222075     | 0,768421053     |
| TRIM56                                                                                              | 0,716021013 | -0,323689116 | 0,134 | 0,112 | 1         | 0,799024078   | 1,25152674      | 1,196428571     |
| UBAP2                                                                                               | 0,378371044 | -0,324452079 | 0,098 | 0,123 | 1         | 0,79860163    | 1,25218878      | 0,796747967     |
| NAA50                                                                                               | 0,740346283 | -0,324536465 | 0,207 | 0,193 | 1         | 0,798554919   | 1,252262025     | 1,07253886      |
| NEGR1                                                                                               | 0,540778822 | -0,324777298 | 0,11  | 0,126 | 1         | 0,798421626   | 1,252471085     | 0,873015873     |
| NCOA1                                                                                               | 0,951165407 | -0,324834173 | 0,195 | 0,172 | 1         | 0,79839015    | 1,252520463     | 1,13372093      |
| CREBBP                                                                                              | 0,894031081 | -0,324855921 | 0,28  | 0,249 | 1         | 0,798378115   | 1,252539344     | 1,124497992     |
| LRRC8A                                                                                              | 0,549842985 | -0,325004907 | 0,256 | 0,193 | 1         | 0,798295671   | 1,252668699     | 1,32642487      |
| ABCD3                                                                                               | 0,624436564 | -0,325473734 | 0,256 | 0,193 | 1         | 0,798036294   | 1,25307584      | 1,32642487      |
| SRSF10                                                                                              | 0,216978412 | -0,325663308 | 0,439 | 0,277 | 1         | 0,797931437   | 1,253240509     | 1,584837545     |
| MT1E                                                                                                | 0,000218813 | -0,325777605 | 0,439 | 0,189 | 1         | 0,797868224   | 1,2533398       | 2,322751323     |

Supplementary Table 2

| Differentially expressed genes_keloid-XL_comparing SC-Keloid vs. (SC-Myel, SC-Nonmyel, SC-Nonmyel2) |             |              |       |       |           |               |                 |                 |
|-----------------------------------------------------------------------------------------------------|-------------|--------------|-------|-------|-----------|---------------|-----------------|-----------------|
| gene                                                                                                | p_val       | avg_log2FC   | pct.1 | pct.2 | p_val_adj | Foldchange_UP | Foldchange_DOWN | Ratio_pct1_pct2 |
| SMIM13                                                                                              | 0,698680648 | -0,325827357 | 0,122 | 0,126 | 1         | 0,797840709   | 1,253383023     | 0,968253968     |
| MTMR3                                                                                               | 0,126835528 | -0,325947928 | 0,037 | 0,084 | 1         | 0,797774034   | 1,253487777     | 0,44047619      |
| AK5                                                                                                 | 0,052581173 | -0,326121821 | 0,012 | 0,067 | 1         | 0,797677881   | 1,253638873     | 0,179104478     |
| MAF1                                                                                                | 0,044097358 | -0,32622147  | 0,476 | 0,263 | 1         | 0,797622787   | 1,253725466     | 1,809885932     |
| ATXN7                                                                                               | 0,862474431 | -0,326616572 | 0,085 | 0,074 | 1         | 0,797404376   | 1,254068864     | 1,148648649     |
| ADAM17                                                                                              | 0,16545601  | -0,326625206 | 0,427 | 0,274 | 1         | 0,797399604   | 1,254076369     | 1,558394161     |
| XPA                                                                                                 | 0,212055607 | -0,326780317 | 0,159 | 0,095 | 1         | 0,797313876   | 1,254211208     | 1,673684211     |
| MUCL1                                                                                               | 0,159203343 | -0,326790111 | 0,012 | 0,046 | 1         | 0,797308464   | 1,254219722     | 0,260869565     |
| CNKS2                                                                                               | 0,031028599 | -0,327220819 | 0,012 | 0,077 | 1         | 0,797070468   | 1,254594218     | 0,155844156     |
| RBM43                                                                                               | 0,149962908 | -0,327265344 | 0,256 | 0,154 | 1         | 0,797045868   | 1,254632939     | 1,662337662     |
| ADPRHL1                                                                                             | 0,01991529  | -0,327532863 | 0     | 0,063 | 1         | 0,796898086   | 1,254865607     | 0               |
| NCOA7                                                                                               | 0,881508495 | -0,327572744 | 0,207 | 0,189 | 1         | 0,796876057   | 1,254900296     | 1,095238095     |
| LINC00844                                                                                           | 0,740727219 | -0,328053723 | 0,085 | 0,091 | 1         | 0,796610432   | 1,255318736     | 0,934065934     |
| PFKL                                                                                                | 0,01634179  | -0,328091181 | 0,317 | 0,158 | 1         | 0,796589749   | 1,255351329     | 2,006329114     |
| BRAF                                                                                                | 0,906253866 | -0,328512616 | 0,195 | 0,165 | 1         | 0,796357086   | 1,255718091     | 1,181818182     |
| NPC2                                                                                                | 0,395931265 | -0,328575178 | 0,598 | 0,389 | 1         | 0,796322553   | 1,255772546     | 1,537275064     |
| FXVD6                                                                                               | 0,000828974 | -0,328658868 | 0,28  | 0,105 | 1         | 0,79627636    | 1,255845395     | 2,666666667     |
| SLC25A5                                                                                             | 0,887543425 | -0,32885575  | 0,683 | 0,491 | 1         | 0,796167701   | 1,25601679      | 1,391038697     |
| SIN3A                                                                                               | 0,658466221 | -0,32956578  | 0,195 | 0,193 | 1         | 0,795775959   | 1,256635098     | 1,010362694     |
| KMT2C                                                                                               | 0,161262401 | -0,329718832 | 0,354 | 0,218 | 1         | 0,795691542   | 1,256768418     | 1,623853211     |
| TNRC6B                                                                                              | 0,327242373 | -0,32981763  | 0,537 | 0,365 | 1         | 0,795637053   | 1,256854486     | 1,471232877     |
| NTRK2                                                                                               | 0,016614385 | -0,330357122 | 0     | 0,067 | 1         | 0,795339582   | 1,257324572     | 0               |
| RELT                                                                                                | 0,429681097 | -0,330593388 | 0,049 | 0,07  | 1         | 0,795209343   | 1,257530497     | 0,7             |
| KATNBL1                                                                                             | 0,556080572 | -0,330754304 | 0,244 | 0,182 | 1         | 0,795120651   | 1,257670768     | 1,340659341     |
| PER3                                                                                                | 0,458683771 | -0,330946042 | 0,134 | 0,158 | 1         | 0,795014985   | 1,257837927     | 0,848101266     |
| MEX3D                                                                                               | 0,166468598 | -0,330976267 | 0,366 | 0,225 | 1         | 0,794998329   | 1,257864279     | 1,626666667     |
| H2AW                                                                                                | 0,643230196 | -0,331436809 | 0,11  | 0,119 | 1         | 0,794744587   | 1,258265883     | 0,924369748     |
| CCDC117                                                                                             | 0,475329148 | -0,331741308 | 0,098 | 0,116 | 1         | 0,794576864   | 1,258531484     | 0,844827586     |
| TBCE                                                                                                | 0,172849624 | -0,332231897 | 0,037 | 0,077 | 1         | 0,794306714   | 1,258959521     | 0,480519481     |
| YTHDF3                                                                                              | 0,075609469 | -0,332239955 | 0,232 | 0,126 | 1         | 0,794302277   | 1,258966553     | 1,841269841     |

Supplementary Table 2

| Differentially expressed genes_keloid-XL_comparing SC-Keloid vs. (SC-Myel, SC-Nonmyel, SC-Nonmyel2) |             |              |       |       |           |               |                 |                 |
|-----------------------------------------------------------------------------------------------------|-------------|--------------|-------|-------|-----------|---------------|-----------------|-----------------|
| gene                                                                                                | p_val       | avg_log2FC   | pct.1 | pct.2 | p_val_adj | Foldchange_UP | Foldchange_DOWN | Ratio_pct1_pct2 |
| VPS13C                                                                                              | 0,020317235 | -0,332312395 | 0,427 | 0,225 | 1         | 0,794262395   | 1,259029769     | 1,897777778     |
| STAG1                                                                                               | 0,274287354 | -0,333062797 | 0,256 | 0,172 | 1         | 0,793849376   | 1,25968481      | 1,488372093     |
| FAM107B                                                                                             | 0,297798707 | -0,333426465 | 0,366 | 0,253 | 1         | 0,793649291   | 1,260002385     | 1,446640316     |
| GSE1                                                                                                | 0,248684    | -0,333792958 | 0,049 | 0,084 | 1         | 0,793447703   | 1,260322509     | 0,583333333     |
| AK3                                                                                                 | 0,375985858 | -0,334442589 | 0,293 | 0,204 | 1         | 0,793090502   | 1,260890147     | 1,43627451      |
| FAR1                                                                                                | 0,955980625 | -0,334455657 | 0,183 | 0,165 | 1         | 0,793083318   | 1,260901569     | 1,109090909     |
| NFKB2                                                                                               | 0,628084086 | -0,334898437 | 0,146 | 0,158 | 1         | 0,792839949   | 1,261288613     | 0,924050633     |
| DDX17                                                                                               | 0,765092901 | -0,334994874 | 0,78  | 0,6   | 1         | 0,792786953   | 1,261372927     | 1,3             |
| KIAA1109                                                                                            | 0,680538799 | -0,335321594 | 0,207 | 0,161 | 1         | 0,792607435   | 1,261658616     | 1,285714286     |
| AL627171.1                                                                                          | 0,063131319 | -0,335584269 | 0,012 | 0,063 | 1         | 0,792463136   | 1,261888351     | 0,19047619      |
| ARMCX4                                                                                              | 0,439833432 | -0,335590147 | 0,073 | 0,095 | 1         | 0,792459907   | 1,261893492     | 0,768421053     |
| CHMP2B                                                                                              | 0,084677419 | -0,335924789 | 0,366 | 0,214 | 1         | 0,792276113   | 1,26218623      | 1,710280374     |
| LDHA                                                                                                | 0,264857162 | -0,33660993  | 0,561 | 0,386 | 1         | 0,791899947   | 1,262785789     | 1,453367876     |
| CYSTM1                                                                                              | 0,212057819 | -0,336655585 | 0,622 | 0,386 | 1         | 0,791874888   | 1,262825751     | 1,611398964     |
| CPT1A                                                                                               | 0,034875837 | -0,337069069 | 0,024 | 0,095 | 1         | 0,791647965   | 1,263187736     | 0,252631579     |
| CNTN1                                                                                               | 0,11202894  | -0,337201423 | 0,024 | 0,07  | 1         | 0,791575342   | 1,263303627     | 0,342857143     |
| ZNF397                                                                                              | 0,810639159 | -0,337525429 | 0,122 | 0,102 | 1         | 0,791397586   | 1,263587377     | 1,196078431     |
| CNOT6                                                                                               | 0,453842854 | -0,337723993 | 0,098 | 0,119 | 1         | 0,791288671   | 1,263761301     | 0,823529412     |
| YY1AP1                                                                                              | 0,294594782 | -0,337930401 | 0,268 | 0,179 | 1         | 0,791175468   | 1,263942122     | 1,497206704     |
| CHERP                                                                                               | 0,233012742 | -0,337976219 | 0,061 | 0,098 | 1         | 0,791150342   | 1,263982263     | 0,62244898      |
| ERRFI1                                                                                              | 0,877653482 | -0,338191123 | 0,122 | 0,105 | 1         | 0,791032501   | 1,26417056      | 1,161904762     |
| TTYH1                                                                                               | 0,996459061 | -0,338209541 | 0,195 | 0,172 | 1         | 0,791022402   | 1,264186699     | 1,13372093      |
| MAP3K3                                                                                              | 0,809485451 | -0,338470322 | 0,146 | 0,123 | 1         | 0,790879431   | 1,264415234     | 1,18699187      |
| ATP1B3                                                                                              | 0,242424151 | -0,338550612 | 0,378 | 0,235 | 1         | 0,790835417   | 1,264485604     | 1,608510638     |
| SCAF11                                                                                              | 0,179415703 | -0,338591648 | 0,476 | 0,298 | 1         | 0,790812923   | 1,264521572     | 1,597315436     |
| CASK                                                                                                | 0,618140307 | -0,338806345 | 0,073 | 0,084 | 1         | 0,790695246   | 1,264709767     | 0,869047619     |
| RAB38                                                                                               | 0,318650799 | -0,339914405 | 0,049 | 0,077 | 1         | 0,790088187   | 1,265681499     | 0,636363636     |
| FKBPL                                                                                               | 0,387890691 | -0,340141879 | 0,085 | 0,112 | 1         | 0,78996362    | 1,265881079     | 0,758928571     |
| ARF6                                                                                                | 0,5624931   | -0,340219472 | 0,549 | 0,379 | 1         | 0,789921135   | 1,265949163     | 1,448548813     |
| GJA1                                                                                                | 0,70493481  | -0,340723305 | 0,098 | 0,105 | 1         | 0,789645319   | 1,266391348     | 0,933333333     |

Supplementary Table 2

| Differentially expressed genes_keloid-XL_comparing SC-Keloid vs. (SC-Myel, SC-Nonmyel, SC-Nonmyel2) |             |              |       |       |           |               |                 |                 |
|-----------------------------------------------------------------------------------------------------|-------------|--------------|-------|-------|-----------|---------------|-----------------|-----------------|
| gene                                                                                                | p_val       | avg_log2FC   | pct.1 | pct.2 | p_val_adj | Foldchange_UP | Foldchange_DOWN | Ratio_pct1_pct2 |
| KCNH8                                                                                               | 0,127486067 | -0,340866407 | 0,037 | 0,084 | 1         | 0,789566997   | 1,266516969     | 0,44047619      |
| IFNGR1                                                                                              | 0,604150896 | -0,340951411 | 0,268 | 0,2   | 1         | 0,789520477   | 1,266591595     | 1,34            |
| KAT2B                                                                                               | 0,747325565 | -0,341430792 | 0,098 | 0,102 | 1         | 0,789258177   | 1,26701253      | 0,960784314     |
| NASP                                                                                                | 0,576752772 | -0,341541048 | 0,512 | 0,351 | 1         | 0,789197862   | 1,267109363     | 1,458689459     |
| NSD1                                                                                                | 0,544166062 | -0,342065418 | 0,232 | 0,175 | 1         | 0,788911067   | 1,267569998     | 1,325714286     |
| MYOT                                                                                                | 0,194214173 | -0,342683667 | 0,476 | 0,305 | 1         | 0,788573062   | 1,268113316     | 1,560655738     |
| MGAT3                                                                                               | 0,215491374 | -0,343276266 | 0,049 | 0,088 | 1         | 0,788249215   | 1,268634311     | 0,556818182     |
| TFAP2C                                                                                              | 0,716718211 | -0,343611651 | 0,11  | 0,088 | 1         | 0,788065992   | 1,268929265     | 1,25            |
| GAS6                                                                                                | 0,109391882 | -0,343679835 | 0,012 | 0,053 | 1         | 0,788028747   | 1,268989239     | 0,226415094     |
| MAPK8IP1                                                                                            | 0,759100858 | -0,343754196 | 0,11  | 0,116 | 1         | 0,787988131   | 1,269054648     | 0,948275862     |
| INSIG1                                                                                              | 0,977882688 | -0,343762213 | 0,134 | 0,123 | 1         | 0,787983752   | 1,269061701     | 1,089430894     |
| DNAJC27                                                                                             | 0,843959765 | -0,343858131 | 0,061 | 0,063 | 1         | 0,787931364   | 1,269146077     | 0,968253968     |
| MT-ATP6                                                                                             | 0,0016524   | -0,343887587 | 0,902 | 0,923 | 1         | 0,787915277   | 1,26917199      | 0,977248104     |
| DOT1L                                                                                               | 0,217873661 | -0,344103538 | 0,085 | 0,13  | 1         | 0,787797346   | 1,269361981     | 0,653846154     |
| RGS2                                                                                                | 0,271584812 | -0,344173913 | 0,293 | 0,2   | 1         | 0,787758918   | 1,269423903     | 1,465           |
| SPTAN1                                                                                              | 0,799109332 | -0,344563365 | 0,72  | 0,544 | 1         | 0,787546293   | 1,269766627     | 1,323529412     |
| LINC00342                                                                                           | 0,489177521 | -0,344782011 | 0,061 | 0,081 | 1         | 0,787426947   | 1,269959079     | 0,75308642      |
| SPART                                                                                               | 0,468682361 | -0,34490163  | 0,183 | 0,133 | 1         | 0,787361661   | 1,27006438      | 1,37593985      |
| BIRC6                                                                                               | 0,563492547 | -0,34505897  | 0,195 | 0,147 | 1         | 0,787275796   | 1,270202901     | 1,326530612     |
| RSPO3                                                                                               | 0,742553245 | -0,345248287 | 0,195 | 0,161 | 1         | 0,787172493   | 1,270369593     | 1,211180124     |
| PHF23                                                                                               | 0,737742299 | -0,345821531 | 0,122 | 0,123 | 1         | 0,786859778   | 1,270874466     | 0,991869919     |
| OPTN                                                                                                | 0,461033329 | -0,34647035  | 0,415 | 0,295 | 1         | 0,786505986   | 1,271446141     | 1,406779661     |
| SMARCA5                                                                                             | 0,527558116 | -0,346672392 | 0,415 | 0,295 | 1         | 0,786395847   | 1,271624213     | 1,406779661     |
| ZMIZ1                                                                                               | 0,191424132 | -0,346790693 | 0,256 | 0,161 | 1         | 0,786331365   | 1,27172849      | 1,590062112     |
| TFAP2A                                                                                              | 0,025878786 | -0,347493008 | 0,524 | 0,288 | 1         | 0,785948666   | 1,272347728     | 1,819444444     |
| RBM5                                                                                                | 0,242051572 | -0,348341059 | 0,39  | 0,26  | 1         | 0,785486802   | 1,273095865     | 1,5             |
| NRDC                                                                                                | 0,554980812 | -0,348405626 | 0,341 | 0,249 | 1         | 0,785451649   | 1,273152843     | 1,369477912     |
| NOP56                                                                                               | 0,084256376 | -0,348446066 | 0,366 | 0,214 | 1         | 0,785429633   | 1,273188531     | 1,710280374     |
| PPP6R3                                                                                              | 0,753064346 | -0,348783643 | 0,195 | 0,154 | 1         | 0,785245871   | 1,27348648      | 1,266233766     |
| INSC                                                                                                | 0,512001477 | -0,349170393 | 0,317 | 0,232 | 1         | 0,785035395   | 1,273827915     | 1,36637931      |

Supplementary Table 2

| Differentially expressed genes_keloid-XL_comparing SC-Keloid vs. (SC-Myel, SC-Nonmyel, SC-Nonmyel2) |             |              |       |       |           |               |                 |                 |
|-----------------------------------------------------------------------------------------------------|-------------|--------------|-------|-------|-----------|---------------|-----------------|-----------------|
| gene                                                                                                | p_val       | avg_log2FC   | pct.1 | pct.2 | p_val_adj | Foldchange_UP | Foldchange_DOWN | Ratio_pct1_pct2 |
| LGI4                                                                                                | 0,570999251 | -0,349416584 | 0,61  | 0,421 | 1         | 0,784901442   | 1,274045308     | 1,448931116     |
| EZR                                                                                                 | 0,405558706 | -0,350356613 | 0,549 | 0,365 | 1         | 0,784390184   | 1,274875719     | 1,504109589     |
| CLDN11                                                                                              | 0,163066643 | -0,350371818 | 0,049 | 0,095 | 1         | 0,784381917   | 1,274889155     | 0,515789474     |
| AXIN2                                                                                               | 0,625165383 | -0,350389621 | 0,073 | 0,084 | 1         | 0,784372238   | 1,274904887     | 0,869047619     |
| CNN3                                                                                                | 0,517376363 | -0,350654451 | 0,89  | 0,744 | 1         | 0,784228267   | 1,275138939     | 1,196236559     |
| DOK6                                                                                                | 0,004659136 | -0,350657383 | 0     | 0,091 | 1         | 0,784226673   | 1,27514153      | 0               |
| JADE1                                                                                               | 0,818883392 | -0,350789309 | 0,146 | 0,144 | 1         | 0,784154964   | 1,27525814      | 1,013888889     |
| PRDX1                                                                                               | 0,666405874 | -0,35097703  | 0,695 | 0,498 | 1         | 0,784052937   | 1,275424085     | 1,395582329     |
| PTAR1                                                                                               | 0,86922692  | -0,352122745 | 0,293 | 0,242 | 1         | 0,78343053    | 1,276437364     | 1,210743802     |
| TOPORS                                                                                              | 0,823413407 | -0,352446209 | 0,098 | 0,098 | 1         | 0,783254898   | 1,276723584     | 1               |
| ADM                                                                                                 | 0,318845664 | -0,352459308 | 0,061 | 0,091 | 1         | 0,783247786   | 1,276735176     | 0,67032967      |
| GATAD1                                                                                              | 0,367275334 | -0,352535622 | 0,183 | 0,126 | 1         | 0,783206356   | 1,276802713     | 1,452380952     |
| ATP6V0E1                                                                                            | 0,610572005 | -0,352964415 | 0,549 | 0,389 | 1         | 0,782973609   | 1,277182256     | 1,411311054     |
| PDZD4                                                                                               | 0,701619403 | -0,353049062 | 0,122 | 0,098 | 1         | 0,782927671   | 1,277257194     | 1,244897959     |
| MT-ND1                                                                                              | 0,039920432 | -0,353280644 | 0,902 | 0,8   | 1         | 0,782802005   | 1,277462236     | 1,1275          |
| NDEL1                                                                                               | 0,577052013 | -0,353677072 | 0,293 | 0,218 | 1         | 0,782586934   | 1,27781331      | 1,344036697     |
| BCL9L                                                                                               | 0,94025416  | -0,354099853 | 0,207 | 0,186 | 1         | 0,782357631   | 1,278187827     | 1,112903226     |
| MGAT4C                                                                                              | 0,034342747 | -0,354211151 | 0     | 0,053 | 1         | 0,782297277   | 1,278286438     | 0               |
| FLNB                                                                                                | 0,35795592  | -0,354412756 | 0,183 | 0,126 | 1         | 0,782187965   | 1,278465081     | 1,452380952     |
| CDV3                                                                                                | 0,543794486 | -0,355170705 | 0,415 | 0,302 | 1         | 0,781777135   | 1,279136925     | 1,374172185     |
| NUP188                                                                                              | 0,500166193 | -0,355221075 | 0,146 | 0,105 | 1         | 0,781749841   | 1,279181585     | 1,39047619      |
| XPO1                                                                                                | 0,072319125 | -0,355222196 | 0,439 | 0,256 | 1         | 0,781749233   | 1,279182579     | 1,71484375      |
| PHIP                                                                                                | 0,777586277 | -0,355332516 | 0,268 | 0,246 | 1         | 0,781689457   | 1,279280399     | 1,089430894     |
| KLF16                                                                                               | 0,754336675 | -0,35555892  | 0,22  | 0,211 | 1         | 0,781566795   | 1,279481174     | 1,042654028     |
| SLC41A1                                                                                             | 0,093341908 | -0,356034122 | 0,049 | 0,105 | 1         | 0,781309401   | 1,279902685     | 0,466666667     |
| DUSP16                                                                                              | 0,203770637 | -0,35640431  | 0,073 | 0,116 | 1         | 0,781108946   | 1,280231144     | 0,629310345     |
| PTP4A2                                                                                              | 0,529592663 | -0,356543309 | 0,524 | 0,361 | 1         | 0,781033693   | 1,280354496     | 1,451523546     |
| PCGF5                                                                                               | 0,065722874 | -0,356753018 | 0,305 | 0,168 | 1         | 0,780920171   | 1,28054062      | 1,81547619      |
| NUP98                                                                                               | 0,398193082 | -0,35724258  | 0,134 | 0,158 | 1         | 0,780655219   | 1,280975231     | 0,848101266     |
| KLF2                                                                                                | 0,028318375 | -0,357396954 | 0,683 | 0,393 | 1         | 0,780571691   | 1,281112308     | 1,737913486     |

Supplementary Table 2

| Differentially expressed genes_keloid-XL_comparing SC-Keloid vs. (SC-Myel, SC-Nonmyel, SC-Nonmyel2) |             |              |       |       |           |               |                 |                 |
|-----------------------------------------------------------------------------------------------------|-------------|--------------|-------|-------|-----------|---------------|-----------------|-----------------|
| gene                                                                                                | p_val       | avg_log2FC   | pct.1 | pct.2 | p_val_adj | Foldchange_UP | Foldchange_DOWN | Ratio_pct1_pct2 |
| ATN1                                                                                                | 0,42016442  | -0,357507377 | 0,561 | 0,372 | 1         | 0,780511949   | 1,281210367     | 1,508064516     |
| POGZ                                                                                                | 0,170449103 | -0,357518432 | 0,476 | 0,305 | 1         | 0,780505968   | 1,281220184     | 1,560655738     |
| CBL                                                                                                 | 0,618569622 | -0,357796203 | 0,256 | 0,196 | 1         | 0,780355707   | 1,281466889     | 1,306122449     |
| FRYL                                                                                                | 0,710349084 | -0,359166528 | 0,244 | 0,193 | 1         | 0,779614848   | 1,282684652     | 1,264248705     |
| TGIF2                                                                                               | 0,299406334 | -0,360114286 | 0,098 | 0,13  | 1         | 0,779102859   | 1,283527571     | 0,753846154     |
| ANTXR2                                                                                              | 0,240250124 | -0,360523635 | 0,098 | 0,14  | 1         | 0,778881828   | 1,28389181      | 0,7             |
| CDK19                                                                                               | 0,228650188 | -0,36106505  | 0,11  | 0,154 | 1         | 0,778589584   | 1,284373719     | 0,714285714     |
| CLN8                                                                                                | 0,814406956 | -0,361146356 | 0,159 | 0,13  | 1         | 0,778545706   | 1,284446105     | 1,223076923     |
| KDM3A                                                                                               | 0,672796684 | -0,361537605 | 0,134 | 0,14  | 1         | 0,778334599   | 1,284794485     | 0,957142857     |
| OXR1                                                                                                | 0,791507316 | -0,361728248 | 0,232 | 0,189 | 1         | 0,778231753   | 1,284964274     | 1,227513228     |
| HOOK3                                                                                               | 0,339900293 | -0,361766076 | 0,415 | 0,281 | 1         | 0,778211348   | 1,284997966     | 1,476868327     |
| FGD4                                                                                                | 0,42117241  | -0,361832245 | 0,146 | 0,168 | 1         | 0,778175657   | 1,285056904     | 0,869047619     |
| THSD7B                                                                                              | 0,034342747 | -0,361917023 | 0     | 0,053 | 1         | 0,77812993    | 1,285132421     | 0               |
| ZMYM2                                                                                               | 0,118223461 | -0,36212452  | 0,378 | 0,221 | 1         | 0,778018022   | 1,285317269     | 1,71040724      |
| EIF1AX                                                                                              | 0,50102754  | -0,362560311 | 0,598 | 0,421 | 1         | 0,777783044   | 1,285705581     | 1,420427553     |
| KLHL26                                                                                              | 0,173448227 | -0,362915268 | 0,049 | 0,091 | 1         | 0,777591704   | 1,286021951     | 0,538461538     |
| RNASE4                                                                                              | 0,524440298 | -0,363641873 | 0,11  | 0,126 | 1         | 0,777200173   | 1,286669812     | 0,873015873     |
| HIF1A                                                                                               | 0,359911359 | -0,363747966 | 0,232 | 0,158 | 1         | 0,777143021   | 1,286764434     | 1,46835443      |
| SMAD7                                                                                               | 0,750526475 | -0,363753891 | 0,159 | 0,13  | 1         | 0,777139829   | 1,286769719     | 1,223076923     |
| UACA                                                                                                | 0,093879674 | -0,364042487 | 0,317 | 0,186 | 1         | 0,776984386   | 1,287027149     | 1,704301075     |
| PABPC1                                                                                              | 0,573960203 | -0,364048077 | 0,78  | 0,618 | 1         | 0,776981376   | 1,287032136     | 1,262135922     |
| FAM181B                                                                                             | 0,676884659 | -0,364059687 | 0,11  | 0,116 | 1         | 0,776975123   | 1,287042493     | 0,948275862     |
| ANKRD13A                                                                                            | 0,484354275 | -0,364232872 | 0,061 | 0,081 | 1         | 0,776881858   | 1,287197003     | 0,75308642      |
| DMXL2                                                                                               | 0,32123519  | -0,364313666 | 0,049 | 0,077 | 1         | 0,776838353   | 1,287269091     | 0,636363636     |
| FAM133B                                                                                             | 0,208116529 | -0,365938047 | 0,585 | 0,365 | 1         | 0,775964176   | 1,288719288     | 1,602739726     |
| REL                                                                                                 | 0,286980076 | -0,366038213 | 0,11  | 0,144 | 1         | 0,775910302   | 1,288808767     | 0,763888889     |
| SMAD5                                                                                               | 0,880612054 | -0,366410034 | 0,244 | 0,2   | 1         | 0,775710355   | 1,28914097      | 1,22            |
| DNTTIP2                                                                                             | 0,837252272 | -0,366629855 | 0,195 | 0,161 | 1         | 0,775592171   | 1,28933741      | 1,211180124     |
| CDKN2AIP                                                                                            | 0,884278568 | -0,367136846 | 0,195 | 0,175 | 1         | 0,775319661   | 1,289790587     | 1,114285714     |
| CWC25                                                                                               | 0,080385448 | -0,367174976 | 0,207 | 0,112 | 1         | 0,775299169   | 1,289824676     | 1,848214286     |

Supplementary Table 2

| Differentially expressed genes_keloid-XL_comparing SC-Keloid vs. (SC-Myel, SC-Nonmyel, SC-Nonmyel2) |             |              |       |       |           |               |                 |                 |
|-----------------------------------------------------------------------------------------------------|-------------|--------------|-------|-------|-----------|---------------|-----------------|-----------------|
| gene                                                                                                | p_val       | avg_log2FC   | pct.1 | pct.2 | p_val_adj | Foldchange_UP | Foldchange_DOWN | Ratio_pct1_pct2 |
| RBM8A                                                                                               | 0,885275348 | -0,367403035 | 0,622 | 0,446 | 1         | 0,775176621   | 1,290028586     | 1,394618834     |
| RRAGC                                                                                               | 0,675243321 | -0,367931953 | 0,207 | 0,158 | 1         | 0,774892479   | 1,29050162      | 1,310126582     |
| IL6                                                                                                 | 0,111382367 | -0,368064054 | 0,024 | 0,07  | 1         | 0,774821529   | 1,290619791     | 0,342857143     |
| RBM7                                                                                                | 0,988370909 | -0,368085089 | 0,183 | 0,161 | 1         | 0,774810232   | 1,290638609     | 1,136645963     |
| GPNMB                                                                                               | 0,961691101 | -0,368289437 | 0,11  | 0,102 | 1         | 0,774700493   | 1,290821433     | 1,078431373     |
| IGF2BP2                                                                                             | 0,82885603  | -0,368499031 | 0,159 | 0,151 | 1         | 0,774587953   | 1,291008975     | 1,052980132     |
| RBPJ                                                                                                | 0,739714056 | -0,368724754 | 0,402 | 0,305 | 1         | 0,774466771   | 1,291210982     | 1,318032787     |
| TTYH2                                                                                               | 0,332829204 | -0,369061261 | 0,085 | 0,116 | 1         | 0,774286148   | 1,291512191     | 0,732758621     |
| FAM13B                                                                                              | 0,136416412 | -0,369109246 | 0,11  | 0,172 | 1         | 0,774260396   | 1,291555148     | 0,639534884     |
| SNHG18                                                                                              | 0,233012742 | -0,369534054 | 0,061 | 0,098 | 1         | 0,774032445   | 1,291935508     | 0,62244898      |
| GOLGB1                                                                                              | 0,697445755 | -0,370082106 | 0,366 | 0,284 | 1         | 0,773738461   | 1,292426382     | 1,288732394     |
| STOX2                                                                                               | 0,214645572 | -0,371256806 | 0,098 | 0,14  | 1         | 0,773108709   | 1,293479156     | 0,7             |
| EGR2                                                                                                | 0,804555207 | -0,371280954 | 0,134 | 0,112 | 1         | 0,773095768   | 1,293500807     | 1,196428571     |
| RBM38                                                                                               | 0,646131015 | -0,372354571 | 0,146 | 0,147 | 1         | 0,772520664   | 1,294463756     | 0,993197279     |
| PCM1                                                                                                | 0,562063348 | -0,372946229 | 0,634 | 0,439 | 1         | 0,772203913   | 1,294994732     | 1,444191344     |
| RIPK2                                                                                               | 0,577392821 | -0,373247027 | 0,195 | 0,147 | 1         | 0,772042928   | 1,295264763     | 1,326530612     |
| AKAP7                                                                                               | 0,438877684 | -0,37334364  | 0,085 | 0,109 | 1         | 0,771991228   | 1,295351506     | 0,779816514     |
| ZDHHC8                                                                                              | 0,111142373 | -0,374045655 | 0,268 | 0,158 | 1         | 0,771615669   | 1,295981977     | 1,696202532     |
| CEP97                                                                                               | 0,644675697 | -0,374128831 | 0,171 | 0,172 | 1         | 0,771571184   | 1,296056697     | 0,994186047     |
| HAS2                                                                                                | 0,158215489 | -0,374281693 | 0,305 | 0,196 | 1         | 0,771489436   | 1,296194029     | 1,556122449     |
| SESN1                                                                                               | 0,81579734  | -0,374443775 | 0,085 | 0,088 | 1         | 0,771402766   | 1,29633966      | 0,965909091     |
| HMBOX1                                                                                              | 0,616190002 | -0,374559743 | 0,11  | 0,119 | 1         | 0,771340762   | 1,296443867     | 0,924369748     |
| LCOR                                                                                                | 0,905208515 | -0,37458939  | 0,195 | 0,175 | 1         | 0,77132491    | 1,29647051      | 1,114285714     |
| RB1CC1                                                                                              | 0,987424741 | -0,374606502 | 0,317 | 0,263 | 1         | 0,771315762   | 1,296485887     | 1,205323194     |
| EZH1                                                                                                | 0,898918423 | -0,374740513 | 0,11  | 0,095 | 1         | 0,771244118   | 1,296606322     | 1,157894737     |
| CLASP2                                                                                              | 0,851856147 | -0,375046799 | 0,195 | 0,179 | 1         | 0,7710804     | 1,296881623     | 1,089385475     |
| FZD7                                                                                                | 0,148169052 | -0,375089909 | 0,073 | 0,123 | 1         | 0,771057359   | 1,296920376     | 0,593495935     |
| EPM2AIP1                                                                                            | 0,78471049  | -0,375168474 | 0,171 | 0,14  | 1         | 0,771015371   | 1,296991005     | 1,221428571     |
| SCGB2A2                                                                                             | 0,70094195  | -0,375432402 | 0,061 | 0,07  | 1         | 0,770874333   | 1,297228299     | 0,871428571     |
| IPO7                                                                                                | 0,804580941 | -0,375457065 | 0,28  | 0,221 | 1         | 0,770861155   | 1,297250476     | 1,266968326     |

Supplementary Table 2

| Differentially expressed genes_keloid-XL_comparing SC-Keloid vs. (SC-Myel, SC-Nonmyel, SC-Nonmyel2) |             |              |       |       |           |               |                 |                 |
|-----------------------------------------------------------------------------------------------------|-------------|--------------|-------|-------|-----------|---------------|-----------------|-----------------|
| gene                                                                                                | p_val       | avg_log2FC   | pct.1 | pct.2 | p_val_adj | Foldchange_UP | Foldchange_DOWN | Ratio_pct1_pct2 |
| MAX                                                                                                 | 0,930456389 | -0,37593649  | 0,22  | 0,193 | 1         | 0,770605031   | 1,29768164      | 1,139896373     |
| PDZRN3                                                                                              | 0,584773161 | -0,376631249 | 0,134 | 0,144 | 1         | 0,77023402    | 1,298306715     | 0,930555556     |
| DAAM2                                                                                               | 0,891754206 | -0,376814099 | 0,146 | 0,126 | 1         | 0,770136405   | 1,298471275     | 1,158730159     |
| RAP1GAP                                                                                             | 0,008621864 | -0,377041223 | 0,012 | 0,102 | 1         | 0,770015172   | 1,29867571      | 0,117647059     |
| RAB11FIP5                                                                                           | 0,014577016 | -0,37709661  | 0,012 | 0,091 | 1         | 0,76998561    | 1,298725569     | 0,131868132     |
| LITAF                                                                                               | 0,227777344 | -0,37769426  | 0,476 | 0,295 | 1         | 0,769666703   | 1,299263689     | 1,613559322     |
| TNFAIP2                                                                                             | 0,633994778 | -0,377702955 | 0,073 | 0,084 | 1         | 0,769662064   | 1,29927152      | 0,869047619     |
| KIAA0232                                                                                            | 0,909942628 | -0,377958903 | 0,183 | 0,165 | 1         | 0,769525531   | 1,299502044     | 1,109090909     |
| FAM3C                                                                                               | 0,654739504 | -0,37825541  | 0,634 | 0,425 | 1         | 0,769367392   | 1,299769149     | 1,491764706     |
| LGR4                                                                                                | 0,633140162 | -0,378864474 | 0,134 | 0,14  | 1         | 0,769042656   | 1,30031799      | 0,957142857     |
| FNIP2                                                                                               | 0,628955844 | -0,378918881 | 0,122 | 0,13  | 1         | 0,769013654   | 1,300367028     | 0,938461538     |
| SLC25A37                                                                                            | 0,573183953 | -0,379634431 | 0,256 | 0,189 | 1         | 0,768632332   | 1,301012146     | 1,354497354     |
| IFITM1                                                                                              | 0,052655547 | -0,380116503 | 0,024 | 0,088 | 1         | 0,768375539   | 1,301446948     | 0,272727273     |
| DAZAP1                                                                                              | 0,593459982 | -0,380195265 | 0,293 | 0,218 | 1         | 0,768333592   | 1,301518001     | 1,344036697     |
| FNBP1                                                                                               | 0,402423498 | -0,380339201 | 0,134 | 0,158 | 1         | 0,76825694    | 1,301647858     | 0,848101266     |
| SNRNP70                                                                                             | 0,548188312 | -0,380373924 | 0,549 | 0,389 | 1         | 0,768238449   | 1,301679187     | 1,411311054     |
| ZFYVE28                                                                                             | 0,189916689 | -0,380531177 | 0,061 | 0,105 | 1         | 0,768154717   | 1,301821076     | 0,580952381     |
| FUNDC2                                                                                              | 0,274604414 | -0,381619755 | 0,366 | 0,235 | 1         | 0,767575328   | 1,30280373      | 1,557446809     |
| RMND5A                                                                                              | 0,674814184 | -0,381654896 | 0,195 | 0,189 | 1         | 0,767556632   | 1,302835463     | 1,031746032     |
| FLRT3                                                                                               | 0,40663287  | -0,382421024 | 0,28  | 0,196 | 1         | 0,767149137   | 1,303527505     | 1,428571429     |
| BNIP3L                                                                                              | 0,989144982 | -0,38243527  | 0,305 | 0,26  | 1         | 0,767141562   | 1,303540376     | 1,173076923     |
| NCOA3                                                                                               | 0,345549451 | -0,382750016 | 0,098 | 0,126 | 1         | 0,766974216   | 1,303824795     | 0,777777778     |
| SPRED1                                                                                              | 0,71683564  | -0,382977439 | 0,232 | 0,179 | 1         | 0,766853322   | 1,304030343     | 1,296089385     |
| SPAG9                                                                                               | 0,875114215 | -0,383038368 | 0,585 | 0,432 | 1         | 0,766820936   | 1,304085417     | 1,354166667     |
| PRKCA                                                                                               | 0,69148689  | -0,38329115  | 0,439 | 0,326 | 1         | 0,766686589   | 1,304313932     | 1,346625767     |
| TNS1                                                                                                | 0,569762883 | -0,383334568 | 0,232 | 0,175 | 1         | 0,766663516   | 1,304353186     | 1,325714286     |
| ZHX1                                                                                                | 0,774149577 | -0,383620704 | 0,171 | 0,137 | 1         | 0,766511476   | 1,30461191      | 1,248175182     |
| PPP3R1                                                                                              | 0,79986163  | -0,384220904 | 0,244 | 0,218 | 1         | 0,766192652   | 1,305154777     | 1,119266055     |
| DPYD                                                                                                | 0,316737346 | -0,38456216  | 0,085 | 0,116 | 1         | 0,766011438   | 1,305463535     | 0,732758621     |
| HIPK2                                                                                               | 0,445517444 | -0,384611987 | 0,11  | 0,13  | 1         | 0,765984983   | 1,305508623     | 0,846153846     |



Supplementary Table 2

| Differentially expressed genes_keloid-XL_comparing SC-Keloid vs. (SC-Myel, SC-Nonmyel, SC-Nonmyel2) |             |              |       |       |           |               |                 |                 |
|-----------------------------------------------------------------------------------------------------|-------------|--------------|-------|-------|-----------|---------------|-----------------|-----------------|
| gene                                                                                                | p_val       | avg_log2FC   | pct.1 | pct.2 | p_val_adj | Foldchange_UP | Foldchange_DOWN | Ratio_pct1_pct2 |
| PAG1                                                                                                | 0,014682754 | -0,385416226 | 0,012 | 0,091 | 1         | 0,765558099   | 1,306236589     | 0,131868132     |
| MID1IP1                                                                                             | 0,15574506  | -0,385730241 | 0,415 | 0,249 | 1         | 0,765391487   | 1,306520934     | 1,666666667     |
| ID3                                                                                                 | 0,354737678 | -0,386007711 | 0,72  | 0,512 | 1         | 0,765244295   | 1,306772239     | 1,40625         |
| SERTAD3                                                                                             | 0,503625245 | -0,38617692  | 0,207 | 0,218 | 1         | 0,765154547   | 1,306925515     | 0,949541284     |
| DIS3                                                                                                | 0,537960754 | -0,386817694 | 0,061 | 0,077 | 1         | 0,764814779   | 1,307506115     | 0,792207792     |
| SWAP70                                                                                              | 0,449762538 | -0,387102094 | 0,073 | 0,095 | 1         | 0,764664025   | 1,307763891     | 0,768421053     |
| MAP3K11                                                                                             | 0,738175729 | -0,387902155 | 0,378 | 0,281 | 1         | 0,76424009    | 1,308489326     | 1,34519573      |
| ZNF608                                                                                              | 0,305511406 | -0,388325823 | 0,122 | 0,154 | 1         | 0,764015693   | 1,308873639     | 0,792207792     |
| SVIP                                                                                                | 0,012493045 | -0,388537217 | 0,341 | 0,168 | 1         | 0,763903752   | 1,309065438     | 2,029761905     |
| ATXN2                                                                                               | 0,838061167 | -0,388933742 | 0,28  | 0,225 | 1         | 0,763693822   | 1,309425284     | 1,244444444     |
| UBXN7                                                                                               | 0,574685263 | -0,389721185 | 0,268 | 0,2   | 1         | 0,763277101   | 1,310140182     | 1,34            |
| FCGR2B                                                                                              | 0,187395723 | -0,389909289 | 0,024 | 0,06  | 1         | 0,763177589   | 1,310311014     | 0,4             |
| ITPR1                                                                                               | 0,57079528  | -0,389969538 | 0,146 | 0,158 | 1         | 0,763145718   | 1,310365736     | 0,924050633     |
| AKIRIN1                                                                                             | 0,905639621 | -0,3907526   | 0,195 | 0,161 | 1         | 0,762731612   | 1,311077165     | 1,211180124     |
| USP34                                                                                               | 0,524283085 | -0,390844175 | 0,476 | 0,333 | 1         | 0,762683199   | 1,311160389     | 1,429429429     |
| CELF2                                                                                               | 0,774921041 | -0,392547431 | 0,463 | 0,358 | 1         | 0,761783301   | 1,312709268     | 1,293296089     |
| FAM126A                                                                                             | 0,379476141 | -0,392682352 | 0,366 | 0,256 | 1         | 0,761712063   | 1,312832039     | 1,4296875       |
| SKIL                                                                                                | 0,062838794 | -0,39308534  | 0,5   | 0,284 | 1         | 0,761499323   | 1,313198803     | 1,76056338      |
| CHD4                                                                                                | 0,61401566  | -0,394322908 | 0,476 | 0,347 | 1         | 0,760846377   | 1,31432577      | 1,371757925     |
| YPEL5                                                                                               | 0,945917677 | -0,394444792 | 0,317 | 0,27  | 1         | 0,760782101   | 1,314436814     | 1,174074074     |
| SIAH1                                                                                               | 0,460076372 | -0,395182649 | 0,366 | 0,256 | 1         | 0,760393103   | 1,315109246     | 1,4296875       |
| ZFR                                                                                                 | 0,820602584 | -0,395646341 | 0,366 | 0,288 | 1         | 0,760148746   | 1,315531999     | 1,270833333     |
| VANGL2                                                                                              | 0,449762538 | -0,395784485 | 0,073 | 0,095 | 1         | 0,760075963   | 1,315657972     | 0,768421053     |
| SYNPO2                                                                                              | 0,030376861 | -0,39673411  | 0,012 | 0,077 | 1         | 0,759575823   | 1,316524263     | 0,155844156     |
| P2RX7                                                                                               | 0,981666481 | -0,3988442   | 0,146 | 0,13  | 1         | 0,758465677   | 1,318451224     | 1,123076923     |
| MAP4K5                                                                                              | 0,882357889 | -0,399040835 | 0,39  | 0,316 | 1         | 0,758362307   | 1,318630937     | 1,234177215     |
| NUDT3                                                                                               | 0,582611152 | -0,400138925 | 0,317 | 0,235 | 1         | 0,757785308   | 1,31963498      | 1,34893617      |
| USP12                                                                                               | 0,901953173 | -0,400482816 | 0,207 | 0,186 | 1         | 0,757604699   | 1,319949575     | 1,112903226     |
| MSANTD3                                                                                             | 0,913380714 | -0,400623933 | 0,195 | 0,165 | 1         | 0,757530598   | 1,320078691     | 1,181818182     |
| SMIM5                                                                                               | 0,345085212 | -0,401706934 | 0,207 | 0,144 | 1         | 0,756962149   | 1,321070019     | 1,4375          |

Supplementary Table 2

| Differentially expressed genes_keloid-XL_comparing SC-Keloid vs. (SC-Myel, SC-Nonmyel, SC-Nonmyel2) |             |              |       |       |           |               |                 |                 |
|-----------------------------------------------------------------------------------------------------|-------------|--------------|-------|-------|-----------|---------------|-----------------|-----------------|
| gene                                                                                                | p_val       | avg_log2FC   | pct.1 | pct.2 | p_val_adj | Foldchange_UP | Foldchange_DOWN | Ratio_pct1_pct2 |
| PLEKHA7                                                                                             | 0,021054818 | -0,401740944 | 0,012 | 0,084 | 1         | 0,756944304   | 1,321101163     | 0,142857143     |
| TARDBP                                                                                              | 0,932322688 | -0,402101497 | 0,293 | 0,235 | 1         | 0,756755155   | 1,321431369     | 1,246808511     |
| MAT2A                                                                                               | 0,753518005 | -0,402297092 | 0,146 | 0,144 | 1         | 0,756652564   | 1,321610535     | 1,013888889     |
| SLC44A1                                                                                             | 0,577122618 | -0,402314975 | 0,366 | 0,263 | 1         | 0,756643185   | 1,321626917     | 1,391634981     |
| TUT4                                                                                                | 0,663537427 | -0,402315216 | 0,268 | 0,253 | 1         | 0,756643059   | 1,321627138     | 1,059288538     |
| KPNA4                                                                                               | 0,623785139 | -0,402613456 | 0,305 | 0,274 | 1         | 0,756486658   | 1,321900378     | 1,113138686     |
| ARHGEF17                                                                                            | 0,780697459 | -0,402860224 | 0,11  | 0,109 | 1         | 0,756357275   | 1,322126504     | 1,009174312     |
| SBF2                                                                                                | 0,073022887 | -0,402882277 | 0,061 | 0,126 | 1         | 0,756345714   | 1,322146714     | 0,484126984     |
| MFSD2A                                                                                              | 0,674935978 | -0,403943354 | 0,122 | 0,095 | 1         | 0,755789639   | 1,323119488     | 1,284210526     |
| USP51                                                                                               | 0,5757463   | -0,404448153 | 0,122 | 0,091 | 1         | 0,755525234   | 1,323582528     | 1,340659341     |
| KLF13                                                                                               | 0,881107086 | -0,40457265  | 0,378 | 0,305 | 1         | 0,755460039   | 1,323696751     | 1,239344262     |
| AZIN1                                                                                               | 0,301567043 | -0,404656875 | 0,402 | 0,267 | 1         | 0,755415937   | 1,323774031     | 1,505617978     |
| KTN1                                                                                                | 0,578768196 | -0,404672585 | 0,695 | 0,554 | 1         | 0,755407711   | 1,323788446     | 1,254512635     |
| PSME4                                                                                               | 0,393031055 | -0,404790516 | 0,134 | 0,154 | 1         | 0,755345964   | 1,323896662     | 0,87012987      |
| LGALS3                                                                                              | 0,51905305  | -0,405315981 | 0,866 | 0,607 | 1         | 0,755070898   | 1,324378946     | 1,426688633     |
| DEDD2                                                                                               | 0,362233303 | -0,40541141  | 0,28  | 0,189 | 1         | 0,755020954   | 1,324466552     | 1,481481481     |
| SLC30A1                                                                                             | 0,319914191 | -0,405917536 | 0,085 | 0,116 | 1         | 0,754756124   | 1,324931283     | 0,732758621     |
| TRIM69                                                                                              | 0,156836717 | -0,406488906 | 0,073 | 0,123 | 1         | 0,754457267   | 1,325456117     | 0,593495935     |
| CLMN                                                                                                | 0,866470549 | -0,406712356 | 0,122 | 0,116 | 1         | 0,754340423   | 1,325661424     | 1,051724138     |
| LRIG1                                                                                               | 0,453824146 | -0,406784359 | 0,146 | 0,165 | 1         | 0,754302776   | 1,325727587     | 0,884848485     |
| RBM25                                                                                               | 0,879896162 | -0,407146053 | 0,622 | 0,474 | 1         | 0,754113691   | 1,326059999     | 1,312236287     |
| PPP1CC                                                                                              | 0,705318462 | -0,407386036 | 0,317 | 0,242 | 1         | 0,753988259   | 1,326280599     | 1,309917355     |
| MTR                                                                                                 | 0,669403118 | -0,407701094 | 0,159 | 0,158 | 1         | 0,75382362    | 1,326570265     | 1,006329114     |
| C10orf90                                                                                            | 0,00964585  | -0,407781826 | 0     | 0,077 | 1         | 0,753781438   | 1,326644501     | 0               |
| MLLT6                                                                                               | 0,275366462 | -0,407886931 | 0,22  | 0,242 | 1         | 0,753726525   | 1,326741155     | 0,909090909     |
| SORBS3                                                                                              | 0,813762289 | -0,408281336 | 0,244 | 0,193 | 1         | 0,753520499   | 1,32710391      | 1,264248705     |
| PCBP1                                                                                               | 0,594019395 | -0,409918318 | 0,744 | 0,558 | 1         | 0,752665987   | 1,328610589     | 1,333333333     |
| ZBTB43                                                                                              | 0,656943012 | -0,411158187 | 0,244 | 0,189 | 1         | 0,752019415   | 1,329752903     | 1,291005291     |
| ABHD5                                                                                               | 0,159439323 | -0,411692383 | 0,134 | 0,193 | 1         | 0,751741011   | 1,330245371     | 0,694300518     |
| DDX5                                                                                                | 0,162911949 | -0,412287449 | 0,854 | 0,775 | 1         | 0,751431006   | 1,330794168     | 1,101935484     |

Supplementary Table 2

| Differentially expressed genes_keloid-XL_comparing SC-Keloid vs. (SC-Myel, SC-Nonmyel, SC-Nonmyel2) |             |              |       |       |           |               |                 |                 |
|-----------------------------------------------------------------------------------------------------|-------------|--------------|-------|-------|-----------|---------------|-----------------|-----------------|
| gene                                                                                                | p_val       | avg_log2FC   | pct.1 | pct.2 | p_val_adj | Foldchange_UP | Foldchange_DOWN | Ratio_pct1_pct2 |
| WAC                                                                                                 | 0,336704313 | -0,412656635 | 0,5   | 0,323 | 1         | 0,751238739   | 1,331134762     | 1,547987616     |
| TENT4B                                                                                              | 0,716098154 | -0,412707964 | 0,159 | 0,126 | 1         | 0,751212011   | 1,331182123     | 1,261904762     |
| CLDND1                                                                                              | 0,971158855 | -0,412815616 | 0,537 | 0,389 | 1         | 0,751155959   | 1,331281458     | 1,380462725     |
| BAIAP2                                                                                              | 0,431599839 | -0,413215448 | 0,171 | 0,186 | 1         | 0,75094781    | 1,331650464     | 0,919354839     |
| SMCHD1                                                                                              | 0,704330668 | -0,4134519   | 0,256 | 0,193 | 1         | 0,750824744   | 1,331868733     | 1,32642487      |
| FBXO25                                                                                              | 0,12602802  | -0,413464848 | 0,085 | 0,14  | 1         | 0,750818005   | 1,331880687     | 0,607142857     |
| GFRA1                                                                                               | 0,370335901 | -0,413551774 | 0,195 | 0,218 | 1         | 0,750772767   | 1,331960939     | 0,894495413     |
| NAA16                                                                                               | 0,086704843 | -0,414199944 | 0,061 | 0,123 | 1         | 0,750435538   | 1,332559492     | 0,495934959     |
| DYRK3                                                                                               | 0,068300349 | -0,414247844 | 0,049 | 0,112 | 1         | 0,750410623   | 1,332603737     | 0,4375          |
| AEBP2                                                                                               | 0,332443593 | -0,414662354 | 0,28  | 0,189 | 1         | 0,750195049   | 1,33298667      | 1,481481481     |
| LACTB                                                                                               | 0,109129058 | -0,414761871 | 0,073 | 0,13  | 1         | 0,750143302   | 1,333078623     | 0,561538462     |
| SPECC1L                                                                                             | 0,617679096 | -0,415314256 | 0,11  | 0,119 | 1         | 0,749856139   | 1,333589136     | 0,924369748     |
| CLIC4                                                                                               | 0,095562539 | -0,41540344  | 0,878 | 0,709 | 1         | 0,749809786   | 1,333671578     | 1,238363893     |
| SNHG7                                                                                               | 0,545460201 | -0,41546934  | 0,476 | 0,333 | 1         | 0,749775537   | 1,333732499     | 1,429429429     |
| DDHD1                                                                                               | 0,529998706 | -0,415605801 | 0,183 | 0,133 | 1         | 0,749704621   | 1,333858659     | 1,37593985      |
| LARP4B                                                                                              | 0,349544264 | -0,415690937 | 0,134 | 0,158 | 1         | 0,74966038    | 1,333937375     | 0,848101266     |
| TSIX                                                                                                | 0,293989663 | -0,415877122 | 0,073 | 0,105 | 1         | 0,749563641   | 1,334109535     | 0,695238095     |
| KLHL28                                                                                              | 0,363411885 | -0,416218241 | 0,207 | 0,14  | 1         | 0,74938643    | 1,334425017     | 1,478571429     |
| LUC7L3                                                                                              | 0,821795385 | -0,416588106 | 0,598 | 0,442 | 1         | 0,749194334   | 1,334767169     | 1,352941176     |
| IL17B                                                                                               | 0,951476382 | -0,416831174 | 0,073 | 0,067 | 1         | 0,749068119   | 1,334992071     | 1,089552239     |
| FGF2                                                                                                | 0,655554304 | -0,417246392 | 0,402 | 0,302 | 1         | 0,748852563   | 1,335376347     | 1,331125828     |
| FGFBP2                                                                                              | 0,438826248 | -0,41757801  | 0,024 | 0,042 | 1         | 0,748680451   | 1,335683332     | 0,571428571     |
| RAB11FIP1                                                                                           | 0,008748668 | -0,417888746 | 0,012 | 0,102 | 1         | 0,748519213   | 1,335971051     | 0,117647059     |
| WNK1                                                                                                | 0,647416822 | -0,418150401 | 0,427 | 0,316 | 1         | 0,74838347    | 1,336213372     | 1,351265823     |
| VWA1                                                                                                | 0,955507096 | -0,418542846 | 0,817 | 0,649 | 1         | 0,748179921   | 1,3365769       | 1,258859784     |
| LRRC8B                                                                                              | 0,697161003 | -0,418724738 | 0,122 | 0,126 | 1         | 0,748085598   | 1,336745424     | 0,968253968     |
| NCAM2                                                                                               | 0,983458312 | -0,418974522 | 0,134 | 0,119 | 1         | 0,747956088   | 1,336976884     | 1,12605042      |
| CDKN2D                                                                                              | 0,936187326 | -0,419137772 | 0,232 | 0,193 | 1         | 0,747871457   | 1,33712818      | 1,202072539     |
| MAP2K3                                                                                              | 0,515329686 | -0,419408616 | 0,207 | 0,211 | 1         | 0,747731068   | 1,337379229     | 0,981042654     |
| CNOT1                                                                                               | 0,810398232 | -0,419926065 | 0,232 | 0,211 | 1         | 0,747462929   | 1,33785899      | 1,099526066     |

Supplementary Table 2

| Differentially expressed genes_keloid-XL_comparing SC-Keloid vs. (SC-Myel, SC-Nonmyel, SC-Nonmyel2) |             |              |       |       |           |               |                 |                 |
|-----------------------------------------------------------------------------------------------------|-------------|--------------|-------|-------|-----------|---------------|-----------------|-----------------|
| gene                                                                                                | p_val       | avg_log2FC   | pct.1 | pct.2 | p_val_adj | Foldchange_UP | Foldchange_DOWN | Ratio_pct1_pct2 |
| AKAP9                                                                                               | 0,90447187  | -0,420121354 | 0,317 | 0,27  | 1         | 0,747361756   | 1,338040101     | 1,174074074     |
| RCAN3                                                                                               | 0,497319113 | -0,420162063 | 0,195 | 0,14  | 1         | 0,747340668   | 1,338077857     | 1,392857143     |
| TMEM245                                                                                             | 0,554105181 | -0,42032115  | 0,22  | 0,221 | 1         | 0,747258263   | 1,338225417     | 0,995475113     |
| SRPK2                                                                                               | 0,288283801 | -0,420340246 | 0,305 | 0,2   | 1         | 0,747248372   | 1,33824313      | 1,525           |
| SDR42E2                                                                                             | 0,172170601 | -0,420974953 | 0,061 | 0,109 | 1         | 0,746919696   | 1,338832013     | 0,559633028     |
| TAPT1                                                                                               | 0,92439736  | -0,421068809 | 0,159 | 0,144 | 1         | 0,746871106   | 1,338919115     | 1,104166667     |
| ATP6V1B2                                                                                            | 0,739510441 | -0,421120492 | 0,171 | 0,165 | 1         | 0,74684435    | 1,338967081     | 1,036363636     |
| MT-CO1                                                                                              | 0,010943849 | -0,42176735  | 0,829 | 0,782 | 1         | 0,746509564   | 1,339567566     | 1,060102302     |
| DDX24                                                                                               | 0,879956008 | -0,421869923 | 0,622 | 0,439 | 1         | 0,746456491   | 1,33966281      | 1,416856492     |
| DIP2B                                                                                               | 0,753785064 | -0,421893707 | 0,366 | 0,277 | 1         | 0,746444185   | 1,339684896     | 1,321299639     |
| FGD5-AS1                                                                                            | 0,220481806 | -0,421967968 | 0,415 | 0,267 | 1         | 0,746405764   | 1,339753856     | 1,554307116     |
| S100A2                                                                                              | 0,025522941 | -0,422106669 | 0,268 | 0,133 | 1         | 0,746334008   | 1,339882666     | 2,015037594     |
| SEMA4A                                                                                              | 0,322532505 | -0,422688143 | 0,049 | 0,077 | 1         | 0,746033261   | 1,340422811     | 0,636363636     |
| NORAD                                                                                               | 0,858310449 | -0,422718983 | 0,646 | 0,495 | 1         | 0,746017313   | 1,340451465     | 1,305050505     |
| TNRC6C                                                                                              | 0,946979476 | -0,422969883 | 0,183 | 0,161 | 1         | 0,745887584   | 1,340684604     | 1,136645963     |
| YWHAG                                                                                               | 0,353897272 | -0,423319655 | 0,451 | 0,404 | 1         | 0,74570677    | 1,341009684     | 1,116336634     |
| RNF114                                                                                              | 0,461385788 | -0,42350359  | 0,354 | 0,242 | 1         | 0,745611703   | 1,341180665     | 1,462809917     |
| TET1                                                                                                | 0,563531116 | -0,424085336 | 0,122 | 0,133 | 1         | 0,745311107   | 1,341721585     | 0,917293233     |
| SOX6                                                                                                | 0,786705115 | -0,424459239 | 0,317 | 0,256 | 1         | 0,745117969   | 1,342069365     | 1,23828125      |
| ZNF83                                                                                               | 0,602182047 | -0,425023938 | 0,256 | 0,193 | 1         | 0,744826373   | 1,34259478      | 1,32642487      |
| OSBPL1A                                                                                             | 0,667030163 | -0,425161897 | 0,122 | 0,126 | 1         | 0,744755151   | 1,342723173     | 0,968253968     |
| PPM1B                                                                                               | 0,740486275 | -0,425404241 | 0,268 | 0,207 | 1         | 0,744630058   | 1,342948743     | 1,29468599      |
| CHPT1                                                                                               | 0,768237793 | -0,426374026 | 0,146 | 0,144 | 1         | 0,744129683   | 1,343851781     | 1,013888889     |
| GNAI1                                                                                               | 0,132188596 | -0,427248245 | 0,073 | 0,126 | 1         | 0,743678905   | 1,344666351     | 0,579365079     |
| SLC9A3R1                                                                                            | 0,070679524 | -0,42724985  | 0,049 | 0,116 | 1         | 0,743678078   | 1,344667847     | 0,422413793     |
| ARID4A                                                                                              | 0,73987168  | -0,42763386  | 0,232 | 0,218 | 1         | 0,743480155   | 1,345025813     | 1,064220183     |
| ADGRL3                                                                                              | 0,003880909 | -0,428454201 | 0     | 0,095 | 1         | 0,74305752    | 1,345790835     | 0               |
| DHH                                                                                                 | 0,117312262 | -0,428980714 | 0,098 | 0,158 | 1         | 0,74278639    | 1,346282072     | 0,620253165     |
| PHACTR4                                                                                             | 0,569151606 | -0,429534044 | 0,329 | 0,242 | 1         | 0,742501557   | 1,346798523     | 1,359504132     |
| KLF10                                                                                               | 0,241110104 | -0,429566833 | 0,439 | 0,432 | 1         | 0,742484682   | 1,346829132     | 1,016203704     |

Supplementary Table 2

| Differentially expressed genes_keloid-XL_comparing SC-Keloid vs. (SC-Myel, SC-Nonmyel, SC-Nonmyel2) |             |              |       |       |           |               |                 |                 |
|-----------------------------------------------------------------------------------------------------|-------------|--------------|-------|-------|-----------|---------------|-----------------|-----------------|
| gene                                                                                                | p_val       | avg_log2FC   | pct.1 | pct.2 | p_val_adj | Foldchange_UP | Foldchange_DOWN | Ratio_pct1_pct2 |
| CFD                                                                                                 | 0,145939827 | -0,42974642  | 0,037 | 0,081 | 1         | 0,742392263   | 1,346996797     | 0,456790123     |
| NR1D2                                                                                               | 0,140645657 | -0,429879384 | 0,134 | 0,189 | 1         | 0,742323845   | 1,347120946     | 0,708994709     |
| FBXW7                                                                                               | 0,313594504 | -0,429919171 | 0,415 | 0,277 | 1         | 0,742303373   | 1,347158099     | 1,498194946     |
| PAF1                                                                                                | 0,696344977 | -0,430296564 | 0,232 | 0,179 | 1         | 0,74210922    | 1,347510546     | 1,296089385     |
| CEMIP2                                                                                              | 0,031468471 | -0,43040409  | 0,037 | 0,112 | 1         | 0,742053912   | 1,347610981     | 0,330357143     |
| NEK9                                                                                                | 0,368508738 | -0,430504253 | 0,049 | 0,074 | 1         | 0,742002394   | 1,347704546     | 0,662162162     |
| ARIH1                                                                                               | 0,769552233 | -0,430932199 | 0,244 | 0,225 | 1         | 0,741782327   | 1,348104375     | 1,084444444     |
| TNFAIP3                                                                                             | 0,200595487 | -0,430942129 | 0,439 | 0,288 | 1         | 0,741777221   | 1,348113654     | 1,524305556     |
| ST13                                                                                                | 0,980934396 | -0,431406278 | 0,659 | 0,467 | 1         | 0,741538613   | 1,348547443     | 1,411134904     |
| NFATC1                                                                                              | 0,010742918 | -0,431818931 | 0,024 | 0,116 | 1         | 0,741326541   | 1,348933222     | 0,206896552     |
| SMG1                                                                                                | 0,31103548  | -0,43225248  | 0,329 | 0,34  | 1         | 0,741103796   | 1,349338656     | 0,967647059     |
| VEGFA                                                                                               | 0,778843803 | -0,432402708 | 0,524 | 0,382 | 1         | 0,741026629   | 1,34947917      | 1,371727749     |
| PIAS1                                                                                               | 0,33075288  | -0,432438433 | 0,134 | 0,161 | 1         | 0,741008279   | 1,349512587     | 0,832298137     |
| TRABD2B                                                                                             | 0,329701031 | -0,433144961 | 0,073 | 0,102 | 1         | 0,740645476   | 1,350173643     | 0,715686275     |
| FOXN3                                                                                               | 0,303546968 | -0,433786874 | 0,146 | 0,175 | 1         | 0,740316006   | 1,350774523     | 0,834285714     |
| CREB5                                                                                               | 0,382677604 | -0,433933528 | 0,488 | 0,33  | 1         | 0,740240755   | 1,35091184      | 1,478787879     |
| NFASC                                                                                               | 0,03647635  | -0,433965368 | 0,012 | 0,074 | 1         | 0,740224418   | 1,350941655     | 0,162162162     |
| CKS2                                                                                                | 0,370756146 | -0,434200138 | 0,171 | 0,193 | 1         | 0,740103971   | 1,351161512     | 0,886010363     |
| PMEL                                                                                                | 0,28286347  | -0,434259531 | 0     | 0,014 | 1         | 0,740073503   | 1,351217138     | 0               |
| EP300                                                                                               | 0,549210303 | -0,434739471 | 0,28  | 0,204 | 1         | 0,739827344   | 1,351666721     | 1,37254902      |
| BAG5                                                                                                | 0,614381516 | -0,435026295 | 0,171 | 0,13  | 1         | 0,739680273   | 1,351935474     | 1,315384615     |
| MED13                                                                                               | 0,969369753 | -0,436131942 | 0,354 | 0,291 | 1         | 0,739113617   | 1,352971962     | 1,216494845     |
| GPR155                                                                                              | 0,824385598 | -0,436719866 | 0,512 | 0,393 | 1         | 0,738812476   | 1,353523434     | 1,302798982     |
| PLEKHG3                                                                                             | 0,003880909 | -0,437109346 | 0     | 0,095 | 1         | 0,738613048   | 1,353888891     | 0               |
| SNAI1                                                                                               | 0,466637347 | -0,437111619 | 0,22  | 0,161 | 1         | 0,738611885   | 1,353891023     | 1,366459627     |
| PCNP                                                                                                | 0,846029343 | -0,437133387 | 0,488 | 0,361 | 1         | 0,73860074    | 1,353911452     | 1,351800554     |
| APLP2                                                                                               | 0,080627697 | -0,437444669 | 0,646 | 0,568 | 1         | 0,738441393   | 1,354203609     | 1,137323944     |
| PPP2CA                                                                                              | 0,967959744 | -0,437750357 | 0,524 | 0,389 | 1         | 0,738284944   | 1,354490577     | 1,347043702     |
| HNRNPA2B1                                                                                           | 0,041907833 | -0,437990048 | 0,89  | 0,804 | 1         | 0,738162295   | 1,354715632     | 1,106965174     |
| CDK13                                                                                               | 0,60077118  | -0,438016235 | 0,354 | 0,26  | 1         | 0,738148896   | 1,354740222     | 1,361538462     |

Supplementary Table 2

| Differentially expressed genes_keloid-XL_comparing SC-Keloid vs. (SC-Myel, SC-Nonmyel, SC-Nonmyel2) |             |              |       |       |           |               |                 |                 |
|-----------------------------------------------------------------------------------------------------|-------------|--------------|-------|-------|-----------|---------------|-----------------|-----------------|
| gene                                                                                                | p_val       | avg_log2FC   | pct.1 | pct.2 | p_val_adj | Foldchange_UP | Foldchange_DOWN | Ratio_pct1_pct2 |
| CRY1                                                                                                | 0,105593679 | -0,438094551 | 0,293 | 0,172 | 1         | 0,738108827   | 1,354813766     | 1,703488372     |
| ZNF638                                                                                              | 0,429773148 | -0,439232311 | 0,317 | 0,218 | 1         | 0,737526958   | 1,355882641     | 1,45412844      |
| FHOD3                                                                                               | 0,3852785   | -0,439391799 | 0,098 | 0,123 | 1         | 0,73744543    | 1,35603254      | 0,796747967     |
| MEF2A                                                                                               | 0,622618213 | -0,43944651  | 0,402 | 0,298 | 1         | 0,737417465   | 1,356083966     | 1,348993289     |
| CENATAC                                                                                             | 0,046904047 | -0,439753211 | 0,049 | 0,119 | 1         | 0,737260714   | 1,356372285     | 0,411764706     |
| MAP1LC3B                                                                                            | 0,500609458 | -0,440435736 | 0,585 | 0,488 | 1         | 0,736912006   | 1,357014124     | 1,198770492     |
| IRF2                                                                                                | 0,680256882 | -0,441134813 | 0,207 | 0,2   | 1         | 0,736555012   | 1,357671842     | 1,035           |
| KIDINS220                                                                                           | 0,324114909 | -0,441214508 | 0,415 | 0,277 | 1         | 0,736514326   | 1,357746842     | 1,498194946     |
| TCF7L2                                                                                              | 0,864126428 | -0,44142738  | 0,305 | 0,267 | 1         | 0,73640566    | 1,357947195     | 1,142322097     |
| MAG                                                                                                 | 0,013861137 | -0,44164621  | 0     | 0,07  | 1         | 0,736293969   | 1,358153186     | 0               |
| DRP2                                                                                                | 0,011563645 | -0,44203383  | 0     | 0,074 | 1         | 0,73609617    | 1,35851814      | 0               |
| UBR2                                                                                                | 0,537075405 | -0,442601962 | 0,232 | 0,168 | 1         | 0,735806353   | 1,359053229     | 1,380952381     |
| CADM4                                                                                               | 0,740481625 | -0,443120802 | 0,488 | 0,4   | 1         | 0,735541781   | 1,359542077     | 1,22            |
| TFEB                                                                                                | 0,0562275   | -0,443207548 | 0,049 | 0,116 | 1         | 0,735497556   | 1,359623825     | 0,422413793     |
| NFKB1                                                                                               | 0,593333519 | -0,443490694 | 0,305 | 0,221 | 1         | 0,73535322    | 1,359890694     | 1,380090498     |
| UBE2H                                                                                               | 0,758225692 | -0,443953849 | 0,512 | 0,358 | 1         | 0,735117184   | 1,360327335     | 1,430167598     |
| SH3D19                                                                                              | 0,944049308 | -0,444298886 | 0,244 | 0,204 | 1         | 0,734941393   | 1,360652712     | 1,196078431     |
| LMO4                                                                                                | 0,697578227 | -0,444962039 | 0,732 | 0,558 | 1         | 0,734603646   | 1,361278298     | 1,311827957     |
| FBLN5                                                                                               | 0,311488754 | -0,445114284 | 0,085 | 0,116 | 1         | 0,734526128   | 1,361421959     | 0,732758621     |
| DSE                                                                                                 | 0,202351144 | -0,44532143  | 0,037 | 0,074 | 1         | 0,734420671   | 1,361617449     | 0,5             |
| BACH2                                                                                               | 0,457861096 | -0,446302101 | 0,11  | 0,13  | 1         | 0,733921618   | 1,362543322     | 0,846153846     |
| ME2                                                                                                 | 0,295242955 | -0,447354083 | 0,256 | 0,168 | 1         | 0,733386654   | 1,363537221     | 1,523809524     |
| RDH5                                                                                                | 0,879322147 | -0,448038715 | 0,098 | 0,095 | 1         | 0,733038707   | 1,364184442     | 1,031578947     |
| HNRNPL                                                                                              | 0,95551737  | -0,448649662 | 0,451 | 0,351 | 1         | 0,732728348   | 1,364762265     | 1,284900285     |
| MMP1                                                                                                | 0,157701408 | -0,448650409 | 0,024 | 0,063 | 1         | 0,732727969   | 1,364762971     | 0,380952381     |
| PTPDC1                                                                                              | 0,132723091 | -0,449225351 | 0,061 | 0,112 | 1         | 0,732436021   | 1,365306964     | 0,544642857     |
| H2AC6                                                                                               | 0,943632264 | -0,449240033 | 0,085 | 0,077 | 1         | 0,732428567   | 1,365320858     | 1,103896104     |
| GNAQ                                                                                                | 0,250381898 | -0,449490468 | 0,146 | 0,186 | 1         | 0,732301437   | 1,365557883     | 0,784946237     |
| MT-ND4L                                                                                             | 0,953653299 | -0,45016422  | 0,476 | 0,375 | 1         | 0,731959525   | 1,36619576      | 1,269333333     |
| ANKRD36C                                                                                            | 0,36937799  | -0,450319662 | 0,134 | 0,161 | 1         | 0,731880665   | 1,366342967     | 0,832298137     |

Supplementary Table 2

| Differentially expressed genes_keloid-XL_comparing SC-Keloid vs. (SC-Myel, SC-Nonmyel, SC-Nonmyel2) |             |              |       |       |           |               |                 |                 |
|-----------------------------------------------------------------------------------------------------|-------------|--------------|-------|-------|-----------|---------------|-----------------|-----------------|
| gene                                                                                                | p_val       | avg_log2FC   | pct.1 | pct.2 | p_val_adj | Foldchange_UP | Foldchange_DOWN | Ratio_pct1_pct2 |
| CD59                                                                                                | 0,104963845 | -0,450342938 | 0,878 | 0,825 | 1         | 0,731868857   | 1,366365012     | 1,064242424     |
| SRRM2                                                                                               | 0,596334687 | -0,450623467 | 0,707 | 0,533 | 1         | 0,731726561   | 1,366630725     | 1,326454034     |
| GRIK3                                                                                               | 0,007033319 | -0,451409108 | 0,012 | 0,109 | 1         | 0,731328197   | 1,367375147     | 0,110091743     |
| SEMA4C                                                                                              | 0,858396288 | -0,451504749 | 0,293 | 0,235 | 1         | 0,731279716   | 1,367465797     | 1,246808511     |
| LARP4                                                                                               | 0,99749305  | -0,452402397 | 0,28  | 0,232 | 1         | 0,730824854   | 1,368316903     | 1,206896552     |
| SUGP2                                                                                               | 0,349111994 | -0,454945506 | 0,268 | 0,182 | 1         | 0,729537728   | 1,370731028     | 1,472527473     |
| GTF2I                                                                                               | 0,237619254 | -0,455802113 | 0,598 | 0,53  | 1         | 0,72910469    | 1,371545148     | 1,128301887     |
| ARGLU1                                                                                              | 0,379596352 | -0,455905988 | 0,646 | 0,53  | 1         | 0,729052196   | 1,371643904     | 1,218867925     |
| WDR26                                                                                               | 0,745114014 | -0,456003088 | 0,195 | 0,182 | 1         | 0,729003129   | 1,371736224     | 1,071428571     |
| FBLN1                                                                                               | 0,2782102   | -0,45616247  | 0,049 | 0,081 | 1         | 0,728922597   | 1,371887776     | 0,604938272     |
| SPRY1                                                                                               | 0,906665031 | -0,457353242 | 0,305 | 0,253 | 1         | 0,728321207   | 1,373020572     | 1,205533597     |
| MIDEAS                                                                                              | 0,825362342 | -0,457405475 | 0,341 | 0,267 | 1         | 0,728294838   | 1,373070283     | 1,277153558     |
| ARHGEF16                                                                                            | 0,003231342 | -0,45813959  | 0     | 0,098 | 1         | 0,72792434    | 1,373769148     | 0               |
| USP9X                                                                                               | 0,415742385 | -0,458320813 | 0,341 | 0,235 | 1         | 0,727832908   | 1,373941724     | 1,45106383      |
| OTUD4                                                                                               | 0,704987663 | -0,458383735 | 0,159 | 0,158 | 1         | 0,727801165   | 1,374001648     | 1,006329114     |
| EIF2AK3                                                                                             | 0,201542676 | -0,459680397 | 0,159 | 0,196 | 1         | 0,727147327   | 1,375237126     | 0,81122449      |
| ISG20                                                                                               | 0,065238659 | -0,460326252 | 0,049 | 0,112 | 1         | 0,726821876   | 1,375852919     | 0,4375          |
| TSPAN15                                                                                             | 0,635664958 | -0,461571216 | 0,329 | 0,288 | 1         | 0,72619494    | 1,377040715     | 1,142361111     |
| IL34                                                                                                | 0,008373173 | -0,461997858 | 0,012 | 0,102 | 1         | 0,725980218   | 1,377448001     | 0,117647059     |
| DIXDC1                                                                                              | 0,813802961 | -0,462613782 | 0,171 | 0,158 | 1         | 0,725670344   | 1,378036195     | 1,082278481     |
| TCIM                                                                                                | 0,731016665 | -0,462785782 | 0,671 | 0,561 | 1         | 0,725583834   | 1,378200496     | 1,196078431     |
| HLA-E                                                                                               | 0,608823198 | -0,462818132 | 0,659 | 0,488 | 1         | 0,725567564   | 1,378231401     | 1,350409836     |
| A2M                                                                                                 | 0,255297484 | -0,463693451 | 0,207 | 0,133 | 1         | 0,725127478   | 1,379067861     | 1,556390977     |
| PNRC2                                                                                               | 0,3548348   | -0,463890418 | 0,232 | 0,242 | 1         | 0,725028485   | 1,379256154     | 0,958677686     |
| ELMO1                                                                                               | 0,025473606 | -0,464160544 | 0,012 | 0,081 | 1         | 0,724892746   | 1,379514426     | 0,148148148     |
| LPIN1                                                                                               | 0,142961862 | -0,464367584 | 0,085 | 0,14  | 1         | 0,724788724   | 1,379712413     | 0,607142857     |
| CTTNBP2NL                                                                                           | 0,600646901 | -0,464843765 | 0,22  | 0,211 | 1         | 0,724549537   | 1,380167882     | 1,042654028     |
| HNRNPA3                                                                                             | 0,115904904 | -0,465735588 | 0,659 | 0,582 | 1         | 0,724101785   | 1,381021316     | 1,132302405     |
| SLC35E3                                                                                             | 0,133531908 | -0,466885978 | 0,049 | 0,098 | 1         | 0,723524623   | 1,382122968     | 0,5             |
| LUZP1                                                                                               | 0,979233325 | -0,467929312 | 0,268 | 0,232 | 1         | 0,723001571   | 1,383122859     | 1,155172414     |

Supplementary Table 2

| Differentially expressed genes_keloid-XL_comparing SC-Keloid vs. (SC-Myel, SC-Nonmyel, SC-Nonmyel2) |             |              |       |       |             |               |                 |                 |
|-----------------------------------------------------------------------------------------------------|-------------|--------------|-------|-------|-------------|---------------|-----------------|-----------------|
| gene                                                                                                | p_val       | avg_log2FC   | pct.1 | pct.2 | p_val_adj   | Foldchange_UP | Foldchange_DOWN | Ratio_pct1_pct2 |
| ATF4                                                                                                | 0,089386672 | -0,468260425 | 0,78  | 0,705 | 1           | 0,722835654   | 1,383440335     | 1,106382979     |
| ETNK1                                                                                               | 0,238971654 | -0,46863974  | 0,268 | 0,288 | 1           | 0,72264563    | 1,383804119     | 0,930555556     |
| ZBTB1                                                                                               | 0,746727569 | -0,468977128 | 0,207 | 0,189 | 1           | 0,722476653   | 1,384127772     | 1,095238095     |
| TACSTD2                                                                                             | 0,342676622 | -0,468989951 | 0,085 | 0,053 | 1           | 0,722470231   | 1,384140074     | 1,603773585     |
| KDM2A                                                                                               | 0,52293185  | -0,46963764  | 0,415 | 0,288 | 1           | 0,722145955   | 1,384761616     | 1,440972222     |
| ARL6IP1                                                                                             | 0,840706435 | -0,470573241 | 0,61  | 0,439 | 1           | 0,721677789   | 1,385659937     | 1,38952164      |
| KMT5C                                                                                               | 0,341283531 | -0,470701933 | 0,098 | 0,126 | 1           | 0,721613416   | 1,385783548     | 0,777777778     |
| H3-3B                                                                                               | 3,88951E-05 | -0,471203666 | 0,915 | 0,958 | 0,820725079 | 0,721362501   | 1,386265572     | 0,955114823     |
| FUS                                                                                                 | 0,027314012 | -0,471264879 | 0,817 | 0,688 | 1           | 0,721331894   | 1,386324392     | 1,1875          |
| ZFC3H1                                                                                              | 0,976764004 | -0,471459374 | 0,22  | 0,186 | 1           | 0,721234656   | 1,3865113       | 1,182795699     |
| NKAIN3                                                                                              | 0,097915858 | -0,473240576 | 0,098 | 0,158 | 1           | 0,720344744   | 1,388224192     | 0,620253165     |
| MSH6                                                                                                | 0,127318893 | -0,473628435 | 0,073 | 0,126 | 1           | 0,72015111    | 1,388597458     | 0,579365079     |
| RHEB                                                                                                | 0,776453587 | -0,474215687 | 0,646 | 0,467 | 1           | 0,71985803    | 1,389162804     | 1,383297645     |
| SSBP2                                                                                               | 0,937375584 | -0,475004417 | 0,256 | 0,214 | 1           | 0,719464587   | 1,389922476     | 1,196261682     |
| PTPN13                                                                                              | 0,649200105 | -0,475424855 | 0,159 | 0,158 | 1           | 0,719254948   | 1,390327593     | 1,006329114     |
| USP1                                                                                                | 0,226723731 | -0,475471431 | 0,159 | 0,193 | 1           | 0,719231728   | 1,390372479     | 0,823834197     |
| TJP1                                                                                                | 0,444037947 | -0,475477147 | 0,354 | 0,242 | 1           | 0,719228878   | 1,390377988     | 1,462809917     |
| PCDH17                                                                                              | 0,090188698 | -0,475501642 | 0,037 | 0,091 | 1           | 0,719216666   | 1,390401595     | 0,406593407     |
| AMOTL2                                                                                              | 0,696714871 | -0,475506222 | 0,159 | 0,158 | 1           | 0,719214383   | 1,390406009     | 1,006329114     |
| GATAD2B                                                                                             | 0,237135049 | -0,476295749 | 0,22  | 0,249 | 1           | 0,718820895   | 1,391167129     | 0,883534137     |
| ZNF644                                                                                              | 0,956051209 | -0,477518114 | 0,415 | 0,323 | 1           | 0,718212111   | 1,392346335     | 1,284829721     |
| CCDC80                                                                                              | 5,39915E-06 | -0,479452453 | 0,61  | 0,253 | 0,113927393 | 0,717249791   | 1,394214419     | 2,411067194     |
| C1S                                                                                                 | 0,016081655 | -0,479853546 | 0,037 | 0,126 | 1           | 0,717050411   | 1,394602088     | 0,293650794     |
| MAP3K4                                                                                              | 0,030645728 | -0,479927513 | 0,085 | 0,175 | 1           | 0,717013649   | 1,39467359      | 0,485714286     |
| HLA-DMA                                                                                             | 0,023107526 | -0,479983874 | 0,024 | 0,102 | 1           | 0,716985638   | 1,394728077     | 0,235294118     |
| SMC3                                                                                                | 0,625387396 | -0,480404257 | 0,293 | 0,214 | 1           | 0,716776748   | 1,395134542     | 1,369158879     |
| MT2A                                                                                                | 0,862470153 | -0,480477741 | 0,756 | 0,646 | 1           | 0,71674024    | 1,395205605     | 1,170278638     |
| AKAP13                                                                                              | 0,989630672 | -0,480971812 | 0,707 | 0,509 | 1           | 0,716494824   | 1,395683494     | 1,388998035     |
| NEK1                                                                                                | 0,769714518 | -0,481030941 | 0,146 | 0,144 | 1           | 0,716465459   | 1,395740698     | 1,013888889     |
| OLFM1                                                                                               | 0,486537129 | -0,483002949 | 0,22  | 0,218 | 1           | 0,715486797   | 1,397649829     | 1,009174312     |



Supplementary Table 2

| Differentially expressed genes_keloid-XL_comparing SC-Keloid vs. (SC-Myel, SC-Nonmyel, SC-Nonmyel2) |             |              |       |       |           |               |                 |                 |
|-----------------------------------------------------------------------------------------------------|-------------|--------------|-------|-------|-----------|---------------|-----------------|-----------------|
| gene                                                                                                | p_val       | avg_log2FC   | pct.1 | pct.2 | p_val_adj | Foldchange_UP | Foldchange_DOWN | Ratio_pct1_pct2 |
| ABLIM1                                                                                              | 0,296201858 | -0,483155496 | 0,134 | 0,168 | 1         | 0,715411148   | 1,397797621     | 0,797619048     |
| CBX4                                                                                                | 0,92011476  | -0,483700109 | 0,232 | 0,193 | 1         | 0,715141133   | 1,398325385     | 1,202072539     |
| RIOK3                                                                                               | 0,950446905 | -0,483705291 | 0,354 | 0,281 | 1         | 0,715138565   | 1,398330407     | 1,259786477     |
| PRDM16-DT                                                                                           | 0,014389586 | -0,485367403 | 0,073 | 0,182 | 1         | 0,714315136   | 1,399942335     | 0,401098901     |
| MRPS6                                                                                               | 0,323805777 | -0,485875573 | 0,195 | 0,218 | 1         | 0,714063573   | 1,400435533     | 0,894495413     |
| ENTPD2                                                                                              | 0,005772333 | -0,486082582 | 0,012 | 0,109 | 1         | 0,71396112    | 1,400636493     | 0,110091743     |
| NCL                                                                                                 | 0,61647577  | -0,487282203 | 0,744 | 0,568 | 1         | 0,713367698   | 1,401801627     | 1,309859155     |
| PHF3                                                                                                | 0,741752527 | -0,48747772  | 0,256 | 0,232 | 1         | 0,713271028   | 1,401991615     | 1,103448276     |
| GPC4                                                                                                | 0,004659124 | -0,488098831 | 0     | 0,091 | 1         | 0,712964016   | 1,402595331     | 0               |
| RASAL2                                                                                              | 0,471606135 | -0,48811268  | 0,134 | 0,151 | 1         | 0,712957172   | 1,402608796     | 0,887417219     |
| ITGAV                                                                                               | 0,964211107 | -0,48880499  | 0,39  | 0,302 | 1         | 0,712615125   | 1,403282031     | 1,291390728     |
| L1CAM                                                                                               | 0,561502238 | -0,489302978 | 0,854 | 0,632 | 1         | 0,712369188   | 1,403766497     | 1,351265823     |
| SLITRK2                                                                                             | 0,005858223 | -0,489644291 | 0,012 | 0,109 | 1         | 0,712200675   | 1,40409864      | 0,110091743     |
| C1R                                                                                                 | 0,459012479 | -0,489751431 | 0,329 | 0,242 | 1         | 0,712147787   | 1,404202918     | 1,359504132     |
| PRRC2C                                                                                              | 0,62089158  | -0,489797559 | 0,585 | 0,467 | 1         | 0,712125017   | 1,404247816     | 1,25267666      |
| MED13L                                                                                              | 0,831372624 | -0,489844201 | 0,427 | 0,323 | 1         | 0,712101994   | 1,404293216     | 1,321981424     |
| KAT6A                                                                                               | 0,162906827 | -0,489920274 | 0,232 | 0,27  | 1         | 0,712064447   | 1,404367265     | 0,859259259     |
| PNISR                                                                                               | 0,30812782  | -0,489939399 | 0,732 | 0,586 | 1         | 0,712055008   | 1,404385882     | 1,249146758     |
| TXNRD1                                                                                              | 0,036200515 | -0,490142948 | 0,244 | 0,126 | 1         | 0,711954551   | 1,40458404      | 1,936507937     |
| PLXNA3                                                                                              | 0,508686403 | -0,490783792 | 0,256 | 0,182 | 1         | 0,711638371   | 1,405208095     | 1,406593407     |
| LHPP                                                                                                | 0,835225428 | -0,490984571 | 0,171 | 0,14  | 1         | 0,71153934    | 1,40540367      | 1,221428571     |
| SREBF1                                                                                              | 0,378885114 | -0,491421937 | 0,28  | 0,196 | 1         | 0,711323663   | 1,405829795     | 1,428571429     |
| SERPINA3                                                                                            | 0,033380767 | -0,491485801 | 0,024 | 0,095 | 1         | 0,711292176   | 1,405892029     | 0,252631579     |
| NID2                                                                                                | 0,004332414 | -0,491534721 | 0,024 | 0,133 | 1         | 0,711268057   | 1,405939702     | 0,180451128     |
| REST                                                                                                | 0,815113954 | -0,491729972 | 0,293 | 0,253 | 1         | 0,711171802   | 1,406129992     | 1,158102767     |
| PPM1K                                                                                               | 0,520133059 | -0,492165647 | 0,159 | 0,168 | 1         | 0,71095707    | 1,406554688     | 0,946428571     |
| ICAM1                                                                                               | 0,755785083 | -0,492462624 | 0,11  | 0,112 | 1         | 0,710810735   | 1,406844256     | 0,982142857     |
| KPNA2                                                                                               | 0,410034121 | -0,492877233 | 0,232 | 0,239 | 1         | 0,710606488   | 1,40724862      | 0,970711297     |
| CNTN2                                                                                               | 0,003231342 | -0,492912794 | 0     | 0,098 | 1         | 0,710588973   | 1,407283307     | 0               |
| KDM5B                                                                                               | 0,969904035 | -0,492977528 | 0,293 | 0,246 | 1         | 0,710557089   | 1,407346454     | 1,191056911     |

Supplementary Table 2

| Differentially expressed genes_keloid-XL_comparing SC-Keloid vs. (SC-Myel, SC-Nonmyel, SC-Nonmyel2) |             |              |       |       |             |               |                 |                 |
|-----------------------------------------------------------------------------------------------------|-------------|--------------|-------|-------|-------------|---------------|-----------------|-----------------|
| gene                                                                                                | p_val       | avg_log2FC   | pct.1 | pct.2 | p_val_adj   | Foldchange_UP | Foldchange_DOWN | Ratio_pct1_pct2 |
| ANKRD37                                                                                             | 0,925032943 | -0,494115181 | 0,146 | 0,133 | 1           | 0,709996993   | 1,40845667      | 1,097744361     |
| HIVEP2                                                                                              | 0,656262097 | -0,496385002 | 0,244 | 0,228 | 1           | 0,708880819   | 1,410674367     | 1,070175439     |
| SAMD8                                                                                               | 0,658597226 | -0,496641109 | 0,159 | 0,158 | 1           | 0,708754989   | 1,410924812     | 1,006329114     |
| THRA                                                                                                | 0,857365726 | -0,496660997 | 0,146 | 0,137 | 1           | 0,708745219   | 1,410944263     | 1,065693431     |
| SDC2                                                                                                | 0,918699328 | -0,496690808 | 0,195 | 0,172 | 1           | 0,708730574   | 1,410973417     | 1,13372093      |
| TP53BP2                                                                                             | 0,294123261 | -0,497407835 | 0,122 | 0,158 | 1           | 0,708378419   | 1,411674853     | 0,772151899     |
| ALDH1A1                                                                                             | 0,006707687 | -0,498037014 | 0     | 0,084 | 1           | 0,708069553   | 1,412290638     | 0               |
| GAB1                                                                                                | 0,312614505 | -0,498584368 | 0,268 | 0,281 | 1           | 0,707800964   | 1,412826558     | 0,953736655     |
| THBS1                                                                                               | 0,713406178 | -0,498714054 | 0,305 | 0,281 | 1           | 0,707737342   | 1,412953565     | 1,085409253     |
| ARHGAP5-AS1                                                                                         | 0,379116422 | -0,498770678 | 0,073 | 0,098 | 1           | 0,707709564   | 1,413009023     | 0,744897959     |
| RGS11                                                                                               | 0,100290152 | -0,499104803 | 0,098 | 0,158 | 1           | 0,707545679   | 1,41333631      | 0,620253165     |
| CPEB4                                                                                               | 0,10699471  | -0,499173756 | 0,085 | 0,144 | 1           | 0,707511863   | 1,413403862     | 0,590277778     |
| FAM53B                                                                                              | 0,018595318 | -0,499334463 | 0,037 | 0,123 | 1           | 0,707433056   | 1,413561315     | 0,300813008     |
| MRPS24                                                                                              | 0,046268216 | -0,500570721 | 0,573 | 0,337 | 1           | 0,70682711    | 1,414773127     | 1,700296736     |
| PTMA                                                                                                | 8,24976E-06 | -0,501273085 | 0,976 | 0,982 | 0,174078154 | 0,70648308    | 1,415462065     | 0,99389002      |
| NXF1                                                                                                | 0,70391839  | -0,501535099 | 0,268 | 0,207 | 1           | 0,706354785   | 1,415719157     | 1,29468599      |
| ZBTB2                                                                                               | 0,154641977 | -0,502916854 | 0,098 | 0,147 | 1           | 0,70567859    | 1,417075725     | 0,666666667     |
| CHORDC1                                                                                             | 0,523273786 | -0,503499303 | 0,268 | 0,253 | 1           | 0,70539375    | 1,417647946     | 1,059288538     |
| SRGAP2                                                                                              | 0,835118357 | -0,504269713 | 0,524 | 0,382 | 1           | 0,705017164   | 1,418405183     | 1,371727749     |
| KBTBD2                                                                                              | 0,613067252 | -0,504493711 | 0,195 | 0,189 | 1           | 0,704907709   | 1,418625427     | 1,031746032     |
| PUM1                                                                                                | 0,711780506 | -0,50456776  | 0,427 | 0,312 | 1           | 0,70487153    | 1,418698242     | 1,368589744     |
| STK32A                                                                                              | 0,006213416 | -0,507273319 | 0,012 | 0,109 | 1           | 0,703550887   | 1,421361295     | 0,110091743     |
| NRBP2                                                                                               | 0,794718849 | -0,507303309 | 0,293 | 0,26  | 1           | 0,703536262   | 1,421390842     | 1,126923077     |
| ID4                                                                                                 | 0,709436244 | -0,508415459 | 0,39  | 0,354 | 1           | 0,702994126   | 1,422486992     | 1,101694915     |
| H1-2                                                                                                | 0,788232686 | -0,50901324  | 0,134 | 0,112 | 1           | 0,702702901   | 1,423076521     | 1,196428571     |
| RFX1                                                                                                | 0,603730029 | -0,509146552 | 0,183 | 0,182 | 1           | 0,702637971   | 1,423208026     | 1,005494505     |
| RNF24                                                                                               | 0,746091122 | -0,509898189 | 0,256 | 0,228 | 1           | 0,702271996   | 1,423949704     | 1,122807018     |
| NEU1                                                                                                | 0,892680179 | -0,510020655 | 0,256 | 0,207 | 1           | 0,702212384   | 1,424070584     | 1,236714976     |
| HPS5                                                                                                | 0,356362194 | -0,510231847 | 0,098 | 0,126 | 1           | 0,702109597   | 1,424279064     | 0,777777778     |
| TRIM28                                                                                              | 0,477602902 | -0,510729129 | 0,537 | 0,368 | 1           | 0,701867629   | 1,424770084     | 1,45923913      |

Supplementary Table 2

| Differentially expressed genes_keloid-XL_comparing SC-Keloid vs. (SC-Myel, SC-Nonmyel, SC-Nonmyel2) |             |              |       |       |             |               |                 |                 |
|-----------------------------------------------------------------------------------------------------|-------------|--------------|-------|-------|-------------|---------------|-----------------|-----------------|
| gene                                                                                                | p_val       | avg_log2FC   | pct.1 | pct.2 | p_val_adj   | Foldchange_UP | Foldchange_DOWN | Ratio_pct1_pct2 |
| FSTL5                                                                                               | 0,008044669 | -0,511939371 | 0     | 0,081 | 1           | 0,701279096   | 1,42596579      | 0               |
| SLC2A3                                                                                              | 0,712688743 | -0,512130176 | 0,195 | 0,186 | 1           | 0,701186354   | 1,426154395     | 1,048387097     |
| PNPLA8                                                                                              | 0,778770841 | -0,512551483 | 0,256 | 0,221 | 1           | 0,700981618   | 1,426570932     | 1,158371041     |
| TAB2                                                                                                | 0,972143347 | -0,512984237 | 0,293 | 0,239 | 1           | 0,700771381   | 1,426998914     | 1,225941423     |
| NIPBL                                                                                               | 0,894008154 | -0,513087602 | 0,305 | 0,253 | 1           | 0,700721175   | 1,427101158     | 1,205533597     |
| RSNB1                                                                                               | 0,216054632 | -0,513374415 | 0,146 | 0,182 | 1           | 0,700581883   | 1,427384899     | 0,802197802     |
| PRELP                                                                                               | 0,040452851 | -0,514644815 | 0,037 | 0,109 | 1           | 0,69996524    | 1,428642371     | 0,339449541     |
| CNOT6L                                                                                              | 0,092149643 | -0,51674773  | 0,098 | 0,161 | 1           | 0,698945693   | 1,430726321     | 0,608695652     |
| ADNP                                                                                                | 0,393705243 | -0,517243002 | 0,22  | 0,225 | 1           | 0,698705789   | 1,431217568     | 0,977777778     |
| SERPINB9                                                                                            | 0,00388092  | -0,518232044 | 0     | 0,095 | 1           | 0,698226954   | 1,432199078     | 0               |
| CAPN7                                                                                               | 0,351492746 | -0,518315517 | 0,134 | 0,158 | 1           | 0,698186556   | 1,432281946     | 0,848101266     |
| SRCIN1                                                                                              | 0,313581269 | -0,518777552 | 0,085 | 0,116 | 1           | 0,697962992   | 1,432740721     | 0,732758621     |
| KIF19                                                                                               | 0,017521927 | -0,519395584 | 0,012 | 0,088 | 1           | 0,697664058   | 1,433354619     | 0,136363636     |
| PLEKHB2                                                                                             | 0,986455686 | -0,52031031  | 0,341 | 0,274 | 1           | 0,697221851   | 1,434263711     | 1,244525547     |
| LINC00632                                                                                           | 0,086452046 | -0,52032995  | 0,146 | 0,221 | 1           | 0,69721236    | 1,434283237     | 0,660633484     |
| HECA                                                                                                | 0,062588291 | -0,520356031 | 0,085 | 0,154 | 1           | 0,697199756   | 1,434309166     | 0,551948052     |
| BRD4                                                                                                | 0,818581779 | -0,520680886 | 0,439 | 0,344 | 1           | 0,697042783   | 1,434632169     | 1,276162791     |
| ANKRD50                                                                                             | 0,751959654 | -0,52162021  | 0,22  | 0,2   | 1           | 0,696589093   | 1,435566548     | 1,1             |
| CDC20B                                                                                              | 0,468682361 | -0,521667126 | 0,183 | 0,133 | 1           | 0,696566441   | 1,435613232     | 1,37593985      |
| OAT                                                                                                 | 0,702851767 | -0,52190004  | 0,585 | 0,396 | 1           | 0,696453994   | 1,435845022     | 1,477272727     |
| BBX                                                                                                 | 0,51563381  | -0,524541525 | 0,28  | 0,263 | 1           | 0,695179997   | 1,438476373     | 1,064638783     |
| SIPA1L2                                                                                             | 0,864222993 | -0,524841859 | 0,585 | 0,446 | 1           | 0,695035292   | 1,43877586      | 1,311659193     |
| PPTC7                                                                                               | 0,989297867 | -0,524892655 | 0,232 | 0,196 | 1           | 0,695010821   | 1,438826519     | 1,183673469     |
| POU2F1                                                                                              | 0,463539863 | -0,525086437 | 0,171 | 0,182 | 1           | 0,694917474   | 1,439019795     | 0,93956044      |
| UGT8                                                                                                | 0,004659136 | -0,526168628 | 0     | 0,091 | 1           | 0,694396399   | 1,440099633     | 0               |
| TMEM132B                                                                                            | 0,004392324 | -0,527138648 | 0,024 | 0,133 | 1           | 0,693929667   | 1,441068234     | 0,180451128     |
| WEE1                                                                                                | 0,229110706 | -0,527236321 | 0,159 | 0,196 | 1           | 0,693882688   | 1,4411658       | 0,81122449      |
| FRMD3                                                                                               | 0,018153029 | -0,528609728 | 0,037 | 0,123 | 1           | 0,693222445   | 1,442538405     | 0,300813008     |
| EIF1                                                                                                | 5,57336E-06 | -0,528762717 | 0,988 | 0,958 | 0,117603406 | 0,693148937   | 1,442691385     | 1,03131524      |
| DYNLL2                                                                                              | 0,916911058 | -0,529502937 | 0,317 | 0,263 | 1           | 0,692793386   | 1,443431793     | 1,205323194     |

Supplementary Table 2

| Differentially expressed genes_keloid-XL_comparing SC-Keloid vs. (SC-Myel, SC-Nonmyel, SC-Nonmyel2) |             |              |       |       |           |               |                 |                 |
|-----------------------------------------------------------------------------------------------------|-------------|--------------|-------|-------|-----------|---------------|-----------------|-----------------|
| gene                                                                                                | p_val       | avg_log2FC   | pct.1 | pct.2 | p_val_adj | Foldchange_UP | Foldchange_DOWN | Ratio_pct1_pct2 |
| FNIP1                                                                                               | 0,558467615 | -0,53091851  | 0,341 | 0,309 | 1         | 0,692113951   | 1,444848784     | 1,103559871     |
| TRAK1                                                                                               | 0,80429231  | -0,531434625 | 0,341 | 0,291 | 1         | 0,691866396   | 1,445365762     | 1,171821306     |
| SRGAP1                                                                                              | 0,251609611 | -0,531471016 | 0,098 | 0,137 | 1         | 0,691848944   | 1,445402221     | 0,715328467     |
| DDIT3                                                                                               | 0,95055407  | -0,531792327 | 0,476 | 0,379 | 1         | 0,691694875   | 1,445724171     | 1,255936675     |
| H2AX                                                                                                | 0,753638694 | -0,531884598 | 0,39  | 0,333 | 1         | 0,691650638   | 1,445816639     | 1,171171171     |
| KIF1B                                                                                               | 0,806412534 | -0,532624569 | 0,402 | 0,333 | 1         | 0,691295975   | 1,4465584       | 1,207207207     |
| ZCCHC8                                                                                              | 0,151949638 | -0,532841008 | 0,085 | 0,133 | 1         | 0,691192272   | 1,446775435     | 0,639097744     |
| ANKRD11                                                                                             | 0,941499318 | -0,532961384 | 0,488 | 0,358 | 1         | 0,691134602   | 1,446896157     | 1,363128492     |
| IGFBP7                                                                                              | 0,068061771 | -0,533481668 | 0,854 | 0,772 | 1         | 0,690885401   | 1,44741805      | 1,106217617     |
| KITLG                                                                                               | 0,021054818 | -0,534146379 | 0,012 | 0,084 | 1         | 0,690567154   | 1,448085091     | 0,142857143     |
| CNOT4                                                                                               | 0,937422527 | -0,534436379 | 0,378 | 0,291 | 1         | 0,690428355   | 1,448376204     | 1,298969072     |
| TERF1                                                                                               | 0,779030565 | -0,535054628 | 0,268 | 0,214 | 1         | 0,690132544   | 1,448997021     | 1,252336449     |
| RNF168                                                                                              | 0,294399497 | -0,535149462 | 0,146 | 0,172 | 1         | 0,69008718    | 1,449092272     | 0,848837209     |
| CREBRF                                                                                              | 0,345753065 | -0,535411669 | 0,329 | 0,326 | 1         | 0,68996177    | 1,449355666     | 1,009202454     |
| SBDS                                                                                                | 0,181716986 | -0,535601487 | 0,683 | 0,561 | 1         | 0,689870996   | 1,449546372     | 1,217468806     |
| SETD2                                                                                               | 0,29553264  | -0,536848058 | 0,256 | 0,27  | 1         | 0,689275166   | 1,450799404     | 0,948148148     |
| PLEKHM2                                                                                             | 0,676995913 | -0,537307282 | 0,28  | 0,214 | 1         | 0,689055798   | 1,451261281     | 1,308411215     |
| SBNO1                                                                                               | 0,993507027 | -0,539230508 | 0,256 | 0,211 | 1         | 0,688137844   | 1,453197217     | 1,213270142     |
| ARRDC3                                                                                              | 0,344543055 | -0,539485561 | 0,366 | 0,246 | 1         | 0,688016199   | 1,453454149     | 1,487804878     |
| ASPH                                                                                                | 0,727317511 | -0,539820302 | 0,415 | 0,344 | 1         | 0,687856581   | 1,453791426     | 1,206395349     |
| TRIM8                                                                                               | 0,573434379 | -0,540652521 | 0,561 | 0,379 | 1         | 0,687459906   | 1,454630288     | 1,480211082     |
| RBM6                                                                                                | 0,510488169 | -0,54327096  | 0,415 | 0,347 | 1         | 0,686213322   | 1,457272786     | 1,195965418     |
| NPEPPS                                                                                              | 0,449374292 | -0,544314397 | 0,366 | 0,33  | 1         | 0,685717194   | 1,458327148     | 1,109090909     |
| CLDN19                                                                                              | 0,00964585  | -0,546354409 | 0     | 0,077 | 1         | 0,684748256   | 1,460390722     | 0               |
| SMURF1                                                                                              | 0,07753822  | -0,546423191 | 0,049 | 0,109 | 1         | 0,68471561    | 1,46046035      | 0,449541284     |
| C1orf21                                                                                             | 0,592735417 | -0,549520143 | 0,415 | 0,295 | 1         | 0,683247346   | 1,463598805     | 1,406779661     |
| CENPC                                                                                               | 0,436752202 | -0,549802779 | 0,171 | 0,186 | 1         | 0,683113506   | 1,463885564     | 0,919354839     |
| PRDM16                                                                                              | 0,013007156 | -0,550136406 | 0,024 | 0,112 | 1         | 0,682955552   | 1,464224131     | 0,214285714     |
| DAB2IP                                                                                              | 0,07906665  | -0,551819804 | 0,085 | 0,151 | 1         | 0,682159115   | 1,465933648     | 0,562913907     |
| IGFBP4                                                                                              | 0,644532455 | -0,552631286 | 0,329 | 0,246 | 1         | 0,681775525   | 1,466758432     | 1,337398374     |

Supplementary Table 2

| Differentially expressed genes_keloid-XL_comparing SC-Keloid vs. (SC-Myel, SC-Nonmyel, SC-Nonmyel2) |             |              |       |       |           |               |                 |                 |
|-----------------------------------------------------------------------------------------------------|-------------|--------------|-------|-------|-----------|---------------|-----------------|-----------------|
| gene                                                                                                | p_val       | avg_log2FC   | pct.1 | pct.2 | p_val_adj | Foldchange_UP | Foldchange_DOWN | Ratio_pct1_pct2 |
| PGRMC1                                                                                              | 0,278036653 | -0,55477122  | 0,585 | 0,477 | 1         | 0,680765004   | 1,468935674     | 1,226415094     |
| SCRN1                                                                                               | 0,287946391 | -0,554949625 | 0,159 | 0,189 | 1         | 0,680680825   | 1,469117335     | 0,841269841     |
| MEG8                                                                                                | 0,394697245 | -0,555628431 | 0,159 | 0,109 | 1         | 0,680360632   | 1,469808736     | 1,458715596     |
| MEX3C                                                                                               | 0,549626603 | -0,555742281 | 0,378 | 0,26  | 1         | 0,680306943   | 1,46992473      | 1,453846154     |
| C7orf61                                                                                             | 0,005125606 | -0,556238508 | 0,024 | 0,13  | 1         | 0,680072986   | 1,47043041      | 0,184615385     |
| VAPA                                                                                                | 0,290900695 | -0,556732666 | 0,72  | 0,568 | 1         | 0,679840085   | 1,470934154     | 1,267605634     |
| HSPA9                                                                                               | 0,736138416 | -0,556885617 | 0,524 | 0,407 | 1         | 0,679768014   | 1,471090106     | 1,287469287     |
| BMP2K                                                                                               | 0,601968146 | -0,557651798 | 0,256 | 0,239 | 1         | 0,679407101   | 1,471871575     | 1,071129707     |
| PPM1D                                                                                               | 0,115258234 | -0,55787245  | 0,098 | 0,154 | 1         | 0,679303197   | 1,472096707     | 0,636363636     |
| MECP2                                                                                               | 0,413794224 | -0,557891299 | 0,293 | 0,281 | 1         | 0,679294322   | 1,47211594      | 1,042704626     |
| STON1                                                                                               | 0,010822123 | -0,558741827 | 0,037 | 0,137 | 1         | 0,678893969   | 1,472984069     | 0,270072993     |
| TMPRSS5                                                                                             | 0,012122532 | -0,560062652 | 0,012 | 0,095 | 1         | 0,678272708   | 1,474333242     | 0,126315789     |
| SYNM                                                                                                | 0,023926293 | -0,560145905 | 0,061 | 0,147 | 1         | 0,678233568   | 1,474418323     | 0,414965986     |
| FGFR1OP2                                                                                            | 0,678079399 | -0,560456508 | 0,256 | 0,232 | 1         | 0,678087564   | 1,47473579      | 1,103448276     |
| AGO2                                                                                                | 0,733921324 | -0,560529118 | 0,207 | 0,193 | 1         | 0,678053438   | 1,474810014     | 1,07253886      |
| OSER1                                                                                               | 0,178879819 | -0,560836645 | 0,171 | 0,211 | 1         | 0,677908918   | 1,475124421     | 0,81042654      |
| HMOX1                                                                                               | 0,137185497 | -0,56229402  | 0,024 | 0,067 | 1         | 0,677224457   | 1,476615308     | 0,358208955     |
| SCN9A                                                                                               | 0,643669271 | -0,562512922 | 0,366 | 0,316 | 1         | 0,677121709   | 1,476839373     | 1,158227848     |
| KCTD12                                                                                              | 0,944101832 | -0,563432117 | 0,415 | 0,33  | 1         | 0,676690427   | 1,477780623     | 1,257575758     |
| ANKHD1                                                                                              | 0,175049181 | -0,563468439 | 0,207 | 0,246 | 1         | 0,67667339    | 1,477817829     | 0,841463415     |
| ACKR3                                                                                               | 0,005118559 | -0,563787594 | 0,012 | 0,112 | 1         | 0,676523712   | 1,47814479      | 0,107142857     |
| STOM                                                                                                | 0,214434414 | -0,56400107  | 0,195 | 0,221 | 1         | 0,676423614   | 1,478363527     | 0,882352941     |
| PALS1                                                                                               | 0,222541978 | -0,564068123 | 0,11  | 0,147 | 1         | 0,676392176   | 1,47843224      | 0,74829932      |
| TLE3                                                                                                | 0,453998346 | -0,565689892 | 0,402 | 0,358 | 1         | 0,675632254   | 1,480095117     | 1,122905028     |
| MAN2A2                                                                                              | 0,075800559 | -0,565790664 | 0,195 | 0,263 | 1         | 0,675585063   | 1,480198505     | 0,741444867     |
| ZFP91                                                                                               | 0,300724936 | -0,566225184 | 0,329 | 0,312 | 1         | 0,675381617   | 1,480644388     | 1,054487179     |
| ERC1                                                                                                | 0,293615706 | -0,566458277 | 0,122 | 0,151 | 1         | 0,675272506   | 1,480883631     | 0,80794702      |
| TGIF1                                                                                               | 0,901258981 | -0,566610114 | 0,341 | 0,267 | 1         | 0,67520144    | 1,481039495     | 1,277153558     |
| ARID4B                                                                                              | 0,658050018 | -0,566622885 | 0,415 | 0,347 | 1         | 0,675195463   | 1,481052606     | 1,195965418     |
| GTDC1                                                                                               | 0,954977299 | -0,56679692  | 0,146 | 0,133 | 1         | 0,675114018   | 1,481231279     | 1,097744361     |

Supplementary Table 2

| Differentially expressed genes_keloid-XL_comparing SC-Keloid vs. (SC-Myel, SC-Nonmyel, SC-Nonmyel2) |             |              |       |       |           |               |                 |                 |
|-----------------------------------------------------------------------------------------------------|-------------|--------------|-------|-------|-----------|---------------|-----------------|-----------------|
| gene                                                                                                | p_val       | avg_log2FC   | pct.1 | pct.2 | p_val_adj | Foldchange_UP | Foldchange_DOWN | Ratio_pct1_pct2 |
| SAV1                                                                                                | 0,822883053 | -0,566957686 | 0,244 | 0,193 | 1         | 0,675038791   | 1,481396349     | 1,264248705     |
| G3BP1                                                                                               | 0,910739808 | -0,567348161 | 0,439 | 0,337 | 1         | 0,674856112   | 1,481797353     | 1,302670623     |
| METRNL                                                                                              | 0,095502125 | -0,570419754 | 0,171 | 0,228 | 1         | 0,673420827   | 1,484955557     | 0,75            |
| SRRM1                                                                                               | 0,257453032 | -0,571970171 | 0,622 | 0,505 | 1         | 0,672697513   | 1,486552249     | 1,231683168     |
| JDP2                                                                                                | 0,783634425 | -0,573356194 | 0,244 | 0,218 | 1         | 0,67205155    | 1,487981092     | 1,119266055     |
| DEPP1                                                                                               | 0,384409212 | -0,573718574 | 0,122 | 0,147 | 1         | 0,671882764   | 1,488354894     | 0,829931973     |
| RNF103                                                                                              | 0,17432741  | -0,573805926 | 0,11  | 0,154 | 1         | 0,671842084   | 1,488445013     | 0,714285714     |
| NNMT                                                                                                | 0,085652226 | -0,573987874 | 0,049 | 0,109 | 1         | 0,671757359   | 1,488632743     | 0,449541284     |
| AHSA1                                                                                               | 0,961560902 | -0,574386222 | 0,476 | 0,347 | 1         | 0,671571903   | 1,489043831     | 1,371757925     |
| ATP1B2                                                                                              | 0,012921635 | -0,575717161 | 0,024 | 0,112 | 1         | 0,670952639   | 1,490418163     | 0,214285714     |
| CAMSAP2                                                                                             | 0,241911663 | -0,576951152 | 0,232 | 0,253 | 1         | 0,670378994   | 1,491693518     | 0,916996047     |
| ASTN2                                                                                               | 0,409938929 | -0,577327434 | 0,122 | 0,144 | 1         | 0,670204169   | 1,492082631     | 0,847222222     |
| APOLD1                                                                                              | 0,029298609 | -0,578098435 | 0,085 | 0,175 | 1         | 0,669846096   | 1,492880239     | 0,485714286     |
| TUBB2B                                                                                              | 0,216622886 | -0,578630841 | 0,427 | 0,442 | 1         | 0,669598945   | 1,493431267     | 0,966063348     |
| HIPK3                                                                                               | 0,836722713 | -0,579198708 | 0,354 | 0,277 | 1         | 0,669335432   | 1,49401922      | 1,277978339     |
| HNRNPA0                                                                                             | 0,168744397 | -0,579435276 | 0,744 | 0,586 | 1         | 0,669225686   | 1,494264224     | 1,269624573     |
| ANKRD28                                                                                             | 0,906195085 | -0,580068703 | 0,207 | 0,182 | 1         | 0,668931921   | 1,494920437     | 1,137362637     |
| STAG2                                                                                               | 0,279562156 | -0,580608689 | 0,293 | 0,288 | 1         | 0,668681594   | 1,495480075     | 1,017361111     |
| FERMT2                                                                                              | 0,670288447 | -0,581116512 | 0,634 | 0,474 | 1         | 0,668446262   | 1,496006571     | 1,337552743     |
| LRRFIP2                                                                                             | 0,321051414 | -0,582052594 | 0,293 | 0,295 | 1         | 0,668012686   | 1,496977559     | 0,993220339     |
| AHCTF1                                                                                              | 0,16520594  | -0,582344636 | 0,159 | 0,204 | 1         | 0,667877475   | 1,497280619     | 0,779411765     |
| BCL3                                                                                                | 0,294477843 | -0,582555891 | 0,134 | 0,165 | 1         | 0,667779685   | 1,497499884     | 0,812121212     |
| ODC1                                                                                                | 0,130185178 | -0,582942398 | 0,195 | 0,235 | 1         | 0,667600806   | 1,497901127     | 0,829787234     |
| KIF1A                                                                                               | 0,004659136 | -0,58368643  | 0     | 0,091 | 1         | 0,667256597   | 1,498673829     | 0               |
| SSPN                                                                                                | 0,543575423 | -0,583702841 | 0,195 | 0,196 | 1         | 0,667249007   | 1,498690878     | 0,994897959     |
| MARCKS                                                                                              | 0,000103749 | -0,584480338 | 0,927 | 0,909 | 1         | 0,66688951    | 1,499498769     | 1,01980198      |
| HNRNPDL                                                                                             | 0,01481871  | -0,584995908 | 0,829 | 0,719 | 1         | 0,666651229   | 1,500034735     | 1,152990264     |
| JARID2                                                                                              | 0,148022629 | -0,58570571  | 0,159 | 0,207 | 1         | 0,666323319   | 1,500772929     | 0,768115942     |
| ARHGAP24                                                                                            | 0,109504233 | -0,586202294 | 0,329 | 0,368 | 1         | 0,666094007   | 1,501289593     | 0,894021739     |
| RBMS1                                                                                               | 0,364396648 | -0,586208127 | 0,537 | 0,333 | 1         | 0,666091313   | 1,501295663     | 1,612612613     |

Supplementary Table 2

| Differentially expressed genes_keloid-XL_comparing SC-Keloid vs. (SC-Myel, SC-Nonmyel, SC-Nonmyel2) |             |              |       |       |           |               |                 |                 |
|-----------------------------------------------------------------------------------------------------|-------------|--------------|-------|-------|-----------|---------------|-----------------|-----------------|
| gene                                                                                                | p_val       | avg_log2FC   | pct.1 | pct.2 | p_val_adj | Foldchange_UP | Foldchange_DOWN | Ratio_pct1_pct2 |
| SKI                                                                                                 | 0,146290779 | -0,58798275  | 0,451 | 0,425 | 1         | 0,665272475   | 1,503143505     | 1,061176471     |
| QKI                                                                                                 | 0,005926391 | -0,588537316 | 0,829 | 0,74  | 1         | 0,665016796   | 1,503721418     | 1,12027027      |
| EFNB2                                                                                               | 0,188893431 | -0,58959141  | 0,085 | 0,13  | 1         | 0,664531084   | 1,504820502     | 0,653846154     |
| CLDND2                                                                                              | 0,083976729 | -0,589594382 | 0,049 | 0,109 | 1         | 0,664529715   | 1,504823603     | 0,449541284     |
| TMED5                                                                                               | 0,22983265  | -0,590017137 | 0,232 | 0,249 | 1         | 0,664335016   | 1,505264627     | 0,931726908     |
| TNFRSF25                                                                                            | 0,03713082  | -0,590865863 | 0,037 | 0,109 | 1         | 0,663944308   | 1,506150424     | 0,339449541     |
| NAMPT                                                                                               | 0,142142199 | -0,590963951 | 0,232 | 0,274 | 1         | 0,663899168   | 1,506252829     | 0,846715328     |
| STAT3                                                                                               | 0,220722663 | -0,590966724 | 0,488 | 0,432 | 1         | 0,663897892   | 1,506255724     | 1,12962963      |
| APOE                                                                                                | 0,692863907 | -0,59135143  | 0,146 | 0,116 | 1         | 0,663720882   | 1,506657433     | 1,25862069      |
| RAPGEF2                                                                                             | 0,07030722  | -0,592170568 | 0,183 | 0,249 | 1         | 0,663344139   | 1,50751313      | 0,734939759     |
| RBM39                                                                                               | 0,017170864 | -0,593383075 | 0,768 | 0,639 | 1         | 0,662786869   | 1,508780646     | 1,201877934     |
| PLPP3                                                                                               | 0,024697395 | -0,593481633 | 0,061 | 0,147 | 1         | 0,662741592   | 1,508883722     | 0,414965986     |
| ZEB2-AS1                                                                                            | 0,008924289 | -0,593511775 | 0,024 | 0,119 | 1         | 0,662727745   | 1,508915248     | 0,201680672     |
| SF1                                                                                                 | 0,181924005 | -0,595131569 | 0,683 | 0,551 | 1         | 0,661984082   | 1,510610342     | 1,239564428     |
| SYNE3                                                                                               | 0,026811415 | -0,595269834 | 0,098 | 0,196 | 1         | 0,661920642   | 1,510755123     | 0,5             |
| ZBTB21                                                                                              | 0,127181263 | -0,596161829 | 0,122 | 0,175 | 1         | 0,661511513   | 1,511689487     | 0,697142857     |
| MKNK2                                                                                               | 0,067081276 | -0,598415606 | 0,134 | 0,2   | 1         | 0,660478907   | 1,514052892     | 0,67            |
| TMEM123                                                                                             | 0,523486402 | -0,598699565 | 0,39  | 0,337 | 1         | 0,660348921   | 1,514350926     | 1,15727003      |
| DHRS3                                                                                               | 0,001545518 | -0,598724457 | 0     | 0,112 | 1         | 0,660337527   | 1,514377055     | 0               |
| MYC                                                                                                 | 0,48260324  | -0,599847102 | 0,183 | 0,193 | 1         | 0,659823881   | 1,515555938     | 0,948186528     |
| HES4                                                                                                | 0,475106315 | -0,599971235 | 0,159 | 0,168 | 1         | 0,65976711    | 1,515686345     | 0,946428571     |
| HERPUD1                                                                                             | 0,810952256 | -0,601107829 | 0,512 | 0,386 | 1         | 0,659247532   | 1,516880915     | 1,32642487      |
| MOB4                                                                                                | 0,943352747 | -0,601250976 | 0,341 | 0,26  | 1         | 0,659182124   | 1,517031431     | 1,311538462     |
| FOXO3                                                                                               | 0,430286679 | -0,602297806 | 0,305 | 0,288 | 1         | 0,65870399    | 1,518132599     | 1,059027778     |
| IFIT2                                                                                               | 0,038719661 | -0,602653347 | 0,024 | 0,091 | 1         | 0,658541677   | 1,518506777     | 0,263736264     |
| UBL3                                                                                                | 0,800337556 | -0,603980993 | 0,451 | 0,347 | 1         | 0,65793593    | 1,519904832     | 1,299711816     |
| ADAM23                                                                                              | 0,090931284 | -0,604233346 | 0,085 | 0,147 | 1         | 0,657820856   | 1,520170714     | 0,578231293     |
| ARL13B                                                                                              | 0,904730411 | -0,60565367  | 0,28  | 0,235 | 1         | 0,657173554   | 1,521668049     | 1,191489362     |
| CASKIN2                                                                                             | 0,620557994 | -0,606409822 | 0,159 | 0,161 | 1         | 0,656829204   | 1,522465801     | 0,98757764      |
| PROSER2                                                                                             | 0,001991506 | -0,607313118 | 0,024 | 0,147 | 1         | 0,65641808    | 1,523419342     | 0,163265306     |

Supplementary Table 2

| Differentially expressed genes_keloid-XL_comparing SC-Keloid vs. (SC-Myel, SC-Nonmyel, SC-Nonmyel2) |             |              |       |       |           |               |                 |                 |
|-----------------------------------------------------------------------------------------------------|-------------|--------------|-------|-------|-----------|---------------|-----------------|-----------------|
| gene                                                                                                | p_val       | avg_log2FC   | pct.1 | pct.2 | p_val_adj | Foldchange_UP | Foldchange_DOWN | Ratio_pct1_pct2 |
| USP53                                                                                               | 0,704998042 | -0,607671031 | 0,415 | 0,298 | 1         | 0,656255252   | 1,523797329     | 1,39261745      |
| ABCA8                                                                                               | 0,566415417 | -0,609913224 | 0,195 | 0,196 | 1         | 0,655236112   | 1,526167409     | 0,994897959     |
| TXNIP                                                                                               | 0,611548794 | -0,610981162 | 0,537 | 0,467 | 1         | 0,654751261   | 1,527297555     | 1,149892934     |
| ANKRD33B                                                                                            | 0,00223705  | -0,611076168 | 0     | 0,105 | 1         | 0,654708145   | 1,527398136     | 0               |
| KANK4                                                                                               | 0,012210874 | -0,611447978 | 0,012 | 0,095 | 1         | 0,654539436   | 1,527791826     | 0,126315789     |
| ARC                                                                                                 | 0,845496012 | -0,611845579 | 0,28  | 0,225 | 1         | 0,654359072   | 1,528212938     | 1,244444444     |
| ADAMTS8                                                                                             | 0,007407443 | -0,612049972 | 0,024 | 0,123 | 1         | 0,654266373   | 1,528429461     | 0,195121951     |
| ITSN1                                                                                               | 0,130934433 | -0,613755175 | 0,11  | 0,161 | 1         | 0,653493515   | 1,530237067     | 0,683229814     |
| LPAR1                                                                                               | 0,697993254 | -0,614017212 | 0,305 | 0,267 | 1         | 0,653374832   | 1,530515029     | 1,142322097     |
| KMT2E                                                                                               | 0,544839707 | -0,616507799 | 0,622 | 0,488 | 1         | 0,652247855   | 1,533159506     | 1,274590164     |
| RTN4                                                                                                | 0,073898102 | -0,617050435 | 0,707 | 0,589 | 1         | 0,652002574   | 1,533736277     | 1,200339559     |
| HBEGF                                                                                               | 0,372434721 | -0,617563259 | 0,61  | 0,565 | 1         | 0,651770853   | 1,534281559     | 1,079646018     |
| TIMP3                                                                                               | 0,004687679 | -0,618965625 | 0,793 | 0,768 | 1         | 0,651137609   | 1,535773676     | 1,032552083     |
| ZC3H12C                                                                                             | 0,003643848 | -0,619269175 | 0,049 | 0,168 | 1         | 0,651000621   | 1,536096844     | 0,291666667     |
| EIF4E                                                                                               | 0,676137919 | -0,620226059 | 0,427 | 0,337 | 1         | 0,650568981   | 1,537116016     | 1,267062315     |
| ARMCX1                                                                                              | 0,115321438 | -0,620544192 | 0,134 | 0,186 | 1         | 0,650425538   | 1,537455007     | 0,720430108     |
| UBR5                                                                                                | 0,252134312 | -0,621031732 | 0,183 | 0,211 | 1         | 0,650205772   | 1,537974659     | 0,867298578     |
| FGFR1                                                                                               | 0,011915965 | -0,622863832 | 0,049 | 0,147 | 1         | 0,64938059    | 1,539928996     | 0,333333333     |
| GOS2                                                                                                | 0,825889227 | -0,623586675 | 0,049 | 0,053 | 1         | 0,649055308   | 1,540700751     | 0,924528302     |
| KRT14                                                                                               | 0,235372752 | -0,62368219  | 0,195 | 0,232 | 1         | 0,649012338   | 1,540802757     | 0,840517241     |
| RAB21                                                                                               | 0,3319922   | -0,625813145 | 0,28  | 0,277 | 1         | 0,648054412   | 1,543080305     | 1,010830325     |
| ZMYM5                                                                                               | 0,337821911 | -0,626252083 | 0,305 | 0,298 | 1         | 0,647857272   | 1,543549857     | 1,023489933     |
| PTPN12                                                                                              | 0,67882035  | -0,628524342 | 0,488 | 0,375 | 1         | 0,646837694   | 1,545982879     | 1,301333333     |
| TAOK1                                                                                               | 0,280901273 | -0,628532673 | 0,512 | 0,421 | 1         | 0,646833959   | 1,545991806     | 1,216152019     |
| JMJD6                                                                                               | 0,304188239 | -0,629917969 | 0,268 | 0,277 | 1         | 0,646213158   | 1,547477002     | 0,967509025     |
| DLX2                                                                                                | 0,022813074 | -0,630574734 | 0,024 | 0,102 | 1         | 0,645919046   | 1,548181628     | 0,235294118     |
| PLXDC2                                                                                              | 0,036313962 | -0,632101585 | 0,256 | 0,333 | 1         | 0,64523581    | 1,549820987     | 0,768768769     |
| ELF1                                                                                                | 0,90599295  | -0,632170301 | 0,378 | 0,284 | 1         | 0,645205078   | 1,549894807     | 1,330985915     |
| KHDRBS3                                                                                             | 0,554296543 | -0,63218399  | 0,61  | 0,467 | 1         | 0,645198956   | 1,549909513     | 1,30620985      |
| OTUD7B                                                                                              | 0,188399426 | -0,633046928 | 0,232 | 0,256 | 1         | 0,644813151   | 1,550836857     | 0,90625         |



Supplementary Table 2

| Differentially expressed genes_keloid-XL_comparing SC-Keloid vs. (SC-Myel, SC-Nonmyel, SC-Nonmyel2) |             |              |       |       |           |               |                 |                 |
|-----------------------------------------------------------------------------------------------------|-------------|--------------|-------|-------|-----------|---------------|-----------------|-----------------|
| gene                                                                                                | p_val       | avg_log2FC   | pct.1 | pct.2 | p_val_adj | Foldchange_UP | Foldchange_DOWN | Ratio_pct1_pct2 |
| FGF7                                                                                                | 0,001922541 | -0,634707197 | 0,012 | 0,13  | 1         | 0,64407152    | 1,552622604     | 0,092307692     |
| SNHG12                                                                                              | 0,188984796 | -0,635107437 | 0,183 | 0,214 | 1         | 0,643892862   | 1,553053401     | 0,855140187     |
| GLS                                                                                                 | 0,576295667 | -0,635815174 | 0,378 | 0,319 | 1         | 0,643577068   | 1,553815463     | 1,184952978     |
| ADD3                                                                                                | 0,017524954 | -0,641169262 | 0,22  | 0,316 | 1         | 0,64119307    | 1,559592652     | 0,696202532     |
| EGR3                                                                                                | 0,623843473 | -0,642313825 | 0,22  | 0,207 | 1         | 0,640684581   | 1,560830446     | 1,062801932     |
| ING1                                                                                                | 0,252397511 | -0,642977094 | 0,402 | 0,382 | 1         | 0,640390098   | 1,561548192     | 1,052356021     |
| ARAP2                                                                                               | 0,006164805 | -0,646434181 | 0,037 | 0,147 | 1         | 0,638857388   | 1,56529457      | 0,25170068      |
| OGA                                                                                                 | 0,213048486 | -0,647342739 | 0,366 | 0,347 | 1         | 0,638455185   | 1,566280647     | 1,054755043     |
| SAMHD1                                                                                              | 0,066632711 | -0,647381834 | 0,195 | 0,256 | 1         | 0,638437884   | 1,566323092     | 0,76171875      |
| HNRNPC                                                                                              | 0,02169574  | -0,647384177 | 0,732 | 0,646 | 1         | 0,638436847   | 1,566325635     | 1,133126935     |
| PAXBP1                                                                                              | 0,260100723 | -0,648017    | 0,317 | 0,312 | 1         | 0,638156865   | 1,567012839     | 1,016025641     |
| RSF1                                                                                                | 0,222732696 | -0,64901196  | 0,402 | 0,372 | 1         | 0,637716909   | 1,568093908     | 1,080645161     |
| EGFLAM                                                                                              | 0,001541711 | -0,649246572 | 0,012 | 0,133 | 1         | 0,637613212   | 1,568348933     | 0,090225564     |
| C11orf96                                                                                            | 0,779457278 | -0,649709498 | 0,341 | 0,309 | 1         | 0,63740865    | 1,568852259     | 1,103559871     |
| PLK2                                                                                                | 0,178224446 | -0,650177097 | 0,268 | 0,309 | 1         | 0,63720209    | 1,56936083      | 0,867313916     |
| RAB8B                                                                                               | 0,40487943  | -0,651684438 | 0,28  | 0,267 | 1         | 0,636536682   | 1,57100137      | 1,048689139     |
| TANC1                                                                                               | 0,281536204 | -0,652228685 | 0,293 | 0,288 | 1         | 0,636296599   | 1,57159413      | 1,017361111     |
| SPIRE1                                                                                              | 0,003996392 | -0,652851639 | 0,073 | 0,196 | 1         | 0,636021906   | 1,57227289      | 0,37244898      |
| AZGP1                                                                                               | 0,01007718  | -0,653008935 | 0,012 | 0,098 | 1         | 0,635952565   | 1,572444323     | 0,12244898      |
| EFNA1                                                                                               | 0,065614949 | -0,653240545 | 0,073 | 0,14  | 1         | 0,635850477   | 1,572696783     | 0,521428571     |
| CCT4                                                                                                | 0,358563923 | -0,655195358 | 0,463 | 0,396 | 1         | 0,634989501   | 1,574829189     | 1,169191919     |
| RXRG                                                                                                | 0,004459885 | -0,655532975 | 0,061 | 0,186 | 1         | 0,634840918   | 1,575197771     | 0,327956989     |
| RSRP1                                                                                               | 0,049540445 | -0,65582911  | 0,537 | 0,523 | 1         | 0,634710621   | 1,575521138     | 1,026768642     |
| NAV2                                                                                                | 0,419039532 | -0,656726801 | 0,244 | 0,246 | 1         | 0,634315807   | 1,576501782     | 0,991869919     |
| IGSF1                                                                                               | 0,000502359 | -0,657334185 | 0     | 0,133 | 1         | 0,634048812   | 1,57716564      | 0               |
| RAF1                                                                                                | 0,471202953 | -0,657697933 | 0,415 | 0,347 | 1         | 0,633888969   | 1,577563342     | 1,195965418     |
| RNF213                                                                                              | 0,487619154 | -0,658168322 | 0,354 | 0,326 | 1         | 0,633682324   | 1,578077788     | 1,085889571     |
| MIDN                                                                                                | 0,571394657 | -0,659215395 | 0,366 | 0,316 | 1         | 0,63322258    | 1,579223534     | 1,158227848     |
| DNAJC3-DT                                                                                           | 0,322506292 | -0,660245103 | 0,098 | 0,126 | 1         | 0,632770785   | 1,580351091     | 0,777777778     |
| RLF                                                                                                 | 0,316172057 | -0,660814852 | 0,195 | 0,218 | 1         | 0,63252094    | 1,580975326     | 0,894495413     |

Supplementary Table 2

| Differentially expressed genes_keloid-XL_comparing SC-Keloid vs. (SC-Myel, SC-Nonmyel, SC-Nonmyel2) |             |              |       |       |           |               |                 |                 |
|-----------------------------------------------------------------------------------------------------|-------------|--------------|-------|-------|-----------|---------------|-----------------|-----------------|
| gene                                                                                                | p_val       | avg_log2FC   | pct.1 | pct.2 | p_val_adj | Foldchange_UP | Foldchange_DOWN | Ratio_pct1_pct2 |
| B4GALNT1                                                                                            | 0,007930243 | -0,662085449 | 0,061 | 0,168 | 1         | 0,631964118   | 1,582368321     | 0,363095238     |
| UBE2D3                                                                                              | 0,096051    | -0,662193621 | 0,634 | 0,537 | 1         | 0,631916735   | 1,58248697      | 1,180633147     |
| STARD13                                                                                             | 0,095365233 | -0,663093611 | 0,402 | 0,411 | 1         | 0,631522652   | 1,583474475     | 0,97810219      |
| BAZ2A                                                                                               | 0,245693698 | -0,663450418 | 0,232 | 0,253 | 1         | 0,631366484   | 1,583866147     | 0,916996047     |
| CORO1C                                                                                              | 0,685478808 | -0,663589775 | 0,341 | 0,295 | 1         | 0,6313055     | 1,584019148     | 1,155932203     |
| CEP350                                                                                              | 0,671001001 | -0,66427894  | 0,268 | 0,239 | 1         | 0,631004002   | 1,584776003     | 1,121338912     |
| AUTS2                                                                                               | 0,067303014 | -0,665185241 | 0,146 | 0,218 | 1         | 0,63060773    | 1,585771872     | 0,669724771     |
| KCTD11                                                                                              | 0,2643677   | -0,666922095 | 0,098 | 0,133 | 1         | 0,629849001   | 1,587682125     | 0,736842105     |
| AOPEP                                                                                               | 0,152379808 | -0,668121578 | 0,549 | 0,488 | 1         | 0,62932555    | 1,589002702     | 1,125           |
| DCD                                                                                                 | 0,148409881 | -0,669221986 | 0,232 | 0,281 | 1         | 0,628845719   | 1,590215168     | 0,825622776     |
| CSF1                                                                                                | 0,213413805 | -0,671575624 | 0,146 | 0,182 | 1         | 0,627820645   | 1,59281159      | 0,802197802     |
| MGP                                                                                                 | 0,95698874  | -0,674301682 | 0,122 | 0,116 | 1         | 0,626635461   | 1,595824148     | 1,051724138     |
| F3                                                                                                  | 0,006809183 | -0,675470028 | 0,061 | 0,182 | 1         | 0,626128194   | 1,597117026     | 0,335164835     |
| SERTAD1                                                                                             | 0,085948038 | -0,677803365 | 0,439 | 0,449 | 1         | 0,625116347   | 1,599702207     | 0,977728285     |
| WTAP                                                                                                | 0,644170057 | -0,677927534 | 0,5   | 0,389 | 1         | 0,625062547   | 1,599839896     | 1,285347044     |
| NFKBIZ                                                                                              | 0,132933898 | -0,678601907 | 0,22  | 0,27  | 1         | 0,624770436   | 1,600587899     | 0,814814815     |
| CLEC2B                                                                                              | 0,04938389  | -0,679678046 | 0,073 | 0,151 | 1         | 0,62430458    | 1,601782259     | 0,483443709     |
| SEMA3G                                                                                              | 0,000107925 | -0,682408227 | 0     | 0,161 | 1         | 0,623124252   | 1,604816369     | 0               |
| MT1M                                                                                                | 0,097025781 | -0,683170573 | 0,159 | 0,084 | 1         | 0,622795069   | 1,605664607     | 1,892857143     |
| GJC3                                                                                                | 0,014577016 | -0,683865559 | 0,012 | 0,091 | 1         | 0,622495124   | 1,606438286     | 0,131868132     |
| KIF21A                                                                                              | 0,007833771 | -0,684248183 | 0,085 | 0,196 | 1         | 0,622330051   | 1,606864395     | 0,433673469     |
| HLA-DQB1                                                                                            | 0,026332727 | -0,686099235 | 0,037 | 0,116 | 1         | 0,621532081   | 1,608927408     | 0,318965517     |
| COL21A1                                                                                             | 0,001879465 | -0,686301299 | 0,012 | 0,13  | 1         | 0,621445036   | 1,609152769     | 0,092307692     |
| MAP3K2                                                                                              | 0,466843843 | -0,687349302 | 0,268 | 0,253 | 1         | 0,620993769   | 1,610322116     | 1,059288538     |
| RERE                                                                                                | 0,04624853  | -0,6879464   | 0,329 | 0,375 | 1         | 0,620736807   | 1,610988728     | 0,877333333     |
| CDKN1B                                                                                              | 0,025089816 | -0,688315173 | 0,22  | 0,298 | 1         | 0,620578159   | 1,611400572     | 0,738255034     |
| CTNND1                                                                                              | 0,146949136 | -0,689329413 | 0,378 | 0,365 | 1         | 0,620142035   | 1,612533814     | 1,035616438     |
| GFRA3                                                                                               | 0,795073821 | -0,690974146 | 0,634 | 0,474 | 1         | 0,619435449   | 1,614373218     | 1,337552743     |
| MBOAT2                                                                                              | 0,258190455 | -0,69112714  | 0,22  | 0,235 | 1         | 0,619369763   | 1,614544427     | 0,936170213     |
| DEPDC7                                                                                              | 0,003486677 | -0,691568351 | 0,024 | 0,137 | 1         | 0,619180374   | 1,61503827      | 0,175182482     |

Supplementary Table 2

| Differentially expressed genes_keloid-XL_comparing SC-Keloid vs. (SC-Myel, SC-Nonmyel, SC-Nonmyel2) |             |              |       |       |           |               |                 |                 |
|-----------------------------------------------------------------------------------------------------|-------------|--------------|-------|-------|-----------|---------------|-----------------|-----------------|
| gene                                                                                                | p_val       | avg_log2FC   | pct.1 | pct.2 | p_val_adj | Foldchange_UP | Foldchange_DOWN | Ratio_pct1_pct2 |
| NUP153                                                                                              | 0,013817663 | -0,691932236 | 0,134 | 0,242 | 1         | 0,619024221   | 1,615445675     | 0,553719008     |
| FOXD3                                                                                               | 0,249346391 | -0,695229501 | 0,72  | 0,66  | 1         | 0,617611062   | 1,619141982     | 1,090909091     |
| FKBP4                                                                                               | 0,026716527 | -0,695301387 | 0,159 | 0,246 | 1         | 0,617580289   | 1,619222662     | 0,646341463     |
| PHF13                                                                                               | 0,2535945   | -0,695908044 | 0,244 | 0,256 | 1         | 0,61732065    | 1,619903693     | 0,953125        |
| HSPA8                                                                                               | 0,001658443 | -0,696649346 | 0,78  | 0,793 | 1         | 0,617003532   | 1,620736264     | 0,983606557     |
| FTL                                                                                                 | 0,000693232 | -0,698517774 | 0,963 | 0,937 | 1         | 0,616204971   | 1,622836632     | 1,027748132     |
| AFF4                                                                                                | 0,078645667 | -0,699345859 | 0,415 | 0,407 | 1         | 0,61585138    | 1,623768383     | 1,01965602      |
| KCNK12                                                                                              | 0,00964585  | -0,701756229 | 0     | 0,077 | 1         | 0,614823311   | 1,626483547     | 0               |
| THSD7A                                                                                              | 0,000608521 | -0,702852969 | 0,085 | 0,253 | 1         | 0,614356099   | 1,627720473     | 0,335968379     |
| SFRP1                                                                                               | 0,025959751 | -0,704088    | 0,11  | 0,207 | 1         | 0,613830399   | 1,629114494     | 0,531400966     |
| ARHGAP5                                                                                             | 0,20243409  | -0,704809662 | 0,415 | 0,382 | 1         | 0,613523427   | 1,629929611     | 1,086387435     |
| EIF5                                                                                                | 0,003286173 | -0,705883065 | 0,61  | 0,618 | 1         | 0,613067119   | 1,631142772     | 0,987055016     |
| PHLDA1                                                                                              | 0,969207977 | -0,706405011 | 0,488 | 0,379 | 1         | 0,612845361   | 1,631733002     | 1,287598945     |
| IFI16                                                                                               | 0,408753023 | -0,706513016 | 0,5   | 0,418 | 1         | 0,612799482   | 1,631855164     | 1,196172249     |
| SYNE1                                                                                               | 0,146240999 | -0,706607967 | 0,232 | 0,263 | 1         | 0,612759153   | 1,631962568     | 0,882129278     |
| PLSCR4                                                                                              | 0,008349323 | -0,706625869 | 0,11  | 0,225 | 1         | 0,612751549   | 1,631982819     | 0,488888889     |
| PEG10                                                                                               | 0,366448595 | -0,707571067 | 0,524 | 0,368 | 1         | 0,612350229   | 1,633052381     | 1,423913043     |
| NSD3                                                                                                | 0,219160189 | -0,711121031 | 0,451 | 0,396 | 1         | 0,610845303   | 1,637075696     | 1,138888889     |
| SCML1                                                                                               | 0,04898466  | -0,712693702 | 0,195 | 0,267 | 1         | 0,610179788   | 1,638861232     | 0,730337079     |
| ZBTB44                                                                                              | 0,015462989 | -0,713835226 | 0,134 | 0,232 | 1         | 0,609697178   | 1,640158485     | 0,577586207     |
| GOLGA4                                                                                              | 0,267220941 | -0,714612877 | 0,378 | 0,365 | 1         | 0,609368624   | 1,641042813     | 1,035616438     |
| LSMEM1                                                                                              | 0,016663647 | -0,715176403 | 0,073 | 0,172 | 1         | 0,609130647   | 1,64168394      | 0,424418605     |
| ARHGEF26                                                                                            | 0,060024453 | -0,715466028 | 0,159 | 0,235 | 1         | 0,609008374   | 1,642013545     | 0,676595745     |
| MT-ND2                                                                                              | 0,000379166 | -0,717066709 | 0,829 | 0,789 | 1         | 0,60833305    | 1,643836383     | 1,050697085     |
| TM4SF1                                                                                              | 0,157960915 | -0,71762768  | 0,329 | 0,34  | 1         | 0,608096555   | 1,644475688     | 0,967647059     |
| H2AZ1                                                                                               | 0,205619363 | -0,718165602 | 0,732 | 0,604 | 1         | 0,607869862   | 1,645088961     | 1,21192053      |
| RPS6KA5                                                                                             | 0,185323404 | -0,719303813 | 0,134 | 0,175 | 1         | 0,607390474   | 1,646387362     | 0,765714286     |
| IFITM2                                                                                              | 0,07002714  | -0,71956903  | 0,622 | 0,558 | 1         | 0,607278825   | 1,646690052     | 1,114695341     |
| KLHL24                                                                                              | 0,394322663 | -0,72078548  | 0,232 | 0,232 | 1         | 0,606766996   | 1,648079092     | 1               |
| KANSL1L                                                                                             | 0,075412696 | -0,721518553 | 0,146 | 0,211 | 1         | 0,606458759   | 1,64891674      | 0,691943128     |

Supplementary Table 2

| Differentially expressed genes_keloid-XL_comparing SC-Keloid vs. (SC-Myel, SC-Nonmyel, SC-Nonmyel2) |             |              |       |       |           |               |                 |                 |
|-----------------------------------------------------------------------------------------------------|-------------|--------------|-------|-------|-----------|---------------|-----------------|-----------------|
| gene                                                                                                | p_val       | avg_log2FC   | pct.1 | pct.2 | p_val_adj | Foldchange_UP | Foldchange_DOWN | Ratio_pct1_pct2 |
| RHOBTB3                                                                                             | 0,748080174 | -0,723633343 | 0,207 | 0,193 | 1         | 0,605570426   | 1,651335594     | 1,07253886      |
| BAG3                                                                                                | 0,935854937 | -0,724247922 | 0,39  | 0,302 | 1         | 0,605312512   | 1,652039202     | 1,291390728     |
| MID1                                                                                                | 0,000221855 | -0,725407067 | 0,012 | 0,168 | 1         | 0,604826364   | 1,653367081     | 0,071428571     |
| ZBTB11                                                                                              | 0,002890227 | -0,726575905 | 0,098 | 0,232 | 1         | 0,604336546   | 1,654707143     | 0,422413793     |
| KLF6                                                                                                | 0,014039866 | -0,727355744 | 0,768 | 0,754 | 1         | 0,604009965   | 1,655601825     | 1,018567639     |
| BTG1                                                                                                | 0,001318009 | -0,727398466 | 0,829 | 0,761 | 1         | 0,603992079   | 1,655650852     | 1,08935611      |
| NCAM1                                                                                               | 0,006869029 | -0,727600959 | 0,207 | 0,333 | 1         | 0,60390731    | 1,655883251     | 0,621621622     |
| PLEKHA1                                                                                             | 0,737546011 | -0,730878345 | 0,427 | 0,333 | 1         | 0,602536964   | 1,659649216     | 1,282282282     |
| FNDC3B                                                                                              | 0,707237732 | -0,731031309 | 0,415 | 0,33  | 1         | 0,602473082   | 1,659825192     | 1,257575758     |
| NFAT5                                                                                               | 0,013439697 | -0,732048709 | 0,195 | 0,295 | 1         | 0,602048364   | 1,660996126     | 0,661016949     |
| DYRK1A                                                                                              | 0,01914096  | -0,733650217 | 0,134 | 0,228 | 1         | 0,601380412   | 1,66284099      | 0,587719298     |
| HSPE1                                                                                               | 0,114138064 | -0,733978132 | 0,671 | 0,568 | 1         | 0,601243738   | 1,663218986     | 1,181338028     |
| SBSPON                                                                                              | 0,001273364 | -0,736872528 | 0,012 | 0,137 | 1         | 0,600038706   | 1,666559156     | 0,087591241     |
| ARID1A                                                                                              | 0,139965018 | -0,737512175 | 0,293 | 0,319 | 1         | 0,599772726   | 1,667298222     | 0,918495298     |
| RBMS3                                                                                               | 0,00156455  | -0,739073298 | 0,037 | 0,168 | 1         | 0,599124071   | 1,669103361     | 0,220238095     |
| N4BP2L1                                                                                             | 0,006452336 | -0,739334824 | 0,122 | 0,239 | 1         | 0,599015474   | 1,669405957     | 0,510460251     |
| CXCL14                                                                                              | 0,0562275   | -0,739797259 | 0,049 | 0,116 | 1         | 0,598823499   | 1,669941146     | 0,422413793     |
| LAMB1                                                                                               | 0,03211057  | -0,742421682 | 0,72  | 0,607 | 1         | 0,597735162   | 1,67298172      | 1,18616145      |
| EIF1B                                                                                               | 0,042217557 | -0,742926172 | 0,573 | 0,526 | 1         | 0,597526179   | 1,673566841     | 1,089353612     |
| FAM102A                                                                                             | 0,055170613 | -0,743538745 | 0,244 | 0,295 | 1         | 0,597272521   | 1,674277594     | 0,827118644     |
| FOSL2                                                                                               | 0,111702711 | -0,744732651 | 0,268 | 0,295 | 1         | 0,596778452   | 1,675663719     | 0,908474576     |
| RDH10                                                                                               | 0,01337224  | -0,745112986 | 0,098 | 0,2   | 1         | 0,596621145   | 1,67610553      | 0,49            |
| ZNF516                                                                                              | 0,000798298 | -0,745207822 | 0,085 | 0,239 | 1         | 0,596581927   | 1,676215713     | 0,355648536     |
| PTEN                                                                                                | 0,042977858 | -0,745364625 | 0,39  | 0,407 | 1         | 0,596517089   | 1,676397907     | 0,958230958     |
| EPHA2                                                                                               | 0,024545008 | -0,746834359 | 0,11  | 0,2   | 1         | 0,595909702   | 1,678106593     | 0,55            |
| SPATA6                                                                                              | 0,114494845 | -0,749307571 | 0,378 | 0,379 | 1         | 0,594889009   | 1,680985839     | 0,997361478     |
| WSB1                                                                                                | 0,073120052 | -0,750227466 | 0,659 | 0,558 | 1         | 0,594509815   | 1,682058015     | 1,181003584     |
| JMJD1C                                                                                              | 0,331591698 | -0,752179756 | 0,537 | 0,432 | 1         | 0,593705854   | 1,684335758     | 1,243055556     |
| RASGEF1B                                                                                            | 0,002565299 | -0,752442987 | 0,098 | 0,235 | 1         | 0,593597538   | 1,684643106     | 0,417021277     |
| SRSF7                                                                                               | 0,028523563 | -0,753287341 | 0,646 | 0,604 | 1         | 0,59325023    | 1,685629352     | 1,069536424     |

Supplementary Table 2

| Differentially expressed genes_keloid-XL_comparing SC-Keloid vs. (SC-Myel, SC-Nonmyel, SC-Nonmyel2) |             |              |       |       |           |               |                 |                 |
|-----------------------------------------------------------------------------------------------------|-------------|--------------|-------|-------|-----------|---------------|-----------------|-----------------|
| gene                                                                                                | p_val       | avg_log2FC   | pct.1 | pct.2 | p_val_adj | Foldchange_UP | Foldchange_DOWN | Ratio_pct1_pct2 |
| HSPA2                                                                                               | 0,228461577 | -0,755042446 | 0,183 | 0,214 | 1         | 0,592528952   | 1,687681246     | 0,855140187     |
| PRDM2                                                                                               | 0,309832775 | -0,756431792 | 0,159 | 0,179 | 1         | 0,591958609   | 1,689307302     | 0,888268156     |
| ATP13A3                                                                                             | 0,115724874 | -0,75720093  | 0,22  | 0,263 | 1         | 0,591643104   | 1,690208155     | 0,836501901     |
| GATM                                                                                                | 0,996951439 | -0,757517667 | 0,305 | 0,249 | 1         | 0,591513226   | 1,690579273     | 1,224899598     |
| ANKRD12                                                                                             | 0,293045618 | -0,757599242 | 0,415 | 0,365 | 1         | 0,591479781   | 1,690674867     | 1,136986301     |
| FTH1                                                                                                | 0,000363863 | -0,758189024 | 0,988 | 0,975 | 1         | 0,59123803    | 1,691366166     | 1,013333333     |
| TGFBR3                                                                                              | 9,96362E-05 | -0,758927668 | 0,037 | 0,228 | 1         | 0,5909354     | 1,692232349     | 0,162280702     |
| INF2                                                                                                | 0,074190193 | -0,758940895 | 0,268 | 0,312 | 1         | 0,590929983   | 1,692247863     | 0,858974359     |
| KDM6B                                                                                               | 0,072087145 | -0,761628294 | 0,232 | 0,284 | 1         | 0,589830245   | 1,695403058     | 0,816901408     |
| BTG3                                                                                                | 0,921571545 | -0,763146737 | 0,537 | 0,379 | 1         | 0,589209772   | 1,697188416     | 1,416886544     |
| PPP1R12B                                                                                            | 0,13355687  | -0,76428524  | 0,159 | 0,207 | 1         | 0,58874498    | 1,698528282     | 0,768115942     |
| CACYBP                                                                                              | 0,418430216 | -0,770167958 | 0,488 | 0,382 | 1         | 0,586349208   | 1,705468322     | 1,277486911     |
| RBBP6                                                                                               | 0,482252904 | -0,772663646 | 0,402 | 0,34  | 1         | 0,585335772   | 1,708421129     | 1,182352941     |
| PTGDS                                                                                               | 0,088286982 | -0,772927755 | 0,037 | 0,091 | 1         | 0,585228626   | 1,708733913     | 0,406593407     |
| HNRNPH1                                                                                             | 0,00119197  | -0,773326043 | 0,793 | 0,712 | 1         | 0,585067083   | 1,709205712     | 1,113764045     |
| SNHG8                                                                                               | 0,028972244 | -0,77372987  | 0,598 | 0,561 | 1         | 0,584903339   | 1,709684205     | 1,065953654     |
| UBE2R2                                                                                              | 0,435959414 | -0,774333873 | 0,512 | 0,407 | 1         | 0,584658513   | 1,710400136     | 1,257985258     |
| CDKN1C                                                                                              | 0,065678794 | -0,774413075 | 0,415 | 0,442 | 1         | 0,584626417   | 1,710494037     | 0,938914027     |
| MAGI1                                                                                               | 0,220315592 | -0,776116436 | 0,11  | 0,147 | 1         | 0,583936568   | 1,712514776     | 0,74829932      |
| PCDH10                                                                                              | 0,041644213 | -0,779530095 | 0,122 | 0,207 | 1         | 0,582556509   | 1,716571672     | 0,589371981     |
| MXI1                                                                                                | 0,054693096 | -0,780666732 | 0,183 | 0,249 | 1         | 0,582097718   | 1,717924617     | 0,734939759     |
| FXR1                                                                                                | 0,034798357 | -0,781038421 | 0,451 | 0,453 | 1         | 0,581947769   | 1,718367272     | 0,995584989     |
| SH3BP5                                                                                              | 0,125353071 | -0,783431106 | 0,268 | 0,288 | 1         | 0,580983419   | 1,721219519     | 0,930555556     |
| PPP1R18                                                                                             | 0,043578026 | -0,783460901 | 0,488 | 0,477 | 1         | 0,58097142    | 1,721255066     | 1,023060797     |
| PFKFB3                                                                                              | 0,000982404 | -0,787936774 | 0,049 | 0,196 | 1         | 0,579171785   | 1,726603447     | 0,25            |
| BPTF                                                                                                | 0,045312783 | -0,788597523 | 0,305 | 0,344 | 1         | 0,578906587   | 1,727394407     | 0,886627907     |
| PRPF4B                                                                                              | 0,342312069 | -0,790430645 | 0,488 | 0,407 | 1         | 0,578171482   | 1,729590669     | 1,199017199     |
| KDSR                                                                                                | 0,103986978 | -0,791418196 | 0,378 | 0,386 | 1         | 0,577775848   | 1,73077501      | 0,979274611     |
| IER2                                                                                                | 0,021562043 | -0,792412855 | 0,756 | 0,702 | 1         | 0,577377641   | 1,731968697     | 1,076923077     |
| CYTH3                                                                                               | 0,076650548 | -0,79320019  | 0,293 | 0,326 | 1         | 0,577062629   | 1,732914157     | 0,898773006     |

Supplementary Table 2

| Differentially expressed genes_keloid-XL_comparing SC-Keloid vs. (SC-Myel, SC-Nonmyel, SC-Nonmyel2) |             |              |       |       |             |               |                 |                 |
|-----------------------------------------------------------------------------------------------------|-------------|--------------|-------|-------|-------------|---------------|-----------------|-----------------|
| gene                                                                                                | p_val       | avg_log2FC   | pct.1 | pct.2 | p_val_adj   | Foldchange_UP | Foldchange_DOWN | Ratio_pct1_pct2 |
| MYLIP                                                                                               | 0,003256133 | -0,795267297 | 0,11  | 0,239 | 1           | 0,576236401   | 1,735398872     | 0,460251046     |
| TSC22D3                                                                                             | 0,335574272 | -0,799795899 | 0,366 | 0,249 | 1           | 0,574430437   | 1,740854827     | 1,469879518     |
| LIMS2                                                                                               | 0,013043675 | -0,801628592 | 0,098 | 0,2   | 1           | 0,573701187   | 1,743067685     | 0,49            |
| SLC5A3                                                                                              | 0,008380523 | -0,804107105 | 0,122 | 0,239 | 1           | 0,572716429   | 1,746064804     | 0,510460251     |
| SFPQ                                                                                                | 0,009446881 | -0,805176926 | 0,72  | 0,618 | 1           | 0,572291893   | 1,747360068     | 1,165048544     |
| CSKMT                                                                                               | 0,480388842 | -0,805190305 | 0,268 | 0,256 | 1           | 0,572286585   | 1,747376272     | 1,046875        |
| SNHG32                                                                                              | 0,460170594 | -0,806552333 | 0,634 | 0,481 | 1           | 0,571746553   | 1,749026724     | 1,318087318     |
| KMT2A                                                                                               | 0,194734079 | -0,806741342 | 0,5   | 0,442 | 1           | 0,571671652   | 1,749255881     | 1,131221719     |
| STIP1                                                                                               | 0,209488902 | -0,807757764 | 0,439 | 0,382 | 1           | 0,571269034   | 1,750488719     | 1,14921466      |
| SON                                                                                                 | 3,15662E-05 | -0,811287328 | 0,841 | 0,775 | 0,666078685 | 0,569873129   | 1,754776545     | 1,08516129      |
| PRIMA1                                                                                              | 0,003322826 | -0,811912308 | 0,049 | 0,172 | 1           | 0,569626311   | 1,755536885     | 0,284883721     |
| SECISBP2L                                                                                           | 0,628944386 | -0,813931469 | 0,488 | 0,389 | 1           | 0,568829634   | 1,757995612     | 1,254498715     |
| DUSP6                                                                                               | 0,476012495 | -0,814939476 | 0,171 | 0,179 | 1           | 0,568432333   | 1,759224347     | 0,955307263     |
| SFRP5                                                                                               | 0,008044669 | -0,815981121 | 0     | 0,081 | 1           | 0,568022065   | 1,760494989     | 0               |
| LRRC4C                                                                                              | 0,004324109 | -0,816596479 | 0,159 | 0,295 | 1           | 0,567779837   | 1,76124606      | 0,538983051     |
| DOCK5                                                                                               | 0,083253403 | -0,817825113 | 0,317 | 0,351 | 1           | 0,567296507   | 1,762746619     | 0,903133903     |
| MBNL1                                                                                               | 0,186793467 | -0,819082482 | 0,659 | 0,526 | 1           | 0,5668023     | 1,764283595     | 1,252851711     |
| GADD45G                                                                                             | 0,239919445 | -0,819108048 | 0,171 | 0,207 | 1           | 0,566792256   | 1,764314861     | 0,826086957     |
| ITGB4                                                                                               | 0,087922522 | -0,822342711 | 0,39  | 0,407 | 1           | 0,565522876   | 1,768275064     | 0,958230958     |
| PELI1                                                                                               | 0,161495042 | -0,823006253 | 0,341 | 0,344 | 1           | 0,565262834   | 1,769088538     | 0,99127907      |
| ZBTB7A                                                                                              | 0,095027808 | -0,823836454 | 0,512 | 0,463 | 1           | 0,564937646   | 1,770106855     | 1,105831533     |
| FNBP4                                                                                               | 0,106636739 | -0,824834364 | 0,402 | 0,389 | 1           | 0,564547014   | 1,77133166      | 1,033419023     |
| SIK3                                                                                                | 0,003893828 | -0,828007165 | 0,244 | 0,361 | 1           | 0,563306816   | 1,775231492     | 0,675900277     |
| LPL                                                                                                 | 0,002881848 | -0,830022029 | 0,024 | 0,14  | 1           | 0,562520653   | 1,777712506     | 0,171428571     |
| SETD5                                                                                               | 0,118708644 | -0,833943129 | 0,39  | 0,389 | 1           | 0,560993854   | 1,782550723     | 1,002570694     |
| PLEKHA5                                                                                             | 0,102794439 | -0,835136164 | 0,207 | 0,26  | 1           | 0,560530133   | 1,784025411     | 0,796153846     |
| CHD2                                                                                                | 0,189145495 | -0,840606342 | 0,341 | 0,337 | 1           | 0,558408829   | 1,790802629     | 1,011869436     |
| CEP85L                                                                                              | 0,024149535 | -0,842162993 | 0,183 | 0,267 | 1           | 0,557806638   | 1,792735928     | 0,685393258     |
| TAF5                                                                                                | 2,8877E-05  | -0,843012163 | 0,012 | 0,204 | 0,609332944 | 0,557478409   | 1,793791443     | 0,058823529     |
| ABCA2                                                                                               | 0,116669954 | -0,843927986 | 0,207 | 0,249 | 1           | 0,557124634   | 1,794930503     | 0,831325301     |

Supplementary Table 2

| Differentially expressed genes_keloid-XL_comparing SC-Keloid vs. (SC-Myel, SC-Nonmyel, SC-Nonmyel2) |             |              |       |       |             |               |                 |                 |
|-----------------------------------------------------------------------------------------------------|-------------|--------------|-------|-------|-------------|---------------|-----------------|-----------------|
| gene                                                                                                | p_val       | avg_log2FC   | pct.1 | pct.2 | p_val_adj   | Foldchange_UP | Foldchange_DOWN | Ratio_pct1_pct2 |
| AC009041.2                                                                                          | 0,00118293  | -0,845046807 | 0,085 | 0,235 | 1           | 0,556692748   | 1,796323025     | 0,361702128     |
| SEMA5A                                                                                              | 0,000588254 | -0,845825908 | 0,012 | 0,151 | 1           | 0,556392197   | 1,797293358     | 0,079470199     |
| ARL4A                                                                                               | 0,02099776  | -0,846065659 | 0,195 | 0,277 | 1           | 0,556299742   | 1,797592062     | 0,703971119     |
| CNKSR3                                                                                              | 0,272548    | -0,847431384 | 0,341 | 0,326 | 1           | 0,555773371   | 1,799294555     | 1,04601227      |
| RAPGEF5                                                                                             | 6,53104E-05 | -0,847876636 | 0,024 | 0,207 | 1           | 0,555601872   | 1,799849949     | 0,115942029     |
| NET1                                                                                                | 0,34884716  | -0,850739029 | 0,256 | 0,253 | 1           | 0,554500617   | 1,803424504     | 1,011857708     |
| NEDD9                                                                                               | 0,145012375 | -0,85448301  | 0,232 | 0,267 | 1           | 0,553063482   | 1,808110702     | 0,868913858     |
| MAFK                                                                                                | 0,013113248 | -0,854858067 | 0,207 | 0,305 | 1           | 0,552919721   | 1,808580817     | 0,678688525     |
| HLA-DPA1                                                                                            | 0,001722994 | -0,855542417 | 0,049 | 0,186 | 1           | 0,552657502   | 1,80943893      | 0,26344086      |
| ARHGAP19                                                                                            | 5,98374E-05 | -0,85652499  | 0     | 0,172 | 1           | 0,552281233   | 1,810671701     | 0               |
| MSX1                                                                                                | 0,201470073 | -0,862608635 | 0,256 | 0,277 | 1           | 0,549957243   | 1,818323174     | 0,924187726     |
| RETREG1                                                                                             | 0,01229808  | -0,863996502 | 0,146 | 0,249 | 1           | 0,549428441   | 1,820073235     | 0,586345382     |
| ART3                                                                                                | 7,10588E-05 | -0,864445524 | 0,024 | 0,207 | 1           | 0,549257464   | 1,8206398       | 0,115942029     |
| YME1L1                                                                                              | 0,291401904 | -0,865504336 | 0,402 | 0,365 | 1           | 0,548854505   | 1,821976481     | 1,101369863     |
| YPEL2                                                                                               | 0,004612794 | -0,867453078 | 0,159 | 0,281 | 1           | 0,548113632   | 1,824439206     | 0,565836299     |
| EIF4A2                                                                                              | 1,41557E-05 | -0,869129644 | 0,695 | 0,712 | 0,298698621 | 0,547477036   | 1,826560632     | 0,976123596     |
| FOXO1                                                                                               | 0,007706064 | -0,870110989 | 0,183 | 0,288 | 1           | 0,547104759   | 1,827803511     | 0,635416667     |
| GPM6B                                                                                               | 1,56355E-09 | -0,872799507 | 0,951 | 0,926 | 3,29925E-05 | 0,546086158   | 1,831212869     | 1,02699784      |
| TLE1                                                                                                | 0,044170723 | -0,873116412 | 0,585 | 0,512 | 1           | 0,545966217   | 1,831615161     | 1,142578125     |
| POLR1F                                                                                              | 0,307133575 | -0,874051646 | 0,207 | 0,221 | 1           | 0,545612406   | 1,832802899     | 0,936651584     |
| ERF                                                                                                 | 0,090107691 | -0,874468432 | 0,659 | 0,526 | 1           | 0,545454805   | 1,833332462     | 1,252851711     |
| SMC5                                                                                                | 0,129080495 | -0,877764074 | 0,317 | 0,323 | 1           | 0,544210209   | 1,83752525      | 0,981424149     |
| MTURN                                                                                               | 0,034106341 | -0,882141926 | 0,232 | 0,312 | 1           | 0,542561309   | 1,84310968      | 0,743589744     |
| SQSTM1                                                                                              | 0,015009446 | -0,882244982 | 0,634 | 0,572 | 1           | 0,542522553   | 1,843241344     | 1,108391608     |
| SOD1                                                                                                | 6,06875E-05 | -0,882286579 | 0,768 | 0,702 | 1           | 0,542506911   | 1,843294491     | 1,094017094     |
| CAB39L                                                                                              | 7,30416E-05 | -0,88317814  | 0,049 | 0,242 | 1           | 0,542171754   | 1,844433968     | 0,202479339     |
| TGFBR2                                                                                              | 0,005625106 | -0,888415093 | 0,451 | 0,502 | 1           | 0,54020725    | 1,851141391     | 0,898406375     |
| DCUN1D3                                                                                             | 0,005672689 | -0,889169943 | 0,098 | 0,221 | 1           | 0,539924675   | 1,852110203     | 0,443438914     |
| NCMAP                                                                                               | 0,004659136 | -0,889276698 | 0     | 0,091 | 1           | 0,539884724   | 1,852247258     | 0               |
| HNRNPH3                                                                                             | 0,001695773 | -0,895891279 | 0,683 | 0,6   | 1           | 0,537415084   | 1,860759083     | 1,138333333     |

Supplementary Table 2

| Differentially expressed genes_keloid-XL_comparing SC-Keloid vs. (SC-Myel, SC-Nonmyel, SC-Nonmyel2) |             |              |       |       |             |               |                 |                 |
|-----------------------------------------------------------------------------------------------------|-------------|--------------|-------|-------|-------------|---------------|-----------------|-----------------|
| gene                                                                                                | p_val       | avg_log2FC   | pct.1 | pct.2 | p_val_adj   | Foldchange_UP | Foldchange_DOWN | Ratio_pct1_pct2 |
| NRXN3                                                                                               | 0,016006318 | -0,896123022 | 0,11  | 0,211 | 1           | 0,537328765   | 1,861058006     | 0,521327014     |
| UGCG                                                                                                | 0,393631658 | -0,89740889  | 0,305 | 0,281 | 1           | 0,53685006    | 1,862717498     | 1,085409253     |
| ASH1L                                                                                               | 0,010534061 | -0,898198946 | 0,354 | 0,414 | 1           | 0,536556148   | 1,863737849     | 0,855072464     |
| S1PR3                                                                                               | 0,001073975 | -0,900580028 | 0,134 | 0,288 | 1           | 0,535671324   | 1,866816376     | 0,465277778     |
| NRP2                                                                                                | 0,150280991 | -0,900883231 | 0,268 | 0,295 | 1           | 0,535558757   | 1,867208755     | 0,908474576     |
| NDRG2                                                                                               | 0,009523129 | -0,90479251  | 0,476 | 0,502 | 1           | 0,534109515   | 1,872275203     | 0,948207171     |
| TRA2A                                                                                               | 0,121988029 | -0,905323811 | 0,402 | 0,382 | 1           | 0,533912855   | 1,872964832     | 1,052356021     |
| SGK1                                                                                                | 0,11742609  | -0,905338581 | 0,122 | 0,175 | 1           | 0,533907389   | 1,872984007     | 0,697142857     |
| UBC                                                                                                 | 9,37059E-09 | -0,907302016 | 0,927 | 0,958 | 0,000197729 | 0,533181262   | 1,875534779     | 0,967640919     |
| ARID5B                                                                                              | 0,663481193 | -0,908422976 | 0,439 | 0,358 | 1           | 0,532767146   | 1,876992618     | 1,226256983     |
| ADAMTS1                                                                                             | 0,972684986 | -0,908907647 | 0,524 | 0,389 | 1           | 0,532588194   | 1,877623296     | 1,347043702     |
| LINC00472                                                                                           | 0,000172724 | -0,919513371 | 0,037 | 0,211 | 1           | 0,52868732    | 1,89147718      | 0,17535545      |
| MLIP                                                                                                | 0,002689271 | -0,919897681 | 0     | 0,102 | 1           | 0,528546505   | 1,891981105     | 0               |
| PLEKHA4                                                                                             | 0,129770819 | -0,923775348 | 0,756 | 0,593 | 1           | 0,527127788   | 1,897073201     | 1,274873524     |
| SOD3                                                                                                | 0,000296301 | -0,924476914 | 0,024 | 0,182 | 1           | 0,526871514   | 1,89799595      | 0,131868132     |
| PIM3                                                                                                | 0,162087503 | -0,925671993 | 0,317 | 0,323 | 1           | 0,526435253   | 1,899568836     | 0,981424149     |
| RASD1                                                                                               | 0,119360831 | -0,930094232 | 0,146 | 0,196 | 1           | 0,524824061   | 1,905400447     | 0,744897959     |
| SRSF3                                                                                               | 4,27164E-06 | -0,930901245 | 0,744 | 0,754 | 0,090135889 | 0,524530568   | 1,906466585     | 0,986737401     |
| ZBTB10                                                                                              | 0,00019776  | -0,934003421 | 0,049 | 0,221 | 1           | 0,5234039     | 1,910570403     | 0,221719457     |
| CD44                                                                                                | 0,666473177 | -0,938437729 | 0,646 | 0,46  | 1           | 0,521797621   | 1,91645182      | 1,404347826     |
| CDH19                                                                                               | 1,75202E-06 | -0,940589199 | 0,878 | 0,839 | 0,036969286 | 0,521020051   | 1,919311929     | 1,046483909     |
| KCTD9                                                                                               | 0,021552688 | -0,941869776 | 0,244 | 0,316 | 1           | 0,520557785   | 1,921016321     | 0,772151899     |
| MTUS1                                                                                               | 0,000286244 | -0,947081947 | 0,11  | 0,281 | 1           | 0,518680506   | 1,927969124     | 0,391459075     |
| PCDH9                                                                                               | 0,18821338  | -0,947281042 | 0,232 | 0,263 | 1           | 0,518608931   | 1,928235206     | 0,882129278     |
| FMNL2                                                                                               | 0,000414543 | -0,950464312 | 0,073 | 0,235 | 1           | 0,517465896   | 1,932494505     | 0,310638298     |
| ZFAS1                                                                                               | 0,000627272 | -0,950474032 | 0,854 | 0,779 | 1           | 0,517462409   | 1,932507525     | 1,096277279     |
| C1orf198                                                                                            | 0,015972855 | -0,956126046 | 0,549 | 0,526 | 1           | 0,515439124   | 1,940093317     | 1,043726236     |
| HBP1                                                                                                | 0,014028085 | -0,956967206 | 0,268 | 0,347 | 1           | 0,515138686   | 1,941224813     | 0,772334294     |
| SNHG15                                                                                              | 0,047252309 | -0,958445997 | 0,378 | 0,382 | 1           | 0,51461093    | 1,943215626     | 0,989528796     |
| PER1                                                                                                | 0,000423882 | -0,964892351 | 0,171 | 0,333 | 1           | 0,512316637   | 1,951917871     | 0,513513514     |



Supplementary Table 2

| Differentially expressed genes_keloid-XL_comparing SC-Keloid vs. (SC-Myel, SC-Nonmyel, SC-Nonmyel2) |             |              |       |       |             |               |                 |                 |
|-----------------------------------------------------------------------------------------------------|-------------|--------------|-------|-------|-------------|---------------|-----------------|-----------------|
| gene                                                                                                | p_val       | avg_log2FC   | pct.1 | pct.2 | p_val_adj   | Foldchange_UP | Foldchange_DOWN | Ratio_pct1_pct2 |
| ZSWIM6                                                                                              | 0,000693805 | -0,966505667 | 0,159 | 0,312 | 1           | 0,511744052   | 1,954101854     | 0,509615385     |
| EPB41L2                                                                                             | 6,05283E-05 | -0,971728724 | 0,317 | 0,495 | 1           | 0,50989471    | 1,961189202     | 0,64040404      |
| TRA2B                                                                                               | 0,000429517 | -0,97220628  | 0,695 | 0,649 | 1           | 0,509725954   | 1,961838497     | 1,070878274     |
| TMEM176B                                                                                            | 0,015413204 | -0,972271163 | 0,244 | 0,333 | 1           | 0,509703031   | 1,961926729     | 0,732732733     |
| BCAS1                                                                                               | 0,013093178 | -0,97275158  | 0,024 | 0,112 | 1           | 0,509533328   | 1,962580159     | 0,214285714     |
| AHNAK                                                                                               | 8,74123E-07 | -0,974233928 | 0,829 | 0,804 | 0,018444863 | 0,509010059   | 1,964597717     | 1,031094527     |
| IER3                                                                                                | 3,9131E-08  | -0,977143088 | 0,695 | 0,853 | 0,000825703 | 0,507984687   | 1,968563278     | 0,814771395     |
| PRRG4                                                                                               | 2,8877E-05  | -0,982632065 | 0,012 | 0,204 | 0,609334608 | 0,506055645   | 1,976067276     | 0,058823529     |
| TMEM176A                                                                                            | 0,008193538 | -0,983435796 | 0,171 | 0,284 | 1           | 0,505773798   | 1,977168458     | 0,602112676     |
| PTTG1                                                                                               | 0,002803135 | -0,985455961 | 0,085 | 0,221 | 1           | 0,505066073   | 1,979938969     | 0,384615385     |
| NIBAN1                                                                                              | 0,005046841 | -0,986275746 | 0,183 | 0,302 | 1           | 0,50477916    | 1,981064354     | 0,605960265     |
| CD55                                                                                                | 0,001442003 | -0,987526241 | 0,061 | 0,2   | 1           | 0,504341818   | 1,982782239     | 0,305           |
| RGCC                                                                                                | 0,019409297 | -0,988335115 | 0,317 | 0,4   | 1           | 0,504059129   | 1,983894236     | 0,7925          |
| IVNS1ABP                                                                                            | 0,001197649 | -0,989904465 | 0,22  | 0,358 | 1           | 0,503511116   | 1,986053471     | 0,61452514      |
| SORCS1                                                                                              | 8,44887E-05 | -0,99211631  | 0,195 | 0,404 | 1           | 0,502739758   | 1,989100692     | 0,482673267     |
| MCL1                                                                                                | 0,009230773 | -0,992664566 | 0,585 | 0,537 | 1           | 0,502548742   | 1,989856738     | 1,089385475     |
| NFIB                                                                                                | 0,000138585 | -0,99424114  | 0,159 | 0,344 | 1           | 0,501999857   | 1,992032438     | 0,462209302     |
| DCN                                                                                                 | 0,004833607 | -0,99442412  | 0,085 | 0,211 | 1           | 0,501936192   | 1,992285108     | 0,402843602     |
| SOX8                                                                                                | 0,00010852  | -1,002615243 | 0,061 | 0,249 | 1           | 0,499094447   | 2,003628784     | 0,24497992      |
| SOX4                                                                                                | 0,001478087 | -1,008401681 | 0,878 | 0,863 | 1           | 0,497096661   | 2,011681183     | 1,017381228     |
| SPTBN1                                                                                              | 7,8065E-07  | -1,010781586 | 0,805 | 0,796 | 0,016472488 | 0,496277315   | 2,015002441     | 1,011306533     |
| SPATA13                                                                                             | 0,001791155 | -1,010928003 | 0,098 | 0,235 | 1           | 0,496226951   | 2,01520695      | 0,417021277     |
| ALCAM                                                                                               | 0,001808764 | -1,012715733 | 0,232 | 0,358 | 1           | 0,495612427   | 2,017705662     | 0,648044693     |
| ATP1A1                                                                                              | 0,028406087 | -1,013686181 | 0,683 | 0,572 | 1           | 0,495279159   | 2,019063355     | 1,194055944     |
| PMP22                                                                                               | 0,000146011 | -1,016212696 | 0,878 | 0,923 | 1           | 0,494412562   | 2,022602331     | 0,951245937     |
| PLAAT3                                                                                              | 0,02741831  | -1,016874176 | 0,317 | 0,358 | 1           | 0,494185924   | 2,023529913     | 0,88547486      |
| TRIP10                                                                                              | 0,000298778 | -1,018561964 | 0,134 | 0,302 | 1           | 0,493608121   | 2,025898596     | 0,443708609     |
| SLIT2                                                                                               | 9,21519E-05 | -1,020502524 | 0,037 | 0,221 | 1           | 0,492944618   | 2,028625454     | 0,167420814     |
| TLE4                                                                                                | 0,031553452 | -1,020964404 | 0,329 | 0,393 | 1           | 0,492786827   | 2,029275024     | 0,837150127     |
| ZNF106                                                                                              | 0,003640465 | -1,023324938 | 0,22  | 0,337 | 1           | 0,49198119    | 2,032598037     | 0,652818991     |

Supplementary Table 2

| Differentially expressed genes_keloid-XL_comparing SC-Keloid vs. (SC-Myel, SC-Nonmyel, SC-Nonmyel2) |             |              |       |       |            |               |                 |                 |
|-----------------------------------------------------------------------------------------------------|-------------|--------------|-------|-------|------------|---------------|-----------------|-----------------|
| gene                                                                                                | p_val       | avg_log2FC   | pct.1 | pct.2 | p_val_adj  | Foldchange_UP | Foldchange_DOWN | Ratio_pct1_pct2 |
| ARHGAP15                                                                                            | 0,000565562 | -1,026296709 | 0,073 | 0,235 | 1          | 0,490968813   | 2,036789249     | 0,310638298     |
| DNAJB6                                                                                              | 0,00037992  | -1,028128412 | 0,5   | 0,537 | 1          | 0,490345855   | 2,03937688      | 0,931098696     |
| SORBS1                                                                                              | 0,00112419  | -1,028882144 | 0,244 | 0,375 | 1          | 0,490089742   | 2,040442624     | 0,650666667     |
| SAMD4A                                                                                              | 0,000822707 | -1,029004143 | 0,098 | 0,253 | 1          | 0,4900483     | 2,040615178     | 0,387351779     |
| ASPA                                                                                                | 0,023707292 | -1,029020961 | 0,5   | 0,477 | 1          | 0,490042588   | 2,040638967     | 1,048218029     |
| PCF11                                                                                               | 0,003988835 | -1,038522032 | 0,317 | 0,4   | 1          | 0,486825947   | 2,054122231     | 0,7925          |
| CADM3                                                                                               | 0,000109261 | -1,041476756 | 0,122 | 0,319 | 1          | 0,485829919   | 2,058333505     | 0,382445141     |
| ARHGEF10                                                                                            | 0,004282503 | -1,043961258 | 0,183 | 0,302 | 1          | 0,484993979   | 2,061881267     | 0,605960265     |
| NLGN4X                                                                                              | 0,009461598 | -1,046664784 | 0,146 | 0,253 | 1          | 0,48408598    | 2,065748735     | 0,577075099     |
| FRMD6                                                                                               | 0,058623489 | -1,047971574 | 0,439 | 0,428 | 1          | 0,483647694   | 2,067620732     | 1,025700935     |
| SLC25A25                                                                                            | 0,000168578 | -1,04881242  | 0,122 | 0,302 | 1          | 0,483365892   | 2,068826156     | 0,40397351      |
| GBP2                                                                                                | 0,043047461 | -1,050450938 | 0,183 | 0,256 | 1          | 0,482817228   | 2,071177127     | 0,71484375      |
| TUBB4B                                                                                              | 0,00158914  | -1,052244643 | 0,585 | 0,593 | 1          | 0,482217314   | 2,073753827     | 0,986509275     |
| ITPRID2                                                                                             | 0,007546254 | -1,053439731 | 0,354 | 0,404 | 1          | 0,481818024   | 2,075472377     | 0,876237624     |
| HMGB2                                                                                               | 0,000262183 | -1,06171006  | 0,171 | 0,344 | 1          | 0,479063877   | 2,087404305     | 0,497093023     |
| NFE2L2                                                                                              | 0,000975892 | -1,062184533 | 0,61  | 0,582 | 1          | 0,478906349   | 2,088090923     | 1,048109966     |
| CYLD                                                                                                | 0,031247118 | -1,063104749 | 0,268 | 0,326 | 1          | 0,478600978   | 2,089423226     | 0,82208589      |
| PPP4R2                                                                                              | 0,010474498 | -1,063890516 | 0,415 | 0,432 | 1          | 0,478340378   | 2,090561544     | 0,960648148     |
| CHD1                                                                                                | 0,002928706 | -1,064584656 | 0,244 | 0,354 | 1          | 0,478110284   | 2,091567642     | 0,689265537     |
| EMP2                                                                                                | 0,008679859 | -1,06481433  | 0,598 | 0,558 | 1          | 0,478034176   | 2,091900642     | 1,071684588     |
| CTSC                                                                                                | 0,00820675  | -1,066558087 | 0,354 | 0,411 | 1          | 0,477456735   | 2,09443061      | 0,861313869     |
| JUND                                                                                                | 7,05324E-11 | -1,066916172 | 0,915 | 0,968 | 1,4883E-06 | 0,477338242   | 2,094950523     | 0,945247934     |
| VASN                                                                                                | 0,000228067 | -1,068195459 | 0,024 | 0,186 | 1          | 0,476915158   | 2,096809011     | 0,129032258     |
| RORB                                                                                                | 0,001917069 | -1,069490289 | 0,085 | 0,225 | 1          | 0,476487315   | 2,098691758     | 0,377777778     |
| DNAJB1                                                                                              | 0,001402413 | -1,072583363 | 0,817 | 0,768 | 1          | 0,475466841   | 2,103196087     | 1,063802083     |
| IRF2BP2                                                                                             | 0,000791403 | -1,077045418 | 0,378 | 0,46  | 1          | 0,47399856    | 2,109711049     | 0,82173913      |
| MAL                                                                                                 | 0,00098012  | -1,079548534 | 0,341 | 0,453 | 1          | 0,473176873   | 2,113374634     | 0,752759382     |
| CLK1                                                                                                | 9,33902E-05 | -1,081319221 | 0,598 | 0,635 | 1          | 0,472596477   | 2,11597007      | 0,941732283     |
| MAFF                                                                                                | 0,00033854  | -1,08511983  | 0,244 | 0,389 | 1          | 0,471353116   | 2,121551692     | 0,627249357     |
| CCNL1                                                                                               | 0,000681839 | -1,088092357 | 0,561 | 0,572 | 1          | 0,47038294    | 2,12592744      | 0,980769231     |

Supplementary Table 2

| Differentially expressed genes_keloid-XL_comparing SC-Keloid vs. (SC-Myel, SC-Nonmyel, SC-Nonmyel2) |             |              |       |       |             |               |                 |                 |
|-----------------------------------------------------------------------------------------------------|-------------|--------------|-------|-------|-------------|---------------|-----------------|-----------------|
| gene                                                                                                | p_val       | avg_log2FC   | pct.1 | pct.2 | p_val_adj   | Foldchange_UP | Foldchange_DOWN | Ratio_pct1_pct2 |
| C2orf88                                                                                             | 6,58491E-06 | -1,090579736 | 0,012 | 0,228 | 0,138948179 | 0,469572643   | 2,129595955     | 0,052631579     |
| NRN1                                                                                                | 0,00327573  | -1,093133015 | 0,451 | 0,47  | 1           | 0,468742329   | 2,133368246     | 0,959574468     |
| RSRC2                                                                                               | 0,003261089 | -1,097712806 | 0,683 | 0,604 | 1           | 0,46725668    | 2,14015132      | 1,130794702     |
| ZEB2                                                                                                | 6,79951E-09 | -1,098214651 | 0,744 | 0,828 | 0,000143477 | 0,467094172   | 2,140895905     | 0,898550725     |
| ASXL1                                                                                               | 3,73311E-05 | -1,098624422 | 0,5   | 0,582 | 0,787722732 | 0,466961521   | 2,141504074     | 0,859106529     |
| PTX3                                                                                                | 0,290496029 | -1,099882467 | 0,207 | 0,228 | 1           | 0,466554503   | 2,143372302     | 0,907894737     |
| BTG2                                                                                                | 0,042149395 | -1,100123896 | 0,232 | 0,295 | 1           | 0,466476434   | 2,143731017     | 0,786440678     |
| TIPARP                                                                                              | 9,50116E-05 | -1,100922856 | 0,11  | 0,298 | 1           | 0,466218172   | 2,144918537     | 0,369127517     |
| LIMCH1                                                                                              | 0,091804719 | -1,102490448 | 0,146 | 0,204 | 1           | 0,465711868   | 2,147250412     | 0,715686275     |
| DKK3                                                                                                | 0,000996512 | -1,102559717 | 0,28  | 0,404 | 1           | 0,465689508   | 2,147353512     | 0,693069307     |
| IER5                                                                                                | 0,003903983 | -1,102655419 | 0,354 | 0,442 | 1           | 0,465658617   | 2,147495963     | 0,800904977     |
| CSRNP1                                                                                              | 0,006094633 | -1,105535538 | 0,378 | 0,446 | 1           | 0,464729928   | 2,151787391     | 0,847533632     |
| KCNQ1OT1                                                                                            | 0,051506743 | -1,107030399 | 0,159 | 0,232 | 1           | 0,464248644   | 2,154018139     | 0,685344828     |
| NUFIP2                                                                                              | 0,000929622 | -1,109018953 | 0,329 | 0,435 | 1           | 0,463609183   | 2,1569892       | 0,756321839     |
| YY1                                                                                                 | 0,000420078 | -1,109286518 | 0,488 | 0,53  | 1           | 0,463523209   | 2,157389276     | 0,920754717     |
| DMD                                                                                                 | 3,7762E-05  | -1,110962466 | 0,122 | 0,337 | 0,796816952 | 0,462985056   | 2,159896926     | 0,362017804     |
| ADGRB3                                                                                              | 1,9552E-05  | -1,114194432 | 0,049 | 0,263 | 0,412566885 | 0,461949025   | 2,164741011     | 0,186311787     |
| CCND2                                                                                               | 1,05918E-05 | -1,114912219 | 0,049 | 0,267 | 0,223497981 | 0,461719248   | 2,165818307     | 0,183520599     |
| FOS                                                                                                 | 0,002876694 | -1,115834211 | 0,854 | 0,828 | 1           | 0,461424268   | 2,167202873     | 1,031400966     |
| SOWAHC                                                                                              | 0,000915484 | -1,117170316 | 0,122 | 0,274 | 1           | 0,460997133   | 2,169210886     | 0,445255474     |
| SYNE2                                                                                               | 0,002415436 | -1,117270403 | 0,22  | 0,344 | 1           | 0,460965152   | 2,169361382     | 0,639534884     |
| DDX3X                                                                                               | 6,25341E-05 | -1,118807252 | 0,683 | 0,681 | 1           | 0,460474365   | 2,171673551     | 1,002936858     |
| SPEN                                                                                                | 0,00031373  | -1,121049447 | 0,256 | 0,414 | 1           | 0,459759265   | 2,175051329     | 0,618357488     |
| HEXIM1                                                                                              | 0,074616611 | -1,129319237 | 0,451 | 0,428 | 1           | 0,45713138    | 2,187554919     | 1,053738318     |
| IRF1                                                                                                | 0,001650333 | -1,129470976 | 0,244 | 0,379 | 1           | 0,457083303   | 2,187785014     | 0,643799472     |
| SERPING1                                                                                            | 2,28686E-05 | -1,130390032 | 0,037 | 0,242 | 0,482550535 | 0,456792215   | 2,189179167     | 0,152892562     |
| BRD2                                                                                                | 3,86413E-05 | -1,13517887  | 0,61  | 0,674 | 0,815369644 | 0,455278466   | 2,196457935     | 0,90504451      |
| FADS3                                                                                               | 0,002168807 | -1,14490256  | 0,354 | 0,428 | 1           | 0,452220231   | 2,211311948     | 0,827102804     |
| KLF4                                                                                                | 0,001084534 | -1,154160699 | 0,476 | 0,53  | 1           | 0,449327511   | 2,225548127     | 0,898113208     |
| XIST                                                                                                | 2,41601E-10 | -1,156086962 | 0,829 | 0,87  | 5,09803E-06 | 0,448727976   | 2,228521627     | 0,952873563     |

Supplementary Table 2

| Differentially expressed genes_keloid-XL_comparing SC-Keloid vs. (SC-Myel, SC-Nonmyel, SC-Nonmyel2) |             |              |       |       |             |               |                 |                 |
|-----------------------------------------------------------------------------------------------------|-------------|--------------|-------|-------|-------------|---------------|-----------------|-----------------|
| gene                                                                                                | p_val       | avg_log2FC   | pct.1 | pct.2 | p_val_adj   | Foldchange_UP | Foldchange_DOWN | Ratio_pct1_pct2 |
| CDKN1A                                                                                              | 0,000111294 | -1,156790532 | 0,22  | 0,414 | 1           | 0,448509195   | 2,229608692     | 0,531400966     |
| ZBTB20                                                                                              | 0,001523583 | -1,158611844 | 0,549 | 0,558 | 1           | 0,447943338   | 2,232425211     | 0,983870968     |
| TEAD1                                                                                               | 0,002436266 | -1,161386154 | 0,305 | 0,393 | 1           | 0,447082768   | 2,236722307     | 0,776081425     |
| IRS2                                                                                                | 0,004577856 | -1,162817592 | 0,256 | 0,358 | 1           | 0,446639394   | 2,238942677     | 0,715083799     |
| NFATC2                                                                                              | 0,010085384 | -1,162834125 | 0,183 | 0,295 | 1           | 0,446634275   | 2,238968335     | 0,620338983     |
| PPP1R15B                                                                                            | 0,000159377 | -1,168144115 | 0,207 | 0,375 | 1           | 0,444993413   | 2,247224276     | 0,552           |
| RYBP                                                                                                | 0,003560602 | -1,169513049 | 0,427 | 0,463 | 1           | 0,444571371   | 2,249357618     | 0,92224622      |
| SLC3A2                                                                                              | 0,000364396 | -1,170885937 | 0,537 | 0,568 | 1           | 0,444148512   | 2,251499155     | 0,945422535     |
| PLLP                                                                                                | 9,15713E-06 | -1,172560035 | 0,037 | 0,256 | 0,1932246   | 0,443633423   | 2,254113304     | 0,14453125      |
| ZNF503                                                                                              | 0,001977811 | -1,176783899 | 0,354 | 0,442 | 1           | 0,44233647    | 2,260722475     | 0,800904977     |
| TSPYL2                                                                                              | 0,000165819 | -1,178591515 | 0,22  | 0,386 | 1           | 0,441782594   | 2,26355681      | 0,569948187     |
| LATS2                                                                                               | 0,004588081 | -1,181229306 | 0,22  | 0,323 | 1           | 0,440975587   | 2,267699231     | 0,681114551     |
| BPGM                                                                                                | 0,04335325  | -1,184577655 | 0,305 | 0,34  | 1           | 0,439953314   | 2,272968444     | 0,897058824     |
| RC3H1                                                                                               | 0,000124599 | -1,186149397 | 0,171 | 0,351 | 1           | 0,439474269   | 2,275446076     | 0,487179487     |
| ZFP36                                                                                               | 3,13483E-06 | -1,188247694 | 0,561 | 0,73  | 0,066148022 | 0,438835549   | 2,278757958     | 0,768493151     |
| SMTN                                                                                                | 0,000394082 | -1,188746545 | 0,122 | 0,288 | 1           | 0,438683836   | 2,279546036     | 0,423611111     |
| SERTAD2                                                                                             | 4,26626E-05 | -1,198139379 | 0,329 | 0,498 | 0,900223754 | 0,435837012   | 2,294435703     | 0,66064257      |
| SELENOP                                                                                             | 1,76314E-05 | -1,200250064 | 0,049 | 0,263 | 0,372039924 | 0,435199841   | 2,297794956     | 0,186311787     |
| MAFG                                                                                                | 0,017469533 | -1,204915328 | 0,268 | 0,337 | 1           | 0,433794802   | 2,305237394     | 0,795252226     |
| MALAT1                                                                                              | 3,96845E-19 | -1,205507326 | 0,976 | 0,993 | 8,37383E-15 | 0,433616835   | 2,306183524     | 0,982880161     |
| NDRG1                                                                                               | 5,4556E-06  | -1,21133755  | 0,305 | 0,516 | 0,115118586 | 0,431868037   | 2,315522138     | 0,591085271     |
| BHLHE40                                                                                             | 0,010403459 | -1,214456384 | 0,451 | 0,47  | 1           | 0,430935428   | 2,320533274     | 0,959574468     |
| FOSB                                                                                                | 0,000764419 | -1,217622322 | 0,695 | 0,688 | 1           | 0,429990794   | 2,325631185     | 1,010174419     |
| YBX3                                                                                                | 0,020882093 | -1,226035455 | 0,378 | 0,411 | 1           | 0,427490583   | 2,339232815     | 0,919708029     |
| TSC22D4                                                                                             | 0,005694514 | -1,229027113 | 0,183 | 0,295 | 1           | 0,426605032   | 2,34408862      | 0,620338983     |
| NFIA                                                                                                | 6,56452E-08 | -1,234528653 | 0,098 | 0,396 | 0,00138518  | 0,424981324   | 2,353044579     | 0,247474747     |
| HSPH1                                                                                               | 0,00121086  | -1,236969562 | 0,537 | 0,533 | 1           | 0,424262902   | 2,357029086     | 1,00750469      |
| GEM                                                                                                 | 0,028567994 | -1,240077956 | 0,159 | 0,242 | 1           | 0,42334978    | 2,362112956     | 0,657024793     |
| HSPA12A                                                                                             | 1,24551E-05 | -1,240662477 | 0,415 | 0,565 | 0,262814488 | 0,42317829    | 2,363070182     | 0,734513274     |
| DNAJB4                                                                                              | 0,000308234 | -1,242910075 | 0,354 | 0,47  | 1           | 0,422519528   | 2,366754516     | 0,753191489     |

Supplementary Table 2

| Differentially expressed genes_keloid-XL_comparing SC-Keloid vs. (SC-Myel, SC-Nonmyel, SC-Nonmyel2) |             |              |       |       |             |               |                 |                 |
|-----------------------------------------------------------------------------------------------------|-------------|--------------|-------|-------|-------------|---------------|-----------------|-----------------|
| gene                                                                                                | p_val       | avg_log2FC   | pct.1 | pct.2 | p_val_adj   | Foldchange_UP | Foldchange_DOWN | Ratio_pct1_pct2 |
| TAF1D                                                                                               | 0,038238065 | -1,24404445  | 0,646 | 0,544 | 1           | 0,422187436   | 2,368616201     | 1,1875          |
| ZFAND5                                                                                              | 9,6132E-05  | -1,24466185  | 0,549 | 0,568 | 1           | 0,4220068     | 2,369630065     | 0,966549296     |
| HSPA1A                                                                                              | 6,77719E-09 | -1,248843858 | 0,951 | 0,989 | 0,000143005 | 0,42078528    | 2,376508988     | 0,961577351     |
| NR4A1                                                                                               | 0,000256126 | -1,251226616 | 0,78  | 0,719 | 1           | 0,420090884   | 2,380437277     | 1,084840056     |
| GLDN                                                                                                | 0,002689271 | -1,255417271 | 0     | 0,102 | 1           | 0,418872399   | 2,387361883     | 0               |
| ITIH5                                                                                               | 0,006122625 | -1,256012808 | 0,317 | 0,4   | 1           | 0,418699527   | 2,388347577     | 0,7925          |
| HSPD1                                                                                               | 6,30936E-05 | -1,256210575 | 0,427 | 0,54  | 1           | 0,418642134   | 2,388674999     | 0,790740741     |
| VGLL3                                                                                               | 0,000152097 | -1,258151423 | 0,085 | 0,27  | 1           | 0,418079317   | 2,391890629     | 0,314814815     |
| KLHL21                                                                                              | 0,00198904  | -1,261487805 | 0,183 | 0,319 | 1           | 0,417113582   | 2,397428525     | 0,573667712     |
| BCL6                                                                                                | 7,55282E-05 | -1,267157176 | 0,22  | 0,407 | 1           | 0,415477664   | 2,406868256     | 0,540540541     |
| ZFP36L1                                                                                             | 2,04988E-08 | -1,271589458 | 0,732 | 0,804 | 0,000432546 | 0,414203182   | 2,414274064     | 0,910447761     |
| ANGPTL4                                                                                             | 2,24997E-05 | -1,2896198   | 0,024 | 0,225 | 0,474765642 | 0,409058816   | 2,444636224     | 0,106666667     |
| MEGF9                                                                                               | 4,74474E-05 | -1,297695527 | 0,317 | 0,47  | 1           | 0,406775438   | 2,458358856     | 0,674468085     |
| SOCS3                                                                                               | 0,721206689 | -1,299251645 | 0,402 | 0,319 | 1           | 0,406336919   | 2,46101192      | 1,260188088     |
| IL6ST                                                                                               | 2,20169E-05 | -1,29929372  | 0,451 | 0,544 | 0,464578301 | 0,406325068   | 2,461083693     | 0,829044118     |
| AMD1                                                                                                | 2,24116E-06 | -1,310352447 | 0,463 | 0,586 | 0,047290693 | 0,403222361   | 2,48002119      | 0,790102389     |
| TMOD2                                                                                               | 9,5606E-06  | -1,311084307 | 0,122 | 0,34  | 0,201738295 | 0,403017864   | 2,48127959      | 0,358823529     |
| PMP2                                                                                                | 0,000251226 | -1,314924128 | 0,329 | 0,467 | 1           | 0,401946633   | 2,487892464     | 0,704496788     |
| HLA-DPB1                                                                                            | 0,000398747 | -1,324203587 | 0,122 | 0,288 | 1           | 0,399369597   | 2,503946239     | 0,423611111     |
| ETS1                                                                                                | 0,001553021 | -1,331115805 | 0,561 | 0,554 | 1           | 0,39746072    | 2,515971892     | 1,012635379     |
| NR2F1                                                                                               | 0,001952007 | -1,331742774 | 0,232 | 0,347 | 1           | 0,397288028   | 2,517065526     | 0,668587896     |
| HSPB1                                                                                               | 3,65227E-05 | -1,333690955 | 0,939 | 0,895 | 0,770664657 | 0,396751902   | 2,520466806     | 1,049162011     |
| HSP90AB1                                                                                            | 4,47197E-14 | -1,335125262 | 0,902 | 0,916 | 9,43631E-10 | 0,396357653   | 2,522973865     | 0,984716157     |
| ATP1A2                                                                                              | 9,41013E-08 | -1,336886774 | 0,012 | 0,295 | 0,001985632 | 0,395874001   | 2,526056265     | 0,040677966     |
| HNRNPU                                                                                              | 5,17449E-09 | -1,345756287 | 0,744 | 0,765 | 0,000109187 | 0,393447682   | 2,541633986     | 0,97254902      |
| ANK3                                                                                                | 3,49009E-06 | -1,352489352 | 0,232 | 0,456 | 0,073644445 | 0,391615738   | 2,553523528     | 0,50877193      |
| CEBPB                                                                                               | 1,66675E-06 | -1,357678381 | 0,622 | 0,681 | 0,035170074 | 0,39020972    | 2,562724478     | 0,913362702     |
| DUSP8                                                                                               | 4,89803E-07 | -1,370050582 | 0,183 | 0,435 | 0,010335333 | 0,386877684   | 2,584796284     | 0,420689655     |
| ABCA1                                                                                               | 0,000566005 | -1,376216169 | 0,134 | 0,288 | 1           | 0,385227828   | 2,595866462     | 0,465277778     |
| INTS6                                                                                               | 3,27061E-05 | -1,378887135 | 0,415 | 0,537 | 0,690131474 | 0,384515288   | 2,600676829     | 0,772811918     |

Supplementary Table 2

| Differentially expressed genes_keloid-XL_comparing SC-Keloid vs. (SC-Myel, SC-Nonmyel, SC-Nonmyel2) |             |              |       |       |             |               |                 |                 |
|-----------------------------------------------------------------------------------------------------|-------------|--------------|-------|-------|-------------|---------------|-----------------|-----------------|
| gene                                                                                                | p_val       | avg_log2FC   | pct.1 | pct.2 | p_val_adj   | Foldchange_UP | Foldchange_DOWN | Ratio_pct1_pct2 |
| TENT5A                                                                                              | 0,000744287 | -1,384654075 | 0,476 | 0,523 | 1           | 0,382981318   | 2,61109342      | 0,910133843     |
| PPP1R10                                                                                             | 5,01829E-05 | -1,386913785 | 0,317 | 0,463 | 1           | 0,38238192    | 2,615186409     | 0,684665227     |
| GJC1                                                                                                | 0,00010703  | -1,389041068 | 0,11  | 0,295 | 1           | 0,381818505   | 2,6190454       | 0,372881356     |
| GPBP1                                                                                               | 1,53694E-07 | -1,390048611 | 0,634 | 0,677 | 0,003243095 | 0,381551946   | 2,620875115     | 0,93648449      |
| ITGB8                                                                                               | 0,000115815 | -1,395365153 | 0,549 | 0,604 | 1           | 0,380148459   | 2,630551241     | 0,908940397     |
| HSPA1B                                                                                              | 2,81771E-10 | -1,396996146 | 0,89  | 0,954 | 5,94566E-06 | 0,379718937   | 2,63352681      | 0,932914046     |
| SOX2                                                                                                | 9,59828E-05 | -1,399915488 | 0,439 | 0,558 | 1           | 0,37895134    | 2,638861234     | 0,786738351     |
| TOB1                                                                                                | 0,000186181 | -1,403738645 | 0,232 | 0,386 | 1           | 0,377948444   | 2,645863519     | 0,601036269     |
| DLC1                                                                                                | 1,2224E-05  | -1,412051162 | 0,512 | 0,593 | 0,257939526 | 0,375777043   | 2,661152452     | 0,863406408     |
| HES1                                                                                                | 6,38192E-10 | -1,416591298 | 0,78  | 0,839 | 1,34665E-05 | 0,374596338   | 2,669540244     | 0,929678188     |
| COL3A1                                                                                              | 6,37512E-06 | -1,425468877 | 0,561 | 0,66  | 0,134521476 | 0,372298349   | 2,686017822     | 0,85            |
| RELN                                                                                                | 1,65747E-08 | -1,443994475 | 0,073 | 0,382 | 0,000349743 | 0,367548242   | 2,720731285     | 0,191099476     |
| GLUL                                                                                                | 1,19769E-05 | -1,463820968 | 0,146 | 0,365 | 0,252724355 | 0,362531694   | 2,75837952      | 0,4             |
| MT3                                                                                                 | 0,000502361 | -1,469856906 | 0     | 0,133 | 1           | 0,361018105   | 2,769944185     | 0               |
| GAS2L3                                                                                              | 1,53798E-07 | -1,475539079 | 0,073 | 0,354 | 0,003245296 | 0,359599002   | 2,78087535      | 0,206214689     |
| CHL1                                                                                                | 8,06882E-09 | -1,481580601 | 0,024 | 0,344 | 0,00017026  | 0,358096271   | 2,79254514      | 0,069767442     |
| GADD45A                                                                                             | 0,009559458 | -1,493560164 | 0,439 | 0,456 | 1           | 0,355135093   | 2,815829858     | 0,962719298     |
| DDIT4                                                                                               | 4,46027E-05 | -1,496615424 | 0,293 | 0,47  | 0,941161438 | 0,354383804   | 2,821799386     | 0,623404255     |
| IER5L                                                                                               | 0,005543766 | -1,50451314  | 0,695 | 0,621 | 1           | 0,352449108   | 2,837289063     | 1,119162641     |
| FXYD1                                                                                               | 6,28715E-10 | -1,511111633 | 0,72  | 0,758 | 1,32665E-05 | 0,350840783   | 2,85029577      | 0,949868074     |
| ID2                                                                                                 | 0,011030066 | -1,513946166 | 0,378 | 0,418 | 1           | 0,350152146   | 2,855901389     | 0,90430622      |
| SOD2                                                                                                | 0,000918176 | -1,559132568 | 0,305 | 0,411 | 1           | 0,339355061   | 2,946766134     | 0,742092457     |
| HSPA6                                                                                               | 0,31345034  | -1,565095814 | 0,134 | 0,172 | 1           | 0,337955263   | 2,958971526     | 0,779069767     |
| VMP1                                                                                                | 4,24101E-05 | -1,571952159 | 0,585 | 0,614 | 0,894896008 | 0,336352956   | 2,973067378     | 0,95276873      |
| NEAT1                                                                                               | 3,21094E-12 | -1,594229614 | 0,866 | 0,902 | 6,77541E-08 | 0,331199038   | 3,019332445     | 0,960088692     |
| NRXN1                                                                                               | 8,83204E-14 | -1,601394854 | 0,61  | 0,821 | 1,86365E-09 | 0,329558194   | 3,034365458     | 0,742996346     |
| ABL2                                                                                                | 0,000158701 | -1,603953596 | 0,488 | 0,547 | 1           | 0,328974213   | 3,039751938     | 0,89213894      |
| DST                                                                                                 | 2,95375E-14 | -1,617157243 | 0,817 | 0,849 | 6,23271E-10 | 0,325977153   | 3,067699657     | 0,962308598     |
| PLP1                                                                                                | 9,96894E-12 | -1,635483892 | 0,744 | 0,789 | 2,10355E-07 | 0,321862434   | 3,106917411     | 0,942965779     |
| GADD45B                                                                                             | 2,36262E-12 | -1,642325033 | 0,634 | 0,895 | 4,98536E-08 | 0,320339802   | 3,121685143     | 0,708379888     |

Supplementary Table 2

| Differentially expressed genes_keloid-XL_comparing SC-Keloid vs. (SC-Myel, SC-Nonmyel, SC-Nonmyel2) |             |              |       |       |             |               |                 |                 |
|-----------------------------------------------------------------------------------------------------|-------------|--------------|-------|-------|-------------|---------------|-----------------|-----------------|
| gene                                                                                                | p_val       | avg_log2FC   | pct.1 | pct.2 | p_val_adj   | Foldchange_UP | Foldchange_DOWN | Ratio_pct1_pct2 |
| JUNB                                                                                                | 1,12974E-10 | -1,659763695 | 0,866 | 0,891 | 2,38387E-06 | 0,316490984   | 3,159647672     | 0,971941639     |
| COL14A1                                                                                             | 5,83415E-07 | -1,667159913 | 0,439 | 0,596 | 0,012310633 | 0,314872592   | 3,17588773      | 0,736577181     |
| PNRC1                                                                                               | 1,10575E-13 | -1,668895572 | 0,634 | 0,796 | 2,33325E-09 | 0,314494006   | 3,179710836     | 0,796482412     |
| KLF9                                                                                                | 3,71439E-10 | -1,674044994 | 0,329 | 0,614 | 7,83774E-06 | 0,313373482   | 3,191080479     | 0,535830619     |
| SLC38A2                                                                                             | 1,90144E-12 | -1,696646353 | 0,524 | 0,74  | 4,01224E-08 | 0,308502406   | 3,241465803     | 0,708108108     |
| CTNNAL1                                                                                             | 8,968E-08   | -1,70201682  | 0,244 | 0,488 | 0,001892338 | 0,307356133   | 3,253554725     | 0,5             |
| MBNL2                                                                                               | 1,27204E-06 | -1,71780746  | 0,463 | 0,572 | 0,026841385 | 0,304010391   | 3,289361251     | 0,809440559     |
| DNAJA1                                                                                              | 2,80229E-13 | -1,738385202 | 0,622 | 0,761 | 5,91312E-09 | 0,299704946   | 3,336614938     | 0,817345598     |
| LTBP4                                                                                               | 9,77851E-11 | -1,763308105 | 0,476 | 0,73  | 2,06336E-06 | 0,294571936   | 3,39475652      | 0,652054795     |
| SNCA                                                                                                | 1,1646E-11  | -1,764778363 | 0,098 | 0,488 | 2,45742E-07 | 0,294271889   | 3,398217899     | 0,200819672     |
| IFRD1                                                                                               | 1,1949E-08  | -1,782705847 | 0,451 | 0,614 | 0,000252136 | 0,290637779   | 3,440708921     | 0,734527687     |
| HSP90AA1                                                                                            | 5,89236E-17 | -1,782837355 | 0,963 | 0,979 | 1,24335E-12 | 0,290611288   | 3,441022571     | 0,983656793     |
| NR4A2                                                                                               | 4,42478E-07 | -1,786638698 | 0,427 | 0,6   | 0,009336732 | 0,289846567   | 3,450101242     | 0,711666667     |
| BCL2                                                                                                | 3,12472E-10 | -1,81571783  | 0,061 | 0,421 | 6,59347E-06 | 0,284062869   | 3,520347458     | 0,144893112     |
| PCSK2                                                                                               | 6,22968E-08 | -1,830151157 | 0,085 | 0,386 | 0,001314524 | 0,281235154   | 3,555743254     | 0,220207254     |
| PPP1R15A                                                                                            | 5,70646E-20 | -1,842238925 | 0,817 | 0,909 | 1,20412E-15 | 0,27888864    | 3,585660571     | 0,898789879     |
| CADM2                                                                                               | 8,46535E-10 | -1,843247537 | 0,012 | 0,361 | 1,78627E-05 | 0,278693732   | 3,588168242     | 0,033240997     |
| CRYAB                                                                                               | 2,46617E-18 | -1,851039933 | 0,939 | 0,975 | 5,20386E-14 | 0,277192488   | 3,607601368     | 0,963076923     |
| JUN                                                                                                 | 4,28819E-16 | -1,858418199 | 0,866 | 0,947 | 9,04851E-12 | 0,275778483   | 3,626098709     | 0,914466737     |
| XKR4                                                                                                | 1,58697E-08 | -1,873910393 | 0,122 | 0,425 | 0,000334867 | 0,272832915   | 3,665246921     | 0,287058824     |
| HLA-DRA                                                                                             | 2,40197E-05 | -1,874854415 | 0,122 | 0,34  | 0,5068407   | 0,272654446   | 3,667646046     | 0,358823529     |
| AATK                                                                                                | 2,43521E-05 | -1,880261249 | 0,256 | 0,435 | 0,513853782 | 0,271634523   | 3,681417187     | 0,588505747     |
| COL28A1                                                                                             | 2,13645E-13 | -1,884155571 | 0,037 | 0,505 | 4,50813E-09 | 0,270902278   | 3,691368003     | 0,073267327     |
| MATN2                                                                                               | 1,13263E-08 | -1,888215803 | 0,366 | 0,589 | 0,000238997 | 0,270140939   | 3,701771393     | 0,62139219      |
| NFKBIA                                                                                              | 2,65177E-14 | -1,891556174 | 0,585 | 0,846 | 5,5955E-10  | 0,269516187   | 3,710352289     | 0,691489362     |
| RARRES2                                                                                             | 2,62545E-10 | -1,894729464 | 0,085 | 0,449 | 5,53997E-06 | 0,268924022   | 3,718522402     | 0,189309577     |
| CCN1                                                                                                | 5,61969E-09 | -1,905220362 | 0,598 | 0,733 | 0,000118581 | 0,26697557    | 3,745661069     | 0,815825375     |
| SCN7A                                                                                               | 1,33597E-07 | -1,914611499 | 0,378 | 0,582 | 0,002819024 | 0,265243353   | 3,770122757     | 0,649484536     |
| NR2F2                                                                                               | 1,32725E-09 | -1,936088324 | 0,427 | 0,621 | 2,80062E-05 | 0,261324026   | 3,8266669       | 0,687600644     |
| ADIRF                                                                                               | 2,67054E-12 | -1,95719281  | 0,098 | 0,533 | 5,6351E-08  | 0,257529069   | 3,883056797     | 0,183864916     |

Supplementary Table 2

| Differentially expressed genes_keloid-XL_comparing SC-Keloid vs. (SC-Myel, SC-Nonmyel, SC-Nonmyel2) |             |              |       |       |             |               |                 |                 |
|-----------------------------------------------------------------------------------------------------|-------------|--------------|-------|-------|-------------|---------------|-----------------|-----------------|
| gene                                                                                                | p_val       | avg_log2FC   | pct.1 | pct.2 | p_val_adj   | Foldchange_UP | Foldchange_DOWN | Ratio_pct1_pct2 |
| ATF3                                                                                                | 1,56431E-14 | -1,959062089 | 0,61  | 0,804 | 3,30086E-10 | 0,257195608   | 3,88809128      | 0,758706468     |
| TSC22D2                                                                                             | 5,22856E-07 | -1,976725423 | 0,329 | 0,519 | 0,011032783 | 0,254065886   | 3,935986911     | 0,633911368     |
| ZFP36L2                                                                                             | 1,14172E-09 | -1,995961635 | 0,683 | 0,765 | 2,40914E-05 | 0,250700776   | 3,988818931     | 0,892810458     |
| CEBPD                                                                                               | 0,000644349 | -2,053752922 | 0,256 | 0,386 | 1           | 0,24085672    | 4,151845969     | 0,663212435     |
| SAT1                                                                                                | 1,13365E-12 | -2,060780688 | 0,439 | 0,705 | 2,39211E-08 | 0,239686293   | 4,172120099     | 0,622695035     |
| BGN                                                                                                 | 8,30342E-12 | -2,072024057 | 0,085 | 0,491 | 1,7521E-07  | 0,237825603   | 4,204761752     | 0,17311609      |
| FGL2                                                                                                | 4,76E-09    | -2,29874962  | 0,024 | 0,354 | 0,000100441 | 0,20323917    | 4,920311384     | 0,06779661      |
| PRX                                                                                                 | 0,000732524 | -2,308527105 | 0     | 0,126 | 1           | 0,201866427   | 4,953770748     | 0               |
| AHR                                                                                                 | 6,02994E-18 | -2,405040415 | 0,524 | 0,789 | 1,27238E-13 | 0,188803784   | 5,296504015     | 0,664131812     |
| HLA-DRB1                                                                                            | 5,57028E-09 | -2,444499209 | 0,049 | 0,386 | 0,000117539 | 0,183709838   | 5,443366625     | 0,126943005     |
| CD74                                                                                                | 4,67864E-07 | -2,495629909 | 0,195 | 0,456 | 0,009872407 | 0,177312984   | 5,639744908     | 0,427631579     |
| PDK4                                                                                                | 2,2883E-12  | -2,504317532 | 0,049 | 0,474 | 4,82853E-08 | 0,176248449   | 5,673808788     | 0,103375527     |
| MPZ                                                                                                 | 0,000121653 | -3,080526922 | 0,451 | 0,575 | 1           | 0,118214022   | 8,459233361     | 0,784347826     |
| BIRC3                                                                                               | 4,25981E-11 | -3,196010323 | 0,146 | 0,505 | 8,98864E-07 | 0,109120168   | 9,16420876      | 0,289108911     |
| MBP                                                                                                 | 4,00758E-05 | -3,229516093 | 0,037 | 0,232 | 0,845640308 | 0,106615116   | 9,379532994     | 0,159482759     |
| CCL2                                                                                                | 3,20766E-08 | -3,422990956 | 0,049 | 0,351 | 0,000676848 | 0,093234586   | 10,72563349     | 0,13960114      |



Supplementary Table 3

| Differentially expressed genes_keloid-MD_comparing SC-Keloid vs. (SC-Myel+Nonmyel) |             |             |       |       |             |               |                 |                 |
|------------------------------------------------------------------------------------|-------------|-------------|-------|-------|-------------|---------------|-----------------|-----------------|
| gene                                                                               | p_val       | avg_log2FC  | pct.1 | pct.2 | p_val_adj   | Foldchange_UP | Foldchange_DOWN | Ratio_pct1_pct2 |
| IGFBP3                                                                             | 2,22407E-10 | 3,826013826 | 0,558 | 0     | 4,69301E-06 | 14,1822431    | 0,070510708     | #DIV/0!         |
| TGFBI                                                                              | 1,18949E-11 | 3,072015943 | 0,665 | 0,073 | 2,50995E-07 | 8,409476203   | 0,11891347      | 9,109589041     |
| IBSP                                                                               | 0,001347452 | 3,016370678 | 0,206 | 0     | 1           | 8,091295313   | 0,123589606     | #DIV/0!         |
| TNFAIP6                                                                            | 1,65361E-08 | 2,530897305 | 0,616 | 0,146 | 0,000348929 | 5,77931019    | 0,173031031     | 4,219178082     |
| CSRP2                                                                              | 2,24514E-05 | 2,376098972 | 0,352 | 0,024 | 0,473747591 | 5,191311189   | 0,192629562     | 14,66666667     |
| ELN                                                                                | 1,98271E-05 | 2,361032928 | 0,354 | 0,024 | 0,418372299 | 5,137380489   | 0,19465173      | 14,75           |
| COL7A1                                                                             | 2,16879E-05 | 2,197332219 | 0,378 | 0,049 | 0,457635946 | 4,58630474    | 0,218040461     | 7,714285714     |
| ENC1                                                                               | 0,000142734 | 2,154935498 | 0,271 | 0     | 1           | 4,453487356   | 0,224543132     | #DIV/0!         |
| TAGLN                                                                              | 0,000112532 | 2,154164283 | 0,364 | 0,073 | 1           | 4,451107312   | 0,224663197     | 4,98630137      |
| TPM2                                                                               | 4,75012E-05 | 2,150011461 | 0,367 | 0,049 | 1           | 4,438313146   | 0,225310826     | 7,489795918     |
| COL6A1                                                                             | 1,74493E-09 | 2,003241665 | 0,753 | 0,341 | 3,68197E-05 | 4,008997909   | 0,249438893     | 2,208211144     |
| COL12A1                                                                            | 1,39165E-05 | 1,989216882 | 0,451 | 0,098 | 0,293653107 | 3,970214301   | 0,251875573     | 4,602040816     |
| ABI2                                                                               | 0,000607262 | 1,924139098 | 0,26  | 0,024 | 1           | 3,79510315    | 0,263497449     | 10,83333333     |
| PHLDA2                                                                             | 0,000170642 | 1,912549396 | 0,332 | 0,049 | 1           | 3,764737816   | 0,265622747     | 6,775510204     |
| CALB2                                                                              | 0,001745422 | 1,823248491 | 0,198 | 0     | 1           | 3,53877121    | 0,282583965     | #DIV/0!         |
| CYTOR                                                                              | 0,000955647 | 1,812957228 | 0,247 | 0,024 | 1           | 3,513617702   | 0,284606945     | 10,29166667     |
| RGS16                                                                              | 0,00545016  | 1,701067917 | 0,278 | 0,098 | 1           | 3,251415469   | 0,307558357     | 2,836734694     |
| MIR4435-2HG                                                                        | 0,003052658 | 1,631515263 | 0,18  | 0     | 1           | 3,09838251    | 0,322749046     | #DIV/0!         |
| RPL22L1                                                                            | 0,000961423 | 1,622006838 | 0,381 | 0,146 | 1           | 3,078029029   | 0,324883226     | 2,609589041     |
| APOD                                                                               | 0,010631937 | 1,601735768 | 0,351 | 0,171 | 1           | 3,035082575   | 0,329480327     | 2,052631579     |
| CAV1                                                                               | 0,002760453 | 1,56530164  | 0,183 | 0     | 1           | 2,959393707   | 0,337907051     | #DIV/0!         |
| PDGFC                                                                              | 0,004117545 | 1,55989176  | 0,171 | 0     | 1           | 2,948317226   | 0,339176528     | #DIV/0!         |
| PEG10                                                                              | 0,012341638 | 1,558748519 | 0,199 | 0,049 | 1           | 2,945981803   | 0,33944541      | 4,06122449      |
| SPARCL1                                                                            | 9,37615E-07 | 1,55499519  | 0,751 | 0,366 | 0,019784609 | 2,938327469   | 0,340329664     | 2,051912568     |
| SCRG1                                                                              | 0,015608841 | 1,540000321 | 0,228 | 0,073 | 1           | 2,907945682   | 0,343885378     | 3,123287671     |
| RAPH1                                                                              | 0,006100788 | 1,533475566 | 0,158 | 0     | 1           | 2,894823856   | 0,345444162     | #DIV/0!         |
| PPP1R14B                                                                           | 7,07426E-05 | 1,525258782 | 0,537 | 0,244 | 1           | 2,878383422   | 0,347417232     | 2,200819672     |
| MACF1                                                                              | 0,006009828 | 1,512488868 | 0,226 | 0,049 | 1           | 2,853018037   | 0,350506021     | 4,612244898     |
| SH3BGRL3                                                                           | 0,001371387 | 1,509299061 | 0,376 | 0,146 | 1           | 2,846716966   | 0,351281849     | 2,575342466     |
| LRRFIP1                                                                            | 0,004775282 | 1,495976646 | 0,166 | 0     | 1           | 2,820550263   | 0,354540748     | #DIV/0!         |

Supplementary Table 3

| Differentially expressed genes_keloid-MD_comparing SC-Keloid vs. (SC-Myel+Nonmyel) |             |             |       |       |             |               |                 |                 |
|------------------------------------------------------------------------------------|-------------|-------------|-------|-------|-------------|---------------|-----------------|-----------------|
| gene                                                                               | p_val       | avg_log2FC  | pct.1 | pct.2 | p_val_adj   | Foldchange_UP | Foldchange_DOWN | Ratio_pct1_pct2 |
| LOXL2                                                                              | 0,023882406 | 1,477865903 | 0,179 | 0,049 | 1           | 2,785364053   | 0,359019496     | 3,653061224     |
| CALD1                                                                              | 0,000101058 | 1,475270444 | 0,56  | 0,293 | 1           | 2,78035759    | 0,359665967     | 1,911262799     |
| KCNMA1                                                                             | 0,009886669 | 1,456354117 | 0,142 | 0     | 1           | 2,744140058   | 0,364412887     | #DIV/0!         |
| PLS3                                                                               | 0,000795191 | 1,439431984 | 0,354 | 0,098 | 1           | 2,712140623   | 0,368712445     | 3,612244898     |
| ADAMTS16                                                                           | 0,008159464 | 1,439060091 | 0,148 | 0     | 1           | 2,711441588   | 0,368807502     | #DIV/0!         |
| MYLK                                                                               | 0,00815947  | 1,429016646 | 0,148 | 0     | 1           | 2,692631205   | 0,371383945     | #DIV/0!         |
| ITGB1                                                                              | 4,30687E-09 | 1,426912848 | 0,876 | 0,707 | 9,08792E-05 | 2,688707561   | 0,371925908     | 1,23903819      |
| APOE                                                                               | 0,112629248 | 1,407990138 | 0,099 | 0,024 | 1           | 2,653672142   | 0,376836303     | 4,125           |
| AKAP12                                                                             | 0,008955586 | 1,366435792 | 0,219 | 0,049 | 1           | 2,578327974   | 0,387848253     | 4,469387755     |
| NES                                                                                | 0,000204704 | 1,364010214 | 0,48  | 0,171 | 1           | 2,573996718   | 0,388500884     | 2,807017544     |
| MMP15                                                                              | 0,008773976 | 1,363518911 | 0,183 | 0,024 | 1           | 2,573120305   | 0,388633209     | 7,625           |
| CTNNB1                                                                             | 0,04930284  | 1,351147335 | 0,241 | 0,122 | 1           | 2,551149306   | 0,391980194     | 1,975409836     |
| MMP2                                                                               | 0,00856184  | 1,340157872 | 0,147 | 0     | 1           | 2,531790223   | 0,394977432     | #DIV/0!         |
| COL8A1                                                                             | 0,000397566 | 1,331335578 | 0,439 | 0,171 | 1           | 2,516355191   | 0,397400178     | 2,567251462     |
| LYPD1                                                                              | 0,010003049 | 1,325757938 | 0,18  | 0,024 | 1           | 2,50664543    | 0,39893955      | 7,5             |
| HMCN2                                                                              | 0,033207773 | 1,323767497 | 0,137 | 0,024 | 1           | 2,503189473   | 0,399490335     | 5,708333333     |
| PPP1CB                                                                             | 0,012972156 | 1,313095515 | 0,204 | 0,049 | 1           | 2,484741063   | 0,402456423     | 4,163265306     |
| SH3GLB1                                                                            | 0,030268881 | 1,311151416 | 0,295 | 0,171 | 1           | 2,481395013   | 0,402999117     | 1,725146199     |
| SERPINE1                                                                           | 0,01445645  | 1,296813484 | 0,129 | 0     | 1           | 2,45685631    | 0,407024211     | #DIV/0!         |
| HNRNPH1                                                                            | 0,024018686 | 1,285157307 | 0,239 | 0,098 | 1           | 2,437086245   | 0,410326061     | 2,43877551      |
| XIST                                                                               | 0,344454496 | 1,264273077 | 0,244 | 0,22  | 1           | 2,40206148    | 0,416309078     | 1,109090909     |
| KIRREL3                                                                            | 0,025173188 | 1,255823166 | 0,147 | 0,024 | 1           | 2,38803365    | 0,418754568     | 6,125           |
| ACTN1                                                                              | 0,025089605 | 1,254620454 | 0,211 | 0,073 | 1           | 2,386043679   | 0,419103811     | 2,890410959     |
| POSTN                                                                              | 0,020035233 | 1,253101878 | 0,281 | 0,122 | 1           | 2,38353346    | 0,419545191     | 2,303278689     |
| CCDC80                                                                             | 0,030078082 | 1,238996269 | 0,142 | 0,024 | 1           | 2,360342583   | 0,423667313     | 5,916666667     |
| FHDC1                                                                              | 0,022039264 | 1,23851783  | 0,115 | 0     | 1           | 2,359559955   | 0,423807837     | #DIV/0!         |
| S100A11                                                                            | 3,85705E-07 | 1,235368003 | 0,848 | 0,634 | 0,008138763 | 2,354413963   | 0,424734144     | 1,337539432     |
| ISLR                                                                               | 0,022683488 | 1,229794745 | 0,153 | 0,024 | 1           | 2,3453362     | 0,426378103     | 6,375           |
| NDUFB11                                                                            | 0,014569115 | 1,227325425 | 0,262 | 0,098 | 1           | 2,341325351   | 0,427108518     | 2,673469388     |
| PLAUR                                                                              | 0,013152811 | 1,197063285 | 0,132 | 0     | 1           | 2,292724942   | 0,43616222      | #DIV/0!         |

Supplementary Table 3

| Differentially expressed genes_keloid-MD_comparing SC-Keloid vs. (SC-Myel+Nonmyel) |             |             |       |       |             |               |                 |                 |
|------------------------------------------------------------------------------------|-------------|-------------|-------|-------|-------------|---------------|-----------------|-----------------|
| gene                                                                               | p_val       | avg_log2FC  | pct.1 | pct.2 | p_val_adj   | Foldchange_UP | Foldchange_DOWN | Ratio_pct1_pct2 |
| ABHD2                                                                              | 0,01182678  | 1,192244487 | 0,247 | 0,073 | 1           | 2,285079703   | 0,437621497     | 3,383561644     |
| ACTB                                                                               | 4,84305E-08 | 1,188098723 | 0,904 | 0,61  | 0,001021931 | 2,278522667   | 0,438880865     | 1,481967213     |
| LIF                                                                                | 0,027795105 | 1,178603146 | 0,107 | 0     | 1           | 2,263575058   | 0,441779033     | #DIV/0!         |
| GPC1                                                                               | 0,014089135 | 1,176442897 | 0,314 | 0,146 | 1           | 2,260188185   | 0,442441035     | 2,150684932     |
| MYL6                                                                               | 4,20785E-08 | 1,16278345  | 0,898 | 0,732 | 0,000887898 | 2,238889692   | 0,446649964     | 1,226775956     |
| PXDC1                                                                              | 0,02203925  | 1,160429529 | 0,115 | 0     | 1           | 2,235239669   | 0,447379319     | #DIV/0!         |
| COL11A1                                                                            | 0,02940641  | 1,150976493 | 0,145 | 0,024 | 1           | 2,220641484   | 0,450320327     | 6,041666667     |
| LPGAT1                                                                             | 0,04697897  | 1,141845792 | 0,126 | 0,024 | 1           | 2,206631604   | 0,453179406     | 5,25            |
| S100A4                                                                             | 1,90244E-06 | 1,13735155  | 0,909 | 0,707 | 0,040143328 | 2,199768264   | 0,454593339     | 1,285714286     |
| MXRA5                                                                              | 0,0277951   | 1,130121554 | 0,107 | 0     | 1           | 2,188771809   | 0,45687723      | #DIV/0!         |
| S100A16                                                                            | 0,003671536 | 1,123640251 | 0,507 | 0,341 | 1           | 2,178960813   | 0,458934366     | 1,486803519     |
| COL1A1                                                                             | 3,52006E-05 | 1,11018316  | 0,834 | 0,78  | 0,742767886 | 2,158730521   | 0,463235216     | 1,069230769     |
| SLC20A1                                                                            | 0,025335749 | 1,107707716 | 0,11  | 0     | 1           | 2,155029646   | 0,464030739     | #DIV/0!         |
| CSPG4                                                                              | 0,027795117 | 1,105888123 | 0,107 | 0     | 1           | 2,152313337   | 0,464616366     | #DIV/0!         |
| HNRNPU                                                                             | 0,034282811 | 1,104927644 | 0,254 | 0,122 | 1           | 2,150880904   | 0,464925788     | 2,081967213     |
| MMP14                                                                              | 0,014630451 | 1,104514808 | 0,244 | 0,073 | 1           | 2,150265505   | 0,465058849     | 3,342465753     |
| PTN                                                                                | 1,02669E-05 | 1,099170055 | 0,861 | 0,61  | 0,216642016 | 2,142314152   | 0,466784948     | 1,41147541      |
| CMYA5                                                                              | 0,042381122 | 1,09544739  | 0,169 | 0,049 | 1           | 2,136793349   | 0,467990974     | 3,448979592     |
| SPATS2L                                                                            | 0,074246738 | 1,095405315 | 0,169 | 0,073 | 1           | 2,136731031   | 0,468004623     | 2,315068493     |
| IGFBP5                                                                             | 3,2973E-10  | 1,094847978 | 0,994 | 0,829 | 6,95764E-06 | 2,135905736   | 0,468185456     | 1,199034982     |
| CD276                                                                              | 0,035516068 | 1,093631759 | 0,137 | 0,024 | 1           | 2,134105886   | 0,468580311     | 5,708333333     |
| ANXA1                                                                              | 2,50564E-05 | 1,085487398 | 0,745 | 0,439 | 0,528714207 | 2,122092286   | 0,47123304      | 1,697038724     |
| EIF1B                                                                              | 0,058384905 | 1,082729724 | 0,182 | 0,073 | 1           | 2,118039836   | 0,472134651     | 2,493150685     |
| CCN2                                                                               | 0,018437781 | 1,064080484 | 0,228 | 0,073 | 1           | 2,090836839   | 0,478277397     | 3,123287671     |
| TMEM263                                                                            | 0,033432902 | 1,062665483 | 0,1   | 0     | 1           | 2,088787144   | 0,478746723     | #DIV/0!         |
| GAPDH                                                                              | 0,00093486  | 1,062528657 | 0,62  | 0,415 | 1           | 2,088589051   | 0,47879213      | 1,493975904     |
| PRRX1                                                                              | 0,018605839 | 1,052368121 | 0,203 | 0,049 | 1           | 2,073931322   | 0,482176044     | 4,142857143     |
| SAR1A                                                                              | 0,024186905 | 1,047497077 | 0,112 | 0     | 1           | 2,066940812   | 0,48380679      | #DIV/0!         |
| ACSL3                                                                              | 0,043189113 | 1,046993834 | 0,131 | 0,024 | 1           | 2,066219945   | 0,483975582     | 5,458333333     |
| TPM4                                                                               | 0,000442689 | 1,034535881 | 0,622 | 0,415 | 1           | 2,048454547   | 0,488172902     | 1,498795181     |

Supplementary Table 3

| Differentially expressed genes_keloid-MD_comparing SC-Keloid vs. (SC-Myel+Nonmyel) |             |             |       |       |            |               |                 |                 |
|------------------------------------------------------------------------------------|-------------|-------------|-------|-------|------------|---------------|-----------------|-----------------|
| gene                                                                               | p_val       | avg_log2FC  | pct.1 | pct.2 | p_val_adj  | Foldchange_UP | Foldchange_DOWN | Ratio_pct1_pct2 |
| MYH9                                                                               | 0,033784575 | 1,031939588 | 0,207 | 0,073 | 1          | 2,044771435   | 0,489052215     | 2,835616438     |
| TMSB10                                                                             | 4,55874E-10 | 1,031905121 | 0,982 | 0,951 | 9,6194E-06 | 2,044722586   | 0,489063899     | 1,032597266     |
| COL4A1                                                                             | 0,001051648 | 1,0180855   | 0,612 | 0,39  | 1          | 2,025229635   | 0,493771167     | 1,569230769     |
| RRBP1                                                                              | 0,030651585 | 1,012715817 | 0,241 | 0,098 | 1          | 2,01770578    | 0,495612398     | 2,459183673     |
| CALR                                                                               | 0,013408544 | 1,008204488 | 0,453 | 0,293 | 1          | 2,011406238   | 0,497164611     | 1,546075085     |
| SMS                                                                                | 0,056061412 | 1,005465385 | 0,12  | 0,024 | 1          | 2,007591002   | 0,498109425     | 5               |
| WNK1                                                                               | 0,11870092  | 1,004788195 | 0,126 | 0,049 | 1          | 2,006648875   | 0,498343289     | 2,571428571     |
| CCN3                                                                               | 0,000969321 | 1,002749862 | 0,52  | 0,22  | 1          | 2,003815753   | 0,499047878     | 2,363636364     |
| NDUFS8                                                                             | 0,05386535  | 1,001640688 | 0,156 | 0,049 | 1          | 2,00227577    | 0,499431704     | 3,183673469     |
| DSTN                                                                               | 0,030086565 | 1,000642355 | 0,34  | 0,195 | 1          | 2,000890691   | 0,499777426     | 1,743589744     |
| CDH2                                                                               | 0,021485611 | 1,000617354 | 0,282 | 0,122 | 1          | 2,000856018   | 0,499786087     | 2,31147541      |
| ARL4C                                                                              | 0,03048686  | 0,997378857 | 0,104 | 0     | 1          | 1,996369623   | 0,500909245     | #DIV/0!         |
| CYTL1                                                                              | 0,040141131 | 0,997194083 | 0,257 | 0,122 | 1          | 1,996113953   | 0,500973403     | 2,106557377     |
| ARHGAP21                                                                           | 0,038382068 | 0,991922275 | 0,096 | 0     | 1          | 1,988833187   | 0,502807378     | #DIV/0!         |
| COL6A3                                                                             | 0,058233972 | 0,9918572   | 0,247 | 0,122 | 1          | 1,988743479   | 0,502830059     | 2,024590164     |
| CDH6                                                                               | 0,024210887 | 0,991672303 | 0,357 | 0,195 | 1          | 1,988488617   | 0,502894506     | 1,830769231     |
| TRAF1                                                                              | 0,044049806 | 0,979922243 | 0,091 | 0     | 1          | 1,972359102   | 0,507007065     | #DIV/0!         |
| PITPNB                                                                             | 0,068063798 | 0,977886848 | 0,115 | 0,024 | 1          | 1,969578404   | 0,50772287      | 4,791666667     |
| OCIAD2                                                                             | 0,042074498 | 0,977706842 | 0,093 | 0     | 1          | 1,969332673   | 0,507786223     | #DIV/0!         |
| FAT1                                                                               | 0,042386265 | 0,974937656 | 0,136 | 0,024 | 1          | 1,965556257   | 0,508761831     | 5,666666667     |
| COL6A2                                                                             | 0,006381882 | 0,974239662 | 0,423 | 0,22  | 1          | 1,964605526   | 0,509008036     | 1,922727273     |
| SCX                                                                                | 0,124979823 | 0,967508172 | 0,093 | 0,024 | 1          | 1,955460198   | 0,511388573     | 3,875           |
| EMC10                                                                              | 0,03681456  | 0,961704083 | 0,139 | 0,024 | 1          | 1,947609014   | 0,513450078     | 5,791666667     |
| RGS3                                                                               | 0,108262296 | 0,959478327 | 0,131 | 0,049 | 1          | 1,944606606   | 0,514242828     | 2,673469388     |
| MYL12A                                                                             | 0,000974968 | 0,953786324 | 0,66  | 0,488 | 1          | 1,936949478   | 0,516275727     | 1,352459016     |
| PPFIBP1                                                                            | 0,018062746 | 0,948313232 | 0,349 | 0,171 | 1          | 1,929615274   | 0,51823802      | 2,040935673     |
| RCN2                                                                               | 0,070064138 | 0,945930969 | 0,258 | 0,146 | 1          | 1,926431608   | 0,519094473     | 1,767123288     |
| TUBA1C                                                                             | 0,031926643 | 0,942139757 | 0,102 | 0     | 1          | 1,921375847   | 0,520460378     | #DIV/0!         |
| VCAN                                                                               | 0,046997366 | 0,939925604 | 0,196 | 0,073 | 1          | 1,918429308   | 0,52125976      | 2,684931507     |
| ACTR3                                                                              | 0,033728845 | 0,937572902 | 0,177 | 0,049 | 1          | 1,915303342   | 0,522110507     | 3,612244898     |

Supplementary Table 3

| Differentially expressed genes_keloid-MD_comparing SC-Keloid vs. (SC-Myel+Nonmyel) |             |             |       |       |           |               |                 |                 |
|------------------------------------------------------------------------------------|-------------|-------------|-------|-------|-----------|---------------|-----------------|-----------------|
| gene                                                                               | p_val       | avg_log2FC  | pct.1 | pct.2 | p_val_adj | Foldchange_UP | Foldchange_DOWN | Ratio_pct1_pct2 |
| SVIP                                                                               | 0,125397768 | 0,936955116 | 0,093 | 0,024 | 1         | 1,914483354   | 0,522334132     | 3,875           |
| HMGB1                                                                              | 0,000350938 | 0,936199902 | 0,758 | 0,61  | 1         | 1,913481432   | 0,522607632     | 1,242622951     |
| C1orf56                                                                            | 0,058331147 | 0,934443185 | 0,124 | 0,024 | 1         | 1,911152874   | 0,52324438      | 5,166666667     |
| HPF1                                                                               | 0,040186561 | 0,934249944 | 0,094 | 0     | 1         | 1,910896904   | 0,52331447      | #DIV/0!         |
| METAP2                                                                             | 0,094275321 | 0,932777478 | 0,166 | 0,073 | 1         | 1,908947568   | 0,523848856     | 2,273972603     |
| ATP1B1                                                                             | 0,068236718 | 0,932305571 | 0,182 | 0,073 | 1         | 1,908323252   | 0,524020236     | 2,493150685     |
| FNBP1L                                                                             | 0,052910279 | 0,9315141   | 0,085 | 0     | 1         | 1,907276622   | 0,524307795     | #DIV/0!         |
| GOLT1B                                                                             | 0,061491606 | 0,927837538 | 0,118 | 0,024 | 1         | 1,902422308   | 0,525645644     | 4,916666667     |
| STK17A                                                                             | 0,202475227 | 0,92322439  | 0,187 | 0,122 | 1         | 1,896348857   | 0,527329134     | 1,532786885     |
| SUB1                                                                               | 0,019890815 | 0,919997001 | 0,384 | 0,22  | 1         | 1,89211136    | 0,528510119     | 1,745454545     |
| MRC2                                                                               | 0,05291029  | 0,917990052 | 0,085 | 0     | 1         | 1,889481054   | 0,529245847     | #DIV/0!         |
| LBH                                                                                | 0,050542167 | 0,91470832  | 0,086 | 0     | 1         | 1,885187891   | 0,530451105     | #DIV/0!         |
| STX8                                                                               | 0,099598284 | 0,913797926 | 0,136 | 0,049 | 1         | 1,883998643   | 0,530785945     | 2,775510204     |
| TSC22D1                                                                            | 0,100522668 | 0,912468661 | 0,1   | 0,024 | 1         | 1,88226357    | 0,531275224     | 4,166666667     |
| GLIPR1                                                                             | 0,038382068 | 0,910556189 | 0,096 | 0     | 1         | 1,879770049   | 0,531979962     | #DIV/0!         |
| PGAM1                                                                              | 0,060672542 | 0,90966939  | 0,152 | 0,049 | 1         | 1,878614944   | 0,532307061     | 3,102040816     |
| UBE2D3                                                                             | 0,063619692 | 0,904888289 | 0,183 | 0,073 | 1         | 1,872399505   | 0,534074057     | 2,506849315     |
| MAPK1                                                                              | 0,092439062 | 0,902725063 | 0,104 | 0,024 | 1         | 1,86959407    | 0,534875466     | 4,333333333     |
| SSBP1                                                                              | 0,090157676 | 0,902165791 | 0,314 | 0,22  | 1         | 1,868869447   | 0,535082855     | 1,427272727     |
| EMP3                                                                               | 0,0035053   | 0,898603122 | 0,614 | 0,415 | 1         | 1,864260054   | 0,536405851     | 1,479518072     |
| PRKAR1A                                                                            | 0,230354105 | 0,898601059 | 0,183 | 0,122 | 1         | 1,864257388   | 0,536406618     | 1,5             |
| SRGAP2                                                                             | 0,066513834 | 0,896824641 | 0,077 | 0     | 1         | 1,861963304   | 0,537067512     | #DIV/0!         |
| ADAMTSL1                                                                           | 0,304963959 | 0,893746917 | 0,144 | 0,098 | 1         | 1,857995384   | 0,53821447      | 1,469387755     |
| RNF7                                                                               | 0,065902331 | 0,891736551 | 0,238 | 0,122 | 1         | 1,855408108   | 0,538964983     | 1,950819672     |
| SF3B1                                                                              | 0,130229191 | 0,890320846 | 0,124 | 0,049 | 1         | 1,853588304   | 0,539494125     | 2,530612245     |
| RNASEH2B                                                                           | 0,21173413  | 0,888884492 | 0,105 | 0,049 | 1         | 1,851743781   | 0,540031515     | 2,142857143     |
| C9orf78                                                                            | 0,050542178 | 0,888472397 | 0,086 | 0     | 1         | 1,85121492    | 0,540185793     | #DIV/0!         |
| LAMC1                                                                              | 0,150504178 | 0,886749002 | 0,148 | 0,073 | 1         | 1,849004841   | 0,540831467     | 2,02739726      |
| ACTN4                                                                              | 0,047028497 | 0,884718749 | 0,199 | 0,073 | 1         | 1,846404633   | 0,541593095     | 2,726027397     |
| UBE2Q2                                                                             | 0,080814635 | 0,884311589 | 0,108 | 0,024 | 1         | 1,845883611   | 0,541745966     | 4,5             |

Supplementary Table 3

| Differentially expressed genes_keloid-MD_comparing SC-Keloid vs. (SC-Myel+Nonmyel) |             |             |       |       |           |               |                 |                 |
|------------------------------------------------------------------------------------|-------------|-------------|-------|-------|-----------|---------------|-----------------|-----------------|
| gene                                                                               | p_val       | avg_log2FC  | pct.1 | pct.2 | p_val_adj | Foldchange_UP | Foldchange_DOWN | Ratio_pct1_pct2 |
| OPRD1                                                                              | 0,087553549 | 0,884233892 | 0,067 | 0     | 1         | 1,845784202   | 0,541775143     | #DIV/0!         |
| TRIO                                                                               | 0,055388557 | 0,879873053 | 0,083 | 0     | 1         | 1,840213368   | 0,543415246     | #DIV/0!         |
| PDIA4                                                                              | 0,139886207 | 0,879247739 | 0,206 | 0,122 | 1         | 1,839415929   | 0,543650832     | 1,68852459      |
| ARGLU1                                                                             | 0,084352475 | 0,87770874  | 0,231 | 0,122 | 1         | 1,837454774   | 0,544231082     | 1,893442623     |
| CRIP1                                                                              | 0,069628488 | 0,877345481 | 0,075 | 0     | 1         | 1,836992175   | 0,544368133     | #DIV/0!         |
| TMEM167A                                                                           | 0,049774001 | 0,875843311 | 0,254 | 0,122 | 1         | 1,835080448   | 0,544935238     | 2,081967213     |
| TNFRSF12A                                                                          | 0,008287873 | 0,874363866 | 0,632 | 0,439 | 1         | 1,833199587   | 0,545494341     | 1,439635535     |
| RBM33                                                                              | 0,063538949 | 0,872459033 | 0,078 | 0     | 1         | 1,830780756   | 0,546215049     | #DIV/0!         |
| PSMA2                                                                              | 0,133171828 | 0,872112725 | 0,091 | 0,024 | 1         | 1,830341345   | 0,546346179     | 3,791666667     |
| PRICKLE2                                                                           | 0,069628459 | 0,861768258 | 0,075 | 0     | 1         | 1,8172643     | 0,550277689     | #DIV/0!         |
| TPGS1                                                                              | 0,121265357 | 0,861310186 | 0,094 | 0,024 | 1         | 1,81668739    | 0,550452436     | 3,916666667     |
| PTPRE                                                                              | 0,052910268 | 0,860982625 | 0,085 | 0     | 1         | 1,816274961   | 0,55057743      | #DIV/0!         |
| CCT4                                                                               | 0,073039185 | 0,859663615 | 0,112 | 0,024 | 1         | 1,814615158   | 0,551081035     | 4,666666667     |
| NCOR2                                                                              | 0,055388568 | 0,857075916 | 0,083 | 0     | 1         | 1,811363279   | 0,552070372     | #DIV/0!         |
| GNB1                                                                               | 0,061964333 | 0,851731853 | 0,27  | 0,146 | 1         | 1,804665999   | 0,554119156     | 1,849315068     |
| COMMD2                                                                             | 0,060697175 | 0,850036341 | 0,08  | 0     | 1         | 1,80254633    | 0,554770761     | #DIV/0!         |
| SMURF2                                                                             | 0,079881743 | 0,848158418 | 0,07  | 0     | 1         | 1,800201523   | 0,555493364     | #DIV/0!         |
| EIF4E2                                                                             | 0,080028732 | 0,8479681   | 0,11  | 0,024 | 1         | 1,79996406    | 0,555566648     | 4,583333333     |
| DTYMK                                                                              | 0,091815775 | 0,84601434  | 0,104 | 0,024 | 1         | 1,797528121   | 0,55631953      | 4,333333333     |
| SEC23A                                                                             | 0,072889747 | 0,844703661 | 0,073 | 0     | 1         | 1,79589582    | 0,556825173     | #DIV/0!         |
| MICOS10                                                                            | 0,053769627 | 0,844027008 | 0,226 | 0,098 | 1         | 1,795053705   | 0,557086396     | 2,306122449     |
| RAB32                                                                              | 0,113791335 | 0,843087541 | 0,096 | 0,024 | 1         | 1,793885166   | 0,557449283     | 4               |
| PICALM                                                                             | 0,063538949 | 0,842298793 | 0,078 | 0     | 1         | 1,792904685   | 0,557754134     | #DIV/0!         |
| ARID5B                                                                             | 0,195333488 | 0,841360695 | 0,139 | 0,073 | 1         | 1,791739245   | 0,558116926     | 1,904109589     |
| BTF3L4                                                                             | 0,077914411 | 0,83783684  | 0,112 | 0,024 | 1         | 1,787368172   | 0,559481821     | 4,666666667     |
| C6orf62                                                                            | 0,199660813 | 0,837646644 | 0,077 | 0,024 | 1         | 1,787132553   | 0,559555584     | 3,208333333     |
| PDCD5                                                                              | 0,093909907 | 0,83666399  | 0,33  | 0,244 | 1         | 1,785915709   | 0,559936841     | 1,352459016     |
| ANO4                                                                               | 0,055388568 | 0,836033498 | 0,083 | 0     | 1         | 1,785135392   | 0,5601816       | #DIV/0!         |
| ADGRG1                                                                             | 0,095976694 | 0,83337706  | 0,064 | 0     | 1         | 1,781851441   | 0,561214014     | #DIV/0!         |
| CDKN2A                                                                             | 0,095976694 | 0,830491186 | 0,064 | 0     | 1         | 1,778290704   | 0,562337754     | #DIV/0!         |

Supplementary Table 3

| Differentially expressed genes_keloid-MD_ comparing SC-Keloid vs. (SC-Myel+Nonmyel) |             |             |       |       |           |               |                 |                 |
|-------------------------------------------------------------------------------------|-------------|-------------|-------|-------|-----------|---------------|-----------------|-----------------|
| gene                                                                                | p_val       | avg_log2FC  | pct.1 | pct.2 | p_val_adj | Foldchange_UP | Foldchange_DOWN | Ratio_pct1_pct2 |
| MMP17                                                                               | 0,069628488 | 0,829597145 | 0,075 | 0     | 1         | 1,777189035   | 0,562686344     | #DIV/0!         |
| SDCCAG8                                                                             | 0,117421062 | 0,828969034 | 0,19  | 0,098 | 1         | 1,776415463   | 0,562931376     | 1,93877551      |
| ICE1                                                                                | 0,057982323 | 0,827187405 | 0,081 | 0     | 1         | 1,774223066   | 0,563626986     | #DIV/0!         |
| HDLBP                                                                               | 0,17693256  | 0,824890622 | 0,169 | 0,098 | 1         | 1,771400735   | 0,564525        | 1,724489796     |
| PDCL3                                                                               | 0,063538949 | 0,823316891 | 0,078 | 0     | 1         | 1,769469495   | 0,565141136     | #DIV/0!         |
| NUFIP2                                                                              | 0,087339057 | 0,819655885 | 0,108 | 0,024 | 1         | 1,764984954   | 0,566577068     | 4,5             |
| ZFAND6                                                                              | 0,34655277  | 0,819441439 | 0,088 | 0,049 | 1         | 1,764722622   | 0,566661291     | 1,795918367     |
| MMADHC                                                                              | 0,069628474 | 0,818893614 | 0,075 | 0     | 1         | 1,764052642   | 0,566876507     | #DIV/0!         |
| CEP170                                                                              | 0,110282783 | 0,818464305 | 0,134 | 0,049 | 1         | 1,763527783   | 0,56704522      | 2,734693878     |
| MSI2                                                                                | 0,160582972 | 0,818246835 | 0,085 | 0,024 | 1         | 1,763261972   | 0,567130702     | 3,541666667     |
| STMN1                                                                               | 0,137468561 | 0,817859933 | 0,241 | 0,146 | 1         | 1,762789164   | 0,567282816     | 1,650684932     |
| RANBP9                                                                              | 0,079881743 | 0,816262882 | 0,07  | 0     | 1         | 1,76083885    | 0,567911141     | #DIV/0!         |
| RAB10                                                                               | 0,069137323 | 0,812516187 | 0,153 | 0,049 | 1         | 1,756271866   | 0,569387929     | 3,12244898      |
| MRPL27                                                                              | 0,072202492 | 0,81047796  | 0,153 | 0,049 | 1         | 1,753792372   | 0,570192923     | 3,12244898      |
| COX6A1                                                                              | 0,040738686 | 0,809545404 | 0,405 | 0,268 | 1         | 1,75265909    | 0,570561615     | 1,51119403      |
| VCP                                                                                 | 0,221454149 | 0,803961465 | 0,104 | 0,049 | 1         | 1,745888548   | 0,572774248     | 2,12244898      |
| CCND1                                                                               | 0,045667773 | 0,802390147 | 0,375 | 0,244 | 1         | 1,743988041   | 0,573398427     | 1,536885246     |
| MAML2                                                                               | 0,181159236 | 0,802304635 | 0,142 | 0,073 | 1         | 1,743884674   | 0,573432415     | 1,945205479     |
| MORN2                                                                               | 0,131363803 | 0,801727057 | 0,093 | 0,024 | 1         | 1,743186654   | 0,573662033     | 3,875           |
| P3H2                                                                                | 0,166890311 | 0,800819584 | 0,116 | 0,049 | 1         | 1,742090513   | 0,574022987     | 2,367346939     |
| OSTC                                                                                | 0,068706736 | 0,79911735  | 0,297 | 0,171 | 1         | 1,740036236   | 0,574700675     | 1,736842105     |
| IL7R                                                                                | 0,072889747 | 0,798251718 | 0,073 | 0     | 1         | 1,738992509   | 0,575045605     | #DIV/0!         |
| EGR1                                                                                | 0,168634497 | 0,796872806 | 0,177 | 0,098 | 1         | 1,737331193   | 0,57559549      | 1,806122449     |
| APC                                                                                 | 0,23222496  | 0,794988878 | 0,102 | 0,049 | 1         | 1,735063998   | 0,576347617     | 2,081632653     |
| CDC42                                                                               | 0,038826896 | 0,793686216 | 0,397 | 0,244 | 1         | 1,733498053   | 0,576868257     | 1,62704918      |
| COX8A                                                                               | 0,140101442 | 0,788560128 | 0,282 | 0,195 | 1         | 1,727349633   | 0,578921592     | 1,446153846     |
| EIF4E                                                                               | 0,167724207 | 0,788121058 | 0,083 | 0,024 | 1         | 1,726824011   | 0,579097808     | 3,458333333     |
| SEC61A1                                                                             | 0,246120141 | 0,78682032  | 0,1   | 0,049 | 1         | 1,725267802   | 0,57962016      | 2,040816327     |
| HOXB2                                                                               | 0,13405794  | 0,785684919 | 0,091 | 0,024 | 1         | 1,723910551   | 0,580076501     | 3,791666667     |
| IER2                                                                                | 0,137463312 | 0,784601614 | 0,183 | 0,098 | 1         | 1,72261657    | 0,580512238     | 1,867346939     |

Supplementary Table 3

| Differentially expressed genes_keloid-MD_comparing SC-Keloid vs. (SC-Myel+Nonmyel) |             |             |       |       |           |               |                 |                 |
|------------------------------------------------------------------------------------|-------------|-------------|-------|-------|-----------|---------------|-----------------|-----------------|
| gene                                                                               | p_val       | avg_log2FC  | pct.1 | pct.2 | p_val_adj | Foldchange_UP | Foldchange_DOWN | Ratio_pct1_pct2 |
| G3BP2                                                                              | 0,095976714 | 0,784084553 | 0,064 | 0     | 1         | 1,721999296   | 0,58072033      | #DIV/0!         |
| TBCA                                                                               | 0,014376407 | 0,781077833 | 0,442 | 0,244 | 1         | 1,718414215   | 0,581931871     | 1,81147541      |
| ATXN1                                                                              | 0,072889747 | 0,77734415  | 0,073 | 0     | 1         | 1,713972723   | 0,583439857     | #DIV/0!         |
| RTTN                                                                               | 0,069628502 | 0,776582343 | 0,075 | 0     | 1         | 1,713067909   | 0,58374802      | #DIV/0!         |
| FAM174C                                                                            | 0,069628474 | 0,776421392 | 0,075 | 0     | 1         | 1,712876804   | 0,583813148     | #DIV/0!         |
| EIF3H                                                                              | 0,302050805 | 0,772724081 | 0,12  | 0,073 | 1         | 1,708492697   | 0,585311252     | 1,643835616     |
| PRPF40A                                                                            | 0,111860022 | 0,770065249 | 0,132 | 0,049 | 1         | 1,70534691    | 0,586390953     | 2,693877551     |
| ATP2B4                                                                             | 0,087553567 | 0,769774756 | 0,067 | 0     | 1         | 1,705003566   | 0,586509037     | #DIV/0!         |
| CTHRC1                                                                             | 0,078554811 | 0,769192596 | 0,148 | 0,049 | 1         | 1,704315697   | 0,586745755     | 3,020408163     |
| BLOC1S2                                                                            | 0,181795904 | 0,76806119  | 0,08  | 0,024 | 1         | 1,702979644   | 0,587206079     | 3,333333333     |
| PARK7                                                                              | 0,06819946  | 0,766711939 | 0,455 | 0,39  | 1         | 1,701387711   | 0,587755509     | 1,166666667     |
| HUWE1                                                                              | 0,148178913 | 0,766290434 | 0,088 | 0,024 | 1         | 1,700890697   | 0,587927256     | 3,666666667     |
| FABP5                                                                              | 0,016197143 | 0,766045193 | 0,514 | 0,341 | 1         | 1,700601591   | 0,588027205     | 1,507331378     |
| CRTAP                                                                              | 0,181025993 | 0,764363736 | 0,115 | 0,049 | 1         | 1,6986207     | 0,588712948     | 2,346938776     |
| PYGB                                                                               | 0,100494807 | 0,763519887 | 0,062 | 0     | 1         | 1,697627448   | 0,589057394     | #DIV/0!         |
| HSPE1                                                                              | 0,081989549 | 0,7633339   | 0,34  | 0,22  | 1         | 1,697408609   | 0,589133338     | 1,545454545     |
| COL1A2                                                                             | 0,0077298   | 0,762894352 | 0,799 | 0,732 | 1         | 1,696891536   | 0,589312857     | 1,091530055     |
| LRRC75A                                                                            | 0,101190241 | 0,762517624 | 0,104 | 0,024 | 1         | 1,696448488   | 0,589466764     | 4,333333333     |
| PSMC1                                                                              | 0,229426013 | 0,761804982 | 0,104 | 0,049 | 1         | 1,695610708   | 0,589758012     | 2,12244898      |
| TXN                                                                                | 0,081882048 | 0,761001407 | 0,384 | 0,268 | 1         | 1,694666522   | 0,590086596     | 1,432835821     |
| NT5E                                                                               | 0,060697175 | 0,758290364 | 0,08  | 0     | 1         | 1,691484977   | 0,591196501     | #DIV/0!         |
| TMEM141                                                                            | 0,105333015 | 0,756876018 | 0,102 | 0,024 | 1         | 1,689827543   | 0,591776365     | 4,25            |
| ODF2L                                                                              | 0,09166642  | 0,756847039 | 0,065 | 0     | 1         | 1,6897936     | 0,591788252     | #DIV/0!         |
| SUMF2                                                                              | 0,105682642 | 0,753981558 | 0,102 | 0,024 | 1         | 1,686440662   | 0,59296483      | 4,25            |
| PPP1R12A                                                                           | 0,365695191 | 0,751793405 | 0,187 | 0,146 | 1         | 1,683884756   | 0,593864869     | 1,280821918     |
| XYLT1                                                                              | 0,095976714 | 0,751330036 | 0,064 | 0     | 1         | 1,683344008   | 0,594055639     | #DIV/0!         |
| EIF2AK1                                                                            | 0,219301764 | 0,751299169 | 0,073 | 0,024 | 1         | 1,683307993   | 0,594068349     | 3,041666667     |
| DLG1                                                                               | 0,178645687 | 0,745029435 | 0,081 | 0,024 | 1         | 1,676008464   | 0,596655698     | 3,375           |
| PAFAH1B1                                                                           | 0,223886045 | 0,742987406 | 0,187 | 0,122 | 1         | 1,673637875   | 0,597500818     | 1,532786885     |
| UROS                                                                               | 0,072889747 | 0,74280142  | 0,073 | 0     | 1         | 1,673422132   | 0,59757785      | #DIV/0!         |



Supplementary Table 3

| Differentially expressed genes_keloid-MD_comparing SC-Keloid vs. (SC-Myel+Nonmyel) |             |             |       |       |             |               |                 |                 |
|------------------------------------------------------------------------------------|-------------|-------------|-------|-------|-------------|---------------|-----------------|-----------------|
| gene                                                                               | p_val       | avg_log2FC  | pct.1 | pct.2 | p_val_adj   | Foldchange_UP | Foldchange_DOWN | Ratio_pct1_pct2 |
| ZMPSTE24                                                                           | 0,203575596 | 0,742536698 | 0,077 | 0,024 | 1           | 1,6731151     | 0,597687511     | 3,208333333     |
| ANKLE2                                                                             | 0,083628404 | 0,742496071 | 0,069 | 0     | 1           | 1,673067986   | 0,597704342     | #DIV/0!         |
| KDELR2                                                                             | 0,049101819 | 0,740956548 | 0,26  | 0,122 | 1           | 1,671283581   | 0,598342503     | 2,131147541     |
| TATDN1                                                                             | 0,095976714 | 0,739143031 | 0,064 | 0     | 1           | 1,66918404    | 0,599095112     | #DIV/0!         |
| CKS2                                                                               | 0,105231676 | 0,738643481 | 0,061 | 0     | 1           | 1,668606165   | 0,599302592     | #DIV/0!         |
| UBR4                                                                               | 0,261452711 | 0,733281066 | 0,099 | 0,049 | 1           | 1,662415564   | 0,60153431      | 2,020408163     |
| PLEC                                                                               | 0,10615644  | 0,731454306 | 0,198 | 0,098 | 1           | 1,660311923   | 0,602296464     | 2,020408163     |
| CPSF6                                                                              | 0,09166642  | 0,731164191 | 0,065 | 0     | 1           | 1,659978081   | 0,602417593     | #DIV/0!         |
| POLE4                                                                              | 0,23987969  | 0,730732209 | 0,102 | 0,049 | 1           | 1,659481112   | 0,602598001     | 2,081632653     |
| S100A10                                                                            | 1,21656E-05 | 0,729949194 | 0,979 | 0,902 | 0,256706467 | 1,658580682   | 0,602925146     | 1,085365854     |
| THUMPD3                                                                            | 0,076304917 | 0,728673049 | 0,072 | 0     | 1           | 1,657114222   | 0,603458703     | #DIV/0!         |
| ARPC5                                                                              | 0,031093359 | 0,728400425 | 0,526 | 0,415 | 1           | 1,65680111    | 0,603572749     | 1,26746988      |
| MRPL23                                                                             | 0,079881726 | 0,727582984 | 0,07  | 0     | 1           | 1,655862621   | 0,603914834     | #DIV/0!         |
| MTCH2                                                                              | 0,079881743 | 0,727580358 | 0,07  | 0     | 1           | 1,655859606   | 0,603915934     | #DIV/0!         |
| GGCT                                                                               | 0,240907358 | 0,727104249 | 0,07  | 0,024 | 1           | 1,655313241   | 0,604115267     | 2,916666667     |
| PRKAR1B                                                                            | 0,100494807 | 0,726727017 | 0,062 | 0     | 1           | 1,65488047    | 0,60427325      | #DIV/0!         |
| NOPCHAP1                                                                           | 0,128720137 | 0,724447841 | 0,094 | 0,024 | 1           | 1,652268147   | 0,605228638     | 3,916666667     |
| PTPN14                                                                             | 0,295720575 | 0,722549913 | 0,121 | 0,073 | 1           | 1,650095945   | 0,606025367     | 1,657534247     |
| TMBIM6                                                                             | 0,379015509 | 0,722034841 | 0,25  | 0,22  | 1           | 1,649506933   | 0,606241768     | 1,136363636     |
| FBXO22                                                                             | 0,091666401 | 0,721642127 | 0,065 | 0     | 1           | 1,649057984   | 0,606406815     | #DIV/0!         |
| PGM3                                                                               | 0,169241516 | 0,721556501 | 0,116 | 0,049 | 1           | 1,648960113   | 0,606442807     | 2,367346939     |
| FKBP9                                                                              | 0,225108449 | 0,721492277 | 0,104 | 0,049 | 1           | 1,648886707   | 0,606469805     | 2,12244898      |
| ID4                                                                                | 0,145609743 | 0,721255445 | 0,049 | 0     | 1           | 1,64861605    | 0,606569371     | #DIV/0!         |
| MZT1                                                                               | 0,105231697 | 0,720893389 | 0,061 | 0     | 1           | 1,648202368   | 0,606721613     | #DIV/0!         |
| ARF4                                                                               | 0,126056933 | 0,720210328 | 0,215 | 0,122 | 1           | 1,647422192   | 0,607008941     | 1,762295082     |
| PSMD7                                                                              | 0,235150366 | 0,720040266 | 0,156 | 0,098 | 1           | 1,647228009   | 0,607080498     | 1,591836735     |
| B4GALT6                                                                            | 0,120876608 | 0,718560084 | 0,056 | 0     | 1           | 1,645538846   | 0,607703673     | #DIV/0!         |
| MFF                                                                                | 0,100494787 | 0,718184069 | 0,062 | 0     | 1           | 1,645110019   | 0,607862081     | #DIV/0!         |
| SLC25A3                                                                            | 0,058183594 | 0,717529998 | 0,285 | 0,146 | 1           | 1,644364348   | 0,608137729     | 1,952054795     |
| TTL                                                                                | 0,115409678 | 0,716917603 | 0,057 | 0     | 1           | 1,643666497   | 0,608395926     | #DIV/0!         |

Supplementary Table 3

| Differentially expressed genes_keloid-MD_comparing SC-Keloid vs. (SC-Myel+Nonmyel) |             |             |       |       |           |               |                 |                 |
|------------------------------------------------------------------------------------|-------------|-------------|-------|-------|-----------|---------------|-----------------|-----------------|
| gene                                                                               | p_val       | avg_log2FC  | pct.1 | pct.2 | p_val_adj | Foldchange_UP | Foldchange_DOWN | Ratio_pct1_pct2 |
| TAF10                                                                              | 0,161297158 | 0,716307556 | 0,118 | 0,049 | 1         | 1,642971616   | 0,608653242     | 2,408163265     |
| FRMD4A                                                                             | 0,112597491 | 0,715917117 | 0,284 | 0,171 | 1         | 1,642527035   | 0,608817985     | 1,660818713     |
| UBE2V2                                                                             | 0,36086972  | 0,715069658 | 0,113 | 0,073 | 1         | 1,641562476   | 0,609175718     | 1,547945205     |
| RAB14                                                                              | 0,343212076 | 0,714670827 | 0,19  | 0,146 | 1         | 1,64110873    | 0,609344147     | 1,301369863     |
| MICAL2                                                                             | 0,120876633 | 0,712288132 | 0,056 | 0     | 1         | 1,638400581   | 0,610351346     | #DIV/0!         |
| GRB10                                                                              | 0,100494807 | 0,711438671 | 0,062 | 0     | 1         | 1,637436172   | 0,610710828     | #DIV/0!         |
| RIF1                                                                               | 0,110554622 | 0,70912542  | 0,1   | 0,024 | 1         | 1,634812772   | 0,611690841     | 4,166666667     |
| LSM12                                                                              | 0,095976714 | 0,709102192 | 0,064 | 0     | 1         | 1,634786451   | 0,61170069      | #DIV/0!         |
| NDUFAB1                                                                            | 0,06430675  | 0,708878029 | 0,308 | 0,171 | 1         | 1,634532462   | 0,611795742     | 1,801169591     |
| TIAL1                                                                              | 0,205553766 | 0,708574601 | 0,077 | 0,024 | 1         | 1,634188723   | 0,611924428     | 3,208333333     |
| VPS4B                                                                              | 0,105231719 | 0,706598249 | 0,061 | 0     | 1         | 1,631951575   | 0,61276328      | #DIV/0!         |
| SMC6                                                                               | 0,087553567 | 0,705956737 | 0,067 | 0     | 1         | 1,63122607    | 0,613035813     | #DIV/0!         |
| APP                                                                                | 0,197053065 | 0,705604374 | 0,271 | 0,195 | 1         | 1,630827709   | 0,613185559     | 1,38974359      |
| COTL1                                                                              | 0,182044114 | 0,704240212 | 0,172 | 0,098 | 1         | 1,629286384   | 0,61376564      | 1,755102041     |
| PBDC1                                                                              | 0,140479232 | 0,7037118   | 0,089 | 0,024 | 1         | 1,628689738   | 0,613990484     | 3,708333333     |
| TMED3                                                                              | 0,079881726 | 0,703530338 | 0,07  | 0     | 1         | 1,628484894   | 0,614067716     | #DIV/0!         |
| PSMD12                                                                             | 0,282603123 | 0,70232719  | 0,152 | 0,098 | 1         | 1,627127372   | 0,614580037     | 1,551020408     |
| ST6GAL2                                                                            | 0,105231719 | 0,702325662 | 0,061 | 0     | 1         | 1,627125649   | 0,614580688     | #DIV/0!         |
| TNS3                                                                               | 0,178841896 | 0,701751347 | 0,174 | 0,098 | 1         | 1,626478043   | 0,614825392     | 1,775510204     |
| TNIK                                                                               | 0,110199181 | 0,701490032 | 0,059 | 0     | 1         | 1,626183467   | 0,614936765     | #DIV/0!         |
| SLC38A2                                                                            | 0,36383004  | 0,70123361  | 0,086 | 0,049 | 1         | 1,625894458   | 0,615046072     | 1,755102041     |
| NDUFS4                                                                             | 0,314719232 | 0,700122604 | 0,172 | 0,122 | 1         | 1,624642853   | 0,615519896     | 1,409836066     |
| CHD1                                                                               | 0,105231719 | 0,699043081 | 0,061 | 0     | 1         | 1,623427639   | 0,615980642     | #DIV/0!         |
| XIAP                                                                               | 0,37524532  | 0,698967385 | 0,085 | 0,049 | 1         | 1,623342462   | 0,616012963     | 1,734693878     |
| RAMP1                                                                              | 0,110199181 | 0,69705223  | 0,059 | 0     | 1         | 1,621188931   | 0,616831253     | #DIV/0!         |
| HBEGF                                                                              | 0,232733654 | 0,696210713 | 0,265 | 0,195 | 1         | 1,620243575   | 0,617191153     | 1,358974359     |
| SAMD8                                                                              | 0,091666401 | 0,695840187 | 0,065 | 0     | 1         | 1,619827503   | 0,617349686     | #DIV/0!         |
| MAF                                                                                | 0,511959114 | 0,69554385  | 0,124 | 0,098 | 1         | 1,619494816   | 0,617476506     | 1,265306122     |
| SNHG9                                                                              | 0,120876633 | 0,694225732 | 0,056 | 0     | 1         | 1,618015841   | 0,618040921     | #DIV/0!         |
| GULP1                                                                              | 0,206737466 | 0,693388391 | 0,139 | 0,073 | 1         | 1,617077016   | 0,618399736     | 1,904109589     |

Supplementary Table 3

| Differentially expressed genes_keloid-MD_comparing SC-Keloid vs. (SC-Myel+Nonmyel) |             |             |       |       |           |               |                 |                 |
|------------------------------------------------------------------------------------|-------------|-------------|-------|-------|-----------|---------------|-----------------|-----------------|
| gene                                                                               | p_val       | avg_log2FC  | pct.1 | pct.2 | p_val_adj | Foldchange_UP | Foldchange_DOWN | Ratio_pct1_pct2 |
| ISG15                                                                              | 0,210405449 | 0,693203868 | 0,171 | 0,098 | 1         | 1,616870202   | 0,618478836     | 1,744897959     |
| MAP1B                                                                              | 0,098304332 | 0,692409814 | 0,388 | 0,268 | 1         | 1,615980528   | 0,618819338     | 1,447761194     |
| UBE2D2                                                                             | 0,063256798 | 0,691601269 | 0,123 | 0,024 | 1         | 1,61507512    | 0,619166246     | 5,125           |
| ANXA5                                                                              | 0,003594845 | 0,691535755 | 0,727 | 0,659 | 1         | 1,61500178    | 0,619194364     | 1,103186646     |
| EVA1B                                                                              | 0,132145609 | 0,690228852 | 0,094 | 0,024 | 1         | 1,61353945    | 0,619755532     | 3,916666667     |
| CYFIP1                                                                             | 0,110199181 | 0,689481163 | 0,059 | 0     | 1         | 1,612703437   | 0,620076808     | #DIV/0!         |
| IL1RAP                                                                             | 0,032613042 | 0,684994702 | 0,222 | 0,073 | 1         | 1,607696077   | 0,622008111     | 3,04109589      |
| DDX46                                                                              | 0,158020538 | 0,681756052 | 0,121 | 0,049 | 1         | 1,604091072   | 0,623406001     | 2,469387755     |
| NF1                                                                                | 0,126614201 | 0,681507702 | 0,054 | 0     | 1         | 1,603814962   | 0,623513325     | #DIV/0!         |
| HOXB7                                                                              | 0,100494766 | 0,680320164 | 0,062 | 0     | 1         | 1,602495343   | 0,624026775     | #DIV/0!         |
| TMX1                                                                               | 0,141080542 | 0,67875521  | 0,091 | 0,024 | 1         | 1,600757989   | 0,624704051     | 3,791666667     |
| RNF181                                                                             | 0,12237192  | 0,678469488 | 0,097 | 0,024 | 1         | 1,600440994   | 0,624827784     | 4,041666667     |
| TMEM47                                                                             | 0,140417978 | 0,678018824 | 0,156 | 0,073 | 1         | 1,599941132   | 0,625022996     | 2,136986301     |
| UFM1                                                                               | 0,066801754 | 0,677027427 | 0,161 | 0,049 | 1         | 1,598842056   | 0,625452649     | 3,285714286     |
| NEDD8                                                                              | 0,080741086 | 0,676893408 | 0,317 | 0,195 | 1         | 1,598693539   | 0,625510754     | 1,625641026     |
| CCDC6                                                                              | 0,100494766 | 0,676300226 | 0,062 | 0     | 1         | 1,59803635    | 0,625767993     | #DIV/0!         |
| COX17                                                                              | 0,178883699 | 0,675276906 | 0,26  | 0,171 | 1         | 1,596903247   | 0,626212015     | 1,520467836     |
| SNRPA1                                                                             | 0,277470194 | 0,67422106  | 0,065 | 0,024 | 1         | 1,59573497    | 0,62667048      | 2,708333333     |
| UBE2G2                                                                             | 0,149513217 | 0,674189139 | 0,089 | 0,024 | 1         | 1,595699664   | 0,626684346     | 3,708333333     |
| IL11                                                                               | 0,120876633 | 0,674153677 | 0,056 | 0     | 1         | 1,595660442   | 0,62669975      | #DIV/0!         |
| VMP1                                                                               | 0,378026594 | 0,673874876 | 0,19  | 0,146 | 1         | 1,59535211    | 0,626820872     | 1,301369863     |
| PHB2                                                                               | 0,271118559 | 0,672908966 | 0,097 | 0,049 | 1         | 1,59428435    | 0,62724068      | 1,979591837     |
| RHEB                                                                               | 0,161068605 | 0,672741218 | 0,152 | 0,073 | 1         | 1,594098988   | 0,627313616     | 2,082191781     |
| GASK1B                                                                             | 0,16517844  | 0,67273823  | 0,086 | 0,024 | 1         | 1,594095686   | 0,627314915     | 3,583333333     |
| MRPL51                                                                             | 0,05943798  | 0,672227907 | 0,287 | 0,146 | 1         | 1,593531908   | 0,627536854     | 1,965753425     |
| CHPF                                                                               | 0,211967748 | 0,67219846  | 0,075 | 0,024 | 1         | 1,593499383   | 0,627549663     | 3,125           |
| RASSF4                                                                             | 0,210671427 | 0,671183417 | 0,195 | 0,122 | 1         | 1,592378632   | 0,627991346     | 1,598360656     |
| TP53I3                                                                             | 0,396802126 | 0,670997677 | 0,083 | 0,049 | 1         | 1,592173634   | 0,628072202     | 1,693877551     |
| PALLD                                                                              | 0,460062362 | 0,670984096 | 0,155 | 0,122 | 1         | 1,592158646   | 0,628078114     | 1,270491803     |
| CNN2                                                                               | 0,095976714 | 0,670666498 | 0,064 | 0     | 1         | 1,591808183   | 0,628216396     | #DIV/0!         |

Supplementary Table 3

| Differentially expressed genes_keloid-MD_ comparing SC-Keloid vs. (SC-Myel+Nonmyel) |             |             |       |       |           |               |                 |                 |
|-------------------------------------------------------------------------------------|-------------|-------------|-------|-------|-----------|---------------|-----------------|-----------------|
| gene                                                                                | p_val       | avg_log2FC  | pct.1 | pct.2 | p_val_adj | Foldchange_UP | Foldchange_DOWN | Ratio_pct1_pct2 |
| ATXN2                                                                               | 0,225009538 | 0,668227441 | 0,073 | 0,024 | 1         | 1,589119305   | 0,629279373     | 3,041666667     |
| GDI2                                                                                | 0,381160023 | 0,667778086 | 0,164 | 0,122 | 1         | 1,58862442    | 0,629475405     | 1,344262295     |
| BAZ1A                                                                               | 0,09166642  | 0,667385812 | 0,065 | 0     | 1         | 1,588192527   | 0,629646585     | #DIV/0!         |
| PDZD11                                                                              | 0,087553531 | 0,666161381 | 0,067 | 0     | 1         | 1,586845182   | 0,630181199     | #DIV/0!         |
| PSMA5                                                                               | 0,11789216  | 0,66608036  | 0,191 | 0,098 | 1         | 1,586756068   | 0,630216591     | 1,948979592     |
| BACH1                                                                               | 0,31708468  | 0,666057604 | 0,174 | 0,122 | 1         | 1,58673104    | 0,630226532     | 1,426229508     |
| THRAP3                                                                              | 0,043647766 | 0,666033016 | 0,175 | 0,049 | 1         | 1,586703997   | 0,630237273     | 3,571428571     |
| TTC3                                                                                | 0,070572067 | 0,665161998 | 0,27  | 0,146 | 1         | 1,585746324   | 0,630617889     | 1,849315068     |
| NCS1                                                                                | 0,087911188 | 0,664479257 | 0,11  | 0,024 | 1         | 1,584996063   | 0,630916393     | 4,583333333     |
| POP7                                                                                | 0,083628404 | 0,663982688 | 0,069 | 0     | 1         | 1,584450609   | 0,631133589     | #DIV/0!         |
| DBNDD1                                                                              | 0,100494807 | 0,663669375 | 0,062 | 0     | 1         | 1,584106548   | 0,631270669     | #DIV/0!         |
| SLC25A13                                                                            | 0,110199158 | 0,662930238 | 0,059 | 0     | 1         | 1,58329517    | 0,631594171     | #DIV/0!         |
| MT-ND6                                                                              | 0,300156101 | 0,662000502 | 0,064 | 0,024 | 1         | 1,582275153   | 0,632001329     | 2,666666667     |
| PRPS2                                                                               | 0,120876633 | 0,661737597 | 0,056 | 0     | 1         | 1,581986839   | 0,63211651      | #DIV/0!         |
| ZYX                                                                                 | 0,154117216 | 0,660831129 | 0,088 | 0,024 | 1         | 1,580993164   | 0,632513804     | 3,666666667     |
| ARPC4                                                                               | 0,39424641  | 0,660596771 | 0,11  | 0,073 | 1         | 1,58073636    | 0,632616561     | 1,506849315     |
| DUSP10                                                                              | 0,145609774 | 0,660527718 | 0,049 | 0     | 1         | 1,580660702   | 0,632646841     | #DIV/0!         |
| CDC123                                                                              | 0,083628404 | 0,660443801 | 0,069 | 0     | 1         | 1,580568762   | 0,632683641     | #DIV/0!         |
| SRRM1                                                                               | 0,305158683 | 0,660089297 | 0,201 | 0,146 | 1         | 1,580180428   | 0,632839125     | 1,376712329     |
| KLC1                                                                                | 0,156136374 | 0,659148731 | 0,088 | 0,024 | 1         | 1,579150564   | 0,63325184      | 3,666666667     |
| EXOC5                                                                               | 0,126614227 | 0,658578532 | 0,054 | 0     | 1         | 1,578526556   | 0,633502171     | #DIV/0!         |
| MLF1                                                                                | 0,264689479 | 0,657686721 | 0,067 | 0,024 | 1         | 1,577551082   | 0,633893895     | 2,791666667     |
| ARCN1                                                                               | 0,151125841 | 0,655975993 | 0,088 | 0,024 | 1         | 1,575681552   | 0,634646004     | 3,666666667     |
| BIRC2                                                                               | 0,289985518 | 0,655236175 | 0,094 | 0,049 | 1         | 1,574873745   | 0,634971536     | 1,918367347     |
| CDC26                                                                               | 0,226944183 | 0,654927016 | 0,107 | 0,049 | 1         | 1,574536298   | 0,63510762      | 2,183673469     |
| CBX5                                                                                | 0,219311692 | 0,654707679 | 0,268 | 0,195 | 1         | 1,574296935   | 0,635204184     | 1,374358974     |
| SELENON                                                                             | 0,180028006 | 0,654411894 | 0,115 | 0,049 | 1         | 1,573974202   | 0,635334429     | 2,346938776     |
| WDR11                                                                               | 0,126614253 | 0,653878673 | 0,054 | 0     | 1         | 1,573392566   | 0,635569292     | #DIV/0!         |
| RHOC                                                                                | 0,306593887 | 0,652930395 | 0,222 | 0,171 | 1         | 1,572358722   | 0,635987187     | 1,298245614     |
| CBFB                                                                                | 0,07383279  | 0,652258936 | 0,118 | 0,024 | 1         | 1,571627084   | 0,636283257     | 4,916666667     |

Supplementary Table 3

| Differentially expressed genes_keloid-MD_ comparing SC-Keloid vs. (SC-Myel+Nonmyel) |             |             |       |       |           |               |                 |                 |
|-------------------------------------------------------------------------------------|-------------|-------------|-------|-------|-----------|---------------|-----------------|-----------------|
| gene                                                                                | p_val       | avg_log2FC  | pct.1 | pct.2 | p_val_adj | Foldchange_UP | Foldchange_DOWN | Ratio_pct1_pct2 |
| RPL36A                                                                              | 0,250781094 | 0,651674532 | 0,1   | 0,049 | 1         | 1,570990582   | 0,636541053     | 2,040816327     |
| TPM3                                                                                | 0,338798681 | 0,651018175 | 0,282 | 0,244 | 1         | 1,57027602    | 0,636830715     | 1,155737705     |
| GNG7                                                                                | 0,200308816 | 0,649560092 | 0,078 | 0,024 | 1         | 1,568689797   | 0,637474663     | 3,25            |
| LINC00511                                                                           | 0,163767782 | 0,647945966 | 0,085 | 0,024 | 1         | 1,566935685   | 0,638188286     | 3,541666667     |
| PFKFB4                                                                              | 0,145609743 | 0,646562952 | 0,049 | 0     | 1         | 1,56543429    | 0,638800368     | #DIV/0!         |
| SLC4A7                                                                              | 0,152594689 | 0,643927648 | 0,048 | 0     | 1         | 1,562577395   | 0,639968301     | #DIV/0!         |
| COX7A2                                                                              | 0,024322344 | 0,6434674   | 0,592 | 0,463 | 1         | 1,562078981   | 0,640172496     | 1,278617711     |
| RAB1B                                                                               | 0,186913784 | 0,642411479 | 0,081 | 0,024 | 1         | 1,5609361     | 0,640641215     | 3,375           |
| ADAM19                                                                              | 0,188127171 | 0,64113318  | 0,115 | 0,049 | 1         | 1,559553646   | 0,641209107     | 2,346938776     |
| SH3BGRL                                                                             | 0,47228077  | 0,640627239 | 0,175 | 0,146 | 1         | 1,559006819   | 0,641434013     | 1,198630137     |
| SEC61G                                                                              | 0,135712796 | 0,64055818  | 0,512 | 0,439 | 1         | 1,558932195   | 0,641464718     | 1,166287016     |
| DNM1                                                                                | 0,3868575   | 0,640398177 | 0,054 | 0,024 | 1         | 1,55875931    | 0,641535864     | 2,25            |
| MRPL32                                                                              | 0,105231719 | 0,6395302   | 0,061 | 0     | 1         | 1,557821787   | 0,64192195      | #DIV/0!         |
| PSMG3                                                                               | 0,206216258 | 0,63869299  | 0,077 | 0,024 | 1         | 1,556918029   | 0,642294572     | 3,208333333     |
| N4BP2L2                                                                             | 0,269802583 | 0,638058198 | 0,209 | 0,146 | 1         | 1,55623313    | 0,642577247     | 1,431506849     |
| FLNA                                                                                | 0,104334177 | 0,63723843  | 0,348 | 0,22  | 1         | 1,555349099   | 0,642942476     | 1,581818182     |
| UBAP2L                                                                              | 0,110199181 | 0,637158388 | 0,059 | 0     | 1         | 1,555262809   | 0,642978148     | #DIV/0!         |
| PLRG1                                                                               | 0,120876608 | 0,636459804 | 0,056 | 0     | 1         | 1,5545099     | 0,643289567     | #DIV/0!         |
| CPEB4                                                                               | 0,152594656 | 0,635442474 | 0,048 | 0     | 1         | 1,553414108   | 0,643743349     | #DIV/0!         |
| PPP1CC                                                                              | 0,222856836 | 0,634995753 | 0,073 | 0,024 | 1         | 1,552933178   | 0,643942711     | 3,041666667     |
| A1BG                                                                                | 0,550559037 | 0,633873169 | 0,144 | 0,122 | 1         | 1,551725286   | 0,644443967     | 1,180327869     |
| GTF2B                                                                               | 0,319769465 | 0,633156083 | 0,061 | 0,024 | 1         | 1,550954199   | 0,644764365     | 2,541666667     |
| USP7                                                                                | 0,126614253 | 0,632225922 | 0,054 | 0     | 1         | 1,549954561   | 0,645180204     | #DIV/0!         |
| RSRC1                                                                               | 0,243228791 | 0,631642239 | 0,07  | 0,024 | 1         | 1,54932761    | 0,645441283     | 2,916666667     |
| PPP2R3C                                                                             | 0,095976694 | 0,631383183 | 0,064 | 0     | 1         | 1,549049432   | 0,645557191     | #DIV/0!         |
| RSU1                                                                                | 0,27230422  | 0,631275136 | 0,129 | 0,073 | 1         | 1,548933424   | 0,64560554      | 1,767123288     |
| ZMAT3                                                                               | 0,340557082 | 0,630972361 | 0,059 | 0,024 | 1         | 1,548608388   | 0,645741046     | 2,458333333     |
| TNC                                                                                 | 0,069611224 | 0,629675233 | 0,565 | 0,463 | 1         | 1,547216658   | 0,646321893     | 1,220302376     |
| SECISBP2                                                                            | 0,132637849 | 0,629553781 | 0,053 | 0     | 1         | 1,547086413   | 0,646376306     | #DIV/0!         |
| PSMG1                                                                               | 0,132637821 | 0,629333261 | 0,053 | 0     | 1         | 1,546849955   | 0,646475113     | #DIV/0!         |

Supplementary Table 3

| Differentially expressed genes_keloid-MD_comparing SC-Keloid vs. (SC-Myel+Nonmyel) |             |             |       |       |           |               |                 |                 |
|------------------------------------------------------------------------------------|-------------|-------------|-------|-------|-----------|---------------|-----------------|-----------------|
| gene                                                                               | p_val       | avg_log2FC  | pct.1 | pct.2 | p_val_adj | Foldchange_UP | Foldchange_DOWN | Ratio_pct1_pct2 |
| AQP1                                                                               | 0,527910438 | 0,628179562 | 0,147 | 0,122 | 1         | 1,545613459   | 0,646992296     | 1,204918033     |
| CMC1                                                                               | 0,147333764 | 0,627720396 | 0,126 | 0,049 | 1         | 1,545121615   | 0,647198247     | 2,571428571     |
| EMP1                                                                               | 0,296476365 | 0,626438605 | 0,319 | 0,268 | 1         | 1,543749431   | 0,647773518     | 1,190298507     |
| DYNLT2B                                                                            | 0,132637849 | 0,626132383 | 0,053 | 0     | 1         | 1,543421794   | 0,647911027     | #DIV/0!         |
| PCSK7                                                                              | 0,252512104 | 0,62582476  | 0,069 | 0,024 | 1         | 1,543092728   | 0,648049195     | 2,875           |
| MARCKSL1                                                                           | 0,199685074 | 0,624729474 | 0,144 | 0,073 | 1         | 1,541921666   | 0,648541377     | 1,97260274      |
| ADAM9                                                                              | 0,145609774 | 0,624518902 | 0,049 | 0     | 1         | 1,541696628   | 0,648636043     | #DIV/0!         |
| DHX36                                                                              | 0,394057722 | 0,624143704 | 0,137 | 0,098 | 1         | 1,541295735   | 0,648804754     | 1,397959184     |
| ADGRL4                                                                             | 0,105231719 | 0,623083951 | 0,061 | 0     | 1         | 1,540163969   | 0,649281518     | #DIV/0!         |
| PIAS2                                                                              | 0,159939023 | 0,622808448 | 0,046 | 0     | 1         | 1,53986988    | 0,64940552      | #DIV/0!         |
| SMAD5                                                                              | 0,276324689 | 0,622598058 | 0,099 | 0,049 | 1         | 1,539645336   | 0,64950023      | 2,020408163     |
| YWHAE                                                                              | 0,05090204  | 0,621535634 | 0,502 | 0,39  | 1         | 1,538511934   | 0,649978709     | 1,287179487     |
| WSB2                                                                               | 0,353664434 | 0,621086248 | 0,088 | 0,049 | 1         | 1,538032776   | 0,650181203     | 1,795918367     |
| DNM3                                                                               | 0,126614253 | 0,621001804 | 0,054 | 0     | 1         | 1,537942754   | 0,65021926      | #DIV/0!         |
| PRTFDC1                                                                            | 0,145609774 | 0,620888569 | 0,049 | 0     | 1         | 1,537822049   | 0,650270297     | #DIV/0!         |
| TASP1                                                                              | 0,132637849 | 0,619829139 | 0,053 | 0     | 1         | 1,536693177   | 0,650747992     | #DIV/0!         |
| AKAP11                                                                             | 0,159939023 | 0,619772405 | 0,046 | 0     | 1         | 1,536632748   | 0,650773584     | #DIV/0!         |
| EMC2                                                                               | 0,445001242 | 0,619620363 | 0,078 | 0,049 | 1         | 1,536470814   | 0,650842171     | 1,591836735     |
| UQCRH                                                                              | 0,039008758 | 0,618913748 | 0,381 | 0,195 | 1         | 1,535718454   | 0,651161023     | 1,953846154     |
| CKLF                                                                               | 0,390295542 | 0,618011866 | 0,112 | 0,073 | 1         | 1,534758719   | 0,651568215     | 1,534246575     |
| H1-2                                                                               | 0,152594689 | 0,617979413 | 0,048 | 0     | 1         | 1,534724195   | 0,651582873     | #DIV/0!         |
| MRPL18                                                                             | 0,279821258 | 0,617683499 | 0,097 | 0,049 | 1         | 1,534409438   | 0,651716534     | 1,979591837     |
| LRP1                                                                               | 0,503431883 | 0,615643859 | 0,126 | 0,098 | 1         | 1,532241668   | 0,652638563     | 1,285714286     |
| JPT1                                                                               | 0,175544951 | 0,614895435 | 0,083 | 0,024 | 1         | 1,531446995   | 0,652977219     | 3,458333333     |
| ATP1B3                                                                             | 0,20621628  | 0,614669079 | 0,077 | 0,024 | 1         | 1,531206733   | 0,653079678     | 3,208333333     |
| STK32B                                                                             | 0,115409701 | 0,614569424 | 0,057 | 0     | 1         | 1,531100968   | 0,653124791     | #DIV/0!         |
| EEF1E1                                                                             | 0,376189758 | 0,614232571 | 0,085 | 0,049 | 1         | 1,530743515   | 0,653277306     | 1,734693878     |
| DDX42                                                                              | 0,335311806 | 0,614151347 | 0,059 | 0,024 | 1         | 1,530657336   | 0,653314087     | 2,458333333     |
| PRPF38A                                                                            | 0,167664901 | 0,614038116 | 0,045 | 0     | 1         | 1,530537206   | 0,653365365     | #DIV/0!         |
| PFDN4                                                                              | 0,270592529 | 0,612895269 | 0,099 | 0,049 | 1         | 1,529325254   | 0,65388314      | 2,020408163     |

Supplementary Table 3

| Differentially expressed genes_keloid-MD_comparing SC-Keloid vs. (SC-Myel+Nonmyel) |             |             |       |       |           |               |                 |                 |
|------------------------------------------------------------------------------------|-------------|-------------|-------|-------|-----------|---------------|-----------------|-----------------|
| gene                                                                               | p_val       | avg_log2FC  | pct.1 | pct.2 | p_val_adj | Foldchange_UP | Foldchange_DOWN | Ratio_pct1_pct2 |
| KIF1B                                                                              | 0,181295579 | 0,612324338 | 0,083 | 0,024 | 1         | 1,528720159   | 0,654141959     | 3,458333333     |
| CDC42SE1                                                                           | 0,178162579 | 0,612248204 | 0,179 | 0,098 | 1         | 1,528639488   | 0,65417648      | 1,826530612     |
| SCOC                                                                               | 0,195658185 | 0,611662737 | 0,113 | 0,049 | 1         | 1,52801927    | 0,654442009     | 2,306122449     |
| PSMB4                                                                              | 0,430648459 | 0,611325085 | 0,134 | 0,098 | 1         | 1,52766169    | 0,654595194     | 1,367346939     |
| LRRCS9                                                                             | 0,095976714 | 0,610770887 | 0,064 | 0     | 1         | 1,527074965   | 0,654846699     | #DIV/0!         |
| MAP3K2                                                                             | 0,209321042 | 0,610605275 | 0,11  | 0,049 | 1         | 1,526899677   | 0,654921875     | 2,244897959     |
| MTX2                                                                               | 0,152594689 | 0,610199127 | 0,048 | 0     | 1         | 1,526469884   | 0,655106275     | #DIV/0!         |
| PPP2R1A                                                                            | 0,233559343 | 0,609465774 | 0,072 | 0,024 | 1         | 1,525694144   | 0,655439365     | 3               |
| PCGF3                                                                              | 0,138963816 | 0,608777667 | 0,051 | 0     | 1         | 1,524966624   | 0,655752057     | #DIV/0!         |
| TGS1                                                                               | 0,145609774 | 0,608219033 | 0,049 | 0     | 1         | 1,524376247   | 0,656006023     | #DIV/0!         |
| PLPP4                                                                              | 0,138963816 | 0,608049839 | 0,051 | 0     | 1         | 1,524197484   | 0,656082962     | #DIV/0!         |
| PRMT1                                                                              | 0,218852939 | 0,606455035 | 0,166 | 0,098 | 1         | 1,522513516   | 0,656808619     | 1,693877551     |
| GNAS                                                                               | 0,044144352 | 0,605943925 | 0,557 | 0,415 | 1         | 1,521974223   | 0,657041351     | 1,342168675     |
| GPATCH2L                                                                           | 0,132637821 | 0,605446733 | 0,053 | 0     | 1         | 1,521449799   | 0,657267825     | #DIV/0!         |
| ATF6                                                                               | 0,145609774 | 0,6052558   | 0,049 | 0     | 1         | 1,521248457   | 0,657354816     | #DIV/0!         |
| CREBZF                                                                             | 0,407079473 | 0,605077815 | 0,053 | 0,024 | 1         | 1,521060792   | 0,657435919     | 2,208333333     |
| FRG1                                                                               | 0,34466749  | 0,604805515 | 0,089 | 0,049 | 1         | 1,520773729   | 0,657560018     | 1,816326531     |
| DPM1                                                                               | 0,126614253 | 0,603943227 | 0,054 | 0     | 1         | 1,519865045   | 0,657953154     | #DIV/0!         |
| MRPS25                                                                             | 0,159939023 | 0,603266253 | 0,046 | 0     | 1         | 1,519152027   | 0,658261966     | #DIV/0!         |
| AGFG1                                                                              | 0,305932966 | 0,60174635  | 0,062 | 0,024 | 1         | 1,517552418   | 0,658955821     | 2,583333333     |
| COL4A2                                                                             | 0,051850111 | 0,601616958 | 0,577 | 0,488 | 1         | 1,517416318   | 0,659014924     | 1,182377049     |
| UBE2N                                                                              | 0,528518639 | 0,601601338 | 0,099 | 0,073 | 1         | 1,51739989    | 0,659022059     | 1,356164384     |
| FBXW5                                                                              | 0,132637849 | 0,601516922 | 0,053 | 0     | 1         | 1,517311105   | 0,659060622     | #DIV/0!         |
| TCEAL4                                                                             | 0,345411353 | 0,601220348 | 0,281 | 0,244 | 1         | 1,516999225   | 0,659196118     | 1,151639344     |
| PLGRKT                                                                             | 0,200496104 | 0,601162877 | 0,113 | 0,049 | 1         | 1,516938794   | 0,659222378     | 2,306122449     |
| MINDY2                                                                             | 0,459184296 | 0,60104357  | 0,078 | 0,049 | 1         | 1,516813353   | 0,659276897     | 1,591836735     |
| MRPL57                                                                             | 0,281465408 | 0,600699494 | 0,182 | 0,122 | 1         | 1,516451644   | 0,65943415      | 1,491803279     |
| UBA52                                                                              | 0,062107083 | 0,600094599 | 0,595 | 0,488 | 1         | 1,515815956   | 0,659710696     | 1,219262295     |
| PAFAH1B2                                                                           | 0,213314061 | 0,598168542 | 0,11  | 0,049 | 1         | 1,513793631   | 0,660592025     | 2,244897959     |
| CAMTA1                                                                             | 0,382353335 | 0,597823576 | 0,14  | 0,098 | 1         | 1,513431707   | 0,66075         | 1,428571429     |

Supplementary Table 3

| Differentially expressed genes_keloid-MD_comparing SC-Keloid vs. (SC-Myel+Nonmyel) |             |             |       |       |           |               |                 |                 |
|------------------------------------------------------------------------------------|-------------|-------------|-------|-------|-----------|---------------|-----------------|-----------------|
| gene                                                                               | p_val       | avg_log2FC  | pct.1 | pct.2 | p_val_adj | Foldchange_UP | Foldchange_DOWN | Ratio_pct1_pct2 |
| SFXN3                                                                              | 0,417378363 | 0,597477251 | 0,081 | 0,049 | 1         | 1,513068446   | 0,660908634     | 1,653061224     |
| SLC35B1                                                                            | 0,335311776 | 0,597109856 | 0,059 | 0,024 | 1         | 1,512683178   | 0,661076962     | 2,458333333     |
| RPS10                                                                              | 0,380126395 | 0,596541241 | 0,303 | 0,268 | 1         | 1,512087096   | 0,661337566     | 1,130597015     |
| DRAP1                                                                              | 0,172837688 | 0,596243848 | 0,282 | 0,195 | 1         | 1,511775431   | 0,661473907     | 1,446153846     |
| AFF4                                                                               | 0,213888886 | 0,595667771 | 0,11  | 0,049 | 1         | 1,51117189    | 0,66173809      | 2,244897959     |
| ZNF217                                                                             | 0,132637849 | 0,595237036 | 0,053 | 0     | 1         | 1,510720778   | 0,66193569      | #DIV/0!         |
| FHL2                                                                               | 0,105231697 | 0,595102569 | 0,061 | 0     | 1         | 1,510579977   | 0,661997389     | #DIV/0!         |
| DSEL                                                                               | 0,218969605 | 0,594461235 | 0,199 | 0,122 | 1         | 1,509908615   | 0,662291737     | 1,631147541     |
| PPIP5K2                                                                            | 0,159939023 | 0,594188926 | 0,046 | 0     | 1         | 1,509623646   | 0,662416757     | #DIV/0!         |
| S100A13                                                                            | 0,090488015 | 0,593891658 | 0,539 | 0,415 | 1         | 1,50931262    | 0,662553262     | 1,298795181     |
| NFE2L1                                                                             | 0,126614253 | 0,59288283  | 0,054 | 0     | 1         | 1,508257577   | 0,663016726     | #DIV/0!         |
| STX7                                                                               | 0,152594689 | 0,592022429 | 0,048 | 0     | 1         | 1,507358343   | 0,663412257     | #DIV/0!         |
| SQLE                                                                               | 0,244006085 | 0,590923748 | 0,07  | 0,024 | 1         | 1,506210855   | 0,663917669     | 2,916666667     |
| SOCS4                                                                              | 0,152594689 | 0,590570787 | 0,048 | 0     | 1         | 1,5058424     | 0,664080119     | #DIV/0!         |
| EMC6                                                                               | 0,119875675 | 0,590559414 | 0,134 | 0,049 | 1         | 1,505830529   | 0,664085354     | 2,734693878     |
| VCL                                                                                | 0,268315494 | 0,590227069 | 0,306 | 0,244 | 1         | 1,50548368    | 0,664238353     | 1,254098361     |
| MVP                                                                                | 0,175796304 | 0,58977514  | 0,043 | 0     | 1         | 1,505012156   | 0,66444646      | #DIV/0!         |
| UBA2                                                                               | 0,115409701 | 0,58936763  | 0,057 | 0     | 1         | 1,504587104   | 0,664634169     | #DIV/0!         |
| GLDC                                                                               | 0,145609774 | 0,589279979 | 0,049 | 0     | 1         | 1,504495695   | 0,66467455      | #DIV/0!         |
| TM2D3                                                                              | 0,184359294 | 0,5888628   | 0,041 | 0     | 1         | 1,504060709   | 0,66486678      | #DIV/0!         |
| SUGP2                                                                              | 0,205503946 | 0,588806827 | 0,078 | 0,024 | 1         | 1,504002356   | 0,664892575     | 3,25            |
| G3BP1                                                                              | 0,379700349 | 0,587657612 | 0,113 | 0,073 | 1         | 1,502804782   | 0,665422423     | 1,547945205     |
| PTAR1                                                                              | 0,262306507 | 0,586897002 | 0,069 | 0,024 | 1         | 1,502012691   | 0,665773336     | 2,875           |
| MRPL43                                                                             | 0,448251928 | 0,586482085 | 0,078 | 0,049 | 1         | 1,501580775   | 0,665964839     | 1,591836735     |
| RSL24D1                                                                            | 0,315238704 | 0,58604961  | 0,174 | 0,122 | 1         | 1,501130716   | 0,666164505     | 1,426229508     |
| PTMS                                                                               | 0,086167334 | 0,585663704 | 0,472 | 0,366 | 1         | 1,500729233   | 0,666342721     | 1,289617486     |
| ARF3                                                                               | 0,152594689 | 0,585158988 | 0,048 | 0     | 1         | 1,500204306   | 0,666575876     | #DIV/0!         |
| CERCAM                                                                             | 0,126614253 | 0,584869506 | 0,054 | 0     | 1         | 1,499903315   | 0,666709641     | #DIV/0!         |
| FHOD1                                                                              | 0,175796267 | 0,584305989 | 0,043 | 0     | 1         | 1,499317566   | 0,666970109     | #DIV/0!         |
| RAB8B                                                                              | 0,335061993 | 0,583286908 | 0,091 | 0,049 | 1         | 1,498258863   | 0,667441405     | 1,857142857     |



Supplementary Table 3

| Differentially expressed genes_keloid-MD_comparing SC-Keloid vs. (SC-Myel+Nonmyel) |             |             |       |       |           |               |                 |                 |
|------------------------------------------------------------------------------------|-------------|-------------|-------|-------|-----------|---------------|-----------------|-----------------|
| gene                                                                               | p_val       | avg_log2FC  | pct.1 | pct.2 | p_val_adj | Foldchange_UP | Foldchange_DOWN | Ratio_pct1_pct2 |
| POLK                                                                               | 0,446830069 | 0,582962743 | 0,049 | 0,024 | 1         | 1,497922251   | 0,667591391     | 2,041666667     |
| KPNA1                                                                              | 0,126614253 | 0,582494424 | 0,054 | 0     | 1         | 1,497436083   | 0,667808136     | #DIV/0!         |
| HSD17B12                                                                           | 0,120876633 | 0,582215904 | 0,056 | 0     | 1         | 1,497147023   | 0,667937073     | #DIV/0!         |
| PHTF2                                                                              | 0,175796304 | 0,580792191 | 0,043 | 0     | 1         | 1,495670303   | 0,668596547     | #DIV/0!         |
| PLEKHG1                                                                            | 0,298907334 | 0,580269586 | 0,096 | 0,049 | 1         | 1,495128606   | 0,668838785     | 1,959183673     |
| TARS1                                                                              | 0,279949012 | 0,579268826 | 0,099 | 0,049 | 1         | 1,494091834   | 0,669302902     | 2,020408163     |
| FAM98A                                                                             | 0,281885742 | 0,577669954 | 0,065 | 0,024 | 1         | 1,492436919   | 0,67004507      | 2,708333333     |
| IFT22                                                                              | 0,132637849 | 0,577237861 | 0,053 | 0     | 1         | 1,491989994   | 0,670245782     | #DIV/0!         |
| SCARA3                                                                             | 0,46896141  | 0,577123402 | 0,048 | 0,024 | 1         | 1,49187163    | 0,670298959     | 2               |
| TDG                                                                                | 0,132637849 | 0,576820795 | 0,053 | 0     | 1         | 1,491558741   | 0,670439569     | #DIV/0!         |
| OPTN                                                                               | 0,179555918 | 0,575650497 | 0,083 | 0,024 | 1         | 1,490349296   | 0,670983643     | 3,458333333     |
| GIPC1                                                                              | 0,1747279   | 0,574695339 | 0,085 | 0,024 | 1         | 1,489362914   | 0,671428025     | 3,541666667     |
| PSENN                                                                              | 0,175289942 | 0,574629421 | 0,085 | 0,024 | 1         | 1,489294865   | 0,671458704     | 3,541666667     |
| HLA-B                                                                              | 0,035371625 | 0,574609226 | 0,541 | 0,366 | 1         | 1,489274018   | 0,671468103     | 1,478142077     |
| ANO6                                                                               | 0,159717944 | 0,574532648 | 0,088 | 0,024 | 1         | 1,489194969   | 0,671503746     | 3,666666667     |
| BCAP29                                                                             | 0,140092788 | 0,574148775 | 0,161 | 0,073 | 1         | 1,488798776   | 0,671682444     | 2,205479452     |
| ARHGDI                                                                             | 0,398765836 | 0,57335744  | 0,163 | 0,122 | 1         | 1,487982377   | 0,67205097      | 1,336065574     |
| AK2                                                                                | 0,138963787 | 0,573242964 | 0,051 | 0     | 1         | 1,487864312   | 0,672104299     | #DIV/0!         |
| SMC3                                                                               | 0,226336653 | 0,573049415 | 0,107 | 0,049 | 1         | 1,487664717   | 0,672194473     | 2,183673469     |
| ZBED5                                                                              | 0,574546332 | 0,572881874 | 0,069 | 0,049 | 1         | 1,487491964   | 0,672272539     | 1,408163265     |
| SH3KBP1                                                                            | 0,237224249 | 0,57233334  | 0,105 | 0,049 | 1         | 1,486926505   | 0,672528196     | 2,142857143     |
| SMC4                                                                               | 0,145609774 | 0,572014832 | 0,049 | 0     | 1         | 1,486598268   | 0,672676688     | #DIV/0!         |
| SDHAF3                                                                             | 0,304974331 | 0,571874108 | 0,062 | 0,024 | 1         | 1,486453268   | 0,672742306     | 2,583333333     |
| UGGT2                                                                              | 0,145609774 | 0,571073399 | 0,049 | 0     | 1         | 1,485628502   | 0,673115788     | #DIV/0!         |
| MYL9                                                                               | 0,137366474 | 0,570919221 | 0,389 | 0,293 | 1         | 1,485469744   | 0,673187727     | 1,327645051     |
| KNOP1                                                                              | 0,369947755 | 0,570663239 | 0,056 | 0,024 | 1         | 1,485206196   | 0,673307183     | 2,333333333     |
| ANAPC5                                                                             | 0,379700333 | 0,569506573 | 0,113 | 0,073 | 1         | 1,484015924   | 0,673847217     | 1,547945205     |
| PAPSS1                                                                             | 0,175796304 | 0,569363067 | 0,043 | 0     | 1         | 1,483868315   | 0,673914248     | #DIV/0!         |
| CSNK1G3                                                                            | 0,167664901 | 0,568782798 | 0,045 | 0     | 1         | 1,483271606   | 0,674185359     | #DIV/0!         |
| LIN7C                                                                              | 0,446830036 | 0,568758474 | 0,049 | 0,024 | 1         | 1,483246598   | 0,674196726     | 2,041666667     |

Supplementary Table 3

| Differentially expressed genes_keloid-MD_comparing SC-Keloid vs. (SC-Myel+Nonmyel) |             |             |       |       |           |               |                 |                 |
|------------------------------------------------------------------------------------|-------------|-------------|-------|-------|-----------|---------------|-----------------|-----------------|
| gene                                                                               | p_val       | avg_log2FC  | pct.1 | pct.2 | p_val_adj | Foldchange_UP | Foldchange_DOWN | Ratio_pct1_pct2 |
| HLA-A                                                                              | 0,122597131 | 0,568534438 | 0,451 | 0,366 | 1         | 1,483016283   | 0,67430143      | 1,232240437     |
| ARL13B                                                                             | 0,152594689 | 0,567214519 | 0,048 | 0     | 1         | 1,481660095   | 0,674918629     | #DIV/0!         |
| MPV17                                                                              | 0,159938989 | 0,567210862 | 0,046 | 0     | 1         | 1,481656339   | 0,67492034      | #DIV/0!         |
| PKM                                                                                | 0,385214642 | 0,567108761 | 0,191 | 0,146 | 1         | 1,481551484   | 0,674968107     | 1,308219178     |
| NHLRC2                                                                             | 0,184359294 | 0,566318336 | 0,041 | 0     | 1         | 1,480739993   | 0,67533801      | #DIV/0!         |
| ZNF451                                                                             | 0,175796304 | 0,566106243 | 0,043 | 0     | 1         | 1,480522323   | 0,6754373       | #DIV/0!         |
| CFAP20                                                                             | 0,126614253 | 0,565305721 | 0,054 | 0     | 1         | 1,479701039   | 0,67581219      | #DIV/0!         |
| FAM118A                                                                            | 0,167664901 | 0,563802435 | 0,045 | 0     | 1         | 1,478159996   | 0,676516752     | #DIV/0!         |
| AP3B1                                                                              | 0,368809289 | 0,5627482   | 0,056 | 0,024 | 1         | 1,477080239   | 0,677011291     | 2,333333333     |
| AGRN                                                                               | 0,436909149 | 0,562087762 | 0,134 | 0,098 | 1         | 1,476404216   | 0,677321285     | 1,367346939     |
| GBP1                                                                               | 0,159939023 | 0,561968418 | 0,046 | 0     | 1         | 1,476282089   | 0,677377317     | #DIV/0!         |
| HMGXB3                                                                             | 0,145609743 | 0,561943018 | 0,049 | 0     | 1         | 1,476256097   | 0,677389243     | #DIV/0!         |
| PTPRJ                                                                              | 0,175796304 | 0,561725239 | 0,043 | 0     | 1         | 1,476033269   | 0,677491504     | #DIV/0!         |
| CHD9                                                                               | 0,272029571 | 0,56145811  | 0,185 | 0,122 | 1         | 1,475759992   | 0,67761696      | 1,516393443     |
| RBM3                                                                               | 0,136621547 | 0,561402038 | 0,349 | 0,244 | 1         | 1,475702637   | 0,677643297     | 1,430327869     |
| ITPK1                                                                              | 0,299293423 | 0,560787163 | 0,096 | 0,049 | 1         | 1,475073827   | 0,67793217      | 1,959183673     |
| RRP7A                                                                              | 0,138963816 | 0,559979269 | 0,051 | 0     | 1         | 1,474248033   | 0,678311911     | #DIV/0!         |
| COX6C                                                                              | 0,152293112 | 0,559478723 | 0,614 | 0,585 | 1         | 1,473736628   | 0,678547293     | 1,04957265      |
| MAPK1IP1L                                                                          | 0,37337614  | 0,559283437 | 0,056 | 0,024 | 1         | 1,473537154   | 0,678639149     | 2,333333333     |
| COL5A3                                                                             | 0,331971455 | 0,558658731 | 0,255 | 0,195 | 1         | 1,472899231   | 0,678933072     | 1,307692308     |
| RICTOR                                                                             | 0,212935447 | 0,557108822 | 0,037 | 0     | 1         | 1,471317723   | 0,679662852     | #DIV/0!         |
| NAP1L1                                                                             | 0,170327079 | 0,557051422 | 0,284 | 0,195 | 1         | 1,471259185   | 0,679689894     | 1,456410256     |
| PTBP1                                                                              | 0,218180253 | 0,556966079 | 0,075 | 0,024 | 1         | 1,471172155   | 0,679730103     | 3,125           |
| FN1                                                                                | 0,202080975 | 0,556925735 | 0,593 | 0,537 | 1         | 1,471131016   | 0,679749111     | 1,104283054     |
| AEBP2                                                                              | 0,425810682 | 0,556097408 | 0,051 | 0,024 | 1         | 1,470286604   | 0,680139503     | 2,125           |
| PAXX                                                                               | 0,386857532 | 0,555699008 | 0,054 | 0,024 | 1         | 1,469880641   | 0,680327349     | 2,25            |
| SMU1                                                                               | 0,268918195 | 0,555686031 | 0,067 | 0,024 | 1         | 1,469867419   | 0,680333469     | 2,791666667     |
| U2AF2                                                                              | 0,516839263 | 0,555275198 | 0,045 | 0,024 | 1         | 1,469448908   | 0,680527234     | 1,875           |
| EMILIN1                                                                            | 0,167664901 | 0,554795245 | 0,045 | 0     | 1         | 1,468960136   | 0,680753668     | #DIV/0!         |
| GNL3                                                                               | 0,335311837 | 0,554498533 | 0,059 | 0,024 | 1         | 1,468658053   | 0,680893689     | 2,458333333     |

Supplementary Table 3

| Differentially expressed genes_keloid-MD_comparing SC-Keloid vs. (SC-Myel+Nonmyel) |             |             |       |       |           |               |                 |                 |
|------------------------------------------------------------------------------------|-------------|-------------|-------|-------|-----------|---------------|-----------------|-----------------|
| gene                                                                               | p_val       | avg_log2FC  | pct.1 | pct.2 | p_val_adj | Foldchange_UP | Foldchange_DOWN | Ratio_pct1_pct2 |
| SCARB2                                                                             | 0,255317507 | 0,554190423 | 0,287 | 0,22  | 1         | 1,468344432   | 0,68103912      | 1,304545455     |
| NDUFS5                                                                             | 0,042314917 | 0,553470772 | 0,547 | 0,415 | 1         | 1,467612169   | 0,681378924     | 1,318072289     |
| WDR43                                                                              | 0,226452941 | 0,553275691 | 0,073 | 0,024 | 1         | 1,467413732   | 0,681471066     | 3,041666667     |
| SKIL                                                                               | 0,330436148 | 0,553268805 | 0,15  | 0,098 | 1         | 1,467406728   | 0,681474319     | 1,530612245     |
| SF3B2                                                                              | 0,618110704 | 0,552458849 | 0,091 | 0,073 | 1         | 1,46658313    | 0,681857018     | 1,246575342     |
| GNB4                                                                               | 0,431490231 | 0,552269503 | 0,08  | 0,049 | 1         | 1,466390661   | 0,681946515     | 1,632653061     |
| C5orf15                                                                            | 0,34993221  | 0,552085956 | 0,089 | 0,049 | 1         | 1,466204112   | 0,68203328      | 1,816326531     |
| PIH1D1                                                                             | 0,340557052 | 0,552078183 | 0,059 | 0,024 | 1         | 1,466196212   | 0,682036955     | 2,458333333     |
| SHROOM4                                                                            | 0,184359294 | 0,551948377 | 0,041 | 0     | 1         | 1,466064297   | 0,682098324     | #DIV/0!         |
| PPP2R2D                                                                            | 0,159938989 | 0,551717085 | 0,046 | 0     | 1         | 1,465829277   | 0,682207686     | #DIV/0!         |
| CASD1                                                                              | 0,409565984 | 0,551563895 | 0,053 | 0,024 | 1         | 1,465673639   | 0,682280129     | 2,208333333     |
| RARA                                                                               | 0,448179788 | 0,550743638 | 0,049 | 0,024 | 1         | 1,464840554   | 0,682668156     | 2,041666667     |
| REEP3                                                                              | 0,317890286 | 0,549380129 | 0,152 | 0,098 | 1         | 1,463456769   | 0,683313659     | 1,551020408     |
| SMARCC2                                                                            | 0,175796304 | 0,549036836 | 0,043 | 0     | 1         | 1,463108577   | 0,683476275     | #DIV/0!         |
| TMEM223                                                                            | 0,175796304 | 0,548923838 | 0,043 | 0     | 1         | 1,462993985   | 0,683529809     | #DIV/0!         |
| ATP5MK                                                                             | 0,182214746 | 0,548816358 | 0,359 | 0,268 | 1         | 1,462884997   | 0,683580734     | 1,339552239     |
| AAK1                                                                               | 0,309787554 | 0,548545842 | 0,062 | 0,024 | 1         | 1,462610721   | 0,683708922     | 2,583333333     |
| FAM177A1                                                                           | 0,326740079 | 0,54847987  | 0,15  | 0,098 | 1         | 1,462543839   | 0,683740188     | 1,530612245     |
| GNA12                                                                              | 0,167664901 | 0,548432828 | 0,045 | 0     | 1         | 1,462496152   | 0,683762483     | #DIV/0!         |
| ZFC3H1                                                                             | 0,175796267 | 0,548358145 | 0,043 | 0     | 1         | 1,462420446   | 0,68379788      | #DIV/0!         |
| SPRYD7                                                                             | 0,293647206 | 0,547555643 | 0,064 | 0,024 | 1         | 1,461607197   | 0,68417835      | 2,666666667     |
| TMED2                                                                              | 0,423409558 | 0,546965096 | 0,136 | 0,098 | 1         | 1,461009031   | 0,684458466     | 1,387755102     |
| MAN2A1                                                                             | 0,322778256 | 0,546164543 | 0,061 | 0,024 | 1         | 1,46019854    | 0,684838378     | 2,541666667     |
| PSMA4                                                                              | 0,135819617 | 0,545573709 | 0,301 | 0,195 | 1         | 1,459600661   | 0,6851189       | 1,543589744     |
| TNFAIP3                                                                            | 0,295497189 | 0,544908524 | 0,064 | 0,024 | 1         | 1,458927836   | 0,685434862     | 2,666666667     |
| DBNL                                                                               | 0,225730428 | 0,544592766 | 0,073 | 0,024 | 1         | 1,45860856    | 0,685584897     | 3,041666667     |
| ATP5F1E                                                                            | 0,007606393 | 0,54269165  | 0,815 | 0,707 | 1         | 1,45668774    | 0,686488924     | 1,152758133     |
| CTNNA1                                                                             | 0,363044837 | 0,542362538 | 0,303 | 0,268 | 1         | 1,456355474   | 0,686645546     | 1,130597015     |
| PPP2R5E                                                                            | 0,132637821 | 0,541528589 | 0,053 | 0     | 1         | 1,455513871   | 0,687042576     | #DIV/0!         |
| KLF5                                                                               | 0,132637849 | 0,54147563  | 0,053 | 0     | 1         | 1,455460443   | 0,687067797     | #DIV/0!         |

Supplementary Table 3

| Differentially expressed genes_keloid-MD_ comparing SC-Keloid vs. (SC-Myel+Nonmyel) |             |             |       |       |           |               |                 |                 |
|-------------------------------------------------------------------------------------|-------------|-------------|-------|-------|-----------|---------------|-----------------|-----------------|
| gene                                                                                | p_val       | avg_log2FC  | pct.1 | pct.2 | p_val_adj | Foldchange_UP | Foldchange_DOWN | Ratio_pct1_pct2 |
| CCT8                                                                                | 0,459392286 | 0,54045372  | 0,132 | 0,098 | 1         | 1,454429856   | 0,687554643     | 1,346938776     |
| SCFD1                                                                               | 0,223811431 | 0,539448015 | 0,075 | 0,024 | 1         | 1,453416324   | 0,688034105     | 3,125           |
| EXOSC10                                                                             | 0,425810682 | 0,539327478 | 0,051 | 0,024 | 1         | 1,453294896   | 0,688091593     | 2,125           |
| DNAJC15                                                                             | 0,135220251 | 0,538945119 | 0,308 | 0,195 | 1         | 1,452909779   | 0,688273983     | 1,579487179     |
| RABGGTB                                                                             | 0,46896141  | 0,538810622 | 0,048 | 0,024 | 1         | 1,452774336   | 0,688338151     | 2               |
| ITGB5                                                                               | 0,568724929 | 0,538636374 | 0,07  | 0,049 | 1         | 1,452598881   | 0,688421293     | 1,428571429     |
| CLOCK                                                                               | 0,184359294 | 0,538448655 | 0,041 | 0     | 1         | 1,452409885   | 0,688510874     | #DIV/0!         |
| TNIP1                                                                               | 0,159938989 | 0,538220876 | 0,046 | 0     | 1         | 1,452180591   | 0,688619588     | #DIV/0!         |
| FUNDC2                                                                              | 0,233768921 | 0,537419984 | 0,073 | 0,024 | 1         | 1,451374657   | 0,689001971     | 3,041666667     |
| ACTR2                                                                               | 0,158997262 | 0,537144992 | 0,246 | 0,146 | 1         | 1,451098037   | 0,689133315     | 1,684931507     |
| TUBB                                                                                | 0,311843915 | 0,537091385 | 0,34  | 0,293 | 1         | 1,451044119   | 0,689158921     | 1,160409556     |
| HSP90B1                                                                             | 0,035475592 | 0,536158578 | 0,62  | 0,488 | 1         | 1,450106217   | 0,689604657     | 1,270491803     |
| TIA1                                                                                | 0,302974919 | 0,536117335 | 0,064 | 0,024 | 1         | 1,450064762   | 0,689624371     | 2,666666667     |
| STAG2                                                                               | 0,160234696 | 0,534993998 | 0,088 | 0,024 | 1         | 1,448936127   | 0,690161548     | 3,666666667     |
| ASNSD1                                                                              | 0,254269863 | 0,534659477 | 0,07  | 0,024 | 1         | 1,448600198   | 0,690321596     | 2,916666667     |
| SH3YL1                                                                              | 0,650068924 | 0,534486528 | 0,064 | 0,049 | 1         | 1,448426551   | 0,690404356     | 1,306122449     |
| APRT                                                                                | 0,288267129 | 0,534381611 | 0,282 | 0,22  | 1         | 1,448321221   | 0,690454566     | 1,281818182     |
| PTPRK                                                                               | 0,184359255 | 0,534104821 | 0,041 | 0     | 1         | 1,448043378   | 0,690587047     | #DIV/0!         |
| DYRK2                                                                               | 0,394411787 | 0,533934074 | 0,085 | 0,049 | 1         | 1,447872008   | 0,690668785     | 1,734693878     |
| SLIRP                                                                               | 0,191948678 | 0,533347586 | 0,263 | 0,171 | 1         | 1,447283536   | 0,690949614     | 1,538011696     |
| TSPAN5                                                                              | 0,558444252 | 0,533326369 | 0,07  | 0,049 | 1         | 1,447262251   | 0,690959776     | 1,428571429     |
| ARNTL                                                                               | 0,193382275 | 0,531958621 | 0,04  | 0     | 1         | 1,445890823   | 0,691615151     | #DIV/0!         |
| HDAC9                                                                               | 0,2129354   | 0,531826616 | 0,037 | 0     | 1         | 1,445758532   | 0,691678436     | #DIV/0!         |
| CCL4L2                                                                              | 0,441492135 | 0,531710083 | 0,014 | 0     | 1         | 1,445641757   | 0,691734308     | #DIV/0!         |
| CAPZB                                                                               | 0,382279844 | 0,531613689 | 0,142 | 0,098 | 1         | 1,445545169   | 0,691780528     | 1,448979592     |
| CMC2                                                                                | 0,214287413 | 0,53125122  | 0,077 | 0,024 | 1         | 1,445182029   | 0,691954356     | 3,208333333     |
| TSIX                                                                                | 0,246599212 | 0,530836214 | 0,032 | 0     | 1         | 1,444766368   | 0,692153432     | #DIV/0!         |
| PKN1                                                                                | 0,132637821 | 0,53064589  | 0,053 | 0     | 1         | 1,444575783   | 0,692244749     | #DIV/0!         |
| STT3A                                                                               | 0,159939023 | 0,530118508 | 0,046 | 0     | 1         | 1,44404781    | 0,692497847     | #DIV/0!         |
| KDM1A                                                                               | 0,184359294 | 0,529987823 | 0,041 | 0     | 1         | 1,443917008   | 0,69256058      | #DIV/0!         |

Supplementary Table 3

| Differentially expressed genes_keloid-MD_ comparing SC-Keloid vs. (SC-Myel+Nonmyel) |             |             |       |       |           |               |                 |                 |
|-------------------------------------------------------------------------------------|-------------|-------------|-------|-------|-----------|---------------|-----------------|-----------------|
| gene                                                                                | p_val       | avg_log2FC  | pct.1 | pct.2 | p_val_adj | Foldchange_UP | Foldchange_DOWN | Ratio_pct1_pct2 |
| FKBP1A                                                                              | 0,143397667 | 0,529769662 | 0,128 | 0,049 | 1         | 1,443698679   | 0,692665315     | 2,612244898     |
| MTHFD2                                                                              | 0,145609774 | 0,52957345  | 0,049 | 0     | 1         | 1,443502344   | 0,692759526     | #DIV/0!         |
| OGT                                                                                 | 0,159939023 | 0,529378309 | 0,046 | 0     | 1         | 1,443307107   | 0,692853236     | #DIV/0!         |
| SLC26A2                                                                             | 0,212935447 | 0,527535395 | 0,037 | 0     | 1         | 1,441464588   | 0,69373886      | #DIV/0!         |
| AC011043.1                                                                          | 0,184359294 | 0,52748941  | 0,041 | 0     | 1         | 1,441418643   | 0,693760973     | #DIV/0!         |
| ATP5MC1                                                                             | 0,28279636  | 0,526888273 | 0,3   | 0,244 | 1         | 1,440818163   | 0,694050107     | 1,229508197     |
| ATP2B1                                                                              | 0,598348227 | 0,526766967 | 0,144 | 0,122 | 1         | 1,44069702    | 0,694108467     | 1,180327869     |
| LEO1                                                                                | 0,152594689 | 0,526238726 | 0,048 | 0     | 1         | 1,440169607   | 0,694362661     | #DIV/0!         |
| HEBP2                                                                               | 0,531644509 | 0,526135997 | 0,072 | 0,049 | 1         | 1,440067061   | 0,694412105     | 1,469387755     |
| CDV3                                                                                | 0,489781346 | 0,52579581  | 0,102 | 0,073 | 1         | 1,439727534   | 0,694575867     | 1,397260274     |
| HNRNPA1                                                                             | 0,401313791 | 0,525505483 | 0,239 | 0,195 | 1         | 1,439437833   | 0,694715657     | 1,225641026     |
| RAB2B                                                                               | 0,202896302 | 0,525427533 | 0,038 | 0     | 1         | 1,439360062   | 0,694753194     | #DIV/0!         |
| FRYL                                                                                | 0,184359294 | 0,525124956 | 0,041 | 0     | 1         | 1,439058216   | 0,69489892      | #DIV/0!         |
| MYO5A                                                                               | 0,377977804 | 0,524959454 | 0,056 | 0,024 | 1         | 1,438893141   | 0,694978641     | 2,333333333     |
| BRD4                                                                                | 0,545020041 | 0,524306873 | 0,097 | 0,073 | 1         | 1,438242426   | 0,695293076     | 1,328767123     |
| ACLY                                                                                | 0,277514251 | 0,523956313 | 0,067 | 0,024 | 1         | 1,437892991   | 0,695462045     | 2,791666667     |
| SEMA4C                                                                              | 0,246599267 | 0,523261319 | 0,032 | 0     | 1         | 1,437200477   | 0,695797153     | #DIV/0!         |
| SMC5                                                                                | 0,275780244 | 0,523019001 | 0,067 | 0,024 | 1         | 1,436959102   | 0,69591403      | 2,791666667     |
| MRT04                                                                               | 0,159939023 | 0,52299595  | 0,046 | 0     | 1         | 1,436936143   | 0,695925149     | #DIV/0!         |
| VEGFB                                                                               | 0,357118309 | 0,522971137 | 0,057 | 0,024 | 1         | 1,436911429   | 0,695937119     | 2,375           |
| FAM126A                                                                             | 0,539087502 | 0,522810059 | 0,072 | 0,049 | 1         | 1,436751006   | 0,696014825     | 1,469387755     |
| YKT6                                                                                | 0,159939023 | 0,522707509 | 0,046 | 0     | 1         | 1,436648882   | 0,696064301     | #DIV/0!         |
| CARNMT1                                                                             | 0,223537229 | 0,522081424 | 0,035 | 0     | 1         | 1,436025556   | 0,696366437     | #DIV/0!         |
| NID1                                                                                | 0,105023016 | 0,521700429 | 0,254 | 0,146 | 1         | 1,435646372   | 0,696550362     | 1,739726027     |
| DNMT3A                                                                              | 0,175796304 | 0,520958341 | 0,043 | 0     | 1         | 1,4349081     | 0,696908743     | #DIV/0!         |
| DYNLT1                                                                              | 0,170830772 | 0,520718997 | 0,368 | 0,268 | 1         | 1,434670068   | 0,69702437      | 1,373134328     |
| GPN3                                                                                | 0,351643454 | 0,52016264  | 0,057 | 0,024 | 1         | 1,434116912   | 0,697293221     | 2,375           |
| NEK7                                                                                | 0,629338049 | 0,519845222 | 0,038 | 0,024 | 1         | 1,433801416   | 0,697446654     | 1,583333333     |
| SPG11                                                                               | 0,193382275 | 0,519684239 | 0,04  | 0     | 1         | 1,433641434   | 0,697524483     | #DIV/0!         |
| WDR26                                                                               | 0,167664901 | 0,518646033 | 0,045 | 0     | 1         | 1,432610114   | 0,698026623     | #DIV/0!         |

Supplementary Table 3

| Differentially expressed genes_keloid-MD_comparing SC-Keloid vs. (SC-Myel+Nonmyel) |             |             |       |       |             |               |                 |                 |
|------------------------------------------------------------------------------------|-------------|-------------|-------|-------|-------------|---------------|-----------------|-----------------|
| gene                                                                               | p_val       | avg_log2FC  | pct.1 | pct.2 | p_val_adj   | Foldchange_UP | Foldchange_DOWN | Ratio_pct1_pct2 |
| UBE4A                                                                              | 0,159939023 | 0,518541418 | 0,046 | 0     | 1           | 1,432506234   | 0,698077241     | #DIV/0!         |
| SAFB                                                                               | 0,193382275 | 0,518486712 | 0,04  | 0     | 1           | 1,432451916   | 0,698103712     | #DIV/0!         |
| DGCR6L                                                                             | 0,338452708 | 0,518456137 | 0,059 | 0,024 | 1           | 1,432421558   | 0,698118507     | 2,458333333     |
| S100A6                                                                             | 2,22201E-05 | 0,518330371 | 0,998 | 1     | 0,468866548 | 1,432296694   | 0,698179368     | 0,998           |
| TTC17                                                                              | 0,202896302 | 0,518103007 | 0,038 | 0     | 1           | 1,432070986   | 0,698289407     | #DIV/0!         |
| MRPL41                                                                             | 0,041705787 | 0,517555958 | 0,281 | 0,122 | 1           | 1,431528069   | 0,698554239     | 2,303278689     |
| PMM2                                                                               | 0,202896302 | 0,517169531 | 0,038 | 0     | 1           | 1,431144684   | 0,698741372     | #DIV/0!         |
| PLN                                                                                | 0,159939023 | 0,516870227 | 0,046 | 0     | 1           | 1,430847807   | 0,698886349     | #DIV/0!         |
| OSBPL8                                                                             | 0,283411616 | 0,516850491 | 0,158 | 0,098 | 1           | 1,430828233   | 0,69889591      | 1,612244898     |
| TSTD1                                                                              | 0,31562943  | 0,516570881 | 0,062 | 0,024 | 1           | 1,43055095    | 0,699031377     | 2,583333333     |
| PRPF8                                                                              | 0,545329634 | 0,515956826 | 0,072 | 0,049 | 1           | 1,429942193   | 0,699328969     | 1,469387755     |
| AP2S1                                                                              | 0,533812714 | 0,515918685 | 0,241 | 0,22  | 1           | 1,42990439    | 0,699347458     | 1,095454545     |
| TOMM22                                                                             | 0,392468883 | 0,51584707  | 0,085 | 0,049 | 1           | 1,429833412   | 0,699382174     | 1,734693878     |
| TADA3                                                                              | 0,152594656 | 0,515610184 | 0,048 | 0     | 1           | 1,429598657   | 0,69949702      | #DIV/0!         |
| DGUOK                                                                              | 0,406042428 | 0,515297717 | 0,166 | 0,122 | 1           | 1,42928906    | 0,699648537     | 1,360655738     |
| ACSBG1                                                                             | 0,184359294 | 0,515295605 | 0,041 | 0     | 1           | 1,429286968   | 0,699649561     | #DIV/0!         |
| SET                                                                                | 0,288436131 | 0,514839266 | 0,456 | 0,439 | 1           | 1,428834941   | 0,699870903     | 1,038724374     |
| RPAP3                                                                              | 0,184359294 | 0,514637954 | 0,041 | 0     | 1           | 1,428635577   | 0,699968569     | #DIV/0!         |
| COA5                                                                               | 0,31562943  | 0,513907584 | 0,062 | 0,024 | 1           | 1,427912508   | 0,70032302      | 2,583333333     |
| RCOR3                                                                              | 0,184359294 | 0,51354219  | 0,041 | 0     | 1           | 1,427550903   | 0,700500415     | #DIV/0!         |
| UBE2K                                                                              | 0,317836688 | 0,513446177 | 0,124 | 0,073 | 1           | 1,427455901   | 0,700547035     | 1,698630137     |
| ITGA5                                                                              | 0,138963816 | 0,513398231 | 0,051 | 0     | 1           | 1,427408463   | 0,700570317     | #DIV/0!         |
| PPM1B                                                                              | 0,184359294 | 0,513326401 | 0,041 | 0     | 1           | 1,427337396   | 0,700605199     | #DIV/0!         |
| SHFL                                                                               | 0,37337614  | 0,513167909 | 0,056 | 0,024 | 1           | 1,427180599   | 0,70068217      | 2,333333333     |
| TAP1                                                                               | 0,145609774 | 0,512679022 | 0,049 | 0     | 1           | 1,426697051   | 0,700919652     | #DIV/0!         |
| AXL                                                                                | 0,710847028 | 0,512175297 | 0,061 | 0,049 | 1           | 1,426198999   | 0,701164424     | 1,244897959     |
| UXT                                                                                | 0,289704622 | 0,512114367 | 0,155 | 0,098 | 1           | 1,426138768   | 0,701194037     | 1,581632653     |
| LOXL1                                                                              | 0,159938989 | 0,511546968 | 0,046 | 0     | 1           | 1,42557799    | 0,701469865     | #DIV/0!         |
| SRA1                                                                               | 0,369080472 | 0,510894862 | 0,088 | 0,049 | 1           | 1,424933766   | 0,701787005     | 1,795918367     |
| FSCN1                                                                              | 0,158474364 | 0,510754291 | 0,089 | 0,024 | 1           | 1,424794933   | 0,701855388     | 3,708333333     |

Supplementary Table 3

| Differentially expressed genes_keloid-MD_comparing SC-Keloid vs. (SC-Myel+Nonmyel) |             |             |       |       |           |               |                 |                 |
|------------------------------------------------------------------------------------|-------------|-------------|-------|-------|-----------|---------------|-----------------|-----------------|
| gene                                                                               | p_val       | avg_log2FC  | pct.1 | pct.2 | p_val_adj | Foldchange_UP | Foldchange_DOWN | Ratio_pct1_pct2 |
| NNT                                                                                | 0,159939023 | 0,510559208 | 0,046 | 0     | 1         | 1,424602284   | 0,7019503       | #DIV/0!         |
| NCBP2                                                                              | 0,2163403   | 0,51026321  | 0,077 | 0,024 | 1         | 1,424310027   | 0,702094334     | 3,208333333     |
| UFSP2                                                                              | 0,145609774 | 0,509730248 | 0,049 | 0     | 1         | 1,423783954   | 0,70235375      | #DIV/0!         |
| SWI5                                                                               | 0,457868417 | 0,509162214 | 0,159 | 0,122 | 1         | 1,423223477   | 0,702630343     | 1,303278689     |
| RAP1B                                                                              | 0,298411817 | 0,509048904 | 0,231 | 0,171 | 1         | 1,423111701   | 0,70268553      | 1,350877193     |
| RAB11A                                                                             | 0,292676629 | 0,508980847 | 0,065 | 0,024 | 1         | 1,423044569   | 0,702718679     | 2,708333333     |
| HERC4                                                                              | 0,175796304 | 0,508856023 | 0,043 | 0     | 1         | 1,422921451   | 0,702779482     | #DIV/0!         |
| NUP50                                                                              | 0,193382275 | 0,508530705 | 0,04  | 0     | 1         | 1,422600628   | 0,702937972     | #DIV/0!         |
| ZFPL1                                                                              | 0,193382275 | 0,508492912 | 0,04  | 0     | 1         | 1,422563361   | 0,702956387     | #DIV/0!         |
| ABCC3                                                                              | 0,202896302 | 0,508431027 | 0,038 | 0     | 1         | 1,422502342   | 0,702986541     | #DIV/0!         |
| SLC30A7                                                                            | 0,159939023 | 0,507581547 | 0,046 | 0     | 1         | 1,421664997   | 0,703400591     | #DIV/0!         |
| SNX3                                                                               | 0,548507893 | 0,507100827 | 0,219 | 0,195 | 1         | 1,421191364   | 0,70363501      | 1,123076923     |
| NIFK                                                                               | 0,468971713 | 0,506317079 | 0,158 | 0,122 | 1         | 1,420419507   | 0,704017366     | 1,295081967     |
| DNAJC8                                                                             | 0,384080655 | 0,506316983 | 0,169 | 0,122 | 1         | 1,420419413   | 0,704017412     | 1,385245902     |
| RB1                                                                                | 0,36880932  | 0,506200468 | 0,056 | 0,024 | 1         | 1,420304702   | 0,704074273     | 2,333333333     |
| LIMK1                                                                              | 0,175796267 | 0,505725019 | 0,043 | 0     | 1         | 1,419836708   | 0,704306343     | #DIV/0!         |
| PLEKHF2                                                                            | 0,202896302 | 0,50569879  | 0,038 | 0     | 1         | 1,419810895   | 0,704319148     | #DIV/0!         |
| CISD3                                                                              | 0,599229448 | 0,505583865 | 0,067 | 0,049 | 1         | 1,419697798   | 0,704375256     | 1,367346939     |
| LAYN                                                                               | 0,167664866 | 0,505350858 | 0,045 | 0     | 1         | 1,419468524   | 0,704489027     | #DIV/0!         |
| SPAG16                                                                             | 0,42969869  | 0,505237792 | 0,051 | 0,024 | 1         | 1,419357282   | 0,704544242     | 2,125           |
| DNAJC24                                                                            | 0,223537229 | 0,504914523 | 0,035 | 0     | 1         | 1,419039278   | 0,704702129     | #DIV/0!         |
| QDPR                                                                               | 0,193382233 | 0,504531078 | 0,04  | 0     | 1         | 1,418662171   | 0,704889452     | #DIV/0!         |
| MYSM1                                                                              | 0,212935447 | 0,504469986 | 0,037 | 0     | 1         | 1,418602097   | 0,704919302     | #DIV/0!         |
| MLX                                                                                | 0,138963816 | 0,503467403 | 0,051 | 0     | 1         | 1,4176166     | 0,705409347     | #DIV/0!         |
| COX20                                                                              | 0,158353802 | 0,503338473 | 0,187 | 0,098 | 1         | 1,417489917   | 0,70547239      | 1,908163265     |
| RGS20                                                                              | 0,202896302 | 0,503126595 | 0,038 | 0     | 1         | 1,417281756   | 0,705576005     | #DIV/0!         |
| C16orf87                                                                           | 0,194222901 | 0,503013786 | 0,081 | 0,024 | 1         | 1,417170939   | 0,705631179     | 3,375           |
| LENG8                                                                              | 0,366938042 | 0,502745943 | 0,089 | 0,049 | 1         | 1,416907859   | 0,705762195     | 1,816326531     |
| MFSD1                                                                              | 0,212935447 | 0,502024153 | 0,037 | 0     | 1         | 1,416199148   | 0,70611538      | #DIV/0!         |
| CAP1                                                                               | 0,489854792 | 0,501835598 | 0,246 | 0,22  | 1         | 1,416014068   | 0,706207673     | 1,118181818     |

Supplementary Table 3

| Differentially expressed genes_keloid-MD_comparing SC-Keloid vs. (SC-Myel+Nonmyel) |             |             |       |       |           |               |                 |                 |
|------------------------------------------------------------------------------------|-------------|-------------|-------|-------|-----------|---------------|-----------------|-----------------|
| gene                                                                               | p_val       | avg_log2FC  | pct.1 | pct.2 | p_val_adj | Foldchange_UP | Foldchange_DOWN | Ratio_pct1_pct2 |
| WDFY1                                                                              | 0,167664901 | 0,501543355 | 0,045 | 0     | 1         | 1,415727259   | 0,706350742     | #DIV/0!         |
| SS18L2                                                                             | 0,468961377 | 0,501417967 | 0,048 | 0,024 | 1         | 1,415604219   | 0,706412136     | 2               |
| NGFR                                                                               | 0,384318125 | 0,501325306 | 0,29  | 0,244 | 1         | 1,415513302   | 0,706457508     | 1,18852459      |
| LCOR                                                                               | 0,493741572 | 0,501196557 | 0,046 | 0,024 | 1         | 1,415386984   | 0,706520557     | 1,916666667     |
| PDIA3                                                                              | 0,102602298 | 0,500974003 | 0,378 | 0,244 | 1         | 1,415168659   | 0,706629555     | 1,549180328     |
| KPNB1                                                                              | 0,455421966 | 0,500588618 | 0,107 | 0,073 | 1         | 1,414790678   | 0,706818341     | 1,465753425     |
| BLOC1S6                                                                            | 0,115852356 | 0,500339396 | 0,102 | 0,024 | 1         | 1,414546298   | 0,706940453     | 4,25            |
| FMR1                                                                               | 0,408321585 | 0,499627673 | 0,053 | 0,024 | 1         | 1,413848633   | 0,707289293     | 2,208333333     |
| EI24                                                                               | 0,359323201 | 0,499592363 | 0,057 | 0,024 | 1         | 1,413814029   | 0,707306604     | 2,375           |
| GPX7                                                                               | 0,175796267 | 0,498558071 | 0,043 | 0     | 1         | 1,412800806   | 0,707813866     | #DIV/0!         |
| ZNF32                                                                              | 0,175796304 | 0,498431444 | 0,043 | 0     | 1         | 1,412676808   | 0,707875994     | #DIV/0!         |
| VBP1                                                                               | 0,447866039 | 0,498276298 | 0,107 | 0,073 | 1         | 1,412524899   | 0,707952122     | 1,465753425     |
| GMFG                                                                               | 0,23474314  | 0,497773406 | 0,033 | 0     | 1         | 1,412032609   | 0,708198942     | #DIV/0!         |
| MRPL42                                                                             | 0,346871778 | 0,497740273 | 0,12  | 0,073 | 1         | 1,412000181   | 0,708215207     | 1,643835616     |
| STAM2                                                                              | 0,184359294 | 0,497206951 | 0,041 | 0     | 1         | 1,411478302   | 0,708477062     | #DIV/0!         |
| BMERB1                                                                             | 0,152594689 | 0,496912487 | 0,048 | 0     | 1         | 1,411190239   | 0,708621681     | #DIV/0!         |
| HINT1                                                                              | 0,113527073 | 0,496828463 | 0,485 | 0,39  | 1         | 1,411108052   | 0,708662953     | 1,243589744     |
| NASP                                                                               | 0,758613942 | 0,496576784 | 0,128 | 0,122 | 1         | 1,410861905   | 0,708786591     | 1,049180328     |
| DCTN5                                                                              | 0,193382275 | 0,496295788 | 0,04  | 0     | 1         | 1,410587136   | 0,708924656     | #DIV/0!         |
| TLE4                                                                               | 0,202896302 | 0,495751977 | 0,038 | 0     | 1         | 1,410055528   | 0,709191929     | #DIV/0!         |
| TMEM9B                                                                             | 0,430999272 | 0,495730112 | 0,051 | 0,024 | 1         | 1,410034157   | 0,709202678     | 2,125           |
| WAPL                                                                               | 0,184359294 | 0,495534603 | 0,041 | 0     | 1         | 1,409843088   | 0,709298793     | #DIV/0!         |
| TTC14                                                                              | 0,193382275 | 0,495051325 | 0,04  | 0     | 1         | 1,409370894   | 0,709536435     | #DIV/0!         |
| MRPS21                                                                             | 0,544030246 | 0,495037643 | 0,199 | 0,171 | 1         | 1,409357527   | 0,709543165     | 1,16374269      |
| KLHL9                                                                              | 0,212935447 | 0,495027121 | 0,037 | 0     | 1         | 1,409347249   | 0,709548339     | #DIV/0!         |
| CARD8                                                                              | 0,212935354 | 0,494868345 | 0,037 | 0     | 1         | 1,409192152   | 0,709626433     | #DIV/0!         |
| DEF8                                                                               | 0,153244537 | 0,494770596 | 0,091 | 0,024 | 1         | 1,409096676   | 0,709674515     | 3,791666667     |
| DNAL1                                                                              | 0,193382192 | 0,494576247 | 0,04  | 0     | 1         | 1,408906865   | 0,709770124     | #DIV/0!         |
| AGK                                                                                | 0,452242808 | 0,494446936 | 0,049 | 0,024 | 1         | 1,408780589   | 0,709833744     | 2,041666667     |
| NCLN                                                                               | 0,246599267 | 0,494028957 | 0,032 | 0     | 1         | 1,408372495   | 0,710039428     | #DIV/0!         |



Supplementary Table 3

| Differentially expressed genes_keloid-MD_comparing SC-Keloid vs. (SC-Myel+Nonmyel) |             |             |       |       |           |               |                 |                 |
|------------------------------------------------------------------------------------|-------------|-------------|-------|-------|-----------|---------------|-----------------|-----------------|
| gene                                                                               | p_val       | avg_log2FC  | pct.1 | pct.2 | p_val_adj | Foldchange_UP | Foldchange_DOWN | Ratio_pct1_pct2 |
| ZNF385A                                                                            | 0,159939023 | 0,493100779 | 0,046 | 0     | 1         | 1,40746669    | 0,710496388     | #DIV/0!         |
| XPOT                                                                               | 0,407079473 | 0,492668762 | 0,053 | 0,024 | 1         | 1,407045285   | 0,710709179     | 2,208333333     |
| RUNX1                                                                              | 0,335228033 | 0,492304116 | 0,177 | 0,122 | 1         | 1,406689695   | 0,710888836     | 1,450819672     |
| FNDC3A                                                                             | 0,235251999 | 0,491165005 | 0,073 | 0,024 | 1         | 1,405579451   | 0,711450355     | 3,041666667     |
| LGI1                                                                               | 0,223537229 | 0,490923186 | 0,035 | 0     | 1         | 1,405343873   | 0,711569616     | #DIV/0!         |
| PFKL                                                                               | 0,223537229 | 0,490540922 | 0,035 | 0     | 1         | 1,404971555   | 0,711758182     | #DIV/0!         |
| ANO10                                                                              | 0,193382275 | 0,490078289 | 0,04  | 0     | 1         | 1,404521091   | 0,71198646      | #DIV/0!         |
| ZRANB2                                                                             | 0,57703005  | 0,490076585 | 0,121 | 0,098 | 1         | 1,404519433   | 0,711987301     | 1,234693878     |
| RHOBTB3                                                                            | 0,159939023 | 0,489345799 | 0,046 | 0     | 1         | 1,403808164   | 0,712348044     | #DIV/0!         |
| MSANTD3                                                                            | 0,167664901 | 0,488916954 | 0,045 | 0     | 1         | 1,40339094    | 0,712559823     | #DIV/0!         |
| NAA25                                                                              | 0,193382275 | 0,488818249 | 0,04  | 0     | 1         | 1,403294927   | 0,712608576     | #DIV/0!         |
| SEPTIN11                                                                           | 0,464706069 | 0,488751601 | 0,078 | 0,049 | 1         | 1,403230102   | 0,712641497     | 1,591836735     |
| ANAPC11                                                                            | 0,365239357 | 0,488596985 | 0,357 | 0,317 | 1         | 1,403079722   | 0,712717876     | 1,126182965     |
| LSM4                                                                               | 0,386693037 | 0,487906526 | 0,115 | 0,073 | 1         | 1,402408384   | 0,713059057     | 1,575342466     |
| PUS7L                                                                              | 0,495212277 | 0,487744224 | 0,046 | 0,024 | 1         | 1,402250623   | 0,71313928      | 1,916666667     |
| ZBTB7A                                                                             | 0,430999272 | 0,487674058 | 0,051 | 0,024 | 1         | 1,402182426   | 0,713173965     | 2,125           |
| NRBP1                                                                              | 0,253469835 | 0,487616126 | 0,07  | 0,024 | 1         | 1,402126121   | 0,713202603     | 2,916666667     |
| RIOK2                                                                              | 0,246599212 | 0,487107909 | 0,032 | 0     | 1         | 1,401632283   | 0,713453887     | #DIV/0!         |
| ATP6V1E1                                                                           | 0,304734185 | 0,487008095 | 0,096 | 0,049 | 1         | 1,401535314   | 0,713503249     | 1,959183673     |
| TXNL1                                                                              | 0,193567955 | 0,486729732 | 0,145 | 0,073 | 1         | 1,401264918   | 0,713640931     | 1,98630137      |
| ZFR                                                                                | 0,65579605  | 0,486720721 | 0,064 | 0,049 | 1         | 1,401256165   | 0,713645388     | 1,306122449     |
| CTSA                                                                               | 0,427104409 | 0,486436672 | 0,051 | 0,024 | 1         | 1,400980303   | 0,71378591      | 2,125           |
| EIF6                                                                               | 0,399123332 | 0,486113664 | 0,113 | 0,073 | 1         | 1,400666669   | 0,713945739     | 1,547945205     |
| DPH3                                                                               | 0,184359294 | 0,485960771 | 0,041 | 0     | 1         | 1,400518238   | 0,714021405     | #DIV/0!         |
| SDCBP                                                                              | 0,433944372 | 0,485836198 | 0,081 | 0,049 | 1         | 1,400397312   | 0,714083062     | 1,653061224     |
| RBMX                                                                               | 0,908189415 | 0,48551861  | 0,096 | 0,098 | 1         | 1,40008907    | 0,714240274     | 0,979591837     |
| PCED1A                                                                             | 0,223537181 | 0,485513426 | 0,035 | 0     | 1         | 1,400084039   | 0,71424284      | #DIV/0!         |
| NAPG                                                                               | 0,202896302 | 0,484866379 | 0,038 | 0     | 1         | 1,399456243   | 0,714563249     | #DIV/0!         |
| TRMT13                                                                             | 0,272474262 | 0,484348433 | 0,029 | 0     | 1         | 1,39895391    | 0,714819833     | #DIV/0!         |
| INTS1                                                                              | 0,212935447 | 0,484262116 | 0,037 | 0     | 1         | 1,398870214   | 0,714862601     | #DIV/0!         |

Supplementary Table 3

| Differentially expressed genes_keloid-MD_comparing SC-Keloid vs. (SC-Myel+Nonmyel) |             |             |       |       |           |               |                 |                 |
|------------------------------------------------------------------------------------|-------------|-------------|-------|-------|-----------|---------------|-----------------|-----------------|
| gene                                                                               | p_val       | avg_log2FC  | pct.1 | pct.2 | p_val_adj | Foldchange_UP | Foldchange_DOWN | Ratio_pct1_pct2 |
| ARL5A                                                                              | 0,470369259 | 0,483913295 | 0,048 | 0,024 | 1         | 1,398532029   | 0,715035465     | 2               |
| CTSO                                                                               | 0,193382233 | 0,483825377 | 0,04  | 0     | 1         | 1,398446805   | 0,715079041     | #DIV/0!         |
| FLII                                                                               | 0,272474323 | 0,483611651 | 0,029 | 0     | 1         | 1,398239649   | 0,715184983     | #DIV/0!         |
| COQ4                                                                               | 0,320729886 | 0,483484406 | 0,094 | 0,049 | 1         | 1,398116331   | 0,715248065     | 1,918367347     |
| PIM3                                                                               | 0,193382275 | 0,482829996 | 0,04  | 0     | 1         | 1,397482286   | 0,715572577     | #DIV/0!         |
| RREB1                                                                              | 0,202896302 | 0,482362366 | 0,038 | 0     | 1         | 1,397029384   | 0,715804557     | #DIV/0!         |
| ATP7A                                                                              | 0,223537229 | 0,482102291 | 0,035 | 0     | 1         | 1,396777564   | 0,715933607     | #DIV/0!         |
| NDUFS2                                                                             | 0,201038943 | 0,481862461 | 0,113 | 0,049 | 1         | 1,396545387   | 0,716052632     | 2,306122449     |
| ZNF365                                                                             | 0,23474314  | 0,481810279 | 0,033 | 0     | 1         | 1,396494875   | 0,716078532     | #DIV/0!         |
| IFTAP                                                                              | 0,223537229 | 0,481292809 | 0,035 | 0     | 1         | 1,395994066   | 0,716335423     | #DIV/0!         |
| LYST                                                                               | 0,726839559 | 0,481211268 | 0,085 | 0,073 | 1         | 1,395915167   | 0,716375911     | 1,164383562     |
| TMEM184B                                                                           | 0,202896302 | 0,48109947  | 0,038 | 0     | 1         | 1,395806998   | 0,716431427     | #DIV/0!         |
| FAM229B                                                                            | 0,586396023 | 0,480906671 | 0,069 | 0,049 | 1         | 1,395620478   | 0,716527176     | 1,408163265     |
| CRCP                                                                               | 0,184359294 | 0,480882087 | 0,041 | 0     | 1         | 1,395596696   | 0,716539386     | #DIV/0!         |
| SNAPC2                                                                             | 0,175796304 | 0,480670893 | 0,043 | 0     | 1         | 1,395392411   | 0,716644287     | #DIV/0!         |
| ZNF431                                                                             | 0,202896302 | 0,480480235 | 0,038 | 0     | 1         | 1,395208017   | 0,716739001     | #DIV/0!         |
| SSR2                                                                               | 0,468102708 | 0,480386089 | 0,25  | 0,22  | 1         | 1,395116972   | 0,716785775     | 1,136363636     |
| ULK1                                                                               | 0,193382275 | 0,480084976 | 0,04  | 0     | 1         | 1,394825821   | 0,716935394     | #DIV/0!         |
| DDX21                                                                              | 0,212122191 | 0,479479843 | 0,144 | 0,073 | 1         | 1,394240889   | 0,717236173     | 1,97260274      |
| FOXP1                                                                              | 0,32915059  | 0,47902087  | 0,152 | 0,098 | 1         | 1,393797401   | 0,717464389     | 1,551020408     |
| PTPN2                                                                              | 0,212935447 | 0,478856091 | 0,037 | 0     | 1         | 1,393638216   | 0,717546339     | #DIV/0!         |
| MRPL20                                                                             | 0,071902572 | 0,478764827 | 0,255 | 0,122 | 1         | 1,393550058   | 0,717591732     | 2,090163934     |
| MAZ                                                                                | 0,340192386 | 0,478601476 | 0,091 | 0,049 | 1         | 1,393392281   | 0,717672987     | 1,857142857     |
| ENO1                                                                               | 0,26018329  | 0,478531782 | 0,22  | 0,146 | 1         | 1,39332497    | 0,717707657     | 1,506849315     |
| IFT57                                                                              | 0,347110747 | 0,47827205  | 0,091 | 0,049 | 1         | 1,393074149   | 0,71783688      | 1,857142857     |
| PPIL2                                                                              | 0,212935447 | 0,477789714 | 0,037 | 0     | 1         | 1,39260848    | 0,718076914     | #DIV/0!         |
| FMN1                                                                               | 0,246599267 | 0,477664384 | 0,032 | 0     | 1         | 1,392487507   | 0,718139297     | #DIV/0!         |
| BMPR2                                                                              | 0,341612405 | 0,477501606 | 0,059 | 0,024 | 1         | 1,392330403   | 0,718220329     | 2,458333333     |
| ATG12                                                                              | 0,197955137 | 0,47743876  | 0,081 | 0,024 | 1         | 1,392269752   | 0,718251616     | 3,375           |
| RBL2                                                                               | 0,223537229 | 0,477242017 | 0,035 | 0     | 1         | 1,392079898   | 0,718349573     | #DIV/0!         |

Supplementary Table 3

| Differentially expressed genes_keloid-MD_comparing SC-Keloid vs. (SC-Myel+Nonmyel) |             |             |       |       |           |               |                 |                 |
|------------------------------------------------------------------------------------|-------------|-------------|-------|-------|-----------|---------------|-----------------|-----------------|
| gene                                                                               | p_val       | avg_log2FC  | pct.1 | pct.2 | p_val_adj | Foldchange_UP | Foldchange_DOWN | Ratio_pct1_pct2 |
| MED28                                                                              | 0,212935447 | 0,476943804 | 0,037 | 0     | 1         | 1,391792177   | 0,718498075     | #DIV/0!         |
| TGOLN2                                                                             | 0,174792039 | 0,476407737 | 0,153 | 0,073 | 1         | 1,391275121   | 0,718765099     | 2,095890411     |
| CEBPG                                                                              | 0,202896302 | 0,476297467 | 0,038 | 0     | 1         | 1,391168785   | 0,718820039     | #DIV/0!         |
| SMNDC1                                                                             | 0,202896302 | 0,476030312 | 0,038 | 0     | 1         | 1,390911195   | 0,718953161     | #DIV/0!         |
| CFL1                                                                               | 0,141359854 | 0,47591195  | 0,539 | 0,463 | 1         | 1,390797086   | 0,719012148     | 1,164146868     |
| TOB2                                                                               | 0,473192114 | 0,475807335 | 0,048 | 0,024 | 1         | 1,390696238   | 0,719064288     | 2               |
| OTUD7B                                                                             | 0,341612345 | 0,475732597 | 0,059 | 0,024 | 1         | 1,390624196   | 0,719101539     | 2,458333333     |
| NDUFB7                                                                             | 0,486123263 | 0,475687583 | 0,27  | 0,244 | 1         | 1,390580808   | 0,719123976     | 1,106557377     |
| MAGED2                                                                             | 0,432868618 | 0,474978044 | 0,255 | 0,22  | 1         | 1,389897068   | 0,719477739     | 1,159090909     |
| HMG20B                                                                             | 0,256569878 | 0,47470711  | 0,104 | 0,049 | 1         | 1,389636073   | 0,719612868     | 2,12244898      |
| EXTL2                                                                              | 0,202896258 | 0,474682424 | 0,038 | 0     | 1         | 1,389612295   | 0,719625181     | #DIV/0!         |
| PALM2AKAP2                                                                         | 0,223537132 | 0,474295468 | 0,035 | 0     | 1         | 1,389239626   | 0,719818224     | #DIV/0!         |
| NDUFA4                                                                             | 0,069399431 | 0,47412791  | 0,745 | 0,659 | 1         | 1,389078287   | 0,719901829     | 1,130500759     |
| NRP2                                                                               | 0,32063876  | 0,474028792 | 0,096 | 0,049 | 1         | 1,388982856   | 0,719951291     | 1,959183673     |
| MED31                                                                              | 0,390428593 | 0,47303985  | 0,054 | 0,024 | 1         | 1,388031058   | 0,720444974     | 2,25            |
| RAB12                                                                              | 0,193382275 | 0,472944497 | 0,04  | 0     | 1         | 1,387939322   | 0,720492592     | #DIV/0!         |
| MRPL34                                                                             | 0,560889734 | 0,472646198 | 0,097 | 0,073 | 1         | 1,387652374   | 0,720641581     | 1,328767123     |
| SNX17                                                                              | 0,359323201 | 0,472430079 | 0,057 | 0,024 | 1         | 1,387444516   | 0,720749542     | 2,375           |
| TRAF7                                                                              | 0,246599267 | 0,472387072 | 0,032 | 0     | 1         | 1,387403156   | 0,720771029     | #DIV/0!         |
| GLUD1                                                                              | 0,246599212 | 0,471734329 | 0,032 | 0     | 1         | 1,386775572   | 0,721097213     | #DIV/0!         |
| B2M                                                                                | 0,004795032 | 0,47135224  | 0,973 | 0,927 | 1         | 1,386408342   | 0,721288216     | 1,049622438     |
| NDUFA2                                                                             | 0,630134067 | 0,471228264 | 0,163 | 0,146 | 1         | 1,386289207   | 0,721350202     | 1,116438356     |
| ZCCHC14                                                                            | 0,246599267 | 0,471060324 | 0,032 | 0     | 1         | 1,386127843   | 0,721434177     | #DIV/0!         |
| KCND3                                                                              | 0,175796304 | 0,470940924 | 0,043 | 0     | 1         | 1,38601313    | 0,721493887     | #DIV/0!         |
| RTKN2                                                                              | 0,223537229 | 0,4709178   | 0,035 | 0     | 1         | 1,385990914   | 0,721505451     | #DIV/0!         |
| LASP1                                                                              | 0,629047722 | 0,470881983 | 0,065 | 0,049 | 1         | 1,385956505   | 0,721523364     | 1,326530612     |
| PGGT1B                                                                             | 0,193382275 | 0,470508995 | 0,04  | 0     | 1         | 1,385598233   | 0,721709927     | #DIV/0!         |
| RAD54L2                                                                            | 0,223537229 | 0,470239806 | 0,035 | 0     | 1         | 1,385339721   | 0,721844602     | #DIV/0!         |
| CTSZ                                                                               | 0,285200223 | 0,470096037 | 0,161 | 0,098 | 1         | 1,385201675   | 0,72191654      | 1,642857143     |
| EPB41L4A-AS1                                                                       | 0,23474314  | 0,469973022 | 0,033 | 0     | 1         | 1,385083567   | 0,721978098     | #DIV/0!         |

Supplementary Table 3

| Differentially expressed genes_keloid-MD_ comparing SC-Keloid vs. (SC-Myel+Nonmyel) |             |             |       |       |           |               |                 |                 |
|-------------------------------------------------------------------------------------|-------------|-------------|-------|-------|-----------|---------------|-----------------|-----------------|
| gene                                                                                | p_val       | avg_log2FC  | pct.1 | pct.2 | p_val_adj | Foldchange_UP | Foldchange_DOWN | Ratio_pct1_pct2 |
| NDEL1                                                                               | 0,223537229 | 0,469934151 | 0,035 | 0     | 1         | 1,385046249   | 0,721997551     | #DIV/0!         |
| CYRIB                                                                               | 0,193382275 | 0,468793297 | 0,04  | 0     | 1         | 1,383951415   | 0,722568718     | #DIV/0!         |
| YWHAZ                                                                               | 0,231229701 | 0,4686001   | 0,416 | 0,341 | 1         | 1,383766097   | 0,722665487     | 1,219941349     |
| TRAM2                                                                               | 0,345854599 | 0,468591587 | 0,059 | 0,024 | 1         | 1,383757932   | 0,722669751     | 2,458333333     |
| UBE2M                                                                               | 0,485656954 | 0,468383406 | 0,104 | 0,073 | 1         | 1,383558271   | 0,722774039     | 1,424657534     |
| OPA1                                                                                | 0,223537229 | 0,46767397  | 0,035 | 0     | 1         | 1,382878081   | 0,723129547     | #DIV/0!         |
| FIBP                                                                                | 0,462866615 | 0,46739762  | 0,132 | 0,098 | 1         | 1,382613215   | 0,723268076     | 1,346938776     |
| MCM3                                                                                | 0,193382275 | 0,467369893 | 0,04  | 0     | 1         | 1,382586643   | 0,723281977     | #DIV/0!         |
| POLR2J                                                                              | 0,672241385 | 0,467219864 | 0,137 | 0,122 | 1         | 1,382442872   | 0,723357196     | 1,12295082      |
| PDE1C                                                                               | 0,193382275 | 0,467211815 | 0,04  | 0     | 1         | 1,38243516    | 0,723361232     | #DIV/0!         |
| PHACTR2                                                                             | 0,368228052 | 0,466924448 | 0,057 | 0,024 | 1         | 1,382159823   | 0,723505331     | 2,375           |
| CORO1C                                                                              | 0,879218738 | 0,466757393 | 0,075 | 0,073 | 1         | 1,381999786   | 0,723589113     | 1,02739726      |
| IFI44L                                                                              | 0,41456612  | 0,466174751 | 0,053 | 0,024 | 1         | 1,381441769   | 0,723881399     | 2,208333333     |
| TP53BP2                                                                             | 0,598891708 | 0,465823619 | 0,04  | 0,024 | 1         | 1,381105587   | 0,724057602     | 1,666666667     |
| MRPS33                                                                              | 0,353049165 | 0,465747261 | 0,12  | 0,073 | 1         | 1,38103249    | 0,724095926     | 1,643835616     |
| CAPS                                                                                | 0,636023144 | 0,465332835 | 0,091 | 0,073 | 1         | 1,380635834   | 0,724303958     | 1,246575342     |
| CISD1                                                                               | 0,249617734 | 0,465276324 | 0,072 | 0,024 | 1         | 1,380581755   | 0,72433233      | 3               |
| RGMB                                                                                | 0,372098431 | 0,465025837 | 0,118 | 0,073 | 1         | 1,380342073   | 0,724458103     | 1,616438356     |
| OXCT1                                                                               | 0,23474314  | 0,464756676 | 0,033 | 0     | 1         | 1,380084569   | 0,724593277     | #DIV/0!         |
| MAGOHB                                                                              | 0,202175671 | 0,464746437 | 0,08  | 0,024 | 1         | 1,380074775   | 0,724598419     | 3,333333333     |
| RRM2B                                                                               | 0,23474314  | 0,464606623 | 0,033 | 0     | 1         | 1,379941036   | 0,724668644     | #DIV/0!         |
| AHDC1                                                                               | 0,223537181 | 0,464504114 | 0,035 | 0     | 1         | 1,37984299    | 0,724720137     | #DIV/0!         |
| BMS1                                                                                | 0,175796304 | 0,46434966  | 0,043 | 0     | 1         | 1,379695272   | 0,724797729     | #DIV/0!         |
| PRRC2C                                                                              | 0,456267497 | 0,464316831 | 0,209 | 0,171 | 1         | 1,379663878   | 0,724814222     | 1,222222222     |
| CNIH3                                                                               | 0,202896302 | 0,464294725 | 0,038 | 0     | 1         | 1,379642737   | 0,724825328     | #DIV/0!         |
| NOC2L                                                                               | 0,202896302 | 0,463414877 | 0,038 | 0     | 1         | 1,378801599   | 0,725267508     | #DIV/0!         |
| SLC12A4                                                                             | 0,246599267 | 0,463371073 | 0,032 | 0     | 1         | 1,378759735   | 0,72528953      | #DIV/0!         |
| BAZ1B                                                                               | 0,607355073 | 0,463323333 | 0,067 | 0,049 | 1         | 1,378714113   | 0,72531353      | 1,367346939     |
| IQGAP1                                                                              | 0,276675388 | 0,463273549 | 0,131 | 0,073 | 1         | 1,378666537   | 0,72533856      | 1,794520548     |
| GATAD2A                                                                             | 0,212935447 | 0,463262997 | 0,037 | 0     | 1         | 1,378656453   | 0,725343865     | #DIV/0!         |

Supplementary Table 3

| Differentially expressed genes_keloid-MD_ comparing SC-Keloid vs. (SC-Myel+Nonmyel) |             |             |       |       |           |               |                 |                 |
|-------------------------------------------------------------------------------------|-------------|-------------|-------|-------|-----------|---------------|-----------------|-----------------|
| gene                                                                                | p_val       | avg_log2FC  | pct.1 | pct.2 | p_val_adj | Foldchange_UP | Foldchange_DOWN | Ratio_pct1_pct2 |
| PLPBP                                                                               | 0,23474314  | 0,463212056 | 0,033 | 0     | 1         | 1,378607775   | 0,725369477     | #DIV/0!         |
| GLS                                                                                 | 0,574190235 | 0,463150081 | 0,097 | 0,073 | 1         | 1,378548554   | 0,725400638     | 1,328767123     |
| SERPINE2                                                                            | 0,330919407 | 0,462650206 | 0,254 | 0,195 | 1         | 1,378070987   | 0,725652023     | 1,302564103     |
| MARCHF5                                                                             | 0,2129354   | 0,462556737 | 0,037 | 0     | 1         | 1,377981708   | 0,725699038     | #DIV/0!         |
| CAPNS1                                                                              | 0,441480163 | 0,462440343 | 0,11  | 0,073 | 1         | 1,377870539   | 0,725757589     | 1,506849315     |
| NEPRO                                                                               | 0,272474323 | 0,462376012 | 0,029 | 0     | 1         | 1,3778091     | 0,725789951     | #DIV/0!         |
| HMGCR                                                                               | 0,234743088 | 0,462330604 | 0,033 | 0     | 1         | 1,377765735   | 0,725812796     | #DIV/0!         |
| GNA13                                                                               | 0,212935447 | 0,462091953 | 0,037 | 0     | 1         | 1,377537843   | 0,72593287      | #DIV/0!         |
| SPTY2D1                                                                             | 0,193382275 | 0,46190973  | 0,04  | 0     | 1         | 1,377363861   | 0,726024566     | #DIV/0!         |
| HMGA1                                                                               | 0,194222901 | 0,461569171 | 0,081 | 0,024 | 1         | 1,377038763   | 0,72619597      | 3,375           |
| POLR3GL                                                                             | 0,376824125 | 0,461484836 | 0,056 | 0,024 | 1         | 1,376958268   | 0,726238422     | 2,333333333     |
| UCHL3                                                                               | 0,542739193 | 0,461231379 | 0,043 | 0,024 | 1         | 1,376716381   | 0,726366021     | 1,791666667     |
| CYB5R3                                                                              | 0,317890324 | 0,460808063 | 0,152 | 0,098 | 1         | 1,376312484   | 0,726579183     | 1,551020408     |
| DPCD                                                                                | 0,212935447 | 0,460800382 | 0,037 | 0     | 1         | 1,376305157   | 0,726583051     | #DIV/0!         |
| ZDHHC17                                                                             | 0,212935447 | 0,460623688 | 0,037 | 0     | 1         | 1,376136603   | 0,726672045     | #DIV/0!         |
| GTF3C1                                                                              | 0,449531819 | 0,46045349  | 0,049 | 0,024 | 1         | 1,375974268   | 0,726757777     | 2,041666667     |
| TLK2                                                                                | 0,184359294 | 0,460331786 | 0,041 | 0     | 1         | 1,375858197   | 0,726819088     | #DIV/0!         |
| PWP1                                                                                | 0,372231166 | 0,460202295 | 0,056 | 0,024 | 1         | 1,375734711   | 0,726884327     | 2,333333333     |
| STX12                                                                               | 0,566146278 | 0,460007954 | 0,07  | 0,049 | 1         | 1,375549402   | 0,72698225      | 1,428571429     |
| LZIC                                                                                | 0,787823724 | 0,459813228 | 0,08  | 0,073 | 1         | 1,375363751   | 0,727080381     | 1,095890411     |
| CCDC28B                                                                             | 0,159939023 | 0,459666968 | 0,046 | 0     | 1         | 1,375224325   | 0,727154095     | #DIV/0!         |
| TBC1D23                                                                             | 0,317592677 | 0,459477366 | 0,062 | 0,024 | 1         | 1,375043601   | 0,727249666     | 2,583333333     |
| PGP                                                                                 | 0,210462674 | 0,45901577  | 0,078 | 0,024 | 1         | 1,374603721   | 0,72748239      | 3,25            |
| PLOD1                                                                               | 0,192317084 | 0,458986999 | 0,118 | 0,049 | 1         | 1,374576309   | 0,727496898     | 2,408163265     |
| SAR1B                                                                               | 0,250096026 | 0,458532575 | 0,105 | 0,049 | 1         | 1,374143409   | 0,727726083     | 2,142857143     |
| TPMT                                                                                | 0,23474314  | 0,458184683 | 0,033 | 0     | 1         | 1,373812088   | 0,727901588     | #DIV/0!         |
| RPL26L1                                                                             | 0,112576547 | 0,457964213 | 0,175 | 0,073 | 1         | 1,37360216    | 0,728012833     | 2,397260274     |
| NOTCH3                                                                              | 0,246599267 | 0,45795631  | 0,032 | 0     | 1         | 1,373594635   | 0,728016821     | #DIV/0!         |
| DYNC2I1                                                                             | 0,571722516 | 0,4578295   | 0,041 | 0,024 | 1         | 1,373473904   | 0,728080815     | 1,708333333     |
| ARID3B                                                                              | 0,246599267 | 0,457761545 | 0,032 | 0     | 1         | 1,373409212   | 0,72811511      | #DIV/0!         |

Supplementary Table 3

| Differentially expressed genes_keloid-MD_ comparing SC-Keloid vs. (SC-Myel+Nonmyel) |             |             |       |       |           |               |                 |                 |
|-------------------------------------------------------------------------------------|-------------|-------------|-------|-------|-----------|---------------|-----------------|-----------------|
| gene                                                                                | p_val       | avg_log2FC  | pct.1 | pct.2 | p_val_adj | Foldchange_UP | Foldchange_DOWN | Ratio_pct1_pct2 |
| UBB                                                                                 | 0,091484878 | 0,457496977 | 0,435 | 0,293 | 1         | 1,373157372   | 0,728248648     | 1,484641638     |
| FRMD5                                                                               | 0,159938989 | 0,457288135 | 0,046 | 0     | 1         | 1,372958611   | 0,728354076     | #DIV/0!         |
| CTBP1                                                                               | 0,448179788 | 0,457282738 | 0,049 | 0,024 | 1         | 1,372953475   | 0,7283568       | 2,041666667     |
| HSPB3                                                                               | 0,301657292 | 0,456358088 | 0,026 | 0     | 1         | 1,372073806   | 0,728823767     | #DIV/0!         |
| EXOSC6                                                                              | 0,193382275 | 0,45626191  | 0,04  | 0     | 1         | 1,371982339   | 0,728872356     | #DIV/0!         |
| TACC1                                                                               | 0,219793232 | 0,456214551 | 0,077 | 0,024 | 1         | 1,371937301   | 0,728896283     | 3,208333333     |
| ARL6IP6                                                                             | 0,138963816 | 0,456191695 | 0,051 | 0     | 1         | 1,371915566   | 0,728907831     | #DIV/0!         |
| HS2ST1                                                                              | 0,474607012 | 0,456157036 | 0,048 | 0,024 | 1         | 1,371882609   | 0,728925342     | 2               |
| GRK2                                                                                | 0,212935447 | 0,454996123 | 0,037 | 0     | 1         | 1,370779121   | 0,729512133     | #DIV/0!         |
| ATP6AP1                                                                             | 0,293588255 | 0,454825242 | 0,065 | 0,024 | 1         | 1,370616768   | 0,729598545     | 2,708333333     |
| IRF1                                                                                | 0,302974891 | 0,454322579 | 0,064 | 0,024 | 1         | 1,370139301   | 0,729852796     | 2,666666667     |
| CYP20A1                                                                             | 0,152594689 | 0,453911294 | 0,048 | 0     | 1         | 1,369748757   | 0,730060893     | #DIV/0!         |
| MTX3                                                                                | 0,570058968 | 0,453558559 | 0,041 | 0,024 | 1         | 1,369413898   | 0,730239412     | 1,708333333     |
| FAM136A                                                                             | 0,25829635  | 0,453310741 | 0,07  | 0,024 | 1         | 1,369178687   | 0,73036486      | 2,916666667     |
| KAT6B                                                                               | 0,549137741 | 0,453205311 | 0,043 | 0,024 | 1         | 1,369078633   | 0,730418236     | 1,791666667     |
| HNRNPR                                                                              | 0,521931905 | 0,45292076  | 0,199 | 0,171 | 1         | 1,36880863    | 0,730562314     | 1,16374269      |
| LINC01116                                                                           | 0,390428625 | 0,452858863 | 0,054 | 0,024 | 1         | 1,368749903   | 0,730593659     | 2,25            |
| RSL1D1                                                                              | 0,202942163 | 0,452811753 | 0,115 | 0,049 | 1         | 1,368705208   | 0,730617516     | 2,346938776     |
| NOP58                                                                               | 0,446830069 | 0,452447894 | 0,049 | 0,024 | 1         | 1,368360055   | 0,730801807     | 2,041666667     |
| KRT10                                                                               | 0,105977541 | 0,452442289 | 0,541 | 0,415 | 1         | 1,368354738   | 0,730804646     | 1,303614458     |
| TMEM106B                                                                            | 0,708326101 | 0,452294577 | 0,086 | 0,073 | 1         | 1,368214644   | 0,730879474     | 1,178082192     |
| KLHL4                                                                               | 0,223537181 | 0,452135779 | 0,035 | 0     | 1         | 1,368064053   | 0,730959927     | #DIV/0!         |
| RPL7                                                                                | 0,072312877 | 0,452124976 | 0,574 | 0,463 | 1         | 1,368053809   | 0,7309654       | 1,239740821     |
| TCAF1                                                                               | 0,526462569 | 0,452040257 | 0,073 | 0,049 | 1         | 1,367973475   | 0,731008326     | 1,489795918     |
| RLF                                                                                 | 0,223537229 | 0,451960598 | 0,035 | 0     | 1         | 1,367897944   | 0,73104869      | #DIV/0!         |
| ICAM3                                                                               | 0,2129354   | 0,451581523 | 0,037 | 0     | 1         | 1,36753857    | 0,731240802     | #DIV/0!         |
| KRTCAP2                                                                             | 0,787800166 | 0,45156334  | 0,15  | 0,146 | 1         | 1,367521334   | 0,731250018     | 1,02739726      |
| BRD1                                                                                | 0,66150724  | 0,451086019 | 0,037 | 0,024 | 1         | 1,36706896    | 0,731491995     | 1,541666667     |
| HBS1L                                                                               | 0,471779573 | 0,45103659  | 0,048 | 0,024 | 1         | 1,367022123   | 0,731517057     | 2               |
| RNF115                                                                              | 0,269822412 | 0,450949599 | 0,069 | 0,024 | 1         | 1,366939697   | 0,731561167     | 2,875           |

Supplementary Table 3

| Differentially expressed genes_keloid-MD_comparing SC-Keloid vs. (SC-Myel+Nonmyel) |             |             |       |       |           |               |                 |                 |
|------------------------------------------------------------------------------------|-------------|-------------|-------|-------|-----------|---------------|-----------------|-----------------|
| gene                                                                               | p_val       | avg_log2FC  | pct.1 | pct.2 | p_val_adj | Foldchange_UP | Foldchange_DOWN | Ratio_pct1_pct2 |
| TBCB                                                                               | 0,892711065 | 0,450556861 | 0,185 | 0,195 | 1         | 1,366567631   | 0,731760344     | 0,948717949     |
| SPG21                                                                              | 0,212935447 | 0,450460536 | 0,037 | 0     | 1         | 1,366476393   | 0,731809203     | #DIV/0!         |
| PSMA1                                                                              | 0,434784271 | 0,449776202 | 0,163 | 0,122 | 1         | 1,365828366   | 0,732156415     | 1,336065574     |
| DHX9                                                                               | 0,248835925 | 0,449466546 | 0,072 | 0,024 | 1         | 1,36553524    | 0,73231358      | 3               |
| PSME4                                                                              | 0,259157012 | 0,449384959 | 0,03  | 0     | 1         | 1,365458019   | 0,732354994     | #DIV/0!         |
| UBXN6                                                                              | 0,184359294 | 0,449329836 | 0,041 | 0     | 1         | 1,365405848   | 0,732382977     | #DIV/0!         |
| SNX5                                                                               | 0,833459055 | 0,449188351 | 0,054 | 0,049 | 1         | 1,36527195    | 0,732454805     | 1,102040816     |
| CCDC124                                                                            | 0,360428849 | 0,448844537 | 0,057 | 0,024 | 1         | 1,364946625   | 0,73262938      | 2,375           |
| ZNF280D                                                                            | 0,23474314  | 0,448478765 | 0,033 | 0     | 1         | 1,364600609   | 0,73281515      | #DIV/0!         |
| EXOC1                                                                              | 0,202896258 | 0,448100553 | 0,038 | 0     | 1         | 1,364242917   | 0,733007288     | #DIV/0!         |
| RASA3                                                                              | 0,571722516 | 0,448036287 | 0,041 | 0,024 | 1         | 1,364182146   | 0,733039941     | 1,708333333     |
| DIP2C                                                                              | 0,690945164 | 0,447920559 | 0,062 | 0,049 | 1         | 1,364072721   | 0,733098745     | 1,265306122     |
| ASCC3                                                                              | 0,184359294 | 0,447800191 | 0,041 | 0     | 1         | 1,363958918   | 0,733159912     | #DIV/0!         |
| EIF2B3                                                                             | 0,184359294 | 0,447746161 | 0,041 | 0     | 1         | 1,363907837   | 0,73318737      | #DIV/0!         |
| UBXN7                                                                              | 0,394019678 | 0,447729941 | 0,054 | 0,024 | 1         | 1,363892503   | 0,733195613     | 2,25            |
| KRT14                                                                              | 0,334790321 | 0,447503367 | 0,022 | 0     | 1         | 1,363678322   | 0,73331077      | #DIV/0!         |
| NUP58                                                                              | 0,212935447 | 0,447495311 | 0,037 | 0     | 1         | 1,363670707   | 0,733314865     | #DIV/0!         |
| MAGT1                                                                              | 0,377977773 | 0,447376376 | 0,056 | 0,024 | 1         | 1,363558291   | 0,733375322     | 2,333333333     |
| VAMP7                                                                              | 0,223537229 | 0,446878237 | 0,035 | 0     | 1         | 1,363087558   | 0,733628587     | #DIV/0!         |
| CCDC50                                                                             | 0,612409728 | 0,446736168 | 0,145 | 0,122 | 1         | 1,362953336   | 0,733700835     | 1,18852459      |
| CTBP2                                                                              | 0,223537229 | 0,446723607 | 0,035 | 0     | 1         | 1,362941469   | 0,733707223     | #DIV/0!         |
| FAM91A1                                                                            | 0,570059001 | 0,446722619 | 0,041 | 0,024 | 1         | 1,362940535   | 0,733707725     | 1,708333333     |
| EHMT1                                                                              | 0,246599267 | 0,446276895 | 0,032 | 0     | 1         | 1,362519517   | 0,733934441     | #DIV/0!         |
| EXTL1                                                                              | 0,23474314  | 0,446096525 | 0,033 | 0     | 1         | 1,362349181   | 0,734026206     | #DIV/0!         |
| ATXN3                                                                              | 0,478865648 | 0,445681457 | 0,048 | 0,024 | 1         | 1,361957285   | 0,734237418     | 2               |
| CCDC47                                                                             | 0,905966414 | 0,44566312  | 0,14  | 0,146 | 1         | 1,361939974   | 0,73424675      | 0,95890411      |
| PDAP1                                                                              | 0,513959621 | 0,445587798 | 0,153 | 0,122 | 1         | 1,36186887    | 0,734285086     | 1,254098361     |
| MAPRE1                                                                             | 0,734557207 | 0,445464278 | 0,108 | 0,098 | 1         | 1,361752275   | 0,734347956     | 1,102040816     |
| LMNA                                                                               | 0,236435008 | 0,444929451 | 0,512 | 0,439 | 1         | 1,361247549   | 0,734620239     | 1,166287016     |
| ARID1B                                                                             | 0,723942184 | 0,444724981 | 0,11  | 0,098 | 1         | 1,361054636   | 0,734724363     | 1,12244898      |

Supplementary Table 3

| Differentially expressed genes_keloid-MD_ comparing SC-Keloid vs. (SC-Myel+Nonmyel) |             |             |       |       |           |               |                 |                 |
|-------------------------------------------------------------------------------------|-------------|-------------|-------|-------|-----------|---------------|-----------------|-----------------|
| gene                                                                                | p_val       | avg_log2FC  | pct.1 | pct.2 | p_val_adj | Foldchange_UP | Foldchange_DOWN | Ratio_pct1_pct2 |
| RAP2C                                                                               | 0,202896302 | 0,4425452   | 0,038 | 0     | 1         | 1,358999758   | 0,735835304     | #DIV/0!         |
| CACUL1                                                                              | 0,184359294 | 0,442542355 | 0,041 | 0     | 1         | 1,358997079   | 0,735836755     | #DIV/0!         |
| FSTL1                                                                               | 0,158983873 | 0,442366432 | 0,126 | 0,049 | 1         | 1,358831372   | 0,735926488     | 2,571428571     |
| ADAM10                                                                              | 0,694147987 | 0,442260452 | 0,112 | 0,098 | 1         | 1,358731557   | 0,735980551     | 1,142857143     |
| GTF3A                                                                               | 0,446804613 | 0,442074271 | 0,163 | 0,122 | 1         | 1,358556223   | 0,736075536     | 1,336065574     |
| KIAA1109                                                                            | 0,471779539 | 0,441881624 | 0,048 | 0,024 | 1         | 1,358374823   | 0,736173833     | 2               |
| TOLLIP                                                                              | 0,246599267 | 0,441836809 | 0,032 | 0     | 1         | 1,358332628   | 0,736196701     | #DIV/0!         |
| GFM1                                                                                | 0,246599267 | 0,441717111 | 0,032 | 0     | 1         | 1,358219934   | 0,736257785     | #DIV/0!         |
| TRA2B                                                                               | 0,970128421 | 0,441681927 | 0,116 | 0,122 | 1         | 1,35818681    | 0,736275741     | 0,950819672     |
| CAPRIN1                                                                             | 0,272156813 | 0,440882533 | 0,132 | 0,073 | 1         | 1,35743445    | 0,736683823     | 1,808219178     |
| TMEM65                                                                              | 0,246599267 | 0,440275312 | 0,032 | 0     | 1         | 1,356863235   | 0,736993953     | #DIV/0!         |
| DCAF5                                                                               | 0,23474314  | 0,439982651 | 0,033 | 0     | 1         | 1,356588014   | 0,737143473     | #DIV/0!         |
| RUVBL1                                                                              | 0,45360176  | 0,439826735 | 0,049 | 0,024 | 1         | 1,356441412   | 0,737223142     | 2,041666667     |
| NME1                                                                                | 0,426373946 | 0,439024611 | 0,167 | 0,122 | 1         | 1,355687453   | 0,737633145     | 1,368852459     |
| DMXL1                                                                               | 0,246599267 | 0,438869643 | 0,032 | 0     | 1         | 1,355541839   | 0,737712383     | #DIV/0!         |
| EIF5A                                                                               | 0,74387017  | 0,438453639 | 0,177 | 0,171 | 1         | 1,355151023   | 0,737925134     | 1,035087719     |
| MRPL40                                                                              | 0,469861132 | 0,437911924 | 0,134 | 0,098 | 1         | 1,354642275   | 0,738202268     | 1,367346939     |
| INO80                                                                               | 0,23474314  | 0,437722865 | 0,033 | 0     | 1         | 1,354464766   | 0,738299013     | #DIV/0!         |
| PSMB6                                                                               | 0,210328596 | 0,437548314 | 0,236 | 0,146 | 1         | 1,3543009     | 0,738388345     | 1,616438356     |
| SEC11A                                                                              | 0,114701617 | 0,436973011 | 0,386 | 0,268 | 1         | 1,353760953   | 0,738682851     | 1,440298507     |
| TIMM10B                                                                             | 0,246599267 | 0,436947479 | 0,032 | 0     | 1         | 1,353736995   | 0,738695923     | #DIV/0!         |
| SLC15A4                                                                             | 0,223537181 | 0,436449056 | 0,035 | 0     | 1         | 1,353269386   | 0,738951173     | #DIV/0!         |
| PRKCSH                                                                              | 0,391623426 | 0,436428639 | 0,054 | 0,024 | 1         | 1,353250235   | 0,73896163      | 2,25            |
| CLDN4                                                                               | 0,246599267 | 0,436348045 | 0,032 | 0     | 1         | 1,35317464    | 0,739002912     | #DIV/0!         |
| MED4                                                                                | 0,573633107 | 0,435832773 | 0,097 | 0,073 | 1         | 1,352691427   | 0,739266901     | 1,328767123     |
| PLXNA3                                                                              | 0,193382233 | 0,435270188 | 0,04  | 0     | 1         | 1,352164042   | 0,739555238     | #DIV/0!         |
| ZNF91                                                                               | 0,272474323 | 0,435218695 | 0,029 | 0     | 1         | 1,352115782   | 0,739581634     | #DIV/0!         |
| ARID1A                                                                              | 0,801997177 | 0,435190157 | 0,056 | 0,049 | 1         | 1,352089035   | 0,739596265     | 1,142857143     |
| CSTB                                                                                | 0,410512727 | 0,435105742 | 0,268 | 0,22  | 1         | 1,352009924   | 0,739639541     | 1,218181818     |
| HBP1                                                                                | 0,570016345 | 0,434480995 | 0,07  | 0,049 | 1         | 1,351424575   | 0,739959905     | 1,428571429     |



Supplementary Table 3

| Differentially expressed genes_keloid-MD_comparing SC-Keloid vs. (SC-Myel+Nonmyel) |             |             |       |       |           |               |                 |                 |
|------------------------------------------------------------------------------------|-------------|-------------|-------|-------|-----------|---------------|-----------------|-----------------|
| gene                                                                               | p_val       | avg_log2FC  | pct.1 | pct.2 | p_val_adj | Foldchange_UP | Foldchange_DOWN | Ratio_pct1_pct2 |
| COPS3                                                                              | 0,518370363 | 0,434346008 | 0,045 | 0,024 | 1         | 1,351298134   | 0,740029143     | 1,875           |
| TM9SF2                                                                             | 0,352357903 | 0,433811604 | 0,091 | 0,049 | 1         | 1,350797678   | 0,740303316     | 1,857142857     |
| PDGFA                                                                              | 0,456992444 | 0,433423471 | 0,38  | 0,341 | 1         | 1,350434317   | 0,740502509     | 1,114369501     |
| PIGC                                                                               | 0,828464453 | 0,433399491 | 0,054 | 0,049 | 1         | 1,350411871   | 0,740514818     | 1,102040816     |
| CTDNBP1                                                                            | 0,771594757 | 0,433343839 | 0,057 | 0,049 | 1         | 1,35035978    | 0,740543383     | 1,163265306     |
| RALGAPB                                                                            | 0,223537229 | 0,433317203 | 0,035 | 0     | 1         | 1,350334848   | 0,740557056     | #DIV/0!         |
| CKAP5                                                                              | 0,2129354   | 0,433177916 | 0,037 | 0     | 1         | 1,350204485   | 0,740628558     | #DIV/0!         |
| ELP2                                                                               | 0,2129354   | 0,433069333 | 0,037 | 0     | 1         | 1,350102866   | 0,740684303     | #DIV/0!         |
| RBM18                                                                              | 0,202896302 | 0,43267015  | 0,038 | 0     | 1         | 1,349729355   | 0,740889272     | #DIV/0!         |
| AGPS                                                                               | 0,23474314  | 0,432407011 | 0,033 | 0     | 1         | 1,349483195   | 0,741024419     | #DIV/0!         |
| TWF2                                                                               | 0,73447319  | 0,432195649 | 0,059 | 0,049 | 1         | 1,349285503   | 0,74113299      | 1,204081633     |
| POGZ                                                                               | 0,736022212 | 0,432053255 | 0,059 | 0,049 | 1         | 1,349152335   | 0,741206144     | 1,204081633     |
| SACM1L                                                                             | 0,223537229 | 0,431775439 | 0,035 | 0     | 1         | 1,348892558   | 0,74134889      | #DIV/0!         |
| RALY                                                                               | 0,390428625 | 0,431752069 | 0,054 | 0,024 | 1         | 1,348870708   | 0,741360899     | 2,25            |
| PIGF                                                                               | 0,695517811 | 0,431704167 | 0,035 | 0,024 | 1         | 1,348825922   | 0,741385515     | 1,458333333     |
| PARP4                                                                              | 0,259157069 | 0,431629233 | 0,03  | 0     | 1         | 1,348755865   | 0,741424024     | #DIV/0!         |
| ATP6V1A                                                                            | 0,234743088 | 0,431338555 | 0,033 | 0     | 1         | 1,348484141   | 0,741573423     | #DIV/0!         |
| UBAP2                                                                              | 0,516839263 | 0,431236779 | 0,045 | 0,024 | 1         | 1,348389014   | 0,74162574      | 1,875           |
| ZFYVE16                                                                            | 0,319830816 | 0,430429137 | 0,096 | 0,049 | 1         | 1,347634378   | 0,742041029     | 1,959183673     |
| ENDOG                                                                              | 0,492273208 | 0,430302745 | 0,046 | 0,024 | 1         | 1,347516319   | 0,74210604      | 1,916666667     |
| GGA1                                                                               | 0,259157069 | 0,43028197  | 0,03  | 0     | 1         | 1,347496915   | 0,742116727     | #DIV/0!         |
| FHL3                                                                               | 0,49668532  | 0,429900664 | 0,046 | 0,024 | 1         | 1,347140817   | 0,742312895     | 1,916666667     |
| TRPC4AP                                                                            | 0,259157069 | 0,429747204 | 0,03  | 0     | 1         | 1,346997528   | 0,74239186      | #DIV/0!         |
| CCDC43                                                                             | 0,193382233 | 0,429727427 | 0,04  | 0     | 1         | 1,346979064   | 0,742402037     | #DIV/0!         |
| ATP10D                                                                             | 0,223537229 | 0,429652737 | 0,035 | 0     | 1         | 1,346909331   | 0,742440472     | #DIV/0!         |
| CCT2                                                                               | 0,606756196 | 0,429314793 | 0,215 | 0,195 | 1         | 1,346593861   | 0,742614406     | 1,102564103     |
| SRP72                                                                              | 0,44419532  | 0,429313648 | 0,108 | 0,073 | 1         | 1,346592793   | 0,742614995     | 1,479452055     |
| ACTL6A                                                                             | 0,350130179 | 0,429238279 | 0,059 | 0,024 | 1         | 1,346522445   | 0,742653792     | 2,458333333     |
| SLFN5                                                                              | 0,33268481  | 0,429072617 | 0,094 | 0,049 | 1         | 1,346367836   | 0,742739074     | 1,918367347     |
| MDH1                                                                               | 0,40558398  | 0,428786196 | 0,113 | 0,073 | 1         | 1,346100565   | 0,742886546     | 1,547945205     |

Supplementary Table 3

| Differentially expressed genes_keloid-MD_comparing SC-Keloid vs. (SC-Myel+Nonmyel) |             |             |       |       |           |               |                 |                 |
|------------------------------------------------------------------------------------|-------------|-------------|-------|-------|-----------|---------------|-----------------|-----------------|
| gene                                                                               | p_val       | avg_log2FC  | pct.1 | pct.2 | p_val_adj | Foldchange_UP | Foldchange_DOWN | Ratio_pct1_pct2 |
| NEAT1                                                                              | 0,296541476 | 0,428235549 | 0,62  | 0,561 | 1         | 1,345586885   | 0,743170145     | 1,10516934      |
| WDR33                                                                              | 0,34692037  | 0,428216097 | 0,059 | 0,024 | 1         | 1,345568743   | 0,743180165     | 2,458333333     |
| BUD31                                                                              | 0,799000516 | 0,428124383 | 0,152 | 0,146 | 1         | 1,345483205   | 0,743227412     | 1,04109589      |
| PRKDC                                                                              | 0,305500166 | 0,428067674 | 0,183 | 0,122 | 1         | 1,345430319   | 0,743256627     | 1,5             |
| UBE2Q1                                                                             | 0,66150724  | 0,428049569 | 0,037 | 0,024 | 1         | 1,345413435   | 0,743265954     | 1,541666667     |
| CDC42SE2                                                                           | 0,193382275 | 0,428023486 | 0,04  | 0     | 1         | 1,34538911    | 0,743279392     | #DIV/0!         |
| RARS1                                                                              | 0,413312722 | 0,427945116 | 0,053 | 0,024 | 1         | 1,345316028   | 0,743319769     | 2,208333333     |
| BRD2                                                                               | 0,491780173 | 0,427536433 | 0,077 | 0,049 | 1         | 1,344934984   | 0,743530365     | 1,571428571     |
| TAGLN2                                                                             | 0,329373326 | 0,427002981 | 0,49  | 0,463 | 1         | 1,344437772   | 0,743805344     | 1,058315335     |
| OST4                                                                               | 0,345156952 | 0,426736406 | 0,458 | 0,439 | 1         | 1,344189375   | 0,743942794     | 1,043280182     |
| MRPS23                                                                             | 0,691509509 | 0,42669113  | 0,088 | 0,073 | 1         | 1,344147192   | 0,743966142     | 1,205479452     |
| SPEN                                                                               | 0,471779573 | 0,426592441 | 0,048 | 0,024 | 1         | 1,344055247   | 0,744017035     | 2               |
| PPP3CB                                                                             | 0,23474314  | 0,42655323  | 0,033 | 0     | 1         | 1,344018718   | 0,744037257     | #DIV/0!         |
| EPS15                                                                              | 0,90485429  | 0,426473902 | 0,051 | 0,049 | 1         | 1,343944817   | 0,74407817      | 1,040816327     |
| CDR2                                                                               | 0,246599267 | 0,426401706 | 0,032 | 0     | 1         | 1,343877565   | 0,744115406     | #DIV/0!         |
| SH3BP2                                                                             | 0,631143136 | 0,426393032 | 0,038 | 0,024 | 1         | 1,343869485   | 0,74411988      | 1,583333333     |
| PCNX1                                                                              | 0,286616306 | 0,426258796 | 0,027 | 0     | 1         | 1,34374445    | 0,74418912      | #DIV/0!         |
| HP1BP3                                                                             | 0,676629799 | 0,425610508 | 0,23  | 0,22  | 1         | 1,343140762   | 0,744523603     | 1,045454545     |
| TRIM13                                                                             | 0,336545295 | 0,425585098 | 0,061 | 0,024 | 1         | 1,343117106   | 0,744536717     | 2,541666667     |
| TIMM17A                                                                            | 0,204107825 | 0,425348536 | 0,08  | 0,024 | 1         | 1,34289689    | 0,74465881      | 3,333333333     |
| POMC                                                                               | 0,246599212 | 0,425286668 | 0,032 | 0     | 1         | 1,342839303   | 0,744690744     | #DIV/0!         |
| XRN2                                                                               | 0,155644485 | 0,425242141 | 0,124 | 0,049 | 1         | 1,342797858   | 0,744713729     | 2,530612245     |
| COX5B                                                                              | 0,385695012 | 0,425204947 | 0,295 | 0,244 | 1         | 1,34276324    | 0,744732929     | 1,209016393     |
| DARS1                                                                              | 0,359323201 | 0,425158626 | 0,057 | 0,024 | 1         | 1,342720129   | 0,74475684      | 2,375           |
| NUDT15                                                                             | 0,23474314  | 0,424606982 | 0,033 | 0     | 1         | 1,34220681    | 0,745041668     | #DIV/0!         |
| HUS1                                                                               | 0,184359294 | 0,424407718 | 0,041 | 0     | 1         | 1,342021438   | 0,745144579     | #DIV/0!         |
| TPI1                                                                               | 0,892628014 | 0,424122263 | 0,204 | 0,22  | 1         | 1,341755928   | 0,74529203      | 0,927272727     |
| NCL                                                                                | 0,513658928 | 0,423706516 | 0,278 | 0,244 | 1         | 1,341369325   | 0,745506835     | 1,139344262     |
| VMA21                                                                              | 0,371955395 | 0,423471958 | 0,089 | 0,049 | 1         | 1,341151259   | 0,745628051     | 1,816326531     |
| RBM39                                                                              | 0,818128078 | 0,423298081 | 0,215 | 0,22  | 1         | 1,34098963    | 0,745717922     | 0,977272727     |

Supplementary Table 3

| Differentially expressed genes_keloid-MD_comparing SC-Keloid vs. (SC-Myel+Nonmyel) |             |             |       |       |           |               |                 |                 |
|------------------------------------------------------------------------------------|-------------|-------------|-------|-------|-----------|---------------|-----------------|-----------------|
| gene                                                                               | p_val       | avg_log2FC  | pct.1 | pct.2 | p_val_adj | Foldchange_UP | Foldchange_DOWN | Ratio_pct1_pct2 |
| FAM111A                                                                            | 0,212935447 | 0,423269394 | 0,037 | 0     | 1         | 1,340962966   | 0,74573275      | #DIV/0!         |
| IMMP1L                                                                             | 0,570059001 | 0,423250317 | 0,041 | 0,024 | 1         | 1,340945234   | 0,745742611     | 1,708333333     |
| WDR61                                                                              | 0,394914891 | 0,422191073 | 0,086 | 0,049 | 1         | 1,339961057   | 0,746290345     | 1,755102041     |
| IPO5                                                                               | 0,49668532  | 0,422136374 | 0,046 | 0,024 | 1         | 1,339910255   | 0,746318641     | 1,916666667     |
| SNRPE                                                                              | 0,23704819  | 0,421834577 | 0,223 | 0,146 | 1         | 1,339629988   | 0,746474779     | 1,52739726      |
| RAD23A                                                                             | 0,428400391 | 0,421668186 | 0,051 | 0,024 | 1         | 1,339475493   | 0,746560878     | 2,125           |
| QSER1                                                                              | 0,193382275 | 0,421100898 | 0,04  | 0     | 1         | 1,338948896   | 0,746854494     | #DIV/0!         |
| PTRH2                                                                              | 0,272474323 | 0,421045521 | 0,029 | 0     | 1         | 1,338897502   | 0,746883162     | #DIV/0!         |
| DCAF16                                                                             | 0,259157069 | 0,42040865  | 0,03  | 0     | 1         | 1,338306583   | 0,747212943     | #DIV/0!         |
| S100A7                                                                             | 0,286616306 | 0,420337162 | 0,027 | 0     | 1         | 1,338240269   | 0,747249969     | #DIV/0!         |
| CKS1B                                                                              | 0,434914659 | 0,419919087 | 0,051 | 0,024 | 1         | 1,33785252    | 0,747466545     | 2,125           |
| CS                                                                                 | 0,498160694 | 0,419804249 | 0,046 | 0,024 | 1         | 1,337746032   | 0,747526045     | 1,916666667     |
| MCUR1                                                                              | 0,442367817 | 0,419436612 | 0,081 | 0,049 | 1         | 1,337405181   | 0,747716559     | 1,653061224     |
| RAB3GAP1                                                                           | 0,522977659 | 0,41942192  | 0,045 | 0,024 | 1         | 1,337391562   | 0,747724173     | 1,875           |
| PRPF4B                                                                             | 0,621955982 | 0,419363047 | 0,144 | 0,122 | 1         | 1,337336987   | 0,747754687     | 1,180327869     |
| CERS5                                                                              | 0,223537229 | 0,418988159 | 0,035 | 0     | 1         | 1,336989522   | 0,747949018     | #DIV/0!         |
| PEPD                                                                               | 0,657231016 | 0,418894937 | 0,064 | 0,049 | 1         | 1,336903133   | 0,747997349     | 1,306122449     |
| LRPPRC                                                                             | 0,184359294 | 0,418453167 | 0,041 | 0     | 1         | 1,33649382    | 0,74822643      | #DIV/0!         |
| TTC19                                                                              | 0,32253574  | 0,418337122 | 0,062 | 0,024 | 1         | 1,336386322   | 0,748286617     | 2,583333333     |
| HMCN1                                                                              | 0,297253656 | 0,417469519 | 0,065 | 0,024 | 1         | 1,335582893   | 0,748736754     | 2,708333333     |
| ATP2A2                                                                             | 0,718426852 | 0,417327431 | 0,061 | 0,049 | 1         | 1,33545136    | 0,748810499     | 1,244897959     |
| SLC3A2                                                                             | 0,601504176 | 0,417299169 | 0,096 | 0,073 | 1         | 1,335425199   | 0,748825169     | 1,315068493     |
| TTI2                                                                               | 0,259157069 | 0,417234624 | 0,03  | 0     | 1         | 1,335365455   | 0,748858671     | #DIV/0!         |
| FAAP20                                                                             | 0,428092404 | 0,417173381 | 0,137 | 0,098 | 1         | 1,335308769   | 0,748890461     | 1,397959184     |
| EIF2AK3                                                                            | 0,246599267 | 0,416647748 | 0,032 | 0     | 1         | 1,33482235    | 0,749163363     | #DIV/0!         |
| TOGARAM1                                                                           | 0,23474314  | 0,416056547 | 0,033 | 0     | 1         | 1,334275466   | 0,749470424     | #DIV/0!         |
| PAQR3                                                                              | 0,246599267 | 0,415755132 | 0,032 | 0     | 1         | 1,333996731   | 0,749627024     | #DIV/0!         |
| CCNC                                                                               | 0,212935447 | 0,415668228 | 0,037 | 0     | 1         | 1,333916378   | 0,749672181     | #DIV/0!         |
| PPP2CB                                                                             | 0,820375507 | 0,415375212 | 0,148 | 0,146 | 1         | 1,333645483   | 0,749824457     | 1,01369863      |
| RBM15B                                                                             | 0,246599267 | 0,415317319 | 0,032 | 0     | 1         | 1,333591967   | 0,749854547     | #DIV/0!         |

Supplementary Table 3

| Differentially expressed genes_keloid-MD_comparing SC-Keloid vs. (SC-Myel+Nonmyel) |             |             |       |       |           |               |                 |                 |
|------------------------------------------------------------------------------------|-------------|-------------|-------|-------|-----------|---------------|-----------------|-----------------|
| gene                                                                               | p_val       | avg_log2FC  | pct.1 | pct.2 | p_val_adj | Foldchange_UP | Foldchange_DOWN | Ratio_pct1_pct2 |
| GPS2                                                                               | 0,259157012 | 0,414849954 | 0,03  | 0     | 1         | 1,333160016   | 0,750097503     | #DIV/0!         |
| TMEM267                                                                            | 0,246599267 | 0,414819908 | 0,032 | 0     | 1         | 1,333132252   | 0,750113126     | #DIV/0!         |
| TRIM38                                                                             | 0,259157069 | 0,414586329 | 0,03  | 0     | 1         | 1,332916429   | 0,750234582     | #DIV/0!         |
| NSMCE3                                                                             | 0,23474314  | 0,414229535 | 0,033 | 0     | 1         | 1,332586825   | 0,750420146     | #DIV/0!         |
| CALML5                                                                             | 0,301657223 | 0,414210421 | 0,026 | 0     | 1         | 1,33256917    | 0,750430088     | #DIV/0!         |
| TMEM50A                                                                            | 0,612331734 | 0,413856005 | 0,239 | 0,22  | 1         | 1,332241848   | 0,750614464     | 1,086363636     |
| CUX1                                                                               | 0,622679374 | 0,413723697 | 0,118 | 0,098 | 1         | 1,332119675   | 0,750683305     | 1,204081633     |
| FAM174A                                                                            | 0,223537181 | 0,413706268 | 0,035 | 0     | 1         | 1,332103581   | 0,750692374     | #DIV/0!         |
| GABPA                                                                              | 0,212935447 | 0,413667645 | 0,037 | 0     | 1         | 1,33206792    | 0,750712471     | #DIV/0!         |
| TIMM44                                                                             | 0,246599267 | 0,413448109 | 0,032 | 0     | 1         | 1,331865233   | 0,750826716     | #DIV/0!         |
| ARL14EP                                                                            | 0,600624894 | 0,412421378 | 0,04  | 0,024 | 1         | 1,330917715   | 0,751361252     | 1,666666667     |
| RASL11B                                                                            | 0,23474314  | 0,411778318 | 0,033 | 0     | 1         | 1,33032461    | 0,751696234     | #DIV/0!         |
| PSMF1                                                                              | 0,23474314  | 0,41142541  | 0,033 | 0     | 1         | 1,329999229   | 0,751880135     | #DIV/0!         |
| PTPN9                                                                              | 0,246599212 | 0,411172287 | 0,032 | 0     | 1         | 1,3297659     | 0,752012065     | #DIV/0!         |
| RCN1                                                                               | 0,432162653 | 0,410495561 | 0,083 | 0,049 | 1         | 1,329142292   | 0,752364894     | 1,693877551     |
| NAE1                                                                               | 0,414566088 | 0,41045131  | 0,053 | 0,024 | 1         | 1,329101524   | 0,752387972     | 2,208333333     |
| UQCRCQ                                                                             | 0,546158054 | 0,409559554 | 0,386 | 0,39  | 1         | 1,328280236   | 0,75285318      | 0,98974359      |
| GTF3C6                                                                             | 0,225893748 | 0,409404246 | 0,142 | 0,073 | 1         | 1,328137253   | 0,75293423      | 1,945205479     |
| ALG14                                                                              | 0,679140502 | 0,409324259 | 0,062 | 0,049 | 1         | 1,328063619   | 0,752975976     | 1,265306122     |
| NSMCE4A                                                                            | 0,259157069 | 0,409043983 | 0,03  | 0     | 1         | 1,327805638   | 0,753122273     | #DIV/0!         |
| PRNP                                                                               | 0,189954979 | 0,40852769  | 0,447 | 0,366 | 1         | 1,327330545   | 0,753391839     | 1,221311475     |
| IST1                                                                               | 0,516839263 | 0,408137446 | 0,045 | 0,024 | 1         | 1,326971555   | 0,753595656     | 1,875           |
| GALNT7                                                                             | 0,259157069 | 0,408072667 | 0,03  | 0     | 1         | 1,326911974   | 0,753629495     | #DIV/0!         |
| CCNY                                                                               | 0,246599267 | 0,407766768 | 0,032 | 0     | 1         | 1,326630655   | 0,753789306     | #DIV/0!         |
| PFDN6                                                                              | 0,189579745 | 0,407375943 | 0,083 | 0,024 | 1         | 1,32627132    | 0,753993534     | 3,458333333     |
| UBE2A                                                                              | 0,185638573 | 0,406639703 | 0,085 | 0,024 | 1         | 1,325594666   | 0,754378412     | 3,541666667     |
| VDAC1                                                                              | 0,123576256 | 0,406571807 | 0,247 | 0,146 | 1         | 1,325532283   | 0,754413916     | 1,691780822     |
| GPBP1                                                                              | 0,62479868  | 0,406416966 | 0,118 | 0,098 | 1         | 1,325390024   | 0,75449489      | 1,204081633     |
| F2R                                                                                | 0,643055639 | 0,406406563 | 0,065 | 0,049 | 1         | 1,325380467   | 0,75450033      | 1,326530612     |
| ARL6IP5                                                                            | 0,645921332 | 0,406212041 | 0,187 | 0,171 | 1         | 1,325201775   | 0,754602068     | 1,093567251     |

Supplementary Table 3

| Differentially expressed genes_keloid-MD_ comparing SC-Keloid vs. (SC-Myel+Nonmyel) |             |             |       |       |           |               |                 |                 |
|-------------------------------------------------------------------------------------|-------------|-------------|-------|-------|-----------|---------------|-----------------|-----------------|
| gene                                                                                | p_val       | avg_log2FC  | pct.1 | pct.2 | p_val_adj | Foldchange_UP | Foldchange_DOWN | Ratio_pct1_pct2 |
| PPP2R5C                                                                             | 0,331914941 | 0,406137912 | 0,061 | 0,024 | 1         | 1,325133684   | 0,754640842     | 2,541666667     |
| RPS27L                                                                              | 0,261191955 | 0,406033787 | 0,453 | 0,366 | 1         | 1,325038048   | 0,75469531      | 1,237704918     |
| TRAPPC12                                                                            | 0,286616306 | 0,405755688 | 0,027 | 0     | 1         | 1,324782654   | 0,754840801     | #DIV/0!         |
| MAGOH                                                                               | 0,661509547 | 0,405528686 | 0,139 | 0,122 | 1         | 1,324574221   | 0,754959582     | 1,139344262     |
| FUS                                                                                 | 0,361378138 | 0,405486893 | 0,252 | 0,195 | 1         | 1,324535851   | 0,754981452     | 1,292307692     |
| COL9A2                                                                              | 0,301657292 | 0,40531193  | 0,026 | 0     | 1         | 1,324375227   | 0,755073018     | #DIV/0!         |
| CARD19                                                                              | 0,539841164 | 0,405228428 | 0,1   | 0,073 | 1         | 1,324298576   | 0,755116722     | 1,369863014     |
| NTAN1                                                                               | 0,897908053 | 0,405129058 | 0,051 | 0,049 | 1         | 1,324207363   | 0,755168735     | 1,040816327     |
| RPL39                                                                               | 0,015266087 | 0,404964578 | 0,88  | 0,805 | 1         | 1,3240564     | 0,755254836     | 1,093167702     |
| ARPC2                                                                               | 0,444337977 | 0,404340382 | 0,348 | 0,317 | 1         | 1,323483659   | 0,755581675     | 1,097791798     |
| ZNF721                                                                              | 0,212935447 | 0,404090083 | 0,037 | 0     | 1         | 1,323254062   | 0,755712776     | #DIV/0!         |
| PFN1                                                                                | 0,363854528 | 0,404020374 | 0,293 | 0,244 | 1         | 1,323190126   | 0,755749291     | 1,200819672     |
| RPLP0                                                                               | 0,179902999 | 0,403550703 | 0,589 | 0,512 | 1         | 1,32275943    | 0,755995366     | 1,150390625     |
| RPS15A                                                                              | 0,147123179 | 0,403520178 | 0,764 | 0,805 | 1         | 1,322731443   | 0,756011362     | 0,949068323     |
| ACYP1                                                                               | 0,246599267 | 0,403070529 | 0,032 | 0     | 1         | 1,322319248   | 0,756247027     | #DIV/0!         |
| BAZ2B                                                                               | 0,80362691  | 0,402991352 | 0,056 | 0,049 | 1         | 1,32224668    | 0,756288532     | 1,142857143     |
| EFCAB2                                                                              | 0,259157069 | 0,402906386 | 0,03  | 0     | 1         | 1,322168809   | 0,756333074     | #DIV/0!         |
| LARGE1                                                                              | 0,246599267 | 0,402726083 | 0,032 | 0     | 1         | 1,322003579   | 0,756427604     | #DIV/0!         |
| MUS81                                                                               | 0,731498497 | 0,402660331 | 0,033 | 0,024 | 1         | 1,32194333    | 0,756462079     | 1,375           |
| HIVEP2                                                                              | 0,480289805 | 0,402457805 | 0,048 | 0,024 | 1         | 1,321757767   | 0,75656828      | 2               |
| MTRF1L                                                                              | 0,223537229 | 0,402209865 | 0,035 | 0     | 1         | 1,321530631   | 0,756698314     | #DIV/0!         |
| ACTG1                                                                               | 0,209901656 | 0,401478879 | 0,727 | 0,659 | 1         | 1,320861207   | 0,757081815     | 1,103186646     |
| NUDT22                                                                              | 0,519903805 | 0,401070601 | 0,045 | 0,024 | 1         | 1,32048746    | 0,757296097     | 1,875           |
| RP9                                                                                 | 0,396424782 | 0,400845934 | 0,054 | 0,024 | 1         | 1,32028184    | 0,757414038     | 2,25            |
| KCMF1                                                                               | 0,432302168 | 0,400542455 | 0,051 | 0,024 | 1         | 1,320004141   | 0,757573381     | 2,125           |
| TRIP6                                                                               | 0,454963013 | 0,400452619 | 0,049 | 0,024 | 1         | 1,319921947   | 0,757620557     | 2,041666667     |
| RPAP2                                                                               | 0,549137741 | 0,400141556 | 0,043 | 0,024 | 1         | 1,319637386   | 0,757783927     | 1,791666667     |
| COPB2                                                                               | 0,492934246 | 0,400059402 | 0,077 | 0,049 | 1         | 1,319562242   | 0,75782708      | 1,571428571     |
| SYNJ2BP                                                                             | 0,286616306 | 0,400046523 | 0,027 | 0     | 1         | 1,319550462   | 0,757833845     | #DIV/0!         |
| CNST                                                                                | 0,3347904   | 0,399705307 | 0,022 | 0     | 1         | 1,319238408   | 0,758013104     | #DIV/0!         |

Supplementary Table 3

| Differentially expressed genes_keloid-MD_ comparing SC-Keloid vs. (SC-Myel+Nonmyel) |             |             |       |       |           |               |                 |                 |
|-------------------------------------------------------------------------------------|-------------|-------------|-------|-------|-----------|---------------|-----------------|-----------------|
| gene                                                                                | p_val       | avg_log2FC  | pct.1 | pct.2 | p_val_adj | Foldchange_UP | Foldchange_DOWN | Ratio_pct1_pct2 |
| RUFY3                                                                               | 0,246599267 | 0,399604952 | 0,032 | 0     | 1         | 1,319146644   | 0,758065833     | #DIV/0!         |
| LIX1L                                                                               | 0,524518128 | 0,399431784 | 0,045 | 0,024 | 1         | 1,318988316   | 0,75815683      | 1,875           |
| KPNA2                                                                               | 0,246599267 | 0,399330033 | 0,032 | 0     | 1         | 1,318895292   | 0,758210304     | #DIV/0!         |
| NAV1                                                                                | 0,425974449 | 0,398998254 | 0,083 | 0,049 | 1         | 1,318592019   | 0,758384691     | 1,693877551     |
| RAB1A                                                                               | 0,935074472 | 0,398897243 | 0,088 | 0,098 | 1         | 1,3184997     | 0,758437791     | 0,897959184     |
| RNF13                                                                               | 0,274061149 | 0,39863733  | 0,069 | 0,024 | 1         | 1,318262183   | 0,758574442     | 2,875           |
| TDP2                                                                                | 0,259157069 | 0,398382862 | 0,03  | 0     | 1         | 1,318029684   | 0,758708254     | #DIV/0!         |
| INIP                                                                                | 0,697473218 | 0,398381354 | 0,035 | 0,024 | 1         | 1,318028306   | 0,758709047     | 1,458333333     |
| PABPC4                                                                              | 0,259157069 | 0,398247873 | 0,03  | 0     | 1         | 1,317906365   | 0,758779247     | #DIV/0!         |
| RAI14                                                                               | 0,23474314  | 0,39804579  | 0,033 | 0     | 1         | 1,317721775   | 0,75888554      | #DIV/0!         |
| SEC61B                                                                              | 0,141637519 | 0,397985235 | 0,571 | 0,537 | 1         | 1,317666466   | 0,758917393     | 1,063314711     |
| EIF3J                                                                               | 0,739670556 | 0,397856678 | 0,156 | 0,146 | 1         | 1,317549055   | 0,758985023     | 1,068493151     |
| DKC1                                                                                | 0,246599267 | 0,397772944 | 0,032 | 0     | 1         | 1,317472587   | 0,759029076     | #DIV/0!         |
| EIF3B                                                                               | 0,370475519 | 0,397661511 | 0,057 | 0,024 | 1         | 1,31737083    | 0,759087705     | 2,375           |
| PLOD3                                                                               | 0,488498993 | 0,39762366  | 0,105 | 0,073 | 1         | 1,317336268   | 0,759107621     | 1,438356164     |
| PDLIM5                                                                              | 0,570059001 | 0,397404628 | 0,041 | 0,024 | 1         | 1,317136283   | 0,759222878     | 1,708333333     |
| METTL16                                                                             | 0,272474323 | 0,397353367 | 0,029 | 0     | 1         | 1,317089484   | 0,759249855     | #DIV/0!         |
| ACTR6                                                                               | 0,155720477 | 0,397333766 | 0,091 | 0,024 | 1         | 1,31707159    | 0,759260171     | 3,791666667     |
| C3orf70                                                                             | 0,84743619  | 0,39725906  | 0,078 | 0,073 | 1         | 1,317003391   | 0,759299488     | 1,068493151     |
| SND1                                                                                | 0,398838727 | 0,397108025 | 0,054 | 0,024 | 1         | 1,316865521   | 0,759378983     | 2,25            |
| RAD17                                                                               | 0,301657223 | 0,397087067 | 0,026 | 0     | 1         | 1,316846392   | 0,759390014     | #DIV/0!         |
| CENPW                                                                               | 0,167664901 | 0,396826119 | 0,045 | 0     | 1         | 1,316608228   | 0,759527381     | #DIV/0!         |
| HTATSF1                                                                             | 0,350130209 | 0,396735105 | 0,059 | 0,024 | 1         | 1,316525171   | 0,759575298     | 2,458333333     |
| C2orf76                                                                             | 0,246599212 | 0,396683358 | 0,032 | 0     | 1         | 1,31647795    | 0,759602544     | #DIV/0!         |
| GGH                                                                                 | 0,401261501 | 0,396620868 | 0,054 | 0,024 | 1         | 1,316420928   | 0,759635447     | 2,25            |
| RPS6KB1                                                                             | 0,259157069 | 0,396556453 | 0,03  | 0     | 1         | 1,316362153   | 0,759669364     | #DIV/0!         |
| CD2AP                                                                               | 0,193382275 | 0,395961156 | 0,04  | 0     | 1         | 1,315819096   | 0,75998289      | #DIV/0!         |
| SLC22A18                                                                            | 0,246599267 | 0,395680574 | 0,032 | 0     | 1         | 1,315563215   | 0,76013071      | #DIV/0!         |
| VEZT                                                                                | 0,49668532  | 0,395603813 | 0,046 | 0,024 | 1         | 1,31549322    | 0,760171155     | 1,916666667     |
| OXLD1                                                                               | 0,598891708 | 0,395591243 | 0,04  | 0,024 | 1         | 1,315481759   | 0,760177778     | 1,666666667     |

Supplementary Table 3

| Differentially expressed genes_keloid-MD_comparing SC-Keloid vs. (SC-Myel+Nonmyel) |             |             |       |       |           |               |                 |                 |
|------------------------------------------------------------------------------------|-------------|-------------|-------|-------|-----------|---------------|-----------------|-----------------|
| gene                                                                               | p_val       | avg_log2FC  | pct.1 | pct.2 | p_val_adj | Foldchange_UP | Foldchange_DOWN | Ratio_pct1_pct2 |
| ERGIC3                                                                             | 0,72683957  | 0,3950321   | 0,085 | 0,073 | 1         | 1,314972018   | 0,760472456     | 1,164383562     |
| ANKFY1                                                                             | 0,23474314  | 0,394969627 | 0,033 | 0     | 1         | 1,314915077   | 0,760505387     | #DIV/0!         |
| NEU1                                                                               | 0,259157069 | 0,394766838 | 0,03  | 0     | 1         | 1,314730262   | 0,760612294     | #DIV/0!         |
| ADAMTS2                                                                            | 0,20998483  | 0,394682    | 0,08  | 0,024 | 1         | 1,314652952   | 0,760657023     | 3,333333333     |
| PTTG1                                                                              | 0,193382233 | 0,394390433 | 0,04  | 0     | 1         | 1,314387289   | 0,760810766     | #DIV/0!         |
| RBM12                                                                              | 0,23474314  | 0,394081424 | 0,033 | 0     | 1         | 1,314105792   | 0,760973741     | #DIV/0!         |
| LRIF1                                                                              | 0,246599212 | 0,39404372  | 0,032 | 0     | 1         | 1,314071449   | 0,760993629     | #DIV/0!         |
| IDS                                                                                | 0,459363725 | 0,393868872 | 0,08  | 0,049 | 1         | 1,313912199   | 0,761085863     | 1,632653061     |
| THUMPD2                                                                            | 0,223537229 | 0,393794533 | 0,035 | 0     | 1         | 1,313844497   | 0,761125081     | #DIV/0!         |
| PNN                                                                                | 0,321969445 | 0,393702715 | 0,155 | 0,098 | 1         | 1,313760882   | 0,761173524     | 1,581632653     |
| EP400                                                                              | 0,272474323 | 0,393451595 | 0,029 | 0     | 1         | 1,313532226   | 0,761306027     | #DIV/0!         |
| UBE2W                                                                              | 0,286616306 | 0,393385668 | 0,027 | 0     | 1         | 1,313472202   | 0,761340817     | #DIV/0!         |
| WBP11                                                                              | 0,718426852 | 0,393366241 | 0,061 | 0,049 | 1         | 1,313454516   | 0,761351069     | 1,244897959     |
| MRPL15                                                                             | 0,471779573 | 0,393069699 | 0,048 | 0,024 | 1         | 1,313184566   | 0,761507579     | 2               |
| TAF2                                                                               | 0,272474323 | 0,392549428 | 0,029 | 0     | 1         | 1,312711085   | 0,761782247     | #DIV/0!         |
| CCDC167                                                                            | 0,359295665 | 0,39248089  | 0,12  | 0,073 | 1         | 1,312648723   | 0,761818438     | 1,643835616     |
| NHLRC3                                                                             | 0,286616306 | 0,392380045 | 0,027 | 0     | 1         | 1,312556972   | 0,761871691     | #DIV/0!         |
| HSPA6                                                                              | 0,301657292 | 0,392314333 | 0,026 | 0     | 1         | 1,312497189   | 0,761906394     | #DIV/0!         |
| TPST2                                                                              | 0,248899845 | 0,392213686 | 0,073 | 0,024 | 1         | 1,312405628   | 0,761959548     | 3,041666667     |
| EEF1AKMT1                                                                          | 0,259157069 | 0,392155676 | 0,03  | 0     | 1         | 1,312352858   | 0,761990187     | #DIV/0!         |
| UCK2                                                                               | 0,212935447 | 0,391874039 | 0,037 | 0     | 1         | 1,312096691   | 0,762138954     | #DIV/0!         |
| ATOX1                                                                              | 0,123156586 | 0,391716096 | 0,51  | 0,366 | 1         | 1,311953053   | 0,762222396     | 1,393442623     |
| CIB1                                                                               | 0,469845083 | 0,391519476 | 0,136 | 0,098 | 1         | 1,311774264   | 0,762326284     | 1,387755102     |
| RAB5A                                                                              | 0,576979871 | 0,391505508 | 0,097 | 0,073 | 1         | 1,311761564   | 0,762333664     | 1,328767123     |
| ITPR3                                                                              | 0,423402649 | 0,391459182 | 0,053 | 0,024 | 1         | 1,311719443   | 0,762358144     | 2,208333333     |
| PTPA                                                                               | 0,246599267 | 0,390291408 | 0,032 | 0     | 1         | 1,310658115   | 0,762975477     | #DIV/0!         |
| E2F4                                                                               | 0,246599267 | 0,390215983 | 0,032 | 0     | 1         | 1,310589595   | 0,763015366     | #DIV/0!         |
| VCPIP1                                                                             | 0,301657292 | 0,389945008 | 0,026 | 0     | 1         | 1,310343456   | 0,763158694     | #DIV/0!         |
| MFSD14C                                                                            | 0,259157012 | 0,389259886 | 0,03  | 0     | 1         | 1,309721334   | 0,763521196     | #DIV/0!         |
| CAPN1                                                                              | 0,23474314  | 0,389254391 | 0,033 | 0     | 1         | 1,309716345   | 0,763524105     | #DIV/0!         |

Supplementary Table 3

| Differentially expressed genes_keloid-MD_comparing SC-Keloid vs. (SC-Myel+Nonmyel) |             |             |       |       |           |               |                 |                 |
|------------------------------------------------------------------------------------|-------------|-------------|-------|-------|-----------|---------------|-----------------|-----------------|
| gene                                                                               | p_val       | avg_log2FC  | pct.1 | pct.2 | p_val_adj | Foldchange_UP | Foldchange_DOWN | Ratio_pct1_pct2 |
| KIAA2013                                                                           | 0,521439549 | 0,388773779 | 0,045 | 0,024 | 1         | 1,309280106   | 0,763778504     | 1,875           |
| RPL36                                                                              | 0,055331486 | 0,388335067 | 0,738 | 0,61  | 1         | 1,308882025   | 0,764010797     | 1,209836066     |
| TMEM41B                                                                            | 0,571722516 | 0,388313689 | 0,041 | 0,024 | 1         | 1,30886263    | 0,764022119     | 1,708333333     |
| CEP68                                                                              | 0,259157069 | 0,388234306 | 0,03  | 0     | 1         | 1,308790613   | 0,76406416      | #DIV/0!         |
| DCTN1                                                                              | 0,955539094 | 0,38810681  | 0,067 | 0,073 | 1         | 1,308674955   | 0,764131686     | 0,917808219     |
| TCEAL3                                                                             | 0,396849075 | 0,387988474 | 0,086 | 0,049 | 1         | 1,308567617   | 0,764194366     | 1,755102041     |
| RBM6                                                                               | 0,573898963 | 0,387849498 | 0,07  | 0,049 | 1         | 1,308441567   | 0,764267985     | 1,428571429     |
| FAHD1                                                                              | 0,23474314  | 0,387737132 | 0,033 | 0     | 1         | 1,308339662   | 0,764327513     | #DIV/0!         |
| FBLIM1                                                                             | 0,223537229 | 0,387707563 | 0,035 | 0     | 1         | 1,308312847   | 0,764343178     | #DIV/0!         |
| NDUFB10                                                                            | 0,481481816 | 0,387656683 | 0,322 | 0,293 | 1         | 1,308266707   | 0,764370135     | 1,098976109     |
| WDR1                                                                               | 0,591646932 | 0,38755927  | 0,147 | 0,122 | 1         | 1,308178374   | 0,764421748     | 1,204918033     |
| PIGS                                                                               | 0,202896302 | 0,387366785 | 0,038 | 0     | 1         | 1,308003848   | 0,764523745     | #DIV/0!         |
| CDK2AP1                                                                            | 0,259157069 | 0,387075633 | 0,03  | 0     | 1         | 1,307739905   | 0,76467805      | #DIV/0!         |
| DPP8                                                                               | 0,272474323 | 0,386925185 | 0,029 | 0     | 1         | 1,307603537   | 0,764757797     | #DIV/0!         |
| ACTR8                                                                              | 0,31768239  | 0,386765001 | 0,024 | 0     | 1         | 1,307458361   | 0,764842713     | #DIV/0!         |
| EXOC7                                                                              | 0,246599267 | 0,386654278 | 0,032 | 0     | 1         | 1,307358021   | 0,764901415     | #DIV/0!         |
| ITFG1                                                                              | 0,23474314  | 0,386559416 | 0,033 | 0     | 1         | 1,307272061   | 0,764951711     | #DIV/0!         |
| MDFIC                                                                              | 0,286616306 | 0,386488814 | 0,027 | 0     | 1         | 1,307208088   | 0,764989147     | #DIV/0!         |
| CHKA                                                                               | 0,272474323 | 0,386231382 | 0,029 | 0     | 1         | 1,306974852   | 0,765125663     | #DIV/0!         |
| GARRE1                                                                             | 0,286616306 | 0,386167631 | 0,027 | 0     | 1         | 1,306917099   | 0,765159474     | #DIV/0!         |
| ANKRD12                                                                            | 0,870164084 | 0,386046913 | 0,1   | 0,098 | 1         | 1,306807748   | 0,765223501     | 1,020408163     |
| KLF6                                                                               | 0,743819773 | 0,385799192 | 0,246 | 0,244 | 1         | 1,306583379   | 0,765354907     | 1,008196721     |
| AP1S1                                                                              | 0,946449349 | 0,385298777 | 0,072 | 0,073 | 1         | 1,306130254   | 0,765620425     | 0,98630137      |
| RBM25                                                                              | 0,457363441 | 0,385080427 | 0,137 | 0,098 | 1         | 1,305932588   | 0,765736309     | 1,397959184     |
| CALU                                                                               | 0,2279966   | 0,384904585 | 0,47  | 0,39  | 1         | 1,305773425   | 0,765829646     | 1,205128205     |
| PCDH1                                                                              | 0,246599267 | 0,384884775 | 0,032 | 0     | 1         | 1,305755495   | 0,765840162     | #DIV/0!         |
| SLC25A24                                                                           | 0,32752869  | 0,384729665 | 0,062 | 0,024 | 1         | 1,305615115   | 0,765922505     | 2,583333333     |
| SCAND1                                                                             | 0,356164178 | 0,384641303 | 0,211 | 0,146 | 1         | 1,305535152   | 0,765969418     | 1,445205479     |
| ACTA2                                                                              | 0,530703027 | 0,384562948 | 0,045 | 0,024 | 1         | 1,305464248   | 0,76601102      | 1,875           |
| MSMO1                                                                              | 0,436224413 | 0,384412347 | 0,051 | 0,024 | 1         | 1,305327979   | 0,766090987     | 2,125           |



Supplementary Table 3

| Differentially expressed genes_keloid-MD_ comparing SC-Keloid vs. (SC-Myel+Nonmyel) |             |             |       |       |           |               |                 |                 |
|-------------------------------------------------------------------------------------|-------------|-------------|-------|-------|-----------|---------------|-----------------|-----------------|
| gene                                                                                | p_val       | avg_log2FC  | pct.1 | pct.2 | p_val_adj | Foldchange_UP | Foldchange_DOWN | Ratio_pct1_pct2 |
| NUDT21                                                                              | 0,272474323 | 0,384307364 | 0,029 | 0     | 1         | 1,305232996   | 0,766146736     | #DIV/0!         |
| FNBP1                                                                               | 0,286616306 | 0,384269675 | 0,027 | 0     | 1         | 1,305198898   | 0,766166752     | #DIV/0!         |
| PLEKHO1                                                                             | 0,393654427 | 0,384000639 | 0,116 | 0,073 | 1         | 1,304955526   | 0,766309641     | 1,589041096     |
| COL5A1                                                                              | 0,127942835 | 0,383984861 | 0,298 | 0,171 | 1         | 1,304941254   | 0,766318021     | 1,742690058     |
| TXNL4A                                                                              | 0,151978339 | 0,383928064 | 0,257 | 0,146 | 1         | 1,304889881   | 0,766348191     | 1,760273973     |
| UTRN                                                                                | 0,595119379 | 0,383452769 | 0,198 | 0,171 | 1         | 1,304460057   | 0,766600706     | 1,157894737     |
| CCDC12                                                                              | 0,919532957 | 0,383398927 | 0,065 | 0,073 | 1         | 1,304411375   | 0,766629316     | 0,890410959     |
| ST6GAL1                                                                             | 0,981962686 | 0,38314617  | 0,07  | 0,073 | 1         | 1,304182865   | 0,766763639     | 0,95890411      |
| ABRACL                                                                              | 0,333937764 | 0,383136098 | 0,094 | 0,049 | 1         | 1,30417376    | 0,766768992     | 1,918367347     |
| VPS36                                                                               | 0,274914326 | 0,383036805 | 0,069 | 0,024 | 1         | 1,304084004   | 0,766821767     | 2,875           |
| CYB561D2                                                                            | 0,246599267 | 0,382888517 | 0,032 | 0     | 1         | 1,30394997    | 0,766900589     | #DIV/0!         |
| CBWD1                                                                               | 0,286616306 | 0,382827237 | 0,027 | 0     | 1         | 1,303894584   | 0,766933165     | #DIV/0!         |
| EPHA3                                                                               | 0,286616306 | 0,382256236 | 0,027 | 0     | 1         | 1,303378621   | 0,767236767     | #DIV/0!         |
| GEMIN6                                                                              | 0,246599267 | 0,382127843 | 0,032 | 0     | 1         | 1,303262631   | 0,767305051     | #DIV/0!         |
| DIS3                                                                                | 0,272474262 | 0,381373548 | 0,029 | 0     | 1         | 1,302581415   | 0,767706332     | #DIV/0!         |
| C18orf32                                                                            | 0,202896302 | 0,381182975 | 0,038 | 0     | 1         | 1,302409362   | 0,767807749     | #DIV/0!         |
| DNAAF4                                                                              | 0,272474323 | 0,381132357 | 0,029 | 0     | 1         | 1,302363667   | 0,767834688     | #DIV/0!         |
| FAM228B                                                                             | 0,259157012 | 0,381107038 | 0,03  | 0     | 1         | 1,302340811   | 0,767848164     | #DIV/0!         |
| DAAM1                                                                               | 0,138585163 | 0,380849226 | 0,096 | 0,024 | 1         | 1,302108101   | 0,767985392     | 4               |
| CDC42BPA                                                                            | 0,339135672 | 0,380099498 | 0,061 | 0,024 | 1         | 1,301431608   | 0,768384596     | 2,541666667     |
| FBXO7                                                                               | 0,2981748   | 0,379888953 | 0,065 | 0,024 | 1         | 1,301241693   | 0,768496741     | 2,708333333     |
| EFTUD2                                                                              | 0,272474323 | 0,379656913 | 0,029 | 0     | 1         | 1,30103242    | 0,768620354     | #DIV/0!         |
| EIF2A                                                                               | 0,419602142 | 0,379629378 | 0,053 | 0,024 | 1         | 1,30100759    | 0,768635024     | 2,208333333     |
| PCDHGA10                                                                            | 0,23474314  | 0,379522196 | 0,033 | 0     | 1         | 1,300910937   | 0,76869213      | #DIV/0!         |
| IPO9                                                                                | 0,223537181 | 0,379257943 | 0,035 | 0     | 1         | 1,300672676   | 0,768832942     | #DIV/0!         |
| MTF2                                                                                | 0,259157069 | 0,379244865 | 0,03  | 0     | 1         | 1,300660886   | 0,768839911     | #DIV/0!         |
| PHYH                                                                                | 0,259157012 | 0,378779331 | 0,03  | 0     | 1         | 1,300241251   | 0,769088044     | #DIV/0!         |
| TMTC2                                                                               | 0,286616306 | 0,378565656 | 0,027 | 0     | 1         | 1,30004869    | 0,76920196      | #DIV/0!         |
| EIF2AK4                                                                             | 0,611436271 | 0,378441443 | 0,067 | 0,049 | 1         | 1,299936763   | 0,76926819      | 1,367346939     |
| ZXDC                                                                                | 0,301657292 | 0,378438926 | 0,026 | 0     | 1         | 1,299934495   | 0,769269532     | #DIV/0!         |

Supplementary Table 3

| Differentially expressed genes_keloid-MD_comparing SC-Keloid vs. (SC-Myel+Nonmyel) |             |             |       |       |           |               |                 |                 |
|------------------------------------------------------------------------------------|-------------|-------------|-------|-------|-----------|---------------|-----------------|-----------------|
| gene                                                                               | p_val       | avg_log2FC  | pct.1 | pct.2 | p_val_adj | Foldchange_UP | Foldchange_DOWN | Ratio_pct1_pct2 |
| PPME1                                                                              | 0,246599267 | 0,378324181 | 0,032 | 0     | 1         | 1,299831108   | 0,769330718     | #DIV/0!         |
| BTF3                                                                               | 0,491945751 | 0,378313652 | 0,327 | 0,293 | 1         | 1,299821622   | 0,769336333     | 1,116040956     |
| RANBP1                                                                             | 0,498337942 | 0,378095916 | 0,182 | 0,146 | 1         | 1,299625464   | 0,769452452     | 1,246575342     |
| MAPKAPK5                                                                           | 0,246599267 | 0,377997953 | 0,032 | 0     | 1         | 1,299537218   | 0,769504702     | #DIV/0!         |
| ELF2                                                                               | 0,781162874 | 0,377996742 | 0,057 | 0,049 | 1         | 1,299536128   | 0,769505348     | 1,163265306     |
| CBWD5                                                                              | 0,301657292 | 0,377918367 | 0,026 | 0     | 1         | 1,299465532   | 0,769547153     | #DIV/0!         |
| PHF6                                                                               | 0,454963013 | 0,377858988 | 0,049 | 0,024 | 1         | 1,299412049   | 0,769578826     | 2,041666667     |
| PSPC1                                                                              | 0,259157069 | 0,377635261 | 0,03  | 0     | 1         | 1,299210557   | 0,769698179     | #DIV/0!         |
| SIKE1                                                                              | 0,259157069 | 0,37753457  | 0,03  | 0     | 1         | 1,299119883   | 0,769751901     | #DIV/0!         |
| ZBTB43                                                                             | 0,286616306 | 0,37724728  | 0,027 | 0     | 1         | 1,29886121    | 0,7699052       | #DIV/0!         |
| MLH3                                                                               | 0,286616306 | 0,377093341 | 0,027 | 0     | 1         | 1,298722626   | 0,769987355     | #DIV/0!         |
| RILPL2                                                                             | 0,272474323 | 0,376827177 | 0,029 | 0     | 1         | 1,298483046   | 0,770129424     | #DIV/0!         |
| COMMD5                                                                             | 0,286616306 | 0,376669308 | 0,027 | 0     | 1         | 1,298340966   | 0,770213701     | #DIV/0!         |
| XRN1                                                                               | 0,526060884 | 0,376596012 | 0,045 | 0,024 | 1         | 1,298275005   | 0,770252832     | 1,875           |
| RBFOX2                                                                             | 0,501118424 | 0,376184242 | 0,046 | 0,024 | 1         | 1,297904507   | 0,770472708     | 1,916666667     |
| JMJD8                                                                              | 0,246599267 | 0,375751117 | 0,032 | 0     | 1         | 1,29751491    | 0,770704053     | #DIV/0!         |
| PARVB                                                                              | 0,436224413 | 0,375540019 | 0,051 | 0,024 | 1         | 1,297325069   | 0,770816832     | 2,125           |
| UNK                                                                                | 0,23474314  | 0,375114577 | 0,033 | 0     | 1         | 1,296942552   | 0,771044175     | #DIV/0!         |
| PHKG1                                                                              | 0,570059001 | 0,375089454 | 0,041 | 0,024 | 1         | 1,296919967   | 0,771057602     | 1,708333333     |
| TM9SF3                                                                             | 0,286591694 | 0,374824598 | 0,209 | 0,146 | 1         | 1,296681895   | 0,771199169     | 1,431506849     |
| SCN9A                                                                              | 0,854483812 | 0,374512463 | 0,078 | 0,073 | 1         | 1,296401381   | 0,77136604      | 1,068493151     |
| MIEN1                                                                              | 0,622378279 | 0,374329205 | 0,067 | 0,049 | 1         | 1,296236717   | 0,771464029     | 1,367346939     |
| TMEM230                                                                            | 0,607750154 | 0,373994292 | 0,121 | 0,098 | 1         | 1,295935838   | 0,771643141     | 1,234693878     |
| CACNA1D                                                                            | 0,571722483 | 0,373777872 | 0,041 | 0,024 | 1         | 1,295741448   | 0,771758904     | 1,708333333     |
| ZBTB14                                                                             | 0,286616306 | 0,373742881 | 0,027 | 0     | 1         | 1,295710022   | 0,771777622     | #DIV/0!         |
| AKT3                                                                               | 0,848844758 | 0,373628459 | 0,078 | 0,073 | 1         | 1,295607262   | 0,771838836     | 1,068493151     |
| NIPSNAP2                                                                           | 0,937940638 | 0,373317835 | 0,049 | 0,049 | 1         | 1,295328336   | 0,772005037     | 1               |
| DCAF10                                                                             | 0,286616241 | 0,372935173 | 0,027 | 0     | 1         | 1,294984808   | 0,772209831     | #DIV/0!         |
| NFX1                                                                               | 0,301657292 | 0,37281672  | 0,026 | 0     | 1         | 1,294878487   | 0,772273237     | #DIV/0!         |
| GON7                                                                               | 0,259157069 | 0,372492781 | 0,03  | 0     | 1         | 1,294587771   | 0,77244666      | #DIV/0!         |

Supplementary Table 3

| Differentially expressed genes_keloid-MD_ comparing SC-Keloid vs. (SC-Myel+Nonmyel) |             |             |       |       |           |               |                 |                 |
|-------------------------------------------------------------------------------------|-------------|-------------|-------|-------|-----------|---------------|-----------------|-----------------|
| gene                                                                                | p_val       | avg_log2FC  | pct.1 | pct.2 | p_val_adj | Foldchange_UP | Foldchange_DOWN | Ratio_pct1_pct2 |
| GAPVD1                                                                              | 0,49668532  | 0,372394898 | 0,046 | 0,024 | 1         | 1,294499939   | 0,772499071     | 1,916666667     |
| TMEM131                                                                             | 0,259157069 | 0,371712254 | 0,03  | 0     | 1         | 1,293887563   | 0,772864682     | #DIV/0!         |
| FNIP2                                                                               | 0,3347904   | 0,371627737 | 0,022 | 0     | 1         | 1,293811766   | 0,77290996      | #DIV/0!         |
| SHMT2                                                                               | 0,246599267 | 0,371550154 | 0,032 | 0     | 1         | 1,293742191   | 0,772951525     | #DIV/0!         |
| ENSA                                                                                | 0,45921246  | 0,371233792 | 0,108 | 0,073 | 1         | 1,293458523   | 0,773121041     | 1,479452055     |
| MORF4L2                                                                             | 0,254819288 | 0,370878053 | 0,139 | 0,073 | 1         | 1,293139622   | 0,7733117       | 1,904109589     |
| KAT8                                                                                | 0,272474323 | 0,370854574 | 0,029 | 0     | 1         | 1,293118577   | 0,773324286     | #DIV/0!         |
| SRP19                                                                               | 0,481490838 | 0,370724743 | 0,078 | 0,049 | 1         | 1,293002212   | 0,773393882     | 1,591836735     |
| UPF3B                                                                               | 0,259157069 | 0,370559457 | 0,03  | 0     | 1         | 1,292854084   | 0,773482493     | #DIV/0!         |
| DCBLD1                                                                              | 0,272474323 | 0,370142989 | 0,029 | 0     | 1         | 1,292480925   | 0,773705809     | #DIV/0!         |
| PIAS1                                                                               | 0,246599267 | 0,369997932 | 0,032 | 0     | 1         | 1,292350978   | 0,773783606     | #DIV/0!         |
| BSDC1                                                                               | 0,731498497 | 0,369940741 | 0,033 | 0,024 | 1         | 1,292299748   | 0,773814281     | 1,375           |
| MRPL13                                                                              | 0,258521384 | 0,369710315 | 0,136 | 0,073 | 1         | 1,29209336    | 0,773937883     | 1,863013699     |
| TMTC3                                                                               | 0,23474314  | 0,369587663 | 0,033 | 0     | 1         | 1,291983516   | 0,774003683     | #DIV/0!         |
| NSFL1C                                                                              | 0,317682464 | 0,369540299 | 0,024 | 0     | 1         | 1,2919411     | 0,774029094     | #DIV/0!         |
| SMARCD1                                                                             | 0,888695482 | 0,369334209 | 0,128 | 0,146 | 1         | 1,291756559   | 0,774139673     | 0,876712329     |
| AP2A1                                                                               | 0,259157069 | 0,368919618 | 0,03  | 0     | 1         | 1,291385397   | 0,774362171     | #DIV/0!         |
| ABT1                                                                                | 0,286616306 | 0,368838161 | 0,027 | 0     | 1         | 1,291312485   | 0,774405894     | #DIV/0!         |
| FBXO11                                                                              | 0,604098048 | 0,368633034 | 0,04  | 0,024 | 1         | 1,291128895   | 0,77451601      | 1,666666667     |
| KATNAL1                                                                             | 0,665867195 | 0,368519343 | 0,064 | 0,049 | 1         | 1,291027152   | 0,774577048     | 1,306122449     |
| ETNK1                                                                               | 0,63295049  | 0,368441541 | 0,038 | 0,024 | 1         | 1,290957532   | 0,77461882      | 1,583333333     |
| PIGT                                                                                | 0,504688253 | 0,368237371 | 0,075 | 0,049 | 1         | 1,290774848   | 0,774728452     | 1,530612245     |
| ZNF407-AS1                                                                          | 0,769589184 | 0,368077004 | 0,032 | 0,024 | 1         | 1,290631377   | 0,774814574     | 1,333333333     |
| REPIN1                                                                              | 0,317682464 | 0,368043675 | 0,024 | 0     | 1         | 1,290601561   | 0,774832474     | #DIV/0!         |
| DHX40                                                                               | 0,301657292 | 0,367760891 | 0,026 | 0     | 1         | 1,290348613   | 0,774984364     | #DIV/0!         |
| SYCP2                                                                               | 0,3347904   | 0,367455967 | 0,022 | 0     | 1         | 1,290075918   | 0,77514818      | #DIV/0!         |
| GCFC2                                                                               | 0,259157069 | 0,367385    | 0,03  | 0     | 1         | 1,29001246    | 0,775186311     | #DIV/0!         |
| RBFA                                                                                | 0,4774438   | 0,367132123 | 0,048 | 0,024 | 1         | 1,289786365   | 0,775322198     | 2               |
| RECQL                                                                               | 0,631537249 | 0,366896117 | 0,094 | 0,073 | 1         | 1,28957539    | 0,775449041     | 1,287671233     |
| KLF2                                                                                | 0,509421129 | 0,366783102 | 0,075 | 0,049 | 1         | 1,289474373   | 0,77550979      | 1,530612245     |

Supplementary Table 3

| Differentially expressed genes_keloid-MD_comparing SC-Keloid vs. (SC-Myel+Nonmyel) |             |             |       |       |           |               |                 |                 |
|------------------------------------------------------------------------------------|-------------|-------------|-------|-------|-----------|---------------|-----------------|-----------------|
| gene                                                                               | p_val       | avg_log2FC  | pct.1 | pct.2 | p_val_adj | Foldchange_UP | Foldchange_DOWN | Ratio_pct1_pct2 |
| RAN                                                                                | 0,532987468 | 0,366436226 | 0,23  | 0,195 | 1         | 1,289164375   | 0,775696272     | 1,179487179     |
| LIMD2                                                                              | 0,852721591 | 0,366291171 | 0,029 | 0,024 | 1         | 1,289034763   | 0,775774268     | 1,208333333     |
| CDKN2B                                                                             | 0,3347904   | 0,365966931 | 0,022 | 0     | 1         | 1,28874509    | 0,77594864      | #DIV/0!         |
| FXR1                                                                               | 0,463783215 | 0,365923239 | 0,136 | 0,098 | 1         | 1,288706061   | 0,77597214      | 1,387755102     |
| FKBP5                                                                              | 0,301657292 | 0,365842961 | 0,026 | 0     | 1         | 1,288634354   | 0,77601532      | #DIV/0!         |
| ERLEC1                                                                             | 0,673581738 | 0,365813116 | 0,14  | 0,122 | 1         | 1,288607696   | 0,776031374     | 1,147540984     |
| ALKBH5                                                                             | 0,527605956 | 0,365744141 | 0,045 | 0,024 | 1         | 1,288546089   | 0,776068476     | 1,875           |
| STARD4-AS1                                                                         | 0,286616306 | 0,365743225 | 0,027 | 0     | 1         | 1,288545271   | 0,776068969     | #DIV/0!         |
| EVA1A                                                                              | 0,259157069 | 0,36574115  | 0,03  | 0     | 1         | 1,288543418   | 0,776070085     | #DIV/0!         |
| THBS1                                                                              | 0,394700919 | 0,365729964 | 0,118 | 0,073 | 1         | 1,288533427   | 0,776076103     | 1,616438356     |
| CUL4B                                                                              | 0,600624894 | 0,365680648 | 0,04  | 0,024 | 1         | 1,288489382   | 0,776102631     | 1,666666667     |
| ZBTB8OS                                                                            | 0,393452236 | 0,365663447 | 0,088 | 0,049 | 1         | 1,288474019   | 0,776111885     | 1,795918367     |
| BRMS1                                                                              | 0,223537181 | 0,365565018 | 0,035 | 0     | 1         | 1,288386115   | 0,776164838     | #DIV/0!         |
| RHOA                                                                               | 0,566497511 | 0,365226776 | 0,472 | 0,512 | 1         | 1,288084086   | 0,776346832     | 0,921875        |
| CPNE8                                                                              | 0,272474323 | 0,365105231 | 0,029 | 0     | 1         | 1,287975572   | 0,776412241     | #DIV/0!         |
| CCDC92                                                                             | 0,317682464 | 0,364887514 | 0,024 | 0     | 1         | 1,287781218   | 0,776529418     | #DIV/0!         |
| TRIM24                                                                             | 0,742228981 | 0,364630732 | 0,059 | 0,049 | 1         | 1,287552029   | 0,776667643     | 1,204081633     |
| SELENOK                                                                            | 0,400597092 | 0,364612282 | 0,273 | 0,22  | 1         | 1,287535564   | 0,776677576     | 1,240909091     |
| CLIP1                                                                              | 0,255138083 | 0,364356296 | 0,072 | 0,024 | 1         | 1,287307129   | 0,776815398     | 3               |
| RMDN1                                                                              | 0,413157832 | 0,364256219 | 0,085 | 0,049 | 1         | 1,287217833   | 0,776869287     | 1,734693878     |
| SAMD1                                                                              | 0,23474314  | 0,364104831 | 0,033 | 0     | 1         | 1,287082768   | 0,776950811     | #DIV/0!         |
| GMPS                                                                               | 0,246599267 | 0,363770817 | 0,032 | 0     | 1         | 1,286784816   | 0,777130712     | #DIV/0!         |
| RPL35                                                                              | 0,099296261 | 0,363691754 | 0,659 | 0,585 | 1         | 1,286714299   | 0,777173302     | 1,126495726     |
| TMEM60                                                                             | 0,23474314  | 0,363489058 | 0,033 | 0     | 1         | 1,286533531   | 0,777282501     | #DIV/0!         |
| C17orf75                                                                           | 0,286616241 | 0,363403447 | 0,027 | 0     | 1         | 1,286457189   | 0,777328627     | #DIV/0!         |
| RASSF3                                                                             | 0,286616306 | 0,362821394 | 0,027 | 0     | 1         | 1,285938274   | 0,777642302     | #DIV/0!         |
| PTP4A1                                                                             | 0,61978277  | 0,362571671 | 0,094 | 0,073 | 1         | 1,285715704   | 0,77777692      | 1,287671233     |
| LARP4B                                                                             | 0,23474314  | 0,362111698 | 0,033 | 0     | 1         | 1,285305846   | 0,778024937     | #DIV/0!         |
| VASH1                                                                              | 0,272474323 | 0,361721707 | 0,029 | 0     | 1         | 1,284958448   | 0,778235282     | #DIV/0!         |
| TTC1                                                                               | 0,582578207 | 0,361671497 | 0,097 | 0,073 | 1         | 1,284913728   | 0,778262367     | 1,328767123     |

Supplementary Table 3

| Differentially expressed genes_keloid-MD_ comparing SC-Keloid vs. (SC-Myel+Nonmyel) |             |             |       |       |           |               |                 |                 |
|-------------------------------------------------------------------------------------|-------------|-------------|-------|-------|-----------|---------------|-----------------|-----------------|
| gene                                                                                | p_val       | avg_log2FC  | pct.1 | pct.2 | p_val_adj | Foldchange_UP | Foldchange_DOWN | Ratio_pct1_pct2 |
| THADA                                                                               | 0,301657292 | 0,361626204 | 0,026 | 0     | 1         | 1,284873389   | 0,778286801     | #DIV/0!         |
| RNF168                                                                              | 0,852721591 | 0,361596308 | 0,029 | 0,024 | 1         | 1,284846764   | 0,778302929     | 1,208333333     |
| DDX5                                                                                | 0,213064266 | 0,361494629 | 0,611 | 0,561 | 1         | 1,284756213   | 0,778357785     | 1,08912656      |
| ELOB                                                                                | 0,08866707  | 0,361349548 | 0,577 | 0,488 | 1         | 1,284627021   | 0,778436062     | 1,182377049     |
| ATP8B2                                                                              | 0,632950459 | 0,361253256 | 0,038 | 0,024 | 1         | 1,284541282   | 0,77848802      | 1,583333333     |
| UGGT1                                                                               | 0,272474323 | 0,361239427 | 0,029 | 0     | 1         | 1,28452897    | 0,778495483     | #DIV/0!         |
| NUP188                                                                              | 0,272474323 | 0,360828868 | 0,029 | 0     | 1         | 1,284163473   | 0,778717057     | #DIV/0!         |
| GNG5                                                                                | 0,329087807 | 0,360568592 | 0,47  | 0,39  | 1         | 1,283931818   | 0,778857557     | 1,205128205     |
| DDR1                                                                                | 0,785959491 | 0,360468638 | 0,057 | 0,049 | 1         | 1,283842867   | 0,778911521     | 1,163265306     |
| PNPLA2                                                                              | 0,272474323 | 0,36028955  | 0,029 | 0     | 1         | 1,283683508   | 0,779008217     | #DIV/0!         |
| CXorf38                                                                             | 0,23474314  | 0,36010958  | 0,033 | 0     | 1         | 1,283523384   | 0,7791054       | #DIV/0!         |
| UVSSA                                                                               | 0,272474323 | 0,359846811 | 0,029 | 0     | 1         | 1,283289627   | 0,779247318     | #DIV/0!         |
| JAK1                                                                                | 0,760435046 | 0,359709833 | 0,083 | 0,073 | 1         | 1,28316779    | 0,779321307     | 1,136986301     |
| SNTB2                                                                               | 0,286616306 | 0,359687703 | 0,027 | 0     | 1         | 1,283148108   | 0,779333262     | #DIV/0!         |
| C4orf3                                                                              | 0,669140508 | 0,359643579 | 0,255 | 0,244 | 1         | 1,283108863   | 0,779357098     | 1,045081967     |
| RNF19A                                                                              | 0,346027682 | 0,359595765 | 0,093 | 0,049 | 1         | 1,28306634    | 0,779382928     | 1,897959184     |
| SPRED1                                                                              | 0,719946175 | 0,359309145 | 0,061 | 0,049 | 1         | 1,282811458   | 0,779537783     | 1,244897959     |
| GRIK2                                                                               | 0,286616306 | 0,359247103 | 0,027 | 0     | 1         | 1,282756293   | 0,779571307     | #DIV/0!         |
| PMPCA                                                                               | 0,272474323 | 0,359083726 | 0,029 | 0     | 1         | 1,282611036   | 0,779659594     | #DIV/0!         |
| TACC2                                                                               | 0,286616306 | 0,359044197 | 0,027 | 0     | 1         | 1,282575894   | 0,779680957     | #DIV/0!         |
| SDC4                                                                                | 0,234743088 | 0,358748313 | 0,033 | 0     | 1         | 1,282312876   | 0,779840879     | #DIV/0!         |
| TMEM14B                                                                             | 0,718039898 | 0,358624384 | 0,161 | 0,146 | 1         | 1,282202728   | 0,779907871     | 1,102739726     |
| RIPK1                                                                               | 0,301657292 | 0,358206203 | 0,026 | 0     | 1         | 1,281831122   | 0,780133968     | #DIV/0!         |
| NPEPL1                                                                              | 0,286616306 | 0,357641085 | 0,027 | 0     | 1         | 1,281329114   | 0,780439614     | #DIV/0!         |
| HPS4                                                                                | 0,286616306 | 0,357232057 | 0,027 | 0     | 1         | 1,280965887   | 0,780660914     | #DIV/0!         |
| FRA10AC1                                                                            | 0,272474323 | 0,357143327 | 0,029 | 0     | 1         | 1,280887107   | 0,780708928     | #DIV/0!         |
| ST3GAL2                                                                             | 0,259157069 | 0,356996991 | 0,03  | 0     | 1         | 1,28075719    | 0,780788121     | #DIV/0!         |
| TP53BP1                                                                             | 0,246599267 | 0,356989731 | 0,032 | 0     | 1         | 1,280750745   | 0,78079205      | #DIV/0!         |
| PGD                                                                                 | 0,259157069 | 0,356953372 | 0,03  | 0     | 1         | 1,280718468   | 0,780811728     | #DIV/0!         |
| LUC7L2                                                                              | 0,907713174 | 0,356849873 | 0,043 | 0,049 | 1         | 1,280626592   | 0,780867746     | 0,87755102      |

Supplementary Table 3

| Differentially expressed genes_keloid-MD_ comparing SC-Keloid vs. (SC-Myel+Nonmyel) |             |             |       |       |           |               |                 |                 |
|-------------------------------------------------------------------------------------|-------------|-------------|-------|-------|-----------|---------------|-----------------|-----------------|
| gene                                                                                | p_val       | avg_log2FC  | pct.1 | pct.2 | p_val_adj | Foldchange_UP | Foldchange_DOWN | Ratio_pct1_pct2 |
| ERGIC1                                                                              | 0,217891216 | 0,356824629 | 0,078 | 0,024 | 1         | 1,280604185   | 0,780881409     | 3,25            |
| SNRPB                                                                               | 0,668522209 | 0,356787622 | 0,14  | 0,122 | 1         | 1,280571335   | 0,78090144      | 1,147540984     |
| GPR107                                                                              | 0,301657292 | 0,356506    | 0,026 | 0     | 1         | 1,280321386   | 0,781053891     | #DIV/0!         |
| TNFAIP8                                                                             | 0,259157069 | 0,356449707 | 0,03  | 0     | 1         | 1,280271429   | 0,781084368     | #DIV/0!         |
| HSPBP1                                                                              | 0,272474262 | 0,356135051 | 0,029 | 0     | 1         | 1,279992229   | 0,781254743     | #DIV/0!         |
| AMPH                                                                                | 0,23474314  | 0,355576081 | 0,033 | 0     | 1         | 1,279496394   | 0,781557498     | #DIV/0!         |
| ARL16                                                                               | 0,384945473 | 0,355543957 | 0,056 | 0,024 | 1         | 1,279467904   | 0,781574901     | 2,333333333     |
| DNAJC4                                                                              | 0,246599267 | 0,35531745  | 0,032 | 0     | 1         | 1,279267039   | 0,78169762      | #DIV/0!         |
| ETV5                                                                                | 0,301657292 | 0,355280537 | 0,026 | 0     | 1         | 1,279234308   | 0,781717621     | #DIV/0!         |
| CNDP2                                                                               | 0,259157069 | 0,354871825 | 0,03  | 0     | 1         | 1,278871956   | 0,781939111     | #DIV/0!         |
| CD82                                                                                | 0,265406236 | 0,354554164 | 0,104 | 0,049 | 1         | 1,278590397   | 0,782111302     | 2,12244898      |
| PALS1                                                                               | 0,301657292 | 0,35446202  | 0,026 | 0     | 1         | 1,278508737   | 0,782161256     | #DIV/0!         |
| IDI1                                                                                | 0,446614406 | 0,354387053 | 0,081 | 0,049 | 1         | 1,278442304   | 0,782201901     | 1,653061224     |
| C19orf53                                                                            | 0,421914588 | 0,354163026 | 0,271 | 0,22  | 1         | 1,278243798   | 0,782323374     | 1,231818182     |
| LEF1                                                                                | 0,524518128 | 0,35415717  | 0,045 | 0,024 | 1         | 1,278238609   | 0,782326549     | 1,875           |
| FBXL15                                                                              | 0,317682464 | 0,354120903 | 0,024 | 0     | 1         | 1,278206477   | 0,782346215     | #DIV/0!         |
| AMMECR1L                                                                            | 0,353096361 | 0,353758833 | 0,021 | 0     | 1         | 1,277885728   | 0,782542584     | #DIV/0!         |
| CCP110                                                                              | 0,286616306 | 0,353497693 | 0,027 | 0     | 1         | 1,277654441   | 0,782684244     | #DIV/0!         |
| EIF2B1                                                                              | 0,246599267 | 0,352228408 | 0,032 | 0     | 1         | 1,276530854   | 0,783373153     | #DIV/0!         |
| AHI1                                                                                | 0,441485813 | 0,35107408  | 0,051 | 0,024 | 1         | 1,275509886   | 0,784000196     | 2,125           |
| FBXW7                                                                               | 0,527605956 | 0,350819694 | 0,045 | 0,024 | 1         | 1,275284999   | 0,784138448     | 1,875           |
| MRPS6                                                                               | 0,55074314  | 0,350590604 | 0,043 | 0,024 | 1         | 1,275082508   | 0,784262974     | 1,791666667     |
| ZC3H7A                                                                              | 0,573388302 | 0,350535628 | 0,041 | 0,024 | 1         | 1,27503392    | 0,78429286      | 1,708333333     |
| MAFG                                                                                | 0,272474323 | 0,350206563 | 0,029 | 0     | 1         | 1,27474313    | 0,78447177      | #DIV/0!         |
| ULK2                                                                                | 0,246599267 | 0,350179948 | 0,032 | 0     | 1         | 1,274719614   | 0,784486242     | #DIV/0!         |
| MAT2B                                                                               | 0,272474323 | 0,34996369  | 0,029 | 0     | 1         | 1,274528549   | 0,784603845     | #DIV/0!         |
| PLA2G12A                                                                            | 0,259157069 | 0,349719526 | 0,03  | 0     | 1         | 1,274312864   | 0,784736644     | #DIV/0!         |
| PAF1                                                                                | 0,286616306 | 0,349622833 | 0,027 | 0     | 1         | 1,27422746    | 0,78478924      | #DIV/0!         |
| KCTD10                                                                              | 0,286616306 | 0,349399988 | 0,027 | 0     | 1         | 1,274030652   | 0,784910472     | #DIV/0!         |
| QTRT2                                                                               | 0,301657292 | 0,349359764 | 0,026 | 0     | 1         | 1,273995131   | 0,784932356     | #DIV/0!         |

Supplementary Table 3

| Differentially expressed genes_keloid-MD_comparing SC-Keloid vs. (SC-Myel+Nonmyel) |             |             |       |       |           |               |                 |                 |
|------------------------------------------------------------------------------------|-------------|-------------|-------|-------|-----------|---------------|-----------------|-----------------|
| gene                                                                               | p_val       | avg_log2FC  | pct.1 | pct.2 | p_val_adj | Foldchange_UP | Foldchange_DOWN | Ratio_pct1_pct2 |
| DDOST                                                                              | 0,191020481 | 0,349084024 | 0,12  | 0,049 | 1         | 1,273751657   | 0,785082394     | 2,448979592     |
| NFKB1                                                                              | 0,578399554 | 0,348683961 | 0,041 | 0,024 | 1         | 1,273398492   | 0,785300129     | 1,708333333     |
| SP100                                                                              | 0,46593639  | 0,348621692 | 0,08  | 0,049 | 1         | 1,273343531   | 0,785334024     | 1,632653061     |
| RTN3                                                                               | 0,326526131 | 0,348479054 | 0,062 | 0,024 | 1         | 1,273217643   | 0,785411674     | 2,583333333     |
| POLR3D                                                                             | 0,202896302 | 0,348293422 | 0,038 | 0     | 1         | 1,273053829   | 0,785512739     | #DIV/0!         |
| POLR3G                                                                             | 0,272474323 | 0,348117102 | 0,029 | 0     | 1         | 1,272898251   | 0,785608747     | #DIV/0!         |
| NSD2                                                                               | 0,246599267 | 0,348115963 | 0,032 | 0     | 1         | 1,272897246   | 0,785609367     | #DIV/0!         |
| PITPNA-AS1                                                                         | 0,665267831 | 0,348008869 | 0,037 | 0,024 | 1         | 1,27280276    | 0,785667687     | 1,541666667     |
| RNF145                                                                             | 0,465935494 | 0,34790272  | 0,049 | 0,024 | 1         | 1,272709115   | 0,785725496     | 2,041666667     |
| CERK                                                                               | 0,272474323 | 0,347872887 | 0,029 | 0     | 1         | 1,272682797   | 0,785741744     | #DIV/0!         |
| POGLUT1                                                                            | 0,259157012 | 0,347853562 | 0,03  | 0     | 1         | 1,27266575    | 0,785752269     | #DIV/0!         |
| CNTLN                                                                              | 0,272474323 | 0,347566333 | 0,029 | 0     | 1         | 1,272412397   | 0,785908722     | #DIV/0!         |
| UNC5B                                                                              | 0,259157069 | 0,347063525 | 0,03  | 0     | 1         | 1,271969013   | 0,786182674     | #DIV/0!         |
| MAP3K7                                                                             | 0,301657292 | 0,346929881 | 0,026 | 0     | 1         | 1,27185119    | 0,786255505     | #DIV/0!         |
| MELTF                                                                              | 0,549137741 | 0,3469058   | 0,043 | 0,024 | 1         | 1,271829961   | 0,786268629     | 1,791666667     |
| NAB2                                                                               | 0,259157069 | 0,346613113 | 0,03  | 0     | 1         | 1,271571964   | 0,78642816      | #DIV/0!         |
| PCOLCE                                                                             | 0,609324585 | 0,346518654 | 0,04  | 0,024 | 1         | 1,271488712   | 0,786479652     | 1,666666667     |
| SLC2A13                                                                            | 0,372736722 | 0,346490145 | 0,019 | 0     | 1         | 1,271463586   | 0,786495194     | #DIV/0!         |
| PARP8                                                                              | 0,85499711  | 0,346487154 | 0,029 | 0,024 | 1         | 1,27146095    | 0,786496825     | 1,208333333     |
| CRNDE                                                                              | 0,301657292 | 0,346032894 | 0,026 | 0     | 1         | 1,27106067    | 0,786744507     | #DIV/0!         |
| CLCN3                                                                              | 0,581701562 | 0,345731149 | 0,07  | 0,049 | 1         | 1,27079485    | 0,786909075     | 1,428571429     |
| ETHE1                                                                              | 0,286616241 | 0,345508439 | 0,027 | 0     | 1         | 1,270598692   | 0,78703056      | #DIV/0!         |
| PRDX6                                                                              | 0,97557216  | 0,345426735 | 0,239 | 0,268 | 1         | 1,270526737   | 0,787075133     | 0,891791045     |
| BET1                                                                               | 0,272474323 | 0,345351499 | 0,029 | 0     | 1         | 1,270460481   | 0,78711618      | #DIV/0!         |
| IFT81                                                                              | 0,259157069 | 0,345252084 | 0,03  | 0     | 1         | 1,270372937   | 0,787170421     | #DIV/0!         |
| SURF6                                                                              | 0,272474323 | 0,345240431 | 0,029 | 0     | 1         | 1,270362676   | 0,787176779     | #DIV/0!         |
| ST3GAL6                                                                            | 0,317682464 | 0,345163786 | 0,024 | 0     | 1         | 1,270295188   | 0,787218601     | #DIV/0!         |
| RGS5                                                                               | 0,393875079 | 0,345134855 | 0,018 | 0     | 1         | 1,270269714   | 0,787234387     | #DIV/0!         |
| UBXN4                                                                              | 0,505256641 | 0,345097772 | 0,271 | 0,244 | 1         | 1,270237064   | 0,787254622     | 1,110655738     |
| FARP1                                                                              | 0,223537229 | 0,34498233  | 0,035 | 0     | 1         | 1,270135426   | 0,78731762      | #DIV/0!         |

Supplementary Table 3

| Differentially expressed genes_keloid-MD_comparing SC-Keloid vs. (SC-Myel+Nonmyel) |             |             |       |       |           |               |                 |                 |
|------------------------------------------------------------------------------------|-------------|-------------|-------|-------|-----------|---------------|-----------------|-----------------|
| gene                                                                               | p_val       | avg_log2FC  | pct.1 | pct.2 | p_val_adj | Foldchange_UP | Foldchange_DOWN | Ratio_pct1_pct2 |
| P3H1                                                                               | 0,461803682 | 0,344692465 | 0,049 | 0,024 | 1         | 1,269880257   | 0,787475823     | 2,041666667     |
| FBXO17                                                                             | 0,272474323 | 0,344512386 | 0,029 | 0     | 1         | 1,269721759   | 0,787574122     | #DIV/0!         |
| CCNB1IP1                                                                           | 0,259157069 | 0,344450333 | 0,03  | 0     | 1         | 1,269667147   | 0,787607998     | #DIV/0!         |
| DUSP3                                                                              | 0,259157069 | 0,344147704 | 0,03  | 0     | 1         | 1,269400842   | 0,787773229     | #DIV/0!         |
| BID                                                                                | 0,223537229 | 0,344101081 | 0,035 | 0     | 1         | 1,269359819   | 0,787798688     | #DIV/0!         |
| SRPX                                                                               | 0,604949328 | 0,344050584 | 0,096 | 0,073 | 1         | 1,26931539    | 0,787826263     | 1,315068493     |
| RO60                                                                               | 0,734703567 | 0,343987092 | 0,158 | 0,146 | 1         | 1,26925953    | 0,787860935     | 1,082191781     |
| MIX23                                                                              | 0,286616306 | 0,343889125 | 0,027 | 0     | 1         | 1,269173343   | 0,787914437     | #DIV/0!         |
| ISCA2                                                                              | 0,301657292 | 0,343739011 | 0,026 | 0     | 1         | 1,269041291   | 0,787996425     | #DIV/0!         |
| FNIP1                                                                              | 0,41960211  | 0,343496992 | 0,053 | 0,024 | 1         | 1,268828421   | 0,788128626     | 2,208333333     |
| TRAPPC6B                                                                           | 0,701390054 | 0,343244165 | 0,035 | 0,024 | 1         | 1,268606083   | 0,788266755     | 1,458333333     |
| GSTZ1                                                                              | 0,403693089 | 0,343009755 | 0,054 | 0,024 | 1         | 1,268399976   | 0,788394843     | 2,25            |
| CAPG                                                                               | 0,23474314  | 0,342998325 | 0,033 | 0     | 1         | 1,268389927   | 0,788401089     | #DIV/0!         |
| NUDCD1                                                                             | 0,769589184 | 0,342792609 | 0,032 | 0,024 | 1         | 1,268209078   | 0,788513517     | 1,333333333     |
| GPCPD1                                                                             | 0,317682464 | 0,342463045 | 0,024 | 0     | 1         | 1,267919406   | 0,788693663     | #DIV/0!         |
| HMGCL                                                                              | 0,259157069 | 0,342410191 | 0,03  | 0     | 1         | 1,267872956   | 0,788722557     | #DIV/0!         |
| BCLAF1                                                                             | 0,915519446 | 0,341713509 | 0,121 | 0,122 | 1         | 1,267260844   | 0,789103526     | 0,991803279     |
| APH1B                                                                              | 0,286616306 | 0,341696525 | 0,027 | 0     | 1         | 1,267245926   | 0,789112815     | #DIV/0!         |
| TMEM242                                                                            | 0,281804989 | 0,341287423 | 0,069 | 0,024 | 1         | 1,266886626   | 0,789336614     | 2,875           |
| NIPSNAP3A                                                                          | 0,272474262 | 0,341077012 | 0,029 | 0     | 1         | 1,266701869   | 0,789451744     | #DIV/0!         |
| S100PBP                                                                            | 0,259157069 | 0,340795964 | 0,03  | 0     | 1         | 1,26645513    | 0,78960555      | #DIV/0!         |
| SLC39A13                                                                           | 0,246599267 | 0,340307181 | 0,032 | 0     | 1         | 1,26602613    | 0,789873113     | #DIV/0!         |
| MRE11                                                                              | 0,317682464 | 0,34025322  | 0,024 | 0     | 1         | 1,265978778   | 0,789902657     | #DIV/0!         |
| HDGFL2                                                                             | 0,259157069 | 0,340150896 | 0,03  | 0     | 1         | 1,26588899    | 0,789958683     | #DIV/0!         |
| MRPL9                                                                              | 0,301657292 | 0,340009856 | 0,026 | 0     | 1         | 1,265765241   | 0,790035915     | #DIV/0!         |
| POLR2K                                                                             | 0,578785523 | 0,339935538 | 0,147 | 0,195 | 1         | 1,265700039   | 0,790076613     | 0,753846154     |
| MTERF4                                                                             | 0,600624894 | 0,339657457 | 0,04  | 0,024 | 1         | 1,265456097   | 0,790228916     | 1,666666667     |
| NELFB                                                                              | 0,301657292 | 0,339603911 | 0,026 | 0     | 1         | 1,265409131   | 0,790258246     | #DIV/0!         |
| STING1                                                                             | 0,317682464 | 0,339302139 | 0,024 | 0     | 1         | 1,26514447    | 0,790423563     | #DIV/0!         |
| RNF217                                                                             | 0,667151297 | 0,339186752 | 0,037 | 0,024 | 1         | 1,265043287   | 0,790486784     | 1,541666667     |



Supplementary Table 3

| Differentially expressed genes_keloid-MD_comparing SC-Keloid vs. (SC-Myel+Nonmyel) |             |             |       |       |           |               |                 |                 |
|------------------------------------------------------------------------------------|-------------|-------------|-------|-------|-----------|---------------|-----------------|-----------------|
| gene                                                                               | p_val       | avg_log2FC  | pct.1 | pct.2 | p_val_adj | Foldchange_UP | Foldchange_DOWN | Ratio_pct1_pct2 |
| YWHAG                                                                              | 0,862854676 | 0,339154275 | 0,124 | 0,122 | 1         | 1,26501481    | 0,790504579     | 1,016393443     |
| DDIT3                                                                              | 0,816694959 | 0,338992175 | 0,056 | 0,049 | 1         | 1,264872682   | 0,790593405     | 1,142857143     |
| PSMB3                                                                              | 0,422861972 | 0,338766141 | 0,169 | 0,122 | 1         | 1,264674524   | 0,79071728      | 1,385245902     |
| RHOG                                                                               | 0,259157069 | 0,338748872 | 0,03  | 0     | 1         | 1,264659386   | 0,790726745     | #DIV/0!         |
| ZNF800                                                                             | 0,223537229 | 0,338671264 | 0,035 | 0     | 1         | 1,264591357   | 0,790769283     | #DIV/0!         |
| CCNH                                                                               | 0,301657292 | 0,338647321 | 0,026 | 0     | 1         | 1,264570369   | 0,790782407     | #DIV/0!         |
| SLC30A9                                                                            | 0,667151297 | 0,338630818 | 0,037 | 0,024 | 1         | 1,264555904   | 0,790791452     | 1,541666667     |
| DRAM2                                                                              | 0,272474323 | 0,338504468 | 0,029 | 0     | 1         | 1,264445161   | 0,790860712     | #DIV/0!         |
| TCHP                                                                               | 0,301657292 | 0,338355695 | 0,026 | 0     | 1         | 1,264314775   | 0,790942271     | #DIV/0!         |
| STT3B                                                                              | 0,663386475 | 0,338312901 | 0,037 | 0,024 | 1         | 1,264277273   | 0,790965733     | 1,541666667     |
| IQSEC1                                                                             | 0,78435971  | 0,338211605 | 0,057 | 0,049 | 1         | 1,264188508   | 0,791021271     | 1,163265306     |
| BIRC6                                                                              | 0,746895108 | 0,338179172 | 0,059 | 0,049 | 1         | 1,264160088   | 0,791039054     | 1,204081633     |
| UBP1                                                                               | 0,737604407 | 0,338112308 | 0,033 | 0,024 | 1         | 1,2641015     | 0,791075717     | 1,375           |
| CSE1L                                                                              | 0,272474323 | 0,338055187 | 0,029 | 0     | 1         | 1,264051451   | 0,791107039     | #DIV/0!         |
| DCAF6                                                                              | 0,317682464 | 0,338023022 | 0,024 | 0     | 1         | 1,264023269   | 0,791124677     | #DIV/0!         |
| CDKAL1                                                                             | 0,353096361 | 0,337944251 | 0,021 | 0     | 1         | 1,263954255   | 0,791167873     | #DIV/0!         |
| CANT1                                                                              | 0,317682464 | 0,337696899 | 0,024 | 0     | 1         | 1,263737567   | 0,791303532     | #DIV/0!         |
| GABARAP                                                                            | 0,631143168 | 0,337491257 | 0,038 | 0,024 | 1         | 1,263557447   | 0,791416332     | 1,583333333     |
| FANCL                                                                              | 0,317682464 | 0,337335325 | 0,024 | 0     | 1         | 1,263420884   | 0,791501876     | #DIV/0!         |
| SPOPL                                                                              | 0,946292034 | 0,336937299 | 0,026 | 0,024 | 1         | 1,263072366   | 0,791720274     | 1,083333333     |
| MCM3AP                                                                             | 0,317682464 | 0,336754188 | 0,024 | 0     | 1         | 1,262912064   | 0,791820768     | #DIV/0!         |
| MKNK2                                                                              | 0,272474323 | 0,336734066 | 0,029 | 0     | 1         | 1,262894449   | 0,791831812     | #DIV/0!         |
| RNF170                                                                             | 0,301657292 | 0,33664382  | 0,026 | 0     | 1         | 1,262815453   | 0,791881345     | #DIV/0!         |
| POLR3K                                                                             | 0,476024264 | 0,336554584 | 0,048 | 0,024 | 1         | 1,262737346   | 0,791930328     | 2               |
| SLC25A32                                                                           | 0,3347904   | 0,336406827 | 0,022 | 0     | 1         | 1,262608026   | 0,792011439     | #DIV/0!         |
| ATG7                                                                               | 0,286616306 | 0,336351186 | 0,027 | 0     | 1         | 1,262559332   | 0,792041986     | #DIV/0!         |
| RLIM                                                                               | 0,286616306 | 0,336299703 | 0,027 | 0     | 1         | 1,262514277   | 0,79207025      | #DIV/0!         |
| PIK3CA                                                                             | 0,911464155 | 0,33618816  | 0,043 | 0,049 | 1         | 1,262416669   | 0,792131492     | 0,87755102      |
| SUZ12                                                                              | 0,445455658 | 0,336147793 | 0,051 | 0,024 | 1         | 1,262381347   | 0,792153657     | 2,125           |
| METAP1                                                                             | 0,259157069 | 0,336113251 | 0,03  | 0     | 1         | 1,262351122   | 0,792172623     | #DIV/0!         |

Supplementary Table 3

| Differentially expressed genes_keloid-MD_ comparing SC-Keloid vs. (SC-Myel+Nonmyel) |             |             |       |       |           |               |                 |                 |
|-------------------------------------------------------------------------------------|-------------|-------------|-------|-------|-----------|---------------|-----------------|-----------------|
| gene                                                                                | p_val       | avg_log2FC  | pct.1 | pct.2 | p_val_adj | Foldchange_UP | Foldchange_DOWN | Ratio_pct1_pct2 |
| TSPYL1                                                                              | 0,317682464 | 0,335714373 | 0,024 | 0     | 1         | 1,262002154   | 0,792391675     | #DIV/0!         |
| WRN                                                                                 | 0,301657292 | 0,335553799 | 0,026 | 0     | 1         | 1,261861699   | 0,792479874     | #DIV/0!         |
| RBMS3                                                                               | 0,317682464 | 0,335294949 | 0,024 | 0     | 1         | 1,261635315   | 0,792622074     | #DIV/0!         |
| GID8                                                                                | 0,286616306 | 0,335023681 | 0,027 | 0     | 1         | 1,261398114   | 0,792771124     | #DIV/0!         |
| GPX8                                                                                | 0,282943116 | 0,334967558 | 0,1   | 0,049 | 1         | 1,261349044   | 0,792801964     | 2,040816327     |
| OSBPL9                                                                              | 0,406605304 | 0,334802798 | 0,086 | 0,049 | 1         | 1,261205003   | 0,792892509     | 1,755102041     |
| GPALPP1                                                                             | 0,731498497 | 0,334647797 | 0,033 | 0,024 | 1         | 1,261069508   | 0,792977702     | 1,375           |
| KIFAP3                                                                              | 0,415161362 | 0,33447181  | 0,085 | 0,049 | 1         | 1,260915686   | 0,793074438     | 1,734693878     |
| GSK3B                                                                               | 0,403693057 | 0,334283509 | 0,054 | 0,024 | 1         | 1,260751121   | 0,793177958     | 2,25            |
| PHF2                                                                                | 0,852721591 | 0,334229661 | 0,029 | 0,024 | 1         | 1,260704066   | 0,793207563     | 1,208333333     |
| RPL31                                                                               | 0,140704308 | 0,334027014 | 0,354 | 0,22  | 1         | 1,260526994   | 0,793318988     | 1,609090909     |
| ZNF330                                                                              | 0,272474323 | 0,33382449  | 0,029 | 0     | 1         | 1,260350056   | 0,793430361     | #DIV/0!         |
| C3orf14                                                                             | 0,184359255 | 0,333773078 | 0,041 | 0     | 1         | 1,260305142   | 0,793458637     | #DIV/0!         |
| LTN1                                                                                | 0,529153339 | 0,333465886 | 0,045 | 0,024 | 1         | 1,260036815   | 0,793627605     | 1,875           |
| LTBR                                                                                | 0,501118424 | 0,333388408 | 0,046 | 0,024 | 1         | 1,259969148   | 0,793670227     | 1,916666667     |
| STX18                                                                               | 0,272474323 | 0,333046695 | 0,029 | 0     | 1         | 1,25967075    | 0,793858236     | #DIV/0!         |
| TAX1BP1                                                                             | 0,511365899 | 0,332034447 | 0,131 | 0,098 | 1         | 1,258787229   | 0,794415432     | 1,336734694     |
| FKBP15                                                                              | 0,259157069 | 0,332021368 | 0,03  | 0     | 1         | 1,258775817   | 0,794422634     | #DIV/0!         |
| ARL4D                                                                               | 0,286616306 | 0,331976433 | 0,027 | 0     | 1         | 1,258736612   | 0,794447377     | #DIV/0!         |
| NEDD4                                                                               | 0,317682464 | 0,331963339 | 0,024 | 0     | 1         | 1,258725187   | 0,794454588     | #DIV/0!         |
| PPP6R2                                                                              | 0,246599267 | 0,331819703 | 0,032 | 0     | 1         | 1,258599874   | 0,794533689     | #DIV/0!         |
| SLC39A10                                                                            | 0,589553394 | 0,331757903 | 0,07  | 0,049 | 1         | 1,258545961   | 0,794567724     | 1,428571429     |
| GOT2                                                                                | 0,286616306 | 0,331693317 | 0,027 | 0     | 1         | 1,25848962    | 0,794603296     | #DIV/0!         |
| PHLDB2                                                                              | 0,667151266 | 0,331625663 | 0,037 | 0,024 | 1         | 1,258430605   | 0,794640559     | 1,541666667     |
| TSPAN4                                                                              | 0,505572404 | 0,3315982   | 0,046 | 0,024 | 1         | 1,258406651   | 0,794655686     | 1,916666667     |
| COG5                                                                                | 0,301657292 | 0,331355585 | 0,026 | 0     | 1         | 1,258195044   | 0,794789333     | #DIV/0!         |
| RUNX2                                                                               | 0,317682464 | 0,331274304 | 0,024 | 0     | 1         | 1,25812416    | 0,794834113     | #DIV/0!         |
| ZC3H15                                                                              | 0,99790415  | 0,331093635 | 0,158 | 0,171 | 1         | 1,257966615   | 0,794933656     | 0,923976608     |
| DALRD3                                                                              | 0,3347904   | 0,331038672 | 0,022 | 0     | 1         | 1,257918691   | 0,794963941     | #DIV/0!         |
| BAG4                                                                                | 0,317682464 | 0,33096543  | 0,024 | 0     | 1         | 1,257854831   | 0,795004301     | #DIV/0!         |

Supplementary Table 3

| Differentially expressed genes_keloid-MD_comparing SC-Keloid vs. (SC-Myel+Nonmyel) |             |             |       |       |           |               |                 |                 |
|------------------------------------------------------------------------------------|-------------|-------------|-------|-------|-----------|---------------|-----------------|-----------------|
| gene                                                                               | p_val       | avg_log2FC  | pct.1 | pct.2 | p_val_adj | Foldchange_UP | Foldchange_DOWN | Ratio_pct1_pct2 |
| RAP2B                                                                              | 0,502600771 | 0,330895322 | 0,046 | 0,024 | 1         | 1,257793707   | 0,795042935     | 1,916666667     |
| SP1                                                                                | 0,286616306 | 0,330873434 | 0,027 | 0     | 1         | 1,257774624   | 0,795054997     | #DIV/0!         |
| KIF22                                                                              | 0,3347904   | 0,330773501 | 0,022 | 0     | 1         | 1,257687503   | 0,795110071     | #DIV/0!         |
| SFT2D1                                                                             | 0,756255092 | 0,330689712 | 0,057 | 0,073 | 1         | 1,257614461   | 0,795156251     | 0,780821918     |
| SEC23IP                                                                            | 0,3347904   | 0,330682054 | 0,022 | 0     | 1         | 1,257607785   | 0,795160472     | #DIV/0!         |
| VPS25                                                                              | 0,391991111 | 0,330452924 | 0,056 | 0,024 | 1         | 1,257408067   | 0,79528677      | 2,333333333     |
| CARHSP1                                                                            | 0,576726861 | 0,330346371 | 0,041 | 0,024 | 1         | 1,257315202   | 0,79534551      | 1,708333333     |
| NAA35                                                                              | 0,353096361 | 0,33016474  | 0,021 | 0     | 1         | 1,25715692    | 0,795445648     | #DIV/0!         |
| DIDO1                                                                              | 0,697473218 | 0,330139335 | 0,035 | 0,024 | 1         | 1,257134782   | 0,795459655     | 1,458333333     |
| ALDH1L2                                                                            | 0,301657292 | 0,329870554 | 0,026 | 0     | 1         | 1,256900594   | 0,795607867     | #DIV/0!         |
| CYCS                                                                               | 0,208646017 | 0,329594059 | 0,116 | 0,049 | 1         | 1,25665973    | 0,795760361     | 2,367346939     |
| RAP2A                                                                              | 0,301657292 | 0,329449053 | 0,026 | 0     | 1         | 1,256533429   | 0,795840347     | #DIV/0!         |
| ACAA1                                                                              | 0,576726861 | 0,32914493  | 0,041 | 0,024 | 1         | 1,256268577   | 0,796008129     | 1,708333333     |
| TRNAU1AP                                                                           | 0,272474323 | 0,329122249 | 0,029 | 0     | 1         | 1,256248827   | 0,796020644     | #DIV/0!         |
| NPTN                                                                               | 0,398715149 | 0,329093309 | 0,116 | 0,073 | 1         | 1,256223627   | 0,796036612     | 1,589041096     |
| GET3                                                                               | 0,55074314  | 0,329005142 | 0,043 | 0,024 | 1         | 1,256146859   | 0,796085261     | 1,791666667     |
| ADAMTS4                                                                            | 0,558804806 | 0,328909466 | 0,043 | 0,024 | 1         | 1,256063557   | 0,796138057     | 1,791666667     |
| RPS6KC1                                                                            | 0,301657292 | 0,328822797 | 0,026 | 0     | 1         | 1,255988102   | 0,796185886     | #DIV/0!         |
| MSANTD4                                                                            | 0,31768239  | 0,328706895 | 0,024 | 0     | 1         | 1,255887203   | 0,796249852     | #DIV/0!         |
| SETD5                                                                              | 0,605050652 | 0,328601482 | 0,069 | 0,049 | 1         | 1,255795443   | 0,796308034     | 1,408163265     |
| PNPLA8                                                                             | 0,375170281 | 0,328584294 | 0,089 | 0,049 | 1         | 1,255780481   | 0,796317521     | 1,816326531     |
| KCTD20                                                                             | 0,834636898 | 0,328480713 | 0,104 | 0,098 | 1         | 1,255690324   | 0,796374696     | 1,06122449      |
| TMEM51                                                                             | 0,317682464 | 0,328189533 | 0,024 | 0     | 1         | 1,255436913   | 0,796535445     | #DIV/0!         |
| YJU2B                                                                              | 0,301657292 | 0,328126879 | 0,026 | 0     | 1         | 1,255382392   | 0,796570038     | #DIV/0!         |
| CSAD                                                                               | 0,286616306 | 0,328071319 | 0,027 | 0     | 1         | 1,255334047   | 0,796600716     | #DIV/0!         |
| USO1                                                                               | 0,990980764 | 0,327984187 | 0,07  | 0,073 | 1         | 1,255258233   | 0,796648828     | 0,95890411      |
| SRP54                                                                              | 0,284428919 | 0,327630088 | 0,102 | 0,049 | 1         | 1,254950176   | 0,796844384     | 2,081632653     |
| LMBRD2                                                                             | 0,3347904   | 0,327545125 | 0,022 | 0     | 1         | 1,254876272   | 0,796891313     | #DIV/0!         |
| SMPD4                                                                              | 0,317682464 | 0,327480641 | 0,024 | 0     | 1         | 1,254820184   | 0,796926932     | #DIV/0!         |
| TGFB1I1                                                                            | 0,765151587 | 0,327459602 | 0,108 | 0,098 | 1         | 1,254801885   | 0,796938554     | 1,102040816     |

Supplementary Table 3

| Differentially expressed genes_keloid-MD_comparing SC-Keloid vs. (SC-Myel+Nonmyel) |             |             |       |       |           |               |                 |                 |
|------------------------------------------------------------------------------------|-------------|-------------|-------|-------|-----------|---------------|-----------------|-----------------|
| gene                                                                               | p_val       | avg_log2FC  | pct.1 | pct.2 | p_val_adj | Foldchange_UP | Foldchange_DOWN | Ratio_pct1_pct2 |
| MFSD14B                                                                            | 0,769589184 | 0,327207692 | 0,032 | 0,024 | 1         | 1,254582803   | 0,79707772      | 1,333333333     |
| MCCC2                                                                              | 0,353096277 | 0,327142578 | 0,021 | 0     | 1         | 1,25452618    | 0,797113696     | #DIV/0!         |
| MIDN                                                                               | 0,581701562 | 0,327099587 | 0,07  | 0,049 | 1         | 1,254488797   | 0,79713745      | 1,428571429     |
| UTP11                                                                              | 0,439447705 | 0,327064058 | 0,083 | 0,049 | 1         | 1,254457903   | 0,797157081     | 1,693877551     |
| NIN                                                                                | 0,425947475 | 0,326699546 | 0,053 | 0,024 | 1         | 1,254140991   | 0,797358516     | 2,208333333     |
| VAMP4                                                                              | 0,317682464 | 0,326600045 | 0,024 | 0     | 1         | 1,254054498   | 0,797413511     | #DIV/0!         |
| DRAXIN                                                                             | 0,301657292 | 0,32641872  | 0,026 | 0     | 1         | 1,253896892   | 0,79751374      | #DIV/0!         |
| TUT7                                                                               | 0,301657292 | 0,326298578 | 0,026 | 0     | 1         | 1,253792477   | 0,797580157     | #DIV/0!         |
| MRPL16                                                                             | 0,973889212 | 0,326186321 | 0,048 | 0,049 | 1         | 1,253694922   | 0,79764222      | 0,979591837     |
| RIC8B                                                                              | 0,3347904   | 0,326115457 | 0,022 | 0     | 1         | 1,253633343   | 0,7976814       | #DIV/0!         |
| CDC5L                                                                              | 0,803311251 | 0,326054557 | 0,105 | 0,098 | 1         | 1,253580425   | 0,797715073     | 1,071428571     |
| CSGALNACT2                                                                         | 0,733531942 | 0,325672631 | 0,033 | 0,024 | 1         | 1,253248607   | 0,797926281     | 1,375           |
| PDLIM3                                                                             | 0,609324617 | 0,325545879 | 0,04  | 0,024 | 1         | 1,253138505   | 0,797996387     | 1,666666667     |
| PDPK1                                                                              | 0,317682464 | 0,325364033 | 0,024 | 0     | 1         | 1,252980561   | 0,798096979     | #DIV/0!         |
| PPIA                                                                               | 0,489908135 | 0,325286374 | 0,356 | 0,317 | 1         | 1,252913117   | 0,79813994      | 1,123028391     |
| TRAPPC13                                                                           | 0,3347904   | 0,325157056 | 0,022 | 0     | 1         | 1,252800815   | 0,798211486     | #DIV/0!         |
| H2AZ1                                                                              | 0,801178891 | 0,325069956 | 0,407 | 0,439 | 1         | 1,252725182   | 0,798259678     | 0,927107062     |
| LEPROTL1                                                                           | 0,461172504 | 0,325062446 | 0,134 | 0,098 | 1         | 1,25271866    | 0,798263834     | 1,367346939     |
| FAM50A                                                                             | 0,805743193 | 0,324761196 | 0,105 | 0,098 | 1         | 1,252457107   | 0,798430537     | 1,071428571     |
| LYPLAL1                                                                            | 0,521439583 | 0,324735331 | 0,045 | 0,024 | 1         | 1,252434653   | 0,798444851     | 1,875           |
| EMG1                                                                               | 0,259157069 | 0,324718053 | 0,03  | 0     | 1         | 1,252419653   | 0,798454414     | #DIV/0!         |
| PSMD11                                                                             | 0,533052106 | 0,324648588 | 0,102 | 0,073 | 1         | 1,252359351   | 0,79849286      | 1,397260274     |
| RFC1                                                                               | 0,394700873 | 0,324389075 | 0,118 | 0,073 | 1         | 1,252134096   | 0,798636506     | 1,616438356     |
| CCT5                                                                               | 0,600316413 | 0,324257429 | 0,148 | 0,122 | 1         | 1,252019845   | 0,798709385     | 1,213114754     |
| ZNHIT6                                                                             | 0,393172943 | 0,324242284 | 0,056 | 0,024 | 1         | 1,252006701   | 0,79871777      | 2,333333333     |
| CDK6                                                                               | 0,954540052 | 0,324150193 | 0,134 | 0,146 | 1         | 1,251926784   | 0,798768756     | 0,917808219     |
| NPTXR                                                                              | 0,301657292 | 0,324109276 | 0,026 | 0     | 1         | 1,251891279   | 0,79879141      | #DIV/0!         |
| ZSCAN18                                                                            | 0,317682464 | 0,323913787 | 0,024 | 0     | 1         | 1,251721656   | 0,798899656     | #DIV/0!         |
| UHMK1                                                                              | 0,429781401 | 0,32337403  | 0,053 | 0,024 | 1         | 1,251253435   | 0,799198605     | 2,208333333     |
| RAB23                                                                              | 0,3347904   | 0,323239959 | 0,022 | 0     | 1         | 1,251137161   | 0,799272879     | #DIV/0!         |

Supplementary Table 3

| Differentially expressed genes_keloid-MD_comparing SC-Keloid vs. (SC-Myel+Nonmyel) |             |             |       |       |           |               |                 |                 |
|------------------------------------------------------------------------------------|-------------|-------------|-------|-------|-----------|---------------|-----------------|-----------------|
| gene                                                                               | p_val       | avg_log2FC  | pct.1 | pct.2 | p_val_adj | Foldchange_UP | Foldchange_DOWN | Ratio_pct1_pct2 |
| SNX9                                                                               | 0,272474323 | 0,323184535 | 0,029 | 0     | 1         | 1,251089097   | 0,799303585     | #DIV/0!         |
| C11orf49                                                                           | 0,246599267 | 0,323166732 | 0,032 | 0     | 1         | 1,251073658   | 0,799313449     | #DIV/0!         |
| CRYZ                                                                               | 0,301657292 | 0,323149715 | 0,026 | 0     | 1         | 1,251058902   | 0,799322876     | #DIV/0!         |
| CDC16                                                                              | 0,301657292 | 0,323104251 | 0,026 | 0     | 1         | 1,251019477   | 0,799348066     | #DIV/0!         |
| TFAP2B                                                                             | 0,3347904   | 0,323092939 | 0,022 | 0     | 1         | 1,251009668   | 0,799354334     | #DIV/0!         |
| KDSR                                                                               | 0,410547541 | 0,322935126 | 0,086 | 0,049 | 1         | 1,250872831   | 0,799441778     | 1,755102041     |
| ELOVL5                                                                             | 0,286616306 | 0,322926435 | 0,027 | 0     | 1         | 1,250865295   | 0,799446594     | #DIV/0!         |
| MTERF3                                                                             | 0,286616306 | 0,322901087 | 0,027 | 0     | 1         | 1,250843318   | 0,79946064      | #DIV/0!         |
| UBR3                                                                               | 0,301657292 | 0,322812432 | 0,026 | 0     | 1         | 1,250766454   | 0,79950977      | #DIV/0!         |
| TSPAN31                                                                            | 0,769589184 | 0,322703622 | 0,032 | 0,024 | 1         | 1,250672124   | 0,799570072     | 1,333333333     |
| INSYN2A                                                                            | 0,301657292 | 0,322312592 | 0,026 | 0     | 1         | 1,250333185   | 0,799786818     | #DIV/0!         |
| NQO2                                                                               | 0,272474323 | 0,322174306 | 0,029 | 0     | 1         | 1,250213343   | 0,799863483     | #DIV/0!         |
| METTL14                                                                            | 0,3347904   | 0,321940412 | 0,022 | 0     | 1         | 1,250010672   | 0,79999317      | #DIV/0!         |
| GJA1                                                                               | 0,372736722 | 0,321864911 | 0,019 | 0     | 1         | 1,249945257   | 0,800035037     | #DIV/0!         |
| THBS3                                                                              | 0,286616306 | 0,321854521 | 0,027 | 0     | 1         | 1,249936255   | 0,800040799     | #DIV/0!         |
| BTBD1                                                                              | 0,3347904   | 0,321808403 | 0,022 | 0     | 1         | 1,249896299   | 0,800066374     | #DIV/0!         |
| MYDGF                                                                              | 0,274009348 | 0,321731119 | 0,293 | 0,22  | 1         | 1,249829407   | 0,800109195     | 1,331818182     |
| SOX11                                                                              | 0,353096361 | 0,321571285 | 0,021 | 0     | 1         | 1,249690886   | 0,800197882     | #DIV/0!         |
| HSPB11                                                                             | 0,395366456 | 0,32141899  | 0,088 | 0,049 | 1         | 1,249558972   | 0,800282358     | 1,795918367     |
| FBXO25                                                                             | 0,286616306 | 0,321417655 | 0,027 | 0     | 1         | 1,249557816   | 0,800283098     | #DIV/0!         |
| RPS27A                                                                             | 0,059779339 | 0,321301239 | 0,89  | 0,878 | 1         | 1,249456988   | 0,800347678     | 1,013667426     |
| NFXL1                                                                              | 0,301657292 | 0,321125996 | 0,026 | 0     | 1         | 1,249305227   | 0,800444902     | #DIV/0!         |
| DUSP14                                                                             | 0,669036862 | 0,321047829 | 0,037 | 0,024 | 1         | 1,24923754    | 0,800488272     | 1,541666667     |
| DNMT1                                                                              | 0,777844648 | 0,321011194 | 0,083 | 0,073 | 1         | 1,249205818   | 0,800508599     | 1,136986301     |
| ENTPD4                                                                             | 0,634759975 | 0,320873351 | 0,038 | 0,024 | 1         | 1,249086468   | 0,800585088     | 1,583333333     |
| TTC9C                                                                              | 0,317682464 | 0,320798613 | 0,024 | 0     | 1         | 1,249021761   | 0,800626563     | #DIV/0!         |
| ZBTB6                                                                              | 0,317682464 | 0,320705443 | 0,024 | 0     | 1         | 1,248941102   | 0,800678269     | #DIV/0!         |
| BAG3                                                                               | 0,286616241 | 0,320654045 | 0,027 | 0     | 1         | 1,248896607   | 0,800706795     | #DIV/0!         |
| UBR5                                                                               | 0,773817043 | 0,320599999 | 0,032 | 0,024 | 1         | 1,248849822   | 0,800736792     | 1,333333333     |
| ARMT1                                                                              | 0,3347904   | 0,320563118 | 0,022 | 0     | 1         | 1,248817897   | 0,800757262     | #DIV/0!         |

Supplementary Table 3

| Differentially expressed genes_keloid-MD_comparing SC-Keloid vs. (SC-Myel+Nonmyel) |             |             |       |       |           |               |                 |                 |
|------------------------------------------------------------------------------------|-------------|-------------|-------|-------|-----------|---------------|-----------------|-----------------|
| gene                                                                               | p_val       | avg_log2FC  | pct.1 | pct.2 | p_val_adj | Foldchange_UP | Foldchange_DOWN | Ratio_pct1_pct2 |
| TLL7                                                                               | 0,335621266 | 0,319927172 | 0,062 | 0,024 | 1         | 1,248267534   | 0,801110317     | 2,583333333     |
| SMAD2                                                                              | 0,871109437 | 0,319898658 | 0,053 | 0,049 | 1         | 1,248242863   | 0,801126151     | 1,081632653     |
| CMIP                                                                               | 0,272474323 | 0,319780648 | 0,029 | 0     | 1         | 1,248140763   | 0,801191684     | #DIV/0!         |
| STK17B                                                                             | 0,317682464 | 0,319763882 | 0,024 | 0     | 1         | 1,248126258   | 0,801200995     | #DIV/0!         |
| INTS11                                                                             | 0,301657292 | 0,319715661 | 0,026 | 0     | 1         | 1,248084541   | 0,801227775     | #DIV/0!         |
| NFATC3                                                                             | 0,272474323 | 0,319318287 | 0,029 | 0     | 1         | 1,247740818   | 0,801448495     | #DIV/0!         |
| SLFN12                                                                             | 0,372736722 | 0,318954751 | 0,019 | 0     | 1         | 1,247426447   | 0,801650472     | #DIV/0!         |
| C2orf49                                                                            | 0,301657292 | 0,318838452 | 0,026 | 0     | 1         | 1,247325893   | 0,801715098     | #DIV/0!         |
| HYOU1                                                                              | 0,576726861 | 0,318663013 | 0,041 | 0,024 | 1         | 1,247174221   | 0,801812596     | 1,708333333     |
| CZIB                                                                               | 0,711798768 | 0,318523418 | 0,088 | 0,073 | 1         | 1,247053551   | 0,801890183     | 1,205479452     |
| NBR1                                                                               | 0,865315819 | 0,318516896 | 0,041 | 0,049 | 1         | 1,247047913   | 0,801893808     | 0,836734694     |
| SYTL2                                                                              | 0,31768239  | 0,318443333 | 0,024 | 0     | 1         | 1,246984327   | 0,801934698     | #DIV/0!         |
| COBLL1                                                                             | 0,301657292 | 0,318396488 | 0,026 | 0     | 1         | 1,246943838   | 0,801960737     | #DIV/0!         |
| TMC7                                                                               | 0,272474323 | 0,318131344 | 0,029 | 0     | 1         | 1,246714691   | 0,802108138     | #DIV/0!         |
| APOM                                                                               | 0,353096361 | 0,318060051 | 0,021 | 0     | 1         | 1,246653084   | 0,802147777     | #DIV/0!         |
| CALM1                                                                              | 0,135122184 | 0,31800634  | 0,756 | 0,732 | 1         | 1,246606672   | 0,802177641     | 1,032786885     |
| ZNF267                                                                             | 0,286616306 | 0,317751867 | 0,027 | 0     | 1         | 1,246386806   | 0,802319147     | #DIV/0!         |
| RPLP1                                                                              | 0,013588084 | 0,317746411 | 0,971 | 1     | 1         | 1,246382093   | 0,802322182     | 0,971           |
| SLK                                                                                | 0,727559287 | 0,317541405 | 0,061 | 0,049 | 1         | 1,246204996   | 0,802436199     | 1,244897959     |
| LPP                                                                                | 0,39335826  | 0,317513376 | 0,177 | 0,122 | 1         | 1,246180784   | 0,802451789     | 1,450819672     |
| MMP16                                                                              | 0,301657292 | 0,317271632 | 0,026 | 0     | 1         | 1,245971986   | 0,802586263     | #DIV/0!         |
| TWF1                                                                               | 0,793971781 | 0,317123189 | 0,057 | 0,049 | 1         | 1,245843791   | 0,802668847     | 1,163265306     |
| DTX3L                                                                              | 0,31768239  | 0,317064077 | 0,024 | 0     | 1         | 1,245792746   | 0,802701736     | #DIV/0!         |
| GALC                                                                               | 0,286616306 | 0,317045642 | 0,027 | 0     | 1         | 1,245776827   | 0,802711993     | #DIV/0!         |
| ZMIZ2                                                                              | 0,301657292 | 0,316922116 | 0,026 | 0     | 1         | 1,245670166   | 0,802780726     | #DIV/0!         |
| NOVA1                                                                              | 0,372736722 | 0,316386476 | 0,019 | 0     | 1         | 1,245207763   | 0,803078835     | #DIV/0!         |
| MKRN1                                                                              | 0,699430636 | 0,31629354  | 0,035 | 0,024 | 1         | 1,245127551   | 0,80313057      | 1,458333333     |
| PHTF1                                                                              | 0,353096361 | 0,316149183 | 0,021 | 0     | 1         | 1,24500297    | 0,803210936     | #DIV/0!         |
| SEC16A                                                                             | 0,731498497 | 0,315754871 | 0,033 | 0,024 | 1         | 1,244662736   | 0,803430496     | 1,375           |
| STAT5B                                                                             | 0,317682464 | 0,315685157 | 0,024 | 0     | 1         | 1,244602593   | 0,803469321     | #DIV/0!         |

Supplementary Table 3

| Differentially expressed genes_keloid-MD_ comparing SC-Keloid vs. (SC-Myel+Nonmyel) |             |             |       |       |           |               |                 |                 |
|-------------------------------------------------------------------------------------|-------------|-------------|-------|-------|-----------|---------------|-----------------|-----------------|
| gene                                                                                | p_val       | avg_log2FC  | pct.1 | pct.2 | p_val_adj | Foldchange_UP | Foldchange_DOWN | Ratio_pct1_pct2 |
| INHBA                                                                               | 0,317682464 | 0,31568241  | 0,024 | 0     | 1         | 1,244600223   | 0,803470851     | #DIV/0!         |
| TYW5                                                                                | 0,372736722 | 0,315515453 | 0,019 | 0     | 1         | 1,244456199   | 0,803563839     | #DIV/0!         |
| BCLAF3                                                                              | 0,353096361 | 0,315488383 | 0,021 | 0     | 1         | 1,244432849   | 0,803578916     | #DIV/0!         |
| MPDU1                                                                               | 0,259157069 | 0,315457054 | 0,03  | 0     | 1         | 1,244405825   | 0,803596367     | #DIV/0!         |
| ARL3                                                                                | 0,998001518 | 0,315266682 | 0,177 | 0,195 | 1         | 1,24424163    | 0,803702412     | 0,907692308     |
| SF3B6                                                                               | 0,67674459  | 0,315214023 | 0,287 | 0,268 | 1         | 1,244196215   | 0,803731749     | 1,070895522     |
| RNF128                                                                              | 0,663386475 | 0,314984449 | 0,037 | 0,024 | 1         | 1,243998244   | 0,803859656     | 1,541666667     |
| TLE5                                                                                | 0,69826546  | 0,314692888 | 0,155 | 0,195 | 1         | 1,243746864   | 0,804022128     | 0,794871795     |
| RIOK1                                                                               | 0,286616241 | 0,314450275 | 0,027 | 0     | 1         | 1,243537725   | 0,804157349     | #DIV/0!         |
| MNS1                                                                                | 0,286616306 | 0,314221419 | 0,027 | 0     | 1         | 1,243340477   | 0,804284923     | #DIV/0!         |
| UNC93B1                                                                             | 0,317682464 | 0,314175322 | 0,024 | 0     | 1         | 1,24330075    | 0,804310622     | #DIV/0!         |
| CREB3L1                                                                             | 0,4167109   | 0,3140162   | 0,016 | 0     | 1         | 1,243163628   | 0,804399338     | #DIV/0!         |
| ZNF75A                                                                              | 0,372736722 | 0,31382357  | 0,019 | 0     | 1         | 1,242997651   | 0,804506749     | #DIV/0!         |
| DIP2B                                                                               | 0,636571708 | 0,313608283 | 0,038 | 0,024 | 1         | 1,242812178   | 0,804626811     | 1,583333333     |
| CCZ1B                                                                               | 0,3347904   | 0,313586513 | 0,022 | 0     | 1         | 1,242793424   | 0,804638953     | #DIV/0!         |
| SETX                                                                                | 0,40758874  | 0,313574795 | 0,086 | 0,049 | 1         | 1,24278333    | 0,804645489     | 1,755102041     |
| WWC2                                                                                | 0,259157069 | 0,313242032 | 0,03  | 0     | 1         | 1,24249671    | 0,804831105     | #DIV/0!         |
| GSS                                                                                 | 0,272474323 | 0,313198931 | 0,029 | 0     | 1         | 1,242459591   | 0,80485515      | #DIV/0!         |
| AKT2                                                                                | 0,729085139 | 0,312991984 | 0,061 | 0,049 | 1         | 1,24228138    | 0,80497061      | 1,244897959     |
| PEDS1                                                                               | 0,286616306 | 0,312899622 | 0,027 | 0     | 1         | 1,24220185    | 0,805022147     | #DIV/0!         |
| XPO6                                                                                | 0,317682464 | 0,312810565 | 0,024 | 0     | 1         | 1,242125172   | 0,805071842     | #DIV/0!         |
| FAM174B                                                                             | 0,353096361 | 0,312602973 | 0,021 | 0     | 1         | 1,241946454   | 0,805187693     | #DIV/0!         |
| PLCE1                                                                               | 0,353096361 | 0,312313368 | 0,021 | 0     | 1         | 1,241697171   | 0,805349342     | #DIV/0!         |
| SENP7                                                                               | 0,769589159 | 0,312296236 | 0,032 | 0,024 | 1         | 1,241682427   | 0,805358905     | 1,333333333     |
| NCOA1                                                                               | 0,663386475 | 0,312181019 | 0,037 | 0,024 | 1         | 1,241583266   | 0,805423226     | 1,541666667     |
| RFC4                                                                                | 0,272474262 | 0,312176674 | 0,029 | 0     | 1         | 1,241579527   | 0,805425652     | #DIV/0!         |
| VPS13A                                                                              | 0,353096361 | 0,312105607 | 0,021 | 0     | 1         | 1,241518369   | 0,805465328     | #DIV/0!         |
| DLD                                                                                 | 0,286616306 | 0,31209301  | 0,027 | 0     | 1         | 1,241507528   | 0,805472361     | #DIV/0!         |
| ANKRD13D                                                                            | 0,317682464 | 0,311941599 | 0,024 | 0     | 1         | 1,241377239   | 0,8055569       | #DIV/0!         |
| ZPR1                                                                                | 0,286616306 | 0,311514432 | 0,027 | 0     | 1         | 1,241009734   | 0,805795452     | #DIV/0!         |

Supplementary Table 3

| Differentially expressed genes_keloid-MD_comparing SC-Keloid vs. (SC-Myel+Nonmyel) |             |             |       |       |           |               |                 |                 |
|------------------------------------------------------------------------------------|-------------|-------------|-------|-------|-----------|---------------|-----------------|-----------------|
| gene                                                                               | p_val       | avg_log2FC  | pct.1 | pct.2 | p_val_adj | Foldchange_UP | Foldchange_DOWN | Ratio_pct1_pct2 |
| DNAJC13                                                                            | 0,3347904   | 0,31139924  | 0,022 | 0     | 1         | 1,24091065    | 0,805859793     | #DIV/0!         |
| RNF146                                                                             | 0,872813248 | 0,311241302 | 0,053 | 0,049 | 1         | 1,24077481    | 0,805948019     | 1,081632653     |
| SYNRG                                                                              | 0,629338049 | 0,311240107 | 0,038 | 0,024 | 1         | 1,240773782   | 0,805948687     | 1,583333333     |
| GTF2H3                                                                             | 0,272474323 | 0,311157472 | 0,029 | 0     | 1         | 1,240702715   | 0,805994851     | #DIV/0!         |
| PITPNM3                                                                            | 0,317682464 | 0,310885952 | 0,024 | 0     | 1         | 1,240469232   | 0,806146557     | #DIV/0!         |
| NABP2                                                                              | 0,663386475 | 0,310737643 | 0,037 | 0,024 | 1         | 1,240341719   | 0,806229433     | 1,541666667     |
| IGFBP6                                                                             | 0,272474323 | 0,310591077 | 0,029 | 0     | 1         | 1,240215717   | 0,806311343     | #DIV/0!         |
| POLR2M                                                                             | 0,3347904   | 0,310221787 | 0,022 | 0     | 1         | 1,239898296   | 0,806517763     | #DIV/0!         |
| RASSF8                                                                             | 0,301614389 | 0,310174342 | 0,18  | 0,122 | 1         | 1,239857521   | 0,806544287     | 1,475409836     |
| UBR1                                                                               | 0,286616241 | 0,310064677 | 0,027 | 0     | 1         | 1,239763278   | 0,806605598     | #DIV/0!         |
| STX2                                                                               | 0,395366517 | 0,310059169 | 0,088 | 0,049 | 1         | 1,239758545   | 0,806608677     | 1,795918367     |
| CLIC1                                                                              | 0,269311705 | 0,309982122 | 0,491 | 0,439 | 1         | 1,239692338   | 0,806651755     | 1,118451025     |
| CPEB2                                                                              | 0,4167109   | 0,309962736 | 0,016 | 0     | 1         | 1,23967568    | 0,806662594     | #DIV/0!         |
| NDUFV3                                                                             | 0,987201093 | 0,309904754 | 0,046 | 0,049 | 1         | 1,239625858   | 0,806695015     | 0,93877551      |
| PSMB2                                                                              | 0,698287718 | 0,309717946 | 0,136 | 0,171 | 1         | 1,239465354   | 0,806799477     | 0,795321637     |
| COP1                                                                               | 0,353096361 | 0,309678594 | 0,021 | 0     | 1         | 1,239431547   | 0,806821484     | #DIV/0!         |
| C12orf75                                                                           | 0,389633919 | 0,309600434 | 0,056 | 0,024 | 1         | 1,2393644     | 0,806865196     | 2,333333333     |
| DHRS1                                                                              | 0,3347904   | 0,309550944 | 0,022 | 0     | 1         | 1,239321886   | 0,806892875     | #DIV/0!         |
| YES1                                                                               | 0,55396095  | 0,309491014 | 0,043 | 0,024 | 1         | 1,239270406   | 0,806926394     | 1,791666667     |
| NDUFS6                                                                             | 0,666048102 | 0,309390622 | 0,281 | 0,268 | 1         | 1,239184172   | 0,806982548     | 1,048507463     |
| NDUFB4                                                                             | 0,679274599 | 0,309250964 | 0,346 | 0,341 | 1         | 1,23906422    | 0,80706067      | 1,014662757     |
| PAPOLA                                                                             | 0,397970876 | 0,30922873  | 0,142 | 0,098 | 1         | 1,239045125   | 0,807073108     | 1,448979592     |
| NGRN                                                                               | 0,317682464 | 0,309093202 | 0,024 | 0     | 1         | 1,238928733   | 0,807148929     | #DIV/0!         |
| IQCG                                                                               | 0,272474323 | 0,309038398 | 0,029 | 0     | 1         | 1,238881671   | 0,807179591     | #DIV/0!         |
| NDN                                                                                | 0,353096361 | 0,308988345 | 0,021 | 0     | 1         | 1,238838689   | 0,807207596     | #DIV/0!         |
| NOL9                                                                               | 0,317682464 | 0,308977551 | 0,024 | 0     | 1         | 1,238829421   | 0,807213635     | #DIV/0!         |
| SPOCK1                                                                             | 0,286616306 | 0,308966869 | 0,027 | 0     | 1         | 1,238820249   | 0,807219612     | #DIV/0!         |
| KHDRBS1                                                                            | 0,449339497 | 0,308966845 | 0,164 | 0,122 | 1         | 1,238820228   | 0,807219625     | 1,344262295     |
| B3GNT2                                                                             | 0,353096361 | 0,308789854 | 0,021 | 0     | 1         | 1,238668258   | 0,807318662     | #DIV/0!         |
| ACIN1                                                                              | 0,815058583 | 0,308695482 | 0,056 | 0,049 | 1         | 1,238587235   | 0,807371473     | 1,142857143     |



Supplementary Table 3

| Differentially expressed genes_keloid-MD_comparing SC-Keloid vs. (SC-Myel+Nonmyel) |             |             |       |       |           |               |                 |                 |
|------------------------------------------------------------------------------------|-------------|-------------|-------|-------|-----------|---------------|-----------------|-----------------|
| gene                                                                               | p_val       | avg_log2FC  | pct.1 | pct.2 | p_val_adj | Foldchange_UP | Foldchange_DOWN | Ratio_pct1_pct2 |
| IDH1                                                                               | 0,272474323 | 0,308521024 | 0,029 | 0     | 1         | 1,238437467   | 0,807469111     | #DIV/0!         |
| ALKBH2                                                                             | 0,605837969 | 0,30836898  | 0,04  | 0,024 | 1         | 1,238306956   | 0,807554213     | 1,666666667     |
| PUS7                                                                               | 0,301657292 | 0,308316472 | 0,026 | 0     | 1         | 1,238261888   | 0,807583606     | #DIV/0!         |
| SELENOI                                                                            | 0,301657292 | 0,308222558 | 0,026 | 0     | 1         | 1,238181285   | 0,807636177     | #DIV/0!         |
| TOPORS                                                                             | 0,80994187  | 0,308202983 | 0,03  | 0,024 | 1         | 1,238164485   | 0,807647136     | 1,25            |
| STIM2                                                                              | 0,286616306 | 0,308130102 | 0,027 | 0     | 1         | 1,238101938   | 0,807687937     | #DIV/0!         |
| TFDP1                                                                              | 0,484576096 | 0,308053671 | 0,048 | 0,024 | 1         | 1,238036348   | 0,807730728     | 2               |
| C14orf132                                                                          | 0,335621266 | 0,307908033 | 0,062 | 0,024 | 1         | 1,237911375   | 0,807812271     | 2,583333333     |
| KRR1                                                                               | 0,657775266 | 0,307854528 | 0,093 | 0,073 | 1         | 1,237865466   | 0,807842231     | 1,273972603     |
| ZNF736                                                                             | 0,286616306 | 0,307624141 | 0,027 | 0     | 1         | 1,237667805   | 0,807971247     | #DIV/0!         |
| TRAP1                                                                              | 0,259157069 | 0,307569685 | 0,03  | 0     | 1         | 1,237621088   | 0,808001746     | #DIV/0!         |
| TFAP2C                                                                             | 0,393875079 | 0,30744701  | 0,018 | 0     | 1         | 1,237515856   | 0,808070454     | #DIV/0!         |
| SLC35A5                                                                            | 0,317682464 | 0,307402086 | 0,024 | 0     | 1         | 1,237477321   | 0,808095617     | #DIV/0!         |
| PPP1R12C                                                                           | 0,353096361 | 0,307335454 | 0,021 | 0     | 1         | 1,237420169   | 0,808132941     | #DIV/0!         |
| ARAP3                                                                              | 0,301657292 | 0,30729051  | 0,026 | 0     | 1         | 1,23738162    | 0,808158117     | #DIV/0!         |
| VARS1                                                                              | 0,852721591 | 0,307259375 | 0,029 | 0,024 | 1         | 1,237354917   | 0,808175558     | 1,208333333     |
| ANKRD13A                                                                           | 0,317682464 | 0,307218406 | 0,024 | 0     | 1         | 1,23731978    | 0,808198508     | #DIV/0!         |
| RNF141                                                                             | 0,631143168 | 0,30720223  | 0,038 | 0,024 | 1         | 1,237305906   | 0,80820757      | 1,583333333     |
| RPS24                                                                              | 0,144478753 | 0,307181753 | 0,863 | 0,78  | 1         | 1,237288345   | 0,808219042     | 1,106410256     |
| IKZF5                                                                              | 0,3347904   | 0,306968552 | 0,022 | 0     | 1         | 1,237105512   | 0,808338489     | #DIV/0!         |
| HEXB                                                                               | 0,883048237 | 0,306912548 | 0,053 | 0,049 | 1         | 1,23705749    | 0,808369868     | 1,081632653     |
| SLC19A1                                                                            | 0,317682464 | 0,306865184 | 0,024 | 0     | 1         | 1,237016877   | 0,808396408     | #DIV/0!         |
| PCYT1A                                                                             | 0,695517811 | 0,306718879 | 0,035 | 0,024 | 1         | 1,236891436   | 0,808478392     | 1,458333333     |
| FBXO28                                                                             | 0,286616306 | 0,306530472 | 0,027 | 0     | 1         | 1,236729917   | 0,808583981     | #DIV/0!         |
| PEA15                                                                              | 0,614332945 | 0,306337628 | 0,145 | 0,122 | 1         | 1,236564615   | 0,808692071     | 1,18852459      |
| STK19                                                                              | 0,3347904   | 0,306218251 | 0,022 | 0     | 1         | 1,236462299   | 0,80875899      | #DIV/0!         |
| CENPJ                                                                              | 0,353096361 | 0,306196766 | 0,021 | 0     | 1         | 1,236443885   | 0,808771034     | #DIV/0!         |
| ZNF480                                                                             | 0,317682464 | 0,306168505 | 0,024 | 0     | 1         | 1,236419665   | 0,808786877     | #DIV/0!         |
| DMPK                                                                               | 0,317682464 | 0,306010449 | 0,024 | 0     | 1         | 1,236284215   | 0,80887549      | #DIV/0!         |
| CNTRL                                                                              | 0,317682464 | 0,305772034 | 0,024 | 0     | 1         | 1,236079927   | 0,809009173     | #DIV/0!         |

Supplementary Table 3

| Differentially expressed genes_keloid-MD_comparing SC-Keloid vs. (SC-Myel+Nonmyel) |             |             |       |       |           |               |                 |                 |
|------------------------------------------------------------------------------------|-------------|-------------|-------|-------|-----------|---------------|-----------------|-----------------|
| gene                                                                               | p_val       | avg_log2FC  | pct.1 | pct.2 | p_val_adj | Foldchange_UP | Foldchange_DOWN | Ratio_pct1_pct2 |
| PARP1                                                                              | 0,674944812 | 0,305676448 | 0,091 | 0,073 | 1         | 1,235998033   | 0,809062776     | 1,246575342     |
| SLC35E4                                                                            | 0,301657223 | 0,305636274 | 0,026 | 0     | 1         | 1,235963616   | 0,809085306     | #DIV/0!         |
| SNRPN                                                                              | 0,532255015 | 0,305571769 | 0,045 | 0,024 | 1         | 1,235908355   | 0,809121482     | 1,875           |
| THYN1                                                                              | 0,286616306 | 0,305365324 | 0,027 | 0     | 1         | 1,235731513   | 0,809237273     | #DIV/0!         |
| SBF1                                                                               | 0,372736722 | 0,305139936 | 0,019 | 0     | 1         | 1,235538473   | 0,809363708     | #DIV/0!         |
| ATRN                                                                               | 0,301657292 | 0,30506847  | 0,026 | 0     | 1         | 1,235477271   | 0,809403801     | #DIV/0!         |
| LRRC40                                                                             | 0,317682316 | 0,304747714 | 0,024 | 0     | 1         | 1,235202617   | 0,809583777     | #DIV/0!         |
| NDUFB6                                                                             | 0,936319894 | 0,304688246 | 0,196 | 0,22  | 1         | 1,235151702   | 0,809617149     | 0,890909091     |
| CPNE1                                                                              | 0,517550788 | 0,304655062 | 0,046 | 0,024 | 1         | 1,235123293   | 0,809635772     | 1,916666667     |
| PLPP1                                                                              | 0,36455836  | 0,304307983 | 0,338 | 0,268 | 1         | 1,234826186   | 0,809830575     | 1,26119403      |
| CHMP7                                                                              | 0,317682464 | 0,30410381  | 0,024 | 0     | 1         | 1,234651444   | 0,809945191     | #DIV/0!         |
| VPS39                                                                              | 0,317682464 | 0,30404026  | 0,024 | 0     | 1         | 1,234597059   | 0,80998087      | #DIV/0!         |
| PDCD6IP                                                                            | 0,26813959  | 0,303979405 | 0,07  | 0,024 | 1         | 1,234544984   | 0,810015037     | 2,916666667     |
| MRM3                                                                               | 0,372736722 | 0,303907593 | 0,019 | 0     | 1         | 1,234483534   | 0,810055357     | #DIV/0!         |
| KCNMB1                                                                             | 0,272474323 | 0,303325144 | 0,029 | 0     | 1         | 1,233985245   | 0,810382461     | #DIV/0!         |
| MAPK9                                                                              | 0,3347904   | 0,303311553 | 0,022 | 0     | 1         | 1,23397362    | 0,810390096     | #DIV/0!         |
| RAB5B                                                                              | 0,89810723  | 0,30323063  | 0,027 | 0,024 | 1         | 1,233904407   | 0,810435553     | 1,125           |
| ARMC9                                                                              | 0,353096361 | 0,303226428 | 0,021 | 0     | 1         | 1,233900813   | 0,810437913     | #DIV/0!         |
| COA1                                                                               | 0,959823805 | 0,30312201  | 0,072 | 0,073 | 1         | 1,23381151    | 0,810496573     | 0,98630137      |
| RANGRF                                                                             | 0,301657292 | 0,302724366 | 0,026 | 0     | 1         | 1,233471487   | 0,810719997     | #DIV/0!         |
| IFNAR1                                                                             | 0,514672769 | 0,302674783 | 0,105 | 0,073 | 1         | 1,233429095   | 0,810747861     | 1,438356164     |
| ARFGAP1                                                                            | 0,372736722 | 0,302640425 | 0,019 | 0     | 1         | 1,233399721   | 0,810767169     | #DIV/0!         |
| SIRT1                                                                              | 0,372736722 | 0,302621495 | 0,019 | 0     | 1         | 1,233383538   | 0,810777807     | #DIV/0!         |
| FDFT1                                                                              | 0,246599267 | 0,30250337  | 0,032 | 0     | 1         | 1,233282554   | 0,810844195     | #DIV/0!         |
| SAP30L                                                                             | 0,3347904   | 0,302426381 | 0,022 | 0     | 1         | 1,233216743   | 0,810887467     | #DIV/0!         |
| FEZ2                                                                               | 0,695244379 | 0,302127334 | 0,116 | 0,146 | 1         | 1,232961144   | 0,811055567     | 0,794520548     |
| HADHA                                                                              | 0,692754897 | 0,302052918 | 0,166 | 0,146 | 1         | 1,232897547   | 0,811097404     | 1,136986301     |
| PCNX4                                                                              | 0,827520293 | 0,301758882 | 0,04  | 0,049 | 1         | 1,232646296   | 0,811262731     | 0,816326531     |
| DHX38                                                                              | 0,301657292 | 0,301501801 | 0,026 | 0     | 1         | 1,232426664   | 0,811407307     | #DIV/0!         |
| MRTFB                                                                              | 0,372736631 | 0,301430107 | 0,019 | 0     | 1         | 1,232365421   | 0,81144763      | #DIV/0!         |

Supplementary Table 3

| Differentially expressed genes_keloid-MD_comparing SC-Keloid vs. (SC-Myel+Nonmyel) |             |             |       |       |           |               |                 |                 |
|------------------------------------------------------------------------------------|-------------|-------------|-------|-------|-----------|---------------|-----------------|-----------------|
| gene                                                                               | p_val       | avg_log2FC  | pct.1 | pct.2 | p_val_adj | Foldchange_UP | Foldchange_DOWN | Ratio_pct1_pct2 |
| GOLGA3                                                                             | 0,433635297 | 0,301408324 | 0,053 | 0,024 | 1         | 1,232346813   | 0,811459882     | 2,208333333     |
| TMEM45A                                                                            | 0,301657292 | 0,30133102  | 0,026 | 0     | 1         | 1,232280782   | 0,811503364     | #DIV/0!         |
| CTSB                                                                               | 0,58693069  | 0,301217216 | 0,07  | 0,049 | 1         | 1,23218358    | 0,81156738      | 1,428571429     |
| PARD3                                                                              | 0,372736722 | 0,301143519 | 0,019 | 0     | 1         | 1,232120638   | 0,811608838     | #DIV/0!         |
| LYAR                                                                               | 0,3347904   | 0,301069819 | 0,022 | 0     | 1         | 1,232057697   | 0,8116503       | #DIV/0!         |
| NUP54                                                                              | 0,634760007 | 0,301020301 | 0,038 | 0,024 | 1         | 1,232015409   | 0,811678159     | 1,583333333     |
| CENPQ                                                                              | 0,3347904   | 0,301016846 | 0,022 | 0     | 1         | 1,232012459   | 0,811680103     | #DIV/0!         |
| COL5A2                                                                             | 0,688861863 | 0,300863492 | 0,416 | 0,415 | 1         | 1,231881507   | 0,811766387     | 1,002409639     |
| NAGK                                                                               | 0,733669239 | 0,300798135 | 0,061 | 0,049 | 1         | 1,231825702   | 0,811803162     | 1,244897959     |
| LDLR                                                                               | 0,3347904   | 0,300772786 | 0,022 | 0     | 1         | 1,231804058   | 0,811817426     | #DIV/0!         |
| MICU2                                                                              | 0,88646433  | 0,300674221 | 0,053 | 0,049 | 1         | 1,231719904   | 0,811872891     | 1,081632653     |
| FAHD2B                                                                             | 0,3347904   | 0,300131129 | 0,022 | 0     | 1         | 1,231256319   | 0,812178573     | #DIV/0!         |
| TNFAIP1                                                                            | 0,852721591 | 0,300003259 | 0,029 | 0,024 | 1         | 1,231147195   | 0,812250561     | 1,208333333     |
| EEF2KMT                                                                            | 0,286616306 | 0,299978458 | 0,027 | 0     | 1         | 1,23112603    | 0,812264525     | #DIV/0!         |
| AKAP9                                                                              | 0,555391097 | 0,299867882 | 0,069 | 0,098 | 1         | 1,231031674   | 0,812326784     | 0,704081633     |
| SMC2                                                                               | 0,527605956 | 0,299845474 | 0,045 | 0,024 | 1         | 1,231012554   | 0,812339401     | 1,875           |
| YWHAQ                                                                              | 0,530295073 | 0,299593219 | 0,206 | 0,171 | 1         | 1,23079733    | 0,81248145      | 1,204678363     |
| ACTG2                                                                              | 0,317682464 | 0,299224889 | 0,024 | 0     | 1         | 1,230483139   | 0,812688909     | #DIV/0!         |
| SIRT2                                                                              | 0,911807829 | 0,299191213 | 0,051 | 0,049 | 1         | 1,230454417   | 0,81270788      | 1,040816327     |
| PLEKHG4                                                                            | 0,317682464 | 0,299066576 | 0,024 | 0     | 1         | 1,230348121   | 0,812778094     | #DIV/0!         |
| CINP                                                                               | 0,511543309 | 0,298858159 | 0,046 | 0,024 | 1         | 1,230170392   | 0,812895519     | 1,916666667     |
| ACER3                                                                              | 0,353096361 | 0,298852859 | 0,021 | 0     | 1         | 1,230165873   | 0,812898506     | #DIV/0!         |
| EMC1                                                                               | 0,317682464 | 0,298793221 | 0,024 | 0     | 1         | 1,230115022   | 0,81293211      | #DIV/0!         |
| TCTN3                                                                              | 0,3347904   | 0,298667293 | 0,022 | 0     | 1         | 1,230007654   | 0,813003071     | #DIV/0!         |
| DDX24                                                                              | 0,450511927 | 0,2985333   | 0,164 | 0,122 | 1         | 1,22989342    | 0,813078584     | 1,344262295     |
| IFIT5                                                                              | 0,334790321 | 0,298513911 | 0,022 | 0     | 1         | 1,229876891   | 0,813089511     | #DIV/0!         |
| POMGNT1                                                                            | 0,669036832 | 0,29834776  | 0,037 | 0,024 | 1         | 1,229735257   | 0,813183158     | 1,541666667     |
| PLA2G4A                                                                            | 0,733531942 | 0,298280344 | 0,033 | 0,024 | 1         | 1,229677795   | 0,813221158     | 1,375           |
| IL32                                                                               | 0,246599267 | 0,298060628 | 0,032 | 0     | 1         | 1,229490534   | 0,813345017     | #DIV/0!         |
| ANGPTL2                                                                            | 0,738800261 | 0,298045411 | 0,112 | 0,098 | 1         | 1,229477566   | 0,813353596     | 1,142857143     |

Supplementary Table 3

| Differentially expressed genes_keloid-MD_comparing SC-Keloid vs. (SC-Myel+Nonmyel) |             |             |       |       |           |               |                 |                 |
|------------------------------------------------------------------------------------|-------------|-------------|-------|-------|-----------|---------------|-----------------|-----------------|
| gene                                                                               | p_val       | avg_log2FC  | pct.1 | pct.2 | p_val_adj | Foldchange_UP | Foldchange_DOWN | Ratio_pct1_pct2 |
| STXBP6                                                                             | 0,636571708 | 0,298031034 | 0,038 | 0,024 | 1         | 1,229465314   | 0,813361702     | 1,583333333     |
| TRIM22                                                                             | 0,317682464 | 0,297983242 | 0,024 | 0     | 1         | 1,229424587   | 0,813388646     | #DIV/0!         |
| CC2D1B                                                                             | 0,3347904   | 0,29782784  | 0,022 | 0     | 1         | 1,229292164   | 0,813476266     | #DIV/0!         |
| KPNA4                                                                              | 0,683272199 | 0,297614589 | 0,064 | 0,049 | 1         | 1,22911047    | 0,813596519     | 1,306122449     |
| ARHGAP23                                                                           | 0,317682464 | 0,297507689 | 0,024 | 0     | 1         | 1,2290194     | 0,813656806     | #DIV/0!         |
| GXYLT2                                                                             | 0,286616241 | 0,297390329 | 0,027 | 0     | 1         | 1,228919426   | 0,813722998     | #DIV/0!         |
| RPS16                                                                              | 0,510132444 | 0,297285132 | 0,416 | 0,39  | 1         | 1,228829821   | 0,813782334     | 1,066666667     |
| LIMD1                                                                              | 0,317682464 | 0,297200545 | 0,024 | 0     | 1         | 1,228757775   | 0,813830049     | #DIV/0!         |
| NDUFV1                                                                             | 0,71028789  | 0,296914237 | 0,062 | 0,049 | 1         | 1,228513948   | 0,813991572     | 1,265306122     |
| GABBR1                                                                             | 0,353096361 | 0,296860555 | 0,021 | 0     | 1         | 1,228468236   | 0,814021861     | #DIV/0!         |
| CENPK                                                                              | 0,301657292 | 0,296780482 | 0,026 | 0     | 1         | 1,228400055   | 0,814067043     | #DIV/0!         |
| RPS2                                                                               | 0,275482796 | 0,296687881 | 0,636 | 0,561 | 1         | 1,228321211   | 0,814119296     | 1,13368984      |
| CSDE1                                                                              | 0,293091415 | 0,296668733 | 0,187 | 0,122 | 1         | 1,228304909   | 0,814130102     | 1,532786885     |
| PLEKHJ1                                                                            | 0,769589184 | 0,296452415 | 0,032 | 0,024 | 1         | 1,228120751   | 0,814252181     | 1,333333333     |
| TMEM87A                                                                            | 0,509242529 | 0,29628703  | 0,077 | 0,049 | 1         | 1,227979971   | 0,81434553      | 1,571428571     |
| DNM1L                                                                              | 0,44280686  | 0,296134718 | 0,051 | 0,024 | 1         | 1,227850335   | 0,814431508     | 2,125           |
| CPQ                                                                                | 0,805257498 | 0,296042075 | 0,056 | 0,049 | 1         | 1,227771491   | 0,814483809     | 1,142857143     |
| USP5                                                                               | 0,272474323 | 0,296038646 | 0,029 | 0     | 1         | 1,227768572   | 0,814485745     | #DIV/0!         |
| C1GALT1                                                                            | 0,997483596 | 0,295963086 | 0,024 | 0,024 | 1         | 1,22770427    | 0,814528404     | 1               |
| SPA17                                                                              | 0,301657292 | 0,295059722 | 0,026 | 0     | 1         | 1,226935766   | 0,815038592     | #DIV/0!         |
| VPS35L                                                                             | 0,3347904   | 0,294997172 | 0,022 | 0     | 1         | 1,226882572   | 0,81507393      | #DIV/0!         |
| RNF121                                                                             | 0,353096361 | 0,294876189 | 0,021 | 0     | 1         | 1,226779691   | 0,815142285     | #DIV/0!         |
| ARPC3                                                                              | 0,414665019 | 0,294866942 | 0,354 | 0,317 | 1         | 1,226771829   | 0,815147509     | 1,116719243     |
| SNW1                                                                               | 0,952389764 | 0,294853777 | 0,096 | 0,098 | 1         | 1,226760634   | 0,815154948     | 0,979591837     |
| ZFX                                                                                | 0,353876931 | 0,294806495 | 0,061 | 0,024 | 1         | 1,226720429   | 0,815181663     | 2,541666667     |
| ATP6V1B2                                                                           | 0,950688894 | 0,294803555 | 0,022 | 0,024 | 1         | 1,22671793    | 0,815183324     | 0,916666667     |
| EDEM2                                                                              | 0,246599267 | 0,294771224 | 0,032 | 0     | 1         | 1,226690439   | 0,815201593     | #DIV/0!         |
| IRAK4                                                                              | 0,353096361 | 0,294611397 | 0,021 | 0     | 1         | 1,226554549   | 0,815291909     | #DIV/0!         |
| IL13RA1                                                                            | 0,372736722 | 0,294397396 | 0,019 | 0     | 1         | 1,226372623   | 0,815412854     | #DIV/0!         |
| MYO1B                                                                              | 0,272474323 | 0,294210762 | 0,029 | 0     | 1         | 1,226213983   | 0,815518346     | #DIV/0!         |

Supplementary Table 3

| Differentially expressed genes_keloid-MD_comparing SC-Keloid vs. (SC-Myel+Nonmyel) |             |             |       |       |           |               |                 |                 |
|------------------------------------------------------------------------------------|-------------|-------------|-------|-------|-----------|---------------|-----------------|-----------------|
| gene                                                                               | p_val       | avg_log2FC  | pct.1 | pct.2 | p_val_adj | Foldchange_UP | Foldchange_DOWN | Ratio_pct1_pct2 |
| BEX1                                                                               | 0,393875079 | 0,293947796 | 0,018 | 0     | 1         | 1,225990497   | 0,815667008     | #DIV/0!         |
| DMKN                                                                               | 0,775933499 | 0,29356299  | 0,032 | 0,024 | 1         | 1,225663536   | 0,815884597     | 1,333333333     |
| ITGA4                                                                              | 0,317682464 | 0,293507556 | 0,024 | 0     | 1         | 1,225616441   | 0,815915947     | #DIV/0!         |
| LRRC58                                                                             | 0,638385585 | 0,293419499 | 0,038 | 0,024 | 1         | 1,225541637   | 0,815965749     | 1,583333333     |
| EMC8                                                                               | 0,552350912 | 0,29335756  | 0,043 | 0,024 | 1         | 1,225489022   | 0,816000782     | 1,791666667     |
| PRR14                                                                              | 0,3347904   | 0,293172542 | 0,022 | 0     | 1         | 1,225331869   | 0,816105437     | #DIV/0!         |
| MCAM                                                                               | 0,498505722 | 0,293125139 | 0,316 | 0,268 | 1         | 1,225291608   | 0,816132252     | 1,179104478     |
| NUP155                                                                             | 0,353096361 | 0,293112768 | 0,021 | 0     | 1         | 1,225281102   | 0,81613925      | #DIV/0!         |
| BDNF                                                                               | 0,317682464 | 0,29296459  | 0,024 | 0     | 1         | 1,225155261   | 0,81622308      | #DIV/0!         |
| ULK3                                                                               | 0,317682464 | 0,29288704  | 0,024 | 0     | 1         | 1,225089406   | 0,816266956     | #DIV/0!         |
| PSMB8                                                                              | 0,675374938 | 0,29276746  | 0,116 | 0,098 | 1         | 1,224987867   | 0,816334616     | 1,183673469     |
| NMD3                                                                               | 0,301657292 | 0,292733285 | 0,026 | 0     | 1         | 1,224958849   | 0,816353954     | #DIV/0!         |
| NLN                                                                                | 0,3347904   | 0,292655121 | 0,022 | 0     | 1         | 1,224892484   | 0,816398184     | #DIV/0!         |
| GEMIN2                                                                             | 0,3347904   | 0,292447777 | 0,022 | 0     | 1         | 1,224716455   | 0,816515526     | #DIV/0!         |
| MIR22HG                                                                            | 0,353096361 | 0,292396451 | 0,021 | 0     | 1         | 1,224672885   | 0,816544575     | #DIV/0!         |
| KCTD5                                                                              | 0,3347904   | 0,292319481 | 0,022 | 0     | 1         | 1,224607549   | 0,81658814      | #DIV/0!         |
| LFNG                                                                               | 0,301657292 | 0,292298887 | 0,026 | 0     | 1         | 1,224590068   | 0,816599797     | #DIV/0!         |
| PTTG1IP                                                                            | 0,580723382 | 0,292254722 | 0,177 | 0,146 | 1         | 1,22455258    | 0,816624795     | 1,212328767     |
| RAB2A                                                                              | 0,409764151 | 0,292105358 | 0,289 | 0,22  | 1         | 1,224425807   | 0,816709346     | 1,313636364     |
| C11orf1                                                                            | 0,317682464 | 0,292058407 | 0,024 | 0     | 1         | 1,22438596    | 0,816735925     | #DIV/0!         |
| FBXO4                                                                              | 0,773817043 | 0,291962352 | 0,032 | 0,024 | 1         | 1,224304443   | 0,816790305     | 1,333333333     |
| MDC1                                                                               | 0,286616306 | 0,291808109 | 0,027 | 0     | 1         | 1,224173556   | 0,816877636     | #DIV/0!         |
| FAM193A                                                                            | 0,670924516 | 0,291774746 | 0,037 | 0,024 | 1         | 1,224145247   | 0,816896526     | 1,541666667     |
| ZNF544                                                                             | 0,353096361 | 0,291719973 | 0,021 | 0     | 1         | 1,224098772   | 0,816927541     | #DIV/0!         |
| GDI1                                                                               | 0,547375304 | 0,291542564 | 0,073 | 0,049 | 1         | 1,223948253   | 0,817028005     | 1,489795918     |
| NLRP1                                                                              | 0,754692567 | 0,291519591 | 0,059 | 0,049 | 1         | 1,223928763   | 0,817041016     | 1,204081633     |
| TNFRSF10B                                                                          | 0,353096361 | 0,291440717 | 0,021 | 0     | 1         | 1,223861852   | 0,817085685     | #DIV/0!         |
| DCXR                                                                               | 0,665267831 | 0,29129757  | 0,037 | 0,024 | 1         | 1,223740424   | 0,817166762     | 1,541666667     |
| CDH13                                                                              | 0,735567259 | 0,290976723 | 0,033 | 0,024 | 1         | 1,223468301   | 0,817348516     | 1,375           |
| TET3                                                                               | 0,353096361 | 0,290824912 | 0,021 | 0     | 1         | 1,223339565   | 0,817434528     | #DIV/0!         |

Supplementary Table 3

| Differentially expressed genes_keloid-MD_ comparing SC-Keloid vs. (SC-Myel+Nonmyel) |             |             |       |       |           |               |                 |                 |
|-------------------------------------------------------------------------------------|-------------|-------------|-------|-------|-----------|---------------|-----------------|-----------------|
| gene                                                                                | p_val       | avg_log2FC  | pct.1 | pct.2 | p_val_adj | Foldchange_UP | Foldchange_DOWN | Ratio_pct1_pct2 |
| TTYH3                                                                               | 0,612820128 | 0,290707686 | 0,04  | 0,024 | 1         | 1,223240167   | 0,817500951     | 1,666666667     |
| RTF1                                                                                | 0,742939576 | 0,290562725 | 0,136 | 0,122 | 1         | 1,223117263   | 0,817583097     | 1,114754098     |
| SAMD9                                                                               | 0,89810723  | 0,290494384 | 0,027 | 0,024 | 1         | 1,223059325   | 0,817621827     | 1,125           |
| SYNJ2                                                                               | 0,301657292 | 0,290260528 | 0,026 | 0     | 1         | 1,222861087   | 0,817754372     | #DIV/0!         |
| ERCC3                                                                               | 0,393875079 | 0,290177666 | 0,018 | 0     | 1         | 1,222790853   | 0,817801341     | #DIV/0!         |
| MARCHF7                                                                             | 0,445455658 | 0,29011533  | 0,051 | 0,024 | 1         | 1,22273802    | 0,817836677     | 2,125           |
| ANKRA2                                                                              | 0,3347904   | 0,290008072 | 0,022 | 0     | 1         | 1,222647118   | 0,817897483     | #DIV/0!         |
| MTMR2                                                                               | 0,372736722 | 0,289987034 | 0,019 | 0     | 1         | 1,222629289   | 0,81790941      | #DIV/0!         |
| TIPIN                                                                               | 0,317682464 | 0,289964604 | 0,024 | 0     | 1         | 1,222610281   | 0,817922126     | #DIV/0!         |
| ATG13                                                                               | 0,317682464 | 0,289942598 | 0,024 | 0     | 1         | 1,222591632   | 0,817934602     | #DIV/0!         |
| FLNC                                                                                | 0,3347904   | 0,289928067 | 0,022 | 0     | 1         | 1,222579318   | 0,81794284      | #DIV/0!         |
| ISOC2                                                                               | 0,623751984 | 0,289901193 | 0,067 | 0,049 | 1         | 1,222556545   | 0,817958077     | 1,367346939     |
| TMEM185A                                                                            | 0,317682464 | 0,289776356 | 0,024 | 0     | 1         | 1,222450761   | 0,818028858     | #DIV/0!         |
| MAML1                                                                               | 0,286616306 | 0,289723985 | 0,027 | 0     | 1         | 1,222406386   | 0,818058554     | #DIV/0!         |
| OXTR                                                                                | 0,353096361 | 0,289630525 | 0,021 | 0     | 1         | 1,222327199   | 0,818111551     | #DIV/0!         |
| SNUPN                                                                               | 0,301657292 | 0,289620109 | 0,026 | 0     | 1         | 1,222318374   | 0,818117457     | #DIV/0!         |
| LAPTM4B                                                                             | 0,739643453 | 0,289445968 | 0,033 | 0,024 | 1         | 1,222170842   | 0,818216215     | 1,375           |
| D2HGDH                                                                              | 0,393875079 | 0,289371445 | 0,018 | 0     | 1         | 1,222107713   | 0,81825848      | #DIV/0!         |
| ARPP19                                                                              | 0,30870413  | 0,289366549 | 0,161 | 0,098 | 1         | 1,222103565   | 0,818261257     | 1,642857143     |
| METTL5                                                                              | 0,753037527 | 0,2893052   | 0,11  | 0,098 | 1         | 1,222051598   | 0,818296054     | 1,12244898      |
| RCC2                                                                                | 0,9640001   | 0,288900487 | 0,091 | 0,098 | 1         | 1,221708829   | 0,818525639     | 0,928571429     |
| BANF1                                                                               | 0,784945631 | 0,288618745 | 0,132 | 0,122 | 1         | 1,221470266   | 0,818685503     | 1,081967213     |
| JMJD6                                                                               | 0,317682464 | 0,288560269 | 0,024 | 0     | 1         | 1,221420758   | 0,818718687     | #DIV/0!         |
| SPEF2                                                                               | 0,353096361 | 0,288347825 | 0,021 | 0     | 1         | 1,221240911   | 0,818839257     | #DIV/0!         |
| SGTB                                                                                | 0,353096361 | 0,288316787 | 0,021 | 0     | 1         | 1,221214637   | 0,818856874     | #DIV/0!         |
| SCRIB                                                                               | 0,372736722 | 0,288155425 | 0,019 | 0     | 1         | 1,221078055   | 0,818948466     | #DIV/0!         |
| ARRDC4                                                                              | 0,372736722 | 0,288131415 | 0,019 | 0     | 1         | 1,221057733   | 0,818962096     | #DIV/0!         |
| CDYL                                                                                | 0,670924516 | 0,288084602 | 0,037 | 0,024 | 1         | 1,221018113   | 0,818988669     | 1,541666667     |
| SLC38A10                                                                            | 0,317682464 | 0,288000842 | 0,024 | 0     | 1         | 1,220947225   | 0,81903622      | #DIV/0!         |
| TMEM218                                                                             | 0,353096361 | 0,287952804 | 0,021 | 0     | 1         | 1,220906571   | 0,819063492     | #DIV/0!         |

Supplementary Table 3

| Differentially expressed genes_keloid-MD_ comparing SC-Keloid vs. (SC-Myel+Nonmyel) |             |             |       |       |           |               |                 |                 |
|-------------------------------------------------------------------------------------|-------------|-------------|-------|-------|-----------|---------------|-----------------|-----------------|
| gene                                                                                | p_val       | avg_log2FC  | pct.1 | pct.2 | p_val_adj | Foldchange_UP | Foldchange_DOWN | Ratio_pct1_pct2 |
| FAM78B                                                                              | 0,317682464 | 0,287682598 | 0,024 | 0     | 1         | 1,220677926   | 0,819216911     | #DIV/0!         |
| CCDC25                                                                              | 0,952389766 | 0,287607317 | 0,096 | 0,098 | 1         | 1,220614232   | 0,819259659     | 0,979591837     |
| NOM1                                                                                | 0,3347904   | 0,287592248 | 0,022 | 0     | 1         | 1,220601483   | 0,819268217     | #DIV/0!         |
| MAPK8IP3                                                                            | 0,372736722 | 0,287586418 | 0,019 | 0     | 1         | 1,220596551   | 0,819271527     | #DIV/0!         |
| TNFSF4                                                                              | 0,317682464 | 0,287344742 | 0,024 | 0     | 1         | 1,220392096   | 0,819408781     | #DIV/0!         |
| CRLF1                                                                               | 0,218962072 | 0,287328892 | 0,177 | 0,098 | 1         | 1,220378689   | 0,819417783     | 1,806122449     |
| DCBLD2                                                                              | 0,553840054 | 0,287295094 | 0,207 | 0,171 | 1         | 1,2203501     | 0,81943698      | 1,210526316     |
| FKBP14                                                                              | 0,82981415  | 0,28722449  | 0,056 | 0,049 | 1         | 1,220290379   | 0,819477083     | 1,142857143     |
| TNRC18                                                                              | 0,286616306 | 0,287133927 | 0,027 | 0     | 1         | 1,220213779   | 0,819528527     | #DIV/0!         |
| PPIL1                                                                               | 0,31768239  | 0,287055282 | 0,024 | 0     | 1         | 1,220147264   | 0,819573202     | #DIV/0!         |
| ZNF394                                                                              | 0,393875079 | 0,286924638 | 0,018 | 0     | 1         | 1,220036778   | 0,819647422     | #DIV/0!         |
| TES                                                                                 | 0,353096277 | 0,286629452 | 0,021 | 0     | 1         | 1,219787174   | 0,819815146     | #DIV/0!         |
| TLN1                                                                                | 0,850611944 | 0,286571001 | 0,26  | 0,268 | 1         | 1,219737756   | 0,819848361     | 0,970149254     |
| DHX29                                                                               | 0,758370512 | 0,286405392 | 0,085 | 0,073 | 1         | 1,219597749   | 0,819942478     | 1,164383562     |
| ATP6VOB                                                                             | 0,158838917 | 0,286236704 | 0,305 | 0,195 | 1         | 1,219455154   | 0,820038356     | 1,564102564     |
| EFS                                                                                 | 0,635569838 | 0,286115074 | 0,053 | 0,073 | 1         | 1,219352349   | 0,820107494     | 0,726027397     |
| RTN1                                                                                | 0,317682464 | 0,286086283 | 0,024 | 0     | 1         | 1,219328016   | 0,820123861     | #DIV/0!         |
| HELLS                                                                               | 0,552350912 | 0,285532337 | 0,043 | 0,024 | 1         | 1,218859925   | 0,820438821     | 1,791666667     |
| INTS10                                                                              | 0,703351459 | 0,285447245 | 0,035 | 0,024 | 1         | 1,218788038   | 0,820487213     | 1,458333333     |
| PAPOLG                                                                              | 0,393875079 | 0,285439717 | 0,018 | 0     | 1         | 1,218781678   | 0,820491494     | #DIV/0!         |
| DACT1                                                                               | 0,3347904   | 0,285338181 | 0,022 | 0     | 1         | 1,218695904   | 0,820549242     | #DIV/0!         |
| ZBED4                                                                               | 0,393875079 | 0,285298178 | 0,018 | 0     | 1         | 1,218662112   | 0,820571995     | #DIV/0!         |
| PSMB10                                                                              | 0,372736722 | 0,285266088 | 0,019 | 0     | 1         | 1,218635006   | 0,820590247     | #DIV/0!         |
| ZNF84                                                                               | 0,3347904   | 0,285161857 | 0,022 | 0     | 1         | 1,218546966   | 0,820649534     | #DIV/0!         |
| CCT6A                                                                               | 0,637859641 | 0,285087813 | 0,12  | 0,098 | 1         | 1,218484428   | 0,820691654     | 1,224489796     |
| N4BP1                                                                               | 0,286616306 | 0,285054048 | 0,027 | 0     | 1         | 1,21845591    | 0,820710862     | #DIV/0!         |
| HPS1                                                                                | 0,3347904   | 0,285048106 | 0,022 | 0     | 1         | 1,218450891   | 0,820714242     | #DIV/0!         |
| ELK1                                                                                | 0,393875079 | 0,284930187 | 0,018 | 0     | 1         | 1,218351306   | 0,820781326     | #DIV/0!         |
| GOSR1                                                                               | 0,630640081 | 0,284909608 | 0,067 | 0,049 | 1         | 1,218333927   | 0,820793034     | 1,367346939     |
| VRK1                                                                                | 0,286616306 | 0,284903575 | 0,027 | 0     | 1         | 1,218328832   | 0,820796466     | #DIV/0!         |

Supplementary Table 3

| Differentially expressed genes_keloid-MD_comparing SC-Keloid vs. (SC-Myel+Nonmyel) |             |             |       |       |           |               |                 |                 |
|------------------------------------------------------------------------------------|-------------|-------------|-------|-------|-----------|---------------|-----------------|-----------------|
| gene                                                                               | p_val       | avg_log2FC  | pct.1 | pct.2 | p_val_adj | Foldchange_UP | Foldchange_DOWN | Ratio_pct1_pct2 |
| DPP9                                                                               | 0,3347904   | 0,28486917  | 0,022 | 0     | 1         | 1,218299778   | 0,82081604      | #DIV/0!         |
| SSU72                                                                              | 0,764188993 | 0,284673192 | 0,11  | 0,098 | 1         | 1,218134293   | 0,820927549     | 1,12244898      |
| AP2B1                                                                              | 0,666351432 | 0,284496288 | 0,091 | 0,073 | 1         | 1,217984934   | 0,821028218     | 1,246575342     |
| EHD4                                                                               | 0,878877608 | 0,284324144 | 0,077 | 0,073 | 1         | 1,217839611   | 0,82112619      | 1,054794521     |
| PSMD8                                                                              | 0,89666555  | 0,284111245 | 0,231 | 0,244 | 1         | 1,217659908   | 0,821247372     | 0,946721311     |
| RASA1                                                                              | 0,769589184 | 0,28397235  | 0,032 | 0,024 | 1         | 1,217542684   | 0,821326442     | 1,333333333     |
| FGFR1                                                                              | 0,353096361 | 0,283935258 | 0,021 | 0     | 1         | 1,217511381   | 0,821347558     | #DIV/0!         |
| GOLGA2                                                                             | 0,585208114 | 0,283877183 | 0,089 | 0,122 | 1         | 1,217462371   | 0,821380622     | 0,729508197     |
| P3H4                                                                               | 0,317682464 | 0,283734143 | 0,024 | 0     | 1         | 1,217341668   | 0,821462064     | #DIV/0!         |
| TRIM27                                                                             | 0,89810723  | 0,283210468 | 0,027 | 0,024 | 1         | 1,216899874   | 0,821760296     | 1,125           |
| ADAMTS12                                                                           | 0,3347904   | 0,283195056 | 0,022 | 0     | 1         | 1,216886873   | 0,821769075     | #DIV/0!         |
| ZNF148                                                                             | 0,519058384 | 0,28312119  | 0,046 | 0,024 | 1         | 1,216824571   | 0,82181115      | 1,916666667     |
| AC147651.4                                                                         | 0,846810353 | 0,28303802  | 0,054 | 0,049 | 1         | 1,216754424   | 0,821858528     | 1,102040816     |
| ZNF518B                                                                            | 0,393875079 | 0,282858916 | 0,018 | 0     | 1         | 1,216603379   | 0,821960564     | #DIV/0!         |
| MRPS35                                                                             | 0,532255015 | 0,282720873 | 0,045 | 0,024 | 1         | 1,216486975   | 0,822039217     | 1,875           |
| CYP27C1                                                                            | 0,372736722 | 0,282713694 | 0,019 | 0     | 1         | 1,216480922   | 0,822043307     | #DIV/0!         |
| CLU                                                                                | 0,794326939 | 0,282669563 | 0,085 | 0,073 | 1         | 1,216443711   | 0,822068453     | 1,164383562     |
| KIF3B                                                                              | 0,259157069 | 0,282625257 | 0,03  | 0     | 1         | 1,216406354   | 0,8220937       | #DIV/0!         |
| ZNF107                                                                             | 0,4167109   | 0,282378188 | 0,016 | 0     | 1         | 1,216198056   | 0,8222345       | #DIV/0!         |
| NDUFAF7                                                                            | 0,353096361 | 0,282072594 | 0,021 | 0     | 1         | 1,215940466   | 0,822408686     | #DIV/0!         |
| IWS1                                                                               | 0,301657292 | 0,282028327 | 0,026 | 0     | 1         | 1,215903157   | 0,82243392      | #DIV/0!         |
| WDR83                                                                              | 0,334790321 | 0,28193704  | 0,022 | 0     | 1         | 1,215826222   | 0,822485962     | #DIV/0!         |
| VPS37A                                                                             | 0,353096361 | 0,281779376 | 0,021 | 0     | 1         | 1,215693359   | 0,822575851     | #DIV/0!         |
| CTNBP1                                                                             | 0,530703027 | 0,281687179 | 0,045 | 0,024 | 1         | 1,215615672   | 0,822628421     | 1,875           |
| FAM220A                                                                            | 0,353096361 | 0,28165508  | 0,021 | 0     | 1         | 1,215588626   | 0,822646724     | #DIV/0!         |
| TNS1                                                                               | 0,560423984 | 0,281635463 | 0,043 | 0,024 | 1         | 1,215572097   | 0,82265791      | 1,791666667     |
| CPNE2                                                                              | 0,614571199 | 0,281486462 | 0,04  | 0,024 | 1         | 1,215446559   | 0,822742878     | 1,666666667     |
| DENND10                                                                            | 0,353096361 | 0,281439717 | 0,021 | 0     | 1         | 1,215407178   | 0,822769536     | #DIV/0!         |
| SOCS5                                                                              | 0,3347904   | 0,281421434 | 0,022 | 0     | 1         | 1,215391776   | 0,822779963     | #DIV/0!         |
| WDR55                                                                              | 0,372736722 | 0,281354388 | 0,019 | 0     | 1         | 1,215335294   | 0,822818201     | #DIV/0!         |



Supplementary Table 3

| Differentially expressed genes_keloid-MD_ comparing SC-Keloid vs. (SC-Myel+Nonmyel) |             |             |       |       |           |               |                 |                 |
|-------------------------------------------------------------------------------------|-------------|-------------|-------|-------|-----------|---------------|-----------------|-----------------|
| gene                                                                                | p_val       | avg_log2FC  | pct.1 | pct.2 | p_val_adj | Foldchange_UP | Foldchange_DOWN | Ratio_pct1_pct2 |
| ENOPH1                                                                              | 0,667151297 | 0,281330992 | 0,037 | 0,024 | 1         | 1,215315585   | 0,822831545     | 1,541666667     |
| EEF1D                                                                               | 0,353188845 | 0,281315501 | 0,506 | 0,463 | 1         | 1,215302536   | 0,82284038      | 1,09287257      |
| TMEM183A                                                                            | 0,731498497 | 0,281171754 | 0,033 | 0,024 | 1         | 1,215181452   | 0,82292237      | 1,375           |
| FAM131A                                                                             | 0,3347904   | 0,281106453 | 0,022 | 0     | 1         | 1,21512645    | 0,822959619     | #DIV/0!         |
| TTC23                                                                               | 0,372736722 | 0,281088445 | 0,019 | 0     | 1         | 1,215111283   | 0,822969891     | #DIV/0!         |
| ZNF354A                                                                             | 0,4167109   | 0,281048982 | 0,016 | 0     | 1         | 1,215078045   | 0,822992403     | #DIV/0!         |
| ATF2                                                                                | 0,667151297 | 0,280999521 | 0,037 | 0,024 | 1         | 1,215036389   | 0,823020619     | 1,541666667     |
| IFT80                                                                               | 0,353096361 | 0,280940687 | 0,021 | 0     | 1         | 1,21498684    | 0,823054182     | #DIV/0!         |
| LIMK2                                                                               | 0,301657292 | 0,280805479 | 0,026 | 0     | 1         | 1,214872978   | 0,823131322     | #DIV/0!         |
| PEF1                                                                                | 0,301657292 | 0,280734802 | 0,026 | 0     | 1         | 1,214813463   | 0,823171648     | #DIV/0!         |
| NPB                                                                                 | 0,372736722 | 0,280588606 | 0,019 | 0     | 1         | 1,214690366   | 0,823255068     | #DIV/0!         |
| EGR3                                                                                | 0,286616306 | 0,280585361 | 0,027 | 0     | 1         | 1,214687633   | 0,82325692      | #DIV/0!         |
| MBD1                                                                                | 0,3347904   | 0,280457289 | 0,022 | 0     | 1         | 1,214579807   | 0,823330006     | #DIV/0!         |
| METTL2B                                                                             | 0,353096361 | 0,280448331 | 0,021 | 0     | 1         | 1,214572266   | 0,823335118     | #DIV/0!         |
| UPF3A                                                                               | 0,416625054 | 0,280444389 | 0,115 | 0,073 | 1         | 1,214568947   | 0,823337368     | 1,575342466     |
| BRWD3                                                                               | 0,950688894 | 0,280200484 | 0,022 | 0,024 | 1         | 1,214363626   | 0,823476575     | 0,916666667     |
| RFC5                                                                                | 0,317682464 | 0,280195202 | 0,024 | 0     | 1         | 1,21435918    | 0,82347959      | #DIV/0!         |
| VPS4A                                                                               | 0,667151297 | 0,28003426  | 0,037 | 0,024 | 1         | 1,214223718   | 0,82357146      | 1,541666667     |
| PYCR1                                                                               | 0,393875079 | 0,280002627 | 0,018 | 0     | 1         | 1,214197095   | 0,823589518     | #DIV/0!         |
| ERRFI1                                                                              | 0,353096361 | 0,279905192 | 0,021 | 0     | 1         | 1,214115095   | 0,823645142     | #DIV/0!         |
| UBN2                                                                                | 0,353096361 | 0,279630629 | 0,021 | 0     | 1         | 1,213884056   | 0,823801907     | #DIV/0!         |
| SNX1                                                                                | 0,711783759 | 0,279488511 | 0,062 | 0,049 | 1         | 1,213764484   | 0,823883062     | 1,265306122     |
| USP14                                                                               | 0,510418125 | 0,279392519 | 0,077 | 0,049 | 1         | 1,213683726   | 0,823937883     | 1,571428571     |
| ZNF407                                                                              | 0,372736722 | 0,279081593 | 0,019 | 0     | 1         | 1,213422185   | 0,824115475     | #DIV/0!         |
| ST8SIA2                                                                             | 0,273156646 | 0,279042537 | 0,07  | 0,024 | 1         | 1,213389336   | 0,824137785     | 2,916666667     |
| DAB2                                                                                | 0,301657292 | 0,278581929 | 0,026 | 0     | 1         | 1,213002      | 0,824400949     | #DIV/0!         |
| PRPF4                                                                               | 0,3347904   | 0,278524823 | 0,022 | 0     | 1         | 1,212953987   | 0,824433582     | #DIV/0!         |
| APOBEC3C                                                                            | 0,771702241 | 0,278468205 | 0,032 | 0,024 | 1         | 1,212906385   | 0,824465937     | 1,333333333     |
| XPNPEP3                                                                             | 0,701390025 | 0,278405015 | 0,035 | 0,024 | 1         | 1,212853262   | 0,824502049     | 1,458333333     |
| YPEL5                                                                               | 0,589553394 | 0,278332468 | 0,07  | 0,049 | 1         | 1,212792274   | 0,824543511     | 1,428571429     |

Supplementary Table 3

| Differentially expressed genes_keloid-MD_comparing SC-Keloid vs. (SC-Myel+Nonmyel) |             |             |       |       |           |               |                 |                 |
|------------------------------------------------------------------------------------|-------------|-------------|-------|-------|-----------|---------------|-----------------|-----------------|
| gene                                                                               | p_val       | avg_log2FC  | pct.1 | pct.2 | p_val_adj | Foldchange_UP | Foldchange_DOWN | Ratio_pct1_pct2 |
| LPIN2                                                                              | 0,3347904   | 0,277737858 | 0,022 | 0     | 1         | 1,212292522   | 0,824883419     | #DIV/0!         |
| NSUN5                                                                              | 0,353096361 | 0,277483557 | 0,021 | 0     | 1         | 1,212078853   | 0,825028832     | #DIV/0!         |
| NDUFAF6                                                                            | 0,353096361 | 0,277271108 | 0,021 | 0     | 1         | 1,211900376   | 0,825150334     | #DIV/0!         |
| USP38                                                                              | 0,372736722 | 0,277254213 | 0,019 | 0     | 1         | 1,211886184   | 0,825159997     | #DIV/0!         |
| PLBD2                                                                              | 0,317682464 | 0,277164846 | 0,024 | 0     | 1         | 1,211811117   | 0,825211112     | #DIV/0!         |
| COMMD4                                                                             | 0,532255015 | 0,27698866  | 0,045 | 0,024 | 1         | 1,211663136   | 0,825311896     | 1,875           |
| ZNF652                                                                             | 0,394356932 | 0,276925484 | 0,056 | 0,024 | 1         | 1,211610079   | 0,825348037     | 2,333333333     |
| THAP11                                                                             | 0,317682464 | 0,276848415 | 0,024 | 0     | 1         | 1,211545356   | 0,825392128     | #DIV/0!         |
| TAF6                                                                               | 0,372736722 | 0,276799024 | 0,019 | 0     | 1         | 1,211503879   | 0,825420386     | #DIV/0!         |
| ACP2                                                                               | 0,372736722 | 0,276786935 | 0,019 | 0     | 1         | 1,211493727   | 0,825427303     | #DIV/0!         |
| KANSL1L                                                                            | 0,353096361 | 0,276762547 | 0,021 | 0     | 1         | 1,211473248   | 0,825441257     | #DIV/0!         |
| LIPA                                                                               | 0,812135813 | 0,276752323 | 0,03  | 0,024 | 1         | 1,211464663   | 0,825447106     | 1,25            |
| IGF2R                                                                              | 0,372736722 | 0,276591951 | 0,019 | 0     | 1         | 1,211330002   | 0,825538869     | #DIV/0!         |
| HAS2                                                                               | 0,946292034 | 0,276577732 | 0,026 | 0,024 | 1         | 1,211318063   | 0,825547006     | 1,083333333     |
| RBM19                                                                              | 0,353096361 | 0,276340296 | 0,021 | 0     | 1         | 1,211118723   | 0,825682884     | #DIV/0!         |
| C21orf91                                                                           | 0,372736722 | 0,276167483 | 0,019 | 0     | 1         | 1,210973659   | 0,825781794     | #DIV/0!         |
| BZW1                                                                               | 0,820741008 | 0,276091669 | 0,241 | 0,244 | 1         | 1,210910023   | 0,82582519      | 0,987704918     |
| TUSC3                                                                              | 0,523758072 | 0,276084838 | 0,075 | 0,049 | 1         | 1,210904289   | 0,825829101     | 1,530612245     |
| TNPO3                                                                              | 0,317682464 | 0,276043904 | 0,024 | 0     | 1         | 1,210869933   | 0,825852532     | #DIV/0!         |
| FAM104B                                                                            | 0,317682464 | 0,275903514 | 0,024 | 0     | 1         | 1,210752108   | 0,825932901     | #DIV/0!         |
| NOL4L                                                                              | 0,393875079 | 0,275540174 | 0,018 | 0     | 1         | 1,21044722    | 0,826140937     | #DIV/0!         |
| KLHDC10                                                                            | 0,699430636 | 0,275494367 | 0,035 | 0,024 | 1         | 1,210408788   | 0,826167168     | 1,458333333     |
| GAS7                                                                               | 0,279667573 | 0,275056869 | 0,392 | 0,317 | 1         | 1,210041787   | 0,826417741     | 1,23659306      |
| RRP1B                                                                              | 0,246599267 | 0,274581918 | 0,032 | 0     | 1         | 1,209643493   | 0,826689852     | #DIV/0!         |
| ZNF814                                                                             | 0,353096361 | 0,274541423 | 0,021 | 0     | 1         | 1,20960954    | 0,826713056     | #DIV/0!         |
| TAF12                                                                              | 0,711783759 | 0,274489181 | 0,062 | 0,049 | 1         | 1,209565739   | 0,826742993     | 1,265306122     |
| MYO19                                                                              | 0,317682464 | 0,274446375 | 0,024 | 0     | 1         | 1,20952985    | 0,826767524     | #DIV/0!         |
| LYPLA2                                                                             | 0,852721591 | 0,274359793 | 0,029 | 0,024 | 1         | 1,209457265   | 0,826817143     | 1,208333333     |
| SSR3                                                                               | 0,614397863 | 0,27425012  | 0,225 | 0,195 | 1         | 1,209365325   | 0,82688         | 1,153846154     |
| TRPV2                                                                              | 0,372736722 | 0,27422764  | 0,019 | 0     | 1         | 1,209346481   | 0,826892884     | #DIV/0!         |

Supplementary Table 3

| Differentially expressed genes_keloid-MD_comparing SC-Keloid vs. (SC-Myel+Nonmyel) |             |             |       |       |           |               |                 |                 |
|------------------------------------------------------------------------------------|-------------|-------------|-------|-------|-----------|---------------|-----------------|-----------------|
| gene                                                                               | p_val       | avg_log2FC  | pct.1 | pct.2 | p_val_adj | Foldchange_UP | Foldchange_DOWN | Ratio_pct1_pct2 |
| API5                                                                               | 0,731498497 | 0,274213904 | 0,033 | 0,024 | 1         | 1,209334967   | 0,826900757     | 1,375           |
| TMEM14A                                                                            | 0,500905628 | 0,274109432 | 0,078 | 0,049 | 1         | 1,209247396   | 0,826960639     | 1,591836735     |
| GAN                                                                                | 0,372736722 | 0,273709123 | 0,019 | 0     | 1         | 1,20891191    | 0,82719013      | #DIV/0!         |
| ETS2                                                                               | 0,701390054 | 0,273576795 | 0,035 | 0,024 | 1         | 1,20880103    | 0,827266006     | 1,458333333     |
| TUBGCP2                                                                            | 0,45078022  | 0,273498541 | 0,051 | 0,024 | 1         | 1,208735464   | 0,827310879     | 2,125           |
| ZDHHC24                                                                            | 0,317682464 | 0,273489517 | 0,024 | 0     | 1         | 1,208727904   | 0,827316054     | #DIV/0!         |
| AP3M2                                                                              | 0,317682464 | 0,273432032 | 0,024 | 0     | 1         | 1,208679743   | 0,82734902      | #DIV/0!         |
| SERTAD3                                                                            | 0,317682464 | 0,27329807  | 0,024 | 0     | 1         | 1,208567515   | 0,827425847     | #DIV/0!         |
| ERG28                                                                              | 0,301657292 | 0,273291223 | 0,026 | 0     | 1         | 1,208561779   | 0,827429774     | #DIV/0!         |
| HSPA13                                                                             | 0,511595097 | 0,273218088 | 0,077 | 0,049 | 1         | 1,208500515   | 0,82747172      | 1,571428571     |
| SFT2D3                                                                             | 0,317682464 | 0,273185094 | 0,024 | 0     | 1         | 1,208472877   | 0,827490645     | #DIV/0!         |
| ARL8B                                                                              | 0,286616306 | 0,272733112 | 0,027 | 0     | 1         | 1,208094334   | 0,82774993      | #DIV/0!         |
| MAP1A                                                                              | 0,317682464 | 0,272652142 | 0,024 | 0     | 1         | 1,208026533   | 0,827796388     | #DIV/0!         |
| AGAP3                                                                              | 0,393875079 | 0,272489905 | 0,018 | 0     | 1         | 1,207890693   | 0,827889482     | #DIV/0!         |
| SPRYD3                                                                             | 0,317682464 | 0,272464192 | 0,024 | 0     | 1         | 1,207869165   | 0,827904238     | #DIV/0!         |
| EFNB2                                                                              | 0,353096361 | 0,272396138 | 0,021 | 0     | 1         | 1,20781219    | 0,827943292     | #DIV/0!         |
| ABHD6                                                                              | 0,353096361 | 0,272379651 | 0,021 | 0     | 1         | 1,207798387   | 0,827952754     | #DIV/0!         |
| SIN3B                                                                              | 0,317682464 | 0,272378913 | 0,024 | 0     | 1         | 1,207797768   | 0,827953177     | #DIV/0!         |
| ABHD14A                                                                            | 0,301657292 | 0,272313702 | 0,026 | 0     | 1         | 1,207743177   | 0,827990602     | #DIV/0!         |
| ZSWIM8                                                                             | 0,353096361 | 0,272265624 | 0,021 | 0     | 1         | 1,207702929   | 0,828018195     | #DIV/0!         |
| UCHL1                                                                              | 0,317682464 | 0,272135016 | 0,024 | 0     | 1         | 1,2075936     | 0,82809316      | #DIV/0!         |
| NDUFA11                                                                            | 0,847469848 | 0,271912622 | 0,174 | 0,171 | 1         | 1,207407461   | 0,828220822     | 1,01754386      |
| H2AJ                                                                               | 0,757421449 | 0,271714041 | 0,33  | 0,317 | 1         | 1,207241278   | 0,828334831     | 1,041009464     |
| HDAC7                                                                              | 0,3347904   | 0,271649579 | 0,022 | 0     | 1         | 1,207187338   | 0,828371843     | #DIV/0!         |
| MOB4                                                                               | 0,585113027 | 0,27151487  | 0,041 | 0,024 | 1         | 1,207074625   | 0,828449194     | 1,708333333     |
| RABL2B                                                                             | 0,393875079 | 0,271480949 | 0,018 | 0     | 1         | 1,207046244   | 0,828468673     | #DIV/0!         |
| TMCC1                                                                              | 0,317682464 | 0,271468213 | 0,024 | 0     | 1         | 1,207035588   | 0,828475987     | #DIV/0!         |
| VPS26B                                                                             | 0,3347904   | 0,271426793 | 0,022 | 0     | 1         | 1,207000934   | 0,828499773     | #DIV/0!         |
| ZNF785                                                                             | 0,372736722 | 0,271404763 | 0,019 | 0     | 1         | 1,206982504   | 0,828512424     | #DIV/0!         |
| OSER1                                                                              | 0,301657292 | 0,271311822 | 0,026 | 0     | 1         | 1,20690475    | 0,8285658       | #DIV/0!         |

Supplementary Table 3

| Differentially expressed genes_keloid-MD_ comparing SC-Keloid vs. (SC-Myel+Nonmyel) |             |             |       |       |           |               |                 |                 |
|-------------------------------------------------------------------------------------|-------------|-------------|-------|-------|-----------|---------------|-----------------|-----------------|
| gene                                                                                | p_val       | avg_log2FC  | pct.1 | pct.2 | p_val_adj | Foldchange_UP | Foldchange_DOWN | Ratio_pct1_pct2 |
| EFR3A                                                                               | 0,414743942 | 0,271253016 | 0,054 | 0,024 | 1         | 1,206855557   | 0,828599574     | 2,25            |
| RBM22                                                                               | 0,429781369 | 0,271243161 | 0,053 | 0,024 | 1         | 1,206847312   | 0,828605234     | 2,208333333     |
| PRR16                                                                               | 0,372736722 | 0,271231356 | 0,019 | 0     | 1         | 1,206837438   | 0,828612014     | #DIV/0!         |
| PPP1R15B                                                                            | 0,353096361 | 0,270819445 | 0,021 | 0     | 1         | 1,206492916   | 0,82884863      | #DIV/0!         |
| ZBTB38                                                                              | 0,604079581 | 0,270732518 | 0,097 | 0,073 | 1         | 1,206420224   | 0,828898571     | 1,328767123     |
| WAC-AS1                                                                             | 0,55396095  | 0,270429934 | 0,043 | 0,024 | 1         | 1,206167221   | 0,829072439     | 1,791666667     |
| NTN1                                                                                | 0,441492135 | 0,270326736 | 0,014 | 0     | 1         | 1,206080945   | 0,829131746     | #DIV/0!         |
| SEH1L                                                                               | 0,393874981 | 0,270311238 | 0,018 | 0     | 1         | 1,206067989   | 0,829140653     | #DIV/0!         |
| SMG7                                                                                | 0,3347904   | 0,270295329 | 0,022 | 0     | 1         | 1,206054689   | 0,829149796     | #DIV/0!         |
| FXR2                                                                                | 0,372736722 | 0,270164694 | 0,019 | 0     | 1         | 1,205945487   | 0,829224878     | #DIV/0!         |
| ATP1A1                                                                              | 0,387260925 | 0,27012837  | 0,089 | 0,049 | 1         | 1,205915125   | 0,829245757     | 1,816326531     |
| GPD2                                                                                | 0,372736722 | 0,270104595 | 0,019 | 0     | 1         | 1,205895252   | 0,829259422     | #DIV/0!         |
| CELSR1                                                                              | 0,393875079 | 0,269684502 | 0,018 | 0     | 1         | 1,205544162   | 0,829500927     | #DIV/0!         |
| NDUFS3                                                                              | 0,588201752 | 0,2696175   | 0,097 | 0,073 | 1         | 1,205488176   | 0,829539451     | 1,328767123     |
| ITPK1-AS1                                                                           | 0,393875079 | 0,269467115 | 0,018 | 0     | 1         | 1,205362523   | 0,829625926     | #DIV/0!         |
| TMEM167B                                                                            | 0,372736722 | 0,269225539 | 0,019 | 0     | 1         | 1,205160705   | 0,829764857     | #DIV/0!         |
| ADAT1                                                                               | 0,3347904   | 0,268976264 | 0,022 | 0     | 1         | 1,204952491   | 0,829908239     | #DIV/0!         |
| SRBD1                                                                               | 0,857273836 | 0,268882941 | 0,029 | 0,024 | 1         | 1,204874549   | 0,829961925     | 1,208333333     |
| C4orf33                                                                             | 0,372736722 | 0,268706563 | 0,019 | 0     | 1         | 1,204727255   | 0,830063399     | #DIV/0!         |
| PSME3IP1                                                                            | 0,309376833 | 0,268638702 | 0,065 | 0,024 | 1         | 1,204670589   | 0,830102444     | 2,708333333     |
| DLGAP4                                                                              | 0,325130163 | 0,268606808 | 0,128 | 0,073 | 1         | 1,204643957   | 0,830120796     | 1,753424658     |
| SORCS2                                                                              | 0,733531942 | 0,26860374  | 0,033 | 0,024 | 1         | 1,204641395   | 0,830122561     | 1,375           |
| HSCB                                                                                | 0,353096361 | 0,26860324  | 0,021 | 0     | 1         | 1,204640977   | 0,830122849     | #DIV/0!         |
| ARHGEF17                                                                            | 0,353096361 | 0,268525493 | 0,021 | 0     | 1         | 1,204576061   | 0,830167585     | #DIV/0!         |
| LAMA5                                                                               | 0,353096361 | 0,268383514 | 0,021 | 0     | 1         | 1,204457522   | 0,830249288     | #DIV/0!         |
| ZNF738                                                                              | 0,3347904   | 0,268323014 | 0,022 | 0     | 1         | 1,204407014   | 0,830284106     | #DIV/0!         |
| ARSK                                                                                | 0,317682464 | 0,268306613 | 0,024 | 0     | 1         | 1,204393321   | 0,830293545     | #DIV/0!         |
| SRSF6                                                                               | 0,748075526 | 0,268268996 | 0,112 | 0,098 | 1         | 1,204361918   | 0,830315194     | 1,142857143     |
| AC005523.2                                                                          | 0,3347904   | 0,268178332 | 0,022 | 0     | 1         | 1,204286234   | 0,830367376     | #DIV/0!         |
| EXOSC4                                                                              | 0,555573283 | 0,268073536 | 0,043 | 0,024 | 1         | 1,204198759   | 0,830427695     | 1,791666667     |

Supplementary Table 3

| Differentially expressed genes_keloid-MD_comparing SC-Keloid vs. (SC-Myel+Nonmyel) |             |             |       |       |           |               |                 |                 |
|------------------------------------------------------------------------------------|-------------|-------------|-------|-------|-----------|---------------|-----------------|-----------------|
| gene                                                                               | p_val       | avg_log2FC  | pct.1 | pct.2 | p_val_adj | Foldchange_UP | Foldchange_DOWN | Ratio_pct1_pct2 |
| SLC35A4                                                                            | 0,852721591 | 0,268059595 | 0,029 | 0,024 | 1         | 1,204187123   | 0,83043572      | 1,208333333     |
| DERL1                                                                              | 0,614571199 | 0,267922191 | 0,04  | 0,024 | 1         | 1,20407244    | 0,830514815     | 1,666666667     |
| TRIM44                                                                             | 0,89672578  | 0,267851375 | 0,1   | 0,098 | 1         | 1,204013338   | 0,830555583     | 1,020408163     |
| COPS8                                                                              | 0,292552949 | 0,267540459 | 0,067 | 0,024 | 1         | 1,203753889   | 0,830734596     | 2,791666667     |
| PSMB9                                                                              | 0,573152984 | 0,267523829 | 0,126 | 0,098 | 1         | 1,203740014   | 0,830744171     | 1,285714286     |
| KDM4B                                                                              | 0,317682464 | 0,26751821  | 0,024 | 0     | 1         | 1,203735325   | 0,830747407     | #DIV/0!         |
| UQCR10                                                                             | 0,269887878 | 0,267416734 | 0,311 | 0,22  | 1         | 1,20365066    | 0,830805842     | 1,413636364     |
| HS3ST1                                                                             | 0,372736722 | 0,26741645  | 0,019 | 0     | 1         | 1,203650423   | 0,830806005     | #DIV/0!         |
| TMEM109                                                                            | 0,667151297 | 0,267185717 | 0,037 | 0,024 | 1         | 1,203457936   | 0,830938889     | 1,541666667     |
| RPE                                                                                | 0,393875079 | 0,267074172 | 0,018 | 0     | 1         | 1,203364892   | 0,831003137     | #DIV/0!         |
| USP47                                                                              | 0,93564492  | 0,266826021 | 0,067 | 0,073 | 1         | 1,203157925   | 0,831146086     | 0,917808219     |
| MYEOV                                                                              | 0,3347904   | 0,266797851 | 0,022 | 0     | 1         | 1,203134433   | 0,831162315     | #DIV/0!         |
| THOC3                                                                              | 0,372736722 | 0,266756093 | 0,019 | 0     | 1         | 1,203099609   | 0,831186373     | #DIV/0!         |
| EIF5A2                                                                             | 0,372736722 | 0,266580964 | 0,019 | 0     | 1         | 1,202953573   | 0,831287277     | #DIV/0!         |
| CDK12                                                                              | 0,85182868  | 0,266557756 | 0,054 | 0,049 | 1         | 1,202934222   | 0,83130065      | 1,102040816     |
| USP19                                                                              | 0,393875079 | 0,26646317  | 0,018 | 0     | 1         | 1,202855358   | 0,831355153     | #DIV/0!         |
| TAF9                                                                               | 0,37613146  | 0,26645958  | 0,057 | 0,024 | 1         | 1,202852365   | 0,831357222     | 2,375           |
| RPL18A                                                                             | 0,432572513 | 0,266440193 | 0,678 | 0,659 | 1         | 1,202836201   | 0,831368394     | 1,028831563     |
| PHYKPL                                                                             | 0,393875079 | 0,266417812 | 0,018 | 0     | 1         | 1,202817541   | 0,831381291     | #DIV/0!         |
| GTF2H2                                                                             | 0,372736722 | 0,266078119 | 0,019 | 0     | 1         | 1,202534362   | 0,831577069     | #DIV/0!         |
| ZNF524                                                                             | 0,353096361 | 0,266008618 | 0,021 | 0     | 1         | 1,202476432   | 0,831617131     | #DIV/0!         |
| DDX19A                                                                             | 0,301657292 | 0,265869416 | 0,026 | 0     | 1         | 1,202360414   | 0,831697375     | #DIV/0!         |
| KDM6A                                                                              | 0,353096361 | 0,265742836 | 0,021 | 0     | 1         | 1,202254925   | 0,83177035      | #DIV/0!         |
| CCNT1                                                                              | 0,372736722 | 0,265641872 | 0,019 | 0     | 1         | 1,202170791   | 0,831828562     | #DIV/0!         |
| SAYSD1                                                                             | 0,89810723  | 0,265608693 | 0,027 | 0,024 | 1         | 1,202143144   | 0,831847692     | 1,125           |
| CEP104                                                                             | 0,353096361 | 0,265588903 | 0,021 | 0     | 1         | 1,202126653   | 0,831859103     | #DIV/0!         |
| SLC17A9                                                                            | 0,393875079 | 0,265571857 | 0,018 | 0     | 1         | 1,20211245    | 0,831868932     | #DIV/0!         |
| SMARCA1                                                                            | 0,471476374 | 0,265508488 | 0,049 | 0,024 | 1         | 1,202059649   | 0,831905472     | 2,041666667     |
| TRIM8                                                                              | 0,986492653 | 0,265264306 | 0,048 | 0,049 | 1         | 1,201856213   | 0,832046287     | 0,979591837     |
| HDAC1                                                                              | 0,667151297 | 0,265236124 | 0,037 | 0,024 | 1         | 1,201832736   | 0,832062541     | 1,541666667     |

Supplementary Table 3

| Differentially expressed genes_keloid-MD_comparing SC-Keloid vs. (SC-Myel+Nonmyel) |             |             |       |       |           |               |                 |                 |
|------------------------------------------------------------------------------------|-------------|-------------|-------|-------|-----------|---------------|-----------------|-----------------|
| gene                                                                               | p_val       | avg_log2FC  | pct.1 | pct.2 | p_val_adj | Foldchange_UP | Foldchange_DOWN | Ratio_pct1_pct2 |
| MT-ND4L                                                                            | 0,597332167 | 0,264970712 | 0,089 | 0,122 | 1         | 1,201611656   | 0,832215629     | 0,729508197     |
| ZNF791                                                                             | 0,3347904   | 0,264929475 | 0,022 | 0     | 1         | 1,20157731    | 0,832239417     | #DIV/0!         |
| TRAPPC4                                                                            | 0,520152763 | 0,264928295 | 0,104 | 0,073 | 1         | 1,201576328   | 0,832240098     | 1,424657534     |
| C1orf131                                                                           | 0,698717218 | 0,26490122  | 0,056 | 0,073 | 1         | 1,201553778   | 0,832255716     | 0,767123288     |
| GLRX3                                                                              | 0,790764234 | 0,264750531 | 0,057 | 0,049 | 1         | 1,201428282   | 0,83234265      | 1,163265306     |
| ARNT2                                                                              | 0,334790321 | 0,26469958  | 0,022 | 0     | 1         | 1,201385852   | 0,832372046     | #DIV/0!         |
| EID2                                                                               | 0,4167109   | 0,264539224 | 0,016 | 0     | 1         | 1,201252326   | 0,832464569     | #DIV/0!         |
| COX7B                                                                              | 0,442245873 | 0,26444655  | 0,4   | 0,366 | 1         | 1,201175163   | 0,832518046     | 1,092896175     |
| STK39                                                                              | 0,441492135 | 0,264439234 | 0,014 | 0     | 1         | 1,201169072   | 0,832522268     | #DIV/0!         |
| POM121C                                                                            | 0,946292034 | 0,264325155 | 0,026 | 0,024 | 1         | 1,201074095   | 0,832588101     | 1,083333333     |
| COA6                                                                               | 0,553603467 | 0,264261623 | 0,073 | 0,049 | 1         | 1,201021205   | 0,832624766     | 1,489795918     |
| GTPBP8                                                                             | 0,852721591 | 0,264193769 | 0,029 | 0,024 | 1         | 1,200964719   | 0,832663928     | 1,208333333     |
| FMC1                                                                               | 0,766791004 | 0,264143659 | 0,059 | 0,073 | 1         | 1,200923006   | 0,83269285      | 0,808219178     |
| PARG                                                                               | 0,372736722 | 0,26388036  | 0,019 | 0     | 1         | 1,200703851   | 0,832844834     | #DIV/0!         |
| POU3F2                                                                             | 0,259157069 | 0,263784604 | 0,03  | 0     | 1         | 1,20062416    | 0,832900114     | #DIV/0!         |
| ZNF566                                                                             | 0,441492135 | 0,263741924 | 0,014 | 0     | 1         | 1,200588641   | 0,832924755     | #DIV/0!         |
| KLF4                                                                               | 0,935991717 | 0,263722008 | 0,045 | 0,049 | 1         | 1,200572068   | 0,832936253     | 0,918367347     |
| CARS2                                                                              | 0,3347904   | 0,263710898 | 0,022 | 0     | 1         | 1,200562823   | 0,832942668     | #DIV/0!         |
| MCPH1                                                                              | 0,393875079 | 0,263627423 | 0,018 | 0     | 1         | 1,200493359   | 0,832990864     | #DIV/0!         |
| NARS1                                                                              | 0,926710642 | 0,263390321 | 0,11  | 0,122 | 1         | 1,200296079   | 0,833127774     | 0,901639344     |
| SPECC1L                                                                            | 0,353096361 | 0,263374763 | 0,021 | 0     | 1         | 1,200283134   | 0,833136759     | #DIV/0!         |
| MINDY3                                                                             | 0,3347904   | 0,263326005 | 0,022 | 0     | 1         | 1,20024257    | 0,833164916     | #DIV/0!         |
| CYHR1                                                                              | 0,817995719 | 0,263317745 | 0,04  | 0,049 | 1         | 1,200235698   | 0,833169686     | 0,816326531     |
| B4GALT5                                                                            | 0,301657292 | 0,263307295 | 0,026 | 0     | 1         | 1,200227005   | 0,833175721     | #DIV/0!         |
| CLCN7                                                                              | 0,372736722 | 0,263016164 | 0,019 | 0     | 1         | 1,199984827   | 0,833343871     | #DIV/0!         |
| C9orf64                                                                            | 0,441492135 | 0,262980901 | 0,014 | 0     | 1         | 1,199955497   | 0,833364239     | #DIV/0!         |
| RTN4                                                                               | 0,833001495 | 0,262965227 | 0,198 | 0,195 | 1         | 1,19994246    | 0,833373293     | 1,015384615     |
| PMEPA1                                                                             | 0,385274249 | 0,262930373 | 0,77  | 0,756 | 1         | 1,199913471   | 0,833393427     | 1,018518519     |
| THOC7                                                                              | 0,745173223 | 0,262896915 | 0,137 | 0,122 | 1         | 1,199885644   | 0,833412755     | 1,12295082      |
| LCLAT1                                                                             | 0,372736722 | 0,262892931 | 0,019 | 0     | 1         | 1,19988233    | 0,833415056     | #DIV/0!         |

Supplementary Table 3

| Differentially expressed genes_keloid-MD_comparing SC-Keloid vs. (SC-Myel+Nonmyel) |             |             |       |       |           |               |                 |                 |
|------------------------------------------------------------------------------------|-------------|-------------|-------|-------|-----------|---------------|-----------------|-----------------|
| gene                                                                               | p_val       | avg_log2FC  | pct.1 | pct.2 | p_val_adj | Foldchange_UP | Foldchange_DOWN | Ratio_pct1_pct2 |
| AKAP10                                                                             | 0,353096361 | 0,262891912 | 0,021 | 0     | 1         | 1,199881482   | 0,833415645     | #DIV/0!         |
| KAT7                                                                               | 0,372736722 | 0,26226225  | 0,019 | 0     | 1         | 1,199357911   | 0,833779467     | #DIV/0!         |
| NDUFB2                                                                             | 0,768498251 | 0,262082157 | 0,443 | 0,439 | 1         | 1,199208203   | 0,833883555     | 1,009111617     |
| COL27A1                                                                            | 0,467317281 | 0,261980317 | 0,049 | 0,024 | 1         | 1,199123554   | 0,833942421     | 2,041666667     |
| DNAJC7                                                                             | 0,481473815 | 0,261976911 | 0,08  | 0,049 | 1         | 1,199120723   | 0,83394439      | 1,632653061     |
| MVB12A                                                                             | 0,665750794 | 0,261954296 | 0,054 | 0,073 | 1         | 1,199101926   | 0,833957463     | 0,739726027     |
| R3HDM2                                                                             | 0,528582598 | 0,261836422 | 0,075 | 0,049 | 1         | 1,199003959   | 0,834025603     | 1,530612245     |
| C15orf61                                                                           | 0,533809299 | 0,261191846 | 0,045 | 0,024 | 1         | 1,19846838    | 0,834398317     | 1,875           |
| CHMP2B                                                                             | 0,589553374 | 0,260678734 | 0,07  | 0,049 | 1         | 1,198042206   | 0,834695134     | 1,428571429     |
| RPGRIP1L                                                                           | 0,353096361 | 0,260526377 | 0,021 | 0     | 1         | 1,197915693   | 0,834783287     | #DIV/0!         |
| MPZL1                                                                              | 0,301657292 | 0,260470857 | 0,026 | 0     | 1         | 1,197869594   | 0,834815413     | #DIV/0!         |
| SLC25A16                                                                           | 0,3347904   | 0,260455359 | 0,022 | 0     | 1         | 1,197856725   | 0,834824382     | #DIV/0!         |
| WDR5                                                                               | 0,4167109   | 0,260275365 | 0,016 | 0     | 1         | 1,197707287   | 0,834928543     | #DIV/0!         |
| STON2                                                                              | 0,812135813 | 0,260048987 | 0,03  | 0,024 | 1         | 1,197519366   | 0,835059564     | 1,25            |
| RNF150                                                                             | 0,393875079 | 0,259999033 | 0,018 | 0     | 1         | 1,197477902   | 0,835088479     | #DIV/0!         |
| N4BP2                                                                              | 0,372736722 | 0,259979997 | 0,019 | 0     | 1         | 1,197462102   | 0,835099498     | #DIV/0!         |
| PGM2                                                                               | 0,372736722 | 0,25990209  | 0,019 | 0     | 1         | 1,197397439   | 0,835144595     | #DIV/0!         |
| DESI2                                                                              | 0,787560176 | 0,259880229 | 0,057 | 0,049 | 1         | 1,197379295   | 0,835157251     | 1,163265306     |
| WWC1                                                                               | 0,372736722 | 0,25983509  | 0,019 | 0     | 1         | 1,197341832   | 0,835183381     | #DIV/0!         |
| PLA2G4C                                                                            | 0,393875079 | 0,259356116 | 0,018 | 0     | 1         | 1,196944381   | 0,835460708     | #DIV/0!         |
| GCSH                                                                               | 0,597649235 | 0,259345586 | 0,15  | 0,122 | 1         | 1,196935645   | 0,835466806     | 1,229508197     |
| PIP5K1A                                                                            | 0,814331231 | 0,259216767 | 0,03  | 0,024 | 1         | 1,196828775   | 0,835541408     | 1,25            |
| PRKAA1                                                                             | 0,737604434 | 0,259073941 | 0,033 | 0,024 | 1         | 1,196710295   | 0,83562413      | 1,375           |
| SPRY2                                                                              | 0,711080569 | 0,258890861 | 0,056 | 0,073 | 1         | 1,196558441   | 0,835730179     | 0,767123288     |
| PHRF1                                                                              | 0,393875079 | 0,258777527 | 0,018 | 0     | 1         | 1,196464446   | 0,835795834     | #DIV/0!         |
| SEC14L2                                                                            | 0,857273836 | 0,258776773 | 0,029 | 0,024 | 1         | 1,196463821   | 0,835796271     | 1,208333333     |
| SEMA7A                                                                             | 0,353096361 | 0,258399013 | 0,021 | 0     | 1         | 1,196150576   | 0,836015147     | #DIV/0!         |
| PIN4                                                                               | 0,558641653 | 0,258388185 | 0,156 | 0,122 | 1         | 1,196141599   | 0,836021422     | 1,278688525     |
| PTPN4                                                                              | 0,353096277 | 0,258280305 | 0,021 | 0     | 1         | 1,196052158   | 0,836083939     | #DIV/0!         |
| SLC20A2                                                                            | 0,739643453 | 0,258034603 | 0,033 | 0,024 | 1         | 1,195848479   | 0,836226343     | 1,375           |

Supplementary Table 3

| Differentially expressed genes_keloid-MD_ comparing SC-Keloid vs. (SC-Myel+Nonmyel) |             |             |       |       |           |               |                 |                 |
|-------------------------------------------------------------------------------------|-------------|-------------|-------|-------|-----------|---------------|-----------------|-----------------|
| gene                                                                                | p_val       | avg_log2FC  | pct.1 | pct.2 | p_val_adj | Foldchange_UP | Foldchange_DOWN | Ratio_pct1_pct2 |
| EPS8                                                                                | 0,380694346 | 0,257962417 | 0,057 | 0,024 | 1         | 1,195788645   | 0,836268185     | 2,375           |
| DMWD                                                                                | 0,812135813 | 0,257840916 | 0,03  | 0,024 | 1         | 1,195687943   | 0,836338617     | 1,25            |
| PINK1                                                                               | 0,317682464 | 0,257723982 | 0,024 | 0     | 1         | 1,195591033   | 0,836406407     | #DIV/0!         |
| TSPO                                                                                | 0,255539745 | 0,25768821  | 0,351 | 0,268 | 1         | 1,195561388   | 0,836427146     | 1,309701493     |
| MDM1                                                                                | 0,441492135 | 0,257522416 | 0,014 | 0     | 1         | 1,195424003   | 0,836523273     | #DIV/0!         |
| AGO3                                                                                | 0,775933499 | 0,257406897 | 0,032 | 0,024 | 1         | 1,195328287   | 0,836590258     | 1,333333333     |
| UBE4B                                                                               | 0,393875079 | 0,257343344 | 0,018 | 0     | 1         | 1,195275632   | 0,836627112     | #DIV/0!         |
| RNF220                                                                              | 0,353096361 | 0,257317853 | 0,021 | 0     | 1         | 1,195254513   | 0,836641894     | #DIV/0!         |
| SACS                                                                                | 0,535365871 | 0,257193635 | 0,045 | 0,024 | 1         | 1,195151604   | 0,836713934     | 1,875           |
| NKAIN4                                                                              | 0,498250693 | 0,257169088 | 0,011 | 0     | 1         | 1,195131269   | 0,83672817      | #DIV/0!         |
| SLC38A6                                                                             | 0,372736722 | 0,257160894 | 0,019 | 0     | 1         | 1,195124481   | 0,836732923     | #DIV/0!         |
| BCKDK                                                                               | 0,353096361 | 0,257036453 | 0,021 | 0     | 1         | 1,1950214     | 0,836805099     | #DIV/0!         |
| ZFP62                                                                               | 0,4167109   | 0,257031975 | 0,016 | 0     | 1         | 1,19501769    | 0,836807696     | #DIV/0!         |
| HPS3                                                                                | 0,372736722 | 0,256823112 | 0,019 | 0     | 1         | 1,194844697   | 0,836928852     | #DIV/0!         |
| IFT74                                                                               | 0,372736722 | 0,256821135 | 0,019 | 0     | 1         | 1,19484306    | 0,836929998     | #DIV/0!         |
| RPS20                                                                               | 0,327573298 | 0,256738734 | 0,388 | 0,341 | 1         | 1,194774817   | 0,836977802     | 1,137829912     |
| CNEP1R1                                                                             | 0,4167109   | 0,256616638 | 0,016 | 0     | 1         | 1,194673707   | 0,837048639     | #DIV/0!         |
| FAM135A                                                                             | 0,372736722 | 0,256605771 | 0,019 | 0     | 1         | 1,194664708   | 0,837054944     | #DIV/0!         |
| VPS13C                                                                              | 0,679849573 | 0,25658377  | 0,118 | 0,098 | 1         | 1,194646489   | 0,837067709     | 1,204081633     |
| SIPA1L1                                                                             | 0,697473218 | 0,256551558 | 0,035 | 0,024 | 1         | 1,194619816   | 0,837086399     | 1,458333333     |
| TBC1D16                                                                             | 0,353096361 | 0,256492456 | 0,021 | 0     | 1         | 1,194570878   | 0,837120692     | #DIV/0!         |
| APEX1                                                                               | 0,879499051 | 0,256457174 | 0,124 | 0,122 | 1         | 1,194541664   | 0,837141165     | 1,016393443     |
| DAZAP2                                                                              | 0,811127793 | 0,256396106 | 0,083 | 0,098 | 1         | 1,194491102   | 0,837176601     | 0,846938776     |
| MARCHF6                                                                             | 0,339715378 | 0,256351856 | 0,062 | 0,024 | 1         | 1,194454464   | 0,837202279     | 2,583333333     |
| CDK8                                                                                | 0,416710794 | 0,256301516 | 0,016 | 0     | 1         | 1,194412787   | 0,837231492     | #DIV/0!         |
| UBR7                                                                                | 0,372736722 | 0,256219638 | 0,019 | 0     | 1         | 1,194345002   | 0,837279009     | #DIV/0!         |
| ZNF507                                                                              | 0,4167109   | 0,256213603 | 0,016 | 0     | 1         | 1,194340006   | 0,837282512     | #DIV/0!         |
| PMS2                                                                                | 0,353096361 | 0,256207664 | 0,021 | 0     | 1         | 1,194335089   | 0,837285959     | #DIV/0!         |
| HOXB3                                                                               | 0,372736722 | 0,256204349 | 0,019 | 0     | 1         | 1,194332345   | 0,837287882     | #DIV/0!         |
| TJAP1                                                                               | 0,416710794 | 0,256166893 | 0,016 | 0     | 1         | 1,194301338   | 0,837309621     | #DIV/0!         |



Supplementary Table 3

| Differentially expressed genes_keloid-MD_ comparing SC-Keloid vs. (SC-Myel+Nonmyel) |             |             |       |       |           |               |                 |                 |
|-------------------------------------------------------------------------------------|-------------|-------------|-------|-------|-----------|---------------|-----------------|-----------------|
| gene                                                                                | p_val       | avg_log2FC  | pct.1 | pct.2 | p_val_adj | Foldchange_UP | Foldchange_DOWN | Ratio_pct1_pct2 |
| ARHGAP18                                                                            | 0,493210511 | 0,256121133 | 0,048 | 0,024 | 1         | 1,194263457   | 0,837336179     | 2               |
| POMT2                                                                               | 0,393875079 | 0,25602381  | 0,018 | 0     | 1         | 1,194182895   | 0,837392667     | #DIV/0!         |
| DYRK1A                                                                              | 0,814331231 | 0,255730645 | 0,03  | 0,024 | 1         | 1,193940254   | 0,837562848     | 1,25            |
| ANGEL2                                                                              | 0,997483596 | 0,255690564 | 0,024 | 0,024 | 1         | 1,193907085   | 0,837586118     | 1               |
| EMB                                                                                 | 0,3347904   | 0,255685573 | 0,022 | 0     | 1         | 1,193902954   | 0,837589016     | #DIV/0!         |
| TRIM73                                                                              | 0,441492135 | 0,255585825 | 0,014 | 0     | 1         | 1,193820411   | 0,837646928     | #DIV/0!         |
| TMEM106C                                                                            | 0,701390054 | 0,255574317 | 0,035 | 0,024 | 1         | 1,193810888   | 0,83765361      | 1,458333333     |
| SYNM                                                                                | 0,372736722 | 0,255518147 | 0,019 | 0     | 1         | 1,193764409   | 0,837686224     | #DIV/0!         |
| HSPA9                                                                               | 0,885414806 | 0,255328291 | 0,11  | 0,122 | 1         | 1,193607322   | 0,837796469     | 0,901639344     |
| VDAC2                                                                               | 0,600748239 | 0,255298644 | 0,177 | 0,146 | 1         | 1,193582794   | 0,837813686     | 1,212328767     |
| FUBP3                                                                               | 0,705314812 | 0,25528025  | 0,035 | 0,024 | 1         | 1,193567576   | 0,837824368     | 1,458333333     |
| TSPAN14                                                                             | 0,735567259 | 0,255232108 | 0,033 | 0,024 | 1         | 1,193527748   | 0,837852326     | 1,375           |
| SART1                                                                               | 0,4167109   | 0,255223725 | 0,016 | 0     | 1         | 1,193520813   | 0,837857195     | #DIV/0!         |
| ATG5                                                                                | 0,449445736 | 0,255209725 | 0,051 | 0,024 | 1         | 1,193509231   | 0,837865325     | 2,125           |
| NELFA                                                                               | 0,946292034 | 0,255029886 | 0,026 | 0,024 | 1         | 1,193360463   | 0,837969776     | 1,083333333     |
| NPHP1                                                                               | 0,372736722 | 0,254860624 | 0,019 | 0     | 1         | 1,193220462   | 0,838068095     | #DIV/0!         |
| TEX264                                                                              | 0,563669143 | 0,254628585 | 0,043 | 0,024 | 1         | 1,193028564   | 0,838202898     | 1,791666667     |
| SLC1A4                                                                              | 0,372736722 | 0,254609224 | 0,019 | 0     | 1         | 1,193012553   | 0,838214147     | #DIV/0!         |
| RRN3                                                                                | 0,286616306 | 0,254580966 | 0,027 | 0     | 1         | 1,192989187   | 0,838230565     | #DIV/0!         |
| RBM43                                                                               | 0,915287163 | 0,254271929 | 0,051 | 0,049 | 1         | 1,192733666   | 0,83841014      | 1,040816327     |
| DENND4C                                                                             | 0,353096361 | 0,254173329 | 0,021 | 0     | 1         | 1,192652152   | 0,838467443     | #DIV/0!         |
| MLYCD                                                                               | 0,4167109   | 0,254144955 | 0,016 | 0     | 1         | 1,192628696   | 0,838483933     | #DIV/0!         |
| TMUB2                                                                               | 0,393875079 | 0,254105888 | 0,018 | 0     | 1         | 1,1925964     | 0,838506639     | #DIV/0!         |
| MICALL1                                                                             | 0,372736722 | 0,254033023 | 0,019 | 0     | 1         | 1,192536169   | 0,83854899      | #DIV/0!         |
| MPRIP                                                                               | 0,308432845 | 0,253997254 | 0,065 | 0,024 | 1         | 1,192506603   | 0,83856978      | 2,708333333     |
| TUBG1                                                                               | 0,3347904   | 0,253903302 | 0,022 | 0     | 1         | 1,192428946   | 0,838624392     | #DIV/0!         |
| ZNF675                                                                              | 0,393875079 | 0,253811661 | 0,018 | 0     | 1         | 1,192353205   | 0,838677664     | #DIV/0!         |
| RILPL1                                                                              | 0,393875079 | 0,253509318 | 0,018 | 0     | 1         | 1,192103351   | 0,838853442     | #DIV/0!         |
| SRRD                                                                                | 0,317682464 | 0,253484022 | 0,024 | 0     | 1         | 1,19208245    | 0,838868151     | #DIV/0!         |
| DGKI                                                                                | 0,393875079 | 0,253454122 | 0,018 | 0     | 1         | 1,192057743   | 0,838885537     | #DIV/0!         |

Supplementary Table 3

| Differentially expressed genes_keloid-MD_comparing SC-Keloid vs. (SC-Myel+Nonmyel) |             |             |       |       |           |               |                 |                 |
|------------------------------------------------------------------------------------|-------------|-------------|-------|-------|-----------|---------------|-----------------|-----------------|
| gene                                                                               | p_val       | avg_log2FC  | pct.1 | pct.2 | p_val_adj | Foldchange_UP | Foldchange_DOWN | Ratio_pct1_pct2 |
| AP5M1                                                                              | 0,3347904   | 0,253379357 | 0,022 | 0     | 1         | 1,191995969   | 0,838929012     | #DIV/0!         |
| GPATCH4                                                                            | 0,449445736 | 0,253370272 | 0,051 | 0,024 | 1         | 1,191988462   | 0,838934295     | 2,125           |
| ENAH                                                                               | 0,317682464 | 0,253323168 | 0,024 | 0     | 1         | 1,191949545   | 0,838961686     | #DIV/0!         |
| SLC35A3                                                                            | 0,705314841 | 0,25294965  | 0,035 | 0,024 | 1         | 1,191640985   | 0,839178924     | 1,458333333     |
| PYM1                                                                               | 0,3347904   | 0,252873023 | 0,022 | 0     | 1         | 1,191577695   | 0,839223497     | #DIV/0!         |
| RPS6KA3                                                                            | 0,372736722 | 0,252700122 | 0,019 | 0     | 1         | 1,191434898   | 0,83932408      | #DIV/0!         |
| LDHB                                                                               | 0,966096634 | 0,252670958 | 0,206 | 0,22  | 1         | 1,191410813   | 0,839341048     | 0,936363636     |
| FZD6                                                                               | 0,393875079 | 0,252661623 | 0,018 | 0     | 1         | 1,191403104   | 0,839346478     | #DIV/0!         |
| SPATC1L                                                                            | 0,3347904   | 0,252451236 | 0,022 | 0     | 1         | 1,191229375   | 0,839468889     | #DIV/0!         |
| CRISPLD1                                                                           | 0,372736722 | 0,252271446 | 0,019 | 0     | 1         | 1,191080933   | 0,839573511     | #DIV/0!         |
| TSPAN9                                                                             | 0,4167109   | 0,252154396 | 0,016 | 0     | 1         | 1,1909843     | 0,839641631     | #DIV/0!         |
| CLINT1                                                                             | 0,850146834 | 0,252118941 | 0,08  | 0,073 | 1         | 1,190955032   | 0,839662266     | 1,095890411     |
| MAPK14                                                                             | 0,393875079 | 0,252096511 | 0,018 | 0     | 1         | 1,190936516   | 0,83967532      | #DIV/0!         |
| TLK1                                                                               | 0,739643453 | 0,252038826 | 0,033 | 0,024 | 1         | 1,190888898   | 0,839708894     | 1,375           |
| ANKS3                                                                              | 0,353096361 | 0,252016872 | 0,021 | 0     | 1         | 1,190870777   | 0,839721672     | #DIV/0!         |
| SS18                                                                               | 0,338688882 | 0,251956029 | 0,062 | 0,024 | 1         | 1,190820555   | 0,839757087     | 2,583333333     |
| POFUT2                                                                             | 0,317682464 | 0,251770746 | 0,024 | 0     | 1         | 1,190667629   | 0,839864943     | #DIV/0!         |
| SEPSECS                                                                            | 0,372736722 | 0,251764506 | 0,019 | 0     | 1         | 1,190662479   | 0,839868575     | #DIV/0!         |
| GRINA                                                                              | 0,699430636 | 0,251717021 | 0,035 | 0,024 | 1         | 1,190623291   | 0,839896219     | 1,458333333     |
| GABPB1                                                                             | 0,353096361 | 0,251672653 | 0,021 | 0     | 1         | 1,190586675   | 0,839922049     | #DIV/0!         |
| SP2                                                                                | 0,393875079 | 0,251658226 | 0,018 | 0     | 1         | 1,190574769   | 0,839930449     | #DIV/0!         |
| CNN3                                                                               | 0,454583465 | 0,25138651  | 0,507 | 0,463 | 1         | 1,190350558   | 0,840088656     | 1,095032397     |
| PDXK                                                                               | 0,396731373 | 0,251360059 | 0,056 | 0,024 | 1         | 1,190328734   | 0,840104058     | 2,333333333     |
| DCSTAMP                                                                            | 0,441492135 | 0,251309409 | 0,014 | 0     | 1         | 1,190286945   | 0,840133553     | #DIV/0!         |
| EPHA2                                                                              | 0,4167109   | 0,251063178 | 0,016 | 0     | 1         | 1,190083811   | 0,840276954     | #DIV/0!         |
| PPT1                                                                               | 0,979161456 | 0,251059686 | 0,072 | 0,073 | 1         | 1,19008093    | 0,840278988     | 0,98630137      |
| VPS33A                                                                             | 0,393875079 | 0,250963753 | 0,018 | 0     | 1         | 1,190001797   | 0,840334865     | #DIV/0!         |
| TBC1D2B                                                                            | 0,353096361 | 0,250931749 | 0,021 | 0     | 1         | 1,189975399   | 0,840353507     | #DIV/0!         |
| ANKRD28                                                                            | 0,915287163 | 0,250915875 | 0,051 | 0,049 | 1         | 1,189962306   | 0,840362753     | 1,040816327     |
| PPP4R1                                                                             | 0,533809299 | 0,250801987 | 0,045 | 0,024 | 1         | 1,189868373   | 0,840429095     | 1,875           |

Supplementary Table 3

| Differentially expressed genes_keloid-MD_comparing SC-Keloid vs. (SC-Myel+Nonmyel) |             |             |       |       |           |               |                 |                 |
|------------------------------------------------------------------------------------|-------------|-------------|-------|-------|-----------|---------------|-----------------|-----------------|
| gene                                                                               | p_val       | avg_log2FC  | pct.1 | pct.2 | p_val_adj | Foldchange_UP | Foldchange_DOWN | Ratio_pct1_pct2 |
| ELK4                                                                               | 0,457331705 | 0,250615925 | 0,081 | 0,049 | 1         | 1,189714928   | 0,84053749      | 1,653061224     |
| AGGF1                                                                              | 0,393875079 | 0,250598518 | 0,018 | 0     | 1         | 1,189700573   | 0,840547632     | #DIV/0!         |
| RPL24                                                                              | 0,322532063 | 0,250544267 | 0,748 | 0,707 | 1         | 1,189655837   | 0,840579241     | 1,057991513     |
| XPNPEP1                                                                            | 0,372736722 | 0,250300195 | 0,019 | 0     | 1         | 1,18945459    | 0,84072146      | #DIV/0!         |
| HNRNPA2B1                                                                          | 0,23991973  | 0,250230505 | 0,584 | 0,512 | 1         | 1,189397135   | 0,840762072     | 1,140625        |
| DNAAF5                                                                             | 0,4167109   | 0,250205011 | 0,016 | 0     | 1         | 1,189376117   | 0,84077693      | #DIV/0!         |
| C1orf109                                                                           | 0,372736722 | 0,250160506 | 0,019 | 0     | 1         | 1,189339427   | 0,840802867     | #DIV/0!         |
| PLEKHA8                                                                            | 0,393875079 | 0,250132315 | 0,018 | 0     | 1         | 1,189316187   | 0,840819297     | #DIV/0!         |
| MYOF                                                                               | 0,607580193 | 0,249851239 | 0,04  | 0,024 | 1         | 1,189084499   | 0,840983127     | 1,666666667     |
| MEA1                                                                               | 0,560423984 | 0,249696119 | 0,043 | 0,024 | 1         | 1,188956654   | 0,841073556     | 1,791666667     |
| PBX3                                                                               | 0,3347904   | 0,249621255 | 0,022 | 0     | 1         | 1,188894958   | 0,841117201     | #DIV/0!         |
| SV2A                                                                               | 0,4167109   | 0,249490854 | 0,016 | 0     | 1         | 1,188787502   | 0,841193231     | #DIV/0!         |
| ANKH                                                                               | 0,665267831 | 0,248859523 | 0,037 | 0,024 | 1         | 1,188267396   | 0,841561422     | 1,541666667     |
| ZMYM4                                                                              | 0,540049274 | 0,24878529  | 0,045 | 0,024 | 1         | 1,188206257   | 0,841604725     | 1,875           |
| PXMP2                                                                              | 0,3347904   | 0,248742712 | 0,022 | 0     | 1         | 1,18817119    | 0,841629564     | #DIV/0!         |
| S100A3                                                                             | 0,301657292 | 0,248622071 | 0,026 | 0     | 1         | 1,188071837   | 0,841699945     | #DIV/0!         |
| ZNF680                                                                             | 0,353096361 | 0,248507966 | 0,021 | 0     | 1         | 1,187977874   | 0,841766519     | #DIV/0!         |
| DCUN1D1                                                                            | 0,896472903 | 0,248260127 | 0,043 | 0,049 | 1         | 1,18777381    | 0,841911138     | 0,87755102      |
| FKBP7                                                                              | 0,559623075 | 0,24813343  | 0,049 | 0,073 | 1         | 1,187669504   | 0,841985078     | 0,671232877     |
| SNX18                                                                              | 0,4167109   | 0,247919421 | 0,016 | 0     | 1         | 1,187493339   | 0,842109987     | #DIV/0!         |
| KDM5C                                                                              | 0,733531915 | 0,247876771 | 0,033 | 0,024 | 1         | 1,187458234   | 0,842134882     | 1,375           |
| CORO1B                                                                             | 0,678495791 | 0,247867468 | 0,037 | 0,024 | 1         | 1,187450577   | 0,842140313     | 1,541666667     |
| FHIP2A                                                                             | 0,393875079 | 0,247780601 | 0,018 | 0     | 1         | 1,187379081   | 0,842191021     | #DIV/0!         |
| SIPA1L3                                                                            | 0,393875079 | 0,247690161 | 0,018 | 0     | 1         | 1,187304649   | 0,842243818     | #DIV/0!         |
| FGF1                                                                               | 0,3347904   | 0,247553698 | 0,022 | 0     | 1         | 1,187192348   | 0,842323488     | #DIV/0!         |
| CHML                                                                               | 0,699430636 | 0,247440787 | 0,035 | 0,024 | 1         | 1,187099437   | 0,842389415     | 1,458333333     |
| CEP89                                                                              | 0,353096361 | 0,247399153 | 0,021 | 0     | 1         | 1,18706518    | 0,842413725     | #DIV/0!         |
| GATC                                                                               | 0,353096361 | 0,247312342 | 0,021 | 0     | 1         | 1,186993753   | 0,842464417     | #DIV/0!         |
| PDCD11                                                                             | 0,317682464 | 0,247258016 | 0,024 | 0     | 1         | 1,186949056   | 0,842496141     | #DIV/0!         |
| PLCB3                                                                              | 0,393875079 | 0,247229752 | 0,018 | 0     | 1         | 1,186925803   | 0,842512647     | #DIV/0!         |

Supplementary Table 3

| Differentially expressed genes_keloid-MD_ comparing SC-Keloid vs. (SC-Myel+Nonmyel) |             |             |       |       |           |               |                 |                 |
|-------------------------------------------------------------------------------------|-------------|-------------|-------|-------|-----------|---------------|-----------------|-----------------|
| gene                                                                                | p_val       | avg_log2FC  | pct.1 | pct.2 | p_val_adj | Foldchange_UP | Foldchange_DOWN | Ratio_pct1_pct2 |
| AARD                                                                                | 0,393875079 | 0,247040265 | 0,018 | 0     | 1         | 1,186769919   | 0,842623312     | #DIV/0!         |
| SLC15A3                                                                             | 0,755638693 | 0,24702343  | 0,112 | 0,098 | 1         | 1,186756071   | 0,842633145     | 1,142857143     |
| CFAP298                                                                             | 0,338688853 | 0,247015651 | 0,062 | 0,024 | 1         | 1,186749672   | 0,842637688     | 2,583333333     |
| DEK                                                                                 | 0,817139147 | 0,246995782 | 0,177 | 0,171 | 1         | 1,186733328   | 0,842649293     | 1,035087719     |
| SLC50A1                                                                             | 0,353096361 | 0,246981148 | 0,021 | 0     | 1         | 1,186721291   | 0,84265784      | #DIV/0!         |
| GSN-AS1                                                                             | 0,393875079 | 0,246980042 | 0,018 | 0     | 1         | 1,18672038    | 0,842658487     | #DIV/0!         |
| DIP2C-AS1                                                                           | 0,393875079 | 0,246942269 | 0,018 | 0     | 1         | 1,18668931    | 0,842680549     | #DIV/0!         |
| KRIT1                                                                               | 0,670924516 | 0,246896836 | 0,037 | 0,024 | 1         | 1,18665194    | 0,842707088     | 1,541666667     |
| MUC12                                                                               | 0,393875079 | 0,24683667  | 0,018 | 0     | 1         | 1,186602453   | 0,842742233     | #DIV/0!         |
| KDELRL1                                                                             | 0,709476385 | 0,246627243 | 0,118 | 0,146 | 1         | 1,186430213   | 0,842864577     | 0,808219178     |
| FBN1                                                                                | 0,868613398 | 0,246626943 | 0,078 | 0,073 | 1         | 1,186429967   | 0,842864752     | 1,068493151     |
| HDAC6                                                                               | 0,3347904   | 0,246377845 | 0,022 | 0     | 1         | 1,186225134   | 0,843010295     | #DIV/0!         |
| MIS18BP1                                                                            | 0,317682464 | 0,246281652 | 0,024 | 0     | 1         | 1,186146044   | 0,843066505     | #DIV/0!         |
| ERMARD                                                                              | 0,393875079 | 0,246031247 | 0,018 | 0     | 1         | 1,185940185   | 0,843212847     | #DIV/0!         |
| TTC31                                                                               | 0,353096361 | 0,246000573 | 0,021 | 0     | 1         | 1,18591497    | 0,843230775     | #DIV/0!         |
| RNF41                                                                               | 0,372736722 | 0,245923878 | 0,019 | 0     | 1         | 1,185851928   | 0,843275603     | #DIV/0!         |
| SLC9A3R2                                                                            | 0,722660405 | 0,245890818 | 0,112 | 0,098 | 1         | 1,185824754   | 0,843294928     | 1,142857143     |
| PHF21A                                                                              | 0,859551749 | 0,245856943 | 0,029 | 0,024 | 1         | 1,18579691    | 0,843314729     | 1,208333333     |
| ETAA1                                                                               | 0,393875079 | 0,245844425 | 0,018 | 0     | 1         | 1,185786622   | 0,843322046     | #DIV/0!         |
| CHDH                                                                                | 0,4167109   | 0,245737624 | 0,016 | 0     | 1         | 1,185698842   | 0,843384479     | #DIV/0!         |
| ECRG4                                                                               | 0,441492135 | 0,245652929 | 0,014 | 0     | 1         | 1,185629237   | 0,843433992     | #DIV/0!         |
| KIF4A                                                                               | 0,441492135 | 0,245429845 | 0,014 | 0     | 1         | 1,185445917   | 0,843564422     | #DIV/0!         |
| C8orf76                                                                             | 0,393875079 | 0,245354462 | 0,018 | 0     | 1         | 1,185383977   | 0,843608501     | #DIV/0!         |
| SLC39A9                                                                             | 0,372736722 | 0,245203562 | 0,019 | 0     | 1         | 1,185259998   | 0,843696743     | #DIV/0!         |
| COMMD10                                                                             | 0,536924729 | 0,245152439 | 0,045 | 0,024 | 1         | 1,185217998   | 0,843726641     | 1,875           |
| SETD1B                                                                              | 0,393875079 | 0,245132883 | 0,018 | 0     | 1         | 1,185201932   | 0,843738078     | #DIV/0!         |
| ZNF557                                                                              | 0,441492135 | 0,244914069 | 0,014 | 0     | 1         | 1,185022185   | 0,843866058     | #DIV/0!         |
| KDM1B                                                                               | 0,353096361 | 0,244830384 | 0,021 | 0     | 1         | 1,184953449   | 0,843915008     | #DIV/0!         |
| EXOG                                                                                | 0,372736722 | 0,244610292 | 0,019 | 0     | 1         | 1,184772691   | 0,844043763     | #DIV/0!         |
| HIKESHI                                                                             | 0,584619122 | 0,244603738 | 0,126 | 0,098 | 1         | 1,184767309   | 0,844047597     | 1,285714286     |

Supplementary Table 3

| Differentially expressed genes_keloid-MD_comparing SC-Keloid vs. (SC-Myel+Nonmyel) |             |             |       |       |           |               |                 |                 |
|------------------------------------------------------------------------------------|-------------|-------------|-------|-------|-----------|---------------|-----------------|-----------------|
| gene                                                                               | p_val       | avg_log2FC  | pct.1 | pct.2 | p_val_adj | Foldchange_UP | Foldchange_DOWN | Ratio_pct1_pct2 |
| ANAPC10                                                                            | 0,737604407 | 0,24456074  | 0,033 | 0,024 | 1         | 1,184731998   | 0,844072754     | 1,375           |
| ZNF444                                                                             | 0,393875079 | 0,244532518 | 0,018 | 0     | 1         | 1,184708823   | 0,844089265     | #DIV/0!         |
| GMFB                                                                               | 0,767645944 | 0,244502524 | 0,085 | 0,073 | 1         | 1,184684193   | 0,844106814     | 1,164383562     |
| CMTR2                                                                              | 0,4167109   | 0,24434747  | 0,016 | 0     | 1         | 1,184556875   | 0,84419754      | #DIV/0!         |
| VSIG10                                                                             | 0,353096361 | 0,243932772 | 0,021 | 0     | 1         | 1,184216427   | 0,844440237     | #DIV/0!         |
| LAPTM5                                                                             | 0,441492135 | 0,243815913 | 0,014 | 0     | 1         | 1,184120509   | 0,844508639     | #DIV/0!         |
| ME2                                                                                | 0,992483923 | 0,243800248 | 0,07  | 0,073 | 1         | 1,184107652   | 0,844517809     | 0,95890411      |
| NAB1                                                                               | 0,4167109   | 0,243738951 | 0,016 | 0     | 1         | 1,184057343   | 0,844553692     | #DIV/0!         |
| STK38                                                                              | 0,393875079 | 0,243667696 | 0,018 | 0     | 1         | 1,183998863   | 0,844595406     | #DIV/0!         |
| ITFG2                                                                              | 0,4167109   | 0,243614781 | 0,016 | 0     | 1         | 1,183955437   | 0,844626384     | #DIV/0!         |
| CENATAC                                                                            | 0,3347904   | 0,243388057 | 0,022 | 0     | 1         | 1,18376939    | 0,84475913      | #DIV/0!         |
| BMI1                                                                               | 0,393875079 | 0,243263452 | 0,018 | 0     | 1         | 1,183667153   | 0,844832095     | #DIV/0!         |
| ZBED1                                                                              | 0,372736722 | 0,243107834 | 0,019 | 0     | 1         | 1,183539482   | 0,844923228     | #DIV/0!         |
| MKLN1                                                                              | 0,711216725 | 0,243015082 | 0,035 | 0,024 | 1         | 1,183463394   | 0,844977551     | 1,458333333     |
| PSMB7                                                                              | 0,207189302 | 0,242942991 | 0,118 | 0,049 | 1         | 1,183404258   | 0,845019775     | 2,408163265     |
| TOX2                                                                               | 0,372736722 | 0,242915676 | 0,019 | 0     | 1         | 1,183381852   | 0,845035775     | #DIV/0!         |
| CDC73                                                                              | 0,364795264 | 0,242909321 | 0,091 | 0,049 | 1         | 1,183376639   | 0,845039497     | 1,857142857     |
| EDEM1                                                                              | 0,353096361 | 0,242834695 | 0,021 | 0     | 1         | 1,183315429   | 0,845083209     | #DIV/0!         |
| NUFIP1                                                                             | 0,353096361 | 0,242796219 | 0,021 | 0     | 1         | 1,183283871   | 0,845105747     | #DIV/0!         |
| NOP10                                                                              | 0,673020095 | 0,242598994 | 0,242 | 0,22  | 1         | 1,18312212    | 0,845221286     | 1,1             |
| INSIG2                                                                             | 0,393875079 | 0,242541008 | 0,018 | 0     | 1         | 1,183074568   | 0,845255259     | #DIV/0!         |
| LSM10                                                                              | 0,380721334 | 0,242476532 | 0,089 | 0,049 | 1         | 1,183021696   | 0,845293035     | 1,816326531     |
| PTPRZ1                                                                             | 0,944036913 | 0,242455925 | 0,442 | 0,488 | 1         | 1,183004798   | 0,845305109     | 0,905737705     |
| MIS12                                                                              | 0,393875079 | 0,242333135 | 0,018 | 0     | 1         | 1,182904115   | 0,845377057     | #DIV/0!         |
| VPS45                                                                              | 0,701390054 | 0,242289769 | 0,035 | 0,024 | 1         | 1,182868558   | 0,845402469     | 1,458333333     |
| MKKS                                                                               | 0,393875079 | 0,242165832 | 0,018 | 0     | 1         | 1,182766947   | 0,845475098     | #DIV/0!         |
| PIGG                                                                               | 0,372736722 | 0,242129581 | 0,019 | 0     | 1         | 1,182737228   | 0,845496342     | #DIV/0!         |
| AKAP8                                                                              | 0,4167109   | 0,242057007 | 0,016 | 0     | 1         | 1,182677732   | 0,845538876     | #DIV/0!         |
| MRPL24                                                                             | 0,701390054 | 0,242045373 | 0,035 | 0,024 | 1         | 1,182668195   | 0,845545694     | 1,458333333     |
| ZNF654                                                                             | 0,393875079 | 0,241965071 | 0,018 | 0     | 1         | 1,182602368   | 0,84559276      | #DIV/0!         |

Supplementary Table 3

| Differentially expressed genes_keloid-MD_comparing SC-Keloid vs. (SC-Myel+Nonmyel) |             |             |       |       |           |               |                 |                 |
|------------------------------------------------------------------------------------|-------------|-------------|-------|-------|-----------|---------------|-----------------|-----------------|
| gene                                                                               | p_val       | avg_log2FC  | pct.1 | pct.2 | p_val_adj | Foldchange_UP | Foldchange_DOWN | Ratio_pct1_pct2 |
| TNK2                                                                               | 0,393875079 | 0,241835227 | 0,018 | 0     | 1         | 1,182495937   | 0,845668867     | #DIV/0!         |
| FAM89B                                                                             | 0,687650321 | 0,241801741 | 0,064 | 0,049 | 1         | 1,182468491   | 0,845688496     | 1,306122449     |
| MMUT                                                                               | 0,393875079 | 0,24178568  | 0,018 | 0     | 1         | 1,182455327   | 0,845697911     | #DIV/0!         |
| TMEM126B                                                                           | 0,868210642 | 0,241740593 | 0,064 | 0,073 | 1         | 1,182418374   | 0,845724341     | 0,876712329     |
| TNKS                                                                               | 0,670924516 | 0,241678047 | 0,037 | 0,024 | 1         | 1,182367113   | 0,845761007     | 1,541666667     |
| RYK                                                                                | 0,861830832 | 0,241635436 | 0,029 | 0,024 | 1         | 1,182332191   | 0,845785988     | 1,208333333     |
| MTPAP                                                                              | 0,441492135 | 0,241572501 | 0,014 | 0     | 1         | 1,182280616   | 0,845822884     | #DIV/0!         |
| CYBC1                                                                              | 0,441492135 | 0,241460336 | 0,014 | 0     | 1         | 1,1821887     | 0,845888647     | #DIV/0!         |
| SUPT3H                                                                             | 0,393875079 | 0,241320145 | 0,018 | 0     | 1         | 1,182073829   | 0,845970848     | #DIV/0!         |
| RELA                                                                               | 0,535365839 | 0,241284115 | 0,045 | 0,024 | 1         | 1,182044308   | 0,845991976     | 1,875           |
| SRSF7                                                                              | 0,505309542 | 0,241106101 | 0,14  | 0,195 | 1         | 1,181898465   | 0,846096369     | 0,717948718     |
| TBPL1                                                                              | 0,372736722 | 0,241082537 | 0,019 | 0     | 1         | 1,18187916    | 0,846110189     | #DIV/0!         |
| RFLNB                                                                              | 0,353096361 | 0,241007635 | 0,021 | 0     | 1         | 1,181817802   | 0,846154118     | #DIV/0!         |
| C16orf91                                                                           | 0,611071265 | 0,2409924   | 0,04  | 0,024 | 1         | 1,181805321   | 0,846163054     | 1,666666667     |
| SMAP1                                                                              | 0,451567573 | 0,240948787 | 0,083 | 0,049 | 1         | 1,181769596   | 0,846188634     | 1,693877551     |
| ITGAE                                                                              | 0,850720801 | 0,240920064 | 0,104 | 0,098 | 1         | 1,181746068   | 0,846205481     | 1,06122449      |
| MAP2                                                                               | 0,393875079 | 0,240909247 | 0,018 | 0     | 1         | 1,181737208   | 0,846211826     | #DIV/0!         |
| CASP7                                                                              | 0,819898546 | 0,240864593 | 0,04  | 0,049 | 1         | 1,181700631   | 0,846238018     | 0,816326531     |
| DENR                                                                               | 0,656306193 | 0,240854123 | 0,145 | 0,122 | 1         | 1,181692055   | 0,84624416      | 1,18852459      |
| MRPL14                                                                             | 0,85326852  | 0,240720875 | 0,152 | 0,146 | 1         | 1,181582918   | 0,846322323     | 1,04109589      |
| COPS4                                                                              | 0,670924516 | 0,240677035 | 0,037 | 0,024 | 1         | 1,181547013   | 0,846348041     | 1,541666667     |
| TMEM161B                                                                           | 0,353096361 | 0,240631034 | 0,021 | 0     | 1         | 1,18150934    | 0,846375028     | #DIV/0!         |
| ANAPC7                                                                             | 0,948097145 | 0,240484236 | 0,022 | 0,024 | 1         | 1,181389124   | 0,846461153     | 0,916666667     |
| TMEM259                                                                            | 0,573213825 | 0,240351348 | 0,072 | 0,049 | 1         | 1,181280311   | 0,846539124     | 1,469387755     |
| TMEM250                                                                            | 0,393875079 | 0,240335057 | 0,018 | 0     | 1         | 1,181266972   | 0,846548684     | #DIV/0!         |
| SMARCD3                                                                            | 0,393875079 | 0,240320885 | 0,018 | 0     | 1         | 1,181255368   | 0,846557        | #DIV/0!         |
| SOS1                                                                               | 0,372736722 | 0,240319363 | 0,019 | 0     | 1         | 1,181254121   | 0,846557893     | #DIV/0!         |
| DNAJC17                                                                            | 0,353096361 | 0,240311568 | 0,021 | 0     | 1         | 1,181247739   | 0,846562467     | #DIV/0!         |
| PI4KA                                                                              | 0,831366235 | 0,24026874  | 0,019 | 0,024 | 1         | 1,181212673   | 0,846587599     | 0,791666667     |
| CBX6                                                                               | 0,991895345 | 0,240152822 | 0,048 | 0,049 | 1         | 1,181117769   | 0,846655623     | 0,979591837     |

Supplementary Table 3

| Differentially expressed genes_keloid-MD_comparing SC-Keloid vs. (SC-Myel+Nonmyel) |             |             |       |       |           |               |                 |                 |
|------------------------------------------------------------------------------------|-------------|-------------|-------|-------|-----------|---------------|-----------------|-----------------|
| gene                                                                               | p_val       | avg_log2FC  | pct.1 | pct.2 | p_val_adj | Foldchange_UP | Foldchange_DOWN | Ratio_pct1_pct2 |
| RNF38                                                                              | 0,286616306 | 0,239954486 | 0,027 | 0     | 1         | 1,180955404   | 0,846772026     | #DIV/0!         |
| HIRIP3                                                                             | 0,372736722 | 0,239797154 | 0,019 | 0     | 1         | 1,180826623   | 0,846864375     | #DIV/0!         |
| CACNA2D4                                                                           | 0,353096361 | 0,239791723 | 0,021 | 0     | 1         | 1,180822178   | 0,846867563     | #DIV/0!         |
| RPL27A                                                                             | 0,556546556 | 0,239566538 | 0,435 | 0,439 | 1         | 1,180637882   | 0,846999758     | 0,990888383     |
| PXDN                                                                               | 0,900566997 | 0,239509935 | 0,11  | 0,122 | 1         | 1,180591561   | 0,84703299      | 0,901639344     |
| ASCC1                                                                              | 0,353096361 | 0,239259265 | 0,021 | 0     | 1         | 1,18038645    | 0,847180175     | #DIV/0!         |
| LRRC15                                                                             | 0,441492135 | 0,23908527  | 0,014 | 0     | 1         | 1,180244099   | 0,847282355     | #DIV/0!         |
| REEP4                                                                              | 0,468534179 | 0,239045812 | 0,013 | 0     | 1         | 1,18021182    | 0,847305529     | #DIV/0!         |
| ARMCX5                                                                             | 0,4167109   | 0,238991461 | 0,016 | 0     | 1         | 1,180167358   | 0,84733745      | #DIV/0!         |
| PTPN21                                                                             | 0,372736722 | 0,238986474 | 0,019 | 0     | 1         | 1,180163278   | 0,847340379     | #DIV/0!         |
| RBM28                                                                              | 0,454797234 | 0,23881177  | 0,051 | 0,024 | 1         | 1,180020375   | 0,847442994     | 2,125           |
| TXNDC17                                                                            | 0,400311764 | 0,238603535 | 0,309 | 0,244 | 1         | 1,179850066   | 0,847565321     | 1,266393443     |
| SLC39A14                                                                           | 0,317682464 | 0,238516518 | 0,024 | 0     | 1         | 1,179778905   | 0,847616444     | #DIV/0!         |
| TIMP2                                                                              | 0,652750934 | 0,238469288 | 0,325 | 0,293 | 1         | 1,179740282   | 0,847644194     | 1,109215017     |
| FASN                                                                               | 0,393875079 | 0,238403312 | 0,018 | 0     | 1         | 1,179686333   | 0,847682958     | #DIV/0!         |
| CEP78                                                                              | 0,4167109   | 0,238297086 | 0,016 | 0     | 1         | 1,179599476   | 0,847745375     | #DIV/0!         |
| CREBBP                                                                             | 0,861533059 | 0,238269716 | 0,041 | 0,049 | 1         | 1,179577097   | 0,847761458     | 0,836734694     |
| SERPINB1                                                                           | 0,946792011 | 0,238153645 | 0,049 | 0,049 | 1         | 1,179482199   | 0,847829667     | 1               |
| ZNF775                                                                             | 0,353096361 | 0,238054596 | 0,021 | 0     | 1         | 1,179401224   | 0,847887877     | #DIV/0!         |
| CGGBP1                                                                             | 0,714439797 | 0,237928696 | 0,115 | 0,098 | 1         | 1,179298305   | 0,847961873     | 1,173469388     |
| EIF3E                                                                              | 0,261580146 | 0,237615466 | 0,172 | 0,098 | 1         | 1,17904229    | 0,848145998     | 1,755102041     |
| UPF1                                                                               | 0,353096361 | 0,237414736 | 0,021 | 0     | 1         | 1,178878254   | 0,848264014     | #DIV/0!         |
| PRKAR2B                                                                            | 0,393875079 | 0,237266253 | 0,018 | 0     | 1         | 1,17875693    | 0,848351322     | #DIV/0!         |
| TUBGCP5                                                                            | 0,393875079 | 0,237230258 | 0,018 | 0     | 1         | 1,178727521   | 0,848372488     | #DIV/0!         |
| MFSB8                                                                              | 0,372736722 | 0,237112664 | 0,019 | 0     | 1         | 1,178631447   | 0,848441642     | #DIV/0!         |
| PIGP                                                                               | 0,683580784 | 0,237073722 | 0,091 | 0,073 | 1         | 1,178599633   | 0,848464544     | 1,246575342     |
| PTPRS                                                                              | 0,3347904   | 0,237002218 | 0,022 | 0     | 1         | 1,17854122    | 0,848506597     | #DIV/0!         |
| SLC25A40                                                                           | 0,4167109   | 0,236789    | 0,016 | 0     | 1         | 1,178367055   | 0,848632008     | #DIV/0!         |
| AGTRAP                                                                             | 0,681343498 | 0,236667531 | 0,035 | 0,049 | 1         | 1,178267845   | 0,848703463     | 0,714285714     |
| UBTD1                                                                              | 0,733531942 | 0,23658066  | 0,033 | 0,024 | 1         | 1,178196898   | 0,848754569     | 1,375           |

Supplementary Table 3

| Differentially expressed genes_keloid-MD_comparing SC-Keloid vs. (SC-Myel+Nonmyel) |             |             |       |       |           |               |                 |                 |
|------------------------------------------------------------------------------------|-------------|-------------|-------|-------|-----------|---------------|-----------------|-----------------|
| gene                                                                               | p_val       | avg_log2FC  | pct.1 | pct.2 | p_val_adj | Foldchange_UP | Foldchange_DOWN | Ratio_pct1_pct2 |
| GADD45G                                                                            | 0,468534305 | 0,236415706 | 0,013 | 0     | 1         | 1,178062194   | 0,848851619     | #DIV/0!         |
| NDUFA6                                                                             | 0,326630508 | 0,23622899  | 0,193 | 0,122 | 1         | 1,177909737   | 0,848961485     | 1,581967213     |
| ARL15                                                                              | 0,353096361 | 0,236057719 | 0,021 | 0     | 1         | 1,177769909   | 0,849062277     | #DIV/0!         |
| GDAP1                                                                              | 0,353096361 | 0,236029224 | 0,021 | 0     | 1         | 1,177746646   | 0,849079047     | #DIV/0!         |
| SESTD1                                                                             | 0,372736722 | 0,236019145 | 0,019 | 0     | 1         | 1,177738418   | 0,849084979     | #DIV/0!         |
| PMM1                                                                               | 0,555573283 | 0,235992223 | 0,043 | 0,024 | 1         | 1,177716441   | 0,849100824     | 1,791666667     |
| PRCC                                                                               | 0,353096361 | 0,235964242 | 0,021 | 0     | 1         | 1,177693599   | 0,849117292     | #DIV/0!         |
| PSMA7                                                                              | 0,501086792 | 0,235561384 | 0,624 | 0,61  | 1         | 1,177364786   | 0,849354433     | 1,02295082      |
| EIF4G1                                                                             | 0,628053268 | 0,235545267 | 0,069 | 0,049 | 1         | 1,177351633   | 0,849363921     | 1,408163265     |
| ATG4B                                                                              | 0,778051622 | 0,235491551 | 0,032 | 0,024 | 1         | 1,177307798   | 0,849395546     | 1,333333333     |
| FBXL5                                                                              | 0,43234845  | 0,235396093 | 0,053 | 0,024 | 1         | 1,177229902   | 0,84945175      | 2,208333333     |
| MIA2                                                                               | 0,441492135 | 0,235341416 | 0,014 | 0     | 1         | 1,177185287   | 0,849483944     | #DIV/0!         |
| B4GALNT3                                                                           | 0,3347904   | 0,235322551 | 0,022 | 0     | 1         | 1,177169894   | 0,849495052     | #DIV/0!         |
| RPL27                                                                              | 0,455494327 | 0,235173785 | 0,541 | 0,512 | 1         | 1,177048514   | 0,849582654     | 1,056640625     |
| ABHD18                                                                             | 0,4167109   | 0,235065642 | 0,016 | 0     | 1         | 1,176960287   | 0,84964634      | #DIV/0!         |
| SESN1                                                                              | 0,393875079 | 0,234891167 | 0,018 | 0     | 1         | 1,176817958   | 0,8497491       | #DIV/0!         |
| MAP2K3                                                                             | 0,3347904   | 0,234883481 | 0,022 | 0     | 1         | 1,176811688   | 0,849753627     | #DIV/0!         |
| NAGLU                                                                              | 0,353096361 | 0,234840221 | 0,021 | 0     | 1         | 1,176776402   | 0,849779107     | #DIV/0!         |
| PRRG1                                                                              | 0,393875079 | 0,234769081 | 0,018 | 0     | 1         | 1,176718376   | 0,849821011     | #DIV/0!         |
| FAP                                                                                | 0,393875079 | 0,234740361 | 0,018 | 0     | 1         | 1,176694951   | 0,849837929     | #DIV/0!         |
| TATDN2                                                                             | 0,353096361 | 0,234685354 | 0,021 | 0     | 1         | 1,176650086   | 0,849870332     | #DIV/0!         |
| MAP3K13                                                                            | 0,918338373 | 0,234644019 | 0,075 | 0,073 | 1         | 1,176616375   | 0,849894682     | 1,02739726      |
| KLHL12                                                                             | 0,441492135 | 0,234577993 | 0,014 | 0     | 1         | 1,176562527   | 0,849933579     | #DIV/0!         |
| DRG1                                                                               | 0,372736722 | 0,23456857  | 0,019 | 0     | 1         | 1,176554842   | 0,849939131     | #DIV/0!         |
| CSPP1                                                                              | 0,393875079 | 0,234562379 | 0,018 | 0     | 1         | 1,176549794   | 0,849942778     | #DIV/0!         |
| BRPF3                                                                              | 0,393875079 | 0,234518263 | 0,018 | 0     | 1         | 1,176513817   | 0,849968769     | #DIV/0!         |
| MEAK7                                                                              | 0,441492135 | 0,234465967 | 0,014 | 0     | 1         | 1,17647117    | 0,84999958      | #DIV/0!         |
| RFX7                                                                               | 0,393875079 | 0,234465952 | 0,018 | 0     | 1         | 1,176471158   | 0,849999588     | #DIV/0!         |
| ANTXR1                                                                             | 0,976185351 | 0,234421192 | 0,072 | 0,073 | 1         | 1,176434658   | 0,850025961     | 0,98630137      |
| THOC2                                                                              | 0,522251653 | 0,234360013 | 0,077 | 0,049 | 1         | 1,176384771   | 0,850062007     | 1,571428571     |



Supplementary Table 3

| Differentially expressed genes_keloid-MD_comparing SC-Keloid vs. (SC-Myel+Nonmyel) |             |             |       |       |           |               |                 |                 |
|------------------------------------------------------------------------------------|-------------|-------------|-------|-------|-----------|---------------|-----------------|-----------------|
| gene                                                                               | p_val       | avg_log2FC  | pct.1 | pct.2 | p_val_adj | Foldchange_UP | Foldchange_DOWN | Ratio_pct1_pct2 |
| OSGEP                                                                              | 0,707280187 | 0,234328941 | 0,035 | 0,024 | 1         | 1,176359435   | 0,850080316     | 1,458333333     |
| CLPTM1                                                                             | 0,558804806 | 0,234219615 | 0,043 | 0,024 | 1         | 1,176270295   | 0,850144737     | 1,791666667     |
| INSIG1                                                                             | 0,393875079 | 0,234022456 | 0,018 | 0     | 1         | 1,176109557   | 0,850260925     | #DIV/0!         |
| GGT7                                                                               | 0,393875079 | 0,233991895 | 0,018 | 0     | 1         | 1,176084643   | 0,850278937     | #DIV/0!         |
| AIG1                                                                               | 0,922250631 | 0,23394626  | 0,051 | 0,049 | 1         | 1,176047442   | 0,850305833     | 1,040816327     |
| GABARAPL1                                                                          | 0,4167109   | 0,233794512 | 0,016 | 0     | 1         | 1,175923748   | 0,850395276     | #DIV/0!         |
| ZNF445                                                                             | 0,4167109   | 0,233699108 | 0,016 | 0     | 1         | 1,175845987   | 0,850451514     | #DIV/0!         |
| GSE1                                                                               | 0,372736722 | 0,233645646 | 0,019 | 0     | 1         | 1,175802415   | 0,850483303     | #DIV/0!         |
| YLPM1                                                                              | 0,737604434 | 0,233360833 | 0,033 | 0,024 | 1         | 1,175570314   | 0,850650947     | 1,375           |
| RPS7                                                                               | 0,243919817 | 0,233251111 | 0,831 | 0,805 | 1         | 1,175480911   | 0,850715644     | 1,032298137     |
| ZNF529                                                                             | 0,441492135 | 0,232974735 | 0,014 | 0     | 1         | 1,175255746   | 0,85087863      | #DIV/0!         |
| ITGA2                                                                              | 0,61853608  | 0,23282295  | 0,069 | 0,049 | 1         | 1,175132105   | 0,850968156     | 1,408163265     |
| ASL                                                                                | 0,950688894 | 0,232798962 | 0,022 | 0,024 | 1         | 1,175112566   | 0,850982305     | 0,916666667     |
| ALDH1A3                                                                            | 0,561383869 | 0,232636695 | 0,1   | 0,073 | 1         | 1,174980403   | 0,851078024     | 1,369863014     |
| DUSP5                                                                              | 0,353096361 | 0,232586806 | 0,021 | 0     | 1         | 1,174939773   | 0,851107455     | #DIV/0!         |
| RBM27                                                                              | 0,468534305 | 0,232535571 | 0,013 | 0     | 1         | 1,174898047   | 0,851137681     | #DIV/0!         |
| PLSCR4                                                                             | 0,4167109   | 0,232515127 | 0,016 | 0     | 1         | 1,174881398   | 0,851149743     | #DIV/0!         |
| XPO5                                                                               | 0,372736722 | 0,232512551 | 0,019 | 0     | 1         | 1,1748793     | 0,851151263     | #DIV/0!         |
| CD164                                                                              | 0,658205347 | 0,232502389 | 0,12  | 0,098 | 1         | 1,174871025   | 0,851157258     | 1,224489796     |
| EIF4ENIF1                                                                          | 0,4167109   | 0,232499329 | 0,016 | 0     | 1         | 1,174868533   | 0,851159063     | #DIV/0!         |
| PPM1M                                                                              | 0,393875079 | 0,232266515 | 0,018 | 0     | 1         | 1,174678954   | 0,85129643      | #DIV/0!         |
| ATL3                                                                               | 0,71627796  | 0,232186965 | 0,062 | 0,049 | 1         | 1,174614185   | 0,851343371     | 1,265306122     |
| THUMPD3-AS1                                                                        | 0,583972395 | 0,232134583 | 0,07  | 0,098 | 1         | 1,174571537   | 0,851374283     | 0,714285714     |
| DCUN1D5                                                                            | 0,766318817 | 0,231985315 | 0,085 | 0,073 | 1         | 1,174450017   | 0,851462374     | 1,164383562     |
| PABIR1                                                                             | 0,441492135 | 0,231705902 | 0,014 | 0     | 1         | 1,174222578   | 0,851627297     | #DIV/0!         |
| ACSS2                                                                              | 0,441492135 | 0,231642222 | 0,014 | 0     | 1         | 1,174170749   | 0,851664888     | #DIV/0!         |
| MNAT1                                                                              | 0,263170687 | 0,23160149  | 0,072 | 0,024 | 1         | 1,174137599   | 0,851688934     | 3               |
| FAM219A                                                                            | 0,372736722 | 0,231562537 | 0,019 | 0     | 1         | 1,174105897   | 0,85171193      | #DIV/0!         |
| PIGN                                                                               | 0,372736722 | 0,23151574  | 0,019 | 0     | 1         | 1,174067813   | 0,851739558     | #DIV/0!         |
| ARFGAP2                                                                            | 0,85499711  | 0,231493249 | 0,029 | 0,024 | 1         | 1,17404951    | 0,851752836     | 1,208333333     |

Supplementary Table 3

| Differentially expressed genes_keloid-MD_ comparing SC-Keloid vs. (SC-Myel+Nonmyel) |             |             |       |       |           |               |                 |                 |
|-------------------------------------------------------------------------------------|-------------|-------------|-------|-------|-----------|---------------|-----------------|-----------------|
| gene                                                                                | p_val       | avg_log2FC  | pct.1 | pct.2 | p_val_adj | Foldchange_UP | Foldchange_DOWN | Ratio_pct1_pct2 |
| CWF19L1                                                                             | 0,4167109   | 0,231463963 | 0,016 | 0     | 1         | 1,174025678   | 0,851770127     | #DIV/0!         |
| ERBIN                                                                               | 0,573213845 | 0,231448481 | 0,072 | 0,049 | 1         | 1,174013079   | 0,851779267     | 1,469387755     |
| CBLB                                                                                | 0,393875079 | 0,231400218 | 0,018 | 0     | 1         | 1,173973805   | 0,851807762     | #DIV/0!         |
| IDE                                                                                 | 0,4167109   | 0,231346227 | 0,016 | 0     | 1         | 1,173929871   | 0,851839641     | #DIV/0!         |
| GPATCH8                                                                             | 0,556674696 | 0,231253484 | 0,049 | 0,073 | 1         | 1,173854408   | 0,851894403     | 0,671232877     |
| ICA1L                                                                               | 0,441492135 | 0,231117957 | 0,014 | 0     | 1         | 1,173744141   | 0,851974434     | #DIV/0!         |
| UBA3                                                                                | 0,674706052 | 0,231067983 | 0,037 | 0,024 | 1         | 1,173703485   | 0,852003946     | 1,541666667     |
| AGL                                                                                 | 0,4167109   | 0,231044828 | 0,016 | 0     | 1         | 1,173684647   | 0,85201762      | #DIV/0!         |
| ZDHC21                                                                              | 0,739643453 | 0,230860917 | 0,033 | 0,024 | 1         | 1,173535038   | 0,85212624      | 1,375           |
| VPS35                                                                               | 0,882785065 | 0,230849057 | 0,078 | 0,073 | 1         | 1,173525391   | 0,852133246     | 1,068493151     |
| BICC1                                                                               | 0,393875079 | 0,230793827 | 0,018 | 0     | 1         | 1,173480466   | 0,852165868     | #DIV/0!         |
| HK1                                                                                 | 0,615828502 | 0,23069835  | 0,069 | 0,049 | 1         | 1,173402808   | 0,852222266     | 1,408163265     |
| POLR3A                                                                              | 0,441492135 | 0,230667677 | 0,014 | 0     | 1         | 1,173377861   | 0,852240385     | #DIV/0!         |
| DPY19L3                                                                             | 0,737604434 | 0,230456123 | 0,033 | 0,024 | 1         | 1,173205812   | 0,852365365     | 1,375           |
| TMA7                                                                                | 0,763753583 | 0,230296583 | 0,502 | 0,512 | 1         | 1,17307608    | 0,852459629     | 0,98046875      |
| CAMK1                                                                               | 0,393875079 | 0,230184343 | 0,018 | 0     | 1         | 1,17298482    | 0,852525951     | #DIV/0!         |
| PXK                                                                                 | 0,372736722 | 0,230132414 | 0,019 | 0     | 1         | 1,172942599   | 0,852556639     | #DIV/0!         |
| MLEC                                                                                | 0,395033085 | 0,230041735 | 0,121 | 0,073 | 1         | 1,172868878   | 0,852610226     | 1,657534247     |
| CENPF                                                                               | 0,468534305 | 0,229978398 | 0,013 | 0     | 1         | 1,172817388   | 0,852647658     | #DIV/0!         |
| KIFC3                                                                               | 0,61632447  | 0,229898359 | 0,04  | 0,024 | 1         | 1,172752324   | 0,852694964     | 1,666666667     |
| NSUN3                                                                               | 0,441492135 | 0,229881603 | 0,014 | 0     | 1         | 1,172738703   | 0,852704867     | #DIV/0!         |
| BLZF1                                                                               | 0,353096361 | 0,22973542  | 0,021 | 0     | 1         | 1,17261988    | 0,852791273     | #DIV/0!         |
| LATS1                                                                               | 0,590171772 | 0,229603774 | 0,041 | 0,024 | 1         | 1,172512882   | 0,852869094     | 1,708333333     |
| MAP9                                                                                | 0,578355394 | 0,229585976 | 0,072 | 0,049 | 1         | 1,172498418   | 0,852879615     | 1,469387755     |
| CLASP1                                                                              | 0,393875079 | 0,229433646 | 0,018 | 0     | 1         | 1,172374624   | 0,852969673     | #DIV/0!         |
| ERI1                                                                                | 0,393875079 | 0,229429287 | 0,018 | 0     | 1         | 1,172371081   | 0,852972251     | #DIV/0!         |
| CAPN2                                                                               | 0,640143725 | 0,22939092  | 0,053 | 0,073 | 1         | 1,172339904   | 0,852994935     | 0,726027397     |
| S100A9                                                                              | 0,393875079 | 0,229326697 | 0,018 | 0     | 1         | 1,172287717   | 0,853032908     | #DIV/0!         |
| ECM1                                                                                | 0,702200606 | 0,229319405 | 0,097 | 0,122 | 1         | 1,172281792   | 0,853037219     | 0,795081967     |
| CDK5RAP1                                                                            | 0,441492135 | 0,229318111 | 0,014 | 0     | 1         | 1,17228074    | 0,853037985     | #DIV/0!         |

Supplementary Table 3

| Differentially expressed genes_keloid-MD_comparing SC-Keloid vs. (SC-Myel+Nonmyel) |             |             |       |       |           |               |                 |                 |
|------------------------------------------------------------------------------------|-------------|-------------|-------|-------|-----------|---------------|-----------------|-----------------|
| gene                                                                               | p_val       | avg_log2FC  | pct.1 | pct.2 | p_val_adj | Foldchange_UP | Foldchange_DOWN | Ratio_pct1_pct2 |
| MTREX                                                                              | 0,514542475 | 0,229191683 | 0,046 | 0,024 | 1         | 1,172178014   | 0,853112742     | 1,916666667     |
| CIBAR1                                                                             | 0,312220211 | 0,229133464 | 0,065 | 0,024 | 1         | 1,172130713   | 0,85314717      | 2,708333333     |
| ITGA3                                                                              | 0,35559266  | 0,22899664  | 0,093 | 0,049 | 1         | 1,172019554   | 0,853228085     | 1,897959184     |
| PTPRG                                                                              | 0,4167109   | 0,228804577 | 0,016 | 0     | 1         | 1,171863536   | 0,853341681     | #DIV/0!         |
| GRK6                                                                               | 0,441492135 | 0,228783592 | 0,014 | 0     | 1         | 1,17184649    | 0,853354094     | #DIV/0!         |
| HS1BP3                                                                             | 0,393875079 | 0,228642529 | 0,018 | 0     | 1         | 1,171731916   | 0,853437537     | #DIV/0!         |
| NAA30                                                                              | 0,4167109   | 0,228529966 | 0,016 | 0     | 1         | 1,171640498   | 0,853504127     | #DIV/0!         |
| LCTL                                                                               | 0,950688894 | 0,228364403 | 0,022 | 0,024 | 1         | 1,171506049   | 0,85360208      | 0,916666667     |
| LHPP                                                                               | 0,372736631 | 0,228340235 | 0,019 | 0     | 1         | 1,171486424   | 0,85361638      | #DIV/0!         |
| FADD                                                                               | 0,372736722 | 0,22832551  | 0,019 | 0     | 1         | 1,171474467   | 0,853625092     | #DIV/0!         |
| NT5C2                                                                              | 0,393875079 | 0,228257612 | 0,018 | 0     | 1         | 1,171419335   | 0,853665267     | #DIV/0!         |
| NDFIP1                                                                             | 0,638120351 | 0,228147012 | 0,121 | 0,098 | 1         | 1,171329535   | 0,853730714     | 1,234693878     |
| LINC00900                                                                          | 0,76591327  | 0,228062711 | 0,018 | 0,024 | 1         | 1,171261093   | 0,853780601     | 0,75            |
| NCOA2                                                                              | 0,4167109   | 0,228019687 | 0,016 | 0     | 1         | 1,171226163   | 0,853806063     | #DIV/0!         |
| SEMA4D                                                                             | 0,369782927 | 0,227977584 | 0,059 | 0,024 | 1         | 1,171191984   | 0,85383098      | 2,458333333     |
| ABHD13                                                                             | 0,4167109   | 0,227954958 | 0,016 | 0     | 1         | 1,171173616   | 0,853844372     | #DIV/0!         |
| DPP3                                                                               | 0,353096361 | 0,227738795 | 0,021 | 0     | 1         | 1,170998149   | 0,853972315     | #DIV/0!         |
| ARHGDI3                                                                            | 0,317682464 | 0,227487845 | 0,024 | 0     | 1         | 1,170794477   | 0,854120873     | #DIV/0!         |
| MCM4                                                                               | 0,353096361 | 0,227461401 | 0,021 | 0     | 1         | 1,170773017   | 0,854136528     | #DIV/0!         |
| B3GALNT2                                                                           | 0,353096361 | 0,227268023 | 0,021 | 0     | 1         | 1,170616098   | 0,854251024     | #DIV/0!         |
| ATPAF1                                                                             | 0,393875079 | 0,227154445 | 0,018 | 0     | 1         | 1,170523943   | 0,854318279     | #DIV/0!         |
| RNF169                                                                             | 0,778051622 | 0,227058821 | 0,032 | 0,024 | 1         | 1,170446362   | 0,854374906     | 1,333333333     |
| NGDN                                                                               | 0,4167109   | 0,226802601 | 0,016 | 0     | 1         | 1,17023851    | 0,854526655     | #DIV/0!         |
| BRSK1                                                                              | 0,64111043  | 0,226791795 | 0,038 | 0,024 | 1         | 1,170229746   | 0,854533055     | 1,583333333     |
| OGFR                                                                               | 0,857273836 | 0,226677446 | 0,029 | 0,024 | 1         | 1,170136996   | 0,854600789     | 1,208333333     |
| TESK1                                                                              | 0,393875079 | 0,226641393 | 0,018 | 0     | 1         | 1,170107755   | 0,854622145     | #DIV/0!         |
| ADK                                                                                | 0,683580772 | 0,22655299  | 0,091 | 0,073 | 1         | 1,170036057   | 0,854674516     | 1,246575342     |
| B4GALT4                                                                            | 0,393875079 | 0,226439514 | 0,018 | 0     | 1         | 1,16994403    | 0,854741743     | #DIV/0!         |
| MSRB3                                                                              | 0,893302787 | 0,226356067 | 0,053 | 0,049 | 1         | 1,169876362   | 0,854791184     | 1,081632653     |
| NSUN6                                                                              | 0,393875079 | 0,22628806  | 0,018 | 0     | 1         | 1,169821216   | 0,854831479     | #DIV/0!         |

Supplementary Table 3

| Differentially expressed genes_keloid-MD_comparing SC-Keloid vs. (SC-Myel+Nonmyel) |             |             |       |       |           |               |                 |                 |
|------------------------------------------------------------------------------------|-------------|-------------|-------|-------|-----------|---------------|-----------------|-----------------|
| gene                                                                               | p_val       | avg_log2FC  | pct.1 | pct.2 | p_val_adj | Foldchange_UP | Foldchange_DOWN | Ratio_pct1_pct2 |
| LSG1                                                                               | 0,372736722 | 0,226067358 | 0,019 | 0     | 1         | 1,169642272   | 0,85496226      | #DIV/0!         |
| LONP1                                                                              | 0,393875079 | 0,22603981  | 0,018 | 0     | 1         | 1,169619938   | 0,854978585     | #DIV/0!         |
| NDUFB8                                                                             | 0,692929193 | 0,225960317 | 0,239 | 0,22  | 1         | 1,169555494   | 0,855025696     | 1,086363636     |
| SLC41A1                                                                            | 0,393875079 | 0,225946285 | 0,018 | 0     | 1         | 1,169544118   | 0,855034012     | #DIV/0!         |
| TADA2A                                                                             | 0,4167109   | 0,22580322  | 0,016 | 0     | 1         | 1,169428146   | 0,855118806     | #DIV/0!         |
| TNPO2                                                                              | 0,372736722 | 0,225616478 | 0,019 | 0     | 1         | 1,169276785   | 0,8552295       | #DIV/0!         |
| RPS18                                                                              | 0,284807074 | 0,225550841 | 0,805 | 0,756 | 1         | 1,169223589   | 0,85526841      | 1,064814815     |
| TUBE1                                                                              | 0,393875079 | 0,225506387 | 0,018 | 0     | 1         | 1,169187563   | 0,855294764     | #DIV/0!         |
| SRSF11                                                                             | 0,414990531 | 0,225429905 | 0,204 | 0,146 | 1         | 1,169125582   | 0,855340107     | 1,397260274     |
| KIAA1328                                                                           | 0,441492135 | 0,225370006 | 0,014 | 0     | 1         | 1,169077042   | 0,85537562      | #DIV/0!         |
| KIAA1217                                                                           | 0,962740311 | 0,225354376 | 0,049 | 0,049 | 1         | 1,169064376   | 0,855384888     | 1               |
| SYVN1                                                                              | 0,816528109 | 0,225274501 | 0,03  | 0,024 | 1         | 1,168999653   | 0,855432247     | 1,25            |
| MEG8                                                                               | 0,4167109   | 0,225127452 | 0,016 | 0     | 1         | 1,168880506   | 0,855519443     | #DIV/0!         |
| BSG                                                                                | 0,8123864   | 0,225123335 | 0,132 | 0,122 | 1         | 1,168877171   | 0,855521884     | 1,081967213     |
| ARSI                                                                               | 0,4167109   | 0,225107369 | 0,016 | 0     | 1         | 1,168864235   | 0,855531352     | #DIV/0!         |
| PHPT1                                                                              | 0,288927043 | 0,225103864 | 0,48  | 0,366 | 1         | 1,168861395   | 0,855533431     | 1,31147541      |
| POLG                                                                               | 0,4167109   | 0,225091509 | 0,016 | 0     | 1         | 1,168851385   | 0,855540758     | #DIV/0!         |
| AASDHPPT                                                                           | 0,821050045 | 0,224933744 | 0,081 | 0,073 | 1         | 1,168723574   | 0,85563432      | 1,109589041     |
| TOP3B                                                                              | 0,393875079 | 0,224907012 | 0,018 | 0     | 1         | 1,168701918   | 0,855650174     | #DIV/0!         |
| GENE                                                                               | 0,441492135 | 0,224906237 | 0,014 | 0     | 1         | 1,16870129    | 0,855650634     | #DIV/0!         |
| BCKDHB                                                                             | 0,393874981 | 0,224894034 | 0,018 | 0     | 1         | 1,168691405   | 0,855657872     | #DIV/0!         |
| BIVM                                                                               | 0,441492135 | 0,224877039 | 0,014 | 0     | 1         | 1,168677638   | 0,855667951     | #DIV/0!         |
| COL22A1                                                                            | 0,441492135 | 0,224847044 | 0,014 | 0     | 1         | 1,16865334    | 0,855685741     | #DIV/0!         |
| FARS2                                                                              | 0,498250693 | 0,224605073 | 0,011 | 0     | 1         | 1,168457349   | 0,85582927      | #DIV/0!         |
| ACSL1                                                                              | 0,441492135 | 0,22432102  | 0,014 | 0     | 1         | 1,168227312   | 0,855997792     | #DIV/0!         |
| HDGFL3                                                                             | 0,493210511 | 0,224317886 | 0,048 | 0,024 | 1         | 1,168224775   | 0,855999651     | 2               |
| NECTIN3                                                                            | 0,353096361 | 0,224050612 | 0,021 | 0     | 1         | 1,16800837    | 0,856158248     | #DIV/0!         |
| EXTL3                                                                              | 0,946292034 | 0,224031004 | 0,026 | 0,024 | 1         | 1,167992495   | 0,856169885     | 1,083333333     |
| ANKRD39                                                                            | 0,707280187 | 0,223863711 | 0,035 | 0,024 | 1         | 1,167857064   | 0,856269171     | 1,458333333     |
| GREB1                                                                              | 0,468534305 | 0,223774468 | 0,013 | 0     | 1         | 1,167784824   | 0,85632214      | #DIV/0!         |

Supplementary Table 3

| Differentially expressed genes_keloid-MD_comparing SC-Keloid vs. (SC-Myel+Nonmyel) |             |             |       |       |           |               |                 |                 |
|------------------------------------------------------------------------------------|-------------|-------------|-------|-------|-----------|---------------|-----------------|-----------------|
| gene                                                                               | p_val       | avg_log2FC  | pct.1 | pct.2 | p_val_adj | Foldchange_UP | Foldchange_DOWN | Ratio_pct1_pct2 |
| GRWD1                                                                              | 0,3347904   | 0,223626705 | 0,022 | 0     | 1         | 1,167665224   | 0,85640985      | #DIV/0!         |
| ING5                                                                               | 0,773817043 | 0,22361544  | 0,032 | 0,024 | 1         | 1,167656106   | 0,856416538     | 1,333333333     |
| ADARB1                                                                             | 0,545761008 | 0,223563442 | 0,102 | 0,073 | 1         | 1,167614022   | 0,856447406     | 1,397260274     |
| FKBP4                                                                              | 0,372736722 | 0,223465322 | 0,019 | 0     | 1         | 1,167534614   | 0,856505656     | #DIV/0!         |
| PHF12                                                                              | 0,372736722 | 0,223392785 | 0,019 | 0     | 1         | 1,167475913   | 0,856548721     | #DIV/0!         |
| GOPC                                                                               | 0,977162731 | 0,223380791 | 0,096 | 0,098 | 1         | 1,167466207   | 0,856555842     | 0,979591837     |
| CLIP4                                                                              | 0,441492135 | 0,223359424 | 0,014 | 0     | 1         | 1,167448917   | 0,856568528     | #DIV/0!         |
| GJC1                                                                               | 0,3347904   | 0,223332875 | 0,022 | 0     | 1         | 1,167427433   | 0,856584291     | #DIV/0!         |
| CRAT                                                                               | 0,393875079 | 0,223236385 | 0,018 | 0     | 1         | 1,167349356   | 0,856641583     | #DIV/0!         |
| STXBP5                                                                             | 0,4167109   | 0,223212393 | 0,016 | 0     | 1         | 1,167329943   | 0,856655829     | #DIV/0!         |
| TMEM214                                                                            | 0,353096361 | 0,223042599 | 0,021 | 0     | 1         | 1,167192565   | 0,856756657     | #DIV/0!         |
| SAAL1                                                                              | 0,441492135 | 0,222928206 | 0,014 | 0     | 1         | 1,167100021   | 0,856824592     | #DIV/0!         |
| GGA2                                                                               | 0,4167109   | 0,222872237 | 0,016 | 0     | 1         | 1,167054744   | 0,856857834     | #DIV/0!         |
| PDHB                                                                               | 0,624330303 | 0,222828875 | 0,072 | 0,098 | 1         | 1,167019668   | 0,856883588     | 0,734693878     |
| FIP1L1                                                                             | 0,997483596 | 0,222793092 | 0,024 | 0,024 | 1         | 1,166990723   | 0,856904841     | 1               |
| SPAG7                                                                              | 0,897974641 | 0,222738936 | 0,065 | 0,073 | 1         | 1,166946917   | 0,856937008     | 0,890410959     |
| AP5S1                                                                              | 0,4167109   | 0,222605721 | 0,016 | 0     | 1         | 1,166839169   | 0,85701614      | #DIV/0!         |
| TMEM129                                                                            | 0,441492135 | 0,222528124 | 0,014 | 0     | 1         | 1,16677641    | 0,857062237     | #DIV/0!         |
| SEC24C                                                                             | 0,393875079 | 0,222216408 | 0,018 | 0     | 1         | 1,166524339   | 0,857247437     | #DIV/0!         |
| YTHDF3-DT                                                                          | 0,441492135 | 0,222200755 | 0,014 | 0     | 1         | 1,166511682   | 0,857256739     | #DIV/0!         |
| NOLC1                                                                              | 0,735567259 | 0,222165877 | 0,033 | 0,024 | 1         | 1,166483481   | 0,857277464     | 1,375           |
| SNRNP27                                                                            | 0,350684525 | 0,222141244 | 0,061 | 0,024 | 1         | 1,166463564   | 0,857292101     | 2,541666667     |
| GRPEL2                                                                             | 0,441492135 | 0,2221335   | 0,014 | 0     | 1         | 1,166457303   | 0,857296703     | #DIV/0!         |
| LCA5                                                                               | 0,441492135 | 0,222007959 | 0,014 | 0     | 1         | 1,166355804   | 0,857371307     | #DIV/0!         |
| INTU                                                                               | 0,372736722 | 0,221957416 | 0,019 | 0     | 1         | 1,166314943   | 0,857401344     | #DIV/0!         |
| GTF2H1                                                                             | 0,892879868 | 0,221905339 | 0,021 | 0,024 | 1         | 1,166272843   | 0,857432294     | 0,875           |
| FAM3A                                                                              | 0,393875079 | 0,221797337 | 0,018 | 0     | 1         | 1,166185538   | 0,857496485     | #DIV/0!         |
| PIP5K1C                                                                            | 0,393875079 | 0,221728535 | 0,018 | 0     | 1         | 1,166129924   | 0,85753738      | #DIV/0!         |
| SMIM15                                                                             | 0,845958065 | 0,221722631 | 0,08  | 0,073 | 1         | 1,166125152   | 0,85754089      | 1,095890411     |
| SEM1                                                                               | 0,710647213 | 0,221707672 | 0,582 | 0,634 | 1         | 1,166113061   | 0,857549781     | 0,917981073     |

Supplementary Table 3

| Differentially expressed genes_keloid-MD_comparing SC-Keloid vs. (SC-Myel+Nonmyel) |             |             |       |       |           |               |                 |                 |
|------------------------------------------------------------------------------------|-------------|-------------|-------|-------|-----------|---------------|-----------------|-----------------|
| gene                                                                               | p_val       | avg_log2FC  | pct.1 | pct.2 | p_val_adj | Foldchange_UP | Foldchange_DOWN | Ratio_pct1_pct2 |
| SRF                                                                                | 0,4167109   | 0,221707128 | 0,016 | 0     | 1         | 1,166112621   | 0,857550105     | #DIV/0!         |
| H1-0                                                                               | 0,872152537 | 0,221560867 | 0,078 | 0,073 | 1         | 1,165994406   | 0,857637048     | 1,068493151     |
| PLPP3                                                                              | 0,4167109   | 0,221538256 | 0,016 | 0     | 1         | 1,165976132   | 0,857650489     | #DIV/0!         |
| RNF187                                                                             | 0,618079932 | 0,221431922 | 0,04  | 0,024 | 1         | 1,165890196   | 0,857713705     | 1,666666667     |
| FIGNL1                                                                             | 0,4167109   | 0,221343784 | 0,016 | 0     | 1         | 1,165818972   | 0,857766106     | #DIV/0!         |
| FKBP10                                                                             | 0,628139269 | 0,221303295 | 0,096 | 0,073 | 1         | 1,165786253   | 0,85779018      | 1,315068493     |
| FAM102B                                                                            | 0,393875079 | 0,221241141 | 0,018 | 0     | 1         | 1,16573603    | 0,857827136     | #DIV/0!         |
| DDX55                                                                              | 0,393875079 | 0,221207042 | 0,018 | 0     | 1         | 1,165708477   | 0,857847412     | #DIV/0!         |
| ZDHC12                                                                             | 0,4167109   | 0,221114704 | 0,016 | 0     | 1         | 1,16563387    | 0,857902319     | #DIV/0!         |
| PDLIM1                                                                             | 0,776288788 | 0,221073209 | 0,085 | 0,073 | 1         | 1,165600345   | 0,857926994     | 1,164383562     |
| SH3RF3                                                                             | 0,4167109   | 0,221029794 | 0,016 | 0     | 1         | 1,165565268   | 0,857952812     | #DIV/0!         |
| PSME3                                                                              | 0,950688894 | 0,220940634 | 0,022 | 0,024 | 1         | 1,165493238   | 0,858005836     | 0,916666667     |
| RPAP1                                                                              | 0,4167109   | 0,220932068 | 0,016 | 0     | 1         | 1,165486318   | 0,858010931     | #DIV/0!         |
| SNAI2                                                                              | 0,393875079 | 0,220897695 | 0,018 | 0     | 1         | 1,16545855    | 0,858031373     | #DIV/0!         |
| DOP1A                                                                              | 0,892879868 | 0,220728737 | 0,021 | 0,024 | 1         | 1,165322068   | 0,858131865     | 0,875           |
| MYBBP1A                                                                            | 0,4167109   | 0,220639791 | 0,016 | 0     | 1         | 1,165250225   | 0,858184773     | #DIV/0!         |
| PPAT                                                                               | 0,393875079 | 0,220537145 | 0,018 | 0     | 1         | 1,165167322   | 0,858245834     | #DIV/0!         |
| EHBP1                                                                              | 0,953344238 | 0,220481041 | 0,091 | 0,098 | 1         | 1,165122011   | 0,858279211     | 0,928571429     |
| LMLN                                                                               | 0,393875079 | 0,220286983 | 0,018 | 0     | 1         | 1,1649653     | 0,858394666     | #DIV/0!         |
| COMTD1                                                                             | 0,4167109   | 0,220237769 | 0,016 | 0     | 1         | 1,164925561   | 0,858423949     | #DIV/0!         |
| SENP6                                                                              | 0,838798603 | 0,219931929 | 0,085 | 0,098 | 1         | 1,164678632   | 0,858605947     | 0,867346939     |
| ZFP14                                                                              | 0,372736722 | 0,219903845 | 0,019 | 0     | 1         | 1,16465596    | 0,858622661     | #DIV/0!         |
| SMAP2                                                                              | 0,521062004 | 0,219772556 | 0,077 | 0,049 | 1         | 1,164549979   | 0,858700802     | 1,571428571     |
| PSMB5                                                                              | 0,576465812 | 0,219690651 | 0,18  | 0,146 | 1         | 1,164483866   | 0,858749553     | 1,232876712     |
| VKORC1L1                                                                           | 0,688959443 | 0,219535046 | 0,035 | 0,049 | 1         | 1,164358275   | 0,858842181     | 0,714285714     |
| PRR7                                                                               | 0,393875079 | 0,219456672 | 0,018 | 0     | 1         | 1,164295023   | 0,858888838     | #DIV/0!         |
| TSEN15                                                                             | 0,619837545 | 0,219278865 | 0,04  | 0,024 | 1         | 1,164151537   | 0,8589947       | 1,666666667     |
| MYCBP2                                                                             | 0,52318976  | 0,219226488 | 0,067 | 0,098 | 1         | 1,164109273   | 0,859025886     | 0,683673469     |
| ACAP2                                                                              | 0,789289046 | 0,218983078 | 0,081 | 0,098 | 1         | 1,163912882   | 0,859170833     | 0,826530612     |
| MXD1                                                                               | 0,372736722 | 0,218842352 | 0,019 | 0     | 1         | 1,163799355   | 0,859254643     | #DIV/0!         |

Supplementary Table 3

| Differentially expressed genes_keloid-MD_comparing SC-Keloid vs. (SC-Myel+Nonmyel) |             |             |       |       |           |               |                 |                 |
|------------------------------------------------------------------------------------|-------------|-------------|-------|-------|-----------|---------------|-----------------|-----------------|
| gene                                                                               | p_val       | avg_log2FC  | pct.1 | pct.2 | p_val_adj | Foldchange_UP | Foldchange_DOWN | Ratio_pct1_pct2 |
| FAM120A                                                                            | 0,717778223 | 0,218687062 | 0,062 | 0,049 | 1         | 1,163674092   | 0,859347137     | 1,265306122     |
| ZFY                                                                                | 0,393875079 | 0,218571513 | 0,018 | 0     | 1         | 1,163580894   | 0,859415968     | #DIV/0!         |
| BTN2A2                                                                             | 0,393875079 | 0,218446458 | 0,018 | 0     | 1         | 1,163480038   | 0,859490466     | #DIV/0!         |
| PAFAH1B3                                                                           | 0,514542508 | 0,218357172 | 0,046 | 0,024 | 1         | 1,163408034   | 0,85954366      | 1,916666667     |
| PSMC2                                                                              | 0,672509108 | 0,21835055  | 0,075 | 0,098 | 1         | 1,163402694   | 0,859547606     | 0,765306122     |
| SLC25A1                                                                            | 0,4167109   | 0,21822885  | 0,016 | 0     | 1         | 1,163304558   | 0,859620117     | #DIV/0!         |
| MMRN1                                                                              | 0,498250693 | 0,218165783 | 0,011 | 0     | 1         | 1,163253706   | 0,859657696     | #DIV/0!         |
| UCHL5                                                                              | 0,773817043 | 0,218070689 | 0,032 | 0,024 | 1         | 1,163177033   | 0,859714361     | 1,333333333     |
| CCDC57                                                                             | 0,393875079 | 0,218064503 | 0,018 | 0     | 1         | 1,163172046   | 0,859718047     | #DIV/0!         |
| GINM1                                                                              | 0,482594278 | 0,218051853 | 0,08  | 0,049 | 1         | 1,163161847   | 0,859725586     | 1,632653061     |
| NKTR                                                                               | 0,829220728 | 0,217946878 | 0,107 | 0,122 | 1         | 1,163077214   | 0,859788144     | 0,87704918      |
| DHX15                                                                              | 0,707280159 | 0,217832181 | 0,035 | 0,024 | 1         | 1,162984752   | 0,859856502     | 1,458333333     |
| SUPV3L1                                                                            | 0,468534305 | 0,217791605 | 0,013 | 0     | 1         | 1,162952043   | 0,859880686     | #DIV/0!         |
| USP4                                                                               | 0,393875079 | 0,21772828  | 0,018 | 0     | 1         | 1,162900998   | 0,85991843      | #DIV/0!         |
| KLHL28                                                                             | 0,4167109   | 0,217714222 | 0,016 | 0     | 1         | 1,162889667   | 0,859926809     | #DIV/0!         |
| SLC43A3                                                                            | 0,317682464 | 0,217644618 | 0,024 | 0     | 1         | 1,162833563   | 0,859968298     | #DIV/0!         |
| AASDH                                                                              | 0,441492019 | 0,217635406 | 0,014 | 0     | 1         | 1,162826138   | 0,859973789     | #DIV/0!         |
| AGTPBP1                                                                            | 0,441492135 | 0,217597345 | 0,014 | 0     | 1         | 1,162795461   | 0,859996477     | #DIV/0!         |
| DYNLT3                                                                             | 0,965734108 | 0,217281384 | 0,12  | 0,122 | 1         | 1,162540828   | 0,860184843     | 0,983606557     |
| AGPAT1                                                                             | 0,767220359 | 0,217125103 | 0,059 | 0,049 | 1         | 1,162414902   | 0,860278029     | 1,204081633     |
| NUDT16L1                                                                           | 0,638385585 | 0,216970436 | 0,038 | 0,024 | 1         | 1,162290289   | 0,860370261     | 1,583333333     |
| POGLUT3                                                                            | 0,731642281 | 0,216961441 | 0,037 | 0,049 | 1         | 1,162283043   | 0,860375626     | 0,755102041     |
| CCAR1                                                                              | 0,9234215   | 0,216723591 | 0,067 | 0,073 | 1         | 1,162091438   | 0,860517483     | 0,917808219     |
| RASD1                                                                              | 0,468534305 | 0,216698715 | 0,013 | 0     | 1         | 1,162071401   | 0,860532321     | #DIV/0!         |
| TRMT5                                                                              | 0,393875079 | 0,216494622 | 0,018 | 0     | 1         | 1,161907019   | 0,860654066     | #DIV/0!         |
| SDC1                                                                               | 0,353096361 | 0,216440669 | 0,021 | 0     | 1         | 1,161863567   | 0,860686253     | #DIV/0!         |
| SPNS1                                                                              | 0,737604434 | 0,216438118 | 0,033 | 0,024 | 1         | 1,161861513   | 0,860687775     | 1,375           |
| TAF9B                                                                              | 0,353096361 | 0,216437438 | 0,021 | 0     | 1         | 1,161860965   | 0,86068818      | #DIV/0!         |
| ASB8                                                                               | 0,857273836 | 0,216281142 | 0,029 | 0,024 | 1         | 1,1617351     | 0,860781429     | 1,208333333     |
| TECR                                                                               | 0,776571338 | 0,216238135 | 0,11  | 0,098 | 1         | 1,16170047    | 0,860807089     | 1,12244898      |

Supplementary Table 3

| Differentially expressed genes_keloid-MD_ comparing SC-Keloid vs. (SC-Myel+Nonmyel) |             |             |       |       |           |               |                 |                 |
|-------------------------------------------------------------------------------------|-------------|-------------|-------|-------|-----------|---------------|-----------------|-----------------|
| gene                                                                                | p_val       | avg_log2FC  | pct.1 | pct.2 | p_val_adj | Foldchange_UP | Foldchange_DOWN | Ratio_pct1_pct2 |
| POMP                                                                                | 0,982649173 | 0,216166778 | 0,394 | 0,439 | 1         | 1,161643012   | 0,860849667     | 0,897494305     |
| IKBKG                                                                               | 0,372736722 | 0,216010251 | 0,019 | 0     | 1         | 1,161516985   | 0,860943071     | #DIV/0!         |
| TP53I13                                                                             | 0,883048237 | 0,215806572 | 0,053 | 0,049 | 1         | 1,161353015   | 0,861064627     | 1,081632653     |
| SRI                                                                                 | 0,986646016 | 0,215728165 | 0,182 | 0,195 | 1         | 1,161289899   | 0,861111425     | 0,933333333     |
| LRP11                                                                               | 0,4167109   | 0,215576575 | 0,016 | 0     | 1         | 1,161167884   | 0,86120191      | #DIV/0!         |
| ZNF484                                                                              | 0,468534305 | 0,215575318 | 0,013 | 0     | 1         | 1,161166872   | 0,861202661     | #DIV/0!         |
| RABEPK                                                                              | 0,372736722 | 0,215562544 | 0,019 | 0     | 1         | 1,161156591   | 0,861210286     | #DIV/0!         |
| SMCR5                                                                               | 0,468534305 | 0,215533715 | 0,013 | 0     | 1         | 1,161133388   | 0,861227496     | #DIV/0!         |
| ZNF622                                                                              | 0,393875079 | 0,215419276 | 0,018 | 0     | 1         | 1,161041287   | 0,861295814     | #DIV/0!         |
| NFKBIE                                                                              | 0,372736722 | 0,215407163 | 0,019 | 0     | 1         | 1,161031539   | 0,861303045     | #DIV/0!         |
| COQ10B                                                                              | 0,649314029 | 0,215361015 | 0,038 | 0,024 | 1         | 1,160994401   | 0,861330596     | 1,583333333     |
| HEATR1                                                                              | 0,4167109   | 0,215341098 | 0,016 | 0     | 1         | 1,160978373   | 0,861342488     | #DIV/0!         |
| ARHGAP5                                                                             | 0,910812494 | 0,215328691 | 0,112 | 0,122 | 1         | 1,160968389   | 0,861349895     | 0,918032787     |
| PLEKHH3                                                                             | 0,4167109   | 0,215184878 | 0,016 | 0     | 1         | 1,160852665   | 0,861435762     | #DIV/0!         |
| NRBF2                                                                               | 0,824028932 | 0,215167063 | 0,062 | 0,073 | 1         | 1,160838331   | 0,861446399     | 0,849315068     |
| CTPS1                                                                               | 0,393875079 | 0,215144408 | 0,018 | 0     | 1         | 1,160820102   | 0,861459927     | #DIV/0!         |
| ZFP1                                                                                | 0,4167109   | 0,21495867  | 0,016 | 0     | 1         | 1,160670663   | 0,861570841     | #DIV/0!         |
| RASGEF1B                                                                            | 0,498250693 | 0,214649229 | 0,011 | 0     | 1         | 1,16042174    | 0,861755658     | #DIV/0!         |
| ZNF568                                                                              | 0,4167109   | 0,214646512 | 0,016 | 0     | 1         | 1,160419555   | 0,861757281     | #DIV/0!         |
| ACP6                                                                                | 0,441492135 | 0,214569454 | 0,014 | 0     | 1         | 1,160357575   | 0,861803311     | #DIV/0!         |
| ERN1                                                                                | 0,441492135 | 0,214554473 | 0,014 | 0     | 1         | 1,160345526   | 0,86181226      | #DIV/0!         |
| DEDD                                                                                | 0,393875079 | 0,214443732 | 0,018 | 0     | 1         | 1,160256462   | 0,861878415     | #DIV/0!         |
| IL1R1                                                                               | 0,4167109   | 0,214281564 | 0,016 | 0     | 1         | 1,160126049   | 0,861975301     | #DIV/0!         |
| CCDC149                                                                             | 0,468534305 | 0,214257753 | 0,013 | 0     | 1         | 1,160106901   | 0,861989528     | #DIV/0!         |
| ANKRD27                                                                             | 0,468534305 | 0,214150588 | 0,013 | 0     | 1         | 1,160020731   | 0,862053559     | #DIV/0!         |
| BAG6                                                                                | 0,816528109 | 0,213993188 | 0,03  | 0,024 | 1         | 1,159894178   | 0,862147616     | 1,25            |
| RNF6                                                                                | 0,737604434 | 0,21385952  | 0,033 | 0,024 | 1         | 1,159786717   | 0,862227499     | 1,375           |
| RXRA                                                                                | 0,814193336 | 0,213849466 | 0,04  | 0,049 | 1         | 1,159778635   | 0,862233507     | 0,816326531     |
| NRM                                                                                 | 0,393875079 | 0,213717831 | 0,018 | 0     | 1         | 1,159672818   | 0,862312183     | #DIV/0!         |
| CCDC191                                                                             | 0,468534305 | 0,213716943 | 0,013 | 0     | 1         | 1,159672105   | 0,862312714     | #DIV/0!         |



Supplementary Table 3

| Differentially expressed genes_keloid-MD_ comparing SC-Keloid vs. (SC-Myel+Nonmyel) |             |             |       |       |           |               |                 |                 |
|-------------------------------------------------------------------------------------|-------------|-------------|-------|-------|-----------|---------------|-----------------|-----------------|
| gene                                                                                | p_val       | avg_log2FC  | pct.1 | pct.2 | p_val_adj | Foldchange_UP | Foldchange_DOWN | Ratio_pct1_pct2 |
| E2F6                                                                                | 0,372736722 | 0,213675608 | 0,019 | 0     | 1         | 1,159638879   | 0,862337421     | #DIV/0!         |
| SPRTN                                                                               | 0,372736722 | 0,213469908 | 0,019 | 0     | 1         | 1,159473549   | 0,862460382     | #DIV/0!         |
| MYC                                                                                 | 0,393875079 | 0,213417672 | 0,018 | 0     | 1         | 1,159431568   | 0,86249161      | #DIV/0!         |
| EPC2                                                                                | 0,639736679 | 0,213413352 | 0,033 | 0,049 | 1         | 1,159428097   | 0,862494192     | 0,673469388     |
| SLC16A3                                                                             | 0,372736722 | 0,213363917 | 0,019 | 0     | 1         | 1,159388369   | 0,862523747     | #DIV/0!         |
| TIGAR                                                                               | 0,441492135 | 0,213251839 | 0,014 | 0     | 1         | 1,159298303   | 0,862590756     | #DIV/0!         |
| TTLL1                                                                               | 0,468534305 | 0,213174948 | 0,013 | 0     | 1         | 1,159236518   | 0,862636731     | #DIV/0!         |
| GINS3                                                                               | 0,4167109   | 0,213005462 | 0,016 | 0     | 1         | 1,15910034    | 0,862738078     | #DIV/0!         |
| CDH11                                                                               | 0,4167109   | 0,212976372 | 0,016 | 0     | 1         | 1,159076969   | 0,862755474     | #DIV/0!         |
| CTR9                                                                                | 0,4167109   | 0,212820359 | 0,016 | 0     | 1         | 1,158951633   | 0,862848778     | #DIV/0!         |
| NIP7                                                                                | 0,739643453 | 0,212653574 | 0,033 | 0,024 | 1         | 1,158817658   | 0,862948535     | 1,375           |
| NPRL3                                                                               | 0,441492135 | 0,212612826 | 0,014 | 0     | 1         | 1,158784928   | 0,862972909     | #DIV/0!         |
| KIAA1586                                                                            | 0,372736722 | 0,212435923 | 0,019 | 0     | 1         | 1,158642848   | 0,863078732     | #DIV/0!         |
| CAMK1D                                                                              | 0,890218621 | 0,21217637  | 0,021 | 0,024 | 1         | 1,158434417   | 0,863234021     | 0,875           |
| CYTH1                                                                               | 0,946292034 | 0,21217435  | 0,026 | 0,024 | 1         | 1,158432794   | 0,86323523      | 1,083333333     |
| THAP1                                                                               | 0,861830832 | 0,212123638 | 0,029 | 0,024 | 1         | 1,158392076   | 0,863265574     | 1,208333333     |
| METTL4                                                                              | 0,441492135 | 0,212115535 | 0,014 | 0     | 1         | 1,158385569   | 0,863270423     | #DIV/0!         |
| UBE3B                                                                               | 0,393875079 | 0,212011819 | 0,018 | 0     | 1         | 1,158302296   | 0,863332486     | #DIV/0!         |
| EPS8L1                                                                              | 0,468534305 | 0,211947379 | 0,013 | 0     | 1         | 1,158250559   | 0,863371049     | #DIV/0!         |
| SHROOM2                                                                             | 0,4167109   | 0,211882423 | 0,016 | 0     | 1         | 1,158198412   | 0,863409922     | #DIV/0!         |
| GMPPB                                                                               | 0,393875079 | 0,211798649 | 0,018 | 0     | 1         | 1,158131159   | 0,86346006      | #DIV/0!         |
| ATP6V1D                                                                             | 0,698481502 | 0,211438817 | 0,091 | 0,073 | 1         | 1,157842338   | 0,863675448     | 1,246575342     |
| MARK4                                                                               | 0,4167109   | 0,211429262 | 0,016 | 0     | 1         | 1,15783467    | 0,863681168     | #DIV/0!         |
| MAP3K20                                                                             | 0,441492135 | 0,211251943 | 0,014 | 0     | 1         | 1,157692372   | 0,863787328     | #DIV/0!         |
| RAD51D                                                                              | 0,4167109   | 0,211229865 | 0,016 | 0     | 1         | 1,157674655   | 0,863800547     | #DIV/0!         |
| RAB3IP                                                                              | 0,4167109   | 0,211159437 | 0,016 | 0     | 1         | 1,157618142   | 0,863842716     | #DIV/0!         |
| DHRS4-AS1                                                                           | 0,4167109   | 0,211139502 | 0,016 | 0     | 1         | 1,157602147   | 0,863854652     | #DIV/0!         |
| RGPD5                                                                               | 0,4167109   | 0,211115962 | 0,016 | 0     | 1         | 1,157583258   | 0,863868748     | #DIV/0!         |
| CLASP2                                                                              | 0,722107714 | 0,211057242 | 0,037 | 0,049 | 1         | 1,157536144   | 0,863903909     | 0,755102041     |
| IL1RAPL1                                                                            | 0,780171394 | 0,210973815 | 0,032 | 0,024 | 1         | 1,157469209   | 0,863953868     | 1,333333333     |

Supplementary Table 3

| Differentially expressed genes_keloid-MD_comparing SC-Keloid vs. (SC-Myel+Nonmyel) |             |             |       |       |           |               |                 |                 |
|------------------------------------------------------------------------------------|-------------|-------------|-------|-------|-----------|---------------|-----------------|-----------------|
| gene                                                                               | p_val       | avg_log2FC  | pct.1 | pct.2 | p_val_adj | Foldchange_UP | Foldchange_DOWN | Ratio_pct1_pct2 |
| TPST1                                                                              | 0,441492135 | 0,21091089  | 0,014 | 0     | 1         | 1,157418725   | 0,863991551     | #DIV/0!         |
| PDE4A                                                                              | 0,393875079 | 0,210781886 | 0,018 | 0     | 1         | 1,157315235   | 0,864068812     | #DIV/0!         |
| DNAH14                                                                             | 0,468534305 | 0,210711245 | 0,013 | 0     | 1         | 1,157258569   | 0,864111121     | #DIV/0!         |
| METTL1                                                                             | 0,441492135 | 0,210533549 | 0,014 | 0     | 1         | 1,157116038   | 0,864217561     | #DIV/0!         |
| RPS6KB2                                                                            | 0,353096361 | 0,210505356 | 0,021 | 0     | 1         | 1,157093426   | 0,864234449     | #DIV/0!         |
| PTPN11                                                                             | 0,439647866 | 0,210466601 | 0,085 | 0,049 | 1         | 1,157062344   | 0,864257665     | 1,734693878     |
| TTN-AS1                                                                            | 0,441492135 | 0,210301842 | 0,014 | 0     | 1         | 1,156930212   | 0,864356371     | #DIV/0!         |
| DBT                                                                                | 0,4167109   | 0,21027041  | 0,016 | 0     | 1         | 1,156905007   | 0,864375203     | #DIV/0!         |
| NAA16                                                                              | 0,468534305 | 0,210134495 | 0,013 | 0     | 1         | 1,156796021   | 0,864456639     | #DIV/0!         |
| PSMC3IP                                                                            | 0,393875079 | 0,210132519 | 0,018 | 0     | 1         | 1,156794436   | 0,864457823     | #DIV/0!         |
| PHF13                                                                              | 0,4167109   | 0,210132043 | 0,016 | 0     | 1         | 1,156794055   | 0,864458108     | #DIV/0!         |
| SFXN1                                                                              | 0,353096361 | 0,210065083 | 0,021 | 0     | 1         | 1,156740366   | 0,864498231     | #DIV/0!         |
| DZIP1L                                                                             | 0,468534305 | 0,210009151 | 0,013 | 0     | 1         | 1,156695521   | 0,864531748     | #DIV/0!         |
| PIGM                                                                               | 0,468534305 | 0,209947848 | 0,013 | 0     | 1         | 1,156646372   | 0,864568484     | #DIV/0!         |
| RPRD1A                                                                             | 0,544753088 | 0,209901394 | 0,045 | 0,024 | 1         | 1,156609129   | 0,864596323     | 1,875           |
| ELK3                                                                               | 0,378421325 | 0,20966772  | 0,091 | 0,049 | 1         | 1,156421808   | 0,864736373     | 1,857142857     |
| GRAMD4                                                                             | 0,393875079 | 0,209604713 | 0,018 | 0     | 1         | 1,156371304   | 0,86477414      | #DIV/0!         |
| NUS1                                                                               | 0,474957726 | 0,209416087 | 0,049 | 0,024 | 1         | 1,156220123   | 0,864887213     | 2,041666667     |
| MOB2                                                                               | 0,817995719 | 0,209324682 | 0,04  | 0,049 | 1         | 1,156146871   | 0,864942011     | 0,816326531     |
| RCHY1                                                                              | 0,393875079 | 0,2092781   | 0,018 | 0     | 1         | 1,156109542   | 0,864969939     | #DIV/0!         |
| BRIX1                                                                              | 0,284418948 | 0,209211677 | 0,069 | 0,024 | 1         | 1,156056314   | 0,865009764     | 2,875           |
| HMGB3                                                                              | 0,563669111 | 0,209204449 | 0,043 | 0,024 | 1         | 1,156050522   | 0,865014098     | 1,791666667     |
| COX10                                                                              | 0,393875079 | 0,209133766 | 0,018 | 0     | 1         | 1,155993885   | 0,865056479     | #DIV/0!         |
| ERAP2                                                                              | 0,4167109   | 0,209129493 | 0,016 | 0     | 1         | 1,155990461   | 0,865059041     | #DIV/0!         |
| MED8                                                                               | 0,456140696 | 0,209089149 | 0,051 | 0,024 | 1         | 1,155958135   | 0,865083232     | 2,125           |
| TRAF3IP1                                                                           | 0,468534305 | 0,209062721 | 0,013 | 0     | 1         | 1,15593696    | 0,86509908      | #DIV/0!         |
| MTSS2                                                                              | 0,353096361 | 0,209050368 | 0,021 | 0     | 1         | 1,155927062   | 0,865106487     | #DIV/0!         |
| DOCK2                                                                              | 0,372736722 | 0,209048238 | 0,019 | 0     | 1         | 1,155925355   | 0,865107764     | #DIV/0!         |
| KHNYN                                                                              | 0,468534305 | 0,20904476  | 0,013 | 0     | 1         | 1,155922569   | 0,86510985      | #DIV/0!         |
| HNRNPUL2                                                                           | 0,65114288  | 0,208990503 | 0,038 | 0,024 | 1         | 1,155879098   | 0,865142385     | 1,583333333     |

Supplementary Table 3

| Differentially expressed genes_keloid-MD_comparing SC-Keloid vs. (SC-Myel+Nonmyel) |             |             |       |       |           |               |                 |                 |
|------------------------------------------------------------------------------------|-------------|-------------|-------|-------|-----------|---------------|-----------------|-----------------|
| gene                                                                               | p_val       | avg_log2FC  | pct.1 | pct.2 | p_val_adj | Foldchange_UP | Foldchange_DOWN | Ratio_pct1_pct2 |
| ECSIT                                                                              | 0,393875079 | 0,208979869 | 0,018 | 0     | 1         | 1,155870578   | 0,865148762     | #DIV/0!         |
| KIF5A                                                                              | 0,441492135 | 0,208953313 | 0,014 | 0     | 1         | 1,155849302   | 0,865164688     | #DIV/0!         |
| COPS7B                                                                             | 0,948729862 | 0,208932739 | 0,026 | 0,024 | 1         | 1,155832818   | 0,865177026     | 1,083333333     |
| LAMP2                                                                              | 0,974640484 | 0,208896347 | 0,207 | 0,22  | 1         | 1,155803663   | 0,86519885      | 0,940909091     |
| DDX3X                                                                              | 0,446038769 | 0,208831998 | 0,12  | 0,171 | 1         | 1,155752111   | 0,865237442     | 0,701754386     |
| GANC                                                                               | 0,4167109   | 0,208773415 | 0,016 | 0     | 1         | 1,155705181   | 0,865272577     | #DIV/0!         |
| HMGXB4                                                                             | 0,412796632 | 0,208772979 | 0,061 | 0,098 | 1         | 1,155704832   | 0,865272838     | 0,62244898      |
| SYNGAP1                                                                            | 0,468534305 | 0,208719633 | 0,013 | 0     | 1         | 1,155662099   | 0,865304834     | #DIV/0!         |
| ITGA6                                                                              | 0,411148007 | 0,208715281 | 0,351 | 0,293 | 1         | 1,155658612   | 0,865307444     | 1,197952218     |
| MPRIIP-AS1                                                                         | 0,441492135 | 0,208714188 | 0,014 | 0     | 1         | 1,155657737   | 0,8653081       | #DIV/0!         |
| KAZN                                                                               | 0,372736722 | 0,208521636 | 0,019 | 0     | 1         | 1,155503505   | 0,865423597     | #DIV/0!         |
| IFT27                                                                              | 0,516045527 | 0,208194009 | 0,046 | 0,024 | 1         | 1,155241127   | 0,865620152     | 1,916666667     |
| PUM1                                                                               | 0,437509098 | 0,208105411 | 0,053 | 0,024 | 1         | 1,155170184   | 0,865673313     | 2,208333333     |
| ALDH9A1                                                                            | 0,739643453 | 0,208060298 | 0,033 | 0,024 | 1         | 1,155134063   | 0,865700383     | 1,375           |
| TSM                                                                                | 0,857273836 | 0,208037893 | 0,029 | 0,024 | 1         | 1,155116124   | 0,865713827     | 1,208333333     |
| MSC                                                                                | 0,441492135 | 0,207872657 | 0,014 | 0     | 1         | 1,154983832   | 0,865812985     | #DIV/0!         |
| NXF1                                                                               | 0,4167109   | 0,20764091  | 0,016 | 0     | 1         | 1,154798317   | 0,865952076     | #DIV/0!         |
| ZDHHC5                                                                             | 0,893302787 | 0,2075896   | 0,053 | 0,049 | 1         | 1,154757247   | 0,865982875     | 1,081632653     |
| RNF11                                                                              | 0,9234215   | 0,207556934 | 0,067 | 0,073 | 1         | 1,1547311     | 0,866002483     | 0,917808219     |
| HIPK3                                                                              | 0,715160978 | 0,20754504  | 0,035 | 0,024 | 1         | 1,15472158    | 0,866009623     | 1,458333333     |
| HTRA2                                                                              | 0,857273836 | 0,207493822 | 0,029 | 0,024 | 1         | 1,154680587   | 0,866040367     | 1,208333333     |
| CASC15                                                                             | 0,55485326  | 0,207173009 | 0,073 | 0,049 | 1         | 1,154423848   | 0,866232971     | 1,489795918     |
| DLAT                                                                               | 0,393875079 | 0,207166174 | 0,018 | 0     | 1         | 1,15441838    | 0,866237075     | #DIV/0!         |
| NEFM                                                                               | 0,4167109   | 0,207131576 | 0,016 | 0     | 1         | 1,154390695   | 0,866257849     | #DIV/0!         |
| PCDHGA12                                                                           | 0,393875079 | 0,207078599 | 0,018 | 0     | 1         | 1,154348306   | 0,866289659     | #DIV/0!         |
| STK16                                                                              | 0,372736722 | 0,207054264 | 0,019 | 0     | 1         | 1,154328834   | 0,866304271     | #DIV/0!         |
| SPRY4                                                                              | 0,441492135 | 0,20698754  | 0,014 | 0     | 1         | 1,154275448   | 0,866344339     | #DIV/0!         |
| RUNX1T1                                                                            | 0,393875079 | 0,206906478 | 0,018 | 0     | 1         | 1,154210594   | 0,866393018     | #DIV/0!         |
| KCTD17                                                                             | 0,950688894 | 0,206746836 | 0,022 | 0,024 | 1         | 1,154082881   | 0,866488895     | 0,916666667     |
| CIAO3                                                                              | 0,441492135 | 0,206706138 | 0,014 | 0     | 1         | 1,154050325   | 0,866513338     | #DIV/0!         |

Supplementary Table 3

| Differentially expressed genes_keloid-MD_ comparing SC-Keloid vs. (SC-Myel+Nonmyel) |             |             |       |       |           |               |                 |                 |
|-------------------------------------------------------------------------------------|-------------|-------------|-------|-------|-----------|---------------|-----------------|-----------------|
| gene                                                                                | p_val       | avg_log2FC  | pct.1 | pct.2 | p_val_adj | Foldchange_UP | Foldchange_DOWN | Ratio_pct1_pct2 |
| ZNF93                                                                               | 0,441492135 | 0,206671228 | 0,014 | 0     | 1         | 1,154022401   | 0,866534306     | #DIV/0!         |
| HEATR6                                                                              | 0,4167109   | 0,206663019 | 0,016 | 0     | 1         | 1,154015834   | 0,866539237     | #DIV/0!         |
| ANKRD10                                                                             | 0,856542922 | 0,206349811 | 0,276 | 0,317 | 1         | 1,153765326   | 0,866727382     | 0,870662461     |
| PLEKHO2                                                                             | 0,950688894 | 0,206324998 | 0,022 | 0,024 | 1         | 1,153745482   | 0,866742289     | 0,916666667     |
| DCP1A                                                                               | 0,81872643  | 0,206270288 | 0,03  | 0,024 | 1         | 1,15370173    | 0,866775159     | 1,25            |
| PGAM5                                                                               | 0,441492135 | 0,206112579 | 0,014 | 0     | 1         | 1,15357562    | 0,866869916     | #DIV/0!         |
| BANP                                                                                | 0,393875079 | 0,206106232 | 0,018 | 0     | 1         | 1,153570544   | 0,866873729     | #DIV/0!         |
| KDM2B                                                                               | 0,441492135 | 0,206095507 | 0,014 | 0     | 1         | 1,153561969   | 0,866880174     | #DIV/0!         |
| CHCHD5                                                                              | 0,425480286 | 0,205955945 | 0,116 | 0,073 | 1         | 1,153450382   | 0,866964037     | 1,589041096     |
| SCAI                                                                                | 0,393875079 | 0,205624628 | 0,018 | 0     | 1         | 1,153185521   | 0,86716316      | #DIV/0!         |
| ATP6V1H                                                                             | 0,696310026 | 0,205614298 | 0,016 | 0,024 | 1         | 1,153177264   | 0,867169369     | 0,666666667     |
| SOGA1                                                                               | 0,493210479 | 0,205385166 | 0,048 | 0,024 | 1         | 1,152994128   | 0,867307105     | 2               |
| SDSL                                                                                | 0,441492135 | 0,205382772 | 0,014 | 0     | 1         | 1,152992215   | 0,867308545     | #DIV/0!         |
| ZNF780A                                                                             | 0,498250693 | 0,205314139 | 0,011 | 0     | 1         | 1,152937365   | 0,867349806     | #DIV/0!         |
| GABRA2                                                                              | 0,682104412 | 0,20530343  | 0,118 | 0,146 | 1         | 1,152928807   | 0,867356244     | 0,808219178     |
| KLHL7                                                                               | 0,857273836 | 0,205297781 | 0,029 | 0,024 | 1         | 1,152924293   | 0,86735964      | 1,208333333     |
| CYP7B1                                                                              | 0,441492135 | 0,205192208 | 0,014 | 0     | 1         | 1,152839928   | 0,867423114     | #DIV/0!         |
| LRRC27                                                                              | 0,441492135 | 0,205178551 | 0,014 | 0     | 1         | 1,152829014   | 0,867431325     | #DIV/0!         |
| ILDR2                                                                               | 0,4167109   | 0,205118985 | 0,016 | 0     | 1         | 1,152781417   | 0,867467141     | #DIV/0!         |
| DDX6                                                                                | 0,53628252  | 0,205045441 | 0,132 | 0,098 | 1         | 1,152722654   | 0,867511362     | 1,346938776     |
| MNT                                                                                 | 0,441492135 | 0,205042536 | 0,014 | 0     | 1         | 1,152720333   | 0,867513109     | #DIV/0!         |
| MAN1C1                                                                              | 0,468534305 | 0,204874953 | 0,013 | 0     | 1         | 1,152586441   | 0,867613885     | #DIV/0!         |
| GMNN                                                                                | 0,4167109   | 0,204751128 | 0,016 | 0     | 1         | 1,15248752    | 0,867688354     | #DIV/0!         |
| BCHE                                                                                | 0,658110548 | 0,204608712 | 0,054 | 0,073 | 1         | 1,152373758   | 0,867774013     | 0,739726027     |
| ITPA                                                                                | 0,760888528 | 0,204534337 | 0,112 | 0,098 | 1         | 1,152314351   | 0,86781875      | 1,142857143     |
| TYMS                                                                                | 0,3347904   | 0,204425311 | 0,022 | 0     | 1         | 1,152227272   | 0,867884335     | #DIV/0!         |
| CPSF2                                                                               | 0,713187893 | 0,204359458 | 0,035 | 0,024 | 1         | 1,15217468    | 0,867923951     | 1,458333333     |
| ZMYM1                                                                               | 0,4167109   | 0,204260192 | 0,016 | 0     | 1         | 1,152095406   | 0,867983671     | #DIV/0!         |
| GABPB2                                                                              | 0,441492135 | 0,204128051 | 0,014 | 0     | 1         | 1,151989886   | 0,868063176     | #DIV/0!         |
| TIAM1                                                                               | 0,4167109   | 0,203995144 | 0,016 | 0     | 1         | 1,151883765   | 0,86814315      | #DIV/0!         |

Supplementary Table 3

| Differentially expressed genes_keloid-MD_comparing SC-Keloid vs. (SC-Myel+Nonmyel) |             |             |       |       |           |               |                 |                 |
|------------------------------------------------------------------------------------|-------------|-------------|-------|-------|-----------|---------------|-----------------|-----------------|
| gene                                                                               | p_val       | avg_log2FC  | pct.1 | pct.2 | p_val_adj | Foldchange_UP | Foldchange_DOWN | Ratio_pct1_pct2 |
| THAP9-AS1                                                                          | 0,441492135 | 0,203648424 | 0,014 | 0     | 1         | 1,151606968   | 0,868351814     | #DIV/0!         |
| FICD                                                                               | 0,441492135 | 0,203548839 | 0,014 | 0     | 1         | 1,151527479   | 0,868411756     | #DIV/0!         |
| PAWR                                                                               | 0,4167109   | 0,203540448 | 0,016 | 0     | 1         | 1,151520781   | 0,868416807     | #DIV/0!         |
| ANKRD46                                                                            | 0,441492135 | 0,203536006 | 0,014 | 0     | 1         | 1,151517236   | 0,86841948      | #DIV/0!         |
| SLC35E1                                                                            | 0,950688894 | 0,203453752 | 0,022 | 0,024 | 1         | 1,151451585   | 0,868468994     | 0,916666667     |
| KPNA3                                                                              | 0,737604434 | 0,203340985 | 0,033 | 0,024 | 1         | 1,151361586   | 0,86853688      | 1,375           |
| PRICKLE1                                                                           | 0,353096361 | 0,203157555 | 0,021 | 0     | 1         | 1,151215208   | 0,868647316     | #DIV/0!         |
| LRFN4                                                                              | 0,857273836 | 0,203118917 | 0,029 | 0,024 | 1         | 1,151184376   | 0,86867058      | 1,208333333     |
| DNM3OS                                                                             | 0,468534305 | 0,203103345 | 0,013 | 0     | 1         | 1,15117195    | 0,868679957     | #DIV/0!         |
| XPO4                                                                               | 0,468534305 | 0,203100604 | 0,013 | 0     | 1         | 1,151169763   | 0,868681607     | #DIV/0!         |
| FBXO38                                                                             | 0,498250693 | 0,202860279 | 0,011 | 0     | 1         | 1,150978017   | 0,868826325     | #DIV/0!         |
| SNRPG                                                                              | 0,389847059 | 0,202763549 | 0,271 | 0,22  | 1         | 1,150900848   | 0,86888458      | 1,231818182     |
| PLAGL1                                                                             | 0,4167109   | 0,202636515 | 0,016 | 0     | 1         | 1,150799513   | 0,868961091     | #DIV/0!         |
| CUTC                                                                               | 0,864111066 | 0,202628268 | 0,029 | 0,024 | 1         | 1,150792934   | 0,868966059     | 1,208333333     |
| ELOVL1                                                                             | 0,976233096 | 0,202468653 | 0,046 | 0,049 | 1         | 1,150665621   | 0,869062203     | 0,93877551      |
| PPP2R1B                                                                            | 0,4167109   | 0,202357844 | 0,016 | 0     | 1         | 1,150577246   | 0,869128956     | #DIV/0!         |
| NUP88                                                                              | 0,393875079 | 0,20219372  | 0,018 | 0     | 1         | 1,150446361   | 0,869227835     | #DIV/0!         |
| CFH                                                                                | 0,4167109   | 0,202172903 | 0,016 | 0     | 1         | 1,150429761   | 0,869240378     | #DIV/0!         |
| COL3A1                                                                             | 0,573778909 | 0,202066959 | 0,451 | 0,537 | 1         | 1,150345282   | 0,869304213     | 0,839851024     |
| FOXS1                                                                              | 0,393875079 | 0,201868535 | 0,018 | 0     | 1         | 1,150187078   | 0,869423782     | #DIV/0!         |
| GOLGA8A                                                                            | 0,4167109   | 0,201736708 | 0,016 | 0     | 1         | 1,150081984   | 0,86950323      | #DIV/0!         |
| MED16                                                                              | 0,4167109   | 0,201667164 | 0,016 | 0     | 1         | 1,150026547   | 0,869545145     | #DIV/0!         |
| ETFDH                                                                              | 0,468534305 | 0,201643625 | 0,013 | 0     | 1         | 1,150007783   | 0,869559333     | #DIV/0!         |
| CEP95                                                                              | 0,393875079 | 0,20146886  | 0,018 | 0     | 1         | 1,149868482   | 0,869664676     | #DIV/0!         |
| IDH3B                                                                              | 0,32418213  | 0,201393685 | 0,064 | 0,024 | 1         | 1,149808567   | 0,869709993     | 2,666666667     |
| EEF2                                                                               | 0,763005409 | 0,201048606 | 0,321 | 0,317 | 1         | 1,149533576   | 0,869918044     | 1,012618297     |
| XPR1                                                                               | 0,393875079 | 0,200993442 | 0,018 | 0     | 1         | 1,149489623   | 0,869951307     | #DIV/0!         |
| DFFB                                                                               | 0,531202783 | 0,200935586 | 0,01  | 0     | 1         | 1,149443526   | 0,869986195     | #DIV/0!         |
| ST3GAL3                                                                            | 0,4167109   | 0,200906397 | 0,016 | 0     | 1         | 1,149420271   | 0,870003797     | #DIV/0!         |
| LYPLA1                                                                             | 0,478453273 | 0,200860938 | 0,049 | 0,024 | 1         | 1,149384053   | 0,870031212     | 2,041666667     |

Supplementary Table 3

| Differentially expressed genes_keloid-MD_comparing SC-Keloid vs. (SC-Myel+Nonmyel) |             |             |       |       |           |               |                 |                 |
|------------------------------------------------------------------------------------|-------------|-------------|-------|-------|-----------|---------------|-----------------|-----------------|
| gene                                                                               | p_val       | avg_log2FC  | pct.1 | pct.2 | p_val_adj | Foldchange_UP | Foldchange_DOWN | Ratio_pct1_pct2 |
| C1orf52                                                                            | 0,946292034 | 0,200632797 | 0,026 | 0,024 | 1         | 1,14920231    | 0,870168805     | 1,083333333     |
| NAT10                                                                              | 0,4167109   | 0,200631558 | 0,016 | 0     | 1         | 1,149201322   | 0,870169552     | #DIV/0!         |
| SGSM2                                                                              | 0,696310026 | 0,200624908 | 0,016 | 0,024 | 1         | 1,149196025   | 0,870173563     | 0,666666667     |
| CD40                                                                               | 0,441492135 | 0,200590035 | 0,014 | 0     | 1         | 1,149168247   | 0,870194597     | #DIV/0!         |
| STRN4                                                                              | 0,441492135 | 0,200497304 | 0,014 | 0     | 1         | 1,149094385   | 0,870250532     | #DIV/0!         |
| RPA1                                                                               | 0,773817043 | 0,200483767 | 0,032 | 0,024 | 1         | 1,149083603   | 0,870258698     | 1,333333333     |
| GAREM1                                                                             | 0,441492135 | 0,200469107 | 0,014 | 0     | 1         | 1,149071927   | 0,870267541     | #DIV/0!         |
| ETV6                                                                               | 0,593609897 | 0,200430021 | 0,032 | 0,049 | 1         | 1,149040796   | 0,870291119     | 0,653061224     |
| INO80C                                                                             | 0,393875079 | 0,200358418 | 0,018 | 0     | 1         | 1,148983769   | 0,870334314     | #DIV/0!         |
| H4C5                                                                               | 0,468534305 | 0,200174715 | 0,013 | 0     | 1         | 1,148837474   | 0,870445143     | #DIV/0!         |
| DPY30                                                                              | 0,877913993 | 0,200086618 | 0,102 | 0,098 | 1         | 1,148767324   | 0,870498298     | 1,040816327     |
| TBC1D1                                                                             | 0,393875079 | 0,200075453 | 0,018 | 0     | 1         | 1,148758434   | 0,870505035     | #DIV/0!         |
| AACS                                                                               | 0,468534305 | 0,199992584 | 0,013 | 0     | 1         | 1,14869245    | 0,870555038     | #DIV/0!         |
| EREG                                                                               | 0,498250693 | 0,199961215 | 0,011 | 0     | 1         | 1,148667474   | 0,870573967     | #DIV/0!         |
| DMAC2                                                                              | 0,441492135 | 0,199883848 | 0,014 | 0     | 1         | 1,148605876   | 0,870620655     | #DIV/0!         |
| KIN                                                                                | 0,798716335 | 0,199813965 | 0,061 | 0,073 | 1         | 1,14855024    | 0,870662828     | 0,835616438     |
| KCNQ1OT1                                                                           | 0,865540993 | 0,199717667 | 0,08  | 0,073 | 1         | 1,148473579   | 0,870720945     | 1,095890411     |
| CSTF2                                                                              | 0,441492135 | 0,199653581 | 0,014 | 0     | 1         | 1,148422563   | 0,870759624     | #DIV/0!         |
| UVRAG                                                                              | 0,4167109   | 0,199639006 | 0,016 | 0     | 1         | 1,148410962   | 0,870768421     | #DIV/0!         |
| SLTM                                                                               | 0,904773289 | 0,199500009 | 0,112 | 0,122 | 1         | 1,148300323   | 0,87085232      | 0,918032787     |
| MTLN                                                                               | 0,666307824 | 0,199360539 | 0,12  | 0,098 | 1         | 1,148189318   | 0,870936512     | 1,224489796     |
| PDLIM7                                                                             | 0,734646948 | 0,199285519 | 0,239 | 0,22  | 1         | 1,148129614   | 0,870981802     | 1,086363636     |
| COQ6                                                                               | 0,441492135 | 0,199229301 | 0,014 | 0     | 1         | 1,148084875   | 0,871015742     | #DIV/0!         |
| RAB18                                                                              | 0,762225436 | 0,199128521 | 0,086 | 0,073 | 1         | 1,148004678   | 0,87107659      | 1,178082192     |
| UPRT                                                                               | 0,468534305 | 0,199111556 | 0,013 | 0     | 1         | 1,147991178   | 0,871086833     | #DIV/0!         |
| CHCHD3                                                                             | 0,368673416 | 0,19908932  | 0,059 | 0,024 | 1         | 1,147973485   | 0,871100259     | 2,458333333     |
| MGAT2                                                                              | 0,4167109   | 0,199067383 | 0,016 | 0     | 1         | 1,147956029   | 0,871113505     | #DIV/0!         |
| PML                                                                                | 0,441492135 | 0,199041408 | 0,014 | 0     | 1         | 1,147935361   | 0,871129189     | #DIV/0!         |
| LNPK                                                                               | 0,517550821 | 0,199012471 | 0,046 | 0,024 | 1         | 1,147912337   | 0,871146662     | 1,916666667     |
| VAC14                                                                              | 0,498250693 | 0,198879439 | 0,011 | 0     | 1         | 1,147806492   | 0,871226994     | #DIV/0!         |

Supplementary Table 3

| Differentially expressed genes_keloid-MD_comparing SC-Keloid vs. (SC-Myel+Nonmyel) |             |             |       |       |           |               |                 |                 |
|------------------------------------------------------------------------------------|-------------|-------------|-------|-------|-----------|---------------|-----------------|-----------------|
| gene                                                                               | p_val       | avg_log2FC  | pct.1 | pct.2 | p_val_adj | Foldchange_UP | Foldchange_DOWN | Ratio_pct1_pct2 |
| RP2                                                                                | 0,861830832 | 0,198814375 | 0,029 | 0,024 | 1         | 1,147754728   | 0,871266287     | 1,208333333     |
| MRAS                                                                               | 0,4167109   | 0,198734745 | 0,016 | 0     | 1         | 1,147691379   | 0,871314378     | #DIV/0!         |
| ZNF302                                                                             | 0,816528109 | 0,198635488 | 0,03  | 0,024 | 1         | 1,147612421   | 0,871374326     | 1,25            |
| TRAF4                                                                              | 0,393875079 | 0,198624385 | 0,018 | 0     | 1         | 1,147603589   | 0,871381032     | #DIV/0!         |
| LENG9                                                                              | 0,498250693 | 0,198555224 | 0,011 | 0     | 1         | 1,147548575   | 0,871422806     | #DIV/0!         |
| CCDC136                                                                            | 0,468534305 | 0,198537902 | 0,013 | 0     | 1         | 1,147534798   | 0,871433269     | #DIV/0!         |
| TXLNG                                                                              | 0,4167109   | 0,198424763 | 0,016 | 0     | 1         | 1,147444809   | 0,871501611     | #DIV/0!         |
| MED1                                                                               | 0,743726974 | 0,198372599 | 0,033 | 0,024 | 1         | 1,147403321   | 0,871533123     | 1,375           |
| EVC                                                                                | 0,468534305 | 0,198211491 | 0,013 | 0     | 1         | 1,147275196   | 0,871630454     | #DIV/0!         |
| WWP2                                                                               | 0,468534305 | 0,198064529 | 0,013 | 0     | 1         | 1,147158334   | 0,871719248     | #DIV/0!         |
| HEXD                                                                               | 0,441492135 | 0,198030045 | 0,014 | 0     | 1         | 1,147130914   | 0,871740085     | #DIV/0!         |
| MYL12B                                                                             | 0,606076319 | 0,197998494 | 0,537 | 0,537 | 1         | 1,147105826   | 0,87175915      | 1               |
| CPE                                                                                | 0,393875079 | 0,197949655 | 0,018 | 0     | 1         | 1,147066995   | 0,871788661     | #DIV/0!         |
| TRIM4                                                                              | 0,441492135 | 0,197913907 | 0,014 | 0     | 1         | 1,147038573   | 0,871810263     | #DIV/0!         |
| NPDC1                                                                              | 0,407522619 | 0,19785184  | 0,056 | 0,024 | 1         | 1,146989226   | 0,871847771     | 2,333333333     |
| MDP1                                                                               | 0,441492135 | 0,197837553 | 0,014 | 0     | 1         | 1,146977868   | 0,871856405     | #DIV/0!         |
| UHRF2                                                                              | 0,896472903 | 0,197833639 | 0,043 | 0,049 | 1         | 1,146974756   | 0,87185877      | 0,87755102      |
| CSK                                                                                | 0,948729862 | 0,197751247 | 0,026 | 0,024 | 1         | 1,146909255   | 0,871908563     | 1,083333333     |
| RBBP5                                                                              | 0,4167109   | 0,19772493  | 0,016 | 0     | 1         | 1,146888333   | 0,871924468     | #DIV/0!         |
| EPB41                                                                              | 0,441492135 | 0,197455308 | 0,014 | 0     | 1         | 1,146674014   | 0,872087435     | #DIV/0!         |
| BNIP1                                                                              | 0,393875079 | 0,197434836 | 0,018 | 0     | 1         | 1,146657743   | 0,87209981      | #DIV/0!         |
| TRMT2A                                                                             | 0,372736722 | 0,197384848 | 0,019 | 0     | 1         | 1,146618013   | 0,872130028     | #DIV/0!         |
| FHIP2B                                                                             | 0,4167109   | 0,197364937 | 0,016 | 0     | 1         | 1,146602188   | 0,872142065     | #DIV/0!         |
| AP4E1                                                                              | 0,468534305 | 0,197132396 | 0,013 | 0     | 1         | 1,146417388   | 0,872282653     | #DIV/0!         |
| NSMAF                                                                              | 0,393875079 | 0,197105303 | 0,018 | 0     | 1         | 1,146395859   | 0,872299034     | #DIV/0!         |
| BOLA3                                                                              | 0,603196414 | 0,197047507 | 0,099 | 0,073 | 1         | 1,146349933   | 0,87233398      | 1,356164384     |
| FHIP1B                                                                             | 0,441492135 | 0,196976436 | 0,014 | 0     | 1         | 1,146293462   | 0,872376955     | #DIV/0!         |
| SLC38A9                                                                            | 0,4167109   | 0,196893277 | 0,016 | 0     | 1         | 1,146227391   | 0,872427241     | #DIV/0!         |
| E2F3                                                                               | 0,892879868 | 0,196873509 | 0,021 | 0,024 | 1         | 1,146211685   | 0,872439195     | 0,875           |
| PPP1R2                                                                             | 0,718967219 | 0,196800929 | 0,115 | 0,098 | 1         | 1,146154022   | 0,872483087     | 1,173469388     |

Supplementary Table 3

| Differentially expressed genes_keloid-MD_comparing SC-Keloid vs. (SC-Myel+Nonmyel) |             |             |       |       |           |               |                 |                 |
|------------------------------------------------------------------------------------|-------------|-------------|-------|-------|-----------|---------------|-----------------|-----------------|
| gene                                                                               | p_val       | avg_log2FC  | pct.1 | pct.2 | p_val_adj | Foldchange_UP | Foldchange_DOWN | Ratio_pct1_pct2 |
| ANAPC1                                                                             | 0,372736722 | 0,196793337 | 0,019 | 0     | 1         | 1,146147991   | 0,872487679     | #DIV/0!         |
| NIPBL                                                                              | 0,656586737 | 0,196766655 | 0,054 | 0,073 | 1         | 1,146126793   | 0,872503815     | 0,739726027     |
| IPO7                                                                               | 0,512773547 | 0,196691521 | 0,077 | 0,049 | 1         | 1,146067106   | 0,872549255     | 1,571428571     |
| ZMYND19                                                                            | 0,372736722 | 0,196684314 | 0,019 | 0     | 1         | 1,146061381   | 0,872553614     | #DIV/0!         |
| KLHDC2                                                                             | 0,993696336 | 0,196663474 | 0,048 | 0,049 | 1         | 1,146044825   | 0,872566219     | 0,979591837     |
| THG1L                                                                              | 0,441492135 | 0,196657796 | 0,014 | 0     | 1         | 1,146040315   | 0,872569653     | #DIV/0!         |
| DEAF1                                                                              | 0,950688894 | 0,196617943 | 0,022 | 0,024 | 1         | 1,146008658   | 0,872593757     | 0,916666667     |
| H1-4                                                                               | 0,393875079 | 0,196598191 | 0,018 | 0     | 1         | 1,145992967   | 0,872605704     | #DIV/0!         |
| MTHFS                                                                              | 0,468534305 | 0,196489172 | 0,013 | 0     | 1         | 1,145906373   | 0,872671646     | #DIV/0!         |
| STK11IP                                                                            | 0,468534305 | 0,196476406 | 0,013 | 0     | 1         | 1,145896232   | 0,872679368     | #DIV/0!         |
| ZNF599                                                                             | 0,468534305 | 0,196417144 | 0,013 | 0     | 1         | 1,145849163   | 0,872715216     | #DIV/0!         |
| HIBADH                                                                             | 0,441492135 | 0,196297957 | 0,014 | 0     | 1         | 1,145754504   | 0,872787317     | #DIV/0!         |
| MAD1L1                                                                             | 0,831366235 | 0,196293723 | 0,019 | 0,024 | 1         | 1,145751142   | 0,872789879     | 0,791666667     |
| LINC01137                                                                          | 0,441492135 | 0,196050464 | 0,014 | 0     | 1         | 1,145557968   | 0,872937056     | #DIV/0!         |
| TRDMT1                                                                             | 0,816528109 | 0,195996905 | 0,03  | 0,024 | 1         | 1,145515441   | 0,872969464     | 1,25            |
| MACIR                                                                              | 0,833441088 | 0,1959675   | 0,081 | 0,073 | 1         | 1,145492093   | 0,872987257     | 1,109589041     |
| CXCL2                                                                              | 0,468534305 | 0,195902032 | 0,013 | 0     | 1         | 1,145440113   | 0,873026873     | #DIV/0!         |
| UBTF                                                                               | 0,988091349 | 0,19587603  | 0,072 | 0,073 | 1         | 1,145419469   | 0,873042608     | 0,98630137      |
| ZBTB40                                                                             | 0,441492135 | 0,195857251 | 0,014 | 0     | 1         | 1,145404559   | 0,873053972     | #DIV/0!         |
| INVS                                                                               | 0,468534305 | 0,195844275 | 0,013 | 0     | 1         | 1,145394257   | 0,873061825     | #DIV/0!         |
| RAB30                                                                              | 0,441492135 | 0,1957098   | 0,014 | 0     | 1         | 1,145287499   | 0,873143207     | #DIV/0!         |
| LOX                                                                                | 0,393875079 | 0,195709383 | 0,018 | 0     | 1         | 1,145287168   | 0,87314346      | #DIV/0!         |
| NUP37                                                                              | 0,393875079 | 0,195652954 | 0,018 | 0     | 1         | 1,145242372   | 0,873177612     | #DIV/0!         |
| ASXL2                                                                              | 0,468534305 | 0,195620436 | 0,013 | 0     | 1         | 1,145216559   | 0,873197294     | #DIV/0!         |
| CLCC1                                                                              | 0,905181209 | 0,195615089 | 0,027 | 0,024 | 1         | 1,145212315   | 0,87320053      | 1,125           |
| AKT1S1                                                                             | 0,4167109   | 0,195561661 | 0,016 | 0     | 1         | 1,145169904   | 0,873232868     | #DIV/0!         |
| CDKL5                                                                              | 0,4167109   | 0,195306639 | 0,016 | 0     | 1         | 1,144967493   | 0,873387241     | #DIV/0!         |
| ZNF608                                                                             | 0,4167109   | 0,195231137 | 0,016 | 0     | 1         | 1,144907574   | 0,87343295      | #DIV/0!         |
| L1TD1                                                                              | 0,468534305 | 0,195176734 | 0,013 | 0     | 1         | 1,144864401   | 0,873465887     | #DIV/0!         |
| MBTD1                                                                              | 0,4167109   | 0,195149461 | 0,016 | 0     | 1         | 1,144842759   | 0,8734824       | #DIV/0!         |



Supplementary Table 3

| Differentially expressed genes_keloid-MD_comparing SC-Keloid vs. (SC-Myel+Nonmyel) |             |             |       |       |           |               |                 |                 |
|------------------------------------------------------------------------------------|-------------|-------------|-------|-------|-----------|---------------|-----------------|-----------------|
| gene                                                                               | p_val       | avg_log2FC  | pct.1 | pct.2 | p_val_adj | Foldchange_UP | Foldchange_DOWN | Ratio_pct1_pct2 |
| EXOSC9                                                                             | 0,643840181 | 0,195042077 | 0,038 | 0,024 | 1         | 1,144757548   | 0,873547418     | 1,583333333     |
| FN3KRP                                                                             | 0,441492135 | 0,195008149 | 0,014 | 0     | 1         | 1,144730626   | 0,873567962     | #DIV/0!         |
| MFSD3                                                                              | 0,372736722 | 0,194988528 | 0,019 | 0     | 1         | 1,144715058   | 0,873579842     | #DIV/0!         |
| FCF1                                                                               | 0,864111049 | 0,194968642 | 0,029 | 0,024 | 1         | 1,14469928    | 0,873591884     | 1,208333333     |
| DHPS                                                                               | 0,771495695 | 0,19464065  | 0,038 | 0,049 | 1         | 1,144439065   | 0,873790515     | 0,775510204     |
| PRELID2                                                                            | 0,498250693 | 0,194533531 | 0,011 | 0     | 1         | 1,144354094   | 0,873855396     | #DIV/0!         |
| VEGFC                                                                              | 0,468534305 | 0,194468405 | 0,013 | 0     | 1         | 1,144302437   | 0,873894844     | #DIV/0!         |
| OTUD6B                                                                             | 0,951168171 | 0,194289337 | 0,026 | 0,024 | 1         | 1,144160415   | 0,874003319     | 1,083333333     |
| TMEM67                                                                             | 1           | 0,194222728 | 0,024 | 0,024 | 1         | 1,144107591   | 0,874043672     | 1               |
| UBE2S                                                                              | 0,94398204  | 0,194169355 | 0,158 | 0,171 | 1         | 1,144065265   | 0,874076008     | 0,923976608     |
| FARSB                                                                              | 0,441492135 | 0,194061297 | 0,014 | 0     | 1         | 1,143979577   | 0,874141479     | #DIV/0!         |
| SNRNP48                                                                            | 0,393875079 | 0,194046047 | 0,018 | 0     | 1         | 1,143967485   | 0,87415072      | #DIV/0!         |
| MAP1S                                                                              | 0,393875079 | 0,194031327 | 0,018 | 0     | 1         | 1,143955813   | 0,874159639     | #DIV/0!         |
| PLAG1                                                                              | 0,498250693 | 0,193975564 | 0,011 | 0     | 1         | 1,143911598   | 0,874193427     | #DIV/0!         |
| PEX19                                                                              | 0,393875079 | 0,193958733 | 0,018 | 0     | 1         | 1,143898253   | 0,874203626     | #DIV/0!         |
| NDUFA4L2                                                                           | 0,441492135 | 0,193939672 | 0,014 | 0     | 1         | 1,14388314    | 0,874215176     | #DIV/0!         |
| MAP2K4                                                                             | 0,441492135 | 0,193935391 | 0,014 | 0     | 1         | 1,143879745   | 0,87421777      | #DIV/0!         |
| ZNF688                                                                             | 0,372736722 | 0,193860321 | 0,019 | 0     | 1         | 1,143820225   | 0,874263261     | #DIV/0!         |
| TOP3A                                                                              | 0,468534305 | 0,193648527 | 0,013 | 0     | 1         | 1,143652319   | 0,874391616     | #DIV/0!         |
| ZNF805                                                                             | 0,441492135 | 0,193622089 | 0,014 | 0     | 1         | 1,143631362   | 0,874407639     | #DIV/0!         |
| FUCA1                                                                              | 0,468534305 | 0,193590705 | 0,013 | 0     | 1         | 1,143606484   | 0,874426661     | #DIV/0!         |
| MROH1                                                                              | 0,498250693 | 0,193505903 | 0,011 | 0     | 1         | 1,143539265   | 0,874478062     | #DIV/0!         |
| FAM13A                                                                             | 0,441492135 | 0,193494822 | 0,014 | 0     | 1         | 1,143530482   | 0,874484779     | #DIV/0!         |
| GEM                                                                                | 0,441492135 | 0,193468021 | 0,014 | 0     | 1         | 1,143509238   | 0,874501024     | #DIV/0!         |
| LINC00592                                                                          | 0,498250693 | 0,193457442 | 0,011 | 0     | 1         | 1,143500853   | 0,874507437     | #DIV/0!         |
| VPS11                                                                              | 0,441492135 | 0,193447148 | 0,014 | 0     | 1         | 1,143492694   | 0,874513677     | #DIV/0!         |
| TXNIP                                                                              | 0,876309075 | 0,193314474 | 0,174 | 0,171 | 1         | 1,14338754    | 0,874594103     | 1,01754386      |
| C20orf27                                                                           | 0,4167109   | 0,193299607 | 0,016 | 0     | 1         | 1,143375758   | 0,874603116     | #DIV/0!         |
| MRTFA                                                                              | 0,441492135 | 0,19313313  | 0,014 | 0     | 1         | 1,143243827   | 0,874704045     | #DIV/0!         |
| GAB2                                                                               | 0,531202783 | 0,193129561 | 0,01  | 0     | 1         | 1,143240999   | 0,874706209     | #DIV/0!         |

Supplementary Table 3

| Differentially expressed genes_keloid-MD_comparing SC-Keloid vs. (SC-Myel+Nonmyel) |             |             |       |       |           |               |                 |                 |
|------------------------------------------------------------------------------------|-------------|-------------|-------|-------|-----------|---------------|-----------------|-----------------|
| gene                                                                               | p_val       | avg_log2FC  | pct.1 | pct.2 | p_val_adj | Foldchange_UP | Foldchange_DOWN | Ratio_pct1_pct2 |
| SUSD6                                                                              | 0,441492135 | 0,193124622 | 0,014 | 0     | 1         | 1,143237086   | 0,874709203     | #DIV/0!         |
| SLC25A51                                                                           | 0,468534305 | 0,193113618 | 0,013 | 0     | 1         | 1,143228366   | 0,874715875     | #DIV/0!         |
| GCNT1                                                                              | 0,441492135 | 0,193094535 | 0,014 | 0     | 1         | 1,143213244   | 0,874727445     | #DIV/0!         |
| MTAP                                                                               | 0,3103227   | 0,192995262 | 0,065 | 0,024 | 1         | 1,143134581   | 0,874787638     | 2,708333333     |
| GK                                                                                 | 0,441492135 | 0,192973619 | 0,014 | 0     | 1         | 1,143117433   | 0,874800761     | #DIV/0!         |
| ASNS                                                                               | 0,372736722 | 0,192806134 | 0,019 | 0     | 1         | 1,142984733   | 0,874902325     | #DIV/0!         |
| NEMP1                                                                              | 0,468534305 | 0,192642091 | 0,013 | 0     | 1         | 1,142854777   | 0,875001811     | #DIV/0!         |
| ITGB3                                                                              | 0,468534305 | 0,19253896  | 0,013 | 0     | 1         | 1,142773083   | 0,875064363     | #DIV/0!         |
| ANKRD11                                                                            | 0,921513844 | 0,19253537  | 0,089 | 0,098 | 1         | 1,142770239   | 0,875066541     | 0,908163265     |
| PXMP4                                                                              | 0,468534305 | 0,192377284 | 0,013 | 0     | 1         | 1,142645024   | 0,875162433     | #DIV/0!         |
| STXBP4                                                                             | 0,441492135 | 0,192263525 | 0,014 | 0     | 1         | 1,142554929   | 0,875231444     | #DIV/0!         |
| PCSK5                                                                              | 0,468534305 | 0,192207655 | 0,013 | 0     | 1         | 1,142510683   | 0,875265339     | #DIV/0!         |
| GHITM                                                                              | 0,783224406 | 0,19214836  | 0,081 | 0,098 | 1         | 1,142463727   | 0,875301313     | 0,826530612     |
| ZNF347                                                                             | 0,498250693 | 0,192048736 | 0,011 | 0     | 1         | 1,142384838   | 0,875361758     | #DIV/0!         |
| SPATA20                                                                            | 0,468534305 | 0,191864652 | 0,013 | 0     | 1         | 1,142239082   | 0,875473459     | #DIV/0!         |
| USPL1                                                                              | 0,4167109   | 0,191857448 | 0,016 | 0     | 1         | 1,142233378   | 0,875477831     | #DIV/0!         |
| FAM216A                                                                            | 0,372736722 | 0,191841456 | 0,019 | 0     | 1         | 1,142220716   | 0,875487536     | #DIV/0!         |
| DNAJA3                                                                             | 0,441492135 | 0,191789149 | 0,014 | 0     | 1         | 1,142179304   | 0,875519278     | #DIV/0!         |
| FLVCR1                                                                             | 0,393875079 | 0,19168929  | 0,018 | 0     | 1         | 1,142100249   | 0,875579881     | #DIV/0!         |
| WASHC5                                                                             | 0,4167109   | 0,191684019 | 0,016 | 0     | 1         | 1,142096076   | 0,87558308      | #DIV/0!         |
| USP15                                                                              | 0,8689834   | 0,191406539 | 0,064 | 0,073 | 1         | 1,141876433   | 0,875751501     | 0,876712329     |
| TEAD4                                                                              | 0,441492135 | 0,191295279 | 0,014 | 0     | 1         | 1,141788375   | 0,875819041     | #DIV/0!         |
| LARP1B                                                                             | 0,543182859 | 0,191291073 | 0,045 | 0,024 | 1         | 1,141785046   | 0,875821595     | 1,875           |
| DLST                                                                               | 1           | 0,191142945 | 0,024 | 0,024 | 1         | 1,14166782    | 0,875911524     | 1               |
| CENPP                                                                              | 0,468534305 | 0,191072414 | 0,013 | 0     | 1         | 1,141612008   | 0,875954346     | #DIV/0!         |
| ERVMER34-1                                                                         | 0,468534305 | 0,191046423 | 0,013 | 0     | 1         | 1,14159144    | 0,875970128     | #DIV/0!         |
| AAAS                                                                               | 0,441492135 | 0,190965365 | 0,014 | 0     | 1         | 1,141527302   | 0,876019346     | #DIV/0!         |
| MEX3A                                                                              | 0,4167109   | 0,190911838 | 0,016 | 0     | 1         | 1,14148495    | 0,876051848     | #DIV/0!         |
| SMUG1                                                                              | 1           | 0,190874487 | 0,024 | 0,024 | 1         | 1,141455398   | 0,876074529     | 1               |
| NEK4                                                                               | 0,4167109   | 0,190870336 | 0,016 | 0     | 1         | 1,141452113   | 0,87607705      | #DIV/0!         |

Supplementary Table 3

| Differentially expressed genes_keloid-MD_comparing SC-Keloid vs. (SC-Myel+Nonmyel) |             |             |       |       |           |               |                 |                 |
|------------------------------------------------------------------------------------|-------------|-------------|-------|-------|-----------|---------------|-----------------|-----------------|
| gene                                                                               | p_val       | avg_log2FC  | pct.1 | pct.2 | p_val_adj | Foldchange_UP | Foldchange_DOWN | Ratio_pct1_pct2 |
| NIPA2                                                                              | 0,565295112 | 0,190868089 | 0,043 | 0,024 | 1         | 1,141450335   | 0,876078415     | 1,791666667     |
| ACADSB                                                                             | 0,4167109   | 0,190823726 | 0,016 | 0     | 1         | 1,141415237   | 0,876105354     | #DIV/0!         |
| RPL5                                                                               | 0,409002306 | 0,19076602  | 0,737 | 0,756 | 1         | 1,141369582   | 0,876140398     | 0,974867725     |
| ENO2                                                                               | 0,468534305 | 0,190619111 | 0,013 | 0     | 1         | 1,141253363   | 0,87622962      | #DIV/0!         |
| FANCF                                                                              | 0,468534305 | 0,190519739 | 0,013 | 0     | 1         | 1,141174756   | 0,876289976     | #DIV/0!         |
| ZCWPW1                                                                             | 0,498250693 | 0,190508508 | 0,011 | 0     | 1         | 1,141165873   | 0,876296798     | #DIV/0!         |
| GMDS                                                                               | 0,441492135 | 0,190503251 | 0,014 | 0     | 1         | 1,141161715   | 0,876299991     | #DIV/0!         |
| TRMT10A                                                                            | 0,498250693 | 0,190490544 | 0,011 | 0     | 1         | 1,141151663   | 0,876307709     | #DIV/0!         |
| CKMT2-AS1                                                                          | 0,468534305 | 0,190445533 | 0,013 | 0     | 1         | 1,141116061   | 0,87633505      | #DIV/0!         |
| LIMA1                                                                              | 0,426177566 | 0,19039619  | 0,22  | 0,171 | 1         | 1,141077033   | 0,876365023     | 1,286549708     |
| GEN1                                                                               | 0,468534305 | 0,190175634 | 0,013 | 0     | 1         | 1,140902601   | 0,87649901      | #DIV/0!         |
| NOA1                                                                               | 0,4167109   | 0,190159117 | 0,016 | 0     | 1         | 1,140889539   | 0,876509045     | #DIV/0!         |
| PRMT7                                                                              | 0,468534305 | 0,190128711 | 0,013 | 0     | 1         | 1,140865494   | 0,876527518     | #DIV/0!         |
| CORO7                                                                              | 0,4167109   | 0,190085711 | 0,016 | 0     | 1         | 1,140831491   | 0,876553644     | #DIV/0!         |
| MEDAG                                                                              | 0,393875079 | 0,19001012  | 0,018 | 0     | 1         | 1,140771718   | 0,876599572     | #DIV/0!         |
| ELP4                                                                               | 0,441492135 | 0,189975949 | 0,014 | 0     | 1         | 1,140744698   | 0,876620335     | #DIV/0!         |
| TCEAL9                                                                             | 0,808980536 | 0,189946864 | 0,254 | 0,244 | 1         | 1,140721701   | 0,876638008     | 1,040983607     |
| YTHDC1                                                                             | 0,666260974 | 0,189907209 | 0,093 | 0,073 | 1         | 1,140690347   | 0,876662104     | 1,273972603     |
| ALG3                                                                               | 0,372736722 | 0,189820985 | 0,019 | 0     | 1         | 1,140622175   | 0,8767145       | #DIV/0!         |
| RFXAP                                                                              | 0,468534305 | 0,189424197 | 0,013 | 0     | 1         | 1,14030851    | 0,876955659     | #DIV/0!         |
| CHST6                                                                              | 0,498250693 | 0,189179743 | 0,011 | 0     | 1         | 1,140115309   | 0,877104265     | #DIV/0!         |
| WWTR1                                                                              | 0,580561009 | 0,189175018 | 0,129 | 0,098 | 1         | 1,140111575   | 0,877107137     | 1,316326531     |
| TOMM70                                                                             | 0,823127312 | 0,189135344 | 0,03  | 0,024 | 1         | 1,140080222   | 0,877131258     | 1,25            |
| FYN                                                                                | 0,77939996  | 0,189111915 | 0,108 | 0,098 | 1         | 1,140061708   | 0,877145503     | 1,102040816     |
| COX19                                                                              | 0,898107217 | 0,189071768 | 0,027 | 0,024 | 1         | 1,140029983   | 0,877169912     | 1,125           |
| GLT8D1                                                                             | 0,864379241 | 0,189061955 | 0,104 | 0,098 | 1         | 1,140022229   | 0,877175878     | 1,06122449      |
| MEF2A                                                                              | 0,901173873 | 0,189061084 | 0,11  | 0,122 | 1         | 1,14002154    | 0,877176408     | 0,901639344     |
| SRPX2                                                                              | 0,588623777 | 0,18896284  | 0,051 | 0,073 | 1         | 1,139943911   | 0,877236143     | 0,698630137     |
| RPL4                                                                               | 0,827796832 | 0,188917747 | 0,234 | 0,268 | 1         | 1,139908281   | 0,877263563     | 0,873134328     |
| ABR                                                                                | 0,542398606 | 0,18891713  | 0,045 | 0,024 | 1         | 1,139907793   | 0,877263938     | 1,875           |

Supplementary Table 3

| Differentially expressed genes_keloid-MD_comparing SC-Keloid vs. (SC-Myel+Nonmyel) |             |             |       |       |           |               |                 |                 |
|------------------------------------------------------------------------------------|-------------|-------------|-------|-------|-----------|---------------|-----------------|-----------------|
| gene                                                                               | p_val       | avg_log2FC  | pct.1 | pct.2 | p_val_adj | Foldchange_UP | Foldchange_DOWN | Ratio_pct1_pct2 |
| CALM2                                                                              | 0,306644379 | 0,188911269 | 0,738 | 0,634 | 1         | 1,139903162   | 0,877267502     | 1,164037855     |
| DHTKD1                                                                             | 0,441492135 | 0,188910053 | 0,014 | 0     | 1         | 1,139902202   | 0,877268242     | #DIV/0!         |
| TRAPPC9                                                                            | 0,468534305 | 0,188909739 | 0,013 | 0     | 1         | 1,139901954   | 0,877268432     | #DIV/0!         |
| ASCC2                                                                              | 0,441492135 | 0,188776062 | 0,014 | 0     | 1         | 1,139796338   | 0,877349722     | #DIV/0!         |
| INO80E                                                                             | 0,892879868 | 0,188682143 | 0,021 | 0,024 | 1         | 1,139722139   | 0,877406839     | 0,875           |
| TRIP12                                                                             | 0,60673112  | 0,188627721 | 0,07  | 0,049 | 1         | 1,139679147   | 0,877439938     | 1,428571429     |
| RAPGEF1                                                                            | 0,468534305 | 0,188577746 | 0,013 | 0     | 1         | 1,139639669   | 0,877470333     | #DIV/0!         |
| ZNF25                                                                              | 0,864111066 | 0,188472014 | 0,029 | 0,024 | 1         | 1,139556151   | 0,877534643     | 1,208333333     |
| TGFB2                                                                              | 0,468534305 | 0,188464753 | 0,013 | 0     | 1         | 1,139550416   | 0,877539059     | #DIV/0!         |
| ZNF24                                                                              | 0,935066304 | 0,188430369 | 0,075 | 0,073 | 1         | 1,139523257   | 0,877559974     | 1,02739726      |
| C10orf88                                                                           | 0,498250693 | 0,188404445 | 0,011 | 0     | 1         | 1,13950278    | 0,877575744     | #DIV/0!         |
| HINT2                                                                              | 0,683475205 | 0,188161653 | 0,096 | 0,122 | 1         | 1,139311029   | 0,877723444     | 0,786885246     |
| AKAP17A                                                                            | 0,900464352 | 0,188080801 | 0,027 | 0,024 | 1         | 1,139247181   | 0,877772635     | 1,125           |
| GOLGA7                                                                             | 0,85852906  | 0,188035245 | 0,054 | 0,049 | 1         | 1,139211207   | 0,877800353     | 1,102040816     |
| TIMM23                                                                             | 0,498250693 | 0,188012729 | 0,011 | 0     | 1         | 1,139193428   | 0,877814053     | #DIV/0!         |
| SCYL1                                                                              | 0,4167109   | 0,18781786  | 0,016 | 0     | 1         | 1,139039564   | 0,87793263      | #DIV/0!         |
| TCERG1                                                                             | 0,707280187 | 0,187697288 | 0,035 | 0,024 | 1         | 1,138944375   | 0,878006005     | 1,458333333     |
| KIAA0100                                                                           | 0,820926176 | 0,187678784 | 0,03  | 0,024 | 1         | 1,138929766   | 0,878017266     | 1,25            |
| BRCC3                                                                              | 0,441492135 | 0,187407155 | 0,014 | 0     | 1         | 1,13871535    | 0,878182594     | #DIV/0!         |
| MED17                                                                              | 0,441492135 | 0,187266517 | 0,014 | 0     | 1         | 1,13860435    | 0,878268206     | #DIV/0!         |
| PIGQ                                                                               | 0,4167109   | 0,187189502 | 0,016 | 0     | 1         | 1,13854357    | 0,878315091     | #DIV/0!         |
| ARRDC3                                                                             | 0,722107714 | 0,187072514 | 0,037 | 0,049 | 1         | 1,13845125    | 0,878386317     | 0,755102041     |
| MRPS15                                                                             | 0,650538652 | 0,186961618 | 0,094 | 0,073 | 1         | 1,138363743   | 0,878453839     | 1,287671233     |
| ARHGAP42                                                                           | 0,647487289 | 0,186955109 | 0,038 | 0,024 | 1         | 1,138358608   | 0,878457802     | 1,583333333     |
| NAPEPLD                                                                            | 0,902822352 | 0,186940542 | 0,027 | 0,024 | 1         | 1,138347113   | 0,878466672     | 1,125           |
| PLEKHM3                                                                            | 0,468534305 | 0,186791866 | 0,013 | 0     | 1         | 1,138229808   | 0,878557206     | #DIV/0!         |
| CGRRF1                                                                             | 0,857273836 | 0,1866531   | 0,029 | 0,024 | 1         | 1,138120332   | 0,878641714     | 1,208333333     |
| HSPA2                                                                              | 0,531202783 | 0,186639064 | 0,01  | 0     | 1         | 1,138109259   | 0,878650263     | #DIV/0!         |
| ANKRD17                                                                            | 0,728287957 | 0,186636149 | 0,057 | 0,073 | 1         | 1,13810696    | 0,878652038     | 0,780821918     |
| ACSL4                                                                              | 0,896472895 | 0,186561216 | 0,043 | 0,049 | 1         | 1,138047849   | 0,878697676     | 0,87755102      |

Supplementary Table 3

| Differentially expressed genes_keloid-MD_comparing SC-Keloid vs. (SC-Myel+Nonmyel) |             |             |       |       |           |               |                 |                 |
|------------------------------------------------------------------------------------|-------------|-------------|-------|-------|-----------|---------------|-----------------|-----------------|
| gene                                                                               | p_val       | avg_log2FC  | pct.1 | pct.2 | p_val_adj | Foldchange_UP | Foldchange_DOWN | Ratio_pct1_pct2 |
| ARFGEF1                                                                            | 0,780171394 | 0,186448697 | 0,032 | 0,024 | 1         | 1,137959093   | 0,878766211     | 1,333333333     |
| WDR77                                                                              | 0,393875079 | 0,186360762 | 0,018 | 0     | 1         | 1,137889735   | 0,878819774     | #DIV/0!         |
| BRI3BP                                                                             | 0,441492135 | 0,186146031 | 0,014 | 0     | 1         | 1,137720383   | 0,878950588     | #DIV/0!         |
| DPY19L1                                                                            | 0,522080298 | 0,186119239 | 0,046 | 0,024 | 1         | 1,137699255   | 0,878966911     | 1,916666667     |
| PAR6B                                                                              | 0,468534305 | 0,186070471 | 0,013 | 0     | 1         | 1,137660797   | 0,878996624     | #DIV/0!         |
| MFAP5                                                                              | 0,498250693 | 0,186041937 | 0,011 | 0     | 1         | 1,137638297   | 0,879014009     | #DIV/0!         |
| MLH1                                                                               | 0,441492135 | 0,185962471 | 0,014 | 0     | 1         | 1,137575635   | 0,879062428     | #DIV/0!         |
| NUAK1                                                                              | 0,393875079 | 0,185946062 | 0,018 | 0     | 1         | 1,137562697   | 0,879072426     | #DIV/0!         |
| LINC00672                                                                          | 0,498250693 | 0,185886075 | 0,011 | 0     | 1         | 1,137515399   | 0,879108978     | #DIV/0!         |
| VPS13D                                                                             | 0,441492135 | 0,185867846 | 0,014 | 0     | 1         | 1,137501025   | 0,879120087     | #DIV/0!         |
| TAPBP                                                                              | 0,565101863 | 0,185838101 | 0,102 | 0,073 | 1         | 1,137477573   | 0,879138212     | 1,397260274     |
| SLX4                                                                               | 0,441492135 | 0,185812921 | 0,014 | 0     | 1         | 1,13745772    | 0,879153556     | #DIV/0!         |
| RBPMS                                                                              | 1           | 0,185800005 | 0,024 | 0,024 | 1         | 1,137447537   | 0,879161427     | 1               |
| MAX                                                                                | 0,676599912 | 0,185783475 | 0,037 | 0,024 | 1         | 1,137434505   | 0,8791715       | 1,541666667     |
| UBE2T                                                                              | 0,393875079 | 0,185724    | 0,018 | 0     | 1         | 1,137387615   | 0,879207745     | #DIV/0!         |
| PKDCC                                                                              | 0,393875079 | 0,185630005 | 0,018 | 0     | 1         | 1,137313514   | 0,879265029     | #DIV/0!         |
| WDR91                                                                              | 0,468534305 | 0,18555634  | 0,013 | 0     | 1         | 1,137255443   | 0,879309926     | #DIV/0!         |
| SFI1                                                                               | 0,441492135 | 0,185545892 | 0,014 | 0     | 1         | 1,137247207   | 0,879316294     | #DIV/0!         |
| DNASE1                                                                             | 0,531202783 | 0,185434591 | 0,01  | 0     | 1         | 1,137159475   | 0,879384134     | #DIV/0!         |
| ATP2B1-AS1                                                                         | 0,890218621 | 0,185191788 | 0,021 | 0,024 | 1         | 1,136968109   | 0,879532146     | 0,875           |
| C1orf174                                                                           | 0,441492135 | 0,185146674 | 0,014 | 0     | 1         | 1,136932555   | 0,87955965      | #DIV/0!         |
| KMT2C                                                                              | 0,808448437 | 0,185141625 | 0,057 | 0,049 | 1         | 1,136928577   | 0,879562727     | 1,163265306     |
| GGCX                                                                               | 0,543182891 | 0,185091559 | 0,045 | 0,024 | 1         | 1,136889123   | 0,879593252     | 1,875           |
| ATAD1                                                                              | 0,84959238  | 0,184999566 | 0,085 | 0,098 | 1         | 1,136816631   | 0,879649341     | 0,867346939     |
| PIGU                                                                               | 0,498250693 | 0,184809404 | 0,011 | 0     | 1         | 1,136666797   | 0,879765295     | #DIV/0!         |
| ATG16L2                                                                            | 0,498250693 | 0,184773748 | 0,011 | 0     | 1         | 1,136638705   | 0,879787039     | #DIV/0!         |
| IMMT                                                                               | 0,626689809 | 0,184740825 | 0,069 | 0,049 | 1         | 1,136612766   | 0,879807116     | 1,408163265     |
| BCAT1                                                                              | 0,498250693 | 0,184599301 | 0,011 | 0     | 1         | 1,136501274   | 0,879893427     | #DIV/0!         |
| TEDC1                                                                              | 0,441492135 | 0,184309774 | 0,014 | 0     | 1         | 1,136273218   | 0,880070025     | #DIV/0!         |
| ERCC6L2                                                                            | 0,951168171 | 0,184291078 | 0,026 | 0,024 | 1         | 1,136258493   | 0,88008143      | 1,083333333     |

Supplementary Table 3

| Differentially expressed genes_keloid-MD_comparing SC-Keloid vs. (SC-Myel+Nonmyel) |             |             |       |       |           |               |                 |                 |
|------------------------------------------------------------------------------------|-------------|-------------|-------|-------|-----------|---------------|-----------------|-----------------|
| gene                                                                               | p_val       | avg_log2FC  | pct.1 | pct.2 | p_val_adj | Foldchange_UP | Foldchange_DOWN | Ratio_pct1_pct2 |
| CCZ1                                                                               | 0,831366235 | 0,184194048 | 0,019 | 0,024 | 1         | 1,136182076   | 0,880140623     | 0,791666667     |
| ZNF432                                                                             | 0,441492135 | 0,184165648 | 0,014 | 0     | 1         | 1,13615971    | 0,880157949     | #DIV/0!         |
| UNC13B                                                                             | 0,498250693 | 0,184153329 | 0,011 | 0     | 1         | 1,136150008   | 0,880165465     | #DIV/0!         |
| SLC25A23                                                                           | 0,441492135 | 0,184146995 | 0,014 | 0     | 1         | 1,13614502    | 0,880169329     | #DIV/0!         |
| NUDT12                                                                             | 0,468534305 | 0,18412007  | 0,013 | 0     | 1         | 1,136123816   | 0,880185756     | #DIV/0!         |
| HSF2                                                                               | 0,468534305 | 0,184095531 | 0,013 | 0     | 1         | 1,136104492   | 0,880200727     | #DIV/0!         |
| CUL7                                                                               | 0,468534305 | 0,183926212 | 0,013 | 0     | 1         | 1,135971163   | 0,880304037     | #DIV/0!         |
| TIMM9                                                                              | 0,956046136 | 0,18381741  | 0,026 | 0,024 | 1         | 1,135885496   | 0,880370428     | 1,083333333     |
| ZFP90                                                                              | 0,543233108 | 0,18367405  | 0,03  | 0,049 | 1         | 1,135772629   | 0,880457914     | 0,612244898     |
| ELOC                                                                               | 0,933328359 | 0,183616377 | 0,193 | 0,195 | 1         | 1,135727227   | 0,880493112     | 0,98974359      |
| HOXB6                                                                              | 0,441492135 | 0,183540406 | 0,014 | 0     | 1         | 1,135667422   | 0,880539479     | #DIV/0!         |
| TRUB2                                                                              | 0,375671348 | 0,183522039 | 0,091 | 0,049 | 1         | 1,135652964   | 0,880550689     | 1,857142857     |
| WDR36                                                                              | 0,951168171 | 0,183508328 | 0,026 | 0,024 | 1         | 1,13564217    | 0,880559058     | 1,083333333     |
| YIF1A                                                                              | 0,930776589 | 0,183471016 | 0,112 | 0,122 | 1         | 1,135612801   | 0,880581832     | 0,918032787     |
| HNRNPAB                                                                            | 0,804262197 | 0,183463959 | 0,209 | 0,195 | 1         | 1,135607245   | 0,880586139     | 1,071794872     |
| RBM42                                                                              | 0,647487289 | 0,183392817 | 0,038 | 0,024 | 1         | 1,135551248   | 0,880629563     | 1,583333333     |
| MARK2                                                                              | 0,4167109   | 0,183352131 | 0,016 | 0     | 1         | 1,135519224   | 0,880654399     | #DIV/0!         |
| HOXC6                                                                              | 0,441492019 | 0,183335344 | 0,014 | 0     | 1         | 1,135506012   | 0,880664646     | #DIV/0!         |
| ZBTB33                                                                             | 0,441492135 | 0,183186906 | 0,014 | 0     | 1         | 1,135389186   | 0,880755262     | #DIV/0!         |
| TMED8                                                                              | 0,884899866 | 0,183145761 | 0,021 | 0,024 | 1         | 1,135356806   | 0,880780381     | 0,875           |
| NME2                                                                               | 0,393875079 | 0,183105539 | 0,018 | 0     | 1         | 1,135325152   | 0,880804938     | #DIV/0!         |
| ARF1                                                                               | 0,662315576 | 0,182907911 | 0,223 | 0,195 | 1         | 1,13516964    | 0,880925603     | 1,143589744     |
| ZNF496                                                                             | 0,441492135 | 0,182904251 | 0,014 | 0     | 1         | 1,135166761   | 0,880927838     | #DIV/0!         |
| TRPV4                                                                              | 0,441492135 | 0,182886983 | 0,014 | 0     | 1         | 1,135153174   | 0,880938382     | #DIV/0!         |
| CRABP1                                                                             | 0,468534305 | 0,182864606 | 0,013 | 0     | 1         | 1,135135567   | 0,880952046     | #DIV/0!         |
| ROCK2                                                                              | 0,810520881 | 0,182850377 | 0,108 | 0,098 | 1         | 1,135124371   | 0,880960735     | 1,102040816     |
| ABCF3                                                                              | 0,4167109   | 0,182812841 | 0,016 | 0     | 1         | 1,135094838   | 0,880983655     | #DIV/0!         |
| NINL                                                                               | 0,498250693 | 0,182797777 | 0,011 | 0     | 1         | 1,135082986   | 0,880992854     | #DIV/0!         |
| KLF16                                                                              | 0,3347904   | 0,18275221  | 0,022 | 0     | 1         | 1,135047136   | 0,881020681     | #DIV/0!         |
| ABHD4                                                                              | 0,441492135 | 0,182699962 | 0,014 | 0     | 1         | 1,135006029   | 0,881052588     | #DIV/0!         |

Supplementary Table 3

| Differentially expressed genes_keloid-MD_comparing SC-Keloid vs. (SC-Myel+Nonmyel) |             |             |       |       |           |               |                 |                 |
|------------------------------------------------------------------------------------|-------------|-------------|-------|-------|-----------|---------------|-----------------|-----------------|
| gene                                                                               | p_val       | avg_log2FC  | pct.1 | pct.2 | p_val_adj | Foldchange_UP | Foldchange_DOWN | Ratio_pct1_pct2 |
| LRRC75B                                                                            | 0,498250693 | 0,182699722 | 0,011 | 0     | 1         | 1,135005841   | 0,881052734     | #DIV/0!         |
| PYGL                                                                               | 0,956046136 | 0,182626871 | 0,026 | 0,024 | 1         | 1,134948529   | 0,881097226     | 1,083333333     |
| MGMT                                                                               | 0,772961273 | 0,182616732 | 0,085 | 0,073 | 1         | 1,134940553   | 0,881103418     | 1,164383562     |
| NUP62                                                                              | 0,498250693 | 0,182565532 | 0,011 | 0     | 1         | 1,134900276   | 0,881134688     | #DIV/0!         |
| LSM14A                                                                             | 0,31412538  | 0,182541573 | 0,065 | 0,024 | 1         | 1,134881428   | 0,881149321     | 2,708333333     |
| GOLGA5                                                                             | 0,81872643  | 0,182482352 | 0,03  | 0,024 | 1         | 1,134834843   | 0,881185493     | 1,25            |
| RDH11                                                                              | 0,544753088 | 0,18230839  | 0,045 | 0,024 | 1         | 1,134698011   | 0,881291753     | 1,875           |
| SH3RF1                                                                             | 0,676599912 | 0,1821577   | 0,037 | 0,024 | 1         | 1,134579498   | 0,881383809     | 1,541666667     |
| RABGGTA                                                                            | 0,441492135 | 0,182117497 | 0,014 | 0     | 1         | 1,134547882   | 0,881408371     | #DIV/0!         |
| SKAP1                                                                              | 0,468534305 | 0,182078863 | 0,013 | 0     | 1         | 1,1345175     | 0,881431974     | #DIV/0!         |
| CSRNP2                                                                             | 0,498250693 | 0,181982477 | 0,011 | 0     | 1         | 1,134441706   | 0,881490864     | #DIV/0!         |
| SLC29A1                                                                            | 0,468534305 | 0,181955164 | 0,013 | 0     | 1         | 1,134420229   | 0,881507553     | #DIV/0!         |
| GFUS                                                                               | 0,643840181 | 0,181832793 | 0,038 | 0,024 | 1         | 1,13432401    | 0,881582326     | 1,583333333     |
| STX17                                                                              | 0,588013025 | 0,181817187 | 0,032 | 0,049 | 1         | 1,13431174    | 0,881591863     | 0,653061224     |
| CCS                                                                                | 0,634048282 | 0,181769889 | 0,053 | 0,073 | 1         | 1,134274553   | 0,881620766     | 0,726027397     |
| FAR1                                                                               | 0,724011232 | 0,181724621 | 0,037 | 0,049 | 1         | 1,134238963   | 0,88164843      | 0,755102041     |
| MCAT                                                                               | 0,441492135 | 0,18170876  | 0,014 | 0     | 1         | 1,134226493   | 0,881658122     | #DIV/0!         |
| NUP205                                                                             | 0,441492135 | 0,18167342  | 0,014 | 0     | 1         | 1,134198709   | 0,88167972      | #DIV/0!         |
| MLLT10                                                                             | 0,441492135 | 0,18162178  | 0,014 | 0     | 1         | 1,134158112   | 0,881711279     | #DIV/0!         |
| VAT1                                                                               | 0,999099467 | 0,181407448 | 0,048 | 0,049 | 1         | 1,133989631   | 0,881842279     | 0,979591837     |
| ZNF74                                                                              | 0,441492135 | 0,181395704 | 0,014 | 0     | 1         | 1,133980399   | 0,881849458     | #DIV/0!         |
| EZH1                                                                               | 0,864111066 | 0,181344499 | 0,029 | 0,024 | 1         | 1,133940152   | 0,881880757     | 1,208333333     |
| BMT2                                                                               | 0,441492135 | 0,181336004 | 0,014 | 0     | 1         | 1,133933475   | 0,88188595      | #DIV/0!         |
| COPG2                                                                              | 0,441492135 | 0,18128489  | 0,014 | 0     | 1         | 1,133893301   | 0,881917195     | #DIV/0!         |
| SLC16A1                                                                            | 0,441492135 | 0,180949361 | 0,014 | 0     | 1         | 1,133629621   | 0,882122327     | #DIV/0!         |
| NDRG3                                                                              | 0,441492135 | 0,180848825 | 0,014 | 0     | 1         | 1,133550626   | 0,882183801     | #DIV/0!         |
| USP25                                                                              | 0,441492135 | 0,180810611 | 0,014 | 0     | 1         | 1,133520601   | 0,882207169     | #DIV/0!         |
| RABGEF1                                                                            | 0,468534305 | 0,180808085 | 0,013 | 0     | 1         | 1,133518616   | 0,882208713     | #DIV/0!         |
| PDE4D                                                                              | 0,468534305 | 0,180779192 | 0,013 | 0     | 1         | 1,133495915   | 0,882226382     | #DIV/0!         |
| LINC00665                                                                          | 0,498250693 | 0,180554683 | 0,011 | 0     | 1         | 1,133319537   | 0,882363683     | #DIV/0!         |

Supplementary Table 3

| Differentially expressed genes_keloid-MD_comparing SC-Keloid vs. (SC-Myel+Nonmyel) |             |             |       |       |           |               |                 |                 |
|------------------------------------------------------------------------------------|-------------|-------------|-------|-------|-----------|---------------|-----------------|-----------------|
| gene                                                                               | p_val       | avg_log2FC  | pct.1 | pct.2 | p_val_adj | Foldchange_UP | Foldchange_DOWN | Ratio_pct1_pct2 |
| IRAK1BP1                                                                           | 0,4167109   | 0,180538545 | 0,016 | 0     | 1         | 1,13330686    | 0,882373553     | #DIV/0!         |
| ASB1                                                                               | 0,441492135 | 0,180453988 | 0,014 | 0     | 1         | 1,133240438   | 0,882425271     | #DIV/0!         |
| TMEM158                                                                            | 0,498250693 | 0,180397131 | 0,011 | 0     | 1         | 1,133195778   | 0,882460048     | #DIV/0!         |
| SIAH1                                                                              | 0,865315807 | 0,180369231 | 0,041 | 0,049 | 1         | 1,133173863   | 0,882477114     | 0,836734694     |
| COA3                                                                               | 0,816392855 | 0,180339905 | 0,083 | 0,073 | 1         | 1,133150829   | 0,882495052     | 1,136986301     |
| AVEN                                                                               | 0,393875079 | 0,180329708 | 0,018 | 0     | 1         | 1,13314282    | 0,88250129      | #DIV/0!         |
| C11orf80                                                                           | 0,498250693 | 0,180325298 | 0,011 | 0     | 1         | 1,133139356   | 0,882503988     | #DIV/0!         |
| KIF20B                                                                             | 0,468534305 | 0,180277571 | 0,013 | 0     | 1         | 1,13310187    | 0,882533183     | #DIV/0!         |
| EIF3I                                                                              | 0,719227882 | 0,180182915 | 0,12  | 0,146 | 1         | 1,133027529   | 0,882591088     | 0,821917808     |
| PPFIA1                                                                             | 0,345494556 | 0,180086207 | 0,096 | 0,049 | 1         | 1,132951582   | 0,882650253     | 1,959183673     |
| SPIRE1                                                                             | 0,780171394 | 0,179949834 | 0,032 | 0,024 | 1         | 1,132844493   | 0,882733691     | 1,333333333     |
| CCDC88B                                                                            | 0,468534305 | 0,179935547 | 0,013 | 0     | 1         | 1,132833274   | 0,882742432     | #DIV/0!         |
| TRAPPC2                                                                            | 0,745771449 | 0,179788248 | 0,033 | 0,024 | 1         | 1,132717618   | 0,882832565     | 1,375           |
| TMED7                                                                              | 0,789425724 | 0,179755972 | 0,061 | 0,073 | 1         | 1,132692277   | 0,882852316     | 0,835616438     |
| METTL13                                                                            | 0,892879868 | 0,179747465 | 0,021 | 0,024 | 1         | 1,132685599   | 0,882857521     | 0,875           |
| PFKP                                                                               | 0,441492135 | 0,17974665  | 0,014 | 0     | 1         | 1,132684959   | 0,88285802      | #DIV/0!         |
| PDE12                                                                              | 0,498250693 | 0,179716474 | 0,011 | 0     | 1         | 1,132661267   | 0,882876487     | #DIV/0!         |
| TMEM175                                                                            | 0,498250693 | 0,1796485   | 0,011 | 0     | 1         | 1,132607901   | 0,882918086     | #DIV/0!         |
| NADK                                                                               | 0,441492135 | 0,179569077 | 0,014 | 0     | 1         | 1,132545552   | 0,882966693     | #DIV/0!         |
| DZIP1                                                                              | 0,441492135 | 0,179548879 | 0,014 | 0     | 1         | 1,132529696   | 0,882979055     | #DIV/0!         |
| RABIF                                                                              | 0,953606936 | 0,179406424 | 0,026 | 0,024 | 1         | 1,132417873   | 0,883066246     | 1,083333333     |
| SFPQ                                                                               | 0,720018769 | 0,179169108 | 0,183 | 0,22  | 1         | 1,132231611   | 0,883211518     | 0,831818182     |
| PNPO                                                                               | 0,468534305 | 0,179159479 | 0,013 | 0     | 1         | 1,132224054   | 0,883217413     | #DIV/0!         |
| SULF1                                                                              | 0,4167109   | 0,179098309 | 0,016 | 0     | 1         | 1,132176049   | 0,883254862     | #DIV/0!         |
| LAMB2                                                                              | 0,587133413 | 0,179082185 | 0,051 | 0,073 | 1         | 1,132163395   | 0,883264734     | 0,698630137     |
| MRRF                                                                               | 0,4167109   | 0,179080421 | 0,016 | 0     | 1         | 1,132162011   | 0,883265814     | #DIV/0!         |
| KITLG                                                                              | 0,4167109   | 0,178983993 | 0,016 | 0     | 1         | 1,132086341   | 0,883324852     | #DIV/0!         |
| RHNO1                                                                              | 0,4167109   | 0,178681563 | 0,016 | 0     | 1         | 1,131849048   | 0,883510042     | #DIV/0!         |
| PGAP3                                                                              | 0,498250693 | 0,178637745 | 0,011 | 0     | 1         | 1,131814672   | 0,883536876     | #DIV/0!         |
| DHX16                                                                              | 0,997483596 | 0,178586423 | 0,024 | 0,024 | 1         | 1,13177441    | 0,883568308     | 1               |



Supplementary Table 3

| Differentially expressed genes_keloid-MD_comparing SC-Keloid vs. (SC-Myel+Nonmyel) |             |             |       |       |           |               |                 |                 |
|------------------------------------------------------------------------------------|-------------|-------------|-------|-------|-----------|---------------|-----------------|-----------------|
| gene                                                                               | p_val       | avg_log2FC  | pct.1 | pct.2 | p_val_adj | Foldchange_UP | Foldchange_DOWN | Ratio_pct1_pct2 |
| RUSF1                                                                              | 0,441492135 | 0,178571914 | 0,014 | 0     | 1         | 1,131763028   | 0,883577194     | #DIV/0!         |
| BRD9                                                                               | 0,80522554  | 0,178571086 | 0,057 | 0,049 | 1         | 1,131762379   | 0,8835777       | 1,163265306     |
| ZNF439                                                                             | 0,468534305 | 0,178533045 | 0,013 | 0     | 1         | 1,131732537   | 0,883600999     | #DIV/0!         |
| MSL2                                                                               | 0,441492135 | 0,178524457 | 0,014 | 0     | 1         | 1,131725799   | 0,883606259     | #DIV/0!         |
| CDC23                                                                              | 0,948097145 | 0,178501142 | 0,022 | 0,024 | 1         | 1,13170751    | 0,883620539     | 0,916666667     |
| SGO2                                                                               | 0,498250693 | 0,17841154  | 0,011 | 0     | 1         | 1,131637225   | 0,88367542      | #DIV/0!         |
| TRIM41                                                                             | 0,468534305 | 0,178394982 | 0,013 | 0     | 1         | 1,131624237   | 0,883685562     | #DIV/0!         |
| NRP1                                                                               | 0,726744375 | 0,178346762 | 0,057 | 0,073 | 1         | 1,131586415   | 0,883715099     | 0,780821918     |
| TBK1                                                                               | 0,588013025 | 0,178129072 | 0,032 | 0,049 | 1         | 1,131415681   | 0,883848454     | 0,653061224     |
| PET100                                                                             | 0,915835393 | 0,178088784 | 0,203 | 0,22  | 1         | 1,131384086   | 0,883873136     | 0,922727273     |
| PTCD2                                                                              | 0,498250693 | 0,178071811 | 0,011 | 0     | 1         | 1,131370776   | 0,883883534     | #DIV/0!         |
| SELENOH                                                                            | 0,992484915 | 0,178028132 | 0,207 | 0,22  | 1         | 1,131336523   | 0,883910295     | 0,940909091     |
| KDM4A                                                                              | 0,441492135 | 0,177995857 | 0,014 | 0     | 1         | 1,131311214   | 0,883930069     | #DIV/0!         |
| B3GALT2                                                                            | 0,905181209 | 0,177913023 | 0,027 | 0,024 | 1         | 1,13124626    | 0,883980823     | 1,125           |
| RARRES1                                                                            | 0,498250693 | 0,177887693 | 0,011 | 0     | 1         | 1,131226399   | 0,883996343     | #DIV/0!         |
| STRADA                                                                             | 0,441492135 | 0,177863043 | 0,014 | 0     | 1         | 1,131207071   | 0,884011448     | #DIV/0!         |
| ZNF821                                                                             | 0,4167109   | 0,177854242 | 0,016 | 0     | 1         | 1,13120017    | 0,88401684      | #DIV/0!         |
| RBM48                                                                              | 0,468534305 | 0,177812061 | 0,013 | 0     | 1         | 1,131167097   | 0,884042687     | #DIV/0!         |
| BBC3                                                                               | 0,468534305 | 0,177801946 | 0,013 | 0     | 1         | 1,131159166   | 0,884048885     | #DIV/0!         |
| NECAB1                                                                             | 0,468534305 | 0,177723589 | 0,013 | 0     | 1         | 1,131097731   | 0,884096902     | #DIV/0!         |
| MTG1                                                                               | 0,441492135 | 0,177660232 | 0,014 | 0     | 1         | 1,13104806    | 0,884135728     | #DIV/0!         |
| EPHB3                                                                              | 0,468534305 | 0,177575318 | 0,013 | 0     | 1         | 1,13098149    | 0,884187769     | #DIV/0!         |
| XXYL1                                                                              | 0,372736722 | 0,177458459 | 0,019 | 0     | 1         | 1,130889884   | 0,884259391     | #DIV/0!         |
| CISD2                                                                              | 0,611145784 | 0,17744685  | 0,099 | 0,073 | 1         | 1,130880784   | 0,884266507     | 1,356164384     |
| GPANK1                                                                             | 0,4167109   | 0,177442536 | 0,016 | 0     | 1         | 1,130877402   | 0,884269151     | #DIV/0!         |
| SART3                                                                              | 0,905181209 | 0,177424848 | 0,027 | 0,024 | 1         | 1,130863538   | 0,884279992     | 1,125           |
| ZNF528                                                                             | 0,4167109   | 0,177304875 | 0,016 | 0     | 1         | 1,1307695     | 0,884353531     | #DIV/0!         |
| CRLF3                                                                              | 0,531202783 | 0,177290274 | 0,01  | 0     | 1         | 1,130758056   | 0,884362481     | #DIV/0!         |
| CYP4V2                                                                             | 0,441492135 | 0,177222106 | 0,014 | 0     | 1         | 1,130704628   | 0,884404269     | #DIV/0!         |
| PPCDC                                                                              | 0,441492135 | 0,177188783 | 0,014 | 0     | 1         | 1,130678512   | 0,884424697     | #DIV/0!         |

Supplementary Table 3

| Differentially expressed genes_keloid-MD_comparing SC-Keloid vs. (SC-Myel+Nonmyel) |             |             |       |       |           |               |                 |                 |
|------------------------------------------------------------------------------------|-------------|-------------|-------|-------|-----------|---------------|-----------------|-----------------|
| gene                                                                               | p_val       | avg_log2FC  | pct.1 | pct.2 | p_val_adj | Foldchange_UP | Foldchange_DOWN | Ratio_pct1_pct2 |
| PKNOX2                                                                             | 0,498250693 | 0,177181726 | 0,011 | 0     | 1         | 1,130672981   | 0,884429023     | #DIV/0!         |
| RSRP1                                                                              | 0,822450119 | 0,177162821 | 0,156 | 0,146 | 1         | 1,130658165   | 0,884440613     | 1,068493151     |
| SSNA1                                                                              | 0,735216852 | 0,176945491 | 0,123 | 0,146 | 1         | 1,130487854   | 0,884573856     | 0,842465753     |
| RRP12                                                                              | 0,468534305 | 0,176828613 | 0,013 | 0     | 1         | 1,130396272   | 0,884645522     | #DIV/0!         |
| CARM1                                                                              | 0,866392432 | 0,176784141 | 0,029 | 0,024 | 1         | 1,130361428   | 0,884672792     | 1,208333333     |
| GDE1                                                                               | 0,593105318 | 0,17675774  | 0,051 | 0,073 | 1         | 1,130340743   | 0,884688981     | 0,698630137     |
| RND2                                                                               | 0,468534305 | 0,176585246 | 0,013 | 0     | 1         | 1,130205603   | 0,884794764     | #DIV/0!         |
| MED6                                                                               | 0,905181209 | 0,176489933 | 0,027 | 0,024 | 1         | 1,130130937   | 0,884853221     | 1,125           |
| SRSF2                                                                              | 0,650285813 | 0,176462086 | 0,174 | 0,146 | 1         | 1,130109123   | 0,884870301     | 1,191780822     |
| COPA                                                                               | 0,740030428 | 0,176410008 | 0,088 | 0,073 | 1         | 1,130068329   | 0,884902243     | 1,205479452     |
| RNF152                                                                             | 0,441492135 | 0,176276379 | 0,014 | 0     | 1         | 1,129963663   | 0,884984211     | #DIV/0!         |
| SREBF1                                                                             | 0,67849582  | 0,176260188 | 0,037 | 0,024 | 1         | 1,129950981   | 0,884994143     | 1,541666667     |
| SSX2IP                                                                             | 0,468534305 | 0,176220369 | 0,013 | 0     | 1         | 1,129919795   | 0,885018569     | #DIV/0!         |
| C11orf54                                                                           | 0,546325504 | 0,176141142 | 0,045 | 0,024 | 1         | 1,129857746   | 0,885067172     | 1,875           |
| RYBP                                                                               | 0,833313679 | 0,176092288 | 0,062 | 0,073 | 1         | 1,129819486   | 0,885097144     | 0,849315068     |
| FPGS                                                                               | 0,4167109   | 0,176013465 | 0,016 | 0     | 1         | 1,129757759   | 0,885145503     | #DIV/0!         |
| ZNRF1                                                                              | 0,4167109   | 0,176008257 | 0,016 | 0     | 1         | 1,129753681   | 0,885148698     | #DIV/0!         |
| SENP1                                                                              | 0,441492135 | 0,176007407 | 0,014 | 0     | 1         | 1,129753015   | 0,88514922      | #DIV/0!         |
| IMPDH2                                                                             | 0,544753088 | 0,175836611 | 0,045 | 0,024 | 1         | 1,129619275   | 0,885254016     | 1,875           |
| OXR1                                                                               | 0,54641521  | 0,175758047 | 0,049 | 0,073 | 1         | 1,129557761   | 0,885302226     | 0,671232877     |
| MTMR14                                                                             | 0,393875079 | 0,175619755 | 0,018 | 0     | 1         | 1,129449491   | 0,885387092     | #DIV/0!         |
| TDP1                                                                               | 0,468534305 | 0,175613133 | 0,013 | 0     | 1         | 1,129444307   | 0,885391155     | #DIV/0!         |
| ZBTB11                                                                             | 0,81872643  | 0,175606869 | 0,03  | 0,024 | 1         | 1,129439403   | 0,885395        | 1,25            |
| ERV3-1                                                                             | 0,441492135 | 0,175419025 | 0,014 | 0     | 1         | 1,129292356   | 0,885510289     | #DIV/0!         |
| IP6K2                                                                              | 0,418466935 | 0,175415968 | 0,054 | 0,024 | 1         | 1,129289963   | 0,885512165     | 2,25            |
| CARD10                                                                             | 0,353096361 | 0,175222784 | 0,021 | 0     | 1         | 1,129138755   | 0,885630748     | #DIV/0!         |
| ADGRA3                                                                             | 0,498250693 | 0,175142584 | 0,011 | 0     | 1         | 1,129075988   | 0,885679982     | #DIV/0!         |
| CST6                                                                               | 0,4167109   | 0,175130197 | 0,016 | 0     | 1         | 1,129066294   | 0,885687586     | #DIV/0!         |
| GIGYF1                                                                             | 0,441492135 | 0,174990182 | 0,014 | 0     | 1         | 1,128956722   | 0,885773547     | #DIV/0!         |
| LKAAEAR1                                                                           | 0,372736722 | 0,174980632 | 0,019 | 0     | 1         | 1,128949249   | 0,88577941      | #DIV/0!         |

Supplementary Table 3

| Differentially expressed genes_keloid-MD_comparing SC-Keloid vs. (SC-Myel+Nonmyel) |             |             |       |       |           |               |                 |                 |
|------------------------------------------------------------------------------------|-------------|-------------|-------|-------|-----------|---------------|-----------------|-----------------|
| gene                                                                               | p_val       | avg_log2FC  | pct.1 | pct.2 | p_val_adj | Foldchange_UP | Foldchange_DOWN | Ratio_pct1_pct2 |
| SUPT6H                                                                             | 0,689913676 | 0,174718297 | 0,037 | 0,024 | 1         | 1,128743983   | 0,885940492     | 1,541666667     |
| TBRG4                                                                              | 0,468534305 | 0,174690664 | 0,013 | 0     | 1         | 1,128722363   | 0,885957462     | #DIV/0!         |
| VWA8                                                                               | 0,468534305 | 0,174664979 | 0,013 | 0     | 1         | 1,128702269   | 0,885973235     | #DIV/0!         |
| DECR2                                                                              | 0,468534305 | 0,174607671 | 0,013 | 0     | 1         | 1,128657434   | 0,886008429     | #DIV/0!         |
| ZBTB1                                                                              | 0,328636331 | 0,174506572 | 0,064 | 0,024 | 1         | 1,128578344   | 0,88607052      | 2,666666667     |
| NOTCH2NLA                                                                          | 0,498250693 | 0,174496893 | 0,011 | 0     | 1         | 1,128570773   | 0,886076464     | #DIV/0!         |
| WDR7                                                                               | 0,4167109   | 0,174482205 | 0,016 | 0     | 1         | 1,128559283   | 0,886085485     | #DIV/0!         |
| RNFT1                                                                              | 0,4167109   | 0,174454642 | 0,016 | 0     | 1         | 1,128537722   | 0,886102414     | #DIV/0!         |
| DAPL1                                                                              | 0,498250693 | 0,1744015   | 0,011 | 0     | 1         | 1,128496153   | 0,886135054     | #DIV/0!         |
| NCKIPSD                                                                            | 0,468534305 | 0,174352086 | 0,013 | 0     | 1         | 1,128457501   | 0,886165406     | #DIV/0!         |
| FAAP100                                                                            | 0,441492135 | 0,174343702 | 0,014 | 0     | 1         | 1,128450943   | 0,886170556     | #DIV/0!         |
| DCTN4                                                                              | 0,953606936 | 0,174298565 | 0,026 | 0,024 | 1         | 1,128415638   | 0,886198282     | 1,083333333     |
| ZRANB1                                                                             | 0,892879868 | 0,174277592 | 0,021 | 0,024 | 1         | 1,128399235   | 0,886211165     | 0,875           |
| ITGB3BP                                                                            | 0,816528088 | 0,174229984 | 0,03  | 0,024 | 1         | 1,128361999   | 0,88624041      | 1,25            |
| TBC1D19                                                                            | 0,468534305 | 0,174172402 | 0,013 | 0     | 1         | 1,128316963   | 0,886275783     | #DIV/0!         |
| STN1                                                                               | 0,498250693 | 0,173971281 | 0,011 | 0     | 1         | 1,12815968    | 0,886399344     | #DIV/0!         |
| SKA2                                                                               | 0,574204735 | 0,173970581 | 0,108 | 0,146 | 1         | 1,128159132   | 0,886399774     | 0,739726027     |
| SUCO                                                                               | 0,905181209 | 0,173962921 | 0,027 | 0,024 | 1         | 1,128153142   | 0,886404481     | 1,125           |
| AMOTL1                                                                             | 0,937978649 | 0,173796666 | 0,075 | 0,073 | 1         | 1,128023142   | 0,886506635     | 1,02739726      |
| PHLPP2                                                                             | 0,498250693 | 0,17378462  | 0,011 | 0     | 1         | 1,128013723   | 0,886514037     | #DIV/0!         |
| IPO8                                                                               | 0,468534305 | 0,173761831 | 0,013 | 0     | 1         | 1,127995905   | 0,886528041     | #DIV/0!         |
| UTP18                                                                              | 0,468534305 | 0,173741988 | 0,013 | 0     | 1         | 1,127980391   | 0,886540234     | #DIV/0!         |
| POFUT1                                                                             | 0,441492135 | 0,173580598 | 0,014 | 0     | 1         | 1,127854214   | 0,886639414     | #DIV/0!         |
| DCAF8                                                                              | 0,997483596 | 0,17355845  | 0,024 | 0,024 | 1         | 1,1278369     | 0,886653026     | 1               |
| JRKL                                                                               | 0,441492135 | 0,173531824 | 0,014 | 0     | 1         | 1,127816085   | 0,88666939      | #DIV/0!         |
| RPRD2                                                                              | 0,4167109   | 0,173366698 | 0,016 | 0     | 1         | 1,127687006   | 0,886770881     | #DIV/0!         |
| CEP43                                                                              | 0,468534305 | 0,173296783 | 0,013 | 0     | 1         | 1,127632358   | 0,886813856     | #DIV/0!         |
| EPSTI1                                                                             | 0,468534305 | 0,173277552 | 0,013 | 0     | 1         | 1,127617327   | 0,886825677     | #DIV/0!         |
| TVP23B                                                                             | 0,441492135 | 0,173169674 | 0,014 | 0     | 1         | 1,127533012   | 0,886891993     | #DIV/0!         |
| HYPK                                                                               | 0,498250693 | 0,17313279  | 0,011 | 0     | 1         | 1,127504187   | 0,886914667     | #DIV/0!         |

Supplementary Table 3

| Differentially expressed genes_keloid-MD_comparing SC-Keloid vs. (SC-Myel+Nonmyel) |             |             |       |       |           |               |                 |                 |
|------------------------------------------------------------------------------------|-------------|-------------|-------|-------|-----------|---------------|-----------------|-----------------|
| gene                                                                               | p_val       | avg_log2FC  | pct.1 | pct.2 | p_val_adj | Foldchange_UP | Foldchange_DOWN | Ratio_pct1_pct2 |
| LTBP2                                                                              | 0,707280187 | 0,173052301 | 0,035 | 0,024 | 1         | 1,127441284   | 0,88696415      | 1,458333333     |
| LIG4                                                                               | 0,393875079 | 0,172972149 | 0,018 | 0     | 1         | 1,127378648   | 0,887013428     | #DIV/0!         |
| USP13                                                                              | 0,468534305 | 0,172956152 | 0,013 | 0     | 1         | 1,127366147   | 0,887023264     | #DIV/0!         |
| WDR46                                                                              | 0,782292802 | 0,172896044 | 0,032 | 0,024 | 1         | 1,127319178   | 0,887060222     | 1,333333333     |
| G6PD                                                                               | 0,393875079 | 0,172870971 | 0,018 | 0     | 1         | 1,127299586   | 0,887075638     | #DIV/0!         |
| ERO1A                                                                              | 0,393875079 | 0,172817601 | 0,018 | 0     | 1         | 1,127257885   | 0,887108455     | #DIV/0!         |
| MKNK1                                                                              | 0,4167109   | 0,172814019 | 0,016 | 0     | 1         | 1,127255086   | 0,887110657     | #DIV/0!         |
| PISD                                                                               | 0,468534305 | 0,172743485 | 0,013 | 0     | 1         | 1,127199975   | 0,887154029     | #DIV/0!         |
| PRMT3                                                                              | 0,441492135 | 0,172694665 | 0,014 | 0     | 1         | 1,127161832   | 0,887184051     | #DIV/0!         |
| APMAP                                                                              | 0,896725017 | 0,172640392 | 0,053 | 0,049 | 1         | 1,12711943    | 0,887217427     | 1,081632653     |
| GNAQ                                                                               | 0,623359383 | 0,172606953 | 0,04  | 0,024 | 1         | 1,127093306   | 0,887237991     | 1,666666667     |
| DCAF17                                                                             | 0,498250693 | 0,172586722 | 0,011 | 0     | 1         | 1,127077501   | 0,887250433     | #DIV/0!         |
| CD302                                                                              | 0,4167109   | 0,172569278 | 0,016 | 0     | 1         | 1,127063873   | 0,887261161     | #DIV/0!         |
| CAPRIN2                                                                            | 0,948097145 | 0,172545043 | 0,022 | 0,024 | 1         | 1,12704494    | 0,887276066     | 0,916666667     |
| WVOX                                                                               | 0,4167109   | 0,172474098 | 0,016 | 0     | 1         | 1,126989519   | 0,887319699     | #DIV/0!         |
| PEX10                                                                              | 0,441492135 | 0,172334887 | 0,014 | 0     | 1         | 1,126880777   | 0,887405323     | #DIV/0!         |
| KCTD7                                                                              | 0,498250693 | 0,172193368 | 0,011 | 0     | 1         | 1,126770242   | 0,887492377     | #DIV/0!         |
| RBM14                                                                              | 0,948729862 | 0,17209629  | 0,026 | 0,024 | 1         | 1,126694425   | 0,887552097     | 1,083333333     |
| GFM2                                                                               | 0,441492135 | 0,172002362 | 0,014 | 0     | 1         | 1,126621073   | 0,887609884     | #DIV/0!         |
| FADS2                                                                              | 0,468534305 | 0,171925714 | 0,013 | 0     | 1         | 1,126561219   | 0,887657043     | #DIV/0!         |
| MICAL3                                                                             | 0,855093738 | 0,171900294 | 0,064 | 0,073 | 1         | 1,12654137    | 0,887672683     | 0,876712329     |
| CEP63                                                                              | 0,986492653 | 0,171769702 | 0,048 | 0,049 | 1         | 1,1264394     | 0,887753038     | 0,979591837     |
| MBOAT7                                                                             | 0,468534305 | 0,171701952 | 0,013 | 0     | 1         | 1,126386503   | 0,887794729     | #DIV/0!         |
| ANKRD49                                                                            | 0,763143412 | 0,171665592 | 0,018 | 0,024 | 1         | 1,126358115   | 0,887817104     | 0,75            |
| GFOD2                                                                              | 0,468534305 | 0,171604574 | 0,013 | 0     | 1         | 1,126310477   | 0,887854655     | #DIV/0!         |
| FOXJ2                                                                              | 0,498250693 | 0,171572162 | 0,011 | 0     | 1         | 1,126285174   | 0,887874602     | #DIV/0!         |
| SASS6                                                                              | 0,441492135 | 0,171552664 | 0,014 | 0     | 1         | 1,126269952   | 0,887886601     | #DIV/0!         |
| PER2                                                                               | 0,531202783 | 0,171548738 | 0,01  | 0     | 1         | 1,126266887   | 0,887889018     | #DIV/0!         |
| IGF1                                                                               | 0,498250693 | 0,171482349 | 0,011 | 0     | 1         | 1,12621506    | 0,887929877     | #DIV/0!         |
| CCNYL1                                                                             | 0,468534305 | 0,171452643 | 0,013 | 0     | 1         | 1,126191871   | 0,88794816      | #DIV/0!         |

Supplementary Table 3

| Differentially expressed genes_keloid-MD_comparing SC-Keloid vs. (SC-Myel+Nonmyel) |             |             |       |       |           |               |                 |                 |
|------------------------------------------------------------------------------------|-------------|-------------|-------|-------|-----------|---------------|-----------------|-----------------|
| gene                                                                               | p_val       | avg_log2FC  | pct.1 | pct.2 | p_val_adj | Foldchange_UP | Foldchange_DOWN | Ratio_pct1_pct2 |
| SNX29                                                                              | 0,441492135 | 0,171390158 | 0,014 | 0     | 1         | 1,126143096   | 0,887986619     | #DIV/0!         |
| SNRK                                                                               | 0,441492019 | 0,171377679 | 0,014 | 0     | 1         | 1,126133355   | 0,8879943       | #DIV/0!         |
| SLC25A12                                                                           | 0,468534305 | 0,171277746 | 0,013 | 0     | 1         | 1,126055352   | 0,888055812     | #DIV/0!         |
| PANK3                                                                              | 0,327147246 | 0,171140332 | 0,064 | 0,024 | 1         | 1,125948103   | 0,888140402     | 2,666666667     |
| MAP3K12                                                                            | 0,865239683 | 0,17106886  | 0,054 | 0,049 | 1         | 1,125892324   | 0,888184402     | 1,102040816     |
| TRIM66                                                                             | 0,498250693 | 0,17070586  | 0,011 | 0     | 1         | 1,125609071   | 0,888407908     | #DIV/0!         |
| NSA2                                                                               | 0,779763445 | 0,170585655 | 0,231 | 0,22  | 1         | 1,125515289   | 0,888481933     | 1,05            |
| SIGMAR1                                                                            | 0,441492135 | 0,170484987 | 0,014 | 0     | 1         | 1,125436756   | 0,888543932     | #DIV/0!         |
| PANX1                                                                              | 0,468534305 | 0,170473137 | 0,013 | 0     | 1         | 1,125427512   | 0,88855123      | #DIV/0!         |
| PRKCI                                                                              | 0,907540903 | 0,170433035 | 0,027 | 0,024 | 1         | 1,125396229   | 0,888575929     | 1,125           |
| PPP5C                                                                              | 0,468534305 | 0,1703421   | 0,013 | 0     | 1         | 1,125325296   | 0,888631939     | #DIV/0!         |
| RBM10                                                                              | 0,531202783 | 0,170326343 | 0,01  | 0     | 1         | 1,125313006   | 0,888641644     | #DIV/0!         |
| FRY                                                                                | 0,531202783 | 0,170296813 | 0,01  | 0     | 1         | 1,125289972   | 0,888659834     | #DIV/0!         |
| MTRES1                                                                             | 0,820926176 | 0,170208178 | 0,03  | 0,024 | 1         | 1,12522084    | 0,888714432     | 1,25            |
| CLSPN                                                                              | 0,4167109   | 0,170196543 | 0,016 | 0     | 1         | 1,125211765   | 0,888721599     | #DIV/0!         |
| HNRNPA3                                                                            | 0,476702521 | 0,170178093 | 0,359 | 0,317 | 1         | 1,125197376   | 0,888732965     | 1,132492114     |
| FAM120C                                                                            | 0,544157477 | 0,17014132  | 0,013 | 0,024 | 1         | 1,125168696   | 0,888755618     | 0,541666667     |
| LPCAT4                                                                             | 0,498250693 | 0,170032371 | 0,011 | 0     | 1         | 1,125083729   | 0,888822738     | #DIV/0!         |
| ZNF559                                                                             | 0,498250693 | 0,169849435 | 0,011 | 0     | 1         | 1,124941076   | 0,888935449     | #DIV/0!         |
| UBA5                                                                               | 0,519058384 | 0,169773207 | 0,046 | 0,024 | 1         | 1,124881638   | 0,888982419     | 1,916666667     |
| COG7                                                                               | 0,393875079 | 0,169761571 | 0,018 | 0     | 1         | 1,124872566   | 0,888989589     | #DIV/0!         |
| SDHAF1                                                                             | 0,468534305 | 0,169742249 | 0,013 | 0     | 1         | 1,124857501   | 0,889001495     | #DIV/0!         |
| HLTF                                                                               | 0,997298407 | 0,169671078 | 0,048 | 0,049 | 1         | 1,12480201    | 0,889045353     | 0,979591837     |
| KANSL3                                                                             | 0,498250693 | 0,169561828 | 0,011 | 0     | 1         | 1,124716836   | 0,88911268      | #DIV/0!         |
| TGFB3                                                                              | 0,498250693 | 0,169330356 | 0,011 | 0     | 1         | 1,124536397   | 0,889255344     | #DIV/0!         |
| UCK1                                                                               | 0,441492135 | 0,169311246 | 0,014 | 0     | 1         | 1,124521501   | 0,889267123     | #DIV/0!         |
| PIGO                                                                               | 0,468534305 | 0,169158895 | 0,013 | 0     | 1         | 1,124402756   | 0,889361036     | #DIV/0!         |
| TAFAZZIN                                                                           | 0,498250693 | 0,169147837 | 0,011 | 0     | 1         | 1,124394138   | 0,889367853     | #DIV/0!         |
| NFE2L3                                                                             | 0,861830832 | 0,169128326 | 0,029 | 0,024 | 1         | 1,124378931   | 0,889379881     | 1,208333333     |
| LAP3                                                                               | 0,703792334 | 0,169062888 | 0,064 | 0,049 | 1         | 1,124327933   | 0,889420223     | 1,306122449     |

Supplementary Table 3

| Differentially expressed genes_keloid-MD_comparing SC-Keloid vs. (SC-Myel+Nonmyel) |             |             |       |       |           |               |                 |                 |
|------------------------------------------------------------------------------------|-------------|-------------|-------|-------|-----------|---------------|-----------------|-----------------|
| gene                                                                               | p_val       | avg_log2FC  | pct.1 | pct.2 | p_val_adj | Foldchange_UP | Foldchange_DOWN | Ratio_pct1_pct2 |
| WBP2                                                                               | 0,674706052 | 0,169045045 | 0,037 | 0,024 | 1         | 1,124314027   | 0,889431223     | 1,541666667     |
| WASHC2C                                                                            | 0,468534305 | 0,169042537 | 0,013 | 0     | 1         | 1,124312073   | 0,889432769     | #DIV/0!         |
| MAP3K6                                                                             | 0,498250693 | 0,169019332 | 0,011 | 0     | 1         | 1,124293989   | 0,889447075     | #DIV/0!         |
| IFITM10                                                                            | 0,468534305 | 0,168939423 | 0,013 | 0     | 1         | 1,124231718   | 0,889496341     | #DIV/0!         |
| RPLP2                                                                              | 0,442646455 | 0,168927573 | 0,732 | 0,78  | 1         | 1,124222483   | 0,889503648     | 0,938461538     |
| CCAR2                                                                              | 0,498250693 | 0,168874758 | 0,011 | 0     | 1         | 1,124181328   | 0,889536212     | #DIV/0!         |
| ACOT8                                                                              | 0,498250693 | 0,168840726 | 0,011 | 0     | 1         | 1,12415481    | 0,889557196     | #DIV/0!         |
| CSKMT                                                                              | 0,441492135 | 0,168788068 | 0,014 | 0     | 1         | 1,124113779   | 0,889589665     | #DIV/0!         |
| TRMT112                                                                            | 0,844123989 | 0,168736022 | 0,179 | 0,171 | 1         | 1,124073227   | 0,889621758     | 1,046783626     |
| SLC35C1                                                                            | 0,441492135 | 0,168726791 | 0,014 | 0     | 1         | 1,124066035   | 0,88962745      | #DIV/0!         |
| PPP1R35                                                                            | 0,892879868 | 0,168660313 | 0,021 | 0,024 | 1         | 1,12401424    | 0,889668444     | 0,875           |
| ATP13A1                                                                            | 0,498250693 | 0,168480851 | 0,011 | 0     | 1         | 1,123874428   | 0,88977912      | #DIV/0!         |
| TMEM251                                                                            | 0,948729855 | 0,168445672 | 0,026 | 0,024 | 1         | 1,123847024   | 0,889800817     | 1,083333333     |
| HPCAL1                                                                             | 0,952959176 | 0,168410969 | 0,069 | 0,073 | 1         | 1,123819991   | 0,889822221     | 0,945205479     |
| CDK11B                                                                             | 0,4167109   | 0,168337642 | 0,016 | 0     | 1         | 1,123762873   | 0,889867448     | #DIV/0!         |
| MANF                                                                               | 0,870025765 | 0,168294162 | 0,201 | 0,195 | 1         | 1,123729006   | 0,889894267     | 1,030769231     |
| LRWD1                                                                              | 0,498250693 | 0,168244044 | 0,011 | 0     | 1         | 1,123689969   | 0,889925182     | #DIV/0!         |
| MUL1                                                                               | 0,441492135 | 0,168240614 | 0,014 | 0     | 1         | 1,123687297   | 0,889927298     | #DIV/0!         |
| PPP4R3A                                                                            | 0,968060041 | 0,168179398 | 0,049 | 0,049 | 1         | 1,123639618   | 0,88996506      | 1               |
| SLC37A4                                                                            | 0,468534305 | 0,168162248 | 0,013 | 0     | 1         | 1,123626261   | 0,889975639     | #DIV/0!         |
| CDK5R1                                                                             | 0,498250693 | 0,168078049 | 0,011 | 0     | 1         | 1,123560685   | 0,890027582     | #DIV/0!         |
| GEMIN7                                                                             | 0,468534305 | 0,168056588 | 0,013 | 0     | 1         | 1,123543972   | 0,890040822     | #DIV/0!         |
| SNX7                                                                               | 0,85509373  | 0,168019573 | 0,064 | 0,073 | 1         | 1,123515146   | 0,890063657     | 0,876712329     |
| MAP3K3                                                                             | 0,441492135 | 0,167998599 | 0,014 | 0     | 1         | 1,123498812   | 0,890076598     | #DIV/0!         |
| CEP135                                                                             | 0,498250693 | 0,167987532 | 0,011 | 0     | 1         | 1,123490194   | 0,890083425     | #DIV/0!         |
| CHAMP1                                                                             | 0,531202783 | 0,167981049 | 0,01  | 0     | 1         | 1,123485145   | 0,890087425     | #DIV/0!         |
| TBP                                                                                | 0,498250693 | 0,167965384 | 0,011 | 0     | 1         | 1,123472946   | 0,89009709      | #DIV/0!         |
| MAPKAPK3                                                                           | 0,4167109   | 0,167947975 | 0,016 | 0     | 1         | 1,12345939    | 0,890107831     | #DIV/0!         |
| PIGX                                                                               | 0,786540441 | 0,167799204 | 0,032 | 0,024 | 1         | 1,123343544   | 0,890199624     | 1,333333333     |
| MYL6B                                                                              | 0,892003002 | 0,167784553 | 0,088 | 0,098 | 1         | 1,123332136   | 0,890208664     | 0,897959184     |

Supplementary Table 3

| Differentially expressed genes_keloid-MD_comparing SC-Keloid vs. (SC-Myel+Nonmyel) |             |             |       |       |           |               |                 |                 |
|------------------------------------------------------------------------------------|-------------|-------------|-------|-------|-----------|---------------|-----------------|-----------------|
| gene                                                                               | p_val       | avg_log2FC  | pct.1 | pct.2 | p_val_adj | Foldchange_UP | Foldchange_DOWN | Ratio_pct1_pct2 |
| MIR4458HG                                                                          | 0,498250693 | 0,167713294 | 0,011 | 0     | 1         | 1,123276653   | 0,890252635     | #DIV/0!         |
| KCTD11                                                                             | 0,468534305 | 0,167577506 | 0,013 | 0     | 1         | 1,123170934   | 0,89033643      | #DIV/0!         |
| COG1                                                                               | 0,498250693 | 0,167520828 | 0,011 | 0     | 1         | 1,123126809   | 0,890371409     | #DIV/0!         |
| GCLC                                                                               | 0,498250693 | 0,167309161 | 0,011 | 0     | 1         | 1,12296204    | 0,890502051     | #DIV/0!         |
| CHFR                                                                               | 0,531202783 | 0,167276817 | 0,01  | 0     | 1         | 1,122936864   | 0,890522016     | #DIV/0!         |
| VPS37C                                                                             | 0,498250693 | 0,167244907 | 0,011 | 0     | 1         | 1,122912027   | 0,890541713     | #DIV/0!         |
| TCTA                                                                               | 0,468534305 | 0,167114852 | 0,013 | 0     | 1         | 1,122810805   | 0,890621996     | #DIV/0!         |
| PAN3                                                                               | 0,478453273 | 0,167110959 | 0,049 | 0,024 | 1         | 1,122807775   | 0,890624399     | 2,041666667     |
| TTC4                                                                               | 0,468534305 | 0,167024265 | 0,013 | 0     | 1         | 1,122740306   | 0,89067792      | #DIV/0!         |
| ITGAV                                                                              | 0,993415623 | 0,167016506 | 0,142 | 0,146 | 1         | 1,122734267   | 0,89068271      | 0,97260274      |
| ZBTB46                                                                             | 0,531202783 | 0,166995161 | 0,01  | 0     | 1         | 1,122717657   | 0,890695888     | #DIV/0!         |
| IFT46                                                                              | 0,441492135 | 0,166927049 | 0,014 | 0     | 1         | 1,122664653   | 0,89073794      | #DIV/0!         |
| E2F7                                                                               | 0,393875079 | 0,166879101 | 0,018 | 0     | 1         | 1,122627341   | 0,890767544     | #DIV/0!         |
| PPP2R5A                                                                            | 0,468534305 | 0,166809858 | 0,013 | 0     | 1         | 1,122573461   | 0,890810299     | #DIV/0!         |
| FITM2                                                                              | 0,498250693 | 0,16678881  | 0,011 | 0     | 1         | 1,122557083   | 0,890823295     | #DIV/0!         |
| FBXO9                                                                              | 0,584157914 | 0,166788274 | 0,051 | 0,073 | 1         | 1,122556667   | 0,890823626     | 0,698630137     |
| HECTD2                                                                             | 0,441492135 | 0,166623847 | 0,014 | 0     | 1         | 1,122428734   | 0,89092516      | #DIV/0!         |
| FAM199X                                                                            | 0,816093994 | 0,166584167 | 0,04  | 0,049 | 1         | 1,122397863   | 0,890949665     | 0,816326531     |
| OS9                                                                                | 0,976698036 | 0,166491675 | 0,116 | 0,122 | 1         | 1,122325907   | 0,891006786     | 0,950819672     |
| ZMYM6                                                                              | 0,468534305 | 0,166471237 | 0,013 | 0     | 1         | 1,122310008   | 0,891019409     | #DIV/0!         |
| EHBP1L1                                                                            | 0,892879868 | 0,166356377 | 0,021 | 0,024 | 1         | 1,122220659   | 0,89109035      | 0,875           |
| USP37                                                                              | 0,942915322 | 0,166319796 | 0,022 | 0,024 | 1         | 1,122192204   | 0,891112945     | 0,916666667     |
| MPG                                                                                | 0,783198472 | 0,166282561 | 0,159 | 0,146 | 1         | 1,122163241   | 0,891135944     | 1,089041096     |
| HIF1AN                                                                             | 0,76591327  | 0,166255801 | 0,018 | 0,024 | 1         | 1,122142427   | 0,891152474     | 0,75            |
| RPRD1B                                                                             | 0,468534305 | 0,166207123 | 0,013 | 0     | 1         | 1,122104566   | 0,891182543     | #DIV/0!         |
| RRAS2                                                                              | 0,498250554 | 0,166206923 | 0,011 | 0     | 1         | 1,12210441    | 0,891182666     | #DIV/0!         |
| ARFGF2                                                                             | 0,498250693 | 0,166199566 | 0,011 | 0     | 1         | 1,122098688   | 0,891187211     | #DIV/0!         |
| CCNI                                                                               | 0,737666561 | 0,166167503 | 0,244 | 0,22  | 1         | 1,12207375    | 0,891207017     | 1,109090909     |
| PSMD3                                                                              | 0,812293772 | 0,16603073  | 0,04  | 0,049 | 1         | 1,121967379   | 0,891291511     | 0,816326531     |
| KCTD13                                                                             | 0,441492135 | 0,165989428 | 0,014 | 0     | 1         | 1,121935259   | 0,891317028     | #DIV/0!         |

Supplementary Table 3

| Differentially expressed genes_keloid-MD_comparing SC-Keloid vs. (SC-Myel+Nonmyel) |             |             |       |       |           |               |                 |                 |
|------------------------------------------------------------------------------------|-------------|-------------|-------|-------|-----------|---------------|-----------------|-----------------|
| gene                                                                               | p_val       | avg_log2FC  | pct.1 | pct.2 | p_val_adj | Foldchange_UP | Foldchange_DOWN | Ratio_pct1_pct2 |
| POMT1                                                                              | 0,498250693 | 0,165977675 | 0,011 | 0     | 1         | 1,121926119   | 0,891324288     | #DIV/0!         |
| HELB                                                                               | 0,531202783 | 0,165936557 | 0,01  | 0     | 1         | 1,121894144   | 0,891349693     | #DIV/0!         |
| WHAMM                                                                              | 0,441492135 | 0,165801314 | 0,014 | 0     | 1         | 1,121788979   | 0,891433254     | #DIV/0!         |
| PRR3                                                                               | 0,498250693 | 0,165749767 | 0,011 | 0     | 1         | 1,121748898   | 0,891465105     | #DIV/0!         |
| SMARCB1                                                                            | 0,719279574 | 0,165638849 | 0,062 | 0,049 | 1         | 1,121662659   | 0,891533646     | 1,265306122     |
| FLYWCH1                                                                            | 0,468534305 | 0,165627203 | 0,013 | 0     | 1         | 1,121653604   | 0,891540843     | #DIV/0!         |
| PPP2R3B                                                                            | 0,441492135 | 0,165489683 | 0,014 | 0     | 1         | 1,121546692   | 0,89162583      | #DIV/0!         |
| CTU2                                                                               | 0,498250693 | 0,165447263 | 0,011 | 0     | 1         | 1,121513715   | 0,891652047     | #DIV/0!         |
| SNX19                                                                              | 0,468534305 | 0,165281669 | 0,013 | 0     | 1         | 1,121384994   | 0,891754398     | #DIV/0!         |
| KCNC2                                                                              | 0,531202783 | 0,165266658 | 0,01  | 0     | 1         | 1,121373326   | 0,891763676     | #DIV/0!         |
| MRPS9                                                                              | 0,857273836 | 0,165236345 | 0,029 | 0,024 | 1         | 1,121349764   | 0,891782414     | 1,208333333     |
| MTHFSD                                                                             | 0,498250693 | 0,165210994 | 0,011 | 0     | 1         | 1,121330061   | 0,891798084     | #DIV/0!         |
| YTHDF1                                                                             | 0,4167109   | 0,165154039 | 0,016 | 0     | 1         | 1,121285794   | 0,891833292     | #DIV/0!         |
| RWDD2A                                                                             | 0,468534305 | 0,165048841 | 0,013 | 0     | 1         | 1,121204034   | 0,891898325     | #DIV/0!         |
| HLCS                                                                               | 0,890218621 | 0,164999156 | 0,021 | 0,024 | 1         | 1,121165422   | 0,891929041     | 0,875           |
| TTC39C                                                                             | 0,950688894 | 0,164936502 | 0,022 | 0,024 | 1         | 1,121116733   | 0,891967777     | 0,916666667     |
| RTL10                                                                              | 0,468534305 | 0,164841061 | 0,013 | 0     | 1         | 1,121042568   | 0,892026787     | #DIV/0!         |
| MTFMT                                                                              | 0,4167109   | 0,164782387 | 0,016 | 0     | 1         | 1,120996976   | 0,892063066     | #DIV/0!         |
| DR1                                                                                | 0,898436868 | 0,16477964  | 0,053 | 0,049 | 1         | 1,120994842   | 0,892064765     | 1,081632653     |
| LRR47                                                                              | 0,498250693 | 0,164770785 | 0,011 | 0     | 1         | 1,120987962   | 0,89207024      | #DIV/0!         |
| ITSN2                                                                              | 0,902822352 | 0,16456984  | 0,027 | 0,024 | 1         | 1,120831836   | 0,8921945       | 1,125           |
| GMPPA                                                                              | 0,393875079 | 0,164517241 | 0,018 | 0     | 1         | 1,120790973   | 0,892227029     | #DIV/0!         |
| HOXB-AS1                                                                           | 0,468534305 | 0,164459853 | 0,013 | 0     | 1         | 1,12074639    | 0,892262521     | #DIV/0!         |
| RNF34                                                                              | 0,956046136 | 0,164396637 | 0,026 | 0,024 | 1         | 1,120697282   | 0,892301619     | 1,083333333     |
| TRAFD1                                                                             | 0,468534305 | 0,164295145 | 0,013 | 0     | 1         | 1,120618445   | 0,892364394     | #DIV/0!         |
| DNPEP                                                                              | 0,892879868 | 0,164239204 | 0,021 | 0,024 | 1         | 1,120574994   | 0,892398996     | 0,875           |
| NENF                                                                               | 0,7712228   | 0,164202405 | 0,166 | 0,195 | 1         | 1,120546412   | 0,892421759     | 0,851282051     |
| LPCAT3                                                                             | 0,498250693 | 0,164099555 | 0,011 | 0     | 1         | 1,120466531   | 0,892485382     | #DIV/0!         |
| YAE1                                                                               | 0,942915322 | 0,16405355  | 0,022 | 0,024 | 1         | 1,120430801   | 0,892513843     | 0,916666667     |
| SETD6                                                                              | 0,468534305 | 0,164013832 | 0,013 | 0     | 1         | 1,120399956   | 0,892538414     | #DIV/0!         |



Supplementary Table 3

| Differentially expressed genes_keloid-MD_comparing SC-Keloid vs. (SC-Myel+Nonmyel) |             |             |       |       |           |               |                 |                 |
|------------------------------------------------------------------------------------|-------------|-------------|-------|-------|-----------|---------------|-----------------|-----------------|
| gene                                                                               | p_val       | avg_log2FC  | pct.1 | pct.2 | p_val_adj | Foldchange_UP | Foldchange_DOWN | Ratio_pct1_pct2 |
| OTULIN                                                                             | 1           | 0,163886337 | 0,024 | 0,024 | 1         | 1,120300948   | 0,892617294     | 1               |
| SEPTIN8                                                                            | 0,468534305 | 0,16374266  | 0,013 | 0     | 1         | 1,120189383   | 0,892706193     | #DIV/0!         |
| MTERF2                                                                             | 0,468534305 | 0,163682509 | 0,013 | 0     | 1         | 1,12014268    | 0,892743414     | #DIV/0!         |
| MAMLD1                                                                             | 0,498250693 | 0,163601524 | 0,011 | 0     | 1         | 1,120079803   | 0,892793529     | #DIV/0!         |
| PAK1                                                                               | 0,441492135 | 0,163516477 | 0,014 | 0     | 1         | 1,120013776   | 0,892846161     | #DIV/0!         |
| PRDX5                                                                              | 0,27489098  | 0,16338206  | 0,252 | 0,171 | 1         | 1,119909428   | 0,892929352     | 1,473684211     |
| HACL1                                                                              | 0,498250693 | 0,163350021 | 0,011 | 0     | 1         | 1,119884558   | 0,892949182     | #DIV/0!         |
| PTK7                                                                               | 0,696310026 | 0,16332906  | 0,016 | 0,024 | 1         | 1,119868287   | 0,892962156     | 0,666666667     |
| B4GALT2                                                                            | 0,790794466 | 0,163324586 | 0,032 | 0,024 | 1         | 1,119864814   | 0,892964925     | 1,333333333     |
| MOB1A                                                                              | 0,933388445 | 0,163191345 | 0,091 | 0,098 | 1         | 1,119761393   | 0,8930474       | 0,928571429     |
| ZNF697                                                                             | 0,831366235 | 0,163160606 | 0,019 | 0,024 | 1         | 1,119737535   | 0,893066427     | 0,791666667     |
| RPP38                                                                              | 0,680393765 | 0,163121535 | 0,037 | 0,024 | 1         | 1,119707211   | 0,893090614     | 1,541666667     |
| TFRC                                                                               | 0,372736722 | 0,163045236 | 0,019 | 0     | 1         | 1,119647995   | 0,893137847     | #DIV/0!         |
| PDGFB                                                                              | 0,914935357 | 0,163043502 | 0,113 | 0,122 | 1         | 1,119646649   | 0,893138921     | 0,926229508     |
| TEF                                                                                | 0,468534305 | 0,162999399 | 0,013 | 0     | 1         | 1,119612422   | 0,893166225     | #DIV/0!         |
| LACTB2                                                                             | 0,468534305 | 0,162883277 | 0,013 | 0     | 1         | 1,119522308   | 0,893238118     | #DIV/0!         |
| TRIM16                                                                             | 0,441492135 | 0,162873272 | 0,014 | 0     | 1         | 1,119514545   | 0,893244312     | #DIV/0!         |
| KIF16B                                                                             | 0,441492135 | 0,162829305 | 0,014 | 0     | 1         | 1,119480427   | 0,893271535     | #DIV/0!         |
| GSTM4                                                                              | 0,468534305 | 0,16281038  | 0,013 | 0     | 1         | 1,119465743   | 0,893283253     | #DIV/0!         |
| IPP                                                                                | 0,95604613  | 0,162696275 | 0,026 | 0,024 | 1         | 1,119377205   | 0,893353907     | 1,083333333     |
| PREB                                                                               | 0,393875079 | 0,162634912 | 0,018 | 0     | 1         | 1,119329596   | 0,893391905     | #DIV/0!         |
| TUSC2                                                                              | 0,741684304 | 0,162596949 | 0,033 | 0,024 | 1         | 1,119300142   | 0,893415414     | 1,375           |
| RNF180                                                                             | 0,498250693 | 0,162450033 | 0,011 | 0     | 1         | 1,119186164   | 0,893506399     | #DIV/0!         |
| ZFAND2A                                                                            | 0,468534305 | 0,162418366 | 0,013 | 0     | 1         | 1,119161599   | 0,893526012     | #DIV/0!         |
| SLC16A1-AS1                                                                        | 0,468534305 | 0,162197084 | 0,013 | 0     | 1         | 1,118989954   | 0,893663072     | #DIV/0!         |
| MAFG-DT                                                                            | 0,531202783 | 0,162191543 | 0,01  | 0     | 1         | 1,118985656   | 0,893666505     | #DIV/0!         |
| PLAAT4                                                                             | 0,498250693 | 0,162026154 | 0,011 | 0     | 1         | 1,118857384   | 0,89376896      | #DIV/0!         |
| GHDC                                                                               | 0,441492135 | 0,161902954 | 0,014 | 0     | 1         | 1,118761843   | 0,893845287     | #DIV/0!         |
| ZBTB4                                                                              | 0,722107714 | 0,161893854 | 0,037 | 0,049 | 1         | 1,118754786   | 0,893850925     | 0,755102041     |
| ISYNA1                                                                             | 0,416710794 | 0,161883523 | 0,016 | 0     | 1         | 1,118746774   | 0,893857326     | #DIV/0!         |

Supplementary Table 3

| Differentially expressed genes_keloid-MD_comparing SC-Keloid vs. (SC-Myel+Nonmyel) |             |             |       |       |           |               |                 |                 |
|------------------------------------------------------------------------------------|-------------|-------------|-------|-------|-----------|---------------|-----------------|-----------------|
| gene                                                                               | p_val       | avg_log2FC  | pct.1 | pct.2 | p_val_adj | Foldchange_UP | Foldchange_DOWN | Ratio_pct1_pct2 |
| COL19A1                                                                            | 0,468534305 | 0,161872338 | 0,013 | 0     | 1         | 1,118738101   | 0,893864255     | #DIV/0!         |
| INPP5A                                                                             | 0,441492135 | 0,161781869 | 0,014 | 0     | 1         | 1,118667949   | 0,89392031      | #DIV/0!         |
| TFE3                                                                               | 0,468534305 | 0,161781449 | 0,013 | 0     | 1         | 1,118667624   | 0,89392057      | #DIV/0!         |
| BUD13                                                                              | 0,468534305 | 0,161704037 | 0,013 | 0     | 1         | 1,1186076     | 0,893968537     | #DIV/0!         |
| CPOX                                                                               | 0,441492135 | 0,161684755 | 0,014 | 0     | 1         | 1,118592649   | 0,893980486     | #DIV/0!         |
| CAMKMT                                                                             | 0,498250693 | 0,161664103 | 0,011 | 0     | 1         | 1,118576637   | 0,893993283     | #DIV/0!         |
| LUC7L3                                                                             | 0,871690703 | 0,161643218 | 0,155 | 0,171 | 1         | 1,118560444   | 0,894006225     | 0,906432749     |
| PAXIP1-DT                                                                          | 0,441492135 | 0,161564755 | 0,014 | 0     | 1         | 1,118499612   | 0,894054848     | #DIV/0!         |
| SSUH2                                                                              | 0,441492135 | 0,161468028 | 0,014 | 0     | 1         | 1,118424623   | 0,894114793     | #DIV/0!         |
| MYCBP                                                                              | 0,468534305 | 0,16140184  | 0,013 | 0     | 1         | 1,118373313   | 0,894155814     | #DIV/0!         |
| ZSCAN16                                                                            | 0,531202783 | 0,161364049 | 0,01  | 0     | 1         | 1,118344018   | 0,894179236     | #DIV/0!         |
| BVES                                                                               | 0,76591327  | 0,161209532 | 0,018 | 0,024 | 1         | 1,118224246   | 0,894275011     | 0,75            |
| ME3                                                                                | 0,468534305 | 0,161201542 | 0,013 | 0     | 1         | 1,118218053   | 0,894279964     | #DIV/0!         |
| MINK1                                                                              | 0,468534305 | 0,161175567 | 0,013 | 0     | 1         | 1,118197921   | 0,894296065     | #DIV/0!         |
| EIF3G                                                                              | 0,870496033 | 0,161102296 | 0,128 | 0,122 | 1         | 1,118141131   | 0,894341485     | 1,049180328     |
| CRKL                                                                               | 0,468534305 | 0,161046702 | 0,013 | 0     | 1         | 1,118098044   | 0,894375949     | #DIV/0!         |
| UTP14C                                                                             | 0,905181209 | 0,161009456 | 0,027 | 0,024 | 1         | 1,118069179   | 0,89439904      | 1,125           |
| MRGBP                                                                              | 0,715160978 | 0,160978105 | 0,035 | 0,024 | 1         | 1,118044883   | 0,894418476     | 1,458333333     |
| DONSON                                                                             | 0,531202783 | 0,160865904 | 0,01  | 0     | 1         | 1,117957934   | 0,894488039     | #DIV/0!         |
| JPX                                                                                | 0,728310263 | 0,160850709 | 0,062 | 0,049 | 1         | 1,117946159   | 0,89449746      | 1,265306122     |
| CLPTM1L                                                                            | 0,596098937 | 0,160843732 | 0,041 | 0,024 | 1         | 1,117940752   | 0,894501786     | 1,708333333     |
| FNTA                                                                               | 0,864139323 | 0,160833288 | 0,08  | 0,073 | 1         | 1,11793266    | 0,894508262     | 1,095890411     |
| TUBGCP3                                                                            | 0,498250693 | 0,16080157  | 0,011 | 0     | 1         | 1,117908082   | 0,894527928     | #DIV/0!         |
| ARMC7                                                                              | 0,531202783 | 0,160790858 | 0,01  | 0     | 1         | 1,117899781   | 0,89453457      | #DIV/0!         |
| PPM1G                                                                              | 0,658924658 | 0,16072099  | 0,094 | 0,073 | 1         | 1,117845644   | 0,894577892     | 1,287671233     |
| ITPR2                                                                              | 0,4167109   | 0,160660415 | 0,016 | 0     | 1         | 1,11779871    | 0,894615454     | #DIV/0!         |
| ZNF880                                                                             | 0,531202783 | 0,160648751 | 0,01  | 0     | 1         | 1,117789673   | 0,894622686     | #DIV/0!         |
| YY1AP1                                                                             | 0,907540903 | 0,160540928 | 0,027 | 0,024 | 1         | 1,117706135   | 0,894689551     | 1,125           |
| ZNF414                                                                             | 0,498250693 | 0,160515628 | 0,011 | 0     | 1         | 1,117686535   | 0,894705241     | #DIV/0!         |
| PRH1                                                                               | 0,468534305 | 0,160336828 | 0,013 | 0     | 1         | 1,117548023   | 0,894816132     | #DIV/0!         |

Supplementary Table 3

| Differentially expressed genes_keloid-MD_comparing SC-Keloid vs. (SC-Myel+Nonmyel) |             |             |       |       |           |               |                 |                 |
|------------------------------------------------------------------------------------|-------------|-------------|-------|-------|-----------|---------------|-----------------|-----------------|
| gene                                                                               | p_val       | avg_log2FC  | pct.1 | pct.2 | p_val_adj | Foldchange_UP | Foldchange_DOWN | Ratio_pct1_pct2 |
| TCP11L2                                                                            | 0,498250693 | 0,160131112 | 0,011 | 0     | 1         | 1,117388682   | 0,894943735     | #DIV/0!         |
| GSKIP                                                                              | 0,945505945 | 0,159990776 | 0,022 | 0,024 | 1         | 1,117279995   | 0,895030793     | 0,916666667     |
| PSEN1                                                                              | 1           | 0,159892526 | 0,024 | 0,024 | 1         | 1,117203909   | 0,895091748     | 1               |
| BBIP1                                                                              | 0,792317058 | 0,159774705 | 0,083 | 0,098 | 1         | 1,117112674   | 0,895164851     | 0,846938776     |
| SLC26A11                                                                           | 0,531202783 | 0,159765913 | 0,01  | 0     | 1         | 1,117105866   | 0,895170306     | #DIV/0!         |
| AHCTF1                                                                             | 0,948097145 | 0,159731379 | 0,022 | 0,024 | 1         | 1,117079125   | 0,895191735     | 0,916666667     |
| PRMT5                                                                              | 0,468534305 | 0,159718356 | 0,013 | 0     | 1         | 1,117069042   | 0,895199815     | #DIV/0!         |
| PAM                                                                                | 0,623359383 | 0,15958855  | 0,04  | 0,024 | 1         | 1,116968538   | 0,895280365     | 1,666666667     |
| ABITRAM                                                                            | 0,468534305 | 0,159583967 | 0,013 | 0     | 1         | 1,11696499    | 0,895283209     | #DIV/0!         |
| UMPS                                                                               | 0,441492135 | 0,159474694 | 0,014 | 0     | 1         | 1,116880392   | 0,895351022     | #DIV/0!         |
| GEMIN4                                                                             | 0,498250693 | 0,159474133 | 0,011 | 0     | 1         | 1,116879958   | 0,89535137      | #DIV/0!         |
| SCUBE3                                                                             | 0,441492135 | 0,159459387 | 0,014 | 0     | 1         | 1,116868542   | 0,895360521     | #DIV/0!         |
| FAS                                                                                | 0,468534305 | 0,159378421 | 0,013 | 0     | 1         | 1,116805864   | 0,895410772     | #DIV/0!         |
| UBAP1                                                                              | 0,902822352 | 0,159365104 | 0,027 | 0,024 | 1         | 1,116795555   | 0,895419037     | 1,125           |
| C15orf39                                                                           | 0,468534305 | 0,159357698 | 0,013 | 0     | 1         | 1,116789822   | 0,895423634     | #DIV/0!         |
| RELCH                                                                              | 0,498250693 | 0,159253077 | 0,011 | 0     | 1         | 1,116708837   | 0,89548857      | #DIV/0!         |
| SRGN                                                                               | 0,940325302 | 0,159163657 | 0,022 | 0,024 | 1         | 1,116639624   | 0,895544075     | 0,916666667     |
| OXSRI                                                                              | 0,674706022 | 0,159128683 | 0,037 | 0,024 | 1         | 1,116612555   | 0,895565786     | 1,541666667     |
| APOC1                                                                              | 0,441492135 | 0,159105557 | 0,014 | 0     | 1         | 1,116594657   | 0,895580141     | #DIV/0!         |
| ZFAND2B                                                                            | 0,859551749 | 0,159078548 | 0,029 | 0,024 | 1         | 1,116573752   | 0,895596908     | 1,208333333     |
| PSMG3-AS1                                                                          | 0,441492135 | 0,159022136 | 0,014 | 0     | 1         | 1,116530093   | 0,895631928     | #DIV/0!         |
| FER                                                                                | 0,897580873 | 0,158913716 | 0,053 | 0,049 | 1         | 1,116446188   | 0,895699238     | 1,081632653     |
| WDR59                                                                              | 0,468534305 | 0,158848566 | 0,013 | 0     | 1         | 1,116395772   | 0,895739688     | #DIV/0!         |
| TBL1X                                                                              | 0,468534305 | 0,158839678 | 0,013 | 0     | 1         | 1,116388894   | 0,895745206     | #DIV/0!         |
| TTLL3                                                                              | 0,498250554 | 0,158757235 | 0,011 | 0     | 1         | 1,1163251     | 0,895796394     | #DIV/0!         |
| C12orf4                                                                            | 0,498250693 | 0,158753432 | 0,011 | 0     | 1         | 1,116322158   | 0,895798756     | #DIV/0!         |
| IQCK                                                                               | 0,498250693 | 0,158637659 | 0,011 | 0     | 1         | 1,116232579   | 0,895870645     | #DIV/0!         |
| ZNF512B                                                                            | 0,498250693 | 0,158600535 | 0,011 | 0     | 1         | 1,116203856   | 0,895893698     | #DIV/0!         |
| SRP14                                                                              | 0,898114128 | 0,158529138 | 0,644 | 0,756 | 1         | 1,116148618   | 0,895938036     | 0,851851852     |
| MRPL19                                                                             | 0,804844863 | 0,158519319 | 0,083 | 0,073 | 1         | 1,116141021   | 0,895944133     | 1,136986301     |

Supplementary Table 3

| Differentially expressed genes_keloid-MD_comparing SC-Keloid vs. (SC-Myel+Nonmyel) |             |             |       |       |           |               |                 |                 |
|------------------------------------------------------------------------------------|-------------|-------------|-------|-------|-----------|---------------|-----------------|-----------------|
| gene                                                                               | p_val       | avg_log2FC  | pct.1 | pct.2 | p_val_adj | Foldchange_UP | Foldchange_DOWN | Ratio_pct1_pct2 |
| AC012313.1                                                                         | 0,498250693 | 0,158458692 | 0,011 | 0     | 1         | 1,116094118   | 0,895981785     | #DIV/0!         |
| GCAT                                                                               | 0,498250693 | 0,158290194 | 0,011 | 0     | 1         | 1,115963772   | 0,896086436     | #DIV/0!         |
| ZNF692                                                                             | 0,498250554 | 0,158199465 | 0,011 | 0     | 1         | 1,115893593   | 0,896142792     | #DIV/0!         |
| AHNAK2                                                                             | 0,441492135 | 0,158165357 | 0,014 | 0     | 1         | 1,115867212   | 0,896163978     | #DIV/0!         |
| ELOA                                                                               | 0,782292802 | 0,158141965 | 0,032 | 0,024 | 1         | 1,115849119   | 0,896178509     | 1,333333333     |
| SYNE3                                                                              | 0,532291913 | 0,157984239 | 0,03  | 0,049 | 1         | 1,115727133   | 0,896276491     | 0,612244898     |
| CCNJL                                                                              | 0,441492135 | 0,157958939 | 0,014 | 0     | 1         | 1,115707568   | 0,896292209     | #DIV/0!         |
| TGIF1                                                                              | 0,62843294  | 0,157943561 | 0,033 | 0,049 | 1         | 1,115695675   | 0,896301763     | 0,673469388     |
| NECAP1                                                                             | 1           | 0,157831922 | 0,024 | 0,024 | 1         | 1,115609343   | 0,896371123     | 1               |
| FOXK2                                                                              | 0,905181209 | 0,157796317 | 0,027 | 0,024 | 1         | 1,115581811   | 0,896393245     | 1,125           |
| GPSM3                                                                              | 0,531202783 | 0,157752449 | 0,01  | 0     | 1         | 1,11554789    | 0,896420502     | #DIV/0!         |
| PKP1                                                                               | 0,372736722 | 0,157748713 | 0,019 | 0     | 1         | 1,115545001   | 0,896422824     | #DIV/0!         |
| TFG                                                                                | 0,942353855 | 0,15768963  | 0,069 | 0,073 | 1         | 1,115499317   | 0,896459536     | 0,945205479     |
| APEH                                                                               | 0,907540903 | 0,157559304 | 0,027 | 0,024 | 1         | 1,115398553   | 0,896540522     | 1,125           |
| TUBA1B                                                                             | 0,900382804 | 0,157458505 | 0,418 | 0,463 | 1         | 1,115320624   | 0,896603164     | 0,902807775     |
| WDHD1                                                                              | 0,468534305 | 0,157452347 | 0,013 | 0     | 1         | 1,115315863   | 0,896606991     | #DIV/0!         |
| ATAD2                                                                              | 0,441492135 | 0,157404053 | 0,014 | 0     | 1         | 1,115278529   | 0,896637005     | #DIV/0!         |
| RABEP2                                                                             | 0,441492019 | 0,15738785  | 0,014 | 0     | 1         | 1,115266003   | 0,896647075     | #DIV/0!         |
| CENPC                                                                              | 0,715160978 | 0,157340969 | 0,035 | 0,024 | 1         | 1,115229763   | 0,896676213     | 1,458333333     |
| MORN4                                                                              | 0,4167109   | 0,157288392 | 0,016 | 0     | 1         | 1,115189121   | 0,896708891     | #DIV/0!         |
| CCDC9B                                                                             | 0,448124727 | 0,157258137 | 0,045 | 0,073 | 1         | 1,115165734   | 0,896727697     | 0,616438356     |
| PIDD1                                                                              | 0,498250693 | 0,157175938 | 0,011 | 0     | 1         | 1,115102198   | 0,89677879      | #DIV/0!         |
| MPPE1                                                                              | 0,441492135 | 0,157132629 | 0,014 | 0     | 1         | 1,115068724   | 0,896805711     | #DIV/0!         |
| TMEM126A                                                                           | 0,644825643 | 0,157069469 | 0,113 | 0,146 | 1         | 1,115019908   | 0,896844973     | 0,773972603     |
| FAM221A                                                                            | 0,498250693 | 0,157061511 | 0,011 | 0     | 1         | 1,115013757   | 0,896849921     | #DIV/0!         |
| OFD1                                                                               | 0,68324445  | 0,157060284 | 0,035 | 0,049 | 1         | 1,11501281    | 0,896850683     | 0,714285714     |
| ARHGEF6                                                                            | 0,696310026 | 0,156816581 | 0,016 | 0,024 | 1         | 1,114824475   | 0,897002194     | 0,666666667     |
| STARD3NL                                                                           | 0,74986576  | 0,156752841 | 0,033 | 0,024 | 1         | 1,114775222   | 0,897041826     | 1,375           |
| RHOF                                                                               | 0,531202783 | 0,1566365   | 0,01  | 0     | 1         | 1,114685328   | 0,897114167     | #DIV/0!         |
| PLCD3                                                                              | 0,531202783 | 0,156562085 | 0,01  | 0     | 1         | 1,114627834   | 0,897160442     | #DIV/0!         |

Supplementary Table 3

| Differentially expressed genes_keloid-MD_comparing SC-Keloid vs. (SC-Myel+Nonmyel) |             |             |       |       |           |               |                 |                 |
|------------------------------------------------------------------------------------|-------------|-------------|-------|-------|-----------|---------------|-----------------|-----------------|
| gene                                                                               | p_val       | avg_log2FC  | pct.1 | pct.2 | p_val_adj | Foldchange_UP | Foldchange_DOWN | Ratio_pct1_pct2 |
| CIAO2B                                                                             | 0,927806097 | 0,156501847 | 0,357 | 0,366 | 1         | 1,114581295   | 0,897197903     | 0,975409836     |
| MRPL47                                                                             | 0,749204168 | 0,156478896 | 0,115 | 0,098 | 1         | 1,114563564   | 0,897212176     | 1,173469388     |
| RHBDD1                                                                             | 0,441492135 | 0,156396723 | 0,014 | 0     | 1         | 1,114500082   | 0,897263281     | #DIV/0!         |
| HRAS                                                                               | 0,529418887 | 0,156346073 | 0,077 | 0,049 | 1         | 1,114460955   | 0,897294782     | 1,571428571     |
| NDUFS7                                                                             | 0,648114485 | 0,156301559 | 0,094 | 0,122 | 1         | 1,114426569   | 0,897322468     | 0,770491803     |
| SPACA9                                                                             | 0,468534305 | 0,156254658 | 0,013 | 0     | 1         | 1,114390341   | 0,89735164      | #DIV/0!         |
| AP001816.1                                                                         | 0,531202783 | 0,156239322 | 0,01  | 0     | 1         | 1,114378495   | 0,897361179     | #DIV/0!         |
| TOMM40                                                                             | 0,676599912 | 0,156196208 | 0,037 | 0,024 | 1         | 1,114345193   | 0,897387997     | 1,541666667     |
| TAF1                                                                               | 0,570186496 | 0,156039173 | 0,043 | 0,024 | 1         | 1,114223904   | 0,897485681     | 1,791666667     |
| INPP4B                                                                             | 0,441492135 | 0,155850891 | 0,014 | 0     | 1         | 1,1140785     | 0,897602817     | #DIV/0!         |
| ZNF571                                                                             | 0,441492135 | 0,155835855 | 0,014 | 0     | 1         | 1,114066889   | 0,897612172     | #DIV/0!         |
| POGLUT2                                                                            | 0,76591327  | 0,155748011 | 0,018 | 0,024 | 1         | 1,113999057   | 0,897666828     | 0,75            |
| HARS1                                                                              | 0,57182143  | 0,155600594 | 0,043 | 0,024 | 1         | 1,113885232   | 0,897758558     | 1,791666667     |
| NACC1                                                                              | 0,4167109   | 0,155569036 | 0,016 | 0     | 1         | 1,113860867   | 0,897778196     | #DIV/0!         |
| ZNF10                                                                              | 0,531202783 | 0,15522102  | 0,01  | 0     | 1         | 1,113592207   | 0,89799479      | #DIV/0!         |
| TTC8                                                                               | 0,531202783 | 0,155197531 | 0,01  | 0     | 1         | 1,113574076   | 0,898009411     | #DIV/0!         |
| TCF7                                                                               | 0,4167109   | 0,155182545 | 0,016 | 0     | 1         | 1,113562509   | 0,898018739     | #DIV/0!         |
| DCAF15                                                                             | 0,441492135 | 0,155172464 | 0,014 | 0     | 1         | 1,113554728   | 0,898025014     | #DIV/0!         |
| PROCR                                                                              | 0,441492135 | 0,155133188 | 0,014 | 0     | 1         | 1,113524413   | 0,898049462     | #DIV/0!         |
| SRD5A3                                                                             | 0,498250693 | 0,155124557 | 0,011 | 0     | 1         | 1,113517751   | 0,898054835     | #DIV/0!         |
| RHOT1                                                                              | 1           | 0,155100874 | 0,024 | 0,024 | 1         | 1,113499472   | 0,898069577     | 1               |
| OGFRL1                                                                             | 0,441492135 | 0,154978994 | 0,014 | 0     | 1         | 1,113405407   | 0,89814545      | #DIV/0!         |
| ARF5                                                                               | 0,60432919  | 0,154713263 | 0,099 | 0,073 | 1         | 1,113200346   | 0,898310895     | 1,356164384     |
| WDR53                                                                              | 0,531202783 | 0,154691019 | 0,01  | 0     | 1         | 1,113183183   | 0,898324746     | #DIV/0!         |
| ARC                                                                                | 0,441492135 | 0,154594748 | 0,014 | 0     | 1         | 1,113108903   | 0,898384693     | #DIV/0!         |
| KANK1                                                                              | 0,468534305 | 0,154580515 | 0,013 | 0     | 1         | 1,113097922   | 0,898393556     | #DIV/0!         |
| CRAMP1                                                                             | 0,531202783 | 0,154562711 | 0,01  | 0     | 1         | 1,113084185   | 0,898404643     | #DIV/0!         |
| GAA                                                                                | 0,725916459 | 0,154491193 | 0,037 | 0,049 | 1         | 1,113029008   | 0,89844918      | 0,755102041     |
| DHODH                                                                              | 0,498250693 | 0,154489553 | 0,011 | 0     | 1         | 1,113027743   | 0,898450202     | #DIV/0!         |
| OTUD3                                                                              | 0,498250693 | 0,154464597 | 0,011 | 0     | 1         | 1,11300849    | 0,898465743     | #DIV/0!         |

Supplementary Table 3

| Differentially expressed genes_keloid-MD_ comparing SC-Keloid vs. (SC-Myel+Nonmyel) |             |             |       |       |           |               |                 |                 |
|-------------------------------------------------------------------------------------|-------------|-------------|-------|-------|-----------|---------------|-----------------|-----------------|
| gene                                                                                | p_val       | avg_log2FC  | pct.1 | pct.2 | p_val_adj | Foldchange_UP | Foldchange_DOWN | Ratio_pct1_pct2 |
| QPCT                                                                                | 0,997298407 | 0,154418929 | 0,048 | 0,049 | 1         | 1,112973258   | 0,898494185     | 0,979591837     |
| PRDM2                                                                               | 0,813288836 | 0,154305463 | 0,057 | 0,049 | 1         | 1,112885728   | 0,898564853     | 1,163265306     |
| CCPG1                                                                               | 0,92408929  | 0,154216457 | 0,091 | 0,098 | 1         | 1,112817072   | 0,89862029      | 0,928571429     |
| LRIG1                                                                               | 0,498250693 | 0,15410242  | 0,011 | 0     | 1         | 1,112729113   | 0,898691324     | #DIV/0!         |
| SMARCAD1                                                                            | 0,82592442  | 0,154084363 | 0,019 | 0,024 | 1         | 1,112715186   | 0,898702573     | 0,791666667     |
| RSPH3                                                                               | 0,498250693 | 0,154020693 | 0,011 | 0     | 1         | 1,11266608    | 0,898742236     | #DIV/0!         |
| RPL28                                                                               | 0,430088917 | 0,153943602 | 0,75  | 0,634 | 1         | 1,112606626   | 0,898790261     | 1,1829653       |
| ZNF562                                                                              | 0,468534305 | 0,153866902 | 0,013 | 0     | 1         | 1,112547476   | 0,898838047     | #DIV/0!         |
| FURIN                                                                               | 0,539573649 | 0,153832827 | 0,03  | 0,049 | 1         | 1,1125212     | 0,898859276     | 0,612244898     |
| LMO7                                                                                | 0,441492135 | 0,153806693 | 0,014 | 0     | 1         | 1,112501046   | 0,898875559     | #DIV/0!         |
| MRPL46                                                                              | 0,997483596 | 0,153763616 | 0,024 | 0,024 | 1         | 1,112467829   | 0,898902399     | 1               |
| ZNF277                                                                              | 0,531202783 | 0,153703771 | 0,01  | 0     | 1         | 1,112421683   | 0,898939687     | #DIV/0!         |
| AHCYL2                                                                              | 0,498250693 | 0,153667159 | 0,011 | 0     | 1         | 1,112393453   | 0,8989625       | #DIV/0!         |
| TMEM120B                                                                            | 0,498250693 | 0,15366112  | 0,011 | 0     | 1         | 1,112388797   | 0,898966263     | #DIV/0!         |
| GALNT10                                                                             | 0,468534305 | 0,153495412 | 0,013 | 0     | 1         | 1,112261035   | 0,899069525     | #DIV/0!         |
| GTF2IRD1                                                                            | 0,468534305 | 0,153494364 | 0,013 | 0     | 1         | 1,112260227   | 0,899070177     | #DIV/0!         |
| ANKRD42                                                                             | 0,498250693 | 0,15333711  | 0,011 | 0     | 1         | 1,112138997   | 0,899168182     | #DIV/0!         |
| FASTKD5                                                                             | 0,531202783 | 0,153312194 | 0,01  | 0     | 1         | 1,11211979    | 0,899183711     | #DIV/0!         |
| NIPAL3                                                                              | 0,622403257 | 0,153223276 | 0,014 | 0,024 | 1         | 1,112051249   | 0,899239132     | 0,583333333     |
| COQ2                                                                                | 0,498250693 | 0,153128244 | 0,011 | 0     | 1         | 1,111977999   | 0,899298368     | #DIV/0!         |
| PCIF1                                                                               | 1           | 0,152947711 | 0,024 | 0,024 | 1         | 1,111838859   | 0,89941091      | 1               |
| BLMH                                                                                | 0,441492135 | 0,152839028 | 0,014 | 0     | 1         | 1,111755104   | 0,899478668     | #DIV/0!         |
| ZFP69B                                                                              | 0,498250693 | 0,152838612 | 0,011 | 0     | 1         | 1,111754783   | 0,899478927     | #DIV/0!         |
| PRR5                                                                                | 0,498250693 | 0,152758931 | 0,011 | 0     | 1         | 1,111693382   | 0,899528607     | #DIV/0!         |
| RPS21                                                                               | 0,979428831 | 0,152749881 | 0,467 | 0,537 | 1         | 1,111686408   | 0,89953425      | 0,869646182     |
| KLHL13                                                                              | 0,468534305 | 0,152747463 | 0,013 | 0     | 1         | 1,111684545   | 0,899535758     | #DIV/0!         |
| DDX3Y                                                                               | 0,441492135 | 0,152721539 | 0,014 | 0     | 1         | 1,11166457    | 0,899551922     | #DIV/0!         |
| TMEM135                                                                             | 0,531202783 | 0,152559369 | 0,01  | 0     | 1         | 1,111539617   | 0,899653044     | #DIV/0!         |
| YEATS4                                                                              | 0,936194942 | 0,152360934 | 0,051 | 0,049 | 1         | 1,111386741   | 0,899776795     | 1,040816327     |
| CD44                                                                                | 0,761065804 | 0,152332436 | 0,121 | 0,146 | 1         | 1,111364788   | 0,899794569     | 0,828767123     |

Supplementary Table 3

| Differentially expressed genes_keloid-MD_comparing SC-Keloid vs. (SC-Myel+Nonmyel) |             |             |       |       |           |               |                 |                 |
|------------------------------------------------------------------------------------|-------------|-------------|-------|-------|-----------|---------------|-----------------|-----------------|
| gene                                                                               | p_val       | avg_log2FC  | pct.1 | pct.2 | p_val_adj | Foldchange_UP | Foldchange_DOWN | Ratio_pct1_pct2 |
| GOT1                                                                               | 0,468534305 | 0,152132822 | 0,013 | 0     | 1         | 1,111211028   | 0,899919075     | #DIV/0!         |
| KAT2B                                                                              | 0,441492135 | 0,152095239 | 0,014 | 0     | 1         | 1,111182081   | 0,899942518     | #DIV/0!         |
| CSNK1G2                                                                            | 0,997483596 | 0,152042861 | 0,024 | 0,024 | 1         | 1,111141739   | 0,899975192     | 1               |
| SEC14L1                                                                            | 0,391084448 | 0,151897017 | 0,057 | 0,024 | 1         | 1,111029418   | 0,900066177     | 2,375           |
| UTY                                                                                | 0,468534305 | 0,151894253 | 0,013 | 0     | 1         | 1,111027289   | 0,900067901     | #DIV/0!         |
| TMEM178B                                                                           | 0,52359464  | 0,151892638 | 0,046 | 0,024 | 1         | 1,111026046   | 0,900068908     | 1,916666667     |
| LPAR6                                                                              | 0,498250693 | 0,151869606 | 0,011 | 0     | 1         | 1,111008309   | 0,900083277     | #DIV/0!         |
| WDR74                                                                              | 0,498250693 | 0,151694601 | 0,011 | 0     | 1         | 1,110873547   | 0,900192468     | #DIV/0!         |
| BAK1                                                                               | 0,441492135 | 0,15167689  | 0,014 | 0     | 1         | 1,11085991    | 0,900203519     | #DIV/0!         |
| P4HA2                                                                              | 0,885837904 | 0,151670617 | 0,198 | 0,195 | 1         | 1,11085508    | 0,900207433     | 1,015384615     |
| ATG4C                                                                              | 0,441492135 | 0,151581377 | 0,014 | 0     | 1         | 1,110786368   | 0,900263119     | #DIV/0!         |
| ZMAT5                                                                              | 0,831366235 | 0,151576125 | 0,019 | 0,024 | 1         | 1,110782324   | 0,900266396     | 0,791666667     |
| RAB7A                                                                              | 0,906493159 | 0,151404491 | 0,126 | 0,122 | 1         | 1,110650185   | 0,900373505     | 1,032786885     |
| BCL2L1                                                                             | 0,745771449 | 0,151354635 | 0,033 | 0,024 | 1         | 1,110611804   | 0,90040462      | 1,375           |
| CD58                                                                               | 0,783248487 | 0,151339829 | 0,061 | 0,073 | 1         | 1,110600406   | 0,900413861     | 0,835616438     |
| KMT5B                                                                              | 0,746708604 | 0,151324294 | 0,059 | 0,073 | 1         | 1,110588448   | 0,900423557     | 0,808219178     |
| ZNF469                                                                             | 0,498250693 | 0,151307283 | 0,011 | 0     | 1         | 1,110575352   | 0,900434174     | #DIV/0!         |
| HOXC9                                                                              | 0,896472903 | 0,151245979 | 0,043 | 0,049 | 1         | 1,110528162   | 0,900472437     | 0,87755102      |
| SLC7A5                                                                             | 0,441492019 | 0,151215185 | 0,014 | 0     | 1         | 1,110504459   | 0,900491657     | #DIV/0!         |
| PIK3C3                                                                             | 0,498250693 | 0,15115952  | 0,011 | 0     | 1         | 1,110461611   | 0,900526403     | #DIV/0!         |
| OSBPL3                                                                             | 0,468534305 | 0,151149183 | 0,013 | 0     | 1         | 1,110453655   | 0,900532855     | #DIV/0!         |
| IGF1R                                                                              | 0,945505945 | 0,151061321 | 0,022 | 0,024 | 1         | 1,110386029   | 0,9005877       | 0,916666667     |
| SLC35F2                                                                            | 0,498250693 | 0,151059619 | 0,011 | 0     | 1         | 1,110384719   | 0,900588763     | #DIV/0!         |
| CDKN2AIP                                                                           | 0,997483595 | 0,15099218  | 0,024 | 0,024 | 1         | 1,110332815   | 0,900630862     | 1               |
| LOXL1-AS1                                                                          | 0,4167109   | 0,150937963 | 0,016 | 0     | 1         | 1,110291089   | 0,900664708     | #DIV/0!         |
| FAM189B                                                                            | 0,531202783 | 0,150880091 | 0,01  | 0     | 1         | 1,110246552   | 0,900700838     | #DIV/0!         |
| ENDOV                                                                              | 0,786540464 | 0,150845246 | 0,032 | 0,024 | 1         | 1,110219737   | 0,900722593     | 1,333333333     |
| GUCY1A1                                                                            | 0,531202783 | 0,150572713 | 0,01  | 0     | 1         | 1,11001003    | 0,90089276      | #DIV/0!         |
| WDR90                                                                              | 0,531202783 | 0,150448072 | 0,01  | 0     | 1         | 1,109914136   | 0,900970596     | #DIV/0!         |
| LSM3                                                                               | 0,94138683  | 0,150407737 | 0,183 | 0,195 | 1         | 1,109883105   | 0,900995786     | 0,938461538     |

Supplementary Table 3

| Differentially expressed genes_keloid-MD_comparing SC-Keloid vs. (SC-Myel+Nonmyel) |             |             |       |       |           |               |                 |                 |
|------------------------------------------------------------------------------------|-------------|-------------|-------|-------|-----------|---------------|-----------------|-----------------|
| gene                                                                               | p_val       | avg_log2FC  | pct.1 | pct.2 | p_val_adj | Foldchange_UP | Foldchange_DOWN | Ratio_pct1_pct2 |
| MEN1                                                                               | 0,498250693 | 0,150337799 | 0,011 | 0     | 1         | 1,109829302   | 0,901039465     | #DIV/0!         |
| SGMS2                                                                              | 0,468534305 | 0,150267993 | 0,013 | 0     | 1         | 1,109775603   | 0,901083063     | #DIV/0!         |
| GYPC                                                                               | 0,498250693 | 0,150215811 | 0,011 | 0     | 1         | 1,109735464   | 0,901115656     | #DIV/0!         |
| GUK1                                                                               | 0,60793601  | 0,150154772 | 0,388 | 0,366 | 1         | 1,109688513   | 0,901153782     | 1,06010929      |
| SLC30A6                                                                            | 0,531202783 | 0,150089683 | 0,01  | 0     | 1         | 1,109638449   | 0,901194439     | #DIV/0!         |
| TMEM17                                                                             | 0,531202783 | 0,150051126 | 0,01  | 0     | 1         | 1,109608793   | 0,901218525     | #DIV/0!         |
| ASB6                                                                               | 0,441492135 | 0,149944572 | 0,014 | 0     | 1         | 1,109526843   | 0,901285089     | #DIV/0!         |
| PROSER1                                                                            | 0,468534305 | 0,149797013 | 0,013 | 0     | 1         | 1,109413367   | 0,901377277     | #DIV/0!         |
| GFPT1                                                                              | 0,932706865 | 0,149794208 | 0,051 | 0,049 | 1         | 1,10941121    | 0,90137903      | 1,040816327     |
| UBA6                                                                               | 0,597602426 | 0,149632449 | 0,051 | 0,073 | 1         | 1,109286826   | 0,901480101     | 0,698630137     |
| SELENOS                                                                            | 0,573515223 | 0,149599395 | 0,239 | 0,195 | 1         | 1,109261412   | 0,901500755     | 1,225641026     |
| EPM2A                                                                              | 0,498250693 | 0,149531605 | 0,011 | 0     | 1         | 1,10920929    | 0,901543116     | #DIV/0!         |
| KRT16                                                                              | 0,531202783 | 0,149442114 | 0,01  | 0     | 1         | 1,109140487   | 0,901599041     | #DIV/0!         |
| BAIAP2-DT                                                                          | 0,498250693 | 0,149400734 | 0,011 | 0     | 1         | 1,109108675   | 0,901624902     | #DIV/0!         |
| ZCCHC8                                                                             | 0,953606936 | 0,149395402 | 0,026 | 0,024 | 1         | 1,109104576   | 0,901628234     | 1,083333333     |
| GINS2                                                                              | 0,498250693 | 0,149363722 | 0,011 | 0     | 1         | 1,109080222   | 0,901648032     | #DIV/0!         |
| NREP                                                                               | 0,706857577 | 0,149332351 | 0,078 | 0,098 | 1         | 1,109056105   | 0,901667639     | 0,795918367     |
| BOP1                                                                               | 0,91226272  | 0,149325667 | 0,027 | 0,024 | 1         | 1,109050967   | 0,901671816     | 1,125           |
| KLF10                                                                              | 0,999099467 | 0,149277215 | 0,048 | 0,049 | 1         | 1,109013721   | 0,901702099     | 0,979591837     |
| DOCK7                                                                              | 0,689496655 | 0,149211256 | 0,056 | 0,073 | 1         | 1,108963019   | 0,901743325     | 0,767123288     |
| PPP1R14A                                                                           | 0,498250693 | 0,14907428  | 0,011 | 0     | 1         | 1,108857734   | 0,901828945     | #DIV/0!         |
| TMEM248                                                                            | 0,835569002 | 0,148911664 | 0,056 | 0,049 | 1         | 1,108732754   | 0,901930602     | 1,142857143     |
| EFHD2                                                                              | 0,761568531 | 0,14879331  | 0,086 | 0,073 | 1         | 1,108641801   | 0,902004596     | 1,178082192     |
| PHLPP1                                                                             | 0,498250693 | 0,148761518 | 0,011 | 0     | 1         | 1,108617371   | 0,902024473     | #DIV/0!         |
| ERCC2                                                                              | 0,531202783 | 0,148727782 | 0,01  | 0     | 1         | 1,108591447   | 0,902045566     | #DIV/0!         |
| TCOF1                                                                              | 0,441492135 | 0,148676287 | 0,014 | 0     | 1         | 1,108551878   | 0,902077764     | #DIV/0!         |
| ALDH2                                                                              | 0,468534305 | 0,14858484  | 0,013 | 0     | 1         | 1,108481613   | 0,902134946     | #DIV/0!         |
| PCYT2                                                                              | 0,945505945 | 0,148453392 | 0,022 | 0,024 | 1         | 1,108380621   | 0,902217146     | 0,916666667     |
| ZHX3                                                                               | 0,531202783 | 0,148408732 | 0,01  | 0     | 1         | 1,10834631    | 0,902245075     | #DIV/0!         |
| MACROD2                                                                            | 0,531202783 | 0,148338223 | 0,01  | 0     | 1         | 1,108292143   | 0,902289172     | #DIV/0!         |



Supplementary Table 3

| Differentially expressed genes_keloid-MD_ comparing SC-Keloid vs. (SC-Myel+Nonmyel) |             |             |       |       |           |               |                 |                 |
|-------------------------------------------------------------------------------------|-------------|-------------|-------|-------|-----------|---------------|-----------------|-----------------|
| gene                                                                                | p_val       | avg_log2FC  | pct.1 | pct.2 | p_val_adj | Foldchange_UP | Foldchange_DOWN | Ratio_pct1_pct2 |
| VAMP8                                                                               | 0,531202783 | 0,148138067 | 0,01  | 0     | 1         | 1,108138392   | 0,902414362     | #DIV/0!         |
| CCDC77                                                                              | 0,531202783 | 0,148100419 | 0,01  | 0     | 1         | 1,108109475   | 0,902437911     | #DIV/0!         |
| LARP7                                                                               | 0,909000183 | 0,148063399 | 0,112 | 0,122 | 1         | 1,108081041   | 0,902461068     | 0,918032787     |
| PUS1                                                                                | 0,468534305 | 0,148057828 | 0,013 | 0     | 1         | 1,108076762   | 0,902464553     | #DIV/0!         |
| B3GNT7                                                                              | 0,468534305 | 0,147915151 | 0,013 | 0     | 1         | 1,107967183   | 0,902553808     | #DIV/0!         |
| MED24                                                                               | 0,441492135 | 0,147901393 | 0,014 | 0     | 1         | 1,107956617   | 0,902562415     | #DIV/0!         |
| HOXB5                                                                               | 0,468534305 | 0,147824456 | 0,013 | 0     | 1         | 1,107897533   | 0,902610548     | #DIV/0!         |
| DMAC2L                                                                              | 0,685147471 | 0,147790402 | 0,035 | 0,049 | 1         | 1,107871382   | 0,902631854     | 0,714285714     |
| ZC3H8                                                                               | 0,953606936 | 0,147733477 | 0,026 | 0,024 | 1         | 1,107827669   | 0,902667471     | 1,083333333     |
| MR1                                                                                 | 0,531202783 | 0,147685503 | 0,01  | 0     | 1         | 1,107790832   | 0,902697487     | #DIV/0!         |
| USP49                                                                               | 0,531202783 | 0,147587107 | 0,01  | 0     | 1         | 1,107715279   | 0,902759056     | #DIV/0!         |
| SHLD1                                                                               | 0,498250693 | 0,147439873 | 0,011 | 0     | 1         | 1,107602237   | 0,902851192     | #DIV/0!         |
| PEX2                                                                                | 0,786335412 | 0,147436648 | 0,061 | 0,073 | 1         | 1,107599761   | 0,90285321      | 0,835616438     |
| ZNF513                                                                              | 0,498250693 | 0,14741431  | 0,011 | 0     | 1         | 1,107582612   | 0,902867189     | #DIV/0!         |
| TPRA1                                                                               | 0,531202783 | 0,147181783 | 0,01  | 0     | 1         | 1,107404111   | 0,903012721     | #DIV/0!         |
| ATL2                                                                                | 1           | 0,147178694 | 0,024 | 0,024 | 1         | 1,10740174    | 0,903014655     | 1               |
| CDK2                                                                                | 0,531202783 | 0,147066371 | 0,01  | 0     | 1         | 1,107315525   | 0,903084963     | #DIV/0!         |
| TRPS1                                                                               | 0,846434546 | 0,146897213 | 0,041 | 0,049 | 1         | 1,107185698   | 0,903190857     | 0,836734694     |
| SVIL                                                                                | 0,393875079 | 0,146896459 | 0,018 | 0     | 1         | 1,10718512    | 0,903191329     | #DIV/0!         |
| PITRM1                                                                              | 0,468534305 | 0,146831553 | 0,013 | 0     | 1         | 1,107135309   | 0,903231964     | #DIV/0!         |
| PPWD1                                                                               | 0,350351273 | 0,146782592 | 0,024 | 0,049 | 1         | 1,107097737   | 0,903262618     | 0,489795918     |
| COPZ1                                                                               | 0,901050166 | 0,14652628  | 0,065 | 0,073 | 1         | 1,106901065   | 0,903423107     | 0,890410959     |
| APOBEC3G                                                                            | 0,890218621 | 0,146515307 | 0,021 | 0,024 | 1         | 1,106892646   | 0,903429979     | 0,875           |
| CHST1                                                                               | 0,531202783 | 0,146301193 | 0,01  | 0     | 1         | 1,106728382   | 0,903564069     | #DIV/0!         |
| GADD45GIP1                                                                          | 0,783826085 | 0,146275089 | 0,276 | 0,317 | 1         | 1,106708357   | 0,903580418     | 0,870662461     |
| PGBD1                                                                               | 0,531202783 | 0,146241818 | 0,01  | 0     | 1         | 1,106682835   | 0,903601256     | #DIV/0!         |
| ZNF789                                                                              | 0,531202783 | 0,14609927  | 0,01  | 0     | 1         | 1,106573493   | 0,903690543     | #DIV/0!         |
| ALYREF                                                                              | 0,810061102 | 0,146068527 | 0,057 | 0,049 | 1         | 1,106549912   | 0,9037098       | 1,163265306     |
| CYBA                                                                                | 0,669768476 | 0,145991214 | 0,257 | 0,317 | 1         | 1,106490615   | 0,903758231     | 0,810725552     |
| UTP14A                                                                              | 0,531202783 | 0,145987401 | 0,01  | 0     | 1         | 1,10648769    | 0,903760619     | #DIV/0!         |

Supplementary Table 3

| Differentially expressed genes_keloid-MD_comparing SC-Keloid vs. (SC-Myel+Nonmyel) |             |             |       |       |           |               |                 |                 |
|------------------------------------------------------------------------------------|-------------|-------------|-------|-------|-----------|---------------|-----------------|-----------------|
| gene                                                                               | p_val       | avg_log2FC  | pct.1 | pct.2 | p_val_adj | Foldchange_UP | Foldchange_DOWN | Ratio_pct1_pct2 |
| BRD8                                                                               | 0,945505945 | 0,145889672 | 0,022 | 0,024 | 1         | 1,106412739   | 0,903821842     | 0,916666667     |
| VIPAS39                                                                            | 0,441492135 | 0,145810442 | 0,014 | 0     | 1         | 1,106351979   | 0,90387148      | #DIV/0!         |
| DNAL4                                                                              | 0,498250693 | 0,145786755 | 0,011 | 0     | 1         | 1,106333813   | 0,903886321     | #DIV/0!         |
| CHD1L                                                                              | 0,4167109   | 0,145779501 | 0,016 | 0     | 1         | 1,106328251   | 0,903890865     | #DIV/0!         |
| STRAP                                                                              | 0,701730154 | 0,145717808 | 0,099 | 0,122 | 1         | 1,106280942   | 0,903929519     | 0,81147541      |
| PODN                                                                               | 0,468534305 | 0,145680777 | 0,013 | 0     | 1         | 1,106252547   | 0,903952721     | #DIV/0!         |
| NADK2                                                                              | 0,531202783 | 0,145677896 | 0,01  | 0     | 1         | 1,106250338   | 0,903954526     | #DIV/0!         |
| CAPZA1                                                                             | 0,833042884 | 0,145658212 | 0,107 | 0,098 | 1         | 1,106235245   | 0,903966859     | 1,091836735     |
| BTRC                                                                               | 0,531202783 | 0,145635017 | 0,01  | 0     | 1         | 1,106217459   | 0,903981393     | #DIV/0!         |
| DNAJC16                                                                            | 0,760376583 | 0,145555934 | 0,018 | 0,024 | 1         | 1,106156822   | 0,904030947     | 0,75            |
| TMEM115                                                                            | 0,441492135 | 0,145534274 | 0,014 | 0     | 1         | 1,106140215   | 0,90404452      | #DIV/0!         |
| RPL19                                                                              | 0,453225718 | 0,145503728 | 0,85  | 0,902 | 1         | 1,106116795   | 0,904063661     | 0,942350333     |
| CGAS                                                                               | 0,498250693 | 0,145464393 | 0,011 | 0     | 1         | 1,106086637   | 0,904088311     | #DIV/0!         |
| FBXO33                                                                             | 0,531202783 | 0,14535146  | 0,01  | 0     | 1         | 1,106000057   | 0,904159085     | #DIV/0!         |
| DCLRE1C                                                                            | 0,531202783 | 0,145255025 | 0,01  | 0     | 1         | 1,10592613    | 0,904219525     | #DIV/0!         |
| KIF3C                                                                              | 0,468534305 | 0,14516219  | 0,013 | 0     | 1         | 1,105854969   | 0,904277711     | #DIV/0!         |
| THEM4                                                                              | 0,997483596 | 0,145113444 | 0,024 | 0,024 | 1         | 1,105817604   | 0,904308266     | 1               |
| ADAL                                                                               | 0,468534305 | 0,145099906 | 0,013 | 0     | 1         | 1,105807227   | 0,904316752     | #DIV/0!         |
| CTNS                                                                               | 0,531202783 | 0,14492254  | 0,01  | 0     | 1         | 1,105671287   | 0,904427936     | #DIV/0!         |
| MAN2C1                                                                             | 0,441492135 | 0,144873963 | 0,014 | 0     | 1         | 1,105634058   | 0,90445839      | #DIV/0!         |
| SULF2                                                                              | 0,498250554 | 0,144848476 | 0,011 | 0     | 1         | 1,105614526   | 0,904474368     | #DIV/0!         |
| B3GLCT                                                                             | 0,441492135 | 0,144794504 | 0,014 | 0     | 1         | 1,105573165   | 0,904508206     | #DIV/0!         |
| C6orf120                                                                           | 0,498250693 | 0,144791261 | 0,011 | 0     | 1         | 1,10557068    | 0,904510239     | #DIV/0!         |
| TK2                                                                                | 1           | 0,144747573 | 0,024 | 0,024 | 1         | 1,105537202   | 0,90453763      | 1               |
| RRP9                                                                               | 0,468534305 | 0,144739627 | 0,013 | 0     | 1         | 1,105531113   | 0,904542612     | #DIV/0!         |
| TRIM69                                                                             | 0,468534305 | 0,144185692 | 0,013 | 0     | 1         | 1,105106716   | 0,904889985     | #DIV/0!         |
| KIF2A                                                                              | 0,969833612 | 0,144160956 | 0,049 | 0,049 | 1         | 1,105087768   | 0,9049055       | 1               |
| GPATCH2                                                                            | 0,784545255 | 0,144147779 | 0,059 | 0,049 | 1         | 1,105077675   | 0,904913765     | 1,204081633     |
| NCSTN                                                                              | 0,630310951 | 0,144141961 | 0,033 | 0,049 | 1         | 1,105073218   | 0,904917415     | 0,673469388     |
| SRP9                                                                               | 0,76470303  | 0,144109449 | 0,187 | 0,171 | 1         | 1,105048315   | 0,904937808     | 1,093567251     |

Supplementary Table 3

| Differentially expressed genes_keloid-MD_comparing SC-Keloid vs. (SC-Myel+Nonmyel) |             |             |       |       |           |               |                 |                 |
|------------------------------------------------------------------------------------|-------------|-------------|-------|-------|-----------|---------------|-----------------|-----------------|
| gene                                                                               | p_val       | avg_log2FC  | pct.1 | pct.2 | p_val_adj | Foldchange_UP | Foldchange_DOWN | Ratio_pct1_pct2 |
| WASHC4                                                                             | 0,356015471 | 0,144101176 | 0,061 | 0,024 | 1         | 1,105041978   | 0,904942997     | 2,541666667     |
| NLGN3                                                                              | 0,948097145 | 0,144083121 | 0,022 | 0,024 | 1         | 1,105028149   | 0,904954322     | 0,916666667     |
| FAM117B                                                                            | 0,498250693 | 0,144031504 | 0,011 | 0     | 1         | 1,104988614   | 0,9049867       | #DIV/0!         |
| NRDC                                                                               | 0,870450133 | 0,14402957  | 0,08  | 0,073 | 1         | 1,104987133   | 0,904987913     | 1,095890411     |
| POLE3                                                                              | 0,920858794 | 0,143981986 | 0,1   | 0,098 | 1         | 1,104950688   | 0,905017763     | 1,020408163     |
| CNOT7                                                                              | 0,864111066 | 0,14394862  | 0,029 | 0,024 | 1         | 1,104925133   | 0,905038695     | 1,208333333     |
| GNL3L                                                                              | 0,468534305 | 0,143898766 | 0,013 | 0     | 1         | 1,104886952   | 0,90506997      | #DIV/0!         |
| AP3S2                                                                              | 0,498250693 | 0,143859075 | 0,011 | 0     | 1         | 1,104856555   | 0,90509487      | #DIV/0!         |
| ABCC1                                                                              | 0,498250693 | 0,143856643 | 0,011 | 0     | 1         | 1,104854692   | 0,905096396     | #DIV/0!         |
| MOAP1                                                                              | 0,823206629 | 0,143841907 | 0,019 | 0,024 | 1         | 1,104843408   | 0,90510564      | 0,791666667     |
| ZSCAN5A                                                                            | 0,531202783 | 0,143796794 | 0,01  | 0     | 1         | 1,104808859   | 0,905133944     | #DIV/0!         |
| NDUFAF2                                                                            | 0,581094919 | 0,143736687 | 0,128 | 0,098 | 1         | 1,104762831   | 0,905171655     | 1,306122449     |
| FAM162A                                                                            | 0,583967018 | 0,143733415 | 0,091 | 0,122 | 1         | 1,104760325   | 0,905173708     | 0,745901639     |
| RNGTT                                                                              | 0,498250693 | 0,143620787 | 0,011 | 0     | 1         | 1,104674083   | 0,905244375     | #DIV/0!         |
| ATP13A3                                                                            | 0,442705017 | 0,143604517 | 0,053 | 0,024 | 1         | 1,104661624   | 0,905254585     | 2,208333333     |
| PRRT2                                                                              | 0,468534305 | 0,143520941 | 0,013 | 0     | 1         | 1,104597633   | 0,905307028     | #DIV/0!         |
| GPNMB                                                                              | 0,696310026 | 0,143509345 | 0,016 | 0,024 | 1         | 1,104588754   | 0,905314305     | 0,666666667     |
| MTM1                                                                               | 0,468534305 | 0,143500793 | 0,013 | 0     | 1         | 1,104582207   | 0,905319671     | #DIV/0!         |
| SYAP1                                                                              | 0,934717672 | 0,143497996 | 0,091 | 0,098 | 1         | 1,104580065   | 0,905321426     | 0,928571429     |
| POLB                                                                               | 0,531202783 | 0,143495494 | 0,01  | 0     | 1         | 1,104578149   | 0,905322996     | #DIV/0!         |
| FKBP2                                                                              | 0,579055962 | 0,14341005  | 0,332 | 0,293 | 1         | 1,104512733   | 0,905376615     | 1,133105802     |
| KRBA1                                                                              | 0,498250693 | 0,143362006 | 0,011 | 0     | 1         | 1,104475951   | 0,905406767     | #DIV/0!         |
| ZCCHC9                                                                             | 0,907540903 | 0,143251051 | 0,027 | 0,024 | 1         | 1,104391011   | 0,905476403     | 1,125           |
| PLEKHA3                                                                            | 0,882620873 | 0,143204329 | 0,065 | 0,073 | 1         | 1,104355246   | 0,905505727     | 0,890410959     |
| HOXB4                                                                              | 0,441492135 | 0,143162155 | 0,014 | 0     | 1         | 1,104322963   | 0,905532198     | #DIV/0!         |
| RDH14                                                                              | 0,823127332 | 0,143133131 | 0,03  | 0,024 | 1         | 1,104300747   | 0,905550416     | 1,25            |
| SDHD                                                                               | 0,726802487 | 0,143097217 | 0,062 | 0,049 | 1         | 1,104273257   | 0,905572959     | 1,265306122     |
| PPM1D                                                                              | 0,468534305 | 0,143094378 | 0,013 | 0     | 1         | 1,104271084   | 0,90557474      | #DIV/0!         |
| AGPAT4                                                                             | 0,790794489 | 0,142989568 | 0,032 | 0,024 | 1         | 1,104190863   | 0,905640532     | 1,333333333     |
| FOXRED2                                                                            | 0,498250693 | 0,142968945 | 0,011 | 0     | 1         | 1,104175078   | 0,905653478     | #DIV/0!         |

Supplementary Table 3

| Differentially expressed genes_keloid-MD_ comparing SC-Keloid vs. (SC-Myel+Nonmyel) |             |             |       |       |           |               |                 |                 |
|-------------------------------------------------------------------------------------|-------------|-------------|-------|-------|-----------|---------------|-----------------|-----------------|
| gene                                                                                | p_val       | avg_log2FC  | pct.1 | pct.2 | p_val_adj | Foldchange_UP | Foldchange_DOWN | Ratio_pct1_pct2 |
| TP53TG1                                                                             | 0,902822352 | 0,142915831 | 0,027 | 0,024 | 1         | 1,104134429   | 0,90568682      | 1,125           |
| PAIP1                                                                               | 0,813288836 | 0,142812568 | 0,057 | 0,049 | 1         | 1,104055401   | 0,905751649     | 1,163265306     |
| CMSS1                                                                               | 0,702225201 | 0,142800946 | 0,091 | 0,073 | 1         | 1,104046507   | 0,905758945     | 1,246575342     |
| PSMD2                                                                               | 0,689108836 | 0,142659834 | 0,077 | 0,098 | 1         | 1,103938525   | 0,905847543     | 0,785714286     |
| MYO18A                                                                              | 0,468534305 | 0,142655793 | 0,013 | 0     | 1         | 1,103935432   | 0,905850081     | #DIV/0!         |
| GNPNAT1                                                                             | 0,625123529 | 0,142551686 | 0,04  | 0,024 | 1         | 1,103855773   | 0,90591545      | 1,666666667     |
| SPNS2                                                                               | 0,498250693 | 0,142424612 | 0,011 | 0     | 1         | 1,103758549   | 0,905995248     | #DIV/0!         |
| ZDHHC18                                                                             | 0,468534305 | 0,142363627 | 0,013 | 0     | 1         | 1,103711892   | 0,906033547     | #DIV/0!         |
| TELO2                                                                               | 0,531202783 | 0,142204209 | 0,01  | 0     | 1         | 1,103589938   | 0,906133669     | #DIV/0!         |
| STARD4                                                                              | 0,531202783 | 0,142175333 | 0,01  | 0     | 1         | 1,10356785    | 0,906151805     | #DIV/0!         |
| TRPC1                                                                               | 0,531202783 | 0,142153452 | 0,01  | 0     | 1         | 1,103551113   | 0,906165549     | #DIV/0!         |
| CYSTM1                                                                              | 0,863756112 | 0,142115806 | 0,15  | 0,146 | 1         | 1,103522317   | 0,906189195     | 1,02739726      |
| PHAF1                                                                               | 0,531202783 | 0,142112614 | 0,01  | 0     | 1         | 1,103519875   | 0,9061912       | #DIV/0!         |
| HAUS4                                                                               | 0,531202783 | 0,141924164 | 0,01  | 0     | 1         | 1,103375739   | 0,906309578     | #DIV/0!         |
| USP18                                                                               | 0,531202783 | 0,141893311 | 0,01  | 0     | 1         | 1,103352143   | 0,90632896      | #DIV/0!         |
| CA11                                                                                | 0,531202628 | 0,141882868 | 0,01  | 0     | 1         | 1,103344156   | 0,90633552      | #DIV/0!         |
| TPRN                                                                                | 0,441492135 | 0,14181922  | 0,014 | 0     | 1         | 1,103295481   | 0,906375506     | #DIV/0!         |
| CD47                                                                                | 0,69854934  | 0,141773205 | 0,116 | 0,146 | 1         | 1,103260292   | 0,906404416     | 0,794520548     |
| DDX58                                                                               | 0,498250693 | 0,14169252  | 0,011 | 0     | 1         | 1,103198592   | 0,906455109     | #DIV/0!         |
| RNF214                                                                              | 0,953606936 | 0,14164556  | 0,026 | 0,024 | 1         | 1,103162683   | 0,906484615     | 1,083333333     |
| KLHL18                                                                              | 0,468534305 | 0,141603808 | 0,013 | 0     | 1         | 1,103130758   | 0,906510849     | #DIV/0!         |
| LSM14B                                                                              | 0,468534305 | 0,14155173  | 0,013 | 0     | 1         | 1,103090938   | 0,906543573     | #DIV/0!         |
| PSME2                                                                               | 0,622310828 | 0,141494494 | 0,152 | 0,122 | 1         | 1,103047176   | 0,906579539     | 1,245901639     |
| ARHGEF28                                                                            | 0,468534305 | 0,141412642 | 0,013 | 0     | 1         | 1,102984595   | 0,906630976     | #DIV/0!         |
| SGPL1                                                                               | 1           | 0,141398738 | 0,024 | 0,024 | 1         | 1,102973965   | 0,906639714     | 1               |
| MEF2C                                                                               | 0,656925728 | 0,141371415 | 0,26  | 0,244 | 1         | 1,102953077   | 0,906656884     | 1,06557377      |
| NIF3L1                                                                              | 0,531202783 | 0,141330445 | 0,01  | 0     | 1         | 1,102921755   | 0,906682632     | #DIV/0!         |
| MLPH                                                                                | 0,531202783 | 0,141323045 | 0,01  | 0     | 1         | 1,102916098   | 0,906687283     | #DIV/0!         |
| CEP126                                                                              | 0,890218621 | 0,141269869 | 0,021 | 0,024 | 1         | 1,102875447   | 0,906720703     | 0,875           |
| DUT                                                                                 | 0,956349541 | 0,141234329 | 0,161 | 0,171 | 1         | 1,102848278   | 0,90674304      | 0,941520468     |

Supplementary Table 3

| Differentially expressed genes_keloid-MD_comparing SC-Keloid vs. (SC-Myel+Nonmyel) |             |             |       |       |           |               |                 |                 |
|------------------------------------------------------------------------------------|-------------|-------------|-------|-------|-----------|---------------|-----------------|-----------------|
| gene                                                                               | p_val       | avg_log2FC  | pct.1 | pct.2 | p_val_adj | Foldchange_UP | Foldchange_DOWN | Ratio_pct1_pct2 |
| HOOK2                                                                              | 0,531202783 | 0,14103744  | 0,01  | 0     | 1         | 1,102697779   | 0,906866794     | #DIV/0!         |
| SEPTIN6                                                                            | 0,531202783 | 0,140971736 | 0,01  | 0     | 1         | 1,102647561   | 0,906908096     | #DIV/0!         |
| CA13                                                                               | 0,531202628 | 0,140962061 | 0,01  | 0     | 1         | 1,102640166   | 0,906914178     | #DIV/0!         |
| USP11                                                                              | 0,875323687 | 0,140947797 | 0,054 | 0,049 | 1         | 1,102629264   | 0,906923145     | 1,102040816     |
| SEL1L                                                                              | 0,560775542 | 0,140847248 | 0,102 | 0,073 | 1         | 1,102552419   | 0,906986355     | 1,397260274     |
| SLC7A6                                                                             | 0,468534305 | 0,140717142 | 0,013 | 0     | 1         | 1,102452993   | 0,907068153     | #DIV/0!         |
| MRPS28                                                                             | 0,81872643  | 0,140706981 | 0,03  | 0,024 | 1         | 1,102445228   | 0,907074542     | 1,25            |
| PSMD14                                                                             | 0,54319075  | 0,140682697 | 0,075 | 0,049 | 1         | 1,102426671   | 0,907089811     | 1,530612245     |
| NME4                                                                               | 0,53015651  | 0,140577776 | 0,107 | 0,073 | 1         | 1,102346499   | 0,907155782     | 1,465753425     |
| TAF8                                                                               | 0,468534305 | 0,140570719 | 0,013 | 0     | 1         | 1,102341107   | 0,907160219     | #DIV/0!         |
| TUFT1                                                                              | 0,531202783 | 0,140456914 | 0,01  | 0     | 1         | 1,102254154   | 0,907231782     | #DIV/0!         |
| NACAD                                                                              | 0,945505945 | 0,140444386 | 0,022 | 0,024 | 1         | 1,102244583   | 0,90723966      | 0,916666667     |
| SGK1                                                                               | 0,531202783 | 0,140402033 | 0,01  | 0     | 1         | 1,102212225   | 0,907266294     | #DIV/0!         |
| FAM86C1P                                                                           | 0,441492135 | 0,140319059 | 0,014 | 0     | 1         | 1,102148834   | 0,907318476     | #DIV/0!         |
| ABCC10                                                                             | 0,498250693 | 0,140291651 | 0,011 | 0     | 1         | 1,102127897   | 0,907335712     | #DIV/0!         |
| BLVRA                                                                              | 0,901861966 | 0,140230624 | 0,053 | 0,049 | 1         | 1,102081277   | 0,907374094     | 1,081632653     |
| GALNT5                                                                             | 0,531202783 | 0,140207167 | 0,01  | 0     | 1         | 1,102063358   | 0,907388848     | #DIV/0!         |
| MTHFD2L                                                                            | 0,468534305 | 0,140156559 | 0,013 | 0     | 1         | 1,102024699   | 0,907420678     | #DIV/0!         |
| ZNF384                                                                             | 0,531202783 | 0,140154341 | 0,01  | 0     | 1         | 1,102023005   | 0,907422073     | #DIV/0!         |
| TFB2M                                                                              | 0,441492135 | 0,140018157 | 0,014 | 0     | 1         | 1,101918984   | 0,907507734     | #DIV/0!         |
| FDX2                                                                               | 0,531202783 | 0,139988751 | 0,01  | 0     | 1         | 1,101896524   | 0,907526231     | #DIV/0!         |
| SYNCRIP                                                                            | 0,703061848 | 0,139959376 | 0,159 | 0,195 | 1         | 1,101874089   | 0,90754471      | 0,815384615     |
| ECT2                                                                               | 0,498250693 | 0,139839785 | 0,011 | 0     | 1         | 1,101782753   | 0,907619943     | #DIV/0!         |
| ZKSCAN5                                                                            | 0,498250693 | 0,139819288 | 0,011 | 0     | 1         | 1,1017671     | 0,907632838     | #DIV/0!         |
| LZTFL1                                                                             | 0,531202783 | 0,139810942 | 0,01  | 0     | 1         | 1,101760726   | 0,907638089     | #DIV/0!         |
| PDLIM4                                                                             | 0,98048708  | 0,139805855 | 0,404 | 0,415 | 1         | 1,101756842   | 0,907641289     | 0,973493976     |
| HARS2                                                                              | 0,498250693 | 0,139664983 | 0,011 | 0     | 1         | 1,101649265   | 0,907729921     | #DIV/0!         |
| PCDHGA6                                                                            | 0,498250693 | 0,139611829 | 0,011 | 0     | 1         | 1,101608677   | 0,907763365     | #DIV/0!         |
| DDX60                                                                              | 0,531202783 | 0,139566368 | 0,01  | 0     | 1         | 1,101573965   | 0,90779197      | #DIV/0!         |
| KNSTRN                                                                             | 0,498250693 | 0,139560542 | 0,011 | 0     | 1         | 1,101569517   | 0,907795636     | #DIV/0!         |

Supplementary Table 3

| Differentially expressed genes_keloid-MD_ comparing SC-Keloid vs. (SC-Myel+Nonmyel) |             |             |       |       |           |               |                 |                 |
|-------------------------------------------------------------------------------------|-------------|-------------|-------|-------|-----------|---------------|-----------------|-----------------|
| gene                                                                                | p_val       | avg_log2FC  | pct.1 | pct.2 | p_val_adj | Foldchange_UP | Foldchange_DOWN | Ratio_pct1_pct2 |
| ELL2                                                                                | 0,498250693 | 0,139317254 | 0,011 | 0     | 1         | 1,10138377    | 0,907948734     | #DIV/0!         |
| ALG1                                                                                | 0,498250693 | 0,139176591 | 0,011 | 0     | 1         | 1,10127639    | 0,908037264     | #DIV/0!         |
| H2AX                                                                                | 0,953606936 | 0,139129064 | 0,026 | 0,024 | 1         | 1,101240111   | 0,908067178     | 1,083333333     |
| FUCA2                                                                               | 0,864348798 | 0,139083556 | 0,064 | 0,073 | 1         | 1,101205374   | 0,908095822     | 0,876712329     |
| H1-3                                                                                | 0,531202783 | 0,139070252 | 0,01  | 0     | 1         | 1,10119522    | 0,908104196     | #DIV/0!         |
| BLOC1S5                                                                             | 0,544157477 | 0,13903799  | 0,013 | 0,024 | 1         | 1,101170594   | 0,908124504     | 0,541666667     |
| PEX16                                                                               | 0,890218621 | 0,139019852 | 0,021 | 0,024 | 1         | 1,10115675    | 0,908135921     | 0,875           |
| PET117                                                                              | 0,531202783 | 0,138887105 | 0,01  | 0     | 1         | 1,101055434   | 0,908219486     | #DIV/0!         |
| PNO1                                                                                | 0,759820886 | 0,138542304 | 0,061 | 0,049 | 1         | 1,100792315   | 0,908436574     | 1,244897959     |
| RAC2                                                                                | 0,498250693 | 0,138537592 | 0,011 | 0     | 1         | 1,10078872    | 0,908439542     | #DIV/0!         |
| DUSP15                                                                              | 0,441492135 | 0,138406471 | 0,014 | 0     | 1         | 1,100688678   | 0,90852211      | #DIV/0!         |
| ERCC8                                                                               | 0,498250693 | 0,138348281 | 0,011 | 0     | 1         | 1,100644283   | 0,908558755     | #DIV/0!         |
| HMGCS1                                                                              | 0,873641567 | 0,138289083 | 0,054 | 0,049 | 1         | 1,100599122   | 0,908596037     | 1,102040816     |
| MAP4K4                                                                              | 0,550493944 | 0,138232957 | 0,128 | 0,171 | 1         | 1,100556306   | 0,908631385     | 0,748538012     |
| DDT                                                                                 | 0,470252337 | 0,138118536 | 0,201 | 0,146 | 1         | 1,100469023   | 0,908703452     | 1,376712329     |
| UBE2L3                                                                              | 0,744909537 | 0,138110496 | 0,185 | 0,22  | 1         | 1,10046289    | 0,908708516     | 0,840909091     |
| EPM2AIP1                                                                            | 0,852090203 | 0,138045443 | 0,041 | 0,049 | 1         | 1,10041327    | 0,908749492     | 0,836734694     |
| BBS4                                                                                | 0,441492135 | 0,137947005 | 0,014 | 0     | 1         | 1,10033819    | 0,908811499     | #DIV/0!         |
| SGTA                                                                                | 0,827533785 | 0,137945086 | 0,03  | 0,024 | 1         | 1,100336726   | 0,908812708     | 1,25            |
| CLDN1                                                                               | 0,531202783 | 0,137881446 | 0,01  | 0     | 1         | 1,100288189   | 0,908852799     | #DIV/0!         |
| CFAP20DC                                                                            | 0,468534305 | 0,137829503 | 0,013 | 0     | 1         | 1,100248575   | 0,908885522     | #DIV/0!         |
| TSR1                                                                                | 0,882242416 | 0,137711511 | 0,021 | 0,024 | 1         | 1,100158593   | 0,908959859     | 0,875           |
| FZR1                                                                                | 0,441492135 | 0,137700757 | 0,014 | 0     | 1         | 1,100150393   | 0,908966634     | #DIV/0!         |
| RPS6                                                                                | 0,53784936  | 0,137591408 | 0,649 | 0,659 | 1         | 1,100067011   | 0,909035532     | 0,984825493     |
| BLOC1S4                                                                             | 0,870958486 | 0,137574391 | 0,029 | 0,024 | 1         | 1,100054035   | 0,909046254     | 1,208333333     |
| TSPYL5                                                                              | 0,498250693 | 0,137538054 | 0,011 | 0     | 1         | 1,100026329   | 0,90906915      | #DIV/0!         |
| BMP2                                                                                | 0,441492135 | 0,137507487 | 0,014 | 0     | 1         | 1,100003022   | 0,909088412     | #DIV/0!         |
| RNF111                                                                              | 0,498250693 | 0,137489818 | 0,011 | 0     | 1         | 1,09998955    | 0,909099546     | #DIV/0!         |
| SDE2                                                                                | 0,468534305 | 0,137473856 | 0,013 | 0     | 1         | 1,09997738    | 0,909109604     | #DIV/0!         |
| SHOC2                                                                               | 0,691759345 | 0,137449642 | 0,077 | 0,098 | 1         | 1,099958918   | 0,909124862     | 0,785714286     |

Supplementary Table 3

| Differentially expressed genes_keloid-MD_ comparing SC-Keloid vs. (SC-Myel+Nonmyel) |             |             |       |       |           |               |                 |                 |
|-------------------------------------------------------------------------------------|-------------|-------------|-------|-------|-----------|---------------|-----------------|-----------------|
| gene                                                                                | p_val       | avg_log2FC  | pct.1 | pct.2 | p_val_adj | Foldchange_UP | Foldchange_DOWN | Ratio_pct1_pct2 |
| YIPF5                                                                               | 0,62820347  | 0,13736776  | 0,073 | 0,098 | 1         | 1,09989649    | 0,909176462     | 0,744897959     |
| ELP3                                                                                | 0,498250693 | 0,137284832 | 0,011 | 0     | 1         | 1,099833269   | 0,909228725     | #DIV/0!         |
| ADCY3                                                                               | 0,441492135 | 0,1372804   | 0,014 | 0     | 1         | 1,09982989    | 0,909231518     | #DIV/0!         |
| KIF3A                                                                               | 0,890218621 | 0,137246219 | 0,021 | 0,024 | 1         | 1,099803832   | 0,90925306      | 0,875           |
| RAPGEF6                                                                             | 0,531202783 | 0,137216663 | 0,01  | 0     | 1         | 1,099781301   | 0,909271688     | #DIV/0!         |
| TTBK2                                                                               | 0,942915322 | 0,137197292 | 0,022 | 0,024 | 1         | 1,099766535   | 0,909283896     | 0,916666667     |
| CLIP3                                                                               | 0,498250693 | 0,137169765 | 0,011 | 0     | 1         | 1,099745551   | 0,909301246     | #DIV/0!         |
| APLNR                                                                               | 0,948729862 | 0,137080665 | 0,026 | 0,024 | 1         | 1,099677634   | 0,909357406     | 1,083333333     |
| BORCS5                                                                              | 0,76591327  | 0,137080167 | 0,018 | 0,024 | 1         | 1,099677254   | 0,90935772      | 0,75            |
| METTL2A                                                                             | 0,498250693 | 0,136997107 | 0,011 | 0     | 1         | 1,099613944   | 0,909410075     | #DIV/0!         |
| KIAA0930                                                                            | 0,945505945 | 0,136963845 | 0,022 | 0,024 | 1         | 1,099588592   | 0,909431043     | 0,916666667     |
| CUBN                                                                                | 0,696310026 | 0,136938333 | 0,016 | 0,024 | 1         | 1,099569148   | 0,909447125     | 0,666666667     |
| NANP                                                                                | 0,498250693 | 0,136931934 | 0,011 | 0     | 1         | 1,099564271   | 0,909451159     | #DIV/0!         |
| SUSD1                                                                               | 0,531202783 | 0,136836926 | 0,01  | 0     | 1         | 1,099491862   | 0,909511052     | #DIV/0!         |
| BDP1                                                                                | 0,459572794 | 0,136769147 | 0,083 | 0,049 | 1         | 1,099440208   | 0,909553783     | 1,693877551     |
| PLEK2                                                                               | 0,468534305 | 0,13668899  | 0,013 | 0     | 1         | 1,099379124   | 0,90960432      | #DIV/0!         |
| EBF1                                                                                | 0,468534305 | 0,13668508  | 0,013 | 0     | 1         | 1,099376145   | 0,909606784     | #DIV/0!         |
| PLXNA1                                                                              | 0,531202783 | 0,136560521 | 0,01  | 0     | 1         | 1,099281231   | 0,909685321     | #DIV/0!         |
| SMIM27                                                                              | 0,831366235 | 0,13653775  | 0,019 | 0,024 | 1         | 1,099263881   | 0,90969968      | 0,791666667     |
| ADPGK                                                                               | 0,946292034 | 0,136516824 | 0,026 | 0,024 | 1         | 1,099247936   | 0,909712875     | 1,083333333     |
| PRECSIT                                                                             | 0,498250693 | 0,136504896 | 0,011 | 0     | 1         | 1,099238848   | 0,909720396     | #DIV/0!         |
| NEO1                                                                                | 0,531202783 | 0,136466271 | 0,01  | 0     | 1         | 1,099209419   | 0,909744752     | #DIV/0!         |
| CAND1                                                                               | 0,503216649 | 0,136434285 | 0,078 | 0,049 | 1         | 1,099185048   | 0,909764922     | 1,591836735     |
| NUP93                                                                               | 0,468534305 | 0,136433669 | 0,013 | 0     | 1         | 1,099184579   | 0,909765311     | #DIV/0!         |
| UTP3                                                                                | 0,864111066 | 0,136426352 | 0,029 | 0,024 | 1         | 1,099179004   | 0,909769925     | 1,208333333     |
| PYROXD1                                                                             | 0,937735913 | 0,136331643 | 0,022 | 0,024 | 1         | 1,099106848   | 0,909829651     | 0,916666667     |
| PDCD2                                                                               | 0,751915569 | 0,136125153 | 0,033 | 0,024 | 1         | 1,098949547   | 0,909959882     | 1,375           |
| RPA2                                                                                | 0,747817715 | 0,136124151 | 0,033 | 0,024 | 1         | 1,098948783   | 0,909960514     | 1,375           |
| MOB1B                                                                               | 0,786540464 | 0,136072978 | 0,032 | 0,024 | 1         | 1,098909804   | 0,909992792     | 1,333333333     |
| MRPL35                                                                              | 0,586152837 | 0,136033451 | 0,032 | 0,049 | 1         | 1,098879696   | 0,910017724     | 0,653061224     |

Supplementary Table 3

| Differentially expressed genes_keloid-MD_comparing SC-Keloid vs. (SC-Myel+Nonmyel) |             |             |       |       |           |               |                 |                 |
|------------------------------------------------------------------------------------|-------------|-------------|-------|-------|-----------|---------------|-----------------|-----------------|
| gene                                                                               | p_val       | avg_log2FC  | pct.1 | pct.2 | p_val_adj | Foldchange_UP | Foldchange_DOWN | Ratio_pct1_pct2 |
| VPS9D1                                                                             | 0,498250693 | 0,135971962 | 0,011 | 0     | 1         | 1,098832862   | 0,91005651      | #DIV/0!         |
| KLHL8                                                                              | 0,468534305 | 0,13571742  | 0,013 | 0     | 1         | 1,098639007   | 0,91021709      | #DIV/0!         |
| SPOCD1                                                                             | 0,751915569 | 0,135668038 | 0,033 | 0,024 | 1         | 1,098601402   | 0,910248247     | 1,375           |
| SNAPC3                                                                             | 0,468534305 | 0,135580696 | 0,013 | 0     | 1         | 1,098534894   | 0,910303356     | #DIV/0!         |
| CIAO1                                                                              | 0,909901414 | 0,135561774 | 0,027 | 0,024 | 1         | 1,098520486   | 0,910315295     | 1,125           |
| SMDT1                                                                              | 0,64691369  | 0,135377654 | 0,179 | 0,146 | 1         | 1,098380299   | 0,910431479     | 1,226027397     |
| RNF113A                                                                            | 0,498250693 | 0,135255534 | 0,011 | 0     | 1         | 1,098287328   | 0,910508547     | #DIV/0!         |
| DENND4B                                                                            | 0,498250693 | 0,135252332 | 0,011 | 0     | 1         | 1,098284891   | 0,910510568     | #DIV/0!         |
| METTL6                                                                             | 0,498250693 | 0,13521688  | 0,011 | 0     | 1         | 1,098257902   | 0,910532943     | #DIV/0!         |
| ZNF780B                                                                            | 0,531202783 | 0,135155922 | 0,01  | 0     | 1         | 1,098211499   | 0,910571417     | #DIV/0!         |
| THAP4                                                                              | 0,76591327  | 0,135107029 | 0,018 | 0,024 | 1         | 1,098174281   | 0,910602276     | 0,75            |
| ZDHHC9                                                                             | 0,498250693 | 0,135079408 | 0,011 | 0     | 1         | 1,098153256   | 0,91061971      | #DIV/0!         |
| FILIP1L                                                                            | 0,669794828 | 0,135063268 | 0,067 | 0,049 | 1         | 1,098140971   | 0,910629898     | 1,367346939     |
| ANP32E                                                                             | 0,766015602 | 0,135049022 | 0,061 | 0,049 | 1         | 1,098130127   | 0,91063889      | 1,244897959     |
| CIAPIN1                                                                            | 0,82532988  | 0,134979617 | 0,03  | 0,024 | 1         | 1,0980773     | 0,9106827       | 1,25            |
| ZNF140                                                                             | 0,531202783 | 0,134835146 | 0,01  | 0     | 1         | 1,097967344   | 0,9107739       | #DIV/0!         |
| PIAS4                                                                              | 0,531202783 | 0,134763052 | 0,01  | 0     | 1         | 1,097912478   | 0,910819414     | #DIV/0!         |
| CALHM2                                                                             | 1           | 0,134728074 | 0,024 | 0,024 | 1         | 1,097885859   | 0,910841497     | 1               |
| PEMT                                                                               | 0,74986576  | 0,134608383 | 0,033 | 0,024 | 1         | 1,097794779   | 0,910917067     | 1,375           |
| ADCY1                                                                              | 0,531202783 | 0,134567221 | 0,01  | 0     | 1         | 1,097763458   | 0,910943057     | #DIV/0!         |
| FBXO31                                                                             | 0,531202783 | 0,134552328 | 0,01  | 0     | 1         | 1,097752126   | 0,910952461     | #DIV/0!         |
| DUSP12                                                                             | 0,792923849 | 0,134268227 | 0,032 | 0,024 | 1         | 1,097535973   | 0,911131867     | 1,333333333     |
| CNTROB                                                                             | 0,531202783 | 0,13402206  | 0,01  | 0     | 1         | 1,097348717   | 0,911287346     | #DIV/0!         |
| PGAP6                                                                              | 0,994967217 | 0,133796042 | 0,024 | 0,024 | 1         | 1,097176815   | 0,911430123     | 1               |
| SPTLC2                                                                             | 0,683244479 | 0,13379167  | 0,035 | 0,049 | 1         | 1,097173491   | 0,911432885     | 0,714285714     |
| MRPS5                                                                              | 0,729819075 | 0,133765695 | 0,062 | 0,049 | 1         | 1,097153737   | 0,911449295     | 1,265306122     |
| OGN                                                                                | 0,498250693 | 0,133697876 | 0,011 | 0     | 1         | 1,097102162   | 0,911492142     | #DIV/0!         |
| SIAH2                                                                              | 0,498250693 | 0,133621194 | 0,011 | 0     | 1         | 1,097043851   | 0,911540591     | #DIV/0!         |
| ANAPC13                                                                            | 0,999099467 | 0,133606032 | 0,048 | 0,049 | 1         | 1,097032322   | 0,911550171     | 0,979591837     |
| FYCO1                                                                              | 0,498250693 | 0,133581106 | 0,011 | 0     | 1         | 1,097013368   | 0,91156592      | #DIV/0!         |



Supplementary Table 3

| Differentially expressed genes_keloid-MD_ comparing SC-Keloid vs. (SC-Myel+Nonmyel) |             |             |       |       |           |               |                 |                 |
|-------------------------------------------------------------------------------------|-------------|-------------|-------|-------|-----------|---------------|-----------------|-----------------|
| gene                                                                                | p_val       | avg_log2FC  | pct.1 | pct.2 | p_val_adj | Foldchange_UP | Foldchange_DOWN | Ratio_pct1_pct2 |
| MCTP2                                                                               | 0,531202783 | 0,133561922 | 0,01  | 0     | 1         | 1,09699878    | 0,911578042     | #DIV/0!         |
| COX41                                                                               | 0,737119742 | 0,133449017 | 0,514 | 0,512 | 1         | 1,096912933   | 0,911649384     | 1,00390625      |
| NRAS                                                                                | 0,61741197  | 0,133431548 | 0,07  | 0,049 | 1         | 1,096899651   | 0,911660423     | 1,428571429     |
| POLR1A                                                                              | 0,531202783 | 0,133429365 | 0,01  | 0     | 1         | 1,096897991   | 0,911661803     | #DIV/0!         |
| CNFN                                                                                | 0,531202783 | 0,133427019 | 0,01  | 0     | 1         | 1,096896208   | 0,911663285     | #DIV/0!         |
| FAM32A                                                                              | 0,815539468 | 0,133341222 | 0,062 | 0,073 | 1         | 1,096830977   | 0,911717503     | 0,849315068     |
| CD83                                                                                | 0,498250693 | 0,133311316 | 0,011 | 0     | 1         | 1,096808241   | 0,911736402     | #DIV/0!         |
| RNF182                                                                              | 0,531202783 | 0,133297126 | 0,01  | 0     | 1         | 1,096797453   | 0,91174537      | #DIV/0!         |
| ANKRD37                                                                             | 0,4167109   | 0,133282167 | 0,016 | 0     | 1         | 1,09678608    | 0,911754824     | #DIV/0!         |
| FBRSL1                                                                              | 0,531202783 | 0,133274194 | 0,01  | 0     | 1         | 1,096780019   | 0,911759863     | #DIV/0!         |
| HCG11                                                                               | 0,468534305 | 0,133232779 | 0,013 | 0     | 1         | 1,096748535   | 0,911786037     | #DIV/0!         |
| ACOT2                                                                               | 0,531202783 | 0,133097082 | 0,01  | 0     | 1         | 1,096645382   | 0,911871802     | #DIV/0!         |
| SAV1                                                                                | 0,953606936 | 0,132867036 | 0,026 | 0,024 | 1         | 1,096470529   | 0,912017216     | 1,083333333     |
| EML3                                                                                | 0,531202783 | 0,132798334 | 0,01  | 0     | 1         | 1,096418316   | 0,912060648     | #DIV/0!         |
| BMP1                                                                                | 0,712452802 | 0,132704713 | 0,099 | 0,122 | 1         | 1,096347169   | 0,912119836     | 0,81147541      |
| PDE4DIP                                                                             | 0,713187893 | 0,132696778 | 0,035 | 0,024 | 1         | 1,096341138   | 0,912124854     | 1,458333333     |
| ABHD14B                                                                             | 0,441492135 | 0,132322918 | 0,014 | 0     | 1         | 1,096057069   | 0,912361252     | #DIV/0!         |
| ROPN1B                                                                              | 0,531202783 | 0,132289554 | 0,01  | 0     | 1         | 1,096031721   | 0,912382352     | #DIV/0!         |
| PDRG1                                                                               | 0,75396713  | 0,132258629 | 0,033 | 0,024 | 1         | 1,096008228   | 0,91240191      | 1,375           |
| LIG3                                                                                | 0,950688894 | 0,131860332 | 0,022 | 0,024 | 1         | 1,095705686   | 0,912653839     | 0,916666667     |
| PRMT9                                                                               | 0,544157477 | 0,131842677 | 0,013 | 0,024 | 1         | 1,095692277   | 0,912665008     | 0,541666667     |
| PPP3CC                                                                              | 0,461761449 | 0,131802763 | 0,011 | 0,024 | 1         | 1,095661964   | 0,912690258     | 0,458333333     |
| H4C8                                                                                | 0,531202783 | 0,13178844  | 0,01  | 0     | 1         | 1,095651086   | 0,912699319     | #DIV/0!         |
| B3GALT4                                                                             | 0,696310026 | 0,131776806 | 0,016 | 0,024 | 1         | 1,095642251   | 0,912706679     | 0,666666667     |
| SEPTIN7                                                                             | 0,522945202 | 0,131766486 | 0,514 | 0,463 | 1         | 1,095634413   | 0,912713208     | 1,110151188     |
| GLO1                                                                                | 0,966938241 | 0,131739699 | 0,07  | 0,073 | 1         | 1,095614071   | 0,912730155     | 0,95890411      |
| PLA2G15                                                                             | 0,498250693 | 0,131737613 | 0,011 | 0     | 1         | 1,095612486   | 0,912731475     | #DIV/0!         |
| OAT                                                                                 | 0,811127793 | 0,131540105 | 0,083 | 0,098 | 1         | 1,095462505   | 0,912856438     | 0,846938776     |
| TRIM26                                                                              | 0,441492135 | 0,131410734 | 0,014 | 0     | 1         | 1,095364276   | 0,9129383       | #DIV/0!         |
| BTN3A1                                                                              | 0,498250693 | 0,131285254 | 0,011 | 0     | 1         | 1,095269009   | 0,913017708     | #DIV/0!         |

Supplementary Table 3

| Differentially expressed genes_keloid-MD_comparing SC-Keloid vs. (SC-Myel+Nonmyel) |             |             |       |       |           |               |                 |                 |
|------------------------------------------------------------------------------------|-------------|-------------|-------|-------|-----------|---------------|-----------------|-----------------|
| gene                                                                               | p_val       | avg_log2FC  | pct.1 | pct.2 | p_val_adj | Foldchange_UP | Foldchange_DOWN | Ratio_pct1_pct2 |
| ANKDD1A                                                                            | 0,8286443   | 0,131211271 | 0,019 | 0,024 | 1         | 1,095212844   | 0,91306453      | 0,791666667     |
| SAMD9L                                                                             | 0,951168171 | 0,131180234 | 0,026 | 0,024 | 1         | 1,095189283   | 0,913084172     | 1,083333333     |
| NME6                                                                               | 0,531202783 | 0,131152321 | 0,01  | 0     | 1         | 1,095168093   | 0,913101839     | #DIV/0!         |
| TMEM258                                                                            | 0,806269235 | 0,13114528  | 0,305 | 0,293 | 1         | 1,095162749   | 0,913106295     | 1,040955631     |
| GNL2                                                                               | 0,445527121 | 0,131106169 | 0,027 | 0,049 | 1         | 1,09513306    | 0,913131049     | 0,551020408     |
| ZNF251                                                                             | 0,531202783 | 0,131094708 | 0,01  | 0     | 1         | 1,095124359   | 0,913138304     | #DIV/0!         |
| FAR2                                                                               | 0,531202783 | 0,1310243   | 0,01  | 0     | 1         | 1,095070916   | 0,913182868     | #DIV/0!         |
| DIRAS1                                                                             | 0,531202783 | 0,13094737  | 0,01  | 0     | 1         | 1,095012523   | 0,913231565     | #DIV/0!         |
| ACOT13                                                                             | 0,813288847 | 0,130926112 | 0,057 | 0,049 | 1         | 1,094996388   | 0,913245021     | 1,163265306     |
| MDFI                                                                               | 0,468534305 | 0,13089627  | 0,013 | 0     | 1         | 1,094973739   | 0,913263911     | #DIV/0!         |
| NSUN2                                                                              | 0,531202783 | 0,130846085 | 0,01  | 0     | 1         | 1,094935651   | 0,91329568      | #DIV/0!         |
| SAMD5                                                                              | 0,679444539 | 0,130821261 | 0,035 | 0,049 | 1         | 1,094916811   | 0,913311395     | 0,714285714     |
| ZNF783                                                                             | 0,531202783 | 0,130750404 | 0,01  | 0     | 1         | 1,094863035   | 0,913356253     | #DIV/0!         |
| VASN                                                                               | 0,468534305 | 0,130745639 | 0,013 | 0     | 1         | 1,09485942    | 0,91335927      | #DIV/0!         |
| RNASEL                                                                             | 0,531202783 | 0,130737401 | 0,01  | 0     | 1         | 1,094853168   | 0,913364485     | #DIV/0!         |
| GFPT2                                                                              | 0,531202783 | 0,130667873 | 0,01  | 0     | 1         | 1,094800405   | 0,913408504     | #DIV/0!         |
| RAB29                                                                              | 0,468534305 | 0,130650626 | 0,013 | 0     | 1         | 1,094787317   | 0,913419424     | #DIV/0!         |
| RRP15                                                                              | 0,90700302  | 0,130636686 | 0,053 | 0,049 | 1         | 1,094776738   | 0,91342825      | 1,081632653     |
| USP46-DT                                                                           | 0,498250693 | 0,130576261 | 0,011 | 0     | 1         | 1,094730886   | 0,913466508     | #DIV/0!         |
| SETD9                                                                              | 0,498250693 | 0,130182793 | 0,011 | 0     | 1         | 1,09443236    | 0,913715673     | #DIV/0!         |
| MEIS1                                                                              | 0,531202783 | 0,130086483 | 0,01  | 0     | 1         | 1,094359302   | 0,913776672     | #DIV/0!         |
| SLC23A2                                                                            | 0,905181209 | 0,130062435 | 0,027 | 0,024 | 1         | 1,09434106    | 0,913791903     | 1,125           |
| TOR4A                                                                              | 0,375818168 | 0,130018073 | 0,01  | 0,024 | 1         | 1,09430741    | 0,913820003     | 0,416666667     |
| BROX                                                                               | 0,357087731 | 0,129760086 | 0,061 | 0,024 | 1         | 1,09411174    | 0,913983429     | 2,541666667     |
| SASH1                                                                              | 0,853553112 | 0,129554512 | 0,064 | 0,073 | 1         | 1,093955848   | 0,914113674     | 0,876712329     |
| IL15                                                                               | 0,696310026 | 0,129431581 | 0,016 | 0,024 | 1         | 1,093862637   | 0,914191569     | 0,666666667     |
| OTUD6B-AS1                                                                         | 0,868345594 | 0,129427052 | 0,08  | 0,073 | 1         | 1,093859202   | 0,914194439     | 1,095890411     |
| BTBD10                                                                             | 0,688005704 | 0,129423301 | 0,037 | 0,024 | 1         | 1,093856359   | 0,914196816     | 1,541666667     |
| SLC35C2                                                                            | 0,490845434 | 0,129411478 | 0,029 | 0,049 | 1         | 1,093847394   | 0,914204308     | 0,591836735     |
| E2F1                                                                               | 0,498250693 | 0,129386452 | 0,011 | 0     | 1         | 1,09382842    | 0,914220166     | #DIV/0!         |

Supplementary Table 3

| Differentially expressed genes_keloid-MD_ comparing SC-Keloid vs. (SC-Myel+Nonmyel) |             |             |       |       |           |               |                 |                 |
|-------------------------------------------------------------------------------------|-------------|-------------|-------|-------|-----------|---------------|-----------------|-----------------|
| gene                                                                                | p_val       | avg_log2FC  | pct.1 | pct.2 | p_val_adj | Foldchange_UP | Foldchange_DOWN | Ratio_pct1_pct2 |
| CDK18                                                                               | 0,751915569 | 0,128967295 | 0,033 | 0,024 | 1         | 1,093510668   | 0,91448582      | 1,375           |
| CEP57                                                                               | 0,968060043 | 0,128908198 | 0,049 | 0,049 | 1         | 1,093465876   | 0,914523281     | 1               |
| SLC35A2                                                                             | 0,953606936 | 0,128907879 | 0,026 | 0,024 | 1         | 1,093465634   | 0,914523483     | 1,083333333     |
| ORMDL2                                                                              | 0,907540903 | 0,12885876  | 0,027 | 0,024 | 1         | 1,093428405   | 0,91455462      | 1,125           |
| MTERF1                                                                              | 0,531202783 | 0,128824253 | 0,01  | 0     | 1         | 1,093402253   | 0,914576495     | #DIV/0!         |
| ANKHD1                                                                              | 0,441492135 | 0,128813265 | 0,014 | 0     | 1         | 1,093393925   | 0,914583461     | #DIV/0!         |
| ALG8                                                                                | 0,868674911 | 0,12874181  | 0,029 | 0,024 | 1         | 1,093339772   | 0,91462876      | 1,208333333     |
| TMSB15A                                                                             | 0,531202783 | 0,128706453 | 0,01  | 0     | 1         | 1,093312977   | 0,914651176     | #DIV/0!         |
| UNC119B                                                                             | 0,468534305 | 0,128612783 | 0,013 | 0     | 1         | 1,093241994   | 0,914710563     | #DIV/0!         |
| ZNF354B                                                                             | 0,531202783 | 0,128573532 | 0,01  | 0     | 1         | 1,093212251   | 0,91473545      | #DIV/0!         |
| CIC                                                                                 | 0,942915322 | 0,128551477 | 0,022 | 0,024 | 1         | 1,093195538   | 0,914749434     | 0,916666667     |
| HSD17B8                                                                             | 0,531202783 | 0,12845609  | 0,01  | 0     | 1         | 1,093123262   | 0,914809917     | #DIV/0!         |
| NFIL3                                                                               | 0,612061228 | 0,128329184 | 0,07  | 0,049 | 1         | 1,09302711    | 0,914890391     | 1,428571429     |
| CAMTA2                                                                              | 0,498250693 | 0,128307718 | 0,011 | 0     | 1         | 1,093010847   | 0,914904004     | #DIV/0!         |
| WWP1                                                                                | 0,958485748 | 0,128172451 | 0,026 | 0,024 | 1         | 1,092908371   | 0,914989789     | 1,083333333     |
| MAU2                                                                                | 0,531202783 | 0,128168835 | 0,01  | 0     | 1         | 1,092905632   | 0,914992083     | #DIV/0!         |
| PIGW                                                                                | 0,531202783 | 0,128151466 | 0,01  | 0     | 1         | 1,092892474   | 0,915003099     | #DIV/0!         |
| SMIM8                                                                               | 0,945505945 | 0,128139964 | 0,022 | 0,024 | 1         | 1,092883761   | 0,915010394     | 0,916666667     |
| LXN                                                                                 | 0,468534305 | 0,128125208 | 0,013 | 0     | 1         | 1,092872583   | 0,915019752     | #DIV/0!         |
| MSRB1                                                                               | 0,531202783 | 0,128113997 | 0,01  | 0     | 1         | 1,09286409    | 0,915026863     | #DIV/0!         |
| TMEM150A                                                                            | 0,531202783 | 0,12810861  | 0,01  | 0     | 1         | 1,09286001    | 0,915030279     | #DIV/0!         |
| MRPS16                                                                              | 0,903598224 | 0,128078678 | 0,067 | 0,073 | 1         | 1,092837336   | 0,915049264     | 0,917808219     |
| DHRS12                                                                              | 0,531202783 | 0,128009294 | 0,01  | 0     | 1         | 1,092784779   | 0,915093273     | #DIV/0!         |
| TNKS1BP1                                                                            | 0,831366235 | 0,127978518 | 0,019 | 0,024 | 1         | 1,092761467   | 0,915112794     | 0,791666667     |
| MEX3B                                                                               | 0,498250693 | 0,127871591 | 0,011 | 0     | 1         | 1,092680479   | 0,915180622     | #DIV/0!         |
| GALM                                                                                | 0,531202783 | 0,127802972 | 0,01  | 0     | 1         | 1,092628509   | 0,915224152     | #DIV/0!         |
| POLR1B                                                                              | 0,498250693 | 0,127786541 | 0,011 | 0     | 1         | 1,092616065   | 0,915234575     | #DIV/0!         |
| DLX5                                                                                | 0,531202783 | 0,127781055 | 0,01  | 0     | 1         | 1,09261191    | 0,915238055     | #DIV/0!         |
| PDSS2                                                                               | 0,531202783 | 0,12774104  | 0,01  | 0     | 1         | 1,092581606   | 0,915263441     | #DIV/0!         |
| PIP4K2C                                                                             | 0,498250693 | 0,127725371 | 0,011 | 0     | 1         | 1,09256974    | 0,915273381     | #DIV/0!         |

Supplementary Table 3

| Differentially expressed genes_keloid-MD_comparing SC-Keloid vs. (SC-Myel+Nonmyel) |             |             |       |       |           |               |                 |                 |
|------------------------------------------------------------------------------------|-------------|-------------|-------|-------|-----------|---------------|-----------------|-----------------|
| gene                                                                               | p_val       | avg_log2FC  | pct.1 | pct.2 | p_val_adj | Foldchange_UP | Foldchange_DOWN | Ratio_pct1_pct2 |
| ZNF326                                                                             | 0,72981909  | 0,127700176 | 0,062 | 0,049 | 1         | 1,09255066    | 0,915289366     | 1,265306122     |
| CCDC144A                                                                           | 0,498250693 | 0,127549803 | 0,011 | 0     | 1         | 1,092436788   | 0,915384772     | #DIV/0!         |
| PHKG2                                                                              | 0,531202783 | 0,127426466 | 0,01  | 0     | 1         | 1,092343398   | 0,915463032     | #DIV/0!         |
| ABCD1                                                                              | 0,531202783 | 0,127406945 | 0,01  | 0     | 1         | 1,092328619   | 0,915475419     | #DIV/0!         |
| INTS9                                                                              | 0,531202783 | 0,127361532 | 0,01  | 0     | 1         | 1,092294235   | 0,915504237     | #DIV/0!         |
| SLC17A5                                                                            | 0,468534305 | 0,127282067 | 0,013 | 0     | 1         | 1,092234072   | 0,915554665     | #DIV/0!         |
| PRIM1                                                                              | 0,498250693 | 0,127148567 | 0,011 | 0     | 1         | 1,092133006   | 0,91563939      | #DIV/0!         |
| ZNF322                                                                             | 0,750557745 | 0,126908034 | 0,061 | 0,049 | 1         | 1,091950936   | 0,915792063     | 1,244897959     |
| PCGF1                                                                              | 0,498250693 | 0,12689322  | 0,011 | 0     | 1         | 1,091939724   | 0,915801466     | #DIV/0!         |
| WDR12                                                                              | 0,958485748 | 0,126840534 | 0,026 | 0,024 | 1         | 1,091899848   | 0,915834911     | 1,083333333     |
| TBC1D4                                                                             | 0,498250693 | 0,126784663 | 0,011 | 0     | 1         | 1,091857563   | 0,915870379     | #DIV/0!         |
| STXBP1                                                                             | 0,468534305 | 0,126730312 | 0,013 | 0     | 1         | 1,09181643    | 0,915904884     | #DIV/0!         |
| LYSMD4                                                                             | 0,441492135 | 0,126674273 | 0,014 | 0     | 1         | 1,091774021   | 0,915940461     | #DIV/0!         |
| NFKB2                                                                              | 0,498250693 | 0,126665484 | 0,011 | 0     | 1         | 1,09176737    | 0,915946041     | #DIV/0!         |
| TMOD3                                                                              | 0,376124955 | 0,126532764 | 0,093 | 0,049 | 1         | 1,091666938   | 0,916030307     | 1,897959184     |
| NLK                                                                                | 0,441492135 | 0,126435712 | 0,014 | 0     | 1         | 1,091593502   | 0,916091932     | #DIV/0!         |
| GFOD1                                                                              | 0,531202783 | 0,126146659 | 0,01  | 0     | 1         | 1,091374817   | 0,916275495     | #DIV/0!         |
| GON4L                                                                              | 0,461536803 | 0,126009445 | 0,051 | 0,024 | 1         | 1,091271021   | 0,916362646     | 2,125           |
| TRIM25                                                                             | 0,531202783 | 0,125964336 | 0,01  | 0     | 1         | 1,091236901   | 0,916391298     | #DIV/0!         |
| RPS6KA4                                                                            | 0,468534305 | 0,125916858 | 0,013 | 0     | 1         | 1,09120099    | 0,916421456     | #DIV/0!         |
| CIPC                                                                               | 0,531202783 | 0,125884444 | 0,01  | 0     | 1         | 1,091176473   | 0,916442046     | #DIV/0!         |
| TMEM138                                                                            | 0,531202783 | 0,125836729 | 0,01  | 0     | 1         | 1,091140385   | 0,916472357     | #DIV/0!         |
| APAF1                                                                              | 0,82592442  | 0,125774919 | 0,019 | 0,024 | 1         | 1,091093638   | 0,916511622     | 0,791666667     |
| AP1B1                                                                              | 0,531202783 | 0,125729593 | 0,01  | 0     | 1         | 1,091059359   | 0,916540417     | #DIV/0!         |
| RIPOR2                                                                             | 0,531202783 | 0,125693214 | 0,01  | 0     | 1         | 1,091031847   | 0,916563529     | #DIV/0!         |
| CASP3                                                                              | 0,700847225 | 0,125515966 | 0,064 | 0,049 | 1         | 1,090897812   | 0,916676144     | 1,306122449     |
| ATP5MC3                                                                            | 0,906643586 | 0,12544596  | 0,391 | 0,39  | 1         | 1,090844878   | 0,916720626     | 1,002564103     |
| RAB4B                                                                              | 0,531202783 | 0,125423615 | 0,01  | 0     | 1         | 1,090827983   | 0,916734825     | #DIV/0!         |
| PACSIN2                                                                            | 0,720581252 | 0,125406039 | 0,057 | 0,073 | 1         | 1,090814693   | 0,916745994     | 0,780821918     |
| PARP11                                                                             | 0,531202783 | 0,125351598 | 0,01  | 0     | 1         | 1,090773532   | 0,916780588     | #DIV/0!         |

Supplementary Table 3

| Differentially expressed genes_keloid-MD_ comparing SC-Keloid vs. (SC-Myel+Nonmyel) |             |             |       |       |           |               |                 |                 |
|-------------------------------------------------------------------------------------|-------------|-------------|-------|-------|-----------|---------------|-----------------|-----------------|
| gene                                                                                | p_val       | avg_log2FC  | pct.1 | pct.2 | p_val_adj | Foldchange_UP | Foldchange_DOWN | Ratio_pct1_pct2 |
| PDIK1L                                                                              | 0,531202783 | 0,125311179 | 0,01  | 0     | 1         | 1,090742973   | 0,916806273     | #DIV/0!         |
| MFN1                                                                                | 0,521741037 | 0,125307222 | 0,048 | 0,073 | 1         | 1,090739981   | 0,916808788     | 0,657534247     |
| HCCS                                                                                | 0,498250693 | 0,125304788 | 0,011 | 0     | 1         | 1,090738141   | 0,916810335     | #DIV/0!         |
| S100A8                                                                              | 0,666966446 | 0,125146471 | 0,067 | 0,049 | 1         | 1,090618453   | 0,916910948     | 1,367346939     |
| TWIST2                                                                              | 0,498250693 | 0,12505642  | 0,011 | 0     | 1         | 1,09055038    | 0,916968182     | #DIV/0!         |
| ZNF264                                                                              | 0,914624801 | 0,125049167 | 0,027 | 0,024 | 1         | 1,090544898   | 0,916972792     | 1,125           |
| ZNF415                                                                              | 0,531202783 | 0,125010134 | 0,01  | 0     | 1         | 1,090515393   | 0,916997602     | #DIV/0!         |
| RIMKLB                                                                              | 0,531202783 | 0,124944946 | 0,01  | 0     | 1         | 1,090466119   | 0,917039037     | #DIV/0!         |
| MORC2                                                                               | 0,531202783 | 0,124883202 | 0,01  | 0     | 1         | 1,090419451   | 0,917078285     | #DIV/0!         |
| MTHFD1                                                                              | 0,531202783 | 0,124861623 | 0,01  | 0     | 1         | 1,090403141   | 0,917092003     | #DIV/0!         |
| CAMSAP2                                                                             | 0,76007963  | 0,124815414 | 0,038 | 0,049 | 1         | 1,090368217   | 0,917121377     | 0,775510204     |
| UBE2O                                                                               | 0,531202783 | 0,124589819 | 0,01  | 0     | 1         | 1,090197728   | 0,917264799     | #DIV/0!         |
| MRPL52                                                                              | 0,754066485 | 0,124516547 | 0,244 | 0,22  | 1         | 1,090142361   | 0,917311386     | 1,109090909     |
| C4orf46                                                                             | 0,498250693 | 0,124491218 | 0,011 | 0     | 1         | 1,090123221   | 0,917327492     | #DIV/0!         |
| ATP11B                                                                              | 0,609917149 | 0,124455971 | 0,053 | 0,073 | 1         | 1,090096589   | 0,917349903     | 0,726027397     |
| HEATR5A                                                                             | 0,531202783 | 0,124364635 | 0,01  | 0     | 1         | 1,090027577   | 0,917407982     | #DIV/0!         |
| ATP5PD                                                                              | 0,71005271  | 0,12432023  | 0,223 | 0,195 | 1         | 1,089994028   | 0,917436219     | 1,143589744     |
| HEMK1                                                                               | 0,531202783 | 0,124319417 | 0,01  | 0     | 1         | 1,089993413   | 0,917436737     | #DIV/0!         |
| GPR176                                                                              | 0,498250693 | 0,124275437 | 0,011 | 0     | 1         | 1,089960186   | 0,917464705     | #DIV/0!         |
| RBM45                                                                               | 0,531202783 | 0,124126589 | 0,01  | 0     | 1         | 1,089847737   | 0,917559368     | #DIV/0!         |
| ZNF891                                                                              | 0,468534305 | 0,124027092 | 0,013 | 0     | 1         | 1,089772576   | 0,91762265      | #DIV/0!         |
| NPRL2                                                                               | 0,531202783 | 0,123934053 | 0,01  | 0     | 1         | 1,0897023     | 0,917681829     | #DIV/0!         |
| ORC6                                                                                | 0,441492135 | 0,123833102 | 0,014 | 0     | 1         | 1,089626052   | 0,917746045     | #DIV/0!         |
| ZNF317                                                                              | 0,531202783 | 0,123703233 | 0,01  | 0     | 1         | 1,08952797    | 0,917828663     | #DIV/0!         |
| HES4                                                                                | 0,531202783 | 0,123579225 | 0,01  | 0     | 1         | 1,089434323   | 0,917907559     | #DIV/0!         |
| NBL1                                                                                | 0,994967217 | 0,123573193 | 0,024 | 0,024 | 1         | 1,089429767   | 0,917911397     | 1               |
| SLC16A2                                                                             | 0,531202783 | 0,123540994 | 0,01  | 0     | 1         | 1,089405453   | 0,917931884     | #DIV/0!         |
| LACTB                                                                               | 0,902822352 | 0,123502616 | 0,027 | 0,024 | 1         | 1,089376473   | 0,917956303     | 1,125           |
| HMCES                                                                               | 0,531202783 | 0,123479615 | 0,01  | 0     | 1         | 1,089359106   | 0,917970938     | #DIV/0!         |
| YPEL1                                                                               | 0,498250693 | 0,123421334 | 0,011 | 0     | 1         | 1,0893151     | 0,918008022     | #DIV/0!         |

Supplementary Table 3

| Differentially expressed genes_keloid-MD_ comparing SC-Keloid vs. (SC-Myel+Nonmyel) |             |             |       |       |           |               |                 |                 |
|-------------------------------------------------------------------------------------|-------------|-------------|-------|-------|-----------|---------------|-----------------|-----------------|
| gene                                                                                | p_val       | avg_log2FC  | pct.1 | pct.2 | p_val_adj | Foldchange_UP | Foldchange_DOWN | Ratio_pct1_pct2 |
| LAS1L                                                                               | 0,531202783 | 0,123299958 | 0,01  | 0     | 1         | 1,089223458   | 0,918085259     | #DIV/0!         |
| S100A1                                                                              | 0,831392232 | 0,12328973  | 0,041 | 0,049 | 1         | 1,089215736   | 0,918091767     | 0,836734694     |
| VSTM4                                                                               | 0,498250693 | 0,123277289 | 0,011 | 0     | 1         | 1,089206343   | 0,918099684     | #DIV/0!         |
| ARID5A                                                                              | 0,866392432 | 0,123180865 | 0,029 | 0,024 | 1         | 1,089133547   | 0,918161049     | 1,208333333     |
| DNAJC11                                                                             | 0,468534305 | 0,123118948 | 0,013 | 0     | 1         | 1,089086805   | 0,918200455     | #DIV/0!         |
| COX6B1                                                                              | 0,946267541 | 0,123096963 | 0,308 | 0,317 | 1         | 1,089070209   | 0,918214447     | 0,971608833     |
| SCG2                                                                                | 0,864111066 | 0,123058542 | 0,029 | 0,024 | 1         | 1,089041206   | 0,918238901     | 1,208333333     |
| LOXL3                                                                               | 0,538498816 | 0,123053754 | 0,131 | 0,098 | 1         | 1,089037591   | 0,918241949     | 1,336734694     |
| DNTTIP1                                                                             | 0,971607333 | 0,122979266 | 0,049 | 0,049 | 1         | 1,088981365   | 0,918289359     | 1               |
| MYLIP                                                                               | 0,531202783 | 0,122941461 | 0,01  | 0     | 1         | 1,088952829   | 0,918313423     | #DIV/0!         |
| GIT2                                                                                | 0,531202783 | 0,122804092 | 0,01  | 0     | 1         | 1,088849147   | 0,918400866     | #DIV/0!         |
| NUP35                                                                               | 0,468534305 | 0,122655987 | 0,013 | 0     | 1         | 1,088737373   | 0,918495153     | #DIV/0!         |
| GNB5                                                                                | 0,622403257 | 0,122541377 | 0,014 | 0,024 | 1         | 1,088650885   | 0,918568123     | 0,583333333     |
| TMEM19                                                                              | 0,831366118 | 0,122199832 | 0,019 | 0,024 | 1         | 1,088393188   | 0,918785611     | 0,791666667     |
| LRCH2                                                                               | 0,531202783 | 0,122180911 | 0,01  | 0     | 1         | 1,088378914   | 0,918797661     | #DIV/0!         |
| ZNF506                                                                              | 0,82592442  | 0,121972648 | 0,019 | 0,024 | 1         | 1,08822181    | 0,918930305     | 0,791666667     |
| KRCC1                                                                               | 0,821994604 | 0,121906495 | 0,085 | 0,098 | 1         | 1,088171912   | 0,918972443     | 0,867346939     |
| RGS1                                                                                | 0,531202783 | 0,121855216 | 0,01  | 0     | 1         | 1,088133235   | 0,919005107     | #DIV/0!         |
| MINPP1                                                                              | 0,531202783 | 0,121826988 | 0,01  | 0     | 1         | 1,088111944   | 0,919023089     | #DIV/0!         |
| CDC42EP4                                                                            | 0,498250693 | 0,121822784 | 0,011 | 0     | 1         | 1,088108774   | 0,919025767     | #DIV/0!         |
| ZCCHC3                                                                              | 0,468534305 | 0,121526647 | 0,013 | 0     | 1         | 1,087885445   | 0,919214431     | #DIV/0!         |
| MTA2                                                                                | 0,531202783 | 0,121475851 | 0,01  | 0     | 1         | 1,087847142   | 0,919246796     | #DIV/0!         |
| REXO4                                                                               | 0,831366235 | 0,121444184 | 0,019 | 0,024 | 1         | 1,087823264   | 0,919266974     | 0,791666667     |
| MID1IP1                                                                             | 0,677547611 | 0,121428102 | 0,035 | 0,049 | 1         | 1,087811138   | 0,919277221     | 0,714285714     |
| FBXO8                                                                               | 0,940325302 | 0,12137464  | 0,022 | 0,024 | 1         | 1,087770827   | 0,919311288     | 0,916666667     |
| IFRD1                                                                               | 0,579707937 | 0,121304537 | 0,051 | 0,073 | 1         | 1,087717972   | 0,919355596     | 0,698630137     |
| VASP                                                                                | 0,686099717 | 0,121202353 | 0,037 | 0,024 | 1         | 1,087640933   | 0,919421079     | 1,541666667     |
| ZDHHC13                                                                             | 0,498250693 | 0,121196911 | 0,011 | 0     | 1         | 1,08763683    | 0,919424547     | #DIV/0!         |
| POLR2G                                                                              | 0,89668853  | 0,121106415 | 0,128 | 0,122 | 1         | 1,087568609   | 0,919482221     | 1,049180328     |
| DTD2                                                                                | 0,531202783 | 0,121063488 | 0,01  | 0     | 1         | 1,087536249   | 0,919509581     | #DIV/0!         |

Supplementary Table 3

| Differentially expressed genes_keloid-MD_comparing SC-Keloid vs. (SC-Myel+Nonmyel) |             |             |       |       |           |               |                 |                 |
|------------------------------------------------------------------------------------|-------------|-------------|-------|-------|-----------|---------------|-----------------|-----------------|
| gene                                                                               | p_val       | avg_log2FC  | pct.1 | pct.2 | p_val_adj | Foldchange_UP | Foldchange_DOWN | Ratio_pct1_pct2 |
| ARRDC2                                                                             | 0,531202783 | 0,12104902  | 0,01  | 0     | 1         | 1,087525342   | 0,919518802     | #DIV/0!         |
| B9D2                                                                               | 0,531202783 | 0,121030958 | 0,01  | 0     | 1         | 1,087511727   | 0,919530314     | #DIV/0!         |
| DNAAF2                                                                             | 0,88755861  | 0,121010529 | 0,021 | 0,024 | 1         | 1,087496328   | 0,919543335     | 0,875           |
| CENPH                                                                              | 0,498250693 | 0,121000492 | 0,011 | 0     | 1         | 1,087488761   | 0,919549733     | #DIV/0!         |
| POP4                                                                               | 0,649314029 | 0,120815316 | 0,038 | 0,024 | 1         | 1,087349187   | 0,919667768     | 1,583333333     |
| DAP3                                                                               | 0,885253373 | 0,120764242 | 0,043 | 0,049 | 1         | 1,087310694   | 0,919700327     | 0,87755102      |
| SPCS3                                                                              | 0,823564295 | 0,120654338 | 0,217 | 0,244 | 1         | 1,087227866   | 0,919770392     | 0,889344262     |
| NKAPL                                                                              | 0,531202783 | 0,120624897 | 0,01  | 0     | 1         | 1,087205679   | 0,919789162     | #DIV/0!         |
| CHMP6                                                                              | 0,909901414 | 0,120617014 | 0,027 | 0,024 | 1         | 1,087199739   | 0,919794187     | 1,125           |
| CCDC122                                                                            | 0,498250693 | 0,120424106 | 0,011 | 0     | 1         | 1,087054375   | 0,919917185     | #DIV/0!         |
| RPL12                                                                              | 0,854770061 | 0,120418199 | 0,895 | 0,927 | 1         | 1,087049924   | 0,919920951     | 0,965480043     |
| ENTPD3-AS1                                                                         | 0,498250554 | 0,12040975  | 0,011 | 0     | 1         | 1,087043558   | 0,919926339     | #DIV/0!         |
| SP140L                                                                             | 0,88755861  | 0,120346777 | 0,021 | 0,024 | 1         | 1,086996109   | 0,919966494     | 0,875           |
| RBMX2                                                                              | 0,630428831 | 0,120341524 | 0,04  | 0,024 | 1         | 1,086992151   | 0,919969844     | 1,666666667     |
| DLX1                                                                               | 0,531202783 | 0,120318337 | 0,01  | 0     | 1         | 1,086974682   | 0,919984629     | #DIV/0!         |
| DYNC1L1                                                                            | 0,848641765 | 0,120300462 | 0,081 | 0,073 | 1         | 1,086961215   | 0,919996028     | 1,109589041     |
| ING2                                                                               | 0,842668501 | 0,120289873 | 0,041 | 0,049 | 1         | 1,086953237   | 0,920002781     | 0,836734694     |
| SETDB1                                                                             | 0,531202783 | 0,120214587 | 0,01  | 0     | 1         | 1,086896516   | 0,920050792     | #DIV/0!         |
| CLUAP1                                                                             | 0,552637731 | 0,120210969 | 0,045 | 0,024 | 1         | 1,08689379    | 0,920053099     | 1,875           |
| CAB39                                                                              | 0,62843294  | 0,120186578 | 0,033 | 0,049 | 1         | 1,086875414   | 0,920068654     | 0,673469388     |
| LMNB1                                                                              | 0,531202783 | 0,119992332 | 0,01  | 0     | 1         | 1,086729086   | 0,920192542     | #DIV/0!         |
| RNF216                                                                             | 0,761978757 | 0,119976631 | 0,038 | 0,049 | 1         | 1,08671726    | 0,920202556     | 0,775510204     |
| SLC39A6                                                                            | 0,76007963  | 0,119912501 | 0,038 | 0,049 | 1         | 1,086668954   | 0,920243461     | 0,775510204     |
| UBE2Z                                                                              | 0,936194942 | 0,119861536 | 0,051 | 0,049 | 1         | 1,086630567   | 0,920275971     | 1,040816327     |
| POLR2I                                                                             | 0,726066199 | 0,119859335 | 0,144 | 0,171 | 1         | 1,08662891    | 0,920277375     | 0,842105263     |
| LMAN2                                                                              | 0,876769227 | 0,119858494 | 0,08  | 0,073 | 1         | 1,086628276   | 0,920277911     | 1,095890411     |
| STAU1                                                                              | 0,490334636 | 0,119801361 | 0,081 | 0,049 | 1         | 1,086585245   | 0,920314356     | 1,653061224     |
| TPX2                                                                               | 0,498250693 | 0,1196752   | 0,011 | 0     | 1         | 1,086490229   | 0,92039484      | #DIV/0!         |
| LRRC37B                                                                            | 0,531202783 | 0,119637983 | 0,01  | 0     | 1         | 1,086462201   | 0,920418584     | #DIV/0!         |
| SPAG9                                                                              | 0,517123605 | 0,119600741 | 0,124 | 0,171 | 1         | 1,086434156   | 0,920442343     | 0,725146199     |

Supplementary Table 3

| Differentially expressed genes_keloid-MD_comparing SC-Keloid vs. (SC-Myel+Nonmyel) |             |             |       |       |           |               |                 |                 |
|------------------------------------------------------------------------------------|-------------|-------------|-------|-------|-----------|---------------|-----------------|-----------------|
| gene                                                                               | p_val       | avg_log2FC  | pct.1 | pct.2 | p_val_adj | Foldchange_UP | Foldchange_DOWN | Ratio_pct1_pct2 |
| LLGL1                                                                              | 0,531202783 | 0,1195546   | 0,01  | 0     | 1         | 1,086399409   | 0,920471782     | #DIV/0!         |
| NPL                                                                                | 0,700847209 | 0,119528783 | 0,064 | 0,049 | 1         | 1,086379969   | 0,920488254     | 1,306122449     |
| ZNF853                                                                             | 0,498250693 | 0,119400385 | 0,011 | 0     | 1         | 1,086283286   | 0,92057018      | #DIV/0!         |
| TEAD3                                                                              | 0,531202783 | 0,119354561 | 0,01  | 0     | 1         | 1,086248783   | 0,92059942      | #DIV/0!         |
| WDR3                                                                               | 0,531202783 | 0,119284952 | 0,01  | 0     | 1         | 1,086196374   | 0,92064384      | #DIV/0!         |
| RAB21                                                                              | 0,73106453  | 0,119182639 | 0,08  | 0,098 | 1         | 1,086119345   | 0,920709132     | 0,816326531     |
| CTTN                                                                               | 0,854915034 | 0,119172472 | 0,152 | 0,171 | 1         | 1,086111691   | 0,920715621     | 0,888888889     |
| DUSP22                                                                             | 0,696310026 | 0,118774994 | 0,016 | 0,024 | 1         | 1,085812497   | 0,920969322     | 0,666666667     |
| BCL2L12                                                                            | 0,76591327  | 0,118659046 | 0,018 | 0,024 | 1         | 1,085725235   | 0,921043343     | 0,75            |
| ZBTB2                                                                              | 0,531202783 | 0,118457021 | 0,01  | 0     | 1         | 1,085573208   | 0,921172329     | #DIV/0!         |
| NAA40                                                                              | 0,531202783 | 0,118419296 | 0,01  | 0     | 1         | 1,085544822   | 0,921196416     | #DIV/0!         |
| TRIB3                                                                              | 0,498250693 | 0,118403611 | 0,011 | 0     | 1         | 1,08553302    | 0,921206432     | #DIV/0!         |
| SCHIP1                                                                             | 0,696310026 | 0,118339472 | 0,016 | 0,024 | 1         | 1,085484761   | 0,921247388     | 0,666666667     |
| LCA5L                                                                              | 0,531202783 | 0,118326073 | 0,01  | 0     | 1         | 1,085474679   | 0,921255944     | #DIV/0!         |
| ARHGAP29                                                                           | 0,498250693 | 0,11825218  | 0,011 | 0     | 1         | 1,085419084   | 0,92130313      | #DIV/0!         |
| UTP23                                                                              | 0,975155189 | 0,118196049 | 0,049 | 0,049 | 1         | 1,085376855   | 0,921338976     | 1               |
| EP300                                                                              | 0,751915569 | 0,118046443 | 0,033 | 0,024 | 1         | 1,085264308   | 0,921434523     | 1,375           |
| NABP1                                                                              | 0,531202783 | 0,118045596 | 0,01  | 0     | 1         | 1,085263671   | 0,921435064     | #DIV/0!         |
| USP46                                                                              | 0,490845484 | 0,117829456 | 0,029 | 0,049 | 1         | 1,085101092   | 0,921573121     | 0,591836735     |
| FOXC2                                                                              | 0,531202783 | 0,117676904 | 0,01  | 0     | 1         | 1,084986359   | 0,921670574     | #DIV/0!         |
| HELZ2                                                                              | 0,531202783 | 0,117673637 | 0,01  | 0     | 1         | 1,084983901   | 0,921672661     | #DIV/0!         |
| NCOA7                                                                              | 0,823127332 | 0,117656034 | 0,03  | 0,024 | 1         | 1,084970664   | 0,921683907     | 1,25            |
| SLC27A5                                                                            | 0,498250693 | 0,117655026 | 0,011 | 0     | 1         | 1,084969905   | 0,921684551     | #DIV/0!         |
| JMJD1C                                                                             | 0,816024357 | 0,117629118 | 0,105 | 0,122 | 1         | 1,084950422   | 0,921701103     | 0,860655738     |
| MCRS1                                                                              | 0,994967217 | 0,117617213 | 0,024 | 0,024 | 1         | 1,084941469   | 0,921708708     | 1               |
| ZBTB34                                                                             | 0,531202783 | 0,117594902 | 0,01  | 0     | 1         | 1,08492469    | 0,921722963     | #DIV/0!         |
| ZNF561                                                                             | 0,498250693 | 0,117527181 | 0,011 | 0     | 1         | 1,084873764   | 0,92176623      | #DIV/0!         |
| UAP1                                                                               | 0,503387237 | 0,117471098 | 0,048 | 0,024 | 1         | 1,084831592   | 0,921802063     | 2               |
| RPUSD1                                                                             | 0,498250693 | 0,117304068 | 0,011 | 0     | 1         | 1,084706001   | 0,921908793     | #DIV/0!         |
| RGP1                                                                               | 0,498250693 | 0,117233858 | 0,011 | 0     | 1         | 1,084653215   | 0,921953659     | #DIV/0!         |



Supplementary Table 3

| Differentially expressed genes_keloid-MD_comparing SC-Keloid vs. (SC-Myel+Nonmyel) |             |             |       |       |           |               |                 |                 |
|------------------------------------------------------------------------------------|-------------|-------------|-------|-------|-----------|---------------|-----------------|-----------------|
| gene                                                                               | p_val       | avg_log2FC  | pct.1 | pct.2 | p_val_adj | Foldchange_UP | Foldchange_DOWN | Ratio_pct1_pct2 |
| EXOSC7                                                                             | 0,445316153 | 0,117172364 | 0,053 | 0,024 | 1         | 1,084606983   | 0,921992958     | 2,208333333     |
| ASB2                                                                               | 0,531202783 | 0,117161779 | 0,01  | 0     | 1         | 1,084599025   | 0,921999722     | #DIV/0!         |
| H1-5                                                                               | 0,531202783 | 0,117118142 | 0,01  | 0     | 1         | 1,08456622    | 0,92202761      | #DIV/0!         |
| PKNOX1                                                                             | 0,619599159 | 0,117021099 | 0,014 | 0,024 | 1         | 1,084493269   | 0,922089633     | 0,583333333     |
| DNAJA4                                                                             | 0,531202783 | 0,116942461 | 0,01  | 0     | 1         | 1,084434158   | 0,922139895     | #DIV/0!         |
| ATP5MF                                                                             | 0,589639198 | 0,116930729 | 0,362 | 0,341 | 1         | 1,084425339   | 0,922147393     | 1,061583578     |
| ATF5                                                                               | 0,531202783 | 0,11690935  | 0,01  | 0     | 1         | 1,08440927    | 0,922161059     | #DIV/0!         |
| ATP5PF                                                                             | 0,736656509 | 0,116588479 | 0,419 | 0,488 | 1         | 1,084168112   | 0,92236618      | 0,858606557     |
| DCAF11                                                                             | 0,8286443   | 0,116465356 | 0,019 | 0,024 | 1         | 1,08407559    | 0,922444901     | 0,791666667     |
| NAF1                                                                               | 0,531202783 | 0,116450782 | 0,01  | 0     | 1         | 1,084064639   | 0,922454219     | #DIV/0!         |
| HILPDA                                                                             | 0,693510359 | 0,11644415  | 0,016 | 0,024 | 1         | 1,084059655   | 0,92245846      | 0,666666667     |
| GMCL1                                                                              | 0,960703279 | 0,116443781 | 0,046 | 0,049 | 1         | 1,084059378   | 0,922458695     | 0,93877551      |
| DOP1B                                                                              | 0,498250693 | 0,116184007 | 0,011 | 0     | 1         | 1,083864198   | 0,92262481      | #DIV/0!         |
| ABHD17A                                                                            | 0,74172287  | 0,116105709 | 0,08  | 0,098 | 1         | 1,083805376   | 0,922674884     | 0,816326531     |
| RFT1                                                                               | 0,531202783 | 0,116058573 | 0,01  | 0     | 1         | 1,083769967   | 0,92270503      | #DIV/0!         |
| RASL12                                                                             | 0,950688894 | 0,11586292  | 0,022 | 0,024 | 1         | 1,083622999   | 0,922830173     | 0,916666667     |
| MTOR                                                                               | 0,696310026 | 0,115861147 | 0,016 | 0,024 | 1         | 1,083621668   | 0,922831307     | 0,666666667     |
| LCP1                                                                               | 0,531202783 | 0,115755792 | 0,01  | 0     | 1         | 1,083542538   | 0,9228987       | #DIV/0!         |
| SLC25A53                                                                           | 0,531202783 | 0,115712554 | 0,01  | 0     | 1         | 1,083510064   | 0,922926361     | #DIV/0!         |
| HRH1                                                                               | 0,531202783 | 0,115682009 | 0,01  | 0     | 1         | 1,083487124   | 0,922945901     | #DIV/0!         |
| SRGAP3                                                                             | 0,531202783 | 0,11551217  | 0,01  | 0     | 1         | 1,08335958    | 0,92305456      | #DIV/0!         |
| UBXN1                                                                              | 0,762197856 | 0,115501293 | 0,137 | 0,122 | 1         | 1,083351412   | 0,923061519     | 1,12295082      |
| PTMA                                                                               | 0,843044458 | 0,115490027 | 0,933 | 0,927 | 1         | 1,083342952   | 0,923068727     | 1,006472492     |
| ADAMTS1                                                                            | 0,89103105  | 0,115420991 | 0,182 | 0,195 | 1         | 1,083291113   | 0,923112899     | 0,933333333     |
| RBBP6                                                                              | 0,755956956 | 0,11539757  | 0,059 | 0,073 | 1         | 1,083273527   | 0,923127885     | 0,808219178     |
| STEAP4                                                                             | 0,531202783 | 0,115348242 | 0,01  | 0     | 1         | 1,083236489   | 0,923159449     | #DIV/0!         |
| DHDDS                                                                              | 0,622403257 | 0,11530748  | 0,014 | 0,024 | 1         | 1,083205883   | 0,923185532     | 0,583333333     |
| CACNA2D1                                                                           | 0,693510359 | 0,115272823 | 0,016 | 0,024 | 1         | 1,083179863   | 0,923207709     | 0,666666667     |
| AZIN1                                                                              | 0,810148279 | 0,11516936  | 0,062 | 0,073 | 1         | 1,083102185   | 0,92327392      | 0,849315068     |
| CBLL1                                                                              | 0,8286443   | 0,115165213 | 0,019 | 0,024 | 1         | 1,083099072   | 0,923276574     | 0,791666667     |

Supplementary Table 3

| Differentially expressed genes_keloid-MD_ comparing SC-Keloid vs. (SC-Myel+Nonmyel) |             |             |       |       |           |               |                 |                 |
|-------------------------------------------------------------------------------------|-------------|-------------|-------|-------|-----------|---------------|-----------------|-----------------|
| gene                                                                                | p_val       | avg_log2FC  | pct.1 | pct.2 | p_val_adj | Foldchange_UP | Foldchange_DOWN | Ratio_pct1_pct2 |
| LIN52                                                                               | 0,498250693 | 0,115137828 | 0,011 | 0     | 1         | 1,083078512   | 0,9232941       | #DIV/0!         |
| TMEM70                                                                              | 0,905181209 | 0,115125894 | 0,027 | 0,024 | 1         | 1,083069553   | 0,923301737     | 1,125           |
| PTPMT1                                                                              | 0,358162082 | 0,114970792 | 0,061 | 0,024 | 1         | 1,082953121   | 0,923401005     | 2,541666667     |
| TXN2                                                                                | 0,507388688 | 0,114736385 | 0,048 | 0,073 | 1         | 1,082777178   | 0,92355105      | 0,657534247     |
| NVL                                                                                 | 0,531202783 | 0,114660813 | 0,01  | 0     | 1         | 1,082720461   | 0,923599429     | #DIV/0!         |
| PAG1                                                                                | 0,498250693 | 0,114609713 | 0,011 | 0     | 1         | 1,082682112   | 0,923632144     | #DIV/0!         |
| CCDC102B                                                                            | 0,531202783 | 0,114510522 | 0,01  | 0     | 1         | 1,082607676   | 0,923695649     | #DIV/0!         |
| SSBP4                                                                               | 0,289986158 | 0,114435129 | 0,054 | 0,098 | 1         | 1,082551102   | 0,923743921     | 0,551020408     |
| QSOX2                                                                               | 0,88755861  | 0,1143828   | 0,021 | 0,024 | 1         | 1,082511837   | 0,923777428     | 0,875           |
| AADAT                                                                               | 0,531202783 | 0,114097849 | 0,01  | 0     | 1         | 1,082298048   | 0,923959904     | #DIV/0!         |
| KHSRP                                                                               | 0,868674911 | 0,113810514 | 0,029 | 0,024 | 1         | 1,082082513   | 0,924143943     | 1,208333333     |
| ANLN                                                                                | 0,498250693 | 0,113751503 | 0,011 | 0     | 1         | 1,082038253   | 0,924181745     | #DIV/0!         |
| EBLN2                                                                               | 0,468534305 | 0,113651894 | 0,013 | 0     | 1         | 1,081963547   | 0,924245556     | #DIV/0!         |
| CYB561                                                                              | 0,531202783 | 0,113603995 | 0,01  | 0     | 1         | 1,081927626   | 0,924276242     | #DIV/0!         |
| RNF20                                                                               | 0,997483596 | 0,113541122 | 0,024 | 0,024 | 1         | 1,081880476   | 0,924316523     | 1               |
| CANX                                                                                | 0,900813178 | 0,113506673 | 0,271 | 0,293 | 1         | 1,081854643   | 0,924338594     | 0,924914676     |
| DNAJC10                                                                             | 0,620429263 | 0,113492695 | 0,073 | 0,098 | 1         | 1,081844162   | 0,92434755      | 0,744897959     |
| LSR                                                                                 | 0,531202783 | 0,113322071 | 0,01  | 0     | 1         | 1,081716222   | 0,924456877     | #DIV/0!         |
| TMEM216                                                                             | 0,498250693 | 0,113267528 | 0,011 | 0     | 1         | 1,081675327   | 0,924491828     | #DIV/0!         |
| SLC25A14                                                                            | 0,544157477 | 0,113234966 | 0,013 | 0,024 | 1         | 1,081650913   | 0,924512694     | 0,541666667     |
| CHIC2                                                                               | 0,88712176  | 0,113215139 | 0,043 | 0,049 | 1         | 1,081636048   | 0,9245254       | 0,87755102      |
| NDUFA10                                                                             | 0,920748419 | 0,113092684 | 0,102 | 0,098 | 1         | 1,081544243   | 0,924603877     | 1,040816327     |
| ZNF605                                                                              | 0,763143412 | 0,113037692 | 0,018 | 0,024 | 1         | 1,081503019   | 0,924639121     | 0,75            |
| ZNF121                                                                              | 0,882242416 | 0,112788814 | 0,021 | 0,024 | 1         | 1,081316466   | 0,924798643     | 0,875           |
| SUCLG1                                                                              | 0,927723315 | 0,112771728 | 0,077 | 0,073 | 1         | 1,081303659   | 0,924809596     | 1,054794521     |
| BRF1                                                                                | 0,498250693 | 0,112748487 | 0,011 | 0     | 1         | 1,08128624    | 0,924824494     | #DIV/0!         |
| ARID4B                                                                              | 0,573802288 | 0,1126277   | 0,102 | 0,073 | 1         | 1,081195715   | 0,924901926     | 1,397260274     |
| SDF2                                                                                | 0,753641525 | 0,112621272 | 0,061 | 0,049 | 1         | 1,081190898   | 0,924906047     | 1,244897959     |
| CTSS                                                                                | 0,498250693 | 0,112594844 | 0,011 | 0     | 1         | 1,081171093   | 0,92492299      | #DIV/0!         |
| HSPB2                                                                               | 0,23952967  | 0,11256286  | 0,035 | 0,073 | 1         | 1,081147124   | 0,924943496     | 0,479452055     |

Supplementary Table 3

| Differentially expressed genes_keloid-MD_ comparing SC-Keloid vs. (SC-Myel+Nonmyel) |             |             |       |       |           |               |                 |                 |
|-------------------------------------------------------------------------------------|-------------|-------------|-------|-------|-----------|---------------|-----------------|-----------------|
| gene                                                                                | p_val       | avg_log2FC  | pct.1 | pct.2 | p_val_adj | Foldchange_UP | Foldchange_DOWN | Ratio_pct1_pct2 |
| ICAM1                                                                               | 0,531202783 | 0,112505138 | 0,01  | 0     | 1         | 1,081103868   | 0,924980503     | #DIV/0!         |
| PDE7A                                                                               | 0,498250693 | 0,112048793 | 0,011 | 0     | 1         | 1,080761954   | 0,925273134     | #DIV/0!         |
| RNMT                                                                                | 0,943555822 | 0,112007529 | 0,115 | 0,122 | 1         | 1,080731042   | 0,925299599     | 0,942622951     |
| RAB8A                                                                               | 0,486899481 | 0,112001434 | 0,049 | 0,024 | 1         | 1,080726477   | 0,925303508     | 2,041666667     |
| NRXN2                                                                               | 0,743633828 | 0,111895158 | 0,059 | 0,073 | 1         | 1,080646867   | 0,925371673     | 0,808219178     |
| C18orf25                                                                            | 0,958485748 | 0,111827281 | 0,026 | 0,024 | 1         | 1,080596026   | 0,925415212     | 1,083333333     |
| TMEM177                                                                             | 0,696310026 | 0,111816355 | 0,016 | 0,024 | 1         | 1,080587842   | 0,92542222      | 0,666666667     |
| CROT                                                                                | 0,531202783 | 0,11169756  | 0,01  | 0     | 1         | 1,080498867   | 0,925498425     | #DIV/0!         |
| KANSL2                                                                              | 0,531202783 | 0,111647994 | 0,01  | 0     | 1         | 1,080461746   | 0,925530223     | #DIV/0!         |
| MTMR4                                                                               | 0,498250693 | 0,111643977 | 0,011 | 0     | 1         | 1,080458737   | 0,9255328       | #DIV/0!         |
| BHLHE41                                                                             | 0,498250693 | 0,111314766 | 0,011 | 0     | 1         | 1,080212214   | 0,925744023     | #DIV/0!         |
| DUSP7                                                                               | 0,498250693 | 0,111133956 | 0,011 | 0     | 1         | 1,080076842   | 0,925860051     | #DIV/0!         |
| CC2D2A                                                                              | 0,498250693 | 0,111047995 | 0,011 | 0     | 1         | 1,080012489   | 0,925915219     | #DIV/0!         |
| TMEM161A                                                                            | 0,890218621 | 0,11102254  | 0,021 | 0,024 | 1         | 1,079993433   | 0,925931556     | 0,875           |
| ARMCX3                                                                              | 0,370116414 | 0,110988854 | 0,152 | 0,22  | 1         | 1,079968216   | 0,925953176     | 0,690909091     |
| FKBPL                                                                               | 0,498250693 | 0,110944531 | 0,011 | 0     | 1         | 1,079935037   | 0,925981624     | #DIV/0!         |
| TMCO1                                                                               | 0,502480058 | 0,110710889 | 0,225 | 0,171 | 1         | 1,079760158   | 0,926131598     | 1,315789474     |
| AFF2                                                                                | 0,531202783 | 0,110592397 | 0,01  | 0     | 1         | 1,079671479   | 0,926207666     | #DIV/0!         |
| LIN7A                                                                               | 0,531202783 | 0,11058743  | 0,01  | 0     | 1         | 1,079667761   | 0,926210855     | #DIV/0!         |
| S1PR2                                                                               | 0,395207964 | 0,110468303 | 0,026 | 0,049 | 1         | 1,079578614   | 0,926287338     | 0,530612245     |
| CECR2                                                                               | 0,531202783 | 0,110422453 | 0,01  | 0     | 1         | 1,079544305   | 0,926316776     | #DIV/0!         |
| TRIP13                                                                              | 0,531202783 | 0,110419976 | 0,01  | 0     | 1         | 1,079542451   | 0,926318367     | #DIV/0!         |
| ZNF92                                                                               | 0,622403257 | 0,110339815 | 0,014 | 0,024 | 1         | 1,07948247    | 0,926369838     | 0,583333333     |
| NDUFA1                                                                              | 0,811141186 | 0,110304276 | 0,402 | 0,39  | 1         | 1,079455878   | 0,926392658     | 1,030769231     |
| PLK3                                                                                | 0,696310026 | 0,11021469  | 0,016 | 0,024 | 1         | 1,07938885    | 0,926450185     | 0,666666667     |
| CFDP1                                                                               | 0,959677628 | 0,110070509 | 0,123 | 0,122 | 1         | 1,079280983   | 0,926542778     | 1,008196721     |
| C11orf96                                                                            | 0,605467522 | 0,109993477 | 0,041 | 0,024 | 1         | 1,079223357   | 0,926592251     | 1,708333333     |
| ZNF226                                                                              | 0,626889824 | 0,109772485 | 0,04  | 0,024 | 1         | 1,079058054   | 0,926734197     | 1,666666667     |
| AHSA1                                                                               | 0,686433289 | 0,109766248 | 0,056 | 0,073 | 1         | 1,079053389   | 0,926738204     | 0,767123288     |
| LYSMD3                                                                              | 0,62843294  | 0,109747777 | 0,033 | 0,049 | 1         | 1,079039574   | 0,926750069     | 0,673469388     |

Supplementary Table 3

| Differentially expressed genes_keloid-MD_comparing SC-Keloid vs. (SC-Myel+Nonmyel) |             |             |       |       |           |               |                 |                 |
|------------------------------------------------------------------------------------|-------------|-------------|-------|-------|-----------|---------------|-----------------|-----------------|
| gene                                                                               | p_val       | avg_log2FC  | pct.1 | pct.2 | p_val_adj | Foldchange_UP | Foldchange_DOWN | Ratio_pct1_pct2 |
| SCRN2                                                                              | 0,892879868 | 0,109677749 | 0,021 | 0,024 | 1         | 1,078987199   | 0,926795055     | 0,875           |
| C5orf63                                                                            | 0,531202783 | 0,109491646 | 0,01  | 0     | 1         | 1,078848022   | 0,926914616     | #DIV/0!         |
| RMND1                                                                              | 0,498250693 | 0,109485658 | 0,011 | 0     | 1         | 1,078843544   | 0,926918463     | #DIV/0!         |
| HDHD2                                                                              | 0,531202783 | 0,109393272 | 0,01  | 0     | 1         | 1,078774461   | 0,926977822     | #DIV/0!         |
| CHD2                                                                               | 0,714510935 | 0,109292679 | 0,037 | 0,049 | 1         | 1,078699245   | 0,927042458     | 0,755102041     |
| EPB41L4A                                                                           | 0,622403257 | 0,109236809 | 0,014 | 0,024 | 1         | 1,078657472   | 0,92707836      | 0,583333333     |
| RNASEK                                                                             | 0,275985056 | 0,109055389 | 0,037 | 0,073 | 1         | 1,078521838   | 0,927194948     | 0,506849315     |
| ERLIN1                                                                             | 0,890218621 | 0,109041725 | 0,021 | 0,024 | 1         | 1,078511623   | 0,92720373      | 0,875           |
| MED13                                                                              | 0,374241566 | 0,108894906 | 0,059 | 0,024 | 1         | 1,078401872   | 0,927298094     | 2,458333333     |
| SNRNP70                                                                            | 0,680474888 | 0,10882478  | 0,121 | 0,098 | 1         | 1,078349455   | 0,927343168     | 1,234693878     |
| PDIA5                                                                              | 0,531202783 | 0,108807443 | 0,01  | 0     | 1         | 1,078336496   | 0,927354312     | #DIV/0!         |
| TXNDC5                                                                             | 0,531202783 | 0,108772095 | 0,01  | 0     | 1         | 1,078310076   | 0,927377034     | #DIV/0!         |
| TMEM59L                                                                            | 0,991895345 | 0,108637143 | 0,048 | 0,049 | 1         | 1,078209214   | 0,927463786     | 0,979591837     |
| FBXO45                                                                             | 0,622403257 | 0,108498024 | 0,014 | 0,024 | 1         | 1,078105247   | 0,927553226     | 0,583333333     |
| C6orf89                                                                            | 0,714510935 | 0,108170418 | 0,037 | 0,049 | 1         | 1,07786046    | 0,927763878     | 0,755102041     |
| BPTF                                                                               | 0,992556925 | 0,108134941 | 0,072 | 0,073 | 1         | 1,077833954   | 0,927786693     | 0,98630137      |
| AAGAB                                                                              | 0,498250693 | 0,108119384 | 0,011 | 0     | 1         | 1,077822332   | 0,927796698     | #DIV/0!         |
| POC1B                                                                              | 0,544157477 | 0,108077736 | 0,013 | 0,024 | 1         | 1,077791217   | 0,927823482     | 0,541666667     |
| KTN1                                                                               | 0,989641777 | 0,108069338 | 0,163 | 0,171 | 1         | 1,077784943   | 0,927828883     | 0,953216374     |
| TMEM87B                                                                            | 0,531202783 | 0,107901063 | 0,01  | 0     | 1         | 1,077659239   | 0,92793711      | #DIV/0!         |
| ABCA2                                                                              | 0,498250693 | 0,107741044 | 0,011 | 0     | 1         | 1,077539715   | 0,92804004      | #DIV/0!         |
| MIB1                                                                               | 0,273178504 | 0,107724543 | 0,053 | 0,098 | 1         | 1,077527391   | 0,928050654     | 0,540816327     |
| AKAP8L                                                                             | 0,529674458 | 0,107653815 | 0,046 | 0,024 | 1         | 1,077474567   | 0,928096153     | 1,916666667     |
| CNPPD1                                                                             | 0,945505945 | 0,107617029 | 0,022 | 0,024 | 1         | 1,077447093   | 0,928119818     | 0,916666667     |
| ISG20L2                                                                            | 0,498250693 | 0,10743027  | 0,011 | 0     | 1         | 1,077307625   | 0,928239972     | #DIV/0!         |
| MYO10                                                                              | 0,749737704 | 0,107346728 | 0,088 | 0,073 | 1         | 1,077245243   | 0,928293726     | 1,205479452     |
| KDEL3                                                                              | 0,900814547 | 0,107332361 | 0,089 | 0,098 | 1         | 1,077234516   | 0,92830297      | 0,908163265     |
| METTL17                                                                            | 0,75396713  | 0,107322504 | 0,033 | 0,024 | 1         | 1,077227156   | 0,928309312     | 1,375           |
| RTL8C                                                                              | 0,683819292 | 0,107254668 | 0,077 | 0,098 | 1         | 1,077176505   | 0,928352963     | 0,785714286     |
| BTBD2                                                                              | 0,531202783 | 0,107181488 | 0,01  | 0     | 1         | 1,077121868   | 0,928400054     | #DIV/0!         |

Supplementary Table 3

| Differentially expressed genes_keloid-MD_comparing SC-Keloid vs. (SC-Myel+Nonmyel) |             |             |       |       |           |               |                 |                 |
|------------------------------------------------------------------------------------|-------------|-------------|-------|-------|-----------|---------------|-----------------|-----------------|
| gene                                                                               | p_val       | avg_log2FC  | pct.1 | pct.2 | p_val_adj | Foldchange_UP | Foldchange_DOWN | Ratio_pct1_pct2 |
| FAM110B                                                                            | 0,531202783 | 0,107086263 | 0,01  | 0     | 1         | 1,077050774   | 0,928461335     | #DIV/0!         |
| TMEM199                                                                            | 0,498250693 | 0,107064097 | 0,011 | 0     | 1         | 1,077034226   | 0,928475601     | #DIV/0!         |
| SPSB1                                                                              | 0,531202783 | 0,106892149 | 0,01  | 0     | 1         | 1,076905868   | 0,928586268     | #DIV/0!         |
| TEP1                                                                               | 0,498250693 | 0,106884826 | 0,011 | 0     | 1         | 1,076900401   | 0,928590981     | #DIV/0!         |
| DOCK8                                                                              | 0,88755861  | 0,106807012 | 0,021 | 0,024 | 1         | 1,076842318   | 0,928641067     | 0,875           |
| PI4K2B                                                                             | 0,531202783 | 0,106753902 | 0,01  | 0     | 1         | 1,076802677   | 0,928675254     | #DIV/0!         |
| FAM118B                                                                            | 0,531202783 | 0,10666443  | 0,01  | 0     | 1         | 1,076735899   | 0,92873285      | #DIV/0!         |
| PITPNA                                                                             | 0,748247493 | 0,10647628  | 0,059 | 0,073 | 1         | 1,076595485   | 0,928853979     | 0,808219178     |
| TMEM18                                                                             | 0,989579838 | 0,10640253  | 0,072 | 0,073 | 1         | 1,076540451   | 0,928901463     | 0,98630137      |
| ANK2                                                                               | 0,729735818 | 0,106042433 | 0,08  | 0,098 | 1         | 1,07627178    | 0,929133346     | 0,816326531     |
| ACO2                                                                               | 0,76591327  | 0,105964246 | 0,018 | 0,024 | 1         | 1,076213453   | 0,929183702     | 0,75            |
| HLA-DRB5                                                                           | 0,531202783 | 0,105833723 | 0,01  | 0     | 1         | 1,07611609    | 0,92926777      | #DIV/0!         |
| PWWP2A                                                                             | 0,971607333 | 0,105820447 | 0,049 | 0,049 | 1         | 1,076106188   | 0,929276322     | 1               |
| FOXJ3                                                                              | 0,338303853 | 0,105607342 | 0,04  | 0,073 | 1         | 1,075947245   | 0,929413598     | 0,547945205     |
| PRKD3                                                                              | 0,39601304  | 0,105544093 | 0,061 | 0,098 | 1         | 1,075900075   | 0,929454345     | 0,62244898      |
| REL                                                                                | 0,407522681 | 0,105512387 | 0,056 | 0,024 | 1         | 1,07587643    | 0,929474772     | 2,333333333     |
| TRIM33                                                                             | 0,65847921  | 0,105503976 | 0,038 | 0,024 | 1         | 1,075870158   | 0,929480191     | 1,583333333     |
| CRLS1                                                                              | 0,870958486 | 0,105480002 | 0,029 | 0,024 | 1         | 1,07585228    | 0,929495637     | 1,208333333     |
| NAXE                                                                               | 0,953606936 | 0,105445521 | 0,026 | 0,024 | 1         | 1,075826567   | 0,929517853     | 1,083333333     |
| HES6                                                                               | 0,528151113 | 0,105397382 | 0,046 | 0,024 | 1         | 1,07579067    | 0,929548869     | 1,916666667     |
| PTGR2                                                                              | 0,375818168 | 0,105362504 | 0,01  | 0,024 | 1         | 1,075764662   | 0,929571341     | 0,416666667     |
| STX16                                                                              | 0,581189503 | 0,105227292 | 0,051 | 0,073 | 1         | 1,075663844   | 0,929658467     | 0,698630137     |
| MAP1LC3B                                                                           | 0,595081264 | 0,105108602 | 0,171 | 0,22  | 1         | 1,075575354   | 0,929734952     | 0,777272727     |
| ALDH16A1                                                                           | 0,531202783 | 0,104942096 | 0,01  | 0     | 1         | 1,075451225   | 0,929842262     | #DIV/0!         |
| HIC2                                                                               | 0,531202783 | 0,104923134 | 0,01  | 0     | 1         | 1,07543709    | 0,929854484     | #DIV/0!         |
| GALK1                                                                              | 0,788666689 | 0,104923013 | 0,032 | 0,024 | 1         | 1,075437      | 0,929854562     | 1,333333333     |
| MED25                                                                              | 0,498250693 | 0,104762565 | 0,011 | 0     | 1         | 1,075317403   | 0,92995798      | #DIV/0!         |
| SLC39A4                                                                            | 0,498250693 | 0,104635395 | 0,011 | 0     | 1         | 1,075222621   | 0,930039957     | #DIV/0!         |
| BCAS4                                                                              | 0,441492135 | 0,104592089 | 0,014 | 0     | 1         | 1,075190346   | 0,930067875     | #DIV/0!         |
| BATF3                                                                              | 0,531202783 | 0,104452295 | 0,01  | 0     | 1         | 1,075086167   | 0,930158001     | #DIV/0!         |

Supplementary Table 3

| Differentially expressed genes_keloid-MD_ comparing SC-Keloid vs. (SC-Myel+Nonmyel) |             |             |       |       |           |               |                 |                 |
|-------------------------------------------------------------------------------------|-------------|-------------|-------|-------|-----------|---------------|-----------------|-----------------|
| gene                                                                                | p_val       | avg_log2FC  | pct.1 | pct.2 | p_val_adj | Foldchange_UP | Foldchange_DOWN | Ratio_pct1_pct2 |
| AFAP1L1                                                                             | 0,675652726 | 0,104154621 | 0,035 | 0,049 | 1         | 1,074864365   | 0,930349942     | 0,714285714     |
| DPH7                                                                                | 0,531202783 | 0,104112279 | 0,01  | 0     | 1         | 1,074832819   | 0,930377248     | #DIV/0!         |
| PTGES2                                                                              | 0,884899866 | 0,104022938 | 0,021 | 0,024 | 1         | 1,074766261   | 0,930434864     | 0,875           |
| MSH6                                                                                | 0,829739068 | 0,104016867 | 0,03  | 0,024 | 1         | 1,074761738   | 0,930438779     | 1,25            |
| SEMA3A                                                                              | 0,531202783 | 0,103953684 | 0,01  | 0     | 1         | 1,07471467    | 0,930479529     | #DIV/0!         |
| SAP30BP                                                                             | 0,936298134 | 0,103561084 | 0,069 | 0,073 | 1         | 1,074422248   | 0,930732775     | 0,945205479     |
| DAZAP1                                                                              | 0,462891379 | 0,103552836 | 0,051 | 0,024 | 1         | 1,074416105   | 0,930738096     | 2,125           |
| HAUS8                                                                               | 0,531202783 | 0,103505879 | 0,01  | 0     | 1         | 1,074381136   | 0,93076839      | #DIV/0!         |
| RECQL5                                                                              | 0,531202783 | 0,103263674 | 0,01  | 0     | 1         | 1,07420078    | 0,930924664     | #DIV/0!         |
| ATP5MJ                                                                              | 0,64249705  | 0,103166438 | 0,262 | 0,317 | 1         | 1,074128382   | 0,930987409     | 0,826498423     |
| ACTR10                                                                              | 0,900147881 | 0,103160911 | 0,089 | 0,098 | 1         | 1,074124268   | 0,930990976     | 0,908163265     |
| PTPRF                                                                               | 0,996397881 | 0,103140065 | 0,048 | 0,049 | 1         | 1,074108747   | 0,931004428     | 0,979591837     |
| CCDC113                                                                             | 0,531202783 | 0,10302555  | 0,01  | 0     | 1         | 1,074023493   | 0,93107833      | #DIV/0!         |
| TMEM41A                                                                             | 0,498250693 | 0,102985435 | 0,011 | 0     | 1         | 1,073993629   | 0,93110422      | #DIV/0!         |
| TANC1                                                                               | 0,734351833 | 0,102853452 | 0,062 | 0,049 | 1         | 1,07389538    | 0,931189405     | 1,265306122     |
| ARL4A                                                                               | 0,846279737 | 0,102821593 | 0,056 | 0,049 | 1         | 1,073871666   | 0,931209968     | 1,142857143     |
| USP10                                                                               | 0,212712819 | 0,102702124 | 0,033 | 0,073 | 1         | 1,073782743   | 0,931287085     | 0,452054795     |
| SLC44A2                                                                             | 0,588012986 | 0,10268769  | 0,032 | 0,049 | 1         | 1,073772      | 0,931296402     | 0,653061224     |
| SYCE1L                                                                              | 0,531202783 | 0,102586774 | 0,01  | 0     | 1         | 1,073696892   | 0,931361549     | #DIV/0!         |
| HCFC2                                                                               | 0,958485748 | 0,102565688 | 0,026 | 0,024 | 1         | 1,0736812     | 0,931375161     | 1,083333333     |
| EFCAB7                                                                              | 0,622403257 | 0,102142403 | 0,014 | 0,024 | 1         | 1,073366229   | 0,931648465     | 0,583333333     |
| BCL7B                                                                               | 0,675652696 | 0,102035876 | 0,035 | 0,049 | 1         | 1,073286976   | 0,93171726      | 0,714285714     |
| DBI                                                                                 | 0,90116077  | 0,101788376 | 0,544 | 0,561 | 1         | 1,073102865   | 0,931877113     | 0,96969697      |
| JADE1                                                                               | 0,942915322 | 0,10167803  | 0,022 | 0,024 | 1         | 1,073020791   | 0,931948391     | 0,916666667     |
| PCNX3                                                                               | 0,498250693 | 0,101623315 | 0,011 | 0     | 1         | 1,072980096   | 0,931983737     | #DIV/0!         |
| ATP5MC2                                                                             | 0,352803943 | 0,101482392 | 0,396 | 0,317 | 1         | 1,072875292   | 0,932074778     | 1,249211356     |
| NKAPD1                                                                              | 0,549477165 | 0,10145116  | 0,045 | 0,024 | 1         | 1,072852067   | 0,932094956     | 1,875           |
| MTRNR2L8                                                                            | 0,760376583 | 0,101432335 | 0,018 | 0,024 | 1         | 1,072838068   | 0,932107119     | 0,75            |
| HMGB2                                                                               | 0,539573649 | 0,101331104 | 0,03  | 0,049 | 1         | 1,072762792   | 0,932172525     | 0,612244898     |
| RNF139                                                                              | 0,498250693 | 0,101301322 | 0,011 | 0     | 1         | 1,072740646   | 0,932191768     | #DIV/0!         |

Supplementary Table 3

| Differentially expressed genes_keloid-MD_comparing SC-Keloid vs. (SC-Myel+Nonmyel) |             |             |       |       |           |               |                 |                 |
|------------------------------------------------------------------------------------|-------------|-------------|-------|-------|-----------|---------------|-----------------|-----------------|
| gene                                                                               | p_val       | avg_log2FC  | pct.1 | pct.2 | p_val_adj | Foldchange_UP | Foldchange_DOWN | Ratio_pct1_pct2 |
| FAM53C                                                                             | 0,795054755 | 0,101240812 | 0,032 | 0,024 | 1         | 1,072695654   | 0,932230867     | 1,333333333     |
| ATP6V0A2                                                                           | 0,634074104 | 0,101104174 | 0,033 | 0,049 | 1         | 1,072594064   | 0,932319163     | 0,673469388     |
| SBF2                                                                               | 0,864111066 | 0,101033306 | 0,029 | 0,024 | 1         | 1,072541377   | 0,932364961     | 1,208333333     |
| HIVEP1                                                                             | 0,605467522 | 0,100923706 | 0,041 | 0,024 | 1         | 1,072459901   | 0,932435795     | 1,708333333     |
| STOML1                                                                             | 0,531202783 | 0,100570837 | 0,01  | 0     | 1         | 1,07219762    | 0,932663887     | #DIV/0!         |
| CREBL2                                                                             | 0,82592442  | 0,100555872 | 0,019 | 0,024 | 1         | 1,072186498   | 0,932673562     | 0,791666667     |
| PRELID3B                                                                           | 0,52359464  | 0,10052557  | 0,046 | 0,024 | 1         | 1,072163978   | 0,932693152     | 1,916666667     |
| SNIP1                                                                              | 0,760376583 | 0,100406265 | 0,018 | 0,024 | 1         | 1,072075318   | 0,932770285     | 0,75            |
| MCOLN1                                                                             | 0,531202783 | 0,100183621 | 0,01  | 0     | 1         | 1,071909882   | 0,932914246     | #DIV/0!         |
| REX1BD                                                                             | 0,806524744 | 0,100156535 | 0,191 | 0,22  | 1         | 1,071889758   | 0,932931761     | 0,868181818     |
| FEM1B                                                                              | 0,942915322 | 0,100020095 | 0,022 | 0,024 | 1         | 1,071788391   | 0,933019995     | 0,916666667     |
| FAM171A1                                                                           | 0,531202783 | 0,099943181 | 0,01  | 0     | 1         | 1,071731253   | 0,933069739     | #DIV/0!         |
| EEF1AKMT2                                                                          | 0,635959294 | 0,099924296 | 0,033 | 0,049 | 1         | 1,071717224   | 0,933081953     | 0,673469388     |
| USB1                                                                               | 0,576739524 | 0,099751398 | 0,043 | 0,024 | 1         | 1,071588792   | 0,933193784     | 1,791666667     |
| ELOF1                                                                              | 0,844551086 | 0,099710358 | 0,041 | 0,049 | 1         | 1,07155831    | 0,933220331     | 0,836734694     |
| PDGFRA                                                                             | 0,531202783 | 0,099507879 | 0,01  | 0     | 1         | 1,07140793    | 0,933351315     | #DIV/0!         |
| CYFIP2                                                                             | 0,88755861  | 0,099484558 | 0,021 | 0,024 | 1         | 1,071390611   | 0,933366403     | 0,875           |
| VPS54                                                                              | 0,820490956 | 0,099478861 | 0,019 | 0,024 | 1         | 1,07138638    | 0,933370088     | 0,791666667     |
| THAP6                                                                              | 0,76591327  | 0,099418134 | 0,018 | 0,024 | 1         | 1,071341283   | 0,933409377     | 0,75            |
| COMMD6                                                                             | 0,912931812 | 0,099235871 | 0,375 | 0,415 | 1         | 1,071205944   | 0,933527307     | 0,903614458     |
| PRPF39                                                                             | 0,531202783 | 0,09922241  | 0,01  | 0     | 1         | 1,071195949   | 0,933536017     | #DIV/0!         |
| IFT43                                                                              | 0,902075673 | 0,099218129 | 0,067 | 0,073 | 1         | 1,071192771   | 0,933538787     | 0,917808219     |
| TUBGCP4                                                                            | 0,763143368 | 0,099068132 | 0,018 | 0,024 | 1         | 1,071081404   | 0,933635852     | 0,75            |
| MORF4L1                                                                            | 0,823091035 | 0,098890499 | 0,458 | 0,537 | 1         | 1,070949535   | 0,933750814     | 0,852886406     |
| FREM2                                                                              | 0,997483596 | 0,098793067 | 0,024 | 0,024 | 1         | 1,070877211   | 0,933813877     | 1               |
| NISCH                                                                              | 0,675652726 | 0,098613646 | 0,035 | 0,049 | 1         | 1,07074404    | 0,933930018     | 0,714285714     |
| TDRD7                                                                              | 0,531202783 | 0,098443853 | 0,01  | 0     | 1         | 1,070618029   | 0,93403994      | #DIV/0!         |
| MSRA                                                                               | 0,945505945 | 0,09839115  | 0,022 | 0,024 | 1         | 1,070578919   | 0,934074062     | 0,916666667     |
| GOLPH3                                                                             | 0,997298407 | 0,098295275 | 0,048 | 0,049 | 1         | 1,070507776   | 0,934136138     | 0,979591837     |
| UBASH3B                                                                            | 0,498250693 | 0,098202848 | 0,011 | 0     | 1         | 1,070439195   | 0,934195986     | #DIV/0!         |

Supplementary Table 3

| Differentially expressed genes_keloid-MD_comparing SC-Keloid vs. (SC-Myel+Nonmyel) |             |             |       |       |           |               |                 |                 |
|------------------------------------------------------------------------------------|-------------|-------------|-------|-------|-----------|---------------|-----------------|-----------------|
| gene                                                                               | p_val       | avg_log2FC  | pct.1 | pct.2 | p_val_adj | Foldchange_UP | Foldchange_DOWN | Ratio_pct1_pct2 |
| TRAF5                                                                              | 0,531202783 | 0,098161728 | 0,01  | 0     | 1         | 1,070408686   | 0,934222613     | #DIV/0!         |
| ANP32A                                                                             | 0,967185008 | 0,098041797 | 0,099 | 0,098 | 1         | 1,070319707   | 0,934300279     | 1,010204082     |
| ZNF276                                                                             | 0,535926531 | 0,097923555 | 0,03  | 0,049 | 1         | 1,070231988   | 0,934376856     | 0,612244898     |
| ANKRD9                                                                             | 0,531202783 | 0,097828307 | 0,01  | 0     | 1         | 1,070161332   | 0,934438547     | #DIV/0!         |
| BCAR1                                                                              | 0,462891379 | 0,097821547 | 0,051 | 0,024 | 1         | 1,070156318   | 0,934442925     | 2,125           |
| LARP6                                                                              | 0,973381196 | 0,097583271 | 0,049 | 0,049 | 1         | 1,069979585   | 0,93459727      | 1               |
| PTP4A2                                                                             | 0,976233954 | 0,097568812 | 0,118 | 0,122 | 1         | 1,069968862   | 0,934606637     | 0,967213115     |
| SGSH                                                                               | 0,531202783 | 0,097532368 | 0,01  | 0     | 1         | 1,069941833   | 0,934630247     | #DIV/0!         |
| TRAPPC10                                                                           | 0,884899866 | 0,09723884  | 0,021 | 0,024 | 1         | 1,069724167   | 0,934820424     | 0,875           |
| UBA1                                                                               | 0,65847921  | 0,096978603 | 0,038 | 0,024 | 1         | 1,069531226   | 0,934989064     | 1,583333333     |
| TMCO3                                                                              | 0,656642008 | 0,096968884 | 0,038 | 0,024 | 1         | 1,06952402    | 0,934995363     | 1,583333333     |
| UQCRC2                                                                             | 0,472867249 | 0,096941659 | 0,046 | 0,073 | 1         | 1,069503838   | 0,935013008     | 0,630136986     |
| PRKG1                                                                              | 0,531202783 | 0,096582453 | 0,01  | 0     | 1         | 1,069237582   | 0,935245839     | #DIV/0!         |
| HERPUD2                                                                            | 0,940325293 | 0,096553644 | 0,022 | 0,024 | 1         | 1,069216232   | 0,935264515     | 0,916666667     |
| SNX11                                                                              | 0,461761449 | 0,096514628 | 0,011 | 0,024 | 1         | 1,069187316   | 0,935289809     | 0,458333333     |
| ZER1                                                                               | 0,461761449 | 0,096417885 | 0,011 | 0,024 | 1         | 1,069115622   | 0,935352529     | 0,458333333     |
| ASH1L                                                                              | 0,998511364 | 0,09604257  | 0,072 | 0,073 | 1         | 1,068837529   | 0,935595891     | 0,98630137      |
| VPS13B                                                                             | 0,76591327  | 0,095898026 | 0,018 | 0,024 | 1         | 1,068730448   | 0,935689633     | 0,75            |
| KCTD18                                                                             | 0,531202783 | 0,095865363 | 0,01  | 0     | 1         | 1,068706252   | 0,935710817     | #DIV/0!         |
| SEPTIN9                                                                            | 0,638058236 | 0,095764516 | 0,153 | 0,122 | 1         | 1,06863155    | 0,935776227     | 1,254098361     |
| MBD4                                                                               | 0,792923849 | 0,095636289 | 0,032 | 0,024 | 1         | 1,068536574   | 0,935859403     | 1,333333333     |
| PLCG1                                                                              | 0,531202783 | 0,095593396 | 0,01  | 0     | 1         | 1,068504805   | 0,935887228     | #DIV/0!         |
| ARHGAP22                                                                           | 0,498250693 | 0,095488931 | 0,011 | 0     | 1         | 1,068427438   | 0,935954998     | #DIV/0!         |
| ZC3H6                                                                              | 0,75396713  | 0,095426691 | 0,033 | 0,024 | 1         | 1,068381345   | 0,935995377     | 1,375           |
| SOX18                                                                              | 0,531202783 | 0,095353263 | 0,01  | 0     | 1         | 1,06832697    | 0,936043017     | #DIV/0!         |
| PSMC4                                                                              | 0,620429229 | 0,095343997 | 0,073 | 0,098 | 1         | 1,068320109   | 0,936049029     | 0,744897959     |
| ATG4A                                                                              | 0,531202783 | 0,095240942 | 0,01  | 0     | 1         | 1,068243799   | 0,936115895     | #DIV/0!         |
| MIEF1                                                                              | 0,531202783 | 0,095200664 | 0,01  | 0     | 1         | 1,068213975   | 0,936142031     | #DIV/0!         |
| RAB28                                                                              | 0,531202783 | 0,094888361 | 0,01  | 0     | 1         | 1,067982762   | 0,936344701     | #DIV/0!         |
| RPS13                                                                              | 0,663780255 | 0,094785446 | 0,85  | 0,829 | 1         | 1,06790658    | 0,936411498     | 1,025331725     |



Supplementary Table 3

| Differentially expressed genes_keloid-MD_comparing SC-Keloid vs. (SC-Myel+Nonmyel) |             |             |       |       |           |               |                 |                 |
|------------------------------------------------------------------------------------|-------------|-------------|-------|-------|-----------|---------------|-----------------|-----------------|
| gene                                                                               | p_val       | avg_log2FC  | pct.1 | pct.2 | p_val_adj | Foldchange_UP | Foldchange_DOWN | Ratio_pct1_pct2 |
| TMEM42                                                                             | 0,8286443   | 0,094767927 | 0,019 | 0,024 | 1         | 1,067893612   | 0,936422869     | 0,791666667     |
| TK1                                                                                | 0,498250693 | 0,09460542  | 0,011 | 0     | 1         | 1,06777333    | 0,936528355     | #DIV/0!         |
| ZNF207                                                                             | 0,873251381 | 0,094340552 | 0,088 | 0,098 | 1         | 1,067577313   | 0,93670031      | 0,897959184     |
| RANBP3                                                                             | 0,531202783 | 0,09411341  | 0,01  | 0     | 1         | 1,067409244   | 0,936847799     | #DIV/0!         |
| STYX                                                                               | 0,693510359 | 0,09383808  | 0,016 | 0,024 | 1         | 1,067205554   | 0,937026608     | 0,666666667     |
| SH3GL1                                                                             | 0,786125697 | 0,093793225 | 0,059 | 0,049 | 1         | 1,067172374   | 0,937055741     | 1,204081633     |
| PRPF3                                                                              | 0,887558592 | 0,093770763 | 0,021 | 0,024 | 1         | 1,067155759   | 0,937070331     | 0,875           |
| CDK1                                                                               | 0,498250693 | 0,093667598 | 0,011 | 0     | 1         | 1,067079451   | 0,937137342     | #DIV/0!         |
| ALDH18A1                                                                           | 0,919351205 | 0,093657623 | 0,027 | 0,024 | 1         | 1,067072073   | 0,937143821     | 1,125           |
| TRPA1                                                                              | 0,531202783 | 0,093614711 | 0,01  | 0     | 1         | 1,067040334   | 0,937171697     | #DIV/0!         |
| MRPS10                                                                             | 0,583102324 | 0,093605349 | 0,072 | 0,098 | 1         | 1,06703341    | 0,937177778     | 0,734693878     |
| ACTR1B                                                                             | 0,788666689 | 0,093313111 | 0,032 | 0,024 | 1         | 1,066817289   | 0,937367636     | 1,333333333     |
| CCDC22                                                                             | 0,498250693 | 0,093151636 | 0,011 | 0     | 1         | 1,066697891   | 0,937472557     | #DIV/0!         |
| HELZ                                                                               | 0,978703534 | 0,093136517 | 0,049 | 0,049 | 1         | 1,066686713   | 0,937482382     | 1               |
| MIPEP                                                                              | 0,531202783 | 0,093071157 | 0,01  | 0     | 1         | 1,066638389   | 0,937524854     | #DIV/0!         |
| DIRAS3                                                                             | 0,531202783 | 0,092976942 | 0,01  | 0     | 1         | 1,066568735   | 0,937586081     | #DIV/0!         |
| PFDN2                                                                              | 0,785397591 | 0,092931795 | 0,281 | 0,317 | 1         | 1,066535358   | 0,937615422     | 0,886435331     |
| SLC4A1AP                                                                           | 0,531202783 | 0,092761794 | 0,01  | 0     | 1         | 1,06640969    | 0,937725913     | #DIV/0!         |
| RWDD4                                                                              | 0,987576088 | 0,092470098 | 0,049 | 0,049 | 1         | 1,066194096   | 0,93791553      | 1               |
| TAF4                                                                               | 0,531202783 | 0,092443974 | 0,01  | 0     | 1         | 1,066174789   | 0,937932514     | #DIV/0!         |
| NSRP1                                                                              | 0,959469845 | 0,092401518 | 0,099 | 0,098 | 1         | 1,066143414   | 0,937960116     | 1,010204082     |
| ARFIP2                                                                             | 0,909901414 | 0,092206334 | 0,027 | 0,024 | 1         | 1,065999184   | 0,938087022     | 1,125           |
| SYS1                                                                               | 0,498250554 | 0,091957289 | 0,011 | 0     | 1         | 1,065815182   | 0,938248973     | #DIV/0!         |
| ARAP1                                                                              | 0,531202783 | 0,091918786 | 0,01  | 0     | 1         | 1,065786738   | 0,938274014     | #DIV/0!         |
| SH3BP4                                                                             | 0,531202783 | 0,091839451 | 0,01  | 0     | 1         | 1,065728131   | 0,938325611     | #DIV/0!         |
| GBA2                                                                               | 0,760376539 | 0,091707781 | 0,018 | 0,024 | 1         | 1,06563087    | 0,938411253     | 0,75            |
| NONO                                                                               | 0,913022038 | 0,091502494 | 0,152 | 0,146 | 1         | 1,065479248   | 0,938544793     | 1,04109589      |
| FASTKD1                                                                            | 0,375818168 | 0,09144422  | 0,01  | 0,024 | 1         | 1,065436211   | 0,938582704     | 0,416666667     |
| MED27                                                                              | 0,76591327  | 0,091422998 | 0,018 | 0,024 | 1         | 1,065420539   | 0,93859651      | 0,75            |
| PABIR2                                                                             | 0,531202783 | 0,091376935 | 0,01  | 0     | 1         | 1,065386522   | 0,938626479     | #DIV/0!         |

Supplementary Table 3

| Differentially expressed genes_keloid-MD_comparing SC-Keloid vs. (SC-Myel+Nonmyel) |             |             |       |       |           |               |                 |                 |
|------------------------------------------------------------------------------------|-------------|-------------|-------|-------|-----------|---------------|-----------------|-----------------|
| gene                                                                               | p_val       | avg_log2FC  | pct.1 | pct.2 | p_val_adj | Foldchange_UP | Foldchange_DOWN | Ratio_pct1_pct2 |
| RPP21                                                                              | 0,622403178 | 0,091302297 | 0,014 | 0,024 | 1         | 1,065331406   | 0,93867504      | 0,583333333     |
| PHACTR1                                                                            | 0,56547333  | 0,091229643 | 0,075 | 0,049 | 1         | 1,065277757   | 0,938722313     | 1,530612245     |
| HMG3                                                                               | 0,920107101 | 0,09117414  | 0,314 | 0,341 | 1         | 1,065236775   | 0,938758428     | 0,920821114     |
| GNPTG                                                                              | 0,881518523 | 0,091128967 | 0,043 | 0,049 | 1         | 1,065203421   | 0,938787822     | 0,87755102      |
| EXOC6B                                                                             | 0,823206629 | 0,0911211   | 0,019 | 0,024 | 1         | 1,065197613   | 0,938792941     | 0,791666667     |
| CADM1                                                                              | 0,831765102 | 0,091106077 | 0,356 | 0,341 | 1         | 1,065186521   | 0,938802717     | 1,04398827      |
| MCFD2                                                                              | 0,900553502 | 0,0909248   | 0,067 | 0,073 | 1         | 1,065052687   | 0,938920687     | 0,917808219     |
| FZD8                                                                               | 0,531202783 | 0,090850045 | 0,01  | 0     | 1         | 1,064997501   | 0,938969339     | #DIV/0!         |
| GRAMD1A                                                                            | 0,882242416 | 0,090845091 | 0,021 | 0,024 | 1         | 1,064993844   | 0,938972564     | 0,875           |
| DNASE2                                                                             | 0,88755861  | 0,090838214 | 0,021 | 0,024 | 1         | 1,064988768   | 0,938977039     | 0,875           |
| C1QTNF4                                                                            | 0,622403257 | 0,090531517 | 0,014 | 0,024 | 1         | 1,064762389   | 0,939176674     | 0,583333333     |
| SKA3                                                                               | 0,531202783 | 0,090397512 | 0,01  | 0     | 1         | 1,064663493   | 0,939263914     | #DIV/0!         |
| ANP32B                                                                             | 0,776237594 | 0,09036944  | 0,113 | 0,098 | 1         | 1,064642778   | 0,93928219      | 1,153061224     |
| DHFR                                                                               | 0,531202783 | 0,090308589 | 0,01  | 0     | 1         | 1,064597873   | 0,939321809     | #DIV/0!         |
| TASOR                                                                              | 0,582672839 | 0,090227887 | 0,051 | 0,073 | 1         | 1,064538323   | 0,939374355     | 0,698630137     |
| HSD17B11                                                                           | 0,942915322 | 0,090167557 | 0,022 | 0,024 | 1         | 1,064493807   | 0,939413638     | 0,916666667     |
| NOTCH2                                                                             | 0,671869124 | 0,090073062 | 0,035 | 0,049 | 1         | 1,064424086   | 0,93947517      | 0,714285714     |
| CSTF1                                                                              | 0,531202783 | 0,090036507 | 0,01  | 0     | 1         | 1,064397116   | 0,939498975     | #DIV/0!         |
| MBD3                                                                               | 0,393554634 | 0,090032941 | 0,026 | 0,049 | 1         | 1,064394485   | 0,939501298     | 0,530612245     |
| CBL                                                                                | 0,749787402 | 0,090018983 | 0,059 | 0,073 | 1         | 1,064384188   | 0,939510387     | 0,808219178     |
| CD109                                                                              | 0,760376583 | 0,08981087  | 0,018 | 0,024 | 1         | 1,064230658   | 0,939645924     | 0,75            |
| CAV2                                                                               | 0,991895345 | 0,089716043 | 0,048 | 0,049 | 1         | 1,064160709   | 0,939707688     | 0,979591837     |
| PTDSS1                                                                             | 0,763143412 | 0,089656736 | 0,018 | 0,024 | 1         | 1,064116964   | 0,939746319     | 0,75            |
| CERS1                                                                              | 0,696310026 | 0,089637933 | 0,016 | 0,024 | 1         | 1,064103095   | 0,939758567     | 0,666666667     |
| GPR108                                                                             | 0,348773914 | 0,089493383 | 0,024 | 0,049 | 1         | 1,063996484   | 0,93985273      | 0,489795918     |
| SEZ6L2                                                                             | 0,82592442  | 0,089404666 | 0,019 | 0,024 | 1         | 1,063931056   | 0,939910527     | 0,791666667     |
| KLF12                                                                              | 0,531202783 | 0,089395315 | 0,01  | 0     | 1         | 1,06392416    | 0,93991662      | #DIV/0!         |
| BRAT1                                                                              | 0,531202783 | 0,089353005 | 0,01  | 0     | 1         | 1,063892959   | 0,939944185     | #DIV/0!         |
| RBBP7                                                                              | 0,84449029  | 0,089227823 | 0,081 | 0,073 | 1         | 1,06380065    | 0,940025747     | 1,109589041     |
| NMB                                                                                | 0,375818168 | 0,089168573 | 0,01  | 0,024 | 1         | 1,063756961   | 0,940064353     | 0,416666667     |

Supplementary Table 3

| Differentially expressed genes_keloid-MD_comparing SC-Keloid vs. (SC-Myel+Nonmyel) |             |             |       |       |           |               |                 |                 |
|------------------------------------------------------------------------------------|-------------|-------------|-------|-------|-----------|---------------|-----------------|-----------------|
| gene                                                                               | p_val       | avg_log2FC  | pct.1 | pct.2 | p_val_adj | Foldchange_UP | Foldchange_DOWN | Ratio_pct1_pct2 |
| NAA15                                                                              | 0,837026181 | 0,089161573 | 0,041 | 0,049 | 1         | 1,0637518     | 0,940068914     | 0,836734694     |
| MTIF2                                                                              | 0,8286443   | 0,089125899 | 0,019 | 0,024 | 1         | 1,063725497   | 0,94009216      | 0,791666667     |
| TANGO6                                                                             | 0,498250693 | 0,08904466  | 0,011 | 0     | 1         | 1,063665599   | 0,940145099     | #DIV/0!         |
| SLC25A37                                                                           | 0,671869124 | 0,088953808 | 0,035 | 0,049 | 1         | 1,063598618   | 0,940204306     | 0,714285714     |
| THAP12                                                                             | 0,634074138 | 0,088930338 | 0,033 | 0,049 | 1         | 1,063581316   | 0,940219601     | 0,673469388     |
| GDF11                                                                              | 0,940325302 | 0,088901336 | 0,022 | 0,024 | 1         | 1,063559935   | 0,940238502     | 0,916666667     |
| AP2M1                                                                              | 0,716570926 | 0,088611801 | 0,116 | 0,098 | 1         | 1,06334651    | 0,940427218     | 1,183673469     |
| CEP164                                                                             | 0,823206629 | 0,088594377 | 0,019 | 0,024 | 1         | 1,063333668   | 0,940438576     | 0,791666667     |
| HMGN1                                                                              | 0,983042775 | 0,088518606 | 0,238 | 0,244 | 1         | 1,063277823   | 0,940487969     | 0,975409836     |
| SLC31A1                                                                            | 0,760376583 | 0,088431889 | 0,018 | 0,024 | 1         | 1,063213913   | 0,940544502     | 0,75            |
| MTHFD1L                                                                            | 0,827533805 | 0,088088235 | 0,03  | 0,024 | 1         | 1,062960683   | 0,940768569     | 1,25            |
| ZNF570                                                                             | 0,763143412 | 0,088013503 | 0,018 | 0,024 | 1         | 1,062905623   | 0,940817302     | 0,75            |
| NCBP1                                                                              | 0,531202783 | 0,088005442 | 0,01  | 0     | 1         | 1,062899684   | 0,940822559     | #DIV/0!         |
| METTL26                                                                            | 0,964185125 | 0,087982479 | 0,14  | 0,146 | 1         | 1,062882766   | 0,940837534     | 0,95890411      |
| RNF14                                                                              | 0,945505945 | 0,087942802 | 0,022 | 0,024 | 1         | 1,062853535   | 0,940863409     | 0,916666667     |
| ZADH2                                                                              | 0,758075453 | 0,087445117 | 0,033 | 0,024 | 1         | 1,062486947   | 0,941188033     | 1,375           |
| RELB                                                                               | 0,498250693 | 0,087362677 | 0,011 | 0     | 1         | 1,062426235   | 0,941241817     | #DIV/0!         |
| HNRNPK                                                                             | 0,959298732 | 0,087111637 | 0,274 | 0,268 | 1         | 1,062241381   | 0,941405615     | 1,02238806      |
| SF3A1                                                                              | 0,7971379   | 0,087036849 | 0,04  | 0,049 | 1         | 1,062186316   | 0,941454418     | 0,816326531     |
| SMOX                                                                               | 0,544157477 | 0,086984314 | 0,013 | 0,024 | 1         | 1,062147638   | 0,941488701     | 0,541666667     |
| AP3M1                                                                              | 0,884899847 | 0,086976359 | 0,021 | 0,024 | 1         | 1,062141781   | 0,941493892     | 0,875           |
| ZNF593                                                                             | 0,534224625 | 0,086969344 | 0,077 | 0,049 | 1         | 1,062136617   | 0,941498471     | 1,571428571     |
| YARS1                                                                              | 0,76007963  | 0,086836845 | 0,038 | 0,049 | 1         | 1,062039074   | 0,941584942     | 0,775510204     |
| ALG10B                                                                             | 0,892879868 | 0,08679289  | 0,021 | 0,024 | 1         | 1,062006716   | 0,941613631     | 0,875           |
| DHX8                                                                               | 0,989934634 | 0,086765024 | 0,024 | 0,024 | 1         | 1,061986203   | 0,941631819     | 1               |
| THOC5                                                                              | 0,531202783 | 0,086711354 | 0,01  | 0     | 1         | 1,061946697   | 0,941666849     | #DIV/0!         |
| XRCC5                                                                              | 0,649468108 | 0,086660282 | 0,223 | 0,268 | 1         | 1,061909104   | 0,941700185     | 0,832089552     |
| KMT2B                                                                              | 0,693510359 | 0,086630638 | 0,016 | 0,024 | 1         | 1,061887285   | 0,941719535     | 0,666666667     |
| PTRHD1                                                                             | 0,940163457 | 0,086399318 | 0,075 | 0,073 | 1         | 1,061717037   | 0,941870541     | 1,02739726      |
| SETDB2                                                                             | 0,531202783 | 0,086384668 | 0,01  | 0     | 1         | 1,061706255   | 0,941880106     | #DIV/0!         |

Supplementary Table 3

| Differentially expressed genes_keloid-MD_ comparing SC-Keloid vs. (SC-Myel+Nonmyel) |             |             |       |       |           |               |                 |                 |
|-------------------------------------------------------------------------------------|-------------|-------------|-------|-------|-----------|---------------|-----------------|-----------------|
| gene                                                                                | p_val       | avg_log2FC  | pct.1 | pct.2 | p_val_adj | Foldchange_UP | Foldchange_DOWN | Ratio_pct1_pct2 |
| GBA                                                                                 | 0,622403257 | 0,086337821 | 0,014 | 0,024 | 1         | 1,06167178    | 0,941910691     | 0,583333333     |
| CETN3                                                                               | 0,88755861  | 0,086026409 | 0,021 | 0,024 | 1         | 1,061442639   | 0,942114028     | 0,875           |
| ZCCHC10                                                                             | 0,630428831 | 0,086016762 | 0,04  | 0,024 | 1         | 1,061435541   | 0,942120328     | 1,666666667     |
| PRXL2C                                                                              | 0,729819075 | 0,085863588 | 0,062 | 0,049 | 1         | 1,061322852   | 0,94222036      | 1,265306122     |
| HSDL2                                                                               | 0,958485748 | 0,085561239 | 0,026 | 0,024 | 1         | 1,061100452   | 0,942417844     | 1,083333333     |
| ATP5IF1                                                                             | 0,946822482 | 0,085485831 | 0,303 | 0,317 | 1         | 1,061044991   | 0,942467104     | 0,955835962     |
| RRAGA                                                                               | 0,917497413 | 0,085445814 | 0,045 | 0,049 | 1         | 1,06101556    | 0,942493247     | 0,918367347     |
| TRIM37                                                                              | 0,80849795  | 0,085190002 | 0,04  | 0,049 | 1         | 1,060827442   | 0,94266038      | 0,816326531     |
| CDC37L1                                                                             | 0,930246096 | 0,085106809 | 0,069 | 0,073 | 1         | 1,060766272   | 0,94271474      | 0,945205479     |
| TIMM13                                                                              | 0,715570834 | 0,085087805 | 0,244 | 0,22  | 1         | 1,060752299   | 0,942727158     | 1,109090909     |
| TNFRSF14                                                                            | 0,82592442  | 0,084972786 | 0,019 | 0,024 | 1         | 1,060667734   | 0,94280232      | 0,791666667     |
| NUDT5                                                                               | 0,552889969 | 0,084928389 | 0,089 | 0,122 | 1         | 1,060635093   | 0,942831334     | 0,729508197     |
| AKTIP                                                                               | 0,622403257 | 0,084502715 | 0,014 | 0,024 | 1         | 1,060322194   | 0,943109562     | 0,583333333     |
| GBF1                                                                                | 0,989934634 | 0,084386442 | 0,024 | 0,024 | 1         | 1,060236742   | 0,943185574     | 1               |
| ANXA4                                                                               | 0,746708589 | 0,084372085 | 0,059 | 0,073 | 1         | 1,060226191   | 0,943194961     | 0,808219178     |
| CHN1                                                                                | 0,8286443   | 0,084235457 | 0,019 | 0,024 | 1         | 1,060125789   | 0,943284288     | 0,791666667     |
| RESF1                                                                               | 0,870958486 | 0,084171491 | 0,029 | 0,024 | 1         | 1,060078786   | 0,943326112     | 1,208333333     |
| LINC00623                                                                           | 0,802462224 | 0,084102497 | 0,062 | 0,073 | 1         | 1,060028091   | 0,943371226     | 0,849315068     |
| POLR1C                                                                              | 0,622403257 | 0,084096521 | 0,014 | 0,024 | 1         | 1,0600237     | 0,943375134     | 0,583333333     |
| WDR54                                                                               | 0,884899866 | 0,084036089 | 0,021 | 0,024 | 1         | 1,059979298   | 0,943414651     | 0,875           |
| PRPSAP2                                                                             | 0,960925749 | 0,084006365 | 0,026 | 0,024 | 1         | 1,05995746    | 0,943434089     | 1,083333333     |
| AP1M1                                                                               | 0,8286443   | 0,083959079 | 0,019 | 0,024 | 1         | 1,059922719   | 0,943465011     | 0,791666667     |
| RPL26                                                                               | 0,741318853 | 0,083594447 | 0,684 | 0,707 | 1         | 1,059654864   | 0,943703496     | 0,967468175     |
| RUNDC1                                                                              | 0,461761449 | 0,083334019 | 0,011 | 0,024 | 1         | 1,059463598   | 0,943873864     | 0,458333333     |
| NSF                                                                                 | 0,756020429 | 0,083150929 | 0,033 | 0,024 | 1         | 1,059329151   | 0,943993657     | 1,375           |
| PFKFB3                                                                              | 0,544157477 | 0,083076734 | 0,013 | 0,024 | 1         | 1,059274674   | 0,944042206     | 0,541666667     |
| ADRM1                                                                               | 0,412158249 | 0,082901591 | 0,08  | 0,122 | 1         | 1,059146086   | 0,94415682      | 0,655737705     |
| ZC3H18                                                                              | 0,395207964 | 0,08267053  | 0,026 | 0,049 | 1         | 1,058976467   | 0,944308047     | 0,530612245     |
| HMBOX1                                                                              | 0,578383352 | 0,082547828 | 0,043 | 0,024 | 1         | 1,058886404   | 0,944388365     | 1,791666667     |
| DNM2                                                                                | 0,873243137 | 0,082531507 | 0,029 | 0,024 | 1         | 1,058874426   | 0,944399048     | 1,208333333     |

Supplementary Table 3

| Differentially expressed genes_keloid-MD_comparing SC-Keloid vs. (SC-Myel+Nonmyel) |             |             |       |       |           |               |                 |                 |
|------------------------------------------------------------------------------------|-------------|-------------|-------|-------|-----------|---------------|-----------------|-----------------|
| gene                                                                               | p_val       | avg_log2FC  | pct.1 | pct.2 | p_val_adj | Foldchange_UP | Foldchange_DOWN | Ratio_pct1_pct2 |
| VPS50                                                                              | 0,763143412 | 0,082396718 | 0,018 | 0,024 | 1         | 1,058775501   | 0,944487287     | 0,75            |
| FAN1                                                                               | 0,375818168 | 0,082180971 | 0,01  | 0,024 | 1         | 1,058617179   | 0,94462854      | 0,416666667     |
| CUL2                                                                               | 0,792923849 | 0,082061389 | 0,032 | 0,024 | 1         | 1,058529436   | 0,944706841     | 1,333333333     |
| ZDHHC7                                                                             | 0,882242416 | 0,081982628 | 0,021 | 0,024 | 1         | 1,058471649   | 0,944758417     | 0,875           |
| MRPS18A                                                                            | 0,632201526 | 0,081936776 | 0,04  | 0,024 | 1         | 1,058438009   | 0,944788444     | 1,666666667     |
| S100A2                                                                             | 0,490845484 | 0,081726586 | 0,029 | 0,049 | 1         | 1,058283814   | 0,944926103     | 0,591836735     |
| MRPS34                                                                             | 0,928349299 | 0,081626039 | 0,161 | 0,171 | 1         | 1,058210061   | 0,944991961     | 0,941520468     |
| VTI1B                                                                              | 0,870578147 | 0,081395232 | 0,088 | 0,098 | 1         | 1,058040778   | 0,945143156     | 0,897959184     |
| EIF2B2                                                                             | 0,440354126 | 0,081188529 | 0,027 | 0,049 | 1         | 1,057889198   | 0,945278581     | 0,551020408     |
| EIF3L                                                                              | 0,913169051 | 0,080974539 | 0,102 | 0,098 | 1         | 1,057732296   | 0,945418802     | 1,040816327     |
| TRIP10                                                                             | 0,544157477 | 0,080764543 | 0,013 | 0,024 | 1         | 1,057578346   | 0,945556425     | 0,541666667     |
| NGLY1                                                                              | 0,919351205 | 0,080704497 | 0,027 | 0,024 | 1         | 1,05753433    | 0,94559578      | 1,125           |
| IRF2                                                                               | 0,76007963  | 0,080284718 | 0,038 | 0,049 | 1         | 1,057226665   | 0,94587096      | 0,775510204     |
| TGFBR1                                                                             | 0,80849795  | 0,080241055 | 0,04  | 0,049 | 1         | 1,057194669   | 0,945899587     | 0,816326531     |
| RNF2                                                                               | 0,831366235 | 0,080071589 | 0,019 | 0,024 | 1         | 1,057070493   | 0,946010703     | 0,791666667     |
| PIK3C2A                                                                            | 0,988293494 | 0,079592746 | 0,048 | 0,049 | 1         | 1,056719701   | 0,946324744     | 0,979591837     |
| TMEM170A                                                                           | 0,91462479  | 0,079534531 | 0,027 | 0,024 | 1         | 1,056677061   | 0,946362931     | 1,125           |
| PHF3                                                                               | 0,338176366 | 0,079403906 | 0,057 | 0,098 | 1         | 1,056581391   | 0,94644862      | 0,581632653     |
| FAM89A                                                                             | 0,994967217 | 0,079178566 | 0,024 | 0,024 | 1         | 1,056416373   | 0,946596461     | 1               |
| ASF1A                                                                              | 0,82592442  | 0,079047503 | 0,019 | 0,024 | 1         | 1,056320406   | 0,94668246      | 0,791666667     |
| AMZ2                                                                               | 0,760376583 | 0,078953295 | 0,018 | 0,024 | 1         | 1,05625143    | 0,94674428      | 0,75            |
| CYREN                                                                              | 0,992450888 | 0,078770104 | 0,024 | 0,024 | 1         | 1,056117318   | 0,946864503     | 1               |
| PLK2                                                                               | 0,919351205 | 0,078677817 | 0,027 | 0,024 | 1         | 1,056049762   | 0,946925075     | 1,125           |
| PPP3CA                                                                             | 0,927578432 | 0,078541261 | 0,128 | 0,122 | 1         | 1,055949808   | 0,947014709     | 1,049180328     |
| LRRC23                                                                             | 0,914624801 | 0,077831662 | 0,027 | 0,024 | 1         | 1,05543056    | 0,947480619     | 1,125           |
| TTC5                                                                               | 0,544157477 | 0,077814092 | 0,013 | 0,024 | 1         | 1,055417706   | 0,947492158     | 0,541666667     |
| MZF1                                                                               | 0,622403257 | 0,077658809 | 0,014 | 0,024 | 1         | 1,055304113   | 0,947594146     | 0,583333333     |
| ZNF621                                                                             | 0,348773914 | 0,077512094 | 0,024 | 0,049 | 1         | 1,0551968     | 0,947690516     | 0,489795918     |
| UTP15                                                                              | 0,544157477 | 0,077364726 | 0,013 | 0,024 | 1         | 1,055089019   | 0,947787326     | 0,541666667     |
| UBN1                                                                               | 0,866392432 | 0,077339253 | 0,029 | 0,024 | 1         | 1,05507039    | 0,947804061     | 1,208333333     |

Supplementary Table 3

| Differentially expressed genes_keloid-MD_comparing SC-Keloid vs. (SC-Myel+Nonmyel) |             |             |       |       |           |               |                 |                 |
|------------------------------------------------------------------------------------|-------------|-------------|-------|-------|-----------|---------------|-----------------|-----------------|
| gene                                                                               | p_val       | avg_log2FC  | pct.1 | pct.2 | p_val_adj | Foldchange_UP | Foldchange_DOWN | Ratio_pct1_pct2 |
| GART                                                                               | 0,752497679 | 0,077313049 | 0,038 | 0,049 | 1         | 1,055051227   | 0,947821276     | 0,775510204     |
| TLCD5                                                                              | 0,071078164 | 0,077166898 | 0,013 | 0,049 | 1         | 1,054944351   | 0,947917299     | 0,265306122     |
| ARHGEF19                                                                           | 0,287685455 | 0,077023154 | 0,008 | 0,024 | 1         | 1,054839246   | 0,94801175      | 0,333333333     |
| EIF1AX                                                                             | 0,788001126 | 0,076744317 | 0,172 | 0,195 | 1         | 1,054635392   | 0,948194995     | 0,882051282     |
| AGA                                                                                | 0,967147605 | 0,076659877 | 0,094 | 0,098 | 1         | 1,054573667   | 0,948250494     | 0,959183673     |
| CAAP1                                                                              | 0,689913676 | 0,076630019 | 0,037 | 0,024 | 1         | 1,054551841   | 0,948270119     | 1,541666667     |
| THRA                                                                               | 0,763143412 | 0,076416794 | 0,018 | 0,024 | 1         | 1,054395994   | 0,94841028      | 0,75            |
| CEBPB                                                                              | 0,698169015 | 0,076371232 | 0,099 | 0,122 | 1         | 1,054362695   | 0,948440232     | 0,81147541      |
| CSNK2A2                                                                            | 0,572326808 | 0,076279297 | 0,051 | 0,073 | 1         | 1,054295509   | 0,948500674     | 0,698630137     |
| SSB                                                                                | 0,955526619 | 0,07627255  | 0,233 | 0,244 | 1         | 1,054290578   | 0,948505109     | 0,954918033     |
| SLU7                                                                               | 0,605438345 | 0,076249067 | 0,053 | 0,073 | 1         | 1,054273417   | 0,948520549     | 0,726027397     |
| GORASP2                                                                            | 0,882057725 | 0,076174861 | 0,054 | 0,049 | 1         | 1,054219191   | 0,948569338     | 1,102040816     |
| CCDC117                                                                            | 0,400192902 | 0,076046054 | 0,026 | 0,049 | 1         | 1,054125073   | 0,948654031     | 0,530612245     |
| MACO1                                                                              | 0,584295384 | 0,076003588 | 0,032 | 0,049 | 1         | 1,054094045   | 0,948681956     | 0,653061224     |
| FADS3                                                                              | 0,82592442  | 0,075875013 | 0,019 | 0,024 | 1         | 1,054000106   | 0,948766508     | 0,791666667     |
| GNG12                                                                              | 0,78148869  | 0,075863364 | 0,137 | 0,122 | 1         | 1,053991596   | 0,948774169     | 1,12295082      |
| CRIP1                                                                              | 0,356797452 | 0,075809471 | 0,077 | 0,122 | 1         | 1,053952224   | 0,948809611     | 0,631147541     |
| HSPD1                                                                              | 0,857116944 | 0,075537832 | 0,155 | 0,171 | 1         | 1,053753799   | 0,948988275     | 0,906432749     |
| SLC35F5                                                                            | 0,8286443   | 0,075031889 | 0,019 | 0,024 | 1         | 1,05338432    | 0,949321137     | 0,791666667     |
| ZNF521                                                                             | 0,760376583 | 0,075021233 | 0,018 | 0,024 | 1         | 1,053376539   | 0,949328149     | 0,75            |
| NCBP2AS2                                                                           | 0,681847869 | 0,074966421 | 0,056 | 0,073 | 1         | 1,053336519   | 0,949364218     | 0,767123288     |
| CDKN3                                                                              | 0,498250693 | 0,074809415 | 0,011 | 0     | 1         | 1,053221892   | 0,949467541     | #DIV/0!         |
| LAMA2                                                                              | 0,950425096 | 0,074768577 | 0,07  | 0,073 | 1         | 1,05319208    | 0,949494417     | 0,95890411      |
| CAMK2N1                                                                            | 0,982462478 | 0,074410721 | 0,123 | 0,122 | 1         | 1,052930871   | 0,949729966     | 1,008196721     |
| MED15                                                                              | 0,741926943 | 0,074307495 | 0,062 | 0,049 | 1         | 1,052855536   | 0,949797922     | 1,265306122     |
| FAM98B                                                                             | 0,882242416 | 0,074171506 | 0,021 | 0,024 | 1         | 1,052756298   | 0,949887455     | 0,875           |
| STEEP1                                                                             | 0,693510359 | 0,07390531  | 0,016 | 0,024 | 1         | 1,052562069   | 0,950062737     | 0,666666667     |
| HLA-F                                                                              | 0,721091616 | 0,073541167 | 0,035 | 0,024 | 1         | 1,05229643    | 0,950302568     | 1,458333333     |
| ANXA7                                                                              | 0,416005035 | 0,073452116 | 0,081 | 0,122 | 1         | 1,052231479   | 0,950361228     | 0,663934426     |
| FASTKD2                                                                            | 0,817777402 | 0,073419965 | 0,019 | 0,024 | 1         | 1,05220803    | 0,950382407     | 0,791666667     |

Supplementary Table 3

| Differentially expressed genes_keloid-MD_comparing SC-Keloid vs. (SC-Myel+Nonmyel) |             |             |       |       |           |               |                 |                 |
|------------------------------------------------------------------------------------|-------------|-------------|-------|-------|-----------|---------------|-----------------|-----------------|
| gene                                                                               | p_val       | avg_log2FC  | pct.1 | pct.2 | p_val_adj | Foldchange_UP | Foldchange_DOWN | Ratio_pct1_pct2 |
| EXOSC1                                                                             | 0,914624801 | 0,073368984 | 0,027 | 0,024 | 1         | 1,052170848   | 0,950415991     | 1,125           |
| RPS3A                                                                              | 0,576284167 | 0,073308496 | 0,818 | 0,829 | 1         | 1,052126735   | 0,950455841     | 0,986731001     |
| FARP2                                                                              | 0,440354071 | 0,073250866 | 0,027 | 0,049 | 1         | 1,052084707   | 0,950493808     | 0,551020408     |
| CDKL1                                                                              | 0,544157477 | 0,073233681 | 0,013 | 0,024 | 1         | 1,052072175   | 0,95050513      | 0,541666667     |
| SPRING1                                                                            | 0,919351205 | 0,073146465 | 0,027 | 0,024 | 1         | 1,052008576   | 0,950562594     | 1,125           |
| MIB2                                                                               | 0,461761449 | 0,072994064 | 0,011 | 0,024 | 1         | 1,051897451   | 0,950663013     | 0,458333333     |
| ATP5F1C                                                                            | 0,144961875 | 0,072977773 | 0,25  | 0,146 | 1         | 1,051885573   | 0,950673748     | 1,712328767     |
| PLEKHA2                                                                            | 0,461761449 | 0,07286963  | 0,011 | 0,024 | 1         | 1,051806728   | 0,950745012     | 0,458333333     |
| INTS12                                                                             | 0,393554695 | 0,072774725 | 0,026 | 0,049 | 1         | 1,051737539   | 0,950807557     | 0,530612245     |
| FHL1                                                                               | 0,709839556 | 0,072733822 | 0,057 | 0,073 | 1         | 1,051707721   | 0,950834514     | 0,780821918     |
| PPT2                                                                               | 0,619599159 | 0,072727811 | 0,014 | 0,024 | 1         | 1,051703339   | 0,950838476     | 0,583333333     |
| COL9A3                                                                             | 0,712569869 | 0,072727595 | 0,231 | 0,268 | 1         | 1,051703181   | 0,950838619     | 0,861940299     |
| IRAK1                                                                              | 0,79718719  | 0,072671408 | 0,032 | 0,024 | 1         | 1,051662223   | 0,95087565      | 1,333333333     |
| JAG1                                                                               | 0,684579851 | 0,072654012 | 0,099 | 0,122 | 1         | 1,051649542   | 0,950887116     | 0,81147541      |
| RALBP1                                                                             | 0,4804695   | 0,072461621 | 0,14  | 0,098 | 1         | 1,051509308   | 0,95101393      | 1,428571429     |
| C12orf73                                                                           | 0,994967217 | 0,072388167 | 0,024 | 0,024 | 1         | 1,051455772   | 0,951062352     | 1               |
| COX15                                                                              | 0,443798953 | 0,072305949 | 0,027 | 0,049 | 1         | 1,051395853   | 0,951116554     | 0,551020408     |
| NPM3                                                                               | 0,792923849 | 0,072182203 | 0,032 | 0,024 | 1         | 1,051305674   | 0,951198139     | 1,333333333     |
| TRPM7                                                                              | 0,792456218 | 0,072038595 | 0,059 | 0,049 | 1         | 1,051201031   | 0,951292827     | 1,204081633     |
| SMARCA2                                                                            | 0,72307225  | 0,071547282 | 0,035 | 0,024 | 1         | 1,050843103   | 0,951616847     | 1,458333333     |
| ENY2                                                                               | 0,710052689 | 0,071514718 | 0,219 | 0,268 | 1         | 1,050819383   | 0,951638327     | 0,817164179     |
| ALG6                                                                               | 0,375818168 | 0,071401424 | 0,01  | 0,024 | 1         | 1,050736867   | 0,951713061     | 0,416666667     |
| DERL2                                                                              | 0,654297771 | 0,07080689  | 0,067 | 0,049 | 1         | 1,050303948   | 0,952105343     | 1,367346939     |
| MAD2L1                                                                             | 0,940325302 | 0,070656267 | 0,022 | 0,024 | 1         | 1,050194297   | 0,952204752     | 0,916666667     |
| EAPP                                                                               | 0,87290699  | 0,070634755 | 0,131 | 0,122 | 1         | 1,050178638   | 0,95221895      | 1,073770492     |
| NDUFB9                                                                             | 0,756430338 | 0,070590563 | 0,142 | 0,122 | 1         | 1,05014647    | 0,952248118     | 1,163934426     |
| MOSPD3                                                                             | 0,531202783 | 0,070483088 | 0,01  | 0     | 1         | 1,050068241   | 0,95231906      | #DIV/0!         |
| MAN1A2                                                                             | 0,966938239 | 0,070429532 | 0,07  | 0,073 | 1         | 1,050029261   | 0,952354413     | 0,95890411      |
| NTMT1                                                                              | 0,986730129 | 0,070318967 | 0,073 | 0,073 | 1         | 1,049948792   | 0,952427402     | 1               |
| SYPL1                                                                              | 0,835931546 | 0,07031713  | 0,129 | 0,146 | 1         | 1,049947455   | 0,952428614     | 0,883561644     |

Supplementary Table 3

| Differentially expressed genes_keloid-MD_ comparing SC-Keloid vs. (SC-Myel+Nonmyel) |             |             |       |       |           |               |                 |                 |
|-------------------------------------------------------------------------------------|-------------|-------------|-------|-------|-----------|---------------|-----------------|-----------------|
| gene                                                                                | p_val       | avg_log2FC  | pct.1 | pct.2 | p_val_adj | Foldchange_UP | Foldchange_DOWN | Ratio_pct1_pct2 |
| NAA50                                                                               | 0,895989176 | 0,070311135 | 0,067 | 0,073 | 1         | 1,049943092   | 0,952432572     | 0,917808219     |
| RPL35A                                                                              | 0,645191837 | 0,07028865  | 0,804 | 0,732 | 1         | 1,049926729   | 0,952447416     | 1,098360656     |
| FUT11                                                                               | 0,757612816 | 0,070219724 | 0,018 | 0,024 | 1         | 1,049876569   | 0,952492921     | 0,75            |
| SORBS2                                                                              | 0,28046268  | 0,070213176 | 0,107 | 0,171 | 1         | 1,049871804   | 0,952497244     | 0,625730994     |
| OGDH                                                                                | 0,635959294 | 0,069936421 | 0,033 | 0,049 | 1         | 1,049670424   | 0,952679981     | 0,673469388     |
| AKT1                                                                                | 0,822711124 | 0,069901062 | 0,086 | 0,098 | 1         | 1,049644698   | 0,952703331     | 0,87755102      |
| PSMC6                                                                               | 0,869748527 | 0,069882456 | 0,08  | 0,073 | 1         | 1,049631161   | 0,952715618     | 1,095890411     |
| TBC1D12                                                                             | 0,875528845 | 0,069755531 | 0,029 | 0,024 | 1         | 1,049538821   | 0,952799439     | 1,208333333     |
| NUB1                                                                                | 0,827852217 | 0,069690115 | 0,057 | 0,049 | 1         | 1,049491233   | 0,952842643     | 1,163265306     |
| QRICH1                                                                              | 0,544157477 | 0,06966658  | 0,013 | 0,024 | 1         | 1,049474112   | 0,952858187     | 0,541666667     |
| UNKL                                                                                | 0,287685455 | 0,069582345 | 0,008 | 0,024 | 1         | 1,049412839   | 0,952913823     | 0,333333333     |
| RNF213                                                                              | 0,833578091 | 0,069529828 | 0,064 | 0,073 | 1         | 1,049374638   | 0,952948512     | 0,876712329     |
| RPS11                                                                               | 0,742287008 | 0,069261155 | 0,555 | 0,634 | 1         | 1,049179231   | 0,953125996     | 0,875394322     |
| GNAI3                                                                               | 0,73106453  | 0,069231751 | 0,08  | 0,098 | 1         | 1,049157848   | 0,953145422     | 0,816326531     |
| TRIM62                                                                              | 0,544157477 | 0,069086906 | 0,013 | 0,024 | 1         | 1,049052519   | 0,953241122     | 0,541666667     |
| SCLT1                                                                               | 0,760132187 | 0,069040387 | 0,033 | 0,024 | 1         | 1,049018694   | 0,953271859     | 1,375           |
| LENG1                                                                               | 0,485519363 | 0,068870215 | 0,029 | 0,049 | 1         | 1,048894964   | 0,953384308     | 0,591836735     |
| LPAR4                                                                               | 0,375818168 | 0,068805449 | 0,01  | 0,024 | 1         | 1,048847878   | 0,953427109     | 0,416666667     |
| MSL1                                                                                | 0,607014362 | 0,068800987 | 0,072 | 0,049 | 1         | 1,048844635   | 0,953430057     | 1,469387755     |
| POPDC3                                                                              | 0,914624801 | 0,068733007 | 0,027 | 0,024 | 1         | 1,048795214   | 0,953474984     | 1,125           |
| ZNF677                                                                              | 0,209830716 | 0,068605487 | 0,019 | 0,049 | 1         | 1,048702515   | 0,953559266     | 0,387755102     |
| LRRC42                                                                              | 0,544157477 | 0,068534921 | 0,013 | 0,024 | 1         | 1,048651221   | 0,953605908     | 0,541666667     |
| DAPK3                                                                               | 0,884899866 | 0,068504054 | 0,021 | 0,024 | 1         | 1,048628785   | 0,953626311     | 0,875           |
| MED19                                                                               | 0,605467522 | 0,068412972 | 0,041 | 0,024 | 1         | 1,048562584   | 0,953686518     | 1,708333333     |
| USP16                                                                               | 0,790248863 | 0,068369664 | 0,112 | 0,098 | 1         | 1,048531108   | 0,953715147     | 1,142857143     |
| PGK1                                                                                | 0,545667643 | 0,067907343 | 0,11  | 0,146 | 1         | 1,048195153   | 0,95402082      | 0,753424658     |
| TM2D2                                                                               | 0,576739556 | 0,067832825 | 0,043 | 0,024 | 1         | 1,048141013   | 0,954070099     | 1,791666667     |
| PFDN1                                                                               | 0,873792767 | 0,067824201 | 0,155 | 0,146 | 1         | 1,048134747   | 0,954075802     | 1,061643836     |
| ABI1                                                                                | 0,905536106 | 0,06760998  | 0,078 | 0,073 | 1         | 1,047979125   | 0,95421748      | 1,068493151     |
| CYBRD1                                                                              | 0,935147182 | 0,067373129 | 0,022 | 0,024 | 1         | 1,04780709    | 0,95437415      | 0,916666667     |



Supplementary Table 3

| Differentially expressed genes_keloid-MD_ comparing SC-Keloid vs. (SC-Myel+Nonmyel) |             |             |       |       |           |               |                 |                 |
|-------------------------------------------------------------------------------------|-------------|-------------|-------|-------|-----------|---------------|-----------------|-----------------|
| gene                                                                                | p_val       | avg_log2FC  | pct.1 | pct.2 | p_val_adj | Foldchange_UP | Foldchange_DOWN | Ratio_pct1_pct2 |
| RPS25                                                                               | 0,73952409  | 0,067348604 | 0,509 | 0,488 | 1         | 1,047789278   | 0,954390373     | 1,043032787     |
| NDUFC2                                                                              | 0,670237934 | 0,06722763  | 0,309 | 0,366 | 1         | 1,047701421   | 0,954470405     | 0,844262295     |
| ABLIM3                                                                              | 0,532727737 | 0,06722676  | 0,046 | 0,024 | 1         | 1,04770079    | 0,95447098      | 1,916666667     |
| FXVD3                                                                               | 0,911034414 | 0,067170707 | 0,045 | 0,049 | 1         | 1,047660084   | 0,954508065     | 0,918367347     |
| MGST2                                                                               | 0,683244479 | 0,067074641 | 0,035 | 0,049 | 1         | 1,047590325   | 0,954571626     | 0,714285714     |
| UACA                                                                                | 0,974937655 | 0,06699062  | 0,073 | 0,073 | 1         | 1,047529316   | 0,954627221     | 1               |
| MED14                                                                               | 0,756020429 | 0,066689317 | 0,033 | 0,024 | 1         | 1,047310565   | 0,954826613     | 1,375           |
| PSMA6                                                                               | 0,879586292 | 0,066616646 | 0,021 | 0,024 | 1         | 1,047257812   | 0,954874711     | 0,875           |
| TMEM101                                                                             | 0,916987636 | 0,066541755 | 0,027 | 0,024 | 1         | 1,047203449   | 0,95492428      | 1,125           |
| TMEM179B                                                                            | 0,563640088 | 0,066509706 | 0,07  | 0,098 | 1         | 1,047180187   | 0,954945493     | 0,714285714     |
| ZYG11B                                                                              | 0,950662154 | 0,066508565 | 0,046 | 0,049 | 1         | 1,047179358   | 0,954946249     | 0,93877551      |
| SH2B3                                                                               | 0,41062975  | 0,066187337 | 0,062 | 0,098 | 1         | 1,046946221   | 0,955158899     | 0,632653061     |
| ERCC6                                                                               | 0,763143412 | 0,066087515 | 0,018 | 0,024 | 1         | 1,046873784   | 0,95522499      | 0,75            |
| SRPRB                                                                               | 0,793360595 | 0,065996117 | 0,04  | 0,049 | 1         | 1,046807465   | 0,955285507     | 0,816326531     |
| NMRK1                                                                               | 0,760132187 | 0,06576006  | 0,033 | 0,024 | 1         | 1,046636198   | 0,955441826     | 1,375           |
| PPP6R1                                                                              | 0,624684133 | 0,065448007 | 0,033 | 0,049 | 1         | 1,046409836   | 0,955648509     | 0,673469388     |
| PPARA                                                                               | 0,544157477 | 0,065356272 | 0,013 | 0,024 | 1         | 1,046343301   | 0,955709277     | 0,541666667     |
| MAP2K2                                                                              | 0,951180169 | 0,065326469 | 0,124 | 0,122 | 1         | 1,046321686   | 0,95572902      | 1,016393443     |
| PARP12                                                                              | 0,622403257 | 0,065270817 | 0,014 | 0,024 | 1         | 1,046281326   | 0,955765888     | 0,583333333     |
| GSTT2B                                                                              | 0,868674911 | 0,065170162 | 0,029 | 0,024 | 1         | 1,04620833    | 0,955832573     | 1,208333333     |
| EPB41L3                                                                             | 0,947451778 | 0,064868326 | 0,116 | 0,122 | 1         | 1,045989468   | 0,95603257      | 0,950819672     |
| TYMP                                                                                | 0,758075453 | 0,064848502 | 0,033 | 0,024 | 1         | 1,045975096   | 0,956045707     | 1,375           |
| RANBP6                                                                              | 0,300183592 | 0,064711895 | 0,022 | 0,049 | 1         | 1,045876058   | 0,956136238     | 0,448979592     |
| AP1AR                                                                               | 0,823206629 | 0,064468552 | 0,019 | 0,024 | 1         | 1,045699663   | 0,956297526     | 0,791666667     |
| RBM26                                                                               | 0,778624485 | 0,064453212 | 0,061 | 0,073 | 1         | 1,045688544   | 0,956307694     | 0,835616438     |
| TOR1AIP2                                                                            | 0,983626147 | 0,064327491 | 0,072 | 0,073 | 1         | 1,045597423   | 0,956391033     | 0,98630137      |
| OGFOD1                                                                              | 0,616800584 | 0,064142988 | 0,014 | 0,024 | 1         | 1,045463713   | 0,956513351     | 0,583333333     |
| FGD5-AS1                                                                            | 0,628926281 | 0,064117544 | 0,126 | 0,098 | 1         | 1,045445274   | 0,956530222     | 1,285714286     |
| KANSL1-AS1                                                                          | 0,622403257 | 0,063737726 | 0,014 | 0,024 | 1         | 1,045170077   | 0,95678208      | 0,583333333     |
| CCDC14                                                                              | 0,674231619 | 0,063694659 | 0,056 | 0,073 | 1         | 1,045138877   | 0,956810642     | 0,767123288     |

Supplementary Table 3

| Differentially expressed genes_keloid-MD_comparing SC-Keloid vs. (SC-Myel+Nonmyel) |             |             |       |       |           |               |                 |                 |
|------------------------------------------------------------------------------------|-------------|-------------|-------|-------|-----------|---------------|-----------------|-----------------|
| gene                                                                               | p_val       | avg_log2FC  | pct.1 | pct.2 | p_val_adj | Foldchange_UP | Foldchange_DOWN | Ratio_pct1_pct2 |
| PPIE                                                                               | 0,7971379   | 0,063562249 | 0,04  | 0,049 | 1         | 1,045042959   | 0,956898462     | 0,816326531     |
| CRNKL1                                                                             | 0,831945713 | 0,063351753 | 0,03  | 0,024 | 1         | 1,044890494   | 0,957038088     | 1,25            |
| SERPINB8                                                                           | 0,723072223 | 0,063324262 | 0,035 | 0,024 | 1         | 1,044870583   | 0,957056325     | 1,458333333     |
| RNF149                                                                             | 0,831945713 | 0,063321257 | 0,03  | 0,024 | 1         | 1,044868406   | 0,957058318     | 1,25            |
| LYRM7                                                                              | 0,940325302 | 0,063222709 | 0,022 | 0,024 | 1         | 1,044797036   | 0,957123696     | 0,916666667     |
| CHD8                                                                               | 0,846434546 | 0,063141634 | 0,041 | 0,049 | 1         | 1,044738323   | 0,957177484     | 0,836734694     |
| POLR1H                                                                             | 0,425971637 | 0,062760903 | 0,054 | 0,024 | 1         | 1,044462651   | 0,957430119     | 2,25            |
| TFCP2                                                                              | 0,760376583 | 0,062682943 | 0,018 | 0,024 | 1         | 1,044406212   | 0,957481858     | 0,75            |
| PITHD1                                                                             | 0,902075683 | 0,062521019 | 0,067 | 0,073 | 1         | 1,044288997   | 0,957589329     | 0,917808219     |
| IFFO1                                                                              | 0,690714871 | 0,062473695 | 0,016 | 0,024 | 1         | 1,044254742   | 0,957620741     | 0,666666667     |
| POLR2H                                                                             | 0,644938554 | 0,062417345 | 0,075 | 0,098 | 1         | 1,044213956   | 0,957658145     | 0,765306122     |
| DYNC2H1                                                                            | 0,942915322 | 0,062290525 | 0,022 | 0,024 | 1         | 1,044122168   | 0,957742332     | 0,916666667     |
| CHD4                                                                               | 0,947197558 | 0,062220676 | 0,148 | 0,146 | 1         | 1,044071617   | 0,957788703     | 1,01369863      |
| MSANTD2                                                                            | 0,690714871 | 0,061874159 | 0,016 | 0,024 | 1         | 1,043820874   | 0,958018779     | 0,666666667     |
| RBPJ                                                                               | 0,916941953 | 0,061789863 | 0,078 | 0,073 | 1         | 1,043759887   | 0,958074757     | 1,068493151     |
| RFNG                                                                               | 0,443798953 | 0,061291314 | 0,027 | 0,049 | 1         | 1,043399259   | 0,958405894     | 0,551020408     |
| CABIN1                                                                             | 0,820490956 | 0,061057914 | 0,019 | 0,024 | 1         | 1,043230471   | 0,958560959     | 0,791666667     |
| TBC1D32                                                                            | 0,690714871 | 0,061003795 | 0,016 | 0,024 | 1         | 1,043191338   | 0,958596917     | 0,666666667     |
| SLC35F6                                                                            | 0,300183592 | 0,060809175 | 0,022 | 0,049 | 1         | 1,04305062    | 0,958726241     | 0,448979592     |
| ZNF195                                                                             | 0,622403257 | 0,060776561 | 0,014 | 0,024 | 1         | 1,043027041   | 0,958747914     | 0,583333333     |
| UTP25                                                                              | 0,690714871 | 0,060619716 | 0,016 | 0,024 | 1         | 1,042913653   | 0,958852151     | 0,666666667     |
| VIM-AS1                                                                            | 0,817777434 | 0,060571723 | 0,019 | 0,024 | 1         | 1,042878959   | 0,95888405      | 0,791666667     |
| KLHL21                                                                             | 0,8286443   | 0,060522506 | 0,019 | 0,024 | 1         | 1,042843383   | 0,958916762     | 0,791666667     |
| CCNT2                                                                              | 0,470087757 | 0,060498937 | 0,046 | 0,073 | 1         | 1,042826346   | 0,958932428     | 0,630136986     |
| GOLM1                                                                              | 0,710723073 | 0,06032035  | 0,037 | 0,049 | 1         | 1,042697266   | 0,959051139     | 0,755102041     |
| GBP2                                                                               | 0,82592439  | 0,060294314 | 0,019 | 0,024 | 1         | 1,042678449   | 0,959068447     | 0,791666667     |
| DYNC1H1                                                                            | 0,717943562 | 0,06028684  | 0,209 | 0,244 | 1         | 1,042673047   | 0,959073415     | 0,856557377     |
| TAF15                                                                              | 0,6062866   | 0,06025232  | 0,073 | 0,098 | 1         | 1,042648099   | 0,959096363     | 0,744897959     |
| L3MBTL2                                                                            | 0,693510359 | 0,059859918 | 0,016 | 0,024 | 1         | 1,042364545   | 0,959357266     | 0,666666667     |
| SUPT7L                                                                             | 0,348773849 | 0,059671618 | 0,024 | 0,049 | 1         | 1,042228505   | 0,959482489     | 0,489795918     |

Supplementary Table 3

| Differentially expressed genes_keloid-MD_comparing SC-Keloid vs. (SC-Myel+Nonmyel) |             |             |       |       |           |               |                 |                 |
|------------------------------------------------------------------------------------|-------------|-------------|-------|-------|-----------|---------------|-----------------|-----------------|
| gene                                                                               | p_val       | avg_log2FC  | pct.1 | pct.2 | p_val_adj | Foldchange_UP | Foldchange_DOWN | Ratio_pct1_pct2 |
| PSMD10                                                                             | 0,280604995 | 0,059670924 | 0,054 | 0,098 | 1         | 1,042228004   | 0,95948295      | 0,551020408     |
| CFAP36                                                                             | 0,970640415 | 0,059571304 | 0,096 | 0,098 | 1         | 1,042156039   | 0,959549207     | 0,979591837     |
| IARS2                                                                              | 0,61526983  | 0,05956385  | 0,073 | 0,098 | 1         | 1,042150654   | 0,959554164     | 0,744897959     |
| NEDD1                                                                              | 0,96336611  | 0,059390021 | 0,026 | 0,024 | 1         | 1,042025094   | 0,959669787     | 1,083333333     |
| SLC12A2                                                                            | 0,554221352 | 0,059246646 | 0,045 | 0,024 | 1         | 1,041921543   | 0,959765164     | 1,875           |
| TULP3                                                                              | 0,852885231 | 0,05921605  | 0,056 | 0,049 | 1         | 1,041899447   | 0,959785518     | 1,142857143     |
| USF2                                                                               | 0,471476341 | 0,058763007 | 0,046 | 0,073 | 1         | 1,041572314   | 0,960086963     | 0,630136986     |
| CDKN2D                                                                             | 0,576893101 | 0,058586985 | 0,032 | 0,049 | 1         | 1,041445241   | 0,960204109     | 0,653061224     |
| CDK14                                                                              | 0,461761449 | 0,058538618 | 0,011 | 0,024 | 1         | 1,041410327   | 0,960236301     | 0,458333333     |
| PSMC3                                                                              | 0,339979559 | 0,058483097 | 0,129 | 0,073 | 1         | 1,04137025    | 0,960273255     | 1,767123288     |
| ROGDI                                                                              | 0,817777434 | 0,058303365 | 0,019 | 0,024 | 1         | 1,041240523   | 0,960392894     | 0,791666667     |
| DTNBP1                                                                             | 0,823206629 | 0,058295819 | 0,019 | 0,024 | 1         | 1,041235077   | 0,960397918     | 0,791666667     |
| ZMYM5                                                                              | 0,624684098 | 0,058203806 | 0,033 | 0,049 | 1         | 1,041168671   | 0,960459173     | 0,673469388     |
| SLC35B4                                                                            | 0,989934634 | 0,058129762 | 0,024 | 0,024 | 1         | 1,041115236   | 0,960508468     | 1               |
| TMEM161B-DT                                                                        | 0,994967217 | 0,058123696 | 0,024 | 0,024 | 1         | 1,041110858   | 0,960512507     | 1               |
| RAB11FIP1                                                                          | 0,619599159 | 0,05801941  | 0,014 | 0,024 | 1         | 1,041035603   | 0,96058194      | 0,583333333     |
| RPL29                                                                              | 0,808001814 | 0,057878922 | 0,636 | 0,683 | 1         | 1,040934234   | 0,960675485     | 0,931185944     |
| AIFM1                                                                              | 0,758075428 | 0,057820403 | 0,033 | 0,024 | 1         | 1,040892012   | 0,960714453     | 1,375           |
| BUD23                                                                              | 0,908167953 | 0,057663085 | 0,067 | 0,073 | 1         | 1,040778514   | 0,96081922      | 0,917808219     |
| PAQR4                                                                              | 0,690714871 | 0,057599222 | 0,016 | 0,024 | 1         | 1,040732444   | 0,960861753     | 0,666666667     |
| EHMT2                                                                              | 0,687923594 | 0,057590782 | 0,016 | 0,024 | 1         | 1,040726356   | 0,960867374     | 0,666666667     |
| LZTS2                                                                              | 0,622403257 | 0,057576002 | 0,014 | 0,024 | 1         | 1,040715693   | 0,960877218     | 0,583333333     |
| TET1                                                                               | 0,8286443   | 0,057452881 | 0,019 | 0,024 | 1         | 1,040626882   | 0,960959223     | 0,791666667     |
| NFRKB                                                                              | 0,461761449 | 0,057081574 | 0,011 | 0,024 | 1         | 1,04035909    | 0,961206578     | 0,458333333     |
| WIPI1                                                                              | 0,696310026 | 0,05704247  | 0,016 | 0,024 | 1         | 1,040330891   | 0,961232631     | 0,666666667     |
| BICD2                                                                              | 0,408732391 | 0,05691139  | 0,056 | 0,024 | 1         | 1,040236374   | 0,96131997      | 2,333333333     |
| SNU13                                                                              | 0,766038566 | 0,056908141 | 0,236 | 0,268 | 1         | 1,040234031   | 0,961322135     | 0,880597015     |
| MFSD12                                                                             | 0,930246092 | 0,056905132 | 0,069 | 0,073 | 1         | 1,040231861   | 0,961324141     | 0,945205479     |
| IBTK                                                                               | 0,827852217 | 0,056893842 | 0,057 | 0,049 | 1         | 1,040223721   | 0,961331664     | 1,163265306     |
| RPS4X                                                                              | 0,990278733 | 0,056791856 | 0,772 | 0,78  | 1         | 1,040150189   | 0,961399624     | 0,98974359      |

Supplementary Table 3

| Differentially expressed genes_keloid-MD_comparing SC-Keloid vs. (SC-Myel+Nonmyel) |             |             |       |       |           |               |                 |                 |
|------------------------------------------------------------------------------------|-------------|-------------|-------|-------|-----------|---------------|-----------------|-----------------|
| gene                                                                               | p_val       | avg_log2FC  | pct.1 | pct.2 | p_val_adj | Foldchange_UP | Foldchange_DOWN | Ratio_pct1_pct2 |
| THOC6                                                                              | 0,541384208 | 0,056702381 | 0,013 | 0,024 | 1         | 1,040085681   | 0,961459251     | 0,541666667     |
| OBI1                                                                               | 0,760376583 | 0,056182146 | 0,018 | 0,024 | 1         | 1,039710694   | 0,961806015     | 0,75            |
| DYRK1B                                                                             | 0,287685455 | 0,056176994 | 0,008 | 0,024 | 1         | 1,039706981   | 0,96180945      | 0,333333333     |
| ABRAXAS1                                                                           | 0,831366235 | 0,056158136 | 0,019 | 0,024 | 1         | 1,039693392   | 0,961822022     | 0,791666667     |
| FAM104A                                                                            | 0,706942342 | 0,056142702 | 0,037 | 0,049 | 1         | 1,039682268   | 0,961832312     | 0,755102041     |
| UBL7-DT                                                                            | 0,619599159 | 0,05610242  | 0,014 | 0,024 | 1         | 1,03965324    | 0,961859168     | 0,583333333     |
| CHORDC1                                                                            | 0,264077938 | 0,056031005 | 0,037 | 0,073 | 1         | 1,039601777   | 0,961906782     | 0,506849315     |
| CORO2B                                                                             | 0,461761449 | 0,056001121 | 0,011 | 0,024 | 1         | 1,039580243   | 0,961926708     | 0,458333333     |
| SAMD12                                                                             | 0,666209301 | 0,055973641 | 0,035 | 0,049 | 1         | 1,039560442   | 0,96194503      | 0,714285714     |
| DPAGT1                                                                             | 0,693510359 | 0,055971533 | 0,016 | 0,024 | 1         | 1,039558922   | 0,961946436     | 0,666666667     |
| KBTBD2                                                                             | 0,877815593 | 0,055866319 | 0,029 | 0,024 | 1         | 1,039483112   | 0,962016592     | 1,208333333     |
| ARFIP1                                                                             | 0,490310188 | 0,055790991 | 0,067 | 0,098 | 1         | 1,039428838   | 0,962066823     | 0,683673469     |
| USP33                                                                              | 0,716407514 | 0,055732505 | 0,037 | 0,049 | 1         | 1,039386701   | 0,962105826     | 0,755102041     |
| UQCC1                                                                              | 0,461761449 | 0,05563713  | 0,011 | 0,024 | 1         | 1,039317991   | 0,962169431     | 0,458333333     |
| ACYP2                                                                              | 0,569386907 | 0,055576244 | 0,051 | 0,073 | 1         | 1,039274129   | 0,962210038     | 0,698630137     |
| HECTD4                                                                             | 0,992450888 | 0,055565219 | 0,024 | 0,024 | 1         | 1,039266187   | 0,962217392     | 1               |
| ADAM15                                                                             | 0,690714871 | 0,055356385 | 0,016 | 0,024 | 1         | 1,039115762   | 0,962356685     | 0,666666667     |
| OBSL1                                                                              | 0,616800584 | 0,055243909 | 0,014 | 0,024 | 1         | 1,039034753   | 0,962431716     | 0,583333333     |
| MRPL44                                                                             | 0,345632755 | 0,055209265 | 0,024 | 0,049 | 1         | 1,039009802   | 0,962454828     | 0,489795918     |
| STX5                                                                               | 0,98741848  | 0,055018745 | 0,024 | 0,024 | 1         | 1,038872601   | 0,962581936     | 1               |
| ARMC1                                                                              | 0,716407514 | 0,054925335 | 0,037 | 0,049 | 1         | 1,03880534    | 0,962644262     | 0,755102041     |
| KCTD3                                                                              | 0,619599159 | 0,054889751 | 0,014 | 0,024 | 1         | 1,038779718   | 0,962668006     | 0,583333333     |
| PDGFRB                                                                             | 0,994967217 | 0,054868054 | 0,024 | 0,024 | 1         | 1,038764096   | 0,962682484     | 1               |
| AUTS2                                                                              | 0,483750966 | 0,054862679 | 0,029 | 0,049 | 1         | 1,038760225   | 0,962686071     | 0,591836735     |
| CHST11                                                                             | 0,689913676 | 0,054359588 | 0,037 | 0,024 | 1         | 1,038398057   | 0,963021833     | 1,541666667     |
| OTUD4                                                                              | 0,829739088 | 0,053829108 | 0,03  | 0,024 | 1         | 1,038016307   | 0,963376003     | 1,25            |
| MAML3                                                                              | 0,664003134 | 0,05378713  | 0,038 | 0,024 | 1         | 1,037986104   | 0,963404034     | 1,583333333     |
| USP8                                                                               | 0,642358991 | 0,053679931 | 0,118 | 0,146 | 1         | 1,03790898    | 0,963475622     | 0,808219178     |
| AP5Z1                                                                              | 0,20008191  | 0,053603082 | 0,006 | 0,024 | 1         | 1,037853695   | 0,963526945     | 0,25            |
| DESI1                                                                              | 0,795054755 | 0,053534438 | 0,032 | 0,024 | 1         | 1,037804314   | 0,963572792     | 1,333333333     |

Supplementary Table 3

| Differentially expressed genes_keloid-MD_ comparing SC-Keloid vs. (SC-Myel+Nonmyel) |             |             |       |       |           |               |                 |                 |
|-------------------------------------------------------------------------------------|-------------|-------------|-------|-------|-----------|---------------|-----------------|-----------------|
| gene                                                                                | p_val       | avg_log2FC  | pct.1 | pct.2 | p_val_adj | Foldchange_UP | Foldchange_DOWN | Ratio_pct1_pct2 |
| ID1                                                                                 | 0,721091616 | 0,053512062 | 0,035 | 0,024 | 1         | 1,037788218   | 0,963587737     | 1,458333333     |
| JKAMP                                                                               | 0,735199369 | 0,053345325 | 0,059 | 0,073 | 1         | 1,037668284   | 0,963699108     | 0,808219178     |
| PRSS23                                                                              | 0,571528413 | 0,053326404 | 0,234 | 0,195 | 1         | 1,037654675   | 0,963711747     | 1,2             |
| KRTDAP                                                                              | 0,895608877 | 0,053272591 | 0,105 | 0,098 | 1         | 1,037615971   | 0,963747694     | 1,071428571     |
| MACROH2A1                                                                           | 0,906526217 | 0,053265116 | 0,113 | 0,122 | 1         | 1,037610595   | 0,963752688     | 0,926229508     |
| TSC2                                                                                | 0,481986069 | 0,053030875 | 0,029 | 0,049 | 1         | 1,037442138   | 0,963909179     | 0,591836735     |
| HINT3                                                                               | 0,461761449 | 0,052983522 | 0,011 | 0,024 | 1         | 1,037408088   | 0,963940817     | 0,458333333     |
| RETSAT                                                                              | 0,690714871 | 0,052599929 | 0,016 | 0,024 | 1         | 1,037132291   | 0,964197151     | 0,666666667     |
| NCK1                                                                                | 0,435879468 | 0,052385024 | 0,045 | 0,073 | 1         | 1,036977811   | 0,964340788     | 0,616438356     |
| EIF2AK2                                                                             | 0,871134101 | 0,052356361 | 0,065 | 0,073 | 1         | 1,036957209   | 0,964359948     | 0,890410959     |
| FTSJ1                                                                               | 0,763143412 | 0,051959936 | 0,018 | 0,024 | 1         | 1,036672312   | 0,964624972     | 0,75            |
| NET1                                                                                | 0,261951653 | 0,05191477  | 0,037 | 0,073 | 1         | 1,036639858   | 0,964655171     | 0,506849315     |
| WDFY2                                                                               | 0,795054755 | 0,051884129 | 0,032 | 0,024 | 1         | 1,036617841   | 0,96467566      | 1,333333333     |
| PCCB                                                                                | 0,757612816 | 0,051773653 | 0,018 | 0,024 | 1         | 1,036538464   | 0,964749534     | 0,75            |
| CCDC115                                                                             | 0,375818168 | 0,05170035  | 0,01  | 0,024 | 1         | 1,036485799   | 0,964798554     | 0,416666667     |
| VAMP5                                                                               | 0,930174379 | 0,051541388 | 0,285 | 0,268 | 1         | 1,036371601   | 0,964904865     | 1,063432836     |
| METTL8                                                                              | 0,693510359 | 0,051499725 | 0,016 | 0,024 | 1         | 1,036341673   | 0,964932731     | 0,666666667     |
| CLTC                                                                                | 0,874685269 | 0,051478297 | 0,107 | 0,098 | 1         | 1,03632628    | 0,964947063     | 1,091836735     |
| DGCR8                                                                               | 0,461761449 | 0,051448003 | 0,011 | 0,024 | 1         | 1,03630452    | 0,964967325     | 0,458333333     |
| CYB5R4                                                                              | 0,619599159 | 0,051378309 | 0,014 | 0,024 | 1         | 1,036254458   | 0,965013942     | 0,583333333     |
| SCAF8                                                                               | 0,91226272  | 0,051325443 | 0,027 | 0,024 | 1         | 1,036216487   | 0,965049305     | 1,125           |
| PARP9                                                                               | 0,693510359 | 0,051304554 | 0,016 | 0,024 | 1         | 1,036201484   | 0,965063278     | 0,666666667     |
| NUP133                                                                              | 0,690714871 | 0,050956267 | 0,016 | 0,024 | 1         | 1,03595136    | 0,965296286     | 0,666666667     |
| MON1B                                                                               | 0,693510359 | 0,050352496 | 0,016 | 0,024 | 1         | 1,035517903   | 0,965700349     | 0,666666667     |
| SLC25A46                                                                            | 0,727039075 | 0,050327291 | 0,035 | 0,024 | 1         | 1,035499811   | 0,965717221     | 1,458333333     |
| TRAF2                                                                               | 0,531202783 | 0,049861639 | 0,01  | 0     | 1         | 1,035165642   | 0,966028971     | #DIV/0!         |
| SNRPF                                                                               | 0,506467856 | 0,049789344 | 0,211 | 0,268 | 1         | 1,03511377    | 0,966077381     | 0,787313433     |
| NDUFAF5                                                                             | 0,877815593 | 0,049488756 | 0,029 | 0,024 | 1         | 1,034898125   | 0,966278686     | 1,208333333     |
| DPT                                                                                 | 0,992450888 | 0,049414287 | 0,024 | 0,024 | 1         | 1,034844707   | 0,966328564     | 1               |
| GLB1                                                                                | 0,664003163 | 0,049295792 | 0,038 | 0,024 | 1         | 1,034759714   | 0,966407937     | 1,583333333     |

Supplementary Table 3

| Differentially expressed genes_keloid-MD_comparing SC-Keloid vs. (SC-Myel+Nonmyel) |             |             |       |       |           |               |                 |                 |
|------------------------------------------------------------------------------------|-------------|-------------|-------|-------|-----------|---------------|-----------------|-----------------|
| gene                                                                               | p_val       | avg_log2FC  | pct.1 | pct.2 | p_val_adj | Foldchange_UP | Foldchange_DOWN | Ratio_pct1_pct2 |
| SCAMP3                                                                             | 0,98741848  | 0,049245871 | 0,024 | 0,024 | 1         | 1,034723909   | 0,966441377     | 1               |
| LTA4H                                                                              | 0,760376583 | 0,049129981 | 0,018 | 0,024 | 1         | 1,034640794   | 0,966519014     | 0,75            |
| ARHGEF10                                                                           | 0,391905621 | 0,049065055 | 0,026 | 0,049 | 1         | 1,034594233   | 0,966562511     | 0,530612245     |
| STK25                                                                              | 0,390260747 | 0,049056331 | 0,026 | 0,049 | 1         | 1,034587977   | 0,966568356     | 0,530612245     |
| ORAI1                                                                              | 0,477053396 | 0,049031298 | 0,046 | 0,073 | 1         | 1,034570025   | 0,966585128     | 0,630136986     |
| PYGO2                                                                              | 0,118110366 | 0,048986629 | 0,005 | 0,024 | 1         | 1,034537993   | 0,966615056     | 0,208333333     |
| EXOSC8                                                                             | 0,572493431 | 0,048794788 | 0,073 | 0,049 | 1         | 1,034400435   | 0,966743599     | 1,489795918     |
| ARSD                                                                               | 0,873243137 | 0,048754175 | 0,029 | 0,024 | 1         | 1,034371317   | 0,966770814     | 1,208333333     |
| NUBP2                                                                              | 0,789588166 | 0,04846755  | 0,04  | 0,049 | 1         | 1,034165835   | 0,966962905     | 0,816326531     |
| FMNL3                                                                              | 0,60673112  | 0,048374173 | 0,07  | 0,049 | 1         | 1,034098902   | 0,967025493     | 1,428571429     |
| NFATC2IP                                                                           | 0,881518523 | 0,048346268 | 0,043 | 0,049 | 1         | 1,034078901   | 0,967044197     | 0,87755102      |
| APTX                                                                               | 0,91462479  | 0,048159943 | 0,027 | 0,024 | 1         | 1,033945357   | 0,967169099     | 1,125           |
| PCDHGC3                                                                            | 0,963492785 | 0,048096051 | 0,075 | 0,073 | 1         | 1,033899568   | 0,967211933     | 1,02739726      |
| RCAN1                                                                              | 0,922869212 | 0,04803922  | 0,352 | 0,366 | 1         | 1,033858842   | 0,967250034     | 0,961748634     |
| MALSU1                                                                             | 0,537696513 | 0,047772425 | 0,049 | 0,073 | 1         | 1,03366767    | 0,967428922     | 0,671232877     |
| FAM20B                                                                             | 0,17226174  | 0,046736479 | 0,018 | 0,049 | 1         | 1,032925697   | 0,968123847     | 0,367346939     |
| ABCE1                                                                              | 0,581677535 | 0,046497625 | 0,043 | 0,024 | 1         | 1,032754699   | 0,968284144     | 1,791666667     |
| NAGPA                                                                              | 0,541384208 | 0,046471628 | 0,013 | 0,024 | 1         | 1,03273609    | 0,968301592     | 0,541666667     |
| SAE1                                                                               | 0,620945014 | 0,046418849 | 0,033 | 0,049 | 1         | 1,032698309   | 0,968337017     | 0,673469388     |
| SNRPD2                                                                             | 0,473680284 | 0,046399696 | 0,265 | 0,341 | 1         | 1,032684599   | 0,968349873     | 0,7771261       |
| TMEM260                                                                            | 0,541384208 | 0,046381001 | 0,013 | 0,024 | 1         | 1,032671217   | 0,968362421     | 0,541666667     |
| VCPKMT                                                                             | 0,375818168 | 0,046301762 | 0,01  | 0,024 | 1         | 1,0326145     | 0,968415609     | 0,416666667     |
| LMAN1                                                                              | 0,690406632 | 0,046145189 | 0,193 | 0,171 | 1         | 1,032502439   | 0,968520715     | 1,128654971     |
| CD46                                                                               | 0,925805371 | 0,046118923 | 0,102 | 0,098 | 1         | 1,032483641   | 0,968538348     | 1,040816327     |
| ADSS2                                                                              | 0,786125697 | 0,045993743 | 0,059 | 0,049 | 1         | 1,032394058   | 0,96862239      | 1,204081633     |
| CTNND1                                                                             | 0,233503292 | 0,045953601 | 0,085 | 0,146 | 1         | 1,032365333   | 0,968649342     | 0,582191781     |
| RFTN2                                                                              | 0,485519363 | 0,045887998 | 0,029 | 0,049 | 1         | 1,03231839    | 0,96869339      | 0,591836735     |
| IFNGR2                                                                             | 0,926784504 | 0,045812492 | 0,115 | 0,122 | 1         | 1,032264363   | 0,968744089     | 0,942622951     |
| GNPAT                                                                              | 0,989934634 | 0,045715512 | 0,024 | 0,024 | 1         | 1,032194975   | 0,968809212     | 1               |
| NR3C1                                                                              | 0,695863383 | 0,045705685 | 0,166 | 0,195 | 1         | 1,032187944   | 0,968815811     | 0,851282051     |

Supplementary Table 3

| Differentially expressed genes_keloid-MD_comparing SC-Keloid vs. (SC-Myel+Nonmyel) |             |             |       |       |           |               |                 |                 |
|------------------------------------------------------------------------------------|-------------|-------------|-------|-------|-----------|---------------|-----------------|-----------------|
| gene                                                                               | p_val       | avg_log2FC  | pct.1 | pct.2 | p_val_adj | Foldchange_UP | Foldchange_DOWN | Ratio_pct1_pct2 |
| ZDHHC6                                                                             | 0,544157477 | 0,045347755 | 0,013 | 0,024 | 1         | 1,031931892   | 0,969056202     | 0,541666667     |
| TINF2                                                                              | 0,820490956 | 0,045311396 | 0,019 | 0,024 | 1         | 1,031905885   | 0,969080625     | 0,791666667     |
| SCAMP2                                                                             | 0,525060358 | 0,044737956 | 0,03  | 0,049 | 1         | 1,031495807   | 0,96946589      | 0,612244898     |
| ANGPTL7                                                                            | 0,171167093 | 0,044724727 | 0,018 | 0,049 | 1         | 1,031486348   | 0,96947478      | 0,367346939     |
| RGS9                                                                               | 0,375818168 | 0,044688996 | 0,01  | 0,024 | 1         | 1,031460801   | 0,969498791     | 0,416666667     |
| PES1                                                                               | 0,693510359 | 0,044668092 | 0,016 | 0,024 | 1         | 1,031445856   | 0,969512839     | 0,666666667     |
| RPS14                                                                              | 0,915347689 | 0,044415151 | 0,767 | 0,854 | 1         | 1,031265033   | 0,969682834     | 0,898126464     |
| MLLT1                                                                              | 0,43863748  | 0,043977751 | 0,027 | 0,049 | 1         | 1,030952419   | 0,969976869     | 0,551020408     |
| PLXNB2                                                                             | 0,632201526 | 0,043739187 | 0,04  | 0,024 | 1         | 1,030781956   | 0,970137277     | 1,666666667     |
| HIBCH                                                                              | 0,948837288 | 0,04359635  | 0,046 | 0,049 | 1         | 1,030679906   | 0,970233333     | 0,93877551      |
| ZNF333                                                                             | 0,693510359 | 0,043579032 | 0,016 | 0,024 | 1         | 1,030667533   | 0,97024498      | 0,666666667     |
| SURF4                                                                              | 0,889141638 | 0,043558802 | 0,113 | 0,122 | 1         | 1,030653081   | 0,970258585     | 0,926229508     |
| FAM217B                                                                            | 0,882242416 | 0,043496572 | 0,021 | 0,024 | 1         | 1,030608626   | 0,970300437     | 0,875           |
| ESYT2                                                                              | 0,389416667 | 0,043445036 | 0,061 | 0,098 | 1         | 1,030571811   | 0,970335099     | 0,62244898      |
| MEX3C                                                                              | 0,851232871 | 0,043444928 | 0,056 | 0,049 | 1         | 1,030571734   | 0,970335171     | 1,142857143     |
| VRK2                                                                               | 0,760376583 | 0,04327835  | 0,018 | 0,024 | 1         | 1,030452748   | 0,970447216     | 0,75            |
| PRDX3                                                                              | 0,825250845 | 0,043269031 | 0,083 | 0,073 | 1         | 1,030446092   | 0,970453484     | 1,136986301     |
| ATP5MG                                                                             | 0,874552259 | 0,043222572 | 0,407 | 0,39  | 1         | 1,030412908   | 0,970484737     | 1,043589744     |
| HECA                                                                               | 0,541384208 | 0,043113299 | 0,013 | 0,024 | 1         | 1,030334865   | 0,970558246     | 0,541666667     |
| PHF1                                                                               | 0,459067691 | 0,042975601 | 0,011 | 0,024 | 1         | 1,03023653    | 0,970650885     | 0,458333333     |
| MOSPD2                                                                             | 0,932559137 | 0,042929694 | 0,022 | 0,024 | 1         | 1,030203748   | 0,970681773     | 0,916666667     |
| CETN2                                                                              | 0,662159797 | 0,0429289   | 0,038 | 0,024 | 1         | 1,030203181   | 0,970682307     | 1,583333333     |
| PDHA1                                                                              | 0,260473072 | 0,042590038 | 0,053 | 0,098 | 1         | 1,029961234   | 0,970910328     | 0,540816327     |
| RAD51C                                                                             | 0,485486209 | 0,042495466 | 0,049 | 0,024 | 1         | 1,02989372    | 0,970973976     | 2,041666667     |
| FCHO2                                                                              | 0,836362923 | 0,042463005 | 0,03  | 0,024 | 1         | 1,029870547   | 0,970995823     | 1,25            |
| CCDC74A                                                                            | 0,375818168 | 0,04231096  | 0,01  | 0,024 | 1         | 1,029762015   | 0,971098162     | 0,416666667     |
| KIF13A                                                                             | 0,616800504 | 0,042276525 | 0,014 | 0,024 | 1         | 1,029737437   | 0,97112134      | 0,583333333     |
| CORO2A                                                                             | 0,541384208 | 0,04216791  | 0,013 | 0,024 | 1         | 1,029659915   | 0,971194455     | 0,541666667     |
| TMEM11                                                                             | 0,622403257 | 0,042156318 | 0,014 | 0,024 | 1         | 1,029651642   | 0,971202259     | 0,583333333     |
| NUDT2                                                                              | 0,873243137 | 0,042070019 | 0,029 | 0,024 | 1         | 1,029590052   | 0,971260356     | 1,208333333     |

Supplementary Table 3

| Differentially expressed genes_keloid-MD_comparing SC-Keloid vs. (SC-Myel+Nonmyel) |             |             |       |       |           |               |                 |                 |
|------------------------------------------------------------------------------------|-------------|-------------|-------|-------|-----------|---------------|-----------------|-----------------|
| gene                                                                               | p_val       | avg_log2FC  | pct.1 | pct.2 | p_val_adj | Foldchange_UP | Foldchange_DOWN | Ratio_pct1_pct2 |
| DNAJC27                                                                            | 0,461761449 | 0,041964138 | 0,011 | 0,024 | 1         | 1,029514492   | 0,97133164      | 0,458333333     |
| VPS29                                                                              | 0,51833571  | 0,041667601 | 0,199 | 0,146 | 1         | 1,029302903   | 0,971531312     | 1,363013699     |
| PNKP                                                                               | 0,87552883  | 0,041575936 | 0,029 | 0,024 | 1         | 1,029237506   | 0,971593042     | 1,208333333     |
| POLR3F                                                                             | 0,754852144 | 0,041539062 | 0,018 | 0,024 | 1         | 1,0292112     | 0,971617876     | 0,75            |
| PLXND1                                                                             | 0,951703412 | 0,041487068 | 0,093 | 0,098 | 1         | 1,029174108   | 0,971652893     | 0,948979592     |
| CNOT3                                                                              | 0,690714871 | 0,041450085 | 0,016 | 0,024 | 1         | 1,029147726   | 0,971677802     | 0,666666667     |
| RPS19                                                                              | 0,938136477 | 0,040924569 | 0,729 | 0,756 | 1         | 1,028772918   | 0,972031809     | 0,964285714     |
| CASK                                                                               | 0,919351205 | 0,040899203 | 0,027 | 0,024 | 1         | 1,028754829   | 0,9720489       | 1,125           |
| MYO9B                                                                              | 0,442977999 | 0,040621758 | 0,083 | 0,122 | 1         | 1,028557008   | 0,972235853     | 0,680327869     |
| GNS                                                                                | 0,466968348 | 0,040412078 | 0,051 | 0,024 | 1         | 1,028407529   | 0,972377167     | 2,125           |
| SPG7                                                                               | 0,988293494 | 0,040393684 | 0,048 | 0,049 | 1         | 1,028394418   | 0,972389564     | 0,979591837     |
| ABCA3                                                                              | 0,690714871 | 0,040233332 | 0,016 | 0,024 | 1         | 1,02828012    | 0,972497649     | 0,666666667     |
| GFER                                                                               | 0,459067691 | 0,040228977 | 0,011 | 0,024 | 1         | 1,028277016   | 0,972500585     | 0,458333333     |
| CCT7                                                                               | 0,320350723 | 0,039769999 | 0,093 | 0,146 | 1         | 1,027949933   | 0,972810025     | 0,636986301     |
| XAF1                                                                               | 0,693510359 | 0,039655801 | 0,016 | 0,024 | 1         | 1,027868568   | 0,972887032     | 0,666666667     |
| LSM6                                                                               | 0,826231031 | 0,038889435 | 0,057 | 0,049 | 1         | 1,027322705   | 0,973403971     | 1,163265306     |
| DNAJC9                                                                             | 0,838573473 | 0,038582273 | 0,03  | 0,024 | 1         | 1,027104002   | 0,973611239     | 1,25            |
| RAB3GAP2                                                                           | 0,530479341 | 0,038545592 | 0,03  | 0,049 | 1         | 1,027077888   | 0,973635993     | 0,612244898     |
| NCAPD3                                                                             | 0,932559137 | 0,038408326 | 0,022 | 0,024 | 1         | 1,026980171   | 0,973728635     | 0,916666667     |
| PIN1                                                                               | 0,60082345  | 0,037940381 | 0,131 | 0,098 | 1         | 1,026647119   | 0,97404452      | 1,336734694     |
| MYL5                                                                               | 0,763143412 | 0,037904043 | 0,018 | 0,024 | 1         | 1,02662126    | 0,974069054     | 0,75            |
| H1-10                                                                              | 0,445316153 | 0,037806623 | 0,053 | 0,024 | 1         | 1,026551939   | 0,974134831     | 2,208333333     |
| TMF1                                                                               | 0,738893851 | 0,037704978 | 0,062 | 0,049 | 1         | 1,026479616   | 0,974203467     | 1,265306122     |
| SMIM12                                                                             | 0,756285721 | 0,037650282 | 0,038 | 0,049 | 1         | 1,0264407     | 0,974240402     | 0,775510204     |
| RPL41                                                                              | 0,749967397 | 0,037513459 | 0,963 | 0,951 | 1         | 1,026343359   | 0,974332801     | 1,012618297     |
| INTS13                                                                             | 0,375818168 | 0,037422552 | 0,01  | 0,024 | 1         | 1,026278689   | 0,974394198     | 0,416666667     |
| TAF7                                                                               | 0,71913572  | 0,037294758 | 0,08  | 0,098 | 1         | 1,026187785   | 0,974480514     | 0,816326531     |
| MSN                                                                                | 0,721173874 | 0,037052133 | 0,169 | 0,146 | 1         | 1,02601522    | 0,974644411     | 1,157534247     |
| TCEAL1                                                                             | 0,393554695 | 0,03697939  | 0,026 | 0,049 | 1         | 1,025963489   | 0,974693555     | 0,530612245     |
| NOSIP                                                                              | 0,55739524  | 0,036757896 | 0,045 | 0,024 | 1         | 1,025805987   | 0,974843209     | 1,875           |



Supplementary Table 3

| Differentially expressed genes_keloid-MD_ comparing SC-Keloid vs. (SC-Myel+Nonmyel) |             |             |       |       |           |               |                 |                 |
|-------------------------------------------------------------------------------------|-------------|-------------|-------|-------|-----------|---------------|-----------------|-----------------|
| gene                                                                                | p_val       | avg_log2FC  | pct.1 | pct.2 | p_val_adj | Foldchange_UP | Foldchange_DOWN | Ratio_pct1_pct2 |
| TCEA1                                                                               | 0,896122684 | 0,03674801  | 0,279 | 0,268 | 1         | 1,025798958   | 0,974849889     | 1,041044776     |
| PSMB8-AS1                                                                           | 0,375818168 | 0,036681345 | 0,01  | 0,024 | 1         | 1,025751558   | 0,974894937     | 0,416666667     |
| CHMP5                                                                               | 0,858790805 | 0,036382067 | 0,182 | 0,195 | 1         | 1,025538794   | 0,975097194     | 0,933333333     |
| SETD2                                                                               | 0,977489667 | 0,036291904 | 0,048 | 0,049 | 1         | 1,025474704   | 0,975158136     | 0,979591837     |
| MED21                                                                               | 0,760132187 | 0,036196872 | 0,033 | 0,024 | 1         | 1,025407157   | 0,975222372     | 1,375           |
| NOB1                                                                                | 0,619599159 | 0,036089247 | 0,014 | 0,024 | 1         | 1,025330664   | 0,975295127     | 0,583333333     |
| AGPAT2                                                                              | 0,332270268 | 0,036067897 | 0,04  | 0,073 | 1         | 1,025315491   | 0,97530956      | 0,547945205     |
| SETD7                                                                               | 0,795248656 | 0,03598777  | 0,04  | 0,049 | 1         | 1,025258547   | 0,97536373      | 0,816326531     |
| RPS5                                                                                | 0,876395448 | 0,035969363 | 0,603 | 0,683 | 1         | 1,025245466   | 0,975376174     | 0,882869693     |
| LTBP1                                                                               | 0,968247855 | 0,0359604   | 0,026 | 0,024 | 1         | 1,025239096   | 0,975382234     | 1,083333333     |
| EEF2K                                                                               | 0,461761449 | 0,035904513 | 0,011 | 0,024 | 1         | 1,025199381   | 0,975420019     | 0,458333333     |
| CYB5A                                                                               | 0,971043787 | 0,035862562 | 0,099 | 0,098 | 1         | 1,025169571   | 0,975448383     | 1,010204082     |
| MCTS1                                                                               | 0,97977211  | 0,035697701 | 0,096 | 0,098 | 1         | 1,025052428   | 0,975559856     | 0,979591837     |
| CALCOCO1                                                                            | 0,490845484 | 0,03565518  | 0,029 | 0,049 | 1         | 1,025022217   | 0,97558861      | 0,591836735     |
| LINC00667                                                                           | 0,535926576 | 0,035641088 | 0,03  | 0,049 | 1         | 1,025012204   | 0,97559814      | 0,612244898     |
| CNP                                                                                 | 0,54063855  | 0,035399611 | 0,129 | 0,171 | 1         | 1,024840653   | 0,975761448     | 0,754385965     |
| ETFA                                                                                | 0,612697234 | 0,035301221 | 0,073 | 0,098 | 1         | 1,024770763   | 0,975827996     | 0,744897959     |
| CCL4                                                                                | 0,608438325 | 0,035274024 | 0,014 | 0,024 | 1         | 1,024751445   | 0,975846392     | 0,583333333     |
| TCF12                                                                               | 0,681154823 | 0,035263642 | 0,067 | 0,049 | 1         | 1,02474407    | 0,975853414     | 1,367346939     |
| CLDN12                                                                              | 0,690714871 | 0,035253839 | 0,016 | 0,024 | 1         | 1,024737107   | 0,975860046     | 0,666666667     |
| ZHX1                                                                                | 0,799321141 | 0,035135918 | 0,032 | 0,024 | 1         | 1,024653353   | 0,975939812     | 1,333333333     |
| LCORL                                                                               | 0,693510359 | 0,035126676 | 0,016 | 0,024 | 1         | 1,024646788   | 0,975946064     | 0,666666667     |
| N6AMT1                                                                              | 0,937735913 | 0,034937938 | 0,022 | 0,024 | 1         | 1,024512749   | 0,976073749     | 0,916666667     |
| SEMA3C                                                                              | 0,815594305 | 0,034790712 | 0,293 | 0,317 | 1         | 1,024408204   | 0,976173362     | 0,924290221     |
| CLSTN3                                                                              | 0,287685455 | 0,034676355 | 0,008 | 0,024 | 1         | 1,024327007   | 0,976250742     | 0,333333333     |
| ATP11C                                                                              | 0,287685455 | 0,034669708 | 0,008 | 0,024 | 1         | 1,024322287   | 0,97625524      | 0,333333333     |
| SH3GLB2                                                                             | 0,108029643 | 0,034618575 | 0,027 | 0,073 | 1         | 1,024285983   | 0,976289841     | 0,369863014     |
| CEP350                                                                              | 0,882392792 | 0,034534353 | 0,08  | 0,073 | 1         | 1,024226188   | 0,976346838     | 1,095890411     |
| COA8                                                                                | 0,945991764 | 0,034100389 | 0,075 | 0,073 | 1         | 1,023918146   | 0,976640568     | 1,02739726      |
| ESRRA                                                                               | 0,459067691 | 0,034085938 | 0,011 | 0,024 | 1         | 1,023907891   | 0,97665035      | 0,458333333     |

Supplementary Table 3

| Differentially expressed genes_keloid-MD_comparing SC-Keloid vs. (SC-Myel+Nonmyel) |             |             |       |       |           |               |                 |                 |
|------------------------------------------------------------------------------------|-------------|-------------|-------|-------|-----------|---------------|-----------------|-----------------|
| gene                                                                               | p_val       | avg_log2FC  | pct.1 | pct.2 | p_val_adj | Foldchange_UP | Foldchange_DOWN | Ratio_pct1_pct2 |
| RABL3                                                                              | 0,693510359 | 0,033892479 | 0,016 | 0,024 | 1         | 1,023770598   | 0,976781324     | 0,666666667     |
| NOP16                                                                              | 0,836362923 | 0,033848279 | 0,03  | 0,024 | 1         | 1,023739233   | 0,97681125      | 1,25            |
| MAK16                                                                              | 0,879586292 | 0,033670362 | 0,021 | 0,024 | 1         | 1,023612991   | 0,97693172      | 0,875           |
| ATF7                                                                               | 0,832720112 | 0,03361584  | 0,057 | 0,049 | 1         | 1,023574308   | 0,976968641     | 1,163265306     |
| SLC25A45                                                                           | 0,20008191  | 0,033194835 | 0,006 | 0,024 | 1         | 1,023275653   | 0,97725378      | 0,25            |
| TRIM47                                                                             | 0,879586292 | 0,03301515  | 0,021 | 0,024 | 1         | 1,023148214   | 0,977375503     | 0,875           |
| DEPDC5                                                                             | 0,622403257 | 0,032930407 | 0,014 | 0,024 | 1         | 1,023088117   | 0,977432915     | 0,583333333     |
| CREB3                                                                              | 0,468331793 | 0,032692108 | 0,051 | 0,024 | 1         | 1,02291914    | 0,977594377     | 2,125           |
| USF3                                                                               | 0,929971805 | 0,032514785 | 0,022 | 0,024 | 1         | 1,02279342    | 0,977714541     | 0,916666667     |
| LYRM4                                                                              | 0,635405677 | 0,032492849 | 0,054 | 0,073 | 1         | 1,022777869   | 0,977729407     | 0,739726027     |
| MAN1B1                                                                             | 0,954739545 | 0,032431938 | 0,075 | 0,073 | 1         | 1,022734688   | 0,977770689     | 1,02739726      |
| MAST2                                                                              | 0,373270628 | 0,032394932 | 0,01  | 0,024 | 1         | 1,022708455   | 0,977795769     | 0,416666667     |
| ZFHX4                                                                              | 0,992450888 | 0,032366244 | 0,024 | 0,024 | 1         | 1,022688119   | 0,977815213     | 1               |
| WDR45                                                                              | 0,697565184 | 0,032097431 | 0,037 | 0,024 | 1         | 1,022497581   | 0,977997423     | 1,541666667     |
| C7orf26                                                                            | 0,541384208 | 0,03202912  | 0,013 | 0,024 | 1         | 1,022449168   | 0,978043732     | 0,541666667     |
| DUSP2                                                                              | 0,757612816 | 0,031480367 | 0,018 | 0,024 | 1         | 1,022060337   | 0,978415818     | 0,75            |
| CREM                                                                               | 0,53769657  | 0,031397185 | 0,049 | 0,073 | 1         | 1,022001409   | 0,978472232     | 0,671232877     |
| LGALS7B                                                                            | 0,757612816 | 0,03120446  | 0,018 | 0,024 | 1         | 1,021864892   | 0,978602952     | 0,75            |
| RIC1                                                                               | 0,541384208 | 0,031115791 | 0,013 | 0,024 | 1         | 1,02180209    | 0,978663099     | 0,541666667     |
| L3HYPDH                                                                            | 0,932559127 | 0,031082029 | 0,022 | 0,024 | 1         | 1,021778178   | 0,978686002     | 0,916666667     |
| DPH6                                                                               | 0,438637424 | 0,030946412 | 0,027 | 0,049 | 1         | 1,021682132   | 0,978778006     | 0,551020408     |
| MFAP2                                                                              | 0,776892216 | 0,030906873 | 0,061 | 0,049 | 1         | 1,021654132   | 0,978804831     | 1,244897959     |
| PHAX                                                                               | 0,496313984 | 0,03077843  | 0,067 | 0,098 | 1         | 1,021563178   | 0,978891978     | 0,683673469     |
| CWF19L2                                                                            | 0,253399298 | 0,030739479 | 0,053 | 0,098 | 1         | 1,021535598   | 0,978918407     | 0,540816327     |
| AP1G1                                                                              | 0,872193095 | 0,030633268 | 0,043 | 0,049 | 1         | 1,021460395   | 0,978990477     | 0,87755102      |
| MTMR11                                                                             | 0,287685455 | 0,030565859 | 0,008 | 0,024 | 1         | 1,021412669   | 0,979036221     | 0,333333333     |
| GTF2A2                                                                             | 0,727607125 | 0,03040477  | 0,188 | 0,22  | 1         | 1,021298627   | 0,979145545     | 0,854545455     |
| ZMIZ1                                                                              | 0,911957355 | 0,03020667  | 0,045 | 0,049 | 1         | 1,021158399   | 0,979280003     | 0,918367347     |
| GPR17                                                                              | 0,731328965 | 0,030012565 | 0,062 | 0,049 | 1         | 1,021021018   | 0,979411767     | 1,265306122     |
| DIRC3                                                                              | 0,764250734 | 0,029955152 | 0,033 | 0,024 | 1         | 1,020980387   | 0,979450744     | 1,375           |

Supplementary Table 3

| Differentially expressed genes_keloid-MD_comparing SC-Keloid vs. (SC-Myel+Nonmyel) |             |             |       |       |           |               |                 |                 |
|------------------------------------------------------------------------------------|-------------|-------------|-------|-------|-----------|---------------|-----------------|-----------------|
| gene                                                                               | p_val       | avg_log2FC  | pct.1 | pct.2 | p_val_adj | Foldchange_UP | Foldchange_DOWN | Ratio_pct1_pct2 |
| UBE2D4                                                                             | 0,489066629 | 0,029925981 | 0,029 | 0,049 | 1         | 1,020959743   | 0,979470549     | 0,591836735     |
| DNAJC3                                                                             | 0,749692998 | 0,02980369  | 0,145 | 0,122 | 1         | 1,020873205   | 0,979553578     | 1,18852459      |
| IL17RC                                                                             | 0,992450888 | 0,029653355 | 0,024 | 0,024 | 1         | 1,020766831   | 0,979655657     | 1               |
| ECD                                                                                | 0,994967217 | 0,029538003 | 0,024 | 0,024 | 1         | 1,020685217   | 0,979733399     | 1               |
| PDCD10                                                                             | 0,993519635 | 0,029467347 | 0,097 | 0,098 | 1         | 1,02063523    | 0,979781973     | 0,989795918     |
| MGME1                                                                              | 0,79718719  | 0,029457554 | 0,032 | 0,024 | 1         | 1,020628302   | 0,979788624     | 1,333333333     |
| TEFM                                                                               | 0,882242416 | 0,029363222 | 0,021 | 0,024 | 1         | 1,02056157    | 0,97985269      | 0,875           |
| CEMIP2                                                                             | 0,619599159 | 0,029103101 | 0,014 | 0,024 | 1         | 1,020377577   | 0,980029376     | 0,583333333     |
| EMC9                                                                               | 0,757612816 | 0,02909162  | 0,018 | 0,024 | 1         | 1,020369457   | 0,980037175     | 0,75            |
| LTO1                                                                               | 0,696310026 | 0,029087317 | 0,016 | 0,024 | 1         | 1,020366414   | 0,980040098     | 0,666666667     |
| TRMT11                                                                             | 0,756285721 | 0,029067276 | 0,038 | 0,049 | 1         | 1,02035224    | 0,980053712     | 0,775510204     |
| PNISR                                                                              | 0,524542198 | 0,028916733 | 0,207 | 0,268 | 1         | 1,020245772   | 0,980155985     | 0,77238806      |
| ST7-AS1                                                                            | 0,20008191  | 0,028889285 | 0,006 | 0,024 | 1         | 1,020226362   | 0,980174633     | 0,25            |
| RBBP4                                                                              | 0,678028425 | 0,028682323 | 0,096 | 0,073 | 1         | 1,020080016   | 0,980315254     | 1,315068493     |
| RPL7L1                                                                             | 0,901551251 | 0,02817639  | 0,091 | 0,098 | 1         | 1,019722351   | 0,980659097     | 0,928571429     |
| AFAP1                                                                              | 0,697565184 | 0,028032171 | 0,037 | 0,024 | 1         | 1,019620419   | 0,980757134     | 1,541666667     |
| AKAP13                                                                             | 0,620537418 | 0,027977479 | 0,179 | 0,22  | 1         | 1,019581767   | 0,980794315     | 0,813636364     |
| NDUFA8                                                                             | 0,478697035 | 0,027604258 | 0,105 | 0,146 | 1         | 1,019318038   | 0,981048076     | 0,719178082     |
| KHK                                                                                | 0,287685455 | 0,027537138 | 0,008 | 0,024 | 1         | 1,019270617   | 0,981093719     | 0,333333333     |
| SLC10A3                                                                            | 0,544157477 | 0,027528689 | 0,013 | 0,024 | 1         | 1,019264647   | 0,981099465     | 0,541666667     |
| SP3                                                                                | 0,639920194 | 0,027401673 | 0,054 | 0,073 | 1         | 1,019174914   | 0,981185846     | 0,739726027     |
| RRAD                                                                               | 0,255984018 | 0,02733222  | 0,021 | 0,049 | 1         | 1,019125852   | 0,981233082     | 0,428571429     |
| TECPR2                                                                             | 0,876931522 | 0,027110113 | 0,021 | 0,024 | 1         | 1,018968966   | 0,981384157     | 0,875           |
| GDAP2                                                                              | 0,287685455 | 0,027083262 | 0,008 | 0,024 | 1         | 1,018950001   | 0,981402423     | 0,333333333     |
| PRPF18                                                                             | 0,823206629 | 0,026875955 | 0,019 | 0,024 | 1         | 1,018803594   | 0,981543455     | 0,791666667     |
| HAX1                                                                               | 0,822522885 | 0,026687941 | 0,083 | 0,073 | 1         | 1,018670831   | 0,981671379     | 1,136986301     |
| FLYWCH2                                                                            | 0,500291052 | 0,02662505  | 0,048 | 0,073 | 1         | 1,018626426   | 0,981714174     | 0,657534247     |
| LGALS1                                                                             | 0,809852509 | 0,026484251 | 0,927 | 0,951 | 1         | 1,018527018   | 0,981809988     | 0,974763407     |
| SLC25A21-AS1                                                                       | 0,20008191  | 0,026293858 | 0,006 | 0,024 | 1         | 1,018392612   | 0,981939566     | 0,25            |
| ZKSCAN1                                                                            | 0,562068859 | 0,026070789 | 0,051 | 0,073 | 1         | 1,01823516    | 0,982091406     | 0,698630137     |

Supplementary Table 3

| Differentially expressed genes_keloid-MD_comparing SC-Keloid vs. (SC-Myel+Nonmyel) |             |             |       |       |           |               |                 |                 |
|------------------------------------------------------------------------------------|-------------|-------------|-------|-------|-----------|---------------|-----------------|-----------------|
| gene                                                                               | p_val       | avg_log2FC  | pct.1 | pct.2 | p_val_adj | Foldchange_UP | Foldchange_DOWN | Ratio_pct1_pct2 |
| KIFBP                                                                              | 0,668093817 | 0,026001066 | 0,035 | 0,049 | 1         | 1,018185952   | 0,982138869     | 0,714285714     |
| ANKRD36C                                                                           | 0,375818168 | 0,02599609  | 0,01  | 0,024 | 1         | 1,01818244    | 0,982142257     | 0,416666667     |
| NDUFA5                                                                             | 0,746565383 | 0,025811151 | 0,126 | 0,146 | 1         | 1,018051928   | 0,982268166     | 0,863013699     |
| MYO1E                                                                              | 0,964586419 | 0,025653952 | 0,026 | 0,024 | 1         | 1,017941005   | 0,982375202     | 1,083333333     |
| CSNK1D                                                                             | 0,566454234 | 0,025508939 | 0,051 | 0,073 | 1         | 1,017838691   | 0,98247395      | 0,698630137     |
| EIF4G2                                                                             | 0,942603481 | 0,025341373 | 0,322 | 0,317 | 1         | 1,017720479   | 0,982588069     | 1,015772871     |
| NAALADL2                                                                           | 0,760376583 | 0,025274219 | 0,018 | 0,024 | 1         | 1,017673107   | 0,982633808     | 0,75            |
| LBX2-AS1                                                                           | 0,20008191  | 0,025134148 | 0,006 | 0,024 | 1         | 1,017574306   | 0,982729216     | 0,25            |
| MIER3                                                                              | 0,118110366 | 0,024999404 | 0,005 | 0,024 | 1         | 1,017479272   | 0,982821005     | 0,208333333     |
| STK3                                                                               | 0,760376583 | 0,024922257 | 0,018 | 0,024 | 1         | 1,017424864   | 0,982873561     | 0,75            |
| TAOK3                                                                              | 0,907589684 | 0,024798174 | 0,069 | 0,073 | 1         | 1,017337361   | 0,9829581       | 0,945205479     |
| PBX2                                                                               | 0,875528845 | 0,024720348 | 0,029 | 0,024 | 1         | 1,017282483   | 0,983011127     | 1,208333333     |
| BCAS3                                                                              | 0,287685455 | 0,02461835  | 0,008 | 0,024 | 1         | 1,017210564   | 0,983080628     | 0,333333333     |
| SRC                                                                                | 0,375818168 | 0,024548726 | 0,01  | 0,024 | 1         | 1,017161475   | 0,983128072     | 0,416666667     |
| DPYD                                                                               | 0,541384208 | 0,024547463 | 0,013 | 0,024 | 1         | 1,017160585   | 0,983128933     | 0,541666667     |
| KCTD15                                                                             | 0,987418478 | 0,024303291 | 0,024 | 0,024 | 1         | 1,016988447   | 0,983295339     | 1               |
| RAB38                                                                              | 0,20008191  | 0,024090777 | 0,006 | 0,024 | 1         | 1,016838653   | 0,983440192     | 0,25            |
| ARHGEF40                                                                           | 0,831251633 | 0,023993087 | 0,11  | 0,122 | 1         | 1,016769801   | 0,983506786     | 0,901639344     |
| AREG                                                                               | 0,461761449 | 0,023899884 | 0,011 | 0,024 | 1         | 1,016704117   | 0,983570327     | 0,458333333     |
| SAMM50                                                                             | 0,531200001 | 0,023815167 | 0,046 | 0,024 | 1         | 1,016644416   | 0,983628085     | 1,916666667     |
| ANKRD26                                                                            | 0,171167093 | 0,023622824 | 0,018 | 0,049 | 1         | 1,016508884   | 0,983759233     | 0,367346939     |
| FAM207A                                                                            | 0,714436245 | 0,023518628 | 0,057 | 0,073 | 1         | 1,016435471   | 0,983830285     | 0,780821918     |
| MPC1                                                                               | 0,606363457 | 0,023376823 | 0,094 | 0,122 | 1         | 1,016335569   | 0,983926993     | 0,770491803     |
| SPATA33                                                                            | 0,921715487 | 0,02318648  | 0,027 | 0,024 | 1         | 1,016201487   | 0,984056816     | 1,125           |
| HM13                                                                               | 0,20572129  | 0,022987567 | 0,118 | 0,195 | 1         | 1,016061387   | 0,984192504     | 0,605128205     |
| SLC35B2                                                                            | 0,772225315 | 0,022951024 | 0,061 | 0,049 | 1         | 1,01603565    | 0,984217433     | 1,244897959     |
| POLR3C                                                                             | 0,118110366 | 0,022937133 | 0,005 | 0,024 | 1         | 1,016025868   | 0,98422691      | 0,208333333     |
| PAK2                                                                               | 0,669869237 | 0,022832324 | 0,222 | 0,195 | 1         | 1,015952058   | 0,984298415     | 1,138461538     |
| UBXN2B                                                                             | 0,614007565 | 0,022818973 | 0,014 | 0,024 | 1         | 1,015942656   | 0,984307523     | 0,583333333     |
| CNOT10                                                                             | 0,685136562 | 0,022765148 | 0,016 | 0,024 | 1         | 1,015904754   | 0,984344247     | 0,666666667     |

Supplementary Table 3

| Differentially expressed genes_keloid-MD_comparing SC-Keloid vs. (SC-Myel+Nonmyel) |             |             |       |       |           |               |                 |                 |
|------------------------------------------------------------------------------------|-------------|-------------|-------|-------|-----------|---------------|-----------------|-----------------|
| gene                                                                               | p_val       | avg_log2FC  | pct.1 | pct.2 | p_val_adj | Foldchange_UP | Foldchange_DOWN | Ratio_pct1_pct2 |
| TAOK2                                                                              | 0,757612816 | 0,022738491 | 0,018 | 0,024 | 1         | 1,015885983   | 0,984362435     | 0,75            |
| FBXL20                                                                             | 0,875528845 | 0,022733859 | 0,029 | 0,024 | 1         | 1,015882721   | 0,984365596     | 1,208333333     |
| GLIS3                                                                              | 0,7178368   | 0,022642724 | 0,1   | 0,122 | 1         | 1,01581855    | 0,98442778      | 0,819672131     |
| ARMC6                                                                              | 0,817777434 | 0,022085405 | 0,019 | 0,024 | 1         | 1,01542621    | 0,984808142     | 0,791666667     |
| BEX4                                                                               | 0,794041007 | 0,021800008 | 0,059 | 0,049 | 1         | 1,015225356   | 0,985002979     | 1,204081633     |
| C9orf50                                                                            | 0,20008191  | 0,021455782 | 0,006 | 0,024 | 1         | 1,014983153   | 0,985238027     | 0,25            |
| DIP2A                                                                              | 0,566454234 | 0,021091678 | 0,051 | 0,073 | 1         | 1,014727026   | 0,985486711     | 0,698630137     |
| LCAT                                                                               | 0,538618014 | 0,020997797 | 0,013 | 0,024 | 1         | 1,014660997   | 0,985550842     | 0,541666667     |
| ACOX1                                                                              | 0,696310026 | 0,020989892 | 0,016 | 0,024 | 1         | 1,014655438   | 0,985556242     | 0,666666667     |
| PTDSS2                                                                             | 0,876931522 | 0,020808896 | 0,021 | 0,024 | 1         | 1,01452815    | 0,985679894     | 0,875           |
| ATRIP                                                                              | 0,20008191  | 0,020551161 | 0,006 | 0,024 | 1         | 1,014346923   | 0,985856        | 0,25            |
| COIL                                                                               | 0,706942316 | 0,020524395 | 0,037 | 0,049 | 1         | 1,014328104   | 0,985874291     | 0,755102041     |
| INPP4A                                                                             | 0,984902451 | 0,020486484 | 0,024 | 0,024 | 1         | 1,014301449   | 0,985900198     | 1               |
| MAGED1                                                                             | 0,602460685 | 0,020325498 | 0,053 | 0,073 | 1         | 1,014188273   | 0,986010218     | 0,726027397     |
| NSD1                                                                               | 0,922448722 | 0,020285462 | 0,053 | 0,049 | 1         | 1,014160129   | 0,986037581     | 1,081632653     |
| TRNT1                                                                              | 0,250575068 | 0,020208503 | 0,021 | 0,049 | 1         | 1,014106031   | 0,986090181     | 0,428571429     |
| NUDT16                                                                             | 0,829516157 | 0,020036085 | 0,041 | 0,049 | 1         | 1,013984841   | 0,986208037     | 0,836734694     |
| BAG1                                                                               | 0,553069501 | 0,019924713 | 0,112 | 0,146 | 1         | 1,013906567   | 0,986284173     | 0,767123288     |
| RBM7                                                                               | 0,134211055 | 0,019811582 | 0,016 | 0,049 | 1         | 1,013827064   | 0,986361516     | 0,326530612     |
| BRD7                                                                               | 0,352165855 | 0,019689113 | 0,077 | 0,122 | 1         | 1,013741005   | 0,986445251     | 0,631147541     |
| MSH2                                                                               | 0,98741848  | 0,019624434 | 0,024 | 0,024 | 1         | 1,013695557   | 0,986489477     | 1               |
| E2F5                                                                               | 0,687923594 | 0,019601684 | 0,016 | 0,024 | 1         | 1,013679573   | 0,986505033     | 0,666666667     |
| LRCH3                                                                              | 0,130723313 | 0,019291269 | 0,073 | 0,146 | 1         | 1,01346149    | 0,986717315     | 0,5             |
| FBXL17                                                                             | 0,842998363 | 0,019221533 | 0,03  | 0,024 | 1         | 1,013412503   | 0,986765012     | 1,25            |
| HSD17B4                                                                            | 0,835147254 | 0,018995206 | 0,041 | 0,049 | 1         | 1,013253533   | 0,986919825     | 0,836734694     |
| TMCO4                                                                              | 0,20008191  | 0,018948759 | 0,006 | 0,024 | 1         | 1,013220912   | 0,9869516       | 0,25            |
| CTDSP1                                                                             | 0,727039049 | 0,01885834  | 0,035 | 0,024 | 1         | 1,013157412   | 0,987013457     | 1,458333333     |
| PCBP4                                                                              | 0,820638761 | 0,01878299  | 0,108 | 0,122 | 1         | 1,013104498   | 0,987065009     | 0,885245902     |
| KBTBD4                                                                             | 0,375818168 | 0,018754892 | 0,01  | 0,024 | 1         | 1,013084766   | 0,987084233     | 0,416666667     |
| PKD1                                                                               | 0,608890546 | 0,018387835 | 0,041 | 0,024 | 1         | 1,012827046   | 0,987335404     | 1,708333333     |

Supplementary Table 3

| Differentially expressed genes_keloid-MD_ comparing SC-Keloid vs. (SC-Myel+Nonmyel) |             |             |       |       |           |               |                 |                 |
|-------------------------------------------------------------------------------------|-------------|-------------|-------|-------|-----------|---------------|-----------------|-----------------|
| gene                                                                                | p_val       | avg_log2FC  | pct.1 | pct.2 | p_val_adj | Foldchange_UP | Foldchange_DOWN | Ratio_pct1_pct2 |
| RAB22A                                                                              | 0,879580256 | 0,018341503 | 0,08  | 0,073 | 1         | 1,012794519   | 0,987367113     | 1,095890411     |
| MAP4K3                                                                              | 0,535858926 | 0,018151743 | 0,013 | 0,024 | 1         | 1,012661314   | 0,987496991     | 0,541666667     |
| WDR13                                                                               | 0,978703534 | 0,017993043 | 0,049 | 0,049 | 1         | 1,012549925   | 0,987605624     | 1               |
| CREG1                                                                               | 0,544157477 | 0,017981666 | 0,013 | 0,024 | 1         | 1,01254194    | 0,987613412     | 0,541666667     |
| PLEKHG2                                                                             | 0,984902451 | 0,017722351 | 0,024 | 0,024 | 1         | 1,012359958   | 0,987790945     | 1               |
| ERIS                                                                                | 0,88010336  | 0,017563463 | 0,029 | 0,024 | 1         | 1,01224847    | 0,98789974      | 1,208333333     |
| PBX1                                                                                | 0,687923594 | 0,017489332 | 0,016 | 0,024 | 1         | 1,012196459   | 0,987950502     | 0,666666667     |
| DEXI                                                                                | 0,238516217 | 0,0172443   | 0,035 | 0,073 | 1         | 1,012024559   | 0,988118313     | 0,479452055     |
| CLCN5                                                                               | 0,817777402 | 0,017103703 | 0,019 | 0,024 | 1         | 1,011925937   | 0,988214615     | 0,791666667     |
| ATF4                                                                                | 0,860299397 | 0,017083815 | 0,158 | 0,171 | 1         | 1,011911987   | 0,988228238     | 0,923976608     |
| FNBP4                                                                               | 0,304033574 | 0,016797195 | 0,056 | 0,098 | 1         | 1,011710971   | 0,988424588     | 0,571428571     |
| NUPR1                                                                               | 0,528669863 | 0,016608891 | 0,03  | 0,049 | 1         | 1,011578929   | 0,988553608     | 0,612244898     |
| IRF2BPL                                                                             | 0,984026821 | 0,01642664  | 0,049 | 0,049 | 1         | 1,011451147   | 0,988678497     | 1               |
| ST3GAL5                                                                             | 0,965806825 | 0,016268404 | 0,026 | 0,024 | 1         | 1,011340216   | 0,988786942     | 1,083333333     |
| SCO1                                                                                | 0,395207964 | 0,016166714 | 0,026 | 0,049 | 1         | 1,011268934   | 0,98885664      | 0,530612245     |
| PCCA                                                                                | 0,538618014 | 0,015986334 | 0,013 | 0,024 | 1         | 1,011142503   | 0,988980285     | 0,541666667     |
| RASSF8-AS1                                                                          | 0,885427968 | 0,015963383 | 0,054 | 0,049 | 1         | 1,011126417   | 0,988996018     | 1,102040816     |
| MFS11                                                                               | 0,98741848  | 0,015515662 | 0,024 | 0,024 | 1         | 1,010812676   | 0,989302987     | 1               |
| CSGALNACT1                                                                          | 0,287685455 | 0,015449644 | 0,008 | 0,024 | 1         | 1,010766422   | 0,989348259     | 0,333333333     |
| DYNLL2                                                                              | 0,908266335 | 0,015439924 | 0,045 | 0,049 | 1         | 1,010759613   | 0,989354924     | 0,918367347     |
| B3GAT3                                                                              | 0,569386907 | 0,015362815 | 0,051 | 0,073 | 1         | 1,010705591   | 0,989407805     | 0,698630137     |
| WDR70                                                                               | 0,984902451 | 0,015198674 | 0,024 | 0,024 | 1         | 1,010590606   | 0,98952038      | 1               |
| CBX7                                                                                | 0,459067691 | 0,015111935 | 0,011 | 0,024 | 1         | 1,010529848   | 0,989579875     | 0,458333333     |
| APBB3                                                                               | 0,20008191  | 0,015101083 | 0,006 | 0,024 | 1         | 1,010522246   | 0,989587318     | 0,25            |
| ZNF720                                                                              | 0,712616118 | 0,015007871 | 0,037 | 0,049 | 1         | 1,010456959   | 0,989651257     | 0,755102041     |
| SPSB3                                                                               | 0,789588166 | 0,014307877 | 0,04  | 0,049 | 1         | 1,009966806   | 0,990131551     | 0,816326531     |
| RER1                                                                                | 0,86658713  | 0,013866182 | 0,183 | 0,171 | 1         | 1,009657642   | 0,990434736     | 1,070175439     |
| PRPF40B                                                                             | 0,375818168 | 0,013803594 | 0,01  | 0,024 | 1         | 1,009613841   | 0,990477704     | 0,416666667     |
| RPL17                                                                               | 0,957146825 | 0,013732757 | 0,051 | 0,049 | 1         | 1,00956427    | 0,990526339     | 1,040816327     |
| ZNRD2                                                                               | 0,735864816 | 0,01371272  | 0,062 | 0,049 | 1         | 1,009550248   | 0,990540096     | 1,265306122     |

Supplementary Table 3

| Differentially expressed genes_keloid-MD_comparing SC-Keloid vs. (SC-Myel+Nonmyel) |             |             |       |       |           |               |                 |                 |
|------------------------------------------------------------------------------------|-------------|-------------|-------|-------|-----------|---------------|-----------------|-----------------|
| gene                                                                               | p_val       | avg_log2FC  | pct.1 | pct.2 | p_val_adj | Foldchange_UP | Foldchange_DOWN | Ratio_pct1_pct2 |
| BEND6                                                                              | 0,877815593 | 0,013474263 | 0,029 | 0,024 | 1         | 1,009383398   | 0,990703831     | 1,208333333     |
| MVB12B                                                                             | 0,921715487 | 0,013473401 | 0,027 | 0,024 | 1         | 1,009382795   | 0,990704423     | 1,125           |
| BOLA3-AS1                                                                          | 0,459067691 | 0,013432438 | 0,011 | 0,024 | 1         | 1,009354136   | 0,990732553     | 0,458333333     |
| MAD2L1BP                                                                           | 0,61959908  | 0,013236212 | 0,014 | 0,024 | 1         | 1,009216859   | 0,990867316     | 0,583333333     |
| MRPL11                                                                             | 0,768973753 | 0,013208593 | 0,083 | 0,098 | 1         | 1,009197539   | 0,990886285     | 0,846938776     |
| TRAPPC1                                                                            | 0,937076034 | 0,012954409 | 0,118 | 0,122 | 1         | 1,009019747   | 0,991060882     | 0,967213115     |
| CDK10                                                                              | 0,754852144 | 0,012843504 | 0,018 | 0,024 | 1         | 1,008942183   | 0,991137071     | 0,75            |
| SDF4                                                                               | 0,94300162  | 0,01266042  | 0,118 | 0,122 | 1         | 1,008814153   | 0,991262858     | 0,967213115     |
| PKP4                                                                               | 0,544157477 | 0,012649702 | 0,013 | 0,024 | 1         | 1,008806658   | 0,991270222     | 0,541666667     |
| SF1                                                                                | 0,684255322 | 0,012533162 | 0,121 | 0,146 | 1         | 1,00872517    | 0,9913503       | 0,828767123     |
| JARID2                                                                             | 0,842998381 | 0,012480548 | 0,03  | 0,024 | 1         | 1,008688383   | 0,991386454     | 1,25            |
| MB21D2                                                                             | 0,616800504 | 0,012473283 | 0,014 | 0,024 | 1         | 1,008683304   | 0,991391447     | 0,583333333     |
| ZNF581                                                                             | 0,619599159 | 0,012271204 | 0,014 | 0,024 | 1         | 1,008542027   | 0,991530321     | 0,583333333     |
| BACE2                                                                              | 0,608890546 | 0,012043325 | 0,041 | 0,024 | 1         | 1,008382737   | 0,991686949     | 1,708333333     |
| ACVR1                                                                              | 0,754852144 | 0,012002167 | 0,018 | 0,024 | 1         | 1,008353969   | 0,991715241     | 0,75            |
| BBS5                                                                               | 0,461761449 | 0,011969728 | 0,011 | 0,024 | 1         | 1,008331297   | 0,99173754      | 0,458333333     |
| FBXO30                                                                             | 0,98741848  | 0,011923982 | 0,024 | 0,024 | 1         | 1,008299324   | 0,991768988     | 1               |
| PGLS                                                                               | 0,865124303 | 0,011900866 | 0,183 | 0,171 | 1         | 1,008283169   | 0,991784878     | 1,070175439     |
| UBLCP1                                                                             | 0,827452846 | 0,011800784 | 0,064 | 0,073 | 1         | 1,008213225   | 0,991853683     | 0,876712329     |
| TPP1                                                                               | 0,701284799 | 0,011711149 | 0,037 | 0,049 | 1         | 1,008150587   | 0,991915308     | 0,755102041     |
| SUPT20H                                                                            | 0,862885395 | 0,011652389 | 0,043 | 0,049 | 1         | 1,008109526   | 0,991955709     | 0,87755102      |
| TMEM220                                                                            | 0,690714871 | 0,011455753 | 0,016 | 0,024 | 1         | 1,007972132   | 0,99209092      | 0,666666667     |
| STARD7                                                                             | 0,608890546 | 0,011278813 | 0,041 | 0,024 | 1         | 1,007848517   | 0,992212603     | 1,708333333     |
| RSF1                                                                               | 0,778658679 | 0,011261035 | 0,105 | 0,122 | 1         | 1,007836098   | 0,992224829     | 0,860655738     |
| OGG1                                                                               | 0,757612816 | 0,011182451 | 0,018 | 0,024 | 1         | 1,007781201   | 0,992278878     | 0,75            |
| ADCY6                                                                              | 0,253269486 | 0,010890925 | 0,021 | 0,049 | 1         | 1,00757758    | 0,992479408     | 0,428571429     |
| NSD3                                                                               | 0,367812809 | 0,010597617 | 0,097 | 0,146 | 1         | 1,007372754   | 0,992681205     | 0,664383562     |
| UQCC2                                                                              | 0,542412385 | 0,010564369 | 0,167 | 0,122 | 1         | 1,007349539   | 0,992704083     | 1,368852459     |
| SH3PXD2A                                                                           | 0,889795263 | 0,010454891 | 0,349 | 0,39  | 1         | 1,0072731     | 0,992779416     | 0,894871795     |
| MAGI3                                                                              | 0,461761449 | 0,01029966  | 0,011 | 0,024 | 1         | 1,007164725   | 0,992886243     | 0,458333333     |

Supplementary Table 3

| Differentially expressed genes_keloid-MD_comparing SC-Keloid vs. (SC-Myel+Nonmyel) |             |              |       |       |           |               |                 |                 |
|------------------------------------------------------------------------------------|-------------|--------------|-------|-------|-----------|---------------|-----------------|-----------------|
| gene                                                                               | p_val       | avg_log2FC   | pct.1 | pct.2 | p_val_adj | Foldchange_UP | Foldchange_DOWN | Ratio_pct1_pct2 |
| TBC1D10A                                                                           | 0,929971805 | 0,010173011  | 0,022 | 0,024 | 1         | 1,007076314   | 0,992973409     | 0,916666667     |
| ZNF43                                                                              | 0,490845484 | 0,010165535  | 0,029 | 0,049 | 1         | 1,007071095   | 0,992978554     | 0,591836735     |
| EXOC3                                                                              | 0,541384208 | 0,010008065  | 0,013 | 0,024 | 1         | 1,006961179   | 0,993086944     | 0,541666667     |
| CIAO2A                                                                             | 0,984902451 | -0,010002758 | 0,024 | 0,024 | 1         | 0,993090597   | 1,006957475     | 1               |
| CES2                                                                               | 0,118110366 | -0,010204813 | 0,005 | 0,024 | 1         | 0,992951521   | 1,007098513     | 0,208333333     |
| GNA11                                                                              | 0,17744375  | -0,010314196 | 0,032 | 0,073 | 1         | 0,992876239   | 1,007174873     | 0,438356164     |
| UTP20                                                                              | 0,716407514 | -0,010514674 | 0,037 | 0,049 | 1         | 0,992738278   | 1,00731484      | 0,755102041     |
| H4C3                                                                               | 0,302879042 | -0,010643579 | 0,075 | 0,122 | 1         | 0,992649581   | 1,007404848     | 0,614754098     |
| FBXO34                                                                             | 0,760376583 | -0,010781346 | 0,018 | 0,024 | 1         | 0,992554795   | 1,007501052     | 0,75            |
| ACSF3                                                                              | 0,616800504 | -0,010951092 | 0,014 | 0,024 | 1         | 0,992438018   | 1,007619601     | 0,583333333     |
| SSBP3                                                                              | 0,045584188 | -0,01105948  | 0,033 | 0,098 | 1         | 0,99236346    | 1,007695305     | 0,336734694     |
| TBL1XR1                                                                            | 0,60465015  | -0,011308864 | 0,094 | 0,122 | 1         | 0,992191935   | 1,00786951      | 0,770491803     |
| MAP7D3                                                                             | 0,754099011 | -0,011371662 | 0,062 | 0,049 | 1         | 0,992148748   | 1,007913382     | 1,265306122     |
| POLA1                                                                              | 0,616800584 | -0,011385191 | 0,014 | 0,024 | 1         | 0,992139444   | 1,007922834     | 0,583333333     |
| GRB14                                                                              | 0,373270628 | -0,011510617 | 0,01  | 0,024 | 1         | 0,992053192   | 1,008010465     | 0,416666667     |
| COA7                                                                               | 0,614007565 | -0,011655448 | 0,014 | 0,024 | 1         | 0,991953606   | 1,008111664     | 0,583333333     |
| ZNF28                                                                              | 0,20008191  | -0,011966566 | 0,006 | 0,024 | 1         | 0,991739714   | 1,008329087     | 0,25            |
| EZH2                                                                               | 0,817777434 | -0,012240137 | 0,019 | 0,024 | 1         | 0,991551673   | 1,008520309     | 0,791666667     |
| LINC01550                                                                          | 0,118110366 | -0,012258754 | 0,005 | 0,024 | 1         | 0,991538878   | 1,008533324     | 0,208333333     |
| RPL36AL                                                                            | 0,827421282 | -0,012403301 | 0,539 | 0,561 | 1         | 0,991439538   | 1,008634376     | 0,960784314     |
| LETM1                                                                              | 0,884681879 | -0,012409379 | 0,029 | 0,024 | 1         | 0,991435361   | 1,008638625     | 1,208333333     |
| STMP1                                                                              | 0,687677458 | -0,012653412 | 0,18  | 0,146 | 1         | 0,991267674   | 1,008809252     | 1,232876712     |
| BLCAP                                                                              | 0,478466805 | -0,012686519 | 0,029 | 0,049 | 1         | 0,991244926   | 1,008832403     | 0,591836735     |
| OSBP                                                                               | 0,107410446 | -0,012873207 | 0,027 | 0,073 | 1         | 0,991116665   | 1,008962956     | 0,369863014     |
| EIF4E3                                                                             | 0,071078164 | -0,012889444 | 0,013 | 0,049 | 1         | 0,99110551    | 1,008974312     | 0,265306122     |
| CYP2U1                                                                             | 0,20008191  | -0,013161113 | 0,006 | 0,024 | 1         | 0,990918896   | 1,009164326     | 0,25            |
| LRP12                                                                              | 0,902733559 | -0,013454822 | 0,045 | 0,049 | 1         | 0,990717182   | 1,009369796     | 0,918367347     |
| ELP1                                                                               | 0,45638276  | -0,013584558 | 0,011 | 0,024 | 1         | 0,990628095   | 1,009460569     | 0,458333333     |
| TPPP3                                                                              | 0,582225779 | -0,013659766 | 0,072 | 0,049 | 1         | 0,990576454   | 1,009513194     | 1,469387755     |
| SRPK2                                                                              | 0,152070172 | -0,01385543  | 0,045 | 0,098 | 1         | 0,990442117   | 1,009650118     | 0,459183673     |



Supplementary Table 3

| Differentially expressed genes_keloid-MD_comparing SC-Keloid vs. (SC-Myel+Nonmyel) |             |              |       |       |           |               |                 |                 |
|------------------------------------------------------------------------------------|-------------|--------------|-------|-------|-----------|---------------|-----------------|-----------------|
| gene                                                                               | p_val       | avg_log2FC   | pct.1 | pct.2 | p_val_adj | Foldchange_UP | Foldchange_DOWN | Ratio_pct1_pct2 |
| IFFO2                                                                              | 0,884681879 | -0,014021064 | 0,029 | 0,024 | 1         | 0,990328413   | 1,00976604      | 1,208333333     |
| GLMP                                                                               | 0,616800584 | -0,014107686 | 0,014 | 0,024 | 1         | 0,990268953   | 1,00982667      | 0,583333333     |
| SLC35D2                                                                            | 0,690714871 | -0,014235862 | 0,016 | 0,024 | 1         | 0,990180977   | 1,009916393     | 0,666666667     |
| PHF14                                                                              | 0,823955342 | -0,014262523 | 0,085 | 0,073 | 1         | 0,990162678   | 1,009935056     | 1,164383562     |
| KATNBL1                                                                            | 0,406176626 | -0,014273321 | 0,062 | 0,098 | 1         | 0,990155267   | 1,009942615     | 0,632653061     |
| GSPT1                                                                              | 0,894936662 | -0,014538294 | 0,091 | 0,098 | 1         | 0,989973427   | 1,010128123     | 0,928571429     |
| PPP1R11                                                                            | 0,342509686 | -0,014916271 | 0,024 | 0,049 | 1         | 0,989714094   | 1,010392805     | 0,489795918     |
| ZNF574                                                                             | 0,050627188 | -0,015349958 | 0,003 | 0,024 | 1         | 0,989416622   | 1,010696584     | 0,125           |
| ALG2                                                                               | 0,619599159 | -0,015510587 | 0,014 | 0,024 | 1         | 0,989306467   | 1,01080912      | 0,583333333     |
| THOC1                                                                              | 0,973130786 | -0,015574659 | 0,026 | 0,024 | 1         | 0,989262531   | 1,010854013     | 1,083333333     |
| SNX12                                                                              | 0,879586272 | -0,015596514 | 0,021 | 0,024 | 1         | 0,989247546   | 1,010869326     | 0,875           |
| SUN2                                                                               | 0,827641054 | -0,015673846 | 0,041 | 0,049 | 1         | 0,989194521   | 1,010923513     | 0,836734694     |
| WRNIP1                                                                             | 0,459067691 | -0,015715465 | 0,011 | 0,024 | 1         | 0,989165985   | 1,010952676     | 0,458333333     |
| GBE1                                                                               | 0,805731929 | -0,015730918 | 0,032 | 0,024 | 1         | 0,98915539    | 1,010963505     | 1,333333333     |
| TMED1                                                                              | 0,795626646 | -0,015850777 | 0,059 | 0,049 | 1         | 0,989073215   | 1,011047499     | 1,204081633     |
| SLC36A4                                                                            | 0,932559137 | -0,015882438 | 0,022 | 0,024 | 1         | 0,989051509   | 1,011069687     | 0,916666667     |
| LURAP1                                                                             | 0,535858926 | -0,015920596 | 0,013 | 0,024 | 1         | 0,989025349   | 1,01109643      | 0,541666667     |
| ZMAT2                                                                              | 0,675465578 | -0,015940543 | 0,067 | 0,049 | 1         | 0,989011675   | 1,011110409     | 1,367346939     |
| SAMD4A                                                                             | 0,7520946   | -0,01595583  | 0,018 | 0,024 | 1         | 0,989001195   | 1,011121124     | 0,75            |
| HEXIM2                                                                             | 0,118110366 | -0,016004795 | 0,005 | 0,024 | 1         | 0,98896763    | 1,011155441     | 0,208333333     |
| PANK2                                                                              | 0,383723316 | -0,016270418 | 0,026 | 0,049 | 1         | 0,988785562   | 1,011341628     | 0,530612245     |
| NFKBIL1                                                                            | 0,973130786 | -0,016279662 | 0,026 | 0,024 | 1         | 0,988779226   | 1,011348109     | 1,083333333     |
| VWA5A                                                                              | 0,050627188 | -0,016350494 | 0,003 | 0,024 | 1         | 0,988730681   | 1,011397764     | 0,125           |
| LG MN                                                                              | 0,212288248 | -0,016377931 | 0,019 | 0,049 | 1         | 0,988711878   | 1,011416999     | 0,387755102     |
| ROBO3                                                                              | 0,373270628 | -0,016420887 | 0,01  | 0,024 | 1         | 0,988682439   | 1,011447114     | 0,416666667     |
| SMC1A                                                                              | 0,423829417 | -0,016441168 | 0,045 | 0,073 | 1         | 0,988668541   | 1,011461333     | 0,616438356     |
| HS3ST3A1                                                                           | 0,069844092 | -0,016607375 | 0,013 | 0,049 | 1         | 0,988554647   | 1,011577866     | 0,265306122     |
| FAM168A                                                                            | 0,533363571 | -0,016611649 | 0,049 | 0,073 | 1         | 0,988551718   | 1,011580863     | 0,671232877     |
| ZRSR2                                                                              | 0,817777434 | -0,016655923 | 0,019 | 0,024 | 1         | 0,988521381   | 1,011611907     | 0,791666667     |
| DCAKD                                                                              | 0,541384208 | -0,016902768 | 0,013 | 0,024 | 1         | 0,98835226    | 1,011785008     | 0,541666667     |

Supplementary Table 3

| Differentially expressed genes_keloid-MD_comparing SC-Keloid vs. (SC-Myel+Nonmyel) |             |              |       |       |           |               |                 |                 |
|------------------------------------------------------------------------------------|-------------|--------------|-------|-------|-----------|---------------|-----------------|-----------------|
| gene                                                                               | p_val       | avg_log2FC   | pct.1 | pct.2 | p_val_adj | Foldchange_UP | Foldchange_DOWN | Ratio_pct1_pct2 |
| GM2A                                                                               | 0,370733807 | -0,017120983 | 0,01  | 0,024 | 1         | 0,988202778   | 1,011938058     | 0,416666667     |
| ING1                                                                               | 0,639313385 | -0,017293072 | 0,04  | 0,024 | 1         | 0,988084909   | 1,012058772     | 1,666666667     |
| PGRMC1                                                                             | 0,713358792 | -0,01738816  | 0,123 | 0,146 | 1         | 0,988019787   | 1,012125478     | 0,842465753     |
| RRS1                                                                               | 0,461761449 | -0,017472818 | 0,011 | 0,024 | 1         | 0,987961811   | 1,012184873     | 0,458333333     |
| KLHL2                                                                              | 0,118110366 | -0,017720188 | 0,005 | 0,024 | 1         | 0,987792426   | 1,012358441     | 0,208333333     |
| RABL2A                                                                             | 0,285374202 | -0,017765042 | 0,008 | 0,024 | 1         | 0,987761716   | 1,012389915     | 0,333333333     |
| CCL5                                                                               | 0,373270628 | -0,018109303 | 0,01  | 0,024 | 1         | 0,987526041   | 1,012631524     | 0,416666667     |
| ST3GAL4                                                                            | 0,62940734  | -0,018202126 | 0,054 | 0,073 | 1         | 0,987462505   | 1,01269668      | 0,739726027     |
| SEPHS1                                                                             | 0,815066093 | -0,018239097 | 0,019 | 0,024 | 1         | 0,987437201   | 1,012722631     | 0,791666667     |
| TEX10                                                                              | 0,616800584 | -0,018409728 | 0,014 | 0,024 | 1         | 0,987320421   | 1,012842416     | 0,583333333     |
| PELI1                                                                              | 0,749340217 | -0,018422087 | 0,018 | 0,024 | 1         | 0,987311963   | 1,012851092     | 0,75            |
| MEGF8                                                                              | 0,96309133  | -0,018529114 | 0,048 | 0,049 | 1         | 0,987238721   | 1,012926234     | 0,979591837     |
| ZDHHC3                                                                             | 0,666209301 | -0,018540947 | 0,035 | 0,049 | 1         | 0,987230624   | 1,012934542     | 0,714285714     |
| PPAN                                                                               | 0,614007565 | -0,018578363 | 0,014 | 0,024 | 1         | 0,987205021   | 1,012960812     | 0,583333333     |
| CCDC71L                                                                            | 0,440354126 | -0,018619277 | 0,027 | 0,049 | 1         | 0,987177025   | 1,01298954      | 0,551020408     |
| IP6K1                                                                              | 0,481986069 | -0,018634687 | 0,029 | 0,049 | 1         | 0,98716648    | 1,01300036      | 0,591836735     |
| CCDC171                                                                            | 0,375818168 | -0,018646327 | 0,01  | 0,024 | 1         | 0,987158516   | 1,013008533     | 0,416666667     |
| ARHGEF10L                                                                          | 0,45638276  | -0,019070795 | 0,011 | 0,024 | 1         | 0,986868118   | 1,013306623     | 0,458333333     |
| LINC00324                                                                          | 0,050627188 | -0,019128658 | 0,003 | 0,024 | 1         | 0,986828538   | 1,013347265     | 0,125           |
| HOXC4                                                                              | 0,118110366 | -0,019251479 | 0,005 | 0,024 | 1         | 0,986744529   | 1,013433538     | 0,208333333     |
| PRDM16                                                                             | 0,118110366 | -0,019265486 | 0,005 | 0,024 | 1         | 0,986734949   | 1,013443378     | 0,208333333     |
| DNTTIP2                                                                            | 0,99733763  | -0,019321701 | 0,049 | 0,049 | 1         | 0,986696502   | 1,013482867     | 1               |
| SH2B1                                                                              | 0,541384208 | -0,019369566 | 0,013 | 0,024 | 1         | 0,986663766   | 1,013516493     | 0,541666667     |
| IL17RA                                                                             | 0,459067691 | -0,019434769 | 0,011 | 0,024 | 1         | 0,986619175   | 1,0135623       | 0,458333333     |
| GCDH                                                                               | 0,118110366 | -0,019528679 | 0,005 | 0,024 | 1         | 0,986554954   | 1,013628278     | 0,208333333     |
| IRF2BP1                                                                            | 0,118110366 | -0,019561634 | 0,005 | 0,024 | 1         | 0,986532419   | 1,013651433     | 0,208333333     |
| TRAK2                                                                              | 0,998225085 | -0,019634331 | 0,049 | 0,049 | 1         | 0,986482709   | 1,013702512     | 1               |
| GK5                                                                                | 0,699482913 | -0,019792691 | 0,037 | 0,024 | 1         | 0,986374432   | 1,013813789     | 1,541666667     |
| SUSD4                                                                              | 0,116646669 | -0,020007786 | 0,005 | 0,024 | 1         | 0,986227382   | 1,013964952     | 0,208333333     |
| EDIL3                                                                              | 0,973130786 | -0,020114983 | 0,026 | 0,024 | 1         | 0,986154104   | 1,014040296     | 1,083333333     |

Supplementary Table 3

| Differentially expressed genes_keloid-MD_comparing SC-Keloid vs. (SC-Myel+Nonmyel) |             |              |       |       |           |               |                 |                 |
|------------------------------------------------------------------------------------|-------------|--------------|-------|-------|-----------|---------------|-----------------|-----------------|
| gene                                                                               | p_val       | avg_log2FC   | pct.1 | pct.2 | p_val_adj | Foldchange_UP | Foldchange_DOWN | Ratio_pct1_pct2 |
| MEGF6                                                                              | 0,116646669 | -0,020130391 | 0,005 | 0,024 | 1         | 0,986143573   | 1,014051126     | 0,208333333     |
| RBMS2                                                                              | 0,345632755 | -0,020218889 | 0,024 | 0,049 | 1         | 0,986083082   | 1,014113332     | 0,489795918     |
| JMY                                                                                | 0,476712453 | -0,020382821 | 0,029 | 0,049 | 1         | 0,985971041   | 1,014228571     | 0,591836735     |
| LLPH                                                                               | 0,613496118 | -0,020617973 | 0,033 | 0,049 | 1         | 0,985810346   | 1,014393898     | 0,673469388     |
| GATD1                                                                              | 0,933546859 | -0,020664222 | 0,027 | 0,024 | 1         | 0,985778744   | 1,014426418     | 1,125           |
| TAF13                                                                              | 0,757612816 | -0,020711623 | 0,018 | 0,024 | 1         | 0,985746356   | 1,014459749     | 0,75            |
| MTG2                                                                               | 0,459067691 | -0,020872354 | 0,011 | 0,024 | 1         | 0,985636539   | 1,014572776     | 0,458333333     |
| MGST3                                                                              | 0,327464188 | -0,021034958 | 0,482 | 0,659 | 1         | 0,985525456   | 1,014687133     | 0,731411229     |
| ARMCX2                                                                             | 0,461761449 | -0,021040396 | 0,011 | 0,024 | 1         | 0,985521742   | 1,014690958     | 0,458333333     |
| METAP1D                                                                            | 0,614007565 | -0,021231522 | 0,014 | 0,024 | 1         | 0,98539119    | 1,014825392     | 0,583333333     |
| GOLM2                                                                              | 0,240771496 | -0,021254456 | 0,086 | 0,146 | 1         | 0,985375526   | 1,014841524     | 0,589041096     |
| ABL1                                                                               | 0,687923594 | -0,021396219 | 0,016 | 0,024 | 1         | 0,985278705   | 1,01494125      | 0,666666667     |
| TMEM209                                                                            | 0,7520946   | -0,021475825 | 0,018 | 0,024 | 1         | 0,98522434    | 1,014997254     | 0,75            |
| MAN1A1                                                                             | 0,20008191  | -0,021720397 | 0,006 | 0,024 | 1         | 0,985057335   | 1,015169336     | 0,25            |
| RERE                                                                               | 0,180867153 | -0,021851979 | 0,032 | 0,073 | 1         | 0,984967496   | 1,015261929     | 0,438356164     |
| SEPHS2                                                                             | 0,478466805 | -0,021977915 | 0,029 | 0,049 | 1         | 0,98488152    | 1,015350557     | 0,591836735     |
| ERICH1                                                                             | 0,768375961 | -0,02199776  | 0,033 | 0,024 | 1         | 0,984867972   | 1,015364524     | 1,375           |
| B3GALT6                                                                            | 0,982386573 | -0,022057767 | 0,024 | 0,024 | 1         | 0,984827009   | 1,015406758     | 1               |
| BMP2K                                                                              | 0,383723316 | -0,022145365 | 0,026 | 0,049 | 1         | 0,984767213   | 1,015468414     | 0,530612245     |
| DENND4A                                                                            | 0,370733807 | -0,02214924  | 0,01  | 0,024 | 1         | 0,984764568   | 1,015471141     | 0,416666667     |
| NCEH1                                                                              | 0,459067691 | -0,022151116 | 0,011 | 0,024 | 1         | 0,984763288   | 1,015472462     | 0,458333333     |
| PPARD                                                                              | 0,287685455 | -0,022374348 | 0,008 | 0,024 | 1         | 0,984610924   | 1,015629601     | 0,333333333     |
| PEX13                                                                              | 0,533106974 | -0,022428912 | 0,013 | 0,024 | 1         | 0,984573687   | 1,015668013     | 0,541666667     |
| TXNRD1                                                                             | 0,927604088 | -0,022433931 | 0,053 | 0,049 | 1         | 0,984570261   | 1,015671547     | 1,081632653     |
| ZNF587                                                                             | 0,685136562 | -0,022460044 | 0,016 | 0,024 | 1         | 0,984552441   | 1,015689931     | 0,666666667     |
| CREB3L2                                                                            | 0,819560358 | -0,022618931 | 0,131 | 0,146 | 1         | 0,984444016   | 1,015801797     | 0,897260274     |
| RPL6                                                                               | 0,723277895 | -0,022674712 | 0,705 | 0,732 | 1         | 0,984405953   | 1,015841073     | 0,963114754     |
| TCF7L1                                                                             | 0,118110366 | -0,022742479 | 0,005 | 0,024 | 1         | 0,984359714   | 1,015888791     | 0,208333333     |
| PPP4C                                                                              | 0,841276503 | -0,022755698 | 0,088 | 0,098 | 1         | 0,984350695   | 1,015898099     | 0,897959184     |
| COMP                                                                               | 0,820490956 | -0,022764787 | 0,019 | 0,024 | 1         | 0,984344493   | 1,0159045       | 0,791666667     |

Supplementary Table 3

| Differentially expressed genes_keloid-MD_comparing SC-Keloid vs. (SC-Myel+Nonmyel) |             |              |       |       |           |               |                 |                 |
|------------------------------------------------------------------------------------|-------------|--------------|-------|-------|-----------|---------------|-----------------|-----------------|
| gene                                                                               | p_val       | avg_log2FC   | pct.1 | pct.2 | p_val_adj | Foldchange_UP | Foldchange_DOWN | Ratio_pct1_pct2 |
| DLG5                                                                               | 0,982386573 | -0,022791539 | 0,024 | 0,024 | 1         | 0,984326241   | 1,015923338     | 1               |
| CYTH2                                                                              | 0,617215661 | -0,022833523 | 0,033 | 0,049 | 1         | 0,984297596   | 1,015952902     | 0,673469388     |
| POU5F2                                                                             | 0,622403257 | -0,022955291 | 0,014 | 0,024 | 1         | 0,984214522   | 1,016038655     | 0,583333333     |
| SREBF2                                                                             | 0,749340217 | -0,023036312 | 0,018 | 0,024 | 1         | 0,984159251   | 1,016095717     | 0,75            |
| URB1                                                                               | 0,968247851 | -0,023214165 | 0,026 | 0,024 | 1         | 0,984037933   | 1,016220987     | 1,083333333     |
| TRAPPC14                                                                           | 0,050627188 | -0,023226679 | 0,003 | 0,024 | 1         | 0,984029397   | 1,016229803     | 0,125           |
| TSSC4                                                                              | 0,970289289 | -0,023357459 | 0,048 | 0,049 | 1         | 0,983940199   | 1,016321928     | 0,979591837     |
| HSPA5                                                                              | 0,842718397 | -0,02345222  | 0,386 | 0,415 | 1         | 0,983875573   | 1,016388685     | 0,930120482     |
| RARG                                                                               | 0,45638276  | -0,023513208 | 0,011 | 0,024 | 1         | 0,983833982   | 1,016431653     | 0,458333333     |
| BRCA1                                                                              | 0,373270628 | -0,02379389  | 0,01  | 0,024 | 1         | 0,983642592   | 1,016629422     | 0,416666667     |
| AKIRIN2                                                                            | 0,478466805 | -0,024021977 | 0,029 | 0,049 | 1         | 0,983487092   | 1,016790163     | 0,591836735     |
| TMEM64                                                                             | 0,921715487 | -0,024209463 | 0,027 | 0,024 | 1         | 0,983359291   | 1,016922308     | 1,125           |
| SLC36A1                                                                            | 0,287685455 | -0,024306054 | 0,008 | 0,024 | 1         | 0,983293456   | 1,016990395     | 0,333333333     |
| PIK3R3                                                                             | 0,535858926 | -0,024333502 | 0,013 | 0,024 | 1         | 0,983274748   | 1,017009744     | 0,541666667     |
| ATXN7L1                                                                            | 0,616800584 | -0,024453775 | 0,014 | 0,024 | 1         | 0,983192779   | 1,017094533     | 0,583333333     |
| EMC3                                                                               | 0,925507723 | -0,024719715 | 0,078 | 0,073 | 1         | 0,983011558   | 1,017282037     | 1,068493151     |
| FNTB                                                                               | 0,342509686 | -0,025168517 | 0,024 | 0,049 | 1         | 0,982705805   | 1,017598548     | 0,489795918     |
| ZNF250                                                                             | 0,20008191  | -0,025425127 | 0,006 | 0,024 | 1         | 0,982531028   | 1,017779563     | 0,25            |
| GLOD4                                                                              | 0,705253435 | -0,025570263 | 0,057 | 0,073 | 1         | 0,982432189   | 1,017881957     | 0,780821918     |
| C1QTNF1                                                                            | 0,538618014 | -0,025766691 | 0,013 | 0,024 | 1         | 0,982298437   | 1,018020555     | 0,541666667     |
| CLK2                                                                               | 0,614007565 | -0,025778582 | 0,014 | 0,024 | 1         | 0,982290341   | 1,018028946     | 0,583333333     |
| PCBD2                                                                              | 0,375818168 | -0,025882147 | 0,01  | 0,024 | 1         | 0,982219829   | 1,018102028     | 0,416666667     |
| STOX2                                                                              | 0,817777434 | -0,025912386 | 0,019 | 0,024 | 1         | 0,982199242   | 1,018123368     | 0,791666667     |
| SIVA1                                                                              | 0,888758675 | -0,025991525 | 0,159 | 0,146 | 1         | 0,982145365   | 1,018179219     | 1,089041096     |
| SERAC1                                                                             | 0,287685455 | -0,026029319 | 0,008 | 0,024 | 1         | 0,982119636   | 1,018205892     | 0,333333333     |
| ETV1                                                                               | 0,817777434 | -0,026061313 | 0,019 | 0,024 | 1         | 0,982097856   | 1,018228472     | 0,791666667     |
| TST                                                                                | 0,685136562 | -0,026079781 | 0,016 | 0,024 | 1         | 0,982085285   | 1,018241507     | 0,666666667     |
| CSF1                                                                               | 0,375818168 | -0,026210708 | 0,01  | 0,024 | 1         | 0,981996163   | 1,018333918     | 0,416666667     |
| RNF135                                                                             | 0,461761449 | -0,026331591 | 0,011 | 0,024 | 1         | 0,981913885   | 1,018419248     | 0,458333333     |
| MITD1                                                                              | 0,53480596  | -0,026723112 | 0,049 | 0,073 | 1         | 0,981647448   | 1,018695665     | 0,671232877     |

Supplementary Table 3

| Differentially expressed genes_keloid-MD_comparing SC-Keloid vs. (SC-Myel+Nonmyel) |             |              |       |       |           |               |                 |                 |
|------------------------------------------------------------------------------------|-------------|--------------|-------|-------|-----------|---------------|-----------------|-----------------|
| gene                                                                               | p_val       | avg_log2FC   | pct.1 | pct.2 | p_val_adj | Foldchange_UP | Foldchange_DOWN | Ratio_pct1_pct2 |
| CHTF8                                                                              | 0,970689183 | -0,026739332 | 0,026 | 0,024 | 1         | 0,981636411   | 1,018707119     | 1,083333333     |
| CSTF3                                                                              | 0,733003026 | -0,026773409 | 0,035 | 0,024 | 1         | 0,981613225   | 1,018731181     | 1,458333333     |
| RNF40                                                                              | 0,764250734 | -0,026838546 | 0,033 | 0,024 | 1         | 0,981568906   | 1,018777178     | 1,375           |
| ATP5F1B                                                                            | 0,214890318 | -0,026928409 | 0,155 | 0,244 | 1         | 0,981507768   | 1,018840638     | 0,635245902     |
| FMNL2                                                                              | 0,198124435 | -0,026939521 | 0,006 | 0,024 | 1         | 0,981500208   | 1,018848485     | 0,25            |
| GORASP1                                                                            | 0,538618014 | -0,027097511 | 0,013 | 0,024 | 1         | 0,98139273    | 1,018960066     | 0,541666667     |
| BCL9L                                                                              | 0,149845514 | -0,027231009 | 0,03  | 0,073 | 1         | 0,981301922   | 1,019054358     | 0,410958904     |
| GTF2E2                                                                             | 0,569535318 | -0,027301992 | 0,032 | 0,049 | 1         | 0,981253641   | 1,019104499     | 0,653061224     |
| LEMD2                                                                              | 0,345632755 | -0,027311303 | 0,024 | 0,049 | 1         | 0,981247308   | 1,019111076     | 0,489795918     |
| ACADS                                                                              | 0,370733807 | -0,027448806 | 0,01  | 0,024 | 1         | 0,98115379    | 1,019208212     | 0,416666667     |
| ZNF787                                                                             | 0,373270628 | -0,027495936 | 0,01  | 0,024 | 1         | 0,981121739   | 1,019241507     | 0,416666667     |
| HAUS5                                                                              | 0,45638276  | -0,027561445 | 0,011 | 0,024 | 1         | 0,981077189   | 1,01928779      | 0,458333333     |
| PDE5A                                                                              | 0,198124435 | -0,027623338 | 0,006 | 0,024 | 1         | 0,981035101   | 1,019331519     | 0,25            |
| ADCK5                                                                              | 0,050627188 | -0,027691708 | 0,003 | 0,024 | 1         | 0,980988611   | 1,019379827     | 0,125           |
| RPF1                                                                               | 0,936071274 | -0,027848238 | 0,046 | 0,049 | 1         | 0,980882181   | 1,019490434     | 0,93877551      |
| ARL1                                                                               | 0,646453188 | -0,028188936 | 0,139 | 0,171 | 1         | 0,980650569   | 1,019731219     | 0,812865497     |
| ZNF583                                                                             | 0,285374202 | -0,028442563 | 0,008 | 0,024 | 1         | 0,980478185   | 1,019910504     | 0,333333333     |
| CHCHD4                                                                             | 0,050627188 | -0,028460651 | 0,003 | 0,024 | 1         | 0,980465892   | 1,019923291     | 0,125           |
| DDX52                                                                              | 0,707612334 | -0,028595167 | 0,065 | 0,049 | 1         | 0,980374479   | 1,020018393     | 1,326530612     |
| DNAJC2                                                                             | 0,859167552 | -0,028731907 | 0,043 | 0,049 | 1         | 0,980281562   | 1,020115076     | 0,87755102      |
| NPM1                                                                               | 0,816244294 | -0,028781953 | 0,364 | 0,39  | 1         | 0,980247558   | 1,020150463     | 0,933333333     |
| TNFSF12                                                                            | 0,541384208 | -0,028875896 | 0,013 | 0,024 | 1         | 0,980183729   | 1,020216894     | 0,541666667     |
| KIAA1549L                                                                          | 0,20008191  | -0,02914228  | 0,006 | 0,024 | 1         | 0,980002762   | 1,020405288     | 0,25            |
| LMF2                                                                               | 0,768375961 | -0,029165466 | 0,033 | 0,024 | 1         | 0,979987012   | 1,020421687     | 1,375           |
| NAA20                                                                              | 0,95760211  | -0,029230014 | 0,096 | 0,098 | 1         | 0,979943167   | 1,020467343     | 0,979591837     |
| SLC25A17                                                                           | 0,815066093 | -0,029230497 | 0,019 | 0,024 | 1         | 0,979942839   | 1,020467685     | 0,791666667     |
| SRGAP1                                                                             | 0,212288248 | -0,029247387 | 0,019 | 0,049 | 1         | 0,979931366   | 1,020479632     | 0,387755102     |
| ECHDC1                                                                             | 0,639887292 | -0,029469417 | 0,097 | 0,122 | 1         | 0,979780567   | 1,020636695     | 0,795081967     |
| ZNF511                                                                             | 0,65494676  | -0,029898604 | 0,035 | 0,049 | 1         | 0,979489136   | 1,020940369     | 0,714285714     |
| POP5                                                                               | 0,821250773 | -0,029900123 | 0,085 | 0,073 | 1         | 0,979488104   | 1,020941444     | 1,164383562     |

Supplementary Table 3

| Differentially expressed genes_keloid-MD_ comparing SC-Keloid vs. (SC-Myel+Nonmyel) |             |              |       |       |           |               |                 |                 |
|-------------------------------------------------------------------------------------|-------------|--------------|-------|-------|-----------|---------------|-----------------|-----------------|
| gene                                                                                | p_val       | avg_log2FC   | pct.1 | pct.2 | p_val_adj | Foldchange_UP | Foldchange_DOWN | Ratio_pct1_pct2 |
| EIF4A1                                                                              | 0,576532627 | -0,030004255 | 0,132 | 0,098 | 1         | 0,979417409   | 1,021015137     | 1,346938776     |
| AMPD2                                                                               | 0,198124435 | -0,030112722 | 0,006 | 0,024 | 1         | 0,979343776   | 1,021091903     | 0,25            |
| ACADM                                                                               | 0,78299827  | -0,030203938 | 0,04  | 0,049 | 1         | 0,979281857   | 1,021156465     | 0,816326531     |
| ENG                                                                                 | 0,468331793 | -0,030388768 | 0,051 | 0,024 | 1         | 0,979156405   | 1,021287299     | 2,125           |
| SCML1                                                                               | 0,744939532 | -0,030437994 | 0,038 | 0,049 | 1         | 0,979122996   | 1,021322146     | 0,775510204     |
| PPM1A                                                                               | 0,57320861  | -0,030548247 | 0,032 | 0,049 | 1         | 0,979048173   | 1,0214002       | 0,653061224     |
| DUSP1                                                                               | 0,458265617 | -0,030615392 | 0,104 | 0,146 | 1         | 0,979002608   | 1,021447739     | 0,712328767     |
| USP32                                                                               | 0,874278136 | -0,030791611 | 0,021 | 0,024 | 1         | 0,978883034   | 1,021572512     | 0,875           |
| ZNF493                                                                              | 0,616800584 | -0,030868281 | 0,014 | 0,024 | 1         | 0,978831014   | 1,021626804     | 0,583333333     |
| KLHL5                                                                               | 0,070458912 | -0,031137251 | 0,013 | 0,049 | 1         | 0,978648542   | 1,021817289     | 0,265306122     |
| SRSF3                                                                               | 0,517329982 | -0,031289466 | 0,215 | 0,171 | 1         | 0,978545293   | 1,021925104     | 1,257309942     |
| SYNGR1                                                                              | 0,509060582 | -0,031574725 | 0,089 | 0,122 | 1         | 0,978351827   | 1,022127186     | 0,729508197     |
| SGMS1                                                                               | 0,100838432 | -0,031581428 | 0,014 | 0,049 | 1         | 0,978347282   | 1,022131934     | 0,285714286     |
| SF3B5                                                                               | 0,925579634 | -0,031606068 | 0,266 | 0,268 | 1         | 0,978330573   | 1,022149392     | 0,992537313     |
| MS4A6A                                                                              | 0,050627188 | -0,031637332 | 0,003 | 0,024 | 1         | 0,978309372   | 1,022171543     | 0,125           |
| SUCLA2                                                                              | 0,989350819 | -0,031770232 | 0,049 | 0,049 | 1         | 0,978219255   | 1,022265709     | 1               |
| POLR2F                                                                              | 0,959067463 | -0,031851946 | 0,226 | 0,22  | 1         | 0,97816385    | 1,022323611     | 1,027272727     |
| RAE1                                                                                | 0,433510677 | -0,031987009 | 0,027 | 0,049 | 1         | 0,978072281   | 1,022419324     | 0,551020408     |
| RNPEP                                                                               | 0,871626162 | -0,032132275 | 0,021 | 0,024 | 1         | 0,977973802   | 1,022522278     | 0,875           |
| MFSD5                                                                               | 0,287685455 | -0,032153465 | 0,008 | 0,024 | 1         | 0,977959439   | 1,022537296     | 0,333333333     |
| PIZO1                                                                               | 0,861156576 | -0,032242176 | 0,056 | 0,049 | 1         | 0,977899306   | 1,022600174     | 1,142857143     |
| PORCN                                                                               | 0,118110366 | -0,032522104 | 0,005 | 0,024 | 1         | 0,977709581   | 1,022798609     | 0,208333333     |
| DCLRE1A                                                                             | 0,118110366 | -0,033072248 | 0,005 | 0,024 | 1         | 0,977336821   | 1,023188709     | 0,208333333     |
| TUBG2                                                                               | 0,287685273 | -0,033083458 | 0,008 | 0,024 | 1         | 0,977329228   | 1,023196658     | 0,333333333     |
| BCL10                                                                               | 0,948412442 | -0,033221576 | 0,051 | 0,049 | 1         | 0,977235666   | 1,02329462      | 1,040816327     |
| TCF3                                                                                | 0,664326889 | -0,033644456 | 0,035 | 0,049 | 1         | 0,976949263   | 1,023594611     | 0,714285714     |
| TMPO                                                                                | 0,32394079  | -0,033770399 | 0,04  | 0,073 | 1         | 0,976863982   | 1,023683971     | 0,547945205     |
| ZNF26                                                                               | 0,535858926 | -0,033830855 | 0,013 | 0,024 | 1         | 0,976823047   | 1,023726869     | 0,541666667     |
| CBX3                                                                                | 0,885056034 | -0,033881387 | 0,281 | 0,268 | 1         | 0,976788834   | 1,023762727     | 1,048507463     |
| NAT14                                                                               | 0,858148677 | -0,033886971 | 0,065 | 0,073 | 1         | 0,976785053   | 1,02376669      | 0,890410959     |

Supplementary Table 3

| Differentially expressed genes_keloid-MD_ comparing SC-Keloid vs. (SC-Myel+Nonmyel) |             |              |       |       |           |               |                 |                 |
|-------------------------------------------------------------------------------------|-------------|--------------|-------|-------|-----------|---------------|-----------------|-----------------|
| gene                                                                                | p_val       | avg_log2FC   | pct.1 | pct.2 | p_val_adj | Foldchange_UP | Foldchange_DOWN | Ratio_pct1_pct2 |
| UBE2H                                                                               | 0,606713635 | -0,033992565 | 0,159 | 0,195 | 1         | 0,976713562   | 1,023841624     | 0,815384615     |
| LPCAT1                                                                              | 0,373270628 | -0,034042952 | 0,01  | 0,024 | 1         | 0,976679451   | 1,023877383     | 0,416666667     |
| TIMM10                                                                              | 0,921223701 | -0,034093611 | 0,078 | 0,073 | 1         | 0,976645156   | 1,023913336     | 1,068493151     |
| ZNF362                                                                              | 0,388620075 | -0,034125551 | 0,026 | 0,049 | 1         | 0,976623534   | 1,023936005     | 0,530612245     |
| RPF2                                                                                | 0,860096721 | -0,034133762 | 0,043 | 0,049 | 1         | 0,976617976   | 1,023941832     | 0,87755102      |
| MRPL3                                                                               | 0,535947135 | -0,034327882 | 0,091 | 0,122 | 1         | 0,976486577   | 1,024079617     | 0,745901639     |
| MXD4                                                                                | 0,648848565 | -0,034339305 | 0,075 | 0,098 | 1         | 0,976478845   | 1,024087726     | 0,765306122     |
| CEP250                                                                              | 0,45638276  | -0,034347663 | 0,011 | 0,024 | 1         | 0,976473189   | 1,024093658     | 0,458333333     |
| TMEM63B                                                                             | 0,180867109 | -0,034428225 | 0,032 | 0,073 | 1         | 0,976418662   | 1,024150847     | 0,438356164     |
| GAL3ST4                                                                             | 0,373270628 | -0,034660478 | 0,01  | 0,024 | 1         | 0,976261486   | 1,024315733     | 0,416666667     |
| WASL                                                                                | 0,627911575 | -0,034829463 | 0,054 | 0,073 | 1         | 0,976147142   | 1,02443572      | 0,739726027     |
| PBRM1                                                                               | 0,652825814 | -0,034893    | 0,097 | 0,073 | 1         | 0,976104153   | 1,024480838     | 1,328767123     |
| RGS14                                                                               | 0,009951995 | -0,035006675 | 0,002 | 0,024 | 1         | 0,976027245   | 1,024561563     | 0,083333333     |
| BAZ2A                                                                               | 0,823893804 | -0,035116289 | 0,041 | 0,049 | 1         | 0,975953091   | 1,024639411     | 0,836734694     |
| TRRAP                                                                               | 0,932559127 | -0,035201824 | 0,022 | 0,024 | 1         | 0,97589523    | 1,024700162     | 0,916666667     |
| GOLGB1                                                                              | 0,876067263 | -0,035636328 | 0,108 | 0,098 | 1         | 0,975601359   | 1,025008823     | 1,102040816     |
| ZNF430                                                                              | 0,687923594 | -0,035858402 | 0,016 | 0,024 | 1         | 0,975451196   | 1,025166615     | 0,666666667     |
| UFL1                                                                                | 0,491660274 | -0,035989007 | 0,069 | 0,098 | 1         | 0,975362894   | 1,025259426     | 0,704081633     |
| KDM7A                                                                               | 0,285374202 | -0,036210036 | 0,008 | 0,024 | 1         | 0,975213474   | 1,025416513     | 0,333333333     |
| BCAR3                                                                               | 0,254624236 | -0,036297268 | 0,021 | 0,049 | 1         | 0,975154509   | 1,025478517     | 0,428571429     |
| NCBP3                                                                               | 0,486255282 | -0,036319505 | 0,048 | 0,073 | 1         | 0,975139479   | 1,025494323     | 0,657534247     |
| MICOS13                                                                             | 0,786463482 | -0,036465061 | 0,217 | 0,244 | 1         | 0,975041101   | 1,025597792     | 0,889344262     |
| ZNF197                                                                              | 0,287685455 | -0,036478332 | 0,008 | 0,024 | 1         | 0,975032132   | 1,025607226     | 0,333333333     |
| SERGEF                                                                              | 0,687923594 | -0,036492016 | 0,016 | 0,024 | 1         | 0,975022884   | 1,025616954     | 0,666666667     |
| CNIH4                                                                               | 0,736391909 | -0,036552311 | 0,12  | 0,098 | 1         | 0,974982135   | 1,025659819     | 1,224489796     |
| C1QBP                                                                               | 0,641746342 | -0,036600305 | 0,182 | 0,22  | 1         | 0,974949701   | 1,02569394      | 0,827272727     |
| SRSF10                                                                              | 0,130670697 | -0,036764859 | 0,091 | 0,171 | 1         | 0,974838504   | 1,025810938     | 0,532163743     |
| PIKFYVE                                                                             | 0,685136562 | -0,037056767 | 0,016 | 0,024 | 1         | 0,97464128    | 1,026018516     | 0,666666667     |
| CHMP3                                                                               | 0,671384471 | -0,03706898  | 0,121 | 0,146 | 1         | 0,974633029   | 1,026027202     | 0,828767123     |
| ZNF575                                                                              | 0,009951995 | -0,037090655 | 0,002 | 0,024 | 1         | 0,974618387   | 1,026042617     | 0,083333333     |

Supplementary Table 3

| Differentially expressed genes_keloid-MD_ comparing SC-Keloid vs. (SC-Myel+Nonmyel) |             |              |       |       |           |               |                 |                 |
|-------------------------------------------------------------------------------------|-------------|--------------|-------|-------|-----------|---------------|-----------------|-----------------|
| gene                                                                                | p_val       | avg_log2FC   | pct.1 | pct.2 | p_val_adj | Foldchange_UP | Foldchange_DOWN | Ratio_pct1_pct2 |
| SLC25A29                                                                            | 0,287685455 | -0,037276266 | 0,008 | 0,024 | 1         | 0,974493005   | 1,026174632     | 0,333333333     |
| RFWD3                                                                               | 0,453706681 | -0,037297495 | 0,011 | 0,024 | 1         | 0,974478665   | 1,026189732     | 0,458333333     |
| PPP1CA                                                                              | 0,783569972 | -0,037320021 | 0,107 | 0,122 | 1         | 0,97446345    | 1,026205755     | 0,87704918      |
| NFAT5                                                                               | 0,938428497 | -0,037364446 | 0,07  | 0,073 | 1         | 0,974433444   | 1,026237355     | 0,95890411      |
| TFEB                                                                                | 0,287685455 | -0,037369233 | 0,008 | 0,024 | 1         | 0,97443021    | 1,02624076      | 0,333333333     |
| NELFCD                                                                              | 0,744939532 | -0,037981179 | 0,038 | 0,049 | 1         | 0,974016975   | 1,026676152     | 0,775510204     |
| UBFD1                                                                               | 0,510723655 | -0,038020909 | 0,048 | 0,024 | 1         | 0,973990152   | 1,026704426     | 2               |
| ARHGAP31                                                                            | 0,754852144 | -0,038030661 | 0,018 | 0,024 | 1         | 0,973983569   | 1,026711366     | 0,75            |
| PLOD2                                                                               | 0,734994618 | -0,03805595  | 0,035 | 0,024 | 1         | 0,973966496   | 1,026729363     | 1,458333333     |
| MTF1                                                                                | 0,373270628 | -0,0380648   | 0,01  | 0,024 | 1         | 0,973960521   | 1,026735662     | 0,416666667     |
| PXN-AS1                                                                             | 0,817777434 | -0,038731406 | 0,019 | 0,024 | 1         | 0,973510601   | 1,027210181     | 0,791666667     |
| C1S                                                                                 | 0,300183592 | -0,038856468 | 0,022 | 0,049 | 1         | 0,973426214   | 1,02729923      | 0,448979592     |
| SGCD                                                                                | 0,538618014 | -0,038922994 | 0,013 | 0,024 | 1         | 0,973381328   | 1,027346602     | 0,541666667     |
| IMPA1                                                                               | 0,48022468  | -0,039005837 | 0,029 | 0,049 | 1         | 0,973325436   | 1,027405596     | 0,591836735     |
| MYO6                                                                                | 0,749340217 | -0,039360853 | 0,018 | 0,024 | 1         | 0,973085951   | 1,027658449     | 0,75            |
| CLDN15                                                                              | 0,287685455 | -0,039361248 | 0,008 | 0,024 | 1         | 0,973085685   | 1,027658731     | 0,333333333     |
| IKZF1                                                                               | 0,009951995 | -0,039560728 | 0,002 | 0,024 | 1         | 0,972951147   | 1,027800834     | 0,083333333     |
| USP34                                                                               | 0,467407878 | -0,039671078 | 0,065 | 0,098 | 1         | 0,972876729   | 1,027879453     | 0,663265306     |
| NUDT8                                                                               | 0,685136562 | -0,039819575 | 0,016 | 0,024 | 1         | 0,972776596   | 1,027985258     | 0,666666667     |
| POM121                                                                              | 0,687923594 | -0,039940508 | 0,016 | 0,024 | 1         | 0,972695057   | 1,028071432     | 0,666666667     |
| DTX3                                                                                | 0,874278136 | -0,04002465  | 0,021 | 0,024 | 1         | 0,972638329   | 1,028131393     | 0,875           |
| B3GAT2                                                                              | 0,754852144 | -0,040075694 | 0,018 | 0,024 | 1         | 0,972603916   | 1,02816777      | 0,75            |
| PPRC1                                                                               | 0,285374202 | -0,04032129  | 0,008 | 0,024 | 1         | 0,97243836    | 1,028342814     | 0,333333333     |
| CENPB                                                                               | 0,392939578 | -0,040630691 | 0,043 | 0,073 | 1         | 0,972229833   | 1,028563377     | 0,589041096     |
| ZNF500                                                                              | 0,20008191  | -0,040642176 | 0,006 | 0,024 | 1         | 0,972222093   | 1,028571565     | 0,25            |
| ZNF776                                                                              | 0,541384208 | -0,040699158 | 0,013 | 0,024 | 1         | 0,972183694   | 1,028612191     | 0,541666667     |
| ARFRP1                                                                              | 0,92073098  | -0,040725603 | 0,053 | 0,049 | 1         | 0,972165874   | 1,028631046     | 1,081632653     |
| DCP1B                                                                               | 0,20008191  | -0,040792367 | 0,006 | 0,024 | 1         | 0,972120886   | 1,02867865      | 0,25            |
| SLC2A4RG                                                                            | 0,922448717 | -0,041001924 | 0,053 | 0,049 | 1         | 0,971979691   | 1,02882808      | 1,081632653     |
| GANAB                                                                               | 0,398612997 | -0,041552134 | 0,12  | 0,171 | 1         | 0,971609072   | 1,029220526     | 0,701754386     |



Supplementary Table 3

| Differentially expressed genes_keloid-MD_comparing SC-Keloid vs. (SC-Myel+Nonmyel) |             |              |       |       |           |               |                 |                 |
|------------------------------------------------------------------------------------|-------------|--------------|-------|-------|-----------|---------------|-----------------|-----------------|
| gene                                                                               | p_val       | avg_log2FC   | pct.1 | pct.2 | p_val_adj | Foldchange_UP | Foldchange_DOWN | Ratio_pct1_pct2 |
| CERS2                                                                              | 0,510842663 | -0,041594411 | 0,069 | 0,098 | 1         | 0,9715806     | 1,029250687     | 0,704081633     |
| TMED9                                                                              | 0,748916296 | -0,041669473 | 0,22  | 0,244 | 1         | 0,971530051   | 1,029304239     | 0,901639344     |
| DPYSL3                                                                             | 0,135157373 | -0,041717238 | 0,016 | 0,049 | 1         | 0,971497886   | 1,029338318     | 0,326530612     |
| ARMC8                                                                              | 0,130651429 | -0,041993797 | 0,029 | 0,073 | 1         | 0,971311672   | 1,029535657     | 0,397260274     |
| ATG101                                                                             | 0,344280633 | -0,042121765 | 0,059 | 0,098 | 1         | 0,97122552    | 1,029626981     | 0,602040816     |
| ABCB7                                                                              | 0,1323338   | -0,042139512 | 0,016 | 0,049 | 1         | 0,971213572   | 1,029639647     | 0,326530612     |
| HERC3                                                                              | 0,20008191  | -0,042199067 | 0,006 | 0,024 | 1         | 0,971173481   | 1,029682152     | 0,25            |
| ZNF71                                                                              | 0,198124435 | -0,042207592 | 0,006 | 0,024 | 1         | 0,971167742   | 1,029688237     | 0,25            |
| SMARCA5                                                                            | 0,642489108 | -0,042324473 | 0,139 | 0,171 | 1         | 0,971089066   | 1,029771661     | 0,812865497     |
| TBCD                                                                               | 0,368207718 | -0,042369585 | 0,01  | 0,024 | 1         | 0,971058701   | 1,029803861     | 0,416666667     |
| EMD                                                                                | 0,945188371 | -0,042370758 | 0,046 | 0,049 | 1         | 0,971057911   | 1,029804699     | 0,93877551      |
| SF3A2                                                                              | 0,614007565 | -0,042400252 | 0,014 | 0,024 | 1         | 0,971038059   | 1,029825752     | 0,583333333     |
| MTA1                                                                               | 0,746589028 | -0,042543396 | 0,018 | 0,024 | 1         | 0,970941718   | 1,029927936     | 0,75            |
| PARP10                                                                             | 0,198124435 | -0,042571724 | 0,006 | 0,024 | 1         | 0,970922653   | 1,02994816      | 0,25            |
| SNRNP40                                                                            | 0,478466805 | -0,042606498 | 0,029 | 0,049 | 1         | 0,970899251   | 1,029972985     | 0,591836735     |
| SLF2                                                                               | 0,757151733 | -0,042778431 | 0,061 | 0,073 | 1         | 0,970783551   | 1,030095739     | 0,835616438     |
| NPLOC4                                                                             | 0,521463509 | -0,042931492 | 0,03  | 0,049 | 1         | 0,970680563   | 1,030205032     | 0,612244898     |
| DDA1                                                                               | 0,486255282 | -0,04310213  | 0,048 | 0,073 | 1         | 0,97056576    | 1,030326889     | 0,657534247     |
| KIAA0895L                                                                          | 0,687923594 | -0,04313654  | 0,016 | 0,024 | 1         | 0,970542611   | 1,030351464     | 0,666666667     |
| PPID                                                                               | 0,613496118 | -0,043275718 | 0,033 | 0,049 | 1         | 0,970448986   | 1,030450868     | 0,673469388     |
| CAVIN3                                                                             | 0,993826851 | -0,04335037  | 0,459 | 0,463 | 1         | 0,970398772   | 1,030504189     | 0,991360691     |
| ERAP1                                                                              | 0,344068959 | -0,043354634 | 0,024 | 0,049 | 1         | 0,970395904   | 1,030507235     | 0,489795918     |
| NEDD9                                                                              | 0,206131125 | -0,043448749 | 0,033 | 0,073 | 1         | 0,970332602   | 1,030574463     | 0,452054795     |
| EIF4G3                                                                             | 0,853596691 | -0,043498758 | 0,043 | 0,049 | 1         | 0,970298967   | 1,030610187     | 0,87755102      |
| FAM214B                                                                            | 0,476712453 | -0,043797199 | 0,029 | 0,049 | 1         | 0,970098268   | 1,030823405     | 0,591836735     |
| CNPY4                                                                              | 0,295791334 | -0,043923695 | 0,022 | 0,049 | 1         | 0,970013214   | 1,030913791     | 0,448979592     |
| NIBAN2                                                                             | 0,952588445 | -0,044055688 | 0,126 | 0,122 | 1         | 0,969924471   | 1,031008115     | 1,032786885     |
| PLAA                                                                               | 0,68235381  | -0,044154481 | 0,016 | 0,024 | 1         | 0,969858054   | 1,031078719     | 0,666666667     |
| GPSM1                                                                              | 0,749340217 | -0,044228855 | 0,018 | 0,024 | 1         | 0,969808057   | 1,031131874     | 0,75            |
| TCEAL7                                                                             | 0,906081716 | -0,044617252 | 0,069 | 0,073 | 1         | 0,969547004   | 1,031409509     | 0,945205479     |

Supplementary Table 3

| Differentially expressed genes_keloid-MD_ comparing SC-Keloid vs. (SC-Myel+Nonmyel) |             |              |       |       |           |               |                 |                 |
|-------------------------------------------------------------------------------------|-------------|--------------|-------|-------|-----------|---------------|-----------------|-----------------|
| gene                                                                                | p_val       | avg_log2FC   | pct.1 | pct.2 | p_val_adj | Foldchange_UP | Foldchange_DOWN | Ratio_pct1_pct2 |
| ETV3                                                                                | 0,733003026 | -0,044776219 | 0,035 | 0,024 | 1         | 0,969440178   | 1,031523164     | 1,458333333     |
| SLC25A28                                                                            | 0,1323338   | -0,045009445 | 0,016 | 0,049 | 1         | 0,969283472   | 1,031689933     | 0,326530612     |
| DNAJC3-DT                                                                           | 0,283075535 | -0,0454129   | 0,008 | 0,024 | 1         | 0,969012445   | 1,03197849      | 0,333333333     |
| WWC3                                                                                | 0,47321434  | -0,045456422 | 0,029 | 0,049 | 1         | 0,968983214   | 1,032009622     | 0,591836735     |
| SLC25A33                                                                            | 0,285374202 | -0,045685315 | 0,008 | 0,024 | 1         | 0,96882949    | 1,03217337      | 0,333333333     |
| ISG20                                                                               | 0,118110366 | -0,045729113 | 0,005 | 0,024 | 1         | 0,968800079   | 1,032204706     | 0,208333333     |
| CAPN10                                                                              | 0,050627188 | -0,046013898 | 0,003 | 0,024 | 1         | 0,968608858   | 1,032408481     | 0,125           |
| PGF                                                                                 | 0,118110366 | -0,046037864 | 0,005 | 0,024 | 1         | 0,968592768   | 1,032425631     | 0,208333333     |
| PLEKHB2                                                                             | 0,264077938 | -0,046078257 | 0,037 | 0,073 | 1         | 0,968565649   | 1,032454538     | 0,506849315     |
| RCOR1                                                                               | 0,251919765 | -0,046328843 | 0,021 | 0,049 | 1         | 0,968397431   | 1,032633884     | 0,428571429     |
| SLC2A6                                                                              | 0,20008191  | -0,046482913 | 0,006 | 0,024 | 1         | 0,968294018   | 1,032744168     | 0,25            |
| SPPL2A                                                                              | 0,856711396 | -0,046484457 | 0,262 | 0,293 | 1         | 0,968292982   | 1,032745273     | 0,894197952     |
| TFAM                                                                                | 0,494651088 | -0,046505772 | 0,048 | 0,073 | 1         | 0,968278676   | 1,032760531     | 0,657534247     |
| REV1                                                                                | 0,253269486 | -0,046537219 | 0,021 | 0,049 | 1         | 0,96825757    | 1,032783043     | 0,428571429     |
| ZNF33A                                                                              | 0,342509621 | -0,046635187 | 0,024 | 0,049 | 1         | 0,968191822   | 1,032853178     | 0,489795918     |
| SPIN2B                                                                              | 0,009951995 | -0,046886715 | 0,002 | 0,024 | 1         | 0,968023036   | 1,033033267     | 0,083333333     |
| LSP1                                                                                | 0,285374202 | -0,047131298 | 0,008 | 0,024 | 1         | 0,967858939   | 1,033208415     | 0,333333333     |
| NDUFA12                                                                             | 0,888789623 | -0,047255308 | 0,306 | 0,293 | 1         | 0,967775748   | 1,03329723      | 1,044368601     |
| UQCRCF1                                                                             | 0,351499061 | -0,047390513 | 0,059 | 0,098 | 1         | 0,967685056   | 1,033394072     | 0,602040816     |
| AGO2                                                                                | 0,791733921 | -0,047575069 | 0,062 | 0,073 | 1         | 0,967561273   | 1,033526277     | 0,849315068     |
| RAB5IF                                                                              | 0,25515508  | -0,047659182 | 0,053 | 0,098 | 1         | 0,967504863   | 1,033586536     | 0,540816327     |
| MRPL55                                                                              | 0,647238323 | -0,047664469 | 0,077 | 0,098 | 1         | 0,967501318   | 1,033590324     | 0,785714286     |
| LTC4S                                                                               | 0,287685455 | -0,047710354 | 0,008 | 0,024 | 1         | 0,967470546   | 1,033623198     | 0,333333333     |
| TMEM50B                                                                             | 0,63615714  | -0,047930338 | 0,054 | 0,073 | 1         | 0,967323036   | 1,033780818     | 0,739726027     |
| UNC50                                                                               | 0,639313385 | -0,04800242  | 0,04  | 0,024 | 1         | 0,967274707   | 1,03383247      | 1,666666667     |
| MAPK8                                                                               | 0,973130782 | -0,048049007 | 0,026 | 0,024 | 1         | 0,967243473   | 1,033865855     | 1,083333333     |
| FOXN3                                                                               | 0,7520946   | -0,048110199 | 0,018 | 0,024 | 1         | 0,967202448   | 1,033909708     | 0,75            |
| CRBN                                                                                | 0,559154418 | -0,048177367 | 0,051 | 0,073 | 1         | 0,967157419   | 1,033957845     | 0,698630137     |
| DIAPH2                                                                              | 0,453706681 | -0,048203374 | 0,011 | 0,024 | 1         | 0,967139984   | 1,033976484     | 0,458333333     |
| LSM7                                                                                | 0,945418718 | -0,048330453 | 0,544 | 0,561 | 1         | 0,967054798   | 1,034067565     | 0,96969697      |

Supplementary Table 3

| Differentially expressed genes_keloid-MD_ comparing SC-Keloid vs. (SC-Myel+Nonmyel) |             |              |       |       |           |               |                 |                 |
|-------------------------------------------------------------------------------------|-------------|--------------|-------|-------|-----------|---------------|-----------------|-----------------|
| gene                                                                                | p_val       | avg_log2FC   | pct.1 | pct.2 | p_val_adj | Foldchange_UP | Foldchange_DOWN | Ratio_pct1_pct2 |
| TP53                                                                                | 0,70140256  | -0,048385174 | 0,037 | 0,024 | 1         | 0,967018118   | 1,034106788     | 1,541666667     |
| PCNA                                                                                | 0,321586141 | -0,048520196 | 0,04  | 0,073 | 1         | 0,966927619   | 1,034203574     | 0,547945205     |
| YIF1B                                                                               | 0,929971805 | -0,048541421 | 0,022 | 0,024 | 1         | 0,966913394   | 1,03421879      | 0,916666667     |
| ANKZF1                                                                              | 0,287685455 | -0,048615823 | 0,008 | 0,024 | 1         | 0,96686353    | 1,034272127     | 0,333333333     |
| TMEM243                                                                             | 0,653077191 | -0,048639732 | 0,035 | 0,049 | 1         | 0,966847507   | 1,034289268     | 0,714285714     |
| RNF19B                                                                              | 0,285374202 | -0,048811274 | 0,008 | 0,024 | 1         | 0,966732552   | 1,034412256     | 0,333333333     |
| MAEA                                                                                | 0,173361616 | -0,048948198 | 0,018 | 0,049 | 1         | 0,966640805   | 1,034510435     | 0,367346939     |
| CCDC174                                                                             | 0,207996287 | -0,048975518 | 0,033 | 0,073 | 1         | 0,9666225     | 1,034530026     | 0,452054795     |
| ZNF846                                                                              | 0,287685455 | -0,049035847 | 0,008 | 0,024 | 1         | 0,96658208    | 1,034573288     | 0,333333333     |
| UBE3D                                                                               | 0,287685455 | -0,049173448 | 0,008 | 0,024 | 1         | 0,966489894   | 1,034671967     | 0,333333333     |
| GAS1                                                                                | 0,370733807 | -0,049235686 | 0,01  | 0,024 | 1         | 0,9664482     | 1,034716605     | 0,416666667     |
| NOP53                                                                               | 0,696113365 | -0,049317335 | 0,057 | 0,073 | 1         | 0,966393506   | 1,034775166     | 0,780821918     |
| PRPF6                                                                               | 0,949370949 | -0,049490955 | 0,077 | 0,073 | 1         | 0,966277213   | 1,034899702     | 1,054794521     |
| ZMYND8                                                                              | 0,737405863 | -0,049504431 | 0,038 | 0,049 | 1         | 0,966268187   | 1,034909369     | 0,775510204     |
| RWDD2B                                                                              | 0,459067691 | -0,049582213 | 0,011 | 0,024 | 1         | 0,966216093   | 1,034965167     | 0,458333333     |
| PTS                                                                                 | 0,718042606 | -0,049604876 | 0,093 | 0,073 | 1         | 0,966200915   | 1,034981425     | 1,273972603     |
| ZNF655                                                                              | 0,900890334 | -0,049855564 | 0,045 | 0,049 | 1         | 0,966033039   | 1,035161283     | 0,918367347     |
| TIMM23B                                                                             | 0,375818014 | -0,050000096 | 0,01  | 0,024 | 1         | 0,965936264   | 1,035264993     | 0,416666667     |
| FUBP1                                                                               | 0,471477621 | -0,050061824 | 0,081 | 0,049 | 1         | 0,965894937   | 1,035309289     | 1,653061224     |
| RBM12B                                                                              | 0,923506759 | -0,05008959  | 0,022 | 0,024 | 1         | 0,965876347   | 1,035329215     | 0,916666667     |
| SLC30A5                                                                             | 0,613496154 | -0,050122464 | 0,033 | 0,049 | 1         | 0,965854338   | 1,035352807     | 0,673469388     |
| SMCHD1                                                                              | 0,731376006 | -0,050460613 | 0,059 | 0,073 | 1         | 0,965627981   | 1,035595508     | 0,808219178     |
| WDR41                                                                               | 0,655882326 | -0,050521322 | 0,035 | 0,049 | 1         | 0,965587348   | 1,035639087     | 0,714285714     |
| DMAP1                                                                               | 0,611220134 | -0,050624561 | 0,014 | 0,024 | 1         | 0,965518253   | 1,0357132       | 0,583333333     |
| DYRK4                                                                               | 0,982386573 | -0,050816837 | 0,024 | 0,024 | 1         | 0,965389582   | 1,035851245     | 1               |
| KLF3                                                                                | 0,800908072 | -0,050826552 | 0,108 | 0,122 | 1         | 0,965383081   | 1,03585822      | 0,885245902     |
| ALKBH1                                                                              | 0,050627188 | -0,050862244 | 0,003 | 0,024 | 1         | 0,965359198   | 1,035883847     | 0,125           |
| SNAPC5                                                                              | 0,482086424 | -0,050909061 | 0,048 | 0,073 | 1         | 0,965327872   | 1,035917463     | 0,657534247     |
| HAUS6                                                                               | 0,874278136 | -0,050964165 | 0,021 | 0,024 | 1         | 0,965291002   | 1,035957031     | 0,875           |
| NACC2                                                                               | 0,970689183 | -0,050967453 | 0,026 | 0,024 | 1         | 0,965288801   | 1,035959392     | 1,083333333     |

Supplementary Table 3

| Differentially expressed genes_keloid-MD_comparing SC-Keloid vs. (SC-Myel+Nonmyel) |             |              |       |       |           |               |                 |                 |
|------------------------------------------------------------------------------------|-------------|--------------|-------|-------|-----------|---------------|-----------------|-----------------|
| gene                                                                               | p_val       | avg_log2FC   | pct.1 | pct.2 | p_val_adj | Foldchange_UP | Foldchange_DOWN | Ratio_pct1_pct2 |
| AARS1                                                                              | 0,174908036 | -0,051000239 | 0,032 | 0,073 | 1         | 0,965266865   | 1,035982935     | 0,438356164     |
| PHYHIPL                                                                            | 0,050627188 | -0,051031092 | 0,003 | 0,024 | 1         | 0,965246222   | 1,036005091     | 0,125           |
| HGSNAT                                                                             | 0,45360176  | -0,051121165 | 0,046 | 0,073 | 1         | 0,96518596    | 1,036069775     | 0,630136986     |
| ESCO1                                                                              | 0,613496154 | -0,051187289 | 0,033 | 0,049 | 1         | 0,965141723   | 1,036117263     | 0,673469388     |
| ATN1                                                                               | 0,586635189 | -0,051250289 | 0,043 | 0,024 | 1         | 0,965099578   | 1,036162509     | 1,791666667     |
| NMNAT3                                                                             | 0,009951995 | -0,051257472 | 0,002 | 0,024 | 1         | 0,965094773   | 1,036167668     | 0,083333333     |
| CSNK1A1                                                                            | 0,427346442 | -0,051354956 | 0,246 | 0,317 | 1         | 0,965029563   | 1,036237685     | 0,776025237     |
| SFMBT1                                                                             | 0,118110366 | -0,051493879 | 0,005 | 0,024 | 1         | 0,96493664    | 1,036337473     | 0,208333333     |
| POLR2A                                                                             | 0,859501049 | -0,051549217 | 0,056 | 0,049 | 1         | 0,964899629   | 1,036377225     | 1,142857143     |
| THAP2                                                                              | 0,676801274 | -0,051916493 | 0,016 | 0,024 | 1         | 0,964654019   | 1,036641096     | 0,666666667     |
| GTF3C4                                                                             | 0,336317863 | -0,051949187 | 0,024 | 0,049 | 1         | 0,964632159   | 1,036664588     | 0,489795918     |
| SMAD4                                                                              | 0,92932323  | -0,05199837  | 0,053 | 0,049 | 1         | 0,964599274   | 1,03669993      | 1,081632653     |
| MDH2                                                                               | 0,489114133 | -0,052055619 | 0,067 | 0,098 | 1         | 0,964560998   | 1,036741069     | 0,683673469     |
| BBS9                                                                               | 0,982386573 | -0,052103357 | 0,024 | 0,024 | 1         | 0,964529081   | 1,036775375     | 1               |
| DDX23                                                                              | 0,100054015 | -0,052309416 | 0,014 | 0,049 | 1         | 0,964391329   | 1,036923467     | 0,285714286     |
| ACAP3                                                                              | 0,884681865 | -0,052664279 | 0,029 | 0,024 | 1         | 0,964154144   | 1,037178553     | 1,208333333     |
| MLXIP                                                                              | 0,989350819 | -0,052674751 | 0,049 | 0,049 | 1         | 0,964147146   | 1,037186082     | 1               |
| WBP2NL                                                                             | 0,009951995 | -0,053092804 | 0,002 | 0,024 | 1         | 0,963867803   | 1,037486673     | 0,083333333     |
| PTPRA                                                                              | 0,689483621 | -0,053220878 | 0,1   | 0,122 | 1         | 0,963782241   | 1,037578779     | 0,819672131     |
| BORCS8                                                                             | 0,453706681 | -0,053382198 | 0,011 | 0,024 | 1         | 0,963674478   | 1,037694805     | 0,458333333     |
| TM2D1                                                                              | 0,733648417 | -0,053407863 | 0,038 | 0,049 | 1         | 0,963657334   | 1,037713266     | 0,775510204     |
| TXLNA                                                                              | 0,413283703 | -0,053443682 | 0,045 | 0,073 | 1         | 0,963633409   | 1,037739031     | 0,616438356     |
| USP22                                                                              | 0,624391573 | -0,053459246 | 0,1   | 0,073 | 1         | 0,963623014   | 1,037750226     | 1,369863014     |
| BCS1L                                                                              | 0,480224629 | -0,053511141 | 0,029 | 0,049 | 1         | 0,963588352   | 1,037787555     | 0,591836735     |
| CNOT6L                                                                             | 0,38698361  | -0,053625348 | 0,026 | 0,049 | 1         | 0,963512075   | 1,037869713     | 0,530612245     |
| ZSCAN29                                                                            | 0,285374202 | -0,053687344 | 0,008 | 0,024 | 1         | 0,963470671   | 1,037914313     | 0,333333333     |
| NFKBIZ                                                                             | 0,872193095 | -0,053691473 | 0,043 | 0,049 | 1         | 0,963467914   | 1,037917284     | 0,87755102      |
| OPA3                                                                               | 0,924799387 | -0,053808684 | 0,022 | 0,024 | 1         | 0,963389641   | 1,038001612     | 0,916666667     |
| GNRH1                                                                              | 0,009951995 | -0,053929964 | 0,002 | 0,024 | 1         | 0,963308657   | 1,038088875     | 0,083333333     |
| SH3BGR                                                                             | 0,900890334 | -0,054000068 | 0,045 | 0,049 | 1         | 0,963261849   | 1,038139319     | 0,918367347     |

Supplementary Table 3

| Differentially expressed genes_keloid-MD_ comparing SC-Keloid vs. (SC-Myel+Nonmyel) |             |              |       |       |           |               |                 |                 |
|-------------------------------------------------------------------------------------|-------------|--------------|-------|-------|-----------|---------------|-----------------|-----------------|
| gene                                                                                | p_val       | avg_log2FC   | pct.1 | pct.2 | p_val_adj | Foldchange_UP | Foldchange_DOWN | Ratio_pct1_pct2 |
| NAA60                                                                               | 0,171167093 | -0,054039909 | 0,018 | 0,049 | 1         | 0,963235248   | 1,038167989     | 0,367346939     |
| RSPH9                                                                               | 0,749340217 | -0,054079906 | 0,018 | 0,024 | 1         | 0,963208544   | 1,038196771     | 0,75            |
| ARV1                                                                                | 0,535858926 | -0,0541761   | 0,013 | 0,024 | 1         | 0,963144323   | 1,038265997     | 0,541666667     |
| KCTD2                                                                               | 0,287685455 | -0,05420787  | 0,008 | 0,024 | 1         | 0,963123113   | 1,038288861     | 0,333333333     |
| PAICS                                                                               | 0,732904563 | -0,054214629 | 0,059 | 0,073 | 1         | 0,9631186     | 1,038293726     | 0,808219178     |
| INF2                                                                                | 0,733003026 | -0,054383687 | 0,035 | 0,024 | 1         | 0,963005747   | 1,038415402     | 1,458333333     |
| RING1                                                                               | 0,294336857 | -0,054389064 | 0,022 | 0,049 | 1         | 0,963002158   | 1,038419272     | 0,448979592     |
| TFAP4                                                                               | 0,009951995 | -0,054416674 | 0,002 | 0,024 | 1         | 0,962983728   | 1,038439145     | 0,083333333     |
| PCDHB11                                                                             | 0,009951995 | -0,054470639 | 0,002 | 0,024 | 1         | 0,962947708   | 1,03847799      | 0,083333333     |
| FAM241A                                                                             | 0,459067691 | -0,054793758 | 0,011 | 0,024 | 1         | 0,962732062   | 1,038710603     | 0,458333333     |
| CD63                                                                                | 0,777989555 | -0,054995987 | 0,794 | 0,756 | 1         | 0,962597121   | 1,038856213     | 1,05026455      |
| CRABP2                                                                              | 0,68235381  | -0,055113384 | 0,016 | 0,024 | 1         | 0,962518794   | 1,038940752     | 0,666666667     |
| IAH1                                                                                | 0,475804951 | -0,055182981 | 0,169 | 0,22  | 1         | 0,962472363   | 1,038990873     | 0,768181818     |
| TIMP1                                                                               | 0,83330907  | -0,055309313 | 0,632 | 0,61  | 1         | 0,962388086   | 1,039081858     | 1,036065574     |
| PSMB1                                                                               | 0,385661592 | -0,055344404 | 0,4   | 0,317 | 1         | 0,962364677   | 1,039107132     | 1,261829653     |
| SGPP1                                                                               | 0,050627188 | -0,055465056 | 0,003 | 0,024 | 1         | 0,962284199   | 1,039194036     | 0,125           |
| CFLAR                                                                               | 0,874422089 | -0,055478096 | 0,056 | 0,049 | 1         | 0,962275501   | 1,039203429     | 1,142857143     |
| NACA2                                                                               | 0,459067691 | -0,055503976 | 0,011 | 0,024 | 1         | 0,962258239   | 1,039222071     | 0,458333333     |
| MCRIP2                                                                              | 0,535858926 | -0,055608752 | 0,013 | 0,024 | 1         | 0,962188358   | 1,039297547     | 0,541666667     |
| TRIM2                                                                               | 0,734994593 | -0,055824281 | 0,035 | 0,024 | 1         | 0,962044624   | 1,039452823     | 1,458333333     |
| VEGFA                                                                               | 0,702713435 | -0,055842105 | 0,094 | 0,073 | 1         | 0,962032738   | 1,039465665     | 1,287671233     |
| ZNF816                                                                              | 0,009951995 | -0,055846806 | 0,002 | 0,024 | 1         | 0,962029603   | 1,039469052     | 0,083333333     |
| ASPSCR1                                                                             | 0,478466805 | -0,055875748 | 0,029 | 0,049 | 1         | 0,962010304   | 1,039489905     | 0,591836735     |
| DVL2                                                                                | 0,287685455 | -0,05598147  | 0,008 | 0,024 | 1         | 0,96193981    | 1,039566083     | 0,333333333     |
| ATP5F1A                                                                             | 0,869783828 | -0,056541687 | 0,175 | 0,171 | 1         | 0,961566349   | 1,039969838     | 1,023391813     |
| MTRF1L                                                                              | 0,746589028 | -0,05654338  | 0,018 | 0,024 | 1         | 0,961565221   | 1,039971058     | 0,75            |
| RBL1                                                                                | 0,45638276  | -0,056916594 | 0,011 | 0,024 | 1         | 0,961316503   | 1,040240125     | 0,458333333     |
| ZNF781                                                                              | 0,198124435 | -0,057031152 | 0,006 | 0,024 | 1         | 0,961240172   | 1,04032273      | 0,25            |
| RAD9A                                                                               | 0,20008191  | -0,057057911 | 0,006 | 0,024 | 1         | 0,961222344   | 1,040342026     | 0,25            |
| FLAD1                                                                               | 0,538618014 | -0,057100578 | 0,013 | 0,024 | 1         | 0,961193916   | 1,040372794     | 0,541666667     |

Supplementary Table 3

| Differentially expressed genes_keloid-MD_comparing SC-Keloid vs. (SC-Myel+Nonmyel) |             |              |       |       |           |               |                 |                 |
|------------------------------------------------------------------------------------|-------------|--------------|-------|-------|-----------|---------------|-----------------|-----------------|
| gene                                                                               | p_val       | avg_log2FC   | pct.1 | pct.2 | p_val_adj | Foldchange_UP | Foldchange_DOWN | Ratio_pct1_pct2 |
| BHLHE40                                                                            | 0,326936686 | -0,057149632 | 0,077 | 0,122 | 1         | 0,961161234   | 1,040408169     | 0,631147541     |
| C9orf72                                                                            | 0,20008191  | -0,057254765 | 0,006 | 0,024 | 1         | 0,961091195   | 1,040483989     | 0,25            |
| MKRN2                                                                              | 0,9288124   | -0,057450187 | 0,027 | 0,024 | 1         | 0,960961018   | 1,040624939     | 1,125           |
| TLN2                                                                               | 0,743053794 | -0,057490253 | 0,038 | 0,049 | 1         | 0,960934331   | 1,040653839     | 0,775510204     |
| MIF4GD                                                                             | 0,611220134 | -0,057651489 | 0,014 | 0,024 | 1         | 0,960826942   | 1,040770149     | 0,583333333     |
| PLEKHM1                                                                            | 0,538618014 | -0,057912428 | 0,013 | 0,024 | 1         | 0,960653174   | 1,040958409     | 0,541666667     |
| TTC7B                                                                              | 0,538618014 | -0,058000027 | 0,013 | 0,024 | 1         | 0,960594846   | 1,041021617     | 0,541666667     |
| SOX4                                                                               | 0,783148124 | -0,058279515 | 0,499 | 0,488 | 1         | 0,960408771   | 1,04122331      | 1,022540984     |
| SLC6A8                                                                             | 0,20008191  | -0,058472189 | 0,006 | 0,024 | 1         | 0,960280516   | 1,041362376     | 0,25            |
| MRPL10                                                                             | 0,535858926 | -0,058554162 | 0,013 | 0,024 | 1         | 0,960225955   | 1,041421547     | 0,541666667     |
| MTMR10                                                                             | 0,815066093 | -0,058762382 | 0,019 | 0,024 | 1         | 0,960087378   | 1,041571864     | 0,791666667     |
| PARVA                                                                              | 0,895363895 | -0,058795284 | 0,045 | 0,049 | 1         | 0,960065483   | 1,041595618     | 0,918367347     |
| PLIN2                                                                              | 0,927385212 | -0,058921961 | 0,022 | 0,024 | 1         | 0,959981188   | 1,04168708      | 0,916666667     |
| LARP1                                                                              | 0,988204446 | -0,059222288 | 0,073 | 0,073 | 1         | 0,959781368   | 1,041903952     | 1               |
| FBXO48                                                                             | 0,009951995 | -0,059257897 | 0,002 | 0,024 | 1         | 0,959757679   | 1,041929668     | 0,083333333     |
| RNF10                                                                              | 0,926446105 | -0,059260447 | 0,027 | 0,024 | 1         | 0,959755983   | 1,04193151      | 1,125           |
| NCAPH2                                                                             | 0,535858926 | -0,059563486 | 0,013 | 0,024 | 1         | 0,959554406   | 1,042150391     | 0,541666667     |
| AGAP1                                                                              | 0,560610721 | -0,059655276 | 0,051 | 0,073 | 1         | 0,959493357   | 1,042216699     | 0,698630137     |
| JAM3                                                                               | 0,55533563  | -0,059870176 | 0,093 | 0,122 | 1         | 0,959350444   | 1,042371957     | 0,762295082     |
| ZNF48                                                                              | 0,285374202 | -0,059988657 | 0,008 | 0,024 | 1         | 0,959271661   | 1,042457565     | 0,333333333     |
| GSK3A                                                                              | 0,929971805 | -0,060083146 | 0,022 | 0,024 | 1         | 0,959208836   | 1,042525843     | 0,916666667     |
| HNRNPDL                                                                            | 0,635120763 | -0,060177431 | 0,257 | 0,293 | 1         | 0,959146151   | 1,042593977     | 0,877133106     |
| ZNF638                                                                             | 0,627911575 | -0,060185197 | 0,054 | 0,073 | 1         | 0,959140988   | 1,042599589     | 0,739726027     |
| PLTP                                                                               | 0,476712453 | -0,060414218 | 0,029 | 0,049 | 1         | 0,95898874    | 1,042765111     | 0,591836735     |
| DDI2                                                                               | 0,535858926 | -0,060542638 | 0,013 | 0,024 | 1         | 0,958903381   | 1,042857935     | 0,541666667     |
| POLR1G                                                                             | 0,050627188 | -0,060647277 | 0,003 | 0,024 | 1         | 0,958833834   | 1,042933576     | 0,125           |
| COPRS                                                                              | 0,867784262 | -0,060828922 | 0,083 | 0,073 | 1         | 0,958713118   | 1,043064897     | 1,136986301     |
| FBXL7                                                                              | 0,283075535 | -0,061073718 | 0,008 | 0,024 | 1         | 0,958550458   | 1,043241899     | 0,333333333     |
| NBN                                                                                | 0,950815635 | -0,061163019 | 0,077 | 0,073 | 1         | 0,958491126   | 1,043306477     | 1,054794521     |
| RPL8                                                                               | 0,665785126 | -0,061178219 | 0,681 | 0,756 | 1         | 0,958481028   | 1,043317469     | 0,900793651     |

Supplementary Table 3

| Differentially expressed genes_keloid-MD_comparing SC-Keloid vs. (SC-Myel+Nonmyel) |             |              |       |       |           |               |                 |                 |
|------------------------------------------------------------------------------------|-------------|--------------|-------|-------|-----------|---------------|-----------------|-----------------|
| gene                                                                               | p_val       | avg_log2FC   | pct.1 | pct.2 | p_val_adj | Foldchange_UP | Foldchange_DOWN | Ratio_pct1_pct2 |
| NUBPL                                                                              | 0,749340217 | -0,061216236 | 0,018 | 0,024 | 1         | 0,958455771   | 1,043344962     | 0,75            |
| NUP153                                                                             | 0,974840088 | -0,061373082 | 0,024 | 0,024 | 1         | 0,958351576   | 1,043458397     | 1               |
| UBE3C                                                                              | 0,452242808 | -0,061382162 | 0,046 | 0,073 | 1         | 0,958345544   | 1,043464965     | 0,630136986     |
| TBC1D20                                                                            | 0,471470594 | -0,061492468 | 0,029 | 0,049 | 1         | 0,958272273   | 1,04354475      | 0,591836735     |
| CEP44                                                                              | 0,979870869 | -0,061528484 | 0,024 | 0,024 | 1         | 0,958248351   | 1,043570801     | 1               |
| GGNBP2                                                                             | 0,684006303 | -0,061622511 | 0,067 | 0,049 | 1         | 0,9581859     | 1,043638818     | 1,367346939     |
| EXOSC3                                                                             | 0,924799387 | -0,061700657 | 0,022 | 0,024 | 1         | 0,958134      | 1,04369535      | 0,916666667     |
| TP53RK                                                                             | 0,340954939 | -0,06172606  | 0,024 | 0,049 | 1         | 0,958117129   | 1,043713727     | 0,489795918     |
| CDC40                                                                              | 0,701284799 | -0,061841634 | 0,037 | 0,049 | 1         | 0,958040377   | 1,043797343     | 0,755102041     |
| HOXD-AS2                                                                           | 0,430112146 | -0,061876043 | 0,027 | 0,049 | 1         | 0,958017528   | 1,043822238     | 0,551020408     |
| GAMT                                                                               | 0,517879382 | -0,061899684 | 0,03  | 0,049 | 1         | 0,958001829   | 1,043839343     | 0,612244898     |
| CPT1A                                                                              | 0,20008191  | -0,061910342 | 0,006 | 0,024 | 1         | 0,957994752   | 1,043847054     | 0,25            |
| RAP1A                                                                              | 0,541276384 | -0,06191207  | 0,132 | 0,171 | 1         | 0,957993605   | 1,043848304     | 0,771929825     |
| ZNF623                                                                             | 0,20008191  | -0,061959303 | 0,006 | 0,024 | 1         | 0,957962241   | 1,04388248      | 0,25            |
| VMO1                                                                               | 0,009951995 | -0,062084307 | 0,002 | 0,024 | 1         | 0,957879241   | 1,043972933     | 0,083333333     |
| RPS12                                                                              | 0,721964134 | -0,062173357 | 0,868 | 0,878 | 1         | 0,957820118   | 1,044037373     | 0,988610478     |
| ACAT2                                                                              | 0,734994618 | -0,062294497 | 0,035 | 0,024 | 1         | 0,957739695   | 1,044125043     | 1,458333333     |
| FBLN1                                                                              | 0,974840088 | -0,062331619 | 0,024 | 0,024 | 1         | 0,957715052   | 1,044151909     | 1               |
| MSX1                                                                               | 0,812356965 | -0,062518325 | 0,019 | 0,024 | 1         | 0,957591117   | 1,044287047     | 0,791666667     |
| REXO2                                                                              | 0,931174607 | -0,062554009 | 0,158 | 0,146 | 1         | 0,957567432   | 1,044312877     | 1,082191781     |
| UQCC3                                                                              | 0,985197757 | -0,062639031 | 0,099 | 0,098 | 1         | 0,957511002   | 1,044374423     | 1,010204082     |
| FIGN                                                                               | 0,150043617 | -0,062708705 | 0,11  | 0,195 | 1         | 0,957464761   | 1,044424861     | 0,564102564     |
| HNRNPM                                                                             | 0,333126427 | -0,063213431 | 0,171 | 0,244 | 1         | 0,957129851   | 1,044790317     | 0,700819672     |
| ZNF234                                                                             | 0,198124435 | -0,063238211 | 0,006 | 0,024 | 1         | 0,957113411   | 1,044808262     | 0,25            |
| CBY1                                                                               | 0,965886356 | -0,063351902 | 0,051 | 0,049 | 1         | 0,957037989   | 1,044890602     | 1,040816327     |
| PRXL2A                                                                             | 0,817777402 | -0,063557606 | 0,019 | 0,024 | 1         | 0,956901541   | 1,045039596     | 0,791666667     |
| SOS2                                                                               | 0,812676447 | -0,063561949 | 0,041 | 0,049 | 1         | 0,956898661   | 1,045042742     | 0,836734694     |
| CRYZL1                                                                             | 0,100054015 | -0,063739112 | 0,014 | 0,049 | 1         | 0,956781161   | 1,045171081     | 0,285714286     |
| RPL34                                                                              | 0,542765259 | -0,063767847 | 0,802 | 0,878 | 1         | 0,956762104   | 1,045191898     | 0,913439636     |
| AIP                                                                                | 0,856766002 | -0,063768491 | 0,083 | 0,073 | 1         | 0,956761677   | 1,045192365     | 1,136986301     |

Supplementary Table 3

| Differentially expressed genes_keloid-MD_comparing SC-Keloid vs. (SC-Myel+Nonmyel) |             |              |       |       |           |               |                 |                 |
|------------------------------------------------------------------------------------|-------------|--------------|-------|-------|-----------|---------------|-----------------|-----------------|
| gene                                                                               | p_val       | avg_log2FC   | pct.1 | pct.2 | p_val_adj | Foldchange_UP | Foldchange_DOWN | Ratio_pct1_pct2 |
| PHLDA3                                                                             | 0,424751006 | -0,063833574 | 0,083 | 0,122 | 1         | 0,956718517   | 1,045239517     | 0,680327869     |
| SLC7A2                                                                             | 0,20008191  | -0,063971329 | 0,006 | 0,024 | 1         | 0,956627169   | 1,045339326     | 0,25            |
| TRAPPC11                                                                           | 0,611220134 | -0,064183405 | 0,014 | 0,024 | 1         | 0,956486555   | 1,045493002     | 0,583333333     |
| TIPRL                                                                              | 0,53748307  | -0,064258566 | 0,07  | 0,098 | 1         | 0,956436726   | 1,045547471     | 0,714285714     |
| SLC10A7                                                                            | 0,285374202 | -0,064340027 | 0,008 | 0,024 | 1         | 0,956382723   | 1,045606509     | 0,333333333     |
| ZNF248                                                                             | 0,483750966 | -0,064352645 | 0,029 | 0,049 | 1         | 0,956374359   | 1,045615654     | 0,591836735     |
| SNTB1                                                                              | 0,285374202 | -0,06435691  | 0,008 | 0,024 | 1         | 0,956371531   | 1,045618745     | 0,333333333     |
| TLNRD1                                                                             | 0,749340217 | -0,064478397 | 0,018 | 0,024 | 1         | 0,956291      | 1,045706799     | 0,75            |
| PIGH                                                                               | 0,842998381 | -0,064657737 | 0,03  | 0,024 | 1         | 0,956172132   | 1,045836797     | 1,25            |
| ISCA1                                                                              | 0,430273345 | -0,0648846   | 0,083 | 0,122 | 1         | 0,956021786   | 1,046001268     | 0,680327869     |
| C2orf68                                                                            | 0,685136562 | -0,064989214 | 0,016 | 0,024 | 1         | 0,955952465   | 1,046077119     | 0,666666667     |
| LPCAT2                                                                             | 0,375355658 | -0,065000596 | 0,061 | 0,098 | 1         | 0,955944923   | 1,046085372     | 0,62244898      |
| ARL6                                                                               | 0,285374202 | -0,06510097  | 0,008 | 0,024 | 1         | 0,955878416   | 1,046158155     | 0,333333333     |
| TMX2                                                                               | 0,380479892 | -0,065268869 | 0,026 | 0,049 | 1         | 0,955767178   | 1,046279913     | 0,530612245     |
| ZNF117                                                                             | 0,538618014 | -0,065291218 | 0,013 | 0,024 | 1         | 0,955752373   | 1,046296121     | 0,541666667     |
| TGFBRAP1                                                                           | 0,373270628 | -0,065397427 | 0,01  | 0,024 | 1         | 0,955682015   | 1,04637315      | 0,416666667     |
| PTBP3                                                                              | 0,7669823   | -0,065421674 | 0,083 | 0,098 | 1         | 0,955665952   | 1,046390737     | 0,846938776     |
| NAMPT                                                                              | 0,63087744  | -0,065519901 | 0,07  | 0,049 | 1         | 0,955600887   | 1,046461983     | 1,428571429     |
| EHD1                                                                               | 0,198124435 | -0,065582508 | 0,006 | 0,024 | 1         | 0,95555942    | 1,046507396     | 0,25            |
| HSP90AB1                                                                           | 0,810768126 | -0,06568265  | 0,581 | 0,61  | 1         | 0,955493094   | 1,04658004      | 0,952459016     |
| GAS2L1                                                                             | 0,340954939 | -0,06578605  | 0,024 | 0,049 | 1         | 0,955424614   | 1,046655053     | 0,489795918     |
| NDUFB5                                                                             | 0,699406818 | -0,065800989 | 0,08  | 0,098 | 1         | 0,955414721   | 1,046665891     | 0,816326531     |
| SPOUT1                                                                             | 0,541384208 | -0,065838505 | 0,013 | 0,024 | 1         | 0,955389876   | 1,046693109     | 0,541666667     |
| PHLDB1                                                                             | 0,813509796 | -0,065930944 | 0,088 | 0,098 | 1         | 0,955328663   | 1,046760176     | 0,897959184     |
| ELAVL1                                                                             | 0,977673364 | -0,065985598 | 0,072 | 0,073 | 1         | 0,955292473   | 1,046799832     | 0,98630137      |
| CEP295                                                                             | 0,45638276  | -0,066449442 | 0,011 | 0,024 | 1         | 0,954985384   | 1,047136445     | 0,458333333     |
| RPA3                                                                               | 0,956487541 | -0,066515207 | 0,104 | 0,098 | 1         | 0,954941852   | 1,04718418      | 1,06122449      |
| GTF3C5                                                                             | 0,608438325 | -0,066519937 | 0,014 | 0,024 | 1         | 0,954938721   | 1,047187613     | 0,583333333     |
| ARHGEF11                                                                           | 0,342509686 | -0,066552017 | 0,024 | 0,049 | 1         | 0,954917487   | 1,047210899     | 0,489795918     |
| RAPGEF2                                                                            | 0,97557264  | -0,066917911 | 0,026 | 0,024 | 1         | 0,954675334   | 1,047476524     | 1,083333333     |



Supplementary Table 3

| Differentially expressed genes_keloid-MD_comparing SC-Keloid vs. (SC-Myel+Nonmyel) |             |              |       |       |           |               |                 |                 |
|------------------------------------------------------------------------------------|-------------|--------------|-------|-------|-----------|---------------|-----------------|-----------------|
| gene                                                                               | p_val       | avg_log2FC   | pct.1 | pct.2 | p_val_adj | Foldchange_UP | Foldchange_DOWN | Ratio_pct1_pct2 |
| ZC3H12C                                                                            | 0,20008191  | -0,066923502 | 0,006 | 0,024 | 1         | 0,954671633   | 1,047480584     | 0,25            |
| SRR                                                                                | 0,614007565 | -0,067016201 | 0,014 | 0,024 | 1         | 0,954610294   | 1,047547891     | 0,583333333     |
| MAVS                                                                               | 0,929971805 | -0,067071398 | 0,022 | 0,024 | 1         | 0,954573772   | 1,04758797      | 0,916666667     |
| UBE2V1                                                                             | 0,780178765 | -0,067129327 | 0,04  | 0,049 | 1         | 0,954535443   | 1,047630035     | 0,816326531     |
| RUBCN                                                                              | 0,749340217 | -0,067190922 | 0,018 | 0,024 | 1         | 0,954494691   | 1,047674764     | 0,75            |
| SMIM14                                                                             | 0,845732107 | -0,067194119 | 0,057 | 0,049 | 1         | 0,954492575   | 1,047677086     | 1,163265306     |
| CDC14A                                                                             | 0,538618014 | -0,067205581 | 0,013 | 0,024 | 1         | 0,954484992   | 1,047685409     | 0,541666667     |
| DMTF1                                                                              | 0,697522234 | -0,067483859 | 0,037 | 0,049 | 1         | 0,954300902   | 1,047887515     | 0,755102041     |
| P4HA1                                                                              | 0,82534913  | -0,067612428 | 0,086 | 0,073 | 1         | 0,954215861   | 1,047980903     | 1,178082192     |
| USP31                                                                              | 0,285374202 | -0,067685263 | 0,008 | 0,024 | 1         | 0,954167688   | 1,048033812     | 0,333333333     |
| MLST8                                                                              | 0,9288124   | -0,067697907 | 0,027 | 0,024 | 1         | 0,954159326   | 1,048042998     | 1,125           |
| DBF4                                                                               | 0,746588981 | -0,067795667 | 0,018 | 0,024 | 1         | 0,954094672   | 1,048114017     | 0,75            |
| KCTD14                                                                             | 0,009700686 | -0,06780939  | 0,002 | 0,024 | 1         | 0,954085597   | 1,048123987     | 0,083333333     |
| COL18A1                                                                            | 0,376441483 | -0,067814742 | 0,638 | 0,683 | 1         | 0,954082057   | 1,048127876     | 0,934114202     |
| RPL14                                                                              | 0,327036209 | -0,068035662 | 0,638 | 0,805 | 1         | 0,95393597    | 1,048288388     | 0,792546584     |
| DDX19B                                                                             | 0,118110366 | -0,068056112 | 0,005 | 0,024 | 1         | 0,953922448   | 1,048303247     | 0,208333333     |
| NUCKS1                                                                             | 0,833676748 | -0,068070825 | 0,499 | 0,488 | 1         | 0,953912719   | 1,048313939     | 1,022540984     |
| PPP2R5D                                                                            | 0,685136562 | -0,068418313 | 0,016 | 0,024 | 1         | 0,953682988   | 1,048566466     | 0,666666667     |
| RRP1                                                                               | 0,246571074 | -0,068516753 | 0,021 | 0,049 | 1         | 0,953617917   | 1,048638015     | 0,428571429     |
| FTSJ3                                                                              | 0,133269869 | -0,068533527 | 0,016 | 0,049 | 1         | 0,953606829   | 1,048650208     | 0,326530612     |
| ANKRD40                                                                            | 0,327027176 | -0,068597577 | 0,057 | 0,098 | 1         | 0,953564494   | 1,048696765     | 0,581632653     |
| CDC27                                                                              | 0,699482913 | -0,068605103 | 0,037 | 0,024 | 1         | 0,95355952    | 1,048702236     | 1,541666667     |
| RNF185                                                                             | 0,611220134 | -0,068872011 | 0,014 | 0,024 | 1         | 0,953383121   | 1,048896271     | 0,583333333     |
| CD68                                                                               | 0,118110366 | -0,068905948 | 0,005 | 0,024 | 1         | 0,953360695   | 1,048920944     | 0,208333333     |
| LUM                                                                                | 0,732140121 | -0,069115043 | 0,059 | 0,073 | 1         | 0,953222531   | 1,049072979     | 0,808219178     |
| EXT2                                                                               | 0,807871786 | -0,069160497 | 0,032 | 0,024 | 1         | 0,953192498   | 1,049106032     | 1,333333333     |
| IMPDH1                                                                             | 0,071078164 | -0,069360858 | 0,013 | 0,049 | 1         | 0,953060129   | 1,049251741     | 0,265306122     |
| CEP20                                                                              | 0,385351356 | -0,069423936 | 0,026 | 0,049 | 1         | 0,95301846    | 1,049297618     | 0,530612245     |
| CDK19                                                                              | 0,749340217 | -0,069496805 | 0,018 | 0,024 | 1         | 0,952970325   | 1,049350619     | 0,75            |
| DGKZ                                                                               | 0,565873297 | -0,069509266 | 0,032 | 0,049 | 1         | 0,952962094   | 1,049359682     | 0,653061224     |

Supplementary Table 3

| Differentially expressed genes_keloid-MD_ comparing SC-Keloid vs. (SC-Myel+Nonmyel) |             |              |       |       |           |               |                 |                 |
|-------------------------------------------------------------------------------------|-------------|--------------|-------|-------|-----------|---------------|-----------------|-----------------|
| gene                                                                                | p_val       | avg_log2FC   | pct.1 | pct.2 | p_val_adj | Foldchange_UP | Foldchange_DOWN | Ratio_pct1_pct2 |
| PATZ1                                                                               | 0,676801274 | -0,069550795 | 0,016 | 0,024 | 1         | 0,952934662   | 1,04938989      | 0,666666667     |
| ELOVL4                                                                              | 0,533106974 | -0,06959856  | 0,013 | 0,024 | 1         | 0,952903113   | 1,049424634     | 0,541666667     |
| CLPX                                                                                | 0,660568421 | -0,069701048 | 0,035 | 0,049 | 1         | 0,952835422   | 1,049499186     | 0,714285714     |
| NBPF1                                                                               | 0,285374202 | -0,069715713 | 0,008 | 0,024 | 1         | 0,952825737   | 1,049509854     | 0,333333333     |
| NARF                                                                                | 0,874278136 | -0,070039058 | 0,021 | 0,024 | 1         | 0,952612208   | 1,049745103     | 0,875           |
| IKZF2                                                                               | 0,285374202 | -0,070051107 | 0,008 | 0,024 | 1         | 0,952604252   | 1,04975387      | 0,333333333     |
| DNAJB14                                                                             | 0,84292095  | -0,070102609 | 0,065 | 0,073 | 1         | 0,952570246   | 1,049791345     | 0,890410959     |
| MRPL12                                                                              | 0,691892397 | -0,070240845 | 0,037 | 0,049 | 1         | 0,952478977   | 1,049891939     | 0,755102041     |
| DHRS7B                                                                              | 0,560401558 | -0,070339355 | 0,032 | 0,049 | 1         | 0,952413942   | 1,04996363      | 0,653061224     |
| FKBP1B                                                                              | 0,874278136 | -0,070354629 | 0,021 | 0,024 | 1         | 0,952403859   | 1,049974746     | 0,875           |
| GLYR1                                                                               | 0,474961629 | -0,070359818 | 0,029 | 0,049 | 1         | 0,952400433   | 1,049978523     | 0,591836735     |
| LY6G5C                                                                              | 0,118110366 | -0,070519523 | 0,005 | 0,024 | 1         | 0,95229501    | 1,050094761     | 0,208333333     |
| RAP1GDS1                                                                            | 0,763878606 | -0,07056531  | 0,089 | 0,073 | 1         | 0,952264787   | 1,050128088     | 1,219178082     |
| ADIPOR2                                                                             | 0,7520946   | -0,070769296 | 0,018 | 0,024 | 1         | 0,952130153   | 1,050276579     | 0,75            |
| COMMD9                                                                              | 0,874278136 | -0,070801154 | 0,021 | 0,024 | 1         | 0,952109128   | 1,050299772     | 0,875           |
| MYD88                                                                               | 0,616800584 | -0,070814361 | 0,014 | 0,024 | 1         | 0,952100412   | 1,050309386     | 0,583333333     |
| HIF1A                                                                               | 0,791481517 | -0,071049162 | 0,115 | 0,098 | 1         | 0,951945469   | 1,05048034      | 1,173469388     |
| YWHAH                                                                               | 0,592868675 | -0,071088764 | 0,139 | 0,171 | 1         | 0,951919339   | 1,050509176     | 0,812865497     |
| TWIST1                                                                              | 0,285374202 | -0,071139815 | 0,008 | 0,024 | 1         | 0,951885655   | 1,05054635      | 0,333333333     |
| PLSCR1                                                                              | 0,453706681 | -0,07119186  | 0,011 | 0,024 | 1         | 0,951851316   | 1,050584249     | 0,458333333     |
| AFG3L2                                                                              | 0,44145438  | -0,071210883 | 0,046 | 0,073 | 1         | 0,951838765   | 1,050598102     | 0,630136986     |
| TTPAL                                                                               | 0,20008191  | -0,071275293 | 0,006 | 0,024 | 1         | 0,951796271   | 1,050645007     | 0,25            |
| LRFN3                                                                               | 0,198124435 | -0,071465044 | 0,006 | 0,024 | 1         | 0,951671094   | 1,050783203     | 0,25            |
| CHST14                                                                              | 0,871626162 | -0,071609173 | 0,021 | 0,024 | 1         | 0,951576024   | 1,050888184     | 0,875           |
| DHRS4                                                                               | 0,60566217  | -0,071619761 | 0,014 | 0,024 | 1         | 0,95156904    | 1,050895897     | 0,583333333     |
| EBP                                                                                 | 0,886972594 | -0,071636913 | 0,029 | 0,024 | 1         | 0,951557727   | 1,050908391     | 1,208333333     |
| SHLD2                                                                               | 0,291442309 | -0,071687975 | 0,022 | 0,049 | 1         | 0,951524049   | 1,050945587     | 0,448979592     |
| POLR1D                                                                              | 0,952260474 | -0,071716355 | 0,077 | 0,073 | 1         | 0,951505331   | 1,05096626      | 1,054794521     |
| ADAMTS13                                                                            | 9,44793E-05 | -0,072062554 | 0     | 0,024 | 1         | 0,951277029   | 1,051218488     | 0               |
| ARHGDI3                                                                             | 9,44793E-05 | -0,072062554 | 0     | 0,024 | 1         | 0,951277029   | 1,051218488     | 0               |

Supplementary Table 3

| Differentially expressed genes_keloid-MD_comparing SC-Keloid vs. (SC-Myel+Nonmyel) |             |              |       |       |           |               |                 |                 |
|------------------------------------------------------------------------------------|-------------|--------------|-------|-------|-----------|---------------|-----------------|-----------------|
| gene                                                                               | p_val       | avg_log2FC   | pct.1 | pct.2 | p_val_adj | Foldchange_UP | Foldchange_DOWN | Ratio_pct1_pct2 |
| C6orf132                                                                           | 9,44793E-05 | -0,072062554 | 0     | 0,024 | 1         | 0,951277029   | 1,051218488     | 0               |
| CACHD1                                                                             | 9,44793E-05 | -0,072062554 | 0     | 0,024 | 1         | 0,951277029   | 1,051218488     | 0               |
| FAM124A                                                                            | 9,44793E-05 | -0,072062554 | 0     | 0,024 | 1         | 0,951277029   | 1,051218488     | 0               |
| IGFBP7-AS1                                                                         | 9,44793E-05 | -0,072062554 | 0     | 0,024 | 1         | 0,951277029   | 1,051218488     | 0               |
| TTC9                                                                               | 9,44793E-05 | -0,072062554 | 0     | 0,024 | 1         | 0,951277029   | 1,051218488     | 0               |
| WFDC2                                                                              | 9,44793E-05 | -0,072062554 | 0     | 0,024 | 1         | 0,951277029   | 1,051218488     | 0               |
| ZNF416                                                                             | 9,44793E-05 | -0,072062554 | 0     | 0,024 | 1         | 0,951277029   | 1,051218488     | 0               |
| TMEM169                                                                            | 0,45638276  | -0,072254161 | 0,011 | 0,024 | 1         | 0,951150696   | 1,051358111     | 0,458333333     |
| ZNF354C                                                                            | 0,046010032 | -0,072339306 | 0,011 | 0,049 | 1         | 0,951094563   | 1,051420162     | 0,224489796     |
| FMOD                                                                               | 0,198124435 | -0,072347754 | 0,006 | 0,024 | 1         | 0,951088994   | 1,051426319     | 0,25            |
| COLGALT1                                                                           | 0,820150565 | -0,072421473 | 0,041 | 0,049 | 1         | 0,951040396   | 1,051480046     | 0,836734694     |
| F13A1                                                                              | 0,116646669 | -0,07244799  | 0,005 | 0,024 | 1         | 0,951022916   | 1,051499373     | 0,208333333     |
| VIM                                                                                | 0,12521782  | -0,072466634 | 0,978 | 0,976 | 1         | 0,951010626   | 1,051512962     | 1,00204918      |
| CRISPLD2                                                                           | 0,541384208 | -0,072487237 | 0,013 | 0,024 | 1         | 0,950997045   | 1,051527979     | 0,541666667     |
| PACRGL                                                                             | 0,373270628 | -0,072564253 | 0,01  | 0,024 | 1         | 0,950946279   | 1,051584114     | 0,416666667     |
| DNAJB1                                                                             | 0,426002514 | -0,072603539 | 0,187 | 0,244 | 1         | 0,950920384   | 1,05161275      | 0,766393443     |
| TTC33                                                                              | 0,68235381  | -0,072895009 | 0,016 | 0,024 | 1         | 0,950728287   | 1,05182523      | 0,666666667     |
| KIAA0753                                                                           | 0,373270628 | -0,073030588 | 0,01  | 0,024 | 1         | 0,950638945   | 1,051924082     | 0,416666667     |
| OSTM1                                                                              | 0,291032113 | -0,073436417 | 0,073 | 0,122 | 1         | 0,950371569   | 1,052220029     | 0,598360656     |
| RASA4                                                                              | 0,285374202 | -0,073951934 | 0,008 | 0,024 | 1         | 0,950032034   | 1,052596085     | 0,333333333     |
| CLTB                                                                               | 0,647238323 | -0,074050648 | 0,077 | 0,098 | 1         | 0,949967032   | 1,05266811      | 0,785714286     |
| RPL30                                                                              | 0,983666275 | -0,074146196 | 0,909 | 0,927 | 1         | 0,949904119   | 1,052737829     | 0,980582524     |
| ACAD9                                                                              | 0,285374202 | -0,074224549 | 0,008 | 0,024 | 1         | 0,949852531   | 1,052795005     | 0,333333333     |
| SDR39U1                                                                            | 0,927385212 | -0,07423526  | 0,022 | 0,024 | 1         | 0,949845479   | 1,052802821     | 0,916666667     |
| LRRC28                                                                             | 0,980457013 | -0,074262503 | 0,026 | 0,024 | 1         | 0,949827543   | 1,052822702     | 1,083333333     |
| LIAS                                                                               | 0,370733807 | -0,074277789 | 0,01  | 0,024 | 1         | 0,949817479   | 1,052833857     | 0,416666667     |
| RBMXL1                                                                             | 0,685136562 | -0,074493393 | 0,016 | 0,024 | 1         | 0,949675544   | 1,05299121      | 0,666666667     |
| IQCE                                                                               | 0,535858926 | -0,074607814 | 0,013 | 0,024 | 1         | 0,949600228   | 1,053074726     | 0,541666667     |
| DHX35                                                                              | 0,285374202 | -0,074738489 | 0,008 | 0,024 | 1         | 0,94951422    | 1,053170115     | 0,333333333     |
| FAM210B                                                                            | 0,941687421 | -0,074812617 | 0,182 | 0,195 | 1         | 0,949465434   | 1,05322423      | 0,933333333     |

Supplementary Table 3

| Differentially expressed genes_keloid-MD_comparing SC-Keloid vs. (SC-Myel+Nonmyel) |             |              |       |       |           |               |                 |                 |
|------------------------------------------------------------------------------------|-------------|--------------|-------|-------|-----------|---------------|-----------------|-----------------|
| gene                                                                               | p_val       | avg_log2FC   | pct.1 | pct.2 | p_val_adj | Foldchange_UP | Foldchange_DOWN | Ratio_pct1_pct2 |
| ELAC2                                                                              | 0,171167093 | -0,074843914 | 0,018 | 0,049 | 1         | 0,949444837   | 1,053247078     | 0,367346939     |
| TMEM132A                                                                           | 0,614007565 | -0,074883278 | 0,014 | 0,024 | 1         | 0,949418931   | 1,053275817     | 0,583333333     |
| PCGF2                                                                              | 0,24923539  | -0,074931292 | 0,021 | 0,049 | 1         | 0,949387334   | 1,053310871     | 0,428571429     |
| RETREG3                                                                            | 0,209830716 | -0,074969398 | 0,019 | 0,049 | 1         | 0,949362258   | 1,053338692     | 0,387755102     |
| SEMA3D                                                                             | 0,116646669 | -0,075031989 | 0,005 | 0,024 | 1         | 0,949321071   | 1,053384393     | 0,208333333     |
| MLLT11                                                                             | 0,60566217  | -0,075204875 | 0,014 | 0,024 | 1         | 0,949207316   | 1,053510633     | 0,583333333     |
| SLC27A3                                                                            | 0,20008191  | -0,075316022 | 0,006 | 0,024 | 1         | 0,94913419    | 1,0535918       | 0,25            |
| LPAR1                                                                              | 0,224645465 | -0,075326087 | 0,035 | 0,073 | 1         | 0,949127569   | 1,05359915      | 0,479452055     |
| ZNF827                                                                             | 0,64934456  | -0,075568676 | 0,035 | 0,049 | 1         | 0,948967987   | 1,053776327     | 0,714285714     |
| LPL                                                                                | 0,198124435 | -0,075646439 | 0,006 | 0,024 | 1         | 0,948916838   | 1,053833129     | 0,25            |
| CRK                                                                                | 0,093865594 | -0,075718209 | 0,054 | 0,122 | 1         | 0,948869633   | 1,053885555     | 0,442622951     |
| C12orf76                                                                           | 0,898929107 | -0,075909117 | 0,054 | 0,049 | 1         | 0,94874408    | 1,054025022     | 1,102040816     |
| SHC1                                                                               | 0,800024072 | -0,076114283 | 0,064 | 0,073 | 1         | 0,948609168   | 1,054174926     | 0,876712329     |
| TXNDC9                                                                             | 0,862940087 | -0,076120515 | 0,089 | 0,098 | 1         | 0,94860507    | 1,05417948      | 0,908163265     |
| ZBTB10                                                                             | 0,294336857 | -0,076469857 | 0,022 | 0,049 | 1         | 0,948375398   | 1,054434776     | 0,448979592     |
| TPRG1L                                                                             | 0,069844092 | -0,076841922 | 0,013 | 0,049 | 1         | 0,948130847   | 1,054706745     | 0,265306122     |
| LMBR1L                                                                             | 0,285374202 | -0,07707171  | 0,008 | 0,024 | 1         | 0,947979844   | 1,054874749     | 0,333333333     |
| FABP7                                                                              | 0,515517076 | -0,077108966 | 0,089 | 0,122 | 1         | 0,947955364   | 1,05490199      | 0,729508197     |
| UCN2                                                                               | 0,812356965 | -0,07751555  | 0,019 | 0,024 | 1         | 0,947688246   | 1,055199327     | 0,791666667     |
| PYCR2                                                                              | 0,474961629 | -0,077837802 | 0,029 | 0,049 | 1         | 0,947476587   | 1,055435052     | 0,591836735     |
| CTDSPL2                                                                            | 0,593567549 | -0,077856865 | 0,053 | 0,073 | 1         | 0,947464067   | 1,055448997     | 0,726027397     |
| SYNPO2                                                                             | 0,198124435 | -0,077900126 | 0,006 | 0,024 | 1         | 0,947435657   | 1,055480647     | 0,25            |
| MEMO1                                                                              | 0,285374202 | -0,07792505  | 0,008 | 0,024 | 1         | 0,947419289   | 1,055498881     | 0,333333333     |
| ZUP1                                                                               | 0,538618014 | -0,077966827 | 0,013 | 0,024 | 1         | 0,947391855   | 1,055529447     | 0,541666667     |
| SUMO3                                                                              | 0,301141346 | -0,078087344 | 0,056 | 0,098 | 1         | 0,947312716   | 1,055617626     | 0,571428571     |
| PLIN3                                                                              | 0,794071977 | -0,078223922 | 0,061 | 0,049 | 1         | 0,94722304    | 1,055717564     | 1,244897959     |
| LACC1                                                                              | 0,871626162 | -0,078479023 | 0,021 | 0,024 | 1         | 0,947055564   | 1,055904255     | 0,875           |
| TMEM80                                                                             | 0,20008191  | -0,078489448 | 0,006 | 0,024 | 1         | 0,947048721   | 1,055911885     | 0,25            |
| LINC00920                                                                          | 0,611220134 | -0,078568879 | 0,014 | 0,024 | 1         | 0,94699658    | 1,055970022     | 0,583333333     |
| MOK                                                                                | 0,614007565 | -0,078678048 | 0,014 | 0,024 | 1         | 0,946924924   | 1,05604993      | 0,583333333     |

Supplementary Table 3

| Differentially expressed genes_keloid-MD_comparing SC-Keloid vs. (SC-Myel+Nonmyel) |             |              |       |       |           |               |                 |                 |
|------------------------------------------------------------------------------------|-------------|--------------|-------|-------|-----------|---------------|-----------------|-----------------|
| gene                                                                               | p_val       | avg_log2FC   | pct.1 | pct.2 | p_val_adj | Foldchange_UP | Foldchange_DOWN | Ratio_pct1_pct2 |
| CYP27A1                                                                            | 0,100838432 | -0,078764344 | 0,014 | 0,049 | 1         | 0,946868284   | 1,056113101     | 0,285714286     |
| IQCB1                                                                              | 0,20008191  | -0,078837451 | 0,006 | 0,024 | 1         | 0,946820304   | 1,05616662      | 0,25            |
| C11orf24                                                                           | 0,849645004 | -0,078841616 | 0,03  | 0,024 | 1         | 0,946817571   | 1,056169669     | 1,25            |
| GCC2                                                                               | 0,808156245 | -0,079036371 | 0,134 | 0,146 | 1         | 0,946689765   | 1,056312255     | 0,917808219     |
| NPIPA1                                                                             | 0,614007565 | -0,079132185 | 0,014 | 0,024 | 1         | 0,946626894   | 1,05638241      | 0,583333333     |
| PSMD1                                                                              | 0,823487604 | -0,079304058 | 0,112 | 0,098 | 1         | 0,946514126   | 1,056508268     | 1,142857143     |
| HIPK2                                                                              | 0,204977577 | -0,079318949 | 0,019 | 0,049 | 1         | 0,946504356   | 1,056519173     | 0,387755102     |
| CLIC4                                                                              | 0,6529479   | -0,079414064 | 0,282 | 0,317 | 1         | 0,946441956   | 1,056588831     | 0,889589905     |
| PIGA                                                                               | 0,285374202 | -0,079726693 | 0,008 | 0,024 | 1         | 0,946236887   | 1,056817816     | 0,333333333     |
| TMED4                                                                              | 0,295125746 | -0,079893028 | 0,11  | 0,171 | 1         | 0,946127797   | 1,056939668     | 0,643274854     |
| CHID1                                                                              | 0,959486964 | -0,080133144 | 0,077 | 0,073 | 1         | 0,945970341   | 1,057115595     | 1,054794521     |
| IKBIP                                                                              | 0,835300088 | -0,080331071 | 0,132 | 0,146 | 1         | 0,945840569   | 1,057260634     | 0,904109589     |
| IL27RA                                                                             | 0,20008191  | -0,080554878 | 0,006 | 0,024 | 1         | 0,945693851   | 1,057424661     | 0,25            |
| TRIB1                                                                              | 0,676801274 | -0,080598144 | 0,016 | 0,024 | 1         | 0,945665491   | 1,057456373     | 0,666666667     |
| PDPN                                                                               | 0,530362187 | -0,080605434 | 0,013 | 0,024 | 1         | 0,945660713   | 1,057461716     | 0,541666667     |
| THY1                                                                               | 0,699402607 | -0,080627158 | 0,037 | 0,049 | 1         | 0,945646473   | 1,05747764      | 0,755102041     |
| AZIN2                                                                              | 0,611220134 | -0,080723346 | 0,014 | 0,024 | 1         | 0,945583426   | 1,057548147     | 0,583333333     |
| FYTTD1                                                                             | 0,322855631 | -0,080993655 | 0,113 | 0,171 | 1         | 0,945406275   | 1,057746311     | 0,660818713     |
| CDKN1B                                                                             | 0,9288124   | -0,081275133 | 0,027 | 0,024 | 1         | 0,945221839   | 1,057952704     | 1,125           |
| CLTA                                                                               | 0,568489608 | -0,081302551 | 0,241 | 0,293 | 1         | 0,945203875   | 1,05797281      | 0,822525597     |
| TGDS                                                                               | 0,538618014 | -0,081344811 | 0,013 | 0,024 | 1         | 0,945176188   | 1,058003801     | 0,541666667     |
| GAR1                                                                               | 0,351499061 | -0,08145939  | 0,059 | 0,098 | 1         | 0,945101125   | 1,058087831     | 0,602040816     |
| CDK7                                                                               | 0,611220134 | -0,081476088 | 0,014 | 0,024 | 1         | 0,945090186   | 1,058100078     | 0,583333333     |
| TMEM203                                                                            | 0,295791265 | -0,081514182 | 0,022 | 0,049 | 1         | 0,945065232   | 1,058128017     | 0,448979592     |
| RHOQ                                                                               | 0,673140407 | -0,081611935 | 0,1   | 0,122 | 1         | 0,945001199   | 1,058199716     | 0,819672131     |
| SUDS3                                                                              | 0,994675291 | -0,081796851 | 0,049 | 0,049 | 1         | 0,944880082   | 1,058335358     | 1               |
| CMTM3                                                                              | 0,140677824 | -0,081805075 | 0,11  | 0,195 | 1         | 0,944874696   | 1,058341391     | 0,564102564     |
| APOO                                                                               | 0,68235381  | -0,082042206 | 0,016 | 0,024 | 1         | 0,944719403   | 1,058515361     | 0,666666667     |
| TIMM22                                                                             | 0,614007565 | -0,082149041 | 0,014 | 0,024 | 1         | 0,944649447   | 1,05859375      | 0,583333333     |
| UTP4                                                                               | 0,370733807 | -0,082207938 | 0,01  | 0,024 | 1         | 0,944610883   | 1,058636967     | 0,416666667     |

Supplementary Table 3

| Differentially expressed genes_keloid-MD_comparing SC-Keloid vs. (SC-Myel+Nonmyel) |             |              |       |       |           |               |                 |                 |
|------------------------------------------------------------------------------------|-------------|--------------|-------|-------|-----------|---------------|-----------------|-----------------|
| gene                                                                               | p_val       | avg_log2FC   | pct.1 | pct.2 | p_val_adj | Foldchange_UP | Foldchange_DOWN | Ratio_pct1_pct2 |
| PPIC                                                                               | 0,97557264  | -0,082336052 | 0,026 | 0,024 | 1         | 0,944527003   | 1,05873098      | 1,083333333     |
| LINC01560                                                                          | 0,118110366 | -0,082482814 | 0,005 | 0,024 | 1         | 0,944430924   | 1,058838688     | 0,208333333     |
| ATP10B                                                                             | 0,7520946   | -0,082527693 | 0,018 | 0,024 | 1         | 0,944401545   | 1,058871626     | 0,75            |
| TMX3                                                                               | 0,433809177 | -0,082644128 | 0,083 | 0,122 | 1         | 0,944325329   | 1,058957088     | 0,680327869     |
| IFI44                                                                              | 0,563094259 | -0,082723819 | 0,093 | 0,122 | 1         | 0,944273168   | 1,059015584     | 0,762295082     |
| SNX24                                                                              | 0,116646669 | -0,082911352 | 0,005 | 0,024 | 1         | 0,944150432   | 1,059153252     | 0,208333333     |
| TMEM104                                                                            | 0,198124435 | -0,083016654 | 0,006 | 0,024 | 1         | 0,944081521   | 1,059230562     | 0,25            |
| MFSD6                                                                              | 0,871626162 | -0,083221461 | 0,021 | 0,024 | 1         | 0,943947507   | 1,059380943     | 0,875           |
| SMG9                                                                               | 0,927385212 | -0,083239659 | 0,022 | 0,024 | 1         | 0,943935601   | 1,059394305     | 0,916666667     |
| GALNT17                                                                            | 0,978014724 | -0,083306918 | 0,026 | 0,024 | 1         | 0,943891595   | 1,059443696     | 1,083333333     |
| SMIM26                                                                             | 0,470409098 | -0,083310005 | 0,107 | 0,146 | 1         | 0,943889575   | 1,059445963     | 0,732876712     |
| ECE1                                                                               | 0,683629624 | -0,083411403 | 0,1   | 0,122 | 1         | 0,943823238   | 1,059520427     | 0,819672131     |
| INSC                                                                               | 0,018781715 | -0,083511927 | 0,018 | 0,073 | 1         | 0,943757476   | 1,059594255     | 0,246575342     |
| ATP13A2                                                                            | 0,280789447 | -0,083574415 | 0,008 | 0,024 | 1         | 0,9437166     | 1,059640151     | 0,333333333     |
| SORT1                                                                              | 0,687017218 | -0,083639421 | 0,057 | 0,073 | 1         | 0,943674078   | 1,059687898     | 0,780821918     |
| BICRA                                                                              | 0,118110366 | -0,083729444 | 0,005 | 0,024 | 1         | 0,943615195   | 1,059754024     | 0,208333333     |
| SNHG7                                                                              | 0,189535638 | -0,083753685 | 0,081 | 0,146 | 1         | 0,943599341   | 1,05977183      | 0,554794521     |
| ENPP2                                                                              | 0,196181004 | -0,083802167 | 0,006 | 0,024 | 1         | 0,943567631   | 1,059807445     | 0,25            |
| MSH3                                                                               | 0,208609703 | -0,083976291 | 0,019 | 0,049 | 1         | 0,943453756   | 1,059935364     | 0,387755102     |
| SRRT                                                                               | 0,558583316 | -0,084312338 | 0,032 | 0,049 | 1         | 0,943234022   | 1,060182284     | 0,653061224     |
| NANS                                                                               | 0,62557569  | -0,084376849 | 0,072 | 0,049 | 1         | 0,943191846   | 1,060229692     | 1,469387755     |
| NBPF11                                                                             | 0,538617911 | -0,084491236 | 0,013 | 0,024 | 1         | 0,943117066   | 1,060313758     | 0,541666667     |
| CEP162                                                                             | 0,7520946   | -0,08464959  | 0,018 | 0,024 | 1         | 0,943013553   | 1,060430147     | 0,75            |
| MEAF6                                                                              | 0,880258701 | -0,084733512 | 0,115 | 0,122 | 1         | 0,942958699   | 1,060491834     | 0,942622951     |
| CDIPT                                                                              | 0,043430515 | -0,084742561 | 0,033 | 0,098 | 1         | 0,942952784   | 1,060498486     | 0,336734694     |
| MYO15B                                                                             | 0,118110366 | -0,084917464 | 0,005 | 0,024 | 1         | 0,942838474   | 1,060627062     | 0,208333333     |
| AP2A2                                                                              | 0,733648417 | -0,084976772 | 0,038 | 0,049 | 1         | 0,942799715   | 1,060670664     | 0,775510204     |
| RNF167                                                                             | 0,208609703 | -0,085077833 | 0,019 | 0,049 | 1         | 0,942733675   | 1,060744966     | 0,387755102     |
| CDK4                                                                               | 0,105016396 | -0,085100379 | 0,056 | 0,122 | 1         | 0,942718942   | 1,060761544     | 0,459016393     |
| PAQR7                                                                              | 0,131402831 | -0,085522631 | 0,016 | 0,049 | 1         | 0,942443065   | 1,061072056     | 0,326530612     |

Supplementary Table 3

| Differentially expressed genes_keloid-MD_comparing SC-Keloid vs. (SC-Myel+Nonmyel) |             |              |       |       |           |               |                 |                 |
|------------------------------------------------------------------------------------|-------------|--------------|-------|-------|-----------|---------------|-----------------|-----------------|
| gene                                                                               | p_val       | avg_log2FC   | pct.1 | pct.2 | p_val_adj | Foldchange_UP | Foldchange_DOWN | Ratio_pct1_pct2 |
| GLRX5                                                                              | 0,975317556 | -0,085567898 | 0,121 | 0,122 | 1         | 0,942413494   | 1,061105349     | 0,991803279     |
| BTN3A2                                                                             | 0,749340217 | -0,08562115  | 0,018 | 0,024 | 1         | 0,942378709   | 1,061144517     | 0,75            |
| COPS7A                                                                             | 0,350053601 | -0,085668813 | 0,041 | 0,073 | 1         | 0,942347576   | 1,061179575     | 0,561643836     |
| BAX                                                                                | 0,800787208 | -0,085731509 | 0,203 | 0,22  | 1         | 0,942306624   | 1,061225693     | 0,922727273     |
| SORBS3                                                                             | 0,927385212 | -0,085844282 | 0,022 | 0,024 | 1         | 0,942232968   | 1,06130865      | 0,916666667     |
| MRPS36                                                                             | 0,595293864 | -0,086100957 | 0,099 | 0,073 | 1         | 0,942065347   | 1,061497488     | 1,356164384     |
| RIOK3                                                                              | 0,250365639 | -0,0862654   | 0,07  | 0,122 | 1         | 0,941957974   | 1,061618488     | 0,573770492     |
| PLP2                                                                               | 0,707657708 | -0,086360538 | 0,081 | 0,098 | 1         | 0,941895859   | 1,061688498     | 0,826530612     |
| DCTD                                                                               | 0,289377348 | -0,086634423 | 0,073 | 0,122 | 1         | 0,941717064   | 1,061890071     | 0,598360656     |
| KRBOX1                                                                             | 0,212288248 | -0,086644041 | 0,019 | 0,049 | 1         | 0,941710786   | 1,06189715      | 0,387755102     |
| MCCC1                                                                              | 0,198124435 | -0,086729035 | 0,006 | 0,024 | 1         | 0,941655308   | 1,061959712     | 0,25            |
| GSTO1                                                                              | 0,4404839   | -0,087100917 | 0,206 | 0,268 | 1         | 0,94141261    | 1,062233487     | 0,768656716     |
| WNT16                                                                              | 0,685136562 | -0,08712908  | 0,016 | 0,024 | 1         | 0,941394233   | 1,062254224     | 0,666666667     |
| LDHA                                                                               | 0,387965485 | -0,087274226 | 0,161 | 0,22  | 1         | 0,941299526   | 1,0623611       | 0,731818182     |
| TMEM185B                                                                           | 0,20008191  | -0,087314235 | 0,006 | 0,024 | 1         | 0,941273422   | 1,062390562     | 0,25            |
| COPE                                                                               | 0,554705038 | -0,087323718 | 0,155 | 0,195 | 1         | 0,941267235   | 1,062397545     | 0,794871795     |
| CD151                                                                              | 0,298941545 | -0,087410364 | 0,402 | 0,512 | 1         | 0,941210706   | 1,062461353     | 0,78515625      |
| FAM219B                                                                            | 0,868975631 | -0,087612316 | 0,021 | 0,024 | 1         | 0,941078962   | 1,062610089     | 0,875           |
| ANKRD29                                                                            | 0,118110366 | -0,087622878 | 0,005 | 0,024 | 1         | 0,941072073   | 1,062617868     | 0,208333333     |
| LY6E                                                                               | 0,119658907 | -0,087679525 | 0,073 | 0,146 | 1         | 0,941035123   | 1,062659593     | 0,5             |
| ANXA2                                                                              | 0,804070476 | -0,087855278 | 0,713 | 0,732 | 1         | 0,94092049    | 1,062789057     | 0,974043716     |
| TOP1                                                                               | 0,718961978 | -0,088025707 | 0,104 | 0,122 | 1         | 0,940809343   | 1,062914614     | 0,852459016     |
| REEP5                                                                              | 0,630299779 | -0,08809627  | 0,142 | 0,171 | 1         | 0,940763329   | 1,062966603     | 0,830409357     |
| CCDC137                                                                            | 0,125117108 | -0,088646184 | 0,029 | 0,073 | 1         | 0,940404806   | 1,063371852     | 0,397260274     |
| P2RX7                                                                              | 0,098499781 | -0,088664496 | 0,014 | 0,049 | 1         | 0,940392869   | 1,06338535      | 0,285714286     |
| TADA1                                                                              | 0,050627188 | -0,089548811 | 0,003 | 0,024 | 1         | 0,939816622   | 1,064037363     | 0,125           |
| NXPH3                                                                              | 0,679575369 | -0,089600233 | 0,016 | 0,024 | 1         | 0,939783125   | 1,064075289     | 0,666666667     |
| NPIP15                                                                             | 0,285374202 | -0,08962281  | 0,008 | 0,024 | 1         | 0,939768418   | 1,064091941     | 0,333333333     |
| TRIM5                                                                              | 0,616800584 | -0,089634027 | 0,014 | 0,024 | 1         | 0,939761111   | 1,064100215     | 0,583333333     |
| TIPARP                                                                             | 0,165771877 | -0,08966967  | 0,018 | 0,049 | 1         | 0,939737894   | 1,064126505     | 0,367346939     |

Supplementary Table 3

| Differentially expressed genes_keloid-MD_comparing SC-Keloid vs. (SC-Myel+Nonmyel) |             |              |       |       |           |               |                 |                 |
|------------------------------------------------------------------------------------|-------------|--------------|-------|-------|-----------|---------------|-----------------|-----------------|
| gene                                                                               | p_val       | avg_log2FC   | pct.1 | pct.2 | p_val_adj | Foldchange_UP | Foldchange_DOWN | Ratio_pct1_pct2 |
| NR2C2AP                                                                            | 0,208609703 | -0,089824835 | 0,019 | 0,049 | 1         | 0,939636828   | 1,06424096      | 0,387755102     |
| MCU                                                                                | 0,368207718 | -0,090204446 | 0,01  | 0,024 | 1         | 0,939389618   | 1,064521026     | 0,416666667     |
| TAB3                                                                               | 0,45638276  | -0,090213136 | 0,011 | 0,024 | 1         | 0,93938396    | 1,064527438     | 0,458333333     |
| SERPINH1                                                                           | 0,834503783 | -0,090365275 | 0,233 | 0,22  | 1         | 0,939284902   | 1,064639704     | 1,059090909     |
| PIGZ                                                                               | 0,287685455 | -0,090382    | 0,008 | 0,024 | 1         | 0,939274013   | 1,064652046     | 0,333333333     |
| POLE                                                                               | 0,118110366 | -0,090393957 | 0,005 | 0,024 | 1         | 0,939266229   | 1,06466087      | 0,208333333     |
| MAGEF1                                                                             | 0,348835149 | -0,090580315 | 0,041 | 0,073 | 1         | 0,939144908   | 1,064798405     | 0,561643836     |
| UTP6                                                                               | 0,847428251 | -0,090623809 | 0,03  | 0,024 | 1         | 0,939116596   | 1,064830506     | 1,25            |
| RUVBL2                                                                             | 0,978014724 | -0,090786088 | 0,026 | 0,024 | 1         | 0,939010966   | 1,064950289     | 1,083333333     |
| XRCC4                                                                              | 0,336317863 | -0,090835686 | 0,024 | 0,049 | 1         | 0,938978685   | 1,064986901     | 0,489795918     |
| CYB5B                                                                              | 0,857309812 | -0,09091734  | 0,043 | 0,049 | 1         | 0,938925542   | 1,065047179     | 0,87755102      |
| PRKD2                                                                              | 0,196181004 | -0,090980493 | 0,006 | 0,024 | 1         | 0,938884442   | 1,065093802     | 0,25            |
| NRIP1                                                                              | 0,549012036 | -0,091197123 | 0,051 | 0,073 | 1         | 0,938743473   | 1,065253745     | 0,698630137     |
| KCNN4                                                                              | 0,778300716 | -0,091295339 | 0,04  | 0,049 | 1         | 0,938679567   | 1,065326268     | 0,816326531     |
| CD55                                                                               | 0,533106974 | -0,09151877  | 0,013 | 0,024 | 1         | 0,938534205   | 1,065491268     | 0,541666667     |
| PEX3                                                                               | 0,535858926 | -0,091523948 | 0,013 | 0,024 | 1         | 0,938530836   | 1,065495093     | 0,541666667     |
| EIF4A2                                                                             | 0,410053524 | -0,091683661 | 0,081 | 0,122 | 1         | 0,938426942   | 1,065613054     | 0,663934426     |
| TMEM170B                                                                           | 0,050627188 | -0,091991944 | 0,003 | 0,024 | 1         | 0,938226436   | 1,065840784     | 0,125           |
| PDE6D                                                                              | 0,749340217 | -0,092090359 | 0,018 | 0,024 | 1         | 0,938162436   | 1,065913494     | 0,75            |
| FBL                                                                                | 0,902309131 | -0,092174019 | 0,054 | 0,049 | 1         | 0,938108034   | 1,065975307     | 1,102040816     |
| ITPRIPL2                                                                           | 0,363566559 | -0,092240096 | 0,097 | 0,146 | 1         | 0,938065069   | 1,066024131     | 0,664383562     |
| BBS2                                                                               | 0,293611351 | -0,092274015 | 0,022 | 0,049 | 1         | 0,938043015   | 1,066049194     | 0,448979592     |
| TPM1                                                                               | 0,514438027 | -0,092497911 | 0,089 | 0,122 | 1         | 0,937897448   | 1,066214651     | 0,729508197     |
| HVCN1                                                                              | 0,050627188 | -0,092509656 | 0,003 | 0,024 | 1         | 0,937889813   | 1,06622333      | 0,125           |
| PYCARD                                                                             | 0,251919765 | -0,092586751 | 0,021 | 0,049 | 1         | 0,937839695   | 1,06628031      | 0,428571429     |
| SMTN                                                                               | 0,611220134 | -0,092677378 | 0,014 | 0,024 | 1         | 0,937780784   | 1,066347293     | 0,583333333     |
| RPS17                                                                              | 0,354454415 | -0,092757469 | 0,118 | 0,171 | 1         | 0,937728725   | 1,066406492     | 0,69005848      |
| RPL15                                                                              | 0,758285245 | -0,092942416 | 0,699 | 0,756 | 1         | 0,937608519   | 1,06654321      | 0,924603175     |
| PARD6A                                                                             | 0,287685455 | -0,09302052  | 0,008 | 0,024 | 1         | 0,937557761   | 1,066600951     | 0,333333333     |
| RNASET2                                                                            | 0,196181004 | -0,093046854 | 0,006 | 0,024 | 1         | 0,937540648   | 1,066620421     | 0,25            |



Supplementary Table 3

| Differentially expressed genes_keloid-MD_comparing SC-Keloid vs. (SC-Myel+Nonmyel) |             |              |       |       |           |               |                 |                 |
|------------------------------------------------------------------------------------|-------------|--------------|-------|-------|-----------|---------------|-----------------|-----------------|
| gene                                                                               | p_val       | avg_log2FC   | pct.1 | pct.2 | p_val_adj | Foldchange_UP | Foldchange_DOWN | Ratio_pct1_pct2 |
| VSIR                                                                               | 0,116646669 | -0,093096311 | 0,005 | 0,024 | 1         | 0,937508508   | 1,066656986     | 0,208333333     |
| BACH2                                                                              | 0,166840557 | -0,093304048 | 0,018 | 0,049 | 1         | 0,937373524   | 1,066810587     | 0,367346939     |
| LRRC57                                                                             | 0,517879382 | -0,09362386  | 0,03  | 0,049 | 1         | 0,937165754   | 1,067047101     | 0,612244898     |
| RETREG2                                                                            | 0,173232649 | -0,093750476 | 0,032 | 0,073 | 1         | 0,937083508   | 1,067140753     | 0,438356164     |
| ERMAP                                                                              | 0,198124435 | -0,093762606 | 0,006 | 0,024 | 1         | 0,937075629   | 1,067149725     | 0,25            |
| PRR12                                                                              | 0,198124435 | -0,093762766 | 0,006 | 0,024 | 1         | 0,937075525   | 1,067149843     | 0,25            |
| PDP2                                                                               | 0,198124435 | -0,093912359 | 0,006 | 0,024 | 1         | 0,936978365   | 1,067260502     | 0,25            |
| SPATA13                                                                            | 0,129556135 | -0,094020157 | 0,016 | 0,049 | 1         | 0,936908357   | 1,06734025      | 0,326530612     |
| EPRS1                                                                              | 0,723640466 | -0,094049511 | 0,123 | 0,098 | 1         | 0,936889294   | 1,067361967     | 1,255102041     |
| RELL1                                                                              | 0,20008191  | -0,094405224 | 0,006 | 0,024 | 1         | 0,936658322   | 1,06762517      | 0,25            |
| POLR3H                                                                             | 0,886972594 | -0,094519858 | 0,029 | 0,024 | 1         | 0,936583899   | 1,067710005     | 1,208333333     |
| BBX                                                                                | 0,385959009 | -0,094631081 | 0,062 | 0,098 | 1         | 0,936511697   | 1,067792323     | 0,632653061     |
| XPC                                                                                | 0,476712453 | -0,094649855 | 0,029 | 0,049 | 1         | 0,93649951    | 1,067806218     | 0,591836735     |
| SLC35A1                                                                            | 0,453706681 | -0,094665282 | 0,011 | 0,024 | 1         | 0,936489496   | 1,067817636     | 0,458333333     |
| TADA2B                                                                             | 0,050627188 | -0,094786469 | 0,003 | 0,024 | 1         | 0,936410834   | 1,067907337     | 0,125           |
| EML4                                                                               | 0,564046536 | -0,094902265 | 0,032 | 0,049 | 1         | 0,936335677   | 1,067993054     | 0,653061224     |
| BFAR                                                                               | 0,026878214 | -0,095021309 | 0,019 | 0,073 | 1         | 0,936258419   | 1,068081184     | 0,260273973     |
| UBALD2                                                                             | 0,319070354 | -0,095266834 | 0,057 | 0,098 | 1         | 0,936099095   | 1,068262971     | 0,581632653     |
| ATP10A                                                                             | 0,050627188 | -0,095614528 | 0,003 | 0,024 | 1         | 0,935873519   | 1,068520457     | 0,125           |
| EMC7                                                                               | 0,404096295 | -0,095777248 | 0,142 | 0,195 | 1         | 0,935767969   | 1,068640981     | 0,728205128     |
| IREB2                                                                              | 0,609786569 | -0,095938239 | 0,033 | 0,049 | 1         | 0,935663552   | 1,068760237     | 0,673469388     |
| MBLAC2                                                                             | 0,196181004 | -0,096013582 | 0,006 | 0,024 | 1         | 0,93561469    | 1,068816053     | 0,25            |
| NAP1L2                                                                             | 0,009951995 | -0,096160349 | 0,002 | 0,024 | 1         | 0,935519513   | 1,068924791     | 0,083333333     |
| COLEC12                                                                            | 0,050627188 | -0,096170424 | 0,003 | 0,024 | 1         | 0,93551298    | 1,068932256     | 0,125           |
| MRPS18C                                                                            | 0,994153741 | -0,096238547 | 0,123 | 0,122 | 1         | 0,935468807   | 1,068982731     | 1,008196721     |
| RANBP17                                                                            | 0,050627188 | -0,096355606 | 0,003 | 0,024 | 1         | 0,935392907   | 1,069069471     | 0,125           |
| SNAP29                                                                             | 0,565873256 | -0,096390171 | 0,032 | 0,049 | 1         | 0,935370496   | 1,069095085     | 0,653061224     |
| FKBP11                                                                             | 0,48973268  | -0,09654532  | 0,049 | 0,024 | 1         | 0,935269911   | 1,069210063     | 2,041666667     |
| URI1                                                                               | 0,141538461 | -0,096563373 | 0,093 | 0,171 | 1         | 0,935258208   | 1,069223442     | 0,543859649     |
| PRR13                                                                              | 0,606086984 | -0,096572921 | 0,033 | 0,049 | 1         | 0,935252018   | 1,069230519     | 0,673469388     |

Supplementary Table 3

| Differentially expressed genes_keloid-MD_comparing SC-Keloid vs. (SC-Myel+Nonmyel) |             |              |       |       |           |               |                 |                 |
|------------------------------------------------------------------------------------|-------------|--------------|-------|-------|-----------|---------------|-----------------|-----------------|
| gene                                                                               | p_val       | avg_log2FC   | pct.1 | pct.2 | p_val_adj | Foldchange_UP | Foldchange_DOWN | Ratio_pct1_pct2 |
| YIPF1                                                                              | 0,285374202 | -0,096610194 | 0,008 | 0,024 | 1         | 0,935227855   | 1,069258143     | 0,333333333     |
| STK24                                                                              | 0,746589028 | -0,096642213 | 0,018 | 0,024 | 1         | 0,9352071     | 1,069281874     | 0,75            |
| DCAF13                                                                             | 0,625537208 | -0,096733114 | 0,075 | 0,098 | 1         | 0,935148176   | 1,069349249     | 0,765306122     |
| SMIM29                                                                             | 0,428418642 | -0,096766054 | 0,027 | 0,049 | 1         | 0,935126825   | 1,069373665     | 0,551020408     |
| CASP4                                                                              | 0,207393847 | -0,09683875  | 0,019 | 0,049 | 1         | 0,935079706   | 1,069427552     | 0,387755102     |
| KPNA5                                                                              | 0,425043464 | -0,096903785 | 0,027 | 0,049 | 1         | 0,935037554   | 1,069475761     | 0,551020408     |
| EIF5AL1                                                                            | 0,370733807 | -0,096986235 | 0,01  | 0,024 | 1         | 0,934984118   | 1,069536883     | 0,416666667     |
| KEAP1                                                                              | 0,166840557 | -0,096987584 | 0,018 | 0,049 | 1         | 0,934983244   | 1,069537883     | 0,367346939     |
| NCKAP1                                                                             | 0,201827521 | -0,09733393  | 0,049 | 0,098 | 1         | 0,934758811   | 1,069794677     | 0,5             |
| NUCB2                                                                              | 0,557584551 | -0,097379787 | 0,18  | 0,22  | 1         | 0,9347291     | 1,069828681     | 0,818181818     |
| NCKAP5L                                                                            | 0,375818168 | -0,097386082 | 0,01  | 0,024 | 1         | 0,934725021   | 1,069833349     | 0,416666667     |
| C17orf67                                                                           | 0,118110366 | -0,097412488 | 0,005 | 0,024 | 1         | 0,934707913   | 1,069852931     | 0,208333333     |
| GINS1                                                                              | 0,198124435 | -0,097586115 | 0,006 | 0,024 | 1         | 0,934595428   | 1,069981694     | 0,25            |
| DVL3                                                                               | 0,853596691 | -0,097810594 | 0,043 | 0,049 | 1         | 0,934450019   | 1,070148193     | 0,87755102      |
| CCSAP                                                                              | 0,116646669 | -0,098193114 | 0,005 | 0,024 | 1         | 0,93420229    | 1,070431973     | 0,208333333     |
| MLLT3                                                                              | 0,050627188 | -0,098248287 | 0,003 | 0,024 | 1         | 0,934166564   | 1,07047291      | 0,125           |
| COX16                                                                              | 0,474961578 | -0,098306088 | 0,029 | 0,049 | 1         | 0,934129137   | 1,070515799     | 0,591836735     |
| CAMK2G                                                                             | 0,608438325 | -0,098373937 | 0,014 | 0,024 | 1         | 0,934085207   | 1,070566146     | 0,583333333     |
| SLMAP                                                                              | 0,931179325 | -0,098399425 | 0,027 | 0,024 | 1         | 0,934068704   | 1,07058506      | 1,125           |
| LAMTOR2                                                                            | 0,975829929 | -0,098720771 | 0,128 | 0,122 | 1         | 0,933860673   | 1,070823548     | 1,049180328     |
| BPHL                                                                               | 0,428418698 | -0,098729094 | 0,027 | 0,049 | 1         | 0,933855286   | 1,070829726     | 0,551020408     |
| MMS19                                                                              | 0,68235381  | -0,098742489 | 0,016 | 0,024 | 1         | 0,933846615   | 1,070839669     | 0,666666667     |
| TRNP1                                                                              | 0,430112146 | -0,098903958 | 0,027 | 0,049 | 1         | 0,933742103   | 1,070959526     | 0,551020408     |
| ADNP                                                                               | 0,549012036 | -0,098931365 | 0,051 | 0,073 | 1         | 0,933724365   | 1,070979871     | 0,698630137     |
| RBM41                                                                              | 0,133269869 | -0,099146908 | 0,016 | 0,049 | 1         | 0,933584874   | 1,07113989      | 0,326530612     |
| ITGA7                                                                              | 0,737405863 | -0,09922726  | 0,038 | 0,049 | 1         | 0,933532879   | 1,07119955      | 0,775510204     |
| ZBTB21                                                                             | 0,866326572 | -0,099232402 | 0,021 | 0,024 | 1         | 0,933529552   | 1,071203368     | 0,875           |
| SNAPC4                                                                             | 0,116646669 | -0,099492051 | 0,005 | 0,024 | 1         | 0,933361555   | 1,071396176     | 0,208333333     |
| ALAD                                                                               | 0,071078164 | -0,099533754 | 0,013 | 0,049 | 1         | 0,933334575   | 1,071427146     | 0,265306122     |
| ST6GALNAC4                                                                         | 0,116646669 | -0,099656914 | 0,005 | 0,024 | 1         | 0,933254902   | 1,071518615     | 0,208333333     |

Supplementary Table 3

| Differentially expressed genes_keloid-MD_ comparing SC-Keloid vs. (SC-Myel+Nonmyel) |             |              |       |       |           |               |                 |                 |
|-------------------------------------------------------------------------------------|-------------|--------------|-------|-------|-----------|---------------|-----------------|-----------------|
| gene                                                                                | p_val       | avg_log2FC   | pct.1 | pct.2 | p_val_adj | Foldchange_UP | Foldchange_DOWN | Ratio_pct1_pct2 |
| CPLANE1                                                                             | 0,428418698 | -0,099799386 | 0,027 | 0,049 | 1         | 0,933162744   | 1,071624437     | 0,551020408     |
| PHETA2                                                                              | 0,287685455 | -0,099939528 | 0,008 | 0,024 | 1         | 0,933072102   | 1,071728539     | 0,333333333     |
| WDR20                                                                               | 0,380479892 | -0,100017126 | 0,026 | 0,049 | 1         | 0,933021916   | 1,071786186     | 0,530612245     |
| RMC1                                                                                | 0,530362187 | -0,100088098 | 0,013 | 0,024 | 1         | 0,932976017   | 1,071838913     | 0,541666667     |
| CBR1                                                                                | 0,786944905 | -0,100104289 | 0,182 | 0,195 | 1         | 0,932965547   | 1,071850941     | 0,933333333     |
| STARD5                                                                              | 0,050627188 | -0,100166156 | 0,003 | 0,024 | 1         | 0,93292554    | 1,071896906     | 0,125           |
| ASPN                                                                                | 0,925141918 | -0,10040428  | 0,046 | 0,049 | 1         | 0,932771568   | 1,072073843     | 0,93877551      |
| CNNM2                                                                               | 0,118110366 | -0,100620418 | 0,005 | 0,024 | 1         | 0,932631836   | 1,072234468     | 0,208333333     |
| NPHP3                                                                               | 0,871626162 | -0,1009439   | 0,021 | 0,024 | 1         | 0,932422743   | 1,072474912     | 0,875           |
| MZT2B                                                                               | 0,595720618 | -0,100978243 | 0,289 | 0,244 | 1         | 0,932400548   | 1,072500442     | 1,18442623      |
| LINC00662                                                                           | 0,433510677 | -0,101057571 | 0,027 | 0,049 | 1         | 0,93234928    | 1,072559417     | 0,551020408     |
| PCMTD1                                                                              | 0,938689033 | -0,101063587 | 0,1   | 0,098 | 1         | 0,932345392   | 1,072563889     | 1,020408163     |
| LSM1                                                                                | 0,460362462 | -0,101153414 | 0,086 | 0,122 | 1         | 0,932287343   | 1,072630673     | 0,704918033     |
| WTAP                                                                                | 0,202884881 | -0,101166048 | 0,083 | 0,146 | 1         | 0,932279179   | 1,072640066     | 0,568493151     |
| ESYT1                                                                               | 0,868975631 | -0,101226984 | 0,021 | 0,024 | 1         | 0,932239802   | 1,072685373     | 0,875           |
| KANSL1                                                                              | 0,396810025 | -0,101342911 | 0,062 | 0,098 | 1         | 0,932164896   | 1,072771571     | 0,632653061     |
| ZNF90                                                                               | 0,116646669 | -0,101558938 | 0,005 | 0,024 | 1         | 0,932025325   | 1,072932218     | 0,208333333     |
| ATP6AP2                                                                             | 0,373659276 | -0,101589641 | 0,203 | 0,268 | 1         | 0,93200549    | 1,072955053     | 0,757462687     |
| GCH1                                                                                | 0,118110366 | -0,101989233 | 0,005 | 0,024 | 1         | 0,931747383   | 1,073252277     | 0,208333333     |
| GUF1                                                                                | 0,931179325 | -0,102020765 | 0,027 | 0,024 | 1         | 0,931727019   | 1,073275734     | 1,125           |
| TRADD                                                                               | 0,806945473 | -0,102058596 | 0,019 | 0,024 | 1         | 0,931702587   | 1,073303879     | 0,791666667     |
| TAMALIN                                                                             | 0,917863394 | -0,102127676 | 0,046 | 0,049 | 1         | 0,931657976   | 1,073355272     | 0,93877551      |
| CCNG2                                                                               | 0,93354685  | -0,102455939 | 0,027 | 0,024 | 1         | 0,931446015   | 1,073599526     | 1,125           |
| SMARCC1                                                                             | 0,96309133  | -0,102600869 | 0,048 | 0,049 | 1         | 0,931352449   | 1,073707382     | 0,979591837     |
| PPP2R2B                                                                             | 0,050627188 | -0,102694626 | 0,003 | 0,024 | 1         | 0,931291925   | 1,073777162     | 0,125           |
| ZNF211                                                                              | 0,049781231 | -0,102741359 | 0,003 | 0,024 | 1         | 0,931261758   | 1,073811945     | 0,125           |
| TEN1                                                                                | 0,891556838 | -0,102846485 | 0,029 | 0,024 | 1         | 0,931193901   | 1,073890195     | 1,208333333     |
| APOBEC3F                                                                            | 0,118110366 | -0,102857299 | 0,005 | 0,024 | 1         | 0,931186922   | 1,073898244     | 0,208333333     |
| CUEDC1                                                                              | 0,973130786 | -0,102902901 | 0,026 | 0,024 | 1         | 0,931157488   | 1,073932189     | 1,083333333     |
| SERBP1                                                                              | 0,982928659 | -0,103074446 | 0,29  | 0,268 | 1         | 0,931046775   | 1,074059894     | 1,082089552     |

Supplementary Table 3

| Differentially expressed genes_keloid-MD_comparing SC-Keloid vs. (SC-Myel+Nonmyel) |             |              |       |       |           |               |                 |                 |
|------------------------------------------------------------------------------------|-------------|--------------|-------|-------|-----------|---------------|-----------------|-----------------|
| gene                                                                               | p_val       | avg_log2FC   | pct.1 | pct.2 | p_val_adj | Foldchange_UP | Foldchange_DOWN | Ratio_pct1_pct2 |
| CMTR1                                                                              | 0,535858926 | -0,103148719 | 0,013 | 0,024 | 1         | 0,930998843   | 1,07411519      | 0,541666667     |
| YBX1                                                                               | 0,915885123 | -0,103365308 | 0,589 | 0,61  | 1         | 0,930859085   | 1,074276457     | 0,96557377      |
| MCUB                                                                               | 0,746589028 | -0,103462603 | 0,018 | 0,024 | 1         | 0,93079631    | 1,074348908     | 0,75            |
| PRKAB2                                                                             | 0,171167093 | -0,103499528 | 0,018 | 0,049 | 1         | 0,930772487   | 1,074376407     | 0,367346939     |
| STX10                                                                              | 0,815477266 | -0,103600932 | 0,041 | 0,049 | 1         | 0,930707068   | 1,074451924     | 0,836734694     |
| RBM23                                                                              | 0,651209798 | -0,103695551 | 0,035 | 0,049 | 1         | 0,930646029   | 1,074522395     | 0,714285714     |
| GBP3                                                                               | 0,673250327 | -0,103896434 | 0,038 | 0,024 | 1         | 0,930516454   | 1,074672023     | 1,583333333     |
| TSC1                                                                               | 0,812356965 | -0,104111327 | 0,019 | 0,024 | 1         | 0,930377861   | 1,07483211      | 0,791666667     |
| B4GALT7                                                                            | 0,741096359 | -0,104199254 | 0,018 | 0,024 | 1         | 0,93032116    | 1,07489762      | 0,75            |
| EMILIN2                                                                            | 0,45638276  | -0,104208369 | 0,011 | 0,024 | 1         | 0,930315282   | 1,074904411     | 0,458333333     |
| ZFAND5                                                                             | 0,585347663 | -0,104441968 | 0,073 | 0,098 | 1         | 0,930164659   | 1,075078472     | 0,744897959     |
| HMBS                                                                               | 0,60566217  | -0,104548202 | 0,014 | 0,024 | 1         | 0,930096168   | 1,075157638     | 0,583333333     |
| HSD17B10                                                                           | 0,667465091 | -0,10464667  | 0,057 | 0,073 | 1         | 0,930032689   | 1,075231024     | 0,780821918     |
| ZNF143                                                                             | 0,135157373 | -0,104671061 | 0,016 | 0,049 | 1         | 0,930016965   | 1,075249203     | 0,326530612     |
| HSPA8                                                                              | 0,603208503 | -0,104736674 | 0,324 | 0,366 | 1         | 0,92997467    | 1,075298105     | 0,885245902     |
| CSTF2T                                                                             | 0,535858926 | -0,104783872 | 0,013 | 0,024 | 1         | 0,929944246   | 1,075333284     | 0,541666667     |
| TENT4A                                                                             | 0,339404719 | -0,104832195 | 0,024 | 0,049 | 1         | 0,929913098   | 1,075369303     | 0,489795918     |
| SNTA1                                                                              | 0,453706553 | -0,105011957 | 0,011 | 0,024 | 1         | 0,929797237   | 1,075503304     | 0,458333333     |
| SNX2                                                                               | 0,203356142 | -0,105057561 | 0,033 | 0,073 | 1         | 0,929767846   | 1,075537302     | 0,452054795     |
| PCDHB6                                                                             | 0,009951995 | -0,105086714 | 0,002 | 0,024 | 1         | 0,929749058   | 1,075559035     | 0,083333333     |
| YIPF4                                                                              | 0,94123334  | -0,10509144  | 0,078 | 0,073 | 1         | 0,929746012   | 1,075562559     | 1,068493151     |
| ERH                                                                                | 0,614595772 | -0,105103602 | 0,233 | 0,268 | 1         | 0,929738174   | 1,075571626     | 0,869402985     |
| LINC00839                                                                          | 0,453706681 | -0,105250527 | 0,011 | 0,024 | 1         | 0,929643494   | 1,075681168     | 0,458333333     |
| CUL5                                                                               | 0,917469655 | -0,105522779 | 0,07  | 0,073 | 1         | 0,929468077   | 1,07588418      | 0,95890411      |
| TMEM33                                                                             | 0,616543444 | -0,105618346 | 0,077 | 0,098 | 1         | 0,929406509   | 1,075955451     | 0,785714286     |
| TMEM238                                                                            | 0,049781231 | -0,105698545 | 0,003 | 0,024 | 1         | 0,929354845   | 1,076015265     | 0,125           |
| DIMT1                                                                              | 0,886972594 | -0,105757473 | 0,029 | 0,024 | 1         | 0,929316886   | 1,076059216     | 1,208333333     |
| PRKAR2A                                                                            | 0,41853701  | -0,105773668 | 0,045 | 0,073 | 1         | 0,929306453   | 1,076071296     | 0,616438356     |
| FECH                                                                               | 0,050627188 | -0,105913034 | 0,003 | 0,024 | 1         | 0,929216686   | 1,076175251     | 0,125           |
| XPO1                                                                               | 0,834668395 | -0,105936904 | 0,108 | 0,098 | 1         | 0,929201312   | 1,076193057     | 1,102040816     |

Supplementary Table 3

| Differentially expressed genes_keloid-MD_comparing SC-Keloid vs. (SC-Myel+Nonmyel) |             |              |       |       |           |               |                 |                 |
|------------------------------------------------------------------------------------|-------------|--------------|-------|-------|-----------|---------------|-----------------|-----------------|
| gene                                                                               | p_val       | avg_log2FC   | pct.1 | pct.2 | p_val_adj | Foldchange_UP | Foldchange_DOWN | Ratio_pct1_pct2 |
| PKN3                                                                               | 0,118110366 | -0,106004182 | 0,005 | 0,024 | 1         | 0,929157981   | 1,076243245     | 0,208333333     |
| CHST3                                                                              | 0,382237974 | -0,106026713 | 0,1   | 0,146 | 1         | 0,92914347    | 1,076260053     | 0,684931507     |
| PFN2                                                                               | 0,936071274 | -0,106465616 | 0,046 | 0,049 | 1         | 0,928860845   | 1,076587527     | 0,93877551      |
| APBB1                                                                              | 0,198124435 | -0,106571674 | 0,006 | 0,024 | 1         | 0,928792563   | 1,076666674     | 0,25            |
| XBP1                                                                               | 0,380933899 | -0,106591026 | 0,08  | 0,122 | 1         | 0,928780105   | 1,076681116     | 0,655737705     |
| GAS6                                                                               | 0,283075535 | -0,106629526 | 0,008 | 0,024 | 1         | 0,92875532    | 1,076709849     | 0,333333333     |
| PEX26                                                                              | 0,871626162 | -0,106772331 | 0,021 | 0,024 | 1         | 0,928663391   | 1,076816432     | 0,875           |
| GNPDA1                                                                             | 0,56222262  | -0,106832238 | 0,032 | 0,049 | 1         | 0,92862483    | 1,076861148     | 0,653061224     |
| C1orf35                                                                            | 0,389736093 | -0,106963615 | 0,062 | 0,098 | 1         | 0,92854027    | 1,076959215     | 0,632653061     |
| PPP6R3                                                                             | 0,932426714 | -0,106978445 | 0,046 | 0,049 | 1         | 0,928530725   | 1,076970285     | 0,93877551      |
| HDHD5                                                                              | 0,60566217  | -0,107126297 | 0,014 | 0,024 | 1         | 0,928435571   | 1,077080663     | 0,583333333     |
| SOCS7                                                                              | 0,812356965 | -0,107206036 | 0,019 | 0,024 | 1         | 0,928384257   | 1,077140195     | 0,791666667     |
| TSEN54                                                                             | 0,050627188 | -0,107356955 | 0,003 | 0,024 | 1         | 0,928287145   | 1,077252879     | 0,125           |
| TMEM186                                                                            | 0,370733807 | -0,107617338 | 0,01  | 0,024 | 1         | 0,92811962    | 1,077447324     | 0,416666667     |
| GOLGA1                                                                             | 0,806945473 | -0,107748962 | 0,019 | 0,024 | 1         | 0,928034946   | 1,077545629     | 0,791666667     |
| CD2BP2                                                                             | 0,581804423 | -0,107756586 | 0,053 | 0,073 | 1         | 0,928030042   | 1,077551323     | 0,726027397     |
| MSRB2                                                                              | 0,21854105  | -0,107871088 | 0,085 | 0,146 | 1         | 0,92795639    | 1,077636848     | 0,582191781     |
| SREK1IP1                                                                           | 0,31658015  | -0,107878023 | 0,075 | 0,122 | 1         | 0,927951929   | 1,077642029     | 0,614754098     |
| TMLHE                                                                              | 0,283075535 | -0,108004556 | 0,008 | 0,024 | 1         | 0,927870546   | 1,077736548     | 0,333333333     |
| DIAPH1                                                                             | 0,469730397 | -0,108006464 | 0,029 | 0,049 | 1         | 0,927869319   | 1,077737974     | 0,591836735     |
| THAP5                                                                              | 0,814543406 | -0,108338398 | 0,041 | 0,049 | 1         | 0,92765586    | 1,077985968     | 0,836734694     |
| EMC4                                                                               | 0,838363791 | -0,108551536 | 0,065 | 0,073 | 1         | 0,927518822   | 1,078145236     | 0,890410959     |
| LONP2                                                                              | 0,47321434  | -0,108861704 | 0,029 | 0,049 | 1         | 0,927319434   | 1,078377054     | 0,591836735     |
| HNRNPC                                                                             | 0,43380161  | -0,10895141  | 0,183 | 0,244 | 1         | 0,927261776   | 1,078444109     | 0,75            |
| BTN3A3                                                                             | 0,049781231 | -0,109027109 | 0,003 | 0,024 | 1         | 0,927213124   | 1,078500697     | 0,125           |
| ACBD5                                                                              | 0,973889212 | -0,109131195 | 0,048 | 0,049 | 1         | 0,927146231   | 1,07857851      | 0,979591837     |
| EIF1AD                                                                             | 0,167914406 | -0,109193827 | 0,018 | 0,049 | 1         | 0,927105981   | 1,078625336     | 0,367346939     |
| GEMIN8                                                                             | 0,535858926 | -0,109275288 | 0,013 | 0,024 | 1         | 0,927053634   | 1,078686242     | 0,541666667     |
| SEC24B                                                                             | 0,198124435 | -0,109337713 | 0,006 | 0,024 | 1         | 0,927013522   | 1,078732917     | 0,25            |
| TEX2                                                                               | 0,933546859 | -0,109387906 | 0,027 | 0,024 | 1         | 0,92698127    | 1,078770448     | 1,125           |

Supplementary Table 3

| Differentially expressed genes_keloid-MD_comparing SC-Keloid vs. (SC-Myel+Nonmyel) |             |              |       |       |           |               |                 |                 |
|------------------------------------------------------------------------------------|-------------|--------------|-------|-------|-----------|---------------|-----------------|-----------------|
| gene                                                                               | p_val       | avg_log2FC   | pct.1 | pct.2 | p_val_adj | Foldchange_UP | Foldchange_DOWN | Ratio_pct1_pct2 |
| PPHLN1                                                                             | 0,805731929 | -0,109443363 | 0,032 | 0,024 | 1         | 0,926945638   | 1,078811917     | 1,333333333     |
| PRDM15                                                                             | 0,050627188 | -0,10945993  | 0,003 | 0,024 | 1         | 0,926934993   | 1,078824305     | 0,125           |
| THAP3                                                                              | 0,608438325 | -0,109520729 | 0,014 | 0,024 | 1         | 0,926895931   | 1,07886977      | 0,583333333     |
| PPIL3                                                                              | 0,098499781 | -0,109580041 | 0,014 | 0,049 | 1         | 0,926857825   | 1,078914126     | 0,285714286     |
| MMD                                                                                | 0,365692371 | -0,109804861 | 0,01  | 0,024 | 1         | 0,926713401   | 1,07908227      | 0,416666667     |
| WRAP53                                                                             | 0,050627188 | -0,109888574 | 0,003 | 0,024 | 1         | 0,926659629   | 1,079144886     | 0,125           |
| NKD1                                                                               | 0,118110366 | -0,109906438 | 0,005 | 0,024 | 1         | 0,926648155   | 1,079158248     | 0,208333333     |
| SDHB                                                                               | 0,287887207 | -0,109967234 | 0,056 | 0,098 | 1         | 0,926609107   | 1,079203725     | 0,571428571     |
| RCC1L                                                                              | 0,68235381  | -0,110041993 | 0,016 | 0,024 | 1         | 0,926561092   | 1,079259651     | 0,666666667     |
| ZNF678                                                                             | 0,453706681 | -0,110044393 | 0,011 | 0,024 | 1         | 0,92655955    | 1,079261446     | 0,458333333     |
| CEP97                                                                              | 0,778300697 | -0,110220635 | 0,04  | 0,049 | 1         | 0,926446367   | 1,079393298     | 0,816326531     |
| ACP1                                                                               | 0,881574599 | -0,110222007 | 0,108 | 0,098 | 1         | 0,926445486   | 1,079394325     | 1,102040816     |
| ZNF181                                                                             | 0,013972402 | -0,110234376 | 0,008 | 0,049 | 1         | 0,926437544   | 1,079403579     | 0,163265306     |
| ZDHHC8                                                                             | 0,924799387 | -0,110376024 | 0,022 | 0,024 | 1         | 0,926346587   | 1,079509563     | 0,916666667     |
| LATS2-AS1                                                                          | 0,050627188 | -0,110451159 | 0,003 | 0,024 | 1         | 0,926298345   | 1,079565785     | 0,125           |
| BBS10                                                                              | 0,809650081 | -0,110519233 | 0,019 | 0,024 | 1         | 0,926254638   | 1,079616726     | 0,791666667     |
| LRRC45                                                                             | 0,45638276  | -0,110687897 | 0,011 | 0,024 | 1         | 0,926146357   | 1,079742951     | 0,458333333     |
| DDX60L                                                                             | 0,679575369 | -0,110732519 | 0,016 | 0,024 | 1         | 0,926117712   | 1,079776347     | 0,666666667     |
| TKT                                                                                | 0,851110944 | -0,110991928 | 0,085 | 0,073 | 1         | 0,925951203   | 1,079970517     | 1,164383562     |
| QKI                                                                                | 0,589055446 | -0,111031478 | 0,397 | 0,439 | 1         | 0,92592582    | 1,080000124     | 0,904328018     |
| DOK5                                                                               | 0,166840557 | -0,111203234 | 0,018 | 0,049 | 1         | 0,925815593   | 1,080128708     | 0,367346939     |
| LSM5                                                                               | 0,794975478 | -0,111233952 | 0,112 | 0,098 | 1         | 0,92579588    | 1,080151706     | 1,142857143     |
| NAIP                                                                               | 0,746589028 | -0,111347364 | 0,018 | 0,024 | 1         | 0,925723105   | 1,080236622     | 0,75            |
| DSTYK                                                                              | 0,980457013 | -0,111423917 | 0,026 | 0,024 | 1         | 0,925673986   | 1,080293943     | 1,083333333     |
| UBE2F                                                                              | 0,97232506  | -0,111611299 | 0,024 | 0,024 | 1         | 0,925553764   | 1,080434265     | 1               |
| PEX11A                                                                             | 0,050627188 | -0,112143186 | 0,003 | 0,024 | 1         | 0,925212597   | 1,080832668     | 0,125           |
| CTSG                                                                               | 0,050627188 | -0,112153653 | 0,003 | 0,024 | 1         | 0,925205885   | 1,08084051      | 0,125           |
| PCMT1                                                                              | 0,386449056 | -0,112274776 | 0,14  | 0,195 | 1         | 0,925128211   | 1,080931257     | 0,717948718     |
| NMT1                                                                               | 0,414593356 | -0,112370813 | 0,045 | 0,073 | 1         | 0,925066629   | 1,081003214     | 0,616438356     |
| OSBPL5                                                                             | 0,370733807 | -0,112493248 | 0,01  | 0,024 | 1         | 0,924988127   | 1,081094958     | 0,416666667     |

Supplementary Table 3

| Differentially expressed genes_keloid-MD_comparing SC-Keloid vs. (SC-Myel+Nonmyel) |             |              |       |       |           |               |                 |                 |
|------------------------------------------------------------------------------------|-------------|--------------|-------|-------|-----------|---------------|-----------------|-----------------|
| gene                                                                               | p_val       | avg_log2FC   | pct.1 | pct.2 | p_val_adj | Foldchange_UP | Foldchange_DOWN | Ratio_pct1_pct2 |
| AMD1                                                                               | 0,288015289 | -0,112520649 | 0,038 | 0,073 | 1         | 0,924970559   | 1,081115491     | 0,520547945     |
| PCDHGB6                                                                            | 0,749340217 | -0,112543094 | 0,018 | 0,024 | 1         | 0,924956168   | 1,081132311     | 0,75            |
| PCNX2                                                                              | 0,527624595 | -0,112660603 | 0,013 | 0,024 | 1         | 0,924880832   | 1,081220375     | 0,541666667     |
| PIP4K2B                                                                            | 0,431809474 | -0,112836153 | 0,027 | 0,049 | 1         | 0,924768298   | 1,081351947     | 0,551020408     |
| ZDHC16                                                                             | 0,368207718 | -0,11311445  | 0,01  | 0,024 | 1         | 0,924589927   | 1,081560561     | 0,416666667     |
| MED30                                                                              | 0,409369473 | -0,113174214 | 0,045 | 0,073 | 1         | 0,924551626   | 1,081605366     | 0,616438356     |
| STIM1                                                                              | 0,287136479 | -0,113252307 | 0,022 | 0,049 | 1         | 0,924501582   | 1,081663915     | 0,448979592     |
| F8A1                                                                               | 0,050627188 | -0,113321877 | 0,003 | 0,024 | 1         | 0,924457001   | 1,081716076     | 0,125           |
| SMARCAL1                                                                           | 0,118110366 | -0,113354522 | 0,005 | 0,024 | 1         | 0,924436083   | 1,081740553     | 0,208333333     |
| RDH5                                                                               | 0,050627188 | -0,113524485 | 0,003 | 0,024 | 1         | 0,924327182   | 1,081868        | 0,125           |
| CNOT8                                                                              | 0,9288124   | -0,113533736 | 0,027 | 0,024 | 1         | 0,924321255   | 1,081874938     | 1,125           |
| GSTCD                                                                              | 0,611220134 | -0,113542214 | 0,014 | 0,024 | 1         | 0,924315823   | 1,081881295     | 0,583333333     |
| MAPRE3                                                                             | 0,673250327 | -0,113662128 | 0,038 | 0,024 | 1         | 0,924238999   | 1,081971223     | 1,583333333     |
| CHD3                                                                               | 0,162466472 | -0,113799453 | 0,062 | 0,122 | 1         | 0,924151029   | 1,082074216     | 0,508196721     |
| LRRC37A2                                                                           | 0,050627188 | -0,114064406 | 0,003 | 0,024 | 1         | 0,923981323   | 1,082272959     | 0,125           |
| CAPN12                                                                             | 0,050627188 | -0,114300932 | 0,003 | 0,024 | 1         | 0,923829851   | 1,082450409     | 0,125           |
| RAB11FIP2                                                                          | 0,516092109 | -0,114362606 | 0,03  | 0,049 | 1         | 0,923790358   | 1,082496684     | 0,612244898     |
| ACO1                                                                               | 0,370733807 | -0,114398221 | 0,01  | 0,024 | 1         | 0,923767554   | 1,082523407     | 0,416666667     |
| RPL23                                                                              | 0,846683302 | -0,114655882 | 0,435 | 0,488 | 1         | 0,923602586   | 1,08271676      | 0,891393443     |
| C17orf80                                                                           | 0,806945473 | -0,114995878 | 0,019 | 0,024 | 1         | 0,923384949   | 1,082971952     | 0,791666667     |
| DDR2                                                                               | 0,798800451 | -0,115066883 | 0,059 | 0,049 | 1         | 0,923339504   | 1,083025253     | 1,204081633     |
| MTPN                                                                               | 0,963792482 | -0,11513171  | 0,23  | 0,22  | 1         | 0,923298015   | 1,083073919     | 1,045454545     |
| WDR24                                                                              | 0,530362187 | -0,115155347 | 0,013 | 0,024 | 1         | 0,923282888   | 1,083091665     | 0,541666667     |
| ITPKB                                                                              | 0,809650081 | -0,115283706 | 0,019 | 0,024 | 1         | 0,923200746   | 1,083188033     | 0,791666667     |
| UBAC2                                                                              | 0,066149683 | -0,115310543 | 0,024 | 0,073 | 1         | 0,923183572   | 1,083208183     | 0,328767123     |
| SPHK1                                                                              | 0,350053601 | -0,115608455 | 0,041 | 0,073 | 1         | 0,922992957   | 1,083431886     | 0,561643836     |
| TIMM50                                                                             | 0,382099494 | -0,115742374 | 0,026 | 0,049 | 1         | 0,922907284   | 1,08353246      | 0,530612245     |
| SPRED3                                                                             | 0,116646669 | -0,115924953 | 0,005 | 0,024 | 1         | 0,922790494   | 1,083669594     | 0,208333333     |
| DGKA                                                                               | 0,009951995 | -0,116105154 | 0,002 | 0,024 | 1         | 0,922675239   | 1,083804959     | 0,083333333     |
| AAMDC                                                                              | 0,334265023 | -0,116236868 | 0,096 | 0,146 | 1         | 0,922591005   | 1,083903912     | 0,657534247     |

Supplementary Table 3

| Differentially expressed genes_keloid-MD_comparing SC-Keloid vs. (SC-Myel+Nonmyel) |             |              |       |       |           |               |                 |                 |
|------------------------------------------------------------------------------------|-------------|--------------|-------|-------|-----------|---------------|-----------------|-----------------|
| gene                                                                               | p_val       | avg_log2FC   | pct.1 | pct.2 | p_val_adj | Foldchange_UP | Foldchange_DOWN | Ratio_pct1_pct2 |
| UROD                                                                               | 0,53578996  | -0,116239759 | 0,046 | 0,024 | 1         | 0,922589156   | 1,083906084     | 1,916666667     |
| BCAT2                                                                              | 0,365692371 | -0,116364101 | 0,01  | 0,024 | 1         | 0,922509645   | 1,083999507     | 0,416666667     |
| GOLGA4                                                                             | 0,345000315 | -0,116367527 | 0,137 | 0,195 | 1         | 0,922507454   | 1,084002081     | 0,702564103     |
| MYPOP                                                                              | 0,116646669 | -0,116405687 | 0,005 | 0,024 | 1         | 0,922483053   | 1,084030754     | 0,208333333     |
| CCM2                                                                               | 0,737405863 | -0,116451846 | 0,038 | 0,049 | 1         | 0,922453539   | 1,084065438     | 0,775510204     |
| ENTPD5                                                                             | 0,196181004 | -0,116459235 | 0,006 | 0,024 | 1         | 0,922448814   | 1,084070991     | 0,25            |
| INPP1                                                                              | 0,977355366 | -0,116549506 | 0,024 | 0,024 | 1         | 0,922391098   | 1,084138824     | 1               |
| KMT2A                                                                              | 0,63693645  | -0,116654961 | 0,077 | 0,098 | 1         | 0,922323677   | 1,084218073     | 0,785714286     |
| FUNDC1                                                                             | 0,28359514  | -0,116711996 | 0,038 | 0,073 | 1         | 0,922287215   | 1,084260937     | 0,520547945     |
| KBTBD7                                                                             | 0,049781231 | -0,116944193 | 0,003 | 0,024 | 1         | 0,922138788   | 1,08443546      | 0,125           |
| KDM5B                                                                              | 0,426729135 | -0,117150877 | 0,027 | 0,049 | 1         | 0,922006689   | 1,08459083      | 0,551020408     |
| KIAA0319L                                                                          | 0,250575068 | -0,117283147 | 0,021 | 0,049 | 1         | 0,921922161   | 1,084690272     | 0,428571429     |
| STON1                                                                              | 0,050627188 | -0,117332014 | 0,003 | 0,024 | 1         | 0,921890935   | 1,084727013     | 0,125           |
| IGFBP2                                                                             | 0,352534271 | -0,117342791 | 0,211 | 0,293 | 1         | 0,921884048   | 1,084735116     | 0,720136519     |
| DNAJB5                                                                             | 0,45638276  | -0,117644187 | 0,011 | 0,024 | 1         | 0,921691475   | 1,084961754     | 0,458333333     |
| EFEMP2                                                                             | 0,506917944 | -0,117891238 | 0,089 | 0,122 | 1         | 0,921533656   | 1,085147561     | 0,729508197     |
| SLC66A2                                                                            | 0,426729135 | -0,117947937 | 0,027 | 0,049 | 1         | 0,92149744    | 1,08519021      | 0,551020408     |
| LINC00472                                                                          | 0,009951995 | -0,11816146  | 0,002 | 0,024 | 1         | 0,921361066   | 1,085350832     | 0,083333333     |
| AKAP1                                                                              | 0,283075535 | -0,118199733 | 0,008 | 0,024 | 1         | 0,921336623   | 1,085379626     | 0,333333333     |
| AFTPH                                                                              | 0,292887183 | -0,118420548 | 0,022 | 0,049 | 1         | 0,921195617   | 1,085545764     | 0,448979592     |
| CDC42EP3                                                                           | 0,305363567 | -0,118565515 | 0,094 | 0,146 | 1         | 0,921103057   | 1,085654849     | 0,643835616     |
| NOTCH4                                                                             | 0,45638276  | -0,118692084 | 0,011 | 0,024 | 1         | 0,921022251   | 1,085750099     | 0,458333333     |
| TMEM254                                                                            | 0,099274471 | -0,118865025 | 0,014 | 0,049 | 1         | 0,920911852   | 1,085880259     | 0,285714286     |
| HEY1                                                                               | 0,527624595 | -0,118876872 | 0,013 | 0,024 | 1         | 0,920904289   | 1,085889176     | 0,541666667     |
| PBXIP1                                                                             | 0,804243171 | -0,118900075 | 0,019 | 0,024 | 1         | 0,920889478   | 1,085906641     | 0,791666667     |
| DHX37                                                                              | 0,049781231 | -0,118940329 | 0,003 | 0,024 | 1         | 0,920863784   | 1,08593694      | 0,125           |
| EGLN1                                                                              | 0,294336857 | -0,118961845 | 0,022 | 0,049 | 1         | 0,92085005    | 1,085953136     | 0,448979592     |
| C10orf82                                                                           | 0,009951995 | -0,119148889 | 0,002 | 0,024 | 1         | 0,920730671   | 1,086093937     | 0,083333333     |
| BOLA1                                                                              | 0,292887183 | -0,119177195 | 0,022 | 0,049 | 1         | 0,920712606   | 1,086115247     | 0,448979592     |
| DENND5B                                                                            | 0,050627188 | -0,119278845 | 0,003 | 0,024 | 1         | 0,920647736   | 1,086191776     | 0,125           |



Supplementary Table 3

| Differentially expressed genes_keloid-MD_comparing SC-Keloid vs. (SC-Myel+Nonmyel) |             |              |       |       |           |               |                 |                 |
|------------------------------------------------------------------------------------|-------------|--------------|-------|-------|-----------|---------------|-----------------|-----------------|
| gene                                                                               | p_val       | avg_log2FC   | pct.1 | pct.2 | p_val_adj | Foldchange_UP | Foldchange_DOWN | Ratio_pct1_pct2 |
| RPL37                                                                              | 0,417442148 | -0,119280176 | 0,66  | 0,707 | 1         | 0,920646887   | 1,086192778     | 0,933521924     |
| KLHDC4                                                                             | 0,118110366 | -0,119290101 | 0,005 | 0,024 | 1         | 0,920640554   | 1,086200251     | 0,208333333     |
| WARS1                                                                              | 0,816411419 | -0,119397434 | 0,041 | 0,049 | 1         | 0,920572063   | 1,086281064     | 0,836734694     |
| USP48                                                                              | 0,787812744 | -0,119458246 | 0,061 | 0,049 | 1         | 0,92053326    | 1,086326853     | 1,244897959     |
| RRM1                                                                               | 0,290002235 | -0,119653277 | 0,022 | 0,049 | 1         | 0,920408826   | 1,086473719     | 0,448979592     |
| ASH2L                                                                              | 0,097729926 | -0,119654329 | 0,014 | 0,049 | 1         | 0,920408155   | 1,086474511     | 0,285714286     |
| DDX54                                                                              | 0,931179325 | -0,119854963 | 0,027 | 0,024 | 1         | 0,920280163   | 1,086625617     | 1,125           |
| ATF1                                                                               | 0,246571074 | -0,119978749 | 0,021 | 0,049 | 1         | 0,920201205   | 1,086718855     | 0,428571429     |
| NOTCH1                                                                             | 0,288015331 | -0,120030349 | 0,038 | 0,073 | 1         | 0,920168293   | 1,086757724     | 0,520547945     |
| BECN1                                                                              | 0,325122316 | -0,120110886 | 0,04  | 0,073 | 1         | 0,920116928   | 1,086818392     | 0,547945205     |
| DZIP3                                                                              | 0,679575369 | -0,120127969 | 0,016 | 0,024 | 1         | 0,920106032   | 1,086831262     | 0,666666667     |
| PAK1IP1                                                                            | 0,767059846 | -0,12054349  | 0,04  | 0,049 | 1         | 0,919841064   | 1,087144333     | 0,816326531     |
| CSNK2A1                                                                            | 0,77247132  | -0,120574356 | 0,062 | 0,049 | 1         | 0,919821385   | 1,087167592     | 1,265306122     |
| ENTR1                                                                              | 0,933546859 | -0,120854018 | 0,027 | 0,024 | 1         | 0,919643098   | 1,087378356     | 1,125           |
| HOOK3                                                                              | 0,799813268 | -0,120940532 | 0,152 | 0,171 | 1         | 0,919587951   | 1,087443566     | 0,888888889     |
| IDH3G                                                                              | 0,417219976 | -0,12101329  | 0,045 | 0,073 | 1         | 0,919541576   | 1,087498409     | 0,616438356     |
| ZNF558                                                                             | 0,116646669 | -0,12123181  | 0,005 | 0,024 | 1         | 0,919402306   | 1,087663141     | 0,208333333     |
| RPL18                                                                              | 0,680887012 | -0,121315889 | 0,758 | 0,829 | 1         | 0,919348725   | 1,087726531     | 0,914354644     |
| SLIT3                                                                              | 0,373270628 | -0,121516037 | 0,01  | 0,024 | 1         | 0,919221191   | 1,087877444     | 0,416666667     |
| LRP3                                                                               | 0,009951995 | -0,121542878 | 0,002 | 0,024 | 1         | 0,91920409    | 1,087897683     | 0,083333333     |
| CFAP97                                                                             | 0,463301852 | -0,121709218 | 0,128 | 0,171 | 1         | 0,919098113   | 1,088023123     | 0,748538012     |
| ASMTL                                                                              | 0,809650081 | -0,121743153 | 0,019 | 0,024 | 1         | 0,919076494   | 1,088048716     | 0,791666667     |
| MRPL4                                                                              | 0,530123235 | -0,121767952 | 0,07  | 0,098 | 1         | 0,919060697   | 1,088067419     | 0,714285714     |
| SCP2                                                                               | 0,978171888 | -0,122046252 | 0,153 | 0,146 | 1         | 0,918883424   | 1,088277331     | 1,047945205     |
| MAP2K7                                                                             | 0,208609703 | -0,122164542 | 0,019 | 0,049 | 1         | 0,918808086   | 1,088366565     | 0,387755102     |
| USP1                                                                               | 0,383797971 | -0,122245874 | 0,08  | 0,122 | 1         | 0,91875629    | 1,088427923     | 0,655737705     |
| DNAJC5                                                                             | 0,741096359 | -0,122254226 | 0,018 | 0,024 | 1         | 0,918750971   | 1,088434224     | 0,75            |
| PABPC1                                                                             | 0,515000209 | -0,122313839 | 0,171 | 0,22  | 1         | 0,918713008   | 1,0884792       | 0,777272727     |
| ASF1B                                                                              | 0,115197258 | -0,122366166 | 0,005 | 0,024 | 1         | 0,918679686   | 1,088518681     | 0,208333333     |
| TMUB1                                                                              | 0,809650049 | -0,122485233 | 0,019 | 0,024 | 1         | 0,91860387    | 1,088608521     | 0,791666667     |

Supplementary Table 3

| Differentially expressed genes_keloid-MD_comparing SC-Keloid vs. (SC-Myel+Nonmyel) |             |              |       |       |           |               |                 |                 |
|------------------------------------------------------------------------------------|-------------|--------------|-------|-------|-----------|---------------|-----------------|-----------------|
| gene                                                                               | p_val       | avg_log2FC   | pct.1 | pct.2 | p_val_adj | Foldchange_UP | Foldchange_DOWN | Ratio_pct1_pct2 |
| AHCY                                                                               | 0,124438362 | -0,12266109  | 0,029 | 0,073 | 1         | 0,918491904   | 1,088741224     | 0,397260274     |
| PRMT2                                                                              | 0,213906502 | -0,122759041 | 0,191 | 0,293 | 1         | 0,918429546   | 1,088815146     | 0,651877133     |
| LBR                                                                                | 0,690019535 | -0,122827907 | 0,037 | 0,049 | 1         | 0,918385706   | 1,088867121     | 0,755102041     |
| PREX2                                                                              | 0,009951995 | -0,122977455 | 0,002 | 0,024 | 1         | 0,918290512   | 1,088979998     | 0,083333333     |
| SERF2                                                                              | 0,257856148 | -0,123360529 | 0,724 | 0,805 | 1         | 0,918046714   | 1,089269189     | 0,899378882     |
| RASD2                                                                              | 0,050627188 | -0,123383866 | 0,003 | 0,024 | 1         | 0,918031864   | 1,089286809     | 0,125           |
| PGM2L1                                                                             | 0,752389961 | -0,123427863 | 0,085 | 0,098 | 1         | 0,918003868   | 1,089320029     | 0,867346939     |
| ZNF667-AS1                                                                         | 0,027409798 | -0,1234584   | 0,01  | 0,049 | 1         | 0,917984437   | 1,089343087     | 0,204081633     |
| THOP1                                                                              | 0,370733807 | -0,123469256 | 0,01  | 0,024 | 1         | 0,917977529   | 1,089351284     | 0,416666667     |
| CHST12                                                                             | 0,935914981 | -0,123498034 | 0,027 | 0,024 | 1         | 0,917959218   | 1,089373014     | 1,125           |
| MOCS3                                                                              | 0,118110366 | -0,12366868  | 0,005 | 0,024 | 1         | 0,917850646   | 1,089501875     | 0,208333333     |
| CCDC88A                                                                            | 0,874422081 | -0,123668862 | 0,056 | 0,049 | 1         | 0,91785053    | 1,089502013     | 1,142857143     |
| CCDC18                                                                             | 0,050627188 | -0,123691417 | 0,003 | 0,024 | 1         | 0,917836181   | 1,089519046     | 0,125           |
| IPCEF1                                                                             | 0,009951995 | -0,12369487  | 0,002 | 0,024 | 1         | 0,917833984   | 1,089521654     | 0,083333333     |
| MRPL54                                                                             | 0,502054846 | -0,123953058 | 0,152 | 0,195 | 1         | 0,917669741   | 1,089716655     | 0,779487179     |
| FAM120AOS                                                                          | 0,104961924 | -0,1241072   | 0,027 | 0,073 | 1         | 0,917571699   | 1,089833089     | 0,369863014     |
| TRIT1                                                                              | 0,20008191  | -0,124348038 | 0,006 | 0,024 | 1         | 0,917418536   | 1,090015037     | 0,25            |
| PGGHG                                                                              | 0,116646669 | -0,124424129 | 0,005 | 0,024 | 1         | 0,917370151   | 1,090072529     | 0,208333333     |
| MRPL21                                                                             | 0,774208317 | -0,124521556 | 0,108 | 0,122 | 1         | 0,917308202   | 1,090146145     | 0,885245902     |
| ZNF830                                                                             | 0,099274471 | -0,124687684 | 0,014 | 0,049 | 1         | 0,917202579   | 1,090271684     | 0,285714286     |
| B3GNT5                                                                             | 0,676801274 | -0,124773892 | 0,016 | 0,024 | 1         | 0,917147773   | 1,090336835     | 0,666666667     |
| HDAC5                                                                              | 0,614007565 | -0,12491461  | 0,014 | 0,024 | 1         | 0,91705832    | 1,09044319      | 0,583333333     |
| ZSCAN25                                                                            | 0,009951995 | -0,125076759 | 0,002 | 0,024 | 1         | 0,916955255   | 1,090565755     | 0,083333333     |
| AC019117.2                                                                         | 0,009951995 | -0,125304476 | 0,002 | 0,024 | 1         | 0,916810533   | 1,090737905     | 0,083333333     |
| LATS2                                                                              | 0,069233684 | -0,125317239 | 0,013 | 0,049 | 1         | 0,916802422   | 1,090747554     | 0,265306122     |
| CPD                                                                                | 0,286905962 | -0,125537704 | 0,038 | 0,073 | 1         | 0,916662332   | 1,09091425      | 0,520547945     |
| CPEB1                                                                              | 0,009951995 | -0,126065657 | 0,002 | 0,024 | 1         | 0,916326941   | 1,091313542     | 0,083333333     |
| ITGB1BP1                                                                           | 0,630299816 | -0,126120413 | 0,142 | 0,171 | 1         | 0,916292164   | 1,091354962     | 0,830409357     |
| PRKAG1                                                                             | 0,431809474 | -0,126167425 | 0,027 | 0,049 | 1         | 0,916262306   | 1,091390526     | 0,551020408     |
| SAT2                                                                               | 0,66402773  | -0,126282258 | 0,145 | 0,171 | 1         | 0,916189378   | 1,091477399     | 0,847953216     |

Supplementary Table 3

| Differentially expressed genes_keloid-MD_comparing SC-Keloid vs. (SC-Myel+Nonmyel) |             |              |       |       |           |               |                 |                 |
|------------------------------------------------------------------------------------|-------------|--------------|-------|-------|-----------|---------------|-----------------|-----------------|
| gene                                                                               | p_val       | avg_log2FC   | pct.1 | pct.2 | p_val_adj | Foldchange_UP | Foldchange_DOWN | Ratio_pct1_pct2 |
| CCNL1                                                                              | 0,161882915 | -0,126347581 | 0,062 | 0,122 | 1         | 0,916147896   | 1,091526821     | 0,508196721     |
| DDX10                                                                              | 0,152151875 | -0,126417498 | 0,03  | 0,073 | 1         | 0,916103497   | 1,091579721     | 0,410958904     |
| ARHGAP10                                                                           | 0,606086984 | -0,126614841 | 0,033 | 0,049 | 1         | 0,915978194   | 1,091729046     | 0,673469388     |
| CDC25B                                                                             | 0,451039476 | -0,126621121 | 0,011 | 0,024 | 1         | 0,915974207   | 1,091733798     | 0,458333333     |
| GSPT2                                                                              | 0,194251578 | -0,126818439 | 0,006 | 0,024 | 1         | 0,915848937   | 1,091883125     | 0,25            |
| ZMYM2                                                                              | 0,861121253 | -0,126833452 | 0,067 | 0,073 | 1         | 0,915839407   | 1,091894488     | 0,917808219     |
| DYNC2L1                                                                            | 0,283075535 | -0,127074462 | 0,008 | 0,024 | 1         | 0,915686424   | 1,09207691      | 0,333333333     |
| ZNF358                                                                             | 0,0674287   | -0,127075025 | 0,013 | 0,049 | 1         | 0,915686066   | 1,092077336     | 0,265306122     |
| SYNE1                                                                              | 0,513379208 | -0,12709956  | 0,049 | 0,073 | 1         | 0,915670494   | 1,092095909     | 0,671232877     |
| ARIH2                                                                              | 0,445482666 | -0,12712823  | 0,046 | 0,073 | 1         | 0,915652297   | 1,092117611     | 0,630136986     |
| CD99                                                                               | 0,51903525  | -0,127130331 | 0,306 | 0,366 | 1         | 0,915650964   | 1,092119201     | 0,836065574     |
| TNFSF10                                                                            | 0,194251578 | -0,127188166 | 0,006 | 0,024 | 1         | 0,915614258   | 1,092162984     | 0,25            |
| PHF19                                                                              | 0,691892397 | -0,127200382 | 0,037 | 0,049 | 1         | 0,915606505   | 1,092172232     | 0,755102041     |
| DNAJC25                                                                            | 0,196181004 | -0,12727201  | 0,006 | 0,024 | 1         | 0,915561048   | 1,092226458     | 0,25            |
| MIS18A                                                                             | 0,917046786 | -0,127502252 | 0,022 | 0,024 | 1         | 0,915414943   | 1,092400782     | 0,916666667     |
| LDB1                                                                               | 0,100838432 | -0,12750231  | 0,014 | 0,049 | 1         | 0,915414907   | 1,092400826     | 0,285714286     |
| ODF3B                                                                              | 0,009951995 | -0,127646932 | 0,002 | 0,024 | 1         | 0,915323146   | 1,092510338     | 0,083333333     |
| BRD3OS                                                                             | 0,198124435 | -0,127651133 | 0,006 | 0,024 | 1         | 0,915320481   | 1,09251352      | 0,25            |
| MGST1                                                                              | 0,116646669 | -0,127676097 | 0,005 | 0,024 | 1         | 0,915304642   | 1,092532424     | 0,208333333     |
| RORA                                                                               | 0,099274471 | -0,127716031 | 0,014 | 0,049 | 1         | 0,915279307   | 1,092562666     | 0,285714286     |
| STIP1                                                                              | 0,849886809 | -0,127838532 | 0,043 | 0,049 | 1         | 0,915201593   | 1,092655441     | 0,87755102      |
| TRAF3IP2-AS1                                                                       | 0,741096359 | -0,127899096 | 0,018 | 0,024 | 1         | 0,915163174   | 1,092701311     | 0,75            |
| STK32C                                                                             | 0,339404719 | -0,128064691 | 0,024 | 0,049 | 1         | 0,915058136   | 1,092826741     | 0,489795918     |
| TTC38                                                                              | 0,050627188 | -0,128194915 | 0,003 | 0,024 | 1         | 0,914975542   | 1,092925389     | 0,125           |
| RNF215                                                                             | 0,116646669 | -0,128417269 | 0,005 | 0,024 | 1         | 0,914834534   | 1,093093847     | 0,208333333     |
| CCT3                                                                               | 0,446560854 | -0,128435775 | 0,105 | 0,146 | 1         | 0,914822798   | 1,09310787      | 0,719178082     |
| SLC22A5                                                                            | 0,009951995 | -0,1286965   | 0,002 | 0,024 | 1         | 0,914657486   | 1,093305435     | 0,083333333     |
| TBC1D22A                                                                           | 0,608438325 | -0,128741169 | 0,014 | 0,024 | 1         | 0,914629166   | 1,093339286     | 0,583333333     |
| SH3PXD2B                                                                           | 0,51430804  | -0,128897803 | 0,03  | 0,049 | 1         | 0,91452987    | 1,093457997     | 0,612244898     |
| ST3GAL1                                                                            | 0,368207718 | -0,128952438 | 0,01  | 0,024 | 1         | 0,914495238   | 1,093499407     | 0,416666667     |

Supplementary Table 3

| Differentially expressed genes_keloid-MD_comparing SC-Keloid vs. (SC-Myel+Nonmyel) |             |              |       |       |           |               |                 |                 |
|------------------------------------------------------------------------------------|-------------|--------------|-------|-------|-----------|---------------|-----------------|-----------------|
| gene                                                                               | p_val       | avg_log2FC   | pct.1 | pct.2 | p_val_adj | Foldchange_UP | Foldchange_DOWN | Ratio_pct1_pct2 |
| PTHLH                                                                              | 0,049781231 | -0,129035134 | 0,003 | 0,024 | 1         | 0,91444282    | 1,093562089     | 0,125           |
| POU2F1                                                                             | 0,774548473 | -0,129108042 | 0,04  | 0,049 | 1         | 0,914396609   | 1,093617354     | 0,816326531     |
| TOR1AIP1                                                                           | 0,469730397 | -0,129157084 | 0,029 | 0,049 | 1         | 0,914365526   | 1,09365453      | 0,591836735     |
| MRI1                                                                               | 0,005730439 | -0,129256581 | 0,006 | 0,049 | 1         | 0,914302468   | 1,093729958     | 0,12244898      |
| IGF2BP2                                                                            | 0,891556824 | -0,129368401 | 0,029 | 0,024 | 1         | 0,914231605   | 1,093814734     | 1,208333333     |
| PHACTR3                                                                            | 0,368207718 | -0,129811137 | 0,01  | 0,024 | 1         | 0,913951088   | 1,094150457     | 0,416666667     |
| GPR157                                                                             | 0,009951995 | -0,130138906 | 0,002 | 0,024 | 1         | 0,913743468   | 1,094399068     | 0,083333333     |
| MTCH1                                                                              | 0,721311886 | -0,13016608  | 0,128 | 0,146 | 1         | 0,913726258   | 1,094419681     | 0,876712329     |
| LANCL1                                                                             | 0,170742101 | -0,130231961 | 0,032 | 0,073 | 1         | 0,913684533   | 1,09446966      | 0,438356164     |
| PDK4                                                                               | 0,049781231 | -0,130321739 | 0,003 | 0,024 | 1         | 0,913627677   | 1,09453777      | 0,125           |
| ABRAXAS2                                                                           | 0,530362187 | -0,130371333 | 0,013 | 0,024 | 1         | 0,913596271   | 1,094575396     | 0,541666667     |
| UBC                                                                                | 0,336480518 | -0,130553    | 0,539 | 0,61  | 1         | 0,913481236   | 1,094713236     | 0,883606557     |
| MRPL39                                                                             | 0,202581839 | -0,130599778 | 0,019 | 0,049 | 1         | 0,913451618   | 1,094748732     | 0,387755102     |
| KCNH8                                                                              | 0,009951995 | -0,13065807  | 0,002 | 0,024 | 1         | 0,913414711   | 1,094792965     | 0,083333333     |
| YTHDF2                                                                             | 0,483473901 | -0,130659219 | 0,048 | 0,073 | 1         | 0,913413983   | 1,094793837     | 0,657534247     |
| SLC5A3                                                                             | 0,611220134 | -0,130969704 | 0,014 | 0,024 | 1         | 0,913217427   | 1,095029476     | 0,583333333     |
| PPP1R13L                                                                           | 0,050627188 | -0,131053233 | 0,003 | 0,024 | 1         | 0,913164555   | 1,095092877     | 0,125           |
| KIF5C                                                                              | 0,009951995 | -0,131122274 | 0,002 | 0,024 | 1         | 0,913120856   | 1,095145285     | 0,083333333     |
| EFNA1                                                                              | 0,116646669 | -0,131133959 | 0,005 | 0,024 | 1         | 0,913113461   | 1,095154155     | 0,208333333     |
| PURB                                                                               | 0,818587952 | -0,131240223 | 0,112 | 0,122 | 1         | 0,913046206   | 1,095234823     | 0,918032787     |
| GNL1                                                                               | 0,56222262  | -0,131280031 | 0,032 | 0,049 | 1         | 0,913021013   | 1,095265044     | 0,653061224     |
| ARSB                                                                               | 0,749340217 | -0,13130785  | 0,018 | 0,024 | 1         | 0,913003408   | 1,095286164     | 0,75            |
| HHIPL1                                                                             | 0,050627188 | -0,131393279 | 0,003 | 0,024 | 1         | 0,912949346   | 1,095351023     | 0,125           |
| GRIPAP1                                                                            | 0,04646789  | -0,131594556 | 0,011 | 0,049 | 1         | 0,912821985   | 1,095503851     | 0,224489796     |
| HEG1                                                                               | 0,045555981 | -0,131689142 | 0,011 | 0,049 | 1         | 0,912762141   | 1,095575677     | 0,224489796     |
| DSE                                                                                | 0,453706681 | -0,131790263 | 0,011 | 0,024 | 1         | 0,912698166   | 1,09565247      | 0,458333333     |
| SLIT2                                                                              | 0,116646669 | -0,131953865 | 0,005 | 0,024 | 1         | 0,912594672   | 1,095776724     | 0,208333333     |
| CPSF1                                                                              | 0,283075535 | -0,132083002 | 0,008 | 0,024 | 1         | 0,912512988   | 1,095874813     | 0,333333333     |
| HOMER3                                                                             | 0,972089177 | -0,13216892  | 0,048 | 0,049 | 1         | 0,912458645   | 1,095940079     | 0,979591837     |
| ZNF7                                                                               | 0,922214356 | -0,13217891  | 0,022 | 0,024 | 1         | 0,912452327   | 1,095947668     | 0,916666667     |

Supplementary Table 3

| Differentially expressed genes_keloid-MD_comparing SC-Keloid vs. (SC-Myel+Nonmyel) |             |              |       |       |           |               |                 |                 |
|------------------------------------------------------------------------------------|-------------|--------------|-------|-------|-----------|---------------|-----------------|-----------------|
| gene                                                                               | p_val       | avg_log2FC   | pct.1 | pct.2 | p_val_adj | Foldchange_UP | Foldchange_DOWN | Ratio_pct1_pct2 |
| CD69                                                                               | 0,196181004 | -0,132352457 | 0,006 | 0,024 | 1         | 0,912342572   | 1,096079511     | 0,25            |
| EIF4EBP2                                                                           | 0,380479892 | -0,132390934 | 0,026 | 0,049 | 1         | 0,91231824    | 1,096108744     | 0,530612245     |
| ZNF34                                                                              | 0,445731781 | -0,132785417 | 0,011 | 0,024 | 1         | 0,912068815   | 1,096408499     | 0,458333333     |
| PCBP1                                                                              | 0,265940807 | -0,132890473 | 0,167 | 0,244 | 1         | 0,9120024     | 1,096488342     | 0,68442623      |
| RAD21                                                                              | 0,434424945 | -0,133005557 | 0,085 | 0,122 | 1         | 0,911929653   | 1,096575812     | 0,696721311     |
| NUDCD3                                                                             | 0,519669852 | -0,133129177 | 0,03  | 0,049 | 1         | 0,911851516   | 1,096669779     | 0,612244898     |
| NECTIN1                                                                            | 0,194251578 | -0,133156744 | 0,006 | 0,024 | 1         | 0,911834092   | 1,096690734     | 0,25            |
| TSC22D2                                                                            | 0,690019507 | -0,133263603 | 0,037 | 0,049 | 1         | 0,911766556   | 1,096771968     | 0,755102041     |
| SHARPIN                                                                            | 0,64934456  | -0,133353498 | 0,035 | 0,049 | 1         | 0,911709746   | 1,09684031      | 0,714285714     |
| HLA-DQB1                                                                           | 0,60566217  | -0,133677916 | 0,014 | 0,024 | 1         | 0,911504753   | 1,097086984     | 0,583333333     |
| BAIAP2                                                                             | 0,608438325 | -0,133694515 | 0,014 | 0,024 | 1         | 0,911494265   | 1,097099607     | 0,583333333     |
| NCOA6                                                                              | 0,741096359 | -0,133794025 | 0,018 | 0,024 | 1         | 0,911431397   | 1,097175281     | 0,75            |
| SIK2                                                                               | 0,071078164 | -0,133811709 | 0,013 | 0,049 | 1         | 0,911420226   | 1,09718873      | 0,265306122     |
| TDRD3                                                                              | 0,123089492 | -0,134018713 | 0,029 | 0,073 | 1         | 0,911289461   | 1,097346171     | 0,397260274     |
| FAHD2A                                                                             | 0,602891701 | -0,134030653 | 0,014 | 0,024 | 1         | 0,911281918   | 1,097355253     | 0,583333333     |
| WDR82                                                                              | 0,807620021 | -0,134206008 | 0,064 | 0,073 | 1         | 0,911171161   | 1,097488641     | 0,876712329     |
| PHF10                                                                              | 0,998225085 | -0,134253774 | 0,049 | 0,049 | 1         | 0,911140994   | 1,097524978     | 1               |
| ZNF438                                                                             | 0,116646669 | -0,134291369 | 0,005 | 0,024 | 1         | 0,911117251   | 1,097553579     | 0,208333333     |
| AUH                                                                                | 0,097729926 | -0,134333841 | 0,014 | 0,049 | 1         | 0,911090429   | 1,097585891     | 0,285714286     |
| WDR81                                                                              | 0,368207718 | -0,134361664 | 0,01  | 0,024 | 1         | 0,911072858   | 1,097607058     | 0,416666667     |
| RFC3                                                                               | 0,334781231 | -0,134451335 | 0,024 | 0,049 | 1         | 0,911016232   | 1,097675282     | 0,489795918     |
| TYK2                                                                               | 0,749340217 | -0,134614379 | 0,018 | 0,024 | 1         | 0,910913281   | 1,097799342     | 0,75            |
| SLCO3A1                                                                            | 0,746589028 | -0,135097727 | 0,018 | 0,024 | 1         | 0,910608148   | 1,0981672       | 0,75            |
| ZNF254                                                                             | 0,922214356 | -0,135187829 | 0,022 | 0,024 | 1         | 0,910551278   | 1,098235787     | 0,916666667     |
| ARHGAP17                                                                           | 0,128640375 | -0,135210703 | 0,016 | 0,049 | 1         | 0,910536841   | 1,0982532       | 0,326530612     |
| METTL25                                                                            | 0,001799447 | -0,135286711 | 0,011 | 0,073 | 1         | 0,910488872   | 1,098311063     | 0,150684932     |
| ITGA1                                                                              | 0,597962766 | -0,135375993 | 0,236 | 0,293 | 1         | 0,910432527   | 1,098379035     | 0,805460751     |
| KRT6A                                                                              | 0,009700686 | -0,135398765 | 0,002 | 0,024 | 1         | 0,910418157   | 1,098396372     | 0,083333333     |
| KIF23                                                                              | 0,050627188 | -0,135776306 | 0,003 | 0,024 | 1         | 0,910179939   | 1,09868385      | 0,125           |
| NEMP2                                                                              | 0,283075535 | -0,135934958 | 0,008 | 0,024 | 1         | 0,910079853   | 1,098804678     | 0,333333333     |

Supplementary Table 3

| Differentially expressed genes_keloid-MD_comparing SC-Keloid vs. (SC-Myel+Nonmyel) |             |              |       |       |           |               |                 |                 |
|------------------------------------------------------------------------------------|-------------|--------------|-------|-------|-----------|---------------|-----------------|-----------------|
| gene                                                                               | p_val       | avg_log2FC   | pct.1 | pct.2 | p_val_adj | Foldchange_UP | Foldchange_DOWN | Ratio_pct1_pct2 |
| TBC1D7                                                                             | 0,311128865 | -0,136007016 | 0,04  | 0,073 | 1         | 0,910034399   | 1,098859561     | 0,547945205     |
| TNFAIP8L1                                                                          | 0,009951995 | -0,136084758 | 0,002 | 0,024 | 1         | 0,909985361   | 1,098918777     | 0,083333333     |
| UBE2D1                                                                             | 0,510749547 | -0,136316528 | 0,03  | 0,049 | 1         | 0,909839183   | 1,099095333     | 0,612244898     |
| HEY2                                                                               | 0,050627188 | -0,136449031 | 0,003 | 0,024 | 1         | 0,909755624   | 1,099196283     | 0,125           |
| KXD1                                                                               | 0,121087629 | -0,136515279 | 0,029 | 0,073 | 1         | 0,909713849   | 1,099246759     | 0,397260274     |
| TACO1                                                                              | 0,038553062 | -0,137021732 | 0,021 | 0,073 | 1         | 0,909394553   | 1,099632713     | 0,287671233     |
| ATP2C1                                                                             | 0,85174134  | -0,137165355 | 0,043 | 0,049 | 1         | 0,909304026   | 1,099742189     | 0,87755102      |
| ZNF626                                                                             | 0,168993438 | -0,137295718 | 0,018 | 0,049 | 1         | 0,909221864   | 1,099841567     | 0,367346939     |
| KDM4C                                                                              | 0,04646789  | -0,137594781 | 0,011 | 0,049 | 1         | 0,909033406   | 1,100069583     | 0,224489796     |
| HIGD2A                                                                             | 0,892421765 | -0,137834507 | 0,093 | 0,098 | 1         | 0,908882369   | 1,100252391     | 0,948979592     |
| PLK4                                                                               | 0,009951995 | -0,137836257 | 0,002 | 0,024 | 1         | 0,908881267   | 1,100253726     | 0,083333333     |
| MRPS30                                                                             | 0,851862947 | -0,138006793 | 0,03  | 0,024 | 1         | 0,908773838   | 1,10038379      | 1,25            |
| JAK2                                                                               | 0,285374202 | -0,138037444 | 0,008 | 0,024 | 1         | 0,90875453    | 1,100407169     | 0,333333333     |
| NXT2                                                                               | 0,049781231 | -0,138038236 | 0,003 | 0,024 | 1         | 0,908754031   | 1,100407773     | 0,125           |
| RHOU                                                                               | 0,009951995 | -0,138065939 | 0,002 | 0,024 | 1         | 0,908736581   | 1,100428904     | 0,083333333     |
| RPS6KA5                                                                            | 0,674031557 | -0,13815798  | 0,016 | 0,024 | 1         | 0,908678607   | 1,100499111     | 0,666666667     |
| IMPACT                                                                             | 0,889264253 | -0,138178066 | 0,029 | 0,024 | 1         | 0,908665956   | 1,100514433     | 1,208333333     |
| CHCHD1                                                                             | 0,943001512 | -0,13824362  | 0,105 | 0,098 | 1         | 0,908624669   | 1,10056444      | 1,071428571     |
| SERINC5                                                                            | 0,160415045 | -0,138293942 | 0,046 | 0,098 | 1         | 0,908592976   | 1,100602829     | 0,469387755     |
| DHRS4L2                                                                            | 0,776423942 | -0,138341725 | 0,04  | 0,049 | 1         | 0,908562883   | 1,100639282     | 0,816326531     |
| TEAD1                                                                              | 0,898547087 | -0,138367229 | 0,069 | 0,073 | 1         | 0,908546822   | 1,10065874      | 0,945205479     |
| FOXD1                                                                              | 0,049781231 | -0,138862107 | 0,003 | 0,024 | 1         | 0,908235223   | 1,101036356     | 0,125           |
| ORAI2                                                                              | 0,196537849 | -0,139425356 | 0,033 | 0,073 | 1         | 0,907880704   | 1,1014663       | 0,452054795     |
| CAPN7                                                                              | 0,377253366 | -0,139433811 | 0,026 | 0,049 | 1         | 0,907875383   | 1,101472756     | 0,530612245     |
| SLC41A3                                                                            | 0,330198527 | -0,139434509 | 0,024 | 0,049 | 1         | 0,907874944   | 1,101473289     | 0,489795918     |
| LRRC41                                                                             | 0,889264253 | -0,139512352 | 0,029 | 0,024 | 1         | 0,907825959   | 1,101532722     | 1,208333333     |
| SPTSSA                                                                             | 0,12238158  | -0,139672672 | 0,23  | 0,366 | 1         | 0,907725082   | 1,101655137     | 0,628415301     |
| CTTNBP2NL                                                                          | 0,889842537 | -0,139825161 | 0,045 | 0,049 | 1         | 0,907629143   | 1,101771585     | 0,918367347     |
| DERA                                                                               | 0,859167563 | -0,139982152 | 0,043 | 0,049 | 1         | 0,907530382   | 1,101891484     | 0,87755102      |
| IFT88                                                                              | 0,342509686 | -0,140151645 | 0,024 | 0,049 | 1         | 0,907423769   | 1,102020946     | 0,489795918     |

Supplementary Table 3

| Differentially expressed genes_keloid-MD_ comparing SC-Keloid vs. (SC-Myel+Nonmyel) |             |              |       |       |           |               |                 |                 |
|-------------------------------------------------------------------------------------|-------------|--------------|-------|-------|-----------|---------------|-----------------|-----------------|
| gene                                                                                | p_val       | avg_log2FC   | pct.1 | pct.2 | p_val_adj | Foldchange_UP | Foldchange_DOWN | Ratio_pct1_pct2 |
| YBX3                                                                                | 0,285099022 | -0,140170138 | 0,056 | 0,098 | 1         | 0,907412137   | 1,102035072     | 0,571428571     |
| IFT52                                                                               | 0,804243171 | -0,140301634 | 0,019 | 0,024 | 1         | 0,907329434   | 1,102135523     | 0,791666667     |
| ABCD4                                                                               | 0,611220134 | -0,140303419 | 0,014 | 0,024 | 1         | 0,907328311   | 1,102136886     | 0,583333333     |
| SERP1                                                                               | 0,295595113 | -0,140325078 | 0,187 | 0,268 | 1         | 0,90731469    | 1,102153433     | 0,697761194     |
| UXS1                                                                                | 0,737405863 | -0,140362145 | 0,038 | 0,049 | 1         | 0,907291379   | 1,10218175      | 0,775510204     |
| REXO1                                                                               | 0,011375116 | -0,140641898 | 0,016 | 0,073 | 1         | 0,907115463   | 1,102395495     | 0,219178082     |
| RAB33B                                                                              | 0,891556838 | -0,140702501 | 0,029 | 0,024 | 1         | 0,907077358   | 1,102441805     | 1,208333333     |
| TMEM208                                                                             | 0,94372937  | -0,140987084 | 0,147 | 0,146 | 1         | 0,906898448   | 1,102659291     | 1,006849315     |
| PPP1R18                                                                             | 0,848991835 | -0,141015777 | 0,057 | 0,049 | 1         | 0,906880411   | 1,102681222     | 1,163265306     |
| FGGY                                                                                | 0,118110366 | -0,141109427 | 0,005 | 0,024 | 1         | 0,906821545   | 1,102752802     | 0,208333333     |
| SMARCA4                                                                             | 0,550455373 | -0,141491644 | 0,051 | 0,073 | 1         | 0,90658133    | 1,103044997     | 0,698630137     |
| MMP28                                                                               | 0,099274471 | -0,141540401 | 0,014 | 0,049 | 1         | 0,906550692   | 1,103082275     | 0,285714286     |
| PRDX4                                                                               | 0,385461999 | -0,141612803 | 0,282 | 0,366 | 1         | 0,906505198   | 1,103137635     | 0,770491803     |
| KHDC4                                                                               | 0,514086134 | -0,141676868 | 0,049 | 0,073 | 1         | 0,906464944   | 1,103186623     | 0,671232877     |
| ZNF786                                                                              | 0,009951995 | -0,141914253 | 0,002 | 0,024 | 1         | 0,906315804   | 1,103368159     | 0,083333333     |
| ETFB                                                                                | 0,532712482 | -0,142047037 | 0,115 | 0,146 | 1         | 0,906232392   | 1,103469716     | 0,787671233     |
| RNPS1                                                                               | 0,596419916 | -0,142176639 | 0,096 | 0,122 | 1         | 0,906150985   | 1,103568849     | 0,786885246     |
| SERPINF1                                                                            | 0,130476948 | -0,142208578 | 0,016 | 0,049 | 1         | 0,906130925   | 1,103593281     | 0,326530612     |
| COPZ2                                                                               | 0,55758808  | -0,142385284 | 0,094 | 0,122 | 1         | 0,906019946   | 1,103728461     | 0,770491803     |
| B4GALT1                                                                             | 0,635177885 | -0,142401378 | 0,056 | 0,073 | 1         | 0,906009838   | 1,103740774     | 0,767123288     |
| DISP2                                                                               | 9,44793E-05 | -0,142463462 | 0     | 0,024 | 1         | 0,905970851   | 1,103788272     | 0               |
| ITK                                                                                 | 9,44793E-05 | -0,142463462 | 0     | 0,024 | 1         | 0,905970851   | 1,103788272     | 0               |
| NRIP3                                                                               | 9,44793E-05 | -0,142463462 | 0     | 0,024 | 1         | 0,905970851   | 1,103788272     | 0               |
| PYCARD-AS1                                                                          | 9,44793E-05 | -0,142463462 | 0     | 0,024 | 1         | 0,905970851   | 1,103788272     | 0               |
| RYR1                                                                                | 9,44793E-05 | -0,142463462 | 0     | 0,024 | 1         | 0,905970851   | 1,103788272     | 0               |
| TUT4                                                                                | 0,929254309 | -0,142546382 | 0,105 | 0,098 | 1         | 0,905918781   | 1,103851715     | 1,071428571     |
| TEAD2                                                                               | 0,451039476 | -0,142739944 | 0,011 | 0,024 | 1         | 0,905797244   | 1,103999826     | 0,458333333     |
| PHF5A                                                                               | 0,774576085 | -0,142940102 | 0,033 | 0,024 | 1         | 0,905671584   | 1,104153004     | 1,375           |
| SNAPIN                                                                              | 0,640051691 | -0,143308612 | 0,035 | 0,049 | 1         | 0,905440276   | 1,104435075     | 0,714285714     |
| GGA3                                                                                | 0,533106974 | -0,143491668 | 0,013 | 0,024 | 1         | 0,905325397   | 1,10457522      | 0,541666667     |

Supplementary Table 3

| Differentially expressed genes_keloid-MD_comparing SC-Keloid vs. (SC-Myel+Nonmyel) |             |              |       |       |           |               |                 |                 |
|------------------------------------------------------------------------------------|-------------|--------------|-------|-------|-----------|---------------|-----------------|-----------------|
| gene                                                                               | p_val       | avg_log2FC   | pct.1 | pct.2 | p_val_adj | Foldchange_UP | Foldchange_DOWN | Ratio_pct1_pct2 |
| GXYLT1                                                                             | 0,533106974 | -0,143569021 | 0,013 | 0,024 | 1         | 0,905276858   | 1,104634446     | 0,541666667     |
| EZR                                                                                | 0,788950318 | -0,143617963 | 0,086 | 0,098 | 1         | 0,905246147   | 1,10467192      | 0,87755102      |
| STOML2                                                                             | 0,23607669  | -0,143647958 | 0,086 | 0,146 | 1         | 0,905227327   | 1,104694887     | 0,589041096     |
| MAPKAPK2                                                                           | 0,334781231 | -0,143676248 | 0,024 | 0,049 | 1         | 0,905209576   | 1,10471655      | 0,489795918     |
| NDUFAF8                                                                            | 0,678493927 | -0,143774682 | 0,148 | 0,171 | 1         | 0,905147817   | 1,104791926     | 0,865497076     |
| PPP2CA                                                                             | 0,619262568 | -0,143791831 | 0,097 | 0,122 | 1         | 0,905137058   | 1,104805059     | 0,795081967     |
| MALAT1                                                                             | 0,176387223 | -0,143928401 | 0,994 | 0,976 | 1         | 0,905051378   | 1,104909648     | 1,018442623     |
| PRELID3A                                                                           | 0,453706681 | -0,144184015 | 0,011 | 0,024 | 1         | 0,904891037   | 1,105105431     | 0,458333333     |
| ZNF790                                                                             | 0,20008191  | -0,144203207 | 0,006 | 0,024 | 1         | 0,904879      | 1,105120133     | 0,25            |
| ALG13                                                                              | 0,891556838 | -0,144270233 | 0,029 | 0,024 | 1         | 0,904836961   | 1,105171476     | 1,208333333     |
| IVD                                                                                | 0,198791742 | -0,144379839 | 0,033 | 0,073 | 1         | 0,90476822    | 1,105255443     | 0,452054795     |
| JCAD                                                                               | 0,196181004 | -0,144389063 | 0,006 | 0,024 | 1         | 0,904762435   | 1,10526251      | 0,25            |
| ATAD3C                                                                             | 0,009951995 | -0,144665252 | 0,002 | 0,024 | 1         | 0,904589245   | 1,105474121     | 0,083333333     |
| RPL11                                                                              | 0,523250668 | -0,145072227 | 0,917 | 0,976 | 1         | 0,904334102   | 1,105786012     | 0,93954918      |
| EXOC4                                                                              | 0,917046786 | -0,145281855 | 0,022 | 0,024 | 1         | 0,904202709   | 1,105946698     | 0,916666667     |
| CHCHD2                                                                             | 0,434452813 | -0,145382184 | 0,408 | 0,463 | 1         | 0,904139831   | 1,106023611     | 0,881209503     |
| PCYOX1                                                                             | 0,507741841 | -0,145686936 | 0,049 | 0,073 | 1         | 0,903948862   | 1,10625727      | 0,671232877     |
| DGKH                                                                               | 0,24923539  | -0,145780135 | 0,021 | 0,049 | 1         | 0,903890468   | 1,106328737     | 0,428571429     |
| NRG2                                                                               | 0,049781231 | -0,146009673 | 0,003 | 0,024 | 1         | 0,903746668   | 1,106504772     | 0,125           |
| G2E3                                                                               | 0,383723316 | -0,14609507  | 0,026 | 0,049 | 1         | 0,903693174   | 1,106570271     | 0,530612245     |
| RABL6                                                                              | 0,926445848 | -0,146168174 | 0,07  | 0,073 | 1         | 0,903647383   | 1,106626344     | 0,95890411      |
| AURKAIP1                                                                           | 0,413420037 | -0,146247614 | 0,188 | 0,244 | 1         | 0,903597626   | 1,106687281     | 0,770491803     |
| CCDC28A                                                                            | 0,370733807 | -0,146268746 | 0,01  | 0,024 | 1         | 0,903584391   | 1,106703491     | 0,416666667     |
| TMSB4X                                                                             | 0,260943329 | -0,146374692 | 0,876 | 0,878 | 1         | 0,903518038   | 1,106784766     | 0,997722096     |
| PGRMC2                                                                             | 0,591921588 | -0,146428144 | 0,096 | 0,122 | 1         | 0,903484563   | 1,106825773     | 0,786885246     |
| COMMD8                                                                             | 0,510556457 | -0,146461694 | 0,049 | 0,073 | 1         | 0,903463553   | 1,106851513     | 0,671232877     |
| RHOBTB2                                                                            | 0,280789447 | -0,146814851 | 0,008 | 0,024 | 1         | 0,903242421   | 1,107122492     | 0,333333333     |
| DCAF4                                                                              | 0,196181004 | -0,146914953 | 0,006 | 0,024 | 1         | 0,903179751   | 1,107199313     | 0,25            |
| MRGPRF                                                                             | 0,050627188 | -0,146954396 | 0,003 | 0,024 | 1         | 0,903155059   | 1,107229584     | 0,125           |
| CLK1                                                                               | 0,223101927 | -0,147069466 | 0,069 | 0,122 | 1         | 0,903083025   | 1,107317901     | 0,56557377      |



Supplementary Table 3

| Differentially expressed genes_keloid-MD_comparing SC-Keloid vs. (SC-Myel+Nonmyel) |             |              |       |       |           |               |                 |                 |
|------------------------------------------------------------------------------------|-------------|--------------|-------|-------|-----------|---------------|-----------------|-----------------|
| gene                                                                               | p_val       | avg_log2FC   | pct.1 | pct.2 | p_val_adj | Foldchange_UP | Foldchange_DOWN | Ratio_pct1_pct2 |
| CRIM1                                                                              | 0,064842572 | -0,147089516 | 0,024 | 0,073 | 1         | 0,903070475   | 1,10733329      | 0,328767123     |
| BRMS1L                                                                             | 0,60566217  | -0,147338849 | 0,014 | 0,024 | 1         | 0,902914415   | 1,107524681     | 0,583333333     |
| ZNF808                                                                             | 0,451039476 | -0,147378537 | 0,011 | 0,024 | 1         | 0,902889577   | 1,107555149     | 0,458333333     |
| RPL39L                                                                             | 0,777084882 | -0,147420105 | 0,062 | 0,049 | 1         | 0,902863563   | 1,107587061     | 1,265306122     |
| SLC39A1                                                                            | 0,974629988 | -0,147422648 | 0,051 | 0,049 | 1         | 0,902861972   | 1,107589013     | 1,040816327     |
| PSMA3                                                                              | 0,340241907 | -0,147442379 | 0,196 | 0,268 | 1         | 0,902849624   | 1,107604161     | 0,731343284     |
| PDS5B                                                                              | 0,125830702 | -0,14745897  | 0,059 | 0,122 | 1         | 0,902839241   | 1,107616898     | 0,483606557     |
| LAPTM4A                                                                            | 0,417500901 | -0,147557582 | 0,34  | 0,415 | 1         | 0,902777532   | 1,10769261      | 0,819277108     |
| RTCA                                                                               | 0,292887183 | -0,147566838 | 0,022 | 0,049 | 1         | 0,902771739   | 1,107699717     | 0,448979592     |
| ZNF766                                                                             | 0,283075535 | -0,147702864 | 0,008 | 0,024 | 1         | 0,902686625   | 1,107804162     | 0,333333333     |
| DPYSL2                                                                             | 0,40954783  | -0,14791909  | 0,064 | 0,098 | 1         | 0,902551343   | 1,107970209     | 0,653061224     |
| ERGIC2                                                                             | 0,685576993 | -0,147924785 | 0,102 | 0,122 | 1         | 0,902547781   | 1,107974582     | 0,836065574     |
| NUTM2A-AS1                                                                         | 0,165771877 | -0,148012386 | 0,018 | 0,049 | 1         | 0,902492979   | 1,108041861     | 0,367346939     |
| LARP4                                                                              | 0,418536974 | -0,148059564 | 0,045 | 0,073 | 1         | 0,902463467   | 1,108078096     | 0,616438356     |
| DGAT1                                                                              | 0,377253366 | -0,148171952 | 0,026 | 0,049 | 1         | 0,902393167   | 1,10816442      | 0,530612245     |
| SMAGP                                                                              | 0,009951995 | -0,148288004 | 0,002 | 0,024 | 1         | 0,90232058    | 1,108253566     | 0,083333333     |
| WDR45B                                                                             | 0,415804345 | -0,148323673 | 0,083 | 0,122 | 1         | 0,902298271   | 1,108280966     | 0,680327869     |
| EPAS1                                                                              | 0,368207718 | -0,148372197 | 0,01  | 0,024 | 1         | 0,902267924   | 1,108318243     | 0,416666667     |
| SLC33A1                                                                            | 0,51430804  | -0,148590504 | 0,03  | 0,049 | 1         | 0,902131404   | 1,108485965     | 0,612244898     |
| STAG1                                                                              | 0,810810552 | -0,148669655 | 0,041 | 0,049 | 1         | 0,902081911   | 1,108546782     | 0,836734694     |
| VIRMA                                                                              | 0,453706681 | -0,148893605 | 0,011 | 0,024 | 1         | 0,901941892   | 1,108718876     | 0,458333333     |
| FGD1                                                                               | 0,196181004 | -0,14890438  | 0,006 | 0,024 | 1         | 0,901935155   | 1,108727156     | 0,25            |
| EIF3J-DT                                                                           | 0,863679013 | -0,149137766 | 0,021 | 0,024 | 1         | 0,901789261   | 1,10890653      | 0,875           |
| DNAJB9                                                                             | 0,73898314  | -0,149205921 | 0,035 | 0,024 | 1         | 0,90174666    | 1,108958918     | 1,458333333     |
| NR2F2                                                                              | 0,337276686 | -0,149413365 | 0,078 | 0,122 | 1         | 0,901617008   | 1,109118385     | 0,639344262     |
| ARHGEF16                                                                           | 9,44793E-05 | -0,149426662 | 0     | 0,024 | 1         | 0,901608698   | 1,109128608     | 0               |
| GALNT3                                                                             | 9,44793E-05 | -0,149426662 | 0     | 0,024 | 1         | 0,901608698   | 1,109128608     | 0               |
| KCNC3                                                                              | 9,44793E-05 | -0,149426662 | 0     | 0,024 | 1         | 0,901608698   | 1,109128608     | 0               |
| MERTK                                                                              | 9,44793E-05 | -0,149426662 | 0     | 0,024 | 1         | 0,901608698   | 1,109128608     | 0               |
| TLCD1                                                                              | 9,44793E-05 | -0,149426662 | 0     | 0,024 | 1         | 0,901608698   | 1,109128608     | 0               |

Supplementary Table 3

| Differentially expressed genes_keloid-MD_ comparing SC-Keloid vs. (SC-Myel+Nonmyel) |             |              |       |       |           |               |                 |                 |
|-------------------------------------------------------------------------------------|-------------|--------------|-------|-------|-----------|---------------|-----------------|-----------------|
| gene                                                                                | p_val       | avg_log2FC   | pct.1 | pct.2 | p_val_adj | Foldchange_UP | Foldchange_DOWN | Ratio_pct1_pct2 |
| ZMYND15                                                                             | 9,44793E-05 | -0,149426662 | 0     | 0,024 | 1         | 0,901608698   | 1,109128608     | 0               |
| GSDMD                                                                               | 0,053516997 | -0,149500673 | 0,035 | 0,098 | 1         | 0,901562446   | 1,109185508     | 0,357142857     |
| CDS2                                                                                | 0,917046786 | -0,149542021 | 0,022 | 0,024 | 1         | 0,901536607   | 1,109217299     | 0,916666667     |
| CDK11A                                                                              | 0,027100643 | -0,149602448 | 0,01  | 0,049 | 1         | 0,901498847   | 1,109263759     | 0,204081633     |
| UNG                                                                                 | 0,280789447 | -0,149799212 | 0,008 | 0,024 | 1         | 0,901375903   | 1,109415058     | 0,333333333     |
| SQSTM1                                                                              | 0,530355556 | -0,149873472 | 0,136 | 0,171 | 1         | 0,901329508   | 1,109472164     | 0,795321637     |
| SLITRK2                                                                             | 0,026491352 | -0,1498769   | 0,01  | 0,049 | 1         | 0,901327367   | 1,1094748       | 0,204081633     |
| MAST3                                                                               | 0,009951995 | -0,150074178 | 0,002 | 0,024 | 1         | 0,901204125   | 1,109626523     | 0,083333333     |
| ATF7IP2                                                                             | 0,747964175 | -0,150191234 | 0,018 | 0,024 | 1         | 0,901131007   | 1,109716559     | 0,75            |
| FLNB                                                                                | 0,467993756 | -0,150268729 | 0,029 | 0,049 | 1         | 0,901082603   | 1,109776169     | 0,591836735     |
| TMEM8B                                                                              | 0,280789447 | -0,15029088  | 0,008 | 0,024 | 1         | 0,901068769   | 1,109793209     | 0,333333333     |
| SF3A3                                                                               | 0,651209798 | -0,150381068 | 0,035 | 0,049 | 1         | 0,901012441   | 1,109862588     | 0,714285714     |
| PSAT1                                                                               | 0,53310687  | -0,150430462 | 0,013 | 0,024 | 1         | 0,900981593   | 1,109900588     | 0,541666667     |
| CAMK2D                                                                              | 0,665970164 | -0,150513466 | 0,057 | 0,073 | 1         | 0,900929758   | 1,109964446     | 0,780821918     |
| JAZF1                                                                               | 0,743841064 | -0,150523245 | 0,018 | 0,024 | 1         | 0,900923651   | 1,10997197      | 0,75            |
| TSR3                                                                                | 0,97812835  | -0,150553955 | 0,051 | 0,049 | 1         | 0,900904474   | 1,109995598     | 1,040816327     |
| TFPT                                                                                | 0,083320067 | -0,15079033  | 0,026 | 0,073 | 1         | 0,900756879   | 1,110177478     | 0,356164384     |
| NECAP2                                                                              | 0,88616459  | -0,150791357 | 0,045 | 0,049 | 1         | 0,900756238   | 1,110178267     | 0,918367347     |
| RB1CC1                                                                              | 0,484345645 | -0,150806264 | 0,067 | 0,098 | 1         | 0,900746931   | 1,110189739     | 0,683673469     |
| ZFP91                                                                               | 0,849886809 | -0,150965122 | 0,043 | 0,049 | 1         | 0,900647753   | 1,110311991     | 0,87755102      |
| CAND2                                                                               | 0,009951995 | -0,150968246 | 0,002 | 0,024 | 1         | 0,900645803   | 1,110314395     | 0,083333333     |
| DNPH1                                                                               | 0,431875092 | -0,151043136 | 0,123 | 0,171 | 1         | 0,900599052   | 1,110372033     | 0,719298246     |
| SCMH1                                                                               | 0,068627663 | -0,151055586 | 0,013 | 0,049 | 1         | 0,90059128    | 1,110381615     | 0,265306122     |
| SEPTIN10                                                                            | 0,205492835 | -0,151088609 | 0,085 | 0,146 | 1         | 0,900570666   | 1,110407031     | 0,582191781     |
| CD200                                                                               | 0,889264239 | -0,151095915 | 0,029 | 0,024 | 1         | 0,900566105   | 1,110412655     | 1,208333333     |
| FRS2                                                                                | 0,547570515 | -0,151182382 | 0,051 | 0,073 | 1         | 0,900512132   | 1,110479209     | 0,698630137     |
| RSPRY1                                                                              | 0,512527184 | -0,151191909 | 0,03  | 0,049 | 1         | 0,900506186   | 1,110486542     | 0,612244898     |
| GTPBP3                                                                              | 0,863679013 | -0,151244451 | 0,021 | 0,024 | 1         | 0,90047339    | 1,110526986     | 0,875           |
| YPEL3                                                                               | 0,380173608 | -0,151285646 | 0,043 | 0,073 | 1         | 0,900447678   | 1,110558697     | 0,589041096     |
| CWC25                                                                               | 0,294336857 | -0,151345297 | 0,022 | 0,049 | 1         | 0,900410448   | 1,110604616     | 0,448979592     |

Supplementary Table 3

| Differentially expressed genes_keloid-MD_comparing SC-Keloid vs. (SC-Myel+Nonmyel) |             |              |       |       |           |               |                 |                 |
|------------------------------------------------------------------------------------|-------------|--------------|-------|-------|-----------|---------------|-----------------|-----------------|
| gene                                                                               | p_val       | avg_log2FC   | pct.1 | pct.2 | p_val_adj | Foldchange_UP | Foldchange_DOWN | Ratio_pct1_pct2 |
| SLC41A2                                                                            | 0,337859026 | -0,151423379 | 0,024 | 0,049 | 1         | 0,900361717   | 1,110664726     | 0,489795918     |
| TRMT61A                                                                            | 0,674031557 | -0,151579213 | 0,016 | 0,024 | 1         | 0,900264469   | 1,110784702     | 0,666666667     |
| ILF3                                                                               | 0,351840937 | -0,151600018 | 0,097 | 0,146 | 1         | 0,900251487   | 1,11080072      | 0,664383562     |
| SYBU                                                                               | 0,009951995 | -0,151831027 | 0,002 | 0,024 | 1         | 0,900107347   | 1,110978599     | 0,083333333     |
| OGA                                                                                | 0,314162236 | -0,151984767 | 0,057 | 0,098 | 1         | 0,900011432   | 1,111096997     | 0,581632653     |
| IFRD2                                                                              | 0,404184947 | -0,152002642 | 0,045 | 0,073 | 1         | 0,900000282   | 1,111110763     | 0,616438356     |
| ARIH1                                                                              | 0,716149938 | -0,152176974 | 0,059 | 0,073 | 1         | 0,899891534   | 1,111245035     | 0,808219178     |
| DUOXA1                                                                             | 9,44793E-05 | -0,152208554 | 0     | 0,024 | 1         | 0,899871836   | 1,111269361     | 0               |
| EHHADH                                                                             | 9,44793E-05 | -0,152208554 | 0     | 0,024 | 1         | 0,899871836   | 1,111269361     | 0               |
| NBPF9                                                                              | 9,44793E-05 | -0,152208554 | 0     | 0,024 | 1         | 0,899871836   | 1,111269361     | 0               |
| SIGLEC10                                                                           | 9,44793E-05 | -0,152208554 | 0     | 0,024 | 1         | 0,899871836   | 1,111269361     | 0               |
| GALNT18                                                                            | 0,009951995 | -0,152660732 | 0,002 | 0,024 | 1         | 0,899589837   | 1,111617716     | 0,083333333     |
| ATG2B                                                                              | 0,602891701 | -0,152708534 | 0,014 | 0,024 | 1         | 0,899560031   | 1,111654549     | 0,583333333     |
| NR1D1                                                                              | 0,287685455 | -0,152780623 | 0,008 | 0,024 | 1         | 0,899515082   | 1,111710098     | 0,333333333     |
| CDKN2AIPNL                                                                         | 0,288566959 | -0,152896517 | 0,022 | 0,049 | 1         | 0,899442826   | 1,111799406     | 0,448979592     |
| GUCD1                                                                              | 0,097729926 | -0,15323191  | 0,014 | 0,049 | 1         | 0,89923375    | 1,112057904     | 0,285714286     |
| PLEKHA4                                                                            | 0,189718983 | -0,153407197 | 0,153 | 0,244 | 1         | 0,899124501   | 1,112193027     | 0,62704918      |
| RINT1                                                                              | 0,280789447 | -0,153478844 | 0,008 | 0,024 | 1         | 0,899079849   | 1,112248262     | 0,333333333     |
| KIAA1549                                                                           | 0,049781231 | -0,153690459 | 0,003 | 0,024 | 1         | 0,898947982   | 1,112411419     | 0,125           |
| IRF3                                                                               | 0,342783368 | -0,153976839 | 0,041 | 0,073 | 1         | 0,898769555   | 1,112632258     | 0,561643836     |
| MAP2K1                                                                             | 0,863679013 | -0,154035597 | 0,021 | 0,024 | 1         | 0,898732951   | 1,112677574     | 0,875           |
| FBLN2                                                                              | 0,943087568 | -0,15408355  | 0,053 | 0,049 | 1         | 0,898703079   | 1,112714558     | 1,081632653     |
| TIMP4                                                                              | 0,578302256 | -0,154277967 | 0,113 | 0,146 | 1         | 0,898581979   | 1,112864517     | 0,773972603     |
| TMEM237                                                                            | 0,749340217 | -0,154847184 | 0,018 | 0,024 | 1         | 0,898227512   | 1,113303686     | 0,75            |
| EBNA1BP2                                                                           | 0,504935391 | -0,155032258 | 0,049 | 0,073 | 1         | 0,898112291   | 1,113446514     | 0,671232877     |
| SARNP                                                                              | 0,448381168 | -0,155131307 | 0,011 | 0,024 | 1         | 0,898050633   | 1,113522961     | 0,458333333     |
| CLIP2                                                                              | 0,804243171 | -0,155181703 | 0,019 | 0,024 | 1         | 0,898019263   | 1,113561859     | 0,791666667     |
| AIDA                                                                               | 0,46785628  | -0,155381993 | 0,067 | 0,098 | 1         | 0,897894599   | 1,113716466     | 0,683673469     |
| PIM1                                                                               | 0,009951995 | -0,155392931 | 0,002 | 0,024 | 1         | 0,897887792   | 1,11372491      | 0,083333333     |
| ELOVL6                                                                             | 0,285374202 | -0,155489121 | 0,008 | 0,024 | 1         | 0,897827928   | 1,113799169     | 0,333333333     |

Supplementary Table 3

| Differentially expressed genes_keloid-MD_comparing SC-Keloid vs. (SC-Myel+Nonmyel) |             |              |       |       |           |               |                 |                 |
|------------------------------------------------------------------------------------|-------------|--------------|-------|-------|-----------|---------------|-----------------|-----------------|
| gene                                                                               | p_val       | avg_log2FC   | pct.1 | pct.2 | p_val_adj | Foldchange_UP | Foldchange_DOWN | Ratio_pct1_pct2 |
| PRELID1                                                                            | 0,504744247 | -0,15570864  | 0,198 | 0,244 | 1         | 0,897691326   | 1,113968656     | 0,81147541      |
| NECTIN2                                                                            | 0,649344591 | -0,155939523 | 0,035 | 0,049 | 1         | 0,897547675   | 1,114146946     | 0,714285714     |
| SEPTIN1                                                                            | 0,451039476 | -0,156003487 | 0,011 | 0,024 | 1         | 0,897507882   | 1,114196344     | 0,458333333     |
| AKIP1                                                                              | 0,246571001 | -0,156079739 | 0,021 | 0,049 | 1         | 0,897460446   | 1,114255235     | 0,428571429     |
| FXYD7                                                                              | 9,44793E-05 | -0,156198723 | 0     | 0,024 | 1         | 0,897386432   | 1,114347135     | 0               |
| GIPR                                                                               | 9,44793E-05 | -0,156198723 | 0     | 0,024 | 1         | 0,897386432   | 1,114347135     | 0               |
| KCNH2                                                                              | 9,44793E-05 | -0,156198723 | 0     | 0,024 | 1         | 0,897386432   | 1,114347135     | 0               |
| MPP2                                                                               | 9,44793E-05 | -0,156198723 | 0     | 0,024 | 1         | 0,897386432   | 1,114347135     | 0               |
| SCGB2A2                                                                            | 9,44793E-05 | -0,156198723 | 0     | 0,024 | 1         | 0,897386432   | 1,114347135     | 0               |
| THSD1                                                                              | 9,44793E-05 | -0,156198723 | 0     | 0,024 | 1         | 0,897386432   | 1,114347135     | 0               |
| TMEM139                                                                            | 9,44793E-05 | -0,156198723 | 0     | 0,024 | 1         | 0,897386432   | 1,114347135     | 0               |
| NOL3                                                                               | 0,746589028 | -0,156473159 | 0,018 | 0,024 | 1         | 0,897215743   | 1,114559132     | 0,75            |
| COG4                                                                               | 0,530362187 | -0,156483166 | 0,013 | 0,024 | 1         | 0,89720952    | 1,114566863     | 0,541666667     |
| ADGRB3                                                                             | 0,048947161 | -0,156681802 | 0,003 | 0,024 | 1         | 0,897085997   | 1,114720331     | 0,125           |
| JOSD1                                                                              | 0,835525655 | -0,15670173  | 0,059 | 0,049 | 1         | 0,897073606   | 1,114735729     | 1,204081633     |
| TOX4                                                                               | 0,741926928 | -0,156761715 | 0,061 | 0,073 | 1         | 0,897036308   | 1,114782079     | 0,835616438     |
| RBSN                                                                               | 0,743841064 | -0,156872185 | 0,018 | 0,024 | 1         | 0,896967622   | 1,114867443     | 0,75            |
| ABHD5                                                                              | 0,368207718 | -0,156993943 | 0,01  | 0,024 | 1         | 0,896891925   | 1,114961538     | 0,416666667     |
| FBXL6                                                                              | 0,448381168 | -0,157002062 | 0,011 | 0,024 | 1         | 0,896886878   | 1,114967812     | 0,458333333     |
| ZNF644                                                                             | 0,230315525 | -0,157071388 | 0,104 | 0,171 | 1         | 0,89684378    | 1,115021391     | 0,608187135     |
| ODC1                                                                               | 0,477937139 | -0,157126365 | 0,048 | 0,073 | 1         | 0,896809605   | 1,115063883     | 0,657534247     |
| ZNF281                                                                             | 0,380479892 | -0,157262716 | 0,026 | 0,049 | 1         | 0,89672485    | 1,115169274     | 0,530612245     |
| LDOC1                                                                              | 0,048947161 | -0,15730402  | 0,003 | 0,024 | 1         | 0,896699178   | 1,115201201     | 0,125           |
| SMG8                                                                               | 0,009951995 | -0,15731113  | 0,002 | 0,024 | 1         | 0,896694759   | 1,115206697     | 0,083333333     |
| MAP3K10                                                                            | 0,116646669 | -0,157428012 | 0,005 | 0,024 | 1         | 0,896622114   | 1,115297051     | 0,208333333     |
| AAMP                                                                               | 0,676963166 | -0,157621269 | 0,037 | 0,049 | 1         | 0,896502015   | 1,115446461     | 0,755102041     |
| PSMD6                                                                              | 0,376394081 | -0,157626292 | 0,043 | 0,073 | 1         | 0,896498894   | 1,115450344     | 0,589041096     |
| NDUFA13                                                                            | 0,578651024 | -0,157675253 | 0,158 | 0,195 | 1         | 0,89646847    | 1,1154882       | 0,81025641      |
| FKBP8                                                                              | 0,241344348 | -0,15771237  | 0,053 | 0,098 | 1         | 0,896445406   | 1,1155169       | 0,540816327     |
| CAMLG                                                                              | 0,100768619 | -0,157807452 | 0,088 | 0,171 | 1         | 0,896386327   | 1,115590421     | 0,514619883     |

Supplementary Table 3

| Differentially expressed genes_keloid-MD_ comparing SC-Keloid vs. (SC-Myel+Nonmyel) |             |              |       |       |           |               |                 |                 |
|-------------------------------------------------------------------------------------|-------------|--------------|-------|-------|-----------|---------------|-----------------|-----------------|
| gene                                                                                | p_val       | avg_log2FC   | pct.1 | pct.2 | p_val_adj | Foldchange_UP | Foldchange_DOWN | Ratio_pct1_pct2 |
| ZFAND3                                                                              | 0,957694802 | -0,158044551 | 0,048 | 0,049 | 1         | 0,896239023   | 1,115773777     | 0,979591837     |
| KLF7                                                                                | 0,845212704 | -0,158254664 | 0,03  | 0,024 | 1         | 0,896108505   | 1,115936289     | 1,25            |
| FARSA                                                                               | 0,208609703 | -0,158550156 | 0,019 | 0,049 | 1         | 0,895924983   | 1,116164878     | 0,387755102     |
| YIPF2                                                                               | 0,334781231 | -0,158793621 | 0,024 | 0,049 | 1         | 0,895773802   | 1,116353255     | 0,489795918     |
| ILRUN                                                                               | 0,149082682 | -0,158847612 | 0,03  | 0,073 | 1         | 0,895740279   | 1,116395034     | 0,410958904     |
| C1R                                                                                 | 0,228548381 | -0,159142935 | 0,035 | 0,073 | 1         | 0,895556938   | 1,116623586     | 0,479452055     |
| DUSP18                                                                              | 0,451039476 | -0,159547248 | 0,011 | 0,024 | 1         | 0,895305995   | 1,116936562     | 0,458333333     |
| TAF1D                                                                               | 0,701035945 | -0,159701858 | 0,059 | 0,073 | 1         | 0,895210053   | 1,117056267     | 0,808219178     |
| CUL3                                                                                | 0,737378808 | -0,15973847  | 0,061 | 0,073 | 1         | 0,895187335   | 1,117084616     | 0,835616438     |
| KDM2A                                                                               | 0,179866792 | -0,159932978 | 0,048 | 0,098 | 1         | 0,895066651   | 1,117235235     | 0,489795918     |
| COPB1                                                                               | 0,781061333 | -0,159960097 | 0,086 | 0,098 | 1         | 0,895049826   | 1,117256236     | 0,87755102      |
| HYAL2                                                                               | 0,974629988 | -0,160062671 | 0,051 | 0,049 | 1         | 0,894986192   | 1,117335674     | 1,040816327     |
| WDR47                                                                               | 0,207393847 | -0,160139062 | 0,019 | 0,049 | 1         | 0,894938803   | 1,117394839     | 0,387755102     |
| CRTC3                                                                               | 0,227568155 | -0,16046852  | 0,035 | 0,073 | 1         | 0,894734456   | 1,11765004      | 0,479452055     |
| DOT1L                                                                               | 0,974840088 | -0,160659879 | 0,024 | 0,024 | 1         | 0,894615786   | 1,117798295     | 1               |
| RAB35                                                                               | 0,866326572 | -0,160803612 | 0,021 | 0,024 | 1         | 0,894526662   | 1,117909664     | 0,875           |
| KIF1C                                                                               | 0,166840557 | -0,160862591 | 0,018 | 0,049 | 1         | 0,894490093   | 1,117955366     | 0,367346939     |
| U2SURP                                                                              | 0,232086598 | -0,161146208 | 0,124 | 0,195 | 1         | 0,894314264   | 1,118175165     | 0,635897436     |
| LAGE3                                                                               | 0,740581072 | -0,161357721 | 0,083 | 0,098 | 1         | 0,894183159   | 1,118339113     | 0,846938776     |
| NFIX                                                                                | 0,603700323 | -0,161525079 | 0,137 | 0,171 | 1         | 0,894079436   | 1,118468851     | 0,801169591     |
| CWC15                                                                               | 0,657223962 | -0,161879817 | 0,124 | 0,146 | 1         | 0,893859622   | 1,118743901     | 0,849315068     |
| MARK3                                                                               | 0,239927202 | -0,162017434 | 0,088 | 0,146 | 1         | 0,893774362   | 1,118850621     | 0,602739726     |
| MICAL1                                                                              | 0,196181004 | -0,162079127 | 0,006 | 0,024 | 1         | 0,893736143   | 1,118898467     | 0,25            |
| AMN1                                                                                | 0,452371839 | -0,162271647 | 0,011 | 0,024 | 1         | 0,893616886   | 1,119047788     | 0,458333333     |
| IQCN                                                                                | 0,009951995 | -0,162297873 | 0,002 | 0,024 | 1         | 0,893600641   | 1,119068131     | 0,083333333     |
| CXCL16                                                                              | 0,096204645 | -0,162378455 | 0,014 | 0,049 | 1         | 0,893550731   | 1,119130638     | 0,285714286     |
| ZNHIT3                                                                              | 0,446473118 | -0,16239662  | 0,065 | 0,098 | 1         | 0,89353948    | 1,119144729     | 0,663265306     |
| LRR1                                                                                | 0,676801274 | -0,162618756 | 0,016 | 0,024 | 1         | 0,89340191    | 1,119317061     | 0,666666667     |
| IDH3A                                                                               | 0,863679013 | -0,162627012 | 0,021 | 0,024 | 1         | 0,893396797   | 1,119323466     | 0,875           |
| HEXIM1                                                                              | 0,112676848 | -0,162852979 | 0,057 | 0,122 | 1         | 0,893256877   | 1,119498798     | 0,467213115     |

Supplementary Table 3

| Differentially expressed genes_keloid-MD_comparing SC-Keloid vs. (SC-Myel+Nonmyel) |             |              |       |       |           |               |                 |                 |
|------------------------------------------------------------------------------------|-------------|--------------|-------|-------|-----------|---------------|-----------------|-----------------|
| gene                                                                               | p_val       | avg_log2FC   | pct.1 | pct.2 | p_val_adj | Foldchange_UP | Foldchange_DOWN | Ratio_pct1_pct2 |
| SARS1                                                                              | 0,341169856 | -0,16292359  | 0,097 | 0,146 | 1         | 0,893213158   | 1,119553592     | 0,664383562     |
| UBE2L6                                                                             | 0,41335313  | -0,163190032 | 0,027 | 0,049 | 1         | 0,893048212   | 1,119760374     | 0,551020408     |
| AC079354.3                                                                         | 0,009700686 | -0,163639399 | 0,002 | 0,024 | 1         | 0,892770091   | 1,120109209     | 0,083333333     |
| MSL3                                                                               | 0,551900576 | -0,163738965 | 0,051 | 0,073 | 1         | 0,89270848    | 1,120186514     | 0,698630137     |
| ASB7                                                                               | 0,45638276  | -0,163831632 | 0,011 | 0,024 | 1         | 0,892651141   | 1,120258468     | 0,458333333     |
| SNRPC                                                                              | 0,97113211  | -0,163928164 | 0,051 | 0,049 | 1         | 0,892591415   | 1,120333428     | 1,040816327     |
| CRIP2                                                                              | 0,479558905 | -0,164042094 | 0,215 | 0,268 | 1         | 0,892520929   | 1,120421905     | 0,802238806     |
| YBEY                                                                               | 0,772674319 | -0,164107535 | 0,04  | 0,049 | 1         | 0,892480446   | 1,120472728     | 0,816326531     |
| ZNF576                                                                             | 0,116646669 | -0,164140834 | 0,005 | 0,024 | 1         | 0,892459846   | 1,120498591     | 0,208333333     |
| KIAA2026                                                                           | 0,646550869 | -0,164259348 | 0,035 | 0,049 | 1         | 0,892386536   | 1,12059064      | 0,714285714     |
| B9D1                                                                               | 0,674031557 | -0,164306251 | 0,016 | 0,024 | 1         | 0,892357524   | 1,120627072     | 0,666666667     |
| PDE8A                                                                              | 0,199698613 | -0,164354565 | 0,033 | 0,073 | 1         | 0,892327641   | 1,120664601     | 0,452054795     |
| POLD3                                                                              | 0,280789447 | -0,164483871 | 0,008 | 0,024 | 1         | 0,892247667   | 1,120765049     | 0,333333333     |
| TMEM181                                                                            | 0,935914981 | -0,164631335 | 0,027 | 0,024 | 1         | 0,892156471   | 1,120879613     | 1,125           |
| ADAMTS17                                                                           | 9,44793E-05 | -0,164764853 | 0     | 0,024 | 1         | 0,892073908   | 1,120983353     | 0               |
| ANG                                                                                | 9,44793E-05 | -0,164764853 | 0     | 0,024 | 1         | 0,892073908   | 1,120983353     | 0               |
| CCR10                                                                              | 9,44793E-05 | -0,164764853 | 0     | 0,024 | 1         | 0,892073908   | 1,120983353     | 0               |
| FGFR3                                                                              | 9,44793E-05 | -0,164764853 | 0     | 0,024 | 1         | 0,892073908   | 1,120983353     | 0               |
| KIRREL2                                                                            | 9,44793E-05 | -0,164764853 | 0     | 0,024 | 1         | 0,892073908   | 1,120983353     | 0               |
| PIEZO2                                                                             | 9,44793E-05 | -0,164764853 | 0     | 0,024 | 1         | 0,892073908   | 1,120983353     | 0               |
| RAB42                                                                              | 9,44793E-05 | -0,164764853 | 0     | 0,024 | 1         | 0,892073908   | 1,120983353     | 0               |
| RBMS3-AS3                                                                          | 9,44793E-05 | -0,164764853 | 0     | 0,024 | 1         | 0,892073908   | 1,120983353     | 0               |
| ZNF653                                                                             | 9,44793E-05 | -0,164764853 | 0     | 0,024 | 1         | 0,892073908   | 1,120983353     | 0               |
| APEX2                                                                              | 0,196181004 | -0,165052662 | 0,006 | 0,024 | 1         | 0,891895962   | 1,121207004     | 0,25            |
| IRF7                                                                               | 0,198124435 | -0,165125165 | 0,006 | 0,024 | 1         | 0,891851141   | 1,121263352     | 0,25            |
| CLK4                                                                               | 0,741096359 | -0,165134473 | 0,018 | 0,024 | 1         | 0,891845387   | 1,121270587     | 0,75            |
| COX5A                                                                              | 0,830759678 | -0,165271612 | 0,161 | 0,171 | 1         | 0,891760614   | 1,121377177     | 0,941520468     |
| ZBTB25                                                                             | 0,530362187 | -0,165454053 | 0,013 | 0,024 | 1         | 0,891647851   | 1,121518993     | 0,541666667     |
| MARCHF2                                                                            | 0,368207718 | -0,165564342 | 0,01  | 0,024 | 1         | 0,89157969    | 1,121604732     | 0,416666667     |
| PPP3R1                                                                             | 0,519669852 | -0,165614001 | 0,03  | 0,049 | 1         | 0,891549001   | 1,12164334      | 0,612244898     |

Supplementary Table 3

| Differentially expressed genes_keloid-MD_comparing SC-Keloid vs. (SC-Myel+Nonmyel) |             |              |       |       |           |               |                 |                 |
|------------------------------------------------------------------------------------|-------------|--------------|-------|-------|-----------|---------------|-----------------|-----------------|
| gene                                                                               | p_val       | avg_log2FC   | pct.1 | pct.2 | p_val_adj | Foldchange_UP | Foldchange_DOWN | Ratio_pct1_pct2 |
| ROM1                                                                               | 0,009700686 | -0,165964936 | 0,002 | 0,024 | 1         | 0,891332159   | 1,121916213     | 0,083333333     |
| TIGD6                                                                              | 0,116646669 | -0,166010975 | 0,005 | 0,024 | 1         | 0,891303716   | 1,121952015     | 0,208333333     |
| SF3B3                                                                              | 0,914464287 | -0,16628817  | 0,022 | 0,024 | 1         | 0,891132479   | 1,122167605     | 0,916666667     |
| ALPK1                                                                              | 0,283075535 | -0,16635827  | 0,008 | 0,024 | 1         | 0,891089181   | 1,122222131     | 0,333333333     |
| NAT9                                                                               | 0,451039476 | -0,166432773 | 0,011 | 0,024 | 1         | 0,891043165   | 1,122280087     | 0,458333333     |
| EIF2D                                                                              | 0,533106974 | -0,166464854 | 0,013 | 0,024 | 1         | 0,891023351   | 1,122305043     | 0,541666667     |
| H6PD                                                                               | 0,125117108 | -0,166543371 | 0,029 | 0,073 | 1         | 0,89097486    | 1,122366124     | 0,397260274     |
| ORC5                                                                               | 0,280789447 | -0,16678703  | 0,008 | 0,024 | 1         | 0,890824394   | 1,122555699     | 0,333333333     |
| PXN                                                                                | 0,169096698 | -0,167060152 | 0,032 | 0,073 | 1         | 0,890655765   | 1,122768234     | 0,438356164     |
| ANKRD13B                                                                           | 0,050627188 | -0,167135314 | 0,003 | 0,024 | 1         | 0,890609364   | 1,12282673      | 0,125           |
| FUT8                                                                               | 0,955896378 | -0,167188082 | 0,048 | 0,049 | 1         | 0,89057679    | 1,122867799     | 0,979591837     |
| QRSL1                                                                              | 0,285374202 | -0,167267245 | 0,008 | 0,024 | 1         | 0,890527924   | 1,122929414     | 0,333333333     |
| MFGE8                                                                              | 0,088212316 | -0,167284694 | 0,167 | 0,293 | 1         | 0,890517153   | 1,122942996     | 0,56996587      |
| TRIR                                                                               | 0,450725816 | -0,16758896  | 0,171 | 0,22  | 1         | 0,890329362   | 1,123179851     | 0,777272727     |
| WIPI2                                                                              | 0,47106522  | -0,16763867  | 0,048 | 0,073 | 1         | 0,890298685   | 1,123218553     | 0,657534247     |
| YIPF3                                                                              | 0,371390924 | -0,167665572 | 0,043 | 0,073 | 1         | 0,890282084   | 1,123239497     | 0,589041096     |
| CCDC97                                                                             | 0,044659199 | -0,167674484 | 0,011 | 0,049 | 1         | 0,890276584   | 1,123246436     | 0,224489796     |
| KIAA1614                                                                           | 0,116646669 | -0,167678514 | 0,005 | 0,024 | 1         | 0,890274097   | 1,123249573     | 0,208333333     |
| EEA1                                                                               | 0,251368408 | -0,167740605 | 0,166 | 0,244 | 1         | 0,890235783   | 1,123297917     | 0,680327869     |
| IKZF3                                                                              | 0,050627188 | -0,167943112 | 0,003 | 0,024 | 1         | 0,890110831   | 1,123455602     | 0,125           |
| ZNF670                                                                             | 0,009700686 | -0,168158771 | 0,002 | 0,024 | 1         | 0,889977784   | 1,123623553     | 0,083333333     |
| ELP5                                                                               | 0,919234569 | -0,16822068  | 0,054 | 0,049 | 1         | 0,889939594   | 1,123671771     | 1,102040816     |
| HLA-DPA1                                                                           | 0,285374202 | -0,1683009   | 0,008 | 0,024 | 1         | 0,889890111   | 1,123734253     | 0,333333333     |
| ANKRD52                                                                            | 0,804243171 | -0,168450454 | 0,019 | 0,024 | 1         | 0,889797868   | 1,123850749     | 0,791666667     |
| BOD1                                                                               | 0,168278471 | -0,168521701 | 0,032 | 0,073 | 1         | 0,889753926   | 1,123906251     | 0,438356164     |
| ST8SIA1                                                                            | 0,000264836 | -0,168580133 | 0,003 | 0,049 | 1         | 0,88971789    | 1,123951773     | 0,06122449      |
| ARHGAP20                                                                           | 0,050627188 | -0,168639666 | 0,003 | 0,024 | 1         | 0,889681176   | 1,123998154     | 0,125           |
| CRYL1                                                                              | 0,206183141 | -0,168663622 | 0,019 | 0,049 | 1         | 0,889666404   | 1,124016818     | 0,387755102     |
| RBM4                                                                               | 0,679575369 | -0,168823794 | 0,016 | 0,024 | 1         | 0,889567636   | 1,124141616     | 0,666666667     |
| PHLDA1                                                                             | 0,363706226 | -0,168902707 | 0,061 | 0,098 | 1         | 0,889518979   | 1,124203107     | 0,62244898      |

Supplementary Table 3

| Differentially expressed genes_keloid-MD_comparing SC-Keloid vs. (SC-Myel+Nonmyel) |             |              |       |       |           |               |                 |                 |
|------------------------------------------------------------------------------------|-------------|--------------|-------|-------|-----------|---------------|-----------------|-----------------|
| gene                                                                               | p_val       | avg_log2FC   | pct.1 | pct.2 | p_val_adj | Foldchange_UP | Foldchange_DOWN | Ratio_pct1_pct2 |
| GYG1                                                                               | 0,368207718 | -0,168912426 | 0,01  | 0,024 | 1         | 0,889512987   | 1,12421068      | 0,416666667     |
| ZNF138                                                                             | 0,448381168 | -0,168932743 | 0,011 | 0,024 | 1         | 0,88950046    | 1,124226512     | 0,458333333     |
| TTC28                                                                              | 0,370733807 | -0,168961879 | 0,01  | 0,024 | 1         | 0,889482496   | 1,124249217     | 0,416666667     |
| BTN2A1                                                                             | 0,891556838 | -0,169053482 | 0,029 | 0,024 | 1         | 0,889426021   | 1,124320602     | 1,208333333     |
| TPRKB                                                                              | 0,927837306 | -0,169106734 | 0,107 | 0,098 | 1         | 0,889393192   | 1,124362104     | 1,091836735     |
| ETFRF1                                                                             | 0,297907478 | -0,169597859 | 0,112 | 0,171 | 1         | 0,889090474   | 1,124744926     | 0,65497076      |
| EEF1B2                                                                             | 0,134871452 | -0,16966395  | 0,415 | 0,561 | 1         | 0,889049745   | 1,124796453     | 0,739750446     |
| NAALADL1                                                                           | 0,026794459 | -0,16967223  | 0,01  | 0,049 | 1         | 0,889044643   | 1,124802908     | 0,204081633     |
| RPL13                                                                              | 0,260452125 | -0,169935931 | 0,829 | 0,878 | 1         | 0,888882155   | 1,125008522     | 0,944191344     |
| AFMID                                                                              | 0,203777145 | -0,169944109 | 0,019 | 0,049 | 1         | 0,888877116   | 1,1250149       | 0,387755102     |
| ACTR3C                                                                             | 0,009951995 | -0,17005425  | 0,002 | 0,024 | 1         | 0,888809258   | 1,125100791     | 0,083333333     |
| PSTK                                                                               | 0,533106974 | -0,170082094 | 0,013 | 0,024 | 1         | 0,888792105   | 1,125122506     | 0,541666667     |
| ATR                                                                                | 0,674031557 | -0,17027702  | 0,016 | 0,024 | 1         | 0,888672026   | 1,125274535     | 0,666666667     |
| TRIM14                                                                             | 0,861032984 | -0,17028388  | 0,021 | 0,024 | 1         | 0,8886678     | 1,125279885     | 0,875           |
| POC5                                                                               | 0,050627188 | -0,170284568 | 0,003 | 0,024 | 1         | 0,888667376   | 1,125280422     | 0,125           |
| SIPA1                                                                              | 0,608438325 | -0,170307349 | 0,014 | 0,024 | 1         | 0,888653344   | 1,125298191     | 0,583333333     |
| MOSMO                                                                              | 0,980457013 | -0,170558496 | 0,026 | 0,024 | 1         | 0,888498659   | 1,125494101     | 1,083333333     |
| PQBP1                                                                              | 0,889842546 | -0,170884669 | 0,045 | 0,049 | 1         | 0,888297805   | 1,125748589     | 0,918367347     |
| SLF1                                                                               | 0,893850316 | -0,1709601   | 0,029 | 0,024 | 1         | 0,888251361   | 1,12580745      | 1,208333333     |
| GDNF                                                                               | 0,009951995 | -0,170961671 | 0,002 | 0,024 | 1         | 0,888250394   | 1,125808676     | 0,083333333     |
| MAP7D1                                                                             | 0,122419352 | -0,171207175 | 0,029 | 0,073 | 1         | 0,888099253   | 1,126000271     | 0,397260274     |
| PSMD5                                                                              | 0,123089492 | -0,171461326 | 0,029 | 0,073 | 1         | 0,887942815   | 1,12619865      | 0,397260274     |
| GNB2                                                                               | 0,301202612 | -0,171619073 | 0,131 | 0,195 | 1         | 0,887845732   | 1,126321797     | 0,671794872     |
| FAM114A2                                                                           | 0,026432918 | -0,171879583 | 0,019 | 0,073 | 1         | 0,887685426   | 1,126525197     | 0,260273973     |
| RAD23B                                                                             | 0,408520125 | -0,172045491 | 0,091 | 0,049 | 1         | 0,88758335    | 1,126654754     | 1,857142857     |
| BCL2L13                                                                            | 0,470381007 | -0,172155467 | 0,048 | 0,073 | 1         | 0,887515692   | 1,126740641     | 0,657534247     |
| ATF6B                                                                              | 0,343988324 | -0,172274201 | 0,041 | 0,073 | 1         | 0,887442652   | 1,126833376     | 0,561643836     |
| OLA1                                                                               | 0,700283249 | -0,172339813 | 0,059 | 0,073 | 1         | 0,887402293   | 1,126884624     | 0,808219178     |
| RABGAP1                                                                            | 0,147565917 | -0,172448386 | 0,03  | 0,073 | 1         | 0,887335513   | 1,126969433     | 0,410958904     |
| MCM2                                                                               | 0,196181004 | -0,172739278 | 0,006 | 0,024 | 1         | 0,887156617   | 1,127196688     | 0,25            |



Supplementary Table 3

| Differentially expressed genes_keloid-MD_comparing SC-Keloid vs. (SC-Myel+Nonmyel) |             |              |       |       |           |               |                 |                 |
|------------------------------------------------------------------------------------|-------------|--------------|-------|-------|-----------|---------------|-----------------|-----------------|
| gene                                                                               | p_val       | avg_log2FC   | pct.1 | pct.2 | p_val_adj | Foldchange_UP | Foldchange_DOWN | Ratio_pct1_pct2 |
| CCDC15                                                                             | 0,050627188 | -0,17289332  | 0,003 | 0,024 | 1         | 0,887061896   | 1,12731705      | 0,125           |
| CCDC157                                                                            | 0,116646669 | -0,173026627 | 0,005 | 0,024 | 1         | 0,886979934   | 1,12742122      | 0,208333333     |
| APOA1                                                                              | 9,44793E-05 | -0,173038811 | 0     | 0,024 | 1         | 0,886972444   | 1,127430741     | 0               |
| CNTNAP1                                                                            | 9,44793E-05 | -0,173038811 | 0     | 0,024 | 1         | 0,886972444   | 1,127430741     | 0               |
| HLF                                                                                | 9,44793E-05 | -0,173038811 | 0     | 0,024 | 1         | 0,886972444   | 1,127430741     | 0               |
| PREX1                                                                              | 9,44793E-05 | -0,173038811 | 0     | 0,024 | 1         | 0,886972444   | 1,127430741     | 0               |
| PRKCZ                                                                              | 9,44793E-05 | -0,173038811 | 0     | 0,024 | 1         | 0,886972444   | 1,127430741     | 0               |
| RAB3D                                                                              | 9,44793E-05 | -0,173038811 | 0     | 0,024 | 1         | 0,886972444   | 1,127430741     | 0               |
| GET1                                                                               | 0,44145438  | -0,173097719 | 0,046 | 0,073 | 1         | 0,886936228   | 1,127476777     | 0,630136986     |
| EXOC2                                                                              | 0,368207718 | -0,173113567 | 0,01  | 0,024 | 1         | 0,886926485   | 1,127489163     | 0,416666667     |
| GRB2                                                                               | 0,243576495 | -0,17332147  | 0,07  | 0,122 | 1         | 0,886798681   | 1,127651654     | 0,573770492     |
| BTG2                                                                               | 0,645620743 | -0,173779442 | 0,035 | 0,049 | 1         | 0,886517219   | 1,128009675     | 0,714285714     |
| RFX3                                                                               | 0,466260678 | -0,173822462 | 0,029 | 0,049 | 1         | 0,886490784   | 1,128043312     | 0,591836735     |
| TRMT10B                                                                            | 0,749340217 | -0,173875706 | 0,018 | 0,024 | 1         | 0,886458068   | 1,128084944     | 0,75            |
| MFAP1                                                                              | 0,033962939 | -0,173901909 | 0,032 | 0,098 | 1         | 0,886441968   | 1,128105433     | 0,326530612     |
| PTEN                                                                               | 0,442516958 | -0,173906493 | 0,086 | 0,122 | 1         | 0,886439151   | 1,128109018     | 0,704918033     |
| SKP1                                                                               | 0,313072855 | -0,174025912 | 0,526 | 0,634 | 1         | 0,886365779   | 1,128202401     | 0,829652997     |
| OSM                                                                                | 9,44793E-05 | -0,17458606  | 0     | 0,024 | 1         | 0,886021701   | 1,128640527     | 0               |
| PTPRN2                                                                             | 9,44793E-05 | -0,17458606  | 0     | 0,024 | 1         | 0,886021701   | 1,128640527     | 0               |
| TMEM201                                                                            | 9,44793E-05 | -0,17458606  | 0     | 0,024 | 1         | 0,886021701   | 1,128640527     | 0               |
| ST13                                                                               | 0,402940268 | -0,174601383 | 0,164 | 0,22  | 1         | 0,886012291   | 1,128652514     | 0,745454545     |
| HEATR3                                                                             | 0,530362187 | -0,174729238 | 0,013 | 0,024 | 1         | 0,885933774   | 1,128752543     | 0,541666667     |
| CCDC112                                                                            | 0,129303481 | -0,17477692  | 0,059 | 0,122 | 1         | 0,885904493   | 1,12878985      | 0,483606557     |
| ACOT7                                                                              | 0,900890326 | -0,174861183 | 0,045 | 0,049 | 1         | 0,885852752   | 1,128855781     | 0,918367347     |
| ERC1                                                                               | 0,558583358 | -0,175316652 | 0,032 | 0,049 | 1         | 0,885573126   | 1,129212225     | 0,653061224     |
| COPS2                                                                              | 0,646985447 | -0,175463256 | 0,124 | 0,098 | 1         | 0,885483141   | 1,129326978     | 1,265306122     |
| SCD5                                                                               | 0,009700686 | -0,175687051 | 0,002 | 0,024 | 1         | 0,885345793   | 1,129502177     | 0,083333333     |
| KIF21A                                                                             | 0,005641332 | -0,176016015 | 0,006 | 0,049 | 1         | 0,885143939   | 1,129759756     | 0,12244898      |
| SMAD1                                                                              | 0,847428251 | -0,176131519 | 0,03  | 0,024 | 1         | 0,885073076   | 1,129850209     | 1,25            |
| MDM4                                                                               | 0,069044211 | -0,176167914 | 0,081 | 0,171 | 1         | 0,885050748   | 1,129878712     | 0,473684211     |

Supplementary Table 3

| Differentially expressed genes_keloid-MD_comparing SC-Keloid vs. (SC-Myel+Nonmyel) |             |              |       |       |           |               |                 |                 |
|------------------------------------------------------------------------------------|-------------|--------------|-------|-------|-----------|---------------|-----------------|-----------------|
| gene                                                                               | p_val       | avg_log2FC   | pct.1 | pct.2 | p_val_adj | Foldchange_UP | Foldchange_DOWN | Ratio_pct1_pct2 |
| TET2                                                                               | 0,690019535 | -0,176430352 | 0,037 | 0,049 | 1         | 0,884889765   | 1,130084266     | 0,755102041     |
| SLC48A1                                                                            | 0,194251578 | -0,176671265 | 0,006 | 0,024 | 1         | 0,884742011   | 1,130272992     | 0,25            |
| FBXW4                                                                              | 0,451039476 | -0,176765638 | 0,011 | 0,024 | 1         | 0,884684138   | 1,130346931     | 0,458333333     |
| SPARC                                                                              | 0,246736283 | -0,176839663 | 0,938 | 0,927 | 1         | 0,884638746   | 1,13040493      | 1,011866235     |
| SFR1                                                                               | 0,005730439 | -0,176852738 | 0,006 | 0,049 | 1         | 0,884630729   | 1,130415175     | 0,12244898      |
| TRA2A                                                                              | 0,63750543  | -0,1769069   | 0,1   | 0,122 | 1         | 0,884597519   | 1,130457614     | 0,819672131     |
| INPPL1                                                                             | 0,51430804  | -0,176994798 | 0,03  | 0,049 | 1         | 0,884543625   | 1,130526491     | 0,612244898     |
| TNFRSF11B                                                                          | 0,009951995 | -0,177206581 | 0,002 | 0,024 | 1         | 0,884413786   | 1,13069246      | 0,083333333     |
| NAV3                                                                               | 0,806945473 | -0,177256011 | 0,019 | 0,024 | 1         | 0,884383485   | 1,130731201     | 0,791666667     |
| SEC24A                                                                             | 0,553146021 | -0,177473871 | 0,032 | 0,049 | 1         | 0,884249945   | 1,130901965     | 0,653061224     |
| BPNT1                                                                              | 0,33324913  | -0,177501456 | 0,024 | 0,049 | 1         | 0,884233038   | 1,130923589     | 0,489795918     |
| WNT3                                                                               | 0,009951995 | -0,177620758 | 0,002 | 0,024 | 1         | 0,88415992    | 1,131017113     | 0,083333333     |
| ATP5PO                                                                             | 0,261786057 | -0,177900693 | 0,166 | 0,244 | 1         | 0,883988378   | 1,131236592     | 0,680327869     |
| MTURN                                                                              | 0,380173608 | -0,178169919 | 0,043 | 0,073 | 1         | 0,883823429   | 1,131447716     | 0,589041096     |
| CGREF1                                                                             | 0,009700686 | -0,178204311 | 0,002 | 0,024 | 1         | 0,88380236    | 1,131474688     | 0,083333333     |
| SARM1                                                                              | 0,194251578 | -0,178313092 | 0,006 | 0,024 | 1         | 0,883735723   | 1,131560006     | 0,25            |
| MOCS1                                                                              | 0,000264836 | -0,17846436  | 0,003 | 0,049 | 1         | 0,883643067   | 1,131678657     | 0,06122449      |
| YEATS2                                                                             | 0,743841064 | -0,178465782 | 0,018 | 0,024 | 1         | 0,883642196   | 1,131679773     | 0,75            |
| TNIP2                                                                              | 0,728024215 | -0,178525273 | 0,038 | 0,049 | 1         | 0,883605759   | 1,13172644      | 0,775510204     |
| SNRPD3                                                                             | 0,757664895 | -0,178607414 | 0,185 | 0,195 | 1         | 0,883555452   | 1,131790877     | 0,948717949     |
| PRADC1                                                                             | 0,026794502 | -0,178862962 | 0,01  | 0,049 | 1         | 0,883398959   | 1,131991372     | 0,204081633     |
| URM1                                                                               | 0,722414622 | -0,178880886 | 0,038 | 0,049 | 1         | 0,883387984   | 1,132005436     | 0,775510204     |
| MRPS7                                                                              | 0,497612942 | -0,17905912  | 0,069 | 0,098 | 1         | 0,883278855   | 1,132145295     | 0,704081633     |
| VAV2                                                                               | 0,009951995 | -0,179128937 | 0,002 | 0,024 | 1         | 0,883236111   | 1,132200085     | 0,083333333     |
| SLC39A3                                                                            | 0,529003585 | -0,179757845 | 0,051 | 0,073 | 1         | 0,882851169   | 1,132693748     | 0,698630137     |
| RHBDF2                                                                             | 0,283075535 | -0,179891983 | 0,008 | 0,024 | 1         | 0,882769088   | 1,132799067     | 0,333333333     |
| GALNT15                                                                            | 0,196181004 | -0,180111451 | 0,006 | 0,024 | 1         | 0,882634808   | 1,132971406     | 0,25            |
| MTO1                                                                               | 0,280789447 | -0,180198939 | 0,008 | 0,024 | 1         | 0,882581285   | 1,133040114     | 0,333333333     |
| RAB40B                                                                             | 0,026794502 | -0,180497548 | 0,01  | 0,049 | 1         | 0,882398627   | 1,133274655     | 0,204081633     |
| SMCO4                                                                              | 0,448381168 | -0,180561082 | 0,011 | 0,024 | 1         | 0,882359769   | 1,133324564     | 0,458333333     |

Supplementary Table 3

| Differentially expressed genes_keloid-MD_comparing SC-Keloid vs. (SC-Myel+Nonmyel) |             |              |       |       |           |               |                 |                 |
|------------------------------------------------------------------------------------|-------------|--------------|-------|-------|-----------|---------------|-----------------|-----------------|
| gene                                                                               | p_val       | avg_log2FC   | pct.1 | pct.2 | p_val_adj | Foldchange_UP | Foldchange_DOWN | Ratio_pct1_pct2 |
| LRRN1                                                                              | 0,049781231 | -0,1808201   | 0,003 | 0,024 | 1         | 0,882201366   | 1,133528056     | 0,125           |
| RPP40                                                                              | 0,049781231 | -0,181181476 | 0,003 | 0,024 | 1         | 0,881980414   | 1,133812026     | 0,125           |
| LPIN1                                                                              | 0,129556135 | -0,181216913 | 0,016 | 0,049 | 1         | 0,88195875    | 1,133839876     | 0,326530612     |
| NPW                                                                                | 0,116646669 | -0,181352845 | 0,005 | 0,024 | 1         | 0,881875656   | 1,133946712     | 0,208333333     |
| TMX4                                                                               | 0,824061986 | -0,181430081 | 0,088 | 0,098 | 1         | 0,881828445   | 1,13400742      | 0,897959184     |
| TERF2                                                                              | 0,33324913  | -0,181452339 | 0,024 | 0,049 | 1         | 0,88181484    | 1,134024916     | 0,489795918     |
| EBAG9                                                                              | 0,794067056 | -0,18174668  | 0,041 | 0,049 | 1         | 0,881634949   | 1,134256306     | 0,836734694     |
| CXCL14                                                                             | 0,173232649 | -0,181769966 | 0,032 | 0,073 | 1         | 0,881620719   | 1,134274614     | 0,438356164     |
| LRRTM2                                                                             | 0,73898314  | -0,182170385 | 0,035 | 0,024 | 1         | 0,88137606    | 1,134589474     | 1,458333333     |
| ZNF563                                                                             | 0,050627188 | -0,182191236 | 0,003 | 0,024 | 1         | 0,881363322   | 1,134605872     | 0,125           |
| COMMD3                                                                             | 0,712877513 | -0,182346874 | 0,081 | 0,098 | 1         | 0,881268245   | 1,134728281     | 0,826530612     |
| PPP2R3A                                                                            | 0,282497361 | -0,182551178 | 0,038 | 0,073 | 1         | 0,881143455   | 1,134888984     | 0,520547945     |
| OGFOD3                                                                             | 0,222711966 | -0,182566461 | 0,035 | 0,073 | 1         | 0,881134121   | 1,134901006     | 0,479452055     |
| C17orf58                                                                           | 0,283075535 | -0,182568511 | 0,008 | 0,024 | 1         | 0,881132869   | 1,134902619     | 0,333333333     |
| NEK8                                                                               | 0,049781231 | -0,182574504 | 0,003 | 0,024 | 1         | 0,881129208   | 1,134907333     | 0,125           |
| CASP2                                                                              | 0,530362187 | -0,18260247  | 0,013 | 0,024 | 1         | 0,881112128   | 1,134929333     | 0,541666667     |
| NID2                                                                               | 0,674031557 | -0,18268201  | 0,016 | 0,024 | 1         | 0,881063551   | 1,134991907     | 0,666666667     |
| TANC2                                                                              | 0,673457881 | -0,183122182 | 0,057 | 0,073 | 1         | 0,880794776   | 1,13533825      | 0,780821918     |
| COG2                                                                               | 0,861032984 | -0,183184128 | 0,021 | 0,024 | 1         | 0,880756958   | 1,135387        | 0,875           |
| HLA-E                                                                              | 0,45077078  | -0,183216532 | 0,128 | 0,171 | 1         | 0,880737176   | 1,135412502     | 0,748538012     |
| SFT2D2                                                                             | 0,374043763 | -0,183410073 | 0,026 | 0,049 | 1         | 0,880619031   | 1,13556483      | 0,530612245     |
| DCP2                                                                               | 0,743841064 | -0,183847479 | 0,018 | 0,024 | 1         | 0,880352079   | 1,135909171     | 0,75            |
| EDF1                                                                               | 0,228025026 | -0,183958112 | 0,359 | 0,463 | 1         | 0,880284572   | 1,135996281     | 0,77537797      |
| NIFK-AS1                                                                           | 0,285374202 | -0,183990291 | 0,008 | 0,024 | 1         | 0,880264937   | 1,13602162      | 0,333333333     |
| BOC                                                                                | 0,048947161 | -0,183993356 | 0,003 | 0,024 | 1         | 0,880263067   | 1,136024033     | 0,125           |
| ODF2                                                                               | 0,196181004 | -0,184018422 | 0,006 | 0,024 | 1         | 0,880247774   | 1,136043771     | 0,25            |
| ZNF768                                                                             | 0,013789213 | -0,184108025 | 0,008 | 0,049 | 1         | 0,880193105   | 1,136114331     | 0,163265306     |
| SUMF1                                                                              | 0,982899486 | -0,184149476 | 0,026 | 0,024 | 1         | 0,880167816   | 1,136146973     | 1,083333333     |
| BTBD3                                                                              | 0,891556838 | -0,184198654 | 0,029 | 0,024 | 1         | 0,880137813   | 1,136185703     | 1,208333333     |
| PPP1R8                                                                             | 0,06802601  | -0,18438892  | 0,013 | 0,049 | 1         | 0,880021746   | 1,136335556     | 0,265306122     |

Supplementary Table 3

| Differentially expressed genes_keloid-MD_ comparing SC-Keloid vs. (SC-Myel+Nonmyel) |             |              |       |       |           |               |                 |                 |
|-------------------------------------------------------------------------------------|-------------|--------------|-------|-------|-----------|---------------|-----------------|-----------------|
| gene                                                                                | p_val       | avg_log2FC   | pct.1 | pct.2 | p_val_adj | Foldchange_UP | Foldchange_DOWN | Ratio_pct1_pct2 |
| CCDC106                                                                             | 0,363187776 | -0,184448981 | 0,01  | 0,024 | 1         | 0,879985111   | 1,136382864     | 0,416666667     |
| CLASRP                                                                              | 0,116646669 | -0,184574976 | 0,005 | 0,024 | 1         | 0,879908262   | 1,136482112     | 0,208333333     |
| STARD10                                                                             | 0,194251578 | -0,1847088   | 0,006 | 0,024 | 1         | 0,879826646   | 1,136587536     | 0,25            |
| SLC35E2B                                                                            | 0,365692371 | -0,184837839 | 0,01  | 0,024 | 1         | 0,879747955   | 1,136689201     | 0,416666667     |
| VPS41                                                                               | 0,810013082 | -0,184906527 | 0,032 | 0,024 | 1         | 0,879706071   | 1,136743321     | 1,333333333     |
| AC144450.1                                                                          | 9,44793E-05 | -0,185262506 | 0     | 0,024 | 1         | 0,879489034   | 1,137023842     | 0               |
| AXIN2                                                                               | 9,44793E-05 | -0,185262506 | 0     | 0,024 | 1         | 0,879489034   | 1,137023842     | 0               |
| KCNIP4                                                                              | 9,44793E-05 | -0,185262506 | 0     | 0,024 | 1         | 0,879489034   | 1,137023842     | 0               |
| MAK                                                                                 | 9,44793E-05 | -0,185262506 | 0     | 0,024 | 1         | 0,879489034   | 1,137023842     | 0               |
| C8orf48                                                                             | 0,368207718 | -0,185502988 | 0,01  | 0,024 | 1         | 0,879342444   | 1,137213388     | 0,416666667     |
| TMEM14C                                                                             | 0,37360233  | -0,185518994 | 0,185 | 0,244 | 1         | 0,879332689   | 1,137226004     | 0,758196721     |
| OSBPL10                                                                             | 0,688148569 | -0,18556989  | 0,037 | 0,049 | 1         | 0,879301667   | 1,137266125     | 0,755102041     |
| CHURC1                                                                              | 0,464538686 | -0,18558807  | 0,172 | 0,22  | 1         | 0,879290587   | 1,137280456     | 0,781818182     |
| ELAC1                                                                               | 0,096964887 | -0,185903011 | 0,014 | 0,049 | 1         | 0,879098659   | 1,137528752     | 0,285714286     |
| GLRX2                                                                               | 0,697337529 | -0,185969845 | 0,104 | 0,122 | 1         | 0,879057935   | 1,13758145      | 0,852459016     |
| FCRLA                                                                               | 0,009951995 | -0,185987241 | 0,002 | 0,024 | 1         | 0,879047335   | 1,137595167     | 0,083333333     |
| CD40LG                                                                              | 0,009951995 | -0,186055307 | 0,002 | 0,024 | 1         | 0,879005863   | 1,13764884      | 0,083333333     |
| BEX3                                                                                | 0,281675611 | -0,186055682 | 0,384 | 0,463 | 1         | 0,879005635   | 1,137649135     | 0,82937365      |
| DGKD                                                                                | 0,050627188 | -0,18635686  | 0,003 | 0,024 | 1         | 0,878822152   | 1,137886656     | 0,125           |
| DYNC112                                                                             | 0,165019177 | -0,186467189 | 0,169 | 0,268 | 1         | 0,878754947   | 1,137973679     | 0,630597015     |
| WDR37                                                                               | 0,283075535 | -0,186474989 | 0,008 | 0,024 | 1         | 0,878750196   | 1,137979832     | 0,333333333     |
| C4orf48                                                                             | 0,656686916 | -0,186843246 | 0,265 | 0,293 | 1         | 0,878525918   | 1,138270345     | 0,90443686      |
| UBE2J2                                                                              | 0,30769352  | -0,186870712 | 0,04  | 0,073 | 1         | 0,878509193   | 1,138292015     | 0,547945205     |
| FLOT2                                                                               | 0,423361688 | -0,187143488 | 0,027 | 0,049 | 1         | 0,878343105   | 1,138507257     | 0,551020408     |
| OSGEPL1                                                                             | 0,198124435 | -0,187153839 | 0,006 | 0,024 | 1         | 0,878336804   | 1,138515426     | 0,25            |
| ILVBL                                                                               | 0,082804735 | -0,187281974 | 0,026 | 0,073 | 1         | 0,878258796   | 1,13861655      | 0,356164384     |
| MAP4                                                                                | 0,869598541 | -0,18730018  | 0,329 | 0,317 | 1         | 0,878247713   | 1,138630918     | 1,03785489      |
| LRPAP1                                                                              | 0,400532776 | -0,187390614 | 0,145 | 0,195 | 1         | 0,878192663   | 1,138702294     | 0,743589744     |
| CEP85L                                                                              | 0,380479892 | -0,187467018 | 0,026 | 0,049 | 1         | 0,878146156   | 1,138762601     | 0,530612245     |
| SUFU                                                                                | 0,198124435 | -0,187526314 | 0,006 | 0,024 | 1         | 0,878110064   | 1,138809406     | 0,25            |

Supplementary Table 3

| Differentially expressed genes_keloid-MD_ comparing SC-Keloid vs. (SC-Myel+Nonmyel) |             |              |       |       |           |               |                 |                 |
|-------------------------------------------------------------------------------------|-------------|--------------|-------|-------|-----------|---------------|-----------------|-----------------|
| gene                                                                                | p_val       | avg_log2FC   | pct.1 | pct.2 | p_val_adj | Foldchange_UP | Foldchange_DOWN | Ratio_pct1_pct2 |
| C1D                                                                                 | 0,831284772 | -0,187559771 | 0,089 | 0,098 | 1         | 0,8780897     | 1,138835816     | 0,908163265     |
| PRPF38B                                                                             | 0,579632226 | -0,187571621 | 0,096 | 0,122 | 1         | 0,878082488   | 1,13884517      | 0,786885246     |
| SMIM19                                                                              | 0,576856031 | -0,187572184 | 0,096 | 0,122 | 1         | 0,878082145   | 1,138845615     | 0,786885246     |
| SSR4                                                                                | 0,4577207   | -0,187604213 | 0,397 | 0,439 | 1         | 0,878062651   | 1,138870898     | 0,904328018     |
| OCRL                                                                                | 0,009951995 | -0,187635583 | 0,002 | 0,024 | 1         | 0,878043559   | 1,138895662     | 0,083333333     |
| ATXN10                                                                              | 0,816411419 | -0,187685854 | 0,041 | 0,049 | 1         | 0,878012964   | 1,138935348     | 0,836734694     |
| LGR4                                                                                | 0,919630147 | -0,18785076  | 0,022 | 0,024 | 1         | 0,877912609   | 1,13906554      | 0,916666667     |
| CEP112                                                                              | 0,368207718 | -0,18787501  | 0,01  | 0,024 | 1         | 0,877897852   | 1,139084687     | 0,416666667     |
| MYO1C                                                                               | 0,769480397 | -0,187910126 | 0,091 | 0,073 | 1         | 0,877876484   | 1,139112413     | 1,246575342     |
| CEP76                                                                               | 0,115197258 | -0,188040903 | 0,005 | 0,024 | 1         | 0,87779691    | 1,139215675     | 0,208333333     |
| FAM50B                                                                              | 0,280789447 | -0,188139354 | 0,008 | 0,024 | 1         | 0,87773701    | 1,13929342      | 0,333333333     |
| ATXN7L3                                                                             | 0,741096359 | -0,188155707 | 0,018 | 0,024 | 1         | 0,877727061   | 1,139306334     | 0,75            |
| CLN5                                                                                | 0,064908909 | -0,188244792 | 0,037 | 0,098 | 1         | 0,877672864   | 1,139376687     | 0,37755102      |
| OLFML3                                                                              | 0,524894226 | -0,188253068 | 0,013 | 0,024 | 1         | 0,87766783    | 1,139383223     | 0,541666667     |
| LRR8A                                                                               | 0,922214356 | -0,188286034 | 0,022 | 0,024 | 1         | 0,877647775   | 1,139409258     | 0,916666667     |
| C10orf143                                                                           | 0,050627188 | -0,188355504 | 0,003 | 0,024 | 1         | 0,877605514   | 1,139464126     | 0,125           |
| DOCK9                                                                               | 0,196181004 | -0,188427381 | 0,006 | 0,024 | 1         | 0,877561792   | 1,139520897     | 0,25            |
| CUL4A                                                                               | 0,969810307 | -0,188506496 | 0,024 | 0,024 | 1         | 0,877513669   | 1,139583388     | 1               |
| BST1                                                                                | 0,116646669 | -0,188578512 | 0,005 | 0,024 | 1         | 0,877469867   | 1,139640275     | 0,208333333     |
| TEKT3                                                                               | 0,009951995 | -0,188621018 | 0,002 | 0,024 | 1         | 0,877444015   | 1,139673852     | 0,083333333     |
| TMEM38A                                                                             | 0,009951995 | -0,188726172 | 0,002 | 0,024 | 1         | 0,877380062   | 1,139756923     | 0,083333333     |
| NDP                                                                                 | 0,000258468 | -0,18872995  | 0,003 | 0,049 | 1         | 0,877377765   | 1,139759907     | 0,06122449      |
| CEP152                                                                              | 0,448381168 | -0,188784656 | 0,011 | 0,024 | 1         | 0,877344496   | 1,139803127     | 0,458333333     |
| HCG18                                                                               | 0,83877741  | -0,188877564 | 0,043 | 0,049 | 1         | 0,877287998   | 1,139876532     | 0,87755102      |
| IFIT1                                                                               | 0,280789447 | -0,188893989 | 0,008 | 0,024 | 1         | 0,87727801    | 1,139889509     | 0,333333333     |
| PCDH20                                                                              | 0,684412367 | -0,188998733 | 0,037 | 0,049 | 1         | 0,877214319   | 1,139972272     | 0,755102041     |
| IKZF4                                                                               | 0,368207718 | -0,189061886 | 0,01  | 0,024 | 1         | 0,87717592    | 1,140022175     | 0,416666667     |
| SERTAD1                                                                             | 0,115029195 | -0,189577008 | 0,073 | 0,146 | 1         | 0,876862776   | 1,140429298     | 0,5             |
| HSDL1                                                                               | 0,738354944 | -0,189604272 | 0,018 | 0,024 | 1         | 0,876846205   | 1,14045085      | 0,75            |
| ADPRS                                                                               | 0,969810307 | -0,189652513 | 0,024 | 0,024 | 1         | 0,876816886   | 1,140488985     | 1               |

Supplementary Table 3

| Differentially expressed genes_keloid-MD_comparing SC-Keloid vs. (SC-Myel+Nonmyel) |             |              |       |       |             |               |                 |                 |
|------------------------------------------------------------------------------------|-------------|--------------|-------|-------|-------------|---------------|-----------------|-----------------|
| gene                                                                               | p_val       | avg_log2FC   | pct.1 | pct.2 | p_val_adj   | Foldchange_UP | Foldchange_DOWN | Ratio_pct1_pct2 |
| ICMT                                                                               | 0,245246426 | -0,189759993 | 0,021 | 0,049 | 1           | 0,876751566   | 1,140573954     | 0,428571429     |
| LINC00685                                                                          | 0,285374202 | -0,190391138 | 0,008 | 0,024 | 1           | 0,876368092   | 1,141073037     | 0,333333333     |
| EIF3M                                                                              | 0,514845504 | -0,190431052 | 0,091 | 0,122 | 1           | 0,876343846   | 1,141104607     | 0,745901639     |
| CNOT4                                                                              | 0,639635186 | -0,19077222  | 0,056 | 0,073 | 1           | 0,876136633   | 1,141374487     | 0,767123288     |
| SLC35D1                                                                            | 0,602891701 | -0,190782681 | 0,014 | 0,024 | 1           | 0,87613028    | 1,141382763     | 0,583333333     |
| LZTS1                                                                              | 0,741096359 | -0,190784822 | 0,018 | 0,024 | 1           | 0,87612898    | 1,141384457     | 0,75            |
| NUMB                                                                               | 0,179866822 | -0,190877025 | 0,048 | 0,098 | 1           | 0,876072988   | 1,141457405     | 0,489795918     |
| GSTA4                                                                              | 0,168993438 | -0,190904076 | 0,018 | 0,049 | 1           | 0,876056562   | 1,141478808     | 0,367346939     |
| HMG2                                                                               | 0,339784309 | -0,191034908 | 0,182 | 0,244 | 1           | 0,875977119   | 1,141582329     | 0,745901639     |
| CHADL                                                                              | 0,0674287   | -0,191071764 | 0,013 | 0,049 | 1           | 0,875954741   | 1,141611493     | 0,265306122     |
| PTRH1                                                                              | 0,8121558   | -0,191127185 | 0,032 | 0,024 | 1           | 0,875921092   | 1,141655348     | 1,333333333     |
| ASXL1                                                                              | 0,280310372 | -0,191266994 | 0,038 | 0,073 | 1           | 0,875836213   | 1,141765989     | 0,520547945     |
| FBXW2                                                                              | 0,19341397  | -0,191310786 | 0,033 | 0,073 | 1           | 0,875809627   | 1,141800648     | 0,452054795     |
| NRIP2                                                                              | 1,27911E-05 | -0,191335301 | 0,002 | 0,049 | 0,269904161 | 0,875794745   | 1,14182005      | 0,040816327     |
| ASPHD1                                                                             | 0,194251578 | -0,191477093 | 0,006 | 0,024 | 1           | 0,875708674   | 1,141932277     | 0,25            |
| SMIM5                                                                              | 0,075221017 | -0,191924429 | 0,038 | 0,098 | 1           | 0,875437185   | 1,142286411     | 0,387755102     |
| PICK1                                                                              | 0,448381168 | -0,191977301 | 0,011 | 0,024 | 1           | 0,875405103   | 1,142328273     | 0,458333333     |
| ZBTB22                                                                             | 0,20008191  | -0,192038949 | 0,006 | 0,024 | 1           | 0,875367697   | 1,142377088     | 0,25            |
| FXYS5                                                                              | 0,317354631 | -0,192148544 | 0,077 | 0,122 | 1           | 0,875301202   | 1,142463872     | 0,631147541     |
| NOMO1                                                                              | 0,451039476 | -0,192243033 | 0,011 | 0,024 | 1           | 0,875243876   | 1,1425387       | 0,458333333     |
| MACROD1                                                                            | 0,52217111  | -0,192278959 | 0,013 | 0,024 | 1           | 0,875222081   | 1,142567152     | 0,541666667     |
| ING4                                                                               | 0,600556524 | -0,192343414 | 0,033 | 0,049 | 1           | 0,875182979   | 1,142618199     | 0,673469388     |
| SLC7A6OS                                                                           | 0,741096359 | -0,192477506 | 0,018 | 0,024 | 1           | 0,875101639   | 1,142724406     | 0,75            |
| SEC13                                                                              | 0,55056947  | -0,192520014 | 0,072 | 0,098 | 1           | 0,875075855   | 1,142758075     | 0,734693878     |
| PAAF1                                                                              | 0,068627663 | -0,192680903 | 0,013 | 0,049 | 1           | 0,874978272   | 1,142885522     | 0,265306122     |
| PDCD4                                                                              | 0,218453516 | -0,192684125 | 0,051 | 0,098 | 1           | 0,874976318   | 1,142888075     | 0,520408163     |
| ANTXR2                                                                             | 0,010490919 | -0,193064726 | 0,026 | 0,098 | 1           | 0,874745519   | 1,143189623     | 0,265306122     |
| EXOC6                                                                              | 0,128640375 | -0,19307827  | 0,016 | 0,049 | 1           | 0,874737307   | 1,143200355     | 0,326530612     |
| RPL13A                                                                             | 0,42276419  | -0,193152889 | 0,563 | 0,634 | 1           | 0,874692065   | 1,143259486     | 0,888012618     |
| CSNK1E                                                                             | 0,381063387 | -0,193175275 | 0,081 | 0,122 | 1           | 0,874678493   | 1,143277225     | 0,663934426     |

Supplementary Table 3

| Differentially expressed genes_keloid-MD_comparing SC-Keloid vs. (SC-Myel+Nonmyel) |             |              |       |       |           |               |                 |                 |
|------------------------------------------------------------------------------------|-------------|--------------|-------|-------|-----------|---------------|-----------------|-----------------|
| gene                                                                               | p_val       | avg_log2FC   | pct.1 | pct.2 | p_val_adj | Foldchange_UP | Foldchange_DOWN | Ratio_pct1_pct2 |
| HERC2                                                                              | 0,378911182 | -0,193346146 | 0,043 | 0,073 | 1         | 0,874574903   | 1,143412641     | 0,589041096     |
| ACAA2                                                                              | 0,116996211 | -0,19336401  | 0,043 | 0,098 | 1         | 0,874564074   | 1,1434268       | 0,43877551      |
| NORAD                                                                              | 0,318699823 | -0,193426545 | 0,258 | 0,341 | 1         | 0,874526166   | 1,143476364     | 0,75659824      |
| EDEM3                                                                              | 0,360568724 | -0,193565962 | 0,061 | 0,098 | 1         | 0,874441659   | 1,143586871     | 0,62244898      |
| MANBA                                                                              | 0,363187776 | -0,193579153 | 0,01  | 0,024 | 1         | 0,874433663   | 1,143597327     | 0,416666667     |
| MRPS26                                                                             | 0,810132145 | -0,193756736 | 0,136 | 0,146 | 1         | 0,874326035   | 1,143738102     | 0,931506849     |
| USP3-AS1                                                                           | 0,049781231 | -0,193797725 | 0,003 | 0,024 | 1         | 0,874301194   | 1,143770598     | 0,125           |
| TCF20                                                                              | 0,368207718 | -0,19381576  | 0,01  | 0,024 | 1         | 0,874290265   | 1,143784897     | 0,416666667     |
| MTA3                                                                               | 0,530362187 | -0,193832788 | 0,013 | 0,024 | 1         | 0,874279946   | 1,143798396     | 0,541666667     |
| ZNF512                                                                             | 0,096964887 | -0,194201086 | 0,014 | 0,049 | 1         | 0,874056784   | 1,144090428     | 0,285714286     |
| ADAMTS15                                                                           | 0,368207718 | -0,194239583 | 0,01  | 0,024 | 1         | 0,874033461   | 1,144120957     | 0,416666667     |
| THAP7                                                                              | 0,466260678 | -0,194407099 | 0,029 | 0,049 | 1         | 0,87393198    | 1,144253813     | 0,591836735     |
| SEMA4B                                                                             | 0,026794502 | -0,194544505 | 0,01  | 0,049 | 1         | 0,873848748   | 1,1443628       | 0,204081633     |
| ERCC1                                                                              | 0,423941925 | -0,194590965 | 0,085 | 0,122 | 1         | 0,873820608   | 1,144399652     | 0,696721311     |
| KIAA1143                                                                           | 0,948253802 | -0,194688703 | 0,053 | 0,049 | 1         | 0,873761411   | 1,144477185     | 1,081632653     |
| CTIF                                                                               | 0,045555981 | -0,194816882 | 0,011 | 0,049 | 1         | 0,873683783   | 1,144578873     | 0,224489796     |
| ZNF592                                                                             | 0,527624595 | -0,19498684  | 0,013 | 0,024 | 1         | 0,873580864   | 1,144713719     | 0,541666667     |
| SENP5                                                                              | 0,260698511 | -0,195003326 | 0,054 | 0,098 | 1         | 0,873570882   | 1,1447268       | 0,551020408     |
| TPK1                                                                               | 0,283075535 | -0,195022624 | 0,008 | 0,024 | 1         | 0,873559197   | 1,144742112     | 0,333333333     |
| PRKRA                                                                              | 0,774548473 | -0,195144239 | 0,04  | 0,049 | 1         | 0,873485562   | 1,144838614     | 0,816326531     |
| BABAM2                                                                             | 0,365692371 | -0,195160631 | 0,01  | 0,024 | 1         | 0,873475637   | 1,144851623     | 0,416666667     |
| RNASEH1-AS1                                                                        | 0,861032984 | -0,195629893 | 0,021 | 0,024 | 1         | 0,87319157    | 1,145224066     | 0,875           |
| ZCCHC17                                                                            | 0,540898597 | -0,195738584 | 0,116 | 0,146 | 1         | 0,873125787   | 1,145310349     | 0,794520548     |
| GPKOW                                                                              | 0,679575369 | -0,195854137 | 0,016 | 0,024 | 1         | 0,873055856   | 1,145402087     | 0,666666667     |
| TNFAIP2                                                                            | 0,026191169 | -0,196116127 | 0,01  | 0,049 | 1         | 0,872897326   | 1,145610108     | 0,204081633     |
| LDLRAP1                                                                            | 0,767059846 | -0,196285913 | 0,04  | 0,049 | 1         | 0,872794604   | 1,145744939     | 0,816326531     |
| JTB                                                                                | 0,430964735 | -0,196452219 | 0,105 | 0,146 | 1         | 0,872693999   | 1,145877022     | 0,719178082     |
| STRN3                                                                              | 0,096370963 | -0,196515969 | 0,072 | 0,146 | 1         | 0,872655437   | 1,145927657     | 0,493150685     |
| CYSLTR1                                                                            | 0,009951995 | -0,196577059 | 0,002 | 0,024 | 1         | 0,872618485   | 1,145976182     | 0,083333333     |
| HSPA14                                                                             | 0,050627188 | -0,19676859  | 0,003 | 0,024 | 1         | 0,872502645   | 1,146128331     | 0,125           |

Supplementary Table 3

| Differentially expressed genes_keloid-MD_ comparing SC-Keloid vs. (SC-Myel+Nonmyel) |             |              |       |       |           |               |                 |                 |
|-------------------------------------------------------------------------------------|-------------|--------------|-------|-------|-----------|---------------|-----------------|-----------------|
| gene                                                                                | p_val       | avg_log2FC   | pct.1 | pct.2 | p_val_adj | Foldchange_UP | Foldchange_DOWN | Ratio_pct1_pct2 |
| EVL                                                                                 | 0,206183141 | -0,19681678  | 0,019 | 0,049 | 1         | 0,872473502   | 1,146166615     | 0,387755102     |
| ALKBH4                                                                              | 0,128640375 | -0,197055602 | 0,016 | 0,049 | 1         | 0,872329085   | 1,146356366     | 0,326530612     |
| CCNG1                                                                               | 0,600126951 | -0,197105225 | 0,014 | 0,024 | 1         | 0,872299081   | 1,146395797     | 0,583333333     |
| AKR1B1                                                                              | 0,157780712 | -0,197155034 | 0,046 | 0,098 | 1         | 0,872268965   | 1,146435377     | 0,469387755     |
| RPN1                                                                                | 0,765846908 | -0,197196972 | 0,062 | 0,073 | 1         | 0,87224361    | 1,146468703     | 0,849315068     |
| SOCS6                                                                               | 0,129556135 | -0,197318693 | 0,016 | 0,049 | 1         | 0,872170021   | 1,146565436     | 0,326530612     |
| FERMT3                                                                              | 0,448381168 | -0,197356867 | 0,011 | 0,024 | 1         | 0,872146944   | 1,146595774     | 0,458333333     |
| SFMBT2                                                                              | 0,445731781 | -0,197426465 | 0,011 | 0,024 | 1         | 0,872104871   | 1,146651089     | 0,458333333     |
| FLOT1                                                                               | 0,540800099 | -0,197443921 | 0,113 | 0,146 | 1         | 0,872094319   | 1,146664963     | 0,773972603     |
| CACFD1                                                                              | 0,283075535 | -0,197534597 | 0,008 | 0,024 | 1         | 0,872039508   | 1,146737036     | 0,333333333     |
| DGCR2                                                                               | 0,06802601  | -0,197561363 | 0,013 | 0,049 | 1         | 0,872023329   | 1,14675831      | 0,265306122     |
| SURF1                                                                               | 0,105953965 | -0,197609661 | 0,041 | 0,098 | 1         | 0,871994137   | 1,146796702     | 0,418367347     |
| SMARCE1                                                                             | 0,846041221 | -0,197652458 | 0,067 | 0,073 | 1         | 0,871968269   | 1,146830722     | 0,917808219     |
| ITSN1                                                                               | 0,216038595 | -0,197698296 | 0,035 | 0,073 | 1         | 0,871940565   | 1,14686716      | 0,479452055     |
| PRPF31                                                                              | 0,497955188 | -0,197987446 | 0,049 | 0,073 | 1         | 0,871765825   | 1,147097042     | 0,671232877     |
| SDHAF4                                                                              | 0,281930738 | -0,19803403  | 0,008 | 0,024 | 1         | 0,871737677   | 1,147134082     | 0,333333333     |
| CTSL                                                                                | 0,310271684 | -0,198097076 | 0,057 | 0,098 | 1         | 0,871699582   | 1,147184214     | 0,581632653     |
| C20orf96                                                                            | 0,049781231 | -0,198150635 | 0,003 | 0,024 | 1         | 0,871667222   | 1,147226803     | 0,125           |
| GTF2E1                                                                              | 0,050627188 | -0,198445298 | 0,003 | 0,024 | 1         | 0,871489207   | 1,147461142     | 0,125           |
| MDN1                                                                                | 0,28785105  | -0,19849892  | 0,022 | 0,049 | 1         | 0,871456816   | 1,147503791     | 0,448979592     |
| ATXN7L2                                                                             | 0,050627188 | -0,198548644 | 0,003 | 0,024 | 1         | 0,871426781   | 1,147543341     | 0,125           |
| SNRPA                                                                               | 0,891556838 | -0,198585413 | 0,029 | 0,024 | 1         | 0,871404571   | 1,147572589     | 1,208333333     |
| RAB31                                                                               | 0,728355846 | -0,198613939 | 0,124 | 0,146 | 1         | 0,871387341   | 1,14759528      | 0,849315068     |
| LRR8B                                                                               | 0,027103281 | -0,198667866 | 0,019 | 0,073 | 1         | 0,871354771   | 1,147638176     | 0,260273973     |
| CHUK                                                                                | 0,676801274 | -0,198801076 | 0,016 | 0,024 | 1         | 0,871274318   | 1,147744148     | 0,666666667     |
| TUBA1A                                                                              | 0,299597691 | -0,198828672 | 0,512 | 0,585 | 1         | 0,871257653   | 1,147766102     | 0,875213675     |
| CYB5D2                                                                              | 0,245246426 | -0,199187365 | 0,021 | 0,049 | 1         | 0,871041062   | 1,148051503     | 0,428571429     |
| DNAJC19                                                                             | 0,29792394  | -0,199227834 | 0,131 | 0,195 | 1         | 0,871016628   | 1,148083708     | 0,671794872     |
| SYNPO                                                                               | 0,197887971 | -0,199229356 | 0,033 | 0,073 | 1         | 0,87101571    | 1,148084919     | 0,452054795     |
| FADS1                                                                               | 0,50914813  | -0,199663122 | 0,049 | 0,073 | 1         | 0,870753866   | 1,148430159     | 0,671232877     |



Supplementary Table 3

| Differentially expressed genes_keloid-MD_comparing SC-Keloid vs. (SC-Myel+Nonmyel) |             |              |       |       |             |               |                 |                 |
|------------------------------------------------------------------------------------|-------------|--------------|-------|-------|-------------|---------------|-----------------|-----------------|
| gene                                                                               | p_val       | avg_log2FC   | pct.1 | pct.2 | p_val_adj   | Foldchange_UP | Foldchange_DOWN | Ratio_pct1_pct2 |
| ZNF717                                                                             | 0,049781231 | -0,199674834 | 0,003 | 0,024 | 1           | 0,870746797   | 1,148439481     | 0,125           |
| SMG6                                                                               | 0,776423942 | -0,199815861 | 0,04  | 0,049 | 1           | 0,870661683   | 1,14855175      | 0,816326531     |
| BET1L                                                                              | 0,804243171 | -0,199936085 | 0,019 | 0,024 | 1           | 0,870589131   | 1,148647466     | 0,791666667     |
| TARS2                                                                              | 0,005730439 | -0,200021505 | 0,006 | 0,049 | 1           | 0,870537587   | 1,148715478     | 0,12244898      |
| PRPS1                                                                              | 0,203777145 | -0,200141935 | 0,019 | 0,049 | 1           | 0,870464921   | 1,148811371     | 0,387755102     |
| MTX1                                                                               | 0,426863733 | -0,200191363 | 0,046 | 0,073 | 1           | 0,870435099   | 1,148850731     | 0,630136986     |
| TWSG1                                                                              | 0,944809391 | -0,200343382 | 0,053 | 0,049 | 1           | 0,870343384   | 1,148971794     | 1,081632653     |
| IL6R                                                                               | 0,365692371 | -0,200347923 | 0,01  | 0,024 | 1           | 0,870340645   | 1,14897541      | 0,416666667     |
| HNRNPLL                                                                            | 0,919630147 | -0,200492047 | 0,022 | 0,024 | 1           | 0,870253703   | 1,149090198     | 0,916666667     |
| STRADB                                                                             | 0,049781231 | -0,20098441  | 0,003 | 0,024 | 1           | 0,869956753   | 1,149482427     | 0,125           |
| MARCHF1                                                                            | 0,365692371 | -0,201005455 | 0,01  | 0,024 | 1           | 0,869944063   | 1,149499195     | 0,416666667     |
| PDIA6                                                                              | 0,426840415 | -0,20128846  | 0,349 | 0,415 | 1           | 0,869773428   | 1,149724707     | 0,840963855     |
| ZC3H7B                                                                             | 0,404184911 | -0,201298458 | 0,045 | 0,073 | 1           | 0,869767401   | 1,149732675     | 0,616438356     |
| IFITM1                                                                             | 0,280789447 | -0,201497252 | 0,008 | 0,024 | 1           | 0,869647561   | 1,149891111     | 0,333333333     |
| MCM6                                                                               | 0,448381168 | -0,201554082 | 0,011 | 0,024 | 1           | 0,869613304   | 1,149936409     | 0,458333333     |
| TMEM30A                                                                            | 0,395701072 | -0,20156006  | 0,142 | 0,195 | 1           | 0,869609701   | 1,149941173     | 0,728205128     |
| MORC2-AS1                                                                          | 0,365692371 | -0,201642621 | 0,01  | 0,024 | 1           | 0,869559938   | 1,150006983     | 0,416666667     |
| PHKB                                                                               | 0,285710793 | -0,201909186 | 0,022 | 0,049 | 1           | 0,869399285   | 1,150219488     | 0,448979592     |
| URGCP                                                                              | 0,674031557 | -0,20210788  | 0,016 | 0,024 | 1           | 0,869279556   | 1,150377911     | 0,666666667     |
| NRBP2                                                                              | 0,438780487 | -0,20214603  | 0,046 | 0,073 | 1           | 0,869256569   | 1,150408332     | 0,630136986     |
| ARL5B                                                                              | 0,228548381 | -0,202279751 | 0,035 | 0,073 | 1           | 0,869176003   | 1,150514966     | 0,479452055     |
| CELF2                                                                              | 0,182170008 | -0,202344256 | 0,1   | 0,171 | 1           | 0,869137142   | 1,150566409     | 0,584795322     |
| DNAJB12                                                                            | 0,969810307 | -0,202379661 | 0,024 | 0,024 | 1           | 0,869115812   | 1,150594645     | 1               |
| HLA-C                                                                              | 0,917210489 | -0,202600114 | 0,423 | 0,463 | 1           | 0,868983017   | 1,150770476     | 0,913606911     |
| DCD                                                                                | 1,27911E-05 | -0,20280217  | 0,002 | 0,049 | 0,269904161 | 0,86886132    | 1,150931659     | 0,040816327     |
| SDC2                                                                               | 0,045105711 | -0,202939247 | 0,011 | 0,049 | 1           | 0,868778769   | 1,151041019     | 0,224489796     |
| GIT1                                                                               | 0,107980172 | -0,203273565 | 0,041 | 0,098 | 1           | 0,868577469   | 1,151307783     | 0,418367347     |
| NDFIP2                                                                             | 0,116996211 | -0,203483441 | 0,043 | 0,098 | 1           | 0,868451122   | 1,151475281     | 0,43877551      |
| AMIGO1                                                                             | 9,44793E-05 | -0,203504636 | 0     | 0,024 | 1           | 0,868438363   | 1,151492198     | 0               |
| CEP85                                                                              | 9,44793E-05 | -0,203504636 | 0     | 0,024 | 1           | 0,868438363   | 1,151492198     | 0               |

Supplementary Table 3

| Differentially expressed genes_keloid-MD_comparing SC-Keloid vs. (SC-Myel+Nonmyel) |             |              |       |       |           |               |                 |                 |
|------------------------------------------------------------------------------------|-------------|--------------|-------|-------|-----------|---------------|-----------------|-----------------|
| gene                                                                               | p_val       | avg_log2FC   | pct.1 | pct.2 | p_val_adj | Foldchange_UP | Foldchange_DOWN | Ratio_pct1_pct2 |
| DGKG                                                                               | 9,44793E-05 | -0,203504636 | 0     | 0,024 | 1         | 0,868438363   | 1,151492198     | 0               |
| GKAP1                                                                              | 9,44793E-05 | -0,203504636 | 0     | 0,024 | 1         | 0,868438363   | 1,151492198     | 0               |
| HPX                                                                                | 9,44793E-05 | -0,203504636 | 0     | 0,024 | 1         | 0,868438363   | 1,151492198     | 0               |
| NRG1                                                                               | 9,44793E-05 | -0,203504636 | 0     | 0,024 | 1         | 0,868438363   | 1,151492198     | 0               |
| RGR                                                                                | 9,44793E-05 | -0,203504636 | 0     | 0,024 | 1         | 0,868438363   | 1,151492198     | 0               |
| USP54                                                                              | 9,44793E-05 | -0,203504636 | 0     | 0,024 | 1         | 0,868438363   | 1,151492198     | 0               |
| CEBPD                                                                              | 0,073270243 | -0,203602951 | 0,038 | 0,098 | 1         | 0,868379184   | 1,151570671     | 0,387755102     |
| RAMAC                                                                              | 0,917863394 | -0,203651347 | 0,046 | 0,049 | 1         | 0,868350054   | 1,151609302     | 0,93877551      |
| LRIG2                                                                              | 0,451039476 | -0,203898165 | 0,011 | 0,024 | 1         | 0,868201509   | 1,151806337     | 0,458333333     |
| NPC2                                                                               | 0,6817101   | -0,204103021 | 0,104 | 0,122 | 1         | 0,868078237   | 1,1519699       | 0,852459016     |
| DEPP1                                                                              | 0,917046786 | -0,204122733 | 0,022 | 0,024 | 1         | 0,868066376   | 1,15198564      | 0,916666667     |
| PMS1                                                                               | 0,098499781 | -0,204157386 | 0,014 | 0,049 | 1         | 0,868045526   | 1,15201331      | 0,285714286     |
| MMP24OS                                                                            | 0,140886079 | -0,204162468 | 0,03  | 0,073 | 1         | 0,868042468   | 1,152017369     | 0,410958904     |
| PCDHGB7                                                                            | 0,096204645 | -0,204429475 | 0,014 | 0,049 | 1         | 0,86788183    | 1,152230598     | 0,285714286     |
| RPIA                                                                               | 0,200206568 | -0,204451639 | 0,019 | 0,049 | 1         | 0,867868497   | 1,1522483       | 0,387755102     |
| KATNIP                                                                             | 0,115197258 | -0,204466747 | 0,005 | 0,024 | 1         | 0,867859409   | 1,152260366     | 0,208333333     |
| CPPED1                                                                             | 0,041111012 | -0,204489084 | 0,033 | 0,098 | 1         | 0,867845972   | 1,152278207     | 0,336734694     |
| UQCR11                                                                             | 0,35423392  | -0,204654939 | 0,317 | 0,39  | 1         | 0,867746208   | 1,152410683     | 0,812820513     |
| CD320                                                                              | 0,328139444 | -0,204812003 | 0,059 | 0,098 | 1         | 0,867651743   | 1,152536151     | 0,602040816     |
| RFK                                                                                | 0,461082882 | -0,20481443  | 0,029 | 0,049 | 1         | 0,867650283   | 1,15253809      | 0,591836735     |
| BRAF                                                                               | 0,195641553 | -0,20485783  | 0,033 | 0,073 | 1         | 0,867624182   | 1,152572762     | 0,452054795     |
| FZD3                                                                               | 0,287136479 | -0,20488882  | 0,022 | 0,049 | 1         | 0,867605546   | 1,152597519     | 0,448979592     |
| FOXP4                                                                              | 0,027100643 | -0,205203025 | 0,01  | 0,049 | 1         | 0,86741661    | 1,152848572     | 0,204081633     |
| NUCB1                                                                              | 0,291015201 | -0,205370771 | 0,093 | 0,146 | 1         | 0,867315759   | 1,152982624     | 0,636986301     |
| ZNF532                                                                             | 0,338587259 | -0,205485682 | 0,041 | 0,073 | 1         | 0,86724668    | 1,153074463     | 0,561643836     |
| ADAM17                                                                             | 0,117773524 | -0,205553178 | 0,057 | 0,122 | 1         | 0,867206107   | 1,153128411     | 0,467213115     |
| NT5DC2                                                                             | 0,429495474 | -0,205633266 | 0,046 | 0,073 | 1         | 0,867157968   | 1,153192425     | 0,630136986     |
| ZNF44                                                                              | 0,005381463 | -0,205698215 | 0,006 | 0,049 | 1         | 0,86711893    | 1,153244342     | 0,12244898      |
| DDX56                                                                              | 0,050033658 | -0,205754578 | 0,022 | 0,073 | 1         | 0,867085054   | 1,153289398     | 0,301369863     |
| DAD1                                                                               | 0,476996617 | -0,205914082 | 0,427 | 0,488 | 1         | 0,866989195   | 1,153416912     | 0,875           |

Supplementary Table 3

| Differentially expressed genes_keloid-MD_comparing SC-Keloid vs. (SC-Myel+Nonmyel) |             |              |       |       |           |               |                 |                 |
|------------------------------------------------------------------------------------|-------------|--------------|-------|-------|-----------|---------------|-----------------|-----------------|
| gene                                                                               | p_val       | avg_log2FC   | pct.1 | pct.2 | p_val_adj | Foldchange_UP | Foldchange_DOWN | Ratio_pct1_pct2 |
| TSPAN6                                                                             | 0,121752067 | -0,206005154 | 0,029 | 0,073 | 1         | 0,866934466   | 1,153489726     | 0,397260274     |
| UBQLN2                                                                             | 0,451039476 | -0,206231299 | 0,011 | 0,024 | 1         | 0,866798583   | 1,153670552     | 0,458333333     |
| SLC35E3                                                                            | 0,8121558   | -0,206392087 | 0,032 | 0,024 | 1         | 0,866701984   | 1,153799135     | 1,333333333     |
| POLR1E                                                                             | 0,046010032 | -0,206578301 | 0,011 | 0,049 | 1         | 0,866590123   | 1,15394807      | 0,224489796     |
| PIK3C2B                                                                            | 0,049781231 | -0,206675204 | 0,003 | 0,024 | 1         | 0,866531918   | 1,154025581     | 0,125           |
| USP9Y                                                                              | 0,049781231 | -0,207206478 | 0,003 | 0,024 | 1         | 0,866212875   | 1,154450631     | 0,125           |
| HMGN3-AS1                                                                          | 0,196181004 | -0,20728186  | 0,006 | 0,024 | 1         | 0,866167616   | 1,154510953     | 0,25            |
| TRMT1                                                                              | 0,198124435 | -0,207428616 | 0,006 | 0,024 | 1         | 0,866079511   | 1,1546284       | 0,25            |
| MIA                                                                                | 0,358072657 | -0,207491409 | 0,285 | 0,341 | 1         | 0,866041816   | 1,154678655     | 0,835777126     |
| MCM7                                                                               | 0,806945473 | -0,207629293 | 0,019 | 0,024 | 1         | 0,865959049   | 1,154789019     | 0,791666667     |
| ACSS3                                                                              | 0,198124435 | -0,207716499 | 0,006 | 0,024 | 1         | 0,865906707   | 1,154858823     | 0,25            |
| MPHOSPH10                                                                          | 0,330129831 | -0,207832704 | 0,059 | 0,098 | 1         | 0,865836963   | 1,154951847     | 0,602040816     |
| UGP2                                                                               | 0,120790205 | -0,207949066 | 0,043 | 0,098 | 1         | 0,865767131   | 1,155045005     | 0,43877551      |
| EXOSC5                                                                             | 0,049321705 | -0,207959056 | 0,022 | 0,073 | 1         | 0,865761135   | 1,155053004     | 0,301369863     |
| RAB13                                                                              | 0,330470967 | -0,208046458 | 0,285 | 0,366 | 1         | 0,865708687   | 1,155122982     | 0,778688525     |
| CAPN5                                                                              | 0,247900727 | -0,208185358 | 0,021 | 0,049 | 1         | 0,865625343   | 1,1552342       | 0,428571429     |
| ASAP1                                                                              | 0,118610563 | -0,208452994 | 0,043 | 0,098 | 1         | 0,865464774   | 1,155448529     | 0,43877551      |
| RSBN1                                                                              | 0,372445254 | -0,208536448 | 0,026 | 0,049 | 1         | 0,865414712   | 1,155515369     | 0,530612245     |
| INSR                                                                               | 0,113762049 | -0,208632106 | 0,005 | 0,024 | 1         | 0,865357333   | 1,155591988     | 0,208333333     |
| GALK2                                                                              | 0,288566959 | -0,208704932 | 0,022 | 0,049 | 1         | 0,865313651   | 1,155650322     | 0,448979592     |
| ZDHHC2                                                                             | 0,049781231 | -0,20875375  | 0,003 | 0,024 | 1         | 0,865284371   | 1,155689428     | 0,125           |
| ARHGEF12                                                                           | 0,160462029 | -0,208801184 | 0,169 | 0,268 | 1         | 0,865255922   | 1,155727426     | 0,630597015     |
| TIMM29                                                                             | 0,801543206 | -0,208818221 | 0,019 | 0,024 | 1         | 0,865245704   | 1,155741074     | 0,791666667     |
| TRIQQ                                                                              | 0,869645238 | -0,208832646 | 0,045 | 0,049 | 1         | 0,865237053   | 1,15575263      | 0,918367347     |
| BBLN                                                                               | 0,534857641 | -0,208932671 | 0,225 | 0,268 | 1         | 0,865177067   | 1,155832764     | 0,839552239     |
| PPP2R2A                                                                            | 0,599787395 | -0,208954149 | 0,054 | 0,073 | 1         | 0,865164187   | 1,155849971     | 0,739726027     |
| NF2                                                                                | 0,982899486 | -0,208962341 | 0,026 | 0,024 | 1         | 0,865159274   | 1,155856534     | 1,083333333     |
| PSKH1                                                                              | 0,198124435 | -0,209261443 | 0,006 | 0,024 | 1         | 0,864979926   | 1,156096194     | 0,25            |
| RPS19BP1                                                                           | 0,386854854 | -0,209289636 | 0,158 | 0,22  | 1         | 0,864963023   | 1,156118786     | 0,718181818     |
| ANXA6                                                                              | 0,880830033 | -0,209426781 | 0,094 | 0,098 | 1         | 0,864880802   | 1,156228694     | 0,959183673     |

Supplementary Table 3

| Differentially expressed genes_keloid-MD_comparing SC-Keloid vs. (SC-Myel+Nonmyel) |             |              |       |       |           |               |                 |                 |
|------------------------------------------------------------------------------------|-------------|--------------|-------|-------|-----------|---------------|-----------------|-----------------|
| gene                                                                               | p_val       | avg_log2FC   | pct.1 | pct.2 | p_val_adj | Foldchange_UP | Foldchange_DOWN | Ratio_pct1_pct2 |
| PACRG                                                                              | 0,049781231 | -0,209576295 | 0,003 | 0,024 | 1         | 0,864791174   | 1,156348526     | 0,125           |
| NUDT4                                                                              | 0,695005998 | -0,210002104 | 0,164 | 0,146 | 1         | 0,86453597    | 1,156689871     | 1,123287671     |
| VAPA                                                                               | 0,178558069 | -0,21003155  | 0,215 | 0,317 | 1         | 0,864518325   | 1,156713479     | 0,678233438     |
| FBXW8                                                                              | 0,113762049 | -0,210070173 | 0,005 | 0,024 | 1         | 0,864495181   | 1,156744447     | 0,208333333     |
| ZNF146                                                                             | 0,254602952 | -0,21016657  | 0,037 | 0,073 | 1         | 0,86443742    | 1,15682174      | 0,506849315     |
| ZNF397                                                                             | 0,598718119 | -0,210188096 | 0,033 | 0,049 | 1         | 0,864424522   | 1,156839001     | 0,673469388     |
| PPP1R9A                                                                            | 0,109519807 | -0,210255753 | 0,041 | 0,098 | 1         | 0,864383984   | 1,156893253     | 0,418367347     |
| ANKRD16                                                                            | 0,113762049 | -0,210469589 | 0,005 | 0,024 | 1         | 0,864255875   | 1,15706474      | 0,208333333     |
| CLEC11A                                                                            | 0,2615816   | -0,210660549 | 0,054 | 0,098 | 1         | 0,864141487   | 1,157217903     | 0,551020408     |
| RBX1                                                                               | 0,381462628 | -0,210682065 | 0,415 | 0,488 | 1         | 0,8641286     | 1,157235162     | 0,850409836     |
| MAFF                                                                               | 0,68627951  | -0,210701909 | 0,037 | 0,049 | 1         | 0,864116714   | 1,15725108      | 0,755102041     |
| TCF7L2                                                                             | 0,246571074 | -0,211057602 | 0,021 | 0,049 | 1         | 0,863903694   | 1,157536433     | 0,428571429     |
| P4HA3                                                                              | 0,448381168 | -0,211278577 | 0,011 | 0,024 | 1         | 0,863771381   | 1,157713744     | 0,458333333     |
| PPP1R10                                                                            | 0,705247568 | -0,211285067 | 0,037 | 0,024 | 1         | 0,863767496   | 1,157718952     | 1,541666667     |
| MED13L                                                                             | 0,4869258   | -0,211388644 | 0,069 | 0,098 | 1         | 0,863705485   | 1,157802072     | 0,704081633     |
| SZRD1                                                                              | 0,848299759 | -0,211751453 | 0,067 | 0,073 | 1         | 0,863488307   | 1,158093273     | 0,917808219     |
| BCAS2                                                                              | 0,238394721 | -0,211897831 | 0,053 | 0,098 | 1         | 0,863400701   | 1,158210781     | 0,540816327     |
| PFDN5                                                                              | 0,379257236 | -0,212121076 | 0,523 | 0,659 | 1         | 0,863267107   | 1,158390018     | 0,793626707     |
| IQCH-AS1                                                                           | 0,049781231 | -0,212199015 | 0,003 | 0,024 | 1         | 0,863220472   | 1,1584526       | 0,125           |
| CHRAC1                                                                             | 0,722269122 | -0,212227232 | 0,065 | 0,049 | 1         | 0,863203589   | 1,158475258     | 1,326530612     |
| IL6                                                                                | 0,115197258 | -0,212347306 | 0,005 | 0,024 | 1         | 0,863131748   | 1,15857168      | 0,208333333     |
| SLAIN2                                                                             | 0,489948506 | -0,212417831 | 0,089 | 0,122 | 1         | 0,863089556   | 1,158628318     | 0,729508197     |
| PRDX1                                                                              | 0,636369786 | -0,212449087 | 0,244 | 0,268 | 1         | 0,863070857   | 1,15865342      | 0,910447761     |
| C8orf33                                                                            | 0,236303504 | -0,212451914 | 0,053 | 0,098 | 1         | 0,863069166   | 1,15865569      | 0,540816327     |
| ZNF620                                                                             | 0,049781231 | -0,212775787 | 0,003 | 0,024 | 1         | 0,862875436   | 1,158915828     | 0,125           |
| KARS1                                                                              | 0,95050249  | -0,213172834 | 0,048 | 0,049 | 1         | 0,862637995   | 1,159234819     | 0,979591837     |
| PTGES3                                                                             | 0,924006253 | -0,213227219 | 0,223 | 0,195 | 1         | 0,862605476   | 1,15927852      | 1,143589744     |
| RPL23A                                                                             | 0,319862116 | -0,213230963 | 0,547 | 0,561 | 1         | 0,862603238   | 1,159281528     | 0,975044563     |
| YAF2                                                                               | 0,212913632 | -0,213371477 | 0,051 | 0,098 | 1         | 0,862519227   | 1,159394444     | 0,520408163     |
| SLC25A36                                                                           | 0,109080757 | -0,213378786 | 0,057 | 0,122 | 1         | 0,862514857   | 1,159400318     | 0,467213115     |

Supplementary Table 3

| Differentially expressed genes_keloid-MD_ comparing SC-Keloid vs. (SC-Myel+Nonmyel) |             |              |       |       |           |               |                 |                 |
|-------------------------------------------------------------------------------------|-------------|--------------|-------|-------|-----------|---------------|-----------------|-----------------|
| gene                                                                                | p_val       | avg_log2FC   | pct.1 | pct.2 | p_val_adj | Foldchange_UP | Foldchange_DOWN | Ratio_pct1_pct2 |
| GNPDA2                                                                              | 0,558583358 | -0,21365732  | 0,032 | 0,049 | 1         | 0,862348352   | 1,159624179     | 0,653061224     |
| MGAT4B                                                                              | 0,253708033 | -0,213931862 | 0,054 | 0,098 | 1         | 0,862184265   | 1,159844874     | 0,551020408     |
| CHMP4A                                                                              | 0,249110138 | -0,21396747  | 0,072 | 0,122 | 1         | 0,862162985   | 1,159873501     | 0,590163934     |
| TAF1B                                                                               | 0,199026585 | -0,213987246 | 0,019 | 0,049 | 1         | 0,862151167   | 1,1598894       | 0,387755102     |
| NT5C3B                                                                              | 0,585921384 | -0,214200407 | 0,033 | 0,049 | 1         | 0,862023791   | 1,160060789     | 0,673469388     |
| ABHD17B                                                                             | 0,049781231 | -0,214436478 | 0,003 | 0,024 | 1         | 0,861882748   | 1,160250628     | 0,125           |
| MTMR3                                                                               | 0,863679013 | -0,214484448 | 0,021 | 0,024 | 1         | 0,861854091   | 1,160289207     | 0,875           |
| SELENOF                                                                             | 0,399628804 | -0,214890992 | 0,166 | 0,22  | 1         | 0,861611259   | 1,160616217     | 0,754545455     |
| ZNF160                                                                              | 0,985342118 | -0,215030937 | 0,026 | 0,024 | 1         | 0,861527685   | 1,160728805     | 1,083333333     |
| PRDX2                                                                               | 0,045183708 | -0,215032488 | 0,077 | 0,171 | 1         | 0,861526759   | 1,160730052     | 0,450292398     |
| RASAL2                                                                              | 0,378864515 | -0,215087269 | 0,026 | 0,049 | 1         | 0,861494046   | 1,160774128     | 0,530612245     |
| RPS23                                                                               | 0,248828077 | -0,215161873 | 0,901 | 1     | 1         | 0,861449498   | 1,160834155     | 0,901           |
| RHBDD2                                                                              | 0,026191169 | -0,215243979 | 0,01  | 0,049 | 1         | 0,861400473   | 1,160900222     | 0,204081633     |
| CXXC5                                                                               | 0,34602189  | -0,215350141 | 0,175 | 0,244 | 1         | 0,861337088   | 1,160985651     | 0,717213115     |
| GPX4                                                                                | 0,212159608 | -0,215420571 | 0,357 | 0,463 | 1         | 0,861295041   | 1,161042329     | 0,771058315     |
| ESPL1                                                                               | 0,009951995 | -0,215500567 | 0,002 | 0,024 | 1         | 0,861247284   | 1,16110671      | 0,083333333     |
| HOXC8                                                                               | 0,00163192  | -0,215548949 | 0,005 | 0,049 | 1         | 0,861218401   | 1,161145649     | 0,102040816     |
| MBD6                                                                                | 0,201391649 | -0,215733999 | 0,019 | 0,049 | 1         | 0,861107943   | 1,161294595     | 0,387755102     |
| AIMP1                                                                               | 0,357940224 | -0,215742099 | 0,099 | 0,146 | 1         | 0,861103108   | 1,161301116     | 0,678082192     |
| TM7SF3                                                                              | 0,013608147 | -0,21617638  | 0,008 | 0,049 | 1         | 0,860843937   | 1,161650744     | 0,163265306     |
| METTL21A                                                                            | 0,130015836 | -0,216279705 | 0,016 | 0,049 | 1         | 0,860782286   | 1,161733944     | 0,326530612     |
| PHC1                                                                                | 0,467993705 | -0,216361357 | 0,029 | 0,049 | 1         | 0,860733357   | 1,161799696     | 0,591836735     |
| ABCA1                                                                               | 0,530362187 | -0,21644595  | 0,013 | 0,024 | 1         | 0,860683102   | 1,16186782      | 0,541666667     |
| ZNF701                                                                              | 0,674031557 | -0,216737079 | 0,016 | 0,024 | 1         | 0,860509438   | 1,162102303     | 0,666666667     |
| EID1                                                                                | 0,37043283  | -0,21673927  | 0,589 | 0,634 | 1         | 0,860508131   | 1,162104068     | 0,929022082     |
| RARS2                                                                               | 0,774576085 | -0,216949423 | 0,033 | 0,024 | 1         | 0,860382793   | 1,16227336      | 1,375           |
| FAIM                                                                                | 0,117532409 | -0,217221219 | 0,043 | 0,098 | 1         | 0,860220716   | 1,162492348     | 0,43877551      |
| ZNF514                                                                              | 0,370733807 | -0,217241645 | 0,01  | 0,024 | 1         | 0,860208537   | 1,162508806     | 0,416666667     |
| RNPEPL1                                                                             | 0,510749547 | -0,217266331 | 0,03  | 0,049 | 1         | 0,860193819   | 1,162528698     | 0,612244898     |
| HNRNPD                                                                              | 0,304029767 | -0,217340398 | 0,175 | 0,244 | 1         | 0,860149658   | 1,162588383     | 0,717213115     |

Supplementary Table 3

| Differentially expressed genes_keloid-MD_comparing SC-Keloid vs. (SC-Myel+Nonmyel) |             |              |       |       |           |               |                 |                 |
|------------------------------------------------------------------------------------|-------------|--------------|-------|-------|-----------|---------------|-----------------|-----------------|
| gene                                                                               | p_val       | avg_log2FC   | pct.1 | pct.2 | p_val_adj | Foldchange_UP | Foldchange_DOWN | Ratio_pct1_pct2 |
| PACSIN3                                                                            | 0,026191169 | -0,21736334  | 0,01  | 0,049 | 1         | 0,86013598    | 1,162606871     | 0,204081633     |
| BTD                                                                                | 0,013608147 | -0,217414906 | 0,008 | 0,049 | 1         | 0,860105236   | 1,162648427     | 0,163265306     |
| MRPS22                                                                             | 0,014574696 | -0,217423415 | 0,027 | 0,098 | 1         | 0,860100164   | 1,162655284     | 0,275510204     |
| AGER                                                                               | 0,196181004 | -0,217455435 | 0,006 | 0,024 | 1         | 0,860081074   | 1,162681089     | 0,25            |
| CEP55                                                                              | 0,113762049 | -0,217498051 | 0,005 | 0,024 | 1         | 0,860055669   | 1,162715434     | 0,208333333     |
| NRXN3                                                                              | 0,013608147 | -0,217525188 | 0,008 | 0,049 | 1         | 0,860039491   | 1,162737304     | 0,163265306     |
| ITGBL1                                                                             | 0,363187776 | -0,218105827 | 0,01  | 0,024 | 1         | 0,859693422   | 1,163205364     | 0,416666667     |
| CYB5R1                                                                             | 0,524894226 | -0,218258958 | 0,013 | 0,024 | 1         | 0,859602177   | 1,163328836     | 0,541666667     |
| CREB1                                                                              | 0,537532987 | -0,218370791 | 0,051 | 0,073 | 1         | 0,859535546   | 1,163419017     | 0,698630137     |
| BPGM                                                                               | 0,028171458 | -0,218590895 | 0,03  | 0,098 | 1         | 0,859404421   | 1,163596527     | 0,306122449     |
| PRKAB1                                                                             | 0,118110366 | -0,218594381 | 0,005 | 0,024 | 1         | 0,859402345   | 1,163599338     | 0,208333333     |
| ZFYVE19                                                                            | 0,013608147 | -0,218681668 | 0,008 | 0,049 | 1         | 0,85935035    | 1,163669742     | 0,163265306     |
| ATM                                                                                | 0,573054256 | -0,218717145 | 0,053 | 0,073 | 1         | 0,859329219   | 1,163698357     | 0,726027397     |
| NFYB                                                                               | 0,538961273 | -0,218786529 | 0,051 | 0,073 | 1         | 0,859287892   | 1,163754324     | 0,698630137     |
| SMIM20                                                                             | 0,196987167 | -0,218907811 | 0,033 | 0,073 | 1         | 0,859215657   | 1,163852161     | 0,452054795     |
| NCDN                                                                               | 0,365692371 | -0,219040344 | 0,01  | 0,024 | 1         | 0,859136729   | 1,163959083     | 0,416666667     |
| CRTC2                                                                              | 0,280789447 | -0,219227569 | 0,008 | 0,024 | 1         | 0,859025243   | 1,164110145     | 0,333333333     |
| ACSS1                                                                              | 0,198124435 | -0,219260953 | 0,006 | 0,024 | 1         | 0,859005365   | 1,164137083     | 0,25            |
| DEDD2                                                                              | 0,203777145 | -0,21950694  | 0,019 | 0,049 | 1         | 0,858858913   | 1,164335592     | 0,387755102     |
| HACD2                                                                              | 0,241956599 | -0,219584234 | 0,021 | 0,049 | 1         | 0,858812899   | 1,164397974     | 0,428571429     |
| DNAJA2                                                                             | 0,870240606 | -0,219652682 | 0,057 | 0,049 | 1         | 0,858772154   | 1,16445322      | 1,163265306     |
| ERAL1                                                                              | 0,001663452 | -0,219759352 | 0,005 | 0,049 | 1         | 0,858708661   | 1,16453932      | 0,102040816     |
| ZNF730                                                                             | 0,009951995 | -0,219802563 | 0,002 | 0,024 | 1         | 0,858682941   | 1,164574201     | 0,083333333     |
| RANGAP1                                                                            | 0,026491352 | -0,219852507 | 0,01  | 0,049 | 1         | 0,858653216   | 1,164614517     | 0,204081633     |
| HIGD1A                                                                             | 0,173197521 | -0,219881972 | 0,048 | 0,098 | 1         | 0,858635679   | 1,164638302     | 0,489795918     |
| ABCF1                                                                              | 0,818680564 | -0,219912853 | 0,065 | 0,073 | 1         | 0,8586173     | 1,164663232     | 0,890410959     |
| SSR1                                                                               | 0,519138591 | -0,219956893 | 0,091 | 0,122 | 1         | 0,85859109    | 1,164698786     | 0,745901639     |
| TNFRSF25                                                                           | 0,116646669 | -0,220159549 | 0,005 | 0,024 | 1         | 0,858470492   | 1,164862403     | 0,208333333     |
| BABAM1                                                                             | 0,598718082 | -0,220214698 | 0,033 | 0,049 | 1         | 0,858437677   | 1,164906932     | 0,673469388     |
| CBR4                                                                               | 0,919630147 | -0,220316952 | 0,022 | 0,024 | 1         | 0,858376835   | 1,1649895       | 0,916666667     |

Supplementary Table 3

| Differentially expressed genes_keloid-MD_ comparing SC-Keloid vs. (SC-Myel+Nonmyel) |             |              |       |       |             |               |                 |                 |
|-------------------------------------------------------------------------------------|-------------|--------------|-------|-------|-------------|---------------|-----------------|-----------------|
| gene                                                                                | p_val       | avg_log2FC   | pct.1 | pct.2 | p_val_adj   | Foldchange_UP | Foldchange_DOWN | Ratio_pct1_pct2 |
| NUDT9                                                                               | 0,678822541 | -0,220359086 | 0,037 | 0,049 | 1           | 0,858351767   | 1,165023524     | 0,755102041     |
| IRGQ                                                                                | 0,287136479 | -0,220499904 | 0,022 | 0,049 | 1           | 0,858267989   | 1,165137245     | 0,448979592     |
| MAP3K1                                                                              | 0,254602952 | -0,220624365 | 0,037 | 0,073 | 1           | 0,85819395    | 1,165237765     | 0,506849315     |
| STK32A                                                                              | 3,19985E-08 | -0,221030232 | 0     | 0,049 | 0,000675201 | 0,857952551   | 1,165565623     | 0               |
| HDDC2                                                                               | 0,140813834 | -0,221284803 | 0,061 | 0,122 | 1           | 0,857801175   | 1,165771311     | 0,5             |
| XRCC1                                                                               | 0,608438325 | -0,221286038 | 0,014 | 0,024 | 1           | 0,857800441   | 1,165772309     | 0,583333333     |
| TRANK1                                                                              | 0,009700686 | -0,221341558 | 0,002 | 0,024 | 1           | 0,85776743    | 1,165817173     | 0,083333333     |
| DNAJB4                                                                              | 0,945110868 | -0,221388205 | 0,048 | 0,049 | 1           | 0,857739696   | 1,165854868     | 0,979591837     |
| PERP                                                                                | 0,681710078 | -0,221394809 | 0,104 | 0,122 | 1           | 0,85773577    | 1,165860204     | 0,852459016     |
| ZNF268                                                                              | 0,026794502 | -0,221693224 | 0,01  | 0,049 | 1           | 0,857558369   | 1,166101382     | 0,204081633     |
| VRK3                                                                                | 0,194251578 | -0,221913484 | 0,006 | 0,024 | 1           | 0,857427454   | 1,166279428     | 0,25            |
| UBAC1                                                                               | 0,370851108 | -0,22218039  | 0,026 | 0,049 | 1           | 0,85726884    | 1,166495215     | 0,530612245     |
| EDC3                                                                                | 0,365692371 | -0,222206968 | 0,01  | 0,024 | 1           | 0,857253047   | 1,166516705     | 0,416666667     |
| CMTM7                                                                               | 0,013608147 | -0,222327184 | 0,008 | 0,049 | 1           | 0,857181617   | 1,166613912     | 0,163265306     |
| MBNL1                                                                               | 0,523022005 | -0,222624303 | 0,152 | 0,195 | 1           | 0,857005101   | 1,166854198     | 0,779487179     |
| MEPCE                                                                               | 0,196181004 | -0,222663781 | 0,006 | 0,024 | 1           | 0,856981651   | 1,166886128     | 0,25            |
| STX4                                                                                | 0,260698511 | -0,222688358 | 0,054 | 0,098 | 1           | 0,856967052   | 1,166906007     | 0,551020408     |
| HSPH1                                                                               | 0,041266766 | -0,223116239 | 0,061 | 0,146 | 1           | 0,856712926   | 1,167252144     | 0,417808219     |
| FAM53B                                                                              | 0,044659199 | -0,223258    | 0,011 | 0,049 | 1           | 0,856628748   | 1,167366846     | 0,224489796     |
| TRIM3                                                                               | 0,196181004 | -0,223489951 | 0,006 | 0,024 | 1           | 0,856491034   | 1,167554546     | 0,25            |
| GARS1                                                                               | 0,167478502 | -0,223494162 | 0,064 | 0,122 | 1           | 0,856488534   | 1,167557953     | 0,524590164     |
| EHD2                                                                                | 0,595048988 | -0,223506283 | 0,033 | 0,049 | 1           | 0,856481338   | 1,167567763     | 0,673469388     |
| SNAP23                                                                              | 0,790933902 | -0,223870159 | 0,064 | 0,073 | 1           | 0,856265344   | 1,167862284     | 0,876712329     |
| PJA1                                                                                | 0,720548051 | -0,2239987   | 0,038 | 0,049 | 1           | 0,856189056   | 1,167966342     | 0,775510204     |
| CCL27                                                                               | 0,009951995 | -0,224061035 | 0,002 | 0,024 | 1           | 0,856152063   | 1,168016808     | 0,083333333     |
| ZNF577                                                                              | 0,524894226 | -0,224077165 | 0,013 | 0,024 | 1           | 0,856142491   | 1,168029867     | 0,541666667     |
| CLPP                                                                                | 0,235470691 | -0,224111316 | 0,053 | 0,098 | 1           | 0,856122225   | 1,168057516     | 0,540816327     |
| GPR137B                                                                             | 0,019788634 | -0,224149607 | 0,029 | 0,098 | 1           | 0,856099502   | 1,168088519     | 0,295918367     |
| BYSL                                                                                | 0,048947161 | -0,224282434 | 0,003 | 0,024 | 1           | 0,856020686   | 1,168196068     | 0,125           |
| RPGR                                                                                | 0,680683845 | -0,224287297 | 0,037 | 0,049 | 1           | 0,856017801   | 1,168200006     | 0,755102041     |

Supplementary Table 3

| Differentially expressed genes_keloid-MD_comparing SC-Keloid vs. (SC-Myel+Nonmyel) |             |              |       |       |           |               |                 |                 |
|------------------------------------------------------------------------------------|-------------|--------------|-------|-------|-----------|---------------|-----------------|-----------------|
| gene                                                                               | p_val       | avg_log2FC   | pct.1 | pct.2 | p_val_adj | Foldchange_UP | Foldchange_DOWN | Ratio_pct1_pct2 |
| PLCG2                                                                              | 0,506027128 | -0,224432762 | 0,226 | 0,268 | 1         | 0,855931494   | 1,1683178       | 0,843283582     |
| C1orf43                                                                            | 0,121472932 | -0,224489881 | 0,059 | 0,122 | 1         | 0,855897607   | 1,168364056     | 0,483606557     |
| WDR75                                                                              | 0,676801274 | -0,224640969 | 0,016 | 0,024 | 1         | 0,855807977   | 1,168486421     | 0,666666667     |
| NTAQ1                                                                              | 0,026191169 | -0,224738314 | 0,01  | 0,049 | 1         | 0,855750234   | 1,168565267     | 0,204081633     |
| CNNM3                                                                              | 0,280789447 | -0,225048345 | 0,008 | 0,024 | 1         | 0,855566355   | 1,168816415     | 0,333333333     |
| ARSA                                                                               | 0,018112928 | -0,225108268 | 0,018 | 0,073 | 1         | 0,855530819   | 1,168864963     | 0,246575342     |
| PATL1                                                                              | 0,738354944 | -0,225229346 | 0,018 | 0,024 | 1         | 0,855459022   | 1,168963065     | 0,75            |
| LYSMD1                                                                             | 0,196181004 | -0,225260788 | 0,006 | 0,024 | 1         | 0,855440379   | 1,168988541     | 0,25            |
| SESN2                                                                              | 0,001600938 | -0,225340512 | 0,005 | 0,049 | 1         | 0,855393108   | 1,169053142     | 0,102040816     |
| HYI                                                                                | 0,53221582  | -0,225405522 | 0,072 | 0,098 | 1         | 0,855354563   | 1,169105822     | 0,734693878     |
| ATIC                                                                               | 0,16364998  | -0,225499131 | 0,018 | 0,049 | 1         | 0,855299066   | 1,169181681     | 0,367346939     |
| CD96                                                                               | 9,44793E-05 | -0,225594722 | 0     | 0,024 | 1         | 0,855242397   | 1,169259153     | 0               |
| CHST7                                                                              | 9,44793E-05 | -0,225594722 | 0     | 0,024 | 1         | 0,855242397   | 1,169259153     | 0               |
| CSF2                                                                               | 9,44793E-05 | -0,225594722 | 0     | 0,024 | 1         | 0,855242397   | 1,169259153     | 0               |
| MAP3K5                                                                             | 9,44793E-05 | -0,225594722 | 0     | 0,024 | 1         | 0,855242397   | 1,169259153     | 0               |
| COL16A1                                                                            | 0,723479867 | -0,225915579 | 0,107 | 0,122 | 1         | 0,855052211   | 1,169519226     | 0,87704918      |
| COQ7                                                                               | 0,196181004 | -0,226052835 | 0,006 | 0,024 | 1         | 0,854970866   | 1,169630498     | 0,25            |
| MIPOL1                                                                             | 0,204977577 | -0,226070882 | 0,019 | 0,049 | 1         | 0,854960172   | 1,169645129     | 0,387755102     |
| NAXD                                                                               | 0,276254967 | -0,226077187 | 0,008 | 0,024 | 1         | 0,854956435   | 1,169650241     | 0,333333333     |
| PPP1R3D                                                                            | 0,116646669 | -0,226283029 | 0,005 | 0,024 | 1         | 0,854834459   | 1,169817137     | 0,208333333     |
| EID3                                                                               | 0,280789447 | -0,226574714 | 0,008 | 0,024 | 1         | 0,854661646   | 1,170053675     | 0,333333333     |
| YPEL2                                                                              | 0,050800475 | -0,226778766 | 0,035 | 0,098 | 1         | 0,854540772   | 1,170219178     | 0,357142857     |
| NCAPG2                                                                             | 0,445731781 | -0,227049687 | 0,011 | 0,024 | 1         | 0,854380315   | 1,170438951     | 0,458333333     |
| UBE2B                                                                              | 0,436910352 | -0,227108342 | 0,172 | 0,22  | 1         | 0,85434558    | 1,170486538     | 0,781818182     |
| CYC1                                                                               | 0,265643856 | -0,227239022 | 0,072 | 0,122 | 1         | 0,854268196   | 1,170592566     | 0,590163934     |
| PAXBP1                                                                             | 0,960205063 | -0,22738045  | 0,073 | 0,073 | 1         | 0,854184456   | 1,170707326     | 1               |
| DNAJB2                                                                             | 0,305453413 | -0,227382973 | 0,057 | 0,098 | 1         | 0,854182962   | 1,170709373     | 0,581632653     |
| RALA                                                                               | 0,559238183 | -0,227420784 | 0,096 | 0,122 | 1         | 0,854160576   | 1,170740056     | 0,786885246     |
| MDM2                                                                               | 0,330129859 | -0,227456341 | 0,059 | 0,098 | 1         | 0,854139524   | 1,17076891      | 0,602040816     |
| ZBTB37                                                                             | 0,420009788 | -0,227762257 | 0,027 | 0,049 | 1         | 0,853958427   | 1,171017192     | 0,551020408     |



Supplementary Table 3

| Differentially expressed genes_keloid-MD_comparing SC-Keloid vs. (SC-Myel+Nonmyel) |             |              |       |       |           |               |                 |                 |
|------------------------------------------------------------------------------------|-------------|--------------|-------|-------|-----------|---------------|-----------------|-----------------|
| gene                                                                               | p_val       | avg_log2FC   | pct.1 | pct.2 | p_val_adj | Foldchange_UP | Foldchange_DOWN | Ratio_pct1_pct2 |
| NDUFC1                                                                             | 0,293053126 | -0,227763424 | 0,351 | 0,415 | 1         | 0,853957736   | 1,17101814      | 0,845783133     |
| CDC42EP5                                                                           | 0,169856556 | -0,227875348 | 0,134 | 0,22  | 1         | 0,853891489   | 1,17110899      | 0,609090909     |
| RIN2                                                                               | 0,280789447 | -0,227891059 | 0,008 | 0,024 | 1         | 0,853882191   | 1,171121744     | 0,333333333     |
| ECHDC3                                                                             | 0,048947161 | -0,227960324 | 0,003 | 0,024 | 1         | 0,853841196   | 1,171177972     | 0,125           |
| GUSB                                                                               | 0,235470691 | -0,228251342 | 0,053 | 0,098 | 1         | 0,853668978   | 1,171414244     | 0,540816327     |
| AMMECR1                                                                            | 0,60566217  | -0,228323347 | 0,014 | 0,024 | 1         | 0,853626372   | 1,171472711     | 0,583333333     |
| NEK1                                                                               | 0,165771877 | -0,228330762 | 0,018 | 0,049 | 1         | 0,853621985   | 1,171478732     | 0,367346939     |
| CAMSAP1                                                                            | 0,674031557 | -0,228486218 | 0,016 | 0,024 | 1         | 0,853530009   | 1,17160497      | 0,666666667     |
| NDUFAF1                                                                            | 0,202581839 | -0,228569828 | 0,019 | 0,049 | 1         | 0,853480544   | 1,171672871     | 0,387755102     |
| WDFY3                                                                              | 0,285710793 | -0,22860092  | 0,022 | 0,049 | 1         | 0,853462151   | 1,171698122     | 0,448979592     |
| NOC4L                                                                              | 0,027100643 | -0,228834645 | 0,01  | 0,049 | 1         | 0,853323897   | 1,171887959     | 0,204081633     |
| FAM161A                                                                            | 0,451039476 | -0,228992657 | 0,011 | 0,024 | 1         | 0,853230441   | 1,172016318     | 0,458333333     |
| SHPRH                                                                              | 0,836928887 | -0,229015823 | 0,043 | 0,049 | 1         | 0,85321674    | 1,172035138     | 0,87755102      |
| BRPF1                                                                              | 0,044216422 | -0,22901866  | 0,011 | 0,049 | 1         | 0,853215062   | 1,172037443     | 0,224489796     |
| PDZD2                                                                              | 0,009700686 | -0,229061168 | 0,002 | 0,024 | 1         | 0,853189924   | 1,172071976     | 0,083333333     |
| PHF20L1                                                                            | 0,526154072 | -0,229103527 | 0,091 | 0,122 | 1         | 0,853164873   | 1,17210639      | 0,745901639     |
| NUDT6                                                                              | 0,448381168 | -0,229402556 | 0,011 | 0,024 | 1         | 0,852988055   | 1,17234936      | 0,458333333     |
| BRD3                                                                               | 0,765191034 | -0,229453122 | 0,04  | 0,049 | 1         | 0,852958158   | 1,172390451     | 0,816326531     |
| AFF1                                                                               | 0,243926778 | -0,229518775 | 0,021 | 0,049 | 1         | 0,852919344   | 1,172443804     | 0,428571429     |
| PTPRB                                                                              | 0,048947161 | -0,229578142 | 0,003 | 0,024 | 1         | 0,852884247   | 1,172492051     | 0,125           |
| SSRP1                                                                              | 0,135383661 | -0,229779211 | 0,045 | 0,098 | 1         | 0,852765389   | 1,172655473     | 0,459183673     |
| RGL1                                                                               | 0,198124435 | -0,229876283 | 0,006 | 0,024 | 1         | 0,852708012   | 1,172734378     | 0,25            |
| GRAMD2B                                                                            | 0,327147218 | -0,230002909 | 0,059 | 0,098 | 1         | 0,852633172   | 1,172837314     | 0,602040816     |
| TRUB1                                                                              | 0,465395425 | -0,230061214 | 0,029 | 0,049 | 1         | 0,852598715   | 1,172884714     | 0,591836735     |
| TNFSF9                                                                             | 0,192336114 | -0,230105906 | 0,006 | 0,024 | 1         | 0,852572303   | 1,172921048     | 0,25            |
| FAM204A                                                                            | 0,35488028  | -0,230200728 | 0,163 | 0,22  | 1         | 0,85251627    | 1,172998142     | 0,740909091     |
| RIPK2                                                                              | 0,861032984 | -0,230298413 | 0,021 | 0,024 | 1         | 0,852458548   | 1,173077568     | 0,875           |
| PGAP2                                                                              | 0,001663452 | -0,230376158 | 0,005 | 0,049 | 1         | 0,852412611   | 1,173140785     | 0,102040816     |
| QSOX1                                                                              | 0,010692527 | -0,230445441 | 0,037 | 0,122 | 1         | 0,852371676   | 1,173197125     | 0,303278689     |
| ZNF672                                                                             | 0,000264836 | -0,230482583 | 0,003 | 0,049 | 1         | 0,852349732   | 1,17322733      | 0,06122449      |

Supplementary Table 3

| Differentially expressed genes_keloid-MD_comparing SC-Keloid vs. (SC-Myel+Nonmyel) |             |              |       |       |           |               |                 |                 |
|------------------------------------------------------------------------------------|-------------|--------------|-------|-------|-----------|---------------|-----------------|-----------------|
| gene                                                                               | p_val       | avg_log2FC   | pct.1 | pct.2 | p_val_adj | Foldchange_UP | Foldchange_DOWN | Ratio_pct1_pct2 |
| UBE2E1                                                                             | 0,64190582  | -0,230515867 | 0,035 | 0,049 | 1         | 0,852330068   | 1,173254397     | 0,714285714     |
| ZNF836                                                                             | 0,00163192  | -0,230586444 | 0,005 | 0,049 | 1         | 0,852288373   | 1,173311794     | 0,102040816     |
| POLR1F                                                                             | 0,283250411 | -0,230723651 | 0,056 | 0,098 | 1         | 0,85220732    | 1,173423387     | 0,571428571     |
| BOD1L1                                                                             | 0,051175381 | -0,230808454 | 0,078 | 0,171 | 1         | 0,852157228   | 1,173492364     | 0,456140351     |
| LMF1                                                                               | 0,196181004 | -0,230963852 | 0,006 | 0,024 | 1         | 0,852065444   | 1,173618772     | 0,25            |
| ADAR                                                                               | 0,054145001 | -0,230999718 | 0,078 | 0,171 | 1         | 0,852044262   | 1,173647949     | 0,456140351     |
| CEBPZOS                                                                            | 0,468331793 | -0,231075891 | 0,048 | 0,073 | 1         | 0,851999276   | 1,173709918     | 0,657534247     |
| EFNB1                                                                              | 0,194251578 | -0,231174443 | 0,006 | 0,024 | 1         | 0,851941076   | 1,173790098     | 0,25            |
| BAG5                                                                               | 0,920929257 | -0,231849593 | 0,054 | 0,049 | 1         | 0,85154248    | 1,174339535     | 1,102040816     |
| PNPT1                                                                              | 0,507203964 | -0,231880261 | 0,03  | 0,049 | 1         | 0,851524378   | 1,174364499     | 0,612244898     |
| CCSER2                                                                             | 0,536713624 | -0,231914799 | 0,093 | 0,122 | 1         | 0,851503993   | 1,174392613     | 0,762295082     |
| PFKFB2                                                                             | 0,194251578 | -0,231916036 | 0,006 | 0,024 | 1         | 0,851503264   | 1,17439362      | 0,25            |
| LRP10                                                                              | 0,156134089 | -0,231971167 | 0,062 | 0,122 | 1         | 0,851470725   | 1,174438499     | 0,508196721     |
| ACBD6                                                                              | 0,358486585 | -0,232077117 | 0,061 | 0,098 | 1         | 0,851408196   | 1,174524752     | 0,62244898      |
| CPT1C                                                                              | 0,009951995 | -0,2320908   | 0,002 | 0,024 | 1         | 0,851400121   | 1,174535891     | 0,083333333     |
| RILP                                                                               | 0,005553478 | -0,232154086 | 0,006 | 0,049 | 1         | 0,851362774   | 1,174587415     | 0,12244898      |
| TGFB1                                                                              | 0,75959289  | -0,23222457  | 0,04  | 0,049 | 1         | 0,851321181   | 1,174644802     | 0,816326531     |
| MALL                                                                               | 0,009951995 | -0,232225546 | 0,002 | 0,024 | 1         | 0,851320605   | 1,174645597     | 0,083333333     |
| KLF11                                                                              | 0,093952504 | -0,232245236 | 0,014 | 0,049 | 1         | 0,851308986   | 1,174661629     | 0,285714286     |
| C18orf54                                                                           | 0,09544918  | -0,232409219 | 0,014 | 0,049 | 1         | 0,851212228   | 1,174795154     | 0,285714286     |
| TPSAB1                                                                             | 0,009700686 | -0,232445416 | 0,002 | 0,024 | 1         | 0,851190871   | 1,17482463      | 0,083333333     |
| CALM3                                                                              | 0,54319075  | -0,232479628 | 0,072 | 0,098 | 1         | 0,851170687   | 1,174852489     | 0,734693878     |
| TRIM28                                                                             | 0,772674319 | -0,232502854 | 0,04  | 0,049 | 1         | 0,851156984   | 1,174871403     | 0,816326531     |
| DUSP11                                                                             | 0,967295855 | -0,232554484 | 0,024 | 0,024 | 1         | 0,851126524   | 1,17491345      | 1               |
| MRPL50                                                                             | 0,274893326 | -0,232831204 | 0,038 | 0,073 | 1         | 0,850963287   | 1,175138828     | 0,520547945     |
| HPRT1                                                                              | 0,143825623 | -0,233126371 | 0,03  | 0,073 | 1         | 0,850789202   | 1,17537928      | 0,410958904     |
| RGS12                                                                              | 0,801543206 | -0,233167506 | 0,019 | 0,024 | 1         | 0,850764945   | 1,175412793     | 0,791666667     |
| NEK5                                                                               | 0,196181004 | -0,233373791 | 0,006 | 0,024 | 1         | 0,850643306   | 1,175580873     | 0,25            |
| RPL22                                                                              | 0,119067167 | -0,233563836 | 0,673 | 0,805 | 1         | 0,850531259   | 1,175735741     | 0,836024845     |
| SLBP                                                                               | 0,339184709 | -0,233678374 | 0,041 | 0,073 | 1         | 0,850463736   | 1,175829089     | 0,561643836     |

Supplementary Table 3

| Differentially expressed genes_keloid-MD_comparing SC-Keloid vs. (SC-Myel+Nonmyel) |             |              |       |       |           |               |                 |                 |
|------------------------------------------------------------------------------------|-------------|--------------|-------|-------|-----------|---------------|-----------------|-----------------|
| gene                                                                               | p_val       | avg_log2FC   | pct.1 | pct.2 | p_val_adj | Foldchange_UP | Foldchange_DOWN | Ratio_pct1_pct2 |
| MX1                                                                                | 0,045555981 | -0,233898674 | 0,011 | 0,049 | 1         | 0,85033388    | 1,176008652     | 0,224489796     |
| ATG16L1                                                                            | 0,530362187 | -0,233912556 | 0,013 | 0,024 | 1         | 0,850325698   | 1,176019968     | 0,541666667     |
| STAT6                                                                              | 0,421683813 | -0,23411522  | 0,027 | 0,049 | 1         | 0,850206256   | 1,176185182     | 0,551020408     |
| CEP290                                                                             | 0,835081291 | -0,23426656  | 0,043 | 0,049 | 1         | 0,850117074   | 1,176308571     | 0,87755102      |
| NAP1L4                                                                             | 0,126364706 | -0,234959788 | 0,112 | 0,195 | 1         | 0,849708683   | 1,176873934     | 0,574358974     |
| ZCCHC7                                                                             | 0,061432982 | -0,234994777 | 0,037 | 0,098 | 1         | 0,849688075   | 1,176902476     | 0,37755102      |
| SRPRA                                                                              | 0,381135764 | -0,235521724 | 0,062 | 0,098 | 1         | 0,849377782   | 1,177332421     | 0,632653061     |
| BICD1                                                                              | 0,644792837 | -0,235543054 | 0,102 | 0,122 | 1         | 0,849365224   | 1,177349828     | 0,836065574     |
| CCDC180                                                                            | 0,001663452 | -0,23593626  | 0,005 | 0,049 | 1         | 0,849133762   | 1,177670757     | 0,102040816     |
| DLGAP1-AS1                                                                         | 0,365692371 | -0,236082655 | 0,01  | 0,024 | 1         | 0,849047602   | 1,177790265     | 0,416666667     |
| KRI1                                                                               | 0,365692371 | -0,236108162 | 0,01  | 0,024 | 1         | 0,84903259    | 1,17781109      | 0,416666667     |
| PIGK                                                                               | 0,59688227  | -0,236133272 | 0,033 | 0,049 | 1         | 0,849017813   | 1,177831589     | 0,673469388     |
| LINS1                                                                              | 0,280789447 | -0,236220861 | 0,008 | 0,024 | 1         | 0,848966269   | 1,1779031       | 0,333333333     |
| G6PC3                                                                              | 0,126823956 | -0,236547852 | 0,016 | 0,049 | 1         | 0,84877387    | 1,178170106     | 0,326530612     |
| AZI2                                                                               | 0,558583358 | -0,236637436 | 0,032 | 0,049 | 1         | 0,848721167   | 1,178243266     | 0,653061224     |
| RUFY1                                                                              | 0,593939955 | -0,236775172 | 0,054 | 0,073 | 1         | 0,848640143   | 1,17835576      | 0,739726027     |
| COQ8B                                                                              | 0,096204645 | -0,236858991 | 0,014 | 0,049 | 1         | 0,848590839   | 1,178424223     | 0,285714286     |
| CRPPA                                                                              | 0,118110366 | -0,237080342 | 0,005 | 0,024 | 1         | 0,848460651   | 1,178605041     | 0,208333333     |
| ATMIN                                                                              | 0,558583316 | -0,237300815 | 0,032 | 0,049 | 1         | 0,848330999   | 1,17878517      | 0,653061224     |
| AHCYL1                                                                             | 0,183467291 | -0,237423422 | 0,065 | 0,122 | 1         | 0,848258907   | 1,178885352     | 0,532786885     |
| FKTN                                                                               | 0,369261143 | -0,237559495 | 0,026 | 0,049 | 1         | 0,848178903   | 1,178996549     | 0,530612245     |
| C1QL1                                                                              | 0,982471828 | -0,237701919 | 0,075 | 0,073 | 1         | 0,848095175   | 1,179112946     | 1,02739726      |
| NCK2                                                                               | 0,243346971 | -0,23789123  | 0,037 | 0,073 | 1         | 0,847983895   | 1,17926768      | 0,506849315     |
| IFT172                                                                             | 0,009700686 | -0,238012263 | 0,002 | 0,024 | 1         | 0,847912758   | 1,179366617     | 0,083333333     |
| CKB                                                                                | 0,627778305 | -0,238050749 | 0,056 | 0,073 | 1         | 0,847890139   | 1,179398078     | 0,767123288     |
| ANKRD13C                                                                           | 0,861032984 | -0,238098096 | 0,021 | 0,024 | 1         | 0,847862313   | 1,179436785     | 0,875           |
| CDR2L                                                                              | 0,985342118 | -0,238255394 | 0,026 | 0,024 | 1         | 0,847769874   | 1,179565387     | 1,083333333     |
| AKR7A2                                                                             | 0,118399687 | -0,239340922 | 0,059 | 0,122 | 1         | 0,847132226   | 1,180453263     | 0,483606557     |
| COQ9                                                                               | 0,32565663  | -0,239518794 | 0,024 | 0,049 | 1         | 0,847027789   | 1,180598811     | 0,489795918     |
| SEMA6A                                                                             | 0,97232506  | -0,2395675   | 0,024 | 0,024 | 1         | 0,846999193   | 1,180638669     | 1               |

Supplementary Table 3

| Differentially expressed genes_keloid-MD_comparing SC-Keloid vs. (SC-Myel+Nonmyel) |             |              |       |       |           |               |                 |                 |
|------------------------------------------------------------------------------------|-------------|--------------|-------|-------|-----------|---------------|-----------------|-----------------|
| gene                                                                               | p_val       | avg_log2FC   | pct.1 | pct.2 | p_val_adj | Foldchange_UP | Foldchange_DOWN | Ratio_pct1_pct2 |
| AP3S1                                                                              | 0,226174026 | -0,239696696 | 0,088 | 0,146 | 1         | 0,846923346   | 1,180744403     | 0,602739726     |
| PDK3                                                                               | 0,116646669 | -0,240026725 | 0,005 | 0,024 | 1         | 0,846729627   | 1,181014539     | 0,208333333     |
| THBS2                                                                              | 0,935367531 | -0,240114406 | 0,148 | 0,146 | 1         | 0,846678168   | 1,181086318     | 1,01369863      |
| TP53INP1                                                                           | 0,861032984 | -0,240401301 | 0,021 | 0,024 | 1         | 0,846509814   | 1,181321213     | 0,875           |
| ARHGAP35                                                                           | 0,070608912 | -0,240553352 | 0,038 | 0,098 | 1         | 0,846420602   | 1,181445724     | 0,387755102     |
| NUP43                                                                              | 0,738354944 | -0,240618592 | 0,018 | 0,024 | 1         | 0,846382326   | 1,181499151     | 0,75            |
| TOR1B                                                                              | 0,198124435 | -0,240701717 | 0,006 | 0,024 | 1         | 0,846333562   | 1,181567228     | 0,25            |
| DTWD1                                                                              | 0,7797991   | -0,240719736 | 0,091 | 0,073 | 1         | 0,846322991   | 1,181581985     | 1,246575342     |
| MRPL45                                                                             | 0,201391649 | -0,240725785 | 0,019 | 0,049 | 1         | 0,846319442   | 1,18158694      | 0,387755102     |
| HIPK1                                                                              | 0,687533554 | -0,240957853 | 0,059 | 0,073 | 1         | 0,846183317   | 1,181777022     | 0,808219178     |
| SCRN3                                                                              | 0,674031557 | -0,241213509 | 0,016 | 0,024 | 1         | 0,84603338    | 1,18198646      | 0,666666667     |
| AZGP1                                                                              | 0,00163192  | -0,241265082 | 0,005 | 0,049 | 1         | 0,846003137   | 1,182028714     | 0,102040816     |
| NBPF14                                                                             | 0,009700686 | -0,241333792 | 0,002 | 0,024 | 1         | 0,845962846   | 1,18208501      | 0,083333333     |
| SRRM2                                                                              | 0,197896324 | -0,241418425 | 0,263 | 0,366 | 1         | 0,84591322    | 1,182154358     | 0,718579235     |
| GTF2F2                                                                             | 0,459729697 | -0,241815193 | 0,067 | 0,098 | 1         | 0,845680611   | 1,182479517     | 0,683673469     |
| OCIAD1                                                                             | 0,199608763 | -0,241893546 | 0,121 | 0,195 | 1         | 0,845634683   | 1,182543739     | 0,620512821     |
| FBH1                                                                               | 0,280789447 | -0,241937298 | 0,008 | 0,024 | 1         | 0,845609038   | 1,182579603     | 0,333333333     |
| TERF2IP                                                                            | 0,451445335 | -0,241954216 | 0,152 | 0,195 | 1         | 0,845599122   | 1,18259347      | 0,779487179     |
| PFKM                                                                               | 0,196181004 | -0,242123075 | 0,006 | 0,024 | 1         | 0,845500156   | 1,182731893     | 0,25            |
| SDF2L1                                                                             | 0,49597224  | -0,242350495 | 0,134 | 0,171 | 1         | 0,845366885   | 1,182918349     | 0,783625731     |
| DENND6A                                                                            | 0,801543206 | -0,242414573 | 0,019 | 0,024 | 1         | 0,845329338   | 1,18297089      | 0,791666667     |
| NDUFB3                                                                             | 0,538880226 | -0,242455567 | 0,179 | 0,22  | 1         | 0,845305319   | 1,183004504     | 0,813636364     |
| CDK5RAP2                                                                           | 0,674031557 | -0,242481071 | 0,016 | 0,024 | 1         | 0,845290376   | 1,183025418     | 0,666666667     |
| PCM1                                                                               | 0,503112518 | -0,242482937 | 0,113 | 0,146 | 1         | 0,845289282   | 1,183026948     | 0,773972603     |
| RBBP8                                                                              | 0,096204645 | -0,242511823 | 0,014 | 0,049 | 1         | 0,845272358   | 1,183050635     | 0,285714286     |
| ECH1                                                                               | 0,142944801 | -0,24252474  | 0,061 | 0,122 | 1         | 0,84526479    | 1,183061227     | 0,5             |
| ARIH2OS                                                                            | 0,194251578 | -0,242571003 | 0,006 | 0,024 | 1         | 0,845237685   | 1,183099165     | 0,25            |
| CRELD1                                                                             | 0,011603552 | -0,242740354 | 0,016 | 0,073 | 1         | 0,845138473   | 1,183238052     | 0,219178082     |
| CAVIN1                                                                             | 0,315020435 | -0,242804592 | 0,156 | 0,22  | 1         | 0,845100843   | 1,183290738     | 0,709090909     |
| ABCD3                                                                              | 0,406772282 | -0,242845759 | 0,045 | 0,073 | 1         | 0,845076728   | 1,183324504     | 0,616438356     |

Supplementary Table 3

| Differentially expressed genes_keloid-MD_comparing SC-Keloid vs. (SC-Myel+Nonmyel) |             |              |       |       |           |               |                 |                 |
|------------------------------------------------------------------------------------|-------------|--------------|-------|-------|-----------|---------------|-----------------|-----------------|
| gene                                                                               | p_val       | avg_log2FC   | pct.1 | pct.2 | p_val_adj | Foldchange_UP | Foldchange_DOWN | Ratio_pct1_pct2 |
| MVD                                                                                | 0,066835713 | -0,242851366 | 0,013 | 0,049 | 1         | 0,845073444   | 1,183329103     | 0,265306122     |
| TFAP2A                                                                             | 0,605660801 | -0,243319736 | 0,054 | 0,073 | 1         | 0,844799136   | 1,183713332     | 0,739726027     |
| CDR1                                                                               | 0,741096311 | -0,243336299 | 0,018 | 0,024 | 1         | 0,844789437   | 1,183726922     | 0,75            |
| WTIP                                                                               | 0,164178451 | -0,243375459 | 0,018 | 0,049 | 1         | 0,844766507   | 1,183759053     | 0,367346939     |
| SLC25A11                                                                           | 0,853574549 | -0,243439592 | 0,067 | 0,073 | 1         | 0,844728955   | 1,183811677     | 0,917808219     |
| SLC11A2                                                                            | 0,026191169 | -0,243681818 | 0,01  | 0,049 | 1         | 0,844587138   | 1,184010453     | 0,204081633     |
| IRF2BP2                                                                            | 0,227528431 | -0,243738461 | 0,07  | 0,122 | 1         | 0,844553978   | 1,184056941     | 0,573770492     |
| PHIP                                                                               | 0,46696838  | -0,243780846 | 0,048 | 0,073 | 1         | 0,844529167   | 1,184091727     | 0,657534247     |
| MAN2B2                                                                             | 0,917046786 | -0,244152331 | 0,022 | 0,024 | 1         | 0,844311733   | 1,184396663     | 0,916666667     |
| PPIL4                                                                              | 0,633516194 | -0,244282986 | 0,078 | 0,098 | 1         | 0,844235273   | 1,184503931     | 0,795918367     |
| CIZ1                                                                               | 0,081781673 | -0,244293784 | 0,026 | 0,073 | 1         | 0,844228955   | 1,184512796     | 0,356164384     |
| HAGH                                                                               | 0,298791616 | -0,244361988 | 0,057 | 0,098 | 1         | 0,844189044   | 1,184568796     | 0,581632653     |
| AL035681.1                                                                         | 9,44793E-05 | -0,244442251 | 0     | 0,024 | 1         | 0,84414208    | 1,1846347       | 0               |
| C20orf203                                                                          | 9,44793E-05 | -0,244442251 | 0     | 0,024 | 1         | 0,84414208    | 1,1846347       | 0               |
| PRR14L                                                                             | 0,331721562 | -0,244818421 | 0,024 | 0,049 | 1         | 0,843922006   | 1,184943623     | 0,489795918     |
| TRAK1                                                                              | 0,18641081  | -0,244867063 | 0,033 | 0,073 | 1         | 0,843893553   | 1,184983576     | 0,452054795     |
| GRHPR                                                                              | 0,434991648 | -0,244992075 | 0,086 | 0,122 | 1         | 0,843820431   | 1,185086261     | 0,704918033     |
| SYP                                                                                | 0,001663452 | -0,245167755 | 0,005 | 0,049 | 1         | 0,843717684   | 1,18523058      | 0,102040816     |
| AKAP6                                                                              | 0,194251578 | -0,245188156 | 0,006 | 0,024 | 1         | 0,843705753   | 1,185247341     | 0,25            |
| PSMD9                                                                              | 0,188143779 | -0,245437317 | 0,033 | 0,073 | 1         | 0,843560053   | 1,185452057     | 0,452054795     |
| UQCRB                                                                              | 0,140035442 | -0,245547441 | 0,335 | 0,463 | 1         | 0,843495665   | 1,185542549     | 0,723542117     |
| SCN1B                                                                              | 0,018112928 | -0,245607287 | 0,018 | 0,073 | 1         | 0,843460676   | 1,185591728     | 0,246575342     |
| ID3                                                                                | 0,174165114 | -0,245672115 | 0,22  | 0,317 | 1         | 0,843422775   | 1,185645004     | 0,694006309     |
| TMEM205                                                                            | 0,401868561 | -0,245744781 | 0,064 | 0,098 | 1         | 0,843380295   | 1,185704724     | 0,653061224     |
| PI4KB                                                                              | 0,418339787 | -0,246069668 | 0,027 | 0,049 | 1         | 0,843190391   | 1,185971769     | 0,551020408     |
| NUMA1                                                                              | 0,37014661  | -0,246127763 | 0,043 | 0,073 | 1         | 0,843156438   | 1,186019527     | 0,589041096     |
| ZNF219                                                                             | 0,162596738 | -0,246268187 | 0,018 | 0,049 | 1         | 0,843074374   | 1,186134973     | 0,367346939     |
| RNF157                                                                             | 0,196181004 | -0,246555438 | 0,006 | 0,024 | 1         | 0,842906529   | 1,186371164     | 0,25            |
| MOSPD1                                                                             | 0,761457575 | -0,246673631 | 0,04  | 0,049 | 1         | 0,842837476   | 1,186468362     | 0,816326531     |
| SCAF11                                                                             | 0,215334017 | -0,24681453  | 0,126 | 0,195 | 1         | 0,842755165   | 1,186584243     | 0,646153846     |

Supplementary Table 3

| Differentially expressed genes_keloid-MD_ comparing SC-Keloid vs. (SC-Myel+Nonmyel) |             |              |       |       |           |               |                 |                 |
|-------------------------------------------------------------------------------------|-------------|--------------|-------|-------|-----------|---------------|-----------------|-----------------|
| gene                                                                                | p_val       | avg_log2FC   | pct.1 | pct.2 | p_val_adj | Foldchange_UP | Foldchange_DOWN | Ratio_pct1_pct2 |
| CLDN14                                                                              | 0,009700686 | -0,246915833 | 0,002 | 0,024 | 1         | 0,842695991   | 1,186667565     | 0,083333333     |
| ZKSCAN8                                                                             | 0,368207718 | -0,246950515 | 0,01  | 0,024 | 1         | 0,842675733   | 1,186696093     | 0,416666667     |
| EXPH5                                                                               | 9,44793E-05 | -0,247196469 | 0     | 0,024 | 1         | 0,842532084   | 1,186898421     | 0               |
| FAM83F                                                                              | 9,44793E-05 | -0,247196469 | 0     | 0,024 | 1         | 0,842532084   | 1,186898421     | 0               |
| LINC02875                                                                           | 9,44793E-05 | -0,247196469 | 0     | 0,024 | 1         | 0,842532084   | 1,186898421     | 0               |
| LINC02897                                                                           | 9,44793E-05 | -0,247196469 | 0     | 0,024 | 1         | 0,842532084   | 1,186898421     | 0               |
| RIC8A                                                                               | 0,455937379 | -0,247250813 | 0,029 | 0,049 | 1         | 0,842500348   | 1,18694313      | 0,591836735     |
| LDAH                                                                                | 0,360693945 | -0,247462952 | 0,01  | 0,024 | 1         | 0,842376473   | 1,187117676     | 0,416666667     |
| CYB5R2                                                                              | 0,917046786 | -0,247470562 | 0,022 | 0,024 | 1         | 0,842372029   | 1,187123937     | 0,916666667     |
| PRRC1                                                                               | 0,308835794 | -0,247514075 | 0,04  | 0,073 | 1         | 0,842346623   | 1,187159743     | 0,547945205     |
| MRPS14                                                                              | 0,250468681 | -0,247762368 | 0,037 | 0,073 | 1         | 0,842201664   | 1,187364075     | 0,506849315     |
| AC093323.1                                                                          | 0,001600938 | -0,247883095 | 0,005 | 0,049 | 1         | 0,842131191   | 1,187463439     | 0,102040816     |
| MTMR12                                                                              | 0,238698091 | -0,24795437  | 0,021 | 0,049 | 1         | 0,842089587   | 1,187522106     | 0,428571429     |
| ACBD3                                                                               | 0,862331946 | -0,247980875 | 0,093 | 0,098 | 1         | 0,842074116   | 1,187543923     | 0,948979592     |
| CSNK1G1                                                                             | 0,743841064 | -0,248000448 | 0,018 | 0,024 | 1         | 0,842062692   | 1,187560035     | 0,75            |
| MON2                                                                                | 0,142350025 | -0,248047268 | 0,03  | 0,073 | 1         | 0,842035365   | 1,187598576     | 0,410958904     |
| PIP4K2A                                                                             | 0,598718119 | -0,24841878  | 0,033 | 0,049 | 1         | 0,841818558   | 1,187904436     | 0,673469388     |
| NEK6                                                                                | 0,011375116 | -0,248490957 | 0,016 | 0,073 | 1         | 0,841776443   | 1,187963868     | 0,219178082     |
| SNX21                                                                               | 0,026491352 | -0,248503466 | 0,01  | 0,049 | 1         | 0,841769145   | 1,187974169     | 0,204081633     |
| SIMC1                                                                               | 0,049781231 | -0,249024892 | 0,003 | 0,024 | 1         | 0,841464964   | 1,188403609     | 0,125           |
| SFXN5                                                                               | 0,634502811 | -0,24905544  | 0,035 | 0,049 | 1         | 0,841447146   | 1,188428773     | 0,714285714     |
| EPC1                                                                                | 0,242386832 | -0,249120694 | 0,089 | 0,146 | 1         | 0,841409088   | 1,188482528     | 0,609589041     |
| CTSK                                                                                | 0,262987891 | -0,249219798 | 0,073 | 0,122 | 1         | 0,841351291   | 1,188564172     | 0,598360656     |
| LAMP1                                                                               | 0,614179973 | -0,249552879 | 0,121 | 0,146 | 1         | 0,841157067   | 1,188838612     | 0,828767123     |
| WASHC3                                                                              | 0,211349601 | -0,249592417 | 0,051 | 0,098 | 1         | 0,841134015   | 1,188871194     | 0,520408163     |
| COG6                                                                                | 0,858388491 | -0,249657555 | 0,021 | 0,024 | 1         | 0,841096038   | 1,188924872     | 0,875           |
| RUFY2                                                                               | 0,547734758 | -0,249734331 | 0,032 | 0,049 | 1         | 0,841051279   | 1,188988146     | 0,653061224     |
| EVI5                                                                                | 0,421043803 | -0,249817617 | 0,105 | 0,146 | 1         | 0,841002727   | 1,189056787     | 0,719178082     |
| C16orf72                                                                            | 0,958592581 | -0,249916926 | 0,053 | 0,049 | 1         | 0,840944837   | 1,18913864      | 1,081632653     |
| ZNF579                                                                              | 0,026491352 | -0,24999872  | 0,01  | 0,049 | 1         | 0,840897161   | 1,18920606      | 0,204081633     |

Supplementary Table 3

| Differentially expressed genes_keloid-MD_comparing SC-Keloid vs. (SC-Myel+Nonmyel) |             |              |       |       |             |               |                 |                 |
|------------------------------------------------------------------------------------|-------------|--------------|-------|-------|-------------|---------------|-----------------|-----------------|
| gene                                                                               | p_val       | avg_log2FC   | pct.1 | pct.2 | p_val_adj   | Foldchange_UP | Foldchange_DOWN | Ratio_pct1_pct2 |
| GPD1L                                                                              | 0,116646669 | -0,250038144 | 0,005 | 0,024 | 1           | 0,840874183   | 1,189238557     | 0,208333333     |
| P2RY1                                                                              | 0,048618272 | -0,250097246 | 0,022 | 0,073 | 1           | 0,840839736   | 1,189287277     | 0,301369863     |
| H2AC6                                                                              | 0,096204645 | -0,250272098 | 0,014 | 0,049 | 1           | 0,840737834   | 1,189431426     | 0,285714286     |
| ADIPOR1                                                                            | 0,251497827 | -0,250889494 | 0,037 | 0,073 | 1           | 0,84037812    | 1,189940547     | 0,506849315     |
| CEP57L1                                                                            | 0,081781673 | -0,250922296 | 0,026 | 0,073 | 1           | 0,840359013   | 1,189967602     | 0,356164384     |
| ABI3BP                                                                             | 0,026794502 | -0,250949767 | 0,01  | 0,049 | 1           | 0,840343012   | 1,189990261     | 0,204081633     |
| ACOT9                                                                              | 0,593218243 | -0,251223017 | 0,033 | 0,049 | 1           | 0,840183864   | 1,19021567      | 0,673469388     |
| ESF1                                                                               | 0,603196401 | -0,251360535 | 0,096 | 0,122 | 1           | 0,840103781   | 1,190329127     | 0,786885246     |
| CCDC126                                                                            | 0,554955581 | -0,251574502 | 0,032 | 0,049 | 1           | 0,839979193   | 1,190505679     | 0,653061224     |
| CLEC2B                                                                             | 0,863679013 | -0,251714717 | 0,021 | 0,024 | 1           | 0,839897561   | 1,190621389     | 0,875           |
| PABPC5                                                                             | 0,115197258 | -0,251804299 | 0,005 | 0,024 | 1           | 0,83984541    | 1,190695321     | 0,208333333     |
| UQCRC1                                                                             | 0,194183592 | -0,251821097 | 0,085 | 0,146 | 1           | 0,839835631   | 1,190709185     | 0,582191781     |
| DPM3                                                                               | 0,182841234 | -0,251895954 | 0,065 | 0,122 | 1           | 0,839792056   | 1,190770969     | 0,532786885     |
| SUMO1                                                                              | 0,347744087 | -0,251941877 | 0,161 | 0,22  | 1           | 0,839765325   | 1,190808873     | 0,731818182     |
| POLM                                                                               | 0,115197258 | -0,251978586 | 0,005 | 0,024 | 1           | 0,839743957   | 1,190839173     | 0,208333333     |
| HEYL                                                                               | 1,27911E-05 | -0,251988807 | 0,002 | 0,049 | 0,269904161 | 0,839738008   | 1,19084761      | 0,040816327     |
| PCBP2                                                                              | 0,395944589 | -0,252041748 | 0,225 | 0,293 | 1           | 0,839707194   | 1,19089131      | 0,767918089     |
| DENND5A                                                                            | 0,400322462 | -0,25240439  | 0,045 | 0,073 | 1           | 0,839496148   | 1,191190695     | 0,616438356     |
| COL21A1                                                                            | 0,116646669 | -0,252481416 | 0,005 | 0,024 | 1           | 0,839451328   | 1,191254295     | 0,208333333     |
| MTRR                                                                               | 0,050627188 | -0,252645634 | 0,003 | 0,024 | 1           | 0,839355781   | 1,1913899       | 0,125           |
| SRSF1                                                                              | 0,246577744 | -0,252686429 | 0,07  | 0,122 | 1           | 0,839332047   | 1,19142359      | 0,573770492     |
| ZNF131                                                                             | 0,143086364 | -0,252690182 | 0,03  | 0,073 | 1           | 0,839329864   | 1,191426689     | 0,410958904     |
| ITPRID2                                                                            | 0,374762564 | -0,252712904 | 0,062 | 0,098 | 1           | 0,839316644   | 1,191445454     | 0,632653061     |
| GSDMB                                                                              | 9,44793E-05 | -0,252895881 | 0     | 0,024 | 1           | 0,839210201   | 1,191596574     | 0               |
| GYG2                                                                               | 9,44793E-05 | -0,252895881 | 0     | 0,024 | 1           | 0,839210201   | 1,191596574     | 0               |
| LINC01011                                                                          | 9,44793E-05 | -0,252895881 | 0     | 0,024 | 1           | 0,839210201   | 1,191596574     | 0               |
| PODNL1                                                                             | 9,44793E-05 | -0,252895881 | 0     | 0,024 | 1           | 0,839210201   | 1,191596574     | 0               |
| SMIM1                                                                              | 9,44793E-05 | -0,252895881 | 0     | 0,024 | 1           | 0,839210201   | 1,191596574     | 0               |
| LHFPL6                                                                             | 0,586105677 | -0,252991753 | 0,097 | 0,122 | 1           | 0,839154434   | 1,191675762     | 0,795081967     |
| SSC5D                                                                              | 0,800567588 | -0,253028727 | 0,041 | 0,049 | 1           | 0,839132928   | 1,191706303     | 0,836734694     |

Supplementary Table 3

| Differentially expressed genes_keloid-MD_comparing SC-Keloid vs. (SC-Myel+Nonmyel) |             |              |       |       |           |               |                 |                 |
|------------------------------------------------------------------------------------|-------------|--------------|-------|-------|-----------|---------------|-----------------|-----------------|
| gene                                                                               | p_val       | avg_log2FC   | pct.1 | pct.2 | p_val_adj | Foldchange_UP | Foldchange_DOWN | Ratio_pct1_pct2 |
| NUTF2                                                                              | 0,381135737 | -0,253104227 | 0,062 | 0,098 | 1         | 0,839089015   | 1,19176867      | 0,632653061     |
| SEC61A2                                                                            | 0,198124435 | -0,253203906 | 0,006 | 0,024 | 1         | 0,839031042   | 1,191851015     | 0,25            |
| WDCP                                                                               | 0,115197258 | -0,253387456 | 0,005 | 0,024 | 1         | 0,838924302   | 1,192002661     | 0,208333333     |
| EEF1AKMT3                                                                          | 0,194251578 | -0,253408939 | 0,006 | 0,024 | 1         | 0,838911809   | 1,192020411     | 0,25            |
| HMOX2                                                                              | 0,497955188 | -0,253442479 | 0,049 | 0,073 | 1         | 0,838892307   | 1,192048123     | 0,671232877     |
| PHGDH                                                                              | 0,798845609 | -0,253569734 | 0,019 | 0,024 | 1         | 0,838818314   | 1,192153275     | 0,791666667     |
| MCM5                                                                               | 0,281462479 | -0,253574987 | 0,022 | 0,049 | 1         | 0,83881526    | 1,192157615     | 0,448979592     |
| RPS26                                                                              | 0,288980247 | -0,253603091 | 0,638 | 0,707 | 1         | 0,83879892    | 1,192180838     | 0,902404526     |
| TRIP11                                                                             | 0,401868561 | -0,253655266 | 0,064 | 0,098 | 1         | 0,838768586   | 1,192223954     | 0,653061224     |
| MCEE                                                                               | 0,30998095  | -0,253727414 | 0,04  | 0,073 | 1         | 0,838726641   | 1,192283578     | 0,547945205     |
| ODR4                                                                               | 0,595048988 | -0,253933306 | 0,033 | 0,049 | 1         | 0,838606951   | 1,192453745     | 0,673469388     |
| SLC35B3                                                                            | 0,065275888 | -0,254100644 | 0,024 | 0,073 | 1         | 0,838509687   | 1,192592066     | 0,328767123     |
| FGF2                                                                               | 0,019887807 | -0,254158966 | 0,081 | 0,195 | 1         | 0,838475791   | 1,192640278     | 0,415384615     |
| CRELD2                                                                             | 0,452254876 | -0,254629339 | 0,067 | 0,098 | 1         | 0,83820246    | 1,193029188     | 0,683673469     |
| GAS8                                                                               | 0,851862947 | -0,254638869 | 0,03  | 0,024 | 1         | 0,838196924   | 1,193037068     | 1,25            |
| FBXW11                                                                             | 0,722044411 | -0,254730643 | 0,081 | 0,098 | 1         | 0,838143605   | 1,193112963     | 0,826530612     |
| CENPS                                                                              | 0,196181004 | -0,255210476 | 0,006 | 0,024 | 1         | 0,837864889   | 1,193509852     | 0,25            |
| TMEM63A                                                                            | 0,527624595 | -0,255516515 | 0,013 | 0,024 | 1         | 0,837687172   | 1,193763059     | 0,541666667     |
| CCDC51                                                                             | 0,192336114 | -0,255525161 | 0,006 | 0,024 | 1         | 0,837682151   | 1,193770213     | 0,25            |
| ORC2                                                                               | 0,203777145 | -0,255610363 | 0,019 | 0,049 | 1         | 0,837632681   | 1,193840716     | 0,387755102     |
| IFT20                                                                              | 0,711783759 | -0,25572685  | 0,061 | 0,073 | 1         | 0,837565051   | 1,193937114     | 0,835616438     |
| SMURF1                                                                             | 0,451039476 | -0,256254448 | 0,011 | 0,024 | 1         | 0,837258807   | 1,19437382      | 0,458333333     |
| IGSF8                                                                              | 0,967295855 | -0,256282901 | 0,024 | 0,024 | 1         | 0,837242295   | 1,194397376     | 1               |
| SPATA7                                                                             | 0,451039476 | -0,256315471 | 0,011 | 0,024 | 1         | 0,837223394   | 1,194424341     | 0,458333333     |
| MCC                                                                                | 0,013789213 | -0,256679765 | 0,008 | 0,049 | 1         | 0,837012014   | 1,194725982     | 0,163265306     |
| ZNF205                                                                             | 0,451039476 | -0,256912935 | 0,011 | 0,024 | 1         | 0,836876745   | 1,194919091     | 0,458333333     |
| SLC35G1                                                                            | 0,527624595 | -0,257121152 | 0,013 | 0,024 | 1         | 0,836755972   | 1,19509156      | 0,541666667     |
| MED29                                                                              | 0,64190582  | -0,257250467 | 0,035 | 0,049 | 1         | 0,836680974   | 1,195198686     | 0,714285714     |
| PDS5A                                                                              | 0,632657687 | -0,257303956 | 0,035 | 0,049 | 1         | 0,836649953   | 1,195243        | 0,714285714     |
| PAIP2                                                                              | 0,342797809 | -0,257332226 | 0,136 | 0,195 | 1         | 0,836633559   | 1,195266421     | 0,697435897     |



Supplementary Table 3

| Differentially expressed genes_keloid-MD_ comparing SC-Keloid vs. (SC-Myel+Nonmyel) |             |              |       |       |           |               |                 |                 |
|-------------------------------------------------------------------------------------|-------------|--------------|-------|-------|-----------|---------------|-----------------|-----------------|
| gene                                                                                | p_val       | avg_log2FC   | pct.1 | pct.2 | p_val_adj | Foldchange_UP | Foldchange_DOWN | Ratio_pct1_pct2 |
| BNIP3L                                                                              | 0,192068131 | -0,257396312 | 0,049 | 0,098 | 1         | 0,836596396   | 1,195319517     | 0,5             |
| TSGA10                                                                              | 0,001663452 | -0,257439611 | 0,005 | 0,049 | 1         | 0,836571288   | 1,195355393     | 0,102040816     |
| DAP                                                                                 | 0,531003349 | -0,2574601   | 0,072 | 0,098 | 1         | 0,836559407   | 1,195372369     | 0,734693878     |
| WIZ                                                                                 | 0,600126951 | -0,257494772 | 0,014 | 0,024 | 1         | 0,836539303   | 1,195401097     | 0,583333333     |
| CHD6                                                                                | 0,632657719 | -0,257572705 | 0,035 | 0,049 | 1         | 0,836494115   | 1,195465673     | 0,714285714     |
| C19orf54                                                                            | 0,009951995 | -0,257655818 | 0,002 | 0,024 | 1         | 0,836445926   | 1,195534546     | 0,083333333     |
| MRPL49                                                                              | 0,735616852 | -0,257760703 | 0,018 | 0,024 | 1         | 0,836385118   | 1,195621465     | 0,75            |
| WDR35                                                                               | 0,197150764 | -0,257830928 | 0,006 | 0,024 | 1         | 0,836344407   | 1,195679664     | 0,25            |
| DAGLA                                                                               | 0,196181004 | -0,258102397 | 0,006 | 0,024 | 1         | 0,836187048   | 1,195904675     | 0,25            |
| TMEM100                                                                             | 0,025893931 | -0,258489944 | 0,01  | 0,049 | 1         | 0,835962456   | 1,19622597      | 0,204081633     |
| EIF3D                                                                               | 0,205176523 | -0,258582225 | 0,051 | 0,098 | 1         | 0,835908986   | 1,196302489     | 0,520408163     |
| DIXDC1                                                                              | 0,864151038 | -0,258898789 | 0,045 | 0,049 | 1         | 0,835725587   | 1,196565016     | 0,918367347     |
| MOGS                                                                                | 0,917046786 | -0,258938609 | 0,022 | 0,024 | 1         | 0,83570252    | 1,196598043     | 0,916666667     |
| EPHX1                                                                               | 0,049781231 | -0,259063259 | 0,003 | 0,024 | 1         | 0,835630318   | 1,196701434     | 0,125           |
| ARSL                                                                                | 0,203777072 | -0,259064349 | 0,019 | 0,049 | 1         | 0,835629686   | 1,196702339     | 0,387755102     |
| ATP9B                                                                               | 0,551339358 | -0,259199312 | 0,032 | 0,049 | 1         | 0,835551518   | 1,196814295     | 0,653061224     |
| GCLM                                                                                | 0,013972402 | -0,25920401  | 0,008 | 0,049 | 1         | 0,835548797   | 1,196818192     | 0,163265306     |
| ZNF639                                                                              | 0,328680026 | -0,259244896 | 0,024 | 0,049 | 1         | 0,835525117   | 1,19685211      | 0,489795918     |
| TNFRSF1A                                                                            | 0,171658534 | -0,259287137 | 0,064 | 0,122 | 1         | 0,835500654   | 1,196887154     | 0,524590164     |
| MANBAL                                                                              | 0,064842572 | -0,259361885 | 0,024 | 0,073 | 1         | 0,835457367   | 1,196949168     | 0,328767123     |
| SPTAN1                                                                              | 0,215241613 | -0,259363836 | 0,142 | 0,22  | 1         | 0,835456237   | 1,196950786     | 0,645454545     |
| BCOR                                                                                | 0,277051506 | -0,259380558 | 0,038 | 0,073 | 1         | 0,835446554   | 1,19696466      | 0,520547945     |
| IMPA2                                                                               | 0,009951995 | -0,259396617 | 0,002 | 0,024 | 1         | 0,835437254   | 1,196977984     | 0,083333333     |
| BRWD1                                                                               | 0,551339358 | -0,259426102 | 0,032 | 0,049 | 1         | 0,83542018    | 1,197002447     | 0,653061224     |
| PPIG                                                                                | 0,790982569 | -0,259619644 | 0,156 | 0,171 | 1         | 0,835308113   | 1,19716304      | 0,912280702     |
| CKAP4                                                                               | 0,554312655 | -0,259634223 | 0,053 | 0,073 | 1         | 0,835299672   | 1,197175138     | 0,726027397     |
| PLEKHA1                                                                             | 0,050557095 | -0,259724888 | 0,078 | 0,171 | 1         | 0,83524718    | 1,197250376     | 0,456140351     |
| SPPL3                                                                               | 0,75959291  | -0,259788773 | 0,04  | 0,049 | 1         | 0,835210195   | 1,197303393     | 0,816326531     |
| TRAPPC6A                                                                            | 0,548634772 | -0,259921339 | 0,032 | 0,049 | 1         | 0,835133452   | 1,197413416     | 0,653061224     |
| SCD                                                                                 | 0,206290612 | -0,26003923  | 0,123 | 0,195 | 1         | 0,835065212   | 1,197511267     | 0,630769231     |

Supplementary Table 3

| Differentially expressed genes_keloid-MD_comparing SC-Keloid vs. (SC-Myel+Nonmyel) |             |              |       |       |           |               |                 |                 |
|------------------------------------------------------------------------------------|-------------|--------------|-------|-------|-----------|---------------|-----------------|-----------------|
| gene                                                                               | p_val       | avg_log2FC   | pct.1 | pct.2 | p_val_adj | Foldchange_UP | Foldchange_DOWN | Ratio_pct1_pct2 |
| UGDH                                                                               | 0,303540047 | -0,2601418   | 0,057 | 0,098 | 1         | 0,835005844   | 1,197596408     | 0,581632653     |
| UIMC1                                                                              | 0,798845609 | -0,260191946 | 0,019 | 0,024 | 1         | 0,834976821   | 1,197638036     | 0,791666667     |
| COMT                                                                               | 0,40420616  | -0,260661052 | 0,225 | 0,293 | 1         | 0,834705364   | 1,198027523     | 0,767918089     |
| POGK                                                                               | 0,098456396 | -0,260870378 | 0,027 | 0,073 | 1         | 0,834584263   | 1,198201361     | 0,369863014     |
| MGAT1                                                                              | 0,600556524 | -0,26104522  | 0,033 | 0,049 | 1         | 0,834483124   | 1,198346582     | 0,673469388     |
| RTL6                                                                               | 0,201391649 | -0,26113015  | 0,019 | 0,049 | 1         | 0,834434001   | 1,198417129     | 0,387755102     |
| REV3L                                                                              | 0,508975138 | -0,261225457 | 0,03  | 0,049 | 1         | 0,834378878   | 1,198496302     | 0,612244898     |
| CDK2AP2                                                                            | 0,725295753 | -0,261351232 | 0,061 | 0,073 | 1         | 0,83430614    | 1,198600792     | 0,835616438     |
| CMTM6                                                                              | 0,27238501  | -0,261406636 | 0,073 | 0,122 | 1         | 0,8342741     | 1,198646823     | 0,598360656     |
| BAG2                                                                               | 0,115197258 | -0,261454698 | 0,005 | 0,024 | 1         | 0,834246308   | 1,198686755     | 0,208333333     |
| KBTBD3                                                                             | 0,044659199 | -0,261558172 | 0,011 | 0,049 | 1         | 0,834186476   | 1,198772731     | 0,224489796     |
| ZFP28                                                                              | 0,194251578 | -0,261648104 | 0,006 | 0,024 | 1         | 0,834134478   | 1,19884746      | 0,25            |
| ELP6                                                                               | 0,582288623 | -0,261727968 | 0,033 | 0,049 | 1         | 0,834088303   | 1,198913827     | 0,673469388     |
| USP53                                                                              | 0,149441454 | -0,262042294 | 0,062 | 0,122 | 1         | 0,833906597   | 1,199175068     | 0,508196721     |
| SEC22A                                                                             | 0,194251578 | -0,262167166 | 0,006 | 0,024 | 1         | 0,833834421   | 1,199278867     | 0,25            |
| SNX14                                                                              | 0,074435688 | -0,262327077 | 0,038 | 0,098 | 1         | 0,833742003   | 1,199411805     | 0,387755102     |
| NT5C                                                                               | 0,06064553  | -0,262394691 | 0,112 | 0,22  | 1         | 0,833702929   | 1,199468018     | 0,509090909     |
| HNRNPF                                                                             | 0,335269806 | -0,262462484 | 0,118 | 0,171 | 1         | 0,833663754   | 1,199524383     | 0,69005848      |
| MTIF3                                                                              | 0,210489979 | -0,262724498 | 0,086 | 0,146 | 1         | 0,833512363   | 1,199742253     | 0,589041096     |
| C19orf12                                                                           | 0,284289899 | -0,262833534 | 0,022 | 0,049 | 1         | 0,83344937    | 1,199832931     | 0,448979592     |
| IMP4                                                                               | 0,274893326 | -0,263116051 | 0,038 | 0,073 | 1         | 0,833286175   | 1,200067912     | 0,520547945     |
| LNPEP                                                                              | 0,077279019 | -0,263173385 | 0,069 | 0,146 | 1         | 0,83325306    | 1,200115605     | 0,47260274      |
| LMAN2L                                                                             | 0,113762049 | -0,263427507 | 0,005 | 0,024 | 1         | 0,8331063     | 1,200327017     | 0,208333333     |
| KIAA0586                                                                           | 0,524894226 | -0,263558429 | 0,013 | 0,024 | 1         | 0,833030701   | 1,200435949     | 0,541666667     |
| MEF2D                                                                              | 0,243346971 | -0,263594123 | 0,037 | 0,073 | 1         | 0,833010091   | 1,20046565      | 0,506849315     |
| YDJC                                                                               | 0,049781231 | -0,263856263 | 0,003 | 0,024 | 1         | 0,832858745   | 1,200683796     | 0,125           |
| CCDC85B                                                                            | 0,452476743 | -0,263943843 | 0,153 | 0,195 | 1         | 0,832808187   | 1,200756687     | 0,784615385     |
| SCAPER                                                                             | 0,333249065 | -0,263991909 | 0,024 | 0,049 | 1         | 0,832780441   | 1,200796693     | 0,489795918     |
| GTPBP4                                                                             | 0,500151774 | -0,26401638  | 0,03  | 0,049 | 1         | 0,832766316   | 1,200817061     | 0,612244898     |
| SP110                                                                              | 0,061875376 | -0,264498693 | 0,024 | 0,073 | 1         | 0,832487957   | 1,201218578     | 0,328767123     |

Supplementary Table 3

| Differentially expressed genes_keloid-MD_comparing SC-Keloid vs. (SC-Myel+Nonmyel) |             |              |       |       |           |               |                 |                 |
|------------------------------------------------------------------------------------|-------------|--------------|-------|-------|-----------|---------------|-----------------|-----------------|
| gene                                                                               | p_val       | avg_log2FC   | pct.1 | pct.2 | p_val_adj | Foldchange_UP | Foldchange_DOWN | Ratio_pct1_pct2 |
| DOK1                                                                               | 0,201391649 | -0,26453247  | 0,019 | 0,049 | 1         | 0,832468467   | 1,201246702     | 0,387755102     |
| CCDC181                                                                            | 0,115197258 | -0,264535474 | 0,005 | 0,024 | 1         | 0,832466733   | 1,201249203     | 0,208333333     |
| CHERP                                                                              | 0,668505389 | -0,264612739 | 0,016 | 0,024 | 1         | 0,832422151   | 1,201313539     | 0,666666667     |
| SCPEP1                                                                             | 0,83138881  | -0,264637709 | 0,043 | 0,049 | 1         | 0,832407743   | 1,201334331     | 0,87755102      |
| STK40                                                                              | 0,455937379 | -0,26473858  | 0,029 | 0,049 | 1         | 0,832349545   | 1,201418329     | 0,591836735     |
| ADGRE5                                                                             | 0,520543566 | -0,264804692 | 0,051 | 0,073 | 1         | 0,832311403   | 1,201473386     | 0,698630137     |
| ZDHHC4                                                                             | 0,331721562 | -0,264815211 | 0,024 | 0,049 | 1         | 0,832305334   | 1,201482147     | 0,489795918     |
| UBL7                                                                               | 0,196181004 | -0,264994201 | 0,006 | 0,024 | 1         | 0,83220208    | 1,201631219     | 0,25            |
| EBPL                                                                               | 0,316361088 | -0,265003511 | 0,059 | 0,098 | 1         | 0,832196709   | 1,201638974     | 0,602040816     |
| TIMP3                                                                              | 0,58410924  | -0,265094818 | 0,478 | 0,561 | 1         | 0,832144042   | 1,201715027     | 0,852049911     |
| KRT17                                                                              | 0,280789447 | -0,265317748 | 0,008 | 0,024 | 1         | 0,832015467   | 1,201900734     | 0,333333333     |
| NTPCR                                                                              | 0,330198527 | -0,265357779 | 0,024 | 0,049 | 1         | 0,831992381   | 1,201934084     | 0,489795918     |
| FAF1                                                                               | 0,985342118 | -0,265366942 | 0,026 | 0,024 | 1         | 0,831987096   | 1,201941719     | 1,083333333     |
| SLC37A3                                                                            | 0,09544918  | -0,265378564 | 0,014 | 0,049 | 1         | 0,831980394   | 1,201951401     | 0,285714286     |
| CREB3L4                                                                            | 0,050627188 | -0,265416794 | 0,003 | 0,024 | 1         | 0,831958348   | 1,201983252     | 0,125           |
| CARD6                                                                              | 0,276254967 | -0,265447537 | 0,008 | 0,024 | 1         | 0,831940619   | 1,202008866     | 0,333333333     |
| DIS3L                                                                              | 0,096204645 | -0,265556272 | 0,014 | 0,049 | 1         | 0,831877919   | 1,202099464     | 0,285714286     |
| ZNF682                                                                             | 0,113762049 | -0,265607664 | 0,005 | 0,024 | 1         | 0,831848286   | 1,202142286     | 0,208333333     |
| DDX39B                                                                             | 0,917046786 | -0,265935408 | 0,022 | 0,024 | 1         | 0,831659332   | 1,202415413     | 0,916666667     |
| ZFPM1                                                                              | 0,410671689 | -0,266430946 | 0,045 | 0,073 | 1         | 0,831373723   | 1,202828491     | 0,616438356     |
| SPECC1                                                                             | 0,985342118 | -0,266700778 | 0,026 | 0,024 | 1         | 0,831218243   | 1,203053481     | 1,083333333     |
| SLC9A6                                                                             | 0,196181004 | -0,266742888 | 0,006 | 0,024 | 1         | 0,831193981   | 1,203088597     | 0,25            |
| ACVR2B                                                                             | 0,115197258 | -0,267226121 | 0,005 | 0,024 | 1         | 0,830915618   | 1,203491641     | 0,208333333     |
| TRAF3IP2                                                                           | 0,195214341 | -0,267370763 | 0,006 | 0,024 | 1         | 0,830832316   | 1,203612306     | 0,25            |
| SMC5-DT                                                                            | 0,049781231 | -0,267437202 | 0,003 | 0,024 | 1         | 0,830794055   | 1,203667737     | 0,125           |
| SSH2                                                                               | 0,127729654 | -0,267458218 | 0,016 | 0,049 | 1         | 0,830781953   | 1,203685271     | 0,326530612     |
| SYDE1                                                                              | 0,035688029 | -0,267487881 | 0,021 | 0,073 | 1         | 0,830764872   | 1,20371002      | 0,287671233     |
| NKRF                                                                               | 0,115197258 | -0,267582366 | 0,005 | 0,024 | 1         | 0,830710465   | 1,203788856     | 0,208333333     |
| MAPKBP1                                                                            | 0,448381168 | -0,268045294 | 0,011 | 0,024 | 1         | 0,830443951   | 1,204175186     | 0,458333333     |
| IGIP                                                                               | 0,524894121 | -0,268508511 | 0,013 | 0,024 | 1         | 0,830177358   | 1,204561882     | 0,541666667     |

Supplementary Table 3

| Differentially expressed genes_keloid-MD_comparing SC-Keloid vs. (SC-Myel+Nonmyel) |             |              |       |       |           |               |                 |                 |
|------------------------------------------------------------------------------------|-------------|--------------|-------|-------|-----------|---------------|-----------------|-----------------|
| gene                                                                               | p_val       | avg_log2FC   | pct.1 | pct.2 | p_val_adj | Foldchange_UP | Foldchange_DOWN | Ratio_pct1_pct2 |
| TMEM132B                                                                           | 0,000258468 | -0,268517005 | 0,003 | 0,049 | 1         | 0,83017247    | 1,204568974     | 0,06122449      |
| NDUFA7                                                                             | 0,454229416 | -0,268522393 | 0,029 | 0,049 | 1         | 0,830169369   | 1,204573473     | 0,591836735     |
| TBC1D5                                                                             | 0,430814737 | -0,268575016 | 0,046 | 0,073 | 1         | 0,830139089   | 1,204617411     | 0,630136986     |
| SLC44A1                                                                            | 0,156475882 | -0,268689676 | 0,046 | 0,098 | 1         | 0,830073115   | 1,204713153     | 0,469387755     |
| MARS2                                                                              | 0,049781231 | -0,268690926 | 0,003 | 0,024 | 1         | 0,830072396   | 1,204714197     | 0,125           |
| PRUNE1                                                                             | 0,115197258 | -0,268983601 | 0,005 | 0,024 | 1         | 0,829904019   | 1,204958619     | 0,208333333     |
| USP3                                                                               | 0,52217111  | -0,269275781 | 0,013 | 0,024 | 1         | 0,829735961   | 1,205202676     | 0,541666667     |
| EIF4H                                                                              | 0,062074976 | -0,269386963 | 0,113 | 0,22  | 1         | 0,829672019   | 1,205295558     | 0,513636364     |
| RPS4Y1                                                                             | 0,417706321 | -0,269401275 | 0,215 | 0,268 | 1         | 0,829663789   | 1,205307516     | 0,802238806     |
| MGRN1                                                                              | 0,416673646 | -0,2694552   | 0,027 | 0,049 | 1         | 0,829632778   | 1,205352569     | 0,551020408     |
| SLC27A1                                                                            | 0,068627663 | -0,269534964 | 0,013 | 0,049 | 1         | 0,82958691    | 1,205419212     | 0,265306122     |
| PMF1                                                                               | 0,41335313  | -0,269543813 | 0,027 | 0,049 | 1         | 0,829581822   | 1,205426605     | 0,551020408     |
| MRFAP1                                                                             | 0,253775692 | -0,269603298 | 0,171 | 0,244 | 1         | 0,829547618   | 1,205476308     | 0,700819672     |
| SUPT16H                                                                            | 0,85256089  | -0,269666045 | 0,093 | 0,098 | 1         | 0,829511539   | 1,205528739     | 0,948979592     |
| CXXC1                                                                              | 0,094698473 | -0,269729456 | 0,014 | 0,049 | 1         | 0,82947508    | 1,205581727     | 0,285714286     |
| RPN2                                                                               | 0,311266281 | -0,269750122 | 0,177 | 0,244 | 1         | 0,829463198   | 1,205598997     | 0,725409836     |
| PCDHB4                                                                             | 0,000252244 | -0,26977243  | 0,003 | 0,049 | 1         | 0,829450373   | 1,205617639     | 0,06122449      |
| TBX3                                                                               | 0,284289899 | -0,269953776 | 0,022 | 0,049 | 1         | 0,829346118   | 1,205769194     | 0,448979592     |
| PREPL                                                                              | 0,222711966 | -0,26995718  | 0,035 | 0,073 | 1         | 0,829344161   | 1,20577204      | 0,479452055     |
| GADD45A                                                                            | 0,299737342 | -0,270265896 | 0,057 | 0,098 | 1         | 0,829166712   | 1,206030085     | 0,581632653     |
| INTS7                                                                              | 0,115197258 | -0,270624651 | 0,005 | 0,024 | 1         | 0,828960549   | 1,206330025     | 0,208333333     |
| IGSF3                                                                              | 0,045105711 | -0,270659435 | 0,011 | 0,049 | 1         | 0,828940562   | 1,206359111     | 0,224489796     |
| CCDC186                                                                            | 0,209793864 | -0,270842972 | 0,051 | 0,098 | 1         | 0,828835113   | 1,206512592     | 0,520408163     |
| PRLR                                                                               | 0,063556845 | -0,271083677 | 0,024 | 0,073 | 1         | 0,828696839   | 1,206713907     | 0,328767123     |
| TRIB2                                                                              | 0,582323977 | -0,271119557 | 0,054 | 0,073 | 1         | 0,828676229   | 1,206743919     | 0,739726027     |
| LINC01588                                                                          | 0,192336114 | -0,271120513 | 0,006 | 0,024 | 1         | 0,82867568    | 1,206744719     | 0,25            |
| TAPT1                                                                              | 0,443091335 | -0,271228539 | 0,011 | 0,024 | 1         | 0,828613633   | 1,20683508      | 0,458333333     |
| PJA2                                                                               | 0,224312438 | -0,271267024 | 0,164 | 0,244 | 1         | 0,828591529   | 1,206867274     | 0,672131148     |
| ZFAND1                                                                             | 0,001799447 | -0,271271171 | 0,011 | 0,073 | 1         | 0,828589147   | 1,206870743     | 0,150684932     |
| SPRYD4                                                                             | 0,050627188 | -0,271272813 | 0,003 | 0,024 | 1         | 0,828588204   | 1,206872117     | 0,125           |

Supplementary Table 3

| Differentially expressed genes_keloid-MD_comparing SC-Keloid vs. (SC-Myel+Nonmyel) |             |              |       |       |           |               |                 |                 |
|------------------------------------------------------------------------------------|-------------|--------------|-------|-------|-----------|---------------|-----------------|-----------------|
| gene                                                                               | p_val       | avg_log2FC   | pct.1 | pct.2 | p_val_adj | Foldchange_UP | Foldchange_DOWN | Ratio_pct1_pct2 |
| CCND3                                                                              | 0,139433735 | -0,271339887 | 0,03  | 0,073 | 1         | 0,828549682   | 1,206928229     | 0,410958904     |
| HSP90AA1                                                                           | 0,246966068 | -0,271365204 | 0,571 | 0,585 | 1         | 0,828535143   | 1,206949408     | 0,976068376     |
| ZNF865                                                                             | 0,009700686 | -0,271465625 | 0,002 | 0,024 | 1         | 0,828477473   | 1,207033423     | 0,083333333     |
| MCRIP1                                                                             | 0,202941807 | -0,271618034 | 0,142 | 0,22  | 1         | 0,828389956   | 1,207160943     | 0,645454545     |
| MLF2                                                                               | 0,248734413 | -0,271666138 | 0,072 | 0,122 | 1         | 0,828362335   | 1,207201194     | 0,590163934     |
| HNRNPA0                                                                            | 0,102569665 | -0,271748388 | 0,124 | 0,22  | 1         | 0,82831511    | 1,20727002      | 0,563636364     |
| XPA                                                                                | 0,119152582 | -0,271762733 | 0,043 | 0,098 | 1         | 0,828306874   | 1,207282024     | 0,43877551      |
| SORD                                                                               | 0,113762049 | -0,27184958  | 0,005 | 0,024 | 1         | 0,828257013   | 1,207354703     | 0,208333333     |
| ATE1                                                                               | 0,455082842 | -0,271934223 | 0,029 | 0,049 | 1         | 0,828208421   | 1,20742554      | 0,591836735     |
| ECHDC2                                                                             | 0,115197258 | -0,272088284 | 0,005 | 0,024 | 1         | 0,828119984   | 1,207554484     | 0,208333333     |
| GIGYF2                                                                             | 0,120426031 | -0,272170068 | 0,029 | 0,073 | 1         | 0,828073041   | 1,20762294      | 0,397260274     |
| LYRM1                                                                              | 0,001570499 | -0,272216529 | 0,005 | 0,049 | 1         | 0,828046374   | 1,207661831     | 0,102040816     |
| SPART                                                                              | 0,119152582 | -0,27228833  | 0,043 | 0,098 | 1         | 0,828005164   | 1,207721937     | 0,43877551      |
| POMGNT2                                                                            | 0,026491352 | -0,272329235 | 0,01  | 0,049 | 1         | 0,827981688   | 1,20775618      | 0,204081633     |
| PTGDS                                                                              | 0,026191169 | -0,272533962 | 0,01  | 0,049 | 1         | 0,8278642     | 1,20792758      | 0,204081633     |
| TSHZ1                                                                              | 0,125923264 | -0,272596134 | 0,016 | 0,049 | 1         | 0,827828525   | 1,207979636     | 0,326530612     |
| EYA3                                                                               | 0,128640375 | -0,272606771 | 0,016 | 0,049 | 1         | 0,827822421   | 1,207988542     | 0,326530612     |
| EIF4EBP1                                                                           | 0,684341422 | -0,272694056 | 0,081 | 0,098 | 1         | 0,827772339   | 1,208061629     | 0,826530612     |
| RTF2                                                                               | 0,313916323 | -0,272987619 | 0,077 | 0,122 | 1         | 0,827603918   | 1,208307474     | 0,631147541     |
| PGM1                                                                               | 0,162596738 | -0,273019776 | 0,018 | 0,049 | 1         | 0,827585472   | 1,208334407     | 0,367346939     |
| RGS10                                                                              | 0,145312922 | -0,273077635 | 0,03  | 0,073 | 1         | 0,827552282   | 1,208382867     | 0,410958904     |
| TMEM160                                                                            | 0,183313216 | -0,273385262 | 0,201 | 0,293 | 1         | 0,827375841   | 1,20864056      | 0,686006826     |
| CSNK2B                                                                             | 0,071206179 | -0,273407654 | 0,067 | 0,146 | 1         | 0,827363      | 1,208659319     | 0,45890411      |
| CERS4                                                                              | 0,026491352 | -0,273412944 | 0,01  | 0,049 | 1         | 0,827359966   | 1,208663751     | 0,204081633     |
| RCAN3                                                                              | 0,108196068 | -0,273772147 | 0,057 | 0,122 | 1         | 0,827153995   | 1,208964722     | 0,467213115     |
| GPR153                                                                             | 0,798845609 | -0,274146018 | 0,019 | 0,024 | 1         | 0,826939668   | 1,209278063     | 0,791666667     |
| MT-ND4                                                                             | 0,041662408 | -0,274388664 | 0,75  | 0,805 | 1         | 0,826800597   | 1,209481468     | 0,931677019     |
| AKR1A1                                                                             | 0,096586482 | -0,27444143  | 0,056 | 0,122 | 1         | 0,826770358   | 1,209525705     | 0,459016393     |
| C22orf39                                                                           | 0,086309506 | -0,274474461 | 0,04  | 0,098 | 1         | 0,826751429   | 1,209553398     | 0,408163265     |
| ANKS1A                                                                             | 0,524894226 | -0,274482988 | 0,013 | 0,024 | 1         | 0,826746542   | 1,209560547     | 0,541666667     |

Supplementary Table 3

| Differentially expressed genes_keloid-MD_comparing SC-Keloid vs. (SC-Myel+Nonmyel) |             |              |       |       |           |               |                 |                 |
|------------------------------------------------------------------------------------|-------------|--------------|-------|-------|-----------|---------------|-----------------|-----------------|
| gene                                                                               | p_val       | avg_log2FC   | pct.1 | pct.2 | p_val_adj | Foldchange_UP | Foldchange_DOWN | Ratio_pct1_pct2 |
| TM7SF2                                                                             | 0,000264836 | -0,27450365  | 0,003 | 0,049 | 1         | 0,826734702   | 1,20957787      | 0,06122449      |
| ZNF483                                                                             | 0,048947161 | -0,274546711 | 0,003 | 0,024 | 1         | 0,826710026   | 1,209613974     | 0,125           |
| HCFC1                                                                              | 0,003700002 | -0,27479237  | 0,013 | 0,073 | 1         | 0,826569268   | 1,209819962     | 0,178082192     |
| RC3H1                                                                              | 0,5877417   | -0,274864158 | 0,033 | 0,049 | 1         | 0,826528139   | 1,209880164     | 0,673469388     |
| IFNGR1                                                                             | 0,097881314 | -0,274989454 | 0,027 | 0,073 | 1         | 0,82645636    | 1,209985244     | 0,369863014     |
| FOXO1                                                                              | 0,505436034 | -0,274998811 | 0,03  | 0,049 | 1         | 0,826450999   | 1,209993092     | 0,612244898     |
| ABCB8                                                                              | 0,801543206 | -0,275145419 | 0,019 | 0,024 | 1         | 0,826367019   | 1,210116059     | 0,791666667     |
| TMEM231                                                                            | 0,049781231 | -0,275263405 | 0,003 | 0,024 | 1         | 0,82629944    | 1,210215028     | 0,125           |
| C12orf43                                                                           | 0,671266251 | -0,275552773 | 0,016 | 0,024 | 1         | 0,826133722   | 1,210457791     | 0,666666667     |
| GRIK4                                                                              | 0,049781231 | -0,275733284 | 0,003 | 0,024 | 1         | 0,826030362   | 1,210609254     | 0,125           |
| NUDC                                                                               | 0,465393618 | -0,275737847 | 0,11  | 0,146 | 1         | 0,826027749   | 1,210613083     | 0,753424658     |
| SNX4                                                                               | 0,678822541 | -0,276078612 | 0,037 | 0,049 | 1         | 0,825832665   | 1,210899063     | 0,755102041     |
| OTUD1                                                                              | 0,363187776 | -0,276095986 | 0,01  | 0,024 | 1         | 0,825822719   | 1,210913646     | 0,416666667     |
| MGAT4A                                                                             | 0,049781231 | -0,276391899 | 0,003 | 0,024 | 1         | 0,825653351   | 1,211162044     | 0,125           |
| RAB6A                                                                              | 0,978551022 | -0,276527948 | 0,104 | 0,098 | 1         | 0,825575494   | 1,211276264     | 1,06122449      |
| BTA1F1                                                                             | 0,600126951 | -0,276642198 | 0,014 | 0,024 | 1         | 0,825510117   | 1,211372192     | 0,583333333     |
| NACA                                                                               | 0,06176923  | -0,276670006 | 0,764 | 0,902 | 1         | 0,825494206   | 1,211395541     | 0,847006652     |
| GLIPR2                                                                             | 0,084589173 | -0,27695655  | 0,04  | 0,098 | 1         | 0,825330265   | 1,211636169     | 0,408163265     |
| SRSF4                                                                              | 0,348448268 | -0,276997304 | 0,099 | 0,146 | 1         | 0,825306951   | 1,211670396     | 0,678082192     |
| ACAP1                                                                              | 0,280789447 | -0,277061689 | 0,008 | 0,024 | 1         | 0,82527012    | 1,211724472     | 0,333333333     |
| CHM                                                                                | 0,284289899 | -0,277069414 | 0,022 | 0,049 | 1         | 0,825265701   | 1,21173096      | 0,448979592     |
| ZC3H14                                                                             | 0,75959289  | -0,277090938 | 0,04  | 0,049 | 1         | 0,825253388   | 1,211749039     | 0,816326531     |
| ID2                                                                                | 0,284289899 | -0,277435478 | 0,022 | 0,049 | 1         | 0,825056327   | 1,21203846      | 0,448979592     |
| NELFE                                                                              | 0,045384169 | -0,277596153 | 0,048 | 0,122 | 1         | 0,824964445   | 1,212173453     | 0,393442623     |
| PKD2                                                                               | 0,073657071 | -0,277614166 | 0,038 | 0,098 | 1         | 0,824954145   | 1,212188588     | 0,387755102     |
| NAA38                                                                              | 0,255830812 | -0,277628141 | 0,236 | 0,317 | 1         | 0,824946153   | 1,212200331     | 0,744479495     |
| MAPK10                                                                             | 0,009700686 | -0,277657751 | 0,002 | 0,024 | 1         | 0,824929222   | 1,21222521      | 0,083333333     |
| FKRP                                                                               | 0,113762049 | -0,277846412 | 0,005 | 0,024 | 1         | 0,824821354   | 1,212383743     | 0,208333333     |
| FGF7                                                                               | 0,013252307 | -0,277873257 | 0,008 | 0,049 | 1         | 0,824806006   | 1,212406302     | 0,163265306     |
| IVNS1ABP                                                                           | 0,795922918 | -0,277927839 | 0,041 | 0,049 | 1         | 0,824774801   | 1,212452173     | 0,836734694     |

Supplementary Table 3

| Differentially expressed genes_keloid-MD_comparing SC-Keloid vs. (SC-Myel+Nonmyel) |             |              |       |       |           |               |                 |                 |
|------------------------------------------------------------------------------------|-------------|--------------|-------|-------|-----------|---------------|-----------------|-----------------|
| gene                                                                               | p_val       | avg_log2FC   | pct.1 | pct.2 | p_val_adj | Foldchange_UP | Foldchange_DOWN | Ratio_pct1_pct2 |
| LMBR1                                                                              | 0,600126951 | -0,277984518 | 0,014 | 0,024 | 1         | 0,824742399   | 1,212499807     | 0,583333333     |
| SDHC                                                                               | 0,068089922 | -0,278055571 | 0,083 | 0,171 | 1         | 0,824701781   | 1,212559525     | 0,485380117     |
| EIF3F                                                                              | 0,254031023 | -0,278057341 | 0,072 | 0,122 | 1         | 0,82470077    | 1,212561012     | 0,590163934     |
| COG3                                                                               | 0,738354944 | -0,278067245 | 0,018 | 0,024 | 1         | 0,824695108   | 1,212569337     | 0,75            |
| SKI                                                                                | 0,342783368 | -0,278074862 | 0,041 | 0,073 | 1         | 0,824690754   | 1,212575738     | 0,561643836     |
| RAC1                                                                               | 0,143025391 | -0,278385182 | 0,3   | 0,415 | 1         | 0,824513384   | 1,212836588     | 0,722891566     |
| DUS1L                                                                              | 0,245246426 | -0,278446474 | 0,021 | 0,049 | 1         | 0,824478356   | 1,212888116     | 0,428571429     |
| JAGN1                                                                              | 0,273818551 | -0,278585975 | 0,038 | 0,073 | 1         | 0,824398637   | 1,213005402     | 0,520547945     |
| ANKRD44                                                                            | 0,469697407 | -0,278809422 | 0,048 | 0,073 | 1         | 0,824270963   | 1,213193289     | 0,657534247     |
| WARS2                                                                              | 0,005553478 | -0,278829018 | 0,006 | 0,049 | 1         | 0,824259767   | 1,213209768     | 0,12244898      |
| MARVELD1                                                                           | 0,075208027 | -0,278914193 | 0,053 | 0,122 | 1         | 0,824211105   | 1,213281396     | 0,43442623      |
| SLC4A3                                                                             | 0,009951995 | -0,279013018 | 0,002 | 0,024 | 1         | 0,824154648   | 1,213364509     | 0,083333333     |
| DYNC2I2                                                                            | 0,938283669 | -0,279055539 | 0,027 | 0,024 | 1         | 0,824130358   | 1,213400271     | 1,125           |
| CFAP410                                                                            | 0,591463759 | -0,279672404 | 0,077 | 0,098 | 1         | 0,823778053   | 1,213919206     | 0,785714286     |
| LAMTOR1                                                                            | 0,276792213 | -0,279757274 | 0,152 | 0,22  | 1         | 0,823729594   | 1,213990619     | 0,690909091     |
| RBCK1                                                                              | 0,082021608 | -0,279911136 | 0,054 | 0,122 | 1         | 0,823641749   | 1,214120097     | 0,442622951     |
| SFSWAP                                                                             | 0,895077609 | -0,279924539 | 0,07  | 0,073 | 1         | 0,823634097   | 1,214131377     | 0,95890411      |
| TIMM8A                                                                             | 0,162596738 | -0,280076587 | 0,018 | 0,049 | 1         | 0,823547297   | 1,214259343     | 0,367346939     |
| POU3F1                                                                             | 0,088456559 | -0,280304778 | 0,07  | 0,146 | 1         | 0,823417047   | 1,214451418     | 0,479452055     |
| SLFN11                                                                             | 0,508975138 | -0,280333832 | 0,03  | 0,049 | 1         | 0,823400465   | 1,214475875     | 0,612244898     |
| SOX10                                                                              | 0,224000736 | -0,280366893 | 0,167 | 0,244 | 1         | 0,823381596   | 1,214503707     | 0,68442623      |
| PDPR                                                                               | 0,445731781 | -0,280367564 | 0,011 | 0,024 | 1         | 0,823381213   | 1,214504272     | 0,458333333     |
| SNRNP25                                                                            | 0,945110868 | -0,280392945 | 0,048 | 0,049 | 1         | 0,823366728   | 1,214525638     | 0,979591837     |
| BAP1                                                                               | 0,013252307 | -0,280564203 | 0,008 | 0,049 | 1         | 0,823268994   | 1,214669819     | 0,163265306     |
| SGCE                                                                               | 0,194815178 | -0,280736222 | 0,195 | 0,293 | 1         | 0,823170837   | 1,214814659     | 0,66552901      |
| ZNF141                                                                             | 0,115197258 | -0,280797381 | 0,005 | 0,024 | 1         | 0,823135943   | 1,214866158     | 0,208333333     |
| NRSN2                                                                              | 0,199026585 | -0,281042531 | 0,019 | 0,049 | 1         | 0,822996083   | 1,215072612     | 0,387755102     |
| C11orf68                                                                           | 0,416673646 | -0,281071448 | 0,027 | 0,049 | 1         | 0,822979587   | 1,215096967     | 0,551020408     |
| FCHSD2                                                                             | 0,049781231 | -0,281150882 | 0,003 | 0,024 | 1         | 0,822934275   | 1,215163871     | 0,125           |
| TALDO1                                                                             | 0,4797172   | -0,281212316 | 0,134 | 0,171 | 1         | 0,822899233   | 1,215215618     | 0,783625731     |

Supplementary Table 3

| Differentially expressed genes_keloid-MD_ comparing SC-Keloid vs. (SC-Myel+Nonmyel) |             |              |       |       |           |               |                 |                 |
|-------------------------------------------------------------------------------------|-------------|--------------|-------|-------|-----------|---------------|-----------------|-----------------|
| gene                                                                                | p_val       | avg_log2FC   | pct.1 | pct.2 | p_val_adj | Foldchange_UP | Foldchange_DOWN | Ratio_pct1_pct2 |
| NADSYN1                                                                             | 0,096204645 | -0,281415227 | 0,014 | 0,049 | 1         | 0,822783503   | 1,215386546     | 0,285714286     |
| TRABD                                                                               | 0,094698473 | -0,281648653 | 0,014 | 0,049 | 1         | 0,822650389   | 1,21558321      | 0,285714286     |
| LAMB1                                                                               | 0,452554558 | -0,281829958 | 0,088 | 0,122 | 1         | 0,822547012   | 1,215735983     | 0,721311475     |
| CELSR2                                                                              | 0,013789213 | -0,282060952 | 0,008 | 0,049 | 1         | 0,822415322   | 1,215930654     | 0,163265306     |
| SLFN13                                                                              | 0,009951995 | -0,28210364  | 0,002 | 0,024 | 1         | 0,822390988   | 1,215966633     | 0,083333333     |
| LGALS3BP                                                                            | 0,137418655 | -0,282241444 | 0,096 | 0,171 | 1         | 0,822312438   | 1,216082786     | 0,561403509     |
| CCDC61                                                                              | 0,365692371 | -0,282283347 | 0,01  | 0,024 | 1         | 0,822288554   | 1,216118107     | 0,416666667     |
| METTL27                                                                             | 0,113762049 | -0,282323498 | 0,005 | 0,024 | 1         | 0,82226567    | 1,216151952     | 0,208333333     |
| CAST                                                                                | 0,470196552 | -0,282739069 | 0,158 | 0,195 | 1         | 0,822028849   | 1,216502318     | 0,81025641      |
| RFXANK                                                                              | 0,512197616 | -0,282880489 | 0,048 | 0,024 | 1         | 0,821948274   | 1,216621571     | 2               |
| RPL10                                                                               | 0,058003976 | -0,282904155 | 0,928 | 0,951 | 1         | 0,821934791   | 1,216641529     | 0,975814932     |
| MTMR9                                                                               | 0,369261143 | -0,283049328 | 0,026 | 0,049 | 1         | 0,821852086   | 1,216763961     | 0,530612245     |
| LGALS8                                                                              | 0,545936837 | -0,28310822  | 0,032 | 0,049 | 1         | 0,821818539   | 1,216813631     | 0,653061224     |
| ASPH                                                                                | 0,766473258 | -0,283337439 | 0,104 | 0,122 | 1         | 0,821687976   | 1,217006977     | 0,852459016     |
| UBQLN4                                                                              | 0,858388514 | -0,283412383 | 0,021 | 0,024 | 1         | 0,821645293   | 1,217070199     | 0,875           |
| WDR25                                                                               | 0,115197258 | -0,283420848 | 0,005 | 0,024 | 1         | 0,821640472   | 1,21707734      | 0,208333333     |
| SPIDR                                                                               | 0,026878214 | -0,283429719 | 0,019 | 0,073 | 1         | 0,82163542    | 1,217084823     | 0,260273973     |
| RIOX2                                                                               | 0,238698091 | -0,283490045 | 0,021 | 0,049 | 1         | 0,821601064   | 1,217135717     | 0,428571429     |
| SP4                                                                                 | 0,009951995 | -0,283710379 | 0,002 | 0,024 | 1         | 0,821475595   | 1,217321617     | 0,083333333     |
| SLC27A4                                                                             | 0,127729654 | -0,283811164 | 0,016 | 0,049 | 1         | 0,82141821    | 1,217406661     | 0,326530612     |
| RXRB                                                                                | 0,003567901 | -0,283859673 | 0,013 | 0,073 | 1         | 0,821390591   | 1,217447595     | 0,178082192     |
| ZNF706                                                                              | 0,341771159 | -0,284079942 | 0,301 | 0,39  | 1         | 0,821265192   | 1,217633488     | 0,771794872     |
| TMEM245                                                                             | 0,119111328 | -0,284096989 | 0,029 | 0,073 | 1         | 0,821255488   | 1,217647876     | 0,397260274     |
| PTPN12                                                                              | 0,404226873 | -0,284129114 | 0,105 | 0,146 | 1         | 0,821237201   | 1,217674989     | 0,719178082     |
| SLC25A39                                                                            | 0,328680026 | -0,284354577 | 0,024 | 0,049 | 1         | 0,821108869   | 1,217865302     | 0,489795918     |
| PEX11B                                                                              | 0,115197258 | -0,284562408 | 0,005 | 0,024 | 1         | 0,82099059    | 1,218040757     | 0,208333333     |
| ZNF35                                                                               | 0,448381168 | -0,284687371 | 0,011 | 0,024 | 1         | 0,820919481   | 1,218146266     | 0,458333333     |
| SHTN1                                                                               | 0,649735737 | -0,284747461 | 0,104 | 0,122 | 1         | 0,82088529    | 1,218197003     | 0,852459016     |
| GNG10                                                                               | 0,285710793 | -0,285029995 | 0,022 | 0,049 | 1         | 0,820724545   | 1,218435596     | 0,448979592     |
| DPM2                                                                                | 0,222426889 | -0,285319306 | 0,053 | 0,098 | 1         | 0,820559977   | 1,21867996      | 0,540816327     |



Supplementary Table 3

| Differentially expressed genes_keloid-MD_ comparing SC-Keloid vs. (SC-Myel+Nonmyel) |             |              |       |       |           |               |                 |                 |
|-------------------------------------------------------------------------------------|-------------|--------------|-------|-------|-----------|---------------|-----------------|-----------------|
| gene                                                                                | p_val       | avg_log2FC   | pct.1 | pct.2 | p_val_adj | Foldchange_UP | Foldchange_DOWN | Ratio_pct1_pct2 |
| RGS2                                                                                | 0,333249065 | -0,285410825 | 0,024 | 0,049 | 1         | 0,820507926   | 1,21875727      | 0,489795918     |
| FKBP3                                                                               | 0,232333439 | -0,285686638 | 0,167 | 0,244 | 1         | 0,820351077   | 1,218990294     | 0,68442623      |
| THTPA                                                                               | 0,010930188 | -0,285723047 | 0,016 | 0,073 | 1         | 0,820330374   | 1,219021057     | 0,219178082     |
| TENM4                                                                               | 0,000252244 | -0,285837519 | 0,003 | 0,049 | 1         | 0,820265287   | 1,219117786     | 0,06122449      |
| MRPL58                                                                              | 0,893850329 | -0,285894887 | 0,029 | 0,024 | 1         | 0,82023267    | 1,219166264     | 1,208333333     |
| NR4A1                                                                               | 0,381173063 | -0,286034382 | 0,124 | 0,171 | 1         | 0,820153365   | 1,219284152     | 0,725146199     |
| NARS2                                                                               | 0,363187776 | -0,286046055 | 0,01  | 0,024 | 1         | 0,820146729   | 1,219294017     | 0,416666667     |
| ALG11                                                                               | 0,009951995 | -0,286181251 | 0,002 | 0,024 | 1         | 0,820069876   | 1,219408283     | 0,083333333     |
| RPL7A                                                                               | 0,052480286 | -0,286293525 | 0,826 | 0,927 | 1         | 0,820006059   | 1,219503184     | 0,891046386     |
| KLHL42                                                                              | 0,268753967 | -0,28642902  | 0,056 | 0,098 | 1         | 0,819929049   | 1,219617723     | 0,571428571     |
| C16orf74                                                                            | 9,44793E-05 | -0,286564107 | 0     | 0,024 | 1         | 0,819852279   | 1,219731927     | 0               |
| GPR37L1                                                                             | 9,44793E-05 | -0,286564107 | 0     | 0,024 | 1         | 0,819852279   | 1,219731927     | 0               |
| H2AC19                                                                              | 9,44793E-05 | -0,286564107 | 0     | 0,024 | 1         | 0,819852279   | 1,219731927     | 0               |
| LINC00052                                                                           | 9,44793E-05 | -0,286564107 | 0     | 0,024 | 1         | 0,819852279   | 1,219731927     | 0               |
| RERG                                                                                | 9,44793E-05 | -0,286564107 | 0     | 0,024 | 1         | 0,819852279   | 1,219731927     | 0               |
| ARL2                                                                                | 0,132853973 | -0,286685296 | 0,113 | 0,195 | 1         | 0,819783413   | 1,219834391     | 0,579487179     |
| NOL10                                                                               | 0,201391649 | -0,286695891 | 0,019 | 0,049 | 1         | 0,819777392   | 1,21984335      | 0,387755102     |
| RTP4                                                                                | 0,113762049 | -0,287076921 | 0,005 | 0,024 | 1         | 0,819560909   | 1,220165565     | 0,208333333     |
| KLHL29                                                                              | 0,303152258 | -0,287116722 | 0,04  | 0,073 | 1         | 0,8195383     | 1,220199227     | 0,547945205     |
| ZNF334                                                                              | 0,048947161 | -0,287117747 | 0,003 | 0,024 | 1         | 0,819537718   | 1,220200094     | 0,125           |
| PKIA                                                                                | 0,636350177 | -0,287447751 | 0,035 | 0,049 | 1         | 0,819350277   | 1,220479236     | 0,714285714     |
| PELO                                                                                | 0,234225295 | -0,287473509 | 0,053 | 0,098 | 1         | 0,819335648   | 1,220501027     | 0,540816327     |
| NAV2-AS3                                                                            | 0,524894226 | -0,287548883 | 0,013 | 0,024 | 1         | 0,819292843   | 1,220564794     | 0,541666667     |
| SLC39A7                                                                             | 0,752245129 | -0,288434867 | 0,062 | 0,073 | 1         | 0,818789855   | 1,221314594     | 0,849315068     |
| FLT3LG                                                                              | 0,194251578 | -0,288595776 | 0,006 | 0,024 | 1         | 0,818698538   | 1,22145082      | 0,25            |
| UGCG                                                                                | 0,392249439 | -0,289109119 | 0,057 | 0,024 | 1         | 0,818407278   | 1,221885517     | 2,375           |
| FAM71E1                                                                             | 0,009700686 | -0,289478971 | 0,002 | 0,024 | 1         | 0,818197497   | 1,222198802     | 0,083333333     |
| C1QB                                                                                | 9,44793E-05 | -0,289880161 | 0     | 0,024 | 1         | 0,817970001   | 1,222538722     | 0               |
| RALGDS                                                                              | 0,524894226 | -0,289934213 | 0,013 | 0,024 | 1         | 0,817939356   | 1,222584527     | 0,541666667     |
| SNRNP200                                                                            | 0,567066037 | -0,289986594 | 0,075 | 0,098 | 1         | 0,817909659   | 1,222628916     | 0,765306122     |

Supplementary Table 3

| Differentially expressed genes_keloid-MD_comparing SC-Keloid vs. (SC-Myel+Nonmyel) |             |              |       |       |           |               |                 |                 |
|------------------------------------------------------------------------------------|-------------|--------------|-------|-------|-----------|---------------|-----------------|-----------------|
| gene                                                                               | p_val       | avg_log2FC   | pct.1 | pct.2 | p_val_adj | Foldchange_UP | Foldchange_DOWN | Ratio_pct1_pct2 |
| CCDC93                                                                             | 0,094698473 | -0,290026826 | 0,014 | 0,049 | 1         | 0,81788685    | 1,222663012     | 0,285714286     |
| PRAF2                                                                              | 0,503671353 | -0,29005698  | 0,03  | 0,049 | 1         | 0,817869756   | 1,222688567     | 0,612244898     |
| FAM200B                                                                            | 0,458834271 | -0,290126172 | 0,048 | 0,073 | 1         | 0,817830532   | 1,222747209     | 0,657534247     |
| AP4M1                                                                              | 0,162596738 | -0,290133229 | 0,018 | 0,049 | 1         | 0,817826531   | 1,22275319      | 0,367346939     |
| MRPL30                                                                             | 0,162596738 | -0,290162469 | 0,018 | 0,049 | 1         | 0,817809956   | 1,222777973     | 0,367346939     |
| ADO                                                                                | 0,600126951 | -0,290291862 | 0,014 | 0,024 | 1         | 0,817736611   | 1,222887647     | 0,583333333     |
| STAMBP                                                                             | 0,772955202 | -0,290657136 | 0,088 | 0,098 | 1         | 0,817529596   | 1,223197307     | 0,897959184     |
| TMEM256                                                                            | 0,162795388 | -0,290720237 | 0,064 | 0,122 | 1         | 0,817493839   | 1,223250809     | 0,524590164     |
| HMG20A                                                                             | 0,967295855 | -0,290809353 | 0,024 | 0,024 | 1         | 0,817443344   | 1,223326372     | 1               |
| TDRKH                                                                              | 0,280789447 | -0,290809963 | 0,008 | 0,024 | 1         | 0,817442998   | 1,22332689      | 0,333333333     |
| UBE2I                                                                              | 0,544950653 | -0,29113544  | 0,159 | 0,195 | 1         | 0,817258601   | 1,223602907     | 0,815384615     |
| COA4                                                                               | 0,381005345 | -0,2911836   | 0,102 | 0,146 | 1         | 0,817231319   | 1,223643754     | 0,698630137     |
| ZNF224                                                                             | 0,129556135 | -0,291325325 | 0,016 | 0,049 | 1         | 0,817151042   | 1,223763966     | 0,326530612     |
| TCP1                                                                               | 0,187539114 | -0,291355438 | 0,102 | 0,171 | 1         | 0,817133986   | 1,22378951      | 0,596491228     |
| SLC9B2                                                                             | 0,009700686 | -0,291543398 | 0,002 | 0,024 | 1         | 0,817027533   | 1,22394896      | 0,083333333     |
| INPP5K                                                                             | 0,001681787 | -0,291591445 | 0,011 | 0,073 | 1         | 0,817000324   | 1,223989723     | 0,150684932     |
| DTX2                                                                               | 0,280789447 | -0,291633582 | 0,008 | 0,024 | 1         | 0,816976462   | 1,224025473     | 0,333333333     |
| MIA3                                                                               | 0,937490598 | -0,292036298 | 0,08  | 0,073 | 1         | 0,816748442   | 1,224367197     | 1,095890411     |
| PHF23                                                                              | 0,035966113 | -0,292057301 | 0,021 | 0,073 | 1         | 0,816736551   | 1,224385022     | 0,287671233     |
| RRAGB                                                                              | 0,093211256 | -0,292265484 | 0,014 | 0,049 | 1         | 0,816618703   | 1,224561715     | 0,285714286     |
| RASA2                                                                              | 0,202581839 | -0,29233697  | 0,019 | 0,049 | 1         | 0,816578241   | 1,224622393     | 0,387755102     |
| WDTC1                                                                              | 0,59736795  | -0,292457883 | 0,014 | 0,024 | 1         | 0,816509806   | 1,224725034     | 0,583333333     |
| EIF5                                                                               | 0,185830441 | -0,292513853 | 0,22  | 0,317 | 1         | 0,816478129   | 1,224772549     | 0,694006309     |
| ASAP2                                                                              | 0,106064225 | -0,292614935 | 0,089 | 0,171 | 1         | 0,816420925   | 1,224858366     | 0,520467836     |
| STUB1                                                                              | 0,282600638 | -0,292762051 | 0,132 | 0,195 | 1         | 0,816337676   | 1,224983275     | 0,676923077     |
| MYLPF                                                                              | 0,115197258 | -0,293012042 | 0,005 | 0,024 | 1         | 0,816196234   | 1,225195558     | 0,208333333     |
| MARCKS                                                                             | 0,281494241 | -0,293091292 | 0,67  | 0,756 | 1         | 0,816151399   | 1,225262863     | 0,886243386     |
| DNAH1                                                                              | 0,009700686 | -0,293281148 | 0,002 | 0,024 | 1         | 0,816044003   | 1,225424115     | 0,083333333     |
| MAGI2                                                                              | 0,462805234 | -0,29328148  | 0,029 | 0,049 | 1         | 0,816043815   | 1,225424397     | 0,591836735     |
| POLR2B                                                                             | 0,398604068 | -0,293317636 | 0,064 | 0,098 | 1         | 0,816023364   | 1,225455109     | 0,653061224     |

Supplementary Table 3

| Differentially expressed genes_keloid-MD_ comparing SC-Keloid vs. (SC-Myel+Nonmyel) |             |              |       |       |           |               |                 |                 |
|-------------------------------------------------------------------------------------|-------------|--------------|-------|-------|-----------|---------------|-----------------|-----------------|
| gene                                                                                | p_val       | avg_log2FC   | pct.1 | pct.2 | p_val_adj | Foldchange_UP | Foldchange_DOWN | Ratio_pct1_pct2 |
| DTNA                                                                                | 0,52217111  | -0,293326932 | 0,013 | 0,024 | 1         | 0,816018105   | 1,225463005     | 0,541666667     |
| H2AZ2                                                                               | 0,077073176 | -0,293457791 | 0,19  | 0,317 | 1         | 0,815944093   | 1,225574165     | 0,599369085     |
| CLUH                                                                                | 0,738354944 | -0,293585112 | 0,018 | 0,024 | 1         | 0,815872087   | 1,22568233      | 0,75            |
| DCUN1D4                                                                             | 0,202581692 | -0,293615345 | 0,019 | 0,049 | 1         | 0,81585499    | 1,225708015     | 0,387755102     |
| WIPF2                                                                               | 0,116461935 | -0,293654884 | 0,043 | 0,098 | 1         | 0,81583263    | 1,225741608     | 0,43877551      |
| ARMH4                                                                               | 0,009951995 | -0,293961182 | 0,002 | 0,024 | 1         | 0,81565944    | 1,226001872     | 0,083333333     |
| KLK11                                                                               | 9,44793E-05 | -0,294011805 | 0     | 0,024 | 1         | 0,815630819   | 1,226044893     | 0               |
| MRC1                                                                                | 9,44793E-05 | -0,294011805 | 0     | 0,024 | 1         | 0,815630819   | 1,226044893     | 0               |
| MROH8                                                                               | 9,44793E-05 | -0,294011805 | 0     | 0,024 | 1         | 0,815630819   | 1,226044893     | 0               |
| ZNF214                                                                              | 9,44793E-05 | -0,294011805 | 0     | 0,024 | 1         | 0,815630819   | 1,226044893     | 0               |
| MXRA7                                                                               | 0,92481763  | -0,294085579 | 0,116 | 0,122 | 1         | 0,815589112   | 1,226107589     | 0,950819672     |
| SYMPK                                                                               | 0,801543206 | -0,29426112  | 0,019 | 0,024 | 1         | 0,815489881   | 1,226256786     | 0,791666667     |
| FTX                                                                                 | 0,163956813 | -0,2946136   | 0,064 | 0,122 | 1         | 0,815290664   | 1,226556422     | 0,524590164     |
| TIMMDC1                                                                             | 0,658004456 | -0,29496724  | 0,08  | 0,098 | 1         | 0,815090841   | 1,226857118     | 0,816326531     |
| ZBTB41                                                                              | 0,459364066 | -0,294982078 | 0,029 | 0,049 | 1         | 0,815082458   | 1,226869737     | 0,591836735     |
| ZFYVE9                                                                              | 0,0674287   | -0,29498459  | 0,013 | 0,049 | 1         | 0,815081038   | 1,226871873     | 0,265306122     |
| GCA                                                                                 | 0,671266251 | -0,295005856 | 0,016 | 0,024 | 1         | 0,815069024   | 1,226889957     | 0,666666667     |
| ZNF596                                                                              | 0,048947161 | -0,295182604 | 0,003 | 0,024 | 1         | 0,814969174   | 1,227040276     | 0,125           |
| DTD1                                                                                | 0,42273788  | -0,295353728 | 0,065 | 0,098 | 1         | 0,814872513   | 1,227185829     | 0,663265306     |
| NUBP1                                                                               | 0,282873795 | -0,295632758 | 0,022 | 0,049 | 1         | 0,814714925   | 1,2274232       | 0,448979592     |
| FBXL3                                                                               | 0,492408216 | -0,295713027 | 0,049 | 0,073 | 1         | 0,814669596   | 1,227491494     | 0,671232877     |
| FRRS1                                                                               | 0,009700686 | -0,296017653 | 0,002 | 0,024 | 1         | 0,814497597   | 1,227750706     | 0,083333333     |
| CPSF7                                                                               | 0,001023014 | -0,29614237  | 0,018 | 0,098 | 1         | 0,814427189   | 1,227856847     | 0,183673469     |
| SLC2A8                                                                              | 0,668505389 | -0,29617228  | 0,016 | 0,024 | 1         | 0,814410304   | 1,227882303     | 0,666666667     |
| MRPL33                                                                              | 0,14731824  | -0,296219021 | 0,298 | 0,415 | 1         | 0,814383919   | 1,227922086     | 0,718072289     |
| TMC6                                                                                | 0,000233465 | -0,296315076 | 0,008 | 0,073 | 1         | 0,814329699   | 1,228003843     | 0,109589041     |
| WSB1                                                                                | 0,117290047 | -0,296315647 | 0,158 | 0,268 | 1         | 0,814329377   | 1,228004329     | 0,589552239     |
| GTPBP2                                                                              | 0,044216422 | -0,296357562 | 0,011 | 0,049 | 1         | 0,814305718   | 1,228040008     | 0,224489796     |
| HEATR5B                                                                             | 0,026794502 | -0,296545524 | 0,01  | 0,049 | 1         | 0,814199633   | 1,228200013     | 0,204081633     |
| RALGAPA1                                                                            | 0,335610379 | -0,296549658 | 0,041 | 0,073 | 1         | 0,8141973     | 1,228203533     | 0,561643836     |

Supplementary Table 3

| Differentially expressed genes_keloid-MD_comparing SC-Keloid vs. (SC-Myel+Nonmyel) |             |              |       |       |             |               |                 |                 |
|------------------------------------------------------------------------------------|-------------|--------------|-------|-------|-------------|---------------|-----------------|-----------------|
| gene                                                                               | p_val       | avg_log2FC   | pct.1 | pct.2 | p_val_adj   | Foldchange_UP | Foldchange_DOWN | Ratio_pct1_pct2 |
| OSMR                                                                               | 0,025599615 | -0,296928941 | 0,01  | 0,049 | 1           | 0,813983277   | 1,228526468     | 0,204081633     |
| SBNO1                                                                              | 0,221749697 | -0,296948505 | 0,035 | 0,073 | 1           | 0,813972238   | 1,228543129     | 0,479452055     |
| KCNG1                                                                              | 0,044216422 | -0,296957353 | 0,011 | 0,049 | 1           | 0,813967246   | 1,228550663     | 0,224489796     |
| LHFPL2                                                                             | 0,07877384  | -0,29706758  | 0,026 | 0,073 | 1           | 0,813905059   | 1,228644532     | 0,356164384     |
| TMEM192                                                                            | 0,59736795  | -0,297232512 | 0,014 | 0,024 | 1           | 0,813812016   | 1,228785002     | 0,583333333     |
| PI4K2A                                                                             | 0,125027562 | -0,297404793 | 0,016 | 0,049 | 1           | 0,81371484    | 1,228931748     | 0,326530612     |
| CRY1                                                                               | 0,445731781 | -0,297455025 | 0,011 | 0,024 | 1           | 0,813686508   | 1,228974537     | 0,458333333     |
| TMEM234                                                                            | 0,160505608 | -0,297637574 | 0,018 | 0,049 | 1           | 0,813583557   | 1,229130053     | 0,367346939     |
| SGCB                                                                               | 0,0570022   | -0,297771779 | 0,161 | 0,293 | 1           | 0,813507877   | 1,229244397     | 0,549488055     |
| ZFH3                                                                               | 0,493791846 | -0,297849102 | 0,049 | 0,073 | 1           | 0,813464278   | 1,229310281     | 0,671232877     |
| NTNG1                                                                              | 0,001663452 | -0,298122856 | 0,005 | 0,049 | 1           | 0,813309936   | 1,229543567     | 0,102040816     |
| SMG1                                                                               | 0,371686675 | -0,298373862 | 0,081 | 0,122 | 1           | 0,813168445   | 1,229757507     | 0,663934426     |
| ALG12                                                                              | 0,001570499 | -0,298522733 | 0,005 | 0,049 | 1           | 0,813084539   | 1,229884412     | 0,102040816     |
| PPP1R7                                                                             | 0,129596905 | -0,298539383 | 0,094 | 0,171 | 1           | 0,813075155   | 1,229898606     | 0,549707602     |
| CCDC90B                                                                            | 0,356354243 | -0,298708237 | 0,144 | 0,195 | 1           | 0,812979998   | 1,230042562     | 0,738461538     |
| TBC1D8B                                                                            | 0,938283669 | -0,29874189  | 0,027 | 0,024 | 1           | 0,812961034   | 1,230071255     | 1,125           |
| TRAPPC3                                                                            | 0,513547187 | -0,298888015 | 0,051 | 0,073 | 1           | 0,812878697   | 1,23019585      | 0,698630137     |
| MT-CO3                                                                             | 0,117826745 | -0,298896637 | 0,809 | 0,854 | 1           | 0,812873839   | 1,230203203     | 0,947306792     |
| DDB1                                                                               | 0,394276312 | -0,29903824  | 0,064 | 0,098 | 1           | 0,812794058   | 1,230323956     | 0,653061224     |
| MPC2                                                                               | 0,110157927 | -0,299045665 | 0,126 | 0,22  | 1           | 0,812789874   | 1,230330288     | 0,572727273     |
| DHX32                                                                              | 0,287136479 | -0,299325461 | 0,022 | 0,049 | 1           | 0,812632258   | 1,23056892      | 0,448979592     |
| HACD3                                                                              | 0,962934771 | -0,299344489 | 0,1   | 0,098 | 1           | 0,81262154    | 1,230585151     | 1,020408163     |
| FHOD3                                                                              | 1,27911E-05 | -0,299517853 | 0,002 | 0,049 | 0,269904161 | 0,812523896   | 1,230733035     | 0,040816327     |
| DICER1                                                                             | 0,160491237 | -0,299656112 | 0,064 | 0,122 | 1           | 0,812446032   | 1,230850986     | 0,524590164     |
| AOPEP                                                                              | 0,627941455 | -0,299666086 | 0,166 | 0,195 | 1           | 0,812440415   | 1,230859496     | 0,851282051     |
| HLA-DMA                                                                            | 0,000264836 | -0,299758448 | 0,003 | 0,049 | 1           | 0,812388404   | 1,230938299     | 0,06122449      |
| CASC3                                                                              | 0,344630415 | -0,299983191 | 0,061 | 0,098 | 1           | 0,81226186    | 1,23113007      | 0,62244898      |
| STX6                                                                               | 0,863679013 | -0,300145293 | 0,021 | 0,024 | 1           | 0,812170599   | 1,231268407     | 0,875           |
| ZNF771                                                                             | 0,280789447 | -0,300385879 | 0,008 | 0,024 | 1           | 0,812035172   | 1,231473752     | 0,333333333     |
| COX14                                                                              | 0,344904699 | -0,30044607  | 0,08  | 0,122 | 1           | 0,812001293   | 1,231525132     | 0,655737705     |

Supplementary Table 3

| Differentially expressed genes_keloid-MD_comparing SC-Keloid vs. (SC-Myel+Nonmyel) |             |              |       |       |           |               |                 |                 |
|------------------------------------------------------------------------------------|-------------|--------------|-------|-------|-----------|---------------|-----------------|-----------------|
| gene                                                                               | p_val       | avg_log2FC   | pct.1 | pct.2 | p_val_adj | Foldchange_UP | Foldchange_DOWN | Ratio_pct1_pct2 |
| NEDD4L                                                                             | 0,013608147 | -0,300673887 | 0,008 | 0,049 | 1         | 0,81187308    | 1,231719619     | 0,163265306     |
| MRPL53                                                                             | 0,278515928 | -0,30098557  | 0,008 | 0,024 | 1         | 0,811697699   | 1,231985751     | 0,333333333     |
| CCDC34                                                                             | 0,322651378 | -0,301028707 | 0,024 | 0,049 | 1         | 0,81167343    | 1,232022588     | 0,489795918     |
| ZNF236                                                                             | 0,044216422 | -0,301134735 | 0,011 | 0,049 | 1         | 0,81161378    | 1,232113137     | 0,224489796     |
| VAPB                                                                               | 0,143086364 | -0,301240359 | 0,03  | 0,073 | 1         | 0,811554361   | 1,232203347     | 0,410958904     |
| DDIT4                                                                              | 0,162217041 | -0,301582879 | 0,064 | 0,122 | 1         | 0,811361707   | 1,232495927     | 0,524590164     |
| TMBIM1                                                                             | 0,410048335 | -0,301616874 | 0,027 | 0,049 | 1         | 0,811342589   | 1,23252497      | 0,551020408     |
| YWHAB                                                                              | 0,274595314 | -0,301699119 | 0,359 | 0,439 | 1         | 0,811296338   | 1,232595235     | 0,817767654     |
| TOMM5                                                                              | 0,57631776  | -0,301720434 | 0,075 | 0,098 | 1         | 0,811284351   | 1,232613446     | 0,765306122     |
| PCGF5                                                                              | 0,186410768 | -0,301759793 | 0,033 | 0,073 | 1         | 0,811262218   | 1,232647074     | 0,452054795     |
| COMMD7                                                                             | 0,289444279 | -0,301799186 | 0,057 | 0,098 | 1         | 0,811240067   | 1,232680732     | 0,581632653     |
| TRAF3                                                                              | 0,735616804 | -0,30186726  | 0,018 | 0,024 | 1         | 0,81120179    | 1,232738898     | 0,75            |
| PRAG1                                                                              | 0,000692755 | -0,301885562 | 0,01  | 0,073 | 1         | 0,811191498   | 1,232754537     | 0,136986301     |
| KIDINS220                                                                          | 0,086324858 | -0,301919595 | 0,086 | 0,171 | 1         | 0,811172363   | 1,232783617     | 0,502923977     |
| GPN1                                                                               | 0,125923264 | -0,302138278 | 0,016 | 0,049 | 1         | 0,811049415   | 1,232970496     | 0,326530612     |
| TMEM165                                                                            | 0,569444123 | -0,302217541 | 0,099 | 0,122 | 1         | 0,811004857   | 1,233038238     | 0,81147541      |
| PRDM1                                                                              | 0,025019654 | -0,302351668 | 0,01  | 0,049 | 1         | 0,810929461   | 1,233152879     | 0,204081633     |
| LYSMD2                                                                             | 0,047923282 | -0,302668767 | 0,022 | 0,073 | 1         | 0,810751241   | 1,233423952     | 0,301369863     |
| IFIH1                                                                              | 0,049781231 | -0,302720229 | 0,003 | 0,024 | 1         | 0,810722322   | 1,23346795      | 0,125           |
| KLHL22                                                                             | 0,278515928 | -0,302773476 | 0,008 | 0,024 | 1         | 0,810692401   | 1,233513475     | 0,333333333     |
| SEPTIN2                                                                            | 0,159816631 | -0,302793063 | 0,257 | 0,366 | 1         | 0,810681394   | 1,233530223     | 0,702185792     |
| FAM76A                                                                             | 0,632657687 | -0,302890989 | 0,035 | 0,049 | 1         | 0,810626369   | 1,233613954     | 0,714285714     |
| DDX39A                                                                             | 0,519140372 | -0,303219209 | 0,051 | 0,073 | 1         | 0,810441968   | 1,233894639     | 0,698630137     |
| CRYBG3                                                                             | 0,18641081  | -0,303545696 | 0,033 | 0,073 | 1         | 0,810258584   | 1,234173904     | 0,452054795     |
| VAMP3                                                                              | 0,438325329 | -0,303592188 | 0,107 | 0,146 | 1         | 0,810232472   | 1,234213678     | 0,732876712     |
| ZBTB24                                                                             | 0,168993438 | -0,303650905 | 0,018 | 0,049 | 1         | 0,810199497   | 1,234263911     | 0,367346939     |
| DCAF7                                                                              | 0,295312779 | -0,303761231 | 0,04  | 0,073 | 1         | 0,810137542   | 1,234358301     | 0,547945205     |
| HAUS2                                                                              | 0,025135067 | -0,303791398 | 0,019 | 0,073 | 1         | 0,810120602   | 1,234384112     | 0,260273973     |
| MPHOSPH8                                                                           | 0,426625266 | -0,304226349 | 0,153 | 0,195 | 1         | 0,8098764     | 1,234756316     | 0,784615385     |
| HKDC1                                                                              | 0,52217111  | -0,304333205 | 0,013 | 0,024 | 1         | 0,809816417   | 1,234847775     | 0,541666667     |

Supplementary Table 3

| Differentially expressed genes_keloid-MD_comparing SC-Keloid vs. (SC-Myel+Nonmyel) |             |              |       |       |             |               |                 |                 |
|------------------------------------------------------------------------------------|-------------|--------------|-------|-------|-------------|---------------|-----------------|-----------------|
| gene                                                                               | p_val       | avg_log2FC   | pct.1 | pct.2 | p_val_adj   | Foldchange_UP | Foldchange_DOWN | Ratio_pct1_pct2 |
| ACVR2A                                                                             | 0,524894226 | -0,304581642 | 0,013 | 0,024 | 1           | 0,809676976   | 1,235060438     | 0,541666667     |
| MAPK3                                                                              | 0,011039945 | -0,30474313  | 0,016 | 0,073 | 1           | 0,809586349   | 1,235198692     | 0,219178082     |
| YTHDF3                                                                             | 0,400322462 | -0,304748273 | 0,045 | 0,073 | 1           | 0,809583463   | 1,235203095     | 0,616438356     |
| RBIS                                                                               | 0,31447487  | -0,304883127 | 0,252 | 0,317 | 1           | 0,809507792   | 1,23531856      | 0,794952681     |
| TFPI                                                                               | 0,242612126 | -0,305044423 | 0,021 | 0,049 | 1           | 0,809417293   | 1,235456678     | 0,428571429     |
| NOL7                                                                               | 0,30611245  | -0,305153758 | 0,226 | 0,293 | 1           | 0,809355954   | 1,235550311     | 0,771331058     |
| IDH2                                                                               | 0,411698765 | -0,305334526 | 0,027 | 0,049 | 1           | 0,809254548   | 1,235705134     | 0,551020408     |
| PIGL                                                                               | 0,026191169 | -0,305396442 | 0,01  | 0,049 | 1           | 0,809219818   | 1,235758168     | 0,204081633     |
| TOPBP1                                                                             | 0,49839689  | -0,305418383 | 0,03  | 0,049 | 1           | 0,809207511   | 1,235776962     | 0,612244898     |
| ADNP2                                                                              | 0,005553478 | -0,305560214 | 0,006 | 0,049 | 1           | 0,809127963   | 1,235898457     | 0,12244898      |
| BAD                                                                                | 0,404871    | -0,305708741 | 0,085 | 0,122 | 1           | 0,809044666   | 1,236025701     | 0,696721311     |
| MAP3K11                                                                            | 0,578666376 | -0,305749072 | 0,033 | 0,049 | 1           | 0,80902205    | 1,236060254     | 0,673469388     |
| WRAP73                                                                             | 0,59736795  | -0,305931701 | 0,014 | 0,024 | 1           | 0,808919643   | 1,236216736     | 0,583333333     |
| EEF1A1                                                                             | 0,143532466 | -0,306229762 | 0,89  | 0,902 | 1           | 0,808752537   | 1,236472164     | 0,986696231     |
| TRABD2B                                                                            | 3,19985E-08 | -0,306331484 | 0     | 0,049 | 0,000675201 | 0,808695515   | 1,236559349     | 0               |
| LEAP2                                                                              | 0,00546686  | -0,306352251 | 0,006 | 0,049 | 1           | 0,808683875   | 1,236577149     | 0,12244898      |
| GAS2L3                                                                             | 0,006257301 | -0,306496063 | 0,014 | 0,073 | 1           | 0,808603266   | 1,236700421     | 0,191780822     |
| C1GALT1C1                                                                          | 0,240338747 | -0,306542545 | 0,037 | 0,073 | 1           | 0,808577215   | 1,236740267     | 0,506849315     |
| AP3D1                                                                              | 0,222711923 | -0,306546362 | 0,035 | 0,073 | 1           | 0,808575075   | 1,236743539     | 0,479452055     |
| TSEN34                                                                             | 0,237403369 | -0,306763818 | 0,021 | 0,049 | 1           | 0,808453209   | 1,236929965     | 0,428571429     |
| STAU2                                                                              | 0,094698473 | -0,306965387 | 0,014 | 0,049 | 1           | 0,808340262   | 1,237102798     | 0,285714286     |
| STARD3                                                                             | 0,736985433 | -0,306977159 | 0,018 | 0,024 | 1           | 0,808333666   | 1,237112892     | 0,75            |
| SMIM30                                                                             | 0,07169603  | -0,307171738 | 0,053 | 0,122 | 1           | 0,808224652   | 1,237279756     | 0,43442623      |
| SAFB2                                                                              | 0,508975138 | -0,307211785 | 0,03  | 0,049 | 1           | 0,808202217   | 1,237314101     | 0,612244898     |
| GPR180                                                                             | 0,59736795  | -0,307500622 | 0,014 | 0,024 | 1           | 0,808040426   | 1,237561844     | 0,583333333     |
| MAPKAP1                                                                            | 0,192962894 | -0,307608146 | 0,067 | 0,122 | 1           | 0,807980205   | 1,237654083     | 0,549180328     |
| SCNM1                                                                              | 0,372445316 | -0,307872639 | 0,026 | 0,049 | 1           | 0,80783209    | 1,237881006     | 0,530612245     |
| BACH1-AS1                                                                          | 0,009700686 | -0,308037969 | 0,002 | 0,024 | 1           | 0,807739519   | 1,238022873     | 0,083333333     |
| GID4                                                                               | 0,025893931 | -0,308174933 | 0,01  | 0,049 | 1           | 0,807662839   | 1,238140412     | 0,204081633     |
| TRIOBP                                                                             | 0,065058898 | -0,308356494 | 0,024 | 0,073 | 1           | 0,807561202   | 1,238296239     | 0,328767123     |

Supplementary Table 3

| Differentially expressed genes_keloid-MD_ comparing SC-Keloid vs. (SC-Myel+Nonmyel) |             |              |       |       |             |               |                 |                 |
|-------------------------------------------------------------------------------------|-------------|--------------|-------|-------|-------------|---------------|-----------------|-----------------|
| gene                                                                                | p_val       | avg_log2FC   | pct.1 | pct.2 | p_val_adj   | Foldchange_UP | Foldchange_DOWN | Ratio_pct1_pct2 |
| OTUB1                                                                               | 0,295312779 | -0,308493268 | 0,04  | 0,073 | 1           | 0,807484646   | 1,238413641     | 0,547945205     |
| MIR99AHG                                                                            | 0,048947161 | -0,308539966 | 0,003 | 0,024 | 1           | 0,807458509   | 1,238453727     | 0,125           |
| ZNF462                                                                              | 0,228068494 | -0,30858671  | 0,053 | 0,098 | 1           | 0,807432347   | 1,238493855     | 0,540816327     |
| CCNDBP1                                                                             | 0,019788634 | -0,308666699 | 0,029 | 0,098 | 1           | 0,807387581   | 1,238562524     | 0,295918367     |
| RNF5                                                                                | 0,01639729  | -0,30880737  | 0,04  | 0,122 | 1           | 0,80730886    | 1,238683297     | 0,327868852     |
| NOL11                                                                               | 0,142350025 | -0,308824529 | 0,03  | 0,073 | 1           | 0,807299258   | 1,238698029     | 0,410958904     |
| SIN3A                                                                               | 0,094698473 | -0,308830467 | 0,014 | 0,049 | 1           | 0,807295935   | 1,238703128     | 0,285714286     |
| ZNF12                                                                               | 0,201391649 | -0,309440733 | 0,019 | 0,049 | 1           | 0,806954518   | 1,239227215     | 0,387755102     |
| KIF9                                                                                | 0,326197875 | -0,309500421 | 0,041 | 0,073 | 1           | 0,806921133   | 1,239278486     | 0,561643836     |
| NCOA3                                                                               | 0,060756626 | -0,309656109 | 0,037 | 0,098 | 1           | 0,806834059   | 1,23941223      | 0,37755102      |
| SSPN                                                                                | 0,941540603 | -0,309820384 | 0,046 | 0,049 | 1           | 0,806742192   | 1,239553366     | 0,93877551      |
| IGSF10                                                                              | 0,194251578 | -0,310105471 | 0,006 | 0,024 | 1           | 0,806582791   | 1,239798334     | 0,25            |
| ALMS1                                                                               | 0,009700686 | -0,310357808 | 0,002 | 0,024 | 1           | 0,806441726   | 1,240015202     | 0,083333333     |
| HIP1                                                                                | 0,462805234 | -0,310656039 | 0,029 | 0,049 | 1           | 0,806275037   | 1,240271562     | 0,591836735     |
| CNTN1                                                                               | 9,44793E-05 | -0,310686756 | 0     | 0,024 | 1           | 0,806257871   | 1,240297969     | 0               |
| GPR162                                                                              | 9,44793E-05 | -0,310686756 | 0     | 0,024 | 1           | 0,806257871   | 1,240297969     | 0               |
| MIEF2                                                                               | 9,44793E-05 | -0,310686756 | 0     | 0,024 | 1           | 0,806257871   | 1,240297969     | 0               |
| NKAIN2                                                                              | 9,44793E-05 | -0,310686756 | 0     | 0,024 | 1           | 0,806257871   | 1,240297969     | 0               |
| CADM2                                                                               | 1,19732E-05 | -0,310705042 | 0,002 | 0,049 | 0,252647346 | 0,806247651   | 1,240313691     | 0,040816327     |
| SNF8                                                                                | 0,573900816 | -0,310797752 | 0,139 | 0,171 | 1           | 0,806195842   | 1,240393397     | 0,812865497     |
| ITM2B                                                                               | 0,034714965 | -0,310890545 | 0,404 | 0,61  | 1           | 0,80614399    | 1,240473182     | 0,662295082     |
| GAL3ST1                                                                             | 0,445731781 | -0,310946994 | 0,011 | 0,024 | 1           | 0,806112448   | 1,240521719     | 0,458333333     |
| IRS1                                                                                | 0,360693945 | -0,311009953 | 0,01  | 0,024 | 1           | 0,80607727    | 1,240575856     | 0,416666667     |
| SUPT4H1                                                                             | 0,070879974 | -0,311148335 | 0,053 | 0,122 | 1           | 0,805999956   | 1,240694857     | 0,43442623      |
| RNF31                                                                               | 0,049781231 | -0,311437666 | 0,003 | 0,024 | 1           | 0,805838329   | 1,240943702     | 0,125           |
| CERT1                                                                               | 0,420009788 | -0,311494887 | 0,027 | 0,049 | 1           | 0,805806369   | 1,240992922     | 0,551020408     |
| ZNF516                                                                              | 0,52217111  | -0,312038825 | 0,013 | 0,024 | 1           | 0,805502614   | 1,2414609       | 0,541666667     |
| KMT5A                                                                               | 0,100537136 | -0,312269176 | 0,041 | 0,098 | 1           | 0,805374011   | 1,241659137     | 0,418367347     |
| PRMT6                                                                               | 0,001600938 | -0,312425008 | 0,005 | 0,049 | 1           | 0,805287024   | 1,241793261     | 0,102040816     |
| CHMP2A                                                                              | 0,269122596 | -0,312604804 | 0,239 | 0,317 | 1           | 0,805186672   | 1,241948029     | 0,753943218     |

Supplementary Table 3

| Differentially expressed genes_keloid-MD_comparing SC-Keloid vs. (SC-Myel+Nonmyel) |             |              |       |       |           |               |                 |                 |
|------------------------------------------------------------------------------------|-------------|--------------|-------|-------|-----------|---------------|-----------------|-----------------|
| gene                                                                               | p_val       | avg_log2FC   | pct.1 | pct.2 | p_val_adj | Foldchange_UP | Foldchange_DOWN | Ratio_pct1_pct2 |
| HDAC3                                                                              | 0,078281439 | -0,312729306 | 0,026 | 0,073 | 1         | 0,805117188   | 1,242055212     | 0,356164384     |
| RWDD1                                                                              | 0,295487936 | -0,312970272 | 0,207 | 0,268 | 1         | 0,804982725   | 1,242262684     | 0,77238806      |
| CKAP2                                                                              | 0,281462479 | -0,313202619 | 0,022 | 0,049 | 1         | 0,804853092   | 1,242462767     | 0,448979592     |
| ER12                                                                               | 0,278515928 | -0,313255458 | 0,008 | 0,024 | 1         | 0,804823615   | 1,242508273     | 0,333333333     |
| PROSER2                                                                            | 0,009700686 | -0,313629231 | 0,002 | 0,024 | 1         | 0,804615129   | 1,242830223     | 0,083333333     |
| CD34                                                                               | 0,009700686 | -0,31405289  | 0,002 | 0,024 | 1         | 0,804378882   | 1,243195244     | 0,083333333     |
| TNS2                                                                               | 0,412525399 | -0,314383063 | 0,027 | 0,049 | 1         | 0,804194814   | 1,243479793     | 0,551020408     |
| PCMTD2                                                                             | 0,421468024 | -0,314580857 | 0,085 | 0,122 | 1         | 0,804084566   | 1,243650286     | 0,696721311     |
| PHACTR4                                                                            | 0,307113605 | -0,314982971 | 0,077 | 0,122 | 1         | 0,803860479   | 1,243996969     | 0,631147541     |
| APBB2                                                                              | 0,52217111  | -0,315107206 | 0,013 | 0,024 | 1         | 0,803791259   | 1,244104098     | 0,541666667     |
| RSBN1L                                                                             | 0,417197499 | -0,315258346 | 0,065 | 0,098 | 1         | 0,803707057   | 1,244234441     | 0,663265306     |
| UFD1                                                                               | 0,324967989 | -0,315262148 | 0,078 | 0,122 | 1         | 0,803704939   | 1,244237719     | 0,639344262     |
| NDUFS1                                                                             | 0,131875181 | -0,315280561 | 0,045 | 0,098 | 1         | 0,803694681   | 1,244253599     | 0,459183673     |
| ATP8A1                                                                             | 0,118110366 | -0,315298276 | 0,005 | 0,024 | 1         | 0,803684812   | 1,244268879     | 0,208333333     |
| UBE3A                                                                              | 0,78866572  | -0,315470675 | 0,064 | 0,073 | 1         | 0,80358878    | 1,244417574     | 0,876712329     |
| MYADM                                                                              | 0,151869527 | -0,315926061 | 0,08  | 0,146 | 1         | 0,803335167   | 1,244810436     | 0,547945205     |
| GTDC1                                                                              | 0,036527829 | -0,316140312 | 0,021 | 0,073 | 1         | 0,803215874   | 1,244995314     | 0,287671233     |
| ENDOD1                                                                             | 0,294713739 | -0,316144101 | 0,096 | 0,146 | 1         | 0,803213765   | 1,244998584     | 0,657534247     |
| ZNF708                                                                             | 0,096204645 | -0,316391246 | 0,014 | 0,049 | 1         | 0,80307618    | 1,24521188      | 0,285714286     |
| GIN1                                                                               | 0,005553478 | -0,316398454 | 0,006 | 0,049 | 1         | 0,803072168   | 1,245218101     | 0,12244898      |
| KMT2E                                                                              | 0,142756349 | -0,316676849 | 0,152 | 0,244 | 1         | 0,802917215   | 1,245458412     | 0,62295082      |
| FAM168B                                                                            | 0,402894981 | -0,31692417  | 0,045 | 0,073 | 1         | 0,802779583   | 1,24567194      | 0,616438356     |
| SCYL2                                                                              | 0,418339787 | -0,316961537 | 0,027 | 0,049 | 1         | 0,802758791   | 1,245704204     | 0,551020408     |
| DCTN2                                                                              | 0,169387817 | -0,317120415 | 0,1   | 0,171 | 1         | 0,802670391   | 1,245841395     | 0,584795322     |
| GJB2                                                                               | 0,009951995 | -0,317153826 | 0,002 | 0,024 | 1         | 0,802651802   | 1,245870248     | 0,083333333     |
| DOHH                                                                               | 0,005381463 | -0,317305691 | 0,006 | 0,049 | 1         | 0,802567316   | 1,246001402     | 0,12244898      |
| MSTO1                                                                              | 0,013252307 | -0,317380729 | 0,008 | 0,049 | 1         | 0,802525573   | 1,246066211     | 0,163265306     |
| TCEAL8                                                                             | 0,660958757 | -0,317417735 | 0,126 | 0,146 | 1         | 0,802504988   | 1,246098173     | 0,863013699     |
| TUBD1                                                                              | 0,06802601  | -0,317687887 | 0,013 | 0,049 | 1         | 0,802354729   | 1,246331533     | 0,265306122     |
| GPS1                                                                               | 0,165035267 | -0,317752921 | 0,032 | 0,073 | 1         | 0,802318561   | 1,246387717     | 0,438356164     |



Supplementary Table 3

| Differentially expressed genes_keloid-MD_comparing SC-Keloid vs. (SC-Myel+Nonmyel) |             |              |       |       |             |               |                 |                 |
|------------------------------------------------------------------------------------|-------------|--------------|-------|-------|-------------|---------------|-----------------|-----------------|
| gene                                                                               | p_val       | avg_log2FC   | pct.1 | pct.2 | p_val_adj   | Foldchange_UP | Foldchange_DOWN | Ratio_pct1_pct2 |
| ABCA10                                                                             | 9,44793E-05 | -0,318016216 | 0     | 0,024 | 1           | 0,80217215    | 1,246615206     | 0               |
| C17orf107                                                                          | 9,44793E-05 | -0,318016216 | 0     | 0,024 | 1           | 0,80217215    | 1,246615206     | 0               |
| OR2AT4                                                                             | 9,44793E-05 | -0,318016216 | 0     | 0,024 | 1           | 0,80217215    | 1,246615206     | 0               |
| SEMG2                                                                              | 9,44793E-05 | -0,318016216 | 0     | 0,024 | 1           | 0,80217215    | 1,246615206     | 0               |
| GJB1                                                                               | 9,44793E-05 | -0,318305059 | 0     | 0,024 | 1           | 0,802011563   | 1,246864817     | 0               |
| LINC01556                                                                          | 9,44793E-05 | -0,318305059 | 0     | 0,024 | 1           | 0,802011563   | 1,246864817     | 0               |
| PLPP7                                                                              | 9,44793E-05 | -0,318305059 | 0     | 0,024 | 1           | 0,802011563   | 1,246864817     | 0               |
| STX1B                                                                              | 9,44793E-05 | -0,318305059 | 0     | 0,024 | 1           | 0,802011563   | 1,246864817     | 0               |
| SYT14                                                                              | 9,44793E-05 | -0,318305059 | 0     | 0,024 | 1           | 0,802011563   | 1,246864817     | 0               |
| WFIKKN1                                                                            | 9,44793E-05 | -0,318305059 | 0     | 0,024 | 1           | 0,802011563   | 1,246864817     | 0               |
| HDAC2                                                                              | 0,498343753 | -0,31842817  | 0,093 | 0,122 | 1           | 0,801943127   | 1,246971221     | 0,762295082     |
| WDR19                                                                              | 0,443091335 | -0,318582807 | 0,011 | 0,024 | 1           | 0,801857174   | 1,247104887     | 0,458333333     |
| USP24                                                                              | 0,044216422 | -0,318617241 | 0,011 | 0,049 | 1           | 0,801838036   | 1,247134653     | 0,224489796     |
| SDAD1                                                                              | 0,046558331 | -0,318653641 | 0,022 | 0,073 | 1           | 0,801817805   | 1,247166119     | 0,301369863     |
| CDKN2C                                                                             | 0,099576395 | -0,318677612 | 0,041 | 0,098 | 1           | 0,801804482   | 1,247186842     | 0,418367347     |
| ZC3HAV1                                                                            | 0,146330194 | -0,318735558 | 0,046 | 0,098 | 1           | 0,801772279   | 1,247236936     | 0,469387755     |
| GAB1                                                                               | 0,073657071 | -0,318738367 | 0,038 | 0,098 | 1           | 0,801770717   | 1,247239365     | 0,387755102     |
| TMED10                                                                             | 0,291698434 | -0,318854948 | 0,25  | 0,317 | 1           | 0,801705931   | 1,247340155     | 0,788643533     |
| DMXL2                                                                              | 0,125923264 | -0,318857524 | 0,016 | 0,049 | 1           | 0,801704499   | 1,247342383     | 0,326530612     |
| C18orf21                                                                           | 0,52217111  | -0,31891334  | 0,013 | 0,024 | 1           | 0,801673483   | 1,247390641     | 0,541666667     |
| SEC11C                                                                             | 0,518947125 | -0,318995104 | 0,116 | 0,146 | 1           | 0,80162805    | 1,247461339     | 0,794520548     |
| LRRC14                                                                             | 0,360693945 | -0,319019974 | 0,01  | 0,024 | 1           | 0,801614231   | 1,247482843     | 0,416666667     |
| PALM                                                                               | 5,34856E-07 | -0,319050089 | 0,003 | 0,073 | 0,011286001 | 0,801597498   | 1,247508884     | 0,04109589      |
| IK                                                                                 | 0,045089706 | -0,319228009 | 0,077 | 0,171 | 1           | 0,801498648   | 1,247662741     | 0,450292398     |
| NOL6                                                                               | 0,276254967 | -0,31945008  | 0,008 | 0,024 | 1           | 0,801375284   | 1,247854807     | 0,333333333     |
| IFI27L1                                                                            | 0,754007335 | -0,319788644 | 0,04  | 0,049 | 1           | 0,801187243   | 1,248147681     | 0,816326531     |
| ARAF                                                                               | 0,668505389 | -0,31979169  | 0,016 | 0,024 | 1           | 0,801185552   | 1,248150316     | 0,666666667     |
| CHMP1A                                                                             | 0,201391649 | -0,319855621 | 0,019 | 0,049 | 1           | 0,80115005    | 1,248205627     | 0,387755102     |
| DHRS11                                                                             | 0,066835713 | -0,319934017 | 0,013 | 0,049 | 1           | 0,801106516   | 1,248273457     | 0,265306122     |
| PUSL1                                                                              | 0,200206568 | -0,320015163 | 0,019 | 0,049 | 1           | 0,801061458   | 1,248343669     | 0,387755102     |

Supplementary Table 3

| Differentially expressed genes_keloid-MD_comparing SC-Keloid vs. (SC-Myel+Nonmyel) |             |              |       |       |             |               |                 |                 |
|------------------------------------------------------------------------------------|-------------|--------------|-------|-------|-------------|---------------|-----------------|-----------------|
| gene                                                                               | p_val       | avg_log2FC   | pct.1 | pct.2 | p_val_adj   | Foldchange_UP | Foldchange_DOWN | Ratio_pct1_pct2 |
| MT3                                                                                | 3,19985E-08 | -0,32009655  | 0     | 0,049 | 0,000675201 | 0,801016269   | 1,248414094     | 0               |
| CUL1                                                                               | 0,196681885 | -0,320170468 | 0,019 | 0,049 | 1           | 0,800975229   | 1,24847806      | 0,387755102     |
| MTRNR2L12                                                                          | 0,422388699 | -0,320213158 | 0,105 | 0,146 | 1           | 0,800951529   | 1,248515003     | 0,719178082     |
| CYTH3                                                                              | 0,327166061 | -0,320246258 | 0,024 | 0,049 | 1           | 0,800933152   | 1,248543648     | 0,489795918     |
| CIR1                                                                               | 0,281467684 | -0,320393519 | 0,075 | 0,122 | 1           | 0,800851402   | 1,248671098     | 0,614754098     |
| SMIM4                                                                              | 0,103463743 | -0,320918961 | 0,041 | 0,098 | 1           | 0,800559778   | 1,249125958     | 0,418367347     |
| BTG1                                                                               | 0,099039161 | -0,320934618 | 0,244 | 0,39  | 1           | 0,80055109    | 1,249139514     | 0,625641026     |
| ALKBH8                                                                             | 0,798845609 | -0,320991969 | 0,019 | 0,024 | 1           | 0,800519267   | 1,249189172     | 0,791666667     |
| WAC                                                                                | 0,442484058 | -0,32108971  | 0,088 | 0,122 | 1           | 0,800465034   | 1,249273806     | 0,721311475     |
| R3HDM4                                                                             | 0,967295855 | -0,321362051 | 0,024 | 0,024 | 1           | 0,800313943   | 1,249509657     | 1               |
| NDUFB1                                                                             | 0,435223725 | -0,321940049 | 0,292 | 0,317 | 1           | 0,799993371   | 1,250010358     | 0,921135647     |
| H3-3A                                                                              | 0,100117258 | -0,322210032 | 0,774 | 0,829 | 1           | 0,799843676   | 1,250244304     | 0,933655006     |
| GFRA1                                                                              | 0,098456396 | -0,322227884 | 0,027 | 0,073 | 1           | 0,799833779   | 1,250259775     | 0,369863014     |
| PCNT                                                                               | 0,59736795  | -0,322340825 | 0,014 | 0,024 | 1           | 0,799771167   | 1,250357654     | 0,583333333     |
| DLX2                                                                               | 9,44793E-05 | -0,322404892 | 0     | 0,024 | 1           | 0,799735651   | 1,250413182     | 0               |
| FAM87B                                                                             | 9,44793E-05 | -0,322404892 | 0     | 0,024 | 1           | 0,799735651   | 1,250413182     | 0               |
| FMN2                                                                               | 9,44793E-05 | -0,322404892 | 0     | 0,024 | 1           | 0,799735651   | 1,250413182     | 0               |
| HOXD8                                                                              | 9,44793E-05 | -0,322404892 | 0     | 0,024 | 1           | 0,799735651   | 1,250413182     | 0               |
| LINC00893                                                                          | 9,44793E-05 | -0,322404892 | 0     | 0,024 | 1           | 0,799735651   | 1,250413182     | 0               |
| LPP-AS1                                                                            | 9,44793E-05 | -0,322404892 | 0     | 0,024 | 1           | 0,799735651   | 1,250413182     | 0               |
| SDCBP2                                                                             | 9,44793E-05 | -0,322404892 | 0     | 0,024 | 1           | 0,799735651   | 1,250413182     | 0               |
| SNRPD1                                                                             | 0,103814489 | -0,32245012  | 0,265 | 0,39  | 1           | 0,79971058    | 1,250452382     | 0,679487179     |
| RRAGC                                                                              | 0,321155557 | -0,322665751 | 0,024 | 0,049 | 1           | 0,799591061   | 1,250639294     | 0,489795918     |
| NKIRAS1                                                                            | 0,005381463 | -0,322797205 | 0,006 | 0,049 | 1           | 0,799518208   | 1,250753254     | 0,12244898      |
| SERTAD2                                                                            | 0,461082882 | -0,322918867 | 0,029 | 0,049 | 1           | 0,799450788   | 1,250858734     | 0,591836735     |
| ZFYVE1                                                                             | 0,524894226 | -0,323152599 | 0,013 | 0,024 | 1           | 0,799321279   | 1,251061403     | 0,541666667     |
| TMEM38B                                                                            | 0,327166061 | -0,323555624 | 0,024 | 0,049 | 1           | 0,799098015   | 1,251410942     | 0,489795918     |
| TCTN1                                                                              | 0,580476195 | -0,324023923 | 0,033 | 0,049 | 1           | 0,79883867    | 1,251817216     | 0,673469388     |
| GALT                                                                               | 0,003567901 | -0,32417574  | 0,013 | 0,073 | 1           | 0,798754611   | 1,251948954     | 0,178082192     |
| EAF1                                                                               | 0,443091335 | -0,324340372 | 0,011 | 0,024 | 1           | 0,798663467   | 1,252091827     | 0,458333333     |

Supplementary Table 3

| Differentially expressed genes_keloid-MD_ comparing SC-Keloid vs. (SC-Myel+Nonmyel) |             |              |       |       |           |               |                 |                 |
|-------------------------------------------------------------------------------------|-------------|--------------|-------|-------|-----------|---------------|-----------------|-----------------|
| gene                                                                                | p_val       | avg_log2FC   | pct.1 | pct.2 | p_val_adj | Foldchange_UP | Foldchange_DOWN | Ratio_pct1_pct2 |
| DDX49                                                                               | 0,798845609 | -0,324354957 | 0,019 | 0,024 | 1         | 0,798655393   | 1,252104485     | 0,791666667     |
| IL17RE                                                                              | 0,013972402 | -0,324463899 | 0,008 | 0,049 | 1         | 0,798595087   | 1,252199039     | 0,163265306     |
| GORAB                                                                               | 0,668505389 | -0,324755311 | 0,016 | 0,024 | 1         | 0,798433794   | 1,252451998     | 0,666666667     |
| TEX9                                                                                | 0,443091335 | -0,325107117 | 0,011 | 0,024 | 1         | 0,798239116   | 1,25275745      | 0,458333333     |
| ZNF292                                                                              | 0,306554006 | -0,325199176 | 0,04  | 0,073 | 1         | 0,798188182   | 1,252837391     | 0,547945205     |
| RABAC1                                                                              | 0,244219391 | -0,325203475 | 0,324 | 0,415 | 1         | 0,798185804   | 1,252841125     | 0,780722892     |
| FBXO32                                                                              | 0,237403369 | -0,325258687 | 0,021 | 0,049 | 1         | 0,798155258   | 1,252889072     | 0,428571429     |
| ERCC4                                                                               | 0,001659122 | -0,325328228 | 0,011 | 0,073 | 1         | 0,798116786   | 1,252949465     | 0,150684932     |
| DHX30                                                                               | 0,08384551  | -0,325453112 | 0,054 | 0,122 | 1         | 0,798047702   | 1,253057929     | 0,442622951     |
| TRIAP1                                                                              | 0,044231226 | -0,325472785 | 0,048 | 0,122 | 1         | 0,798036819   | 1,253075016     | 0,393442623     |
| POLR3E                                                                              | 0,366093953 | -0,325494994 | 0,026 | 0,049 | 1         | 0,798024534   | 1,253094306     | 0,530612245     |
| TRMT61B                                                                             | 0,735616852 | -0,325630024 | 0,018 | 0,024 | 1         | 0,797949846   | 1,253211596     | 0,75            |
| RPE65                                                                               | 0,503671353 | -0,325877872 | 0,03  | 0,049 | 1         | 0,797812774   | 1,25342691      | 0,612244898     |
| SYNGR2                                                                              | 0,276254967 | -0,325937804 | 0,008 | 0,024 | 1         | 0,797779632   | 1,253478981     | 0,333333333     |
| PLEKHM2                                                                             | 0,239997787 | -0,326050126 | 0,021 | 0,049 | 1         | 0,797717523   | 1,253576575     | 0,428571429     |
| TCF4                                                                                | 0,169581576 | -0,326108135 | 0,276 | 0,39  | 1         | 0,797685448   | 1,253626981     | 0,707692308     |
| NPC1                                                                                | 0,600126951 | -0,326459522 | 0,014 | 0,024 | 1         | 0,797491186   | 1,253932355     | 0,583333333     |
| USP39                                                                               | 0,065662619 | -0,326576478 | 0,013 | 0,049 | 1         | 0,797426537   | 1,254034012     | 0,265306122     |
| BUB3                                                                                | 0,166650938 | -0,326763095 | 0,032 | 0,073 | 1         | 0,797323394   | 1,254196236     | 0,438356164     |
| VPS26A                                                                              | 0,337082225 | -0,326874007 | 0,061 | 0,098 | 1         | 0,7972621     | 1,25429266      | 0,62244898      |
| SAP18                                                                               | 0,531576558 | -0,326915575 | 0,313 | 0,366 | 1         | 0,797239129   | 1,2543288       | 0,855191257     |
| INTS3                                                                               | 0,161548618 | -0,326987577 | 0,018 | 0,049 | 1         | 0,797199341   | 1,254391403     | 0,367346939     |
| MRPL28                                                                              | 0,234639927 | -0,327102215 | 0,053 | 0,098 | 1         | 0,797135997   | 1,254491082     | 0,540816327     |
| PCDHB5                                                                              | 0,009951995 | -0,327335421 | 0,002 | 0,024 | 1         | 0,797007154   | 1,254693882     | 0,083333333     |
| TULP4                                                                               | 0,148791414 | -0,327486025 | 0,097 | 0,171 | 1         | 0,796923958   | 1,254824867     | 0,567251462     |
| GMEB1                                                                               | 0,52217111  | -0,327563245 | 0,013 | 0,024 | 1         | 0,796881304   | 1,254892034     | 0,541666667     |
| SPAST                                                                               | 0,120426031 | -0,327649803 | 0,029 | 0,073 | 1         | 0,796833495   | 1,254967326     | 0,397260274     |
| CDC34                                                                               | 0,985342118 | -0,327822675 | 0,026 | 0,024 | 1         | 0,796738019   | 1,255117712     | 1,083333333     |
| TUBB6                                                                               | 0,433531246 | -0,32797313  | 0,088 | 0,122 | 1         | 0,796654933   | 1,255248613     | 0,721311475     |
| PSD3                                                                                | 0,443091335 | -0,328205397 | 0,011 | 0,024 | 1         | 0,796526687   | 1,255450717     | 0,458333333     |

Supplementary Table 3

| Differentially expressed genes_keloid-MD_comparing SC-Keloid vs. (SC-Myel+Nonmyel) |             |              |       |       |           |               |                 |                 |
|------------------------------------------------------------------------------------|-------------|--------------|-------|-------|-----------|---------------|-----------------|-----------------|
| gene                                                                               | p_val       | avg_log2FC   | pct.1 | pct.2 | p_val_adj | Foldchange_UP | Foldchange_DOWN | Ratio_pct1_pct2 |
| FAM133B                                                                            | 0,362537739 | -0,328232811 | 0,169 | 0,22  | 1         | 0,796511551   | 1,255474573     | 0,768181818     |
| KLHL36                                                                             | 0,237403369 | -0,328311788 | 0,021 | 0,049 | 1         | 0,796467949   | 1,255543303     | 0,428571429     |
| DARS2                                                                              | 0,194251578 | -0,329027856 | 0,006 | 0,024 | 1         | 0,796072728   | 1,256166635     | 0,25            |
| SF3B4                                                                              | 0,06023086  | -0,329867907 | 0,024 | 0,073 | 1         | 0,795609326   | 1,256898288     | 0,328767123     |
| CBARP                                                                              | 0,524894226 | -0,330077741 | 0,013 | 0,024 | 1         | 0,795493616   | 1,257081112     | 0,541666667     |
| MT-ATP8                                                                            | 0,201391649 | -0,330195738 | 0,019 | 0,049 | 1         | 0,795428557   | 1,257183931     | 0,387755102     |
| TRPM3                                                                              | 0,009700686 | -0,33033522  | 0,002 | 0,024 | 1         | 0,795351657   | 1,257305484     | 0,083333333     |
| PARP6                                                                              | 0,360693945 | -0,330393044 | 0,01  | 0,024 | 1         | 0,79531978    | 1,257355878     | 0,416666667     |
| FSD1L                                                                              | 0,194251578 | -0,330431712 | 0,006 | 0,024 | 1         | 0,795298463   | 1,25738958      | 0,25            |
| SLC25A25                                                                           | 0,125923264 | -0,330503935 | 0,016 | 0,049 | 1         | 0,79525865    | 1,257452528     | 0,326530612     |
| ILF2                                                                               | 0,239723086 | -0,330683873 | 0,089 | 0,146 | 1         | 0,795159469   | 1,257609371     | 0,609589041     |
| FSTL5                                                                              | 9,44793E-05 | -0,330931202 | 0     | 0,024 | 1         | 0,795023162   | 1,257824988     | 0               |
| GFAP                                                                               | 9,44793E-05 | -0,330931202 | 0     | 0,024 | 1         | 0,795023162   | 1,257824988     | 0               |
| NAGS                                                                               | 9,44793E-05 | -0,330931202 | 0     | 0,024 | 1         | 0,795023162   | 1,257824988     | 0               |
| OPN3                                                                               | 0,445731781 | -0,331344805 | 0,011 | 0,024 | 1         | 0,794795271   | 1,258185643     | 0,458333333     |
| TM9SF4                                                                             | 0,285710793 | -0,331528875 | 0,022 | 0,049 | 1         | 0,794693872   | 1,258346182     | 0,448979592     |
| TIGD7                                                                              | 0,005641332 | -0,331701182 | 0,006 | 0,049 | 1         | 0,794598964   | 1,25849648      | 0,12244898      |
| CILK1                                                                              | 0,458834303 | -0,331824082 | 0,048 | 0,073 | 1         | 0,794531277   | 1,258603693     | 0,657534247     |
| CCDC152                                                                            | 0,671266251 | -0,332166015 | 0,016 | 0,024 | 1         | 0,794342988   | 1,258902031     | 0,666666667     |
| PDCL                                                                               | 0,90877498  | -0,332386074 | 0,046 | 0,049 | 1         | 0,794221833   | 1,25909407      | 0,93877551      |
| GRN                                                                                | 0,264150117 | -0,332576261 | 0,073 | 0,122 | 1         | 0,794117139   | 1,259260064     | 0,598360656     |
| CHRN1                                                                              | 0,16364998  | -0,332662032 | 0,018 | 0,049 | 1         | 0,794069929   | 1,259334931     | 0,367346939     |
| HGS                                                                                | 0,303152258 | -0,332744889 | 0,04  | 0,073 | 1         | 0,794024326   | 1,25940726      | 0,547945205     |
| FOXK1                                                                              | 0,025347466 | -0,333062954 | 0,019 | 0,073 | 1         | 0,793849289   | 1,259684947     | 0,260273973     |
| TMEM98                                                                             | 0,065082467 | -0,333130371 | 0,013 | 0,049 | 1         | 0,793812194   | 1,259743813     | 0,265306122     |
| MESD                                                                               | 0,109104244 | -0,333457053 | 0,108 | 0,195 | 1         | 0,793632464   | 1,260029101     | 0,553846154     |
| ATRX                                                                               | 0,298658492 | -0,333693523 | 0,158 | 0,22  | 1         | 0,793502392   | 1,260235647     | 0,718181818     |
| RCN3                                                                               | 0,012817271 | -0,334220439 | 0,038 | 0,122 | 1         | 0,793212633   | 1,260696007     | 0,31147541      |
| TNNC2                                                                              | 0,048947161 | -0,334733726 | 0,003 | 0,024 | 1         | 0,792930472   | 1,261144622     | 0,125           |
| FAM193B                                                                            | 0,005641332 | -0,334923132 | 0,006 | 0,049 | 1         | 0,792826378   | 1,261310203     | 0,12244898      |

Supplementary Table 3

| Differentially expressed genes_keloid-MD_comparing SC-Keloid vs. (SC-Myel+Nonmyel) |             |              |       |       |           |               |                 |                 |
|------------------------------------------------------------------------------------|-------------|--------------|-------|-------|-----------|---------------|-----------------|-----------------|
| gene                                                                               | p_val       | avg_log2FC   | pct.1 | pct.2 | p_val_adj | Foldchange_UP | Foldchange_DOWN | Ratio_pct1_pct2 |
| PCDH17                                                                             | 0,009700686 | -0,335128301 | 0,002 | 0,024 | 1         | 0,792713636   | 1,26148959      | 0,083333333     |
| RBM5                                                                               | 0,781157727 | -0,335207412 | 0,065 | 0,073 | 1         | 0,792670168   | 1,261558767     | 0,890410959     |
| ACTR1A                                                                             | 0,077791509 | -0,33521031  | 0,026 | 0,073 | 1         | 0,792668577   | 1,2615613       | 0,356164384     |
| ARFGAP3                                                                            | 0,213300051 | -0,335551677 | 0,088 | 0,146 | 1         | 0,792481039   | 1,261859843     | 0,602739726     |
| ADGRG6                                                                             | 0,205321572 | -0,336216016 | 0,086 | 0,146 | 1         | 0,792116198   | 1,262441045     | 0,589041096     |
| TEX261                                                                             | 0,59736795  | -0,33627285  | 0,014 | 0,024 | 1         | 0,792084994   | 1,262490778     | 0,583333333     |
| MAP1LC3A                                                                           | 0,435646629 | -0,336361237 | 0,108 | 0,146 | 1         | 0,792036468   | 1,262568127     | 0,739726027     |
| RPUSD3                                                                             | 0,037097002 | -0,336576174 | 0,021 | 0,073 | 1         | 0,791918476   | 1,262756243     | 0,287671233     |
| PIP4P1                                                                             | 0,443091335 | -0,336623914 | 0,011 | 0,024 | 1         | 0,791892272   | 1,262798029     | 0,458333333     |
| ISCU                                                                               | 0,155954285 | -0,336633503 | 0,116 | 0,195 | 1         | 0,791887009   | 1,262806422     | 0,594871795     |
| LDLRAD3                                                                            | 0,009700686 | -0,336646993 | 0,002 | 0,024 | 1         | 0,791879604   | 1,262818231     | 0,083333333     |
| RFC2                                                                               | 0,043341977 | -0,336794276 | 0,011 | 0,049 | 1         | 0,791798766   | 1,262947157     | 0,224489796     |
| MAGI1                                                                              | 0,043777355 | -0,336850058 | 0,011 | 0,049 | 1         | 0,791768151   | 1,26299599      | 0,224489796     |
| SOX13                                                                              | 0,138711898 | -0,336889659 | 0,03  | 0,073 | 1         | 0,791746418   | 1,263030659     | 0,410958904     |
| VEZF1                                                                              | 0,007128679 | -0,337081553 | 0,07  | 0,195 | 1         | 0,791641115   | 1,263198666     | 0,358974359     |
| MOV10                                                                              | 0,013429186 | -0,337285654 | 0,008 | 0,049 | 1         | 0,791529128   | 1,263377386     | 0,163265306     |
| ATXN1L                                                                             | 0,276254967 | -0,337463991 | 0,008 | 0,024 | 1         | 0,791431289   | 1,263533567     | 0,333333333     |
| PDCD6                                                                              | 0,316659017 | -0,337834313 | 0,164 | 0,22  | 1         | 0,791228165   | 1,263857942     | 0,745454545     |
| HACE1                                                                              | 0,013789213 | -0,337919719 | 0,008 | 0,049 | 1         | 0,791181326   | 1,263932763     | 0,163265306     |
| CCNQ                                                                               | 0,798845609 | -0,338124132 | 0,019 | 0,024 | 1         | 0,791069233   | 1,26411186      | 0,791666667     |
| ANKRD50                                                                            | 0,165035267 | -0,338209383 | 0,032 | 0,073 | 1         | 0,791022489   | 1,264186561     | 0,438356164     |
| FRMD6                                                                              | 0,082173205 | -0,338474117 | 0,104 | 0,195 | 1         | 0,79087735    | 1,26441856      | 0,533333333     |
| ANKRD54                                                                            | 0,369261143 | -0,33851398  | 0,026 | 0,049 | 1         | 0,790855498   | 1,264453497     | 0,530612245     |
| METTL23                                                                            | 0,287943443 | -0,338719581 | 0,075 | 0,122 | 1         | 0,7907428     | 1,264633709     | 0,614754098     |
| PAQR8                                                                              | 0,010821401 | -0,338791813 | 0,016 | 0,073 | 1         | 0,79070321    | 1,264697028     | 0,219178082     |
| GDPD3                                                                              | 0,009700686 | -0,338821456 | 0,002 | 0,024 | 1         | 0,790686964   | 1,264723014     | 0,083333333     |
| H2AW                                                                               | 0,026794502 | -0,339052419 | 0,01  | 0,049 | 1         | 0,790560392   | 1,264925501     | 0,204081633     |
| RAD1                                                                               | 0,061875376 | -0,339077825 | 0,024 | 0,073 | 1         | 0,79054647    | 1,264947777     | 0,328767123     |
| AGO1                                                                               | 0,370851108 | -0,339144708 | 0,026 | 0,049 | 1         | 0,790509821   | 1,265006421     | 0,530612245     |
| ATP9A                                                                              | 0,113762049 | -0,339386601 | 0,005 | 0,024 | 1         | 0,79037729    | 1,265218539     | 0,208333333     |

Supplementary Table 3

| Differentially expressed genes_keloid-MD_comparing SC-Keloid vs. (SC-Myel+Nonmyel) |             |              |       |       |             |               |                 |                 |
|------------------------------------------------------------------------------------|-------------|--------------|-------|-------|-------------|---------------|-----------------|-----------------|
| gene                                                                               | p_val       | avg_log2FC   | pct.1 | pct.2 | p_val_adj   | Foldchange_UP | Foldchange_DOWN | Ratio_pct1_pct2 |
| GATAD2B                                                                            | 0,072885127 | -0,339616172 | 0,038 | 0,098 | 1           | 0,79025153    | 1,265419885     | 0,387755102     |
| HNRNPL                                                                             | 0,133620512 | -0,339736816 | 0,045 | 0,098 | 1           | 0,790185449   | 1,265525709     | 0,459183673     |
| SUGT1                                                                              | 0,10082838  | -0,33981551  | 0,089 | 0,171 | 1           | 0,790142348   | 1,265594741     | 0,520467836     |
| ST6GALNAC5                                                                         | 3,19985E-08 | -0,339894879 | 0     | 0,049 | 0,000675201 | 0,79009888    | 1,265664369     | 0               |
| CERS6                                                                              | 0,162596738 | -0,340024871 | 0,018 | 0,049 | 1           | 0,790027692   | 1,265778415     | 0,367346939     |
| CNOT6                                                                              | 0,096739202 | -0,340422067 | 0,027 | 0,073 | 1           | 0,789810216   | 1,266126951     | 0,369863014     |
| NKIRAS2                                                                            | 0,001691453 | -0,340605606 | 0,019 | 0,098 | 1           | 0,789709743   | 1,266288037     | 0,193877551     |
| MICA                                                                               | 0,668505389 | -0,340874101 | 0,016 | 0,024 | 1           | 0,789562786   | 1,266523723     | 0,666666667     |
| IDNK                                                                               | 0,276254967 | -0,340927589 | 0,008 | 0,024 | 1           | 0,789533513   | 1,266570681     | 0,333333333     |
| SEC62                                                                              | 0,094909774 | -0,340991197 | 0,311 | 0,463 | 1           | 0,789498704   | 1,266626525     | 0,671706263     |
| SNHG32                                                                             | 0,043103088 | -0,341016115 | 0,048 | 0,122 | 1           | 0,789485068   | 1,266648402     | 0,393442623     |
| RND3                                                                               | 0,405008545 | -0,341138394 | 0,212 | 0,268 | 1           | 0,789418156   | 1,266755765     | 0,791044776     |
| GLMN                                                                               | 0,194251578 | -0,341197161 | 0,006 | 0,024 | 1           | 0,789386      | 1,266807366     | 0,25            |
| EIF4B                                                                              | 0,185346234 | -0,341298617 | 0,067 | 0,122 | 1           | 0,78933049    | 1,266896456     | 0,549180328     |
| PTCD3                                                                              | 0,9144643   | -0,341315838 | 0,022 | 0,024 | 1           | 0,789321068   | 1,266911578     | 0,916666667     |
| DIS3L2                                                                             | 0,121494347 | -0,341362806 | 0,016 | 0,049 | 1           | 0,789295372   | 1,266952824     | 0,326530612     |
| OSR1                                                                               | 0,194251578 | -0,341437864 | 0,006 | 0,024 | 1           | 0,789254308   | 1,267018741     | 0,25            |
| DNAH9                                                                              | 0,009700686 | -0,341479653 | 0,002 | 0,024 | 1           | 0,789231447   | 1,267055442     | 0,083333333     |
| TRPV1                                                                              | 0,278515928 | -0,341722733 | 0,008 | 0,024 | 1           | 0,789098481   | 1,267268946     | 0,333333333     |
| ALDH6A1                                                                            | 0,006538836 | -0,341792624 | 0,014 | 0,073 | 1           | 0,789060254   | 1,26733034      | 0,191780822     |
| ZNF66                                                                              | 1,27911E-05 | -0,341811266 | 0,002 | 0,049 | 0,269904161 | 0,789050058   | 1,267346716     | 0,040816327     |
| RSAD1                                                                              | 0,042057731 | -0,341871866 | 0,011 | 0,049 | 1           | 0,789016915   | 1,267399952     | 0,224489796     |
| TFB1M                                                                              | 0,048947161 | -0,341880342 | 0,003 | 0,024 | 1           | 0,789012279   | 1,267407398     | 0,125           |
| NBEAL2                                                                             | 0,050627188 | -0,34201159  | 0,003 | 0,024 | 1           | 0,788940503   | 1,267522705     | 0,125           |
| BCL9                                                                               | 0,09174284  | -0,342183992 | 0,014 | 0,049 | 1           | 0,78884623    | 1,267674183     | 0,285714286     |
| ACD                                                                                | 0,443091335 | -0,342444293 | 0,011 | 0,024 | 1           | 0,788703914   | 1,267902926     | 0,458333333     |
| KYAT3                                                                              | 0,284289899 | -0,342648239 | 0,022 | 0,049 | 1           | 0,788592427   | 1,268082175     | 0,448979592     |
| NUP160                                                                             | 0,138711898 | -0,343168917 | 0,03  | 0,073 | 1           | 0,78830787    | 1,268539917     | 0,410958904     |
| BZW2                                                                               | 0,488958228 | -0,343213707 | 0,049 | 0,073 | 1           | 0,788283397   | 1,2685793       | 0,671232877     |
| CIT                                                                                | 0,2670516   | -0,343494863 | 0,093 | 0,146 | 1           | 0,788129789   | 1,268826548     | 0,636986301     |

Supplementary Table 3

| Differentially expressed genes_keloid-MD_comparing SC-Keloid vs. (SC-Myel+Nonmyel) |             |              |       |       |           |               |                 |                 |
|------------------------------------------------------------------------------------|-------------|--------------|-------|-------|-----------|---------------|-----------------|-----------------|
| gene                                                                               | p_val       | avg_log2FC   | pct.1 | pct.2 | p_val_adj | Foldchange_UP | Foldchange_DOWN | Ratio_pct1_pct2 |
| C8orf88                                                                            | 0,735616852 | -0,343680603 | 0,018 | 0,024 | 1         | 0,788028328   | 1,268989914     | 0,75            |
| SLC31A2                                                                            | 0,278515928 | -0,343741662 | 0,008 | 0,024 | 1         | 0,787994977   | 1,269043623     | 0,333333333     |
| INPP5F                                                                             | 0,367488605 | -0,343839411 | 0,102 | 0,146 | 1         | 0,787941588   | 1,269129609     | 0,698630137     |
| SPATA5                                                                             | 0,445731781 | -0,344089314 | 0,011 | 0,024 | 1         | 0,787805113   | 1,269349466     | 0,458333333     |
| UPF2                                                                               | 0,082790336 | -0,344102286 | 0,07  | 0,146 | 1         | 0,78779803    | 1,26936088      | 0,479452055     |
| PCDHB2                                                                             | 0,115197258 | -0,344251454 | 0,005 | 0,024 | 1         | 0,78771658    | 1,269492132     | 0,208333333     |
| HSBP1                                                                              | 0,09485119  | -0,34428858  | 0,45  | 0,634 | 1         | 0,787696309   | 1,269524801     | 0,70977918      |
| MRPS2                                                                              | 0,093952504 | -0,344444535 | 0,014 | 0,049 | 1         | 0,787611163   | 1,269662044     | 0,285714286     |
| TBC1D15                                                                            | 0,428178427 | -0,344626601 | 0,046 | 0,073 | 1         | 0,787511774   | 1,269822284     | 0,630136986     |
| RBM8A                                                                              | 0,975522094 | -0,344846463 | 0,308 | 0,293 | 1         | 0,787391769   | 1,270015816     | 1,051194539     |
| EPB41L4B                                                                           | 9,44793E-05 | -0,344944781 | 0     | 0,024 | 1         | 0,787338111   | 1,270102369     | 0               |
| ROR2                                                                               | 9,44793E-05 | -0,344944781 | 0     | 0,024 | 1         | 0,787338111   | 1,270102369     | 0               |
| WWC2-AS1                                                                           | 9,44793E-05 | -0,344944781 | 0     | 0,024 | 1         | 0,787338111   | 1,270102369     | 0               |
| SMN2                                                                               | 0,009700686 | -0,345110655 | 0,002 | 0,024 | 1         | 0,787247592   | 1,270248407     | 0,083333333     |
| TUBB2A                                                                             | 0,487256192 | -0,3451437   | 0,112 | 0,146 | 1         | 0,78722956    | 1,270277503     | 0,767123288     |
| TSHZ3                                                                              | 0,043341977 | -0,345169871 | 0,011 | 0,049 | 1         | 0,78721528    | 1,270300546     | 0,224489796     |
| BTBD9                                                                              | 0,009700686 | -0,345175783 | 0,002 | 0,024 | 1         | 0,787212054   | 1,270305751     | 0,083333333     |
| GTF2I                                                                              | 0,333897576 | -0,345582067 | 0,182 | 0,244 | 1         | 0,786990395   | 1,270663539     | 0,745901639     |
| ZSCAN16-AS1                                                                        | 0,314425409 | -0,345728193 | 0,059 | 0,098 | 1         | 0,786910687   | 1,270792246     | 0,602040816     |
| TTY14                                                                              | 0,115197258 | -0,346057536 | 0,005 | 0,024 | 1         | 0,786731069   | 1,27108238      | 0,208333333     |
| CCDC82                                                                             | 0,182877478 | -0,346210268 | 0,102 | 0,171 | 1         | 0,786647786   | 1,271216951     | 0,596491228     |
| DAAM2                                                                              | 0,665848564 | -0,34641461  | 0,037 | 0,049 | 1         | 0,786536374   | 1,271397018     | 0,755102041     |
| PCTP                                                                               | 0,443091335 | -0,346440304 | 0,011 | 0,024 | 1         | 0,786522366   | 1,271419662     | 0,458333333     |
| DHRS3                                                                              | 0,009951995 | -0,346729145 | 0,002 | 0,024 | 1         | 0,786364912   | 1,271674237     | 0,083333333     |
| ZNF142                                                                             | 0,116646669 | -0,346900612 | 0,005 | 0,024 | 1         | 0,786271457   | 1,271825387     | 0,208333333     |
| EIF3A                                                                              | 0,322637655 | -0,346957964 | 0,115 | 0,171 | 1         | 0,7862402     | 1,271875948     | 0,67251462      |
| ZNF331                                                                             | 0,735616852 | -0,347020421 | 0,018 | 0,024 | 1         | 0,786206164   | 1,27193101      | 0,75            |
| ATG14                                                                              | 0,32565663  | -0,34715654  | 0,024 | 0,049 | 1         | 0,786131988   | 1,272051024     | 0,489795918     |
| PCDH7                                                                              | 0,02621267  | -0,347186382 | 0,019 | 0,073 | 1         | 0,786115727   | 1,272077336     | 0,260273973     |
| FBXO44                                                                             | 0,026191169 | -0,347264037 | 0,01  | 0,049 | 1         | 0,786073414   | 1,272145809     | 0,204081633     |

Supplementary Table 3

| Differentially expressed genes_keloid-MD_comparing SC-Keloid vs. (SC-Myel+Nonmyel) |             |              |       |       |           |               |                 |                 |
|------------------------------------------------------------------------------------|-------------|--------------|-------|-------|-----------|---------------|-----------------|-----------------|
| gene                                                                               | p_val       | avg_log2FC   | pct.1 | pct.2 | p_val_adj | Foldchange_UP | Foldchange_DOWN | Ratio_pct1_pct2 |
| MLKL                                                                               | 0,001663452 | -0,347295724 | 0,005 | 0,049 | 1         | 0,786056149   | 1,272173751     | 0,102040816     |
| RSRC2                                                                              | 0,799973134 | -0,347384231 | 0,212 | 0,22  | 1         | 0,786007928   | 1,272251799     | 0,963636364     |
| MPDZ                                                                               | 0,063684296 | -0,347694245 | 0,051 | 0,122 | 1         | 0,785839044   | 1,272525217     | 0,418032787     |
| EIF2S1                                                                             | 0,181667396 | -0,347771477 | 0,085 | 0,146 | 1         | 0,785796977   | 1,272593341     | 0,582191781     |
| NPAT                                                                               | 0,735616852 | -0,347829891 | 0,018 | 0,024 | 1         | 0,785765161   | 1,272644868     | 0,75            |
| MMS22L                                                                             | 0,276254967 | -0,348177993 | 0,008 | 0,024 | 1         | 0,78557559    | 1,272951977     | 0,333333333     |
| ILK                                                                                | 0,139123511 | -0,348322954 | 0,096 | 0,171 | 1         | 0,78549666    | 1,273079888     | 0,561403509     |
| TRAPPC2L                                                                           | 0,264797514 | -0,348423701 | 0,11  | 0,171 | 1         | 0,785441809   | 1,273168793     | 0,643274854     |
| RPP30                                                                              | 0,459364118 | -0,348487105 | 0,029 | 0,049 | 1         | 0,785407291   | 1,273224748     | 0,591836735     |
| TAX1BP3                                                                            | 0,219826418 | -0,348517528 | 0,088 | 0,146 | 1         | 0,785390728   | 1,273251598     | 0,602739726     |
| RPL37A                                                                             | 0,099889727 | -0,348547486 | 0,708 | 0,732 | 1         | 0,78537442    | 1,273278037     | 0,967213115     |
| TPD52L2                                                                            | 0,100055846 | -0,348614902 | 0,041 | 0,098 | 1         | 0,785337721   | 1,273337538     | 0,418367347     |
| REPS1                                                                              | 0,005381463 | -0,349382665 | 0,006 | 0,049 | 1         | 0,784919896   | 1,274015355     | 0,12244898      |
| TMEM54                                                                             | 0,119111328 | -0,349497652 | 0,029 | 0,073 | 1         | 0,784857339   | 1,274116901     | 0,397260274     |
| SCRN1                                                                              | 0,158434867 | -0,349561356 | 0,018 | 0,049 | 1         | 0,784822683   | 1,274173162     | 0,367346939     |
| TRPT1                                                                              | 0,620720672 | -0,349929701 | 0,035 | 0,049 | 1         | 0,78462233    | 1,274498523     | 0,714285714     |
| RRAS                                                                               | 0,110862398 | -0,350085173 | 0,075 | 0,146 | 1         | 0,78453778    | 1,274635876     | 0,51369863      |
| STK38L                                                                             | 0,363187776 | -0,350184041 | 0,01  | 0,024 | 1         | 0,784484017   | 1,27472323      | 0,416666667     |
| TRMT6                                                                              | 0,798845609 | -0,350191336 | 0,019 | 0,024 | 1         | 0,78448005    | 1,274729676     | 0,791666667     |
| DYNC1L12                                                                           | 0,155907879 | -0,350214501 | 0,177 | 0,268 | 1         | 0,784467454   | 1,274750144     | 0,660447761     |
| ARAP2                                                                              | 0,00546686  | -0,350243356 | 0,006 | 0,049 | 1         | 0,784451764   | 1,274775641     | 0,12244898      |
| GOLIM4                                                                             | 0,193193464 | -0,350301392 | 0,104 | 0,171 | 1         | 0,784420208   | 1,274826923     | 0,608187135     |
| LETMD1                                                                             | 0,194357478 | -0,350690543 | 0,019 | 0,049 | 1         | 0,784208648   | 1,275170839     | 0,387755102     |
| LTBP3                                                                              | 0,009085351 | -0,350700472 | 0,061 | 0,171 | 1         | 0,784203251   | 1,275179616     | 0,356725146     |
| ATP6V1F                                                                            | 0,085234742 | -0,350714714 | 0,123 | 0,22  | 1         | 0,784195509   | 1,275192204     | 0,559090909     |
| SLC12A6                                                                            | 0,192336114 | -0,350749574 | 0,006 | 0,024 | 1         | 0,784176561   | 1,275223017     | 0,25            |
| USP6NL                                                                             | 0,324151736 | -0,350884019 | 0,024 | 0,049 | 1         | 0,784103487   | 1,27534186      | 0,489795918     |
| EPS15L1                                                                            | 0,360693945 | -0,351155228 | 0,01  | 0,024 | 1         | 0,783956099   | 1,275581632     | 0,416666667     |
| PCDHB14                                                                            | 0,115197258 | -0,35138567  | 0,005 | 0,024 | 1         | 0,783830888   | 1,275785396     | 0,208333333     |
| INKA2                                                                              | 0,115197258 | -0,351668084 | 0,005 | 0,024 | 1         | 0,783677464   | 1,276035162     | 0,208333333     |



Supplementary Table 3

| Differentially expressed genes_keloid-MD_comparing SC-Keloid vs. (SC-Myel+Nonmyel) |             |              |       |       |             |               |                 |                 |
|------------------------------------------------------------------------------------|-------------|--------------|-------|-------|-------------|---------------|-----------------|-----------------|
| gene                                                                               | p_val       | avg_log2FC   | pct.1 | pct.2 | p_val_adj   | Foldchange_UP | Foldchange_DOWN | Ratio_pct1_pct2 |
| TSR2                                                                               | 0,270611476 | -0,352222304 | 0,038 | 0,073 | 1           | 0,783376468   | 1,276525453     | 0,520547945     |
| DROSHA                                                                             | 0,196181004 | -0,35232595  | 0,006 | 0,024 | 1           | 0,78332019    | 1,276617164     | 0,25            |
| SCAF1                                                                              | 0,443091335 | -0,352801518 | 0,011 | 0,024 | 1           | 0,78306202    | 1,277038056     | 0,458333333     |
| CCDC140                                                                            | 0,009700686 | -0,353238486 | 0,002 | 0,024 | 1           | 0,78282488    | 1,277424908     | 0,083333333     |
| SERPING1                                                                           | 0,006610977 | -0,353248411 | 0,014 | 0,073 | 1           | 0,782819495   | 1,277433696     | 0,191780822     |
| FXN                                                                                | 0,194251578 | -0,353537179 | 0,006 | 0,024 | 1           | 0,782662822   | 1,277689411     | 0,25            |
| SRSF9                                                                              | 0,124317872 | -0,353578783 | 0,171 | 0,268 | 1           | 0,782640252   | 1,277726257     | 0,638059701     |
| RBMS1                                                                              | 0,139610622 | -0,353855619 | 0,097 | 0,171 | 1           | 0,782490087   | 1,277971461     | 0,567251462     |
| CTBP1-DT                                                                           | 0,194251578 | -0,353969723 | 0,006 | 0,024 | 1           | 0,782428202   | 1,278072541     | 0,25            |
| MYO9A                                                                              | 0,461536771 | -0,354233954 | 0,048 | 0,073 | 1           | 0,782284912   | 1,278306643     | 0,657534247     |
| THNSL2                                                                             | 0,001614632 | -0,354234871 | 0,011 | 0,073 | 1           | 0,782284416   | 1,278307455     | 0,150684932     |
| ELF1                                                                               | 0,881681242 | -0,354395861 | 0,07  | 0,073 | 1           | 0,782197125   | 1,278450109     | 0,95890411      |
| MFSD4B                                                                             | 0,001600938 | -0,354459065 | 0,005 | 0,049 | 1           | 0,782162858   | 1,278506119     | 0,102040816     |
| ARHGAP39                                                                           | 7,54298E-06 | -0,354523736 | 0,005 | 0,073 | 0,159164324 | 0,782127797   | 1,278563431     | 0,068493151     |
| CAMKK2                                                                             | 0,080266293 | -0,354766242 | 0,026 | 0,073 | 1           | 0,781996339   | 1,278778366     | 0,356164384     |
| CHCHD7                                                                             | 0,070608935 | -0,354836783 | 0,038 | 0,098 | 1           | 0,781958104   | 1,278840894     | 0,387755102     |
| LMBRD1                                                                             | 0,038004746 | -0,3550104   | 0,046 | 0,122 | 1           | 0,781864007   | 1,278994801     | 0,37704918      |
| PEAK1                                                                              | 0,671396882 | -0,355045779 | 0,037 | 0,049 | 1           | 0,781844833   | 1,279026167     | 0,755102041     |
| CLMN                                                                               | 0,000943332 | -0,355068581 | 0,018 | 0,098 | 1           | 0,781832477   | 1,279046381     | 0,183673469     |
| MEX3D                                                                              | 0,01040074  | -0,355248017 | 0,037 | 0,122 | 1           | 0,781735242   | 1,279205473     | 0,303278689     |
| CAB39L                                                                             | 0,000264836 | -0,355430246 | 0,003 | 0,049 | 1           | 0,781636506   | 1,279367062     | 0,06122449      |
| TMEM53                                                                             | 0,025599615 | -0,35548217  | 0,01  | 0,049 | 1           | 0,781608374   | 1,279413109     | 0,204081633     |
| RAB9A                                                                              | 0,040215867 | -0,355630504 | 0,061 | 0,146 | 1           | 0,781528016   | 1,279544661     | 0,417808219     |
| DBN1                                                                               | 0,731240299 | -0,355786907 | 0,062 | 0,073 | 1           | 0,781443294   | 1,279683385     | 0,849315068     |
| HEXA                                                                               | 0,744726689 | -0,355865164 | 0,04  | 0,049 | 1           | 0,781400907   | 1,279752801     | 0,816326531     |
| PSMD4                                                                              | 0,013101509 | -0,356013233 | 0,105 | 0,244 | 1           | 0,781320713   | 1,279884154     | 0,430327869     |
| SMYD4                                                                              | 0,360693945 | -0,356238523 | 0,01  | 0,024 | 1           | 0,781198713   | 1,280084035     | 0,416666667     |
| COX7C                                                                              | 0,132106299 | -0,356359382 | 0,416 | 0,537 | 1           | 0,781133272   | 1,280191275     | 0,774674115     |
| SLITRK5                                                                            | 0,026191169 | -0,356459477 | 0,01  | 0,049 | 1           | 0,781079079   | 1,280280099     | 0,204081633     |
| RIPOR1                                                                             | 0,09544918  | -0,35659181  | 0,014 | 0,049 | 1           | 0,781007437   | 1,280397539     | 0,285714286     |

Supplementary Table 3

| Differentially expressed genes_keloid-MD_comparing SC-Keloid vs. (SC-Myel+Nonmyel) |             |              |       |       |           |               |                 |                 |
|------------------------------------------------------------------------------------|-------------|--------------|-------|-------|-----------|---------------|-----------------|-----------------|
| gene                                                                               | p_val       | avg_log2FC   | pct.1 | pct.2 | p_val_adj | Foldchange_UP | Foldchange_DOWN | Ratio_pct1_pct2 |
| POLR2L                                                                             | 0,077349009 | -0,356889113 | 0,351 | 0,512 | 1         | 0,780846507   | 1,280661425     | 0,685546875     |
| FBXL4                                                                              | 0,158434867 | -0,356896331 | 0,018 | 0,049 | 1         | 0,780842601   | 1,280667832     | 0,367346939     |
| OAZ2                                                                               | 0,941540603 | -0,356943786 | 0,046 | 0,049 | 1         | 0,780816916   | 1,280709958     | 0,93877551      |
| TMEM219                                                                            | 0,13950247  | -0,35732271  | 0,115 | 0,195 | 1         | 0,780611862   | 1,281046381     | 0,58974359      |
| SNX27                                                                              | 0,315392301 | -0,357344052 | 0,059 | 0,098 | 1         | 0,780600314   | 1,281065332     | 0,602040816     |
| APOOL                                                                              | 0,115234642 | -0,357544642 | 0,029 | 0,073 | 1         | 0,780491788   | 1,281243462     | 0,397260274     |
| SUMO4                                                                              | 0,00163192  | -0,357666247 | 0,005 | 0,049 | 1         | 0,780426003   | 1,281351462     | 0,102040816     |
| DTWD2                                                                              | 0,005297272 | -0,357793867 | 0,006 | 0,049 | 1         | 0,78035697    | 1,281464814     | 0,12244898      |
| SOX6                                                                               | 0,063684313 | -0,357897032 | 0,051 | 0,122 | 1         | 0,78030117    | 1,281556453     | 0,418032787     |
| JMJD4                                                                              | 0,52217111  | -0,358067362 | 0,013 | 0,024 | 1         | 0,78020905    | 1,281707768     | 0,541666667     |
| GLRX                                                                               | 0,160505534 | -0,358206699 | 0,018 | 0,049 | 1         | 0,7801337     | 1,281831563     | 0,367346939     |
| MCL1                                                                               | 0,411765385 | -0,358335254 | 0,123 | 0,171 | 1         | 0,780064188   | 1,281945789     | 0,719298246     |
| UBE2E3                                                                             | 0,003852663 | -0,35837814  | 0,067 | 0,195 | 1         | 0,780041      | 1,281983896     | 0,343589744     |
| NFATC2                                                                             | 0,500151774 | -0,358415703 | 0,03  | 0,049 | 1         | 0,78002069    | 1,282017276     | 0,612244898     |
| BIN1                                                                               | 0,513547187 | -0,358567301 | 0,051 | 0,073 | 1         | 0,77993873    | 1,282151997     | 0,698630137     |
| TRAPPC8                                                                            | 0,52217111  | -0,358764857 | 0,013 | 0,024 | 1         | 0,779831936   | 1,282327581     | 0,541666667     |
| PLEKHG5                                                                            | 0,115197258 | -0,35888045  | 0,005 | 0,024 | 1         | 0,779769456   | 1,282430329     | 0,208333333     |
| LEMD3                                                                              | 0,239997787 | -0,358938921 | 0,021 | 0,049 | 1         | 0,779737854   | 1,282482305     | 0,428571429     |
| NR1H2                                                                              | 0,59736795  | -0,359016428 | 0,014 | 0,024 | 1         | 0,779695964   | 1,282551207     | 0,583333333     |
| IL6ST                                                                              | 0,070934396 | -0,359257648 | 0,136 | 0,244 | 1         | 0,779565609   | 1,282765669     | 0,557377049     |
| POR                                                                                | 0,127729654 | -0,359274494 | 0,016 | 0,049 | 1         | 0,779556506   | 1,282780648     | 0,326530612     |
| MRPS27                                                                             | 0,200206568 | -0,359453563 | 0,019 | 0,049 | 1         | 0,779459753   | 1,282939878     | 0,387755102     |
| GNG11                                                                              | 0,175867622 | -0,359949342 | 0,183 | 0,268 | 1         | 0,779191939   | 1,283380833     | 0,682835821     |
| DNAJC1                                                                             | 0,588074331 | -0,360103824 | 0,099 | 0,122 | 1         | 0,779108509   | 1,283518263     | 0,81147541      |
| PLPP5                                                                              | 0,098149031 | -0,360231341 | 0,041 | 0,098 | 1         | 0,779039648   | 1,283631715     | 0,418367347     |
| SNX8                                                                               | 0,445731781 | -0,360687034 | 0,011 | 0,024 | 1         | 0,778793618   | 1,284037231     | 0,458333333     |
| EPB41L2                                                                            | 0,541474392 | -0,360705117 | 0,073 | 0,098 | 1         | 0,778783856   | 1,284053326     | 0,744897959     |
| PIBF1                                                                              | 0,165035267 | -0,360865719 | 0,032 | 0,073 | 1         | 0,778697166   | 1,284196275     | 0,438356164     |
| HDAC11                                                                             | 0,094698473 | -0,360868018 | 0,014 | 0,049 | 1         | 0,778695925   | 1,284198321     | 0,285714286     |
| SMIM17                                                                             | 9,44793E-05 | -0,360946942 | 0     | 0,024 | 1         | 0,778653327   | 1,284268577     | 0               |

Supplementary Table 3

| Differentially expressed genes_keloid-MD_comparing SC-Keloid vs. (SC-Myel+Nonmyel) |             |              |       |       |           |               |                 |                 |
|------------------------------------------------------------------------------------|-------------|--------------|-------|-------|-----------|---------------|-----------------|-----------------|
| gene                                                                               | p_val       | avg_log2FC   | pct.1 | pct.2 | p_val_adj | Foldchange_UP | Foldchange_DOWN | Ratio_pct1_pct2 |
| RXYLT1                                                                             | 0,070235299 | -0,36131573  | 0,038 | 0,098 | 1         | 0,77845431    | 1,284596909     | 0,387755102     |
| GALNT1                                                                             | 0,095607774 | -0,361528232 | 0,027 | 0,073 | 1         | 0,778339656   | 1,284786137     | 0,369863014     |
| SNAPC1                                                                             | 0,238698091 | -0,361569022 | 0,021 | 0,049 | 1         | 0,77831765    | 1,284822463     | 0,428571429     |
| FUOM                                                                               | 0,011375116 | -0,362047919 | 0,016 | 0,073 | 1         | 0,778059333   | 1,285249026     | 0,219178082     |
| AUP1                                                                               | 0,112265861 | -0,362087102 | 0,075 | 0,146 | 1         | 0,778038202   | 1,285283933     | 0,51369863      |
| TARDBP                                                                             | 0,209793894 | -0,362223162 | 0,051 | 0,098 | 1         | 0,777964829   | 1,285405154     | 0,520408163     |
| RPS29                                                                              | 0,108556106 | -0,362342239 | 0,566 | 0,61  | 1         | 0,77790062    | 1,285511252     | 0,927868852     |
| MBIP                                                                               | 0,281462479 | -0,362662233 | 0,022 | 0,049 | 1         | 0,777728098   | 1,285796414     | 0,448979592     |
| BMP8B                                                                              | 0,072189358 | -0,362743828 | 0,053 | 0,122 | 1         | 0,777684113   | 1,285869138     | 0,43442623      |
| ASB3                                                                               | 0,360693945 | -0,362907013 | 0,01  | 0,024 | 1         | 0,777596153   | 1,286014593     | 0,416666667     |
| ABCB4                                                                              | 0,000264836 | -0,362909481 | 0,003 | 0,049 | 1         | 0,777594823   | 1,286016793     | 0,06122449      |
| DISC1                                                                              | 0,234828829 | -0,363017914 | 0,021 | 0,049 | 1         | 0,777536381   | 1,286113453     | 0,428571429     |
| CLYBL                                                                              | 0,115197258 | -0,363040267 | 0,005 | 0,024 | 1         | 0,777524334   | 1,28613338      | 0,208333333     |
| YARS2                                                                              | 0,524894226 | -0,363042995 | 0,013 | 0,024 | 1         | 0,777522864   | 1,286135812     | 0,541666667     |
| DEPDC7                                                                             | 0,00163192  | -0,363100198 | 0,005 | 0,049 | 1         | 0,777492036   | 1,286186808     | 0,102040816     |
| TSPAN3                                                                             | 0,158800054 | -0,363136654 | 0,099 | 0,171 | 1         | 0,777472389   | 1,28621931      | 0,578947368     |
| FAM13B                                                                             | 0,296424314 | -0,363570998 | 0,04  | 0,073 | 1         | 0,777238355   | 1,286606603     | 0,547945205     |
| ZNF684                                                                             | 0,044659199 | -0,363652881 | 0,011 | 0,049 | 1         | 0,777194243   | 1,286679629     | 0,224489796     |
| ARRDC1                                                                             | 0,001663452 | -0,363686439 | 0,005 | 0,049 | 1         | 0,777176165   | 1,286709558     | 0,102040816     |
| CCNL2                                                                              | 0,021014784 | -0,363706747 | 0,041 | 0,122 | 1         | 0,777165225   | 1,286727671     | 0,336065574     |
| SIDT2                                                                              | 0,025599615 | -0,363984717 | 0,01  | 0,049 | 1         | 0,7770155     | 1,286975614     | 0,204081633     |
| IER3IP1                                                                            | 0,846041213 | -0,364013629 | 0,067 | 0,073 | 1         | 0,776999929   | 1,287001405     | 0,917808219     |
| MRPL48                                                                             | 0,281462479 | -0,364030027 | 0,022 | 0,049 | 1         | 0,776991097   | 1,287016034     | 0,448979592     |
| EPDR1                                                                              | 0,052716698 | -0,3644432   | 0,049 | 0,122 | 1         | 0,776768606   | 1,287384675     | 0,401639344     |
| MX2                                                                                | 0,04757893  | -0,364635272 | 0,022 | 0,073 | 1         | 0,776665199   | 1,287556081     | 0,301369863     |
| PNMA1                                                                              | 0,85683569  | -0,364746736 | 0,045 | 0,049 | 1         | 0,776605195   | 1,287655563     | 0,918367347     |
| ARHGEF9                                                                            | 0,167463219 | -0,364829844 | 0,032 | 0,073 | 1         | 0,776560459   | 1,287729742     | 0,438356164     |
| LZTR1                                                                              | 0,043341977 | -0,364959444 | 0,011 | 0,049 | 1         | 0,776490703   | 1,287845426     | 0,224489796     |
| EML2                                                                               | 0,192336114 | -0,365138467 | 0,006 | 0,024 | 1         | 0,776394355   | 1,288005244     | 0,25            |
| IFI27                                                                              | 0,451654015 | -0,365148735 | 0,107 | 0,146 | 1         | 0,776388829   | 1,288014411     | 0,732876712     |

Supplementary Table 3

| Differentially expressed genes_keloid-MD_comparing SC-Keloid vs. (SC-Myel+Nonmyel) |             |              |       |       |           |               |                 |                 |
|------------------------------------------------------------------------------------|-------------|--------------|-------|-------|-----------|---------------|-----------------|-----------------|
| gene                                                                               | p_val       | avg_log2FC   | pct.1 | pct.2 | p_val_adj | Foldchange_UP | Foldchange_DOWN | Ratio_pct1_pct2 |
| TOB1                                                                               | 0,010606711 | -0,365195468 | 0,016 | 0,073 | 1         | 0,77636368    | 1,288056134     | 0,219178082     |
| CNOT1                                                                              | 0,150705251 | -0,365233624 | 0,046 | 0,098 | 1         | 0,776343147   | 1,2880902       | 0,469387755     |
| DDX1                                                                               | 0,05265236  | -0,365300087 | 0,08  | 0,171 | 1         | 0,776307383   | 1,288149543     | 0,467836257     |
| APPBP2                                                                             | 0,163431416 | -0,365455479 | 0,032 | 0,073 | 1         | 0,776223771   | 1,288288296     | 0,438356164     |
| USP51                                                                              | 0,115197258 | -0,365597571 | 0,005 | 0,024 | 1         | 0,776147325   | 1,288415187     | 0,208333333     |
| TBC1D25                                                                            | 0,00546686  | -0,365607617 | 0,006 | 0,049 | 1         | 0,77614192    | 1,288424158     | 0,12244898      |
| AGAP2-AS1                                                                          | 0,199026585 | -0,365728611 | 0,019 | 0,049 | 1         | 0,77607683    | 1,288532218     | 0,387755102     |
| TMEM127                                                                            | 0,32565663  | -0,365776383 | 0,024 | 0,049 | 1         | 0,776051133   | 1,288574886     | 0,489795918     |
| PRPSAP1                                                                            | 0,421628507 | -0,365883864 | 0,046 | 0,073 | 1         | 0,775993319   | 1,288670889     | 0,630136986     |
| EIF2S2                                                                             | 0,120564031 | -0,365974387 | 0,23  | 0,341 | 1         | 0,77594463    | 1,288751751     | 0,674486804     |
| STYXL1                                                                             | 0,59736795  | -0,366207466 | 0,014 | 0,024 | 1         | 0,77581928    | 1,288959975     | 0,583333333     |
| KLHL24                                                                             | 0,536991365 | -0,366227962 | 0,032 | 0,049 | 1         | 0,775808258   | 1,288978287     | 0,653061224     |
| FAM214A                                                                            | 0,59736795  | -0,366892592 | 0,014 | 0,024 | 1         | 0,775450936   | 1,289572239     | 0,583333333     |
| CTDSPL                                                                             | 0,064411599 | -0,366938398 | 0,024 | 0,073 | 1         | 0,775426315   | 1,289613184     | 0,328767123     |
| SPTLC1                                                                             | 0,020628971 | -0,366976926 | 0,054 | 0,146 | 1         | 0,775405608   | 1,289647624     | 0,369863014     |
| NSL1                                                                               | 0,519140372 | -0,367272958 | 0,051 | 0,073 | 1         | 0,775246516   | 1,289912279     | 0,698630137     |
| AKIRIN1                                                                            | 0,189014708 | -0,367553258 | 0,033 | 0,073 | 1         | 0,775095909   | 1,290162919     | 0,452054795     |
| KRT1                                                                               | 0,049054394 | -0,367566612 | 0,035 | 0,098 | 1         | 0,775088734   | 1,290174862     | 0,357142857     |
| BCAP31                                                                             | 0,044945715 | -0,367690649 | 0,062 | 0,146 | 1         | 0,775022098   | 1,29028579      | 0,424657534     |
| OSTF1                                                                              | 0,152620555 | -0,368118833 | 0,064 | 0,122 | 1         | 0,774792109   | 1,290668797     | 0,524590164     |
| IFNAR2                                                                             | 0,081274001 | -0,368124732 | 0,026 | 0,073 | 1         | 0,774788942   | 1,290674074     | 0,356164384     |
| SEMA5A                                                                             | 0,005381463 | -0,368182997 | 0,006 | 0,049 | 1         | 0,774757652   | 1,2907262       | 0,12244898      |
| PCNP                                                                               | 0,034054787 | -0,368435305 | 0,121 | 0,244 | 1         | 0,774622169   | 1,290951951     | 0,495901639     |
| ACBD4                                                                              | 0,001540594 | -0,368581697 | 0,005 | 0,049 | 1         | 0,774543571   | 1,291082953     | 0,102040816     |
| C6orf226                                                                           | 0,165035225 | -0,36863273  | 0,032 | 0,073 | 1         | 0,774516173   | 1,291128623     | 0,438356164     |
| DUSP4                                                                              | 0,122370244 | -0,368736407 | 0,016 | 0,049 | 1         | 0,774460516   | 1,291221411     | 0,326530612     |
| HSPA4                                                                              | 0,948907021 | -0,368954557 | 0,075 | 0,073 | 1         | 0,774343418   | 1,291416671     | 1,02739726      |
| FNDC3B                                                                             | 0,357549727 | -0,369016638 | 0,102 | 0,146 | 1         | 0,774310098   | 1,291472244     | 0,698630137     |
| KMT2E-AS1                                                                          | 0,360693945 | -0,369059226 | 0,01  | 0,024 | 1         | 0,774287241   | 1,291510369     | 0,416666667     |
| SMARCD2                                                                            | 0,524894226 | -0,369375903 | 0,013 | 0,024 | 1         | 0,774117301   | 1,291793891     | 0,541666667     |

Supplementary Table 3

| Differentially expressed genes_keloid-MD_ comparing SC-Keloid vs. (SC-Myel+Nonmyel) |             |              |       |       |             |               |                 |                 |
|-------------------------------------------------------------------------------------|-------------|--------------|-------|-------|-------------|---------------|-----------------|-----------------|
| gene                                                                                | p_val       | avg_log2FC   | pct.1 | pct.2 | p_val_adj   | Foldchange_UP | Foldchange_DOWN | Ratio_pct1_pct2 |
| NDRG4                                                                               | 0,003567901 | -0,369466781 | 0,013 | 0,073 | 1           | 0,774068539   | 1,291875266     | 0,178082192     |
| SATB1                                                                               | 0,216510394 | -0,369601399 | 0,035 | 0,073 | 1           | 0,773996314   | 1,291995817     | 0,479452055     |
| HSF1                                                                                | 0,281462479 | -0,369926447 | 0,022 | 0,049 | 1           | 0,773821947   | 1,292286944     | 0,448979592     |
| TTC12                                                                               | 0,194251578 | -0,370018936 | 0,006 | 0,024 | 1           | 0,77377234    | 1,292369794     | 0,25            |
| ADH5                                                                                | 0,10243146  | -0,370035933 | 0,144 | 0,244 | 1           | 0,773763225   | 1,292385019     | 0,590163934     |
| MIOS                                                                                | 0,011039945 | -0,370036243 | 0,016 | 0,073 | 1           | 0,773763058   | 1,292385297     | 0,219178082     |
| TARBP1                                                                              | 0,043777355 | -0,370161424 | 0,011 | 0,049 | 1           | 0,773695923   | 1,292497441     | 0,224489796     |
| CBR3                                                                                | 0,369261143 | -0,37038629  | 0,026 | 0,049 | 1           | 0,77357534    | 1,292698912     | 0,530612245     |
| HDGF                                                                                | 0,184409964 | -0,370431781 | 0,067 | 0,122 | 1           | 0,773550948   | 1,292739674     | 0,549180328     |
| MYNN                                                                                | 0,125027562 | -0,370496538 | 0,016 | 0,049 | 1           | 0,773516227   | 1,292797702     | 0,326530612     |
| PTGES                                                                               | 0,194251578 | -0,370977698 | 0,006 | 0,024 | 1           | 0,773258291   | 1,293228941     | 0,25            |
| CFD                                                                                 | 0,239997787 | -0,37108227  | 0,021 | 0,049 | 1           | 0,773202244   | 1,293322682     | 0,428571429     |
| TSPYL4                                                                              | 0,321155557 | -0,371086191 | 0,024 | 0,049 | 1           | 0,773200143   | 1,293326197     | 0,489795918     |
| RTRAF                                                                               | 0,346352201 | -0,371140067 | 0,257 | 0,317 | 1           | 0,773171269   | 1,293374496     | 0,810725552     |
| PPIH                                                                                | 0,269644845 | -0,371281418 | 0,056 | 0,098 | 1           | 0,773095519   | 1,293501223     | 0,571428571     |
| MED11                                                                               | 0,061094029 | -0,371508163 | 0,037 | 0,098 | 1           | 0,772974024   | 1,293704535     | 0,37755102      |
| SERPINB6                                                                            | 0,10800287  | -0,371723703 | 0,112 | 0,195 | 1           | 0,772858549   | 1,29389783      | 0,574358974     |
| AEN                                                                                 | 0,668505389 | -0,371916371 | 0,016 | 0,024 | 1           | 0,772755343   | 1,294070638     | 0,666666667     |
| GSR                                                                                 | 0,237403369 | -0,372331162 | 0,021 | 0,049 | 1           | 0,772533199   | 1,294442752     | 0,428571429     |
| ZNF318                                                                              | 0,192336114 | -0,372619127 | 0,006 | 0,024 | 1           | 0,772379015   | 1,294701152     | 0,25            |
| PLCD1                                                                               | 0,049781231 | -0,372689504 | 0,003 | 0,024 | 1           | 0,772341338   | 1,29476431      | 0,125           |
| RNF44                                                                               | 0,043341977 | -0,372910237 | 0,011 | 0,049 | 1           | 0,772223179   | 1,294962425     | 0,224489796     |
| PRKRIP1                                                                             | 0,278654203 | -0,373005644 | 0,022 | 0,049 | 1           | 0,772172112   | 1,295048065     | 0,448979592     |
| FIBIN                                                                               | 0,066027921 | -0,373311648 | 0,134 | 0,244 | 1           | 0,772008347   | 1,295322782     | 0,549180328     |
| C5orf51                                                                             | 0,187275815 | -0,373524297 | 0,033 | 0,073 | 1           | 0,771894564   | 1,295513723     | 0,452054795     |
| ELMOD3                                                                              | 0,113762049 | -0,373575145 | 0,005 | 0,024 | 1           | 0,771867359   | 1,295559384     | 0,208333333     |
| TTL11                                                                               | 0,050627188 | -0,373691445 | 0,003 | 0,024 | 1           | 0,771805139   | 1,295663827     | 0,125           |
| EIF3K                                                                               | 0,527771496 | -0,373976018 | 0,289 | 0,317 | 1           | 0,771652915   | 1,295919423     | 0,911671924     |
| FLRT1                                                                               | 0,000631925 | -0,374003592 | 0,01  | 0,073 | 1           | 0,771638166   | 1,295944192     | 0,136986301     |
| GSAP                                                                                | 3,19985E-08 | -0,374095806 | 0     | 0,049 | 0,000675201 | 0,771588846   | 1,296027029     | 0               |

Supplementary Table 3

| Differentially expressed genes_keloid-MD_ comparing SC-Keloid vs. (SC-Myel+Nonmyel) |             |              |       |       |             |               |                 |                 |
|-------------------------------------------------------------------------------------|-------------|--------------|-------|-------|-------------|---------------|-----------------|-----------------|
| gene                                                                                | p_val       | avg_log2FC   | pct.1 | pct.2 | p_val_adj   | Foldchange_UP | Foldchange_DOWN | Ratio_pct1_pct2 |
| MRS2                                                                                | 0,59736795  | -0,374363694 | 0,014 | 0,024 | 1           | 0,771445587   | 1,296267705     | 0,583333333     |
| ATP6V1C1                                                                            | 0,159467695 | -0,37457911  | 0,018 | 0,049 | 1           | 0,771330407   | 1,296461272     | 0,367346939     |
| TSLP                                                                                | 0,048947161 | -0,374582107 | 0,003 | 0,024 | 1           | 0,771328804   | 1,296463965     | 0,125           |
| UBL5                                                                                | 0,281840637 | -0,374867846 | 0,478 | 0,537 | 1           | 0,771176051   | 1,296720767     | 0,890130354     |
| CENPU                                                                               | 0,192336114 | -0,374903365 | 0,006 | 0,024 | 1           | 0,771157065   | 1,296752692     | 0,25            |
| DGKB                                                                                | 0,117160397 | -0,374951343 | 0,029 | 0,073 | 1           | 0,77113142    | 1,296795817     | 0,397260274     |
| CD14                                                                                | 1,27911E-05 | -0,374998574 | 0,002 | 0,049 | 0,269904161 | 0,771106175   | 1,296838273     | 0,040816327     |
| ELMOD2                                                                              | 0,660318477 | -0,37535833  | 0,037 | 0,049 | 1           | 0,770913913   | 1,297161698     | 0,755102041     |
| MT-ND5                                                                              | 0,130057568 | -0,375790647 | 0,242 | 0,366 | 1           | 0,770682936   | 1,297550463     | 0,661202186     |
| HABP4                                                                               | 0,188143779 | -0,375858511 | 0,033 | 0,073 | 1           | 0,770646684   | 1,2976115       | 0,452054795     |
| CREB5                                                                               | 0,119611253 | -0,37598583  | 0,131 | 0,22  | 1           | 0,770578677   | 1,297726021     | 0,595454545     |
| VPS33B                                                                              | 0,049781231 | -0,376244336 | 0,003 | 0,024 | 1           | 0,770440615   | 1,297958571     | 0,125           |
| MT1X                                                                                | 0,048539111 | -0,376290639 | 0,094 | 0,195 | 1           | 0,770415888   | 1,29800023      | 0,482051282     |
| OXA1L                                                                               | 0,095607774 | -0,376395879 | 0,027 | 0,073 | 1           | 0,770359691   | 1,298094918     | 0,369863014     |
| TENM3                                                                               | 0,559961889 | -0,376895703 | 0,171 | 0,195 | 1           | 0,770092845   | 1,298544723     | 0,876923077     |
| STMN3                                                                               | 0,13373938  | -0,376960645 | 0,03  | 0,073 | 1           | 0,77005818    | 1,298603178     | 0,410958904     |
| MAPK6                                                                               | 0,516339853 | -0,377232142 | 0,051 | 0,073 | 1           | 0,769913279   | 1,298847581     | 0,698630137     |
| NR2C2                                                                               | 0,454229416 | -0,377275167 | 0,029 | 0,049 | 1           | 0,769890318   | 1,298886317     | 0,591836735     |
| ATL1                                                                                | 0,034593957 | -0,377429373 | 0,021 | 0,073 | 1           | 0,769808031   | 1,299025159     | 0,287671233     |
| FAM234A                                                                             | 0,291297819 | -0,377527138 | 0,057 | 0,098 | 1           | 0,769755866   | 1,299113192     | 0,581632653     |
| DCK                                                                                 | 0,322651378 | -0,378235868 | 0,024 | 0,049 | 1           | 0,769377813   | 1,299751543     | 0,489795918     |
| IMMP2L                                                                              | 0,048947161 | -0,378881484 | 0,003 | 0,024 | 1           | 0,769033588   | 1,300333321     | 0,125           |
| SMIM10                                                                              | 0,002775486 | -0,378900399 | 0,021 | 0,098 | 1           | 0,769023506   | 1,300350369     | 0,214285714     |
| UBE2R2                                                                              | 0,050551177 | -0,378991158 | 0,064 | 0,146 | 1           | 0,768975128   | 1,300432177     | 0,438356164     |
| LIMS1                                                                               | 0,235703581 | -0,379121297 | 0,244 | 0,317 | 1           | 0,768905766   | 1,300549488     | 0,769716088     |
| TMEM121                                                                             | 0,536991365 | -0,379497899 | 0,032 | 0,049 | 1           | 0,768705076   | 1,300889028     | 0,653061224     |
| SLC9A1                                                                              | 0,065662619 | -0,379599263 | 0,013 | 0,049 | 1           | 0,768651069   | 1,300980432     | 0,265306122     |
| KLHDC3                                                                              | 0,239997787 | -0,37970829  | 0,021 | 0,049 | 1           | 0,768592983   | 1,301078753     | 0,428571429     |
| RCCD1                                                                               | 0,192336114 | -0,37972205  | 0,006 | 0,024 | 1           | 0,768585653   | 1,301091162     | 0,25            |
| RPS15                                                                               | 0,010090135 | -0,37984863  | 0,853 | 0,927 | 1           | 0,768518221   | 1,301205323     | 0,9201726       |

Supplementary Table 3

| Differentially expressed genes_keloid-MD_comparing SC-Keloid vs. (SC-Myel+Nonmyel) |             |              |       |       |           |               |                 |                 |
|------------------------------------------------------------------------------------|-------------|--------------|-------|-------|-----------|---------------|-----------------|-----------------|
| gene                                                                               | p_val       | avg_log2FC   | pct.1 | pct.2 | p_val_adj | Foldchange_UP | Foldchange_DOWN | Ratio_pct1_pct2 |
| TAF3                                                                               | 0,124136836 | -0,379998602 | 0,016 | 0,049 | 1         | 0,768438335   | 1,301340595     | 0,326530612     |
| CCDC127                                                                            | 0,209510424 | -0,380188435 | 0,035 | 0,073 | 1         | 0,768337229   | 1,301511839     | 0,479452055     |
| PLVAP                                                                              | 0,113762049 | -0,380191519 | 0,005 | 0,024 | 1         | 0,768335587   | 1,301514621     | 0,208333333     |
| VPS72                                                                              | 0,411698765 | -0,380554839 | 0,027 | 0,049 | 1         | 0,768142118   | 1,301842429     | 0,551020408     |
| CHSY1                                                                              | 0,208589615 | -0,38063441  | 0,035 | 0,073 | 1         | 0,768099753   | 1,301914232     | 0,479452055     |
| ZMYND11                                                                            | 0,362215296 | -0,380874906 | 0,062 | 0,098 | 1         | 0,767971722   | 1,302131279     | 0,632653061     |
| HPS5                                                                               | 0,281462479 | -0,380899703 | 0,022 | 0,049 | 1         | 0,767958522   | 1,30215366      | 0,448979592     |
| CFL2                                                                               | 0,265323761 | -0,3812356   | 0,038 | 0,073 | 1         | 0,767779742   | 1,30245687      | 0,520547945     |
| ARL6IP1                                                                            | 0,112256398 | -0,381491144 | 0,043 | 0,098 | 1         | 0,767643758   | 1,302687594     | 0,43877551      |
| POLR2C                                                                             | 0,024590262 | -0,381562482 | 0,03  | 0,098 | 1         | 0,7676058     | 1,302752011     | 0,306122449     |
| PGPEP1                                                                             | 0,735616852 | -0,38170423  | 0,018 | 0,024 | 1         | 0,767530385   | 1,302880015     | 0,75            |
| TP53INP2                                                                           | 0,524894226 | -0,381950469 | 0,013 | 0,024 | 1         | 0,767399394   | 1,30310241      | 0,541666667     |
| GNAI2                                                                              | 0,028490946 | -0,382049269 | 0,252 | 0,439 | 1         | 0,767346842   | 1,303191654     | 0,574031891     |
| DDX17                                                                              | 0,168119357 | -0,382187959 | 0,29  | 0,39  | 1         | 0,767273079   | 1,303316938     | 0,743589744     |
| PCGF6                                                                              | 0,042057731 | -0,382364765 | 0,011 | 0,049 | 1         | 0,767179053   | 1,303476673     | 0,224489796     |
| HECTD1                                                                             | 0,079522324 | -0,382373217 | 0,054 | 0,122 | 1         | 0,767174559   | 1,30348431      | 0,442622951     |
| NEK9                                                                               | 0,161548618 | -0,382602804 | 0,018 | 0,049 | 1         | 0,767052482   | 1,30369176      | 0,367346939     |
| HAT1                                                                               | 0,188143779 | -0,382789357 | 0,033 | 0,073 | 1         | 0,766953302   | 1,303860349     | 0,452054795     |
| SRSF5                                                                              | 0,018673256 | -0,382796374 | 0,175 | 0,341 | 1         | 0,766949572   | 1,303866691     | 0,513196481     |
| LAMTOR3                                                                            | 0,44912723  | -0,382981419 | 0,029 | 0,049 | 1         | 0,766851206   | 1,30403394      | 0,591836735     |
| PPM1F                                                                              | 0,097881314 | -0,383202255 | 0,027 | 0,073 | 1         | 0,766733832   | 1,304233566     | 0,369863014     |
| SCAMP1                                                                             | 0,16104771  | -0,383415762 | 0,032 | 0,073 | 1         | 0,76662037    | 1,304426597     | 0,438356164     |
| TRIM23                                                                             | 0,127729654 | -0,383424042 | 0,016 | 0,049 | 1         | 0,76661597    | 1,304434083     | 0,326530612     |
| NNT-AS1                                                                            | 0,774576062 | -0,383526595 | 0,033 | 0,024 | 1         | 0,766561478   | 1,304526811     | 1,375           |
| PCF11                                                                              | 0,267865229 | -0,383667461 | 0,056 | 0,098 | 1         | 0,766486634   | 1,304654192     | 0,571428571     |
| ITPR1                                                                              | 0,010930188 | -0,3837911   | 0,016 | 0,073 | 1         | 0,766420948   | 1,304766006     | 0,219178082     |
| BMPR1A                                                                             | 0,158434867 | -0,383898546 | 0,018 | 0,049 | 1         | 0,766363871   | 1,304863183     | 0,367346939     |
| MESP1                                                                              | 0,02492421  | -0,384087599 | 0,019 | 0,073 | 1         | 0,766263452   | 1,305034185     | 0,260273973     |
| TM4SF1                                                                             | 0,668505389 | -0,384148748 | 0,016 | 0,024 | 1         | 0,766230974   | 1,305089501     | 0,666666667     |
| SUPT5H                                                                             | 0,039623694 | -0,384581971 | 0,033 | 0,098 | 1         | 0,76600092    | 1,305481462     | 0,336734694     |

Supplementary Table 3

| Differentially expressed genes_keloid-MD_comparing SC-Keloid vs. (SC-Myel+Nonmyel) |             |              |       |       |             |               |                 |                 |
|------------------------------------------------------------------------------------|-------------|--------------|-------|-------|-------------|---------------|-----------------|-----------------|
| gene                                                                               | p_val       | avg_log2FC   | pct.1 | pct.2 | p_val_adj   | Foldchange_UP | Foldchange_DOWN | Ratio_pct1_pct2 |
| ANAPC16                                                                            | 0,108311924 | -0,384589576 | 0,166 | 0,268 | 1           | 0,765996882   | 1,305488343     | 0,619402985     |
| PIAS3                                                                              | 0,281462479 | -0,385303065 | 0,022 | 0,049 | 1           | 0,765618149   | 1,306134136     | 0,448979592     |
| MBNL2                                                                              | 0,170416461 | -0,385329979 | 0,083 | 0,146 | 1           | 0,765603867   | 1,306158503     | 0,568493151     |
| PSMG2                                                                              | 0,038636416 | -0,385440459 | 0,061 | 0,146 | 1           | 0,76554524    | 1,306258531     | 0,417808219     |
| PIP4P2                                                                             | 0,096172157 | -0,385457367 | 0,027 | 0,073 | 1           | 0,765536268   | 1,30627384      | 0,369863014     |
| EWSR1                                                                              | 0,038091748 | -0,385460044 | 0,061 | 0,146 | 1           | 0,765534847   | 1,306276264     | 0,417808219     |
| ZNF124                                                                             | 0,012904719 | -0,385992554 | 0,008 | 0,049 | 1           | 0,765252334   | 1,30675851      | 0,163265306     |
| ALG5                                                                               | 0,581564843 | -0,386022194 | 0,077 | 0,098 | 1           | 0,765236612   | 1,306785357     | 0,785714286     |
| SNHG8                                                                              | 0,030415174 | -0,386451023 | 0,153 | 0,293 | 1           | 0,765009186   | 1,307173846     | 0,5221843       |
| SMPD1                                                                              | 0,195517149 | -0,38664582  | 0,019 | 0,049 | 1           | 0,7649059     | 1,307350356     | 0,387755102     |
| STOM                                                                               | 0,002947161 | -0,386690972 | 0,021 | 0,098 | 1           | 0,764881961   | 1,307391273     | 0,214285714     |
| CAHM                                                                               | 0,278515928 | -0,387025455 | 0,008 | 0,024 | 1           | 0,764704646   | 1,307694421     | 0,333333333     |
| COASY                                                                              | 0,066247027 | -0,387509683 | 0,013 | 0,049 | 1           | 0,764448023   | 1,308133411     | 0,265306122     |
| IRS2                                                                               | 0,59736795  | -0,387538864 | 0,014 | 0,024 | 1           | 0,764432561   | 1,308159871     | 0,583333333     |
| VGLL4                                                                              | 0,114005448 | -0,387644119 | 0,185 | 0,293 | 1           | 0,764376792   | 1,308255314     | 0,631399317     |
| YME1L1                                                                             | 0,452214911 | -0,387781253 | 0,069 | 0,098 | 1           | 0,764304139   | 1,308379674     | 0,704081633     |
| R3HCC1                                                                             | 0,163377097 | -0,388047462 | 0,048 | 0,098 | 1           | 0,76416312    | 1,308621122     | 0,489795918     |
| PACS2                                                                              | 0,009746979 | -0,388389945 | 0,026 | 0,098 | 1           | 0,763981736   | 1,308931814     | 0,265306122     |
| UNC45A                                                                             | 0,59736795  | -0,388764171 | 0,014 | 0,024 | 1           | 0,76378359    | 1,309271387     | 0,583333333     |
| PARL                                                                               | 0,109689443 | -0,38889289  | 0,043 | 0,098 | 1           | 0,763715447   | 1,309388207     | 0,43877551      |
| DENND2A                                                                            | 0,278515928 | -0,388958348 | 0,008 | 0,024 | 1           | 0,763680797   | 1,309447618     | 0,333333333     |
| MEIS3                                                                              | 0,445731781 | -0,38927077  | 0,011 | 0,024 | 1           | 0,763515436   | 1,309731215     | 0,458333333     |
| OAF                                                                                | 0,112265878 | -0,389322515 | 0,075 | 0,146 | 1           | 0,763488052   | 1,309778192     | 0,51369863      |
| FAM3C                                                                              | 0,142931156 | -0,389658675 | 0,134 | 0,22  | 1           | 0,763310174   | 1,310083416     | 0,609090909     |
| JAKMIP2                                                                            | 0,121494347 | -0,389971002 | 0,016 | 0,049 | 1           | 0,763144944   | 1,310367065     | 0,326530612     |
| ROCK1                                                                              | 0,214541692 | -0,389980666 | 0,126 | 0,195 | 1           | 0,763139832   | 1,310375843     | 0,646153846     |
| SHMT1                                                                              | 9,55558E-09 | -0,390031636 | 0,002 | 0,073 | 0,000201632 | 0,763112871   | 1,310422139     | 0,02739726      |
| NIT1                                                                               | 0,09174284  | -0,390730145 | 0,014 | 0,049 | 1           | 0,762743484   | 1,311056759     | 0,285714286     |
| GCC1                                                                               | 0,113762049 | -0,39075686  | 0,005 | 0,024 | 1           | 0,76272936    | 1,311081037     | 0,208333333     |
| NFKBIB                                                                             | 0,025893931 | -0,390804204 | 0,01  | 0,049 | 1           | 0,76270433    | 1,311124062     | 0,204081633     |



Supplementary Table 3

| Differentially expressed genes_keloid-MD_comparing SC-Keloid vs. (SC-Myel+Nonmyel) |             |              |       |       |             |               |                 |                 |
|------------------------------------------------------------------------------------|-------------|--------------|-------|-------|-------------|---------------|-----------------|-----------------|
| gene                                                                               | p_val       | avg_log2FC   | pct.1 | pct.2 | p_val_adj   | Foldchange_UP | Foldchange_DOWN | Ratio_pct1_pct2 |
| GLUL                                                                               | 0,183833515 | -0,391156302 | 0,033 | 0,073 | 1           | 0,762518211   | 1,311444088     | 0,452054795     |
| AIFM2                                                                              | 0,066247027 | -0,391478221 | 0,013 | 0,049 | 1           | 0,762348084   | 1,311736753     | 0,265306122     |
| PMVK                                                                               | 0,017740221 | -0,391725489 | 0,067 | 0,171 | 1           | 0,762217434   | 1,311961595     | 0,391812865     |
| ZNRF2                                                                              | 0,45448456  | -0,391873435 | 0,069 | 0,098 | 1           | 0,762139273   | 1,312096142     | 0,704081633     |
| ZNF22                                                                              | 0,534913819 | -0,392028291 | 0,096 | 0,122 | 1           | 0,762057471   | 1,312236987     | 0,786885246     |
| MYG1                                                                               | 0,016925987 | -0,39222348  | 0,04  | 0,122 | 1           | 0,761954376   | 1,312414538     | 0,327868852     |
| ZEB1                                                                               | 0,030428627 | -0,392431775 | 0,045 | 0,122 | 1           | 0,761844373   | 1,312604037     | 0,368852459     |
| KCNE4                                                                              | 0,536991322 | -0,392456396 | 0,032 | 0,049 | 1           | 0,761831372   | 1,312626437     | 0,653061224     |
| GRM7                                                                               | 0,048947161 | -0,3925652   | 0,003 | 0,024 | 1           | 0,761773919   | 1,312725436     | 0,125           |
| FBRS                                                                               | 0,013918574 | -0,392792204 | 0,027 | 0,098 | 1           | 0,761654065   | 1,312932006     | 0,275510204     |
| CALHM5                                                                             | 0,048947161 | -0,393157427 | 0,003 | 0,024 | 1           | 0,761461275   | 1,313264421     | 0,125           |
| STAT1                                                                              | 0,135145817 | -0,393301764 | 0,03  | 0,073 | 1           | 0,761385097   | 1,313395816     | 0,410958904     |
| RGS19                                                                              | 4,73768E-05 | -0,393550368 | 0,006 | 0,073 | 0,999698382 | 0,761253907   | 1,313622158     | 0,082191781     |
| SNX13                                                                              | 0,390131515 | -0,393649695 | 0,045 | 0,073 | 1           | 0,761201498   | 1,313712602     | 0,616438356     |
| FGD4                                                                               | 0,046896464 | -0,393723324 | 0,022 | 0,073 | 1           | 0,76116265    | 1,31377965      | 0,301369863     |
| COMMD1                                                                             | 0,39222359  | -0,394064693 | 0,129 | 0,171 | 1           | 0,760982566   | 1,314090552     | 0,754385965     |
| LDAF1                                                                              | 0,360693945 | -0,394747963 | 0,01  | 0,024 | 1           | 0,760622245   | 1,314713061     | 0,416666667     |
| RAB4A                                                                              | 0,082896638 | -0,394900631 | 0,04  | 0,098 | 1           | 0,760541759   | 1,314852193     | 0,408163265     |
| MAP6                                                                               | 0,012904719 | -0,395429811 | 0,008 | 0,049 | 1           | 0,760262844   | 1,315334569     | 0,163265306     |
| TIGD5                                                                              | 0,278515928 | -0,395468513 | 0,008 | 0,024 | 1           | 0,760242449   | 1,315369855     | 0,333333333     |
| CCDC59                                                                             | 0,844403846 | -0,39559514  | 0,083 | 0,073 | 1           | 0,760175724   | 1,315485312     | 1,136986301     |
| USP42                                                                              | 0,013077492 | -0,395598053 | 0,008 | 0,049 | 1           | 0,76017419    | 1,315487968     | 0,163265306     |
| RABEP1                                                                             | 0,761737901 | -0,39596116  | 0,062 | 0,049 | 1           | 0,759982888   | 1,3158191       | 1,265306122     |
| NT5C3A                                                                             | 0,080230018 | -0,396508377 | 0,054 | 0,122 | 1           | 0,75969468    | 1,316318288     | 0,442622951     |
| CEP83                                                                              | 0,093952504 | -0,396520896 | 0,014 | 0,049 | 1           | 0,759688087   | 1,31632971      | 0,285714286     |
| TUSC1                                                                              | 0,187275815 | -0,396646884 | 0,033 | 0,073 | 1           | 0,759621748   | 1,316444668     | 0,452054795     |
| C12orf29                                                                           | 0,184689665 | -0,396874877 | 0,033 | 0,073 | 1           | 0,759501713   | 1,316652725     | 0,452054795     |
| HDAC4                                                                              | 0,365692371 | -0,39688556  | 0,01  | 0,024 | 1           | 0,759496088   | 1,316662476     | 0,416666667     |
| ZBTB20                                                                             | 0,237993681 | -0,396922056 | 0,196 | 0,268 | 1           | 0,759476876   | 1,316695783     | 0,731343284     |
| C1QTNF2                                                                            | 0,048947161 | -0,397136132 | 0,003 | 0,024 | 1           | 0,759364189   | 1,316891177     | 0,125           |

Supplementary Table 3

| Differentially expressed genes_keloid-MD_comparing SC-Keloid vs. (SC-Myel+Nonmyel) |             |              |       |       |           |               |                 |                 |
|------------------------------------------------------------------------------------|-------------|--------------|-------|-------|-----------|---------------|-----------------|-----------------|
| gene                                                                               | p_val       | avg_log2FC   | pct.1 | pct.2 | p_val_adj | Foldchange_UP | Foldchange_DOWN | Ratio_pct1_pct2 |
| PDK2                                                                               | 0,000714212 | -0,397156675 | 0,01  | 0,073 | 1         | 0,759353375   | 1,316909929     | 0,136986301     |
| DPP7                                                                               | 0,048564322 | -0,397306156 | 0,064 | 0,146 | 1         | 0,759274701   | 1,317046385     | 0,438356164     |
| CYB561A3                                                                           | 0,445731781 | -0,397671484 | 0,011 | 0,024 | 1         | 0,759082457   | 1,317379937     | 0,458333333     |
| PTER                                                                               | 0,443091335 | -0,397750817 | 0,011 | 0,024 | 1         | 0,759040717   | 1,317452381     | 0,458333333     |
| TUFM                                                                               | 0,221444386 | -0,397973508 | 0,11  | 0,171 | 1         | 0,758923562   | 1,317655756     | 0,643274854     |
| DCPS                                                                               | 0,067379238 | -0,398096231 | 0,053 | 0,122 | 1         | 0,758859007   | 1,317767847     | 0,43442623      |
| ARPC1A                                                                             | 0,508527262 | -0,398246943 | 0,096 | 0,122 | 1         | 0,758779737   | 1,317905516     | 0,786885246     |
| LMO4                                                                               | 0,049829903 | -0,399015727 | 0,29  | 0,439 | 1         | 0,758375506   | 1,318607988     | 0,660592255     |
| PGBD2                                                                              | 0,113762049 | -0,399431022 | 0,005 | 0,024 | 1         | 0,75815723    | 1,318987619     | 0,208333333     |
| CDK17                                                                              | 0,195517149 | -0,399723224 | 0,019 | 0,049 | 1         | 0,75800369    | 1,319254792     | 0,387755102     |
| AGPAT5                                                                             | 0,277257237 | -0,39974824  | 0,022 | 0,049 | 1         | 0,757990546   | 1,319277668     | 0,448979592     |
| CASKIN2                                                                            | 0,366093953 | -0,399759666 | 0,026 | 0,049 | 1         | 0,757984543   | 1,319288117     | 0,530612245     |
| RPL3                                                                               | 0,033847028 | -0,399877732 | 0,577 | 0,756 | 1         | 0,757922514   | 1,319396088     | 0,763227513     |
| RHOB                                                                               | 0,575274872 | -0,400144098 | 0,375 | 0,39  | 1         | 0,757782592   | 1,319639711     | 0,961538462     |
| RABGAP1L                                                                           | 0,280055949 | -0,400297723 | 0,022 | 0,049 | 1         | 0,757701903   | 1,319780241     | 0,448979592     |
| PPA2                                                                               | 0,735616852 | -0,400390573 | 0,018 | 0,024 | 1         | 0,75765314    | 1,319865183     | 0,75            |
| EPHA5                                                                              | 0,113762049 | -0,400426932 | 0,005 | 0,024 | 1         | 0,757634046   | 1,319898446     | 0,208333333     |
| MYH10                                                                              | 0,057788941 | -0,400570112 | 0,037 | 0,098 | 1         | 0,757558858   | 1,320029446     | 0,37755102      |
| QPRT                                                                               | 0,009700686 | -0,400679988 | 0,002 | 0,024 | 1         | 0,757501165   | 1,320129984     | 0,083333333     |
| PDHX                                                                               | 0,043341977 | -0,400823758 | 0,011 | 0,049 | 1         | 0,757425681   | 1,320261546     | 0,224489796     |
| TNRC6A                                                                             | 0,031848043 | -0,401123478 | 0,059 | 0,146 | 1         | 0,757268342   | 1,320535859     | 0,404109589     |
| INTS8                                                                              | 0,522171111 | -0,401201739 | 0,013 | 0,024 | 1         | 0,757227264   | 1,320607495     | 0,541666667     |
| MRNIP                                                                              | 0,062292253 | -0,401208997 | 0,024 | 0,073 | 1         | 0,757223454   | 1,320614139     | 0,328767123     |
| SAC3D1                                                                             | 0,159467695 | -0,401438494 | 0,018 | 0,049 | 1         | 0,757103008   | 1,320824232     | 0,367346939     |
| ARL2BP                                                                             | 0,05651152  | -0,401664518 | 0,081 | 0,171 | 1         | 0,756984404   | 1,321031179     | 0,473684211     |
| SLC2A3                                                                             | 0,269548195 | -0,401741622 | 0,038 | 0,073 | 1         | 0,756943949   | 1,321101783     | 0,520547945     |
| PEX5                                                                               | 0,276254967 | -0,401743533 | 0,008 | 0,024 | 1         | 0,756942946   | 1,321103533     | 0,333333333     |
| CDCA4                                                                              | 0,443091335 | -0,401936868 | 0,011 | 0,024 | 1         | 0,756841515   | 1,321280586     | 0,458333333     |
| SDHAF2                                                                             | 0,445743914 | -0,402068379 | 0,029 | 0,049 | 1         | 0,756772527   | 1,321401034     | 0,591836735     |
| VPS28                                                                              | 0,038537326 | -0,402297849 | 0,195 | 0,341 | 1         | 0,756652167   | 1,321611229     | 0,571847507     |

Supplementary Table 3

| Differentially expressed genes_keloid-MD_comparing SC-Keloid vs. (SC-Myel+Nonmyel) |             |              |       |       |             |               |                 |                 |
|------------------------------------------------------------------------------------|-------------|--------------|-------|-------|-------------|---------------|-----------------|-----------------|
| gene                                                                               | p_val       | avg_log2FC   | pct.1 | pct.2 | p_val_adj   | Foldchange_UP | Foldchange_DOWN | Ratio_pct1_pct2 |
| CARS1                                                                              | 0,158434867 | -0,402299704 | 0,018 | 0,049 | 1           | 0,756651194   | 1,321612928     | 0,367346939     |
| KIRREL1                                                                            | 0,096271356 | -0,402385107 | 0,041 | 0,098 | 1           | 0,756606404   | 1,321691166     | 0,418367347     |
| CD99L2                                                                             | 0,065662619 | -0,402458644 | 0,013 | 0,049 | 1           | 0,756567839   | 1,321758536     | 0,265306122     |
| PTPN18                                                                             | 0,006326643 | -0,402501745 | 0,014 | 0,073 | 1           | 0,756545237   | 1,321798025     | 0,191780822     |
| RNASEH1                                                                            | 0,359810603 | -0,402626666 | 0,026 | 0,049 | 1           | 0,756479731   | 1,321912483     | 0,530612245     |
| CDCA7                                                                              | 0,113762049 | -0,402966358 | 0,005 | 0,024 | 1           | 0,756301635   | 1,322223772     | 0,208333333     |
| PSAP                                                                               | 0,059690441 | -0,403105496 | 0,407 | 0,585 | 1           | 0,756228698   | 1,322351297     | 0,695726496     |
| METRNL                                                                             | 0,016819058 | -0,403235612 | 0,04  | 0,122 | 1           | 0,756160497   | 1,322470565     | 0,327868852     |
| BLOC1S1                                                                            | 0,125267933 | -0,403251139 | 0,247 | 0,366 | 1           | 0,756152359   | 1,322484799     | 0,674863388     |
| SLC4A2                                                                             | 0,735616852 | -0,403303344 | 0,018 | 0,024 | 1           | 0,756124998   | 1,322532654     | 0,75            |
| MICALL2                                                                            | 0,048343323 | -0,403367398 | 0,078 | 0,171 | 1           | 0,756091427   | 1,322591375     | 0,456140351     |
| DDX50                                                                              | 0,068635414 | -0,403383739 | 0,053 | 0,122 | 1           | 0,756082863   | 1,322606356     | 0,43442623      |
| LRRC1                                                                              | 0,278515928 | -0,403755713 | 0,008 | 0,024 | 1           | 0,755887946   | 1,32294741      | 0,333333333     |
| HAUS1                                                                              | 0,240338789 | -0,403858235 | 0,037 | 0,073 | 1           | 0,755834232   | 1,323041426     | 0,506849315     |
| ARID4A                                                                             | 0,388868829 | -0,403866984 | 0,045 | 0,073 | 1           | 0,755829648   | 1,323049449     | 0,616438356     |
| FLRT3                                                                              | 0,221231127 | -0,40415245  | 0,053 | 0,098 | 1           | 0,755680107   | 1,323311268     | 0,540816327     |
| WDSUB1                                                                             | 0,360693945 | -0,404358523 | 0,01  | 0,024 | 1           | 0,755572174   | 1,323500301     | 0,416666667     |
| SREK1                                                                              | 0,581280957 | -0,40529651  | 0,075 | 0,098 | 1           | 0,755081089   | 1,324361072     | 0,765306122     |
| EDRF1                                                                              | 0,360693945 | -0,405322882 | 0,01  | 0,024 | 1           | 0,755067286   | 1,324385281     | 0,416666667     |
| ATRAID                                                                             | 0,165600199 | -0,405685095 | 0,163 | 0,244 | 1           | 0,754877737   | 1,324717832     | 0,668032787     |
| TMEM123                                                                            | 0,184098714 | -0,405736907 | 0,067 | 0,122 | 1           | 0,754850628   | 1,324765408     | 0,549180328     |
| TMEM134                                                                            | 0,199274313 | -0,405905781 | 0,069 | 0,122 | 1           | 0,754762274   | 1,324920487     | 0,56557377      |
| PEX1                                                                               | 0,52217111  | -0,406107691 | 0,013 | 0,024 | 1           | 0,75465665    | 1,325105927     | 0,541666667     |
| TYRO3                                                                              | 9,55558E-09 | -0,406598002 | 0,002 | 0,073 | 0,000201632 | 0,754400218   | 1,325556351     | 0,02739726      |
| NCAPG                                                                              | 0,009700686 | -0,406633837 | 0,002 | 0,024 | 1           | 0,75438148    | 1,325589276     | 0,083333333     |
| RPS28                                                                              | 0,008235563 | -0,406800613 | 0,783 | 0,976 | 1           | 0,754294278   | 1,325742524     | 0,802254098     |
| ATAD2B                                                                             | 0,367675424 | -0,406875591 | 0,026 | 0,049 | 1           | 0,754255078   | 1,325811426     | 0,530612245     |
| IQSEC2                                                                             | 0,009700686 | -0,406993544 | 0,002 | 0,024 | 1           | 0,754193413   | 1,325919827     | 0,083333333     |
| CDK13                                                                              | 0,531819005 | -0,407785808 | 0,073 | 0,098 | 1           | 0,753779358   | 1,326648163     | 0,744897959     |
| GNAL                                                                               | 0,009700686 | -0,407846672 | 0,002 | 0,024 | 1           | 0,753747558   | 1,326704132     | 0,083333333     |

Supplementary Table 3

| Differentially expressed genes_keloid-MD_comparing SC-Keloid vs. (SC-Myel+Nonmyel) |             |              |       |       |            |               |                 |                 |
|------------------------------------------------------------------------------------|-------------|--------------|-------|-------|------------|---------------|-----------------|-----------------|
| gene                                                                               | p_val       | avg_log2FC   | pct.1 | pct.2 | p_val_adj  | Foldchange_UP | Foldchange_DOWN | Ratio_pct1_pct2 |
| COL15A1                                                                            | 0,026120539 | -0,407966348 | 0,086 | 0,195 | 1          | 0,753685035   | 1,326814191     | 0,441025641     |
| KLF9                                                                               | 0,020568889 | -0,408445947 | 0,083 | 0,195 | 1          | 0,753434527   | 1,327255341     | 0,425641026     |
| TRAM2-AS1                                                                          | 0,125923264 | -0,408691677 | 0,016 | 0,049 | 1          | 0,753306208   | 1,327481427     | 0,326530612     |
| RAB5C                                                                              | 0,388740893 | -0,408707371 | 0,102 | 0,146 | 1          | 0,753298013   | 1,327495869     | 0,698630137     |
| C19orf25                                                                           | 0,061875376 | -0,409042069 | 0,024 | 0,073 | 1          | 0,753123272   | 1,327803876     | 0,328767123     |
| STK10                                                                              | 0,322651378 | -0,409065448 | 0,024 | 0,049 | 1          | 0,753111068   | 1,327825393     | 0,489795918     |
| SUCLG2                                                                             | 0,111317375 | -0,409111136 | 0,059 | 0,122 | 1          | 0,753087218   | 1,327867445     | 0,483606557     |
| NMI                                                                                | 0,438850599 | -0,409584261 | 0,048 | 0,073 | 1          | 0,752840287   | 1,328302985     | 0,657534247     |
| ATP11A                                                                             | 5,19512E-07 | -0,409700023 | 0,003 | 0,073 | 0,01096223 | 0,752779882   | 1,328409571     | 0,04109589      |
| NSMCE2                                                                             | 0,274477641 | -0,409911521 | 0,022 | 0,049 | 1          | 0,752669533   | 1,328604329     | 0,448979592     |
| NUP98                                                                              | 0,062292253 | -0,410799205 | 0,024 | 0,073 | 1          | 0,752206561   | 1,329422065     | 0,328767123     |
| NOL8                                                                               | 0,362943767 | -0,411625545 | 0,026 | 0,049 | 1          | 0,751775839   | 1,330183744     | 0,530612245     |
| REST                                                                               | 0,32903423  | -0,41174234  | 0,08  | 0,122 | 1          | 0,751714981   | 1,330291434     | 0,655737705     |
| PPP1R3E                                                                            | 0,280789447 | -0,411824014 | 0,008 | 0,024 | 1          | 0,751672426   | 1,330366747     | 0,333333333     |
| CUTA                                                                               | 0,09791226  | -0,411828502 | 0,107 | 0,195 | 1          | 0,751670087   | 1,330370886     | 0,548717949     |
| ORMDL3                                                                             | 0,443091335 | -0,411834532 | 0,011 | 0,024 | 1          | 0,751666945   | 1,330376447     | 0,458333333     |
| ANAPC15                                                                            | 0,214541997 | -0,411944906 | 0,053 | 0,098 | 1          | 0,751609441   | 1,330478231     | 0,540816327     |
| ANKRD35                                                                            | 0,278515928 | -0,412053488 | 0,008 | 0,024 | 1          | 0,751552875   | 1,330578371     | 0,333333333     |
| ERO1B                                                                              | 0,360693945 | -0,412286746 | 0,01  | 0,024 | 1          | 0,751431372   | 1,33079352      | 0,416666667     |
| ARVCF                                                                              | 0,113762049 | -0,412425399 | 0,005 | 0,024 | 1          | 0,751359157   | 1,330921425     | 0,208333333     |
| STXBP5-AS1                                                                         | 0,009700686 | -0,41261606  | 0,002 | 0,024 | 1          | 0,751259867   | 1,331097325     | 0,083333333     |
| AGO4                                                                               | 0,278515928 | -0,412810871 | 0,008 | 0,024 | 1          | 0,75115843    | 1,331277079     | 0,333333333     |
| DCTPP1                                                                             | 0,147570216 | -0,412831908 | 0,046 | 0,098 | 1          | 0,751147476   | 1,331296492     | 0,469387755     |
| SHISA5                                                                             | 0,354206959 | -0,41350851  | 0,043 | 0,073 | 1          | 0,750795282   | 1,331920996     | 0,589041096     |
| MANEA                                                                              | 0,010257514 | -0,413919906 | 0,037 | 0,122 | 1          | 0,750581218   | 1,332300858     | 0,303278689     |
| DCTN3                                                                              | 0,228194345 | -0,413975788 | 0,129 | 0,195 | 1          | 0,750552145   | 1,332352465     | 0,661538462     |
| ARL6IP4                                                                            | 0,088741459 | -0,413992928 | 0,27  | 0,39  | 1          | 0,750543228   | 1,332368294     | 0,692307692     |
| TSTD2                                                                              | 0,07730408  | -0,4143805   | 0,026 | 0,073 | 1          | 0,750341626   | 1,332726275     | 0,356164384     |
| DAXX                                                                               | 0,52217111  | -0,414670226 | 0,013 | 0,024 | 1          | 0,750190955   | 1,332993944     | 0,541666667     |
| IFI27L2                                                                            | 0,072930944 | -0,414760631 | 0,279 | 0,415 | 1          | 0,750143947   | 1,333077477     | 0,672289157     |

Supplementary Table 3

| Differentially expressed genes_keloid-MD_comparing SC-Keloid vs. (SC-Myel+Nonmyel) |             |              |       |       |             |               |                 |                 |
|------------------------------------------------------------------------------------|-------------|--------------|-------|-------|-------------|---------------|-----------------|-----------------|
| gene                                                                               | p_val       | avg_log2FC   | pct.1 | pct.2 | p_val_adj   | Foldchange_UP | Foldchange_DOWN | Ratio_pct1_pct2 |
| MON1A                                                                              | 0,59736795  | -0,41491634  | 0,014 | 0,024 | 1           | 0,750062988   | 1,333221363     | 0,583333333     |
| PA2G4                                                                              | 0,203324046 | -0,415046993 | 0,187 | 0,268 | 1           | 0,749995065   | 1,333342107     | 0,697761194     |
| AP4B1-AS1                                                                          | 0,048947161 | -0,415118697 | 0,003 | 0,024 | 1           | 0,74995779    | 1,333408378     | 0,125           |
| NIT2                                                                               | 0,196997934 | -0,415144443 | 0,069 | 0,122 | 1           | 0,749944406   | 1,333432174     | 0,56557377      |
| AKAP7                                                                              | 0,000703408 | -0,415239464 | 0,01  | 0,073 | 1           | 0,749895014   | 1,333520001     | 0,136986301     |
| MRFAP1L1                                                                           | 0,061875376 | -0,415283108 | 0,024 | 0,073 | 1           | 0,749872329   | 1,333560343     | 0,328767123     |
| CADPS2                                                                             | 0,048947161 | -0,415958327 | 0,003 | 0,024 | 1           | 0,749521451   | 1,33418463      | 0,125           |
| KCTD1                                                                              | 7,54298E-06 | -0,41643967  | 0,005 | 0,073 | 0,159164324 | 0,749271421   | 1,334629844     | 0,068493151     |
| RASGEF1C                                                                           | 0,039138181 | -0,416739885 | 0,033 | 0,098 | 1           | 0,749115519   | 1,3349076       | 0,336734694     |
| MRPL36                                                                             | 0,689855308 | -0,416893197 | 0,128 | 0,146 | 1           | 0,749035917   | 1,335049465     | 0,876712329     |
| POLDIP3                                                                            | 0,449127177 | -0,416973573 | 0,029 | 0,049 | 1           | 0,748994187   | 1,335123846     | 0,591836735     |
| CHP1                                                                               | 0,05942242  | -0,417070693 | 0,037 | 0,098 | 1           | 0,748943768   | 1,335213728     | 0,37755102      |
| NCOA4                                                                              | 0,268487785 | -0,417705316 | 0,038 | 0,073 | 1           | 0,748614389   | 1,335801201     | 0,520547945     |
| RDH10                                                                              | 0,057466743 | -0,417770117 | 0,037 | 0,098 | 1           | 0,748580765   | 1,335861202     | 0,37755102      |
| LRIG3                                                                              | 0,278515928 | -0,417984473 | 0,008 | 0,024 | 1           | 0,748469549   | 1,336059699     | 0,333333333     |
| SERINC1                                                                            | 0,123664728 | -0,417997317 | 0,164 | 0,268 | 1           | 0,748462885   | 1,336071594     | 0,611940299     |
| NOC3L                                                                              | 0,037599888 | -0,418475703 | 0,046 | 0,122 | 1           | 0,748214742   | 1,336514698     | 0,37704918      |
| PRKACB                                                                             | 0,148541404 | -0,418610335 | 0,099 | 0,171 | 1           | 0,748144922   | 1,336639427     | 0,578947368     |
| FOSB                                                                               | 0,239391812 | -0,418675068 | 0,112 | 0,171 | 1           | 0,748111354   | 1,336699403     | 0,65497076      |
| M6PR                                                                               | 0,143265198 | -0,418802935 | 0,046 | 0,098 | 1           | 0,748045051   | 1,33681788      | 0,469387755     |
| DIPK1B                                                                             | 9,44793E-05 | -0,419374681 | 0     | 0,024 | 1           | 0,747748657   | 1,337347772     | 0               |
| JSRP1                                                                              | 9,44793E-05 | -0,419374681 | 0     | 0,024 | 1           | 0,747748657   | 1,337347772     | 0               |
| S100A14                                                                            | 9,44793E-05 | -0,419374681 | 0     | 0,024 | 1           | 0,747748657   | 1,337347772     | 0               |
| SEPTIN3                                                                            | 9,44793E-05 | -0,419374681 | 0     | 0,024 | 1           | 0,747748657   | 1,337347772     | 0               |
| H2AC20                                                                             | 0,52217111  | -0,419467942 | 0,013 | 0,024 | 1           | 0,747700321   | 1,337434225     | 0,541666667     |
| SUMO2                                                                              | 0,04640657  | -0,419596391 | 0,411 | 0,561 | 1           | 0,747633753   | 1,337553308     | 0,732620321     |
| FRMD8                                                                              | 0,034864728 | -0,419660974 | 0,021 | 0,073 | 1           | 0,747600286   | 1,337613186     | 0,287671233     |
| CEPT1                                                                              | 0,360693945 | -0,419753816 | 0,01  | 0,024 | 1           | 0,747552177   | 1,337699268     | 0,416666667     |
| YTHDC2                                                                             | 0,851862947 | -0,419865483 | 0,03  | 0,024 | 1           | 0,747494318   | 1,337802812     | 1,25            |
| ECI2                                                                               | 0,069124115 | -0,419935538 | 0,038 | 0,098 | 1           | 0,747458021   | 1,337867776     | 0,387755102     |

Supplementary Table 3

| Differentially expressed genes_keloid-MD_comparing SC-Keloid vs. (SC-Myel+Nonmyel) |             |              |       |       |             |               |                 |                 |
|------------------------------------------------------------------------------------|-------------|--------------|-------|-------|-------------|---------------|-----------------|-----------------|
| gene                                                                               | p_val       | avg_log2FC   | pct.1 | pct.2 | p_val_adj   | Foldchange_UP | Foldchange_DOWN | Ratio_pct1_pct2 |
| VANGL2                                                                             | 0,043341977 | -0,420116894 | 0,011 | 0,049 | 1           | 0,747364067   | 1,338035964     | 0,224489796     |
| RASSF1                                                                             | 0,355417468 | -0,420208124 | 0,043 | 0,073 | 1           | 0,747316808   | 1,338120579     | 0,589041096     |
| SFN                                                                                | 0,013252307 | -0,420462023 | 0,008 | 0,049 | 1           | 0,7471853     | 1,338356095     | 0,163265306     |
| MTRFR                                                                              | 0,015641886 | -0,420781024 | 0,018 | 0,073 | 1           | 0,747020105   | 1,338652057     | 0,246575342     |
| MGA                                                                                | 0,125027562 | -0,420878938 | 0,016 | 0,049 | 1           | 0,746969407   | 1,338742913     | 0,326530612     |
| ING3                                                                               | 0,016683922 | -0,420966285 | 0,018 | 0,073 | 1           | 0,746924184   | 1,338823969     | 0,246575342     |
| VPS37B                                                                             | 0,039138181 | -0,42156442  | 0,033 | 0,098 | 1           | 0,746614576   | 1,339379154     | 0,336734694     |
| GLI4                                                                               | 0,009588188 | -0,421622393 | 0,026 | 0,098 | 1           | 0,746584575   | 1,339432977     | 0,265306122     |
| NMT2                                                                               | 0,443091335 | -0,421689777 | 0,011 | 0,024 | 1           | 0,746549705   | 1,339495539     | 0,458333333     |
| INTS6                                                                              | 0,283019551 | -0,421695448 | 0,057 | 0,098 | 1           | 0,74654677    | 1,339500805     | 0,581632653     |
| SELENOO                                                                            | 0,000252244 | -0,422697198 | 0,003 | 0,049 | 1           | 0,746028578   | 1,340431224     | 0,06122449      |
| STAT5A                                                                             | 0,276254967 | -0,422776548 | 0,008 | 0,024 | 1           | 0,745987547   | 1,340504951     | 0,333333333     |
| ZNF395                                                                             | 1,27911E-05 | -0,422827961 | 0,002 | 0,049 | 0,269904161 | 0,745960963   | 1,340552723     | 0,040816327     |
| TSC22D3                                                                            | 0,178503134 | -0,422851207 | 0,065 | 0,122 | 1           | 0,745948943   | 1,340574324     | 0,532786885     |
| SPP1                                                                               | 1,23757E-05 | -0,422888324 | 0,002 | 0,049 | 0,261139758 | 0,745929752   | 1,340608813     | 0,040816327     |
| EFCAB14                                                                            | 0,005291963 | -0,422905425 | 0,045 | 0,146 | 1           | 0,74592091    | 1,340624705     | 0,308219178     |
| LYRM2                                                                              | 0,068405179 | -0,423396502 | 0,085 | 0,171 | 1           | 0,74566705    | 1,341081116     | 0,497076023     |
| ATP6VOE2                                                                           | 0,04757893  | -0,423438871 | 0,022 | 0,073 | 1           | 0,745645152   | 1,341120502     | 0,301369863     |
| KLHDC8B                                                                            | 0,360693945 | -0,423486801 | 0,01  | 0,024 | 1           | 0,74562038    | 1,341165057     | 0,416666667     |
| MTR                                                                                | 0,240121148 | -0,423489726 | 0,054 | 0,098 | 1           | 0,745618868   | 1,341167777     | 0,551020408     |
| SRD5A1                                                                             | 0,024733964 | -0,423848658 | 0,01  | 0,049 | 1           | 0,745433387   | 1,341501491     | 0,204081633     |
| PCBD1                                                                              | 0,198389748 | -0,423860828 | 0,051 | 0,098 | 1           | 0,745427099   | 1,341512807     | 0,520408163     |
| ANKIB1                                                                             | 0,422933797 | -0,423939721 | 0,046 | 0,073 | 1           | 0,745386337   | 1,341586169     | 0,630136986     |
| CXCL12                                                                             | 0,469858947 | -0,423996015 | 0,128 | 0,171 | 1           | 0,745357252   | 1,341638519     | 0,748538012     |
| CEBPZ                                                                              | 0,069073082 | -0,424113774 | 0,102 | 0,195 | 1           | 0,745296416   | 1,341748034     | 0,523076923     |
| ZZEF1                                                                              | 0,238698091 | -0,424288114 | 0,021 | 0,049 | 1           | 0,745206357   | 1,341910184     | 0,428571429     |
| PRRC2A                                                                             | 0,540560695 | -0,424443988 | 0,032 | 0,049 | 1           | 0,745125846   | 1,342055177     | 0,653061224     |
| CEP192                                                                             | 0,192336114 | -0,424804939 | 0,006 | 0,024 | 1           | 0,744939445   | 1,342390991     | 0,25            |
| MYO1G                                                                              | 0,009700686 | -0,425125906 | 0,002 | 0,024 | 1           | 0,744773731   | 1,342689676     | 0,083333333     |
| COX7A1                                                                             | 0,068174708 | -0,425388152 | 0,155 | 0,268 | 1           | 0,744638362   | 1,342933766     | 0,578358209     |

Supplementary Table 3

| Differentially expressed genes_keloid-MD_comparing SC-Keloid vs. (SC-Myel+Nonmyel) |             |              |       |       |           |               |                 |                 |
|------------------------------------------------------------------------------------|-------------|--------------|-------|-------|-----------|---------------|-----------------|-----------------|
| gene                                                                               | p_val       | avg_log2FC   | pct.1 | pct.2 | p_val_adj | Foldchange_UP | Foldchange_DOWN | Ratio_pct1_pct2 |
| ROMO1                                                                              | 0,067480133 | -0,42541451  | 0,324 | 0,463 | 1         | 0,744624758   | 1,342958301     | 0,699784017     |
| HHEX                                                                               | 0,048947161 | -0,425645667 | 0,003 | 0,024 | 1         | 0,744505459   | 1,343173496     | 0,125           |
| HOPX                                                                               | 0,360693945 | -0,425726977 | 0,01  | 0,024 | 1         | 0,744463501   | 1,343249198     | 0,416666667     |
| EIPR1                                                                              | 0,239997787 | -0,425854965 | 0,021 | 0,049 | 1         | 0,744397459   | 1,343368369     | 0,428571429     |
| COX11                                                                              | 0,060230893 | -0,42586336  | 0,024 | 0,073 | 1         | 0,744393127   | 1,343376187     | 0,328767123     |
| MAF1                                                                               | 0,004037322 | -0,425891276 | 0,022 | 0,098 | 1         | 0,744378723   | 1,34340218      | 0,224489796     |
| DECR1                                                                              | 0,088126613 | -0,42592513  | 0,124 | 0,22  | 1         | 0,744361256   | 1,343433705     | 0,563636364     |
| IKBKB                                                                              | 0,238698091 | -0,426160743 | 0,021 | 0,049 | 1         | 0,744239701   | 1,343653126     | 0,428571429     |
| TMEM168                                                                            | 0,137992943 | -0,426237115 | 0,03  | 0,073 | 1         | 0,744200304   | 1,343724256     | 0,410958904     |
| USE1                                                                               | 0,129442959 | -0,426377358 | 0,062 | 0,122 | 1         | 0,744127964   | 1,343854885     | 0,508196721     |
| SINHCAF                                                                            | 0,010713578 | -0,426785062 | 0,016 | 0,073 | 1         | 0,743917705   | 1,34423471      | 0,219178082     |
| ATP6V1G1                                                                           | 0,150820497 | -0,427125394 | 0,255 | 0,366 | 1         | 0,743742235   | 1,344551852     | 0,696721311     |
| NBAS                                                                               | 0,009667293 | -0,427125665 | 0,026 | 0,098 | 1         | 0,743742095   | 1,344552105     | 0,265306122     |
| CBX4                                                                               | 0,59736795  | -0,427186204 | 0,014 | 0,024 | 1         | 0,743710886   | 1,344608528     | 0,583333333     |
| LRRC7                                                                              | 0,192336114 | -0,427204074 | 0,006 | 0,024 | 1         | 0,743701675   | 1,344625182     | 0,25            |
| POLR2E                                                                             | 0,112211985 | -0,427510084 | 0,059 | 0,122 | 1         | 0,743543945   | 1,344910421     | 0,483606557     |
| BTBD6                                                                              | 0,04757893  | -0,427728165 | 0,022 | 0,073 | 1         | 0,743431558   | 1,345113736     | 0,301369863     |
| RPAIN                                                                              | 0,126935167 | -0,427836554 | 0,078 | 0,146 | 1         | 0,743375706   | 1,345214797     | 0,534246575     |
| NIPA1                                                                              | 0,192336114 | -0,427912158 | 0,006 | 0,024 | 1         | 0,743336751   | 1,345285295     | 0,25            |
| ATG3                                                                               | 0,140848865 | -0,428142247 | 0,046 | 0,098 | 1         | 0,743218209   | 1,345499866     | 0,469387755     |
| AC093157.1                                                                         | 0,093211256 | -0,428465682 | 0,014 | 0,049 | 1         | 0,743051607   | 1,345801544     | 0,285714286     |
| SIRT7                                                                              | 0,005381463 | -0,428752383 | 0,006 | 0,049 | 1         | 0,742903958   | 1,346069017     | 0,12244898      |
| SNRNP35                                                                            | 0,05942242  | -0,428857446 | 0,037 | 0,098 | 1         | 0,742849859   | 1,346167046     | 0,37755102      |
| SAMD4B                                                                             | 0,366368165 | -0,429338204 | 0,062 | 0,098 | 1         | 0,742602355   | 1,346615712     | 0,632653061     |
| RHOT2                                                                              | 0,159467695 | -0,429396929 | 0,018 | 0,049 | 1         | 0,742572128   | 1,346670528     | 0,367346939     |
| CXCR4                                                                              | 0,094698473 | -0,429444169 | 0,014 | 0,049 | 1         | 0,742547814   | 1,346714624     | 0,285714286     |
| C19orf73                                                                           | 0,276254967 | -0,429659501 | 0,008 | 0,024 | 1         | 0,742436992   | 1,346915646     | 0,333333333     |
| DCAF12                                                                             | 0,487936714 | -0,429862457 | 0,03  | 0,049 | 1         | 0,742332554   | 1,347105141     | 0,612244898     |
| LENG8-AS1                                                                          | 0,276254967 | -0,429892276 | 0,008 | 0,024 | 1         | 0,742317211   | 1,347132985     | 0,333333333     |
| DDHD2                                                                              | 0,115234642 | -0,42996912  | 0,029 | 0,073 | 1         | 0,742277673   | 1,34720474      | 0,397260274     |

Supplementary Table 3

| Differentially expressed genes_keloid-MD_comparing SC-Keloid vs. (SC-Myel+Nonmyel) |             |              |       |       |             |               |                 |                 |
|------------------------------------------------------------------------------------|-------------|--------------|-------|-------|-------------|---------------|-----------------|-----------------|
| gene                                                                               | p_val       | avg_log2FC   | pct.1 | pct.2 | p_val_adj   | Foldchange_UP | Foldchange_DOWN | Ratio_pct1_pct2 |
| EED                                                                                | 0,668505389 | -0,430139037 | 0,016 | 0,024 | 1           | 0,742190254   | 1,347363421     | 0,666666667     |
| CCDC138                                                                            | 0,066247027 | -0,43028678  | 0,013 | 0,049 | 1           | 0,742114253   | 1,347501407     | 0,265306122     |
| FAM98C                                                                             | 0,237403369 | -0,430340693 | 0,021 | 0,049 | 1           | 0,74208652    | 1,347551764     | 0,428571429     |
| WDR6                                                                               | 0,59736795  | -0,431204667 | 0,014 | 0,024 | 1           | 0,741642247   | 1,348359002     | 0,583333333     |
| OSBPL2                                                                             | 0,093952504 | -0,431281275 | 0,014 | 0,049 | 1           | 0,741602866   | 1,348430603     | 0,285714286     |
| RRP8                                                                               | 0,160505608 | -0,431301543 | 0,018 | 0,049 | 1           | 0,741592448   | 1,348449547     | 0,367346939     |
| ERBB2                                                                              | 0,058112616 | -0,43168935  | 0,037 | 0,098 | 1           | 0,741393129   | 1,348812069     | 0,37755102      |
| SCCPDH                                                                             | 0,098544396 | -0,431706367 | 0,163 | 0,268 | 1           | 0,741384384   | 1,348827978     | 0,608208955     |
| TSPYL2                                                                             | 0,031633651 | -0,431714225 | 0,032 | 0,098 | 1           | 0,741380346   | 1,348835325     | 0,326530612     |
| RGL2                                                                               | 0,093211256 | -0,433006196 | 0,014 | 0,049 | 1           | 0,740716718   | 1,350043784     | 0,285714286     |
| LARS1                                                                              | 0,391437642 | -0,433054302 | 0,129 | 0,171 | 1           | 0,740692019   | 1,3500888       | 0,754385965     |
| RNPC3                                                                              | 0,001540594 | -0,433285175 | 0,005 | 0,049 | 1           | 0,740573496   | 1,350304872     | 0,102040816     |
| PM20D2                                                                             | 0,360693945 | -0,433474401 | 0,01  | 0,024 | 1           | 0,740476368   | 1,350481991     | 0,416666667     |
| BEND5                                                                              | 0,197851694 | -0,434005561 | 0,019 | 0,049 | 1           | 0,740203796   | 1,350979292     | 0,387755102     |
| MRPL2                                                                              | 0,070608935 | -0,43409861  | 0,038 | 0,098 | 1           | 0,740156057   | 1,351066429     | 0,387755102     |
| TTF2                                                                               | 0,278515928 | -0,43419584  | 0,008 | 0,024 | 1           | 0,740106176   | 1,351157486     | 0,333333333     |
| GPR173                                                                             | 0,001570499 | -0,434217415 | 0,005 | 0,049 | 1           | 0,740095108   | 1,351177693     | 0,102040816     |
| SEC31A                                                                             | 0,662075438 | -0,434253806 | 0,134 | 0,146 | 1           | 0,74007644    | 1,351211775     | 0,917808219     |
| STXBP3                                                                             | 0,014028385 | -0,43432782  | 0,051 | 0,146 | 1           | 0,740038473   | 1,351281098     | 0,349315068     |
| CTDSP2                                                                             | 0,031946387 | -0,434616325 | 0,073 | 0,171 | 1           | 0,739890497   | 1,351551349     | 0,426900585     |
| NKAP                                                                               | 0,710265924 | -0,434646978 | 0,081 | 0,098 | 1           | 0,739874777   | 1,351580066     | 0,826530612     |
| MBNL3                                                                              | 0,009700686 | -0,434827654 | 0,002 | 0,024 | 1           | 0,739782125   | 1,351749342     | 0,083333333     |
| TRMT10C                                                                            | 0,092825526 | -0,434899871 | 0,027 | 0,073 | 1           | 0,739745094   | 1,351817008     | 0,369863014     |
| MBTPS1                                                                             | 0,159925889 | -0,435016513 | 0,065 | 0,122 | 1           | 0,739685288   | 1,351926307     | 0,532786885     |
| CYP3A5                                                                             | 9,44793E-05 | -0,435043473 | 0     | 0,024 | 1           | 0,739671465   | 1,351951571     | 0               |
| HSPB7                                                                              | 9,44793E-05 | -0,435043473 | 0     | 0,024 | 1           | 0,739671465   | 1,351951571     | 0               |
| TRHDE                                                                              | 9,44793E-05 | -0,435043473 | 0     | 0,024 | 1           | 0,739671465   | 1,351951571     | 0               |
| CUEDC2                                                                             | 0,042536567 | -0,43514891  | 0,062 | 0,146 | 1           | 0,73961741    | 1,35205038      | 0,424657534     |
| PEX7                                                                               | 0,278515928 | -0,4352768   | 0,008 | 0,024 | 1           | 0,739551848   | 1,35217024      | 0,333333333     |
| CNR1                                                                               | 1,20272E-11 | -0,435590239 | 0     | 0,073 | 2,53785E-07 | 0,739391191   | 1,352464044     | 0               |



Supplementary Table 3

| Differentially expressed genes_keloid-MD_comparing SC-Keloid vs. (SC-Myel+Nonmyel) |             |              |       |       |             |               |                 |                 |
|------------------------------------------------------------------------------------|-------------|--------------|-------|-------|-------------|---------------|-----------------|-----------------|
| gene                                                                               | p_val       | avg_log2FC   | pct.1 | pct.2 | p_val_adj   | Foldchange_UP | Foldchange_DOWN | Ratio_pct1_pct2 |
| RAD18                                                                              | 0,443091335 | -0,435955959 | 0,011 | 0,024 | 1           | 0,739203781   | 1,352806934     | 0,458333333     |
| THEMIS2                                                                            | 0,009700686 | -0,436161811 | 0,002 | 0,024 | 1           | 0,739098314   | 1,352999974     | 0,083333333     |
| LSM2                                                                               | 0,028624124 | -0,436230535 | 0,088 | 0,195 | 1           | 0,739063108   | 1,353064426     | 0,451282051     |
| EIF5B                                                                              | 0,100283799 | -0,436849964 | 0,206 | 0,317 | 1           | 0,738745855   | 1,353645496     | 0,649842271     |
| LUC7L                                                                              | 0,240537821 | -0,436879724 | 0,054 | 0,098 | 1           | 0,738730617   | 1,35367342      | 0,551020408     |
| EIF1AY                                                                             | 0,207671743 | -0,437148592 | 0,035 | 0,073 | 1           | 0,738592955   | 1,353925721     | 0,479452055     |
| ZNF227                                                                             | 0,443091335 | -0,437487856 | 0,011 | 0,024 | 1           | 0,738419289   | 1,354244147     | 0,458333333     |
| GNPTAB                                                                             | 0,09118762  | -0,437882952 | 0,027 | 0,073 | 1           | 0,738217093   | 1,354615071     | 0,369863014     |
| TGIF2                                                                              | 0,281462479 | -0,437900924 | 0,022 | 0,049 | 1           | 0,738207897   | 1,354631946     | 0,448979592     |
| CTSF                                                                               | 0,006326643 | -0,438453237 | 0,014 | 0,073 | 1           | 0,73792534    | 1,355150645     | 0,191780822     |
| EIF2S3                                                                             | 0,045082546 | -0,438550023 | 0,078 | 0,171 | 1           | 0,737875837   | 1,35524156      | 0,456140351     |
| MAFB                                                                               | 0,050327106 | -0,438613405 | 0,064 | 0,146 | 1           | 0,73784342    | 1,355301101     | 0,438356164     |
| ATP1B2                                                                             | 1,23757E-05 | -0,438657577 | 0,002 | 0,049 | 0,261139758 | 0,737820829   | 1,355342599     | 0,040816327     |
| SIRT6                                                                              | 0,360693789 | -0,438781323 | 0,01  | 0,024 | 1           | 0,737757546   | 1,355458857     | 0,416666667     |
| PRXL2B                                                                             | 0,59736795  | -0,438925915 | 0,014 | 0,024 | 1           | 0,737683609   | 1,355594713     | 0,583333333     |
| CYLD                                                                               | 0,320403048 | -0,439026638 | 0,041 | 0,073 | 1           | 0,737632108   | 1,355689359     | 0,561643836     |
| CLEC2D                                                                             | 0,048947161 | -0,439188486 | 0,003 | 0,024 | 1           | 0,737549362   | 1,355841454     | 0,125           |
| TARS3                                                                              | 0,316958653 | -0,439855846 | 0,041 | 0,073 | 1           | 0,737208267   | 1,356468783     | 0,561643836     |
| DCTN6                                                                              | 0,026683422 | -0,440337278 | 0,086 | 0,195 | 1           | 0,736962299   | 1,356921516     | 0,441025641     |
| ZSWIM4                                                                             | 0,093211256 | -0,440619998 | 0,014 | 0,049 | 1           | 0,736817893   | 1,357187454     | 0,285714286     |
| RECK                                                                               | 0,041636868 | -0,440911542 | 0,011 | 0,049 | 1           | 0,73666901    | 1,357461745     | 0,224489796     |
| PARN                                                                               | 0,44912723  | -0,441092091 | 0,029 | 0,049 | 1           | 0,736576824   | 1,357631638     | 0,591836735     |
| WDPCP                                                                              | 0,192336114 | -0,441319726 | 0,006 | 0,024 | 1           | 0,736460612   | 1,357845869     | 0,25            |
| PPP1R16A                                                                           | 0,012904719 | -0,441746032 | 0,008 | 0,049 | 1           | 0,736243026   | 1,358247161     | 0,163265306     |
| GMPR2                                                                              | 0,005297272 | -0,441844039 | 0,006 | 0,049 | 1           | 0,736193012   | 1,358339435     | 0,12244898      |
| NT5DC1                                                                             | 0,276254967 | -0,442162737 | 0,008 | 0,024 | 1           | 0,736030402   | 1,358639531     | 0,333333333     |
| ZMYM3                                                                              | 0,025308197 | -0,442167593 | 0,01  | 0,049 | 1           | 0,736027924   | 1,358644104     | 0,204081633     |
| MGAT3                                                                              | 0,009700686 | -0,44225585  | 0,002 | 0,024 | 1           | 0,735982899   | 1,358727222     | 0,083333333     |
| ZNF33B                                                                             | 0,113762049 | -0,442890588 | 0,005 | 0,024 | 1           | 0,735659162   | 1,359325149     | 0,208333333     |
| C2orf74                                                                            | 0,714633421 | -0,442928024 | 0,059 | 0,073 | 1           | 0,735640073   | 1,359360422     | 0,808219178     |

Supplementary Table 3

| Differentially expressed genes_keloid-MD_comparing SC-Keloid vs. (SC-Myel+Nonmyel) |             |              |       |       |             |               |                 |                 |
|------------------------------------------------------------------------------------|-------------|--------------|-------|-------|-------------|---------------|-----------------|-----------------|
| gene                                                                               | p_val       | avg_log2FC   | pct.1 | pct.2 | p_val_adj   | Foldchange_UP | Foldchange_DOWN | Ratio_pct1_pct2 |
| HDDC3                                                                              | 0,016683922 | -0,442957745 | 0,018 | 0,073 | 1           | 0,735624918   | 1,359388426     | 0,246575342     |
| DST                                                                                | 0,092923145 | -0,443001822 | 0,327 | 0,463 | 1           | 0,735602444   | 1,359429958     | 0,706263499     |
| STARD9                                                                             | 0,065662619 | -0,443150904 | 0,013 | 0,049 | 1           | 0,735526434   | 1,359570443     | 0,265306122     |
| PIK3IP1                                                                            | 0,026191169 | -0,443164812 | 0,01  | 0,049 | 1           | 0,735519343   | 1,359583551     | 0,204081633     |
| ARHGAP5-AS1                                                                        | 1,19732E-05 | -0,443243625 | 0,002 | 0,049 | 0,252647346 | 0,735479164   | 1,359657825     | 0,040816327     |
| SRM                                                                                | 0,013558626 | -0,443303937 | 0,078 | 0,195 | 1           | 0,735448417   | 1,359714667     | 0,4             |
| CPT2                                                                               | 0,276254967 | -0,443789224 | 0,008 | 0,024 | 1           | 0,735201072   | 1,360172118     | 0,333333333     |
| MOCS2                                                                              | 0,017305056 | -0,444021292 | 0,096 | 0,22  | 1           | 0,73508282    | 1,360390929     | 0,436363636     |
| GRID2                                                                              | 1,27911E-05 | -0,444581721 | 0,002 | 0,049 | 0,269904161 | 0,734797325   | 1,360919489     | 0,040816327     |
| AQR                                                                                | 0,091730987 | -0,444616615 | 0,027 | 0,073 | 1           | 0,734779553   | 1,360952406     | 0,369863014     |
| HSD17B7                                                                            | 0,276254967 | -0,444950489 | 0,008 | 0,024 | 1           | 0,734609527   | 1,361267399     | 0,333333333     |
| EMSY                                                                               | 0,034593957 | -0,444997309 | 0,021 | 0,073 | 1           | 0,734585687   | 1,361311577     | 0,287671233     |
| OPHN1                                                                              | 0,042910262 | -0,445373501 | 0,011 | 0,049 | 1           | 0,734394164   | 1,361666594     | 0,224489796     |
| ZC2HC1A                                                                            | 0,125117868 | -0,445904371 | 0,061 | 0,122 | 1           | 0,734123978   | 1,36216774      | 0,5             |
| TMEM97                                                                             | 0,00546686  | -0,446182725 | 0,006 | 0,049 | 1           | 0,73398235    | 1,362430582     | 0,12244898      |
| NFIA                                                                               | 0,000641705 | -0,446843968 | 0,01  | 0,073 | 1           | 0,733646014   | 1,36305518      | 0,136986301     |
| NUP42                                                                              | 0,017148854 | -0,44703258  | 0,018 | 0,073 | 1           | 0,733550106   | 1,363233393     | 0,246575342     |
| MCMBP                                                                              | 0,40185536  | -0,447113584 | 0,027 | 0,049 | 1           | 0,73350892    | 1,363309937     | 0,551020408     |
| ADSL                                                                               | 0,360693945 | -0,447231177 | 0,01  | 0,024 | 1           | 0,733449135   | 1,363421064     | 0,416666667     |
| VHL                                                                                | 0,047638065 | -0,447482201 | 0,035 | 0,098 | 1           | 0,733321528   | 1,363658316     | 0,357142857     |
| TCF25                                                                              | 0,082962059 | -0,447707045 | 0,177 | 0,293 | 1           | 0,733207249   | 1,363870858     | 0,604095563     |
| ADGRB1                                                                             | 9,44793E-05 | -0,449031381 | 0     | 0,024 | 1           | 0,732534503   | 1,365123412     | 0               |
| RN7SL832P                                                                          | 9,44793E-05 | -0,449031381 | 0     | 0,024 | 1           | 0,732534503   | 1,365123412     | 0               |
| TRPV6                                                                              | 9,44793E-05 | -0,449031381 | 0     | 0,024 | 1           | 0,732534503   | 1,365123412     | 0               |
| TMEM200B                                                                           | 0,009700686 | -0,449247087 | 0,002 | 0,024 | 1           | 0,732424986   | 1,365327534     | 0,083333333     |
| MBOAT2                                                                             | 0,493151946 | -0,449322555 | 0,03  | 0,049 | 1           | 0,732386673   | 1,365398957     | 0,612244898     |
| CHCHD6                                                                             | 0,192053221 | -0,449442187 | 0,019 | 0,049 | 1           | 0,732325944   | 1,365512184     | 0,387755102     |
| MDK                                                                                | 0,257357136 | -0,449772263 | 0,056 | 0,098 | 1           | 0,732158414   | 1,365824637     | 0,571428571     |
| UBQLN1                                                                             | 0,229029922 | -0,450109759 | 0,072 | 0,122 | 1           | 0,731987157   | 1,366144187     | 0,590163934     |
| SLC2A10                                                                            | 0,113762049 | -0,45061038  | 0,005 | 0,024 | 1           | 0,731733199   | 1,366618327     | 0,208333333     |

Supplementary Table 3

| Differentially expressed genes_keloid-MD_comparing SC-Keloid vs. (SC-Myel+Nonmyel) |             |              |       |       |             |               |                 |                 |
|------------------------------------------------------------------------------------|-------------|--------------|-------|-------|-------------|---------------|-----------------|-----------------|
| gene                                                                               | p_val       | avg_log2FC   | pct.1 | pct.2 | p_val_adj   | Foldchange_UP | Foldchange_DOWN | Ratio_pct1_pct2 |
| ECT2L                                                                              | 0,009700686 | -0,450647082 | 0,002 | 0,024 | 1           | 0,731714584   | 1,366653094     | 0,083333333     |
| ATAT1                                                                              | 0,52217111  | -0,451017871 | 0,013 | 0,024 | 1           | 0,731526549   | 1,367004386     | 0,541666667     |
| NBEAL1                                                                             | 0,034069709 | -0,451511112 | 0,14  | 0,268 | 1           | 0,731276491   | 1,367471828     | 0,52238806      |
| SHC4                                                                               | 0,00137919  | -0,451697012 | 0,027 | 0,122 | 1           | 0,731182267   | 1,367648047     | 0,221311475     |
| RACK1                                                                              | 0,039070293 | -0,45189689  | 0,498 | 0,659 | 1           | 0,731080973   | 1,36783754      | 0,75569044      |
| ANKRD6                                                                             | 0,016230095 | -0,451976296 | 0,018 | 0,073 | 1           | 0,731040735   | 1,367912829     | 0,246575342     |
| CTNBL1                                                                             | 0,288702237 | -0,452016664 | 0,04  | 0,073 | 1           | 0,73102028    | 1,367951104     | 0,547945205     |
| NEGR1                                                                              | 0,018139715 | -0,452133375 | 0,029 | 0,098 | 1           | 0,730961145   | 1,368061774     | 0,295918367     |
| PGS1                                                                               | 1,23757E-05 | -0,452189613 | 0,002 | 0,049 | 0,261139758 | 0,730932652   | 1,368115103     | 0,040816327     |
| RNF114                                                                             | 0,551806552 | -0,452317822 | 0,075 | 0,098 | 1           | 0,730867698   | 1,36823669      | 0,765306122     |
| MED7                                                                               | 0,275865051 | -0,452878302 | 0,022 | 0,049 | 1           | 0,730583815   | 1,368768346     | 0,448979592     |
| MXI1                                                                               | 0,061048548 | -0,453635463 | 0,024 | 0,073 | 1           | 0,730200487   | 1,369486898     | 0,328767123     |
| ZNF573                                                                             | 0,192336114 | -0,45393599  | 0,006 | 0,024 | 1           | 0,730048396   | 1,369772204     | 0,25            |
| LAMTOR5                                                                            | 0,113236082 | -0,454474248 | 0,276 | 0,39  | 1           | 0,729776071   | 1,37028335      | 0,707692308     |
| VKORC1                                                                             | 0,11922021  | -0,454910442 | 0,113 | 0,195 | 1           | 0,729555459   | 1,370697713     | 0,579487179     |
| SLC52A2                                                                            | 0,445743914 | -0,455105312 | 0,029 | 0,049 | 1           | 0,729456922   | 1,370882871     | 0,591836735     |
| ST7L                                                                               | 0,065662619 | -0,455293527 | 0,013 | 0,049 | 1           | 0,729361763   | 1,371061729     | 0,265306122     |
| PPM1K                                                                              | 0,321155557 | -0,455717898 | 0,024 | 0,049 | 1           | 0,729147252   | 1,371465088     | 0,489795918     |
| ZFP36L2                                                                            | 0,057827265 | -0,4560319   | 0,139 | 0,244 | 1           | 0,72898857    | 1,371763619     | 0,569672131     |
| SLC16A4                                                                            | 0,576859289 | -0,456508995 | 0,033 | 0,049 | 1           | 0,728747536   | 1,372217333     | 0,673469388     |
| ZFP57                                                                              | 9,44793E-05 | -0,456669637 | 0     | 0,024 | 1           | 0,728666395   | 1,372370136     | 0               |
| ZNF106                                                                             | 0,359962272 | -0,456911716 | 0,083 | 0,122 | 1           | 0,728544138   | 1,372600434     | 0,680327869     |
| OSGIN2                                                                             | 0,006396675 | -0,457559893 | 0,014 | 0,073 | 1           | 0,72821689    | 1,373217258     | 0,191780822     |
| TMOD2                                                                              | 0,531665802 | -0,457575707 | 0,053 | 0,073 | 1           | 0,728208907   | 1,37323231      | 0,726027397     |
| IGFN1                                                                              | 9,44793E-05 | -0,458168673 | 0     | 0,024 | 1           | 0,727909666   | 1,373796841     | 0               |
| ZNFX1                                                                              | 0,190908763 | -0,458361641 | 0,019 | 0,049 | 1           | 0,72781231    | 1,373980607     | 0,387755102     |
| ESS2                                                                               | 0,192336114 | -0,459301228 | 0,006 | 0,024 | 1           | 0,727338461   | 1,374875734     | 0,25            |
| PON3                                                                               | 9,44793E-05 | -0,459677665 | 0     | 0,024 | 1           | 0,727148704   | 1,375234522     | 0               |
| KCNAB1                                                                             | 0,049781231 | -0,460158487 | 0,003 | 0,024 | 1           | 0,7269064     | 1,375692936     | 0,125           |
| FTO                                                                                | 0,001636738 | -0,460398701 | 0,011 | 0,073 | 1           | 0,726785378   | 1,375922013     | 0,150684932     |

Supplementary Table 3

| Differentially expressed genes_keloid-MD_comparing SC-Keloid vs. (SC-Myel+Nonmyel) |             |              |       |       |           |               |                 |                 |
|------------------------------------------------------------------------------------|-------------|--------------|-------|-------|-----------|---------------|-----------------|-----------------|
| gene                                                                               | p_val       | avg_log2FC   | pct.1 | pct.2 | p_val_adj | Foldchange_UP | Foldchange_DOWN | Ratio_pct1_pct2 |
| EGFLAM                                                                             | 0,013252307 | -0,460517644 | 0,008 | 0,049 | 1         | 0,72672546    | 1,376035456     | 0,163265306     |
| CCT6B                                                                              | 0,113762049 | -0,460658056 | 0,005 | 0,024 | 1         | 0,726654735   | 1,376169386     | 0,208333333     |
| PHC2                                                                               | 0,21089718  | -0,460753869 | 0,07  | 0,122 | 1         | 0,726606477   | 1,376260784     | 0,573770492     |
| SELENOT                                                                            | 0,01299887  | -0,460952785 | 0,093 | 0,22  | 1         | 0,726506301   | 1,376450554     | 0,422727273     |
| CWC27                                                                              | 0,076336687 | -0,461121558 | 0,026 | 0,073 | 1         | 0,726421316   | 1,376611586     | 0,356164384     |
| ZCCHC24                                                                            | 0,005552737 | -0,461219016 | 0,11  | 0,268 | 1         | 0,726372245   | 1,376704584     | 0,410447761     |
| BCCIP                                                                              | 0,043214795 | -0,461249451 | 0,048 | 0,122 | 1         | 0,726356922   | 1,376733627     | 0,393442623     |
| SMIM13                                                                             | 0,09029307  | -0,461467135 | 0,014 | 0,049 | 1         | 0,726247333   | 1,376941374     | 0,285714286     |
| P4HTM                                                                              | 0,094422534 | -0,461765273 | 0,041 | 0,098 | 1         | 0,726097267   | 1,377225953     | 0,418367347     |
| PAPSS2                                                                             | 0,048947161 | -0,463173888 | 0,003 | 0,024 | 1         | 0,725388667   | 1,378571302     | 0,125           |
| ZW10                                                                               | 0,113762049 | -0,463205521 | 0,005 | 0,024 | 1         | 0,725372763   | 1,37860153      | 0,208333333     |
| NRDE2                                                                              | 0,060638578 | -0,463338522 | 0,024 | 0,073 | 1         | 0,725305894   | 1,378728628     | 0,328767123     |
| PPP6C                                                                              | 0,157407112 | -0,463411872 | 0,018 | 0,049 | 1         | 0,725269019   | 1,378798727     | 0,367346939     |
| NR6A1                                                                              | 0,276254967 | -0,463604442 | 0,008 | 0,024 | 1         | 0,725172217   | 1,37898278      | 0,333333333     |
| ZNF649                                                                             | 0,066247027 | -0,463831099 | 0,013 | 0,049 | 1         | 0,725058296   | 1,379199445     | 0,265306122     |
| ZNF486                                                                             | 0,000264836 | -0,463851594 | 0,003 | 0,049 | 1         | 0,725047996   | 1,379219038     | 0,06122449      |
| EPN1                                                                               | 0,060638578 | -0,464313045 | 0,024 | 0,073 | 1         | 0,724816124   | 1,379660257     | 0,328767123     |
| ADAMTS7                                                                            | 0,024993722 | -0,464415903 | 0,043 | 0,122 | 1         | 0,72476445    | 1,379758624     | 0,352459016     |
| ABHD3                                                                              | 0,001600938 | -0,464428335 | 0,005 | 0,049 | 1         | 0,724758204   | 1,379770514     | 0,102040816     |
| CHMP1B                                                                             | 0,185548762 | -0,464507768 | 0,033 | 0,073 | 1         | 0,724718301   | 1,379846484     | 0,452054795     |
| CAT                                                                                | 0,094486966 | -0,464598264 | 0,027 | 0,073 | 1         | 0,724672843   | 1,37993304      | 0,369863014     |
| PTGR1                                                                              | 0,366844989 | -0,464705836 | 0,064 | 0,098 | 1         | 0,724618811   | 1,380035936     | 0,653061224     |
| CLEC16A                                                                            | 0,009700686 | -0,465333144 | 0,002 | 0,024 | 1         | 0,724303804   | 1,38063613      | 0,083333333     |
| F8                                                                                 | 9,44793E-05 | -0,465815235 | 0     | 0,024 | 1         | 0,72406181    | 1,381097561     | 0               |
| ZNF329                                                                             | 9,44793E-05 | -0,465815235 | 0     | 0,024 | 1         | 0,72406181    | 1,381097561     | 0               |
| FOXD3                                                                              | 0,771877993 | -0,465858156 | 0,166 | 0,171 | 1         | 0,72404027    | 1,381138649     | 0,970760234     |
| COPS6                                                                              | 0,253711864 | -0,466332783 | 0,116 | 0,171 | 1         | 0,723802109   | 1,3815931       | 0,678362573     |
| NR2F6                                                                              | 0,073961348 | -0,466409754 | 0,026 | 0,073 | 1         | 0,723763494   | 1,381666813     | 0,356164384     |
| SELE                                                                               | 0,048947161 | -0,467148963 | 0,003 | 0,024 | 1         | 0,723392746   | 1,382374934     | 0,125           |
| NRCAM                                                                              | 0,005381463 | -0,467226888 | 0,006 | 0,049 | 1         | 0,723353675   | 1,382449602     | 0,12244898      |

Supplementary Table 3

| Differentially expressed genes_keloid-MD_comparing SC-Keloid vs. (SC-Myel+Nonmyel) |             |              |       |       |           |               |                 |                 |
|------------------------------------------------------------------------------------|-------------|--------------|-------|-------|-----------|---------------|-----------------|-----------------|
| gene                                                                               | p_val       | avg_log2FC   | pct.1 | pct.2 | p_val_adj | Foldchange_UP | Foldchange_DOWN | Ratio_pct1_pct2 |
| CHTOP                                                                              | 0,480049611 | -0,467231494 | 0,049 | 0,073 | 1         | 0,723351365   | 1,382454016     | 0,671232877     |
| INPP5B                                                                             | 0,001614632 | -0,467391179 | 0,011 | 0,073 | 1         | 0,723271305   | 1,382607043     | 0,150684932     |
| SCAP                                                                               | 0,013077492 | -0,467478571 | 0,008 | 0,049 | 1         | 0,723227494   | 1,382690797     | 0,163265306     |
| DMAC1                                                                              | 0,172555948 | -0,467631374 | 0,067 | 0,122 | 1         | 0,723150897   | 1,382837252     | 0,549180328     |
| RGS4                                                                               | 9,44793E-05 | -0,468002628 | 0     | 0,024 | 1         | 0,72296483    | 1,383193149     | 0               |
| PNKD                                                                               | 0,042183165 | -0,468013313 | 0,126 | 0,244 | 1         | 0,722959476   | 1,383203393     | 0,516393443     |
| CPSF4                                                                              | 0,192336114 | -0,468385744 | 0,006 | 0,024 | 1         | 0,722772868   | 1,383560513     | 0,25            |
| INAFM1                                                                             | 0,268975707 | -0,46849363  | 0,022 | 0,049 | 1         | 0,722718821   | 1,38366398      | 0,448979592     |
| SETD4                                                                              | 0,232274121 | -0,468563755 | 0,021 | 0,049 | 1         | 0,722683692   | 1,383731237     | 0,428571429     |
| FAM172A                                                                            | 0,20138556  | -0,468706513 | 0,051 | 0,098 | 1         | 0,722612185   | 1,383868168     | 0,520408163     |
| RNF8                                                                               | 0,095607774 | -0,468864394 | 0,027 | 0,073 | 1         | 0,72253311    | 1,384019619     | 0,369863014     |
| GOSR2                                                                              | 0,193202863 | -0,469087976 | 0,019 | 0,049 | 1         | 0,722421144   | 1,384234124     | 0,387755102     |
| TSNAX                                                                              | 0,119610881 | -0,470949345 | 0,045 | 0,098 | 1         | 0,721489675   | 1,38602122      | 0,459183673     |
| LSAMP                                                                              | 0,116801394 | -0,471210567 | 0,077 | 0,146 | 1         | 0,721359051   | 1,386272202     | 0,52739726      |
| HSPBAP1                                                                            | 0,192336114 | -0,471706792 | 0,006 | 0,024 | 1         | 0,721110977   | 1,386749103     | 0,25            |
| CNPY3                                                                              | 0,131650991 | -0,471797056 | 0,03  | 0,073 | 1         | 0,721065861   | 1,386835869     | 0,410958904     |
| AFAP1L2                                                                            | 0,034164176 | -0,471842412 | 0,107 | 0,22  | 1         | 0,721043192   | 1,38687947      | 0,486363636     |
| ALDH3A2                                                                            | 0,033266744 | -0,471972183 | 0,021 | 0,073 | 1         | 0,720978337   | 1,387004226     | 0,287671233     |
| AK3                                                                                | 0,217671448 | -0,472332142 | 0,053 | 0,098 | 1         | 0,720798472   | 1,387350333     | 0,540816327     |
| EFCAB11                                                                            | 0,271717138 | -0,472419888 | 0,022 | 0,049 | 1         | 0,720754634   | 1,387434715     | 0,448979592     |
| ZNF737                                                                             | 0,048947161 | -0,473176607 | 0,003 | 0,024 | 1         | 0,720376684   | 1,38816264      | 0,125           |
| AMFR                                                                               | 0,092276953 | -0,473554242 | 0,027 | 0,073 | 1         | 0,720188146   | 1,388526049     | 0,369863014     |
| ANGPTL4                                                                            | 0,276254967 | -0,473612778 | 0,008 | 0,024 | 1         | 0,720158925   | 1,388582388     | 0,333333333     |
| SPCS2                                                                              | 0,061590419 | -0,474096348 | 0,4   | 0,561 | 1         | 0,719917579   | 1,389047898     | 0,713012478     |
| BRI3                                                                               | 0,032529631 | -0,474934133 | 0,175 | 0,317 | 1         | 0,719499639   | 1,389854764     | 0,552050473     |
| AGPAT3                                                                             | 0,075856706 | -0,475126498 | 0,026 | 0,073 | 1         | 0,719403709   | 1,390040096     | 0,356164384     |
| ELAVL4                                                                             | 0,113762049 | -0,47533563  | 0,005 | 0,024 | 1         | 0,719299432   | 1,39024161      | 0,208333333     |
| FRMPD4                                                                             | 0,049781231 | -0,475425884 | 0,003 | 0,024 | 1         | 0,719254435   | 1,390328584     | 0,125           |
| MALT1                                                                              | 0,113762049 | -0,477143087 | 0,005 | 0,024 | 1         | 0,718398834   | 1,391984443     | 0,208333333     |
| ZNF549                                                                             | 0,113762049 | -0,477421495 | 0,005 | 0,024 | 1         | 0,718260212   | 1,39225309      | 0,208333333     |

Supplementary Table 3

| Differentially expressed genes_keloid-MD_comparing SC-Keloid vs. (SC-Myel+Nonmyel) |             |              |       |       |           |               |                 |                 |
|------------------------------------------------------------------------------------|-------------|--------------|-------|-------|-----------|---------------|-----------------|-----------------|
| gene                                                                               | p_val       | avg_log2FC   | pct.1 | pct.2 | p_val_adj | Foldchange_UP | Foldchange_DOWN | Ratio_pct1_pct2 |
| MT1F                                                                               | 0,139652494 | -0,477556094 | 0,046 | 0,098 | 1         | 0,718193204   | 1,392382989     | 0,469387755     |
| FOSL2                                                                              | 0,014993355 | -0,478358022 | 0,04  | 0,122 | 1         | 0,717794104   | 1,393157166     | 0,327868852     |
| STAT2                                                                              | 0,055878208 | -0,478851535 | 0,037 | 0,098 | 1         | 0,717548605   | 1,393633815     | 0,37755102      |
| JOSD2                                                                              | 0,402310302 | -0,479472489 | 0,132 | 0,171 | 1         | 0,71723983    | 1,394233781     | 0,771929825     |
| HNRNPH3                                                                            | 0,162697324 | -0,479531108 | 0,142 | 0,22  | 1         | 0,717210688   | 1,394290433     | 0,645454545     |
| CNPY2                                                                              | 0,050116622 | -0,47958647  | 0,201 | 0,341 | 1         | 0,717183166   | 1,394343938     | 0,589442815     |
| PHC3                                                                               | 0,205844796 | -0,479719268 | 0,035 | 0,073 | 1         | 0,717117153   | 1,394472291     | 0,479452055     |
| RNASE1                                                                             | 0,276254967 | -0,479732557 | 0,008 | 0,024 | 1         | 0,717110548   | 1,394485136     | 0,333333333     |
| LRP6                                                                               | 0,251361233 | -0,479743391 | 0,056 | 0,098 | 1         | 0,717105162   | 1,394495609     | 0,571428571     |
| ALAS1                                                                              | 0,065662619 | -0,480045014 | 0,013 | 0,049 | 1         | 0,716955254   | 1,394787185     | 0,265306122     |
| PDLIM2                                                                             | 0,015367343 | -0,481153452 | 0,053 | 0,146 | 1         | 0,716404621   | 1,395859227     | 0,363013699     |
| TPT1                                                                               | 0,030690725 | -0,481504513 | 0,671 | 0,756 | 1         | 0,716230315   | 1,396198932     | 0,887566138     |
| FAM107B                                                                            | 0,027159491 | -0,482120981 | 0,088 | 0,195 | 1         | 0,715924333   | 1,396795659     | 0,451282051     |
| WBP4                                                                               | 0,447694863 | -0,482138491 | 0,069 | 0,098 | 1         | 0,715915643   | 1,396812613     | 0,704081633     |
| GASK1A                                                                             | 0,009700686 | -0,48220318  | 0,002 | 0,024 | 1         | 0,715883543   | 1,396875245     | 0,083333333     |
| ARID2                                                                              | 0,383843012 | -0,482836261 | 0,045 | 0,073 | 1         | 0,715569469   | 1,397488355     | 0,616438356     |
| AIMP2                                                                              | 0,034593957 | -0,482952243 | 0,021 | 0,073 | 1         | 0,715511945   | 1,397600707     | 0,287671233     |
| CABLES1                                                                            | 0,048947161 | -0,48299389  | 0,003 | 0,024 | 1         | 0,71549129    | 1,397641052     | 0,125           |
| STX3                                                                               | 0,000210269 | -0,483205717 | 0,008 | 0,073 | 1         | 0,715386244   | 1,39784628      | 0,109589041     |
| ZNF8                                                                               | 0,443091335 | -0,483254877 | 0,011 | 0,024 | 1         | 0,715361868   | 1,397893912     | 0,458333333     |
| GTF3C3                                                                             | 0,092474707 | -0,483274513 | 0,014 | 0,049 | 1         | 0,715352132   | 1,397912938     | 0,285714286     |
| DCUN1D3                                                                            | 0,025019654 | -0,483329228 | 0,01  | 0,049 | 1         | 0,715325002   | 1,397965956     | 0,204081633     |
| TXNDC15                                                                            | 0,080578396 | -0,483335166 | 0,088 | 0,171 | 1         | 0,715322058   | 1,39797171      | 0,514619883     |
| DIPK2A                                                                             | 0,276254967 | -0,483353379 | 0,008 | 0,024 | 1         | 0,715313027   | 1,397989358     | 0,333333333     |
| ZEB2-AS1                                                                           | 0,005214273 | -0,484062862 | 0,006 | 0,049 | 1         | 0,71496134    | 1,398677025     | 0,12244898      |
| SWT1                                                                               | 0,009700686 | -0,484461437 | 0,002 | 0,024 | 1         | 0,714763844   | 1,399063493     | 0,083333333     |
| CCNF                                                                               | 0,048947161 | -0,484760664 | 0,003 | 0,024 | 1         | 0,714615611   | 1,399353701     | 0,125           |
| RGS11                                                                              | 5,24294E-05 | -0,485130289 | 0,006 | 0,073 | 1         | 0,714432547   | 1,399712268     | 0,082191781     |
| FBXO21                                                                             | 0,173787979 | -0,485727498 | 0,033 | 0,073 | 1         | 0,714136866   | 1,400291803     | 0,452054795     |
| FGFR1OP2                                                                           | 0,19690412  | -0,485791045 | 0,051 | 0,098 | 1         | 0,714105411   | 1,400353484     | 0,520408163     |

Supplementary Table 3

| Differentially expressed genes_keloid-MD_comparing SC-Keloid vs. (SC-Myel+Nonmyel) |             |              |       |       |           |               |                 |                 |
|------------------------------------------------------------------------------------|-------------|--------------|-------|-------|-----------|---------------|-----------------|-----------------|
| gene                                                                               | p_val       | avg_log2FC   | pct.1 | pct.2 | p_val_adj | Foldchange_UP | Foldchange_DOWN | Ratio_pct1_pct2 |
| RTCB                                                                               | 0,154934793 | -0,486171164 | 0,048 | 0,098 | 1         | 0,713917285   | 1,400722495     | 0,489795918     |
| DDB2                                                                               | 0,65114288  | -0,486349714 | 0,037 | 0,049 | 1         | 0,713828934   | 1,400895862     | 0,755102041     |
| ZCRB1                                                                              | 0,055461943 | -0,486621112 | 0,15  | 0,268 | 1         | 0,713694662   | 1,401159421     | 0,559701493     |
| RMND5A                                                                             | 0,013252307 | -0,48679586  | 0,008 | 0,049 | 1         | 0,713608221   | 1,401329148     | 0,163265306     |
| BCL2                                                                               | 0,042910262 | -0,487017359 | 0,011 | 0,049 | 1         | 0,713498668   | 1,401544313     | 0,224489796     |
| SOX15                                                                              | 0,048947161 | -0,4874571   | 0,003 | 0,024 | 1         | 0,713281223   | 1,401971576     | 0,125           |
| KDM6B                                                                              | 0,020138334 | -0,487550349 | 0,041 | 0,122 | 1         | 0,713235121   | 1,402062195     | 0,336065574     |
| DYM                                                                                | 0,010188663 | -0,487775325 | 0,016 | 0,073 | 1         | 0,713123907   | 1,402280853     | 0,219178082     |
| ZNF154                                                                             | 0,048947161 | -0,487844358 | 0,003 | 0,024 | 1         | 0,713089785   | 1,402347953     | 0,125           |
| AC012613.2                                                                         | 0,009700686 | -0,487984788 | 0,002 | 0,024 | 1         | 0,713020377   | 1,402484462     | 0,083333333     |
| ARL8A                                                                              | 0,01881179  | -0,488099164 | 0,054 | 0,146 | 1         | 0,712963851   | 1,402595655     | 0,369863014     |
| ETS1                                                                               | 0,558608603 | -0,488752952 | 0,12  | 0,146 | 1         | 0,71264083    | 1,403231415     | 0,821917808     |
| GLA                                                                                | 0,017617487 | -0,488792832 | 0,029 | 0,098 | 1         | 0,712621131   | 1,403270204     | 0,295918367     |
| AVL9                                                                               | 0,9144643   | -0,489119261 | 0,022 | 0,024 | 1         | 0,712459909   | 1,403587749     | 0,916666667     |
| KMT2D                                                                              | 0,024451103 | -0,489272807 | 0,01  | 0,049 | 1         | 0,712384086   | 1,403737141     | 0,204081633     |
| WASF2                                                                              | 0,352752883 | -0,489651514 | 0,166 | 0,22  | 1         | 0,71219711    | 1,40410567      | 0,754545455     |
| RMDN3                                                                              | 0,260107653 | -0,490380064 | 0,038 | 0,073 | 1         | 0,711837547   | 1,404814911     | 0,520547945     |
| MT-CYB                                                                             | 0,083678144 | -0,49162946  | 0,766 | 0,732 | 1         | 0,711221351   | 1,40603203      | 1,046448087     |
| PHYHD1                                                                             | 0,000252244 | -0,49196562  | 0,003 | 0,049 | 1         | 0,71105565    | 1,406359685     | 0,06122449      |
| TMED5                                                                              | 0,03965515  | -0,491972594 | 0,048 | 0,122 | 1         | 0,711052213   | 1,406366484     | 0,393442623     |
| ZNF420                                                                             | 0,005381463 | -0,492955146 | 0,006 | 0,049 | 1         | 0,710568113   | 1,407324621     | 0,12244898      |
| KIF5B                                                                              | 0,021424655 | -0,493284827 | 0,22  | 0,39  | 1         | 0,710405755   | 1,407646255     | 0,564102564     |
| ST7                                                                                | 0,005297272 | -0,493429004 | 0,006 | 0,049 | 1         | 0,710334763   | 1,407786937     | 0,12244898      |
| DDX27                                                                              | 0,0252873   | -0,493494051 | 0,043 | 0,122 | 1         | 0,710302737   | 1,407850411     | 0,352459016     |
| TNFRSF19                                                                           | 0,182978698 | -0,494299087 | 0,123 | 0,195 | 1         | 0,709906492   | 1,408636223     | 0,630769231     |
| SPIN1                                                                              | 0,09488205  | -0,494820338 | 0,041 | 0,098 | 1         | 0,709650047   | 1,40914526      | 0,418367347     |
| TTC37                                                                              | 0,13316633  | -0,495888746 | 0,062 | 0,122 | 1         | 0,7091247     | 1,410189209     | 0,508196721     |
| KCNA2                                                                              | 0,009746979 | -0,496836452 | 0,026 | 0,098 | 1         | 0,708659029   | 1,411115866     | 0,265306122     |
| RAB27A                                                                             | 0,048947161 | -0,497062238 | 0,003 | 0,024 | 1         | 0,708548131   | 1,411336727     | 0,125           |
| BTG3                                                                               | 0,012320841 | -0,497100534 | 0,123 | 0,268 | 1         | 0,708529323   | 1,411374191     | 0,458955224     |

Supplementary Table 3

| Differentially expressed genes_keloid-MD_comparing SC-Keloid vs. (SC-Myel+Nonmyel) |             |              |       |       |             |               |                 |                 |
|------------------------------------------------------------------------------------|-------------|--------------|-------|-------|-------------|---------------|-----------------|-----------------|
| gene                                                                               | p_val       | avg_log2FC   | pct.1 | pct.2 | p_val_adj   | Foldchange_UP | Foldchange_DOWN | Ratio_pct1_pct2 |
| SLC46A1                                                                            | 0,009700686 | -0,497277726 | 0,002 | 0,024 | 1           | 0,708442307   | 1,411547547     | 0,083333333     |
| CADM4                                                                              | 0,030617158 | -0,497455601 | 0,073 | 0,171 | 1           | 0,708354966   | 1,411721592     | 0,426900585     |
| ATF7IP                                                                             | 0,004467583 | -0,497598352 | 0,056 | 0,171 | 1           | 0,708284879   | 1,411861286     | 0,32748538      |
| DDX51                                                                              | 0,048947161 | -0,497656065 | 0,003 | 0,024 | 1           | 0,708256546   | 1,411917766     | 0,125           |
| ARNT                                                                               | 0,033528665 | -0,49780626  | 0,021 | 0,073 | 1           | 0,708182815   | 1,412064765     | 0,287671233     |
| BCL6                                                                               | 0,024507087 | -0,49782446  | 0,019 | 0,073 | 1           | 0,708173881   | 1,412082579     | 0,260273973     |
| ZDHC20                                                                             | 0,05942242  | -0,498475127 | 0,037 | 0,098 | 1           | 0,707854561   | 1,412719583     | 0,37755102      |
| KDM3A                                                                              | 0,124136836 | -0,498481888 | 0,016 | 0,049 | 1           | 0,707851244   | 1,412726204     | 0,326530612     |
| TMEM39A                                                                            | 0,104694764 | -0,498561412 | 0,043 | 0,098 | 1           | 0,707812227   | 1,412804078     | 0,43877551      |
| ZNF273                                                                             | 0,009700686 | -0,498603789 | 0,002 | 0,024 | 1           | 0,707791436   | 1,412845578     | 0,083333333     |
| DDX59                                                                              | 0,001636738 | -0,49874812  | 0,011 | 0,073 | 1           | 0,70772063    | 1,412986929     | 0,150684932     |
| TOM1L2                                                                             | 2,91909E-05 | -0,499088078 | 0,011 | 0,098 | 0,615956684 | 0,707553882   | 1,413319926     | 0,112244898     |
| ENKD1                                                                              | 0,065662619 | -0,500233777 | 0,013 | 0,049 | 1           | 0,70699221    | 1,414442743     | 0,265306122     |
| DBF4B                                                                              | 0,009700686 | -0,500513434 | 0,002 | 0,024 | 1           | 0,706855177   | 1,41471695      | 0,083333333     |
| CNIH1                                                                              | 0,370986003 | -0,500609925 | 0,064 | 0,098 | 1           | 0,706807903   | 1,414811572     | 0,653061224     |
| ZNF274                                                                             | 0,192336114 | -0,500618391 | 0,006 | 0,024 | 1           | 0,706803755   | 1,414819875     | 0,25            |
| ZNF530                                                                             | 0,048947161 | -0,500726761 | 0,003 | 0,024 | 1           | 0,706750664   | 1,414926155     | 0,125           |
| SHISA4                                                                             | 0,128044318 | -0,500881111 | 0,061 | 0,122 | 1           | 0,706675055   | 1,415077543     | 0,5             |
| KIAA1191                                                                           | 0,079593912 | -0,500927392 | 0,04  | 0,098 | 1           | 0,706652386   | 1,415122938     | 0,408163265     |
| SMYD2                                                                              | 0,034864728 | -0,501022873 | 0,021 | 0,073 | 1           | 0,706605619   | 1,415216597     | 0,287671233     |
| LUZP1                                                                              | 0,419206994 | -0,501209647 | 0,067 | 0,098 | 1           | 0,706514147   | 1,415399826     | 0,683673469     |
| RPL9                                                                               | 0,024824425 | -0,501248235 | 0,512 | 0,707 | 1           | 0,70649525    | 1,415437684     | 0,724186704     |
| LINC00327                                                                          | 0,00546686  | -0,501472471 | 0,006 | 0,049 | 1           | 0,706385448   | 1,415657701     | 0,12244898      |
| QTRT1                                                                              | 0,313744509 | -0,501533697 | 0,024 | 0,049 | 1           | 0,706355471   | 1,415717781     | 0,489795918     |
| SEMA6D                                                                             | 0,115234602 | -0,502671792 | 0,029 | 0,073 | 1           | 0,70579847    | 1,416835035     | 0,397260274     |
| UBE2J1                                                                             | 0,444849252 | -0,502798633 | 0,067 | 0,098 | 1           | 0,705736419   | 1,416959608     | 0,683673469     |
| GTPBP1                                                                             | 0,276254967 | -0,503111914 | 0,008 | 0,024 | 1           | 0,705583185   | 1,417267334     | 0,333333333     |
| CCDC91                                                                             | 0,029008278 | -0,503326547 | 0,045 | 0,122 | 1           | 0,705478222   | 1,417478199     | 0,368852459     |
| BBOX1                                                                              | 0,005381463 | -0,503446367 | 0,006 | 0,049 | 1           | 0,705419632   | 1,41759593      | 0,12244898      |
| VPS8                                                                               | 0,612514492 | -0,503655044 | 0,035 | 0,049 | 1           | 0,705317605   | 1,417800991     | 0,714285714     |



Supplementary Table 3

| Differentially expressed genes_keloid-MD_comparing SC-Keloid vs. (SC-Myel+Nonmyel) |             |              |       |       |           |               |                 |                 |
|------------------------------------------------------------------------------------|-------------|--------------|-------|-------|-----------|---------------|-----------------|-----------------|
| gene                                                                               | p_val       | avg_log2FC   | pct.1 | pct.2 | p_val_adj | Foldchange_UP | Foldchange_DOWN | Ratio_pct1_pct2 |
| AHR                                                                                | 0,052897203 | -0,503799182 | 0,097 | 0,195 | 1         | 0,705247141   | 1,417942649     | 0,497435897     |
| TNPO1                                                                              | 0,123412261 | -0,504125121 | 0,045 | 0,098 | 1         | 0,705087827   | 1,418263033     | 0,459183673     |
| TNRC6B                                                                             | 0,189974774 | -0,504304258 | 0,148 | 0,22  | 1         | 0,705000283   | 1,418439146     | 0,672727273     |
| MYEF2                                                                              | 0,065524015 | -0,504647023 | 0,038 | 0,098 | 1         | 0,704832805   | 1,418776189     | 0,387755102     |
| NME7                                                                               | 0,403604369 | -0,504840154 | 0,046 | 0,073 | 1         | 0,704738456   | 1,418966131     | 0,630136986     |
| C8orf82                                                                            | 0,012983268 | -0,50490439  | 0,027 | 0,098 | 1         | 0,704707078   | 1,419029311     | 0,275510204     |
| UBE2G1                                                                             | 0,03432496  | -0,505074967 | 0,021 | 0,073 | 1         | 0,704623762   | 1,4191971       | 0,287671233     |
| PLAT                                                                               | 0,021624154 | -0,505192751 | 0,265 | 0,439 | 1         | 0,704566238   | 1,419312971     | 0,603644647     |
| GAK                                                                                | 0,798845609 | -0,505389572 | 0,019 | 0,024 | 1         | 0,704470123   | 1,419506615     | 0,791666667     |
| CDK5RAP3                                                                           | 0,036785729 | -0,505610912 | 0,033 | 0,098 | 1         | 0,704362051   | 1,419724414     | 0,336734694     |
| FBLN5                                                                              | 0,001600938 | -0,5057877   | 0,005 | 0,049 | 1         | 0,704275744   | 1,419898397     | 0,102040816     |
| CCDC66                                                                             | 0,229739309 | -0,50610216  | 0,072 | 0,122 | 1         | 0,704122251   | 1,420207923     | 0,590163934     |
| PUS3                                                                               | 0,025308197 | -0,506428358 | 0,01  | 0,049 | 1         | 0,703963065   | 1,420529073     | 0,204081633     |
| FDX1                                                                               | 0,343031327 | -0,506467749 | 0,083 | 0,122 | 1         | 0,703943845   | 1,420567859     | 0,680327869     |
| OAZ1                                                                               | 0,064360939 | -0,506622369 | 0,45  | 0,585 | 1         | 0,703868404   | 1,420720115     | 0,769230769     |
| RNH1                                                                               | 0,004720369 | -0,506681954 | 0,158 | 0,341 | 1         | 0,703839334   | 1,420778794     | 0,463343109     |
| PAQR6                                                                              | 0,065082467 | -0,507702162 | 0,013 | 0,049 | 1         | 0,703341787   | 1,421783859     | 0,265306122     |
| HNRNPUL1                                                                           | 0,033315318 | -0,507917252 | 0,061 | 0,146 | 1         | 0,703236934   | 1,421995848     | 0,417808219     |
| NCOR1                                                                              | 0,139784285 | -0,507946167 | 0,081 | 0,146 | 1         | 0,703222839   | 1,422024348     | 0,554794521     |
| CDC37                                                                              | 0,201547602 | -0,508008794 | 0,129 | 0,195 | 1         | 0,703192314   | 1,422086079     | 0,661538462     |
| ABLIM2                                                                             | 0,009700686 | -0,508135402 | 0,002 | 0,024 | 1         | 0,703130606   | 1,422210883     | 0,083333333     |
| SPDYE3                                                                             | 0,009700686 | -0,508827393 | 0,002 | 0,024 | 1         | 0,702793429   | 1,422893213     | 0,083333333     |
| SOCS3                                                                              | 0,028679046 | -0,508840398 | 0,032 | 0,098 | 1         | 0,702787093   | 1,42290604      | 0,326530612     |
| CDADC1                                                                             | 0,006188645 | -0,509583262 | 0,014 | 0,073 | 1         | 0,702425311   | 1,423638903     | 0,191780822     |
| SPTBN1                                                                             | 0,132452793 | -0,510140571 | 0,287 | 0,39  | 1         | 0,702154019   | 1,424188957     | 0,735897436     |
| SRP68                                                                              | 0,06450655  | -0,51050282  | 0,013 | 0,049 | 1         | 0,701977736   | 1,424546604     | 0,265306122     |
| RGCC                                                                               | 0,565810436 | -0,511470921 | 0,053 | 0,073 | 1         | 0,701506841   | 1,425502848     | 0,726027397     |
| NDUFV2                                                                             | 0,089231349 | -0,511882153 | 0,188 | 0,293 | 1         | 0,701306909   | 1,425909237     | 0,641638225     |
| TRAM1                                                                              | 0,084535321 | -0,512441629 | 0,108 | 0,195 | 1         | 0,701034996   | 1,42646231      | 0,553846154     |
| ZNF428                                                                             | 0,124319505 | -0,512732058 | 0,188 | 0,293 | 1         | 0,700893885   | 1,426749501     | 0,641638225     |

Supplementary Table 3

| Differentially expressed genes_keloid-MD_ comparing SC-Keloid vs. (SC-Myel+Nonmyel) |             |              |       |       |           |               |                 |                 |
|-------------------------------------------------------------------------------------|-------------|--------------|-------|-------|-----------|---------------|-----------------|-----------------|
| gene                                                                                | p_val       | avg_log2FC   | pct.1 | pct.2 | p_val_adj | Foldchange_UP | Foldchange_DOWN | Ratio_pct1_pct2 |
| SDC3                                                                                | 0,081222215 | -0,512984986 | 0,177 | 0,293 | 1         | 0,700771017   | 1,426999655     | 0,604095563     |
| TBRG1                                                                               | 0,258041216 | -0,513473382 | 0,038 | 0,073 | 1         | 0,700533825   | 1,42748282      | 0,520547945     |
| SS18L1                                                                              | 0,042057731 | -0,513520397 | 0,011 | 0,049 | 1         | 0,700510997   | 1,427529339     | 0,224489796     |
| NAPA                                                                                | 0,019175889 | -0,513702407 | 0,041 | 0,122 | 1         | 0,700422626   | 1,427709447     | 0,336065574     |
| ARMCX1                                                                              | 0,016230095 | -0,513743326 | 0,018 | 0,073 | 1         | 0,70040276    | 1,427749942     | 0,246575342     |
| PEX5L                                                                               | 0,009700686 | -0,514427501 | 0,002 | 0,024 | 1         | 0,700070684   | 1,42842719      | 0,083333333     |
| AK1                                                                                 | 0,012904719 | -0,514784242 | 0,008 | 0,049 | 1         | 0,699897596   | 1,428780447     | 0,163265306     |
| DENND2B                                                                             | 0,0316918   | -0,514832278 | 0,059 | 0,146 | 1         | 0,699874293   | 1,42882802      | 0,404109589     |
| RAB34                                                                               | 0,052874751 | -0,515416136 | 0,099 | 0,195 | 1         | 0,699591111   | 1,429406383     | 0,507692308     |
| SKIV2L                                                                              | 0,012733968 | -0,515451896 | 0,008 | 0,049 | 1         | 0,699573771   | 1,429441814     | 0,163265306     |
| RAB11B                                                                              | 0,179134308 | -0,515586349 | 0,049 | 0,098 | 1         | 0,699508576   | 1,429575038     | 0,5             |
| OLFM1                                                                               | 0,010291777 | -0,515611249 | 0,016 | 0,073 | 1         | 0,699496503   | 1,429599712     | 0,219178082     |
| PSMD13                                                                              | 0,226409134 | -0,515931745 | 0,093 | 0,146 | 1         | 0,699341127   | 1,429917335     | 0,636986301     |
| CNOT9                                                                               | 0,003357237 | -0,516760611 | 0,013 | 0,073 | 1         | 0,698939453   | 1,430739095     | 0,178082192     |
| GPATCH1                                                                             | 0,00066169  | -0,516920779 | 0,01  | 0,073 | 1         | 0,698861861   | 1,430897945     | 0,136986301     |
| FIS1                                                                                | 0,006763367 | -0,517157346 | 0,289 | 0,512 | 1         | 0,698747273   | 1,431132597     | 0,564453125     |
| MOB3A                                                                               | 0,048947161 | -0,51749107  | 0,003 | 0,024 | 1         | 0,698585658   | 1,431463684     | 0,125           |
| AC005498.3                                                                          | 9,44793E-05 | -0,517714844 | 0     | 0,024 | 1         | 0,69847731    | 1,431685733     | 0               |
| UNC5CL                                                                              | 9,44793E-05 | -0,517714844 | 0     | 0,024 | 1         | 0,69847731    | 1,431685733     | 0               |
| ZNF429                                                                              | 9,44793E-05 | -0,517714844 | 0     | 0,024 | 1         | 0,69847731    | 1,431685733     | 0               |
| RBM4B                                                                               | 0,155366769 | -0,518392682 | 0,018 | 0,049 | 1         | 0,698149214   | 1,432358556     | 0,367346939     |
| KCTD9                                                                               | 0,006759141 | -0,518518579 | 0,046 | 0,146 | 1         | 0,698088292   | 1,432483557     | 0,315068493     |
| CDC14B                                                                              | 0,31081185  | -0,518544074 | 0,024 | 0,049 | 1         | 0,698075956   | 1,432508872     | 0,489795918     |
| WDR18                                                                               | 0,000255806 | -0,518551424 | 0,022 | 0,122 | 1         | 0,698072399   | 1,43251617      | 0,180327869     |
| DPF2                                                                                | 0,017876937 | -0,518747625 | 0,029 | 0,098 | 1         | 0,697977471   | 1,432711        | 0,295918367     |
| PRRC2B                                                                              | 0,314425465 | -0,519000031 | 0,059 | 0,098 | 1         | 0,697855367   | 1,432961682     | 0,602040816     |
| VPS26C                                                                              | 0,343429792 | -0,519199496 | 0,043 | 0,073 | 1         | 0,697758889   | 1,433159814     | 0,589041096     |
| H2BC11                                                                              | 0,009700686 | -0,519300693 | 0,002 | 0,024 | 1         | 0,697709947   | 1,433260346     | 0,083333333     |
| MAN2A2                                                                              | 0,023759144 | -0,519449726 | 0,03  | 0,098 | 1         | 0,697637876   | 1,433408412     | 0,306122449     |
| PIK3R1                                                                              | 0,004872389 | -0,5195488   | 0,211 | 0,415 | 1         | 0,697589969   | 1,433506851     | 0,508433735     |

Supplementary Table 3

| Differentially expressed genes_keloid-MD_comparing SC-Keloid vs. (SC-Myel+Nonmyel) |             |              |       |       |             |               |                 |                 |
|------------------------------------------------------------------------------------|-------------|--------------|-------|-------|-------------|---------------|-----------------|-----------------|
| gene                                                                               | p_val       | avg_log2FC   | pct.1 | pct.2 | p_val_adj   | Foldchange_UP | Foldchange_DOWN | Ratio_pct1_pct2 |
| SOWAHC                                                                             | 0,000199509 | -0,519634342 | 0,014 | 0,098 | 1           | 0,697548608   | 1,433591851     | 0,142857143     |
| YRDC                                                                               | 0,315217644 | -0,519715001 | 0,024 | 0,049 | 1           | 0,69750961    | 1,433672004     | 0,489795918     |
| HSBP1L1                                                                            | 0,276254967 | -0,519775191 | 0,008 | 0,024 | 1           | 0,69748051    | 1,433731819     | 0,333333333     |
| ASPA                                                                               | 0,076236838 | -0,520068478 | 0,053 | 0,122 | 1           | 0,697338733   | 1,434023313     | 0,43442623      |
| CLDN11                                                                             | 0,005381463 | -0,520346014 | 0,006 | 0,049 | 1           | 0,697204596   | 1,434299207     | 0,12244898      |
| GPR183                                                                             | 0,048947161 | -0,520592087 | 0,003 | 0,024 | 1           | 0,697085688   | 1,434543869     | 0,125           |
| RHBDF1                                                                             | 0,006928114 | -0,520951333 | 0,035 | 0,122 | 1           | 0,696912128   | 1,434901129     | 0,286885246     |
| NUP214                                                                             | 0,01699263  | -0,521255711 | 0,018 | 0,073 | 1           | 0,69676511    | 1,435203895     | 0,246575342     |
| ADD1                                                                               | 0,019879942 | -0,521419007 | 0,085 | 0,195 | 1           | 0,696686249   | 1,435366352     | 0,435897436     |
| MIER1                                                                              | 0,041834056 | -0,521579795 | 0,078 | 0,171 | 1           | 0,696608608   | 1,435526332     | 0,456140351     |
| ACOX2                                                                              | 0,048947161 | -0,521589217 | 0,003 | 0,024 | 1           | 0,696604058   | 1,435535708     | 0,125           |
| CCDC65                                                                             | 9,44793E-05 | -0,521593601 | 0     | 0,024 | 1           | 0,696601942   | 1,43554007      | 0               |
| RND1                                                                               | 9,44793E-05 | -0,521593601 | 0     | 0,024 | 1           | 0,696601942   | 1,43554007      | 0               |
| SLC35F4                                                                            | 9,44793E-05 | -0,521593601 | 0     | 0,024 | 1           | 0,696601942   | 1,43554007      | 0               |
| ABCC5                                                                              | 0,313744509 | -0,522111462 | 0,024 | 0,049 | 1           | 0,696351939   | 1,436055455     | 0,489795918     |
| KLHL20                                                                             | 0,00988482  | -0,522375386 | 0,016 | 0,073 | 1           | 0,696224561   | 1,436318188     | 0,219178082     |
| ARMCX6                                                                             | 0,023708808 | -0,522592291 | 0,043 | 0,122 | 1           | 0,696119893   | 1,436534151     | 0,352459016     |
| ATP5ME                                                                             | 0,280076009 | -0,522760759 | 0,415 | 0,488 | 1           | 0,69603861    | 1,436701909     | 0,850409836     |
| DNAJC30                                                                            | 0,025308197 | -0,52313049  | 0,01  | 0,049 | 1           | 0,695860253   | 1,437070152     | 0,204081633     |
| MID2                                                                               | 9,44793E-05 | -0,523161604 | 0     | 0,024 | 1           | 0,695845246   | 1,437101145     | 0               |
| WNK3                                                                               | 0,005381463 | -0,523769093 | 0,006 | 0,049 | 1           | 0,695552302   | 1,437706406     | 0,12244898      |
| ICE2                                                                               | 0,111457882 | -0,523970004 | 0,029 | 0,073 | 1           | 0,695455445   | 1,437906636     | 0,397260274     |
| CD81                                                                               | 0,03661663  | -0,524018191 | 0,536 | 0,659 | 1           | 0,695432217   | 1,437954664     | 0,813353566     |
| SLC25A4                                                                            | 0,056192959 | -0,524074823 | 0,037 | 0,098 | 1           | 0,695404919   | 1,438011111     | 0,37755102      |
| AVPI1                                                                              | 0,000217749 | -0,524308295 | 0,008 | 0,073 | 1           | 0,69529239    | 1,438243844     | 0,109589041     |
| METTL9                                                                             | 0,050891335 | -0,524429968 | 0,081 | 0,171 | 1           | 0,695233754   | 1,438365146     | 0,473684211     |
| RHOJ                                                                               | 0,259073007 | -0,524725055 | 0,038 | 0,073 | 1           | 0,695091566   | 1,438659378     | 0,520547945     |
| RC3H2                                                                              | 0,493537897 | -0,524735599 | 0,051 | 0,073 | 1           | 0,695086486   | 1,438669893     | 0,698630137     |
| ZSCAN30                                                                            | 0,045226252 | -0,524922405 | 0,022 | 0,073 | 1           | 0,694996489   | 1,43885619      | 0,301369863     |
| FCGR2B                                                                             | 7,54298E-06 | -0,52502608  | 0,005 | 0,073 | 0,159164324 | 0,694946547   | 1,438959592     | 0,068493151     |

Supplementary Table 3

| Differentially expressed genes_keloid-MD_ comparing SC-Keloid vs. (SC-Myel+Nonmyel) |             |              |       |       |             |               |                 |                 |
|-------------------------------------------------------------------------------------|-------------|--------------|-------|-------|-------------|---------------|-----------------|-----------------|
| gene                                                                                | p_val       | avg_log2FC   | pct.1 | pct.2 | p_val_adj   | Foldchange_UP | Foldchange_DOWN | Ratio_pct1_pct2 |
| LIN37                                                                               | 0,009700686 | -0,525357037 | 0,002 | 0,024 | 1           | 0,694787143   | 1,439289731     | 0,083333333     |
| HGH1                                                                                | 3,19985E-08 | -0,525428996 | 0     | 0,049 | 0,000675201 | 0,694752489   | 1,439361521     | 0               |
| ADAMTS9-AS2                                                                         | 5,24294E-05 | -0,525454462 | 0,006 | 0,073 | 1           | 0,694740226   | 1,439386929     | 0,082191781     |
| LIN9                                                                                | 0,009700686 | -0,525679611 | 0,002 | 0,024 | 1           | 0,694631812   | 1,439611579     | 0,083333333     |
| AIF1L                                                                               | 0,004192283 | -0,526112906 | 0,022 | 0,098 | 1           | 0,69442322    | 1,440044013     | 0,224489796     |
| ESD                                                                                 | 0,239850408 | -0,526600632 | 0,132 | 0,195 | 1           | 0,694188499   | 1,440530925     | 0,676923077     |
| NSMCE1                                                                              | 0,181282705 | -0,526760893 | 0,033 | 0,073 | 1           | 0,694111389   | 1,440690955     | 0,452054795     |
| CTCF                                                                                | 0,003659483 | -0,526806492 | 0,032 | 0,122 | 1           | 0,694089451   | 1,440736491     | 0,262295082     |
| KPTN                                                                                | 2,37674E-07 | -0,52738187  | 0,006 | 0,098 | 0,00501515  | 0,693812689   | 1,441311202     | 0,06122449      |
| LIMCH1                                                                              | 0,233421859 | -0,527396506 | 0,037 | 0,073 | 1           | 0,69380565    | 1,441325824     | 0,506849315     |
| ARHGAP1                                                                             | 0,045175259 | -0,528098591 | 0,035 | 0,098 | 1           | 0,693468093   | 1,442027413     | 0,357142857     |
| SSBP2                                                                               | 0,006397304 | -0,528353807 | 0,024 | 0,098 | 1           | 0,693345428   | 1,442282534     | 0,244897959     |
| MRPL37                                                                              | 0,313744509 | -0,528509272 | 0,024 | 0,049 | 1           | 0,693270716   | 1,442437963     | 0,489795918     |
| TCEA2                                                                               | 0,039219546 | -0,528837388 | 0,062 | 0,146 | 1           | 0,693113062   | 1,442766057     | 0,424657534     |
| SAP30                                                                               | 0,000929933 | -0,528981739 | 0,046 | 0,171 | 1           | 0,693043715   | 1,442910423     | 0,269005848     |
| NFE2L2                                                                              | 0,001997074 | -0,530074681 | 0,1   | 0,268 | 1           | 0,692518885   | 1,444003942     | 0,373134328     |
| AATF                                                                                | 0,001152809 | -0,530102583 | 0,027 | 0,122 | 1           | 0,692505492   | 1,44403187      | 0,221311475     |
| SCAF4                                                                               | 0,063934846 | -0,530133903 | 0,013 | 0,049 | 1           | 0,692490458   | 1,444063219     | 0,265306122     |
| MIGA1                                                                               | 0,001208795 | -0,531056925 | 0,027 | 0,122 | 1           | 0,692047551   | 1,444987412     | 0,221311475     |
| KANK2                                                                               | 0,146233503 | -0,531575168 | 0,083 | 0,146 | 1           | 0,691798999   | 1,445506572     | 0,568493151     |
| SCFD2                                                                               | 0,009700686 | -0,532273103 | 0,002 | 0,024 | 1           | 0,691464408   | 1,446206036     | 0,083333333     |
| CNTN4                                                                               | 3,19985E-08 | -0,532542765 | 0     | 0,049 | 0,000675201 | 0,691335174   | 1,44647638      | 0               |
| NUDT1                                                                               | 0,246287952 | -0,532556071 | 0,134 | 0,195 | 1           | 0,691328798   | 1,44648972      | 0,687179487     |
| HEPH                                                                                | 5,13797E-05 | -0,532567858 | 0,006 | 0,073 | 1           | 0,69132315    | 1,446501538     | 0,082191781     |
| ALCAM                                                                               | 0,019412652 | -0,53391787  | 0,041 | 0,122 | 1           | 0,690676542   | 1,447855746     | 0,336065574     |
| KBTBD8                                                                              | 9,44793E-05 | -0,535232582 | 0     | 0,024 | 1           | 0,690047423   | 1,449175762     | 0               |
| SMO                                                                                 | 9,44793E-05 | -0,535232582 | 0     | 0,024 | 1           | 0,690047423   | 1,449175762     | 0               |
| ZNF541                                                                              | 9,44793E-05 | -0,535232582 | 0     | 0,024 | 1           | 0,690047423   | 1,449175762     | 0               |
| ORC3                                                                                | 0,000849329 | -0,535827737 | 0,018 | 0,098 | 1           | 0,689762816   | 1,449773715     | 0,183673469     |
| ADHFE1                                                                              | 0,009700686 | -0,536244964 | 0,002 | 0,024 | 1           | 0,689563366   | 1,450193049     | 0,083333333     |

Supplementary Table 3

| Differentially expressed genes_keloid-MD_comparing SC-Keloid vs. (SC-Myel+Nonmyel) |             |              |       |       |             |               |                 |                 |
|------------------------------------------------------------------------------------|-------------|--------------|-------|-------|-------------|---------------|-----------------|-----------------|
| gene                                                                               | p_val       | avg_log2FC   | pct.1 | pct.2 | p_val_adj   | Foldchange_UP | Foldchange_DOWN | Ratio_pct1_pct2 |
| IGBP1                                                                              | 0,07718773  | -0,536292964 | 0,04  | 0,098 | 1           | 0,689540424   | 1,450241299     | 0,408163265     |
| ZNF260                                                                             | 0,016531424 | -0,536905692 | 0,018 | 0,073 | 1           | 0,689247631   | 1,450857363     | 0,246575342     |
| PPCS                                                                               | 0,380672611 | -0,536938857 | 0,065 | 0,098 | 1           | 0,689231786   | 1,450890716     | 0,663265306     |
| SMIM7                                                                              | 0,04616336  | -0,537324551 | 0,113 | 0,22  | 1           | 0,68904755    | 1,451278653     | 0,513636364     |
| R3HDM1                                                                             | 0,057832235 | -0,537478315 | 0,024 | 0,073 | 1           | 0,688974114   | 1,45143334      | 0,328767123     |
| ZNF567                                                                             | 0,042910262 | -0,538008258 | 0,011 | 0,049 | 1           | 0,688721081   | 1,451966591     | 0,224489796     |
| BCL2L2                                                                             | 0,012733968 | -0,538056615 | 0,008 | 0,049 | 1           | 0,688697996   | 1,452015259     | 0,163265306     |
| TOR1A                                                                              | 0,045713083 | -0,53897372  | 0,035 | 0,098 | 1           | 0,688260338   | 1,452938583     | 0,357142857     |
| LTV1                                                                               | 0,016735226 | -0,539333073 | 0,029 | 0,098 | 1           | 0,688088924   | 1,453300532     | 0,295918367     |
| TAF11                                                                              | 0,110541513 | -0,539712467 | 0,073 | 0,146 | 1           | 0,687907997   | 1,453682766     | 0,5             |
| CCN5                                                                               | 0,001487667 | -0,539754857 | 0,011 | 0,073 | 1           | 0,687887785   | 1,453725479     | 0,150684932     |
| MTCO2P12                                                                           | 0,091314481 | -0,540565649 | 0,737 | 0,707 | 1           | 0,687501302   | 1,4545427       | 1,042432815     |
| GTF2F1                                                                             | 0,342245436 | -0,540838714 | 0,043 | 0,073 | 1           | 0,687371188   | 1,454818033     | 0,589041096     |
| ADI1                                                                               | 0,146609842 | -0,540999407 | 0,121 | 0,195 | 1           | 0,68729463    | 1,454980086     | 0,620512821     |
| SELENOP                                                                            | 8,48295E-05 | -0,54112335  | 0,013 | 0,098 | 1           | 0,687235587   | 1,45510509      | 0,132653061     |
| VDAC3                                                                              | 0,210206176 | -0,54143156  | 0,11  | 0,171 | 1           | 0,687088785   | 1,455415984     | 0,643274854     |
| IL11RA                                                                             | 0,003357237 | -0,54150436  | 0,013 | 0,073 | 1           | 0,687054115   | 1,455489427     | 0,178082192     |
| PSD4                                                                               | 0,113762049 | -0,541898596 | 0,005 | 0,024 | 1           | 0,686866394   | 1,455887214     | 0,208333333     |
| PEG3                                                                               | 9,44793E-05 | -0,542749488 | 0     | 0,024 | 1           | 0,686461403   | 1,45674614      | 0               |
| SLC7A7                                                                             | 9,44793E-05 | -0,542749488 | 0     | 0,024 | 1           | 0,686461403   | 1,45674614      | 0               |
| ZSCAN32                                                                            | 1,19732E-05 | -0,542889646 | 0,002 | 0,049 | 0,252647346 | 0,686394717   | 1,45688767      | 0,040816327     |
| CALML3                                                                             | 1,27911E-05 | -0,542970122 | 0,002 | 0,049 | 0,269904161 | 0,68635643    | 1,45696894      | 0,040816327     |
| DFFA                                                                               | 0,566072795 | -0,543117365 | 0,033 | 0,049 | 1           | 0,686286383   | 1,457117648     | 0,673469388     |
| COBL                                                                               | 0,236148807 | -0,543344589 | 0,073 | 0,122 | 1           | 0,686178302   | 1,457347161     | 0,598360656     |
| SAMHD1                                                                             | 0,004773625 | -0,543517221 | 0,033 | 0,122 | 1           | 0,686096199   | 1,457521556     | 0,270491803     |
| AQP7                                                                               | 0,000252244 | -0,543676945 | 0,003 | 0,049 | 1           | 0,686020244   | 1,457682932     | 0,06122449      |
| DNAJC6                                                                             | 1,23757E-05 | -0,543810073 | 0,002 | 0,049 | 0,261139758 | 0,685956943   | 1,457817449     | 0,040816327     |
| CCDC159                                                                            | 0,001540594 | -0,543884214 | 0,005 | 0,049 | 1           | 0,685921692   | 1,457892368     | 0,102040816     |
| LRRCC1                                                                             | 0,019636091 | -0,543985171 | 0,056 | 0,146 | 1           | 0,685873694   | 1,457994392     | 0,383561644     |
| LAMTOR4                                                                            | 0,221470358 | -0,544081049 | 0,252 | 0,317 | 1           | 0,685828114   | 1,45809129      | 0,794952681     |

Supplementary Table 3

| Differentially expressed genes_keloid-MD_comparing SC-Keloid vs. (SC-Myel+Nonmyel) |             |              |       |       |             |               |                 |                 |
|------------------------------------------------------------------------------------|-------------|--------------|-------|-------|-------------|---------------|-----------------|-----------------|
| gene                                                                               | p_val       | avg_log2FC   | pct.1 | pct.2 | p_val_adj   | Foldchange_UP | Foldchange_DOWN | Ratio_pct1_pct2 |
| ZHX2                                                                               | 3,19985E-08 | -0,544318331 | 0     | 0,049 | 0,000675201 | 0,685715324   | 1,458331125     | 0               |
| PPTC7                                                                              | 0,006120667 | -0,544383292 | 0,014 | 0,073 | 1           | 0,685684449   | 1,458396791     | 0,191780822     |
| TRPV3                                                                              | 0,012904719 | -0,544404414 | 0,008 | 0,049 | 1           | 0,685674441   | 1,458418143     | 0,163265306     |
| KCNK7                                                                              | 9,44793E-05 | -0,544449015 | 0     | 0,024 | 1           | 0,685653213   | 1,458463231     | 0               |
| LCP2                                                                               | 9,44793E-05 | -0,544449015 | 0     | 0,024 | 1           | 0,685653213   | 1,458463231     | 0               |
| PLA2G5                                                                             | 9,44793E-05 | -0,544449015 | 0     | 0,024 | 1           | 0,685653213   | 1,458463231     | 0               |
| SERPINB4                                                                           | 9,44793E-05 | -0,544449015 | 0     | 0,024 | 1           | 0,685653213   | 1,458463231     | 0               |
| TPD52                                                                              | 9,44793E-05 | -0,544449015 | 0     | 0,024 | 1           | 0,685653213   | 1,458463231     | 0               |
| CIB2                                                                               | 0,016531424 | -0,544952549 | 0,018 | 0,073 | 1           | 0,685413946   | 1,458972357     | 0,246575342     |
| MED10                                                                              | 0,103563599 | -0,545835072 | 0,094 | 0,171 | 1           | 0,684994794   | 1,45986511      | 0,549707602     |
| MYBL1                                                                              | 0,443091335 | -0,545944364 | 0,011 | 0,024 | 1           | 0,684942903   | 1,459975708     | 0,458333333     |
| DNAJC14                                                                            | 0,06450649  | -0,546034652 | 0,013 | 0,049 | 1           | 0,684900039   | 1,460067079     | 0,265306122     |
| SRPK1                                                                              | 0,425810682 | -0,54639396  | 0,048 | 0,073 | 1           | 0,684729484   | 1,46043076      | 0,657534247     |
| ERP29                                                                              | 0,105285771 | -0,546497075 | 0,094 | 0,171 | 1           | 0,684680545   | 1,460535146     | 0,549707602     |
| VTI1A                                                                              | 0,073028287 | -0,547564931 | 0,026 | 0,073 | 1           | 0,684173945   | 1,461616607     | 0,356164384     |
| TAP2                                                                               | 0,001637633 | -0,548207184 | 0,019 | 0,098 | 1           | 0,683869435   | 1,462267428     | 0,193877551     |
| KPNA6                                                                              | 0,038020898 | -0,549215798 | 0,048 | 0,122 | 1           | 0,683391497   | 1,463290083     | 0,393442623     |
| NCAM2                                                                              | 0,005080862 | -0,549490375 | 0,045 | 0,146 | 1           | 0,683261444   | 1,463568606     | 0,308219178     |
| TAOK1                                                                              | 0,050912451 | -0,550312235 | 0,134 | 0,244 | 1           | 0,682872322   | 1,464402595     | 0,549180328     |
| CCDC32                                                                             | 0,03326677  | -0,550434104 | 0,021 | 0,073 | 1           | 0,68281464    | 1,464526302     | 0,287671233     |
| FOXO3                                                                              | 0,482751383 | -0,550502286 | 0,03  | 0,049 | 1           | 0,682782371   | 1,464595518     | 0,612244898     |
| NFYC                                                                               | 0,155587981 | -0,551314007 | 0,032 | 0,073 | 1           | 0,682398317   | 1,465419793     | 0,438356164     |
| APIP                                                                               | 0,157910369 | -0,55140124  | 0,032 | 0,073 | 1           | 0,682357056   | 1,465508403     | 0,438356164     |
| ADGRL3                                                                             | 3,19985E-08 | -0,552222476 | 0     | 0,049 | 0,000675201 | 0,681968744   | 1,466342862     | 0               |
| HNRNPH2                                                                            | 0,017361345 | -0,553475749 | 0,029 | 0,098 | 1           | 0,681376573   | 1,467617232     | 0,295918367     |
| AXIN1                                                                              | 0,025019654 | -0,55431992  | 0,01  | 0,049 | 1           | 0,680977993   | 1,468476237     | 0,204081633     |
| RAB20                                                                              | 3,19985E-08 | -0,554747658 | 0     | 0,049 | 0,000675201 | 0,680776122   | 1,468911684     | 0               |
| MGAT4C                                                                             | 9,44793E-05 | -0,554876775 | 0     | 0,024 | 1           | 0,680715198   | 1,469043152     | 0               |
| POLD2                                                                              | 0,067304257 | -0,554891116 | 0,038 | 0,098 | 1           | 0,680708431   | 1,469057755     | 0,387755102     |
| MPST                                                                               | 0,009109312 | -0,555253752 | 0,037 | 0,122 | 1           | 0,68053735    | 1,469427064     | 0,303278689     |

Supplementary Table 3

| Differentially expressed genes_keloid-MD_ comparing SC-Keloid vs. (SC-Myel+Nonmyel) |             |              |       |       |             |               |                 |                 |
|-------------------------------------------------------------------------------------|-------------|--------------|-------|-------|-------------|---------------|-----------------|-----------------|
| gene                                                                                | p_val       | avg_log2FC   | pct.1 | pct.2 | p_val_adj   | Foldchange_UP | Foldchange_DOWN | Ratio_pct1_pct2 |
| ZNF83                                                                               | 0,016230095 | -0,555505842 | 0,018 | 0,073 | 1           | 0,680418446   | 1,469683847     | 0,246575342     |
| CHCHD10                                                                             | 0,060692441 | -0,555875745 | 0,069 | 0,146 | 1           | 0,680244011   | 1,470060719     | 0,47260274      |
| PAX3                                                                                | 6,69941E-05 | -0,555988751 | 0,019 | 0,122 | 1           | 0,68019073    | 1,470175873     | 0,155737705     |
| ZSWIM6                                                                              | 0,04544351  | -0,556211863 | 0,035 | 0,098 | 1           | 0,680085547   | 1,470403253     | 0,357142857     |
| EFHC1                                                                               | 0,173787979 | -0,556595215 | 0,033 | 0,073 | 1           | 0,679904859   | 1,470794019     | 0,452054795     |
| GRPEL1                                                                              | 0,906958691 | -0,556603537 | 0,046 | 0,049 | 1           | 0,679900937   | 1,470802503     | 0,93877551      |
| FBXL12                                                                              | 0,005381463 | -0,556636324 | 0,006 | 0,049 | 1           | 0,679885485   | 1,47083593      | 0,12244898      |
| ALKBH3                                                                              | 0,00988482  | -0,557059503 | 0,016 | 0,073 | 1           | 0,679686087   | 1,471267426     | 0,219178082     |
| RNF4                                                                                | 0,023892748 | -0,55727347  | 0,019 | 0,073 | 1           | 0,67958529    | 1,471485647     | 0,260273973     |
| PPA1                                                                                | 0,11638979  | -0,558789958 | 0,078 | 0,146 | 1           | 0,67887132    | 1,473033211     | 0,534246575     |
| TSN                                                                                 | 0,033749261 | -0,558975241 | 0,046 | 0,122 | 1           | 0,678784139   | 1,473222403     | 0,37704918      |
| ANKRD65                                                                             | 0,000217749 | -0,559106673 | 0,008 | 0,073 | 1           | 0,678722303   | 1,473356622     | 0,109589041     |
| MEG3                                                                                | 0,471838284 | -0,559459121 | 0,136 | 0,171 | 1           | 0,678556513   | 1,473716604     | 0,795321637     |
| SCAMP4                                                                              | 0,023490648 | -0,55950442  | 0,019 | 0,073 | 1           | 0,678535207   | 1,473762878     | 0,260273973     |
| RDX                                                                                 | 0,09837223  | -0,559529107 | 0,225 | 0,341 | 1           | 0,678523596   | 1,473788097     | 0,659824047     |
| HBB                                                                                 | 0,000869435 | -0,559789143 | 0,018 | 0,098 | 1           | 0,678401308   | 1,474053762     | 0,183673469     |
| IFI35                                                                               | 1,18138E-05 | -0,560267215 | 0,016 | 0,122 | 0,24928273  | 0,67817654    | 1,474542306     | 0,131147541     |
| MTMR6                                                                               | 0,161047668 | -0,560764936 | 0,032 | 0,073 | 1           | 0,677942614   | 1,475051102     | 0,438356164     |
| RPL38                                                                               | 0,100412575 | -0,560995841 | 0,466 | 0,537 | 1           | 0,677834117   | 1,475287205     | 0,867783985     |
| PTPN1                                                                               | 0,336362711 | -0,562350304 | 0,043 | 0,073 | 1           | 0,677198037   | 1,476672917     | 0,589041096     |
| DHH                                                                                 | 9,20921E-09 | -0,562468811 | 0,002 | 0,073 | 0,000194324 | 0,677142412   | 1,47679422      | 0,02739726      |
| NXPE3                                                                               | 0,009354324 | -0,563031774 | 0,026 | 0,098 | 1           | 0,676878232   | 1,477370601     | 0,265306122     |
| NHP2                                                                                | 0,207637254 | -0,563354553 | 0,105 | 0,171 | 1           | 0,676726808   | 1,477701175     | 0,614035088     |
| ZNF37A                                                                              | 0,043606468 | -0,563373314 | 0,022 | 0,073 | 1           | 0,676718008   | 1,477720391     | 0,301369863     |
| RPSA                                                                                | 0,025726061 | -0,563859507 | 0,351 | 0,512 | 1           | 0,67648999    | 1,478218472     | 0,685546875     |
| COQ5                                                                                | 0,062803989 | -0,563964945 | 0,013 | 0,049 | 1           | 0,676440552   | 1,47832651      | 0,265306122     |
| MAP3K4                                                                              | 0,12062336  | -0,56428014  | 0,016 | 0,049 | 1           | 0,676292781   | 1,478649525     | 0,326530612     |
| GALNT2                                                                              | 0,052640705 | -0,564418308 | 0,081 | 0,171 | 1           | 0,676228015   | 1,478791143     | 0,473684211     |
| FAM184B                                                                             | 0,09029307  | -0,565432559 | 0,014 | 0,049 | 1           | 0,675752777   | 1,479831136     | 0,285714286     |
| DPY19L4                                                                             | 0,03326677  | -0,565807462 | 0,021 | 0,073 | 1           | 0,675577197   | 1,48021574      | 0,287671233     |

Supplementary Table 3

| Differentially expressed genes_keloid-MD_comparing SC-Keloid vs. (SC-Myel+Nonmyel) |             |              |       |       |             |               |                 |                 |
|------------------------------------------------------------------------------------|-------------|--------------|-------|-------|-------------|---------------|-----------------|-----------------|
| gene                                                                               | p_val       | avg_log2FC   | pct.1 | pct.2 | p_val_adj   | Foldchange_UP | Foldchange_DOWN | Ratio_pct1_pct2 |
| ZFP37                                                                              | 0,005214273 | -0,56698076  | 0,006 | 0,049 | 1           | 0,675027995   | 1,481420042     | 0,12244898      |
| DDHD1                                                                              | 0,000718795 | -0,567396735 | 0,026 | 0,122 | 1           | 0,674833391   | 1,481847244     | 0,213114754     |
| APLP2                                                                              | 0,091662649 | -0,5678964   | 0,131 | 0,22  | 1           | 0,674599708   | 1,482360558     | 0,595454545     |
| MRPL22                                                                             | 0,113701892 | -0,568276896 | 0,112 | 0,195 | 1           | 0,674421813   | 1,482751567     | 0,574358974     |
| ARHGAP19                                                                           | 0,001570499 | -0,568736546 | 0,005 | 0,049 | 1           | 0,674206973   | 1,483224054     | 0,102040816     |
| ADAMTS9                                                                            | 0,004434856 | -0,570249835 | 0,022 | 0,098 | 1           | 0,673500147   | 1,484780672     | 0,224489796     |
| SH3D19                                                                             | 0,640051691 | -0,570876055 | 0,035 | 0,049 | 1           | 0,673207869   | 1,485425299     | 0,714285714     |
| TERF1                                                                              | 0,124154057 | -0,57098157  | 0,061 | 0,122 | 1           | 0,673158634   | 1,485533943     | 0,5             |
| ANAPC4                                                                             | 0,016837655 | -0,571003683 | 0,018 | 0,073 | 1           | 0,673148316   | 1,485556713     | 0,246575342     |
| JUND                                                                               | 0,035661529 | -0,571380562 | 0,493 | 0,659 | 1           | 0,672972491   | 1,485944839     | 0,748103187     |
| DCN                                                                                | 0,013519471 | -0,571388594 | 0,08  | 0,195 | 1           | 0,672968744   | 1,485953112     | 0,41025641      |
| SOX5                                                                               | 0,079594694 | -0,572047751 | 0,056 | 0,122 | 1           | 0,67266134    | 1,486632188     | 0,459016393     |
| YIPF6                                                                              | 0,040494448 | -0,572224044 | 0,048 | 0,122 | 1           | 0,672579147   | 1,486813862     | 0,393442623     |
| MXRA8                                                                              | 0,026514952 | -0,572355608 | 0,14  | 0,268 | 1           | 0,672517816   | 1,486949455     | 0,52238806      |
| STARD13                                                                            | 0,01085889  | -0,572406638 | 0,064 | 0,171 | 1           | 0,672494028   | 1,487002052     | 0,374269006     |
| NME3                                                                               | 0,010122936 | -0,572682953 | 0,185 | 0,366 | 1           | 0,67236524    | 1,48728688      | 0,505464481     |
| TAB2                                                                               | 0,204595577 | -0,572904998 | 0,053 | 0,098 | 1           | 0,672261764   | 1,487515806     | 0,540816327     |
| YJU2                                                                               | 0,025308197 | -0,573044073 | 0,01  | 0,049 | 1           | 0,672196962   | 1,487659208     | 0,204081633     |
| LIMS2                                                                              | 0,001549953 | -0,573716669 | 0,011 | 0,073 | 1           | 0,671883651   | 1,488352928     | 0,150684932     |
| NAV2                                                                               | 0,197767964 | -0,573953214 | 0,035 | 0,073 | 1           | 0,671773498   | 1,48859698      | 0,479452055     |
| OARD1                                                                              | 0,07210488  | -0,574297663 | 0,026 | 0,073 | 1           | 0,671613128   | 1,488952431     | 0,356164384     |
| ZBED3                                                                              | 4,90088E-07 | -0,574514436 | 0,003 | 0,073 | 0,010341346 | 0,671512222   | 1,489176171     | 0,04109589      |
| GPSM2                                                                              | 0,108783591 | -0,574663702 | 0,077 | 0,146 | 1           | 0,671442749   | 1,489330254     | 0,52739726      |
| BARD1                                                                              | 0,092825526 | -0,575661679 | 0,027 | 0,073 | 1           | 0,670978442   | 1,490360847     | 0,369863014     |
| OCEL1                                                                              | 0,024171051 | -0,576193316 | 0,01  | 0,049 | 1           | 0,670731231   | 1,49091015      | 0,204081633     |
| TXNRD2                                                                             | 1,63698E-06 | -0,576832447 | 0,008 | 0,098 | 0,034541966 | 0,670434155   | 1,491570787     | 0,081632653     |
| FAH                                                                                | 0,024733964 | -0,577312942 | 0,01  | 0,049 | 1           | 0,670210901   | 1,492067643     | 0,204081633     |
| VOPP1                                                                              | 4,83489E-05 | -0,577600368 | 0,006 | 0,073 | 1           | 0,670077389   | 1,492364936     | 0,082191781     |
| FMO5                                                                               | 3,19985E-08 | -0,577602288 | 0     | 0,049 | 0,000675201 | 0,670076498   | 1,492366922     | 0               |
| RNF166                                                                             | 0,012904719 | -0,577755809 | 0,008 | 0,049 | 1           | 0,670005197   | 1,492525737     | 0,163265306     |



Supplementary Table 3

| Differentially expressed genes_keloid-MD_ comparing SC-Keloid vs. (SC-Myel+Nonmyel) |             |              |       |       |             |               |                 |                 |
|-------------------------------------------------------------------------------------|-------------|--------------|-------|-------|-------------|---------------|-----------------|-----------------|
| gene                                                                                | p_val       | avg_log2FC   | pct.1 | pct.2 | p_val_adj   | Foldchange_UP | Foldchange_DOWN | Ratio_pct1_pct2 |
| CRTC1                                                                               | 0,042057731 | -0,577835292 | 0,011 | 0,049 | 1           | 0,669968285   | 1,492607967     | 0,224489796     |
| ARSG                                                                                | 0,009700686 | -0,577877253 | 0,002 | 0,024 | 1           | 0,669948799   | 1,49265138      | 0,083333333     |
| SAMD15                                                                              | 0,009700686 | -0,577941265 | 0,002 | 0,024 | 1           | 0,669919074   | 1,492717611     | 0,083333333     |
| PHB                                                                                 | 0,297398466 | -0,578037035 | 0,14  | 0,195 | 1           | 0,669874605   | 1,492816705     | 0,717948718     |
| GJC3                                                                                | 9,44793E-05 | -0,578919043 | 0     | 0,024 | 1           | 0,669465195   | 1,493729634     | 0               |
| PRIMPOL                                                                             | 0,000641705 | -0,578925607 | 0,01  | 0,073 | 1           | 0,669462149   | 1,49373643      | 0,136986301     |
| KHDRBS3                                                                             | 0,006746303 | -0,579150138 | 0,1   | 0,244 | 1           | 0,669357966   | 1,493968923     | 0,409836066     |
| SEC63                                                                               | 0,057646101 | -0,57936272  | 0,067 | 0,146 | 1           | 0,669259343   | 1,494189077     | 0,45890411      |
| ATPAF2                                                                              | 0,001540594 | -0,579417152 | 0,005 | 0,049 | 1           | 0,669234093   | 1,494245452     | 0,102040816     |
| MTDH                                                                                | 0,003610108 | -0,580303209 | 0,233 | 0,463 | 1           | 0,668823197   | 1,495163452     | 0,503239741     |
| RBM11                                                                               | 2,87083E-05 | -0,580544734 | 0,011 | 0,098 | 0,605774103 | 0,668711237   | 1,495413782     | 0,112244898     |
| SLC30A4                                                                             | 0,001570499 | -0,580736967 | 0,005 | 0,049 | 1           | 0,66862214    | 1,495613052     | 0,102040816     |
| H3-3B                                                                               | 0,00171367  | -0,580758314 | 0,777 | 0,829 | 1           | 0,668612247   | 1,495635182     | 0,937273824     |
| DMD                                                                                 | 0,000230522 | -0,581254751 | 0,014 | 0,098 | 1           | 0,668382214   | 1,496149926     | 0,142857143     |
| CLDND1                                                                              | 0,32355984  | -0,581619442 | 0,081 | 0,122 | 1           | 0,668213279   | 1,496528177     | 0,663934426     |
| ALDH7A1                                                                             | 0,001741977 | -0,582133614 | 0,029 | 0,122 | 1           | 0,667975172   | 1,497061629     | 0,237704918     |
| WLS                                                                                 | 0,109833053 | -0,58252381  | 0,147 | 0,244 | 1           | 0,667794534   | 1,497466585     | 0,602459016     |
| RNF126                                                                              | 0,107175871 | -0,583244568 | 0,029 | 0,073 | 1           | 0,667460993   | 1,498214893     | 0,397260274     |
| NTHL1                                                                               | 0,007842866 | -0,583449416 | 0,048 | 0,146 | 1           | 0,667366227   | 1,498427639     | 0,328767123     |
| SNX6                                                                                | 0,036369272 | -0,583662133 | 0,145 | 0,268 | 1           | 0,667267835   | 1,49864859      | 0,541044776     |
| CSRNP1                                                                              | 0,107175871 | -0,583847961 | 0,029 | 0,073 | 1           | 0,667181892   | 1,498841638     | 0,397260274     |
| GLCE                                                                                | 0,006742807 | -0,58407656  | 0,024 | 0,098 | 1           | 0,667076184   | 1,499079152     | 0,244897959     |
| GGPS1                                                                               | 0,393761395 | -0,584133331 | 0,027 | 0,049 | 1           | 0,667049935   | 1,499138143     | 0,551020408     |
| UBL3                                                                                | 0,071060102 | -0,584234999 | 0,067 | 0,146 | 1           | 0,667002928   | 1,499243792     | 0,45890411      |
| WDR76                                                                               | 7,36447E-06 | -0,585402092 | 0,005 | 0,073 | 0,155397639 | 0,666463564   | 1,500457121     | 0,068493151     |
| ZNHIT1                                                                              | 0,123392827 | -0,5856538   | 0,198 | 0,293 | 1           | 0,666347295   | 1,500718931     | 0,675767918     |
| CACNA2D2                                                                            | 9,44793E-05 | -0,585757076 | 0     | 0,024 | 1           | 0,666299596   | 1,500826363     | 0               |
| COX7A2L                                                                             | 0,113472928 | -0,586318084 | 0,18  | 0,268 | 1           | 0,666040548   | 1,50141009      | 0,671641791     |
| SVBP                                                                                | 0,655543259 | -0,586769485 | 0,057 | 0,073 | 1           | 0,665832185   | 1,501879936     | 0,780821918     |
| MOXD1                                                                               | 0,070737719 | -0,587021878 | 0,026 | 0,073 | 1           | 0,665715711   | 1,502142706     | 0,356164384     |

Supplementary Table 3

| Differentially expressed genes_keloid-MD_ comparing SC-Keloid vs. (SC-Myel+Nonmyel) |             |              |       |       |             |               |                 |                 |
|-------------------------------------------------------------------------------------|-------------|--------------|-------|-------|-------------|---------------|-----------------|-----------------|
| gene                                                                                | p_val       | avg_log2FC   | pct.1 | pct.2 | p_val_adj   | Foldchange_UP | Foldchange_DOWN | Ratio_pct1_pct2 |
| UBL4A                                                                               | 0,024451103 | -0,58715085  | 0,01  | 0,049 | 1           | 0,665656201   | 1,502276998     | 0,204081633     |
| LINC00957                                                                           | 1,23757E-05 | -0,587329095 | 0,002 | 0,049 | 0,261139758 | 0,665573964   | 1,502462617     | 0,040816327     |
| ERP44                                                                               | 0,07855429  | -0,589050447 | 0,056 | 0,122 | 1           | 0,664780308   | 1,50425635      | 0,459016393     |
| SPATA6                                                                              | 0,223056554 | -0,589178751 | 0,115 | 0,171 | 1           | 0,66472119    | 1,504390135     | 0,67251462      |
| HSPB1                                                                               | 0,01834427  | -0,590296583 | 0,321 | 0,488 | 1           | 0,664206348   | 1,505556222     | 0,657786885     |
| ARHGEF26                                                                            | 0,005063609 | -0,590408645 | 0,045 | 0,146 | 1           | 0,664154758   | 1,505673171     | 0,308219178     |
| IFI16                                                                               | 0,00433567  | -0,590483929 | 0,14  | 0,317 | 1           | 0,664120101   | 1,505751744     | 0,441640379     |
| SPATS2                                                                              | 0,033006626 | -0,591507943 | 0,021 | 0,073 | 1           | 0,663648881   | 1,506820893     | 0,287671233     |
| ERF                                                                                 | 0,023498528 | -0,592457018 | 0,088 | 0,195 | 1           | 0,663212444   | 1,50781248      | 0,451282051     |
| POLN                                                                                | 9,44793E-05 | -0,592760871 | 0     | 0,024 | 1           | 0,663072776   | 1,508130081     | 0               |
| CTSD                                                                                | 0,282200439 | -0,592810822 | 0,156 | 0,22  | 1           | 0,663049819   | 1,508182299     | 0,709090909     |
| DNAAF9                                                                              | 0,091730987 | -0,593388738 | 0,027 | 0,073 | 1           | 0,662784267   | 1,508786568     | 0,369863014     |
| NMRAL1                                                                              | 0,088861793 | -0,593597235 | 0,014 | 0,049 | 1           | 0,662688489   | 1,509004633     | 0,285714286     |
| WDR73                                                                               | 0,154859762 | -0,594215541 | 0,018 | 0,049 | 1           | 0,662404537   | 1,509651496     | 0,367346939     |
| F3                                                                                  | 8,61198E-05 | -0,594405466 | 0,013 | 0,098 | 1           | 0,66231734    | 1,509850249     | 0,132653061     |
| IPO9-AS1                                                                            | 1,27911E-05 | -0,594603724 | 0,002 | 0,049 | 0,269904161 | 0,662226329   | 1,510057749     | 0,040816327     |
| MEGF9                                                                               | 0,002147216 | -0,595053915 | 0,051 | 0,171 | 1           | 0,662019714   | 1,510529034     | 0,298245614     |
| FOXRED1                                                                             | 0,025019654 | -0,595253297 | 0,01  | 0,049 | 1           | 0,661928229   | 1,510737805     | 0,204081633     |
| CAPZA2                                                                              | 0,106542526 | -0,59526157  | 0,115 | 0,195 | 1           | 0,661924433   | 1,510746469     | 0,58974359      |
| SDHA                                                                                | 0,30935226  | -0,595365627 | 0,024 | 0,049 | 1           | 0,661876692   | 1,510855438     | 0,489795918     |
| APCDD1                                                                              | 0,001570499 | -0,595786377 | 0,005 | 0,049 | 1           | 0,66168369    | 1,51129613      | 0,102040816     |
| NUP107                                                                              | 0,000839439 | -0,596012876 | 0,018 | 0,098 | 1           | 0,661579816   | 1,511533418     | 0,183673469     |
| ACACA                                                                               | 0,001508168 | -0,596192942 | 0,011 | 0,073 | 1           | 0,661497247   | 1,511722088     | 0,150684932     |
| SPOP                                                                                | 0,009900678 | -0,596728774 | 0,049 | 0,146 | 1           | 0,661251606   | 1,512283662     | 0,335616438     |
| LINC01006                                                                           | 0,006396675 | -0,597124475 | 0,014 | 0,073 | 1           | 0,661070263   | 1,512698507     | 0,191780822     |
| NDUFA3                                                                              | 0,025846158 | -0,597285441 | 0,121 | 0,244 | 1           | 0,66099651    | 1,512867292     | 0,495901639     |
| PURA                                                                                | 0,044413349 | -0,597437644 | 0,08  | 0,171 | 1           | 0,660926779   | 1,513026907     | 0,467836257     |
| YAP1                                                                                | 0,134945066 | -0,597951375 | 0,046 | 0,098 | 1           | 0,66069147    | 1,513565779     | 0,469387755     |
| TRIP4                                                                               | 0,023690958 | -0,598496982 | 0,019 | 0,073 | 1           | 0,660441653   | 1,514138296     | 0,260273973     |
| HLA-DMB                                                                             | 0,048947161 | -0,599471236 | 0,003 | 0,024 | 1           | 0,659995807   | 1,515161142     | 0,125           |

Supplementary Table 3

| Differentially expressed genes_keloid-MD_comparing SC-Keloid vs. (SC-Myel+Nonmyel) |             |              |       |       |           |               |                 |                 |
|------------------------------------------------------------------------------------|-------------|--------------|-------|-------|-----------|---------------|-----------------|-----------------|
| gene                                                                               | p_val       | avg_log2FC   | pct.1 | pct.2 | p_val_adj | Foldchange_UP | Foldchange_DOWN | Ratio_pct1_pct2 |
| GRSF1                                                                              | 0,011170949 | -0,600023379 | 0,038 | 0,122 | 1         | 0,659743264   | 1,515741129     | 0,31147541      |
| TMA16                                                                              | 0,027488717 | -0,600068933 | 0,045 | 0,122 | 1         | 0,659722433   | 1,51578899      | 0,368852459     |
| TUBB4B                                                                             | 0,048797837 | -0,600406146 | 0,081 | 0,171 | 1         | 0,659568248   | 1,51614333      | 0,473684211     |
| FBXO42                                                                             | 0,042057731 | -0,600643355 | 0,011 | 0,049 | 1         | 0,65945981    | 1,516392636     | 0,224489796     |
| YY1                                                                                | 0,065000992 | -0,601161477 | 0,121 | 0,22  | 1         | 0,659223018   | 1,516937323     | 0,55            |
| MORC3                                                                              | 0,196885054 | -0,601258616 | 0,035 | 0,073 | 1         | 0,659178633   | 1,517039464     | 0,479452055     |
| RNF130                                                                             | 0,000218623 | -0,60237461  | 0,061 | 0,22  | 1         | 0,658668924   | 1,518213421     | 0,277272727     |
| PRPF19                                                                             | 0,012009632 | -0,602887442 | 0,027 | 0,098 | 1         | 0,65843483    | 1,518753193     | 0,275510204     |
| EIF2B4                                                                             | 0,041636868 | -0,603813109 | 0,011 | 0,049 | 1         | 0,658012498   | 1,519727974     | 0,224489796     |
| ACAT1                                                                              | 0,088509484 | -0,605455099 | 0,027 | 0,073 | 1         | 0,657264013   | 1,521458623     | 0,369863014     |
| BNIP3                                                                              | 0,001568324 | -0,606185781 | 0,019 | 0,098 | 1         | 0,656931213   | 1,522229391     | 0,193877551     |
| STAM                                                                               | 0,028679046 | -0,606308495 | 0,032 | 0,098 | 1         | 0,656875337   | 1,522358876     | 0,326530612     |
| TOMM20                                                                             | 0,111574787 | -0,606531548 | 0,234 | 0,341 | 1         | 0,656773787   | 1,522594263     | 0,686217009     |
| DEGS1                                                                              | 0,009035509 | -0,606563074 | 0,088 | 0,22  | 1         | 0,656759435   | 1,522627536     | 0,4             |
| DDRGK1                                                                             | 0,085601227 | -0,607060637 | 0,041 | 0,098 | 1         | 0,656532968   | 1,523152757     | 0,418367347     |
| ATP5PB                                                                             | 0,140043494 | -0,607572194 | 0,124 | 0,195 | 1         | 0,656300213   | 1,523692939     | 0,635897436     |
| MAFK                                                                               | 0,005214273 | -0,607939664 | 0,006 | 0,049 | 1         | 0,656133067   | 1,52408109      | 0,12244898      |
| ZNF337                                                                             | 0,025308197 | -0,608147314 | 0,01  | 0,049 | 1         | 0,656038636   | 1,524300469     | 0,204081633     |
| SLC6A6                                                                             | 0,225691035 | -0,608554508 | 0,037 | 0,073 | 1         | 0,655853498   | 1,524730756     | 0,506849315     |
| MECP2                                                                              | 0,027748485 | -0,609111386 | 0,032 | 0,098 | 1         | 0,655600388   | 1,525319414     | 0,326530612     |
| PARP2                                                                              | 0,023094435 | -0,610324255 | 0,019 | 0,073 | 1         | 0,655049459   | 1,526602284     | 0,260273973     |
| ATAD3A                                                                             | 0,001549953 | -0,610612238 | 0,011 | 0,073 | 1         | 0,654918714   | 1,526907046     | 0,150684932     |
| NUDCD2                                                                             | 0,153829239 | -0,61083724  | 0,126 | 0,195 | 1         | 0,654816581   | 1,527145201     | 0,646153846     |
| FOXN2                                                                              | 0,002666165 | -0,610900848 | 0,021 | 0,098 | 1         | 0,654787711   | 1,527212534     | 0,214285714     |
| NEURL1B                                                                            | 0,032748226 | -0,610905486 | 0,021 | 0,073 | 1         | 0,654785607   | 1,527217443     | 0,287671233     |
| BPNT2                                                                              | 0,111923472 | -0,611237845 | 0,061 | 0,122 | 1         | 0,654634779   | 1,527569314     | 0,5             |
| PPP1R15A                                                                           | 0,051568108 | -0,611538318 | 0,156 | 0,268 | 1         | 0,654498451   | 1,527887497     | 0,582089552     |
| ANTKMT                                                                             | 0,030874278 | -0,611641623 | 0,108 | 0,22  | 1         | 0,654451586   | 1,527996907     | 0,490909091     |
| MIF                                                                                | 0,031514594 | -0,612009545 | 0,126 | 0,244 | 1         | 0,654284707   | 1,528386633     | 0,516393443     |
| MAT2A                                                                              | 0,104205392 | -0,61214599  | 0,043 | 0,098 | 1         | 0,65422283    | 1,528531189     | 0,43877551      |

Supplementary Table 3

| Differentially expressed genes_keloid-MD_ comparing SC-Keloid vs. (SC-Myel+Nonmyel) |             |              |       |       |             |               |                 |                 |
|-------------------------------------------------------------------------------------|-------------|--------------|-------|-------|-------------|---------------|-----------------|-----------------|
| gene                                                                                | p_val       | avg_log2FC   | pct.1 | pct.2 | p_val_adj   | Foldchange_UP | Foldchange_DOWN | Ratio_pct1_pct2 |
| CIRBP                                                                               | 0,010329636 | -0,612294678 | 0,372 | 0,561 | 1           | 0,654155407   | 1,528688731     | 0,663101604     |
| ZC3H13                                                                              | 0,093662732 | -0,612462904 | 0,093 | 0,171 | 1           | 0,654079134   | 1,528866996     | 0,543859649     |
| PUF60                                                                               | 0,087572835 | -0,612940682 | 0,112 | 0,195 | 1           | 0,653862558   | 1,529373395     | 0,574358974     |
| MT-ATP6                                                                             | 0,009340507 | -0,61294921  | 0,777 | 0,854 | 1           | 0,653858693   | 1,529382435     | 0,909836066     |
| SPRY1                                                                               | 0,061668235 | -0,613018168 | 0,053 | 0,122 | 1           | 0,65382744    | 1,529455539     | 0,43442623      |
| ACAD8                                                                               | 0,392154527 | -0,613766419 | 0,027 | 0,049 | 1           | 0,653488422   | 1,530248993     | 0,551020408     |
| SNHG15                                                                              | 0,020824985 | -0,615454089 | 0,056 | 0,146 | 1           | 0,652724416   | 1,532040131     | 0,383561644     |
| STK11                                                                               | 0,107175871 | -0,615460272 | 0,029 | 0,073 | 1           | 0,652721618   | 1,532046698     | 0,397260274     |
| COG8                                                                                | 0,01256522  | -0,615482392 | 0,008 | 0,049 | 1           | 0,652711611   | 1,532070187     | 0,163265306     |
| CCDC86                                                                              | 0,012733968 | -0,615635814 | 0,008 | 0,049 | 1           | 0,652642203   | 1,532233123     | 0,163265306     |
| SMG5                                                                                | 0,001614632 | -0,615729117 | 0,011 | 0,073 | 1           | 0,652599996   | 1,532332219     | 0,150684932     |
| HYKK                                                                                | 0,005381463 | -0,616865391 | 0,006 | 0,049 | 1           | 0,652086207   | 1,533539568     | 0,12244898      |
| ZNF460                                                                              | 0,024451103 | -0,617161481 | 0,01  | 0,049 | 1           | 0,651952391   | 1,533854334     | 0,204081633     |
| TANK                                                                                | 0,108171648 | -0,617197643 | 0,043 | 0,098 | 1           | 0,651936049   | 1,533892782     | 0,43877551      |
| RBM34                                                                               | 0,00148235  | -0,617559039 | 0,005 | 0,049 | 1           | 0,651772759   | 1,534277071     | 0,102040816     |
| MECR                                                                                | 0,024733964 | -0,617560229 | 0,01  | 0,049 | 1           | 0,651772222   | 1,534278336     | 0,204081633     |
| IL1RAPL2                                                                            | 0,005986726 | -0,618893921 | 0,014 | 0,073 | 1           | 0,651169972   | 1,535697348     | 0,191780822     |
| LRMDA                                                                               | 0,035211582 | -0,619528782 | 0,033 | 0,098 | 1           | 0,650883487   | 1,536373283     | 0,336734694     |
| DAB2IP                                                                              | 0,005297272 | -0,621441492 | 0,006 | 0,049 | 1           | 0,650021124   | 1,538411543     | 0,12244898      |
| SYNJ1                                                                               | 0,005214273 | -0,621498332 | 0,006 | 0,049 | 1           | 0,649995515   | 1,538472155     | 0,12244898      |
| AMOTL2                                                                              | 0,024451103 | -0,62161585  | 0,01  | 0,049 | 1           | 0,64994257    | 1,538597479     | 0,204081633     |
| PER3                                                                                | 0,003541465 | -0,621903567 | 0,043 | 0,146 | 1           | 0,649812965   | 1,538904353     | 0,294520548     |
| RIDA                                                                                | 0,005297272 | -0,622015646 | 0,006 | 0,049 | 1           | 0,649762485   | 1,53902391      | 0,12244898      |
| P4HB                                                                                | 0,045184897 | -0,622031926 | 0,246 | 0,39  | 1           | 0,649755152   | 1,539041278     | 0,630769231     |
| XRR1                                                                                | 0,227224025 | -0,622372255 | 0,021 | 0,049 | 1           | 0,649601894   | 1,539404378     | 0,428571429     |
| STRN                                                                                | 0,002608809 | -0,622417807 | 0,03  | 0,122 | 1           | 0,649581384   | 1,539452983     | 0,245901639     |
| PTPDC1                                                                              | 0,00327619  | -0,622521499 | 0,013 | 0,073 | 1           | 0,649534698   | 1,539563634     | 0,178082192     |
| ENTPD1                                                                              | 1,70667E-06 | -0,623944904 | 0,008 | 0,098 | 0,036012446 | 0,648894164   | 1,541083363     | 0,081632653     |
| TMEM59                                                                              | 0,164077307 | -0,624532234 | 0,301 | 0,39  | 1           | 0,648630049   | 1,541710875     | 0,771794872     |
| SLC7A1                                                                              | 0,668505389 | -0,625382421 | 0,016 | 0,024 | 1           | 0,648247921   | 1,542619679     | 0,666666667     |

Supplementary Table 3

| Differentially expressed genes_keloid-MD_comparing SC-Keloid vs. (SC-Myel+Nonmyel) |             |              |       |       |             |               |                 |                 |
|------------------------------------------------------------------------------------|-------------|--------------|-------|-------|-------------|---------------|-----------------|-----------------|
| gene                                                                               | p_val       | avg_log2FC   | pct.1 | pct.2 | p_val_adj   | Foldchange_UP | Foldchange_DOWN | Ratio_pct1_pct2 |
| USP40                                                                              | 0,003707499 | -0,625524696 | 0,022 | 0,098 | 1           | 0,648183996   | 1,542771816     | 0,224489796     |
| UBXN2A                                                                             | 0,051420515 | -0,626265266 | 0,1   | 0,195 | 1           | 0,647851352   | 1,543563962     | 0,512820513     |
| GLG1                                                                               | 0,188621685 | -0,626779927 | 0,131 | 0,195 | 1           | 0,647620282   | 1,544114705     | 0,671794872     |
| SIK3                                                                               | 0,002586772 | -0,627034193 | 0,021 | 0,098 | 1           | 0,647506153   | 1,544386869     | 0,214285714     |
| PCDH9                                                                              | 5,3724E-06  | -0,627178218 | 0,029 | 0,171 | 0,113363028 | 0,647441515   | 1,544541054     | 0,169590643     |
| TPP2                                                                               | 0,116515691 | -0,627941465 | 0,029 | 0,073 | 1           | 0,647099082   | 1,545358398     | 0,397260274     |
| TXNDC12                                                                            | 0,014239591 | -0,628187656 | 0,04  | 0,122 | 1           | 0,646988666   | 1,545622131     | 0,327868852     |
| MIDEAS                                                                             | 0,074072035 | -0,628421568 | 0,04  | 0,098 | 1           | 0,646883775   | 1,545872751     | 0,408163265     |
| ARPC5L                                                                             | 0,138380206 | -0,629360398 | 0,102 | 0,171 | 1           | 0,646462954   | 1,546879051     | 0,596491228     |
| PABPN1                                                                             | 0,18787004  | -0,62950884  | 0,107 | 0,171 | 1           | 0,646396441   | 1,54703822      | 0,625730994     |
| CDC42BPB                                                                           | 0,060518458 | -0,63144959  | 0,053 | 0,122 | 1           | 0,645527477   | 1,549120736     | 0,43442623      |
| PSMG4                                                                              | 0,064822874 | -0,631973907 | 0,038 | 0,098 | 1           | 0,645292916   | 1,549683834     | 0,387755102     |
| WDR48                                                                              | 0,154354157 | -0,632288191 | 0,018 | 0,049 | 1           | 0,645152358   | 1,550021461     | 0,367346939     |
| GSN                                                                                | 0,056241969 | -0,632627093 | 0,368 | 0,512 | 1           | 0,645000823   | 1,550385618     | 0,71875         |
| DAB1                                                                               | 0,000641705 | -0,633069738 | 0,01  | 0,073 | 1           | 0,644802956   | 1,550861377     | 0,136986301     |
| MRPL1                                                                              | 0,110838028 | -0,633219196 | 0,029 | 0,073 | 1           | 0,64473616    | 1,551022049     | 0,397260274     |
| CITED2                                                                             | 0,056662974 | -0,635325113 | 0,024 | 0,073 | 1           | 0,643795718   | 1,553287746     | 0,328767123     |
| STK35                                                                              | 1,23757E-05 | -0,635406201 | 0,002 | 0,049 | 0,261139758 | 0,643759534   | 1,553375052     | 0,040816327     |
| CTNNA1                                                                             | 0,002553887 | -0,635584397 | 0,041 | 0,146 | 1           | 0,643680024   | 1,553566931     | 0,280821918     |
| MBP                                                                                | 0,52217111  | -0,63627719  | 0,013 | 0,024 | 1           | 0,643370999   | 1,554313144     | 0,541666667     |
| LRR4                                                                               | 0,000252244 | -0,636718076 | 0,003 | 0,049 | 1           | 0,643174415   | 1,554788214     | 0,06122449      |
| TBC1D10B                                                                           | 0,225973824 | -0,637433234 | 0,021 | 0,049 | 1           | 0,642855667   | 1,555559128     | 0,428571429     |
| GPAA1                                                                              | 0,116426106 | -0,637485854 | 0,045 | 0,098 | 1           | 0,64283222    | 1,555615865     | 0,459183673     |
| MBD2                                                                               | 0,002720291 | -0,637511652 | 0,041 | 0,146 | 1           | 0,642820725   | 1,555643684     | 0,280821918     |
| LAMA4                                                                              | 0,009394905 | -0,637698673 | 0,108 | 0,244 | 1           | 0,642737399   | 1,555845359     | 0,442622951     |
| SPON2                                                                              | 0,008975842 | -0,637809066 | 0,026 | 0,098 | 1           | 0,64268822    | 1,555964415     | 0,265306122     |
| CNOT11                                                                             | 0,012398455 | -0,638190621 | 0,008 | 0,049 | 1           | 0,642518268   | 1,556375981     | 0,163265306     |
| LMCD1                                                                              | 0,022636604 | -0,638517649 | 0,03  | 0,098 | 1           | 0,64237264    | 1,556728818     | 0,306122449     |
| PTPRM                                                                              | 0,005920751 | -0,638794217 | 0,014 | 0,073 | 1           | 0,642249507   | 1,557027275     | 0,191780822     |
| BIN3                                                                               | 0,062803989 | -0,638941859 | 0,013 | 0,049 | 1           | 0,642183784   | 1,557186625     | 0,265306122     |

Supplementary Table 3

| Differentially expressed genes_keloid-MD_comparing SC-Keloid vs. (SC-Myel+Nonmyel) |             |              |       |       |             |               |                 |                 |
|------------------------------------------------------------------------------------|-------------|--------------|-------|-------|-------------|---------------|-----------------|-----------------|
| gene                                                                               | p_val       | avg_log2FC   | pct.1 | pct.2 | p_val_adj   | Foldchange_UP | Foldchange_DOWN | Ratio_pct1_pct2 |
| METTL3                                                                             | 0,118896054 | -0,638992549 | 0,016 | 0,049 | 1           | 0,642161221   | 1,55724134      | 0,326530612     |
| SYF2                                                                               | 0,162259447 | -0,639473503 | 0,144 | 0,22  | 1           | 0,641947178   | 1,557760567     | 0,654545455     |
| DDX18                                                                              | 0,005990081 | -0,63947501  | 0,166 | 0,341 | 1           | 0,641946508   | 1,557762193     | 0,486803519     |
| PDXDC1                                                                             | 0,064127934 | -0,63993629  | 0,038 | 0,098 | 1           | 0,641741288   | 1,558260344     | 0,387755102     |
| ALKBH7                                                                             | 0,213533429 | -0,639974246 | 0,11  | 0,171 | 1           | 0,641724404   | 1,558301341     | 0,643274854     |
| SETD3                                                                              | 0,150269897 | -0,63998205  | 0,032 | 0,073 | 1           | 0,641720933   | 1,558309771     | 0,438356164     |
| PSMC5                                                                              | 0,109576707 | -0,640152337 | 0,152 | 0,244 | 1           | 0,641645192   | 1,558493715     | 0,62295082      |
| GLTP                                                                               | 0,031604804 | -0,640500376 | 0,046 | 0,122 | 1           | 0,64149042    | 1,558869734     | 0,37704918      |
| MT-ND1                                                                             | 0,001165889 | -0,640556648 | 0,456 | 0,634 | 1           | 0,641465399   | 1,558930539     | 0,719242902     |
| A2M                                                                                | 0,002630998 | -0,640674246 | 0,041 | 0,146 | 1           | 0,641413113   | 1,559057618     | 0,280821918     |
| MARCHF3                                                                            | 0,000612778 | -0,641150844 | 0,01  | 0,073 | 1           | 0,641201256   | 1,559572741     | 0,136986301     |
| MYLK-AS1                                                                           | 3,19985E-08 | -0,64142508  | 0     | 0,049 | 0,000675201 | 0,641079384   | 1,559869222     | 0               |
| ITM2C                                                                              | 0,016674048 | -0,641556253 | 0,115 | 0,244 | 1           | 0,641021098   | 1,560011055     | 0,471311475     |
| LCMT1                                                                              | 0,192513775 | -0,641864325 | 0,035 | 0,073 | 1           | 0,64088423    | 1,560344215     | 0,479452055     |
| SHF                                                                                | 1,20272E-11 | -0,642184857 | 0     | 0,073 | 2,53785E-07 | 0,640741857   | 1,560690924     | 0               |
| FEZ1                                                                               | 0,040200975 | -0,642365369 | 0,078 | 0,171 | 1           | 0,640661691   | 1,560886212     | 0,456140351     |
| PLEKHB1                                                                            | 0,004153045 | -0,642624601 | 0,022 | 0,098 | 1           | 0,640546584   | 1,561166706     | 0,224489796     |
| WEE1                                                                               | 0,27034404  | -0,642781867 | 0,022 | 0,049 | 1           | 0,640476762   | 1,561336896     | 0,448979592     |
| KLK6                                                                               | 4,64233E-05 | -0,64314113  | 0,006 | 0,073 | 0,979578521 | 0,640317289   | 1,561725752     | 0,082191781     |
| ILF3-DT                                                                            | 0,001571243 | -0,644018611 | 0,011 | 0,073 | 1           | 0,639927952   | 1,562675919     | 0,150684932     |
| KRT10-AS1                                                                          | 0,153346567 | -0,644253439 | 0,018 | 0,049 | 1           | 0,639823799   | 1,562930297     | 0,367346939     |
| PDZD8                                                                              | 0,088174758 | -0,644493519 | 0,041 | 0,098 | 1           | 0,639717334   | 1,563190407     | 0,418367347     |
| SLITRK6                                                                            | 0,033982764 | -0,645592919 | 0,108 | 0,22  | 1           | 0,639230026   | 1,564382084     | 0,490909091     |
| TOR3A                                                                              | 0,001469411 | -0,645875722 | 0,019 | 0,098 | 1           | 0,639104734   | 1,56468877      | 0,193877551     |
| SECISBP2L                                                                          | 0,018092934 | -0,647270953 | 0,085 | 0,195 | 1           | 0,638486954   | 1,566202713     | 0,435897436     |
| GALNS                                                                              | 0,118039703 | -0,647407034 | 0,016 | 0,049 | 1           | 0,638426732   | 1,566350452     | 0,326530612     |
| CSRP1                                                                              | 0,108043009 | -0,647963956 | 0,246 | 0,341 | 1           | 0,638180328   | 1,566955225     | 0,721407625     |
| C1orf198                                                                           | 0,011048645 | -0,648266295 | 0,078 | 0,195 | 1           | 0,638046602   | 1,567283638     | 0,4             |
| FAM8A1                                                                             | 0,015787152 | -0,648544694 | 0,018 | 0,073 | 1           | 0,637923489   | 1,567586109     | 0,246575342     |
| SYNC                                                                               | 0,087310071 | -0,650492865 | 0,041 | 0,098 | 1           | 0,637062638   | 1,569704359     | 0,418367347     |

Supplementary Table 3

| Differentially expressed genes_keloid-MD_comparing SC-Keloid vs. (SC-Myel+Nonmyel) |             |              |       |       |             |               |                 |                 |
|------------------------------------------------------------------------------------|-------------|--------------|-------|-------|-------------|---------------|-----------------|-----------------|
| gene                                                                               | p_val       | avg_log2FC   | pct.1 | pct.2 | p_val_adj   | Foldchange_UP | Foldchange_DOWN | Ratio_pct1_pct2 |
| PRCP                                                                               | 0,092831254 | -0,650679497 | 0,057 | 0,122 | 1           | 0,636980231   | 1,569907434     | 0,467213115     |
| ABL2                                                                               | 0,03502394  | -0,651449821 | 0,077 | 0,171 | 1           | 0,636640207   | 1,570745907     | 0,450292398     |
| NFIC                                                                               | 0,194116959 | -0,651519037 | 0,195 | 0,268 | 1           | 0,636609664   | 1,570821268     | 0,72761194      |
| PPP4R3B                                                                            | 0,011208755 | -0,65162027  | 0,038 | 0,122 | 1           | 0,636564995   | 1,570931496     | 0,31147541      |
| ITGB4                                                                              | 0,003542378 | -0,652755596 | 0,032 | 0,122 | 1           | 0,636064249   | 1,572168224     | 0,262295082     |
| KLF15                                                                              | 0,000240215 | -0,65317725  | 0,003 | 0,049 | 1           | 0,635878374   | 1,572627786     | 0,06122449      |
| RRP36                                                                              | 0,001437857 | -0,656129579 | 0,049 | 0,171 | 1           | 0,634578444   | 1,575849304     | 0,286549708     |
| DUSP8                                                                              | 0,124871903 | -0,656633169 | 0,03  | 0,073 | 1           | 0,634356976   | 1,576399469     | 0,410958904     |
| DOCK6                                                                              | 0,062244792 | -0,65697009  | 0,013 | 0,049 | 1           | 0,634208848   | 1,576767658     | 0,265306122     |
| ZNF770                                                                             | 0,043288461 | -0,656991277 | 0,022 | 0,073 | 1           | 0,634199534   | 1,576790815     | 0,301369863     |
| CCL2                                                                               | 0,041636868 | -0,657443085 | 0,011 | 0,049 | 1           | 0,634000954   | 1,577284694     | 0,224489796     |
| COPS9                                                                              | 0,02141186  | -0,657521972 | 0,25  | 0,415 | 1           | 0,633966287   | 1,577370943     | 0,602409639     |
| XPO7                                                                               | 0,09174284  | -0,657775175 | 0,014 | 0,049 | 1           | 0,633855031   | 1,577647807     | 0,285714286     |
| MT1M                                                                               | 1,86568E-05 | -0,658318316 | 0,024 | 0,146 | 0,393676124 | 0,633616445   | 1,578241866     | 0,164383562     |
| ZNF609                                                                             | 0,00319693  | -0,658380465 | 0,013 | 0,073 | 1           | 0,63358915    | 1,578309856     | 0,178082192     |
| C6orf47                                                                            | 0,01256522  | -0,658551237 | 0,008 | 0,049 | 1           | 0,633514156   | 1,578496692     | 0,163265306     |
| NDST1                                                                              | 0,006175897 | -0,658623522 | 0,024 | 0,098 | 1           | 0,633482416   | 1,578575783     | 0,244897959     |
| SCG5                                                                               | 0,08745614  | -0,659611042 | 0,027 | 0,073 | 1           | 0,633048947   | 1,579656683     | 0,369863014     |
| HTATIP2                                                                            | 0,00327619  | -0,659646826 | 0,013 | 0,073 | 1           | 0,633033246   | 1,579695864     | 0,178082192     |
| SLC22A17                                                                           | 0,018366979 | -0,661160437 | 0,041 | 0,122 | 1           | 0,632369444   | 1,581354081     | 0,336065574     |
| CTBS                                                                               | 0,006175897 | -0,661181519 | 0,024 | 0,098 | 1           | 0,632360203   | 1,581377189     | 0,244897959     |
| SOD1                                                                               | 0,041895412 | -0,661287363 | 0,316 | 0,488 | 1           | 0,632313811   | 1,581493211     | 0,647540984     |
| ISY1                                                                               | 0,12062336  | -0,661949082 | 0,016 | 0,049 | 1           | 0,632023855   | 1,582218759     | 0,326530612     |
| CCDC107                                                                            | 0,009088617 | -0,663411985 | 0,091 | 0,22  | 1           | 0,631383303   | 1,583823954     | 0,413636364     |
| THSD7B                                                                             | 3,19985E-08 | -0,663538616 | 0     | 0,049 | 0,000675201 | 0,631327887   | 1,583962978     | 0               |
| UBE2E2                                                                             | 0,062803989 | -0,663563424 | 0,013 | 0,049 | 1           | 0,631317031   | 1,583990216     | 0,265306122     |
| ERLIN2                                                                             | 0,077584593 | -0,664022498 | 0,04  | 0,098 | 1           | 0,631116174   | 1,584494331     | 0,408163265     |
| GALNT11                                                                            | 0,088706787 | -0,66458518  | 0,056 | 0,122 | 1           | 0,630870073   | 1,585112438     | 0,459016393     |
| TIMM17B                                                                            | 0,011915922 | -0,665051632 | 0,027 | 0,098 | 1           | 0,630666133   | 1,58562502      | 0,275510204     |
| TMEM43                                                                             | 0,02195414  | -0,665078385 | 0,043 | 0,122 | 1           | 0,630654439   | 1,585654423     | 0,352459016     |

Supplementary Table 3

| Differentially expressed genes_keloid-MD_comparing SC-Keloid vs. (SC-Myel+Nonmyel) |             |              |       |       |             |               |                 |                 |
|------------------------------------------------------------------------------------|-------------|--------------|-------|-------|-------------|---------------|-----------------|-----------------|
| gene                                                                               | p_val       | avg_log2FC   | pct.1 | pct.2 | p_val_adj   | Foldchange_UP | Foldchange_DOWN | Ratio_pct1_pct2 |
| MRPS12                                                                             | 0,082880275 | -0,665122102 | 0,073 | 0,146 | 1           | 0,630635328   | 1,585702473     | 0,5             |
| ZNF664                                                                             | 0,007313048 | -0,665313449 | 0,048 | 0,146 | 1           | 0,630551692   | 1,585912801     | 0,328767123     |
| ZBTB7B                                                                             | 6,85286E-06 | -0,665565966 | 0,005 | 0,073 | 0,144602248 | 0,630441335   | 1,58619041      | 0,068493151     |
| AEBP1                                                                              | 0,003513342 | -0,665764953 | 0,096 | 0,244 | 1           | 0,630354386   | 1,586409204     | 0,393442623     |
| LYRM9                                                                              | 0,012233654 | -0,666088267 | 0,008 | 0,049 | 1           | 0,630213137   | 1,586764765     | 0,163265306     |
| SERINC3                                                                            | 0,009345779 | -0,66723304  | 0,077 | 0,195 | 1           | 0,629713264   | 1,588024356     | 0,394871795     |
| C12orf57                                                                           | 0,05291305  | -0,667416464 | 0,262 | 0,39  | 1           | 0,629633207   | 1,588226271     | 0,671794872     |
| ARMC10                                                                             | 0,035677024 | -0,668124826 | 0,048 | 0,122 | 1           | 0,629324134   | 1,589006279     | 0,393442623     |
| CDC42EP1                                                                           | 0,012581882 | -0,668685037 | 0,04  | 0,122 | 1           | 0,629079809   | 1,589623424     | 0,327868852     |
| MAP4K5                                                                             | 0,213604734 | -0,669300206 | 0,089 | 0,146 | 1           | 0,628811625   | 1,590301388     | 0,609589041     |
| SUN1                                                                               | 0,000413814 | -0,669309331 | 0,043 | 0,171 | 1           | 0,628807648   | 1,590311447     | 0,251461988     |
| GLI3                                                                               | 0,014147762 | -0,669605702 | 0,04  | 0,122 | 1           | 0,628678486   | 1,590638176     | 0,327868852     |
| NFATC4                                                                             | 7,19E-06    | -0,670129759 | 0,005 | 0,073 | 0,151716284 | 0,628450161   | 1,591216078     | 0,068493151     |
| MPHOSPH9                                                                           | 0,032748226 | -0,670326114 | 0,021 | 0,073 | 1           | 0,628364633   | 1,591432662     | 0,287671233     |
| CRADD                                                                              | 0,032748201 | -0,670704755 | 0,021 | 0,073 | 1           | 0,628199738   | 1,591850394     | 0,287671233     |
| APPL2                                                                              | 0,000696322 | -0,671250695 | 0,035 | 0,146 | 1           | 0,627962061   | 1,592452892     | 0,239726027     |
| ITCH                                                                               | 0,087310071 | -0,672156104 | 0,041 | 0,098 | 1           | 0,627568087   | 1,593452599     | 0,418367347     |
| HERPUD1                                                                            | 0,021824703 | -0,672706616 | 0,072 | 0,171 | 1           | 0,627328662   | 1,594060755     | 0,421052632     |
| EIF4A3                                                                             | 0,017518215 | -0,674331309 | 0,054 | 0,146 | 1           | 0,626622592   | 1,59585692      | 0,369863014     |
| DVL1                                                                               | 0,008755374 | -0,674449669 | 0,026 | 0,098 | 1           | 0,626571186   | 1,595987851     | 0,265306122     |
| XRCC6                                                                              | 0,11266943  | -0,675538306 | 0,075 | 0,146 | 1           | 0,626098562   | 1,597192615     | 0,51369863      |
| ATP5F1D                                                                            | 0,004242685 | -0,676246564 | 0,23  | 0,439 | 1           | 0,625791269   | 1,597976912     | 0,523917995     |
| THSD7A                                                                             | 1,11647E-06 | -0,676817646 | 0,013 | 0,122 | 0,02355858  | 0,625543602   | 1,598609587     | 0,106557377     |
| VGLL3                                                                              | 0,015497797 | -0,677081008 | 0,018 | 0,073 | 1           | 0,625429421   | 1,598901437     | 0,246575342     |
| SLC66A3                                                                            | 2,51395E-05 | -0,677223692 | 0,018 | 0,122 | 0,530468292 | 0,625367568   | 1,599059578     | 0,147540984     |
| HTRA1                                                                              | 0,053725617 | -0,677666191 | 0,139 | 0,244 | 1           | 0,625175787   | 1,599550112     | 0,569672131     |
| RPL10A                                                                             | 0,026671352 | -0,677720437 | 0,396 | 0,537 | 1           | 0,62515228    | 1,599610257     | 0,737430168     |
| HMGNS                                                                              | 0,200206494 | -0,678392008 | 0,019 | 0,049 | 1           | 0,624861341   | 1,600355045     | 0,387755102     |
| GATM                                                                               | 5,2213E-05  | -0,679127592 | 0,035 | 0,171 | 1           | 0,624542826   | 1,601171222     | 0,204678363     |
| FGL2                                                                               | 4,83489E-05 | -0,679554765 | 0,006 | 0,073 | 1           | 0,62435793    | 1,601645389     | 0,082191781     |



Supplementary Table 3

| Differentially expressed genes_keloid-MD_ comparing SC-Keloid vs. (SC-Myel+Nonmyel) |             |              |       |       |             |               |                 |                 |
|-------------------------------------------------------------------------------------|-------------|--------------|-------|-------|-------------|---------------|-----------------|-----------------|
| gene                                                                                | p_val       | avg_log2FC   | pct.1 | pct.2 | p_val_adj   | Foldchange_UP | Foldchange_DOWN | Ratio_pct1_pct2 |
| IFIT3                                                                               | 0,00585671  | -0,679680826 | 0,024 | 0,098 | 1           | 0,624303377   | 1,601785346     | 0,244897959     |
| UPP1                                                                                | 0,453802752 | -0,679916159 | 0,07  | 0,098 | 1           | 0,624201548   | 1,602046651     | 0,714285714     |
| MFAP4                                                                               | 0,52217111  | -0,68017995  | 0,013 | 0,024 | 1           | 0,624087426   | 1,602339605     | 0,541666667     |
| NTRK3                                                                               | 0,000210269 | -0,683697574 | 0,008 | 0,073 | 1           | 0,62256761    | 1,606251247     | 0,109589041     |
| LRRFIP2                                                                             | 0,019531008 | -0,685367743 | 0,056 | 0,146 | 1           | 0,621847298   | 1,608111836     | 0,383561644     |
| EGFL8                                                                               | 0,022898514 | -0,685424639 | 0,019 | 0,073 | 1           | 0,621822774   | 1,608175258     | 0,260273973     |
| TFDP2                                                                               | 0,019012928 | -0,685448027 | 0,056 | 0,146 | 1           | 0,621812693   | 1,608201329     | 0,383561644     |
| B4GALNT4                                                                            | 0,000631925 | -0,68570621  | 0,01  | 0,073 | 1           | 0,621701425   | 1,608489156     | 0,136986301     |
| PTPN13                                                                              | 0,182130039 | -0,686270461 | 0,033 | 0,073 | 1           | 0,621458319   | 1,609118374     | 0,452054795     |
| PMP22                                                                               | 0,00091272  | -0,686926912 | 0,4   | 0,659 | 1           | 0,621175609   | 1,609850717     | 0,606980273     |
| NFU1                                                                                | 0,01122513  | -0,68710135  | 0,051 | 0,146 | 1           | 0,621100507   | 1,610045378     | 0,349315068     |
| NEK3                                                                                | 0,000203031 | -0,687571809 | 0,008 | 0,073 | 1           | 0,620898001   | 1,610570495     | 0,109589041     |
| SYT11                                                                               | 0,140981527 | -0,687595526 | 0,161 | 0,244 | 1           | 0,620887793   | 1,610596972     | 0,659836066     |
| NDUFA9                                                                              | 0,193540755 | -0,687639093 | 0,053 | 0,098 | 1           | 0,620869044   | 1,61064561      | 0,540816327     |
| NLGN4X                                                                              | 0,000676604 | -0,688262664 | 0,026 | 0,122 | 1           | 0,620600746   | 1,611341924     | 0,213114754     |
| CELF1                                                                               | 0,093322066 | -0,689270586 | 0,072 | 0,146 | 1           | 0,620167322   | 1,612468063     | 0,493150685     |
| DHRS7                                                                               | 0,066644132 | -0,689859821 | 0,142 | 0,244 | 1           | 0,619914081   | 1,613126772     | 0,581967213     |
| TSPAN15                                                                             | 0,002394737 | -0,691137747 | 0,03  | 0,122 | 1           | 0,61936521    | 1,614556297     | 0,245901639     |
| KRAS                                                                                | 0,045291125 | -0,691893438 | 0,099 | 0,195 | 1           | 0,619040868   | 1,615402232     | 0,507692308     |
| RALB                                                                                | 0,049047881 | -0,692276821 | 0,051 | 0,122 | 1           | 0,618876385   | 1,615831567     | 0,418032787     |
| PLXDC2                                                                              | 0,005294836 | -0,693326395 | 0,046 | 0,146 | 1           | 0,618426311   | 1,617007528     | 0,315068493     |
| DNAJB6                                                                              | 0,215211182 | -0,693398373 | 0,11  | 0,171 | 1           | 0,618395457   | 1,617088205     | 0,643274854     |
| C1orf21                                                                             | 0,002833505 | -0,693562122 | 0,08  | 0,22  | 1           | 0,618325272   | 1,617271757     | 0,363636364     |
| PRDM16-DT                                                                           | 1,19732E-05 | -0,695298083 | 0,002 | 0,049 | 0,252647346 | 0,617581703   | 1,619218954     | 0,040816327     |
| SOX8                                                                                | 7,36447E-06 | -0,695868641 | 0,005 | 0,073 | 0,155397639 | 0,61733751    | 1,619859451     | 0,068493151     |
| BRK1                                                                                | 0,025380223 | -0,697302922 | 0,278 | 0,439 | 1           | 0,616724078   | 1,621470664     | 0,633257403     |
| DNAJA1                                                                              | 0,924200276 | -0,69761172  | 0,223 | 0,22  | 1           | 0,616592087   | 1,621817764     | 1,013636364     |
| TVP23A                                                                              | 3,19985E-08 | -0,698103023 | 0     | 0,049 | 0,000675201 | 0,616382145   | 1,622370161     | 0               |
| CHIC1                                                                               | 0,023094435 | -0,698260508 | 0,019 | 0,073 | 1           | 0,616314864   | 1,622547269     | 0,260273973     |
| AATK                                                                                | 0,000441173 | -0,698411069 | 0,024 | 0,122 | 1           | 0,616250548   | 1,622716608     | 0,196721311     |

Supplementary Table 3

| Differentially expressed genes_keloid-MD_comparing SC-Keloid vs. (SC-Myel+Nonmyel) |             |              |       |       |             |               |                 |                 |
|------------------------------------------------------------------------------------|-------------|--------------|-------|-------|-------------|---------------|-----------------|-----------------|
| gene                                                                               | p_val       | avg_log2FC   | pct.1 | pct.2 | p_val_adj   | Foldchange_UP | Foldchange_DOWN | Ratio_pct1_pct2 |
| MT1E                                                                               | 0,001546637 | -0,699322135 | 0,1   | 0,268 | 1           | 0,615861508   | 1,623741681     | 0,373134328     |
| HTT                                                                                | 0,010402762 | -0,700417867 | 0,038 | 0,122 | 1           | 0,615393936   | 1,624975388     | 0,31147541      |
| ARHGAP26                                                                           | 0,001551423 | -0,701359589 | 0,019 | 0,098 | 1           | 0,614992368   | 1,62603644      | 0,193877551     |
| TRIM56                                                                             | 0,005908853 | -0,702226818 | 0,024 | 0,098 | 1           | 0,614622796   | 1,627014172     | 0,244897959     |
| TTF1                                                                               | 0,001008547 | -0,702282962 | 0,027 | 0,122 | 1           | 0,614598878   | 1,62707749      | 0,221311475     |
| TMEM128                                                                            | 0,016248693 | -0,702521636 | 0,029 | 0,098 | 1           | 0,614497209   | 1,627346691     | 0,295918367     |
| SELENOW                                                                            | 0,014864142 | -0,703124292 | 0,273 | 0,463 | 1           | 0,614240569   | 1,628026623     | 0,589632829     |
| BGN                                                                                | 0,000181306 | -0,70333769  | 0,04  | 0,171 | 1           | 0,61414972    | 1,628267452     | 0,233918129     |
| TGFBR3                                                                             | 1,47452E-06 | -0,705698025 | 0,008 | 0,098 | 0,031113926 | 0,613145756   | 1,630933575     | 0,081632653     |
| CALCOCO2                                                                           | 0,041808027 | -0,705921754 | 0,035 | 0,098 | 1           | 0,613050679   | 1,631186515     | 0,357142857     |
| TRIM58                                                                             | 0,042482188 | -0,706418146 | 0,011 | 0,049 | 1           | 0,612839781   | 1,631747858     | 0,224489796     |
| MGP                                                                                | 0,502646842 | -0,706966701 | 0,089 | 0,122 | 1           | 0,612606806   | 1,632368415     | 0,729508197     |
| FAF2                                                                               | 0,171341894 | -0,707132021 | 0,033 | 0,073 | 1           | 0,61253661    | 1,632555481     | 0,452054795     |
| ZNF641                                                                             | 0,000651626 | -0,707275638 | 0,01  | 0,073 | 1           | 0,612475637   | 1,632718005     | 0,136986301     |
| RPS9                                                                               | 0,000537668 | -0,707845658 | 0,522 | 0,732 | 1           | 0,612233691   | 1,633363232     | 0,713114754     |
| GATAD1                                                                             | 0,087776979 | -0,709100895 | 0,073 | 0,146 | 1           | 0,61170124    | 1,634784981     | 0,5             |
| PCID2                                                                              | 0,026313742 | -0,709880306 | 0,032 | 0,098 | 1           | 0,61137086    | 1,635668407     | 0,326530612     |
| CNBD2                                                                              | 9,55558E-09 | -0,71204929  | 0,002 | 0,073 | 0,000201632 | 0,6104524     | 1,638129361     | 0,02739726      |
| TLCD2                                                                              | 1,84072E-08 | -0,712694275 | 0,005 | 0,098 | 0,000388411 | 0,610179546   | 1,638861884     | 0,051020408     |
| ARHGEF1                                                                            | 9,5746E-06  | -0,713423765 | 0,016 | 0,122 | 0,202033719 | 0,609871091   | 1,639690773     | 0,131147541     |
| FRMD3                                                                              | 2,6748E-11  | -0,713476702 | 0,005 | 0,122 | 5,6441E-07  | 0,609848713   | 1,63975094      | 0,040983607     |
| ARHGAP12                                                                           | 0,006623192 | -0,714194797 | 0,073 | 0,195 | 1           | 0,609545239   | 1,640567322     | 0,374358974     |
| GAP43                                                                              | 0,444621531 | -0,715166891 | 0,093 | 0,122 | 1           | 0,609134663   | 1,641673115     | 0,762295082     |
| PLD3                                                                               | 0,011653522 | -0,715911629 | 0,065 | 0,171 | 1           | 0,608820301   | 1,642520788     | 0,380116959     |
| DLC1                                                                               | 0,007769135 | -0,716148663 | 0,091 | 0,22  | 1           | 0,60872028    | 1,642790675     | 0,413636364     |
| USP9X                                                                              | 0,110760758 | -0,717863829 | 0,045 | 0,098 | 1           | 0,607997026   | 1,644744888     | 0,459183673     |
| TAF5                                                                               | 9,20921E-09 | -0,719199388 | 0,002 | 0,073 | 0,000194324 | 0,60743444    | 1,646268197     | 0,02739726      |
| ILKAP                                                                              | 0,002177923 | -0,720528465 | 0,03  | 0,122 | 1           | 0,6068751     | 1,647785515     | 0,245901639     |
| DHX33                                                                              | 0,22472854  | -0,723186497 | 0,021 | 0,049 | 1           | 0,605758019   | 1,650824206     | 0,428571429     |
| RPL21                                                                              | 0,012102602 | -0,723651155 | 0,48  | 0,61  | 1           | 0,60556295    | 1,651355982     | 0,786885246     |

Supplementary Table 3

| Differentially expressed genes_keloid-MD_comparing SC-Keloid vs. (SC-Myel+Nonmyel) |             |              |       |       |             |               |                 |                 |
|------------------------------------------------------------------------------------|-------------|--------------|-------|-------|-------------|---------------|-----------------|-----------------|
| gene                                                                               | p_val       | avg_log2FC   | pct.1 | pct.2 | p_val_adj   | Foldchange_UP | Foldchange_DOWN | Ratio_pct1_pct2 |
| PYURF                                                                              | 0,129073854 | -0,72409568  | 0,102 | 0,171 | 1           | 0,605376392   | 1,651864878     | 0,596491228     |
| PLEKHA5                                                                            | 0,001372048 | -0,724937023 | 0,049 | 0,171 | 1           | 0,605023455   | 1,652828485     | 0,286549708     |
| IMP3                                                                               | 0,034737414 | -0,726378771 | 0,048 | 0,122 | 1           | 0,60441913    | 1,654481054     | 0,393442623     |
| MAD2L2                                                                             | 0,060777188 | -0,726536334 | 0,088 | 0,171 | 1           | 0,604353123   | 1,654661757     | 0,514619883     |
| NDE1                                                                               | 0,003318345 | -0,727648546 | 0,032 | 0,122 | 1           | 0,603887391   | 1,655937871     | 0,262295082     |
| NOP56                                                                              | 0,005294836 | -0,728079221 | 0,046 | 0,146 | 1           | 0,603707144   | 1,656432278     | 0,315068493     |
| DPP4                                                                               | 1,19732E-05 | -0,728280874 | 0,002 | 0,049 | 0,252647346 | 0,603622767   | 1,656663823     | 0,040816327     |
| PPP4R2                                                                             | 0,061436044 | -0,729034286 | 0,105 | 0,195 | 1           | 0,603307622   | 1,6575292       | 0,538461538     |
| IER5L                                                                              | 0,112171546 | -0,729407656 | 0,08  | 0,146 | 1           | 0,603151506   | 1,657958225     | 0,547945205     |
| MAPKAPK5-AS1                                                                       | 0,005961414 | -0,729719795 | 0,024 | 0,098 | 1           | 0,603021023   | 1,658316977     | 0,244897959     |
| RHPN1                                                                              | 1,23757E-05 | -0,729728093 | 0,002 | 0,049 | 0,261139758 | 0,603017555   | 1,658326515     | 0,040816327     |
| POLI                                                                               | 0,043606468 | -0,730024617 | 0,022 | 0,073 | 1           | 0,602893626   | 1,658667394     | 0,301369863     |
| ECI1                                                                               | 0,002884485 | -0,730421612 | 0,054 | 0,171 | 1           | 0,602727748   | 1,659123881     | 0,315789474     |
| DRAM1                                                                              | 0,023893783 | -0,730627049 | 0,01  | 0,049 | 1           | 0,602641926   | 1,659360155     | 0,204081633     |
| FAM76B                                                                             | 0,010617301 | -0,731278152 | 0,038 | 0,122 | 1           | 0,602370009   | 1,66010921      | 0,31147541      |
| SIX5                                                                               | 5,04593E-07 | -0,731808064 | 0,003 | 0,073 | 0,010647424 | 0,602148795   | 1,660719091     | 0,04109589      |
| RAD54B                                                                             | 0,000240215 | -0,732408316 | 0,003 | 0,049 | 1           | 0,601898315   | 1,661410199     | 0,06122449      |
| SNHG18                                                                             | 1,23757E-05 | -0,732420571 | 0,002 | 0,049 | 0,261139758 | 0,601893202   | 1,661424312     | 0,040816327     |
| TLE3                                                                               | 0,026630998 | -0,732430135 | 0,075 | 0,171 | 1           | 0,601889213   | 1,661435326     | 0,438596491     |
| HES1                                                                               | 0,024138028 | -0,732744958 | 0,089 | 0,195 | 1           | 0,601757883   | 1,661797922     | 0,456410256     |
| MT-ND2                                                                             | 0,000189324 | -0,733150049 | 0,41  | 0,659 | 1           | 0,601588941   | 1,662264599     | 0,62215478      |
| GTPBP6                                                                             | 0,14509156  | -0,733745195 | 0,032 | 0,073 | 1           | 0,601340822   | 1,662950465     | 0,438356164     |
| NINJ1                                                                              | 0,032676682 | -0,734090333 | 0,061 | 0,146 | 1           | 0,60119698    | 1,663348343     | 0,417808219     |
| KLF13                                                                              | 0,015767971 | -0,736934978 | 0,054 | 0,146 | 1           | 0,600012733   | 1,666631298     | 0,369863014     |
| MRPS31                                                                             | 0,10597668  | -0,737256483 | 0,029 | 0,073 | 1           | 0,599879035   | 1,667002749     | 0,397260274     |
| TOMM7                                                                              | 0,004413505 | -0,737407277 | 0,472 | 0,683 | 1           | 0,599816337   | 1,667176997     | 0,691068814     |
| SLC25A6                                                                            | 0,015336489 | -0,738858736 | 0,225 | 0,39  | 1           | 0,599213181   | 1,668855146     | 0,576923077     |
| APPL1                                                                              | 0,026570676 | -0,740151476 | 0,075 | 0,171 | 1           | 0,598676491   | 1,670351209     | 0,438596491     |
| TMEM9                                                                              | 0,04111683  | -0,746412615 | 0,022 | 0,073 | 1           | 0,59608393    | 1,677616104     | 0,301369863     |
| AP1S2                                                                              | 0,001067775 | -0,746517186 | 0,319 | 0,561 | 1           | 0,596040726   | 1,677737706     | 0,568627451     |

Supplementary Table 3

| Differentially expressed genes_keloid-MD_comparing SC-Keloid vs. (SC-Myel+Nonmyel) |             |              |       |       |             |               |                 |                 |
|------------------------------------------------------------------------------------|-------------|--------------|-------|-------|-------------|---------------|-----------------|-----------------|
| gene                                                                               | p_val       | avg_log2FC   | pct.1 | pct.2 | p_val_adj   | Foldchange_UP | Foldchange_DOWN | Ratio_pct1_pct2 |
| GALR1                                                                              | 0,004163489 | -0,746848086 | 0,145 | 0,317 | 1           | 0,595904032   | 1,678122561     | 0,457413249     |
| C15orf40                                                                           | 0,004773625 | -0,746923295 | 0,033 | 0,122 | 1           | 0,595872968   | 1,678210045     | 0,270491803     |
| PRRG4                                                                              | 9,20921E-09 | -0,747178476 | 0,002 | 0,073 | 0,000194324 | 0,59576758    | 1,678506909     | 0,02739726      |
| RTKN                                                                               | 0,003924529 | -0,748464515 | 0,022 | 0,098 | 1           | 0,595236741   | 1,680003822     | 0,224489796     |
| ASTN2                                                                              | 4,93398E-05 | -0,748543389 | 0,006 | 0,073 | 1           | 0,5952042     | 1,680095673     | 0,082191781     |
| ARPIN                                                                              | 0,040805833 | -0,748762539 | 0,011 | 0,049 | 1           | 0,595113793   | 1,680350903     | 0,224489796     |
| LGI4                                                                               | 0,006015092 | -0,749058684 | 0,118 | 0,268 | 1           | 0,594991645   | 1,680695868     | 0,440298507     |
| BIRC3                                                                              | 0,022319389 | -0,7508833   | 0,019 | 0,073 | 1           | 0,594239619   | 1,682822835     | 0,260273973     |
| TLE1                                                                               | 7,24906E-05 | -0,753447765 | 0,046 | 0,195 | 1           | 0,593184265   | 1,6858168       | 0,235897436     |
| FBXO3                                                                              | 0,002121997 | -0,75374633  | 0,03  | 0,122 | 1           | 0,593061519   | 1,686165715     | 0,245901639     |
| C5orf24                                                                            | 0,016961688 | -0,754560691 | 0,102 | 0,22  | 1           | 0,592726847   | 1,687117777     | 0,463636364     |
| DDAH2                                                                              | 0,019845213 | -0,75517968  | 0,1   | 0,22  | 1           | 0,592472592   | 1,687841791     | 0,454545455     |
| GPBP1L1                                                                            | 0,016422599 | -0,756396489 | 0,041 | 0,122 | 1           | 0,591973094   | 1,689265964     | 0,336065574     |
| RALGPS2                                                                            | 0,268487785 | -0,756554143 | 0,038 | 0,073 | 1           | 0,591908408   | 1,689450573     | 0,520547945     |
| TATDN3                                                                             | 0,113762049 | -0,757186346 | 0,005 | 0,024 | 1           | 0,591649086   | 1,690191068     | 0,208333333     |
| ERBB3                                                                              | 0,001021535 | -0,757462538 | 0,225 | 0,463 | 1           | 0,59153583    | 1,690514672     | 0,485961123     |
| CLSTN1                                                                             | 0,002972796 | -0,75773121  | 0,067 | 0,195 | 1           | 0,591425679   | 1,690829525     | 0,343589744     |
| RNASEH2C                                                                           | 0,024103231 | -0,757960575 | 0,187 | 0,317 | 1           | 0,591331659   | 1,691098361     | 0,589905363     |
| EPN2                                                                               | 0,005658778 | -0,759079165 | 0,088 | 0,22  | 1           | 0,59087335    | 1,692410058     | 0,4             |
| PHF20                                                                              | 0,000550638 | -0,760201023 | 0,045 | 0,171 | 1           | 0,590414057   | 1,69372661      | 0,263157895     |
| IFIT2                                                                              | 0,000421192 | -0,760455716 | 0,016 | 0,098 | 1           | 0,590309835   | 1,694025646     | 0,163265306     |
| MFSD10                                                                             | 0,003897006 | -0,760500628 | 0,069 | 0,195 | 1           | 0,590291459   | 1,694078383     | 0,353846154     |
| NDUFAF4                                                                            | 0,000623926 | -0,760798805 | 0,026 | 0,122 | 1           | 0,590169469   | 1,694428553     | 0,213114754     |
| PACS1                                                                              | 0,435681552 | -0,761037805 | 0,029 | 0,049 | 1           | 0,590071709   | 1,694709278     | 0,591836735     |
| CASP6                                                                              | 1,53756E-06 | -0,761883027 | 0,008 | 0,098 | 0,032443949 | 0,589726109   | 1,695702437     | 0,081632653     |
| PTOV1                                                                              | 0,010019702 | -0,762330349 | 0,051 | 0,146 | 1           | 0,589543287   | 1,696228287     | 0,349315068     |
| ARHGAP24                                                                           | 6,09814E-05 | -0,76307617  | 0,027 | 0,146 | 1           | 0,589238593   | 1,697105404     | 0,184931507     |
| PDCD7                                                                              | 0,000419115 | -0,764844385 | 0,033 | 0,146 | 1           | 0,588516845   | 1,699186707     | 0,226027397     |
| ARHGEF2                                                                            | 0,141408454 | -0,764941517 | 0,048 | 0,098 | 1           | 0,588477223   | 1,699301112     | 0,489795918     |
| USP36                                                                              | 0,009985192 | -0,765367572 | 0,016 | 0,073 | 1           | 0,588303461   | 1,699803021     | 0,219178082     |

Supplementary Table 3

| Differentially expressed genes_keloid-MD_comparing SC-Keloid vs. (SC-Myel+Nonmyel) |             |              |       |       |             |               |                 |                 |
|------------------------------------------------------------------------------------|-------------|--------------|-------|-------|-------------|---------------|-----------------|-----------------|
| gene                                                                               | p_val       | avg_log2FC   | pct.1 | pct.2 | p_val_adj   | Foldchange_UP | Foldchange_DOWN | Ratio_pct1_pct2 |
| PPP1R12B                                                                           | 0,008682967 | -0,765538324 | 0,026 | 0,098 | 1           | 0,588233835   | 1,700004216     | 0,265306122     |
| KDM3B                                                                              | 0,087448854 | -0,766728215 | 0,014 | 0,049 | 1           | 0,587748878   | 1,701406906     | 0,285714286     |
| LEPROT                                                                             | 0,000180313 | -0,767856926 | 0,152 | 0,39  | 1           | 0,587289225   | 1,702738545     | 0,38974359      |
| CPXM2                                                                              | 9,44793E-05 | -0,768843329 | 0     | 0,024 | 1           | 0,586887819   | 1,703903143     | 0               |
| BHLHB9                                                                             | 0,00024616  | -0,76938908  | 0,003 | 0,049 | 1           | 0,58666585    | 1,704547827     | 0,06122449      |
| EIF1                                                                               | 0,001003828 | -0,769817453 | 0,643 | 0,78  | 1           | 0,58649168    | 1,705054027     | 0,824358974     |
| ABHD11                                                                             | 0,012233654 | -0,77128919  | 0,008 | 0,049 | 1           | 0,585893687   | 1,70679429      | 0,163265306     |
| ACADVL                                                                             | 0,037161563 | -0,771320729 | 0,062 | 0,146 | 1           | 0,585880879   | 1,706831604     | 0,424657534     |
| ZDHHC1                                                                             | 0,000240215 | -0,772349753 | 0,003 | 0,049 | 1           | 0,585463139   | 1,708049462     | 0,06122449      |
| SEC22C                                                                             | 0,020100408 | -0,773217754 | 0,03  | 0,098 | 1           | 0,585111      | 1,709077423     | 0,306122449     |
| CIDEB                                                                              | 1,20272E-11 | -0,773707299 | 0     | 0,073 | 2,53785E-07 | 0,58491249    | 1,709657458     | 0               |
| RCBTB2                                                                             | 4,73768E-05 | -0,774458439 | 0,006 | 0,073 | 0,999698382 | 0,584608034   | 1,710547822     | 0,082191781     |
| VPS53                                                                              | 9,91879E-05 | -0,77455152  | 0,029 | 0,146 | 1           | 0,584570317   | 1,710658189     | 0,198630137     |
| PKIB                                                                               | 1,20272E-11 | -0,775231761 | 0     | 0,073 | 2,53785E-07 | 0,584294753   | 1,711464967     | 0               |
| CD59                                                                               | 0,047142318 | -0,775544346 | 0,206 | 0,317 | 1           | 0,584168169   | 1,711835826     | 0,649842271     |
| TMBIM4                                                                             | 0,005434861 | -0,77654234  | 0,155 | 0,317 | 1           | 0,583764207   | 1,713020409     | 0,488958991     |
| LINC00682                                                                          | 1,19732E-05 | -0,777918751 | 0,002 | 0,049 | 0,252647346 | 0,583207529   | 1,714655506     | 0,040816327     |
| NXT1                                                                               | 0,034122752 | -0,778207781 | 0,033 | 0,098 | 1           | 0,5830907     | 1,714999054     | 0,336734694     |
| SSH1                                                                               | 0,021199242 | -0,77872299  | 0,019 | 0,073 | 1           | 0,582882507   | 1,715611617     | 0,260273973     |
| RANBP2                                                                             | 0,008229732 | -0,778795845 | 0,049 | 0,146 | 1           | 0,582853072   | 1,715698256     | 0,335616438     |
| AC007364.1                                                                         | 7,19E-06    | -0,779763331 | 0,005 | 0,073 | 0,151716284 | 0,582462336   | 1,716849207     | 0,068493151     |
| SRFBP1                                                                             | 0,00094177  | -0,784892844 | 0,037 | 0,146 | 1           | 0,580395065   | 1,722964341     | 0,253424658     |
| TBC1D9B                                                                            | 0,001479757 | -0,786680447 | 0,029 | 0,122 | 1           | 0,579676359   | 1,725100541     | 0,237704918     |
| SIGIRR                                                                             | 0,000232245 | -0,787743495 | 0,062 | 0,22  | 1           | 0,579249382   | 1,726372149     | 0,281818182     |
| BLVRB                                                                              | 0,00115867  | -0,788157419 | 0,073 | 0,22  | 1           | 0,579083213   | 1,726867533     | 0,331818182     |
| SLC9A3R1                                                                           | 0,003081313 | -0,788192008 | 0,013 | 0,073 | 1           | 0,57906933    | 1,726908936     | 0,178082192     |
| EMP2                                                                               | 0,000673197 | -0,788196777 | 0,137 | 0,341 | 1           | 0,579067415   | 1,726914645     | 0,401759531     |
| CLSTN2                                                                             | 3,19985E-08 | -0,789575356 | 0     | 0,049 | 0,000675201 | 0,578514347   | 1,7285656       | 0               |
| KATNA1                                                                             | 0,015774634 | -0,790545496 | 0,029 | 0,098 | 1           | 0,578125456   | 1,729728365     | 0,295918367     |
| LRCH1                                                                              | 0,001400776 | -0,790755017 | 0,029 | 0,122 | 1           | 0,578041502   | 1,72997959      | 0,237704918     |

Supplementary Table 3

| Differentially expressed genes_keloid-MD_ comparing SC-Keloid vs. (SC-Myel+Nonmyel) |             |              |       |       |             |               |                 |                 |
|-------------------------------------------------------------------------------------|-------------|--------------|-------|-------|-------------|---------------|-----------------|-----------------|
| gene                                                                                | p_val       | avg_log2FC   | pct.1 | pct.2 | p_val_adj   | Foldchange_UP | Foldchange_DOWN | Ratio_pct1_pct2 |
| TVP23C                                                                              | 9,44793E-05 | -0,790977856 | 0     | 0,024 | 1           | 0,577952224   | 1,730246823     | 0               |
| RTL8A                                                                               | 0,002958966 | -0,791016997 | 0,043 | 0,146 | 1           | 0,577936544   | 1,730293766     | 0,294520548     |
| ADGRA2                                                                              | 0,06168972  | -0,791494167 | 0,013 | 0,049 | 1           | 0,577745424   | 1,730866154     | 0,265306122     |
| MICU1                                                                               | 0,030455829 | -0,792138955 | 0,094 | 0,195 | 1           | 0,577487268   | 1,731639908     | 0,482051282     |
| IER3                                                                                | 0,181411876 | -0,79259872  | 0,145 | 0,22  | 1           | 0,577303261   | 1,732191843     | 0,659090909     |
| BTC                                                                                 | 0,057780508 | -0,792829404 | 0,054 | 0,122 | 1           | 0,577210959   | 1,732468839     | 0,442622951     |
| ARPC1B                                                                              | 0,006663035 | -0,793990974 | 0,198 | 0,366 | 1           | 0,576746411   | 1,733864279     | 0,540983607     |
| SELENOM                                                                             | 0,005793972 | -0,794275483 | 0,278 | 0,463 | 1           | 0,576632684   | 1,734206243     | 0,600431965     |
| HSPG2                                                                               | 0,01794725  | -0,794326605 | 0,155 | 0,293 | 1           | 0,576612251   | 1,734267696     | 0,529010239     |
| DOCK1                                                                               | 0,00848938  | -0,794345129 | 0,049 | 0,146 | 1           | 0,576604847   | 1,734289964     | 0,335616438     |
| PHF11                                                                               | 0,022129198 | -0,794396727 | 0,019 | 0,073 | 1           | 0,576584226   | 1,734351991     | 0,260273973     |
| ASAH1                                                                               | 0,014805081 | -0,794844806 | 0,1   | 0,22  | 1           | 0,576405175   | 1,734890738     | 0,454545455     |
| MPLKIP                                                                              | 0,011712675 | -0,795959169 | 0,067 | 0,171 | 1           | 0,575960122   | 1,736231316     | 0,391812865     |
| CHMP4B                                                                              | 0,086411494 | -0,797666957 | 0,075 | 0,146 | 1           | 0,575278733   | 1,738287795     | 0,51369863      |
| APH1A                                                                               | 0,035738195 | -0,798659831 | 0,064 | 0,146 | 1           | 0,574882958   | 1,739484509     | 0,438356164     |
| GNG2                                                                                | 0,004934051 | -0,799509718 | 0,171 | 0,341 | 1           | 0,574544396   | 1,740509536     | 0,501466276     |
| PLCB1                                                                               | 0,025449963 | -0,799959038 | 0,032 | 0,098 | 1           | 0,574365485   | 1,741051693     | 0,326530612     |
| KIAA0232                                                                            | 0,062111771 | -0,800963056 | 0,054 | 0,122 | 1           | 0,573965905   | 1,742263768     | 0,442622951     |
| CLEC14A                                                                             | 6,85286E-06 | -0,801686902 | 0,005 | 0,073 | 0,144602248 | 0,573678      | 1,743138137     | 0,068493151     |
| PCSK2                                                                               | 4,60164E-13 | -0,801858799 | 0,003 | 0,122 | 9,70992E-09 | 0,57360965    | 1,743345844     | 0,024590164     |
| UCKL1                                                                               | 0,022319389 | -0,803560035 | 0,019 | 0,073 | 1           | 0,572933644   | 1,745402822     | 0,260273973     |
| ARTN                                                                                | 5,035E-05   | -0,80366333  | 0,006 | 0,073 | 1           | 0,572892625   | 1,745527795     | 0,082191781     |
| SARAF                                                                               | 0,012258391 | -0,803957047 | 0,15  | 0,293 | 1           | 0,572776002   | 1,745883202     | 0,511945392     |
| C1orf122                                                                            | 0,003254697 | -0,804000823 | 0,164 | 0,341 | 1           | 0,572758622   | 1,745936178     | 0,480938416     |
| SIPA1L2                                                                             | 0,007382339 | -0,804141503 | 0,077 | 0,195 | 1           | 0,572702774   | 1,746106437     | 0,394871795     |
| SBNO2                                                                               | 0,192336114 | -0,804768751 | 0,006 | 0,024 | 1           | 0,572453831   | 1,746865765     | 0,25            |
| MTHFR                                                                               | 0,000189251 | -0,805524182 | 0,008 | 0,073 | 1           | 0,572154159   | 1,747780707     | 0,109589041     |
| ABHD12                                                                              | 0,002299985 | -0,806852109 | 0,041 | 0,146 | 1           | 0,571627763   | 1,74939019      | 0,280821918     |
| CNOT2                                                                               | 0,006521675 | -0,806915766 | 0,061 | 0,171 | 1           | 0,571602541   | 1,749467382     | 0,356725146     |
| CLK3                                                                                | 0,000641705 | -0,808049826 | 0,01  | 0,073 | 1           | 0,571153397   | 1,750843126     | 0,136986301     |

Supplementary Table 3

| Differentially expressed genes_keloid-MD_comparing SC-Keloid vs. (SC-Myel+Nonmyel) |             |              |       |       |             |               |                 |                 |
|------------------------------------------------------------------------------------|-------------|--------------|-------|-------|-------------|---------------|-----------------|-----------------|
| gene                                                                               | p_val       | avg_log2FC   | pct.1 | pct.2 | p_val_adj   | Foldchange_UP | Foldchange_DOWN | Ratio_pct1_pct2 |
| FEM1C                                                                              | 0,010617301 | -0,809663346 | 0,038 | 0,122 | 1           | 0,570514972   | 1,752802377     | 0,31147541      |
| RSPO3                                                                              | 3,07853E-05 | -0,811244648 | 0,026 | 0,146 | 0,649599658 | 0,569889988   | 1,754724633     | 0,178082192     |
| TTC32                                                                              | 7,54999E-06 | -0,812353629 | 0,022 | 0,146 | 0,159312315 | 0,569452089   | 1,756073986     | 0,150684932     |
| SON                                                                                | 0,026223298 | -0,812648704 | 0,273 | 0,415 | 1           | 0,569335631   | 1,756433193     | 0,657831325     |
| SETD1A                                                                             | 0,000622283 | -0,813577923 | 0,01  | 0,073 | 1           | 0,568969048   | 1,757564851     | 0,136986301     |
| KIAA1755                                                                           | 0,014933055 | -0,814544784 | 0,018 | 0,073 | 1           | 0,568587866   | 1,758743126     | 0,246575342     |
| C9orf85                                                                            | 0,005552464 | -0,814883938 | 0,024 | 0,098 | 1           | 0,568454216   | 1,759156626     | 0,244897959     |
| BDH2                                                                               | 0,000988998 | -0,815470149 | 0,048 | 0,171 | 1           | 0,568223282   | 1,75987157      | 0,280701754     |
| FERMT2                                                                             | 0,005031856 | -0,816689709 | 0,134 | 0,293 | 1           | 0,567743147   | 1,761359879     | 0,457337884     |
| CMPK1                                                                              | 0,002864122 | -0,819351909 | 0,11  | 0,268 | 1           | 0,566696458   | 1,764613111     | 0,410447761     |
| RBM17                                                                              | 0,035238895 | -0,819883418 | 0,064 | 0,146 | 1           | 0,566487718   | 1,765263338     | 0,438356164     |
| TENT5A                                                                             | 0,005274668 | -0,820023355 | 0,059 | 0,171 | 1           | 0,566432773   | 1,765434572     | 0,34502924      |
| ATP6V0D1                                                                           | 0,000583566 | -0,823201816 | 0,035 | 0,146 | 1           | 0,565186215   | 1,769328362     | 0,239726027     |
| GABARAPL2                                                                          | 0,002052299 | -0,824142182 | 0,246 | 0,463 | 1           | 0,56481794    | 1,770482007     | 0,531317495     |
| SLC25A5                                                                            | 0,003921296 | -0,824455382 | 0,228 | 0,415 | 1           | 0,564695335   | 1,770866409     | 0,54939759      |
| CNBP                                                                               | 0,061197858 | -0,826025582 | 0,19  | 0,293 | 1           | 0,564081066   | 1,772794834     | 0,648464164     |
| PKN2                                                                               | 0,059011306 | -0,827030901 | 0,054 | 0,122 | 1           | 0,563688132   | 1,774030608     | 0,442622951     |
| DSC3                                                                               | 0,113762049 | -0,827116909 | 0,005 | 0,024 | 1           | 0,563654528   | 1,774136372     | 0,208333333     |
| ZFP36L1                                                                            | 0,006500448 | -0,829432859 | 0,144 | 0,293 | 1           | 0,562750423   | 1,77698667      | 0,491467577     |
| TCIM                                                                               | 0,000491298 | -0,830919525 | 0,124 | 0,317 | 1           | 0,562170819   | 1,778818761     | 0,391167192     |
| NR4A2                                                                              | 2,79918E-05 | -0,83103592  | 0,053 | 0,22  | 0,590655059 | 0,562125466   | 1,778962279     | 0,240909091     |
| C11orf58                                                                           | 0,043544782 | -0,832863507 | 0,289 | 0,439 | 1           | 0,561413824   | 1,781217272     | 0,658314351     |
| THUMPD1                                                                            | 0,012536894 | -0,833020745 | 0,067 | 0,171 | 1           | 0,561352639   | 1,781411417     | 0,391812865     |
| CLNS1A                                                                             | 0,003178998 | -0,833562361 | 0,069 | 0,195 | 1           | 0,561141936   | 1,782080319     | 0,353846154     |
| CDH19                                                                              | 7,78291E-05 | -0,833988924 | 0,341 | 0,634 | 1           | 0,560976047   | 1,782607306     | 0,53785489      |
| LAMP5                                                                              | 3,7483E-16  | -0,834048017 | 0,003 | 0,146 | 7,90928E-12 | 0,56095307    | 1,782680323     | 0,020547945     |
| NPEPPS                                                                             | 0,010122715 | -0,83625403  | 0,038 | 0,122 | 1           | 0,560095977   | 1,78540829      | 0,31147541      |
| METTL15                                                                            | 0,014453845 | -0,837921668 | 0,018 | 0,073 | 1           | 0,559448925   | 1,78747327      | 0,246575342     |
| CNKS3                                                                              | 0,03692674  | -0,839032366 | 0,064 | 0,146 | 1           | 0,559018384   | 1,788849935     | 0,438356164     |
| CMAS                                                                               | 7,82931E-05 | -0,839200528 | 0,029 | 0,146 | 1           | 0,558953228   | 1,789058457     | 0,198630137     |

Supplementary Table 3

| Differentially expressed genes_keloid-MD_comparing SC-Keloid vs. (SC-Myel+Nonmyel) |             |              |       |       |             |               |                 |                 |
|------------------------------------------------------------------------------------|-------------|--------------|-------|-------|-------------|---------------|-----------------|-----------------|
| gene                                                                               | p_val       | avg_log2FC   | pct.1 | pct.2 | p_val_adj   | Foldchange_UP | Foldchange_DOWN | Ratio_pct1_pct2 |
| LINC00632                                                                          | 0,00570276  | -0,840729492 | 0,024 | 0,098 | 1           | 0,558361165   | 1,790955501     | 0,244897959     |
| JDP2                                                                               | 4,92358E-05 | -0,840940897 | 0,027 | 0,146 | 1           | 0,558279352   | 1,791217957     | 0,184931507     |
| BTBD7                                                                              | 0,007977213 | -0,845463301 | 0,049 | 0,146 | 1           | 0,556532058   | 1,796841683     | 0,335616438     |
| PTBP2                                                                              | 0,12783641  | -0,84683438  | 0,046 | 0,098 | 1           | 0,556003404   | 1,79855014      | 0,469387755     |
| AC009041.2                                                                         | 6,85286E-06 | -0,847515986 | 0,005 | 0,073 | 0,144602248 | 0,55574078    | 1,799400073     | 0,068493151     |
| SLC43A2                                                                            | 3,19985E-08 | -0,848900179 | 0     | 0,049 | 0,000675201 | 0,555207831   | 1,801127334     | 0               |
| ADAMTS8                                                                            | 9,20921E-09 | -0,851069332 | 0,002 | 0,073 | 0,000194324 | 0,554373679   | 1,803837442     | 0,02739726      |
| CMTM5                                                                              | 0,000233812 | -0,852304064 | 0,041 | 0,171 | 1           | 0,553899421   | 1,805381919     | 0,239766082     |
| C14orf119                                                                          | 0,008715663 | -0,852858725 | 0,051 | 0,146 | 1           | 0,553686509   | 1,806076152     | 0,349315068     |
| ANXA3                                                                              | 6,77092E-06 | -0,853219532 | 0,005 | 0,073 | 0,142873101 | 0,553548053   | 1,806527895     | 0,068493151     |
| DBP                                                                                | 2,7329E-15  | -0,85501267  | 0,002 | 0,122 | 5,7667E-11  | 0,552860471   | 1,80877464      | 0,016393443     |
| ZNF503                                                                             | 0,00482015  | -0,85543476  | 0,046 | 0,146 | 1           | 0,552698744   | 1,809303911     | 0,315068493     |
| CREBRF                                                                             | 0,0016918   | -0,855512914 | 0,04  | 0,146 | 1           | 0,552668804   | 1,809401928     | 0,273972603     |
| NR2F1                                                                              | 0,083343493 | -0,856354189 | 0,027 | 0,073 | 1           | 0,552346622   | 1,810457348     | 0,369863014     |
| HLA-DPB1                                                                           | 9,01333E-06 | -0,857144452 | 0,016 | 0,122 | 0,190190222 | 0,552044146   | 1,811449331     | 0,131147541     |
| FST                                                                                | 0,00055285  | -0,857690119 | 0,045 | 0,171 | 1           | 0,551835388   | 1,812134601     | 0,263157895     |
| STAT3                                                                              | 0,088724987 | -0,861110091 | 0,075 | 0,146 | 1           | 0,550528787   | 1,816435441     | 0,51369863      |
| PSME1                                                                              | 0,003343127 | -0,864477193 | 0,142 | 0,317 | 1           | 0,549245408   | 1,820679766     | 0,447949527     |
| ATF3                                                                               | 9,30193E-05 | -0,866097765 | 0,029 | 0,146 | 1           | 0,548628789   | 1,822726075     | 0,198630137     |
| TMEM222                                                                            | 0,009125562 | -0,866850484 | 0,026 | 0,098 | 1           | 0,54834262    | 1,823677321     | 0,265306122     |
| OTUD5                                                                              | 0,010840928 | -0,866877675 | 0,027 | 0,098 | 1           | 0,548332285   | 1,823711693     | 0,275510204     |
| TPGS2                                                                              | 0,018952476 | -0,870405156 | 0,043 | 0,122 | 1           | 0,546993216   | 1,82817624      | 0,352459016     |
| FXVD6                                                                              | 0,000189251 | -0,870628458 | 0,008 | 0,073 | 1           | 0,546908558   | 1,82845923      | 0,109589041     |
| TSC22D4                                                                            | 1,47452E-06 | -0,872999232 | 0,008 | 0,098 | 0,031113926 | 0,546010563   | 1,831466398     | 0,081632653     |
| MTUS1                                                                              | 0,00229035  | -0,873570184 | 0,021 | 0,098 | 1           | 0,545794521   | 1,832191351     | 0,214285714     |
| RNF103                                                                             | 0,030018296 | -0,877127747 | 0,021 | 0,073 | 1           | 0,544450296   | 1,836714954     | 0,287671233     |
| TIMM8B                                                                             | 0,068184026 | -0,877322581 | 0,217 | 0,317 | 1           | 0,544376773   | 1,836963017     | 0,684542587     |
| PON2                                                                               | 0,010740394 | -0,879342028 | 0,116 | 0,244 | 1           | 0,543615302   | 1,83953615      | 0,475409836     |
| USP12                                                                              | 0,053272784 | -0,879897766 | 0,024 | 0,073 | 1           | 0,543405937   | 1,840244891     | 0,328767123     |
| FSTL3                                                                              | 0,022858535 | -0,88194838  | 0,091 | 0,195 | 1           | 0,542634101   | 1,842862433     | 0,466666667     |



Supplementary Table 3

| Differentially expressed genes_keloid-MD_comparing SC-Keloid vs. (SC-Myel+Nonmyel) |             |              |       |       |             |               |                 |                 |
|------------------------------------------------------------------------------------|-------------|--------------|-------|-------|-------------|---------------|-----------------|-----------------|
| gene                                                                               | p_val       | avg_log2FC   | pct.1 | pct.2 | p_val_adj   | Foldchange_UP | Foldchange_DOWN | Ratio_pct1_pct2 |
| PTK2                                                                               | 0,000526359 | -0,882010059 | 0,08  | 0,244 | 1           | 0,542610903   | 1,842941222     | 0,327868852     |
| ZEB2                                                                               | 0,00156488  | -0,882464256 | 0,308 | 0,537 | 1           | 0,542440102   | 1,843521519     | 0,573556797     |
| IGFBP4                                                                             | 1,13557E-07 | -0,885455371 | 0,029 | 0,195 | 0,002396159 | 0,541316635   | 1,847347625     | 0,148717949     |
| NR1D2                                                                              | 0,005583711 | -0,891112566 | 0,035 | 0,122 | 1           | 0,539198143   | 1,854605793     | 0,286885246     |
| UHRF1BP1L                                                                          | 0,065905535 | -0,891868337 | 0,026 | 0,073 | 1           | 0,538915753   | 1,855577602     | 0,356164384     |
| GRIK3                                                                              | 8,5527E-09  | -0,893060437 | 0,002 | 0,073 | 0,00018047  | 0,53847063    | 1,8571115       | 0,02739726      |
| ORMDL1                                                                             | 0,000171793 | -0,897642876 | 0,086 | 0,268 | 1           | 0,536762997   | 1,86301963      | 0,320895522     |
| ABCA8                                                                              | 0,000367698 | -0,901638719 | 0,024 | 0,122 | 1           | 0,535278377   | 1,868186802     | 0,196721311     |
| ITGB8                                                                              | 0,001107663 | -0,9025381   | 0,225 | 0,463 | 1           | 0,534944787   | 1,8693518       | 0,485961123     |
| ZBTB44                                                                             | 0,044115661 | -0,905865753 | 0,035 | 0,098 | 1           | 0,53371233    | 1,873668536     | 0,357142857     |
| KCTD12                                                                             | 0,019512391 | -0,906876264 | 0,086 | 0,195 | 1           | 0,533338631   | 1,874981375     | 0,441025641     |
| SOCS2                                                                              | 0,000145416 | -0,90747059  | 0,126 | 0,341 | 1           | 0,533118965   | 1,875753941     | 0,369501466     |
| MAGEH1                                                                             | 1,27463E-06 | -0,907491698 | 0,019 | 0,146 | 0,026895928 | 0,533111165   | 1,875781386     | 0,130136986     |
| FH                                                                                 | 0,004484998 | -0,907661601 | 0,033 | 0,122 | 1           | 0,533048386   | 1,876002305     | 0,270491803     |
| PRIMA1                                                                             | 4,73768E-05 | -0,909153225 | 0,006 | 0,073 | 0,999698382 | 0,532497544   | 1,877942935     | 0,082191781     |
| MYOT                                                                               | 0,000190527 | -0,909567277 | 0,086 | 0,268 | 1           | 0,532344739   | 1,87848198      | 0,320895522     |
| BICRAL                                                                             | 0,021017392 | -0,911692961 | 0,019 | 0,073 | 1           | 0,531560953   | 1,881251799     | 0,260273973     |
| CACYBP                                                                             | 0,000124635 | -0,911988802 | 0,061 | 0,22  | 1           | 0,531451962   | 1,88163761      | 0,277272727     |
| C2orf88                                                                            | 4,76504E-13 | -0,912839769 | 0,003 | 0,122 | 1,00547E-08 | 0,53113858    | 1,882747812     | 0,024590164     |
| NCAM1                                                                              | 6,42006E-05 | -0,915919643 | 0,037 | 0,171 | 1           | 0,530005912   | 1,886771407     | 0,216374269     |
| NKAIN3                                                                             | 1,4154E-06  | -0,91664091  | 0,019 | 0,146 | 0,029866352 | 0,529741005   | 1,887714923     | 0,130136986     |
| RAP1GAP                                                                            | 1,20272E-11 | -0,918584509 | 0     | 0,073 | 2,53785E-07 | 0,529027818   | 1,890259767     | 0               |
| MORC4                                                                              | 0,000375706 | -0,919853424 | 0,024 | 0,122 | 1           | 0,528562719   | 1,891923066     | 0,196721311     |
| MAPRE2                                                                             | 9,37297E-05 | -0,923698027 | 0,07  | 0,244 | 1           | 0,52715604    | 1,89697153      | 0,286885246     |
| NTM                                                                                | 0,001588724 | -0,924414541 | 0,346 | 0,561 | 1           | 0,526894293   | 1,897913895     | 0,616755793     |
| TJP1                                                                               | 0,000342908 | -0,925383079 | 0,093 | 0,268 | 1           | 0,526540687   | 1,899188467     | 0,347014925     |
| FOS                                                                                | 0,041675509 | -0,92759998  | 0,287 | 0,415 | 1           | 0,525732205   | 1,902109077     | 0,691566265     |
| NIBAN1                                                                             | 0,000237168 | -0,928171761 | 0,032 | 0,146 | 1           | 0,525523884   | 1,902863086     | 0,219178082     |
| PLAC9                                                                              | 6,21639E-05 | -0,931570844 | 0,271 | 0,561 | 1           | 0,524287173   | 1,90735164      | 0,483065954     |
| PKIG                                                                               | 0,014885299 | -0,932937942 | 0,086 | 0,195 | 1           | 0,523790594   | 1,909159904     | 0,441025641     |

Supplementary Table 3

| Differentially expressed genes_keloid-MD_ comparing SC-Keloid vs. (SC-Myel+Nonmyel) |             |              |       |       |             |               |                 |                 |
|-------------------------------------------------------------------------------------|-------------|--------------|-------|-------|-------------|---------------|-----------------|-----------------|
| gene                                                                                | p_val       | avg_log2FC   | pct.1 | pct.2 | p_val_adj   | Foldchange_UP | Foldchange_DOWN | Ratio_pct1_pct2 |
| CD4                                                                                 | 6,86488E-09 | -0,935176873 | 0,008 | 0,122 | 0,000144856 | 0,522978349   | 1,912125045     | 0,06557377      |
| DYNLRB1                                                                             | 0,002885558 | -0,935786925 | 0,18  | 0,366 | 1           | 0,522757252   | 1,912933769     | 0,491803279     |
| SH3BP5                                                                              | 2,38967E-05 | -0,938514957 | 0,043 | 0,195 | 0,504244622 | 0,521769689   | 1,916554412     | 0,220512821     |
| TUBB2B                                                                              | 0,002221276 | -0,93929608  | 0,021 | 0,098 | 1           | 0,521487262   | 1,917592378     | 0,214285714     |
| TPR                                                                                 | 0,019345539 | -0,941091905 | 0,123 | 0,244 | 1           | 0,520838534   | 1,919980827     | 0,504098361     |
| SFRP2                                                                               | 0,874995474 | -0,941355739 | 0,07  | 0,073 | 1           | 0,520743294   | 1,920331978     | 0,95890411      |
| ATG10                                                                               | 0,000773141 | -0,941987979 | 0,018 | 0,098 | 1           | 0,520515136   | 1,92117372      | 0,183673469     |
| CCN1                                                                                | 0,003637605 | -0,944337493 | 0,167 | 0,341 | 1           | 0,519668136   | 1,924305014     | 0,48973607      |
| NFIB                                                                                | 0,00051042  | -0,945319993 | 0,035 | 0,146 | 1           | 0,519314354   | 1,925615944     | 0,239726027     |
| CHPT1                                                                               | 0,000568198 | -0,946317328 | 0,035 | 0,146 | 1           | 0,518955476   | 1,926947583     | 0,239726027     |
| ADD3                                                                                | 2,45688E-09 | -0,949449713 | 0,022 | 0,195 | 5,18427E-05 | 0,51782994    | 1,931135924     | 0,112820513     |
| IGFBP7                                                                              | 0,155292056 | -0,949669873 | 0,367 | 0,415 | 1           | 0,517750924   | 1,931430644     | 0,884337349     |
| MRPS11                                                                              | 0,752148317 | -0,950263683 | 0,04  | 0,049 | 1           | 0,517537862   | 1,932225781     | 0,816326531     |
| MT2A                                                                                | 0,001094023 | -0,951910746 | 0,482 | 0,659 | 1           | 0,516947349   | 1,93443298      | 0,731411229     |
| JUNB                                                                                | 0,038270009 | -0,952210673 | 0,158 | 0,268 | 1           | 0,51683989    | 1,934835178     | 0,589552239     |
| ABTB1                                                                               | 6,85286E-06 | -0,952550641 | 0,005 | 0,073 | 0,144602248 | 0,516718112   | 1,935291171     | 0,068493151     |
| PRKCA                                                                               | 0,000137168 | -0,957645132 | 0,049 | 0,195 | 1           | 0,514896678   | 1,942137214     | 0,251282051     |
| DOCK5                                                                               | 0,00122171  | -0,959839813 | 0,049 | 0,171 | 1           | 0,514113994   | 1,945093913     | 0,286549708     |
| LONRF1                                                                              | 0,009785348 | -0,960835268 | 0,016 | 0,073 | 1           | 0,513759379   | 1,946436484     | 0,219178082     |
| PEBP1                                                                               | 0,000324593 | -0,961824964 | 0,501 | 0,756 | 1           | 0,513407059   | 1,947772207     | 0,662698413     |
| ATP6VOE1                                                                            | 0,000801368 | -0,962226009 | 0,29  | 0,512 | 1           | 0,51326436    | 1,948313731     | 0,56640625      |
| OSBPL1A                                                                             | 1,27266E-09 | -0,96239947  | 0,011 | 0,146 | 2,68545E-05 | 0,513202652   | 1,948547999     | 0,075342466     |
| WIPF1                                                                               | 0,000461317 | -0,962486687 | 0,124 | 0,317 | 1           | 0,513171628   | 1,9486658       | 0,391167192     |
| GSTK1                                                                               | 0,000219007 | -0,964786332 | 0,064 | 0,22  | 1           | 0,512354287   | 1,951774436     | 0,290909091     |
| TNKS2                                                                               | 0,011779976 | -0,968677961 | 0,04  | 0,122 | 1           | 0,510974089   | 1,957046399     | 0,327868852     |
| FAM102A                                                                             | 3,30559E-06 | -0,971048668 | 0,014 | 0,122 | 0,069751183 | 0,51013512    | 1,960264958     | 0,114754098     |
| SYDE2                                                                               | 1,23757E-05 | -0,974131747 | 0,002 | 0,049 | 0,261139758 | 0,509046112   | 1,964458576     | 0,040816327     |
| LRRC4C                                                                              | 1,41677E-09 | -0,97666544  | 0,016 | 0,171 | 2,98954E-05 | 0,508152898   | 1,967911634     | 0,093567251     |
| IGSF1                                                                               | 4,90088E-07 | -0,97701807  | 0,003 | 0,073 | 0,010341346 | 0,508028708   | 1,968392698     | 0,04109589      |
| SRCIN1                                                                              | 1,49855E-07 | -0,985012486 | 0,016 | 0,146 | 0,003162093 | 0,505221351   | 1,979330443     | 0,109589041     |

Supplementary Table 3

| Differentially expressed genes_keloid-MD_ comparing SC-Keloid vs. (SC-Myel+Nonmyel) |             |              |       |       |             |               |                 |                 |
|-------------------------------------------------------------------------------------|-------------|--------------|-------|-------|-------------|---------------|-----------------|-----------------|
| gene                                                                                | p_val       | avg_log2FC   | pct.1 | pct.2 | p_val_adj   | Foldchange_UP | Foldchange_DOWN | Ratio_pct1_pct2 |
| CBX1                                                                                | 0,00059729  | -0,985962347 | 0,07  | 0,22  | 1           | 0,504888826   | 1,980634051     | 0,318181818     |
| TMEM107                                                                             | 0,002932731 | -0,986652059 | 0,032 | 0,122 | 1           | 0,50464751    | 1,981581163     | 0,262295082     |
| L1CAM                                                                               | 0,002681265 | -0,989805168 | 0,129 | 0,293 | 1           | 0,503545773   | 1,98591678      | 0,440273038     |
| KCNMB4                                                                              | 8,39955E-07 | -0,990754831 | 0,08  | 0,317 | 0,017723894 | 0,50321442    | 1,987224453     | 0,252365931     |
| NNMT                                                                                | 0,021108127 | -0,990959291 | 0,019 | 0,073 | 1           | 0,503143109   | 1,987506104     | 0,260273973     |
| B4GALNT1                                                                            | 1,44395E-06 | -0,991107063 | 0,008 | 0,098 | 0,030468731 | 0,503091576   | 1,98770969      | 0,081632653     |
| RAPGEF5                                                                             | 2,6748E-11  | -0,992818127 | 0,005 | 0,122 | 5,6441E-07  | 0,502495253   | 1,990068551     | 0,040983607     |
| FCGRT                                                                               | 2,83649E-06 | -0,993578136 | 0,045 | 0,22  | 0,059852674 | 0,502230609   | 1,99111719      | 0,204545455     |
| SOX2                                                                                | 0,000712943 | -0,995801397 | 0,059 | 0,195 | 1           | 0,501457244   | 1,994187961     | 0,302564103     |
| NEMF                                                                                | 0,001389182 | -0,996880002 | 0,04  | 0,146 | 1           | 0,501082479   | 1,995679437     | 0,273972603     |
| SES3                                                                                | 6,30989E-06 | -0,997603838 | 0,038 | 0,195 | 0,133145016 | 0,500831136   | 1,996680972     | 0,194871795     |
| DUSP23                                                                              | 0,000643868 | -1,000947601 | 0,059 | 0,195 | 1           | 0,499671694   | 2,001314085     | 0,302564103     |
| TENT2                                                                               | 0,009648749 | -1,002431147 | 0,038 | 0,122 | 1           | 0,499158138   | 2,003373126     | 0,31147541      |
| ABLIM1                                                                              | 0,000177322 | -1,003908192 | 0,014 | 0,098 | 1           | 0,498647357   | 2,00542525      | 0,142857143     |
| CDKN1C                                                                              | 1,33323E-06 | -1,004083067 | 0,019 | 0,146 | 0,028132413 | 0,498586917   | 2,005668351     | 0,130136986     |
| MMP19                                                                               | 4,45706E-05 | -1,006320095 | 0,006 | 0,073 | 0,940485029 | 0,497814413   | 2,008780731     | 0,082191781     |
| SEMA3G                                                                              | 8,5527E-09  | -1,010084663 | 0,002 | 0,073 | 0,00018047  | 0,496517109   | 2,014029288     | 0,02739726      |
| KCNS3                                                                               | 0,009722285 | -1,01348624  | 0,051 | 0,146 | 1           | 0,495347803   | 2,018783556     | 0,349315068     |
| PTX3                                                                                | 0,000340908 | -1,014169058 | 0,024 | 0,122 | 1           | 0,495113414   | 2,019739259     | 0,196721311     |
| INO80D                                                                              | 0,000149279 | -1,01863544  | 0,04  | 0,171 | 1           | 0,493582982   | 2,026001778     | 0,233918129     |
| STEAP1B                                                                             | 4,65208E-05 | -1,029581798 | 0,019 | 0,122 | 0,981635404 | 0,489852124   | 2,041432404     | 0,155737705     |
| SURF2                                                                               | 3,40544E-05 | -1,034289613 | 0,045 | 0,195 | 0,718582677 | 0,48825624    | 2,048104905     | 0,230769231     |
| BRAP                                                                                | 0,000172449 | -1,036023999 | 0,014 | 0,098 | 1           | 0,487669618   | 2,050568586     | 0,142857143     |
| SHISA9                                                                              | 2,41617E-15 | -1,041389346 | 0,002 | 0,122 | 5,09836E-11 | 0,485859356   | 2,058208798     | 0,016393443     |
| PSIP1                                                                               | 0,001903322 | -1,041686941 | 0,041 | 0,146 | 1           | 0,485759144   | 2,058633403     | 0,280821918     |
| CCNK                                                                                | 4,86813E-05 | -1,043846218 | 0,027 | 0,146 | 1           | 0,485032654   | 2,06171686      | 0,184931507     |
| TSPAN11                                                                             | 8,20955E-08 | -1,04528617  | 0,07  | 0,317 | 0,001732298 | 0,484548785   | 2,063775684     | 0,220820189     |
| NDRG1                                                                               | 0,000921006 | -1,045361944 | 0,038 | 0,146 | 1           | 0,484523336   | 2,063884082     | 0,260273973     |
| PLAAT3                                                                              | 5,75522E-07 | -1,050371313 | 0,067 | 0,293 | 0,012144097 | 0,482843877   | 2,071062818     | 0,228668942     |
| FAM181B                                                                             | 2,52657E-07 | -1,051753753 | 0,011 | 0,122 | 0,005331316 | 0,482381421   | 2,073048332     | 0,090163934     |

Supplementary Table 3

| Differentially expressed genes_keloid-MD_comparing SC-Keloid vs. (SC-Myel+Nonmyel) |             |              |       |       |             |               |                 |                 |
|------------------------------------------------------------------------------------|-------------|--------------|-------|-------|-------------|---------------|-----------------|-----------------|
| gene                                                                               | p_val       | avg_log2FC   | pct.1 | pct.2 | p_val_adj   | Foldchange_UP | Foldchange_DOWN | Ratio_pct1_pct2 |
| OLFML2A                                                                            | 0,00023685  | -1,053874601 | 0,115 | 0,317 | 1           | 0,481672812   | 2,076098079     | 0,362776025     |
| ARHGEF7                                                                            | 0,002860699 | -1,058820868 | 0,032 | 0,122 | 1           | 0,480024229   | 2,083228178     | 0,262295082     |
| HADHB                                                                              | 0,001258384 | -1,062511387 | 0,051 | 0,171 | 1           | 0,478797861   | 2,08856405      | 0,298245614     |
| NDRG2                                                                              | 2,90111E-07 | -1,063788004 | 0,038 | 0,22  | 0,006121627 | 0,478374368   | 2,090413003     | 0,172727273     |
| GFRA2                                                                              | 0,010545355 | -1,065603313 | 0,038 | 0,122 | 1           | 0,47777282    | 2,093044975     | 0,31147541      |
| CCND2                                                                              | 6,2601E-06  | -1,068621904 | 0,01  | 0,098 | 0,132094472 | 0,476774208   | 2,097428896     | 0,102040816     |
| MMGT1                                                                              | 0,001017386 | -1,071917883 | 0,038 | 0,146 | 1           | 0,475686213   | 2,102226157     | 0,260273973     |
| ZFP36                                                                              | 7,96442E-05 | -1,086282422 | 0,096 | 0,293 | 1           | 0,47097343    | 2,123262028     | 0,327645051     |
| GADD45B                                                                            | 0,007456628 | -1,087980325 | 0,128 | 0,268 | 1           | 0,470419469   | 2,125762358     | 0,47761194      |
| FTH1                                                                               | 3,18472E-11 | -1,08940806  | 0,831 | 1     | 6,72008E-07 | 0,469954158   | 2,127867118     | 0,831           |
| CADM3                                                                              | 1,24529E-09 | -1,09318455  | 0,011 | 0,146 | 2,62768E-05 | 0,468725585   | 2,133444455     | 0,075342466     |
| JUN                                                                                | 0,000945817 | -1,102055107 | 0,329 | 0,561 | 1           | 0,46585242    | 2,146602566     | 0,586452763     |
| TYW3                                                                               | 0,002992104 | -1,103735528 | 0,045 | 0,146 | 1           | 0,465310121   | 2,149104339     | 0,308219178     |
| MYH14                                                                              | 5,10086E-10 | -1,115042736 | 0,006 | 0,122 | 1,07633E-05 | 0,461677479   | 2,166014253     | 0,049180328     |
| PROS1                                                                              | 0,00019516  | -1,120302913 | 0,077 | 0,244 | 1           | 0,459997233   | 2,173926122     | 0,31557377      |
| RXRG                                                                               | 4,93413E-13 | -1,124899784 | 0,003 | 0,122 | 1,04115E-08 | 0,458533872   | 2,180863968     | 0,024590164     |
| MLLT6                                                                              | 4,64985E-08 | -1,126763886 | 0,027 | 0,195 | 0,000981165 | 0,457941785   | 2,183683677     | 0,138461538     |
| FAM20C                                                                             | 4,3908E-08  | -1,13902522  | 0,027 | 0,195 | 0,000926502 | 0,454066271   | 2,202321695     | 0,138461538     |
| TRIM52                                                                             | 1,91852E-07 | -1,139489478 | 0,006 | 0,098 | 0,004048264 | 0,453920177   | 2,203030514     | 0,06122449      |
| GPR155                                                                             | 1,43273E-05 | -1,140596057 | 0,085 | 0,293 | 0,302320337 | 0,453572143   | 2,204720936     | 0,290102389     |
| RPS27                                                                              | 2,62559E-08 | -1,140944967 | 0,608 | 0,927 | 0,000554025 | 0,453462462   | 2,205254203     | 0,65587918      |
| C7orf50                                                                            | 1,11693E-05 | -1,146369671 | 0,085 | 0,293 | 0,235683993 | 0,451760591   | 2,213561828     | 0,290102389     |
| IFI6                                                                               | 0,009221589 | -1,148585052 | 0,064 | 0,171 | 1           | 0,451067407   | 2,216963552     | 0,374269006     |
| SYNE2                                                                              | 8,21374E-07 | -1,164448349 | 0,041 | 0,22  | 0,017331803 | 0,446134818   | 2,241474908     | 0,186363636     |
| AHNAK                                                                              | 4,05593E-05 | -1,167980827 | 0,276 | 0,537 | 0,855841975 | 0,445043781   | 2,246969944     | 0,51396648      |
| COL28A1                                                                            | 3,48327E-16 | -1,184530924 | 0,003 | 0,146 | 7,35005E-12 | 0,439967565   | 2,272894821     | 0,020547945     |
| S1PR3                                                                              | 6,23714E-10 | -1,191476668 | 0,021 | 0,195 | 1,3161E-05  | 0,437854466   | 2,283863881     | 0,107692308     |
| NFKBIA                                                                             | 0,00051598  | -1,195244096 | 0,158 | 0,366 | 1           | 0,436712552   | 2,289835716     | 0,431693989     |
| GSTM3                                                                              | 4,51512E-06 | -1,195658375 | 0,048 | 0,22  | 0,095273602 | 0,436587165   | 2,290493352     | 0,218181818     |
| RAB30-DT                                                                           | 5,13372E-09 | -1,205445317 | 0,018 | 0,171 | 0,000108327 | 0,433635472   | 2,306084404     | 0,105263158     |

Supplementary Table 3

| Differentially expressed genes_keloid-MD_comparing SC-Keloid vs. (SC-Myel+Nonmyel) |             |              |       |       |             |               |                 |                 |
|------------------------------------------------------------------------------------|-------------|--------------|-------|-------|-------------|---------------|-----------------|-----------------|
| gene                                                                               | p_val       | avg_log2FC   | pct.1 | pct.2 | p_val_adj   | Foldchange_UP | Foldchange_DOWN | Ratio_pct1_pct2 |
| TNRC6C                                                                             | 0,000124338 | -1,206447076 | 0,04  | 0,171 | 1           | 0,433334475   | 2,307686227     | 0,233918129     |
| NUDT3                                                                              | 1,51247E-05 | -1,209836045 | 0,086 | 0,293 | 0,319145745 | 0,432317743   | 2,31311348      | 0,293515358     |
| HSPA1B                                                                             | 1,85628E-05 | -1,214050542 | 0,118 | 0,341 | 0,391692977 | 0,431056671   | 2,319880579     | 0,346041056     |
| SBDS                                                                               | 1,45314E-05 | -1,216899068 | 0,195 | 0,463 | 0,306627834 | 0,430206412   | 2,324465587     | 0,421166307     |
| HCFC1R1                                                                            | 3,9349E-06  | -1,21737787  | 0,088 | 0,317 | 0,083030395 | 0,430063659   | 2,325237159     | 0,277602524     |
| HSPA12A                                                                            | 7,12388E-06 | -1,217800855 | 0,107 | 0,341 | 0,150321    | 0,429937586   | 2,325918998     | 0,313782991     |
| ADAM23                                                                             | 6,09248E-13 | -1,227961231 | 0,01  | 0,171 | 1,28557E-08 | 0,42692033    | 2,342357416     | 0,058479532     |
| TOP2B                                                                              | 0,000998014 | -1,239317283 | 0,051 | 0,171 | 1           | 0,423573053   | 2,36086784      | 0,298245614     |
| IFITM3                                                                             | 1,75937E-06 | -1,245375    | 0,442 | 0,707 | 0,03712442  | 0,421798246   | 2,370801704     | 0,625176803     |
| FTL                                                                                | 3,32754E-09 | -1,261440778 | 0,751 | 0,976 | 7,02144E-05 | 0,417127179   | 2,397350379     | 0,769467213     |
| METRN                                                                              | 5,7176E-07  | -1,268525434 | 0,236 | 0,561 | 0,012064706 | 0,41508381    | 2,409152024     | 0,420677362     |
| SNCA                                                                               | 7,5769E-13  | -1,286370337 | 0,035 | 0,293 | 1,5988E-08  | 0,409981201   | 2,43913623      | 0,119453925     |
| LGALS3                                                                             | 1,75678E-07 | -1,291812105 | 0,456 | 0,78  | 0,003706979 | 0,408437687   | 2,448353893     | 0,584615385     |
| MT-ND3                                                                             | 0,000113898 | -1,299972061 | 0,38  | 0,61  | 1           | 0,406134063   | 2,462241142     | 0,62295082      |
| CST3                                                                               | 3,81343E-08 | -1,304526052 | 0,603 | 0,829 | 0,000804672 | 0,404854087   | 2,470025699     | 0,727382388     |
| ZNF536                                                                             | 1,26513E-05 | -1,304967144 | 0,024 | 0,146 | 0,266954591 | 0,404730325   | 2,470781005     | 0,164383562     |
| TGFBR2                                                                             | 1,18892E-06 | -1,310382045 | 0,174 | 0,463 | 0,025087356 | 0,403214089   | 2,48007207      | 0,375809935     |
| ZFYVE21                                                                            | 5,82564E-08 | -1,320712818 | 0,043 | 0,244 | 0,001229268 | 0,400337088   | 2,497894972     | 0,176229508     |
| SOD2                                                                               | 1,74114E-06 | -1,332784817 | 0,045 | 0,22  | 0,036739766 | 0,397001175   | 2,518884232     | 0,204545455     |
| CD9                                                                                | 7,54731E-07 | -1,350583166 | 0,407 | 0,683 | 0,015925586 | 0,392133509   | 2,550151868     | 0,595900439     |
| DUSP6                                                                              | 5,82965E-06 | -1,365423748 | 0,04  | 0,195 | 0,123011398 | 0,388120422   | 2,576519923     | 0,205128205     |
| ARHGAP15                                                                           | 4,36146E-12 | -1,366193516 | 0,011 | 0,171 | 9,20312E-08 | 0,387913391   | 2,577895025     | 0,064327485     |
| ADIRF                                                                              | 7,81319E-08 | -1,376840686 | 0,043 | 0,244 | 0,00164866  | 0,385061106   | 2,596990409     | 0,176229508     |
| PNRC1                                                                              | 5,78133E-08 | -1,385025233 | 0,163 | 0,488 | 0,001219919 | 0,382882803   | 2,611765254     | 0,334016393     |
| VAMP2                                                                              | 2,57157E-07 | -1,411330789 | 0,078 | 0,317 | 0,005426273 | 0,375964725   | 2,659824005     | 0,246056782     |
| LITAF                                                                              | 4,78668E-10 | -1,419589044 | 0,057 | 0,317 | 1,01004E-05 | 0,37381878    | 2,675092992     | 0,179810726     |
| SORCS1                                                                             | 5,55773E-13 | -1,432179713 | 0,029 | 0,268 | 1,17274E-08 | 0,370570589   | 2,698541198     | 0,108208955     |
| PLL                                                                                | 1,11022E-15 | -1,44187816  | 0,01  | 0,195 | 2,34268E-11 | 0,3680878     | 2,716743122     | 0,051282051     |
| RETREG1                                                                            | 3,01166E-07 | -1,460805972 | 0,018 | 0,146 | 0,006354904 | 0,363290118   | 2,752620979     | 0,123287671     |
| IFITM2                                                                             | 1,79967E-06 | -1,486108715 | 0,128 | 0,39  | 0,037974916 | 0,356974094   | 2,801323729     | 0,328205128     |

Supplementary Table 3

| Differentially expressed genes_keloid-MD_comparing SC-Keloid vs. (SC-Myel+Nonmyel) |             |              |       |       |             |               |                 |                 |
|------------------------------------------------------------------------------------|-------------|--------------|-------|-------|-------------|---------------|-----------------|-----------------|
| gene                                                                               | p_val       | avg_log2FC   | pct.1 | pct.2 | p_val_adj   | Foldchange_UP | Foldchange_DOWN | Ratio_pct1_pct2 |
| LTBP4                                                                              | 1,34436E-10 | -1,51529628  | 0,045 | 0,293 | 2,83673E-06 | 0,349824617   | 2,858575273     | 0,153583618     |
| S100B                                                                              | 2,95964E-12 | -1,519857271 | 0,85  | 1     | 6,24514E-08 | 0,348720415   | 2,867626781     | 0,85            |
| TTYH1                                                                              | 8,80318E-16 | -1,540709208 | 0,027 | 0,293 | 1,85756E-11 | 0,343716447   | 2,90937489      | 0,092150171     |
| CRYAB                                                                              | 1,89446E-05 | -1,546950391 | 0,381 | 0,61  | 0,399749585 | 0,342232721   | 2,921988279     | 0,624590164     |
| IQGAP2                                                                             | 9,60288E-13 | -1,547710957 | 0,043 | 0,317 | 2,0263E-08  | 0,342052349   | 2,923529112     | 0,135646688     |
| ANK3                                                                               | 5,63694E-17 | -1,56942002  | 0,024 | 0,293 | 1,18945E-12 | 0,336943822   | 2,96785379      | 0,081911263     |
| TMEM176A                                                                           | 3,05486E-15 | -1,569593631 | 0,014 | 0,22  | 6,44605E-11 | 0,336903277   | 2,968210958     | 0,063636364     |
| VWA1                                                                               | 1,47265E-07 | -1,581976879 | 0,156 | 0,463 | 0,003107436 | 0,334023873   | 2,993797995     | 0,336933045     |
| SCN7A                                                                              | 6,30515E-15 | -1,585607694 | 0,024 | 0,268 | 1,33045E-10 | 0,333184295   | 3,001341942     | 0,089552239     |
| RBP1                                                                               | 8,90566E-13 | -1,599958998 | 0,006 | 0,146 | 1,87918E-08 | 0,329886353   | 3,03134698      | 0,04109589      |
| FXD1                                                                               | 7,24941E-11 | -1,605555924 | 0,102 | 0,439 | 1,5297E-06  | 0,32860904    | 3,043129912     | 0,232346241     |
| ATP1A2                                                                             | 6,89571E-26 | -1,617596307 | 0,008 | 0,268 | 1,45506E-21 | 0,325877961   | 3,06863341      | 0,029850746     |
| CD74                                                                               | 3,19572E-05 | -1,627469134 | 0,035 | 0,171 | 0,67432957  | 0,323655487   | 3,089705076     | 0,204678363     |
| DKK3                                                                               | 1,17623E-13 | -1,690691303 | 0,013 | 0,195 | 2,48197E-09 | 0,309778451   | 3,228113497     | 0,066666667     |
| CHL1                                                                               | 3,88905E-32 | -1,727079828 | 0     | 0,22  | 8,20629E-28 | 0,302062746   | 3,310570442     | 0               |
| HLA-DRA                                                                            | 1,54573E-09 | -1,774819636 | 0,029 | 0,22  | 3,26165E-05 | 0,292230844   | 3,421952267     | 0,131818182     |
| MPZ                                                                                | 2,0858E-11  | -1,785756358 | 0,065 | 0,366 | 4,40124E-07 | 0,290023889   | 3,447991834     | 0,177595628     |
| EDNRB                                                                              | 3,06015E-13 | -1,858126174 | 0,094 | 0,463 | 6,45723E-09 | 0,27583431    | 3,625364803     | 0,203023758     |
| SORBS1                                                                             | 4,25043E-16 | -1,873818743 | 0,027 | 0,293 | 8,96883E-12 | 0,272850247   | 3,665014085     | 0,092150171     |
| NRN1                                                                               | 8,62781E-19 | -1,898695819 | 0,078 | 0,512 | 1,82055E-14 | 0,268185693   | 3,728759683     | 0,15234375      |
| RELN                                                                               | 1,28061E-24 | -1,988846649 | 0,01  | 0,268 | 2,70221E-20 | 0,251940219   | 3,969195571     | 0,037313433     |
| MATN2                                                                              | 9,95581E-23 | -1,995184607 | 0,043 | 0,439 | 2,10077E-18 | 0,250835838   | 3,986671151     | 0,097949886     |
| PMP2                                                                               | 5,41329E-10 | -1,999150432 | 0,093 | 0,39  | 1,14226E-05 | 0,250147262   | 3,99764519      | 0,238461538     |
| TMEM176B                                                                           | 1,29279E-20 | -2,015899251 | 0,014 | 0,268 | 2,72793E-16 | 0,247259996   | 4,044325881     | 0,052238806     |
| MAL                                                                                | 1,66876E-33 | -2,018604417 | 0,005 | 0,293 | 3,52125E-29 | 0,246796798   | 4,051916424     | 0,017064846     |
| GPM6B                                                                              | 1,92496E-16 | -2,118662376 | 0,348 | 0,854 | 4,06187E-12 | 0,230260304   | 4,342910965     | 0,407494145     |
| HLA-DRB1                                                                           | 1,95767E-14 | -2,189114858 | 0,032 | 0,293 | 4,13087E-10 | 0,219285928   | 4,560256133     | 0,109215017     |
| SFRP1                                                                              | 1,16207E-20 | -2,20802637  | 0,014 | 0,268 | 2,45208E-16 | 0,216430185   | 4,620427591     | 0,052238806     |
| CTSC                                                                               | 3,68766E-15 | -2,213092144 | 0,043 | 0,341 | 7,78132E-11 | 0,215671561   | 4,63667994      | 0,126099707     |
| PLP1                                                                               | 5,68979E-22 | -2,355647819 | 0,163 | 0,732 | 1,2006E-17  | 0,195379659   | 5,118240073     | 0,222677596     |

Supplementary Table 3

| Differentially expressed genes_keloid-MD_ comparing SC-Keloid vs. (SC-Myel+Nonmyel) |             |              |       |       |             |               |                 |                 |
|-------------------------------------------------------------------------------------|-------------|--------------|-------|-------|-------------|---------------|-----------------|-----------------|
| gene                                                                                | p_val       | avg_log2FC   | pct.1 | pct.2 | p_val_adj   | Foldchange_UP | Foldchange_DOWN | Ratio_pct1_pct2 |
| RARRES2                                                                             | 9,43064E-34 | -2,387601209 | 0,022 | 0,439 | 1,98996E-29 | 0,191099882   | 5,232865612     | 0,050113895     |
| XKR4                                                                                | 9,55545E-33 | -2,505286079 | 0,008 | 0,317 | 2,0163E-28  | 0,176130165   | 5,677619157     | 0,025236593     |
| NRXN1                                                                               | 7,48626E-23 | -2,518763318 | 0,107 | 0,634 | 1,57967E-18 | 0,17449247    | 5,73090634      | 0,168769716     |
| GFRA3                                                                               | 1,07626E-23 | -2,530542662 | 0,094 | 0,61  | 2,27102E-19 | 0,173073571   | 5,777889695     | 0,154098361     |
| ITIH5                                                                               | 8,40829E-22 | -2,641291554 | 0,193 | 0,78  | 1,77423E-17 | 0,16028468    | 6,238899434     | 0,247435897     |
| COL14A1                                                                             | 2,6818E-32  | -3,241808881 | 0,083 | 0,683 | 5,65886E-28 | 0,105710539   | 9,459794746     | 0,121522694     |

Supplementary Table 4

| Differentially expressed genes_keloid-CCD_ comparing SC-Keloid vs. (SC-Myel, SC-Nonmyel) |             |             |       |       |             |               |                 |                 |
|------------------------------------------------------------------------------------------|-------------|-------------|-------|-------|-------------|---------------|-----------------|-----------------|
| gene                                                                                     | p_val       | avg_log2FC  | pct.1 | pct.2 | p_val_adj   | Foldchange_UP | Foldchange_DOWN | Ratio_pct1_pct2 |
| TGFBI                                                                                    | 3,3958E-29  | 3,029870367 | 0,975 | 0,14  | 7,16547E-25 | 8,167363097   | 0,122438538     | 6,964285714     |
| IGFBP3                                                                                   | 6,21642E-20 | 2,225248255 | 0,875 | 0,15  | 1,31173E-15 | 4,675913543   | 0,213861952     | 5,833333333     |
| SPARCL1                                                                                  | 5,90085E-17 | 2,144847772 | 0,95  | 0,46  | 1,24514E-12 | 4,422455947   | 0,226118702     | 2,065217391     |
| CALB2                                                                                    | 2,05172E-20 | 2,118389279 | 0,725 | 0,05  | 4,32934E-16 | 4,342088945   | 0,230303896     | 14,5            |
| COL1A1                                                                                   | 1,63999E-24 | 2,093393801 | 1     | 0,81  | 3,46053E-20 | 4,267507831   | 0,234328803     | 1,234567901     |
| COL7A1                                                                                   | 6,3641E-26  | 2,067868872 | 0,988 | 0,16  | 1,34289E-21 | 4,192668807   | 0,238511565     | 6,175           |
| TAGLN                                                                                    | 5,87919E-16 | 2,052665699 | 0,825 | 0,22  | 1,24057E-11 | 4,148718293   | 0,241038299     | 3,75            |
| TPM2                                                                                     | 3,5852E-21  | 1,999061802 | 0,887 | 0,21  | 7,56513E-17 | 3,997399608   | 0,25016263      | 4,223809524     |
| CCN3                                                                                     | 8,75885E-16 | 1,990677492 | 0,9   | 0,28  | 1,8482E-11  | 3,974235852   | 0,251620698     | 3,214285714     |
| SH3BGR13                                                                                 | 1,45349E-21 | 1,86491222  | 0,975 | 0,39  | 3,06702E-17 | 3,642457705   | 0,274539907     | 2,5             |
| S100A16                                                                                  | 3,44511E-25 | 1,835382546 | 0,988 | 0,48  | 7,26952E-21 | 3,568660221   | 0,280217207     | 2,058333333     |
| GAPDH                                                                                    | 7,72324E-24 | 1,805821795 | 1     | 0,88  | 1,62968E-19 | 3,496282587   | 0,286018071     | 1,136363636     |
| MYL9                                                                                     | 4,00764E-17 | 1,803266166 | 0,912 | 0,45  | 8,45653E-13 | 3,490094659   | 0,28652518      | 2,026666667     |
| MMP15                                                                                    | 6,83522E-27 | 1,76026051  | 0,925 | 0,08  | 1,4423E-22  | 3,387592898   | 0,295194857     | 11,5625         |
| TUBB                                                                                     | 4,19036E-15 | 1,691825785 | 0,925 | 0,52  | 8,84208E-11 | 3,230652965   | 0,309534949     | 1,778846154     |
| TMSB10                                                                                   | 2,3336E-28  | 1,682307007 | 1     | 0,99  | 4,92412E-24 | 3,209407559   | 0,311583986     | 1,01010101      |
| ACTB                                                                                     | 1,47582E-19 | 1,633679244 | 1     | 0,98  | 3,11414E-15 | 3,103033439   | 0,322265299     | 1,020408163     |
| ACTG1                                                                                    | 1,97276E-22 | 1,573185619 | 1     | 0,99  | 4,16273E-18 | 2,975610346   | 0,336065507     | 1,01010101      |
| LYPD1                                                                                    | 2,83443E-23 | 1,563763486 | 0,875 | 0,12  | 5,98092E-19 | 2,956240181   | 0,338267508     | 7,291666667     |
| MYL6                                                                                     | 2,71876E-24 | 1,557423071 | 1     | 0,96  | 5,73685E-20 | 2,943276483   | 0,339757412     | 1,041666667     |
| DYNLT1                                                                                   | 1,34649E-23 | 1,557257959 | 0,95  | 0,22  | 2,84123E-19 | 2,942939654   | 0,339796298     | 4,318181818     |
| ELN                                                                                      | 3,06905E-18 | 1,547271244 | 0,887 | 0,2   | 6,476E-14   | 2,922638197   | 0,342156618     | 4,435           |
| COL6A1                                                                                   | 3,31601E-18 | 1,540858142 | 0,975 | 0,59  | 6,99711E-14 | 2,909675248   | 0,343680966     | 1,652542373     |
| PFN1                                                                                     | 5,70664E-20 | 1,52880683  | 0,988 | 0,71  | 1,20416E-15 | 2,885470996   | 0,346563872     | 1,391549296     |
| PPP1R14B                                                                                 | 1,41925E-18 | 1,522643659 | 0,988 | 0,5   | 2,99477E-14 | 2,873170601   | 0,348047554     | 1,976           |
| TNC                                                                                      | 8,27834E-20 | 1,502706938 | 1     | 0,48  | 1,74681E-15 | 2,833739103   | 0,352890638     | 2,083333333     |
| CSR2                                                                                     | 1,6932E-14  | 1,49962749  | 0,863 | 0,27  | 3,57281E-10 | 2,827696907   | 0,353644691     | 3,196296296     |
| LGALS1                                                                                   | 6,26133E-22 | 1,470354423 | 1     | 1     | 1,3212E-17  | 2,770899573   | 0,360893628     | 1               |
| PKM                                                                                      | 2,16474E-16 | 1,453166298 | 0,925 | 0,46  | 4,56782E-12 | 2,738083224   | 0,365218994     | 2,010869565     |
| PDLIM7                                                                                   | 2,77723E-19 | 1,450864861 | 0,963 | 0,31  | 5,86023E-15 | 2,73371882    | 0,365802069     | 3,106451613     |



Supplementary Table 4

| Differentially expressed genes_keloid-CCD_ comparing SC-Keloid vs. (SC-Myel, SC-Nonmyel) |             |             |       |       |             |               |                 |                 |
|------------------------------------------------------------------------------------------|-------------|-------------|-------|-------|-------------|---------------|-----------------|-----------------|
| gene                                                                                     | p_val       | avg_log2FC  | pct.1 | pct.2 | p_val_adj   | Foldchange_UP | Foldchange_DOWN | Ratio_pct1_pct2 |
| IBSP                                                                                     | 6,70661E-08 | 1,444980941 | 0,362 | 0,04  | 0,001415162 | 2,722592266   | 0,36729701      | 9,05            |
| GPC1                                                                                     | 1,83699E-17 | 1,414195724 | 0,975 | 0,47  | 3,87624E-13 | 2,66511119    | 0,375218867     | 2,074468085     |
| ATOX1                                                                                    | 2,74785E-19 | 1,401377359 | 0,963 | 0,37  | 5,79824E-15 | 2,641536526   | 0,378567546     | 2,602702703     |
| TPST2                                                                                    | 1,75159E-22 | 1,393029391 | 0,825 | 0,06  | 3,69602E-18 | 2,626295754   | 0,380764428     | 13,75           |
| COL6A2                                                                                   | 1,94339E-16 | 1,375468894 | 1     | 0,67  | 4,10075E-12 | 2,594522224   | 0,385427417     | 1,492537313     |
| S100A11                                                                                  | 5,04646E-20 | 1,370548241 | 1     | 0,88  | 1,06485E-15 | 2,585688066   | 0,386744253     | 1,136363636     |
| PHLDA2                                                                                   | 3,91637E-15 | 1,358169141 | 0,9   | 0,31  | 8,26392E-11 | 2,563596386   | 0,390077005     | 2,903225806     |
| MYL12A                                                                                   | 6,50073E-18 | 1,350758895 | 0,988 | 0,75  | 1,37172E-13 | 2,550462512   | 0,392085747     | 1,317333333     |
| MMP2                                                                                     | 5,11286E-16 | 1,342596902 | 0,838 | 0,18  | 1,07886E-11 | 2,536074105   | 0,394310244     | 4,655555556     |
| LOXL2                                                                                    | 1,4314E-19  | 1,341531332 | 0,85  | 0,12  | 3,0204E-15  | 2,53420166    | 0,394601588     | 7,083333333     |
| AP2S1                                                                                    | 4,52551E-19 | 1,336250654 | 0,963 | 0,28  | 9,54928E-15 | 2,524942709   | 0,39604859      | 3,439285714     |
| LSM7                                                                                     | 6,58724E-19 | 1,321361836 | 0,988 | 0,51  | 1,38997E-14 | 2,499018941   | 0,400157031     | 1,937254902     |
| FLNA                                                                                     | 1,78529E-15 | 1,317363949 | 0,912 | 0,37  | 3,76714E-11 | 2,492103435   | 0,401267454     | 2,464864865     |
| PHPT1                                                                                    | 2,12461E-17 | 1,279498574 | 0,925 | 0,38  | 4,48315E-13 | 2,4275459     | 0,411938658     | 2,434210526     |
| IGFBP5                                                                                   | 5,05386E-14 | 1,277428875 | 1     | 0,88  | 1,06642E-09 | 2,424065824   | 0,412530052     | 1,136363636     |
| FABP5                                                                                    | 1,83518E-14 | 1,249814978 | 0,938 | 0,34  | 3,87242E-10 | 2,378109223   | 0,420502133     | 2,758823529     |
| COL5A3                                                                                   | 7,93283E-15 | 1,248370564 | 0,925 | 0,35  | 1,67391E-10 | 2,375729472   | 0,420923347     | 2,642857143     |
| TUBA1B                                                                                   | 3,97747E-10 | 1,236175943 | 1     | 0,81  | 8,39286E-06 | 2,355732853   | 0,424496351     | 1,234567901     |
| FRMD4A                                                                                   | 1,50205E-15 | 1,228656547 | 0,887 | 0,21  | 3,16948E-11 | 2,343486603   | 0,426714622     | 4,223809524     |
| CLIC1                                                                                    | 3,08113E-18 | 1,226160735 | 1     | 0,74  | 6,50148E-14 | 2,339435957   | 0,427453462     | 1,351351351     |
| CCND1                                                                                    | 6,8291E-11  | 1,212947256 | 0,95  | 0,48  | 1,44101E-06 | 2,318107154   | 0,431386443     | 1,979166667     |
| CYTL1                                                                                    | 1,39178E-17 | 1,21098016  | 0,863 | 0,16  | 2,9368E-13  | 2,314948598   | 0,431975034     | 5,39375         |
| ENC1                                                                                     | 4,11531E-16 | 1,200181374 | 0,75  | 0,11  | 8,68371E-12 | 2,297685554   | 0,435220563     | 6,818181818     |
| MYH9                                                                                     | 5,24561E-16 | 1,185638328 | 0,8   | 0,18  | 1,10688E-11 | 2,274640151   | 0,439629978     | 4,444444444     |
| RAB13                                                                                    | 4,97563E-15 | 1,184904613 | 1     | 0,51  | 1,04991E-10 | 2,273483626   | 0,439853619     | 1,960784314     |
| SLC15A3                                                                                  | 5,15643E-15 | 1,1559317   | 0,863 | 0,24  | 1,08806E-10 | 2,228281808   | 0,448776271     | 3,595833333     |
| TXNDC17                                                                                  | 1,16656E-16 | 1,150631405 | 0,887 | 0,23  | 2,46156E-12 | 2,220110377   | 0,450428055     | 3,856521739     |
| S100A6                                                                                   | 1,61011E-20 | 1,147988244 | 1     | 1     | 3,3975E-16  | 2,216046638   | 0,451254041     | 1               |
| NES                                                                                      | 4,2088E-13  | 1,143989489 | 0,988 | 0,53  | 8,881E-09   | 2,209912869   | 0,452506528     | 1,864150943     |
| P4HB                                                                                     | 6,92769E-14 | 1,138376339 | 0,938 | 0,53  | 1,46181E-09 | 2,201331379   | 0,454270543     | 1,769811321     |

Supplementary Table 4

| Differentially expressed genes_keloid-CCD_ comparing SC-Keloid vs. (SC-Myel, SC-Nonmyel) |             |             |       |       |             |               |                 |                 |
|------------------------------------------------------------------------------------------|-------------|-------------|-------|-------|-------------|---------------|-----------------|-----------------|
| gene                                                                                     | p_val       | avg_log2FC  | pct.1 | pct.2 | p_val_adj   | Foldchange_UP | Foldchange_DOWN | Ratio_pct1_pct2 |
| POLR2L                                                                                   | 1,95998E-15 | 1,138189398 | 0,988 | 0,52  | 4,13575E-11 | 2,201046154   | 0,45432941      | 1,9             |
| HYI                                                                                      | 2,28524E-15 | 1,135694735 | 0,85  | 0,2   | 4,82209E-11 | 2,197243463   | 0,455115701     | 4,25            |
| CAPG                                                                                     | 3,37153E-17 | 1,135563323 | 0,625 | 0,03  | 7,11427E-13 | 2,197043331   | 0,455157159     | 20,83333333     |
| RGS16                                                                                    | 1,13933E-13 | 1,118747254 | 0,988 | 0,44  | 2,4041E-09  | 2,171583239   | 0,460493516     | 2,245454545     |
| ATP5MC2                                                                                  | 1,24947E-16 | 1,096272223 | 1     | 0,51  | 2,63651E-12 | 2,138015368   | 0,467723486     | 1,960784314     |
| ATP5F1E                                                                                  | 4,98831E-19 | 1,088301205 | 1     | 0,79  | 1,05258E-14 | 2,126235217   | 0,470314851     | 1,265822785     |
| PRDX4                                                                                    | 4,1054E-13  | 1,077380062 | 0,875 | 0,34  | 8,66281E-09 | 2,11020047    | 0,473888625     | 2,573529412     |
| RGS3                                                                                     | 3,78097E-15 | 1,073800841 | 0,875 | 0,19  | 7,97822E-11 | 2,104971706   | 0,475065768     | 4,605263158     |
| COL4A2                                                                                   | 1,27818E-14 | 1,071202259 | 1     | 0,74  | 2,69708E-10 | 2,101183644   | 0,475922227     | 1,351351351     |
| S100A13                                                                                  | 5,83955E-13 | 1,071143079 | 1     | 0,64  | 1,2322E-08  | 2,101097453   | 0,475941751     | 1,5625          |
| S100A4                                                                                   | 8,79212E-07 | 1,068093632 | 0,988 | 0,86  | 0,018552263 | 2,096661022   | 0,47694882      | 1,148837209     |
| PSMA7                                                                                    | 1,11621E-15 | 1,067484655 | 0,988 | 0,64  | 2,35532E-11 | 2,095776185   | 0,477150188     | 1,54375         |
| CD82                                                                                     | 4,03895E-13 | 1,064633263 | 0,825 | 0,23  | 8,52258E-09 | 2,091638111   | 0,478094176     | 3,586956522     |
| ATP5MC3                                                                                  | 6,15585E-15 | 1,059149606 | 0,963 | 0,42  | 1,29895E-10 | 2,083702925   | 0,479914861     | 2,292857143     |
| ITGB1                                                                                    | 6,62582E-15 | 1,059129923 | 1     | 0,96  | 1,39812E-10 | 2,083674497   | 0,479921409     | 1,041666667     |
| ATP5MF                                                                                   | 2,12975E-14 | 1,050576404 | 0,938 | 0,43  | 4,49398E-10 | 2,071357258   | 0,482775241     | 2,181395349     |
| OCIAD2                                                                                   | 2,99432E-17 | 1,045330164 | 0,6   | 0,02  | 6,31832E-13 | 2,063838618   | 0,484534009     | 30              |
| COPE                                                                                     | 1,99576E-16 | 1,044921562 | 0,975 | 0,45  | 4,21126E-12 | 2,063254178   | 0,484671259     | 2,166666667     |
| AKAP12                                                                                   | 5,63076E-11 | 1,035610985 | 0,787 | 0,25  | 1,18815E-06 | 2,049981635   | 0,487809248     | 3,148           |
| MYDGF                                                                                    | 1,06628E-13 | 1,027666891 | 0,963 | 0,53  | 2,24995E-09 | 2,038724583   | 0,490502743     | 1,816981132     |
| CD151                                                                                    | 1,71636E-13 | 1,025258533 | 0,988 | 0,72  | 3,6217E-09  | 2,035324085   | 0,491322246     | 1,372222222     |
| CENPF                                                                                    | 1,86541E-06 | 1,02475982  | 0,325 | 0,05  | 0,039361992 | 2,034620632   | 0,491492116     | 6,5             |
| NAA10                                                                                    | 8,99326E-15 | 1,020914526 | 0,863 | 0,24  | 1,89767E-10 | 2,029204868   | 0,492803864     | 3,595833333     |
| COL5A1                                                                                   | 4,26394E-14 | 1,019889266 | 0,9   | 0,26  | 8,99734E-10 | 2,027763312   | 0,493154203     | 3,461538462     |
| DTYMK                                                                                    | 4,1941E-14  | 1,019487704 | 0,7   | 0,12  | 8,84997E-10 | 2,027198981   | 0,493291487     | 5,833333333     |
| SEM1                                                                                     | 5,37376E-16 | 1,008045867 | 0,975 | 0,55  | 1,13392E-11 | 2,0111851     | 0,497219276     | 1,772727273     |
| RPLP0                                                                                    | 3,10005E-15 | 1,00746981  | 1     | 0,83  | 6,54141E-11 | 2,01038221    | 0,497417852     | 1,204819277     |
| DBNDD1                                                                                   | 1,27797E-19 | 1,005609943 | 0,713 | 0,04  | 2,69664E-15 | 2,007792172   | 0,498059517     | 17,825          |
| MMP14                                                                                    | 2,95402E-15 | 1,002467136 | 0,875 | 0,19  | 6,23328E-11 | 2,003423103   | 0,499145686     | 4,605263158     |
| OSTC                                                                                     | 1,91829E-13 | 0,994174677 | 0,95  | 0,43  | 4,04779E-09 | 1,991940669   | 0,502022985     | 2,209302326     |

Supplementary Table 4

| Differentially expressed genes_keloid-CCD_ comparing SC-Keloid vs. (SC-Myel, SC-Nonmyel) |             |             |       |       |             |               |                 |                 |
|------------------------------------------------------------------------------------------|-------------|-------------|-------|-------|-------------|---------------|-----------------|-----------------|
| gene                                                                                     | p_val       | avg_log2FC  | pct.1 | pct.2 | p_val_adj   | Foldchange_UP | Foldchange_DOWN | Ratio_pct1_pct2 |
| TPM4                                                                                     | 4,78989E-12 | 0,991834718 | 0,975 | 0,59  | 1,01071E-07 | 1,988712488   | 0,502837894     | 1,652542373     |
| NDUFB2                                                                                   | 5,16805E-14 | 0,980552255 | 0,963 | 0,56  | 1,09051E-09 | 1,973220601   | 0,506785708     | 1,719642857     |
| MPG                                                                                      | 4,74855E-12 | 0,976328602 | 0,912 | 0,36  | 1,00199E-07 | 1,967452223   | 0,508271555     | 2,533333333     |
| ISLR                                                                                     | 4,04736E-16 | 0,975019948 | 0,637 | 0,05  | 8,54033E-12 | 1,965668376   | 0,508732812     | 12,74           |
| HINT1                                                                                    | 1,83393E-14 | 0,973651185 | 1     | 0,66  | 3,86978E-10 | 1,963804324   | 0,509215703     | 1,515151515     |
| NPL                                                                                      | 1,24293E-17 | 0,972811448 | 0,662 | 0,04  | 2,62271E-13 | 1,962661603   | 0,509512184     | 16,55           |
| HLA-A                                                                                    | 3,53098E-13 | 0,959540939 | 1     | 0,85  | 7,45072E-09 | 1,944691002   | 0,514220511     | 1,176470588     |
| PPIB                                                                                     | 5,76542E-16 | 0,958489347 | 1     | 0,83  | 1,21656E-11 | 1,943274017   | 0,514595467     | 1,204819277     |
| ANAPC11                                                                                  | 3,03694E-13 | 0,957185954 | 0,938 | 0,43  | 6,40826E-09 | 1,941519173   | 0,515060584     | 2,181395349     |
| OST4                                                                                     | 1,02526E-12 | 0,956171899 | 0,975 | 0,56  | 2,1634E-08  | 1,940154979   | 0,515422742     | 1,741071429     |
| PTN                                                                                      | 3,65096E-11 | 0,953967406 | 1     | 0,89  | 7,7039E-07  | 1,937192611   | 0,51621093      | 1,123595506     |
| RPS2                                                                                     | 1,45372E-18 | 0,953436001 | 1     | 0,99  | 3,06749E-14 | 1,936479194   | 0,516401107     | 1,01010101      |
| MDH2                                                                                     | 5,10244E-15 | 0,952800001 | 0,838 | 0,19  | 1,07666E-10 | 1,935625702   | 0,516628808     | 4,410526316     |
| COL8A1                                                                                   | 1,78603E-12 | 0,94464964  | 0,95  | 0,42  | 3,76871E-08 | 1,924721409   | 0,519555711     | 2,261904762     |
| UBE2C                                                                                    | 3,06402E-06 | 0,943442983 | 0,225 | 0,01  | 0,064653977 | 1,923112262   | 0,519990445     | 22,5            |
| PDLIM4                                                                                   | 2,45394E-13 | 0,942756451 | 1     | 0,8   | 5,17806E-09 | 1,922197333   | 0,52023795      | 1,25            |
| CAVIN3                                                                                   | 5,4541E-12  | 0,937565707 | 1     | 0,71  | 1,15087E-07 | 1,915293791   | 0,522113111     | 1,408450704     |
| PLOD1                                                                                    | 3,39935E-18 | 0,932512246 | 0,825 | 0,11  | 7,17296E-14 | 1,908596651   | 0,523945172     | 7,5             |
| NDUFA4                                                                                   | 6,3537E-15  | 0,926000747 | 1     | 0,8   | 1,34069E-10 | 1,90000175    | 0,526315305     | 1,25            |
| CDK2AP1                                                                                  | 6,55931E-14 | 0,925404801 | 0,825 | 0,2   | 1,38408E-09 | 1,899217062   | 0,526532759     | 4,125           |
| COL1A2                                                                                   | 1,26869E-07 | 0,925132586 | 0,988 | 0,89  | 0,002677054 | 1,898858742   | 0,526632117     | 1,11011236      |
| GLIPR1                                                                                   | 1,69335E-17 | 0,924960456 | 0,637 | 0,03  | 3,57314E-13 | 1,898632201   | 0,526694954     | 21,23333333     |
| HMCN2                                                                                    | 2,43395E-13 | 0,924485157 | 0,7   | 0,13  | 5,13589E-09 | 1,898006794   | 0,526868504     | 5,384615385     |
| PLP2                                                                                     | 2,22196E-12 | 0,92389857  | 0,825 | 0,23  | 4,68856E-08 | 1,897235239   | 0,527082767     | 3,586956522     |
| RPS18                                                                                    | 9,71405E-18 | 0,923803981 | 1     | 1     | 2,04976E-13 | 1,897110853   | 0,527117326     | 1               |
| BBLN                                                                                     | 2,36145E-12 | 0,923117572 | 0,988 | 0,41  | 4,98291E-08 | 1,896208455   | 0,527368179     | 2,409756098     |
| GUK1                                                                                     | 1,30816E-12 | 0,919674781 | 0,963 | 0,64  | 2,76036E-08 | 1,891688813   | 0,528628172     | 1,5046875       |
| ANXA2                                                                                    | 2,73749E-11 | 0,917872872 | 1     | 0,97  | 5,77639E-07 | 1,88932759    | 0,529288836     | 1,030927835     |
| MRPL41                                                                                   | 1,79376E-13 | 0,917188681 | 0,9   | 0,27  | 3,78501E-09 | 1,888431798   | 0,529539908     | 3,333333333     |
| FIBP                                                                                     | 1,11679E-13 | 0,912215436 | 0,762 | 0,16  | 2,35653E-09 | 1,88193322    | 0,531368483     | 4,7625          |

Supplementary Table 4

| Differentially expressed genes_keloid-CCD_ comparing SC-Keloid vs. (SC-Myel, SC-Nonmyel) |             |             |       |       |             |               |                 |                 |
|------------------------------------------------------------------------------------------|-------------|-------------|-------|-------|-------------|---------------|-----------------|-----------------|
| gene                                                                                     | p_val       | avg_log2FC  | pct.1 | pct.2 | p_val_adj   | Foldchange_UP | Foldchange_DOWN | Ratio_pct1_pct2 |
| KCNN4                                                                                    | 4,28184E-13 | 0,910064582 | 0,575 | 0,07  | 9,03511E-09 | 1,879129615   | 0,532161269     | 8,214285714     |
| PSMB1                                                                                    | 1,91753E-11 | 0,909584232 | 0,975 | 0,52  | 4,04617E-07 | 1,878504058   | 0,532338483     | 1,875           |
| MRPL52                                                                                   | 3,8742E-13  | 0,906273021 | 0,825 | 0,22  | 8,17496E-09 | 1,87419754    | 0,533561686     | 3,75            |
| RPS27L                                                                                   | 1,12997E-08 | 0,905206343 | 0,9   | 0,45  | 0,000238435 | 1,872812336   | 0,533956329     | 2               |
| CRLF1                                                                                    | 3,81803E-08 | 0,902386951 | 0,5   | 0,11  | 0,000805642 | 1,86915596    | 0,535000835     | 4,545454545     |
| CALR                                                                                     | 1,4241E-11  | 0,901747135 | 0,988 | 0,76  | 3,00499E-07 | 1,868327199   | 0,535238153     | 1,3             |
| RPL36                                                                                    | 2,75197E-15 | 0,895209107 | 1     | 0,89  | 5,80694E-11 | 1,859879441   | 0,537669259     | 1,123595506     |
| NME1                                                                                     | 1,45606E-10 | 0,893896639 | 0,8   | 0,28  | 3,07244E-06 | 1,858188216   | 0,538158617     | 2,857142857     |
| HOXB2                                                                                    | 1,08738E-12 | 0,893718654 | 0,7   | 0,14  | 2,29448E-08 | 1,857958985   | 0,538225014     | 5               |
| NDUFA12                                                                                  | 1,21017E-11 | 0,891467085 | 0,863 | 0,33  | 2,55359E-07 | 1,855061587   | 0,539065661     | 2,615151515     |
| MGST3                                                                                    | 9,02006E-12 | 0,889468609 | 0,925 | 0,51  | 1,90332E-07 | 1,852493665   | 0,539812912     | 1,81372549      |
| S100A10                                                                                  | 2,29261E-14 | 0,889299694 | 1     | 0,98  | 4,83764E-10 | 1,852276783   | 0,539876119     | 1,020408163     |
| MICOS10                                                                                  | 1,15987E-11 | 0,879452929 | 0,912 | 0,36  | 2,44743E-07 | 1,839677562   | 0,543573516     | 2,533333333     |
| SERPINE1                                                                                 | 9,37923E-11 | 0,879202432 | 0,588 | 0,1   | 1,97911E-06 | 1,839358164   | 0,543667905     | 5,88            |
| UQCR11                                                                                   | 1,89671E-13 | 0,878999046 | 1     | 0,46  | 4,00224E-09 | 1,839098877   | 0,543744555     | 2,173913043     |
| TGFB1I1                                                                                  | 3,83194E-13 | 0,878429591 | 0,938 | 0,38  | 8,08577E-09 | 1,838373098   | 0,543959222     | 2,468421053     |
| NT5E                                                                                     | 8,93941E-20 | 0,874817546 | 0,637 | 0,01  | 1,8863E-15  | 1,833776159   | 0,545322827     | 63,7            |
| NDUFS8                                                                                   | 9,15028E-12 | 0,868337725 | 0,812 | 0,24  | 1,9308E-07  | 1,825558277   | 0,547777637     | 3,383333333     |
| BMP1                                                                                     | 7,05266E-12 | 0,867650052 | 0,762 | 0,19  | 1,48818E-07 | 1,824688316   | 0,548038803     | 4,010526316     |
| PARK7                                                                                    | 1,16785E-11 | 0,86760244  | 1     | 0,57  | 2,46428E-07 | 1,8246281     | 0,548056889     | 1,754385965     |
| ARL4C                                                                                    | 6,16744E-14 | 0,864817572 | 0,7   | 0,11  | 1,30139E-09 | 1,821109375   | 0,549115838     | 6,363636364     |
| MICOS13                                                                                  | 1,42203E-13 | 0,855737892 | 0,95  | 0,33  | 3,00063E-09 | 1,809684114   | 0,552582626     | 2,878787879     |
| COX7A2                                                                                   | 3,73194E-11 | 0,853839792 | 0,988 | 0,59  | 7,87477E-07 | 1,807304746   | 0,553310117     | 1,674576271     |
| EEF1B2                                                                                   | 3,60748E-11 | 0,851781368 | 0,975 | 0,71  | 7,61214E-07 | 1,804727938   | 0,554100138     | 1,373239437     |
| ERCC1                                                                                    | 5,33282E-14 | 0,85112822  | 0,887 | 0,22  | 1,12528E-09 | 1,803911072   | 0,554351052     | 4,031818182     |
| ARPC4                                                                                    | 2,96255E-15 | 0,850046654 | 0,775 | 0,13  | 6,25127E-11 | 1,802559215   | 0,554766796     | 5,961538462     |
| SSR4                                                                                     | 6,65058E-12 | 0,848875119 | 0,988 | 0,76  | 1,40334E-07 | 1,801096048   | 0,555217475     | 1,3             |
| VAMP5                                                                                    | 6,49432E-10 | 0,84875443  | 1     | 0,49  | 1,37037E-05 | 1,800945383   | 0,555263924     | 2,040816327     |
| LOXL1                                                                                    | 4,35814E-15 | 0,84402633  | 0,637 | 0,06  | 9,19612E-11 | 1,795052862   | 0,557086658     | 10,61666667     |
| TAF10                                                                                    | 3,2723E-13  | 0,841941347 | 0,775 | 0,17  | 6,90487E-09 | 1,792460525   | 0,557892342     | 4,558823529     |

Supplementary Table 4

| Differentially expressed genes_keloid-CCD_ comparing SC-Keloid vs. (SC-Myel, SC-Nonmyel) |             |             |       |       |             |               |                 |                 |
|------------------------------------------------------------------------------------------|-------------|-------------|-------|-------|-------------|---------------|-----------------|-----------------|
| gene                                                                                     | p_val       | avg_log2FC  | pct.1 | pct.2 | p_val_adj   | Foldchange_UP | Foldchange_DOWN | Ratio_pct1_pct2 |
| TMED9                                                                                    | 5,47359E-10 | 0,839058279 | 0,988 | 0,56  | 1,15498E-05 | 1,788882066   | 0,559008343     | 1,764285714     |
| COX6B1                                                                                   | 2,97107E-10 | 0,837122523 | 1     | 0,56  | 6,26926E-06 | 1,786483418   | 0,559758904     | 1,785714286     |
| PAFAH1B3                                                                                 | 1,6972E-15  | 0,836269583 | 0,688 | 0,08  | 3,58125E-11 | 1,785427538   | 0,560089938     | 8,6             |
| APRT                                                                                     | 6,37213E-10 | 0,83515384  | 0,95  | 0,38  | 1,34458E-05 | 1,784047269   | 0,560523265     | 2,5             |
| ADAMTS16                                                                                 | 8,73596E-15 | 0,834733136 | 0,625 | 0,06  | 1,84337E-10 | 1,783527098   | 0,560686743     | 10,41666667     |
| MFSD12                                                                                   | 1,60196E-14 | 0,83190798  | 0,775 | 0,14  | 3,3803E-10  | 1,780037926   | 0,561785783     | 5,535714286     |
| COL12A1                                                                                  | 1,01888E-07 | 0,831668534 | 0,912 | 0,45  | 0,002149935 | 1,779742515   | 0,561879031     | 2,026666667     |
| CHST3                                                                                    | 3,77376E-14 | 0,831011194 | 0,762 | 0,15  | 7,963E-10   | 1,77893179    | 0,5621351       | 5,08            |
| MKI67                                                                                    | 6,74984E-06 | 0,829071885 | 0,188 | 0     | 0,142428329 | 1,776542109   | 0,562891245     | #DIV/0!         |
| CDH2                                                                                     | 1,74827E-10 | 0,827491426 | 0,787 | 0,23  | 3,68902E-06 | 1,77459699    | 0,563508225     | 3,42173913      |
| MCRIP1                                                                                   | 8,38829E-10 | 0,825862144 | 0,925 | 0,42  | 1,77001E-05 | 1,772594011   | 0,564144973     | 2,202380952     |
| HLA-C                                                                                    | 3,9692E-11  | 0,82513055  | 0,988 | 0,84  | 8,37541E-07 | 1,771695352   | 0,564431125     | 1,176190476     |
| NIBAN2                                                                                   | 4,10414E-13 | 0,824598984 | 0,887 | 0,26  | 8,66015E-09 | 1,771042685   | 0,564639129     | 3,411538462     |
| URM1                                                                                     | 1,90238E-13 | 0,82052394  | 0,75  | 0,15  | 4,0142E-09  | 1,766047247   | 0,566236267     | 5               |
| MRPL57                                                                                   | 4,58064E-13 | 0,819927799 | 0,713 | 0,15  | 9,66561E-09 | 1,765317643   | 0,566470292     | 4,753333333     |
| CYBA                                                                                     | 1,06971E-09 | 0,819627479 | 0,988 | 0,59  | 2,25719E-05 | 1,764950203   | 0,566588223     | 1,674576271     |
| ATP5MJ                                                                                   | 7,7273E-11  | 0,819032234 | 0,9   | 0,37  | 1,63054E-06 | 1,764222148   | 0,566822042     | 2,432432432     |
| RPS19                                                                                    | 8,72468E-14 | 0,814921011 | 1     | 0,97  | 1,84099E-09 | 1,759201831   | 0,568439608     | 1,030927835     |
| POLR2E                                                                                   | 3,50573E-14 | 0,811431026 | 0,812 | 0,16  | 7,39743E-10 | 1,754951336   | 0,56981637      | 5,075           |
| HLA-B                                                                                    | 4,71958E-11 | 0,810626999 | 0,988 | 0,87  | 9,95879E-07 | 1,753973559   | 0,570134022     | 1,135632184     |
| DCTN3                                                                                    | 1,03843E-10 | 0,810238967 | 0,925 | 0,35  | 2,19118E-06 | 1,753501867   | 0,570287388     | 2,642857143     |
| ZCRB1                                                                                    | 6,67113E-13 | 0,80893704  | 0,863 | 0,22  | 1,40767E-08 | 1,751920173   | 0,570802263     | 3,922727273     |
| ABHD2                                                                                    | 2,79164E-12 | 0,80861527  | 0,775 | 0,18  | 5,89064E-08 | 1,75152948    | 0,570929585     | 4,305555556     |
| PLGRKT                                                                                   | 6,00421E-13 | 0,808599469 | 0,675 | 0,11  | 1,26695E-08 | 1,751510296   | 0,570935839     | 6,136363636     |
| RPL28                                                                                    | 1,83032E-18 | 0,808221115 | 1     | 0,99  | 3,86216E-14 | 1,751051014   | 0,571085589     | 1,01010101      |
| TRAPPC1                                                                                  | 1,03188E-13 | 0,806683863 | 0,75  | 0,14  | 2,17737E-09 | 1,74918619    | 0,571694429     | 5,357142857     |
| PRELID1                                                                                  | 5,48506E-10 | 0,805422038 | 0,9   | 0,42  | 1,1574E-05  | 1,747656967   | 0,572194669     | 2,142857143     |
| COL9A3                                                                                   | 2,43549E-09 | 0,803195516 | 0,963 | 0,53  | 5,13914E-05 | 1,744961875   | 0,573078423     | 1,816981132     |
| SNRPE                                                                                    | 2,90371E-12 | 0,800438786 | 0,887 | 0,26  | 6,12712E-08 | 1,741630751   | 0,57417452      | 3,411538462     |
| ATP5F1D                                                                                  | 3,02856E-10 | 0,799167523 | 0,925 | 0,49  | 6,39056E-06 | 1,740096751   | 0,574680689     | 1,887755102     |

Supplementary Table 4

| Differentially expressed genes_keloid-CCD_ comparing SC-Keloid vs. (SC-Myel, SC-Nonmyel) |             |             |       |       |             |               |                 |                 |
|------------------------------------------------------------------------------------------|-------------|-------------|-------|-------|-------------|---------------|-----------------|-----------------|
| gene                                                                                     | p_val       | avg_log2FC  | pct.1 | pct.2 | p_val_adj   | Foldchange_UP | Foldchange_DOWN | Ratio_pct1_pct2 |
| NDUFB7                                                                                   | 7,76949E-10 | 0,798589617 | 0,95  | 0,49  | 1,63944E-05 | 1,739399852   | 0,574910938     | 1,93877551      |
| PGLS                                                                                     | 1,58142E-10 | 0,798240326 | 0,9   | 0,31  | 3,33696E-06 | 1,738978778   | 0,575050146     | 2,903225806     |
| ANXA5                                                                                    | 7,82129E-13 | 0,797485929 | 1     | 0,91  | 1,65037E-08 | 1,738069689   | 0,575350923     | 1,098901099     |
| ATP5MC1                                                                                  | 2,7126E-09  | 0,796007841 | 0,887 | 0,37  | 5,72387E-05 | 1,736289892   | 0,575940691     | 2,397297297     |
| DAD1                                                                                     | 1,85631E-12 | 0,795551352 | 1     | 0,74  | 3,91701E-08 | 1,735740593   | 0,576122955     | 1,351351351     |
| POMP                                                                                     | 5,10265E-10 | 0,795122578 | 0,963 | 0,5   | 1,07671E-05 | 1,735224801   | 0,576294207     | 1,926           |
| CALD1                                                                                    | 1,55978E-09 | 0,793894347 | 0,988 | 0,73  | 3,2913E-05  | 1,733748155   | 0,576785041     | 1,353424658     |
| PIN1                                                                                     | 6,47685E-13 | 0,791700474 | 0,875 | 0,24  | 1,36668E-08 | 1,731113687   | 0,577662812     | 3,645833333     |
| P4HA2                                                                                    | 1,74433E-10 | 0,788037595 | 0,875 | 0,33  | 3,68071E-06 | 1,726724113   | 0,579131311     | 2,651515152     |
| RRBP1                                                                                    | 4,19119E-11 | 0,787744204 | 0,825 | 0,23  | 8,84383E-07 | 1,726372997   | 0,579249097     | 3,586956522     |
| SDCCAG8                                                                                  | 2,20216E-11 | 0,787041052 | 0,75  | 0,18  | 4,64677E-07 | 1,725531788   | 0,579531485     | 4,166666667     |
| COX8A                                                                                    | 3,46281E-10 | 0,786816186 | 0,988 | 0,63  | 7,30688E-06 | 1,725262859   | 0,579621821     | 1,568253968     |
| ARPC3                                                                                    | 1,32637E-10 | 0,786303554 | 0,925 | 0,51  | 2,79877E-06 | 1,724649932   | 0,579827814     | 1,81372549      |
| MRPL20                                                                                   | 7,88632E-11 | 0,786262855 | 0,775 | 0,22  | 1,66409E-06 | 1,724601278   | 0,579844172     | 3,522727273     |
| RASSF4                                                                                   | 4,43022E-09 | 0,785490047 | 0,8   | 0,26  | 9,34822E-05 | 1,723677709   | 0,58015486      | 3,076923077     |
| LOXL3                                                                                    | 6,20163E-13 | 0,785206868 | 0,713 | 0,13  | 1,30861E-08 | 1,723339411   | 0,580268747     | 5,484615385     |
| MAGED2                                                                                   | 2,32466E-08 | 0,784908694 | 0,988 | 0,62  | 0,000490526 | 1,722983271   | 0,580388688     | 1,593548387     |
| RSU1                                                                                     | 5,55256E-14 | 0,783229991 | 0,8   | 0,17  | 1,17165E-09 | 1,720979593   | 0,581064415     | 4,705882353     |
| MT2A                                                                                     | 6,40702E-06 | 0,776919989 | 0,925 | 0,59  | 0,135194601 | 1,713468879   | 0,583611417     | 1,56779661      |
| RHOC                                                                                     | 6,71905E-08 | 0,775914758 | 0,988 | 0,7   | 0,001417787 | 1,712275395   | 0,584018203     | 1,411428571     |
| TOP2A                                                                                    | 0,000598316 | 0,774467826 | 0,162 | 0,02  | 1           | 1,710558953   | 0,58460423      | 8,1             |
| BANF1                                                                                    | 8,1148E-11  | 0,773238247 | 0,938 | 0,35  | 1,7123E-06  | 1,7091017     | 0,585102689     | 2,68            |
| IL7R                                                                                     | 1,13606E-13 | 0,773196627 | 0,475 | 0,01  | 2,3972E-09  | 1,709052395   | 0,585119569     | 47,5            |
| SCRG1                                                                                    | 7,64518E-09 | 0,771158189 | 0,6   | 0,14  | 0,000161321 | 1,706639316   | 0,58594689      | 4,285714286     |
| LRRFIP1                                                                                  | 6,96948E-10 | 0,770727316 | 0,725 | 0,2   | 1,47063E-05 | 1,70612969    | 0,586121914     | 3,625           |
| PHC2                                                                                     | 2,8529E-11  | 0,770113469 | 0,8   | 0,22  | 6,0199E-07  | 1,70540391    | 0,586371354     | 3,636363636     |
| LAMTOR2                                                                                  | 1,34915E-13 | 0,769944732 | 0,887 | 0,22  | 2,84685E-09 | 1,705204458   | 0,58643994      | 4,031818182     |
| PDCD5                                                                                    | 1,56303E-09 | 0,768909511 | 0,787 | 0,28  | 3,29816E-05 | 1,703981309   | 0,586860897     | 2,810714286     |
| NGFR                                                                                     | 4,77754E-08 | 0,768512412 | 0,975 | 0,64  | 0,001008108 | 1,703512357   | 0,587022452     | 1,5234375       |
| PSMB9                                                                                    | 1,70976E-10 | 0,764826311 | 0,688 | 0,17  | 3,60777E-06 | 1,69916542    | 0,588524218     | 4,047058824     |

Supplementary Table 4

| Differentially expressed genes_keloid-CCD_ comparing SC-Keloid vs. (SC-Myel, SC-Nonmyel) |             |             |       |       |             |               |                 |                 |
|------------------------------------------------------------------------------------------|-------------|-------------|-------|-------|-------------|---------------|-----------------|-----------------|
| gene                                                                                     | p_val       | avg_log2FC  | pct.1 | pct.2 | p_val_adj   | Foldchange_UP | Foldchange_DOWN | Ratio_pct1_pct2 |
| TNFAIP6                                                                                  | 1,65079E-05 | 0,764670905 | 0,975 | 0,74  | 0,348333862 | 1,698982397   | 0,588587617     | 1,317567568     |
| CIAO2B                                                                                   | 2,5692E-08  | 0,763308732 | 0,925 | 0,53  | 0,000542126 | 1,697378998   | 0,589143616     | 1,745283019     |
| PSMB2                                                                                    | 6,56055E-12 | 0,761930696 | 0,812 | 0,21  | 1,38434E-07 | 1,695758467   | 0,589706624     | 3,866666667     |
| FHL3                                                                                     | 3,17561E-15 | 0,761272787 | 0,75  | 0,11  | 6,70086E-11 | 1,69498533    | 0,589975608     | 6,818181818     |
| EIF4EBP1                                                                                 | 1,52982E-13 | 0,760045071 | 0,675 | 0,11  | 3,22807E-09 | 1,693543532   | 0,590477883     | 6,136363636     |
| SPCS1                                                                                    | 7,22645E-09 | 0,756404237 | 0,975 | 0,63  | 0,000152485 | 1,689275036   | 0,591969915     | 1,547619048     |
| SSBP1                                                                                    | 1,20949E-11 | 0,755201925 | 0,863 | 0,27  | 2,55214E-07 | 1,687867816   | 0,592463456     | 3,196296296     |
| UBE2L3                                                                                   | 4,83051E-10 | 0,754749305 | 0,838 | 0,3   | 1,01929E-05 | 1,687338361   | 0,59264936      | 2,793333333     |
| REEP3                                                                                    | 2,13907E-09 | 0,752779462 | 0,838 | 0,27  | 4,51366E-05 | 1,685036056   | 0,593459111     | 3,103703704     |
| DPM2                                                                                     | 1,69443E-15 | 0,752298349 | 0,688 | 0,07  | 3,57542E-11 | 1,68447422    | 0,593657052     | 9,828571429     |
| COL11A1                                                                                  | 1,03273E-09 | 0,751952898 | 0,45  | 0,05  | 2,17915E-05 | 1,684070923   | 0,59379922      | 9               |
| SRM                                                                                      | 1,46359E-11 | 0,75163257  | 0,738 | 0,17  | 3,08832E-07 | 1,683697044   | 0,593931078     | 4,341176471     |
| CD276                                                                                    | 5,74348E-11 | 0,747507971 | 0,762 | 0,2   | 1,21193E-06 | 1,678890306   | 0,595631529     | 3,81            |
| BIRC5                                                                                    | 2,98457E-06 | 0,747006728 | 0,225 | 0,01  | 0,062977491 | 1,678307101   | 0,595838509     | 22,5            |
| SNF8                                                                                     | 1,22537E-11 | 0,744691752 | 0,9   | 0,28  | 2,58566E-07 | 1,675616217   | 0,59679537      | 3,214285714     |
| UQCRH                                                                                    | 1,4365E-09  | 0,743918368 | 0,975 | 0,62  | 3,03116E-05 | 1,674718212   | 0,597115379     | 1,572580645     |
| FSCN1                                                                                    | 1,48639E-11 | 0,740183179 | 0,787 | 0,19  | 3,13643E-07 | 1,670387915   | 0,598663335     | 4,142105263     |
| FHL2                                                                                     | 1,38371E-12 | 0,739270341 | 0,525 | 0,04  | 2,91977E-08 | 1,669331343   | 0,599042248     | 13,125          |
| C1orf122                                                                                 | 1,7749E-08  | 0,739261943 | 0,9   | 0,41  | 0,000374521 | 1,669321626   | 0,599045735     | 2,195121951     |
| PLPP4                                                                                    | 1,00513E-14 | 0,739093059 | 0,5   | 0,01  | 2,12093E-10 | 1,669126224   | 0,599115864     | 50              |
| ANGPTL2                                                                                  | 2,56822E-10 | 0,736338374 | 0,825 | 0,22  | 5,41921E-06 | 1,665942231   | 0,60026091      | 3,75            |
| MZT2B                                                                                    | 6,93628E-08 | 0,734969275 | 0,963 | 0,6   | 0,001463625 | 1,664362024   | 0,60083082      | 1,605           |
| ZYX                                                                                      | 1,24226E-11 | 0,734744887 | 0,725 | 0,16  | 2,6213E-07  | 1,664103178   | 0,600924277     | 4,53125         |
| CFL1                                                                                     | 4,33894E-13 | 0,734604475 | 1     | 0,94  | 9,1556E-09  | 1,663941226   | 0,600982766     | 1,063829787     |
| PDIA4                                                                                    | 9,15403E-11 | 0,734119369 | 0,887 | 0,29  | 1,93159E-06 | 1,66338182    | 0,60118488      | 3,05862069      |
| ETFB                                                                                     | 4,42621E-12 | 0,733117713 | 0,85  | 0,22  | 9,33974E-08 | 1,662227343   | 0,601602425     | 3,863636364     |
| RNF7                                                                                     | 7,89221E-11 | 0,731749431 | 0,825 | 0,27  | 1,66533E-06 | 1,660651599   | 0,602173268     | 3,055555556     |
| NUDT1                                                                                    | 3,70055E-12 | 0,731630966 | 0,762 | 0,17  | 7,80852E-08 | 1,660515243   | 0,602222716     | 4,482352941     |
| SEPTIN9                                                                                  | 5,88772E-10 | 0,731481165 | 0,887 | 0,32  | 1,24237E-05 | 1,660342833   | 0,602285251     | 2,771875        |
| TIMP1                                                                                    | 2,2839E-08  | 0,73135287  | 0,988 | 0,87  | 0,000481927 | 1,660195191   | 0,602338813     | 1,135632184     |

Supplementary Table 4

| Differentially expressed genes_keloid-CCD_ comparing SC-Keloid vs. (SC-Myel, SC-Nonmyel) |             |             |       |       |             |               |                 |                 |
|------------------------------------------------------------------------------------------|-------------|-------------|-------|-------|-------------|---------------|-----------------|-----------------|
| gene                                                                                     | p_val       | avg_log2FC  | pct.1 | pct.2 | p_val_adj   | Foldchange_UP | Foldchange_DOWN | Ratio_pct1_pct2 |
| YIF1A                                                                                    | 2,10625E-09 | 0,731233827 | 0,838 | 0,29  | 4,44441E-05 | 1,660058206   | 0,602388516     | 2,889655172     |
| CUTA                                                                                     | 1,241E-09   | 0,730913816 | 1     | 0,5   | 2,61864E-05 | 1,659690022   | 0,60252215      | 2               |
| HSD17B10                                                                                 | 7,52602E-11 | 0,7303658   | 0,787 | 0,22  | 1,58807E-06 | 1,659059698   | 0,602751065     | 3,577272727     |
| TIMM10                                                                                   | 5,49496E-13 | 0,728396456 | 0,688 | 0,12  | 1,15949E-08 | 1,656796552   | 0,603574409     | 5,733333333     |
| ATP5PF                                                                                   | 7,68357E-10 | 0,726441793 | 0,975 | 0,65  | 1,62131E-05 | 1,654553329   | 0,604392728     | 1,5             |
| FABP7                                                                                    | 4,07959E-13 | 0,725483663 | 0,613 | 0,07  | 8,60834E-09 | 1,653454864   | 0,604794254     | 8,757142857     |
| PDGFC                                                                                    | 2,0907E-13  | 0,724659614 | 0,6   | 0,06  | 4,41158E-09 | 1,652510701   | 0,605139803     | 10              |
| CTHRC1                                                                                   | 2,96624E-08 | 0,723815401 | 0,512 | 0,11  | 0,000625907 | 1,651543994   | 0,605494013     | 4,654545455     |
| ARPC5                                                                                    | 3,88146E-09 | 0,722022539 | 0,963 | 0,72  | 8,19028E-05 | 1,649492867   | 0,606246938     | 1,3375          |
| NDUFA3                                                                                   | 2,56988E-15 | 0,721547214 | 0,762 | 0,11  | 5,4227E-11  | 1,648949498   | 0,606446711     | 6,927272727     |
| MAZ                                                                                      | 4,72465E-11 | 0,721390815 | 0,8   | 0,22  | 9,96948E-07 | 1,648770749   | 0,606512458     | 3,636363636     |
| PDLIM1                                                                                   | 5,25389E-12 | 0,716661494 | 0,8   | 0,18  | 1,10862E-07 | 1,643374737   | 0,608503939     | 4,444444444     |
| TRUB2                                                                                    | 2,0051E-13  | 0,71426114  | 0,65  | 0,09  | 4,23097E-09 | 1,640642766   | 0,609517209     | 7,222222222     |
| FN1                                                                                      | 6,31793E-07 | 0,709975133 | 0,95  | 0,7   | 0,013331466 | 1,635775922   | 0,611330676     | 1,357142857     |
| RPS10                                                                                    | 4,19895E-11 | 0,709966181 | 1     | 0,93  | 8,8602E-07  | 1,635765772   | 0,611334469     | 1,075268817     |
| CALU                                                                                     | 8,86088E-08 | 0,709390031 | 0,963 | 0,64  | 0,001869734 | 1,635112648   | 0,611578659     | 1,5046875       |
| UBA52                                                                                    | 3,60638E-12 | 0,707546463 | 1     | 0,88  | 7,60982E-08 | 1,633024531   | 0,612360672     | 1,136363636     |
| SSR2                                                                                     | 2,61667E-09 | 0,707023024 | 0,975 | 0,64  | 5,52143E-05 | 1,632432144   | 0,61258289      | 1,5234375       |
| TMEM208                                                                                  | 8,77295E-11 | 0,706906088 | 0,775 | 0,21  | 1,85118E-06 | 1,632299835   | 0,612632544     | 3,69047619      |
| COX5B                                                                                    | 2,1742E-09  | 0,705887493 | 0,95  | 0,5   | 4,58778E-05 | 1,631147778   | 0,613065238     | 1,9             |
| CCDC167                                                                                  | 2,03444E-12 | 0,705563941 | 0,588 | 0,07  | 4,29287E-08 | 1,630782003   | 0,613202744     | 8,4             |
| UBTD1                                                                                    | 1,69443E-15 | 0,705505011 | 0,688 | 0,07  | 3,57542E-11 | 1,630715391   | 0,613227793     | 9,828571429     |
| RPL26L1                                                                                  | 6,70264E-11 | 0,703814126 | 0,738 | 0,17  | 1,41432E-06 | 1,628805261   | 0,613946937     | 4,341176471     |
| COX6A1                                                                                   | 1,02737E-08 | 0,697580825 | 0,963 | 0,6   | 0,000216785 | 1,621783034   | 0,616605291     | 1,605           |
| UQCRCQ                                                                                   | 3,73629E-09 | 0,697359756 | 0,963 | 0,48  | 7,88394E-05 | 1,621534542   | 0,616699783     | 2,00625         |
| TWF2                                                                                     | 2,43633E-14 | 0,697081898 | 0,662 | 0,07  | 5,14089E-10 | 1,621222269   | 0,616818569     | 9,457142857     |
| RPL39L                                                                                   | 2,88054E-12 | 0,696537241 | 0,662 | 0,11  | 6,07823E-08 | 1,620610329   | 0,617051479     | 6,018181818     |
| SEPTIN2                                                                                  | 2,21891E-07 | 0,696059595 | 0,963 | 0,53  | 0,004682119 | 1,620073869   | 0,617255805     | 1,816981132     |
| MRPS34                                                                                   | 1,19543E-10 | 0,695632353 | 0,762 | 0,2   | 2,52247E-06 | 1,619594167   | 0,617438628     | 3,81            |
| GTF3C6                                                                                   | 4,74993E-12 | 0,695356718 | 0,775 | 0,19  | 1,00228E-07 | 1,619284765   | 0,617556604     | 4,078947368     |



Supplementary Table 4

| Differentially expressed genes_keloid-CCD_ comparing SC-Keloid vs. (SC-Myel, SC-Nonmyel) |             |             |       |       |             |               |                 |                 |
|------------------------------------------------------------------------------------------|-------------|-------------|-------|-------|-------------|---------------|-----------------|-----------------|
| gene                                                                                     | p_val       | avg_log2FC  | pct.1 | pct.2 | p_val_adj   | Foldchange_UP | Foldchange_DOWN | Ratio_pct1_pct2 |
| TIMM13                                                                                   | 2,57458E-09 | 0,695142159 | 0,887 | 0,35  | 5,43261E-05 | 1,619043961   | 0,617648454     | 2,534285714     |
| TMEM160                                                                                  | 6,26326E-10 | 0,691729011 | 0,8   | 0,24  | 1,32161E-05 | 1,615218132   | 0,619111425     | 3,333333333     |
| GAP43                                                                                    | 3,74993E-10 | 0,690732722 | 0,488 | 0,06  | 7,91274E-06 | 1,614103087   | 0,619539116     | 8,133333333     |
| COL6A3                                                                                   | 7,17129E-07 | 0,690316364 | 0,362 | 0,06  | 0,015132129 | 1,613637329   | 0,619717939     | 6,033333333     |
| NAA38                                                                                    | 1,54525E-08 | 0,689095958 | 0,875 | 0,35  | 0,000326064 | 1,612272897   | 0,620242393     | 2,5             |
| TIMM8B                                                                                   | 6,26326E-10 | 0,688754538 | 0,8   | 0,24  | 1,32161E-05 | 1,611891391   | 0,620389194     | 3,333333333     |
| AURKAIP1                                                                                 | 8,04097E-09 | 0,687875159 | 0,925 | 0,4   | 0,000169672 | 1,610909178   | 0,620767461     | 2,3125          |
| PPIA                                                                                     | 5,84397E-10 | 0,686862239 | 1     | 0,88  | 1,23314E-05 | 1,609778553   | 0,621203456     | 1,136363636     |
| ECM1                                                                                     | 3,9993E-09  | 0,686738984 | 0,863 | 0,29  | 8,43892E-05 | 1,609641028   | 0,62125653      | 2,975862069     |
| EIF5A                                                                                    | 2,16859E-07 | 0,686363598 | 0,912 | 0,52  | 0,004575944 | 1,609222258   | 0,6214182       | 1,753846154     |
| APOD                                                                                     | 3,37913E-07 | 0,685706401 | 0,775 | 0,28  | 0,007130296 | 1,608489369   | 0,621701342     | 2,767857143     |
| MRPL51                                                                                   | 4,2315E-08  | 0,68451428  | 0,95  | 0,43  | 0,000892889 | 1,607160799   | 0,622215276     | 2,209302326     |
| C12orf75                                                                                 | 1,48344E-11 | 0,684176447 | 0,512 | 0,05  | 3,13021E-07 | 1,606784497   | 0,622360996     | 10,24           |
| BAX                                                                                      | 2,10799E-08 | 0,683128087 | 0,85  | 0,31  | 0,000444808 | 1,605617322   | 0,62281341      | 2,741935484     |
| RABAC1                                                                                   | 1,42935E-08 | 0,682813134 | 0,988 | 0,69  | 0,000301608 | 1,60526684    | 0,622949391     | 1,431884058     |
| MZT2A                                                                                    | 1,95741E-11 | 0,681933228 | 0,725 | 0,17  | 4,13033E-07 | 1,60428808    | 0,623329446     | 4,264705882     |
| VCAN                                                                                     | 2,8388E-09  | 0,681325643 | 0,7   | 0,19  | 5,99016E-05 | 1,603612583   | 0,623592014     | 3,684210526     |
| BEX3                                                                                     | 2,08454E-07 | 0,678121163 | 0,963 | 0,53  | 0,004398586 | 1,60005463    | 0,624978661     | 1,816981132     |
| FKBP3                                                                                    | 1,345E-11   | 0,678106802 | 0,812 | 0,22  | 2,83808E-07 | 1,600038703   | 0,624984882     | 3,690909091     |
| PLOD3                                                                                    | 2,27591E-09 | 0,677291447 | 0,762 | 0,24  | 4,80239E-05 | 1,599134678   | 0,625338199     | 3,175           |
| H4C3                                                                                     | 0,008001191 | 0,676945773 | 0,3   | 0,13  | 1           | 1,598751566   | 0,62548805      | 2,307692308     |
| RPA3                                                                                     | 5,56811E-15 | 0,675997539 | 0,625 | 0,05  | 1,17493E-10 | 1,597701107   | 0,625899297     | 12,5            |
| GANAB                                                                                    | 2,39845E-11 | 0,675337084 | 0,7   | 0,15  | 5,06096E-07 | 1,59696986    | 0,626185894     | 4,666666667     |
| TMEM147                                                                                  | 3,14139E-14 | 0,673667086 | 0,787 | 0,14  | 6,62866E-10 | 1,595122349   | 0,626911159     | 5,621428571     |
| SSBP4                                                                                    | 4,51599E-14 | 0,673390441 | 0,775 | 0,13  | 9,5292E-10  | 1,594816505   | 0,627031384     | 5,961538462     |
| CLDN4                                                                                    | 8,4445E-14  | 0,672905265 | 0,512 | 0,02  | 1,78187E-09 | 1,594280261   | 0,627242289     | 25,6            |
| SSNA1                                                                                    | 9,91267E-10 | 0,672018104 | 0,775 | 0,23  | 2,09167E-05 | 1,593300186   | 0,62762812      | 3,369565217     |
| ITGA3                                                                                    | 1,65253E-11 | 0,67169584  | 0,762 | 0,18  | 3,48701E-07 | 1,592944321   | 0,627768332     | 4,233333333     |
| CHCHD2                                                                                   | 1,07578E-09 | 0,671243224 | 0,988 | 0,8   | 2,27001E-05 | 1,592444645   | 0,627965313     | 1,235           |
| ARL6IP4                                                                                  | 2,88367E-09 | 0,669952819 | 0,975 | 0,61  | 6,08482E-05 | 1,591020935   | 0,628527242     | 1,598360656     |

Supplementary Table 4

| Differentially expressed genes_keloid-CCD_ comparing SC-Keloid vs. (SC-Myel, SC-Nonmyel) |             |             |       |       |             |               |                 |                 |
|------------------------------------------------------------------------------------------|-------------|-------------|-------|-------|-------------|---------------|-----------------|-----------------|
| gene                                                                                     | p_val       | avg_log2FC  | pct.1 | pct.2 | p_val_adj   | Foldchange_UP | Foldchange_DOWN | Ratio_pct1_pct2 |
| DYNC2I2                                                                                  | 8,82356E-12 | 0,668825586 | 0,55  | 0,07  | 1,86186E-07 | 1,589778294   | 0,629018526     | 7,857142857     |
| C1QL1                                                                                    | 1,17062E-09 | 0,668144165 | 0,65  | 0,15  | 2,47011E-05 | 1,58902758    | 0,629315698     | 4,333333333     |
| CENPW                                                                                    | 2,57469E-11 | 0,667800149 | 0,45  | 0,03  | 5,43284E-07 | 1,588648716   | 0,629465778     | 15              |
| ANO4                                                                                     | 7,66242E-13 | 0,667512962 | 0,588 | 0,07  | 1,61685E-08 | 1,588332506   | 0,629591094     | 8,4             |
| CCNB1                                                                                    | 1,65991E-06 | 0,666592285 | 0,238 | 0,01  | 0,035025807 | 1,587319212   | 0,629993005     | 23,8            |
| FKBP10                                                                                   | 9,7299E-11  | 0,666468524 | 0,725 | 0,18  | 2,05311E-06 | 1,58718305    | 0,630047051     | 4,027777778     |
| RPL35                                                                                    | 1,59459E-12 | 0,666196354 | 1     | 0,95  | 3,36475E-08 | 1,58688365    | 0,630165923     | 1,052631579     |
| EIF6                                                                                     | 2,65041E-09 | 0,664925153 | 0,812 | 0,25  | 5,59263E-05 | 1,585486016   | 0,630721425     | 3,248           |
| EDF1                                                                                     | 2,32969E-09 | 0,663394692 | 0,975 | 0,73  | 4,91588E-05 | 1,583804969   | 0,631390872     | 1,335616438     |
| ACTN1                                                                                    | 4,0222E-08  | 0,662423979 | 0,887 | 0,37  | 0,000848725 | 1,582739669   | 0,631815844     | 2,397297297     |
| PARVB                                                                                    | 1,13065E-11 | 0,659550655 | 0,65  | 0,11  | 2,38579E-07 | 1,579590564   | 0,633075445     | 5,909090909     |
| UQCRC1                                                                                   | 2,14523E-10 | 0,659416305 | 0,762 | 0,19  | 4,52664E-06 | 1,579443473   | 0,633134403     | 4,010526316     |
| PSMB3                                                                                    | 1,39761E-09 | 0,658048569 | 0,938 | 0,36  | 2,94909E-05 | 1,577946803   | 0,633734926     | 2,605555556     |
| KRT10                                                                                    | 1,42228E-08 | 0,657934728 | 0,988 | 0,61  | 0,000300116 | 1,577822294   | 0,633784935     | 1,619672131     |
| LAMTOR4                                                                                  | 1,16003E-07 | 0,657414577 | 0,963 | 0,46  | 0,002447782 | 1,577253527   | 0,634013482     | 2,093478261     |
| PLAUR                                                                                    | 2,53242E-08 | 0,655630352 | 0,825 | 0,29  | 0,000534367 | 1,575304096   | 0,63479807      | 2,844827586     |
| MACF1                                                                                    | 1,91364E-08 | 0,654148737 | 0,775 | 0,25  | 0,000403796 | 1,573687124   | 0,635450329     | 3,1             |
| ITPA                                                                                     | 5,03629E-09 | 0,653606563 | 0,775 | 0,25  | 0,000106271 | 1,573095833   | 0,63568918      | 3,1             |
| EFEMP2                                                                                   | 8,0824E-11  | 0,651580335 | 0,75  | 0,19  | 1,70547E-06 | 1,570888012   | 0,636582616     | 3,947368421     |
| ARHGDI1                                                                                  | 8,21228E-09 | 0,651217058 | 0,9   | 0,38  | 0,000173287 | 1,570492505   | 0,63674293      | 2,368421053     |
| MRPL17                                                                                   | 1,10044E-12 | 0,650709432 | 0,637 | 0,09  | 2,32203E-08 | 1,569940009   | 0,636967014     | 7,077777778     |
| SCX                                                                                      | 1,63257E-05 | 0,650240329 | 0,425 | 0,12  | 0,344488831 | 1,569429615   | 0,637174162     | 3,541666667     |
| CAPS                                                                                     | 7,60408E-08 | 0,650071749 | 0,662 | 0,21  | 0,001604537 | 1,569246236   | 0,637248621     | 3,152380952     |
| GADD45GIP1                                                                               | 7,76617E-09 | 0,649927732 | 0,9   | 0,35  | 0,000163874 | 1,569089594   | 0,637312237     | 2,571428571     |
| PRDX5                                                                                    | 6,81244E-09 | 0,649608256 | 1     | 0,5   | 0,000143749 | 1,568742168   | 0,637453382     | 2               |
| LSM5                                                                                     | 5,18901E-09 | 0,647875057 | 0,65  | 0,18  | 0,000109493 | 1,566858672   | 0,638219654     | 3,611111111     |
| NME4                                                                                     | 2,15664E-11 | 0,646598587 | 0,75  | 0,17  | 4,55072E-07 | 1,565472958   | 0,638784589     | 4,411764706     |
| RPL12                                                                                    | 2,1305E-12  | 0,645794912 | 1     | 0,96  | 4,49557E-08 | 1,56460113    | 0,639140533     | 1,041666667     |
| PGAM1                                                                                    | 3,96213E-08 | 0,645416965 | 0,887 | 0,39  | 0,000836049 | 1,564191301   | 0,639307992     | 2,274358974     |
| TMEM167A                                                                                 | 7,90846E-10 | 0,644526828 | 0,812 | 0,24  | 1,66876E-05 | 1,563226498   | 0,639702565     | 3,383333333     |

Supplementary Table 4

| Differentially expressed genes_keloid-CCD_ comparing SC-Keloid vs. (SC-Myel, SC-Nonmyel) |             |             |       |       |             |               |                 |                 |
|------------------------------------------------------------------------------------------|-------------|-------------|-------|-------|-------------|---------------|-----------------|-----------------|
| gene                                                                                     | p_val       | avg_log2FC  | pct.1 | pct.2 | p_val_adj   | Foldchange_UP | Foldchange_DOWN | Ratio_pct1_pct2 |
| TSPO                                                                                     | 2,26148E-08 | 0,643940604 | 0,975 | 0,68  | 0,000477195 | 1,562591426   | 0,639962554     | 1,433823529     |
| HSP90B1                                                                                  | 6,54362E-08 | 0,643912307 | 1     | 0,86  | 0,00138077  | 1,562560779   | 0,639975106     | 1,162790698     |
| CYTOR                                                                                    | 1,27827E-09 | 0,643794653 | 0,912 | 0,35  | 2,69728E-05 | 1,562433355   | 0,640027299     | 2,605714286     |
| TMED3                                                                                    | 3,60398E-10 | 0,643481296 | 0,738 | 0,18  | 7,60476E-06 | 1,562094027   | 0,64016633      | 4,1             |
| GSTO1                                                                                    | 8,01729E-11 | 0,642715135 | 0,838 | 0,25  | 1,69173E-06 | 1,561264678   | 0,640506388     | 3,352           |
| STX8                                                                                     | 1,10906E-09 | 0,642463678 | 0,787 | 0,23  | 2,34023E-05 | 1,560992578   | 0,640618036     | 3,42173913      |
| RPS7                                                                                     | 2,19164E-13 | 0,642052945 | 1     | 0,97  | 4,62458E-09 | 1,56054823    | 0,640800445     | 1,030927835     |
| SNRPD1                                                                                   | 2,8627E-09  | 0,640138313 | 0,838 | 0,28  | 6,04059E-05 | 1,558478565   | 0,64165143      | 2,992857143     |
| NDUFS3                                                                                   | 3,93745E-12 | 0,639865979 | 0,8   | 0,18  | 8,30842E-08 | 1,558184403   | 0,641772564     | 4,444444444     |
| PLS3                                                                                     | 1,7879E-08  | 0,639783989 | 0,887 | 0,35  | 0,000377265 | 1,558095852   | 0,641809038     | 2,534285714     |
| ECH1                                                                                     | 2,59627E-10 | 0,638401971 | 0,738 | 0,19  | 5,4784E-06  | 1,556604002   | 0,642424148     | 3,884210526     |
| NHP2                                                                                     | 7,75609E-10 | 0,635781103 | 0,75  | 0,21  | 1,63661E-05 | 1,553778768   | 0,643592267     | 3,571428571     |
| TECR                                                                                     | 3,22354E-07 | 0,635292483 | 0,912 | 0,48  | 0,006801986 | 1,553252615   | 0,643810279     | 1,9             |
| SERF2                                                                                    | 4,46836E-09 | 0,634952549 | 1     | 0,91  | 9,42869E-05 | 1,552886674   | 0,643961995     | 1,098901099     |
| PDGFA                                                                                    | 1,06144E-05 | 0,634071011 | 0,975 | 0,62  | 0,223974895 | 1,551938095   | 0,644355599     | 1,572580645     |
| RBM3                                                                                     | 3,12692E-08 | 0,634021745 | 0,988 | 0,7   | 0,00065981  | 1,551885099   | 0,644377603     | 1,411428571     |
| PSMD13                                                                                   | 1,9915E-09  | 0,633576216 | 0,738 | 0,22  | 4,20227E-05 | 1,551405924   | 0,644576629     | 3,354545455     |
| UQCC2                                                                                    | 8,02075E-11 | 0,6334952   | 0,738 | 0,18  | 1,69246E-06 | 1,551318806   | 0,644612826     | 4,1             |
| NDUFB3                                                                                   | 1,09855E-09 | 0,633464015 | 0,825 | 0,26  | 2,31804E-05 | 1,551285273   | 0,64462676      | 3,173076923     |
| COA4                                                                                     | 3,73232E-11 | 0,632791166 | 0,7   | 0,14  | 7,87557E-07 | 1,550561948   | 0,644927474     | 5               |
| SF3B5                                                                                    | 6,53891E-09 | 0,627077245 | 0,988 | 0,45  | 0,000137978 | 1,544432957   | 0,64748683      | 2,195555556     |
| MRPS21                                                                                   | 9,26529E-09 | 0,625548039 | 0,912 | 0,34  | 0,000195507 | 1,542796778   | 0,648173508     | 2,682352941     |
| FAM114A1                                                                                 | 2,91098E-10 | 0,624157297 | 0,875 | 0,29  | 6,14246E-06 | 1,541310257   | 0,648798641     | 3,017241379     |
| PSMA4                                                                                    | 1,19472E-06 | 0,623215428 | 0,787 | 0,33  | 0,025209824 | 1,540304334   | 0,64922235      | 2,384848485     |
| MCTS1                                                                                    | 4,18545E-13 | 0,62180247  | 0,688 | 0,11  | 8,83171E-09 | 1,538796517   | 0,649858502     | 6,254545455     |
| CD320                                                                                    | 1,20759E-11 | 0,621329187 | 0,625 | 0,1   | 2,54813E-07 | 1,538291791   | 0,650071726     | 6,25            |
| ARPC2                                                                                    | 6,02366E-07 | 0,620811379 | 0,925 | 0,64  | 0,012710525 | 1,537739771   | 0,65030509      | 1,4453125       |
| ORMDL2                                                                                   | 1,23099E-13 | 0,62002027  | 0,512 | 0,03  | 2,59751E-09 | 1,536896774   | 0,650661786     | 17,06666667     |
| KDEL2                                                                                    | 3,99556E-08 | 0,61970175  | 0,875 | 0,4   | 0,000843104 | 1,536557494   | 0,650805456     | 2,1875          |
| NDUFAB1                                                                                  | 2,15534E-07 | 0,619475592 | 0,9   | 0,38  | 0,00454798  | 1,536316641   | 0,650907484     | 2,368421053     |

Supplementary Table 4

| Differentially expressed genes_keloid-CCD_ comparing SC-Keloid vs. (SC-Myel, SC-Nonmyel) |             |             |       |       |             |               |                 |                 |
|------------------------------------------------------------------------------------------|-------------|-------------|-------|-------|-------------|---------------|-----------------|-----------------|
| gene                                                                                     | p_val       | avg_log2FC  | pct.1 | pct.2 | p_val_adj   | Foldchange_UP | Foldchange_DOWN | Ratio_pct1_pct2 |
| RPL8                                                                                     | 3,01886E-11 | 0,618960642 | 1     | 0,97  | 6,37009E-07 | 1,535768372   | 0,651139858     | 1,030927835     |
| TKT                                                                                      | 2,92245E-10 | 0,617489024 | 0,762 | 0,21  | 6,16667E-06 | 1,534202613   | 0,651804391     | 3,628571429     |
| ECHS1                                                                                    | 6,79921E-08 | 0,616799774 | 0,75  | 0,27  | 0,001434701 | 1,533469821   | 0,652115866     | 2,777777778     |
| PSME2                                                                                    | 2,75072E-09 | 0,616335226 | 0,812 | 0,27  | 5,8043E-05  | 1,532976122   | 0,652325881     | 3,007407407     |
| IFI27L2                                                                                  | 1,3443E-06  | 0,61585267  | 0,925 | 0,46  | 0,028366024 | 1,532463455   | 0,652544109     | 2,010869565     |
| MRPL12                                                                                   | 3,45434E-13 | 0,614974936 | 0,6   | 0,06  | 7,289E-09   | 1,53153139    | 0,652941237     | 10              |
| PSMD8                                                                                    | 1,7308E-07  | 0,61332939  | 0,975 | 0,59  | 0,00365217  | 1,529785512   | 0,65368641      | 1,652542373     |
| GASK1B                                                                                   | 1,44884E-11 | 0,613179534 | 0,45  | 0,03  | 3,05719E-07 | 1,529626618   | 0,653754314     | 15              |
| CLPP                                                                                     | 5,45679E-13 | 0,612763764 | 0,637 | 0,09  | 1,15144E-08 | 1,529185859   | 0,653942746     | 7,077777778     |
| CHCHD5                                                                                   | 9,91296E-11 | 0,612277844 | 0,738 | 0,18  | 2,09173E-06 | 1,528670895   | 0,65416304      | 4,1             |
| MRPS12                                                                                   | 8,77795E-13 | 0,611738142 | 0,7   | 0,12  | 1,85223E-08 | 1,528099136   | 0,654407804     | 5,833333333     |
| LAMTOR1                                                                                  | 6,97156E-09 | 0,611706247 | 0,887 | 0,32  | 0,000147107 | 1,528065354   | 0,654422272     | 2,771875        |
| NUCB2                                                                                    | 1,28569E-06 | 0,6116237   | 0,8   | 0,35  | 0,027129365 | 1,527977924   | 0,654459717     | 2,285714286     |
| DDOST                                                                                    | 9,51292E-08 | 0,611594247 | 0,825 | 0,36  | 0,002007322 | 1,52794673    | 0,654473078     | 2,291666667     |
| CDK6                                                                                     | 9,80189E-08 | 0,611138781 | 0,65  | 0,2   | 0,002068296 | 1,527464426   | 0,654679731     | 3,25            |
| TRAF1                                                                                    | 9,77744E-09 | 0,610564906 | 0,625 | 0,16  | 0,000206314 | 1,526856953   | 0,654940201     | 3,90625         |
| RBIS                                                                                     | 2,96671E-07 | 0,609289062 | 0,912 | 0,43  | 0,006260064 | 1,525507277   | 0,655519652     | 2,120930233     |
| PSMB6                                                                                    | 1,22637E-07 | 0,608831032 | 0,9   | 0,46  | 0,002587768 | 1,525023033   | 0,655727801     | 1,956521739     |
| RPL6                                                                                     | 7,79152E-11 | 0,607968073 | 1     | 0,99  | 1,64409E-06 | 1,524111101   | 0,656120147     | 1,01010101      |
| PHB2                                                                                     | 2,06733E-09 | 0,607638975 | 0,887 | 0,28  | 4,36227E-05 | 1,523763471   | 0,656269834     | 3,167857143     |
| COL4A1                                                                                   | 3,25559E-06 | 0,607006422 | 0,988 | 0,76  | 0,068696172 | 1,52309552    | 0,65655764      | 1,3             |
| COPS9                                                                                    | 9,73359E-09 | 0,604150317 | 0,963 | 0,52  | 0,000205388 | 1,520083228   | 0,657858716     | 1,851923077     |
| PTMS                                                                                     | 2,33698E-07 | 0,603909408 | 1     | 0,85  | 0,004931261 | 1,519829418   | 0,657968578     | 1,176470588     |
| UROS                                                                                     | 2,36817E-12 | 0,60347406  | 0,613 | 0,09  | 4,99708E-08 | 1,519370863   | 0,658167156     | 6,811111111     |
| TMSB4X                                                                                   | 4,8883E-07  | 0,603467475 | 1     | 0,98  | 0,010314806 | 1,519363928   | 0,65817016      | 1,020408163     |
| HYAL2                                                                                    | 6,57744E-12 | 0,603212027 | 0,65  | 0,11  | 1,38791E-07 | 1,519094929   | 0,658286708     | 5,909090909     |
| IKBIP                                                                                    | 1,6802E-09  | 0,603191841 | 0,588 | 0,13  | 3,54539E-05 | 1,519073674   | 0,658295919     | 4,523076923     |
| MYLK                                                                                     | 5,45899E-08 | 0,602261359 | 0,525 | 0,12  | 0,001151901 | 1,518094246   | 0,658720631     | 4,375           |
| COL5A2                                                                                   | 1,41466E-07 | 0,600874427 | 0,975 | 0,61  | 0,002985067 | 1,516635531   | 0,659354195     | 1,598360656     |
| LSM4                                                                                     | 1,02185E-10 | 0,599659389 | 0,787 | 0,21  | 2,1562E-06  | 1,515358758   | 0,659909737     | 3,747619048     |

Supplementary Table 4

| Differentially expressed genes_keloid-CCD_ comparing SC-Keloid vs. (SC-Myel, SC-Nonmyel) |             |             |       |       |             |               |                 |                 |
|------------------------------------------------------------------------------------------|-------------|-------------|-------|-------|-------------|---------------|-----------------|-----------------|
| gene                                                                                     | p_val       | avg_log2FC  | pct.1 | pct.2 | p_val_adj   | Foldchange_UP | Foldchange_DOWN | Ratio_pct1_pct2 |
| TBCA                                                                                     | 2,91069E-08 | 0,599609743 | 0,975 | 0,6   | 0,000614184 | 1,515306613   | 0,659932446     | 1,625           |
| SNRPD2                                                                                   | 1,43216E-08 | 0,597681424 | 0,938 | 0,4   | 0,000302201 | 1,513282593   | 0,660815108     | 2,345           |
| NDUFB4                                                                                   | 8,6828E-07  | 0,5970541   | 0,925 | 0,49  | 0,018321585 | 1,512624719   | 0,661102511     | 1,887755102     |
| KDELR3                                                                                   | 2,18373E-10 | 0,596331119 | 0,65  | 0,14  | 4,6079E-06  | 1,511866884   | 0,661433894     | 4,642857143     |
| SEC61G                                                                                   | 3,42781E-07 | 0,596192574 | 0,963 | 0,62  | 0,007233029 | 1,511721703   | 0,661497416     | 1,553225806     |
| POLD2                                                                                    | 3,00579E-13 | 0,59615855  | 0,688 | 0,1   | 6,34252E-09 | 1,511686051   | 0,661513017     | 6,88            |
| COMMD6                                                                                   | 1,07509E-06 | 0,595757836 | 0,95  | 0,51  | 0,022685424 | 1,511266233   | 0,66169678      | 1,862745098     |
| SEC61B                                                                                   | 7,28109E-08 | 0,595221614 | 1     | 0,69  | 0,001536383 | 1,510704629   | 0,661942766     | 1,449275362     |
| MELTF                                                                                    | 1,70935E-11 | 0,594763387 | 0,438 | 0,02  | 3,60689E-07 | 1,510224877   | 0,662153044     | 21,9            |
| ACTR3                                                                                    | 2,46081E-09 | 0,59457268  | 0,812 | 0,26  | 5,19256E-05 | 1,510025257   | 0,662240579     | 3,123076923     |
| MRPS33                                                                                   | 4,19071E-13 | 0,592514464 | 0,512 | 0,03  | 8,84282E-09 | 1,50787252    | 0,663186037     | 17,06666667     |
| PPFIBP1                                                                                  | 2,51789E-07 | 0,591911182 | 0,938 | 0,4   | 0,00531301  | 1,507242115   | 0,663463414     | 2,345           |
| MAD2L2                                                                                   | 2,59842E-08 | 0,59154164  | 0,725 | 0,23  | 0,000548292 | 1,506856089   | 0,66363338      | 3,152173913     |
| MORN2                                                                                    | 1,20026E-12 | 0,589910359 | 0,713 | 0,12  | 2,53267E-08 | 1,505153223   | 0,664384187     | 5,941666667     |
| RPSA                                                                                     | 2,59569E-08 | 0,589673589 | 1     | 0,89  | 0,000547717 | 1,504906223   | 0,664493232     | 1,123595506     |
| SHTN1                                                                                    | 7,84464E-10 | 0,589240698 | 0,613 | 0,13  | 1,6553E-05  | 1,504454733   | 0,664692648     | 4,715384615     |
| UBXN4                                                                                    | 5,6805E-07  | 0,589158431 | 0,912 | 0,47  | 0,011986429 | 1,504368946   | 0,664730552     | 1,940425532     |
| PMEPA1                                                                                   | 1,12935E-07 | 0,588046247 | 1     | 0,9   | 0,002383041 | 1,503209665   | 0,665243195     | 1,111111111     |
| ADAMTSL1                                                                                 | 1,77045E-10 | 0,587364555 | 0,688 | 0,15  | 3,73582E-06 | 1,502499546   | 0,665557606     | 4,586666667     |
| SWI5                                                                                     | 3,04479E-10 | 0,586849651 | 0,8   | 0,22  | 6,42481E-06 | 1,501963393   | 0,665795188     | 3,636363636     |
| ENO1                                                                                     | 1,85998E-06 | 0,584419164 | 0,9   | 0,53  | 0,039247527 | 1,499435188   | 0,666917789     | 1,698113208     |
| LY6E                                                                                     | 7,9039E-07  | 0,584361585 | 0,787 | 0,31  | 0,016678016 | 1,499375345   | 0,666944407     | 2,538709677     |
| PDIA6                                                                                    | 7,00343E-06 | 0,584161893 | 0,963 | 0,61  | 0,147779369 | 1,499167823   | 0,667036729     | 1,578688525     |
| CSPG4                                                                                    | 1,23648E-09 | 0,583796743 | 0,575 | 0,11  | 2,60909E-05 | 1,498788427   | 0,667205579     | 5,227272727     |
| CYB5R3                                                                                   | 3,65402E-09 | 0,583652257 | 0,8   | 0,24  | 7,71035E-05 | 1,498638331   | 0,667272403     | 3,333333333     |
| VPS25                                                                                    | 2,39983E-12 | 0,58302289  | 0,6   | 0,08  | 5,06389E-08 | 1,497984702   | 0,66756356      | 7,5             |
| MAP2K2                                                                                   | 2,63263E-08 | 0,583008644 | 0,912 | 0,35  | 0,000555512 | 1,49796991    | 0,667570152     | 2,605714286     |
| CTSA                                                                                     | 3,64215E-10 | 0,582437812 | 0,725 | 0,17  | 7,68529E-06 | 1,497377324   | 0,667834342     | 4,264705882     |
| DSTN                                                                                     | 1,09351E-05 | 0,581575536 | 0,9   | 0,52  | 0,230742534 | 1,496482633   | 0,668233615     | 1,730769231     |
| CAV1                                                                                     | 1,34992E-08 | 0,580521512 | 0,662 | 0,21  | 0,000284847 | 1,495389712   | 0,668722001     | 3,152380952     |

Supplementary Table 4

| Differentially expressed genes_keloid-CCD_ comparing SC-Keloid vs. (SC-Myel, SC-Nonmyel) |             |             |       |       |             |               |                 |                 |
|------------------------------------------------------------------------------------------|-------------|-------------|-------|-------|-------------|---------------|-----------------|-----------------|
| gene                                                                                     | p_val       | avg_log2FC  | pct.1 | pct.2 | p_val_adj   | Foldchange_UP | Foldchange_DOWN | Ratio_pct1_pct2 |
| NOP10                                                                                    | 1,11993E-08 | 0,580100648 | 0,85  | 0,28  | 0,000236316 | 1,494953539   | 0,66891711      | 3,035714286     |
| NDUFB9                                                                                   | 3,84314E-09 | 0,579684088 | 0,825 | 0,28  | 8,1094E-05  | 1,494521952   | 0,669110279     | 2,946428571     |
| RPS26                                                                                    | 1,07662E-07 | 0,579283008 | 0,963 | 0,81  | 0,002271776 | 1,494106522   | 0,669296322     | 1,188888889     |
| PHB                                                                                      | 5,0894E-08  | 0,57804758  | 0,8   | 0,29  | 0,001073914 | 1,492827616   | 0,669869708     | 2,75862069      |
| WASF2                                                                                    | 5,8101E-07  | 0,577570442 | 0,875 | 0,38  | 0,012259895 | 1,49233398    | 0,670091289     | 2,302631579     |
| WDR1                                                                                     | 1,46642E-06 | 0,577157466 | 0,863 | 0,46  | 0,030942896 | 1,491906855   | 0,670283132     | 1,876086957     |
| PERP                                                                                     | 5,17595E-08 | 0,576410026 | 0,787 | 0,28  | 0,001092177 | 1,491134119   | 0,670630487     | 2,810714286     |
| MAD2L1                                                                                   | 3,49814E-06 | 0,576388479 | 0,312 | 0,05  | 0,07381417  | 1,491111849   | 0,670640503     | 6,24            |
| CSRP1                                                                                    | 9,09945E-05 | 0,576275603 | 0,963 | 0,66  | 1           | 1,490995189   | 0,670692976     | 1,459090909     |
| COX5A                                                                                    | 1,03471E-07 | 0,573620333 | 0,887 | 0,36  | 0,00218335  | 1,488253548   | 0,671928518     | 2,463888889     |
| METTL5                                                                                   | 9,28696E-09 | 0,572693778 | 0,675 | 0,18  | 0,000195964 | 1,48729804    | 0,672360195     | 3,75            |
| TUSC3                                                                                    | 3,92738E-12 | 0,572451384 | 0,625 | 0,09  | 8,28717E-08 | 1,487048172   | 0,672473171     | 6,944444444     |
| CDH6                                                                                     | 7,18192E-08 | 0,572069175 | 0,85  | 0,3   | 0,001515457 | 1,486654266   | 0,672651351     | 2,833333333     |
| COPZ1                                                                                    | 1,51936E-12 | 0,57191649  | 0,637 | 0,09  | 3,206E-08   | 1,486496936   | 0,672722544     | 7,077777778     |
| PSMB7                                                                                    | 2,34246E-08 | 0,571863429 | 0,9   | 0,32  | 0,000494282 | 1,486442265   | 0,672747286     | 2,8125          |
| CHPF                                                                                     | 9,3585E-10  | 0,571475976 | 0,775 | 0,21  | 1,97474E-05 | 1,486043117   | 0,672927985     | 3,69047619      |
| THOC7                                                                                    | 3,58965E-09 | 0,57097958  | 0,713 | 0,18  | 7,57451E-05 | 1,485531894   | 0,673159563     | 3,961111111     |
| ELOB                                                                                     | 6,70142E-08 | 0,570309946 | 1     | 0,77  | 0,001414068 | 1,484842537   | 0,673472085     | 1,298701299     |
| SELENON                                                                                  | 2,04729E-10 | 0,570209494 | 0,75  | 0,18  | 4,31999E-06 | 1,484739154   | 0,67351898      | 4,166666667     |
| GTF3A                                                                                    | 6,74392E-08 | 0,56971986  | 0,738 | 0,25  | 0,001423035 | 1,484235336   | 0,673747603     | 2,952           |
| RPL29                                                                                    | 2,67217E-12 | 0,569206717 | 1     | 0,98  | 5,63854E-08 | 1,483707512   | 0,673987287     | 1,020408163     |
| ANAPC15                                                                                  | 3,62486E-12 | 0,569061854 | 0,613 | 0,08  | 7,64882E-08 | 1,483558538   | 0,674054966     | 7,6625          |
| IL11                                                                                     | 4,71279E-09 | 0,568098366 | 0,488 | 0,08  | 9,94447E-05 | 1,482568091   | 0,674505276     | 6,1             |
| HM13                                                                                     | 2,74475E-07 | 0,567422397 | 0,787 | 0,29  | 0,005791695 | 1,481873602   | 0,674821387     | 2,713793103     |
| FXYS5                                                                                    | 1,39527E-06 | 0,567001016 | 0,662 | 0,23  | 0,029441491 | 1,481440841   | 0,675018517     | 2,87826087      |
| PIGT                                                                                     | 1,87553E-09 | 0,566917684 | 0,688 | 0,17  | 3,95755E-05 | 1,481355274   | 0,675057508     | 4,047058824     |
| KIFC3                                                                                    | 1,11023E-12 | 0,566875609 | 0,662 | 0,09  | 2,34269E-08 | 1,481312072   | 0,675077196     | 7,355555556     |
| GNAS                                                                                     | 2,96176E-06 | 0,566046869 | 1     | 0,76  | 0,062496121 | 1,480461393   | 0,675465098     | 1,315789474     |
| RER1                                                                                     | 2,49709E-08 | 0,566009712 | 0,8   | 0,29  | 0,000526911 | 1,480423264   | 0,675482495     | 2,75862069      |
| TRAPPC2L                                                                                 | 9,08587E-10 | 0,56553238  | 0,738 | 0,2   | 1,91721E-05 | 1,479933531   | 0,675706023     | 3,69            |

Supplementary Table 4

| Differentially expressed genes_keloid-CCD_ comparing SC-Keloid vs. (SC-Myel, SC-Nonmyel) |             |             |       |       |             |               |                 |                 |
|------------------------------------------------------------------------------------------|-------------|-------------|-------|-------|-------------|---------------|-----------------|-----------------|
| gene                                                                                     | p_val       | avg_log2FC  | pct.1 | pct.2 | p_val_adj   | Foldchange_UP | Foldchange_DOWN | Ratio_pct1_pct2 |
| COX4I1                                                                                   | 3,58268E-07 | 0,563902813 | 0,938 | 0,69  | 0,007559804 | 1,478262845   | 0,676469684     | 1,35942029      |
| RPL7                                                                                     | 6,68893E-07 | 0,563856147 | 1     | 0,85  | 0,014114302 | 1,478215029   | 0,676491566     | 1,176470588     |
| THY1                                                                                     | 5,80834E-09 | 0,563849246 | 0,425 | 0,05  | 0,000122562 | 1,478207958   | 0,676494802     | 8,5             |
| COA8                                                                                     | 2,08545E-09 | 0,559999311 | 0,588 | 0,12  | 4,40052E-05 | 1,474268514   | 0,678302487     | 4,9             |
| FIS1                                                                                     | 5,88951E-07 | 0,559740321 | 0,988 | 0,59  | 0,012427456 | 1,474003879   | 0,678424266     | 1,674576271     |
| SRI                                                                                      | 1,20632E-06 | 0,559359073 | 0,875 | 0,38  | 0,025454652 | 1,473614409   | 0,678603571     | 2,302631579     |
| ATP5F1C                                                                                  | 7,2744E-06  | 0,55863911  | 0,9   | 0,52  | 0,153497194 | 1,472879199   | 0,678942306     | 1,730769231     |
| DDT                                                                                      | 4,02868E-07 | 0,557971533 | 0,825 | 0,3   | 0,008500918 | 1,472197813   | 0,679256545     | 2,75            |
| PSMB5                                                                                    | 6,08048E-07 | 0,557889325 | 0,762 | 0,29  | 0,012830416 | 1,472113926   | 0,679295252     | 2,627586207     |
| PSMC5                                                                                    | 7,70692E-08 | 0,557457209 | 0,812 | 0,29  | 0,001626238 | 1,471673064   | 0,679498745     | 2,8             |
| GSTZ1                                                                                    | 1,5906E-10  | 0,556881187 | 0,688 | 0,15  | 3,35633E-06 | 1,471085589   | 0,679770101     | 4,586666667     |
| SNRPB                                                                                    | 1,55184E-05 | 0,555412212 | 0,9   | 0,53  | 0,327453315 | 1,46958847    | 0,680462606     | 1,698113208     |
| THBS2                                                                                    | 8,63369E-06 | 0,555301112 | 0,525 | 0,17  | 0,182179438 | 1,469475302   | 0,68051501      | 3,088235294     |
| NDUFA11                                                                                  | 2,63753E-06 | 0,554933025 | 0,925 | 0,52  | 0,055654431 | 1,469100431   | 0,680688658     | 1,778846154     |
| LIF                                                                                      | 2,55776E-06 | 0,554527252 | 0,338 | 0,06  | 0,053971315 | 1,468687289   | 0,680880135     | 5,633333333     |
| SELENOH                                                                                  | 2,08694E-06 | 0,553421719 | 0,9   | 0,45  | 0,044036435 | 1,467562269   | 0,681402092     | 2               |
| GRN                                                                                      | 7,62926E-07 | 0,553193719 | 0,825 | 0,34  | 0,01609851  | 1,467330358   | 0,681509787     | 2,426470588     |
| NEDD8                                                                                    | 2,58226E-06 | 0,553151126 | 0,963 | 0,52  | 0,054488232 | 1,467287039   | 0,681529908     | 1,851923077     |
| RPL27                                                                                    | 1,95981E-08 | 0,5530984   | 1     | 0,9   | 0,000413539 | 1,467233414   | 0,681554816     | 1,111111111     |
| DTD1                                                                                     | 3,56008E-12 | 0,551941545 | 0,688 | 0,12  | 7,51213E-08 | 1,466057355   | 0,682101554     | 5,733333333     |
| ACTN4                                                                                    | 1,41546E-06 | 0,55120204  | 0,912 | 0,5   | 0,029867666 | 1,465306067   | 0,682451279     | 1,824           |
| GSTP1                                                                                    | 1,00235E-06 | 0,551093728 | 0,988 | 0,72  | 0,021150633 | 1,465196062   | 0,682502517     | 1,372222222     |
| AP1S1                                                                                    | 5,18181E-11 | 0,55077326  | 0,738 | 0,17  | 1,09341E-06 | 1,464870632   | 0,682654139     | 4,341176471     |
| BRK1                                                                                     | 6,96295E-06 | 0,550714136 | 0,95  | 0,56  | 0,146925237 | 1,464810599   | 0,682682116     | 1,696428571     |
| LMF2                                                                                     | 3,06506E-12 | 0,549776259 | 0,65  | 0,11  | 6,46758E-08 | 1,463858655   | 0,683126063     | 5,909090909     |
| NT5DC2                                                                                   | 2,19573E-07 | 0,549755609 | 0,738 | 0,26  | 0,004633208 | 1,463837703   | 0,683135841     | 2,838461538     |
| EVA1B                                                                                    | 2,37928E-07 | 0,549670559 | 0,8   | 0,29  | 0,005020518 | 1,463751409   | 0,683176114     | 2,75862069      |
| SDF2L1                                                                                   | 8,29973E-09 | 0,549532589 | 0,787 | 0,24  | 0,000175133 | 1,463611432   | 0,683241452     | 3,279166667     |
| TMEM14C                                                                                  | 7,59316E-08 | 0,548810754 | 0,887 | 0,33  | 0,001602232 | 1,462879314   | 0,68358339      | 2,687878788     |
| ATP5ME                                                                                   | 1,74937E-06 | 0,547342028 | 0,988 | 0,59  | 0,036913448 | 1,461390798   | 0,684279661     | 1,674576271     |

Supplementary Table 4

| Differentially expressed genes_keloid-CCD_ comparing SC-Keloid vs. (SC-Myel, SC-Nonmyel) |             |             |       |       |             |               |                 |                 |
|------------------------------------------------------------------------------------------|-------------|-------------|-------|-------|-------------|---------------|-----------------|-----------------|
| gene                                                                                     | p_val       | avg_log2FC  | pct.1 | pct.2 | p_val_adj   | Foldchange_UP | Foldchange_DOWN | Ratio_pct1_pct2 |
| RPS6                                                                                     | 6,11176E-09 | 0,546329618 | 1     | 0,98  | 0,000128964 | 1,460365627   | 0,684760023     | 1,020408163     |
| RPL7A                                                                                    | 7,94212E-11 | 0,546310866 | 1     | 1     | 1,67587E-06 | 1,460346646   | 0,684768923     | 1               |
| PSMA5                                                                                    | 1,05598E-08 | 0,546231172 | 0,812 | 0,26  | 0,000222822 | 1,46026598    | 0,68480675      | 3,123076923     |
| TOMM22                                                                                   | 8,44134E-12 | 0,545843088 | 0,688 | 0,12  | 1,78121E-07 | 1,459873222   | 0,684990988     | 5,733333333     |
| AGTRAP                                                                                   | 3,03174E-11 | 0,545029438 | 0,675 | 0,13  | 6,39728E-07 | 1,459050116   | 0,685377417     | 5,192307692     |
| TXNL4A                                                                                   | 1,36638E-07 | 0,544158512 | 0,85  | 0,34  | 0,00288319  | 1,458169582   | 0,685791291     | 2,5             |
| NUDT22                                                                                   | 6,97442E-12 | 0,542777625 | 0,537 | 0,05  | 1,47167E-07 | 1,456774551   | 0,686448016     | 10,74           |
| COQ4                                                                                     | 5,16856E-09 | 0,541231892 | 0,662 | 0,15  | 0,000109062 | 1,455214569   | 0,687183884     | 4,413333333     |
| UBL5                                                                                     | 6,37374E-07 | 0,540535632 | 0,963 | 0,62  | 0,01344922  | 1,454512436   | 0,687515607     | 1,553225806     |
| NDUFS2                                                                                   | 2,46348E-09 | 0,539919962 | 0,8   | 0,22  | 5,19818E-05 | 1,453891856   | 0,687809066     | 3,636363636     |
| NCS1                                                                                     | 3,32167E-10 | 0,538052953 | 0,637 | 0,14  | 7,00905E-06 | 1,452011574   | 0,688699745     | 4,55            |
| ADAMTS2                                                                                  | 2,25825E-12 | 0,53792192  | 0,512 | 0,04  | 4,76514E-08 | 1,451879701   | 0,688762299     | 12,8            |
| DUSP23                                                                                   | 3,87254E-11 | 0,537432986 | 0,75  | 0,16  | 8,17144E-07 | 1,451387738   | 0,688995762     | 4,6875          |
| PRTFDC1                                                                                  | 4,7327E-12  | 0,537064467 | 0,488 | 0,03  | 9,98646E-08 | 1,451017045   | 0,68917178      | 16,26666667     |
| NDUFC2                                                                                   | 2,04546E-07 | 0,535524247 | 0,963 | 0,58  | 0,004316119 | 1,449468767   | 0,689907932     | 1,660344828     |
| AGPAT2                                                                                   | 2,33424E-10 | 0,535261552 | 0,637 | 0,13  | 4,92547E-06 | 1,449204863   | 0,690033566     | 4,9             |
| UFD1                                                                                     | 7,16269E-10 | 0,535085041 | 0,762 | 0,2   | 1,5114E-05  | 1,449027567   | 0,690117996     | 3,81            |
| TUBA1C                                                                                   | 0,0021001   | 0,535055827 | 0,812 | 0,48  | 1           | 1,448998224   | 0,690131971     | 1,691666667     |
| MSC                                                                                      | 3,63267E-09 | 0,534063358 | 0,462 | 0,06  | 7,6653E-05  | 1,448001762   | 0,690606894     | 7,7             |
| NDUFAF8                                                                                  | 3,66596E-08 | 0,532773904 | 0,825 | 0,27  | 0,000773555 | 1,446708143   | 0,691224422     | 3,055555556     |
| RPLP2                                                                                    | 4,6377E-12  | 0,532216934 | 1     | 0,98  | 9,78601E-08 | 1,446149732   | 0,691491329     | 1,020408163     |
| TENM3                                                                                    | 2,24226E-07 | 0,531729267 | 0,787 | 0,28  | 0,004731392 | 1,445660979   | 0,69172511      | 2,810714286     |
| CRIP1                                                                                    | 0,000156943 | 0,531423728 | 0,75  | 0,36  | 1           | 1,445354845   | 0,691871621     | 2,083333333     |
| MRPS23                                                                                   | 5,54674E-12 | 0,530720261 | 0,637 | 0,09  | 1,17042E-07 | 1,444650253   | 0,692209065     | 7,077777778     |
| GIPC1                                                                                    | 2,66928E-07 | 0,529616169 | 0,825 | 0,31  | 0,005632451 | 1,443545088   | 0,692739014     | 2,661290323     |
| SCARB2                                                                                   | 1,76742E-05 | 0,52921503  | 0,938 | 0,55  | 0,372944114 | 1,443143767   | 0,692931656     | 1,705454545     |
| CDKN2A                                                                                   | 5,52286E-08 | 0,529097412 | 0,438 | 0,07  | 0,001165379 | 1,443026118   | 0,69298815      | 6,257142857     |
| BOLA3                                                                                    | 2,58433E-13 | 0,52901927  | 0,6   | 0,06  | 5,4532E-09  | 1,44294796    | 0,693025686     | 10              |
| RPL13                                                                                    | 6,95096E-12 | 0,528746184 | 1     | 1     | 1,46672E-07 | 1,442674852   | 0,693156881     | 1               |
| NIFK                                                                                     | 8,72294E-10 | 0,528454803 | 0,65  | 0,14  | 1,84063E-05 | 1,442383505   | 0,693296891     | 4,642857143     |



Supplementary Table 4

| Differentially expressed genes_keloid-CCD_ comparing SC-Keloid vs. (SC-Myel, SC-Nonmyel) |             |             |       |       |             |               |                 |                 |
|------------------------------------------------------------------------------------------|-------------|-------------|-------|-------|-------------|---------------|-----------------|-----------------|
| gene                                                                                     | p_val       | avg_log2FC  | pct.1 | pct.2 | p_val_adj   | Foldchange_UP | Foldchange_DOWN | Ratio_pct1_pct2 |
| NOL7                                                                                     | 9,40082E-08 | 0,526335886 | 0,775 | 0,28  | 0,001983667 | 1,4402666     | 0,6943159       | 2,767857143     |
| GPX8                                                                                     | 1,89551E-07 | 0,525817703 | 0,562 | 0,15  | 0,00399971  | 1,439749382   | 0,694565327     | 3,746666667     |
| NAP1L4                                                                                   | 3,93102E-09 | 0,525744506 | 0,725 | 0,19  | 8,29485E-05 | 1,439676336   | 0,694600567     | 3,815789474     |
| ARHGAP21                                                                                 | 7,86415E-12 | 0,524816388 | 0,75  | 0,15  | 1,65941E-07 | 1,438750458   | 0,695047563     | 5               |
| ISG15                                                                                    | 2,68291E-09 | 0,524632848 | 0,838 | 0,29  | 5,66121E-05 | 1,438567432   | 0,695135993     | 2,889655172     |
| CDC123                                                                                   | 8,70907E-11 | 0,524031656 | 0,613 | 0,1   | 1,8377E-06  | 1,437968085   | 0,695425726     | 6,13            |
| EMP3                                                                                     | 2,45348E-06 | 0,522759368 | 1     | 0,79  | 0,051770797 | 1,436700525   | 0,696039281     | 1,265822785     |
| NDUFS6                                                                                   | 2,20669E-07 | 0,521865764 | 0,975 | 0,53  | 0,004656339 | 1,435810909   | 0,696470541     | 1,839622642     |
| TYMS                                                                                     | 3,77687E-06 | 0,521588499 | 0,225 | 0,01  | 0,079695817 | 1,435534993   | 0,696604405     | 22,5            |
| DGUOK                                                                                    | 9,32572E-09 | 0,521346982 | 0,863 | 0,28  | 0,000196782 | 1,435294695   | 0,696721031     | 3,082142857     |
| RPLP1                                                                                    | 2,07953E-11 | 0,521070462 | 1     | 1     | 4,38801E-07 | 1,43501962    | 0,696854584     | 1               |
| ARF5                                                                                     | 8,36706E-06 | 0,520375229 | 0,863 | 0,4   | 0,176553365 | 1,434328252   | 0,697190478     | 2,1575          |
| SELENOS                                                                                  | 2,72794E-06 | 0,520242432 | 0,863 | 0,4   | 0,057562229 | 1,434196231   | 0,697254656     | 2,1575          |
| SH3GL1                                                                                   | 3,59291E-11 | 0,520154936 | 0,812 | 0,19  | 7,5814E-07  | 1,434109254   | 0,697296944     | 4,273684211     |
| DNAJC15                                                                                  | 4,83077E-10 | 0,52007159  | 0,85  | 0,25  | 1,01934E-05 | 1,434026406   | 0,697337229     | 3,4             |
| NDUFB11                                                                                  | 7,2169E-06  | 0,51993273  | 0,963 | 0,58  | 0,152283758 | 1,433888388   | 0,697404351     | 1,660344828     |
| DNPH1                                                                                    | 8,09108E-08 | 0,519605346 | 0,863 | 0,31  | 0,001707298 | 1,433563039   | 0,697562627     | 2,783870968     |
| HMGN2                                                                                    | 0,005868792 | 0,519214822 | 0,875 | 0,54  | 1           | 1,433175039   | 0,697751477     | 1,62037037      |
| STMP1                                                                                    | 7,92478E-10 | 0,51816966  | 0,875 | 0,29  | 1,67221E-05 | 1,432137149   | 0,698257147     | 3,017241379     |
| TPX2                                                                                     | 3,79582E-06 | 0,517224886 | 0,25  | 0,02  | 0,080095558 | 1,431199597   | 0,698714562     | 12,5            |
| FAM174C                                                                                  | 9,9254E-10  | 0,516951641 | 0,713 | 0,19  | 2,09436E-05 | 1,430928554   | 0,698846911     | 3,752631579     |
| TK1                                                                                      | 1,66287E-07 | 0,516626989 | 0,275 | 0,01  | 0,003508824 | 1,430606587   | 0,699004191     | 27,5            |
| TUBA1A                                                                                   | 0,000121061 | 0,515629004 | 1     | 0,81  | 1           | 1,429617306   | 0,699487895     | 1,234567901     |
| CDK4                                                                                     | 2,15214E-09 | 0,515231314 | 0,762 | 0,2   | 4,54123E-05 | 1,429223275   | 0,699680741     | 3,81            |
| RPL22L1                                                                                  | 1,10997E-06 | 0,513520337 | 0,838 | 0,36  | 0,023421423 | 1,42752928    | 0,700511026     | 2,327777778     |
| MICAL2                                                                                   | 9,31758E-11 | 0,513115195 | 0,412 | 0,02  | 1,9661E-06  | 1,427128453   | 0,700707773     | 20,6            |
| TPGS1                                                                                    | 3,23799E-08 | 0,51283415  | 0,812 | 0,26  | 0,000683249 | 1,426850468   | 0,700844288     | 3,123076923     |
| RANBP1                                                                                   | 2,84637E-05 | 0,511957113 | 0,825 | 0,44  | 0,600612835 | 1,425983327   | 0,701270472     | 1,875           |
| DPCD                                                                                     | 1,20801E-12 | 0,510535185 | 0,525 | 0,04  | 2,54902E-08 | 1,424578562   | 0,701961988     | 13,125          |
| SLC16A3                                                                                  | 2,46109E-10 | 0,509323348 | 0,4   | 0,02  | 5,19315E-06 | 1,423382445   | 0,702551871     | 20              |

Supplementary Table 4

| Differentially expressed genes_keloid-CCD_ comparing SC-Keloid vs. (SC-Myel, SC-Nonmyel) |             |             |       |       |             |               |                 |                 |
|------------------------------------------------------------------------------------------|-------------|-------------|-------|-------|-------------|---------------|-----------------|-----------------|
| gene                                                                                     | p_val       | avg_log2FC  | pct.1 | pct.2 | p_val_adj   | Foldchange_UP | Foldchange_DOWN | Ratio_pct1_pct2 |
| SRPX                                                                                     | 1,26033E-09 | 0,508684685 | 0,688 | 0,16  | 2,65943E-05 | 1,422752471   | 0,702862951     | 4,3             |
| SNRPD3                                                                                   | 4,64154E-07 | 0,50814234  | 0,887 | 0,37  | 0,009794111 | 1,422217724   | 0,703127224     | 2,397297297     |
| RHBDF1                                                                                   | 1,55217E-10 | 0,507748408 | 0,65  | 0,13  | 3,27523E-06 | 1,421829436   | 0,703319241     | 5               |
| DMAC1                                                                                    | 2,40792E-12 | 0,506994677 | 0,6   | 0,07  | 5,08096E-08 | 1,421086799   | 0,703686784     | 8,571428571     |
| MRPL3                                                                                    | 8,65559E-10 | 0,506708599 | 0,662 | 0,15  | 1,82642E-05 | 1,420805035   | 0,703826335     | 4,413333333     |
| ADARB1                                                                                   | 6,98456E-12 | 0,505148766 | 0,5   | 0,04  | 1,47381E-07 | 1,419269699   | 0,704587719     | 12,5            |
| ZNHIT1                                                                                   | 4,33791E-06 | 0,504510209 | 0,938 | 0,52  | 0,091534218 | 1,418641649   | 0,704899649     | 1,803846154     |
| CIAPIN1                                                                                  | 3,12252E-12 | 0,504234175 | 0,512 | 0,04  | 6,58884E-08 | 1,418370243   | 0,705034531     | 12,8            |
| RPL37A                                                                                   | 1,9982E-08  | 0,504188562 | 1     | 0,98  | 0,00042164  | 1,4183254     | 0,705056822     | 1,020408163     |
| NUTF2                                                                                    | 2,88151E-09 | 0,504096449 | 0,65  | 0,15  | 6,08028E-05 | 1,418234846   | 0,70510184      | 4,333333333     |
| RNASEH2C                                                                                 | 9,22399E-09 | 0,503382692 | 0,85  | 0,26  | 0,000194636 | 1,417533364   | 0,705450768     | 3,269230769     |
| RPS14                                                                                    | 6,54689E-09 | 0,502173634 | 1     | 0,99  | 0,000138146 | 1,416345891   | 0,706042222     | 1,01010101      |
| CNN2                                                                                     | 3,94338E-11 | 0,501208348 | 0,4   | 0,01  | 8,32092E-07 | 1,415398552   | 0,706514783     | 40              |
| MIF                                                                                      | 2,68011E-07 | 0,500423851 | 0,938 | 0,49  | 0,005655295 | 1,414629107   | 0,70689907      | 1,914285714     |
| EIF2AK4                                                                                  | 1,5034E-09  | 0,50037892  | 0,688 | 0,17  | 3,17232E-05 | 1,41458505    | 0,706921086     | 4,047058824     |
| CHID1                                                                                    | 5,96767E-08 | 0,500104937 | 0,662 | 0,19  | 0,001259238 | 1,414316431   | 0,707055351     | 3,484210526     |
| HMG20B                                                                                   | 2,28739E-08 | 0,500047309 | 0,875 | 0,31  | 0,000482663 | 1,414259938   | 0,707083594     | 2,822580645     |
| S100A1                                                                                   | 0,018419727 | 0,499471886 | 0,4   | 0,21  | 1           | 1,413695969   | 0,707365672     | 1,904761905     |
| CYC1                                                                                     | 4,73265E-07 | 0,499275795 | 0,8   | 0,3   | 0,009986369 | 1,413503832   | 0,707461824     | 2,666666667     |
| RCAN1                                                                                    | 0,028144543 | 0,499134273 | 0,912 | 0,73  | 1           | 1,413365181   | 0,707531226     | 1,249315068     |
| HDDC2                                                                                    | 9,48617E-11 | 0,497978242 | 0,6   | 0,1   | 2,00168E-06 | 1,412233105   | 0,708098398     | 6               |
| CD63                                                                                     | 2,17135E-08 | 0,497884195 | 1     | 0,99  | 0,000458177 | 1,412141048   | 0,708144559     | 1,01010101      |
| JOSD2                                                                                    | 1,06852E-06 | 0,497577775 | 0,75  | 0,28  | 0,022546833 | 1,411841149   | 0,708294981     | 2,678571429     |
| VDAC1                                                                                    | 2,28612E-07 | 0,497463149 | 0,925 | 0,43  | 0,00482394  | 1,411728979   | 0,708351259     | 2,151162791     |
| AGRN                                                                                     | 9,53819E-07 | 0,496832199 | 0,775 | 0,28  | 0,020126542 | 1,411111706   | 0,708661119     | 2,767857143     |
| B3GAT3                                                                                   | 3,15518E-08 | 0,496562155 | 0,713 | 0,2   | 0,000665774 | 1,410847599   | 0,708793778     | 3,565           |
| TPM3                                                                                     | 4,22356E-05 | 0,495879911 | 0,875 | 0,49  | 0,891213648 | 1,410180573   | 0,709129043     | 1,785714286     |
| RPN2                                                                                     | 2,07559E-06 | 0,495686229 | 0,875 | 0,41  | 0,043796974 | 1,409991268   | 0,70922425      | 2,134146341     |
| ABCC3                                                                                    | 2,34916E-08 | 0,495406577 | 0,325 | 0,02  | 0,000495697 | 1,409717983   | 0,709361739     | 16,25           |
| MFAP2                                                                                    | 1,771E-10   | 0,495359273 | 0,4   | 0,02  | 3,737E-06   | 1,409671761   | 0,709384998     | 20              |

Supplementary Table 4

| Differentially expressed genes_keloid-CCD_ comparing SC-Keloid vs. (SC-Myel, SC-Nonmyel) |             |             |       |       |             |               |                 |                 |
|------------------------------------------------------------------------------------------|-------------|-------------|-------|-------|-------------|---------------|-----------------|-----------------|
| gene                                                                                     | p_val       | avg_log2FC  | pct.1 | pct.2 | p_val_adj   | Foldchange_UP | Foldchange_DOWN | Ratio_pct1_pct2 |
| PLD3                                                                                     | 3,21315E-08 | 0,495167075 | 0,713 | 0,2   | 0,000678007 | 1,409483974   | 0,70947951      | 3,565           |
| GGH                                                                                      | 4,19837E-08 | 0,494709622 | 0,5   | 0,1   | 0,000885898 | 1,409037124   | 0,709704509     | 5               |
| SPOCD1                                                                                   | 4,36849E-10 | 0,494116664 | 0,362 | 0,01  | 9,21795E-06 | 1,408458118   | 0,709996263     | 36,2            |
| RCN3                                                                                     | 3,87995E-08 | 0,493246334 | 0,613 | 0,17  | 0,000818708 | 1,407608698   | 0,710424709     | 3,605882353     |
| PCYT1A                                                                                   | 1,01405E-10 | 0,490644435 | 0,462 | 0,04  | 2,13975E-06 | 1,405072365   | 0,711707115     | 11,55           |
| TRMT112                                                                                  | 1,10167E-06 | 0,490643013 | 0,975 | 0,45  | 0,023246347 | 1,40507098    | 0,711707817     | 2,166666667     |
| FBXW5                                                                                    | 1,438E-09   | 0,490065974 | 0,6   | 0,13  | 3,03433E-05 | 1,404509102   | 0,711992538     | 4,615384615     |
| UFC1                                                                                     | 2,11042E-07 | 0,48887416  | 0,825 | 0,28  | 0,004453193 | 1,403349313   | 0,71258096      | 2,946428571     |
| TMEM141                                                                                  | 9,23074E-12 | 0,487349793 | 0,7   | 0,12  | 1,94778E-07 | 1,401867302   | 0,713334278     | 5,833333333     |
| SH3KBP1                                                                                  | 1,5325E-08  | 0,486812749 | 0,625 | 0,16  | 0,000323373 | 1,401345553   | 0,713599867     | 3,90625         |
| SLC2A4RG                                                                                 | 8,10594E-08 | 0,48581492  | 0,725 | 0,23  | 0,001710435 | 1,400376658   | 0,714093593     | 3,152173913     |
| HMGB3                                                                                    | 2,90782E-06 | 0,485636618 | 0,362 | 0,07  | 0,06135791  | 1,400203597   | 0,714181853     | 5,171428571     |
| HPCAL1                                                                                   | 3,52142E-08 | 0,485458784 | 0,65  | 0,18  | 0,000743054 | 1,400031012   | 0,714269892     | 3,611111111     |
| SSR3                                                                                     | 8,54559E-06 | 0,484501494 | 0,775 | 0,33  | 0,180320402 | 1,399102339   | 0,714743999     | 2,348484848     |
| DAAM1                                                                                    | 1,63358E-07 | 0,484229899 | 0,65  | 0,19  | 0,003447009 | 1,398838975   | 0,714878565     | 3,421052632     |
| CENPE                                                                                    | 1,85402E-05 | 0,484046134 | 0,225 | 0,02  | 0,391217778 | 1,398660808   | 0,71496963      | 11,25           |
| COA3                                                                                     | 2,86367E-11 | 0,482288278 | 0,613 | 0,1   | 6,04262E-07 | 1,396957644   | 0,715841317     | 6,13            |
| GFUS                                                                                     | 5,24695E-11 | 0,482111697 | 0,55  | 0,07  | 1,10716E-06 | 1,396786671   | 0,715928939     | 7,857142857     |
| AHCY                                                                                     | 6,54923E-10 | 0,481812972 | 0,588 | 0,1   | 1,38195E-05 | 1,396497482   | 0,716077195     | 5,88            |
| CRIP2                                                                                    | 3,64973E-05 | 0,481056447 | 0,925 | 0,58  | 0,770129529 | 1,395765374   | 0,716452792     | 1,594827586     |
| RTRAF                                                                                    | 9,90449E-06 | 0,481018003 | 0,95  | 0,56  | 0,208994738 | 1,395728181   | 0,716471884     | 1,696428571     |
| CENPK                                                                                    | 8,10377E-08 | 0,480505641 | 0,288 | 0,01  | 0,001709977 | 1,395232587   | 0,716726379     | 28,8            |
| EIF3I                                                                                    | 1,52678E-06 | 0,480452972 | 0,863 | 0,37  | 0,032216528 | 1,395181651   | 0,716752546     | 2,332432432     |
| NDUFAF3                                                                                  | 5,24854E-06 | 0,479706421 | 0,8   | 0,34  | 0,110749376 | 1,394459874   | 0,717123539     | 2,352941176     |
| CHD9                                                                                     | 3,95483E-06 | 0,479542574 | 0,787 | 0,3   | 0,083450877 | 1,394301514   | 0,717204987     | 2,623333333     |
| MRPS16                                                                                   | 1,37971E-09 | 0,479501647 | 0,537 | 0,09  | 2,91132E-05 | 1,39426196    | 0,717225334     | 5,966666667     |
| ANAPC5                                                                                   | 9,29538E-09 | 0,478839687 | 0,75  | 0,21  | 0,000196142 | 1,39362237    | 0,717554498     | 3,571428571     |
| TPRKB                                                                                    | 1,10878E-08 | 0,477909247 | 0,6   | 0,13  | 0,000233964 | 1,392723869   | 0,718017421     | 4,615384615     |
| LMAN2                                                                                    | 2,70215E-06 | 0,477817531 | 0,812 | 0,33  | 0,057018019 | 1,392635332   | 0,718063068     | 2,460606061     |
| PDAP1                                                                                    | 4,885E-07   | 0,477413445 | 0,875 | 0,34  | 0,010307843 | 1,392245322   | 0,71826422      | 2,573529412     |

Supplementary Table 4

| Differentially expressed genes_keloid-CCD_ comparing SC-Keloid vs. (SC-Myel, SC-Nonmyel) |             |             |       |       |             |               |                 |                 |
|------------------------------------------------------------------------------------------|-------------|-------------|-------|-------|-------------|---------------|-----------------|-----------------|
| gene                                                                                     | p_val       | avg_log2FC  | pct.1 | pct.2 | p_val_adj   | Foldchange_UP | Foldchange_DOWN | Ratio_pct1_pct2 |
| CTSD                                                                                     | 7,2557E-05  | 0,477370569 | 0,95  | 0,62  | 1           | 1,392203946   | 0,718285566     | 1,532258065     |
| BTC                                                                                      | 7,7325E-08  | 0,476093482 | 0,362 | 0,04  | 0,001631634 | 1,390972099   | 0,718921681     | 9,05            |
| TALDO1                                                                                   | 1,42598E-06 | 0,475233522 | 0,912 | 0,41  | 0,030089512 | 1,390143218   | 0,719350343     | 2,224390244     |
| RPL26                                                                                    | 2,32775E-06 | 0,474988806 | 1     | 0,95  | 0,049117913 | 1,389907436   | 0,719472372     | 1,052631579     |
| PSMD3                                                                                    | 3,68959E-09 | 0,47476857  | 0,6   | 0,13  | 7,7854E-05  | 1,389695274   | 0,719582212     | 4,615384615     |
| C1QBP                                                                                    | 1,31476E-06 | 0,473259828 | 0,85  | 0,37  | 0,027742654 | 1,388242718   | 0,720335131     | 2,297297297     |
| COX6C                                                                                    | 1,68742E-05 | 0,472696573 | 0,975 | 0,73  | 0,356061498 | 1,387700828   | 0,720616418     | 1,335616438     |
| MRPL54                                                                                   | 5,90045E-08 | 0,472650985 | 0,8   | 0,25  | 0,001245055 | 1,387656979   | 0,720639189     | 3,2             |
| PLEC                                                                                     | 1,46507E-05 | 0,472348009 | 0,85  | 0,4   | 0,30914355  | 1,387365591   | 0,720790545     | 2,125           |
| HMGNI                                                                                    | 0,00016028  | 0,471836802 | 0,938 | 0,67  | 1           | 1,386874076   | 0,721045996     | 1,4             |
| ABHD17A                                                                                  | 4,93188E-09 | 0,471722174 | 0,725 | 0,18  | 0,000104068 | 1,386763888   | 0,721103288     | 4,027777778     |
| CCDC80                                                                                   | 7,75492E-07 | 0,471520263 | 0,725 | 0,25  | 0,016363657 | 1,386569818   | 0,721204217     | 2,9             |
| WDR18                                                                                    | 2,02074E-09 | 0,470169191 | 0,625 | 0,14  | 4,26396E-05 | 1,385271916   | 0,721879935     | 4,464285714     |
| SNRPF                                                                                    | 1,4215E-05  | 0,469648128 | 0,9   | 0,44  | 0,299951473 | 1,384771683   | 0,722140706     | 2,045454545     |
| ATP5MK                                                                                   | 3,71965E-06 | 0,469342368 | 0,938 | 0,6   | 0,07848842  | 1,384478229   | 0,72229377      | 1,563333333     |
| CFAP410                                                                                  | 4,11068E-07 | 0,469324403 | 0,65  | 0,2   | 0,008673943 | 1,384460989   | 0,722302765     | 3,25            |
| CCDC34                                                                                   | 1,66602E-07 | 0,469148363 | 0,35  | 0,04  | 0,003515468 | 1,384292066   | 0,722390906     | 8,75            |
| KRTCAP2                                                                                  | 2,608E-07   | 0,469081946 | 0,912 | 0,39  | 0,005503139 | 1,384228339   | 0,722424164     | 2,338461538     |
| NECAP2                                                                                   | 3,00915E-09 | 0,468351789 | 0,537 | 0,1   | 6,34961E-05 | 1,38352795    | 0,72278988      | 5,37            |
| DOK1                                                                                     | 3,58971E-08 | 0,468233137 | 0,512 | 0,1   | 0,000757465 | 1,383414169   | 0,722849327     | 5,12            |
| CKS1B                                                                                    | 0,004947074 | 0,466730975 | 0,588 | 0,31  | 1           | 1,381974481   | 0,723602363     | 1,896774194     |
| ACP1                                                                                     | 2,27973E-07 | 0,466373704 | 0,688 | 0,21  | 0,004810469 | 1,381632289   | 0,723781579     | 3,276190476     |
| ADGRE5                                                                                   | 2,46168E-08 | 0,466157    | 0,537 | 0,11  | 0,000519439 | 1,381424772   | 0,723890305     | 4,881818182     |
| TCF12                                                                                    | 7,20287E-08 | 0,466069006 | 0,575 | 0,14  | 0,001519878 | 1,381340518   | 0,723934458     | 4,107142857     |
| ERGIC1                                                                                   | 2,29803E-08 | 0,465546419 | 0,55  | 0,12  | 0,000484908 | 1,380840246   | 0,724196737     | 4,583333333     |
| RPS5                                                                                     | 3,50611E-07 | 0,464602397 | 0,988 | 0,98  | 0,007398252 | 1,379936994   | 0,724670767     | 1,008163265     |
| NDUFB10                                                                                  | 6,99994E-05 | 0,463814518 | 0,95  | 0,52  | 1           | 1,379183593   | 0,72506663      | 1,826923077     |
| ADGRL4                                                                                   | 1,94461E-09 | 0,463107466 | 0,45  | 0,05  | 4,10332E-05 | 1,378507834   | 0,725422066     | 9               |
| PCLAF                                                                                    | 3,88952E-06 | 0,463053666 | 0,25  | 0,02  | 0,082072811 | 1,378456429   | 0,725449118     | 12,5            |
| IFI27L1                                                                                  | 2,36119E-09 | 0,462290246 | 0,575 | 0,11  | 4,98235E-05 | 1,377727194   | 0,7258331       | 5,227272727     |

Supplementary Table 4

| Differentially expressed genes_keloid-CCD_ comparing SC-Keloid vs. (SC-Myel, SC-Nonmyel) |             |             |       |       |             |               |                 |                 |
|------------------------------------------------------------------------------------------|-------------|-------------|-------|-------|-------------|---------------|-----------------|-----------------|
| gene                                                                                     | p_val       | avg_log2FC  | pct.1 | pct.2 | p_val_adj   | Foldchange_UP | Foldchange_DOWN | Ratio_pct1_pct2 |
| GPR17                                                                                    | 1,00259E-08 | 0,462213295 | 0,488 | 0,08  | 0,000211557 | 1,37765371    | 0,725871816     | 6,1             |
| DCTN2                                                                                    | 3,712E-07   | 0,461722362 | 0,863 | 0,35  | 0,007832682 | 1,37718499    | 0,726118864     | 2,465714286     |
| SH2B3                                                                                    | 3,50344E-09 | 0,461563488 | 0,537 | 0,1   | 7,39261E-05 | 1,377033338   | 0,726198831     | 5,37            |
| DYNLT2B                                                                                  | 1,98476E-08 | 0,461526364 | 0,475 | 0,08  | 0,000418804 | 1,376997904   | 0,726217518     | 5,9375          |
| MRPL33                                                                                   | 2,67408E-06 | 0,460859371 | 0,938 | 0,39  | 0,056425685 | 1,376361432   | 0,726553343     | 2,405128205     |
| SUCLG1                                                                                   | 8,91366E-11 | 0,459511823 | 0,637 | 0,11  | 1,88087E-06 | 1,375076443   | 0,727232297     | 5,790909091     |
| PKP1                                                                                     | 1,19866E-11 | 0,45929129  | 0,388 | 0     | 2,52929E-07 | 1,374866263   | 0,727343471     | #DIV/0!         |
| SMAP2                                                                                    | 5,87626E-11 | 0,458308837 | 0,488 | 0,05  | 1,23995E-06 | 1,373930318   | 0,72783895      | 9,76            |
| ARL1                                                                                     | 1,9603E-07  | 0,457194683 | 0,812 | 0,29  | 0,004136427 | 1,372869679   | 0,728401257     | 2,8             |
| ARFRP1                                                                                   | 9,07316E-09 | 0,456553554 | 0,625 | 0,14  | 0,000191453 | 1,372259716   | 0,728725028     | 4,464285714     |
| DEF8                                                                                     | 3,35813E-11 | 0,456333774 | 0,65  | 0,11  | 7,08599E-07 | 1,372050682   | 0,72883605      | 5,909090909     |
| NDUFV2                                                                                   | 3,70009E-06 | 0,455712382 | 0,875 | 0,4   | 0,078075692 | 1,371459845   | 0,72915004      | 2,1875          |
| NKTR                                                                                     | 2,6663E-08  | 0,45549939  | 0,8   | 0,24  | 0,000562616 | 1,371257385   | 0,729257695     | 3,333333333     |
| GNG5                                                                                     | 6,23969E-05 | 0,454963049 | 1     | 0,7   | 1           | 1,370747696   | 0,729528857     | 1,428571429     |
| PRKCSH                                                                                   | 9,17248E-08 | 0,454919094 | 0,562 | 0,14  | 0,001935485 | 1,370705934   | 0,729551084     | 4,014285714     |
| DNM3                                                                                     | 3,66561E-09 | 0,454789199 | 0,438 | 0,05  | 7,7348E-05  | 1,370582526   | 0,729616773     | 8,76            |
| TMA7                                                                                     | 1,98713E-05 | 0,45456594  | 1     | 0,73  | 0,419304079 | 1,370370443   | 0,729729691     | 1,369863014     |
| SEPTIN7                                                                                  | 1,41736E-05 | 0,454482772 | 1     | 0,7   | 0,2990762   | 1,370291447   | 0,729771759     | 1,428571429     |
| SLC20A1                                                                                  | 3,2945E-08  | 0,454467731 | 0,588 | 0,13  | 0,000695173 | 1,37027716    | 0,729779368     | 4,523076923     |
| RPL4                                                                                     | 6,97173E-05 | 0,454461303 | 1     | 0,74  | 1           | 1,370271055   | 0,72978262      | 1,351351351     |
| ARPC1A                                                                                   | 2,92229E-07 | 0,453797841 | 0,85  | 0,33  | 0,006166322 | 1,369641045   | 0,730118307     | 2,575757576     |
| VPS29                                                                                    | 2,8508E-05  | 0,452998123 | 0,8   | 0,36  | 0,601548162 | 1,368882032   | 0,73052314      | 2,222222222     |
| ERH                                                                                      | 0,000247159 | 0,452800326 | 0,8   | 0,45  | 1           | 1,368694368   | 0,730623303     | 1,777777778     |
| SLC15A4                                                                                  | 2,80856E-10 | 0,452381156 | 0,425 | 0,03  | 5,92634E-06 | 1,368296756   | 0,730835614     | 14,16666667     |
| FDPS                                                                                     | 4,86825E-07 | 0,451590956 | 0,8   | 0,28  | 0,010272489 | 1,367547511   | 0,731236021     | 2,857142857     |
| DBNL                                                                                     | 4,88668E-10 | 0,451327544 | 0,65  | 0,13  | 1,03114E-05 | 1,367297843   | 0,731369544     | 5               |
| CDC20                                                                                    | 3,97851E-06 | 0,451274409 | 0,225 | 0,01  | 0,083950588 | 1,367247485   | 0,731396481     | 22,5            |
| PYCR1                                                                                    | 1,72314E-09 | 0,4505838   | 0,45  | 0,05  | 3,63599E-05 | 1,366593149   | 0,73174668      | 9               |
| SPNS1                                                                                    | 8,28716E-09 | 0,450325787 | 0,55  | 0,11  | 0,000174867 | 1,366348768   | 0,731877558     | 5               |
| AGK                                                                                      | 1,54027E-09 | 0,450301561 | 0,4   | 0,03  | 3,25013E-05 | 1,366325825   | 0,731889848     | 13,33333333     |

Supplementary Table 4

| Differentially expressed genes_keloid-CCD_ comparing SC-Keloid vs. (SC-Myel, SC-Nonmyel) |             |             |       |       |             |               |                 |                 |
|------------------------------------------------------------------------------------------|-------------|-------------|-------|-------|-------------|---------------|-----------------|-----------------|
| gene                                                                                     | p_val       | avg_log2FC  | pct.1 | pct.2 | p_val_adj   | Foldchange_UP | Foldchange_DOWN | Ratio_pct1_pct2 |
| ZNF593                                                                                   | 9,14664E-08 | 0,449730853 | 0,613 | 0,17  | 0,001930032 | 1,365785434   | 0,73217943      | 3,605882353     |
| SMARCD1                                                                                  | 3,89595E-10 | 0,449422491 | 0,637 | 0,12  | 8,22085E-06 | 1,365493542   | 0,732335942     | 5,308333333     |
| EBPL                                                                                     | 2,6168E-09  | 0,448700578 | 0,662 | 0,15  | 5,52171E-05 | 1,364810431   | 0,732702489     | 4,413333333     |
| DCBLD2                                                                                   | 2,51614E-05 | 0,448234007 | 0,75  | 0,33  | 0,530930929 | 1,364369119   | 0,732939485     | 2,272727273     |
| ADAM19                                                                                   | 1,93814E-10 | 0,447770904 | 0,713 | 0,16  | 4,08968E-06 | 1,363931229   | 0,733174796     | 4,45625         |
| AP2B1                                                                                    | 7,02517E-10 | 0,447770799 | 0,562 | 0,09  | 1,48238E-05 | 1,363931129   | 0,733174849     | 6,244444444     |
| RPL32                                                                                    | 4,40116E-09 | 0,447574155 | 1     | 1     | 9,28688E-05 | 1,363745234   | 0,73327479      | 1               |
| NDUFB5                                                                                   | 3,74699E-07 | 0,447543173 | 0,812 | 0,28  | 0,007906514 | 1,363715948   | 0,733290537     | 2,9             |
| YWHAB                                                                                    | 4,07607E-05 | 0,447356338 | 0,975 | 0,68  | 0,860091552 | 1,363539352   | 0,733385508     | 1,433823529     |
| SRPX2                                                                                    | 1,31052E-08 | 0,446514335 | 0,475 | 0,08  | 0,000276532 | 1,362743779   | 0,73381366      | 5,9375          |
| ADH5                                                                                     | 8,73251E-06 | 0,44603357  | 0,662 | 0,26  | 0,184264752 | 1,362289733   | 0,734058237     | 2,546153846     |
| YBEY                                                                                     | 1,05598E-08 | 0,444748141 | 0,525 | 0,1   | 0,000222823 | 1,361076485   | 0,734712568     | 5,25            |
| NDUFS7                                                                                   | 1,1814E-06  | 0,44447967  | 0,787 | 0,28  | 0,024928628 | 1,360823226   | 0,734849304     | 2,810714286     |
| SSRP1                                                                                    | 1,42848E-10 | 0,444394215 | 0,662 | 0,13  | 3,01423E-06 | 1,360742623   | 0,734892832     | 5,092307692     |
| COX7A2L                                                                                  | 1,98631E-06 | 0,444306636 | 0,9   | 0,39  | 0,041913121 | 1,360660022   | 0,734937445     | 2,307692308     |
| ATRAID                                                                                   | 2,2892E-05  | 0,443790933 | 0,9   | 0,48  | 0,483044752 | 1,36017373    | 0,735200201     | 1,875           |
| CHMP6                                                                                    | 5,9238E-11  | 0,442911746 | 0,55  | 0,07  | 1,24998E-06 | 1,359345084   | 0,735648373     | 7,857142857     |
| EEF1E1                                                                                   | 1,16232E-09 | 0,442505952 | 0,675 | 0,15  | 2,45261E-05 | 1,358962788   | 0,735855322     | 4,5             |
| SLC39A3                                                                                  | 5,01837E-10 | 0,441413631 | 0,5   | 0,07  | 1,05893E-05 | 1,357934254   | 0,736412678     | 7,142857143     |
| P3H2                                                                                     | 4,63131E-09 | 0,441087486 | 0,588 | 0,12  | 9,77252E-05 | 1,357627305   | 0,736579175     | 4,9             |
| CISD3                                                                                    | 7,95472E-11 | 0,441058377 | 0,537 | 0,07  | 1,67852E-06 | 1,357599913   | 0,736594037     | 7,671428571     |
| LMAN1                                                                                    | 5,99278E-06 | 0,440144974 | 0,838 | 0,34  | 0,126453692 | 1,356740657   | 0,737060539     | 2,464705882     |
| CDKN3                                                                                    | 8,67798E-05 | 0,439316302 | 0,175 | 0,01  | 1           | 1,355961581   | 0,737484022     | 17,5            |
| RPS29                                                                                    | 2,09232E-06 | 0,439298459 | 1     | 0,94  | 0,044150103 | 1,35594481    | 0,737493143     | 1,063829787     |
| ENSA                                                                                     | 2,36735E-06 | 0,438989522 | 0,688 | 0,24  | 0,049953411 | 1,355654481   | 0,737651086     | 2,866666667     |
| ATP5PD                                                                                   | 4,58397E-06 | 0,43857455  | 0,887 | 0,46  | 0,09672634  | 1,355264601   | 0,737863292     | 1,92826087      |
| MRPL23                                                                                   | 1,08924E-08 | 0,437620583 | 0,637 | 0,15  | 0,000229841 | 1,354368742   | 0,738351358     | 4,246666667     |
| AGPAT1                                                                                   | 6,06342E-08 | 0,437073436 | 0,575 | 0,14  | 0,001279442 | 1,353855192   | 0,738631433     | 4,107142857     |
| TOMM40                                                                                   | 1,95058E-08 | 0,43663034  | 0,637 | 0,16  | 0,000411591 | 1,353439445   | 0,738858324     | 3,98125         |
| ZWINT                                                                                    | 3,22815E-09 | 0,435825023 | 0,338 | 0,01  | 6,81171E-05 | 1,352684161   | 0,739270873     | 33,8            |

Supplementary Table 4

| Differentially expressed genes_keloid-CCD_ comparing SC-Keloid vs. (SC-Myel, SC-Nonmyel) |             |             |       |       |             |               |                 |                 |
|------------------------------------------------------------------------------------------|-------------|-------------|-------|-------|-------------|---------------|-----------------|-----------------|
| gene                                                                                     | p_val       | avg_log2FC  | pct.1 | pct.2 | p_val_adj   | Foldchange_UP | Foldchange_DOWN | Ratio_pct1_pct2 |
| RNF128                                                                                   | 6,0843E-12  | 0,435752725 | 0,425 | 0,01  | 1,28385E-07 | 1,352616376   | 0,739307921     | 42,5            |
| COPZ2                                                                                    | 3,12795E-06 | 0,435330662 | 0,762 | 0,3   | 0,066002892 | 1,352220723   | 0,739524238     | 2,54            |
| LTBP2                                                                                    | 5,47254E-07 | 0,434608981 | 0,375 | 0,06  | 0,011547597 | 1,351544469   | 0,739894264     | 6,25            |
| SEPTIN11                                                                                 | 1,1724E-06  | 0,434044111 | 0,662 | 0,22  | 0,024738799 | 1,351015392   | 0,740184017     | 3,009090909     |
| SSB                                                                                      | 4,42272E-06 | 0,433689117 | 0,863 | 0,38  | 0,093323853 | 1,350682997   | 0,740366172     | 2,271052632     |
| EPRS1                                                                                    | 3,94649E-08 | 0,432755616 | 0,613 | 0,15  | 0,000832749 | 1,349809316   | 0,740845383     | 4,086666667     |
| RBX1                                                                                     | 0,000109454 | 0,43264366  | 0,938 | 0,61  | 1           | 1,349704573   | 0,740902876     | 1,537704918     |
| ACTG2                                                                                    | 0,000138823 | 0,431963946 | 0,138 | 0     | 1           | 1,34906882    | 0,741252029     | #DIV/0!         |
| IRF3                                                                                     | 5,70922E-07 | 0,431952786 | 0,438 | 0,09  | 0,012047027 | 1,349058384   | 0,741257763     | 4,866666667     |
| AIMP1                                                                                    | 1,40993E-08 | 0,43082547  | 0,75  | 0,2   | 0,000297509 | 1,348004647   | 0,741837205     | 3,75            |
| SNRPC                                                                                    | 2,13704E-09 | 0,429780461 | 0,662 | 0,15  | 4,50936E-05 | 1,34702858    | 0,742374746     | 4,413333333     |
| FAM207A                                                                                  | 3,8106E-10  | 0,429555749 | 0,438 | 0,04  | 8,04076E-06 | 1,346818785   | 0,742490386     | 10,95           |
| ATP5MG                                                                                   | 4,17911E-05 | 0,429345002 | 0,975 | 0,68  | 0,881833079 | 1,346622059   | 0,742598856     | 1,433823529     |
| RNASEH2B                                                                                 | 5,50249E-10 | 0,429272294 | 0,637 | 0,12  | 1,16108E-05 | 1,346554194   | 0,742636282     | 5,308333333     |
| LGALS3BP                                                                                 | 0,000759589 | 0,429270674 | 0,95  | 0,56  | 1           | 1,346552682   | 0,742637116     | 1,696428571     |
| MTPN                                                                                     | 5,44361E-05 | 0,429177528 | 0,762 | 0,38  | 1           | 1,346465746   | 0,742685065     | 2,005263158     |
| PBK                                                                                      | 7,4916E-06  | 0,429096098 | 0,212 | 0,01  | 0,158080155 | 1,346389749   | 0,742726986     | 21,2            |
| KDELR1                                                                                   | 3,52101E-05 | 0,428799823 | 0,9   | 0,49  | 0,742968494 | 1,34611328    | 0,742879529     | 1,836734694     |
| TMEM14B                                                                                  | 1,73737E-07 | 0,428706606 | 0,875 | 0,29  | 0,003666034 | 1,346026307   | 0,74292753      | 3,017241379     |
| PMVK                                                                                     | 6,29579E-09 | 0,427368527 | 0,713 | 0,17  | 0,000132847 | 1,344778465   | 0,743616905     | 4,194117647     |
| SMARCB1                                                                                  | 3,496E-10   | 0,427364044 | 0,725 | 0,16  | 7,37692E-06 | 1,344774286   | 0,743619216     | 4,53125         |
| KMT5A                                                                                    | 5,04191E-08 | 0,427195506 | 0,562 | 0,13  | 0,001063893 | 1,344617197   | 0,743706091     | 4,323076923     |
| LAGE3                                                                                    | 3,42115E-09 | 0,426064379 | 0,625 | 0,13  | 7,21897E-05 | 1,343563379   | 0,744289414     | 4,807692308     |
| PRR16                                                                                    | 4,11821E-07 | 0,426024222 | 0,288 | 0,02  | 0,008689834 | 1,343525982   | 0,744310131     | 14,4            |
| DUT                                                                                      | 0,000606283 | 0,425963112 | 0,787 | 0,4   | 1           | 1,343469074   | 0,744341659     | 1,9675          |
| RAMP1                                                                                    | 3,3745E-08  | 0,425961282 | 0,425 | 0,06  | 0,000712054 | 1,34346737    | 0,744342603     | 7,083333333     |
| ABHD11                                                                                   | 9,41239E-10 | 0,425936657 | 0,325 | 0     | 1,98611E-05 | 1,343444439   | 0,744355308     | #DIV/0!         |
| PMM2                                                                                     | 1,92764E-07 | 0,425064229 | 0,325 | 0,03  | 0,004067505 | 1,342632275   | 0,744805572     | 10,83333333     |
| P3H1                                                                                     | 4,44074E-09 | 0,424619409 | 0,562 | 0,11  | 9,37041E-05 | 1,342218372   | 0,74503525      | 5,109090909     |
| PSMA1                                                                                    | 1,30013E-07 | 0,424399429 | 0,875 | 0,31  | 0,002743401 | 1,342013727   | 0,745148861     | 2,822580645     |

Supplementary Table 4

| Differentially expressed genes_keloid-CCD_ comparing SC-Keloid vs. (SC-Myel, SC-Nonmyel) |             |             |       |       |             |               |                 |                 |
|------------------------------------------------------------------------------------------|-------------|-------------|-------|-------|-------------|---------------|-----------------|-----------------|
| gene                                                                                     | p_val       | avg_log2FC  | pct.1 | pct.2 | p_val_adj   | Foldchange_UP | Foldchange_DOWN | Ratio_pct1_pct2 |
| PRKDC                                                                                    | 5,39712E-09 | 0,423511065 | 0,675 | 0,16  | 0,000113885 | 1,341187614   | 0,74560784      | 4,21875         |
| CCNB2                                                                                    | 6,74984E-06 | 0,423288898 | 0,188 | 0     | 0,142428329 | 1,340981095   | 0,745722668     | #DIV/0!         |
| SRP72                                                                                    | 3,93929E-07 | 0,42293559  | 0,787 | 0,25  | 0,008312294 | 1,340652736   | 0,745905314     | 3,148           |
| TMA16                                                                                    | 3,86291E-09 | 0,422696409 | 0,45  | 0,06  | 8,15113E-05 | 1,340430491   | 0,746028986     | 7,5             |
| BCKDK                                                                                    | 3,98547E-13 | 0,420630984 | 0,525 | 0,03  | 8,40974E-09 | 1,338512845   | 0,747097799     | 17,5            |
| RASSF8-AS1                                                                               | 9,02362E-07 | 0,419351646 | 0,512 | 0,13  | 0,019040732 | 1,337326419   | 0,747760596     | 3,938461538     |
| MAP1B                                                                                    | 0,001747955 | 0,418855031 | 0,938 | 0,74  | 1           | 1,336866154   | 0,74801804      | 1,267567568     |
| PRRX1                                                                                    | 5,4953E-07  | 0,41884909  | 0,675 | 0,21  | 0,011595623 | 1,336860649   | 0,74802112      | 3,214285714     |
| MYEOV                                                                                    | 2,92079E-11 | 0,414797131 | 0,375 | 0     | 6,16317E-07 | 1,333111205   | 0,750124968     | #DIV/0!         |
| HRAS                                                                                     | 2,05794E-07 | 0,414379038 | 0,775 | 0,26  | 0,004342464 | 1,332724924   | 0,750342386     | 2,980769231     |
| SURF4                                                                                    | 2,04238E-07 | 0,413576737 | 0,8   | 0,3   | 0,004309616 | 1,331983986   | 0,750759777     | 2,666666667     |
| SDHC                                                                                     | 8,2535E-08  | 0,413395865 | 0,637 | 0,18  | 0,001741572 | 1,331817004   | 0,750853906     | 3,538888889     |
| SUPT16H                                                                                  | 9,458E-09   | 0,412749395 | 0,725 | 0,19  | 0,000199573 | 1,331220352   | 0,751190439     | 3,815789474     |
| CLUAP1                                                                                   | 1,66322E-09 | 0,412679909 | 0,412 | 0,04  | 3,50956E-05 | 1,331156237   | 0,75122662      | 10,3            |
| ELOVL1                                                                                   | 4,59643E-10 | 0,412048163 | 0,55  | 0,08  | 9,69892E-06 | 1,330573461   | 0,751555648     | 6,875           |
| SMC2                                                                                     | 4,1232E-07  | 0,411737372 | 0,5   | 0,12  | 0,008700373 | 1,330286854   | 0,751717569     | 4,166666667     |
| CHST11                                                                                   | 9,15813E-10 | 0,410925192 | 0,4   | 0,03  | 1,93246E-05 | 1,329538166   | 0,752140875     | 13,33333333     |
| REXO2                                                                                    | 1,43184E-05 | 0,410814651 | 0,738 | 0,29  | 0,302131816 | 1,329436299   | 0,752198508     | 2,544827586     |
| EIF4A1                                                                                   | 8,46004E-05 | 0,41080487  | 0,938 | 0,65  | 1           | 1,329427286   | 0,752203607     | 1,443076923     |
| ITGAE                                                                                    | 4,88855E-06 | 0,410680925 | 0,637 | 0,23  | 0,103153273 | 1,329313076   | 0,752268234     | 2,769565217     |
| ACOT7                                                                                    | 5,07924E-07 | 0,410611897 | 0,512 | 0,12  | 0,010717698 | 1,329249475   | 0,752304228     | 4,266666667     |
| MTCH2                                                                                    | 2,60329E-07 | 0,410579232 | 0,588 | 0,17  | 0,00549321  | 1,32921938    | 0,752321261     | 3,458823529     |
| CRELD2                                                                                   | 1,98296E-07 | 0,409861102 | 0,65  | 0,19  | 0,004184237 | 1,328557899   | 0,752695837     | 3,421052632     |
| ECE1                                                                                     | 3,98748E-07 | 0,409441307 | 0,688 | 0,22  | 0,00841398  | 1,328171372   | 0,752914888     | 3,127272727     |
| MRPL28                                                                                   | 1,19488E-08 | 0,408868873 | 0,713 | 0,19  | 0,000252133 | 1,327644483   | 0,75321369      | 3,752631579     |
| PSMC1                                                                                    | 2,17603E-05 | 0,408529681 | 0,8   | 0,34  | 0,459163181 | 1,327332377   | 0,753390799     | 2,352941176     |
| KIF20B                                                                                   | 7,34588E-05 | 0,408508952 | 0,288 | 0,06  | 1           | 1,327313306   | 0,753401624     | 4,8             |
| HIGD2A                                                                                   | 1,01694E-05 | 0,408118601 | 0,75  | 0,31  | 0,214583667 | 1,326954223   | 0,7536055       | 2,419354839     |
| MRPL34                                                                                   | 4,97382E-08 | 0,406785067 | 0,675 | 0,17  | 0,001049525 | 1,325728238   | 0,754302406     | 3,970588235     |
| PPCS                                                                                     | 3,41401E-09 | 0,406449394 | 0,537 | 0,09  | 7,2039E-05  | 1,325419816   | 0,75447793      | 5,966666667     |



Supplementary Table 4

| Differentially expressed genes_keloid-CCD_ comparing SC-Keloid vs. (SC-Myel, SC-Nonmyel) |             |             |       |       |             |               |                 |                 |
|------------------------------------------------------------------------------------------|-------------|-------------|-------|-------|-------------|---------------|-----------------|-----------------|
| gene                                                                                     | p_val       | avg_log2FC  | pct.1 | pct.2 | p_val_adj   | Foldchange_UP | Foldchange_DOWN | Ratio_pct1_pct2 |
| NUBP2                                                                                    | 1,18513E-08 | 0,406038957 | 0,725 | 0,19  | 0,000250074 | 1,325042797   | 0,754692605     | 3,815789474     |
| PGP                                                                                      | 4,10879E-07 | 0,405981153 | 0,637 | 0,2   | 0,008669968 | 1,324989707   | 0,754722844     | 3,185           |
| C3orf14                                                                                  | 1,41361E-09 | 0,405792509 | 0,375 | 0,02  | 2,98285E-05 | 1,324816466   | 0,754821536     | 18,75           |
| PTTG1IP                                                                                  | 3,98352E-07 | 0,405474402 | 0,738 | 0,26  | 0,008405622 | 1,324524383   | 0,754987989     | 2,838461538     |
| MRPL40                                                                                   | 6,98572E-09 | 0,40453043  | 0,725 | 0,19  | 0,000147406 | 1,323658015   | 0,755482148     | 3,815789474     |
| DBI                                                                                      | 0,000625675 | 0,404336892 | 0,988 | 0,76  | 1           | 1,323480458   | 0,755583503     | 1,3             |
| PLXNB2                                                                                   | 1,1689E-08  | 0,403374125 | 0,488 | 0,08  | 0,00024665  | 1,322597542   | 0,756087902     | 6,1             |
| PSMC3                                                                                    | 4,71975E-05 | 0,402893633 | 0,825 | 0,4   | 0,99591521  | 1,322157122   | 0,75633976      | 2,0625          |
| SYT11                                                                                    | 9,75327E-07 | 0,402685076 | 0,8   | 0,3   | 0,020580366 | 1,321966004   | 0,756449105     | 2,666666667     |
| RPL41                                                                                    | 6,55591E-11 | 0,402153969 | 1     | 1     | 1,38336E-06 | 1,321479431   | 0,756727632     | 1               |
| HMBS                                                                                     | 1,37617E-09 | 0,400079155 | 0,375 | 0,02  | 2,90386E-05 | 1,319580309   | 0,757816704     | 18,75           |
| SMC6                                                                                     | 4,81277E-08 | 0,399356429 | 0,55  | 0,12  | 0,001015543 | 1,318919424   | 0,758196431     | 4,583333333     |
| RPS24                                                                                    | 2,29545E-06 | 0,399270638 | 1     | 0,97  | 0,048436389 | 1,318840995   | 0,758241519     | 1,030927835     |
| EIF3F                                                                                    | 6,63093E-06 | 0,39849212  | 0,963 | 0,48  | 0,139919151 | 1,318129504   | 0,758650798     | 2,00625         |
| SLC27A4                                                                                  | 1,31877E-09 | 0,398372326 | 0,4   | 0,03  | 2,78274E-05 | 1,318020058   | 0,758713795     | 13,33333333     |
| COMMD9                                                                                   | 1,72264E-09 | 0,398010188 | 0,425 | 0,04  | 3,63494E-05 | 1,317689257   | 0,758904267     | 10,625          |
| MPDU1                                                                                    | 2,8007E-09  | 0,397989898 | 0,575 | 0,11  | 5,90975E-05 | 1,317670725   | 0,75891494      | 5,227272727     |
| RPL10A                                                                                   | 6,99226E-07 | 0,397640004 | 1     | 0,96  | 0,014754371 | 1,317351192   | 0,759099021     | 1,041666667     |
| HAGH                                                                                     | 4,33284E-10 | 0,397417455 | 0,75  | 0,17  | 9,14273E-06 | 1,317147994   | 0,759216128     | 4,411764706     |
| CCDC28B                                                                                  | 2,79933E-07 | 0,397311134 | 0,425 | 0,08  | 0,005906867 | 1,317050928   | 0,759272082     | 5,3125          |
| PCBP4                                                                                    | 2,02671E-05 | 0,397307905 | 0,812 | 0,35  | 0,427656218 | 1,317047981   | 0,759273781     | 2,32            |
| SMC4                                                                                     | 0,002120996 | 0,397158014 | 0,412 | 0,18  | 1           | 1,316911151   | 0,759352671     | 2,288888889     |
| HOXB7                                                                                    | 9,60985E-08 | 0,397135652 | 0,488 | 0,1   | 0,002027774 | 1,316890739   | 0,759364441     | 4,88            |
| NUF2                                                                                     | 1,44967E-05 | 0,396827887 | 0,175 | 0     | 0,305894872 | 1,316609841   | 0,759526451     | #DIV/0!         |
| CAPNS1                                                                                   | 1,04374E-06 | 0,396542206 | 0,812 | 0,3   | 0,022023871 | 1,316349154   | 0,759676866     | 2,706666667     |
| ANTKMT                                                                                   | 8,98768E-07 | 0,395076197 | 0,775 | 0,26  | 0,018964912 | 1,315012212   | 0,760449212     | 2,980769231     |
| CZIB                                                                                     | 1,32893E-06 | 0,394774588 | 0,637 | 0,2   | 0,028041691 | 1,314737325   | 0,760608208     | 3,185           |
| MLEC                                                                                     | 2,46439E-06 | 0,394539411 | 0,825 | 0,36  | 0,052001103 | 1,314523024   | 0,760732206     | 2,291666667     |
| SNRPG                                                                                    | 1,5532E-05  | 0,394153994 | 0,9   | 0,47  | 0,327741635 | 1,314171895   | 0,760935463     | 1,914893617     |
| MRPS15                                                                                   | 5,97659E-09 | 0,393778327 | 0,725 | 0,18  | 0,000126112 | 1,313829739   | 0,761133631     | 4,027777778     |

Supplementary Table 4

| Differentially expressed genes_keloid-CCD_ comparing SC-Keloid vs. (SC-Myel, SC-Nonmyel) |             |             |       |       |             |               |                 |                 |
|------------------------------------------------------------------------------------------|-------------|-------------|-------|-------|-------------|---------------|-----------------|-----------------|
| gene                                                                                     | p_val       | avg_log2FC  | pct.1 | pct.2 | p_val_adj   | Foldchange_UP | Foldchange_DOWN | Ratio_pct1_pct2 |
| ELK3                                                                                     | 1,88325E-06 | 0,39376848  | 0,412 | 0,09  | 0,039738418 | 1,313820772   | 0,761138826     | 4,577777778     |
| ASPM                                                                                     | 0,00033132  | 0,393479342 | 0,175 | 0,02  | 1           | 1,313557488   | 0,761291385     | 8,75            |
| NDUFV1                                                                                   | 8,50414E-08 | 0,393073201 | 0,787 | 0,24  | 0,001794459 | 1,313187754   | 0,761505731     | 3,279166667     |
| DCPS                                                                                     | 8,90827E-09 | 0,392780905 | 0,512 | 0,09  | 0,000187973 | 1,312921723   | 0,761660031     | 5,688888889     |
| SHC1                                                                                     | 4,58768E-09 | 0,391980588 | 0,662 | 0,15  | 9,68047E-05 | 1,312193598   | 0,762082669     | 4,413333333     |
| OXTR                                                                                     | 1,16317E-08 | 0,391176177 | 0,288 | 0     | 0,00024544  | 1,311462156   | 0,762507706     | #DIV/0!         |
| SMIM7                                                                                    | 4,53824E-07 | 0,391102796 | 0,738 | 0,24  | 0,009576137 | 1,311395451   | 0,762546491     | 3,075           |
| MT1E                                                                                     | 3,10335E-07 | 0,390302789 | 0,425 | 0,08  | 0,006548383 | 1,310668455   | 0,762969458     | 5,3125          |
| IDH2                                                                                     | 4,76442E-09 | 0,389366901 | 0,475 | 0,07  | 0,000100534 | 1,309818489   | 0,763464563     | 6,785714286     |
| MRPL36                                                                                   | 1,07832E-06 | 0,389362703 | 0,562 | 0,16  | 0,022753568 | 1,309814678   | 0,763466784     | 3,5125          |
| HACD3                                                                                    | 1,23089E-06 | 0,389356571 | 0,675 | 0,21  | 0,025972977 | 1,30980911    | 0,763470029     | 3,214285714     |
| TIMM17B                                                                                  | 9,30368E-09 | 0,389257487 | 0,575 | 0,12  | 0,000196317 | 1,309719156   | 0,763522466     | 4,791666667     |
| SLC38A10                                                                                 | 7,5637E-13  | 0,389165468 | 0,6   | 0,06  | 1,59602E-08 | 1,309635621   | 0,763571167     | 10              |
| RBCK1                                                                                    | 3,2615E-09  | 0,389132725 | 0,65  | 0,14  | 6,88208E-05 | 1,309605898   | 0,763588497     | 4,642857143     |
| SCG5                                                                                     | 1,00006E-08 | 0,38908262  | 0,45  | 0,06  | 0,000211023 | 1,309560417   | 0,763615017     | 7,5             |
| ACSBG1                                                                                   | 7,66324E-10 | 0,389031545 | 0,475 | 0,06  | 1,61702E-05 | 1,309514056   | 0,763642052     | 7,916666667     |
| TRAPPC4                                                                                  | 1,13805E-06 | 0,38847222  | 0,637 | 0,19  | 0,024013904 | 1,309006463   | 0,763938169     | 3,352631579     |
| CDK1                                                                                     | 0,001160868 | 0,388360566 | 0,175 | 0,03  | 1           | 1,308905159   | 0,763997294     | 5,833333333     |
| RPS21                                                                                    | 7,04744E-05 | 0,387658103 | 0,988 | 0,83  | 1           | 1,308267995   | 0,764369383     | 1,190361446     |
| LIMK1                                                                                    | 3,22815E-09 | 0,387535516 | 0,338 | 0,01  | 6,81171E-05 | 1,308156835   | 0,764434335     | 33,8            |
| KNOP1                                                                                    | 8,55292E-08 | 0,387330266 | 0,288 | 0,01  | 0,001804752 | 1,307970738   | 0,764543098     | 28,8            |
| TTYH3                                                                                    | 1,4461E-10  | 0,387277984 | 0,412 | 0,02  | 3,05142E-06 | 1,30792334    | 0,764570804     | 20,6            |
| RPL15                                                                                    | 2,46688E-07 | 0,387270801 | 1     | 0,97  | 0,005205369 | 1,307916828   | 0,764574611     | 1,030927835     |
| AGAP2-AS1                                                                                | 9,56151E-08 | 0,387062059 | 0,362 | 0,04  | 0,002017574 | 1,307727601   | 0,764685244     | 9,05            |
| LAYN                                                                                     | 1,77464E-08 | 0,386039646 | 0,412 | 0,05  | 0,000374467 | 1,306801165   | 0,765227356     | 8,24            |
| PDGFB                                                                                    | 2,40759E-08 | 0,385662456 | 0,637 | 0,16  | 0,000508025 | 1,306459549   | 0,765427449     | 3,98125         |
| CARD19                                                                                   | 1,05079E-05 | 0,385401136 | 0,725 | 0,28  | 0,221727671 | 1,306222927   | 0,765566106     | 2,589285714     |
| GINS2                                                                                    | 6,55355E-07 | 0,384763573 | 0,225 | 0     | 0,013828644 | 1,305645802   | 0,765904504     | #DIV/0!         |
| FAAP20                                                                                   | 6,60474E-07 | 0,384708004 | 0,825 | 0,31  | 0,013936668 | 1,305595513   | 0,765934005     | 2,661290323     |
| RPS23                                                                                    | 2,4638E-06  | 0,384693007 | 1     | 1     | 0,051988641 | 1,305581941   | 0,765941967     | 1               |

Supplementary Table 4

| Differentially expressed genes_keloid-CCD_ comparing SC-Keloid vs. (SC-Myel, SC-Nonmyel) |             |             |       |       |             |               |                 |                 |
|------------------------------------------------------------------------------------------|-------------|-------------|-------|-------|-------------|---------------|-----------------|-----------------|
| gene                                                                                     | p_val       | avg_log2FC  | pct.1 | pct.2 | p_val_adj   | Foldchange_UP | Foldchange_DOWN | Ratio_pct1_pct2 |
| CLTC                                                                                     | 4,20601E-06 | 0,38442169  | 0,637 | 0,22  | 0,08875098  | 1,305336433   | 0,766086026     | 2,895454545     |
| ANP32B                                                                                   | 0,000934431 | 0,382988358 | 0,9   | 0,57  | 1           | 1,304040212   | 0,766847518     | 1,578947368     |
| TCEAL4                                                                                   | 0,000205881 | 0,382970658 | 0,875 | 0,41  | 1           | 1,304024213   | 0,766856926     | 2,134146341     |
| CDC42                                                                                    | 0,000193428 | 0,382579263 | 0,988 | 0,7   | 1           | 1,303670487   | 0,767064998     | 1,411428571     |
| SRPRB                                                                                    | 1,88534E-08 | 0,382494693 | 0,488 | 0,08  | 0,000397826 | 1,303594068   | 0,767109965     | 6,1             |
| PDIA3                                                                                    | 0,001328996 | 0,382045586 | 0,963 | 0,7   | 1           | 1,303188327   | 0,767348801     | 1,375714286     |
| MAGOHB                                                                                   | 1,28326E-07 | 0,381623033 | 0,425 | 0,07  | 0,002707802 | 1,302806689   | 0,767573584     | 6,071428571     |
| COMMD4                                                                                   | 1,32854E-06 | 0,381611154 | 0,75  | 0,26  | 0,028033519 | 1,302795963   | 0,767579904     | 2,884615385     |
| NT5C                                                                                     | 1,50521E-06 | 0,381343154 | 0,75  | 0,28  | 0,031761332 | 1,302553973   | 0,767722506     | 2,678571429     |
| SKA2                                                                                     | 5,6683E-06  | 0,381201192 | 0,688 | 0,24  | 0,119606878 | 1,302425807   | 0,767798054     | 2,866666667     |
| MAN1B1                                                                                   | 6,82955E-08 | 0,381133723 | 0,637 | 0,17  | 0,001441104 | 1,3023649     | 0,767833961     | 3,747058824     |
| CHCHD1                                                                                   | 3,3678E-08  | 0,380594823 | 0,637 | 0,17  | 0,000710639 | 1,301878509   | 0,768120829     | 3,747058824     |
| SPCS3                                                                                    | 1,13689E-05 | 0,380495683 | 0,738 | 0,27  | 0,239895787 | 1,301789049   | 0,768173615     | 2,733333333     |
| NDUFS5                                                                                   | 0,000177221 | 0,380089608 | 0,988 | 0,73  | 1           | 1,301422687   | 0,768389863     | 1,353424658     |
| MVP                                                                                      | 5,66669E-08 | 0,379668353 | 0,562 | 0,13  | 0,001195727 | 1,301042737   | 0,76861426      | 4,323076923     |
| SCARA3                                                                                   | 4,59989E-07 | 0,378228607 | 0,537 | 0,13  | 0,009706237 | 1,299745001   | 0,769381686     | 4,130769231     |
| DPP7                                                                                     | 2,98437E-05 | 0,378105182 | 0,8   | 0,32  | 0,629732303 | 1,299633811   | 0,76944751      | 2,5             |
| SNU13                                                                                    | 8,60846E-05 | 0,378092562 | 0,887 | 0,46  | 1           | 1,299622443   | 0,769454241     | 1,92826087      |
| ARF3                                                                                     | 2,04221E-07 | 0,377821963 | 0,65  | 0,18  | 0,004309261 | 1,299378701   | 0,769598577     | 3,611111111     |
| DRAXIN                                                                                   | 1,20392E-06 | 0,377653499 | 0,512 | 0,13  | 0,025403816 | 1,299226981   | 0,769688449     | 3,938461538     |
| STK32B                                                                                   | 8,54394E-07 | 0,377624019 | 0,388 | 0,07  | 0,018028564 | 1,299200433   | 0,769704177     | 5,542857143     |
| RPL18A                                                                                   | 1,37144E-05 | 0,377198417 | 1     | 0,97  | 0,289387231 | 1,29881722    | 0,769931277     | 1,030927835     |
| QSOX1                                                                                    | 9,16953E-08 | 0,376730228 | 0,537 | 0,12  | 0,001934862 | 1,298395791   | 0,770181178     | 4,475           |
| RPL11                                                                                    | 1,23012E-06 | 0,376380215 | 1     | 1     | 0,025956819 | 1,298080824   | 0,770368055     | 1               |
| PSMB4                                                                                    | 6,81196E-06 | 0,376340664 | 0,713 | 0,26  | 0,143739171 | 1,298045239   | 0,770389175     | 2,742307692     |
| PGK1                                                                                     | 3,83418E-05 | 0,375515473 | 0,812 | 0,35  | 0,809050591 | 1,297302997   | 0,770829947     | 2,32            |
| RNPEPL1                                                                                  | 8,98597E-10 | 0,375508506 | 0,562 | 0,09  | 1,89613E-05 | 1,297296732   | 0,770833669     | 6,244444444     |
| APEX1                                                                                    | 7,77066E-06 | 0,375304363 | 0,825 | 0,34  | 0,163968714 | 1,297113176   | 0,770942751     | 2,426470588     |
| TPPP3                                                                                    | 0,001400194 | 0,37500692  | 0,588 | 0,28  | 1           | 1,296845775   | 0,771101714     | 2,1             |
| SNX7                                                                                     | 7,86969E-09 | 0,374864869 | 0,6   | 0,13  | 0,000166058 | 1,296718091   | 0,771177642     | 4,615384615     |

Supplementary Table 4

| Differentially expressed genes_keloid-CCD_ comparing SC-Keloid vs. (SC-Myel, SC-Nonmyel) |             |             |       |       |             |               |                 |                 |
|------------------------------------------------------------------------------------------|-------------|-------------|-------|-------|-------------|---------------|-----------------|-----------------|
| gene                                                                                     | p_val       | avg_log2FC  | pct.1 | pct.2 | p_val_adj   | Foldchange_UP | Foldchange_DOWN | Ratio_pct1_pct2 |
| BCAP29                                                                                   | 6,10056E-05 | 0,374810051 | 0,725 | 0,31  | 1           | 1,296668821   | 0,771206945     | 2,338709677     |
| ADAM12                                                                                   | 1,16076E-08 | 0,374414266 | 0,4   | 0,04  | 0,000244932 | 1,296313145   | 0,771418545     | 10              |
| ZC3H13                                                                                   | 1,86834E-05 | 0,374321547 | 0,7   | 0,27  | 0,394238727 | 1,296229836   | 0,771468124     | 2,592592593     |
| SMS                                                                                      | 1,81329E-05 | 0,37418611  | 0,7   | 0,28  | 0,382621716 | 1,296108155   | 0,771540551     | 2,5             |
| TP53I3                                                                                   | 1,2914E-09  | 0,37368866  | 0,575 | 0,11  | 2,72498E-05 | 1,295661326   | 0,771806629     | 5,227272727     |
| CCDC124                                                                                  | 6,38838E-07 | 0,373556037 | 0,787 | 0,25  | 0,013480131 | 1,295542224   | 0,771877582     | 3,148           |
| SEC61A1                                                                                  | 6,5944E-08  | 0,373130106 | 0,675 | 0,18  | 0,001391485 | 1,295159794   | 0,772105499     | 3,75            |
| DGCR6L                                                                                   | 2,34475E-08 | 0,373110599 | 0,7   | 0,18  | 0,000494766 | 1,295142282   | 0,772115939     | 3,888888889     |
| CREB3L1                                                                                  | 8,23973E-09 | 0,372809715 | 0,35  | 0,02  | 0,000173866 | 1,2948722     | 0,772276986     | 17,5            |
| UBE2F                                                                                    | 1,1996E-07  | 0,372764256 | 0,488 | 0,1   | 0,002531284 | 1,2948314     | 0,772301321     | 4,88            |
| IER3IP1                                                                                  | 3,59402E-06 | 0,372744435 | 0,7   | 0,23  | 0,07583739  | 1,29481361    | 0,772311931     | 3,043478261     |
| ISOC2                                                                                    | 1,38869E-06 | 0,371462222 | 0,738 | 0,26  | 0,029302844 | 1,29366334    | 0,772998638     | 2,838461538     |
| HMGB1                                                                                    | 0,001849544 | 0,371374118 | 1     | 0,99  | 1           | 1,293584339   | 0,773045846     | 1,01010101      |
| OPRD1                                                                                    | 4,03077E-08 | 0,371076377 | 0,35  | 0,03  | 0,000850532 | 1,293317399   | 0,773205403     | 11,66666667     |
| IFI27                                                                                    | 1,44794E-05 | 0,370740533 | 0,488 | 0,15  | 0,305528895 | 1,293016363   | 0,773385418     | 3,253333333     |
| TSR3                                                                                     | 1,1799E-08  | 0,370633301 | 0,65  | 0,15  | 0,00024897  | 1,292920261   | 0,773442903     | 4,333333333     |
| FUCA2                                                                                    | 1,80565E-08 | 0,370589731 | 0,488 | 0,08  | 0,00038101  | 1,292881214   | 0,773466262     | 6,1             |
| TMEM134                                                                                  | 1,4952E-07  | 0,370580453 | 0,662 | 0,18  | 0,00315502  | 1,292872899   | 0,773471236     | 3,677777778     |
| DLGAP4                                                                                   | 5,97786E-05 | 0,370525106 | 0,775 | 0,34  | 1           | 1,292823301   | 0,77350091      | 2,279411765     |
| BLOC1S1                                                                                  | 0,000212988 | 0,370432853 | 0,925 | 0,47  | 1           | 1,292740635   | 0,773550373     | 1,968085106     |
| ATP6V0B                                                                                  | 6,24753E-05 | 0,370092833 | 0,975 | 0,67  | 1           | 1,292435992   | 0,773732708     | 1,455223881     |
| ITGA6                                                                                    | 0,000261736 | 0,369930285 | 0,938 | 0,63  | 1           | 1,292290382   | 0,773819889     | 1,488888889     |
| R3HDM1                                                                                   | 6,09731E-08 | 0,369567558 | 0,362 | 0,04  | 0,001286594 | 1,291965511   | 0,77401447      | 9,05            |
| NID1                                                                                     | 1,01982E-08 | 0,369474301 | 0,725 | 0,19  | 0,000215192 | 1,291882      | 0,774064505     | 3,815789474     |
| PFKFB4                                                                                   | 6,78945E-09 | 0,369261093 | 0,4   | 0,04  | 0,000143264 | 1,291691094   | 0,774178908     | 10              |
| GSTT2B                                                                                   | 1,15696E-09 | 0,369094314 | 0,462 | 0,05  | 2,44131E-05 | 1,29154178    | 0,774268409     | 9,24            |
| IFI6                                                                                     | 1,29237E-05 | 0,368990795 | 0,812 | 0,35  | 0,272703331 | 1,291449111   | 0,774323968     | 2,32            |
| MMP17                                                                                    | 4,12347E-07 | 0,368657174 | 0,7   | 0,21  | 0,008700932 | 1,291150499   | 0,77450305      | 3,333333333     |
| NELFB                                                                                    | 1,08894E-08 | 0,368166646 | 0,438 | 0,06  | 0,000229777 | 1,290711572   | 0,774766432     | 7,3             |
| C14orf119                                                                                | 3,12252E-08 | 0,368071092 | 0,525 | 0,1   | 0,000658883 | 1,290626088   | 0,774817749     | 5,25            |

Supplementary Table 4

| Differentially expressed genes_keloid-CCD_comparing SC-Keloid vs. (SC-Myel, SC-Nonmyel) |             |             |       |       |             |               |                 |                 |
|-----------------------------------------------------------------------------------------|-------------|-------------|-------|-------|-------------|---------------|-----------------|-----------------|
| gene                                                                                    | p_val       | avg_log2FC  | pct.1 | pct.2 | p_val_adj   | Foldchange_UP | Foldchange_DOWN | Ratio_pct1_pct2 |
| OLA1                                                                                    | 2,19657E-07 | 0,368023264 | 0,713 | 0,24  | 0,004634983 | 1,290583301   | 0,774843436     | 2,970833333     |
| ITGB5                                                                                   | 3,10583E-07 | 0,367254503 | 0,45  | 0,09  | 0,006553612 | 1,289895778   | 0,775256433     | 5               |
| PIMREG                                                                                  | 3,09504E-05 | 0,36723218  | 0,162 | 0     | 0,653084942 | 1,28987582    | 0,775268428     | #DIV/0!         |
| ASPCR1                                                                                  | 1,37053E-08 | 0,367151393 | 0,412 | 0,05  | 0,000289195 | 1,289803592   | 0,775311843     | 8,24            |
| GTF2A2                                                                                  | 0,000143731 | 0,366817643 | 0,875 | 0,42  | 1           | 1,289505247   | 0,775491222     | 2,083333333     |
| CIBAR1                                                                                  | 8,35664E-08 | 0,366571192 | 0,525 | 0,11  | 0,001763334 | 1,289284983   | 0,775623708     | 4,772727273     |
| MARCKSL1                                                                                | 0,000208745 | 0,366438898 | 0,9   | 0,56  | 1           | 1,289166762   | 0,775694836     | 1,607142857     |
| COA1                                                                                    | 9,07182E-09 | 0,365954719 | 0,613 | 0,13  | 0,000191424 | 1,288734181   | 0,775955208     | 4,715384615     |
| MRPL15                                                                                  | 2,99688E-08 | 0,365756181 | 0,525 | 0,1   | 0,000632372 | 1,288556843   | 0,776062        | 5,25            |
| PPIH                                                                                    | 1,0404E-13  | 0,365099137 | 0,613 | 0,06  | 2,19535E-09 | 1,287970131   | 0,776415521     | 10,21666667     |
| DHX29                                                                                   | 2,52591E-09 | 0,364849563 | 0,588 | 0,11  | 5,32991E-05 | 1,287747343   | 0,776549845     | 5,345454545     |
| TMEM54                                                                                  | 1,50028E-07 | 0,364634858 | 0,375 | 0,05  | 0,003165745 | 1,287555712   | 0,776665422     | 7,5             |
| GALK1                                                                                   | 1,2835E-09  | 0,364580277 | 0,5   | 0,07  | 2,70832E-05 | 1,287507001   | 0,776694806     | 7,142857143     |
| CENPU                                                                                   | 1,43556E-06 | 0,364175338 | 0,212 | 0     | 0,030291787 | 1,287145671   | 0,776912841     | #DIV/0!         |
| SNRNP25                                                                                 | 4,43287E-09 | 0,363340491 | 0,537 | 0,09  | 9,35381E-05 | 1,286401052   | 0,777362549     | 5,966666667     |
| DBN1                                                                                    | 4,71833E-07 | 0,362583616 | 0,6   | 0,16  | 0,009956146 | 1,28572635    | 0,77777048      | 3,75            |
| RCN1                                                                                    | 1,83951E-05 | 0,362029759 | 0,775 | 0,32  | 0,388155157 | 1,285232848   | 0,778069127     | 2,421875        |
| RPL37                                                                                   | 2,75284E-05 | 0,361702662 | 1     | 0,94  | 0,580876918 | 1,284941485   | 0,778245556     | 1,063829787     |
| PIEZO1                                                                                  | 2,61657E-09 | 0,361188892 | 0,462 | 0,06  | 5,52122E-05 | 1,284483976   | 0,778522752     | 7,7             |
| RPS17                                                                                   | 4,1592E-07  | 0,360451636 | 0,825 | 0,3   | 0,008776333 | 1,283827737   | 0,7789207       | 2,75            |
| ETFA                                                                                    | 1,45364E-06 | 0,359297646 | 0,725 | 0,24  | 0,030673283 | 1,282801234   | 0,779543996     | 3,020833333     |
| PCDH20                                                                                  | 2,67761E-08 | 0,358907099 | 0,45  | 0,07  | 0,000565002 | 1,282454018   | 0,779755053     | 6,428571429     |
| FNBP1L                                                                                  | 1,81665E-08 | 0,358753173 | 0,412 | 0,05  | 0,000383331 | 1,282317196   | 0,779838252     | 8,24            |
| PPIL1                                                                                   | 7,67492E-09 | 0,358547977 | 0,4   | 0,04  | 0,000161949 | 1,282134824   | 0,779949177     | 10              |
| UQCRB                                                                                   | 0,001030026 | 0,358285867 | 0,975 | 0,72  | 1           | 1,281901905   | 0,780090891     | 1,354166667     |
| NUDT9                                                                                   | 1,72147E-07 | 0,357741415 | 0,4   | 0,06  | 0,003632481 | 1,281418225   | 0,780385342     | 6,666666667     |
| CCDC88A                                                                                 | 1,43863E-09 | 0,357018986 | 0,575 | 0,1   | 3,03566E-05 | 1,280776716   | 0,780776218     | 5,75            |
| SMARCA4                                                                                 | 1,67603E-08 | 0,356516745 | 0,55  | 0,11  | 0,000353659 | 1,280330921   | 0,781048074     | 5               |
| CISD2                                                                                   | 1,40662E-08 | 0,356422754 | 0,588 | 0,13  | 0,00029681  | 1,28024751    | 0,781098961     | 4,523076923     |
| MYO5A                                                                                   | 9,15076E-08 | 0,356325999 | 0,412 | 0,06  | 0,001930902 | 1,280161653   | 0,781151347     | 6,866666667     |

Supplementary Table 4

| Differentially expressed genes_keloid-CCD_ comparing SC-Keloid vs. (SC-Myel, SC-Nonmyel) |             |             |       |       |             |               |                 |                 |
|------------------------------------------------------------------------------------------|-------------|-------------|-------|-------|-------------|---------------|-----------------|-----------------|
| gene                                                                                     | p_val       | avg_log2FC  | pct.1 | pct.2 | p_val_adj   | Foldchange_UP | Foldchange_DOWN | Ratio_pct1_pct2 |
| HAX1                                                                                     | 4,4658E-08  | 0,355239147 | 0,75  | 0,22  | 0,000942329 | 1,279197609   | 0,781740048     | 3,409090909     |
| POLR2G                                                                                   | 3,08161E-06 | 0,355056588 | 0,787 | 0,28  | 0,065024953 | 1,279035749   | 0,781838976     | 2,810714286     |
| BSG                                                                                      | 0,00067774  | 0,3550136   | 0,975 | 0,71  | 1           | 1,278997638   | 0,781862273     | 1,373239437     |
| MANF                                                                                     | 0,000236802 | 0,35498723  | 0,863 | 0,42  | 1           | 1,27897426    | 0,781876564     | 2,054761905     |
| C4orf48                                                                                  | 0,000250315 | 0,354274303 | 0,662 | 0,33  | 1           | 1,278342395   | 0,782263034     | 2,006060606     |
| FAM50A                                                                                   | 2,9433E-06  | 0,353686711 | 0,762 | 0,29  | 0,062106579 | 1,277821847   | 0,782581705     | 2,627586207     |
| GLRX5                                                                                    | 4,12494E-05 | 0,35366382  | 0,7   | 0,29  | 0,870404637 | 1,277801573   | 0,782594122     | 2,413793103     |
| HYOU1                                                                                    | 1,28584E-08 | 0,35347234  | 0,462 | 0,07  | 0,000271326 | 1,277631989   | 0,782697998     | 6,6             |
| RUVBL2                                                                                   | 7,62144E-09 | 0,35297666  | 0,55  | 0,1   | 0,00016082  | 1,277193096   | 0,782966963     | 5,5             |
| FHDC1                                                                                    | 9,49626E-09 | 0,352711268 | 0,575 | 0,12  | 0,000200381 | 1,276958172   | 0,783111007     | 4,791666667     |
| JKAMP                                                                                    | 1,51367E-07 | 0,352490713 | 0,6   | 0,15  | 0,003193992 | 1,276762968   | 0,783230736     | 4               |
| MSI2                                                                                     | 1,05355E-08 | 0,352152178 | 0,4   | 0,04  | 0,000222309 | 1,276463405   | 0,783414547     | 10              |
| SHARPIN                                                                                  | 1,35814E-07 | 0,351715554 | 0,65  | 0,18  | 0,002865817 | 1,276077149   | 0,783651679     | 3,611111111     |
| PSMD7                                                                                    | 9,01648E-06 | 0,35166647  | 0,863 | 0,39  | 0,190256739 | 1,276033734   | 0,783678341     | 2,212820513     |
| UBE2T                                                                                    | 0,000148084 | 0,351541548 | 0,238 | 0,04  | 1           | 1,275923248   | 0,783746202     | 5,95            |
| MAP7D3                                                                                   | 1,32655E-07 | 0,351453764 | 0,362 | 0,04  | 0,002799157 | 1,275845614   | 0,783793893     | 9,05            |
| SLC25A11                                                                                 | 3,61029E-09 | 0,351014742 | 0,662 | 0,15  | 7,61807E-05 | 1,275457425   | 0,784032442     | 4,413333333     |
| PAICS                                                                                    | 1,44219E-08 | 0,350670776 | 0,4   | 0,04  | 0,000304316 | 1,275153367   | 0,784219393     | 10              |
| B4GALT2                                                                                  | 1,24812E-08 | 0,350379769 | 0,488 | 0,08  | 0,000263366 | 1,274896181   | 0,784377595     | 6,1             |
| DRAP1                                                                                    | 0,000485843 | 0,348962136 | 0,975 | 0,59  | 1           | 1,273644048   | 0,785148725     | 1,652542373     |
| MRT04                                                                                    | 3,25327E-08 | 0,348283643 | 0,525 | 0,1   | 0,000686472 | 1,273045199   | 0,785518064     | 5,25            |
| ST3GAL4                                                                                  | 1,01869E-05 | 0,348153915 | 0,825 | 0,33  | 0,214953776 | 1,272930732   | 0,785588701     | 2,5             |
| CIB2                                                                                     | 1,68765E-10 | 0,348116835 | 0,35  | 0     | 3,56111E-06 | 1,272898016   | 0,785608892     | #DIV/0!         |
| NCOR2                                                                                    | 1,0488E-05  | 0,34799828  | 0,65  | 0,23  | 0,22130825  | 1,272793418   | 0,785673453     | 2,826086957     |
| SPAG7                                                                                    | 1,23046E-06 | 0,347861937 | 0,688 | 0,23  | 0,025963833 | 1,272673137   | 0,785747708     | 2,991304348     |
| C6orf89                                                                                  | 5,26708E-09 | 0,347785165 | 0,462 | 0,06  | 0,000111141 | 1,272605415   | 0,785789522     | 7,7             |
| RAPH1                                                                                    | 2,8787E-08  | 0,347220171 | 0,562 | 0,12  | 0,000607435 | 1,272107129   | 0,786097316     | 4,683333333     |
| TP53                                                                                     | 6,1286E-08  | 0,346819828 | 0,45  | 0,07  | 0,001293195 | 1,271754173   | 0,786315486     | 6,428571429     |
| UQCR10                                                                                   | 0,000210702 | 0,346585818 | 0,775 | 0,38  | 1           | 1,271547907   | 0,786443039     | 2,039473684     |
| PDZD11                                                                                   | 3,25335E-07 | 0,345714888 | 0,512 | 0,11  | 0,0068649   | 1,270780527   | 0,786917944     | 4,654545455     |

Supplementary Table 4

| Differentially expressed genes_keloid-CCD_ comparing SC-Keloid vs. (SC-Myel, SC-Nonmyel) |             |             |       |       |             |               |                 |                 |
|------------------------------------------------------------------------------------------|-------------|-------------|-------|-------|-------------|---------------|-----------------|-----------------|
| gene                                                                                     | p_val       | avg_log2FC  | pct.1 | pct.2 | p_val_adj   | Foldchange_UP | Foldchange_DOWN | Ratio_pct1_pct2 |
| B3GALT6                                                                                  | 7,52552E-08 | 0,345061333 | 0,462 | 0,08  | 0,001587959 | 1,270204982   | 0,787274506     | 5,775           |
| TUBB6                                                                                    | 0,000136145 | 0,344945536 | 0,575 | 0,23  | 1           | 1,270103033   | 0,787337699     | 2,5             |
| MZT1                                                                                     | 3,36679E-06 | 0,344920262 | 0,512 | 0,14  | 0,071042607 | 1,270080783   | 0,787351493     | 3,657142857     |
| SLIRP                                                                                    | 0,001261795 | 0,344483075 | 0,8   | 0,42  | 1           | 1,269695962   | 0,787590124     | 1,904761905     |
| ALG3                                                                                     | 5,31757E-10 | 0,343971496 | 0,388 | 0,02  | 1,12206E-05 | 1,269245808   | 0,787869452     | 19,4            |
| NAT14                                                                                    | 1,19616E-07 | 0,343915162 | 0,775 | 0,25  | 0,002524014 | 1,269196248   | 0,787900218     | 3,1             |
| GOLIM4                                                                                   | 1,28732E-06 | 0,343830854 | 0,688 | 0,21  | 0,027163773 | 1,269122081   | 0,787946262     | 3,276190476     |
| POSTN                                                                                    | 0,159512137 | 0,343807382 | 0,3   | 0,2   | 1           | 1,269101434   | 0,787959081     | 1,5             |
| STAT1                                                                                    | 1,8278E-08  | 0,343513144 | 0,388 | 0,04  | 0,000385685 | 1,268842627   | 0,788119802     | 9,7             |
| LDHB                                                                                     | 0,000158105 | 0,343445034 | 0,85  | 0,44  | 1           | 1,268782725   | 0,788157011     | 1,931818182     |
| NTAN1                                                                                    | 2,19206E-08 | 0,343167286 | 0,488 | 0,08  | 0,000462546 | 1,268538482   | 0,788308762     | 6,1             |
| CCT7                                                                                     | 1,02112E-05 | 0,343126786 | 0,775 | 0,3   | 0,215466811 | 1,268502873   | 0,788330891     | 2,583333333     |
| SH3GLB1                                                                                  | 3,40373E-06 | 0,342945839 | 0,887 | 0,37  | 0,071822027 | 1,268343783   | 0,788429772     | 2,397297297     |
| DAP                                                                                      | 3,97564E-06 | 0,34287306  | 0,662 | 0,22  | 0,083890034 | 1,268279801   | 0,788469547     | 3,009090909     |
| MICAL1                                                                                   | 3,05375E-09 | 0,342756251 | 0,338 | 0,01  | 6,44371E-05 | 1,268177118   | 0,788533389     | 33,8            |
| WDR61                                                                                    | 1,60023E-07 | 0,342504113 | 0,7   | 0,2   | 0,00337665  | 1,267955499   | 0,788671212     | 3,5             |
| SF3B6                                                                                    | 8,5583E-05  | 0,341356518 | 0,938 | 0,53  | 1           | 1,266947302   | 0,789298812     | 1,769811321     |
| NDUFB1                                                                                   | 3,86433E-05 | 0,341327613 | 0,838 | 0,36  | 0,81541225  | 1,266921919   | 0,789314625     | 2,327777778     |
| EMC9                                                                                     | 7,53099E-07 | 0,341288284 | 0,375 | 0,06  | 0,015891137 | 1,266887382   | 0,789336143     | 6,25            |
| TMEM126A                                                                                 | 1,15108E-07 | 0,340679736 | 0,675 | 0,18  | 0,0024289   | 1,266353104   | 0,789669166     | 3,75            |
| ZDHC12                                                                                   | 4,54546E-09 | 0,340296585 | 0,438 | 0,05  | 9,59137E-05 | 1,266016831   | 0,789878914     | 8,76            |
| WDR54                                                                                    | 1,37025E-07 | 0,339874687 | 0,375 | 0,05  | 0,002891362 | 1,265646655   | 0,790109938     | 7,5             |
| SUPT20H                                                                                  | 6,64963E-07 | 0,339695153 | 0,4   | 0,07  | 0,014031384 | 1,265489163   | 0,790208268     | 5,714285714     |
| MXRA5                                                                                    | 1,04255E-05 | 0,339464364 | 0,325 | 0,06  | 0,219989223 | 1,265286738   | 0,790334689     | 5,416666667     |
| MAEA                                                                                     | 7,1634E-09  | 0,338688696 | 0,475 | 0,07  | 0,000151155 | 1,264606637   | 0,790759728     | 6,785714286     |
| CERCAM                                                                                   | 2,99688E-08 | 0,338599791 | 0,525 | 0,1   | 0,000632372 | 1,264528708   | 0,79080846      | 5,25            |
| ELOF1                                                                                    | 1,08836E-08 | 0,338472311 | 0,525 | 0,09  | 0,000229654 | 1,264416977   | 0,79087834      | 5,833333333     |
| TNIK                                                                                     | 4,51395E-08 | 0,337888715 | 0,375 | 0,04  | 0,000952488 | 1,263905601   | 0,791198329     | 9,375           |
| PSMD2                                                                                    | 3,27425E-06 | 0,337456822 | 0,75  | 0,28  | 0,069089945 | 1,263527288   | 0,791435222     | 2,678571429     |
| ZMAT5                                                                                    | 7,84927E-10 | 0,337292137 | 0,512 | 0,07  | 1,65627E-05 | 1,263383063   | 0,791525571     | 7,314285714     |

Supplementary Table 4

| Differentially expressed genes_keloid-CCD_ comparing SC-Keloid vs. (SC-Myel, SC-Nonmyel) |             |             |       |       |             |               |                 |                 |
|------------------------------------------------------------------------------------------|-------------|-------------|-------|-------|-------------|---------------|-----------------|-----------------|
| gene                                                                                     | p_val       | avg_log2FC  | pct.1 | pct.2 | p_val_adj   | Foldchange_UP | Foldchange_DOWN | Ratio_pct1_pct2 |
| CTSB                                                                                     | 1,10092E-07 | 0,337032531 | 0,662 | 0,19  | 0,002323046 | 1,263155744   | 0,791668014     | 3,484210526     |
| PPP1CA                                                                                   | 1,7572E-06  | 0,336584208 | 0,7   | 0,23  | 0,037078757 | 1,262763275   | 0,791914066     | 3,043478261     |
| NDUFA7                                                                                   | 2,45088E-09 | 0,336527376 | 0,475 | 0,06  | 5,17159E-05 | 1,262713532   | 0,791945263     | 7,916666667     |
| NAE1                                                                                     | 3,15339E-07 | 0,336512958 | 0,475 | 0,1   | 0,006653979 | 1,262700913   | 0,791953177     | 4,75            |
| PRAF2                                                                                    | 1,03734E-09 | 0,336511966 | 0,512 | 0,07  | 2,18889E-05 | 1,262700044   | 0,791953722     | 7,314285714     |
| ST6GAL2                                                                                  | 3,67977E-06 | 0,336305425 | 0,225 | 0,01  | 0,077646725 | 1,262519285   | 0,792067109     | 22,5            |
| DESI1                                                                                    | 1,84007E-07 | 0,336269002 | 0,438 | 0,08  | 0,003882733 | 1,262487411   | 0,792087106     | 5,475           |
| MRPS25                                                                                   | 1,12754E-08 | 0,336254348 | 0,425 | 0,05  | 0,000237923 | 1,262474587   | 0,792095152     | 8,5             |
| SFXN3                                                                                    | 5,48145E-08 | 0,335969062 | 0,462 | 0,08  | 0,00115664  | 1,262224964   | 0,7922518       | 5,775           |
| ZNF385A                                                                                  | 3,86142E-06 | 0,335897788 | 0,325 | 0,05  | 0,08147984  | 1,262162607   | 0,792290941     | 6,5             |
| UCHL1                                                                                    | 1,03261E-06 | 0,335831877 | 0,325 | 0,04  | 0,02178916  | 1,262104945   | 0,792327139     | 8,125           |
| SLC22A18                                                                                 | 9,68967E-08 | 0,335652384 | 0,388 | 0,05  | 0,002044618 | 1,261947931   | 0,792425722     | 7,76            |
| MTCH1                                                                                    | 0,000124937 | 0,335207588 | 0,825 | 0,39  | 1           | 1,261558921   | 0,792670072     | 2,115384615     |
| RAB1B                                                                                    | 3,28352E-09 | 0,334483908 | 0,625 | 0,13  | 6,92856E-05 | 1,26092626    | 0,793067788     | 4,807692308     |
| CALM1                                                                                    | 0,000105419 | 0,333980196 | 0,988 | 0,95  | 1           | 1,260486088   | 0,793344734     | 1,04            |
| GNG7                                                                                     | 3,98655E-05 | 0,333972101 | 0,275 | 0,05  | 0,841202703 | 1,260479016   | 0,793349185     | 5,5             |
| TMCO1                                                                                    | 4,14103E-05 | 0,332840232 | 0,9   | 0,42  | 0,873798084 | 1,259490493   | 0,793971852     | 2,142857143     |
| RTN1                                                                                     | 1,84366E-06 | 0,332415228 | 0,238 | 0,01  | 0,038903004 | 1,259119513   | 0,794205784     | 23,8            |
| SLN                                                                                      | 0,009057333 | 0,332086435 | 0,175 | 0,05  | 1           | 1,258832591   | 0,794386805     | 3,5             |
| IFI44L                                                                                   | 3,34871E-08 | 0,332002325 | 0,4   | 0,05  | 0,000706611 | 1,258759202   | 0,79443312      | 8               |
| MACROD1                                                                                  | 1,73624E-08 | 0,331863717 | 0,312 | 0,01  | 0,000366363 | 1,258638272   | 0,794509449     | 31,2            |
| EPB41L3                                                                                  | 1,91761E-07 | 0,330786534 | 0,588 | 0,15  | 0,004046352 | 1,257698865   | 0,795102888     | 3,92            |
| RTKN2                                                                                    | 1,00006E-08 | 0,330618167 | 0,45  | 0,06  | 0,000211023 | 1,257552096   | 0,795195685     | 7,5             |
| PHYH                                                                                     | 1,74156E-08 | 0,330539206 | 0,388 | 0,04  | 0,000367487 | 1,25748327    | 0,795239208     | 9,7             |
| EMC10                                                                                    | 0,000211629 | 0,330289492 | 0,85  | 0,42  | 1           | 1,257265633   | 0,795376867     | 2,023809524     |
| TOPBP1                                                                                   | 2,30706E-07 | 0,329807211 | 0,35  | 0,04  | 0,004868128 | 1,25684541    | 0,795642799     | 8,75            |
| NDUFA8                                                                                   | 1,26847E-08 | 0,329695824 | 0,675 | 0,16  | 0,000267659 | 1,256748376   | 0,795704231     | 4,21875         |
| OTUB1                                                                                    | 4,75831E-09 | 0,32964549  | 0,512 | 0,08  | 0,000100405 | 1,256704529   | 0,795731993     | 6,4             |
| GSTK1                                                                                    | 3,88953E-05 | 0,329581498 | 0,7   | 0,27  | 0,820730588 | 1,256648789   | 0,795767289     | 2,592592593     |
| CCDC85B                                                                                  | 0,000311886 | 0,329492013 | 0,9   | 0,46  | 1           | 1,256570845   | 0,79581665      | 1,956521739     |



Supplementary Table 4

| Differentially expressed genes_keloid-CCD_ comparing SC-Keloid vs. (SC-Myel, SC-Nonmyel) |             |             |       |       |             |               |                 |                 |
|------------------------------------------------------------------------------------------|-------------|-------------|-------|-------|-------------|---------------|-----------------|-----------------|
| gene                                                                                     | p_val       | avg_log2FC  | pct.1 | pct.2 | p_val_adj   | Foldchange_UP | Foldchange_DOWN | Ratio_pct1_pct2 |
| ACAA2                                                                                    | 1,0418E-06  | 0,329301017 | 0,525 | 0,13  | 0,021983059 | 1,256404501   | 0,795922013     | 4,038461538     |
| MMP11                                                                                    | 3,35032E-07 | 0,328844336 | 0,312 | 0,03  | 0,00706952  | 1,256006853   | 0,796174        | 10,4            |
| MRPS11                                                                                   | 1,98837E-08 | 0,328572303 | 0,537 | 0,1   | 0,000419567 | 1,255770045   | 0,796324139     | 5,37            |
| S100A2                                                                                   | 6,16762E-05 | 0,328303026 | 0,275 | 0,05  | 1           | 1,255535678   | 0,796472786     | 5,5             |
| CDV3                                                                                     | 0,000140464 | 0,327753291 | 0,775 | 0,36  | 1           | 1,255057351   | 0,796776338     | 2,152777778     |
| RABL6                                                                                    | 8,34458E-06 | 0,327613586 | 0,688 | 0,25  | 0,176078915 | 1,254935822   | 0,796853499     | 2,752           |
| EIF3D                                                                                    | 5,39649E-06 | 0,326732641 | 0,762 | 0,28  | 0,113871376 | 1,254169761   | 0,797340225     | 2,721428571     |
| DNMT3A                                                                                   | 1,00215E-07 | 0,326015237 | 0,362 | 0,04  | 0,002114636 | 1,253546259   | 0,797736815     | 9,05            |
| PET100                                                                                   | 1,16726E-05 | 0,325380024 | 0,725 | 0,26  | 0,246303421 | 1,25299445    | 0,798088132     | 2,788461538     |
| TTC1                                                                                     | 4,4402E-06  | 0,325158795 | 0,588 | 0,19  | 0,093692588 | 1,252802325   | 0,798210524     | 3,094736842     |
| TADA3                                                                                    | 2,22729E-06 | 0,325110725 | 0,675 | 0,21  | 0,046998033 | 1,252760583   | 0,79823712      | 3,214285714     |
| XPO1                                                                                     | 2,82585E-06 | 0,325041814 | 0,675 | 0,22  | 0,059628188 | 1,252700745   | 0,798275249     | 3,068181818     |
| SRP9                                                                                     | 0,001571726 | 0,324403574 | 0,875 | 0,49  | 1           | 1,25214668    | 0,79862848      | 1,785714286     |
| LSM3                                                                                     | 5,16077E-05 | 0,324365119 | 0,85  | 0,4   | 1           | 1,252113305   | 0,798649768     | 2,125           |
| ATL3                                                                                     | 8,26596E-07 | 0,324216096 | 0,462 | 0,1   | 0,017442008 | 1,251983974   | 0,798732269     | 4,62            |
| NBPF15                                                                                   | 1,3367E-07  | 0,323994148 | 0,25  | 0     | 0,002820574 | 1,251791381   | 0,798855157     | #DIV/0!         |
| FLYWCH2                                                                                  | 1,97381E-06 | 0,323993844 | 0,625 | 0,19  | 0,041649416 | 1,251791117   | 0,798855325     | 3,289473684     |
| RPS4Y1                                                                                   | 0,005056052 | 0,323589371 | 0,963 | 0,75  | 1           | 1,251440215   | 0,799079323     | 1,284           |
| ZMPSTE24                                                                                 | 3,0561E-08  | 0,323507417 | 0,613 | 0,14  | 0,000644867 | 1,251369127   | 0,799124717     | 4,378571429     |
| TMEM222                                                                                  | 3,75403E-08 | 0,323407799 | 0,525 | 0,1   | 0,000792138 | 1,251282724   | 0,799179898     | 5,25            |
| FARP1                                                                                    | 3,04164E-07 | 0,322436121 | 0,312 | 0,03  | 0,006418169 | 1,250440248   | 0,79971834      | 10,4            |
| IDH3G                                                                                    | 3,25417E-06 | 0,322243894 | 0,625 | 0,19  | 0,068666152 | 1,250273649   | 0,799824903     | 3,289473684     |
| RPS6KB2                                                                                  | 4,06083E-08 | 0,32215671  | 0,5   | 0,09  | 0,000856876 | 1,250198096   | 0,799873239     | 5,555555556     |
| POLR2J                                                                                   | 0,000100645 | 0,322139579 | 0,8   | 0,34  | 1           | 1,25018325    | 0,799882737     | 2,352941176     |
| NIPSNAP3A                                                                                | 6,48791E-09 | 0,322138608 | 0,438 | 0,05  | 0,000136901 | 1,250182409   | 0,799883275     | 8,76            |
| MRPL16                                                                                   | 1,9012E-08  | 0,322116565 | 0,525 | 0,1   | 0,000401172 | 1,250163307   | 0,799895497     | 5,25            |
| SMIM20                                                                                   | 4,43527E-07 | 0,321867892 | 0,438 | 0,08  | 0,009358856 | 1,249947839   | 0,800033384     | 5,475           |
| SPA17                                                                                    | 3,97679E-07 | 0,321375553 | 0,262 | 0,01  | 0,008391435 | 1,249521351   | 0,800306453     | 26,2            |
| CEP55                                                                                    | 8,25503E-05 | 0,32091505  | 0,175 | 0,01  | 1           | 1,249122572   | 0,800561948     | 17,5            |
| CDC16                                                                                    | 1,96015E-08 | 0,320830475 | 0,338 | 0,02  | 0,000413611 | 1,249049346   | 0,800608881     | 16,9            |

Supplementary Table 4

| Differentially expressed genes_keloid-CCD_ comparing SC-Keloid vs. (SC-Myel, SC-Nonmyel) |             |             |       |       |             |               |                 |                 |
|------------------------------------------------------------------------------------------|-------------|-------------|-------|-------|-------------|---------------|-----------------|-----------------|
| gene                                                                                     | p_val       | avg_log2FC  | pct.1 | pct.2 | p_val_adj   | Foldchange_UP | Foldchange_DOWN | Ratio_pct1_pct2 |
| ADAM9                                                                                    | 8,6683E-08  | 0,320780683 | 0,488 | 0,09  | 0,001829097 | 1,249006238   | 0,800636513     | 5,422222222     |
| ROGDI                                                                                    | 1,48189E-07 | 0,32003926  | 0,35  | 0,04  | 0,003126926 | 1,24836452    | 0,801048078     | 8,75            |
| MRPL55                                                                                   | 2,48474E-06 | 0,31938642  | 0,65  | 0,2   | 0,052430539 | 1,247799746   | 0,801410646     | 3,25            |
| LUM                                                                                      | 0,000716299 | 0,318734814 | 0,25  | 0,06  | 1           | 1,247236293   | 0,801772692     | 4,166666667     |
| UQCC3                                                                                    | 4,35849E-07 | 0,31870582  | 0,562 | 0,14  | 0,009196847 | 1,247211227   | 0,801788805     | 4,014285714     |
| MANBAL                                                                                   | 1,94458E-06 | 0,318206824 | 0,512 | 0,13  | 0,041032637 | 1,246779919   | 0,802066175     | 3,938461538     |
| TLN1                                                                                     | 0,000651016 | 0,318078572 | 0,825 | 0,45  | 1           | 1,246669088   | 0,802137479     | 1,833333333     |
| PTPRK                                                                                    | 1,01037E-06 | 0,317839276 | 0,475 | 0,11  | 0,021319804 | 1,246462324   | 0,802270538     | 4,318181818     |
| PIGX                                                                                     | 3,3355E-07  | 0,317500094 | 0,412 | 0,07  | 0,00703823  | 1,246169311   | 0,802459177     | 5,885714286     |
| ZCCHC17                                                                                  | 0,000149783 | 0,317207666 | 0,675 | 0,27  | 1           | 1,245916744   | 0,802621849     | 2,5             |
| TAPBP                                                                                    | 5,66333E-05 | 0,317202326 | 0,838 | 0,37  | 1           | 1,245912132   | 0,802624819     | 2,264864865     |
| DCTPP1                                                                                   | 7,26393E-07 | 0,317064814 | 0,525 | 0,13  | 0,015327612 | 1,245793382   | 0,802701326     | 4,038461538     |
| PTPMT1                                                                                   | 5,4716E-09  | 0,316946651 | 0,6   | 0,12  | 0,000115456 | 1,245691351   | 0,802767074     | 5               |
| ABLIM3                                                                                   | 8,6097E-08  | 0,316619853 | 0,475 | 0,09  | 0,001816733 | 1,24540921    | 0,802948936     | 5,277777778     |
| AKR7A2                                                                                   | 8,55308E-08 | 0,316604124 | 0,75  | 0,22  | 0,001804785 | 1,245395632   | 0,80295769      | 3,409090909     |
| UFL1                                                                                     | 3,2594E-07  | 0,315794122 | 0,562 | 0,14  | 0,006877655 | 1,2446966     | 0,803408638     | 4,014285714     |
| PPIP5K2                                                                                  | 1,88015E-08 | 0,31568841  | 0,512 | 0,09  | 0,00039673  | 1,244605399   | 0,803467509     | 5,688888889     |
| SUMF2                                                                                    | 9,94344E-06 | 0,315481831 | 0,588 | 0,2   | 0,209816578 | 1,244427197   | 0,803582566     | 2,94            |
| OPTN                                                                                     | 0,000158099 | 0,31546472  | 0,738 | 0,32  | 1           | 1,244412438   | 0,803592096     | 2,30625         |
| CIB1                                                                                     | 4,17332E-05 | 0,314592097 | 0,912 | 0,42  | 0,880612879 | 1,243659976   | 0,804078301     | 2,171428571     |
| CAV2                                                                                     | 8,03044E-07 | 0,314353133 | 0,688 | 0,21  | 0,016945042 | 1,243453996   | 0,804211497     | 3,276190476     |
| NRDC                                                                                     | 3,30102E-08 | 0,314271566 | 0,613 | 0,14  | 0,000696547 | 1,243383696   | 0,804256967     | 4,378571429     |
| PGAP6                                                                                    | 2,47293E-08 | 0,314245895 | 0,438 | 0,06  | 0,000521813 | 1,243361571   | 0,804271278     | 7,3             |
| ACTR1A                                                                                   | 3,69317E-08 | 0,314016792 | 0,537 | 0,11  | 0,000779296 | 1,243164139   | 0,804399008     | 4,881818182     |
| SLC35C2                                                                                  | 5,99743E-07 | 0,313687476 | 0,4   | 0,07  | 0,012655178 | 1,242880401   | 0,804582645     | 5,714285714     |
| INSYN2A                                                                                  | 6,55355E-07 | 0,313494328 | 0,225 | 0     | 0,013828644 | 1,242714015   | 0,80469037      | #DIV/0!         |
| EIF3K                                                                                    | 0,002391517 | 0,313189522 | 0,95  | 0,65  | 1           | 1,242451488   | 0,804860399     | 1,461538462     |
| MTX1                                                                                     | 3,47569E-06 | 0,312918565 | 0,488 | 0,13  | 0,073340573 | 1,242218161   | 0,805011577     | 3,753846154     |
| GNB4                                                                                     | 1,92843E-06 | 0,312614514 | 0,575 | 0,17  | 0,040691764 | 1,241956389   | 0,805181252     | 3,382352941     |
| GTSE1                                                                                    | 8,89706E-05 | 0,311849518 | 0,175 | 0,01  | 1           | 1,24129801    | 0,805608317     | 17,5            |

Supplementary Table 4

| Differentially expressed genes_keloid-CCD_ comparing SC-Keloid vs. (SC-Myel, SC-Nonmyel) |             |             |       |       |             |               |                 |                 |
|------------------------------------------------------------------------------------------|-------------|-------------|-------|-------|-------------|---------------|-----------------|-----------------|
| gene                                                                                     | p_val       | avg_log2FC  | pct.1 | pct.2 | p_val_adj   | Foldchange_UP | Foldchange_DOWN | Ratio_pct1_pct2 |
| SNRPB2                                                                                   | 2,11771E-05 | 0,31168881  | 0,787 | 0,33  | 0,446857677 | 1,241159744   | 0,805698062     | 2,384848485     |
| ZNF511                                                                                   | 9,20115E-07 | 0,311228093 | 0,488 | 0,11  | 0,019415354 | 1,240763449   | 0,805955398     | 4,436363636     |
| MRPS18A                                                                                  | 3,85994E-07 | 0,31120788  | 0,412 | 0,07  | 0,008144865 | 1,240746066   | 0,805966669     | 5,885714286     |
| CHMP1A                                                                                   | 3,40384E-10 | 0,310949918 | 0,562 | 0,09  | 7,18245E-06 | 1,240524234   | 0,806110814     | 6,244444444     |
| RTTN                                                                                     | 9,76453E-08 | 0,310895107 | 0,338 | 0,03  | 0,002060414 | 1,240477104   | 0,806141441     | 11,26666667     |
| PMM1                                                                                     | 1,26731E-05 | 0,310444696 | 0,488 | 0,14  | 0,267415569 | 1,240089886   | 0,806393159     | 3,485714286     |
| PEX10                                                                                    | 1,8926E-08  | 0,31030544  | 0,575 | 0,12  | 0,000399357 | 1,239970192   | 0,806470999     | 4,791666667     |
| RBFA                                                                                     | 4,87533E-06 | 0,310032007 | 0,362 | 0,07  | 0,102874275 | 1,239735203   | 0,806623864     | 5,171428571     |
| GRB10                                                                                    | 5,47138E-07 | 0,309977889 | 0,512 | 0,12  | 0,011545162 | 1,239688701   | 0,806654122     | 4,266666667     |
| MTX2                                                                                     | 4,14277E-06 | 0,309734081 | 0,537 | 0,16  | 0,087416559 | 1,239479217   | 0,806790454     | 3,35625         |
| RRM2                                                                                     | 0,000357268 | 0,30963915  | 0,15  | 0,01  | 1           | 1,239397661   | 0,806843543     | 15              |
| AFAP1                                                                                    | 6,8122E-09  | 0,309328993 | 0,488 | 0,07  | 0,000143744 | 1,239131238   | 0,807017021     | 6,971428571     |
| DHRS7                                                                                    | 2,32395E-07 | 0,309150257 | 0,675 | 0,2   | 0,004903767 | 1,238977731   | 0,807117009     | 3,375           |
| FOXS1                                                                                    | 3,55308E-05 | 0,309047607 | 0,188 | 0,01  | 0,749736388 | 1,238889578   | 0,807174439     | 18,8            |
| MRPL19                                                                                   | 3,30967E-06 | 0,308399796 | 0,512 | 0,14  | 0,069837328 | 1,238333407   | 0,807536964     | 3,657142857     |
| CXXC5                                                                                    | 0,002482666 | 0,307758456 | 0,963 | 0,65  | 1           | 1,237783037   | 0,807896029     | 1,481538462     |
| AKT1                                                                                     | 5,71422E-05 | 0,307423696 | 0,738 | 0,3   | 1           | 1,237495857   | 0,808083513     | 2,46            |
| HSPB11                                                                                   | 1,7779E-05  | 0,307361106 | 0,65  | 0,23  | 0,375154332 | 1,237442171   | 0,808118572     | 2,826086957     |
| BCL2L12                                                                                  | 2,29351E-08 | 0,306986773 | 0,412 | 0,05  | 0,000483953 | 1,237121136   | 0,80832828      | 8,24            |
| CYB561D2                                                                                 | 3,64996E-08 | 0,306869792 | 0,35  | 0,03  | 0,000770179 | 1,237020828   | 0,808393826     | 11,66666667     |
| TUFM                                                                                     | 3,55546E-05 | 0,306708707 | 0,863 | 0,43  | 0,75023746  | 1,236882716   | 0,808484092     | 2,006976744     |
| PRR13                                                                                    | 2,21697E-07 | 0,306655492 | 0,438 | 0,08  | 0,004678031 | 1,236837093   | 0,808513914     | 5,475           |
| CNIH3                                                                                    | 6,41814E-08 | 0,306433287 | 0,412 | 0,06  | 0,001354292 | 1,236646609   | 0,808638452     | 6,866666667     |
| CRAT                                                                                     | 4,98791E-08 | 0,306388666 | 0,325 | 0,02  | 0,001052499 | 1,236608361   | 0,808663463     | 16,25           |
| LSM10                                                                                    | 5,75313E-07 | 0,306273226 | 0,662 | 0,2   | 0,012139676 | 1,236509416   | 0,808728172     | 3,31            |
| MSRB2                                                                                    | 1,46687E-08 | 0,305926128 | 0,6   | 0,13  | 0,000309524 | 1,23621196    | 0,808922767     | 4,615384615     |
| TRIO                                                                                     | 3,12667E-06 | 0,305874823 | 0,5   | 0,13  | 0,06597582  | 1,236167999   | 0,808951535     | 3,846153846     |
| CHTF8                                                                                    | 2,29045E-08 | 0,305570042 | 0,338 | 0,02  | 0,000483309 | 1,235906875   | 0,809122451     | 16,9            |
| USP16                                                                                    | 1,61694E-06 | 0,305248366 | 0,65  | 0,19  | 0,034119058 | 1,235631338   | 0,80930288      | 3,421052632     |
| MCRS1                                                                                    | 1,4137E-07  | 0,305087828 | 0,4   | 0,06  | 0,002983053 | 1,235493848   | 0,809392941     | 6,666666667     |

Supplementary Table 4

| Differentially expressed genes_keloid-CCD_ comparing SC-Keloid vs. (SC-Myel, SC-Nonmyel) |             |             |       |       |             |               |                 |                 |
|------------------------------------------------------------------------------------------|-------------|-------------|-------|-------|-------------|---------------|-----------------|-----------------|
| gene                                                                                     | p_val       | avg_log2FC  | pct.1 | pct.2 | p_val_adj   | Foldchange_UP | Foldchange_DOWN | Ratio_pct1_pct2 |
| NDUFA1                                                                                   | 0,000346399 | 0,305038884 | 0,938 | 0,49  | 1           | 1,235451935   | 0,809420401     | 1,914285714     |
| EMC8                                                                                     | 6,3389E-08  | 0,304993918 | 0,55  | 0,12  | 0,001337572 | 1,235413429   | 0,809445629     | 4,583333333     |
| TRPV2                                                                                    | 4,4754E-07  | 0,304810098 | 0,338 | 0,04  | 0,009443535 | 1,23525603    | 0,80954877      | 8,45            |
| BRMS1                                                                                    | 2,30187E-07 | 0,304458226 | 0,5   | 0,11  | 0,004857183 | 1,234954788   | 0,809746243     | 4,545454545     |
| CACNA2D4                                                                                 | 1,4667E-07  | 0,304282933 | 0,375 | 0,05  | 0,003094878 | 1,234804746   | 0,809844636     | 7,5             |
| MRPS7                                                                                    | 1,34407E-07 | 0,30412208  | 0,65  | 0,19  | 0,002836127 | 1,23466708    | 0,809934934     | 3,421052632     |
| PPP4C                                                                                    | 5,2229E-07  | 0,303896912 | 0,688 | 0,21  | 0,011020849 | 1,234474394   | 0,810061354     | 3,276190476     |
| SIVA1                                                                                    | 5,70371E-05 | 0,303236124 | 0,812 | 0,37  | 1           | 1,233909106   | 0,810432467     | 2,194594595     |
| RAB31                                                                                    | 6,97972E-05 | 0,30292296  | 0,65  | 0,26  | 1           | 1,233641292   | 0,810608405     | 2,5             |
| SEC11A                                                                                   | 0,001145883 | 0,302589349 | 0,975 | 0,67  | 1           | 1,233356056   | 0,810795873     | 1,455223881     |
| NAGLU                                                                                    | 5,72092E-08 | 0,302321101 | 0,375 | 0,04  | 0,001207171 | 1,233126753   | 0,810946643     | 9,375           |
| DDX19B                                                                                   | 2,01179E-08 | 0,301360769 | 0,338 | 0,02  | 0,000424508 | 1,232306193   | 0,81148663      | 16,9            |
| TMEM219                                                                                  | 1,08113E-05 | 0,300942081 | 0,838 | 0,34  | 0,22812889  | 1,231948615   | 0,811722168     | 2,464705882     |
| PTPA                                                                                     | 2,23254E-06 | 0,300841443 | 0,475 | 0,12  | 0,047108734 | 1,23186268    | 0,811778793     | 3,958333333     |
| VASP                                                                                     | 6,16613E-07 | 0,300509532 | 0,525 | 0,13  | 0,013011152 | 1,231579307   | 0,811965575     | 4,038461538     |
| RPS9                                                                                     | 0,000215045 | 0,300248845 | 1     | 0,99  | 1           | 1,231356787   | 0,812112306     | 1,01010101      |
| COPS7A                                                                                   | 5,15708E-08 | 0,300162912 | 0,45  | 0,07  | 0,001088195 | 1,231283444   | 0,812160681     | 6,428571429     |
| UBE2I                                                                                    | 0,000662571 | 0,299338254 | 0,775 | 0,37  | 1           | 1,230579833   | 0,812625052     | 2,094594595     |
| RIC8A                                                                                    | 3,28578E-07 | 0,299161529 | 0,488 | 0,1   | 0,006933327 | 1,2304291     | 0,812724601     | 4,88            |
| G6PC3                                                                                    | 2,96102E-07 | 0,29884688  | 0,362 | 0,05  | 0,006248046 | 1,230160775   | 0,812901874     | 7,24            |
| ARL2                                                                                     | 0,001058676 | 0,298539847 | 0,825 | 0,44  | 1           | 1,229899001   | 0,813074894     | 1,875           |
| RACK1                                                                                    | 0,000677703 | 0,29852747  | 1     | 0,94  | 1           | 1,22988845    | 0,813081869     | 1,063829787     |
| LSM2                                                                                     | 7,77943E-05 | 0,297906454 | 0,775 | 0,32  | 1           | 1,229359152   | 0,81343194      | 2,421875        |
| ABR                                                                                      | 1,17977E-06 | 0,297254291 | 0,3   | 0,03  | 0,024894341 | 1,228803552   | 0,813799731     | 10              |
| SRPRA                                                                                    | 4,76379E-08 | 0,296845638 | 0,488 | 0,09  | 0,001005208 | 1,228455534   | 0,814030278     | 5,422222222     |
| HDLBP                                                                                    | 0,000739558 | 0,296769595 | 0,8   | 0,38  | 1           | 1,228390786   | 0,814073186     | 2,105263158     |
| RPS12                                                                                    | 7,87313E-05 | 0,296619039 | 1     | 1     | 1           | 1,2282626     | 0,814158145     | 1               |
| TMEM161A                                                                                 | 8,91558E-07 | 0,296356432 | 0,375 | 0,06  | 0,018812771 | 1,228039045   | 0,814306356     | 6,25            |
| POLR3G                                                                                   | 4,68715E-07 | 0,296185154 | 0,312 | 0,03  | 0,009890357 | 1,227893261   | 0,814403037     | 10,4            |
| SPARC                                                                                    | 0,000870663 | 0,295809211 | 1     | 0,98  | 1           | 1,227573333   | 0,814615285     | 1,020408163     |

Supplementary Table 4

| Differentially expressed genes_keloid-CCD_ comparing SC-Keloid vs. (SC-Myel, SC-Nonmyel) |             |             |       |       |             |               |                 |                 |
|------------------------------------------------------------------------------------------|-------------|-------------|-------|-------|-------------|---------------|-----------------|-----------------|
| gene                                                                                     | p_val       | avg_log2FC  | pct.1 | pct.2 | p_val_adj   | Foldchange_UP | Foldchange_DOWN | Ratio_pct1_pct2 |
| GTF2H3                                                                                   | 1,13019E-07 | 0,295713424 | 0,338 | 0,03  | 0,002384805 | 1,227491832   | 0,814669372     | 11,26666667     |
| FAM136A                                                                                  | 6,36894E-08 | 0,29568463  | 0,488 | 0,09  | 0,001343909 | 1,227467333   | 0,814685632     | 5,422222222     |
| VIM                                                                                      | 8,46092E-05 | 0,295578133 | 1     | 1     | 1           | 1,227376727   | 0,814745773     | 1               |
| MGMT                                                                                     | 2,34817E-07 | 0,295464826 | 0,662 | 0,19  | 0,004954866 | 1,227280335   | 0,814809764     | 3,484210526     |
| NFU1                                                                                     | 5,73664E-09 | 0,295131536 | 0,575 | 0,11  | 0,000121049 | 1,226996842   | 0,814998023     | 5,227272727     |
| REX1BD                                                                                   | 0,00015323  | 0,295043571 | 0,875 | 0,41  | 1           | 1,226922031   | 0,815047716     | 2,134146341     |
| NAP1L1                                                                                   | 0,001791437 | 0,294756133 | 0,975 | 0,73  | 1           | 1,226677608   | 0,81521012      | 1,335616438     |
| USP5                                                                                     | 7,53099E-07 | 0,294592719 | 0,375 | 0,06  | 0,015891137 | 1,226538669   | 0,815302465     | 6,25            |
| RTL8C                                                                                    | 4,64694E-06 | 0,294140829 | 0,688 | 0,23  | 0,09805511  | 1,226154546   | 0,815557878     | 2,991304348     |
| YIF1B                                                                                    | 2,0495E-08  | 0,294092787 | 0,462 | 0,07  | 0,000432465 | 1,226113715   | 0,815585037     | 6,6             |
| DENR                                                                                     | 8,08108E-09 | 0,293624914 | 0,588 | 0,12  | 0,000170519 | 1,225716145   | 0,815849578     | 4,9             |
| NCLN                                                                                     | 1,26069E-06 | 0,293373954 | 0,388 | 0,07  | 0,026601913 | 1,225502947   | 0,81599151      | 5,542857143     |
| NAV1                                                                                     | 4,18356E-09 | 0,293332116 | 0,6   | 0,12  | 8,82774E-05 | 1,225467408   | 0,816015174     | 5               |
| TUBB3                                                                                    | 5,07299E-09 | 0,292772716 | 0,3   | 0     | 0,000107045 | 1,22499233    | 0,816331642     | #DIV/0!         |
| ELMOD2                                                                                   | 1,47289E-08 | 0,292649158 | 0,45  | 0,06  | 0,000310794 | 1,224887421   | 0,816401559     | 7,5             |
| FAM162A                                                                                  | 1,74508E-06 | 0,292566153 | 0,65  | 0,2   | 0,03682301  | 1,22481695    | 0,816448531     | 3,25            |
| MRPL14                                                                                   | 1,52589E-06 | 0,292499804 | 0,8   | 0,28  | 0,032197827 | 1,224760622   | 0,81648608      | 2,857142857     |
| RRAS                                                                                     | 0,000133507 | 0,292295345 | 0,863 | 0,37  | 1           | 1,224587061   | 0,816601801     | 2,332432432     |
| CEP89                                                                                    | 1,74933E-07 | 0,292173725 | 0,325 | 0,03  | 0,003691267 | 1,224483832   | 0,816670644     | 10,83333333     |
| BRD9                                                                                     | 6,22703E-07 | 0,292128783 | 0,5   | 0,12  | 0,013139661 | 1,224445689   | 0,816696085     | 4,166666667     |
| PGM2                                                                                     | 3,64996E-08 | 0,291920184 | 0,35  | 0,03  | 0,000770179 | 1,224268659   | 0,816814179     | 11,66666667     |
| PTRHD1                                                                                   | 6,95394E-06 | 0,291549007 | 0,525 | 0,15  | 0,146735116 | 1,223953719   | 0,817024357     | 3,5             |
| SLC17A9                                                                                  | 1,1147E-06  | 0,291409696 | 0,275 | 0,02  | 0,023521258 | 1,223835536   | 0,817103255     | 13,75           |
| RFNG                                                                                     | 6,38485E-07 | 0,291362427 | 0,575 | 0,15  | 0,01347268  | 1,223795439   | 0,817130027     | 3,833333333     |
| ARPC5L                                                                                   | 1,66966E-05 | 0,291106789 | 0,738 | 0,28  | 0,352314517 | 1,223578608   | 0,817274831     | 2,635714286     |
| PA2G4                                                                                    | 0,006858629 | 0,290921327 | 0,825 | 0,46  | 1           | 1,223421323   | 0,817379901     | 1,793478261     |
| CDK11B                                                                                   | 1,07718E-07 | 0,290837824 | 0,438 | 0,07  | 0,00227296  | 1,223350514   | 0,817427212     | 6,257142857     |
| B4GALT7                                                                                  | 5,74245E-08 | 0,290761646 | 0,512 | 0,1   | 0,001211715 | 1,22328592    | 0,817470375     | 5,12            |
| EIF4E2                                                                                   | 4,15552E-08 | 0,290724337 | 0,613 | 0,14  | 0,000876857 | 1,223254286   | 0,817491516     | 4,378571429     |
| BACE1                                                                                    | 8,16413E-07 | 0,290699888 | 0,575 | 0,15  | 0,017227139 | 1,223233555   | 0,81750537      | 3,833333333     |

Supplementary Table 4

| Differentially expressed genes_keloid-CCD_ comparing SC-Keloid vs. (SC-Myel, SC-Nonmyel) |             |             |       |       |             |               |                 |                 |
|------------------------------------------------------------------------------------------|-------------|-------------|-------|-------|-------------|---------------|-----------------|-----------------|
| gene                                                                                     | p_val       | avg_log2FC  | pct.1 | pct.2 | p_val_adj   | Foldchange_UP | Foldchange_DOWN | Ratio_pct1_pct2 |
| XRN2                                                                                     | 5,64412E-06 | 0,290592072 | 0,713 | 0,25  | 0,11909653  | 1,223142143   | 0,817566466     | 2,852           |
| RRP1                                                                                     | 5,71176E-07 | 0,289974707 | 0,375 | 0,06  | 0,012052379 | 1,222618842   | 0,817916398     | 6,25            |
| BCAP31                                                                                   | 6,42861E-07 | 0,289432817 | 0,8   | 0,26  | 0,013565019 | 1,222159702   | 0,818223673     | 3,076923077     |
| IRAK1                                                                                    | 5,54029E-08 | 0,28912265  | 0,475 | 0,08  | 0,001169057 | 1,221896977   | 0,818399603     | 5,9375          |
| TMEM230                                                                                  | 0,000437419 | 0,28905846  | 0,912 | 0,46  | 1           | 1,221842611   | 0,818436017     | 1,982608696     |
| ANLN                                                                                     | 0,000898421 | 0,28887051  | 0,238 | 0,06  | 1           | 1,221683444   | 0,818542647     | 3,966666667     |
| COMMD3                                                                                   | 5,15495E-06 | 0,288855052 | 0,562 | 0,17  | 0,108774599 | 1,221670354   | 0,818551418     | 3,305882353     |
| ANXA6                                                                                    | 2,57921E-06 | 0,288680695 | 0,75  | 0,26  | 0,054423865 | 1,221522718   | 0,818650349     | 2,884615385     |
| PFDN6                                                                                    | 1,10146E-07 | 0,288316154 | 0,475 | 0,09  | 0,002324183 | 1,221214102   | 0,818857233     | 5,277777778     |
| GAMT                                                                                     | 8,33128E-06 | 0,288306449 | 0,375 | 0,08  | 0,175798289 | 1,221205887   | 0,818862741     | 4,6875          |
| DNAJB11                                                                                  | 1,10151E-05 | 0,288284834 | 0,775 | 0,28  | 0,232429425 | 1,22118759    | 0,81887501      | 2,767857143     |
| PARP1                                                                                    | 1,75215E-05 | 0,288201298 | 0,562 | 0,18  | 0,369721494 | 1,221116882   | 0,818922426     | 3,122222222     |
| SAE1                                                                                     | 4,78195E-08 | 0,287933199 | 0,512 | 0,1   | 0,00100904  | 1,220889981   | 0,819074623     | 5,12            |
| NELFE                                                                                    | 2,37099E-07 | 0,287656327 | 0,637 | 0,17  | 0,005003036 | 1,220655699   | 0,819231828     | 3,747058824     |
| AKR1A1                                                                                   | 7,17044E-07 | 0,287554549 | 0,6   | 0,16  | 0,015130348 | 1,220569588   | 0,819289625     | 3,75            |
| LIMA1                                                                                    | 0,003105885 | 0,287430569 | 0,887 | 0,49  | 1           | 1,220464701   | 0,819360035     | 1,810204082     |
| SCAND1                                                                                   | 0,001688449 | 0,287397901 | 0,838 | 0,45  | 1           | 1,220437065   | 0,819378589     | 1,862222222     |
| IGSF8                                                                                    | 4,34907E-07 | 0,287392138 | 0,537 | 0,12  | 0,009176972 | 1,22043219    | 0,819381862     | 4,475           |
| ATP5F1B                                                                                  | 0,004438641 | 0,287291858 | 0,938 | 0,58  | 1           | 1,220347362   | 0,819438818     | 1,617241379     |
| COMMD10                                                                                  | 1,16076E-08 | 0,287140597 | 0,4   | 0,04  | 0,000244932 | 1,22021942    | 0,819524737     | 10              |
| MANEA                                                                                    | 2,06285E-06 | 0,28704612  | 0,262 | 0,02  | 0,043528179 | 1,220139515   | 0,819578407     | 13,1            |
| GNA11                                                                                    | 1,20727E-06 | 0,286924186 | 0,462 | 0,1   | 0,025474613 | 1,220036395   | 0,819647679     | 4,62            |
| LYPLA1                                                                                   | 1,30529E-07 | 0,286877088 | 0,5   | 0,1   | 0,002754294 | 1,219996567   | 0,819674438     | 5               |
| TMEM50A                                                                                  | 0,000380699 | 0,286865247 | 0,887 | 0,52  | 1           | 1,219986554   | 0,819681165     | 1,705769231     |
| CHST1                                                                                    | 3,5304E-06  | 0,28685192  | 0,275 | 0,03  | 0,074495069 | 1,219975284   | 0,819688737     | 9,166666667     |
| CHMP2A                                                                                   | 0,001419954 | 0,286813921 | 0,925 | 0,5   | 1           | 1,219943151   | 0,819710327     | 1,85            |
| DMAC2                                                                                    | 1,10673E-05 | 0,286695742 | 0,325 | 0,06  | 0,233531527 | 1,219843224   | 0,819777477     | 5,416666667     |
| CENPN                                                                                    | 7,53534E-06 | 0,286622807 | 0,262 | 0,03  | 0,15900314  | 1,219781556   | 0,819818922     | 8,733333333     |
| KIF23                                                                                    | 8,55292E-08 | 0,286389711 | 0,288 | 0,01  | 0,001804752 | 1,219584492   | 0,81995139      | 28,8            |
| PRKAR1B                                                                                  | 5,94679E-07 | 0,286366088 | 0,613 | 0,17  | 0,012548313 | 1,219564522   | 0,819964817     | 3,605882353     |

Supplementary Table 4

| Differentially expressed genes_keloid-CCD_ comparing SC-Keloid vs. (SC-Myel, SC-Nonmyel) |             |             |       |       |             |               |                 |                 |
|------------------------------------------------------------------------------------------|-------------|-------------|-------|-------|-------------|---------------|-----------------|-----------------|
| gene                                                                                     | p_val       | avg_log2FC  | pct.1 | pct.2 | p_val_adj   | Foldchange_UP | Foldchange_DOWN | Ratio_pct1_pct2 |
| RANGRF                                                                                   | 1,94226E-07 | 0,28629576  | 0,475 | 0,09  | 0,004098369 | 1,219505073   | 0,820004789     | 5,277777778     |
| HGSNAT                                                                                   | 6,81911E-07 | 0,285773346 | 0,438 | 0,09  | 0,01438901  | 1,219063559   | 0,820301774     | 4,866666667     |
| RALBP1                                                                                   | 0,000296504 | 0,285538726 | 0,738 | 0,32  | 1           | 1,218865323   | 0,820435188     | 2,30625         |
| NRSN2                                                                                    | 1,95286E-07 | 0,285092957 | 0,275 | 0,01  | 0,004120739 | 1,218488772   | 0,820688728     | 27,5            |
| STOML2                                                                                   | 9,3899E-06  | 0,284974415 | 0,738 | 0,26  | 0,198136308 | 1,218388656   | 0,820756164     | 2,838461538     |
| XPA                                                                                      | 1,12163E-05 | 0,284930451 | 0,438 | 0,12  | 0,236674593 | 1,218351528   | 0,820781176     | 3,65            |
| MRPS26                                                                                   | 4,46444E-07 | 0,284644953 | 0,713 | 0,21  | 0,009420423 | 1,21811045    | 0,820943618     | 3,395238095     |
| IFRD2                                                                                    | 4,26595E-06 | 0,284605311 | 0,5   | 0,13  | 0,090015732 | 1,21807698    | 0,820966176     | 3,846153846     |
| MRPS10                                                                                   | 2,6728E-06  | 0,284577588 | 0,5   | 0,13  | 0,056398658 | 1,218053573   | 0,820981952     | 3,846153846     |
| NDUFA10                                                                                  | 5,23873E-06 | 0,284407796 | 0,65  | 0,22  | 0,110542529 | 1,217910228   | 0,82107858      | 2,954545455     |
| SMIM19                                                                                   | 6,05523E-05 | 0,284347228 | 0,8   | 0,32  | 1           | 1,217859098   | 0,821113051     | 2,5             |
| TRADD                                                                                    | 3,45304E-07 | 0,284284152 | 0,462 | 0,09  | 0,007286265 | 1,217805853   | 0,821148952     | 5,133333333     |
| POP5                                                                                     | 5,85113E-07 | 0,284245783 | 0,462 | 0,1   | 0,012346459 | 1,217773465   | 0,821170791     | 4,62            |
| TAF9                                                                                     | 1,69343E-06 | 0,284196705 | 0,55  | 0,15  | 0,03573303  | 1,21773204    | 0,821198726     | 3,666666667     |
| BTF3L4                                                                                   | 2,8087E-06  | 0,283985594 | 0,7   | 0,23  | 0,059266417 | 1,217553861   | 0,821318902     | 3,043478261     |
| TMEM106C                                                                                 | 0,00012367  | 0,283770357 | 0,488 | 0,17  | 1           | 1,217372226   | 0,821441445     | 2,870588235     |
| GMPPB                                                                                    | 5,96968E-08 | 0,283688761 | 0,262 | 0     | 0,001259663 | 1,217303376   | 0,821487905     | #DIV/0!         |
| ALDH1L2                                                                                  | 1,09968E-06 | 0,283493524 | 0,3   | 0,03  | 0,023204244 | 1,217138652   | 0,821599083     | 10              |
| VEGFC                                                                                    | 1,3367E-07  | 0,283362255 | 0,25  | 0     | 0,002820574 | 1,217027911   | 0,821673843     | #DIV/0!         |
| AK2                                                                                      | 1,26683E-05 | 0,283330509 | 0,525 | 0,16  | 0,267312812 | 1,217001131   | 0,821691923     | 3,28125         |
| C19orf48                                                                                 | 8,03499E-07 | 0,283112662 | 0,425 | 0,08  | 0,016954624 | 1,216817377   | 0,821816008     | 5,3125          |
| CNIH4                                                                                    | 5,62259E-05 | 0,283031553 | 0,725 | 0,3   | 1           | 1,21674897    | 0,821862212     | 2,416666667     |
| OXCT1                                                                                    | 2,53029E-07 | 0,282833066 | 0,35  | 0,04  | 0,005339163 | 1,21658158    | 0,821975293     | 8,75            |
| SMARCE1                                                                                  | 4,86295E-08 | 0,282784087 | 0,575 | 0,13  | 0,001026132 | 1,216540278   | 0,822003199     | 4,423076923     |
| MIS18BP1                                                                                 | 4,20302E-06 | 0,282433838 | 0,338 | 0,06  | 0,088687906 | 1,216244969   | 0,822202784     | 5,633333333     |
| ERGIC3                                                                                   | 2,53879E-06 | 0,282404158 | 0,762 | 0,26  | 0,053571068 | 1,216219949   | 0,822219699     | 2,930769231     |
| PXDN                                                                                     | 1,07984E-05 | 0,281949147 | 0,537 | 0,16  | 0,227857251 | 1,215836426   | 0,82247906      | 3,35625         |
| SPATC1L                                                                                  | 4,28237E-07 | 0,281735816 | 0,412 | 0,07  | 0,009036221 | 1,215656654   | 0,822600688     | 5,885714286     |
| COPS5                                                                                    | 9,60792E-07 | 0,281280046 | 0,6   | 0,16  | 0,020273665 | 1,21527267    | 0,822860602     | 3,75            |
| TMPO                                                                                     | 0,002169778 | 0,280495796 | 0,312 | 0,11  | 1           | 1,214612226   | 0,823308031     | 2,836363636     |

Supplementary Table 4

| Differentially expressed genes_keloid-CCD_ comparing SC-Keloid vs. (SC-Myel, SC-Nonmyel) |             |             |       |       |             |               |                 |                 |
|------------------------------------------------------------------------------------------|-------------|-------------|-------|-------|-------------|---------------|-----------------|-----------------|
| gene                                                                                     | p_val       | avg_log2FC  | pct.1 | pct.2 | p_val_adj   | Foldchange_UP | Foldchange_DOWN | Ratio_pct1_pct2 |
| PFDN2                                                                                    | 0,002057162 | 0,280149245 | 0,887 | 0,55  | 1           | 1,214320498   | 0,823505822     | 1,612727273     |
| TUBG1                                                                                    | 2,01851E-06 | 0,279714222 | 0,338 | 0,05  | 0,042592528 | 1,213954393   | 0,823754175     | 6,76            |
| KCTD17                                                                                   | 1,85289E-06 | 0,27960629  | 0,338 | 0,05  | 0,039097815 | 1,213863577   | 0,823815805     | 6,76            |
| KIF22                                                                                    | 3,41942E-05 | 0,279430781 | 0,35  | 0,08  | 0,721532815 | 1,213715915   | 0,823916031     | 4,375           |
| SHROOM2                                                                                  | 9,20801E-06 | 0,279383716 | 0,212 | 0,01  | 0,194298207 | 1,213676321   | 0,82394291      | 21,2            |
| WASHC3                                                                                   | 1,29294E-07 | 0,279198294 | 0,562 | 0,13  | 0,002728227 | 1,213520343   | 0,824048814     | 4,323076923     |
| MRPS5                                                                                    | 2,68313E-07 | 0,279166349 | 0,525 | 0,12  | 0,005661674 | 1,213493473   | 0,824067061     | 4,375           |
| TRAPPC6A                                                                                 | 7,67858E-07 | 0,278965792 | 0,4   | 0,07  | 0,01620258  | 1,213324791   | 0,824181627     | 5,714285714     |
| NDUFC1                                                                                   | 0,000128027 | 0,278902558 | 0,887 | 0,4   | 1           | 1,213271611   | 0,824217752     | 2,2175          |
| SLC35B1                                                                                  | 3,49041E-05 | 0,278505527 | 0,55  | 0,19  | 0,736511709 | 1,212937764   | 0,824444609     | 2,894736842     |
| JMJD8                                                                                    | 1,97574E-06 | 0,278399071 | 0,55  | 0,15  | 0,041690036 | 1,212848265   | 0,824505446     | 3,666666667     |
| PLK1                                                                                     | 0,000291957 | 0,278179479 | 0,125 | 0     | 1           | 1,212663672   | 0,824630954     | #DIV/0!         |
| ATIC                                                                                     | 5,25099E-07 | 0,278025691 | 0,338 | 0,04  | 0,011080122 | 1,212534411   | 0,824718862     | 8,45            |
| DYRK4                                                                                    | 8,89566E-07 | 0,277818009 | 0,3   | 0,03  | 0,018770734 | 1,212359874   | 0,824837593     | 10              |
| MRPS2                                                                                    | 1,2586E-06  | 0,277547358 | 0,412 | 0,08  | 0,026557774 | 1,212132456   | 0,824992347     | 5,15            |
| TCEAL8                                                                                   | 3,49357E-05 | 0,27742408  | 0,675 | 0,25  | 0,737178347 | 1,212028883   | 0,825062846     | 2,7             |
| ITPR3                                                                                    | 7,24922E-07 | 0,277194282 | 0,537 | 0,13  | 0,015296569 | 1,211835843   | 0,825194275     | 4,130769231     |
| LKAAEAR1                                                                                 | 4,30649E-07 | 0,276835753 | 0,262 | 0,01  | 0,009087133 | 1,211534723   | 0,825399373     | 26,2            |
| RAB5C                                                                                    | 6,00404E-05 | 0,276666572 | 0,725 | 0,3   | 1           | 1,211392658   | 0,82549617      | 2,416666667     |
| MLX                                                                                      | 1,26069E-06 | 0,276575784 | 0,388 | 0,07  | 0,026601913 | 1,211316427   | 0,825548121     | 5,542857143     |
| TAP1                                                                                     | 6,20156E-07 | 0,276537723 | 0,5   | 0,11  | 0,013085911 | 1,211284471   | 0,8255699       | 4,545454545     |
| RPL24                                                                                    | 0,000306223 | 0,276418921 | 1     | 0,99  | 1           | 1,21118473    | 0,825637886     | 1,01010101      |
| CDK10                                                                                    | 1,18918E-08 | 0,276285092 | 0,4   | 0,04  | 0,000250929 | 1,211072381   | 0,825714479     | 10              |
| COA6                                                                                     | 4,28237E-07 | 0,276282535 | 0,412 | 0,07  | 0,009036221 | 1,211070235   | 0,825715942     | 5,885714286     |
| GPX7                                                                                     | 2,51417E-08 | 0,27621833  | 0,362 | 0,03  | 0,000530515 | 1,211016339   | 0,825752691     | 12,06666667     |
| RGS19                                                                                    | 2,97062E-07 | 0,276139813 | 0,238 | 0     | 0,006268295 | 1,210950433   | 0,825797632     | #DIV/0!         |
| GLRX2                                                                                    | 2,32252E-06 | 0,275879925 | 0,575 | 0,16  | 0,049007584 | 1,210732311   | 0,825946405     | 3,59375         |
| CRTAP                                                                                    | 1,04562E-05 | 0,275790627 | 0,675 | 0,22  | 0,220635778 | 1,210657373   | 0,82599753      | 3,068181818     |
| CCT6A                                                                                    | 0,000238615 | 0,275681395 | 0,787 | 0,37  | 1           | 1,210565713   | 0,826060072     | 2,127027027     |
| CTPS1                                                                                    | 1,85115E-07 | 0,275431863 | 0,275 | 0,01  | 0,003906118 | 1,210356349   | 0,826202962     | 27,5            |



Supplementary Table 4

| Differentially expressed genes_keloid-CCD_ comparing SC-Keloid vs. (SC-Myel, SC-Nonmyel) |             |             |       |       |             |               |                 |                 |
|------------------------------------------------------------------------------------------|-------------|-------------|-------|-------|-------------|---------------|-----------------|-----------------|
| gene                                                                                     | p_val       | avg_log2FC  | pct.1 | pct.2 | p_val_adj   | Foldchange_UP | Foldchange_DOWN | Ratio_pct1_pct2 |
| DDX54                                                                                    | 5,153E-07   | 0,274481051 | 0,362 | 0,05  | 0,010873344 | 1,209558923   | 0,826747652     | 7,24            |
| SCOC                                                                                     | 4,91129E-06 | 0,274323076 | 0,625 | 0,19  | 0,103633194 | 1,209426483   | 0,826838186     | 3,289473684     |
| IGFBP6                                                                                   | 2,77119E-07 | 0,274153492 | 0,4   | 0,06  | 0,005847494 | 1,209284328   | 0,826935384     | 6,666666667     |
| MLLT10                                                                                   | 1,46681E-05 | 0,27406787  | 0,3   | 0,05  | 0,309512171 | 1,20921256    | 0,826984463     | 6               |
| EEF1D                                                                                    | 0,003364021 | 0,273890486 | 1     | 0,89  | 1           | 1,209063893   | 0,82708615      | 1,123595506     |
| PICALM                                                                                   | 1,07371E-07 | 0,273874251 | 0,462 | 0,08  | 0,002265626 | 1,209050287   | 0,827095457     | 5,775           |
| IFT22                                                                                    | 5,41765E-07 | 0,273419225 | 0,45  | 0,09  | 0,011431778 | 1,208669013   | 0,827356364     | 5               |
| IMPDH2                                                                                   | 0,000206465 | 0,273291429 | 0,675 | 0,28  | 1           | 1,208561952   | 0,827429656     | 2,410714286     |
| PDHA1                                                                                    | 2,05375E-07 | 0,272709479 | 0,488 | 0,1   | 0,004333624 | 1,208074544   | 0,827763489     | 4,88            |
| EIF3H                                                                                    | 0,0029386   | 0,272510923 | 0,875 | 0,45  | 1           | 1,20790829    | 0,827877421     | 1,944444444     |
| VAMP4                                                                                    | 6,74984E-06 | 0,27240258  | 0,188 | 0     | 0,142428329 | 1,207817583   | 0,827939595     | #DIV/0!         |
| PHGDH                                                                                    | 2,56747E-06 | 0,272393458 | 0,375 | 0,07  | 0,054176194 | 1,207809945   | 0,82794483      | 5,357142857     |
| HSD17B4                                                                                  | 3,46305E-05 | 0,272264169 | 0,4   | 0,11  | 0,730737943 | 1,207701711   | 0,828019031     | 3,636363636     |
| KCNMB1                                                                                   | 1,43556E-06 | 0,27196552  | 0,212 | 0     | 0,030291787 | 1,207451734   | 0,828190454     | #DIV/0!         |
| NME3                                                                                     | 0,001153983 | 0,271487588 | 0,875 | 0,47  | 1           | 1,207051798   | 0,828464861     | 1,861702128     |
| BLOC1S2                                                                                  | 7,11876E-07 | 0,271482367 | 0,662 | 0,19  | 0,015021303 | 1,20704743    | 0,828467859     | 3,484210526     |
| C20orf27                                                                                 | 3,58342E-07 | 0,271407876 | 0,5   | 0,11  | 0,007561385 | 1,206985108   | 0,828510636     | 4,545454545     |
| CAPZB                                                                                    | 0,000119734 | 0,27117828  | 0,812 | 0,36  | 1           | 1,206793039   | 0,828642499     | 2,255555556     |
| RAB5IF                                                                                   | 2,83479E-05 | 0,271155589 | 0,625 | 0,23  | 0,598168646 | 1,206774059   | 0,828655532     | 2,717391304     |
| RPL14                                                                                    | 0,001269457 | 0,270855366 | 1     | 0,96  | 1           | 1,206522956   | 0,828827993     | 1,041666667     |
| IMP4                                                                                     | 1,45319E-06 | 0,270751116 | 0,438 | 0,09  | 0,030663846 | 1,206435775   | 0,828887886     | 4,866666667     |
| ATP5F1A                                                                                  | 0,001500316 | 0,270692296 | 0,85  | 0,47  | 1           | 1,206386589   | 0,828921682     | 1,808510638     |
| HAUS1                                                                                    | 3,94367E-06 | 0,270596998 | 0,325 | 0,05  | 0,083215321 | 1,206306903   | 0,828976438     | 6,5             |
| GATD1                                                                                    | 3,04768E-05 | 0,270536131 | 0,212 | 0,02  | 0,643090303 | 1,20625601    | 0,829011413     | 10,6            |
| KIFAP3                                                                                   | 2,57166E-06 | 0,270366644 | 0,488 | 0,12  | 0,054264587 | 1,206114308   | 0,829108811     | 4,066666667     |
| CKAP5                                                                                    | 3,80515E-05 | 0,2699898   | 0,325 | 0,07  | 0,802925313 | 1,205799303   | 0,829325409     | 4,642857143     |
| PPFIA1                                                                                   | 8,92954E-06 | 0,269931735 | 0,462 | 0,12  | 0,188422162 | 1,205750773   | 0,829358788     | 3,85            |
| GTF2H5                                                                                   | 0,000282018 | 0,269873228 | 0,812 | 0,37  | 1           | 1,205701876   | 0,829392423     | 2,194594595     |
| MYL6B                                                                                    | 1,69104E-05 | 0,26965695  | 0,7   | 0,25  | 0,356826835 | 1,20552114    | 0,829516768     | 2,8             |
| MTLN                                                                                     | 1,84509E-06 | 0,269656398 | 0,55  | 0,15  | 0,038933286 | 1,205520679   | 0,829517085     | 3,666666667     |

Supplementary Table 4

| Differentially expressed genes_keloid-CCD_ comparing SC-Keloid vs. (SC-Myel, SC-Nonmyel) |             |             |       |       |             |               |                 |                 |
|------------------------------------------------------------------------------------------|-------------|-------------|-------|-------|-------------|---------------|-----------------|-----------------|
| gene                                                                                     | p_val       | avg_log2FC  | pct.1 | pct.2 | p_val_adj   | Foldchange_UP | Foldchange_DOWN | Ratio_pct1_pct2 |
| NRP1                                                                                     | 4,92874E-05 | 0,269430195 | 0,525 | 0,17  | 1           | 1,205331678   | 0,829647157     | 3,088235294     |
| MLST8                                                                                    | 2,51362E-07 | 0,269365334 | 0,375 | 0,05  | 0,005303993 | 1,205277489   | 0,829684458     | 7,5             |
| HMMR                                                                                     | 6,57145E-05 | 0,269345068 | 0,15  | 0     | 1           | 1,205260559   | 0,829696112     | #DIV/0!         |
| CANX                                                                                     | 0,005197244 | 0,269314382 | 0,9   | 0,6   | 1           | 1,205234923   | 0,82971376      | 1,5             |
| YKT6                                                                                     | 6,04866E-09 | 0,268273471 | 0,462 | 0,06  | 0,000127633 | 1,204365654   | 0,830312619     | 7,7             |
| EBNA1BP2                                                                                 | 1,83221E-06 | 0,268247706 | 0,637 | 0,19  | 0,038661527 | 1,204344145   | 0,830327448     | 3,352631579     |
| ACSL3                                                                                    | 8,62817E-06 | 0,268151657 | 0,6   | 0,2   | 0,182063111 | 1,204263968   | 0,830382729     | 3               |
| GPATCH4                                                                                  | 3,35557E-06 | 0,267977393 | 0,388 | 0,08  | 0,070805958 | 1,204118512   | 0,830483038     | 4,85            |
| CIAO2A                                                                                   | 2,1492E-07  | 0,267897538 | 0,45  | 0,08  | 0,004535035 | 1,204051865   | 0,830529007     | 5,625           |
| NDUFAF2                                                                                  | 2,16773E-06 | 0,267827779 | 0,575 | 0,17  | 0,045741343 | 1,203993647   | 0,830569167     | 3,382352941     |
| CTU2                                                                                     | 3,92176E-08 | 0,267717268 | 0,3   | 0,01  | 0,00082753  | 1,203901424   | 0,830632791     | 30              |
| ABCE1                                                                                    | 9,45066E-07 | 0,267342052 | 0,588 | 0,16  | 0,019941833 | 1,203588354   | 0,83084885      | 3,675           |
| NSA2                                                                                     | 0,000224386 | 0,267317006 | 0,825 | 0,36  | 1           | 1,203567459   | 0,830863274     | 2,291666667     |
| CTTN                                                                                     | 0,001915583 | 0,267268081 | 0,863 | 0,45  | 1           | 1,203526644   | 0,830891451     | 1,917777778     |
| C19orf25                                                                                 | 4,43527E-07 | 0,26726558  | 0,438 | 0,08  | 0,009358856 | 1,203524558   | 0,830892892     | 5,475           |
| PTGES2                                                                                   | 3,06706E-06 | 0,267228137 | 0,4   | 0,08  | 0,06471809  | 1,203493323   | 0,830914456     | 5               |
| RPL39                                                                                    | 0,000542502 | 0,267060619 | 1     | 0,98  | 1           | 1,203353587   | 0,831010943     | 1,020408163     |
| ANKFY1                                                                                   | 9,29829E-07 | 0,266965898 | 0,375 | 0,06  | 0,019620313 | 1,203274583   | 0,831065506     | 6,25            |
| NOB1                                                                                     | 5,38404E-07 | 0,266635704 | 0,362 | 0,05  | 0,011360854 | 1,202999218   | 0,831255736     | 7,24            |
| HINT2                                                                                    | 6,51294E-08 | 0,266540676 | 0,762 | 0,23  | 0,001374295 | 1,20291998    | 0,831310492     | 3,313043478     |
| SAMM50                                                                                   | 7,02253E-06 | 0,266393046 | 0,462 | 0,12  | 0,148182408 | 1,202796893   | 0,831395563     | 3,85            |
| MYL12B                                                                                   | 0,006049749 | 0,266217741 | 1     | 0,91  | 1           | 1,202650747   | 0,831496594     | 1,098901099     |
| ETV4                                                                                     | 1,3367E-07  | 0,266162912 | 0,25  | 0     | 0,002820574 | 1,202605042   | 0,831528195     | #DIV/0!         |
| CBX1                                                                                     | 2,56085E-05 | 0,266094149 | 0,5   | 0,15  | 0,540365286 | 1,202547724   | 0,831567829     | 3,333333333     |
| RRM1                                                                                     | 5,13275E-07 | 0,266087577 | 0,338 | 0,04  | 0,010830611 | 1,202542246   | 0,831571617     | 8,45            |
| BRD7                                                                                     | 0,000513185 | 0,26601526  | 0,6   | 0,25  | 1           | 1,202481968   | 0,831613302     | 2,4             |
| COPS6                                                                                    | 0,000488803 | 0,265799913 | 0,713 | 0,33  | 1           | 1,202302491   | 0,831737444     | 2,160606061     |
| DCXR                                                                                     | 6,09521E-07 | 0,265639978 | 0,525 | 0,12  | 0,012861495 | 1,202169212   | 0,831829654     | 4,375           |
| RFC4                                                                                     | 4,08316E-06 | 0,265489116 | 0,225 | 0,01  | 0,086158787 | 1,202043509   | 0,831916643     | 22,5            |
| RPN1                                                                                     | 7,57019E-05 | 0,265437041 | 0,55  | 0,2   | 1           | 1,202000121   | 0,831946672     | 2,75            |

Supplementary Table 4

| Differentially expressed genes_keloid-CCD_ comparing SC-Keloid vs. (SC-Myel, SC-Nonmyel) |             |             |       |       |             |               |                 |                 |
|------------------------------------------------------------------------------------------|-------------|-------------|-------|-------|-------------|---------------|-----------------|-----------------|
| gene                                                                                     | p_val       | avg_log2FC  | pct.1 | pct.2 | p_val_adj   | Foldchange_UP | Foldchange_DOWN | Ratio_pct1_pct2 |
| ALG5                                                                                     | 5,6691E-06  | 0,265073272 | 0,637 | 0,2   | 0,11962377  | 1,20169708    | 0,83215647      | 3,185           |
| SLC39A13                                                                                 | 1,19602E-06 | 0,26466234  | 0,575 | 0,15  | 0,025237156 | 1,201354842   | 0,832393532     | 3,833333333     |
| CDK5                                                                                     | 5,96968E-08 | 0,264469549 | 0,262 | 0     | 0,001259663 | 1,201194312   | 0,832504774     | #DIV/0!         |
| LSAMP                                                                                    | 1,79097E-05 | 0,264066125 | 0,713 | 0,26  | 0,377912492 | 1,200858467   | 0,832737602     | 2,742307692     |
| SDC1                                                                                     | 5,96968E-08 | 0,263997968 | 0,262 | 0     | 0,001259663 | 1,200801737   | 0,832776944     | #DIV/0!         |
| AP2A1                                                                                    | 4,33428E-06 | 0,263949361 | 0,412 | 0,09  | 0,091457699 | 1,200761279   | 0,832805002     | 4,577777778     |
| C1orf131                                                                                 | 4,98791E-08 | 0,26379006  | 0,325 | 0,02  | 0,001052499 | 1,2006287     | 0,832896964     | 16,25           |
| CYBC1                                                                                    | 5,2589E-07  | 0,263737799 | 0,388 | 0,06  | 0,011096799 | 1,200585209   | 0,832927137     | 6,466666667     |
| SRR                                                                                      | 6,55355E-07 | 0,263636823 | 0,225 | 0     | 0,013828644 | 1,200501181   | 0,832985436     | #DIV/0!         |
| PTPRF                                                                                    | 5,31205E-07 | 0,262996254 | 0,45  | 0,09  | 0,011208961 | 1,199968266   | 0,833355371     | 5               |
| DNMT1                                                                                    | 6,82729E-09 | 0,262835066 | 0,675 | 0,16  | 0,000144063 | 1,199834205   | 0,833448484     | 4,21875         |
| PSMD1                                                                                    | 6,08312E-06 | 0,262772088 | 0,675 | 0,23  | 0,128359851 | 1,19978183    | 0,833484868     | 2,934782609     |
| SNX17                                                                                    | 9,88473E-07 | 0,262730851 | 0,7   | 0,21  | 0,020857766 | 1,199747537   | 0,833508692     | 3,333333333     |
| YIPF2                                                                                    | 1,30247E-05 | 0,262645522 | 0,425 | 0,11  | 0,274833874 | 1,199676579   | 0,833557992     | 3,863636364     |
| NUDT16L1                                                                                 | 9,32527E-07 | 0,262560238 | 0,438 | 0,09  | 0,019677254 | 1,199605663   | 0,833607268     | 4,866666667     |
| RALA                                                                                     | 8,49246E-06 | 0,26212427  | 0,725 | 0,26  | 0,179199457 | 1,199243209   | 0,833859214     | 2,788461538     |
| ARSI                                                                                     | 5,66846E-07 | 0,261623854 | 0,312 | 0,03  | 0,011961023 | 1,198827309   | 0,834148498     | 10,4            |
| ICE1                                                                                     | 2,06282E-05 | 0,261492099 | 0,45  | 0,13  | 0,435276197 | 1,198717831   | 0,834224681     | 3,461538462     |
| DAP3                                                                                     | 1,69287E-06 | 0,261351401 | 0,45  | 0,1   | 0,03572123  | 1,198600932   | 0,834306043     | 4,5             |
| HSBP1                                                                                    | 0,009810685 | 0,261057201 | 0,988 | 0,77  | 1           | 1,198356533   | 0,834476195     | 1,283116883     |
| OPA1                                                                                     | 1,48838E-05 | 0,261016121 | 0,325 | 0,06  | 0,314062787 | 1,198322412   | 0,834499956     | 5,416666667     |
| NENF                                                                                     | 0,000196044 | 0,260097834 | 0,812 | 0,39  | 1           | 1,197559913   | 0,835031291     | 2,082051282     |
| ITGA7                                                                                    | 0,000214822 | 0,259727443 | 0,312 | 0,08  | 1           | 1,197252496   | 0,835245701     | 3,9             |
| FBXW9                                                                                    | 5,27925E-07 | 0,259680715 | 0,312 | 0,03  | 0,011139747 | 1,197213718   | 0,835272755     | 10,4            |
| TSPAN4                                                                                   | 2,22651E-05 | 0,259676698 | 0,525 | 0,16  | 0,469816887 | 1,197210384   | 0,83527508      | 3,28125         |
| CYRIB                                                                                    | 3,19527E-06 | 0,259334902 | 0,375 | 0,07  | 0,067423343 | 1,196926781   | 0,835472993     | 5,357142857     |
| USP14                                                                                    | 1,09502E-05 | 0,259113494 | 0,462 | 0,13  | 0,231059398 | 1,196743105   | 0,835601221     | 3,553846154     |
| AGPS                                                                                     | 1,11967E-06 | 0,258771319 | 0,462 | 0,1   | 0,02362609  | 1,196459298   | 0,83579943      | 4,62            |
| MRPL37                                                                                   | 2,72934E-07 | 0,258650708 | 0,525 | 0,11  | 0,005759177 | 1,196359277   | 0,835869307     | 4,772727273     |
| TMEM63A                                                                                  | 1,43556E-06 | 0,2586398   | 0,212 | 0     | 0,030291787 | 1,196350231   | 0,835875627     | #DIV/0!         |

Supplementary Table 4

| Differentially expressed genes_keloid-CCD_ comparing SC-Keloid vs. (SC-Myel, SC-Nonmyel) |             |             |       |       |             |               |                 |                 |
|------------------------------------------------------------------------------------------|-------------|-------------|-------|-------|-------------|---------------|-----------------|-----------------|
| gene                                                                                     | p_val       | avg_log2FC  | pct.1 | pct.2 | p_val_adj   | Foldchange_UP | Foldchange_DOWN | Ratio_pct1_pct2 |
| ERLIN2                                                                                   | 1,3367E-07  | 0,258403328 | 0,25  | 0     | 0,002820574 | 1,196154154   | 0,836012647     | #DIV/0!         |
| CXCL12                                                                                   | 6,50025E-06 | 0,258164848 | 0,637 | 0,21  | 0,137161878 | 1,195956444   | 0,836150853     | 3,033333333     |
| NTPCR                                                                                    | 1,60588E-05 | 0,258075093 | 0,462 | 0,13  | 0,33885715  | 1,195882041   | 0,836202874     | 3,553846154     |
| SFT2D1                                                                                   | 2,50049E-06 | 0,258060075 | 0,762 | 0,26  | 0,052762835 | 1,195869593   | 0,836211578     | 2,930769231     |
| MCUB                                                                                     | 3,38611E-08 | 0,257551539 | 0,325 | 0,02  | 0,000714504 | 1,195448134   | 0,836506387     | 16,25           |
| TMEM45A                                                                                  | 1,02827E-05 | 0,257439247 | 0,4   | 0,09  | 0,216974611 | 1,19535509    | 0,836571499     | 4,444444444     |
| COX7C                                                                                    | 0,00203141  | 0,257399351 | 0,975 | 0,61  | 1           | 1,195322035   | 0,836594634     | 1,598360656     |
| LOXL4                                                                                    | 1,47731E-05 | 0,257292327 | 0,2   | 0,01  | 0,311726706 | 1,195233365   | 0,836656698     | 20              |
| POP7                                                                                     | 4,78514E-05 | 0,257276124 | 0,525 | 0,17  | 1           | 1,195219942   | 0,836666094     | 3,088235294     |
| TEX264                                                                                   | 1,22721E-05 | 0,257108598 | 0,525 | 0,16  | 0,258954423 | 1,19508116    | 0,836763253     | 3,28125         |
| LAPTM4B                                                                                  | 0,00011883  | 0,256850423 | 0,512 | 0,18  | 1           | 1,194867316   | 0,836913008     | 2,844444444     |
| JPT1                                                                                     | 1,89457E-05 | 0,256819976 | 0,625 | 0,22  | 0,399773285 | 1,194842099   | 0,836930671     | 2,840909091     |
| C19orf53                                                                                 | 0,00379791  | 0,256675272 | 0,9   | 0,5   | 1           | 1,194722261   | 0,83701462      | 1,8             |
| SMARCD1                                                                                  | 3,56542E-05 | 0,256473492 | 0,238 | 0,03  | 0,752338877 | 1,194555175   | 0,837131696     | 7,933333333     |
| DCBLD1                                                                                   | 1,57276E-06 | 0,256463462 | 0,262 | 0,02  | 0,03318682  | 1,19454687    | 0,837137516     | 13,1            |
| KXD1                                                                                     | 3,47535E-06 | 0,256404442 | 0,525 | 0,14  | 0,073333446 | 1,194498003   | 0,837171764     | 3,75            |
| RASSF8                                                                                   | 0,00012739  | 0,256249994 | 0,775 | 0,34  | 1           | 1,194370133   | 0,837261392     | 2,279411765     |
| MAGED1                                                                                   | 1,68738E-06 | 0,256173543 | 0,575 | 0,16  | 0,035605492 | 1,194306843   | 0,837305761     | 3,59375         |
| COTL1                                                                                    | 0,00054687  | 0,256138621 | 0,9   | 0,5   | 1           | 1,194277933   | 0,83732603      | 1,8             |
| PSMB8                                                                                    | 0,000543651 | 0,255875516 | 0,675 | 0,31  | 1           | 1,194060152   | 0,837478747     | 2,177419355     |
| RPL36A                                                                                   | 0,000618634 | 0,255674942 | 0,912 | 0,53  | 1           | 1,193894157   | 0,837595187     | 1,720754717     |
| TAF6                                                                                     | 4,54913E-06 | 0,255546276 | 0,3   | 0,04  | 0,095991137 | 1,193787685   | 0,837669891     | 7,5             |
| IFT43                                                                                    | 6,3979E-08  | 0,25533755  | 0,45  | 0,07  | 0,001350022 | 1,193614983   | 0,837791092     | 6,428571429     |
| GPSM3                                                                                    | 9,42407E-07 | 0,255246756 | 0,25  | 0,01  | 0,019885724 | 1,193539866   | 0,837843819     | 25              |
| SYDE1                                                                                    | 5,72092E-08 | 0,255183687 | 0,375 | 0,04  | 0,001207171 | 1,193487691   | 0,837880447     | 9,375           |
| MRPL4                                                                                    | 0,000192438 | 0,25511058  | 0,662 | 0,27  | 1           | 1,193427213   | 0,837922907     | 2,451851852     |
| ASCC3                                                                                    | 1,20075E-05 | 0,255004204 | 0,35  | 0,07  | 0,253370628 | 1,19333922    | 0,837984693     | 5               |
| ARHGAP22                                                                                 | 2,11405E-06 | 0,254520672 | 0,262 | 0,02  | 0,044608552 | 1,192939329   | 0,838265598     | 13,1            |
| CYB5B                                                                                    | 1,30253E-05 | 0,254475107 | 0,388 | 0,09  | 0,274846789 | 1,192901653   | 0,838292073     | 4,311111111     |
| E2F1                                                                                     | 1,57477E-06 | 0,253790979 | 0,238 | 0,01  | 0,033229259 | 1,192336112   | 0,838689687     | 23,8            |

Supplementary Table 4

| Differentially expressed genes_keloid-CCD_ comparing SC-Keloid vs. (SC-Myel, SC-Nonmyel) |             |             |       |       |             |               |                 |                 |
|------------------------------------------------------------------------------------------|-------------|-------------|-------|-------|-------------|---------------|-----------------|-----------------|
| gene                                                                                     | p_val       | avg_log2FC  | pct.1 | pct.2 | p_val_adj   | Foldchange_UP | Foldchange_DOWN | Ratio_pct1_pct2 |
| GNA12                                                                                    | 8,17173E-06 | 0,253696958 | 0,488 | 0,13  | 0,172431779 | 1,192258409   | 0,838744347     | 3,753846154     |
| MYBL2                                                                                    | 6,74984E-06 | 0,253689027 | 0,188 | 0     | 0,142428329 | 1,192251854   | 0,838748958     | #DIV/0!         |
| SURF2                                                                                    | 1,15974E-06 | 0,253421017 | 0,525 | 0,13  | 0,024471714 | 1,19203039    | 0,838904786     | 4,038461538     |
| ADRM1                                                                                    | 2,52567E-05 | 0,25330087  | 0,75  | 0,29  | 0,532942252 | 1,191931123   | 0,838974653     | 2,586206897     |
| LINC01116                                                                                | 0,000130036 | 0,253251239 | 0,525 | 0,2   | 1           | 1,191890119   | 0,839003516     | 2,625           |
| NDUFA13                                                                                  | 0,006120286 | 0,252404618 | 0,963 | 0,63  | 1           | 1,191190884   | 0,839496015     | 1,528571429     |
| CHCHD6                                                                                   | 8,61909E-07 | 0,252357105 | 0,325 | 0,04  | 0,018187133 | 1,191151654   | 0,839523663     | 8,125           |
| RDH11                                                                                    | 1,97161E-06 | 0,252295383 | 0,525 | 0,14  | 0,041602971 | 1,191100695   | 0,839559581     | 3,75            |
| CYTH2                                                                                    | 2,57763E-07 | 0,252230942 | 0,662 | 0,18  | 0,005439065 | 1,191047493   | 0,839597082     | 3,677777778     |
| HNRNPD                                                                                   | 0,007912444 | 0,252230574 | 0,825 | 0,52  | 1           | 1,19104719    | 0,839597296     | 1,586538462     |
| CD109                                                                                    | 1,73624E-08 | 0,252202237 | 0,312 | 0,01  | 0,000366363 | 1,191023796   | 0,839613787     | 31,2            |
| CCT2                                                                                     | 0,012666523 | 0,252164889 | 0,9   | 0,56  | 1           | 1,190992963   | 0,839635523     | 1,607142857     |
| SUMO1                                                                                    | 0,007442679 | 0,25212821  | 0,85  | 0,5   | 1           | 1,190962683   | 0,839656871     | 1,7             |
| TMEM126B                                                                                 | 7,61779E-06 | 0,252042307 | 0,575 | 0,18  | 0,160743077 | 1,190891772   | 0,839706868     | 3,194444444     |
| SUGP2                                                                                    | 3,08018E-05 | 0,251985042 | 0,475 | 0,14  | 0,649949483 | 1,190844502   | 0,8397402       | 3,392857143     |
| CMC1                                                                                     | 7,04194E-05 | 0,251923329 | 0,425 | 0,13  | 1           | 1,190793564   | 0,839776121     | 3,269230769     |
| TRIM44                                                                                   | 0,000210456 | 0,251750386 | 0,588 | 0,23  | 1           | 1,190650826   | 0,839876795     | 2,556521739     |
| KCNMA1                                                                                   | 0,000628761 | 0,251702849 | 0,762 | 0,33  | 1           | 1,190611595   | 0,83990447      | 2,309090909     |
| SHISA4                                                                                   | 8,53769E-07 | 0,251579502 | 0,688 | 0,22  | 0,018015389 | 1,190509805   | 0,839976283     | 3,127272727     |
| CCS                                                                                      | 5,41491E-05 | 0,251501102 | 0,537 | 0,18  | 1           | 1,190445111   | 0,84002193      | 2,983333333     |
| DLGAP5                                                                                   | 0,000291957 | 0,251193654 | 0,125 | 0     | 1           | 1,190191446   | 0,840200964     | #DIV/0!         |
| STX2                                                                                     | 5,30582E-05 | 0,251142017 | 0,525 | 0,17  | 1           | 1,190148847   | 0,840231037     | 3,088235294     |
| COPG1                                                                                    | 5,87644E-07 | 0,250937327 | 0,362 | 0,05  | 0,012399868 | 1,18998       | 0,840350258     | 7,24            |
| UGP2                                                                                     | 7,13317E-05 | 0,250415032 | 0,5   | 0,17  | 1           | 1,189549274   | 0,840654542     | 2,941176471     |
| GPS1                                                                                     | 5,50119E-06 | 0,250274581 | 0,512 | 0,14  | 0,116080622 | 1,189433472   | 0,840736387     | 3,657142857     |
| IFI44                                                                                    | 5,93983E-07 | 0,250106309 | 0,537 | 0,13  | 0,012533638 | 1,189294748   | 0,840834454     | 4,130769231     |
| TRPT1                                                                                    | 1,15336E-07 | 0,249805991 | 0,362 | 0,04  | 0,002433714 | 1,189047205   | 0,841009504     | 9,05            |
| ARMCX6                                                                                   | 6,96169E-07 | 0,249771366 | 0,55  | 0,14  | 0,014689871 | 1,189018668   | 0,841029689     | 3,928571429     |
| ASS1                                                                                     | 6,57145E-05 | 0,249758801 | 0,15  | 0     | 1           | 1,189008313   | 0,841037013     | #DIV/0!         |
| CENPH                                                                                    | 0,000180973 | 0,249474682 | 0,162 | 0,01  | 1           | 1,188774176   | 0,841202661     | 16,2            |

Supplementary Table 4

| Differentially expressed genes_keloid-CCD_ comparing SC-Keloid vs. (SC-Myel, SC-Nonmyel) |             |             |       |       |             |               |                 |                 |
|------------------------------------------------------------------------------------------|-------------|-------------|-------|-------|-------------|---------------|-----------------|-----------------|
| gene                                                                                     | p_val       | avg_log2FC  | pct.1 | pct.2 | p_val_adj   | Foldchange_UP | Foldchange_DOWN | Ratio_pct1_pct2 |
| HS3ST1                                                                                   | 9,01318E-06 | 0,249424043 | 0,312 | 0,05  | 0,190187052 | 1,188732451   | 0,841232187     | 6,24            |
| DENND4B                                                                                  | 2,43503E-06 | 0,249398389 | 0,288 | 0,03  | 0,051381536 | 1,188711313   | 0,841247146     | 9,6             |
| PNKD                                                                                     | 5,55273E-05 | 0,249131796 | 0,688 | 0,26  | 1           | 1,188491674   | 0,841402613     | 2,646153846     |
| UBE2Q2                                                                                   | 4,29105E-05 | 0,249072886 | 0,613 | 0,22  | 0,905453637 | 1,188443144   | 0,841436971     | 2,786363636     |
| CENPA                                                                                    | 0,000291957 | 0,248683885 | 0,125 | 0     | 1           | 1,188122742   | 0,841663882     | #DIV/0!         |
| CWC15                                                                                    | 7,21495E-06 | 0,248679595 | 0,662 | 0,22  | 0,152242685 | 1,188119209   | 0,841666385     | 3,009090909     |
| GARS1                                                                                    | 7,83021E-06 | 0,248426975 | 0,55  | 0,16  | 0,165225161 | 1,187911184   | 0,841813776     | 3,4375          |
| RASA1                                                                                    | 1,06354E-05 | 0,248211523 | 0,325 | 0,06  | 0,224417759 | 1,187733794   | 0,841939503     | 5,416666667     |
| LTV1                                                                                     | 2,77431E-07 | 0,248114421 | 0,35  | 0,04  | 0,005854081 | 1,187653856   | 0,841996172     | 8,75            |
| RFXANK                                                                                   | 3,61555E-07 | 0,247894083 | 0,55  | 0,13  | 0,00762917  | 1,187472484   | 0,842124777     | 4,230769231     |
| BABAM1                                                                                   | 1,05526E-05 | 0,247795866 | 0,562 | 0,17  | 0,222670462 | 1,187391644   | 0,84218211      | 3,305882353     |
| PAM                                                                                      | 5,07281E-06 | 0,24774998  | 0,3   | 0,04  | 0,107041321 | 1,187353879   | 0,842208896     | 7,5             |
| SDF2                                                                                     | 0,000275409 | 0,247442208 | 0,575 | 0,23  | 1           | 1,187100606   | 0,842388585     | 2,5             |
| DALRD3                                                                                   | 2,56747E-06 | 0,246710098 | 0,375 | 0,07  | 0,054176194 | 1,186498353   | 0,842816172     | 5,357142857     |
| RARS1                                                                                    | 5,52286E-08 | 0,246225766 | 0,438 | 0,07  | 0,001165379 | 1,186100097   | 0,843099164     | 6,257142857     |
| PCDHGC3                                                                                  | 2,90076E-05 | 0,246065503 | 0,312 | 0,06  | 0,6120893   | 1,185968345   | 0,843192826     | 5,2             |
| TOR3A                                                                                    | 3,12652E-07 | 0,245895598 | 0,462 | 0,09  | 0,006597278 | 1,185828683   | 0,843292134     | 5,133333333     |
| TUSC2                                                                                    | 3,9025E-06  | 0,245820017 | 0,462 | 0,11  | 0,082346748 | 1,18576656    | 0,843336314     | 4,2             |
| PIP5K1A                                                                                  | 1,41187E-06 | 0,245749888 | 0,362 | 0,06  | 0,029791801 | 1,185708922   | 0,843377309     | 6,033333333     |
| LDLRAP1                                                                                  | 5,2673E-07  | 0,245742296 | 0,362 | 0,05  | 0,011114522 | 1,185702683   | 0,843381747     | 7,24            |
| APEH                                                                                     | 2,90079E-06 | 0,245727604 | 0,438 | 0,1   | 0,061209649 | 1,185690608   | 0,843390336     | 4,38            |
| TROAP                                                                                    | 1,44967E-05 | 0,245549664 | 0,175 | 0     | 0,305894872 | 1,185544375   | 0,843494365     | #DIV/0!         |
| LRWD1                                                                                    | 1,28028E-09 | 0,245465977 | 0,438 | 0,04  | 2,70152E-05 | 1,185475607   | 0,843543296     | 10,95           |
| TMX1                                                                                     | 0,000160048 | 0,245430481 | 0,588 | 0,23  | 1           | 1,185446439   | 0,843564051     | 2,556521739     |
| AQP1                                                                                     | 0,027662004 | 0,245392102 | 0,512 | 0,29  | 1           | 1,185414904   | 0,843586491     | 1,765517241     |
| CENPB                                                                                    | 6,34071E-06 | 0,245329746 | 0,438 | 0,11  | 0,133795305 | 1,185363669   | 0,843622954     | 3,981818182     |
| UBAP2L                                                                                   | 1,72292E-06 | 0,245294464 | 0,412 | 0,08  | 0,036355287 | 1,185334681   | 0,843643585     | 5,15            |
| NUSAP1                                                                                   | 0,049692385 | 0,245133252 | 0,212 | 0,1   | 1           | 1,185202235   | 0,843737862     | 2,12            |
| CAP1                                                                                     | 0,009809838 | 0,245082843 | 0,875 | 0,66  | 1           | 1,185160824   | 0,843767343     | 1,325757576     |
| GOLT1B                                                                                   | 8,9712E-07  | 0,244888527 | 0,6   | 0,16  | 0,018930138 | 1,185001206   | 0,843880998     | 3,75            |

Supplementary Table 4

| Differentially expressed genes_keloid-CCD_ comparing SC-Keloid vs. (SC-Myel, SC-Nonmyel) |             |             |       |       |             |               |                 |                 |
|------------------------------------------------------------------------------------------|-------------|-------------|-------|-------|-------------|---------------|-----------------|-----------------|
| gene                                                                                     | p_val       | avg_log2FC  | pct.1 | pct.2 | p_val_adj   | Foldchange_UP | Foldchange_DOWN | Ratio_pct1_pct2 |
| COX7A1                                                                                   | 0,000252755 | 0,244842015 | 0,675 | 0,29  | 1           | 1,184963002   | 0,843908205     | 2,327586207     |
| UBE2M                                                                                    | 0,002055484 | 0,244729677 | 0,95  | 0,47  | 1           | 1,184870737   | 0,843973919     | 2,021276596     |
| FAM204A                                                                                  | 2,43008E-05 | 0,244641752 | 0,787 | 0,29  | 0,512772183 | 1,184798527   | 0,844025357     | 2,713793103     |
| PHLDA3                                                                                   | 0,00017931  | 0,244582832 | 0,8   | 0,4   | 1           | 1,18475014    | 0,844059828     | 2               |
| MTFR1L                                                                                   | 9,50835E-07 | 0,244551483 | 0,438 | 0,09  | 0,020063576 | 1,184724397   | 0,844078169     | 4,866666667     |
| SCFD1                                                                                    | 7,46187E-06 | 0,244229439 | 0,55  | 0,16  | 0,157452839 | 1,184459967   | 0,844266609     | 3,4375          |
| CLTA                                                                                     | 0,012850054 | 0,244168629 | 0,9   | 0,61  | 1           | 1,184410044   | 0,844302195     | 1,475409836     |
| TLN2                                                                                     | 1,42381E-06 | 0,244168155 | 0,388 | 0,07  | 0,030043735 | 1,184409654   | 0,844302473     | 5,542857143     |
| MVB12A                                                                                   | 5,23443E-07 | 0,243755161 | 0,725 | 0,22  | 0,01104518  | 1,184070647   | 0,844544202     | 3,295454545     |
| COA5                                                                                     | 5,604E-07   | 0,243714468 | 0,388 | 0,06  | 0,011824994 | 1,184037249   | 0,844568024     | 6,466666667     |
| UPP1                                                                                     | 0,000108807 | 0,243662179 | 0,75  | 0,29  | 1           | 1,183994335   | 0,844598635     | 2,586206897     |
| PKDCC                                                                                    | 1,82421E-06 | 0,243376073 | 0,262 | 0,02  | 0,038492635 | 1,183759557   | 0,844766147     | 13,1            |
| ASL                                                                                      | 9,27986E-08 | 0,24323321  | 0,462 | 0,08  | 0,001958143 | 1,183642341   | 0,844849804     | 5,775           |
| PFDN4                                                                                    | 6,02715E-05 | 0,242832576 | 0,675 | 0,25  | 1           | 1,183313691   | 0,84508445      | 2,7             |
| FOXM1                                                                                    | 1,44967E-05 | 0,242738048 | 0,175 | 0     | 0,305894872 | 1,18323616    | 0,845139824     | #DIV/0!         |
| STX18                                                                                    | 1,89454E-06 | 0,242592776 | 0,425 | 0,09  | 0,039976674 | 1,183117021   | 0,845224929     | 4,722222222     |
| GXYLT2                                                                                   | 9,6443E-09  | 0,242501364 | 0,35  | 0,02  | 0,000203504 | 1,183042059   | 0,845278486     | 17,5            |
| HARS1                                                                                    | 7,71677E-06 | 0,242249264 | 0,488 | 0,14  | 0,162831464 | 1,182835349   | 0,845426205     | 3,485714286     |
| NACC1                                                                                    | 1,84366E-06 | 0,242223543 | 0,238 | 0,01  | 0,038903004 | 1,182814261   | 0,845441277     | 23,8            |
| GOT2                                                                                     | 7,029E-06   | 0,241855419 | 0,312 | 0,05  | 0,148318842 | 1,182512488   | 0,845657031     | 6,24            |
| LSM6                                                                                     | 1,16363E-06 | 0,241783137 | 0,5   | 0,12  | 0,02455379  | 1,182453243   | 0,845699402     | 4,166666667     |
| GTPBP6                                                                                   | 2,98132E-06 | 0,241714196 | 0,525 | 0,14  | 0,06290884  | 1,18239674    | 0,845739815     | 3,75            |
| MXD3                                                                                     | 0,000138823 | 0,241607234 | 0,138 | 0     | 1           | 1,182309079   | 0,845802521     | #DIV/0!         |
| CCPG1                                                                                    | 4,45247E-05 | 0,241489587 | 0,825 | 0,32  | 0,939515016 | 1,182212669   | 0,845871497     | 2,578125        |
| ELAVL1                                                                                   | 4,32902E-05 | 0,241432406 | 0,637 | 0,22  | 0,913467089 | 1,182165814   | 0,845905023     | 2,895454545     |
| MRPL43                                                                                   | 5,16813E-06 | 0,240952482 | 0,787 | 0,28  | 0,109052784 | 1,181772623   | 0,846186467     | 2,810714286     |
| FBL                                                                                      | 5,05649E-06 | 0,240916318 | 0,55  | 0,16  | 0,106696985 | 1,181742999   | 0,846207679     | 3,4375          |
| DCUN1D5                                                                                  | 1,60107E-07 | 0,240893253 | 0,55  | 0,12  | 0,003378415 | 1,181724106   | 0,846221207     | 4,583333333     |
| SPRYD7                                                                                   | 2,36836E-06 | 0,240845101 | 0,362 | 0,06  | 0,049974762 | 1,181684665   | 0,846249452     | 6,033333333     |
| LMLN                                                                                     | 6,55355E-07 | 0,240791265 | 0,225 | 0     | 0,013828644 | 1,18164057    | 0,846281031     | #DIV/0!         |

Supplementary Table 4

| Differentially expressed genes_keloid-CCD_ comparing SC-Keloid vs. (SC-Myel, SC-Nonmyel) |             |             |       |       |             |               |                 |                 |
|------------------------------------------------------------------------------------------|-------------|-------------|-------|-------|-------------|---------------|-----------------|-----------------|
| gene                                                                                     | p_val       | avg_log2FC  | pct.1 | pct.2 | p_val_adj   | Foldchange_UP | Foldchange_DOWN | Ratio_pct1_pct2 |
| RNF181                                                                                   | 1,01069E-05 | 0,240576961 | 0,725 | 0,26  | 0,213265882 | 1,181465057   | 0,846406751     | 2,788461538     |
| RPL3                                                                                     | 0,003866621 | 0,240505133 | 1     | 1     | 1           | 1,181406236   | 0,846448892     | 1               |
| NDUFB8                                                                                   | 0,007529394 | 0,240277676 | 0,95  | 0,56  | 1           | 1,181219989   | 0,846582355     | 1,696428571     |
| MGME1                                                                                    | 3,21275E-05 | 0,240152412 | 0,288 | 0,05  | 0,677923407 | 1,181117433   | 0,846655863     | 5,76            |
| CAMK1                                                                                    | 1,34829E-05 | 0,24009707  | 0,425 | 0,11  | 0,284502254 | 1,181072126   | 0,846688342     | 3,863636364     |
| PPA1                                                                                     | 4,52534E-05 | 0,239996609 | 0,762 | 0,3   | 0,954890953 | 1,180989886   | 0,846747302     | 2,54            |
| PTS                                                                                      | 5,69319E-06 | 0,239888644 | 0,537 | 0,15  | 0,120131971 | 1,180901509   | 0,846810672     | 3,58            |
| MRPL13                                                                                   | 7,49874E-06 | 0,239592705 | 0,575 | 0,18  | 0,158230963 | 1,180659296   | 0,846984395     | 3,194444444     |
| COMMD8                                                                                   | 2,06287E-07 | 0,239472458 | 0,45  | 0,08  | 0,004352855 | 1,180560893   | 0,847054994     | 5,625           |
| COX7B                                                                                    | 0,010179535 | 0,239450755 | 0,875 | 0,56  | 1           | 1,180543134   | 0,847067736     | 1,5625          |
| ITGB3BP                                                                                  | 1,00479E-05 | 0,238947681 | 0,375 | 0,08  | 0,212020023 | 1,180131545   | 0,847363164     | 4,6875          |
| CLCC1                                                                                    | 3,78401E-06 | 0,238939141 | 0,275 | 0,03  | 0,079846406 | 1,18012456    | 0,84736818      | 9,166666667     |
| GLRX3                                                                                    | 0,000127477 | 0,238840938 | 0,625 | 0,25  | 1           | 1,180044232   | 0,847425861     | 2,5             |
| PPIL2                                                                                    | 1,08753E-06 | 0,238831934 | 0,275 | 0,02  | 0,022948034 | 1,180036867   | 0,84743115      | 13,75           |
| VEGFB                                                                                    | 6,55154E-05 | 0,23869638  | 0,625 | 0,23  | 1           | 1,179925998   | 0,847510778     | 2,717391304     |
| MMAB                                                                                     | 3,94367E-06 | 0,238687867 | 0,325 | 0,05  | 0,083215321 | 1,179919035   | 0,847515779     | 6,5             |
| CCDC25                                                                                   | 1,65211E-07 | 0,238681762 | 0,562 | 0,13  | 0,003486116 | 1,179914042   | 0,847519365     | 4,323076923     |
| HP1BP3                                                                                   | 0,000707651 | 0,238442465 | 0,825 | 0,41  | 1           | 1,179718348   | 0,847659953     | 2,012195122     |
| TOR1A                                                                                    | 2,82014E-08 | 0,238230921 | 0,537 | 0,1   | 0,000595077 | 1,179545378   | 0,847784256     | 5,37            |
| TBC1D7                                                                                   | 2,33924E-06 | 0,23822768  | 0,4   | 0,08  | 0,049360311 | 1,179542728   | 0,84778616      | 5               |
| SCAMP4                                                                                   | 3,59514E-06 | 0,238139942 | 0,412 | 0,09  | 0,075860945 | 1,179470996   | 0,84783772      | 4,577777778     |
| CDIPT                                                                                    | 1,33712E-06 | 0,238065107 | 0,525 | 0,13  | 0,02821457  | 1,179409817   | 0,8478817       | 4,038461538     |
| LBH                                                                                      | 6,04865E-06 | 0,237874298 | 0,55  | 0,16  | 0,127632515 | 1,179253839   | 0,847993847     | 3,4375          |
| MRPL2                                                                                    | 1,93299E-06 | 0,237757651 | 0,488 | 0,12  | 0,040788049 | 1,179158496   | 0,848062413     | 4,066666667     |
| RGS20                                                                                    | 6,07415E-05 | 0,23745654  | 0,225 | 0,03  | 1           | 1,178912415   | 0,848239435     | 7,5             |
| DPP3                                                                                     | 2,4726E-07  | 0,237403836 | 0,35  | 0,04  | 0,005217436 | 1,178869348   | 0,848270422     | 8,75            |
| SLC25A24                                                                                 | 4,66484E-06 | 0,237226065 | 0,325 | 0,05  | 0,098432866 | 1,178724095   | 0,848374954     | 6,5             |
| CPD                                                                                      | 3,20697E-07 | 0,23701769  | 0,438 | 0,08  | 0,006767034 | 1,178553859   | 0,848497498     | 5,475           |
| MXRA8                                                                                    | 0,003304108 | 0,237008228 | 0,887 | 0,48  | 1           | 1,178546129   | 0,848503063     | 1,847916667     |
| ACYP2                                                                                    | 1,19146E-06 | 0,236732664 | 0,35  | 0,05  | 0,025140913 | 1,178321041   | 0,848665148     | 7               |



Supplementary Table 4

| Differentially expressed genes_keloid-CCD_ comparing SC-Keloid vs. (SC-Myel, SC-Nonmyel) |             |             |       |       |             |               |                 |                 |
|------------------------------------------------------------------------------------------|-------------|-------------|-------|-------|-------------|---------------|-----------------|-----------------|
| gene                                                                                     | p_val       | avg_log2FC  | pct.1 | pct.2 | p_val_adj   | Foldchange_UP | Foldchange_DOWN | Ratio_pct1_pct2 |
| SPATS2L                                                                                  | 9,67783E-05 | 0,236696879 | 0,775 | 0,31  | 1           | 1,178291814   | 0,848686198     | 2,5             |
| COL9A2                                                                                   | 1,40003E-05 | 0,236690923 | 0,275 | 0,04  | 0,295421051 | 1,178286949   | 0,848689702     | 6,875           |
| PRC1                                                                                     | 2,2927E-05  | 0,236645518 | 0,225 | 0,02  | 0,483782912 | 1,178249867   | 0,848716412     | 11,25           |
| GLDC                                                                                     | 1,30976E-08 | 0,236556157 | 0,4   | 0,04  | 0,000276372 | 1,178176887   | 0,848768984     | 10              |
| DNAJC1                                                                                   | 5,06443E-05 | 0,236309635 | 0,625 | 0,22  | 1           | 1,177975582   | 0,848914031     | 2,840909091     |
| ATP5PO                                                                                   | 0,00086506  | 0,236218301 | 0,925 | 0,46  | 1           | 1,17790101    | 0,848967775     | 2,010869565     |
| CNPY3                                                                                    | 2,68706E-05 | 0,236058625 | 0,438 | 0,12  | 0,566996675 | 1,177770648   | 0,849061744     | 3,65            |
| PWP1                                                                                     | 4,9685E-06  | 0,235942394 | 0,562 | 0,16  | 0,104840344 | 1,177675765   | 0,849130151     | 3,5125          |
| SPC25                                                                                    | 0,000291957 | 0,235932178 | 0,125 | 0     | 1           | 1,177667425   | 0,849136164     | #DIV/0!         |
| POLR3D                                                                                   | 1,0237E-05  | 0,235391401 | 0,375 | 0,08  | 0,216010948 | 1,177226073   | 0,849454512     | 4,6875          |
| NEMF                                                                                     | 1,21469E-05 | 0,235322579 | 0,55  | 0,17  | 0,256312154 | 1,177169917   | 0,849495035     | 3,235294118     |
| MVD                                                                                      | 8,79794E-07 | 0,235219688 | 0,35  | 0,05  | 0,018564538 | 1,177085965   | 0,849555622     | 7               |
| SH3PXD2A                                                                                 | 0,00792579  | 0,23468869  | 0,887 | 0,56  | 1           | 1,176652808   | 0,849868367     | 1,583928571     |
| MMP24OS                                                                                  | 2,93106E-07 | 0,234568361 | 0,613 | 0,16  | 0,006184821 | 1,176554672   | 0,849939254     | 3,83125         |
| MDH1                                                                                     | 0,000688268 | 0,234314526 | 0,75  | 0,33  | 1           | 1,176347681   | 0,85008881      | 2,272727273     |
| MRPL1                                                                                    | 8,68115E-07 | 0,234154834 | 0,4   | 0,07  | 0,018318097 | 1,176217478   | 0,850182911     | 5,714285714     |
| CHSY1                                                                                    | 8,98127E-06 | 0,233867036 | 0,375 | 0,08  | 0,189513876 | 1,175982862   | 0,850352528     | 4,6875          |
| UNC5B                                                                                    | 1,96778E-05 | 0,233826549 | 0,275 | 0,04  | 0,415221864 | 1,175949861   | 0,850376392     | 6,875           |
| UBAC1                                                                                    | 1,41925E-05 | 0,233717349 | 0,412 | 0,1   | 0,299476423 | 1,175860854   | 0,850440761     | 4,12            |
| ST3GAL2                                                                                  | 6,74984E-06 | 0,233538154 | 0,188 | 0     | 0,142428329 | 1,175714812   | 0,8505464       | #DIV/0!         |
| MSRA                                                                                     | 6,04523E-06 | 0,233528523 | 0,4   | 0,09  | 0,127560366 | 1,175706963   | 0,850552078     | 4,444444444     |
| IGFBP2                                                                                   | 0,964110154 | 0,233509812 | 0,375 | 0,36  | 1           | 1,175691714   | 0,850563109     | 1,041666667     |
| PAQR4                                                                                    | 1,23532E-06 | 0,233460399 | 0,388 | 0,07  | 0,026066465 | 1,175651447   | 0,850592242     | 5,542857143     |
| STX4                                                                                     | 6,14154E-07 | 0,233437586 | 0,55  | 0,14  | 0,012959264 | 1,175632857   | 0,850605692     | 3,928571429     |
| KEAP1                                                                                    | 6,18325E-06 | 0,233413061 | 0,338 | 0,06  | 0,13047273  | 1,175612872   | 0,850620152     | 5,633333333     |
| ABRACL                                                                                   | 3,15936E-05 | 0,233251834 | 0,325 | 0,07  | 0,666656268 | 1,1754815     | 0,850715218     | 4,642857143     |
| PIGC                                                                                     | 9,04251E-07 | 0,232999606 | 0,4   | 0,07  | 0,019080606 | 1,175276008   | 0,850863962     | 5,714285714     |
| TSEN15                                                                                   | 2,44473E-06 | 0,232950739 | 0,338 | 0,05  | 0,051586179 | 1,175236199   | 0,850892783     | 6,76            |
| EI24                                                                                     | 3,34772E-05 | 0,232854463 | 0,713 | 0,26  | 0,706401611 | 1,175157775   | 0,850949568     | 2,742307692     |
| BLVRA                                                                                    | 3,77738E-05 | 0,232713557 | 0,475 | 0,14  | 0,797064475 | 1,175043004   | 0,851032683     | 3,392857143     |

Supplementary Table 4

| Differentially expressed genes_keloid-CCD_ comparing SC-Keloid vs. (SC-Myel, SC-Nonmyel) |             |             |       |       |             |               |                 |                 |
|------------------------------------------------------------------------------------------|-------------|-------------|-------|-------|-------------|---------------|-----------------|-----------------|
| gene                                                                                     | p_val       | avg_log2FC  | pct.1 | pct.2 | p_val_adj   | Foldchange_UP | Foldchange_DOWN | Ratio_pct1_pct2 |
| FAT1                                                                                     | 2,02064E-05 | 0,232609451 | 0,4   | 0,1   | 0,42637448  | 1,174958215   | 0,851094096     | 4               |
| FAM50B                                                                                   | 1,76169E-05 | 0,232325126 | 0,3   | 0,05  | 0,371733492 | 1,174726678   | 0,851261846     | 6               |
| CMYA5                                                                                    | 0,000207898 | 0,231995267 | 0,512 | 0,2   | 1           | 1,174458118   | 0,851456501     | 2,56            |
| NR2C2AP                                                                                  | 4,46871E-07 | 0,231629351 | 0,312 | 0,03  | 0,009429427 | 1,174160274   | 0,851672486     | 10,4            |
| NIPA2                                                                                    | 2,22646E-06 | 0,231600691 | 0,475 | 0,11  | 0,046980553 | 1,174136949   | 0,851689406     | 4,318181818     |
| EIF2B3                                                                                   | 8,12883E-06 | 0,231566926 | 0,312 | 0,05  | 0,171526402 | 1,17410947    | 0,851709339     | 6,24            |
| C14orf132                                                                                | 5,40767E-06 | 0,231551939 | 0,4   | 0,09  | 0,114107165 | 1,174097273   | 0,851718187     | 4,444444444     |
| PTGDS                                                                                    | 0,1696289   | 0,231489195 | 0,125 | 0,06  | 1           | 1,174046212   | 0,851755229     | 2,083333333     |
| MED8                                                                                     | 2,30078E-05 | 0,231350647 | 0,412 | 0,11  | 0,485488438 | 1,173933468   | 0,851837031     | 3,745454545     |
| RANGAP1                                                                                  | 5,4889E-05  | 0,23110045  | 0,3   | 0,06  | 1           | 1,173729898   | 0,851984772     | 5               |
| RPS15A                                                                                   | 0,000926243 | 0,231046064 | 1     | 0,98  | 1           | 1,173685652   | 0,852016891     | 1,020408163     |
| STK11                                                                                    | 8,29381E-05 | 0,23076796  | 0,338 | 0,08  | 1           | 1,173459427   | 0,852181147     | 4,225           |
| RPL10                                                                                    | 0,000907361 | 0,230646454 | 1     | 1     | 1           | 1,1733606     | 0,852252922     | 1               |
| SYNC                                                                                     | 2,90171E-07 | 0,230600509 | 0,325 | 0,03  | 0,006122899 | 1,173323233   | 0,852280064     | 10,83333333     |
| MIF4GD                                                                                   | 0,000158523 | 0,230567809 | 0,4   | 0,12  | 1           | 1,173296639   | 0,852299382     | 3,333333333     |
| B9D1                                                                                     | 4,08316E-06 | 0,230360486 | 0,225 | 0,01  | 0,086158787 | 1,173128042   | 0,852421871     | 22,5            |
| SMIM15                                                                                   | 6,89069E-08 | 0,230137245 | 0,637 | 0,16  | 0,001454004 | 1,172946528   | 0,852553783     | 3,98125         |
| MECR                                                                                     | 7,19883E-06 | 0,230073496 | 0,262 | 0,03  | 0,151902586 | 1,172894699   | 0,852591456     | 8,733333333     |
| RRP36                                                                                    | 2,94601E-05 | 0,22998906  | 0,5   | 0,15  | 0,6216381   | 1,172826056   | 0,852641357     | 3,333333333     |
| AC147651.4                                                                               | 4,5424E-05  | 0,229961418 | 0,388 | 0,1   | 0,958491169 | 1,172803584   | 0,852657694     | 3,88            |
| FAHD1                                                                                    | 5,21685E-06 | 0,229742555 | 0,275 | 0,03  | 0,110080775 | 1,172625679   | 0,852787056     | 9,166666667     |
| ZNF365                                                                                   | 5,26865E-05 | 0,229469004 | 0,275 | 0,05  | 1           | 1,172403357   | 0,852948769     | 5,5             |
| A1BG                                                                                     | 2,56604E-05 | 0,229459566 | 0,738 | 0,28  | 0,541460195 | 1,172395687   | 0,852954349     | 2,635714286     |
| BMP8B                                                                                    | 0,001047073 | 0,229301252 | 0,475 | 0,19  | 1           | 1,172267042   | 0,853047953     | 2,5             |
| COX17                                                                                    | 1,5416E-05  | 0,228921297 | 0,675 | 0,25  | 0,325292262 | 1,171958349   | 0,853272645     | 2,7             |
| ZMAT3                                                                                    | 5,51016E-05 | 0,22882511  | 0,4   | 0,11  | 1           | 1,171880215   | 0,853329536     | 3,636363636     |
| NAGK                                                                                     | 8,31658E-06 | 0,22879224  | 0,562 | 0,16  | 0,175488068 | 1,171853515   | 0,853348979     | 3,5125          |
| SCG2                                                                                     | 0,000357268 | 0,228572777 | 0,15  | 0,01  | 1           | 1,171675266   | 0,8534788       | 15              |
| RUVBL1                                                                                   | 9,44907E-06 | 0,228400908 | 0,412 | 0,1   | 0,199384915 | 1,171535692   | 0,853580482     | 4,12            |
| RTCB                                                                                     | 7,53414E-06 | 0,228383572 | 0,45  | 0,11  | 0,158977953 | 1,171521614   | 0,853590738     | 4,090909091     |

Supplementary Table 4

| Differentially expressed genes_keloid-CCD_ comparing SC-Keloid vs. (SC-Myel, SC-Nonmyel) |             |             |       |       |             |               |                 |                 |
|------------------------------------------------------------------------------------------|-------------|-------------|-------|-------|-------------|---------------|-----------------|-----------------|
| gene                                                                                     | p_val       | avg_log2FC  | pct.1 | pct.2 | p_val_adj   | Foldchange_UP | Foldchange_DOWN | Ratio_pct1_pct2 |
| PPP1R7                                                                                   | 2,52939E-05 | 0,228358621 | 0,738 | 0,27  | 0,533727488 | 1,171501353   | 0,853605501     | 2,733333333     |
| BCCIP                                                                                    | 5,41851E-06 | 0,228090664 | 0,388 | 0,08  | 0,11433606  | 1,171283786   | 0,853764059     | 4,85            |
| CDC42BPB                                                                                 | 2,36152E-05 | 0,228008178 | 0,4   | 0,1   | 0,498304585 | 1,17121682    | 0,853812875     | 4               |
| DNAJC2                                                                                   | 3,34964E-05 | 0,227976319 | 0,462 | 0,14  | 0,706806513 | 1,171190957   | 0,853831729     | 3,3             |
| RND2                                                                                     | 4,11362E-05 | 0,227794958 | 0,262 | 0,04  | 0,868014931 | 1,171043735   | 0,853939071     | 6,55            |
| CDR2L                                                                                    | 2,35354E-06 | 0,227701012 | 0,312 | 0,04  | 0,049662114 | 1,170967481   | 0,85399468      | 7,8             |
| REEP4                                                                                    | 7,65697E-05 | 0,227184594 | 0,175 | 0,01  | 1           | 1,170548405   | 0,854300425     | 17,5            |
| NDUFA2                                                                                   | 0,000558964 | 0,227098927 | 0,75  | 0,32  | 1           | 1,1704789     | 0,854351155     | 2,34375         |
| BOP1                                                                                     | 1,14615E-06 | 0,227064923 | 0,375 | 0,06  | 0,024184898 | 1,170451312   | 0,854371292     | 6,25            |
| ZMAT2                                                                                    | 3,11755E-08 | 0,226955448 | 0,562 | 0,12  | 0,000657834 | 1,170362499   | 0,854436127     | 4,683333333     |
| COX20                                                                                    | 0,000322102 | 0,226812097 | 0,738 | 0,32  | 1           | 1,170246213   | 0,85452103      | 2,30625         |
| RPF1                                                                                     | 4,97007E-05 | 0,226609469 | 0,375 | 0,1   | 1           | 1,170081863   | 0,854641057     | 3,75            |
| RELA                                                                                     | 7,78931E-05 | 0,226437101 | 0,412 | 0,12  | 1           | 1,169942074   | 0,854743173     | 3,433333333     |
| EIF3L                                                                                    | 0,000837551 | 0,226337516 | 0,825 | 0,39  | 1           | 1,169861319   | 0,854802175     | 2,115384615     |
| S100A3                                                                                   | 1,32123E-06 | 0,22574382  | 0,325 | 0,04  | 0,02787937  | 1,169379998   | 0,855154015     | 8,125           |
| ATP5IF1                                                                                  | 0,004864555 | 0,225246387 | 0,912 | 0,5   | 1           | 1,168976872   | 0,855448918     | 1,824           |
| SLC35B2                                                                                  | 4,56842E-06 | 0,225223109 | 0,5   | 0,13  | 0,096398144 | 1,168958011   | 0,85546272      | 3,846153846     |
| SLC52A2                                                                                  | 5,56729E-09 | 0,225214337 | 0,613 | 0,12  | 0,000117475 | 1,168950904   | 0,855467922     | 5,108333333     |
| SMAP1                                                                                    | 8,15194E-05 | 0,224878021 | 0,45  | 0,14  | 1           | 1,168678433   | 0,855667369     | 3,214285714     |
| FLII                                                                                     | 1,74778E-05 | 0,224713041 | 0,312 | 0,06  | 0,368798947 | 1,168544796   | 0,855765225     | 5,2             |
| MFSD3                                                                                    | 7,10004E-05 | 0,224628834 | 0,175 | 0,01  | 1           | 1,168476592   | 0,855815176     | 17,5            |
| MRPS14                                                                                   | 5,48661E-07 | 0,224476357 | 0,388 | 0,06  | 0,011577288 | 1,168353104   | 0,85590563      | 6,466666667     |
| KCNC2                                                                                    | 0,002744062 | 0,224412587 | 0,112 | 0,01  | 1           | 1,168301461   | 0,855943464     | 11,2            |
| ST8SIA2                                                                                  | 3,73255E-06 | 0,224299383 | 0,412 | 0,09  | 0,078760617 | 1,168209792   | 0,85601063      | 4,577777778     |
| AP3B1                                                                                    | 6,79448E-06 | 0,22395161  | 0,362 | 0,07  | 0,143370428 | 1,16792822    | 0,856217003     | 5,171428571     |
| LZIC                                                                                     | 1,38894E-06 | 0,223936185 | 0,412 | 0,08  | 0,029308002 | 1,167915732   | 0,856226158     | 5,15            |
| TEN1                                                                                     | 0,000140337 | 0,223918934 | 0,375 | 0,11  | 1           | 1,167901767   | 0,856236396     | 3,409090909     |
| ACAP3                                                                                    | 9,56327E-06 | 0,223881377 | 0,4   | 0,09  | 0,201794612 | 1,167871364   | 0,856258686     | 4,444444444     |
| ATP5PB                                                                                   | 0,0001477   | 0,223809508 | 0,7   | 0,29  | 1           | 1,167813188   | 0,856301342     | 2,413793103     |
| KNL1                                                                                     | 0,000138823 | 0,223791352 | 0,138 | 0     | 1           | 1,167798491   | 0,856312119     | #DIV/0!         |

Supplementary Table 4

| Differentially expressed genes_keloid-CCD_ comparing SC-Keloid vs. (SC-Myel, SC-Nonmyel) |             |             |       |       |             |               |                 |                 |
|------------------------------------------------------------------------------------------|-------------|-------------|-------|-------|-------------|---------------|-----------------|-----------------|
| gene                                                                                     | p_val       | avg_log2FC  | pct.1 | pct.2 | p_val_adj   | Foldchange_UP | Foldchange_DOWN | Ratio_pct1_pct2 |
| CBX3                                                                                     | 0,004107626 | 0,223620022 | 0,838 | 0,47  | 1           | 1,167659815   | 0,856413818     | 1,782978723     |
| RPL18                                                                                    | 0,008580912 | 0,223442398 | 1     | 1     | 1           | 1,167516062   | 0,856519265     | 1               |
| HLA-F                                                                                    | 4,8427E-05  | 0,223327177 | 0,362 | 0,09  | 1           | 1,167422822   | 0,856587674     | 4,022222222     |
| M6PR                                                                                     | 3,96597E-07 | 0,223026907 | 0,462 | 0,09  | 0,008368583 | 1,16717987    | 0,856765975     | 5,133333333     |
| EDEM1                                                                                    | 0,000298005 | 0,222991351 | 0,262 | 0,06  | 1           | 1,167151104   | 0,856787091     | 4,366666667     |
| TUBGCP2                                                                                  | 9,24442E-06 | 0,222967188 | 0,5   | 0,14  | 0,195066546 | 1,167131557   | 0,856801441     | 3,571428571     |
| SLC9A3R2                                                                                 | 0,001919761 | 0,222887738 | 0,887 | 0,48  | 1           | 1,167067284   | 0,856848627     | 1,847916667     |
| PPM1G                                                                                    | 0,000409623 | 0,222521182 | 0,725 | 0,31  | 1           | 1,166770797   | 0,857066636     | 2,338709677     |
| QPCT                                                                                     | 0,000142582 | 0,22245217  | 0,488 | 0,17  | 1           | 1,166714985   | 0,857107359     | 2,870588235     |
| NUDT8                                                                                    | 2,13652E-05 | 0,221957633 | 0,225 | 0,02  | 0,45082786  | 1,166315118   | 0,857401215     | 11,25           |
| MCAM                                                                                     | 0,00143602  | 0,221904173 | 0,963 | 0,58  | 1           | 1,166271901   | 0,857432987     | 1,660344828     |
| GDI1                                                                                     | 2,64179E-05 | 0,22185164  | 0,725 | 0,26  | 0,557445028 | 1,166229434   | 0,85746421      | 2,788461538     |
| MRPL45                                                                                   | 4,95697E-06 | 0,221697729 | 0,25  | 0,02  | 0,104597055 | 1,166105024   | 0,857555691     | 12,5            |
| DIP2A                                                                                    | 1,89639E-05 | 0,22169574  | 0,438 | 0,12  | 0,400157527 | 1,166103416   | 0,857556874     | 3,65            |
| SVBP                                                                                     | 5,34688E-05 | 0,2213801   | 0,338 | 0,08  | 1           | 1,165848318   | 0,857744515     | 4,225           |
| C7orf50                                                                                  | 0,000894001 | 0,221375074 | 0,75  | 0,35  | 1           | 1,165844256   | 0,857747503     | 2,142857143     |
| POMGNT1                                                                                  | 9,32527E-07 | 0,220663648 | 0,438 | 0,09  | 0,019677254 | 1,165269494   | 0,858170582     | 4,866666667     |
| CISD1                                                                                    | 2,62806E-06 | 0,220323067 | 0,312 | 0,04  | 0,05545465  | 1,164994438   | 0,858373197     | 7,8             |
| RRP7A                                                                                    | 6,54574E-06 | 0,220209165 | 0,388 | 0,08  | 0,138121659 | 1,164902465   | 0,858440969     | 4,85            |
| KCTD20                                                                                   | 8,51306E-07 | 0,220168459 | 0,512 | 0,12  | 0,017963402 | 1,164869597   | 0,85846519      | 4,266666667     |
| CNIH1                                                                                    | 0,000202435 | 0,220088471 | 0,625 | 0,24  | 1           | 1,164805014   | 0,858512788     | 2,604166667     |
| PRKAR2B                                                                                  | 6,74984E-06 | 0,219974298 | 0,188 | 0     | 0,142428329 | 1,164712837   | 0,858580732     | #DIV/0!         |
| BCAR1                                                                                    | 0,001002803 | 0,219885396 | 0,537 | 0,23  | 1           | 1,164641067   | 0,858633641     | 2,334782609     |
| PIP4K2B                                                                                  | 8,0543E-05  | 0,219802087 | 0,225 | 0,03  | 1           | 1,164573816   | 0,858683225     | 7,5             |
| SNRNP35                                                                                  | 2,10618E-05 | 0,219791328 | 0,338 | 0,07  | 0,444426069 | 1,164565131   | 0,858689629     | 4,828571429     |
| FAM214B                                                                                  | 8,02319E-06 | 0,219758072 | 0,338 | 0,06  | 0,169297438 | 1,164538286   | 0,858709423     | 5,633333333     |
| FKBP2                                                                                    | 0,002054127 | 0,219579815 | 0,887 | 0,46  | 1           | 1,164394407   | 0,85881553      | 1,92826087      |
| CEP44                                                                                    | 4,64688E-05 | 0,219528022 | 0,212 | 0,02  | 0,98053888  | 1,164352606   | 0,858846362     | 10,6            |
| HSPBP1                                                                                   | 6,2298E-08  | 0,219267412 | 0,4   | 0,05  | 0,00131455  | 1,164142295   | 0,859001519     | 8               |
| COMMD1                                                                                   | 8,18762E-05 | 0,219265755 | 0,625 | 0,22  | 1           | 1,164140958   | 0,859002506     | 2,840909091     |

Supplementary Table 4

| Differentially expressed genes_keloid-CCD_ comparing SC-Keloid vs. (SC-Myel, SC-Nonmyel) |             |             |       |       |             |               |                 |                 |
|------------------------------------------------------------------------------------------|-------------|-------------|-------|-------|-------------|---------------|-----------------|-----------------|
| gene                                                                                     | p_val       | avg_log2FC  | pct.1 | pct.2 | p_val_adj   | Foldchange_UP | Foldchange_DOWN | Ratio_pct1_pct2 |
| OGFOD3                                                                                   | 2,09385E-06 | 0,219148795 | 0,362 | 0,06  | 0,044182308 | 1,164046585   | 0,859072148     | 6,033333333     |
| DVL1                                                                                     | 4,38072E-06 | 0,218874859 | 0,325 | 0,05  | 0,092437639 | 1,163825578   | 0,859235283     | 6,5             |
| DCAF12                                                                                   | 1,18781E-07 | 0,218829648 | 0,388 | 0,05  | 0,002506404 | 1,163789107   | 0,85926221      | 7,76            |
| CCNY                                                                                     | 2,52642E-06 | 0,218559032 | 0,488 | 0,12  | 0,053310004 | 1,163570828   | 0,859423403     | 4,066666667     |
| CD2BP2                                                                                   | 0,000175418 | 0,218512546 | 0,5   | 0,17  | 1           | 1,163533337   | 0,859451095     | 2,941176471     |
| RCC2                                                                                     | 4,01756E-07 | 0,218473427 | 0,5   | 0,11  | 0,008477445 | 1,163501788   | 0,859474399     | 4,545454545     |
| IL32                                                                                     | 0,001102057 | 0,218280937 | 0,238 | 0,06  | 1           | 1,163346559   | 0,859589082     | 3,966666667     |
| KLF16                                                                                    | 1,34625E-05 | 0,217793396 | 0,35  | 0,07  | 0,284072359 | 1,162953487   | 0,859879618     | 5               |
| PPP1R35                                                                                  | 1,96408E-06 | 0,217659813 | 0,388 | 0,07  | 0,041444071 | 1,16284581    | 0,859959241     | 5,542857143     |
| MNS1                                                                                     | 4,63604E-05 | 0,217351402 | 0,238 | 0,03  | 0,978251361 | 1,162597251   | 0,860143097     | 7,933333333     |
| BTBD6                                                                                    | 7,667E-05   | 0,217319465 | 0,412 | 0,12  | 1           | 1,162571515   | 0,860162138     | 3,433333333     |
| MRM2                                                                                     | 8,2229E-05  | 0,21708476  | 0,288 | 0,06  | 1           | 1,162382397   | 0,860302086     | 4,8             |
| FGF5                                                                                     | 3,12312E-06 | 0,217013433 | 0,2   | 0     | 0,065900895 | 1,16232493    | 0,86034462      | #DIV/0!         |
| EXTL2                                                                                    | 4,87124E-05 | 0,216925767 | 0,412 | 0,11  | 1           | 1,162254303   | 0,8603969       | 3,745454545     |
| PRPF31                                                                                   | 0,000114524 | 0,216795449 | 0,625 | 0,22  | 1           | 1,162149322   | 0,860474623     | 2,840909091     |
| ACYP1                                                                                    | 4,23439E-05 | 0,216724136 | 0,212 | 0,02  | 0,893498367 | 1,162091877   | 0,860517158     | 10,6            |
| MAP9                                                                                     | 5,89306E-06 | 0,21648521  | 0,45  | 0,11  | 0,124349556 | 1,161899438   | 0,860659681     | 4,090909091     |
| OSR1                                                                                     | 0,002666059 | 0,216173023 | 0,088 | 0     | 1           | 1,161648041   | 0,86084594      | #DIV/0!         |
| ARMC1                                                                                    | 5,1055E-05  | 0,216028355 | 0,325 | 0,07  | 1           | 1,16153156    | 0,860932268     | 4,642857143     |
| HOMER3                                                                                   | 6,63205E-06 | 0,215932329 | 0,7   | 0,24  | 0,139942836 | 1,161454252   | 0,860989573     | 2,916666667     |
| B2M                                                                                      | 0,001644308 | 0,215920221 | 1     | 1     | 1           | 1,161444504   | 0,860996799     | 1               |
| ETV5                                                                                     | 6,93518E-05 | 0,215869829 | 0,275 | 0,05  | 1           | 1,161403937   | 0,861026873     | 5,5             |
| TMEM203                                                                                  | 2,64187E-06 | 0,215534202 | 0,45  | 0,1   | 0,055746122 | 1,16113378    | 0,861227205     | 4,5             |
| MBD3                                                                                     | 4,69468E-05 | 0,215125046 | 0,475 | 0,14  | 0,990624258 | 1,160804523   | 0,861471488     | 3,392857143     |
| LIAS                                                                                     | 2,08675E-05 | 0,215044635 | 0,225 | 0,02  | 0,440326004 | 1,160739825   | 0,861519505     | 11,25           |
| RAMAC                                                                                    | 3,80779E-05 | 0,214868743 | 0,35  | 0,08  | 0,803481547 | 1,160598318   | 0,861624547     | 4,375           |
| PSMD4                                                                                    | 0,000199487 | 0,2148649   | 0,838 | 0,38  | 1           | 1,160595226   | 0,861626843     | 2,205263158     |
| RPS6KC1                                                                                  | 9,42407E-07 | 0,214850004 | 0,25  | 0,01  | 0,019885724 | 1,160583243   | 0,861635739     | 25              |
| WSB2                                                                                     | 6,66279E-05 | 0,214807508 | 0,575 | 0,2   | 1           | 1,160549058   | 0,861661119     | 2,875           |
| NABP2                                                                                    | 6,53973E-05 | 0,21468514  | 0,412 | 0,12  | 1           | 1,160450625   | 0,861734208     | 3,433333333     |

Supplementary Table 4

| Differentially expressed genes_keloid-CCD_ comparing SC-Keloid vs. (SC-Myel, SC-Nonmyel) |             |             |       |       |             |               |                 |                 |
|------------------------------------------------------------------------------------------|-------------|-------------|-------|-------|-------------|---------------|-----------------|-----------------|
| gene                                                                                     | p_val       | avg_log2FC  | pct.1 | pct.2 | p_val_adj   | Foldchange_UP | Foldchange_DOWN | Ratio_pct1_pct2 |
| ANKRD39                                                                                  | 1,54894E-05 | 0,21463341  | 0,412 | 0,1   | 0,326841344 | 1,160409016   | 0,861765107     | 4,12            |
| AARD                                                                                     | 0,000191176 | 0,214564486 | 0,212 | 0,03  | 1           | 1,16035358    | 0,861806278     | 7,066666667     |
| DFFA                                                                                     | 1,01181E-05 | 0,214370836 | 0,262 | 0,03  | 0,213502713 | 1,160197838   | 0,861921965     | 8,733333333     |
| ICAM3                                                                                    | 2,39341E-06 | 0,214326562 | 0,338 | 0,05  | 0,050503349 | 1,160162234   | 0,861948416     | 6,76            |
| PRKAR2A                                                                                  | 0,000286799 | 0,214243296 | 0,475 | 0,17  | 1           | 1,160095276   | 0,861998165     | 2,794117647     |
| HOXD-AS2                                                                                 | 4,56081E-05 | 0,21418469  | 0,262 | 0,04  | 0,962376421 | 1,160048151   | 0,862033183     | 6,55            |
| RPUSD1                                                                                   | 1,01181E-05 | 0,214043431 | 0,262 | 0,03  | 0,213502713 | 1,159934572   | 0,862117592     | 8,733333333     |
| PRRC1                                                                                    | 3,00858E-06 | 0,214031732 | 0,4   | 0,08  | 0,063484083 | 1,159925167   | 0,862124582     | 5               |
| G3BP2                                                                                    | 2,02318E-05 | 0,21373508  | 0,5   | 0,15  | 0,426911978 | 1,159686683   | 0,862301874     | 3,333333333     |
| MCM5                                                                                     | 4,73785E-05 | 0,213721604 | 0,238 | 0,03  | 0,99973414  | 1,159675851   | 0,862309928     | 7,933333333     |
| RRP1B                                                                                    | 3,41084E-05 | 0,213529644 | 0,288 | 0,05  | 0,71972226  | 1,159521559   | 0,862424672     | 5,76            |
| GAR1                                                                                     | 1,27888E-05 | 0,213484337 | 0,375 | 0,08  | 0,269856639 | 1,159485145   | 0,862451756     | 4,6875          |
| TIMP2                                                                                    | 0,009855116 | 0,213418612 | 0,988 | 0,69  | 1           | 1,159432324   | 0,862491048     | 1,431884058     |
| CFAP36                                                                                   | 1,38792E-05 | 0,213356149 | 0,662 | 0,22  | 0,292864184 | 1,159382126   | 0,862528391     | 3,009090909     |
| ACOT13                                                                                   | 6,12846E-09 | 0,212998264 | 0,537 | 0,09  | 0,000129317 | 1,159094557   | 0,862742383     | 5,966666667     |
| RUSF1                                                                                    | 1,59154E-05 | 0,212960484 | 0,3   | 0,05  | 0,335829821 | 1,159064204   | 0,862764976     | 6               |
| ALG13                                                                                    | 6,43732E-06 | 0,212948768 | 0,338 | 0,06  | 0,135833858 | 1,159054792   | 0,862771982     | 5,633333333     |
| HGS                                                                                      | 6,54946E-06 | 0,212546415 | 0,45  | 0,11  | 0,138200254 | 1,158731588   | 0,863012634     | 4,090909091     |
| METTL6                                                                                   | 3,12312E-06 | 0,212347193 | 0,2   | 0     | 0,065900895 | 1,15857159    | 0,863131816     | #DIV/0!         |
| COG4                                                                                     | 1,76169E-05 | 0,212015527 | 0,3   | 0,05  | 0,371733492 | 1,158305272   | 0,863330267     | 6               |
| TP53TG1                                                                                  | 2,35742E-05 | 0,212001273 | 0,338 | 0,07  | 0,49744     | 1,158293828   | 0,863338797     | 4,828571429     |
| BUD23                                                                                    | 1,12299E-05 | 0,211544536 | 0,662 | 0,21  | 0,23696216  | 1,157927187   | 0,863612161     | 3,152380952     |
| EREG                                                                                     | 0,001336698 | 0,211450357 | 0,15  | 0,02  | 1           | 1,1578516     | 0,863668539     | 7,5             |
| DDX41                                                                                    | 9,7681E-05  | 0,211276341 | 0,312 | 0,07  | 1           | 1,15771195    | 0,86377272      | 4,457142857     |
| RNF170                                                                                   | 1,12285E-05 | 0,211168158 | 0,238 | 0,02  | 0,236932166 | 1,15762514    | 0,863837494     | 11,9            |
| PRR5                                                                                     | 0,000370381 | 0,211162195 | 0,175 | 0,02  | 1           | 1,157620355   | 0,863841065     | 8,75            |
| RHBDF2                                                                                   | 2,44785E-06 | 0,210961137 | 0,262 | 0,02  | 0,051652011 | 1,157459037   | 0,86396146      | 13,1            |
| FAM177A1                                                                                 | 0,002883166 | 0,210830451 | 0,762 | 0,37  | 1           | 1,157354194   | 0,864039726     | 2,059459459     |
| PDCD6                                                                                    | 0,001413282 | 0,210829644 | 0,787 | 0,37  | 1           | 1,157353547   | 0,864040209     | 2,127027027     |
| RAB11B                                                                                   | 1,16332E-05 | 0,210748602 | 0,662 | 0,22  | 0,245473068 | 1,157288535   | 0,864088747     | 3,009090909     |

Supplementary Table 4

| Differentially expressed genes_keloid-CCD_ comparing SC-Keloid vs. (SC-Myel, SC-Nonmyel) |             |             |       |       |             |               |                 |                 |
|------------------------------------------------------------------------------------------|-------------|-------------|-------|-------|-------------|---------------|-----------------|-----------------|
| gene                                                                                     | p_val       | avg_log2FC  | pct.1 | pct.2 | p_val_adj   | Foldchange_UP | Foldchange_DOWN | Ratio_pct1_pct2 |
| CTSZ                                                                                     | 0,004294074 | 0,21020664  | 0,887 | 0,48  | 1           | 1,15685387    | 0,864413411     | 1,847916667     |
| NBN                                                                                      | 2,60116E-05 | 0,21016017  | 0,5   | 0,15  | 0,54886973  | 1,156816608   | 0,864441254     | 3,333333333     |
| THAP12                                                                                   | 2,08526E-06 | 0,21015693  | 0,388 | 0,07  | 0,044001082 | 1,15681401    | 0,864443196     | 5,542857143     |
| RAB18                                                                                    | 0,000129293 | 0,209977634 | 0,575 | 0,22  | 1           | 1,156670252   | 0,864550635     | 2,613636364     |
| AIMP2                                                                                    | 2,27508E-06 | 0,209968782 | 0,262 | 0,02  | 0,048006395 | 1,156663155   | 0,864555939     | 13,1            |
| RXRA                                                                                     | 7,36991E-07 | 0,209552426 | 0,4   | 0,07  | 0,015551247 | 1,156329395   | 0,864805482     | 5,714285714     |
| CCNA2                                                                                    | 6,57145E-05 | 0,209459253 | 0,15  | 0     | 1           | 1,156254718   | 0,864861336     | #DIV/0!         |
| SACS                                                                                     | 5,37792E-06 | 0,209451125 | 0,362 | 0,07  | 0,113479511 | 1,156248204   | 0,864866208     | 5,171428571     |
| NUDT5                                                                                    | 3,74981E-06 | 0,209302427 | 0,55  | 0,15  | 0,079124707 | 1,156129037   | 0,864955354     | 3,666666667     |
| ERP29                                                                                    | 0,000344435 | 0,209217199 | 0,775 | 0,34  | 1           | 1,156060739   | 0,865006453     | 2,279411765     |
| CCDC50                                                                                   | 0,000153632 | 0,209151335 | 0,675 | 0,27  | 1           | 1,156007963   | 0,865045945     | 2,5             |
| PAXX                                                                                     | 0,000176807 | 0,209077809 | 0,725 | 0,29  | 1           | 1,155949049   | 0,865090032     | 2,5             |
| TCF3                                                                                     | 6,27235E-06 | 0,208860472 | 0,412 | 0,09  | 0,132352778 | 1,155774922   | 0,865220365     | 4,577777778     |
| FASN                                                                                     | 3,96269E-06 | 0,208855656 | 0,275 | 0,03  | 0,083616632 | 1,155771064   | 0,865223253     | 9,166666667     |
| CUEDC2                                                                                   | 3,6517E-05  | 0,208563985 | 0,75  | 0,3   | 0,770545584 | 1,155537424   | 0,865398194     | 2,5             |
| MLF2                                                                                     | 9,86124E-05 | 0,208534734 | 0,875 | 0,39  | 1           | 1,155513996   | 0,86541574      | 2,243589744     |
| SDHB                                                                                     | 1,90529E-05 | 0,208462465 | 0,6   | 0,19  | 0,402035336 | 1,155456114   | 0,865459093     | 3,157894737     |
| MAPKAP1                                                                                  | 3,7151E-06  | 0,208443918 | 0,4   | 0,08  | 0,078392404 | 1,15544126    | 0,865470219     | 5               |
| MPHOSPH10                                                                                | 0,000101043 | 0,208394191 | 0,5   | 0,17  | 1           | 1,155401435   | 0,86550005      | 2,941176471     |
| C12orf73                                                                                 | 4,85676E-06 | 0,207768878 | 0,3   | 0,04  | 0,102482437 | 1,154900753   | 0,865875269     | 7,5             |
| BCAT1                                                                                    | 1,44967E-05 | 0,207687682 | 0,175 | 0     | 0,305894872 | 1,154835756   | 0,865924002     | #DIV/0!         |
| CENPS                                                                                    | 8,97452E-06 | 0,207610327 | 0,212 | 0,01  | 0,189371452 | 1,154773837   | 0,865970433     | 21,2            |
| DUSP10                                                                                   | 0,000157749 | 0,20739722  | 0,3   | 0,07  | 1           | 1,154603273   | 0,866098359     | 4,285714286     |
| TMEM223                                                                                  | 9,78611E-06 | 0,207259389 | 0,312 | 0,05  | 0,206496762 | 1,154492971   | 0,866181108     | 6,24            |
| METTL23                                                                                  | 2,13608E-06 | 0,207244196 | 0,575 | 0,16  | 0,045073393 | 1,154480813   | 0,866190229     | 3,59375         |
| HLA-DQB1                                                                                 | 0,001587262 | 0,20683847  | 0,25  | 0,07  | 1           | 1,154156186   | 0,86643386      | 3,571428571     |
| IARS2                                                                                    | 3,12652E-07 | 0,206819941 | 0,462 | 0,09  | 0,006597278 | 1,154141363   | 0,866444988     | 5,133333333     |
| MT-CO1                                                                                   | 0,164831158 | 0,206803092 | 1     | 0,99  | 1           | 1,154127884   | 0,866455107     | 1,01010101      |
| RNH1                                                                                     | 0,020599176 | 0,20677248  | 0,9   | 0,56  | 1           | 1,154103395   | 0,866473493     | 1,607142857     |
| DCTN1                                                                                    | 1,35462E-05 | 0,206746107 | 0,475 | 0,13  | 0,28583876  | 1,154082298   | 0,866489333     | 3,653846154     |

Supplementary Table 4

| Differentially expressed genes_keloid-CCD_ comparing SC-Keloid vs. (SC-Myel, SC-Nonmyel) |             |             |       |       |             |               |                 |                 |
|------------------------------------------------------------------------------------------|-------------|-------------|-------|-------|-------------|---------------|-----------------|-----------------|
| gene                                                                                     | p_val       | avg_log2FC  | pct.1 | pct.2 | p_val_adj   | Foldchange_UP | Foldchange_DOWN | Ratio_pct1_pct2 |
| TPGS2                                                                                    | 3,51037E-07 | 0,206659673 | 0,512 | 0,11  | 0,007407231 | 1,154013158   | 0,866541246     | 4,654545455     |
| ALDH1A3                                                                                  | 0,00022537  | 0,206573145 | 0,525 | 0,19  | 1           | 1,153943945   | 0,86659322      | 2,763157895     |
| ALKBH2                                                                                   | 1,08144E-05 | 0,206306709 | 0,288 | 0,04  | 0,228194015 | 1,153730856   | 0,866753277     | 7,2             |
| DNTTIP1                                                                                  | 6,32326E-06 | 0,206286142 | 0,45  | 0,11  | 0,133427037 | 1,153714408   | 0,866765633     | 4,090909091     |
| SPOCK1                                                                                   | 1,04548E-05 | 0,206261748 | 0,238 | 0,02  | 0,220607332 | 1,153694901   | 0,866780289     | 11,9            |
| NF2                                                                                      | 0,00012613  | 0,206030399 | 0,325 | 0,08  | 1           | 1,15350991    | 0,866919297     | 4,0625          |
| FKBP11                                                                                   | 9,32418E-06 | 0,205813842 | 0,375 | 0,08  | 0,196749419 | 1,153336775   | 0,867049436     | 4,6875          |
| CINP                                                                                     | 2,51475E-06 | 0,205609728 | 0,312 | 0,04  | 0,053063791 | 1,153173611   | 0,867172116     | 7,8             |
| DECR1                                                                                    | 0,000930956 | 0,205546554 | 0,637 | 0,28  | 1           | 1,153123116   | 0,867210089     | 2,275           |
| TBC1D9B                                                                                  | 4,37205E-07 | 0,205522328 | 0,412 | 0,07  | 0,009225452 | 1,153103753   | 0,867224651     | 5,885714286     |
| EMILIN1                                                                                  | 0,000115743 | 0,205499655 | 0,325 | 0,08  | 1           | 1,153085631   | 0,867238281     | 4,0625          |
| ITM2C                                                                                    | 0,001256712 | 0,205420765 | 0,863 | 0,42  | 1           | 1,153022579   | 0,867285705     | 2,054761905     |
| ALKBH7                                                                                   | 0,003010384 | 0,205244479 | 0,812 | 0,39  | 1           | 1,152881697   | 0,867391687     | 2,082051282     |
| MRPL58                                                                                   | 2,17538E-05 | 0,205009881 | 0,362 | 0,08  | 0,459027058 | 1,152694241   | 0,867532746     | 4,525           |
| FARSA                                                                                    | 1,60711E-06 | 0,204823238 | 0,388 | 0,07  | 0,033911678 | 1,152545126   | 0,867644986     | 5,542857143     |
| UBL4A                                                                                    | 3,5758E-06  | 0,204817903 | 0,4   | 0,08  | 0,075453031 | 1,152540864   | 0,867648195     | 5               |
| PHF6                                                                                     | 6,031E-05   | 0,204768423 | 0,3   | 0,06  | 1           | 1,152501336   | 0,867677953     | 5               |
| PFDN5                                                                                    | 0,007132281 | 0,204684429 | 1     | 0,88  | 1           | 1,152434239   | 0,867728471     | 1,136363636     |
| DEPDC1                                                                                   | 0,000291957 | 0,20455794  | 0,125 | 0     | 1           | 1,152333203   | 0,867804553     | #DIV/0!         |
| LPP                                                                                      | 0,000408517 | 0,204249772 | 0,725 | 0,32  | 1           | 1,152087084   | 0,867989941     | 2,265625        |
| MT1F                                                                                     | 0,000834081 | 0,204059558 | 0,388 | 0,14  | 1           | 1,151935196   | 0,868104389     | 2,771428571     |
| SUSD6                                                                                    | 2,18742E-05 | 0,204001012 | 0,225 | 0,02  | 0,461567883 | 1,15188845    | 0,868139619     | 11,25           |
| KIRREL3                                                                                  | 4,59369E-05 | 0,203900869 | 0,625 | 0,22  | 0,969315365 | 1,151808496   | 0,868199882     | 2,840909091     |
| RFC5                                                                                     | 1,04548E-05 | 0,203842584 | 0,238 | 0,02  | 0,220607332 | 1,151761964   | 0,868234958     | 11,9            |
| CDC42EP1                                                                                 | 0,003460464 | 0,20369113  | 0,762 | 0,36  | 1           | 1,151641059   | 0,868326109     | 2,116666667     |
| RPS3                                                                                     | 0,010709855 | 0,203687837 | 1     | 1     | 1           | 1,15163843    | 0,868328092     | 1               |
| NSL1                                                                                     | 1,03589E-06 | 0,203473447 | 0,475 | 0,1   | 0,021858347 | 1,151467304   | 0,868457138     | 4,75            |
| KCTD10                                                                                   | 4,08363E-06 | 0,203430926 | 0,25  | 0,02  | 0,086168584 | 1,151433368   | 0,868482735     | 12,5            |
| RABEP2                                                                                   | 1,82244E-05 | 0,203370837 | 0,25  | 0,03  | 0,38455339  | 1,151385411   | 0,868518908     | 8,333333333     |
| PLEKHG4                                                                                  | 0,00013667  | 0,203083263 | 0,262 | 0,05  | 1           | 1,151155927   | 0,868692048     | 5,24            |



Supplementary Table 4

| Differentially expressed genes_keloid-CCD_ comparing SC-Keloid vs. (SC-Myel, SC-Nonmyel) |             |             |       |       |             |               |                 |                 |
|------------------------------------------------------------------------------------------|-------------|-------------|-------|-------|-------------|---------------|-----------------|-----------------|
| gene                                                                                     | p_val       | avg_log2FC  | pct.1 | pct.2 | p_val_adj   | Foldchange_UP | Foldchange_DOWN | Ratio_pct1_pct2 |
| PSMG3                                                                                    | 3,56698E-06 | 0,203022167 | 0,55  | 0,15  | 0,075266916 | 1,151107178   | 0,868728837     | 3,666666667     |
| ARL3                                                                                     | 0,008613213 | 0,203018485 | 0,7   | 0,37  | 1           | 1,15110424    | 0,868731054     | 1,891891892     |
| N4BP2                                                                                    | 6,25725E-05 | 0,202980346 | 0,25  | 0,04  | 1           | 1,15107381    | 0,86875402      | 6,25            |
| FKBP8                                                                                    | 0,005959551 | 0,202947494 | 0,875 | 0,49  | 1           | 1,151047599   | 0,868773803     | 1,785714286     |
| CLPTM1L                                                                                  | 1,02759E-06 | 0,202859645 | 0,438 | 0,09  | 0,021683163 | 1,150977511   | 0,868826706     | 4,866666667     |
| GTF2H2                                                                                   | 0,00036224  | 0,202747259 | 0,175 | 0,02  | 1           | 1,150887853   | 0,868894391     | 8,75            |
| GNB1                                                                                     | 0,000728197 | 0,202725627 | 0,887 | 0,45  | 1           | 1,150870597   | 0,868907419     | 1,971111111     |
| SHCBP1                                                                                   | 4,41317E-06 | 0,202621942 | 0,225 | 0,01  | 0,093122364 | 1,150787888   | 0,868969869     | 22,5            |
| HOOK3                                                                                    | 0,000290675 | 0,20261652  | 0,7   | 0,29  | 1           | 1,150783563   | 0,868973135     | 2,413793103     |
| TNFAIP8                                                                                  | 5,07281E-06 | 0,202515855 | 0,3   | 0,04  | 0,107041321 | 1,150703269   | 0,86903377      | 7,5             |
| CENPM                                                                                    | 1,95796E-05 | 0,202494964 | 0,2   | 0,01  | 0,413149116 | 1,150686607   | 0,869046354     | 20              |
| ITGA5                                                                                    | 5,73993E-05 | 0,202460326 | 0,338 | 0,08  | 1           | 1,15065898    | 0,86906722      | 4,225           |
| NAT9                                                                                     | 0,000242479 | 0,202406153 | 0,25  | 0,05  | 1           | 1,150615773   | 0,869099853     | 5               |
| MYO10                                                                                    | 0,000193177 | 0,202272139 | 0,512 | 0,18  | 1           | 1,150508896   | 0,869180589     | 2,844444444     |
| ORMDL3                                                                                   | 1,1321E-05  | 0,202213718 | 0,262 | 0,03  | 0,238884378 | 1,150462308   | 0,869215787     | 8,733333333     |
| RPA2                                                                                     | 4,11362E-05 | 0,202127631 | 0,262 | 0,04  | 0,868014931 | 1,150393661   | 0,869267655     | 6,55            |
| H2AZ2                                                                                    | 0,036589252 | 0,202046696 | 0,75  | 0,48  | 1           | 1,150329126   | 0,869316422     | 1,5625          |
| CD58                                                                                     | 0,000128787 | 0,20204177  | 0,5   | 0,17  | 1           | 1,150325198   | 0,869319391     | 2,941176471     |
| CERK                                                                                     | 4,02759E-06 | 0,201853664 | 0,325 | 0,05  | 0,0849862   | 1,150175222   | 0,869432744     | 6,5             |
| CRNDE                                                                                    | 8,44366E-06 | 0,201738935 | 0,262 | 0,03  | 0,178169623 | 1,150083759   | 0,869501888     | 8,733333333     |
| NPM3                                                                                     | 8,29878E-06 | 0,201600904 | 0,312 | 0,05  | 0,175112594 | 1,149973729   | 0,869585082     | 6,24            |
| NMI                                                                                      | 2,90076E-05 | 0,201490621 | 0,312 | 0,06  | 0,6120893   | 1,149885826   | 0,869651558     | 5,2             |
| H1-3                                                                                     | 0,001278066 | 0,201365742 | 0,1   | 0     | 1           | 1,149786297   | 0,869726838     | #DIV/0!         |
| POLR2B                                                                                   | 1,59874E-06 | 0,201329671 | 0,438 | 0,09  | 0,033735097 | 1,14975755    | 0,869748583     | 4,866666667     |
| ARMC6                                                                                    | 5,20178E-06 | 0,201314925 | 0,25  | 0,02  | 0,109762778 | 1,149745798   | 0,869757473     | 12,5            |
| TBL3                                                                                     | 1,03485E-05 | 0,201224964 | 0,262 | 0,03  | 0,218363508 | 1,149674106   | 0,86981171      | 8,733333333     |
| FBLIM1                                                                                   | 2,43758E-05 | 0,200835217 | 0,312 | 0,06  | 0,514352911 | 1,149363562   | 0,870046723     | 5,2             |
| UCN2                                                                                     | 4,98426E-06 | 0,200711159 | 0,275 | 0,03  | 0,105172973 | 1,149264732   | 0,870121541     | 9,166666667     |
| TUBGCP3                                                                                  | 4,98426E-06 | 0,200561665 | 0,275 | 0,03  | 0,105172973 | 1,149145649   | 0,870211709     | 9,166666667     |
| MED11                                                                                    | 9,09454E-05 | 0,200499839 | 0,312 | 0,07  | 1           | 1,149096404   | 0,870249003     | 4,457142857     |

Supplementary Table 4

| Differentially expressed genes_keloid-CCD_ comparing SC-Keloid vs. (SC-Myel, SC-Nonmyel) |             |             |       |       |             |               |                 |                 |
|------------------------------------------------------------------------------------------|-------------|-------------|-------|-------|-------------|---------------|-----------------|-----------------|
| gene                                                                                     | p_val       | avg_log2FC  | pct.1 | pct.2 | p_val_adj   | Foldchange_UP | Foldchange_DOWN | Ratio_pct1_pct2 |
| MLLT11                                                                                   | 1,94908E-05 | 0,200424111 | 0,3   | 0,05  | 0,411276284 | 1,149036089   | 0,870294684     | 6               |
| CKLF                                                                                     | 0,0004818   | 0,200322268 | 0,588 | 0,24  | 1           | 1,148954979   | 0,870356122     | 2,45            |
| ETV2                                                                                     | 6,74984E-06 | 0,200032482 | 0,188 | 0     | 0,142428329 | 1,148724218   | 0,870530963     | #DIV/0!         |
| ZNHIT3                                                                                   | 7,38711E-06 | 0,200021804 | 0,488 | 0,13  | 0,155875503 | 1,148715716   | 0,870537406     | 3,753846154     |
| SERP2                                                                                    | 9,35923E-05 | 0,199954007 | 0,225 | 0,03  | 1           | 1,148661735   | 0,870578317     | 7,5             |
| PYGB                                                                                     | 1,04652E-06 | 0,199948875 | 0,6   | 0,16  | 0,022082515 | 1,148657649   | 0,870581414     | 3,75            |
| RIOX2                                                                                    | 3,83377E-05 | 0,199775788 | 0,188 | 0,01  | 0,808964604 | 1,148519848   | 0,870685867     | 18,8            |
| FDX2                                                                                     | 0,000211238 | 0,199528712 | 0,312 | 0,08  | 1           | 1,148323169   | 0,870834994     | 3,9             |
| PXMP2                                                                                    | 0,000197069 | 0,19933302  | 0,25  | 0,05  | 1           | 1,148167417   | 0,870953125     | 5               |
| EFTUD2                                                                                   | 5,09929E-06 | 0,199137053 | 0,275 | 0,03  | 0,107600082 | 1,148011467   | 0,871071438     | 9,166666667     |
| VKORC1                                                                                   | 0,0111013   | 0,199007958 | 0,775 | 0,4   | 1           | 1,147908746   | 0,871149387     | 1,9375          |
| HPF1                                                                                     | 6,56E-06    | 0,198928044 | 0,537 | 0,16  | 0,138422527 | 1,147845163   | 0,871197643     | 3,35625         |
| COL18A1                                                                                  | 0,111067322 | 0,19879671  | 1     | 0,95  | 1           | 1,147740674   | 0,871276955     | 1,052631579     |
| SEC13                                                                                    | 5,96027E-06 | 0,198761315 | 0,588 | 0,17  | 0,125767671 | 1,147712516   | 0,871298331     | 3,458823529     |
| PIP4K2A                                                                                  | 0,000511735 | 0,198708215 | 0,275 | 0,07  | 1           | 1,147670274   | 0,871330401     | 3,928571429     |
| RPS28                                                                                    | 0,011723071 | 0,198462114 | 1     | 0,96  | 1           | 1,147474516   | 0,871479049     | 1,041666667     |
| TIMM9                                                                                    | 1,01913E-06 | 0,198224018 | 0,425 | 0,08  | 0,021504608 | 1,147285158   | 0,871622885     | 5,3125          |
| ATP6V1D                                                                                  | 0,000106483 | 0,198173645 | 0,675 | 0,25  | 1           | 1,1472451     | 0,871653319     | 2,7             |
| AMPH                                                                                     | 2,2259E-05  | 0,198111444 | 0,25  | 0,03  | 0,469687388 | 1,147195638   | 0,871690902     | 8,333333333     |
| CAPRIN1                                                                                  | 0,000118858 | 0,197991051 | 0,537 | 0,19  | 1           | 1,147099908   | 0,871763647     | 2,826315789     |
| EHD2                                                                                     | 4,9225E-05  | 0,197828625 | 0,325 | 0,07  | 1           | 1,14697077    | 0,8718618       | 4,642857143     |
| MACROH2A1                                                                                | 7,65762E-05 | 0,197729936 | 0,675 | 0,26  | 1           | 1,146892312   | 0,871921443     | 2,596153846     |
| HDAC2                                                                                    | 0,0001593   | 0,197697499 | 0,738 | 0,31  | 1           | 1,146866527   | 0,871941047     | 2,380645161     |
| DAG1                                                                                     | 0,028887566 | 0,197692378 | 0,875 | 0,54  | 1           | 1,146862456   | 0,871944142     | 1,62037037      |
| EXOSC7                                                                                   | 2,94797E-05 | 0,197551633 | 0,338 | 0,07  | 0,62205018  | 1,146750577   | 0,872029211     | 4,828571429     |
| GUCD1                                                                                    | 6,43732E-06 | 0,197537957 | 0,338 | 0,06  | 0,135833858 | 1,146739706   | 0,872037477     | 5,633333333     |
| AASDHPPT                                                                                 | 6,09521E-07 | 0,197526667 | 0,525 | 0,12  | 0,012861495 | 1,146730732   | 0,872044301     | 4,375           |
| DNAL4                                                                                    | 1,07663E-06 | 0,197262087 | 0,375 | 0,06  | 0,022717868 | 1,146520449   | 0,872204242     | 6,25            |
| FUNDC1                                                                                   | 2,31294E-05 | 0,19719136  | 0,375 | 0,09  | 0,488054222 | 1,146464243   | 0,872247003     | 4,166666667     |
| TMEM214                                                                                  | 5,23975E-05 | 0,196957392 | 0,35  | 0,08  | 1           | 1,146278331   | 0,87238847      | 4,375           |

Supplementary Table 4

| Differentially expressed genes_keloid-CCD_ comparing SC-Keloid vs. (SC-Myel, SC-Nonmyel) |             |             |       |       |             |               |                 |                 |
|------------------------------------------------------------------------------------------|-------------|-------------|-------|-------|-------------|---------------|-----------------|-----------------|
| gene                                                                                     | p_val       | avg_log2FC  | pct.1 | pct.2 | p_val_adj   | Foldchange_UP | Foldchange_DOWN | Ratio_pct1_pct2 |
| GART                                                                                     | 1,37945E-05 | 0,196929966 | 0,3   | 0,05  | 0,291077166 | 1,146256541   | 0,872405054     | 6               |
| CARS2                                                                                    | 0,000204403 | 0,196882039 | 0,375 | 0,11  | 1           | 1,146218462   | 0,872434037     | 3,409090909     |
| SDHAF3                                                                                   | 7,0379E-05  | 0,196791811 | 0,462 | 0,15  | 1           | 1,146146779   | 0,872488602     | 3,08            |
| SLC39A10                                                                                 | 0,001568881 | 0,196719691 | 0,325 | 0,11  | 1           | 1,146089484   | 0,872532218     | 2,954545455     |
| PDCD2                                                                                    | 5,39303E-06 | 0,196597694 | 0,55  | 0,15  | 0,113798273 | 1,145992572   | 0,872606005     | 3,666666667     |
| PRKACA                                                                                   | 3,23121E-06 | 0,19657999  | 0,45  | 0,1   | 0,068181759 | 1,14597851    | 0,872616713     | 4,5             |
| SPRY4                                                                                    | 0,005562134 | 0,196490558 | 0,075 | 0     | 1           | 1,145907474   | 0,872670807     | #DIV/0!         |
| BTBD1                                                                                    | 1,02995E-05 | 0,1964605   | 0,35  | 0,07  | 0,21733056  | 1,145883599   | 0,87268899      | 5               |
| ZFYVE19                                                                                  | 0,000570786 | 0,196356623 | 0,188 | 0,03  | 1           | 1,145801096   | 0,872751827     | 6,266666667     |
| PSKH1                                                                                    | 6,57145E-05 | 0,196305753 | 0,15  | 0     | 1           | 1,145760695   | 0,872782601     | #DIV/0!         |
| C17orf75                                                                                 | 4,30649E-07 | 0,196211737 | 0,262 | 0,01  | 0,009087133 | 1,145686032   | 0,87283948      | 26,2            |
| RNF40                                                                                    | 3,91913E-05 | 0,196187154 | 0,288 | 0,05  | 0,826974994 | 1,14566651    | 0,872854353     | 5,76            |
| UBE2V2                                                                                   | 9,5091E-06  | 0,196110194 | 0,588 | 0,18  | 0,200651478 | 1,145605397   | 0,872900916     | 3,266666667     |
| EXOC7                                                                                    | 9,7581E-06  | 0,196107178 | 0,425 | 0,1   | 0,205905712 | 1,145603002   | 0,872902741     | 4,25            |
| EIF5A1                                                                                   | 2,27508E-06 | 0,196102071 | 0,262 | 0,02  | 0,048006395 | 1,145598946   | 0,872905831     | 13,1            |
| MIR4435-2HG                                                                              | 7,78651E-05 | 0,196080239 | 0,613 | 0,22  | 1           | 1,14558161    | 0,87291904      | 2,786363636     |
| METTL26                                                                                  | 0,000699292 | 0,196068888 | 0,8   | 0,34  | 1           | 1,145572597   | 0,872925908     | 2,352941176     |
| ZSWIM7                                                                                   | 1,50714E-05 | 0,195996117 | 0,575 | 0,18  | 0,318021386 | 1,145514815   | 0,87296994      | 3,194444444     |
| RPL19                                                                                    | 0,003902183 | 0,195704736 | 1     | 0,99  | 1           | 1,145283479   | 0,873146272     | 1,01010101      |
| JTB                                                                                      | 0,005397541 | 0,195647147 | 0,887 | 0,48  | 1           | 1,145237762   | 0,873181127     | 1,847916667     |
| TIMMDC1                                                                                  | 0,000103618 | 0,195462159 | 0,713 | 0,27  | 1           | 1,145090925   | 0,873293097     | 2,640740741     |
| IFT81                                                                                    | 8,46503E-05 | 0,195369476 | 0,312 | 0,07  | 1           | 1,145017364   | 0,873349201     | 4,457142857     |
| NEIL2                                                                                    | 2,70754E-05 | 0,195363419 | 0,262 | 0,04  | 0,571317791 | 1,145012556   | 0,873352868     | 6,55            |
| METTL17                                                                                  | 0,000108385 | 0,195285912 | 0,35  | 0,09  | 1           | 1,144951044   | 0,873399789     | 3,888888889     |
| RPS25                                                                                    | 0,019036087 | 0,195246826 | 1     | 0,93  | 1           | 1,144920025   | 0,873423452     | 1,075268817     |
| SLC37A4                                                                                  | 1,86072E-05 | 0,195049523 | 0,2   | 0,01  | 0,392631437 | 1,144763456   | 0,873542909     | 20              |
| TMEM51                                                                                   | 2,1295E-05  | 0,194751388 | 0,25  | 0,03  | 0,449345203 | 1,144526913   | 0,873723447     | 8,333333333     |
| ZPR1                                                                                     | 7,88831E-07 | 0,194741713 | 0,35  | 0,05  | 0,016645113 | 1,144519238   | 0,873729306     | 7               |
| PPM1F                                                                                    | 0,00014515  | 0,194627821 | 0,238 | 0,04  | 1           | 1,144428889   | 0,873798285     | 5,95            |
| RWDD4                                                                                    | 0,000179747 | 0,194478551 | 0,338 | 0,09  | 1           | 1,144310485   | 0,873888698     | 3,755555556     |

Supplementary Table 4

| Differentially expressed genes_keloid-CCD_ comparing SC-Keloid vs. (SC-Myel, SC-Nonmyel) |             |             |       |       |             |               |                 |                 |
|------------------------------------------------------------------------------------------|-------------|-------------|-------|-------|-------------|---------------|-----------------|-----------------|
| gene                                                                                     | p_val       | avg_log2FC  | pct.1 | pct.2 | p_val_adj   | Foldchange_UP | Foldchange_DOWN | Ratio_pct1_pct2 |
| DELE1                                                                                    | 9,40434E-06 | 0,194424669 | 0,338 | 0,06  | 0,198440955 | 1,144267748   | 0,873921337     | 5,633333333     |
| GPAA1                                                                                    | 0,000151563 | 0,19441583  | 0,762 | 0,32  | 1           | 1,144260737   | 0,873926691     | 2,38125         |
| RAI14                                                                                    | 6,43541E-06 | 0,19431769  | 0,45  | 0,11  | 0,135793581 | 1,144182901   | 0,873986142     | 4,090909091     |
| C12orf43                                                                                 | 1,04548E-05 | 0,193968962 | 0,238 | 0,02  | 0,220607332 | 1,143906363   | 0,874197427     | 11,9            |
| ACTR2                                                                                    | 0,000510379 | 0,193753091 | 0,787 | 0,37  | 1           | 1,143735212   | 0,874328244     | 2,127027027     |
| PSMA3                                                                                    | 0,001479477 | 0,193597607 | 0,812 | 0,4   | 1           | 1,143611955   | 0,874422478     | 2,03            |
| NCK2                                                                                     | 1,59874E-06 | 0,193408242 | 0,438 | 0,09  | 0,033735097 | 1,143461857   | 0,87453726      | 4,866666667     |
| RNF187                                                                                   | 2,35582E-06 | 0,192966132 | 0,725 | 0,22  | 0,049710112 | 1,1431115     | 0,874805301     | 3,295454545     |
| MED31                                                                                    | 2,24983E-05 | 0,192896489 | 0,425 | 0,11  | 0,474737127 | 1,14305632    | 0,874847531     | 3,863636364     |
| RHNO1                                                                                    | 2,04686E-06 | 0,192865159 | 0,238 | 0,01  | 0,043190826 | 1,143031497   | 0,87486653      | 23,8            |
| PRICKLE1                                                                                 | 0,014967807 | 0,192720721 | 0,162 | 0,05  | 1           | 1,142917066   | 0,874954124     | 3,24            |
| SLC39A7                                                                                  | 4,80094E-05 | 0,192681413 | 0,625 | 0,21  | 1           | 1,142885926   | 0,874977963     | 2,976190476     |
| UBN1                                                                                     | 2,6731E-07  | 0,192663463 | 0,475 | 0,09  | 0,005640508 | 1,142871707   | 0,87498885      | 5,277777778     |
| CDH11                                                                                    | 0,000168027 | 0,192612997 | 0,162 | 0,01  | 1           | 1,14283173    | 0,875019457     | 16,2            |
| NECAB3                                                                                   | 0,00020859  | 0,192607195 | 0,25  | 0,05  | 1           | 1,142827134   | 0,875022976     | 5               |
| CKB                                                                                      | 0,029502323 | 0,19254065  | 0,7   | 0,42  | 1           | 1,142774421   | 0,875063338     | 1,666666667     |
| C5orf15                                                                                  | 0,000183657 | 0,192338747 | 0,738 | 0,3   | 1           | 1,142614503   | 0,875185811     | 2,46            |
| HIRIP3                                                                                   | 1,73612E-05 | 0,19233039  | 0,388 | 0,09  | 0,366339049 | 1,142607884   | 0,87519088      | 4,311111111     |
| PLXNA4                                                                                   | 0,000432336 | 0,192220599 | 0,275 | 0,07  | 1           | 1,142520933   | 0,875257486     | 3,928571429     |
| ARHGAP11A                                                                                | 0,000366117 | 0,192216266 | 0,15  | 0,01  | 1           | 1,142517503   | 0,875260114     | 15              |
| TAX1BP3                                                                                  | 0,000865109 | 0,192204908 | 0,95  | 0,49  | 1           | 1,142508507   | 0,875267005     | 1,93877551      |
| RPAP2                                                                                    | 0,000699359 | 0,192186023 | 0,188 | 0,03  | 1           | 1,142493552   | 0,875278463     | 6,266666667     |
| CCDC137                                                                                  | 5,41422E-06 | 0,1919595   | 0,3   | 0,04  | 0,114245529 | 1,142314179   | 0,875415904     | 7,5             |
| FPGS                                                                                     | 2,73269E-06 | 0,191934008 | 0,288 | 0,03  | 0,057662584 | 1,142293995   | 0,875431373     | 9,6             |
| POU3F2                                                                                   | 4,05503E-06 | 0,191917178 | 0,275 | 0,03  | 0,085565155 | 1,142280669   | 0,875441585     | 9,166666667     |
| NAXE                                                                                     | 2,07452E-06 | 0,19187828  | 0,562 | 0,15  | 0,043774546 | 1,142249871   | 0,87546519      | 3,746666667     |
| AP2A2                                                                                    | 2,18695E-05 | 0,191766923 | 0,338 | 0,07  | 0,461469291 | 1,142161708   | 0,875532766     | 4,828571429     |
| KCNK6                                                                                    | 3,09504E-05 | 0,191692383 | 0,162 | 0     | 0,653084942 | 1,142102697   | 0,875578004     | #DIV/0!         |
| WAC-AS1                                                                                  | 1,18394E-05 | 0,191269708 | 0,262 | 0,03  | 0,249822886 | 1,141768138   | 0,875834565     | 8,733333333     |
| CDK16                                                                                    | 3,53485E-06 | 0,191128974 | 0,525 | 0,14  | 0,07458894  | 1,141656765   | 0,875920006     | 3,75            |

Supplementary Table 4

| Differentially expressed genes_keloid-CCD_ comparing SC-Keloid vs. (SC-Myel, SC-Nonmyel) |             |             |       |       |             |               |                 |                 |
|------------------------------------------------------------------------------------------|-------------|-------------|-------|-------|-------------|---------------|-----------------|-----------------|
| gene                                                                                     | p_val       | avg_log2FC  | pct.1 | pct.2 | p_val_adj   | Foldchange_UP | Foldchange_DOWN | Ratio_pct1_pct2 |
| STAMBP                                                                                   | 6,47808E-05 | 0,190987743 | 0,575 | 0,2   | 1           | 1,141545008   | 0,876005758     | 2,875           |
| CHMP7                                                                                    | 8,42761E-06 | 0,19093812  | 0,238 | 0,02  | 0,177830922 | 1,141505745   | 0,876035889     | 11,9            |
| IKBKG                                                                                    | 4,19045E-06 | 0,190878046 | 0,225 | 0,01  | 0,088422589 | 1,141458214   | 0,876072368     | 22,5            |
| PSMA6                                                                                    | 4,34292E-05 | 0,190767697 | 0,238 | 0,03  | 0,91639895  | 1,141370908   | 0,87613938      | 7,933333333     |
| CTNNBIP1                                                                                 | 5,3151E-06  | 0,190668432 | 0,412 | 0,09  | 0,112153866 | 1,141292379   | 0,876199665     | 4,577777778     |
| DDR1                                                                                     | 0,000157406 | 0,190576336 | 0,488 | 0,17  | 1           | 1,141219526   | 0,8762556       | 2,870588235     |
| ER13                                                                                     | 3,75906E-05 | 0,19051138  | 0,512 | 0,16  | 0,793199936 | 1,141168145   | 0,876295053     | 3,2             |
| CD81                                                                                     | 0,017889929 | 0,190373791 | 1     | 0,92  | 1           | 1,141059317   | 0,876378629     | 1,086956522     |
| LHFPL6                                                                                   | 0,000213576 | 0,190342007 | 0,525 | 0,19  | 1           | 1,141034179   | 0,876397937     | 2,763157895     |
| SCN1B                                                                                    | 0,000106695 | 0,19017291  | 0,288 | 0,06  | 1           | 1,140900447   | 0,876500665     | 4,8             |
| NKAP                                                                                     | 0,000377809 | 0,190097278 | 0,462 | 0,17  | 1           | 1,140840638   | 0,876546616     | 2,717647059     |
| SGO1                                                                                     | 6,57145E-05 | 0,190061699 | 0,15  | 0     | 1           | 1,140812503   | 0,876568233     | #DIV/0!         |
| ENDOV                                                                                    | 1,62286E-05 | 0,189816875 | 0,362 | 0,08  | 0,3424402   | 1,140618925   | 0,876716998     | 4,525           |
| GSTA4                                                                                    | 1,06726E-05 | 0,189758741 | 0,488 | 0,13  | 0,225202118 | 1,140572964   | 0,876752327     | 3,753846154     |
| DDX60L                                                                                   | 3,09504E-05 | 0,189754735 | 0,162 | 0     | 0,653084942 | 1,140569797   | 0,876754761     | #DIV/0!         |
| CHP1                                                                                     | 0,000173424 | 0,189644492 | 0,438 | 0,14  | 1           | 1,140482645   | 0,87682176      | 3,128571429     |
| TRIB2                                                                                    | 0,001194591 | 0,189416405 | 0,3   | 0,09  | 1           | 1,14030235    | 0,876960395     | 3,333333333     |
| GSS                                                                                      | 1,64373E-05 | 0,189323866 | 0,488 | 0,14  | 0,346843571 | 1,14022921    | 0,877016648     | 3,485714286     |
| GOLGB1                                                                                   | 0,018547995 | 0,189026227 | 0,688 | 0,39  | 1           | 1,139993997   | 0,877197602     | 1,764102564     |
| MED10                                                                                    | 0,000723255 | 0,188962841 | 0,7   | 0,3   | 1           | 1,139943911   | 0,877236143     | 2,333333333     |
| LINC00926                                                                                | 0,000138823 | 0,188906754 | 0,138 | 0     | 1           | 1,139899595   | 0,877270248     | #DIV/0!         |
| UBE3C                                                                                    | 1,47773E-05 | 0,188893693 | 0,388 | 0,09  | 0,311815291 | 1,139889275   | 0,87727819      | 4,311111111     |
| EIPR1                                                                                    | 3,29198E-05 | 0,188826359 | 0,188 | 0,01  | 0,694641332 | 1,139836075   | 0,877319136     | 18,8            |
| NDUFA6                                                                                   | 0,007354642 | 0,188811479 | 0,725 | 0,38  | 1           | 1,139824319   | 0,877328184     | 1,907894737     |
| EBP                                                                                      | 5,78099E-06 | 0,188769564 | 0,475 | 0,12  | 0,121984759 | 1,139791203   | 0,877353674     | 3,958333333     |
| CFAP298                                                                                  | 1,18252E-06 | 0,18857466  | 0,512 | 0,13  | 0,024952421 | 1,139637231   | 0,87747221      | 3,938461538     |
| LIMD2                                                                                    | 1,68984E-05 | 0,188538048 | 0,412 | 0,1   | 0,356573699 | 1,139608311   | 0,877494478     | 4,12            |
| FAM32A                                                                                   | 0,000624551 | 0,18847795  | 0,5   | 0,19  | 1           | 1,139560839   | 0,877531033     | 2,631578947     |
| GOLM1                                                                                    | 8,25786E-05 | 0,188253729 | 0,275 | 0,05  | 1           | 1,139383745   | 0,877667427     | 5,5             |
| LCMT1                                                                                    | 2,2972E-05  | 0,188227946 | 0,362 | 0,08  | 0,484731561 | 1,139363383   | 0,877683112     | 4,525           |

Supplementary Table 4

| Differentially expressed genes_keloid-CCD_ comparing SC-Keloid vs. (SC-Myel, SC-Nonmyel) |             |             |       |       |             |               |                 |                 |
|------------------------------------------------------------------------------------------|-------------|-------------|-------|-------|-------------|---------------|-----------------|-----------------|
| gene                                                                                     | p_val       | avg_log2FC  | pct.1 | pct.2 | p_val_adj   | Foldchange_UP | Foldchange_DOWN | Ratio_pct1_pct2 |
| ERLIN1                                                                                   | 2,08675E-05 | 0,188063822 | 0,225 | 0,02  | 0,440326004 | 1,139233774   | 0,877782965     | 11,25           |
| DOCK2                                                                                    | 3,09504E-05 | 0,18805615  | 0,162 | 0     | 0,653084942 | 1,139227715   | 0,877787633     | #DIV/0!         |
| EMG1                                                                                     | 2,60509E-06 | 0,18790258  | 0,338 | 0,05  | 0,05497004  | 1,139106455   | 0,877881076     | 6,76            |
| RUNX2                                                                                    | 2,44785E-06 | 0,187847401 | 0,262 | 0,02  | 0,051652011 | 1,139062888   | 0,877914653     | 13,1            |
| GLOD4                                                                                    | 1,59692E-05 | 0,187761408 | 0,475 | 0,13  | 0,336966297 | 1,138994995   | 0,877966983     | 3,653846154     |
| PSME1                                                                                    | 0,002574919 | 0,187640223 | 0,825 | 0,46  | 1           | 1,138899325   | 0,878040735     | 1,793478261     |
| TMEM132A                                                                                 | 4,01733E-05 | 0,187505004 | 0,35  | 0,08  | 0,847697081 | 1,138792585   | 0,878123034     | 4,375           |
| CBFB                                                                                     | 9,96263E-06 | 0,187385163 | 0,6   | 0,18  | 0,210221427 | 1,138697992   | 0,878195981     | 3,333333333     |
| ZNF688                                                                                   | 0,000215114 | 0,18723394  | 0,338 | 0,09  | 1           | 1,13857864    | 0,878288038     | 3,755555556     |
| SLC39A4                                                                                  | 2,14076E-05 | 0,187207692 | 0,275 | 0,04  | 0,451721615 | 1,138557925   | 0,878304018     | 6,875           |
| SPTLC2                                                                                   | 2,32298E-06 | 0,187147616 | 0,375 | 0,07  | 0,049017097 | 1,138510515   | 0,878340592     | 5,357142857     |
| ANPEP                                                                                    | 3,12312E-06 | 0,187131326 | 0,2   | 0     | 0,065900895 | 1,13849766    | 0,87835051      | #DIV/0!         |
| SMDT1                                                                                    | 0,000773065 | 0,187063486 | 0,812 | 0,36  | 1           | 1,138444125   | 0,878391814     | 2,255555556     |
| TIMM22                                                                                   | 6,13398E-06 | 0,187009792 | 0,425 | 0,1   | 0,129433068 | 1,138401756   | 0,878424506     | 4,25            |
| RAB34                                                                                    | 0,027265459 | 0,186850206 | 0,812 | 0,45  | 1           | 1,138275836   | 0,87852168      | 1,804444444     |
| URB1                                                                                     | 3,09504E-05 | 0,186826391 | 0,162 | 0     | 0,653084942 | 1,138257047   | 0,878536182     | #DIV/0!         |
| STARD7                                                                                   | 1,88548E-05 | 0,186707617 | 0,45  | 0,12  | 0,397854214 | 1,13816334    | 0,878608513     | 3,75            |
| CARM1                                                                                    | 6,12514E-08 | 0,186698584 | 0,35  | 0,03  | 0,001292465 | 1,138156215   | 0,878614014     | 11,66666667     |
| MSANTD4                                                                                  | 1,02085E-05 | 0,18668505  | 0,238 | 0,02  | 0,215408588 | 1,138145537   | 0,878622257     | 11,9            |
| CEP152                                                                                   | 4,86715E-05 | 0,186641569 | 0,212 | 0,02  | 1           | 1,138111235   | 0,878648737     | 10,6            |
| RWDD1                                                                                    | 0,000963989 | 0,186621599 | 0,887 | 0,43  | 1           | 1,138095481   | 0,8786609       | 2,062790698     |
| CSK                                                                                      | 4,04749E-06 | 0,186615326 | 0,375 | 0,07  | 0,085406131 | 1,138090533   | 0,87866472      | 5,357142857     |
| UCHL3                                                                                    | 3,99349E-05 | 0,186537759 | 0,512 | 0,16  | 0,842666117 | 1,138029345   | 0,878711963     | 3,2             |
| LIPA                                                                                     | 5,5114E-06  | 0,186520376 | 0,325 | 0,05  | 0,116296016 | 1,138015633   | 0,878722551     | 6,5             |
| GRK6                                                                                     | 0,000524966 | 0,186509755 | 0,212 | 0,04  | 1           | 1,138007255   | 0,87872902      | 5,3             |
| MGA                                                                                      | 0,000301636 | 0,186461076 | 0,2   | 0,03  | 1           | 1,137968857   | 0,87875867      | 6,666666667     |
| TNIP1                                                                                    | 3,07116E-05 | 0,18634981  | 0,6   | 0,2   | 0,648045516 | 1,137881096   | 0,878826446     | 3               |
| MOGS                                                                                     | 1,26355E-06 | 0,186264972 | 0,325 | 0,04  | 0,026662136 | 1,137814185   | 0,878878127     | 8,125           |
| URI1                                                                                     | 0,000132129 | 0,186247371 | 0,738 | 0,29  | 1           | 1,137800303   | 0,87888885      | 2,544827586     |
| METTL9                                                                                   | 0,000100591 | 0,186244674 | 0,637 | 0,24  | 1           | 1,137798176   | 0,878890493     | 2,654166667     |

Supplementary Table 4

| Differentially expressed genes_keloid-CCD_ comparing SC-Keloid vs. (SC-Myel, SC-Nonmyel) |             |             |       |       |             |               |                 |                 |
|------------------------------------------------------------------------------------------|-------------|-------------|-------|-------|-------------|---------------|-----------------|-----------------|
| gene                                                                                     | p_val       | avg_log2FC  | pct.1 | pct.2 | p_val_adj   | Foldchange_UP | Foldchange_DOWN | Ratio_pct1_pct2 |
| LPAR6                                                                                    | 0,000754972 | 0,186232894 | 0,138 | 0,01  | 1           | 1,137788886   | 0,878897669     | 13,8            |
| COP1                                                                                     | 9,42407E-07 | 0,18621762  | 0,25  | 0,01  | 0,019885724 | 1,137776841   | 0,878906974     | 25              |
| DKC1                                                                                     | 1,24646E-06 | 0,186193071 | 0,438 | 0,09  | 0,026301493 | 1,13775748    | 0,87892193      | 4,866666667     |
| UGGT1                                                                                    | 5,9038E-06  | 0,18602893  | 0,3   | 0,04  | 0,124576006 | 1,13762804    | 0,879021934     | 7,5             |
| MPV17L2                                                                                  | 1,59586E-05 | 0,185952894 | 0,2   | 0,01  | 0,336742784 | 1,137568084   | 0,879068263     | 20              |
| RASSF3                                                                                   | 7,46689E-05 | 0,185933673 | 0,175 | 0,01  | 1           | 1,137552929   | 0,879079975     | 17,5            |
| FRMD5                                                                                    | 1,68987E-05 | 0,185538113 | 0,412 | 0,1   | 0,356580072 | 1,137241076   | 0,879321035     | 4,12            |
| RPS16                                                                                    | 0,004121561 | 0,185475958 | 1     | 0,96  | 1           | 1,137192081   | 0,87935892      | 1,041666667     |
| POLR3GL                                                                                  | 0,000159632 | 0,185469673 | 0,588 | 0,22  | 1           | 1,137187127   | 0,87936275      | 2,672727273     |
| PIGP                                                                                     | 7,61086E-05 | 0,185238823 | 0,55  | 0,19  | 1           | 1,137005177   | 0,879503471     | 2,894736842     |
| CIP2A                                                                                    | 1,44967E-05 | 0,185072931 | 0,175 | 0     | 0,305894872 | 1,136874443   | 0,879604609     | #DIV/0!         |
| LINC00667                                                                                | 0,000176411 | 0,184950195 | 0,4   | 0,12  | 1           | 1,136777728   | 0,879679444     | 3,333333333     |
| YBX1                                                                                     | 0,012769089 | 0,184938698 | 0,988 | 0,97  | 1           | 1,13676867    | 0,879686454     | 1,018556701     |
| GNB2                                                                                     | 0,020988638 | 0,184808669 | 0,875 | 0,57  | 1           | 1,136666218   | 0,879765743     | 1,535087719     |
| KIF4A                                                                                    | 0,000138823 | 0,18472121  | 0,138 | 0     | 1           | 1,136597313   | 0,879819078     | #DIV/0!         |
| PPDPF                                                                                    | 0,020864743 | 0,184670244 | 0,975 | 0,77  | 1           | 1,136557161   | 0,87985016      | 1,266233766     |
| SIRT6                                                                                    | 4,89926E-05 | 0,184617145 | 0,3   | 0,06  | 1           | 1,136515331   | 0,879882543     | 5               |
| MED16                                                                                    | 2,93593E-07 | 0,184456088 | 0,375 | 0,05  | 0,006195097 | 1,136388462   | 0,879980776     | 7,5             |
| KPNB1                                                                                    | 0,006019643 | 0,184397665 | 0,725 | 0,37  | 1           | 1,136342443   | 0,880016412     | 1,959459459     |
| TBC1D10B                                                                                 | 0,000494842 | 0,18428822  | 0,275 | 0,07  | 1           | 1,136256242   | 0,880083174     | 3,928571429     |
| ERLEC1                                                                                   | 0,000149982 | 0,184111764 | 0,7   | 0,27  | 1           | 1,136117275   | 0,880190824     | 2,592592593     |
| NUP107                                                                                   | 8,51672E-06 | 0,184021781 | 0,338 | 0,06  | 0,179711211 | 1,136046416   | 0,880245724     | 5,633333333     |
| SNX8                                                                                     | 4,37667E-05 | 0,18360306  | 0,262 | 0,04  | 0,923520168 | 1,135716743   | 0,880501239     | 6,55            |
| TOR4A                                                                                    | 2,00837E-05 | 0,183536099 | 0,2   | 0,01  | 0,423786989 | 1,135664031   | 0,880542108     | 20              |
| RNF150                                                                                   | 2,27565E-05 | 0,183341156 | 0,25  | 0,03  | 0,480184272 | 1,135510586   | 0,880661098     | 8,333333333     |
| GMPPA                                                                                    | 4,53631E-05 | 0,183319321 | 0,238 | 0,03  | 0,95720682  | 1,1354934     | 0,880674427     | 7,933333333     |
| FLNC                                                                                     | 3,12312E-06 | 0,183133136 | 0,2   | 0     | 0,065900895 | 1,13534687    | 0,880788089     | #DIV/0!         |
| AAMDC                                                                                    | 1,39401E-05 | 0,183126496 | 0,613 | 0,2   | 0,294149061 | 1,135341645   | 0,880792142     | 3,065           |
| QTRT1                                                                                    | 2,27062E-06 | 0,183006627 | 0,488 | 0,12  | 0,047912262 | 1,135247317   | 0,880865328     | 4,066666667     |
| VDAC2                                                                                    | 0,044270132 | 0,182956349 | 0,912 | 0,6   | 1           | 1,135207754   | 0,880896027     | 1,52            |

Supplementary Table 4

| Differentially expressed genes_keloid-CCD_ comparing SC-Keloid vs. (SC-Myel, SC-Nonmyel) |             |             |       |       |             |               |                 |                 |
|------------------------------------------------------------------------------------------|-------------|-------------|-------|-------|-------------|---------------|-----------------|-----------------|
| gene                                                                                     | p_val       | avg_log2FC  | pct.1 | pct.2 | p_val_adj   | Foldchange_UP | Foldchange_DOWN | Ratio_pct1_pct2 |
| WDR12                                                                                    | 3,85679E-05 | 0,182793501 | 0,212 | 0,02  | 0,813821874 | 1,135079622   | 0,880995466     | 10,6            |
| COG6                                                                                     | 6,62354E-05 | 0,182741197 | 0,3   | 0,06  | 1           | 1,135038471   | 0,881027406     | 5               |
| TM9SF2                                                                                   | 0,000181712 | 0,18245878  | 0,537 | 0,19  | 1           | 1,134816302   | 0,88119989      | 2,826315789     |
| POP4                                                                                     | 5,39805E-06 | 0,182321321 | 0,325 | 0,05  | 0,113904202 | 1,134708182   | 0,881283854     | 6,5             |
| RSPRY1                                                                                   | 0,00134371  | 0,182316082 | 0,325 | 0,11  | 1           | 1,134704062   | 0,881287054     | 2,954545455     |
| NR2F6                                                                                    | 5,49985E-05 | 0,182278597 | 0,562 | 0,19  | 1           | 1,134674579   | 0,881309953     | 2,957894737     |
| PIKFYVE                                                                                  | 0,000133953 | 0,182158024 | 0,238 | 0,04  | 1           | 1,134579753   | 0,881383611     | 5,95            |
| PDHB                                                                                     | 7,88002E-05 | 0,182115029 | 0,575 | 0,2   | 1           | 1,134545941   | 0,881409878     | 2,875           |
| EPHA3                                                                                    | 0,000331906 | 0,182040713 | 0,15  | 0,01  | 1           | 1,1344875     | 0,881455283     | 15              |
| OXA1L                                                                                    | 2,21968E-06 | 0,18195969  | 0,537 | 0,14  | 0,046837511 | 1,134423788   | 0,881504788     | 3,835714286     |
| PTPN9                                                                                    | 1,83449E-05 | 0,181909294 | 0,3   | 0,05  | 0,387095152 | 1,134384161   | 0,88153558      | 6               |
| COX14                                                                                    | 0,00014051  | 0,181618863 | 0,6   | 0,23  | 1           | 1,134155819   | 0,881713062     | 2,608695652     |
| ZDHHC5                                                                                   | 3,69306E-05 | 0,181227155 | 0,288 | 0,05  | 0,779272992 | 1,133847925   | 0,881952489     | 5,76            |
| CCT8                                                                                     | 0,001574338 | 0,181107417 | 0,75  | 0,35  | 1           | 1,133753824   | 0,882025691     | 2,142857143     |
| PSMG1                                                                                    | 1,52213E-05 | 0,180913359 | 0,412 | 0,1   | 0,321184413 | 1,133601332   | 0,882144341     | 4,12            |
| CYREN                                                                                    | 5,39805E-06 | 0,180824182 | 0,325 | 0,05  | 0,113904202 | 1,133531264   | 0,88219887      | 6,5             |
| FDXR                                                                                     | 0,000291957 | 0,180691089 | 0,125 | 0     | 1           | 1,133426697   | 0,882280259     | #DIV/0!         |
| TYMP                                                                                     | 0,000906469 | 0,18063227  | 0,262 | 0,07  | 1           | 1,133380487   | 0,882316231     | 3,742857143     |
| BCL7C                                                                                    | 0,002025926 | 0,180607947 | 0,85  | 0,43  | 1           | 1,13336138    | 0,882331106     | 1,976744186     |
| CLNS1A                                                                                   | 3,48558E-06 | 0,180536214 | 0,75  | 0,24  | 0,073549135 | 1,133305028   | 0,882374979     | 3,125           |
| AP001816.1                                                                               | 9,56592E-05 | 0,180472657 | 0,2   | 0,02  | 1           | 1,133255103   | 0,882413852     | 10              |
| ANAPC16                                                                                  | 0,000160817 | 0,18022347  | 0,8   | 0,32  | 1           | 1,13305938    | 0,882566278     | 2,5             |
| SNAPC2                                                                                   | 2,6728E-06  | 0,180202174 | 0,5   | 0,13  | 0,056398658 | 1,133042655   | 0,882579306     | 3,846153846     |
| HIGD1A                                                                                   | 3,11598E-05 | 0,180163428 | 0,6   | 0,2   | 0,657502085 | 1,133012226   | 0,882603009     | 3               |
| PCCB                                                                                     | 1,86357E-05 | 0,180114287 | 0,25  | 0,03  | 0,393231119 | 1,132973634   | 0,882633073     | 8,333333333     |
| MRPL35                                                                                   | 1,04921E-06 | 0,180082185 | 0,3   | 0,03  | 0,022139454 | 1,132948423   | 0,882652713     | 10              |
| XRCC4                                                                                    | 1,02085E-05 | 0,179904228 | 0,238 | 0,02  | 0,215408588 | 1,132808682   | 0,882761596     | 11,9            |
| TRAPPC9                                                                                  | 6,57145E-05 | 0,179825707 | 0,15  | 0     | 1           | 1,132747029   | 0,882809643     | #DIV/0!         |
| ATP13A1                                                                                  | 0,000356018 | 0,179820772 | 0,2   | 0,03  | 1           | 1,132743155   | 0,882812662     | 6,666666667     |
| MBOAT7                                                                                   | 4,63604E-05 | 0,179698628 | 0,238 | 0,03  | 0,978251361 | 1,132647256   | 0,882887408     | 7,933333333     |



Supplementary Table 4

| Differentially expressed genes_keloid-CCD_comparing SC-Keloid vs. (SC-Myel, SC-Nonmyel) |             |             |       |       |             |               |                 |                 |
|-----------------------------------------------------------------------------------------|-------------|-------------|-------|-------|-------------|---------------|-----------------|-----------------|
| gene                                                                                    | p_val       | avg_log2FC  | pct.1 | pct.2 | p_val_adj   | Foldchange_UP | Foldchange_DOWN | Ratio_pct1_pct2 |
| IBTK                                                                                    | 2,82287E-05 | 0,179271396 | 0,438 | 0,12  | 0,595653949 | 1,13231189    | 0,8831489       | 3,65            |
| UTRN                                                                                    | 0,002695105 | 0,17923344  | 0,75  | 0,4   | 1           | 1,1322821     | 0,883172135     | 1,875           |
| ST6GAL1                                                                                 | 1,84183E-06 | 0,179176477 | 0,562 | 0,15  | 0,038864361 | 1,132237394   | 0,883207007     | 3,746666667     |
| HGH1                                                                                    | 8,25503E-05 | 0,178910799 | 0,175 | 0,01  | 1           | 1,132028907   | 0,883369668     | 17,5            |
| CDCA4                                                                                   | 4,53631E-05 | 0,178890642 | 0,238 | 0,03  | 0,95720682  | 1,132013091   | 0,883382011     | 7,933333333     |
| GTPBP3                                                                                  | 2,00837E-05 | 0,178727913 | 0,2   | 0,01  | 0,423786989 | 1,131885413   | 0,883481657     | 20              |
| ESYT1                                                                                   | 2,23213E-05 | 0,178719751 | 0,375 | 0,09  | 0,471002448 | 1,131879009   | 0,883486655     | 4,166666667     |
| LPGAT1                                                                                  | 0,00026219  | 0,178701492 | 0,688 | 0,28  | 1           | 1,131864684   | 0,883497837     | 2,457142857     |
| CDCA3                                                                                   | 0,000138823 | 0,1785871   | 0,138 | 0     | 1           | 1,131774941   | 0,883567893     | #DIV/0!         |
| WDR5                                                                                    | 2,0828E-05  | 0,178529519 | 0,25  | 0,03  | 0,439491369 | 1,131729771   | 0,883603158     | 8,333333333     |
| AMDHD2                                                                                  | 0,00922558  | 0,178527217 | 0,138 | 0,03  | 1           | 1,131727965   | 0,883604569     | 4,6             |
| RAD23B                                                                                  | 0,000119936 | 0,17824878  | 0,625 | 0,23  | 1           | 1,131509565   | 0,883775119     | 2,717391304     |
| RGMB                                                                                    | 0,002680769 | 0,178239644 | 0,45  | 0,19  | 1           | 1,1315024     | 0,883780715     | 2,368421053     |
| NOL8                                                                                    | 2,18621E-05 | 0,178230893 | 0,275 | 0,04  | 0,461312778 | 1,131495536   | 0,883786076     | 6,875           |
| TCTA                                                                                    | 0,000112764 | 0,178083717 | 0,288 | 0,06  | 1           | 1,131380113   | 0,88387624      | 4,8             |
| NEDD1                                                                                   | 0,000780217 | 0,178050848 | 0,25  | 0,06  | 1           | 1,131354337   | 0,883896377     | 4,166666667     |
| PITPNM3                                                                                 | 0,000384434 | 0,177961706 | 0,15  | 0,01  | 1           | 1,131284434   | 0,883950994     | 15              |
| NSUN5                                                                                   | 7,99929E-05 | 0,177948033 | 0,25  | 0,04  | 1           | 1,131273712   | 0,883959372     | 6,25            |
| DPH6                                                                                    | 4,64688E-05 | 0,177914751 | 0,212 | 0,02  | 0,98053888  | 1,131247615   | 0,883979764     | 10,6            |
| TOLLIP                                                                                  | 4,19033E-06 | 0,177909286 | 0,462 | 0,11  | 0,088420109 | 1,13124333    | 0,883983112     | 4,2             |
| GTF3C3                                                                                  | 0,000505149 | 0,177860821 | 0,212 | 0,04  | 1           | 1,131205329   | 0,884012809     | 5,3             |
| ANKRD40                                                                                 | 2,33874E-05 | 0,177718465 | 0,637 | 0,21  | 0,493497393 | 1,131093714   | 0,884100042     | 3,033333333     |
| THNSL2                                                                                  | 9,1613E-05  | 0,177534092 | 0,225 | 0,03  | 1           | 1,130949172   | 0,884213035     | 7,5             |
| SDHAF1                                                                                  | 0,000783776 | 0,177371274 | 0,288 | 0,08  | 1           | 1,130821544   | 0,88431283      | 3,6             |
| MRPL21                                                                                  | 1,50005E-05 | 0,177288923 | 0,675 | 0,23  | 0,316525564 | 1,130756997   | 0,884363309     | 2,934782609     |
| AAAS                                                                                    | 4,95697E-06 | 0,177209818 | 0,25  | 0,02  | 0,104597055 | 1,130694997   | 0,884411802     | 12,5            |
| TCIRG1                                                                                  | 9,59217E-06 | 0,17719439  | 0,338 | 0,06  | 0,202404314 | 1,130682906   | 0,88442126      | 5,633333333     |
| SEMA3A                                                                                  | 0,000611714 | 0,177154433 | 0,112 | 0     | 1           | 1,130651591   | 0,884445755     | #DIV/0!         |
| CDK2                                                                                    | 4,13543E-05 | 0,17704763  | 0,188 | 0,01  | 0,872616559 | 1,130567892   | 0,884511233     | 18,8            |
| GEMIN7                                                                                  | 0,000182593 | 0,176894594 | 0,188 | 0,02  | 1           | 1,130447971   | 0,884605064     | 9,4             |

Supplementary Table 4

| Differentially expressed genes_keloid-CCD_ comparing SC-Keloid vs. (SC-Myel, SC-Nonmyel) |             |             |       |       |             |               |                 |                 |
|------------------------------------------------------------------------------------------|-------------|-------------|-------|-------|-------------|---------------|-----------------|-----------------|
| gene                                                                                     | p_val       | avg_log2FC  | pct.1 | pct.2 | p_val_adj   | Foldchange_UP | Foldchange_DOWN | Ratio_pct1_pct2 |
| BLVRB                                                                                    | 7,42871E-05 | 0,176889218 | 0,65  | 0,24  | 1           | 1,130443759   | 0,88460836      | 2,708333333     |
| LIMD1                                                                                    | 0,000159367 | 0,176817909 | 0,188 | 0,02  | 1           | 1,130387885   | 0,884652085     | 9,4             |
| KHDRBS1                                                                                  | 0,003514067 | 0,176778896 | 0,812 | 0,39  | 1           | 1,130357318   | 0,884676008     | 2,082051282     |
| STXBP5                                                                                   | 1,12285E-05 | 0,176766258 | 0,238 | 0,02  | 0,236932166 | 1,130347416   | 0,884683758     | 11,9            |
| SNAPC5                                                                                   | 3,64962E-05 | 0,1767212   | 0,312 | 0,06  | 0,770106607 | 1,130312114   | 0,884711389     | 5,2             |
| AURKB                                                                                    | 0,000138823 | 0,176670541 | 0,138 | 0     | 1           | 1,130272425   | 0,884742455     | #DIV/0!         |
| SEC24D                                                                                   | 9,32178E-07 | 0,176198949 | 0,537 | 0,13  | 0,019669882 | 1,129903018   | 0,88503171      | 4,130769231     |
| MEF2C                                                                                    | 0,006377112 | 0,176150426 | 0,863 | 0,47  | 1           | 1,129865016   | 0,885061477     | 1,836170213     |
| RBM43                                                                                    | 0,000485145 | 0,176050617 | 0,238 | 0,05  | 1           | 1,129786852   | 0,88512271      | 4,76            |
| POPDC3                                                                                   | 7,27088E-05 | 0,17599959  | 0,3   | 0,06  | 1           | 1,129746893   | 0,885154016     | 5               |
| YDJC                                                                                     | 9,44729E-06 | 0,175964343 | 0,212 | 0,01  | 0,199347284 | 1,129719292   | 0,885175642     | 21,2            |
| PIGQ                                                                                     | 7,79251E-05 | 0,175928264 | 0,275 | 0,05  | 1           | 1,129691041   | 0,885197778     | 5,5             |
| RWDD2B                                                                                   | 3,80858E-05 | 0,175870621 | 0,238 | 0,03  | 0,803648485 | 1,129645905   | 0,885233148     | 7,933333333     |
| PHF14                                                                                    | 1,48283E-05 | 0,175729194 | 0,7   | 0,24  | 0,31289251  | 1,129535171   | 0,885319931     | 2,916666667     |
| ATE1                                                                                     | 6,62354E-05 | 0,175685394 | 0,3   | 0,06  | 1           | 1,129500879   | 0,88534681      | 5               |
| GPATCH2                                                                                  | 7,00531E-05 | 0,175649172 | 0,475 | 0,15  | 1           | 1,129472521   | 0,885369038     | 3,166666667     |
| FAM104A                                                                                  | 7,26085E-06 | 0,175581591 | 0,338 | 0,06  | 0,153211206 | 1,129419614   | 0,885410513     | 5,633333333     |
| NME2                                                                                     | 5,71358E-06 | 0,175517918 | 0,275 | 0,03  | 0,120562212 | 1,129369768   | 0,885449592     | 9,166666667     |
| ATP6V1F                                                                                  | 0,00784483  | 0,17528724  | 0,875 | 0,44  | 1           | 1,129189203   | 0,885591181     | 1,988636364     |
| FAM89B                                                                                   | 0,000175715 | 0,175225536 | 0,662 | 0,26  | 1           | 1,129140909   | 0,885629058     | 2,546153846     |
| MPC2                                                                                     | 0,001375264 | 0,175220878 | 0,8   | 0,37  | 1           | 1,129137264   | 0,885631917     | 2,162162162     |
| PUF60                                                                                    | 0,003849699 | 0,175174977 | 0,938 | 0,54  | 1           | 1,129101339   | 0,885660096     | 1,737037037     |
| MRPS27                                                                                   | 4,28726E-05 | 0,175157501 | 0,262 | 0,04  | 0,90465467  | 1,129087662   | 0,885670824     | 6,55            |
| SYCP2                                                                                    | 4,33413E-05 | 0,175064534 | 0,212 | 0,02  | 0,914544097 | 1,129014906   | 0,885727898     | 10,6            |
| PLPP5                                                                                    | 2,70525E-05 | 0,174929594 | 0,462 | 0,13  | 0,570835842 | 1,128909311   | 0,885810747     | 3,553846154     |
| DUSP15                                                                                   | 2,18742E-05 | 0,174923966 | 0,225 | 0,02  | 0,461567883 | 1,128904907   | 0,885814203     | 11,25           |
| IWS1                                                                                     | 0,000180544 | 0,174893477 | 0,275 | 0,06  | 1           | 1,128881049   | 0,885832923     | 4,583333333     |
| ARFGAP1                                                                                  | 8,89882E-06 | 0,174886775 | 0,362 | 0,07  | 0,187773921 | 1,128875805   | 0,885837038     | 5,171428571     |
| GAS8                                                                                     | 1,10477E-05 | 0,174847128 | 0,288 | 0,04  | 0,233117523 | 1,128844783   | 0,885861382     | 7,2             |
| LRRC28                                                                                   | 3,4065E-05  | 0,174836231 | 0,375 | 0,09  | 0,718805772 | 1,128836257   | 0,885868074     | 4,166666667     |

Supplementary Table 4

| Differentially expressed genes_keloid-CCD_ comparing SC-Keloid vs. (SC-Myel, SC-Nonmyel) |             |             |       |       |             |               |                 |                 |
|------------------------------------------------------------------------------------------|-------------|-------------|-------|-------|-------------|---------------|-----------------|-----------------|
| gene                                                                                     | p_val       | avg_log2FC  | pct.1 | pct.2 | p_val_adj   | Foldchange_UP | Foldchange_DOWN | Ratio_pct1_pct2 |
| TRIP6                                                                                    | 0,001053992 | 0,174774114 | 0,637 | 0,28  | 1           | 1,128787654   | 0,885906217     | 2,275           |
| BST1                                                                                     | 1,90875E-05 | 0,174725983 | 0,2   | 0,01  | 0,402765855 | 1,128749997   | 0,885935772     | 20              |
| ARL16                                                                                    | 1,30704E-06 | 0,174555526 | 0,562 | 0,15  | 0,027579746 | 1,12861664    | 0,886040454     | 3,746666667     |
| PLOD2                                                                                    | 1,94908E-05 | 0,174539762 | 0,3   | 0,05  | 0,411276284 | 1,128604308   | 0,886050135     | 6               |
| FKBP9                                                                                    | 8,52793E-06 | 0,174527065 | 0,588 | 0,18  | 0,179947936 | 1,128594376   | 0,886057933     | 3,266666667     |
| CAMK1D                                                                                   | 0,0001393   | 0,174517229 | 0,262 | 0,05  | 1           | 1,128586681   | 0,886063974     | 5,24            |
| TM9SF4                                                                                   | 3,11144E-07 | 0,174319444 | 0,35  | 0,04  | 0,006565443 | 1,128431969   | 0,886185457     | 8,75            |
| MARF1                                                                                    | 4,11362E-05 | 0,174232213 | 0,262 | 0,04  | 0,868014931 | 1,128363742   | 0,886239041     | 6,55            |
| CREB3                                                                                    | 1,07385E-06 | 0,174120525 | 0,65  | 0,18  | 0,022659281 | 1,128276391   | 0,886307653     | 3,611111111     |
| BID                                                                                      | 2,96559E-05 | 0,174055373 | 0,288 | 0,05  | 0,625768651 | 1,128225439   | 0,886347679     | 5,76            |
| ITPK1                                                                                    | 0,000618177 | 0,174012052 | 0,713 | 0,31  | 1           | 1,128191562   | 0,886374295     | 2,3             |
| NEK2                                                                                     | 0,001441587 | 0,173933904 | 0,125 | 0,01  | 1           | 1,128130452   | 0,886422309     | 12,5            |
| DRG2                                                                                     | 3,98263E-05 | 0,173907082 | 0,375 | 0,09  | 0,840375196 | 1,128109478   | 0,886438789     | 4,166666667     |
| RPS4X                                                                                    | 0,023653503 | 0,173603586 | 1     | 0,99  | 1           | 1,127872186   | 0,88625286      | 1,01010101      |
| SIGMAR1                                                                                  | 0,000157749 | 0,17356793  | 0,3   | 0,07  | 1           | 1,127844311   | 0,8866472       | 4,285714286     |
| PLIN3                                                                                    | 0,000277413 | 0,173424648 | 0,675 | 0,28  | 1           | 1,127732304   | 0,886735262     | 2,410714286     |
| BBIP1                                                                                    | 5,88999E-05 | 0,173419486 | 0,55  | 0,19  | 1           | 1,127728269   | 0,886738435     | 2,894736842     |
| EPS8L1                                                                                   | 4,64688E-05 | 0,173149394 | 0,212 | 0,02  | 0,98053888  | 1,127517163   | 0,88690446      | 10,6            |
| CTXN1                                                                                    | 0,00073694  | 0,173081689 | 0,138 | 0,01  | 1           | 1,127464251   | 0,886946082     | 13,8            |
| COQ6                                                                                     | 2,27565E-05 | 0,172963449 | 0,25  | 0,03  | 0,480184272 | 1,127371849   | 0,887018778     | 8,333333333     |
| ANKRA2                                                                                   | 0,005670079 | 0,172963404 | 0,125 | 0,02  | 1           | 1,127371814   | 0,887018805     | 6,25            |
| THOC2                                                                                    | 4,66833E-05 | 0,172648308 | 0,613 | 0,22  | 0,985065059 | 1,127125614   | 0,887212559     | 2,786363636     |
| RFC3                                                                                     | 9,13811E-05 | 0,172445689 | 0,2   | 0,02  | 1           | 1,126967327   | 0,887337172     | 10              |
| H6PD                                                                                     | 0,017470544 | 0,172064208 | 0,125 | 0,03  | 1           | 1,126669371   | 0,887571834     | 4,166666667     |
| CWC27                                                                                    | 1,66074E-05 | 0,172043873 | 0,412 | 0,1   | 0,350433319 | 1,12665349    | 0,887584345     | 4,12            |
| PUSL1                                                                                    | 9,6443E-09  | 0,171990465 | 0,35  | 0,02  | 0,000203504 | 1,126611783   | 0,887617204     | 17,5            |
| TMEM250                                                                                  | 0,000232417 | 0,171963057 | 0,275 | 0,06  | 1           | 1,12659038    | 0,887634066     | 4,583333333     |
| PDRG1                                                                                    | 6,59441E-05 | 0,171855549 | 0,362 | 0,09  | 1           | 1,126506431   | 0,887700214     | 4,022222222     |
| BAK1                                                                                     | 4,41317E-06 | 0,171832305 | 0,225 | 0,01  | 0,093122364 | 1,126488281   | 0,887714517     | 22,5            |
| LMNB2                                                                                    | 0,000129061 | 0,171710436 | 0,262 | 0,05  | 1           | 1,126393127   | 0,887789508     | 5,24            |

Supplementary Table 4

| Differentially expressed genes_keloid-CCD_ comparing SC-Keloid vs. (SC-Myel, SC-Nonmyel) |             |             |       |       |             |               |                 |                 |
|------------------------------------------------------------------------------------------|-------------|-------------|-------|-------|-------------|---------------|-----------------|-----------------|
| gene                                                                                     | p_val       | avg_log2FC  | pct.1 | pct.2 | p_val_adj   | Foldchange_UP | Foldchange_DOWN | Ratio_pct1_pct2 |
| DOCK7                                                                                    | 1,38797E-06 | 0,171489193 | 0,512 | 0,12  | 0,029287647 | 1,126220404   | 0,887925664     | 4,266666667     |
| ATAD3A                                                                                   | 2,51826E-06 | 0,171291868 | 0,362 | 0,06  | 0,053137822 | 1,126066375   | 0,888047119     | 6,033333333     |
| DIAPH3                                                                                   | 0,000291957 | 0,171259053 | 0,125 | 0     | 1           | 1,126040762   | 0,888067318     | #DIV/0!         |
| VPS41                                                                                    | 4,54963E-05 | 0,171161757 | 0,35  | 0,08  | 0,960016377 | 1,125964824   | 0,888127212     | 4,375           |
| FAF2                                                                                     | 6,92552E-06 | 0,171080639 | 0,388 | 0,08  | 0,146135399 | 1,125901516   | 0,88817715      | 4,85            |
| PML                                                                                      | 0,000503135 | 0,170906143 | 0,238 | 0,05  | 1           | 1,125765345   | 0,888284583     | 4,76            |
| EIF4ENIF1                                                                                | 0,000291957 | 0,17090482  | 0,125 | 0     | 1           | 1,125764313   | 0,888285398     | #DIV/0!         |
| NEDD4                                                                                    | 0,000173649 | 0,170576473 | 0,238 | 0,04  | 1           | 1,125508126   | 0,888487588     | 5,95            |
| ZBTB8OS                                                                                  | 3,189E-06   | 0,170562423 | 0,475 | 0,11  | 0,067290985 | 1,125497165   | 0,888496241     | 4,318181818     |
| SPDL1                                                                                    | 5,05615E-05 | 0,170486798 | 0,238 | 0,03  | 1           | 1,125438169   | 0,888542816     | 7,933333333     |
| C3orf70                                                                                  | 0,000252793 | 0,170447564 | 0,388 | 0,12  | 1           | 1,125407563   | 0,88856698      | 3,233333333     |
| TTL7                                                                                     | 2,77389E-06 | 0,170338477 | 0,55  | 0,15  | 0,05853182  | 1,12532247    | 0,88863417      | 3,666666667     |
| GBF1                                                                                     | 6,3802E-05  | 0,17018513  | 0,3   | 0,06  | 1           | 1,125202864   | 0,88872863      | 5               |
| ERAP1                                                                                    | 0,000232417 | 0,170117614 | 0,275 | 0,06  | 1           | 1,125150207   | 0,888770222     | 4,583333333     |
| GDE1                                                                                     | 9,71251E-06 | 0,169923703 | 0,5   | 0,14  | 0,204943665 | 1,124998987   | 0,888889689     | 3,571428571     |
| C11orf1                                                                                  | 9,72594E-05 | 0,169801083 | 0,288 | 0,06  | 1           | 1,124903374   | 0,888965242     | 4,8             |
| PKD1                                                                                     | 3,41708E-05 | 0,16966996  | 0,338 | 0,07  | 0,721037878 | 1,124801138   | 0,889046042     | 4,828571429     |
| RALB                                                                                     | 5,24545E-05 | 0,169655332 | 0,4   | 0,11  | 1           | 1,124789734   | 0,889055056     | 3,636363636     |
| NCAPG                                                                                    | 0,000138823 | 0,169627729 | 0,138 | 0     | 1           | 1,124768214   | 0,889072066     | #DIV/0!         |
| PFKM                                                                                     | 0,000138823 | 0,169555827 | 0,138 | 0     | 1           | 1,124712158   | 0,889116378     | #DIV/0!         |
| THOP1                                                                                    | 5,07796E-06 | 0,169528806 | 0,25  | 0,02  | 0,107150111 | 1,124691093   | 0,889133031     | 12,5            |
| PAWR                                                                                     | 0,000166895 | 0,169418088 | 0,238 | 0,04  | 1           | 1,124604783   | 0,889201269     | 5,95            |
| MED29                                                                                    | 8,40118E-06 | 0,16934504  | 0,362 | 0,07  | 0,177273209 | 1,124547843   | 0,889246293     | 5,171428571     |
| CPTP                                                                                     | 4,44544E-06 | 0,169318487 | 0,275 | 0,03  | 0,093803315 | 1,124527145   | 0,88926266      | 9,166666667     |
| NDUFV3                                                                                   | 6,26172E-05 | 0,169250282 | 0,3   | 0,06  | 1           | 1,124473983   | 0,889304702     | 5               |
| PLEKHJ1                                                                                  | 3,22393E-07 | 0,169236239 | 0,562 | 0,13  | 0,006802824 | 1,124463038   | 0,889313358     | 4,323076923     |
| CMTM3                                                                                    | 0,00066468  | 0,169223375 | 0,688 | 0,29  | 1           | 1,124453012   | 0,889321287     | 2,372413793     |
| AFAP1L1                                                                                  | 1,91785E-05 | 0,169071293 | 0,325 | 0,06  | 0,404685147 | 1,124334483   | 0,889415041     | 5,416666667     |
| HMGCL                                                                                    | 0,000160388 | 0,168989764 | 0,238 | 0,04  | 1           | 1,124270947   | 0,889465305     | 5,95            |
| MAPRE3                                                                                   | 0,002663337 | 0,16892375  | 0,312 | 0,11  | 1           | 1,124219504   | 0,889506005     | 2,836363636     |

Supplementary Table 4

| Differentially expressed genes_keloid-CCD_ comparing SC-Keloid vs. (SC-Myel, SC-Nonmyel) |             |             |       |       |             |               |                 |                 |
|------------------------------------------------------------------------------------------|-------------|-------------|-------|-------|-------------|---------------|-----------------|-----------------|
| gene                                                                                     | p_val       | avg_log2FC  | pct.1 | pct.2 | p_val_adj   | Foldchange_UP | Foldchange_DOWN | Ratio_pct1_pct2 |
| RITA1                                                                                    | 6,74984E-06 | 0,168921164 | 0,188 | 0     | 0,142428329 | 1,124217489   | 0,889507599     | #DIV/0!         |
| PIGW                                                                                     | 3,09504E-05 | 0,168864017 | 0,162 | 0     | 0,653084942 | 1,124172958   | 0,889542835     | #DIV/0!         |
| IQCG                                                                                     | 0,000363426 | 0,168814079 | 0,2   | 0,03  | 1           | 1,124134047   | 0,889573626     | 6,666666667     |
| ZDHHC24                                                                                  | 3,78669E-06 | 0,168747757 | 0,4   | 0,08  | 0,079902949 | 1,12408237    | 0,889614521     | 5               |
| ERI1                                                                                     | 1,86072E-05 | 0,16859559  | 0,2   | 0,01  | 0,392631437 | 1,123963815   | 0,889708358     | 20              |
| ABRAXAS2                                                                                 | 4,53631E-05 | 0,168543491 | 0,238 | 0,03  | 0,95720682  | 1,123923227   | 0,889740487     | 7,933333333     |
| PRKRA                                                                                    | 1,02857E-05 | 0,168427215 | 0,637 | 0,2   | 0,217038006 | 1,123832646   | 0,889812201     | 3,185           |
| SNUPN                                                                                    | 0,000112829 | 0,168399231 | 0,262 | 0,05  | 1           | 1,123810848   | 0,88982946      | 5,24            |
| PIP5K1C                                                                                  | 0,000324278 | 0,168267831 | 0,225 | 0,04  | 1           | 1,123708496   | 0,889910509     | 5,625           |
| CSKMT                                                                                    | 6,04779E-05 | 0,168076342 | 0,275 | 0,05  | 1           | 1,123559356   | 0,890028635     | 5,5             |
| PLN                                                                                      | 0,040690206 | 0,167973714 | 0,088 | 0,02  | 1           | 1,123479433   | 0,890091951     | 4,4             |
| NUCKS1                                                                                   | 0,199068854 | 0,167907499 | 0,95  | 0,79  | 1           | 1,12342787    | 0,890132804     | 1,202531646     |
| ZRANB2                                                                                   | 0,000376611 | 0,167707252 | 0,6   | 0,23  | 1           | 1,123271948   | 0,890256364     | 2,608695652     |
| SIL1                                                                                     | 6,13103E-07 | 0,167678062 | 0,562 | 0,14  | 0,012937081 | 1,123249222   | 0,890274376     | 4,014285714     |
| SSX2IP                                                                                   | 6,57145E-05 | 0,167515235 | 0,15  | 0     | 1           | 1,123122455   | 0,890374861     | #DIV/0!         |
| HELZ2                                                                                    | 6,57145E-05 | 0,167475281 | 0,15  | 0     | 1           | 1,123091352   | 0,890399519     | #DIV/0!         |
| EDEM3                                                                                    | 0,000285676 | 0,167458035 | 0,288 | 0,07  | 1           | 1,123077927   | 0,890410163     | 4,114285714     |
| UHMK1                                                                                    | 0,000359105 | 0,167226401 | 0,362 | 0,11  | 1           | 1,122897624   | 0,890553136     | 3,290909091     |
| STRADA                                                                                   | 0,011660059 | 0,167135208 | 0,15  | 0,04  | 1           | 1,122826648   | 0,890609429     | 3,75            |
| ERFE                                                                                     | 0,000155955 | 0,166988337 | 0,162 | 0,01  | 1           | 1,122712346   | 0,890700101     | 16,2            |
| TM2D2                                                                                    | 1,52213E-05 | 0,166950638 | 0,412 | 0,1   | 0,321184413 | 1,122683009   | 0,890723376     | 4,12            |
| ZCCHC9                                                                                   | 0,000348751 | 0,166906287 | 0,2   | 0,03  | 1           | 1,122648496   | 0,890750759     | 6,666666667     |
| NDC80                                                                                    | 0,000180973 | 0,166722404 | 0,162 | 0,01  | 1           | 1,122505414   | 0,8908643       | 16,2            |
| TMEM242                                                                                  | 4,23758E-05 | 0,166671974 | 0,438 | 0,12  | 0,894172513 | 1,122466177   | 0,890895441     | 3,65            |
| GALNS                                                                                    | 9,34971E-05 | 0,166586207 | 0,2   | 0,02  | 1           | 1,12239945    | 0,890948405     | 10              |
| NREP                                                                                     | 0,000194195 | 0,166380057 | 0,488 | 0,17  | 1           | 1,122239079   | 0,891075724     | 2,870588235     |
| MRPS9                                                                                    | 5,80834E-05 | 0,166312001 | 0,3   | 0,06  | 1           | 1,122186142   | 0,891117759     | 5               |
| NUDT16                                                                                   | 0,000112764 | 0,166283177 | 0,288 | 0,06  | 1           | 1,122163721   | 0,891135564     | 4,8             |
| FAM114A2                                                                                 | 0,00016852  | 0,166231105 | 0,212 | 0,03  | 1           | 1,122123219   | 0,891167729     | 7,066666667     |
| UXT                                                                                      | 0,000210906 | 0,16610046  | 0,762 | 0,33  | 1           | 1,122021608   | 0,891248433     | 2,309090909     |

Supplementary Table 4

| Differentially expressed genes_keloid-CCD_ comparing SC-Keloid vs. (SC-Myel, SC-Nonmyel) |             |             |       |       |             |               |                 |                 |
|------------------------------------------------------------------------------------------|-------------|-------------|-------|-------|-------------|---------------|-----------------|-----------------|
| gene                                                                                     | p_val       | avg_log2FC  | pct.1 | pct.2 | p_val_adj   | Foldchange_UP | Foldchange_DOWN | Ratio_pct1_pct2 |
| NSD2                                                                                     | 1,40222E-05 | 0,165906284 | 0,375 | 0,08  | 0,295882118 | 1,121870603   | 0,891368396     | 4,6875          |
| PDCD11                                                                                   | 0,00016852  | 0,165787472 | 0,212 | 0,03  | 1           | 1,121778215   | 0,891441808     | 7,066666667     |
| MIA                                                                                      | 0,0884957   | 0,165614541 | 1     | 0,84  | 1           | 1,12164376    | 0,891548668     | 1,19047619      |
| ZBTB14                                                                                   | 0,000375171 | 0,165503559 | 0,15  | 0,01  | 1           | 1,121557479   | 0,891617255     | 15              |
| KIF2C                                                                                    | 0,001278066 | 0,165438685 | 0,1   | 0     | 1           | 1,121507047   | 0,891657349     | #DIV/0!         |
| EIF4G1                                                                                   | 2,22811E-05 | 0,165313134 | 0,462 | 0,13  | 0,47015304  | 1,121409451   | 0,891734949     | 3,553846154     |
| DNAJC17                                                                                  | 4,54853E-06 | 0,165265083 | 0,275 | 0,03  | 0,095978629 | 1,121372102   | 0,89176465      | 9,166666667     |
| SPATA20                                                                                  | 0,000582576 | 0,165168412 | 0,188 | 0,03  | 1           | 1,121296964   | 0,891824407     | 6,266666667     |
| ARHGEF1                                                                                  | 5,58759E-06 | 0,165124892 | 0,438 | 0,1   | 0,117903745 | 1,12126314    | 0,89185131      | 4,38            |
| TAGLN2                                                                                   | 0,010358843 | 0,164929078 | 1     | 0,93  | 1           | 1,121110963   | 0,891972367     | 1,075268817     |
| FMN1                                                                                     | 0,000611714 | 0,164825979 | 0,112 | 0     | 1           | 1,121030849   | 0,892036112     | #DIV/0!         |
| ITGA2                                                                                    | 1,48342E-05 | 0,164806452 | 0,5   | 0,14  | 0,313016505 | 1,121015675   | 0,892048186     | 3,571428571     |
| KIF11                                                                                    | 0,003313746 | 0,164723035 | 0,112 | 0,01  | 1           | 1,12095086    | 0,892099766     | 11,2            |
| ALG8                                                                                     | 2,04686E-06 | 0,16462739  | 0,238 | 0,01  | 0,043190826 | 1,120876548   | 0,892158911     | 23,8            |
| TMEM177                                                                                  | 3,09504E-05 | 0,164612439 | 0,162 | 0     | 0,653084942 | 1,120864932   | 0,892168157     | #DIV/0!         |
| TWIST1                                                                                   | 0,005670079 | 0,164604245 | 0,125 | 0,02  | 1           | 1,120858566   | 0,892173224     | 6,25            |
| VRK1                                                                                     | 0,00045095  | 0,164546907 | 0,238 | 0,05  | 1           | 1,12081402    | 0,892208683     | 4,76            |
| GOLGA3                                                                                   | 0,000410376 | 0,164442651 | 0,438 | 0,15  | 1           | 1,120733027   | 0,89227316      | 2,92            |
| TRAPPC3                                                                                  | 0,000206139 | 0,164324182 | 0,525 | 0,18  | 1           | 1,120641001   | 0,892346433     | 2,916666667     |
| CDKN2AIPNL                                                                               | 2,47158E-06 | 0,164299033 | 0,425 | 0,09  | 0,052152812 | 1,120621466   | 0,892361989     | 4,722222222     |
| SLC25A39                                                                                 | 3,87164E-05 | 0,164241613 | 0,4   | 0,1   | 0,816954001 | 1,120576865   | 0,892397506     | 4               |
| MNAT1                                                                                    | 8,13246E-05 | 0,164188548 | 0,4   | 0,11  | 1           | 1,120535649   | 0,892430331     | 3,636363636     |
| TRIP13                                                                                   | 6,57145E-05 | 0,164182003 | 0,15  | 0     | 1           | 1,120530565   | 0,89243438      | #DIV/0!         |
| OGFR                                                                                     | 0,000106594 | 0,16401454  | 0,412 | 0,12  | 1           | 1,120400506   | 0,892537976     | 3,433333333     |
| PJA1                                                                                     | 0,000144173 | 0,164012087 | 0,362 | 0,1   | 1           | 1,120398601   | 0,892539493     | 3,62            |
| ATM                                                                                      | 0,000122612 | 0,164009345 | 0,362 | 0,1   | 1           | 1,120396471   | 0,89254119      | 3,62            |
| MFS10                                                                                    | 0,000628255 | 0,164002389 | 0,738 | 0,31  | 1           | 1,120391069   | 0,892545494     | 2,380645161     |
| XPNPEP1                                                                                  | 2,45987E-06 | 0,164000923 | 0,312 | 0,04  | 0,051905779 | 1,120389931   | 0,8925464       | 7,8             |
| TXN2                                                                                     | 3,14612E-05 | 0,163876093 | 0,675 | 0,23  | 0,663863472 | 1,120292993   | 0,892623632     | 2,934782609     |
| NDUFA9                                                                                   | 2,62902E-05 | 0,163860657 | 0,475 | 0,14  | 0,554749807 | 1,120281007   | 0,892633182     | 3,392857143     |

Supplementary Table 4

| Differentially expressed genes_keloid-CCD_ comparing SC-Keloid vs. (SC-Myel, SC-Nonmyel) |             |             |       |       |             |               |                 |                 |
|------------------------------------------------------------------------------------------|-------------|-------------|-------|-------|-------------|---------------|-----------------|-----------------|
| gene                                                                                     | p_val       | avg_log2FC  | pct.1 | pct.2 | p_val_adj   | Foldchange_UP | Foldchange_DOWN | Ratio_pct1_pct2 |
| RAD51C                                                                                   | 5,7981E-05  | 0,163744945 | 0,325 | 0,07  | 1           | 1,120191157   | 0,89270478      | 4,642857143     |
| CEP164                                                                                   | 0,000300478 | 0,16368958  | 0,325 | 0,09  | 1           | 1,12014817    | 0,892739038     | 3,611111111     |
| RMND1                                                                                    | 0,000346457 | 0,163668414 | 0,175 | 0,02  | 1           | 1,120131736   | 0,892752136     | 8,75            |
| DNAJC30                                                                                  | 8,67798E-05 | 0,163588155 | 0,175 | 0,01  | 1           | 1,120069423   | 0,892801802     | 17,5            |
| DNAJC4                                                                                   | 2,76382E-06 | 0,163531416 | 0,475 | 0,11  | 0,0583193   | 1,120025374   | 0,892836916     | 4,318181818     |
| ACBD3                                                                                    | 0,003174214 | 0,163472712 | 0,688 | 0,33  | 1           | 1,1199798     | 0,892873246     | 2,084848485     |
| COMMD5                                                                                   | 1,2475E-05  | 0,163318823 | 0,35  | 0,07  | 0,26323448  | 1,119860341   | 0,892968492     | 5               |
| TMC7                                                                                     | 0,006187597 | 0,163047948 | 0,162 | 0,04  | 1           | 1,119650099   | 0,893136169     | 4,05            |
| ARFGAP3                                                                                  | 0,001264011 | 0,162889577 | 0,675 | 0,3   | 1           | 1,119527197   | 0,893234218     | 2,25            |
| DNAJC24                                                                                  | 0,00027602  | 0,162881377 | 0,288 | 0,07  | 1           | 1,119520834   | 0,893239294     | 4,114285714     |
| ERAL1                                                                                    | 9,1613E-05  | 0,162836072 | 0,225 | 0,03  | 1           | 1,119485678   | 0,893267345     | 7,5             |
| B3GNT9                                                                                   | 8,93105E-05 | 0,162787498 | 0,2   | 0,02  | 1           | 1,119447987   | 0,893297421     | 10              |
| SDAD1                                                                                    | 0,000406859 | 0,162730987 | 0,3   | 0,08  | 1           | 1,119404139   | 0,893332413     | 3,75            |
| LINC00623                                                                                | 5,0016E-06  | 0,162423339 | 0,462 | 0,11  | 0,1055388   | 1,119165457   | 0,893522932     | 4,2             |
| CCDC14                                                                                   | 2,71594E-06 | 0,162333331 | 0,425 | 0,09  | 0,05730897  | 1,119095636   | 0,893578679     | 4,722222222     |
| WDR46                                                                                    | 5,44292E-05 | 0,162329793 | 0,438 | 0,13  | 1           | 1,119092891   | 0,893580871     | 3,369230769     |
| PHF5A                                                                                    | 0,000224234 | 0,162164359 | 0,275 | 0,06  | 1           | 1,118964572   | 0,893683344     | 4,583333333     |
| CUL5                                                                                     | 0,000677138 | 0,162067869 | 0,425 | 0,15  | 1           | 1,118889736   | 0,893743117     | 2,833333333     |
| MTHFD1                                                                                   | 0,000232417 | 0,162026482 | 0,275 | 0,06  | 1           | 1,118857639   | 0,893768756     | 4,583333333     |
| DHRS4L2                                                                                  | 0,000127567 | 0,161993364 | 0,462 | 0,15  | 1           | 1,118831955   | 0,893789273     | 3,08            |
| METTL8                                                                                   | 4,24089E-05 | 0,161950618 | 0,188 | 0,01  | 0,894869854 | 1,118798805   | 0,893815756     | 18,8            |
| METTL21A                                                                                 | 1,92667E-05 | 0,161851356 | 0,275 | 0,04  | 0,406545813 | 1,118721831   | 0,893877256     | 6,875           |
| PRKAG1                                                                                   | 1,4802E-05  | 0,161818244 | 0,35  | 0,07  | 0,31233741  | 1,118696155   | 0,893897772     | 5               |
| NCAPG2                                                                                   | 6,57145E-05 | 0,16179709  | 0,15  | 0     | 1           | 1,118679752   | 0,893910879     | #DIV/0!         |
| RTL6                                                                                     | 0,000266675 | 0,16179495  | 0,225 | 0,04  | 1           | 1,118678092   | 0,893912205     | 5,625           |
| FAM234A                                                                                  | 0,000197507 | 0,161772638 | 0,412 | 0,13  | 1           | 1,118660791   | 0,89392603      | 3,169230769     |
| RPS15                                                                                    | 0,015052321 | 0,161664387 | 1     | 0,99  | 1           | 1,118576857   | 0,893993107     | 1,01010101      |
| CILK1                                                                                    | 0,000233613 | 0,161613263 | 0,312 | 0,08  | 1           | 1,118537219   | 0,894024788     | 3,9             |
| B3GNT7                                                                                   | 0,000163611 | 0,161556042 | 0,238 | 0,04  | 1           | 1,118492856   | 0,894060248     | 5,95            |
| EXOC5                                                                                    | 5,93713E-05 | 0,161532779 | 0,388 | 0,1   | 1           | 1,118474821   | 0,894074664     | 3,88            |

Supplementary Table 4

| Differentially expressed genes_keloid-CCD_ comparing SC-Keloid vs. (SC-Myel, SC-Nonmyel) |             |             |       |       |             |               |                 |                 |
|------------------------------------------------------------------------------------------|-------------|-------------|-------|-------|-------------|---------------|-----------------|-----------------|
| gene                                                                                     | p_val       | avg_log2FC  | pct.1 | pct.2 | p_val_adj   | Foldchange_UP | Foldchange_DOWN | Ratio_pct1_pct2 |
| CNPY2                                                                                    | 0,036874509 | 0,161527801 | 0,975 | 0,73  | 1           | 1,118470962   | 0,894077749     | 1,335616438     |
| DYNC2I1                                                                                  | 9,66395E-05 | 0,161301346 | 0,438 | 0,13  | 1           | 1,118295413   | 0,894218101     | 3,369230769     |
| PPP6R1                                                                                   | 2,15371E-05 | 0,161183024 | 0,325 | 0,06  | 0,454454589 | 1,1182037     | 0,894291443     | 5,416666667     |
| RNF4                                                                                     | 2,84063E-05 | 0,161141444 | 0,338 | 0,07  | 0,599402379 | 1,118171473   | 0,894317217     | 4,828571429     |
| CDH15                                                                                    | 0,001425758 | 0,161092335 | 0,15  | 0,02  | 1           | 1,118133411   | 0,89434766      | 7,5             |
| MSRB1                                                                                    | 8,17839E-06 | 0,161049761 | 0,288 | 0,04  | 0,172572148 | 1,118100415   | 0,894374053     | 7,2             |
| PIGF                                                                                     | 6,72476E-05 | 0,160877747 | 0,375 | 0,1   | 1           | 1,117967111   | 0,894480696     | 3,75            |
| THRAP3                                                                                   | 0,000616016 | 0,160852236 | 0,775 | 0,34  | 1           | 1,117947343   | 0,894496513     | 2,279411765     |
| UBE3B                                                                                    | 2,50819E-06 | 0,160845696 | 0,262 | 0,02  | 0,052925218 | 1,117942275   | 0,894500568     | 13,1            |
| ZNF32                                                                                    | 0,000160048 | 0,16067481  | 0,575 | 0,22  | 1           | 1,117809863   | 0,894606527     | 2,613636364     |
| SRRD                                                                                     | 2,59401E-06 | 0,160591279 | 0,388 | 0,07  | 0,054736273 | 1,117745145   | 0,894658326     | 5,542857143     |
| NOMO1                                                                                    | 7,9448E-05  | 0,160552013 | 0,275 | 0,05  | 1           | 1,117714723   | 0,894682677     | 5,5             |
| SPCS2                                                                                    | 0,177451765 | 0,160462925 | 0,963 | 0,74  | 1           | 1,117645706   | 0,894737925     | 1,301351351     |
| SPOUT1                                                                                   | 0,000323985 | 0,160301969 | 0,175 | 0,02  | 1           | 1,11752102    | 0,894837754     | 8,75            |
| AC002454.1                                                                               | 0,000611714 | 0,160299681 | 0,112 | 0     | 1           | 1,117519249   | 0,894839173     | #DIV/0!         |
| EIF2AK1                                                                                  | 0,000128382 | 0,160287751 | 0,388 | 0,11  | 1           | 1,117510008   | 0,894846572     | 3,527272727     |
| NFE2L3                                                                                   | 0,000906469 | 0,160259734 | 0,262 | 0,07  | 1           | 1,117488306   | 0,89486395      | 3,742857143     |
| UBA3                                                                                     | 7,47148E-05 | 0,160074938 | 0,338 | 0,08  | 1           | 1,117345175   | 0,894978582     | 4,225           |
| RPL23A                                                                                   | 0,021682567 | 0,160070728 | 1     | 0,93  | 1           | 1,117341914   | 0,894981194     | 1,075268817     |
| LAP3                                                                                     | 0,0002528   | 0,159934156 | 0,45  | 0,15  | 1           | 1,117236147   | 0,89506592      | 3               |
| PPP2R5B                                                                                  | 0,001142385 | 0,159888571 | 0,2   | 0,04  | 1           | 1,117200846   | 0,895094202     | 5               |
| POLD3                                                                                    | 0,009057333 | 0,159822906 | 0,175 | 0,05  | 1           | 1,117149997   | 0,895134944     | 3,5             |
| RIN1                                                                                     | 4,54033E-05 | 0,15976564  | 0,212 | 0,02  | 0,958054417 | 1,117105654   | 0,895170476     | 10,6            |
| NTN1                                                                                     | 0,001548751 | 0,159748789 | 0,125 | 0,01  | 1           | 1,117092606   | 0,895180932     | 12,5            |
| SLC25A26                                                                                 | 2,27067E-05 | 0,159733893 | 0,338 | 0,07  | 0,479133493 | 1,117081072   | 0,895190175     | 4,828571429     |
| LYRM2                                                                                    | 5,21089E-05 | 0,159669724 | 0,537 | 0,17  | 1           | 1,117031387   | 0,895229993     | 3,158823529     |
| CDCA5                                                                                    | 3,09504E-05 | 0,159659636 | 0,162 | 0     | 0,653084942 | 1,117023577   | 0,895236252     | #DIV/0!         |
| TRO                                                                                      | 0,006281588 | 0,159596211 | 0,1   | 0,01  | 1           | 1,11697447    | 0,89527561      | 10              |
| YIPF1                                                                                    | 0,000138823 | 0,159525721 | 0,138 | 0     | 1           | 1,116919896   | 0,895319354     | #DIV/0!         |
| RASL11B                                                                                  | 0,000370979 | 0,159523818 | 0,2   | 0,03  | 1           | 1,116918423   | 0,895320535     | 6,666666667     |



Supplementary Table 4

| Differentially expressed genes_keloid-CCD_ comparing SC-Keloid vs. (SC-Myel, SC-Nonmyel) |             |             |       |       |             |               |                 |                 |
|------------------------------------------------------------------------------------------|-------------|-------------|-------|-------|-------------|---------------|-----------------|-----------------|
| gene                                                                                     | p_val       | avg_log2FC  | pct.1 | pct.2 | p_val_adj   | Foldchange_UP | Foldchange_DOWN | Ratio_pct1_pct2 |
| PYROXD1                                                                                  | 1,95796E-05 | 0,159409813 | 0,2   | 0,01  | 0,413149116 | 1,116830164   | 0,895391289     | 20              |
| GMDS                                                                                     | 8,53014E-05 | 0,159356247 | 0,2   | 0,02  | 1           | 1,116788698   | 0,895424534     | 10              |
| NSD1                                                                                     | 3,27857E-05 | 0,159294532 | 0,462 | 0,13  | 0,691811451 | 1,116740926   | 0,895462839     | 3,553846154     |
| NSMCE1                                                                                   | 0,000187422 | 0,159259933 | 0,525 | 0,18  | 1           | 1,116714144   | 0,895484315     | 2,916666667     |
| CRADD                                                                                    | 4,64688E-05 | 0,159040067 | 0,212 | 0,02  | 0,98053888  | 1,116543971   | 0,895620796     | 10,6            |
| GALNT7                                                                                   | 9,21767E-05 | 0,158955815 | 0,25  | 0,04  | 1           | 1,116478768   | 0,895673101     | 6,25            |
| ABHD6                                                                                    | 0,000138823 | 0,158873049 | 0,138 | 0     | 1           | 1,116414718   | 0,895724487     | #DIV/0!         |
| ECI1                                                                                     | 0,000515991 | 0,15844252  | 0,613 | 0,25  | 1           | 1,116081607   | 0,895991829     | 2,452           |
| MRPL32                                                                                   | 8,86884E-06 | 0,15838165  | 0,575 | 0,17  | 0,187141487 | 1,116034519   | 0,896029633     | 3,382352941     |
| MRPL11                                                                                   | 1,51189E-06 | 0,158344106 | 0,688 | 0,21  | 0,031902291 | 1,116005476   | 0,896052951     | 3,276190476     |
| EMC6                                                                                     | 0,000364899 | 0,15822716  | 0,7   | 0,29  | 1           | 1,115915015   | 0,896125589     | 2,413793103     |
| GOS2                                                                                     | 0,874019543 | 0,158221179 | 0,013 | 0,01  | 1           | 1,115910389   | 0,896129304     | 1,3             |
| ERG28                                                                                    | 5,39805E-06 | 0,158128297 | 0,325 | 0,05  | 0,113904202 | 1,115838548   | 0,896186999     | 6,5             |
| UBE4A                                                                                    | 1,25013E-07 | 0,158032486 | 0,438 | 0,07  | 0,002637898 | 1,115764446   | 0,896246518     | 6,257142857     |
| FEZ2                                                                                     | 0,000261004 | 0,15788626  | 0,625 | 0,25  | 1           | 1,115651362   | 0,896337363     | 2,5             |
| TMEM33                                                                                   | 0,000150222 | 0,157828726 | 0,388 | 0,11  | 1           | 1,115606872   | 0,896373109     | 3,527272727     |
| ECRG4                                                                                    | 2,04686E-06 | 0,157692531 | 0,238 | 0,01  | 0,043190826 | 1,11550156    | 0,896457733     | 23,8            |
| CSTB                                                                                     | 0,009570402 | 0,157662473 | 0,775 | 0,42  | 1           | 1,115478319   | 0,896476411     | 1,845238095     |
| MICALL1                                                                                  | 5,4889E-05  | 0,157622572 | 0,3   | 0,06  | 1           | 1,115447468   | 0,896501205     | 5               |
| ZDHHC3                                                                                   | 6,44026E-07 | 0,157580312 | 0,338 | 0,04  | 0,013589599 | 1,115414795   | 0,896527466     | 8,45            |
| FMNL1                                                                                    | 0,000180973 | 0,157564606 | 0,162 | 0,01  | 1           | 1,115402652   | 0,896537226     | 16,2            |
| COMMD7                                                                                   | 1,82661E-05 | 0,157415731 | 0,637 | 0,21  | 0,385433504 | 1,115287557   | 0,896629747     | 3,033333333     |
| HTATSF1                                                                                  | 1,0851E-05  | 0,157380381 | 0,488 | 0,13  | 0,22896748  | 1,11526023    | 0,896651717     | 3,753846154     |
| PHTF2                                                                                    | 7,79885E-06 | 0,157097416 | 0,312 | 0,05  | 0,164563512 | 1,115041508   | 0,8968276       | 6,24            |
| PPP5C                                                                                    | 4,07707E-05 | 0,157064258 | 0,288 | 0,05  | 0,860302139 | 1,11501588    | 0,896848213     | 5,76            |
| EIF3B                                                                                    | 0,000483522 | 0,156900393 | 0,5   | 0,19  | 1           | 1,114889242   | 0,896950085     | 2,631578947     |
| TMEM256                                                                                  | 0,001170847 | 0,156844822 | 0,575 | 0,25  | 1           | 1,114846298   | 0,896984635     | 2,3             |
| DTX3                                                                                     | 0,00027602  | 0,156554141 | 0,288 | 0,07  | 1           | 1,114621696   | 0,897165382     | 4,114285714     |
| RPS6KA1                                                                                  | 0,000395843 | 0,156507471 | 0,175 | 0,02  | 1           | 1,114585639   | 0,897194405     | 8,75            |
| ZNF598                                                                                   | 4,95137E-05 | 0,156381004 | 0,262 | 0,04  | 1           | 1,114487939   | 0,897273057     | 6,55            |

Supplementary Table 4

| Differentially expressed genes_keloid-CCD_ comparing SC-Keloid vs. (SC-Myel, SC-Nonmyel) |             |             |       |       |             |               |                 |                 |
|------------------------------------------------------------------------------------------|-------------|-------------|-------|-------|-------------|---------------|-----------------|-----------------|
| gene                                                                                     | p_val       | avg_log2FC  | pct.1 | pct.2 | p_val_adj   | Foldchange_UP | Foldchange_DOWN | Ratio_pct1_pct2 |
| RUFY2                                                                                    | 6,12958E-05 | 0,156294691 | 0,25  | 0,04  | 1           | 1,114421264   | 0,89732674      | 6,25            |
| RAF1                                                                                     | 1,99762E-05 | 0,156195532 | 0,525 | 0,16  | 0,42151761  | 1,114344671   | 0,897388417     | 3,28125         |
| NPEPL1                                                                                   | 7,83402E-05 | 0,156157944 | 0,425 | 0,12  | 1           | 1,114315638   | 0,897411798     | 3,541666667     |
| RPL38                                                                                    | 0,034413362 | 0,156154111 | 1     | 0,84  | 1           | 1,114312677   | 0,897414182     | 1,19047619      |
| DPYSL3                                                                                   | 0,000204342 | 0,156145081 | 0,188 | 0,02  | 1           | 1,114305703   | 0,897419799     | 9,4             |
| PCYOX1L                                                                                  | 4,64688E-05 | 0,156057076 | 0,212 | 0,02  | 0,98053888  | 1,114237731   | 0,897474544     | 10,6            |
| CMTR2                                                                                    | 0,000409923 | 0,155806408 | 0,262 | 0,06  | 1           | 1,11404415    | 0,897630494     | 4,366666667     |
| DNAJC9                                                                                   | 1,01718E-05 | 0,155751793 | 0,362 | 0,07  | 0,214635945 | 1,114001977   | 0,897664475     | 5,171428571     |
| MND1                                                                                     | 0,000138823 | 0,155674136 | 0,138 | 0     | 1           | 1,113942015   | 0,897712796     | #DIV/0!         |
| KNSTRN                                                                                   | 0,00613773  | 0,155350878 | 0,1   | 0,01  | 1           | 1,113692446   | 0,897913965     | 10              |
| EEF2KMT                                                                                  | 4,13543E-05 | 0,155230442 | 0,188 | 0,01  | 0,872616559 | 1,113599479   | 0,897988926     | 18,8            |
| ABCB8                                                                                    | 0,000386526 | 0,155103669 | 0,2   | 0,03  | 1           | 1,113501629   | 0,898067837     | 6,666666667     |
| MYEF2                                                                                    | 0,003885837 | 0,154964355 | 0,262 | 0,09  | 1           | 1,113394109   | 0,898154563     | 2,911111111     |
| ABCD4                                                                                    | 1,03595E-05 | 0,154850324 | 0,438 | 0,11  | 0,218596031 | 1,11330611    | 0,898225556     | 3,981818182     |
| EXOSC5                                                                                   | 0,000212465 | 0,15478038  | 0,275 | 0,06  | 1           | 1,113252136   | 0,898269105     | 4,583333333     |
| STRADB                                                                                   | 4,24089E-05 | 0,154778915 | 0,188 | 0,01  | 0,894869854 | 1,113251005   | 0,898270017     | 18,8            |
| PTCD3                                                                                    | 0,000704114 | 0,154738932 | 0,25  | 0,06  | 1           | 1,113220153   | 0,898294912     | 4,166666667     |
| EIF2S1                                                                                   | 0,00039432  | 0,154658596 | 0,55  | 0,2   | 1           | 1,113158166   | 0,898344935     | 2,75            |
| NTHL1                                                                                    | 0,000123867 | 0,154497388 | 0,525 | 0,18  | 1           | 1,113033787   | 0,898445323     | 2,916666667     |
| TBCD                                                                                     | 0,000131283 | 0,154383699 | 0,238 | 0,04  | 1           | 1,112946081   | 0,898516125     | 5,95            |
| ALDH16A1                                                                                 | 7,49618E-05 | 0,154369538 | 0,275 | 0,05  | 1           | 1,112935156   | 0,898524945     | 5,5             |
| DDX55                                                                                    | 0,000659913 | 0,154323173 | 0,212 | 0,04  | 1           | 1,112899389   | 0,898553822     | 5,3             |
| ATAT1                                                                                    | 8,89706E-05 | 0,154160627 | 0,175 | 0,01  | 1           | 1,112774008   | 0,898655066     | 17,5            |
| LYPLAL1                                                                                  | 0,000254117 | 0,154144553 | 0,275 | 0,06  | 1           | 1,11276161    | 0,898665079     | 4,583333333     |
| OGG1                                                                                     | 0,001185544 | 0,154141865 | 0,2   | 0,04  | 1           | 1,112759537   | 0,898666753     | 5               |
| UBE4B                                                                                    | 0,000174798 | 0,154134578 | 0,262 | 0,05  | 1           | 1,112753916   | 0,898671292     | 5,24            |
| LRRC45                                                                                   | 9,21767E-05 | 0,154128717 | 0,25  | 0,04  | 1           | 1,112749395   | 0,898674943     | 6,25            |
| CYB561A3                                                                                 | 0,000128215 | 0,153999387 | 0,288 | 0,06  | 1           | 1,112649648   | 0,898755509     | 4,8             |
| ATG7                                                                                     | 0,00151088  | 0,153997169 | 0,212 | 0,05  | 1           | 1,112647937   | 0,898756891     | 4,24            |
| ATP2B1                                                                                   | 0,000572369 | 0,153993297 | 0,688 | 0,29  | 1           | 1,112644951   | 0,898759302     | 2,372413793     |

Supplementary Table 4

| Differentially expressed genes_keloid-CCD_ comparing SC-Keloid vs. (SC-Myel, SC-Nonmyel) |             |             |       |       |             |               |                 |                 |
|------------------------------------------------------------------------------------------|-------------|-------------|-------|-------|-------------|---------------|-----------------|-----------------|
| gene                                                                                     | p_val       | avg_log2FC  | pct.1 | pct.2 | p_val_adj   | Foldchange_UP | Foldchange_DOWN | Ratio_pct1_pct2 |
| CORO2A                                                                                   | 0,000138823 | 0,153990533 | 0,138 | 0     | 1           | 1,112642819   | 0,898761024     | #DIV/0!         |
| ACTL6A                                                                                   | 0,000195632 | 0,153990158 | 0,45  | 0,15  | 1           | 1,11264253    | 0,898761258     | 3               |
| CBY1                                                                                     | 0,000307976 | 0,153892177 | 0,425 | 0,14  | 1           | 1,112566968   | 0,898822299     | 3,035714286     |
| CKAP2L                                                                                   | 0,001278066 | 0,153794865 | 0,1   | 0     | 1           | 1,112491926   | 0,898882928     | #DIV/0!         |
| MAVS                                                                                     | 3,85679E-05 | 0,153689327 | 0,212 | 0,02  | 0,813821874 | 1,112410546   | 0,898948687     | 10,6            |
| UBA1                                                                                     | 0,000121855 | 0,153523085 | 0,537 | 0,18  | 1           | 1,11228237    | 0,899052279     | 2,983333333     |
| LARS1                                                                                    | 0,001947357 | 0,153477096 | 0,6   | 0,27  | 1           | 1,112246914   | 0,899080939     | 2,222222222     |
| NRM                                                                                      | 1,7745E-05  | 0,153361505 | 0,325 | 0,06  | 0,374437964 | 1,112157803   | 0,899152978     | 5,416666667     |
| TMEM59L                                                                                  | 0,002656888 | 0,153316329 | 0,562 | 0,25  | 1           | 1,112122978   | 0,899181134     | 2,248           |
| BLCAP                                                                                    | 0,000153175 | 0,153161695 | 0,262 | 0,05  | 1           | 1,112003782   | 0,899277517     | 5,24            |
| PTRH1                                                                                    | 2,73235E-06 | 0,153067746 | 0,362 | 0,06  | 0,057655315 | 1,111931371   | 0,89933608      | 6,033333333     |
| R3HCC1                                                                                   | 4,6134E-06  | 0,152948603 | 0,575 | 0,17  | 0,097347413 | 1,111839547   | 0,899410354     | 3,382352941     |
| PRPF19                                                                                   | 1,12934E-05 | 0,1529298   | 0,312 | 0,05  | 0,238302731 | 1,111825056   | 0,899422076     | 6,24            |
| DCTN5                                                                                    | 0,000160388 | 0,15288948  | 0,238 | 0,04  | 1           | 1,111793983   | 0,899447213     | 5,95            |
| FAM118B                                                                                  | 4,43609E-05 | 0,15284903  | 0,212 | 0,02  | 0,9360595   | 1,111762812   | 0,899472432     | 10,6            |
| PPP2R3B                                                                                  | 2,23258E-05 | 0,152773818 | 0,275 | 0,04  | 0,471097584 | 1,111704854   | 0,899519325     | 6,875           |
| MRPS22                                                                                   | 3,12273E-06 | 0,152672134 | 0,438 | 0,1   | 0,065892762 | 1,111626501   | 0,899582728     | 4,38            |
| PIGS                                                                                     | 4,54913E-06 | 0,152608148 | 0,3   | 0,04  | 0,095991137 | 1,1115772     | 0,899622626     | 7,5             |
| BPHL                                                                                     | 4,07707E-05 | 0,152265515 | 0,288 | 0,05  | 0,860302139 | 1,111313237   | 0,899836308     | 5,76            |
| MAPKAPK3                                                                                 | 0,000505149 | 0,152255049 | 0,212 | 0,04  | 1           | 1,111305175   | 0,899842836     | 5,3             |
| ARFIP2                                                                                   | 2,30514E-05 | 0,152178776 | 0,388 | 0,09  | 0,486407168 | 1,111246424   | 0,89989041      | 4,311111111     |
| CFAP97                                                                                   | 0,000338908 | 0,152175468 | 0,762 | 0,33  | 1           | 1,111243876   | 0,899892474     | 2,309090909     |
| TSFM                                                                                     | 7,64299E-05 | 0,151910951 | 0,275 | 0,05  | 1           | 1,111040149   | 0,900057483     | 5,5             |
| ZWILCH                                                                                   | 0,000378693 | 0,151809196 | 0,175 | 0,02  | 1           | 1,110961789   | 0,900120967     | 8,75            |
| GET3                                                                                     | 9,69847E-05 | 0,151771591 | 0,688 | 0,27  | 1           | 1,110932831   | 0,90014443      | 2,548148148     |
| MACIR                                                                                    | 0,000330677 | 0,151655071 | 0,425 | 0,14  | 1           | 1,110843109   | 0,900217134     | 3,035714286     |
| ZNF121                                                                                   | 0,023011948 | 0,151611553 | 0,138 | 0,04  | 1           | 1,110809602   | 0,900244289     | 3,45            |
| PLEK2                                                                                    | 3,09504E-05 | 0,151609225 | 0,162 | 0     | 0,653084942 | 1,110807809   | 0,900245741     | #DIV/0!         |
| L3MBTL2                                                                                  | 1,09647E-05 | 0,151517925 | 0,238 | 0,02  | 0,231366484 | 1,110737515   | 0,900302715     | 11,9            |
| MINDY3                                                                                   | 9,56592E-05 | 0,151426505 | 0,2   | 0,02  | 1           | 1,110667133   | 0,900359766     | 10              |

Supplementary Table 4

| Differentially expressed genes_keloid-CCD_comparing SC-Keloid vs. (SC-Myel, SC-Nonmyel) |             |             |       |       |             |               |                 |                 |
|-----------------------------------------------------------------------------------------|-------------|-------------|-------|-------|-------------|---------------|-----------------|-----------------|
| gene                                                                                    | p_val       | avg_log2FC  | pct.1 | pct.2 | p_val_adj   | Foldchange_UP | Foldchange_DOWN | Ratio_pct1_pct2 |
| MCM4                                                                                    | 1,84687E-05 | 0,15140256  | 0,275 | 0,04  | 0,38970895  | 1,110648698   | 0,90037471      | 6,875           |
| STT3A                                                                                   | 2,73235E-06 | 0,151316424 | 0,362 | 0,06  | 0,057655315 | 1,110582389   | 0,900428469     | 6,033333333     |
| TRIQK                                                                                   | 0,001125039 | 0,151309749 | 0,3   | 0,09  | 1           | 1,110577251   | 0,900432635     | 3,333333333     |
| TBC1D8B                                                                                 | 0,000387179 | 0,151285009 | 0,175 | 0,02  | 1           | 1,110558206   | 0,900448076     | 8,75            |
| DHRXS                                                                                   | 0,000124212 | 0,151236518 | 0,262 | 0,05  | 1           | 1,110520879   | 0,900478342     | 5,24            |
| SDSL                                                                                    | 0,000375171 | 0,151172668 | 0,15  | 0,01  | 1           | 1,110471731   | 0,900518196     | 15              |
| FXD3                                                                                    | 0,001036853 | 0,151100676 | 0,338 | 0,11  | 1           | 1,11041632    | 0,900563133     | 3,072727273     |
| C6orf226                                                                                | 8,40843E-05 | 0,151073239 | 0,225 | 0,03  | 1           | 1,110395202   | 0,90058026      | 7,5             |
| RAC2                                                                                    | 6,57145E-05 | 0,151043831 | 0,15  | 0     | 1           | 1,110372567   | 0,900598618     | #DIV/0!         |
| SNRPA                                                                                   | 6,30961E-05 | 0,151031967 | 0,45  | 0,13  | 1           | 1,110363437   | 0,900606024     | 3,461538462     |
| FOXD1                                                                                   | 0,000611714 | 0,150857775 | 0,112 | 0     | 1           | 1,110229379   | 0,900714771     | #DIV/0!         |
| RAB14                                                                                   | 0,002020681 | 0,150833546 | 0,725 | 0,33  | 1           | 1,110210733   | 0,900729898     | 2,196969697     |
| PEMT                                                                                    | 9,41893E-06 | 0,150827817 | 0,425 | 0,1   | 0,198748944 | 1,110206324   | 0,900733475     | 4,25            |
| GTF2F2                                                                                  | 0,000156255 | 0,150744291 | 0,525 | 0,19  | 1           | 1,11014205    | 0,900785625     | 2,763157895     |
| SH3YL1                                                                                  | 0,000225689 | 0,15063072  | 0,45  | 0,15  | 1           | 1,110054662   | 0,900856538     | 3               |
| PARN                                                                                    | 0,000378693 | 0,150625277 | 0,175 | 0,02  | 1           | 1,110050474   | 0,900859937     | 8,75            |
| LEF1                                                                                    | 5,91868E-05 | 0,150292502 | 0,3   | 0,06  | 1           | 1,109794456   | 0,901067756     | 5               |
| DERL2                                                                                   | 5,81778E-06 | 0,150196694 | 0,575 | 0,16  | 0,122761056 | 1,109720759   | 0,901127596     | 3,59375         |
| CDC27                                                                                   | 0,000439662 | 0,150029855 | 0,462 | 0,16  | 1           | 1,109592434   | 0,901231812     | 2,8875          |
| PHF21A                                                                                  | 0,000286753 | 0,149967635 | 0,25  | 0,05  | 1           | 1,109544581   | 0,901270681     | 5               |
| MARS1                                                                                   | 0,000166273 | 0,14944027  | 0,3   | 0,07  | 1           | 1,10913907    | 0,901600193     | 4,285714286     |
| PCSK7                                                                                   | 8,54877E-05 | 0,149382099 | 0,438 | 0,13  | 1           | 1,109094349   | 0,901636548     | 3,369230769     |
| IMMP1L                                                                                  | 8,46503E-05 | 0,149131547 | 0,312 | 0,07  | 1           | 1,10890175    | 0,901793148     | 4,457142857     |
| TMEM234                                                                                 | 0,001858958 | 0,149112018 | 0,188 | 0,04  | 1           | 1,10888674    | 0,901805355     | 4,7             |
| SEMA6A                                                                                  | 0,001219163 | 0,149012385 | 0,238 | 0,06  | 1           | 1,108810162   | 0,901867636     | 3,966666667     |
| DDX50                                                                                   | 4,31379E-05 | 0,148921787 | 0,35  | 0,08  | 0,910252278 | 1,108740534   | 0,901924273     | 4,375           |
| HDAC8                                                                                   | 0,000366117 | 0,148903677 | 0,15  | 0,01  | 1           | 1,108726616   | 0,901935595     | 15              |
| FAM210B                                                                                 | 0,00067127  | 0,148678435 | 0,762 | 0,34  | 1           | 1,108553529   | 0,902076421     | 2,241176471     |
| CLINT1                                                                                  | 0,000987059 | 0,148593954 | 0,562 | 0,23  | 1           | 1,108488616   | 0,902129247     | 2,443478261     |
| IREB2                                                                                   | 0,000119534 | 0,148460452 | 0,262 | 0,05  | 1           | 1,108386045   | 0,90221273      | 5,24            |

Supplementary Table 4

| Differentially expressed genes_keloid-CCD_ comparing SC-Keloid vs. (SC-Myel, SC-Nonmyel) |             |             |       |       |             |               |                 |                 |
|------------------------------------------------------------------------------------------|-------------|-------------|-------|-------|-------------|---------------|-----------------|-----------------|
| gene                                                                                     | p_val       | avg_log2FC  | pct.1 | pct.2 | p_val_adj   | Foldchange_UP | Foldchange_DOWN | Ratio_pct1_pct2 |
| CDC25B                                                                                   | 0,000611706 | 0,148386235 | 0,212 | 0,04  | 1           | 1,108329027   | 0,902259144     | 5,3             |
| GMFG                                                                                     | 0,009201256 | 0,148361424 | 0,175 | 0,05  | 1           | 1,108309967   | 0,902274661     | 3,5             |
| HDDC3                                                                                    | 9,27729E-06 | 0,148353274 | 0,238 | 0,02  | 0,195760072 | 1,108303706   | 0,902279758     | 11,9            |
| ZYG11B                                                                                   | 4,69797E-05 | 0,148237745 | 0,388 | 0,1   | 0,991319578 | 1,108214958   | 0,902352015     | 3,88            |
| SLC16A2                                                                                  | 0,003162024 | 0,148217753 | 0,112 | 0,01  | 1           | 1,108199602   | 0,902364519     | 11,2            |
| STOML1                                                                                   | 3,84235E-05 | 0,148081122 | 0,288 | 0,05  | 0,810774541 | 1,108094654   | 0,902449982     | 5,76            |
| DNM1                                                                                     | 6,87564E-05 | 0,148077554 | 0,3   | 0,06  | 1           | 1,108091913   | 0,902452213     | 5               |
| ACBD5                                                                                    | 0,002453744 | 0,148012083 | 0,438 | 0,18  | 1           | 1,108041628   | 0,902493169     | 2,433333333     |
| UEVLD                                                                                    | 0,000387179 | 0,147958327 | 0,175 | 0,02  | 1           | 1,108000343   | 0,902526797     | 8,75            |
| TRIM16                                                                                   | 8,47213E-06 | 0,14781836  | 0,312 | 0,05  | 0,178770387 | 1,107892852   | 0,902614362     | 6,24            |
| NOL4L                                                                                    | 0,000151074 | 0,147612205 | 0,238 | 0,04  | 1           | 1,10773455    | 0,902743351     | 5,95            |
| METAP2                                                                                   | 0,000265266 | 0,147559543 | 0,812 | 0,35  | 1           | 1,107694116   | 0,902776304     | 2,32            |
| CCDC51                                                                                   | 0,000176556 | 0,147489263 | 0,162 | 0,01  | 1           | 1,107640156   | 0,902820284     | 16,2            |
| MGAT2                                                                                    | 2,34713E-05 | 0,147417241 | 0,225 | 0,02  | 0,495268417 | 1,107584862   | 0,902865355     | 11,25           |
| CCDC152                                                                                  | 0,000370979 | 0,147140703 | 0,2   | 0,03  | 1           | 1,107372579   | 0,903038435     | 6,666666667     |
| EIF1AY                                                                                   | 4,42095E-05 | 0,147069121 | 0,488 | 0,15  | 0,932864414 | 1,107317636   | 0,903083241     | 3,253333333     |
| C7orf26                                                                                  | 2,34713E-05 | 0,147050719 | 0,225 | 0,02  | 0,495268417 | 1,107303512   | 0,90309476      | 11,25           |
| CDT1                                                                                     | 3,09504E-05 | 0,147048095 | 0,162 | 0     | 0,653084942 | 1,107301498   | 0,903096403     | #DIV/0!         |
| RSRC1                                                                                    | 1,32271E-05 | 0,147025627 | 0,488 | 0,13  | 0,279106011 | 1,107284254   | 0,903110468     | 3,753846154     |
| ENOSF1                                                                                   | 0,000378678 | 0,146978488 | 0,2   | 0,03  | 1           | 1,107248074   | 0,903139977     | 6,666666667     |
| POMGNT2                                                                                  | 6,57145E-05 | 0,146896675 | 0,15  | 0     | 1           | 1,107185286   | 0,903191194     | #DIV/0!         |
| TFPT                                                                                     | 8,96733E-05 | 0,146892537 | 0,225 | 0,03  | 1           | 1,10718211    | 0,903193785     | 7,5             |
| IMPACT                                                                                   | 0,000332935 | 0,146839065 | 0,362 | 0,11  | 1           | 1,107141074   | 0,903227261     | 3,290909091     |
| CBWD5                                                                                    | 0,000324278 | 0,146795693 | 0,225 | 0,04  | 1           | 1,107107791   | 0,903254415     | 5,625           |
| THOC3                                                                                    | 2,00837E-05 | 0,146544837 | 0,2   | 0,01  | 0,423786989 | 1,106915304   | 0,903411487     | 20              |
| DAB2                                                                                     | 0,000761806 | 0,146418982 | 0,162 | 0,02  | 1           | 1,106818744   | 0,903490301     | 8,1             |
| GPR180                                                                                   | 2,73703E-05 | 0,146249134 | 0,338 | 0,07  | 0,57753988  | 1,106688447   | 0,903596674     | 4,828571429     |
| NIPSNAP1                                                                                 | 0,000185492 | 0,146199191 | 0,162 | 0,01  | 1           | 1,106650136   | 0,903627955     | 16,2            |
| ENTPD6                                                                                   | 2,2927E-05  | 0,146150895 | 0,225 | 0,02  | 0,483782912 | 1,10661309    | 0,903658206     | 11,25           |
| FBXO4                                                                                    | 0,002821773 | 0,146149922 | 0,275 | 0,09  | 1           | 1,106612344   | 0,903658815     | 3,055555556     |

Supplementary Table 4

| Differentially expressed genes_keloid-CCD_ comparing SC-Keloid vs. (SC-Myel, SC-Nonmyel) |             |             |       |       |             |               |                 |                 |
|------------------------------------------------------------------------------------------|-------------|-------------|-------|-------|-------------|---------------|-----------------|-----------------|
| gene                                                                                     | p_val       | avg_log2FC  | pct.1 | pct.2 | p_val_adj   | Foldchange_UP | Foldchange_DOWN | Ratio_pct1_pct2 |
| ANKRD6                                                                                   | 0,006858718 | 0,14614712  | 0,162 | 0,04  | 1           | 1,106610195   | 0,90366057      | 4,05            |
| SLC25A38                                                                                 | 8,67798E-05 | 0,146081931 | 0,175 | 0,01  | 1           | 1,106560193   | 0,903701404     | 17,5            |
| YWHAE                                                                                    | 0,126883646 | 0,145777735 | 0,963 | 0,85  | 1           | 1,106326896   | 0,903891972     | 1,132941176     |
| ATP6V1H                                                                                  | 0,000439631 | 0,14573587  | 0,262 | 0,06  | 1           | 1,106294793   | 0,903918202     | 4,366666667     |
| IFITM10                                                                                  | 0,000291957 | 0,145679484 | 0,125 | 0     | 1           | 1,106251556   | 0,903953531     | #DIV/0!         |
| UBE2J1                                                                                   | 2,29576E-05 | 0,145525412 | 0,55  | 0,18  | 0,484427747 | 1,10613342    | 0,904050074     | 3,055555556     |
| FAHD2B                                                                                   | 0,002987596 | 0,145465028 | 0,275 | 0,09  | 1           | 1,106087124   | 0,904087913     | 3,055555556     |
| FYCO1                                                                                    | 0,003162024 | 0,145378425 | 0,112 | 0,01  | 1           | 1,106020729   | 0,904142186     | 11,2            |
| TSTD1                                                                                    | 0,0041405   | 0,145319292 | 0,175 | 0,04  | 1           | 1,105975397   | 0,904179246     | 4,375           |
| PAK4                                                                                     | 8,33612E-05 | 0,145310289 | 0,2   | 0,02  | 1           | 1,105968495   | 0,904184888     | 10              |
| SEC24C                                                                                   | 2,34713E-05 | 0,145266235 | 0,225 | 0,02  | 0,495268417 | 1,105934723   | 0,904212499     | 11,25           |
| SCAP                                                                                     | 0,000204342 | 0,145129374 | 0,188 | 0,02  | 1           | 1,105829814   | 0,904298281     | 9,4             |
| UBE2Q1                                                                                   | 6,15981E-05 | 0,14477893  | 0,362 | 0,09  | 1           | 1,105561231   | 0,90451797      | 4,022222222     |
| FAM217B                                                                                  | 0,001360356 | 0,144719748 | 0,175 | 0,03  | 1           | 1,10551588    | 0,904555076     | 5,833333333     |
| RPUSD3                                                                                   | 1,12285E-05 | 0,144622043 | 0,238 | 0,02  | 0,236932166 | 1,105441012   | 0,904616338     | 11,9            |
| HIKESHI                                                                                  | 0,003571374 | 0,144602734 | 0,713 | 0,32  | 1           | 1,105426217   | 0,904628445     | 2,228125        |
| FAM228B                                                                                  | 0,000556348 | 0,144370799 | 0,275 | 0,07  | 1           | 1,105248517   | 0,90477389      | 3,928571429     |
| DDX27                                                                                    | 0,000120511 | 0,144330977 | 0,45  | 0,14  | 1           | 1,105218011   | 0,904798864     | 3,214285714     |
| CCDC61                                                                                   | 0,000395843 | 0,144300737 | 0,175 | 0,02  | 1           | 1,105194844   | 0,90481783      | 8,75            |
| CYFIP1                                                                                   | 0,001468044 | 0,144206362 | 0,362 | 0,13  | 1           | 1,10512255    | 0,90487702      | 2,784615385     |
| TYSND1                                                                                   | 0,001256963 | 0,143857347 | 0,175 | 0,03  | 1           | 1,104855232   | 0,905095954     | 5,833333333     |
| SMYD2                                                                                    | 0,000208673 | 0,143665581 | 0,275 | 0,06  | 1           | 1,104708382   | 0,905216269     | 4,583333333     |
| DHRS12                                                                                   | 0,001121354 | 0,143593315 | 0,2   | 0,04  | 1           | 1,104653048   | 0,905261613     | 5               |
| CEP63                                                                                    | 1,42516E-05 | 0,14354703  | 0,35  | 0,07  | 0,300723722 | 1,104617608   | 0,905290657     | 5               |
| CCDC18                                                                                   | 0,000611714 | 0,143416599 | 0,112 | 0     | 1           | 1,104517746   | 0,905372506     | #DIV/0!         |
| FERMT3                                                                                   | 0,000384434 | 0,143379916 | 0,15  | 0,01  | 1           | 1,104489663   | 0,905395527     | 15              |
| SCO1                                                                                     | 4,19959E-05 | 0,142981506 | 0,262 | 0,04  | 0,886155152 | 1,104184693   | 0,905645592     | 6,55            |
| RGS5                                                                                     | 0,750137552 | 0,142968683 | 0,05  | 0,04  | 1           | 1,104174878   | 0,905653642     | 1,25            |
| MSH2                                                                                     | 0,000156102 | 0,14296738  | 0,262 | 0,05  | 1           | 1,104173881   | 0,90565446      | 5,24            |
| PXN-AS1                                                                                  | 0,000138823 | 0,142925463 | 0,138 | 0     | 1           | 1,1041418     | 0,905680774     | #DIV/0!         |

Supplementary Table 4

| Differentially expressed genes_keloid-CCD_ comparing SC-Keloid vs. (SC-Myel, SC-Nonmyel) |             |             |       |       |             |               |                 |                 |
|------------------------------------------------------------------------------------------|-------------|-------------|-------|-------|-------------|---------------|-----------------|-----------------|
| gene                                                                                     | p_val       | avg_log2FC  | pct.1 | pct.2 | p_val_adj   | Foldchange_UP | Foldchange_DOWN | Ratio_pct1_pct2 |
| MCUR1                                                                                    | 0,001554605 | 0,142925361 | 0,575 | 0,25  | 1           | 1,104141722   | 0,905680838     | 2,3             |
| DMAP1                                                                                    | 4,68731E-05 | 0,14287845  | 0,45  | 0,13  | 0,989068461 | 1,10410582    | 0,905710287     | 3,461538462     |
| TRABD                                                                                    | 1,53726E-05 | 0,142789929 | 0,35  | 0,07  | 0,324378008 | 1,104038076   | 0,905765862     | 5               |
| RAI1                                                                                     | 6,57145E-05 | 0,142783985 | 0,15  | 0     | 1           | 1,104033528   | 0,905769594     | #DIV/0!         |
| RNF166                                                                                   | 0,000281484 | 0,142741339 | 0,25  | 0,05  | 1           | 1,104000893   | 0,905796369     | 5               |
| UGGT2                                                                                    | 1,56464E-05 | 0,142708504 | 0,438 | 0,11  | 0,330153749 | 1,103975767   | 0,905816985     | 3,981818182     |
| RPL27A                                                                                   | 0,004052912 | 0,142683957 | 0,988 | 0,85  | 1           | 1,103956983   | 0,905832397     | 1,162352941     |
| PSPH                                                                                     | 0,001553021 | 0,142341216 | 0,15  | 0,02  | 1           | 1,103694747   | 0,906047621     | 7,5             |
| SANBR                                                                                    | 2,00837E-05 | 0,142090236 | 0,2   | 0,01  | 0,423786989 | 1,103502759   | 0,906205256     | 20              |
| CKAP2                                                                                    | 0,001440167 | 0,141988419 | 0,238 | 0,06  | 1           | 1,103424882   | 0,906269213     | 3,966666667     |
| KIF5A                                                                                    | 0,000185492 | 0,141813712 | 0,162 | 0,01  | 1           | 1,103291269   | 0,906378967     | 16,2            |
| SLC25A3                                                                                  | 0,104068025 | 0,141720179 | 1     | 0,86  | 1           | 1,103219742   | 0,906437731     | 1,162790698     |
| SLC2A6                                                                                   | 6,57145E-05 | 0,141571862 | 0,15  | 0     | 1           | 1,103106331   | 0,906530923     | #DIV/0!         |
| CBWD2                                                                                    | 0,000521745 | 0,141563944 | 0,238 | 0,05  | 1           | 1,103100277   | 0,906535898     | 4,76            |
| SHROOM4                                                                                  | 0,002228881 | 0,141489872 | 0,188 | 0,04  | 1           | 1,103043642   | 0,906582444     | 4,7             |
| LEPROTL1                                                                                 | 0,000396576 | 0,141480164 | 0,562 | 0,22  | 1           | 1,10303622    | 0,906588544     | 2,554545455     |
| WDR41                                                                                    | 5,02834E-06 | 0,141383156 | 0,412 | 0,09  | 0,106103056 | 1,102962053   | 0,906649506     | 4,577777778     |
| CENPJ                                                                                    | 0,000199343 | 0,141373662 | 0,212 | 0,03  | 1           | 1,102954795   | 0,906655472     | 7,066666667     |
| RPP38                                                                                    | 0,007218215 | 0,141324709 | 0,162 | 0,04  | 1           | 1,10291737    | 0,906686237     | 4,05            |
| ZNF280D                                                                                  | 0,000271971 | 0,141220392 | 0,225 | 0,04  | 1           | 1,102837624   | 0,906751799     | 5,625           |
| AP1B1                                                                                    | 0,00046759  | 0,141175159 | 0,212 | 0,04  | 1           | 1,102803048   | 0,906780229     | 5,3             |
| PEDS1                                                                                    | 2,69086E-06 | 0,141067769 | 0,45  | 0,1   | 0,056779884 | 1,102720961   | 0,90684773      | 4,5             |
| NAPA                                                                                     | 3,59966E-05 | 0,141051335 | 0,6   | 0,2   | 0,759563508 | 1,1027084     | 0,90685806      | 3               |
| PRDX2                                                                                    | 0,004216906 | 0,141045217 | 0,65  | 0,32  | 1           | 1,102703723   | 0,906861906     | 2,03125         |
| TTLL12                                                                                   | 3,09504E-05 | 0,14100012  | 0,162 | 0     | 0,653084942 | 1,102669255   | 0,906890254     | #DIV/0!         |
| AP3D1                                                                                    | 1,19135E-05 | 0,140994217 | 0,462 | 0,12  | 0,251387052 | 1,102664743   | 0,906893964     | 3,85            |
| NEFM                                                                                     | 0,00031643  | 0,140953005 | 0,45  | 0,15  | 1           | 1,102633245   | 0,906919871     | 3               |
| NAGA                                                                                     | 4,24089E-05 | 0,140874757 | 0,188 | 0,01  | 0,894869854 | 1,102573442   | 0,906969061     | 18,8            |
| SMIM29                                                                                   | 0,000108981 | 0,140780311 | 0,537 | 0,18  | 1           | 1,102501265   | 0,907028438     | 2,983333333     |
| NDRG4                                                                                    | 0,000795661 | 0,140744823 | 0,162 | 0,02  | 1           | 1,102474146   | 0,907050749     | 8,1             |

Supplementary Table 4

| Differentially expressed genes_keloid-CCD_ comparing SC-Keloid vs. (SC-Myel, SC-Nonmyel) |             |             |       |       |             |               |                 |                 |
|------------------------------------------------------------------------------------------|-------------|-------------|-------|-------|-------------|---------------|-----------------|-----------------|
| gene                                                                                     | p_val       | avg_log2FC  | pct.1 | pct.2 | p_val_adj   | Foldchange_UP | Foldchange_DOWN | Ratio_pct1_pct2 |
| HDAC1                                                                                    | 6,1743E-06  | 0,140635386 | 0,462 | 0,11  | 0,130283925 | 1,10239052    | 0,907119557     | 4,2             |
| JADE2                                                                                    | 0,000682932 | 0,14056121  | 0,162 | 0,02  | 1           | 1,102333842   | 0,907166198     | 8,1             |
| FKBP7                                                                                    | 2,84703E-05 | 0,140557291 | 0,525 | 0,16  | 0,600751359 | 1,102330847   | 0,907168662     | 3,28125         |
| CHPF2                                                                                    | 3,6205E-05  | 0,140545427 | 0,288 | 0,05  | 0,763961407 | 1,102321783   | 0,907176122     | 5,76            |
| ANKRD65                                                                                  | 0,013924832 | 0,140527003 | 0,2   | 0,07  | 1           | 1,102307705   | 0,907187708     | 2,857142857     |
| SRA1                                                                                     | 3,6407E-05  | 0,14049227  | 0,575 | 0,18  | 0,768224936 | 1,102281167   | 0,907209549     | 3,194444444     |
| NOL3                                                                                     | 0,000100126 | 0,140470819 | 0,2   | 0,02  | 1           | 1,102264778   | 0,907223038     | 10              |
| ZDHHC1                                                                                   | 0,003088561 | 0,140469409 | 0,112 | 0,01  | 1           | 1,102263701   | 0,907223924     | 11,2            |
| TBC1D22A                                                                                 | 0,0041405   | 0,140448473 | 0,175 | 0,04  | 1           | 1,102247705   | 0,90723709      | 4,375           |
| C1orf35                                                                                  | 0,006492531 | 0,14038307  | 0,362 | 0,15  | 1           | 1,102197736   | 0,90727822      | 2,413333333     |
| DEAF1                                                                                    | 0,000286414 | 0,140342935 | 0,375 | 0,11  | 1           | 1,102167075   | 0,90730346      | 3,409090909     |
| HPS4                                                                                     | 0,003726334 | 0,140327932 | 0,25  | 0,08  | 1           | 1,102155613   | 0,907312895     | 3,125           |
| MKRN2                                                                                    | 2,24357E-05 | 0,140310046 | 0,3   | 0,05  | 0,47341608  | 1,102141949   | 0,907324144     | 6               |
| SLC25A46                                                                                 | 0,00063016  | 0,140271482 | 0,325 | 0,1   | 1           | 1,102112488   | 0,907348397     | 3,25            |
| EVA1A                                                                                    | 0,000773413 | 0,140163835 | 0,138 | 0,01  | 1           | 1,102030258   | 0,907416101     | 13,8            |
| SMUG1                                                                                    | 0,000321047 | 0,140127524 | 0,2   | 0,03  | 1           | 1,10200252    | 0,907438941     | 6,666666667     |
| FAHD2A                                                                                   | 0,000117816 | 0,139714721 | 0,35  | 0,09  | 1           | 1,101687246   | 0,907698626     | 3,888888889     |
| NNT                                                                                      | 1,17769E-05 | 0,139694486 | 0,288 | 0,04  | 0,248503909 | 1,101671795   | 0,907711357     | 7,2             |
| TSEN54                                                                                   | 0,004809313 | 0,139680936 | 0,125 | 0,02  | 1           | 1,101661447   | 0,907719883     | 6,25            |
| HMG3                                                                                     | 0,013992342 | 0,139642681 | 0,925 | 0,6   | 1           | 1,101632236   | 0,907743953     | 1,541666667     |
| APH1A                                                                                    | 0,001574841 | 0,13944428  | 0,713 | 0,32  | 1           | 1,101480749   | 0,907868795     | 2,228125        |
| C1QTNF6                                                                                  | 0,002619134 | 0,139413568 | 0,162 | 0,03  | 1           | 1,1014573     | 0,907888122     | 5,4             |
| DR1                                                                                      | 0,001147876 | 0,139401625 | 0,5   | 0,2   | 1           | 1,101448183   | 0,907895638     | 2,5             |
| TMEM18                                                                                   | 0,000136287 | 0,139278539 | 0,5   | 0,17  | 1           | 1,101354214   | 0,9079731       | 2,941176471     |
| VPS13C                                                                                   | 0,000133617 | 0,139217481 | 0,55  | 0,2   | 1           | 1,101307604   | 0,908011528     | 2,75            |
| MPHOSPH9                                                                                 | 4,86715E-05 | 0,139184303 | 0,212 | 0,02  | 1           | 1,101282277   | 0,90803241      | 10,6            |
| MAK16                                                                                    | 4,75229E-05 | 0,139137886 | 0,262 | 0,04  | 1           | 1,101246845   | 0,908061625     | 6,55            |
| TACC2                                                                                    | 0,000294158 | 0,13907831  | 0,225 | 0,04  | 1           | 1,10120137    | 0,908099124     | 5,625           |
| HERC1                                                                                    | 0,000134532 | 0,138785387 | 0,35  | 0,09  | 1           | 1,100977806   | 0,908283523     | 3,888888889     |
| ELAC2                                                                                    | 0,000556055 | 0,138661517 | 0,212 | 0,04  | 1           | 1,10088328    | 0,908361511     | 5,3             |



Supplementary Table 4

| Differentially expressed genes_keloid-CCD_ comparing SC-Keloid vs. (SC-Myel, SC-Nonmyel) |             |             |       |       |             |               |                 |                 |
|------------------------------------------------------------------------------------------|-------------|-------------|-------|-------|-------------|---------------|-----------------|-----------------|
| gene                                                                                     | p_val       | avg_log2FC  | pct.1 | pct.2 | p_val_adj   | Foldchange_UP | Foldchange_DOWN | Ratio_pct1_pct2 |
| BTBD2                                                                                    | 0,000142156 | 0,138603669 | 0,325 | 0,08  | 1           | 1,100839139   | 0,908397934     | 4,0625          |
| ZNF512B                                                                                  | 0,000384434 | 0,138541869 | 0,15  | 0,01  | 1           | 1,100791984   | 0,908436848     | 15              |
| LCTL                                                                                     | 7,7143E-05  | 0,13853459  | 0,225 | 0,03  | 1           | 1,10078643    | 0,908441431     | 7,5             |
| GRHPR                                                                                    | 0,001663966 | 0,138522792 | 0,725 | 0,34  | 1           | 1,100777428   | 0,908448861     | 2,132352941     |
| LINC00839                                                                                | 0,000195366 | 0,138511011 | 0,188 | 0,02  | 1           | 1,100768439   | 0,908456279     | 9,4             |
| RNF121                                                                                   | 0,000156247 | 0,138455368 | 0,362 | 0,1   | 1           | 1,100725984   | 0,908491318     | 3,62            |
| UBXN11                                                                                   | 0,000180973 | 0,138383458 | 0,162 | 0,01  | 1           | 1,100671121   | 0,908536602     | 16,2            |
| RRP9                                                                                     | 4,85676E-06 | 0,138187414 | 0,3   | 0,04  | 0,102482437 | 1,100521564   | 0,908660069     | 7,5             |
| PFN2                                                                                     | 0,000324518 | 0,138163628 | 0,4   | 0,13  | 1           | 1,10050342    | 0,90867505      | 3,076923077     |
| PRICKLE2                                                                                 | 0,001148726 | 0,138163187 | 0,375 | 0,13  | 1           | 1,100503083   | 0,908675328     | 2,884615385     |
| ECSIT                                                                                    | 0,000483565 | 0,138049822 | 0,375 | 0,12  | 1           | 1,10041661    | 0,908746733     | 3,125           |
| SMPDL3A                                                                                  | 8,89706E-05 | 0,138032982 | 0,175 | 0,01  | 1           | 1,100403766   | 0,908757341     | 17,5            |
| SPAST                                                                                    | 0,001737905 | 0,13793788  | 0,288 | 0,09  | 1           | 1,10033123    | 0,908817248     | 3,2             |
| PROSER1                                                                                  | 1,95796E-05 | 0,13768683  | 0,2   | 0,01  | 0,413149116 | 1,100139773   | 0,908975409     | 20              |
| SMC1A                                                                                    | 0,003495158 | 0,137365692 | 0,4   | 0,16  | 1           | 1,099894914   | 0,909177766     | 2,5             |
| ANXA4                                                                                    | 0,000106537 | 0,137292327 | 0,562 | 0,19  | 1           | 1,099838982   | 0,909224001     | 2,957894737     |
| DDX49                                                                                    | 5,17638E-06 | 0,137217356 | 0,488 | 0,12  | 0,109226862 | 1,09978183    | 0,909271251     | 4,066666667     |
| APCDD1L                                                                                  | 0,000138823 | 0,137201566 | 0,138 | 0     | 1           | 1,099769793   | 0,909281203     | #DIV/0!         |
| PRELID3B                                                                                 | 0,000314487 | 0,137070143 | 0,475 | 0,16  | 1           | 1,099669613   | 0,909364038     | 2,96875         |
| PHKG2                                                                                    | 0,000169209 | 0,13701059  | 0,3   | 0,07  | 1           | 1,099624221   | 0,909401576     | 4,285714286     |
| UBALD1                                                                                   | 1,18394E-05 | 0,136927338 | 0,262 | 0,03  | 0,249822886 | 1,099560768   | 0,909454056     | 8,733333333     |
| SFT2D3                                                                                   | 0,000754972 | 0,136882445 | 0,138 | 0,01  | 1           | 1,099526553   | 0,909482356     | 13,8            |
| CNDP2                                                                                    | 4,86715E-05 | 0,136845162 | 0,212 | 0,02  | 1           | 1,099498138   | 0,90950586      | 10,6            |
| MOB3A                                                                                    | 0,000384434 | 0,13682123  | 0,15  | 0,01  | 1           | 1,0994799     | 0,909520947     | 15              |
| DNAAF5                                                                                   | 0,000119534 | 0,13681749  | 0,262 | 0,05  | 1           | 1,099477049   | 0,909523305     | 5,24            |
| AXIN1                                                                                    | 0,000350427 | 0,136701824 | 0,225 | 0,04  | 1           | 1,099388904   | 0,909596228     | 5,625           |
| SYNJ1                                                                                    | 0,002744062 | 0,136699382 | 0,112 | 0,01  | 1           | 1,099387043   | 0,909597767     | 11,2            |
| POGLUT1                                                                                  | 2,79628E-06 | 0,136636127 | 0,288 | 0,03  | 0,0590043   | 1,099338842   | 0,909637649     | 9,6             |
| DGKZ                                                                                     | 0,000126371 | 0,136634228 | 0,388 | 0,11  | 1           | 1,099337395   | 0,909638847     | 3,527272727     |
| ETS2                                                                                     | 0,002403383 | 0,136524666 | 0,325 | 0,11  | 1           | 1,099253912   | 0,90970793      | 2,954545455     |

Supplementary Table 4

| Differentially expressed genes_keloid-CCD_ comparing SC-Keloid vs. (SC-Myel, SC-Nonmyel) |             |             |       |       |             |               |                 |                 |
|------------------------------------------------------------------------------------------|-------------|-------------|-------|-------|-------------|---------------|-----------------|-----------------|
| gene                                                                                     | p_val       | avg_log2FC  | pct.1 | pct.2 | p_val_adj   | Foldchange_UP | Foldchange_DOWN | Ratio_pct1_pct2 |
| ERCC8                                                                                    | 0,001586071 | 0,136507107 | 0,125 | 0,01  | 1           | 1,099240533   | 0,909719002     | 12,5            |
| SPACA9                                                                                   | 0,000384434 | 0,136450635 | 0,15  | 0,01  | 1           | 1,099197505   | 0,909754612     | 15              |
| JAGN1                                                                                    | 0,000225689 | 0,136220805 | 0,45  | 0,15  | 1           | 1,09902241    | 0,909899553     | 3               |
| TLCD5                                                                                    | 0,000163908 | 0,136191762 | 0,162 | 0,01  | 1           | 1,099000286   | 0,90991787      | 16,2            |
| JPX                                                                                      | 0,000225838 | 0,136081536 | 0,338 | 0,09  | 1           | 1,098916323   | 0,909987393     | 3,755555556     |
| PGGT1B                                                                                   | 2,89504E-06 | 0,135903341 | 0,338 | 0,05  | 0,061088249 | 1,098780598   | 0,910099798     | 6,76            |
| MICU2                                                                                    | 0,000635705 | 0,135826282 | 0,375 | 0,12  | 1           | 1,09872191    | 0,91014841      | 3,125           |
| HPRT1                                                                                    | 0,000348934 | 0,135800823 | 0,4   | 0,13  | 1           | 1,098702521   | 0,910164472     | 3,076923077     |
| APC                                                                                      | 2,91701E-05 | 0,135677308 | 0,438 | 0,12  | 0,615518129 | 1,098608461   | 0,910242398     | 3,65            |
| ZNF720                                                                                   | 0,004397335 | 0,135667953 | 0,3   | 0,11  | 1           | 1,098601337   | 0,910248301     | 2,727272727     |
| RTF2                                                                                     | 0,001647184 | 0,135644908 | 0,575 | 0,24  | 1           | 1,098583788   | 0,910262841     | 2,395833333     |
| UNC93B1                                                                                  | 4,84178E-05 | 0,13558714  | 0,238 | 0,03  | 1           | 1,098539801   | 0,910299289     | 7,933333333     |
| DARS1                                                                                    | 0,000159001 | 0,135326484 | 0,525 | 0,18  | 1           | 1,098341342   | 0,910463771     | 2,916666667     |
| HERC2                                                                                    | 8,76272E-05 | 0,135274979 | 0,375 | 0,1   | 1           | 1,098302131   | 0,910496275     | 3,75            |
| TMEM179B                                                                                 | 4,89337E-05 | 0,135211404 | 0,713 | 0,26  | 1           | 1,098253733   | 0,910536399     | 2,742307692     |
| ARPC1B                                                                                   | 0,012165194 | 0,135184254 | 1     | 0,73  | 1           | 1,098233066   | 0,910553535     | 1,369863014     |
| CCDC90B                                                                                  | 0,000470753 | 0,135028523 | 0,625 | 0,25  | 1           | 1,098114524   | 0,910651829     | 2,5             |
| GABPB2                                                                                   | 0,001586071 | 0,134988712 | 0,125 | 0,01  | 1           | 1,098084222   | 0,910676959     | 12,5            |
| SLC35G1                                                                                  | 0,001624218 | 0,134963736 | 0,125 | 0,01  | 1           | 1,098065212   | 0,910692725     | 12,5            |
| TSG101                                                                                   | 0,000717289 | 0,134841559 | 0,6   | 0,24  | 1           | 1,097972225   | 0,910769851     | 2,5             |
| PPP1CB                                                                                   | 0,01855066  | 0,134693071 | 0,812 | 0,46  | 1           | 1,097859223   | 0,910863596     | 1,765217391     |
| RNF14                                                                                    | 1,203E-05   | 0,134643544 | 0,288 | 0,04  | 0,253844696 | 1,097821534   | 0,910894867     | 7,2             |
| TULP4                                                                                    | 0,000131728 | 0,134602083 | 0,45  | 0,14  | 1           | 1,097789985   | 0,910921044     | 3,214285714     |
| SLC4A1AP                                                                                 | 8,19547E-06 | 0,134550009 | 0,388 | 0,08  | 0,172932543 | 1,097750361   | 0,910953925     | 4,85            |
| ALG1                                                                                     | 0,000327773 | 0,134315407 | 0,2   | 0,03  | 1           | 1,097571867   | 0,91110207      | 6,666666667     |
| SGCB                                                                                     | 0,006487017 | 0,134286509 | 0,812 | 0,42  | 1           | 1,097549882   | 0,911120321     | 1,933333333     |
| TMEM53                                                                                   | 4,24918E-05 | 0,134249606 | 0,238 | 0,03  | 0,896619246 | 1,097521807   | 0,911143627     | 7,933333333     |
| PARP10                                                                                   | 0,000199343 | 0,134145588 | 0,212 | 0,03  | 1           | 1,097442679   | 0,911209322     | 7,066666667     |
| PCDHGB6                                                                                  | 0,001278066 | 0,13412433  | 0,1   | 0     | 1           | 1,097426509   | 0,911222749     | #DIV/0!         |
| PYCARD                                                                                   | 2,48541E-05 | 0,133993598 | 0,25  | 0,03  | 0,524447068 | 1,097327068   | 0,911305325     | 8,333333333     |

Supplementary Table 4

| Differentially expressed genes_keloid-CCD_ comparing SC-Keloid vs. (SC-Myel, SC-Nonmyel) |             |             |       |       |             |               |                 |                 |
|------------------------------------------------------------------------------------------|-------------|-------------|-------|-------|-------------|---------------|-----------------|-----------------|
| gene                                                                                     | p_val       | avg_log2FC  | pct.1 | pct.2 | p_val_adj   | Foldchange_UP | Foldchange_DOWN | Ratio_pct1_pct2 |
| SMURF2                                                                                   | 0,000202462 | 0,13398151  | 0,488 | 0,17  | 1           | 1,097317874   | 0,91131296      | 2,870588235     |
| ARHGAP29                                                                                 | 0,079510298 | 0,133856383 | 0,075 | 0,02  | 1           | 1,097222706   | 0,911392003     | 3,75            |
| WNT10A                                                                                   | 0,000611714 | 0,133743993 | 0,112 | 0     | 1           | 1,097137233   | 0,911463006     | #DIV/0!         |
| DOLPP1                                                                                   | 3,09504E-05 | 0,133678706 | 0,162 | 0     | 0,653084942 | 1,097087584   | 0,911504254     | #DIV/0!         |
| SPATA2L                                                                                  | 0,000344691 | 0,133516905 | 0,288 | 0,07  | 1           | 1,096964551   | 0,911606487     | 4,114285714     |
| DHODH                                                                                    | 0,000611714 | 0,133461989 | 0,112 | 0     | 1           | 1,096922796   | 0,911641187     | #DIV/0!         |
| DRD2                                                                                     | 0,000291957 | 0,133402578 | 0,125 | 0     | 1           | 1,096877625   | 0,91167873      | #DIV/0!         |
| HDAC6                                                                                    | 0,000370979 | 0,133300565 | 0,2   | 0,03  | 1           | 1,096800068   | 0,911743197     | 6,666666667     |
| PSMG2                                                                                    | 6,93252E-05 | 0,133202344 | 0,688 | 0,25  | 1           | 1,096725398   | 0,911805272     | 2,752           |
| RB1                                                                                      | 4,65046E-05 | 0,133175455 | 0,375 | 0,09  | 0,981292999 | 1,096704957   | 0,911822267     | 4,166666667     |
| TAF15                                                                                    | 3,32256E-06 | 0,133161005 | 0,462 | 0,11  | 0,070109424 | 1,096693973   | 0,911831399     | 4,2             |
| COQ2                                                                                     | 0,000404687 | 0,133091804 | 0,175 | 0,02  | 1           | 1,09664137    | 0,911875138     | 8,75            |
| PPME1                                                                                    | 0,001596665 | 0,133067322 | 0,312 | 0,1   | 1           | 1,09662276    | 0,911890612     | 3,12            |
| HADH                                                                                     | 0,000467756 | 0,133027131 | 0,238 | 0,05  | 1           | 1,09659221    | 0,911916016     | 4,76            |
| DPH2                                                                                     | 0,000185492 | 0,133021841 | 0,162 | 0,01  | 1           | 1,09658819    | 0,91191936      | 16,2            |
| PITPNA-AS1                                                                               | 0,008104914 | 0,13276684  | 0,175 | 0,05  | 1           | 1,096394381   | 0,912080559     | 3,5             |
| APAF1                                                                                    | 0,010591248 | 0,132735982 | 0,175 | 0,05  | 1           | 1,096370931   | 0,912100068     | 3,5             |
| CEP19                                                                                    | 0,001278066 | 0,132716797 | 0,1   | 0     | 1           | 1,096356351   | 0,912112197     | #DIV/0!         |
| CC2D1A                                                                                   | 0,00456268  | 0,132665382 | 0,212 | 0,06  | 1           | 1,09631728    | 0,912144703     | 3,533333333     |
| B3GNT5                                                                                   | 0,000201558 | 0,132574446 | 0,338 | 0,09  | 1           | 1,096248179   | 0,9122022       | 3,755555556     |
| MMGT1                                                                                    | 5,52326E-05 | 0,13238485  | 0,35  | 0,08  | 1           | 1,096104122   | 0,912322087     | 4,375           |
| DIRAS1                                                                                   | 8,89706E-05 | 0,132330659 | 0,175 | 0,01  | 1           | 1,09606295    | 0,912356357     | 17,5            |
| CPNE2                                                                                    | 0,000390848 | 0,132254774 | 0,488 | 0,18  | 1           | 1,096005299   | 0,912404348     | 2,711111111     |
| CRABP1                                                                                   | 0,000185492 | 0,132117285 | 0,162 | 0,01  | 1           | 1,095900855   | 0,912491304     | 16,2            |
| EEF2                                                                                     | 0,131169016 | 0,131970902 | 0,988 | 0,81  | 1           | 1,095789665   | 0,912583894     | 1,219753086     |
| NDUFAF1                                                                                  | 0,000156102 | 0,131862964 | 0,262 | 0,05  | 1           | 1,095707684   | 0,912652174     | 5,24            |
| SPPL3                                                                                    | 0,000311239 | 0,131766656 | 0,475 | 0,17  | 1           | 1,095634542   | 0,9127131       | 2,794117647     |
| BORCS8                                                                                   | 0,000139047 | 0,131760039 | 0,35  | 0,09  | 1           | 1,095629517   | 0,912717287     | 3,888888889     |
| BUB1                                                                                     | 0,000611714 | 0,131671094 | 0,112 | 0     | 1           | 1,095561971   | 0,912773559     | #DIV/0!         |
| POLDIP2                                                                                  | 8,3552E-05  | 0,131653271 | 0,362 | 0,09  | 1           | 1,095548437   | 0,912784836     | 4,022222222     |

Supplementary Table 4

| Differentially expressed genes_keloid-CCD_ comparing SC-Keloid vs. (SC-Myel, SC-Nonmyel) |             |             |       |       |             |               |                 |                 |
|------------------------------------------------------------------------------------------|-------------|-------------|-------|-------|-------------|---------------|-----------------|-----------------|
| gene                                                                                     | p_val       | avg_log2FC  | pct.1 | pct.2 | p_val_adj   | Foldchange_UP | Foldchange_DOWN | Ratio_pct1_pct2 |
| ZNRD2                                                                                    | 2,03655E-06 | 0,131623646 | 0,537 | 0,14  | 0,042973271 | 1,095525941   | 0,912803579     | 3,835714286     |
| BICD2                                                                                    | 8,38165E-05 | 0,131594883 | 0,475 | 0,15  | 1           | 1,095504099   | 0,912821778     | 3,166666667     |
| RPS3A                                                                                    | 0,096703485 | 0,131516599 | 1     | 0,98  | 1           | 1,095444657   | 0,912871311     | 1,020408163     |
| COX16                                                                                    | 1,7403E-05  | 0,131339182 | 0,325 | 0,06  | 0,367219824 | 1,095309951   | 0,91298358      | 5,416666667     |
| C8orf76                                                                                  | 0,000164999 | 0,131214005 | 0,212 | 0,03  | 1           | 1,095214919   | 0,913062799     | 7,066666667     |
| NOTCH3                                                                                   | 0,011264251 | 0,131149844 | 0,112 | 0,02  | 1           | 1,095166213   | 0,913103406     | 5,6             |
| MRPL10                                                                                   | 0,000116989 | 0,131124933 | 0,288 | 0,06  | 1           | 1,095147303   | 0,913119173     | 4,8             |
| KIF14                                                                                    | 0,000291957 | 0,131079696 | 0,125 | 0     | 1           | 1,095112964   | 0,913147805     | #DIV/0!         |
| ZNF524                                                                                   | 0,000215789 | 0,131066062 | 0,3   | 0,07  | 1           | 1,095102615   | 0,913156435     | 4,285714286     |
| PNO1                                                                                     | 0,000279732 | 0,131050267 | 0,35  | 0,1   | 1           | 1,095090626   | 0,913166432     | 3,5             |
| LAMTOR5                                                                                  | 0,034354064 | 0,130985939 | 0,912 | 0,59  | 1           | 1,095041798   | 0,913207151     | 1,545762712     |
| ARHGAP11B                                                                                | 0,001278066 | 0,130985288 | 0,1   | 0     | 1           | 1,095041304   | 0,913207562     | #DIV/0!         |
| ACACA                                                                                    | 0,000191018 | 0,130864448 | 0,188 | 0,02  | 1           | 1,094949587   | 0,913284056     | 9,4             |
| AFDN                                                                                     | 0,002424934 | 0,130692705 | 0,162 | 0,03  | 1           | 1,094819248   | 0,913392783     | 5,4             |
| CDK5R1                                                                                   | 0,006578444 | 0,130659772 | 0,1   | 0,01  | 1           | 1,094794257   | 0,913413633     | 10              |
| CDC40                                                                                    | 5,60653E-05 | 0,130659485 | 0,462 | 0,14  | 1           | 1,09479404    | 0,913413815     | 3,3             |
| RINL                                                                                     | 0,012163923 | 0,130639419 | 0,088 | 0,01  | 1           | 1,094778812   | 0,91342652      | 8,8             |
| TECPR2                                                                                   | 0,002036225 | 0,130554538 | 0,188 | 0,04  | 1           | 1,094714403   | 0,913480263     | 4,7             |
| ATL1                                                                                     | 0,007241172 | 0,130393293 | 0,238 | 0,08  | 1           | 1,094592057   | 0,913582365     | 2,975           |
| SAAL1                                                                                    | 0,000384434 | 0,130361505 | 0,15  | 0,01  | 1           | 1,094567939   | 0,913602495     | 15              |
| NFE2L1                                                                                   | 0,000115446 | 0,130354228 | 0,425 | 0,13  | 1           | 1,094562418   | 0,913607103     | 3,269230769     |
| TMEM104                                                                                  | 0,000180973 | 0,130144822 | 0,162 | 0,01  | 1           | 1,094403556   | 0,913739721     | 16,2            |
| ZDHC13                                                                                   | 0,001278066 | 0,130049821 | 0,1   | 0     | 1           | 1,094331491   | 0,913799893     | #DIV/0!         |
| INPP5E                                                                                   | 2,37833E-05 | 0,130039267 | 0,25  | 0,03  | 0,501851556 | 1,094323486   | 0,913806578     | 8,333333333     |
| WNT16                                                                                    | 0,011634754 | 0,129984931 | 0,062 | 0     | 1           | 1,094282271   | 0,913840996     | #DIV/0!         |
| PILRB                                                                                    | 0,002036225 | 0,129957768 | 0,188 | 0,04  | 1           | 1,094261669   | 0,913858201     | 4,7             |
| ANKRD9                                                                                   | 0,000224234 | 0,129900546 | 0,275 | 0,06  | 1           | 1,094218268   | 0,913894448     | 4,583333333     |
| WDR77                                                                                    | 2,43131E-05 | 0,129858512 | 0,25  | 0,03  | 0,513030975 | 1,094186387   | 0,913921076     | 8,333333333     |
| SAC3D1                                                                                   | 0,000275913 | 0,129596958 | 0,312 | 0,08  | 1           | 1,093988034   | 0,914086781     | 3,9             |
| TEX30                                                                                    | 4,75229E-05 | 0,129529223 | 0,262 | 0,04  | 1           | 1,093936672   | 0,914129698     | 6,55            |

Supplementary Table 4

| Differentially expressed genes_keloid-CCD_ comparing SC-Keloid vs. (SC-Myel, SC-Nonmyel) |             |             |       |       |             |               |                 |                 |
|------------------------------------------------------------------------------------------|-------------|-------------|-------|-------|-------------|---------------|-----------------|-----------------|
| gene                                                                                     | p_val       | avg_log2FC  | pct.1 | pct.2 | p_val_adj   | Foldchange_UP | Foldchange_DOWN | Ratio_pct1_pct2 |
| PPAN                                                                                     | 2,00837E-05 | 0,129361544 | 0,2   | 0,01  | 0,423786989 | 1,093809536   | 0,91423595      | 20              |
| CTBS                                                                                     | 0,001002534 | 0,12931536  | 0,375 | 0,13  | 1           | 1,09377452    | 0,914265218     | 2,884615385     |
| AAGAB                                                                                    | 6,57145E-05 | 0,129285694 | 0,15  | 0     | 1           | 1,09375203    | 0,914284018     | #DIV/0!         |
| TCERG1                                                                                   | 0,000360927 | 0,129236125 | 0,488 | 0,18  | 1           | 1,09371445    | 0,914315432     | 2,711111111     |
| PLA2G12A                                                                                 | 0,002195191 | 0,129211317 | 0,225 | 0,06  | 1           | 1,093695643   | 0,914331154     | 3,75            |
| STAU2                                                                                    | 1,15289E-05 | 0,129202797 | 0,288 | 0,04  | 0,243270477 | 1,093689184   | 0,914336554     | 7,2             |
| ORAI1                                                                                    | 0,003532013 | 0,129137784 | 0,613 | 0,28  | 1           | 1,0936399     | 0,914377758     | 2,189285714     |
| GNPAT                                                                                    | 0,000118715 | 0,129097269 | 0,312 | 0,07  | 1           | 1,093609188   | 0,914403437     | 4,457142857     |
| NACA                                                                                     | 0,048778888 | 0,129054752 | 1     | 0,97  | 1           | 1,093576959   | 0,914430385     | 1,030927835     |
| ASF1B                                                                                    | 0,000413716 | 0,129027831 | 0,175 | 0,02  | 1           | 1,093556553   | 0,914447449     | 8,75            |
| TFCP2                                                                                    | 0,000204342 | 0,128969124 | 0,188 | 0,02  | 1           | 1,093512054   | 0,914484661     | 9,4             |
| CGGBP1                                                                                   | 0,000139658 | 0,128904388 | 0,637 | 0,24  | 1           | 1,093462988   | 0,914525696     | 2,654166667     |
| GLO1                                                                                     | 9,6728E-05  | 0,128894183 | 0,613 | 0,22  | 1           | 1,093455253   | 0,914532165     | 2,786363636     |
| ENTPD1-AS1                                                                               | 0,003237075 | 0,12888303  | 0,112 | 0,01  | 1           | 1,0934468     | 0,914539235     | 11,2            |
| MCM3                                                                                     | 9,03348E-05 | 0,128846743 | 0,25  | 0,04  | 1           | 1,093419298   | 0,914562238     | 6,25            |
| RETREG2                                                                                  | 0,00045817  | 0,12880988  | 0,338 | 0,1   | 1           | 1,093391359   | 0,914585607     | 3,38            |
| PKMYT1                                                                                   | 0,000291957 | 0,128795311 | 0,125 | 0     | 1           | 1,093380318   | 0,914594843     | #DIV/0!         |
| ATAD5                                                                                    | 8,67798E-05 | 0,128783106 | 0,175 | 0,01  | 1           | 1,093371069   | 0,91460258      | 17,5            |
| BRCA1                                                                                    | 0,000713524 | 0,128706156 | 0,162 | 0,02  | 1           | 1,093312752   | 0,914651364     | 8,1             |
| SLX1A                                                                                    | 0,011634754 | 0,128597345 | 0,062 | 0     | 1           | 1,093230295   | 0,914720352     | #DIV/0!         |
| MLYCD                                                                                    | 0,000138823 | 0,128342261 | 0,138 | 0     | 1           | 1,093037018   | 0,914882098     | #DIV/0!         |
| VEGFA                                                                                    | 0,000212942 | 0,128332567 | 0,675 | 0,27  | 1           | 1,093029673   | 0,914888246     | 2,5             |
| ESRRA                                                                                    | 0,000446909 | 0,128278919 | 0,325 | 0,09  | 1           | 1,092989029   | 0,914922267     | 3,611111111     |
| GAL3ST4                                                                                  | 0,000384434 | 0,128210367 | 0,15  | 0,01  | 1           | 1,092937094   | 0,914965743     | 15              |
| FAM111B                                                                                  | 0,001278066 | 0,128082394 | 0,1   | 0     | 1           | 1,092840151   | 0,915046907     | #DIV/0!         |
| EXOC3                                                                                    | 0,001038827 | 0,12804158  | 0,275 | 0,08  | 1           | 1,092809234   | 0,915072795     | 3,4375          |
| TRIM22                                                                                   | 0,001586071 | 0,128030205 | 0,125 | 0,01  | 1           | 1,092800619   | 0,915080009     | 12,5            |
| ANKRD36                                                                                  | 0,003112143 | 0,12790745  | 0,2   | 0,05  | 1           | 1,092707639   | 0,915157874     | 4               |
| OCIAD1                                                                                   | 0,01363394  | 0,127893655 | 0,85  | 0,46  | 1           | 1,092697191   | 0,915166625     | 1,847826087     |
| CHM                                                                                      | 0,001730325 | 0,127869883 | 0,388 | 0,14  | 1           | 1,092679186   | 0,915181705     | 2,771428571     |

Supplementary Table 4

| Differentially expressed genes_keloid-CCD_ comparing SC-Keloid vs. (SC-Myel, SC-Nonmyel) |             |             |       |       |             |               |                 |                 |
|------------------------------------------------------------------------------------------|-------------|-------------|-------|-------|-------------|---------------|-----------------|-----------------|
| gene                                                                                     | p_val       | avg_log2FC  | pct.1 | pct.2 | p_val_adj   | Foldchange_UP | Foldchange_DOWN | Ratio_pct1_pct2 |
| TOMM5                                                                                    | 1,69497E-07 | 0,127869441 | 0,55  | 0,12  | 0,003576562 | 1,092678851   | 0,915181985     | 4,583333333     |
| AUP1                                                                                     | 0,001489356 | 0,127797418 | 0,662 | 0,3   | 1           | 1,092624303   | 0,915227674     | 2,206666667     |
| VASH1                                                                                    | 0,000177122 | 0,127778579 | 0,238 | 0,04  | 1           | 1,092610035   | 0,915239626     | 5,95            |
| TMEM101                                                                                  | 0,001567171 | 0,1277303   | 0,288 | 0,09  | 1           | 1,092573472   | 0,915270255     | 3,2             |
| VPS51                                                                                    | 0,000686961 | 0,127642488 | 0,55  | 0,22  | 1           | 1,092506973   | 0,915325965     | 2,5             |
| NTNG1                                                                                    | 8,89706E-05 | 0,12760286  | 0,175 | 0,01  | 1           | 1,092476964   | 0,915351108     | 17,5            |
| TCTN1                                                                                    | 1,59408E-05 | 0,12751467  | 0,375 | 0,08  | 0,336367345 | 1,092410185   | 0,915407064     | 4,6875          |
| TGOLN2                                                                                   | 0,001753715 | 0,127450749 | 0,85  | 0,42  | 1           | 1,092361785   | 0,915447623     | 2,023809524     |
| DNAAF9                                                                                   | 0,003009105 | 0,127382897 | 0,138 | 0,02  | 1           | 1,092310411   | 0,915490679     | 6,9             |
| DLX5                                                                                     | 0,00480575  | 0,127288914 | 0,15  | 0,03  | 1           | 1,092239255   | 0,91555032      | 5               |
| CPNE8                                                                                    | 0,005223699 | 0,127267626 | 0,125 | 0,02  | 1           | 1,092223139   | 0,91556383      | 6,25            |
| SRD5A3                                                                                   | 0,000308769 | 0,127237466 | 0,25  | 0,05  | 1           | 1,092200306   | 0,91558297      | 5               |
| DBF4                                                                                     | 0,000281484 | 0,127198898 | 0,25  | 0,05  | 1           | 1,092171108   | 0,915607447     | 5               |
| PSMG3-AS1                                                                                | 0,002721473 | 0,127184975 | 0,162 | 0,03  | 1           | 1,092160568   | 0,915616283     | 5,4             |
| FKBP1A                                                                                   | 0,098771878 | 0,127137041 | 0,875 | 0,58  | 1           | 1,092124281   | 0,915646705     | 1,50862069      |
| GEMIN2                                                                                   | 4,24089E-05 | 0,127090986 | 0,188 | 0,01  | 0,894869854 | 1,092089418   | 0,915675936     | 18,8            |
| ZBTB8A                                                                                   | 0,002619134 | 0,127086098 | 0,162 | 0,03  | 1           | 1,092085718   | 0,915679039     | 5,4             |
| TPRN                                                                                     | 4,95137E-05 | 0,127068936 | 0,262 | 0,04  | 1           | 1,092072727   | 0,915689931     | 6,55            |
| SIRT5                                                                                    | 0,001586071 | 0,127058828 | 0,125 | 0,01  | 1           | 1,092065075   | 0,915696347     | 12,5            |
| AQP3                                                                                     | 0,001440167 | 0,127031827 | 0,238 | 0,06  | 1           | 1,092044637   | 0,915713485     | 3,966666667     |
| DPP9                                                                                     | 0,002073488 | 0,127031182 | 0,188 | 0,04  | 1           | 1,092044149   | 0,915713894     | 4,7             |
| SCAF1                                                                                    | 0,000299964 | 0,127005797 | 0,225 | 0,04  | 1           | 1,092024933   | 0,915730007     | 5,625           |
| SLC25A12                                                                                 | 0,000375171 | 0,127005181 | 0,15  | 0,01  | 1           | 1,092024468   | 0,915730398     | 15              |
| POM121C                                                                                  | 0,000604562 | 0,126999698 | 0,275 | 0,07  | 1           | 1,092020317   | 0,915733878     | 3,928571429     |
| HMOX2                                                                                    | 0,000219116 | 0,126987952 | 0,412 | 0,13  | 1           | 1,092011427   | 0,915741334     | 3,169230769     |
| LENG8                                                                                    | 0,000355806 | 0,126980957 | 0,388 | 0,12  | 1           | 1,092006132   | 0,915745774     | 3,233333333     |
| TRMT2A                                                                                   | 0,000540996 | 0,126980204 | 0,238 | 0,05  | 1           | 1,092005562   | 0,915746252     | 4,76            |
| CHFR                                                                                     | 4,94786E-05 | 0,126774325 | 0,238 | 0,03  | 1           | 1,091849739   | 0,915876942     | 7,933333333     |
| TIMM29                                                                                   | 0,000565694 | 0,126705653 | 0,275 | 0,07  | 1           | 1,091797768   | 0,915920539     | 3,928571429     |
| NIT2                                                                                     | 7,77412E-06 | 0,126577919 | 0,6   | 0,18  | 0,164041645 | 1,091701106   | 0,916001636     | 3,333333333     |

Supplementary Table 4

| Differentially expressed genes_keloid-CCD_ comparing SC-Keloid vs. (SC-Myel, SC-Nonmyel) |             |             |       |       |             |               |                 |                 |
|------------------------------------------------------------------------------------------|-------------|-------------|-------|-------|-------------|---------------|-----------------|-----------------|
| gene                                                                                     | p_val       | avg_log2FC  | pct.1 | pct.2 | p_val_adj   | Foldchange_UP | Foldchange_DOWN | Ratio_pct1_pct2 |
| WDFY2                                                                                    | 4,00412E-05 | 0,126438179 | 0,4   | 0,1   | 0,844910207 | 1,091595369   | 0,916090365     | 4               |
| GEMIN6                                                                                   | 2,34713E-05 | 0,126356341 | 0,225 | 0,02  | 0,495268417 | 1,091533449   | 0,916142333     | 11,25           |
| PEF1                                                                                     | 4,11615E-06 | 0,126189055 | 0,525 | 0,14  | 0,086854803 | 1,091406889   | 0,916248569     | 3,75            |
| MDM2                                                                                     | 0,000870262 | 0,126185457 | 0,362 | 0,12  | 1           | 1,091404167   | 0,916250854     | 3,016666667     |
| MDM4                                                                                     | 0,000954423 | 0,126019712 | 0,475 | 0,18  | 1           | 1,091278788   | 0,916356124     | 2,638888889     |
| INO80B                                                                                   | 0,00152026  | 0,125963385 | 0,15  | 0,02  | 1           | 1,091236181   | 0,916391902     | 7,5             |
| SERPINB1                                                                                 | 8,84954E-05 | 0,125897058 | 0,462 | 0,14  | 1           | 1,091186014   | 0,916434033     | 3,3             |
| IQGAP3                                                                                   | 0,001278066 | 0,125865283 | 0,1   | 0     | 1           | 1,091161981   | 0,916454218     | #DIV/0!         |
| EXOSC1                                                                                   | 1,07966E-05 | 0,125778503 | 0,338 | 0,06  | 0,227819631 | 1,091096348   | 0,916509346     | 5,633333333     |
| TMEM19                                                                                   | 0,002520324 | 0,125754245 | 0,162 | 0,03  | 1           | 1,091078003   | 0,916524756     | 5,4             |
| METTL2A                                                                                  | 4,06743E-05 | 0,125753123 | 0,238 | 0,03  | 0,85826845  | 1,091077154   | 0,916525469     | 7,933333333     |
| TWF1                                                                                     | 5,22707E-05 | 0,125630375 | 0,488 | 0,15  | 1           | 1,090984326   | 0,916603452     | 3,253333333     |
| HOXC9                                                                                    | 0,007220354 | 0,125609445 | 0,537 | 0,26  | 1           | 1,090968499   | 0,91661675      | 2,065384615     |
| TATDN1                                                                                   | 1,26166E-05 | 0,125558499 | 0,5   | 0,14  | 0,266222232 | 1,090929974   | 0,916649119     | 3,571428571     |
| PSMB10                                                                                   | 5,07281E-06 | 0,12553296  | 0,3   | 0,04  | 0,107041321 | 1,090910662   | 0,916665346     | 7,5             |
| CDC37                                                                                    | 0,011070699 | 0,125524903 | 0,637 | 0,32  | 1           | 1,09090457    | 0,916670465     | 1,990625        |
| ANKH                                                                                     | 0,000320903 | 0,125500395 | 0,388 | 0,12  | 1           | 1,090886038   | 0,916686038     | 3,233333333     |
| C15orf61                                                                                 | 1,2107E-05  | 0,12539347  | 0,262 | 0,03  | 0,255469827 | 1,09080519    | 0,916753981     | 8,733333333     |
| SUGT1                                                                                    | 2,18911E-05 | 0,125234302 | 0,775 | 0,29  | 0,46192345  | 1,090684852   | 0,916855128     | 2,672413793     |
| MCOLN1                                                                                   | 0,000584827 | 0,124946826 | 0,275 | 0,07  | 1           | 1,09046754    | 0,917037842     | 3,928571429     |
| TNFSF12                                                                                  | 0,003859321 | 0,124876243 | 0,55  | 0,24  | 1           | 1,090414191   | 0,917082709     | 2,291666667     |
| EXT2                                                                                     | 9,79681E-07 | 0,1248428   | 0,425 | 0,08  | 0,020672243 | 1,090388915   | 0,917103968     | 5,3125          |
| TRAF5                                                                                    | 0,000291957 | 0,124742322 | 0,125 | 0     | 1           | 1,090312976   | 0,917167843     | #DIV/0!         |
| ANKRD52                                                                                  | 0,001121354 | 0,124684942 | 0,2   | 0,04  | 1           | 1,090269612   | 0,917204322     | 5               |
| CD99                                                                                     | 0,04549987  | 0,124606174 | 1     | 0,84  | 1           | 1,090210087   | 0,9172544       | 1,19047619      |
| AIFM1                                                                                    | 0,000395843 | 0,124587054 | 0,175 | 0,02  | 1           | 1,090195639   | 0,917266557     | 8,75            |
| TUFT1                                                                                    | 4,49877E-05 | 0,124565784 | 0,288 | 0,05  | 0,949284452 | 1,090179566   | 0,917280081     | 5,76            |
| ZNF71                                                                                    | 0,000792271 | 0,124364641 | 0,138 | 0,01  | 1           | 1,090027582   | 0,917407978     | 13,8            |
| EXOSC9                                                                                   | 5,69398E-05 | 0,124267268 | 0,325 | 0,07  | 1           | 1,089954014   | 0,9174699       | 4,642857143     |
| MTMR2                                                                                    | 0,000307177 | 0,124264647 | 0,35  | 0,1   | 1           | 1,089952034   | 0,917471567     | 3,5             |

Supplementary Table 4

| Differentially expressed genes_keloid-CCD_ comparing SC-Keloid vs. (SC-Myel, SC-Nonmyel) |             |             |       |       |             |               |                 |                 |
|------------------------------------------------------------------------------------------|-------------|-------------|-------|-------|-------------|---------------|-----------------|-----------------|
| gene                                                                                     | p_val       | avg_log2FC  | pct.1 | pct.2 | p_val_adj   | Foldchange_UP | Foldchange_DOWN | Ratio_pct1_pct2 |
| AIP                                                                                      | 0,000197541 | 0,124177829 | 0,7   | 0,27  | 1           | 1,089886445   | 0,91752678      | 2,592592593     |
| NIF3L1                                                                                   | 0,000757951 | 0,124075712 | 0,188 | 0,03  | 1           | 1,089809303   | 0,917591726     | 6,266666667     |
| ATP2A2                                                                                   | 0,000846023 | 0,123975329 | 0,625 | 0,26  | 1           | 1,089733477   | 0,917655575     | 2,403846154     |
| LPP-AS2                                                                                  | 0,001278066 | 0,123574439 | 0,1   | 0     | 1           | 1,089430709   | 0,917910604     | #DIV/0!         |
| CLPB                                                                                     | 0,000395843 | 0,123561184 | 0,175 | 0,02  | 1           | 1,089420699   | 0,917919038     | 8,75            |
| CCDC97                                                                                   | 0,001624218 | 0,123544337 | 0,125 | 0,01  | 1           | 1,089407978   | 0,917929757     | 12,5            |
| COX18                                                                                    | 0,000384434 | 0,123258066 | 0,15  | 0,01  | 1           | 1,08919183    | 0,918111918     | 15              |
| HDGFL2                                                                                   | 0,004894485 | 0,1232279   | 0,35  | 0,14  | 1           | 1,089169056   | 0,918131115     | 2,5             |
| KIF2A                                                                                    | 1,90784E-05 | 0,123226807 | 0,412 | 0,1   | 0,402574344 | 1,089168231   | 0,918131811     | 4,12            |
| MAPK3                                                                                    | 0,000965109 | 0,12320963  | 0,338 | 0,11  | 1           | 1,089155263   | 0,918142742     | 3,072727273     |
| HOXB8                                                                                    | 0,000728108 | 0,123118222 | 0,188 | 0,03  | 1           | 1,089086257   | 0,918200917     | 6,266666667     |
| MYCBP                                                                                    | 0,000395843 | 0,12306743  | 0,175 | 0,02  | 1           | 1,089047915   | 0,918233244     | 8,75            |
| RMDN1                                                                                    | 0,000363509 | 0,122964057 | 0,45  | 0,15  | 1           | 1,088969885   | 0,91829904      | 3               |
| SFXN1                                                                                    | 0,001063603 | 0,122799411 | 0,225 | 0,05  | 1           | 1,088845614   | 0,918403846     | 4,5             |
| RPL21                                                                                    | 0,034231565 | 0,12274545  | 1     | 0,98  | 1           | 1,088804889   | 0,918438198     | 1,020408163     |
| HDAC10                                                                                   | 0,004628886 | 0,122697589 | 0,15  | 0,03  | 1           | 1,088768769   | 0,918468667     | 5               |
| RCCD1                                                                                    | 0,002228881 | 0,122649315 | 0,188 | 0,04  | 1           | 1,088732338   | 0,918499401     | 4,7             |
| ZDHHC16                                                                                  | 0,000395843 | 0,122612155 | 0,175 | 0,02  | 1           | 1,088704296   | 0,918523059     | 8,75            |
| ASB7                                                                                     | 0,011043276 | 0,122600658 | 0,112 | 0,02  | 1           | 1,08869562    | 0,918530379     | 5,6             |
| IMPA2                                                                                    | 0,000291957 | 0,12253414  | 0,125 | 0     | 1           | 1,088645425   | 0,91857273      | #DIV/0!         |
| SKIV2L                                                                                   | 4,24089E-05 | 0,122452809 | 0,188 | 0,01  | 0,894869854 | 1,088584054   | 0,918624516     | 18,8            |
| ETV3                                                                                     | 0,000344691 | 0,122393989 | 0,288 | 0,07  | 1           | 1,088539673   | 0,91866197      | 4,114285714     |
| NCAPD3                                                                                   | 0,001816182 | 0,12235372  | 0,288 | 0,09  | 1           | 1,08850929    | 0,918687612     | 3,2             |
| ARL6                                                                                     | 0,000773413 | 0,122237839 | 0,138 | 0,01  | 1           | 1,088421861   | 0,918761406     | 13,8            |
| TRAK2                                                                                    | 2,33923E-05 | 0,122211462 | 0,362 | 0,08  | 0,493599997 | 1,088401962   | 0,918778204     | 4,525           |
| OBI1                                                                                     | 0,000685384 | 0,122150553 | 0,188 | 0,03  | 1           | 1,088356012   | 0,918816995     | 6,266666667     |
| C8orf33                                                                                  | 0,000100109 | 0,122150127 | 0,475 | 0,15  | 1           | 1,08835569    | 0,918817267     | 3,166666667     |
| KIFBP                                                                                    | 0,009402428 | 0,122140154 | 0,262 | 0,1   | 1           | 1,088348167   | 0,918823618     | 2,62            |
| PNPT1                                                                                    | 0,000417905 | 0,122072857 | 0,275 | 0,07  | 1           | 1,0882974     | 0,918866479     | 3,928571429     |
| RPS19BP1                                                                                 | 0,001690506 | 0,122047136 | 0,812 | 0,4   | 1           | 1,088277998   | 0,918882861     | 2,03            |



Supplementary Table 4

| Differentially expressed genes_keloid-CCD_ comparing SC-Keloid vs. (SC-Myel, SC-Nonmyel) |             |             |       |       |             |               |                 |                 |
|------------------------------------------------------------------------------------------|-------------|-------------|-------|-------|-------------|---------------|-----------------|-----------------|
| gene                                                                                     | p_val       | avg_log2FC  | pct.1 | pct.2 | p_val_adj   | Foldchange_UP | Foldchange_DOWN | Ratio_pct1_pct2 |
| CDC45                                                                                    | 0,000291957 | 0,122006746 | 0,125 | 0     | 1           | 1,08824753    | 0,918908587     | #DIV/0!         |
| CAST                                                                                     | 0,02732195  | 0,121982364 | 0,775 | 0,44  | 1           | 1,088229138   | 0,918924117     | 1,761363636     |
| SNRNP200                                                                                 | 9,86046E-05 | 0,121929182 | 0,412 | 0,12  | 1           | 1,088189024   | 0,918957992     | 3,433333333     |
| INO80C                                                                                   | 0,000378678 | 0,121891614 | 0,2   | 0,03  | 1           | 1,088160688   | 0,918981921     | 6,666666667     |
| UNG                                                                                      | 0,000378678 | 0,121774573 | 0,2   | 0,03  | 1           | 1,088072413   | 0,919056479     | 6,666666667     |
| MRGBP                                                                                    | 0,000353107 | 0,121690195 | 0,35  | 0,1   | 1           | 1,088008777   | 0,919110232     | 3,5             |
| BBS7                                                                                     | 0,000286753 | 0,121661128 | 0,25  | 0,05  | 1           | 1,087986856   | 0,919128751     | 5               |
| STK25                                                                                    | 2,32693E-05 | 0,121548322 | 0,425 | 0,11  | 0,491006085 | 1,087901789   | 0,919200621     | 3,863636364     |
| CCDC102B                                                                                 | 0,013319742 | 0,121438628 | 0,088 | 0,01  | 1           | 1,087819074   | 0,919270515     | 8,8             |
| GLI4                                                                                     | 0,002041761 | 0,121416142 | 0,25  | 0,07  | 1           | 1,087802119   | 0,919284843     | 3,571428571     |
| PPCDC                                                                                    | 0,011043276 | 0,121396932 | 0,112 | 0,02  | 1           | 1,087787635   | 0,919297083     | 5,6             |
| PRRT2                                                                                    | 0,003237075 | 0,121336286 | 0,112 | 0,01  | 1           | 1,087741909   | 0,919335728     | 11,2            |
| DNAJC19                                                                                  | 0,001802871 | 0,121330828 | 0,55  | 0,23  | 1           | 1,087737794   | 0,919339206     | 2,391304348     |
| POLR2I                                                                                   | 0,00144234  | 0,121305346 | 0,762 | 0,35  | 1           | 1,087718582   | 0,919355444     | 2,177142857     |
| SIDT2                                                                                    | 0,000544521 | 0,121127553 | 0,3   | 0,08  | 1           | 1,087584543   | 0,91946875      | 3,75            |
| TRAPPC14                                                                                 | 0,005858881 | 0,12108477  | 0,1   | 0,01  | 1           | 1,087552291   | 0,919496017     | 10              |
| KLHL35                                                                                   | 0,000611714 | 0,121054844 | 0,112 | 0     | 1           | 1,087529733   | 0,91951509      | #DIV/0!         |
| MRC2                                                                                     | 6,43732E-06 | 0,120997798 | 0,338 | 0,06  | 0,135833858 | 1,087486731   | 0,919551449     | 5,633333333     |
| VSTM4                                                                                    | 0,001278066 | 0,120993892 | 0,1   | 0     | 1           | 1,087483787   | 0,919553939     | #DIV/0!         |
| FAM210A                                                                                  | 0,000212465 | 0,120976464 | 0,275 | 0,06  | 1           | 1,08747065    | 0,919565048     | 4,583333333     |
| ARSD                                                                                     | 0,013300727 | 0,12096746  | 0,15  | 0,04  | 1           | 1,087463863   | 0,919570787     | 3,75            |
| RASSF7                                                                                   | 0,002946286 | 0,120949885 | 0,112 | 0,01  | 1           | 1,087450616   | 0,919581989     | 11,2            |
| VPS45                                                                                    | 0,000973921 | 0,120941464 | 0,225 | 0,05  | 1           | 1,087444268   | 0,919587357     | 4,5             |
| NOPCHAP1                                                                                 | 4,74396E-06 | 0,120868638 | 0,35  | 0,06  | 0,100102334 | 1,087389376   | 0,919633778     | 5,833333333     |
| TIMM50                                                                                   | 1,36489E-05 | 0,120868098 | 0,438 | 0,11  | 0,288005658 | 1,087388969   | 0,919634122     | 3,981818182     |
| C2orf74                                                                                  | 0,00569537  | 0,120859239 | 0,188 | 0,05  | 1           | 1,087382292   | 0,919639769     | 3,76            |
| PIAS3                                                                                    | 0,000318032 | 0,120830119 | 0,225 | 0,04  | 1           | 1,087360344   | 0,919658332     | 5,625           |
| URB2                                                                                     | 0,042211625 | 0,120774257 | 0,088 | 0,02  | 1           | 1,087318242   | 0,919693942     | 4,4             |
| SPEF2                                                                                    | 0,003237075 | 0,120751293 | 0,112 | 0,01  | 1           | 1,087300934   | 0,919708582     | 11,2            |
| AP5M1                                                                                    | 0,000830908 | 0,120747917 | 0,162 | 0,02  | 1           | 1,08729839    | 0,919710734     | 8,1             |

Supplementary Table 4

| Differentially expressed genes_keloid-CCD_ comparing SC-Keloid vs. (SC-Myel, SC-Nonmyel) |             |             |       |       |             |               |                 |                 |
|------------------------------------------------------------------------------------------|-------------|-------------|-------|-------|-------------|---------------|-----------------|-----------------|
| gene                                                                                     | p_val       | avg_log2FC  | pct.1 | pct.2 | p_val_adj   | Foldchange_UP | Foldchange_DOWN | Ratio_pct1_pct2 |
| ARCN1                                                                                    | 9,55931E-05 | 0,1206401   | 0,637 | 0,23  | 1           | 1,087217136   | 0,919779469     | 2,769565217     |
| PRECSIT                                                                                  | 0,000375171 | 0,120621285 | 0,15  | 0,01  | 1           | 1,087202957   | 0,919791464     | 15              |
| TTC13                                                                                    | 8,67798E-05 | 0,12059413  | 0,175 | 0,01  | 1           | 1,087182493   | 0,919808777     | 17,5            |
| SNX19                                                                                    | 0,000195366 | 0,120586905 | 0,188 | 0,02  | 1           | 1,087177048   | 0,919813384     | 9,4             |
| PDLIM2                                                                                   | 0,001321527 | 0,120412752 | 0,45  | 0,17  | 1           | 1,08704582    | 0,919924424     | 2,647058824     |
| DERA                                                                                     | 3,65204E-05 | 0,120395497 | 0,375 | 0,09  | 0,770616878 | 1,087032818   | 0,919935427     | 4,166666667     |
| MAN2B1                                                                                   | 0,005996845 | 0,120344323 | 0,1   | 0,01  | 1           | 1,086994261   | 0,919968059     | 10              |
| PEG10                                                                                    | 0,000523368 | 0,120341534 | 0,762 | 0,35  | 1           | 1,086992159   | 0,919969837     | 2,177142857     |
| TP53I13                                                                                  | 0,011254691 | 0,120205886 | 0,5   | 0,24  | 1           | 1,086889961   | 0,920056341     | 2,083333333     |
| XXYL1                                                                                    | 0,0041405   | 0,120188502 | 0,175 | 0,04  | 1           | 1,086876864   | 0,920067427     | 4,375           |
| RABGEF1                                                                                  | 0,00074289  | 0,120071662 | 0,188 | 0,03  | 1           | 1,086788844   | 0,920141944     | 6,266666667     |
| USB1                                                                                     | 0,000132495 | 0,120017983 | 0,388 | 0,11  | 1           | 1,086748408   | 0,920176181     | 3,527272727     |
| ARHGAP18                                                                                 | 0,000859816 | 0,119962957 | 0,338 | 0,11  | 1           | 1,08670696    | 0,920211278     | 3,072727273     |
| NSF                                                                                      | 0,003963442 | 0,119935186 | 0,212 | 0,06  | 1           | 1,086686041   | 0,920228992     | 3,533333333     |
| DNAAF4                                                                                   | 0,002036225 | 0,119797822 | 0,188 | 0,04  | 1           | 1,086582579   | 0,920316614     | 4,7             |
| TTC37                                                                                    | 1,30644E-06 | 0,119777359 | 0,537 | 0,13  | 0,027567195 | 1,086567167   | 0,920329668     | 4,130769231     |
| RMI1                                                                                     | 0,000138823 | 0,119641494 | 0,138 | 0     | 1           | 1,086464845   | 0,920416343     | #DIV/0!         |
| SLC36A1                                                                                  | 0,001548751 | 0,119395132 | 0,125 | 0,01  | 1           | 1,086279331   | 0,920573532     | 12,5            |
| CHAF1A                                                                                   | 0,000795661 | 0,119350605 | 0,162 | 0,02  | 1           | 1,086245805   | 0,920601944     | 8,1             |
| TTC27                                                                                    | 0,002666059 | 0,119175306 | 0,088 | 0     | 1           | 1,086113825   | 0,920713812     | #DIV/0!         |
| SLCO3A1                                                                                  | 0,000531289 | 0,119144031 | 0,238 | 0,05  | 1           | 1,086090281   | 0,920733771     | 4,76            |
| LRR1                                                                                     | 0,000171543 | 0,119096874 | 0,262 | 0,05  | 1           | 1,08605478    | 0,920763868     | 5,24            |
| DHX33                                                                                    | 1,97589E-06 | 0,119092378 | 0,288 | 0,03  | 0,041693235 | 1,086051396   | 0,920766737     | 9,6             |
| GFER                                                                                     | 7,00538E-05 | 0,118989367 | 0,388 | 0,1   | 1           | 1,085973852   | 0,920832484     | 3,88            |
| CEP57L1                                                                                  | 2,24357E-05 | 0,118942587 | 0,3   | 0,05  | 0,47341608  | 1,08593864    | 0,920862343     | 6               |
| CCNL2                                                                                    | 0,000919668 | 0,118849572 | 0,562 | 0,23  | 1           | 1,085868628   | 0,920921716     | 2,443478261     |
| UQCC1                                                                                    | 0,000611714 | 0,118838495 | 0,112 | 0     | 1           | 1,085860291   | 0,920928786     | #DIV/0!         |
| CNIH2                                                                                    | 0,001278066 | 0,118817754 | 0,1   | 0     | 1           | 1,08584468    | 0,920942026     | #DIV/0!         |
| DECR2                                                                                    | 3,97935E-05 | 0,118790197 | 0,238 | 0,03  | 0,839681846 | 1,08582394    | 0,920959617     | 7,933333333     |
| TTK                                                                                      | 0,000291957 | 0,118599684 | 0,125 | 0     | 1           | 1,085680562   | 0,921081242     | #DIV/0!         |

Supplementary Table 4

| Differentially expressed genes_keloid-CCD_ comparing SC-Keloid vs. (SC-Myel, SC-Nonmyel) |             |             |       |       |             |               |                 |                 |
|------------------------------------------------------------------------------------------|-------------|-------------|-------|-------|-------------|---------------|-----------------|-----------------|
| gene                                                                                     | p_val       | avg_log2FC  | pct.1 | pct.2 | p_val_adj   | Foldchange_UP | Foldchange_DOWN | Ratio_pct1_pct2 |
| BRAP                                                                                     | 0,006027137 | 0,118450492 | 0,125 | 0,02  | 1           | 1,085568295   | 0,921176498     | 6,25            |
| CARHSP1                                                                                  | 0,000458787 | 0,1183916   | 0,6   | 0,23  | 1           | 1,085523983   | 0,921214101     | 2,608695652     |
| ZNF655                                                                                   | 0,001564881 | 0,1183605   | 0,4   | 0,15  | 1           | 1,085500582   | 0,92123396      | 2,666666667     |
| H2BC15                                                                                   | 0,003237075 | 0,118299898 | 0,112 | 0,01  | 1           | 1,085454986   | 0,921272658     | 11,2            |
| HEATR6                                                                                   | 0,000795661 | 0,118135446 | 0,162 | 0,02  | 1           | 1,085331262   | 0,921377679     | 8,1             |
| MRPL24                                                                                   | 0,000186727 | 0,118051085 | 0,388 | 0,11  | 1           | 1,0852678     | 0,921431558     | 3,527272727     |
| CXCL1                                                                                    | 0,052279021 | 0,118044677 | 0,038 | 0     | 1           | 1,08526298    | 0,921435651     | #DIV/0!         |
| FRG1                                                                                     | 0,000106371 | 0,117972618 | 0,5   | 0,16  | 1           | 1,085208775   | 0,921481675     | 3,125           |
| MINPP1                                                                                   | 0,000199807 | 0,117966067 | 0,188 | 0,02  | 1           | 1,085203847   | 0,92148586      | 9,4             |
| CEP295                                                                                   | 4,24089E-05 | 0,117948423 | 0,188 | 0,01  | 0,894869854 | 1,085190575   | 0,921497129     | 18,8            |
| TMEM260                                                                                  | 0,000375171 | 0,117941538 | 0,15  | 0,01  | 1           | 1,085185397   | 0,921501527     | 15              |
| PCDHGA10                                                                                 | 0,001624218 | 0,11785412  | 0,125 | 0,01  | 1           | 1,085119643   | 0,921557366     | 12,5            |
| HIBADH                                                                                   | 0,000348751 | 0,117853144 | 0,2   | 0,03  | 1           | 1,085118909   | 0,921557989     | 6,666666667     |
| LRPAP1                                                                                   | 0,022168883 | 0,117767918 | 0,8   | 0,42  | 1           | 1,085054809   | 0,921612431     | 1,904761905     |
| PCMTD2                                                                                   | 0,00049195  | 0,117711243 | 0,4   | 0,13  | 1           | 1,085012183   | 0,921648637     | 3,076923077     |
| DCAF13                                                                                   | 1,8136E-05  | 0,117597343 | 0,537 | 0,16  | 0,382687969 | 1,084926526   | 0,921721403     | 3,35625         |
| MEX3D                                                                                    | 0,000700329 | 0,117462912 | 0,35  | 0,11  | 1           | 1,084825437   | 0,921807293     | 3,181818182     |
| GBA                                                                                      | 0,000623441 | 0,117455544 | 0,212 | 0,04  | 1           | 1,084819896   | 0,921812002     | 5,3             |
| MYG1                                                                                     | 0,000489586 | 0,117397615 | 0,562 | 0,21  | 1           | 1,084776338   | 0,921849016     | 2,676190476     |
| WDR55                                                                                    | 0,000409923 | 0,1173191   | 0,262 | 0,06  | 1           | 1,084717304   | 0,921899187     | 4,366666667     |
| TMEM237                                                                                  | 2,34713E-05 | 0,117242559 | 0,225 | 0,02  | 0,495268417 | 1,084659756   | 0,921948098     | 11,25           |
| CAPZA1                                                                                   | 0,002793298 | 0,117223186 | 0,613 | 0,27  | 1           | 1,084645191   | 0,921960479     | 2,27037037      |
| SLC35E2B                                                                                 | 0,000778563 | 0,117213993 | 0,162 | 0,02  | 1           | 1,08463828    | 0,921966354     | 8,1             |
| USO1                                                                                     | 3,92385E-05 | 0,117132799 | 0,488 | 0,14  | 0,827971892 | 1,084577239   | 0,922018243     | 3,485714286     |
| AP4M1                                                                                    | 0,000164999 | 0,117118552 | 0,212 | 0,03  | 1           | 1,084566528   | 0,922027348     | 7,066666667     |
| ZCCHC8                                                                                   | 7,06901E-05 | 0,117101307 | 0,375 | 0,1   | 1           | 1,084553564   | 0,922038369     | 3,75            |
| RNF34                                                                                    | 6,60959E-05 | 0,117063286 | 0,338 | 0,08  | 1           | 1,084524982   | 0,92206267      | 4,225           |
| DNAJC13                                                                                  | 0,000299964 | 0,11704142  | 0,225 | 0,04  | 1           | 1,084508545   | 0,922076645     | 5,625           |
| PRMT1                                                                                    | 0,007445672 | 0,116920542 | 0,863 | 0,48  | 1           | 1,084417682   | 0,922153905     | 1,797916667     |
| INPPL1                                                                                   | 0,000195315 | 0,116822919 | 0,362 | 0,1   | 1           | 1,084344305   | 0,922216307     | 3,62            |

Supplementary Table 4

| Differentially expressed genes_keloid-CCD_ comparing SC-Keloid vs. (SC-Myel, SC-Nonmyel) |             |             |       |       |             |               |                 |                 |
|------------------------------------------------------------------------------------------|-------------|-------------|-------|-------|-------------|---------------|-----------------|-----------------|
| gene                                                                                     | p_val       | avg_log2FC  | pct.1 | pct.2 | p_val_adj   | Foldchange_UP | Foldchange_DOWN | Ratio_pct1_pct2 |
| SRSF9                                                                                    | 0,025822879 | 0,116705259 | 0,9   | 0,52  | 1           | 1,084255874   | 0,922291522     | 1,730769231     |
| NDUFB6                                                                                   | 0,0034272   | 0,116497655 | 0,725 | 0,35  | 1           | 1,08409986    | 0,922424249     | 2,071428571     |
| SPC24                                                                                    | 0,000611714 | 0,116497333 | 0,112 | 0     | 1           | 1,084099618   | 0,922424455     | #DIV/0!         |
| FGFR4                                                                                    | 0,002666059 | 0,116495624 | 0,088 | 0     | 1           | 1,084098335   | 0,922425548     | #DIV/0!         |
| U2SURP                                                                                   | 0,006708043 | 0,116450431 | 0,713 | 0,35  | 1           | 1,084064375   | 0,922454443     | 2,037142857     |
| LSM12                                                                                    | 0,000106361 | 0,116424968 | 0,65  | 0,24  | 1           | 1,084045242   | 0,922470725     | 2,708333333     |
| MAPKAPK5-AS1                                                                             | 0,000521745 | 0,116381523 | 0,238 | 0,05  | 1           | 1,084012597   | 0,922498505     | 4,76            |
| PRKRIP1                                                                                  | 1,24042E-06 | 0,116368105 | 0,425 | 0,08  | 0,026174082 | 1,084002516   | 0,922507084     | 5,3125          |
| TMEM192                                                                                  | 0,001002505 | 0,116296768 | 0,2   | 0,04  | 1           | 1,083948916   | 0,922552701     | 5               |
| CDKN2D                                                                                   | 0,002232852 | 0,116235406 | 0,388 | 0,15  | 1           | 1,083902814   | 0,92259194      | 2,586666667     |
| NLGN4Y                                                                                   | 0,005562134 | 0,116193237 | 0,075 | 0     | 1           | 1,083871132   | 0,922618907     | #DIV/0!         |
| TSTD3                                                                                    | 0,011634754 | 0,116143439 | 0,062 | 0     | 1           | 1,083833721   | 0,922650754     | #DIV/0!         |
| NAA20                                                                                    | 0,001712681 | 0,116111474 | 0,675 | 0,29  | 1           | 1,083809707   | 0,922671197     | 2,327586207     |
| TMEM199                                                                                  | 4,73785E-05 | 0,116083808 | 0,238 | 0,03  | 0,99973414  | 1,083788924   | 0,922688891     | 7,933333333     |
| RANBP9                                                                                   | 0,00023279  | 0,115971241 | 0,525 | 0,18  | 1           | 1,083704364   | 0,922760887     | 2,916666667     |
| TRAPPC10                                                                                 | 0,000215789 | 0,115922346 | 0,3   | 0,07  | 1           | 1,083667636   | 0,922792161     | 4,285714286     |
| CEP41                                                                                    | 0,000291957 | 0,115851189 | 0,125 | 0     | 1           | 1,083614189   | 0,922837676     | #DIV/0!         |
| SPATA33                                                                                  | 0,001382953 | 0,115835622 | 0,312 | 0,1   | 1           | 1,083602496   | 0,922847634     | 3,12            |
| FLNB                                                                                     | 3,61063E-05 | 0,115696827 | 0,338 | 0,07  | 0,761879183 | 1,083498253   | 0,922936422     | 4,828571429     |
| PACRGL                                                                                   | 0,002563331 | 0,115668908 | 0,262 | 0,08  | 1           | 1,083477285   | 0,922954282     | 3,275           |
| BMPR2                                                                                    | 0,00066655  | 0,115597328 | 0,562 | 0,22  | 1           | 1,083423529   | 0,923000076     | 2,554545455     |
| VWF                                                                                      | 0,108976957 | 0,115592483 | 0,05  | 0,01  | 1           | 1,083419891   | 0,923003176     | 5               |
| HOXC8                                                                                    | 2,28895E-05 | 0,115526088 | 0,3   | 0,05  | 0,482991248 | 1,083370031   | 0,923045655     | 6               |
| ZMYM1                                                                                    | 0,001548751 | 0,115520357 | 0,125 | 0,01  | 1           | 1,083365728   | 0,923049322     | 12,5            |
| FNTA                                                                                     | 0,006965183 | 0,115280751 | 0,562 | 0,27  | 1           | 1,083185815   | 0,923202636     | 2,081481481     |
| ZNF512                                                                                   | 0,002669855 | 0,115184362 | 0,162 | 0,03  | 1           | 1,083113448   | 0,923264319     | 5,4             |
| ARHGAP1                                                                                  | 4,57835E-05 | 0,115159472 | 0,4   | 0,1   | 0,966077777 | 1,083094762   | 0,923280248     | 4               |
| LINC01137                                                                                | 0,001553021 | 0,115136726 | 0,15  | 0,02  | 1           | 1,083077685   | 0,923294805     | 7,5             |
| MRTFA                                                                                    | 0,000540996 | 0,115048518 | 0,238 | 0,05  | 1           | 1,083011467   | 0,923351258     | 4,76            |
| MIA3                                                                                     | 4,23986E-05 | 0,115029734 | 0,537 | 0,17  | 0,894652138 | 1,082997366   | 0,92336328      | 3,158823529     |

Supplementary Table 4

| Differentially expressed genes_keloid-CCD_ comparing SC-Keloid vs. (SC-Myel, SC-Nonmyel) |             |             |       |       |             |               |                 |                 |
|------------------------------------------------------------------------------------------|-------------|-------------|-------|-------|-------------|---------------|-----------------|-----------------|
| gene                                                                                     | p_val       | avg_log2FC  | pct.1 | pct.2 | p_val_adj   | Foldchange_UP | Foldchange_DOWN | Ratio_pct1_pct2 |
| MTERF4                                                                                   | 0,000159081 | 0,114989578 | 0,262 | 0,05  | 1           | 1,082967222   | 0,923388981     | 5,24            |
| LINC00665                                                                                | 0,001827473 | 0,114975966 | 0,212 | 0,05  | 1           | 1,082957004   | 0,923397694     | 4,24            |
| CBARP                                                                                    | 0,001624218 | 0,114962035 | 0,125 | 0,01  | 1           | 1,082946547   | 0,92340661      | 12,5            |
| SDC3                                                                                     | 0,021807929 | 0,114921657 | 0,863 | 0,48  | 1           | 1,082916238   | 0,923432455     | 1,797916667     |
| MRPS35                                                                                   | 5,1159E-05  | 0,114912329 | 0,412 | 0,11  | 1           | 1,082909236   | 0,923438426     | 3,745454545     |
| COLGALT1                                                                                 | 1,45243E-05 | 0,114862407 | 0,35  | 0,07  | 0,306478111 | 1,082871765   | 0,92347038      | 5               |
| UBAP2                                                                                    | 0,000241638 | 0,114856531 | 0,388 | 0,12  | 1           | 1,082867354   | 0,923474141     | 3,233333333     |
| TSPYL5                                                                                   | 0,022138642 | 0,114629347 | 0,1   | 0,02  | 1           | 1,082696846   | 0,923619574     | 5               |
| DHX36                                                                                    | 0,067947106 | 0,114527873 | 0,725 | 0,41  | 1           | 1,082620696   | 0,92368454      | 1,768292683     |
| H1-5                                                                                     | 0,002666059 | 0,114487987 | 0,088 | 0     | 1           | 1,082590765   | 0,923710078     | #DIV/0!         |
| OTUD6B                                                                                   | 0,000100126 | 0,114439327 | 0,2   | 0,02  | 1           | 1,082554252   | 0,923741234     | 10              |
| SNAP29                                                                                   | 5,91868E-05 | 0,114402474 | 0,3   | 0,06  | 1           | 1,082526599   | 0,92376483      | 5               |
| LGALS8                                                                                   | 0,000647541 | 0,114211195 | 0,212 | 0,04  | 1           | 1,082383082   | 0,923887315     | 5,3             |
| C1GALT1C1                                                                                | 0,000263893 | 0,114192141 | 0,438 | 0,14  | 1           | 1,082368787   | 0,923899518     | 3,128571429     |
| FBXO16                                                                                   | 0,000185492 | 0,114184123 | 0,162 | 0,01  | 1           | 1,082362771   | 0,923904652     | 16,2            |
| TBRG4                                                                                    | 0,001488577 | 0,114181284 | 0,238 | 0,06  | 1           | 1,082360642   | 0,92390647      | 3,966666667     |
| ICMT                                                                                     | 0,000505169 | 0,114136409 | 0,262 | 0,06  | 1           | 1,082326976   | 0,923935209     | 4,366666667     |
| UBL7-DT                                                                                  | 0,004988707 | 0,11400725  | 0,15  | 0,03  | 1           | 1,082230083   | 0,924017929     | 5               |
| ENGASE                                                                                   | 0,002666059 | 0,113979892 | 0,088 | 0     | 1           | 1,082209561   | 0,924035452     | #DIV/0!         |
| TFB1M                                                                                    | 0,000291957 | 0,113956841 | 0,125 | 0     | 1           | 1,08219227    | 0,924050215     | #DIV/0!         |
| EID1                                                                                     | 0,04675824  | 0,113816888 | 1     | 0,84  | 1           | 1,082087293   | 0,92413986      | 1,19047619      |
| AP2M1                                                                                    | 0,054810985 | 0,113816618 | 0,875 | 0,55  | 1           | 1,082087091   | 0,924140033     | 1,590909091     |
| STIL                                                                                     | 0,001586071 | 0,113790178 | 0,125 | 0,01  | 1           | 1,08206726    | 0,92415697      | 12,5            |
| AMPD2                                                                                    | 0,00074289  | 0,11377082  | 0,188 | 0,03  | 1           | 1,082052741   | 0,92416937      | 6,266666667     |
| TMEM175                                                                                  | 0,001488577 | 0,113569657 | 0,238 | 0,06  | 1           | 1,081901875   | 0,924298241     | 3,966666667     |
| ZNF469                                                                                   | 0,000291957 | 0,113564763 | 0,125 | 0     | 1           | 1,081898205   | 0,924301377     | #DIV/0!         |
| RPS27A                                                                                   | 0,04039544  | 0,113369313 | 1     | 1     | 1           | 1,081751644   | 0,924426605     | 1               |
| NT5M                                                                                     | 0,006428475 | 0,11332401  | 0,1   | 0,01  | 1           | 1,081717676   | 0,924455634     | 10              |
| TMEM167B                                                                                 | 0,000467756 | 0,113310166 | 0,238 | 0,05  | 1           | 1,081707296   | 0,924464505     | 4,76            |
| PGM1                                                                                     | 0,000343711 | 0,113288773 | 0,225 | 0,04  | 1           | 1,081691256   | 0,924478214     | 5,625           |

Supplementary Table 4

| Differentially expressed genes_keloid-CCD_ comparing SC-Keloid vs. (SC-Myel, SC-Nonmyel) |             |             |       |       |             |               |                 |                 |
|------------------------------------------------------------------------------------------|-------------|-------------|-------|-------|-------------|---------------|-----------------|-----------------|
| gene                                                                                     | p_val       | avg_log2FC  | pct.1 | pct.2 | p_val_adj   | Foldchange_UP | Foldchange_DOWN | Ratio_pct1_pct2 |
| FAM118A                                                                                  | 0,004146983 | 0,113229201 | 0,325 | 0,12  | 1           | 1,081646591   | 0,924516389     | 2,708333333     |
| STYX                                                                                     | 0,000386526 | 0,113207514 | 0,2   | 0,03  | 1           | 1,081630332   | 0,924530286     | 6,666666667     |
| RRS1                                                                                     | 0,000404687 | 0,113105606 | 0,175 | 0,02  | 1           | 1,081553931   | 0,924595595     | 8,75            |
| THYN1                                                                                    | 0,000111801 | 0,11303762  | 0,488 | 0,16  | 1           | 1,081502964   | 0,924639167     | 3,05            |
| NADK2                                                                                    | 0,005082527 | 0,112955332 | 0,15  | 0,03  | 1           | 1,08144128    | 0,924691908     | 5               |
| RABL3                                                                                    | 0,000386526 | 0,112916163 | 0,2   | 0,03  | 1           | 1,08141192    | 0,924717013     | 6,666666667     |
| BFAR                                                                                     | 2,5792E-05  | 0,112900685 | 0,45  | 0,12  | 0,544237713 | 1,081400317   | 0,924726934     | 3,75            |
| BICC1                                                                                    | 0,000611714 | 0,112888656 | 0,112 | 0     | 1           | 1,081391301   | 0,924734644     | #DIV/0!         |
| PRADC1                                                                                   | 3,54499E-05 | 0,112743113 | 0,338 | 0,07  | 0,748027343 | 1,081282213   | 0,924827939     | 4,828571429     |
| DHRS4-AS1                                                                                | 0,000658209 | 0,112690794 | 0,188 | 0,03  | 1           | 1,081243001   | 0,924861478     | 6,266666667     |
| YEATS4                                                                                   | 0,001486273 | 0,112556892 | 0,312 | 0,1   | 1           | 1,081142652   | 0,924947322     | 3,12            |
| GRSF1                                                                                    | 0,000665353 | 0,112406823 | 0,5   | 0,19  | 1           | 1,081030197   | 0,92504354      | 2,631578947     |
| COMT                                                                                     | 0,165307855 | 0,112310911 | 0,925 | 0,67  | 1           | 1,080958331   | 0,92510504      | 1,380597015     |
| CD99L2                                                                                   | 0,002309471 | 0,112225719 | 0,262 | 0,08  | 1           | 1,080894502   | 0,925159669     | 3,275           |
| ADGRG1                                                                                   | 1,97141E-05 | 0,112163637 | 0,625 | 0,2   | 0,415987979 | 1,08084799    | 0,925199482     | 3,125           |
| PRRC2A                                                                                   | 0,000180364 | 0,112118945 | 0,5   | 0,17  | 1           | 1,080814507   | 0,925228143     | 2,941176471     |
| SLC22A23                                                                                 | 0,01362345  | 0,112091254 | 0,088 | 0,01  | 1           | 1,080793763   | 0,925245902     | 8,8             |
| SCAI                                                                                     | 0,003202904 | 0,112053699 | 0,138 | 0,02  | 1           | 1,080765629   | 0,925269988     | 6,9             |
| CD164                                                                                    | 0,005286629 | 0,112000897 | 0,713 | 0,36  | 1           | 1,080726074   | 0,925303853     | 1,980555556     |
| BRCA2                                                                                    | 0,000185492 | 0,111976469 | 0,162 | 0,01  | 1           | 1,080707775   | 0,92531952      | 16,2            |
| RADX                                                                                     | 0,002666059 | 0,111967305 | 0,088 | 0     | 1           | 1,08070091    | 0,925325398     | #DIV/0!         |
| WDR59                                                                                    | 0,035511223 | 0,111966403 | 0,162 | 0,06  | 1           | 1,080700235   | 0,925325976     | 2,7             |
| EXOSC4                                                                                   | 2,68793E-05 | 0,111914171 | 0,412 | 0,1   | 0,567181055 | 1,08066111    | 0,925359478     | 4,12            |
| CHRNE                                                                                    | 0,001278066 | 0,111860422 | 0,1   | 0     | 1           | 1,080620849   | 0,925393954     | #DIV/0!         |
| DACT3                                                                                    | 0,001459059 | 0,111726162 | 0,212 | 0,05  | 1           | 1,080520289   | 0,925480077     | 4,24            |
| CHTF18                                                                                   | 0,001278066 | 0,111537011 | 0,1   | 0     | 1           | 1,080378632   | 0,925601424     | #DIV/0!         |
| NSUN2                                                                                    | 9,76726E-05 | 0,111526939 | 0,225 | 0,03  | 1           | 1,080371089   | 0,925607886     | 7,5             |
| ACAD8                                                                                    | 4,95137E-05 | 0,111471675 | 0,262 | 0,04  | 1           | 1,080329705   | 0,925643343     | 6,55            |
| GSPT2                                                                                    | 0,015197958 | 0,111255679 | 0,162 | 0,05  | 1           | 1,080167973   | 0,925781938     | 3,24            |
| GFM2                                                                                     | 0,005442759 | 0,111217886 | 0,125 | 0,02  | 1           | 1,080139678   | 0,92580619      | 6,25            |

Supplementary Table 4

| Differentially expressed genes_keloid-CCD_ comparing SC-Keloid vs. (SC-Myel, SC-Nonmyel) |             |             |       |       |             |               |                 |                 |
|------------------------------------------------------------------------------------------|-------------|-------------|-------|-------|-------------|---------------|-----------------|-----------------|
| gene                                                                                     | p_val       | avg_log2FC  | pct.1 | pct.2 | p_val_adj   | Foldchange_UP | Foldchange_DOWN | Ratio_pct1_pct2 |
| SHISA5                                                                                   | 0,000426751 | 0,111214924 | 0,4   | 0,13  | 1           | 1,08013746    | 0,925808091     | 3,076923077     |
| POLR3H                                                                                   | 0,000386526 | 0,111173459 | 0,2   | 0,03  | 1           | 1,080106416   | 0,925834701     | 6,666666667     |
| SRP14                                                                                    | 0,02898884  | 0,111143308 | 1     | 0,92  | 1           | 1,080083843   | 0,92585405      | 1,086956522     |
| RAD51AP1                                                                                 | 0,001387402 | 0,111110537 | 0,175 | 0,03  | 1           | 1,080059309   | 0,925875081     | 5,833333333     |
| PYCR3                                                                                    | 0,00074289  | 0,111071573 | 0,188 | 0,03  | 1           | 1,08003014    | 0,925900087     | 6,266666667     |
| GID8                                                                                     | 0,000410988 | 0,111051551 | 0,462 | 0,16  | 1           | 1,080015151   | 0,925912937     | 2,8875          |
| ER12                                                                                     | 0,005562134 | 0,111028031 | 0,075 | 0     | 1           | 1,079997543   | 0,925928032     | #DIV/0!         |
| DNAJC5                                                                                   | 0,001207685 | 0,111005207 | 0,2   | 0,04  | 1           | 1,079980458   | 0,92594268      | 5               |
| FBXO9                                                                                    | 2,85786E-05 | 0,110837245 | 0,475 | 0,13  | 0,603036742 | 1,079854731   | 0,926050488     | 3,653846154     |
| INPP5A                                                                                   | 4,86715E-05 | 0,110790218 | 0,212 | 0,02  | 1           | 1,079819532   | 0,926080674     | 10,6            |
| HMCN1                                                                                    | 0,002073795 | 0,11077115  | 0,25  | 0,07  | 1           | 1,07980526    | 0,926092914     | 3,571428571     |
| POLR3K                                                                                   | 8,01064E-05 | 0,110756667 | 0,338 | 0,08  | 1           | 1,07979442    | 0,926102211     | 4,225           |
| GPR107                                                                                   | 0,000118715 | 0,110751529 | 0,312 | 0,07  | 1           | 1,079790575   | 0,926105509     | 4,457142857     |
| CACNA1A                                                                                  | 0,001586071 | 0,110729532 | 0,125 | 0,01  | 1           | 1,079774111   | 0,92611963      | 12,5            |
| PEA15                                                                                    | 0,005400319 | 0,110710819 | 0,787 | 0,45  | 1           | 1,079760106   | 0,926131642     | 1,748888889     |
| WDR70                                                                                    | 0,001647937 | 0,110644672 | 0,212 | 0,05  | 1           | 1,0797106     | 0,926174106     | 4,24            |
| RAD9A                                                                                    | 0,000678618 | 0,11053462  | 0,275 | 0,07  | 1           | 1,079628241   | 0,926244759     | 3,928571429     |
| B3GALT4                                                                                  | 0,002774001 | 0,110522691 | 0,162 | 0,03  | 1           | 1,079619314   | 0,926252418     | 5,4             |
| TAF9B                                                                                    | 0,000378678 | 0,110472145 | 0,2   | 0,03  | 1           | 1,079581489   | 0,926284871     | 6,666666667     |
| B4GALNT3                                                                                 | 0,000291957 | 0,110411602 | 0,125 | 0     | 1           | 1,079536185   | 0,926323743     | #DIV/0!         |
| INSIG2                                                                                   | 0,000204342 | 0,110345869 | 0,188 | 0,02  | 1           | 1,079487      | 0,92636595      | 9,4             |
| GUF1                                                                                     | 0,000795661 | 0,110332921 | 0,162 | 0,02  | 1           | 1,079477311   | 0,926374264     | 8,1             |
| KARS1                                                                                    | 2,94139E-05 | 0,110233541 | 0,425 | 0,11  | 0,620662309 | 1,079402954   | 0,92643808      | 3,863636364     |
| SNX5                                                                                     | 2,44665E-05 | 0,110092603 | 0,588 | 0,19  | 0,51626814  | 1,079297512   | 0,926528588     | 3,094736842     |
| SSR1                                                                                     | 0,001344056 | 0,109988738 | 0,575 | 0,24  | 1           | 1,079219812   | 0,926595295     | 2,395833333     |
| RPS8                                                                                     | 0,066260916 | 0,10988041  | 1     | 1     | 1           | 1,07913878    | 0,926664873     | 1               |
| PIF1                                                                                     | 0,001278066 | 0,109809826 | 0,1   | 0     | 1           | 1,079085983   | 0,926710212     | #DIV/0!         |
| DHFR                                                                                     | 0,00239488  | 0,109761583 | 0,188 | 0,04  | 1           | 1,0790499     | 0,926741201     | 4,7             |
| STN1                                                                                     | 0,000449802 | 0,109759347 | 0,212 | 0,04  | 1           | 1,079048228   | 0,926742637     | 5,3             |
| ACTR8                                                                                    | 1,29534E-06 | 0,10959297  | 0,3   | 0,03  | 0,027332886 | 1,078923795   | 0,926849519     | 10              |

Supplementary Table 4

| Differentially expressed genes_keloid-CCD_ comparing SC-Keloid vs. (SC-Myel, SC-Nonmyel) |             |             |       |       |             |               |                 |                 |
|------------------------------------------------------------------------------------------|-------------|-------------|-------|-------|-------------|---------------|-----------------|-----------------|
| gene                                                                                     | p_val       | avg_log2FC  | pct.1 | pct.2 | p_val_adj   | Foldchange_UP | Foldchange_DOWN | Ratio_pct1_pct2 |
| PIK3CD                                                                                   | 0,005562134 | 0,109545876 | 0,075 | 0     | 1           | 1,078888576   | 0,926879774     | #DIV/0!         |
| TMEM94                                                                                   | 0,001620501 | 0,109532361 | 0,15  | 0,02  | 1           | 1,078878469   | 0,926888457     | 7,5             |
| MSTO1                                                                                    | 0,000138823 | 0,109416701 | 0,138 | 0     | 1           | 1,07879198    | 0,926962768     | #DIV/0!         |
| NUDCD2                                                                                   | 0,00300973  | 0,109341787 | 0,662 | 0,3   | 1           | 1,078735964   | 0,927010903     | 2,206666667     |
| USP10                                                                                    | 0,000718901 | 0,109287344 | 0,4   | 0,14  | 1           | 1,078695256   | 0,927045887     | 2,857142857     |
| EXD3                                                                                     | 0,001620501 | 0,109262611 | 0,15  | 0,02  | 1           | 1,078676763   | 0,92706178      | 7,5             |
| FOXK1                                                                                    | 0,002189063 | 0,109241519 | 0,188 | 0,04  | 1           | 1,078660994   | 0,927075333     | 4,7             |
| GPAM                                                                                     | 0,003137076 | 0,109151394 | 0,138 | 0,02  | 1           | 1,078593612   | 0,927133249     | 6,9             |
| MYBBP1A                                                                                  | 0,000611714 | 0,1091151   | 0,112 | 0     | 1           | 1,078566478   | 0,927156574     | #DIV/0!         |
| CENPP                                                                                    | 0,001476524 | 0,108763765 | 0,125 | 0,01  | 1           | 1,07830385    | 0,927382389     | 12,5            |
| DSCC1                                                                                    | 0,001655244 | 0,108747743 | 0,15  | 0,02  | 1           | 1,078291875   | 0,927392688     | 7,5             |
| PKIG                                                                                     | 0,000127025 | 0,108714688 | 0,662 | 0,25  | 1           | 1,078267169   | 0,927413937     | 2,648           |
| NUDT15                                                                                   | 0,000757951 | 0,108645442 | 0,188 | 0,03  | 1           | 1,078215416   | 0,927458451     | 6,266666667     |
| FXN                                                                                      | 0,000611714 | 0,108576736 | 0,112 | 0     | 1           | 1,078164069   | 0,927502621     | #DIV/0!         |
| BTBD10                                                                                   | 0,000118715 | 0,108544305 | 0,312 | 0,07  | 1           | 1,078139833   | 0,927523471     | 4,457142857     |
| ZNF623                                                                                   | 0,017169065 | 0,108494789 | 0,125 | 0,03  | 1           | 1,07810283    | 0,927555306     | 4,166666667     |
| ACOX3                                                                                    | 0,003313746 | 0,108438426 | 0,112 | 0,01  | 1           | 1,078060711   | 0,927591545     | 11,2            |
| RPGRIP1L                                                                                 | 0,000611714 | 0,108346073 | 0,112 | 0     | 1           | 1,077991702   | 0,927650925     | #DIV/0!         |
| MAN2B2                                                                                   | 1,15774E-05 | 0,108297638 | 0,262 | 0,03  | 0,244295199 | 1,077955512   | 0,92768207      | 8,733333333     |
| TRMT13                                                                                   | 0,001548751 | 0,108121857 | 0,125 | 0,01  | 1           | 1,077824179   | 0,927795107     | 12,5            |
| ARMC7                                                                                    | 0,000611714 | 0,108112109 | 0,112 | 0     | 1           | 1,077816897   | 0,927801376     | #DIV/0!         |
| AP1M1                                                                                    | 0,000147094 | 0,108064041 | 0,375 | 0,1   | 1           | 1,077780987   | 0,927832289     | 3,75            |
| TCAIM                                                                                    | 0,000413716 | 0,108026138 | 0,175 | 0,02  | 1           | 1,077752671   | 0,927856666     | 8,75            |
| LMBR1                                                                                    | 0,000404687 | 0,107970529 | 0,175 | 0,02  | 1           | 1,077711113   | 0,927892431     | 8,75            |
| STARD3                                                                                   | 0,00025694  | 0,107918953 | 0,338 | 0,09  | 1           | 1,077672602   | 0,927925604     | 3,755555556     |
| ELMOD1                                                                                   | 0,022138642 | 0,107826834 | 0,1   | 0,02  | 1           | 1,077603793   | 0,927984855     | 5               |
| GOPC                                                                                     | 0,003546983 | 0,107723071 | 0,55  | 0,24  | 1           | 1,077526291   | 0,928051601     | 2,291666667     |
| WDR90                                                                                    | 0,013319742 | 0,107716468 | 0,088 | 0,01  | 1           | 1,07752136    | 0,928055849     | 8,8             |
| ZNF883                                                                                   | 0,000611714 | 0,107711415 | 0,112 | 0     | 1           | 1,077517586   | 0,928059099     | #DIV/0!         |
| UBA5                                                                                     | 0,006549445 | 0,10770632  | 0,288 | 0,11  | 1           | 1,07751378    | 0,928062377     | 2,618181818     |



Supplementary Table 4

| Differentially expressed genes_keloid-CCD_ comparing SC-Keloid vs. (SC-Myel, SC-Nonmyel) |             |             |       |       |             |               |                 |                 |
|------------------------------------------------------------------------------------------|-------------|-------------|-------|-------|-------------|---------------|-----------------|-----------------|
| gene                                                                                     | p_val       | avg_log2FC  | pct.1 | pct.2 | p_val_adj   | Foldchange_UP | Foldchange_DOWN | Ratio_pct1_pct2 |
| COMMD2                                                                                   | 0,000100074 | 0,107583806 | 0,4   | 0,11  | 1           | 1,077422281   | 0,928141192     | 3,636363636     |
| THG1L                                                                                    | 4,24104E-05 | 0,10752143  | 0,288 | 0,05  | 0,894901148 | 1,0773757     | 0,928181321     | 5,76            |
| POLR2F                                                                                   | 0,027420488 | 0,107450606 | 0,925 | 0,5   | 1           | 1,07732281    | 0,928226888     | 1,85            |
| ZNF518B                                                                                  | 0,00555537  | 0,107447657 | 0,125 | 0,02  | 1           | 1,077320609   | 0,928228785     | 6,25            |
| TMED7                                                                                    | 0,000173309 | 0,107413585 | 0,613 | 0,22  | 1           | 1,077295166   | 0,928250708     | 2,786363636     |
| BLOC1S4                                                                                  | 0,001925595 | 0,10734686  | 0,288 | 0,09  | 1           | 1,077245341   | 0,928293641     | 3,2             |
| BTD                                                                                      | 0,000147476 | 0,107328393 | 0,262 | 0,05  | 1           | 1,077231553   | 0,928305523     | 5,24            |
| SFMBT2                                                                                   | 0,051893599 | 0,107306087 | 0,062 | 0,01  | 1           | 1,077214897   | 0,928319876     | 6,2             |
| EIF4G3                                                                                   | 0,000685539 | 0,107206039 | 0,462 | 0,17  | 1           | 1,077140198   | 0,928384255     | 2,717647059     |
| ORC2                                                                                     | 0,002946922 | 0,107202801 | 0,138 | 0,02  | 1           | 1,07713778    | 0,928386339     | 6,9             |
| EPS15L1                                                                                  | 0,000973921 | 0,107072503 | 0,225 | 0,05  | 1           | 1,077040502   | 0,928470191     | 4,5             |
| BORCS5                                                                                   | 0,000757951 | 0,107071613 | 0,188 | 0,03  | 1           | 1,077039838   | 0,928470763     | 6,266666667     |
| PEX16                                                                                    | 0,00304726  | 0,107066956 | 0,312 | 0,11  | 1           | 1,077036361   | 0,92847376      | 2,836363636     |
| SOX11                                                                                    | 0,066331021 | 0,107015164 | 0,162 | 0,07  | 1           | 1,076997696   | 0,928507093     | 2,314285714     |
| RNF168                                                                                   | 0,000215114 | 0,106907547 | 0,338 | 0,09  | 1           | 1,076917362   | 0,928576357     | 3,755555556     |
| TRIM14                                                                                   | 0,000341622 | 0,10686183  | 0,2   | 0,03  | 1           | 1,076883236   | 0,928605783     | 6,666666667     |
| PCDHGA12                                                                                 | 0,006150583 | 0,106801572 | 0,125 | 0,02  | 1           | 1,076838258   | 0,928644569     | 6,25            |
| TSPAN9                                                                                   | 5,05615E-05 | 0,106667668 | 0,238 | 0,03  | 1           | 1,076738315   | 0,928730766     | 7,933333333     |
| ATRX                                                                                     | 0,030003395 | 0,106632224 | 0,838 | 0,47  | 1           | 1,076711863   | 0,928753583     | 1,782978723     |
| PPA2                                                                                     | 0,000808962 | 0,106581578 | 0,288 | 0,08  | 1           | 1,076674065   | 0,928786187     | 3,6             |
| TELO2                                                                                    | 0,000327555 | 0,106456938 | 0,288 | 0,07  | 1           | 1,076581051   | 0,928866432     | 4,114285714     |
| C16orf91                                                                                 | 4,49346E-05 | 0,106429241 | 0,375 | 0,09  | 0,948164747 | 1,076560383   | 0,928884265     | 4,166666667     |
| TXNDC9                                                                                   | 6,01722E-05 | 0,106390582 | 0,438 | 0,12  | 1           | 1,076531536   | 0,928909156     | 3,65            |
| MAGOH                                                                                    | 0,027853765 | 0,106382191 | 0,65  | 0,34  | 1           | 1,076525274   | 0,928914558     | 1,911764706     |
| HAUS7                                                                                    | 0,000291957 | 0,106301051 | 0,125 | 0     | 1           | 1,07646473    | 0,928966804     | #DIV/0!         |
| GUSB                                                                                     | 0,00232206  | 0,106272815 | 0,637 | 0,29  | 1           | 1,076443662   | 0,928984986     | 2,196551724     |
| CATSPER1                                                                                 | 0,001278066 | 0,106195468 | 0,1   | 0     | 1           | 1,076385953   | 0,929034792     | #DIV/0!         |
| STXBP4                                                                                   | 0,00922558  | 0,106188933 | 0,138 | 0,03  | 1           | 1,076381077   | 0,929039001     | 4,6             |
| WDR13                                                                                    | 0,00941356  | 0,106185083 | 0,675 | 0,33  | 1           | 1,076378204   | 0,92904148      | 2,045454545     |
| KIAA1586                                                                                 | 0,002669855 | 0,106082704 | 0,162 | 0,03  | 1           | 1,076301823   | 0,92910741      | 5,4             |

Supplementary Table 4

| Differentially expressed genes_keloid-CCD_ comparing SC-Keloid vs. (SC-Myel, SC-Nonmyel) |             |             |       |       |             |               |                 |                 |
|------------------------------------------------------------------------------------------|-------------|-------------|-------|-------|-------------|---------------|-----------------|-----------------|
| gene                                                                                     | p_val       | avg_log2FC  | pct.1 | pct.2 | p_val_adj   | Foldchange_UP | Foldchange_DOWN | Ratio_pct1_pct2 |
| RABGGTA                                                                                  | 0,001080362 | 0,106034167 | 0,2   | 0,04  | 1           | 1,076265613   | 0,92913867      | 5               |
| DUS3L                                                                                    | 0,02194873  | 0,106020065 | 0,138 | 0,04  | 1           | 1,076255093   | 0,929147751     | 3,45            |
| NDRG3                                                                                    | 0,000556055 | 0,106000811 | 0,212 | 0,04  | 1           | 1,07624073    | 0,929160152     | 5,3             |
| KIFC1                                                                                    | 0,001278066 | 0,105952904 | 0,1   | 0     | 1           | 1,076204992   | 0,929191006     | #DIV/0!         |
| MOV10                                                                                    | 0,000792271 | 0,105898518 | 0,138 | 0,01  | 1           | 1,076164423   | 0,929226035     | 13,8            |
| TVP23C                                                                                   | 0,002885914 | 0,105881894 | 0,138 | 0,02  | 1           | 1,076152022   | 0,929236743     | 6,9             |
| RBM28                                                                                    | 1,27428E-05 | 0,105844039 | 0,462 | 0,12  | 0,268886025 | 1,076123785   | 0,929261126     | 3,85            |
| GTF2E1                                                                                   | 0,000611714 | 0,105735372 | 0,112 | 0     | 1           | 1,076042732   | 0,929331123     | #DIV/0!         |
| TMED8                                                                                    | 0,001990104 | 0,105560881 | 0,225 | 0,06  | 1           | 1,075912595   | 0,92944353      | 3,75            |
| KAT14                                                                                    | 0,006428475 | 0,105520306 | 0,1   | 0,01  | 1           | 1,075882336   | 0,92946967      | 10              |
| C6orf47                                                                                  | 0,003137076 | 0,105503969 | 0,138 | 0,02  | 1           | 1,075870153   | 0,929480195     | 6,9             |
| WASHC5                                                                                   | 0,004287523 | 0,105490545 | 0,175 | 0,04  | 1           | 1,075860142   | 0,929488844     | 4,375           |
| MGST2                                                                                    | 0,002073488 | 0,105439138 | 0,188 | 0,04  | 1           | 1,075821807   | 0,929521965     | 4,7             |
| CALM3                                                                                    | 0,01798681  | 0,105365729 | 0,537 | 0,27  | 1           | 1,075767067   | 0,929569263     | 1,988888889     |
| KLHL4                                                                                    | 0,000795661 | 0,105362474 | 0,162 | 0,02  | 1           | 1,07576464    | 0,92957136      | 8,1             |
| ASPHD2                                                                                   | 0,002666059 | 0,105357884 | 0,088 | 0     | 1           | 1,075761218   | 0,929574318     | #DIV/0!         |
| UQCRC2                                                                                   | 0,001555469 | 0,105353449 | 0,6   | 0,26  | 1           | 1,07575791    | 0,929577176     | 2,307692308     |
| TSN                                                                                      | 0,002180363 | 0,105339947 | 0,412 | 0,16  | 1           | 1,075747843   | 0,929585875     | 2,575           |
| ZNF146                                                                                   | 0,003691659 | 0,105330984 | 0,275 | 0,09  | 1           | 1,075741159   | 0,929591651     | 3,055555556     |
| REP15                                                                                    | 0,003313746 | 0,105330582 | 0,112 | 0,01  | 1           | 1,075740859   | 0,92959191      | 11,2            |
| GMPS                                                                                     | 4,02922E-05 | 0,105244879 | 0,462 | 0,13  | 0,850204997 | 1,075676957   | 0,929647133     | 3,553846154     |
| ACSF3                                                                                    | 0,001564391 | 0,105214954 | 0,212 | 0,05  | 1           | 1,075654646   | 0,929666417     | 4,24            |
| CCZ1B                                                                                    | 0,000550867 | 0,105178469 | 0,238 | 0,05  | 1           | 1,075627443   | 0,929689928     | 4,76            |
| IPO4                                                                                     | 0,003072483 | 0,105162671 | 0,138 | 0,02  | 1           | 1,075615665   | 0,929700108     | 6,9             |
| HR                                                                                       | 0,001488577 | 0,10514294  | 0,238 | 0,06  | 1           | 1,075600954   | 0,929712823     | 3,966666667     |
| UBXN1                                                                                    | 0,018526975 | 0,105127191 | 0,9   | 0,49  | 1           | 1,075589213   | 0,929722973     | 1,836734694     |
| TBRG1                                                                                    | 0,000152636 | 0,105126335 | 0,45  | 0,14  | 1           | 1,075588574   | 0,929723524     | 3,214285714     |
| DHRS7B                                                                                   | 9,37294E-05 | 0,105124574 | 0,438 | 0,13  | 1           | 1,075587261   | 0,929724659     | 3,369230769     |
| DCN                                                                                      | 0,049463005 | 0,105114162 | 0,262 | 0,12  | 1           | 1,075579499   | 0,929731369     | 2,183333333     |
| ME3                                                                                      | 0,00029757  | 0,105048191 | 0,25  | 0,05  | 1           | 1,075530317   | 0,929773884     | 5               |

Supplementary Table 4

| Differentially expressed genes_keloid-CCD_ comparing SC-Keloid vs. (SC-Myel, SC-Nonmyel) |             |             |       |       |             |               |                 |                 |
|------------------------------------------------------------------------------------------|-------------|-------------|-------|-------|-------------|---------------|-----------------|-----------------|
| gene                                                                                     | p_val       | avg_log2FC  | pct.1 | pct.2 | p_val_adj   | Foldchange_UP | Foldchange_DOWN | Ratio_pct1_pct2 |
| ZBP1                                                                                     | 0,011634754 | 0,105025491 | 0,062 | 0     | 1           | 1,075513394   | 0,929788514     | #DIV/0!         |
| CCDC113                                                                                  | 0,001278066 | 0,105014451 | 0,1   | 0     | 1           | 1,075505163   | 0,929795629     | #DIV/0!         |
| CCZ1                                                                                     | 4,19033E-06 | 0,104872108 | 0,462 | 0,11  | 0,088420109 | 1,075399054   | 0,929887372     | 4,2             |
| SRD5A1                                                                                   | 0,000204342 | 0,104858301 | 0,188 | 0,02  | 1           | 1,075388763   | 0,929896271     | 9,4             |
| MED6                                                                                     | 0,000344691 | 0,104853767 | 0,288 | 0,07  | 1           | 1,075385383   | 0,929899193     | 4,114285714     |
| TRPM4                                                                                    | 0,013319742 | 0,104852695 | 0,088 | 0,01  | 1           | 1,075384584   | 0,929899884     | 8,8             |
| PRDX6                                                                                    | 0,280674548 | 0,104765816 | 0,887 | 0,65  | 1           | 1,075319826   | 0,929955885     | 1,364615385     |
| SNX18                                                                                    | 2,3352E-05  | 0,104710446 | 0,3   | 0,05  | 0,492750538 | 1,075278557   | 0,929991576     | 6               |
| MRPL30                                                                                   | 0,001207685 | 0,104709997 | 0,2   | 0,04  | 1           | 1,075278222   | 0,929991866     | 5               |
| ZNF700                                                                                   | 0,024497883 | 0,104685763 | 0,05  | 0     | 1           | 1,07526016    | 0,930007488     | #DIV/0!         |
| POLA2                                                                                    | 0,000291957 | 0,104651484 | 0,125 | 0     | 1           | 1,075234612   | 0,930029585     | #DIV/0!         |
| HPS3                                                                                     | 0,000375171 | 0,104645971 | 0,15  | 0,01  | 1           | 1,075230503   | 0,930033139     | 15              |
| TTI1                                                                                     | 0,001278066 | 0,104643106 | 0,1   | 0     | 1           | 1,075228367   | 0,930034986     | #DIV/0!         |
| PROCR                                                                                    | 0,000100126 | 0,104566342 | 0,2   | 0,02  | 1           | 1,075171158   | 0,930084473     | 10              |
| AHNAK2                                                                                   | 4,86715E-05 | 0,104412341 | 0,212 | 0,02  | 1           | 1,075056394   | 0,930183761     | 10,6            |
| NPIP5                                                                                    | 0,009268119 | 0,104276067 | 0,212 | 0,07  | 1           | 1,074954851   | 0,930271628     | 3,028571429     |
| ULBP2                                                                                    | 0,001307717 | 0,104236294 | 0,175 | 0,03  | 1           | 1,074925217   | 0,930297275     | 5,833333333     |
| LYRM1                                                                                    | 0,000343711 | 0,103984352 | 0,225 | 0,04  | 1           | 1,074737516   | 0,93045975      | 5,625           |
| NAPEPLD                                                                                  | 0,001080362 | 0,103918715 | 0,2   | 0,04  | 1           | 1,074688621   | 0,930502083     | 5               |
| SLC41A3                                                                                  | 0,001232124 | 0,103901914 | 0,262 | 0,07  | 1           | 1,074676105   | 0,930512919     | 3,742857143     |
| NAPG                                                                                     | 1,35332E-06 | 0,103830541 | 0,375 | 0,06  | 0,028556308 | 1,07462294    | 0,930558955     | 6,25            |
| BMP2                                                                                     | 0,012170454 | 0,103758346 | 0,188 | 0,06  | 1           | 1,074569166   | 0,930605523     | 3,133333333     |
| TK2                                                                                      | 0,005208404 | 0,103743519 | 0,225 | 0,07  | 1           | 1,074558122   | 0,930615087     | 3,214285714     |
| MAPK8IP3                                                                                 | 0,000404687 | 0,103673283 | 0,175 | 0,02  | 1           | 1,07450581    | 0,930660394     | 8,75            |
| NUP50                                                                                    | 0,001816182 | 0,103548656 | 0,288 | 0,09  | 1           | 1,074412993   | 0,930740792     | 3,2             |
| CETN2                                                                                    | 0,000289662 | 0,103534119 | 0,475 | 0,16  | 1           | 1,074402166   | 0,930750171     | 2,96875         |
| ACADVL                                                                                   | 0,046597706 | 0,103503856 | 0,825 | 0,45  | 1           | 1,074379629   | 0,930769695     | 1,833333333     |
| DROSHA                                                                                   | 0,003137076 | 0,103483337 | 0,138 | 0,02  | 1           | 1,074364349   | 0,930782933     | 6,9             |
| ZC3HC1                                                                                   | 8,89706E-05 | 0,1034063   | 0,175 | 0,01  | 1           | 1,074306981   | 0,930832637     | 17,5            |
| CNOT10                                                                                   | 0,006150583 | 0,103372027 | 0,125 | 0,02  | 1           | 1,07428146    | 0,93085475      | 6,25            |

Supplementary Table 4

| Differentially expressed genes_keloid-CCD_ comparing SC-Keloid vs. (SC-Myel, SC-Nonmyel) |             |             |       |       |             |               |                 |                 |
|------------------------------------------------------------------------------------------|-------------|-------------|-------|-------|-------------|---------------|-----------------|-----------------|
| gene                                                                                     | p_val       | avg_log2FC  | pct.1 | pct.2 | p_val_adj   | Foldchange_UP | Foldchange_DOWN | Ratio_pct1_pct2 |
| FBXL6                                                                                    | 0,000208673 | 0,103329469 | 0,275 | 0,06  | 1           | 1,074249771   | 0,930882209     | 4,583333333     |
| CDK20                                                                                    | 0,002666059 | 0,103192572 | 0,088 | 0     | 1           | 1,07414784    | 0,930970545     | #DIV/0!         |
| ILRUN                                                                                    | 0,01373349  | 0,103138191 | 0,2   | 0,07  | 1           | 1,074107352   | 0,931005638     | 2,857142857     |
| CEP170                                                                                   | 3,61072E-05 | 0,103081797 | 0,775 | 0,29  | 0,761898454 | 1,074065367   | 0,93104203      | 2,672413793     |
| TNFRSF12A                                                                                | 0,108473021 | 0,103056383 | 0,988 | 0,9   | 1           | 1,074046446   | 0,931058432     | 1,097777778     |
| GLRX                                                                                     | 0,012252992 | 0,103029121 | 0,15  | 0,04  | 1           | 1,074026151   | 0,931076025     | 3,75            |
| MAP4K4                                                                                   | 0,001474365 | 0,103024251 | 0,738 | 0,33  | 1           | 1,074022525   | 0,931079169     | 2,236363636     |
| SLC7A6OS                                                                                 | 0,00906008  | 0,103008644 | 0,138 | 0,03  | 1           | 1,074010907   | 0,931089241     | 4,6             |
| CANT1                                                                                    | 0,000671669 | 0,102869512 | 0,188 | 0,03  | 1           | 1,073907335   | 0,931179039     | 6,266666667     |
| IMPDH1                                                                                   | 0,000245218 | 0,102834719 | 0,275 | 0,06  | 1           | 1,073881436   | 0,931201496     | 4,583333333     |
| RPE65                                                                                    | 1,59154E-05 | 0,102726595 | 0,3   | 0,05  | 0,335829821 | 1,073800956   | 0,931271288     | 6               |
| NAXD                                                                                     | 0,001442989 | 0,102694014 | 0,175 | 0,03  | 1           | 1,073776707   | 0,93129232      | 5,833333333     |
| TAB1                                                                                     | 0,000375171 | 0,102531036 | 0,15  | 0,01  | 1           | 1,073655411   | 0,931397532     | 15              |
| KCTD13                                                                                   | 0,002520324 | 0,102501414 | 0,162 | 0,03  | 1           | 1,073633367   | 0,931416656     | 5,4             |
| PDS5A                                                                                    | 0,001356884 | 0,102488458 | 0,338 | 0,11  | 1           | 1,073623725   | 0,93142502      | 3,072727273     |
| RRP12                                                                                    | 0,011043276 | 0,102454498 | 0,112 | 0,02  | 1           | 1,073598453   | 0,931446945     | 5,6             |
| USP7                                                                                     | 3,03878E-05 | 0,102434423 | 0,5   | 0,15  | 0,641213936 | 1,073583514   | 0,931459907     | 3,333333333     |
| SUCLG2                                                                                   | 3,48587E-06 | 0,10241066  | 0,475 | 0,11  | 0,073555286 | 1,073565831   | 0,931475249     | 4,318181818     |
| FBXO7                                                                                    | 0,001903946 | 0,102408865 | 0,575 | 0,24  | 1           | 1,073564495   | 0,931476408     | 2,395833333     |
| PRPF38A                                                                                  | 0,000426751 | 0,102287151 | 0,4   | 0,13  | 1           | 1,073473927   | 0,931554996     | 3,076923077     |
| UQCERS1                                                                                  | 0,002673465 | 0,102268011 | 0,75  | 0,33  | 1           | 1,073459686   | 0,931567355     | 2,272727273     |
| NUDT18                                                                                   | 0,001586431 | 0,102234758 | 0,15  | 0,02  | 1           | 1,073434944   | 0,931588827     | 7,5             |
| AATF                                                                                     | 3,2117E-05  | 0,102234597 | 0,388 | 0,09  | 0,67770053  | 1,073434824   | 0,931588931     | 4,311111111     |
| CUL4A                                                                                    | 3,7454E-05  | 0,102201339 | 0,338 | 0,07  | 0,79031687  | 1,073410079   | 0,931610407     | 4,828571429     |
| DLL1                                                                                     | 0,114652585 | 0,10212729  | 0,025 | 0     | 1           | 1,073354985   | 0,931658225     | #DIV/0!         |
| HPS1                                                                                     | 0,000808962 | 0,102125811 | 0,288 | 0,08  | 1           | 1,073353884   | 0,93165918      | 3,6             |
| APOL2                                                                                    | 0,001471545 | 0,102091282 | 0,175 | 0,03  | 1           | 1,073328196   | 0,931681478     | 5,833333333     |
| RAP2C                                                                                    | 5,19941E-05 | 0,101916455 | 0,325 | 0,07  | 1           | 1,073198137   | 0,931794387     | 4,642857143     |
| CDS2                                                                                     | 0,000370102 | 0,101911883 | 0,362 | 0,11  | 1           | 1,073194736   | 0,93179734      | 3,290909091     |
| RFC1                                                                                     | 0,000125058 | 0,101748391 | 0,438 | 0,13  | 1           | 1,073073124   | 0,931902941     | 3,369230769     |

Supplementary Table 4

| Differentially expressed genes_keloid-CCD_comparing SC-Keloid vs. (SC-Myel, SC-Nonmyel) |             |             |       |       |             |               |                 |                 |
|-----------------------------------------------------------------------------------------|-------------|-------------|-------|-------|-------------|---------------|-----------------|-----------------|
| gene                                                                                    | p_val       | avg_log2FC  | pct.1 | pct.2 | p_val_adj   | Foldchange_UP | Foldchange_DOWN | Ratio_pct1_pct2 |
| CMAS                                                                                    | 1,42516E-05 | 0,101728927 | 0,35  | 0,07  | 0,300723722 | 1,073058647   | 0,931915514     | 5               |
| PARPBP                                                                                  | 0,003137076 | 0,101704461 | 0,138 | 0,02  | 1           | 1,073040449   | 0,931931318     | 6,9             |
| GLRB                                                                                    | 0,011264251 | 0,101661572 | 0,112 | 0,02  | 1           | 1,07300855    | 0,931959023     | 5,6             |
| MPLKIP                                                                                  | 0,000608893 | 0,101627389 | 0,5   | 0,19  | 1           | 1,072983127   | 0,931981105     | 2,631578947     |
| MRPL22                                                                                  | 0,001401636 | 0,101611253 | 0,6   | 0,24  | 1           | 1,072971126   | 0,931991529     | 2,5             |
| PMF1                                                                                    | 7,62366E-05 | 0,101584394 | 0,562 | 0,19  | 1           | 1,07295115    | 0,93200888      | 2,957894737     |
| RBM33                                                                                   | 0,001837893 | 0,101570624 | 0,438 | 0,17  | 1           | 1,072940909   | 0,932017776     | 2,576470588     |
| CLSPN                                                                                   | 0,004354382 | 0,101542516 | 0,212 | 0,06  | 1           | 1,072920006   | 0,932035934     | 3,533333333     |
| ERCC6L2                                                                                 | 0,002840361 | 0,101479771 | 0,225 | 0,06  | 1           | 1,072873344   | 0,932076471     | 3,75            |
| TMEM121                                                                                 | 0,000743648 | 0,101335387 | 0,325 | 0,1   | 1           | 1,072765976   | 0,932169758     | 3,25            |
| RPE                                                                                     | 0,000592056 | 0,101298146 | 0,238 | 0,05  | 1           | 1,072738285   | 0,93219382      | 4,76            |
| EHMT1                                                                                   | 9,6372E-05  | 0,101280619 | 0,35  | 0,09  | 1           | 1,072725253   | 0,932205145     | 3,888888889     |
| ZNF484                                                                                  | 0,001278066 | 0,101267015 | 0,1   | 0     | 1           | 1,072715138   | 0,932213935     | #DIV/0!         |
| MRPL46                                                                                  | 1,12285E-05 | 0,101224882 | 0,238 | 0,02  | 0,236932166 | 1,07268381    | 0,932241161     | 11,9            |
| SCNM1                                                                                   | 0,001066334 | 0,101144375 | 0,262 | 0,07  | 1           | 1,072623952   | 0,932293184     | 3,742857143     |
| SOX5                                                                                    | 0,003004954 | 0,101065115 | 0,388 | 0,15  | 1           | 1,072565025   | 0,932344405     | 2,586666667     |
| PCK2                                                                                    | 0,001586071 | 0,101055358 | 0,125 | 0,01  | 1           | 1,072557771   | 0,93235071      | 12,5            |
| DCTD                                                                                    | 0,000524159 | 0,100958966 | 0,475 | 0,17  | 1           | 1,072486112   | 0,932413006     | 2,794117647     |
| SLC35F2                                                                                 | 0,020504361 | 0,10094126  | 0,1   | 0,02  | 1           | 1,07247295    | 0,93242445      | 5               |
| GNPNAT1                                                                                 | 0,000166585 | 0,1009131   | 0,362 | 0,1   | 1           | 1,072452017   | 0,93244265      | 3,62            |
| CHMP4A                                                                                  | 7,86052E-05 | 0,100911855 | 0,613 | 0,21  | 1           | 1,072451091   | 0,932443455     | 2,919047619     |
| DIRC3                                                                                   | 0,006976722 | 0,100892006 | 0,162 | 0,04  | 1           | 1,072436336   | 0,932456283     | 4,05            |
| STARD5                                                                                  | 0,001624218 | 0,100803301 | 0,125 | 0,01  | 1           | 1,072370399   | 0,932513618     | 12,5            |
| ZC3H4                                                                                   | 0,002438112 | 0,100793083 | 0,188 | 0,04  | 1           | 1,072362803   | 0,932520223     | 4,7             |
| STK16                                                                                   | 2,03719E-05 | 0,100770107 | 0,35  | 0,07  | 0,429868303 | 1,072345725   | 0,932535074     | 5               |
| TMTC3                                                                                   | 0,000947859 | 0,100726453 | 0,35  | 0,11  | 1           | 1,072313278   | 0,932563291     | 3,181818182     |
| MMP16                                                                                   | 0,001624218 | 0,100663646 | 0,125 | 0,01  | 1           | 1,072266596   | 0,932603891     | 12,5            |
| RNF8                                                                                    | 0,000624065 | 0,100645475 | 0,25  | 0,06  | 1           | 1,072253091   | 0,932615637     | 4,166666667     |
| NUP43                                                                                   | 0,001278066 | 0,100510099 | 0,1   | 0     | 1           | 1,07215248    | 0,932703154     | #DIV/0!         |
| COX19                                                                                   | 0,002980513 | 0,100509215 | 0,3   | 0,1   | 1           | 1,072151824   | 0,932703725     | 3               |

Supplementary Table 4

| Differentially expressed genes_keloid-CCD_ comparing SC-Keloid vs. (SC-Myel, SC-Nonmyel) |             |             |       |       |             |               |                 |                 |
|------------------------------------------------------------------------------------------|-------------|-------------|-------|-------|-------------|---------------|-----------------|-----------------|
| gene                                                                                     | p_val       | avg_log2FC  | pct.1 | pct.2 | p_val_adj   | Foldchange_UP | Foldchange_DOWN | Ratio_pct1_pct2 |
| GALE                                                                                     | 0,000830908 | 0,100490507 | 0,162 | 0,02  | 1           | 1,072137921   | 0,93271582      | 8,1             |
| CYB5R4                                                                                   | 0,002149898 | 0,100401023 | 0,188 | 0,04  | 1           | 1,072071422   | 0,932773674     | 4,7             |
| PPP2R5D                                                                                  | 0,000394526 | 0,100334325 | 0,2   | 0,03  | 1           | 1,07202186    | 0,932816799     | 6,666666667     |
| BUB1B                                                                                    | 0,005562134 | 0,100219309 | 0,075 | 0     | 1           | 1,071936399   | 0,932891168     | #DIV/0!         |
| MCAT                                                                                     | 0,000384434 | 0,100215693 | 0,15  | 0,01  | 1           | 1,071933712   | 0,932893507     | 15              |
| ABI2                                                                                     | 0,003218072 | 0,100107454 | 0,762 | 0,35  | 1           | 1,071853293   | 0,9329635       | 2,177142857     |
| CPOX                                                                                     | 0,000378678 | 0,100084288 | 0,2   | 0,03  | 1           | 1,071836081   | 0,932978482     | 6,666666667     |
| SLMAP                                                                                    | 0,00011259  | 0,100067877 | 0,312 | 0,07  | 1           | 1,07182389    | 0,932989094     | 4,457142857     |
| MRPS36                                                                                   | 0,000756585 | 0,100065861 | 0,537 | 0,2   | 1           | 1,071822392   | 0,932990398     | 2,685           |
| JAM3                                                                                     | 0,001383111 | 0,100042239 | 0,7   | 0,31  | 1           | 1,071804842   | 0,933005674     | 2,258064516     |
| ALDH7A1                                                                                  | 0,005074821 | 0,099954461 | 0,35  | 0,14  | 1           | 1,071739632   | 0,933062443     | 2,5             |
| SCFD2                                                                                    | 0,002666059 | 0,099945546 | 0,088 | 0     | 1           | 1,071733009   | 0,933068209     | #DIV/0!         |
| TEX261                                                                                   | 4,41125E-05 | 0,09993505  | 0,288 | 0,05  | 0,930817568 | 1,071725212   | 0,933074998     | 5,76            |
| IFTAP                                                                                    | 0,000308577 | 0,099832064 | 0,438 | 0,14  | 1           | 1,071648711   | 0,933141607     | 3,128571429     |
| R3HDM4                                                                                   | 0,00263251  | 0,099784644 | 0,3   | 0,1   | 1           | 1,071613487   | 0,933172279     | 3               |
| NOTCH2NLA                                                                                | 0,000611714 | 0,099650359 | 0,112 | 0     | 1           | 1,071513747   | 0,933259142     | #DIV/0!         |
| RAB11FIP3                                                                                | 0,000778563 | 0,09964654  | 0,162 | 0,02  | 1           | 1,07151091    | 0,933261613     | 8,1             |
| PEAK1                                                                                    | 0,006297273 | 0,09958795  | 0,238 | 0,08  | 1           | 1,071467396   | 0,933299514     | 2,975           |
| GHDC                                                                                     | 0,001655244 | 0,099512077 | 0,15  | 0,02  | 1           | 1,071411047   | 0,933348599     | 7,5             |
| ZBTB22                                                                                   | 0,007988348 | 0,099504125 | 0,162 | 0,04  | 1           | 1,071405142   | 0,933353744     | 4,05            |
| SLC31A1                                                                                  | 0,000187937 | 0,099496407 | 0,238 | 0,04  | 1           | 1,07139941    | 0,933358736     | 5,95            |
| DPY19L1                                                                                  | 0,000103782 | 0,099435737 | 0,338 | 0,08  | 1           | 1,071354356   | 0,933397988     | 4,225           |
| CIRBP-AS1                                                                                | 0,005562134 | 0,099237519 | 0,075 | 0     | 1           | 1,071207168   | 0,933526241     | #DIV/0!         |
| TRIM5                                                                                    | 0,016579771 | 0,099203606 | 0,125 | 0,03  | 1           | 1,071181987   | 0,933548185     | 4,166666667     |
| SIPA1L3                                                                                  | 0,000611714 | 0,099086749 | 0,112 | 0     | 1           | 1,071095226   | 0,933623805     | #DIV/0!         |
| NOA1                                                                                     | 0,000299964 | 0,09891866  | 0,225 | 0,04  | 1           | 1,07097044    | 0,933732588     | 5,625           |
| EXTL1                                                                                    | 9,79177E-05 | 0,098900426 | 0,25  | 0,04  | 1           | 1,070956904   | 0,933744389     | 6,25            |
| THBS3                                                                                    | 0,003928532 | 0,098889455 | 0,175 | 0,04  | 1           | 1,07094876    | 0,93375149      | 4,375           |
| MIEN1                                                                                    | 0,01259108  | 0,098871604 | 0,65  | 0,33  | 1           | 1,070935509   | 0,933763043     | 1,96969697      |
| METAP1D                                                                                  | 0,002189063 | 0,098840471 | 0,188 | 0,04  | 1           | 1,070912398   | 0,933783194     | 4,7             |

Supplementary Table 4

| Differentially expressed genes_keloid-CCD_ comparing SC-Keloid vs. (SC-Myel, SC-Nonmyel) |             |             |       |       |             |               |                 |                 |
|------------------------------------------------------------------------------------------|-------------|-------------|-------|-------|-------------|---------------|-----------------|-----------------|
| gene                                                                                     | p_val       | avg_log2FC  | pct.1 | pct.2 | p_val_adj   | Foldchange_UP | Foldchange_DOWN | Ratio_pct1_pct2 |
| SF3A3                                                                                    | 9,65936E-06 | 0,09883617  | 0,488 | 0,13  | 0,203822053 | 1,070909206   | 0,933785978     | 3,753846154     |
| FBXW4                                                                                    | 0,010591248 | 0,098802875 | 0,175 | 0,05  | 1           | 1,070884491   | 0,933807528     | 3,5             |
| GSKIP                                                                                    | 0,006717164 | 0,098761575 | 0,275 | 0,1   | 1           | 1,070853836   | 0,933834261     | 2,75            |
| C14orf28                                                                                 | 0,009914883 | 0,098721289 | 0,138 | 0,03  | 1           | 1,070823933   | 0,933860338     | 4,6             |
| H1-1                                                                                     | 0,002666059 | 0,098714996 | 0,088 | 0     | 1           | 1,070819262   | 0,933864411     | #DIV/0!         |
| SLCO2A1                                                                                  | 0,268357209 | 0,098691028 | 0,013 | 0     | 1           | 1,070801473   | 0,933879926     | #DIV/0!         |
| GORASP1                                                                                  | 0,005082527 | 0,098685437 | 0,15  | 0,03  | 1           | 1,070797323   | 0,933883545     | 5               |
| CELSR1                                                                                   | 0,000384434 | 0,098616272 | 0,15  | 0,01  | 1           | 1,070745988   | 0,933928318     | 15              |
| LRIF1                                                                                    | 0,003695206 | 0,098573415 | 0,325 | 0,12  | 1           | 1,070714181   | 0,933956062     | 2,708333333     |
| RABEPK                                                                                   | 0,000955834 | 0,098564521 | 0,25  | 0,06  | 1           | 1,07070758    | 0,93396182      | 4,166666667     |
| CLSTN1                                                                                   | 0,000828032 | 0,098465553 | 0,562 | 0,22  | 1           | 1,070634133   | 0,934025891     | 2,554545455     |
| CCDC74A                                                                                  | 0,002669855 | 0,098455336 | 0,162 | 0,03  | 1           | 1,070626551   | 0,934032506     | 5,4             |
| SMPD1                                                                                    | 9,24609E-06 | 0,09844799  | 0,362 | 0,07  | 0,195101813 | 1,070621099   | 0,934037262     | 5,171428571     |
| RPAIN                                                                                    | 0,00051179  | 0,098331952 | 0,738 | 0,31  | 1           | 1,070534991   | 0,934112391     | 2,380645161     |
| DDRGK1                                                                                   | 0,000581038 | 0,098312118 | 0,55  | 0,21  | 1           | 1,070520274   | 0,934125233     | 2,619047619     |
| SEZ6L2                                                                                   | 0,00151334  | 0,098248627 | 0,238 | 0,06  | 1           | 1,070473163   | 0,934166343     | 3,966666667     |
| CHST8                                                                                    | 0,024497883 | 0,098232451 | 0,05  | 0     | 1           | 1,07046116    | 0,934176818     | #DIV/0!         |
| MPV17                                                                                    | 2,39377E-05 | 0,098195636 | 0,5   | 0,14  | 0,505109956 | 1,070433844   | 0,934200657     | 3,571428571     |
| SNTA1                                                                                    | 0,000669713 | 0,098184775 | 0,3   | 0,08  | 1           | 1,070425786   | 0,93420769      | 3,75            |
| PRR7                                                                                     | 0,000251725 | 0,098169515 | 0,25  | 0,05  | 1           | 1,070414463   | 0,934217571     | 5               |
| MIX23                                                                                    | 0,001553021 | 0,098101641 | 0,15  | 0,02  | 1           | 1,070364105   | 0,934261524     | 7,5             |
| LAMB2                                                                                    | 0,000273202 | 0,098091617 | 0,575 | 0,22  | 1           | 1,070356668   | 0,934268015     | 2,613636364     |
| NUP133                                                                                   | 0,001500621 | 0,098005825 | 0,175 | 0,03  | 1           | 1,07029302    | 0,934323575     | 5,833333333     |
| MAN1C1                                                                                   | 0,00074289  | 0,097983347 | 0,188 | 0,03  | 1           | 1,070276344   | 0,934338132     | 6,266666667     |
| DYNC1I2                                                                                  | 0,026426944 | 0,097965727 | 0,75  | 0,4   | 1           | 1,070263273   | 0,934349543     | 1,875           |
| ZNF449                                                                                   | 0,053019982 | 0,097951847 | 0,062 | 0,01  | 1           | 1,070252976   | 0,934358532     | 6,2             |
| PGBD2                                                                                    | 0,002666059 | 0,097913912 | 0,088 | 0     | 1           | 1,070224834   | 0,934383102     | #DIV/0!         |
| RMC1                                                                                     | 0,002669855 | 0,097907386 | 0,162 | 0,03  | 1           | 1,070219993   | 0,934387328     | 5,4             |
| DHX30                                                                                    | 0,002093387 | 0,097879471 | 0,4   | 0,15  | 1           | 1,070199286   | 0,934405408     | 2,666666667     |
| NTAQ1                                                                                    | 0,001442989 | 0,097863905 | 0,175 | 0,03  | 1           | 1,070187739   | 0,93441549      | 5,833333333     |

Supplementary Table 4

| Differentially expressed genes_keloid-CCD_comparing SC-Keloid vs. (SC-Myel, SC-Nonmyel) |             |             |       |       |             |               |                 |                 |
|-----------------------------------------------------------------------------------------|-------------|-------------|-------|-------|-------------|---------------|-----------------|-----------------|
| gene                                                                                    | p_val       | avg_log2FC  | pct.1 | pct.2 | p_val_adj   | Foldchange_UP | Foldchange_DOWN | Ratio_pct1_pct2 |
| PSMG4                                                                                   | 0,004645866 | 0,097830918 | 0,288 | 0,1   | 1           | 1,070163269   | 0,934436855     | 2,88            |
| AP3M1                                                                                   | 0,002073795 | 0,097827104 | 0,25  | 0,07  | 1           | 1,07016044    | 0,934439326     | 3,571428571     |
| PXMP4                                                                                   | 0,001442989 | 0,097810555 | 0,175 | 0,03  | 1           | 1,070148165   | 0,934450044     | 5,833333333     |
| TRAP1                                                                                   | 9,20117E-05 | 0,097772998 | 0,338 | 0,08  | 1           | 1,070120307   | 0,934474371     | 4,225           |
| ANGPT2                                                                                  | 0,104582322 | 0,097738364 | 0,05  | 0,01  | 1           | 1,070094617   | 0,934496804     | 5               |
| AGGF1                                                                                   | 0,002569294 | 0,097726338 | 0,162 | 0,03  | 1           | 1,070085697   | 0,934504594     | 5,4             |
| BRF2                                                                                    | 0,003137076 | 0,097661777 | 0,138 | 0,02  | 1           | 1,070037811   | 0,934546415     | 6,9             |
| FGD1                                                                                    | 0,000384434 | 0,097586511 | 0,15  | 0,01  | 1           | 1,069981988   | 0,934595171     | 15              |
| PPP3CB                                                                                  | 1,61007E-05 | 0,097530648 | 0,462 | 0,12  | 0,339741923 | 1,069940558   | 0,934631361     | 3,85            |
| TMEM131                                                                                 | 0,002458846 | 0,097518282 | 0,225 | 0,06  | 1           | 1,069931387   | 0,934639372     | 3,75            |
| ZNF778                                                                                  | 0,000611714 | 0,097517073 | 0,112 | 0     | 1           | 1,06993049    | 0,934640156     | #DIV/0!         |
| ISCA2                                                                                   | 0,000268034 | 0,097516185 | 0,275 | 0,06  | 1           | 1,069929832   | 0,934640731     | 4,583333333     |
| C19orf12                                                                                | 0,000505169 | 0,097440343 | 0,262 | 0,06  | 1           | 1,069873587   | 0,934689866     | 4,366666667     |
| EEF1AKMT2                                                                               | 0,002273097 | 0,097391205 | 0,375 | 0,14  | 1           | 1,069837148   | 0,934721702     | 2,678571429     |
| NOL6                                                                                    | 0,004988707 | 0,09733468  | 0,15  | 0,03  | 1           | 1,069795233   | 0,934758325     | 5               |
| SEC14L2                                                                                 | 0,00095689  | 0,097318578 | 0,325 | 0,1   | 1           | 1,069783293   | 0,934768758     | 3,25            |
| EIF3M                                                                                   | 0,004192454 | 0,09702419  | 0,65  | 0,31  | 1           | 1,069565021   | 0,934959521     | 2,096774194     |
| LRRC29                                                                                  | 0,005562134 | 0,0968869   | 0,075 | 0     | 1           | 1,069463244   | 0,935048498     | #DIV/0!         |
| ZFP62                                                                                   | 0,003313746 | 0,096869336 | 0,112 | 0,01  | 1           | 1,069450224   | 0,935059882     | 11,2            |
| SLC38A6                                                                                 | 0,006578444 | 0,096810239 | 0,1   | 0,01  | 1           | 1,069406417   | 0,935098185     | 10              |
| OIP5                                                                                    | 0,000291957 | 0,096801518 | 0,125 | 0     | 1           | 1,069399953   | 0,935103838     | #DIV/0!         |
| ADCK5                                                                                   | 0,026889313 | 0,096638861 | 0,075 | 0,01  | 1           | 1,06927939    | 0,935209273     | 7,5             |
| MRPL44                                                                                  | 0,00180138  | 0,096633422 | 0,25  | 0,07  | 1           | 1,069275359   | 0,935212798     | 3,571428571     |
| TRPV4                                                                                   | 0,006404327 | 0,096577931 | 0,125 | 0,02  | 1           | 1,069234231   | 0,93524877      | 6,25            |
| NOVA1                                                                                   | 0,021927553 | 0,096497374 | 0,238 | 0,1   | 1           | 1,06917453    | 0,935300994     | 2,38            |
| SLC10A3                                                                                 | 0,00072868  | 0,096482344 | 0,25  | 0,06  | 1           | 1,06916339    | 0,935310738     | 4,166666667     |
| MIR99AHG                                                                                | 0,193555421 | 0,096468113 | 0,088 | 0,04  | 1           | 1,069152844   | 0,935319964     | 2,2             |
| TLR3                                                                                    | 0,011634754 | 0,096236308 | 0,062 | 0     | 1           | 1,068981072   | 0,935470259     | #DIV/0!         |
| ARL2BP                                                                                  | 0,007336435 | 0,096133901 | 0,675 | 0,32  | 1           | 1,068905195   | 0,935536664     | 2,109375        |
| RNASEH1                                                                                 | 0,000149574 | 0,096117799 | 0,412 | 0,12  | 1           | 1,068893265   | 0,935547105     | 3,433333333     |



Supplementary Table 4

| Differentially expressed genes_keloid-CCD_ comparing SC-Keloid vs. (SC-Myel, SC-Nonmyel) |             |             |       |       |             |               |                 |                 |
|------------------------------------------------------------------------------------------|-------------|-------------|-------|-------|-------------|---------------|-----------------|-----------------|
| gene                                                                                     | p_val       | avg_log2FC  | pct.1 | pct.2 | p_val_adj   | Foldchange_UP | Foldchange_DOWN | Ratio_pct1_pct2 |
| ACKR1                                                                                    | 0,523092318 | 0,096113584 | 0,075 | 0,1   | 1           | 1,068890142   | 0,935549839     | 0,75            |
| STYXL1                                                                                   | 0,000394526 | 0,096110286 | 0,2   | 0,03  | 1           | 1,068887698   | 0,935551978     | 6,666666667     |
| VPS33B                                                                                   | 0,013319742 | 0,096047451 | 0,088 | 0,01  | 1           | 1,068841145   | 0,935592725     | 8,8             |
| ZNF382                                                                                   | 0,054166721 | 0,09589107  | 0,062 | 0,01  | 1           | 1,068725295   | 0,935694144     | 6,2             |
| FAIM                                                                                     | 0,001807718 | 0,095832576 | 0,275 | 0,08  | 1           | 1,068681964   | 0,935732083     | 3,4375          |
| GCSH                                                                                     | 0,029507872 | 0,095783542 | 0,812 | 0,46  | 1           | 1,068645642   | 0,935763887     | 1,765217391     |
| UBE2A                                                                                    | 0,001851031 | 0,095706886 | 0,762 | 0,35  | 1           | 1,068588863   | 0,935813609     | 2,177142857     |
| GON7                                                                                     | 0,003895696 | 0,095644328 | 0,238 | 0,07  | 1           | 1,068542527   | 0,935854189     | 3,4             |
| RWDD2A                                                                                   | 0,001655244 | 0,095636539 | 0,15  | 0,02  | 1           | 1,068536759   | 0,935859241     | 7,5             |
| SDHAF2                                                                                   | 9,04251E-07 | 0,095578871 | 0,4   | 0,07  | 0,019080606 | 1,068494048   | 0,93589665      | 5,714285714     |
| EFR3B                                                                                    | 0,001278066 | 0,095517061 | 0,1   | 0     | 1           | 1,068448271   | 0,935936748     | #DIV/0!         |
| METTL3                                                                                   | 0,00068532  | 0,095505506 | 0,212 | 0,04  | 1           | 1,068439713   | 0,935944245     | 5,3             |
| MCM6                                                                                     | 0,033133318 | 0,095473016 | 0,112 | 0,03  | 1           | 1,068415652   | 0,935965322     | 3,733333333     |
| CD68                                                                                     | 0,00922558  | 0,095444581 | 0,138 | 0,03  | 1           | 1,068394594   | 0,93598377      | 4,6             |
| EMC4                                                                                     | 0,007925909 | 0,095435707 | 0,775 | 0,39  | 1           | 1,068388022   | 0,935989527     | 1,987179487     |
| SMYD5                                                                                    | 0,000792271 | 0,09542182  | 0,138 | 0,01  | 1           | 1,068377738   | 0,935998537     | 13,8            |
| BLM                                                                                      | 0,005562134 | 0,095258813 | 0,075 | 0     | 1           | 1,068257031   | 0,936104299     | #DIV/0!         |
| SLC36A4                                                                                  | 0,007051107 | 0,095254151 | 0,2   | 0,06  | 1           | 1,06825358    | 0,936107324     | 3,333333333     |
| ALDH18A1                                                                                 | 0,000602791 | 0,095167922 | 0,238 | 0,05  | 1           | 1,068189732   | 0,936163277     | 4,76            |
| CCDC86                                                                                   | 0,000792271 | 0,095164386 | 0,138 | 0,01  | 1           | 1,068187114   | 0,936165571     | 13,8            |
| MCEE                                                                                     | 0,004287523 | 0,095159563 | 0,175 | 0,04  | 1           | 1,068183543   | 0,936168701     | 4,375           |
| SETX                                                                                     | 0,000504535 | 0,095085794 | 0,45  | 0,15  | 1           | 1,068128926   | 0,936216571     | 3               |
| METTL1                                                                                   | 0,001586431 | 0,095034827 | 0,15  | 0,02  | 1           | 1,068091192   | 0,936249646     | 7,5             |
| NCAPH                                                                                    | 0,002666059 | 0,094995791 | 0,088 | 0     | 1           | 1,068062292   | 0,936274979     | #DIV/0!         |
| ZNF880                                                                                   | 0,053466886 | 0,094981    | 0,1   | 0,03  | 1           | 1,068051342   | 0,936284578     | 3,333333333     |
| DCLRE1B                                                                                  | 0,001278066 | 0,094884611 | 0,1   | 0     | 1           | 1,067979986   | 0,936347135     | #DIV/0!         |
| RPL9                                                                                     | 0,116329808 | 0,094874678 | 1     | 0,99  | 1           | 1,067972633   | 0,936353582     | 1,01010101      |
| NBEAL2                                                                                   | 0,024497883 | 0,09487206  | 0,05  | 0     | 1           | 1,067970695   | 0,936355281     | #DIV/0!         |
| PSMD14                                                                                   | 0,00080903  | 0,094835035 | 0,613 | 0,25  | 1           | 1,067943287   | 0,936379311     | 2,452           |
| GLIPR2                                                                                   | 0,001044791 | 0,094800943 | 0,325 | 0,1   | 1           | 1,067918051   | 0,93640144      | 3,25            |

Supplementary Table 4

| Differentially expressed genes_keloid-CCD_ comparing SC-Keloid vs. (SC-Myel, SC-Nonmyel) |             |             |       |       |            |               |                 |                 |
|------------------------------------------------------------------------------------------|-------------|-------------|-------|-------|------------|---------------|-----------------|-----------------|
| gene                                                                                     | p_val       | avg_log2FC  | pct.1 | pct.2 | p_val_adj  | Foldchange_UP | Foldchange_DOWN | Ratio_pct1_pct2 |
| HPS6                                                                                     | 0,003313746 | 0,094774339 | 0,112 | 0,01  | 1          | 1,067898358   | 0,936418707     | 11,2            |
| PDE4B                                                                                    | 0,002827454 | 0,094697291 | 0,162 | 0,03  | 1          | 1,067841328   | 0,936468718     | 5,4             |
| CEP76                                                                                    | 0,001624218 | 0,094650915 | 0,125 | 0,01  | 1          | 1,067807002   | 0,936498822     | 12,5            |
| AP5Z1                                                                                    | 0,01010845  | 0,094571236 | 0,175 | 0,05  | 1          | 1,06774803    | 0,936550546     | 3,5             |
| SLC35A4                                                                                  | 6,24022E-05 | 0,09453034  | 0,388 | 0,1   | 1          | 1,067717763   | 0,936577095     | 3,88            |
| NRAV                                                                                     | 0,001278066 | 0,094367827 | 0,1   | 0     | 1          | 1,067597496   | 0,936682602     | #DIV/0!         |
| SREK1IP1                                                                                 | 9,00371E-05 | 0,094353583 | 0,512 | 0,16  | 1          | 1,067586956   | 0,936691849     | 3,2             |
| QSOX2                                                                                    | 0,003072483 | 0,094344958 | 0,138 | 0,02  | 1          | 1,067580573   | 0,93669745      | 6,9             |
| CUL2                                                                                     | 0,000149595 | 0,094313186 | 0,325 | 0,08  | 1          | 1,067557062   | 0,936718078     | 4,0625          |
| PSMD11                                                                                   | 0,017023239 | 0,094216668 | 0,675 | 0,35  | 1          | 1,067485644   | 0,936780748     | 1,928571429     |
| NME6                                                                                     | 0,000611714 | 0,094216502 | 0,112 | 0     | 1          | 1,067485521   | 0,936780856     | #DIV/0!         |
| CIAO1                                                                                    | 0,000107511 | 0,094109875 | 0,438 | 0,13  | 1          | 1,067406628   | 0,936850094     | 3,369230769     |
| PLA2G15                                                                                  | 0,000550867 | 0,094082938 | 0,238 | 0,05  | 1          | 1,067386699   | 0,936867586     | 4,76            |
| TMEM60                                                                                   | 0,001230206 | 0,094058903 | 0,2   | 0,04  | 1          | 1,067368916   | 0,936883194     | 5               |
| MARVELD1                                                                                 | 0,006490174 | 0,094057927 | 0,588 | 0,28  | 1          | 1,067368194   | 0,936883829     | 2,1             |
| SNHG9                                                                                    | 0,001254518 | 0,094048521 | 0,488 | 0,19  | 1          | 1,067361235   | 0,936889937     | 2,568421053     |
| VAR51                                                                                    | 3,12483E-05 | 0,093994176 | 0,35  | 0,08  | 0,65936981 | 1,067321029   | 0,936925229     | 4,375           |
| RHBDD2                                                                                   | 0,000108317 | 0,093945038 | 0,4   | 0,11  | 1          | 1,067284677   | 0,936957141     | 3,636363636     |
| EPG5                                                                                     | 0,005996845 | 0,093908577 | 0,1   | 0,01  | 1          | 1,067257704   | 0,936980821     | 10              |
| FANCI                                                                                    | 0,001624218 | 0,093877239 | 0,125 | 0,01  | 1          | 1,067234521   | 0,937001175     | 12,5            |
| SCYL1                                                                                    | 0,000457746 | 0,093857285 | 0,412 | 0,13  | 1          | 1,067219761   | 0,937014134     | 3,169230769     |
| MFSD8                                                                                    | 0,003237075 | 0,093827537 | 0,112 | 0,01  | 1          | 1,067197755   | 0,937033455     | 11,2            |
| NSUN6                                                                                    | 0,002073488 | 0,093726792 | 0,188 | 0,04  | 1          | 1,067123234   | 0,937098892     | 4,7             |
| RNF113A                                                                                  | 0,000571116 | 0,093715508 | 0,238 | 0,05  | 1          | 1,067114888   | 0,937106221     | 4,76            |
| KHK                                                                                      | 0,011950918 | 0,093703837 | 0,112 | 0,02  | 1          | 1,067106255   | 0,937113802     | 5,6             |
| SKAP1                                                                                    | 0,039947093 | 0,093694741 | 0,088 | 0,02  | 1          | 1,067099527   | 0,93711971      | 4,4             |
| TEDC1                                                                                    | 0,000487981 | 0,093680645 | 0,262 | 0,06  | 1          | 1,067089101   | 0,937128867     | 4,366666667     |
| NBPF20                                                                                   | 0,011634754 | 0,09366717  | 0,062 | 0     | 1          | 1,067079135   | 0,937137619     | #DIV/0!         |
| CNOT9                                                                                    | 9,87561E-05 | 0,093614844 | 0,362 | 0,09  | 1          | 1,067040432   | 0,93717161      | 4,022222222     |
| DAPL1                                                                                    | 0,002666059 | 0,09348938  | 0,088 | 0     | 1          | 1,066947641   | 0,937253115     | #DIV/0!         |

Supplementary Table 4

| Differentially expressed genes_keloid-CCD_comparing SC-Keloid vs. (SC-Myel, SC-Nonmyel) |             |             |       |       |           |               |                 |                 |
|-----------------------------------------------------------------------------------------|-------------|-------------|-------|-------|-----------|---------------|-----------------|-----------------|
| gene                                                                                    | p_val       | avg_log2FC  | pct.1 | pct.2 | p_val_adj | Foldchange_UP | Foldchange_DOWN | Ratio_pct1_pct2 |
| ABCB4                                                                                   | 0,10676172  | 0,093414902 | 0,05  | 0,01  | 1         | 1,066892562   | 0,937301501     | 5               |
| PREB                                                                                    | 0,00038799  | 0,093373674 | 0,288 | 0,07  | 1         | 1,066862074   | 0,937328287     | 4,114285714     |
| CSNK1G2                                                                                 | 0,001079188 | 0,093340288 | 0,312 | 0,1   | 1         | 1,066837386   | 0,937349978     | 3,12            |
| ZNF629                                                                                  | 0,026889313 | 0,093253257 | 0,075 | 0,01  | 1         | 1,06677303    | 0,937406526     | 7,5             |
| ASB6                                                                                    | 0,000402795 | 0,093225845 | 0,262 | 0,06  | 1         | 1,066752761   | 0,937424337     | 4,366666667     |
| XIRP1                                                                                   | 0,011634754 | 0,093209991 | 0,062 | 0     | 1         | 1,066741039   | 0,937434639     | #DIV/0!         |
| HJURP                                                                                   | 0,005562134 | 0,093142483 | 0,075 | 0     | 1         | 1,066691124   | 0,937478505     | #DIV/0!         |
| DGCR6                                                                                   | 0,006731552 | 0,093129509 | 0,1   | 0,01  | 1         | 1,066681531   | 0,937486936     | 10              |
| SLC25A17                                                                                | 7,64299E-05 | 0,093128424 | 0,275 | 0,05  | 1         | 1,066680729   | 0,93748764      | 5,5             |
| ITGB1BP1                                                                                | 0,005503564 | 0,093107443 | 0,762 | 0,39  | 1         | 1,066665216   | 0,937501275     | 1,953846154     |
| BPNT1                                                                                   | 0,020902746 | 0,093070648 | 0,1   | 0,02  | 1         | 1,066638013   | 0,937525185     | 5               |
| RNF6                                                                                    | 0,082799575 | 0,092898779 | 0,188 | 0,09  | 1         | 1,06651095    | 0,93763688      | 2,088888889     |
| PGD                                                                                     | 0,000148311 | 0,092871683 | 0,288 | 0,06  | 1         | 1,06649092    | 0,93765449      | 4,8             |
| CC2D2A                                                                                  | 0,01362345  | 0,092835274 | 0,088 | 0,01  | 1         | 1,066464006   | 0,937678154     | 8,8             |
| VAX2                                                                                    | 0,005562134 | 0,092828811 | 0,075 | 0     | 1         | 1,066459228   | 0,937682355     | #DIV/0!         |
| DENND1A                                                                                 | 0,001278066 | 0,09277704  | 0,1   | 0     | 1         | 1,066420959   | 0,937716004     | #DIV/0!         |
| TMEM107                                                                                 | 0,000732596 | 0,092758569 | 0,325 | 0,1   | 1         | 1,066407305   | 0,93772801      | 3,25            |
| SC5D                                                                                    | 0,006150583 | 0,092651304 | 0,125 | 0,02  | 1         | 1,066328021   | 0,937797732     | 6,25            |
| EOLA2                                                                                   | 0,000308769 | 0,092634653 | 0,25  | 0,05  | 1         | 1,066315713   | 0,937808556     | 5               |
| EEF2K                                                                                   | 0,003313746 | 0,092467978 | 0,112 | 0,01  | 1         | 1,066192529   | 0,937916908     | 11,2            |
| SCRN3                                                                                   | 0,00074289  | 0,092425924 | 0,188 | 0,03  | 1         | 1,066161451   | 0,937944248     | 6,266666667     |
| ST6GALNAC4                                                                              | 0,000409923 | 0,092395047 | 0,262 | 0,06  | 1         | 1,066138632   | 0,937964323     | 4,366666667     |
| TTC23                                                                                   | 0,023011948 | 0,092326991 | 0,138 | 0,04  | 1         | 1,066088341   | 0,93800857      | 3,45            |
| ZNF579                                                                                  | 0,003350835 | 0,092298973 | 0,238 | 0,07  | 1         | 1,066067637   | 0,938026787     | 3,4             |
| XPO5                                                                                    | 0,002774001 | 0,0922961   | 0,162 | 0,03  | 1         | 1,066065514   | 0,938028655     | 5,4             |
| TES                                                                                     | 0,000402681 | 0,092276992 | 0,2   | 0,03  | 1         | 1,066051394   | 0,938041079     | 6,666666667     |
| LMCD1                                                                                   | 0,000311254 | 0,092154893 | 0,412 | 0,13  | 1         | 1,065961176   | 0,938120471     | 3,169230769     |
| GTF3C2                                                                                  | 0,000386526 | 0,092148817 | 0,2   | 0,03  | 1         | 1,065956686   | 0,938124422     | 6,666666667     |
| HSDL2                                                                                   | 0,003153046 | 0,092138935 | 0,238 | 0,07  | 1         | 1,065949385   | 0,938130848     | 3,4             |
| TANGO2                                                                                  | 0,054329933 | 0,092134213 | 0,1   | 0,03  | 1         | 1,065945895   | 0,938133919     | 3,333333333     |

Supplementary Table 4

| Differentially expressed genes_keloid-CCD_ comparing SC-Keloid vs. (SC-Myel, SC-Nonmyel) |             |             |       |       |             |               |                 |                 |
|------------------------------------------------------------------------------------------|-------------|-------------|-------|-------|-------------|---------------|-----------------|-----------------|
| gene                                                                                     | p_val       | avg_log2FC  | pct.1 | pct.2 | p_val_adj   | Foldchange_UP | Foldchange_DOWN | Ratio_pct1_pct2 |
| SFI1                                                                                     | 0,006027137 | 0,092121184 | 0,125 | 0,02  | 1           | 1,065936269   | 0,938142391     | 6,25            |
| FURIN                                                                                    | 8,24087E-07 | 0,09210679  | 0,512 | 0,13  | 0,017389056 | 1,065925634   | 0,938151751     | 3,938461538     |
| SLC46A3                                                                                  | 0,024497883 | 0,092074932 | 0,05  | 0     | 1           | 1,065902096   | 0,938172468     | #DIV/0!         |
| ZFTA                                                                                     | 0,001425758 | 0,092061771 | 0,15  | 0,02  | 1           | 1,065892373   | 0,938181026     | 7,5             |
| IL1RAP                                                                                   | 0,02312145  | 0,092023541 | 0,675 | 0,38  | 1           | 1,065864128   | 0,938205887     | 1,776315789     |
| CES2                                                                                     | 0,000788927 | 0,091898097 | 0,188 | 0,03  | 1           | 1,065771454   | 0,938287469     | 6,266666667     |
| PITRM1                                                                                   | 0,000199343 | 0,091829816 | 0,212 | 0,03  | 1           | 1,065721013   | 0,938331878     | 7,066666667     |
| SMIM26                                                                                   | 0,004651405 | 0,091824794 | 0,787 | 0,37  | 1           | 1,065717304   | 0,938335145     | 2,127027027     |
| PCNA                                                                                     | 0,024396035 | 0,091822471 | 0,35  | 0,17  | 1           | 1,065715588   | 0,938336655     | 2,058823529     |
| MFN2                                                                                     | 0,007955766 | 0,09174402  | 0,2   | 0,06  | 1           | 1,065657638   | 0,938387681     | 3,333333333     |
| DDA1                                                                                     | 8,28487E-06 | 0,091696836 | 0,537 | 0,15  | 0,174818991 | 1,065622786   | 0,938418372     | 3,58            |
| UTY                                                                                      | 0,102836599 | 0,09162734  | 0,138 | 0,06  | 1           | 1,065571455   | 0,938463578     | 2,3             |
| SYNRG                                                                                    | 0,001007414 | 0,091623459 | 0,288 | 0,08  | 1           | 1,065568588   | 0,938466103     | 3,6             |
| PAQR7                                                                                    | 0,009393773 | 0,091597956 | 0,138 | 0,03  | 1           | 1,065549752   | 0,938482693     | 4,6             |
| CACNA2D1                                                                                 | 0,006150583 | 0,091562056 | 0,125 | 0,02  | 1           | 1,065523237   | 0,938506046     | 6,25            |
| SACM1L                                                                                   | 0,000432021 | 0,091531758 | 0,262 | 0,06  | 1           | 1,06550086    | 0,938525756     | 4,366666667     |
| TRIM38                                                                                   | 6,80127E-05 | 0,091478117 | 0,275 | 0,05  | 1           | 1,065461244   | 0,938560652     | 5,5             |
| LMNB1                                                                                    | 0,000773295 | 0,091471625 | 0,188 | 0,03  | 1           | 1,06545645    | 0,938564875     | 6,266666667     |
| KLC2                                                                                     | 0,002881846 | 0,091461901 | 0,162 | 0,03  | 1           | 1,065449268   | 0,938571202     | 5,4             |
| PRRC2B                                                                                   | 0,000335667 | 0,091448782 | 0,488 | 0,17  | 1           | 1,06543958    | 0,938579736     | 2,870588235     |
| LINC00862                                                                                | 0,024497883 | 0,091418019 | 0,05  | 0     | 1           | 1,065416862   | 0,93859975      | #DIV/0!         |
| HOGA1                                                                                    | 0,003237075 | 0,091361423 | 0,112 | 0,01  | 1           | 1,065375067   | 0,938636571     | 11,2            |
| CYB5D2                                                                                   | 0,002073795 | 0,091326425 | 0,25  | 0,07  | 1           | 1,065349223   | 0,938659342     | 3,571428571     |
| AURKA                                                                                    | 0,012444222 | 0,091287497 | 0,088 | 0,01  | 1           | 1,065320477   | 0,93868467      | 8,8             |
| C2orf27A                                                                                 | 0,006276301 | 0,091271758 | 0,125 | 0,02  | 1           | 1,065308855   | 0,93869491      | 6,25            |
| ZBTB48                                                                                   | 0,000830908 | 0,091212456 | 0,162 | 0,02  | 1           | 1,065265067   | 0,938733496     | 8,1             |
| PPHLN1                                                                                   | 0,00177383  | 0,091211222 | 0,462 | 0,18  | 1           | 1,065264155   | 0,938734299     | 2,566666667     |
| CPNE1                                                                                    | 0,008887753 | 0,09116827  | 0,688 | 0,33  | 1           | 1,06523244    | 0,938762248     | 2,084848485     |
| ZNF805                                                                                   | 0,001624218 | 0,091149963 | 0,125 | 0,01  | 1           | 1,065218923   | 0,93877416      | 12,5            |
| TPM1                                                                                     | 3,85607E-05 | 0,091122268 | 0,512 | 0,15  | 0,813669619 | 1,065198475   | 0,938792181     | 3,413333333     |

Supplementary Table 4

| Differentially expressed genes_keloid-CCD_ comparing SC-Keloid vs. (SC-Myel, SC-Nonmyel) |             |             |       |       |             |               |                 |                 |
|------------------------------------------------------------------------------------------|-------------|-------------|-------|-------|-------------|---------------|-----------------|-----------------|
| gene                                                                                     | p_val       | avg_log2FC  | pct.1 | pct.2 | p_val_adj   | Foldchange_UP | Foldchange_DOWN | Ratio_pct1_pct2 |
| CARS1                                                                                    | 0,000411862 | 0,091043124 | 0,388 | 0,12  | 1           | 1,065140041   | 0,938843684     | 3,233333333     |
| SLC25A45                                                                                 | 0,012730227 | 0,091009711 | 0,088 | 0,01  | 1           | 1,065115373   | 0,938865428     | 8,8             |
| DNMBP                                                                                    | 0,016579771 | 0,090950153 | 0,125 | 0,03  | 1           | 1,065071403   | 0,938904187     | 4,166666667     |
| AVEN                                                                                     | 0,001655244 | 0,090896524 | 0,15  | 0,02  | 1           | 1,065031812   | 0,93893909      | 7,5             |
| SUPT3H                                                                                   | 0,002937191 | 0,090889895 | 0,162 | 0,03  | 1           | 1,065026918   | 0,938943404     | 5,4             |
| DIDO1                                                                                    | 0,001737905 | 0,090808527 | 0,288 | 0,09  | 1           | 1,064966853   | 0,938996361     | 3,2             |
| CDC42BPA                                                                                 | 4,55179E-05 | 0,090768428 | 0,475 | 0,14  | 0,960473588 | 1,064937253   | 0,939022461     | 3,392857143     |
| TBP                                                                                      | 0,001278066 | 0,090735193 | 0,1   | 0     | 1           | 1,064912721   | 0,939044093     | #DIV/0!         |
| NVL                                                                                      | 0,039215525 | 0,090686088 | 0,088 | 0,02  | 1           | 1,064876475   | 0,939076056     | 4,4             |
| ATP2C1                                                                                   | 0,000575104 | 0,090521752 | 0,375 | 0,12  | 1           | 1,064755183   | 0,939183031     | 3,125           |
| FLOT1                                                                                    | 0,005892862 | 0,090518334 | 0,838 | 0,43  | 1           | 1,06475266    | 0,939185256     | 1,948837209     |
| ZNF827                                                                                   | 0,003928532 | 0,090516711 | 0,175 | 0,04  | 1           | 1,064751462   | 0,939186313     | 4,375           |
| DGCR8                                                                                    | 0,001530226 | 0,090492551 | 0,175 | 0,03  | 1           | 1,064733632   | 0,939202041     | 5,833333333     |
| DIS3L2                                                                                   | 0,000757951 | 0,090458837 | 0,188 | 0,03  | 1           | 1,06470875    | 0,93922399      | 6,266666667     |
| TPD52L2                                                                                  | 8,01271E-06 | 0,090420807 | 0,462 | 0,11  | 0,169076102 | 1,064680685   | 0,939248748     | 4,2             |
| FAM220A                                                                                  | 0,002666059 | 0,090403409 | 0,088 | 0     | 1           | 1,064667845   | 0,939260075     | #DIV/0!         |
| DOHH                                                                                     | 0,000471339 | 0,090366116 | 0,262 | 0,06  | 1           | 1,064640324   | 0,939284355     | 4,366666667     |
| GRPEL2                                                                                   | 0,001624218 | 0,090318484 | 0,125 | 0,01  | 1           | 1,064605174   | 0,939315367     | 12,5            |
| OS9                                                                                      | 0,010040323 | 0,090274238 | 0,688 | 0,36  | 1           | 1,064572525   | 0,939344175     | 1,911111111     |
| CACTIN                                                                                   | 0,000199343 | 0,090196014 | 0,212 | 0,03  | 1           | 1,064514805   | 0,939395108     | 7,066666667     |
| SNX14                                                                                    | 4,49828E-05 | 0,090129053 | 0,462 | 0,13  | 0,949181281 | 1,064465397   | 0,93943871      | 3,553846154     |
| NOP56                                                                                    | 0,005782442 | 0,090083404 | 0,65  | 0,31  | 1           | 1,064431717   | 0,939468436     | 2,096774194     |
| PCGF3                                                                                    | 0,001249338 | 0,09002274  | 0,3   | 0,09  | 1           | 1,06438696    | 0,93950794      | 3,333333333     |
| METTL15                                                                                  | 0,000394526 | 0,090015528 | 0,2   | 0,03  | 1           | 1,064381638   | 0,939512637     | 6,666666667     |
| FAM171B                                                                                  | 0,013022034 | 0,090010787 | 0,088 | 0,01  | 1           | 1,064378141   | 0,939515724     | 8,8             |
| USP22                                                                                    | 0,001355624 | 0,089966798 | 0,713 | 0,31  | 1           | 1,064345687   | 0,939544372     | 2,3             |
| KIAA1143                                                                                 | 0,000268419 | 0,089911345 | 0,388 | 0,12  | 1           | 1,064304778   | 0,939580485     | 3,233333333     |
| GALM                                                                                     | 0,001624218 | 0,089874777 | 0,125 | 0,01  | 1           | 1,064277801   | 0,939604302     | 12,5            |
| MIAT                                                                                     | 0,024497883 | 0,089776686 | 0,05  | 0     | 1           | 1,064205442   | 0,939668189     | #DIV/0!         |
| UBA6-DT                                                                                  | 0,042211625 | 0,089717755 | 0,088 | 0,02  | 1           | 1,064161972   | 0,939706573     | 4,4             |

Supplementary Table 4

| Differentially expressed genes_keloid-CCD_ comparing SC-Keloid vs. (SC-Myel, SC-Nonmyel) |             |             |       |       |             |               |                 |                 |
|------------------------------------------------------------------------------------------|-------------|-------------|-------|-------|-------------|---------------|-----------------|-----------------|
| gene                                                                                     | p_val       | avg_log2FC  | pct.1 | pct.2 | p_val_adj   | Foldchange_UP | Foldchange_DOWN | Ratio_pct1_pct2 |
| CASP3                                                                                    | 0,000239654 | 0,089606582 | 0,362 | 0,1   | 1           | 1,064079972   | 0,939778989     | 3,62            |
| CDCA7L                                                                                   | 0,002666059 | 0,089517557 | 0,088 | 0     | 1           | 1,064014313   | 0,939836982     | #DIV/0!         |
| BAG6                                                                                     | 0,000118445 | 0,08950454  | 0,488 | 0,16  | 1           | 1,064004712   | 0,939845462     | 3,05            |
| TERF2                                                                                    | 0,002111376 | 0,089490469 | 0,188 | 0,04  | 1           | 1,063994335   | 0,939854628     | 4,7             |
| CSAD                                                                                     | 0,001261858 | 0,089436528 | 0,4   | 0,14  | 1           | 1,063954554   | 0,939889769     | 2,857142857     |
| CARNMT1                                                                                  | 0,001624218 | 0,08935987  | 0,125 | 0,01  | 1           | 1,063898021   | 0,939939712     | 12,5            |
| VIPAS39                                                                                  | 0,001471545 | 0,089347823 | 0,175 | 0,03  | 1           | 1,063889138   | 0,939947561     | 5,833333333     |
| DSN1                                                                                     | 0,000729293 | 0,089224785 | 0,162 | 0,02  | 1           | 1,06379841    | 0,940027726     | 8,1             |
| CCDC71                                                                                   | 0,012429073 | 0,089220386 | 0,112 | 0,02  | 1           | 1,063795166   | 0,940030592     | 5,6             |
| DGKI                                                                                     | 0,026889313 | 0,089194563 | 0,075 | 0,01  | 1           | 1,063776125   | 0,940047418     | 7,5             |
| PSMA2                                                                                    | 0,026203023 | 0,089175738 | 0,812 | 0,49  | 1           | 1,063762244   | 0,940059685     | 1,657142857     |
| FSD1                                                                                     | 0,01082616  | 0,089150617 | 0,112 | 0,02  | 1           | 1,063743722   | 0,940076053     | 5,6             |
| PDZD8                                                                                    | 0,00058626  | 0,089045273 | 0,362 | 0,11  | 1           | 1,063666051   | 0,9401447       | 3,290909091     |
| TMUB1                                                                                    | 0,000122688 | 0,08901956  | 0,425 | 0,13  | 1           | 1,063647094   | 0,940161456     | 3,269230769     |
| PCDHGA6                                                                                  | 0,005562134 | 0,088988786 | 0,075 | 0     | 1           | 1,063624406   | 0,94018151      | #DIV/0!         |
| CAMKK2                                                                                   | 0,001393212 | 0,088910436 | 0,238 | 0,06  | 1           | 1,063566644   | 0,940232571     | 3,966666667     |
| ARNTL2                                                                                   | 0,001624218 | 0,088789856 | 0,125 | 0,01  | 1           | 1,063477755   | 0,940311159     | 12,5            |
| ZMYND8                                                                                   | 0,004817547 | 0,088750641 | 0,3   | 0,11  | 1           | 1,063448848   | 0,940336719     | 2,727272727     |
| ZNF514                                                                                   | 0,003009105 | 0,088716078 | 0,138 | 0,02  | 1           | 1,063423371   | 0,940359247     | 6,9             |
| R3HDM2                                                                                   | 0,000289773 | 0,088533042 | 0,512 | 0,18  | 1           | 1,063288462   | 0,940478558     | 2,844444444     |
| MICU1                                                                                    | 1,98172E-05 | 0,088417251 | 0,45  | 0,12  | 0,418161865 | 1,063203126   | 0,940554044     | 3,75            |
| INTS12                                                                                   | 0,000475763 | 0,08839317  | 0,325 | 0,09  | 1           | 1,063185379   | 0,940569744     | 3,611111111     |
| PACS1                                                                                    | 0,001212592 | 0,088346284 | 0,262 | 0,07  | 1           | 1,063150827   | 0,940600312     | 3,742857143     |
| SLC2A11                                                                                  | 0,022997455 | 0,08823097  | 0,1   | 0,02  | 1           | 1,063065854   | 0,940675497     | 5               |
| PLAGL1                                                                                   | 0,042211625 | 0,088213665 | 0,088 | 0,02  | 1           | 1,063053102   | 0,94068678      | 4,4             |
| ZMYND10                                                                                  | 0,00613773  | 0,08817302  | 0,1   | 0,01  | 1           | 1,063023153   | 0,940713283     | 10              |
| SLC25A40                                                                                 | 0,002666059 | 0,088148482 | 0,088 | 0     | 1           | 1,063005073   | 0,940729283     | #DIV/0!         |
| AREL1                                                                                    | 0,001278066 | 0,088091734 | 0,1   | 0     | 1           | 1,062963261   | 0,940766287     | #DIV/0!         |
| KRT80                                                                                    | 0,000138823 | 0,088044178 | 0,138 | 0     | 1           | 1,062928223   | 0,940797298     | #DIV/0!         |
| STX10                                                                                    | 0,000700036 | 0,087990125 | 0,613 | 0,24  | 1           | 1,062888399   | 0,940832547     | 2,554166667     |

Supplementary Table 4

| Differentially expressed genes_keloid-CCD_ comparing SC-Keloid vs. (SC-Myel, SC-Nonmyel) |             |             |       |       |             |               |                 |                 |
|------------------------------------------------------------------------------------------|-------------|-------------|-------|-------|-------------|---------------|-----------------|-----------------|
| gene                                                                                     | p_val       | avg_log2FC  | pct.1 | pct.2 | p_val_adj   | Foldchange_UP | Foldchange_DOWN | Ratio_pct1_pct2 |
| DGKH                                                                                     | 0,002149898 | 0,087960394 | 0,188 | 0,04  | 1           | 1,062866495   | 0,940851936     | 4,7             |
| TMLHE                                                                                    | 0,005858881 | 0,087909612 | 0,1   | 0,01  | 1           | 1,062829084   | 0,940885054     | 10              |
| RRAGA                                                                                    | 0,002564978 | 0,087874866 | 0,65  | 0,28  | 1           | 1,062803487   | 0,940907715     | 2,321428571     |
| MTFR1                                                                                    | 0,010591248 | 0,087774924 | 0,175 | 0,05  | 1           | 1,062729864   | 0,940972898     | 3,5             |
| PKP4                                                                                     | 0,001393212 | 0,087774752 | 0,238 | 0,06  | 1           | 1,062729737   | 0,94097301      | 3,966666667     |
| ADAM10                                                                                   | 0,0015463   | 0,087766792 | 0,613 | 0,27  | 1           | 1,062723874   | 0,940978202     | 2,27037037      |
| PCNT                                                                                     | 0,002937191 | 0,087679948 | 0,162 | 0,03  | 1           | 1,062659904   | 0,941034847     | 5,4             |
| MAN1A2                                                                                   | 0,001979096 | 0,087672691 | 0,562 | 0,25  | 1           | 1,062654559   | 0,94103958      | 2,248           |
| BCL10                                                                                    | 0,000279732 | 0,087540994 | 0,35  | 0,1   | 1           | 1,062557559   | 0,941125487     | 3,5             |
| THNSL1                                                                                   | 0,011634754 | 0,087521689 | 0,062 | 0     | 1           | 1,06254334    | 0,941138081     | #DIV/0!         |
| GPN1                                                                                     | 3,6205E-05  | 0,087474454 | 0,288 | 0,05  | 0,763961407 | 1,062508553   | 0,941168895     | 5,76            |
| SNRNP40                                                                                  | 7,47336E-05 | 0,087459641 | 0,425 | 0,12  | 1           | 1,062497643   | 0,941178559     | 3,541666667     |
| TUBGCP5                                                                                  | 0,001647937 | 0,087440679 | 0,212 | 0,05  | 1           | 1,062483678   | 0,941190929     | 4,24            |
| NONO                                                                                     | 0,000772045 | 0,087338534 | 0,675 | 0,27  | 1           | 1,062408456   | 0,941257569     | 2,5             |
| STK19                                                                                    | 0,001789088 | 0,087271125 | 0,312 | 0,1   | 1           | 1,062358816   | 0,94130155      | 3,12            |
| YPEL1                                                                                    | 0,022652675 | 0,087233256 | 0,138 | 0,04  | 1           | 1,062330931   | 0,941326258     | 3,45            |
| SLC35A2                                                                                  | 0,001289409 | 0,087219284 | 0,35  | 0,12  | 1           | 1,062320643   | 0,941335375     | 2,916666667     |
| SLC19A1                                                                                  | 0,000611714 | 0,087198915 | 0,112 | 0     | 1           | 1,062305644   | 0,941348665     | #DIV/0!         |
| RAP1B                                                                                    | 0,003787389 | 0,087176248 | 0,863 | 0,49  | 1           | 1,062288954   | 0,941363455     | 1,76122449      |
| ECT2                                                                                     | 0,024662875 | 0,087161744 | 0,238 | 0,1   | 1           | 1,062278274   | 0,941372919     | 2,38            |
| HDAC9                                                                                    | 0,012656091 | 0,087120422 | 0,225 | 0,08  | 1           | 1,062247848   | 0,941399883     | 2,8125          |
| PPP1R11                                                                                  | 0,002876772 | 0,087066099 | 0,35  | 0,13  | 1           | 1,062207852   | 0,94143533      | 2,692307692     |
| SLC35E1                                                                                  | 0,001538482 | 0,087034328 | 0,238 | 0,06  | 1           | 1,06218446    | 0,941456063     | 3,966666667     |
| SLC9A7                                                                                   | 0,006731552 | 0,0869083   | 0,1   | 0,01  | 1           | 1,062091676   | 0,941538308     | 10              |
| PIGM                                                                                     | 0,000830908 | 0,086818585 | 0,162 | 0,02  | 1           | 1,062025631   | 0,94159686      | 8,1             |
| BCAS4                                                                                    | 0,000611714 | 0,086817235 | 0,112 | 0     | 1           | 1,062024637   | 0,941597742     | #DIV/0!         |
| STAM2                                                                                    | 8,12671E-05 | 0,086759543 | 0,3   | 0,06  | 1           | 1,061982169   | 0,941635396     | 5               |
| ALG12                                                                                    | 0,003497059 | 0,086723274 | 0,2   | 0,05  | 1           | 1,061955471   | 0,941659069     | 4               |
| ESCO2                                                                                    | 0,000611714 | 0,086713265 | 0,112 | 0     | 1           | 1,061948104   | 0,941665602     | #DIV/0!         |
| WWTR1                                                                                    | 0,00279334  | 0,086701778 | 0,675 | 0,3   | 1           | 1,061939648   | 0,941673099     | 2,25            |

Supplementary Table 4

| Differentially expressed genes_keloid-CCD_ comparing SC-Keloid vs. (SC-Myel, SC-Nonmyel) |             |             |       |       |             |               |                 |                 |
|------------------------------------------------------------------------------------------|-------------|-------------|-------|-------|-------------|---------------|-----------------|-----------------|
| gene                                                                                     | p_val       | avg_log2FC  | pct.1 | pct.2 | p_val_adj   | Foldchange_UP | Foldchange_DOWN | Ratio_pct1_pct2 |
| GTPBP2                                                                                   | 0,003269989 | 0,086571862 | 0,138 | 0,02  | 1           | 1,061844024   | 0,941757902     | 6,9             |
| REEP2                                                                                    | 0,001589924 | 0,086569472 | 0,238 | 0,06  | 1           | 1,061842265   | 0,941759462     | 3,966666667     |
| MTAP                                                                                     | 0,002461445 | 0,086466342 | 0,288 | 0,09  | 1           | 1,061766362   | 0,941826785     | 3,2             |
| PBX3                                                                                     | 1,03799E-05 | 0,086354545 | 0,338 | 0,06  | 0,219027024 | 1,061684087   | 0,941899772     | 5,633333333     |
| CDCA2                                                                                    | 0,003313746 | 0,086292768 | 0,112 | 0,01  | 1           | 1,061638627   | 0,941940106     | 11,2            |
| CCNQ                                                                                     | 6,12138E-05 | 0,086235339 | 0,325 | 0,07  | 1           | 1,061596367   | 0,941977602     | 4,642857143     |
| AZI2                                                                                     | 0,004082305 | 0,086180739 | 0,438 | 0,18  | 1           | 1,061556191   | 0,942013252     | 2,433333333     |
| GLE1                                                                                     | 0,000813108 | 0,086129295 | 0,162 | 0,02  | 1           | 1,061518338   | 0,942046844     | 8,1             |
| TMEM42                                                                                   | 0,006731552 | 0,086102517 | 0,1   | 0,01  | 1           | 1,061498636   | 0,942064329     | 10              |
| TRIOBP                                                                                   | 0,000763713 | 0,085890848 | 0,425 | 0,15  | 1           | 1,061342907   | 0,942202557     | 2,833333333     |
| TRIM36                                                                                   | 0,005562134 | 0,08578376  | 0,075 | 0     | 1           | 1,061264128   | 0,942272497     | #DIV/0!         |
| PACS2                                                                                    | 5,1055E-05  | 0,08568243  | 0,325 | 0,07  | 1           | 1,061189591   | 0,942338681     | 4,642857143     |
| STRAP                                                                                    | 0,027251733 | 0,085625347 | 0,812 | 0,47  | 1           | 1,061147604   | 0,942375967     | 1,727659574     |
| ZADH2                                                                                    | 0,002380703 | 0,08562012  | 0,225 | 0,06  | 1           | 1,06114376    | 0,942379382     | 3,75            |
| TMEM47                                                                                   | 0,014429042 | 0,085600327 | 0,787 | 0,42  | 1           | 1,061129201   | 0,942392311     | 1,873809524     |
| CD248                                                                                    | 0,002666059 | 0,085564692 | 0,088 | 0     | 1           | 1,061102991   | 0,942415589     | #DIV/0!         |
| ZNF85                                                                                    | 0,003237075 | 0,085505921 | 0,112 | 0,01  | 1           | 1,061059766   | 0,94245398      | 11,2            |
| EFHD2                                                                                    | 0,000443537 | 0,085456966 | 0,713 | 0,29  | 1           | 1,061023762   | 0,942485961     | 2,45862069      |
| FGF1                                                                                     | 0,002666059 | 0,085397286 | 0,088 | 0     | 1           | 1,060979871   | 0,94252495      | #DIV/0!         |
| STAT5B                                                                                   | 0,013300727 | 0,085346414 | 0,15  | 0,04  | 1           | 1,06094246    | 0,942558186     | 3,75            |
| IQCK                                                                                     | 0,003269989 | 0,08533048  | 0,138 | 0,02  | 1           | 1,060930742   | 0,942568596     | 6,9             |
| HSD3B7                                                                                   | 0,013022034 | 0,085239528 | 0,088 | 0,01  | 1           | 1,06086386    | 0,94262802      | 8,8             |
| FLAD1                                                                                    | 0,001300119 | 0,085194197 | 0,2   | 0,04  | 1           | 1,060830527   | 0,942657639     | 5               |
| TIMM21                                                                                   | 0,000792271 | 0,085178824 | 0,138 | 0,01  | 1           | 1,060819223   | 0,942667684     | 13,8            |
| MGAT4B                                                                                   | 0,00069675  | 0,085007679 | 0,812 | 0,35  | 1           | 1,060693387   | 0,942779518     | 2,32            |
| GALNT6                                                                                   | 0,011634754 | 0,084993326 | 0,062 | 0     | 1           | 1,060682835   | 0,942788897     | #DIV/0!         |
| PGPEP1                                                                                   | 0,013085057 | 0,084979869 | 0,15  | 0,04  | 1           | 1,060672941   | 0,942797691     | 3,75            |
| TOR1B                                                                                    | 9,97753E-05 | 0,084913852 | 0,225 | 0,03  | 1           | 1,060624406   | 0,942840835     | 7,5             |
| ABHD4                                                                                    | 0,007988348 | 0,084888418 | 0,162 | 0,04  | 1           | 1,060605708   | 0,942857457     | 4,05            |
| ADSS2                                                                                    | 2,27591E-05 | 0,084831102 | 0,462 | 0,12  | 0,480239445 | 1,060563573   | 0,942894915     | 3,85            |



Supplementary Table 4

| Differentially expressed genes_keloid-CCD_ comparing SC-Keloid vs. (SC-Myel, SC-Nonmyel) |             |             |       |       |             |               |                 |                 |
|------------------------------------------------------------------------------------------|-------------|-------------|-------|-------|-------------|---------------|-----------------|-----------------|
| gene                                                                                     | p_val       | avg_log2FC  | pct.1 | pct.2 | p_val_adj   | Foldchange_UP | Foldchange_DOWN | Ratio_pct1_pct2 |
| TYK2                                                                                     | 0,002920793 | 0,084793625 | 0,238 | 0,07  | 1           | 1,060536022   | 0,94291941      | 3,4             |
| OSCP1                                                                                    | 0,020902746 | 0,084740888 | 0,1   | 0,02  | 1           | 1,060497256   | 0,942953878     | 5               |
| KIF18B                                                                                   | 0,001278066 | 0,084737931 | 0,1   | 0     | 1           | 1,060495083   | 0,94295581      | #DIV/0!         |
| LRFN4                                                                                    | 0,00109149  | 0,084696972 | 0,325 | 0,1   | 1           | 1,060464974   | 0,942982582     | 3,25            |
| ZMIZ2                                                                                    | 0,000893589 | 0,084658127 | 0,25  | 0,06  | 1           | 1,060436422   | 0,943007972     | 4,166666667     |
| MKS1                                                                                     | 0,006578444 | 0,084633701 | 0,1   | 0,01  | 1           | 1,060418468   | 0,943023938     | 10              |
| RNF141                                                                                   | 4,58793E-05 | 0,084631213 | 0,288 | 0,05  | 0,968098455 | 1,060416639   | 0,943025565     | 5,76            |
| SHISAL1                                                                                  | 0,003237075 | 0,084610247 | 0,112 | 0,01  | 1           | 1,060401229   | 0,943039269     | 11,2            |
| SLC9A3                                                                                   | 0,005562134 | 0,084493829 | 0,075 | 0     | 1           | 1,060315663   | 0,943115371     | #DIV/0!         |
| GPC2                                                                                     | 0,005562134 | 0,084358893 | 0,075 | 0     | 1           | 1,060216496   | 0,943203585     | #DIV/0!         |
| ADPGK                                                                                    | 9,2385E-05  | 0,084315849 | 0,362 | 0,09  | 1           | 1,060184864   | 0,943231727     | 4,022222222     |
| LRRC23                                                                                   | 0,005242842 | 0,084303137 | 0,212 | 0,06  | 1           | 1,060175523   | 0,943240038     | 3,533333333     |
| HECTD2                                                                                   | 0,002932167 | 0,084240285 | 0,225 | 0,06  | 1           | 1,060129336   | 0,943281132     | 3,75            |
| CUL4B                                                                                    | 0,000487981 | 0,084236536 | 0,262 | 0,06  | 1           | 1,060126581   | 0,943283583     | 4,366666667     |
| PACC1                                                                                    | 0,000521745 | 0,084218245 | 0,238 | 0,05  | 1           | 1,060113141   | 0,943295542     | 4,76            |
| SSC5D                                                                                    | 0,001446769 | 0,084216725 | 0,562 | 0,23  | 1           | 1,060112024   | 0,943296536     | 2,443478261     |
| PHKA2                                                                                    | 0,011634754 | 0,084191769 | 0,062 | 0     | 1           | 1,060093686   | 0,943312854     | #DIV/0!         |
| CENPO                                                                                    | 0,001624218 | 0,084156192 | 0,125 | 0,01  | 1           | 1,060067545   | 0,943336116     | 12,5            |
| PIH1D1                                                                                   | 0,00546756  | 0,084122344 | 0,525 | 0,24  | 1           | 1,060042674   | 0,943358248     | 2,1875          |
| DDX19A                                                                                   | 0,00018066  | 0,08410045  | 0,238 | 0,04  | 1           | 1,060026587   | 0,943372565     | 5,95            |
| MED12                                                                                    | 0,023011948 | 0,084034717 | 0,138 | 0,04  | 1           | 1,059978291   | 0,943415548     | 3,45            |
| ZMYM4                                                                                    | 0,015534175 | 0,08394717  | 0,338 | 0,15  | 1           | 1,05991397    | 0,943472799     | 2,253333333     |
| TIMP4                                                                                    | 0,000389389 | 0,083946265 | 0,775 | 0,36  | 1           | 1,059913305   | 0,943473391     | 2,152777778     |
| PRCC                                                                                     | 0,000502967 | 0,083937805 | 0,412 | 0,14  | 1           | 1,059907089   | 0,943478924     | 2,942857143     |
| ACCS                                                                                     | 0,024497883 | 0,083758813 | 0,05  | 0     | 1           | 1,059775597   | 0,943595986     | #DIV/0!         |
| AP3S2                                                                                    | 0,027487357 | 0,083752489 | 0,075 | 0,01  | 1           | 1,059770952   | 0,943600122     | 7,5             |
| USP27X                                                                                   | 0,013319742 | 0,083746571 | 0,088 | 0,01  | 1           | 1,059766605   | 0,943603993     | 8,8             |
| ORC3                                                                                     | 0,001782697 | 0,08366376  | 0,238 | 0,06  | 1           | 1,059705776   | 0,943658158     | 3,966666667     |
| TIAL1                                                                                    | 0,000256825 | 0,083647391 | 0,7   | 0,28  | 1           | 1,059693752   | 0,943668865     | 2,5             |
| RREB1                                                                                    | 0,003895696 | 0,083612616 | 0,238 | 0,07  | 1           | 1,059668209   | 0,943691612     | 3,4             |

Supplementary Table 4

| Differentially expressed genes_keloid-CCD_ comparing SC-Keloid vs. (SC-Myel, SC-Nonmyel) |             |             |       |       |           |               |                 |                 |
|------------------------------------------------------------------------------------------|-------------|-------------|-------|-------|-----------|---------------|-----------------|-----------------|
| gene                                                                                     | p_val       | avg_log2FC  | pct.1 | pct.2 | p_val_adj | Foldchange_UP | Foldchange_DOWN | Ratio_pct1_pct2 |
| TFB2M                                                                                    | 0,003998067 | 0,083540734 | 0,175 | 0,04  | 1         | 1,059615413   | 0,943738632     | 4,375           |
| SLC7A5                                                                                   | 4,86715E-05 | 0,083495665 | 0,212 | 0,02  | 1         | 1,059582311   | 0,943768114     | 10,6            |
| ACVR2A                                                                                   | 0,014426885 | 0,083478913 | 0,15  | 0,04  | 1         | 1,059570008   | 0,943779073     | 3,75            |
| CSTF3                                                                                    | 0,001538482 | 0,083455397 | 0,238 | 0,06  | 1         | 1,059552738   | 0,943794456     | 3,966666667     |
| KIF15                                                                                    | 0,005562134 | 0,083408788 | 0,075 | 0     | 1         | 1,059518507   | 0,943824948     | #DIV/0!         |
| IFNGR2                                                                                   | 0,077957743 | 0,083338563 | 0,863 | 0,54  | 1         | 1,059466935   | 0,943870891     | 1,598148148     |
| ZBED4                                                                                    | 0,003137076 | 0,083300953 | 0,138 | 0,02  | 1         | 1,059439316   | 0,943895497     | 6,9             |
| ATMIN                                                                                    | 0,003393672 | 0,083271968 | 0,275 | 0,09  | 1         | 1,059418031   | 0,943914461     | 3,055555556     |
| ADAT1                                                                                    | 0,001278066 | 0,083254221 | 0,1   | 0     | 1         | 1,059404999   | 0,943926073     | #DIV/0!         |
| BECN1                                                                                    | 0,002698587 | 0,083206633 | 0,438 | 0,17  | 1         | 1,059370054   | 0,943957209     | 2,576470588     |
| FAM83D                                                                                   | 0,002666059 | 0,083199469 | 0,088 | 0     | 1         | 1,059364794   | 0,943961896     | #DIV/0!         |
| CNFN                                                                                     | 0,003313746 | 0,083180159 | 0,112 | 0,01  | 1         | 1,059350615   | 0,943974531     | 11,2            |
| CDPF1                                                                                    | 0,024497883 | 0,083153587 | 0,05  | 0     | 1         | 1,059331103   | 0,943991918     | #DIV/0!         |
| CDC26                                                                                    | 0,004851274 | 0,083118933 | 0,55  | 0,24  | 1         | 1,059305658   | 0,944014593     | 2,291666667     |
| GAS7                                                                                     | 0,190345267 | 0,083103524 | 0,975 | 0,69  | 1         | 1,059294344   | 0,944024676     | 1,413043478     |
| ARV1                                                                                     | 0,001160873 | 0,083077747 | 0,225 | 0,05  | 1         | 1,059275418   | 0,944041543     | 4,5             |
| RUBCN                                                                                    | 0,001101569 | 0,08307679  | 0,225 | 0,05  | 1         | 1,059274715   | 0,94404217      | 4,5             |
| CSNK2B                                                                                   | 0,003396242 | 0,083070671 | 0,75  | 0,34  | 1         | 1,059270222   | 0,944046174     | 2,205882353     |
| FAM86C1P                                                                                 | 0,002666059 | 0,083043328 | 0,088 | 0     | 1         | 1,059250146   | 0,944064066     | #DIV/0!         |
| SLC39A9                                                                                  | 0,010523115 | 0,083038012 | 0,212 | 0,07  | 1         | 1,059246243   | 0,944067545     | 3,028571429     |
| ABCB9                                                                                    | 0,001278066 | 0,083009165 | 0,1   | 0     | 1         | 1,059225063   | 0,944086422     | #DIV/0!         |
| ENAH                                                                                     | 0,000560907 | 0,082975545 | 0,238 | 0,05  | 1         | 1,05920038    | 0,944108423     | 4,76            |
| FAM167B                                                                                  | 0,001278066 | 0,08296715  | 0,1   | 0     | 1         | 1,059194216   | 0,944113917     | #DIV/0!         |
| OSBPL3                                                                                   | 0,006150583 | 0,082926555 | 0,125 | 0,02  | 1         | 1,059164413   | 0,944140483     | 6,25            |
| CAMTA2                                                                                   | 0,012187918 | 0,082896811 | 0,112 | 0,02  | 1         | 1,059142577   | 0,944159948     | 5,6             |
| USP48                                                                                    | 0,001722898 | 0,082769761 | 0,475 | 0,2   | 1         | 1,059049308   | 0,944243098     | 2,375           |
| ARHGEF12                                                                                 | 0,069795155 | 0,082695594 | 0,775 | 0,45  | 1         | 1,058994865   | 0,944291642     | 1,722222222     |
| POLI                                                                                     | 0,000413716 | 0,082643193 | 0,175 | 0,02  | 1         | 1,058956401   | 0,944325941     | 8,75            |
| CAMK2B                                                                                   | 0,024497883 | 0,082615448 | 0,05  | 0     | 1         | 1,058936037   | 0,944344102     | #DIV/0!         |
| PAXIP1-DT                                                                                | 0,065149494 | 0,082578311 | 0,112 | 0,04  | 1         | 1,058908779   | 0,94436841      | 2,8             |

Supplementary Table 4

| Differentially expressed genes_keloid-CCD_comparing SC-Keloid vs. (SC-Myel, SC-Nonmyel) |             |             |       |       |            |               |                 |                 |
|-----------------------------------------------------------------------------------------|-------------|-------------|-------|-------|------------|---------------|-----------------|-----------------|
| gene                                                                                    | p_val       | avg_log2FC  | pct.1 | pct.2 | p_val_adj  | Foldchange_UP | Foldchange_DOWN | Ratio_pct1_pct2 |
| LRRC15                                                                                  | 0,003313746 | 0,082526924 | 0,112 | 0,01  | 1          | 1,058871062   | 0,944402048     | 11,2            |
| DNLZ                                                                                    | 0,017470544 | 0,08250948  | 0,125 | 0,03  | 1          | 1,058858259   | 0,944413468     | 4,166666667     |
| SRFBP1                                                                                  | 0,000287405 | 0,082473655 | 0,338 | 0,09  | 1          | 1,058831966   | 0,94443692      | 3,755555556     |
| CDKL3                                                                                   | 0,055204571 | 0,082336749 | 0,1   | 0,03  | 1          | 1,058731492   | 0,944526547     | 3,333333333     |
| SYCE1L                                                                                  | 0,003088561 | 0,082308976 | 0,112 | 0,01  | 1          | 1,058711111   | 0,94454473      | 11,2            |
| CMC4                                                                                    | 0,001624218 | 0,082297142 | 0,125 | 0,01  | 1          | 1,058702426   | 0,944552478     | 12,5            |
| MED25                                                                                   | 0,001538482 | 0,082249913 | 0,238 | 0,06  | 1          | 1,058667768   | 0,9445834       | 3,966666667     |
| SEC11C                                                                                  | 3,20293E-06 | 0,082244692 | 0,65  | 0,2   | 0,06758494 | 1,058663937   | 0,944586818     | 3,25            |
| MRPS18C                                                                                 | 0,000353557 | 0,082230592 | 0,512 | 0,18  | 1          | 1,05865359    | 0,94459605      | 2,844444444     |
| PRPSAP2                                                                                 | 0,002669254 | 0,082187115 | 0,3   | 0,1   | 1          | 1,058621687   | 0,944624517     | 3               |
| AKT2                                                                                    | 5,69398E-05 | 0,082084452 | 0,325 | 0,07  | 1          | 1,058546358   | 0,94469174      | 4,642857143     |
| SEC22A                                                                                  | 0,004516944 | 0,081948955 | 0,175 | 0,04  | 1          | 1,058446945   | 0,944780468     | 4,375           |
| LSM1                                                                                    | 0,003486707 | 0,081918505 | 0,65  | 0,29  | 1          | 1,058424605   | 0,944800409     | 2,24137931      |
| C11orf49                                                                                | 0,000647541 | 0,08185999  | 0,212 | 0,04  | 1          | 1,058381677   | 0,944838731     | 5,3             |
| C2CD5                                                                                   | 0,000792271 | 0,081792911 | 0,138 | 0,01  | 1          | 1,058332468   | 0,944882663     | 13,8            |
| PDSS1                                                                                   | 0,000291957 | 0,081637182 | 0,125 | 0     | 1          | 1,058218234   | 0,944984662     | #DIV/0!         |
| EFCAB7                                                                                  | 0,00578692  | 0,081606423 | 0,125 | 0,02  | 1          | 1,058195673   | 0,945004809     | 6,25            |
| RHOG                                                                                    | 0,003027035 | 0,081577904 | 0,488 | 0,21  | 1          | 1,058174755   | 0,94502349      | 2,323809524     |
| DOCK6                                                                                   | 0,005274968 | 0,081574256 | 0,15  | 0,03  | 1          | 1,058172078   | 0,94502588      | 5               |
| B3GLCT                                                                                  | 0,003162024 | 0,081536719 | 0,112 | 0,01  | 1          | 1,058144547   | 0,945050469     | 11,2            |
| STK10                                                                                   | 0,002979078 | 0,081532695 | 0,225 | 0,06  | 1          | 1,058141595   | 0,945053105     | 3,75            |
| NPB                                                                                     | 0,000455227 | 0,081511157 | 0,262 | 0,06  | 1          | 1,058125799   | 0,945067213     | 4,366666667     |
| TLCD1                                                                                   | 0,005562134 | 0,081466014 | 0,075 | 0     | 1          | 1,05809269    | 0,945096786     | #DIV/0!         |
| CYB5R1                                                                                  | 0,000658631 | 0,081457565 | 0,338 | 0,1   | 1          | 1,058086493   | 0,945102321     | 3,38            |
| H2AC11                                                                                  | 0,001278066 | 0,081441275 | 0,1   | 0     | 1          | 1,058074546   | 0,945112992     | #DIV/0!         |
| WARS2                                                                                   | 0,001624218 | 0,081401117 | 0,125 | 0,01  | 1          | 1,058045094   | 0,9451393       | 12,5            |
| SLC5A6                                                                                  | 0,011950918 | 0,081338838 | 0,112 | 0,02  | 1          | 1,057999421   | 0,945180101     | 5,6             |
| ILVBL                                                                                   | 5,83924E-05 | 0,081319915 | 0,388 | 0,1   | 1          | 1,057985544   | 0,945192499     | 3,88            |
| NFYA                                                                                    | 0,054166721 | 0,081269893 | 0,062 | 0,01  | 1          | 1,057948862   | 0,945225272     | 6,2             |
| BCL2A1                                                                                  | 0,013319742 | 0,081218668 | 0,088 | 0,01  | 1          | 1,057911298   | 0,945258834     | 8,8             |

Supplementary Table 4

| Differentially expressed genes_keloid-CCD_ comparing SC-Keloid vs. (SC-Myel, SC-Nonmyel) |             |             |       |       |             |               |                 |                 |
|------------------------------------------------------------------------------------------|-------------|-------------|-------|-------|-------------|---------------|-----------------|-----------------|
| gene                                                                                     | p_val       | avg_log2FC  | pct.1 | pct.2 | p_val_adj   | Foldchange_UP | Foldchange_DOWN | Ratio_pct1_pct2 |
| SP140L                                                                                   | 0,016777178 | 0,081161077 | 0,238 | 0,09  | 1           | 1,057869068   | 0,945296568     | 2,644444444     |
| PEX11B                                                                                   | 0,006404327 | 0,081148252 | 0,125 | 0,02  | 1           | 1,057859664   | 0,945304972     | 6,25            |
| MTIF2                                                                                    | 2,47883E-05 | 0,081132836 | 0,275 | 0,04  | 0,523057667 | 1,057848361   | 0,945315073     | 6,875           |
| ZNF837                                                                                   | 0,005562134 | 0,081090297 | 0,075 | 0     | 1           | 1,057817169   | 0,945342947     | #DIV/0!         |
| RSL1D1                                                                                   | 0,000919624 | 0,081078448 | 0,812 | 0,34  | 1           | 1,057808481   | 0,945350711     | 2,388235294     |
| RNF135                                                                                   | 0,000698362 | 0,081077701 | 0,212 | 0,04  | 1           | 1,057807934   | 0,9453512       | 5,3             |
| JMJD4                                                                                    | 0,00141651  | 0,081062952 | 0,238 | 0,06  | 1           | 1,057797119   | 0,945360865     | 3,966666667     |
| TBC1D9                                                                                   | 0,042211625 | 0,080878013 | 0,088 | 0,02  | 1           | 1,057661529   | 0,945482059     | 4,4             |
| TIMELESS                                                                                 | 0,001278066 | 0,080858594 | 0,1   | 0     | 1           | 1,057647293   | 0,945494785     | #DIV/0!         |
| EDEM2                                                                                    | 0,001075714 | 0,080788068 | 0,325 | 0,1   | 1           | 1,057595591   | 0,945541007     | 3,25            |
| ZNF605                                                                                   | 0,012187918 | 0,080749993 | 0,112 | 0,02  | 1           | 1,05756768    | 0,945565962     | 5,6             |
| CBR4                                                                                     | 0,008266568 | 0,080718165 | 0,212 | 0,07  | 1           | 1,057544349   | 0,945586822     | 3,028571429     |
| CAD                                                                                      | 0,001624218 | 0,080708006 | 0,125 | 0,01  | 1           | 1,057536902   | 0,94559348      | 12,5            |
| USP1                                                                                     | 0,006222951 | 0,080691732 | 0,537 | 0,25  | 1           | 1,057524973   | 0,945604147     | 2,148           |
| BCAT2                                                                                    | 4,67876E-05 | 0,080637475 | 0,288 | 0,05  | 0,987265702 | 1,057485202   | 0,94563971      | 5,76            |
| PTPRG                                                                                    | 0,013319742 | 0,080592937 | 0,088 | 0,01  | 1           | 1,057452557   | 0,945668904     | 8,8             |
| PKN3                                                                                     | 0,006281588 | 0,080579667 | 0,1   | 0,01  | 1           | 1,05744283    | 0,945677602     | 10              |
| DNA2                                                                                     | 0,024497883 | 0,080533741 | 0,05  | 0     | 1           | 1,057409169   | 0,945707707     | #DIV/0!         |
| PUS1                                                                                     | 0,026302537 | 0,080501542 | 0,075 | 0,01  | 1           | 1,057385569   | 0,945728814     | 7,5             |
| HSCB                                                                                     | 0,000580505 | 0,080457833 | 0,3   | 0,08  | 1           | 1,057353534   | 0,945757467     | 3,75            |
| ACSL4                                                                                    | 0,000189221 | 0,080401951 | 0,362 | 0,1   | 1           | 1,057312579   | 0,945794101     | 3,62            |
| HS1BP3                                                                                   | 0,005788164 | 0,080271882 | 0,188 | 0,05  | 1           | 1,057217259   | 0,945879375     | 3,76            |
| ITCH                                                                                     | 0,000163845 | 0,080260741 | 0,35  | 0,09  | 1           | 1,057209095   | 0,945886679     | 3,888888889     |
| GFPT2                                                                                    | 0,003137076 | 0,080176767 | 0,138 | 0,02  | 1           | 1,05714756    | 0,945941738     | 6,9             |
| GMNN                                                                                     | 0,001393212 | 0,080153242 | 0,238 | 0,06  | 1           | 1,057130322   | 0,945957163     | 3,966666667     |
| ZNF879                                                                                   | 0,005562134 | 0,080105395 | 0,075 | 0     | 1           | 1,057095263   | 0,945988536     | #DIV/0!         |
| ZFPL1                                                                                    | 0,000358805 | 0,080103643 | 0,312 | 0,08  | 1           | 1,057093979   | 0,945989684     | 3,9             |
| BNC2                                                                                     | 0,011634754 | 0,080086534 | 0,062 | 0     | 1           | 1,057081443   | 0,946000903     | #DIV/0!         |
| SLC16A8                                                                                  | 0,024497883 | 0,080083563 | 0,05  | 0     | 1           | 1,057079267   | 0,946002851     | #DIV/0!         |
| LYPLA2                                                                                   | 7,40734E-05 | 0,080067874 | 0,3   | 0,06  | 1           | 1,057067771   | 0,946013139     | 5               |

Supplementary Table 4

| Differentially expressed genes_keloid-CCD_ comparing SC-Keloid vs. (SC-Myel, SC-Nonmyel) |             |             |       |       |             |               |                 |                 |
|------------------------------------------------------------------------------------------|-------------|-------------|-------|-------|-------------|---------------|-----------------|-----------------|
| gene                                                                                     | p_val       | avg_log2FC  | pct.1 | pct.2 | p_val_adj   | Foldchange_UP | Foldchange_DOWN | Ratio_pct1_pct2 |
| BCL2L1                                                                                   | 0,009808401 | 0,080064716 | 0,212 | 0,07  | 1           | 1,057065457   | 0,94601521      | 3,028571429     |
| COQ5                                                                                     | 1,08415E-05 | 0,080049255 | 0,312 | 0,05  | 0,228767372 | 1,057054128   | 0,946025348     | 6,24            |
| NUP214                                                                                   | 0,001121018 | 0,080023227 | 0,225 | 0,05  | 1           | 1,057035059   | 0,946042415     | 4,5             |
| IRAK1BP1                                                                                 | 0,002666059 | 0,080014505 | 0,088 | 0     | 1           | 1,057028668   | 0,946048135     | #DIV/0!         |
| RCBTB1                                                                                   | 0,00613773  | 0,080005358 | 0,1   | 0,01  | 1           | 1,057021966   | 0,946054133     | 10              |
| RPL5                                                                                     | 0,246576921 | 0,079890725 | 1     | 0,98  | 1           | 1,056937981   | 0,946129307     | 1,020408163     |
| CHAMP1                                                                                   | 0,002569294 | 0,079860368 | 0,162 | 0,03  | 1           | 1,056915741   | 0,946149216     | 5,4             |
| PCED1A                                                                                   | 0,001530226 | 0,079841889 | 0,175 | 0,03  | 1           | 1,056902204   | 0,946161335     | 5,833333333     |
| TMPO-AS1                                                                                 | 0,003313746 | 0,079815539 | 0,112 | 0,01  | 1           | 1,0568829     | 0,946178616     | 11,2            |
| LPCAT1                                                                                   | 0,001278066 | 0,079575704 | 0,1   | 0     | 1           | 1,056707218   | 0,946335923     | #DIV/0!         |
| NLE1                                                                                     | 0,01687216  | 0,079572357 | 0,125 | 0,03  | 1           | 1,056704766   | 0,946338118     | 4,166666667     |
| PUS7L                                                                                    | 0,005275521 | 0,079313352 | 0,262 | 0,09  | 1           | 1,056515074   | 0,946508028     | 2,911111111     |
| ZBTB37                                                                                   | 0,000830908 | 0,079311585 | 0,162 | 0,02  | 1           | 1,05651378    | 0,946509188     | 8,1             |
| RBL1                                                                                     | 0,001624218 | 0,07926921  | 0,125 | 0,01  | 1           | 1,056482749   | 0,946536989     | 12,5            |
| THOC5                                                                                    | 0,002774001 | 0,079214039 | 0,162 | 0,03  | 1           | 1,056442348   | 0,946573187     | 5,4             |
| MT1G                                                                                     | 0,052279021 | 0,07919178  | 0,038 | 0     | 1           | 1,056426049   | 0,946587791     | #DIV/0!         |
| IFFO1                                                                                    | 0,002498791 | 0,079155214 | 0,225 | 0,06  | 1           | 1,056399273   | 0,946611783     | 3,75            |
| BDNF                                                                                     | 0,005562134 | 0,079153445 | 0,075 | 0     | 1           | 1,056397978   | 0,946612944     | #DIV/0!         |
| BAALC                                                                                    | 0,042972899 | 0,079109012 | 0,125 | 0,04  | 1           | 1,056365442   | 0,946642099     | 3,125           |
| TNFSF4                                                                                   | 0,012187918 | 0,079024889 | 0,112 | 0,02  | 1           | 1,056303848   | 0,946697299     | 5,6             |
| USP8                                                                                     | 0,000990997 | 0,078993809 | 0,5   | 0,19  | 1           | 1,056281093   | 0,946717694     | 2,631578947     |
| BRI3BP                                                                                   | 0,005373635 | 0,078958818 | 0,15  | 0,03  | 1           | 1,056255474   | 0,946740656     | 5               |
| NUP62                                                                                    | 0,001519921 | 0,078915309 | 0,35  | 0,12  | 1           | 1,056223619   | 0,946769208     | 2,916666667     |
| PQBP1                                                                                    | 0,001767596 | 0,078908325 | 0,525 | 0,22  | 1           | 1,056218507   | 0,946773791     | 2,386363636     |
| RAC3                                                                                     | 0,002666059 | 0,078847595 | 0,088 | 0     | 1           | 1,056174046   | 0,946813647     | #DIV/0!         |
| UNC119B                                                                                  | 0,001891202 | 0,078839319 | 0,212 | 0,05  | 1           | 1,056167987   | 0,946819078     | 4,24            |
| PHF11                                                                                    | 8,47213E-06 | 0,078724531 | 0,312 | 0,05  | 0,178770387 | 1,056083957   | 0,946894414     | 6,24            |
| VRK2                                                                                     | 0,002774001 | 0,07871458  | 0,162 | 0,03  | 1           | 1,056076672   | 0,946900946     | 5,4             |
| LY75                                                                                     | 0,024497883 | 0,078696324 | 0,05  | 0     | 1           | 1,056063309   | 0,946912928     | #DIV/0!         |
| LSS                                                                                      | 0,000191176 | 0,078656318 | 0,212 | 0,03  | 1           | 1,056034024   | 0,946939187     | 7,066666667     |

Supplementary Table 4

| Differentially expressed genes_keloid-CCD_ comparing SC-Keloid vs. (SC-Myel, SC-Nonmyel) |             |             |       |       |             |               |                 |                 |
|------------------------------------------------------------------------------------------|-------------|-------------|-------|-------|-------------|---------------|-----------------|-----------------|
| gene                                                                                     | p_val       | avg_log2FC  | pct.1 | pct.2 | p_val_adj   | Foldchange_UP | Foldchange_DOWN | Ratio_pct1_pct2 |
| JARID2                                                                                   | 0,008528398 | 0,078582073 | 0,288 | 0,11  | 1           | 1,05597968    | 0,94698792      | 2,618181818     |
| ABCD1                                                                                    | 0,002666059 | 0,078550127 | 0,088 | 0     | 1           | 1,055956297   | 0,947008889     | #DIV/0!         |
| NFX1                                                                                     | 0,010591248 | 0,078441644 | 0,175 | 0,05  | 1           | 1,055876898   | 0,947080102     | 3,5             |
| ASCC1                                                                                    | 0,001212592 | 0,078295447 | 0,262 | 0,07  | 1           | 1,055769905   | 0,94717608      | 3,742857143     |
| LETM1                                                                                    | 0,000580505 | 0,078254673 | 0,3   | 0,08  | 1           | 1,055740067   | 0,94720285      | 3,75            |
| LTBP1                                                                                    | 0,00026532  | 0,078223544 | 0,338 | 0,09  | 1           | 1,055717287   | 0,947223288     | 3,755555556     |
| GRWD1                                                                                    | 0,000258679 | 0,078195746 | 0,275 | 0,06  | 1           | 1,055696946   | 0,947241539     | 4,583333333     |
| ABCG2                                                                                    | 0,011634754 | 0,078155756 | 0,062 | 0     | 1           | 1,055667684   | 0,947267796     | #DIV/0!         |
| SPSB3                                                                                    | 0,015655839 | 0,078146434 | 0,425 | 0,2   | 1           | 1,055660862   | 0,947273917     | 2,125           |
| ZMYM6                                                                                    | 0,032588088 | 0,078136602 | 0,112 | 0,03  | 1           | 1,055653668   | 0,947280373     | 3,733333333     |
| DLX6-AS1                                                                                 | 0,052279021 | 0,078106784 | 0,038 | 0     | 1           | 1,05563185    | 0,947299952     | #DIV/0!         |
| ZNF765                                                                                   | 0,104582322 | 0,078061765 | 0,05  | 0,01  | 1           | 1,055598909   | 0,947329513     | 5               |
| PVR                                                                                      | 0,002666059 | 0,078047579 | 0,088 | 0     | 1           | 1,055588529   | 0,947338828     | #DIV/0!         |
| FARP2                                                                                    | 0,014897309 | 0,078029007 | 0,188 | 0,06  | 1           | 1,055574941   | 0,947351023     | 3,133333333     |
| CBR1                                                                                     | 0,003411084 | 0,077869185 | 0,8   | 0,39  | 1           | 1,055458011   | 0,947455976     | 2,051282051     |
| RAB30-DT                                                                                 | 0,002275874 | 0,077753592 | 0,25  | 0,07  | 1           | 1,055373448   | 0,947531892     | 3,571428571     |
| MTHFS                                                                                    | 0,000486505 | 0,077749242 | 0,3   | 0,08  | 1           | 1,055370266   | 0,947534749     | 3,75            |
| CASTOR1                                                                                  | 0,011634754 | 0,077720202 | 0,062 | 0     | 1           | 1,055349022   | 0,947553823     | #DIV/0!         |
| ZNF160                                                                                   | 0,000813108 | 0,077681463 | 0,162 | 0,02  | 1           | 1,055320684   | 0,947579267     | 8,1             |
| PLAAT1                                                                                   | 0,021719793 | 0,07758007  | 0,1   | 0,02  | 1           | 1,055246519   | 0,947645865     | 5               |
| GRK2                                                                                     | 1,65774E-05 | 0,077548293 | 0,35  | 0,07  | 0,349799713 | 1,055223276   | 0,947666738     | 5               |
| IFT172                                                                                   | 0,024497883 | 0,077383212 | 0,05  | 0     | 1           | 1,055102539   | 0,947775181     | #DIV/0!         |
| DNAJC14                                                                                  | 0,000413716 | 0,077381887 | 0,175 | 0,02  | 1           | 1,05510157    | 0,947776052     | 8,75            |
| LYL1                                                                                     | 0,001655244 | 0,077313158 | 0,15  | 0,02  | 1           | 1,055051306   | 0,947821205     | 7,5             |
| KIAA1755                                                                                 | 0,029558861 | 0,077171178 | 0,15  | 0,05  | 1           | 1,05494748    | 0,947914487     | 3               |
| MTMR11                                                                                   | 0,009738387 | 0,077147495 | 0,138 | 0,03  | 1           | 1,054930163   | 0,947930048     | 4,6             |
| SPATA22                                                                                  | 0,011634754 | 0,077123937 | 0,062 | 0     | 1           | 1,054912937   | 0,947945527     | #DIV/0!         |
| NAPRT                                                                                    | 0,003895696 | 0,0771032   | 0,238 | 0,07  | 1           | 1,054897774   | 0,947959153     | 3,4             |
| POLR1A                                                                                   | 0,002666059 | 0,077006191 | 0,088 | 0     | 1           | 1,054826844   | 0,948022897     | #DIV/0!         |
| MTFMT                                                                                    | 0,007594534 | 0,076985519 | 0,162 | 0,04  | 1           | 1,054811729   | 0,948036481     | 4,05            |

Supplementary Table 4

| Differentially expressed genes_keloid-CCD_ comparing SC-Keloid vs. (SC-Myel, SC-Nonmyel) |             |             |       |       |           |               |                 |                 |
|------------------------------------------------------------------------------------------|-------------|-------------|-------|-------|-----------|---------------|-----------------|-----------------|
| gene                                                                                     | p_val       | avg_log2FC  | pct.1 | pct.2 | p_val_adj | Foldchange_UP | Foldchange_DOWN | Ratio_pct1_pct2 |
| DCP1B                                                                                    | 0,001324227 | 0,07698461  | 0,2   | 0,04  | 1         | 1,054811065   | 0,948037078     | 5               |
| DHCR24                                                                                   | 0,022138642 | 0,076977282 | 0,1   | 0,02  | 1         | 1,054805707   | 0,948041894     | 5               |
| PSMC2                                                                                    | 0,000267819 | 0,076970413 | 0,488 | 0,16  | 1         | 1,054800685   | 0,948046407     | 3,05            |
| AP4E1                                                                                    | 0,000384434 | 0,076940175 | 0,15  | 0,01  | 1         | 1,054778577   | 0,948066278     | 15              |
| CTIF                                                                                     | 0,006731552 | 0,076906475 | 0,1   | 0,01  | 1         | 1,054753939   | 0,948088425     | 10              |
| ADGRA2                                                                                   | 0,03205056  | 0,076843962 | 0,112 | 0,03  | 1         | 1,054708236   | 0,948129507     | 3,733333333     |
| PIH1D2                                                                                   | 0,011634754 | 0,076785291 | 0,062 | 0     | 1         | 1,054665345   | 0,948168066     | #DIV/0!         |
| INTS11                                                                                   | 0,000532575 | 0,076731976 | 0,5   | 0,18  | 1         | 1,05462637    | 0,948203106     | 2,777777778     |
| WDR83OS                                                                                  | 0,416865403 | 0,076663425 | 0,9   | 0,61  | 1         | 1,05457626    | 0,948248162     | 1,475409836     |
| ABHD10                                                                                   | 0,006578444 | 0,076584476 | 0,1   | 0,01  | 1         | 1,054518552   | 0,948300054     | 10              |
| IL15                                                                                     | 0,003201469 | 0,076547621 | 0,238 | 0,07  | 1         | 1,054491613   | 0,94832428      | 3,4             |
| TPMT                                                                                     | 0,00075311  | 0,076437843 | 0,35  | 0,11  | 1         | 1,054411377   | 0,948396443     | 3,181818182     |
| OXLD1                                                                                    | 0,00242649  | 0,076361294 | 0,288 | 0,09  | 1         | 1,054355432   | 0,948446766     | 3,2             |
| KRBA1                                                                                    | 0,014426885 | 0,076257157 | 0,15  | 0,04  | 1         | 1,054279329   | 0,948515229     | 3,75            |
| LRRC37B                                                                                  | 0,006150583 | 0,076256499 | 0,125 | 0,02  | 1         | 1,054278849   | 0,948515662     | 6,25            |
| TLR6                                                                                     | 0,024497883 | 0,076254018 | 0,05  | 0     | 1         | 1,054277036   | 0,948517293     | #DIV/0!         |
| SPIDR                                                                                    | 0,002721473 | 0,076245106 | 0,162 | 0,03  | 1         | 1,054270523   | 0,948523152     | 5,4             |
| LRRC49                                                                                   | 0,012187918 | 0,076240116 | 0,112 | 0,02  | 1         | 1,054266876   | 0,948526433     | 5,6             |
| ZNF787                                                                                   | 0,000311989 | 0,076236323 | 0,35  | 0,1   | 1         | 1,054264105   | 0,948528927     | 3,5             |
| TET3                                                                                     | 0,013343495 | 0,07623465  | 0,225 | 0,08  | 1         | 1,054262882   | 0,948530027     | 2,8125          |
| GOLGA7B                                                                                  | 0,005562134 | 0,076170525 | 0,075 | 0     | 1         | 1,054216023   | 0,948572188     | #DIV/0!         |
| MDM1                                                                                     | 0,004439263 | 0,076087339 | 0,175 | 0,04  | 1         | 1,054155239   | 0,948626884     | 4,375           |
| NUDT14                                                                                   | 0,022997455 | 0,076059399 | 0,1   | 0,02  | 1         | 1,054134824   | 0,948645256     | 5               |
| SELENBP1                                                                                 | 0,00906008  | 0,076020759 | 0,138 | 0,03  | 1         | 1,054106591   | 0,948670665     | 4,6             |
| SYNCRIP                                                                                  | 0,026523208 | 0,075996662 | 0,812 | 0,48  | 1         | 1,054088984   | 0,94868651      | 1,691666667     |
| DGUOK-AS1                                                                                | 0,054166721 | 0,075959826 | 0,062 | 0,01  | 1         | 1,054062071   | 0,948710733     | 6,2             |
| SERPINB6                                                                                 | 0,030632279 | 0,075948803 | 0,8   | 0,47  | 1         | 1,054054017   | 0,948717982     | 1,70212766      |
| IDE                                                                                      | 0,001655244 | 0,075926947 | 0,15  | 0,02  | 1         | 1,054038049   | 0,948732354     | 7,5             |
| ETAA1                                                                                    | 0,051893599 | 0,075798244 | 0,062 | 0,01  | 1         | 1,053944022   | 0,948816995     | 6,2             |
| KPTN                                                                                     | 0,041445004 | 0,075638434 | 0,088 | 0,02  | 1         | 1,053827282   | 0,948922103     | 4,4             |

Supplementary Table 4

| Differentially expressed genes_keloid-CCD_ comparing SC-Keloid vs. (SC-Myel, SC-Nonmyel) |             |             |       |       |           |               |                 |                 |
|------------------------------------------------------------------------------------------|-------------|-------------|-------|-------|-----------|---------------|-----------------|-----------------|
| gene                                                                                     | p_val       | avg_log2FC  | pct.1 | pct.2 | p_val_adj | Foldchange_UP | Foldchange_DOWN | Ratio_pct1_pct2 |
| ALG6                                                                                     | 0,003148253 | 0,075542458 | 0,3   | 0,1   | 1         | 1,053757177   | 0,948985232     | 3               |
| PASK                                                                                     | 0,005562134 | 0,075539674 | 0,075 | 0     | 1         | 1,053755144   | 0,948987063     | #DIV/0!         |
| SMAD5                                                                                    | 0,000157127 | 0,075458326 | 0,512 | 0,18  | 1         | 1,053695728   | 0,949040575     | 2,844444444     |
| GTF2A1                                                                                   | 5,37217E-05 | 0,075442863 | 0,412 | 0,11  | 1         | 1,053684435   | 0,949050747     | 3,745454545     |
| SLC24A1                                                                                  | 0,024497883 | 0,075404807 | 0,05  | 0     | 1         | 1,053656641   | 0,949075782     | #DIV/0!         |
| CEP43                                                                                    | 0,006276301 | 0,075329272 | 0,125 | 0,02  | 1         | 1,053601476   | 0,949125474     | 6,25            |
| INIP                                                                                     | 0,002041761 | 0,075295811 | 0,25  | 0,07  | 1         | 1,05357704    | 0,949147487     | 3,571428571     |
| TRDMT1                                                                                   | 0,004988707 | 0,075291848 | 0,15  | 0,03  | 1         | 1,053574146   | 0,949150095     | 5               |
| VAV3                                                                                     | 0,024497883 | 0,075274906 | 0,05  | 0     | 1         | 1,053561773   | 0,949161241     | #DIV/0!         |
| DDX11                                                                                    | 0,001624218 | 0,075241738 | 0,125 | 0,01  | 1         | 1,053537552   | 0,949183063     | 12,5            |
| CHRN1                                                                                    | 0,01419515  | 0,075229489 | 0,15  | 0,04  | 1         | 1,053528607   | 0,949191122     | 3,75            |
| NMRAL1                                                                                   | 0,017090697 | 0,075206131 | 0,2   | 0,07  | 1         | 1,05351155    | 0,949206489     | 2,857142857     |
| MAP3K13                                                                                  | 0,00082017  | 0,075012229 | 0,512 | 0,19  | 1         | 1,053369965   | 0,949334074     | 2,694736842     |
| PYCR2                                                                                    | 0,000186273 | 0,075000218 | 0,325 | 0,08  | 1         | 1,053361195   | 0,949341977     | 4,0625          |
| EPHB4                                                                                    | 0,03152065  | 0,074934643 | 0,112 | 0,03  | 1         | 1,053313317   | 0,949385129     | 3,733333333     |
| DCTN4                                                                                    | 0,013893107 | 0,074927184 | 0,238 | 0,09  | 1         | 1,053307872   | 0,949390037     | 2,644444444     |
| FGD6                                                                                     | 0,005562134 | 0,074748281 | 0,075 | 0     | 1         | 1,053177263   | 0,949507775     | #DIV/0!         |
| PSENE1                                                                                   | 0,000274652 | 0,07470985  | 0,613 | 0,23  | 1         | 1,053149209   | 0,949533068     | 2,665217391     |
| RDH8                                                                                     | 0,013022034 | 0,07466933  | 0,088 | 0,01  | 1         | 1,05311963    | 0,949559738     | 8,8             |
| MLPH                                                                                     | 0,002666059 | 0,074622603 | 0,088 | 0     | 1         | 1,053085521   | 0,949590494     | #DIV/0!         |
| MTM1                                                                                     | 0,030418025 | 0,074608882 | 0,15  | 0,05  | 1         | 1,053075506   | 0,949599524     | 3               |
| CORO1B                                                                                   | 0,000774147 | 0,074584033 | 0,662 | 0,27  | 1         | 1,053057368   | 0,949615881     | 2,451851852     |
| SHMT2                                                                                    | 0,000588268 | 0,074565977 | 0,475 | 0,18  | 1         | 1,053044189   | 0,949627765     | 2,638888889     |
| MSANTD2                                                                                  | 0,002311257 | 0,074494457 | 0,25  | 0,07  | 1         | 1,052991986   | 0,949674844     | 3,571428571     |
| FAM199X                                                                                  | 0,001103192 | 0,0744791   | 0,362 | 0,12  | 1         | 1,052980778   | 0,949684953     | 3,016666667     |
| GOLGA5                                                                                   | 0,013279713 | 0,074477354 | 0,188 | 0,06  | 1         | 1,052979503   | 0,949686102     | 3,133333333     |
| ADAM15                                                                                   | 0,000470775 | 0,074372273 | 0,438 | 0,15  | 1         | 1,052902811   | 0,949755276     | 2,92            |
| NCKIPSD                                                                                  | 0,003313746 | 0,074345521 | 0,112 | 0,01  | 1         | 1,052883287   | 0,949772888     | 11,2            |
| ALAD                                                                                     | 0,005274968 | 0,074335789 | 0,15  | 0,03  | 1         | 1,052876184   | 0,949779295     | 5               |
| HDHD5                                                                                    | 0,000494424 | 0,074273039 | 0,3   | 0,08  | 1         | 1,052830391   | 0,949820606     | 3,75            |



Supplementary Table 4

| Differentially expressed genes_keloid-CCD_comparing SC-Keloid vs. (SC-Myel, SC-Nonmyel) |             |             |       |       |           |               |                 |                 |
|-----------------------------------------------------------------------------------------|-------------|-------------|-------|-------|-----------|---------------|-----------------|-----------------|
| gene                                                                                    | p_val       | avg_log2FC  | pct.1 | pct.2 | p_val_adj | Foldchange_UP | Foldchange_DOWN | Ratio_pct1_pct2 |
| RAB4B                                                                                   | 0,01362345  | 0,07422177  | 0,088 | 0,01  | 1         | 1,052792977   | 0,949854361     | 8,8             |
| LRFN3                                                                                   | 0,002666059 | 0,074193291 | 0,088 | 0     | 1         | 1,052772194   | 0,949873111     | #DIV/0!         |
| TRIM65                                                                                  | 0,021307859 | 0,074156869 | 0,1   | 0,02  | 1         | 1,052745617   | 0,949897092     | 5               |
| PDCD1LG2                                                                                | 0,002666059 | 0,074137775 | 0,088 | 0     | 1         | 1,052731684   | 0,949909664     | #DIV/0!         |
| URB1-AS1                                                                                | 0,058821317 | 0,074123786 | 0,1   | 0,03  | 1         | 1,052721477   | 0,949918874     | 3,333333333     |
| LAMB3                                                                                   | 0,011634754 | 0,074088212 | 0,062 | 0     | 1         | 1,052695519   | 0,949942298     | #DIV/0!         |
| TRUB1                                                                                   | 0,003313746 | 0,074081057 | 0,112 | 0,01  | 1         | 1,052690298   | 0,949947009     | 11,2            |
| HK1                                                                                     | 0,000199013 | 0,074080605 | 0,475 | 0,16  | 1         | 1,052689968   | 0,949947307     | 2,96875         |
| PSME3IP1                                                                                | 0,004714406 | 0,074064234 | 0,412 | 0,17  | 1         | 1,052678023   | 0,949958086     | 2,423529412     |
| NRG2                                                                                    | 0,025726858 | 0,073974601 | 0,075 | 0,01  | 1         | 1,052612623   | 0,950017108     | 7,5             |
| CUTC                                                                                    | 0,001017692 | 0,073968297 | 0,35  | 0,11  | 1         | 1,052608023   | 0,95002126      | 3,181818182     |
| TPK1                                                                                    | 0,024497883 | 0,073948685 | 0,05  | 0     | 1         | 1,052593714   | 0,950034174     | #DIV/0!         |
| U2AF2                                                                                   | 0,000697782 | 0,073916365 | 0,4   | 0,13  | 1         | 1,052570134   | 0,950055457     | 3,076923077     |
| RBM4                                                                                    | 0,008114611 | 0,073882342 | 0,288 | 0,11  | 1         | 1,052545312   | 0,950077863     | 2,618181818     |
| CD6                                                                                     | 0,002666059 | 0,073854513 | 0,088 | 0     | 1         | 1,052525009   | 0,950096189     | #DIV/0!         |
| SKA3                                                                                    | 0,013319742 | 0,073774803 | 0,088 | 0,01  | 1         | 1,052466857   | 0,950148685     | 8,8             |
| ZXDC                                                                                    | 0,002881846 | 0,073751766 | 0,162 | 0,03  | 1         | 1,052450052   | 0,950163857     | 5,4             |
| LZTS1                                                                                   | 0,004362795 | 0,073715212 | 0,175 | 0,04  | 1         | 1,052423386   | 0,950187932     | 4,375           |
| HEXA                                                                                    | 0,002706022 | 0,073710111 | 0,45  | 0,18  | 1         | 1,052419665   | 0,950191291     | 2,5             |
| ZNF691                                                                                  | 0,011634754 | 0,073593819 | 0,062 | 0     | 1         | 1,052334835   | 0,950267887     | #DIV/0!         |
| MSRB3                                                                                   | 0,001253115 | 0,073580395 | 0,2   | 0,04  | 1         | 1,052325044   | 0,950276729     | 5               |
| EXOC6                                                                                   | 0,001278066 | 0,073553741 | 0,1   | 0     | 1         | 1,052305602   | 0,950294285     | #DIV/0!         |
| DYNC2L1                                                                                 | 0,000364229 | 0,073520556 | 0,225 | 0,04  | 1         | 1,052281397   | 0,950316144     | 5,625           |
| FAM104B                                                                                 | 9,0437E-05  | 0,073507083 | 0,338 | 0,08  | 1         | 1,05227157    | 0,95032502      | 4,225           |
| PEX14                                                                                   | 0,001586071 | 0,073505311 | 0,125 | 0,01  | 1         | 1,052270278   | 0,950326186     | 12,5            |
| CHAF1B                                                                                  | 0,026889313 | 0,073493932 | 0,075 | 0,01  | 1         | 1,052261978   | 0,950333682     | 7,5             |
| MIA2                                                                                    | 0,016190044 | 0,07330707  | 0,2   | 0,07  | 1         | 1,052125695   | 0,95045678      | 2,857142857     |
| PXN                                                                                     | 0,000342377 | 0,073304503 | 0,35  | 0,1   | 1         | 1,052123822   | 0,950458471     | 3,5             |
| TYW1                                                                                    | 0,000602791 | 0,073177289 | 0,238 | 0,05  | 1         | 1,052031052   | 0,950542285     | 4,76            |
| LRIG2                                                                                   | 0,011634754 | 0,073152856 | 0,062 | 0     | 1         | 1,052013236   | 0,950558383     | #DIV/0!         |

Supplementary Table 4

| Differentially expressed genes_keloid-CCD_ comparing SC-Keloid vs. (SC-Myel, SC-Nonmyel) |             |             |       |       |           |               |                 |                 |
|------------------------------------------------------------------------------------------|-------------|-------------|-------|-------|-----------|---------------|-----------------|-----------------|
| gene                                                                                     | p_val       | avg_log2FC  | pct.1 | pct.2 | p_val_adj | Foldchange_UP | Foldchange_DOWN | Ratio_pct1_pct2 |
| TTC8                                                                                     | 0,012349427 | 0,073141152 | 0,188 | 0,06  | 1         | 1,052004701   | 0,950566094     | 3,133333333     |
| EPM2A                                                                                    | 0,006027137 | 0,073123113 | 0,125 | 0,02  | 1         | 1,051991547   | 0,95057798      | 6,25            |
| PES1                                                                                     | 0,00068532  | 0,073059098 | 0,212 | 0,04  | 1         | 1,05194487    | 0,950620159     | 5,3             |
| MPI                                                                                      | 0,001624218 | 0,073005975 | 0,125 | 0,01  | 1         | 1,051906136   | 0,950655164     | 12,5            |
| TAP2                                                                                     | 7,62789E-05 | 0,072937261 | 0,288 | 0,06  | 1         | 1,051856036   | 0,950700444     | 4,8             |
| NINJ2                                                                                    | 0,002666059 | 0,072877223 | 0,088 | 0     | 1         | 1,051812264   | 0,950740008     | #DIV/0!         |
| PAM16                                                                                    | 0,011634754 | 0,072877015 | 0,062 | 0     | 1         | 1,051812112   | 0,950740145     | #DIV/0!         |
| ZNF83                                                                                    | 0,005623161 | 0,072793202 | 0,3   | 0,11  | 1         | 1,051751009   | 0,95079538      | 2,727272727     |
| TBL2                                                                                     | 0,000788927 | 0,072781071 | 0,188 | 0,03  | 1         | 1,051742165   | 0,950803375     | 6,266666667     |
| APOO                                                                                     | 0,000100126 | 0,072767083 | 0,2   | 0,02  | 1         | 1,051731968   | 0,950812593     | 10              |
| CFAP300                                                                                  | 0,268357209 | 0,072746557 | 0,013 | 0     | 1         | 1,051717005   | 0,950826121     | #DIV/0!         |
| MSL3                                                                                     | 0,001181554 | 0,072682362 | 0,4   | 0,14  | 1         | 1,051670208   | 0,950868431     | 2,857142857     |
| CRYBG1                                                                                   | 0,003088561 | 0,072624546 | 0,112 | 0,01  | 1         | 1,051628063   | 0,950906537     | 11,2            |
| LIN52                                                                                    | 0,018403004 | 0,072532622 | 0,125 | 0,03  | 1         | 1,051561058   | 0,950967128     | 4,166666667     |
| UTP14A                                                                                   | 0,006150583 | 0,072506581 | 0,125 | 0,02  | 1         | 1,051542078   | 0,950984293     | 6,25            |
| RAB40C                                                                                   | 0,000773295 | 0,072496306 | 0,188 | 0,03  | 1         | 1,051534589   | 0,950991066     | 6,266666667     |
| SMIM30                                                                                   | 0,002215522 | 0,072474199 | 0,325 | 0,11  | 1         | 1,051518475   | 0,951005639     | 2,954545455     |
| OSGEP                                                                                    | 0,000517311 | 0,072468833 | 0,425 | 0,14  | 1         | 1,051514564   | 0,951009177     | 3,035714286     |
| SDF4                                                                                     | 0,002468583 | 0,072454636 | 0,787 | 0,36  | 1         | 1,051504217   | 0,951018535     | 2,186111111     |
| ECI2                                                                                     | 7,72116E-05 | 0,072451763 | 0,488 | 0,15  | 1         | 1,051502123   | 0,951020429     | 3,253333333     |
| ABCA3                                                                                    | 0,001956967 | 0,072449525 | 0,212 | 0,05  | 1         | 1,051500492   | 0,951021904     | 4,24            |
| CLCN2                                                                                    | 0,021719793 | 0,0724458   | 0,1   | 0,02  | 1         | 1,051497777   | 0,951024359     | 5               |
| ITFG2                                                                                    | 0,022564497 | 0,072428618 | 0,1   | 0,02  | 1         | 1,051485254   | 0,951035686     | 5               |
| NAALADL1                                                                                 | 0,002937191 | 0,072422047 | 0,162 | 0,03  | 1         | 1,051480465   | 0,951040018     | 5,4             |
| CEP250                                                                                   | 0,03205056  | 0,072354806 | 0,112 | 0,03  | 1         | 1,051431459   | 0,951084345     | 3,733333333     |
| SNX11                                                                                    | 0,011489144 | 0,072303015 | 0,112 | 0,02  | 1         | 1,051393714   | 0,951118488     | 5,6             |
| EMB                                                                                      | 0,005082527 | 0,072178631 | 0,15  | 0,03  | 1         | 1,051303071   | 0,951200494     | 5               |
| TOR2A                                                                                    | 0,005562134 | 0,07215519  | 0,075 | 0     | 1         | 1,051285989   | 0,951215949     | #DIV/0!         |
| SHFL                                                                                     | 0,001514254 | 0,072080864 | 0,562 | 0,23  | 1         | 1,05123183    | 0,951264956     | 2,443478261     |
| NMNAT1                                                                                   | 0,01362345  | 0,072057021 | 0,088 | 0,01  | 1         | 1,051214456   | 0,951280677     | 8,8             |

Supplementary Table 4

| Differentially expressed genes_keloid-CCD_ comparing SC-Keloid vs. (SC-Myel, SC-Nonmyel) |             |             |       |       |             |               |                 |                 |
|------------------------------------------------------------------------------------------|-------------|-------------|-------|-------|-------------|---------------|-----------------|-----------------|
| gene                                                                                     | p_val       | avg_log2FC  | pct.1 | pct.2 | p_val_adj   | Foldchange_UP | Foldchange_DOWN | Ratio_pct1_pct2 |
| CDC48                                                                                    | 0,011634754 | 0,072022268 | 0,062 | 0     | 1           | 1,051189134   | 0,951303593     | #DIV/0!         |
| NCAPD2                                                                                   | 0,006276301 | 0,071921632 | 0,125 | 0,02  | 1           | 1,05111581    | 0,951369954     | 6,25            |
| TATDN2                                                                                   | 0,01362345  | 0,071918362 | 0,088 | 0,01  | 1           | 1,051113428   | 0,95137211      | 8,8             |
| SCAMP3                                                                                   | 2,26774E-05 | 0,071896157 | 0,438 | 0,11  | 0,478514964 | 1,05109725    | 0,951386753     | 3,981818182     |
| SH3PXD2B                                                                                 | 0,000593028 | 0,071864084 | 0,338 | 0,1   | 1           | 1,051073883   | 0,951407904     | 3,38            |
| FAM102B                                                                                  | 0,041445004 | 0,071755691 | 0,088 | 0,02  | 1           | 1,050994916   | 0,951479389     | 4,4             |
| PAGR1                                                                                    | 0,001278066 | 0,071745186 | 0,1   | 0     | 1           | 1,050987264   | 0,951486316     | #DIV/0!         |
| FAM222B                                                                                  | 0,006731552 | 0,071700489 | 0,1   | 0,01  | 1           | 1,050954703   | 0,951515795     | 10              |
| ADPRS                                                                                    | 0,002612825 | 0,071656502 | 0,338 | 0,12  | 1           | 1,05092266    | 0,951544807     | 2,816666667     |
| TARBP1                                                                                   | 0,001655244 | 0,071560639 | 0,15  | 0,02  | 1           | 1,050852832   | 0,951608036     | 7,5             |
| TMEM62                                                                                   | 0,011634754 | 0,071422826 | 0,062 | 0     | 1           | 1,050752454   | 0,951698943     | #DIV/0!         |
| ASH2L                                                                                    | 0,000955834 | 0,071395613 | 0,25  | 0,06  | 1           | 1,050732634   | 0,951716895     | 4,166666667     |
| MOCS1                                                                                    | 0,003088561 | 0,071278052 | 0,112 | 0,01  | 1           | 1,050647017   | 0,95179445      | 11,2            |
| CMTR1                                                                                    | 0,002669855 | 0,071194837 | 0,162 | 0,03  | 1           | 1,050586417   | 0,951849352     | 5,4             |
| TRIM62                                                                                   | 0,003313746 | 0,071141045 | 0,112 | 0,01  | 1           | 1,050547246   | 0,951884843     | 11,2            |
| C10orf62                                                                                 | 0,025726858 | 0,071141036 | 0,075 | 0,01  | 1           | 1,050547239   | 0,951884849     | 7,5             |
| HLCS                                                                                     | 0,000830908 | 0,071128052 | 0,162 | 0,02  | 1           | 1,050537784   | 0,951893416     | 8,1             |
| ZNF510                                                                                   | 0,021719793 | 0,07112563  | 0,1   | 0,02  | 1           | 1,050536021   | 0,951895014     | 5               |
| ADAT2                                                                                    | 0,021719793 | 0,071073641 | 0,1   | 0,02  | 1           | 1,050498164   | 0,951929317     | 5               |
| CPSF2                                                                                    | 0,003149114 | 0,071069832 | 0,262 | 0,08  | 1           | 1,050495391   | 0,95193183      | 3,275           |
| ZFP14                                                                                    | 0,01362345  | 0,071050345 | 0,088 | 0,01  | 1           | 1,050481201   | 0,951944688     | 8,8             |
| PAXIP1-AS2                                                                               | 0,052279021 | 0,071007384 | 0,038 | 0     | 1           | 1,050449921   | 0,951973036     | #DIV/0!         |
| USP40                                                                                    | 0,000479592 | 0,070947255 | 0,262 | 0,06  | 1           | 1,05040614    | 0,952012713     | 4,366666667     |
| YIPF5                                                                                    | 0,000859503 | 0,070809395 | 0,45  | 0,16  | 1           | 1,050305771   | 0,95210369      | 2,8125          |
| ZNF408                                                                                   | 0,010276447 | 0,070802359 | 0,138 | 0,03  | 1           | 1,050300649   | 0,952108333     | 4,6             |
| STX1A                                                                                    | 0,024497883 | 0,070799322 | 0,05  | 0     | 1           | 1,050298438   | 0,952110337     | #DIV/0!         |
| SETD1B                                                                                   | 0,006578444 | 0,070730087 | 0,1   | 0,01  | 1           | 1,050248035   | 0,95215603      | 10              |
| VPS18                                                                                    | 0,005562134 | 0,070683526 | 0,075 | 0     | 1           | 1,050214141   | 0,95218676      | #DIV/0!         |
| ATG4C                                                                                    | 0,012187918 | 0,070672904 | 0,112 | 0,02  | 1           | 1,050206408   | 0,952193771     | 5,6             |
| COQ8B                                                                                    | 0,000924226 | 0,070662587 | 0,25  | 0,06  | 1           | 1,050198898   | 0,95220058      | 4,166666667     |

Supplementary Table 4

| Differentially expressed genes_keloid-CCD_ comparing SC-Keloid vs. (SC-Myel, SC-Nonmyel) |             |             |       |       |             |               |                 |                 |
|------------------------------------------------------------------------------------------|-------------|-------------|-------|-------|-------------|---------------|-----------------|-----------------|
| gene                                                                                     | p_val       | avg_log2FC  | pct.1 | pct.2 | p_val_adj   | Foldchange_UP | Foldchange_DOWN | Ratio_pct1_pct2 |
| KAT2A                                                                                    | 0,001624218 | 0,070631703 | 0,125 | 0,01  | 1           | 1,050176417   | 0,952220964     | 12,5            |
| SF3B4                                                                                    | 0,000411862 | 0,070609201 | 0,388 | 0,12  | 1           | 1,050160037   | 0,952235816     | 3,233333333     |
| CTNS                                                                                     | 0,006578444 | 0,0704968   | 0,1   | 0,01  | 1           | 1,050078222   | 0,952310008     | 10              |
| FLOT2                                                                                    | 0,000773541 | 0,070419709 | 0,275 | 0,07  | 1           | 1,050022112   | 0,952360897     | 3,928571429     |
| ACAD9                                                                                    | 0,001063603 | 0,070332142 | 0,225 | 0,05  | 1           | 1,049958381   | 0,952418704     | 4,5             |
| MVK                                                                                      | 0,000659913 | 0,070294187 | 0,212 | 0,04  | 1           | 1,049930758   | 0,952443761     | 5,3             |
| JOSD1                                                                                    | 0,000561928 | 0,070286217 | 0,412 | 0,14  | 1           | 1,049924958   | 0,952449022     | 2,942857143     |
| RAB23                                                                                    | 0,00097654  | 0,070229392 | 0,288 | 0,08  | 1           | 1,049883605   | 0,952486538     | 3,6             |
| MAPK14                                                                                   | 0,004634092 | 0,0702217   | 0,212 | 0,06  | 1           | 1,049878007   | 0,952491616     | 3,533333333     |
| HCN3                                                                                     | 0,005562134 | 0,070211868 | 0,075 | 0     | 1           | 1,049870852   | 0,952498108     | #DIV/0!         |
| ZNF407                                                                                   | 0,002881846 | 0,070196103 | 0,162 | 0,03  | 1           | 1,049859379   | 0,952508517     | 5,4             |
| TMEM44                                                                                   | 0,01362345  | 0,070189569 | 0,088 | 0,01  | 1           | 1,049854625   | 0,95251283      | 8,8             |
| TNFAIP1                                                                                  | 0,000889098 | 0,070172792 | 0,288 | 0,08  | 1           | 1,049842416   | 0,952523907     | 3,6             |
| DHRS4                                                                                    | 0,000773295 | 0,070059205 | 0,188 | 0,03  | 1           | 1,049759762   | 0,952598905     | 6,266666667     |
| FAM200B                                                                                  | 6,9569E-05  | 0,070040049 | 0,488 | 0,15  | 1           | 1,049745824   | 0,952611553     | 3,253333333     |
| ZNF641                                                                                   | 0,051893599 | 0,069990621 | 0,062 | 0,01  | 1           | 1,049709859   | 0,952644191     | 6,2             |
| ANAPC1                                                                                   | 0,018403004 | 0,069964044 | 0,125 | 0,03  | 1           | 1,049690522   | 0,952661741     | 4,166666667     |
| ATP6VOE2                                                                                 | 0,000345104 | 0,069943771 | 0,575 | 0,21  | 1           | 1,049675772   | 0,952675128     | 2,738095238     |
| MYSM1                                                                                    | 0,002536608 | 0,069942421 | 0,325 | 0,11  | 1           | 1,049674789   | 0,952676019     | 2,954545455     |
| GPATCH11                                                                                 | 0,000371319 | 0,069797223 | 0,225 | 0,04  | 1           | 1,049569152   | 0,952771905     | 5,625           |
| GLCE                                                                                     | 0,005575985 | 0,069784555 | 0,15  | 0,03  | 1           | 1,049559936   | 0,952780271     | 5               |
| KPNA1                                                                                    | 4,66579E-05 | 0,069776162 | 0,438 | 0,12  | 0,984527549 | 1,04955383    | 0,952785814     | 3,65            |
| LAPTM4A                                                                                  | 0,208295578 | 0,069745242 | 0,975 | 0,77  | 1           | 1,049531336   | 0,952806234     | 1,266233766     |
| LRIG3                                                                                    | 0,001278066 | 0,069732923 | 0,1   | 0     | 1           | 1,049522374   | 0,95281437      | #DIV/0!         |
| SZRD1                                                                                    | 0,000372965 | 0,069706592 | 0,688 | 0,27  | 1           | 1,049503219   | 0,952831761     | 2,548148148     |
| CCDC57                                                                                   | 0,003313746 | 0,069661068 | 0,112 | 0,01  | 1           | 1,049470103   | 0,952861827     | 11,2            |
| NELFCD                                                                                   | 6,9569E-05  | 0,069651274 | 0,488 | 0,15  | 1           | 1,049462979   | 0,952868296     | 3,253333333     |
| PIGV                                                                                     | 0,018087455 | 0,069560882 | 0,125 | 0,03  | 1           | 1,049397227   | 0,952928        | 4,166666667     |
| PPP1R8                                                                                   | 0,00421343  | 0,069489333 | 0,175 | 0,04  | 1           | 1,049345184   | 0,95297526      | 4,375           |
| CASTOR3                                                                                  | 0,052846969 | 0,069482247 | 0,138 | 0,05  | 1           | 1,04934003    | 0,952979941     | 2,76            |

Supplementary Table 4

| Differentially expressed genes_keloid-CCD_ comparing SC-Keloid vs. (SC-Myel, SC-Nonmyel) |             |             |       |       |             |               |                 |                 |
|------------------------------------------------------------------------------------------|-------------|-------------|-------|-------|-------------|---------------|-----------------|-----------------|
| gene                                                                                     | p_val       | avg_log2FC  | pct.1 | pct.2 | p_val_adj   | Foldchange_UP | Foldchange_DOWN | Ratio_pct1_pct2 |
| MRS2                                                                                     | 0,005473966 | 0,069432912 | 0,15  | 0,03  | 1           | 1,049304147   | 0,95301253      | 5               |
| NDUFS4                                                                                   | 0,049742266 | 0,069428886 | 0,775 | 0,44  | 1           | 1,049301219   | 0,95301519      | 1,761363636     |
| ETHE1                                                                                    | 0,005848981 | 0,069424057 | 0,388 | 0,16  | 1           | 1,049297706   | 0,95301838      | 2,425           |
| ROBO1                                                                                    | 0,001624218 | 0,069420465 | 0,125 | 0,01  | 1           | 1,049295094   | 0,953020753     | 12,5            |
| HEATR3                                                                                   | 0,00578692  | 0,069381008 | 0,125 | 0,02  | 1           | 1,049266397   | 0,953046817     | 6,25            |
| PDCL3                                                                                    | 6,41082E-06 | 0,069373315 | 0,475 | 0,12  | 0,135274774 | 1,049260801   | 0,9530519       | 3,958333333     |
| GRIK4                                                                                    | 0,052279021 | 0,069357434 | 0,038 | 0     | 1           | 1,049249251   | 0,953062391     | #DIV/0!         |
| RPA1                                                                                     | 0,000711896 | 0,06934802  | 0,312 | 0,09  | 1           | 1,049242405   | 0,95306861      | 3,466666667     |
| EVI5L                                                                                    | 0,006731552 | 0,069336862 | 0,1   | 0,01  | 1           | 1,04923429    | 0,953075981     | 10              |
| ZFYVE27                                                                                  | 0,032200864 | 0,069335922 | 0,15  | 0,05  | 1           | 1,049233606   | 0,953076602     | 3               |
| TSNAXIP1                                                                                 | 0,011634754 | 0,069317233 | 0,062 | 0     | 1           | 1,049220015   | 0,953088948     | #DIV/0!         |
| NUBPL                                                                                    | 0,006276301 | 0,069300575 | 0,125 | 0,02  | 1           | 1,049207899   | 0,953099953     | 6,25            |
| PARP9                                                                                    | 0,005084234 | 0,069278082 | 0,212 | 0,06  | 1           | 1,049191542   | 0,953114813     | 3,533333333     |
| FAM98A                                                                                   | 0,00032976  | 0,06923896  | 0,412 | 0,13  | 1           | 1,049163091   | 0,953140659     | 3,169230769     |
| C2orf69                                                                                  | 0,00152026  | 0,069193426 | 0,15  | 0,02  | 1           | 1,049129978   | 0,953170742     | 7,5             |
| EML2                                                                                     | 0,000830908 | 0,069172453 | 0,162 | 0,02  | 1           | 1,049114726   | 0,9531846       | 8,1             |
| EPN1                                                                                     | 0,000432975 | 0,069086811 | 0,562 | 0,22  | 1           | 1,04905245    | 0,953241185     | 2,554545455     |
| PPP1R14A                                                                                 | 0,053019982 | 0,069010975 | 0,062 | 0,01  | 1           | 1,048997307   | 0,953291293     | 6,2             |
| SRP19                                                                                    | 0,000455126 | 0,069005549 | 0,688 | 0,28  | 1           | 1,048993362   | 0,953294879     | 2,457142857     |
| ODF2                                                                                     | 0,018087455 | 0,068975295 | 0,125 | 0,03  | 1           | 1,048971365   | 0,95331487      | 4,166666667     |
| NUCB1                                                                                    | 0,003930773 | 0,068941501 | 0,738 | 0,36  | 1           | 1,048946793   | 0,953337201     | 2,05            |
| WWC1                                                                                     | 0,001282108 | 0,068930421 | 0,175 | 0,03  | 1           | 1,048938738   | 0,953344522     | 5,833333333     |
| PDIK1L                                                                                   | 0,011634754 | 0,068911966 | 0,062 | 0     | 1           | 1,04892532    | 0,953356718     | #DIV/0!         |
| SDHAF4                                                                                   | 0,021719793 | 0,068890887 | 0,1   | 0,02  | 1           | 1,048909994   | 0,953370647     | 5               |
| DHX32                                                                                    | 0,002438112 | 0,068886383 | 0,188 | 0,04  | 1           | 1,048906719   | 0,953373624     | 4,7             |
| METTL27                                                                                  | 0,010094224 | 0,068858491 | 0,138 | 0,03  | 1           | 1,048886441   | 0,953392056     | 4,6             |
| SEPTIN6                                                                                  | 0,011634754 | 0,068845219 | 0,062 | 0     | 1           | 1,048876792   | 0,953400827     | #DIV/0!         |
| ACTR10                                                                                   | 0,001373404 | 0,068823985 | 0,762 | 0,34  | 1           | 1,048861354   | 0,953414859     | 2,241176471     |
| SCAF8                                                                                    | 0,022452473 | 0,068769654 | 0,238 | 0,1   | 1           | 1,048821855   | 0,953450765     | 2,38            |
| ADK                                                                                      | 0,001765487 | 0,068761419 | 0,613 | 0,26  | 1           | 1,048815869   | 0,953456207     | 2,357692308     |

Supplementary Table 4

| Differentially expressed genes_keloid-CCD_ comparing SC-Keloid vs. (SC-Myel, SC-Nonmyel) |             |             |       |       |             |               |                 |                 |
|------------------------------------------------------------------------------------------|-------------|-------------|-------|-------|-------------|---------------|-----------------|-----------------|
| gene                                                                                     | p_val       | avg_log2FC  | pct.1 | pct.2 | p_val_adj   | Foldchange_UP | Foldchange_DOWN | Ratio_pct1_pct2 |
| ZNF446                                                                                   | 0,006731552 | 0,068682451 | 0,1   | 0,01  | 1           | 1,048758461   | 0,953508398     | 10              |
| NGLY1                                                                                    | 0,008910714 | 0,068682362 | 0,25  | 0,09  | 1           | 1,048758397   | 0,953508456     | 2,777777778     |
| RBM12                                                                                    | 0,000780217 | 0,068653323 | 0,25  | 0,06  | 1           | 1,048737287   | 0,953527649     | 4,166666667     |
| MOG                                                                                      | 0,011634754 | 0,068598609 | 0,062 | 0     | 1           | 1,048697515   | 0,953563812     | #DIV/0!         |
| LAMC3                                                                                    | 0,024497883 | 0,068517129 | 0,05  | 0     | 1           | 1,048638289   | 0,953617668     | #DIV/0!         |
| SF3B3                                                                                    | 0,004759791 | 0,068478957 | 0,25  | 0,08  | 1           | 1,048610543   | 0,9536429       | 3,125           |
| SEMA4C                                                                                   | 0,061518369 | 0,068391254 | 0,2   | 0,09  | 1           | 1,0485468     | 0,953700875     | 2,222222222     |
| RNASEH2A                                                                                 | 0,003313746 | 0,068216561 | 0,112 | 0,01  | 1           | 1,048419841   | 0,953816363     | 11,2            |
| DLD                                                                                      | 0,000712215 | 0,068192508 | 0,375 | 0,12  | 1           | 1,048402361   | 0,953832266     | 3,125           |
| SP110                                                                                    | 0,030693302 | 0,068192198 | 0,2   | 0,08  | 1           | 1,048402136   | 0,953832471     | 2,5             |
| ADPRH                                                                                    | 0,024497883 | 0,068162902 | 0,05  | 0     | 1           | 1,048380847   | 0,95385184      | #DIV/0!         |
| USF1                                                                                     | 0,043780897 | 0,068113112 | 0,088 | 0,02  | 1           | 1,048344666   | 0,95388476      | 4,4             |
| GNG11                                                                                    | 0,008855668 | 0,068103445 | 0,675 | 0,35  | 1           | 1,048337642   | 0,953891151     | 1,928571429     |
| CCT5                                                                                     | 0,007091961 | 0,068103395 | 0,725 | 0,38  | 1           | 1,048337605   | 0,953891185     | 1,907894737     |
| SART1                                                                                    | 0,001461501 | 0,068056996 | 0,275 | 0,08  | 1           | 1,04830389    | 0,953921863     | 3,4375          |
| CST6                                                                                     | 0,052279021 | 0,067959897 | 0,038 | 0     | 1           | 1,048233337   | 0,953986068     | #DIV/0!         |
| VPS37C                                                                                   | 0,001307717 | 0,067858925 | 0,175 | 0,03  | 1           | 1,048159975   | 0,954052839     | 5,833333333     |
| FUZ                                                                                      | 0,004854445 | 0,06784597  | 0,212 | 0,06  | 1           | 1,048150563   | 0,954061406     | 3,533333333     |
| PYROXD2                                                                                  | 0,079510298 | 0,067815429 | 0,075 | 0,02  | 1           | 1,048128375   | 0,954081603     | 3,75            |
| STK39                                                                                    | 0,003313746 | 0,06769993  | 0,112 | 0,01  | 1           | 1,048044467   | 0,954157988     | 11,2            |
| ANO10                                                                                    | 0,002010182 | 0,067461465 | 0,25  | 0,07  | 1           | 1,047871249   | 0,954315715     | 3,571428571     |
| SND1                                                                                     | 2,53633E-05 | 0,067416584 | 0,462 | 0,13  | 0,535191228 | 1,047838651   | 0,954345403     | 3,553846154     |
| VPS26B                                                                                   | 9,52391E-05 | 0,067407689 | 0,338 | 0,08  | 1           | 1,047832191   | 0,954351287     | 4,225           |
| TMEM43                                                                                   | 0,002173267 | 0,067387432 | 0,4   | 0,15  | 1           | 1,047817478   | 0,954364688     | 2,666666667     |
| ETNK2                                                                                    | 0,002937191 | 0,067375143 | 0,162 | 0,03  | 1           | 1,047808553   | 0,954372817     | 5,4             |
| MMP28                                                                                    | 0,064919686 | 0,067249773 | 0,2   | 0,09  | 1           | 1,047717502   | 0,954455755     | 2,222222222     |
| EXOSC8                                                                                   | 0,001658878 | 0,067241642 | 0,512 | 0,21  | 1           | 1,047711597   | 0,954461135     | 2,438095238     |
| UNC119                                                                                   | 0,043780897 | 0,067239908 | 0,088 | 0,02  | 1           | 1,047710338   | 0,954462282     | 4,4             |
| POC1A                                                                                    | 8,89706E-05 | 0,067215645 | 0,175 | 0,01  | 1           | 1,047692718   | 0,954478334     | 17,5            |
| C14orf93                                                                                 | 0,052279021 | 0,067055111 | 0,038 | 0     | 1           | 1,047576144   | 0,954584548     | #DIV/0!         |

Supplementary Table 4

| Differentially expressed genes_keloid-CCD_ comparing SC-Keloid vs. (SC-Myel, SC-Nonmyel) |             |             |       |       |           |               |                 |                 |
|------------------------------------------------------------------------------------------|-------------|-------------|-------|-------|-----------|---------------|-----------------|-----------------|
| gene                                                                                     | p_val       | avg_log2FC  | pct.1 | pct.2 | p_val_adj | Foldchange_UP | Foldchange_DOWN | Ratio_pct1_pct2 |
| RTL8A                                                                                    | 0,002730089 | 0,067025924 | 0,462 | 0,19  | 1         | 1,04755495    | 0,954603861     | 2,431578947     |
| BEND6                                                                                    | 0,001082432 | 0,066951985 | 0,225 | 0,05  | 1         | 1,047501264   | 0,954652786     | 4,5             |
| TAOK2                                                                                    | 0,000635384 | 0,066835843 | 0,212 | 0,04  | 1         | 1,04741694    | 0,954729642     | 5,3             |
| OGFOD1                                                                                   | 0,002024826 | 0,06680595  | 0,212 | 0,05  | 1         | 1,047395237   | 0,954749424     | 4,24            |
| KLHL9                                                                                    | 0,021871795 | 0,06680195  | 0,175 | 0,06  | 1         | 1,047392334   | 0,954752071     | 2,916666667     |
| FAU                                                                                      | 0,177432767 | 0,066759056 | 1     | 0,99  | 1         | 1,047361193   | 0,954780458     | 1,01010101      |
| SEMA7A                                                                                   | 0,002881846 | 0,066757785 | 0,162 | 0,03  | 1         | 1,04736027    | 0,9547813       | 5,4             |
| FBN1                                                                                     | 0,00034914  | 0,066747368 | 0,462 | 0,16  | 1         | 1,047352708   | 0,954788193     | 2,8875          |
| SLC38A9                                                                                  | 0,023437611 | 0,066678199 | 0,1   | 0,02  | 1         | 1,047302494   | 0,954833971     | 5               |
| EYA3                                                                                     | 0,006276301 | 0,06660118  | 0,125 | 0,02  | 1         | 1,047246585   | 0,954884947     | 6,25            |
| THUMPD3                                                                                  | 0,000295231 | 0,066578523 | 0,375 | 0,11  | 1         | 1,047230139   | 0,954899943     | 3,409090909     |
| NEK11                                                                                    | 0,003313746 | 0,06657145  | 0,112 | 0,01  | 1         | 1,047225004   | 0,954904625     | 11,2            |
| SLC7A6                                                                                   | 0,011618772 | 0,066559155 | 0,175 | 0,05  | 1         | 1,04721608    | 0,954912763     | 3,5             |
| SKA1                                                                                     | 0,000291957 | 0,066552394 | 0,125 | 0     | 1         | 1,047211172   | 0,954917238     | #DIV/0!         |
| ZC3H18                                                                                   | 0,015536025 | 0,066500175 | 0,3   | 0,13  | 1         | 1,047173269   | 0,954951802     | 2,307692308     |
| NAGPA                                                                                    | 0,024883489 | 0,066484939 | 0,138 | 0,04  | 1         | 1,04716221    | 0,954961887     | 3,45            |
| PEX11A                                                                                   | 0,011634754 | 0,066480382 | 0,062 | 0     | 1         | 1,047158902   | 0,954964904     | #DIV/0!         |
| NCOA6                                                                                    | 0,018409207 | 0,066479407 | 0,25  | 0,1   | 1         | 1,047158194   | 0,954965549     | 2,5             |
| HSDL1                                                                                    | 0,133573518 | 0,066474352 | 0,112 | 0,05  | 1         | 1,047154526   | 0,954968895     | 2,24            |
| HAUS5                                                                                    | 0,003237075 | 0,066460567 | 0,112 | 0,01  | 1         | 1,04714452    | 0,95497802      | 11,2            |
| ATXN10                                                                                   | 0,000139969 | 0,066451703 | 0,537 | 0,18  | 1         | 1,047138086   | 0,954983887     | 2,983333333     |
| TMEM258                                                                                  | 0,226098999 | 0,066430658 | 0,95  | 0,66  | 1         | 1,047122811   | 0,954997818     | 1,439393939     |
| MTHFSD                                                                                   | 0,005562134 | 0,06642803  | 0,075 | 0     | 1         | 1,047120904   | 0,954999558     | #DIV/0!         |
| PIP4P2                                                                                   | 0,000126373 | 0,06640277  | 0,412 | 0,12  | 1         | 1,04710257    | 0,955016279     | 3,433333333     |
| STAB1                                                                                    | 0,011634754 | 0,066401747 | 0,062 | 0     | 1         | 1,047101828   | 0,955016956     | #DIV/0!         |
| MAFG-DT                                                                                  | 0,001278066 | 0,066399668 | 0,1   | 0     | 1         | 1,047100319   | 0,955018332     | #DIV/0!         |
| GALNT5                                                                                   | 0,042211625 | 0,066275736 | 0,088 | 0,02  | 1         | 1,047010374   | 0,955100374     | 4,4             |
| SUSD5                                                                                    | 0,024497883 | 0,066271413 | 0,05  | 0     | 1         | 1,047007236   | 0,955103237     | #DIV/0!         |
| TAF13                                                                                    | 0,022431734 | 0,066264515 | 0,325 | 0,15  | 1         | 1,04700223    | 0,955107804     | 2,166666667     |
| CBX5                                                                                     | 0,104430812 | 0,066258483 | 0,85  | 0,52  | 1         | 1,046997853   | 0,955111797     | 1,634615385     |

Supplementary Table 4

| Differentially expressed genes_keloid-CCD_ comparing SC-Keloid vs. (SC-Myel, SC-Nonmyel) |             |             |       |       |             |               |                 |                 |
|------------------------------------------------------------------------------------------|-------------|-------------|-------|-------|-------------|---------------|-----------------|-----------------|
| gene                                                                                     | p_val       | avg_log2FC  | pct.1 | pct.2 | p_val_adj   | Foldchange_UP | Foldchange_DOWN | Ratio_pct1_pct2 |
| PRR14L                                                                                   | 0,011489144 | 0,066238118 | 0,112 | 0,02  | 1           | 1,046983073   | 0,955125279     | 5,6             |
| RNASEL                                                                                   | 0,079510298 | 0,06619137  | 0,075 | 0,02  | 1           | 1,046949148   | 0,955156229     | 3,75            |
| GIN51                                                                                    | 0,002666059 | 0,066142743 | 0,088 | 0     | 1           | 1,04691386    | 0,955188424     | #DIV/0!         |
| WDFY3                                                                                    | 0,005803812 | 0,066125616 | 0,262 | 0,09  | 1           | 1,046901432   | 0,955199763     | 2,911111111     |
| VPS28                                                                                    | 0,094530686 | 0,066061093 | 0,875 | 0,53  | 1           | 1,046854611   | 0,955242485     | 1,650943396     |
| TSEN34                                                                                   | 7,27524E-05 | 0,066053041 | 0,488 | 0,15  | 1           | 1,046848769   | 0,955247816     | 3,253333333     |
| SYVN1                                                                                    | 0,001538482 | 0,066010757 | 0,238 | 0,06  | 1           | 1,046818087   | 0,955275814     | 3,966666667     |
| MED18                                                                                    | 0,024497883 | 0,065997046 | 0,05  | 0     | 1           | 1,046808139   | 0,955284892     | #DIV/0!         |
| GTF3C4                                                                                   | 4,24104E-05 | 0,065982194 | 0,288 | 0,05  | 0,894901148 | 1,046797362   | 0,955294727     | 5,76            |
| DNPEP                                                                                    | 0,000235934 | 0,065865545 | 0,362 | 0,1   | 1           | 1,046712727   | 0,95537197      | 3,62            |
| DYNC111                                                                                  | 0,475894584 | 0,065841447 | 0,038 | 0,02  | 1           | 1,046695243   | 0,955387928     | 1,9             |
| FREM1                                                                                    | 0,005562134 | 0,06583131  | 0,075 | 0     | 1           | 1,046687888   | 0,955394642     | #DIV/0!         |
| RMRP                                                                                     | 0,11122839  | 0,06581063  | 0,05  | 0,01  | 1           | 1,046672885   | 0,955408336     | 5               |
| ZSCAN16-AS1                                                                              | 0,000138014 | 0,065774369 | 0,475 | 0,15  | 1           | 1,046646579   | 0,95543235      | 3,166666667     |
| BDP1                                                                                     | 0,004976764 | 0,065754145 | 0,562 | 0,26  | 1           | 1,046631907   | 0,955445743     | 2,161538462     |
| SNAP47                                                                                   | 0,002707566 | 0,065685062 | 0,225 | 0,06  | 1           | 1,04658179    | 0,955491496     | 3,75            |
| AGBL5                                                                                    | 0,005562134 | 0,065659686 | 0,075 | 0     | 1           | 1,046563381   | 0,955508302     | #DIV/0!         |
| VPS13B                                                                                   | 0,041626859 | 0,065564237 | 0,175 | 0,07  | 1           | 1,046494143   | 0,955571521     | 2,5             |
| ZNF287                                                                                   | 0,002666059 | 0,065557919 | 0,088 | 0     | 1           | 1,04648956    | 0,955575706     | #DIV/0!         |
| UBA6                                                                                     | 0,001069721 | 0,065427108 | 0,388 | 0,13  | 1           | 1,046394678   | 0,955662353     | 2,984615385     |
| ZDHHC7                                                                                   | 0,030418025 | 0,065417358 | 0,15  | 0,05  | 1           | 1,046387606   | 0,955668812     | 3               |
| TRPM8                                                                                    | 0,024497883 | 0,065411468 | 0,05  | 0     | 1           | 1,046383334   | 0,955672714     | #DIV/0!         |
| TACO1                                                                                    | 0,002269362 | 0,065401638 | 0,188 | 0,04  | 1           | 1,046376205   | 0,955679225     | 4,7             |
| DYM                                                                                      | 0,015111249 | 0,065385778 | 0,188 | 0,06  | 1           | 1,046364701   | 0,955689731     | 3,133333333     |
| FOLR1                                                                                    | 0,005562134 | 0,065331339 | 0,075 | 0     | 1           | 1,046325218   | 0,955725794     | #DIV/0!         |
| MIPOL1                                                                                   | 0,043780897 | 0,06531449  | 0,088 | 0,02  | 1           | 1,046312999   | 0,955736956     | 4,4             |
| QRSL1                                                                                    | 0,002937191 | 0,065298626 | 0,162 | 0,03  | 1           | 1,046301493   | 0,955747466     | 5,4             |
| LIG4                                                                                     | 0,006731552 | 0,065294884 | 0,1   | 0,01  | 1           | 1,046298779   | 0,955749944     | 10              |
| ORAI2                                                                                    | 0,003785517 | 0,065254726 | 0,375 | 0,14  | 1           | 1,046269656   | 0,955776548     | 2,678571429     |
| MASTL                                                                                    | 0,003202904 | 0,065205617 | 0,138 | 0,02  | 1           | 1,046234041   | 0,955809083     | 6,9             |



Supplementary Table 4

| Differentially expressed genes_keloid-CCD_ comparing SC-Keloid vs. (SC-Myel, SC-Nonmyel) |             |             |       |       |           |               |                 |                 |
|------------------------------------------------------------------------------------------|-------------|-------------|-------|-------|-----------|---------------|-----------------|-----------------|
| gene                                                                                     | p_val       | avg_log2FC  | pct.1 | pct.2 | p_val_adj | Foldchange_UP | Foldchange_DOWN | Ratio_pct1_pct2 |
| THAP1                                                                                    | 0,006272896 | 0,065197055 | 0,188 | 0,05  | 1         | 1,046227833   | 0,955814756     | 3,76            |
| ZP3                                                                                      | 0,114652585 | 0,065185612 | 0,025 | 0     | 1         | 1,046219534   | 0,955822337     | #DIV/0!         |
| SLC25A51                                                                                 | 0,027487357 | 0,065177646 | 0,075 | 0,01  | 1         | 1,046213757   | 0,955827614     | 7,5             |
| GSDMD                                                                                    | 0,00425288  | 0,065125776 | 0,537 | 0,24  | 1         | 1,046176143   | 0,955861981     | 2,2375          |
| MFAP4                                                                                    | 0,185993644 | 0,065108992 | 0,075 | 0,03  | 1         | 1,046163972   | 0,955873101     | 2,5             |
| PSIP1                                                                                    | 0,003389153 | 0,065012804 | 0,438 | 0,19  | 1         | 1,046094224   | 0,955936834     | 2,305263158     |
| PKP3                                                                                     | 0,024497883 | 0,064961641 | 0,05  | 0     | 1         | 1,046057126   | 0,955970735     | #DIV/0!         |
| TMEM8B                                                                                   | 0,004197268 | 0,06495319  | 0,238 | 0,07  | 1         | 1,046050999   | 0,955976335     | 3,4             |
| MUL1                                                                                     | 0,002094837 | 0,064952102 | 0,212 | 0,05  | 1         | 1,04605021    | 0,955977056     | 4,24            |
| LPAR4                                                                                    | 0,108976957 | 0,064926068 | 0,05  | 0,01  | 1         | 1,046031334   | 0,955994307     | 5               |
| SMIM27                                                                                   | 0,002526724 | 0,064750609 | 0,188 | 0,04  | 1         | 1,045904124   | 0,956110581     | 4,7             |
| TMEM115                                                                                  | 0,001117998 | 0,064713914 | 0,375 | 0,13  | 1         | 1,045877522   | 0,9561349       | 2,884615385     |
| LTC4S                                                                                    | 0,01362345  | 0,064643652 | 0,088 | 0,01  | 1         | 1,045826587   | 0,956181467     | 8,8             |
| RTN2                                                                                     | 0,000384434 | 0,064634873 | 0,15  | 0,01  | 1         | 1,045820223   | 0,956187285     | 15              |
| TEDC2                                                                                    | 0,002666059 | 0,064630652 | 0,088 | 0     | 1         | 1,045817163   | 0,956190083     | #DIV/0!         |
| PTGR1                                                                                    | 0,002017359 | 0,064598748 | 0,525 | 0,21  | 1         | 1,045794036   | 0,956211228     | 2,5             |
| CYB5R2                                                                                   | 0,000870262 | 0,064582706 | 0,362 | 0,12  | 1         | 1,045782408   | 0,956221861     | 3,016666667     |
| PTK7                                                                                     | 0,003313746 | 0,064575806 | 0,112 | 0,01  | 1         | 1,045777406   | 0,956226434     | 11,2            |
| MTHFD1L                                                                                  | 0,002041761 | 0,064453966 | 0,25  | 0,07  | 1         | 1,04568909    | 0,956307194     | 3,571428571     |
| ERGIC2                                                                                   | 0,008618408 | 0,064447777 | 0,7   | 0,33  | 1         | 1,045684604   | 0,956311297     | 2,121212121     |
| STK24                                                                                    | 0,002760013 | 0,064421225 | 0,262 | 0,08  | 1         | 1,04566536    | 0,956328897     | 3,275           |
| RC3H2                                                                                    | 0,000502464 | 0,064276888 | 0,3   | 0,08  | 1         | 1,045560749   | 0,95642458      | 3,75            |
| SNX13                                                                                    | 0,001798489 | 0,064247126 | 0,388 | 0,14  | 1         | 1,04553918    | 0,956444311     | 2,771428571     |
| SEC23IP                                                                                  | 0,001272061 | 0,064226808 | 0,262 | 0,07  | 1         | 1,045524456   | 0,95645778      | 3,742857143     |
| SNX6                                                                                     | 0,017921483 | 0,064179112 | 0,725 | 0,35  | 1         | 1,045489891   | 0,956489402     | 2,071428571     |
| CALCRL                                                                                   | 0,108976957 | 0,064172181 | 0,05  | 0,01  | 1         | 1,045484868   | 0,956493997     | 5               |
| SGTA                                                                                     | 0,002474307 | 0,064172008 | 0,512 | 0,21  | 1         | 1,045484742   | 0,956494112     | 2,438095238     |
| MTX3                                                                                     | 0,01466195  | 0,064168173 | 0,15  | 0,04  | 1         | 1,045481964   | 0,956496654     | 3,75            |
| ZNF230                                                                                   | 0,006731552 | 0,064148696 | 0,1   | 0,01  | 1         | 1,045467849   | 0,956509568     | 10              |
| FANCD2                                                                                   | 0,000611714 | 0,064133502 | 0,112 | 0     | 1         | 1,045456838   | 0,956519641     | #DIV/0!         |

Supplementary Table 4

| Differentially expressed genes_keloid-CCD_ comparing SC-Keloid vs. (SC-Myel, SC-Nonmyel) |             |             |       |       |           |               |                 |                 |
|------------------------------------------------------------------------------------------|-------------|-------------|-------|-------|-----------|---------------|-----------------|-----------------|
| gene                                                                                     | p_val       | avg_log2FC  | pct.1 | pct.2 | p_val_adj | Foldchange_UP | Foldchange_DOWN | Ratio_pct1_pct2 |
| MAGT1                                                                                    | 0,001196277 | 0,064117885 | 0,525 | 0,21  | 1         | 1,045445522   | 0,956529995     | 2,5             |
| MTO1                                                                                     | 0,009564696 | 0,0641162   | 0,138 | 0,03  | 1         | 1,045444301   | 0,956531113     | 4,6             |
| CNTNAP3B                                                                                 | 0,114652585 | 0,063930805 | 0,025 | 0     | 1         | 1,045309963   | 0,95665404      | #DIV/0!         |
| CCDC74B                                                                                  | 0,003269989 | 0,063899542 | 0,138 | 0,02  | 1         | 1,045287312   | 0,956674771     | 6,9             |
| FBF1                                                                                     | 0,052279021 | 0,063890598 | 0,038 | 0     | 1         | 1,045280832   | 0,956680702     | #DIV/0!         |
| PTBP3                                                                                    | 0,003285933 | 0,063883206 | 0,412 | 0,16  | 1         | 1,045275476   | 0,956685604     | 2,575           |
| ASB8                                                                                     | 0,00043633  | 0,063831697 | 0,288 | 0,07  | 1         | 1,045238157   | 0,956719761     | 4,114285714     |
| DLG5                                                                                     | 0,008260951 | 0,063828506 | 0,162 | 0,04  | 1         | 1,045235845   | 0,956721878     | 4,05            |
| C20orf96                                                                                 | 0,006404327 | 0,063816473 | 0,125 | 0,02  | 1         | 1,045227127   | 0,956729857     | 6,25            |
| TAF12                                                                                    | 0,006819572 | 0,06375782  | 0,488 | 0,22  | 1         | 1,045184634   | 0,956768754     | 2,218181818     |
| ANKRD36C                                                                                 | 0,009670762 | 0,063690181 | 0,212 | 0,07  | 1         | 1,045135633   | 0,956813612     | 3,028571429     |
| NEMP1                                                                                    | 0,01362345  | 0,063686501 | 0,088 | 0,01  | 1         | 1,045132967   | 0,956816052     | 8,8             |
| PMPCA                                                                                    | 7,05791E-05 | 0,063671503 | 0,362 | 0,09  | 1         | 1,045122102   | 0,956825999     | 4,022222222     |
| NCKAP5                                                                                   | 0,10676172  | 0,063662959 | 0,05  | 0,01  | 1         | 1,045115913   | 0,956831666     | 5               |
| KRBA2                                                                                    | 0,052279021 | 0,063641386 | 0,038 | 0     | 1         | 1,045100285   | 0,956845974     | #DIV/0!         |
| VANGL1                                                                                   | 0,044922833 | 0,063578099 | 0,125 | 0,04  | 1         | 1,04505444    | 0,956887949     | 3,125           |
| ALG11                                                                                    | 0,052279021 | 0,063572908 | 0,038 | 0     | 1         | 1,04505068    | 0,956891392     | #DIV/0!         |
| TICAM2                                                                                   | 0,052279021 | 0,063567756 | 0,038 | 0     | 1         | 1,045046948   | 0,956894809     | #DIV/0!         |
| DTL                                                                                      | 0,024497883 | 0,063525284 | 0,05  | 0     | 1         | 1,045016183   | 0,95692298      | #DIV/0!         |
| HAUS4                                                                                    | 0,006731552 | 0,063501206 | 0,1   | 0,01  | 1         | 1,044998742   | 0,956938951     | 10              |
| GCDH                                                                                     | 0,005256041 | 0,063485803 | 0,25  | 0,08  | 1         | 1,044987586   | 0,956949167     | 3,125           |
| TMEM216                                                                                  | 0,005473966 | 0,063444379 | 0,15  | 0,03  | 1         | 1,044957581   | 0,956976645     | 5               |
| PSMD9                                                                                    | 0,001306906 | 0,063426777 | 0,75  | 0,3   | 1         | 1,044944832   | 0,956988321     | 2,5             |
| SCAMP2                                                                                   | 0,005679321 | 0,063389639 | 0,375 | 0,15  | 1         | 1,044917933   | 0,957012956     | 2,5             |
| WRAP73                                                                                   | 0,001082432 | 0,063374413 | 0,225 | 0,05  | 1         | 1,044906905   | 0,957023056     | 4,5             |
| MRTFB                                                                                    | 0,002827454 | 0,063294335 | 0,162 | 0,03  | 1         | 1,044848908   | 0,957076178     | 5,4             |
| ACTA2                                                                                    | 0,001026851 | 0,063276245 | 0,225 | 0,05  | 1         | 1,044835807   | 0,957088179     | 4,5             |
| S100PBP                                                                                  | 0,010428083 | 0,063187896 | 0,175 | 0,05  | 1         | 1,044771824   | 0,957146792     | 3,5             |
| BCAS3                                                                                    | 0,044583831 | 0,063186581 | 0,088 | 0,02  | 1         | 1,044770872   | 0,957147664     | 4,4             |
| NRBP2                                                                                    | 0,003101944 | 0,063118272 | 0,4   | 0,16  | 1         | 1,044721405   | 0,957192985     | 2,5             |

Supplementary Table 4

| Differentially expressed genes_keloid-CCD_ comparing SC-Keloid vs. (SC-Myel, SC-Nonmyel) |             |             |       |       |             |               |                 |                 |
|------------------------------------------------------------------------------------------|-------------|-------------|-------|-------|-------------|---------------|-----------------|-----------------|
| gene                                                                                     | p_val       | avg_log2FC  | pct.1 | pct.2 | p_val_adj   | Foldchange_UP | Foldchange_DOWN | Ratio_pct1_pct2 |
| LMCD1-AS1                                                                                | 0,114652585 | 0,063112634 | 0,025 | 0     | 1           | 1,044717322   | 0,957196725     | #DIV/0!         |
| CUX1                                                                                     | 4,36856E-05 | 0,063109755 | 0,65  | 0,22  | 0,921810605 | 1,044715238   | 0,957198635     | 2,954545455     |
| RILPL1                                                                                   | 0,001088034 | 0,063061065 | 0,362 | 0,12  | 1           | 1,04467998    | 0,95723094      | 3,016666667     |
| SENP3                                                                                    | 0,011634754 | 0,063002899 | 0,062 | 0     | 1           | 1,044637862   | 0,957269535     | #DIV/0!         |
| PTPRB                                                                                    | 0,219108376 | 0,062896435 | 0,038 | 0,01  | 1           | 1,044560776   | 0,957340179     | 3,8             |
| ARHGDI1                                                                                  | 0,002881846 | 0,06287206  | 0,162 | 0,03  | 1           | 1,044543127   | 0,957356354     | 5,4             |
| RAE1                                                                                     | 0,00034156  | 0,062867529 | 0,325 | 0,09  | 1           | 1,044539847   | 0,95735936      | 3,611111111     |
| EXOC2                                                                                    | 0,017776655 | 0,062860548 | 0,125 | 0,03  | 1           | 1,044534792   | 0,957363993     | 4,166666667     |
| POLR1D                                                                                   | 0,009439432 | 0,062816604 | 0,762 | 0,37  | 1           | 1,044502977   | 0,957393154     | 2,059459459     |
| SLC43A3                                                                                  | 0,006730803 | 0,062811797 | 0,262 | 0,09  | 1           | 1,044499497   | 0,957396345     | 2,911111111     |
| RBM42                                                                                    | 0,000588268 | 0,062722642 | 0,55  | 0,21  | 1           | 1,044434951   | 0,957455511     | 2,619047619     |
| PLXND1                                                                                   | 1,64376E-05 | 0,062676541 | 0,55  | 0,16  | 0,346850675 | 1,044401577   | 0,957486107     | 3,4375          |
| XRCC1                                                                                    | 0,017676384 | 0,062624829 | 0,162 | 0,05  | 1           | 1,044364142   | 0,957520428     | 3,24            |
| WDR35                                                                                    | 0,004676011 | 0,062619704 | 0,175 | 0,04  | 1           | 1,044360432   | 0,957523829     | 4,375           |
| PLEKHB1                                                                                  | 0,019407902 | 0,062616492 | 0,4   | 0,19  | 1           | 1,044358107   | 0,957525961     | 2,105263158     |
| LBR                                                                                      | 0,002245867 | 0,062465003 | 0,325 | 0,11  | 1           | 1,044248451   | 0,95762651      | 2,954545455     |
| ZSCAN5A                                                                                  | 0,011634754 | 0,0623844   | 0,062 | 0     | 1           | 1,04419011    | 0,957680015     | #DIV/0!         |
| PTGS1                                                                                    | 0,052279021 | 0,062379509 | 0,038 | 0     | 1           | 1,04418657    | 0,957683261     | #DIV/0!         |
| MOSPD3                                                                                   | 0,013088848 | 0,062307839 | 0,188 | 0,06  | 1           | 1,044134699   | 0,957730838     | 3,133333333     |
| THEM6                                                                                    | 0,050823809 | 0,062295517 | 0,188 | 0,08  | 1           | 1,044125781   | 0,957739018     | 2,35            |
| ZNF333                                                                                   | 0,123254101 | 0,062282956 | 0,1   | 0,04  | 1           | 1,04411669    | 0,957747356     | 2,5             |
| CDC42SE2                                                                                 | 0,000156585 | 0,062256353 | 0,288 | 0,06  | 1           | 1,044097437   | 0,957765017     | 4,8             |
| RBM45                                                                                    | 0,003269989 | 0,062204244 | 0,138 | 0,02  | 1           | 1,044059726   | 0,957799612     | 6,9             |
| CRYBB1                                                                                   | 0,024497883 | 0,062203982 | 0,05  | 0     | 1           | 1,044059536   | 0,957799786     | #DIV/0!         |
| FAS                                                                                      | 0,003009105 | 0,062189076 | 0,138 | 0,02  | 1           | 1,044048749   | 0,957809682     | 6,9             |
| NANS                                                                                     | 0,000240834 | 0,062163685 | 0,662 | 0,27  | 1           | 1,044030374   | 0,957826539     | 2,451851852     |
| PPP2R1A                                                                                  | 0,000470151 | 0,062076577 | 0,675 | 0,28  | 1           | 1,043967339   | 0,957884373     | 2,410714286     |
| COG2                                                                                     | 0,008123626 | 0,062063234 | 0,162 | 0,04  | 1           | 1,043957683   | 0,957893233     | 4,05            |
| E2F4                                                                                     | 0,000638651 | 0,062006139 | 0,3   | 0,08  | 1           | 1,04391637    | 0,957931142     | 3,75            |
| UFSP2                                                                                    | 0,003493081 | 0,061977646 | 0,425 | 0,17  | 1           | 1,043895752   | 0,957950061     | 2,5             |

Supplementary Table 4

| Differentially expressed genes_keloid-CCD_ comparing SC-Keloid vs. (SC-Myel, SC-Nonmyel) |             |             |       |       |           |               |                 |                 |
|------------------------------------------------------------------------------------------|-------------|-------------|-------|-------|-----------|---------------|-----------------|-----------------|
| gene                                                                                     | p_val       | avg_log2FC  | pct.1 | pct.2 | p_val_adj | Foldchange_UP | Foldchange_DOWN | Ratio_pct1_pct2 |
| FAM131B                                                                                  | 0,011634754 | 0,061972731 | 0,062 | 0     | 1         | 1,043892196   | 0,957953325     | #DIV/0!         |
| FOCAD                                                                                    | 0,002666059 | 0,061953106 | 0,088 | 0     | 1         | 1,043877996   | 0,957966356     | #DIV/0!         |
| ELAVL4                                                                                   | 0,011634754 | 0,061948781 | 0,062 | 0     | 1         | 1,043874866   | 0,957969228     | #DIV/0!         |
| RGS8                                                                                     | 0,052279021 | 0,061914143 | 0,038 | 0     | 1         | 1,043849805   | 0,957992228     | #DIV/0!         |
| MESP1                                                                                    | 0,054166721 | 0,061767506 | 0,062 | 0,01  | 1         | 1,043743712   | 0,958089604     | 6,2             |
| POC1B                                                                                    | 0,010094224 | 0,061741954 | 0,138 | 0,03  | 1         | 1,043725226   | 0,958106574     | 4,6             |
| C5orf22                                                                                  | 0,005562134 | 0,061713315 | 0,075 | 0     | 1         | 1,043704507   | 0,958125593     | #DIV/0!         |
| C2orf81                                                                                  | 0,006731552 | 0,061711687 | 0,1   | 0,01  | 1         | 1,04370333    | 0,958126674     | 10              |
| PROSER3                                                                                  | 0,006731552 | 0,061586696 | 0,1   | 0,01  | 1         | 1,04361291    | 0,958209687     | 10              |
| AC002553.1                                                                               | 0,053019982 | 0,061558921 | 0,062 | 0,01  | 1         | 1,043592818   | 0,958228135     | 6,2             |
| CPXM1                                                                                    | 0,093220017 | 0,061552888 | 0,125 | 0,05  | 1         | 1,043588454   | 0,958232142     | 2,5             |
| SPG11                                                                                    | 0,003327079 | 0,061538757 | 0,2   | 0,05  | 1         | 1,043578233   | 0,958241528     | 4               |
| CLUH                                                                                     | 0,002424934 | 0,061506443 | 0,162 | 0,03  | 1         | 1,043554858   | 0,958262991     | 5,4             |
| SELENOF                                                                                  | 0,044107695 | 0,061421219 | 0,95  | 0,61  | 1         | 1,043493214   | 0,9583196       | 1,557377049     |
| PUS7                                                                                     | 0,001500621 | 0,061417752 | 0,175 | 0,03  | 1         | 1,043490707   | 0,958321903     | 5,833333333     |
| ZNF212                                                                                   | 0,054166721 | 0,061408005 | 0,062 | 0,01  | 1         | 1,043483657   | 0,958328378     | 6,2             |
| MTRR                                                                                     | 0,012730227 | 0,061371812 | 0,088 | 0,01  | 1         | 1,043457479   | 0,95835242      | 8,8             |
| TTC14                                                                                    | 0,019669925 | 0,061331201 | 0,262 | 0,11  | 1         | 1,043428107   | 0,958379397     | 2,381818182     |
| ANAPC4                                                                                   | 0,010924402 | 0,061325119 | 0,175 | 0,05  | 1         | 1,043423708   | 0,958383437     | 3,5             |
| NME5                                                                                     | 0,042211625 | 0,061323529 | 0,088 | 0,02  | 1         | 1,043422558   | 0,958384494     | 4,4             |
| ECPAS                                                                                    | 0,001253115 | 0,06130947  | 0,2   | 0,04  | 1         | 1,04341239    | 0,958393833     | 5               |
| TTC33                                                                                    | 0,001142385 | 0,061266905 | 0,2   | 0,04  | 1         | 1,043381606   | 0,95842211      | 5               |
| AQP7                                                                                     | 0,053019982 | 0,061245255 | 0,062 | 0,01  | 1         | 1,043365948   | 0,958436493     | 6,2             |
| ATPCKMT                                                                                  | 0,001655244 | 0,061215331 | 0,15  | 0,02  | 1         | 1,043344308   | 0,958456372     | 7,5             |
| TRAIP                                                                                    | 0,005562134 | 0,061172415 | 0,075 | 0     | 1         | 1,043313271   | 0,958484884     | #DIV/0!         |
| CYHR1                                                                                    | 0,002956588 | 0,061101267 | 0,488 | 0,2   | 1         | 1,04326182    | 0,958532154     | 2,44            |
| ATP6AP1                                                                                  | 0,028749524 | 0,061032533 | 0,65  | 0,34  | 1         | 1,043212118   | 0,958577822     | 1,911764706     |
| WRAP53                                                                                   | 0,015387523 | 0,060983302 | 0,15  | 0,04  | 1         | 1,04317652    | 0,958610533     | 3,75            |
| ING4                                                                                     | 0,000522921 | 0,060975677 | 0,262 | 0,06  | 1         | 1,043171006   | 0,9586156       | 4,366666667     |
| LMOD3                                                                                    | 0,024497883 | 0,06094438  | 0,05  | 0     | 1         | 1,043148376   | 0,958636396     | #DIV/0!         |

Supplementary Table 4

| Differentially expressed genes_keloid-CCD_ comparing SC-Keloid vs. (SC-Myel, SC-Nonmyel) |             |             |       |       |             |               |                 |                 |
|------------------------------------------------------------------------------------------|-------------|-------------|-------|-------|-------------|---------------|-----------------|-----------------|
| gene                                                                                     | p_val       | avg_log2FC  | pct.1 | pct.2 | p_val_adj   | Foldchange_UP | Foldchange_DOWN | Ratio_pct1_pct2 |
| FBLN7                                                                                    | 0,011634754 | 0,06094264  | 0,062 | 0     | 1           | 1,043147118   | 0,958637552     | #DIV/0!         |
| RECQL                                                                                    | 0,007627662 | 0,060940393 | 0,525 | 0,24  | 1           | 1,043145494   | 0,958639045     | 2,1875          |
| CRLS1                                                                                    | 3,93796E-05 | 0,060921229 | 0,45  | 0,13  | 0,830948445 | 1,043131637   | 0,95865178      | 3,461538462     |
| SPAG5                                                                                    | 0,003313746 | 0,060892602 | 0,112 | 0,01  | 1           | 1,043110939   | 0,958670802     | 11,2            |
| MITD1                                                                                    | 0,000400308 | 0,060887791 | 0,325 | 0,09  | 1           | 1,04310746    | 0,958673999     | 3,611111111     |
| INTS7                                                                                    | 0,041445004 | 0,060877281 | 0,088 | 0,02  | 1           | 1,043099861   | 0,958680983     | 4,4             |
| SH3BP4                                                                                   | 0,002827454 | 0,060785159 | 0,162 | 0,03  | 1           | 1,043033257   | 0,958742201     | 5,4             |
| HOXB4                                                                                    | 0,007837267 | 0,060767349 | 0,2   | 0,06  | 1           | 1,043020381   | 0,958754036     | 3,333333333     |
| STING1                                                                                   | 0,002339201 | 0,060744075 | 0,325 | 0,11  | 1           | 1,043003555   | 0,958769503     | 2,954545455     |
| NOC4L                                                                                    | 0,000505169 | 0,060729587 | 0,262 | 0,06  | 1           | 1,042993081   | 0,958779131     | 4,366666667     |
| SLC6A6                                                                                   | 0,000619581 | 0,060668501 | 0,312 | 0,09  | 1           | 1,04294892    | 0,958819728     | 3,466666667     |
| NDUFA4L2                                                                                 | 0,082314814 | 0,060619058 | 0,075 | 0,02  | 1           | 1,042913177   | 0,958852589     | 3,75            |
| SCP2                                                                                     | 0,130073736 | 0,0605978   | 0,863 | 0,49  | 1           | 1,04289781    | 0,958866718     | 1,76122449      |
| CHCHD4                                                                                   | 0,000813108 | 0,060535764 | 0,162 | 0,02  | 1           | 1,042852966   | 0,95890795      | 8,1             |
| DNASE1L1                                                                                 | 0,01362345  | 0,060515361 | 0,088 | 0,01  | 1           | 1,042838218   | 0,958921511     | 8,8             |
| PEX11G                                                                                   | 0,012429073 | 0,060496283 | 0,112 | 0,02  | 1           | 1,042824428   | 0,958934192     | 5,6             |
| LIN7B                                                                                    | 0,054650935 | 0,060389434 | 0,15  | 0,06  | 1           | 1,042747197   | 0,959005215     | 2,5             |
| LCAT                                                                                     | 0,014897309 | 0,060369103 | 0,188 | 0,06  | 1           | 1,042732502   | 0,95901873      | 3,133333333     |
| ST8SIA4                                                                                  | 0,025726858 | 0,060331968 | 0,075 | 0,01  | 1           | 1,042705663   | 0,959043415     | 7,5             |
| UST                                                                                      | 0,052279021 | 0,060317304 | 0,038 | 0     | 1           | 1,042695065   | 0,959053163     | #DIV/0!         |
| ZNF737                                                                                   | 0,104582322 | 0,06030162  | 0,05  | 0,01  | 1           | 1,042683729   | 0,95906359      | 5               |
| ZNF343                                                                                   | 0,011634754 | 0,060272595 | 0,062 | 0     | 1           | 1,042662752   | 0,959082885     | #DIV/0!         |
| MUC12                                                                                    | 0,014068004 | 0,060215053 | 0,188 | 0,06  | 1           | 1,042621166   | 0,959121139     | 3,133333333     |
| PSME3                                                                                    | 0,002194246 | 0,060153209 | 0,288 | 0,09  | 1           | 1,042576472   | 0,959162255     | 3,2             |
| NFKBIL1                                                                                  | 0,028060342 | 0,060152695 | 0,288 | 0,13  | 1           | 1,042576101   | 0,959162596     | 2,215384615     |
| CCDC69                                                                                   | 0,052279021 | 0,060142901 | 0,038 | 0     | 1           | 1,042569024   | 0,959169107     | #DIV/0!         |
| EXOC4                                                                                    | 0,002482056 | 0,060122161 | 0,188 | 0,04  | 1           | 1,042554036   | 0,959182897     | 4,7             |
| WWP2                                                                                     | 0,006404327 | 0,060113798 | 0,125 | 0,02  | 1           | 1,042547993   | 0,959188457     | 6,25            |
| DDX59                                                                                    | 0,000672505 | 0,060103894 | 0,212 | 0,04  | 1           | 1,042540835   | 0,959195042     | 5,3             |
| IFT122                                                                                   | 0,006276301 | 0,060088976 | 0,125 | 0,02  | 1           | 1,042530056   | 0,95920496      | 6,25            |

Supplementary Table 4

| Differentially expressed genes_keloid-CCD_ comparing SC-Keloid vs. (SC-Myel, SC-Nonmyel) |             |             |       |       |             |               |                 |                 |
|------------------------------------------------------------------------------------------|-------------|-------------|-------|-------|-------------|---------------|-----------------|-----------------|
| gene                                                                                     | p_val       | avg_log2FC  | pct.1 | pct.2 | p_val_adj   | Foldchange_UP | Foldchange_DOWN | Ratio_pct1_pct2 |
| DYRK2                                                                                    | 4,41241E-05 | 0,060044737 | 0,55  | 0,17  | 0,931062217 | 1,042498088   | 0,959234374     | 3,235294118     |
| BEND5                                                                                    | 0,006686666 | 0,060018015 | 0,188 | 0,05  | 1           | 1,042478778   | 0,959252141     | 3,76            |
| LACTB2                                                                                   | 0,011094447 | 0,059993141 | 0,175 | 0,05  | 1           | 1,042460804   | 0,95926868      | 3,5             |
| DGKA                                                                                     | 0,023437611 | 0,059984186 | 0,1   | 0,02  | 1           | 1,042454334   | 0,959274634     | 5               |
| CHMP5                                                                                    | 0,008073589 | 0,059954651 | 0,838 | 0,42  | 1           | 1,042432993   | 0,959294273     | 1,995238095     |
| TMEM69                                                                                   | 0,010276447 | 0,059936514 | 0,138 | 0,03  | 1           | 1,042419888   | 0,959306333     | 4,6             |
| SRPK3                                                                                    | 0,10676172  | 0,059904499 | 0,05  | 0,01  | 1           | 1,042396756   | 0,959327621     | 5               |
| IPO5                                                                                     | 0,004917598 | 0,059894041 | 0,45  | 0,2   | 1           | 1,0423892     | 0,959334575     | 2,25            |
| UTP14C                                                                                   | 0,001276418 | 0,059838599 | 0,2   | 0,04  | 1           | 1,042349142   | 0,959371443     | 5               |
| RAB8B                                                                                    | 0,000689958 | 0,059823632 | 0,462 | 0,16  | 1           | 1,042338328   | 0,959381396     | 2,8875          |
| TMBIM4                                                                                   | 0,082071579 | 0,059746968 | 0,925 | 0,56  | 1           | 1,04228294    | 0,959432378     | 1,651785714     |
| PDGFRB                                                                                   | 0,041626859 | 0,059735472 | 0,175 | 0,07  | 1           | 1,042274635   | 0,959440023     | 2,5             |
| AGA                                                                                      | 0,000910567 | 0,059610671 | 0,537 | 0,21  | 1           | 1,042184476   | 0,959523024     | 2,557142857     |
| KDM1A                                                                                    | 0,00027283  | 0,059596681 | 0,275 | 0,06  | 1           | 1,042174371   | 0,959532328     | 4,583333333     |
| DNAAF11                                                                                  | 0,011634754 | 0,059535771 | 0,062 | 0     | 1           | 1,042130371   | 0,95957284      | #DIV/0!         |
| L3MBTL1                                                                                  | 0,052279021 | 0,059529575 | 0,038 | 0     | 1           | 1,042125895   | 0,959576961     | #DIV/0!         |
| ZNF45                                                                                    | 0,026889313 | 0,059518567 | 0,075 | 0,01  | 1           | 1,042117944   | 0,959584283     | 7,5             |
| TRAF3IP2-AS1                                                                             | 0,018723361 | 0,059504308 | 0,125 | 0,03  | 1           | 1,042107644   | 0,959593767     | 4,166666667     |
| CNTROB                                                                                   | 0,006276301 | 0,059458325 | 0,125 | 0,02  | 1           | 1,04207443    | 0,959624352     | 6,25            |
| DPH1                                                                                     | 0,024497883 | 0,059453516 | 0,05  | 0     | 1           | 1,042070956   | 0,959627552     | #DIV/0!         |
| SEL1L3                                                                                   | 0,011634754 | 0,059435204 | 0,062 | 0     | 1           | 1,042057729   | 0,959639732     | #DIV/0!         |
| LINC00920                                                                                | 0,022467781 | 0,05938453  | 0,225 | 0,09  | 1           | 1,042021128   | 0,95967344      | 2,5             |
| JAKMIP2                                                                                  | 0,006276301 | 0,059305884 | 0,125 | 0,02  | 1           | 1,041964326   | 0,959725756     | 6,25            |
| TPTE2                                                                                    | 0,052279021 | 0,059255062 | 0,038 | 0     | 1           | 1,041927621   | 0,959759565     | #DIV/0!         |
| TTC4                                                                                     | 0,013319742 | 0,059180341 | 0,088 | 0,01  | 1           | 1,041873658   | 0,959809275     | 8,8             |
| FBXO45                                                                                   | 0,006211613 | 0,059117079 | 0,225 | 0,07  | 1           | 1,041827973   | 0,959851363     | 3,214285714     |
| IBA57                                                                                    | 0,108976957 | 0,059071017 | 0,05  | 0,01  | 1           | 1,041794711   | 0,959882009     | 5               |
| ABITRAM                                                                                  | 0,002482056 | 0,059065992 | 0,188 | 0,04  | 1           | 1,041791081   | 0,959885353     | 4,7             |
| ATG4D                                                                                    | 0,000698362 | 0,059048947 | 0,212 | 0,04  | 1           | 1,041778773   | 0,959896694     | 5,3             |
| POLB                                                                                     | 0,007988348 | 0,059030064 | 0,162 | 0,04  | 1           | 1,041765138   | 0,959909257     | 4,05            |

Supplementary Table 4

| Differentially expressed genes_keloid-CCD_comparing SC-Keloid vs. (SC-Myel, SC-Nonmyel) |             |             |       |       |             |               |                 |                 |
|-----------------------------------------------------------------------------------------|-------------|-------------|-------|-------|-------------|---------------|-----------------|-----------------|
| gene                                                                                    | p_val       | avg_log2FC  | pct.1 | pct.2 | p_val_adj   | Foldchange_UP | Foldchange_DOWN | Ratio_pct1_pct2 |
| FJX1                                                                                    | 0,268623818 | 0,058992619 | 0,05  | 0,02  | 1           | 1,041738099   | 0,959934172     | 2,5             |
| TUBGCP6                                                                                 | 0,003313746 | 0,058978123 | 0,112 | 0,01  | 1           | 1,041727632   | 0,959943818     | 11,2            |
| PRKAB1                                                                                  | 0,099725503 | 0,058927702 | 0,088 | 0,03  | 1           | 1,041691225   | 0,959977368     | 2,933333333     |
| GGA3                                                                                    | 0,011634754 | 0,058896436 | 0,062 | 0     | 1           | 1,04166865    | 0,959998172     | #DIV/0!         |
| ERVMER34-1                                                                              | 0,005562134 | 0,058889747 | 0,075 | 0     | 1           | 1,04166382    | 0,960002623     | #DIV/0!         |
| RAD18                                                                                   | 0,002827454 | 0,058810765 | 0,162 | 0,03  | 1           | 1,041606795   | 0,960055181     | 5,4             |
| KCNC4                                                                                   | 0,006731552 | 0,058745667 | 0,1   | 0,01  | 1           | 1,041559796   | 0,960098502     | 10              |
| LYRM4                                                                                   | 0,000127043 | 0,058736029 | 0,537 | 0,18  | 1           | 1,041552838   | 0,960104916     | 2,983333333     |
| H2AJ                                                                                    | 0,031210925 | 0,058700684 | 0,975 | 0,57  | 1           | 1,041527321   | 0,960128439     | 1,710526316     |
| MARS2                                                                                   | 0,005562134 | 0,05861907  | 0,075 | 0     | 1           | 1,041468403   | 0,960182755     | #DIV/0!         |
| SETD4                                                                                   | 0,033686337 | 0,05861602  | 0,112 | 0,03  | 1           | 1,041466201   | 0,960184784     | 3,733333333     |
| H2BC18                                                                                  | 0,011634754 | 0,058381973 | 0,062 | 0     | 1           | 1,041297259   | 0,960340567     | #DIV/0!         |
| C1QC                                                                                    | 0,114652585 | 0,058302272 | 0,025 | 0     | 1           | 1,041239734   | 0,960393622     | #DIV/0!         |
| HOXB5                                                                                   | 0,027487357 | 0,058280946 | 0,075 | 0,01  | 1           | 1,041224343   | 0,960407819     | 7,5             |
| TBC1D32                                                                                 | 0,027487357 | 0,05828054  | 0,075 | 0,01  | 1           | 1,04122405    | 0,960408089     | 7,5             |
| FN3KRP                                                                                  | 2,48541E-05 | 0,058274031 | 0,25  | 0,03  | 0,524447068 | 1,041219352   | 0,960412422     | 8,333333333     |
| KLHDC1                                                                                  | 0,10676172  | 0,058262071 | 0,05  | 0,01  | 1           | 1,04121072    | 0,960420384     | 5               |
| PSEN2                                                                                   | 0,032588088 | 0,058095011 | 0,112 | 0,03  | 1           | 1,041090158   | 0,960531604     | 3,733333333     |
| S100A14                                                                                 | 0,01362345  | 0,058073399 | 0,088 | 0,01  | 1           | 1,041074562   | 0,960545994     | 8,8             |
| AGL                                                                                     | 0,003860939 | 0,058065793 | 0,2   | 0,05  | 1           | 1,041069074   | 0,960551058     | 4               |
| ADAMTS15                                                                                | 0,006404327 | 0,058061129 | 0,125 | 0,02  | 1           | 1,041065708   | 0,960554163     | 6,25            |
| CYSTM1                                                                                  | 0,070131397 | 0,058042301 | 0,875 | 0,52  | 1           | 1,041052122   | 0,960566699     | 1,682692308     |
| PHF19                                                                                   | 0,02639823  | 0,058007673 | 0,462 | 0,23  | 1           | 1,041027135   | 0,960589755     | 2,008695652     |
| TRIB1                                                                                   | 0,005517553 | 0,057998259 | 0,288 | 0,1   | 1           | 1,041020341   | 0,960596023     | 2,88            |
| TOP3A                                                                                   | 0,101227022 | 0,057979326 | 0,088 | 0,03  | 1           | 1,04100668    | 0,960608629     | 2,933333333     |
| TXNDC5                                                                                  | 0,034247231 | 0,057924955 | 0,112 | 0,03  | 1           | 1,040967448   | 0,960644833     | 3,733333333     |
| MILR1                                                                                   | 0,011634754 | 0,057920964 | 0,062 | 0     | 1           | 1,040964569   | 0,96064749      | #DIV/0!         |
| RPS6KA4                                                                                 | 0,005690097 | 0,057884152 | 0,225 | 0,07  | 1           | 1,040938007   | 0,960672003     | 3,214285714     |
| PDE6D                                                                                   | 0,005242842 | 0,057853006 | 0,212 | 0,06  | 1           | 1,040915535   | 0,960692742     | 3,533333333     |
| AL441883.1                                                                              | 0,024497883 | 0,057845431 | 0,05  | 0     | 1           | 1,04091007    | 0,960697786     | #DIV/0!         |

Supplementary Table 4

| Differentially expressed genes_keloid-CCD_ comparing SC-Keloid vs. (SC-Myel, SC-Nonmyel) |             |             |       |       |             |               |                 |                 |
|------------------------------------------------------------------------------------------|-------------|-------------|-------|-------|-------------|---------------|-----------------|-----------------|
| gene                                                                                     | p_val       | avg_log2FC  | pct.1 | pct.2 | p_val_adj   | Foldchange_UP | Foldchange_DOWN | Ratio_pct1_pct2 |
| EPB41                                                                                    | 0,101227022 | 0,057815175 | 0,088 | 0,03  | 1           | 1,04088824    | 0,960717934     | 2,933333333     |
| VXN                                                                                      | 0,011634754 | 0,05773236  | 0,062 | 0     | 1           | 1,040828492   | 0,960773084     | #DIV/0!         |
| H2BC9                                                                                    | 0,011634754 | 0,057721892 | 0,062 | 0     | 1           | 1,040820939   | 0,960780056     | #DIV/0!         |
| CCDC15                                                                                   | 0,002666059 | 0,057719675 | 0,088 | 0     | 1           | 1,04081934    | 0,960781532     | #DIV/0!         |
| PTCD2                                                                                    | 0,011634754 | 0,057714785 | 0,062 | 0     | 1           | 1,040815812   | 0,960784788     | #DIV/0!         |
| LETM2                                                                                    | 0,027487357 | 0,057705455 | 0,075 | 0,01  | 1           | 1,040809081   | 0,960791002     | 7,5             |
| SAMD10                                                                                   | 0,011634754 | 0,057699623 | 0,062 | 0     | 1           | 1,040804873   | 0,960794886     | #DIV/0!         |
| HELQ                                                                                     | 0,135186374 | 0,057670294 | 0,112 | 0,05  | 1           | 1,040783716   | 0,960814418     | 2,24            |
| PSME4                                                                                    | 0,002753631 | 0,057641275 | 0,338 | 0,12  | 1           | 1,040762781   | 0,960833745     | 2,816666667     |
| PTPN21                                                                                   | 0,005690097 | 0,057633731 | 0,225 | 0,07  | 1           | 1,040757339   | 0,960838769     | 3,214285714     |
| MYOM2                                                                                    | 0,011634754 | 0,057610704 | 0,062 | 0     | 1           | 1,040740727   | 0,960854105     | #DIV/0!         |
| RAB12                                                                                    | 0,010376573 | 0,057575318 | 0,212 | 0,07  | 1           | 1,0407152     | 0,960877673     | 3,028571429     |
| RNF20                                                                                    | 0,001345757 | 0,057519334 | 0,3   | 0,09  | 1           | 1,040674816   | 0,960914961     | 3,333333333     |
| PHEX                                                                                     | 0,054166721 | 0,05749219  | 0,062 | 0,01  | 1           | 1,040655236   | 0,960933041     | 6,2             |
| ZBTB18                                                                                   | 0,070958552 | 0,057457023 | 0,112 | 0,04  | 1           | 1,04062987    | 0,960956464     | 2,8             |
| TRIM24                                                                                   | 0,000364668 | 0,057423379 | 0,5   | 0,18  | 1           | 1,040605602   | 0,960978875     | 2,777777778     |
| MBIP                                                                                     | 0,001666473 | 0,057397579 | 0,312 | 0,1   | 1           | 1,040586993   | 0,96099606      | 3,12            |
| SHLD1                                                                                    | 0,033686337 | 0,057386107 | 0,112 | 0,03  | 1           | 1,040578718   | 0,961003702     | 3,733333333     |
| VEZT                                                                                     | 1,83662E-06 | 0,0573835   | 0,525 | 0,13  | 0,038754442 | 1,040576838   | 0,961005438     | 4,038461538     |
| RAMP2                                                                                    | 0,298327182 | 0,057325264 | 0,062 | 0,03  | 1           | 1,040534835   | 0,961044231     | 2,066666667     |
| NINL                                                                                     | 0,052279021 | 0,057297429 | 0,038 | 0     | 1           | 1,040514759   | 0,961062773     | #DIV/0!         |
| GMEB2                                                                                    | 0,011634754 | 0,05729314  | 0,062 | 0     | 1           | 1,040511666   | 0,961065631     | #DIV/0!         |
| TXNDC11                                                                                  | 0,000402681 | 0,057191445 | 0,2   | 0,03  | 1           | 1,040438323   | 0,961133378     | 6,666666667     |
| OAF                                                                                      | 0,009117106 | 0,0571484   | 0,738 | 0,35  | 1           | 1,04040728    | 0,961162055     | 2,108571429     |
| MORN4                                                                                    | 0,001530226 | 0,057129463 | 0,175 | 0,03  | 1           | 1,040393624   | 0,961174671     | 5,833333333     |
| SIMC1                                                                                    | 0,024497883 | 0,057126227 | 0,05  | 0     | 1           | 1,04039129    | 0,961176828     | #DIV/0!         |
| PLK4                                                                                     | 0,002666059 | 0,057120475 | 0,088 | 0     | 1           | 1,040387142   | 0,96118066      | #DIV/0!         |
| GGCT                                                                                     | 0,014037086 | 0,05710617  | 0,475 | 0,23  | 1           | 1,040376826   | 0,96119019      | 2,065217391     |
| CS                                                                                       | 0,001062831 | 0,057090906 | 0,4   | 0,14  | 1           | 1,040365819   | 0,96120036      | 2,857142857     |
| KDM4A                                                                                    | 0,033133318 | 0,057087451 | 0,112 | 0,03  | 1           | 1,040363328   | 0,961202662     | 3,733333333     |



Supplementary Table 4

| Differentially expressed genes_keloid-CCD_comparing SC-Keloid vs. (SC-Myel, SC-Nonmyel) |             |             |       |       |             |               |                 |                 |
|-----------------------------------------------------------------------------------------|-------------|-------------|-------|-------|-------------|---------------|-----------------|-----------------|
| gene                                                                                    | p_val       | avg_log2FC  | pct.1 | pct.2 | p_val_adj   | Foldchange_UP | Foldchange_DOWN | Ratio_pct1_pct2 |
| ZNF747                                                                                  | 0,104284051 | 0,057076921 | 0,088 | 0,03  | 1           | 1,040355734   | 0,961209678     | 2,933333333     |
| ZCCHC4                                                                                  | 0,011634754 | 0,057053343 | 0,062 | 0     | 1           | 1,040338732   | 0,961225387     | #DIV/0!         |
| CSNK1D                                                                                  | 0,006224095 | 0,057016141 | 0,425 | 0,18  | 1           | 1,040311906   | 0,961250174     | 2,361111111     |
| CTDSPL2                                                                                 | 0,002927179 | 0,057006886 | 0,262 | 0,08  | 1           | 1,040305232   | 0,96125634      | 3,275           |
| NOP58                                                                                   | 0,000821118 | 0,056953607 | 0,462 | 0,17  | 1           | 1,040266814   | 0,96129184      | 2,717647059     |
| C2CD3                                                                                   | 0,011950918 | 0,056879725 | 0,112 | 0,02  | 1           | 1,040213542   | 0,96134107      | 5,6             |
| LRRCS9                                                                                  | 0,001755828 | 0,056787722 | 0,688 | 0,29  | 1           | 1,040147208   | 0,961402378     | 2,372413793     |
| KIAA0513                                                                                | 0,08090269  | 0,056725372 | 0,075 | 0,02  | 1           | 1,040102256   | 0,961443929     | 3,75            |
| LRCH4                                                                                   | 0,010094224 | 0,056544874 | 0,138 | 0,03  | 1           | 1,039972136   | 0,961564224     | 4,6             |
| FAM216A                                                                                 | 0,005562134 | 0,05653281  | 0,075 | 0     | 1           | 1,039963439   | 0,961572265     | #DIV/0!         |
| NUDT2                                                                                   | 9,86705E-06 | 0,056504667 | 0,388 | 0,08  | 0,208204536 | 1,039943152   | 0,961591023     | 4,85            |
| FCHSD1                                                                                  | 0,023885059 | 0,056478257 | 0,1   | 0,02  | 1           | 1,039924115   | 0,961608626     | 5               |
| CBWD1                                                                                   | 1,12163E-05 | 0,056398059 | 0,45  | 0,11  | 0,236674593 | 1,039866309   | 0,961662082     | 4,090909091     |
| PHETA2                                                                                  | 0,003735992 | 0,056302643 | 0,2   | 0,05  | 1           | 1,039797537   | 0,961725686     | 4               |
| ARMC9                                                                                   | 0,121642688 | 0,056301873 | 0,1   | 0,04  | 1           | 1,039796982   | 0,9617262       | 2,5             |
| ZNF273                                                                                  | 0,013319742 | 0,056256359 | 0,088 | 0,01  | 1           | 1,039764179   | 0,961756541     | 8,8             |
| RPP25                                                                                   | 0,005788164 | 0,05624272  | 0,188 | 0,05  | 1           | 1,039754349   | 0,961765633     | 3,76            |
| EXOC3-AS1                                                                               | 0,033686337 | 0,056238841 | 0,112 | 0,03  | 1           | 1,039751554   | 0,961768219     | 3,733333333     |
| HPS5                                                                                    | 0,001082432 | 0,056206629 | 0,225 | 0,05  | 1           | 1,039728339   | 0,961789693     | 4,5             |
| MDN1                                                                                    | 0,058821317 | 0,056191892 | 0,1   | 0,03  | 1           | 1,039717719   | 0,961799517     | 3,333333333     |
| NCKAP1                                                                                  | 0,000253423 | 0,056152283 | 0,512 | 0,18  | 1           | 1,039689173   | 0,961825924     | 2,844444444     |
| DPY30                                                                                   | 0,003323547 | 0,05613506  | 0,588 | 0,26  | 1           | 1,039676762   | 0,961837406     | 2,261538462     |
| PICK1                                                                                   | 0,006374119 | 0,05613504  | 0,188 | 0,05  | 1           | 1,039676747   | 0,96183742      | 3,76            |
| NLGN2                                                                                   | 0,001348746 | 0,056123892 | 0,2   | 0,04  | 1           | 1,039668713   | 0,961844852     | 5               |
| RNF139-AS1                                                                              | 0,011634754 | 0,056123332 | 0,062 | 0     | 1           | 1,03966831    | 0,961845226     | #DIV/0!         |
| KRTCAP3                                                                                 | 0,114652585 | 0,056109665 | 0,025 | 0     | 1           | 1,03965846    | 0,961854338     | #DIV/0!         |
| FANCF                                                                                   | 0,024497883 | 0,056094304 | 0,05  | 0     | 1           | 1,039647391   | 0,961864579     | #DIV/0!         |
| SUPT4H1                                                                                 | 0,000630919 | 0,056086817 | 0,512 | 0,19  | 1           | 1,039641996   | 0,961869571     | 2,694736842     |
| BHLHB9                                                                                  | 0,027487357 | 0,056039855 | 0,075 | 0,01  | 1           | 1,039608154   | 0,961900881     | 7,5             |
| FKBP1B                                                                                  | 0,005575985 | 0,056030029 | 0,15  | 0,03  | 1           | 1,039601074   | 0,961907433     | 5               |

Supplementary Table 4

| Differentially expressed genes_keloid-CCD_ comparing SC-Keloid vs. (SC-Myel, SC-Nonmyel) |             |             |       |       |           |               |                 |                 |
|------------------------------------------------------------------------------------------|-------------|-------------|-------|-------|-----------|---------------|-----------------|-----------------|
| gene                                                                                     | p_val       | avg_log2FC  | pct.1 | pct.2 | p_val_adj | Foldchange_UP | Foldchange_DOWN | Ratio_pct1_pct2 |
| PRSS23                                                                                   | 0,052550172 | 0,05597551  | 0,887 | 0,61  | 1         | 1,039561788   | 0,961943784     | 1,454098361     |
| ALYREF                                                                                   | 0,00035151  | 0,055971753 | 0,637 | 0,24  | 1         | 1,039559081   | 0,961946289     | 2,654166667     |
| SLC30A6                                                                                  | 0,027487357 | 0,055971321 | 0,075 | 0,01  | 1         | 1,03955877    | 0,961946577     | 7,5             |
| TM9SF3                                                                                   | 0,002067686 | 0,055958472 | 0,688 | 0,32  | 1         | 1,039549512   | 0,961955144     | 2,15            |
| NFXL1                                                                                    | 0,009738387 | 0,055941662 | 0,138 | 0,03  | 1         | 1,039537399   | 0,961966352     | 4,6             |
| LINC00592                                                                                | 0,005562134 | 0,0558894   | 0,075 | 0     | 1         | 1,039499742   | 0,962001201     | #DIV/0!         |
| RHOA                                                                                     | 0,396537685 | 0,055859109 | 0,988 | 0,94  | 1         | 1,039477917   | 0,962021399     | 1,05106383      |
| ZNF678                                                                                   | 0,010094224 | 0,055825836 | 0,138 | 0,03  | 1         | 1,039453943   | 0,962043587     | 4,6             |
| TLK1                                                                                     | 0,002041031 | 0,055819774 | 0,288 | 0,09  | 1         | 1,039449576   | 0,962047629     | 3,2             |
| POU2F2                                                                                   | 0,114652585 | 0,055808824 | 0,025 | 0     | 1         | 1,039441686   | 0,962054931     | #DIV/0!         |
| ANKRD17                                                                                  | 0,000952794 | 0,055776674 | 0,45  | 0,16  | 1         | 1,039418523   | 0,96207637      | 2,8125          |
| GSTO2                                                                                    | 0,011634754 | 0,055772346 | 0,062 | 0     | 1         | 1,039415405   | 0,962079257     | #DIV/0!         |
| NBAS                                                                                     | 0,010756678 | 0,055767562 | 0,175 | 0,05  | 1         | 1,039411958   | 0,962082447     | 3,5             |
| FAM161A                                                                                  | 0,004595855 | 0,055743842 | 0,175 | 0,04  | 1         | 1,039394869   | 0,962098265     | 4,375           |
| ZNF839                                                                                   | 0,024497883 | 0,055731782 | 0,05  | 0     | 1         | 1,03938618    | 0,962106307     | #DIV/0!         |
| TMC6                                                                                     | 0,005513797 | 0,055712948 | 0,188 | 0,05  | 1         | 1,039372612   | 0,962118867     | 3,76            |
| MYNN                                                                                     | 0,00569537  | 0,055672035 | 0,188 | 0,05  | 1         | 1,039343136   | 0,962146153     | 3,76            |
| MELK                                                                                     | 0,003313746 | 0,055661302 | 0,112 | 0,01  | 1         | 1,039335404   | 0,962153311     | 11,2            |
| FUT10                                                                                    | 0,01362345  | 0,055660125 | 0,088 | 0,01  | 1         | 1,039334556   | 0,962154096     | 8,8             |
| HS2ST1                                                                                   | 0,00079721  | 0,055617478 | 0,375 | 0,12  | 1         | 1,039303834   | 0,962182538     | 3,125           |
| AGPAT3                                                                                   | 0,000157399 | 0,055605526 | 0,325 | 0,08  | 1         | 1,039295223   | 0,962190509     | 4,0625          |
| FAM72A                                                                                   | 0,027487357 | 0,055600805 | 0,075 | 0,01  | 1         | 1,039291822   | 0,962193658     | 7,5             |
| DNAH14                                                                                   | 0,11122839  | 0,055569218 | 0,05  | 0,01  | 1         | 1,039269068   | 0,962214724     | 5               |
| SNAPC4                                                                                   | 0,01362345  | 0,055548568 | 0,088 | 0,01  | 1         | 1,039254192   | 0,962228498     | 8,8             |
| DAXX                                                                                     | 0,00096721  | 0,055515375 | 0,3   | 0,09  | 1         | 1,039230282   | 0,962250636     | 3,333333333     |
| OSBPL7                                                                                   | 0,055334082 | 0,055478102 | 0,062 | 0,01  | 1         | 1,039203433   | 0,962275497     | 6,2             |
| GNPDA2                                                                                   | 0,055714781 | 0,055473557 | 0,188 | 0,08  | 1         | 1,039200159   | 0,962278528     | 2,35            |
| SAPCD2                                                                                   | 0,023885059 | 0,055451438 | 0,1   | 0,02  | 1         | 1,039184226   | 0,962293282     | 5               |
| EML1                                                                                     | 0,002347143 | 0,055432337 | 0,25  | 0,07  | 1         | 1,039170468   | 0,962306022     | 3,571428571     |
| MBLAC2                                                                                   | 0,006731552 | 0,055350142 | 0,1   | 0,01  | 1         | 1,039111265   | 0,96236085      | 10              |

Supplementary Table 4

| Differentially expressed genes_keloid-CCD_ comparing SC-Keloid vs. (SC-Myel, SC-Nonmyel) |             |             |       |       |           |               |                 |                 |
|------------------------------------------------------------------------------------------|-------------|-------------|-------|-------|-----------|---------------|-----------------|-----------------|
| gene                                                                                     | p_val       | avg_log2FC  | pct.1 | pct.2 | p_val_adj | Foldchange_UP | Foldchange_DOWN | Ratio_pct1_pct2 |
| SBF1                                                                                     | 0,002669855 | 0,055319365 | 0,162 | 0,03  | 1         | 1,039089098   | 0,96238138      | 5,4             |
| STK36                                                                                    | 0,054166721 | 0,055309928 | 0,062 | 0,01  | 1         | 1,039082301   | 0,962387675     | 6,2             |
| MEF2A                                                                                    | 0,000301087 | 0,05519345  | 0,588 | 0,22  | 1         | 1,038998412   | 0,962465378     | 2,672727273     |
| SMC5-DT                                                                                  | 0,114652585 | 0,055174231 | 0,025 | 0     | 1         | 1,038984571   | 0,9624782       | #DIV/0!         |
| FAM149A                                                                                  | 0,054166721 | 0,05516318  | 0,062 | 0,01  | 1         | 1,038976613   | 0,962485573     | 6,2             |
| MTRF1                                                                                    | 0,024497883 | 0,055136558 | 0,05  | 0     | 1         | 1,038957441   | 0,962503333     | #DIV/0!         |
| CBWD3                                                                                    | 0,022997455 | 0,055091671 | 0,1   | 0,02  | 1         | 1,038925116   | 0,96253328      | 5               |
| ZFP57                                                                                    | 0,005562134 | 0,055081634 | 0,075 | 0     | 1         | 1,038917888   | 0,962539977     | #DIV/0!         |
| LYZ                                                                                      | 0,439855668 | 0,055023648 | 0,025 | 0,01  | 1         | 1,038876132   | 0,962578665     | 2,5             |
| TRIM61                                                                                   | 0,024497883 | 0,054996103 | 0,05  | 0     | 1         | 1,038856297   | 0,962597043     | #DIV/0!         |
| ENTPD5                                                                                   | 0,043780897 | 0,054993023 | 0,088 | 0,02  | 1         | 1,038854079   | 0,962599098     | 4,4             |
| HOXD10                                                                                   | 0,052279021 | 0,054944948 | 0,038 | 0     | 1         | 1,038819462   | 0,962631176     | #DIV/0!         |
| LCLAT1                                                                                   | 0,006027137 | 0,054925389 | 0,125 | 0,02  | 1         | 1,038805379   | 0,962644226     | 6,25            |
| ZNF558                                                                                   | 0,082314814 | 0,054872239 | 0,075 | 0,02  | 1         | 1,038767109   | 0,962679691     | 3,75            |
| ACO2                                                                                     | 0,006999556 | 0,054847048 | 0,312 | 0,12  | 1         | 1,038748971   | 0,962696501     | 2,6             |
| ZNF470                                                                                   | 0,024497883 | 0,054832586 | 0,05  | 0     | 1         | 1,038738559   | 0,962706151     | #DIV/0!         |
| DPAGT1                                                                                   | 0,008320951 | 0,054794559 | 0,2   | 0,06  | 1         | 1,038711179   | 0,962731527     | 3,333333333     |
| PAR6G                                                                                    | 0,005562134 | 0,054773048 | 0,075 | 0     | 1         | 1,038695692   | 0,962745882     | #DIV/0!         |
| PCNX2                                                                                    | 0,01362345  | 0,054756915 | 0,088 | 0,01  | 1         | 1,038684077   | 0,962756648     | 8,8             |
| PNKP                                                                                     | 0,000859579 | 0,054721008 | 0,338 | 0,1   | 1         | 1,038658226   | 0,96278061      | 3,38            |
| CCAR1                                                                                    | 0,001332712 | 0,054655932 | 0,488 | 0,19  | 1         | 1,038611376   | 0,962824039     | 2,568421053     |
| FBXL13                                                                                   | 0,024497883 | 0,054608404 | 0,05  | 0     | 1         | 1,03857716    | 0,962855759     | #DIV/0!         |
| RTL8B                                                                                    | 0,029952607 | 0,054564846 | 0,188 | 0,07  | 1         | 1,038545804   | 0,96288483      | 2,685714286     |
| C1orf94                                                                                  | 0,079510298 | 0,054539734 | 0,075 | 0,02  | 1         | 1,038527727   | 0,962901591     | 3,75            |
| UBXN2B                                                                                   | 0,026889313 | 0,054490298 | 0,075 | 0,01  | 1         | 1,03849214    | 0,962934587     | 7,5             |
| P4HA3                                                                                    | 0,003313746 | 0,054407821 | 0,112 | 0,01  | 1         | 1,038432773   | 0,962989638     | 11,2            |
| MYO18A                                                                                   | 0,006731552 | 0,054370376 | 0,1   | 0,01  | 1         | 1,038405821   | 0,963014633     | 10              |
| ST7                                                                                      | 0,018212547 | 0,05431701  | 0,162 | 0,05  | 1         | 1,03836741    | 0,963050256     | 3,24            |
| AC073342.1                                                                               | 0,114652585 | 0,054279833 | 0,025 | 0     | 1         | 1,038340654   | 0,963075072     | #DIV/0!         |
| RPF2                                                                                     | 0,0003172   | 0,054278893 | 0,462 | 0,16  | 1         | 1,038339976   | 0,9630757       | 2,8875          |

Supplementary Table 4

| Differentially expressed genes_keloid-CCD_ comparing SC-Keloid vs. (SC-Myel, SC-Nonmyel) |             |             |       |       |           |               |                 |                 |
|------------------------------------------------------------------------------------------|-------------|-------------|-------|-------|-----------|---------------|-----------------|-----------------|
| gene                                                                                     | p_val       | avg_log2FC  | pct.1 | pct.2 | p_val_adj | Foldchange_UP | Foldchange_DOWN | Ratio_pct1_pct2 |
| HMGA1                                                                                    | 0,012351868 | 0,054249804 | 0,713 | 0,41  | 1         | 1,038319041   | 0,963095119     | 1,73902439      |
| ASTE1                                                                                    | 0,005562134 | 0,05422107  | 0,075 | 0     | 1         | 1,038298361   | 0,963114301     | #DIV/0!         |
| BRSK1                                                                                    | 0,003836312 | 0,054204821 | 0,25  | 0,08  | 1         | 1,038286667   | 0,963125148     | 3,125           |
| MRPL42                                                                                   | 0,011026368 | 0,054194751 | 0,575 | 0,29  | 1         | 1,038279419   | 0,963131871     | 1,982758621     |
| MORN3                                                                                    | 0,024497883 | 0,05414167  | 0,05  | 0     | 1         | 1,038241219   | 0,963167308     | #DIV/0!         |
| PHACTR3                                                                                  | 0,055334082 | 0,054124531 | 0,062 | 0,01  | 1         | 1,038228885   | 0,96317875      | 6,2             |
| MEIS1                                                                                    | 0,052279021 | 0,054060098 | 0,038 | 0     | 1         | 1,038182517   | 0,963221769     | #DIV/0!         |
| ANKRD2                                                                                   | 0,052279021 | 0,054008559 | 0,038 | 0     | 1         | 1,038145429   | 0,96325618      | #DIV/0!         |
| MIS18A                                                                                   | 0,014426885 | 0,053977713 | 0,15  | 0,04  | 1         | 1,038123233   | 0,963276775     | 3,75            |
| CCDC43                                                                                   | 0,000734073 | 0,053975238 | 0,438 | 0,15  | 1         | 1,038121452   | 0,963278428     | 2,92            |
| LARS2                                                                                    | 0,024497883 | 0,053961091 | 0,05  | 0     | 1         | 1,038111272   | 0,963287873     | #DIV/0!         |
| SLC25A20                                                                                 | 0,026302537 | 0,05392816  | 0,075 | 0,01  | 1         | 1,038087577   | 0,963309861     | 7,5             |
| ZNF841                                                                                   | 0,024497883 | 0,05389546  | 0,05  | 0     | 1         | 1,038064048   | 0,963331696     | #DIV/0!         |
| CD4                                                                                      | 0,191734257 | 0,053890544 | 0,162 | 0,09  | 1         | 1,038060511   | 0,963334979     | 1,8             |
| PPIL3                                                                                    | 0,000471019 | 0,053805847 | 0,3   | 0,08  | 1         | 1,037999571   | 0,963391535     | 3,75            |
| MRI1                                                                                     | 0,004287523 | 0,053766168 | 0,175 | 0,04  | 1         | 1,037971023   | 0,963418032     | 4,375           |
| FDFT1                                                                                    | 0,00029757  | 0,053763886 | 0,25  | 0,05  | 1         | 1,037969381   | 0,963419556     | 5               |
| FZD6                                                                                     | 0,054329933 | 0,053759564 | 0,1   | 0,03  | 1         | 1,037966271   | 0,963422442     | 3,333333333     |
| XYLT1                                                                                    | 0,002379545 | 0,05374065  | 0,262 | 0,08  | 1         | 1,037952663   | 0,963435073     | 3,275           |
| AC092687.3                                                                               | 0,052279021 | 0,0537331   | 0,038 | 0     | 1         | 1,037947232   | 0,963440115     | #DIV/0!         |
| PARP11                                                                                   | 0,034247231 | 0,053732664 | 0,112 | 0,03  | 1         | 1,037946918   | 0,963440406     | 3,733333333     |
| TWINK                                                                                    | 0,108976957 | 0,053700054 | 0,05  | 0,01  | 1         | 1,037923457   | 0,963462183     | 5               |
| PRRX2                                                                                    | 0,052279021 | 0,053688165 | 0,038 | 0     | 1         | 1,037914904   | 0,963470123     | #DIV/0!         |
| CLEC11A                                                                                  | 0,003479946 | 0,053681602 | 0,537 | 0,24  | 1         | 1,037910182   | 0,963474506     | 2,2375          |
| NCAPH2                                                                                   | 0,000414962 | 0,053647418 | 0,288 | 0,07  | 1         | 1,03788559    | 0,963497335     | 4,114285714     |
| TTC38                                                                                    | 0,012429073 | 0,053642977 | 0,112 | 0,02  | 1         | 1,037882394   | 0,963500302     | 5,6             |
| CDIN1                                                                                    | 0,052279021 | 0,053628584 | 0,038 | 0     | 1         | 1,03787204    | 0,963509914     | #DIV/0!         |
| CCDC32                                                                                   | 0,01983744  | 0,053580751 | 0,212 | 0,08  | 1         | 1,03783763    | 0,96354186      | 2,65            |
| EPB41L4A-DT                                                                              | 0,024497883 | 0,05356401  | 0,05  | 0     | 1         | 1,037825587   | 0,96355304      | #DIV/0!         |
| MRM1                                                                                     | 0,108976957 | 0,053549583 | 0,05  | 0,01  | 1         | 1,037815208   | 0,963562677     | 5               |

Supplementary Table 4

| Differentially expressed genes_keloid-CCD_comparing SC-Keloid vs. (SC-Myel, SC-Nonmyel) |             |             |       |       |             |               |                 |                 |
|-----------------------------------------------------------------------------------------|-------------|-------------|-------|-------|-------------|---------------|-----------------|-----------------|
| gene                                                                                    | p_val       | avg_log2FC  | pct.1 | pct.2 | p_val_adj   | Foldchange_UP | Foldchange_DOWN | Ratio_pct1_pct2 |
| SYT5                                                                                    | 0,052279021 | 0,053495061 | 0,038 | 0     | 1           | 1,037775989   | 0,963599092     | #DIV/0!         |
| MTOR                                                                                    | 0,034247231 | 0,053404997 | 0,112 | 0,03  | 1           | 1,037711204   | 0,963659249     | 3,733333333     |
| RSKR                                                                                    | 0,052279021 | 0,053338524 | 0,038 | 0     | 1           | 1,037663393   | 0,963703651     | #DIV/0!         |
| H3C8                                                                                    | 0,024497883 | 0,05333137  | 0,05  | 0     | 1           | 1,037658247   | 0,96370843      | #DIV/0!         |
| SPDYA                                                                                   | 0,024497883 | 0,053315127 | 0,05  | 0     | 1           | 1,037646564   | 0,96371928      | #DIV/0!         |
| HSPA13                                                                                  | 3,83223E-05 | 0,05329864  | 0,625 | 0,2   | 0,808638195 | 1,037634706   | 0,963730294     | 3,125           |
| IFT46                                                                                   | 0,004439263 | 0,053266102 | 0,175 | 0,04  | 1           | 1,037611304   | 0,96375203      | 4,375           |
| VPS36                                                                                   | 0,01576223  | 0,053247941 | 0,238 | 0,09  | 1           | 1,037598242   | 0,963764162     | 2,644444444     |
| APLNR                                                                                   | 0,152427848 | 0,053188014 | 0,062 | 0,02  | 1           | 1,037555143   | 0,963804195     | 3,1             |
| LIN7A                                                                                   | 0,001655244 | 0,053126683 | 0,15  | 0,02  | 1           | 1,037511036   | 0,963845169     | 7,5             |
| LARP1                                                                                   | 0,000153961 | 0,053117474 | 0,575 | 0,21  | 1           | 1,037504414   | 0,963851321     | 2,738095238     |
| MFS6                                                                                    | 0,003202904 | 0,053110111 | 0,138 | 0,02  | 1           | 1,037499119   | 0,96385624      | 6,9             |
| ZNF142                                                                                  | 0,10676172  | 0,053054697 | 0,05  | 0,01  | 1           | 1,037459269   | 0,963893263     | 5               |
| MAGI2                                                                                   | 0,056519276 | 0,053035057 | 0,138 | 0,05  | 1           | 1,037445146   | 0,963906385     | 2,76            |
| SLC27A1                                                                                 | 0,004368619 | 0,053031726 | 0,25  | 0,08  | 1           | 1,037442751   | 0,96390861      | 3,125           |
| KCNH1                                                                                   | 0,005562134 | 0,052935403 | 0,075 | 0     | 1           | 1,037373487   | 0,963972969     | #DIV/0!         |
| AC019117.2                                                                              | 0,052279021 | 0,05292909  | 0,038 | 0     | 1           | 1,037368948   | 0,963977187     | #DIV/0!         |
| GLYATL2                                                                                 | 0,052279021 | 0,0529233   | 0,038 | 0     | 1           | 1,037364784   | 0,963981056     | #DIV/0!         |
| ADCK1                                                                                   | 0,011634754 | 0,052882544 | 0,062 | 0     | 1           | 1,037335479   | 0,964008289     | #DIV/0!         |
| ABHD16A                                                                                 | 0,055334082 | 0,052820718 | 0,062 | 0,01  | 1           | 1,037291025   | 0,964049602     | 6,2             |
| ZFYVE16                                                                                 | 0,003323547 | 0,052775698 | 0,588 | 0,26  | 1           | 1,037258657   | 0,964079686     | 2,261538462     |
| MTMR10                                                                                  | 0,011266838 | 0,05276696  | 0,175 | 0,05  | 1           | 1,037252375   | 0,964085525     | 3,5             |
| AKR1B1                                                                                  | 0,003186289 | 0,052725069 | 0,562 | 0,25  | 1           | 1,037222257   | 0,964113519     | 2,248           |
| CTBP1-DT                                                                                | 0,022138642 | 0,052713325 | 0,1   | 0,02  | 1           | 1,037213813   | 0,964121367     | 5               |
| COL22A1                                                                                 | 0,011634754 | 0,052707943 | 0,062 | 0     | 1           | 1,037209944   | 0,964124964     | #DIV/0!         |
| JADE3                                                                                   | 0,024497883 | 0,052691602 | 0,05  | 0     | 1           | 1,037198196   | 0,964135884     | #DIV/0!         |
| CHST12                                                                                  | 0,001621978 | 0,052673047 | 0,388 | 0,14  | 1           | 1,037184856   | 0,964148284     | 2,771428571     |
| EVI2A                                                                                   | 0,052279021 | 0,052618628 | 0,038 | 0     | 1           | 1,037145734   | 0,964184653     | #DIV/0!         |
| ZFAT                                                                                    | 0,055334082 | 0,05260524  | 0,062 | 0,01  | 1           | 1,03713611    | 0,964193601     | 6,2             |
| KIAA0895L                                                                               | 0,024497883 | 0,05257014  | 0,05  | 0     | 1           | 1,037110877   | 0,96421706      | #DIV/0!         |

Supplementary Table 4

| Differentially expressed genes_keloid-CCD_comparing SC-Keloid vs. (SC-Myel, SC-Nonmyel) |             |             |       |       |             |               |                 |                 |
|-----------------------------------------------------------------------------------------|-------------|-------------|-------|-------|-------------|---------------|-----------------|-----------------|
| gene                                                                                    | p_val       | avg_log2FC  | pct.1 | pct.2 | p_val_adj   | Foldchange_UP | Foldchange_DOWN | Ratio_pct1_pct2 |
| FLVCR1-DT                                                                               | 0,027487357 | 0,052558297 | 0,075 | 0,01  | 1           | 1,037102363   | 0,964224975     | 7,5             |
| PAIP1                                                                                   | 0,018356832 | 0,052489098 | 0,6   | 0,29  | 1           | 1,03705262    | 0,964271225     | 2,068965517     |
| TMEM209                                                                                 | 0,001530226 | 0,05237638  | 0,175 | 0,03  | 1           | 1,036971598   | 0,964346566     | 5,833333333     |
| EPS8L2                                                                                  | 0,024497883 | 0,052357773 | 0,05  | 0     | 1           | 1,036958224   | 0,964359004     | #DIV/0!         |
| ALKBH6                                                                                  | 0,027487357 | 0,05235493  | 0,075 | 0,01  | 1           | 1,03695618    | 0,964360904     | 7,5             |
| GPD1L                                                                                   | 0,024497883 | 0,052352156 | 0,05  | 0     | 1           | 1,036954187   | 0,964362759     | #DIV/0!         |
| DHPS                                                                                    | 0,00025002  | 0,052340609 | 0,488 | 0,16  | 1           | 1,036945887   | 0,964370477     | 3,05            |
| STAP2                                                                                   | 0,01362345  | 0,052273166 | 0,088 | 0,01  | 1           | 1,036897413   | 0,964415561     | 8,8             |
| DUSP7                                                                                   | 0,082194744 | 0,052264681 | 0,175 | 0,08  | 1           | 1,036891315   | 0,964421233     | 2,1875          |
| GABRA2                                                                                  | 0,005197269 | 0,052249801 | 0,613 | 0,29  | 1           | 1,03688062    | 0,96443118      | 2,113793103     |
| DPH7                                                                                    | 0,004286889 | 0,052241432 | 0,212 | 0,06  | 1           | 1,036874606   | 0,964436774     | 3,533333333     |
| DNAJC11                                                                                 | 0,006404327 | 0,052233326 | 0,125 | 0,02  | 1           | 1,036868779   | 0,964442194     | 6,25            |
| MITF                                                                                    | 0,005562134 | 0,052159218 | 0,075 | 0     | 1           | 1,036815519   | 0,964491736     | #DIV/0!         |
| FNDC10                                                                                  | 0,024497883 | 0,05211132  | 0,05  | 0     | 1           | 1,036781097   | 0,964523758     | #DIV/0!         |
| FAM184B                                                                                 | 0,18346989  | 0,052036944 | 0,075 | 0,03  | 1           | 1,036727649   | 0,964573484     | 2,5             |
| ELAC1                                                                                   | 0,010276447 | 0,051994407 | 0,138 | 0,03  | 1           | 1,036697082   | 0,964601924     | 4,6             |
| FAM43A                                                                                  | 0,005562134 | 0,051971683 | 0,075 | 0     | 1           | 1,036680753   | 0,964617118     | #DIV/0!         |
| PEX7                                                                                    | 0,231562119 | 0,051959107 | 0,1   | 0,05  | 1           | 1,036671716   | 0,964625527     | 2               |
| RFT1                                                                                    | 0,025668223 | 0,051909235 | 0,138 | 0,04  | 1           | 1,036635881   | 0,964658873     | 3,45            |
| NHLRC3                                                                                  | 0,025668223 | 0,051900552 | 0,138 | 0,04  | 1           | 1,036629641   | 0,964664679     | 3,45            |
| NRAS                                                                                    | 4,54963E-05 | 0,051875766 | 0,35  | 0,08  | 0,960016377 | 1,036611832   | 0,964681252     | 4,375           |
| ZNF783                                                                                  | 0,027487357 | 0,051752343 | 0,075 | 0,01  | 1           | 1,036523153   | 0,964763784     | 7,5             |
| SEMA4D                                                                                  | 0,083993367 | 0,051750734 | 0,175 | 0,08  | 1           | 1,036521997   | 0,964764861     | 2,1875          |
| FZR1                                                                                    | 0,01023185  | 0,051739704 | 0,212 | 0,07  | 1           | 1,036514073   | 0,964772236     | 3,028571429     |
| RALYL                                                                                   | 0,027487357 | 0,05173038  | 0,075 | 0,01  | 1           | 1,036507374   | 0,964778472     | 7,5             |
| SLC35B4                                                                                 | 0,000187937 | 0,051709892 | 0,238 | 0,04  | 1           | 1,036492654   | 0,964792173     | 5,95            |
| AARS1                                                                                   | 0,000358805 | 0,051673649 | 0,312 | 0,08  | 1           | 1,036466616   | 0,964816411     | 3,9             |
| SPATA5L1                                                                                | 0,003202904 | 0,051652134 | 0,138 | 0,02  | 1           | 1,036451159   | 0,964830799     | 6,9             |
| EEFSEC                                                                                  | 0,003269989 | 0,05162297  | 0,138 | 0,02  | 1           | 1,036430208   | 0,964850303     | 6,9             |
| CTNBL1                                                                                  | 0,010910007 | 0,051600817 | 0,338 | 0,14  | 1           | 1,036414293   | 0,964865119     | 2,414285714     |

Supplementary Table 4

| Differentially expressed genes_keloid-CCD_ comparing SC-Keloid vs. (SC-Myel, SC-Nonmyel) |             |             |       |       |             |               |                 |                 |
|------------------------------------------------------------------------------------------|-------------|-------------|-------|-------|-------------|---------------|-----------------|-----------------|
| gene                                                                                     | p_val       | avg_log2FC  | pct.1 | pct.2 | p_val_adj   | Foldchange_UP | Foldchange_DOWN | Ratio_pct1_pct2 |
| RTL10                                                                                    | 0,024497883 | 0,051587158 | 0,05  | 0     | 1           | 1,036404481   | 0,964874254     | #DIV/0!         |
| HOXC4                                                                                    | 0,045383468 | 0,05156555  | 0,175 | 0,07  | 1           | 1,036388958   | 0,964888705     | 2,5             |
| SNRNP48                                                                                  | 0,00242045  | 0,05153565  | 0,25  | 0,07  | 1           | 1,036367479   | 0,964908703     | 3,571428571     |
| HHLA3                                                                                    | 0,024497883 | 0,051513708 | 0,05  | 0     | 1           | 1,036351717   | 0,964923378     | #DIV/0!         |
| RNASEH2B-AS1                                                                             | 0,052279021 | 0,051420807 | 0,038 | 0     | 1           | 1,036284984   | 0,964985516     | #DIV/0!         |
| KIF18A                                                                                   | 0,006731552 | 0,05131672  | 0,1   | 0,01  | 1           | 1,036210222   | 0,96505514      | 10              |
| ZDHHC8                                                                                   | 0,014068004 | 0,051231615 | 0,188 | 0,06  | 1           | 1,036149097   | 0,96511207      | 3,133333333     |
| APPL2                                                                                    | 0,006582803 | 0,051207419 | 0,225 | 0,07  | 1           | 1,036131719   | 0,965128257     | 3,214285714     |
| PCBD1                                                                                    | 0,000539484 | 0,051204971 | 0,5   | 0,18  | 1           | 1,036129961   | 0,965129894     | 2,777777778     |
| NAT1                                                                                     | 0,272650094 | 0,05115739  | 0,05  | 0,02  | 1           | 1,03609579    | 0,965161725     | 2,5             |
| UGDH-AS1                                                                                 | 0,052279021 | 0,051155512 | 0,038 | 0     | 1           | 1,036094441   | 0,965162982     | #DIV/0!         |
| HBS1L                                                                                    | 2,22763E-05 | 0,051146494 | 0,412 | 0,1   | 0,470051205 | 1,036087964   | 0,965169015     | 4,12            |
| RAD17                                                                                    | 0,001421443 | 0,051144107 | 0,262 | 0,07  | 1           | 1,03608625    | 0,965170612     | 3,742857143     |
| TTC31                                                                                    | 0,010756678 | 0,051129567 | 0,175 | 0,05  | 1           | 1,036075808   | 0,965180339     | 3,5             |
| KSR2                                                                                     | 0,011634754 | 0,051079139 | 0,062 | 0     | 1           | 1,036039594   | 0,965214077     | #DIV/0!         |
| ZNF891                                                                                   | 0,011634754 | 0,051063434 | 0,062 | 0     | 1           | 1,036028316   | 0,965224584     | #DIV/0!         |
| EXOC8                                                                                    | 0,01362345  | 0,05101427  | 0,088 | 0,01  | 1           | 1,035993011   | 0,965257477     | 8,8             |
| MEDAG                                                                                    | 0,024497883 | 0,050932894 | 0,05  | 0     | 1           | 1,035934577   | 0,965311925     | #DIV/0!         |
| NACC2                                                                                    | 2,28895E-05 | 0,050859678 | 0,3   | 0,05  | 0,482991248 | 1,035882005   | 0,965360915     | 6               |
| LZTS2                                                                                    | 0,000535159 | 0,05084688  | 0,375 | 0,12  | 1           | 1,035872816   | 0,965369479     | 3,125           |
| MAML3                                                                                    | 0,008540154 | 0,050820076 | 0,238 | 0,08  | 1           | 1,03585357    | 0,965387414     | 2,975           |
| ULK2                                                                                     | 0,062770707 | 0,050813005 | 0,15  | 0,06  | 1           | 1,035848494   | 0,965392146     | 2,5             |
| TEFM                                                                                     | 0,053019982 | 0,050800515 | 0,062 | 0,01  | 1           | 1,035839526   | 0,965400504     | 6,2             |
| ADAMTS12                                                                                 | 0,012187918 | 0,050774701 | 0,112 | 0,02  | 1           | 1,035820991   | 0,965417778     | 5,6             |
| HMSD                                                                                     | 0,005562134 | 0,050698586 | 0,075 | 0     | 1           | 1,035766344   | 0,965468714     | #DIV/0!         |
| SMAD1                                                                                    | 0,001655244 | 0,050650404 | 0,15  | 0,02  | 1           | 1,035731753   | 0,965500958     | 7,5             |
| SEC31A                                                                                   | 0,007634285 | 0,050594226 | 0,762 | 0,38  | 1           | 1,035691423   | 0,965538555     | 2,005263158     |
| CHKB                                                                                     | 0,003026673 | 0,050544184 | 0,225 | 0,06  | 1           | 1,035655499   | 0,965572047     | 3,75            |
| MTRES1                                                                                   | 0,005977851 | 0,050521976 | 0,188 | 0,05  | 1           | 1,035639557   | 0,96558691      | 3,76            |
| BHMT2                                                                                    | 0,052279021 | 0,050423881 | 0,038 | 0     | 1           | 1,035569141   | 0,965652567     | #DIV/0!         |

Supplementary Table 4

| Differentially expressed genes_keloid-CCD_comparing SC-Keloid vs. (SC-Myel, SC-Nonmyel) |             |             |       |       |           |               |                 |                 |
|-----------------------------------------------------------------------------------------|-------------|-------------|-------|-------|-----------|---------------|-----------------|-----------------|
| gene                                                                                    | p_val       | avg_log2FC  | pct.1 | pct.2 | p_val_adj | Foldchange_UP | Foldchange_DOWN | Ratio_pct1_pct2 |
| FBXO42                                                                                  | 0,001160873 | 0,050416947 | 0,225 | 0,05  | 1         | 1,035564164   | 0,965657208     | 4,5             |
| EHMT2                                                                                   | 0,001500621 | 0,050255185 | 0,175 | 0,03  | 1         | 1,035448059   | 0,965765488     | 5,833333333     |
| ADAMTSL5                                                                                | 0,268357209 | 0,05024519  | 0,013 | 0     | 1         | 1,035440885   | 0,96577218      | #DIV/0!         |
| ZNF777                                                                                  | 0,010094224 | 0,050237142 | 0,138 | 0,03  | 1         | 1,035435109   | 0,965777567     | 4,6             |
| ZNF485                                                                                  | 0,052279021 | 0,050227451 | 0,038 | 0     | 1         | 1,035428153   | 0,965784054     | #DIV/0!         |
| CSF2RA                                                                                  | 0,268357209 | 0,050189249 | 0,013 | 0     | 1         | 1,035400736   | 0,965809628     | #DIV/0!         |
| ARF1                                                                                    | 0,215817871 | 0,050158875 | 0,95  | 0,7   | 1         | 1,035378937   | 0,965829962     | 1,357142857     |
| KAZN                                                                                    | 0,001530226 | 0,050144466 | 0,175 | 0,03  | 1         | 1,035368597   | 0,965839609     | 5,833333333     |
| ZNF660                                                                                  | 0,027487357 | 0,050142287 | 0,075 | 0,01  | 1         | 1,035367033   | 0,965841067     | 7,5             |
| FOXK2                                                                                   | 0,015371623 | 0,050065994 | 0,238 | 0,09  | 1         | 1,035312282   | 0,965892145     | 2,644444444     |
| SGSM3                                                                                   | 0,001990631 | 0,050013326 | 0,212 | 0,05  | 1         | 1,035274487   | 0,965927407     | 4,24            |
| TP63                                                                                    | 0,005562134 | 0,049925711 | 0,075 | 0     | 1         | 1,035211616   | 0,965986069     | #DIV/0!         |
| MROH6                                                                                   | 0,011634754 | 0,04991918  | 0,062 | 0     | 1         | 1,03520693    | 0,965990443     | #DIV/0!         |
| LINC01117                                                                               | 0,055334082 | 0,04987672  | 0,062 | 0,01  | 1         | 1,035176463   | 0,966018873     | 6,2             |
| ZNF410                                                                                  | 0,024497883 | 0,049849065 | 0,05  | 0     | 1         | 1,03515662    | 0,966037391     | #DIV/0!         |
| EARS2                                                                                   | 0,054166721 | 0,049841492 | 0,062 | 0,01  | 1         | 1,035151186   | 0,966042462     | 6,2             |
| ZNF34                                                                                   | 0,012187918 | 0,049754565 | 0,112 | 0,02  | 1         | 1,035088817   | 0,96610067      | 5,6             |
| CRABP2                                                                                  | 0,042211625 | 0,049750093 | 0,088 | 0,02  | 1         | 1,035085608   | 0,966103665     | 4,4             |
| KCNAB2                                                                                  | 0,024497883 | 0,049746896 | 0,05  | 0     | 1         | 1,035083315   | 0,966105806     | #DIV/0!         |
| APBB3                                                                                   | 0,082314814 | 0,049730793 | 0,075 | 0,02  | 1         | 1,035071761   | 0,966116589     | 3,75            |
| ADGRE2                                                                                  | 0,024497883 | 0,049729771 | 0,05  | 0     | 1         | 1,035071028   | 0,966117274     | #DIV/0!         |
| REM1                                                                                    | 0,013085057 | 0,049701995 | 0,15  | 0,04  | 1         | 1,0350511     | 0,966135874     | 3,75            |
| ATL2                                                                                    | 0,001137292 | 0,049649497 | 0,262 | 0,07  | 1         | 1,035013436   | 0,966171032     | 3,742857143     |
| TAMM41                                                                                  | 0,009914883 | 0,04955432  | 0,138 | 0,03  | 1         | 1,034945158   | 0,966234774     | 4,6             |
| NCDN                                                                                    | 0,006731552 | 0,049547504 | 0,1   | 0,01  | 1         | 1,034940268   | 0,966239339     | 10              |
| TACC3                                                                                   | 0,006731552 | 0,04950457  | 0,1   | 0,01  | 1         | 1,034909469   | 0,966268094     | 10              |
| RFTN1                                                                                   | 0,027487357 | 0,049405436 | 0,075 | 0,01  | 1         | 1,034838358   | 0,966334493     | 7,5             |
| TBCB                                                                                    | 0,115088558 | 0,049360908 | 0,912 | 0,52  | 1         | 1,034806418   | 0,966364319     | 1,753846154     |
| LYSMD2                                                                                  | 0,01418037  | 0,049346252 | 0,262 | 0,1   | 1         | 1,034795907   | 0,966374136     | 2,62            |
| NUDT6                                                                                   | 0,082314814 | 0,049332409 | 0,075 | 0,02  | 1         | 1,034785977   | 0,966383409     | 3,75            |



Supplementary Table 4

| Differentially expressed genes_keloid-CCD_ comparing SC-Keloid vs. (SC-Myel, SC-Nonmyel) |             |             |       |       |           |               |                 |                 |
|------------------------------------------------------------------------------------------|-------------|-------------|-------|-------|-----------|---------------|-----------------|-----------------|
| gene                                                                                     | p_val       | avg_log2FC  | pct.1 | pct.2 | p_val_adj | Foldchange_UP | Foldchange_DOWN | Ratio_pct1_pct2 |
| BBS9                                                                                     | 0,152427848 | 0,049249516 | 0,062 | 0,02  | 1         | 1,034726523   | 0,966438936     | 3,1             |
| DPF1                                                                                     | 0,005562134 | 0,049246254 | 0,075 | 0     | 1         | 1,034724184   | 0,966441121     | #DIV/0!         |
| LRRC20                                                                                   | 0,011634754 | 0,049239732 | 0,062 | 0     | 1         | 1,034719506   | 0,96644549      | #DIV/0!         |
| RAB29                                                                                    | 0,044282066 | 0,049237089 | 0,175 | 0,07  | 1         | 1,034717611   | 0,96644726      | 2,5             |
| TEP1                                                                                     | 0,219108376 | 0,049221213 | 0,038 | 0,01  | 1         | 1,034706224   | 0,966457896     | 3,8             |
| ARMC2                                                                                    | 0,051893599 | 0,049205252 | 0,062 | 0,01  | 1         | 1,034694777   | 0,966468588     | 6,2             |
| ZKSCAN4                                                                                  | 0,052279021 | 0,049065539 | 0,038 | 0     | 1         | 1,03459458    | 0,966562187     | #DIV/0!         |
| BBS10                                                                                    | 0,005562134 | 0,0490451   | 0,075 | 0     | 1         | 1,034579923   | 0,96657588      | #DIV/0!         |
| FBXO31                                                                                   | 0,044583831 | 0,049040017 | 0,088 | 0,02  | 1         | 1,034576278   | 0,966579286     | 4,4             |
| DLG1                                                                                     | 0,00446477  | 0,049014126 | 0,45  | 0,19  | 1         | 1,034557711   | 0,966596633     | 2,368421053     |
| EPCAM                                                                                    | 0,011634754 | 0,049009011 | 0,062 | 0     | 1         | 1,034554043   | 0,96660006      | #DIV/0!         |
| ACSF2                                                                                    | 0,011634754 | 0,048963988 | 0,062 | 0     | 1         | 1,034521758   | 0,966630225     | #DIV/0!         |
| GGACT                                                                                    | 0,011634754 | 0,048955169 | 0,062 | 0     | 1         | 1,034515434   | 0,966636134     | #DIV/0!         |
| PRRT1                                                                                    | 0,041713085 | 0,048954641 | 0,125 | 0,04  | 1         | 1,034515055   | 0,966636488     | 3,125           |
| SPATA7                                                                                   | 0,075062254 | 0,048896498 | 0,112 | 0,04  | 1         | 1,034473363   | 0,966675446     | 2,8             |
| ME2                                                                                      | 0,000790231 | 0,048872727 | 0,512 | 0,19  | 1         | 1,034456319   | 0,966691374     | 2,694736842     |
| RHOD                                                                                     | 0,024497883 | 0,048861314 | 0,05  | 0     | 1         | 1,034448135   | 0,966699021     | #DIV/0!         |
| ZNF154                                                                                   | 0,052279021 | 0,048860592 | 0,038 | 0     | 1         | 1,034447618   | 0,966699505     | #DIV/0!         |
| EMC7                                                                                     | 0,068283172 | 0,048832317 | 0,85  | 0,46  | 1         | 1,034427344   | 0,966718452     | 1,847826087     |
| BBOF1                                                                                    | 0,062632651 | 0,048829846 | 0,1   | 0,03  | 1         | 1,034425573   | 0,966720107     | 3,333333333     |
| C1QTNF2                                                                                  | 0,011634754 | 0,048804955 | 0,062 | 0     | 1         | 1,034407725   | 0,966736786     | #DIV/0!         |
| PBLD                                                                                     | 0,052279021 | 0,048799259 | 0,038 | 0     | 1         | 1,034403641   | 0,966740603     | #DIV/0!         |
| CPSF3                                                                                    | 0,009008069 | 0,048789285 | 0,212 | 0,07  | 1         | 1,03439649    | 0,966747287     | 3,028571429     |
| FADS2                                                                                    | 0,022997455 | 0,048767378 | 0,1   | 0,02  | 1         | 1,034380783   | 0,966761967     | 5               |
| PCDH19                                                                                   | 0,114652585 | 0,048731427 | 0,025 | 0     | 1         | 1,034355007   | 0,966786058     | #DIV/0!         |
| DCAF11                                                                                   | 0,003350835 | 0,048710453 | 0,238 | 0,07  | 1         | 1,03433997    | 0,966800113     | 3,4             |
| SLC38A7                                                                                  | 0,241331026 | 0,048656027 | 0,125 | 0,07  | 1         | 1,03430095    | 0,966836587     | 1,785714286     |
| TSR1                                                                                     | 0,012391459 | 0,048642125 | 0,262 | 0,1   | 1         | 1,034290983   | 0,966845903     | 2,62            |
| ST20-AS1                                                                                 | 0,027487357 | 0,04861623  | 0,075 | 0,01  | 1         | 1,034272419   | 0,966863257     | 7,5             |
| MATN3                                                                                    | 0,012429073 | 0,04857393  | 0,112 | 0,02  | 1         | 1,034242095   | 0,966891606     | 5,6             |

Supplementary Table 4

| Differentially expressed genes_keloid-CCD_ comparing SC-Keloid vs. (SC-Myel, SC-Nonmyel) |             |             |       |       |           |               |                 |                 |
|------------------------------------------------------------------------------------------|-------------|-------------|-------|-------|-----------|---------------|-----------------|-----------------|
| gene                                                                                     | p_val       | avg_log2FC  | pct.1 | pct.2 | p_val_adj | Foldchange_UP | Foldchange_DOWN | Ratio_pct1_pct2 |
| VPS33A                                                                                   | 0,009393773 | 0,048537123 | 0,138 | 0,03  | 1         | 1,034215709   | 0,966916275     | 4,6             |
| ILDR2                                                                                    | 0,272650094 | 0,048471214 | 0,05  | 0,02  | 1         | 1,034168462   | 0,966960448     | 2,5             |
| LRRC34                                                                                   | 0,006731552 | 0,048447807 | 0,1   | 0,01  | 1         | 1,034151683   | 0,966976138     | 10              |
| IL1B                                                                                     | 0,114652585 | 0,048446631 | 0,025 | 0     | 1         | 1,03415084    | 0,966976926     | #DIV/0!         |
| LINC01465                                                                                | 0,024497883 | 0,048290106 | 0,05  | 0     | 1         | 1,034038646   | 0,967081843     | #DIV/0!         |
| BSDC1                                                                                    | 0,000340602 | 0,048262864 | 0,438 | 0,14  | 1         | 1,034019121   | 0,967100105     | 3,128571429     |
| FAH                                                                                      | 0,108976957 | 0,04822232  | 0,05  | 0,01  | 1         | 1,033990062   | 0,967127284     | 5               |
| MMS19                                                                                    | 0,023117849 | 0,04821089  | 0,175 | 0,06  | 1         | 1,03398187    | 0,967134946     | 2,916666667     |
| SLC50A1                                                                                  | 8,01064E-05 | 0,048209508 | 0,338 | 0,08  | 1         | 1,03398088    | 0,967135872     | 4,225           |
| SERINC2                                                                                  | 0,027487357 | 0,048171478 | 0,075 | 0,01  | 1         | 1,033953624   | 0,967161366     | 7,5             |
| CDCA7                                                                                    | 0,005562134 | 0,048169321 | 0,075 | 0     | 1         | 1,033952078   | 0,967162813     | #DIV/0!         |
| GNPTAB                                                                                   | 0,009017324 | 0,048128659 | 0,238 | 0,08  | 1         | 1,033922937   | 0,967190072     | 2,975           |
| RAD54B                                                                                   | 0,011634754 | 0,048063039 | 0,062 | 0     | 1         | 1,033875911   | 0,967234065     | #DIV/0!         |
| YJU2                                                                                     | 0,009096611 | 0,048040461 | 0,2   | 0,06  | 1         | 1,033859731   | 0,967249203     | 3,333333333     |
| IGSF6                                                                                    | 0,114652585 | 0,048021675 | 0,025 | 0     | 1         | 1,033846268   | 0,967261798     | #DIV/0!         |
| RHOBTB2                                                                                  | 0,044583831 | 0,048012069 | 0,088 | 0,02  | 1         | 1,033839385   | 0,967268238     | 4,4             |
| CHD1L                                                                                    | 0,003797999 | 0,048001617 | 0,2   | 0,05  | 1         | 1,033831895   | 0,967275246     | 4               |
| CSTF1                                                                                    | 0,003313746 | 0,047983918 | 0,112 | 0,01  | 1         | 1,033819212   | 0,967287112     | 11,2            |
| TLCD3A                                                                                   | 0,00239488  | 0,047956469 | 0,188 | 0,04  | 1         | 1,033799542   | 0,967305516     | 4,7             |
| PBX4                                                                                     | 0,011634754 | 0,047930762 | 0,062 | 0     | 1         | 1,033781122   | 0,967322752     | #DIV/0!         |
| RANBP6                                                                                   | 0,002937191 | 0,047867995 | 0,162 | 0,03  | 1         | 1,033736146   | 0,967364838     | 5,4             |
| MAP3K10                                                                                  | 0,006276301 | 0,047850742 | 0,125 | 0,02  | 1         | 1,033723784   | 0,967376407     | 6,25            |
| BRAT1                                                                                    | 0,019279445 | 0,047810242 | 0,2   | 0,07  | 1         | 1,033694765   | 0,967403564     | 2,857142857     |
| STARD4-AS1                                                                               | 0,114652585 | 0,04780235  | 0,025 | 0     | 1         | 1,033689111   | 0,967408856     | #DIV/0!         |
| ATP8B2                                                                                   | 4,95137E-05 | 0,047771563 | 0,262 | 0,04  | 1         | 1,033667052   | 0,967429501     | 6,55            |
| OR7C1                                                                                    | 0,052279021 | 0,047729628 | 0,038 | 0     | 1         | 1,033637006   | 0,967457622     | #DIV/0!         |
| SLC7A11                                                                                  | 0,268357209 | 0,047701999 | 0,013 | 0     | 1         | 1,033617212   | 0,967476149     | #DIV/0!         |
| HECTD4                                                                                   | 0,022487321 | 0,047699054 | 0,175 | 0,06  | 1         | 1,033615102   | 0,967478124     | 2,916666667     |
| RFESD                                                                                    | 0,052279021 | 0,04760638  | 0,038 | 0     | 1         | 1,033548708   | 0,967540274     | #DIV/0!         |
| MR1                                                                                      | 0,07611791  | 0,047602948 | 0,112 | 0,04  | 1         | 1,033546249   | 0,967542576     | 2,8             |

Supplementary Table 4

| Differentially expressed genes_keloid-CCD_ comparing SC-Keloid vs. (SC-Myel, SC-Nonmyel) |             |             |       |       |           |               |                 |                 |
|------------------------------------------------------------------------------------------|-------------|-------------|-------|-------|-----------|---------------|-----------------|-----------------|
| gene                                                                                     | p_val       | avg_log2FC  | pct.1 | pct.2 | p_val_adj | Foldchange_UP | Foldchange_DOWN | Ratio_pct1_pct2 |
| ARL10                                                                                    | 0,023885059 | 0,047548221 | 0,1   | 0,02  | 1         | 1,033507043   | 0,967579279     | 5               |
| MGAT5                                                                                    | 0,10741396  | 0,04752469  | 0,088 | 0,03  | 1         | 1,033490187   | 0,967595061     | 2,933333333     |
| AASS                                                                                     | 0,024883489 | 0,047519996 | 0,138 | 0,04  | 1         | 1,033486824   | 0,967598209     | 3,45            |
| VMO1                                                                                     | 0,052279021 | 0,047510341 | 0,038 | 0     | 1         | 1,033479907   | 0,967604685     | #DIV/0!         |
| PRDM4                                                                                    | 0,013741513 | 0,04738561  | 0,15  | 0,04  | 1         | 1,03339056    | 0,967688344     | 3,75            |
| PCBD2                                                                                    | 0,006731552 | 0,047374718 | 0,1   | 0,01  | 1         | 1,033382758   | 0,96769565      | 10              |
| PDCD2L                                                                                   | 0,108976957 | 0,047339572 | 0,05  | 0,01  | 1         | 1,033357584   | 0,967719224     | 5               |
| NPHP3                                                                                    | 0,013867154 | 0,04731176  | 0,188 | 0,06  | 1         | 1,033337663   | 0,967737881     | 3,133333333     |
| LRRC32                                                                                   | 0,054166721 | 0,047255946 | 0,062 | 0,01  | 1         | 1,033297687   | 0,967775321     | 6,2             |
| UTP3                                                                                     | 0,000371319 | 0,047245578 | 0,225 | 0,04  | 1         | 1,033290261   | 0,967782275     | 5,625           |
| TYW5                                                                                     | 0,055334082 | 0,047245135 | 0,062 | 0,01  | 1         | 1,033289944   | 0,967782573     | 6,2             |
| DOLK                                                                                     | 0,012429073 | 0,047235648 | 0,112 | 0,02  | 1         | 1,033283149   | 0,967788937     | 5,6             |
| DZANK1                                                                                   | 0,114652585 | 0,047233827 | 0,025 | 0     | 1         | 1,033281845   | 0,967790158     | #DIV/0!         |
| MTRNR2L1                                                                                 | 0,108976957 | 0,047216243 | 0,05  | 0,01  | 1         | 1,033269251   | 0,967801954     | 5               |
| NOP14                                                                                    | 0,021569568 | 0,047200344 | 0,175 | 0,06  | 1         | 1,033257864   | 0,967812619     | 2,916666667     |
| CASTOR2                                                                                  | 0,214910006 | 0,047172011 | 0,038 | 0,01  | 1         | 1,033237572   | 0,967831626     | 3,8             |
| CPLANE2                                                                                  | 0,055334082 | 0,047163192 | 0,062 | 0,01  | 1         | 1,033231256   | 0,967837543     | 6,2             |
| XRCC3                                                                                    | 0,011634754 | 0,047160313 | 0,062 | 0     | 1         | 1,033229194   | 0,967839474     | #DIV/0!         |
| TBC1D2                                                                                   | 0,052279021 | 0,047079806 | 0,038 | 0     | 1         | 1,033171539   | 0,967893484     | #DIV/0!         |
| CDC25C                                                                                   | 0,002666059 | 0,047054644 | 0,088 | 0     | 1         | 1,033153519   | 0,967910365     | #DIV/0!         |
| THUMP2                                                                                   | 0,001664649 | 0,047053908 | 0,25  | 0,07  | 1         | 1,033152992   | 0,967910859     | 3,571428571     |
| DNAJC3-DT                                                                                | 0,052279021 | 0,047032233 | 0,038 | 0     | 1         | 1,03313747    | 0,967925401     | #DIV/0!         |
| F11R                                                                                     | 0,432207887 | 0,047022126 | 0,025 | 0,01  | 1         | 1,033130232   | 0,967932182     | 2,5             |
| LYRM7                                                                                    | 0,014900385 | 0,047006147 | 0,15  | 0,04  | 1         | 1,03311879    | 0,967942903     | 3,75            |
| TMSB15A                                                                                  | 0,083746858 | 0,046990521 | 0,075 | 0,02  | 1         | 1,0331076     | 0,967953387     | 3,75            |
| ZNF319                                                                                   | 0,114652585 | 0,046980017 | 0,025 | 0     | 1         | 1,033100078   | 0,967960434     | #DIV/0!         |
| GYS1                                                                                     | 0,024497883 | 0,046955217 | 0,05  | 0     | 1         | 1,033082319   | 0,967977074     | #DIV/0!         |
| ASB16-AS1                                                                                | 0,114652585 | 0,046910859 | 0,025 | 0     | 1         | 1,033050556   | 0,968006836     | #DIV/0!         |
| C16orf46                                                                                 | 0,052279021 | 0,046893858 | 0,038 | 0     | 1         | 1,033038382   | 0,968018244     | #DIV/0!         |
| STPG1                                                                                    | 0,024497883 | 0,046871201 | 0,05  | 0     | 1         | 1,033022159   | 0,968033446     | #DIV/0!         |

Supplementary Table 4

| Differentially expressed genes_keloid-CCD_ comparing SC-Keloid vs. (SC-Myel, SC-Nonmyel) |             |             |       |       |           |               |                 |                 |
|------------------------------------------------------------------------------------------|-------------|-------------|-------|-------|-----------|---------------|-----------------|-----------------|
| gene                                                                                     | p_val       | avg_log2FC  | pct.1 | pct.2 | p_val_adj | Foldchange_UP | Foldchange_DOWN | Ratio_pct1_pct2 |
| LARP6                                                                                    | 0,001644167 | 0,046868441 | 0,412 | 0,15  | 1         | 1,033020182   | 0,968035298     | 2,746666667     |
| GMEB1                                                                                    | 0,006476809 | 0,046851403 | 0,188 | 0,05  | 1         | 1,033007983   | 0,96804673      | 3,76            |
| HLA-DQA1                                                                                 | 0,439855668 | 0,046822007 | 0,025 | 0,01  | 1         | 1,032986935   | 0,968066455     | 2,5             |
| ZNF197                                                                                   | 0,053019982 | 0,046768702 | 0,062 | 0,01  | 1         | 1,032948768   | 0,968102224     | 6,2             |
| METTL13                                                                                  | 0,012429073 | 0,046744845 | 0,112 | 0,02  | 1         | 1,032931687   | 0,968118233     | 5,6             |
| HILPDA                                                                                   | 0,001990631 | 0,04672388  | 0,212 | 0,05  | 1         | 1,032916677   | 0,968132302     | 4,24            |
| PPFIA2                                                                                   | 0,052279021 | 0,046710741 | 0,038 | 0     | 1         | 1,03290727    | 0,968141119     | #DIV/0!         |
| P2RX6                                                                                    | 0,024497883 | 0,046709596 | 0,05  | 0     | 1         | 1,032906451   | 0,968141887     | #DIV/0!         |
| LRP8                                                                                     | 0,011634754 | 0,046682718 | 0,062 | 0     | 1         | 1,032887207   | 0,968159924     | #DIV/0!         |
| INF2                                                                                     | 0,000326708 | 0,046649137 | 0,525 | 0,19  | 1         | 1,032863165   | 0,96818246      | 2,763157895     |
| ATG4A                                                                                    | 0,095853273 | 0,046631549 | 0,138 | 0,06  | 1         | 1,032850573   | 0,968194263     | 2,3             |
| ADAMTS6                                                                                  | 0,024497883 | 0,04655033  | 0,05  | 0     | 1         | 1,032792429   | 0,968248771     | #DIV/0!         |
| FAAP24                                                                                   | 0,005562134 | 0,046455272 | 0,075 | 0     | 1         | 1,032724382   | 0,96831257      | #DIV/0!         |
| PDP2                                                                                     | 0,024497883 | 0,046401815 | 0,05  | 0     | 1         | 1,032686116   | 0,96834845      | #DIV/0!         |
| H2AC20                                                                                   | 0,005473966 | 0,046318392 | 0,15  | 0,03  | 1         | 1,032626404   | 0,968404446     | 5               |
| HRH1                                                                                     | 0,022564497 | 0,046296608 | 0,1   | 0,02  | 1         | 1,032610811   | 0,968419068     | 5               |
| FAM185A                                                                                  | 0,078137452 | 0,046210461 | 0,075 | 0,02  | 1         | 1,032549154   | 0,968476897     | 3,75            |
| TMCO6                                                                                    | 0,052279021 | 0,046106129 | 0,038 | 0     | 1         | 1,032474484   | 0,968546938     | #DIV/0!         |
| FAM71E1                                                                                  | 0,108976957 | 0,046096536 | 0,05  | 0,01  | 1         | 1,032467619   | 0,968553378     | 5               |
| TBC1D19                                                                                  | 0,044583831 | 0,046032058 | 0,088 | 0,02  | 1         | 1,032421477   | 0,968596666     | 4,4             |
| MYL5                                                                                     | 0,002760013 | 0,046019716 | 0,262 | 0,08  | 1         | 1,032412644   | 0,968604952     | 3,275           |
| ERCC4                                                                                    | 0,019043486 | 0,045986199 | 0,162 | 0,05  | 1         | 1,03238866    | 0,968627455     | 3,24            |
| VAMP7                                                                                    | 0,006715258 | 0,045962727 | 0,3   | 0,11  | 1         | 1,032371863   | 0,968643214     | 2,727272727     |
| PTCHD1                                                                                   | 0,013319742 | 0,045927936 | 0,088 | 0,01  | 1         | 1,032346968   | 0,968666574     | 8,8             |
| BMS1                                                                                     | 0,004584278 | 0,045905386 | 0,288 | 0,1   | 1         | 1,032330831   | 0,968681715     | 2,88            |
| CCT6B                                                                                    | 0,055334082 | 0,045887369 | 0,062 | 0,01  | 1         | 1,03231794    | 0,968693812     | 6,2             |
| ZNF7                                                                                     | 0,011094447 | 0,045864593 | 0,175 | 0,05  | 1         | 1,032301642   | 0,968709105     | 3,5             |
| TRAF3IP1                                                                                 | 0,008963012 | 0,045839559 | 0,2   | 0,06  | 1         | 1,03228373    | 0,968725914     | 3,333333333     |
| B3GAT2                                                                                   | 0,024497883 | 0,045833672 | 0,05  | 0     | 1         | 1,032279517   | 0,968729868     | #DIV/0!         |
| LRCH1                                                                                    | 0,004988707 | 0,045831692 | 0,15  | 0,03  | 1         | 1,032278101   | 0,968731197     | 5               |

Supplementary Table 4

| Differentially expressed genes_keloid-CCD_ comparing SC-Keloid vs. (SC-Myel, SC-Nonmyel) |             |             |       |       |           |               |                 |                 |
|------------------------------------------------------------------------------------------|-------------|-------------|-------|-------|-----------|---------------|-----------------|-----------------|
| gene                                                                                     | p_val       | avg_log2FC  | pct.1 | pct.2 | p_val_adj | Foldchange_UP | Foldchange_DOWN | Ratio_pct1_pct2 |
| CCDC24                                                                                   | 0,01362345  | 0,045795921 | 0,088 | 0,01  | 1         | 1,032252506   | 0,968755216     | 8,8             |
| RNGTT                                                                                    | 0,002024826 | 0,045768302 | 0,212 | 0,05  | 1         | 1,032232744   | 0,968773763     | 4,24            |
| POU5F2                                                                                   | 0,024497883 | 0,04561091  | 0,05  | 0     | 1         | 1,032120138   | 0,968879458     | #DIV/0!         |
| XKR8                                                                                     | 0,005562134 | 0,04560868  | 0,075 | 0     | 1         | 1,032118543   | 0,968880955     | #DIV/0!         |
| TMEM138                                                                                  | 0,006476809 | 0,045601093 | 0,188 | 0,05  | 1         | 1,032113115   | 0,968886051     | 3,76            |
| ZNF816                                                                                   | 0,052279021 | 0,04557209  | 0,038 | 0     | 1         | 1,032092367   | 0,968905529     | #DIV/0!         |
| PYM1                                                                                     | 0,004779962 | 0,04552998  | 0,212 | 0,06  | 1         | 1,032062242   | 0,96893381      | 3,533333333     |
| SLC6A9                                                                                   | 0,024497883 | 0,045501384 | 0,05  | 0     | 1         | 1,032041786   | 0,968953015     | #DIV/0!         |
| TWIST2                                                                                   | 0,052279021 | 0,045488363 | 0,038 | 0     | 1         | 1,032032471   | 0,968961761     | #DIV/0!         |
| AGBL4                                                                                    | 0,052279021 | 0,045464799 | 0,038 | 0     | 1         | 1,032015614   | 0,968977587     | #DIV/0!         |
| ATXN7                                                                                    | 0,045399153 | 0,045401197 | 0,088 | 0,02  | 1         | 1,031970118   | 0,969020306     | 4,4             |
| ZNF91                                                                                    | 0,014426885 | 0,045376838 | 0,15  | 0,04  | 1         | 1,031952695   | 0,969036667     | 3,75            |
| NAA40                                                                                    | 0,023437611 | 0,045375413 | 0,1   | 0,02  | 1         | 1,031951675   | 0,969037624     | 5               |
| PPIC                                                                                     | 0,10741396  | 0,045253603 | 0,088 | 0,03  | 1         | 1,031864549   | 0,969119446     | 2,933333333     |
| FBXO5                                                                                    | 0,008897236 | 0,045221916 | 0,138 | 0,03  | 1         | 1,031841886   | 0,969140732     | 4,6             |
| ZNF461                                                                                   | 0,114652585 | 0,045204971 | 0,025 | 0     | 1         | 1,031829766   | 0,969152115     | #DIV/0!         |
| GLT8D1                                                                                   | 0,000608073 | 0,045143105 | 0,65  | 0,27  | 1         | 1,03178552    | 0,969193675     | 2,407407407     |
| SUV39H1                                                                                  | 0,011634754 | 0,045084267 | 0,062 | 0     | 1         | 1,031743441   | 0,969233203     | #DIV/0!         |
| NEK8                                                                                     | 0,052279021 | 0,045078846 | 0,038 | 0     | 1         | 1,031739564   | 0,969236845     | #DIV/0!         |
| LDLRAD3                                                                                  | 0,024497883 | 0,045074391 | 0,05  | 0     | 1         | 1,031736378   | 0,969239838     | #DIV/0!         |
| NAGS                                                                                     | 0,024497883 | 0,045022396 | 0,05  | 0     | 1         | 1,031699195   | 0,96927477      | #DIV/0!         |
| HMCES                                                                                    | 0,006276301 | 0,045020134 | 0,125 | 0,02  | 1         | 1,031697578   | 0,96927629      | 6,25            |
| PIK3CA                                                                                   | 0,000158574 | 0,044963713 | 0,35  | 0,09  | 1         | 1,031657231   | 0,969314197     | 3,888888889     |
| GINS4                                                                                    | 0,011634754 | 0,044949211 | 0,062 | 0     | 1         | 1,03164686    | 0,969323941     | #DIV/0!         |
| E2F8                                                                                     | 0,011634754 | 0,044930807 | 0,062 | 0     | 1         | 1,0316337     | 0,969336306     | #DIV/0!         |
| YARS1                                                                                    | 0,002069357 | 0,044927049 | 0,325 | 0,11  | 1         | 1,031631013   | 0,969338831     | 2,954545455     |
| RPL22                                                                                    | 0,304754385 | 0,044906578 | 1     | 0,95  | 1         | 1,031616375   | 0,969352586     | 1,052631579     |
| POLQ                                                                                     | 0,011634754 | 0,044894579 | 0,062 | 0     | 1         | 1,031607795   | 0,969360648     | #DIV/0!         |
| KLHL11                                                                                   | 0,219108376 | 0,044886299 | 0,038 | 0,01  | 1         | 1,031601874   | 0,969366211     | 3,8             |
| SLC25A32                                                                                 | 0,010671495 | 0,044856841 | 0,212 | 0,07  | 1         | 1,03158081    | 0,969386005     | 3,028571429     |

Supplementary Table 4

| Differentially expressed genes_keloid-CCD_ comparing SC-Keloid vs. (SC-Myel, SC-Nonmyel) |             |             |       |       |           |               |                 |                 |
|------------------------------------------------------------------------------------------|-------------|-------------|-------|-------|-----------|---------------|-----------------|-----------------|
| gene                                                                                     | p_val       | avg_log2FC  | pct.1 | pct.2 | p_val_adj | Foldchange_UP | Foldchange_DOWN | Ratio_pct1_pct2 |
| RHBDD3                                                                                   | 0,004595855 | 0,044844425 | 0,175 | 0,04  | 1         | 1,031571932   | 0,969394347     | 4,375           |
| ZNF569                                                                                   | 0,024497883 | 0,044801606 | 0,05  | 0     | 1         | 1,031541316   | 0,969423119     | #DIV/0!         |
| PPAT                                                                                     | 0,018403004 | 0,044800317 | 0,125 | 0,03  | 1         | 1,031540395   | 0,969423985     | 4,166666667     |
| KATNIP                                                                                   | 0,026889313 | 0,044779337 | 0,075 | 0,01  | 1         | 1,031525393   | 0,969438083     | 7,5             |
| NDE1                                                                                     | 0,009017324 | 0,044758197 | 0,238 | 0,08  | 1         | 1,031510278   | 0,969452289     | 2,975           |
| ZNF347                                                                                   | 0,012429073 | 0,044729701 | 0,112 | 0,02  | 1         | 1,031489904   | 0,969471438     | 5,6             |
| ZNF90                                                                                    | 0,14756181  | 0,044681607 | 0,062 | 0,02  | 1         | 1,031455519   | 0,969503756     | 3,1             |
| PLPP6                                                                                    | 0,052279021 | 0,044643115 | 0,038 | 0     | 1         | 1,031427999   | 0,969529624     | #DIV/0!         |
| EFNA3                                                                                    | 0,11122839  | 0,044580652 | 0,05  | 0,01  | 1         | 1,031383343   | 0,969571601     | 5               |
| ICA1                                                                                     | 0,024497883 | 0,04454865  | 0,05  | 0     | 1         | 1,031360466   | 0,969593109     | #DIV/0!         |
| EEA1                                                                                     | 0,009638096 | 0,044528638 | 0,838 | 0,44  | 1         | 1,03134616    | 0,969606558     | 1,904545455     |
| OPRL1                                                                                    | 0,052279021 | 0,044466386 | 0,038 | 0     | 1         | 1,031301658   | 0,969648398     | #DIV/0!         |
| APOE                                                                                     | 0,821771454 | 0,044457238 | 0,238 | 0,23  | 1         | 1,031295118   | 0,969654546     | 1,034782609     |
| TRIT1                                                                                    | 0,026302537 | 0,04445218  | 0,075 | 0,01  | 1         | 1,031291503   | 0,969657946     | 7,5             |
| TCEANC2                                                                                  | 0,01362345  | 0,044440631 | 0,088 | 0,01  | 1         | 1,031283248   | 0,969665707     | 8,8             |
| ANGPTL6                                                                                  | 0,114652585 | 0,044439077 | 0,025 | 0     | 1         | 1,031282136   | 0,969666752     | #DIV/0!         |
| SUMO3                                                                                    | 0,018170877 | 0,044401628 | 0,725 | 0,36  | 1         | 1,031255367   | 0,969691923     | 2,013888889     |
| GCAT                                                                                     | 0,01362345  | 0,044368669 | 0,088 | 0,01  | 1         | 1,031231808   | 0,969714076     | 8,8             |
| NPTN                                                                                     | 0,000500806 | 0,044331164 | 0,7   | 0,28  | 1         | 1,031205      | 0,969739286     | 2,5             |
| GPR108                                                                                   | 0,003006713 | 0,04430438  | 0,312 | 0,11  | 1         | 1,031185856   | 0,969757289     | 2,836363636     |
| WDR91                                                                                    | 0,338191155 | 0,044299918 | 0,1   | 0,06  | 1         | 1,031182666   | 0,969760288     | 1,666666667     |
| ITGB3                                                                                    | 0,104582322 | 0,044249193 | 0,05  | 0,01  | 1         | 1,03114641    | 0,969794386     | 5               |
| C17orf100                                                                                | 0,272650094 | 0,044243559 | 0,05  | 0,02  | 1         | 1,031142384   | 0,969798173     | 2,5             |
| PRLR                                                                                     | 0,295469238 | 0,04413754  | 0,175 | 0,11  | 1         | 1,031066611   | 0,969869443     | 1,590909091     |
| LRRC46                                                                                   | 0,024497883 | 0,044128299 | 0,05  | 0     | 1         | 1,031060007   | 0,969875655     | #DIV/0!         |
| F2R                                                                                      | 0,005825673 | 0,044123205 | 0,338 | 0,13  | 1         | 1,031056366   | 0,96987908      | 2,6             |
| POLR3A                                                                                   | 0,01362345  | 0,044087442 | 0,088 | 0,01  | 1         | 1,031030808   | 0,969903122     | 8,8             |
| EPSTI1                                                                                   | 0,052279021 | 0,044067931 | 0,038 | 0     | 1         | 1,031016864   | 0,96991624      | #DIV/0!         |
| ZNF28                                                                                    | 0,006404327 | 0,04406486  | 0,125 | 0,02  | 1         | 1,03101467    | 0,969918304     | 6,25            |
| OAS3                                                                                     | 0,043780897 | 0,044059666 | 0,088 | 0,02  | 1         | 1,031010958   | 0,969921796     | 4,4             |

Supplementary Table 4

| Differentially expressed genes_keloid-CCD_ comparing SC-Keloid vs. (SC-Myel, SC-Nonmyel) |             |             |       |       |           |               |                 |                 |
|------------------------------------------------------------------------------------------|-------------|-------------|-------|-------|-----------|---------------|-----------------|-----------------|
| gene                                                                                     | p_val       | avg_log2FC  | pct.1 | pct.2 | p_val_adj | Foldchange_UP | Foldchange_DOWN | Ratio_pct1_pct2 |
| SPAG1                                                                                    | 0,012429073 | 0,044055066 | 0,112 | 0,02  | 1         | 1,03100767    | 0,969924889     | 5,6             |
| SETDB1                                                                                   | 0,11122839  | 0,044048104 | 0,05  | 0,01  | 1         | 1,031002695   | 0,969929569     | 5               |
| SLC26A2                                                                                  | 0,005323811 | 0,043996201 | 0,212 | 0,06  | 1         | 1,030965604   | 0,969964465     | 3,533333333     |
| FBXO38                                                                                   | 0,01362345  | 0,043972337 | 0,088 | 0,01  | 1         | 1,03094855    | 0,969980509     | 8,8             |
| LINC00324                                                                                | 0,027487357 | 0,04396923  | 0,075 | 0,01  | 1         | 1,03094633    | 0,969982598     | 7,5             |
| CHN1                                                                                     | 0,003574259 | 0,043956286 | 0,312 | 0,11  | 1         | 1,030937081   | 0,969991301     | 2,836363636     |
| C11orf24                                                                                 | 0,001449001 | 0,043945164 | 0,3   | 0,09  | 1         | 1,030929133   | 0,969998779     | 3,333333333     |
| ABCC1                                                                                    | 0,075062254 | 0,043941249 | 0,112 | 0,04  | 1         | 1,030926335   | 0,970001411     | 2,8             |
| WDPCP                                                                                    | 0,012429073 | 0,043940702 | 0,112 | 0,02  | 1         | 1,030925945   | 0,970001779     | 5,6             |
| ZNF428                                                                                   | 0,11906324  | 0,043932109 | 0,875 | 0,57  | 1         | 1,030919804   | 0,970007556     | 1,535087719     |
| PLXNC1                                                                                   | 0,114652585 | 0,043926436 | 0,025 | 0     | 1         | 1,03091575    | 0,970011371     | #DIV/0!         |
| GIN1                                                                                     | 0,024497883 | 0,043909594 | 0,05  | 0     | 1         | 1,030903716   | 0,970022694     | #DIV/0!         |
| POGLUT2                                                                                  | 0,000371319 | 0,043908828 | 0,225 | 0,04  | 1         | 1,030903168   | 0,97002321      | 5,625           |
| SLC27A3                                                                                  | 0,052279021 | 0,043806131 | 0,038 | 0     | 1         | 1,030829787   | 0,970092262     | #DIV/0!         |
| UBE3D                                                                                    | 0,052279021 | 0,043782209 | 0,038 | 0     | 1         | 1,030812694   | 0,970108348     | #DIV/0!         |
| CEP104                                                                                   | 0,00840035  | 0,043723442 | 0,162 | 0,04  | 1         | 1,030770706   | 0,970147865     | 4,05            |
| USP49                                                                                    | 0,08090269  | 0,043716051 | 0,075 | 0,02  | 1         | 1,030765425   | 0,970152835     | 3,75            |
| MDFIC                                                                                    | 0,000145646 | 0,043700053 | 0,288 | 0,06  | 1         | 1,030753995   | 0,970163593     | 4,8             |
| SCT                                                                                      | 0,052279021 | 0,043651172 | 0,038 | 0     | 1         | 1,030719072   | 0,970196465     | #DIV/0!         |
| ABRAXAS1                                                                                 | 0,002937191 | 0,043638544 | 0,162 | 0,03  | 1         | 1,03071005    | 0,970204957     | 5,4             |
| ERMP1                                                                                    | 0,024497883 | 0,04360414  | 0,05  | 0     | 1         | 1,030685471   | 0,970228094     | #DIV/0!         |
| FBXO36                                                                                   | 0,052279021 | 0,043587321 | 0,038 | 0     | 1         | 1,030673456   | 0,970239405     | #DIV/0!         |
| ANGPT1                                                                                   | 0,114652585 | 0,043577197 | 0,025 | 0     | 1         | 1,030666222   | 0,970246214     | #DIV/0!         |
| AC019171.1                                                                               | 0,024497883 | 0,043509645 | 0,05  | 0     | 1         | 1,030617964   | 0,970291645     | #DIV/0!         |
| MED4                                                                                     | 0,012922533 | 0,043489536 | 0,575 | 0,27  | 1         | 1,030603599   | 0,97030517      | 2,12962963      |
| TANGO6                                                                                   | 0,024497883 | 0,043394915 | 0,05  | 0     | 1         | 1,030536008   | 0,97036881      | #DIV/0!         |
| PDK2                                                                                     | 0,014068004 | 0,043355568 | 0,188 | 0,06  | 1         | 1,030507902   | 0,970395276     | 3,133333333     |
| RGS14                                                                                    | 0,114652585 | 0,04330372  | 0,025 | 0     | 1         | 1,030470868   | 0,970430151     | #DIV/0!         |
| IGF2BP2                                                                                  | 0,001977984 | 0,043292461 | 0,275 | 0,08  | 1         | 1,030462827   | 0,970437724     | 3,4375          |
| AUNIP                                                                                    | 0,055334082 | 0,043282965 | 0,062 | 0,01  | 1         | 1,030456044   | 0,970444112     | 6,2             |

Supplementary Table 4

| Differentially expressed genes_keloid-CCD_comparing SC-Keloid vs. (SC-Myel, SC-Nonmyel) |             |             |       |       |           |               |                 |                 |
|-----------------------------------------------------------------------------------------|-------------|-------------|-------|-------|-----------|---------------|-----------------|-----------------|
| gene                                                                                    | p_val       | avg_log2FC  | pct.1 | pct.2 | p_val_adj | Foldchange_UP | Foldchange_DOWN | Ratio_pct1_pct2 |
| ATPAF1                                                                                  | 0,022487321 | 0,043191769 | 0,175 | 0,06  | 1         | 1,030390908   | 0,970505457     | 2,916666667     |
| CREB3L4                                                                                 | 0,052279021 | 0,04315919  | 0,038 | 0     | 1         | 1,03036764    | 0,970527374     | #DIV/0!         |
| EMILIN2                                                                                 | 0,007720352 | 0,043093771 | 0,2   | 0,06  | 1         | 1,030320919   | 0,970571384     | 3,333333333     |
| IL3RA                                                                                   | 0,214910006 | 0,043092237 | 0,038 | 0,01  | 1         | 1,030319824   | 0,970572415     | 3,8             |
| OXNAD1                                                                                  | 0,01362345  | 0,043077612 | 0,088 | 0,01  | 1         | 1,030309379   | 0,970582255     | 8,8             |
| DERL3                                                                                   | 0,024497883 | 0,043049085 | 0,05  | 0     | 1         | 1,030289007   | 0,970601446     | #DIV/0!         |
| BTBD8                                                                                   | 0,268357209 | 0,043048159 | 0,013 | 0     | 1         | 1,030288345   | 0,97060207      | #DIV/0!         |
| GRPR                                                                                    | 0,268357209 | 0,043048159 | 0,013 | 0     | 1         | 1,030288345   | 0,97060207      | #DIV/0!         |
| UTS2B                                                                                   | 0,268357209 | 0,043048159 | 0,013 | 0     | 1         | 1,030288345   | 0,97060207      | #DIV/0!         |
| PRMT7                                                                                   | 0,001655244 | 0,04303987  | 0,15  | 0,02  | 1         | 1,030282426   | 0,970607646     | 7,5             |
| MAMLD1                                                                                  | 0,00239488  | 0,043011892 | 0,188 | 0,04  | 1         | 1,030262446   | 0,970626469     | 4,7             |
| ZNF561                                                                                  | 0,059755621 | 0,042993686 | 0,1   | 0,03  | 1         | 1,030249445   | 0,970638718     | 3,333333333     |
| NSUN4                                                                                   | 0,005562134 | 0,042966944 | 0,075 | 0     | 1         | 1,030230348   | 0,97065671      | #DIV/0!         |
| SYTL2                                                                                   | 0,000239742 | 0,042962251 | 0,425 | 0,13  | 1         | 1,030226997   | 0,970659867     | 3,269230769     |
| HOXB9                                                                                   | 0,053019982 | 0,042955944 | 0,062 | 0,01  | 1         | 1,030222493   | 0,970664111     | 6,2             |
| INTS9                                                                                   | 0,011634754 | 0,042938878 | 0,062 | 0     | 1         | 1,030210306   | 0,970675593     | #DIV/0!         |
| ZNF398                                                                                  | 0,01362345  | 0,042894827 | 0,088 | 0,01  | 1         | 1,030178851   | 0,970705232     | 8,8             |
| PCYT2                                                                                   | 0,002482056 | 0,042889977 | 0,188 | 0,04  | 1         | 1,030175387   | 0,970708495     | 4,7             |
| ITGA4                                                                                   | 0,108976957 | 0,042878485 | 0,05  | 0,01  | 1         | 1,030167182   | 0,970716227     | 5               |
| PEX13                                                                                   | 0,007594534 | 0,042864352 | 0,162 | 0,04  | 1         | 1,030157089   | 0,970725737     | 4,05            |
| FCF1                                                                                    | 0,006731552 | 0,042784839 | 0,1   | 0,01  | 1         | 1,030100315   | 0,970779239     | 10              |
| CHI3L1                                                                                  | 0,268357209 | 0,042768115 | 0,013 | 0     | 1         | 1,030088374   | 0,970790493     | #DIV/0!         |
| BOD1L1                                                                                  | 0,004438432 | 0,042754065 | 0,688 | 0,33  | 1         | 1,030078342   | 0,970799947     | 2,084848485     |
| ALOX5AP                                                                                 | 0,108976957 | 0,042730786 | 0,05  | 0,01  | 1         | 1,030061721   | 0,970815612     | 5               |
| IFIT5                                                                                   | 0,152427848 | 0,042697669 | 0,062 | 0,02  | 1         | 1,030038077   | 0,970837897     | 3,1             |
| RDH13                                                                                   | 0,082314814 | 0,04268871  | 0,075 | 0,02  | 1         | 1,03003168    | 0,970843926     | 3,75            |
| RBBP9                                                                                   | 0,178498648 | 0,042580889 | 0,075 | 0,03  | 1         | 1,029954702   | 0,970916486     | 2,5             |
| VPS72                                                                                   | 0,000908236 | 0,042580222 | 0,312 | 0,09  | 1         | 1,029954226   | 0,970916935     | 3,466666667     |
| USP31                                                                                   | 0,00922558  | 0,042560806 | 0,138 | 0,03  | 1         | 1,029940365   | 0,970930001     | 4,6             |
| SNAI3-AS1                                                                               | 0,052279021 | 0,042502296 | 0,038 | 0     | 1         | 1,029898596   | 0,970969379     | #DIV/0!         |



Supplementary Table 4

| Differentially expressed genes_keloid-CCD_ comparing SC-Keloid vs. (SC-Myel, SC-Nonmyel) |             |             |       |       |           |               |                 |                 |
|------------------------------------------------------------------------------------------|-------------|-------------|-------|-------|-----------|---------------|-----------------|-----------------|
| gene                                                                                     | p_val       | avg_log2FC  | pct.1 | pct.2 | p_val_adj | Foldchange_UP | Foldchange_DOWN | Ratio_pct1_pct2 |
| SPRED3                                                                                   | 0,042990209 | 0,042458867 | 0,088 | 0,02  | 1         | 1,029867593   | 0,970998608     | 4,4             |
| ZNF625                                                                                   | 0,052279021 | 0,042456782 | 0,038 | 0     | 1         | 1,029866105   | 0,971000011     | #DIV/0!         |
| TMEM102                                                                                  | 0,011634754 | 0,042435774 | 0,062 | 0     | 1         | 1,029851108   | 0,971014151     | #DIV/0!         |
| SLC12A7                                                                                  | 0,055334082 | 0,042435148 | 0,062 | 0,01  | 1         | 1,029850662   | 0,971014572     | 6,2             |
| PPP1R3F                                                                                  | 0,045399153 | 0,042430213 | 0,088 | 0,02  | 1         | 1,029847139   | 0,971017894     | 4,4             |
| CFAP20DC                                                                                 | 0,042211625 | 0,04242     | 0,088 | 0,02  | 1         | 1,029839849   | 0,971024768     | 4,4             |
| POLE2                                                                                    | 0,024497883 | 0,042318302 | 0,05  | 0     | 1         | 1,029767256   | 0,971093219     | #DIV/0!         |
| THAP8                                                                                    | 0,023885059 | 0,042285656 | 0,1   | 0,02  | 1         | 1,029743954   | 0,971115194     | 5               |
| SCUBE2                                                                                   | 0,052279021 | 0,042249534 | 0,038 | 0     | 1         | 1,029718172   | 0,971139509     | #DIV/0!         |
| MIEF2                                                                                    | 0,011634754 | 0,042174729 | 0,062 | 0     | 1         | 1,029664782   | 0,971189864     | #DIV/0!         |
| WDR31                                                                                    | 0,024497883 | 0,042120793 | 0,05  | 0     | 1         | 1,029626288   | 0,971226174     | #DIV/0!         |
| OSGEPL1                                                                                  | 0,011634754 | 0,042076738 | 0,062 | 0     | 1         | 1,029594847   | 0,971255832     | #DIV/0!         |
| SAMD15                                                                                   | 0,223365318 | 0,042059767 | 0,038 | 0,01  | 1         | 1,029582735   | 0,971267258     | 3,8             |
| MCCC2                                                                                    | 0,000326309 | 0,042008914 | 0,25  | 0,05  | 1         | 1,029546445   | 0,971301494     | 5               |
| TBC1D24                                                                                  | 0,223365318 | 0,042001074 | 0,038 | 0,01  | 1         | 1,02954085    | 0,971306773     | 3,8             |
| ZNF740                                                                                   | 0,019048586 | 0,041988506 | 0,125 | 0,03  | 1         | 1,029531881   | 0,971315234     | 4,166666667     |
| PTGES                                                                                    | 0,052279021 | 0,041945452 | 0,038 | 0     | 1         | 1,029501158   | 0,971344221     | #DIV/0!         |
| TFAP2A-AS1                                                                               | 0,114652585 | 0,041938415 | 0,025 | 0     | 1         | 1,029496136   | 0,971348959     | #DIV/0!         |
| GDF15                                                                                    | 0,114652585 | 0,041893966 | 0,025 | 0     | 1         | 1,029464418   | 0,971378886     | #DIV/0!         |
| FAM229A                                                                                  | 0,074018584 | 0,04185481  | 0,112 | 0,04  | 1         | 1,029436477   | 0,971405251     | 2,8             |
| ZSCAN25                                                                                  | 0,054166721 | 0,041794885 | 0,062 | 0,01  | 1         | 1,029393719   | 0,971445601     | 6,2             |
| ATG13                                                                                    | 0,002101099 | 0,041783091 | 0,288 | 0,09  | 1         | 1,029385304   | 0,971453542     | 3,2             |
| ARHGEF19                                                                                 | 0,000830908 | 0,0417763   | 0,162 | 0,02  | 1         | 1,029380458   | 0,971458116     | 8,1             |
| CDCP1                                                                                    | 0,024497883 | 0,041735604 | 0,05  | 0     | 1         | 1,029351422   | 0,971485519     | #DIV/0!         |
| RMI2                                                                                     | 0,024497883 | 0,041650147 | 0,05  | 0     | 1         | 1,02929045    | 0,971543066     | #DIV/0!         |
| PPM1L                                                                                    | 0,005562134 | 0,041631389 | 0,075 | 0     | 1         | 1,029277068   | 0,971555698     | #DIV/0!         |
| LINC00954                                                                                | 0,052279021 | 0,041619812 | 0,038 | 0     | 1         | 1,029268808   | 0,971563494     | #DIV/0!         |
| DDIAS                                                                                    | 0,005562134 | 0,041619126 | 0,075 | 0     | 1         | 1,029268319   | 0,971563956     | #DIV/0!         |
| CACNA1C                                                                                  | 0,114652585 | 0,041612196 | 0,025 | 0     | 1         | 1,029263375   | 0,971568623     | #DIV/0!         |
| NEK4                                                                                     | 0,027487357 | 0,041589135 | 0,075 | 0,01  | 1         | 1,029246923   | 0,971584153     | 7,5             |

Supplementary Table 4

| Differentially expressed genes_keloid-CCD_ comparing SC-Keloid vs. (SC-Myel, SC-Nonmyel) |             |             |       |       |           |               |                 |                 |
|------------------------------------------------------------------------------------------|-------------|-------------|-------|-------|-----------|---------------|-----------------|-----------------|
| gene                                                                                     | p_val       | avg_log2FC  | pct.1 | pct.2 | p_val_adj | Foldchange_UP | Foldchange_DOWN | Ratio_pct1_pct2 |
| E2F3                                                                                     | 0,001655244 | 0,041574309 | 0,15  | 0,02  | 1         | 1,029236345   | 0,971594138     | 7,5             |
| VTA1                                                                                     | 0,00034705  | 0,041536743 | 0,325 | 0,09  | 1         | 1,029209546   | 0,971619438     | 3,611111111     |
| ABLIM2                                                                                   | 0,052279021 | 0,041506202 | 0,038 | 0     | 1         | 1,029187758   | 0,971640006     | #DIV/0!         |
| GALC                                                                                     | 0,014686042 | 0,041488659 | 0,188 | 0,06  | 1         | 1,029175244   | 0,971651821     | 3,133333333     |
| MFNG                                                                                     | 0,024497883 | 0,041381875 | 0,05  | 0     | 1         | 1,029099069   | 0,971723743     | #DIV/0!         |
| EXD2                                                                                     | 0,027487357 | 0,041359498 | 0,075 | 0,01  | 1         | 1,029083108   | 0,971738815     | 7,5             |
| TTLL11                                                                                   | 0,052279021 | 0,041318689 | 0,038 | 0     | 1         | 1,029053999   | 0,971766303     | #DIV/0!         |
| FUCA1                                                                                    | 0,005242842 | 0,041289109 | 0,212 | 0,06  | 1         | 1,0290329     | 0,971786227     | 3,533333333     |
| LRRC41                                                                                   | 0,000280517 | 0,04127179  | 0,312 | 0,08  | 1         | 1,029020548   | 0,971797893     | 3,9             |
| FKBP14                                                                                   | 0,001014693 | 0,041264457 | 0,325 | 0,1   | 1         | 1,029015317   | 0,971802833     | 3,25            |
| EVC                                                                                      | 0,055334082 | 0,041258756 | 0,062 | 0,01  | 1         | 1,02901125    | 0,971806673     | 6,2             |
| KCTD2                                                                                    | 0,018723361 | 0,041251303 | 0,125 | 0,03  | 1         | 1,029005934   | 0,971811694     | 4,166666667     |
| NFYC                                                                                     | 0,000956847 | 0,041245428 | 0,225 | 0,05  | 1         | 1,029001744   | 0,971815651     | 4,5             |
| FANCM                                                                                    | 0,033686337 | 0,041223969 | 0,112 | 0,03  | 1         | 1,028986439   | 0,971830106     | 3,733333333     |
| ABHD17C                                                                                  | 0,01362345  | 0,041186117 | 0,088 | 0,01  | 1         | 1,028959442   | 0,971855604     | 8,8             |
| POLR2K                                                                                   | 0,084548836 | 0,041099861 | 0,787 | 0,46  | 1         | 1,028897924   | 0,971913712     | 1,710869565     |
| FIG4                                                                                     | 0,018723361 | 0,041096405 | 0,125 | 0,03  | 1         | 1,028895459   | 0,97191604      | 4,166666667     |
| TIGD5                                                                                    | 0,034816087 | 0,041075881 | 0,112 | 0,03  | 1         | 1,028880822   | 0,971929866     | 3,733333333     |
| LINC00900                                                                                | 0,024497883 | 0,041073337 | 0,05  | 0     | 1         | 1,028879008   | 0,97193158      | #DIV/0!         |
| TTN                                                                                      | 0,114652585 | 0,041060837 | 0,025 | 0     | 1         | 1,028870094   | 0,971940001     | #DIV/0!         |
| XIAP                                                                                     | 0,02593618  | 0,041052914 | 0,462 | 0,23  | 1         | 1,028864443   | 0,971945339     | 2,008695652     |
| PRKACB                                                                                   | 0,000391642 | 0,04100322  | 0,412 | 0,13  | 1         | 1,028829004   | 0,971978819     | 3,169230769     |
| SOCS7                                                                                    | 0,082314814 | 0,040965619 | 0,075 | 0,02  | 1         | 1,02880219    | 0,972004152     | 3,75            |
| CPVL                                                                                     | 0,268357209 | 0,04093491  | 0,013 | 0     | 1         | 1,028780291   | 0,972024842     | #DIV/0!         |
| ANAPC10                                                                                  | 0,000470107 | 0,040933835 | 0,362 | 0,11  | 1         | 1,028779525   | 0,972025566     | 3,290909091     |
| ZNRF1                                                                                    | 0,006874159 | 0,040909863 | 0,225 | 0,07  | 1         | 1,02876243    | 0,972041718     | 3,214285714     |
| SARM1                                                                                    | 0,149979778 | 0,040881917 | 0,062 | 0,02  | 1         | 1,028742503   | 0,972060547     | 3,1             |
| CHCHD10                                                                                  | 0,006034881 | 0,040824001 | 0,625 | 0,29  | 1         | 1,028701206   | 0,97209957      | 2,155172414     |
| REEP6                                                                                    | 0,006731552 | 0,040789559 | 0,1   | 0,01  | 1         | 1,028676648   | 0,972122778     | 10              |
| VPS8                                                                                     | 0,034247231 | 0,040758127 | 0,112 | 0,03  | 1         | 1,028654236   | 0,972143958     | 3,733333333     |

Supplementary Table 4

| Differentially expressed genes_keloid-CCD_ comparing SC-Keloid vs. (SC-Myel, SC-Nonmyel) |             |             |       |       |           |               |                 |                 |
|------------------------------------------------------------------------------------------|-------------|-------------|-------|-------|-----------|---------------|-----------------|-----------------|
| gene                                                                                     | p_val       | avg_log2FC  | pct.1 | pct.2 | p_val_adj | Foldchange_UP | Foldchange_DOWN | Ratio_pct1_pct2 |
| NSMCE2                                                                                   | 0,043064206 | 0,040754132 | 0,275 | 0,13  | 1         | 1,028651387   | 0,97214665      | 2,115384615     |
| GNS                                                                                      | 0,000658631 | 0,040708128 | 0,338 | 0,1   | 1         | 1,028618586   | 0,97217765      | 3,38            |
| SLC8A1                                                                                   | 0,114652585 | 0,04067027  | 0,025 | 0     | 1         | 1,028591595   | 0,972203161     | #DIV/0!         |
| FGD5                                                                                     | 0,114652585 | 0,040668066 | 0,025 | 0     | 1         | 1,028590024   | 0,972204646     | #DIV/0!         |
| PPIF                                                                                     | 0,009767966 | 0,040654209 | 0,262 | 0,1   | 1         | 1,028580144   | 0,972213984     | 2,62            |
| HES6                                                                                     | 0,004947074 | 0,040649257 | 0,613 | 0,29  | 1         | 1,028576613   | 0,972217322     | 2,113793103     |
| DYNLRB2                                                                                  | 0,114652585 | 0,040601786 | 0,025 | 0     | 1         | 1,028542769   | 0,972249312     | #DIV/0!         |
| NPTXR                                                                                    | 0,010461593 | 0,040555942 | 0,138 | 0,03  | 1         | 1,028510086   | 0,972280207     | 4,6             |
| IK                                                                                       | 0,002542254 | 0,040545038 | 0,75  | 0,33  | 1         | 1,028502313   | 0,972287556     | 2,272727273     |
| HS3ST3A1                                                                                 | 0,032625407 | 0,040542136 | 0,2   | 0,08  | 1         | 1,028500244   | 0,972289512     | 2,5             |
| DNAJC9-AS1                                                                               | 0,052279021 | 0,04053514  | 0,038 | 0     | 1         | 1,028495257   | 0,972294226     | #DIV/0!         |
| LYSMD1                                                                                   | 0,055334082 | 0,040512967 | 0,062 | 0,01  | 1         | 1,028479449   | 0,97230917      | 6,2             |
| KATNAL2                                                                                  | 0,052279021 | 0,040505888 | 0,038 | 0     | 1         | 1,028474403   | 0,972313941     | #DIV/0!         |
| C2orf76                                                                                  | 0,014319279 | 0,040477295 | 0,312 | 0,13  | 1         | 1,02845402    | 0,972333211     | 2,4             |
| TNFSF10                                                                                  | 0,023885059 | 0,040475703 | 0,1   | 0,02  | 1         | 1,028452884   | 0,972334285     | 5               |
| FAM227A                                                                                  | 0,272650094 | 0,040450289 | 0,05  | 0,02  | 1         | 1,028434768   | 0,972351413     | 2,5             |
| BAIAP2L2                                                                                 | 0,006731552 | 0,040444272 | 0,1   | 0,01  | 1         | 1,028430479   | 0,972355468     | 10              |
| NKX6-1                                                                                   | 0,11122839  | 0,04044098  | 0,05  | 0,01  | 1         | 1,028428132   | 0,972357687     | 5               |
| CCDC107                                                                                  | 0,039655907 | 0,040427077 | 0,675 | 0,36  | 1         | 1,028418222   | 0,972367057     | 1,875           |
| SGO2                                                                                     | 0,04823838  | 0,040414384 | 0,175 | 0,07  | 1         | 1,028409173   | 0,972375613     | 2,5             |
| BRIP1                                                                                    | 0,011634754 | 0,040404784 | 0,062 | 0     | 1         | 1,02840233    | 0,972382083     | #DIV/0!         |
| SV2A                                                                                     | 0,024119616 | 0,040388998 | 0,138 | 0,04  | 1         | 1,028391077   | 0,972392723     | 3,45            |
| HYDIN                                                                                    | 0,114652585 | 0,040375402 | 0,025 | 0     | 1         | 1,028381386   | 0,972401887     | #DIV/0!         |
| FASTKD3                                                                                  | 0,044264725 | 0,040351519 | 0,125 | 0,04  | 1         | 1,028364362   | 0,972417985     | 3,125           |
| CTU1                                                                                     | 0,01010845  | 0,04034232  | 0,175 | 0,05  | 1         | 1,028357804   | 0,972424185     | 3,5             |
| TMEM128                                                                                  | 0,010024565 | 0,040335606 | 0,25  | 0,09  | 1         | 1,028353019   | 0,972428711     | 2,777777778     |
| OGDH                                                                                     | 0,000353701 | 0,040320564 | 0,375 | 0,11  | 1         | 1,028342297   | 0,972438849     | 3,409090909     |
| DNAH5                                                                                    | 0,024497883 | 0,040288156 | 0,05  | 0     | 1         | 1,028319197   | 0,972460694     | #DIV/0!         |
| GASK1A                                                                                   | 0,052279021 | 0,040271289 | 0,038 | 0     | 1         | 1,028307175   | 0,972472064     | #DIV/0!         |
| SMG9                                                                                     | 0,001092261 | 0,040178    | 0,35  | 0,11  | 1         | 1,028240684   | 0,972534948     | 3,181818182     |

Supplementary Table 4

| Differentially expressed genes_keloid-CCD_comparing SC-Keloid vs. (SC-Myel, SC-Nonmyel) |             |             |       |       |           |               |                 |                 |
|-----------------------------------------------------------------------------------------|-------------|-------------|-------|-------|-----------|---------------|-----------------|-----------------|
| gene                                                                                    | p_val       | avg_log2FC  | pct.1 | pct.2 | p_val_adj | Foldchange_UP | Foldchange_DOWN | Ratio_pct1_pct2 |
| CTSK                                                                                    | 0,028038106 | 0,04009088  | 0,325 | 0,15  | 1         | 1,028178593   | 0,972593679     | 2,166666667     |
| NRG4                                                                                    | 0,114652585 | 0,040060724 | 0,025 | 0     | 1         | 1,028157101   | 0,972614009     | #DIV/0!         |
| PNPO                                                                                    | 0,006731552 | 0,040050376 | 0,1   | 0,01  | 1         | 1,028149727   | 0,972620985     | 10              |
| PKD1L1                                                                                  | 0,024497883 | 0,040046183 | 0,05  | 0     | 1         | 1,028146739   | 0,972623811     | #DIV/0!         |
| ASRGL1                                                                                  | 0,027487357 | 0,040019982 | 0,075 | 0,01  | 1         | 1,028128067   | 0,972641476     | 7,5             |
| FASTKD1                                                                                 | 0,03205056  | 0,039971458 | 0,112 | 0,03  | 1         | 1,028093487   | 0,97267419      | 3,733333333     |
| WDCP                                                                                    | 0,055334082 | 0,039954193 | 0,062 | 0,01  | 1         | 1,028081183   | 0,972685831     | 6,2             |
| GTPBP10                                                                                 | 0,082314814 | 0,039937652 | 0,075 | 0,02  | 1         | 1,028069396   | 0,972696983     | 3,75            |
| C9orf40                                                                                 | 0,002937191 | 0,039916183 | 0,162 | 0,03  | 1         | 1,028054098   | 0,972711458     | 5,4             |
| KLHL23                                                                                  | 0,027487357 | 0,039885168 | 0,075 | 0,01  | 1         | 1,028031997   | 0,972732369     | 7,5             |
| HMGXB3                                                                                  | 0,000145861 | 0,039859137 | 0,4   | 0,11  | 1         | 1,028013448   | 0,972749921     | 3,636363636     |
| C9orf116                                                                                | 0,055334082 | 0,039853644 | 0,062 | 0,01  | 1         | 1,028009534   | 0,972753624     | 6,2             |
| PUS10                                                                                   | 0,052279021 | 0,03983909  | 0,038 | 0     | 1         | 1,027999163   | 0,972763438     | #DIV/0!         |
| MPPE1                                                                                   | 0,008909192 | 0,039808238 | 0,275 | 0,1   | 1         | 1,02797718    | 0,97278424      | 2,75            |
| RANBP17                                                                                 | 0,052279021 | 0,039744877 | 0,038 | 0     | 1         | 1,027932033   | 0,972826965     | #DIV/0!         |
| ARVCF                                                                                   | 0,152427848 | 0,039725513 | 0,062 | 0,02  | 1         | 1,027918237   | 0,972840022     | 3,1             |
| GLT8D2                                                                                  | 0,114652585 | 0,039718476 | 0,025 | 0     | 1         | 1,027913223   | 0,972844767     | #DIV/0!         |
| ZBTB6                                                                                   | 0,01362345  | 0,03971733  | 0,088 | 0,01  | 1         | 1,027912406   | 0,97284554      | 8,8             |
| HIVEP3                                                                                  | 0,015828814 | 0,039695271 | 0,312 | 0,13  | 1         | 1,027896689   | 0,972860415     | 2,4             |
| PLA2G4A                                                                                 | 0,019048586 | 0,039616533 | 0,125 | 0,03  | 1         | 1,027840591   | 0,972913513     | 4,166666667     |
| MFN1                                                                                    | 0,004579961 | 0,039592523 | 0,312 | 0,11  | 1         | 1,027823486   | 0,972929704     | 2,836363636     |
| SLC37A3                                                                                 | 0,005473966 | 0,039561597 | 0,15  | 0,03  | 1         | 1,027801453   | 0,97295056      | 5               |
| IPO8                                                                                    | 0,010821733 | 0,039500739 | 0,212 | 0,07  | 1         | 1,027758098   | 0,972991604     | 3,028571429     |
| TCF19                                                                                   | 0,044264725 | 0,039468341 | 0,125 | 0,04  | 1         | 1,027735018   | 0,973013455     | 3,125           |
| SAMD14                                                                                  | 0,052279021 | 0,039444179 | 0,038 | 0     | 1         | 1,027717806   | 0,973029751     | #DIV/0!         |
| CBLN3                                                                                   | 0,114652585 | 0,039400292 | 0,025 | 0     | 1         | 1,027686543   | 0,97305935      | #DIV/0!         |
| C2orf42                                                                                 | 0,024497883 | 0,039386226 | 0,05  | 0     | 1         | 1,027676524   | 0,973068837     | #DIV/0!         |
| ZNF586                                                                                  | 0,114652585 | 0,039342951 | 0,025 | 0     | 1         | 1,027645698   | 0,973098026     | #DIV/0!         |
| ZNF318                                                                                  | 0,027487357 | 0,039328723 | 0,075 | 0,01  | 1         | 1,027635563   | 0,973107623     | 7,5             |
| SASS6                                                                                   | 0,015387523 | 0,039304887 | 0,15  | 0,04  | 1         | 1,027618585   | 0,973123701     | 3,75            |

Supplementary Table 4

| Differentially expressed genes_keloid-CCD_ comparing SC-Keloid vs. (SC-Myel, SC-Nonmyel) |             |             |       |       |           |               |                 |                 |
|------------------------------------------------------------------------------------------|-------------|-------------|-------|-------|-----------|---------------|-----------------|-----------------|
| gene                                                                                     | p_val       | avg_log2FC  | pct.1 | pct.2 | p_val_adj | Foldchange_UP | Foldchange_DOWN | Ratio_pct1_pct2 |
| MYCT1                                                                                    | 0,114652585 | 0,039254023 | 0,025 | 0     | 1         | 1,027582355   | 0,97315801      | #DIV/0!         |
| ZNF544                                                                                   | 0,002482056 | 0,039249226 | 0,188 | 0,04  | 1         | 1,027578938   | 0,973161246     | 4,7             |
| LCP1                                                                                     | 0,114652585 | 0,039197404 | 0,025 | 0     | 1         | 1,027542029   | 0,973196202     | #DIV/0!         |
| LRRTM2                                                                                   | 0,126526887 | 0,039082141 | 0,1   | 0,04  | 1         | 1,027459937   | 0,973273959     | 2,5             |
| INHBA                                                                                    | 0,185993644 | 0,039071015 | 0,075 | 0,03  | 1         | 1,027452013   | 0,973281465     | 2,5             |
| TGDS                                                                                     | 0,030855593 | 0,039053922 | 0,15  | 0,05  | 1         | 1,02743984    | 0,973292996     | 3               |
| UBE2N                                                                                    | 0,006927295 | 0,039019288 | 0,7   | 0,35  | 1         | 1,027415175   | 0,973316361     | 2               |
| KDM5D                                                                                    | 0,152427848 | 0,039005776 | 0,062 | 0,02  | 1         | 1,027405553   | 0,973325477     | 3,1             |
| ELOVL6                                                                                   | 0,024497883 | 0,038969711 | 0,05  | 0     | 1         | 1,027379869   | 0,973349809     | #DIV/0!         |
| CLMP                                                                                     | 0,027487357 | 0,038960566 | 0,075 | 0,01  | 1         | 1,027373357   | 0,973355979     | 7,5             |
| PAXIP1                                                                                   | 0,024497883 | 0,038943712 | 0,05  | 0     | 1         | 1,027361355   | 0,97336735      | #DIV/0!         |
| JAG2                                                                                     | 0,214910006 | 0,03891316  | 0,038 | 0,01  | 1         | 1,027339599   | 0,973387963     | 3,8             |
| TTC30A                                                                                   | 0,052279021 | 0,038904904 | 0,038 | 0     | 1         | 1,02733372    | 0,973393533     | #DIV/0!         |
| CERS5                                                                                    | 0,000477128 | 0,038896081 | 0,362 | 0,11  | 1         | 1,027327437   | 0,973399487     | 3,290909091     |
| GLYR1                                                                                    | 0,000804525 | 0,038870462 | 0,312 | 0,09  | 1         | 1,027309195   | 0,973416772     | 3,466666667     |
| WFIKKN1                                                                                  | 0,052279021 | 0,038865591 | 0,038 | 0     | 1         | 1,027305726   | 0,973420059     | #DIV/0!         |
| APOL1                                                                                    | 0,114652585 | 0,038796031 | 0,025 | 0     | 1         | 1,027256195   | 0,973466993     | #DIV/0!         |
| AC098828.2                                                                               | 0,114652585 | 0,038790905 | 0,025 | 0     | 1         | 1,027252545   | 0,973470452     | #DIV/0!         |
| NHSL1                                                                                    | 0,10676172  | 0,038745455 | 0,05  | 0,01  | 1         | 1,027220183   | 0,973501121     | 5               |
| KAT8                                                                                     | 0,013699415 | 0,038726281 | 0,225 | 0,08  | 1         | 1,027206532   | 0,973514059     | 2,8125          |
| ADCK2                                                                                    | 0,00068532  | 0,038720695 | 0,212 | 0,04  | 1         | 1,027202555   | 0,973517828     | 5,3             |
| F12                                                                                      | 0,114652585 | 0,038698295 | 0,025 | 0     | 1         | 1,027186606   | 0,973532944     | #DIV/0!         |
| ZNF43                                                                                    | 0,032588088 | 0,038693417 | 0,112 | 0,03  | 1         | 1,027183132   | 0,973536236     | 3,733333333     |
| CAMK2N2                                                                                  | 0,023885059 | 0,038669244 | 0,1   | 0,02  | 1         | 1,027165921   | 0,973552548     | 5               |
| THADA                                                                                    | 0,082314814 | 0,038668027 | 0,075 | 0,02  | 1         | 1,027165055   | 0,973553369     | 3,75            |
| FNTB                                                                                     | 0,00707478  | 0,038610021 | 0,225 | 0,07  | 1         | 1,027123757   | 0,973592513     | 3,214285714     |
| ZNF350                                                                                   | 0,044583831 | 0,038607542 | 0,088 | 0,02  | 1         | 1,027121992   | 0,973594186     | 4,4             |
| SPESP1                                                                                   | 0,114652585 | 0,038597718 | 0,025 | 0     | 1         | 1,027114998   | 0,973600816     | #DIV/0!         |
| TOM1L1                                                                                   | 0,005575985 | 0,03858427  | 0,15  | 0,03  | 1         | 1,027105424   | 0,973609891     | 5               |
| ING5                                                                                     | 0,014626144 | 0,038501828 | 0,225 | 0,08  | 1         | 1,027046732   | 0,973665529     | 2,8125          |

Supplementary Table 4

| Differentially expressed genes_keloid-CCD_ comparing SC-Keloid vs. (SC-Myel, SC-Nonmyel) |             |             |       |       |           |               |                 |                 |
|------------------------------------------------------------------------------------------|-------------|-------------|-------|-------|-----------|---------------|-----------------|-----------------|
| gene                                                                                     | p_val       | avg_log2FC  | pct.1 | pct.2 | p_val_adj | Foldchange_UP | Foldchange_DOWN | Ratio_pct1_pct2 |
| FAM110D                                                                                  | 0,219108376 | 0,038498453 | 0,038 | 0,01  | 1         | 1,027044329   | 0,973667807     | 3,8             |
| IAH1                                                                                     | 0,016438588 | 0,038468237 | 0,875 | 0,45  | 1         | 1,027022819   | 0,9736882       | 1,944444444     |
| TMEM169                                                                                  | 0,10676172  | 0,038406024 | 0,05  | 0,01  | 1         | 1,026978532   | 0,973730189     | 5               |
| NEURL1                                                                                   | 0,055334082 | 0,038396641 | 0,062 | 0,01  | 1         | 1,026971853   | 0,973736521     | 6,2             |
| GLMP                                                                                     | 3,29356E-05 | 0,038370066 | 0,338 | 0,07  | 0,694975  | 1,026952935   | 0,973754459     | 4,828571429     |
| COPS8                                                                                    | 0,000580258 | 0,038322025 | 0,65  | 0,27  | 1         | 1,026918739   | 0,973786885     | 2,407407407     |
| DPY19L4                                                                                  | 0,000939907 | 0,038277342 | 0,25  | 0,06  | 1         | 1,026886934   | 0,973817045     | 4,166666667     |
| BNIP1                                                                                    | 0,018762896 | 0,03825213  | 0,162 | 0,05  | 1         | 1,026868989   | 0,973834063     | 3,24            |
| LINC00847                                                                                | 0,114652585 | 0,03825188  | 0,025 | 0     | 1         | 1,026868811   | 0,973834232     | #DIV/0!         |
| BCL2L2                                                                                   | 0,005373635 | 0,03824524  | 0,15  | 0,03  | 1         | 1,026864085   | 0,973838714     | 5               |
| APOL6                                                                                    | 0,001735571 | 0,038197776 | 0,212 | 0,05  | 1         | 1,026830302   | 0,973870754     | 4,24            |
| ACADM                                                                                    | 0,001304174 | 0,038196023 | 0,425 | 0,15  | 1         | 1,026829054   | 0,973871937     | 2,833333333     |
| MSH3                                                                                     | 0,020805297 | 0,038178116 | 0,162 | 0,05  | 1         | 1,026816309   | 0,973884025     | 3,24            |
| PABIR3                                                                                   | 0,114652585 | 0,038174208 | 0,025 | 0     | 1         | 1,026813528   | 0,973886663     | #DIV/0!         |
| MCF2L2                                                                                   | 0,052279021 | 0,038171935 | 0,038 | 0     | 1         | 1,02681191    | 0,973888197     | #DIV/0!         |
| ZC3H12D                                                                                  | 0,052279021 | 0,038120431 | 0,038 | 0     | 1         | 1,026775253   | 0,973922966     | #DIV/0!         |
| IFI30                                                                                    | 0,114652585 | 0,038113343 | 0,025 | 0     | 1         | 1,026770209   | 0,973927751     | #DIV/0!         |
| IMMT                                                                                     | 0,000662027 | 0,038069292 | 0,5   | 0,18  | 1         | 1,026738859   | 0,973957488     | 2,777777778     |
| POLL                                                                                     | 0,018723361 | 0,03805063  | 0,125 | 0,03  | 1         | 1,026725577   | 0,973970087     | 4,166666667     |
| MBNL3                                                                                    | 0,260694249 | 0,038026939 | 0,05  | 0,02  | 1         | 1,026708717   | 0,973986081     | 2,5             |
| TMEM143                                                                                  | 0,114652585 | 0,038013507 | 0,025 | 0     | 1         | 1,026699158   | 0,97399515      | #DIV/0!         |
| C1orf54                                                                                  | 0,024497883 | 0,037997111 | 0,05  | 0     | 1         | 1,02668749    | 0,974006219     | #DIV/0!         |
| BTBD19                                                                                   | 0,083746858 | 0,037990385 | 0,075 | 0,02  | 1         | 1,026682703   | 0,97401076      | 3,75            |
| PTPN23                                                                                   | 0,06355593  | 0,037984577 | 0,15  | 0,06  | 1         | 1,02667857    | 0,974014681     | 2,5             |
| GYPC                                                                                     | 0,024497883 | 0,037960738 | 0,05  | 0     | 1         | 1,026661605   | 0,974030776     | #DIV/0!         |
| BICD1                                                                                    | 0,002551635 | 0,037952876 | 0,637 | 0,29  | 1         | 1,026656011   | 0,974036083     | 2,196551724     |
| TOLLIP-DT                                                                                | 0,01362345  | 0,037939143 | 0,088 | 0,01  | 1         | 1,026646238   | 0,974045356     | 8,8             |
| MYO1D                                                                                    | 0,055334082 | 0,037877502 | 0,062 | 0,01  | 1         | 1,026602374   | 0,974086974     | 6,2             |
| INCENP                                                                                   | 0,024497883 | 0,03785732  | 0,05  | 0     | 1         | 1,026588013   | 0,974100601     | #DIV/0!         |
| ARIH2OS                                                                                  | 0,033686337 | 0,0378304   | 0,112 | 0,03  | 1         | 1,026568858   | 0,974118777     | 3,733333333     |

Supplementary Table 4

| Differentially expressed genes_keloid-CCD_ comparing SC-Keloid vs. (SC-Myel, SC-Nonmyel) |             |             |       |       |           |               |                 |                 |
|------------------------------------------------------------------------------------------|-------------|-------------|-------|-------|-----------|---------------|-----------------|-----------------|
| gene                                                                                     | p_val       | avg_log2FC  | pct.1 | pct.2 | p_val_adj | Foldchange_UP | Foldchange_DOWN | Ratio_pct1_pct2 |
| PIFO                                                                                     | 0,114652585 | 0,037775467 | 0,025 | 0     | 1         | 1,02652977    | 0,974155869     | #DIV/0!         |
| CTBP1                                                                                    | 0,000978591 | 0,037757188 | 0,475 | 0,18  | 1         | 1,026516764   | 0,974168212     | 2,638888889     |
| GPR82                                                                                    | 0,114652585 | 0,03775057  | 0,025 | 0     | 1         | 1,026512055   | 0,97417268      | #DIV/0!         |
| RIC1                                                                                     | 0,039465782 | 0,037692501 | 0,162 | 0,06  | 1         | 1,026470738   | 0,974211892     | 2,7             |
| MIGA2                                                                                    | 0,042990209 | 0,037582972 | 0,088 | 0,02  | 1         | 1,026392812   | 0,974285857     | 4,4             |
| TMEM184B                                                                                 | 0,000348442 | 0,037568135 | 0,375 | 0,11  | 1         | 1,026382257   | 0,974295876     | 3,409090909     |
| RAD54L                                                                                   | 0,011634754 | 0,037466739 | 0,062 | 0     | 1         | 1,026310122   | 0,974364355     | #DIV/0!         |
| LRRC8E                                                                                   | 0,052279021 | 0,037458287 | 0,038 | 0     | 1         | 1,02630411    | 0,974370063     | #DIV/0!         |
| SMARCAL1                                                                                 | 0,035392992 | 0,037410708 | 0,112 | 0,03  | 1         | 1,026270264   | 0,974402197     | 3,733333333     |
| SEMA3E                                                                                   | 0,10741396  | 0,037397134 | 0,088 | 0,03  | 1         | 1,026260608   | 0,974411365     | 2,933333333     |
| AP001437.1                                                                               | 0,268357209 | 0,03727331  | 0,013 | 0     | 1         | 1,026172529   | 0,974495001     | #DIV/0!         |
| FSCN2                                                                                    | 0,268357209 | 0,03727331  | 0,013 | 0     | 1         | 1,026172529   | 0,974495001     | #DIV/0!         |
| LDHD                                                                                     | 0,268357209 | 0,03727331  | 0,013 | 0     | 1         | 1,026172529   | 0,974495001     | #DIV/0!         |
| PCDHA3                                                                                   | 0,268357209 | 0,03727331  | 0,013 | 0     | 1         | 1,026172529   | 0,974495001     | #DIV/0!         |
| TTLL9                                                                                    | 0,268357209 | 0,03727331  | 0,013 | 0     | 1         | 1,026172529   | 0,974495001     | #DIV/0!         |
| POLDIP3                                                                                  | 0,000635922 | 0,03719312  | 0,412 | 0,14  | 1         | 1,026115493   | 0,974549168     | 2,942857143     |
| TIMM23                                                                                   | 0,004439263 | 0,037181906 | 0,175 | 0,04  | 1         | 1,026107516   | 0,974556744     | 4,375           |
| MRPS17                                                                                   | 0,005977851 | 0,037174455 | 0,188 | 0,05  | 1         | 1,026102217   | 0,974561777     | 3,76            |
| TMEM185A                                                                                 | 0,004422837 | 0,037159516 | 0,212 | 0,06  | 1         | 1,026091592   | 0,974571869     | 3,533333333     |
| KLHDC9                                                                                   | 0,114652585 | 0,037110264 | 0,025 | 0     | 1         | 1,026056563   | 0,97460514      | #DIV/0!         |
| DUS4L                                                                                    | 0,061661173 | 0,037096797 | 0,1   | 0,03  | 1         | 1,026046985   | 0,974614237     | 3,333333333     |
| CAPN5                                                                                    | 0,001891091 | 0,037035773 | 0,275 | 0,08  | 1         | 1,026003586   | 0,974655463     | 3,4375          |
| L3MBTL3                                                                                  | 0,219108376 | 0,0370329   | 0,038 | 0,01  | 1         | 1,026001543   | 0,974657404     | 3,8             |
| SF3A1                                                                                    | 0,001055422 | 0,03697321  | 0,288 | 0,08  | 1         | 1,025959094   | 0,97469773      | 3,6             |
| DIPK2B                                                                                   | 0,432207887 | 0,036972797 | 0,025 | 0,01  | 1         | 1,0259588     | 0,974698009     | 2,5             |
| PPM1A                                                                                    | 0,000608997 | 0,036961832 | 0,438 | 0,15  | 1         | 1,025951002   | 0,974705418     | 2,92            |
| MCM10                                                                                    | 0,024497883 | 0,036907029 | 0,05  | 0     | 1         | 1,025912031   | 0,974742444     | #DIV/0!         |
| PEBP4                                                                                    | 0,223365318 | 0,036906977 | 0,038 | 0,01  | 1         | 1,025911994   | 0,974742479     | 3,8             |
| POLR2H                                                                                   | 0,006212225 | 0,036887971 | 0,637 | 0,28  | 1         | 1,025898479   | 0,97475532      | 2,275           |
| APEX2                                                                                    | 0,005575985 | 0,036842812 | 0,15  | 0,03  | 1         | 1,025866367   | 0,974785832     | 5               |

Supplementary Table 4

| Differentially expressed genes_keloid-CCD_ comparing SC-Keloid vs. (SC-Myel, SC-Nonmyel) |             |             |       |       |           |               |                 |                 |
|------------------------------------------------------------------------------------------|-------------|-------------|-------|-------|-----------|---------------|-----------------|-----------------|
| gene                                                                                     | p_val       | avg_log2FC  | pct.1 | pct.2 | p_val_adj | Foldchange_UP | Foldchange_DOWN | Ratio_pct1_pct2 |
| AC023590.1                                                                               | 0,268357209 | 0,036831752 | 0,013 | 0     | 1         | 1,025858502   | 0,974793305     | #DIV/0!         |
| MALRD1                                                                                   | 0,268357209 | 0,036831752 | 0,013 | 0     | 1         | 1,025858502   | 0,974793305     | #DIV/0!         |
| PIPOX                                                                                    | 0,268357209 | 0,036831752 | 0,013 | 0     | 1         | 1,025858502   | 0,974793305     | #DIV/0!         |
| H2AC17                                                                                   | 0,114652585 | 0,036823439 | 0,025 | 0     | 1         | 1,025852591   | 0,974798922     | #DIV/0!         |
| ERCC2                                                                                    | 0,027487357 | 0,036821748 | 0,075 | 0,01  | 1         | 1,025851388   | 0,974800065     | 7,5             |
| SPATA5                                                                                   | 0,02527322  | 0,03680652  | 0,138 | 0,04  | 1         | 1,025840561   | 0,974810354     | 3,45            |
| STC1                                                                                     | 0,439855668 | 0,036800386 | 0,025 | 0,01  | 1         | 1,025836199   | 0,974814499     | 2,5             |
| H2AC14                                                                                   | 0,052279021 | 0,036797981 | 0,038 | 0     | 1         | 1,025834489   | 0,974816124     | #DIV/0!         |
| AAR2                                                                                     | 0,023437611 | 0,03678568  | 0,1   | 0,02  | 1         | 1,025825742   | 0,974824436     | 5               |
| KRT6B                                                                                    | 0,268357209 | 0,036735461 | 0,013 | 0     | 1         | 1,025790035   | 0,974858369     | #DIV/0!         |
| TENM2                                                                                    | 0,268357209 | 0,036735461 | 0,013 | 0     | 1         | 1,025790035   | 0,974858369     | #DIV/0!         |
| LIMK2                                                                                    | 0,006404327 | 0,036729763 | 0,125 | 0,02  | 1         | 1,025785983   | 0,974862219     | 6,25            |
| LRRC73                                                                                   | 0,052279021 | 0,03666807  | 0,038 | 0     | 1         | 1,025742119   | 0,974903907     | #DIV/0!         |
| SLC2A13                                                                                  | 0,000863896 | 0,036603327 | 0,25  | 0,06  | 1         | 1,025696088   | 0,974947659     | 4,166666667     |
| ZNF480                                                                                   | 0,034816087 | 0,036588178 | 0,112 | 0,03  | 1         | 1,025685319   | 0,974957896     | 3,733333333     |
| AKR1C3                                                                                   | 0,052279021 | 0,036506502 | 0,038 | 0     | 1         | 1,025627252   | 0,975013093     | #DIV/0!         |
| RBSN                                                                                     | 0,001500621 | 0,036486846 | 0,175 | 0,03  | 1         | 1,025613279   | 0,975026378     | 5,833333333     |
| RGMA                                                                                     | 0,114652585 | 0,036437994 | 0,025 | 0     | 1         | 1,02557855    | 0,975059394     | #DIV/0!         |
| ESPL1                                                                                    | 0,052279021 | 0,036414733 | 0,038 | 0     | 1         | 1,025562015   | 0,975075115     | #DIV/0!         |
| APOC1                                                                                    | 0,114652585 | 0,036411485 | 0,025 | 0     | 1         | 1,025559706   | 0,975077311     | #DIV/0!         |
| CFAP46                                                                                   | 0,052279021 | 0,036377542 | 0,038 | 0     | 1         | 1,025535578   | 0,975100252     | #DIV/0!         |
| ZNF134                                                                                   | 0,055334082 | 0,036372467 | 0,062 | 0,01  | 1         | 1,02553197    | 0,975103682     | 6,2             |
| SNRPA1                                                                                   | 0,000139541 | 0,036336268 | 0,512 | 0,17  | 1         | 1,025506239   | 0,975128149     | 3,011764706     |
| GPS2                                                                                     | 0,001368256 | 0,036309246 | 0,375 | 0,13  | 1         | 1,025487031   | 0,975146413     | 2,884615385     |
| AARSD1                                                                                   | 0,003313746 | 0,036284067 | 0,112 | 0,01  | 1         | 1,025469133   | 0,975163433     | 11,2            |
| CPT1C                                                                                    | 0,114652585 | 0,036282967 | 0,025 | 0     | 1         | 1,025468351   | 0,975164176     | #DIV/0!         |
| NBPF10                                                                                   | 0,052279021 | 0,036274501 | 0,038 | 0     | 1         | 1,025462334   | 0,975169898     | #DIV/0!         |
| RNF123                                                                                   | 0,023885059 | 0,036272265 | 0,1   | 0,02  | 1         | 1,025460744   | 0,97517141      | 5               |
| SPICE1                                                                                   | 0,019378739 | 0,03625235  | 0,125 | 0,03  | 1         | 1,025446589   | 0,975184872     | 4,166666667     |
| EDC4                                                                                     | 0,052279021 | 0,036231983 | 0,038 | 0     | 1         | 1,025432113   | 0,975198638     | #DIV/0!         |



Supplementary Table 4

| Differentially expressed genes_keloid-CCD_ comparing SC-Keloid vs. (SC-Myel, SC-Nonmyel) |             |             |       |       |           |               |                 |                 |
|------------------------------------------------------------------------------------------|-------------|-------------|-------|-------|-----------|---------------|-----------------|-----------------|
| gene                                                                                     | p_val       | avg_log2FC  | pct.1 | pct.2 | p_val_adj | Foldchange_UP | Foldchange_DOWN | Ratio_pct1_pct2 |
| CBX2                                                                                     | 0,10741396  | 0,036203325 | 0,088 | 0,03  | 1         | 1,025411744   | 0,97521801      | 2,933333333     |
| ZNF674-AS1                                                                               | 0,114652585 | 0,03616815  | 0,025 | 0     | 1         | 1,025386742   | 0,975241788     | #DIV/0!         |
| RECK                                                                                     | 0,010276447 | 0,036161524 | 0,138 | 0,03  | 1         | 1,025382033   | 0,975246267     | 4,6             |
| PHKG1                                                                                    | 0,101645395 | 0,036143687 | 0,138 | 0,06  | 1         | 1,025369356   | 0,975258325     | 2,3             |
| PGA5                                                                                     | 0,052279021 | 0,036117208 | 0,038 | 0     | 1         | 1,025350537   | 0,975276224     | #DIV/0!         |
| NKRF                                                                                     | 0,019378739 | 0,036115259 | 0,125 | 0,03  | 1         | 1,025349151   | 0,975277542     | 4,166666667     |
| HOMEZ                                                                                    | 0,114652585 | 0,036058656 | 0,025 | 0     | 1         | 1,025308923   | 0,975315807     | #DIV/0!         |
| AURKC                                                                                    | 0,052279021 | 0,036045363 | 0,038 | 0     | 1         | 1,025299476   | 0,975324794     | #DIV/0!         |
| DAPP1                                                                                    | 0,268357209 | 0,036026739 | 0,013 | 0     | 1         | 1,02528624    | 0,975337385     | #DIV/0!         |
| LAMP3                                                                                    | 0,268357209 | 0,036026739 | 0,013 | 0     | 1         | 1,02528624    | 0,975337385     | #DIV/0!         |
| TCTN2                                                                                    | 0,027487357 | 0,036018795 | 0,075 | 0,01  | 1         | 1,025280595   | 0,975342755     | 7,5             |
| RPP30                                                                                    | 0,000498534 | 0,035980965 | 0,325 | 0,09  | 1         | 1,025253711   | 0,97536833      | 3,611111111     |
| UTS2                                                                                     | 0,114652585 | 0,035966427 | 0,025 | 0     | 1         | 1,025243379   | 0,975378159     | #DIV/0!         |
| VASH2                                                                                    | 0,108976957 | 0,035953716 | 0,05  | 0,01  | 1         | 1,025234346   | 0,975386753     | 5               |
| ADGRB2                                                                                   | 0,055334082 | 0,035915634 | 0,062 | 0,01  | 1         | 1,025207284   | 0,9754125       | 6,2             |
| MAN2C1                                                                                   | 0,038142655 | 0,035914427 | 0,2   | 0,08  | 1         | 1,025206426   | 0,975413316     | 2,5             |
| SERTAD4                                                                                  | 0,268357209 | 0,035900505 | 0,013 | 0     | 1         | 1,025196533   | 0,975422729     | #DIV/0!         |
| MGLL                                                                                     | 0,013300727 | 0,035898698 | 0,15  | 0,04  | 1         | 1,025195249   | 0,975423951     | 3,75            |
| PDZRN4                                                                                   | 0,874019543 | 0,035788354 | 0,013 | 0,01  | 1         | 1,02511684    | 0,975498558     | 1,3             |
| SDK1                                                                                     | 0,055334082 | 0,035778245 | 0,062 | 0,01  | 1         | 1,025109658   | 0,975505394     | 6,2             |
| CCDC191                                                                                  | 0,146900788 | 0,035758927 | 0,112 | 0,05  | 1         | 1,025095931   | 0,975518456     | 2,24            |
| TNKS2                                                                                    | 0,002460136 | 0,035722903 | 0,4   | 0,15  | 1         | 1,025070334   | 0,975542815     | 2,666666667     |
| RFLNB                                                                                    | 0,000623441 | 0,0356255   | 0,212 | 0,04  | 1         | 1,02500113    | 0,975608681     | 5,3             |
| TRIM21                                                                                   | 0,108976957 | 0,035614865 | 0,05  | 0,01  | 1         | 1,024993574   | 0,975615873     | 5               |
| RPL34                                                                                    | 0,587372622 | 0,035601339 | 1     | 0,99  | 1         | 1,024983964   | 0,975625019     | 1,01010101      |
| C9orf72                                                                                  | 0,027487357 | 0,035587671 | 0,075 | 0,01  | 1         | 1,024974253   | 0,975634263     | 7,5             |
| MTA2                                                                                     | 0,002937191 | 0,035561394 | 0,162 | 0,03  | 1         | 1,024955585   | 0,975652033     | 5,4             |
| WDR4                                                                                     | 0,055334082 | 0,035526684 | 0,062 | 0,01  | 1         | 1,024930926   | 0,975675506     | 6,2             |
| ARHGEF39                                                                                 | 0,024497883 | 0,035510002 | 0,05  | 0     | 1         | 1,024919074   | 0,975686788     | #DIV/0!         |
| ENOX2                                                                                    | 0,011634754 | 0,035468626 | 0,062 | 0     | 1         | 1,024889681   | 0,975714771     | #DIV/0!         |

Supplementary Table 4

| Differentially expressed genes_keloid-CCD_ comparing SC-Keloid vs. (SC-Myel, SC-Nonmyel) |             |             |       |       |           |               |                 |                 |
|------------------------------------------------------------------------------------------|-------------|-------------|-------|-------|-----------|---------------|-----------------|-----------------|
| gene                                                                                     | p_val       | avg_log2FC  | pct.1 | pct.2 | p_val_adj | Foldchange_UP | Foldchange_DOWN | Ratio_pct1_pct2 |
| GCNT1                                                                                    | 0,006404327 | 0,035457876 | 0,125 | 0,02  | 1         | 1,024882044   | 0,975722041     | 6,25            |
| TMEM254                                                                                  | 0,01362345  | 0,035421793 | 0,088 | 0,01  | 1         | 1,024856411   | 0,975746446     | 8,8             |
| ALKAL2                                                                                   | 0,114652585 | 0,035419629 | 0,025 | 0     | 1         | 1,024854874   | 0,975747909     | #DIV/0!         |
| ZNF239                                                                                   | 0,11122839  | 0,035393411 | 0,05  | 0,01  | 1         | 1,024836249   | 0,975765642     | 5               |
| EOLA1                                                                                    | 0,044583831 | 0,035340293 | 0,088 | 0,02  | 1         | 1,024798517   | 0,975801569     | 4,4             |
| POMK                                                                                     | 0,024497883 | 0,035319931 | 0,05  | 0     | 1         | 1,024784053   | 0,975815341     | #DIV/0!         |
| MED24                                                                                    | 0,006580985 | 0,035267607 | 0,188 | 0,05  | 1         | 1,024746887   | 0,975850732     | 3,76            |
| ZNF155                                                                                   | 0,223365318 | 0,035254616 | 0,038 | 0,01  | 1         | 1,024737659   | 0,97585952      | 3,8             |
| ZNF577                                                                                   | 0,035392992 | 0,035251423 | 0,112 | 0,03  | 1         | 1,024735391   | 0,97586168      | 3,733333333     |
| PTCD1                                                                                    | 0,082314814 | 0,035251285 | 0,075 | 0,02  | 1         | 1,024735293   | 0,975861773     | 3,75            |
| TMEM97                                                                                   | 0,000788927 | 0,035246399 | 0,188 | 0,03  | 1         | 1,024731823   | 0,975865078     | 6,266666667     |
| OGN                                                                                      | 0,268357209 | 0,035228958 | 0,013 | 0     | 1         | 1,024719434   | 0,975876876     | #DIV/0!         |
| CSTF2T                                                                                   | 0,027487357 | 0,035165393 | 0,075 | 0,01  | 1         | 1,024674287   | 0,975919873     | 7,5             |
| OTOGL                                                                                    | 0,114652585 | 0,035154621 | 0,025 | 0     | 1         | 1,024666636   | 0,97592716      | #DIV/0!         |
| TMEM14A                                                                                  | 0,000792745 | 0,035131879 | 0,575 | 0,22  | 1         | 1,024650483   | 0,975942545     | 2,613636364     |
| ZNF721                                                                                   | 0,009096611 | 0,035120509 | 0,2   | 0,06  | 1         | 1,024642408   | 0,975950236     | 3,333333333     |
| LDAH                                                                                     | 0,010461593 | 0,035118654 | 0,138 | 0,03  | 1         | 1,024641091   | 0,975951491     | 4,6             |
| SFXN4                                                                                    | 0,012429073 | 0,035041477 | 0,112 | 0,02  | 1         | 1,024586279   | 0,976003701     | 5,6             |
| CDK8                                                                                     | 0,044922833 | 0,035039021 | 0,125 | 0,04  | 1         | 1,024584535   | 0,976005362     | 3,125           |
| CACNA1B                                                                                  | 0,268357209 | 0,034988014 | 0,013 | 0     | 1         | 1,024548311   | 0,97603987      | #DIV/0!         |
| CYP3A5                                                                                   | 0,268357209 | 0,034988014 | 0,013 | 0     | 1         | 1,024548311   | 0,97603987      | #DIV/0!         |
| MST1R                                                                                    | 0,268357209 | 0,034988014 | 0,013 | 0     | 1         | 1,024548311   | 0,97603987      | #DIV/0!         |
| MTRNR2L8                                                                                 | 0,268357209 | 0,034988014 | 0,013 | 0     | 1         | 1,024548311   | 0,97603987      | #DIV/0!         |
| SLC2A1-AS1                                                                               | 0,268357209 | 0,034988014 | 0,013 | 0     | 1         | 1,024548311   | 0,97603987      | #DIV/0!         |
| UBE2D4                                                                                   | 0,002884543 | 0,034953481 | 0,262 | 0,08  | 1         | 1,024523787   | 0,976063233     | 3,275           |
| DCAF15                                                                                   | 0,001442989 | 0,034939549 | 0,175 | 0,03  | 1         | 1,024513893   | 0,976072659     | 5,833333333     |
| GIMAP7                                                                                   | 0,874019543 | 0,034933717 | 0,013 | 0,01  | 1         | 1,024509752   | 0,976076604     | 1,3             |
| TRIM69                                                                                   | 0,003103537 | 0,034920942 | 0,262 | 0,08  | 1         | 1,02450068    | 0,976085247     | 3,275           |
| CCNB1IP1                                                                                 | 0,006224095 | 0,034909919 | 0,425 | 0,18  | 1         | 1,024492852   | 0,976092706     | 2,361111111     |
| MAPK12                                                                                   | 0,024497883 | 0,034859973 | 0,05  | 0     | 1         | 1,024457385   | 0,976126498     | #DIV/0!         |

Supplementary Table 4

| Differentially expressed genes_keloid-CCD_ comparing SC-Keloid vs. (SC-Myel, SC-Nonmyel) |             |             |       |       |           |               |                 |                 |
|------------------------------------------------------------------------------------------|-------------|-------------|-------|-------|-----------|---------------|-----------------|-----------------|
| gene                                                                                     | p_val       | avg_log2FC  | pct.1 | pct.2 | p_val_adj | Foldchange_UP | Foldchange_DOWN | Ratio_pct1_pct2 |
| FAM98B                                                                                   | 0,023117849 | 0,034857304 | 0,175 | 0,06  | 1         | 1,02445549    | 0,976128304     | 2,916666667     |
| TLE5                                                                                     | 0,159144059 | 0,034851312 | 0,925 | 0,62  | 1         | 1,024451235   | 0,976132359     | 1,491935484     |
| ITGA11                                                                                   | 0,475894584 | 0,034825277 | 0,038 | 0,02  | 1         | 1,024432747   | 0,976149974     | 1,9             |
| PATJ                                                                                     | 0,21076993  | 0,034784504 | 0,038 | 0,01  | 1         | 1,024403796   | 0,976177562     | 3,8             |
| C1orf109                                                                                 | 0,011601478 | 0,034745225 | 0,212 | 0,07  | 1         | 1,024375906   | 0,97620414      | 3,028571429     |
| IL17RD                                                                                   | 0,114652585 | 0,034713835 | 0,025 | 0     | 1         | 1,024353618   | 0,97622538      | #DIV/0!         |
| H3C2                                                                                     | 0,052279021 | 0,034701987 | 0,038 | 0     | 1         | 1,024345205   | 0,976233398     | #DIV/0!         |
| CMTM8                                                                                    | 0,024497883 | 0,034699317 | 0,05  | 0     | 1         | 1,024343309   | 0,976235204     | #DIV/0!         |
| TMED1                                                                                    | 0,001002904 | 0,034686545 | 0,525 | 0,2   | 1         | 1,024334241   | 0,976243847     | 2,625           |
| HIC1                                                                                     | 0,214910006 | 0,034608814 | 0,038 | 0,01  | 1         | 1,024279053   | 0,976296447     | 3,8             |
| RAPGEFL1                                                                                 | 0,024497883 | 0,034540444 | 0,05  | 0     | 1         | 1,024230513   | 0,976342716     | #DIV/0!         |
| POLR2C                                                                                   | 0,001086563 | 0,034512664 | 0,488 | 0,18  | 1         | 1,024210791   | 0,976361516     | 2,711111111     |
| EXOC3L4                                                                                  | 0,432207887 | 0,034486207 | 0,025 | 0,01  | 1         | 1,024192009   | 0,976379421     | 2,5             |
| CCT3                                                                                     | 0,001935915 | 0,034445576 | 0,825 | 0,38  | 1         | 1,024163164   | 0,976406919     | 2,171052632     |
| TMEM131L                                                                                 | 0,024497883 | 0,03443247  | 0,05  | 0     | 1         | 1,024153861   | 0,976415789     | #DIV/0!         |
| CALHM2                                                                                   | 0,003797999 | 0,034413385 | 0,2   | 0,05  | 1         | 1,024140312   | 0,976428707     | 4               |
| ASNSD1                                                                                   | 0,005652438 | 0,034297384 | 0,35  | 0,14  | 1         | 1,024057969   | 0,97650722      | 2,5             |
| AP4B1                                                                                    | 0,01362345  | 0,034259526 | 0,088 | 0,01  | 1         | 1,024031097   | 0,976532845     | 8,8             |
| TRPC1                                                                                    | 0,154906213 | 0,034224429 | 0,062 | 0,02  | 1         | 1,024006185   | 0,976556602     | 3,1             |
| CTPS2                                                                                    | 0,108976957 | 0,034101586 | 0,05  | 0,01  | 1         | 1,023918996   | 0,976639757     | 5               |
| MTDH                                                                                     | 0,354884857 | 0,03409401  | 0,887 | 0,62  | 1         | 1,023913619   | 0,976644886     | 1,430645161     |
| HOXB3                                                                                    | 0,010276447 | 0,034087638 | 0,138 | 0,03  | 1         | 1,023909097   | 0,9766492       | 4,6             |
| BRF1                                                                                     | 0,014426885 | 0,034087171 | 0,15  | 0,04  | 1         | 1,023908765   | 0,976649516     | 3,75            |
| CLPX                                                                                     | 0,001279733 | 0,034074321 | 0,325 | 0,1   | 1         | 1,023899645   | 0,976658215     | 3,25            |
| FANCB                                                                                    | 0,000830908 | 0,034052652 | 0,162 | 0,02  | 1         | 1,023884267   | 0,976672884     | 8,1             |
| PC                                                                                       | 0,024497883 | 0,034036845 | 0,05  | 0     | 1         | 1,023873048   | 0,976683585     | #DIV/0!         |
| PMS2                                                                                     | 0,018403004 | 0,034028692 | 0,125 | 0,03  | 1         | 1,023867263   | 0,976689104     | 4,166666667     |
| TAS2R14                                                                                  | 0,024497883 | 0,034010662 | 0,05  | 0     | 1         | 1,023854467   | 0,976701311     | #DIV/0!         |
| KANSL1-AS1                                                                               | 0,085199008 | 0,034008948 | 0,075 | 0,02  | 1         | 1,023853251   | 0,976702471     | 3,75            |
| PJKK                                                                                     | 0,114652585 | 0,033987025 | 0,025 | 0     | 1         | 1,023837693   | 0,976717313     | #DIV/0!         |

Supplementary Table 4

| Differentially expressed genes_keloid-CCD_comparing SC-Keloid vs. (SC-Myel, SC-Nonmyel) |             |             |       |       |           |               |                 |                 |
|-----------------------------------------------------------------------------------------|-------------|-------------|-------|-------|-----------|---------------|-----------------|-----------------|
| gene                                                                                    | p_val       | avg_log2FC  | pct.1 | pct.2 | p_val_adj | Foldchange_UP | Foldchange_DOWN | Ratio_pct1_pct2 |
| GGT1                                                                                    | 0,024497883 | 0,033956401 | 0,05  | 0     | 1         | 1,02381596    | 0,976738046     | #DIV/0!         |
| ATXN7L3                                                                                 | 0,00840035  | 0,033938298 | 0,162 | 0,04  | 1         | 1,023803113   | 0,976750303     | 4,05            |
| FAM200A                                                                                 | 0,01362345  | 0,033925664 | 0,088 | 0,01  | 1         | 1,023794148   | 0,976758856     | 8,8             |
| DPT                                                                                     | 0,027487357 | 0,033920706 | 0,075 | 0,01  | 1         | 1,023790629   | 0,976762213     | 7,5             |
| ZNF595                                                                                  | 0,439855668 | 0,03391905  | 0,025 | 0,01  | 1         | 1,023789454   | 0,976763334     | 2,5             |
| ANKRD13C                                                                                | 0,002719325 | 0,033908498 | 0,288 | 0,09  | 1         | 1,023781965   | 0,976770478     | 3,2             |
| PHAX                                                                                    | 0,004268928 | 0,033894004 | 0,4   | 0,16  | 1         | 1,02377168    | 0,976780291     | 2,5             |
| ZNF300                                                                                  | 0,045399153 | 0,03385725  | 0,088 | 0,02  | 1         | 1,023745599   | 0,976805176     | 4,4             |
| H4C1                                                                                    | 0,052279021 | 0,033839931 | 0,038 | 0     | 1         | 1,02373331    | 0,976816902     | #DIV/0!         |
| N4BP1                                                                                   | 0,000810535 | 0,033835136 | 0,338 | 0,1   | 1         | 1,023729907   | 0,976820149     | 3,38            |
| SF3A2                                                                                   | 0,000119055 | 0,033764874 | 0,4   | 0,11  | 1         | 1,02368005    | 0,976867723     | 3,636363636     |
| CSMD2                                                                                   | 0,082314814 | 0,033697309 | 0,075 | 0,02  | 1         | 1,02363211    | 0,976913473     | 3,75            |
| MAGIX                                                                                   | 0,114652585 | 0,033681408 | 0,025 | 0     | 1         | 1,023620828   | 0,97692424      | #DIV/0!         |
| TIGD1                                                                                   | 0,024497883 | 0,033673993 | 0,05  | 0     | 1         | 1,023615567   | 0,976929262     | #DIV/0!         |
| LRCH2                                                                                   | 0,052279021 | 0,033656723 | 0,038 | 0     | 1         | 1,023603314   | 0,976940956     | #DIV/0!         |
| DNAJC16                                                                                 | 0,105839829 | 0,033650004 | 0,088 | 0,03  | 1         | 1,023598547   | 0,976945506     | 2,933333333     |
| DDX20                                                                                   | 0,020502146 | 0,033623649 | 0,162 | 0,05  | 1         | 1,023579848   | 0,976963353     | 3,24            |
| RECQL4                                                                                  | 0,011634754 | 0,033618909 | 0,062 | 0     | 1         | 1,023576485   | 0,976966563     | #DIV/0!         |
| NEK5                                                                                    | 0,11122839  | 0,033612786 | 0,05  | 0,01  | 1         | 1,023572141   | 0,976970709     | 5               |
| TRMO                                                                                    | 0,006686666 | 0,033595154 | 0,188 | 0,05  | 1         | 1,023559631   | 0,976982649     | 3,76            |
| RIOK2                                                                                   | 0,000208467 | 0,033594791 | 0,3   | 0,07  | 1         | 1,023559373   | 0,976982895     | 4,285714286     |
| SYT1                                                                                    | 0,052279021 | 0,033586162 | 0,038 | 0     | 1         | 1,023553251   | 0,976988739     | #DIV/0!         |
| MYOZ3                                                                                   | 0,052279021 | 0,033578432 | 0,038 | 0     | 1         | 1,023547767   | 0,976993973     | #DIV/0!         |
| ATP8B3                                                                                  | 0,052279021 | 0,033539436 | 0,038 | 0     | 1         | 1,023520101   | 0,977020382     | #DIV/0!         |
| MTCO2P12                                                                                | 0,975885982 | 0,033536788 | 1     | 0,99  | 1         | 1,023518223   | 0,977022175     | 1,01010101      |
| RGMB-AS1                                                                                | 0,024497883 | 0,033518048 | 0,05  | 0     | 1         | 1,023504927   | 0,977034867     | #DIV/0!         |
| BTN2A2                                                                                  | 0,01466195  | 0,033488696 | 0,15  | 0,04  | 1         | 1,023484104   | 0,977054745     | 3,75            |
| FBXW8                                                                                   | 0,055334082 | 0,033436944 | 0,062 | 0,01  | 1         | 1,023447391   | 0,977089794     | 6,2             |
| SH3D21                                                                                  | 0,114652585 | 0,033433604 | 0,025 | 0     | 1         | 1,023445021   | 0,977092056     | #DIV/0!         |
| TMEM200C                                                                                | 0,052279021 | 0,033426497 | 0,038 | 0     | 1         | 1,02343998    | 0,977096869     | #DIV/0!         |

Supplementary Table 4

| Differentially expressed genes_keloid-CCD_ comparing SC-Keloid vs. (SC-Myel, SC-Nonmyel) |             |             |       |       |           |               |                 |                 |
|------------------------------------------------------------------------------------------|-------------|-------------|-------|-------|-----------|---------------|-----------------|-----------------|
| gene                                                                                     | p_val       | avg_log2FC  | pct.1 | pct.2 | p_val_adj | Foldchange_UP | Foldchange_DOWN | Ratio_pct1_pct2 |
| ZNF713                                                                                   | 0,052279021 | 0,033425949 | 0,038 | 0     | 1         | 1,023439591   | 0,97709724      | #DIV/0!         |
| PGAP2                                                                                    | 0,026474273 | 0,033392073 | 0,138 | 0,04  | 1         | 1,023415559   | 0,977120184     | 3,45            |
| GZF1                                                                                     | 0,023885059 | 0,033369639 | 0,1   | 0,02  | 1         | 1,023399646   | 0,977135378     | 5               |
| TBC1D1                                                                                   | 0,024761742 | 0,033335204 | 0,175 | 0,06  | 1         | 1,023375219   | 0,977158701     | 2,916666667     |
| POLR1H                                                                                   | 8,90777E-05 | 0,033322257 | 0,375 | 0,1   | 1         | 1,023366035   | 0,977167471     | 3,75            |
| ESD                                                                                      | 0,001349116 | 0,033313911 | 0,775 | 0,37  | 1         | 1,023360115   | 0,977173123     | 2,094594595     |
| KRT8                                                                                     | 0,11122839  | 0,033297538 | 0,05  | 0,01  | 1         | 1,023348501   | 0,977184213     | 5               |
| FRMPD4                                                                                   | 0,052279021 | 0,03327806  | 0,038 | 0     | 1         | 1,023334685   | 0,977197407     | #DIV/0!         |
| TTF2                                                                                     | 0,005575985 | 0,033241452 | 0,15  | 0,03  | 1         | 1,023308718   | 0,977222203     | 5               |
| ZBTB7B                                                                                   | 0,002827454 | 0,033240192 | 0,162 | 0,03  | 1         | 1,023307825   | 0,977223056     | 5,4             |
| GREB1                                                                                    | 0,023885059 | 0,033238078 | 0,1   | 0,02  | 1         | 1,023306325   | 0,977224488     | 5               |
| PPOX                                                                                     | 0,014068004 | 0,033203442 | 0,188 | 0,06  | 1         | 1,023281758   | 0,97724795      | 3,133333333     |
| ACIN1                                                                                    | 0,00674799  | 0,033202378 | 0,35  | 0,14  | 1         | 1,023281003   | 0,977248671     | 2,5             |
| DMXL1                                                                                    | 0,003289532 | 0,033183423 | 0,262 | 0,08  | 1         | 1,023267559   | 0,97726151      | 3,275           |
| PDCD10                                                                                   | 0,001899298 | 0,033167593 | 0,588 | 0,24  | 1         | 1,023256331   | 0,977272233     | 2,45            |
| FGF9                                                                                     | 0,114652585 | 0,033114054 | 0,025 | 0     | 1         | 1,023218358   | 0,977308501     | #DIV/0!         |
| MYPOP                                                                                    | 0,11122839  | 0,033099365 | 0,05  | 0,01  | 1         | 1,02320794    | 0,977318452     | 5               |
| ZUP1                                                                                     | 0,010756678 | 0,033081688 | 0,175 | 0,05  | 1         | 1,023195403   | 0,977330426     | 3,5             |
| ZRANB3                                                                                   | 0,024497883 | 0,033073956 | 0,05  | 0     | 1         | 1,023189919   | 0,977335665     | #DIV/0!         |
| PRPF18                                                                                   | 0,00297039  | 0,033070064 | 0,262 | 0,08  | 1         | 1,023187159   | 0,977338301     | 3,275           |
| EPB41L4A                                                                                 | 0,116907177 | 0,033067795 | 0,1   | 0,04  | 1         | 1,02318555    | 0,977339839     | 2,5             |
| TASOR                                                                                    | 0,004936069 | 0,033043849 | 0,375 | 0,15  | 1         | 1,023168567   | 0,97735606      | 2,5             |
| CASP9                                                                                    | 0,027487357 | 0,033036695 | 0,075 | 0,01  | 1         | 1,023163494   | 0,977360907     | 7,5             |
| RMND5B                                                                                   | 0,002139249 | 0,033033391 | 0,25  | 0,07  | 1         | 1,023161151   | 0,977363145     | 3,571428571     |
| DMP1                                                                                     | 0,114652585 | 0,0329924   | 0,025 | 0     | 1         | 1,02313208    | 0,977390915     | #DIV/0!         |
| ZNF726                                                                                   | 0,024497883 | 0,032984038 | 0,05  | 0     | 1         | 1,02312615    | 0,97739658      | #DIV/0!         |
| KDM4C                                                                                    | 0,083746858 | 0,032959124 | 0,075 | 0,02  | 1         | 1,023108481   | 0,977413459     | 3,75            |
| SZT2                                                                                     | 0,268623818 | 0,032944678 | 0,05  | 0,02  | 1         | 1,023098237   | 0,977423246     | 2,5             |
| KLF12                                                                                    | 0,023885059 | 0,032930054 | 0,1   | 0,02  | 1         | 1,023087866   | 0,977433154     | 5               |
| AC112721.2                                                                               | 0,268357209 | 0,032906614 | 0,013 | 0     | 1         | 1,023071244   | 0,977449035     | #DIV/0!         |

Supplementary Table 4

| Differentially expressed genes_keloid-CCD_ comparing SC-Keloid vs. (SC-Myel, SC-Nonmyel) |             |             |       |       |           |               |                 |                 |
|------------------------------------------------------------------------------------------|-------------|-------------|-------|-------|-----------|---------------|-----------------|-----------------|
| gene                                                                                     | p_val       | avg_log2FC  | pct.1 | pct.2 | p_val_adj | Foldchange_UP | Foldchange_DOWN | Ratio_pct1_pct2 |
| ADRB2                                                                                    | 0,024497883 | 0,032871474 | 0,05  | 0     | 1         | 1,023046325   | 0,977472843     | #DIV/0!         |
| HOXC11                                                                                   | 0,114652585 | 0,032824915 | 0,025 | 0     | 1         | 1,02301331    | 0,977504389     | #DIV/0!         |
| ZNF789                                                                                   | 0,11122839  | 0,032671703 | 0,05  | 0,01  | 1         | 1,022904673   | 0,977608204     | 5               |
| BIRC6                                                                                    | 0,016239359 | 0,032662298 | 0,388 | 0,18  | 1         | 1,022898005   | 0,977614577     | 2,155555556     |
| ANKRD23                                                                                  | 0,114652585 | 0,032639116 | 0,025 | 0     | 1         | 1,022881568   | 0,977630286     | #DIV/0!         |
| SLC25A37                                                                                 | 0,001253437 | 0,032616232 | 0,475 | 0,18  | 1         | 1,022865343   | 0,977645793     | 2,638888889     |
| ZNF565                                                                                   | 0,284975754 | 0,032607588 | 0,05  | 0,02  | 1         | 1,022859215   | 0,977651651     | 2,5             |
| ACHE                                                                                     | 0,011634754 | 0,032605991 | 0,062 | 0     | 1         | 1,022858083   | 0,977652733     | #DIV/0!         |
| SLC45A3                                                                                  | 0,024497883 | 0,032593552 | 0,05  | 0     | 1         | 1,022849264   | 0,977661162     | #DIV/0!         |
| C19orf47                                                                                 | 0,024497883 | 0,032591303 | 0,05  | 0     | 1         | 1,022847669   | 0,977662687     | #DIV/0!         |
| CROT                                                                                     | 0,000602791 | 0,03255156  | 0,238 | 0,05  | 1         | 1,022819492   | 0,977689619     | 4,76            |
| LAPTM5                                                                                   | 0,052279021 | 0,032538631 | 0,038 | 0     | 1         | 1,022810326   | 0,977698381     | #DIV/0!         |
| MESD                                                                                     | 0,000109174 | 0,032522612 | 0,637 | 0,23  | 1         | 1,022798969   | 0,977709237     | 2,769565217     |
| ZFP37                                                                                    | 0,052279021 | 0,032477383 | 0,038 | 0     | 1         | 1,022766905   | 0,977739889     | #DIV/0!         |
| SBNO2                                                                                    | 0,023117849 | 0,032437473 | 0,175 | 0,06  | 1         | 1,022738612   | 0,977766937     | 2,916666667     |
| TRAPPC12                                                                                 | 0,006488182 | 0,032430836 | 0,225 | 0,07  | 1         | 1,022733907   | 0,977771435     | 3,214285714     |
| MFAP3                                                                                    | 0,11122839  | 0,032417451 | 0,05  | 0,01  | 1         | 1,022724418   | 0,977780507     | 5               |
| PLAG1                                                                                    | 0,052279021 | 0,032412255 | 0,038 | 0     | 1         | 1,022720735   | 0,977784029     | #DIV/0!         |
| LINC00663                                                                                | 0,219108376 | 0,032397229 | 0,038 | 0,01  | 1         | 1,022710083   | 0,977794213     | 3,8             |
| PAFAH2                                                                                   | 0,082314814 | 0,032384284 | 0,075 | 0,02  | 1         | 1,022700906   | 0,977802986     | 3,75            |
| SENP6                                                                                    | 0,000860503 | 0,032377539 | 0,588 | 0,23  | 1         | 1,022696125   | 0,977807557     | 2,556521739     |
| RNPS1                                                                                    | 0,011560443 | 0,032356211 | 0,713 | 0,37  | 1         | 1,022681006   | 0,977822013     | 1,927027027     |
| THAP9-AS1                                                                                | 0,004764565 | 0,03234743  | 0,375 | 0,15  | 1         | 1,022674782   | 0,977827964     | 2,5             |
| SLC49A3                                                                                  | 0,02527322  | 0,032307304 | 0,138 | 0,04  | 1         | 1,022646338   | 0,977855162     | 3,45            |
| TCEA2                                                                                    | 0,016689919 | 0,032290612 | 0,6   | 0,29  | 1         | 1,022634506   | 0,977866475     | 2,068965517     |
| SAMD9L                                                                                   | 0,059755621 | 0,032284379 | 0,1   | 0,03  | 1         | 1,022630088   | 0,9778707       | 3,333333333     |
| TMTC2                                                                                    | 0,014686042 | 0,032227349 | 0,188 | 0,06  | 1         | 1,022589664   | 0,977909356     | 3,133333333     |
| DIP2C-AS1                                                                                | 0,114652585 | 0,032185276 | 0,025 | 0     | 1         | 1,022559843   | 0,977937875     | #DIV/0!         |
| MC5R                                                                                     | 0,268357209 | 0,032149807 | 0,013 | 0     | 1         | 1,022534703   | 0,977961918     | #DIV/0!         |
| MYOM1                                                                                    | 0,268357209 | 0,032149807 | 0,013 | 0     | 1         | 1,022534703   | 0,977961918     | #DIV/0!         |

Supplementary Table 4

| Differentially expressed genes_keloid-CCD_ comparing SC-Keloid vs. (SC-Myel, SC-Nonmyel) |             |             |       |       |           |               |                 |                 |
|------------------------------------------------------------------------------------------|-------------|-------------|-------|-------|-----------|---------------|-----------------|-----------------|
| gene                                                                                     | p_val       | avg_log2FC  | pct.1 | pct.2 | p_val_adj | Foldchange_UP | Foldchange_DOWN | Ratio_pct1_pct2 |
| LY6G5C                                                                                   | 0,114652585 | 0,032148455 | 0,025 | 0     | 1         | 1,022533745   | 0,977962835     | #DIV/0!         |
| NHLRC2                                                                                   | 0,002580467 | 0,032124198 | 0,225 | 0,06  | 1         | 1,022516553   | 0,977979278     | 3,75            |
| TNXB                                                                                     | 0,052279021 | 0,032123255 | 0,038 | 0     | 1         | 1,022515884   | 0,977979917     | #DIV/0!         |
| TRIM45                                                                                   | 0,114652585 | 0,032092624 | 0,025 | 0     | 1         | 1,022494175   | 0,978000682     | #DIV/0!         |
| LINC02872                                                                                | 0,219108376 | 0,032072815 | 0,038 | 0,01  | 1         | 1,022480135   | 0,97801411      | 3,8             |
| WDR43                                                                                    | 0,000837543 | 0,032048464 | 0,45  | 0,16  | 1         | 1,022462878   | 0,978030618     | 2,8125          |
| BVES-AS1                                                                                 | 0,052279021 | 0,031954285 | 0,038 | 0     | 1         | 1,022396133   | 0,978094466     | #DIV/0!         |
| LAMC2                                                                                    | 0,114652585 | 0,031944249 | 0,025 | 0     | 1         | 1,022389021   | 0,97810127      | #DIV/0!         |
| MDP1                                                                                     | 0,024883489 | 0,031914635 | 0,138 | 0,04  | 1         | 1,022368035   | 0,978121347     | 3,45            |
| ANGEL1                                                                                   | 0,052279021 | 0,031912977 | 0,038 | 0     | 1         | 1,02236686    | 0,978122472     | #DIV/0!         |
| JAK2                                                                                     | 0,082314814 | 0,031903095 | 0,075 | 0,02  | 1         | 1,022359857   | 0,978129172     | 3,75            |
| PHYHIP                                                                                   | 0,052279021 | 0,03190165  | 0,038 | 0     | 1         | 1,022358833   | 0,978130152     | #DIV/0!         |
| ETFRF1                                                                                   | 0,000221025 | 0,031880822 | 0,688 | 0,26  | 1         | 1,022344073   | 0,978144273     | 2,646153846     |
| ROPN1B                                                                                   | 0,027487357 | 0,03186355  | 0,075 | 0,01  | 1         | 1,022331834   | 0,978155983     | 7,5             |
| NIPSNAP3B                                                                                | 0,268357209 | 0,031848866 | 0,013 | 0     | 1         | 1,022321429   | 0,978165939     | #DIV/0!         |
| SLC13A3                                                                                  | 0,268357209 | 0,031848866 | 0,013 | 0     | 1         | 1,022321429   | 0,978165939     | #DIV/0!         |
| NEIL3                                                                                    | 0,024497883 | 0,031831376 | 0,05  | 0     | 1         | 1,022309035   | 0,978177797     | #DIV/0!         |
| GUCY1B1                                                                                  | 0,024497883 | 0,031823876 | 0,05  | 0     | 1         | 1,02230372    | 0,978182883     | #DIV/0!         |
| TTN-AS1                                                                                  | 0,027487357 | 0,031809303 | 0,075 | 0,01  | 1         | 1,022293394   | 0,978192763     | 7,5             |
| VPS52                                                                                    | 0,075062254 | 0,031786961 | 0,112 | 0,04  | 1         | 1,022277562   | 0,978207912     | 2,8             |
| PLEKHS1                                                                                  | 0,223365318 | 0,031785818 | 0,038 | 0,01  | 1         | 1,022276753   | 0,978208687     | 3,8             |
| FAM86B1                                                                                  | 0,114652585 | 0,031775277 | 0,025 | 0     | 1         | 1,022269283   | 0,978215834     | #DIV/0!         |
| TMEM267                                                                                  | 0,022517254 | 0,031748764 | 0,212 | 0,08  | 1         | 1,022250497   | 0,978233812     | 2,65            |
| GAREM1                                                                                   | 0,034816087 | 0,03173834  | 0,112 | 0,03  | 1         | 1,022243111   | 0,97824088      | 3,733333333     |
| RWDD3                                                                                    | 0,11122839  | 0,031701799 | 0,05  | 0,01  | 1         | 1,022217219   | 0,978265658     | 5               |
| DNAJC22                                                                                  | 0,219108376 | 0,031682171 | 0,038 | 0,01  | 1         | 1,022203312   | 0,978278967     | 3,8             |
| BRIX1                                                                                    | 0,003333959 | 0,031679824 | 0,613 | 0,27  | 1         | 1,022201649   | 0,978280558     | 2,27037037      |
| MPDZ                                                                                     | 0,002326877 | 0,031668282 | 0,362 | 0,13  | 1         | 1,022193472   | 0,978288385     | 2,784615385     |
| HADHA                                                                                    | 0,017401188 | 0,031654376 | 0,762 | 0,39  | 1         | 1,022183618   | 0,978297815     | 1,953846154     |
| OLFML3                                                                                   | 0,055334082 | 0,031647517 | 0,062 | 0,01  | 1         | 1,022178759   | 0,978302465     | 6,2             |

Supplementary Table 4

| Differentially expressed genes_keloid-CCD_ comparing SC-Keloid vs. (SC-Myel, SC-Nonmyel) |             |             |       |       |           |               |                 |                 |
|------------------------------------------------------------------------------------------|-------------|-------------|-------|-------|-----------|---------------|-----------------|-----------------|
| gene                                                                                     | p_val       | avg_log2FC  | pct.1 | pct.2 | p_val_adj | Foldchange_UP | Foldchange_DOWN | Ratio_pct1_pct2 |
| ERCC6L                                                                                   | 0,011634754 | 0,03164236  | 0,062 | 0     | 1         | 1,022175105   | 0,978305963     | #DIV/0!         |
| ENO4                                                                                     | 0,027487357 | 0,031613079 | 0,075 | 0,01  | 1         | 1,022154359   | 0,978325819     | 7,5             |
| ACADS                                                                                    | 0,004518236 | 0,031570416 | 0,35  | 0,13  | 1         | 1,022124133   | 0,97835475      | 2,692307692     |
| FCSK                                                                                     | 0,108976957 | 0,031522161 | 0,05  | 0,01  | 1         | 1,022089946   | 0,978387474     | 5               |
| CSPP1                                                                                    | 0,009508138 | 0,031486046 | 0,2   | 0,06  | 1         | 1,02206436    | 0,978411966     | 3,333333333     |
| BVES                                                                                     | 0,001500621 | 0,031425956 | 0,175 | 0,03  | 1         | 1,02202179    | 0,978452719     | 5,833333333     |
| C18orf21                                                                                 | 0,009738387 | 0,031397337 | 0,138 | 0,03  | 1         | 1,022001517   | 0,978472129     | 4,6             |
| OTUB2                                                                                    | 0,114652585 | 0,031395309 | 0,025 | 0     | 1         | 1,02200008    | 0,978473505     | #DIV/0!         |
| RPS20                                                                                    | 0,110850688 | 0,031322279 | 0,925 | 0,61  | 1         | 1,021948347   | 0,978523037     | 1,516393443     |
| ZNF573                                                                                   | 0,219108376 | 0,031297825 | 0,038 | 0,01  | 1         | 1,021931025   | 0,978539623     | 3,8             |
| RNFT1                                                                                    | 0,096787055 | 0,03128035  | 0,125 | 0,05  | 1         | 1,021918647   | 0,978551476     | 2,5             |
| ABCA7                                                                                    | 0,052279021 | 0,031265606 | 0,038 | 0     | 1         | 1,021908203   | 0,978561477     | #DIV/0!         |
| TAF1C                                                                                    | 0,109006576 | 0,031264456 | 0,088 | 0,03  | 1         | 1,021907389   | 0,978562256     | 2,933333333     |
| BEST1                                                                                    | 0,052279021 | 0,031263193 | 0,038 | 0     | 1         | 1,021906494   | 0,978563113     | #DIV/0!         |
| ABCC10                                                                                   | 0,114652585 | 0,031226471 | 0,025 | 0     | 1         | 1,021880482   | 0,978588022     | #DIV/0!         |
| MFSD13A                                                                                  | 0,214910006 | 0,031203893 | 0,038 | 0,01  | 1         | 1,02186449    | 0,978603337     | 3,8             |
| POC5                                                                                     | 0,082314814 | 0,031196575 | 0,075 | 0,02  | 1         | 1,021859307   | 0,9786083       | 3,75            |
| VAC14                                                                                    | 0,002937191 | 0,031188984 | 0,162 | 0,03  | 1         | 1,02185393    | 0,97861345      | 5,4             |
| EIF2B1                                                                                   | 0,001690359 | 0,031133467 | 0,312 | 0,1   | 1         | 1,021814609   | 0,978651109     | 3,12            |
| LSG1                                                                                     | 0,018485929 | 0,031129701 | 0,162 | 0,05  | 1         | 1,021811941   | 0,978653664     | 3,24            |
| TMEM116                                                                                  | 0,055334082 | 0,031103415 | 0,062 | 0,01  | 1         | 1,021793324   | 0,978671495     | 6,2             |
| STRA6                                                                                    | 0,052279021 | 0,031097086 | 0,038 | 0     | 1         | 1,021788842   | 0,978675788     | #DIV/0!         |
| SUN1                                                                                     | 0,001197227 | 0,031095193 | 0,4   | 0,14  | 1         | 1,021787501   | 0,978677073     | 2,857142857     |
| VTI1A                                                                                    | 0,029195518 | 0,031075264 | 0,188 | 0,07  | 1         | 1,021773386   | 0,978690592     | 2,685714286     |
| BTN3A2                                                                                   | 0,006580985 | 0,031023022 | 0,188 | 0,05  | 1         | 1,021736387   | 0,978726032     | 3,76            |
| DIMT1                                                                                    | 0,000308934 | 0,031004383 | 0,375 | 0,11  | 1         | 1,021723187   | 0,978738677     | 3,409090909     |
| FANCA                                                                                    | 0,012429073 | 0,030965657 | 0,112 | 0,02  | 1         | 1,021695761   | 0,978764949     | 5,6             |
| TACC1                                                                                    | 0,002041652 | 0,030943909 | 0,738 | 0,32  | 1         | 1,02168036    | 0,978779704     | 2,30625         |
| LINC00271                                                                                | 0,268357209 | 0,030931102 | 0,013 | 0     | 1         | 1,02167129    | 0,978788393     | #DIV/0!         |
| NRIP2                                                                                    | 0,268357209 | 0,030931102 | 0,013 | 0     | 1         | 1,02167129    | 0,978788393     | #DIV/0!         |



Supplementary Table 4

| Differentially expressed genes_keloid-CCD_ comparing SC-Keloid vs. (SC-Myel, SC-Nonmyel) |             |             |       |       |             |               |                 |                 |
|------------------------------------------------------------------------------------------|-------------|-------------|-------|-------|-------------|---------------|-----------------|-----------------|
| gene                                                                                     | p_val       | avg_log2FC  | pct.1 | pct.2 | p_val_adj   | Foldchange_UP | Foldchange_DOWN | Ratio_pct1_pct2 |
| P2RY12                                                                                   | 0,268357209 | 0,030931102 | 0,013 | 0     | 1           | 1,02167129    | 0,978788393     | #DIV/0!         |
| RAB17                                                                                    | 0,268357209 | 0,030931102 | 0,013 | 0     | 1           | 1,02167129    | 0,978788393     | #DIV/0!         |
| ZNF699                                                                                   | 0,154906213 | 0,030888555 | 0,062 | 0,02  | 1           | 1,02164116    | 0,978817259     | 3,1             |
| GDAP1                                                                                    | 0,010461593 | 0,030864702 | 0,138 | 0,03  | 1           | 1,021624269   | 0,978833442     | 4,6             |
| CDK17                                                                                    | 0,01491727  | 0,030857128 | 0,2   | 0,07  | 1           | 1,021618905   | 0,978838581     | 2,857142857     |
| MEAF6                                                                                    | 0,003583059 | 0,030828628 | 0,613 | 0,27  | 1           | 1,021598724   | 0,978857918     | 2,27037037      |
| PECR                                                                                     | 0,010094224 | 0,030822491 | 0,138 | 0,03  | 1           | 1,021594378   | 0,978862082     | 4,6             |
| MAP3K6                                                                                   | 0,003269989 | 0,030795231 | 0,138 | 0,02  | 1           | 1,021575075   | 0,978880578     | 6,9             |
| RRP15                                                                                    | 0,003343383 | 0,030762918 | 0,488 | 0,2   | 1           | 1,021552194   | 0,978902503     | 2,44            |
| KIF9                                                                                     | 2,74662E-05 | 0,030760338 | 0,388 | 0,09  | 0,579564765 | 1,021550368   | 0,978904253     | 4,311111111     |
| DENND6A                                                                                  | 0,023763673 | 0,030750839 | 0,175 | 0,06  | 1           | 1,021543642   | 0,978910699     | 2,916666667     |
| MMS22L                                                                                   | 0,034247231 | 0,030728964 | 0,112 | 0,03  | 1           | 1,021528153   | 0,978925542     | 3,733333333     |
| SNED1                                                                                    | 0,024497883 | 0,030726485 | 0,05  | 0     | 1           | 1,021526397   | 0,978927224     | #DIV/0!         |
| FAM225A                                                                                  | 0,027487357 | 0,030703867 | 0,075 | 0,01  | 1           | 1,021510382   | 0,978942571     | 7,5             |
| ANGEL2                                                                                   | 0,011980425 | 0,030694856 | 0,175 | 0,05  | 1           | 1,021504002   | 0,978948686     | 3,5             |
| SERPINB5                                                                                 | 0,268357209 | 0,030677475 | 0,013 | 0     | 1           | 1,021491696   | 0,978960479     | #DIV/0!         |
| HTRA3                                                                                    | 0,114652585 | 0,030674985 | 0,025 | 0     | 1           | 1,021489932   | 0,978962169     | #DIV/0!         |
| PABPC1L                                                                                  | 0,080462265 | 0,030664181 | 0,112 | 0,04  | 1           | 1,021482283   | 0,9789695       | 2,8             |
| MAL2                                                                                     | 0,052279021 | 0,030661555 | 0,038 | 0     | 1           | 1,021480423   | 0,978971282     | #DIV/0!         |
| RAD54L2                                                                                  | 0,001370268 | 0,030643809 | 0,238 | 0,06  | 1           | 1,021467858   | 0,978983325     | 3,966666667     |
| MIR4458HG                                                                                | 0,006272896 | 0,030627496 | 0,188 | 0,05  | 1           | 1,021456309   | 0,978994394     | 3,76            |
| CDK5RAP2                                                                                 | 0,002347143 | 0,030605242 | 0,25  | 0,07  | 1           | 1,021440552   | 0,979009496     | 3,571428571     |
| KRT5                                                                                     | 0,185993644 | 0,030585556 | 0,075 | 0,03  | 1           | 1,021426614   | 0,979022855     | 2,5             |
| CABLES2                                                                                  | 0,024497883 | 0,030536756 | 0,05  | 0     | 1           | 1,021392065   | 0,979055971     | #DIV/0!         |
| MON2                                                                                     | 0,003659162 | 0,030523336 | 0,35  | 0,13  | 1           | 1,021382564   | 0,979065078     | 2,692307692     |
| COL2A1                                                                                   | 0,114652585 | 0,030502547 | 0,025 | 0     | 1           | 1,021367846   | 0,979079187     | #DIV/0!         |
| ENTR1                                                                                    | 0,007149283 | 0,030474164 | 0,3   | 0,11  | 1           | 1,021347752   | 0,979098449     | 2,727272727     |
| PDPR                                                                                     | 0,079357729 | 0,030437422 | 0,112 | 0,04  | 1           | 1,021321741   | 0,979123385     | 2,8             |
| COL11A2                                                                                  | 0,114652585 | 0,030406813 | 0,025 | 0     | 1           | 1,021300073   | 0,979144158     | #DIV/0!         |
| PRR11                                                                                    | 0,023885059 | 0,030378434 | 0,1   | 0,02  | 1           | 1,021279983   | 0,979163419     | 5               |

Supplementary Table 4

| Differentially expressed genes_keloid-CCD_ comparing SC-Keloid vs. (SC-Myel, SC-Nonmyel) |             |             |       |       |           |               |                 |                 |
|------------------------------------------------------------------------------------------|-------------|-------------|-------|-------|-----------|---------------|-----------------|-----------------|
| gene                                                                                     | p_val       | avg_log2FC  | pct.1 | pct.2 | p_val_adj | Foldchange_UP | Foldchange_DOWN | Ratio_pct1_pct2 |
| TMEM241                                                                                  | 0,482174949 | 0,030325039 | 0,038 | 0,02  | 1         | 1,021242185   | 0,979199659     | 1,9             |
| CCDC189                                                                                  | 0,01362345  | 0,030324395 | 0,088 | 0,01  | 1         | 1,02124173    | 0,979200096     | 8,8             |
| ZNF836                                                                                   | 0,027487357 | 0,030308056 | 0,075 | 0,01  | 1         | 1,021230164   | 0,979211186     | 7,5             |
| TNFAIP8L3                                                                                | 0,052279021 | 0,030301948 | 0,038 | 0     | 1         | 1,02122584    | 0,979215332     | #DIV/0!         |
| ATR                                                                                      | 0,019378739 | 0,030300975 | 0,125 | 0,03  | 1         | 1,021225152   | 0,979215992     | 4,166666667     |
| LRATD1                                                                                   | 0,114652585 | 0,030293697 | 0,025 | 0     | 1         | 1,02122       | 0,979220932     | #DIV/0!         |
| HNRNPA1L2                                                                                | 0,045399153 | 0,030285335 | 0,088 | 0,02  | 1         | 1,021214081   | 0,979226608     | 4,4             |
| METRNL                                                                                   | 0,027938118 | 0,03027179  | 0,963 | 0,69  | 1         | 1,021204493   | 0,979235802     | 1,395652174     |
| LYPD6                                                                                    | 0,052279021 | 0,030260482 | 0,038 | 0     | 1         | 1,021196488   | 0,979243477     | #DIV/0!         |
| GPR19                                                                                    | 0,114652585 | 0,030235528 | 0,025 | 0     | 1         | 1,021178825   | 0,979260415     | #DIV/0!         |
| ZHX2                                                                                     | 0,052279021 | 0,030180406 | 0,038 | 0     | 1         | 1,021139809   | 0,97929783      | #DIV/0!         |
| ZNF780B                                                                                  | 0,114652585 | 0,030178634 | 0,025 | 0     | 1         | 1,021138555   | 0,979299033     | #DIV/0!         |
| ARHGEF28                                                                                 | 0,085199008 | 0,030068977 | 0,075 | 0,02  | 1         | 1,021060943   | 0,979373471     | 3,75            |
| MRRF                                                                                     | 0,078265554 | 0,030061027 | 0,112 | 0,04  | 1         | 1,021055316   | 0,979378868     | 2,8             |
| MUS81                                                                                    | 0,000268034 | 0,030021393 | 0,275 | 0,06  | 1         | 1,021027266   | 0,979405774     | 4,583333333     |
| DDX10                                                                                    | 0,004854445 | 0,029979239 | 0,212 | 0,06  | 1         | 1,020997433   | 0,979434392     | 3,533333333     |
| MPST                                                                                     | 0,002111071 | 0,029960734 | 0,525 | 0,21  | 1         | 1,020984337   | 0,979446955     | 2,5             |
| NEU3                                                                                     | 0,027487357 | 0,029956044 | 0,075 | 0,01  | 1         | 1,020981018   | 0,979450139     | 7,5             |
| AMH                                                                                      | 0,268357209 | 0,029905205 | 0,013 | 0     | 1         | 1,02094504    | 0,979484655     | #DIV/0!         |
| CHI3L2                                                                                   | 0,268357209 | 0,029905205 | 0,013 | 0     | 1         | 1,02094504    | 0,979484655     | #DIV/0!         |
| H3C6                                                                                     | 0,268357209 | 0,029905205 | 0,013 | 0     | 1         | 1,02094504    | 0,979484655     | #DIV/0!         |
| ID12                                                                                     | 0,268357209 | 0,029905205 | 0,013 | 0     | 1         | 1,02094504    | 0,979484655     | #DIV/0!         |
| SPIN2A                                                                                   | 0,268357209 | 0,029905205 | 0,013 | 0     | 1         | 1,02094504    | 0,979484655     | #DIV/0!         |
| TTC23L                                                                                   | 0,268357209 | 0,029905205 | 0,013 | 0     | 1         | 1,02094504    | 0,979484655     | #DIV/0!         |
| HENMT1                                                                                   | 0,439855668 | 0,029901838 | 0,025 | 0,01  | 1         | 1,020942658   | 0,97948694      | 2,5             |
| INKA1                                                                                    | 0,055334082 | 0,02983402  | 0,062 | 0,01  | 1         | 1,020894667   | 0,979532985     | 6,2             |
| FAM228A                                                                                  | 0,114652585 | 0,029819663 | 0,025 | 0     | 1         | 1,020884507   | 0,979542733     | #DIV/0!         |
| MMP23B                                                                                   | 0,114652585 | 0,029787802 | 0,025 | 0     | 1         | 1,020861962   | 0,979564366     | #DIV/0!         |
| RINT1                                                                                    | 0,001348746 | 0,029768458 | 0,2   | 0,04  | 1         | 1,020848274   | 0,9795775       | 5               |
| IQCH                                                                                     | 0,052279021 | 0,0297587   | 0,038 | 0     | 1         | 1,020841369   | 0,979584126     | #DIV/0!         |

Supplementary Table 4

| Differentially expressed genes_keloid-CCD_ comparing SC-Keloid vs. (SC-Myel, SC-Nonmyel) |             |             |       |       |           |               |                 |                 |
|------------------------------------------------------------------------------------------|-------------|-------------|-------|-------|-----------|---------------|-----------------|-----------------|
| gene                                                                                     | p_val       | avg_log2FC  | pct.1 | pct.2 | p_val_adj | Foldchange_UP | Foldchange_DOWN | Ratio_pct1_pct2 |
| ROMO1                                                                                    | 0,009741748 | 0,029736774 | 0,85  | 0,46  | 1         | 1,020825855   | 0,979599013     | 1,847826087     |
| RIMKLA                                                                                   | 0,114652585 | 0,029731555 | 0,025 | 0     | 1         | 1,020822162   | 0,979602557     | #DIV/0!         |
| CHST2                                                                                    | 0,052279021 | 0,02972183  | 0,038 | 0     | 1         | 1,02081528    | 0,979609161     | #DIV/0!         |
| PAK1                                                                                     | 0,001624218 | 0,029644324 | 0,125 | 0,01  | 1         | 1,020760441   | 0,979661789     | 12,5            |
| HSPB3                                                                                    | 0,019327738 | 0,029621091 | 0,162 | 0,05  | 1         | 1,020744003   | 0,979677566     | 3,24            |
| TCP11L1                                                                                  | 0,001655244 | 0,029605332 | 0,15  | 0,02  | 1         | 1,020732853   | 0,979688268     | 7,5             |
| JRKL                                                                                     | 0,012429073 | 0,029576588 | 0,112 | 0,02  | 1         | 1,020712516   | 0,979707787     | 5,6             |
| LRTOMT                                                                                   | 0,223365318 | 0,029553221 | 0,038 | 0,01  | 1         | 1,020695984   | 0,979723655     | 3,8             |
| C18orf54                                                                                 | 0,027487357 | 0,029530283 | 0,075 | 0,01  | 1         | 1,020679756   | 0,979739232     | 7,5             |
| EPHA4                                                                                    | 0,219108376 | 0,029519485 | 0,038 | 0,01  | 1         | 1,020672116   | 0,979746565     | 3,8             |
| NEK9                                                                                     | 0,031119861 | 0,02946222  | 0,188 | 0,07  | 1         | 1,020631603   | 0,979785455     | 2,685714286     |
| LRRC47                                                                                   | 0,004244853 | 0,029454948 | 0,25  | 0,08  | 1         | 1,020626459   | 0,979790394     | 3,125           |
| DUS2                                                                                     | 0,052279021 | 0,029382161 | 0,038 | 0     | 1         | 1,020574968   | 0,979839827     | #DIV/0!         |
| TAFAZZIN                                                                                 | 0,004287291 | 0,029377745 | 0,288 | 0,1   | 1         | 1,020571843   | 0,979842827     | 2,88            |
| RNF215                                                                                   | 0,019378739 | 0,02934471  | 0,125 | 0,03  | 1         | 1,020548475   | 0,979865263     | 4,166666667     |
| MAP2                                                                                     | 0,012429073 | 0,029328322 | 0,112 | 0,02  | 1         | 1,020536882   | 0,979876394     | 5,6             |
| PIGB                                                                                     | 0,052279021 | 0,029310093 | 0,038 | 0     | 1         | 1,020523987   | 0,979888776     | #DIV/0!         |
| KRI1                                                                                     | 0,309705255 | 0,029300759 | 0,062 | 0,03  | 1         | 1,020517385   | 0,979895115     | 2,066666667     |
| PIWIL4                                                                                   | 0,114652585 | 0,029277313 | 0,025 | 0     | 1         | 1,0205008     | 0,97991104      | #DIV/0!         |
| POLRMT                                                                                   | 0,128188456 | 0,029277253 | 0,1   | 0,04  | 1         | 1,020500758   | 0,97991108      | 2,5             |
| OXSM                                                                                     | 0,488500108 | 0,02927503  | 0,038 | 0,02  | 1         | 1,020499185   | 0,97991259      | 1,9             |
| ASPHD1                                                                                   | 0,010461593 | 0,02919532  | 0,138 | 0,03  | 1         | 1,020442803   | 0,979966733     | 4,6             |
| FAM171A2                                                                                 | 0,114652585 | 0,029182229 | 0,025 | 0     | 1         | 1,020433543   | 0,979975626     | #DIV/0!         |
| RNF32                                                                                    | 0,052279021 | 0,029172307 | 0,038 | 0     | 1         | 1,020426526   | 0,979982365     | #DIV/0!         |
| POLA1                                                                                    | 0,027487357 | 0,029166489 | 0,075 | 0,01  | 1         | 1,02042241    | 0,979986317     | 7,5             |
| CLEC3B                                                                                   | 0,024497883 | 0,029157869 | 0,05  | 0     | 1         | 1,020416314   | 0,979992172     | #DIV/0!         |
| MYO1E                                                                                    | 0,000788927 | 0,029147762 | 0,188 | 0,03  | 1         | 1,020409165   | 0,979999038     | 6,266666667     |
| CAND2                                                                                    | 0,223365318 | 0,029143898 | 0,038 | 0,01  | 1         | 1,020406432   | 0,980001662     | 3,8             |
| LONP2                                                                                    | 0,01219729  | 0,029104932 | 0,275 | 0,11  | 1         | 1,020378872   | 0,980028132     | 2,5             |
| ELMOD3                                                                                   | 0,126526887 | 0,029094725 | 0,1   | 0,04  | 1         | 1,020371653   | 0,980035066     | 2,5             |

Supplementary Table 4

| Differentially expressed genes_keloid-CCD_comparing SC-Keloid vs. (SC-Myel, SC-Nonmyel) |             |             |       |       |           |               |                 |                 |
|-----------------------------------------------------------------------------------------|-------------|-------------|-------|-------|-----------|---------------|-----------------|-----------------|
| gene                                                                                    | p_val       | avg_log2FC  | pct.1 | pct.2 | p_val_adj | Foldchange_UP | Foldchange_DOWN | Ratio_pct1_pct2 |
| KRBOX4                                                                                  | 0,023885059 | 0,02907952  | 0,1   | 0,02  | 1         | 1,020360899   | 0,980045395     | 5               |
| TDRD7                                                                                   | 0,027487357 | 0,029073636 | 0,075 | 0,01  | 1         | 1,020356738   | 0,980049392     | 7,5             |
| CORO1A                                                                                  | 0,052279021 | 0,029040744 | 0,038 | 0     | 1         | 1,020333475   | 0,980071736     | #DIV/0!         |
| ADAMTSL4                                                                                | 0,114652585 | 0,029029026 | 0,025 | 0     | 1         | 1,020325187   | 0,980079697     | #DIV/0!         |
| TLR2                                                                                    | 0,114652585 | 0,0290271   | 0,025 | 0     | 1         | 1,020323825   | 0,980081005     | #DIV/0!         |
| KDM4A-AS1                                                                               | 0,114652585 | 0,02902457  | 0,025 | 0     | 1         | 1,020322036   | 0,980082724     | #DIV/0!         |
| LANCL2                                                                                  | 0,154906213 | 0,029016102 | 0,062 | 0,02  | 1         | 1,020316047   | 0,980088477     | 3,1             |
| LTBR                                                                                    | 0,001699428 | 0,029014385 | 0,5   | 0,2   | 1         | 1,020314832   | 0,980089643     | 2,5             |
| HMGN4                                                                                   | 0,11122839  | 0,028970459 | 0,05  | 0,01  | 1         | 1,020283768   | 0,980119484     | 5               |
| PRKCZ                                                                                   | 0,488500108 | 0,028925448 | 0,038 | 0,02  | 1         | 1,020251936   | 0,980150064     | 1,9             |
| TCHP                                                                                    | 0,019048586 | 0,028905396 | 0,125 | 0,03  | 1         | 1,020237756   | 0,980163687     | 4,166666667     |
| SPATA24                                                                                 | 0,11122839  | 0,028904895 | 0,05  | 0,01  | 1         | 1,020237401   | 0,980164027     | 5               |
| LSP1                                                                                    | 0,268357209 | 0,028893004 | 0,013 | 0     | 1         | 1,020228992   | 0,980172106     | #DIV/0!         |
| DSG2                                                                                    | 0,055334082 | 0,028862399 | 0,062 | 0,01  | 1         | 1,020207349   | 0,9801929       | 6,2             |
| RALGDS                                                                                  | 0,027232781 | 0,028832409 | 0,175 | 0,06  | 1         | 1,020186142   | 0,980213275     | 2,916666667     |
| RBM48                                                                                   | 0,055334082 | 0,028787818 | 0,062 | 0,01  | 1         | 1,02015461    | 0,980243573     | 6,2             |
| COCH                                                                                    | 0,114652585 | 0,028769286 | 0,025 | 0     | 1         | 1,020141507   | 0,980256164     | #DIV/0!         |
| ZNF341                                                                                  | 0,052279021 | 0,028766526 | 0,038 | 0     | 1         | 1,020139555   | 0,980258039     | #DIV/0!         |
| ZNF528                                                                                  | 0,055334082 | 0,028706685 | 0,062 | 0,01  | 1         | 1,020097242   | 0,9802987       | 6,2             |
| BPNT2                                                                                   | 0,028705781 | 0,028686506 | 0,6   | 0,31  | 1         | 1,020082974   | 0,980312411     | 1,935483871     |
| TDRKH                                                                                   | 0,024497883 | 0,028682326 | 0,05  | 0     | 1         | 1,020080018   | 0,980315252     | #DIV/0!         |
| ABHD13                                                                                  | 0,043614772 | 0,028654191 | 0,125 | 0,04  | 1         | 1,020060125   | 0,98033437      | 3,125           |
| TRIM52                                                                                  | 0,010276447 | 0,028650687 | 0,138 | 0,03  | 1         | 1,020057647   | 0,980336751     | 4,6             |
| MATN1                                                                                   | 0,114652585 | 0,028594604 | 0,025 | 0     | 1         | 1,020017995   | 0,980374861     | #DIV/0!         |
| TMEM251                                                                                 | 0,002980513 | 0,028571206 | 0,3   | 0,1   | 1         | 1,020001452   | 0,980390761     | 3               |
| UNC5B-AS1                                                                               | 0,114652585 | 0,028558598 | 0,025 | 0     | 1         | 1,019992538   | 0,980399329     | #DIV/0!         |
| HOMER2                                                                                  | 0,114652585 | 0,028532254 | 0,025 | 0     | 1         | 1,019973913   | 0,980417231     | #DIV/0!         |
| PTPRQ                                                                                   | 0,268357209 | 0,028519452 | 0,013 | 0     | 1         | 1,019964862   | 0,980425932     | #DIV/0!         |
| SPIRE2                                                                                  | 0,268357209 | 0,028519452 | 0,013 | 0     | 1         | 1,019964862   | 0,980425932     | #DIV/0!         |
| KAZALD1                                                                                 | 0,024497883 | 0,028498637 | 0,05  | 0     | 1         | 1,019950146   | 0,980440077     | #DIV/0!         |

Supplementary Table 4

| Differentially expressed genes_keloid-CCD_ comparing SC-Keloid vs. (SC-Myel, SC-Nonmyel) |             |             |       |       |           |               |                 |                 |
|------------------------------------------------------------------------------------------|-------------|-------------|-------|-------|-----------|---------------|-----------------|-----------------|
| gene                                                                                     | p_val       | avg_log2FC  | pct.1 | pct.2 | p_val_adj | Foldchange_UP | Foldchange_DOWN | Ratio_pct1_pct2 |
| AP000253.1                                                                               | 0,114652585 | 0,028486257 | 0,025 | 0     | 1         | 1,019941394   | 0,98044849      | #DIV/0!         |
| SDR42E2                                                                                  | 0,114652585 | 0,028486257 | 0,025 | 0     | 1         | 1,019941394   | 0,98044849      | #DIV/0!         |
| LECT2                                                                                    | 0,114652585 | 0,028485974 | 0,025 | 0     | 1         | 1,019941194   | 0,980448683     | #DIV/0!         |
| ZBTB45                                                                                   | 0,052279021 | 0,028456171 | 0,038 | 0     | 1         | 1,019920124   | 0,980468937     | #DIV/0!         |
| ZNF749                                                                                   | 0,052279021 | 0,028440086 | 0,038 | 0     | 1         | 1,019908753   | 0,980479869     | #DIV/0!         |
| PPM1N                                                                                    | 0,874019543 | 0,028382443 | 0,013 | 0,01  | 1         | 1,019868003   | 0,980519044     | 1,3             |
| CCDC180                                                                                  | 0,114652585 | 0,028366977 | 0,025 | 0     | 1         | 1,01985707    | 0,980529556     | #DIV/0!         |
| GPATCH2L                                                                                 | 0,009622928 | 0,028365037 | 0,438 | 0,19  | 1         | 1,019855699   | 0,980530875     | 2,305263158     |
| ANKRD54                                                                                  | 0,002123327 | 0,028361411 | 0,388 | 0,14  | 1         | 1,019853136   | 0,980533339     | 2,771428571     |
| ALDOC                                                                                    | 0,178498648 | 0,028340752 | 0,075 | 0,03  | 1         | 1,019838531   | 0,98054738      | 2,5             |
| RBM47                                                                                    | 0,024497883 | 0,028335328 | 0,05  | 0     | 1         | 1,019834697   | 0,980551066     | #DIV/0!         |
| BAHD1                                                                                    | 0,11122839  | 0,028317442 | 0,05  | 0,01  | 1         | 1,019822054   | 0,980563223     | 5               |
| SCN8A                                                                                    | 0,052279021 | 0,028222065 | 0,038 | 0     | 1         | 1,019754636   | 0,98062805      | #DIV/0!         |
| TDP2                                                                                     | 0,0138805   | 0,028199324 | 0,225 | 0,08  | 1         | 1,019738561   | 0,980643508     | 2,8125          |
| ECSCR                                                                                    | 0,082314814 | 0,028183847 | 0,075 | 0,02  | 1         | 1,019727622   | 0,980654028     | 3,75            |
| CSTF2                                                                                    | 0,034816087 | 0,028167719 | 0,112 | 0,03  | 1         | 1,019716222   | 0,980664991     | 3,733333333     |
| GENE                                                                                     | 0,18346989  | 0,028166682 | 0,075 | 0,03  | 1         | 1,019715489   | 0,980665696     | 2,5             |
| KCNRG                                                                                    | 0,114652585 | 0,028138344 | 0,025 | 0     | 1         | 1,01969546    | 0,980684959     | #DIV/0!         |
| ENO3                                                                                     | 0,114652585 | 0,028137278 | 0,025 | 0     | 1         | 1,019694706   | 0,980685683     | #DIV/0!         |
| HSF1                                                                                     | 0,000654081 | 0,028126302 | 0,375 | 0,12  | 1         | 1,019686949   | 0,980693144     | 3,125           |
| ZNF311                                                                                   | 0,114652585 | 0,028066515 | 0,025 | 0     | 1         | 1,019644693   | 0,980733786     | #DIV/0!         |
| RAB11B-AS1                                                                               | 0,10741396  | 0,028036897 | 0,088 | 0,03  | 1         | 1,019623759   | 0,980753921     | 2,933333333     |
| UBOX5                                                                                    | 0,052279021 | 0,027998354 | 0,038 | 0     | 1         | 1,01959652    | 0,980780123     | #DIV/0!         |
| ATP13A2                                                                                  | 0,005575985 | 0,027972687 | 0,15  | 0,03  | 1         | 1,01957838    | 0,980797572     | 5               |
| FEM1A                                                                                    | 0,027302098 | 0,027972678 | 0,138 | 0,04  | 1         | 1,019578374   | 0,980797578     | 3,45            |
| ELP4                                                                                     | 0,024883489 | 0,027956483 | 0,138 | 0,04  | 1         | 1,019566929   | 0,980808588     | 3,45            |
| CORO1C                                                                                   | 0,000592136 | 0,027941923 | 0,6   | 0,23  | 1         | 1,019556639   | 0,980818487     | 2,608695652     |
| PCCA                                                                                     | 0,023885059 | 0,027917821 | 0,1   | 0,02  | 1         | 1,019539606   | 0,980834873     | 5               |
| TTC12                                                                                    | 0,055334082 | 0,027888956 | 0,062 | 0,01  | 1         | 1,019519208   | 0,980854497     | 6,2             |
| LMBRD2                                                                                   | 0,00819759  | 0,027869929 | 0,2   | 0,06  | 1         | 1,019505762   | 0,980867433     | 3,333333333     |

Supplementary Table 4

| Differentially expressed genes_keloid-CCD_comparing SC-Keloid vs. (SC-Myel, SC-Nonmyel) |             |             |       |       |           |               |                 |                 |
|-----------------------------------------------------------------------------------------|-------------|-------------|-------|-------|-----------|---------------|-----------------|-----------------|
| gene                                                                                    | p_val       | avg_log2FC  | pct.1 | pct.2 | p_val_adj | Foldchange_UP | Foldchange_DOWN | Ratio_pct1_pct2 |
| ZNF334                                                                                  | 0,114652585 | 0,027770986 | 0,025 | 0     | 1         | 1,019435845   | 0,980934706     | #DIV/0!         |
| WDR62                                                                                   | 0,052279021 | 0,027770259 | 0,038 | 0     | 1         | 1,019435331   | 0,9809352       | #DIV/0!         |
| TKFC                                                                                    | 0,035392992 | 0,027760474 | 0,112 | 0,03  | 1         | 1,019428417   | 0,980941853     | 3,733333333     |
| SHKBP1                                                                                  | 0,000471943 | 0,027743538 | 0,35  | 0,1   | 1         | 1,01941645    | 0,980953368     | 3,5             |
| TIGD2                                                                                   | 0,108976957 | 0,02774114  | 0,05  | 0,01  | 1         | 1,019414755   | 0,980954999     | 5               |
| GCK                                                                                     | 0,114652585 | 0,027728794 | 0,025 | 0     | 1         | 1,019406031   | 0,980963394     | #DIV/0!         |
| ZNF385D                                                                                 | 0,223365318 | 0,02769708  | 0,038 | 0,01  | 1         | 1,019383623   | 0,980984958     | 3,8             |
| PARP14                                                                                  | 0,001356884 | 0,027652088 | 0,338 | 0,11  | 1         | 1,019351832   | 0,981015552     | 3,072727273     |
| ETFBKMT                                                                                 | 0,055334082 | 0,027650236 | 0,062 | 0,01  | 1         | 1,019350523   | 0,981016811     | 6,2             |
| RARS2                                                                                   | 0,00036444  | 0,027647965 | 0,375 | 0,11  | 1         | 1,019348919   | 0,981018355     | 3,409090909     |
| FAM149B1                                                                                | 0,023885059 | 0,027607995 | 0,1   | 0,02  | 1         | 1,019320678   | 0,981045535     | 5               |
| RBM26-AS1                                                                               | 0,219108376 | 0,02758952  | 0,038 | 0,01  | 1         | 1,019307625   | 0,981058098     | 3,8             |
| GOLGA1                                                                                  | 0,001530226 | 0,02755377  | 0,175 | 0,03  | 1         | 1,019282367   | 0,981082409     | 5,833333333     |
| ZNF346                                                                                  | 0,01362345  | 0,02755232  | 0,088 | 0,01  | 1         | 1,019281343   | 0,981083395     | 8,8             |
| H2BC5                                                                                   | 0,108976957 | 0,027537467 | 0,05  | 0,01  | 1         | 1,019270849   | 0,981093496     | 5               |
| TMCC2                                                                                   | 0,052279021 | 0,027462772 | 0,038 | 0     | 1         | 1,019218078   | 0,981144292     | #DIV/0!         |
| TBR1                                                                                    | 0,052279021 | 0,02745742  | 0,038 | 0     | 1         | 1,019214297   | 0,981147933     | #DIV/0!         |
| FNDC7                                                                                   | 0,114652585 | 0,027425132 | 0,025 | 0     | 1         | 1,019191487   | 0,981169891     | #DIV/0!         |
| PHKB                                                                                    | 0,000219539 | 0,027369315 | 0,3   | 0,07  | 1         | 1,019152056   | 0,981207853     | 4,285714286     |
| GAREM2                                                                                  | 0,114652585 | 0,027369036 | 0,025 | 0     | 1         | 1,019151859   | 0,981208042     | #DIV/0!         |
| DHX34                                                                                   | 0,024497883 | 0,027361387 | 0,05  | 0     | 1         | 1,019146455   | 0,981213245     | #DIV/0!         |
| GPR158                                                                                  | 0,052279021 | 0,027350426 | 0,038 | 0     | 1         | 1,019138712   | 0,9812207       | #DIV/0!         |
| POLR2J2                                                                                 | 0,11122839  | 0,027325821 | 0,05  | 0,01  | 1         | 1,019121331   | 0,981237435     | 5               |
| XG                                                                                      | 0,114652585 | 0,027286483 | 0,025 | 0     | 1         | 1,019093543   | 0,98126419      | #DIV/0!         |
| NBL1                                                                                    | 0,050629588 | 0,027262624 | 0,175 | 0,07  | 1         | 1,019076689   | 0,981280418     | 2,5             |
| CCDC144NL                                                                               | 0,223365318 | 0,027245254 | 0,038 | 0,01  | 1         | 1,01906442    | 0,981292233     | 3,8             |
| KIF24                                                                                   | 0,052279021 | 0,027233857 | 0,038 | 0     | 1         | 1,019056369   | 0,981299985     | #DIV/0!         |
| GABBR2                                                                                  | 0,114652585 | 0,027191388 | 0,025 | 0     | 1         | 1,019026372   | 0,981328872     | #DIV/0!         |
| TRMT61A                                                                                 | 0,000546739 | 0,027149571 | 0,438 | 0,15  | 1         | 1,018996836   | 0,981357316     | 2,92            |
| SLC29A1                                                                                 | 0,054291236 | 0,027130609 | 0,138 | 0,05  | 1         | 1,018983443   | 0,981370215     | 2,76            |

Supplementary Table 4

| Differentially expressed genes_keloid-CCD_ comparing SC-Keloid vs. (SC-Myel, SC-Nonmyel) |             |             |       |       |           |               |                 |                 |
|------------------------------------------------------------------------------------------|-------------|-------------|-------|-------|-----------|---------------|-----------------|-----------------|
| gene                                                                                     | p_val       | avg_log2FC  | pct.1 | pct.2 | p_val_adj | Foldchange_UP | Foldchange_DOWN | Ratio_pct1_pct2 |
| KIAA2013                                                                                 | 0,00044203  | 0,027080568 | 0,375 | 0,11  | 1         | 1,018948099   | 0,981404255     | 3,409090909     |
| ZFYVE9                                                                                   | 0,044264725 | 0,027035754 | 0,125 | 0,04  | 1         | 1,018916448   | 0,981434741     | 3,125           |
| SIPA1                                                                                    | 0,005686216 | 0,027035542 | 0,338 | 0,13  | 1         | 1,018916298   | 0,981434885     | 2,6             |
| DHRS1                                                                                    | 0,065150727 | 0,027033214 | 0,15  | 0,06  | 1         | 1,018914654   | 0,981436469     | 2,5             |
| OGFOD2                                                                                   | 0,055334082 | 0,027024335 | 0,062 | 0,01  | 1         | 1,018908383   | 0,981442509     | 6,2             |
| PPP1R9B                                                                                  | 0,011266838 | 0,026984238 | 0,175 | 0,05  | 1         | 1,018880065   | 0,981469787     | 3,5             |
| ZBTB24                                                                                   | 0,009096611 | 0,02698363  | 0,2   | 0,06  | 1         | 1,018879635   | 0,9814702       | 3,333333333     |
| DRC3                                                                                     | 0,055334082 | 0,02689908  | 0,062 | 0,01  | 1         | 1,018819925   | 0,981527722     | 6,2             |
| POGK                                                                                     | 0,01532789  | 0,026868003 | 0,188 | 0,06  | 1         | 1,018797979   | 0,981548865     | 3,133333333     |
| CCL19                                                                                    | 0,052279021 | 0,026860915 | 0,038 | 0     | 1         | 1,018792974   | 0,981553687     | #DIV/0!         |
| C1orf112                                                                                 | 0,11122839  | 0,026825622 | 0,05  | 0,01  | 1         | 1,018768051   | 0,9815777       | 5               |
| TAF11                                                                                    | 0,000125704 | 0,02679846  | 0,525 | 0,17  | 1         | 1,018748871   | 0,98159618      | 3,088235294     |
| ZNF324B                                                                                  | 0,052279021 | 0,026776115 | 0,038 | 0     | 1         | 1,018733092   | 0,981611384     | #DIV/0!         |
| RPRD1B                                                                                   | 0,00517794  | 0,026773326 | 0,15  | 0,03  | 1         | 1,018731123   | 0,981613281     | 5               |
| CAPN15                                                                                   | 0,019378739 | 0,026759941 | 0,125 | 0,03  | 1         | 1,018721671   | 0,981622388     | 4,166666667     |
| ZNF772                                                                                   | 0,114652585 | 0,026748071 | 0,025 | 0     | 1         | 1,018713289   | 0,981630465     | #DIV/0!         |
| HACE1                                                                                    | 0,152427848 | 0,026740558 | 0,062 | 0,02  | 1         | 1,018707985   | 0,981635577     | 3,1             |
| PTOV1-AS1                                                                                | 0,11122839  | 0,026632227 | 0,05  | 0,01  | 1         | 1,018631493   | 0,98170929      | 5               |
| DNAAF10                                                                                  | 0,774132462 | 0,026611482 | 0,038 | 0,03  | 1         | 1,018616846   | 0,981723407     | 1,266666667     |
| HSD17B8                                                                                  | 0,044922833 | 0,026603409 | 0,125 | 0,04  | 1         | 1,018611146   | 0,9817289       | 3,125           |
| ATP6V1E1                                                                                 | 0,000790037 | 0,026513096 | 0,475 | 0,18  | 1         | 1,018547383   | 0,981790358     | 2,638888889     |
| STEAP1                                                                                   | 0,268357209 | 0,026502038 | 0,013 | 0     | 1         | 1,018539576   | 0,981797884     | #DIV/0!         |
| KIAA0232                                                                                 | 0,001447513 | 0,026496089 | 0,438 | 0,16  | 1         | 1,018535376   | 0,981801932     | 2,7375          |
| GPX3                                                                                     | 0,788345827 | 0,02647422  | 0,038 | 0,03  | 1         | 1,018519937   | 0,981816815     | 1,266666667     |
| FBXO15                                                                                   | 0,114652585 | 0,026467109 | 0,025 | 0     | 1         | 1,018514917   | 0,981821654     | #DIV/0!         |
| ZNF793                                                                                   | 0,052279021 | 0,02645806  | 0,038 | 0     | 1         | 1,018508528   | 0,981827813     | #DIV/0!         |
| G6PD                                                                                     | 0,125732054 | 0,026447381 | 0,162 | 0,08  | 1         | 1,018500989   | 0,98183508      | 2,025           |
| TRAPPC2                                                                                  | 0,010461593 | 0,026444518 | 0,138 | 0,03  | 1         | 1,018498968   | 0,981837028     | 4,6             |
| DNAJA3                                                                                   | 0,000849395 | 0,026429039 | 0,25  | 0,06  | 1         | 1,01848804    | 0,981847563     | 4,166666667     |
| KIF3B                                                                                    | 0,000821068 | 0,026332399 | 0,25  | 0,06  | 1         | 1,018419818   | 0,981913335     | 4,166666667     |

Supplementary Table 4

| Differentially expressed genes_keloid-CCD_ comparing SC-Keloid vs. (SC-Myel, SC-Nonmyel) |             |             |       |       |           |               |                 |                 |
|------------------------------------------------------------------------------------------|-------------|-------------|-------|-------|-----------|---------------|-----------------|-----------------|
| gene                                                                                     | p_val       | avg_log2FC  | pct.1 | pct.2 | p_val_adj | Foldchange_UP | Foldchange_DOWN | Ratio_pct1_pct2 |
| H2AC12                                                                                   | 0,114652585 | 0,026241942 | 0,025 | 0     | 1         | 1,018355965   | 0,981974903     | #DIV/0!         |
| CAMKK1                                                                                   | 0,052279021 | 0,026199869 | 0,038 | 0     | 1         | 1,018326267   | 0,982003541     | #DIV/0!         |
| CFAP299                                                                                  | 0,052279021 | 0,026181402 | 0,038 | 0     | 1         | 1,018313233   | 0,98201611      | #DIV/0!         |
| CRYBA4                                                                                   | 0,114652585 | 0,026146858 | 0,025 | 0     | 1         | 1,018288851   | 0,982039624     | #DIV/0!         |
| HEY2                                                                                     | 0,055334082 | 0,026142609 | 0,062 | 0,01  | 1         | 1,018285852   | 0,982042516     | 6,2             |
| COL19A1                                                                                  | 0,045399153 | 0,026121508 | 0,088 | 0,02  | 1         | 1,018270958   | 0,98205688      | 4,4             |
| TMEM161B                                                                                 | 0,057278664 | 0,026103278 | 0,138 | 0,05  | 1         | 1,018258091   | 0,98206929      | 2,76            |
| AQP5                                                                                     | 0,268357209 | 0,026081682 | 0,013 | 0     | 1         | 1,018242849   | 0,98208399      | #DIV/0!         |
| ATP6V0E2-AS1                                                                             | 0,268357209 | 0,026081682 | 0,013 | 0     | 1         | 1,018242849   | 0,98208399      | #DIV/0!         |
| C6orf223                                                                                 | 0,268357209 | 0,026081682 | 0,013 | 0     | 1         | 1,018242849   | 0,98208399      | #DIV/0!         |
| C9                                                                                       | 0,268357209 | 0,026081682 | 0,013 | 0     | 1         | 1,018242849   | 0,98208399      | #DIV/0!         |
| CCN4                                                                                     | 0,268357209 | 0,026081682 | 0,013 | 0     | 1         | 1,018242849   | 0,98208399      | #DIV/0!         |
| GAS8-AS1                                                                                 | 0,268357209 | 0,026081682 | 0,013 | 0     | 1         | 1,018242849   | 0,98208399      | #DIV/0!         |
| MIR9-1HG                                                                                 | 0,268357209 | 0,026081682 | 0,013 | 0     | 1         | 1,018242849   | 0,98208399      | #DIV/0!         |
| POT1-AS1                                                                                 | 0,268357209 | 0,026081682 | 0,013 | 0     | 1         | 1,018242849   | 0,98208399      | #DIV/0!         |
| PPP1R3G                                                                                  | 0,268357209 | 0,026081682 | 0,013 | 0     | 1         | 1,018242849   | 0,98208399      | #DIV/0!         |
| PEPD                                                                                     | 0,005582919 | 0,025996629 | 0,675 | 0,32  | 1         | 1,018182821   | 0,98214189      | 2,109375        |
| RUNX1T1                                                                                  | 0,034816087 | 0,025963194 | 0,112 | 0,03  | 1         | 1,018159224   | 0,982164652     | 3,733333333     |
| NAP1L3                                                                                   | 0,11122839  | 0,025947491 | 0,05  | 0,01  | 1         | 1,018148142   | 0,982175342     | 5               |
| PRMT6                                                                                    | 0,009738387 | 0,02592041  | 0,138 | 0,03  | 1         | 1,01812903    | 0,982193779     | 4,6             |
| EGOT                                                                                     | 0,268357209 | 0,025913029 | 0,013 | 0     | 1         | 1,018123822   | 0,982198804     | #DIV/0!         |
| RPS6KL1                                                                                  | 0,219108376 | 0,025887065 | 0,038 | 0,01  | 1         | 1,018105499   | 0,982216481     | 3,8             |
| CD93                                                                                     | 0,439855668 | 0,025872845 | 0,025 | 0,01  | 1         | 1,018095464   | 0,982226162     | 2,5             |
| SRBD1                                                                                    | 0,004516944 | 0,025835561 | 0,175 | 0,04  | 1         | 1,018069153   | 0,982251546     | 4,375           |
| USP46-DT                                                                                 | 0,052279021 | 0,025808113 | 0,038 | 0     | 1         | 1,018049784   | 0,982270235     | #DIV/0!         |
| TICRR                                                                                    | 0,052279021 | 0,025803279 | 0,038 | 0     | 1         | 1,018046373   | 0,982273526     | #DIV/0!         |
| TRAM1L1                                                                                  | 0,114652585 | 0,025767117 | 0,025 | 0     | 1         | 1,018020855   | 0,982298147     | #DIV/0!         |
| TEX22                                                                                    | 0,114652585 | 0,0257669   | 0,025 | 0     | 1         | 1,018020702   | 0,982298295     | #DIV/0!         |
| ILF3                                                                                     | 0,021041106 | 0,025728414 | 0,588 | 0,3   | 1         | 1,017993546   | 0,982324499     | 1,96            |
| ZNF554                                                                                   | 0,114652585 | 0,025727531 | 0,025 | 0     | 1         | 1,017992923   | 0,9823251       | #DIV/0!         |



Supplementary Table 4

| Differentially expressed genes_keloid-CCD_ comparing SC-Keloid vs. (SC-Myel, SC-Nonmyel) |             |             |       |       |           |               |                 |                 |
|------------------------------------------------------------------------------------------|-------------|-------------|-------|-------|-----------|---------------|-----------------|-----------------|
| gene                                                                                     | p_val       | avg_log2FC  | pct.1 | pct.2 | p_val_adj | Foldchange_UP | Foldchange_DOWN | Ratio_pct1_pct2 |
| RCOR2                                                                                    | 0,052279021 | 0,025718481 | 0,038 | 0     | 1         | 1,017986536   | 0,982331263     | #DIV/0!         |
| FKBP15                                                                                   | 0,010094224 | 0,025673681 | 0,138 | 0,03  | 1         | 1,017954926   | 0,982361768     | 4,6             |
| DUSP18                                                                                   | 0,044583831 | 0,025659465 | 0,088 | 0,02  | 1         | 1,017944895   | 0,982371448     | 4,4             |
| FAM13C                                                                                   | 0,81721858  | 0,025634722 | 0,025 | 0,02  | 1         | 1,017927436   | 0,982388296     | 1,25            |
| MOCOS                                                                                    | 0,052279021 | 0,025630743 | 0,038 | 0     | 1         | 1,017924629   | 0,982391006     | #DIV/0!         |
| CDC20B                                                                                   | 0,114652585 | 0,025581972 | 0,025 | 0     | 1         | 1,017890218   | 0,982424217     | #DIV/0!         |
| ULK3                                                                                     | 0,140115285 | 0,025573169 | 0,112 | 0,05  | 1         | 1,017884007   | 0,982430211     | 2,24            |
| CARD16                                                                                   | 0,052279021 | 0,025547659 | 0,038 | 0     | 1         | 1,017866009   | 0,982447582     | #DIV/0!         |
| RNF182                                                                                   | 0,027487357 | 0,025517611 | 0,075 | 0,01  | 1         | 1,01784481    | 0,982468045     | 7,5             |
| PIP                                                                                      | 0,052279021 | 0,025517604 | 0,038 | 0     | 1         | 1,017844805   | 0,98246805      | #DIV/0!         |
| SRCAP                                                                                    | 0,045399153 | 0,025482094 | 0,088 | 0,02  | 1         | 1,017819752   | 0,982492232     | 4,4             |
| ZNF527                                                                                   | 0,052279021 | 0,025479498 | 0,038 | 0     | 1         | 1,017817921   | 0,982494        | #DIV/0!         |
| MYH11                                                                                    | 0,268357209 | 0,02547809  | 0,013 | 0     | 1         | 1,017816928   | 0,982494959     | #DIV/0!         |
| TRMT5                                                                                    | 0,055334082 | 0,025434251 | 0,062 | 0,01  | 1         | 1,017786      | 0,982524814     | 6,2             |
| LINC00893                                                                                | 0,114652585 | 0,025432969 | 0,025 | 0     | 1         | 1,017785095   | 0,982525687     | #DIV/0!         |
| ZNF283                                                                                   | 0,11122839  | 0,025420912 | 0,05  | 0,01  | 1         | 1,017776589   | 0,982533898     | 5               |
| SLC35A3                                                                                  | 0,003218652 | 0,02541939  | 0,338 | 0,12  | 1         | 1,017775515   | 0,982534935     | 2,816666667     |
| ZNF551                                                                                   | 0,114652585 | 0,025418027 | 0,025 | 0     | 1         | 1,017774554   | 0,982535863     | #DIV/0!         |
| NRGN                                                                                     | 0,114652585 | 0,025415787 | 0,025 | 0     | 1         | 1,017772974   | 0,982537389     | #DIV/0!         |
| DCAF4                                                                                    | 0,052279021 | 0,02537211  | 0,038 | 0     | 1         | 1,017742161   | 0,982567135     | #DIV/0!         |
| SPRYD4                                                                                   | 0,055334082 | 0,025255456 | 0,062 | 0,01  | 1         | 1,017659871   | 0,982646588     | 6,2             |
| EGFR                                                                                     | 0,268357209 | 0,025250838 | 0,013 | 0     | 1         | 1,017656614   | 0,982649733     | #DIV/0!         |
| IRX3                                                                                     | 0,268357209 | 0,025250838 | 0,013 | 0     | 1         | 1,017656614   | 0,982649733     | #DIV/0!         |
| HLTF                                                                                     | 0,000888926 | 0,025233369 | 0,325 | 0,1   | 1         | 1,017644292   | 0,982661631     | 3,25            |
| CRYGS                                                                                    | 0,052279021 | 0,02522759  | 0,038 | 0     | 1         | 1,017640215   | 0,982665568     | #DIV/0!         |
| ZNF69                                                                                    | 0,052279021 | 0,025215367 | 0,038 | 0     | 1         | 1,017631594   | 0,982673893     | #DIV/0!         |
| TM7SF2                                                                                   | 0,223365318 | 0,025211035 | 0,038 | 0,01  | 1         | 1,017628538   | 0,982676844     | 3,8             |
| NUDCD1                                                                                   | 0,02343883  | 0,025183477 | 0,175 | 0,06  | 1         | 1,0176091     | 0,982695615     | 2,916666667     |
| ZNF284                                                                                   | 0,114652585 | 0,025182086 | 0,025 | 0     | 1         | 1,017608119   | 0,982696562     | #DIV/0!         |
| C9orf50                                                                                  | 0,026474273 | 0,025136509 | 0,138 | 0,04  | 1         | 1,017575971   | 0,982727608     | 3,45            |

Supplementary Table 4

| Differentially expressed genes_keloid-CCD_ comparing SC-Keloid vs. (SC-Myel, SC-Nonmyel) |             |             |       |       |           |               |                 |                 |
|------------------------------------------------------------------------------------------|-------------|-------------|-------|-------|-----------|---------------|-----------------|-----------------|
| gene                                                                                     | p_val       | avg_log2FC  | pct.1 | pct.2 | p_val_adj | Foldchange_UP | Foldchange_DOWN | Ratio_pct1_pct2 |
| LYAR                                                                                     | 0,000143127 | 0,025097309 | 0,438 | 0,13  | 1         | 1,017548323   | 0,98275431      | 3,369230769     |
| PCDHGB1                                                                                  | 0,114652585 | 0,025086387 | 0,025 | 0     | 1         | 1,01754062    | 0,98276175      | #DIV/0!         |
| LINC00662                                                                                | 0,021569568 | 0,025080117 | 0,175 | 0,06  | 1         | 1,017536197   | 0,982766021     | 2,916666667     |
| SLC35C1                                                                                  | 0,208200632 | 0,025033587 | 0,088 | 0,04  | 1         | 1,01750338    | 0,982797718     | 2,2             |
| ATP10D                                                                                   | 0,008831168 | 0,02499569  | 0,2   | 0,06  | 1         | 1,017476653   | 0,982823534     | 3,333333333     |
| ZNF502                                                                                   | 0,114652585 | 0,024984041 | 0,025 | 0     | 1         | 1,017468437   | 0,98283147      | #DIV/0!         |
| ATP5MGL                                                                                  | 0,268357209 | 0,024983222 | 0,013 | 0     | 1         | 1,017467859   | 0,982832029     | #DIV/0!         |
| CRYBB2                                                                                   | 0,268357209 | 0,024983222 | 0,013 | 0     | 1         | 1,017467859   | 0,982832029     | #DIV/0!         |
| CTF1                                                                                     | 0,268357209 | 0,024983222 | 0,013 | 0     | 1         | 1,017467859   | 0,982832029     | #DIV/0!         |
| WDR75                                                                                    | 0,003272114 | 0,024964985 | 0,2   | 0,05  | 1         | 1,017454997   | 0,982844453     | 4               |
| ZNF853                                                                                   | 0,022235805 | 0,024932561 | 0,212 | 0,08  | 1         | 1,017432131   | 0,982866542     | 2,65            |
| VCAM1                                                                                    | 0,114652585 | 0,02492604  | 0,025 | 0     | 1         | 1,017427532   | 0,982870984     | #DIV/0!         |
| VIM-AS1                                                                                  | 0,488500108 | 0,024876217 | 0,038 | 0,02  | 1         | 1,017392396   | 0,982904928     | 1,9             |
| NUFIP1                                                                                   | 0,030337439 | 0,024857209 | 0,188 | 0,07  | 1         | 1,017378992   | 0,982917878     | 2,685714286     |
| SYNJ2                                                                                    | 0,219108376 | 0,024853459 | 0,038 | 0,01  | 1         | 1,017376347   | 0,982920433     | 3,8             |
| AGAP1                                                                                    | 0,015794214 | 0,024833482 | 0,362 | 0,16  | 1         | 1,01736226    | 0,982934043     | 2,2625          |
| MT-ND6                                                                                   | 0,007280643 | 0,024816008 | 0,225 | 0,07  | 1         | 1,017349937   | 0,982945949     | 3,214285714     |
| IKBKE                                                                                    | 0,11122839  | 0,024810991 | 0,05  | 0,01  | 1         | 1,017346399   | 0,982949368     | 5               |
| RPL35A                                                                                   | 0,613401932 | 0,024809317 | 1     | 1     | 1         | 1,017345219   | 0,982950508     | 1               |
| COL18A1-AS1                                                                              | 0,268357209 | 0,024797706 | 0,013 | 0     | 1         | 1,017337032   | 0,982958419     | #DIV/0!         |
| SP140                                                                                    | 0,268357209 | 0,024797706 | 0,013 | 0     | 1         | 1,017337032   | 0,982958419     | #DIV/0!         |
| ZNF214                                                                                   | 0,268357209 | 0,024797706 | 0,013 | 0     | 1         | 1,017337032   | 0,982958419     | #DIV/0!         |
| OPLAH                                                                                    | 0,114652585 | 0,024796284 | 0,025 | 0     | 1         | 1,017336029   | 0,982959387     | #DIV/0!         |
| RNF43                                                                                    | 0,114652585 | 0,024788517 | 0,025 | 0     | 1         | 1,017330552   | 0,98296468      | #DIV/0!         |
| PLD6                                                                                     | 0,055334082 | 0,024716169 | 0,062 | 0,01  | 1         | 1,017279536   | 0,983013975     | 6,2             |
| CRACR2B                                                                                  | 0,114652585 | 0,024714809 | 0,025 | 0     | 1         | 1,017278577   | 0,983014901     | #DIV/0!         |
| GHR                                                                                      | 0,114652585 | 0,024687689 | 0,025 | 0     | 1         | 1,017259454   | 0,98303338      | #DIV/0!         |
| DIRAS3                                                                                   | 0,006033178 | 0,024664638 | 0,225 | 0,07  | 1         | 1,017243201   | 0,983049087     | 3,214285714     |
| SIX2                                                                                     | 0,114652585 | 0,024641875 | 0,025 | 0     | 1         | 1,017227151   | 0,983064597     | #DIV/0!         |
| SPIN2B                                                                                   | 0,152427848 | 0,02463548  | 0,062 | 0,02  | 1         | 1,017222642   | 0,983068955     | 3,1             |

Supplementary Table 4

| Differentially expressed genes_keloid-CCD_comparing SC-Keloid vs. (SC-Myel, SC-Nonmyel) |             |             |       |       |           |               |                 |                 |
|-----------------------------------------------------------------------------------------|-------------|-------------|-------|-------|-----------|---------------|-----------------|-----------------|
| gene                                                                                    | p_val       | avg_log2FC  | pct.1 | pct.2 | p_val_adj | Foldchange_UP | Foldchange_DOWN | Ratio_pct1_pct2 |
| FAM71F2                                                                                 | 0,052279021 | 0,024615792 | 0,038 | 0     | 1         | 1,01720876    | 0,983082371     | #DIV/0!         |
| TRIM73                                                                                  | 0,439855668 | 0,024607788 | 0,025 | 0,01  | 1         | 1,017203117   | 0,983087825     | 2,5             |
| DSC2                                                                                    | 0,268357209 | 0,024593945 | 0,013 | 0     | 1         | 1,017193356   | 0,983097258     | #DIV/0!         |
| BICDL2                                                                                  | 0,114652585 | 0,024590474 | 0,025 | 0     | 1         | 1,01719091    | 0,983099623     | #DIV/0!         |
| PRDX3                                                                                   | 0,012813899 | 0,024585146 | 0,625 | 0,29  | 1         | 1,017187153   | 0,983103254     | 2,155172414     |
| IPPK                                                                                    | 0,219108376 | 0,024583584 | 0,038 | 0,01  | 1         | 1,017186052   | 0,983104318     | 3,8             |
| TRAM2                                                                                   | 0,000228605 | 0,024543653 | 0,438 | 0,14  | 1         | 1,017157898   | 0,983131529     | 3,128571429     |
| ARL17A                                                                                  | 0,439855668 | 0,024466675 | 0,025 | 0,01  | 1         | 1,017103627   | 0,983183988     | 2,5             |
| PDLIM5                                                                                  | 0,009254506 | 0,024420304 | 0,325 | 0,13  | 1         | 1,017070936   | 0,98321559      | 2,5             |
| AGBL5-AS1                                                                               | 0,268357209 | 0,024418277 | 0,013 | 0     | 1         | 1,017069507   | 0,983216971     | #DIV/0!         |
| LINC00352                                                                               | 0,268357209 | 0,024418277 | 0,013 | 0     | 1         | 1,017069507   | 0,983216971     | #DIV/0!         |
| SH3TC2                                                                                  | 0,268357209 | 0,024418277 | 0,013 | 0     | 1         | 1,017069507   | 0,983216971     | #DIV/0!         |
| MRPL49                                                                                  | 0,019307376 | 0,024399196 | 0,25  | 0,1   | 1         | 1,017056055   | 0,983229975     | 2,5             |
| RAB36                                                                                   | 0,223365318 | 0,024398308 | 0,038 | 0,01  | 1         | 1,017055429   | 0,983230581     | 3,8             |
| GNMT                                                                                    | 0,114652585 | 0,024352511 | 0,025 | 0     | 1         | 1,017023145   | 0,983261792     | #DIV/0!         |
| SKIDA1                                                                                  | 0,052279021 | 0,024337503 | 0,038 | 0     | 1         | 1,017012565   | 0,983272021     | #DIV/0!         |
| FAP                                                                                     | 0,219108376 | 0,024261018 | 0,038 | 0,01  | 1         | 1,016958649   | 0,983324151     | 3,8             |
| PHF2                                                                                    | 0,002837219 | 0,024190485 | 0,288 | 0,09  | 1         | 1,016908931   | 0,983372227     | 3,2             |
| IVD                                                                                     | 0,001272061 | 0,024189461 | 0,262 | 0,07  | 1         | 1,016908209   | 0,983372925     | 3,742857143     |
| ANKRD42                                                                                 | 0,008260951 | 0,024183758 | 0,162 | 0,04  | 1         | 1,01690419    | 0,983376812     | 4,05            |
| STK38L                                                                                  | 0,012429073 | 0,024174989 | 0,112 | 0,02  | 1         | 1,016898008   | 0,98338279      | 5,6             |
| NRL                                                                                     | 0,439855668 | 0,024151326 | 0,025 | 0,01  | 1         | 1,01688133    | 0,983398918     | 2,5             |
| GRIA3                                                                                   | 0,268357209 | 0,024150129 | 0,013 | 0     | 1         | 1,016880486   | 0,983399734     | #DIV/0!         |
| SLC18A2                                                                                 | 0,268357209 | 0,024150129 | 0,013 | 0     | 1         | 1,016880486   | 0,983399734     | #DIV/0!         |
| ZNF658                                                                                  | 0,268357209 | 0,024150129 | 0,013 | 0     | 1         | 1,016880486   | 0,983399734     | #DIV/0!         |
| PARP3                                                                                   | 0,027302098 | 0,024117511 | 0,138 | 0,04  | 1         | 1,016857495   | 0,983421969     | 3,45            |
| NDST3                                                                                   | 0,114652585 | 0,024110106 | 0,025 | 0     | 1         | 1,016852276   | 0,983427016     | #DIV/0!         |
| UFSP1                                                                                   | 0,114652585 | 0,024076504 | 0,025 | 0     | 1         | 1,016828593   | 0,983449922     | #DIV/0!         |
| LAS1L                                                                                   | 0,001616235 | 0,024046283 | 0,238 | 0,06  | 1         | 1,016807293   | 0,983470523     | 3,966666667     |
| NBR1                                                                                    | 0,026747286 | 0,024037671 | 0,275 | 0,12  | 1         | 1,016801223   | 0,983476394     | 2,291666667     |

Supplementary Table 4

| Differentially expressed genes_keloid-CCD_ comparing SC-Keloid vs. (SC-Myel, SC-Nonmyel) |             |             |       |       |           |               |                 |                 |
|------------------------------------------------------------------------------------------|-------------|-------------|-------|-------|-----------|---------------|-----------------|-----------------|
| gene                                                                                     | p_val       | avg_log2FC  | pct.1 | pct.2 | p_val_adj | Foldchange_UP | Foldchange_DOWN | Ratio_pct1_pct2 |
| PPP1R3B                                                                                  | 0,223365318 | 0,024035808 | 0,038 | 0,01  | 1         | 1,01679991    | 0,983477664     | 3,8             |
| AGAP5                                                                                    | 0,223365318 | 0,024021469 | 0,038 | 0,01  | 1         | 1,016789804   | 0,983487439     | 3,8             |
| PLCL1                                                                                    | 0,114652585 | 0,023981233 | 0,025 | 0     | 1         | 1,016761447   | 0,983514868     | #DIV/0!         |
| HOXB6                                                                                    | 0,154906213 | 0,023947647 | 0,062 | 0,02  | 1         | 1,016737777   | 0,983537765     | 3,1             |
| KRT18                                                                                    | 0,005473966 | 0,023793537 | 0,15  | 0,03  | 1         | 1,016629174   | 0,983642832     | 5               |
| ECM2                                                                                     | 0,052279021 | 0,023790522 | 0,038 | 0     | 1         | 1,016627049   | 0,983644888     | #DIV/0!         |
| NTSR1                                                                                    | 0,114652585 | 0,023782235 | 0,025 | 0     | 1         | 1,01662121    | 0,983650538     | #DIV/0!         |
| NKAIN4                                                                                   | 0,153278583 | 0,023781714 | 0,212 | 0,12  | 1         | 1,016620842   | 0,983650894     | 1,766666667     |
| APOM                                                                                     | 0,034247231 | 0,023759936 | 0,112 | 0,03  | 1         | 1,016605496   | 0,983665742     | 3,733333333     |
| MRPL47                                                                                   | 0,003333959 | 0,023756926 | 0,613 | 0,27  | 1         | 1,016603375   | 0,983667795     | 2,27037037      |
| TNIP2                                                                                    | 0,002847788 | 0,023752084 | 0,412 | 0,16  | 1         | 1,016599964   | 0,983671095     | 2,575           |
| GAS2L1                                                                                   | 0,000504296 | 0,023718745 | 0,388 | 0,12  | 1         | 1,016576471   | 0,983693827     | 3,233333333     |
| PLXNA2                                                                                   | 0,114652585 | 0,023668431 | 0,025 | 0     | 1         | 1,016541018   | 0,983728135     | #DIV/0!         |
| KRTAP5-AS1                                                                               | 0,223365318 | 0,023608617 | 0,038 | 0,01  | 1         | 1,016498874   | 0,983768921     | 3,8             |
| CEMIP                                                                                    | 0,114652585 | 0,023593314 | 0,025 | 0     | 1         | 1,016488092   | 0,983779356     | #DIV/0!         |
| LMF1                                                                                     | 0,031919537 | 0,023581478 | 0,188 | 0,07  | 1         | 1,016479752   | 0,983787427     | 2,685714286     |
| VOPP1                                                                                    | 0,031517523 | 0,023573392 | 0,188 | 0,07  | 1         | 1,016474056   | 0,98379294      | 2,685714286     |
| ABCC4                                                                                    | 0,114652585 | 0,023571331 | 0,025 | 0     | 1         | 1,016472603   | 0,983794346     | #DIV/0!         |
| HSD17B14                                                                                 | 0,114652585 | 0,02356978  | 0,025 | 0     | 1         | 1,016471511   | 0,983795404     | #DIV/0!         |
| AC004448.2                                                                               | 0,268357209 | 0,023547807 | 0,013 | 0     | 1         | 1,016456029   | 0,983810387     | #DIV/0!         |
| HROB                                                                                     | 0,268357209 | 0,023547807 | 0,013 | 0     | 1         | 1,016456029   | 0,983810387     | #DIV/0!         |
| IL24                                                                                     | 0,268357209 | 0,023547807 | 0,013 | 0     | 1         | 1,016456029   | 0,983810387     | #DIV/0!         |
| KCNH3                                                                                    | 0,268357209 | 0,023547807 | 0,013 | 0     | 1         | 1,016456029   | 0,983810387     | #DIV/0!         |
| SLC9B2                                                                                   | 0,01362345  | 0,023534219 | 0,088 | 0,01  | 1         | 1,016446455   | 0,983819654     | 8,8             |
| NTMT1                                                                                    | 0,002371417 | 0,023531436 | 0,575 | 0,24  | 1         | 1,016444495   | 0,983821551     | 2,395833333     |
| COX4I2                                                                                   | 0,874019543 | 0,023529318 | 0,013 | 0,01  | 1         | 1,016443003   | 0,983822996     | 1,3             |
| AGT                                                                                      | 0,268357209 | 0,023504838 | 0,013 | 0     | 1         | 1,016425756   | 0,98383969      | #DIV/0!         |
| BOLA2                                                                                    | 0,268357209 | 0,023504838 | 0,013 | 0     | 1         | 1,016425756   | 0,98383969      | #DIV/0!         |
| EPHX2                                                                                    | 0,268357209 | 0,023504838 | 0,013 | 0     | 1         | 1,016425756   | 0,98383969      | #DIV/0!         |
| HCAR1                                                                                    | 0,268357209 | 0,023504838 | 0,013 | 0     | 1         | 1,016425756   | 0,98383969      | #DIV/0!         |

Supplementary Table 4

| Differentially expressed genes_keloid-CCD_ comparing SC-Keloid vs. (SC-Myel, SC-Nonmyel) |             |             |       |       |           |               |                 |                 |
|------------------------------------------------------------------------------------------|-------------|-------------|-------|-------|-----------|---------------|-----------------|-----------------|
| gene                                                                                     | p_val       | avg_log2FC  | pct.1 | pct.2 | p_val_adj | Foldchange_UP | Foldchange_DOWN | Ratio_pct1_pct2 |
| IL12A-AS1                                                                                | 0,268357209 | 0,023504838 | 0,013 | 0     | 1         | 1,016425756   | 0,98383969      | #DIV/0!         |
| NAT16                                                                                    | 0,268357209 | 0,023504838 | 0,013 | 0     | 1         | 1,016425756   | 0,98383969      | #DIV/0!         |
| OR5AU1                                                                                   | 0,268357209 | 0,023504838 | 0,013 | 0     | 1         | 1,016425756   | 0,98383969      | #DIV/0!         |
| SLC26A10                                                                                 | 0,268357209 | 0,023504838 | 0,013 | 0     | 1         | 1,016425756   | 0,98383969      | #DIV/0!         |
| SLC4A1                                                                                   | 0,268357209 | 0,023504838 | 0,013 | 0     | 1         | 1,016425756   | 0,98383969      | #DIV/0!         |
| IL15RA                                                                                   | 0,114652585 | 0,023416912 | 0,025 | 0     | 1         | 1,016363811   | 0,983899652     | #DIV/0!         |
| NPIPA1                                                                                   | 0,157415062 | 0,023379233 | 0,062 | 0,02  | 1         | 1,016337267   | 0,983925349     | 3,1             |
| NFS1                                                                                     | 0,002482056 | 0,023377731 | 0,188 | 0,04  | 1         | 1,016335912   | 0,983926661     | 4,7             |
| CCDC183                                                                                  | 0,223365318 | 0,023358652 | 0,038 | 0,01  | 1         | 1,016322768   | 0,983939386     | 3,8             |
| PLCD1                                                                                    | 0,219108376 | 0,023348525 | 0,038 | 0,01  | 1         | 1,016315634   | 0,983946293     | 3,8             |
| INO80E                                                                                   | 0,002421923 | 0,023342245 | 0,375 | 0,14  | 1         | 1,01631121    | 0,983950576     | 2,678571429     |
| ZNF557                                                                                   | 0,11122839  | 0,023271566 | 0,05  | 0,01  | 1         | 1,016261421   | 0,983998782     | 5               |
| FGF22                                                                                    | 0,114652585 | 0,023270188 | 0,025 | 0     | 1         | 1,016260451   | 0,983999721     | #DIV/0!         |
| CARMIL2                                                                                  | 0,114652585 | 0,023233622 | 0,025 | 0     | 1         | 1,016234693   | 0,984024662     | #DIV/0!         |
| MPND                                                                                     | 0,006404327 | 0,023233013 | 0,125 | 0,02  | 1         | 1,016234264   | 0,984025077     | 6,25            |
| HACD1                                                                                    | 0,033686337 | 0,023227967 | 0,112 | 0,03  | 1         | 1,01623071    | 0,984028519     | 3,733333333     |
| MRPL38                                                                                   | 0,023437611 | 0,023197445 | 0,1   | 0,02  | 1         | 1,016209211   | 0,984049337     | 5               |
| PPP5D1P                                                                                  | 0,052279021 | 0,023192373 | 0,038 | 0     | 1         | 1,016205638   | 0,984052797     | #DIV/0!         |
| GPN2                                                                                     | 0,035392992 | 0,023138583 | 0,112 | 0,03  | 1         | 1,016167749   | 0,984089488     | 3,733333333     |
| HMBOX1                                                                                   | 0,033833954 | 0,023117086 | 0,2   | 0,08  | 1         | 1,016152608   | 0,984104151     | 2,5             |
| RGPD2                                                                                    | 0,114652585 | 0,023100228 | 0,025 | 0     | 1         | 1,016140735   | 0,98411565      | #DIV/0!         |
| FBXO43                                                                                   | 0,114652585 | 0,023093079 | 0,025 | 0     | 1         | 1,016135699   | 0,984120527     | #DIV/0!         |
| AMOTL1                                                                                   | 0,004687554 | 0,023059498 | 0,35  | 0,13  | 1         | 1,016112048   | 0,984143434     | 2,692307692     |
| CD72                                                                                     | 0,268357209 | 0,023015852 | 0,013 | 0     | 1         | 1,016081307   | 0,984173208     | #DIV/0!         |
| DCST2                                                                                    | 0,268357209 | 0,023015852 | 0,013 | 0     | 1         | 1,016081307   | 0,984173208     | #DIV/0!         |
| DOCK8-AS1                                                                                | 0,268357209 | 0,023015852 | 0,013 | 0     | 1         | 1,016081307   | 0,984173208     | #DIV/0!         |
| EGR4                                                                                     | 0,268357209 | 0,023015852 | 0,013 | 0     | 1         | 1,016081307   | 0,984173208     | #DIV/0!         |
| INSM2                                                                                    | 0,268357209 | 0,023015852 | 0,013 | 0     | 1         | 1,016081307   | 0,984173208     | #DIV/0!         |
| KIF26B                                                                                   | 0,268357209 | 0,023015852 | 0,013 | 0     | 1         | 1,016081307   | 0,984173208     | #DIV/0!         |
| MRPL48                                                                                   | 0,002162785 | 0,023011516 | 0,288 | 0,09  | 1         | 1,016078254   | 0,984176166     | 3,2             |

Supplementary Table 4

| Differentially expressed genes_keloid-CCD_ comparing SC-Keloid vs. (SC-Myel, SC-Nonmyel) |             |             |       |       |           |               |                 |                 |
|------------------------------------------------------------------------------------------|-------------|-------------|-------|-------|-----------|---------------|-----------------|-----------------|
| gene                                                                                     | p_val       | avg_log2FC  | pct.1 | pct.2 | p_val_adj | Foldchange_UP | Foldchange_DOWN | Ratio_pct1_pct2 |
| SLC39A11                                                                                 | 0,055334082 | 0,02300033  | 0,062 | 0,01  | 1         | 1,016070375   | 0,984183797     | 6,2             |
| ANKMY1                                                                                   | 0,114652585 | 0,022999678 | 0,025 | 0     | 1         | 1,016069916   | 0,984184242     | #DIV/0!         |
| PRELID2                                                                                  | 0,061661173 | 0,022992742 | 0,1   | 0,03  | 1         | 1,016065031   | 0,984188973     | 3,333333333     |
| NMD3                                                                                     | 0,000775487 | 0,022979338 | 0,338 | 0,1   | 1         | 1,016055591   | 0,984198118     | 3,38            |
| SPHK2                                                                                    | 0,019378739 | 0,022897308 | 0,125 | 0,03  | 1         | 1,015997821   | 0,984254079     | 4,166666667     |
| SKP2                                                                                     | 0,055334082 | 0,022888895 | 0,062 | 0,01  | 1         | 1,015991897   | 0,984259819     | 6,2             |
| AVPR1A                                                                                   | 0,874019543 | 0,022851901 | 0,013 | 0,01  | 1         | 1,015965844   | 0,984285058     | 1,3             |
| HIGD1B                                                                                   | 0,114652585 | 0,022836613 | 0,025 | 0     | 1         | 1,015955078   | 0,984295489     | #DIV/0!         |
| SFMBT1                                                                                   | 0,027487357 | 0,022814538 | 0,075 | 0,01  | 1         | 1,015939533   | 0,984310549     | 7,5             |
| OSTM1                                                                                    | 0,00078565  | 0,022797511 | 0,488 | 0,18  | 1         | 1,015927543   | 0,984322167     | 2,711111111     |
| TRERF1                                                                                   | 0,114652585 | 0,022791206 | 0,025 | 0     | 1         | 1,015923103   | 0,984326469     | #DIV/0!         |
| WARS1                                                                                    | 0,001260506 | 0,022773113 | 0,462 | 0,17  | 1         | 1,015910362   | 0,984338813     | 2,717647059     |
| MIR497HG                                                                                 | 0,114652585 | 0,022751645 | 0,025 | 0     | 1         | 1,015895245   | 0,98435346      | #DIV/0!         |
| ZNF407-AS1                                                                               | 0,046263823 | 0,022744436 | 0,125 | 0,04  | 1         | 1,015890169   | 0,984358379     | 3,125           |
| PAFAH1B2                                                                                 | 0,005570565 | 0,022727956 | 0,588 | 0,27  | 1         | 1,015878564   | 0,984369624     | 2,177777778     |
| YEATS2                                                                                   | 0,129866939 | 0,022725456 | 0,1   | 0,04  | 1         | 1,015876804   | 0,98437133      | 2,5             |
| ARMT1                                                                                    | 0,033125374 | 0,022723318 | 0,15  | 0,05  | 1         | 1,015875299   | 0,984372788     | 3               |
| C9orf153                                                                                 | 0,114652585 | 0,022686841 | 0,025 | 0     | 1         | 1,015849614   | 0,984397677     | #DIV/0!         |
| TNFRSF9                                                                                  | 0,114652585 | 0,022667362 | 0,025 | 0     | 1         | 1,015835898   | 0,984410969     | #DIV/0!         |
| NHLRC1                                                                                   | 0,488500108 | 0,02265482  | 0,038 | 0,02  | 1         | 1,015827067   | 0,984419527     | 1,9             |
| DMRTA1                                                                                   | 0,223365318 | 0,022654187 | 0,038 | 0,01  | 1         | 1,015826621   | 0,984419958     | 3,8             |
| GFOD2                                                                                    | 0,001670062 | 0,022647903 | 0,238 | 0,06  | 1         | 1,015822196   | 0,984424246     | 3,966666667     |
| PCBP2                                                                                    | 0,168509154 | 0,022606657 | 0,912 | 0,66  | 1         | 1,015793155   | 0,984452391     | 1,381818182     |
| DACH1                                                                                    | 0,114652585 | 0,022604663 | 0,025 | 0     | 1         | 1,015791751   | 0,984453751     | #DIV/0!         |
| SHISA2                                                                                   | 0,114652585 | 0,022604663 | 0,025 | 0     | 1         | 1,015791751   | 0,984453751     | #DIV/0!         |
| FAM126B                                                                                  | 0,148848497 | 0,022603972 | 0,188 | 0,1   | 1         | 1,015791264   | 0,984454223     | 1,88            |
| SIN3B                                                                                    | 0,011441655 | 0,022591008 | 0,212 | 0,07  | 1         | 1,015782136   | 0,98446307      | 3,028571429     |
| EOGT                                                                                     | 0,045399153 | 0,022581012 | 0,088 | 0,02  | 1         | 1,015775098   | 0,984469891     | 4,4             |
| CARD14                                                                                   | 0,268357209 | 0,022566547 | 0,013 | 0     | 1         | 1,015764914   | 0,984479762     | #DIV/0!         |
| LRRC55                                                                                   | 0,268357209 | 0,022566547 | 0,013 | 0     | 1         | 1,015764914   | 0,984479762     | #DIV/0!         |

Supplementary Table 4

| Differentially expressed genes_keloid-CCD_ comparing SC-Keloid vs. (SC-Myel, SC-Nonmyel) |             |             |       |       |           |               |                 |                 |
|------------------------------------------------------------------------------------------|-------------|-------------|-------|-------|-----------|---------------|-----------------|-----------------|
| gene                                                                                     | p_val       | avg_log2FC  | pct.1 | pct.2 | p_val_adj | Foldchange_UP | Foldchange_DOWN | Ratio_pct1_pct2 |
| MYB                                                                                      | 0,268357209 | 0,022566547 | 0,013 | 0     | 1         | 1,015764914   | 0,984479762     | #DIV/0!         |
| NEFH                                                                                     | 0,268357209 | 0,022566547 | 0,013 | 0     | 1         | 1,015764914   | 0,984479762     | #DIV/0!         |
| PPP1R1B                                                                                  | 0,268357209 | 0,022566547 | 0,013 | 0     | 1         | 1,015764914   | 0,984479762     | #DIV/0!         |
| PSD                                                                                      | 0,268357209 | 0,022566547 | 0,013 | 0     | 1         | 1,015764914   | 0,984479762     | #DIV/0!         |
| SORL1                                                                                    | 0,268357209 | 0,022566547 | 0,013 | 0     | 1         | 1,015764914   | 0,984479762     | #DIV/0!         |
| APOBEC3B                                                                                 | 0,052279021 | 0,022559365 | 0,038 | 0     | 1         | 1,015759857   | 0,984484662     | #DIV/0!         |
| PHETA1                                                                                   | 0,001624218 | 0,02255476  | 0,125 | 0,01  | 1         | 1,015756615   | 0,984487805     | 12,5            |
| ZBTB3                                                                                    | 0,114652585 | 0,022537193 | 0,025 | 0     | 1         | 1,015744247   | 0,984499792     | #DIV/0!         |
| LHX6                                                                                     | 0,114652585 | 0,022514379 | 0,025 | 0     | 1         | 1,015728185   | 0,984515361     | #DIV/0!         |
| MTMR14                                                                                   | 0,001782697 | 0,022498841 | 0,238 | 0,06  | 1         | 1,015717245   | 0,984525964     | 3,966666667     |
| CACNA1D                                                                                  | 0,059755621 | 0,022480182 | 0,1   | 0,03  | 1         | 1,015704109   | 0,984538697     | 3,333333333     |
| ILK                                                                                      | 0,148038307 | 0,022429811 | 0,812 | 0,5   | 1         | 1,015668646   | 0,984573073     | 1,624           |
| REPIN1                                                                                   | 0,000745011 | 0,022381902 | 0,45  | 0,16  | 1         | 1,015634919   | 0,984605769     | 2,8125          |
| C17orf97                                                                                 | 0,114652585 | 0,022363247 | 0,025 | 0     | 1         | 1,015621785   | 0,984618501     | #DIV/0!         |
| LINC00460                                                                                | 0,114652585 | 0,02229677  | 0,025 | 0     | 1         | 1,015574988   | 0,984663872     | #DIV/0!         |
| ADGRB1                                                                                   | 0,114652585 | 0,022288522 | 0,025 | 0     | 1         | 1,015569183   | 0,984669501     | #DIV/0!         |
| COL16A1                                                                                  | 0,0027636   | 0,022279791 | 0,725 | 0,32  | 1         | 1,015563036   | 0,98467546      | 2,265625        |
| MANEA-DT                                                                                 | 0,114652585 | 0,022278507 | 0,025 | 0     | 1         | 1,015562132   | 0,984676336     | #DIV/0!         |
| SRRM5                                                                                    | 0,114652585 | 0,022273356 | 0,025 | 0     | 1         | 1,015558507   | 0,984679852     | #DIV/0!         |
| TMEM25                                                                                   | 0,085199008 | 0,022266793 | 0,075 | 0,02  | 1         | 1,015553887   | 0,984684331     | 3,75            |
| TCN2                                                                                     | 0,114652585 | 0,0222575   | 0,025 | 0     | 1         | 1,015547345   | 0,984690674     | #DIV/0!         |
| REXO4                                                                                    | 0,009017324 | 0,022197796 | 0,238 | 0,08  | 1         | 1,015505319   | 0,984731425     | 2,975           |
| IL4R                                                                                     | 0,023885059 | 0,02216389  | 0,1   | 0,02  | 1         | 1,015481453   | 0,984754568     | 5               |
| RAB33A                                                                                   | 0,114652585 | 0,022135818 | 0,025 | 0     | 1         | 1,015461694   | 0,98477373      | #DIV/0!         |
| CCDC134                                                                                  | 0,114652585 | 0,02212815  | 0,025 | 0     | 1         | 1,015456296   | 0,984778964     | #DIV/0!         |
| TMEM217                                                                                  | 0,035392992 | 0,022071676 | 0,112 | 0,03  | 1         | 1,015416547   | 0,984817514     | 3,733333333     |
| RAPGEF1                                                                                  | 0,004068718 | 0,022066155 | 0,175 | 0,04  | 1         | 1,015412661   | 0,984821283     | 4,375           |
| ZNF695                                                                                   | 0,052279021 | 0,021995782 | 0,038 | 0     | 1         | 1,015363132   | 0,984869322     | #DIV/0!         |
| ACP2                                                                                     | 0,002937191 | 0,021979895 | 0,162 | 0,03  | 1         | 1,015351951   | 0,984880168     | 5,4             |
| SPIN4                                                                                    | 0,152427848 | 0,021972678 | 0,062 | 0,02  | 1         | 1,015346872   | 0,984885094     | 3,1             |

Supplementary Table 4

| Differentially expressed genes_keloid-CCD_ comparing SC-Keloid vs. (SC-Myel, SC-Nonmyel) |             |             |       |       |           |               |                 |                 |
|------------------------------------------------------------------------------------------|-------------|-------------|-------|-------|-----------|---------------|-----------------|-----------------|
| gene                                                                                     | p_val       | avg_log2FC  | pct.1 | pct.2 | p_val_adj | Foldchange_UP | Foldchange_DOWN | Ratio_pct1_pct2 |
| GSN-AS1                                                                                  | 0,114652585 | 0,021936057 | 0,025 | 0     | 1         | 1,015321099   | 0,984910095     | #DIV/0!         |
| ZNF770                                                                                   | 0,005638626 | 0,021927134 | 0,25  | 0,08  | 1         | 1,015314819   | 0,984916187     | 3,125           |
| MFSD11                                                                                   | 0,015657851 | 0,021901155 | 0,275 | 0,11  | 1         | 1,015296536   | 0,984933922     | 2,5             |
| ZNF419                                                                                   | 0,114652585 | 0,021898102 | 0,025 | 0     | 1         | 1,015294388   | 0,984936007     | #DIV/0!         |
| ORC1                                                                                     | 0,052279021 | 0,02188969  | 0,038 | 0     | 1         | 1,015288468   | 0,98494175      | #DIV/0!         |
| ZBED5-AS1                                                                                | 0,276717465 | 0,021880431 | 0,05  | 0,02  | 1         | 1,015281952   | 0,984948071     | 2,5             |
| RASGRP3                                                                                  | 0,214910006 | 0,021877005 | 0,038 | 0,01  | 1         | 1,015279541   | 0,98495041      | 3,8             |
| SALL2                                                                                    | 0,114652585 | 0,021872498 | 0,025 | 0     | 1         | 1,015276369   | 0,984953487     | #DIV/0!         |
| SLC1A2                                                                                   | 0,114652585 | 0,021823332 | 0,025 | 0     | 1         | 1,01524177    | 0,984987054     | #DIV/0!         |
| S100A7                                                                                   | 0,114652585 | 0,02181008  | 0,025 | 0     | 1         | 1,015232444   | 0,984996102     | #DIV/0!         |
| FBXO46                                                                                   | 0,108976957 | 0,021792911 | 0,05  | 0,01  | 1         | 1,015220363   | 0,985007824     | 5               |
| GPATCH1                                                                                  | 0,060702201 | 0,021781655 | 0,1   | 0,03  | 1         | 1,015212441   | 0,985015509     | 3,333333333     |
| GBGT1                                                                                    | 0,114652585 | 0,021778276 | 0,025 | 0     | 1         | 1,015210064   | 0,985017816     | #DIV/0!         |
| CLDN7                                                                                    | 0,114652585 | 0,021748918 | 0,025 | 0     | 1         | 1,015189406   | 0,98503786      | #DIV/0!         |
| CCL22                                                                                    | 0,268357209 | 0,021723819 | 0,013 | 0     | 1         | 1,015171744   | 0,985054998     | #DIV/0!         |
| PLEK                                                                                     | 0,268357209 | 0,021723819 | 0,013 | 0     | 1         | 1,015171744   | 0,985054998     | #DIV/0!         |
| SIAE                                                                                     | 0,114652585 | 0,021719382 | 0,025 | 0     | 1         | 1,015168622   | 0,985058027     | #DIV/0!         |
| AGO4                                                                                     | 0,085199008 | 0,021687398 | 0,075 | 0,02  | 1         | 1,015146116   | 0,985079866     | 3,75            |
| TLE6                                                                                     | 0,114652585 | 0,021668288 | 0,025 | 0     | 1         | 1,01513267    | 0,985092914     | #DIV/0!         |
| WASHC4                                                                                   | 0,000561904 | 0,021652093 | 0,45  | 0,15  | 1         | 1,015121274   | 0,985103973     | 3               |
| CD79A                                                                                    | 0,114652585 | 0,021639989 | 0,025 | 0     | 1         | 1,015112757   | 0,985112238     | #DIV/0!         |
| FBXO48                                                                                   | 0,11122839  | 0,021628685 | 0,05  | 0,01  | 1         | 1,015104804   | 0,985119956     | 5               |
| CHRNA5                                                                                   | 0,114652585 | 0,021624413 | 0,025 | 0     | 1         | 1,015101798   | 0,985122873     | #DIV/0!         |
| TNPO3                                                                                    | 0,006211613 | 0,02158996  | 0,225 | 0,07  | 1         | 1,015077556   | 0,9851464       | 3,214285714     |
| RNASE4                                                                                   | 0,027487357 | 0,021523447 | 0,075 | 0,01  | 1         | 1,015030759   | 0,985191819     | 7,5             |
| ZNF507                                                                                   | 0,011441604 | 0,021523249 | 0,175 | 0,05  | 1         | 1,01503062    | 0,985191954     | 3,5             |
| SSC4D                                                                                    | 0,114652585 | 0,021509548 | 0,025 | 0     | 1         | 1,015020981   | 0,98520131      | #DIV/0!         |
| LRRC75B                                                                                  | 0,008320951 | 0,021485979 | 0,2   | 0,06  | 1         | 1,015004398   | 0,985217406     | 3,333333333     |
| AJM1                                                                                     | 0,114652585 | 0,021466982 | 0,025 | 0     | 1         | 1,014991033   | 0,985230379     | #DIV/0!         |
| ZNF253                                                                                   | 0,223365318 | 0,02144965  | 0,038 | 0,01  | 1         | 1,01497884    | 0,985242215     | 3,8             |



Supplementary Table 4

| Differentially expressed genes_keloid-CCD_ comparing SC-Keloid vs. (SC-Myel, SC-Nonmyel) |             |             |       |       |           |               |                 |                 |
|------------------------------------------------------------------------------------------|-------------|-------------|-------|-------|-----------|---------------|-----------------|-----------------|
| gene                                                                                     | p_val       | avg_log2FC  | pct.1 | pct.2 | p_val_adj | Foldchange_UP | Foldchange_DOWN | Ratio_pct1_pct2 |
| SKAP2                                                                                    | 0,052279021 | 0,021436056 | 0,038 | 0     | 1         | 1,014969276   | 0,985251499     | #DIV/0!         |
| FGF10-AS1                                                                                | 0,268357209 | 0,021432075 | 0,013 | 0     | 1         | 1,014966475   | 0,985254217     | #DIV/0!         |
| HCG27                                                                                    | 0,268357209 | 0,021432075 | 0,013 | 0     | 1         | 1,014966475   | 0,985254217     | #DIV/0!         |
| POPDC2                                                                                   | 0,114652585 | 0,021422801 | 0,025 | 0     | 1         | 1,014959951   | 0,985260551     | #DIV/0!         |
| SPNS2                                                                                    | 0,825988348 | 0,02141856  | 0,025 | 0,02  | 1         | 1,014956967   | 0,985263447     | 1,25            |
| CENPI                                                                                    | 0,052279021 | 0,021409498 | 0,038 | 0     | 1         | 1,014950592   | 0,985269636     | #DIV/0!         |
| B4GALT3                                                                                  | 0,001071889 | 0,021401171 | 0,288 | 0,08  | 1         | 1,014944733   | 0,985275323     | 3,6             |
| AC123768.4                                                                               | 0,114652585 | 0,021323234 | 0,025 | 0     | 1         | 1,014889906   | 0,98532855      | #DIV/0!         |
| PIGL                                                                                     | 0,063616753 | 0,021299389 | 0,1   | 0,03  | 1         | 1,014873132   | 0,985344836     | 3,333333333     |
| RPH3AL                                                                                   | 0,114652585 | 0,021296759 | 0,025 | 0     | 1         | 1,014871282   | 0,985346633     | #DIV/0!         |
| SIRT7                                                                                    | 0,009852533 | 0,021277209 | 0,275 | 0,1   | 1         | 1,014857529   | 0,985359985     | 2,75            |
| CD34                                                                                     | 0,223365318 | 0,021253896 | 0,038 | 0,01  | 1         | 1,01484113    | 0,985375908     | 3,8             |
| NCR3LG1                                                                                  | 0,052279021 | 0,021246509 | 0,038 | 0     | 1         | 1,014835934   | 0,985380953     | #DIV/0!         |
| GLB1L                                                                                    | 0,114652585 | 0,02122703  | 0,025 | 0     | 1         | 1,014822232   | 0,985394258     | #DIV/0!         |
| MORC2                                                                                    | 0,083746858 | 0,021192579 | 0,075 | 0,02  | 1         | 1,014797998   | 0,985417789     | 3,75            |
| MTBP                                                                                     | 0,114652585 | 0,021182292 | 0,025 | 0     | 1         | 1,014790762   | 0,985424816     | #DIV/0!         |
| SLC25A10                                                                                 | 0,023885059 | 0,021176909 | 0,1   | 0,02  | 1         | 1,014786976   | 0,985428492     | 5               |
| REPS1                                                                                    | 0,046263823 | 0,02117522  | 0,125 | 0,04  | 1         | 1,014785788   | 0,985429646     | 3,125           |
| ZMYND19                                                                                  | 0,002827454 | 0,021155121 | 0,162 | 0,03  | 1         | 1,014771651   | 0,985443375     | 5,4             |
| CYP2J2                                                                                   | 0,114652585 | 0,021151527 | 0,025 | 0     | 1         | 1,014769123   | 0,985445829     | #DIV/0!         |
| MAGEE1                                                                                   | 0,114652585 | 0,021122677 | 0,025 | 0     | 1         | 1,01474883    | 0,985465536     | #DIV/0!         |
| SLC4A8                                                                                   | 0,052279021 | 0,021095125 | 0,038 | 0     | 1         | 1,014729451   | 0,985484357     | #DIV/0!         |
| FIGNL1                                                                                   | 0,488500108 | 0,021085467 | 0,038 | 0,02  | 1         | 1,014722658   | 0,985490954     | 1,9             |
| TRNAU1AP                                                                                 | 0,002916894 | 0,02100855  | 0,412 | 0,16  | 1         | 1,01466856    | 0,985543496     | 2,575           |
| GJA3                                                                                     | 0,114652585 | 0,021005474 | 0,025 | 0     | 1         | 1,014666397   | 0,985545597     | #DIV/0!         |
| STON2                                                                                    | 0,066778386 | 0,02094606  | 0,15  | 0,06  | 1         | 1,01462461    | 0,985586186     | 2,5             |
| TBC1D16                                                                                  | 0,230847465 | 0,02092168  | 0,112 | 0,06  | 1         | 1,014607465   | 0,985602841     | 1,866666667     |
| AFF1                                                                                     | 0,047655629 | 0,020913481 | 0,175 | 0,07  | 1         | 1,014601699   | 0,985608442     | 2,5             |
| MEN1                                                                                     | 0,023437611 | 0,020859097 | 0,1   | 0,02  | 1         | 1,014563453   | 0,985645597     | 5               |
| PRMT5                                                                                    | 0,005182399 | 0,020846097 | 0,25  | 0,08  | 1         | 1,014554311   | 0,985654479     | 3,125           |

Supplementary Table 4

| Differentially expressed genes_keloid-CCD_ comparing SC-Keloid vs. (SC-Myel, SC-Nonmyel) |             |             |       |       |           |               |                 |                 |
|------------------------------------------------------------------------------------------|-------------|-------------|-------|-------|-----------|---------------|-----------------|-----------------|
| gene                                                                                     | p_val       | avg_log2FC  | pct.1 | pct.2 | p_val_adj | Foldchange_UP | Foldchange_DOWN | Ratio_pct1_pct2 |
| CSF2RB                                                                                   | 0,874019543 | 0,020842679 | 0,013 | 0,01  | 1         | 1,014551907   | 0,985656814     | 1,3             |
| CHEK1                                                                                    | 0,005788164 | 0,020839957 | 0,188 | 0,05  | 1         | 1,014549993   | 0,985658673     | 3,76            |
| DPY19L2                                                                                  | 0,052279021 | 0,020823138 | 0,038 | 0     | 1         | 1,014538165   | 0,985670165     | #DIV/0!         |
| DMXL2                                                                                    | 0,221706325 | 0,020813694 | 0,1   | 0,05  | 1         | 1,014531524   | 0,985676616     | 2               |
| HSD11B1L                                                                                 | 0,019378739 | 0,020813135 | 0,125 | 0,03  | 1         | 1,014531131   | 0,985676998     | 4,166666667     |
| MEA1                                                                                     | 0,001018499 | 0,020811387 | 0,412 | 0,14  | 1         | 1,014529902   | 0,985678193     | 2,942857143     |
| PPIP5K1                                                                                  | 0,052279021 | 0,020778738 | 0,038 | 0     | 1         | 1,014506943   | 0,985700499     | #DIV/0!         |
| MN1                                                                                      | 0,114652585 | 0,020778583 | 0,025 | 0     | 1         | 1,014506834   | 0,985700605     | #DIV/0!         |
| SPRED2                                                                                   | 0,075380872 | 0,020749721 | 0,162 | 0,07  | 1         | 1,014486538   | 0,985720325     | 2,314285714     |
| DHX57                                                                                    | 0,09439712  | 0,020741607 | 0,125 | 0,05  | 1         | 1,014480832   | 0,985725869     | 2,5             |
| ZNF718                                                                                   | 0,114652585 | 0,020680237 | 0,025 | 0     | 1         | 1,014437679   | 0,985767801     | #DIV/0!         |
| WDHD1                                                                                    | 0,114652585 | 0,020652221 | 0,025 | 0     | 1         | 1,01441798    | 0,985786944     | #DIV/0!         |
| CAAP1                                                                                    | 0,002347143 | 0,020645247 | 0,25  | 0,07  | 1         | 1,014413076   | 0,985791709     | 3,571428571     |
| H2AC16                                                                                   | 0,114652585 | 0,02063908  | 0,025 | 0     | 1         | 1,014408739   | 0,985795923     | #DIV/0!         |
| LAT2                                                                                     | 0,114652585 | 0,020618091 | 0,025 | 0     | 1         | 1,014393981   | 0,985810265     | #DIV/0!         |
| CACNG8                                                                                   | 0,268357209 | 0,020612635 | 0,013 | 0     | 1         | 1,014390146   | 0,985813993     | #DIV/0!         |
| CCL14                                                                                    | 0,268357209 | 0,020612635 | 0,013 | 0     | 1         | 1,014390146   | 0,985813993     | #DIV/0!         |
| BCDIN3D                                                                                  | 0,052279021 | 0,020583973 | 0,038 | 0     | 1         | 1,014369992   | 0,985833579     | #DIV/0!         |
| IL27RA                                                                                   | 0,276717465 | 0,020581998 | 0,05  | 0,02  | 1         | 1,014368604   | 0,985834928     | 2,5             |
| JPH1                                                                                     | 0,114652585 | 0,020558824 | 0,025 | 0     | 1         | 1,014352311   | 0,985850764     | #DIV/0!         |
| LRP4-AS1                                                                                 | 0,114652585 | 0,020534359 | 0,025 | 0     | 1         | 1,014335109   | 0,985867482     | #DIV/0!         |
| ZNF696                                                                                   | 0,052279021 | 0,0205331   | 0,038 | 0     | 1         | 1,014334224   | 0,985868342     | #DIV/0!         |
| TFR2                                                                                     | 0,114652585 | 0,020511969 | 0,025 | 0     | 1         | 1,014319367   | 0,985882782     | #DIV/0!         |
| ZBTB42                                                                                   | 0,11122839  | 0,020470117 | 0,05  | 0,01  | 1         | 1,014289943   | 0,985911383     | 5               |
| CCDC157                                                                                  | 0,154906213 | 0,020450753 | 0,062 | 0,02  | 1         | 1,014276329   | 0,985924616     | 3,1             |
| ABCB10                                                                                   | 0,045399153 | 0,02040996  | 0,088 | 0,02  | 1         | 1,01424765    | 0,985952494     | 4,4             |
| GFM1                                                                                     | 0,257655929 | 0,020346523 | 0,125 | 0,07  | 1         | 1,014203053   | 0,985995848     | 1,785714286     |
| AGBL2                                                                                    | 0,114652585 | 0,020338899 | 0,025 | 0     | 1         | 1,014197694   | 0,986001059     | #DIV/0!         |
| ZBTB39                                                                                   | 0,439855668 | 0,020330701 | 0,025 | 0,01  | 1         | 1,014191931   | 0,986006662     | 2,5             |
| SH2B1                                                                                    | 0,002024826 | 0,020298273 | 0,212 | 0,05  | 1         | 1,014169135   | 0,986028825     | 4,24            |

Supplementary Table 4

| Differentially expressed genes_keloid-CCD_ comparing SC-Keloid vs. (SC-Myel, SC-Nonmyel) |             |             |       |       |             |               |                 |                 |
|------------------------------------------------------------------------------------------|-------------|-------------|-------|-------|-------------|---------------|-----------------|-----------------|
| gene                                                                                     | p_val       | avg_log2FC  | pct.1 | pct.2 | p_val_adj   | Foldchange_UP | Foldchange_DOWN | Ratio_pct1_pct2 |
| STK11IP                                                                                  | 0,003269989 | 0,020265429 | 0,138 | 0,02  | 1           | 1,014146046   | 0,986051273     | 6,9             |
| LIG1                                                                                     | 0,01419515  | 0,020264935 | 0,15  | 0,04  | 1           | 1,014145699   | 0,986051611     | 3,75            |
| LZTFL1                                                                                   | 0,005575985 | 0,020208465 | 0,15  | 0,03  | 1           | 1,014106004   | 0,986090207     | 5               |
| FSIP1                                                                                    | 0,11122839  | 0,020199903 | 0,05  | 0,01  | 1           | 1,014099986   | 0,98609606      | 5               |
| TTPAL                                                                                    | 0,026474273 | 0,020185847 | 0,138 | 0,04  | 1           | 1,014090106   | 0,986105667     | 3,45            |
| MFSD4B                                                                                   | 0,045399153 | 0,020154429 | 0,088 | 0,02  | 1           | 1,014068022   | 0,986127142     | 4,4             |
| ARFGEF3                                                                                  | 0,114652585 | 0,020135862 | 0,025 | 0     | 1           | 1,014054971   | 0,986139833     | #DIV/0!         |
| GPSM1                                                                                    | 0,001580031 | 0,020121379 | 0,425 | 0,16  | 1           | 1,014044791   | 0,986149733     | 2,65625         |
| ALDH4A1                                                                                  | 0,149979778 | 0,020111142 | 0,062 | 0,02  | 1           | 1,014037596   | 0,98615673      | 3,1             |
| GTF2H1                                                                                   | 0,017794508 | 0,020104185 | 0,275 | 0,11  | 1           | 1,014032706   | 0,986161486     | 2,5             |
| COX6B2                                                                                   | 0,114652585 | 0,020048672 | 0,025 | 0     | 1           | 1,013993688   | 0,986199433     | #DIV/0!         |
| PAX8                                                                                     | 0,114652585 | 0,020028428 | 0,025 | 0     | 1           | 1,01397946    | 0,986213271     | #DIV/0!         |
| SYN3                                                                                     | 0,276717465 | 0,019953373 | 0,05  | 0,02  | 1           | 1,013926709   | 0,98626458      | 2,5             |
| XPO7                                                                                     | 0,006582803 | 0,019935773 | 0,225 | 0,07  | 1           | 1,01391434    | 0,986276611     | 3,214285714     |
| TMSB15B                                                                                  | 0,052279021 | 0,019928498 | 0,038 | 0     | 1           | 1,013909228   | 0,986281584     | #DIV/0!         |
| KNTC1                                                                                    | 0,062632651 | 0,019902887 | 0,1   | 0,03  | 1           | 1,013891229   | 0,986299093     | 3,333333333     |
| PARD6A                                                                                   | 0,011601478 | 0,01989408  | 0,212 | 0,07  | 1           | 1,01388504    | 0,986305114     | 3,028571429     |
| STK32C                                                                                   | 0,022801795 | 0,019891696 | 0,212 | 0,08  | 1           | 1,013883364   | 0,986306745     | 2,65            |
| DYSF                                                                                     | 0,114652585 | 0,019886782 | 0,025 | 0     | 1           | 1,013879911   | 0,986310104     | #DIV/0!         |
| TMEM184C                                                                                 | 0,017776655 | 0,01986058  | 0,125 | 0,03  | 1           | 1,013861497   | 0,986328017     | 4,166666667     |
| MBTPS1                                                                                   | 0,003026636 | 0,019851073 | 0,462 | 0,19  | 1           | 1,013854816   | 0,986334517     | 2,431578947     |
| DUS1L                                                                                    | 2,15946E-05 | 0,019818056 | 0,488 | 0,14  | 0,455667922 | 1,013831613   | 0,98635709      | 3,485714286     |
| ZBTB25                                                                                   | 0,128188456 | 0,019802595 | 0,1   | 0,04  | 1           | 1,013820748   | 0,986367661     | 2,5             |
| ORC6                                                                                     | 0,000711633 | 0,019769528 | 0,212 | 0,04  | 1           | 1,013797512   | 0,986390269     | 5,3             |
| HFM1                                                                                     | 0,268357209 | 0,019762172 | 0,013 | 0     | 1           | 1,013792342   | 0,986395298     | #DIV/0!         |
| NKAPL                                                                                    | 0,268357209 | 0,019762172 | 0,013 | 0     | 1           | 1,013792342   | 0,986395298     | #DIV/0!         |
| PAX6                                                                                     | 0,268357209 | 0,019762172 | 0,013 | 0     | 1           | 1,013792342   | 0,986395298     | #DIV/0!         |
| CYB561D1                                                                                 | 0,052279021 | 0,019747309 | 0,038 | 0     | 1           | 1,013781898   | 0,98640546      | #DIV/0!         |
| LINC02693                                                                                | 0,284975754 | 0,019725048 | 0,05  | 0,02  | 1           | 1,013766255   | 0,986420681     | 2,5             |
| TBC1D31                                                                                  | 0,052279021 | 0,019686911 | 0,038 | 0     | 1           | 1,013739458   | 0,986446757     | #DIV/0!         |

Supplementary Table 4

| Differentially expressed genes_keloid-CCD_ comparing SC-Keloid vs. (SC-Myel, SC-Nonmyel) |             |             |       |       |           |               |                 |                 |
|------------------------------------------------------------------------------------------|-------------|-------------|-------|-------|-----------|---------------|-----------------|-----------------|
| gene                                                                                     | p_val       | avg_log2FC  | pct.1 | pct.2 | p_val_adj | Foldchange_UP | Foldchange_DOWN | Ratio_pct1_pct2 |
| PCDHB10                                                                                  | 0,432207887 | 0,019636728 | 0,025 | 0,01  | 1         | 1,013704196   | 0,98648107      | 2,5             |
| TRMT6                                                                                    | 0,060702201 | 0,019635846 | 0,1   | 0,03  | 1         | 1,013703576   | 0,986481673     | 3,333333333     |
| ASNS                                                                                     | 0,000180127 | 0,019621302 | 0,325 | 0,08  | 1         | 1,013693357   | 0,986491618     | 4,0625          |
| KDM2B                                                                                    | 0,053565038 | 0,01961219  | 0,138 | 0,05  | 1         | 1,013686955   | 0,986497849     | 2,76            |
| DAPK1                                                                                    | 0,114652585 | 0,019599277 | 0,025 | 0     | 1         | 1,013677882   | 0,986506678     | #DIV/0!         |
| ATG16L2                                                                                  | 0,108960046 | 0,019596767 | 0,138 | 0,06  | 1         | 1,013676118   | 0,986508395     | 2,3             |
| FBXL2                                                                                    | 0,006731552 | 0,019592811 | 0,1   | 0,01  | 1         | 1,013673339   | 0,9865111       | 10              |
| LGALS9                                                                                   | 0,114652585 | 0,019571241 | 0,025 | 0     | 1         | 1,013658183   | 0,98652585      | #DIV/0!         |
| RTP4                                                                                     | 0,114652585 | 0,019549161 | 0,025 | 0     | 1         | 1,013642669   | 0,986540948     | #DIV/0!         |
| TM6SF2                                                                                   | 0,114652585 | 0,019549161 | 0,025 | 0     | 1         | 1,013642669   | 0,986540948     | #DIV/0!         |
| FLT3LG                                                                                   | 0,223365318 | 0,019466281 | 0,038 | 0,01  | 1         | 1,013584439   | 0,986597625     | 3,8             |
| GSTM4                                                                                    | 0,026867238 | 0,019465954 | 0,175 | 0,06  | 1         | 1,013584209   | 0,986597848     | 2,916666667     |
| P2RX4                                                                                    | 0,004260066 | 0,019453199 | 0,238 | 0,07  | 1         | 1,013575248   | 0,986606571     | 3,4             |
| VCP                                                                                      | 0,004994359 | 0,019403689 | 0,725 | 0,36  | 1         | 1,013540465   | 0,98664043      | 2,013888889     |
| BBS4                                                                                     | 0,005405907 | 0,019331578 | 0,212 | 0,06  | 1         | 1,013489806   | 0,986689747     | 3,533333333     |
| TPD52L1                                                                                  | 0,114652585 | 0,019312443 | 0,025 | 0     | 1         | 1,013476364   | 0,986702834     | #DIV/0!         |
| C19orf18                                                                                 | 0,268357209 | 0,01930004  | 0,013 | 0     | 1         | 1,013467651   | 0,986711317     | #DIV/0!         |
| BTBD16                                                                                   | 0,114652585 | 0,019294878 | 0,025 | 0     | 1         | 1,013464025   | 0,986714847     | #DIV/0!         |
| ACADSB                                                                                   | 0,003269989 | 0,019290061 | 0,138 | 0,02  | 1         | 1,013460641   | 0,986718142     | 6,9             |
| GLB1L2                                                                                   | 0,052279021 | 0,019283047 | 0,038 | 0     | 1         | 1,013455714   | 0,986722938     | #DIV/0!         |
| UCK2                                                                                     | 0,000908788 | 0,019272733 | 0,25  | 0,06  | 1         | 1,013448469   | 0,986729993     | 4,166666667     |
| MRPL9                                                                                    | 0,001790347 | 0,019256655 | 0,338 | 0,11  | 1         | 1,013437174   | 0,986740989     | 3,072727273     |
| ALDH3B1                                                                                  | 0,060702201 | 0,019253794 | 0,1   | 0,03  | 1         | 1,013435165   | 0,986742946     | 3,333333333     |
| HIF1AN                                                                                   | 0,058821317 | 0,019230654 | 0,1   | 0,03  | 1         | 1,01341891    | 0,986758773     | 3,333333333     |
| SLC41A2                                                                                  | 0,063616753 | 0,019226728 | 0,1   | 0,03  | 1         | 1,013416152   | 0,986761458     | 3,333333333     |
| BAP1                                                                                     | 0,003382884 | 0,019182366 | 0,2   | 0,05  | 1         | 1,013384991   | 0,986791801     | 4               |
| YTHDF3                                                                                   | 0,005637319 | 0,01913125  | 0,388 | 0,15  | 1         | 1,013349086   | 0,986826765     | 2,586666667     |
| HERC6                                                                                    | 0,052279021 | 0,019129143 | 0,038 | 0     | 1         | 1,013347606   | 0,986828206     | #DIV/0!         |
| DTX2                                                                                     | 0,272650094 | 0,019120059 | 0,05  | 0,02  | 1         | 1,013341225   | 0,98683442      | 2,5             |
| CHCHD3                                                                                   | 0,00064106  | 0,01908524  | 0,488 | 0,18  | 1         | 1,013316769   | 0,986858237     | 2,711111111     |

Supplementary Table 4

| Differentially expressed genes_keloid-CCD_comparing SC-Keloid vs. (SC-Myel, SC-Nonmyel) |             |             |       |       |           |               |                 |                 |
|-----------------------------------------------------------------------------------------|-------------|-------------|-------|-------|-----------|---------------|-----------------|-----------------|
| gene                                                                                    | p_val       | avg_log2FC  | pct.1 | pct.2 | p_val_adj | Foldchange_UP | Foldchange_DOWN | Ratio_pct1_pct2 |
| VSIG8                                                                                   | 0,223365318 | 0,019069288 | 0,038 | 0,01  | 1         | 1,013305565   | 0,986869148     | 3,8             |
| CAMKV                                                                                   | 0,114652585 | 0,019056131 | 0,025 | 0     | 1         | 1,013296324   | 0,986878149     | #DIV/0!         |
| LONRF1                                                                                  | 0,034245219 | 0,019019172 | 0,2   | 0,08  | 1         | 1,013270365   | 0,986903431     | 2,5             |
| INPP4B                                                                                  | 0,044922833 | 0,019018656 | 0,125 | 0,04  | 1         | 1,013270003   | 0,986903784     | 3,125           |
| CPT2                                                                                    | 0,157415062 | 0,01898176  | 0,062 | 0,02  | 1         | 1,01324409    | 0,986929023     | 3,1             |
| ZP1                                                                                     | 0,114652585 | 0,018980511 | 0,025 | 0     | 1         | 1,013243212   | 0,986929878     | #DIV/0!         |
| UBTF                                                                                    | 0,000140161 | 0,018942601 | 0,462 | 0,14  | 1         | 1,013216588   | 0,986955812     | 3,3             |
| IQCC                                                                                    | 0,052279021 | 0,018921178 | 0,038 | 0     | 1         | 1,013201542   | 0,986970468     | #DIV/0!         |
| ZCWPW1                                                                                  | 0,11122839  | 0,01890073  | 0,05  | 0,01  | 1         | 1,013187182   | 0,986984457     | 5               |
| AP000265.1                                                                              | 0,114652585 | 0,018883281 | 0,025 | 0     | 1         | 1,013174927   | 0,986996394     | #DIV/0!         |
| SPG21                                                                                   | 0,000709555 | 0,018874106 | 0,338 | 0,1   | 1         | 1,013168484   | 0,987002671     | 3,38            |
| CFAP418                                                                                 | 0,114652585 | 0,018865464 | 0,025 | 0     | 1         | 1,013162415   | 0,987008584     | #DIV/0!         |
| TIGD7                                                                                   | 0,223365318 | 0,018843062 | 0,038 | 0,01  | 1         | 1,013146683   | 0,98702391      | 3,8             |
| XRCC2                                                                                   | 0,11122839  | 0,018821678 | 0,05  | 0,01  | 1         | 1,013131666   | 0,98703854      | 5               |
| ACAD10                                                                                  | 0,114652585 | 0,018819422 | 0,025 | 0     | 1         | 1,013130082   | 0,987040083     | #DIV/0!         |
| EDARADD                                                                                 | 0,114652585 | 0,01881453  | 0,025 | 0     | 1         | 1,013126646   | 0,98704343      | #DIV/0!         |
| GLI2                                                                                    | 0,114652585 | 0,01881453  | 0,025 | 0     | 1         | 1,013126646   | 0,98704343      | #DIV/0!         |
| GPRIN1                                                                                  | 0,114652585 | 0,01881453  | 0,025 | 0     | 1         | 1,013126646   | 0,98704343      | #DIV/0!         |
| GPR157                                                                                  | 0,11122839  | 0,018787045 | 0,05  | 0,01  | 1         | 1,013107345   | 0,987062234     | 5               |
| MYOF                                                                                    | 0,001077043 | 0,018777665 | 0,4   | 0,14  | 1         | 1,013100759   | 0,987068652     | 2,857142857     |
| SF3B2                                                                                   | 0,022665666 | 0,018750395 | 0,787 | 0,42  | 1         | 1,013081608   | 0,98708731      | 1,873809524     |
| EEF1AKMT1                                                                               | 0,00033236  | 0,018739164 | 0,25  | 0,05  | 1         | 1,013073722   | 0,987094994     | 5               |
| C19orf73                                                                                | 0,223365318 | 0,018700245 | 0,038 | 0,01  | 1         | 1,013046393   | 0,987121623     | 3,8             |
| TBX1                                                                                    | 0,223365318 | 0,018663764 | 0,038 | 0,01  | 1         | 1,013020777   | 0,987146584     | 3,8             |
| ZNF555                                                                                  | 0,223365318 | 0,018596352 | 0,038 | 0,01  | 1         | 1,012973444   | 0,987192711     | 3,8             |
| HAS2-AS1                                                                                | 0,052279021 | 0,01859177  | 0,038 | 0     | 1         | 1,012970226   | 0,987195847     | #DIV/0!         |
| TRAM2-AS1                                                                               | 0,109006576 | 0,01857743  | 0,088 | 0,03  | 1         | 1,012960157   | 0,987205659     | 2,933333333     |
| PRKAR2A-AS1                                                                             | 0,114652585 | 0,018553946 | 0,025 | 0     | 1         | 1,012943669   | 0,987221729     | #DIV/0!         |
| ANKRD26                                                                                 | 0,008729247 | 0,018542938 | 0,325 | 0,13  | 1         | 1,01293594    | 0,987229261     | 2,5             |
| STAT6                                                                                   | 0,000187937 | 0,018529769 | 0,238 | 0,04  | 1         | 1,012926694   | 0,987238273     | 5,95            |

Supplementary Table 4

| Differentially expressed genes_keloid-CCD_ comparing SC-Keloid vs. (SC-Myel, SC-Nonmyel) |             |             |       |       |           |               |                 |                 |
|------------------------------------------------------------------------------------------|-------------|-------------|-------|-------|-----------|---------------|-----------------|-----------------|
| gene                                                                                     | p_val       | avg_log2FC  | pct.1 | pct.2 | p_val_adj | Foldchange_UP | Foldchange_DOWN | Ratio_pct1_pct2 |
| POLR2J3                                                                                  | 0,223365318 | 0,018526997 | 0,038 | 0,01  | 1         | 1,012924748   | 0,98724017      | 3,8             |
| ZKSCAN3                                                                                  | 0,114652585 | 0,018511791 | 0,025 | 0     | 1         | 1,012914071   | 0,987250576     | #DIV/0!         |
| CCL4                                                                                     | 0,268357209 | 0,018493498 | 0,013 | 0     | 1         | 1,012901228   | 0,987263094     | #DIV/0!         |
| CCL4L2                                                                                   | 0,268357209 | 0,018493498 | 0,013 | 0     | 1         | 1,012901228   | 0,987263094     | #DIV/0!         |
| DYNLT5                                                                                   | 0,268357209 | 0,018493498 | 0,013 | 0     | 1         | 1,012901228   | 0,987263094     | #DIV/0!         |
| LINC00852                                                                                | 0,268357209 | 0,018493498 | 0,013 | 0     | 1         | 1,012901228   | 0,987263094     | #DIV/0!         |
| RAB15                                                                                    | 0,268357209 | 0,018493498 | 0,013 | 0     | 1         | 1,012901228   | 0,987263094     | #DIV/0!         |
| SLC2A12                                                                                  | 0,268357209 | 0,018493498 | 0,013 | 0     | 1         | 1,012901228   | 0,987263094     | #DIV/0!         |
| TMEM106A                                                                                 | 0,268357209 | 0,018493498 | 0,013 | 0     | 1         | 1,012901228   | 0,987263094     | #DIV/0!         |
| ZNF221                                                                                   | 0,268357209 | 0,018493498 | 0,013 | 0     | 1         | 1,012901228   | 0,987263094     | #DIV/0!         |
| LGR5                                                                                     | 0,268357209 | 0,018484652 | 0,013 | 0     | 1         | 1,012895017   | 0,987269147     | #DIV/0!         |
| PPP1R14C                                                                                 | 0,268357209 | 0,018484652 | 0,013 | 0     | 1         | 1,012895017   | 0,987269147     | #DIV/0!         |
| ZNF513                                                                                   | 0,014900385 | 0,018479762 | 0,15  | 0,04  | 1         | 1,012891584   | 0,987272494     | 3,75            |
| OASL                                                                                     | 0,114652585 | 0,018479194 | 0,025 | 0     | 1         | 1,012891186   | 0,987272882     | #DIV/0!         |
| TARS2                                                                                    | 0,061661173 | 0,018476155 | 0,1   | 0,03  | 1         | 1,012889052   | 0,987274962     | 3,333333333     |
| PCDH12                                                                                   | 0,223365318 | 0,018440289 | 0,038 | 0,01  | 1         | 1,012863871   | 0,987299507     | 3,8             |
| ASB1                                                                                     | 0,106476927 | 0,018433536 | 0,138 | 0,06  | 1         | 1,01285913    | 0,987304128     | 2,3             |
| RNF25                                                                                    | 0,01419515  | 0,0184132   | 0,15  | 0,04  | 1         | 1,012844853   | 0,987318045     | 3,75            |
| DGAT1                                                                                    | 0,000562245 | 0,018411331 | 0,3   | 0,08  | 1         | 1,012843541   | 0,987319324     | 3,75            |
| TEC                                                                                      | 0,114652585 | 0,018408872 | 0,025 | 0     | 1         | 1,012841815   | 0,987321007     | #DIV/0!         |
| RN7SL832P                                                                                | 0,114652585 | 0,01836179  | 0,025 | 0     | 1         | 1,012808761   | 0,987353228     | #DIV/0!         |
| CLHC1                                                                                    | 0,188542969 | 0,018355101 | 0,075 | 0,03  | 1         | 1,012804065   | 0,987357806     | 2,5             |
| VSIG2                                                                                    | 0,114652585 | 0,018350141 | 0,025 | 0     | 1         | 1,012800584   | 0,9873612       | #DIV/0!         |
| CDK11A                                                                                   | 0,006999556 | 0,01834512  | 0,312 | 0,12  | 1         | 1,012797059   | 0,987364637     | 2,6             |
| SUPT7L                                                                                   | 0,071149537 | 0,018334092 | 0,162 | 0,07  | 1         | 1,012789317   | 0,987372184     | 2,314285714     |
| CEP78                                                                                    | 0,026474273 | 0,018293875 | 0,138 | 0,04  | 1         | 1,012761084   | 0,987399709     | 3,45            |
| SDCBP2                                                                                   | 0,114652585 | 0,018264585 | 0,025 | 0     | 1         | 1,012740523   | 0,987419756     | #DIV/0!         |
| DNAAF3                                                                                   | 0,114652585 | 0,018253799 | 0,025 | 0     | 1         | 1,012732952   | 0,987427138     | #DIV/0!         |
| PPRC1                                                                                    | 0,038951864 | 0,018230317 | 0,162 | 0,06  | 1         | 1,012716468   | 0,98744321      | 2,7             |
| CRACD                                                                                    | 0,114652585 | 0,018212649 | 0,025 | 0     | 1         | 1,012704066   | 0,987455303     | #DIV/0!         |

Supplementary Table 4

| Differentially expressed genes_keloid-CCD_ comparing SC-Keloid vs. (SC-Myel, SC-Nonmyel) |             |             |       |       |             |               |                 |                 |
|------------------------------------------------------------------------------------------|-------------|-------------|-------|-------|-------------|---------------|-----------------|-----------------|
| gene                                                                                     | p_val       | avg_log2FC  | pct.1 | pct.2 | p_val_adj   | Foldchange_UP | Foldchange_DOWN | Ratio_pct1_pct2 |
| ZRSR2                                                                                    | 0,106476927 | 0,018190464 | 0,138 | 0,06  | 1           | 1,012688493   | 0,987470487     | 2,3             |
| SLC45A1                                                                                  | 0,114652585 | 0,018179257 | 0,025 | 0     | 1           | 1,012680626   | 0,987478158     | #DIV/0!         |
| USP13                                                                                    | 0,007855091 | 0,018167812 | 0,162 | 0,04  | 1           | 1,012672593   | 0,987485992     | 4,05            |
| RAPGEF3                                                                                  | 0,494869729 | 0,018166474 | 0,038 | 0,02  | 1           | 1,012671654   | 0,987486908     | 1,9             |
| C8orf82                                                                                  | 0,001416128 | 0,018164557 | 0,475 | 0,18  | 1           | 1,012670308   | 0,98748822      | 2,638888889     |
| TTC26                                                                                    | 0,157415062 | 0,018157853 | 0,062 | 0,02  | 1           | 1,012665603   | 0,987492808     | 3,1             |
| MTMR8                                                                                    | 0,114652585 | 0,01815241  | 0,025 | 0     | 1           | 1,012661782   | 0,987496534     | #DIV/0!         |
| RABGGTB                                                                                  | 3,29088E-05 | 0,01814736  | 0,537 | 0,17  | 0,694408356 | 1,012658237   | 0,987499991     | 3,158823529     |
| GPR162                                                                                   | 0,223365318 | 0,018093852 | 0,038 | 0,01  | 1           | 1,01262068    | 0,987536617     | 3,8             |
| CMTM4                                                                                    | 0,11122839  | 0,018066668 | 0,05  | 0,01  | 1           | 1,0126016     | 0,987555224     | 5               |
| IRX2                                                                                     | 0,223365318 | 0,01806327  | 0,038 | 0,01  | 1           | 1,012599214   | 0,987557551     | 3,8             |
| NME7                                                                                     | 0,004323714 | 0,018037537 | 0,238 | 0,07  | 1           | 1,012581153   | 0,987575166     | 3,4             |
| CFI                                                                                      | 0,447580525 | 0,018013105 | 0,025 | 0,01  | 1           | 1,012564005   | 0,987591891     | 2,5             |
| DOCK1                                                                                    | 0,008601516 | 0,017979753 | 0,4   | 0,17  | 1           | 1,012540597   | 0,987614722     | 2,352941176     |
| ZNF773                                                                                   | 0,223365318 | 0,017958941 | 0,038 | 0,01  | 1           | 1,012525991   | 0,987628969     | 3,8             |
| ZNF286A                                                                                  | 0,055334082 | 0,017946128 | 0,062 | 0,01  | 1           | 1,012516998   | 0,987637741     | 6,2             |
| UNC5C                                                                                    | 0,052279021 | 0,017886234 | 0,038 | 0     | 1           | 1,012474964   | 0,987678743     | #DIV/0!         |
| ZNF571                                                                                   | 0,439855668 | 0,017879146 | 0,025 | 0,01  | 1           | 1,01246999    | 0,987683596     | 2,5             |
| DHTKD1                                                                                   | 0,062632651 | 0,01784233  | 0,1   | 0,03  | 1           | 1,012444153   | 0,987708801     | 3,333333333     |
| GPAT4                                                                                    | 0,000151858 | 0,017806063 | 0,375 | 0,1   | 1           | 1,012418702   | 0,987733631     | 3,75            |
| LBX2-AS1                                                                                 | 0,157415062 | 0,017783271 | 0,062 | 0,02  | 1           | 1,012402708   | 0,987749235     | 3,1             |
| CNNM2                                                                                    | 0,276717465 | 0,01777318  | 0,05  | 0,02  | 1           | 1,012395626   | 0,987756144     | 2,5             |
| CCL21                                                                                    | 0,114652585 | 0,017767574 | 0,025 | 0     | 1           | 1,012391693   | 0,987759982     | #DIV/0!         |
| IRAG1                                                                                    | 0,114652585 | 0,017767574 | 0,025 | 0     | 1           | 1,012391693   | 0,987759982     | #DIV/0!         |
| MAML1                                                                                    | 0,076251316 | 0,017738046 | 0,162 | 0,07  | 1           | 1,012370972   | 0,987780199     | 2,314285714     |
| DPP4                                                                                     | 0,268357209 | 0,017722007 | 0,013 | 0     | 1           | 1,012359717   | 0,98779118      | #DIV/0!         |
| ESR1                                                                                     | 0,268357209 | 0,017722007 | 0,013 | 0     | 1           | 1,012359717   | 0,98779118      | #DIV/0!         |
| LRRC17                                                                                   | 0,268357209 | 0,017722007 | 0,013 | 0     | 1           | 1,012359717   | 0,98779118      | #DIV/0!         |
| ZFYVE26                                                                                  | 0,188542969 | 0,017698532 | 0,075 | 0,03  | 1           | 1,012343244   | 0,987807254     | 2,5             |
| RUNDC1                                                                                   | 0,063616753 | 0,017685561 | 0,1   | 0,03  | 1           | 1,012334143   | 0,987816135     | 3,333333333     |

Supplementary Table 4

| Differentially expressed genes_keloid-CCD_ comparing SC-Keloid vs. (SC-Myel, SC-Nonmyel) |             |             |       |       |           |               |                 |                 |
|------------------------------------------------------------------------------------------|-------------|-------------|-------|-------|-----------|---------------|-----------------|-----------------|
| gene                                                                                     | p_val       | avg_log2FC  | pct.1 | pct.2 | p_val_adj | Foldchange_UP | Foldchange_DOWN | Ratio_pct1_pct2 |
| NANOS1                                                                                   | 0,188542969 | 0,017677809 | 0,075 | 0,03  | 1         | 1,012328703   | 0,987821443     | 2,5             |
| GSAP                                                                                     | 0,154906213 | 0,017648621 | 0,062 | 0,02  | 1         | 1,012308222   | 0,987841429     | 3,1             |
| CNEP1R1                                                                                  | 0,002438112 | 0,017647929 | 0,188 | 0,04  | 1         | 1,012307736   | 0,987841902     | 4,7             |
| PRAG1                                                                                    | 0,007341753 | 0,017647101 | 0,162 | 0,04  | 1         | 1,012307155   | 0,987842469     | 4,05            |
| ABHD14A                                                                                  | 0,014714397 | 0,017646585 | 0,375 | 0,17  | 1         | 1,012306793   | 0,987842823     | 2,205882353     |
| C19orf38                                                                                 | 0,114652585 | 0,017619584 | 0,025 | 0     | 1         | 1,012287848   | 0,987861311     | #DIV/0!         |
| IGSF10                                                                                   | 0,114652585 | 0,017619584 | 0,025 | 0     | 1         | 1,012287848   | 0,987861311     | #DIV/0!         |
| FAAP100                                                                                  | 0,022801795 | 0,017619463 | 0,212 | 0,08  | 1         | 1,012287763   | 0,987861394     | 2,65            |
| ADD1                                                                                     | 0,001051076 | 0,017602285 | 0,662 | 0,27  | 1         | 1,01227571    | 0,987873156     | 2,451851852     |
| AK4                                                                                      | 0,114652585 | 0,017568951 | 0,025 | 0     | 1         | 1,012252321   | 0,987895981     | #DIV/0!         |
| NOSTRIN                                                                                  | 0,114652585 | 0,017568951 | 0,025 | 0     | 1         | 1,012252321   | 0,987895981     | #DIV/0!         |
| UTP20                                                                                    | 0,002482056 | 0,017549661 | 0,188 | 0,04  | 1         | 1,012238786   | 0,98790919      | 4,7             |
| SH3RF2                                                                                   | 0,114652585 | 0,01753942  | 0,025 | 0     | 1         | 1,012231601   | 0,987916203     | #DIV/0!         |
| MAP7                                                                                     | 0,268357209 | 0,017517154 | 0,013 | 0     | 1         | 1,012215978   | 0,987931451     | #DIV/0!         |
| SYTL1                                                                                    | 0,268357209 | 0,017505251 | 0,013 | 0     | 1         | 1,012207627   | 0,987939602     | #DIV/0!         |
| CCDC68                                                                                   | 0,114652585 | 0,017471602 | 0,025 | 0     | 1         | 1,012184019   | 0,987962644     | #DIV/0!         |
| PDE2A                                                                                    | 0,219108376 | 0,017470624 | 0,038 | 0,01  | 1         | 1,012183333   | 0,987963314     | 3,8             |
| AKAP3                                                                                    | 0,268357209 | 0,017467101 | 0,013 | 0     | 1         | 1,012180861   | 0,987965726     | #DIV/0!         |
| ASPRV1                                                                                   | 0,268357209 | 0,017467101 | 0,013 | 0     | 1         | 1,012180861   | 0,987965726     | #DIV/0!         |
| DISP2                                                                                    | 0,268357209 | 0,017467101 | 0,013 | 0     | 1         | 1,012180861   | 0,987965726     | #DIV/0!         |
| DQX1                                                                                     | 0,268357209 | 0,017467101 | 0,013 | 0     | 1         | 1,012180861   | 0,987965726     | #DIV/0!         |
| FAM71F1                                                                                  | 0,268357209 | 0,017467101 | 0,013 | 0     | 1         | 1,012180861   | 0,987965726     | #DIV/0!         |
| IL23A                                                                                    | 0,268357209 | 0,017467101 | 0,013 | 0     | 1         | 1,012180861   | 0,987965726     | #DIV/0!         |
| LINC00853                                                                                | 0,268357209 | 0,017467101 | 0,013 | 0     | 1         | 1,012180861   | 0,987965726     | #DIV/0!         |
| LRRC37A                                                                                  | 0,268357209 | 0,017467101 | 0,013 | 0     | 1         | 1,012180861   | 0,987965726     | #DIV/0!         |
| PCDHGA5                                                                                  | 0,268357209 | 0,017467101 | 0,013 | 0     | 1         | 1,012180861   | 0,987965726     | #DIV/0!         |
| WIPF3                                                                                    | 0,268357209 | 0,017467101 | 0,013 | 0     | 1         | 1,012180861   | 0,987965726     | #DIV/0!         |
| IRF6                                                                                     | 0,114652585 | 0,017437457 | 0,025 | 0     | 1         | 1,012160064   | 0,987986027     | #DIV/0!         |
| ZNF414                                                                                   | 0,029195518 | 0,017426963 | 0,188 | 0,07  | 1         | 1,012152701   | 0,987993213     | 2,685714286     |
| RBPM5-AS1                                                                                | 0,223365318 | 0,017380039 | 0,038 | 0,01  | 1         | 1,012119781   | 0,988025349     | 3,8             |



Supplementary Table 4

| Differentially expressed genes_keloid-CCD_ comparing SC-Keloid vs. (SC-Myel, SC-Nonmyel) |             |             |       |       |           |               |                 |                 |
|------------------------------------------------------------------------------------------|-------------|-------------|-------|-------|-----------|---------------|-----------------|-----------------|
| gene                                                                                     | p_val       | avg_log2FC  | pct.1 | pct.2 | p_val_adj | Foldchange_UP | Foldchange_DOWN | Ratio_pct1_pct2 |
| GNAL                                                                                     | 0,052279021 | 0,017321614 | 0,038 | 0     | 1         | 1,012078794   | 0,988065362     | #DIV/0!         |
| EDNRA                                                                                    | 0,223365318 | 0,017313035 | 0,038 | 0,01  | 1         | 1,012072776   | 0,988071237     | 3,8             |
| KRBOX1                                                                                   | 0,085199008 | 0,01729875  | 0,075 | 0,02  | 1         | 1,012062755   | 0,98808102      | 3,75            |
| TONSL                                                                                    | 0,114652585 | 0,017249936 | 0,025 | 0     | 1         | 1,012028512   | 0,988114453     | #DIV/0!         |
| SCARB1                                                                                   | 0,81721858  | 0,017232563 | 0,025 | 0,02  | 1         | 1,012016326   | 0,988126352     | 1,25            |
| DRD4                                                                                     | 0,114652585 | 0,017226268 | 0,025 | 0     | 1         | 1,01201191    | 0,988130664     | #DIV/0!         |
| ZNF182                                                                                   | 0,114652585 | 0,017215144 | 0,025 | 0     | 1         | 1,012004106   | 0,988138283     | #DIV/0!         |
| SVIL                                                                                     | 0,075062254 | 0,017175043 | 0,112 | 0,04  | 1         | 1,011975977   | 0,98816575      | 2,8             |
| SHROOM1                                                                                  | 0,114652585 | 0,017155444 | 0,025 | 0     | 1         | 1,01196223    | 0,988179174     | #DIV/0!         |
| ANO7                                                                                     | 0,268357209 | 0,017151458 | 0,013 | 0     | 1         | 1,011959434   | 0,988181904     | #DIV/0!         |
| CASC2                                                                                    | 0,268357209 | 0,017151458 | 0,013 | 0     | 1         | 1,011959434   | 0,988181904     | #DIV/0!         |
| FAM83B                                                                                   | 0,268357209 | 0,017151458 | 0,013 | 0     | 1         | 1,011959434   | 0,988181904     | #DIV/0!         |
| KCNQ3                                                                                    | 0,268357209 | 0,017151458 | 0,013 | 0     | 1         | 1,011959434   | 0,988181904     | #DIV/0!         |
| MYH7B                                                                                    | 0,268357209 | 0,017151458 | 0,013 | 0     | 1         | 1,011959434   | 0,988181904     | #DIV/0!         |
| RAPSN                                                                                    | 0,268357209 | 0,017151458 | 0,013 | 0     | 1         | 1,011959434   | 0,988181904     | #DIV/0!         |
| ST14                                                                                     | 0,268357209 | 0,017151458 | 0,013 | 0     | 1         | 1,011959434   | 0,988181904     | #DIV/0!         |
| TEX14                                                                                    | 0,268357209 | 0,017151458 | 0,013 | 0     | 1         | 1,011959434   | 0,988181904     | #DIV/0!         |
| WFDC3                                                                                    | 0,268357209 | 0,017151458 | 0,013 | 0     | 1         | 1,011959434   | 0,988181904     | #DIV/0!         |
| KIRREL3-AS3                                                                              | 0,114652585 | 0,017134731 | 0,025 | 0     | 1         | 1,011947701   | 0,988193361     | #DIV/0!         |
| CHRNA1                                                                                   | 0,114652585 | 0,017132264 | 0,025 | 0     | 1         | 1,01194597    | 0,988195051     | #DIV/0!         |
| USP21                                                                                    | 0,114652585 | 0,017106731 | 0,025 | 0     | 1         | 1,011928061   | 0,98821254      | #DIV/0!         |
| CASP8                                                                                    | 0,268357209 | 0,017104282 | 0,013 | 0     | 1         | 1,011926343   | 0,988214218     | #DIV/0!         |
| LY6K                                                                                     | 0,268357209 | 0,017104282 | 0,013 | 0     | 1         | 1,011926343   | 0,988214218     | #DIV/0!         |
| PLCG2                                                                                    | 0,268357209 | 0,017104282 | 0,013 | 0     | 1         | 1,011926343   | 0,988214218     | #DIV/0!         |
| S100A5                                                                                   | 0,268357209 | 0,017104282 | 0,013 | 0     | 1         | 1,011926343   | 0,988214218     | #DIV/0!         |
| STK31                                                                                    | 0,268357209 | 0,017104282 | 0,013 | 0     | 1         | 1,011926343   | 0,988214218     | #DIV/0!         |
| TMCO2                                                                                    | 0,268357209 | 0,017104282 | 0,013 | 0     | 1         | 1,011926343   | 0,988214218     | #DIV/0!         |
| WNT5B                                                                                    | 0,268357209 | 0,017104282 | 0,013 | 0     | 1         | 1,011926343   | 0,988214218     | #DIV/0!         |
| FAXC                                                                                     | 0,062632651 | 0,017088344 | 0,1   | 0,03  | 1         | 1,011915164   | 0,988225135     | 3,333333333     |
| ZNF416                                                                                   | 0,874019543 | 0,017081024 | 0,013 | 0,01  | 1         | 1,01191003    | 0,988230149     | 1,3             |

Supplementary Table 4

| Differentially expressed genes_keloid-CCD_ comparing SC-Keloid vs. (SC-Myel, SC-Nonmyel) |             |             |       |       |           |               |                 |                 |
|------------------------------------------------------------------------------------------|-------------|-------------|-------|-------|-----------|---------------|-----------------|-----------------|
| gene                                                                                     | p_val       | avg_log2FC  | pct.1 | pct.2 | p_val_adj | Foldchange_UP | Foldchange_DOWN | Ratio_pct1_pct2 |
| EFCAB11                                                                                  | 0,019378739 | 0,017052119 | 0,125 | 0,03  | 1         | 1,011889756   | 0,988249949     | 4,166666667     |
| CENPQ                                                                                    | 0,029952607 | 0,017024215 | 0,188 | 0,07  | 1         | 1,011870185   | 0,988269064     | 2,685714286     |
| VSNL1                                                                                    | 0,114652585 | 0,016995142 | 0,025 | 0     | 1         | 1,011849793   | 0,98828898      | #DIV/0!         |
| THAP11                                                                                   | 0,014729299 | 0,016994283 | 0,35  | 0,15  | 1         | 1,011849191   | 0,988289568     | 2,333333333     |
| RACGAP1                                                                                  | 0,026474273 | 0,016983899 | 0,138 | 0,04  | 1         | 1,011841908   | 0,988296681     | 3,45            |
| ARMCX5                                                                                   | 0,185993644 | 0,016959576 | 0,075 | 0,03  | 1         | 1,01182485    | 0,988313343     | 2,5             |
| COX10                                                                                    | 0,062632651 | 0,016918186 | 0,1   | 0,03  | 1         | 1,011795822   | 0,988341698     | 3,333333333     |
| ADAM22                                                                                   | 0,114652585 | 0,016915745 | 0,025 | 0     | 1         | 1,011794109   | 0,98834337      | #DIV/0!         |
| ENTPD4                                                                                   | 0,026214728 | 0,016910135 | 0,312 | 0,14  | 1         | 1,011790175   | 0,988347213     | 2,228571429     |
| UBXN6                                                                                    | 0,000391642 | 0,016880064 | 0,412 | 0,13  | 1         | 1,011769086   | 0,988367815     | 3,169230769     |
| ZSCAN32                                                                                  | 0,083746858 | 0,016835461 | 0,075 | 0,02  | 1         | 1,011737806   | 0,988398371     | 3,75            |
| KCNIP2                                                                                   | 0,268357209 | 0,016828155 | 0,013 | 0     | 1         | 1,011732683   | 0,988403377     | #DIV/0!         |
| TLDC2                                                                                    | 0,268357209 | 0,016828155 | 0,013 | 0     | 1         | 1,011732683   | 0,988403377     | #DIV/0!         |
| DNM3OS                                                                                   | 0,114652585 | 0,016817641 | 0,025 | 0     | 1         | 1,011725309   | 0,98841058      | #DIV/0!         |
| ARHGEF4                                                                                  | 0,114652585 | 0,016806508 | 0,025 | 0     | 1         | 1,011717502   | 0,988418208     | #DIV/0!         |
| COG8                                                                                     | 0,109006576 | 0,016751238 | 0,088 | 0,03  | 1         | 1,011678744   | 0,988456075     | 2,933333333     |
| GIMAP4                                                                                   | 0,432207887 | 0,016708435 | 0,025 | 0,01  | 1         | 1,011648729   | 0,988485402     | 2,5             |
| TACR1                                                                                    | 0,432207887 | 0,016708435 | 0,025 | 0,01  | 1         | 1,011648729   | 0,988485402     | 2,5             |
| ACOT11                                                                                   | 0,114652585 | 0,016671882 | 0,025 | 0     | 1         | 1,011623097   | 0,988510447     | #DIV/0!         |
| TSEN2                                                                                    | 0,055334082 | 0,016670751 | 0,062 | 0,01  | 1         | 1,011622304   | 0,988511222     | 6,2             |
| CPT1B                                                                                    | 0,268357209 | 0,01664641  | 0,013 | 0     | 1         | 1,011605236   | 0,9885279       | #DIV/0!         |
| GHRL                                                                                     | 0,268357209 | 0,01664641  | 0,013 | 0     | 1         | 1,011605236   | 0,9885279       | #DIV/0!         |
| RNF223                                                                                   | 0,268357209 | 0,01664641  | 0,013 | 0     | 1         | 1,011605236   | 0,9885279       | #DIV/0!         |
| SLC25A18                                                                                 | 0,268357209 | 0,01664641  | 0,013 | 0     | 1         | 1,011605236   | 0,9885279       | #DIV/0!         |
| ZNF486                                                                                   | 0,268357209 | 0,01664641  | 0,013 | 0     | 1         | 1,011605236   | 0,9885279       | #DIV/0!         |
| VPS37D                                                                                   | 0,045399153 | 0,01662173  | 0,088 | 0,02  | 1         | 1,011587931   | 0,988544811     | 4,4             |
| TRAF7                                                                                    | 0,004590026 | 0,016605996 | 0,325 | 0,12  | 1         | 1,011576899   | 0,988555592     | 2,708333333     |
| MMUT                                                                                     | 0,00307496  | 0,01659325  | 0,225 | 0,06  | 1         | 1,011567962   | 0,988564326     | 3,75            |
| STARD4                                                                                   | 0,152427848 | 0,016582088 | 0,062 | 0,02  | 1         | 1,011560136   | 0,988571974     | 3,1             |
| BDH1                                                                                     | 0,114652585 | 0,016542283 | 0,025 | 0     | 1         | 1,011532226   | 0,98859925      | #DIV/0!         |

Supplementary Table 4

| Differentially expressed genes_keloid-CCD_ comparing SC-Keloid vs. (SC-Myel, SC-Nonmyel) |             |             |       |       |           |               |                 |                 |
|------------------------------------------------------------------------------------------|-------------|-------------|-------|-------|-----------|---------------|-----------------|-----------------|
| gene                                                                                     | p_val       | avg_log2FC  | pct.1 | pct.2 | p_val_adj | Foldchange_UP | Foldchange_DOWN | Ratio_pct1_pct2 |
| EIF2A                                                                                    | 0,001166074 | 0,016528774 | 0,613 | 0,24  | 1         | 1,011522755   | 0,988608507     | 2,554166667     |
| VGLL2                                                                                    | 0,439855668 | 0,01650056  | 0,025 | 0,01  | 1         | 1,011502973   | 0,988627841     | 2,5             |
| LEAP2                                                                                    | 0,043614772 | 0,016482002 | 0,125 | 0,04  | 1         | 1,011489962   | 0,988640558     | 3,125           |
| ANGPTL7                                                                                  | 0,590999446 | 0,016452748 | 0,05  | 0,07  | 1         | 1,011469451   | 0,988660605     | 0,714285714     |
| MYO16                                                                                    | 0,114652585 | 0,016449973 | 0,025 | 0     | 1         | 1,011467506   | 0,988662507     | #DIV/0!         |
| ZNF628                                                                                   | 0,033596086 | 0,016430125 | 0,15  | 0,05  | 1         | 1,011453591   | 0,988676108     | 3               |
| PGBD1                                                                                    | 0,034072508 | 0,016396091 | 0,15  | 0,05  | 1         | 1,01142973    | 0,988699432     | 3               |
| THAP9                                                                                    | 0,223365318 | 0,016377601 | 0,038 | 0,01  | 1         | 1,011416767   | 0,988712104     | 3,8             |
| PELI3                                                                                    | 0,052279021 | 0,016373679 | 0,038 | 0     | 1         | 1,011414018   | 0,988714792     | #DIV/0!         |
| TMEM129                                                                                  | 0,014885283 | 0,016367946 | 0,262 | 0,1   | 1         | 1,011409998   | 0,988718721     | 2,62            |
| MED15                                                                                    | 0,001290527 | 0,016365377 | 0,55  | 0,22  | 1         | 1,011408198   | 0,988720481     | 2,5             |
| ARAP3                                                                                    | 0,047638359 | 0,01636017  | 0,125 | 0,04  | 1         | 1,011404547   | 0,98872405      | 3,125           |
| OPA3                                                                                     | 0,088113826 | 0,01635026  | 0,188 | 0,09  | 1         | 1,0113976     | 0,988730841     | 2,088888889     |
| EME2                                                                                     | 0,439855668 | 0,016293018 | 0,025 | 0,01  | 1         | 1,011357471   | 0,988770072     | 2,5             |
| MAPK7                                                                                    | 0,045399153 | 0,016281793 | 0,088 | 0,02  | 1         | 1,011349603   | 0,988777765     | 4,4             |
| ACTR5                                                                                    | 0,104284051 | 0,016276828 | 0,088 | 0,03  | 1         | 1,011346122   | 0,988781168     | 2,933333333     |
| MELTF-AS1                                                                                | 0,439855668 | 0,016255723 | 0,025 | 0,01  | 1         | 1,011331327   | 0,988795633     | 2,5             |
| GALNT10                                                                                  | 0,086402669 | 0,016246036 | 0,125 | 0,05  | 1         | 1,011324537   | 0,988802272     | 2,5             |
| AC092171.4                                                                               | 0,114652585 | 0,016225919 | 0,025 | 0     | 1         | 1,011310435   | 0,988816061     | #DIV/0!         |
| CCNP                                                                                     | 0,114652585 | 0,016225919 | 0,025 | 0     | 1         | 1,011310435   | 0,988816061     | #DIV/0!         |
| AOC3                                                                                     | 0,114652585 | 0,016222549 | 0,025 | 0     | 1         | 1,011308072   | 0,98881837      | #DIV/0!         |
| SUOX                                                                                     | 0,055334082 | 0,016217758 | 0,062 | 0,01  | 1         | 1,011304714   | 0,988821654     | 6,2             |
| C5orf34                                                                                  | 0,11122839  | 0,016214731 | 0,05  | 0,01  | 1         | 1,011302592   | 0,988823729     | 5               |
| SEC23B                                                                                   | 0,00242045  | 0,016092256 | 0,25  | 0,07  | 1         | 1,011216743   | 0,988907677     | 3,571428571     |
| ARHGEF33                                                                                 | 0,268357209 | 0,016076554 | 0,013 | 0     | 1         | 1,011205737   | 0,98891844      | #DIV/0!         |
| BSN                                                                                      | 0,268357209 | 0,016076554 | 0,013 | 0     | 1         | 1,011205737   | 0,98891844      | #DIV/0!         |
| C1orf162                                                                                 | 0,268357209 | 0,016076554 | 0,013 | 0     | 1         | 1,011205737   | 0,98891844      | #DIV/0!         |
| HRCT1                                                                                    | 0,268357209 | 0,016076554 | 0,013 | 0     | 1         | 1,011205737   | 0,98891844      | #DIV/0!         |
| INSYN1                                                                                   | 0,268357209 | 0,016076554 | 0,013 | 0     | 1         | 1,011205737   | 0,98891844      | #DIV/0!         |
| MSH4                                                                                     | 0,268357209 | 0,016076554 | 0,013 | 0     | 1         | 1,011205737   | 0,98891844      | #DIV/0!         |

Supplementary Table 4

| Differentially expressed genes_keloid-CCD_comparing SC-Keloid vs. (SC-Myel, SC-Nonmyel) |             |             |       |       |           |               |                 |                 |
|-----------------------------------------------------------------------------------------|-------------|-------------|-------|-------|-----------|---------------|-----------------|-----------------|
| gene                                                                                    | p_val       | avg_log2FC  | pct.1 | pct.2 | p_val_adj | Foldchange_UP | Foldchange_DOWN | Ratio_pct1_pct2 |
| RUSC1-AS1                                                                               | 0,268357209 | 0,016076554 | 0,013 | 0     | 1         | 1,011205737   | 0,98891844      | #DIV/0!         |
| SPTLC3                                                                                  | 0,268357209 | 0,016076554 | 0,013 | 0     | 1         | 1,011205737   | 0,98891844      | #DIV/0!         |
| VLDLR                                                                                   | 0,268357209 | 0,016076554 | 0,013 | 0     | 1         | 1,011205737   | 0,98891844      | #DIV/0!         |
| BEX1                                                                                    | 0,079683367 | 0,015961273 | 0,238 | 0,12  | 1         | 1,011124938   | 0,988997464     | 1,983333333     |
| CLEC7A                                                                                  | 0,268357209 | 0,015944363 | 0,013 | 0     | 1         | 1,011113087   | 0,989009057     | #DIV/0!         |
| IL1RL2                                                                                  | 0,268357209 | 0,015944363 | 0,013 | 0     | 1         | 1,011113087   | 0,989009057     | #DIV/0!         |
| PCDHGA9                                                                                 | 0,268357209 | 0,015944363 | 0,013 | 0     | 1         | 1,011113087   | 0,989009057     | #DIV/0!         |
| TMEM190                                                                                 | 0,268357209 | 0,015944363 | 0,013 | 0     | 1         | 1,011113087   | 0,989009057     | #DIV/0!         |
| ACTL7B                                                                                  | 0,268357209 | 0,015896576 | 0,013 | 0     | 1         | 1,011079596   | 0,989041816     | #DIV/0!         |
| ARPP21                                                                                  | 0,268357209 | 0,015896576 | 0,013 | 0     | 1         | 1,011079596   | 0,989041816     | #DIV/0!         |
| DOK2                                                                                    | 0,268357209 | 0,015896576 | 0,013 | 0     | 1         | 1,011079596   | 0,989041816     | #DIV/0!         |
| FMO4                                                                                    | 0,268357209 | 0,015896576 | 0,013 | 0     | 1         | 1,011079596   | 0,989041816     | #DIV/0!         |
| PAXBP1-AS1                                                                              | 0,268357209 | 0,015896576 | 0,013 | 0     | 1         | 1,011079596   | 0,989041816     | #DIV/0!         |
| PICSAR                                                                                  | 0,268357209 | 0,015896576 | 0,013 | 0     | 1         | 1,011079596   | 0,989041816     | #DIV/0!         |
| UMAD1                                                                                   | 0,075062254 | 0,015867084 | 0,112 | 0,04  | 1         | 1,011058928   | 0,989062035     | 2,8             |
| FLT1                                                                                    | 0,439855668 | 0,015856938 | 0,025 | 0,01  | 1         | 1,011051817   | 0,98906899      | 2,5             |
| C1orf220                                                                                | 0,268357209 | 0,015846289 | 0,013 | 0     | 1         | 1,011044354   | 0,989076291     | #DIV/0!         |
| CLIC6                                                                                   | 0,268357209 | 0,015846289 | 0,013 | 0     | 1         | 1,011044354   | 0,989076291     | #DIV/0!         |
| PCDHGA11                                                                                | 0,268357209 | 0,015846289 | 0,013 | 0     | 1         | 1,011044354   | 0,989076291     | #DIV/0!         |
| PCDHGC4                                                                                 | 0,268357209 | 0,015846289 | 0,013 | 0     | 1         | 1,011044354   | 0,989076291     | #DIV/0!         |
| ALDH8A1                                                                                 | 0,268357209 | 0,015824041 | 0,013 | 0     | 1         | 1,011028763   | 0,989091544     | #DIV/0!         |
| CC2D2B                                                                                  | 0,268357209 | 0,015824041 | 0,013 | 0     | 1         | 1,011028763   | 0,989091544     | #DIV/0!         |
| ERICH4                                                                                  | 0,268357209 | 0,015824041 | 0,013 | 0     | 1         | 1,011028763   | 0,989091544     | #DIV/0!         |
| FOXD4L5                                                                                 | 0,268357209 | 0,015824041 | 0,013 | 0     | 1         | 1,011028763   | 0,989091544     | #DIV/0!         |
| EIF2B2                                                                                  | 0,000108349 | 0,015809122 | 0,375 | 0,1   | 1         | 1,011018307   | 0,989101773     | 3,75            |
| FZD8                                                                                    | 0,023885059 | 0,01576942  | 0,1   | 0,02  | 1         | 1,010990485   | 0,989128992     | 5               |
| UCKL1                                                                                   | 0,010631879 | 0,015733267 | 0,325 | 0,13  | 1         | 1,010965151   | 0,989153779     | 2,5             |
| ADORA2B                                                                                 | 0,11122839  | 0,015688966 | 0,05  | 0,01  | 1         | 1,010934107   | 0,989184154     | 5               |
| MED19                                                                                   | 0,001562784 | 0,015658431 | 0,375 | 0,13  | 1         | 1,010912711   | 0,98920509      | 2,884615385     |
| CXCL14                                                                                  | 0,199160536 | 0,01565472  | 0,175 | 0,1   | 1         | 1,010910111   | 0,989207635     | 1,75            |

Supplementary Table 4

| Differentially expressed genes_keloid-CCD_comparing SC-Keloid vs. (SC-Myel, SC-Nonmyel) |             |             |       |       |           |               |                 |                 |
|-----------------------------------------------------------------------------------------|-------------|-------------|-------|-------|-----------|---------------|-----------------|-----------------|
| gene                                                                                    | p_val       | avg_log2FC  | pct.1 | pct.2 | p_val_adj | Foldchange_UP | Foldchange_DOWN | Ratio_pct1_pct2 |
| SPEF1                                                                                   | 0,114652585 | 0,015647379 | 0,025 | 0     | 1         | 1,010904967   | 0,989212669     | #DIV/0!         |
| MTPAP                                                                                   | 0,057278664 | 0,015625766 | 0,138 | 0,05  | 1         | 1,010889823   | 0,989227488     | 2,76            |
| POLG                                                                                    | 0,164257965 | 0,015622271 | 0,125 | 0,06  | 1         | 1,010887374   | 0,989229884     | 2,083333333     |
| RAPGEF4                                                                                 | 0,114652585 | 0,015613882 | 0,025 | 0     | 1         | 1,010881496   | 0,989235637     | #DIV/0!         |
| ZNF782                                                                                  | 0,114652585 | 0,015613882 | 0,025 | 0     | 1         | 1,010881496   | 0,989235637     | #DIV/0!         |
| SERPINF1                                                                                | 0,077185646 | 0,015605846 | 0,112 | 0,04  | 1         | 1,010875865   | 0,989241147     | 2,8             |
| ANKRD20A1                                                                               | 0,268357209 | 0,015603603 | 0,013 | 0     | 1         | 1,010874293   | 0,989242685     | #DIV/0!         |
| ZNF730                                                                                  | 0,268357209 | 0,015603603 | 0,013 | 0     | 1         | 1,010874293   | 0,989242685     | #DIV/0!         |
| SLC30A9                                                                                 | 0,00017206  | 0,015593867 | 0,35  | 0,09  | 1         | 1,010867471   | 0,989249361     | 3,888888889     |
| HOXD9                                                                                   | 0,114652585 | 0,015577634 | 0,025 | 0     | 1         | 1,010856098   | 0,989260492     | #DIV/0!         |
| NXP3                                                                                    | 0,128188456 | 0,015571114 | 0,1   | 0,04  | 1         | 1,010851529   | 0,989264962     | 2,5             |
| PEAR1                                                                                   | 0,223365318 | 0,015558811 | 0,038 | 0,01  | 1         | 1,010842909   | 0,989273399     | 3,8             |
| STIMATE                                                                                 | 0,154906213 | 0,015541815 | 0,062 | 0,02  | 1         | 1,010831      | 0,989285054     | 3,1             |
| NPAT                                                                                    | 0,044583831 | 0,015539538 | 0,088 | 0,02  | 1         | 1,010829405   | 0,989286615     | 4,4             |
| PIGA                                                                                    | 0,154906213 | 0,015538983 | 0,062 | 0,02  | 1         | 1,010829016   | 0,989286995     | 3,1             |
| DNAI4                                                                                   | 0,268357209 | 0,015467096 | 0,013 | 0     | 1         | 1,01077865    | 0,989336291     | #DIV/0!         |
| LDHC                                                                                    | 0,268357209 | 0,015467096 | 0,013 | 0     | 1         | 1,01077865    | 0,989336291     | #DIV/0!         |
| PRR18                                                                                   | 0,268357209 | 0,015467096 | 0,013 | 0     | 1         | 1,01077865    | 0,989336291     | #DIV/0!         |
| TTC9B                                                                                   | 0,268357209 | 0,015467096 | 0,013 | 0     | 1         | 1,01077865    | 0,989336291     | #DIV/0!         |
| FBXL8                                                                                   | 0,157415062 | 0,015436292 | 0,062 | 0,02  | 1         | 1,010757068   | 0,989357415     | 3,1             |
| ACTRT3                                                                                  | 0,268357209 | 0,015422123 | 0,013 | 0     | 1         | 1,010747141   | 0,989367132     | #DIV/0!         |
| KHDC1                                                                                   | 0,268357209 | 0,015422123 | 0,013 | 0     | 1         | 1,010747141   | 0,989367132     | #DIV/0!         |
| NOMO2                                                                                   | 0,268357209 | 0,015422123 | 0,013 | 0     | 1         | 1,010747141   | 0,989367132     | #DIV/0!         |
| TADA1                                                                                   | 0,085199008 | 0,015416519 | 0,075 | 0,02  | 1         | 1,010743215   | 0,989370975     | 3,75            |
| PODXL                                                                                   | 0,114652585 | 0,015410159 | 0,025 | 0     | 1         | 1,010738759   | 0,989375336     | #DIV/0!         |
| ACER3                                                                                   | 0,09321393  | 0,015408743 | 0,2   | 0,1   | 1         | 1,010737767   | 0,989376307     | 2               |
| ELOVL2                                                                                  | 0,223365318 | 0,015403403 | 0,038 | 0,01  | 1         | 1,010734026   | 0,98937997      | 3,8             |
| ADORA3                                                                                  | 0,268357209 | 0,015351231 | 0,013 | 0     | 1         | 1,010697475   | 0,989415749     | #DIV/0!         |
| ALKBH3-AS1                                                                              | 0,268357209 | 0,015351231 | 0,013 | 0     | 1         | 1,010697475   | 0,989415749     | #DIV/0!         |
| FAM81A                                                                                  | 0,268357209 | 0,015351231 | 0,013 | 0     | 1         | 1,010697475   | 0,989415749     | #DIV/0!         |

Supplementary Table 4

| Differentially expressed genes_keloid-CCD_comparing SC-Keloid vs. (SC-Myel, SC-Nonmyel) |             |             |       |       |           |               |                 |                 |
|-----------------------------------------------------------------------------------------|-------------|-------------|-------|-------|-----------|---------------|-----------------|-----------------|
| gene                                                                                    | p_val       | avg_log2FC  | pct.1 | pct.2 | p_val_adj | Foldchange_UP | Foldchange_DOWN | Ratio_pct1_pct2 |
| HBA1                                                                                    | 0,268357209 | 0,015351231 | 0,013 | 0     | 1         | 1,010697475   | 0,989415749     | #DIV/0!         |
| MAEL                                                                                    | 0,268357209 | 0,015351231 | 0,013 | 0     | 1         | 1,010697475   | 0,989415749     | #DIV/0!         |
| SLC25A15                                                                                | 0,268357209 | 0,015351231 | 0,013 | 0     | 1         | 1,010697475   | 0,989415749     | #DIV/0!         |
| VGF                                                                                     | 0,268357209 | 0,015351231 | 0,013 | 0     | 1         | 1,010697475   | 0,989415749     | #DIV/0!         |
| ASMTL-AS1                                                                               | 0,268357209 | 0,015339479 | 0,013 | 0     | 1         | 1,010689242   | 0,989423809     | #DIV/0!         |
| CGNL1                                                                                   | 0,268357209 | 0,015339479 | 0,013 | 0     | 1         | 1,010689242   | 0,989423809     | #DIV/0!         |
| NEB                                                                                     | 0,268357209 | 0,015339479 | 0,013 | 0     | 1         | 1,010689242   | 0,989423809     | #DIV/0!         |
| OR7D2                                                                                   | 0,268357209 | 0,015339479 | 0,013 | 0     | 1         | 1,010689242   | 0,989423809     | #DIV/0!         |
| PDZK1                                                                                   | 0,268357209 | 0,015339479 | 0,013 | 0     | 1         | 1,010689242   | 0,989423809     | #DIV/0!         |
| SYK                                                                                     | 0,268357209 | 0,015339479 | 0,013 | 0     | 1         | 1,010689242   | 0,989423809     | #DIV/0!         |
| AGPAT4                                                                                  | 0,001835126 | 0,015325672 | 0,275 | 0,08  | 1         | 1,01067957    | 0,989433278     | 3,4375          |
| MAPK13                                                                                  | 0,114652585 | 0,015313348 | 0,025 | 0     | 1         | 1,010670936   | 0,98944173      | #DIV/0!         |
| RALGAPA2                                                                                | 0,34027224  | 0,015289951 | 0,075 | 0,04  | 1         | 1,010654546   | 0,989457776     | 1,875           |
| DLX1                                                                                    | 0,114652585 | 0,015286448 | 0,025 | 0     | 1         | 1,010652092   | 0,989460179     | #DIV/0!         |
| GNB5                                                                                    | 0,014426885 | 0,01526568  | 0,15  | 0,04  | 1         | 1,010637544   | 0,989474422     | 3,75            |
| STEEP1                                                                                  | 0,11122839  | 0,015254774 | 0,05  | 0,01  | 1         | 1,010629904   | 0,989481903     | 5               |
| ZNF277                                                                                  | 0,131562433 | 0,015226671 | 0,1   | 0,04  | 1         | 1,010610218   | 0,989501177     | 2,5             |
| DHCR7                                                                                   | 0,027487357 | 0,015199168 | 0,075 | 0,01  | 1         | 1,010590952   | 0,989520041     | 7,5             |
| GRAMD1C                                                                                 | 0,268357209 | 0,015178096 | 0,013 | 0     | 1         | 1,010576191   | 0,989534494     | #DIV/0!         |
| SOX30                                                                                   | 0,268357209 | 0,015178096 | 0,013 | 0     | 1         | 1,010576191   | 0,989534494     | #DIV/0!         |
| C17orf58                                                                                | 0,026885434 | 0,015127929 | 0,138 | 0,04  | 1         | 1,010541051   | 0,989568904     | 3,45            |
| STUB1                                                                                   | 0,122803632 | 0,015093069 | 0,863 | 0,5   | 1         | 1,010516634   | 0,989592815     | 1,726           |
| IL4I1                                                                                   | 0,114652585 | 0,015089261 | 0,025 | 0     | 1         | 1,010513966   | 0,989595427     | #DIV/0!         |
| SMCO4                                                                                   | 0,023885059 | 0,01505804  | 0,1   | 0,02  | 1         | 1,010492098   | 0,989616843     | 5               |
| ATP7B                                                                                   | 0,268357209 | 0,015055184 | 0,013 | 0     | 1         | 1,010490097   | 0,989618802     | #DIV/0!         |
| KCNS1                                                                                   | 0,268357209 | 0,015055184 | 0,013 | 0     | 1         | 1,010490097   | 0,989618802     | #DIV/0!         |
| LINC00159                                                                               | 0,268357209 | 0,015055184 | 0,013 | 0     | 1         | 1,010490097   | 0,989618802     | #DIV/0!         |
| LINC01546                                                                               | 0,268357209 | 0,015055184 | 0,013 | 0     | 1         | 1,010490097   | 0,989618802     | #DIV/0!         |
| SMCO3                                                                                   | 0,114652585 | 0,015044992 | 0,025 | 0     | 1         | 1,010482959   | 0,989625793     | #DIV/0!         |
| LRRC56                                                                                  | 0,114652585 | 0,015038194 | 0,025 | 0     | 1         | 1,010478198   | 0,989630456     | #DIV/0!         |

Supplementary Table 4

| Differentially expressed genes_keloid-CCD_ comparing SC-Keloid vs. (SC-Myel, SC-Nonmyel) |             |             |       |       |           |               |                 |                 |
|------------------------------------------------------------------------------------------|-------------|-------------|-------|-------|-----------|---------------|-----------------|-----------------|
| gene                                                                                     | p_val       | avg_log2FC  | pct.1 | pct.2 | p_val_adj | Foldchange_UP | Foldchange_DOWN | Ratio_pct1_pct2 |
| MAP3K9                                                                                   | 0,114652585 | 0,015038194 | 0,025 | 0     | 1         | 1,010478198   | 0,989630456     | #DIV/0!         |
| VAMP8                                                                                    | 0,027487357 | 0,015035369 | 0,075 | 0,01  | 1         | 1,010476219   | 0,989632394     | 7,5             |
| UPK3BL1                                                                                  | 0,055334082 | 0,015034676 | 0,062 | 0,01  | 1         | 1,010475734   | 0,98963287      | 6,2             |
| PTPN18                                                                                   | 0,006476809 | 0,014931824 | 0,188 | 0,05  | 1         | 1,010403698   | 0,989703425     | 3,76            |
| EEF1AKMT3                                                                                | 0,11122839  | 0,01490219  | 0,05  | 0,01  | 1         | 1,010382944   | 0,989723754     | 5               |
| ADIPOR1                                                                                  | 0,000793159 | 0,014880685 | 0,512 | 0,18  | 1         | 1,010367883   | 0,989738507     | 2,844444444     |
| TBKBP1                                                                                   | 0,114652585 | 0,014880614 | 0,025 | 0     | 1         | 1,010367833   | 0,989738556     | #DIV/0!         |
| ARHGAP28                                                                                 | 0,114652585 | 0,014871085 | 0,025 | 0     | 1         | 1,01036116    | 0,989745093     | #DIV/0!         |
| ROBO2                                                                                    | 0,114652585 | 0,014871085 | 0,025 | 0     | 1         | 1,01036116    | 0,989745093     | #DIV/0!         |
| GCKR                                                                                     | 0,114652585 | 0,014864951 | 0,025 | 0     | 1         | 1,010356864   | 0,989749301     | #DIV/0!         |
| ADCY4                                                                                    | 0,447580525 | 0,014863183 | 0,025 | 0,01  | 1         | 1,010355625   | 0,989750514     | 2,5             |
| EXOG                                                                                     | 0,025102405 | 0,014856494 | 0,175 | 0,06  | 1         | 1,010350941   | 0,989755103     | 2,916666667     |
| MLH3                                                                                     | 0,032230861 | 0,014798032 | 0,2   | 0,08  | 1         | 1,010309999   | 0,989795212     | 2,5             |
| SELPLG                                                                                   | 0,11122839  | 0,014788279 | 0,05  | 0,01  | 1         | 1,01030317    | 0,989801903     | 5               |
| GPR89B                                                                                   | 0,082314814 | 0,014782337 | 0,075 | 0,02  | 1         | 1,010299009   | 0,98980598      | 3,75            |
| LY6G5B                                                                                   | 0,114652585 | 0,014776927 | 0,025 | 0     | 1         | 1,01029522    | 0,989809691     | #DIV/0!         |
| TDP1                                                                                     | 0,019048586 | 0,014760977 | 0,125 | 0,03  | 1         | 1,010284051   | 0,989820634     | 4,166666667     |
| COLGALT2                                                                                 | 0,114652585 | 0,01475164  | 0,025 | 0     | 1         | 1,010277512   | 0,989827041     | #DIV/0!         |
| B3GNTL1                                                                                  | 0,223365318 | 0,014723687 | 0,038 | 0,01  | 1         | 1,010257937   | 0,989846219     | 3,8             |
| NNT-AS1                                                                                  | 0,074518557 | 0,014707321 | 0,162 | 0,07  | 1         | 1,010246477   | 0,989857448     | 2,314285714     |
| RELL1                                                                                    | 0,08090269  | 0,014706558 | 0,075 | 0,02  | 1         | 1,010245943   | 0,989857972     | 3,75            |
| CDC25A                                                                                   | 0,052279021 | 0,014680262 | 0,038 | 0     | 1         | 1,01022753    | 0,989876014     | #DIV/0!         |
| ENKUR                                                                                    | 0,114652585 | 0,014667884 | 0,025 | 0     | 1         | 1,010218862   | 0,989884507     | #DIV/0!         |
| DOP1B                                                                                    | 0,157415062 | 0,014652044 | 0,062 | 0,02  | 1         | 1,010207771   | 0,989895375     | 3,1             |
| H1-10-AS1                                                                                | 0,268357209 | 0,014637859 | 0,013 | 0     | 1         | 1,010197838   | 0,989905108     | #DIV/0!         |
| SLC31A2                                                                                  | 0,087209492 | 0,014625879 | 0,188 | 0,09  | 1         | 1,010189449   | 0,989913328     | 2,088888889     |
| DDX60                                                                                    | 0,027487357 | 0,014597103 | 0,075 | 0,01  | 1         | 1,0101693     | 0,989933074     | 7,5             |
| GOLGA8N                                                                                  | 0,223365318 | 0,014594532 | 0,038 | 0,01  | 1         | 1,0101675     | 0,989934838     | 3,8             |
| MSH5                                                                                     | 0,114652585 | 0,014581472 | 0,025 | 0     | 1         | 1,010158355   | 0,989943799     | #DIV/0!         |
| ZNF732                                                                                   | 0,114652585 | 0,014581472 | 0,025 | 0     | 1         | 1,010158355   | 0,989943799     | #DIV/0!         |

Supplementary Table 4

| Differentially expressed genes_keloid-CCD_ comparing SC-Keloid vs. (SC-Myel, SC-Nonmyel) |             |             |       |       |             |               |                 |                 |
|------------------------------------------------------------------------------------------|-------------|-------------|-------|-------|-------------|---------------|-----------------|-----------------|
| gene                                                                                     | p_val       | avg_log2FC  | pct.1 | pct.2 | p_val_adj   | Foldchange_UP | Foldchange_DOWN | Ratio_pct1_pct2 |
| ADAM8                                                                                    | 0,268357209 | 0,014518831 | 0,013 | 0     | 1           | 1,010114496   | 0,989986783     | #DIV/0!         |
| CCR6                                                                                     | 0,268357209 | 0,014518831 | 0,013 | 0     | 1           | 1,010114496   | 0,989986783     | #DIV/0!         |
| CD1C                                                                                     | 0,268357209 | 0,014518831 | 0,013 | 0     | 1           | 1,010114496   | 0,989986783     | #DIV/0!         |
| CD1E                                                                                     | 0,268357209 | 0,014518831 | 0,013 | 0     | 1           | 1,010114496   | 0,989986783     | #DIV/0!         |
| CFP                                                                                      | 0,268357209 | 0,014518831 | 0,013 | 0     | 1           | 1,010114496   | 0,989986783     | #DIV/0!         |
| CIITA                                                                                    | 0,268357209 | 0,014518831 | 0,013 | 0     | 1           | 1,010114496   | 0,989986783     | #DIV/0!         |
| GPR132                                                                                   | 0,268357209 | 0,014518831 | 0,013 | 0     | 1           | 1,010114496   | 0,989986783     | #DIV/0!         |
| GPR183                                                                                   | 0,268357209 | 0,014518831 | 0,013 | 0     | 1           | 1,010114496   | 0,989986783     | #DIV/0!         |
| MPZL2                                                                                    | 0,268357209 | 0,014518831 | 0,013 | 0     | 1           | 1,010114496   | 0,989986783     | #DIV/0!         |
| RAB3C                                                                                    | 0,268357209 | 0,014518831 | 0,013 | 0     | 1           | 1,010114496   | 0,989986783     | #DIV/0!         |
| SYT15                                                                                    | 0,268357209 | 0,014518831 | 0,013 | 0     | 1           | 1,010114496   | 0,989986783     | #DIV/0!         |
| TMTC1                                                                                    | 0,268357209 | 0,014518831 | 0,013 | 0     | 1           | 1,010114496   | 0,989986783     | #DIV/0!         |
| ZNF467                                                                                   | 0,268357209 | 0,014518831 | 0,013 | 0     | 1           | 1,010114496   | 0,989986783     | #DIV/0!         |
| ASAH2B                                                                                   | 0,114652585 | 0,014494112 | 0,025 | 0     | 1           | 1,010097189   | 0,990003745     | #DIV/0!         |
| DET1                                                                                     | 0,11122839  | 0,014444431 | 0,05  | 0,01  | 1           | 1,010062406   | 0,990037838     | 5               |
| MARK3                                                                                    | 0,008339364 | 0,014440564 | 0,625 | 0,29  | 1           | 1,010059698   | 0,990040492     | 2,155172414     |
| TUBA4A                                                                                   | 0,162496421 | 0,014433181 | 0,125 | 0,06  | 1           | 1,010054529   | 0,990045558     | 2,083333333     |
| TMEM233                                                                                  | 0,223365318 | 0,014348216 | 0,038 | 0,01  | 1           | 1,009995046   | 0,990103867     | 3,8             |
| MEST                                                                                     | 0,114652585 | 0,014345812 | 0,025 | 0     | 1           | 1,009993362   | 0,990105517     | #DIV/0!         |
| RAD51                                                                                    | 0,114652585 | 0,014345812 | 0,025 | 0     | 1           | 1,009993362   | 0,990105517     | #DIV/0!         |
| C9orf135                                                                                 | 0,114652585 | 0,01432694  | 0,025 | 0     | 1           | 1,009980151   | 0,990118468     | #DIV/0!         |
| MCM3AP                                                                                   | 0,005690097 | 0,014300135 | 0,225 | 0,07  | 1           | 1,009961386   | 0,990136865     | 3,214285714     |
| CIZ1                                                                                     | 0,010024565 | 0,014271103 | 0,25  | 0,09  | 1           | 1,009941062   | 0,99015679      | 2,777777778     |
| ZNF490                                                                                   | 0,223365318 | 0,014223122 | 0,038 | 0,01  | 1           | 1,009907474   | 0,990189721     | 3,8             |
| SAYSD1                                                                                   | 0,008831168 | 0,01420759  | 0,2   | 0,06  | 1           | 1,009896602   | 0,990200381     | 3,333333333     |
| NQO1                                                                                     | 0,002580467 | 0,014207554 | 0,225 | 0,06  | 1           | 1,009896576   | 0,990200406     | 3,75            |
| VPS37A                                                                                   | 0,002147709 | 0,014138675 | 0,312 | 0,1   | 1           | 1,009848362   | 0,990247682     | 3,12            |
| VTI1B                                                                                    | 1,63383E-05 | 0,014082292 | 0,5   | 0,14  | 0,344753648 | 1,009808896   | 0,990286384     | 3,571428571     |
| OSBPL6                                                                                   | 0,11122839  | 0,014077018 | 0,05  | 0,01  | 1           | 1,009805205   | 0,990290004     | 5               |
| LSM11                                                                                    | 0,223365318 | 0,014066896 | 0,038 | 0,01  | 1           | 1,00979812    | 0,990296952     | 3,8             |



Supplementary Table 4

| Differentially expressed genes_keloid-CCD_ comparing SC-Keloid vs. (SC-Myel, SC-Nonmyel) |             |             |       |       |           |               |                 |                 |
|------------------------------------------------------------------------------------------|-------------|-------------|-------|-------|-----------|---------------|-----------------|-----------------|
| gene                                                                                     | p_val       | avg_log2FC  | pct.1 | pct.2 | p_val_adj | Foldchange_UP | Foldchange_DOWN | Ratio_pct1_pct2 |
| ARFGEF2                                                                                  | 0,033686337 | 0,014007639 | 0,112 | 0,03  | 1         | 1,009756644   | 0,990337628     | 3,733333333     |
| BSDL2                                                                                    | 0,447580525 | 0,013993523 | 0,025 | 0,01  | 1         | 1,009746765   | 0,990347318     | 2,5             |
| EMX2                                                                                     | 0,114652585 | 0,013988493 | 0,025 | 0     | 1         | 1,009743244   | 0,990350771     | #DIV/0!         |
| TSPAN17                                                                                  | 0,009645348 | 0,013985832 | 0,175 | 0,05  | 1         | 1,009741381   | 0,990352598     | 3,5             |
| FAM71D                                                                                   | 0,114652585 | 0,013964929 | 0,025 | 0     | 1         | 1,009726752   | 0,990366947     | #DIV/0!         |
| TRIM37                                                                                   | 0,000972011 | 0,013962445 | 0,25  | 0,06  | 1         | 1,009725013   | 0,990368652     | 4,166666667     |
| REEP5                                                                                    | 0,094767798 | 0,013955387 | 0,775 | 0,46  | 1         | 1,009720073   | 0,990373497     | 1,684782609     |
| POLD4                                                                                    | 0,043203308 | 0,013953104 | 0,175 | 0,07  | 1         | 1,009718475   | 0,990375065     | 2,5             |
| LINC01547                                                                                | 0,114652585 | 0,01394419  | 0,025 | 0     | 1         | 1,009712237   | 0,990381183     | #DIV/0!         |
| MFSD2B                                                                                   | 0,447580525 | 0,013917599 | 0,025 | 0,01  | 1         | 1,009693626   | 0,990399438     | 2,5             |
| GET1                                                                                     | 0,001551825 | 0,013913589 | 0,362 | 0,12  | 1         | 1,00969082    | 0,990402191     | 3,016666667     |
| A1BG-AS1                                                                                 | 0,055334082 | 0,013905716 | 0,062 | 0,01  | 1         | 1,00968531    | 0,990407596     | 6,2             |
| TRAPPC11                                                                                 | 0,003269989 | 0,013767369 | 0,138 | 0,02  | 1         | 1,009588491   | 0,990502575     | 6,9             |
| LTK                                                                                      | 0,114652585 | 0,013724021 | 0,025 | 0     | 1         | 1,009558156   | 0,990532337     | #DIV/0!         |
| PARP2                                                                                    | 0,015547261 | 0,013710568 | 0,188 | 0,06  | 1         | 1,009548743   | 0,990541573     | 3,133333333     |
| PHF8                                                                                     | 0,229069481 | 0,013681554 | 0,1   | 0,05  | 1         | 1,00952844    | 0,990561494     | 2               |
| ADAMTS9                                                                                  | 0,136266726 | 0,013680385 | 0,162 | 0,08  | 1         | 1,009527622   | 0,990562297     | 2,025           |
| SEMA6B                                                                                   | 0,874019543 | 0,013673494 | 0,013 | 0,01  | 1         | 1,0095228     | 0,990567028     | 1,3             |
| ATP9B                                                                                    | 0,024761742 | 0,013658555 | 0,175 | 0,06  | 1         | 1,009512347   | 0,990577286     | 2,916666667     |
| SMOC2                                                                                    | 0,223365318 | 0,013620115 | 0,038 | 0,01  | 1         | 1,009485449   | 0,990603679     | 3,8             |
| KIF27                                                                                    | 0,188542969 | 0,013607779 | 0,075 | 0,03  | 1         | 1,009476817   | 0,99061215      | 2,5             |
| FCER1G                                                                                   | 0,114652585 | 0,013605008 | 0,025 | 0     | 1         | 1,009474878   | 0,990614053     | #DIV/0!         |
| C1orf115                                                                                 | 0,114652585 | 0,013570684 | 0,025 | 0     | 1         | 1,009450861   | 0,990637621     | #DIV/0!         |
| LIPT1                                                                                    | 0,447580525 | 0,013551866 | 0,025 | 0,01  | 1         | 1,009437695   | 0,990650543     | 2,5             |
| MYCNOS                                                                                   | 0,439855668 | 0,013545601 | 0,025 | 0,01  | 1         | 1,009433311   | 0,990654845     | 2,5             |
| NCBP1                                                                                    | 0,023437611 | 0,013537066 | 0,1   | 0,02  | 1         | 1,009427339   | 0,990660706     | 5               |
| CSF1R                                                                                    | 0,268357209 | 0,013535348 | 0,013 | 0     | 1         | 1,009426137   | 0,990661886     | #DIV/0!         |
| DCSTAMP                                                                                  | 0,268357209 | 0,013535348 | 0,013 | 0     | 1         | 1,009426137   | 0,990661886     | #DIV/0!         |
| EMX2OS                                                                                   | 0,268357209 | 0,013535348 | 0,013 | 0     | 1         | 1,009426137   | 0,990661886     | #DIV/0!         |
| FBXO27                                                                                   | 0,268357209 | 0,013535348 | 0,013 | 0     | 1         | 1,009426137   | 0,990661886     | #DIV/0!         |

Supplementary Table 4

| Differentially expressed genes_keloid-CCD_ comparing SC-Keloid vs. (SC-Myel, SC-Nonmyel) |             |             |       |       |           |               |                 |                 |
|------------------------------------------------------------------------------------------|-------------|-------------|-------|-------|-----------|---------------|-----------------|-----------------|
| gene                                                                                     | p_val       | avg_log2FC  | pct.1 | pct.2 | p_val_adj | Foldchange_UP | Foldchange_DOWN | Ratio_pct1_pct2 |
| SERPINA9                                                                                 | 0,268357209 | 0,013535348 | 0,013 | 0     | 1         | 1,009426137   | 0,990661886     | #DIV/0!         |
| SIX4                                                                                     | 0,114652585 | 0,013523622 | 0,025 | 0     | 1         | 1,009417933   | 0,990669937     | #DIV/0!         |
| HIP1R                                                                                    | 0,055334082 | 0,013481686 | 0,062 | 0,01  | 1         | 1,009388592   | 0,990698734     | 6,2             |
| LINC00342                                                                                | 0,157415062 | 0,013477926 | 0,062 | 0,02  | 1         | 1,009385961   | 0,990701316     | 3,1             |
| AK8                                                                                      | 0,268357209 | 0,013465611 | 0,013 | 0     | 1         | 1,009377344   | 0,990709773     | #DIV/0!         |
| BMP6                                                                                     | 0,268357209 | 0,013465611 | 0,013 | 0     | 1         | 1,009377344   | 0,990709773     | #DIV/0!         |
| CALHM5                                                                                   | 0,268357209 | 0,013465611 | 0,013 | 0     | 1         | 1,009377344   | 0,990709773     | #DIV/0!         |
| CRB2                                                                                     | 0,268357209 | 0,013465611 | 0,013 | 0     | 1         | 1,009377344   | 0,990709773     | #DIV/0!         |
| HOATZ                                                                                    | 0,268357209 | 0,013465611 | 0,013 | 0     | 1         | 1,009377344   | 0,990709773     | #DIV/0!         |
| KCNV2                                                                                    | 0,268357209 | 0,013465611 | 0,013 | 0     | 1         | 1,009377344   | 0,990709773     | #DIV/0!         |
| TAS2R31                                                                                  | 0,268357209 | 0,013465611 | 0,013 | 0     | 1         | 1,009377344   | 0,990709773     | #DIV/0!         |
| TRPA1                                                                                    | 0,268357209 | 0,013465611 | 0,013 | 0     | 1         | 1,009377344   | 0,990709773     | #DIV/0!         |
| H3C3                                                                                     | 0,114652585 | 0,01345216  | 0,025 | 0     | 1         | 1,009367934   | 0,99071901      | #DIV/0!         |
| NEK10                                                                                    | 0,114652585 | 0,013444015 | 0,025 | 0     | 1         | 1,009362235   | 0,990724603     | #DIV/0!         |
| MYO1G                                                                                    | 0,114652585 | 0,013434513 | 0,025 | 0     | 1         | 1,009355587   | 0,990731129     | #DIV/0!         |
| ELP6                                                                                     | 0,003659657 | 0,013396493 | 0,338 | 0,12  | 1         | 1,009328988   | 0,990757238     | 2,816666667     |
| ANK1                                                                                     | 0,268357209 | 0,013348001 | 0,013 | 0     | 1         | 1,009295062   | 0,99079054      | #DIV/0!         |
| ATG9A                                                                                    | 0,268357209 | 0,013348001 | 0,013 | 0     | 1         | 1,009295062   | 0,99079054      | #DIV/0!         |
| CFAP97D1                                                                                 | 0,268357209 | 0,013348001 | 0,013 | 0     | 1         | 1,009295062   | 0,99079054      | #DIV/0!         |
| COLEC11                                                                                  | 0,268357209 | 0,013348001 | 0,013 | 0     | 1         | 1,009295062   | 0,99079054      | #DIV/0!         |
| ELAPOR1                                                                                  | 0,268357209 | 0,013348001 | 0,013 | 0     | 1         | 1,009295062   | 0,99079054      | #DIV/0!         |
| HOTAIR                                                                                   | 0,268357209 | 0,013348001 | 0,013 | 0     | 1         | 1,009295062   | 0,99079054      | #DIV/0!         |
| LINC02584                                                                                | 0,268357209 | 0,013348001 | 0,013 | 0     | 1         | 1,009295062   | 0,99079054      | #DIV/0!         |
| NAPA-AS1                                                                                 | 0,268357209 | 0,013348001 | 0,013 | 0     | 1         | 1,009295062   | 0,99079054      | #DIV/0!         |
| TMEM139                                                                                  | 0,268357209 | 0,013348001 | 0,013 | 0     | 1         | 1,009295062   | 0,99079054      | #DIV/0!         |
| ZCCHC12                                                                                  | 0,268357209 | 0,013348001 | 0,013 | 0     | 1         | 1,009295062   | 0,99079054      | #DIV/0!         |
| ZNF627                                                                                   | 0,268357209 | 0,013348001 | 0,013 | 0     | 1         | 1,009295062   | 0,99079054      | #DIV/0!         |
| ARMC10                                                                                   | 0,000909363 | 0,013323201 | 0,462 | 0,17  | 1         | 1,009277713   | 0,990807572     | 2,717647059     |
| AC226118.1                                                                               | 0,268357209 | 0,013321378 | 0,013 | 0     | 1         | 1,009276438   | 0,990808824     | #DIV/0!         |
| BHLHE40-AS1                                                                              | 0,268357209 | 0,013321378 | 0,013 | 0     | 1         | 1,009276438   | 0,990808824     | #DIV/0!         |

Supplementary Table 4

| Differentially expressed genes_keloid-CCD_ comparing SC-Keloid vs. (SC-Myel, SC-Nonmyel) |             |             |       |       |           |               |                 |                 |
|------------------------------------------------------------------------------------------|-------------|-------------|-------|-------|-----------|---------------|-----------------|-----------------|
| gene                                                                                     | p_val       | avg_log2FC  | pct.1 | pct.2 | p_val_adj | Foldchange_UP | Foldchange_DOWN | Ratio_pct1_pct2 |
| FMO1                                                                                     | 0,268357209 | 0,013321378 | 0,013 | 0     | 1         | 1,009276438   | 0,990808824     | #DIV/0!         |
| RNLS                                                                                     | 0,268357209 | 0,013321378 | 0,013 | 0     | 1         | 1,009276438   | 0,990808824     | #DIV/0!         |
| TMCC1-DT                                                                                 | 0,268357209 | 0,013321378 | 0,013 | 0     | 1         | 1,009276438   | 0,990808824     | #DIV/0!         |
| TSSK3                                                                                    | 0,268357209 | 0,013321378 | 0,013 | 0     | 1         | 1,009276438   | 0,990808824     | #DIV/0!         |
| ZGPAT                                                                                    | 0,268357209 | 0,013321378 | 0,013 | 0     | 1         | 1,009276438   | 0,990808824     | #DIV/0!         |
| AIFM2                                                                                    | 0,002526724 | 0,013303811 | 0,188 | 0,04  | 1         | 1,009264148   | 0,990820889     | 4,7             |
| MIER2                                                                                    | 0,01362345  | 0,013272099 | 0,088 | 0,01  | 1         | 1,009241963   | 0,990842668     | 8,8             |
| BACH1-IT2                                                                                | 0,114652585 | 0,013267218 | 0,025 | 0     | 1         | 1,009238549   | 0,99084602      | #DIV/0!         |
| JAK3                                                                                     | 0,114652585 | 0,013267218 | 0,025 | 0     | 1         | 1,009238549   | 0,99084602      | #DIV/0!         |
| ZDHC11                                                                                   | 0,114652585 | 0,013258538 | 0,025 | 0     | 1         | 1,009232477   | 0,990851982     | #DIV/0!         |
| NEXN                                                                                     | 0,11122839  | 0,013248209 | 0,05  | 0,01  | 1         | 1,009225251   | 0,990859076     | 5               |
| BTF3                                                                                     | 0,49233118  | 0,013210807 | 1     | 0,93  | 1         | 1,009199088   | 0,990884764     | 1,075268817     |
| C16orf86                                                                                 | 0,343957066 | 0,013160599 | 0,075 | 0,04  | 1         | 1,009163966   | 0,990919249     | 1,875           |
| BTN3A1                                                                                   | 0,223365318 | 0,013133995 | 0,038 | 0,01  | 1         | 1,009145357   | 0,990937522     | 3,8             |
| ZEB2-AS1                                                                                 | 0,711389334 | 0,01312774  | 0,013 | 0,02  | 1         | 1,009140982   | 0,990941819     | 0,65            |
| THAP6                                                                                    | 0,061661173 | 0,013088995 | 0,1   | 0,03  | 1         | 1,009113881   | 0,990968432     | 3,333333333     |
| ADSL                                                                                     | 0,001325941 | 0,013077029 | 0,3   | 0,09  | 1         | 1,009105511   | 0,990976651     | 3,333333333     |
| PFAS                                                                                     | 0,034247231 | 0,013072956 | 0,112 | 0,03  | 1         | 1,009102662   | 0,990979449     | 3,733333333     |
| CENPBD1                                                                                  | 0,488500108 | 0,01303837  | 0,038 | 0,02  | 1         | 1,009078471   | 0,991003206     | 1,9             |
| LRRC14                                                                                   | 0,11061781  | 0,013019768 | 0,088 | 0,03  | 1         | 1,00906546    | 0,991015984     | 2,933333333     |
| ALG1L                                                                                    | 0,268357209 | 0,013014694 | 0,013 | 0     | 1         | 1,009061911   | 0,99101947      | #DIV/0!         |
| LINC02603                                                                                | 0,268357209 | 0,013014694 | 0,013 | 0     | 1         | 1,009061911   | 0,99101947      | #DIV/0!         |
| LTB                                                                                      | 0,268357209 | 0,013014694 | 0,013 | 0     | 1         | 1,009061911   | 0,99101947      | #DIV/0!         |
| MMP8                                                                                     | 0,268357209 | 0,013014694 | 0,013 | 0     | 1         | 1,009061911   | 0,99101947      | #DIV/0!         |
| PTPN7                                                                                    | 0,268357209 | 0,013014694 | 0,013 | 0     | 1         | 1,009061911   | 0,99101947      | #DIV/0!         |
| SOGA3                                                                                    | 0,268357209 | 0,013014694 | 0,013 | 0     | 1         | 1,009061911   | 0,99101947      | #DIV/0!         |
| STK33                                                                                    | 0,268357209 | 0,013014694 | 0,013 | 0     | 1         | 1,009061911   | 0,99101947      | #DIV/0!         |
| GEN1                                                                                     | 0,11122839  | 0,012966786 | 0,05  | 0,01  | 1         | 1,009028404   | 0,991052379     | 5               |
| NUP37                                                                                    | 0,016861507 | 0,012961252 | 0,2   | 0,07  | 1         | 1,009024533   | 0,991056181     | 2,857142857     |
| NOL10                                                                                    | 0,003195301 | 0,012936867 | 0,262 | 0,08  | 1         | 1,009007478   | 0,991072932     | 3,275           |

Supplementary Table 4

| Differentially expressed genes_keloid-CCD_comparing SC-Keloid vs. (SC-Myel, SC-Nonmyel) |             |             |       |       |           |               |                 |                 |
|-----------------------------------------------------------------------------------------|-------------|-------------|-------|-------|-----------|---------------|-----------------|-----------------|
| gene                                                                                    | p_val       | avg_log2FC  | pct.1 | pct.2 | p_val_adj | Foldchange_UP | Foldchange_DOWN | Ratio_pct1_pct2 |
| AGMAT                                                                                   | 0,268357209 | 0,012923293 | 0,013 | 0     | 1         | 1,008997984   | 0,991082257     | #DIV/0!         |
| C2CD6                                                                                   | 0,268357209 | 0,012923293 | 0,013 | 0     | 1         | 1,008997984   | 0,991082257     | #DIV/0!         |
| SPATA18                                                                                 | 0,268357209 | 0,012923293 | 0,013 | 0     | 1         | 1,008997984   | 0,991082257     | #DIV/0!         |
| TNFRSF18                                                                                | 0,268357209 | 0,012923293 | 0,013 | 0     | 1         | 1,008997984   | 0,991082257     | #DIV/0!         |
| MMACHC                                                                                  | 0,114652585 | 0,01290614  | 0,025 | 0     | 1         | 1,008985988   | 0,991094041     | #DIV/0!         |
| RCE1                                                                                    | 0,010376573 | 0,012897739 | 0,212 | 0,07  | 1         | 1,008980113   | 0,991099812     | 3,028571429     |
| THAP4                                                                                   | 0,004420445 | 0,012880922 | 0,275 | 0,09  | 1         | 1,008968352   | 0,991111365     | 3,055555556     |
| C17orf49                                                                                | 0,001530226 | 0,012873197 | 0,175 | 0,03  | 1         | 1,008962949   | 0,991116672     | 5,833333333     |
| NARS1                                                                                   | 0,006488348 | 0,012812916 | 0,6   | 0,26  | 1         | 1,008920792   | 0,991158085     | 2,307692308     |
| TMED10                                                                                  | 0,064354742 | 0,012765081 | 0,938 | 0,6   | 1         | 1,00888734    | 0,991190949     | 1,563333333     |
| ZNF845                                                                                  | 0,447580525 | 0,012757096 | 0,025 | 0,01  | 1         | 1,008881756   | 0,991196435     | 2,5             |
| CCDC190                                                                                 | 0,268357209 | 0,012754203 | 0,013 | 0     | 1         | 1,008879733   | 0,991198423     | #DIV/0!         |
| DSPP                                                                                    | 0,268357209 | 0,012754203 | 0,013 | 0     | 1         | 1,008879733   | 0,991198423     | #DIV/0!         |
| ELL3                                                                                    | 0,268357209 | 0,012754203 | 0,013 | 0     | 1         | 1,008879733   | 0,991198423     | #DIV/0!         |
| LCMT2                                                                                   | 0,268357209 | 0,012754203 | 0,013 | 0     | 1         | 1,008879733   | 0,991198423     | #DIV/0!         |
| OOEP                                                                                    | 0,268357209 | 0,012754203 | 0,013 | 0     | 1         | 1,008879733   | 0,991198423     | #DIV/0!         |
| QPCTL                                                                                   | 0,268357209 | 0,012754203 | 0,013 | 0     | 1         | 1,008879733   | 0,991198423     | #DIV/0!         |
| MAPKAPK5                                                                                | 0,011406156 | 0,012710627 | 0,25  | 0,09  | 1         | 1,008849261   | 0,991228362     | 2,777777778     |
| CCT4                                                                                    | 0,03226889  | 0,0127039   | 0,713 | 0,38  | 1         | 1,008844557   | 0,991232984     | 1,876315789     |
| FOXD2-AS1                                                                               | 0,447580525 | 0,012688068 | 0,025 | 0,01  | 1         | 1,008833485   | 0,991243862     | 2,5             |
| AC007563.1                                                                              | 0,268357209 | 0,012680662 | 0,013 | 0     | 1         | 1,008828307   | 0,99124895      | #DIV/0!         |
| CGN                                                                                     | 0,268357209 | 0,012680662 | 0,013 | 0     | 1         | 1,008828307   | 0,99124895      | #DIV/0!         |
| CTSG                                                                                    | 0,268357209 | 0,012680662 | 0,013 | 0     | 1         | 1,008828307   | 0,99124895      | #DIV/0!         |
| EBF3                                                                                    | 0,268357209 | 0,012680662 | 0,013 | 0     | 1         | 1,008828307   | 0,99124895      | #DIV/0!         |
| FBN2                                                                                    | 0,268357209 | 0,012680662 | 0,013 | 0     | 1         | 1,008828307   | 0,99124895      | #DIV/0!         |
| FNDC1                                                                                   | 0,268357209 | 0,012680662 | 0,013 | 0     | 1         | 1,008828307   | 0,99124895      | #DIV/0!         |
| GP6                                                                                     | 0,268357209 | 0,012680662 | 0,013 | 0     | 1         | 1,008828307   | 0,99124895      | #DIV/0!         |
| GPD1                                                                                    | 0,268357209 | 0,012680662 | 0,013 | 0     | 1         | 1,008828307   | 0,99124895      | #DIV/0!         |
| GRAMD2A                                                                                 | 0,268357209 | 0,012680662 | 0,013 | 0     | 1         | 1,008828307   | 0,99124895      | #DIV/0!         |
| HNMT                                                                                    | 0,268357209 | 0,012680662 | 0,013 | 0     | 1         | 1,008828307   | 0,99124895      | #DIV/0!         |

Supplementary Table 4

| Differentially expressed genes_keloid-CCD_comparing SC-Keloid vs. (SC-Myel, SC-Nonmyel) |             |             |       |       |           |               |                 |                 |
|-----------------------------------------------------------------------------------------|-------------|-------------|-------|-------|-----------|---------------|-----------------|-----------------|
| gene                                                                                    | p_val       | avg_log2FC  | pct.1 | pct.2 | p_val_adj | Foldchange_UP | Foldchange_DOWN | Ratio_pct1_pct2 |
| HOXA10                                                                                  | 0,268357209 | 0,012680662 | 0,013 | 0     | 1         | 1,008828307   | 0,99124895      | #DIV/0!         |
| KCNC3                                                                                   | 0,268357209 | 0,012680662 | 0,013 | 0     | 1         | 1,008828307   | 0,99124895      | #DIV/0!         |
| KCNN1                                                                                   | 0,268357209 | 0,012680662 | 0,013 | 0     | 1         | 1,008828307   | 0,99124895      | #DIV/0!         |
| MPIG6B                                                                                  | 0,268357209 | 0,012680662 | 0,013 | 0     | 1         | 1,008828307   | 0,99124895      | #DIV/0!         |
| PAPOLB                                                                                  | 0,268357209 | 0,012680662 | 0,013 | 0     | 1         | 1,008828307   | 0,99124895      | #DIV/0!         |
| PDE3A                                                                                   | 0,268357209 | 0,012680662 | 0,013 | 0     | 1         | 1,008828307   | 0,99124895      | #DIV/0!         |
| REM2                                                                                    | 0,268357209 | 0,012680662 | 0,013 | 0     | 1         | 1,008828307   | 0,99124895      | #DIV/0!         |
| SCN3A                                                                                   | 0,268357209 | 0,012680662 | 0,013 | 0     | 1         | 1,008828307   | 0,99124895      | #DIV/0!         |
| SLC12A5                                                                                 | 0,268357209 | 0,012680662 | 0,013 | 0     | 1         | 1,008828307   | 0,99124895      | #DIV/0!         |
| TEX26-AS1                                                                               | 0,268357209 | 0,012680662 | 0,013 | 0     | 1         | 1,008828307   | 0,99124895      | #DIV/0!         |
| ATP6V1E2                                                                                | 0,200780598 | 0,012622948 | 0,088 | 0,04  | 1         | 1,00878795    | 0,991288605     | 2,2             |
| PET117                                                                                  | 0,079357729 | 0,012588201 | 0,112 | 0,04  | 1         | 1,008763654   | 0,991312481     | 2,8             |
| CABYR                                                                                   | 0,223365318 | 0,01258486  | 0,038 | 0,01  | 1         | 1,008761318   | 0,991314776     | 3,8             |
| GNL3L                                                                                   | 0,080462265 | 0,012566699 | 0,112 | 0,04  | 1         | 1,008748619   | 0,991327255     | 2,8             |
| C6orf52                                                                                 | 0,055334082 | 0,012532446 | 0,062 | 0,01  | 1         | 1,00872467    | 0,991350792     | 6,2             |
| ATF6B                                                                                   | 0,005437688 | 0,012517046 | 0,4   | 0,16  | 1         | 1,008713902   | 0,991361374     | 2,5             |
| HID1                                                                                    | 0,114652585 | 0,012489842 | 0,025 | 0     | 1         | 1,008694882   | 0,991380068     | #DIV/0!         |
| APOL3                                                                                   | 0,439855668 | 0,012444383 | 0,025 | 0,01  | 1         | 1,008663098   | 0,991411306     | 2,5             |
| IRX5                                                                                    | 0,114652585 | 0,012400541 | 0,025 | 0     | 1         | 1,008632447   | 0,991441435     | #DIV/0!         |
| APLF                                                                                    | 0,112247794 | 0,012379065 | 0,088 | 0,03  | 1         | 1,008617432   | 0,991456194     | 2,933333333     |
| ICOSLG                                                                                  | 0,114652585 | 0,012355467 | 0,025 | 0     | 1         | 1,008600935   | 0,991472411     | #DIV/0!         |
| BARX2                                                                                   | 0,268357209 | 0,012349379 | 0,013 | 0     | 1         | 1,008596678   | 0,991476595     | #DIV/0!         |
| L3MBTL4                                                                                 | 0,268357209 | 0,012349379 | 0,013 | 0     | 1         | 1,008596678   | 0,991476595     | #DIV/0!         |
| RIC3                                                                                    | 0,268357209 | 0,012349379 | 0,013 | 0     | 1         | 1,008596678   | 0,991476595     | #DIV/0!         |
| TP53AIP1                                                                                | 0,268357209 | 0,012349379 | 0,013 | 0     | 1         | 1,008596678   | 0,991476595     | #DIV/0!         |
| BICDL1                                                                                  | 0,268357209 | 0,012337973 | 0,013 | 0     | 1         | 1,008588704   | 0,991484434     | #DIV/0!         |
| CILP2                                                                                   | 0,268357209 | 0,012337973 | 0,013 | 0     | 1         | 1,008588704   | 0,991484434     | #DIV/0!         |
| LINC00642                                                                               | 0,268357209 | 0,012337973 | 0,013 | 0     | 1         | 1,008588704   | 0,991484434     | #DIV/0!         |
| RFX4                                                                                    | 0,268357209 | 0,012337973 | 0,013 | 0     | 1         | 1,008588704   | 0,991484434     | #DIV/0!         |
| RIPK3                                                                                   | 0,268357209 | 0,012337973 | 0,013 | 0     | 1         | 1,008588704   | 0,991484434     | #DIV/0!         |

Supplementary Table 4

| Differentially expressed genes_keloid-CCD_comparing SC-Keloid vs. (SC-Myel, SC-Nonmyel) |             |             |       |       |           |               |                 |                 |
|-----------------------------------------------------------------------------------------|-------------|-------------|-------|-------|-----------|---------------|-----------------|-----------------|
| gene                                                                                    | p_val       | avg_log2FC  | pct.1 | pct.2 | p_val_adj | Foldchange_UP | Foldchange_DOWN | Ratio_pct1_pct2 |
| SH3BP1                                                                                  | 0,152152734 | 0,012318486 | 0,112 | 0,05  | 1         | 1,008575081   | 0,991497826     | 2,24            |
| C3orf33                                                                                 | 0,447580525 | 0,012316035 | 0,025 | 0,01  | 1         | 1,008573368   | 0,99149951      | 2,5             |
| CISH                                                                                    | 0,447580525 | 0,012272306 | 0,025 | 0,01  | 1         | 1,008542797   | 0,991529564     | 2,5             |
| SUSD1                                                                                   | 0,11122839  | 0,012226968 | 0,05  | 0,01  | 1         | 1,008511103   | 0,991560724     | 5               |
| CD226                                                                                   | 0,268357209 | 0,012214295 | 0,013 | 0     | 1         | 1,008502245   | 0,991569434     | #DIV/0!         |
| CFAP157                                                                                 | 0,268357209 | 0,012214295 | 0,013 | 0     | 1         | 1,008502245   | 0,991569434     | #DIV/0!         |
| IGF1                                                                                    | 0,268357209 | 0,012214295 | 0,013 | 0     | 1         | 1,008502245   | 0,991569434     | #DIV/0!         |
| KIAA1958                                                                                | 0,268357209 | 0,012214295 | 0,013 | 0     | 1         | 1,008502245   | 0,991569434     | #DIV/0!         |
| MYRFL                                                                                   | 0,268357209 | 0,012214295 | 0,013 | 0     | 1         | 1,008502245   | 0,991569434     | #DIV/0!         |
| PCDHGA4                                                                                 | 0,268357209 | 0,012214295 | 0,013 | 0     | 1         | 1,008502245   | 0,991569434     | #DIV/0!         |
| PCOLCE2                                                                                 | 0,268357209 | 0,012214295 | 0,013 | 0     | 1         | 1,008502245   | 0,991569434     | #DIV/0!         |
| SLC16A10                                                                                | 0,268357209 | 0,012214295 | 0,013 | 0     | 1         | 1,008502245   | 0,991569434     | #DIV/0!         |
| SPNS3                                                                                   | 0,268357209 | 0,012214295 | 0,013 | 0     | 1         | 1,008502245   | 0,991569434     | #DIV/0!         |
| EXO1                                                                                    | 0,11122839  | 0,012204731 | 0,05  | 0,01  | 1         | 1,008495559   | 0,991576007     | 5               |
| CENATAC                                                                                 | 0,029571979 | 0,012186013 | 0,188 | 0,07  | 1         | 1,008482475   | 0,991588873     | 2,685714286     |
| EVC2                                                                                    | 0,027487357 | 0,012185593 | 0,075 | 0,01  | 1         | 1,008482181   | 0,991589161     | 7,5             |
| PRPF39                                                                                  | 0,009369154 | 0,012158317 | 0,2   | 0,06  | 1         | 1,008463115   | 0,991607909     | 3,333333333     |
| APMAP                                                                                   | 0,000322452 | 0,012108768 | 0,525 | 0,19  | 1         | 1,00842848    | 0,991641966     | 2,763157895     |
| FITM2                                                                                   | 0,055334082 | 0,012099951 | 0,062 | 0,01  | 1         | 1,008422317   | 0,991648026     | 6,2             |
| ZNF738                                                                                  | 0,034816087 | 0,012076414 | 0,112 | 0,03  | 1         | 1,008405865   | 0,991664205     | 3,733333333     |
| CELF4                                                                                   | 0,268357209 | 0,01206637  | 0,013 | 0     | 1         | 1,008398844   | 0,991671109     | #DIV/0!         |
| GLYATL1                                                                                 | 0,268357209 | 0,01206637  | 0,013 | 0     | 1         | 1,008398844   | 0,991671109     | #DIV/0!         |
| KRT16                                                                                   | 0,268357209 | 0,01206637  | 0,013 | 0     | 1         | 1,008398844   | 0,991671109     | #DIV/0!         |
| NACA2                                                                                   | 0,268357209 | 0,01206637  | 0,013 | 0     | 1         | 1,008398844   | 0,991671109     | #DIV/0!         |
| NTF3                                                                                    | 0,268357209 | 0,01206637  | 0,013 | 0     | 1         | 1,008398844   | 0,991671109     | #DIV/0!         |
| SERF1A                                                                                  | 0,268357209 | 0,01206637  | 0,013 | 0     | 1         | 1,008398844   | 0,991671109     | #DIV/0!         |
| SRARP                                                                                   | 0,268357209 | 0,01206637  | 0,013 | 0     | 1         | 1,008398844   | 0,991671109     | #DIV/0!         |
| BORA                                                                                    | 0,223365318 | 0,012061726 | 0,038 | 0,01  | 1         | 1,008395599   | 0,991674301     | 3,8             |
| EDA2R                                                                                   | 0,114652585 | 0,0120162   | 0,025 | 0     | 1         | 1,008363778   | 0,991705595     | #DIV/0!         |
| MPP4                                                                                    | 0,114652585 | 0,0120162   | 0,025 | 0     | 1         | 1,008363778   | 0,991705595     | #DIV/0!         |

Supplementary Table 4

| Differentially expressed genes_keloid-CCD_comparing SC-Keloid vs. (SC-Myel, SC-Nonmyel) |             |             |       |       |             |               |                 |                 |
|-----------------------------------------------------------------------------------------|-------------|-------------|-------|-------|-------------|---------------|-----------------|-----------------|
| gene                                                                                    | p_val       | avg_log2FC  | pct.1 | pct.2 | p_val_adj   | Foldchange_UP | Foldchange_DOWN | Ratio_pct1_pct2 |
| SMG6                                                                                    | 0,00297039  | 0,012002428 | 0,262 | 0,08  | 1           | 1,008354152   | 0,991715062     | 3,275           |
| SAXO2                                                                                   | 0,223365318 | 0,011890328 | 0,038 | 0,01  | 1           | 1,008275804   | 0,991792123     | 3,8             |
| ZNF101                                                                                  | 0,223365318 | 0,011888365 | 0,038 | 0,01  | 1           | 1,008274432   | 0,991793472     | 3,8             |
| KLHDC4                                                                                  | 0,001348746 | 0,011834537 | 0,2   | 0,04  | 1           | 1,008236813   | 0,991830477     | 5               |
| ELL                                                                                     | 0,085199008 | 0,011801887 | 0,075 | 0,02  | 1           | 1,008213996   | 0,991852924     | 3,75            |
| KRCC1                                                                                   | 0,001943097 | 0,011796874 | 0,537 | 0,22  | 1           | 1,008210493   | 0,99185637      | 2,440909091     |
| GJB1                                                                                    | 0,447580525 | 0,01177804  | 0,025 | 0,01  | 1           | 1,008197331   | 0,991869319     | 2,5             |
| ZNF771                                                                                  | 0,012429073 | 0,011725805 | 0,112 | 0,02  | 1           | 1,008160828   | 0,991905232     | 5,6             |
| ATP2A1                                                                                  | 0,114652585 | 0,011610185 | 0,025 | 0     | 1           | 1,008080036   | 0,991984728     | #DIV/0!         |
| UMPS                                                                                    | 0,009369154 | 0,011606292 | 0,2   | 0,06  | 1           | 1,008077316   | 0,991987405     | 3,333333333     |
| S1PR1                                                                                   | 0,439855668 | 0,011597826 | 0,025 | 0,01  | 1           | 1,0080714     | 0,991993226     | 2,5             |
| HMG3-AS1                                                                                | 0,81721858  | 0,011576682 | 0,025 | 0,02  | 1           | 1,008056626   | 0,992007764     | 1,25            |
| STEAP3                                                                                  | 0,114652585 | 0,011573837 | 0,025 | 0     | 1           | 1,008054638   | 0,992009721     | #DIV/0!         |
| VEPH1                                                                                   | 0,223365318 | 0,011556201 | 0,038 | 0,01  | 1           | 1,008042315   | 0,992021847     | 3,8             |
| SMG1                                                                                    | 0,014740305 | 0,011555995 | 0,5   | 0,23  | 1           | 1,008042171   | 0,992021989     | 2,173913043     |
| NECAP1                                                                                  | 0,123200185 | 0,011531744 | 0,162 | 0,08  | 1           | 1,008025227   | 0,992038665     | 2,025           |
| FRMD4B                                                                                  | 0,439855668 | 0,011514858 | 0,025 | 0,01  | 1           | 1,008013428   | 0,992050276     | 2,5             |
| TRIB3                                                                                   | 4,24089E-05 | 0,011481308 | 0,188 | 0,01  | 0,894869854 | 1,007989988   | 0,992073346     | 18,8            |
| ENKD1                                                                                   | 0,047655629 | 0,011477913 | 0,175 | 0,07  | 1           | 1,007987615   | 0,992075681     | 2,5             |
| CTSS                                                                                    | 0,11122839  | 0,011474519 | 0,05  | 0,01  | 1           | 1,007985244   | 0,992078015     | 5               |
| TRIAP1                                                                                  | 0,000718898 | 0,011450434 | 0,412 | 0,14  | 1           | 1,007968416   | 0,992094577     | 2,942857143     |
| ZNF674                                                                                  | 0,114652585 | 0,011403997 | 0,025 | 0     | 1           | 1,007935973   | 0,992126511     | #DIV/0!         |
| CPSF1                                                                                   | 0,010461593 | 0,011391136 | 0,138 | 0,03  | 1           | 1,007926987   | 0,992135356     | 4,6             |
| SPINT2                                                                                  | 0,114652585 | 0,011297719 | 0,025 | 0     | 1           | 1,007861725   | 0,9921996       | #DIV/0!         |
| PFKL                                                                                    | 0,000217701 | 0,011293641 | 0,488 | 0,16  | 1           | 1,007858876   | 0,992202405     | 3,05            |
| PRDM5                                                                                   | 0,112247794 | 0,011278913 | 0,088 | 0,03  | 1           | 1,007848586   | 0,992212534     | 2,933333333     |
| ASB2                                                                                    | 0,268357209 | 0,011253177 | 0,013 | 0     | 1           | 1,007830608   | 0,992230234     | #DIV/0!         |
| GOLGA8R                                                                                 | 0,268357209 | 0,011253177 | 0,013 | 0     | 1           | 1,007830608   | 0,992230234     | #DIV/0!         |
| IL20RB                                                                                  | 0,268357209 | 0,011253177 | 0,013 | 0     | 1           | 1,007830608   | 0,992230234     | #DIV/0!         |
| SPACA6P-AS                                                                              | 0,268357209 | 0,011253177 | 0,013 | 0     | 1           | 1,007830608   | 0,992230234     | #DIV/0!         |

Supplementary Table 4

| Differentially expressed genes_keloid-CCD_ comparing SC-Keloid vs. (SC-Myel, SC-Nonmyel) |             |             |       |       |           |               |                 |                 |
|------------------------------------------------------------------------------------------|-------------|-------------|-------|-------|-----------|---------------|-----------------|-----------------|
| gene                                                                                     | p_val       | avg_log2FC  | pct.1 | pct.2 | p_val_adj | Foldchange_UP | Foldchange_DOWN | Ratio_pct1_pct2 |
| TSKU                                                                                     | 0,268357209 | 0,011253177 | 0,013 | 0     | 1         | 1,007830608   | 0,992230234     | #DIV/0!         |
| SLC25A19                                                                                 | 0,284975754 | 0,011225565 | 0,05  | 0,02  | 1         | 1,007811319   | 0,992249225     | 2,5             |
| IQSEC2                                                                                   | 0,085199008 | 0,011190516 | 0,075 | 0,02  | 1         | 1,007786836   | 0,992273331     | 3,75            |
| DCAF4L1                                                                                  | 0,223365318 | 0,011164507 | 0,038 | 0,01  | 1         | 1,007768668   | 0,992291219     | 3,8             |
| ZNF324                                                                                   | 0,062632651 | 0,01115925  | 0,1   | 0,03  | 1         | 1,007764995   | 0,992294835     | 3,333333333     |
| C17orf80                                                                                 | 0,062632651 | 0,011157595 | 0,1   | 0,03  | 1         | 1,007763839   | 0,992295974     | 3,333333333     |
| IL1RAPL1                                                                                 | 0,080727289 | 0,011152474 | 0,162 | 0,07  | 1         | 1,007760262   | 0,992299496     | 2,314285714     |
| TRIM59                                                                                   | 0,11122839  | 0,011140143 | 0,05  | 0,01  | 1         | 1,007751649   | 0,992307977     | 5               |
| CSRNP3                                                                                   | 0,114652585 | 0,011130177 | 0,025 | 0     | 1         | 1,007744687   | 0,992314832     | #DIV/0!         |
| H2BC3                                                                                    | 0,114652585 | 0,011101975 | 0,025 | 0     | 1         | 1,007724988   | 0,99233423      | #DIV/0!         |
| HSF2BP                                                                                   | 0,114652585 | 0,011101975 | 0,025 | 0     | 1         | 1,007724988   | 0,99233423      | #DIV/0!         |
| ASAP1                                                                                    | 0,007905101 | 0,011090279 | 0,312 | 0,12  | 1         | 1,007716818   | 0,992342275     | 2,6             |
| GMIP                                                                                     | 0,276717465 | 0,011049785 | 0,05  | 0,02  | 1         | 1,007688533   | 0,992370129     | 2,5             |
| AKR1C2                                                                                   | 0,280825998 | 0,010964993 | 0,05  | 0,02  | 1         | 1,00762931    | 0,992428455     | 2,5             |
| FHIP2A                                                                                   | 0,093220017 | 0,01085851  | 0,125 | 0,05  | 1         | 1,007554941   | 0,992501708     | 2,5             |
| SRPK1                                                                                    | 0,001538322 | 0,010822292 | 0,338 | 0,11  | 1         | 1,007529648   | 0,992526624     | 3,072727273     |
| LINC00857                                                                                | 0,447580525 | 0,010815528 | 0,025 | 0,01  | 1         | 1,007524924   | 0,992531278     | 2,5             |
| MRPL53                                                                                   | 0,045399153 | 0,01081449  | 0,088 | 0,02  | 1         | 1,007524199   | 0,992531992     | 4,4             |
| HKDC1                                                                                    | 0,005482675 | 0,010803353 | 0,25  | 0,08  | 1         | 1,007516422   | 0,992539654     | 3,125           |
| PCGF6                                                                                    | 0,031119861 | 0,01073679  | 0,188 | 0,07  | 1         | 1,007469937   | 0,992585449     | 2,685714286     |
| DISC1                                                                                    | 0,123264423 | 0,010725198 | 0,225 | 0,12  | 1         | 1,007461842   | 0,992593424     | 1,875           |
| BOC                                                                                      | 0,157415062 | 0,01061003  | 0,062 | 0,02  | 1         | 1,007381422   | 0,992672664     | 3,1             |
| PIP5KL1                                                                                  | 0,223365318 | 0,010542612 | 0,038 | 0,01  | 1         | 1,007334347   | 0,992719054     | 3,8             |
| NIPAL2                                                                                   | 0,114652585 | 0,01051209  | 0,025 | 0     | 1         | 1,007313036   | 0,992740056     | #DIV/0!         |
| LBX2                                                                                     | 0,447580525 | 0,01051169  | 0,025 | 0,01  | 1         | 1,007312757   | 0,992740332     | 2,5             |
| FPGT                                                                                     | 0,061661173 | 0,010502704 | 0,1   | 0,03  | 1         | 1,007306483   | 0,992746515     | 3,333333333     |
| SYP                                                                                      | 0,078265554 | 0,010482766 | 0,112 | 0,04  | 1         | 1,007292562   | 0,992760235     | 2,8             |
| QRICH2                                                                                   | 0,268357209 | 0,010457995 | 0,013 | 0     | 1         | 1,007275267   | 0,99277728      | #DIV/0!         |
| VILL                                                                                     | 0,223365318 | 0,010435078 | 0,038 | 0,01  | 1         | 1,007259266   | 0,992793051     | 3,8             |
| CASP6                                                                                    | 0,051861952 | 0,010377776 | 0,175 | 0,07  | 1         | 1,00721926    | 0,992832484     | 2,5             |



Supplementary Table 4

| Differentially expressed genes_keloid-CCD_ comparing SC-Keloid vs. (SC-Myel, SC-Nonmyel) |             |             |       |       |           |               |                 |                 |
|------------------------------------------------------------------------------------------|-------------|-------------|-------|-------|-----------|---------------|-----------------|-----------------|
| gene                                                                                     | p_val       | avg_log2FC  | pct.1 | pct.2 | p_val_adj | Foldchange_UP | Foldchange_DOWN | Ratio_pct1_pct2 |
| N6AMT1                                                                                   | 0,035392992 | 0,010360884 | 0,112 | 0,03  | 1         | 1,007207467   | 0,992844109     | 3,733333333     |
| GTF2F1                                                                                   | 0,00035434  | 0,010347431 | 0,412 | 0,13  | 1         | 1,007198075   | 0,992853367     | 3,169230769     |
| AC062029.1                                                                               | 0,268357209 | 0,010343131 | 0,013 | 0     | 1         | 1,007195073   | 0,992856326     | #DIV/0!         |
| AGMO                                                                                     | 0,268357209 | 0,010343131 | 0,013 | 0     | 1         | 1,007195073   | 0,992856326     | #DIV/0!         |
| AL627171.1                                                                               | 0,268357209 | 0,010343131 | 0,013 | 0     | 1         | 1,007195073   | 0,992856326     | #DIV/0!         |
| CWH43                                                                                    | 0,268357209 | 0,010343131 | 0,013 | 0     | 1         | 1,007195073   | 0,992856326     | #DIV/0!         |
| DNAH1                                                                                    | 0,268357209 | 0,010343131 | 0,013 | 0     | 1         | 1,007195073   | 0,992856326     | #DIV/0!         |
| INMT                                                                                     | 0,268357209 | 0,010343131 | 0,013 | 0     | 1         | 1,007195073   | 0,992856326     | #DIV/0!         |
| KL                                                                                       | 0,268357209 | 0,010343131 | 0,013 | 0     | 1         | 1,007195073   | 0,992856326     | #DIV/0!         |
| MEOX2                                                                                    | 0,268357209 | 0,010343131 | 0,013 | 0     | 1         | 1,007195073   | 0,992856326     | #DIV/0!         |
| MEPE                                                                                     | 0,268357209 | 0,010343131 | 0,013 | 0     | 1         | 1,007195073   | 0,992856326     | #DIV/0!         |
| MIMT1                                                                                    | 0,268357209 | 0,010343131 | 0,013 | 0     | 1         | 1,007195073   | 0,992856326     | #DIV/0!         |
| MYORG                                                                                    | 0,268357209 | 0,010343131 | 0,013 | 0     | 1         | 1,007195073   | 0,992856326     | #DIV/0!         |
| NPIP11                                                                                   | 0,268357209 | 0,010343131 | 0,013 | 0     | 1         | 1,007195073   | 0,992856326     | #DIV/0!         |
| PCSK6                                                                                    | 0,268357209 | 0,010343131 | 0,013 | 0     | 1         | 1,007195073   | 0,992856326     | #DIV/0!         |
| ROBO4                                                                                    | 0,268357209 | 0,010343131 | 0,013 | 0     | 1         | 1,007195073   | 0,992856326     | #DIV/0!         |
| ST6GALNAC1                                                                               | 0,268357209 | 0,010343131 | 0,013 | 0     | 1         | 1,007195073   | 0,992856326     | #DIV/0!         |
| TSPAN1                                                                                   | 0,268357209 | 0,010343131 | 0,013 | 0     | 1         | 1,007195073   | 0,992856326     | #DIV/0!         |
| MYD88                                                                                    | 0,055334082 | 0,010337273 | 0,062 | 0,01  | 1         | 1,007190983   | 0,992860358     | 6,2             |
| ADORA1                                                                                   | 0,114652585 | 0,010323431 | 0,025 | 0     | 1         | 1,00718132    | 0,992869884     | #DIV/0!         |
| DCAF17                                                                                   | 0,083746858 | 0,010269428 | 0,075 | 0,02  | 1         | 1,00714362    | 0,992907049     | 3,75            |
| TMEM238                                                                                  | 0,180971596 | 0,010268479 | 0,075 | 0,03  | 1         | 1,007142957   | 0,992907703     | 2,5             |
| RIPOR3                                                                                   | 0,509666892 | 0,010257088 | 0,062 | 0,04  | 1         | 1,007135005   | 0,992915542     | 1,55            |
| CD163L1                                                                                  | 0,268357209 | 0,010245292 | 0,013 | 0     | 1         | 1,007126771   | 0,99292366      | #DIV/0!         |
| GNAZ                                                                                     | 0,268357209 | 0,010245292 | 0,013 | 0     | 1         | 1,007126771   | 0,99292366      | #DIV/0!         |
| PLCB4                                                                                    | 0,268357209 | 0,010245292 | 0,013 | 0     | 1         | 1,007126771   | 0,99292366      | #DIV/0!         |
| MTUS2-AS1                                                                                | 0,114652585 | 0,010217074 | 0,025 | 0     | 1         | 1,007107072   | 0,992943082     | #DIV/0!         |
| KCNQ1                                                                                    | 0,268357209 | 0,010188854 | 0,013 | 0     | 1         | 1,007087373   | 0,992962504     | #DIV/0!         |
| CEP135                                                                                   | 0,02338026  | 0,010161523 | 0,212 | 0,08  | 1         | 1,007068295   | 0,992981316     | 2,65            |
| ANG                                                                                      | 0,439855668 | 0,010160096 | 0,025 | 0,01  | 1         | 1,007067298   | 0,992982298     | 2,5             |

Supplementary Table 4

| Differentially expressed genes_keloid-CCD_ comparing SC-Keloid vs. (SC-Myel, SC-Nonmyel) |             |              |       |       |           |               |                 |                 |
|------------------------------------------------------------------------------------------|-------------|--------------|-------|-------|-----------|---------------|-----------------|-----------------|
| gene                                                                                     | p_val       | avg_log2FC   | pct.1 | pct.2 | p_val_adj | Foldchange_UP | Foldchange_DOWN | Ratio_pct1_pct2 |
| DND1                                                                                     | 0,268357209 | 0,01015958   | 0,013 | 0     | 1         | 1,007066938   | 0,992982653     | #DIV/0!         |
| GSTM5                                                                                    | 0,268357209 | 0,01015958   | 0,013 | 0     | 1         | 1,007066938   | 0,992982653     | #DIV/0!         |
| GYG2                                                                                     | 0,268357209 | 0,01015958   | 0,013 | 0     | 1         | 1,007066938   | 0,992982653     | #DIV/0!         |
| PGA4                                                                                     | 0,268357209 | 0,01015958   | 0,013 | 0     | 1         | 1,007066938   | 0,992982653     | #DIV/0!         |
| TMEM26                                                                                   | 0,268357209 | 0,01015958   | 0,013 | 0     | 1         | 1,007066938   | 0,992982653     | #DIV/0!         |
| TRIM68                                                                                   | 0,268357209 | 0,01015958   | 0,013 | 0     | 1         | 1,007066938   | 0,992982653     | #DIV/0!         |
| MTERF3                                                                                   | 0,019378739 | 0,010156213  | 0,125 | 0,03  | 1         | 1,007064588   | 0,992984971     | 4,166666667     |
| UVSSA                                                                                    | 0,017198953 | 0,01011478   | 0,238 | 0,09  | 1         | 1,007035666   | 0,993013489     | 2,644444444     |
| RHBDL1                                                                                   | 0,874019543 | 0,010071264  | 0,013 | 0,01  | 1         | 1,007005292   | 0,993043441     | 1,3             |
| EHD3                                                                                     | 0,11122839  | 0,010058191  | 0,05  | 0,01  | 1         | 1,006996167   | 0,99305244      | 5               |
| LINC00987                                                                                | 0,886527564 | -0,010013907 | 0,013 | 0,01  | 1         | 0,993082923   | 1,006965257     | 1,3             |
| PUDP                                                                                     | 0,223365318 | -0,010023383 | 0,038 | 0,01  | 1         | 0,9930764     | 1,006971871     | 3,8             |
| EFCAB13                                                                                  | 0,83477988  | -0,010048104 | 0,025 | 0,02  | 1         | 0,993059383   | 1,006989126     | 1,25            |
| CTDP1                                                                                    | 0,112247794 | -0,010084502 | 0,088 | 0,03  | 1         | 0,993034329   | 1,007014532     | 2,933333333     |
| RAVER1                                                                                   | 0,157415062 | -0,010095206 | 0,062 | 0,02  | 1         | 0,993026962   | 1,007022003     | 3,1             |
| CCDC8                                                                                    | 0,447580525 | -0,010146117 | 0,025 | 0,01  | 1         | 0,99299192    | 1,00705754      | 2,5             |
| GPR137C                                                                                  | 0,447580525 | -0,01015307  | 0,025 | 0,01  | 1         | 0,992987134   | 1,007062394     | 2,5             |
| ANKRD27                                                                                  | 0,157415062 | -0,010157313 | 0,062 | 0,02  | 1         | 0,992984213   | 1,007065356     | 3,1             |
| DACT1                                                                                    | 0,016222035 | -0,010170817 | 0,188 | 0,06  | 1         | 0,992974919   | 1,007074782     | 3,133333333     |
| CAB39                                                                                    | 0,009209816 | -0,01019113  | 0,35  | 0,14  | 1         | 0,992960938   | 1,007088962     | 2,5             |
| SLC35G2                                                                                  | 0,11061781  | -0,010221556 | 0,088 | 0,03  | 1         | 0,992939997   | 1,007110201     | 2,933333333     |
| AC040977.1                                                                               | 0,447580525 | -0,010234395 | 0,025 | 0,01  | 1         | 0,992931161   | 1,007119163     | 2,5             |
| RBM41                                                                                    | 0,284975754 | -0,01030422  | 0,05  | 0,02  | 1         | 0,992883105   | 1,007167908     | 2,5             |
| SLC46A1                                                                                  | 0,501283468 | -0,010305035 | 0,038 | 0,02  | 1         | 0,992882544   | 1,007168478     | 1,9             |
| LIPE-AS1                                                                                 | 0,886527564 | -0,010328534 | 0,013 | 0,01  | 1         | 0,992866372   | 1,007184883     | 1,3             |
| ZNF420                                                                                   | 0,058821317 | -0,010346396 | 0,1   | 0,03  | 1         | 0,992854079   | 1,007197353     | 3,333333333     |
| DSC3                                                                                     | 0,886527564 | -0,010404316 | 0,013 | 0,01  | 1         | 0,99281422    | 1,00723779      | 1,3             |
| SLC66A2                                                                                  | 0,000217296 | -0,010415301 | 0,462 | 0,15  | 1         | 0,99280666    | 1,007245459     | 3,08            |
| HOXC5                                                                                    | 0,154906213 | -0,010427437 | 0,062 | 0,02  | 1         | 0,992798309   | 1,007253932     | 3,1             |
| HEYL                                                                                     | 0,501283468 | -0,010459908 | 0,038 | 0,02  | 1         | 0,992775964   | 1,007276602     | 1,9             |

Supplementary Table 4

| Differentially expressed genes_keloid-CCD_ comparing SC-Keloid vs. (SC-Myel, SC-Nonmyel) |             |              |       |       |           |               |                 |                 |
|------------------------------------------------------------------------------------------|-------------|--------------|-------|-------|-----------|---------------|-----------------|-----------------|
| gene                                                                                     | p_val       | avg_log2FC   | pct.1 | pct.2 | p_val_adj | Foldchange_UP | Foldchange_DOWN | Ratio_pct1_pct2 |
| SULT1A3                                                                                  | 0,501283468 | -0,010540831 | 0,038 | 0,02  | 1         | 0,992720279   | 1,007333104     | 1,9             |
| FAM91A1                                                                                  | 0,010428083 | -0,010560498 | 0,175 | 0,05  | 1         | 0,992706746   | 1,007346836     | 3,5             |
| ADAM32                                                                                   | 0,886527564 | -0,010591409 | 0,013 | 0,01  | 1         | 0,992685477   | 1,007368419     | 1,3             |
| LIPE                                                                                     | 0,223365318 | -0,010595466 | 0,038 | 0,01  | 1         | 0,992682685   | 1,007371252     | 3,8             |
| ERCC5                                                                                    | 0,886527564 | -0,010635148 | 0,013 | 0,01  | 1         | 0,992655382   | 1,007398961     | 1,3             |
| INPP5B                                                                                   | 0,886527564 | -0,010640062 | 0,013 | 0,01  | 1         | 0,992652001   | 1,007402392     | 1,3             |
| MBLAC1                                                                                   | 0,501283468 | -0,01070653  | 0,038 | 0,02  | 1         | 0,992606268   | 1,007448806     | 1,9             |
| SGPL1                                                                                    | 0,006211613 | -0,010708064 | 0,225 | 0,07  | 1         | 0,992605213   | 1,007449877     | 3,214285714     |
| HIRA                                                                                     | 0,186285832 | -0,010724242 | 0,138 | 0,07  | 1         | 0,992594082   | 1,007461175     | 1,971428571     |
| KATNB1                                                                                   | 0,003797999 | -0,010728172 | 0,2   | 0,05  | 1         | 0,992591378   | 1,007463919     | 4               |
| ACY1                                                                                     | 0,223365318 | -0,010742572 | 0,038 | 0,01  | 1         | 0,992581471   | 1,007473975     | 3,8             |
| QTRT2                                                                                    | 0,01645261  | -0,010764438 | 0,188 | 0,06  | 1         | 0,992566427   | 1,007489245     | 3,133333333     |
| INO80                                                                                    | 0,016806221 | -0,010764657 | 0,362 | 0,16  | 1         | 0,992566276   | 1,007489398     | 2,2625          |
| MAP3K20                                                                                  | 0,011618772 | -0,010786711 | 0,175 | 0,05  | 1         | 0,992551103   | 1,0075048       | 3,5             |
| TCEA3                                                                                    | 0,886527564 | -0,010799739 | 0,013 | 0,01  | 1         | 0,99254214    | 1,007513898     | 1,3             |
| PTCH2                                                                                    | 0,501283468 | -0,010853021 | 0,038 | 0,02  | 1         | 0,992505484   | 1,007551108     | 1,9             |
| PLEKHG2                                                                                  | 0,044929041 | -0,010880484 | 0,162 | 0,06  | 1         | 0,992486591   | 1,007570287     | 2,7             |
| PDIA5                                                                                    | 0,023117849 | -0,010886855 | 0,175 | 0,06  | 1         | 0,992482208   | 1,007574737     | 2,916666667     |
| FAM72C                                                                                   | 0,886527564 | -0,010907313 | 0,013 | 0,01  | 1         | 0,992468134   | 1,007589025     | 1,3             |
| MIR1915HG                                                                                | 0,886527564 | -0,010907313 | 0,013 | 0,01  | 1         | 0,992468134   | 1,007589025     | 1,3             |
| UBE2K                                                                                    | 0,000767374 | -0,010911457 | 0,588 | 0,22  | 1         | 0,992465283   | 1,00759192      | 2,672727273     |
| ELAPOR2                                                                                  | 0,886527564 | -0,010924237 | 0,013 | 0,01  | 1         | 0,992456492   | 1,007600845     | 1,3             |
| IL12A                                                                                    | 0,886527564 | -0,011011276 | 0,013 | 0,01  | 1         | 0,992396618   | 1,007661636     | 1,3             |
| ZNF547                                                                                   | 0,886527564 | -0,01102456  | 0,013 | 0,01  | 1         | 0,992387481   | 1,007670914     | 1,3             |
| DPH3                                                                                     | 0,004639993 | -0,011128896 | 0,475 | 0,19  | 1         | 0,992315713   | 1,007743792     | 2,5             |
| PTGER4                                                                                   | 0,701739822 | -0,011133431 | 0,013 | 0,02  | 1         | 0,992312594   | 1,00774696      | 0,65            |
| SEMA4F                                                                                   | 0,886527564 | -0,011154367 | 0,013 | 0,01  | 1         | 0,992298194   | 1,007761584     | 1,3             |
| PRRT3                                                                                    | 0,157415062 | -0,011217136 | 0,062 | 0,02  | 1         | 0,992255022   | 1,007805431     | 3,1             |
| FLVCR1                                                                                   | 0,053565038 | -0,011239896 | 0,138 | 0,05  | 1         | 0,992239368   | 1,00782133      | 2,76            |
| ATP23                                                                                    | 0,284975754 | -0,011279948 | 0,05  | 0,02  | 1         | 0,992211822   | 1,00784931      | 2,5             |

Supplementary Table 4

| Differentially expressed genes_keloid-CCD_ comparing SC-Keloid vs. (SC-Myel, SC-Nonmyel) |             |              |       |       |           |               |                 |                 |
|------------------------------------------------------------------------------------------|-------------|--------------|-------|-------|-----------|---------------|-----------------|-----------------|
| gene                                                                                     | p_val       | avg_log2FC   | pct.1 | pct.2 | p_val_adj | Foldchange_UP | Foldchange_DOWN | Ratio_pct1_pct2 |
| PARP4                                                                                    | 0,188020793 | -0,011281779 | 0,15  | 0,08  | 1         | 0,992210563   | 1,007850589     | 1,875           |
| IRAK3                                                                                    | 0,83477988  | -0,011326559 | 0,025 | 0,02  | 1         | 0,992179766   | 1,007881872     | 1,25            |
| ICA1L                                                                                    | 0,34786644  | -0,011328532 | 0,088 | 0,05  | 1         | 0,992178409   | 1,007883251     | 1,76            |
| CLSTN2                                                                                   | 0,886527564 | -0,011384696 | 0,013 | 0,01  | 1         | 0,992139784   | 1,007922488     | 1,3             |
| PRDM8                                                                                    | 0,886527564 | -0,011384696 | 0,013 | 0,01  | 1         | 0,992139784   | 1,007922488     | 1,3             |
| ABAT                                                                                     | 0,284975754 | -0,011400141 | 0,05  | 0,02  | 1         | 0,992129163   | 1,007933279     | 2,5             |
| NEURL2                                                                                   | 0,886527564 | -0,011401415 | 0,013 | 0,01  | 1         | 0,992128287   | 1,007934169     | 1,3             |
| DDB2                                                                                     | 0,008657281 | -0,011439356 | 0,238 | 0,08  | 1         | 0,992102195   | 1,007960676     | 2,975           |
| FAM151B                                                                                  | 0,223365318 | -0,011457802 | 0,038 | 0,01  | 1         | 0,992089511   | 1,007973564     | 3,8             |
| ORC4                                                                                     | 0,012313988 | -0,011478742 | 0,25  | 0,09  | 1         | 0,992075111   | 1,007988194     | 2,777777778     |
| C5orf38                                                                                  | 0,886527564 | -0,011511927 | 0,013 | 0,01  | 1         | 0,992052292   | 1,00801138      | 1,3             |
| CENPV                                                                                    | 0,501283468 | -0,011541942 | 0,038 | 0,02  | 1         | 0,992031652   | 1,008032352     | 1,9             |
| DNASE1L3                                                                                 | 0,886527564 | -0,011550143 | 0,013 | 0,01  | 1         | 0,992026014   | 1,008038082     | 1,3             |
| COQ7                                                                                     | 0,027302098 | -0,011586608 | 0,138 | 0,04  | 1         | 0,99200094    | 1,008063561     | 3,45            |
| GSN                                                                                      | 0,06687059  | -0,011664138 | 1     | 0,89  | 1         | 0,991947631   | 1,008117736     | 1,123595506     |
| OBSCN                                                                                    | 0,886527564 | -0,011680064 | 0,013 | 0,01  | 1         | 0,991936681   | 1,008128865     | 1,3             |
| DRC1                                                                                     | 0,83477988  | -0,01168228  | 0,025 | 0,02  | 1         | 0,991935157   | 1,008130413     | 1,25            |
| KIF21B                                                                                   | 0,886527564 | -0,011723268 | 0,013 | 0,01  | 1         | 0,991906976   | 1,008159055     | 1,3             |
| GABRE                                                                                    | 0,223365318 | -0,011754339 | 0,038 | 0,01  | 1         | 0,991885614   | 1,008180768     | 3,8             |
| POLR1B                                                                                   | 0,447580525 | -0,01178524  | 0,025 | 0,01  | 1         | 0,991864369   | 1,008202362     | 2,5             |
| SETDB2                                                                                   | 0,188542969 | -0,011786594 | 0,075 | 0,03  | 1         | 0,991863438   | 1,008203309     | 2,5             |
| LOXL1-AS1                                                                                | 0,223365318 | -0,011905013 | 0,038 | 0,01  | 1         | 0,991782028   | 1,008286067     | 3,8             |
| ACOT2                                                                                    | 0,009264722 | -0,011918833 | 0,238 | 0,08  | 1         | 0,991772527   | 1,008295726     | 2,975           |
| TNFAIP8L1                                                                                | 0,045399153 | -0,011928074 | 0,088 | 0,02  | 1         | 0,991766174   | 1,008302184     | 4,4             |
| SEC31B                                                                                   | 0,447580525 | -0,0119446   | 0,025 | 0,01  | 1         | 0,991754814   | 1,008313734     | 2,5             |
| AL645728.1                                                                               | 0,223365318 | -0,011962827 | 0,038 | 0,01  | 1         | 0,991742284   | 1,008326474     | 3,8             |
| ZNF846                                                                                   | 0,135004841 | -0,012030147 | 0,1   | 0,04  | 1         | 0,991696008   | 1,008373526     | 2,5             |
| MTRF1L                                                                                   | 0,014643295 | -0,012056849 | 0,312 | 0,13  | 1         | 0,991677653   | 1,008392189     | 2,4             |
| SMPD2                                                                                    | 0,284975754 | -0,012068648 | 0,05  | 0,02  | 1         | 0,991669543   | 1,008400437     | 2,5             |
| SLC9A6                                                                                   | 0,188542969 | -0,012141619 | 0,075 | 0,03  | 1         | 0,991619386   | 1,008451442     | 2,5             |

Supplementary Table 4

| Differentially expressed genes_keloid-CCD_ comparing SC-Keloid vs. (SC-Myel, SC-Nonmyel) |             |              |       |       |           |               |                 |                 |
|------------------------------------------------------------------------------------------|-------------|--------------|-------|-------|-----------|---------------|-----------------|-----------------|
| gene                                                                                     | p_val       | avg_log2FC   | pct.1 | pct.2 | p_val_adj | Foldchange_UP | Foldchange_DOWN | Ratio_pct1_pct2 |
| RNASET2                                                                                  | 0,148635808 | -0,012181604 | 0,112 | 0,05  | 1         | 0,991591903   | 1,008479393     | 2,24            |
| ZNF254                                                                                   | 0,164257965 | -0,012188904 | 0,125 | 0,06  | 1         | 0,991586886   | 1,008484495     | 2,083333333     |
| MEG9                                                                                     | 0,886527564 | -0,012218831 | 0,013 | 0,01  | 1         | 0,991566317   | 1,008505415     | 1,3             |
| SFRP5                                                                                    | 0,447580525 | -0,01222878  | 0,025 | 0,01  | 1         | 0,991559478   | 1,00851237      | 2,5             |
| E2F7                                                                                     | 0,004676011 | -0,012291698 | 0,175 | 0,04  | 1         | 0,991516236   | 1,008556354     | 4,375           |
| LYG2                                                                                     | 0,886527564 | -0,012311453 | 0,013 | 0,01  | 1         | 0,991502659   | 1,008570164     | 1,3             |
| NUPR1                                                                                    | 0,34786644  | -0,012333008 | 0,088 | 0,05  | 1         | 0,991487845   | 1,008585233     | 1,76            |
| LIX1L                                                                                    | 0,011331849 | -0,012358938 | 0,3   | 0,12  | 1         | 0,991470025   | 1,008603361     | 2,5             |
| ACAA1                                                                                    | 0,001754892 | -0,012373669 | 0,512 | 0,2   | 1         | 0,991459902   | 1,00861366      | 2,56            |
| PGGHG                                                                                    | 0,284975754 | -0,012375035 | 0,05  | 0,02  | 1         | 0,991458963   | 1,008614614     | 2,5             |
| GPN3                                                                                     | 0,000251149 | -0,012404329 | 0,362 | 0,1   | 1         | 0,991438831   | 1,008635095     | 3,62            |
| TMEM80                                                                                   | 0,076650075 | -0,012450349 | 0,262 | 0,13  | 1         | 0,991407207   | 1,00866727      | 2,015384615     |
| RCN2                                                                                     | 0,406935025 | -0,012500648 | 0,887 | 0,62  | 1         | 0,991372642   | 1,008702437     | 1,430645161     |
| TOMM40L                                                                                  | 0,501283468 | -0,012501781 | 0,038 | 0,02  | 1         | 0,991371863   | 1,008703229     | 1,9             |
| ADORA2A-AS1                                                                              | 0,886527564 | -0,012517582 | 0,013 | 0,01  | 1         | 0,991361005   | 1,008714277     | 1,3             |
| ZNF473                                                                                   | 0,447580525 | -0,012526727 | 0,025 | 0,01  | 1         | 0,991354722   | 1,008720671     | 2,5             |
| DMRT3                                                                                    | 0,886527564 | -0,012568089 | 0,013 | 0,01  | 1         | 0,9913263     | 1,008749591     | 1,3             |
| EGFL6                                                                                    | 0,886527564 | -0,012568089 | 0,013 | 0,01  | 1         | 0,9913263     | 1,008749591     | 1,3             |
| EN1                                                                                      | 0,886527564 | -0,012568089 | 0,013 | 0,01  | 1         | 0,9913263     | 1,008749591     | 1,3             |
| APOBEC3C                                                                                 | 0,025655397 | -0,012568091 | 0,225 | 0,09  | 1         | 0,991326299   | 1,008749593     | 2,5             |
| COG1                                                                                     | 0,027302098 | -0,012654483 | 0,138 | 0,04  | 1         | 0,991266937   | 1,008810001     | 3,45            |
| HLA-DMA                                                                                  | 0,317447852 | -0,01267909  | 0,062 | 0,03  | 1         | 0,99125003    | 1,008827207     | 2,066666667     |
| LEMD2                                                                                    | 0,012158375 | -0,012721937 | 0,25  | 0,09  | 1         | 0,991220592   | 1,008857169     | 2,777777778     |
| GSTCD                                                                                    | 0,047638359 | -0,012725921 | 0,125 | 0,04  | 1         | 0,991217854   | 1,008859955     | 3,125           |
| BIN1                                                                                     | 0,000683948 | -0,012747219 | 0,7   | 0,28  | 1         | 0,991203221   | 1,008874849     | 2,5             |
| TMEM178B                                                                                 | 0,00840035  | -0,012747572 | 0,162 | 0,04  | 1         | 0,991202978   | 1,008875096     | 4,05            |
| DCLRE1A                                                                                  | 0,447580525 | -0,012750573 | 0,025 | 0,01  | 1         | 0,991200917   | 1,008877194     | 2,5             |
| IKZF4                                                                                    | 0,035392992 | -0,012758529 | 0,112 | 0,03  | 1         | 0,99119545    | 1,008882758     | 3,733333333     |
| CCDC9                                                                                    | 0,193718766 | -0,012798399 | 0,075 | 0,03  | 1         | 0,991168059   | 1,008910639     | 2,5             |
| FAM133A                                                                                  | 0,447580525 | -0,012801446 | 0,025 | 0,01  | 1         | 0,991165965   | 1,00891277      | 2,5             |

Supplementary Table 4

| Differentially expressed genes_keloid-CCD_ comparing SC-Keloid vs. (SC-Myel, SC-Nonmyel) |             |              |       |       |           |               |                 |                 |
|------------------------------------------------------------------------------------------|-------------|--------------|-------|-------|-----------|---------------|-----------------|-----------------|
| gene                                                                                     | p_val       | avg_log2FC   | pct.1 | pct.2 | p_val_adj | Foldchange_UP | Foldchange_DOWN | Ratio_pct1_pct2 |
| NCF4                                                                                     | 0,886527564 | -0,012805229 | 0,013 | 0,01  | 1         | 0,991163366   | 1,008915416     | 1,3             |
| KTI12                                                                                    | 0,343957066 | -0,012834151 | 0,075 | 0,04  | 1         | 0,991143497   | 1,008935642     | 1,875           |
| ERG                                                                                      | 0,84359211  | -0,012859648 | 0,025 | 0,02  | 1         | 0,99112598    | 1,008953473     | 1,25            |
| GRK5                                                                                     | 0,085199008 | -0,012908283 | 0,075 | 0,02  | 1         | 0,991092568   | 1,008987487     | 3,75            |
| ZNF468                                                                                   | 0,11122839  | -0,01293329  | 0,05  | 0,01  | 1         | 0,991075389   | 1,009004977     | 5               |
| DHX8                                                                                     | 0,019688996 | -0,012986095 | 0,238 | 0,09  | 1         | 0,991039115   | 1,009041909     | 2,644444444     |
| KANSL3                                                                                   | 0,025447117 | -0,012997172 | 0,175 | 0,06  | 1         | 0,991031506   | 1,009049656     | 2,916666667     |
| CDC7                                                                                     | 0,11061781  | -0,013007533 | 0,088 | 0,03  | 1         | 0,991024388   | 1,009056903     | 2,933333333     |
| ZNF829                                                                                   | 0,447580525 | -0,01301199  | 0,025 | 0,01  | 1         | 0,991021327   | 1,00906002      | 2,5             |
| POLR3B                                                                                   | 0,223365318 | -0,013016505 | 0,038 | 0,01  | 1         | 0,991018226   | 1,009063178     | 3,8             |
| WDR6                                                                                     | 0,003536285 | -0,013030045 | 0,262 | 0,08  | 1         | 0,991008925   | 1,009072648     | 3,275           |
| BEX2                                                                                     | 0,886527564 | -0,013058581 | 0,013 | 0,01  | 1         | 0,990989323   | 1,009092607     | 1,3             |
| STEAP4                                                                                   | 0,501283468 | -0,01309794  | 0,038 | 0,02  | 1         | 0,990962288   | 1,009120138     | 1,9             |
| POLH                                                                                     | 0,157415062 | -0,013118044 | 0,062 | 0,02  | 1         | 0,990948479   | 1,009134199     | 3,1             |
| LMO2                                                                                     | 0,494869729 | -0,013294804 | 0,038 | 0,02  | 1         | 0,990827075   | 1,009257847     | 1,9             |
| MOB3C                                                                                    | 0,093220017 | -0,013301479 | 0,125 | 0,05  | 1         | 0,99082249    | 1,009262517     | 2,5             |
| CENPL                                                                                    | 0,163880441 | -0,013364559 | 0,175 | 0,09  | 1         | 0,990779169   | 1,009306646     | 1,944444444     |
| TRPV1                                                                                    | 0,886527564 | -0,013379605 | 0,013 | 0,01  | 1         | 0,990768836   | 1,009317173     | 1,3             |
| NOX4                                                                                     | 0,447580525 | -0,013389814 | 0,025 | 0,01  | 1         | 0,990761824   | 1,009324315     | 2,5             |
| CWF19L1                                                                                  | 0,157415062 | -0,013396521 | 0,062 | 0,02  | 1         | 0,990757219   | 1,009329007     | 3,1             |
| RBM22                                                                                    | 0,001284525 | -0,01342752  | 0,475 | 0,18  | 1         | 0,990735931   | 1,009350695     | 2,638888889     |
| ZKSCAN5                                                                                  | 0,488500108 | -0,013428834 | 0,038 | 0,02  | 1         | 0,990735028   | 1,009351614     | 1,9             |
| DCLRE1C                                                                                  | 0,081579256 | -0,013432355 | 0,112 | 0,04  | 1         | 0,99073261    | 1,009354078     | 2,8             |
| FANCL                                                                                    | 0,020202855 | -0,01344995  | 0,162 | 0,05  | 1         | 0,990720528   | 1,009366387     | 3,24            |
| ATG12                                                                                    | 0,001970019 | -0,013468864 | 0,512 | 0,2   | 1         | 0,990707539   | 1,00937962      | 2,56            |
| VAR52                                                                                    | 0,317447852 | -0,013480756 | 0,062 | 0,03  | 1         | 0,990699373   | 1,009387941     | 2,066666667     |
| MARK4                                                                                    | 0,221005633 | -0,013495393 | 0,088 | 0,04  | 1         | 0,990689322   | 1,009398181     | 2,2             |
| VPS11                                                                                    | 0,021426774 | -0,013578713 | 0,2   | 0,07  | 1         | 0,990632108   | 1,009456479     | 2,857142857     |
| FANCE                                                                                    | 0,019378739 | -0,013606188 | 0,125 | 0,03  | 1         | 0,990613243   | 1,009475703     | 4,166666667     |
| HCG17                                                                                    | 0,886527564 | -0,01360622  | 0,013 | 0,01  | 1         | 0,990613221   | 1,009475726     | 1,3             |

Supplementary Table 4

| Differentially expressed genes_keloid-CCD_ comparing SC-Keloid vs. (SC-Myel, SC-Nonmyel) |             |              |       |       |           |               |                 |                 |
|------------------------------------------------------------------------------------------|-------------|--------------|-------|-------|-----------|---------------|-----------------|-----------------|
| gene                                                                                     | p_val       | avg_log2FC   | pct.1 | pct.2 | p_val_adj | Foldchange_UP | Foldchange_DOWN | Ratio_pct1_pct2 |
| NUP188                                                                                   | 0,009096611 | -0,013684016 | 0,2   | 0,06  | 1         | 0,990559804   | 1,009530163     | 3,333333333     |
| CPNE5                                                                                    | 0,692138165 | -0,013763372 | 0,013 | 0,02  | 1         | 0,99050532    | 1,009585694     | 0,65            |
| PPP1R21                                                                                  | 0,063616753 | -0,013822303 | 0,1   | 0,03  | 1         | 0,99046486    | 1,009626934     | 3,333333333     |
| ZNF112                                                                                   | 0,447580525 | -0,013851989 | 0,025 | 0,01  | 1         | 0,99044448    | 1,009647709     | 2,5             |
| ZNF436-AS1                                                                               | 0,84359211  | -0,013852982 | 0,025 | 0,02  | 1         | 0,990443798   | 1,009648404     | 1,25            |
| B3GALT2                                                                                  | 0,079357729 | -0,013868411 | 0,112 | 0,04  | 1         | 0,990433205   | 1,009659202     | 2,8             |
| GALK2                                                                                    | 0,001140163 | -0,013871199 | 0,288 | 0,08  | 1         | 0,990431292   | 1,009661153     | 3,6             |
| LHPP                                                                                     | 0,099566196 | -0,013883792 | 0,188 | 0,09  | 1         | 0,990422646   | 1,009669966     | 2,088888889     |
| FICD                                                                                     | 0,280825998 | -0,013923582 | 0,05  | 0,02  | 1         | 0,99039533    | 1,009697814     | 2,5             |
| TCEAL3                                                                                   | 0,018186552 | -0,013928593 | 0,637 | 0,32  | 1         | 0,990391891   | 1,00970132      | 1,990625        |
| KLHL12                                                                                   | 0,218400487 | -0,013931366 | 0,088 | 0,04  | 1         | 0,990389987   | 1,009703261     | 2,2             |
| UBL7                                                                                     | 0,049421853 | -0,013933232 | 0,175 | 0,07  | 1         | 0,990388706   | 1,009704567     | 2,5             |
| PITX3                                                                                    | 0,447580525 | -0,013957327 | 0,025 | 0,01  | 1         | 0,990372165   | 1,009721431     | 2,5             |
| ZNF687                                                                                   | 0,284975754 | -0,013960372 | 0,05  | 0,02  | 1         | 0,990370075   | 1,009723562     | 2,5             |
| DGKE                                                                                     | 0,501283468 | -0,013967663 | 0,038 | 0,02  | 1         | 0,99036507    | 1,009728665     | 1,9             |
| RASGRP2                                                                                  | 0,84359211  | -0,013995182 | 0,025 | 0,02  | 1         | 0,990346179   | 1,009747925     | 1,25            |
| DSEL                                                                                     | 0,001133475 | -0,014012638 | 0,675 | 0,29  | 1         | 0,990334196   | 1,009760143     | 2,327586207     |
| SEH1L                                                                                    | 0,097578995 | -0,014021858 | 0,188 | 0,09  | 1         | 0,990327867   | 1,009766597     | 2,088888889     |
| NUP155                                                                                   | 0,09439712  | -0,01403013  | 0,125 | 0,05  | 1         | 0,990322189   | 1,009772386     | 2,5             |
| ACTR3B                                                                                   | 0,193718766 | -0,0140474   | 0,075 | 0,03  | 1         | 0,990310335   | 1,009784474     | 2,5             |
| MAGI3                                                                                    | 0,032660317 | -0,014080002 | 0,15  | 0,05  | 1         | 0,990287956   | 1,009807293     | 3               |
| SLC25A30                                                                                 | 0,825988348 | -0,01410643  | 0,025 | 0,02  | 1         | 0,990269816   | 1,009825791     | 1,25            |
| ME1                                                                                      | 0,447580525 | -0,014147586 | 0,025 | 0,01  | 1         | 0,990241566   | 1,009854599     | 2,5             |
| NCBP2AS2                                                                                 | 0,000800597 | -0,01415369  | 0,4   | 0,13  | 1         | 0,990237376   | 1,009858872     | 3,076923077     |
| ASAP3                                                                                    | 0,377102913 | -0,014158063 | 0     | 0,01  | 1         | 0,990234375   | 1,009861933     | 0               |
| C1QA                                                                                     | 0,377102913 | -0,014158063 | 0     | 0,01  | 1         | 0,990234375   | 1,009861933     | 0               |
| CASP1                                                                                    | 0,377102913 | -0,014158063 | 0     | 0,01  | 1         | 0,990234375   | 1,009861933     | 0               |
| CHRM1                                                                                    | 0,377102913 | -0,014158063 | 0     | 0,01  | 1         | 0,990234375   | 1,009861933     | 0               |
| EEPD1                                                                                    | 0,377102913 | -0,014158063 | 0     | 0,01  | 1         | 0,990234375   | 1,009861933     | 0               |
| GABRQ                                                                                    | 0,377102913 | -0,014158063 | 0     | 0,01  | 1         | 0,990234375   | 1,009861933     | 0               |

Supplementary Table 4

| Differentially expressed genes_keloid-CCD_comparing SC-Keloid vs. (SC-Myel, SC-Nonmyel) |             |              |       |       |           |               |                 |                 |
|-----------------------------------------------------------------------------------------|-------------|--------------|-------|-------|-----------|---------------|-----------------|-----------------|
| gene                                                                                    | p_val       | avg_log2FC   | pct.1 | pct.2 | p_val_adj | Foldchange_UP | Foldchange_DOWN | Ratio_pct1_pct2 |
| MAMSTR                                                                                  | 0,377102913 | -0,014158063 | 0     | 0,01  | 1         | 0,990234375   | 1,009861933     | 0               |
| NHLRC4                                                                                  | 0,377102913 | -0,014158063 | 0     | 0,01  | 1         | 0,990234375   | 1,009861933     | 0               |
| PROX1                                                                                   | 0,377102913 | -0,014158063 | 0     | 0,01  | 1         | 0,990234375   | 1,009861933     | 0               |
| SCN5A                                                                                   | 0,377102913 | -0,014158063 | 0     | 0,01  | 1         | 0,990234375   | 1,009861933     | 0               |
| USP2-AS1                                                                                | 0,377102913 | -0,014158063 | 0     | 0,01  | 1         | 0,990234375   | 1,009861933     | 0               |
| BMP8A                                                                                   | 0,377102913 | -0,014183117 | 0     | 0,01  | 1         | 0,990217179   | 1,00987947      | 0               |
| CKMT2                                                                                   | 0,377102913 | -0,014183117 | 0     | 0,01  | 1         | 0,990217179   | 1,00987947      | 0               |
| FZD10                                                                                   | 0,377102913 | -0,014183117 | 0     | 0,01  | 1         | 0,990217179   | 1,00987947      | 0               |
| ITPKB-AS1                                                                               | 0,377102913 | -0,014183117 | 0     | 0,01  | 1         | 0,990217179   | 1,00987947      | 0               |
| KLHL41                                                                                  | 0,377102913 | -0,014183117 | 0     | 0,01  | 1         | 0,990217179   | 1,00987947      | 0               |
| LAIR1                                                                                   | 0,377102913 | -0,014183117 | 0     | 0,01  | 1         | 0,990217179   | 1,00987947      | 0               |
| LINC01142                                                                               | 0,377102913 | -0,014183117 | 0     | 0,01  | 1         | 0,990217179   | 1,00987947      | 0               |
| LLGL1                                                                                   | 0,377102913 | -0,014183117 | 0     | 0,01  | 1         | 0,990217179   | 1,00987947      | 0               |
| MZB1                                                                                    | 0,377102913 | -0,014183117 | 0     | 0,01  | 1         | 0,990217179   | 1,00987947      | 0               |
| PM20D1                                                                                  | 0,377102913 | -0,014183117 | 0     | 0,01  | 1         | 0,990217179   | 1,00987947      | 0               |
| SCN4B                                                                                   | 0,377102913 | -0,014183117 | 0     | 0,01  | 1         | 0,990217179   | 1,00987947      | 0               |
| SMTNL2                                                                                  | 0,377102913 | -0,014183117 | 0     | 0,01  | 1         | 0,990217179   | 1,00987947      | 0               |
| SOBP                                                                                    | 0,377102913 | -0,014183117 | 0     | 0,01  | 1         | 0,990217179   | 1,00987947      | 0               |
| TJP2                                                                                    | 0,377102913 | -0,014183117 | 0     | 0,01  | 1         | 0,990217179   | 1,00987947      | 0               |
| TMEM154                                                                                 | 0,377102913 | -0,014183117 | 0     | 0,01  | 1         | 0,990217179   | 1,00987947      | 0               |
| TNNT3                                                                                   | 0,377102913 | -0,014183117 | 0     | 0,01  | 1         | 0,990217179   | 1,00987947      | 0               |
| TP53TG5                                                                                 | 0,377102913 | -0,014183117 | 0     | 0,01  | 1         | 0,990217179   | 1,00987947      | 0               |
| TFDP1                                                                                   | 0,003567291 | -0,014198492 | 0,338 | 0,12  | 1         | 0,990206625   | 1,009890233     | 2,816666667     |
| FMOD                                                                                    | 0,886527564 | -0,014214718 | 0,013 | 0,01  | 1         | 0,990195489   | 1,009901591     | 1,3             |
| FADD                                                                                    | 0,002573388 | -0,014223368 | 0,25  | 0,07  | 1         | 0,990189552   | 1,009907646     | 3,571428571     |
| IFNAR1                                                                                  | 0,000569058 | -0,014348971 | 0,537 | 0,2   | 1         | 0,990103349   | 1,009995574     | 2,685           |
| NPTX1                                                                                   | 0,886527564 | -0,014364435 | 0,013 | 0,01  | 1         | 0,990092736   | 1,0100064       | 1,3             |
| ECHDC3                                                                                  | 0,063616753 | -0,014465269 | 0,1   | 0,03  | 1         | 0,990023538   | 1,010076995     | 3,333333333     |
| MLH1                                                                                    | 0,058303671 | -0,014485849 | 0,188 | 0,08  | 1         | 0,990009416   | 1,010091403     | 2,35            |
| XPO6                                                                                    | 0,010422501 | -0,014496283 | 0,25  | 0,09  | 1         | 0,990002256   | 1,010098709     | 2,777777778     |



Supplementary Table 4

| Differentially expressed genes_keloid-CCD_ comparing SC-Keloid vs. (SC-Myel, SC-Nonmyel) |             |              |       |       |           |               |                 |                 |
|------------------------------------------------------------------------------------------|-------------|--------------|-------|-------|-----------|---------------|-----------------|-----------------|
| gene                                                                                     | p_val       | avg_log2FC   | pct.1 | pct.2 | p_val_adj | Foldchange_UP | Foldchange_DOWN | Ratio_pct1_pct2 |
| MIR503HG                                                                                 | 0,157415062 | -0,014551296 | 0,062 | 0,02  | 1         | 0,989964505   | 1,010137227     | 3,1             |
| PPFIA3                                                                                   | 0,51950331  | -0,014556729 | 0,062 | 0,04  | 1         | 0,989960777   | 1,010141031     | 1,55            |
| LRAT                                                                                     | 0,223365318 | -0,014558346 | 0,038 | 0,01  | 1         | 0,989959668   | 1,010142163     | 3,8             |
| PRKN                                                                                     | 0,284975754 | -0,014572386 | 0,05  | 0,02  | 1         | 0,989950034   | 1,010151994     | 2,5             |
| MRPS30                                                                                   | 0,09917201  | -0,014575562 | 0,25  | 0,13  | 1         | 0,989947854   | 1,010154218     | 1,923076923     |
| CEP170B                                                                                  | 0,035392992 | -0,014579935 | 0,112 | 0,03  | 1         | 0,989944853   | 1,010157279     | 3,733333333     |
| POLE4                                                                                    | 0,00520137  | -0,014581276 | 0,5   | 0,21  | 1         | 0,989943933   | 1,010158218     | 2,380952381     |
| NBPF1                                                                                    | 0,1451813   | -0,014581794 | 0,112 | 0,05  | 1         | 0,989943578   | 1,010158581     | 2,24            |
| SLC1A5                                                                                   | 0,00405127  | -0,014595651 | 0,338 | 0,12  | 1         | 0,989934069   | 1,010168284     | 2,816666667     |
| SCAMP5                                                                                   | 0,447580525 | -0,014621526 | 0,025 | 0,01  | 1         | 0,989916315   | 1,010186401     | 2,5             |
| TPP2                                                                                     | 0,198713285 | -0,014630015 | 0,162 | 0,09  | 1         | 0,98991049    | 1,010192346     | 1,8             |
| C2CD2L                                                                                   | 0,284975754 | -0,014674306 | 0,05  | 0,02  | 1         | 0,989880101   | 1,010223359     | 2,5             |
| SH3BGR2                                                                                  | 0,501283468 | -0,014679281 | 0,038 | 0,02  | 1         | 0,989876687   | 1,010226843     | 1,9             |
| DLG2                                                                                     | 0,447580525 | -0,014679967 | 0,025 | 0,01  | 1         | 0,989876216   | 1,010227323     | 2,5             |
| ACSL6                                                                                    | 0,377102913 | -0,014682551 | 0     | 0,01  | 1         | 0,989874443   | 1,010229133     | 0               |
| C17orf64                                                                                 | 0,377102913 | -0,014682551 | 0     | 0,01  | 1         | 0,989874443   | 1,010229133     | 0               |
| CLYBL                                                                                    | 0,377102913 | -0,014682551 | 0     | 0,01  | 1         | 0,989874443   | 1,010229133     | 0               |
| EFHB                                                                                     | 0,377102913 | -0,014682551 | 0     | 0,01  | 1         | 0,989874443   | 1,010229133     | 0               |
| IGF2BP3                                                                                  | 0,377102913 | -0,014682551 | 0     | 0,01  | 1         | 0,989874443   | 1,010229133     | 0               |
| MAP3K15                                                                                  | 0,377102913 | -0,014682551 | 0     | 0,01  | 1         | 0,989874443   | 1,010229133     | 0               |
| PTK6                                                                                     | 0,377102913 | -0,014682551 | 0     | 0,01  | 1         | 0,989874443   | 1,010229133     | 0               |
| RASGRF1                                                                                  | 0,377102913 | -0,014682551 | 0     | 0,01  | 1         | 0,989874443   | 1,010229133     | 0               |
| SV2B                                                                                     | 0,377102913 | -0,014682551 | 0     | 0,01  | 1         | 0,989874443   | 1,010229133     | 0               |
| VPS16                                                                                    | 0,004013881 | -0,014739098 | 0,238 | 0,07  | 1         | 0,989835646   | 1,010268729     | 3,4             |
| DNAJC6                                                                                   | 0,516405835 | -0,014739749 | 0,05  | 0,03  | 1         | 0,989835199   | 1,010269185     | 1,666666667     |
| MED14OS                                                                                  | 0,84359211  | -0,014797179 | 0,025 | 0,02  | 1         | 0,989795797   | 1,010309402     | 1,25            |
| LST1                                                                                     | 0,886527564 | -0,014838656 | 0,013 | 0,01  | 1         | 0,989767341   | 1,010338449     | 1,3             |
| VSIG10                                                                                   | 0,035392992 | -0,014851277 | 0,112 | 0,03  | 1         | 0,989758682   | 1,010347288     | 3,733333333     |
| AC127496.1                                                                               | 0,886527564 | -0,01485548  | 0,013 | 0,01  | 1         | 0,989755799   | 1,010350231     | 1,3             |
| NDST2                                                                                    | 0,447580525 | -0,014855929 | 0,025 | 0,01  | 1         | 0,989755491   | 1,010350545     | 2,5             |

Supplementary Table 4

| Differentially expressed genes_keloid-CCD_ comparing SC-Keloid vs. (SC-Myel, SC-Nonmyel) |             |              |       |       |           |               |                 |                 |
|------------------------------------------------------------------------------------------|-------------|--------------|-------|-------|-----------|---------------|-----------------|-----------------|
| gene                                                                                     | p_val       | avg_log2FC   | pct.1 | pct.2 | p_val_adj | Foldchange_UP | Foldchange_DOWN | Ratio_pct1_pct2 |
| H3C1                                                                                     | 0,701739822 | -0,014866006 | 0,013 | 0,02  | 1         | 0,989748577   | 1,010357603     | 0,65            |
| C3                                                                                       | 0,447580525 | -0,014878387 | 0,025 | 0,01  | 1         | 0,989740084   | 1,010366273     | 2,5             |
| CFAP44                                                                                   | 0,886527564 | -0,014885833 | 0,013 | 0,01  | 1         | 0,989734976   | 1,010371488     | 1,3             |
| MANBA                                                                                    | 0,045589173 | -0,014896911 | 0,125 | 0,04  | 1         | 0,989727376   | 1,010379246     | 3,125           |
| SLC22A4                                                                                  | 0,059755621 | -0,01490245  | 0,1   | 0,03  | 1         | 0,989723576   | 1,010383126     | 3,333333333     |
| POLE                                                                                     | 0,284975754 | -0,014981023 | 0,05  | 0,02  | 1         | 0,989669675   | 1,010438155     | 2,5             |
| TTLL3                                                                                    | 0,089759246 | -0,015004721 | 0,125 | 0,05  | 1         | 0,989653418   | 1,010454753     | 2,5             |
| C15orf40                                                                                 | 0,007708566 | -0,015021963 | 0,225 | 0,07  | 1         | 0,98964159    | 1,010466829     | 3,214285714     |
| NRF1                                                                                     | 0,317447852 | -0,015076105 | 0,062 | 0,03  | 1         | 0,989604451   | 1,010504751     | 2,066666667     |
| POMT1                                                                                    | 0,246922691 | -0,015094985 | 0,1   | 0,05  | 1         | 0,989591501   | 1,010517975     | 2               |
| SOX17                                                                                    | 0,223365318 | -0,015124424 | 0,038 | 0,01  | 1         | 0,989571308   | 1,010538595     | 3,8             |
| CFAP69                                                                                   | 0,447580525 | -0,015124563 | 0,025 | 0,01  | 1         | 0,989571213   | 1,010538693     | 2,5             |
| SETD1A                                                                                   | 0,112247794 | -0,01514695  | 0,088 | 0,03  | 1         | 0,989555857   | 1,010554375     | 2,933333333     |
| NAB1                                                                                     | 0,009855385 | -0,015189028 | 0,35  | 0,14  | 1         | 0,989526996   | 1,010583849     | 2,5             |
| PSPN                                                                                     | 0,886527564 | -0,01520402  | 0,013 | 0,01  | 1         | 0,989516713   | 1,01059435      | 1,3             |
| DGLUCY                                                                                   | 0,284975754 | -0,015261198 | 0,05  | 0,02  | 1         | 0,989477497   | 1,010634404     | 2,5             |
| IPO13                                                                                    | 0,047638359 | -0,015297312 | 0,125 | 0,04  | 1         | 0,989452728   | 1,010659703     | 3,125           |
| PYGO2                                                                                    | 0,120687358 | -0,01535488  | 0,15  | 0,07  | 1         | 0,989413247   | 1,010700032     | 2,142857143     |
| TAF2                                                                                     | 0,007005721 | -0,015366288 | 0,262 | 0,09  | 1         | 0,989405423   | 1,010708024     | 2,911111111     |
| FAM120B                                                                                  | 0,080462265 | -0,015459964 | 0,112 | 0,04  | 1         | 0,989341181   | 1,010773653     | 2,8             |
| UBFD1                                                                                    | 0,034711404 | -0,015483816 | 0,238 | 0,1   | 1         | 0,989324825   | 1,010790364     | 2,38            |
| GORAB                                                                                    | 0,160749168 | -0,015485494 | 0,125 | 0,06  | 1         | 0,989323674   | 1,01079154      | 2,083333333     |
| AMOT                                                                                     | 0,84359211  | -0,01549062  | 0,025 | 0,02  | 1         | 0,989320159   | 1,010795131     | 1,25            |
| PGS1                                                                                     | 0,105839829 | -0,015497282 | 0,088 | 0,03  | 1         | 0,989315591   | 1,010799799     | 2,933333333     |
| ZC2HC1A                                                                                  | 0,208492388 | -0,015516488 | 0,262 | 0,16  | 1         | 0,98930242    | 1,010813255     | 1,6375          |
| ANKRD13D                                                                                 | 0,000171588 | -0,015527623 | 0,488 | 0,16  | 1         | 0,989294785   | 1,010821057     | 3,05            |
| BACH1-AS1                                                                                | 0,886527564 | -0,015542782 | 0,013 | 0,01  | 1         | 0,98928439    | 1,010831678     | 1,3             |
| TNK1                                                                                     | 0,886527564 | -0,015631857 | 0,013 | 0,01  | 1         | 0,989223312   | 1,010894091     | 1,3             |
| CRLF3                                                                                    | 0,284975754 | -0,015639514 | 0,05  | 0,02  | 1         | 0,989218061   | 1,010899456     | 2,5             |
| KPNA6                                                                                    | 0,005077312 | -0,015639855 | 0,4   | 0,16  | 1         | 0,989217827   | 1,010899695     | 2,5             |

Supplementary Table 4

| Differentially expressed genes_keloid-CCD_ comparing SC-Keloid vs. (SC-Myel, SC-Nonmyel) |             |              |       |       |           |               |                 |                 |
|------------------------------------------------------------------------------------------|-------------|--------------|-------|-------|-----------|---------------|-----------------|-----------------|
| gene                                                                                     | p_val       | avg_log2FC   | pct.1 | pct.2 | p_val_adj | Foldchange_UP | Foldchange_DOWN | Ratio_pct1_pct2 |
| CUL7                                                                                     | 0,325316267 | -0,015649389 | 0,062 | 0,03  | 1         | 0,98921129    | 1,010906375     | 2,066666667     |
| CDYL                                                                                     | 0,000717307 | -0,015672716 | 0,4   | 0,13  | 1         | 0,989195296   | 1,010922721     | 3,076923077     |
| DCP2                                                                                     | 0,008396097 | -0,015683349 | 0,312 | 0,12  | 1         | 0,989188005   | 1,010930172     | 2,6             |
| TMEM79                                                                                   | 0,886527564 | -0,015708025 | 0,013 | 0,01  | 1         | 0,989171086   | 1,010947463     | 1,3             |
| C3orf62                                                                                  | 0,336612809 | -0,015728636 | 0,075 | 0,04  | 1         | 0,989156954   | 1,010961906     | 1,875           |
| TMEM191C                                                                                 | 0,501283468 | -0,015739187 | 0,038 | 0,02  | 1         | 0,989149721   | 1,010969299     | 1,9             |
| TBC1D14                                                                                  | 0,070134189 | -0,015762561 | 0,15  | 0,06  | 1         | 0,989133695   | 1,010985679     | 2,5             |
| TPP1                                                                                     | 0,067707728 | -0,015841737 | 0,362 | 0,2   | 1         | 0,989079412   | 1,011041164     | 1,81            |
| EFHC2                                                                                    | 0,377102913 | -0,015841765 | 0     | 0,01  | 1         | 0,989079393   | 1,011041184     | 0               |
| IL17C                                                                                    | 0,377102913 | -0,015841765 | 0     | 0,01  | 1         | 0,989079393   | 1,011041184     | 0               |
| NPNT                                                                                     | 0,377102913 | -0,015841765 | 0     | 0,01  | 1         | 0,989079393   | 1,011041184     | 0               |
| MTFP1                                                                                    | 0,157415062 | -0,015843316 | 0,062 | 0,02  | 1         | 0,989078329   | 1,011042271     | 3,1             |
| IFT140                                                                                   | 0,886527564 | -0,015863043 | 0,013 | 0,01  | 1         | 0,989064805   | 1,011056095     | 1,3             |
| CDKL5                                                                                    | 0,390582533 | -0,015874578 | 0,1   | 0,06  | 1         | 0,989056897   | 1,011064179     | 1,666666667     |
| CRYBG3                                                                                   | 0,015142229 | -0,015899861 | 0,15  | 0,04  | 1         | 0,989039565   | 1,011081898     | 3,75            |
| MCPH1                                                                                    | 0,108960046 | -0,015900294 | 0,138 | 0,06  | 1         | 0,989039268   | 1,011082201     | 2,3             |
| ZNF222                                                                                   | 0,223365318 | -0,015916568 | 0,038 | 0,01  | 1         | 0,989028111   | 1,011093607     | 3,8             |
| ASF1A                                                                                    | 0,004760342 | -0,015922945 | 0,312 | 0,11  | 1         | 0,989023739   | 1,011098076     | 2,836363636     |
| GCHFR                                                                                    | 0,84359211  | -0,015933918 | 0,025 | 0,02  | 1         | 0,989016217   | 1,011105767     | 1,25            |
| FECH                                                                                     | 0,01362345  | -0,015934413 | 0,088 | 0,01  | 1         | 0,989015877   | 1,011106114     | 8,8             |
| LRRN1                                                                                    | 0,84359211  | -0,015955015 | 0,025 | 0,02  | 1         | 0,989001754   | 1,011120553     | 1,25            |
| TTC7B                                                                                    | 0,063616753 | -0,015957991 | 0,1   | 0,03  | 1         | 0,988999714   | 1,011122638     | 3,333333333     |
| BRD1                                                                                     | 0,066269967 | -0,015996799 | 0,25  | 0,13  | 1         | 0,98897311    | 1,011149838     | 1,923076923     |
| FSCB                                                                                     | 0,377102913 | -0,016033673 | 0     | 0,01  | 1         | 0,988947834   | 1,011175682     | 0               |
| IL10RB-DT                                                                                | 0,377102913 | -0,016033673 | 0     | 0,01  | 1         | 0,988947834   | 1,011175682     | 0               |
| ITGA9                                                                                    | 0,377102913 | -0,016033673 | 0     | 0,01  | 1         | 0,988947834   | 1,011175682     | 0               |
| NBPF9                                                                                    | 0,377102913 | -0,016033673 | 0     | 0,01  | 1         | 0,988947834   | 1,011175682     | 0               |
| NXNL2                                                                                    | 0,377102913 | -0,016033673 | 0     | 0,01  | 1         | 0,988947834   | 1,011175682     | 0               |
| PCOLCE-AS1                                                                               | 0,377102913 | -0,016033673 | 0     | 0,01  | 1         | 0,988947834   | 1,011175682     | 0               |
| TLR5                                                                                     | 0,377102913 | -0,016033673 | 0     | 0,01  | 1         | 0,988947834   | 1,011175682     | 0               |

Supplementary Table 4

| Differentially expressed genes_keloid-CCD_ comparing SC-Keloid vs. (SC-Myel, SC-Nonmyel) |             |              |       |       |           |               |                 |                 |
|------------------------------------------------------------------------------------------|-------------|--------------|-------|-------|-----------|---------------|-----------------|-----------------|
| gene                                                                                     | p_val       | avg_log2FC   | pct.1 | pct.2 | p_val_adj | Foldchange_UP | Foldchange_DOWN | Ratio_pct1_pct2 |
| CDH26                                                                                    | 0,377102913 | -0,016055978 | 0     | 0,01  | 1         | 0,988932544   | 1,011191316     | 0               |
| KCNK7                                                                                    | 0,377102913 | -0,016055978 | 0     | 0,01  | 1         | 0,988932544   | 1,011191316     | 0               |
| SEMA3F                                                                                   | 0,377102913 | -0,016055978 | 0     | 0,01  | 1         | 0,988932544   | 1,011191316     | 0               |
| GMPR2                                                                                    | 0,037245412 | -0,01605643  | 0,2   | 0,08  | 1         | 0,988932234   | 1,011191632     | 2,5             |
| AKNA                                                                                     | 0,223365318 | -0,016071009 | 0,038 | 0,01  | 1         | 0,988922241   | 1,011201851     | 3,8             |
| ARHGAP5-AS1                                                                              | 0,268623818 | -0,016114739 | 0,05  | 0,02  | 1         | 0,988892266   | 1,011232502     | 2,5             |
| RGP1                                                                                     | 0,012429073 | -0,016124914 | 0,112 | 0,02  | 1         | 0,988885292   | 1,011239634     | 5,6             |
| TXNDC12                                                                                  | 0,038162541 | -0,016151711 | 0,6   | 0,32  | 1         | 0,988866924   | 1,011258417     | 1,875           |
| ADGRF5                                                                                   | 0,84359211  | -0,016202764 | 0,025 | 0,02  | 1         | 0,988831931   | 1,011294203     | 1,25            |
| LEPR                                                                                     | 0,11122839  | -0,016220268 | 0,05  | 0,01  | 1         | 0,988819933   | 1,011306474     | 5               |
| SNX29                                                                                    | 0,006775778 | -0,016231435 | 0,225 | 0,07  | 1         | 0,98881228    | 1,011314301     | 3,214285714     |
| GOLPH3L                                                                                  | 0,11122839  | -0,016237328 | 0,05  | 0,01  | 1         | 0,988808241   | 1,011318432     | 5               |
| RNFT2                                                                                    | 0,447580525 | -0,016278995 | 0,025 | 0,01  | 1         | 0,988779683   | 1,011347641     | 2,5             |
| ANKRD35                                                                                  | 0,886527564 | -0,016288344 | 0,013 | 0,01  | 1         | 0,988773276   | 1,011354195     | 1,3             |
| CCDC96                                                                                   | 0,501283468 | -0,016333302 | 0,038 | 0,02  | 1         | 0,988742463   | 1,011385712     | 1,9             |
| STS                                                                                      | 0,886527564 | -0,016356422 | 0,013 | 0,01  | 1         | 0,988726619   | 1,01140192      | 1,3             |
| APOBEC3F                                                                                 | 0,223365318 | -0,016368729 | 0,038 | 0,01  | 1         | 0,988718184   | 1,011410547     | 3,8             |
| RNPEP                                                                                    | 0,003218652 | -0,016454894 | 0,338 | 0,12  | 1         | 0,988659135   | 1,011470956     | 2,816666667     |
| SIK1                                                                                     | 0,886527564 | -0,01647404  | 0,013 | 0,01  | 1         | 0,988646014   | 1,011484379     | 1,3             |
| DNAH10OS                                                                                 | 0,447580525 | -0,016504239 | 0,025 | 0,01  | 1         | 0,98862532    | 1,011505552     | 2,5             |
| GTPBP4                                                                                   | 0,003561563 | -0,016512263 | 0,375 | 0,14  | 1         | 0,988619821   | 1,011511178     | 2,678571429     |
| ARHGAP25                                                                                 | 0,377102913 | -0,016516437 | 0     | 0,01  | 1         | 0,988616961   | 1,011514105     | 0               |
| HCG25                                                                                    | 0,377102913 | -0,016516437 | 0     | 0,01  | 1         | 0,988616961   | 1,011514105     | 0               |
| HLA-DOA                                                                                  | 0,377102913 | -0,016516437 | 0     | 0,01  | 1         | 0,988616961   | 1,011514105     | 0               |
| HPGD                                                                                     | 0,377102913 | -0,016516437 | 0     | 0,01  | 1         | 0,988616961   | 1,011514105     | 0               |
| ITGB6                                                                                    | 0,377102913 | -0,016516437 | 0     | 0,01  | 1         | 0,988616961   | 1,011514105     | 0               |
| LCT                                                                                      | 0,377102913 | -0,016516437 | 0     | 0,01  | 1         | 0,988616961   | 1,011514105     | 0               |
| MAOB                                                                                     | 0,377102913 | -0,016516437 | 0     | 0,01  | 1         | 0,988616961   | 1,011514105     | 0               |
| RARRES1                                                                                  | 0,377102913 | -0,016516437 | 0     | 0,01  | 1         | 0,988616961   | 1,011514105     | 0               |
| SHH                                                                                      | 0,377102913 | -0,016516437 | 0     | 0,01  | 1         | 0,988616961   | 1,011514105     | 0               |

Supplementary Table 4

| Differentially expressed genes_keloid-CCD_ comparing SC-Keloid vs. (SC-Myel, SC-Nonmyel) |             |              |       |       |           |               |                 |                 |
|------------------------------------------------------------------------------------------|-------------|--------------|-------|-------|-----------|---------------|-----------------|-----------------|
| gene                                                                                     | p_val       | avg_log2FC   | pct.1 | pct.2 | p_val_adj | Foldchange_UP | Foldchange_DOWN | Ratio_pct1_pct2 |
| SLC47A1                                                                                  | 0,377102913 | -0,016516437 | 0     | 0,01  | 1         | 0,988616961   | 1,011514105     | 0               |
| ZNF367                                                                                   | 0,11061781  | -0,016573549 | 0,088 | 0,03  | 1         | 0,988577825   | 1,011554148     | 2,933333333     |
| MAMDC2-AS1                                                                               | 0,886527564 | -0,016584134 | 0,013 | 0,01  | 1         | 0,988570572   | 1,01156157      | 1,3             |
| CITED1                                                                                   | 0,447580525 | -0,016602601 | 0,025 | 0,01  | 1         | 0,988557918   | 1,011574518     | 2,5             |
| APLP1                                                                                    | 0,447580525 | -0,016611597 | 0,025 | 0,01  | 1         | 0,988551754   | 1,011580826     | 2,5             |
| SCNN1D                                                                                   | 0,886527564 | -0,016639517 | 0,013 | 0,01  | 1         | 0,988532623   | 1,011600403     | 1,3             |
| ABTB1                                                                                    | 0,525777494 | -0,016680518 | 0,075 | 0,05  | 1         | 0,988504529   | 1,011629153     | 1,5             |
| EPHA7                                                                                    | 0,886527564 | -0,016699855 | 0,013 | 0,01  | 1         | 0,988491281   | 1,011642712     | 1,3             |
| RASA4B                                                                                   | 0,886527564 | -0,016699855 | 0,013 | 0,01  | 1         | 0,988491281   | 1,011642712     | 1,3             |
| ORAI3                                                                                    | 0,098000042 | -0,016705606 | 0,125 | 0,05  | 1         | 0,98848734    | 1,011646745     | 2,5             |
| PEX6                                                                                     | 0,171448164 | -0,016719428 | 0,125 | 0,06  | 1         | 0,98847787    | 1,011656437     | 2,083333333     |
| MTHFD2L                                                                                  | 0,004519867 | -0,01673998  | 0,238 | 0,07  | 1         | 0,988463789   | 1,011670849     | 3,4             |
| CFAP53                                                                                   | 0,886527564 | -0,016764188 | 0,013 | 0,01  | 1         | 0,988447203   | 1,011687825     | 1,3             |
| INPP5J                                                                                   | 0,886527564 | -0,016764188 | 0,013 | 0,01  | 1         | 0,988447203   | 1,011687825     | 1,3             |
| PLPPR4                                                                                   | 0,701739822 | -0,01676711  | 0,013 | 0,02  | 1         | 0,9884452     | 1,011689874     | 0,65            |
| USP9Y                                                                                    | 0,055334082 | -0,016771426 | 0,062 | 0,01  | 1         | 0,988442243   | 1,011692901     | 6,2             |
| EPHX1                                                                                    | 0,035536568 | -0,016787521 | 0,15  | 0,05  | 1         | 0,988431216   | 1,011704187     | 3               |
| SLC11A1                                                                                  | 0,886527564 | -0,016819091 | 0,013 | 0,01  | 1         | 0,988409587   | 1,011726326     | 1,3             |
| XAB2                                                                                     | 0,003614731 | -0,01682214  | 0,2   | 0,05  | 1         | 0,988407498   | 1,011728465     | 4               |
| TSNARE1                                                                                  | 0,886527564 | -0,016852912 | 0,013 | 0,01  | 1         | 0,988386416   | 1,011750044     | 1,3             |
| FAT4                                                                                     | 0,447580525 | -0,016943384 | 0,025 | 0,01  | 1         | 0,988324436   | 1,011813493     | 2,5             |
| MCCC1                                                                                    | 0,347667268 | -0,016956667 | 0,075 | 0,04  | 1         | 0,988315336   | 1,011822809     | 1,875           |
| ASGR1                                                                                    | 0,223365318 | -0,017000439 | 0,038 | 0,01  | 1         | 0,988285351   | 1,011853509     | 3,8             |
| VPS50                                                                                    | 0,325316267 | -0,017100723 | 0,062 | 0,03  | 1         | 0,988216656   | 1,011923847     | 2,066666667     |
| PRKAG2                                                                                   | 0,84359211  | -0,017161129 | 0,025 | 0,02  | 1         | 0,98817528    | 1,011966217     | 1,25            |
| NDC1                                                                                     | 0,045399153 | -0,017163333 | 0,088 | 0,02  | 1         | 0,988173771   | 1,011967763     | 4,4             |
| CHAC2                                                                                    | 0,276717465 | -0,017168284 | 0,05  | 0,02  | 1         | 0,988170379   | 1,011971236     | 2,5             |
| FAM13A                                                                                   | 0,065960419 | -0,017193315 | 0,15  | 0,06  | 1         | 0,988153234   | 1,011988794     | 2,5             |
| LINC02875                                                                                | 0,692138165 | -0,017217511 | 0,013 | 0,02  | 1         | 0,988136662   | 1,012005767     | 0,65            |
| ICE2                                                                                     | 0,041579387 | -0,017267974 | 0,162 | 0,06  | 1         | 0,988102099   | 1,012041166     | 2,7             |

Supplementary Table 4

| Differentially expressed genes_keloid-CCD_ comparing SC-Keloid vs. (SC-Myel, SC-Nonmyel) |             |              |       |       |           |               |                 |                 |
|------------------------------------------------------------------------------------------|-------------|--------------|-------|-------|-----------|---------------|-----------------|-----------------|
| gene                                                                                     | p_val       | avg_log2FC   | pct.1 | pct.2 | p_val_adj | Foldchange_UP | Foldchange_DOWN | Ratio_pct1_pct2 |
| LINC00511                                                                                | 0,002144097 | -0,017283408 | 0,562 | 0,23  | 1         | 0,988091528   | 1,012051992     | 2,443478261     |
| C11orf80                                                                                 | 0,123292651 | -0,017285846 | 0,15  | 0,07  | 1         | 0,988089859   | 1,012053703     | 2,142857143     |
| PTPN4                                                                                    | 0,081579256 | -0,017296116 | 0,112 | 0,04  | 1         | 0,988082825   | 1,012060907     | 2,8             |
| CCDC3                                                                                    | 0,501283468 | -0,017333258 | 0,038 | 0,02  | 1         | 0,988057387   | 1,012086963     | 1,9             |
| ATAD3B                                                                                   | 0,136266726 | -0,017435283 | 0,162 | 0,08  | 1         | 0,987987515   | 1,012158539     | 2,025           |
| ZBTB46                                                                                   | 0,505356819 | -0,017450235 | 0,05  | 0,03  | 1         | 0,987977276   | 1,012169029     | 1,666666667     |
| DTD2                                                                                     | 0,447580525 | -0,017458326 | 0,025 | 0,01  | 1         | 0,987971735   | 1,012174705     | 2,5             |
| SRRT                                                                                     | 0,001475578 | -0,017481038 | 0,4   | 0,14  | 1         | 0,987956182   | 1,01219064      | 2,857142857     |
| IL33                                                                                     | 0,84359211  | -0,017521901 | 0,025 | 0,02  | 1         | 0,9879282     | 1,012219309     | 1,25            |
| CIR1                                                                                     | 0,057006827 | -0,017566665 | 0,462 | 0,24  | 1         | 0,987897547   | 1,012250717     | 1,925           |
| FAM124A                                                                                  | 0,207484841 | -0,017643125 | 0     | 0,02  | 1         | 0,987845192   | 1,012304366     | 0               |
| ADAMTSL3                                                                                 | 0,377102913 | -0,01769983  | 0     | 0,01  | 1         | 0,987806365   | 1,012344155     | 0               |
| ANKRD30B                                                                                 | 0,377102913 | -0,01769983  | 0     | 0,01  | 1         | 0,987806365   | 1,012344155     | 0               |
| DACT3-AS1                                                                                | 0,377102913 | -0,01769983  | 0     | 0,01  | 1         | 0,987806365   | 1,012344155     | 0               |
| FTCDNL1                                                                                  | 0,377102913 | -0,01769983  | 0     | 0,01  | 1         | 0,987806365   | 1,012344155     | 0               |
| HOXA3                                                                                    | 0,377102913 | -0,01769983  | 0     | 0,01  | 1         | 0,987806365   | 1,012344155     | 0               |
| LDB3                                                                                     | 0,377102913 | -0,01769983  | 0     | 0,01  | 1         | 0,987806365   | 1,012344155     | 0               |
| LLGL2                                                                                    | 0,377102913 | -0,01769983  | 0     | 0,01  | 1         | 0,987806365   | 1,012344155     | 0               |
| NYNRIN                                                                                   | 0,377102913 | -0,01769983  | 0     | 0,01  | 1         | 0,987806365   | 1,012344155     | 0               |
| RARB                                                                                     | 0,377102913 | -0,01769983  | 0     | 0,01  | 1         | 0,987806365   | 1,012344155     | 0               |
| TCF15                                                                                    | 0,377102913 | -0,01769983  | 0     | 0,01  | 1         | 0,987806365   | 1,012344155     | 0               |
| TM4SF19-AS1                                                                              | 0,377102913 | -0,01769983  | 0     | 0,01  | 1         | 0,987806365   | 1,012344155     | 0               |
| CDK9                                                                                     | 0,005798568 | -0,0177017   | 0,25  | 0,08  | 1         | 0,987805084   | 1,012345468     | 3,125           |
| CLIC2                                                                                    | 0,701739822 | -0,01770221  | 0,013 | 0,02  | 1         | 0,987804735   | 1,012345825     | 0,65            |
| NRBP1                                                                                    | 0,041850478 | -0,017705886 | 0,537 | 0,28  | 1         | 0,987802219   | 1,012348404     | 1,917857143     |
| C5orf49                                                                                  | 0,886527564 | -0,01771248  | 0,013 | 0,01  | 1         | 0,987797704   | 1,012353032     | 1,3             |
| SPX                                                                                      | 0,886527564 | -0,017723434 | 0,013 | 0,01  | 1         | 0,987790204   | 1,012360718     | 1,3             |
| ZNF506                                                                                   | 0,11415313  | -0,017810742 | 0,2   | 0,1   | 1         | 0,987730427   | 1,012421985     | 2               |
| ZBTB26                                                                                   | 0,447580525 | -0,017829799 | 0,025 | 0,01  | 1         | 0,98771738    | 1,012435359     | 2,5             |
| PCAT6                                                                                    | 0,84359211  | -0,017878403 | 0,025 | 0,02  | 1         | 0,987684104   | 1,012469468     | 1,25            |

Supplementary Table 4

| Differentially expressed genes_keloid-CCD_ comparing SC-Keloid vs. (SC-Myel, SC-Nonmyel) |             |              |       |       |           |               |                 |                 |
|------------------------------------------------------------------------------------------|-------------|--------------|-------|-------|-----------|---------------|-----------------|-----------------|
| gene                                                                                     | p_val       | avg_log2FC   | pct.1 | pct.2 | p_val_adj | Foldchange_UP | Foldchange_DOWN | Ratio_pct1_pct2 |
| CEP112                                                                                   | 0,131562433 | -0,017908553 | 0,1   | 0,04  | 1         | 0,987663464   | 1,012490627     | 2,5             |
| CYP2R1                                                                                   | 0,11122839  | -0,017909586 | 0,05  | 0,01  | 1         | 0,987662757   | 1,012491352     | 5               |
| KCTD14                                                                                   | 0,886527564 | -0,017917977 | 0,013 | 0,01  | 1         | 0,987657012   | 1,012497241     | 1,3             |
| CDK3                                                                                     | 0,501283468 | -0,017926356 | 0,038 | 0,02  | 1         | 0,987651276   | 1,012503122     | 1,9             |
| SWSAP1                                                                                   | 0,886527564 | -0,017957768 | 0,013 | 0,01  | 1         | 0,987629772   | 1,012525168     | 1,3             |
| HCG18                                                                                    | 0,062334572 | -0,017967171 | 0,25  | 0,12  | 1         | 0,987623335   | 1,012531767     | 2,083333333     |
| EXOSC6                                                                                   | 0,002045077 | -0,018004754 | 0,438 | 0,16  | 1         | 0,987597607   | 1,012558144     | 2,7375          |
| PDE4DIP                                                                                  | 0,020805297 | -0,01801154  | 0,162 | 0,05  | 1         | 0,987592962   | 1,012562907     | 3,24            |
| TYROBP                                                                                   | 0,886527564 | -0,018055632 | 0,013 | 0,01  | 1         | 0,987562779   | 1,012593854     | 1,3             |
| PCOLCE                                                                                   | 0,218566967 | -0,018070105 | 0,175 | 0,1   | 1         | 0,987552872   | 1,012604011     | 1,75            |
| STIM2                                                                                    | 0,004481577 | -0,018145173 | 0,275 | 0,09  | 1         | 0,987501488   | 1,012656702     | 3,055555556     |
| PLEKHH1                                                                                  | 0,157415062 | -0,018207312 | 0,062 | 0,02  | 1         | 0,987458956   | 1,012700319     | 3,1             |
| HADHB                                                                                    | 0,063058729 | -0,018212195 | 0,713 | 0,39  | 1         | 0,987455613   | 1,012703747     | 1,828205128     |
| KCND3                                                                                    | 0,003706651 | -0,018227821 | 0,338 | 0,12  | 1         | 0,987444918   | 1,012714716     | 2,816666667     |
| GPALPP1                                                                                  | 0,038598126 | -0,018232827 | 0,2   | 0,08  | 1         | 0,987441492   | 1,01271823      | 2,5             |
| NEURL4                                                                                   | 0,085199008 | -0,018270414 | 0,075 | 0,02  | 1         | 0,987415766   | 1,012744615     | 3,75            |
| AC147651.1                                                                               | 0,886527564 | -0,018280288 | 0,013 | 0,01  | 1         | 0,987409008   | 1,012751547     | 1,3             |
| DDB1                                                                                     | 0,045421874 | -0,018281016 | 0,425 | 0,23  | 1         | 0,98740851    | 1,012752058     | 1,847826087     |
| TRIM11                                                                                   | 0,015994304 | -0,018396351 | 0,188 | 0,06  | 1         | 0,987329576   | 1,012833024     | 3,133333333     |
| EFCAB2                                                                                   | 0,099566196 | -0,018446654 | 0,188 | 0,09  | 1         | 0,98729515    | 1,01286834      | 2,088888889     |
| LRP5                                                                                     | 0,692138165 | -0,018455612 | 0,013 | 0,02  | 1         | 0,987289021   | 1,012874629     | 0,65            |
| GANC                                                                                     | 0,527578779 | -0,018531914 | 0,05  | 0,03  | 1         | 0,987236806   | 1,0129282       | 1,666666667     |
| RAD9B                                                                                    | 0,886527564 | -0,018638073 | 0,013 | 0,01  | 1         | 0,987164163   | 1,013002738     | 1,3             |
| SPEN                                                                                     | 0,126988161 | -0,01865259  | 0,462 | 0,26  | 1         | 0,98715423    | 1,013012931     | 1,776923077     |
| ITCH-AS1                                                                                 | 0,377102913 | -0,018654191 | 0     | 0,01  | 1         | 0,987153135   | 1,013014055     | 0               |
| CYP20A1                                                                                  | 0,006649267 | -0,018665037 | 0,338 | 0,13  | 1         | 0,987145713   | 1,013021671     | 2,6             |
| GORASP2                                                                                  | 0,006966289 | -0,018677531 | 0,462 | 0,2   | 1         | 0,987137165   | 1,013030444     | 2,31            |
| JCAD                                                                                     | 0,886527564 | -0,018689455 | 0,013 | 0,01  | 1         | 0,987129006   | 1,013038817     | 1,3             |
| CLCN7                                                                                    | 0,023293876 | -0,018717114 | 0,25  | 0,1   | 1         | 0,987110081   | 1,013058239     | 2,5             |
| RPP40                                                                                    | 0,035392992 | -0,018725071 | 0,112 | 0,03  | 1         | 0,987104637   | 1,013063826     | 3,733333333     |

Supplementary Table 4

| Differentially expressed genes_keloid-CCD_ comparing SC-Keloid vs. (SC-Myel, SC-Nonmyel) |             |              |       |       |           |               |                 |                 |
|------------------------------------------------------------------------------------------|-------------|--------------|-------|-------|-----------|---------------|-----------------|-----------------|
| gene                                                                                     | p_val       | avg_log2FC   | pct.1 | pct.2 | p_val_adj | Foldchange_UP | Foldchange_DOWN | Ratio_pct1_pct2 |
| ARL17B                                                                                   | 0,284975754 | -0,018749889 | 0,05  | 0,02  | 1         | 0,987087656   | 1,013081253     | 2,5             |
| KRR1                                                                                     | 0,029394084 | -0,018749972 | 0,5   | 0,26  | 1         | 0,987087599   | 1,013081312     | 1,923076923     |
| CHD3                                                                                     | 0,011629278 | -0,018781775 | 0,5   | 0,23  | 1         | 0,98706584    | 1,013103645     | 2,173913043     |
| DDO                                                                                      | 0,447580525 | -0,018825438 | 0,025 | 0,01  | 1         | 0,987035967   | 1,013134306     | 2,5             |
| ISOC1                                                                                    | 0,03588589  | -0,018827289 | 0,25  | 0,11  | 1         | 0,9870347     | 1,013135607     | 2,272727273     |
| PCDHGA7                                                                                  | 0,886527564 | -0,018829435 | 0,013 | 0,01  | 1         | 0,987033232   | 1,013137114     | 1,3             |
| ATP6V1G2                                                                                 | 0,447580525 | -0,018937339 | 0,025 | 0,01  | 1         | 0,986959412   | 1,013212892     | 2,5             |
| ZDHHC18                                                                                  | 0,111488744 | -0,018945534 | 0,138 | 0,06  | 1         | 0,986953805   | 1,013218648     | 2,3             |
| C2orf72                                                                                  | 0,447580525 | -0,018961723 | 0,025 | 0,01  | 1         | 0,986942731   | 1,013230017     | 2,5             |
| HINT3                                                                                    | 0,082194744 | -0,018984344 | 0,175 | 0,08  | 1         | 0,986927256   | 1,013245904     | 2,1875          |
| FAM219A                                                                                  | 0,044922833 | -0,01901579  | 0,125 | 0,04  | 1         | 0,986905745   | 1,01326799      | 3,125           |
| SLC35A1                                                                                  | 0,085199008 | -0,01905275  | 0,075 | 0,02  | 1         | 0,986880462   | 1,013293949     | 3,75            |
| RTL5                                                                                     | 0,223365318 | -0,019058137 | 0,038 | 0,01  | 1         | 0,986876776   | 1,013297733     | 3,8             |
| H4C11                                                                                    | 0,447580525 | -0,019092238 | 0,025 | 0,01  | 1         | 0,98685345    | 1,013321685     | 2,5             |
| CYP51A1                                                                                  | 0,84359211  | -0,01913725  | 0,025 | 0,02  | 1         | 0,986822661   | 1,0133533       | 1,25            |
| ARMC12                                                                                   | 0,886527564 | -0,019149715 | 0,013 | 0,01  | 1         | 0,986814134   | 1,013362056     | 1,3             |
| RSPH9                                                                                    | 0,085199008 | -0,019163947 | 0,075 | 0,02  | 1         | 0,9868044     | 1,013372053     | 3,75            |
| CFB                                                                                      | 0,886527564 | -0,019213976 | 0,013 | 0,01  | 1         | 0,98677018    | 1,013407195     | 1,3             |
| FBRSL1                                                                                   | 0,257586641 | -0,019219399 | 0,112 | 0,06  | 1         | 0,986766471   | 1,013411004     | 1,866666667     |
| PRPH2                                                                                    | 0,377102913 | -0,019246484 | 0     | 0,01  | 1         | 0,986747946   | 1,01343003      | 0               |
| ZFP41                                                                                    | 0,377102913 | -0,019246484 | 0     | 0,01  | 1         | 0,986747946   | 1,01343003      | 0               |
| MEF2C-AS1                                                                                | 0,447580525 | -0,019281051 | 0,025 | 0,01  | 1         | 0,986724303   | 1,013454312     | 2,5             |
| UBR1                                                                                     | 0,028212795 | -0,019284338 | 0,225 | 0,09  | 1         | 0,986722056   | 1,01345662      | 2,5             |
| CRYZ                                                                                     | 0,035392992 | -0,019358409 | 0,112 | 0,03  | 1         | 0,986671397   | 1,013508655     | 3,733333333     |
| IMPA1                                                                                    | 0,006972677 | -0,019375818 | 0,3   | 0,11  | 1         | 0,98665949    | 1,013520885     | 2,727272727     |
| AVL9                                                                                     | 0,058046518 | -0,019402312 | 0,138 | 0,05  | 1         | 0,986641371   | 1,013539498     | 2,76            |
| LYSMD3                                                                                   | 0,011117029 | -0,019446982 | 0,25  | 0,09  | 1         | 0,986610823   | 1,01357088      | 2,777777778     |
| CHGA                                                                                     | 0,377102913 | -0,019496176 | 0     | 0,01  | 1         | 0,986577181   | 1,013605442     | 0               |
| F8A3                                                                                     | 0,377102913 | -0,019496176 | 0     | 0,01  | 1         | 0,986577181   | 1,013605442     | 0               |
| PITX1                                                                                    | 0,377102913 | -0,019496176 | 0     | 0,01  | 1         | 0,986577181   | 1,013605442     | 0               |



Supplementary Table 4

| Differentially expressed genes_keloid-CCD_ comparing SC-Keloid vs. (SC-Myel, SC-Nonmyel) |             |              |       |       |           |               |                 |                 |
|------------------------------------------------------------------------------------------|-------------|--------------|-------|-------|-----------|---------------|-----------------|-----------------|
| gene                                                                                     | p_val       | avg_log2FC   | pct.1 | pct.2 | p_val_adj | Foldchange_UP | Foldchange_DOWN | Ratio_pct1_pct2 |
| RPRM                                                                                     | 0,377102913 | -0,019496176 | 0     | 0,01  | 1         | 0,986577181   | 1,013605442     | 0               |
| WWC2-AS2                                                                                 | 0,377102913 | -0,019496176 | 0     | 0,01  | 1         | 0,986577181   | 1,013605442     | 0               |
| EIF3G                                                                                    | 0,88808849  | -0,019524335 | 0,887 | 0,64  | 1         | 0,986557925   | 1,013625226     | 1,3859375       |
| ALDH5A1                                                                                  | 0,886527564 | -0,019526098 | 0,013 | 0,01  | 1         | 0,986556719   | 1,013626465     | 1,3             |
| PIK3IP1                                                                                  | 0,930291946 | -0,019552635 | 0,088 | 0,09  | 1         | 0,986538572   | 1,01364511      | 0,977777778     |
| TPI1                                                                                     | 0,373277403 | -0,01955593  | 0,963 | 0,81  | 1         | 0,986536319   | 1,013647425     | 1,188888889     |
| DESI2                                                                                    | 0,016481483 | -0,019603905 | 0,488 | 0,23  | 1         | 0,986503514   | 1,013681133     | 2,12173913      |
| DDX39A                                                                                   | 0,014128469 | -0,019672045 | 0,613 | 0,29  | 1         | 0,986456921   | 1,013729012     | 2,113793103     |
| MCM9                                                                                     | 0,193718766 | -0,019684578 | 0,075 | 0,03  | 1         | 0,986448352   | 1,013737818     | 2,5             |
| AMIGO2                                                                                   | 0,83477988  | -0,019710152 | 0,025 | 0,02  | 1         | 0,986430866   | 1,013755788     | 1,25            |
| SPPL2A                                                                                   | 0,175181954 | -0,019737201 | 0,938 | 0,59  | 1         | 0,986412371   | 1,013774796     | 1,589830508     |
| NAF1                                                                                     | 0,003860939 | -0,019832072 | 0,2   | 0,05  | 1         | 0,986347508   | 1,013841463     | 4               |
| OSBPL2                                                                                   | 0,175130448 | -0,019862492 | 0,125 | 0,06  | 1         | 0,98632671    | 1,01386284      | 2,083333333     |
| RAB27A                                                                                   | 0,063616753 | -0,019882282 | 0,1   | 0,03  | 1         | 0,98631318    | 1,013876749     | 3,333333333     |
| PMS1                                                                                     | 0,014271418 | -0,019903794 | 0,188 | 0,06  | 1         | 0,986298474   | 1,013891866     | 3,133333333     |
| ZNF614                                                                                   | 0,188542969 | -0,01991026  | 0,075 | 0,03  | 1         | 0,986294053   | 1,01389641      | 2,5             |
| DFFB                                                                                     | 0,447580525 | -0,019930265 | 0,025 | 0,01  | 1         | 0,986280377   | 1,013910469     | 2,5             |
| CAMK2A                                                                                   | 0,223365318 | -0,019934635 | 0,038 | 0,01  | 1         | 0,98627739    | 1,013913541     | 3,8             |
| COL17A1                                                                                  | 0,501283468 | -0,01998799  | 0,038 | 0,02  | 1         | 0,986240915   | 1,013951039     | 1,9             |
| PDSS2                                                                                    | 0,057278664 | -0,020044877 | 0,138 | 0,05  | 1         | 0,986202027   | 1,013991021     | 2,76            |
| AC009506.1                                                                               | 0,284975754 | -0,020069181 | 0,05  | 0,02  | 1         | 0,986185413   | 1,014008103     | 2,5             |
| SEL1L                                                                                    | 0,005257399 | -0,020086794 | 0,475 | 0,2   | 1         | 0,986173374   | 1,014020482     | 2,375           |
| TCOF1                                                                                    | 0,003587612 | -0,020087416 | 0,262 | 0,08  | 1         | 0,986172948   | 1,01402092      | 3,275           |
| RGS17                                                                                    | 0,886527564 | -0,02009305  | 0,013 | 0,01  | 1         | 0,986169097   | 1,014024879     | 1,3             |
| HSPA1L                                                                                   | 0,501283468 | -0,02009955  | 0,038 | 0,02  | 1         | 0,986164654   | 1,014029448     | 1,9             |
| THAP7                                                                                    | 0,002439309 | -0,02016259  | 0,388 | 0,14  | 1         | 0,986121564   | 1,014073758     | 2,771428571     |
| RBM18                                                                                    | 0,001670062 | -0,020172928 | 0,238 | 0,06  | 1         | 0,986114497   | 1,014081025     | 3,966666667     |
| BICRAL                                                                                   | 0,11061781  | -0,020199901 | 0,088 | 0,03  | 1         | 0,986096061   | 1,014099984     | 2,933333333     |
| TSPOAP1                                                                                  | 0,886527564 | -0,02021353  | 0,013 | 0,01  | 1         | 0,986086745   | 1,014109565     | 1,3             |
| AP000462.3                                                                               | 0,377102913 | -0,020234484 | 0     | 0,01  | 1         | 0,986072423   | 1,014124294     | 0               |

Supplementary Table 4

| Differentially expressed genes_keloid-CCD_ comparing SC-Keloid vs. (SC-Myel, SC-Nonmyel) |             |              |       |       |           |               |                 |                 |
|------------------------------------------------------------------------------------------|-------------|--------------|-------|-------|-----------|---------------|-----------------|-----------------|
| gene                                                                                     | p_val       | avg_log2FC   | pct.1 | pct.2 | p_val_adj | Foldchange_UP | Foldchange_DOWN | Ratio_pct1_pct2 |
| ATP6AP1L                                                                                 | 0,377102913 | -0,020234484 | 0     | 0,01  | 1         | 0,986072423   | 1,014124294     | 0               |
| C7orf25                                                                                  | 0,377102913 | -0,020234484 | 0     | 0,01  | 1         | 0,986072423   | 1,014124294     | 0               |
| DSG1                                                                                     | 0,377102913 | -0,020234484 | 0     | 0,01  | 1         | 0,986072423   | 1,014124294     | 0               |
| FRMPD1                                                                                   | 0,377102913 | -0,020234484 | 0     | 0,01  | 1         | 0,986072423   | 1,014124294     | 0               |
| MBOAT1                                                                                   | 0,377102913 | -0,020234484 | 0     | 0,01  | 1         | 0,986072423   | 1,014124294     | 0               |
| PIANP                                                                                    | 0,377102913 | -0,020234484 | 0     | 0,01  | 1         | 0,986072423   | 1,014124294     | 0               |
| WDR5B                                                                                    | 0,377102913 | -0,020234484 | 0     | 0,01  | 1         | 0,986072423   | 1,014124294     | 0               |
| ZC3H11A                                                                                  | 0,377102913 | -0,020234484 | 0     | 0,01  | 1         | 0,986072423   | 1,014124294     | 0               |
| ZNF41                                                                                    | 0,377102913 | -0,020234484 | 0     | 0,01  | 1         | 0,986072423   | 1,014124294     | 0               |
| NAAA                                                                                     | 0,193718766 | -0,020246142 | 0,075 | 0,03  | 1         | 0,986064455   | 1,014132489     | 2,5             |
| LIN9                                                                                     | 0,11122839  | -0,020328816 | 0,05  | 0,01  | 1         | 0,98600795    | 1,014190606     | 5               |
| GLUD2                                                                                    | 0,84359211  | -0,020370315 | 0,025 | 0,02  | 1         | 0,985979588   | 1,014219779     | 1,25            |
| DPYSL4                                                                                   | 0,886527564 | -0,02038614  | 0,013 | 0,01  | 1         | 0,985968773   | 1,014230904     | 1,3             |
| TIMM8A                                                                                   | 0,047638359 | -0,020411516 | 0,125 | 0,04  | 1         | 0,985951431   | 1,014248744     | 3,125           |
| TOE1                                                                                     | 0,010094224 | -0,020436141 | 0,138 | 0,03  | 1         | 0,985934601   | 1,014266056     | 4,6             |
| SLC25A6                                                                                  | 0,488930303 | -0,020442137 | 0,963 | 0,68  | 1         | 0,985930504   | 1,014270272     | 1,416176471     |
| TRAPPC8                                                                                  | 0,7367096   | -0,020448942 | 0,075 | 0,06  | 1         | 0,985925853   | 1,014275056     | 1,25            |
| EMC1                                                                                     | 0,026694518 | -0,020451971 | 0,262 | 0,11  | 1         | 0,985923783   | 1,014277185     | 2,381818182     |
| DGKQ                                                                                     | 0,193718766 | -0,020460176 | 0,075 | 0,03  | 1         | 0,985918176   | 1,014282954     | 2,5             |
| SLF1                                                                                     | 0,005880063 | -0,020488652 | 0,25  | 0,08  | 1         | 0,985898716   | 1,014302974     | 3,125           |
| TUT7                                                                                     | 0,077844856 | -0,020515983 | 0,212 | 0,1   | 1         | 0,985880039   | 1,01432219      | 2,12            |
| MDFI                                                                                     | 0,110218666 | -0,020526777 | 0,138 | 0,06  | 1         | 0,985872663   | 1,014329779     | 2,3             |
| INTS10                                                                                   | 0,006414854 | -0,020542827 | 0,338 | 0,13  | 1         | 0,985861695   | 1,014341063     | 2,6             |
| SNAI2                                                                                    | 0,045508871 | -0,020546188 | 0,162 | 0,06  | 1         | 0,985859399   | 1,014343426     | 2,7             |
| ZNF18                                                                                    | 0,501283468 | -0,020552249 | 0,038 | 0,02  | 1         | 0,985855257   | 1,014347687     | 1,9             |
| FAM78B                                                                                   | 0,027229122 | -0,020600714 | 0,225 | 0,09  | 1         | 0,985822139   | 1,014381763     | 2,5             |
| BYSL                                                                                     | 0,069512445 | -0,020602394 | 0,162 | 0,07  | 1         | 0,985820991   | 1,014382945     | 2,314285714     |
| USP11                                                                                    | 0,017130738 | -0,020648428 | 0,6   | 0,29  | 1         | 0,985789536   | 1,014415312     | 2,068965517     |
| LINC01023                                                                                | 0,84359211  | -0,020672959 | 0,025 | 0,02  | 1         | 0,985772774   | 1,014432561     | 1,25            |
| FAF1                                                                                     | 0,003567291 | -0,020692976 | 0,338 | 0,12  | 1         | 0,985759097   | 1,014446637     | 2,816666667     |

Supplementary Table 4

| Differentially expressed genes_keloid-CCD_ comparing SC-Keloid vs. (SC-Myel, SC-Nonmyel) |             |              |       |       |           |               |                 |                 |
|------------------------------------------------------------------------------------------|-------------|--------------|-------|-------|-----------|---------------|-----------------|-----------------|
| gene                                                                                     | p_val       | avg_log2FC   | pct.1 | pct.2 | p_val_adj | Foldchange_UP | Foldchange_DOWN | Ratio_pct1_pct2 |
| OCRL                                                                                     | 0,223365318 | -0,020761697 | 0,038 | 0,01  | 1         | 0,985712143   | 1,014494959     | 3,8             |
| AL592183.1                                                                               | 0,84359211  | -0,020789962 | 0,025 | 0,02  | 1         | 0,985692831   | 1,014514836     | 1,25            |
| UBAC2                                                                                    | 0,030455085 | -0,020793876 | 0,262 | 0,11  | 1         | 0,985690157   | 1,014517588     | 2,381818182     |
| EIF4H                                                                                    | 0,248089259 | -0,020813143 | 0,713 | 0,42  | 1         | 0,985676993   | 1,014531137     | 1,697619048     |
| KLHDC8A                                                                                  | 0,223365318 | -0,02082471  | 0,038 | 0,01  | 1         | 0,98566909    | 1,014539271     | 3,8             |
| SCARF1                                                                                   | 0,447580525 | -0,020830714 | 0,025 | 0,01  | 1         | 0,985664988   | 1,014543493     | 2,5             |
| SAMD1                                                                                    | 0,029657115 | -0,02084889  | 0,4   | 0,19  | 1         | 0,98565257    | 1,014556275     | 2,105263158     |
| USP18                                                                                    | 0,284975754 | -0,020883249 | 0,05  | 0,02  | 1         | 0,985629097   | 1,014580438     | 2,5             |
| NR2F2-AS1                                                                                | 0,098000042 | -0,02090616  | 0,125 | 0,05  | 1         | 0,985613444   | 1,01459655      | 2,5             |
| SULF2                                                                                    | 0,521976935 | -0,02095245  | 0,05  | 0,03  | 1         | 0,98558182    | 1,014629105     | 1,666666667     |
| TTLL4                                                                                    | 0,221005633 | -0,020968292 | 0,088 | 0,04  | 1         | 0,985570998   | 1,014640246     | 2,2             |
| POT1                                                                                     | 0,063616753 | -0,020992391 | 0,1   | 0,03  | 1         | 0,985554535   | 1,014657195     | 3,333333333     |
| PIEZO2                                                                                   | 0,886527564 | -0,020997117 | 0,013 | 0,01  | 1         | 0,985551306   | 1,014660519     | 1,3             |
| PLAA                                                                                     | 0,054291236 | -0,02100665  | 0,138 | 0,05  | 1         | 0,985544794   | 1,014667224     | 2,76            |
| EXTL3                                                                                    | 0,080462265 | -0,021013314 | 0,112 | 0,04  | 1         | 0,985540242   | 1,014671911     | 2,8             |
| BTRC                                                                                     | 0,112247794 | -0,021057213 | 0,088 | 0,03  | 1         | 0,985510254   | 1,014702786     | 2,933333333     |
| VPS35L                                                                                   | 0,005575985 | -0,021057595 | 0,15  | 0,03  | 1         | 0,985509993   | 1,014703054     | 5               |
| CAPN1                                                                                    | 0,029113694 | -0,021100428 | 0,412 | 0,2   | 1         | 0,985480734   | 1,014733181     | 2,06            |
| NCSTN                                                                                    | 0,006968553 | -0,021117593 | 0,462 | 0,19  | 1         | 0,985469008   | 1,014745255     | 2,431578947     |
| FHOD1                                                                                    | 0,000133691 | -0,021121133 | 0,45  | 0,14  | 1         | 0,985466591   | 1,014747744     | 3,214285714     |
| FGR                                                                                      | 0,886527564 | -0,021122848 | 0,013 | 0,01  | 1         | 0,985465419   | 1,01474895      | 1,3             |
| NDUFAF7                                                                                  | 0,063616753 | -0,021131082 | 0,1   | 0,03  | 1         | 0,985459795   | 1,014754742     | 3,333333333     |
| TCTN3                                                                                    | 0,003536285 | -0,021173859 | 0,262 | 0,08  | 1         | 0,985430576   | 1,014784831     | 3,275           |
| SEPSECS                                                                                  | 0,928093507 | -0,021174389 | 0,038 | 0,04  | 1         | 0,985430214   | 1,014785203     | 0,95            |
| UHRF1BP1                                                                                 | 0,35516371  | -0,021215451 | 0,075 | 0,04  | 1         | 0,985402167   | 1,014814087     | 1,875           |
| PCBP3                                                                                    | 0,501283468 | -0,021237002 | 0,038 | 0,02  | 1         | 0,985387447   | 1,014829246     | 1,9             |
| ADARB2                                                                                   | 0,377102913 | -0,02123835  | 0     | 0,01  | 1         | 0,985386526   | 1,014830194     | 0               |
| C1RL-AS1                                                                                 | 0,377102913 | -0,02123835  | 0     | 0,01  | 1         | 0,985386526   | 1,014830194     | 0               |
| CTRC                                                                                     | 0,377102913 | -0,02123835  | 0     | 0,01  | 1         | 0,985386526   | 1,014830194     | 0               |
| FAM161B                                                                                  | 0,377102913 | -0,02123835  | 0     | 0,01  | 1         | 0,985386526   | 1,014830194     | 0               |

Supplementary Table 4

| Differentially expressed genes_keloid-CCD_ comparing SC-Keloid vs. (SC-Myel, SC-Nonmyel) |             |              |       |       |           |               |                 |                 |
|------------------------------------------------------------------------------------------|-------------|--------------|-------|-------|-----------|---------------|-----------------|-----------------|
| gene                                                                                     | p_val       | avg_log2FC   | pct.1 | pct.2 | p_val_adj | Foldchange_UP | Foldchange_DOWN | Ratio_pct1_pct2 |
| NAV2-AS2                                                                                 | 0,377102913 | -0,02123835  | 0     | 0,01  | 1         | 0,985386526   | 1,014830194     | 0               |
| SNORC                                                                                    | 0,377102913 | -0,02123835  | 0     | 0,01  | 1         | 0,985386526   | 1,014830194     | 0               |
| ZNF549                                                                                   | 0,377102913 | -0,02123835  | 0     | 0,01  | 1         | 0,985386526   | 1,014830194     | 0               |
| FUT4                                                                                     | 0,284975754 | -0,021238719 | 0,05  | 0,02  | 1         | 0,985386274   | 1,014830454     | 2,5             |
| AC005523.2                                                                               | 0,886527564 | -0,021251925 | 0,013 | 0,01  | 1         | 0,985377254   | 1,014839744     | 1,3             |
| DAAM2                                                                                    | 0,036366201 | -0,021274022 | 0,2   | 0,08  | 1         | 0,985362162   | 1,014855288     | 2,5             |
| FOXO6                                                                                    | 0,701739822 | -0,021304865 | 0,013 | 0,02  | 1         | 0,985341096   | 1,014876984     | 0,65            |
| ZNF280C                                                                                  | 0,447580525 | -0,021325744 | 0,025 | 0,01  | 1         | 0,985326836   | 1,014891672     | 2,5             |
| SLC25A13                                                                                 | 0,009021176 | -0,021337585 | 0,312 | 0,12  | 1         | 0,985318749   | 1,014900001     | 2,6             |
| SARS2                                                                                    | 0,223632981 | -0,021339291 | 0,088 | 0,04  | 1         | 0,985317584   | 1,014901201     | 2,2             |
| CLDN15                                                                                   | 0,284975754 | -0,021348379 | 0,05  | 0,02  | 1         | 0,985311377   | 1,014907595     | 2,5             |
| WIPI2                                                                                    | 0,001521664 | -0,021352866 | 0,438 | 0,16  | 1         | 0,985308313   | 1,014910751     | 2,7375          |
| MSI1                                                                                     | 0,886527564 | -0,021384261 | 0,013 | 0,01  | 1         | 0,985286871   | 1,014932837     | 1,3             |
| TRMT2B                                                                                   | 0,886527564 | -0,021388234 | 0,013 | 0,01  | 1         | 0,985284158   | 1,014935632     | 1,3             |
| VPS26C                                                                                   | 0,018868743 | -0,021459698 | 0,288 | 0,12  | 1         | 0,985235353   | 1,014985908     | 2,4             |
| SENP8                                                                                    | 0,886527564 | -0,021467466 | 0,013 | 0,01  | 1         | 0,985230048   | 1,014991374     | 1,3             |
| ESR2                                                                                     | 0,447580525 | -0,02147768  | 0,025 | 0,01  | 1         | 0,985223073   | 1,014998559     | 2,5             |
| PRSS12                                                                                   | 0,701739822 | -0,021550636 | 0,013 | 0,02  | 1         | 0,985173252   | 1,015049889     | 0,65            |
| PCNX3                                                                                    | 0,026068555 | -0,021566049 | 0,138 | 0,04  | 1         | 0,985162727   | 1,015060733     | 3,45            |
| RAB28                                                                                    | 0,001157848 | -0,021567832 | 0,288 | 0,08  | 1         | 0,98516151    | 1,015061987     | 3,6             |
| SUDS3                                                                                    | 0,017079096 | -0,021577173 | 0,412 | 0,19  | 1         | 0,985155131   | 1,01506856      | 2,168421053     |
| APTX                                                                                     | 0,00360591  | -0,021589424 | 0,3   | 0,1   | 1         | 0,985146766   | 1,015077179     | 3               |
| SART3                                                                                    | 0,046618416 | -0,021594815 | 0,275 | 0,13  | 1         | 0,985143084   | 1,015080973     | 2,115384615     |
| NOLC1                                                                                    | 0,001763987 | -0,021606352 | 0,35  | 0,12  | 1         | 0,985135206   | 1,01508909      | 2,916666667     |
| EGFL7                                                                                    | 0,213256546 | -0,021619951 | 0,088 | 0,04  | 1         | 0,98512592    | 1,015098658     | 2,2             |
| ZNF667                                                                                   | 0,447580525 | -0,021621476 | 0,025 | 0,01  | 1         | 0,985124879   | 1,015099731     | 2,5             |
| ATG16L1                                                                                  | 0,063616753 | -0,021659464 | 0,1   | 0,03  | 1         | 0,98509894    | 1,015126461     | 3,333333333     |
| MAPK15                                                                                   | 0,886527564 | -0,021717683 | 0,013 | 0,01  | 1         | 0,985059188   | 1,015167426     | 1,3             |
| RPS6KA2                                                                                  | 0,886527564 | -0,021746605 | 0,013 | 0,01  | 1         | 0,98503944    | 1,015187778     | 1,3             |
| B3GNT8                                                                                   | 0,377102913 | -0,02181976  | 0     | 0,01  | 1         | 0,984989493   | 1,015239256     | 0               |

Supplementary Table 4

| Differentially expressed genes_keloid-CCD_ comparing SC-Keloid vs. (SC-Myel, SC-Nonmyel) |             |              |       |       |           |               |                 |                 |
|------------------------------------------------------------------------------------------|-------------|--------------|-------|-------|-----------|---------------|-----------------|-----------------|
| gene                                                                                     | p_val       | avg_log2FC   | pct.1 | pct.2 | p_val_adj | Foldchange_UP | Foldchange_DOWN | Ratio_pct1_pct2 |
| CFHR1                                                                                    | 0,377102913 | -0,02181976  | 0     | 0,01  | 1         | 0,984989493   | 1,015239256     | 0               |
| FBXL22                                                                                   | 0,377102913 | -0,02181976  | 0     | 0,01  | 1         | 0,984989493   | 1,015239256     | 0               |
| MAP3K5                                                                                   | 0,377102913 | -0,02181976  | 0     | 0,01  | 1         | 0,984989493   | 1,015239256     | 0               |
| MUC5B                                                                                    | 0,377102913 | -0,02181976  | 0     | 0,01  | 1         | 0,984989493   | 1,015239256     | 0               |
| RIBC1                                                                                    | 0,377102913 | -0,02181976  | 0     | 0,01  | 1         | 0,984989493   | 1,015239256     | 0               |
| SLC25A21                                                                                 | 0,377102913 | -0,02181976  | 0     | 0,01  | 1         | 0,984989493   | 1,015239256     | 0               |
| UNC79                                                                                    | 0,377102913 | -0,02181976  | 0     | 0,01  | 1         | 0,984989493   | 1,015239256     | 0               |
| VIP                                                                                      | 0,377102913 | -0,02181976  | 0     | 0,01  | 1         | 0,984989493   | 1,015239256     | 0               |
| RUNX1                                                                                    | 0,028762639 | -0,021821953 | 0,75  | 0,4   | 1         | 0,984987996   | 1,015240799     | 1,875           |
| SLC4A7                                                                                   | 0,014081004 | -0,021822305 | 0,275 | 0,11  | 1         | 0,984987756   | 1,015241047     | 2,5             |
| NAA30                                                                                    | 0,07981542  | -0,021837589 | 0,162 | 0,07  | 1         | 0,98497732    | 1,015251803     | 2,314285714     |
| TMEM170B                                                                                 | 0,809797238 | -0,021859319 | 0,038 | 0,03  | 1         | 0,984962484   | 1,015267095     | 1,266666667     |
| CAPN3                                                                                    | 0,377102913 | -0,021862747 | 0     | 0,01  | 1         | 0,984960144   | 1,015269507     | 0               |
| SLC6A4                                                                                   | 0,377102913 | -0,021862747 | 0     | 0,01  | 1         | 0,984960144   | 1,015269507     | 0               |
| MKNK1-AS1                                                                                | 0,377102913 | -0,021895929 | 0     | 0,01  | 1         | 0,984937491   | 1,015292858     | 0               |
| RAB11FIP4                                                                                | 0,377102913 | -0,021895929 | 0     | 0,01  | 1         | 0,984937491   | 1,015292858     | 0               |
| CTSH                                                                                     | 0,701739822 | -0,021912788 | 0,013 | 0,02  | 1         | 0,984925981   | 1,015304723     | 0,65            |
| FAM131A                                                                                  | 0,042671641 | -0,021974073 | 0,162 | 0,06  | 1         | 0,984884142   | 1,015347854     | 2,7             |
| ZNF781                                                                                   | 0,701739822 | -0,021991829 | 0,013 | 0,02  | 1         | 0,984872021   | 1,01536035      | 0,65            |
| ZNF624                                                                                   | 0,280825998 | -0,022066945 | 0,05  | 0,02  | 1         | 0,984820743   | 1,015413218     | 2,5             |
| ZNF417                                                                                   | 0,447580525 | -0,022085265 | 0,025 | 0,01  | 1         | 0,984808238   | 1,015426112     | 2,5             |
| CCDC160                                                                                  | 0,207484841 | -0,022129989 | 0     | 0,02  | 1         | 0,984777709   | 1,015457591     | 0               |
| MAPKBP1                                                                                  | 0,034816087 | -0,022171809 | 0,112 | 0,03  | 1         | 0,984749163   | 1,015487027     | 3,733333333     |
| PTPRJ                                                                                    | 0,026108427 | -0,02219063  | 0,262 | 0,11  | 1         | 0,984736317   | 1,015500274     | 2,381818182     |
| MORC2-AS1                                                                                | 0,157415062 | -0,022243349 | 0,062 | 0,02  | 1         | 0,984700333   | 1,015537384     | 3,1             |
| MEAK7                                                                                    | 0,085199008 | -0,022244532 | 0,075 | 0,02  | 1         | 0,984699526   | 1,015538217     | 3,75            |
| LANCL1                                                                                   | 0,012164967 | -0,022308386 | 0,175 | 0,05  | 1         | 0,984655944   | 1,015583165     | 3,5             |
| LINC00323                                                                                | 0,886527564 | -0,022324533 | 0,013 | 0,01  | 1         | 0,984644923   | 1,015594533     | 1,3             |
| CPNE9                                                                                    | 0,377102913 | -0,022399069 | 0     | 0,01  | 1         | 0,984594053   | 1,015647004     | 0               |
| FBXO24                                                                                   | 0,377102913 | -0,022399069 | 0     | 0,01  | 1         | 0,984594053   | 1,015647004     | 0               |

Supplementary Table 4

| Differentially expressed genes_keloid-CCD_ comparing SC-Keloid vs. (SC-Myel, SC-Nonmyel) |             |              |       |       |           |               |                 |                 |
|------------------------------------------------------------------------------------------|-------------|--------------|-------|-------|-----------|---------------|-----------------|-----------------|
| gene                                                                                     | p_val       | avg_log2FC   | pct.1 | pct.2 | p_val_adj | Foldchange_UP | Foldchange_DOWN | Ratio_pct1_pct2 |
| MGAT5B                                                                                   | 0,377102913 | -0,022399069 | 0     | 0,01  | 1         | 0,984594053   | 1,015647004     | 0               |
| SOX1                                                                                     | 0,377102913 | -0,022399069 | 0     | 0,01  | 1         | 0,984594053   | 1,015647004     | 0               |
| DDR2                                                                                     | 0,001047073 | -0,022403334 | 0,488 | 0,18  | 1         | 0,984591142   | 1,015650007     | 2,711111111     |
| IDNK                                                                                     | 0,325316267 | -0,022429587 | 0,062 | 0,03  | 1         | 0,984573226   | 1,015668489     | 2,066666667     |
| USP33                                                                                    | 0,007576091 | -0,022497717 | 0,338 | 0,13  | 1         | 0,984526731   | 1,015716453     | 2,6             |
| ACOT8                                                                                    | 0,058822906 | -0,022510179 | 0,138 | 0,05  | 1         | 0,984518227   | 1,015725227     | 2,76            |
| AP5S1                                                                                    | 0,223632981 | -0,022523116 | 0,088 | 0,04  | 1         | 0,984509399   | 1,015734336     | 2,2             |
| ZNF710                                                                                   | 0,284975754 | -0,022637955 | 0,05  | 0,02  | 1         | 0,984431034   | 1,015815192     | 2,5             |
| BEAN1                                                                                    | 0,928093507 | -0,022641324 | 0,038 | 0,04  | 1         | 0,984428736   | 1,015817564     | 0,95            |
| PARP6                                                                                    | 0,086750908 | -0,022644856 | 0,175 | 0,08  | 1         | 0,984426326   | 1,015820051     | 2,1875          |
| CACNA1G                                                                                  | 0,886527564 | -0,022751102 | 0,013 | 0,01  | 1         | 0,984353831   | 1,015894862     | 1,3             |
| RAD23A                                                                                   | 0,001033909 | -0,022771736 | 0,7   | 0,3   | 1         | 0,984339752   | 1,015909393     | 2,333333333     |
| NPRL3                                                                                    | 0,065618236 | -0,022782184 | 0,2   | 0,09  | 1         | 0,984332624   | 1,015916749     | 2,222222222     |
| DOC2B                                                                                    | 0,701739822 | -0,022789196 | 0,013 | 0,02  | 1         | 0,98432784    | 1,015921688     | 0,65            |
| GRIPAP1                                                                                  | 0,007385577 | -0,022799923 | 0,225 | 0,07  | 1         | 0,984320521   | 1,015929241     | 3,214285714     |
| ANKMY2                                                                                   | 0,026867238 | -0,022807298 | 0,175 | 0,06  | 1         | 0,984315489   | 1,015934435     | 2,916666667     |
| KCNA2                                                                                    | 0,150386432 | -0,022832971 | 0,112 | 0,05  | 1         | 0,984297973   | 1,015952514     | 2,24            |
| KREMEN1                                                                                  | 0,223365318 | -0,022850168 | 0,038 | 0,01  | 1         | 0,98428624    | 1,015964624     | 3,8             |
| FOXJ3                                                                                    | 0,054804787 | -0,022861929 | 0,238 | 0,11  | 1         | 0,984278216   | 1,015972906     | 2,163636364     |
| ANO8                                                                                     | 0,84359211  | -0,022867614 | 0,025 | 0,02  | 1         | 0,984274338   | 1,015976909     | 1,25            |
| POLD1                                                                                    | 0,157415062 | -0,02289818  | 0,062 | 0,02  | 1         | 0,984253484   | 1,015998435     | 3,1             |
| ADCY1                                                                                    | 0,447580525 | -0,022928348 | 0,025 | 0,01  | 1         | 0,984232903   | 1,016019681     | 2,5             |
| BCR                                                                                      | 0,309705255 | -0,022943774 | 0,062 | 0,03  | 1         | 0,984222379   | 1,016030545     | 2,066666667     |
| SGK3                                                                                     | 0,809797238 | -0,022995539 | 0,038 | 0,03  | 1         | 0,984187065   | 1,016067001     | 1,266666667     |
| MOXD1                                                                                    | 0,01334076  | -0,023029823 | 0,262 | 0,1   | 1         | 0,984163677   | 1,016091147     | 2,62            |
| PGM3                                                                                     | 0,000786927 | -0,023068302 | 0,738 | 0,33  | 1         | 0,984137429   | 1,016118248     | 2,236363636     |
| ZNF165                                                                                   | 0,692138165 | -0,023069573 | 0,013 | 0,02  | 1         | 0,984136561   | 1,016119144     | 0,65            |
| GGT5                                                                                     | 0,886527564 | -0,023096415 | 0,013 | 0,01  | 1         | 0,984118251   | 1,016138049     | 1,3             |
| ILF3-DT                                                                                  | 0,107824067 | -0,023097985 | 0,2   | 0,1   | 1         | 0,98411718    | 1,016139155     | 2               |
| PCSK5                                                                                    | 0,046946859 | -0,0231004   | 0,125 | 0,04  | 1         | 0,984115533   | 1,016140856     | 3,125           |

Supplementary Table 4

| Differentially expressed genes_keloid-CCD_ comparing SC-Keloid vs. (SC-Myel, SC-Nonmyel) |             |              |       |       |           |               |                 |                 |
|------------------------------------------------------------------------------------------|-------------|--------------|-------|-------|-----------|---------------|-----------------|-----------------|
| gene                                                                                     | p_val       | avg_log2FC   | pct.1 | pct.2 | p_val_adj | Foldchange_UP | Foldchange_DOWN | Ratio_pct1_pct2 |
| ZNF568                                                                                   | 0,055768288 | -0,023102743 | 0,138 | 0,05  | 1         | 0,984113935   | 1,016142506     | 2,76            |
| UBP1                                                                                     | 0,006130779 | -0,023126508 | 0,25  | 0,08  | 1         | 0,984097724   | 1,016159245     | 3,125           |
| ZHX3                                                                                     | 0,354747305 | -0,023153517 | 0,088 | 0,05  | 1         | 0,9840793     | 1,016178269     | 1,76            |
| TIGD4                                                                                    | 0,84359211  | -0,023236734 | 0,025 | 0,02  | 1         | 0,984022539   | 1,016236885     | 1,25            |
| CACNB3                                                                                   | 0,157415062 | -0,02324641  | 0,062 | 0,02  | 1         | 0,984015939   | 1,016243701     | 3,1             |
| ZSCAN21                                                                                  | 0,023885059 | -0,02325484  | 0,1   | 0,02  | 1         | 0,984010189   | 1,016249639     | 5               |
| ANAPC7                                                                                   | 0,009648959 | -0,023363779 | 0,2   | 0,06  | 1         | 0,983935889   | 1,01632638      | 3,333333333     |
| ADAM33                                                                                   | 0,692138165 | -0,023369032 | 0,013 | 0,02  | 1         | 0,983932306   | 1,01633008      | 0,65            |
| OAZ3                                                                                     | 0,701739822 | -0,023376248 | 0,013 | 0,02  | 1         | 0,983927385   | 1,016335164     | 0,65            |
| KLHL17                                                                                   | 0,223365318 | -0,023395253 | 0,038 | 0,01  | 1         | 0,983914424   | 1,016348552     | 3,8             |
| NSUN3                                                                                    | 0,11061781  | -0,023396176 | 0,088 | 0,03  | 1         | 0,983913794   | 1,016349203     | 2,933333333     |
| RHOT2                                                                                    | 0,014087523 | -0,02340335  | 0,438 | 0,2   | 1         | 0,983908902   | 1,016354256     | 2,19            |
| RAP1GAP                                                                                  | 0,692138165 | -0,023427361 | 0,013 | 0,02  | 1         | 0,983892526   | 1,016371172     | 0,65            |
| CARMIL3                                                                                  | 0,886527564 | -0,023473174 | 0,013 | 0,01  | 1         | 0,983861283   | 1,016403447     | 1,3             |
| ENG                                                                                      | 0,001932147 | -0,02349416  | 0,45  | 0,17  | 1         | 0,983846972   | 1,016418232     | 2,647058824     |
| TTC17                                                                                    | 0,076882284 | -0,023574161 | 0,325 | 0,17  | 1         | 0,983792416   | 1,016474597     | 1,911764706     |
| SGIP1                                                                                    | 0,802630013 | -0,023598124 | 0,038 | 0,03  | 1         | 0,983776075   | 1,016491481     | 1,266666667     |
| VDAC3                                                                                    | 0,021443614 | -0,02362964  | 0,625 | 0,31  | 1         | 0,983754585   | 1,016513686     | 2,016129032     |
| C19orf54                                                                                 | 0,799526327 | -0,023743821 | 0,05  | 0,04  | 1         | 0,98367673    | 1,016594141     | 1,25            |
| SCGB1B2P                                                                                 | 0,501283468 | -0,02375571  | 0,038 | 0,02  | 1         | 0,983668624   | 1,016602518     | 1,9             |
| ZNF471                                                                                   | 0,692138165 | -0,023771287 | 0,013 | 0,02  | 1         | 0,983658003   | 1,016613495     | 0,65            |
| LASP1                                                                                    | 0,013125445 | -0,023809574 | 0,462 | 0,21  | 1         | 0,983631898   | 1,016640475     | 2,2             |
| CSGALNACT1                                                                               | 0,84359211  | -0,023842149 | 0,025 | 0,02  | 1         | 0,983609689   | 1,01666343      | 1,25            |
| TRIM35                                                                                   | 0,055334082 | -0,023900206 | 0,062 | 0,01  | 1         | 0,983570107   | 1,016704344     | 6,2             |
| RHOA                                                                                     | 0,84359211  | -0,023958881 | 0,025 | 0,02  | 1         | 0,983530106   | 1,016745694     | 1,25            |
| ZNF525                                                                                   | 0,701739822 | -0,023969905 | 0,013 | 0,02  | 1         | 0,98352259    | 1,016753463     | 0,65            |
| SLC22A15                                                                                 | 0,377102913 | -0,023977534 | 0     | 0,01  | 1         | 0,983517389   | 1,01675884      | 0               |
| BRCC3                                                                                    | 0,026867238 | -0,024001118 | 0,175 | 0,06  | 1         | 0,983501312   | 1,016775461     | 2,916666667     |
| TIAM1                                                                                    | 0,35516371  | -0,024002199 | 0,075 | 0,04  | 1         | 0,983500575   | 1,016776223     | 1,875           |
| CMTM7                                                                                    | 0,157415062 | -0,024030718 | 0,062 | 0,02  | 1         | 0,983481133   | 1,016796323     | 3,1             |

Supplementary Table 4

| Differentially expressed genes_keloid-CCD_ comparing SC-Keloid vs. (SC-Myel, SC-Nonmyel) |             |              |       |       |           |               |                 |                 |
|------------------------------------------------------------------------------------------|-------------|--------------|-------|-------|-----------|---------------|-----------------|-----------------|
| gene                                                                                     | p_val       | avg_log2FC   | pct.1 | pct.2 | p_val_adj | Foldchange_UP | Foldchange_DOWN | Ratio_pct1_pct2 |
| SERHL2                                                                                   | 0,501283468 | -0,024090582 | 0,038 | 0,02  | 1         | 0,983440325   | 1,016838515     | 1,9             |
| MUTYH                                                                                    | 0,325316267 | -0,02409114  | 0,062 | 0,03  | 1         | 0,983439945   | 1,016838908     | 2,066666667     |
| KCNAB3                                                                                   | 0,447580525 | -0,024103616 | 0,025 | 0,01  | 1         | 0,98343144    | 1,016847702     | 2,5             |
| SNX1                                                                                     | 0,038275302 | -0,024129579 | 0,3   | 0,14  | 1         | 0,983413743   | 1,016866001     | 2,142857143     |
| ZNF276                                                                                   | 0,100465202 | -0,024142202 | 0,138 | 0,06  | 1         | 0,983405138   | 1,016874898     | 2,3             |
| KAT6B                                                                                    | 0,006452998 | -0,024151902 | 0,412 | 0,17  | 1         | 0,983398526   | 1,016881735     | 2,423529412     |
| ZNF597                                                                                   | 0,886527564 | -0,024161678 | 0,013 | 0,01  | 1         | 0,983391862   | 1,016888626     | 1,3             |
| GPR153                                                                                   | 0,072740841 | -0,024172893 | 0,15  | 0,06  | 1         | 0,983384218   | 1,016896531     | 2,5             |
| GSK3B                                                                                    | 0,004504435 | -0,024194199 | 0,412 | 0,16  | 1         | 0,983369695   | 1,016911549     | 2,575           |
| B3GNT4                                                                                   | 0,447580525 | -0,024206762 | 0,025 | 0,01  | 1         | 0,983361132   | 1,016920404     | 2,5             |
| IPP                                                                                      | 0,001530226 | -0,024212794 | 0,175 | 0,03  | 1         | 0,983357021   | 1,016924656     | 5,833333333     |
| PDE1A                                                                                    | 0,886527564 | -0,024232864 | 0,013 | 0,01  | 1         | 0,983343341   | 1,016938803     | 1,3             |
| CHEK2                                                                                    | 0,501283468 | -0,024264903 | 0,038 | 0,02  | 1         | 0,983321503   | 1,016961387     | 1,9             |
| ZNF432                                                                                   | 0,84359211  | -0,024320405 | 0,025 | 0,02  | 1         | 0,983283674   | 1,017000512     | 1,25            |
| GSR                                                                                      | 0,150386432 | -0,024342694 | 0,112 | 0,05  | 1         | 0,983268483   | 1,017016224     | 2,24            |
| WDR25                                                                                    | 0,047638359 | -0,024353298 | 0,125 | 0,04  | 1         | 0,983261256   | 1,017023699     | 3,125           |
| CCDC159                                                                                  | 0,053119313 | -0,024357094 | 0,175 | 0,07  | 1         | 0,983258669   | 1,017026375     | 2,5             |
| SWT1                                                                                     | 0,325316267 | -0,024357397 | 0,062 | 0,03  | 1         | 0,983258463   | 1,017026588     | 2,066666667     |
| H2BC12                                                                                   | 0,284975754 | -0,024395414 | 0,05  | 0,02  | 1         | 0,983232553   | 1,017053389     | 2,5             |
| FBXO10                                                                                   | 0,692138165 | -0,024433161 | 0,013 | 0,02  | 1         | 0,983206828   | 1,01708         | 0,65            |
| CRISPLD1                                                                                 | 0,321366333 | -0,024443183 | 0,062 | 0,03  | 1         | 0,983199997   | 1,017087066     | 2,066666667     |
| OMD                                                                                      | 0,886527564 | -0,024447256 | 0,013 | 0,01  | 1         | 0,983197221   | 1,017089937     | 1,3             |
| MAP3K12                                                                                  | 0,389844265 | -0,024461217 | 0,125 | 0,08  | 1         | 0,983187708   | 1,017099779     | 1,5625          |
| LINC00630                                                                                | 0,886527564 | -0,024550309 | 0,013 | 0,01  | 1         | 0,983126994   | 1,017162591     | 1,3             |
| ZNF440                                                                                   | 0,527578779 | -0,024563444 | 0,05  | 0,03  | 1         | 0,983118043   | 1,017171852     | 1,666666667     |
| UNK                                                                                      | 0,0322029   | -0,024642105 | 0,325 | 0,15  | 1         | 0,983064441   | 1,017227313     | 2,166666667     |
| FBXL14                                                                                   | 0,377102913 | -0,024657839 | 0     | 0,01  | 1         | 0,98305372    | 1,017238407     | 0               |
| H3C10                                                                                    | 0,377102913 | -0,024657839 | 0     | 0,01  | 1         | 0,98305372    | 1,017238407     | 0               |
| LINC00937                                                                                | 0,377102913 | -0,024657839 | 0     | 0,01  | 1         | 0,98305372    | 1,017238407     | 0               |
| MYO7B                                                                                    | 0,377102913 | -0,024657839 | 0     | 0,01  | 1         | 0,98305372    | 1,017238407     | 0               |



Supplementary Table 4

| Differentially expressed genes_keloid-CCD_comparing SC-Keloid vs. (SC-Myel, SC-Nonmyel) |             |              |       |       |           |               |                 |                 |
|-----------------------------------------------------------------------------------------|-------------|--------------|-------|-------|-----------|---------------|-----------------|-----------------|
| gene                                                                                    | p_val       | avg_log2FC   | pct.1 | pct.2 | p_val_adj | Foldchange_UP | Foldchange_DOWN | Ratio_pct1_pct2 |
| NAV2-AS1                                                                                | 0,377102913 | -0,024657839 | 0     | 0,01  | 1         | 0,98305372    | 1,017238407     | 0               |
| SUN3                                                                                    | 0,377102913 | -0,024657839 | 0     | 0,01  | 1         | 0,98305372    | 1,017238407     | 0               |
| UGT2B7                                                                                  | 0,377102913 | -0,024657839 | 0     | 0,01  | 1         | 0,98305372    | 1,017238407     | 0               |
| RCAN2                                                                                   | 0,494869729 | -0,024680406 | 0,038 | 0,02  | 1         | 0,983038342   | 1,017254319     | 1,9             |
| ARFGEF1                                                                                 | 0,031382456 | -0,024686842 | 0,238 | 0,1   | 1         | 0,983033957   | 1,017258857     | 2,38            |
| UTP6                                                                                    | 0,008123601 | -0,024700834 | 0,35  | 0,14  | 1         | 0,983024424   | 1,017268723     | 2,5             |
| TAL1                                                                                    | 0,886527564 | -0,024712435 | 0,013 | 0,01  | 1         | 0,983016519   | 1,017276903     | 1,3             |
| CCDC106                                                                                 | 0,02922694  | -0,024725126 | 0,225 | 0,09  | 1         | 0,983007872   | 1,017285852     | 2,5             |
| GLYCTK                                                                                  | 0,223632981 | -0,024735302 | 0,088 | 0,04  | 1         | 0,983000938   | 1,017293028     | 2,2             |
| NKX3-1                                                                                  | 0,501283468 | -0,024777169 | 0,038 | 0,02  | 1         | 0,982972411   | 1,01732255      | 1,9             |
| DCUN1D2                                                                                 | 0,11122839  | -0,024864431 | 0,05  | 0,01  | 1         | 0,982912958   | 1,017384085     | 5               |
| PSMD10                                                                                  | 0,006746681 | -0,024864949 | 0,312 | 0,12  | 1         | 0,982912605   | 1,01738445      | 2,6             |
| ANXA2R                                                                                  | 0,105839829 | -0,024869674 | 0,088 | 0,03  | 1         | 0,982909386   | 1,017387782     | 2,933333333     |
| NOMO3                                                                                   | 0,447580525 | -0,024880704 | 0,025 | 0,01  | 1         | 0,982901871   | 1,01739556      | 2,5             |
| MIR210HG                                                                                | 0,223365318 | -0,02489622  | 0,038 | 0,01  | 1         | 0,9828913     | 1,017406503     | 3,8             |
| NUP85                                                                                   | 0,005575985 | -0,024925475 | 0,15  | 0,03  | 1         | 0,982871369   | 1,017427134     | 5               |
| ZNF552                                                                                  | 0,84359211  | -0,024974456 | 0,025 | 0,02  | 1         | 0,982838      | 1,017461677     | 1,25            |
| ANKRD16                                                                                 | 0,027302098 | -0,025020587 | 0,138 | 0,04  | 1         | 0,982806574   | 1,017494211     | 3,45            |
| PITPNM1                                                                                 | 0,034425078 | -0,025026467 | 0,188 | 0,07  | 1         | 0,982802568   | 1,017498358     | 2,685714286     |
| RABEP1                                                                                  | 0,002375537 | -0,025026571 | 0,5   | 0,2   | 1         | 0,982802498   | 1,017498432     | 2,5             |
| STRBP                                                                                   | 0,321366333 | -0,025040918 | 0,062 | 0,03  | 1         | 0,982792724   | 1,01750855      | 2,066666667     |
| ABL1                                                                                    | 0,062495522 | -0,025055664 | 0,238 | 0,11  | 1         | 0,982782679   | 1,01751895      | 2,163636364     |
| NDST1                                                                                   | 0,094462831 | -0,02510584  | 0,175 | 0,08  | 1         | 0,982748498   | 1,01755434      | 2,1875          |
| BAIAP2L1                                                                                | 0,886527564 | -0,025120889 | 0,013 | 0,01  | 1         | 0,982738248   | 1,017564954     | 1,3             |
| OSBP                                                                                    | 0,004428937 | -0,025155037 | 0,375 | 0,14  | 1         | 0,982714987   | 1,01758904      | 2,678571429     |
| PTP4A3                                                                                  | 0,447580525 | -0,025164909 | 0,025 | 0,01  | 1         | 0,982708263   | 1,017596003     | 2,5             |
| C7orf57                                                                                 | 0,447580525 | -0,025179513 | 0,025 | 0,01  | 1         | 0,982698315   | 1,017606304     | 2,5             |
| DEPDC1B                                                                                 | 0,055334082 | -0,025237403 | 0,062 | 0,01  | 1         | 0,982658883   | 1,017647138     | 6,2             |
| ACLY                                                                                    | 0,011849784 | -0,025277439 | 0,288 | 0,11  | 1         | 0,982631614   | 1,017675378     | 2,618181818     |
| PREPL                                                                                   | 0,064391675 | -0,025321654 | 0,238 | 0,11  | 1         | 0,9826015     | 1,017706568     | 2,163636364     |

Supplementary Table 4

| Differentially expressed genes_keloid-CCD_ comparing SC-Keloid vs. (SC-Myel, SC-Nonmyel) |             |              |       |       |           |               |                 |                 |
|------------------------------------------------------------------------------------------|-------------|--------------|-------|-------|-----------|---------------|-----------------|-----------------|
| gene                                                                                     | p_val       | avg_log2FC   | pct.1 | pct.2 | p_val_adj | Foldchange_UP | Foldchange_DOWN | Ratio_pct1_pct2 |
| HDHD3                                                                                    | 0,223365318 | -0,02532518  | 0,038 | 0,01  | 1         | 0,982599098   | 1,017709055     | 3,8             |
| BNIP1                                                                                    | 0,377102913 | -0,025333312 | 0     | 0,01  | 1         | 0,98259356    | 1,017714792     | 0               |
| CDKL4                                                                                    | 0,377102913 | -0,025333312 | 0     | 0,01  | 1         | 0,98259356    | 1,017714792     | 0               |
| OR7A5                                                                                    | 0,377102913 | -0,025333312 | 0     | 0,01  | 1         | 0,98259356    | 1,017714792     | 0               |
| SLC22A5                                                                                  | 0,377102913 | -0,025333312 | 0     | 0,01  | 1         | 0,98259356    | 1,017714792     | 0               |
| RIDA                                                                                     | 0,024271833 | -0,025338635 | 0,212 | 0,08  | 1         | 0,982589934   | 1,017718547     | 2,65            |
| RAB30                                                                                    | 0,041931842 | -0,025340797 | 0,212 | 0,09  | 1         | 0,982588462   | 1,017720072     | 2,355555556     |
| CMIP                                                                                     | 0,004293039 | -0,025365032 | 0,312 | 0,11  | 1         | 0,982571956   | 1,017737168     | 2,836363636     |
| LNPK                                                                                     | 0,00169461  | -0,025385763 | 0,338 | 0,11  | 1         | 0,982557837   | 1,017751793     | 3,072727273     |
| TMX3                                                                                     | 0,00087464  | -0,025395905 | 0,613 | 0,24  | 1         | 0,982550929   | 1,017758948     | 2,554166667     |
| ALDH1B1                                                                                  | 0,447580525 | -0,02539629  | 0,025 | 0,01  | 1         | 0,982550667   | 1,017759219     | 2,5             |
| C5orf63                                                                                  | 0,325316267 | -0,025417325 | 0,062 | 0,03  | 1         | 0,982536341   | 1,017774059     | 2,066666667     |
| TPH1                                                                                     | 0,692138165 | -0,025423023 | 0,013 | 0,02  | 1         | 0,982532461   | 1,017778079     | 0,65            |
| ZNF785                                                                                   | 0,317447852 | -0,025447666 | 0,062 | 0,03  | 1         | 0,982515678   | 1,017795464     | 2,066666667     |
| WDR11                                                                                    | 0,00310553  | -0,025550497 | 0,3   | 0,1   | 1         | 0,98244565    | 1,017868011     | 3               |
| CNTN4                                                                                    | 0,501283468 | -0,025594804 | 0,038 | 0,02  | 1         | 0,982415478   | 1,017899272     | 1,9             |
| ZNF235                                                                                   | 0,886527564 | -0,025619551 | 0,013 | 0,01  | 1         | 0,982398627   | 1,017916733     | 1,3             |
| LRRIQ3                                                                                   | 0,886527564 | -0,025730561 | 0,013 | 0,01  | 1         | 0,982323038   | 1,01799506      | 1,3             |
| RHOJ                                                                                     | 0,022235506 | -0,025798665 | 0,25  | 0,1   | 1         | 0,982276667   | 1,018043117     | 2,5             |
| TMEM273                                                                                  | 0,84359211  | -0,025810535 | 0,025 | 0,02  | 1         | 0,982268585   | 1,018051493     | 1,25            |
| PPP2R1B                                                                                  | 0,073271566 | -0,025879042 | 0,212 | 0,1   | 1         | 0,982221943   | 1,018099837     | 2,12            |
| MAN2A1                                                                                   | 0,001831985 | -0,025882299 | 0,438 | 0,16  | 1         | 0,982219725   | 1,018102136     | 2,7375          |
| ZNF526                                                                                   | 0,886527564 | -0,025903696 | 0,013 | 0,01  | 1         | 0,982205158   | 1,018117235     | 1,3             |
| FAM53B-AS1                                                                               | 0,377102913 | -0,025967134 | 0     | 0,01  | 1         | 0,982161969   | 1,018162005     | 0               |
| PON3                                                                                     | 0,377102913 | -0,025967134 | 0     | 0,01  | 1         | 0,982161969   | 1,018162005     | 0               |
| ZNF563                                                                                   | 0,886527564 | -0,025968901 | 0,013 | 0,01  | 1         | 0,982160767   | 1,018163251     | 1,3             |
| PTPRN2                                                                                   | 0,827884433 | -0,026011529 | 0,025 | 0,03  | 1         | 0,982131746   | 1,018193337     | 0,833333333     |
| PCDHB16                                                                                  | 0,886527564 | -0,026026608 | 0,013 | 0,01  | 1         | 0,982121481   | 1,018203979     | 1,3             |
| BTBD3                                                                                    | 0,001538322 | -0,026058474 | 0,338 | 0,11  | 1         | 0,982099789   | 1,018226469     | 3,072727273     |
| MAPK11                                                                                   | 0,284975754 | -0,026086538 | 0,05  | 0,02  | 1         | 0,982080684   | 1,018246276     | 2,5             |

Supplementary Table 4

| Differentially expressed genes_keloid-CCD_comparing SC-Keloid vs. (SC-Myel, SC-Nonmyel) |             |              |       |       |           |               |                 |                 |
|-----------------------------------------------------------------------------------------|-------------|--------------|-------|-------|-----------|---------------|-----------------|-----------------|
| gene                                                                                    | p_val       | avg_log2FC   | pct.1 | pct.2 | p_val_adj | Foldchange_UP | Foldchange_DOWN | Ratio_pct1_pct2 |
| F8A1                                                                                    | 0,057278664 | -0,026102171 | 0,138 | 0,05  | 1         | 0,982070043   | 1,018257309     | 2,76            |
| CFLAR-AS1                                                                               | 0,886527564 | -0,026107535 | 0,013 | 0,01  | 1         | 0,982066392   | 1,018261095     | 1,3             |
| ACAD11                                                                                  | 0,501283468 | -0,026154656 | 0,038 | 0,02  | 1         | 0,982034316   | 1,018294354     | 1,9             |
| MED27                                                                                   | 0,009231985 | -0,026189683 | 0,2   | 0,06  | 1         | 0,982010474   | 1,018319078     | 3,333333333     |
| TMEM120B                                                                                | 0,046946859 | -0,026192671 | 0,125 | 0,04  | 1         | 0,98200844    | 1,018321187     | 3,125           |
| LAD1                                                                                    | 0,886527564 | -0,026212567 | 0,013 | 0,01  | 1         | 0,981994897   | 1,01833523      | 1,3             |
| RUSC1                                                                                   | 0,044362225 | -0,026273902 | 0,212 | 0,09  | 1         | 0,98195315    | 1,018378525     | 2,355555556     |
| DDX1                                                                                    | 0,002338827 | -0,026386446 | 0,512 | 0,21  | 1         | 0,981876551   | 1,018457971     | 2,438095238     |
| TPRG1L                                                                                  | 0,155592577 | -0,026396093 | 0,125 | 0,06  | 1         | 0,981869985   | 1,018464782     | 2,083333333     |
| ZNF181                                                                                  | 0,284975754 | -0,026434142 | 0,05  | 0,02  | 1         | 0,98184409    | 1,018491642     | 2,5             |
| SETBP1                                                                                  | 0,692138165 | -0,026468078 | 0,013 | 0,02  | 1         | 0,981820995   | 1,0185156       | 0,65            |
| CXCL10                                                                                  | 0,377102913 | -0,026491656 | 0     | 0,01  | 1         | 0,981804949   | 1,018532246     | 0               |
| LRRC71                                                                                  | 0,377102913 | -0,026491656 | 0     | 0,01  | 1         | 0,981804949   | 1,018532246     | 0               |
| NAPSA                                                                                   | 0,377102913 | -0,026491656 | 0     | 0,01  | 1         | 0,981804949   | 1,018532246     | 0               |
| SRP14-DT                                                                                | 0,377102913 | -0,026491656 | 0     | 0,01  | 1         | 0,981804949   | 1,018532246     | 0               |
| ATXN7L3B                                                                                | 0,019626227 | -0,026495045 | 0,438 | 0,21  | 1         | 0,981802643   | 1,018534639     | 2,085714286     |
| ZFP69B                                                                                  | 0,447580525 | -0,02649669  | 0,025 | 0,01  | 1         | 0,981801523   | 1,0185358       | 2,5             |
| AL139099.1                                                                              | 0,377102913 | -0,026516002 | 0     | 0,01  | 1         | 0,981788381   | 1,018549434     | 0               |
| ISL2                                                                                    | 0,377102913 | -0,026516002 | 0     | 0,01  | 1         | 0,981788381   | 1,018549434     | 0               |
| TBC1D4                                                                                  | 0,900822541 | -0,02652351  | 0,038 | 0,04  | 1         | 0,981783272   | 1,018554735     | 0,95            |
| SAMD13                                                                                  | 0,886527564 | -0,026536078 | 0,013 | 0,01  | 1         | 0,981774719   | 1,018563608     | 1,3             |
| PGRMC2                                                                                  | 0,017468958 | -0,026538172 | 0,662 | 0,32  | 1         | 0,981773294   | 1,018565086     | 2,06875         |
| LRP11                                                                                   | 0,809797238 | -0,026555288 | 0,038 | 0,03  | 1         | 0,981761646   | 1,018577171     | 1,266666667     |
| LRRC3                                                                                   | 0,377102913 | -0,026579511 | 0     | 0,01  | 1         | 0,981745162   | 1,018594273     | 0               |
| CCDC88C                                                                                 | 0,207484841 | -0,026601379 | 0     | 0,02  | 1         | 0,981730281   | 1,018609713     | 0               |
| MYO5C                                                                                   | 0,207484841 | -0,026601379 | 0     | 0,02  | 1         | 0,981730281   | 1,018609713     | 0               |
| DNAJC27-AS1                                                                             | 0,701739822 | -0,026623928 | 0,013 | 0,02  | 1         | 0,981714937   | 1,018625633     | 0,65            |
| FBXL19                                                                                  | 0,35516371  | -0,026638769 | 0,075 | 0,04  | 1         | 0,981704838   | 1,018636112     | 1,875           |
| FGF13                                                                                   | 0,886527564 | -0,026712287 | 0,013 | 0,01  | 1         | 0,981654814   | 1,018688022     | 1,3             |
| ECHDC1                                                                                  | 0,00111263  | -0,026734628 | 0,625 | 0,26  | 1         | 0,981639612   | 1,018703797     | 2,403846154     |

Supplementary Table 4

| Differentially expressed genes_keloid-CCD_ comparing SC-Keloid vs. (SC-Myel, SC-Nonmyel) |             |              |       |       |           |               |                 |                 |
|------------------------------------------------------------------------------------------|-------------|--------------|-------|-------|-----------|---------------|-----------------|-----------------|
| gene                                                                                     | p_val       | avg_log2FC   | pct.1 | pct.2 | p_val_adj | Foldchange_UP | Foldchange_DOWN | Ratio_pct1_pct2 |
| ZNF888                                                                                   | 0,886527564 | -0,02675164  | 0,013 | 0,01  | 1         | 0,981628036   | 1,01871581      | 1,3             |
| CCAR2                                                                                    | 0,098000042 | -0,026805611 | 0,125 | 0,05  | 1         | 0,981591315   | 1,01875392      | 2,5             |
| CDH23                                                                                    | 0,447580525 | -0,026819834 | 0,025 | 0,01  | 1         | 0,981581638   | 1,018763964     | 2,5             |
| KCNAB1                                                                                   | 0,886527564 | -0,026843329 | 0,013 | 0,01  | 1         | 0,981565652   | 1,018780555     | 1,3             |
| CD1D                                                                                     | 0,886527564 | -0,026858373 | 0,013 | 0,01  | 1         | 0,981555417   | 1,018791179     | 1,3             |
| EMD                                                                                      | 0,001078023 | -0,0268882   | 0,525 | 0,2   | 1         | 0,981535124   | 1,018812242     | 2,625           |
| XRN1                                                                                     | 0,004803603 | -0,026914324 | 0,35  | 0,13  | 1         | 0,981517351   | 1,01883069      | 2,692307692     |
| FAM162B                                                                                  | 0,84359211  | -0,02693923  | 0,025 | 0,02  | 1         | 0,981500407   | 1,018848279     | 1,25            |
| CDON                                                                                     | 0,447580525 | -0,026958556 | 0,025 | 0,01  | 1         | 0,981487259   | 1,018861927     | 2,5             |
| SLC44A4                                                                                  | 0,886527564 | -0,026986314 | 0,013 | 0,01  | 1         | 0,981468375   | 1,018881531     | 1,3             |
| AC139887.4                                                                               | 0,377102913 | -0,027012492 | 0     | 0,01  | 1         | 0,981450566   | 1,018900019     | 0               |
| TAS2R30                                                                                  | 0,377102913 | -0,027012492 | 0     | 0,01  | 1         | 0,981450566   | 1,018900019     | 0               |
| C15orf39                                                                                 | 0,09439712  | -0,027025464 | 0,125 | 0,05  | 1         | 0,981441741   | 1,01890918      | 2,5             |
| TPCN1                                                                                    | 0,023885059 | -0,027056649 | 0,1   | 0,02  | 1         | 0,981420526   | 1,018931206     | 5               |
| AC132192.1                                                                               | 0,886527564 | -0,027071826 | 0,013 | 0,01  | 1         | 0,981410202   | 1,018941924     | 1,3             |
| ARHGAP4                                                                                  | 0,843678119 | -0,027089376 | 0,025 | 0,03  | 1         | 0,981398264   | 1,01895432      | 0,833333333     |
| DBT                                                                                      | 0,529436792 | -0,02710564  | 0,062 | 0,04  | 1         | 0,9813872     | 1,018965806     | 1,55            |
| KIAA0825                                                                                 | 0,501283468 | -0,027145628 | 0,038 | 0,02  | 1         | 0,981359999   | 1,01899405      | 1,9             |
| LTB4R                                                                                    | 0,886527564 | -0,027147569 | 0,013 | 0,01  | 1         | 0,981358679   | 1,018995421     | 1,3             |
| SYTL4                                                                                    | 0,063616753 | -0,027184132 | 0,1   | 0,03  | 1         | 0,981333808   | 1,019021247     | 3,333333333     |
| PSAT1                                                                                    | 0,018035013 | -0,027205051 | 0,2   | 0,07  | 1         | 0,981319578   | 1,019036023     | 2,857142857     |
| HYAL3                                                                                    | 0,886527564 | -0,027219357 | 0,013 | 0,01  | 1         | 0,981309847   | 1,019046128     | 1,3             |
| NSDHL                                                                                    | 0,35516371  | -0,027225424 | 0,075 | 0,04  | 1         | 0,981305721   | 1,019050413     | 1,875           |
| MFSD4A                                                                                   | 0,886527564 | -0,027238397 | 0,013 | 0,01  | 1         | 0,981296897   | 1,019059576     | 1,3             |
| TEX9                                                                                     | 0,447580525 | -0,0272406   | 0,025 | 0,01  | 1         | 0,981295399   | 1,019061132     | 2,5             |
| LTO1                                                                                     | 0,027302098 | -0,027351064 | 0,138 | 0,04  | 1         | 0,981220265   | 1,019139163     | 3,45            |
| NBPF3                                                                                    | 0,157415062 | -0,02736093  | 0,062 | 0,02  | 1         | 0,981213555   | 1,019146132     | 3,1             |
| CSNK1E                                                                                   | 0,005803981 | -0,027393868 | 0,725 | 0,33  | 1         | 0,981191154   | 1,0191694       | 2,196969697     |
| PAPLN                                                                                    | 0,501283468 | -0,027403476 | 0,038 | 0,02  | 1         | 0,981184619   | 1,019176188     | 1,9             |
| PCK1                                                                                     | 0,886527564 | -0,027432647 | 0,013 | 0,01  | 1         | 0,98116478    | 1,019196796     | 1,3             |

Supplementary Table 4

| Differentially expressed genes_keloid-CCD_ comparing SC-Keloid vs. (SC-Myel, SC-Nonmyel) |             |              |       |       |           |               |                 |                 |
|------------------------------------------------------------------------------------------|-------------|--------------|-------|-------|-----------|---------------|-----------------|-----------------|
| gene                                                                                     | p_val       | avg_log2FC   | pct.1 | pct.2 | p_val_adj | Foldchange_UP | Foldchange_DOWN | Ratio_pct1_pct2 |
| GAK                                                                                      | 0,000314515 | -0,027437194 | 0,25  | 0,05  | 1         | 0,981161688   | 1,019200008     | 5               |
| SLC4A5                                                                                   | 0,886527564 | -0,027463035 | 0,013 | 0,01  | 1         | 0,981144114   | 1,019218264     | 1,3             |
| IPO11                                                                                    | 0,284975754 | -0,027481751 | 0,05  | 0,02  | 1         | 0,981131385   | 1,019231486     | 2,5             |
| ANO5                                                                                     | 0,377102913 | -0,02749121  | 0     | 0,01  | 1         | 0,981124953   | 1,019238169     | 0               |
| CCDC13                                                                                   | 0,377102913 | -0,02749121  | 0     | 0,01  | 1         | 0,981124953   | 1,019238169     | 0               |
| SLC3A1                                                                                   | 0,377102913 | -0,02749121  | 0     | 0,01  | 1         | 0,981124953   | 1,019238169     | 0               |
| TC2N                                                                                     | 0,886527564 | -0,027496119 | 0,013 | 0,01  | 1         | 0,981121615   | 1,019241636     | 1,3             |
| PTDSS2                                                                                   | 0,001917005 | -0,027509174 | 0,338 | 0,11  | 1         | 0,981112736   | 1,01925086      | 3,072727273     |
| MTARC2                                                                                   | 0,787095147 | -0,027513426 | 0,05  | 0,04  | 1         | 0,981109844   | 1,019253864     | 1,25            |
| CAMKMT                                                                                   | 0,35516371  | -0,027550626 | 0,075 | 0,04  | 1         | 0,981084547   | 1,019280146     | 1,875           |
| BCL2L13                                                                                  | 0,028227555 | -0,027558646 | 0,275 | 0,12  | 1         | 0,981079093   | 1,019285812     | 2,291666667     |
| ZNF582-DT                                                                                | 0,886527564 | -0,027565218 | 0,013 | 0,01  | 1         | 0,981074624   | 1,019290455     | 1,3             |
| ZMYM3                                                                                    | 0,035392992 | -0,027577437 | 0,112 | 0,03  | 1         | 0,981066315   | 1,019299088     | 3,733333333     |
| FEN1                                                                                     | 0,009017324 | -0,027644657 | 0,238 | 0,08  | 1         | 0,981020605   | 1,019346582     | 2,975           |
| ZSCAN16                                                                                  | 0,447580525 | -0,027645081 | 0,025 | 0,01  | 1         | 0,981020316   | 1,019346881     | 2,5             |
| HAUS2                                                                                    | 0,274731417 | -0,027681691 | 0,125 | 0,07  | 1         | 0,980995422   | 1,019372749     | 1,785714286     |
| HAUS6                                                                                    | 0,046910421 | -0,027824705 | 0,212 | 0,09  | 1         | 0,980898181   | 1,019473804     | 2,355555556     |
| RAD52                                                                                    | 0,692138165 | -0,027857793 | 0,013 | 0,02  | 1         | 0,980875685   | 1,019497186     | 0,65            |
| SEC61A2                                                                                  | 0,055334082 | -0,027876026 | 0,062 | 0,01  | 1         | 0,980863288   | 1,019510071     | 6,2             |
| TINF2                                                                                    | 0,000192245 | -0,027899757 | 0,362 | 0,1   | 1         | 0,980847154   | 1,019526841     | 3,62            |
| H1-2                                                                                     | 0,025963694 | -0,027911661 | 0,225 | 0,09  | 1         | 0,98083906    | 1,019535253     | 2,5             |
| SUPV3L1                                                                                  | 0,032736765 | -0,027912695 | 0,188 | 0,07  | 1         | 0,980838358   | 1,019535983     | 2,685714286     |
| PTTG1                                                                                    | 0,631924746 | -0,027921605 | 0,5   | 0,38  | 1         | 0,9808323     | 1,01954228      | 1,315789474     |
| CHST10                                                                                   | 0,112247794 | -0,027930702 | 0,088 | 0,03  | 1         | 0,980826116   | 1,019548709     | 2,933333333     |
| MC1R                                                                                     | 0,023885059 | -0,02797475  | 0,1   | 0,02  | 1         | 0,98079617    | 1,019579838     | 5               |
| STXBP6                                                                                   | 0,037726642 | -0,027997647 | 0,362 | 0,18  | 1         | 0,980780604   | 1,01959602      | 2,011111111     |
| POLG2                                                                                    | 0,018980462 | -0,028020181 | 0,238 | 0,09  | 1         | 0,980765285   | 1,019611945     | 2,644444444     |
| TMEM135                                                                                  | 0,921266572 | -0,028022146 | 0,038 | 0,04  | 1         | 0,980763949   | 1,019613334     | 0,95            |
| FOXC2                                                                                    | 0,84359211  | -0,028037485 | 0,025 | 0,02  | 1         | 0,980753521   | 1,019624175     | 1,25            |
| RPRD1A                                                                                   | 0,046391154 | -0,028087908 | 0,212 | 0,09  | 1         | 0,980719244   | 1,019659812     | 2,355555556     |

Supplementary Table 4

| Differentially expressed genes_keloid-CCD_ comparing SC-Keloid vs. (SC-Myel, SC-Nonmyel) |             |              |       |       |           |               |                 |                 |
|------------------------------------------------------------------------------------------|-------------|--------------|-------|-------|-----------|---------------|-----------------|-----------------|
| gene                                                                                     | p_val       | avg_log2FC   | pct.1 | pct.2 | p_val_adj | Foldchange_UP | Foldchange_DOWN | Ratio_pct1_pct2 |
| CD300LG                                                                                  | 0,377102913 | -0,028107163 | 0     | 0,01  | 1         | 0,980706155   | 1,019673421     | 0               |
| MYLPF                                                                                    | 0,377102913 | -0,028107163 | 0     | 0,01  | 1         | 0,980706155   | 1,019673421     | 0               |
| RGR                                                                                      | 0,377102913 | -0,028107163 | 0     | 0,01  | 1         | 0,980706155   | 1,019673421     | 0               |
| TMEFF1                                                                                   | 0,377102913 | -0,028107163 | 0     | 0,01  | 1         | 0,980706155   | 1,019673421     | 0               |
| WDR27                                                                                    | 0,527578779 | -0,028130415 | 0,05  | 0,03  | 1         | 0,980690349   | 1,019689856     | 1,666666667     |
| NAP1L5                                                                                   | 0,252571592 | -0,028130956 | 0,112 | 0,06  | 1         | 0,980689981   | 1,019690238     | 1,866666667     |
| RPS13                                                                                    | 0,761348993 | -0,02813758  | 1     | 1     | 1         | 0,980685478   | 1,01969492      | 1               |
| CCL27                                                                                    | 0,886527564 | -0,028161386 | 0,013 | 0,01  | 1         | 0,980669296   | 1,019711746     | 1,3             |
| GNG12-AS1                                                                                | 0,84359211  | -0,028170645 | 0,025 | 0,02  | 1         | 0,980663002   | 1,01971829      | 1,25            |
| AP4S1                                                                                    | 0,061661173 | -0,028171668 | 0,1   | 0,03  | 1         | 0,980662307   | 1,019719014     | 3,333333333     |
| PNPLA6                                                                                   | 0,021112347 | -0,028174062 | 0,162 | 0,05  | 1         | 0,98066068    | 1,019720705     | 3,24            |
| HSDL2-AS1                                                                                | 0,377102913 | -0,028228156 | 0     | 0,01  | 1         | 0,98062391    | 1,019758941     | 0               |
| LRRC10B                                                                                  | 0,377102913 | -0,028228156 | 0     | 0,01  | 1         | 0,98062391    | 1,019758941     | 0               |
| TDO2                                                                                     | 0,377102913 | -0,028228156 | 0     | 0,01  | 1         | 0,98062391    | 1,019758941     | 0               |
| RBBP7                                                                                    | 0,016323106 | -0,028242584 | 0,713 | 0,35  | 1         | 0,980614103   | 1,019769139     | 2,037142857     |
| MTFR2                                                                                    | 0,063616753 | -0,028252412 | 0,1   | 0,03  | 1         | 0,980607423   | 1,019776086     | 3,333333333     |
| COG5                                                                                     | 0,016646758 | -0,028256101 | 0,225 | 0,08  | 1         | 0,980604916   | 1,019778693     | 2,8125          |
| EGLN3                                                                                    | 0,309705255 | -0,028264561 | 0,062 | 0,03  | 1         | 0,980599165   | 1,019784674     | 2,066666667     |
| EML3                                                                                     | 0,153934784 | -0,028291123 | 0,112 | 0,05  | 1         | 0,980581112   | 1,019803449     | 2,24            |
| ZNF697                                                                                   | 0,365228501 | -0,028315528 | 0,088 | 0,05  | 1         | 0,980564524   | 1,019820701     | 1,76            |
| DLX6                                                                                     | 0,886527564 | -0,028358506 | 0,013 | 0,01  | 1         | 0,980535313   | 1,019851082     | 1,3             |
| CACFD1                                                                                   | 0,521976935 | -0,028373822 | 0,05  | 0,03  | 1         | 0,980524904   | 1,019861909     | 1,666666667     |
| HDHD2                                                                                    | 0,050022665 | -0,028423971 | 0,175 | 0,07  | 1         | 0,98049082    | 1,019897361     | 2,5             |
| DDAH1                                                                                    | 0,058822906 | -0,028431548 | 0,138 | 0,05  | 1         | 0,980485671   | 1,019902717     | 2,76            |
| QDPR                                                                                     | 0,011810261 | -0,028433044 | 0,488 | 0,22  | 1         | 0,980484654   | 1,019903775     | 2,218181818     |
| LIMS1                                                                                    | 0,178328629 | -0,028488996 | 0,925 | 0,69  | 1         | 0,980446629   | 1,01994333      | 1,34057971      |
| EIF2S3                                                                                   | 0,024518831 | -0,028548945 | 0,537 | 0,26  | 1         | 0,980405889   | 1,019985713     | 2,065384615     |
| STK35                                                                                    | 0,046263823 | -0,02862922  | 0,125 | 0,04  | 1         | 0,980351338   | 1,020042469     | 3,125           |
| GAB2                                                                                     | 0,521976935 | -0,028789492 | 0,05  | 0,03  | 1         | 0,980242435   | 1,020155795     | 1,666666667     |
| SEMA6C                                                                                   | 0,447580525 | -0,028940634 | 0,025 | 0,01  | 1         | 0,980139747   | 1,020262675     | 2,5             |

Supplementary Table 4

| Differentially expressed genes_keloid-CCD_ comparing SC-Keloid vs. (SC-Myel, SC-Nonmyel) |             |              |       |       |           |               |                 |                 |
|------------------------------------------------------------------------------------------|-------------|--------------|-------|-------|-----------|---------------|-----------------|-----------------|
| gene                                                                                     | p_val       | avg_log2FC   | pct.1 | pct.2 | p_val_adj | Foldchange_UP | Foldchange_DOWN | Ratio_pct1_pct2 |
| APC2                                                                                     | 0,447580525 | -0,028941087 | 0,025 | 0,01  | 1         | 0,980139439   | 1,020262996     | 2,5             |
| ARHGAP45                                                                                 | 0,886527564 | -0,029000195 | 0,013 | 0,01  | 1         | 0,980099283   | 1,020304797     | 1,3             |
| DHX9                                                                                     | 0,000675349 | -0,029080403 | 0,65  | 0,25  | 1         | 0,980044795   | 1,020361524     | 2,6             |
| TNRC18                                                                                   | 0,086377611 | -0,029127841 | 0,162 | 0,07  | 1         | 0,98001257    | 1,020395075     | 2,314285714     |
| RGL2                                                                                     | 0,001782497 | -0,029148195 | 0,375 | 0,13  | 1         | 0,979998744   | 1,020409471     | 2,884615385     |
| TMEM44-AS1                                                                               | 0,886527564 | -0,029215818 | 0,013 | 0,01  | 1         | 0,97995281    | 1,020457302     | 1,3             |
| IRF8                                                                                     | 0,377102913 | -0,02921718  | 0     | 0,01  | 1         | 0,979951885   | 1,020458265     | 0               |
| TATDN3                                                                                   | 0,223632981 | -0,029225581 | 0,088 | 0,04  | 1         | 0,979946178   | 1,020464208     | 2,2             |
| CCNA1                                                                                    | 0,447580525 | -0,029232957 | 0,025 | 0,01  | 1         | 0,979941168   | 1,020469424     | 2,5             |
| ZNF589                                                                                   | 0,84359211  | -0,029241546 | 0,025 | 0,02  | 1         | 0,979935334   | 1,0204755       | 1,25            |
| TRAF2                                                                                    | 0,030337439 | -0,029259771 | 0,188 | 0,07  | 1         | 0,979922955   | 1,020488391     | 2,685714286     |
| RPP14                                                                                    | 0,136751946 | -0,029292828 | 0,1   | 0,04  | 1         | 0,979900502   | 1,020511775     | 2,5             |
| PLEKHO1                                                                                  | 0,113666046 | -0,029342059 | 0,8   | 0,48  | 1         | 0,979867064   | 1,020546599     | 1,666666667     |
| GRHL1                                                                                    | 0,447580525 | -0,029349264 | 0,025 | 0,01  | 1         | 0,97986217    | 1,020551696     | 2,5             |
| ATAD2                                                                                    | 0,043788058 | -0,029356815 | 0,162 | 0,06  | 1         | 0,979857042   | 1,020557038     | 2,7             |
| LATS2-AS1                                                                                | 0,886527564 | -0,029368818 | 0,013 | 0,01  | 1         | 0,97984889    | 1,020565529     | 1,3             |
| PRKAG2-AS1                                                                               | 0,886527564 | -0,029368818 | 0,013 | 0,01  | 1         | 0,97984889    | 1,020565529     | 1,3             |
| FASTK                                                                                    | 0,002249843 | -0,029389464 | 0,462 | 0,18  | 1         | 0,979834867   | 1,020580134     | 2,566666667     |
| PIGZ                                                                                     | 0,521976935 | -0,029409294 | 0,05  | 0,03  | 1         | 0,979821399   | 1,020594162     | 1,666666667     |
| AF186192.1                                                                               | 0,377102913 | -0,02941976  | 0     | 0,01  | 1         | 0,979814291   | 1,020601566     | 0               |
| CNTFR                                                                                    | 0,377102913 | -0,02941976  | 0     | 0,01  | 1         | 0,979814291   | 1,020601566     | 0               |
| DIO2                                                                                     | 0,377102913 | -0,02941976  | 0     | 0,01  | 1         | 0,979814291   | 1,020601566     | 0               |
| LRRC4B                                                                                   | 0,377102913 | -0,02941976  | 0     | 0,01  | 1         | 0,979814291   | 1,020601566     | 0               |
| ZNF540                                                                                   | 0,377102913 | -0,02941976  | 0     | 0,01  | 1         | 0,979814291   | 1,020601566     | 0               |
| TMOD3                                                                                    | 0,010771516 | -0,029436143 | 0,438 | 0,19  | 1         | 0,979803165   | 1,020613156     | 2,305263158     |
| HSPA14                                                                                   | 0,058822906 | -0,029446565 | 0,138 | 0,05  | 1         | 0,979796087   | 1,020620528     | 2,76            |
| POLR2D                                                                                   | 0,005323811 | -0,029500191 | 0,212 | 0,06  | 1         | 0,979759668   | 1,020658467     | 3,533333333     |
| CCDC168                                                                                  | 0,84359211  | -0,029506252 | 0,025 | 0,02  | 1         | 0,979755552   | 1,020662754     | 1,25            |
| NT5DC3                                                                                   | 0,02343883  | -0,02959638  | 0,175 | 0,06  | 1         | 0,979694346   | 1,020726519     | 2,916666667     |
| MSR1                                                                                     | 0,377102913 | -0,029619087 | 0     | 0,01  | 1         | 0,979678927   | 1,020742585     | 0               |

Supplementary Table 4

| Differentially expressed genes_keloid-CCD_ comparing SC-Keloid vs. (SC-Myel, SC-Nonmyel) |             |              |       |       |           |               |                 |                 |
|------------------------------------------------------------------------------------------|-------------|--------------|-------|-------|-----------|---------------|-----------------|-----------------|
| gene                                                                                     | p_val       | avg_log2FC   | pct.1 | pct.2 | p_val_adj | Foldchange_UP | Foldchange_DOWN | Ratio_pct1_pct2 |
| TMEM240                                                                                  | 0,377102913 | -0,029619087 | 0     | 0,01  | 1         | 0,979678927   | 1,020742585     | 0               |
| MAPT                                                                                     | 0,886527564 | -0,029670376 | 0,013 | 0,01  | 1         | 0,979644099   | 1,020778874     | 1,3             |
| TMEM39A                                                                                  | 0,020420521 | -0,029719224 | 0,238 | 0,09  | 1         | 0,97961093    | 1,020813437     | 2,644444444     |
| HOOK2                                                                                    | 0,004260066 | -0,029719761 | 0,238 | 0,07  | 1         | 0,979610565   | 1,020813817     | 3,4             |
| HES5                                                                                     | 0,429993123 | -0,029734212 | 0,013 | 0,03  | 1         | 0,979600753   | 1,020824042     | 0,433333333     |
| TSGA10                                                                                   | 0,827884433 | -0,02976419  | 0,025 | 0,03  | 1         | 0,979580398   | 1,020845254     | 0,833333333     |
| SORD                                                                                     | 0,020805297 | -0,029771692 | 0,162 | 0,05  | 1         | 0,979575304   | 1,020850562     | 3,24            |
| SYPL2                                                                                    | 0,701739822 | -0,02979868  | 0,013 | 0,02  | 1         | 0,97955698    | 1,020869659     | 0,65            |
| KLHL13                                                                                   | 0,133275036 | -0,029817162 | 0,1   | 0,04  | 1         | 0,979544431   | 1,020882737     | 2,5             |
| RSPH3                                                                                    | 0,351402824 | -0,029883318 | 0,075 | 0,04  | 1         | 0,979499514   | 1,020929552     | 1,875           |
| PDK3                                                                                     | 0,21581748  | -0,029885288 | 0,088 | 0,04  | 1         | 0,979498177   | 1,020930946     | 2,2             |
| CEP85                                                                                    | 0,223365318 | -0,029896272 | 0,038 | 0,01  | 1         | 0,979490719   | 1,020938719     | 3,8             |
| ARHGEF5                                                                                  | 0,284975754 | -0,029912315 | 0,05  | 0,02  | 1         | 0,979479827   | 1,020950072     | 2,5             |
| PTGER1                                                                                   | 0,429993123 | -0,029931248 | 0,013 | 0,03  | 1         | 0,979466973   | 1,02096347      | 0,433333333     |
| LIN54                                                                                    | 0,060401558 | -0,0299389   | 0,138 | 0,05  | 1         | 0,979461778   | 1,020968885     | 2,76            |
| AP5B1                                                                                    | 0,501283468 | -0,029963607 | 0,038 | 0,02  | 1         | 0,979445005   | 1,02098637      | 1,9             |
| TCAF2                                                                                    | 0,886527564 | -0,029965572 | 0,013 | 0,01  | 1         | 0,97944367    | 1,020987761     | 1,3             |
| SLC2A1                                                                                   | 0,116684893 | -0,029993304 | 0,138 | 0,06  | 1         | 0,979424844   | 1,021007387     | 2,3             |
| ENY2                                                                                     | 0,121850339 | -0,030011118 | 0,912 | 0,54  | 1         | 0,979412749   | 1,021019994     | 1,688888889     |
| PKD2L2                                                                                   | 0,886527564 | -0,030023212 | 0,013 | 0,01  | 1         | 0,979404539   | 1,021028554     | 1,3             |
| LENG9                                                                                    | 0,521263547 | -0,030117818 | 0,075 | 0,05  | 1         | 0,979340316   | 1,02109551      | 1,5             |
| GLB1                                                                                     | 0,003536285 | -0,030138367 | 0,262 | 0,08  | 1         | 0,979326367   | 1,021110054     | 3,275           |
| EMCN                                                                                     | 0,802630013 | -0,030162728 | 0,038 | 0,03  | 1         | 0,979309831   | 1,021127297     | 1,266666667     |
| KLHDC3                                                                                   | 0,007060515 | -0,030177923 | 0,3   | 0,11  | 1         | 0,979299516   | 1,021138052     | 2,727272727     |
| COMTD1                                                                                   | 0,00058984  | -0,03024511  | 0,3   | 0,08  | 1         | 0,979253911   | 1,021185607     | 3,75            |
| BIRC7                                                                                    | 0,377102913 | -0,03025263  | 0     | 0,01  | 1         | 0,979248807   | 1,02119093      | 0               |
| MGAT4A                                                                                   | 0,377102913 | -0,03025263  | 0     | 0,01  | 1         | 0,979248807   | 1,02119093      | 0               |
| RASAL2-AS1                                                                               | 0,377102913 | -0,03025263  | 0     | 0,01  | 1         | 0,979248807   | 1,02119093      | 0               |
| SEMG2                                                                                    | 0,377102913 | -0,03025263  | 0     | 0,01  | 1         | 0,979248807   | 1,02119093      | 0               |
| SYCP3                                                                                    | 0,377102913 | -0,03025263  | 0     | 0,01  | 1         | 0,979248807   | 1,02119093      | 0               |



Supplementary Table 4

| Differentially expressed genes_keloid-CCD_ comparing SC-Keloid vs. (SC-Myel, SC-Nonmyel) |             |              |       |       |           |               |                 |                 |
|------------------------------------------------------------------------------------------|-------------|--------------|-------|-------|-----------|---------------|-----------------|-----------------|
| gene                                                                                     | p_val       | avg_log2FC   | pct.1 | pct.2 | p_val_adj | Foldchange_UP | Foldchange_DOWN | Ratio_pct1_pct2 |
| TFF3                                                                                     | 0,377102913 | -0,03025263  | 0     | 0,01  | 1         | 0,979248807   | 1,02119093      | 0               |
| TMEM225B                                                                                 | 0,377102913 | -0,03025263  | 0     | 0,01  | 1         | 0,979248807   | 1,02119093      | 0               |
| ZNF233                                                                                   | 0,377102913 | -0,03025263  | 0     | 0,01  | 1         | 0,979248807   | 1,02119093      | 0               |
| CSNK2A2                                                                                  | 0,003023724 | -0,030273635 | 0,488 | 0,2   | 1         | 0,979234549   | 1,021205799     | 2,44            |
| IGHMBP2                                                                                  | 0,135004841 | -0,030286946 | 0,1   | 0,04  | 1         | 0,979225515   | 1,021215221     | 2,5             |
| NUDT12                                                                                   | 0,244314206 | -0,030318609 | 0,1   | 0,05  | 1         | 0,979204023   | 1,021237634     | 2               |
| ADPRHL1                                                                                  | 0,377102913 | -0,030322576 | 0     | 0,01  | 1         | 0,979201331   | 1,021240442     | 0               |
| DNASE1L2                                                                                 | 0,377102913 | -0,030322576 | 0     | 0,01  | 1         | 0,979201331   | 1,021240442     | 0               |
| KIAA1522                                                                                 | 0,377102913 | -0,030322576 | 0     | 0,01  | 1         | 0,979201331   | 1,021240442     | 0               |
| KNDC1                                                                                    | 0,377102913 | -0,030322576 | 0     | 0,01  | 1         | 0,979201331   | 1,021240442     | 0               |
| VPREB3                                                                                   | 0,377102913 | -0,030322576 | 0     | 0,01  | 1         | 0,979201331   | 1,021240442     | 0               |
| CCR10                                                                                    | 0,284975754 | -0,03038071  | 0,05  | 0,02  | 1         | 0,979161874   | 1,021281594     | 2,5             |
| ZNF79                                                                                    | 0,447580525 | -0,030440187 | 0,025 | 0,01  | 1         | 0,979121508   | 1,021323699     | 2,5             |
| BCL7A                                                                                    | 0,11061781  | -0,030441898 | 0,088 | 0,03  | 1         | 0,979120347   | 1,02132491      | 2,933333333     |
| MAN1A1                                                                                   | 0,692138165 | -0,030442543 | 0,013 | 0,02  | 1         | 0,979119909   | 1,021325367     | 0,65            |
| LRRC37A3                                                                                 | 0,84359211  | -0,030444232 | 0,025 | 0,02  | 1         | 0,979118763   | 1,021326563     | 1,25            |
| CHUK                                                                                     | 0,153934784 | -0,030445279 | 0,112 | 0,05  | 1         | 0,979118052   | 1,021327303     | 2,24            |
| SYS1                                                                                     | 0,053817177 | -0,030462824 | 0,225 | 0,1   | 1         | 0,979106145   | 1,021339724     | 2,25            |
| NUDT19                                                                                   | 0,157415062 | -0,030476952 | 0,062 | 0,02  | 1         | 0,979096557   | 1,021349726     | 3,1             |
| WBP1                                                                                     | 0,447580525 | -0,030499016 | 0,025 | 0,01  | 1         | 0,979081583   | 1,021365347     | 2,5             |
| PDE7A                                                                                    | 0,155732654 | -0,030535672 | 0,112 | 0,05  | 1         | 0,979056707   | 1,021391297     | 2,24            |
| MYCL                                                                                     | 0,447580525 | -0,030595571 | 0,025 | 0,01  | 1         | 0,979016058   | 1,021433706     | 2,5             |
| USP30                                                                                    | 0,501283468 | -0,030609619 | 0,038 | 0,02  | 1         | 0,979006525   | 1,021443652     | 1,9             |
| SMPD4                                                                                    | 0,008775841 | -0,030627054 | 0,238 | 0,08  | 1         | 0,978994694   | 1,021455995     | 2,975           |
| POLR3C                                                                                   | 0,081579256 | -0,030705882 | 0,112 | 0,04  | 1         | 0,978941204   | 1,021511809     | 2,8             |
| PNMA8A                                                                                   | 0,886527564 | -0,030706153 | 0,013 | 0,01  | 1         | 0,97894102    | 1,021512001     | 1,3             |
| RGPD5                                                                                    | 0,23407396  | -0,030724491 | 0,1   | 0,05  | 1         | 0,978928577   | 1,021524986     | 2               |
| PIP4K2C                                                                                  | 0,539465965 | -0,030725019 | 0,062 | 0,04  | 1         | 0,978928219   | 1,021525359     | 1,55            |
| SLC35E3                                                                                  | 0,001334213 | -0,030728543 | 0,262 | 0,07  | 1         | 0,978925827   | 1,021527854     | 3,742857143     |
| CCDC150                                                                                  | 0,191117973 | -0,030804464 | 0,075 | 0,03  | 1         | 0,978874313   | 1,021581613     | 2,5             |

Supplementary Table 4

| Differentially expressed genes_keloid-CCD_ comparing SC-Keloid vs. (SC-Myel, SC-Nonmyel) |             |              |       |       |           |               |                 |                 |
|------------------------------------------------------------------------------------------|-------------|--------------|-------|-------|-----------|---------------|-----------------|-----------------|
| gene                                                                                     | p_val       | avg_log2FC   | pct.1 | pct.2 | p_val_adj | Foldchange_UP | Foldchange_DOWN | Ratio_pct1_pct2 |
| PTCH1                                                                                    | 0,501283468 | -0,030851834 | 0,038 | 0,02  | 1         | 0,978842173   | 1,021615156     | 1,9             |
| HOXC10                                                                                   | 0,284975754 | -0,030858914 | 0,05  | 0,02  | 1         | 0,978837369   | 1,02162017      | 2,5             |
| PRIM2                                                                                    | 0,008541848 | -0,030891802 | 0,162 | 0,04  | 1         | 0,978815056   | 1,021643459     | 4,05            |
| MINK1                                                                                    | 0,188542969 | -0,030914089 | 0,075 | 0,03  | 1         | 0,978799935   | 1,021659242     | 2,5             |
| ASIC3                                                                                    | 0,701739822 | -0,03095748  | 0,013 | 0,02  | 1         | 0,978770497   | 1,02168997      | 0,65            |
| RNF122                                                                                   | 0,701739822 | -0,030975659 | 0,013 | 0,02  | 1         | 0,978758164   | 1,021702845     | 0,65            |
| POLR3F                                                                                   | 0,284975754 | -0,031055748 | 0,05  | 0,02  | 1         | 0,978703831   | 1,021759564     | 2,5             |
| KHNYN                                                                                    | 0,152152734 | -0,031068795 | 0,112 | 0,05  | 1         | 0,97869498    | 1,021768805     | 2,24            |
| MAP2K6                                                                                   | 0,510865718 | -0,031074711 | 0,05  | 0,03  | 1         | 0,978690967   | 1,021772994     | 1,666666667     |
| SNRK                                                                                     | 0,015994304 | -0,03108709  | 0,188 | 0,06  | 1         | 0,978682569   | 1,021781762     | 3,133333333     |
| ASPN                                                                                     | 0,133275036 | -0,031100289 | 0,1   | 0,04  | 1         | 0,978673615   | 1,02179111      | 2,5             |
| MYT1                                                                                     | 0,447580525 | -0,031159481 | 0,025 | 0,01  | 1         | 0,978633462   | 1,021833034     | 2,5             |
| FNDC11                                                                                   | 0,886527564 | -0,031188092 | 0,013 | 0,01  | 1         | 0,978614055   | 1,021853299     | 1,3             |
| PAOX                                                                                     | 0,816980451 | -0,031233293 | 0,038 | 0,03  | 1         | 0,978583395   | 1,021885314     | 1,266666667     |
| PEX1                                                                                     | 0,021112347 | -0,031304428 | 0,162 | 0,05  | 1         | 0,978535145   | 1,021935702     | 3,24            |
| PDE7B                                                                                    | 0,886527564 | -0,031306058 | 0,013 | 0,01  | 1         | 0,978534039   | 1,021936856     | 1,3             |
| RASD2                                                                                    | 0,692138165 | -0,031311214 | 0,013 | 0,02  | 1         | 0,978530542   | 1,021940509     | 0,65            |
| GSE1                                                                                     | 0,001753902 | -0,031326583 | 0,238 | 0,06  | 1         | 0,978520117   | 1,021951396     | 3,966666667     |
| PODN                                                                                     | 0,447580525 | -0,03137898  | 0,025 | 0,01  | 1         | 0,97848458    | 1,021988513     | 2,5             |
| KANK3                                                                                    | 0,886527564 | -0,031392353 | 0,013 | 0,01  | 1         | 0,97847551    | 1,021997986     | 1,3             |
| NEO1                                                                                     | 0,325316267 | -0,031394801 | 0,062 | 0,03  | 1         | 0,978473849   | 1,02199972      | 2,066666667     |
| SURF6                                                                                    | 0,013750247 | -0,031398792 | 0,275 | 0,11  | 1         | 0,978471143   | 1,022002547     | 2,5             |
| ZDBF2                                                                                    | 0,157415062 | -0,031429906 | 0,062 | 0,02  | 1         | 0,97845004    | 1,022024589     | 3,1             |
| EXTL3-AS1                                                                                | 0,377102913 | -0,031439358 | 0     | 0,01  | 1         | 0,97844363    | 1,022031284     | 0               |
| F2RL2                                                                                    | 0,377102913 | -0,031439358 | 0     | 0,01  | 1         | 0,97844363    | 1,022031284     | 0               |
| MADCAM1                                                                                  | 0,377102913 | -0,031439358 | 0     | 0,01  | 1         | 0,97844363    | 1,022031284     | 0               |
| STAG3                                                                                    | 0,377102913 | -0,031439358 | 0     | 0,01  | 1         | 0,97844363    | 1,022031284     | 0               |
| LRP10                                                                                    | 0,019996792 | -0,031446018 | 0,588 | 0,3   | 1         | 0,978439113   | 1,022036003     | 1,96            |
| COQ8A                                                                                    | 0,325316267 | -0,031471593 | 0,062 | 0,03  | 1         | 0,978421768   | 1,022054121     | 2,066666667     |
| MTARC1                                                                                   | 0,692138165 | -0,0315131   | 0,013 | 0,02  | 1         | 0,978393619   | 1,022083526     | 0,65            |

Supplementary Table 4

| Differentially expressed genes_keloid-CCD_ comparing SC-Keloid vs. (SC-Myel, SC-Nonmyel) |             |              |       |       |           |               |                 |                 |
|------------------------------------------------------------------------------------------|-------------|--------------|-------|-------|-----------|---------------|-----------------|-----------------|
| gene                                                                                     | p_val       | avg_log2FC   | pct.1 | pct.2 | p_val_adj | Foldchange_UP | Foldchange_DOWN | Ratio_pct1_pct2 |
| PIWIL2                                                                                   | 0,377102913 | -0,031549367 | 0     | 0,01  | 1         | 0,978369024   | 1,02210922      | 0               |
| ZNF596                                                                                   | 0,377102913 | -0,031549367 | 0     | 0,01  | 1         | 0,978369024   | 1,02210922      | 0               |
| MED22                                                                                    | 0,157415062 | -0,031559656 | 0,062 | 0,02  | 1         | 0,978362047   | 1,022116509     | 3,1             |
| NFATC2IP                                                                                 | 0,016508297 | -0,031590502 | 0,4   | 0,18  | 1         | 0,978341129   | 1,022138363     | 2,222222222     |
| THBS4                                                                                    | 0,223365318 | -0,031599963 | 0,038 | 0,01  | 1         | 0,978334713   | 1,022145067     | 3,8             |
| CPXM2                                                                                    | 0,835772999 | -0,031609378 | 0,025 | 0,03  | 1         | 0,978328329   | 1,022151737     | 0,833333333     |
| C12orf42                                                                                 | 0,377102913 | -0,031639317 | 0     | 0,01  | 1         | 0,978308026   | 1,022172949     | 0               |
| CSTA                                                                                     | 0,377102913 | -0,031639317 | 0     | 0,01  | 1         | 0,978308026   | 1,022172949     | 0               |
| DIO3                                                                                     | 0,377102913 | -0,031639317 | 0     | 0,01  | 1         | 0,978308026   | 1,022172949     | 0               |
| TRIM17                                                                                   | 0,377102913 | -0,031639317 | 0     | 0,01  | 1         | 0,978308026   | 1,022172949     | 0               |
| TMOD4                                                                                    | 0,886527564 | -0,031661574 | 0,013 | 0,01  | 1         | 0,978292934   | 1,022188718     | 1,3             |
| USP2                                                                                     | 0,207484841 | -0,031686089 | 0     | 0,02  | 1         | 0,97827631    | 1,022206088     | 0               |
| GALNT16                                                                                  | 0,207484841 | -0,03171084  | 0     | 0,02  | 1         | 0,978259527   | 1,022223626     | 0               |
| ALDH9A1                                                                                  | 0,004013649 | -0,031745658 | 0,388 | 0,15  | 1         | 0,978235918   | 1,022248296     | 2,586666667     |
| PLXNA1                                                                                   | 0,111488744 | -0,031787593 | 0,138 | 0,06  | 1         | 0,978207484   | 1,02227801      | 2,3             |
| ZNF180                                                                                   | 0,692138165 | -0,031798825 | 0,013 | 0,02  | 1         | 0,978199868   | 1,022285969     | 0,65            |
| SCN2B                                                                                    | 0,886527564 | -0,031799659 | 0,013 | 0,01  | 1         | 0,978199303   | 1,02228656      | 1,3             |
| SLFN13                                                                                   | 0,84359211  | -0,031847514 | 0,025 | 0,02  | 1         | 0,978166855   | 1,022320471     | 1,25            |
| ACAT1                                                                                    | 0,000748718 | -0,03185401  | 0,275 | 0,07  | 1         | 0,978162451   | 1,022325074     | 3,928571429     |
| ERAP2                                                                                    | 0,321366333 | -0,031873143 | 0,062 | 0,03  | 1         | 0,978149479   | 1,022338632     | 2,066666667     |
| ALK                                                                                      | 0,377102913 | -0,031891109 | 0     | 0,01  | 1         | 0,978137298   | 1,022351363     | 0               |
| MUC1                                                                                     | 0,377102913 | -0,031891109 | 0     | 0,01  | 1         | 0,978137298   | 1,022351363     | 0               |
| PTGES3L                                                                                  | 0,207484841 | -0,031897245 | 0     | 0,02  | 1         | 0,978133138   | 1,022355712     | 0               |
| XPOT                                                                                     | 0,003098566 | -0,031928306 | 0,325 | 0,11  | 1         | 0,978112079   | 1,022377723     | 2,954545455     |
| CLCN4                                                                                    | 0,527578779 | -0,03193159  | 0,05  | 0,03  | 1         | 0,978109852   | 1,02238005      | 1,666666667     |
| AKAP11                                                                                   | 0,005890356 | -0,031952899 | 0,288 | 0,1   | 1         | 0,978095405   | 1,022395151     | 2,88            |
| ADAT3                                                                                    | 0,692138165 | -0,031987909 | 0,013 | 0,02  | 1         | 0,978071671   | 1,022419962     | 0,65            |
| C6orf163                                                                                 | 0,377102913 | -0,031990114 | 0     | 0,01  | 1         | 0,978070175   | 1,022421525     | 0               |
| GCM1                                                                                     | 0,377102913 | -0,031990114 | 0     | 0,01  | 1         | 0,978070175   | 1,022421525     | 0               |
| KIF4B                                                                                    | 0,377102913 | -0,031990114 | 0     | 0,01  | 1         | 0,978070175   | 1,022421525     | 0               |

Supplementary Table 4

| Differentially expressed genes_keloid-CCD_ comparing SC-Keloid vs. (SC-Myel, SC-Nonmyel) |             |              |       |       |           |               |                 |                 |
|------------------------------------------------------------------------------------------|-------------|--------------|-------|-------|-----------|---------------|-----------------|-----------------|
| gene                                                                                     | p_val       | avg_log2FC   | pct.1 | pct.2 | p_val_adj | Foldchange_UP | Foldchange_DOWN | Ratio_pct1_pct2 |
| LINC01068                                                                                | 0,377102913 | -0,031990114 | 0     | 0,01  | 1         | 0,978070175   | 1,022421525     | 0               |
| LXN                                                                                      | 0,377102913 | -0,031990114 | 0     | 0,01  | 1         | 0,978070175   | 1,022421525     | 0               |
| PCSK1                                                                                    | 0,377102913 | -0,031990114 | 0     | 0,01  | 1         | 0,978070175   | 1,022421525     | 0               |
| SPAG16                                                                                   | 0,024575502 | -0,032009132 | 0,212 | 0,08  | 1         | 0,978057282   | 1,022435003     | 2,65            |
| ARNT2                                                                                    | 0,034425078 | -0,03201547  | 0,188 | 0,07  | 1         | 0,978052986   | 1,022439494     | 2,685714286     |
| C16orf95                                                                                 | 0,692138165 | -0,032025355 | 0,013 | 0,02  | 1         | 0,978046284   | 1,0224465       | 0,65            |
| SSH3                                                                                     | 0,447580525 | -0,032050593 | 0,025 | 0,01  | 1         | 0,978029175   | 1,022464386     | 2,5             |
| BCAN                                                                                     | 0,377102913 | -0,032089736 | 0     | 0,01  | 1         | 0,97800264    | 1,022492128     | 0               |
| DCLK1                                                                                    | 0,377102913 | -0,032089736 | 0     | 0,01  | 1         | 0,97800264    | 1,022492128     | 0               |
| ENTHD1                                                                                   | 0,377102913 | -0,032089736 | 0     | 0,01  | 1         | 0,97800264    | 1,022492128     | 0               |
| HCN1                                                                                     | 0,377102913 | -0,032089736 | 0     | 0,01  | 1         | 0,97800264    | 1,022492128     | 0               |
| IL16                                                                                     | 0,377102913 | -0,032089736 | 0     | 0,01  | 1         | 0,97800264    | 1,022492128     | 0               |
| KIAA0408                                                                                 | 0,377102913 | -0,032089736 | 0     | 0,01  | 1         | 0,97800264    | 1,022492128     | 0               |
| PACRG                                                                                    | 0,377102913 | -0,032089736 | 0     | 0,01  | 1         | 0,97800264    | 1,022492128     | 0               |
| STXBP5-AS1                                                                               | 0,377102913 | -0,032089736 | 0     | 0,01  | 1         | 0,97800264    | 1,022492128     | 0               |
| SV2C                                                                                     | 0,377102913 | -0,032089736 | 0     | 0,01  | 1         | 0,97800264    | 1,022492128     | 0               |
| TMEM215                                                                                  | 0,377102913 | -0,032089736 | 0     | 0,01  | 1         | 0,97800264    | 1,022492128     | 0               |
| TTC9                                                                                     | 0,377102913 | -0,032089736 | 0     | 0,01  | 1         | 0,97800264    | 1,022492128     | 0               |
| WBP2NL                                                                                   | 0,377102913 | -0,032089736 | 0     | 0,01  | 1         | 0,97800264    | 1,022492128     | 0               |
| CLP1                                                                                     | 0,191117973 | -0,032107924 | 0,075 | 0,03  | 1         | 0,97799031    | 1,022505018     | 2,5             |
| CLN5                                                                                     | 0,010474996 | -0,032123113 | 0,45  | 0,2   | 1         | 0,977980014   | 1,022515783     | 2,25            |
| H4C8                                                                                     | 0,284975754 | -0,032134284 | 0,05  | 0,02  | 1         | 0,977972441   | 1,022523701     | 2,5             |
| USP24                                                                                    | 0,011159527 | -0,032145325 | 0,288 | 0,11  | 1         | 0,977964957   | 1,022531526     | 2,618181818     |
| MEIS3                                                                                    | 0,246922691 | -0,032171627 | 0,1   | 0,05  | 1         | 0,977947127   | 1,022550169     | 2               |
| ZC3H7B                                                                                   | 0,053757482 | -0,032209474 | 0,175 | 0,07  | 1         | 0,977921472   | 1,022576995     | 2,5             |
| ZNF329                                                                                   | 0,529436792 | -0,032225    | 0,062 | 0,04  | 1         | 0,977910949   | 1,022587999     | 1,55            |
| ITPKA                                                                                    | 0,284975754 | -0,032250184 | 0,05  | 0,02  | 1         | 0,977893878   | 1,022605849     | 2,5             |
| ALKBH4                                                                                   | 0,112247794 | -0,032280839 | 0,088 | 0,03  | 1         | 0,977873099   | 1,022627579     | 2,933333333     |
| C3orf18                                                                                  | 0,802630013 | -0,032284413 | 0,038 | 0,03  | 1         | 0,977870677   | 1,022630112     | 1,266666667     |
| MPP3                                                                                     | 0,447580525 | -0,032288983 | 0,025 | 0,01  | 1         | 0,977867579   | 1,022633352     | 2,5             |

Supplementary Table 4

| Differentially expressed genes_keloid-CCD_ comparing SC-Keloid vs. (SC-Myel, SC-Nonmyel) |             |              |       |       |           |               |                 |                 |
|------------------------------------------------------------------------------------------|-------------|--------------|-------|-------|-----------|---------------|-----------------|-----------------|
| gene                                                                                     | p_val       | avg_log2FC   | pct.1 | pct.2 | p_val_adj | Foldchange_UP | Foldchange_DOWN | Ratio_pct1_pct2 |
| AREG                                                                                     | 0,343957066 | -0,032301298 | 0,075 | 0,04  | 1         | 0,977859232   | 1,022642081     | 1,875           |
| GTF2H4                                                                                   | 0,84359211  | -0,032317555 | 0,025 | 0,02  | 1         | 0,977848213   | 1,022653604     | 1,25            |
| MROH8                                                                                    | 0,447580525 | -0,032400023 | 0,025 | 0,01  | 1         | 0,977792319   | 1,022712063     | 2,5             |
| MRGPRF                                                                                   | 0,83477988  | -0,032403487 | 0,025 | 0,02  | 1         | 0,977789971   | 1,022714519     | 1,25            |
| ITPRIP                                                                                   | 0,10741396  | -0,032441385 | 0,088 | 0,03  | 1         | 0,977764286   | 1,022741385     | 2,933333333     |
| ENTPD2                                                                                   | 0,377102913 | -0,032443351 | 0     | 0,01  | 1         | 0,977762953   | 1,022742779     | 0               |
| UTF1                                                                                     | 0,377102913 | -0,032443351 | 0     | 0,01  | 1         | 0,977762953   | 1,022742779     | 0               |
| CCNJ                                                                                     | 0,692138165 | -0,032455493 | 0,013 | 0,02  | 1         | 0,977754724   | 1,022751386     | 0,65            |
| SLC45A4                                                                                  | 0,527578779 | -0,032466397 | 0,05  | 0,03  | 1         | 0,977747335   | 1,022759116     | 1,666666667     |
| POMC                                                                                     | 0,157415062 | -0,032467542 | 0,062 | 0,02  | 1         | 0,977746559   | 1,022759928     | 3,1             |
| DOCK11                                                                                   | 0,325316267 | -0,032469471 | 0,062 | 0,03  | 1         | 0,977745251   | 1,022761296     | 2,066666667     |
| CD274                                                                                    | 0,84359211  | -0,03252524  | 0,025 | 0,02  | 1         | 0,977707456   | 1,022800832     | 1,25            |
| INTS3                                                                                    | 0,052487485 | -0,032544486 | 0,175 | 0,07  | 1         | 0,977694413   | 1,022814477     | 2,5             |
| ZBTB11-AS1                                                                               | 0,84359211  | -0,032548752 | 0,025 | 0,02  | 1         | 0,977691522   | 1,022817501     | 1,25            |
| BUD31                                                                                    | 0,119296796 | -0,032561335 | 0,875 | 0,51  | 1         | 0,977682995   | 1,022826423     | 1,715686275     |
| KBTBD3                                                                                   | 0,365228501 | -0,032589817 | 0,088 | 0,05  | 1         | 0,977663693   | 1,022846616     | 1,76            |
| PSORS1C1                                                                                 | 0,527578779 | -0,032610645 | 0,05  | 0,03  | 1         | 0,977649579   | 1,022861382     | 1,666666667     |
| ZNF70                                                                                    | 0,84359211  | -0,032641185 | 0,025 | 0,02  | 1         | 0,977628884   | 1,022883035     | 1,25            |
| HSD11B1                                                                                  | 0,377102913 | -0,032671121 | 0     | 0,01  | 1         | 0,977608598   | 1,02290426      | 0               |
| PTF1A                                                                                    | 0,377102913 | -0,032671121 | 0     | 0,01  | 1         | 0,977608598   | 1,02290426      | 0               |
| GBP3                                                                                     | 0,009022522 | -0,03269127  | 0,275 | 0,1   | 1         | 0,977594945   | 1,022918546     | 2,75            |
| PCDHA10                                                                                  | 0,886527564 | -0,032759457 | 0,013 | 0,01  | 1         | 0,977548741   | 1,022966894     | 1,3             |
| SDR16C5                                                                                  | 0,886527564 | -0,032795691 | 0,013 | 0,01  | 1         | 0,97752419    | 1,022992587     | 1,3             |
| PTRH2                                                                                    | 0,026467531 | -0,032821252 | 0,212 | 0,08  | 1         | 0,977506871   | 1,023010712     | 2,65            |
| AKT3                                                                                     | 0,015732674 | -0,032864869 | 0,488 | 0,23  | 1         | 0,977477318   | 1,023041641     | 2,12173913      |
| CXXC1                                                                                    | 0,020243607 | -0,032883228 | 0,25  | 0,1   | 1         | 0,97746488    | 1,02305466      | 2,5             |
| TCAF1                                                                                    | 0,003481004 | -0,03288729  | 0,475 | 0,19  | 1         | 0,977462127   | 1,02305754      | 2,5             |
| HIPK1                                                                                    | 0,002976131 | -0,032891204 | 0,388 | 0,14  | 1         | 0,977459476   | 1,023060316     | 2,771428571     |
| GOT1                                                                                     | 0,023971422 | -0,032900659 | 0,212 | 0,08  | 1         | 0,977453069   | 1,023067021     | 2,65            |
| CLASP1                                                                                   | 0,048387935 | -0,03294955  | 0,225 | 0,1   | 1         | 0,977419945   | 1,023101692     | 2,25            |

Supplementary Table 4

| Differentially expressed genes_keloid-CCD_ comparing SC-Keloid vs. (SC-Myel, SC-Nonmyel) |             |              |       |       |           |               |                 |                 |
|------------------------------------------------------------------------------------------|-------------|--------------|-------|-------|-----------|---------------|-----------------|-----------------|
| gene                                                                                     | p_val       | avg_log2FC   | pct.1 | pct.2 | p_val_adj | Foldchange_UP | Foldchange_DOWN | Ratio_pct1_pct2 |
| ZCCHC2                                                                                   | 0,820013192 | -0,032966132 | 0,025 | 0,03  | 1         | 0,977408711   | 1,023113451     | 0,833333333     |
| TP53BP1                                                                                  | 0,019295101 | -0,033008694 | 0,288 | 0,12  | 1         | 0,977379876   | 1,023143635     | 2,4             |
| CDH3                                                                                     | 0,886527564 | -0,033028837 | 0,013 | 0,01  | 1         | 0,97736623    | 1,023157921     | 1,3             |
| NIPAL1                                                                                   | 0,501283468 | -0,03309983  | 0,038 | 0,02  | 1         | 0,977318137   | 1,02320827      | 1,9             |
| GOLM2                                                                                    | 0,004567046 | -0,033106364 | 0,65  | 0,29  | 1         | 0,97731371    | 1,023212904     | 2,24137931      |
| ZNF606                                                                                   | 0,692138165 | -0,033129732 | 0,013 | 0,02  | 1         | 0,97729788    | 1,023229478     | 0,65            |
| AC087239.1                                                                               | 0,521976935 | -0,033161541 | 0,05  | 0,03  | 1         | 0,977276333   | 1,023252039     | 1,666666667     |
| ZNF2                                                                                     | 0,501283468 | -0,033228966 | 0,038 | 0,02  | 1         | 0,977230661   | 1,023299862     | 1,9             |
| PPARA                                                                                    | 0,09439712  | -0,033236355 | 0,125 | 0,05  | 1         | 0,977225656   | 1,023305103     | 2,5             |
| AGER                                                                                     | 0,377102913 | -0,033273962 | 0     | 0,01  | 1         | 0,977200182   | 1,023331778     | 0               |
| CLNK                                                                                     | 0,377102913 | -0,033273962 | 0     | 0,01  | 1         | 0,977200182   | 1,023331778     | 0               |
| SLC16A9                                                                                  | 0,377102913 | -0,033273962 | 0     | 0,01  | 1         | 0,977200182   | 1,023331778     | 0               |
| ZFP69                                                                                    | 0,377102913 | -0,033273962 | 0     | 0,01  | 1         | 0,977200182   | 1,023331778     | 0               |
| BAMBI                                                                                    | 0,112247794 | -0,033328829 | 0,088 | 0,03  | 1         | 0,97716302    | 1,023370697     | 2,933333333     |
| CLDN14                                                                                   | 0,377102913 | -0,033335472 | 0     | 0,01  | 1         | 0,97715852    | 1,023375409     | 0               |
| GNAO1                                                                                    | 0,377102913 | -0,033335472 | 0     | 0,01  | 1         | 0,97715852    | 1,023375409     | 0               |
| PCDHB7                                                                                   | 0,377102913 | -0,033335472 | 0     | 0,01  | 1         | 0,97715852    | 1,023375409     | 0               |
| HOXD1                                                                                    | 0,692138165 | -0,033351466 | 0,013 | 0,02  | 1         | 0,977147687   | 1,023386754     | 0,65            |
| CHMP3                                                                                    | 0,01494077  | -0,033401936 | 0,787 | 0,41  | 1         | 0,977113504   | 1,023422556     | 1,919512195     |
| CORO2B                                                                                   | 0,404468101 | -0,033452377 | 0,138 | 0,09  | 1         | 0,977079342   | 1,023458339     | 1,533333333     |
| CMC2                                                                                     | 0,013816109 | -0,033455463 | 0,713 | 0,33  | 1         | 0,977077252   | 1,023460528     | 2,160606061     |
| EXOC1                                                                                    | 0,029149181 | -0,033464329 | 0,275 | 0,12  | 1         | 0,977071247   | 1,023466818     | 2,291666667     |
| GIMD1                                                                                    | 0,377102913 | -0,033474705 | 0     | 0,01  | 1         | 0,97706422    | 1,023474178     | 0               |
| GRIN2B                                                                                   | 0,377102913 | -0,033474705 | 0     | 0,01  | 1         | 0,97706422    | 1,023474178     | 0               |
| CYB5RL                                                                                   | 0,83477988  | -0,033481281 | 0,025 | 0,02  | 1         | 0,977059767   | 1,023478844     | 1,25            |
| HOXD4                                                                                    | 0,377102913 | -0,033490247 | 0     | 0,01  | 1         | 0,977053694   | 1,023485204     | 0               |
| NEUROD2                                                                                  | 0,377102913 | -0,033490247 | 0     | 0,01  | 1         | 0,977053694   | 1,023485204     | 0               |
| REPS2                                                                                    | 0,377102913 | -0,033490247 | 0     | 0,01  | 1         | 0,977053694   | 1,023485204     | 0               |
| RIMS2                                                                                    | 0,377102913 | -0,033490247 | 0     | 0,01  | 1         | 0,977053694   | 1,023485204     | 0               |
| ADA                                                                                      | 0,84359211  | -0,033498976 | 0,025 | 0,02  | 1         | 0,977047783   | 1,023491397     | 1,25            |

Supplementary Table 4

| Differentially expressed genes_keloid-CCD_ comparing SC-Keloid vs. (SC-Myel, SC-Nonmyel) |             |              |       |       |           |               |                 |                 |
|------------------------------------------------------------------------------------------|-------------|--------------|-------|-------|-----------|---------------|-----------------|-----------------|
| gene                                                                                     | p_val       | avg_log2FC   | pct.1 | pct.2 | p_val_adj | Foldchange_UP | Foldchange_DOWN | Ratio_pct1_pct2 |
| HEXB                                                                                     | 0,003915847 | -0,033521631 | 0,512 | 0,22  | 1         | 0,97703244    | 1,02350747      | 2,327272727     |
| CAPN7                                                                                    | 0,004798886 | -0,033632418 | 0,275 | 0,09  | 1         | 0,976957415   | 1,023586069     | 3,055555556     |
| SGSM2                                                                                    | 0,063616753 | -0,033652998 | 0,1   | 0,03  | 1         | 0,976943479   | 1,023600671     | 3,333333333     |
| CLBA1                                                                                    | 0,193718766 | -0,03377163  | 0,075 | 0,03  | 1         | 0,976863149   | 1,023684844     | 2,5             |
| ZNF813                                                                                   | 0,84359211  | -0,033774478 | 0,025 | 0,02  | 1         | 0,97686122    | 1,023686865     | 1,25            |
| HCG11                                                                                    | 0,155732654 | -0,033811585 | 0,112 | 0,05  | 1         | 0,976836095   | 1,023713195     | 2,24            |
| MFS5                                                                                     | 0,252571592 | -0,033829925 | 0,112 | 0,06  | 1         | 0,976823677   | 1,023726209     | 1,866666667     |
| ELK1                                                                                     | 0,031919537 | -0,033836262 | 0,188 | 0,07  | 1         | 0,976819386   | 1,023730706     | 2,685714286     |
| HSPBAP1                                                                                  | 0,527485192 | -0,033897874 | 0,088 | 0,06  | 1         | 0,976777671   | 1,023774427     | 1,466666667     |
| UFM1                                                                                     | 0,051591715 | -0,033905413 | 0,675 | 0,36  | 1         | 0,976772567   | 1,023779776     | 1,875           |
| ZMYND15                                                                                  | 0,84359211  | -0,033920523 | 0,025 | 0,02  | 1         | 0,976762337   | 1,023790499     | 1,25            |
| CDR2                                                                                     | 0,05967179  | -0,033948476 | 0,312 | 0,16  | 1         | 0,976743411   | 1,023810336     | 1,95            |
| EFEMP1                                                                                   | 0,886527564 | -0,033956452 | 0,013 | 0,01  | 1         | 0,976738011   | 1,023815996     | 1,3             |
| NF1                                                                                      | 0,004813664 | -0,033979388 | 0,425 | 0,17  | 1         | 0,976722484   | 1,023832273     | 2,5             |
| VWA5A                                                                                    | 0,692138165 | -0,034083498 | 0,013 | 0,02  | 1         | 0,976652002   | 1,023906159     | 0,65            |
| CFAP70                                                                                   | 0,886527564 | -0,034084999 | 0,013 | 0,01  | 1         | 0,976650986   | 1,023907224     | 1,3             |
| TMEFF2                                                                                   | 0,886527564 | -0,034113318 | 0,013 | 0,01  | 1         | 0,976631815   | 1,023927323     | 1,3             |
| SMARCD2                                                                                  | 0,015208331 | -0,034131078 | 0,225 | 0,08  | 1         | 0,976619793   | 1,023939927     | 2,8125          |
| TEK                                                                                      | 0,701739822 | -0,034152326 | 0,013 | 0,02  | 1         | 0,976605409   | 1,023955009     | 0,65            |
| RAB20                                                                                    | 0,193718766 | -0,034178707 | 0,075 | 0,03  | 1         | 0,976587552   | 1,023973732     | 2,5             |
| CCDC140                                                                                  | 0,377102913 | -0,034204899 | 0     | 0,01  | 1         | 0,976569822   | 1,023992322     | 0               |
| PCDH8                                                                                    | 0,377102913 | -0,034204899 | 0     | 0,01  | 1         | 0,976569822   | 1,023992322     | 0               |
| MYO1F                                                                                    | 0,886527564 | -0,034252868 | 0,013 | 0,01  | 1         | 0,976537351   | 1,024026371     | 1,3             |
| IFT20                                                                                    | 0,026521822 | -0,034257075 | 0,5   | 0,24  | 1         | 0,976534504   | 1,024029357     | 2,083333333     |
| CCDC171                                                                                  | 0,24172513  | -0,034267766 | 0,1   | 0,05  | 1         | 0,976527267   | 1,024036945     | 2               |
| DLX4                                                                                     | 0,377102913 | -0,034286192 | 0     | 0,01  | 1         | 0,976514796   | 1,024050024     | 0               |
| LINC01556                                                                                | 0,377102913 | -0,034286192 | 0     | 0,01  | 1         | 0,976514796   | 1,024050024     | 0               |
| LYG1                                                                                     | 0,377102913 | -0,034286192 | 0     | 0,01  | 1         | 0,976514796   | 1,024050024     | 0               |
| ZNF23                                                                                    | 0,377102913 | -0,034286192 | 0     | 0,01  | 1         | 0,976514796   | 1,024050024     | 0               |
| ZNF211                                                                                   | 0,84359211  | -0,034290037 | 0,025 | 0,02  | 1         | 0,976512193   | 1,024052754     | 1,25            |

Supplementary Table 4

| Differentially expressed genes_keloid-CCD_ comparing SC-Keloid vs. (SC-Myel, SC-Nonmyel) |             |              |       |       |           |               |                 |                 |
|------------------------------------------------------------------------------------------|-------------|--------------|-------|-------|-----------|---------------|-----------------|-----------------|
| gene                                                                                     | p_val       | avg_log2FC   | pct.1 | pct.2 | p_val_adj | Foldchange_UP | Foldchange_DOWN | Ratio_pct1_pct2 |
| MMRN2                                                                                    | 0,886527564 | -0,034357626 | 0,013 | 0,01  | 1         | 0,976466445   | 1,024100731     | 1,3             |
| PIGG                                                                                     | 0,260119902 | -0,034374225 | 0,112 | 0,06  | 1         | 0,97645521    | 1,024112514     | 1,866666667     |
| TEF                                                                                      | 0,155732654 | -0,034389298 | 0,112 | 0,05  | 1         | 0,976445008   | 1,024123214     | 2,24            |
| MTRNR2L12                                                                                | 0,886527564 | -0,034397989 | 0,013 | 0,01  | 1         | 0,976439127   | 1,024129383     | 1,3             |
| TNNI3K                                                                                   | 0,886527564 | -0,034397989 | 0,013 | 0,01  | 1         | 0,976439127   | 1,024129383     | 1,3             |
| PIGO                                                                                     | 0,047638359 | -0,034413368 | 0,125 | 0,04  | 1         | 0,976428718   | 1,0241403       | 3,125           |
| WDFY1                                                                                    | 0,003743575 | -0,034453006 | 0,275 | 0,09  | 1         | 0,976401891   | 1,024168439     | 3,055555556     |
| TRIM66                                                                                   | 0,284975754 | -0,03445463  | 0,05  | 0,02  | 1         | 0,976400792   | 1,024169592     | 2,5             |
| TVP23A                                                                                   | 0,886527564 | -0,034457804 | 0,013 | 0,01  | 1         | 0,976398644   | 1,024171844     | 1,3             |
| FXYD7                                                                                    | 0,501283468 | -0,034480135 | 0,038 | 0,02  | 1         | 0,97638353    | 1,024187698     | 1,9             |
| AL118506.1                                                                               | 0,692138165 | -0,034481588 | 0,013 | 0,02  | 1         | 0,976382547   | 1,02418873      | 0,65            |
| DKAKD                                                                                    | 0,521976935 | -0,034543256 | 0,05  | 0,03  | 1         | 0,976340812   | 1,024232509     | 1,666666667     |
| LINC00311                                                                                | 0,692138165 | -0,03461665  | 0,013 | 0,02  | 1         | 0,976291144   | 1,024284616     | 0,65            |
| DENND2C                                                                                  | 0,35516371  | -0,034711341 | 0,075 | 0,04  | 1         | 0,976227068   | 1,024351847     | 1,875           |
| KRTAP2-3                                                                                 | 0,447580525 | -0,03472327  | 0,025 | 0,01  | 1         | 0,976218996   | 1,024360317     | 2,5             |
| DOCK9                                                                                    | 0,83477988  | -0,034741177 | 0,025 | 0,02  | 1         | 0,976206879   | 1,024373032     | 1,25            |
| ARHGAP6                                                                                  | 0,692138165 | -0,034766729 | 0,013 | 0,02  | 1         | 0,976189589   | 1,024391175     | 0,65            |
| GAST                                                                                     | 0,377102913 | -0,034773798 | 0     | 0,01  | 1         | 0,976184806   | 1,024396194     | 0               |
| MTCP1                                                                                    | 0,377102913 | -0,034773798 | 0     | 0,01  | 1         | 0,976184806   | 1,024396194     | 0               |
| PILRA                                                                                    | 0,377102913 | -0,034773798 | 0     | 0,01  | 1         | 0,976184806   | 1,024396194     | 0               |
| PLAAT5                                                                                   | 0,377102913 | -0,034773798 | 0     | 0,01  | 1         | 0,976184806   | 1,024396194     | 0               |
| FEM1B                                                                                    | 0,021269707 | -0,034811599 | 0,338 | 0,15  | 1         | 0,976159229   | 1,024423035     | 2,253333333     |
| RHBDL2                                                                                   | 0,84359211  | -0,034843932 | 0,025 | 0,02  | 1         | 0,976137352   | 1,024445994     | 1,25            |
| RFWD3                                                                                    | 0,031746961 | -0,034881687 | 0,15  | 0,05  | 1         | 0,976111807   | 1,024472805     | 3               |
| C17orf107                                                                                | 0,886527564 | -0,034889329 | 0,013 | 0,01  | 1         | 0,976106637   | 1,024478231     | 1,3             |
| CUBN                                                                                     | 0,17887143  | -0,034900263 | 0,125 | 0,06  | 1         | 0,976099239   | 1,024485995     | 2,083333333     |
| THOC6                                                                                    | 0,008703623 | -0,034994785 | 0,312 | 0,12  | 1         | 0,976035289   | 1,024553119     | 2,6             |
| MAD1L1                                                                                   | 0,051042135 | -0,035003212 | 0,225 | 0,1   | 1         | 0,976029587   | 1,024559104     | 2,25            |
| OSGIN1                                                                                   | 0,193718766 | -0,035012822 | 0,075 | 0,03  | 1         | 0,976023086   | 1,024565929     | 2,5             |
| MTA3                                                                                     | 0,015769389 | -0,035023898 | 0,188 | 0,06  | 1         | 0,976015593   | 1,024573795     | 3,133333333     |



Supplementary Table 4

| Differentially expressed genes_keloid-CCD_ comparing SC-Keloid vs. (SC-Myel, SC-Nonmyel) |             |              |       |       |           |               |                 |                 |
|------------------------------------------------------------------------------------------|-------------|--------------|-------|-------|-----------|---------------|-----------------|-----------------|
| gene                                                                                     | p_val       | avg_log2FC   | pct.1 | pct.2 | p_val_adj | Foldchange_UP | Foldchange_DOWN | Ratio_pct1_pct2 |
| AGPAT5                                                                                   | 0,021426774 | -0,035045381 | 0,2   | 0,07  | 1         | 0,97600106    | 1,024589052     | 2,857142857     |
| ACVRL1                                                                                   | 0,377102913 | -0,035185137 | 0     | 0,01  | 1         | 0,975906517   | 1,02468831      | 0               |
| SLC2A4                                                                                   | 0,377102913 | -0,035185137 | 0     | 0,01  | 1         | 0,975906517   | 1,02468831      | 0               |
| SLC35F6                                                                                  | 0,07981542  | -0,03519191  | 0,162 | 0,07  | 1         | 0,975901936   | 1,024693121     | 2,314285714     |
| IFT80                                                                                    | 0,321366333 | -0,035223568 | 0,062 | 0,03  | 1         | 0,975880521   | 1,024715607     | 2,066666667     |
| INTU                                                                                     | 0,193718766 | -0,03528003  | 0,075 | 0,03  | 1         | 0,97584233    | 1,024755711     | 2,5             |
| GTF3C5                                                                                   | 0,033196366 | -0,035298898 | 0,238 | 0,1   | 1         | 0,975829567   | 1,024769113     | 2,38            |
| ZKSCAN2                                                                                  | 0,223365318 | -0,035309103 | 0,038 | 0,01  | 1         | 0,975822664   | 1,024776362     | 3,8             |
| CDRT4                                                                                    | 0,377102913 | -0,035327305 | 0     | 0,01  | 1         | 0,975810353   | 1,024789291     | 0               |
| KCNE1                                                                                    | 0,377102913 | -0,035327305 | 0     | 0,01  | 1         | 0,975810353   | 1,024789291     | 0               |
| SAMD11                                                                                   | 0,377102913 | -0,035327305 | 0     | 0,01  | 1         | 0,975810353   | 1,024789291     | 0               |
| CNRIP1                                                                                   | 0,031888759 | -0,035358838 | 0,325 | 0,15  | 1         | 0,975789025   | 1,02481169      | 2,166666667     |
| MAT2B                                                                                    | 0,037691762 | -0,035415758 | 0,2   | 0,08  | 1         | 0,975750527   | 1,024852124     | 2,5             |
| BMT2                                                                                     | 0,343957066 | -0,035467713 | 0,075 | 0,04  | 1         | 0,975715388   | 1,024889032     | 1,875           |
| ABHD14B                                                                                  | 0,043441377 | -0,035524348 | 0,3   | 0,14  | 1         | 0,975677086   | 1,024929266     | 2,142857143     |
| NSMCE4A                                                                                  | 0,067617601 | -0,035553501 | 0,3   | 0,15  | 1         | 0,97565737    | 1,024949978     | 2               |
| CLK2                                                                                     | 0,284975754 | -0,035605704 | 0,05  | 0,02  | 1         | 0,975622067   | 1,024987066     | 2,5             |
| MTMR12                                                                                   | 0,059607897 | -0,035655146 | 0,138 | 0,05  | 1         | 0,975588633   | 1,025022193     | 2,76            |
| PCTP                                                                                     | 0,112247794 | -0,035702007 | 0,088 | 0,03  | 1         | 0,975556945   | 1,025055488     | 2,933333333     |
| ZNF680                                                                                   | 0,047638359 | -0,035741894 | 0,125 | 0,04  | 1         | 0,975529974   | 1,025083828     | 3,125           |
| RELCH                                                                                    | 0,221005633 | -0,035755366 | 0,088 | 0,04  | 1         | 0,975520864   | 1,025093401     | 2,2             |
| ZW10                                                                                     | 0,082576405 | -0,035759877 | 0,162 | 0,07  | 1         | 0,975517814   | 1,025096606     | 2,314285714     |
| C19orf81                                                                                 | 0,835772999 | -0,035763688 | 0,025 | 0,03  | 1         | 0,975515237   | 1,025099314     | 0,833333333     |
| GSTM2                                                                                    | 0,284975754 | -0,035779826 | 0,05  | 0,02  | 1         | 0,975504325   | 1,025110781     | 2,5             |
| C1orf116                                                                                 | 0,377102913 | -0,035782961 | 0     | 0,01  | 1         | 0,975502205   | 1,025113009     | 0               |
| SYT2                                                                                     | 0,377102913 | -0,035782961 | 0     | 0,01  | 1         | 0,975502205   | 1,025113009     | 0               |
| UPK1B                                                                                    | 0,377102913 | -0,035782961 | 0     | 0,01  | 1         | 0,975502205   | 1,025113009     | 0               |
| DIAPH1                                                                                   | 0,009782284 | -0,035795779 | 0,4   | 0,17  | 1         | 0,975493538   | 1,025122116     | 2,352941176     |
| MIEF1                                                                                    | 0,010461593 | -0,03580228  | 0,138 | 0,03  | 1         | 0,975489142   | 1,025126736     | 4,6             |
| STK3                                                                                     | 0,049580658 | -0,035813197 | 0,212 | 0,09  | 1         | 0,97548176    | 1,025134493     | 2,355555556     |

Supplementary Table 4

| Differentially expressed genes_keloid-CCD_ comparing SC-Keloid vs. (SC-Myel, SC-Nonmyel) |             |              |       |       |           |               |                 |                 |
|------------------------------------------------------------------------------------------|-------------|--------------|-------|-------|-----------|---------------|-----------------|-----------------|
| gene                                                                                     | p_val       | avg_log2FC   | pct.1 | pct.2 | p_val_adj | Foldchange_UP | Foldchange_DOWN | Ratio_pct1_pct2 |
| ATP10B                                                                                   | 0,157415062 | -0,035827025 | 0,062 | 0,02  | 1         | 0,975472411   | 1,025144319     | 3,1             |
| OSTF1                                                                                    | 0,01057143  | -0,035862617 | 0,512 | 0,23  | 1         | 0,975448346   | 1,02516961      | 2,226086957     |
| FBXO6                                                                                    | 0,501283468 | -0,035905801 | 0,038 | 0,02  | 1         | 0,975419148   | 1,025200296     | 1,9             |
| PPP6R2                                                                                   | 0,040785121 | -0,035994287 | 0,25  | 0,11  | 1         | 0,975359324   | 1,025263178     | 2,272727273     |
| TTC19                                                                                    | 0,000491071 | -0,036024646 | 0,45  | 0,15  | 1         | 0,975338799   | 1,025284753     | 3               |
| SLX4                                                                                     | 0,692138165 | -0,036031593 | 0,013 | 0,02  | 1         | 0,975334103   | 1,02528969      | 0,65            |
| SNX27                                                                                    | 0,004158184 | -0,036043464 | 0,475 | 0,19  | 1         | 0,975326078   | 1,025298126     | 2,5             |
| CCHCR1                                                                                   | 0,072740841 | -0,036085844 | 0,15  | 0,06  | 1         | 0,975297427   | 1,025328245     | 2,5             |
| ACO1                                                                                     | 0,006173123 | -0,036096268 | 0,188 | 0,05  | 1         | 0,97529038    | 1,025335654     | 3,76            |
| NPR2                                                                                     | 0,534439505 | -0,036120058 | 0,062 | 0,04  | 1         | 0,975274298   | 1,025352562     | 1,55            |
| PABPC4                                                                                   | 0,06129234  | -0,036121198 | 0,637 | 0,35  | 1         | 0,975273527   | 1,025353372     | 1,82            |
| AC009120.4                                                                               | 0,377102913 | -0,036141545 | 0     | 0,01  | 1         | 0,975259772   | 1,025367834     | 0               |
| AC079354.3                                                                               | 0,377102913 | -0,036141545 | 0     | 0,01  | 1         | 0,975259772   | 1,025367834     | 0               |
| ANKRD24                                                                                  | 0,377102913 | -0,036141545 | 0     | 0,01  | 1         | 0,975259772   | 1,025367834     | 0               |
| C8B                                                                                      | 0,377102913 | -0,036141545 | 0     | 0,01  | 1         | 0,975259772   | 1,025367834     | 0               |
| CD53                                                                                     | 0,377102913 | -0,036141545 | 0     | 0,01  | 1         | 0,975259772   | 1,025367834     | 0               |
| FOXH1                                                                                    | 0,377102913 | -0,036141545 | 0     | 0,01  | 1         | 0,975259772   | 1,025367834     | 0               |
| SALL4                                                                                    | 0,377102913 | -0,036141545 | 0     | 0,01  | 1         | 0,975259772   | 1,025367834     | 0               |
| ANKLE2                                                                                   | 0,003950386 | -0,036193206 | 0,45  | 0,18  | 1         | 0,97522485    | 1,025404551     | 2,5             |
| BCL11A                                                                                   | 0,886527564 | -0,036234884 | 0,013 | 0,01  | 1         | 0,975196678   | 1,025434174     | 1,3             |
| TRIM29                                                                                   | 0,886527564 | -0,036234884 | 0,013 | 0,01  | 1         | 0,975196678   | 1,025434174     | 1,3             |
| MAPK1                                                                                    | 0,010579022 | -0,036250122 | 0,725 | 0,34  | 1         | 0,975186377   | 1,025445005     | 2,132352941     |
| WNT11                                                                                    | 0,692138165 | -0,036276166 | 0,013 | 0,02  | 1         | 0,975168773   | 1,025463517     | 0,65            |
| IHO1                                                                                     | 0,377102913 | -0,036277874 | 0     | 0,01  | 1         | 0,975167619   | 1,025464731     | 0               |
| OR51B5                                                                                   | 0,377102913 | -0,036277874 | 0     | 0,01  | 1         | 0,975167619   | 1,025464731     | 0               |
| ZNF263                                                                                   | 0,539438221 | -0,036286423 | 0,075 | 0,05  | 1         | 0,97516184    | 1,025470808     | 1,5             |
| ARSL                                                                                     | 0,02338026  | -0,036294916 | 0,212 | 0,08  | 1         | 0,975156099   | 1,025476845     | 2,65            |
| FHIT                                                                                     | 0,447580525 | -0,036342423 | 0,025 | 0,01  | 1         | 0,975123989   | 1,025510614     | 2,5             |
| EDN1                                                                                     | 0,157415062 | -0,036391713 | 0,062 | 0,02  | 1         | 0,975090674   | 1,025545651     | 3,1             |
| FAM193B                                                                                  | 0,314887306 | -0,036472869 | 0,162 | 0,1   | 1         | 0,975035824   | 1,025603342     | 1,62            |

Supplementary Table 4

| Differentially expressed genes_keloid-CCD_ comparing SC-Keloid vs. (SC-Myel, SC-Nonmyel) |             |              |       |       |           |               |                 |                 |
|------------------------------------------------------------------------------------------|-------------|--------------|-------|-------|-----------|---------------|-----------------|-----------------|
| gene                                                                                     | p_val       | avg_log2FC   | pct.1 | pct.2 | p_val_adj | Foldchange_UP | Foldchange_DOWN | Ratio_pct1_pct2 |
| GDPD5                                                                                    | 0,207484841 | -0,036480443 | 0     | 0,02  | 1         | 0,975030705   | 1,025608727     | 0               |
| OSBPL5                                                                                   | 0,223632981 | -0,036493261 | 0,088 | 0,04  | 1         | 0,975022042   | 1,025617839     | 2,2             |
| SCYL2                                                                                    | 0,021722183 | -0,036565515 | 0,25  | 0,1   | 1         | 0,974973212   | 1,025669206     | 2,5             |
| RBM15B                                                                                   | 0,031400868 | -0,036593158 | 0,275 | 0,12  | 1         | 0,974954531   | 1,025688859     | 2,291666667     |
| CNTD1                                                                                    | 0,886527564 | -0,036603742 | 0,013 | 0,01  | 1         | 0,974947378   | 1,025696384     | 1,3             |
| FBXL19-AS1                                                                               | 0,377102913 | -0,036646498 | 0     | 0,01  | 1         | 0,974918485   | 1,025726782     | 0               |
| LRRTM1                                                                                   | 0,377102913 | -0,036646498 | 0     | 0,01  | 1         | 0,974918485   | 1,025726782     | 0               |
| SHOX2                                                                                    | 0,377102913 | -0,036646498 | 0     | 0,01  | 1         | 0,974918485   | 1,025726782     | 0               |
| EPB41L1                                                                                  | 0,84359211  | -0,036716053 | 0,025 | 0,02  | 1         | 0,974871484   | 1,025776235     | 1,25            |
| C12orf60                                                                                 | 0,692138165 | -0,036776365 | 0,013 | 0,02  | 1         | 0,974830729   | 1,025819119     | 0,65            |
| ARL14EP                                                                                  | 0,037862628 | -0,036823031 | 0,25  | 0,11  | 1         | 0,974799198   | 1,025852301     | 2,272727273     |
| HSPB8                                                                                    | 0,84359211  | -0,036834292 | 0,025 | 0,02  | 1         | 0,974791589   | 1,025860309     | 1,25            |
| TENT5C                                                                                   | 0,112247794 | -0,036838414 | 0,088 | 0,03  | 1         | 0,974788804   | 1,02586324      | 2,933333333     |
| FBLL1                                                                                    | 0,501283468 | -0,036850237 | 0,038 | 0,02  | 1         | 0,974780815   | 1,025871647     | 1,9             |
| CMBL                                                                                     | 0,447580525 | -0,036857761 | 0,025 | 0,01  | 1         | 0,974775732   | 1,025876997     | 2,5             |
| PRKX                                                                                     | 0,539465965 | -0,036884863 | 0,062 | 0,04  | 1         | 0,97475742    | 1,025896268     | 1,55            |
| MARCHF10                                                                                 | 0,886527564 | -0,036932319 | 0,013 | 0,01  | 1         | 0,974725357   | 1,025930015     | 1,3             |
| FGFBP3                                                                                   | 0,534439505 | -0,036968608 | 0,062 | 0,04  | 1         | 0,97470084    | 1,025955821     | 1,55            |
| MYOZ2                                                                                    | 0,692138165 | -0,037001899 | 0,013 | 0,02  | 1         | 0,974678348   | 1,025979496     | 0,65            |
| EGLN2                                                                                    | 0,501283468 | -0,037012287 | 0,038 | 0,02  | 1         | 0,97467133    | 1,025986883     | 1,9             |
| DEPP1                                                                                    | 0,159577739 | -0,037016858 | 0,2   | 0,11  | 1         | 0,974668242   | 1,025990134     | 1,818181818     |
| KIAA0895                                                                                 | 0,843678119 | -0,03705832  | 0,025 | 0,03  | 1         | 0,974640231   | 1,02601962      | 0,833333333     |
| CREG1                                                                                    | 0,070134189 | -0,03713954  | 0,15  | 0,06  | 1         | 0,974585363   | 1,026077384     | 2,5             |
| LENG1                                                                                    | 0,040785121 | -0,037142185 | 0,25  | 0,11  | 1         | 0,974583576   | 1,026079266     | 2,272727273     |
| CLN3                                                                                     | 0,701739822 | -0,037160102 | 0,013 | 0,02  | 1         | 0,974571472   | 1,026092009     | 0,65            |
| KDM5A                                                                                    | 0,015315005 | -0,037191409 | 0,462 | 0,21  | 1         | 0,974550324   | 1,026114276     | 2,2             |
| DPH5                                                                                     | 0,112247794 | -0,037193827 | 0,088 | 0,03  | 1         | 0,974548691   | 1,026115996     | 2,933333333     |
| XPO4                                                                                     | 0,193718766 | -0,037209849 | 0,075 | 0,03  | 1         | 0,974537868   | 1,026127391     | 2,5             |
| B3GALNT1                                                                                 | 0,501283468 | -0,037224501 | 0,038 | 0,02  | 1         | 0,974527971   | 1,026137812     | 1,9             |
| PLCG1                                                                                    | 0,223632981 | -0,037273671 | 0,088 | 0,04  | 1         | 0,974494757   | 1,026172786     | 2,2             |

Supplementary Table 4

| Differentially expressed genes_keloid-CCD_ comparing SC-Keloid vs. (SC-Myel, SC-Nonmyel) |             |              |       |       |           |               |                 |                 |
|------------------------------------------------------------------------------------------|-------------|--------------|-------|-------|-----------|---------------|-----------------|-----------------|
| gene                                                                                     | p_val       | avg_log2FC   | pct.1 | pct.2 | p_val_adj | Foldchange_UP | Foldchange_DOWN | Ratio_pct1_pct2 |
| ZFAND3                                                                                   | 0,011797869 | -0,037288541 | 0,338 | 0,14  | 1         | 0,974484713   | 1,026183363     | 2,414285714     |
| SYT10                                                                                    | 0,321366333 | -0,037309874 | 0,062 | 0,03  | 1         | 0,974470303   | 1,026198537     | 2,066666667     |
| PRRG2                                                                                    | 0,886527564 | -0,037318991 | 0,013 | 0,01  | 1         | 0,974464146   | 1,026205022     | 1,3             |
| TMCC1                                                                                    | 0,397766935 | -0,037348329 | 0,112 | 0,07  | 1         | 0,974444433   | 1,02622589      | 1,6             |
| ZBED6                                                                                    | 0,84359211  | -0,037377622 | 0,025 | 0,02  | 1         | 0,974424544   | 1,026246728     | 1,25            |
| HCFC1                                                                                    | 0,01874929  | -0,03738693  | 0,238 | 0,09  | 1         | 0,974418257   | 1,026253349     | 2,644444444     |
| MED26                                                                                    | 0,035392992 | -0,037398038 | 0,112 | 0,03  | 1         | 0,974410755   | 1,026261251     | 3,733333333     |
| CDHR3                                                                                    | 0,843678119 | -0,037441572 | 0,025 | 0,03  | 1         | 0,974381352   | 1,026292219     | 0,833333333     |
| SHC2                                                                                     | 0,886527564 | -0,03745475  | 0,013 | 0,01  | 1         | 0,974372452   | 1,026301594     | 1,3             |
| ZNF141                                                                                   | 0,35516371  | -0,037497024 | 0,075 | 0,04  | 1         | 0,974343901   | 1,026331667     | 1,875           |
| ADTRP                                                                                    | 0,207484841 | -0,037500363 | 0     | 0,02  | 1         | 0,974341646   | 1,026334042     | 0               |
| ATG101                                                                                   | 0,02659626  | -0,037547449 | 0,775 | 0,41  | 1         | 0,974309847   | 1,026367539     | 1,890243902     |
| NPW                                                                                      | 0,081579256 | -0,037553456 | 0,112 | 0,04  | 1         | 0,97430579    | 1,026371813     | 2,8             |
| LGI2                                                                                     | 0,84359211  | -0,037561093 | 0,025 | 0,02  | 1         | 0,974300632   | 1,026377246     | 1,25            |
| ALG10                                                                                    | 0,84359211  | -0,037570242 | 0,025 | 0,02  | 1         | 0,974294454   | 1,026383755     | 1,25            |
| GNA15                                                                                    | 0,447580525 | -0,037606936 | 0,025 | 0,01  | 1         | 0,974269673   | 1,026409861     | 2,5             |
| LYSMD4                                                                                   | 0,501283468 | -0,037633855 | 0,038 | 0,02  | 1         | 0,974251495   | 1,026429013     | 1,9             |
| POU2F3                                                                                   | 0,886527564 | -0,037692553 | 0,013 | 0,01  | 1         | 0,974211857   | 1,026470775     | 1,3             |
| FANCC                                                                                    | 0,886527564 | -0,037697886 | 0,013 | 0,01  | 1         | 0,974208255   | 1,02647457      | 1,3             |
| COPG2                                                                                    | 0,501283468 | -0,037784804 | 0,038 | 0,02  | 1         | 0,974149564   | 1,026536414     | 1,9             |
| RFXAP                                                                                    | 0,325316267 | -0,037828714 | 0,062 | 0,03  | 1         | 0,974119915   | 1,026567658     | 2,066666667     |
| SMYD4                                                                                    | 0,193718766 | -0,037836249 | 0,075 | 0,03  | 1         | 0,974114828   | 1,02657302      | 2,5             |
| FGF10                                                                                    | 0,581767801 | -0,037875639 | 0,025 | 0,04  | 1         | 0,974088232   | 1,026601048     | 0,625           |
| APOBEC3D                                                                                 | 0,886527564 | -0,037972155 | 0,013 | 0,01  | 1         | 0,974023068   | 1,02666973      | 1,3             |
| TTLL5                                                                                    | 0,264881668 | -0,037990389 | 0,125 | 0,07  | 1         | 0,974010757   | 1,026682706     | 1,785714286     |
| STX17                                                                                    | 0,060401558 | -0,037997803 | 0,138 | 0,05  | 1         | 0,974005752   | 1,026687982     | 2,76            |
| ZNF195                                                                                   | 0,539438221 | -0,038123616 | 0,075 | 0,05  | 1         | 0,973920815   | 1,026777521     | 1,5             |
| CCNO                                                                                     | 0,377102913 | -0,038148575 | 0     | 0,01  | 1         | 0,973903967   | 1,026795284     | 0               |
| FBP1                                                                                     | 0,377102913 | -0,038148575 | 0     | 0,01  | 1         | 0,973903967   | 1,026795284     | 0               |
| ZBED3-AS1                                                                                | 0,377102913 | -0,038148575 | 0     | 0,01  | 1         | 0,973903967   | 1,026795284     | 0               |

Supplementary Table 4

| Differentially expressed genes_keloid-CCD_ comparing SC-Keloid vs. (SC-Myel, SC-Nonmyel) |             |              |       |       |           |               |                 |                 |
|------------------------------------------------------------------------------------------|-------------|--------------|-------|-------|-----------|---------------|-----------------|-----------------|
| gene                                                                                     | p_val       | avg_log2FC   | pct.1 | pct.2 | p_val_adj | Foldchange_UP | Foldchange_DOWN | Ratio_pct1_pct2 |
| NOTCH2                                                                                   | 0,011294651 | -0,038174588 | 0,288 | 0,11  | 1         | 0,973886407   | 1,026813798     | 2,618181818     |
| INVS                                                                                     | 0,223365318 | -0,038234152 | 0,038 | 0,01  | 1         | 0,973846199   | 1,026856193     | 3,8             |
| TMEM86A                                                                                  | 0,377102913 | -0,038239584 | 0     | 0,01  | 1         | 0,973842532   | 1,026860059     | 0               |
| ACOX2                                                                                    | 0,54403098  | -0,038275143 | 0,075 | 0,05  | 1         | 0,97381853    | 1,026885369     | 1,5             |
| KCNB1                                                                                    | 0,223365318 | -0,038319195 | 0,038 | 0,01  | 1         | 0,973788795   | 1,026916725     | 3,8             |
| ZBTB34                                                                                   | 0,84359211  | -0,038320126 | 0,025 | 0,02  | 1         | 0,973788167   | 1,026917387     | 1,25            |
| TRMU                                                                                     | 0,040466505 | -0,038416531 | 0,2   | 0,08  | 1         | 0,973723097   | 1,026986012     | 2,5             |
| PBX2                                                                                     | 0,043629222 | -0,038471981 | 0,312 | 0,15  | 1         | 0,973685673   | 1,027025484     | 2,08            |
| ZNF282                                                                                   | 0,223632981 | -0,03849158  | 0,088 | 0,04  | 1         | 0,973672446   | 1,027039436     | 2,2             |
| MRM3                                                                                     | 0,110952483 | -0,038510834 | 0,2   | 0,1   | 1         | 0,973659451   | 1,027053143     | 2               |
| USP4                                                                                     | 0,155732654 | -0,038542298 | 0,112 | 0,05  | 1         | 0,973638217   | 1,027075543     | 2,24            |
| PRUNE1                                                                                   | 0,321366333 | -0,038607296 | 0,062 | 0,03  | 1         | 0,973594352   | 1,027121817     | 2,066666667     |
| SECTM1                                                                                   | 0,886527564 | -0,03862003  | 0,013 | 0,01  | 1         | 0,973585759   | 1,027130883     | 1,3             |
| ZNF616                                                                                   | 0,157415062 | -0,038626846 | 0,062 | 0,02  | 1         | 0,973581159   | 1,027135736     | 3,1             |
| TBX19                                                                                    | 0,494869729 | -0,038645895 | 0,038 | 0,02  | 1         | 0,973568304   | 1,027149298     | 1,9             |
| ZNF423                                                                                   | 0,447580525 | -0,038657293 | 0,025 | 0,01  | 1         | 0,973560612   | 1,027157413     | 2,5             |
| SUFU                                                                                     | 0,223632981 | -0,038677768 | 0,088 | 0,04  | 1         | 0,973546795   | 1,027171991     | 2,2             |
| NPEPPS                                                                                   | 0,004040329 | -0,038680154 | 0,45  | 0,18  | 1         | 0,973545186   | 1,027173689     | 2,5             |
| TTC21A                                                                                   | 0,692138165 | -0,038725127 | 0,013 | 0,02  | 1         | 0,973514838   | 1,02720571      | 0,65            |
| PPP1R12A                                                                                 | 0,114793425 | -0,038752226 | 0,825 | 0,52  | 1         | 0,973496552   | 1,027225005     | 1,586538462     |
| FAM174B                                                                                  | 0,112247794 | -0,038778217 | 0,088 | 0,03  | 1         | 0,973479014   | 1,027243511     | 2,933333333     |
| TMEM119                                                                                  | 0,447580525 | -0,038797933 | 0,025 | 0,01  | 1         | 0,973465711   | 1,027257549     | 2,5             |
| ATP6VOC                                                                                  | 0,447580525 | -0,038806972 | 0,025 | 0,01  | 1         | 0,973459611   | 1,027263986     | 2,5             |
| TMEM168                                                                                  | 0,035536568 | -0,038820758 | 0,15  | 0,05  | 1         | 0,973450309   | 1,027273802     | 3               |
| PLRG1                                                                                    | 0,000246835 | -0,038824529 | 0,425 | 0,13  | 1         | 0,973447765   | 1,027276487     | 3,269230769     |
| PTPRA                                                                                    | 0,005295194 | -0,038854407 | 0,55  | 0,25  | 1         | 0,973427605   | 1,027297762     | 2,2             |
| FTSJ1                                                                                    | 0,003860939 | -0,03888663  | 0,2   | 0,05  | 1         | 0,973405864   | 1,027320707     | 4               |
| THEM4                                                                                    | 0,022235506 | -0,038888573 | 0,25  | 0,1   | 1         | 0,973404552   | 1,027322091     | 2,5             |
| ZNF445                                                                                   | 0,34027224  | -0,038908766 | 0,075 | 0,04  | 1         | 0,973390928   | 1,02733647      | 1,875           |
| ABCC9                                                                                    | 0,692138165 | -0,038912799 | 0,013 | 0,02  | 1         | 0,973388207   | 1,027339342     | 0,65            |

Supplementary Table 4

| Differentially expressed genes_keloid-CCD_ comparing SC-Keloid vs. (SC-Myel, SC-Nonmyel) |             |              |       |       |           |               |                 |                 |
|------------------------------------------------------------------------------------------|-------------|--------------|-------|-------|-----------|---------------|-----------------|-----------------|
| gene                                                                                     | p_val       | avg_log2FC   | pct.1 | pct.2 | p_val_adj | Foldchange_UP | Foldchange_DOWN | Ratio_pct1_pct2 |
| SIKE1                                                                                    | 0,192979942 | -0,038937674 | 0,225 | 0,13  | 1         | 0,973371424   | 1,027357055     | 1,730769231     |
| AKNAD1                                                                                   | 0,377102913 | -0,038983594 | 0     | 0,01  | 1         | 0,973340443   | 1,027389756     | 0               |
| C7orf31                                                                                  | 0,377102913 | -0,038983594 | 0     | 0,01  | 1         | 0,973340443   | 1,027389756     | 0               |
| DYNLT4                                                                                   | 0,377102913 | -0,038983594 | 0     | 0,01  | 1         | 0,973340443   | 1,027389756     | 0               |
| THSD1                                                                                    | 0,701739822 | -0,038987291 | 0,013 | 0,02  | 1         | 0,973337949   | 1,027392389     | 0,65            |
| ZNF200                                                                                   | 0,223365318 | -0,039003752 | 0,038 | 0,01  | 1         | 0,973326843   | 1,027404112     | 3,8             |
| SPATA6L                                                                                  | 0,692138165 | -0,039026344 | 0,013 | 0,02  | 1         | 0,973311601   | 1,0274202       | 0,65            |
| CCDC17                                                                                   | 0,501283468 | -0,039027159 | 0,038 | 0,02  | 1         | 0,973311051   | 1,027420781     | 1,9             |
| TMEM38A                                                                                  | 0,423434047 | -0,039076878 | 0,013 | 0,03  | 1         | 0,973277509   | 1,027456189     | 0,433333333     |
| LRP2BP                                                                                   | 0,692138165 | -0,039098918 | 0,013 | 0,02  | 1         | 0,97326264    | 1,027471885     | 0,65            |
| BLID                                                                                     | 0,377102913 | -0,039184784 | 0     | 0,01  | 1         | 0,973204716   | 1,02753304      | 0               |
| DTX4                                                                                     | 0,377102913 | -0,039184784 | 0     | 0,01  | 1         | 0,973204716   | 1,02753304      | 0               |
| TP53I11                                                                                  | 0,377102913 | -0,039184784 | 0     | 0,01  | 1         | 0,973204716   | 1,02753304      | 0               |
| WDR38                                                                                    | 0,377102913 | -0,039184784 | 0     | 0,01  | 1         | 0,973204716   | 1,02753304      | 0               |
| ZSCAN2                                                                                   | 0,377102913 | -0,039184784 | 0     | 0,01  | 1         | 0,973204716   | 1,02753304      | 0               |
| CD160                                                                                    | 0,377102913 | -0,03921674  | 0     | 0,01  | 1         | 0,973183159   | 1,0275558       | 0               |
| HSD17B6                                                                                  | 0,377102913 | -0,03921674  | 0     | 0,01  | 1         | 0,973183159   | 1,0275558       | 0               |
| ITGAM                                                                                    | 0,377102913 | -0,03921674  | 0     | 0,01  | 1         | 0,973183159   | 1,0275558       | 0               |
| TMEM213                                                                                  | 0,377102913 | -0,03921674  | 0     | 0,01  | 1         | 0,973183159   | 1,0275558       | 0               |
| WFDC1                                                                                    | 0,447580525 | -0,039218311 | 0,025 | 0,01  | 1         | 0,9731821     | 1,027556919     | 2,5             |
| CHST15                                                                                   | 0,886527564 | -0,039303442 | 0,013 | 0,01  | 1         | 0,973124675   | 1,027617556     | 1,3             |
| DNALI1                                                                                   | 0,110952974 | -0,0393036   | 0,2   | 0,1   | 1         | 0,973124569   | 1,027617668     | 2               |
| IDH1                                                                                     | 0,004183399 | -0,039339949 | 0,275 | 0,09  | 1         | 0,973100051   | 1,027643559     | 3,055555556     |
| POLN                                                                                     | 0,284975754 | -0,039428608 | 0,05  | 0,02  | 1         | 0,973040252   | 1,027706714     | 2,5             |
| SPINK9                                                                                   | 0,377102913 | -0,039452692 | 0     | 0,01  | 1         | 0,973024009   | 1,02772387      | 0               |
| SYT17                                                                                    | 0,377102913 | -0,039452692 | 0     | 0,01  | 1         | 0,973024009   | 1,02772387      | 0               |
| TRHDE                                                                                    | 0,377102913 | -0,039452692 | 0     | 0,01  | 1         | 0,973024009   | 1,02772387      | 0               |
| LRSAM1                                                                                   | 0,321366333 | -0,039458094 | 0,062 | 0,03  | 1         | 0,973020365   | 1,027727718     | 2,066666667     |
| COX15                                                                                    | 0,387170302 | -0,039486495 | 0,1   | 0,06  | 1         | 0,973001211   | 1,027747951     | 1,666666667     |
| LTN1                                                                                     | 0,004904576 | -0,039539009 | 0,388 | 0,15  | 1         | 0,972965794   | 1,027785361     | 2,586666667     |

Supplementary Table 4

| Differentially expressed genes_keloid-CCD_ comparing SC-Keloid vs. (SC-Myel, SC-Nonmyel) |             |              |       |       |           |               |                 |                 |
|------------------------------------------------------------------------------------------|-------------|--------------|-------|-------|-----------|---------------|-----------------|-----------------|
| gene                                                                                     | p_val       | avg_log2FC   | pct.1 | pct.2 | p_val_adj | Foldchange_UP | Foldchange_DOWN | Ratio_pct1_pct2 |
| TGFBR1                                                                                   | 0,119729162 | -0,039542971 | 0,288 | 0,16  | 1         | 0,972963122   | 1,027788184     | 1,8             |
| ACOT9                                                                                    | 0,00522082  | -0,039549731 | 0,462 | 0,19  | 1         | 0,972958563   | 1,027793        | 2,431578947     |
| VMAC                                                                                     | 0,325316267 | -0,039565559 | 0,062 | 0,03  | 1         | 0,972947889   | 1,027804276     | 2,066666667     |
| SETMAR                                                                                   | 0,193718766 | -0,039582723 | 0,075 | 0,03  | 1         | 0,972936314   | 1,027816503     | 2,5             |
| PHYHD1                                                                                   | 0,53440538  | -0,039587619 | 0,112 | 0,08  | 1         | 0,972933012   | 1,027819992     | 1,4             |
| SEZ6                                                                                     | 0,377102913 | -0,039647866 | 0     | 0,01  | 1         | 0,972892383   | 1,027862914     | 0               |
| TMEM9B-AS1                                                                               | 0,377102913 | -0,039647866 | 0     | 0,01  | 1         | 0,972892383   | 1,027862914     | 0               |
| VCX                                                                                      | 0,377102913 | -0,039647866 | 0     | 0,01  | 1         | 0,972892383   | 1,027862914     | 0               |
| TMEM187                                                                                  | 0,193718766 | -0,039659771 | 0,075 | 0,03  | 1         | 0,972884355   | 1,027871396     | 2,5             |
| STK40                                                                                    | 0,110112699 | -0,03966182  | 0,25  | 0,13  | 1         | 0,972882973   | 1,027872856     | 1,923076923     |
| RALY                                                                                     | 0,004031303 | -0,039729214 | 0,7   | 0,31  | 1         | 0,972837526   | 1,027920874     | 2,258064516     |
| ANKRD20A4P                                                                               | 0,886527564 | -0,039760649 | 0,013 | 0,01  | 1         | 0,97281633    | 1,027943271     | 1,3             |
| DENND3                                                                                   | 0,325316267 | -0,039762885 | 0,062 | 0,03  | 1         | 0,972814822   | 1,027944864     | 2,066666667     |
| LHCGR                                                                                    | 0,377102913 | -0,039801008 | 0     | 0,01  | 1         | 0,972789116   | 1,027972028     | 0               |
| LINC00958                                                                                | 0,377102913 | -0,039801008 | 0     | 0,01  | 1         | 0,972789116   | 1,027972028     | 0               |
| TSPAN12                                                                                  | 0,377102913 | -0,039809795 | 0     | 0,01  | 1         | 0,972783191   | 1,027978289     | 0               |
| TADA2A                                                                                   | 0,239155423 | -0,039833503 | 0,1   | 0,05  | 1         | 0,972767205   | 1,027995182     | 2               |
| GABPA                                                                                    | 0,008193937 | -0,039844413 | 0,3   | 0,11  | 1         | 0,972759849   | 1,028002956     | 2,727272727     |
| NRP2                                                                                     | 0,009288094 | -0,039870587 | 0,625 | 0,3   | 1         | 0,972742201   | 1,028021606     | 2,083333333     |
| KLHL29                                                                                   | 0,101585549 | -0,039893465 | 0,188 | 0,09  | 1         | 0,972726775   | 1,028037909     | 2,088888889     |
| ADO                                                                                      | 0,010461593 | -0,039904994 | 0,138 | 0,03  | 1         | 0,972719002   | 1,028046124     | 4,6             |
| CNTNAP1                                                                                  | 0,692138165 | -0,039910396 | 0,013 | 0,02  | 1         | 0,97271536    | 1,028049974     | 0,65            |
| SLPI                                                                                     | 0,886527564 | -0,039959879 | 0,013 | 0,01  | 1         | 0,972681997   | 1,028085236     | 1,3             |
| STAT5A                                                                                   | 0,112247794 | -0,039961208 | 0,088 | 0,03  | 1         | 0,972681101   | 1,028086183     | 2,933333333     |
| AGBL3                                                                                    | 0,501283468 | -0,039974256 | 0,038 | 0,02  | 1         | 0,972672304   | 1,028095481     | 1,9             |
| PANX2                                                                                    | 0,494869729 | -0,039979212 | 0,038 | 0,02  | 1         | 0,972668963   | 1,028099012     | 1,9             |
| RFX8                                                                                     | 0,692138165 | -0,040042653 | 0,013 | 0,02  | 1         | 0,972626192   | 1,028144223     | 0,65            |
| LRRC4                                                                                    | 0,84359211  | -0,040112066 | 0,025 | 0,02  | 1         | 0,972579396   | 1,028193692     | 1,25            |
| RBP5                                                                                     | 0,447580525 | -0,040115435 | 0,025 | 0,01  | 1         | 0,972577125   | 1,028196093     | 2,5             |
| TMEM220                                                                                  | 0,180764063 | -0,040140674 | 0,125 | 0,06  | 1         | 0,972560111   | 1,02821408      | 2,083333333     |

Supplementary Table 4

| Differentially expressed genes_keloid-CCD_ comparing SC-Keloid vs. (SC-Myel, SC-Nonmyel) |             |              |       |       |           |               |                 |                 |
|------------------------------------------------------------------------------------------|-------------|--------------|-------|-------|-----------|---------------|-----------------|-----------------|
| gene                                                                                     | p_val       | avg_log2FC   | pct.1 | pct.2 | p_val_adj | Foldchange_UP | Foldchange_DOWN | Ratio_pct1_pct2 |
| FDXACB1                                                                                  | 0,377102913 | -0,040144355 | 0     | 0,01  | 1         | 0,972557629   | 1,028216704     | 0               |
| SCG3                                                                                     | 0,377102913 | -0,040144355 | 0     | 0,01  | 1         | 0,972557629   | 1,028216704     | 0               |
| STXBP2                                                                                   | 0,377102913 | -0,040144355 | 0     | 0,01  | 1         | 0,972557629   | 1,028216704     | 0               |
| VN1R1                                                                                    | 0,377102913 | -0,040144355 | 0     | 0,01  | 1         | 0,972557629   | 1,028216704     | 0               |
| ATG5                                                                                     | 0,002966424 | -0,040177244 | 0,362 | 0,13  | 1         | 0,972535458   | 1,028240145     | 2,784615385     |
| AL035681.1                                                                               | 0,377102913 | -0,040177897 | 0     | 0,01  | 1         | 0,972535018   | 1,02824061      | 0               |
| HSPA12B                                                                                  | 0,377102913 | -0,040177897 | 0     | 0,01  | 1         | 0,972535018   | 1,02824061      | 0               |
| LEKR1                                                                                    | 0,377102913 | -0,040177897 | 0     | 0,01  | 1         | 0,972535018   | 1,02824061      | 0               |
| PDZD3                                                                                    | 0,377102913 | -0,040177897 | 0     | 0,01  | 1         | 0,972535018   | 1,02824061      | 0               |
| STAC2                                                                                    | 0,207484841 | -0,040205416 | 0     | 0,02  | 1         | 0,972516467   | 1,028260224     | 0               |
| PCDHB15                                                                                  | 0,207484841 | -0,04023816  | 0     | 0,02  | 1         | 0,972494395   | 1,028283562     | 0               |
| RDH5                                                                                     | 0,347667268 | -0,040281473 | 0,075 | 0,04  | 1         | 0,972465199   | 1,028314434     | 1,875           |
| HAGHL                                                                                    | 0,347667268 | -0,040375387 | 0,075 | 0,04  | 1         | 0,972401897   | 1,028381375     | 1,875           |
| SLC25A1                                                                                  | 0,083471342 | -0,040381785 | 0,212 | 0,1   | 1         | 0,972397585   | 1,028385936     | 2,12            |
| PCDHB3                                                                                   | 0,207484841 | -0,040389083 | 0     | 0,02  | 1         | 0,972392666   | 1,028391138     | 0               |
| H2AZ1                                                                                    | 0,292382453 | -0,040392157 | 0,95  | 0,84  | 1         | 0,972390594   | 1,028393329     | 1,130952381     |
| TIPRL                                                                                    | 0,008222752 | -0,040408306 | 0,55  | 0,26  | 1         | 0,972379709   | 1,028404841     | 2,115384615     |
| CTNND2                                                                                   | 0,886527564 | -0,040414826 | 0,013 | 0,01  | 1         | 0,972375315   | 1,028409488     | 1,3             |
| PINK1                                                                                    | 0,039252555 | -0,040416033 | 0,35  | 0,17  | 1         | 0,972374501   | 1,028410349     | 2,058823529     |
| PLXDC1                                                                                   | 0,521976935 | -0,040428475 | 0,05  | 0,03  | 1         | 0,972366116   | 1,028419218     | 1,666666667     |
| CAPN12                                                                                   | 0,377102913 | -0,040470958 | 0     | 0,01  | 1         | 0,972337483   | 1,028449502     | 0               |
| SIX3                                                                                     | 0,377102913 | -0,040470958 | 0     | 0,01  | 1         | 0,972337483   | 1,028449502     | 0               |
| SLC5A12                                                                                  | 0,377102913 | -0,040470958 | 0     | 0,01  | 1         | 0,972337483   | 1,028449502     | 0               |
| SLC6A12                                                                                  | 0,377102913 | -0,040470958 | 0     | 0,01  | 1         | 0,972337483   | 1,028449502     | 0               |
| TMEM68                                                                                   | 0,080462265 | -0,040471838 | 0,112 | 0,04  | 1         | 0,972336889   | 1,02845013      | 2,8             |
| NETO2                                                                                    | 0,447580525 | -0,040473905 | 0,025 | 0,01  | 1         | 0,972335496   | 1,028451603     | 2,5             |
| ELOA                                                                                     | 0,007514457 | -0,040501727 | 0,3   | 0,11  | 1         | 0,972316745   | 1,028471437     | 2,727272727     |
| ELF4                                                                                     | 0,501283468 | -0,040504619 | 0,038 | 0,02  | 1         | 0,972314796   | 1,028473498     | 1,9             |
| KMT2E-AS1                                                                                | 0,34027224  | -0,040566309 | 0,075 | 0,04  | 1         | 0,972273221   | 1,028517477     | 1,875           |
| AKAP5                                                                                    | 0,692138165 | -0,040618916 | 0,013 | 0,02  | 1         | 0,972237768   | 1,028554982     | 0,65            |



Supplementary Table 4

| Differentially expressed genes_keloid-CCD_ comparing SC-Keloid vs. (SC-Myel, SC-Nonmyel) |             |              |       |       |           |               |                 |                 |
|------------------------------------------------------------------------------------------|-------------|--------------|-------|-------|-----------|---------------|-----------------|-----------------|
| gene                                                                                     | p_val       | avg_log2FC   | pct.1 | pct.2 | p_val_adj | Foldchange_UP | Foldchange_DOWN | Ratio_pct1_pct2 |
| GDAP2                                                                                    | 0,060401558 | -0,04067433  | 0,138 | 0,05  | 1         | 0,972200425   | 1,028594489     | 2,76            |
| TRMT1                                                                                    | 0,073627148 | -0,040680747 | 0,15  | 0,06  | 1         | 0,972196101   | 1,028599065     | 2,5             |
| RP9                                                                                      | 0,000403134 | -0,040730434 | 0,512 | 0,18  | 1         | 0,972162619   | 1,028634449     | 2,844444444     |
| PIDD1                                                                                    | 0,914445434 | -0,040738046 | 0,038 | 0,04  | 1         | 0,972157489   | 1,028639918     | 0,95            |
| SCRN2                                                                                    | 0,164243104 | -0,040858341 | 0,188 | 0,1   | 1         | 0,972076432   | 1,028725692     | 1,88            |
| SLC29A3                                                                                  | 0,447580525 | -0,040860967 | 0,025 | 0,01  | 1         | 0,972074663   | 1,028727564     | 2,5             |
| C2CD2                                                                                    | 0,539465965 | -0,040892806 | 0,062 | 0,04  | 1         | 0,97205321    | 1,028750268     | 1,55            |
| TRAPPC13                                                                                 | 0,053119313 | -0,040898224 | 0,175 | 0,07  | 1         | 0,97204956    | 1,028754131     | 2,5             |
| NCAM2                                                                                    | 0,020912502 | -0,040899344 | 0,3   | 0,13  | 1         | 0,972048805   | 1,02875493      | 2,307692308     |
| ASIC1                                                                                    | 0,207484841 | -0,040909192 | 0     | 0,02  | 1         | 0,97204217    | 1,028761952     | 0               |
| C1RL                                                                                     | 0,501283468 | -0,040940462 | 0,038 | 0,02  | 1         | 0,972021101   | 1,02878425      | 1,9             |
| LINC00702                                                                                | 0,501283468 | -0,040961422 | 0,038 | 0,02  | 1         | 0,972006979   | 1,028799197     | 1,9             |
| GIPC3                                                                                    | 0,83477988  | -0,041066533 | 0,025 | 0,02  | 1         | 0,971936164   | 1,028874156     | 1,25            |
| C16orf82                                                                                 | 0,377102913 | -0,041081792 | 0     | 0,01  | 1         | 0,971925884   | 1,028885038     | 0               |
| LINC00682                                                                                | 0,377102913 | -0,041081792 | 0     | 0,01  | 1         | 0,971925884   | 1,028885038     | 0               |
| PNMA8B                                                                                   | 0,377102913 | -0,041081792 | 0     | 0,01  | 1         | 0,971925884   | 1,028885038     | 0               |
| RASGRP4                                                                                  | 0,377102913 | -0,041081792 | 0     | 0,01  | 1         | 0,971925884   | 1,028885038     | 0               |
| UBA7                                                                                     | 0,539438221 | -0,04109806  | 0,075 | 0,05  | 1         | 0,971914924   | 1,02889664      | 1,5             |
| DBF4B                                                                                    | 0,501283468 | -0,041116898 | 0,038 | 0,02  | 1         | 0,971902234   | 1,028910075     | 1,9             |
| SMCR5                                                                                    | 0,501283468 | -0,041183782 | 0,038 | 0,02  | 1         | 0,971857177   | 1,028957777     | 1,9             |
| RBM38                                                                                    | 0,002449956 | -0,041470005 | 0,362 | 0,13  | 1         | 0,971664385   | 1,029161936     | 2,784615385     |
| IVL                                                                                      | 0,886527564 | -0,041470988 | 0,013 | 0,01  | 1         | 0,971663723   | 1,029162638     | 1,3             |
| H3-3A                                                                                    | 0,326977149 | -0,041472796 | 1     | 0,98  | 1         | 0,971662506   | 1,029163927     | 1,020408163     |
| PSTK                                                                                     | 0,317447852 | -0,041482365 | 0,062 | 0,03  | 1         | 0,971656061   | 1,029170753     | 2,066666667     |
| PRORP                                                                                    | 0,886527564 | -0,041488479 | 0,013 | 0,01  | 1         | 0,971651943   | 1,029175115     | 1,3             |
| AQP8                                                                                     | 0,377102913 | -0,041531223 | 0     | 0,01  | 1         | 0,971623156   | 1,029205607     | 0               |
| C6orf118                                                                                 | 0,377102913 | -0,041531223 | 0     | 0,01  | 1         | 0,971623156   | 1,029205607     | 0               |
| ZNF587B                                                                                  | 0,377102913 | -0,041531223 | 0     | 0,01  | 1         | 0,971623156   | 1,029205607     | 0               |
| BRME1                                                                                    | 0,447580525 | -0,041612562 | 0,025 | 0,01  | 1         | 0,971568377   | 1,029263636     | 2,5             |
| SBK1                                                                                     | 0,692138165 | -0,041614401 | 0,013 | 0,02  | 1         | 0,971567138   | 1,029264948     | 0,65            |

Supplementary Table 4

| Differentially expressed genes_keloid-CCD_ comparing SC-Keloid vs. (SC-Myel, SC-Nonmyel) |             |              |       |       |           |               |                 |                 |
|------------------------------------------------------------------------------------------|-------------|--------------|-------|-------|-----------|---------------|-----------------|-----------------|
| gene                                                                                     | p_val       | avg_log2FC   | pct.1 | pct.2 | p_val_adj | Foldchange_UP | Foldchange_DOWN | Ratio_pct1_pct2 |
| CHAC1                                                                                    | 0,692138165 | -0,041621789 | 0,013 | 0,02  | 1         | 0,971562163   | 1,029270219     | 0,65            |
| DNAH6                                                                                    | 0,377102913 | -0,041735483 | 0     | 0,01  | 1         | 0,9714856     | 1,029351335     | 0               |
| FAM135B                                                                                  | 0,377102913 | -0,041735483 | 0     | 0,01  | 1         | 0,9714856     | 1,029351335     | 0               |
| KLHL33                                                                                   | 0,377102913 | -0,041735483 | 0     | 0,01  | 1         | 0,9714856     | 1,029351335     | 0               |
| LAMB4                                                                                    | 0,377102913 | -0,041735483 | 0     | 0,01  | 1         | 0,9714856     | 1,029351335     | 0               |
| MCF2                                                                                     | 0,377102913 | -0,041735483 | 0     | 0,01  | 1         | 0,9714856     | 1,029351335     | 0               |
| MFAP5                                                                                    | 0,377102913 | -0,041735483 | 0     | 0,01  | 1         | 0,9714856     | 1,029351335     | 0               |
| TSIX                                                                                     | 0,377102913 | -0,041735483 | 0     | 0,01  | 1         | 0,9714856     | 1,029351335     | 0               |
| ENHO                                                                                     | 0,207484841 | -0,041752603 | 0     | 0,02  | 1         | 0,971474072   | 1,02936355      | 0               |
| LDB1                                                                                     | 0,054387037 | -0,041769633 | 0,225 | 0,1   | 1         | 0,971462605   | 1,029375701     | 2,25            |
| NCOA5                                                                                    | 0,191117973 | -0,041779488 | 0,075 | 0,03  | 1         | 0,971455969   | 1,029382733     | 2,5             |
| ABCF3                                                                                    | 0,135004841 | -0,041824187 | 0,1   | 0,04  | 1         | 0,971425871   | 1,029414627     | 2,5             |
| AC104532.2                                                                               | 0,692138165 | -0,041840326 | 0,013 | 0,02  | 1         | 0,971415003   | 1,029426143     | 0,65            |
| GTF2IRD2B                                                                                | 0,281533808 | -0,04184302  | 0,138 | 0,08  | 1         | 0,971413189   | 1,029428065     | 1,725           |
| SLC9A8                                                                                   | 0,081579256 | -0,041851274 | 0,112 | 0,04  | 1         | 0,971407632   | 1,029433955     | 2,8             |
| TOMM70                                                                                   | 0,010288321 | -0,041879496 | 0,25  | 0,09  | 1         | 0,971388629   | 1,029454093     | 2,777777778     |
| MEX3A                                                                                    | 0,057139363 | -0,041880547 | 0,275 | 0,13  | 1         | 0,971387922   | 1,029454843     | 2,115384615     |
| ZBTB33                                                                                   | 0,539465965 | -0,041900185 | 0,062 | 0,04  | 1         | 0,971374699   | 1,029468856     | 1,55            |
| KLHDC8B                                                                                  | 0,373704119 | -0,041940837 | 0,1   | 0,06  | 1         | 0,971347328   | 1,029497864     | 1,666666667     |
| EIF2AK2                                                                                  | 0,057266477 | -0,042006343 | 0,475 | 0,25  | 1         | 0,971303225   | 1,02954461      | 1,9             |
| GNPDA1                                                                                   | 0,031517523 | -0,042017593 | 0,188 | 0,07  | 1         | 0,971295651   | 1,029552638     | 2,685714286     |
| NOP14-AS1                                                                                | 0,343957066 | -0,042031715 | 0,075 | 0,04  | 1         | 0,971286143   | 1,029562716     | 1,875           |
| AGAP3                                                                                    | 0,002840361 | -0,042051705 | 0,225 | 0,06  | 1         | 0,971272685   | 1,029576982     | 3,75            |
| GPR4                                                                                     | 0,692138165 | -0,042124863 | 0,013 | 0,02  | 1         | 0,971223434   | 1,029629193     | 0,65            |
| ARF4                                                                                     | 0,139108007 | -0,042134351 | 0,9   | 0,62  | 1         | 0,971217047   | 1,029635964     | 1,451612903     |
| TSPAN11                                                                                  | 0,047653806 | -0,042186799 | 0,613 | 0,33  | 1         | 0,97118174    | 1,029673396     | 1,857575758     |
| ARHGAP35                                                                                 | 0,021793783 | -0,042260713 | 0,288 | 0,12  | 1         | 0,971131984   | 1,029726151     | 2,4             |
| PMEL                                                                                     | 0,692138165 | -0,0422792   | 0,013 | 0,02  | 1         | 0,97111954    | 1,029739346     | 0,65            |
| PYGO1                                                                                    | 0,701739822 | -0,042306782 | 0,013 | 0,02  | 1         | 0,971100974   | 1,029759033     | 0,65            |
| ZBED3                                                                                    | 0,521976935 | -0,042348177 | 0,05  | 0,03  | 1         | 0,97107311    | 1,029788581     | 1,666666667     |

Supplementary Table 4

| Differentially expressed genes_keloid-CCD_ comparing SC-Keloid vs. (SC-Myel, SC-Nonmyel) |             |              |       |       |           |               |                 |                 |
|------------------------------------------------------------------------------------------|-------------|--------------|-------|-------|-----------|---------------|-----------------|-----------------|
| gene                                                                                     | p_val       | avg_log2FC   | pct.1 | pct.2 | p_val_adj | Foldchange_UP | Foldchange_DOWN | Ratio_pct1_pct2 |
| METTL25                                                                                  | 0,534439505 | -0,04237136  | 0,062 | 0,04  | 1         | 0,971057506   | 1,029805129     | 1,55            |
| DAPK2                                                                                    | 0,447580525 | -0,042380822 | 0,025 | 0,01  | 1         | 0,971051137   | 1,029811883     | 2,5             |
| PPIE                                                                                     | 0,001598093 | -0,042388858 | 0,475 | 0,18  | 1         | 0,971045729   | 1,029817619     | 2,638888889     |
| METTL25B                                                                                 | 0,157546415 | -0,042392233 | 0,112 | 0,05  | 1         | 0,971043457   | 1,029820028     | 2,24            |
| GSPT1                                                                                    | 0,072371489 | -0,042406079 | 0,637 | 0,35  | 1         | 0,971034138   | 1,029829911     | 1,82            |
| DNAH10                                                                                   | 0,377102913 | -0,042422787 | 0     | 0,01  | 1         | 0,971022892   | 1,029841838     | 0               |
| FMO5                                                                                     | 0,377102913 | -0,042422787 | 0     | 0,01  | 1         | 0,971022892   | 1,029841838     | 0               |
| PCDHB6                                                                                   | 0,377102913 | -0,042422787 | 0     | 0,01  | 1         | 0,971022892   | 1,029841838     | 0               |
| ZFPM2                                                                                    | 0,377102913 | -0,042422787 | 0     | 0,01  | 1         | 0,971022892   | 1,029841838     | 0               |
| TRIM39                                                                                   | 0,501283468 | -0,04246018  | 0,038 | 0,02  | 1         | 0,970997725   | 1,029868531     | 1,9             |
| CPM                                                                                      | 0,692138165 | -0,042461313 | 0,013 | 0,02  | 1         | 0,970996962   | 1,029869339     | 0,65            |
| PLVAP                                                                                    | 0,343957066 | -0,042468009 | 0,075 | 0,04  | 1         | 0,970992456   | 1,029874119     | 1,875           |
| DCAF5                                                                                    | 0,049463005 | -0,042516927 | 0,262 | 0,12  | 1         | 0,970959532   | 1,029909041     | 2,183333333     |
| NUP35                                                                                    | 0,035392992 | -0,042531384 | 0,112 | 0,03  | 1         | 0,970949803   | 1,029919361     | 3,733333333     |
| XPR1                                                                                     | 0,112247794 | -0,042579636 | 0,088 | 0,03  | 1         | 0,970917329   | 1,029953808     | 2,933333333     |
| TMEM229B                                                                                 | 0,085199008 | -0,042592118 | 0,075 | 0,02  | 1         | 0,970908928   | 1,029962719     | 3,75            |
| RBM14                                                                                    | 0,104675576 | -0,042632924 | 0,188 | 0,09  | 1         | 0,970881467   | 1,029991851     | 2,088888889     |
| ZSCAN12                                                                                  | 0,820013192 | -0,04266485  | 0,025 | 0,03  | 1         | 0,970859982   | 1,030014645     | 0,833333333     |
| ZCCHC18                                                                                  | 0,223365318 | -0,042695218 | 0,038 | 0,01  | 1         | 0,970839546   | 1,030036327     | 3,8             |
| DMPK                                                                                     | 0,233526772 | -0,042716473 | 0,188 | 0,11  | 1         | 0,970825244   | 1,030051502     | 1,709090909     |
| DDHD2                                                                                    | 0,042890126 | -0,042717684 | 0,212 | 0,09  | 1         | 0,970824429   | 1,030052366     | 2,355555556     |
| STK17B                                                                                   | 0,025795918 | -0,042730808 | 0,175 | 0,06  | 1         | 0,970815597   | 1,030061736     | 2,916666667     |
| CETN3                                                                                    | 0,024271833 | -0,042758761 | 0,212 | 0,08  | 1         | 0,970796787   | 1,030081695     | 2,65            |
| RANBP2                                                                                   | 0,010760513 | -0,042775933 | 0,4   | 0,17  | 1         | 0,970785232   | 1,030093956     | 2,352941176     |
| SLC35E4                                                                                  | 0,00297039  | -0,042794483 | 0,262 | 0,08  | 1         | 0,97077275    | 1,030107201     | 3,275           |
| ZNF251                                                                                   | 0,501283468 | -0,042799902 | 0,038 | 0,02  | 1         | 0,970769103   | 1,03011107      | 1,9             |
| NEURL1B                                                                                  | 0,548643101 | -0,042840461 | 0,075 | 0,05  | 1         | 0,970741813   | 1,03014003      | 1,5             |
| ANXA11                                                                                   | 0,00841767  | -0,042868195 | 0,625 | 0,29  | 1         | 0,970723152   | 1,030159833     | 2,155172414     |
| ZNF124                                                                                   | 0,246922691 | -0,042905268 | 0,1   | 0,05  | 1         | 0,970698207   | 1,030186306     | 2               |
| CRYZL1                                                                                   | 0,057312365 | -0,042910186 | 0,225 | 0,1   | 1         | 0,970694898   | 1,030189818     | 2,25            |

Supplementary Table 4

| Differentially expressed genes_keloid-CCD_ comparing SC-Keloid vs. (SC-Myel, SC-Nonmyel) |             |              |       |       |           |               |                 |                 |
|------------------------------------------------------------------------------------------|-------------|--------------|-------|-------|-----------|---------------|-----------------|-----------------|
| gene                                                                                     | p_val       | avg_log2FC   | pct.1 | pct.2 | p_val_adj | Foldchange_UP | Foldchange_DOWN | Ratio_pct1_pct2 |
| PPP1R12C                                                                                 | 0,020174087 | -0,042924439 | 0,238 | 0,09  | 1         | 0,970685308   | 1,030199995     | 2,644444444     |
| DCLK2                                                                                    | 0,155732654 | -0,042963568 | 0,112 | 0,05  | 1         | 0,970658981   | 1,030227937     | 2,24            |
| ARHGEF6                                                                                  | 0,249550622 | -0,042963991 | 0,1   | 0,05  | 1         | 0,970658697   | 1,030228239     | 2               |
| ST7L                                                                                     | 0,024425091 | -0,042995622 | 0,175 | 0,06  | 1         | 0,970637415   | 1,030250827     | 2,916666667     |
| PAN2                                                                                     | 0,193718766 | -0,043042015 | 0,075 | 0,03  | 1         | 0,970606203   | 1,030283958     | 2,5             |
| EMID1                                                                                    | 0,501283468 | -0,043088822 | 0,038 | 0,02  | 1         | 0,970574713   | 1,030317385     | 1,9             |
| ZNF296                                                                                   | 0,223632981 | -0,043124238 | 0,088 | 0,04  | 1         | 0,970550887   | 1,030342678     | 2,2             |
| BUB3                                                                                     | 0,149162752 | -0,043153035 | 0,537 | 0,31  | 1         | 0,970531515   | 1,030363244     | 1,732258065     |
| FRZB                                                                                     | 0,501283468 | -0,043197278 | 0,038 | 0,02  | 1         | 0,970501751   | 1,030394843     | 1,9             |
| GRIK5                                                                                    | 0,377102913 | -0,043210629 | 0     | 0,01  | 1         | 0,970492771   | 1,030404378     | 0               |
| IMPG2                                                                                    | 0,377102913 | -0,043210629 | 0     | 0,01  | 1         | 0,970492771   | 1,030404378     | 0               |
| SLC19A3                                                                                  | 0,377102913 | -0,043210629 | 0     | 0,01  | 1         | 0,970492771   | 1,030404378     | 0               |
| TEX29                                                                                    | 0,377102913 | -0,043210629 | 0     | 0,01  | 1         | 0,970492771   | 1,030404378     | 0               |
| TOR1AIP2                                                                                 | 0,019398333 | -0,043220081 | 0,525 | 0,25  | 1         | 0,970486412   | 1,030411129     | 2,1             |
| HGF                                                                                      | 0,886527564 | -0,043233913 | 0,013 | 0,01  | 1         | 0,970477107   | 1,030421009     | 1,3             |
| ARRB1                                                                                    | 0,207484841 | -0,04324578  | 0     | 0,02  | 1         | 0,970469125   | 1,030429484     | 0               |
| TMEM87B                                                                                  | 0,027602607 | -0,043249854 | 0,175 | 0,06  | 1         | 0,970466385   | 1,030432394     | 2,916666667     |
| PRKD2                                                                                    | 0,793304172 | -0,043297718 | 0,05  | 0,04  | 1         | 0,970434188   | 1,030466582     | 1,25            |
| ADAMTS17                                                                                 | 0,377102913 | -0,043314422 | 0     | 0,01  | 1         | 0,970422952   | 1,030478513     | 0               |
| ACKR4                                                                                    | 0,377102913 | -0,043405652 | 0     | 0,01  | 1         | 0,970361589   | 1,030543677     | 0               |
| ELF3                                                                                     | 0,377102913 | -0,043405652 | 0     | 0,01  | 1         | 0,970361589   | 1,030543677     | 0               |
| GDNF-AS1                                                                                 | 0,377102913 | -0,043405652 | 0     | 0,01  | 1         | 0,970361589   | 1,030543677     | 0               |
| NPAS3                                                                                    | 0,377102913 | -0,043405652 | 0     | 0,01  | 1         | 0,970361589   | 1,030543677     | 0               |
| SNX22                                                                                    | 0,377102913 | -0,043405652 | 0     | 0,01  | 1         | 0,970361589   | 1,030543677     | 0               |
| PRDM1                                                                                    | 0,84359211  | -0,043428144 | 0,025 | 0,02  | 1         | 0,970346461   | 1,030559744     | 1,25            |
| MYO9B                                                                                    | 0,131124386 | -0,043429903 | 0,537 | 0,32  | 1         | 0,970345277   | 1,030561001     | 1,678125        |
| MZF1                                                                                     | 0,774717987 | -0,043444688 | 0,05  | 0,04  | 1         | 0,970335333   | 1,030571562     | 1,25            |
| TRIM4                                                                                    | 0,06378163  | -0,043448665 | 0,188 | 0,08  | 1         | 0,970332658   | 1,030574403     | 2,35            |
| TUT4                                                                                     | 0,004827486 | -0,043518018 | 0,575 | 0,25  | 1         | 0,970286014   | 1,030623946     | 2,3             |
| TBC1D22B                                                                                 | 0,820013192 | -0,04352771  | 0,025 | 0,03  | 1         | 0,970279495   | 1,03063087      | 0,833333333     |

Supplementary Table 4

| Differentially expressed genes_keloid-CCD_ comparing SC-Keloid vs. (SC-Myel, SC-Nonmyel) |             |              |       |       |           |               |                 |                 |
|------------------------------------------------------------------------------------------|-------------|--------------|-------|-------|-----------|---------------|-----------------|-----------------|
| gene                                                                                     | p_val       | avg_log2FC   | pct.1 | pct.2 | p_val_adj | Foldchange_UP | Foldchange_DOWN | Ratio_pct1_pct2 |
| UBD                                                                                      | 0,377102913 | -0,043606837 | 0     | 0,01  | 1         | 0,97022628    | 1,030687398     | 0               |
| OTUD7A                                                                                   | 0,447580525 | -0,043623208 | 0,025 | 0,01  | 1         | 0,970215271   | 1,030699094     | 2,5             |
| TIGD3                                                                                    | 0,207484841 | -0,043625919 | 0     | 0,02  | 1         | 0,970213447   | 1,03070103      | 0               |
| C4orf47                                                                                  | 0,692138165 | -0,043685634 | 0,013 | 0,02  | 1         | 0,97017329    | 1,030743694     | 0,65            |
| BCL9                                                                                     | 0,081579256 | -0,043711148 | 0,112 | 0,04  | 1         | 0,970156133   | 1,030761922     | 2,8             |
| RGS12                                                                                    | 0,096787055 | -0,043783918 | 0,125 | 0,05  | 1         | 0,970107199   | 1,030813915     | 2,5             |
| GRB14                                                                                    | 0,692138165 | -0,043785792 | 0,013 | 0,02  | 1         | 0,970105939   | 1,030815254     | 0,65            |
| CSF3                                                                                     | 0,886527564 | -0,043816422 | 0,013 | 0,01  | 1         | 0,970085342   | 1,03083714      | 1,3             |
| NSMF                                                                                     | 0,080462265 | -0,043853534 | 0,112 | 0,04  | 1         | 0,970060388   | 1,030863658     | 2,8             |
| KRT23                                                                                    | 0,84359211  | -0,043857973 | 0,025 | 0,02  | 1         | 0,970057404   | 1,030866829     | 1,25            |
| MGAT1                                                                                    | 0,006999801 | -0,043865643 | 0,562 | 0,25  | 1         | 0,970052246   | 1,03087231      | 2,248           |
| COG7                                                                                     | 0,35516371  | -0,043971228 | 0,075 | 0,04  | 1         | 0,969981255   | 1,030947758     | 1,875           |
| NXPE3                                                                                    | 0,011553207 | -0,043973601 | 0,25  | 0,09  | 1         | 0,969979659   | 1,030949454     | 2,777777778     |
| NARS2                                                                                    | 0,133275036 | -0,04398353  | 0,1   | 0,04  | 1         | 0,969972984   | 1,030956549     | 2,5             |
| HPDL                                                                                     | 0,447580525 | -0,043984755 | 0,025 | 0,01  | 1         | 0,96997216    | 1,030957425     | 2,5             |
| PNPLA7                                                                                   | 0,207484841 | -0,044004755 | 0     | 0,02  | 1         | 0,969958713   | 1,030971717     | 0               |
| CRIP1                                                                                    | 0,009273782 | -0,044015077 | 0,4   | 0,17  | 1         | 0,969951774   | 1,030979093     | 2,352941176     |
| CLN6                                                                                     | 0,886527564 | -0,044127376 | 0,013 | 0,01  | 1         | 0,969876276   | 1,031059347     | 1,3             |
| TIGAR                                                                                    | 0,035490814 | -0,044147441 | 0,238 | 0,1   | 1         | 0,969862787   | 1,031073688     | 2,38            |
| WDR19                                                                                    | 0,527578779 | -0,044176087 | 0,05  | 0,03  | 1         | 0,96984353    | 1,03109416      | 1,666666667     |
| SP2                                                                                      | 0,050129728 | -0,044183197 | 0,212 | 0,09  | 1         | 0,96983875    | 1,031099242     | 2,355555556     |
| KCNF1                                                                                    | 0,692138165 | -0,044218962 | 0,013 | 0,02  | 1         | 0,969814707   | 1,031124804     | 0,65            |
| CYP2U1                                                                                   | 0,223632981 | -0,044232002 | 0,088 | 0,04  | 1         | 0,969805942   | 1,031134124     | 2,2             |
| MATN1-AS1                                                                                | 0,84359211  | -0,04424965  | 0,025 | 0,02  | 1         | 0,969794078   | 1,031146737     | 1,25            |
| FBXO8                                                                                    | 0,045508871 | -0,044255024 | 0,162 | 0,06  | 1         | 0,969790466   | 1,031150578     | 2,7             |
| ZGRF1                                                                                    | 0,816980451 | -0,044264453 | 0,038 | 0,03  | 1         | 0,969784128   | 1,031157317     | 1,266666667     |
| PLEKHH3                                                                                  | 0,046910421 | -0,044265777 | 0,212 | 0,09  | 1         | 0,969783238   | 1,031158264     | 2,355555556     |
| KLHL18                                                                                   | 0,057312365 | -0,044282531 | 0,225 | 0,1   | 1         | 0,969771976   | 1,031170239     | 2,25            |
| JAZF1                                                                                    | 0,534439505 | -0,044315728 | 0,062 | 0,04  | 1         | 0,969749661   | 1,031193967     | 1,55            |
| ERICH1                                                                                   | 0,010558235 | -0,044316166 | 0,25  | 0,09  | 1         | 0,969749367   | 1,03119428      | 2,777777778     |

Supplementary Table 4

| Differentially expressed genes_keloid-CCD_ comparing SC-Keloid vs. (SC-Myel, SC-Nonmyel) |             |              |       |       |           |               |                 |                 |
|------------------------------------------------------------------------------------------|-------------|--------------|-------|-------|-----------|---------------|-----------------|-----------------|
| gene                                                                                     | p_val       | avg_log2FC   | pct.1 | pct.2 | p_val_adj | Foldchange_UP | Foldchange_DOWN | Ratio_pct1_pct2 |
| SORBS3                                                                                   | 0,006998481 | -0,044326506 | 0,362 | 0,14  | 1         | 0,969742416   | 1,031201671     | 2,585714286     |
| SLC43A1                                                                                  | 0,886527564 | -0,044331281 | 0,013 | 0,01  | 1         | 0,969739207   | 1,031205084     | 1,3             |
| HFE                                                                                      | 0,84359211  | -0,044346802 | 0,025 | 0,02  | 1         | 0,969728774   | 1,031216178     | 1,25            |
| ITPRIPL2                                                                                 | 0,036253755 | -0,04437604  | 0,475 | 0,24  | 1         | 0,969709122   | 1,031237077     | 1,979166667     |
| WDR89                                                                                    | 0,793304172 | -0,04437812  | 0,05  | 0,04  | 1         | 0,969707723   | 1,031238564     | 1,25            |
| PTPN14                                                                                   | 0,013383076 | -0,044448441 | 0,462 | 0,21  | 1         | 0,969660458   | 1,031288831     | 2,2             |
| ADCY5                                                                                    | 0,377102913 | -0,044503684 | 0     | 0,01  | 1         | 0,969623329   | 1,031328321     | 0               |
| LINC02897                                                                                | 0,377102913 | -0,044503684 | 0     | 0,01  | 1         | 0,969623329   | 1,031328321     | 0               |
| MFSD14A                                                                                  | 0,423434047 | -0,044512359 | 0,013 | 0,03  | 1         | 0,969617499   | 1,031334522     | 0,433333333     |
| IDH1-AS1                                                                                 | 0,886527564 | -0,044521864 | 0,013 | 0,01  | 1         | 0,969611111   | 1,031341317     | 1,3             |
| ZNF618                                                                                   | 0,501283468 | -0,044581845 | 0,038 | 0,02  | 1         | 0,9695708     | 1,031384196     | 1,9             |
| LOX                                                                                      | 0,157415062 | -0,04458981  | 0,062 | 0,02  | 1         | 0,969565447   | 1,031389891     | 3,1             |
| WDR76                                                                                    | 0,35516371  | -0,044590958 | 0,075 | 0,04  | 1         | 0,969564675   | 1,031390711     | 1,875           |
| MAOA                                                                                     | 0,886527564 | -0,044619021 | 0,013 | 0,01  | 1         | 0,969545815   | 1,031410774     | 1,3             |
| MAMDC2                                                                                   | 0,081579256 | -0,044698    | 0,112 | 0,04  | 1         | 0,96949274    | 1,031467239     | 2,8             |
| OTUD3                                                                                    | 0,060401558 | -0,044726645 | 0,138 | 0,05  | 1         | 0,969473491   | 1,031487719     | 2,76            |
| VPS54                                                                                    | 0,111488744 | -0,044744645 | 0,138 | 0,06  | 1         | 0,969461395   | 1,031500589     | 2,3             |
| AMY2B                                                                                    | 0,692138165 | -0,044790488 | 0,013 | 0,02  | 1         | 0,96943059    | 1,031533366     | 0,65            |
| CIPC                                                                                     | 0,501283468 | -0,044802622 | 0,038 | 0,02  | 1         | 0,969422436   | 1,031542042     | 1,9             |
| SAP25                                                                                    | 0,377102913 | -0,044807795 | 0     | 0,01  | 1         | 0,96941896    | 1,031545741     | 0               |
| RUSC2                                                                                    | 0,527578779 | -0,044820035 | 0,05  | 0,03  | 1         | 0,969410736   | 1,031554493     | 1,666666667     |
| ST6GALNAC2                                                                               | 0,447580525 | -0,044825306 | 0,025 | 0,01  | 1         | 0,969407194   | 1,031558262     | 2,5             |
| SERPINA5                                                                                 | 0,309705255 | -0,044859568 | 0,062 | 0,03  | 1         | 0,969384172   | 1,03158276      | 2,066666667     |
| FOXD2                                                                                    | 0,84359211  | -0,04487078  | 0,025 | 0,02  | 1         | 0,969376639   | 1,031590777     | 1,25            |
| THTPA                                                                                    | 0,075951038 | -0,044905758 | 0,262 | 0,13  | 1         | 0,969353136   | 1,031615788     | 2,015384615     |
| C5orf58                                                                                  | 0,886527564 | -0,044928472 | 0,013 | 0,01  | 1         | 0,969337875   | 1,03163203      | 1,3             |
| C5orf24                                                                                  | 0,027307651 | -0,044950208 | 0,7   | 0,36  | 1         | 0,969323271   | 1,031647573     | 1,944444444     |
| AGAP4                                                                                    | 0,447580525 | -0,044952476 | 0,025 | 0,01  | 1         | 0,969321747   | 1,031649195     | 2,5             |
| RCVRN                                                                                    | 0,84359211  | -0,04497704  | 0,025 | 0,02  | 1         | 0,969305243   | 1,03166676      | 1,25            |
| MFSD1                                                                                    | 0,046391154 | -0,045018767 | 0,212 | 0,09  | 1         | 0,969277208   | 1,0316966       | 2,355555556     |

Supplementary Table 4

| Differentially expressed genes_keloid-CCD_ comparing SC-Keloid vs. (SC-Myel, SC-Nonmyel) |             |              |       |       |           |               |                 |                 |
|------------------------------------------------------------------------------------------|-------------|--------------|-------|-------|-----------|---------------|-----------------|-----------------|
| gene                                                                                     | p_val       | avg_log2FC   | pct.1 | pct.2 | p_val_adj | Foldchange_UP | Foldchange_DOWN | Ratio_pct1_pct2 |
| RBM46                                                                                    | 0,377102913 | -0,045059723 | 0     | 0,01  | 1         | 0,969249692   | 1,031725888     | 0               |
| RYR3                                                                                     | 0,377102913 | -0,045059723 | 0     | 0,01  | 1         | 0,969249692   | 1,031725888     | 0               |
| TUBB1                                                                                    | 0,377102913 | -0,045059723 | 0     | 0,01  | 1         | 0,969249692   | 1,031725888     | 0               |
| VWA3B                                                                                    | 0,377102913 | -0,045059723 | 0     | 0,01  | 1         | 0,969249692   | 1,031725888     | 0               |
| ZBTB20-AS1                                                                               | 0,377102913 | -0,045059723 | 0     | 0,01  | 1         | 0,969249692   | 1,031725888     | 0               |
| ZNF322                                                                                   | 0,108225763 | -0,045084602 | 0,25  | 0,13  | 1         | 0,969232978   | 1,031743681     | 1,923076923     |
| RCL1                                                                                     | 0,404307785 | -0,045125448 | 0,112 | 0,07  | 1         | 0,969205537   | 1,031772892     | 1,6             |
| ZNF550                                                                                   | 0,914445434 | -0,045155301 | 0,038 | 0,04  | 1         | 0,969185482   | 1,031794243     | 0,95            |
| HTR7                                                                                     | 0,886527564 | -0,045246808 | 0,013 | 0,01  | 1         | 0,969124011   | 1,031859689     | 1,3             |
| TMEM52                                                                                   | 0,84359211  | -0,045262178 | 0,025 | 0,02  | 1         | 0,969113686   | 1,031870682     | 1,25            |
| WFS1                                                                                     | 0,085199008 | -0,045269586 | 0,075 | 0,02  | 1         | 0,96910871    | 1,03187598      | 3,75            |
| EPHA1-AS1                                                                                | 0,692138165 | -0,045276873 | 0,013 | 0,02  | 1         | 0,969103815   | 1,031881192     | 0,65            |
| TRMT12                                                                                   | 0,809797238 | -0,045377057 | 0,038 | 0,03  | 1         | 0,96903652    | 1,031952851     | 1,266666667     |
| AMBRA1                                                                                   | 0,809797238 | -0,045411516 | 0,038 | 0,03  | 1         | 0,969013375   | 1,0319775       | 1,266666667     |
| SYMPK                                                                                    | 0,037061088 | -0,0454451   | 0,25  | 0,11  | 1         | 0,968990818   | 1,032001523     | 2,272727273     |
| PEX19                                                                                    | 0,026143714 | -0,045521378 | 0,212 | 0,08  | 1         | 0,968939587   | 1,032056089     | 2,65            |
| MIB1                                                                                     | 0,011219966 | -0,045593913 | 0,425 | 0,19  | 1         | 0,968890873   | 1,032107979     | 2,236842105     |
| CDC42EP2                                                                                 | 0,539465965 | -0,045622721 | 0,062 | 0,04  | 1         | 0,968871526   | 1,032128588     | 1,55            |
| TLCD4                                                                                    | 0,820013192 | -0,045662744 | 0,025 | 0,03  | 1         | 0,968844647   | 1,032157222     | 0,833333333     |
| SMIM8                                                                                    | 0,060401558 | -0,04568057  | 0,138 | 0,05  | 1         | 0,968832677   | 1,032169976     | 2,76            |
| CD2AP                                                                                    | 0,002126659 | -0,045690678 | 0,35  | 0,12  | 1         | 0,968825889   | 1,032177207     | 2,916666667     |
| RIC8B                                                                                    | 0,012092898 | -0,045726945 | 0,212 | 0,07  | 1         | 0,968801534   | 1,032203155     | 3,028571429     |
| ZFHX4                                                                                    | 0,255070547 | -0,04575098  | 0,112 | 0,06  | 1         | 0,968785394   | 1,032220351     | 1,866666667     |
| PREP                                                                                     | 0,112247794 | -0,045759965 | 0,088 | 0,03  | 1         | 0,968779361   | 1,032226779     | 2,933333333     |
| TRNP1                                                                                    | 0,069280947 | -0,04583639  | 0,312 | 0,16  | 1         | 0,968728042   | 1,032281462     | 1,95            |
| PCNX1                                                                                    | 0,004323714 | -0,045898788 | 0,238 | 0,07  | 1         | 0,968686145   | 1,03232611      | 3,4             |
| CCDC127                                                                                  | 0,030627815 | -0,04592649  | 0,225 | 0,09  | 1         | 0,968667544   | 1,032345933     | 2,5             |
| WDR81                                                                                    | 0,780899628 | -0,045928904 | 0,05  | 0,04  | 1         | 0,968665924   | 1,03234766      | 1,25            |
| TRMT10C                                                                                  | 0,026430865 | -0,045939958 | 0,35  | 0,16  | 1         | 0,968658502   | 1,03235557      | 2,1875          |
| ZNF140                                                                                   | 0,193718766 | -0,045971334 | 0,075 | 0,03  | 1         | 0,968637436   | 1,032378022     | 2,5             |

Supplementary Table 4

| Differentially expressed genes_keloid-CCD_ comparing SC-Keloid vs. (SC-Myel, SC-Nonmyel) |             |              |       |       |           |               |                 |                 |
|------------------------------------------------------------------------------------------|-------------|--------------|-------|-------|-----------|---------------|-----------------|-----------------|
| gene                                                                                     | p_val       | avg_log2FC   | pct.1 | pct.2 | p_val_adj | Foldchange_UP | Foldchange_DOWN | Ratio_pct1_pct2 |
| CACNB1                                                                                   | 0,501283468 | -0,045974662 | 0,038 | 0,02  | 1         | 0,968635201   | 1,032380404     | 1,9             |
| SLC26A6                                                                                  | 0,827884433 | -0,046072956 | 0,025 | 0,03  | 1         | 0,968569208   | 1,032450745     | 0,833333333     |
| BAG2                                                                                     | 0,052487485 | -0,046107405 | 0,175 | 0,07  | 1         | 0,968546081   | 1,032475398     | 2,5             |
| BAZ1B                                                                                    | 0,003194596 | -0,046121158 | 0,55  | 0,23  | 1         | 0,968536848   | 1,032485241     | 2,391304348     |
| TAB3                                                                                     | 0,692138165 | -0,046175459 | 0,013 | 0,02  | 1         | 0,968500394   | 1,032524103     | 0,65            |
| ZNF626                                                                                   | 0,429993123 | -0,046180183 | 0,013 | 0,03  | 1         | 0,968497223   | 1,032527483     | 0,433333333     |
| DNAAF2                                                                                   | 0,020598276 | -0,0461883   | 0,2   | 0,07  | 1         | 0,968491774   | 1,032533292     | 2,857142857     |
| TXLNA                                                                                    | 0,02099844  | -0,046217861 | 0,388 | 0,18  | 1         | 0,96847193    | 1,032554449     | 2,155555556     |
| CRHBP                                                                                    | 0,886527564 | -0,046240398 | 0,013 | 0,01  | 1         | 0,968456801   | 1,032570579     | 1,3             |
| SLC25A21-AS1                                                                             | 0,284975754 | -0,046255698 | 0,05  | 0,02  | 1         | 0,96844653    | 1,03258153      | 2,5             |
| C11orf71                                                                                 | 0,529436792 | -0,046299355 | 0,062 | 0,04  | 1         | 0,968417225   | 1,032612777     | 1,55            |
| GPI                                                                                      | 0,055015543 | -0,046317812 | 0,375 | 0,19  | 1         | 0,968404835   | 1,032625988     | 1,973684211     |
| MON1A                                                                                    | 0,079357729 | -0,046350821 | 0,112 | 0,04  | 1         | 0,968382678   | 1,032649615     | 2,8             |
| FGFBP1                                                                                   | 0,886527564 | -0,046357441 | 0,013 | 0,01  | 1         | 0,968378235   | 1,032654353     | 1,3             |
| TESK2                                                                                    | 0,284975754 | -0,046429439 | 0,05  | 0,02  | 1         | 0,968329909   | 1,032705889     | 2,5             |
| PRXL2A                                                                                   | 0,244314206 | -0,046508935 | 0,1   | 0,05  | 1         | 0,968276553   | 1,032762796     | 2               |
| ANKS3                                                                                    | 0,000624809 | -0,046588871 | 0,238 | 0,05  | 1         | 0,968222905   | 1,03282002      | 4,76            |
| EPHA10                                                                                   | 0,377102913 | -0,046602729 | 0     | 0,01  | 1         | 0,968213605   | 1,032829941     | 0               |
| HAND1                                                                                    | 0,377102913 | -0,046602729 | 0     | 0,01  | 1         | 0,968213605   | 1,032829941     | 0               |
| NR2C1                                                                                    | 0,096474278 | -0,046630187 | 0,175 | 0,08  | 1         | 0,968195177   | 1,032849598     | 2,1875          |
| H4C5                                                                                     | 0,84359211  | -0,046631444 | 0,025 | 0,02  | 1         | 0,968194333   | 1,032850499     | 1,25            |
| ZNF684                                                                                   | 0,062632651 | -0,046720814 | 0,1   | 0,03  | 1         | 0,96813436    | 1,032914481     | 3,333333333     |
| KLK6                                                                                     | 0,071863285 | -0,046803453 | 0,15  | 0,06  | 1         | 0,968078905   | 1,03297365      | 2,5             |
| MYH10                                                                                    | 0,014436496 | -0,046863942 | 0,225 | 0,08  | 1         | 0,968038316   | 1,033016961     | 2,8125          |
| MMP19                                                                                    | 0,080462265 | -0,046893221 | 0,112 | 0,04  | 1         | 0,968018671   | 1,033037926     | 2,8             |
| ZNF260                                                                                   | 0,0816476   | -0,047015742 | 0,162 | 0,07  | 1         | 0,967936465   | 1,033125661     | 2,314285714     |
| ANKDD1A                                                                                  | 0,0138805   | -0,047028272 | 0,225 | 0,08  | 1         | 0,967928059   | 1,033134633     | 2,8125          |
| MGARP                                                                                    | 0,207484841 | -0,047050293 | 0     | 0,02  | 1         | 0,967913284   | 1,033150403     | 0               |
| AMFR                                                                                     | 0,003195301 | -0,047076262 | 0,262 | 0,08  | 1         | 0,967895862   | 1,033169        | 3,275           |
| ANP32A                                                                                   | 0,010026072 | -0,047097686 | 0,613 | 0,29  | 1         | 0,967881489   | 1,033184343     | 2,113793103     |



Supplementary Table 4

| Differentially expressed genes_keloid-CCD_ comparing SC-Keloid vs. (SC-Myel, SC-Nonmyel) |             |              |       |       |           |               |                 |                 |
|------------------------------------------------------------------------------------------|-------------|--------------|-------|-------|-----------|---------------|-----------------|-----------------|
| gene                                                                                     | p_val       | avg_log2FC   | pct.1 | pct.2 | p_val_adj | Foldchange_UP | Foldchange_DOWN | Ratio_pct1_pct2 |
| SPTBN5                                                                                   | 0,84359211  | -0,047117303 | 0,025 | 0,02  | 1         | 0,967868328   | 1,033198392     | 1,25            |
| PARD3                                                                                    | 0,080727289 | -0,047146517 | 0,162 | 0,07  | 1         | 0,96784873    | 1,033219314     | 2,314285714     |
| TIAM2                                                                                    | 0,284975754 | -0,0471478   | 0,05  | 0,02  | 1         | 0,967847869   | 1,033220232     | 2,5             |
| LINC00632                                                                                | 0,54403098  | -0,047156026 | 0,075 | 0,05  | 1         | 0,96784235    | 1,033226124     | 1,5             |
| ZNF613                                                                                   | 0,886527564 | -0,047180185 | 0,013 | 0,01  | 1         | 0,967826143   | 1,033243426     | 1,3             |
| UCP3                                                                                     | 0,207484841 | -0,047229664 | 0     | 0,02  | 1         | 0,967792951   | 1,033278863     | 0               |
| PWP2                                                                                     | 0,886527564 | -0,047290979 | 0,013 | 0,01  | 1         | 0,96775182    | 1,033322779     | 1,3             |
| AXL                                                                                      | 0,012014971 | -0,047319011 | 0,637 | 0,31  | 1         | 0,967733017   | 1,033342857     | 2,05483871      |
| TMEM158                                                                                  | 0,136751946 | -0,04733006  | 0,1   | 0,04  | 1         | 0,967725605   | 1,033350771     | 2,5             |
| IPMK                                                                                     | 0,046507869 | -0,047331612 | 0,175 | 0,07  | 1         | 0,967724564   | 1,033351882     | 2,5             |
| PPP1R13L                                                                                 | 0,284975754 | -0,047347948 | 0,05  | 0,02  | 1         | 0,967713606   | 1,033363583     | 2,5             |
| MYBL1                                                                                    | 0,012776783 | -0,047350253 | 0,212 | 0,07  | 1         | 0,96771206    | 1,033365235     | 3,028571429     |
| HLA-DMB                                                                                  | 0,886527564 | -0,047459116 | 0,013 | 0,01  | 1         | 0,967639041   | 1,033443213     | 1,3             |
| AC010336.1                                                                               | 0,377102913 | -0,047508245 | 0     | 0,01  | 1         | 0,96760609    | 1,033478406     | 0               |
| BMPER                                                                                    | 0,377102913 | -0,047508245 | 0     | 0,01  | 1         | 0,96760609    | 1,033478406     | 0               |
| CR1L                                                                                     | 0,377102913 | -0,047508245 | 0     | 0,01  | 1         | 0,96760609    | 1,033478406     | 0               |
| EN2                                                                                      | 0,377102913 | -0,047508245 | 0     | 0,01  | 1         | 0,96760609    | 1,033478406     | 0               |
| NIPAL3                                                                                   | 0,193718766 | -0,047559076 | 0,075 | 0,03  | 1         | 0,967571999   | 1,03351482      | 2,5             |
| SH3BGRL                                                                                  | 0,040482741 | -0,047565254 | 0,887 | 0,47  | 1         | 0,967567856   | 1,033519245     | 1,887234043     |
| ESAM                                                                                     | 0,820013192 | -0,047575652 | 0,025 | 0,03  | 1         | 0,967560882   | 1,033526694     | 0,833333333     |
| C19orf44                                                                                 | 0,11122839  | -0,047590735 | 0,05  | 0,01  | 1         | 0,967550766   | 1,0335375       | 5               |
| NFRKB                                                                                    | 0,774717987 | -0,04769991  | 0,05  | 0,04  | 1         | 0,96747755    | 1,033615715     | 1,25            |
| GNL2                                                                                     | 0,00514052  | -0,047726859 | 0,312 | 0,11  | 1         | 0,967459479   | 1,033635023     | 2,836363636     |
| CHST9                                                                                    | 0,207484841 | -0,047822169 | 0     | 0,02  | 1         | 0,967395566   | 1,033703311     | 0               |
| DYRK1B                                                                                   | 0,17197478  | -0,047830732 | 0,138 | 0,07  | 1         | 0,967389824   | 1,033709446     | 1,971428571     |
| RHOV                                                                                     | 0,501283468 | -0,047842232 | 0,038 | 0,02  | 1         | 0,967382113   | 1,033717686     | 1,9             |
| POU2F1                                                                                   | 0,008093617 | -0,04796197  | 0,3   | 0,11  | 1         | 0,967301828   | 1,033803484     | 2,727272727     |
| CXCR4                                                                                    | 0,698151432 | -0,047970287 | 0,1   | 0,08  | 1         | 0,967296251   | 1,033809444     | 1,25            |
| PDCL                                                                                     | 0,002363426 | -0,047977579 | 0,35  | 0,12  | 1         | 0,967291362   | 1,03381467      | 2,916666667     |
| LAMA1                                                                                    | 0,692138165 | -0,048007835 | 0,013 | 0,02  | 1         | 0,967271076   | 1,033836351     | 0,65            |

Supplementary Table 4

| Differentially expressed genes_keloid-CCD_ comparing SC-Keloid vs. (SC-Myel, SC-Nonmyel) |             |              |       |       |           |               |                 |                 |
|------------------------------------------------------------------------------------------|-------------|--------------|-------|-------|-----------|---------------|-----------------|-----------------|
| gene                                                                                     | p_val       | avg_log2FC   | pct.1 | pct.2 | p_val_adj | Foldchange_UP | Foldchange_DOWN | Ratio_pct1_pct2 |
| NFATC3                                                                                   | 0,119647686 | -0,048053614 | 0,2   | 0,1   | 1         | 0,967240384   | 1,033869157     | 2               |
| YTHDF3-DT                                                                                | 0,218400487 | -0,048100317 | 0,088 | 0,04  | 1         | 0,967209073   | 1,033902625     | 2,2             |
| CWC22                                                                                    | 0,157103042 | -0,048110664 | 0,188 | 0,1   | 1         | 0,967202136   | 1,033910041     | 1,88            |
| CEP83                                                                                    | 0,106476927 | -0,048166434 | 0,138 | 0,06  | 1         | 0,967164748   | 1,033950009     | 2,3             |
| ATP6V0E1                                                                                 | 0,226046289 | -0,048201026 | 0,938 | 0,55  | 1         | 0,967141558   | 1,033974801     | 1,705454545     |
| CSPG5                                                                                    | 0,886527564 | -0,048208901 | 0,013 | 0,01  | 1         | 0,967136279   | 1,033980445     | 1,3             |
| FAM66C                                                                                   | 0,886527564 | -0,048228784 | 0,013 | 0,01  | 1         | 0,96712295    | 1,033994695     | 1,3             |
| GPATCH3                                                                                  | 0,213256546 | -0,048241955 | 0,088 | 0,04  | 1         | 0,967114121   | 1,034004135     | 2,2             |
| ARHGAP32                                                                                 | 0,816980451 | -0,0482872   | 0,038 | 0,03  | 1         | 0,967083791   | 1,034036563     | 1,266666667     |
| SLCO4A1                                                                                  | 0,692138165 | -0,048298581 | 0,013 | 0,02  | 1         | 0,967076162   | 1,03404472      | 0,65            |
| ZNF707                                                                                   | 0,744169851 | -0,048374672 | 0,062 | 0,05  | 1         | 0,967025158   | 1,03409926      | 1,24            |
| ZZEF1                                                                                    | 0,159016148 | -0,04839058  | 0,125 | 0,06  | 1         | 0,967014495   | 1,034110663     | 2,083333333     |
| PABPC5                                                                                   | 0,809797238 | -0,048409773 | 0,038 | 0,03  | 1         | 0,96700163    | 1,03412442      | 1,266666667     |
| ANKRD29                                                                                  | 0,820013192 | -0,048440691 | 0,025 | 0,03  | 1         | 0,966980907   | 1,034146583     | 0,833333333     |
| AHRR                                                                                     | 0,692138165 | -0,048441355 | 0,013 | 0,02  | 1         | 0,966980462   | 1,034147058     | 0,65            |
| KIAA0930                                                                                 | 0,377043193 | -0,048444428 | 0,1   | 0,06  | 1         | 0,966978402   | 1,034149261     | 1,666666667     |
| KLHL25                                                                                   | 0,84359211  | -0,048493496 | 0,025 | 0,02  | 1         | 0,966945514   | 1,034184435     | 1,25            |
| ADCY9                                                                                    | 0,820013192 | -0,048508148 | 0,025 | 0,03  | 1         | 0,966935694   | 1,034194938     | 0,833333333     |
| SLC35G5                                                                                  | 0,692138165 | -0,048525366 | 0,013 | 0,02  | 1         | 0,966924155   | 1,03420728      | 0,65            |
| RNF213                                                                                   | 0,000859503 | -0,048628635 | 0,45  | 0,16  | 1         | 0,966854944   | 1,034281312     | 2,8125          |
| KMT2D                                                                                    | 0,032660317 | -0,04863011  | 0,15  | 0,05  | 1         | 0,966853955   | 1,03428237      | 3               |
| AC144652.1                                                                               | 0,562875304 | -0,048676972 | 0,025 | 0,04  | 1         | 0,96682255    | 1,034315966     | 0,625           |
| WDR36                                                                                    | 0,01961569  | -0,048687166 | 0,162 | 0,05  | 1         | 0,966815718   | 1,034323275     | 3,24            |
| RBM4B                                                                                    | 0,063616753 | -0,048692243 | 0,1   | 0,03  | 1         | 0,966812316   | 1,034326914     | 3,333333333     |
| ARTN                                                                                     | 0,255070547 | -0,048747127 | 0,112 | 0,06  | 1         | 0,966775537   | 1,034366264     | 1,866666667     |
| OXCT2                                                                                    | 0,886527564 | -0,048758835 | 0,013 | 0,01  | 1         | 0,966767691   | 1,034374658     | 1,3             |
| ZNF266                                                                                   | 0,112247794 | -0,048798674 | 0,088 | 0,03  | 1         | 0,966740995   | 1,034403222     | 2,933333333     |
| PRR7-AS1                                                                                 | 0,84359211  | -0,048823527 | 0,025 | 0,02  | 1         | 0,966724341   | 1,034421042     | 1,25            |
| NKIRAS1                                                                                  | 0,501283468 | -0,048855863 | 0,038 | 0,02  | 1         | 0,966702674   | 1,034444227     | 1,9             |
| GET4                                                                                     | 0,377102913 | -0,048876458 | 0     | 0,01  | 1         | 0,966688874   | 1,034458994     | 0               |

Supplementary Table 4

| Differentially expressed genes_keloid-CCD_ comparing SC-Keloid vs. (SC-Myel, SC-Nonmyel) |             |              |       |       |           |               |                 |                 |
|------------------------------------------------------------------------------------------|-------------|--------------|-------|-------|-----------|---------------|-----------------|-----------------|
| gene                                                                                     | p_val       | avg_log2FC   | pct.1 | pct.2 | p_val_adj | Foldchange_UP | Foldchange_DOWN | Ratio_pct1_pct2 |
| SLC2A9                                                                                   | 0,377102913 | -0,048876458 | 0     | 0,01  | 1         | 0,966688874   | 1,034458994     | 0               |
| ZNF225                                                                                   | 0,377102913 | -0,048876458 | 0     | 0,01  | 1         | 0,966688874   | 1,034458994     | 0               |
| ATF7                                                                                     | 0,000650747 | -0,048922852 | 0,45  | 0,15  | 1         | 0,966657787   | 1,034492261     | 3               |
| TIGD6                                                                                    | 0,886527564 | -0,048950002 | 0,013 | 0,01  | 1         | 0,966639596   | 1,034511729     | 1,3             |
| SSTR2                                                                                    | 0,820013192 | -0,048958118 | 0,025 | 0,03  | 1         | 0,966634158   | 1,034517549     | 0,833333333     |
| EXOC6B                                                                                   | 0,325316267 | -0,048961178 | 0,062 | 0,03  | 1         | 0,966632108   | 1,034519743     | 2,066666667     |
| POLM                                                                                     | 0,799526327 | -0,048981868 | 0,05  | 0,04  | 1         | 0,966618246   | 1,034534579     | 1,25            |
| UCP2                                                                                     | 0,84359211  | -0,049010854 | 0,025 | 0,02  | 1         | 0,966598825   | 1,034555365     | 1,25            |
| SLC25A42                                                                                 | 0,363797175 | -0,049011315 | 0,1   | 0,06  | 1         | 0,966598516   | 1,034555696     | 1,666666667     |
| LZTR1                                                                                    | 0,083513756 | -0,049028153 | 0,162 | 0,07  | 1         | 0,966587235   | 1,03456777      | 2,314285714     |
| MAGEF1                                                                                   | 0,017808249 | -0,04906596  | 0,475 | 0,22  | 1         | 0,966561905   | 1,034594882     | 2,159090909     |
| LMTK2                                                                                    | 0,501283468 | -0,049079365 | 0,038 | 0,02  | 1         | 0,966552924   | 1,034604496     | 1,9             |
| PPP1R26                                                                                  | 0,569139823 | -0,049118841 | 0,025 | 0,04  | 1         | 0,966526477   | 1,034632805     | 0,625           |
| GJC2                                                                                     | 0,207484841 | -0,049144524 | 0     | 0,02  | 1         | 0,966509271   | 1,034651224     | 0               |
| DOCK10                                                                                   | 0,207484841 | -0,049168978 | 0     | 0,02  | 1         | 0,966492889   | 1,034668761     | 0               |
| MKKS                                                                                     | 0,058966282 | -0,04917393  | 0,188 | 0,08  | 1         | 0,966489571   | 1,034672313     | 2,35            |
| NXN                                                                                      | 0,343957066 | -0,049192848 | 0,075 | 0,04  | 1         | 0,966476898   | 1,034685881     | 1,875           |
| CDKL1                                                                                    | 0,548643101 | -0,049241302 | 0,075 | 0,05  | 1         | 0,966444438   | 1,034720632     | 1,5             |
| ZNF383                                                                                   | 0,221005633 | -0,049242792 | 0,088 | 0,04  | 1         | 0,96644344    | 1,034721701     | 2,2             |
| ZNF736                                                                                   | 0,501283468 | -0,049243395 | 0,038 | 0,02  | 1         | 0,966443036   | 1,034722133     | 1,9             |
| HOXD8                                                                                    | 0,246922691 | -0,04930989  | 0,1   | 0,05  | 1         | 0,966398493   | 1,034769826     | 2               |
| ALKBH3                                                                                   | 0,069974895 | -0,049319681 | 0,25  | 0,12  | 1         | 0,966391935   | 1,034776848     | 2,083333333     |
| ANAPC2                                                                                   | 0,270425091 | -0,049334135 | 0,112 | 0,06  | 1         | 0,966382252   | 1,034787215     | 1,866666667     |
| MANEAL                                                                                   | 0,692138165 | -0,049343593 | 0,013 | 0,02  | 1         | 0,966375917   | 1,034793999     | 0,65            |
| B3GAT1                                                                                   | 0,886527564 | -0,04937892  | 0,013 | 0,01  | 1         | 0,966352254   | 1,034819338     | 1,3             |
| GRK7                                                                                     | 0,377102913 | -0,049463022 | 0     | 0,01  | 1         | 0,966295922   | 1,034879665     | 0               |
| LINC00598                                                                                | 0,377102913 | -0,049463022 | 0     | 0,01  | 1         | 0,966295922   | 1,034879665     | 0               |
| TSPOAP1-AS1                                                                              | 0,377102913 | -0,049463022 | 0     | 0,01  | 1         | 0,966295922   | 1,034879665     | 0               |
| ZNF709                                                                                   | 0,377102913 | -0,049463022 | 0     | 0,01  | 1         | 0,966295922   | 1,034879665     | 0               |
| ZPLD1                                                                                    | 0,377102913 | -0,049463022 | 0     | 0,01  | 1         | 0,966295922   | 1,034879665     | 0               |

Supplementary Table 4

| Differentially expressed genes_keloid-CCD_ comparing SC-Keloid vs. (SC-Myel, SC-Nonmyel) |             |              |       |       |           |               |                 |                 |
|------------------------------------------------------------------------------------------|-------------|--------------|-------|-------|-----------|---------------|-----------------|-----------------|
| gene                                                                                     | p_val       | avg_log2FC   | pct.1 | pct.2 | p_val_adj | Foldchange_UP | Foldchange_DOWN | Ratio_pct1_pct2 |
| STRIP1                                                                                   | 0,184450278 | -0,049543058 | 0,138 | 0,07  | 1         | 0,966242317   | 1,034937078     | 1,971428571     |
| UBE2V1                                                                                   | 0,026794807 | -0,049569925 | 0,212 | 0,08  | 1         | 0,966224322   | 1,034956352     | 2,65            |
| PIN4                                                                                     | 0,02414417  | -0,049656778 | 0,525 | 0,25  | 1         | 0,966166156   | 1,03501866      | 2,1             |
| ZNF706                                                                                   | 0,175878194 | -0,049662366 | 0,912 | 0,62  | 1         | 0,966162414   | 1,035022669     | 1,470967742     |
| CATSPERG                                                                                 | 0,501283468 | -0,049670626 | 0,038 | 0,02  | 1         | 0,966156882   | 1,035028595     | 1,9             |
| CNKSRI                                                                                   | 0,886527564 | -0,049687077 | 0,013 | 0,01  | 1         | 0,966145865   | 1,035040398     | 1,3             |
| HSD17B7                                                                                  | 0,173281996 | -0,049697817 | 0,125 | 0,06  | 1         | 0,966138672   | 1,035048103     | 2,083333333     |
| RTN3                                                                                     | 0,011401354 | -0,049718544 | 0,65  | 0,32  | 1         | 0,966124792   | 1,035062973     | 2,03125         |
| ZNF530                                                                                   | 0,692138165 | -0,049754162 | 0,013 | 0,02  | 1         | 0,96610094    | 1,035088528     | 0,65            |
| RBBP8                                                                                    | 0,206340263 | -0,049849176 | 0,15  | 0,08  | 1         | 0,966037316   | 1,035156699     | 1,875           |
| FAM83H                                                                                   | 0,83477988  | -0,04990212  | 0,025 | 0,02  | 1         | 0,966001865   | 1,035194688     | 1,25            |
| CXADR                                                                                    | 0,343957066 | -0,049904858 | 0,075 | 0,04  | 1         | 0,966000032   | 1,035196653     | 1,875           |
| FBXL18                                                                                   | 0,820013192 | -0,04992679  | 0,025 | 0,03  | 1         | 0,965985347   | 1,035212391     | 0,833333333     |
| OTUD5                                                                                    | 0,077066889 | -0,049940801 | 0,212 | 0,1   | 1         | 0,965975965   | 1,035222444     | 2,12            |
| CGAS                                                                                     | 0,432445254 | -0,049984892 | 0,188 | 0,13  | 1         | 0,965946444   | 1,035254083     | 1,446153846     |
| RFC2                                                                                     | 0,004606146 | -0,050061    | 0,275 | 0,09  | 1         | 0,965895488   | 1,035308698     | 3,055555556     |
| KCNN2                                                                                    | 0,447580525 | -0,05008034  | 0,025 | 0,01  | 1         | 0,96588254    | 1,035322577     | 2,5             |
| AQP6                                                                                     | 0,207484841 | -0,050086036 | 0     | 0,02  | 1         | 0,965878726   | 1,035326664     | 0               |
| HCN2                                                                                     | 0,84359211  | -0,05009165  | 0,025 | 0,02  | 1         | 0,965874968   | 1,035330693     | 1,25            |
| LIFR                                                                                     | 0,095586107 | -0,050097362 | 0,125 | 0,05  | 1         | 0,965871144   | 1,035334792     | 2,5             |
| PAPOLG                                                                                   | 0,557924866 | -0,050148901 | 0,075 | 0,05  | 1         | 0,965836639   | 1,03537178      | 1,5             |
| CNOT8                                                                                    | 0,184155255 | -0,050168536 | 0,225 | 0,13  | 1         | 0,965823494   | 1,035385871     | 1,730769231     |
| BRPF3                                                                                    | 0,198713285 | -0,050168988 | 0,162 | 0,09  | 1         | 0,965823192   | 1,035386195     | 1,8             |
| PJA2                                                                                     | 0,230642574 | -0,050173559 | 0,8   | 0,47  | 1         | 0,965820132   | 1,035389476     | 1,70212766      |
| ZNF776                                                                                   | 0,575437444 | -0,050209264 | 0,025 | 0,04  | 1         | 0,965796229   | 1,035415101     | 0,625           |
| ANTXR1                                                                                   | 0,001229645 | -0,050228828 | 0,338 | 0,11  | 1         | 0,965783133   | 1,035429142     | 3,072727273     |
| WIZ                                                                                      | 0,092485138 | -0,050229262 | 0,175 | 0,08  | 1         | 0,965782842   | 1,035429453     | 2,1875          |
| ZSCAN9                                                                                   | 0,527578779 | -0,050258097 | 0,05  | 0,03  | 1         | 0,965763539   | 1,035450148     | 1,666666667     |
| ALS2                                                                                     | 0,347667268 | -0,050261134 | 0,075 | 0,04  | 1         | 0,965761506   | 1,035452328     | 1,875           |
| MST1                                                                                     | 0,692138165 | -0,050261175 | 0,013 | 0,02  | 1         | 0,965761479   | 1,035452358     | 0,65            |

Supplementary Table 4

| Differentially expressed genes_keloid-CCD_ comparing SC-Keloid vs. (SC-Myel, SC-Nonmyel) |             |              |       |       |           |               |                 |                 |
|------------------------------------------------------------------------------------------|-------------|--------------|-------|-------|-----------|---------------|-----------------|-----------------|
| gene                                                                                     | p_val       | avg_log2FC   | pct.1 | pct.2 | p_val_adj | Foldchange_UP | Foldchange_DOWN | Ratio_pct1_pct2 |
| PEX26                                                                                    | 0,003860939 | -0,050278469 | 0,2   | 0,05  | 1         | 0,965749902   | 1,03546477      | 4               |
| SAMD9                                                                                    | 0,046391154 | -0,050324304 | 0,212 | 0,09  | 1         | 0,96571922    | 1,035497667     | 2,355555556     |
| GOLGA7                                                                                   | 0,038492143 | -0,050325715 | 0,662 | 0,34  | 1         | 0,965718276   | 1,03549868      | 1,947058824     |
| PLEKHF1                                                                                  | 0,787095147 | -0,050347701 | 0,05  | 0,04  | 1         | 0,965703559   | 1,035514461     | 1,25            |
| NECTIN3-AS1                                                                              | 0,377102913 | -0,050378549 | 0     | 0,01  | 1         | 0,96568291    | 1,035536603     | 0               |
| SLC9B1                                                                                   | 0,377102913 | -0,050378549 | 0     | 0,01  | 1         | 0,96568291    | 1,035536603     | 0               |
| TMEM178A                                                                                 | 0,377102913 | -0,050378549 | 0     | 0,01  | 1         | 0,96568291    | 1,035536603     | 0               |
| TPCN2                                                                                    | 0,35516371  | -0,050401737 | 0,075 | 0,04  | 1         | 0,965667389   | 1,035553247     | 1,875           |
| RAMP3                                                                                    | 0,795479351 | -0,050427874 | 0,038 | 0,03  | 1         | 0,965649894   | 1,035572008     | 1,266666667     |
| RFX5                                                                                     | 0,972636504 | -0,050433779 | 0,05  | 0,05  | 1         | 0,965645942   | 1,035576246     | 1               |
| LINC00957                                                                                | 0,207484841 | -0,050462644 | 0     | 0,02  | 1         | 0,965626622   | 1,035596966     | 0               |
| FAM20B                                                                                   | 0,015371623 | -0,050468007 | 0,238 | 0,09  | 1         | 0,965623032   | 1,035600816     | 2,644444444     |
| MOCS3                                                                                    | 0,827884433 | -0,050519371 | 0,025 | 0,03  | 1         | 0,965588654   | 1,035637687     | 0,833333333     |
| FBXO22                                                                                   | 0,007893406 | -0,050576261 | 0,425 | 0,18  | 1         | 0,965550578   | 1,035678526     | 2,361111111     |
| DIS3L                                                                                    | 0,136751946 | -0,05061333  | 0,1   | 0,04  | 1         | 0,96552577    | 1,035705137     | 2,5             |
| PIGU                                                                                     | 0,026143714 | -0,0507028   | 0,212 | 0,08  | 1         | 0,965465893   | 1,03576937      | 2,65            |
| TMEM117                                                                                  | 0,325316267 | -0,050715746 | 0,062 | 0,03  | 1         | 0,96545723    | 1,035778664     | 2,066666667     |
| BAG5                                                                                     | 0,041165933 | -0,050764935 | 0,462 | 0,23  | 1         | 0,965424313   | 1,03581398      | 2,008695652     |
| ATPAF2                                                                                   | 0,019327738 | -0,050779386 | 0,162 | 0,05  | 1         | 0,965414643   | 1,035824355     | 3,24            |
| BANP                                                                                     | 0,218400487 | -0,050782932 | 0,088 | 0,04  | 1         | 0,96541227    | 1,035826901     | 2,2             |
| ARHGAP26                                                                                 | 0,262457732 | -0,050801005 | 0,125 | 0,07  | 1         | 0,965400176   | 1,035839878     | 1,785714286     |
| MTERF1                                                                                   | 0,556644247 | -0,050804501 | 0,025 | 0,04  | 1         | 0,965397837   | 1,035842388     | 0,625           |
| ZNF543                                                                                   | 0,84359211  | -0,050828963 | 0,025 | 0,02  | 1         | 0,965381468   | 1,035859951     | 1,25            |
| DNAJC3                                                                                   | 0,034988896 | -0,050842628 | 0,787 | 0,39  | 1         | 0,965372324   | 1,035869763     | 2,017948718     |
| HUWE1                                                                                    | 0,017763047 | -0,050844021 | 0,45  | 0,21  | 1         | 0,965371392   | 1,035870763     | 2,142857143     |
| SP4                                                                                      | 0,960483369 | -0,050848427 | 0,05  | 0,05  | 1         | 0,965368443   | 1,035873927     | 1               |
| PPP2R3C                                                                                  | 0,010161972 | -0,050883905 | 0,45  | 0,2   | 1         | 0,965344704   | 1,0358994       | 2,25            |
| SULF1                                                                                    | 0,060401558 | -0,050897952 | 0,138 | 0,05  | 1         | 0,965335305   | 1,035909487     | 2,76            |
| WEE1                                                                                     | 0,044148151 | -0,050935018 | 0,4   | 0,2   | 1         | 0,965310503   | 1,035936102     | 2               |
| NOSIP                                                                                    | 0,016178283 | -0,050939633 | 0,488 | 0,23  | 1         | 0,965307415   | 1,035939416     | 2,12173913      |

Supplementary Table 4

| Differentially expressed genes_keloid-CCD_ comparing SC-Keloid vs. (SC-Myel, SC-Nonmyel) |             |              |       |       |           |               |                 |                 |
|------------------------------------------------------------------------------------------|-------------|--------------|-------|-------|-----------|---------------|-----------------|-----------------|
| gene                                                                                     | p_val       | avg_log2FC   | pct.1 | pct.2 | p_val_adj | Foldchange_UP | Foldchange_DOWN | Ratio_pct1_pct2 |
| TOMM20                                                                                   | 0,374559284 | -0,050960622 | 0,938 | 0,67  | 1         | 0,965293372   | 1,035954487     | 1,4             |
| BATF3                                                                                    | 0,527578779 | -0,051013533 | 0,05  | 0,03  | 1         | 0,96525797    | 1,035992482     | 1,666666667     |
| TMUB2                                                                                    | 0,061873827 | -0,051021986 | 0,238 | 0,11  | 1         | 0,965252315   | 1,035998551     | 2,163636364     |
| WDR45                                                                                    | 0,028440775 | -0,051027887 | 0,562 | 0,28  | 1         | 0,965248367   | 1,036002789     | 2,007142857     |
| MYLK-AS1                                                                                 | 0,501283468 | -0,051041804 | 0,038 | 0,02  | 1         | 0,965239055   | 1,036012783     | 1,9             |
| AP3M2                                                                                    | 0,171448164 | -0,051087924 | 0,125 | 0,06  | 1         | 0,965208199   | 1,036045903     | 2,083333333     |
| PAAF1                                                                                    | 0,139003994 | -0,051124544 | 0,162 | 0,08  | 1         | 0,9651837     | 1,036072201     | 2,025           |
| NADK                                                                                     | 0,007514457 | -0,051137154 | 0,3   | 0,11  | 1         | 0,965175263   | 1,036081257     | 2,727272727     |
| FOXC1                                                                                    | 0,320180857 | -0,051141463 | 0,15  | 0,09  | 1         | 0,96517238    | 1,036084352     | 1,666666667     |
| HHIPL1                                                                                   | 0,120814239 | -0,051163963 | 0     | 0,03  | 1         | 0,965157328   | 1,03610051      | 0               |
| MTIF3                                                                                    | 0,000917946 | -0,051180288 | 0,438 | 0,15  | 1         | 0,965146407   | 1,036112234     | 2,92            |
| ADPRM                                                                                    | 0,527578779 | -0,051185508 | 0,05  | 0,03  | 1         | 0,965142915   | 1,036115983     | 1,666666667     |
| WBP4                                                                                     | 0,001621766 | -0,05124276  | 0,537 | 0,21  | 1         | 0,965104614   | 1,036157102     | 2,557142857     |
| TANC2                                                                                    | 0,1136224   | -0,051277732 | 0,35  | 0,19  | 1         | 0,96508122    | 1,036182219     | 1,842105263     |
| MID2                                                                                     | 0,84359211  | -0,051288506 | 0,025 | 0,02  | 1         | 0,965074013   | 1,036189957     | 1,25            |
| ACE                                                                                      | 0,692138165 | -0,051306185 | 0,013 | 0,02  | 1         | 0,965062187   | 1,036202655     | 0,65            |
| PBDC1                                                                                    | 0,019487629 | -0,051338517 | 0,588 | 0,28  | 1         | 0,965040559   | 1,036225877     | 2,1             |
| PRMT3                                                                                    | 0,390582533 | -0,051370519 | 0,1   | 0,06  | 1         | 0,965019153   | 1,036248863     | 1,666666667     |
| RIPK1                                                                                    | 0,053119313 | -0,051374645 | 0,175 | 0,07  | 1         | 0,965016393   | 1,036251827     | 2,5             |
| FAM229B                                                                                  | 0,040785639 | -0,051386958 | 0,412 | 0,21  | 1         | 0,965008157   | 1,036260671     | 1,961904762     |
| TMX2                                                                                     | 0,009597897 | -0,051410842 | 0,5   | 0,22  | 1         | 0,964992181   | 1,036277826     | 2,272727273     |
| PAK1IP1                                                                                  | 0,033641113 | -0,051492608 | 0,3   | 0,14  | 1         | 0,964937491   | 1,03633656      | 2,142857143     |
| MTF2                                                                                     | 0,00870096  | -0,051623193 | 0,35  | 0,14  | 1         | 0,964850154   | 1,036430368     | 2,5             |
| HDAC7                                                                                    | 0,162795876 | -0,051623821 | 0,188 | 0,1   | 1         | 0,964849734   | 1,036430819     | 1,88            |
| RPL30                                                                                    | 0,664829901 | -0,05164198  | 1     | 1     | 1         | 0,964837589   | 1,036443865     | 1               |
| MT1M                                                                                     | 0,107712821 | -0,051718523 | 0,138 | 0,06  | 1         | 0,964786401   | 1,036498855     | 2,3             |
| UPF3B                                                                                    | 0,033813678 | -0,051817947 | 0,325 | 0,15  | 1         | 0,964719915   | 1,036570288     | 2,166666667     |
| LSMEM2                                                                                   | 0,886527564 | -0,05182525  | 0,013 | 0,01  | 1         | 0,964715031   | 1,036575535     | 1,3             |
| DNASE1                                                                                   | 0,501283468 | -0,05191516  | 0,038 | 0,02  | 1         | 0,964654911   | 1,036640138     | 1,9             |
| LDOC1                                                                                    | 0,223632981 | -0,051929476 | 0,088 | 0,04  | 1         | 0,964645339   | 1,036650424     | 2,2             |

Supplementary Table 4

| Differentially expressed genes_keloid-CCD_ comparing SC-Keloid vs. (SC-Myel, SC-Nonmyel) |             |              |       |       |           |               |                 |                 |
|------------------------------------------------------------------------------------------|-------------|--------------|-------|-------|-----------|---------------|-----------------|-----------------|
| gene                                                                                     | p_val       | avg_log2FC   | pct.1 | pct.2 | p_val_adj | Foldchange_UP | Foldchange_DOWN | Ratio_pct1_pct2 |
| LYNX1                                                                                    | 0,207484841 | -0,051963335 | 0     | 0,02  | 1         | 0,964622699   | 1,036674754     | 0               |
| TESK1                                                                                    | 0,036036368 | -0,051967358 | 0,15  | 0,05  | 1         | 0,964620009   | 1,036677646     | 3               |
| SNX3                                                                                     | 0,568232774 | -0,052077768 | 0,938 | 0,7   | 1         | 0,96454619    | 1,036756985     | 1,34            |
| RORA                                                                                     | 0,575437444 | -0,052119026 | 0,025 | 0,04  | 1         | 0,964518606   | 1,036786635     | 0,625           |
| MCM8                                                                                     | 0,280825998 | -0,05216874  | 0,05  | 0,02  | 1         | 0,96448537    | 1,036822362     | 2,5             |
| ANXA1                                                                                    | 0,121750436 | -0,052237404 | 1     | 0,9   | 1         | 0,964439468   | 1,03687171      | 1,111111111     |
| RUFY1                                                                                    | 0,000894627 | -0,05230507  | 0,312 | 0,09  | 1         | 0,964394234   | 1,036920343     | 3,466666667     |
| NBPF11                                                                                   | 0,325316267 | -0,052339709 | 0,062 | 0,03  | 1         | 0,964371079   | 1,03694524      | 2,066666667     |
| CD302                                                                                    | 0,000711633 | -0,052346102 | 0,212 | 0,04  | 1         | 0,964366806   | 1,036949835     | 5,3             |
| CHCHD7                                                                                   | 0,000282855 | -0,052398815 | 0,338 | 0,09  | 1         | 0,96433157    | 1,036987724     | 3,755555556     |
| COASY                                                                                    | 0,012630518 | -0,052541793 | 0,25  | 0,09  | 1         | 0,964236005   | 1,0370905       | 2,777777778     |
| KIF9-AS1                                                                                 | 0,377102913 | -0,052553435 | 0     | 0,01  | 1         | 0,964228224   | 1,037098868     | 0               |
| ZNF14                                                                                    | 0,84359211  | -0,052590283 | 0,025 | 0,02  | 1         | 0,964203597   | 1,037125357     | 1,25            |
| NOG                                                                                      | 0,886527564 | -0,052619919 | 0,013 | 0,01  | 1         | 0,96418379    | 1,037146662     | 1,3             |
| TRMT9B                                                                                   | 0,692138165 | -0,052629517 | 0,013 | 0,02  | 1         | 0,964177376   | 1,037153562     | 0,65            |
| PCDH18                                                                                   | 0,793304172 | -0,052684819 | 0,05  | 0,04  | 1         | 0,964140417   | 1,03719332      | 1,25            |
| CCDC122                                                                                  | 0,516405835 | -0,052705053 | 0,05  | 0,03  | 1         | 0,964126895   | 1,037207866     | 1,666666667     |
| EIF2B5                                                                                   | 0,003386287 | -0,052748841 | 0,262 | 0,08  | 1         | 0,964097633   | 1,037239347     | 3,275           |
| DNMT3B                                                                                   | 0,84359211  | -0,052783888 | 0,025 | 0,02  | 1         | 0,964074213   | 1,037264545     | 1,25            |
| PRELID3A                                                                                 | 0,325316267 | -0,05279439  | 0,062 | 0,03  | 1         | 0,964067195   | 1,037272096     | 2,066666667     |
| BCHE                                                                                     | 0,657393155 | -0,05279917  | 0,188 | 0,15  | 1         | 0,964064001   | 1,037275533     | 1,253333333     |
| KLHL2                                                                                    | 0,365228501 | -0,052816405 | 0,088 | 0,05  | 1         | 0,964052484   | 1,037287925     | 1,76            |
| HEXD                                                                                     | 0,029195518 | -0,052833306 | 0,188 | 0,07  | 1         | 0,96404119    | 1,037300076     | 2,685714286     |
| LMAN2L                                                                                   | 0,325316267 | -0,052840272 | 0,062 | 0,03  | 1         | 0,964036535   | 1,037305085     | 2,066666667     |
| PATZ1                                                                                    | 0,033996173 | -0,052847336 | 0,188 | 0,07  | 1         | 0,964031815   | 1,037310164     | 2,685714286     |
| FOXRED2                                                                                  | 0,284975754 | -0,052886888 | 0,05  | 0,02  | 1         | 0,964005386   | 1,037338603     | 2,5             |
| LDAF1                                                                                    | 0,218859405 | -0,053054839 | 0,162 | 0,09  | 1         | 0,963893168   | 1,037459371     | 1,8             |
| TRAPPC6B                                                                                 | 0,010037231 | -0,053139829 | 0,325 | 0,13  | 1         | 0,963836386   | 1,03752049      | 2,5             |
| AIG1                                                                                     | 0,02425116  | -0,053159829 | 0,45  | 0,22  | 1         | 0,963823025   | 1,037534873     | 2,045454545     |
| TBC1D5                                                                                   | 0,046597046 | -0,053160844 | 0,312 | 0,15  | 1         | 0,963822347   | 1,037535603     | 2,08            |

Supplementary Table 4

| Differentially expressed genes_keloid-CCD_ comparing SC-Keloid vs. (SC-Myel, SC-Nonmyel) |             |              |       |       |           |               |                 |                 |
|------------------------------------------------------------------------------------------|-------------|--------------|-------|-------|-----------|---------------|-----------------|-----------------|
| gene                                                                                     | p_val       | avg_log2FC   | pct.1 | pct.2 | p_val_adj | Foldchange_UP | Foldchange_DOWN | Ratio_pct1_pct2 |
| ANXA3                                                                                    | 0,249550622 | -0,053264223 | 0,1   | 0,05  | 1         | 0,963753285   | 1,037609952     | 2               |
| LINC01106                                                                                | 0,377102913 | -0,05330104  | 0     | 0,01  | 1         | 0,963728691   | 1,037636432     | 0               |
| PRPH                                                                                     | 0,377102913 | -0,05330104  | 0     | 0,01  | 1         | 0,963728691   | 1,037636432     | 0               |
| SRSF12                                                                                   | 0,377102913 | -0,05330104  | 0     | 0,01  | 1         | 0,963728691   | 1,037636432     | 0               |
| GNB1L                                                                                    | 0,521976935 | -0,053321044 | 0,05  | 0,03  | 1         | 0,963715328   | 1,03765082      | 1,666666667     |
| ZBTB20-AS2                                                                               | 0,886527564 | -0,053324701 | 0,013 | 0,01  | 1         | 0,963712884   | 1,037653451     | 1,3             |
| GPRASP2                                                                                  | 0,886527564 | -0,053410184 | 0,013 | 0,01  | 1         | 0,963655784   | 1,037714936     | 1,3             |
| LINC02901                                                                                | 0,377102913 | -0,053419469 | 0     | 0,01  | 1         | 0,963649582   | 1,037721614     | 0               |
| MBTPS2                                                                                   | 0,071863285 | -0,053450139 | 0,15  | 0,06  | 1         | 0,963629097   | 1,037743675     | 2,5             |
| IL17B                                                                                    | 0,886527564 | -0,053458457 | 0,013 | 0,01  | 1         | 0,963623541   | 1,037749658     | 1,3             |
| SMO                                                                                      | 0,377102913 | -0,053478882 | 0     | 0,01  | 1         | 0,963609898   | 1,03776435      | 0               |
| TEKT2                                                                                    | 0,377102913 | -0,053478882 | 0     | 0,01  | 1         | 0,963609898   | 1,03776435      | 0               |
| DHX35                                                                                    | 0,816980451 | -0,053525517 | 0,038 | 0,03  | 1         | 0,96357875    | 1,037797897     | 1,266666667     |
| HAAO                                                                                     | 0,207484841 | -0,053540794 | 0     | 0,02  | 1         | 0,963568546   | 1,037808886     | 0               |
| CTNNA2                                                                                   | 0,207484841 | -0,053556178 | 0     | 0,02  | 1         | 0,963558272   | 1,037819953     | 0               |
| POLE3                                                                                    | 0,000207437 | -0,053621394 | 0,6   | 0,21  | 1         | 0,963514715   | 1,037866868     | 2,857142857     |
| NAIF1                                                                                    | 0,894021778 | -0,053711586 | 0,038 | 0,04  | 1         | 0,963454482   | 1,037931754     | 0,95            |
| WNT6                                                                                     | 0,157415062 | -0,053735635 | 0,062 | 0,02  | 1         | 0,963438422   | 1,037949055     | 3,1             |
| HERC3                                                                                    | 0,501283468 | -0,053774668 | 0,038 | 0,02  | 1         | 0,963412356   | 1,037977138     | 1,9             |
| AC008937.3                                                                               | 0,377102913 | -0,053777938 | 0     | 0,01  | 1         | 0,963410172   | 1,037979491     | 0               |
| CD69                                                                                     | 0,377102913 | -0,053777938 | 0     | 0,01  | 1         | 0,963410172   | 1,037979491     | 0               |
| IQANK1                                                                                   | 0,377102913 | -0,053777938 | 0     | 0,01  | 1         | 0,963410172   | 1,037979491     | 0               |
| SLC26A4                                                                                  | 0,377102913 | -0,053777938 | 0     | 0,01  | 1         | 0,963410172   | 1,037979491     | 0               |
| DICER1                                                                                   | 0,014003904 | -0,053798907 | 0,613 | 0,29  | 1         | 0,96339617    | 1,037994577     | 2,113793103     |
| PAQR3                                                                                    | 0,262670353 | -0,05386549  | 0,112 | 0,06  | 1         | 0,963351708   | 1,038042484     | 1,866666667     |
| ZC3H3                                                                                    | 0,085199008 | -0,053878661 | 0,075 | 0,02  | 1         | 0,963342913   | 1,038051961     | 3,75            |
| EIF2B4                                                                                   | 0,012608097 | -0,053883155 | 0,325 | 0,13  | 1         | 0,963339912   | 1,038055194     | 2,5             |
| ZBTB47                                                                                   | 0,886527564 | -0,053923974 | 0,013 | 0,01  | 1         | 0,963312656   | 1,038084565     | 1,3             |
| GIMAP1                                                                                   | 0,692138165 | -0,053959362 | 0,013 | 0,02  | 1         | 0,963289028   | 1,038110028     | 0,65            |
| SLIT3                                                                                    | 0,207484841 | -0,053970912 | 0     | 0,02  | 1         | 0,963281316   | 1,03811834      | 0               |



Supplementary Table 4

| Differentially expressed genes_keloid-CCD_ comparing SC-Keloid vs. (SC-Myel, SC-Nonmyel) |             |              |       |       |           |               |                 |                 |
|------------------------------------------------------------------------------------------|-------------|--------------|-------|-------|-----------|---------------|-----------------|-----------------|
| gene                                                                                     | p_val       | avg_log2FC   | pct.1 | pct.2 | p_val_adj | Foldchange_UP | Foldchange_DOWN | Ratio_pct1_pct2 |
| CRKL                                                                                     | 0,003639615 | -0,05397773  | 0,262 | 0,08  | 1         | 0,963276763   | 1,038123246     | 3,275           |
| ZNF250                                                                                   | 0,325316267 | -0,054006231 | 0,062 | 0,03  | 1         | 0,963257734   | 1,038143754     | 2,066666667     |
| PI4KA                                                                                    | 0,012164967 | -0,05404537  | 0,175 | 0,05  | 1         | 0,963231602   | 1,038171919     | 3,5             |
| TAPBPL                                                                                   | 0,051861952 | -0,054081518 | 0,175 | 0,07  | 1         | 0,963207468   | 1,038197931     | 2,5             |
| BBOX1                                                                                    | 0,539465965 | -0,054130902 | 0,062 | 0,04  | 1         | 0,963174497   | 1,03823347      | 1,55            |
| TPR                                                                                      | 0,140811328 | -0,05415953  | 0,738 | 0,42  | 1         | 0,963155385   | 1,038254072     | 1,757142857     |
| DNAH9                                                                                    | 0,692138165 | -0,054166633 | 0,013 | 0,02  | 1         | 0,963150643   | 1,038259184     | 0,65            |
| STEAP1B                                                                                  | 0,115368355 | -0,054223054 | 0,138 | 0,06  | 1         | 0,963112976   | 1,038299789     | 2,3             |
| PABPC1L2B                                                                                | 0,207484841 | -0,054229423 | 0     | 0,02  | 1         | 0,963108724   | 1,038304373     | 0               |
| COPS7B                                                                                   | 0,075529963 | -0,054238903 | 0,212 | 0,1   | 1         | 0,963102396   | 1,038311195     | 2,12            |
| RPUSD4                                                                                   | 0,079357729 | -0,054244092 | 0,112 | 0,04  | 1         | 0,963098932   | 1,03831493      | 2,8             |
| LINC01001                                                                                | 0,447580525 | -0,05425499  | 0,025 | 0,01  | 1         | 0,963091657   | 1,038322773     | 2,5             |
| FBXW2                                                                                    | 0,027184267 | -0,054312193 | 0,388 | 0,18  | 1         | 0,963053471   | 1,038363944     | 2,155555556     |
| AKAP6                                                                                    | 0,447580525 | -0,054342155 | 0,025 | 0,01  | 1         | 0,963033471   | 1,038385508     | 2,5             |
| TMEM255A                                                                                 | 0,35516371  | -0,054344605 | 0,075 | 0,04  | 1         | 0,963031835   | 1,038387272     | 1,875           |
| SRGAP2                                                                                   | 0,00741395  | -0,054360195 | 0,512 | 0,23  | 1         | 0,963021428   | 1,038398493     | 2,226086957     |
| RASIP1                                                                                   | 0,692138165 | -0,054377095 | 0,013 | 0,02  | 1         | 0,963010147   | 1,038410658     | 0,65            |
| ZNF503-AS1                                                                               | 0,766215557 | -0,054468282 | 0,062 | 0,05  | 1         | 0,962949281   | 1,038476293     | 1,24            |
| TMEM67                                                                                   | 0,020398022 | -0,054483527 | 0,288 | 0,12  | 1         | 0,962939106   | 1,038487267     | 2,4             |
| MCTP1                                                                                    | 0,157415062 | -0,054556364 | 0,062 | 0,02  | 1         | 0,962890491   | 1,038539698     | 3,1             |
| ATP9A                                                                                    | 0,207484841 | -0,054572431 | 0     | 0,02  | 1         | 0,962879768   | 1,038551264     | 0               |
| ARAP1                                                                                    | 0,046263823 | -0,054635746 | 0,125 | 0,04  | 1         | 0,962837511   | 1,038596844     | 3,125           |
| TRIM27                                                                                   | 0,024395708 | -0,05468348  | 0,25  | 0,1   | 1         | 0,962805655   | 1,038631208     | 2,5             |
| CLSTN3                                                                                   | 0,423434047 | -0,054686438 | 0,013 | 0,03  | 1         | 0,962803681   | 1,038633337     | 0,433333333     |
| ZNF487                                                                                   | 0,539465965 | -0,054691509 | 0,062 | 0,04  | 1         | 0,962800296   | 1,038636988     | 1,55            |
| LPCAT4                                                                                   | 0,239155423 | -0,054695785 | 0,1   | 0,05  | 1         | 0,962797443   | 1,038640066     | 2               |
| LAT                                                                                      | 0,692138165 | -0,054714687 | 0,013 | 0,02  | 1         | 0,962784829   | 1,038653674     | 0,65            |
| EFNA2                                                                                    | 0,377102913 | -0,054778602 | 0     | 0,01  | 1         | 0,962742176   | 1,03869969      | 0               |
| HPR                                                                                      | 0,377102913 | -0,054778602 | 0     | 0,01  | 1         | 0,962742176   | 1,03869969      | 0               |
| MCF2L                                                                                    | 0,377102913 | -0,054778602 | 0     | 0,01  | 1         | 0,962742176   | 1,03869969      | 0               |

Supplementary Table 4

| Differentially expressed genes_keloid-CCD_ comparing SC-Keloid vs. (SC-Myel, SC-Nonmyel) |             |              |       |       |           |               |                 |                 |
|------------------------------------------------------------------------------------------|-------------|--------------|-------|-------|-----------|---------------|-----------------|-----------------|
| gene                                                                                     | p_val       | avg_log2FC   | pct.1 | pct.2 | p_val_adj | Foldchange_UP | Foldchange_DOWN | Ratio_pct1_pct2 |
| ZNF256                                                                                   | 0,377102913 | -0,054778602 | 0     | 0,01  | 1         | 0,962742176   | 1,03869969      | 0               |
| ZDHHC4                                                                                   | 0,014159656 | -0,054791346 | 0,312 | 0,13  | 1         | 0,962733671   | 1,038708866     | 2,4             |
| SAR1B                                                                                    | 0,00165306  | -0,054800095 | 0,613 | 0,26  | 1         | 0,962727833   | 1,038715165     | 2,357692308     |
| ZFX                                                                                      | 0,024454169 | -0,054817466 | 0,425 | 0,2   | 1         | 0,962716241   | 1,038727672     | 2,125           |
| ERO1A                                                                                    | 0,024291708 | -0,05484787  | 0,3   | 0,13  | 1         | 0,962695953   | 1,038749563     | 2,307692308     |
| C6orf136                                                                                 | 0,003928532 | -0,05496555  | 0,175 | 0,04  | 1         | 0,962617429   | 1,038834297     | 4,375           |
| PBX1                                                                                     | 0,423434047 | -0,055013937 | 0,013 | 0,03  | 1         | 0,962585144   | 1,038869139     | 0,433333333     |
| NUAK1                                                                                    | 0,11632663  | -0,055134892 | 0,2   | 0,1   | 1         | 0,962504445   | 1,038956241     | 2               |
| KCNN3                                                                                    | 0,907630591 | -0,055179223 | 0,038 | 0,04  | 1         | 0,96247487    | 1,038988166     | 0,95            |
| MED9                                                                                     | 0,112247794 | -0,055235286 | 0,088 | 0,03  | 1         | 0,962437468   | 1,039028543     | 2,933333333     |
| BNIP2                                                                                    | 0,044918126 | -0,055248951 | 0,525 | 0,27  | 1         | 0,962428353   | 1,039038384     | 1,944444444     |
| TNFRSF11B                                                                                | 0,207484841 | -0,055249246 | 0     | 0,02  | 1         | 0,962428156   | 1,039038596     | 0               |
| TSTD2                                                                                    | 0,372322273 | -0,055249836 | 0,088 | 0,05  | 1         | 0,962427762   | 1,039039021     | 1,76            |
| H4-16                                                                                    | 0,907630591 | -0,055264691 | 0,038 | 0,04  | 1         | 0,962417852   | 1,03904972      | 0,95            |
| ARHGEF17                                                                                 | 0,060310265 | -0,055317783 | 0,188 | 0,08  | 1         | 0,962382435   | 1,039087958     | 2,35            |
| SUPT6H                                                                                   | 0,005358655 | -0,05534398  | 0,35  | 0,13  | 1         | 0,96236496    | 1,039106827     | 2,692307692     |
| TRMT44                                                                                   | 0,809797238 | -0,055401609 | 0,038 | 0,03  | 1         | 0,962326519   | 1,039148335     | 1,266666667     |
| PLAC8L1                                                                                  | 0,886527564 | -0,055434996 | 0,013 | 0,01  | 1         | 0,962304249   | 1,039172383     | 1,3             |
| EXOSC3                                                                                   | 0,12999802  | -0,055435805 | 0,15  | 0,07  | 1         | 0,962303709   | 1,039172966     | 2,142857143     |
| CCNT1                                                                                    | 0,139003994 | -0,055491618 | 0,162 | 0,08  | 1         | 0,962266482   | 1,039213169     | 2,025           |
| SLC49A4                                                                                  | 0,047638359 | -0,055500686 | 0,125 | 0,04  | 1         | 0,962260433   | 1,039219701     | 3,125           |
| TMEM231                                                                                  | 0,063616753 | -0,05556175  | 0,1   | 0,03  | 1         | 0,962219705   | 1,039263688     | 3,333333333     |
| ZNF438                                                                                   | 0,501283468 | -0,055577591 | 0,038 | 0,02  | 1         | 0,96220914    | 1,0392751       | 1,9             |
| DNAJC25                                                                                  | 0,09955554  | -0,055588197 | 0,175 | 0,08  | 1         | 0,962202067   | 1,03928274      | 2,1875          |
| DENND1B                                                                                  | 0,159376137 | -0,05562775  | 0,112 | 0,05  | 1         | 0,962175687   | 1,039311234     | 2,24            |
| NHS                                                                                      | 0,207484841 | -0,055685637 | 0     | 0,02  | 1         | 0,962137082   | 1,039352935     | 0               |
| SUGCT                                                                                    | 0,886527564 | -0,055753135 | 0,013 | 0,01  | 1         | 0,962092068   | 1,039401564     | 1,3             |
| CDIP1                                                                                    | 0,816980451 | -0,055770517 | 0,038 | 0,03  | 1         | 0,962080476   | 1,039414087     | 1,266666667     |
| RNF180                                                                                   | 0,527578779 | -0,055777104 | 0,05  | 0,03  | 1         | 0,962076084   | 1,039418833     | 1,666666667     |
| SMARCC2                                                                                  | 0,089495642 | -0,055822469 | 0,338 | 0,18  | 1         | 0,962045832   | 1,039451517     | 1,877777778     |

Supplementary Table 4

| Differentially expressed genes_keloid-CCD_ comparing SC-Keloid vs. (SC-Myel, SC-Nonmyel) |             |              |       |       |           |               |                 |                 |
|------------------------------------------------------------------------------------------|-------------|--------------|-------|-------|-----------|---------------|-----------------|-----------------|
| gene                                                                                     | p_val       | avg_log2FC   | pct.1 | pct.2 | p_val_adj | Foldchange_UP | Foldchange_DOWN | Ratio_pct1_pct2 |
| SLC35E2A                                                                                 | 0,928093507 | -0,055841773 | 0,038 | 0,04  | 1         | 0,96203296    | 1,039465426     | 0,95            |
| EXT1                                                                                     | 0,180819392 | -0,05584712  | 0,138 | 0,07  | 1         | 0,962029394   | 1,039469278     | 1,971428571     |
| ICAM2                                                                                    | 0,263816781 | -0,055890429 | 0,013 | 0,04  | 1         | 0,962000515   | 1,039500483     | 0,325           |
| ITIH4                                                                                    | 0,692138165 | -0,055892694 | 0,013 | 0,02  | 1         | 0,961999004   | 1,039502116     | 0,65            |
| PRXL2B                                                                                   | 0,430690217 | -0,055905726 | 0,125 | 0,08  | 1         | 0,961990315   | 1,039511505     | 1,5625          |
| NIPA1                                                                                    | 0,54451599  | -0,055958006 | 0,062 | 0,04  | 1         | 0,961955455   | 1,039549176     | 1,55            |
| SLC19A2                                                                                  | 0,680945235 | -0,055979281 | 0,038 | 0,05  | 1         | 0,961941269   | 1,039564506     | 0,76            |
| ZER1                                                                                     | 0,046263823 | -0,055988505 | 0,125 | 0,04  | 1         | 0,961935119   | 1,039571152     | 3,125           |
| LYRM9                                                                                    | 0,199514022 | -0,055994446 | 0,138 | 0,07  | 1         | 0,961931158   | 1,039575433     | 1,971428571     |
| USP54                                                                                    | 0,84359211  | -0,055995403 | 0,025 | 0,02  | 1         | 0,96193052    | 1,039576122     | 1,25            |
| GDPD3                                                                                    | 0,84359211  | -0,056025473 | 0,025 | 0,02  | 1         | 0,96191047    | 1,039597791     | 1,25            |
| MYOZ1                                                                                    | 0,692138165 | -0,056051215 | 0,013 | 0,02  | 1         | 0,961893307   | 1,039616341     | 0,65            |
| SBSN                                                                                     | 0,886527564 | -0,056109139 | 0,013 | 0,01  | 1         | 0,961854689   | 1,039658081     | 1,3             |
| DHX38                                                                                    | 0,057505302 | -0,056127781 | 0,3   | 0,15  | 1         | 0,96184226    | 1,039671516     | 2               |
| MRE11                                                                                    | 0,080727289 | -0,056141873 | 0,162 | 0,07  | 1         | 0,961832865   | 1,039681671     | 2,314285714     |
| SPINDOC                                                                                  | 0,018278116 | -0,05616316  | 0,2   | 0,07  | 1         | 0,961818673   | 1,039697012     | 2,857142857     |
| NRDE2                                                                                    | 0,128634778 | -0,056169863 | 0,15  | 0,07  | 1         | 0,961814204   | 1,039701843     | 2,142857143     |
| RNF126                                                                                   | 0,002319146 | -0,056174156 | 0,637 | 0,27  | 1         | 0,961811342   | 1,039704936     | 2,359259259     |
| NECTIN3                                                                                  | 0,042501942 | -0,056277882 | 0,262 | 0,12  | 1         | 0,961742193   | 1,039779691     | 2,183333333     |
| TCF7L2                                                                                   | 0,008497508 | -0,056335632 | 0,312 | 0,12  | 1         | 0,961703696   | 1,039821314     | 2,6             |
| DBR1                                                                                     | 0,325316267 | -0,056344335 | 0,062 | 0,03  | 1         | 0,961697894   | 1,039827586     | 2,066666667     |
| DOCK4                                                                                    | 0,423434047 | -0,056359554 | 0,013 | 0,03  | 1         | 0,961687749   | 1,039838556     | 0,433333333     |
| TTC28                                                                                    | 0,375900964 | -0,056448899 | 0,088 | 0,05  | 1         | 0,961628195   | 1,039902954     | 1,76            |
| PLEKHA6                                                                                  | 0,377102913 | -0,056517021 | 0     | 0,01  | 1         | 0,961582789   | 1,039952058     | 0               |
| RADIL                                                                                    | 0,377102913 | -0,056517021 | 0     | 0,01  | 1         | 0,961582789   | 1,039952058     | 0               |
| WASF3                                                                                    | 0,377102913 | -0,056517021 | 0     | 0,01  | 1         | 0,961582789   | 1,039952058     | 0               |
| YY1AP1                                                                                   | 0,047475849 | -0,056578365 | 0,312 | 0,15  | 1         | 0,961541903   | 1,039996278     | 2,08            |
| RAI2                                                                                     | 0,377102913 | -0,056583528 | 0     | 0,01  | 1         | 0,961538462   | 1,04            | 0               |
| SLC6A16                                                                                  | 0,377102913 | -0,056583528 | 0     | 0,01  | 1         | 0,961538462   | 1,04            | 0               |
| SPINK2                                                                                   | 0,377102913 | -0,056583528 | 0     | 0,01  | 1         | 0,961538462   | 1,04            | 0               |

Supplementary Table 4

| Differentially expressed genes_keloid-CCD_ comparing SC-Keloid vs. (SC-Myel, SC-Nonmyel) |             |              |       |       |           |               |                 |                 |
|------------------------------------------------------------------------------------------|-------------|--------------|-------|-------|-----------|---------------|-----------------|-----------------|
| gene                                                                                     | p_val       | avg_log2FC   | pct.1 | pct.2 | p_val_adj | Foldchange_UP | Foldchange_DOWN | Ratio_pct1_pct2 |
| SRRM2-AS1                                                                                | 0,377102913 | -0,056583528 | 0     | 0,01  | 1         | 0,961538462   | 1,04            | 0               |
| ARID3B                                                                                   | 0,039615109 | -0,056591628 | 0,212 | 0,09  | 1         | 0,961533063   | 1,040005839     | 2,355555556     |
| ANKAR                                                                                    | 0,827884433 | -0,056605606 | 0,025 | 0,03  | 1         | 0,961523747   | 1,040015915     | 0,833333333     |
| ATP6VOA2                                                                                 | 0,242895857 | -0,056621736 | 0,188 | 0,11  | 1         | 0,961512997   | 1,040027543     | 1,709090909     |
| VDR                                                                                      | 0,325316267 | -0,05662271  | 0,062 | 0,03  | 1         | 0,961512348   | 1,040028245     | 2,066666667     |
| RASA4                                                                                    | 0,809797238 | -0,056652934 | 0,038 | 0,03  | 1         | 0,961492204   | 1,040050034     | 1,266666667     |
| RNF144A                                                                                  | 0,692138165 | -0,056659806 | 0,013 | 0,02  | 1         | 0,961487625   | 1,040054988     | 0,65            |
| MMD                                                                                      | 0,544388138 | -0,056669953 | 0,088 | 0,06  | 1         | 0,961480862   | 1,040062303     | 1,466666667     |
| GIGYF2                                                                                   | 0,014885283 | -0,056680785 | 0,262 | 0,1   | 1         | 0,961473644   | 1,040070112     | 2,62            |
| ZNF236                                                                                   | 0,115368355 | -0,056740201 | 0,138 | 0,06  | 1         | 0,961434047   | 1,040112947     | 2,3             |
| ICAM4                                                                                    | 0,501283468 | -0,056743496 | 0,038 | 0,02  | 1         | 0,961431851   | 1,040115323     | 1,9             |
| SYNJ2BP                                                                                  | 0,043379317 | -0,056767158 | 0,262 | 0,12  | 1         | 0,961416083   | 1,040132382     | 2,183333333     |
| SERPINH1                                                                                 | 0,035304265 | -0,05679385  | 0,875 | 0,5   | 1         | 0,961398295   | 1,040151627     | 1,75            |
| HTRA2                                                                                    | 0,014254612 | -0,056863827 | 0,375 | 0,16  | 1         | 0,961351664   | 1,040202079     | 2,34375         |
| RICTOR                                                                                   | 0,105471775 | -0,05687056  | 0,262 | 0,14  | 1         | 0,961347177   | 1,040206934     | 1,871428571     |
| C2orf68                                                                                  | 0,527578779 | -0,056892214 | 0,05  | 0,03  | 1         | 0,961332749   | 1,040222547     | 1,666666667     |
| NDUFAF5                                                                                  | 0,038337391 | -0,056893902 | 0,238 | 0,1   | 1         | 0,961331624   | 1,040223764     | 2,38            |
| HAS1                                                                                     | 0,886527564 | -0,056904575 | 0,013 | 0,01  | 1         | 0,961324512   | 1,040231459     | 1,3             |
| ULK1                                                                                     | 0,404468101 | -0,056987623 | 0,138 | 0,09  | 1         | 0,961269175   | 1,040291342     | 1,533333333     |
| HELLS                                                                                    | 0,015842303 | -0,056999119 | 0,275 | 0,11  | 1         | 0,961261516   | 1,040299631     | 2,5             |
| BANK1                                                                                    | 0,692138165 | -0,056999471 | 0,013 | 0,02  | 1         | 0,961261281   | 1,040299885     | 0,65            |
| ZFP30                                                                                    | 0,207484841 | -0,057022073 | 0     | 0,02  | 1         | 0,961246221   | 1,040316183     | 0               |
| DCAF10                                                                                   | 0,027925979 | -0,057271003 | 0,275 | 0,12  | 1         | 0,961080377   | 1,0404957       | 2,291666667     |
| GTF2H2C                                                                                  | 0,249550622 | -0,057271289 | 0,1   | 0,05  | 1         | 0,961080187   | 1,040495907     | 2               |
| FKTN                                                                                     | 0,099225142 | -0,057303411 | 0,125 | 0,05  | 1         | 0,961058788   | 1,040519073     | 2,5             |
| MTF1                                                                                     | 0,404307785 | -0,057370776 | 0,112 | 0,07  | 1         | 0,961013914   | 1,040567661     | 1,6             |
| IGDCC4                                                                                   | 0,886527564 | -0,057393309 | 0,013 | 0,01  | 1         | 0,960998904   | 1,040583913     | 1,3             |
| BBS5                                                                                     | 0,019378739 | -0,057393905 | 0,125 | 0,03  | 1         | 0,960998507   | 1,040584343     | 4,166666667     |
| KRIT1                                                                                    | 0,017794508 | -0,057443025 | 0,275 | 0,11  | 1         | 0,960965788   | 1,040619772     | 2,5             |
| PLTP                                                                                     | 0,020539582 | -0,05745133  | 0,475 | 0,23  | 1         | 0,960960256   | 1,040625763     | 2,065217391     |

Supplementary Table 4

| Differentially expressed genes_keloid-CCD_ comparing SC-Keloid vs. (SC-Myel, SC-Nonmyel) |             |              |       |       |           |               |                 |                 |
|------------------------------------------------------------------------------------------|-------------|--------------|-------|-------|-----------|---------------|-----------------|-----------------|
| gene                                                                                     | p_val       | avg_log2FC   | pct.1 | pct.2 | p_val_adj | Foldchange_UP | Foldchange_DOWN | Ratio_pct1_pct2 |
| ZNF213                                                                                   | 0,218400487 | -0,057475933 | 0,088 | 0,04  | 1         | 0,960943869   | 1,040643509     | 2,2             |
| ALG10B                                                                                   | 0,534439505 | -0,057532039 | 0,062 | 0,04  | 1         | 0,960906499   | 1,04068398      | 1,55            |
| ZNF75A                                                                                   | 0,132758116 | -0,057558374 | 0,15  | 0,07  | 1         | 0,960888958   | 1,040702978     | 2,142857143     |
| ZNF780A                                                                                  | 0,112247794 | -0,057695508 | 0,088 | 0,03  | 1         | 0,960797626   | 1,040801905     | 2,933333333     |
| STRIP2                                                                                   | 0,207484841 | -0,057720293 | 0     | 0,02  | 1         | 0,96078112    | 1,040819786     | 0               |
| CCDC85C                                                                                  | 0,325316267 | -0,057736318 | 0,062 | 0,03  | 1         | 0,960770449   | 1,040831347     | 2,066666667     |
| ARL8B                                                                                    | 0,038399599 | -0,057866405 | 0,412 | 0,21  | 1         | 0,96068382    | 1,040925202     | 1,961904762     |
| GALNT12                                                                                  | 0,120814239 | -0,057886719 | 0     | 0,03  | 1         | 0,960670293   | 1,04093986      | 0               |
| TFAM                                                                                     | 0,013339639 | -0,057924133 | 0,325 | 0,14  | 1         | 0,96064538    | 1,040966855     | 2,321428571     |
| BAZ2A                                                                                    | 0,006324057 | -0,057926902 | 0,525 | 0,23  | 1         | 0,960643536   | 1,040968853     | 2,282608696     |
| ACTN1-DT                                                                                 | 0,886527564 | -0,057972193 | 0,013 | 0,01  | 1         | 0,960613379   | 1,041001533     | 1,3             |
| KRT7                                                                                     | 0,207484841 | -0,058089804 | 0     | 0,02  | 1         | 0,960535071   | 1,041086401     | 0               |
| INTS14                                                                                   | 0,390582533 | -0,058101294 | 0,1   | 0,06  | 1         | 0,960527422   | 1,041094692     | 1,666666667     |
| WSCD1                                                                                    | 0,207484841 | -0,058153353 | 0     | 0,02  | 1         | 0,960492762   | 1,04113226      | 0               |
| VAMP1                                                                                    | 0,423434047 | -0,058202331 | 0,013 | 0,03  | 1         | 0,960460155   | 1,041167606     | 0,433333333     |
| TADA2B                                                                                   | 0,112247794 | -0,058217313 | 0,088 | 0,03  | 1         | 0,960450181   | 1,041178418     | 2,933333333     |
| CABCOC01                                                                                 | 0,741735351 | -0,0582298   | 0,075 | 0,06  | 1         | 0,960441868   | 1,04118743      | 1,25            |
| PLPP7                                                                                    | 0,692138165 | -0,05823443  | 0,013 | 0,02  | 1         | 0,960438785   | 1,041190772     | 0,65            |
| ZNF564                                                                                   | 0,447580525 | -0,058237861 | 0,025 | 0,01  | 1         | 0,960436501   | 1,041193248     | 2,5             |
| SERPINI1                                                                                 | 0,280825998 | -0,058258202 | 0,05  | 0,02  | 1         | 0,96042296    | 1,041207928     | 2,5             |
| EPHB6                                                                                    | 0,692138165 | -0,058347362 | 0,013 | 0,02  | 1         | 0,960363606   | 1,041272278     | 0,65            |
| RBPMS2                                                                                   | 0,84359211  | -0,058418876 | 0,025 | 0,02  | 1         | 0,960316003   | 1,041323894     | 1,25            |
| COPRS                                                                                    | 0,098716573 | -0,058444649 | 0,688 | 0,37  | 1         | 0,960298847   | 1,041342498     | 1,859459459     |
| SUSD4                                                                                    | 0,914445434 | -0,058553117 | 0,038 | 0,04  | 1         | 0,960226651   | 1,041420793     | 0,95            |
| CNNM3                                                                                    | 0,552939414 | -0,058613611 | 0,088 | 0,06  | 1         | 0,960186388   | 1,041464462     | 1,466666667     |
| LBHD1                                                                                    | 0,120814239 | -0,0586491   | 0     | 0,03  | 1         | 0,960162768   | 1,041490082     | 0               |
| ANO3                                                                                     | 0,207484841 | -0,058714665 | 0     | 0,02  | 1         | 0,960119134   | 1,041537414     | 0               |
| ZNF575                                                                                   | 0,816980451 | -0,058761286 | 0,038 | 0,03  | 1         | 0,960088108   | 1,041571072     | 1,266666667     |
| CRTC1                                                                                    | 0,372322273 | -0,058800513 | 0,088 | 0,05  | 1         | 0,960062003   | 1,041599393     | 1,76            |
| GRID2                                                                                    | 0,207484841 | -0,058860631 | 0     | 0,02  | 1         | 0,960021998   | 1,041642798     | 0               |

Supplementary Table 4

| Differentially expressed genes_keloid-CCD_ comparing SC-Keloid vs. (SC-Myel, SC-Nonmyel) |             |              |       |       |           |               |                 |                 |
|------------------------------------------------------------------------------------------|-------------|--------------|-------|-------|-----------|---------------|-----------------|-----------------|
| gene                                                                                     | p_val       | avg_log2FC   | pct.1 | pct.2 | p_val_adj | Foldchange_UP | Foldchange_DOWN | Ratio_pct1_pct2 |
| SLC35B3                                                                                  | 0,003587612 | -0,05889611  | 0,262 | 0,08  | 1         | 0,959998389   | 1,041668415     | 3,275           |
| FOXRED1                                                                                  | 0,213224933 | -0,059013479 | 0,162 | 0,09  | 1         | 0,959920293   | 1,041753162     | 1,8             |
| OSBPL8                                                                                   | 0,055772965 | -0,059015512 | 0,725 | 0,37  | 1         | 0,95991894    | 1,04175463      | 1,959459459     |
| ZNF135                                                                                   | 0,207484841 | -0,059043547 | 0     | 0,02  | 1         | 0,959900287   | 1,041774874     | 0               |
| RNF111                                                                                   | 0,058046518 | -0,05913472  | 0,138 | 0,05  | 1         | 0,959839626   | 1,041840713     | 2,76            |
| PRR12                                                                                    | 0,501283468 | -0,059166511 | 0,038 | 0,02  | 1         | 0,959818476   | 1,04186367      | 1,9             |
| USP19                                                                                    | 0,54451599  | -0,05922293  | 0,062 | 0,04  | 1         | 0,959780941   | 1,041904415     | 1,55            |
| EID3                                                                                     | 0,223632981 | -0,059230281 | 0,088 | 0,04  | 1         | 0,95977605    | 1,041909724     | 2,2             |
| OMA1                                                                                     | 0,894021778 | -0,05924594  | 0,038 | 0,04  | 1         | 0,959765634   | 1,041921033     | 0,95            |
| ARSG                                                                                     | 0,799526327 | -0,059299159 | 0,05  | 0,04  | 1         | 0,959730229   | 1,041959469     | 1,25            |
| LRR8D                                                                                    | 0,787095147 | -0,059360068 | 0,05  | 0,04  | 1         | 0,959689712   | 1,04200346      | 1,25            |
| PPIL6                                                                                    | 0,94227175  | -0,059390566 | 0,05  | 0,05  | 1         | 0,959669424   | 1,042025488     | 1               |
| IL17RE                                                                                   | 0,006902615 | -0,05940997  | 0,188 | 0,05  | 1         | 0,959656517   | 1,042039503     | 3,76            |
| STIM1                                                                                    | 0,024116098 | -0,059425798 | 0,25  | 0,1   | 1         | 0,959645988   | 1,042050935     | 2,5             |
| EIF2D                                                                                    | 0,001055288 | -0,059507831 | 0,312 | 0,09  | 1         | 0,959591424   | 1,042110189     | 3,466666667     |
| PIM1                                                                                     | 0,070994421 | -0,059674175 | 0,15  | 0,06  | 1         | 0,959480789   | 1,042230352     | 2,5             |
| FASTKD2                                                                                  | 0,189997377 | -0,059780948 | 0,138 | 0,07  | 1         | 0,95940978    | 1,04230749      | 1,971428571     |
| KCTD21                                                                                   | 0,886527564 | -0,059791419 | 0,013 | 0,01  | 1         | 0,959402817   | 1,042315055     | 1,3             |
| APOC2                                                                                    | 0,692138165 | -0,0598138   | 0,013 | 0,02  | 1         | 0,959387934   | 1,042331224     | 0,65            |
| ZSCAN31                                                                                  | 0,692138165 | -0,059920305 | 0,013 | 0,02  | 1         | 0,959317111   | 1,042408176     | 0,65            |
| MEGF8                                                                                    | 0,016004888 | -0,060022061 | 0,312 | 0,13  | 1         | 0,959249451   | 1,042481702     | 2,4             |
| UTP15                                                                                    | 0,124611661 | -0,060042256 | 0,15  | 0,07  | 1         | 0,959236023   | 1,042496295     | 2,142857143     |
| HSD17B12                                                                                 | 0,075654202 | -0,060098179 | 0,462 | 0,25  | 1         | 0,959198841   | 1,042536705     | 1,848           |
| YLPM1                                                                                    | 0,047519147 | -0,060123746 | 0,262 | 0,12  | 1         | 0,959181843   | 1,042555181     | 2,183333333     |
| BAIAP2-DT                                                                                | 0,325316267 | -0,060204782 | 0,062 | 0,03  | 1         | 0,959127967   | 1,042613743     | 2,066666667     |
| ARHGEF9                                                                                  | 0,011992293 | -0,060214705 | 0,288 | 0,11  | 1         | 0,95912137    | 1,042620914     | 2,618181818     |
| GALNT15                                                                                  | 0,207484841 | -0,06024706  | 0     | 0,02  | 1         | 0,959099861   | 1,042644297     | 0               |
| RAB3D                                                                                    | 0,827884433 | -0,060278868 | 0,025 | 0,03  | 1         | 0,959078715   | 1,042667285     | 0,833333333     |
| TTYH2                                                                                    | 0,221005633 | -0,060318655 | 0,088 | 0,04  | 1         | 0,959052265   | 1,042696041     | 2,2             |
| RAB10                                                                                    | 0,050290268 | -0,060337917 | 0,725 | 0,38  | 1         | 0,959039461   | 1,042709963     | 1,907894737     |

Supplementary Table 4

| Differentially expressed genes_keloid-CCD_ comparing SC-Keloid vs. (SC-Myel, SC-Nonmyel) |             |              |       |       |           |               |                 |                 |
|------------------------------------------------------------------------------------------|-------------|--------------|-------|-------|-----------|---------------|-----------------|-----------------|
| gene                                                                                     | p_val       | avg_log2FC   | pct.1 | pct.2 | p_val_adj | Foldchange_UP | Foldchange_DOWN | Ratio_pct1_pct2 |
| NDUFA5                                                                                   | 0,009058118 | -0,060355542 | 0,662 | 0,31  | 1         | 0,959027745   | 1,042722701     | 2,135483871     |
| ABCG1                                                                                    | 0,207484841 | -0,060375405 | 0     | 0,02  | 1         | 0,959014541   | 1,042737057     | 0               |
| A4GALT                                                                                   | 0,692138165 | -0,060381915 | 0,013 | 0,02  | 1         | 0,959010213   | 1,042741762     | 0,65            |
| ACTC1                                                                                    | 0,377102913 | -0,060423196 | 0     | 0,01  | 1         | 0,958982773   | 1,0427716       | 0               |
| H3-5                                                                                     | 0,377102913 | -0,060423196 | 0     | 0,01  | 1         | 0,958982773   | 1,0427716       | 0               |
| OAS1                                                                                     | 0,377102913 | -0,060423196 | 0     | 0,01  | 1         | 0,958982773   | 1,0427716       | 0               |
| OAS2                                                                                     | 0,377102913 | -0,060423196 | 0     | 0,01  | 1         | 0,958982773   | 1,0427716       | 0               |
| RHOXF1                                                                                   | 0,377102913 | -0,060423196 | 0     | 0,01  | 1         | 0,958982773   | 1,0427716       | 0               |
| TMEM196                                                                                  | 0,377102913 | -0,060423196 | 0     | 0,01  | 1         | 0,958982773   | 1,0427716       | 0               |
| FTX                                                                                      | 0,107839769 | -0,060502717 | 0,188 | 0,09  | 1         | 0,958929916   | 1,042829078     | 2,088888889     |
| ZNF746                                                                                   | 0,793304172 | -0,060517949 | 0,05  | 0,04  | 1         | 0,958919791   | 1,042840089     | 1,25            |
| ZC3H15                                                                                   | 0,147717146 | -0,060584847 | 0,65  | 0,39  | 1         | 0,958875327   | 1,042888447     | 1,666666667     |
| PLAAT4                                                                                   | 0,84359211  | -0,060591628 | 0,025 | 0,02  | 1         | 0,95887082    | 1,042893349     | 1,25            |
| ATAD2B                                                                                   | 0,279748933 | -0,060597657 | 0,125 | 0,07  | 1         | 0,958866813   | 1,042897707     | 1,785714286     |
| FUT11                                                                                    | 0,015208331 | -0,060607664 | 0,225 | 0,08  | 1         | 0,958860162   | 1,04290494      | 2,8125          |
| PLEKHG1                                                                                  | 0,016543484 | -0,060617401 | 0,312 | 0,13  | 1         | 0,95885369    | 1,042911979     | 2,4             |
| MACO1                                                                                    | 0,005149697 | -0,060670915 | 0,425 | 0,17  | 1         | 0,958818124   | 1,042950665     | 2,5             |
| LRRC27                                                                                   | 0,390582533 | -0,060722328 | 0,1   | 0,06  | 1         | 0,958783955   | 1,042987833     | 1,666666667     |
| ARHGAP17                                                                                 | 0,159376137 | -0,060736816 | 0,112 | 0,05  | 1         | 0,958774327   | 1,042998307     | 2,24            |
| KRT15                                                                                    | 0,569139823 | -0,060744635 | 0,025 | 0,04  | 1         | 0,958769131   | 1,04300396      | 0,625           |
| MAST3                                                                                    | 0,54451599  | -0,060787357 | 0,062 | 0,04  | 1         | 0,95874074    | 1,043034846     | 1,55            |
| HYKK                                                                                     | 0,799526327 | -0,060831902 | 0,05  | 0,04  | 1         | 0,958711138   | 1,043067052     | 1,25            |
| CLEC4A                                                                                   | 0,377102913 | -0,060856557 | 0     | 0,01  | 1         | 0,958694754   | 1,043084877     | 0               |
| IL19                                                                                     | 0,377102913 | -0,060856557 | 0     | 0,01  | 1         | 0,958694754   | 1,043084877     | 0               |
| ZC3H12B                                                                                  | 0,377102913 | -0,060856557 | 0     | 0,01  | 1         | 0,958694754   | 1,043084877     | 0               |
| MACROD2                                                                                  | 0,529436792 | -0,060968554 | 0,062 | 0,04  | 1         | 0,958620333   | 1,043165855     | 1,55            |
| KLF7                                                                                     | 0,057732576 | -0,060986387 | 0,212 | 0,1   | 1         | 0,958608484   | 1,04317875      | 2,12            |
| SPRTN                                                                                    | 0,147971932 | -0,060997941 | 0,175 | 0,09  | 1         | 0,958600807   | 1,043187105     | 1,944444444     |
| MIOS                                                                                     | 0,552939414 | -0,061001927 | 0,088 | 0,06  | 1         | 0,958598158   | 1,043189987     | 1,466666667     |
| LRRC8C                                                                                   | 0,746914545 | -0,061049158 | 0,05  | 0,06  | 1         | 0,958566776   | 1,043224139     | 0,833333333     |

Supplementary Table 4

| Differentially expressed genes_keloid-CCD_ comparing SC-Keloid vs. (SC-Myel, SC-Nonmyel) |             |              |       |       |           |               |                 |                 |
|------------------------------------------------------------------------------------------|-------------|--------------|-------|-------|-----------|---------------|-----------------|-----------------|
| gene                                                                                     | p_val       | avg_log2FC   | pct.1 | pct.2 | p_val_adj | Foldchange_UP | Foldchange_DOWN | Ratio_pct1_pct2 |
| PRKAA2                                                                                   | 0,886527564 | -0,061058539 | 0,013 | 0,01  | 1         | 0,958560543   | 1,043230923     | 1,3             |
| PSMC4                                                                                    | 0,165674987 | -0,06119168  | 0,675 | 0,37  | 1         | 0,958472085   | 1,043327203     | 1,824324324     |
| OPN3                                                                                     | 0,098519846 | -0,061202405 | 0,175 | 0,08  | 1         | 0,95846496    | 1,043334959     | 2,1875          |
| TXNDC16                                                                                  | 0,793304172 | -0,061218361 | 0,05  | 0,04  | 1         | 0,958454359   | 1,043346499     | 1,25            |
| BRD3OS                                                                                   | 0,325316267 | -0,061240025 | 0,062 | 0,03  | 1         | 0,958439967   | 1,043362166     | 2,066666667     |
| LINC00562                                                                                | 0,692138165 | -0,061287574 | 0,013 | 0,02  | 1         | 0,958408379   | 1,043396554     | 0,65            |
| DHX58                                                                                    | 0,816980451 | -0,061335962 | 0,038 | 0,03  | 1         | 0,958376234   | 1,043431551     | 1,266666667     |
| STX7                                                                                     | 0,002108176 | -0,061342279 | 0,338 | 0,11  | 1         | 0,958372038   | 1,043436119     | 3,072727273     |
| FAM193A                                                                                  | 0,01728634  | -0,061347014 | 0,312 | 0,13  | 1         | 0,958368893   | 1,043439544     | 2,4             |
| ZNF584                                                                                   | 0,104675576 | -0,061367088 | 0,188 | 0,09  | 1         | 0,958355557   | 1,043454063     | 2,088888889     |
| ACTL10                                                                                   | 0,284975754 | -0,061397587 | 0,05  | 0,02  | 1         | 0,958335298   | 1,043476122     | 2,5             |
| HARS2                                                                                    | 0,284975754 | -0,061455165 | 0,05  | 0,02  | 1         | 0,958297052   | 1,043517767     | 2,5             |
| PHYHIPL                                                                                  | 0,207484841 | -0,061534494 | 0     | 0,02  | 1         | 0,958244359   | 1,043575149     | 0               |
| TNFRSF10A                                                                                | 0,207484841 | -0,061534494 | 0     | 0,02  | 1         | 0,958244359   | 1,043575149     | 0               |
| SLX4IP                                                                                   | 0,777311081 | -0,061540642 | 0,062 | 0,05  | 1         | 0,958240276   | 1,043579596     | 1,24            |
| SNTB1                                                                                    | 0,561556035 | -0,061553248 | 0,088 | 0,06  | 1         | 0,958231903   | 1,043588715     | 1,466666667     |
| NRCAM                                                                                    | 0,692138165 | -0,061577491 | 0,013 | 0,02  | 1         | 0,958215801   | 1,043606251     | 0,65            |
| KAT7                                                                                     | 0,034425078 | -0,061720324 | 0,188 | 0,07  | 1         | 0,958120939   | 1,043709577     | 2,685714286     |
| GOSR2                                                                                    | 0,029624103 | -0,061722264 | 0,312 | 0,14  | 1         | 0,95811965    | 1,043710981     | 2,228571429     |
| FUOM                                                                                     | 0,254483648 | -0,061733913 | 0,188 | 0,11  | 1         | 0,958111914   | 1,043719409     | 1,709090909     |
| IZUMO4                                                                                   | 0,84359211  | -0,061739156 | 0,025 | 0,02  | 1         | 0,958108432   | 1,043723201     | 1,25            |
| NCBP2                                                                                    | 0,004329404 | -0,061752637 | 0,537 | 0,23  | 1         | 0,958099479   | 1,043732955     | 2,334782609     |
| HDX                                                                                      | 0,25008975  | -0,061769007 | 0,112 | 0,06  | 1         | 0,958088608   | 1,043744798     | 1,866666667     |
| TMEM232                                                                                  | 0,692138165 | -0,061781784 | 0,013 | 0,02  | 1         | 0,958080122   | 1,043754042     | 0,65            |
| PPL                                                                                      | 0,423434047 | -0,061833837 | 0,013 | 0,03  | 1         | 0,958045555   | 1,043791702     | 0,433333333     |
| SMC3                                                                                     | 0,058964508 | -0,061876991 | 0,713 | 0,38  | 1         | 0,958016899   | 1,043822924     | 1,876315789     |
| LAMA5                                                                                    | 0,083513756 | -0,061953416 | 0,162 | 0,07  | 1         | 0,95796615    | 1,04387822      | 2,314285714     |
| STAT2                                                                                    | 0,08183115  | -0,061953566 | 0,212 | 0,1   | 1         | 0,95796605    | 1,043878329     | 2,12            |
| TECPR1                                                                                   | 0,816980451 | -0,061999434 | 0,038 | 0,03  | 1         | 0,957935594   | 1,043911518     | 1,266666667     |
| CASZ1                                                                                    | 0,795479351 | -0,062140929 | 0,038 | 0,03  | 1         | 0,957841647   | 1,044013907     | 1,266666667     |



Supplementary Table 4

| Differentially expressed genes_keloid-CCD_ comparing SC-Keloid vs. (SC-Myel, SC-Nonmyel) |             |              |       |       |           |               |                 |                 |
|------------------------------------------------------------------------------------------|-------------|--------------|-------|-------|-----------|---------------|-----------------|-----------------|
| gene                                                                                     | p_val       | avg_log2FC   | pct.1 | pct.2 | p_val_adj | Foldchange_UP | Foldchange_DOWN | Ratio_pct1_pct2 |
| NEMP2                                                                                    | 0,325316267 | -0,062165084 | 0,062 | 0,03  | 1         | 0,95782561    | 1,044031387     | 2,066666667     |
| CKMT2-AS1                                                                                | 0,894021778 | -0,062184201 | 0,038 | 0,04  | 1         | 0,957812918   | 1,044045221     | 0,95            |
| NPRL2                                                                                    | 0,193385958 | -0,062199782 | 0,15  | 0,08  | 1         | 0,957802574   | 1,044056497     | 1,875           |
| SOCS6                                                                                    | 0,087686168 | -0,062238613 | 0,175 | 0,08  | 1         | 0,957776795   | 1,044084598     | 2,1875          |
| MAPK10                                                                                   | 0,692138165 | -0,062244379 | 0,013 | 0,02  | 1         | 0,957772967   | 1,044088771     | 0,65            |
| CEBPA                                                                                    | 0,207484841 | -0,062253249 | 0     | 0,02  | 1         | 0,957767078   | 1,04409519      | 0               |
| FAM110A                                                                                  | 0,54403098  | -0,062272463 | 0,075 | 0,05  | 1         | 0,957754323   | 1,044109096     | 1,5             |
| C16orf89                                                                                 | 0,377102913 | -0,062302213 | 0     | 0,01  | 1         | 0,957734573   | 1,044130627     | 0               |
| FRMD1                                                                                    | 0,377102913 | -0,062302213 | 0     | 0,01  | 1         | 0,957734573   | 1,044130627     | 0               |
| KIF1A                                                                                    | 0,377102913 | -0,062302213 | 0     | 0,01  | 1         | 0,957734573   | 1,044130627     | 0               |
| MED12L                                                                                   | 0,377102913 | -0,062302213 | 0     | 0,01  | 1         | 0,957734573   | 1,044130627     | 0               |
| SHROOM3                                                                                  | 0,377102913 | -0,062302213 | 0     | 0,01  | 1         | 0,957734573   | 1,044130627     | 0               |
| WDR86                                                                                    | 0,377102913 | -0,062302213 | 0     | 0,01  | 1         | 0,957734573   | 1,044130627     | 0               |
| ZNF792                                                                                   | 0,377102913 | -0,062302213 | 0     | 0,01  | 1         | 0,957734573   | 1,044130627     | 0               |
| SLC17A7                                                                                  | 0,692138165 | -0,062312807 | 0,013 | 0,02  | 1         | 0,95772754    | 1,044138294     | 0,65            |
| ZNF26                                                                                    | 0,244314206 | -0,062365399 | 0,1   | 0,05  | 1         | 0,957692628   | 1,044176358     | 2               |
| DOP1A                                                                                    | 0,692138165 | -0,062372747 | 0,013 | 0,02  | 1         | 0,95768775    | 1,044181676     | 0,65            |
| SLC30A7                                                                                  | 0,010895886 | -0,062394346 | 0,312 | 0,12  | 1         | 0,957673412   | 1,044197309     | 2,6             |
| PRIM1                                                                                    | 0,112247794 | -0,062535509 | 0,088 | 0,03  | 1         | 0,957579711   | 1,044299486     | 2,933333333     |
| H2BC21                                                                                   | 0,423434047 | -0,06255612  | 0,013 | 0,03  | 1         | 0,957566031   | 1,044314405     | 0,433333333     |
| MFGE8                                                                                    | 0,15952923  | -0,062584405 | 0,85  | 0,52  | 1         | 0,957547257   | 1,04433488      | 1,634615385     |
| E4F1                                                                                     | 0,291293364 | -0,062681238 | 0,138 | 0,08  | 1         | 0,957482989   | 1,044404977     | 1,725           |
| TRAF3                                                                                    | 0,032085969 | -0,062908957 | 0,225 | 0,09  | 1         | 0,95733187    | 1,044569842     | 2,5             |
| EML4                                                                                     | 0,069974895 | -0,062994642 | 0,25  | 0,12  | 1         | 0,957275014   | 1,044631883     | 2,083333333     |
| CLCN6                                                                                    | 0,325316267 | -0,063014054 | 0,062 | 0,03  | 1         | 0,957262133   | 1,044645939     | 2,066666667     |
| OTULINL                                                                                  | 0,692138165 | -0,063067806 | 0,013 | 0,02  | 1         | 0,957226468   | 1,044684861     | 0,65            |
| FAM209B                                                                                  | 0,377102913 | -0,063092478 | 0     | 0,01  | 1         | 0,957210098   | 1,044702727     | 0               |
| IPO9-AS1                                                                                 | 0,377102913 | -0,063092478 | 0     | 0,01  | 1         | 0,957210098   | 1,044702727     | 0               |
| ZC3H10                                                                                   | 0,54451599  | -0,063156845 | 0,062 | 0,04  | 1         | 0,957167392   | 1,044749339     | 1,55            |
| XRCC6                                                                                    | 0,06765685  | -0,063212431 | 0,738 | 0,39  | 1         | 0,957130514   | 1,044789593     | 1,892307692     |

Supplementary Table 4

| Differentially expressed genes_keloid-CCD_comparing SC-Keloid vs. (SC-Myel, SC-Nonmyel) |             |              |       |       |           |               |                 |                 |
|-----------------------------------------------------------------------------------------|-------------|--------------|-------|-------|-----------|---------------|-----------------|-----------------|
| gene                                                                                    | p_val       | avg_log2FC   | pct.1 | pct.2 | p_val_adj | Foldchange_UP | Foldchange_DOWN | Ratio_pct1_pct2 |
| MTMR9                                                                                   | 0,015012041 | -0,063247838 | 0,225 | 0,08  | 1         | 0,957107025   | 1,044815234     | 2,8125          |
| VAT1                                                                                    | 0,014702768 | -0,063290728 | 0,55  | 0,26  | 1         | 0,957078571   | 1,044846296     | 2,115384615     |
| TRMT61B                                                                                 | 0,064495341 | -0,063350915 | 0,188 | 0,08  | 1         | 0,957038644   | 1,044889886     | 2,35            |
| PLEKHM3                                                                                 | 0,816980451 | -0,063420535 | 0,038 | 0,03  | 1         | 0,956992462   | 1,044940311     | 1,266666667     |
| THRA                                                                                    | 0,003386287 | -0,063425162 | 0,262 | 0,08  | 1         | 0,956989392   | 1,044943662     | 3,275           |
| SMG8                                                                                    | 0,423434047 | -0,063450268 | 0,013 | 0,03  | 1         | 0,956972738   | 1,044961847     | 0,433333333     |
| LRP1B                                                                                   | 0,377102913 | -0,063481206 | 0     | 0,01  | 1         | 0,956952217   | 1,044984256     | 0               |
| LCORL                                                                                   | 0,029326105 | -0,063551391 | 0,312 | 0,14  | 1         | 0,956905664   | 1,045035094     | 2,228571429     |
| PARG                                                                                    | 0,063616753 | -0,063552484 | 0,1   | 0,03  | 1         | 0,956904938   | 1,045035886     | 3,333333333     |
| VPS39                                                                                   | 0,184450278 | -0,063584358 | 0,138 | 0,07  | 1         | 0,956883798   | 1,045058974     | 1,971428571     |
| PI16                                                                                    | 0,692138165 | -0,06359969  | 0,013 | 0,02  | 1         | 0,956873628   | 1,045070081     | 0,65            |
| EDA                                                                                     | 0,692138165 | -0,063615538 | 0,013 | 0,02  | 1         | 0,956863118   | 1,04508156      | 0,65            |
| DIS3                                                                                    | 0,031467327 | -0,063655709 | 0,312 | 0,14  | 1         | 0,956836474   | 1,045110661     | 2,228571429     |
| ZNF337-AS1                                                                              | 0,692138165 | -0,063659024 | 0,013 | 0,02  | 1         | 0,956834276   | 1,045113062     | 0,65            |
| KIAA0319L                                                                               | 0,107839769 | -0,063676907 | 0,188 | 0,09  | 1         | 0,956822415   | 1,045126017     | 2,088888889     |
| DTNBP1                                                                                  | 0,041579387 | -0,06368857  | 0,162 | 0,06  | 1         | 0,95681468    | 1,045134466     | 2,7             |
| DDX23                                                                                   | 0,033603221 | -0,063761644 | 0,225 | 0,09  | 1         | 0,956766218   | 1,045187405     | 2,5             |
| MED14                                                                                   | 0,074775991 | -0,063768459 | 0,25  | 0,12  | 1         | 0,956761699   | 1,045192342     | 2,083333333     |
| YIPF3                                                                                   | 0,037806843 | -0,063817804 | 0,65  | 0,32  | 1         | 0,956728974   | 1,045228092     | 2,03125         |
| AGTPBP1                                                                                 | 0,098000042 | -0,063821314 | 0,125 | 0,05  | 1         | 0,956726647   | 1,045230635     | 2,5             |
| KLHL34                                                                                  | 0,809797238 | -0,063905319 | 0,038 | 0,03  | 1         | 0,956670941   | 1,045291497     | 1,266666667     |
| SPATA2                                                                                  | 0,54451599  | -0,063927621 | 0,062 | 0,04  | 1         | 0,956656152   | 1,045307657     | 1,55            |
| MALL                                                                                    | 0,423434047 | -0,063986498 | 0,013 | 0,03  | 1         | 0,956617111   | 1,045350317     | 0,433333333     |
| DDX43                                                                                   | 0,207484841 | -0,064066654 | 0     | 0,02  | 1         | 0,956563963   | 1,045408398     | 0               |
| OTULIN                                                                                  | 0,012471364 | -0,064097885 | 0,25  | 0,09  | 1         | 0,956543256   | 1,045431029     | 2,777777778     |
| CENPC                                                                                   | 0,064176808 | -0,064118354 | 0,25  | 0,12  | 1         | 0,956529685   | 1,045445861     | 2,083333333     |
| SIRT3                                                                                   | 0,35516371  | -0,064167246 | 0,075 | 0,04  | 1         | 0,956497269   | 1,045481292     | 1,875           |
| DLX3                                                                                    | 0,377102913 | -0,064173134 | 0     | 0,01  | 1         | 0,956493365   | 1,045485558     | 0               |
| SLC25A43                                                                                | 0,136751946 | -0,064250223 | 0,1   | 0,04  | 1         | 0,956442257   | 1,045541425     | 2,5             |
| CDK18                                                                                   | 0,002995205 | -0,064265235 | 0,45  | 0,17  | 1         | 0,956432304   | 1,045552304     | 2,647058824     |

Supplementary Table 4

| Differentially expressed genes_keloid-CCD_ comparing SC-Keloid vs. (SC-Myel, SC-Nonmyel) |             |              |       |       |           |               |                 |                 |
|------------------------------------------------------------------------------------------|-------------|--------------|-------|-------|-----------|---------------|-----------------|-----------------|
| gene                                                                                     | p_val       | avg_log2FC   | pct.1 | pct.2 | p_val_adj | Foldchange_UP | Foldchange_DOWN | Ratio_pct1_pct2 |
| ATF6                                                                                     | 0,007149283 | -0,064281505 | 0,3   | 0,11  | 1         | 0,956421519   | 1,045564095     | 2,727272727     |
| N4BP3                                                                                    | 0,207484841 | -0,064325055 | 0     | 0,02  | 1         | 0,956392648   | 1,045595658     | 0               |
| DPY19L3                                                                                  | 0,012000221 | -0,06433298  | 0,225 | 0,08  | 1         | 0,956387394   | 1,045601402     | 2,8125          |
| ORC5                                                                                     | 0,527578779 | -0,064371904 | 0,05  | 0,03  | 1         | 0,956361591   | 1,045629612     | 1,666666667     |
| ITPKC                                                                                    | 0,050022665 | -0,064392277 | 0,175 | 0,07  | 1         | 0,956348087   | 1,045644378     | 2,5             |
| TOMM34                                                                                   | 0,368764775 | -0,06439722  | 0,088 | 0,05  | 1         | 0,956344809   | 1,045647961     | 1,76            |
| SLC9A5                                                                                   | 0,11061781  | -0,064399174 | 0,088 | 0,03  | 1         | 0,956343514   | 1,045649377     | 2,933333333     |
| C3orf38                                                                                  | 0,028836189 | -0,064412729 | 0,262 | 0,11  | 1         | 0,956334529   | 1,045659202     | 2,381818182     |
| PTOV1                                                                                    | 0,001449741 | -0,064417816 | 0,6   | 0,24  | 1         | 0,956331157   | 1,045662889     | 2,5             |
| TXNDC15                                                                                  | 0,040091598 | -0,06443531  | 0,725 | 0,37  | 1         | 0,956319561   | 1,045675568     | 1,959459459     |
| ZSCAN22                                                                                  | 0,692138165 | -0,064437147 | 0,013 | 0,02  | 1         | 0,956318343   | 1,0456769       | 0,65            |
| GNG10                                                                                    | 0,035536568 | -0,064450917 | 0,15  | 0,05  | 1         | 0,956309215   | 1,04568688      | 3               |
| MT1A                                                                                     | 0,325316267 | -0,064464535 | 0,062 | 0,03  | 1         | 0,956300188   | 1,045696751     | 2,066666667     |
| TTC9C                                                                                    | 0,092485138 | -0,064515309 | 0,175 | 0,08  | 1         | 0,956266533   | 1,045733554     | 2,1875          |
| ISYNA1                                                                                   | 0,124553535 | -0,064528113 | 0,288 | 0,16  | 1         | 0,956258046   | 1,045742835     | 1,8             |
| NUBP1                                                                                    | 0,001996898 | -0,064538836 | 0,338 | 0,11  | 1         | 0,956250939   | 1,045750607     | 3,072727273     |
| TMEM17                                                                                   | 0,948339409 | -0,064597369 | 0,05  | 0,05  | 1         | 0,956212143   | 1,045793036     | 1               |
| CNR1                                                                                     | 0,423434047 | -0,064603642 | 0,013 | 0,03  | 1         | 0,956207984   | 1,045797584     | 0,433333333     |
| ARRDC1                                                                                   | 0,267822926 | -0,06463323  | 0,112 | 0,06  | 1         | 0,956188374   | 1,045819032     | 1,866666667     |
| SSU72                                                                                    | 0,000334406 | -0,064708986 | 0,662 | 0,25  | 1         | 0,956138166   | 1,045873949     | 2,648           |
| MEX3B                                                                                    | 0,050964298 | -0,06472191  | 0,262 | 0,12  | 1         | 0,956129601   | 1,045883319     | 2,183333333     |
| BAD                                                                                      | 0,005238519 | -0,064763622 | 0,688 | 0,32  | 1         | 0,956101957   | 1,045913558     | 2,15            |
| AGAP9                                                                                    | 0,207484841 | -0,064833815 | 0     | 0,02  | 1         | 0,95605544    | 1,045964448     | 0               |
| KIF5C                                                                                    | 0,84359211  | -0,064858865 | 0,025 | 0,02  | 1         | 0,95603884    | 1,045982609     | 1,25            |
| POMZP3                                                                                   | 0,527578779 | -0,064885346 | 0,05  | 0,03  | 1         | 0,956021291   | 1,046001809     | 1,666666667     |
| SEPTIN4                                                                                  | 0,84359211  | -0,06491087  | 0,025 | 0,02  | 1         | 0,956004378   | 1,046020314     | 1,25            |
| RAN                                                                                      | 0,594556265 | -0,064925096 | 0,95  | 0,75  | 1         | 0,955994951   | 1,046030629     | 1,266666667     |
| SYNGR3                                                                                   | 0,223365318 | -0,064925691 | 0,038 | 0,01  | 1         | 0,955994557   | 1,046031061     | 3,8             |
| MPV17L                                                                                   | 0,207484841 | -0,06492899  | 0     | 0,02  | 1         | 0,955992371   | 1,046033453     | 0               |
| ALDH1A2                                                                                  | 0,377102913 | -0,065026556 | 0     | 0,01  | 1         | 0,955927721   | 1,046104195     | 0               |

Supplementary Table 4

| Differentially expressed genes_keloid-CCD_ comparing SC-Keloid vs. (SC-Myel, SC-Nonmyel) |             |              |       |       |           |               |                 |                 |
|------------------------------------------------------------------------------------------|-------------|--------------|-------|-------|-----------|---------------|-----------------|-----------------|
| gene                                                                                     | p_val       | avg_log2FC   | pct.1 | pct.2 | p_val_adj | Foldchange_UP | Foldchange_DOWN | Ratio_pct1_pct2 |
| C9orf152                                                                                 | 0,377102913 | -0,065026556 | 0     | 0,01  | 1         | 0,955927721   | 1,046104195     | 0               |
| EPHX3                                                                                    | 0,377102913 | -0,065026556 | 0     | 0,01  | 1         | 0,955927721   | 1,046104195     | 0               |
| LINC02915                                                                                | 0,377102913 | -0,065026556 | 0     | 0,01  | 1         | 0,955927721   | 1,046104195     | 0               |
| CCDC22                                                                                   | 0,020871284 | -0,065075167 | 0,2   | 0,07  | 1         | 0,955895512   | 1,046139444     | 2,857142857     |
| GGA2                                                                                     | 0,820013192 | -0,065077309 | 0,025 | 0,03  | 1         | 0,955894093   | 1,046140998     | 0,833333333     |
| CALM2                                                                                    | 0,725429742 | -0,065080227 | 0,988 | 0,97  | 1         | 0,95589216    | 1,046143113     | 1,018556701     |
| ATG2B                                                                                    | 0,086377611 | -0,06511837  | 0,162 | 0,07  | 1         | 0,955866888   | 1,046170772     | 2,314285714     |
| COX11                                                                                    | 0,000856629 | -0,065123905 | 0,412 | 0,14  | 1         | 0,95586322    | 1,046174786     | 2,942857143     |
| EPN2                                                                                     | 0,008808638 | -0,065137018 | 0,45  | 0,2   | 1         | 0,955854532   | 1,046184295     | 2,25            |
| SH3RF3-AS1                                                                               | 0,207484841 | -0,065223978 | 0     | 0,02  | 1         | 0,955796919   | 1,046247357     | 0               |
| RBM24                                                                                    | 0,84359211  | -0,065333454 | 0,025 | 0,02  | 1         | 0,955724393   | 1,046326752     | 1,25            |
| ZSWIM9                                                                                   | 0,223632981 | -0,065376228 | 0,088 | 0,04  | 1         | 0,955696057   | 1,046357775     | 2,2             |
| TMEM200B                                                                                 | 0,692138165 | -0,065380015 | 0,013 | 0,02  | 1         | 0,955693549   | 1,046360521     | 0,65            |
| PCDHB13                                                                                  | 0,377102913 | -0,065380242 | 0     | 0,01  | 1         | 0,955693398   | 1,046360686     | 0               |
| ZDHC14                                                                                   | 0,793304172 | -0,065436462 | 0,05  | 0,04  | 1         | 0,955656157   | 1,046401462     | 1,25            |
| TRAF6                                                                                    | 0,562875304 | -0,065444484 | 0,025 | 0,04  | 1         | 0,955650843   | 1,046407281     | 0,625           |
| ZSCAN30                                                                                  | 0,191873449 | -0,065450552 | 0,138 | 0,07  | 1         | 0,955646824   | 1,046411682     | 1,971428571     |
| ADM5                                                                                     | 0,669162239 | -0,065460805 | 0,038 | 0,05  | 1         | 0,955640032   | 1,046419118     | 0,76            |
| MAMDC4                                                                                   | 0,207484841 | -0,065649624 | 0     | 0,02  | 1         | 0,955514966   | 1,046556083     | 0               |
| C21orf58                                                                                 | 0,035392992 | -0,065654096 | 0,112 | 0,03  | 1         | 0,955512005   | 1,046559326     | 3,733333333     |
| AC104695.3                                                                               | 0,816980451 | -0,065673864 | 0,038 | 0,03  | 1         | 0,955498912   | 1,046573667     | 1,266666667     |
| MDC1                                                                                     | 0,236605047 | -0,065697585 | 0,1   | 0,05  | 1         | 0,955483202   | 1,046590875     | 2               |
| SLC17A5                                                                                  | 0,015387523 | -0,065698511 | 0,15  | 0,04  | 1         | 0,955482588   | 1,046591547     | 3,75            |
| LARP4                                                                                    | 0,012200269 | -0,065729063 | 0,5   | 0,23  | 1         | 0,955462354   | 1,046613711     | 2,173913043     |
| TSPAN13                                                                                  | 0,036036368 | -0,065736166 | 0,15  | 0,05  | 1         | 0,955457651   | 1,046618863     | 3               |
| ANO1                                                                                     | 0,663300924 | -0,065746562 | 0,038 | 0,05  | 1         | 0,955450765   | 1,046626405     | 0,76            |
| ZNF717                                                                                   | 0,501283468 | -0,065763825 | 0,038 | 0,02  | 1         | 0,955439333   | 1,046638929     | 1,9             |
| DSP                                                                                      | 0,820013192 | -0,065784897 | 0,025 | 0,03  | 1         | 0,955425378   | 1,046654216     | 0,833333333     |
| TTC5                                                                                     | 0,070134189 | -0,065794168 | 0,15  | 0,06  | 1         | 0,955419238   | 1,046660942     | 2,5             |
| CNOT6                                                                                    | 0,372322273 | -0,065995823 | 0,088 | 0,05  | 1         | 0,955285702   | 1,046807251     | 1,76            |

Supplementary Table 4

| Differentially expressed genes_keloid-CCD_ comparing SC-Keloid vs. (SC-Myel, SC-Nonmyel) |             |              |       |       |           |               |                 |                 |
|------------------------------------------------------------------------------------------|-------------|--------------|-------|-------|-----------|---------------|-----------------|-----------------|
| gene                                                                                     | p_val       | avg_log2FC   | pct.1 | pct.2 | p_val_adj | Foldchange_UP | Foldchange_DOWN | Ratio_pct1_pct2 |
| FANCG                                                                                    | 0,24172513  | -0,066164968 | 0,1   | 0,05  | 1         | 0,955173709   | 1,046929989     | 2               |
| DENND11                                                                                  | 0,692138165 | -0,0661662   | 0,013 | 0,02  | 1         | 0,955172893   | 1,046930883     | 0,65            |
| GRIK2                                                                                    | 0,013279713 | -0,066175604 | 0,188 | 0,06  | 1         | 0,955166667   | 1,046937707     | 3,133333333     |
| NRBF2                                                                                    | 0,000157122 | -0,066198802 | 0,475 | 0,15  | 1         | 0,955151308   | 1,046954541     | 3,166666667     |
| MEGF10                                                                                   | 0,120814239 | -0,066219336 | 0     | 0,03  | 1         | 0,955137714   | 1,046969443     | 0               |
| ANKS1B                                                                                   | 0,377102913 | -0,066281525 | 0     | 0,01  | 1         | 0,955096542   | 1,047014575     | 0               |
| CDH1                                                                                     | 0,377102913 | -0,066281525 | 0     | 0,01  | 1         | 0,955096542   | 1,047014575     | 0               |
| CYS1                                                                                     | 0,692138165 | -0,066298801 | 0,013 | 0,02  | 1         | 0,955085105   | 1,047027113     | 0,65            |
| B4GALT6                                                                                  | 0,023034112 | -0,066300095 | 0,3   | 0,13  | 1         | 0,955084249   | 1,047028052     | 2,307692308     |
| CEP131                                                                                   | 0,249550622 | -0,066322818 | 0,1   | 0,05  | 1         | 0,955069206   | 1,047044543     | 2               |
| ZNF281                                                                                   | 0,178308386 | -0,066360387 | 0,238 | 0,14  | 1         | 0,955044336   | 1,047071809     | 1,7             |
| GPT2                                                                                     | 0,54451599  | -0,066371344 | 0,062 | 0,04  | 1         | 0,955037082   | 1,047079761     | 1,55            |
| TNS2                                                                                     | 0,188910738 | -0,066492006 | 0,2   | 0,11  | 1         | 0,954957209   | 1,047167339     | 1,818181818     |
| RAD1                                                                                     | 0,010378529 | -0,066544816 | 0,288 | 0,11  | 1         | 0,954922254   | 1,047205671     | 2,618181818     |
| CNTRL                                                                                    | 0,02992033  | -0,066563557 | 0,225 | 0,09  | 1         | 0,954909849   | 1,047219275     | 2,5             |
| TMEM86B                                                                                  | 0,284975754 | -0,06657624  | 0,05  | 0,02  | 1         | 0,954901454   | 1,047228481     | 2,5             |
| SPECC1L                                                                                  | 0,552939414 | -0,06657936  | 0,088 | 0,06  | 1         | 0,954899389   | 1,047230746     | 1,466666667     |
| AMMECR1                                                                                  | 0,1696289   | -0,066579742 | 0,125 | 0,06  | 1         | 0,954899136   | 1,047231024     | 2,083333333     |
| FRY                                                                                      | 0,423434047 | -0,066618568 | 0,013 | 0,03  | 1         | 0,954873438   | 1,047259207     | 0,433333333     |
| RBM19                                                                                    | 0,273044537 | -0,066619394 | 0,112 | 0,06  | 1         | 0,954872891   | 1,047259807     | 1,866666667     |
| CNTLN                                                                                    | 0,145473921 | -0,06665479  | 0,238 | 0,13  | 1         | 0,954849464   | 1,047285501     | 1,830769231     |
| RAD51B                                                                                   | 0,527578779 | -0,066674832 | 0,05  | 0,03  | 1         | 0,9548362     | 1,04730005      | 1,666666667     |
| BST2                                                                                     | 0,246922691 | -0,06669381  | 0,1   | 0,05  | 1         | 0,95482364    | 1,047313827     | 2               |
| PGAP1                                                                                    | 0,078063885 | -0,066695176 | 0,262 | 0,13  | 1         | 0,954822735   | 1,047314819     | 2,015384615     |
| PRH1                                                                                     | 0,550114966 | -0,066719168 | 0,1   | 0,07  | 1         | 0,954806857   | 1,047332236     | 1,428571429     |
| AEN                                                                                      | 0,12999802  | -0,066775522 | 0,15  | 0,07  | 1         | 0,954769561   | 1,047373147     | 2,142857143     |
| PINLYP                                                                                   | 0,429993123 | -0,066815301 | 0,013 | 0,03  | 1         | 0,954743236   | 1,047402027     | 0,433333333     |
| MARCHF1                                                                                  | 0,701739822 | -0,066827448 | 0,013 | 0,02  | 1         | 0,954735197   | 1,047410845     | 0,65            |
| SMARCA1                                                                                  | 0,023708941 | -0,066933863 | 0,35  | 0,16  | 1         | 0,954664778   | 1,047488106     | 2,1875          |
| HOPX                                                                                     | 0,521976935 | -0,066954699 | 0,05  | 0,03  | 1         | 0,95465099    | 1,047503235     | 1,666666667     |

Supplementary Table 4

| Differentially expressed genes_keloid-CCD_ comparing SC-Keloid vs. (SC-Myel, SC-Nonmyel) |             |              |       |       |           |               |                 |                 |
|------------------------------------------------------------------------------------------|-------------|--------------|-------|-------|-----------|---------------|-----------------|-----------------|
| gene                                                                                     | p_val       | avg_log2FC   | pct.1 | pct.2 | p_val_adj | Foldchange_UP | Foldchange_DOWN | Ratio_pct1_pct2 |
| NIN                                                                                      | 0,095635346 | -0,067016    | 0,288 | 0,15  | 1         | 0,954610427   | 1,047547745     | 1,92            |
| FBXW11                                                                                   | 0,046219881 | -0,067022823 | 0,35  | 0,17  | 1         | 0,954605912   | 1,047552699     | 2,058823529     |
| NBPF14                                                                                   | 0,110218666 | -0,067063645 | 0,138 | 0,06  | 1         | 0,954578902   | 1,04758234      | 2,3             |
| PPP1R3E                                                                                  | 0,527578779 | -0,067087732 | 0,05  | 0,03  | 1         | 0,954562964   | 1,047599831     | 1,666666667     |
| RCBTB2                                                                                   | 0,54403098  | -0,067093631 | 0,075 | 0,05  | 1         | 0,954559061   | 1,047604114     | 1,5             |
| TENT5B                                                                                   | 0,325316267 | -0,06710666  | 0,062 | 0,03  | 1         | 0,95455044    | 1,047613576     | 2,066666667     |
| GCNA                                                                                     | 0,274731417 | -0,06711634  | 0,125 | 0,07  | 1         | 0,954544036   | 1,047620605     | 1,785714286     |
| RIMKLB                                                                                   | 0,133571255 | -0,06711791  | 0,162 | 0,08  | 1         | 0,954542997   | 1,047621745     | 2,025           |
| MT-ATP8                                                                                  | 0,010486377 | -0,067174739 | 0,275 | 0,1   | 1         | 0,954505398   | 1,047663012     | 2,75            |
| CTDSP1                                                                                   | 0,006452998 | -0,067180386 | 0,412 | 0,17  | 1         | 0,954501661   | 1,047667113     | 2,423529412     |
| TDRD3                                                                                    | 0,012471364 | -0,067183683 | 0,25  | 0,09  | 1         | 0,95449948    | 1,047669507     | 2,777777778     |
| SPATA17                                                                                  | 0,894021778 | -0,067223806 | 0,038 | 0,04  | 1         | 0,954472935   | 1,047698645     | 0,95            |
| ST3GAL3                                                                                  | 0,033125374 | -0,067274203 | 0,15  | 0,05  | 1         | 0,954439593   | 1,047735244     | 3               |
| RPS6KB1                                                                                  | 0,005234792 | -0,067300077 | 0,288 | 0,1   | 1         | 0,954422476   | 1,047754035     | 2,88            |
| GOLGA6L4                                                                                 | 0,816980451 | -0,067306993 | 0,038 | 0,03  | 1         | 0,954417901   | 1,047759057     | 1,266666667     |
| CACNG4                                                                                   | 0,527578779 | -0,067346956 | 0,05  | 0,03  | 1         | 0,954391463   | 1,047788081     | 1,666666667     |
| LINC01140                                                                                | 0,527578779 | -0,067352754 | 0,05  | 0,03  | 1         | 0,954387628   | 1,047792292     | 1,666666667     |
| DNASE2                                                                                   | 0,041792483 | -0,067404869 | 0,3   | 0,14  | 1         | 0,954353153   | 1,047830143     | 2,142857143     |
| LLPH                                                                                     | 0,009105969 | -0,06744408  | 0,35  | 0,14  | 1         | 0,954327215   | 1,047858622     | 2,5             |
| TIPARP-AS1                                                                               | 0,207484841 | -0,067478444 | 0     | 0,02  | 1         | 0,954304483   | 1,047883582     | 0               |
| LRP6                                                                                     | 0,091704244 | -0,067511616 | 0,35  | 0,19  | 1         | 0,954282542   | 1,047907676     | 1,842105263     |
| PDCD6IP                                                                                  | 0,061926395 | -0,067514352 | 0,388 | 0,2   | 1         | 0,954280731   | 1,047909663     | 1,94            |
| DENND4C                                                                                  | 0,547263769 | -0,06754867  | 0,125 | 0,09  | 1         | 0,954258032   | 1,04793459      | 1,388888889     |
| DDX25                                                                                    | 0,377102913 | -0,067649291 | 0     | 0,01  | 1         | 0,95419148    | 1,048007681     | 0               |
| IDI2-AS1                                                                                 | 0,377102913 | -0,067649291 | 0     | 0,01  | 1         | 0,95419148    | 1,048007681     | 0               |
| SLC16A7                                                                                  | 0,692138165 | -0,067650554 | 0,013 | 0,02  | 1         | 0,954190644   | 1,048008599     | 0,65            |
| SAR1A                                                                                    | 0,0834881   | -0,067691253 | 0,7   | 0,38  | 1         | 0,954163727   | 1,048038164     | 1,842105263     |
| DENND2A                                                                                  | 0,54451599  | -0,067739026 | 0,062 | 0,04  | 1         | 0,954132131   | 1,048072869     | 1,55            |
| ZNF570                                                                                   | 0,799526327 | -0,067769328 | 0,05  | 0,04  | 1         | 0,954112091   | 1,048094882     | 1,25            |
| FKRP                                                                                     | 0,223632981 | -0,067781077 | 0,088 | 0,04  | 1         | 0,954104321   | 1,048103418     | 2,2             |

Supplementary Table 4

| Differentially expressed genes_keloid-CCD_ comparing SC-Keloid vs. (SC-Myel, SC-Nonmyel) |             |              |       |       |           |               |                 |                 |
|------------------------------------------------------------------------------------------|-------------|--------------|-------|-------|-----------|---------------|-----------------|-----------------|
| gene                                                                                     | p_val       | avg_log2FC   | pct.1 | pct.2 | p_val_adj | Foldchange_UP | Foldchange_DOWN | Ratio_pct1_pct2 |
| CCL28                                                                                    | 0,84359211  | -0,067818176 | 0,025 | 0,02  | 1         | 0,954079786   | 1,048130371     | 1,25            |
| SELENOI                                                                                  | 0,021426774 | -0,067871905 | 0,2   | 0,07  | 1         | 0,954044255   | 1,048169406     | 2,857142857     |
| KLHDC2                                                                                   | 0,016344706 | -0,067898855 | 0,4   | 0,18  | 1         | 0,954026434   | 1,048188986     | 2,222222222     |
| FBRS                                                                                     | 0,120229317 | -0,067949725 | 0,4   | 0,22  | 1         | 0,953992794   | 1,048225947     | 1,818181818     |
| SEC24B                                                                                   | 0,081579256 | -0,067981927 | 0,112 | 0,04  | 1         | 0,953971501   | 1,048249344     | 2,8             |
| MPRIP-AS1                                                                                | 0,816980451 | -0,068016726 | 0,038 | 0,03  | 1         | 0,953948491   | 1,048274629     | 1,266666667     |
| NPHP4                                                                                    | 0,827884433 | -0,068029571 | 0,025 | 0,03  | 1         | 0,953939997   | 1,048283962     | 0,833333333     |
| RHAG                                                                                     | 0,207484841 | -0,068057948 | 0     | 0,02  | 1         | 0,953921234   | 1,048304582     | 0               |
| CNOT3                                                                                    | 0,042909298 | -0,068063455 | 0,2   | 0,08  | 1         | 0,953917593   | 1,048308583     | 2,5             |
| ZDHHC15                                                                                  | 0,207484841 | -0,068063479 | 0     | 0,02  | 1         | 0,953917577   | 1,048308601     | 0               |
| TNN                                                                                      | 0,207484841 | -0,068140032 | 0     | 0,02  | 1         | 0,953866961   | 1,048364228     | 0               |
| MBD6                                                                                     | 0,597159626 | -0,068145551 | 0,188 | 0,14  | 1         | 0,953863312   | 1,048368238     | 1,342857143     |
| EPPK1                                                                                    | 0,207484841 | -0,068173457 | 0     | 0,02  | 1         | 0,953844862   | 1,048388517     | 0               |
| ALKBH8                                                                                   | 0,799526327 | -0,068247537 | 0,05  | 0,04  | 1         | 0,953795885   | 1,048442351     | 1,25            |
| TESC                                                                                     | 0,827884433 | -0,068267018 | 0,025 | 0,03  | 1         | 0,953783006   | 1,048456509     | 0,833333333     |
| EPB41L5                                                                                  | 0,351402824 | -0,068315386 | 0,075 | 0,04  | 1         | 0,953751029   | 1,04849166      | 1,875           |
| KLC4                                                                                     | 0,556644247 | -0,068346001 | 0,025 | 0,04  | 1         | 0,953730791   | 1,04851391      | 0,625           |
| CDK19                                                                                    | 0,012430676 | -0,068346331 | 0,212 | 0,07  | 1         | 0,953730572   | 1,04851415      | 3,028571429     |
| CLDN1                                                                                    | 0,539465965 | -0,068364187 | 0,062 | 0,04  | 1         | 0,953718768   | 1,048527127     | 1,55            |
| TUBE1                                                                                    | 0,213256546 | -0,068393007 | 0,088 | 0,04  | 1         | 0,953699716   | 1,048548073     | 2,2             |
| PMPCB                                                                                    | 0,002331604 | -0,068409431 | 0,412 | 0,15  | 1         | 0,953688859   | 1,04856001      | 2,746666667     |
| SLC35D1                                                                                  | 0,081579256 | -0,068435648 | 0,112 | 0,04  | 1         | 0,953671529   | 1,048579065     | 2,8             |
| CCDC92                                                                                   | 0,042909298 | -0,068440564 | 0,2   | 0,08  | 1         | 0,953668279   | 1,048582638     | 2,5             |
| RMDN3                                                                                    | 0,05851858  | -0,068440712 | 0,225 | 0,1   | 1         | 0,953668181   | 1,048582746     | 2,25            |
| TAF5                                                                                     | 0,35516371  | -0,068473004 | 0,075 | 0,04  | 1         | 0,953646835   | 1,048606217     | 1,875           |
| NOTCH1                                                                                   | 0,002460136 | -0,06854152  | 0,4   | 0,15  | 1         | 0,953601546   | 1,048656018     | 2,666666667     |
| C15orf65                                                                                 | 0,54451599  | -0,068544203 | 0,062 | 0,04  | 1         | 0,953599773   | 1,048657968     | 1,55            |
| UIMC1                                                                                    | 0,069204528 | -0,068582533 | 0,2   | 0,09  | 1         | 0,953574438   | 1,048685829     | 2,222222222     |
| NANOS3                                                                                   | 0,193718766 | -0,068621111 | 0,075 | 0,03  | 1         | 0,953548939   | 1,048713872     | 2,5             |
| CES1                                                                                     | 0,268162956 | -0,068667373 | 0,013 | 0,04  | 1         | 0,953518363   | 1,048747501     | 0,325           |

Supplementary Table 4

| Differentially expressed genes_keloid-CCD_ comparing SC-Keloid vs. (SC-Myel, SC-Nonmyel) |             |              |       |       |           |               |                 |                 |
|------------------------------------------------------------------------------------------|-------------|--------------|-------|-------|-----------|---------------|-----------------|-----------------|
| gene                                                                                     | p_val       | avg_log2FC   | pct.1 | pct.2 | p_val_adj | Foldchange_UP | Foldchange_DOWN | Ratio_pct1_pct2 |
| SLC12A6                                                                                  | 0,820013192 | -0,068699075 | 0,025 | 0,03  | 1         | 0,95349741    | 1,048770546     | 0,833333333     |
| FRRS1L                                                                                   | 0,377102913 | -0,06872912  | 0     | 0,01  | 1         | 0,953477553   | 1,048792388     | 0               |
| ZFPM1                                                                                    | 0,020871284 | -0,068738337 | 0,2   | 0,07  | 1         | 0,953471462   | 1,048799088     | 2,857142857     |
| RNASEH1-AS1                                                                              | 0,930603417 | -0,068784872 | 0,088 | 0,08  | 1         | 0,953440707   | 1,048832919     | 1,1             |
| PIBF1                                                                                    | 0,320451839 | -0,068843287 | 0,175 | 0,11  | 1         | 0,953402103   | 1,048875387     | 1,590909091     |
| ZNF442                                                                                   | 0,423434047 | -0,068865673 | 0,013 | 0,03  | 1         | 0,95338731    | 1,048891662     | 0,433333333     |
| CARF                                                                                     | 0,816979494 | -0,068888441 | 0,038 | 0,03  | 1         | 0,953372264   | 1,048908215     | 1,266666667     |
| RAB33B                                                                                   | 0,240432156 | -0,068944586 | 0,162 | 0,09  | 1         | 0,953335163   | 1,048949036     | 1,8             |
| KCTD21-AS1                                                                               | 0,207484841 | -0,068945823 | 0     | 0,02  | 1         | 0,953334345   | 1,048949936     | 0               |
| DENND6B                                                                                  | 0,521976935 | -0,068947819 | 0,05  | 0,03  | 1         | 0,953333026   | 1,048951388     | 1,666666667     |
| NLGN1                                                                                    | 0,900822541 | -0,069060596 | 0,038 | 0,04  | 1         | 0,953258506   | 1,049033388     | 0,95            |
| ATRIP                                                                                    | 0,501283468 | -0,069076491 | 0,038 | 0,02  | 1         | 0,953248003   | 1,049044946     | 1,9             |
| MEMO1                                                                                    | 0,25527802  | -0,069081638 | 0,125 | 0,07  | 1         | 0,953244602   | 1,049048689     | 1,785714286     |
| FARSB                                                                                    | 0,056352854 | -0,069195085 | 0,188 | 0,08  | 1         | 0,953169646   | 1,049131184     | 2,35            |
| SHC3                                                                                     | 0,820013192 | -0,069195783 | 0,025 | 0,03  | 1         | 0,953169185   | 1,049131692     | 0,833333333     |
| COPB1                                                                                    | 0,023664173 | -0,069218572 | 0,6   | 0,29  | 1         | 0,953154129   | 1,049148264     | 2,068965517     |
| ZNF689                                                                                   | 0,971855722 | -0,069272829 | 0,075 | 0,07  | 1         | 0,953118284   | 1,049187721     | 1,071428571     |
| SMN1                                                                                     | 0,351402824 | -0,069320977 | 0,075 | 0,04  | 1         | 0,953086475   | 1,049222737     | 1,875           |
| EBF4                                                                                     | 0,820013192 | -0,069580154 | 0,025 | 0,03  | 1         | 0,95291527    | 1,049411245     | 0,833333333     |
| BLMH                                                                                     | 0,015657851 | -0,069617899 | 0,275 | 0,11  | 1         | 0,95289034    | 1,049438701     | 2,5             |
| GPRASP1                                                                                  | 0,569139823 | -0,069643194 | 0,025 | 0,04  | 1         | 0,952873632   | 1,049457101     | 0,625           |
| ZNF443                                                                                   | 0,84359211  | -0,069660067 | 0,025 | 0,02  | 1         | 0,952862488   | 1,049469375     | 1,25            |
| SLC35D2                                                                                  | 0,004862597 | -0,069664058 | 0,35  | 0,13  | 1         | 0,952859852   | 1,049472278     | 2,692307692     |
| KBTBD8                                                                                   | 0,207484841 | -0,069683751 | 0     | 0,02  | 1         | 0,952846846   | 1,049486603     | 0               |
| AJUBA                                                                                    | 0,816980451 | -0,069715127 | 0,038 | 0,03  | 1         | 0,952826123   | 1,049509428     | 1,266666667     |
| ZSWIM3                                                                                   | 0,207484841 | -0,06972245  | 0     | 0,02  | 1         | 0,952821287   | 1,049514755     | 0               |
| TMEM9B                                                                                   | 0,004155701 | -0,069724124 | 0,625 | 0,27  | 1         | 0,952820181   | 1,049515973     | 2,314814815     |
| FAM184A                                                                                  | 0,816980451 | -0,069761336 | 0,038 | 0,03  | 1         | 0,952795605   | 1,049543044     | 1,266666667     |
| HNRNPR                                                                                   | 0,515659859 | -0,069843401 | 0,8   | 0,58  | 1         | 0,952741409   | 1,049602747     | 1,379310345     |
| PRPF8                                                                                    | 0,023221859 | -0,06988343  | 0,362 | 0,16  | 1         | 0,952714975   | 1,04963187      | 2,2625          |



Supplementary Table 4

| Differentially expressed genes_keloid-CCD_ comparing SC-Keloid vs. (SC-Myel, SC-Nonmyel) |             |              |       |       |           |               |                 |                 |
|------------------------------------------------------------------------------------------|-------------|--------------|-------|-------|-----------|---------------|-----------------|-----------------|
| gene                                                                                     | p_val       | avg_log2FC   | pct.1 | pct.2 | p_val_adj | Foldchange_UP | Foldchange_DOWN | Ratio_pct1_pct2 |
| FBN3                                                                                     | 0,377102913 | -0,069911693 | 0     | 0,01  | 1         | 0,95269631    | 1,049652433     | 0               |
| RDH12                                                                                    | 0,377102913 | -0,069911693 | 0     | 0,01  | 1         | 0,95269631    | 1,049652433     | 0               |
| HCFC2                                                                                    | 0,019693225 | -0,069981062 | 0,312 | 0,13  | 1         | 0,952650503   | 1,049702904     | 2,4             |
| CROCC                                                                                    | 0,761946743 | -0,069984399 | 0,075 | 0,06  | 1         | 0,9526483     | 1,049705332     | 1,25            |
| LPXN                                                                                     | 0,207484841 | -0,069987717 | 0     | 0,02  | 1         | 0,952646109   | 1,049707746     | 0               |
| ROR1                                                                                     | 0,207484841 | -0,069987717 | 0     | 0,02  | 1         | 0,952646109   | 1,049707746     | 0               |
| CCP110                                                                                   | 0,030272297 | -0,070005682 | 0,225 | 0,09  | 1         | 0,952634246   | 1,049720818     | 2,5             |
| ZNF395                                                                                   | 0,429993123 | -0,070007262 | 0,013 | 0,03  | 1         | 0,952633203   | 1,049721967     | 0,433333333     |
| APP                                                                                      | 0,353734307 | -0,070062954 | 0,938 | 0,66  | 1         | 0,952596429   | 1,049762491     | 1,421212121     |
| TNFRSF10B                                                                                | 0,235427418 | -0,070073287 | 0,175 | 0,1   | 1         | 0,952589606   | 1,04977001      | 1,75            |
| RRP8                                                                                     | 0,228486406 | -0,07011985  | 0,162 | 0,09  | 1         | 0,952558862   | 1,049803891     | 1,8             |
| SMG5                                                                                     | 0,073627148 | -0,070138691 | 0,15  | 0,06  | 1         | 0,952546422   | 1,049817601     | 2,5             |
| WVOX                                                                                     | 0,539438221 | -0,070139637 | 0,075 | 0,05  | 1         | 0,952545798   | 1,049818289     | 1,5             |
| KLHL42                                                                                   | 0,005092259 | -0,070198807 | 0,425 | 0,17  | 1         | 0,952506731   | 1,049861347     | 2,5             |
| NDUFAF4                                                                                  | 0,018656908 | -0,070304937 | 0,312 | 0,13  | 1         | 0,952436664   | 1,049938582     | 2,4             |
| FLYWCH1                                                                                  | 0,17887143  | -0,070321878 | 0,125 | 0,06  | 1         | 0,95242548    | 1,049950911     | 2,083333333     |
| GLMN                                                                                     | 0,527578779 | -0,070382644 | 0,05  | 0,03  | 1         | 0,952385365   | 1,049995135     | 1,666666667     |
| SLC7A1                                                                                   | 0,036354514 | -0,070431426 | 0,275 | 0,12  | 1         | 0,952353162   | 1,050030639     | 2,291666667     |
| HDAC3                                                                                    | 0,019692831 | -0,070485409 | 0,325 | 0,14  | 1         | 0,952317528   | 1,05006993      | 2,321428571     |
| DDIT4L                                                                                   | 0,207484841 | -0,070538406 | 0     | 0,02  | 1         | 0,952282545   | 1,050108505     | 0               |
| TRPM7                                                                                    | 0,002249843 | -0,070578967 | 0,462 | 0,18  | 1         | 0,952255772   | 1,050138029     | 2,566666667     |
| TBC1D25                                                                                  | 0,54403098  | -0,070580789 | 0,075 | 0,05  | 1         | 0,95225457    | 1,050139355     | 1,5             |
| GEMIN4                                                                                   | 0,423434047 | -0,070618982 | 0,013 | 0,03  | 1         | 0,952229361   | 1,050167156     | 0,433333333     |
| KIF7                                                                                     | 0,447580525 | -0,070640668 | 0,025 | 0,01  | 1         | 0,952215047   | 1,050182943     | 2,5             |
| ZNF567                                                                                   | 0,279748933 | -0,070673746 | 0,125 | 0,07  | 1         | 0,952193215   | 1,050207021     | 1,785714286     |
| TTL1                                                                                     | 0,529436792 | -0,07085111  | 0,062 | 0,04  | 1         | 0,95207616    | 1,050336141     | 1,55            |
| USP46                                                                                    | 0,140388411 | -0,070913516 | 0,162 | 0,08  | 1         | 0,952034977   | 1,050381576     | 2,025           |
| LRRC61                                                                                   | 0,159376137 | -0,070921804 | 0,112 | 0,05  | 1         | 0,952029508   | 1,05038761      | 2,24            |
| PIGN                                                                                     | 0,058822906 | -0,070932867 | 0,138 | 0,05  | 1         | 0,952022208   | 1,050395665     | 2,76            |
| PXYLP1                                                                                   | 0,54451599  | -0,070949408 | 0,062 | 0,04  | 1         | 0,952011293   | 1,050407708     | 1,55            |

Supplementary Table 4

| Differentially expressed genes_keloid-CCD_ comparing SC-Keloid vs. (SC-Myel, SC-Nonmyel) |             |              |       |       |           |               |                 |                 |
|------------------------------------------------------------------------------------------|-------------|--------------|-------|-------|-----------|---------------|-----------------|-----------------|
| gene                                                                                     | p_val       | avg_log2FC   | pct.1 | pct.2 | p_val_adj | Foldchange_UP | Foldchange_DOWN | Ratio_pct1_pct2 |
| PTPRM                                                                                    | 0,689351211 | -0,070961406 | 0,138 | 0,11  | 1         | 0,952003376   | 1,050416443     | 1,254545455     |
| TIMM17A                                                                                  | 0,018033434 | -0,070992674 | 0,65  | 0,31  | 1         | 0,951982743   | 1,05043921      | 2,096774194     |
| ABT1                                                                                     | 0,069204528 | -0,071038857 | 0,2   | 0,09  | 1         | 0,951952268   | 1,050472837     | 2,222222222     |
| WIPF2                                                                                    | 0,039182769 | -0,07105973  | 0,375 | 0,18  | 1         | 0,951938496   | 1,050488035     | 2,083333333     |
| FMN2                                                                                     | 0,120814239 | -0,071080829 | 0     | 0,03  | 1         | 0,951924574   | 1,050503399     | 0               |
| TUBD1                                                                                    | 0,157546415 | -0,071265547 | 0,112 | 0,05  | 1         | 0,951802701   | 1,05063791      | 2,24            |
| CTSO                                                                                     | 0,040551261 | -0,071313747 | 0,288 | 0,13  | 1         | 0,951770902   | 1,050673012     | 2,215384615     |
| LURAP1                                                                                   | 0,820013192 | -0,071411134 | 0,025 | 0,03  | 1         | 0,951706656   | 1,050743938     | 0,833333333     |
| GATC                                                                                     | 0,284828372 | -0,071448225 | 0,125 | 0,07  | 1         | 0,951682188   | 1,050770953     | 1,785714286     |
| STRN                                                                                     | 0,098558657 | -0,071455983 | 0,238 | 0,12  | 1         | 0,951677071   | 1,050776603     | 1,983333333     |
| MRPS31                                                                                   | 0,232420437 | -0,071488577 | 0,162 | 0,09  | 1         | 0,95165557    | 1,050800343     | 1,8             |
| NIFK-AS1                                                                                 | 0,894021778 | -0,071501443 | 0,038 | 0,04  | 1         | 0,951647084   | 1,050809714     | 0,95            |
| ZFP82                                                                                    | 0,820013192 | -0,071552708 | 0,025 | 0,03  | 1         | 0,951613268   | 1,050847055     | 0,833333333     |
| NAT10                                                                                    | 0,136751946 | -0,071556565 | 0,1   | 0,04  | 1         | 0,951610724   | 1,050849864     | 2,5             |
| LGALS7                                                                                   | 0,207484841 | -0,071575882 | 0     | 0,02  | 1         | 0,951597982   | 1,050863935     | 0               |
| MTMR1                                                                                    | 0,816980451 | -0,071605434 | 0,038 | 0,03  | 1         | 0,95157849    | 1,050885461     | 1,266666667     |
| CCNK                                                                                     | 0,08183115  | -0,071610863 | 0,212 | 0,1   | 1         | 0,951574909   | 1,050889416     | 2,12            |
| ZNF202                                                                                   | 0,820013192 | -0,071622187 | 0,025 | 0,03  | 1         | 0,95156744    | 1,050897664     | 0,833333333     |
| NCALD                                                                                    | 0,207484841 | -0,071754786 | 0     | 0,02  | 1         | 0,951479985   | 1,050994257     | 0               |
| TBCC                                                                                     | 0,009238586 | -0,071782127 | 0,312 | 0,12  | 1         | 0,951461954   | 1,051014175     | 2,6             |
| TGS1                                                                                     | 0,014529057 | -0,071875403 | 0,262 | 0,1   | 1         | 0,95140044    | 1,051082129     | 2,62            |
| APBA3                                                                                    | 0,284828372 | -0,071884126 | 0,125 | 0,07  | 1         | 0,951394687   | 1,051088485     | 1,785714286     |
| HSD17B11                                                                                 | 0,008808346 | -0,071920006 | 0,312 | 0,12  | 1         | 0,951371026   | 1,051114626     | 2,6             |
| LINC00482                                                                                | 0,377102913 | -0,072005714 | 0     | 0,01  | 1         | 0,951314508   | 1,051177073     | 0               |
| SEMA6A-AS1                                                                               | 0,377102913 | -0,072005714 | 0     | 0,01  | 1         | 0,951314508   | 1,051177073     | 0               |
| SPTBN4                                                                                   | 0,377102913 | -0,072005714 | 0     | 0,01  | 1         | 0,951314508   | 1,051177073     | 0               |
| XKR6                                                                                     | 0,692138165 | -0,072012159 | 0,013 | 0,02  | 1         | 0,951310259   | 1,051181768     | 0,65            |
| TM2D3                                                                                    | 0,006939364 | -0,072107121 | 0,412 | 0,18  | 1         | 0,951247643   | 1,051250962     | 2,288888889     |
| RGN                                                                                      | 0,423434047 | -0,072133203 | 0,013 | 0,03  | 1         | 0,951230446   | 1,051269968     | 0,433333333     |
| ARHGAP20                                                                                 | 0,569139823 | -0,072159958 | 0,025 | 0,04  | 1         | 0,951212805   | 1,051289464     | 0,625           |

Supplementary Table 4

| Differentially expressed genes_keloid-CCD_ comparing SC-Keloid vs. (SC-Myel, SC-Nonmyel) |             |              |       |       |           |               |                 |                 |
|------------------------------------------------------------------------------------------|-------------|--------------|-------|-------|-----------|---------------|-----------------|-----------------|
| gene                                                                                     | p_val       | avg_log2FC   | pct.1 | pct.2 | p_val_adj | Foldchange_UP | Foldchange_DOWN | Ratio_pct1_pct2 |
| ABHD18                                                                                   | 0,816980451 | -0,072193434 | 0,038 | 0,03  | 1         | 0,951190734   | 1,051313858     | 1,266666667     |
| CYTH1                                                                                    | 0,132758116 | -0,072231346 | 0,15  | 0,07  | 1         | 0,951165738   | 1,051341485     | 2,142857143     |
| C8orf48                                                                                  | 0,379500814 | -0,072280642 | 0,088 | 0,05  | 1         | 0,951133238   | 1,05137741      | 1,76            |
| RTN4IP1                                                                                  | 0,84359211  | -0,07230404  | 0,025 | 0,02  | 1         | 0,951117813   | 1,051394461     | 1,25            |
| C20orf204                                                                                | 0,207484841 | -0,072317373 | 0     | 0,02  | 1         | 0,951109022   | 1,051404178     | 0               |
| PTK2B                                                                                    | 0,207484841 | -0,07232733  | 0     | 0,02  | 1         | 0,951102458   | 1,051411435     | 0               |
| SNX4                                                                                     | 0,004922204 | -0,072465324 | 0,35  | 0,13  | 1         | 0,951011489   | 1,051512007     | 2,692307692     |
| AFG3L2                                                                                   | 0,001223505 | -0,072508331 | 0,388 | 0,13  | 1         | 0,95098314    | 1,051543353     | 2,984615385     |
| PIK3C2B                                                                                  | 0,207484841 | -0,07272303  | 0     | 0,02  | 1         | 0,950841627   | 1,051699853     | 0               |
| DHX16                                                                                    | 0,005489145 | -0,072758874 | 0,212 | 0,06  | 1         | 0,950818003   | 1,051725984     | 3,533333333     |
| KCTD5                                                                                    | 0,014249019 | -0,072885099 | 0,225 | 0,08  | 1         | 0,950734818   | 1,051818006     | 2,8125          |
| CPEB3                                                                                    | 0,907630591 | -0,072892263 | 0,038 | 0,04  | 1         | 0,950730097   | 1,051823229     | 0,95            |
| NQO2                                                                                     | 0,02979839  | -0,072902973 | 0,262 | 0,11  | 1         | 0,950723039   | 1,051831037     | 2,381818182     |
| GPR146                                                                                   | 0,207484841 | -0,073074834 | 0     | 0,02  | 1         | 0,950609791   | 1,051956344     | 0               |
| CCDC149                                                                                  | 0,212080942 | -0,073083913 | 0,15  | 0,08  | 1         | 0,950603809   | 1,051962964     | 1,875           |
| USP3                                                                                     | 0,284828372 | -0,073155622 | 0,125 | 0,07  | 1         | 0,95055656    | 1,052015253     | 1,785714286     |
| CHTOP                                                                                    | 0,027001335 | -0,073166886 | 0,45  | 0,22  | 1         | 0,950549138   | 1,052023467     | 2,045454545     |
| MRO                                                                                      | 0,120814239 | -0,073269157 | 0     | 0,03  | 1         | 0,950481758   | 1,052098046     | 0               |
| KYAT3                                                                                    | 0,015301983 | -0,073296073 | 0,3   | 0,12  | 1         | 0,950464025   | 1,052117675     | 2,5             |
| MIR181A1HG                                                                               | 0,016646758 | -0,07330128  | 0,225 | 0,08  | 1         | 0,950460595   | 1,052121472     | 2,8125          |
| MCM7                                                                                     | 0,028854758 | -0,073316503 | 0,35  | 0,16  | 1         | 0,950450566   | 1,052132574     | 2,1875          |
| TAF3                                                                                     | 0,076882284 | -0,073391985 | 0,325 | 0,17  | 1         | 0,950400839   | 1,052187623     | 1,911764706     |
| SLC4A2                                                                                   | 0,013493118 | -0,073518247 | 0,3   | 0,12  | 1         | 0,950317665   | 1,052279713     | 2,5             |
| TRMT1L                                                                                   | 0,894021778 | -0,073564863 | 0,038 | 0,04  | 1         | 0,95028696    | 1,052313714     | 0,95            |
| PPM1M                                                                                    | 0,552939414 | -0,073571503 | 0,088 | 0,06  | 1         | 0,950282586   | 1,052318558     | 1,466666667     |
| IL1A                                                                                     | 0,207484841 | -0,073604761 | 0     | 0,02  | 1         | 0,95026068    | 1,052342817     | 0               |
| CFAP45                                                                                   | 0,207484841 | -0,073627243 | 0     | 0,02  | 1         | 0,950245871   | 1,052359216     | 0               |
| KIAA1328                                                                                 | 0,368764775 | -0,073669632 | 0,088 | 0,05  | 1         | 0,950217952   | 1,052390136     | 1,76            |
| QPRT                                                                                     | 0,820013192 | -0,073800026 | 0,025 | 0,03  | 1         | 0,950132073   | 1,052485258     | 0,833333333     |
| RGS7                                                                                     | 0,120814239 | -0,07381263  | 0     | 0,03  | 1         | 0,950123772   | 1,052494453     | 0               |

Supplementary Table 4

| Differentially expressed genes_keloid-CCD_ comparing SC-Keloid vs. (SC-Myel, SC-Nonmyel) |             |              |       |       |           |               |                 |                 |
|------------------------------------------------------------------------------------------|-------------|--------------|-------|-------|-----------|---------------|-----------------|-----------------|
| gene                                                                                     | p_val       | avg_log2FC   | pct.1 | pct.2 | p_val_adj | Foldchange_UP | Foldchange_DOWN | Ratio_pct1_pct2 |
| DAGLB                                                                                    | 0,223632981 | -0,073818213 | 0,088 | 0,04  | 1         | 0,950120095   | 1,052498526     | 2,2             |
| DMTN                                                                                     | 0,207484841 | -0,073838274 | 0     | 0,02  | 1         | 0,950106884   | 1,052513161     | 0               |
| BCL2L11                                                                                  | 0,422547341 | -0,073909331 | 0,138 | 0,09  | 1         | 0,950060089   | 1,052565002     | 1,533333333     |
| FOXJ2                                                                                    | 0,068439382 | -0,074027182 | 0,15  | 0,06  | 1         | 0,949982484   | 1,052650988     | 2,5             |
| GABBR1                                                                                   | 0,035933268 | -0,074066094 | 0,2   | 0,08  | 1         | 0,949956862   | 1,05267938      | 2,5             |
| CEP192                                                                                   | 0,136751946 | -0,074132447 | 0,1   | 0,04  | 1         | 0,949913172   | 1,052727797     | 2,5             |
| ZFAND4                                                                                   | 0,120814239 | -0,074141814 | 0     | 0,03  | 1         | 0,949907005   | 1,052734631     | 0               |
| SH3BP5L                                                                                  | 0,379500814 | -0,074143663 | 0,088 | 0,05  | 1         | 0,949905787   | 1,05273598      | 1,76            |
| EMC3                                                                                     | 0,021375562 | -0,074196772 | 0,525 | 0,25  | 1         | 0,94987082    | 1,052774735     | 2,1             |
| ACOXL                                                                                    | 0,207484841 | -0,074244666 | 0     | 0,02  | 1         | 0,949839286   | 1,052809685     | 0               |
| MED1                                                                                     | 0,032852317 | -0,074277807 | 0,262 | 0,11  | 1         | 0,949817467   | 1,05283387      | 2,381818182     |
| BLOC1S3                                                                                  | 0,816980451 | -0,074338935 | 0,038 | 0,03  | 1         | 0,949777224   | 1,052878481     | 1,266666667     |
| LMO7DN                                                                                   | 0,207484841 | -0,074363634 | 0     | 0,02  | 1         | 0,949760964   | 1,052896506     | 0               |
| TRIM25                                                                                   | 0,799526327 | -0,074376665 | 0,05  | 0,04  | 1         | 0,949752385   | 1,052906016     | 1,25            |
| TRIM7                                                                                    | 0,501283468 | -0,074471122 | 0,038 | 0,02  | 1         | 0,949690204   | 1,052974955     | 1,9             |
| NUP88                                                                                    | 0,212080942 | -0,074500763 | 0,15  | 0,08  | 1         | 0,949670693   | 1,052996589     | 1,875           |
| KSR1                                                                                     | 0,207484841 | -0,074502382 | 0     | 0,02  | 1         | 0,949669627   | 1,052997771     | 0               |
| SMAD6                                                                                    | 0,692138165 | -0,074509679 | 0,013 | 0,02  | 1         | 0,949664824   | 1,053003096     | 0,65            |
| SMYD3                                                                                    | 0,051807603 | -0,074518214 | 0,212 | 0,09  | 1         | 0,949659205   | 1,053009326     | 2,355555556     |
| NUDCD3                                                                                   | 0,127282673 | -0,074651948 | 0,15  | 0,07  | 1         | 0,949571178   | 1,053106942     | 2,142857143     |
| PIK3R4                                                                                   | 0,54451599  | -0,074669053 | 0,062 | 0,04  | 1         | 0,94955992    | 1,053119428     | 1,55            |
| TCAP                                                                                     | 0,423434047 | -0,074682082 | 0,013 | 0,03  | 1         | 0,949551345   | 1,053128939     | 0,433333333     |
| IL6R                                                                                     | 0,36171348  | -0,074695148 | 0,088 | 0,05  | 1         | 0,949542745   | 1,053138476     | 1,76            |
| CABIN1                                                                                   | 0,074494291 | -0,074739573 | 0,2   | 0,09  | 1         | 0,949513506   | 1,053170906     | 2,222222222     |
| SMOX                                                                                     | 0,050122327 | -0,074800181 | 0,3   | 0,14  | 1         | 0,949473618   | 1,053215151     | 2,142857143     |
| ATP8B1                                                                                   | 0,907630591 | -0,074802044 | 0,038 | 0,04  | 1         | 0,949472392   | 1,053216511     | 0,95            |
| SERPINE2                                                                                 | 0,040441878 | -0,074826415 | 0,825 | 0,45  | 1         | 0,949456353   | 1,053234303     | 1,833333333     |
| KCNJ2                                                                                    | 0,207484841 | -0,074830585 | 0     | 0,02  | 1         | 0,949453608   | 1,053237347     | 0               |
| MYCN                                                                                     | 0,820013192 | -0,074884756 | 0,025 | 0,03  | 1         | 0,949417958   | 1,053276896     | 0,833333333     |
| POLR1E                                                                                   | 0,24172513  | -0,074984214 | 0,1   | 0,05  | 1         | 0,949352509   | 1,05334951      | 2               |

Supplementary Table 4

| Differentially expressed genes_keloid-CCD_ comparing SC-Keloid vs. (SC-Myel, SC-Nonmyel) |             |              |       |       |           |               |                 |                 |
|------------------------------------------------------------------------------------------|-------------|--------------|-------|-------|-----------|---------------|-----------------|-----------------|
| gene                                                                                     | p_val       | avg_log2FC   | pct.1 | pct.2 | p_val_adj | Foldchange_UP | Foldchange_DOWN | Ratio_pct1_pct2 |
| RABIF                                                                                    | 0,057356257 | -0,075053181 | 0,262 | 0,12  | 1         | 0,949307127   | 1,053399866     | 2,183333333     |
| SHLD3                                                                                    | 0,816980451 | -0,075067248 | 0,038 | 0,03  | 1         | 0,94929787    | 1,053410137     | 1,266666667     |
| FN3K                                                                                     | 0,11122839  | -0,075071113 | 0,05  | 0,01  | 1         | 0,949295328   | 1,053412959     | 5               |
| ALG2                                                                                     | 0,044362225 | -0,075147373 | 0,212 | 0,09  | 1         | 0,949245149   | 1,053468644     | 2,355555556     |
| SDK2                                                                                     | 0,423434047 | -0,075187152 | 0,013 | 0,03  | 1         | 0,949218976   | 1,053497691     | 0,433333333     |
| RAC1                                                                                     | 0,906036424 | -0,075201427 | 0,988 | 0,91  | 1         | 0,949209584   | 1,053508115     | 1,085714286     |
| MYO15B                                                                                   | 0,84359211  | -0,075244294 | 0,025 | 0,02  | 1         | 0,949181381   | 1,053539418     | 1,25            |
| PRDM15                                                                                   | 0,692138165 | -0,075275985 | 0,013 | 0,02  | 1         | 0,949160531   | 1,053562561     | 0,65            |
| PITPNM2                                                                                  | 0,377102913 | -0,075314335 | 0     | 0,01  | 1         | 0,9491353     | 1,053590568     | 0               |
| CCDC112                                                                                  | 0,017305456 | -0,075353603 | 0,35  | 0,16  | 1         | 0,949109467   | 1,053619245     | 2,1875          |
| DMTF1                                                                                    | 0,162383012 | -0,075358729 | 0,175 | 0,09  | 1         | 0,949106094   | 1,053622989     | 1,944444444     |
| C1orf50                                                                                  | 0,816980451 | -0,075379305 | 0,038 | 0,03  | 1         | 0,949092558   | 1,053638016     | 1,266666667     |
| WDR24                                                                                    | 0,193718766 | -0,075383236 | 0,075 | 0,03  | 1         | 0,949089972   | 1,053640887     | 2,5             |
| ATXN7L2                                                                                  | 0,816980451 | -0,075393266 | 0,038 | 0,03  | 1         | 0,949083374   | 1,053648212     | 1,266666667     |
| UBE2G1                                                                                   | 0,022073169 | -0,075429008 | 0,462 | 0,22  | 1         | 0,949059861   | 1,053674316     | 2,1             |
| DIPK1B                                                                                   | 0,692138165 | -0,075439618 | 0,013 | 0,02  | 1         | 0,949052881   | 1,053682065     | 0,65            |
| AVIL                                                                                     | 0,78287608  | -0,075478344 | 0,062 | 0,05  | 1         | 0,949027407   | 1,053710349     | 1,24            |
| ANKRD46                                                                                  | 0,799526327 | -0,075530609 | 0,05  | 0,04  | 1         | 0,948993026   | 1,053748523     | 1,25            |
| RECQL5                                                                                   | 0,820013192 | -0,075631943 | 0,025 | 0,03  | 1         | 0,948926372   | 1,05382254      | 0,833333333     |
| GPANK1                                                                                   | 0,137934467 | -0,075640614 | 0,262 | 0,15  | 1         | 0,948920669   | 1,053828874     | 1,746666667     |
| SLC25A34                                                                                 | 0,423434047 | -0,075707213 | 0,013 | 0,03  | 1         | 0,948876865   | 1,053877523     | 0,433333333     |
| FHIP1B                                                                                   | 0,379500814 | -0,075721626 | 0,088 | 0,05  | 1         | 0,948867385   | 1,053888052     | 1,76            |
| THAP3                                                                                    | 0,246716509 | -0,075752432 | 0,188 | 0,11  | 1         | 0,948847124   | 1,053910555     | 1,709090909     |
| C1QTNF3                                                                                  | 0,799526327 | -0,075771402 | 0,05  | 0,04  | 1         | 0,948834648   | 1,053924414     | 1,25            |
| MGRN1                                                                                    | 0,124795967 | -0,075771411 | 0,275 | 0,15  | 1         | 0,948834642   | 1,05392442      | 1,833333333     |
| SLC40A1                                                                                  | 0,799526327 | -0,075809095 | 0,05  | 0,04  | 1         | 0,948809859   | 1,053951949     | 1,25            |
| RARA                                                                                     | 0,009272966 | -0,075826825 | 0,562 | 0,25  | 1         | 0,948798198   | 1,053964902     | 2,248           |
| KIF3C                                                                                    | 0,548643101 | -0,075886028 | 0,075 | 0,05  | 1         | 0,948759263   | 1,054008154     | 1,5             |
| RBP7                                                                                     | 0,501283468 | -0,075977591 | 0,038 | 0,02  | 1         | 0,948699051   | 1,054075051     | 1,9             |
| APBB2                                                                                    | 0,021112347 | -0,076022203 | 0,162 | 0,05  | 1         | 0,948669715   | 1,054107646     | 3,24            |

Supplementary Table 4

| Differentially expressed genes_keloid-CCD_ comparing SC-Keloid vs. (SC-Myel, SC-Nonmyel) |             |              |       |       |           |               |                 |                 |
|------------------------------------------------------------------------------------------|-------------|--------------|-------|-------|-----------|---------------|-----------------|-----------------|
| gene                                                                                     | p_val       | avg_log2FC   | pct.1 | pct.2 | p_val_adj | Foldchange_UP | Foldchange_DOWN | Ratio_pct1_pct2 |
| AJAP1                                                                                    | 0,816980451 | -0,076095552 | 0,038 | 0,03  | 1         | 0,948621485   | 1,05416124      | 1,266666667     |
| CIDEB                                                                                    | 0,120814239 | -0,076262875 | 0     | 0,03  | 1         | 0,94851147    | 1,054283508     | 0               |
| CORO7                                                                                    | 0,128634778 | -0,076290632 | 0,15  | 0,07  | 1         | 0,948493221   | 1,054303792     | 2,142857143     |
| AR                                                                                       | 0,820013192 | -0,076319081 | 0,025 | 0,03  | 1         | 0,948474518   | 1,054324583     | 0,833333333     |
| NOCT                                                                                     | 0,263816781 | -0,076355667 | 0,013 | 0,04  | 1         | 0,948450465   | 1,05435132      | 0,325           |
| SOGA1                                                                                    | 0,027208698 | -0,076366763 | 0,325 | 0,15  | 1         | 0,948443171   | 1,054359429     | 2,166666667     |
| SULT1A1                                                                                  | 0,820013192 | -0,07636743  | 0,025 | 0,03  | 1         | 0,948442732   | 1,054359916     | 0,833333333     |
| LGR4                                                                                     | 0,02583629  | -0,076497436 | 0,25  | 0,1   | 1         | 0,948357269   | 1,054454933     | 2,5             |
| HEPH                                                                                     | 0,249550622 | -0,076540355 | 0,1   | 0,05  | 1         | 0,948329056   | 1,054486303     | 2               |
| HINFP                                                                                    | 0,404307785 | -0,076553987 | 0,112 | 0,07  | 1         | 0,948320095   | 1,054496267     | 1,6             |
| UXS1                                                                                     | 0,001594516 | -0,076584798 | 0,4   | 0,14  | 1         | 0,948299843   | 1,054518787     | 2,857142857     |
| MARCHF2                                                                                  | 0,022223541 | -0,076635355 | 0,375 | 0,17  | 1         | 0,948266612   | 1,054555742     | 2,205882353     |
| ACACB                                                                                    | 0,774717987 | -0,076640082 | 0,05  | 0,04  | 1         | 0,948263505   | 1,054559197     | 1,25            |
| C10orf88                                                                                 | 0,816980451 | -0,076691219 | 0,038 | 0,03  | 1         | 0,948229893   | 1,054596577     | 1,266666667     |
| RAB3A                                                                                    | 0,501283468 | -0,076843948 | 0,038 | 0,02  | 1         | 0,948129516   | 1,054708226     | 1,9             |
| TAF8                                                                                     | 0,026143714 | -0,07693545  | 0,212 | 0,08  | 1         | 0,948069384   | 1,054775122     | 2,65            |
| FRAS1                                                                                    | 0,377102913 | -0,076941454 | 0     | 0,01  | 1         | 0,948065438   | 1,054779512     | 0               |
| UBIAD1                                                                                   | 0,976971284 | -0,076950017 | 0,075 | 0,07  | 1         | 0,948059811   | 1,054785773     | 1,071428571     |
| ADGRL2                                                                                   | 0,663300924 | -0,076954106 | 0,038 | 0,05  | 1         | 0,948057124   | 1,054788762     | 0,76            |
| SSUH2                                                                                    | 0,249550622 | -0,077095052 | 0,1   | 0,05  | 1         | 0,947964506   | 1,054891816     | 2               |
| TMOD1                                                                                    | 0,207484841 | -0,077129847 | 0     | 0,02  | 1         | 0,947941643   | 1,054917259     | 0               |
| FGF12                                                                                    | 0,207484841 | -0,07713742  | 0     | 0,02  | 1         | 0,947936668   | 1,054922796     | 0               |
| UCK1                                                                                     | 0,010397311 | -0,077169499 | 0,312 | 0,12  | 1         | 0,94791559    | 1,054946253     | 2,6             |
| IL17RA                                                                                   | 0,047638359 | -0,077207284 | 0,125 | 0,04  | 1         | 0,947890764   | 1,054973883     | 3,125           |
| ADAP1                                                                                    | 0,180764063 | -0,077291051 | 0,125 | 0,06  | 1         | 0,947835728   | 1,05503514      | 2,083333333     |
| IFITM1                                                                                   | 0,756260013 | -0,077358417 | 0,05  | 0,04  | 1         | 0,947791471   | 1,055084405     | 1,25            |
| DUOXA1                                                                                   | 0,207484841 | -0,077381515 | 0     | 0,02  | 1         | 0,947776296   | 1,055101297     | 0               |
| SAFB2                                                                                    | 0,07898015  | -0,077431282 | 0,4   | 0,21  | 1         | 0,947743602   | 1,055137695     | 1,904761905     |
| CLEC2D                                                                                   | 0,900822541 | -0,07745773  | 0,038 | 0,04  | 1         | 0,947726229   | 1,055157038     | 0,95            |
| MBTD1                                                                                    | 0,091508834 | -0,077500741 | 0,175 | 0,08  | 1         | 0,947697974   | 1,055188496     | 2,1875          |

Supplementary Table 4

| Differentially expressed genes_keloid-CCD_ comparing SC-Keloid vs. (SC-Myel, SC-Nonmyel) |             |              |       |       |           |               |                 |                 |
|------------------------------------------------------------------------------------------|-------------|--------------|-------|-------|-----------|---------------|-----------------|-----------------|
| gene                                                                                     | p_val       | avg_log2FC   | pct.1 | pct.2 | p_val_adj | Foldchange_UP | Foldchange_DOWN | Ratio_pct1_pct2 |
| TSHZ2                                                                                    | 0,54451599  | -0,077531965 | 0,062 | 0,04  | 1         | 0,947677464   | 1,055211333     | 1,55            |
| PLXNB1                                                                                   | 0,966558966 | -0,077551298 | 0,05  | 0,05  | 1         | 0,947664764   | 1,055225474     | 1               |
| C9orf78                                                                                  | 0,010026072 | -0,077586172 | 0,613 | 0,29  | 1         | 0,947641857   | 1,055250982     | 2,113793103     |
| SEPTIN1                                                                                  | 0,107824067 | -0,077630349 | 0,2   | 0,1   | 1         | 0,947612839   | 1,055283296     | 2               |
| ZNF175                                                                                   | 0,423434047 | -0,07767549  | 0,013 | 0,03  | 1         | 0,94758319    | 1,055316315     | 0,433333333     |
| KIAA1614                                                                                 | 0,84359211  | -0,077692313 | 0,025 | 0,02  | 1         | 0,94757214    | 1,055328621     | 1,25            |
| HOXC-AS1                                                                                 | 0,157415062 | -0,077727172 | 0,062 | 0,02  | 1         | 0,947549245   | 1,055354121     | 3,1             |
| VAV2                                                                                     | 0,816980451 | -0,077759487 | 0,038 | 0,03  | 1         | 0,947528021   | 1,05537776      | 1,266666667     |
| P3H4                                                                                     | 0,000350587 | -0,077831782 | 0,288 | 0,07  | 1         | 0,94748054    | 1,055430648     | 4,114285714     |
| BLZF1                                                                                    | 0,120771062 | -0,077862266 | 0,2   | 0,1   | 1         | 0,94746052    | 1,055452949     | 2               |
| DENND10                                                                                  | 0,185304814 | -0,077915494 | 0,212 | 0,12  | 1         | 0,947425565   | 1,05549189      | 1,766666667     |
| INPP4A                                                                                   | 0,557924866 | -0,078050273 | 0,075 | 0,05  | 1         | 0,947337059   | 1,0555905       | 1,5             |
| MRFAP1                                                                                   | 0,722263514 | -0,078071041 | 0,912 | 0,62  | 1         | 0,947323422   | 1,055605696     | 1,470967742     |
| DRG1                                                                                     | 0,01728634  | -0,078096582 | 0,312 | 0,13  | 1         | 0,94730665    | 1,055624385     | 2,4             |
| CBLB                                                                                     | 0,114063525 | -0,078133495 | 0,138 | 0,06  | 1         | 0,947282413   | 1,055651394     | 2,3             |
| RNF41                                                                                    | 0,013505078 | -0,078136629 | 0,262 | 0,1   | 1         | 0,947280355   | 1,055653687     | 2,62            |
| UBTD2                                                                                    | 0,019588999 | -0,07820711  | 0,362 | 0,16  | 1         | 0,947234078   | 1,055705261     | 2,2625          |
| ACD                                                                                      | 0,049580658 | -0,078209134 | 0,212 | 0,09  | 1         | 0,947232749   | 1,055706743     | 2,355555556     |
| RPS27                                                                                    | 0,387790825 | -0,078216182 | 1     | 0,99  | 1         | 0,947228122   | 1,0557119       | 1,01010101      |
| FLVCR2                                                                                   | 0,377102913 | -0,078235217 | 0     | 0,01  | 1         | 0,947215624   | 1,055725829     | 0               |
| PLXNA3                                                                                   | 0,044362225 | -0,078249852 | 0,212 | 0,09  | 1         | 0,947206016   | 1,055736538     | 2,355555556     |
| SOCS4                                                                                    | 0,01213632  | -0,078331912 | 0,288 | 0,11  | 1         | 0,94715214    | 1,055796591     | 2,618181818     |
| RALGPS1                                                                                  | 0,907630591 | -0,078337695 | 0,038 | 0,04  | 1         | 0,947148343   | 1,055800822     | 0,95            |
| PACSIN3                                                                                  | 0,558096179 | -0,078404272 | 0,125 | 0,09  | 1         | 0,947104636   | 1,055849546     | 1,388888889     |
| LY96                                                                                     | 0,207484841 | -0,078431003 | 0     | 0,02  | 1         | 0,947087088   | 1,05586911      | 0               |
| SLC4A3                                                                                   | 0,820013192 | -0,078436175 | 0,025 | 0,03  | 1         | 0,947083692   | 1,055872895     | 0,833333333     |
| CRCP                                                                                     | 0,080217199 | -0,078466163 | 0,212 | 0,1   | 1         | 0,947064006   | 1,055894843     | 2,12            |
| C12orf29                                                                                 | 0,030726511 | -0,078472334 | 0,188 | 0,07  | 1         | 0,947059956   | 1,055899359     | 2,685714286     |
| NR1H3                                                                                    | 0,651640212 | -0,078492058 | 0,038 | 0,05  | 1         | 0,947047007   | 1,055913795     | 0,76            |
| PALMD                                                                                    | 0,569139823 | -0,078508321 | 0,025 | 0,04  | 1         | 0,947036332   | 1,055925698     | 0,625           |

Supplementary Table 4

| Differentially expressed genes_keloid-CCD_comparing SC-Keloid vs. (SC-Myel, SC-Nonmyel) |             |              |       |       |           |               |                 |                 |
|-----------------------------------------------------------------------------------------|-------------|--------------|-------|-------|-----------|---------------|-----------------|-----------------|
| gene                                                                                    | p_val       | avg_log2FC   | pct.1 | pct.2 | p_val_adj | Foldchange_UP | Foldchange_DOWN | Ratio_pct1_pct2 |
| R3HCC1L                                                                                 | 0,501283468 | -0,078508996 | 0,038 | 0,02  | 1         | 0,947035889   | 1,055926193     | 1,9             |
| SFRP4                                                                                   | 0,84359211  | -0,078520355 | 0,025 | 0,02  | 1         | 0,947028432   | 1,055934506     | 1,25            |
| ARHGAP23                                                                                | 0,040792161 | -0,078576861 | 0,262 | 0,12  | 1         | 0,946991341   | 1,055975865     | 2,183333333     |
| NATD1                                                                                   | 0,954410066 | -0,078656651 | 0,05  | 0,05  | 1         | 0,946938968   | 1,056034268     | 1               |
| CAP2                                                                                    | 0,207484841 | -0,078665081 | 0     | 0,02  | 1         | 0,946933435   | 1,056040439     | 0               |
| PCDH1                                                                                   | 0,001117558 | -0,078724635 | 0,425 | 0,15  | 1         | 0,946894346   | 1,056084033     | 2,833333333     |
| GTPBP8                                                                                  | 0,00951816  | -0,078752735 | 0,238 | 0,08  | 1         | 0,946875904   | 1,056104603     | 2,975           |
| LAMP1                                                                                   | 0,622102424 | -0,078761163 | 0,775 | 0,55  | 1         | 0,946870372   | 1,056110773     | 1,409090909     |
| SLC2A3                                                                                  | 0,044724041 | -0,078875167 | 0,262 | 0,12  | 1         | 0,946795552   | 1,056194232     | 2,183333333     |
| MAFA                                                                                    | 0,557924866 | -0,078894781 | 0,075 | 0,05  | 1         | 0,94678268    | 1,056208591     | 1,5             |
| NUP205                                                                                  | 0,136751946 | -0,078896336 | 0,1   | 0,04  | 1         | 0,946781659   | 1,05620973      | 2,5             |
| KIAA1549L                                                                               | 0,259519439 | -0,078903683 | 0,013 | 0,04  | 1         | 0,946776838   | 1,056215108     | 0,325           |
| RETREG3                                                                                 | 0,246922691 | -0,078957546 | 0,1   | 0,05  | 1         | 0,946741491   | 1,056254542     | 2               |
| YJEFN3                                                                                  | 0,799526327 | -0,078981952 | 0,05  | 0,04  | 1         | 0,946725474   | 1,056272412     | 1,25            |
| MPP2                                                                                    | 0,692138165 | -0,07898406  | 0,013 | 0,02  | 1         | 0,946724091   | 1,056273955     | 0,65            |
| ELMO1                                                                                   | 0,263816781 | -0,079001737 | 0,013 | 0,04  | 1         | 0,946712491   | 1,056286897     | 0,325           |
| MEOX1                                                                                   | 0,556644247 | -0,079038441 | 0,025 | 0,04  | 1         | 0,946688406   | 1,05631377      | 0,625           |
| BTN2A1                                                                                  | 0,031124172 | -0,079067815 | 0,262 | 0,11  | 1         | 0,946669131   | 1,056335278     | 2,381818182     |
| CCDC40                                                                                  | 0,207484841 | -0,079075896 | 0     | 0,02  | 1         | 0,946663829   | 1,056341195     | 0               |
| FOXO4                                                                                   | 0,816980451 | -0,079090616 | 0,038 | 0,03  | 1         | 0,94665417    | 1,056351973     | 1,266666667     |
| FXR2                                                                                    | 0,030418212 | -0,079206745 | 0,275 | 0,12  | 1         | 0,946577972   | 1,056437007     | 2,291666667     |
| IL1R1                                                                                   | 0,793304172 | -0,079258779 | 0,05  | 0,04  | 1         | 0,946543833   | 1,05647511      | 1,25            |
| NT5C3B                                                                                  | 0,042252884 | -0,079276971 | 0,388 | 0,19  | 1         | 0,946531897   | 1,056488433     | 2,042105263     |
| SMG7                                                                                    | 0,024575502 | -0,07929811  | 0,212 | 0,08  | 1         | 0,946518028   | 1,056503913     | 2,65            |
| FBXL5                                                                                   | 0,034280914 | -0,079304211 | 0,35  | 0,16  | 1         | 0,946514025   | 1,05650838      | 2,1875          |
| YWHAZ                                                                                   | 0,832206141 | -0,079355485 | 0,95  | 0,79  | 1         | 0,946480386   | 1,05654593      | 1,202531646     |
| FUBP1                                                                                   | 0,067532306 | -0,079404265 | 0,4   | 0,21  | 1         | 0,946448385   | 1,056581654     | 1,904761905     |
| DMWD                                                                                    | 0,005077312 | -0,079418784 | 0,4   | 0,16  | 1         | 0,94643886    | 1,056592287     | 2,5             |
| BCKDHB                                                                                  | 0,037504931 | -0,079425408 | 0,238 | 0,1   | 1         | 0,946434514   | 1,056597139     | 2,38            |
| GPD2                                                                                    | 0,189997377 | -0,079506882 | 0,138 | 0,07  | 1         | 0,946381067   | 1,05665681      | 1,971428571     |



Supplementary Table 4

| Differentially expressed genes_keloid-CCD_ comparing SC-Keloid vs. (SC-Myel, SC-Nonmyel) |             |              |       |       |           |               |                 |                 |
|------------------------------------------------------------------------------------------|-------------|--------------|-------|-------|-----------|---------------|-----------------|-----------------|
| gene                                                                                     | p_val       | avg_log2FC   | pct.1 | pct.2 | p_val_adj | Foldchange_UP | Foldchange_DOWN | Ratio_pct1_pct2 |
| UBASH3B                                                                                  | 0,271998551 | -0,079527639 | 0,138 | 0,08  | 1         | 0,946367452   | 1,056672013     | 1,725           |
| CPSF4                                                                                    | 0,047638359 | -0,079540677 | 0,125 | 0,04  | 1         | 0,946358899   | 1,056681562     | 3,125           |
| VPS4A                                                                                    | 0,005755563 | -0,079615394 | 0,338 | 0,13  | 1         | 0,946309888   | 1,056736289     | 2,6             |
| CHD4                                                                                     | 0,134242905 | -0,079651057 | 0,812 | 0,47  | 1         | 0,946286496   | 1,056762412     | 1,727659574     |
| ZNF248                                                                                   | 0,771757484 | -0,079653177 | 0,062 | 0,05  | 1         | 0,946285106   | 1,056763965     | 1,24            |
| TUT1                                                                                     | 0,085199008 | -0,079653522 | 0,075 | 0,02  | 1         | 0,946284879   | 1,056764218     | 3,75            |
| EZR                                                                                      | 0,504356998 | -0,079715091 | 0,713 | 0,53  | 1         | 0,946244496   | 1,056809317     | 1,345283019     |
| ACVR2B                                                                                   | 0,948339409 | -0,079745492 | 0,05  | 0,05  | 1         | 0,946224557   | 1,056831587     | 1               |
| HMGA2                                                                                    | 0,207484841 | -0,079853827 | 0     | 0,02  | 1         | 0,946153506   | 1,05691095      | 0               |
| KLF11                                                                                    | 0,012004506 | -0,079997523 | 0,25  | 0,09  | 1         | 0,946059271   | 1,057016225     | 2,777777778     |
| ETV7                                                                                     | 0,894021778 | -0,080018368 | 0,038 | 0,04  | 1         | 0,946045602   | 1,057031498     | 0,95            |
| METTL4                                                                                   | 0,132758116 | -0,080048314 | 0,15  | 0,07  | 1         | 0,946025965   | 1,05705344      | 2,142857143     |
| DGKD                                                                                     | 0,081579256 | -0,080065127 | 0,112 | 0,04  | 1         | 0,94601494    | 1,057065758     | 2,8             |
| LINC00461                                                                                | 0,54451599  | -0,080068875 | 0,062 | 0,04  | 1         | 0,946012483   | 1,057068504     | 1,55            |
| POMT2                                                                                    | 0,097492774 | -0,080166606 | 0,175 | 0,08  | 1         | 0,9459484     | 1,057140114     | 2,1875          |
| ZCCHC24                                                                                  | 0,009846058 | -0,080172996 | 0,738 | 0,34  | 1         | 0,94594421    | 1,057144797     | 2,170588235     |
| TRIM32                                                                                   | 0,820013192 | -0,080225097 | 0,025 | 0,03  | 1         | 0,94591005    | 1,057182975     | 0,833333333     |
| PITPNC1                                                                                  | 0,373709887 | -0,080225851 | 0,025 | 0,05  | 1         | 0,945909555   | 1,057183528     | 0,5             |
| ZNF22-AS1                                                                                | 0,207484841 | -0,080235529 | 0     | 0,02  | 1         | 0,945903209   | 1,05719062      | 0               |
| ITIH3                                                                                    | 0,207484841 | -0,080247869 | 0     | 0,02  | 1         | 0,945895119   | 1,057199662     | 0               |
| MPC1                                                                                     | 0,05481009  | -0,080284611 | 0,675 | 0,35  | 1         | 0,94587103    | 1,057226587     | 1,928571429     |
| ADSS1                                                                                    | 0,423434047 | -0,080315179 | 0,013 | 0,03  | 1         | 0,945850989   | 1,057248988     | 0,433333333     |
| CEBPZOS                                                                                  | 0,021644791 | -0,080386639 | 0,325 | 0,14  | 1         | 0,945804139   | 1,057301357     | 2,321428571     |
| PODXL2                                                                                   | 0,894021778 | -0,080395117 | 0,038 | 0,04  | 1         | 0,945798582   | 1,05730757      | 0,95            |
| FAM8A1                                                                                   | 0,139003994 | -0,080437677 | 0,162 | 0,08  | 1         | 0,945770681   | 1,057338761     | 2,025           |
| COL8A2                                                                                   | 0,692138165 | -0,080483083 | 0,013 | 0,02  | 1         | 0,945740915   | 1,05737204      | 0,65            |
| LIN7C                                                                                    | 0,046964166 | -0,080511111 | 0,325 | 0,16  | 1         | 0,945722542   | 1,057392582     | 2,03125         |
| HDAC11                                                                                   | 0,747189097 | -0,080514801 | 0,088 | 0,07  | 1         | 0,945720122   | 1,057395287     | 1,257142857     |
| AAK1                                                                                     | 0,092652465 | -0,080515903 | 0,462 | 0,26  | 1         | 0,9457194     | 1,057396095     | 1,776923077     |
| ZNF426                                                                                   | 0,260119902 | -0,080674569 | 0,112 | 0,06  | 1         | 0,945615396   | 1,057512392     | 1,866666667     |

Supplementary Table 4

| Differentially expressed genes_keloid-CCD_ comparing SC-Keloid vs. (SC-Myel, SC-Nonmyel) |             |              |       |       |           |               |                 |                 |
|------------------------------------------------------------------------------------------|-------------|--------------|-------|-------|-----------|---------------|-----------------|-----------------|
| gene                                                                                     | p_val       | avg_log2FC   | pct.1 | pct.2 | p_val_adj | Foldchange_UP | Foldchange_DOWN | Ratio_pct1_pct2 |
| CHD8                                                                                     | 0,066867459 | -0,080804729 | 0,288 | 0,14  | 1         | 0,945530087   | 1,057607805     | 2,057142857     |
| LINC00518                                                                                | 0,120814239 | -0,080873192 | 0     | 0,03  | 1         | 0,945485218   | 1,057657995     | 0               |
| STX12                                                                                    | 0,014619154 | -0,080914646 | 0,613 | 0,27  | 1         | 0,945458051   | 1,057688386     | 2,27037037      |
| LINS1                                                                                    | 0,249550622 | -0,080955198 | 0,1   | 0,05  | 1         | 0,945431476   | 1,057718117     | 2               |
| RNPC3                                                                                    | 0,966741317 | -0,081001104 | 0,075 | 0,07  | 1         | 0,945401393   | 1,057751773     | 1,071428571     |
| FKBP5                                                                                    | 0,432747448 | -0,081014815 | 0,162 | 0,11  | 1         | 0,945392409   | 1,057761825     | 1,472727273     |
| RNF157                                                                                   | 0,249550622 | -0,08106336  | 0,1   | 0,05  | 1         | 0,945360598   | 1,057797419     | 2               |
| IMMP2L                                                                                   | 0,735955373 | -0,081067397 | 0,05  | 0,06  | 1         | 0,945357952   | 1,057800379     | 0,833333333     |
| RBMX2                                                                                    | 0,004917084 | -0,081084481 | 0,362 | 0,14  | 1         | 0,945346757   | 1,057812905     | 2,585714286     |
| MIPEP                                                                                    | 0,552939414 | -0,0811395   | 0,088 | 0,06  | 1         | 0,945310706   | 1,057853247     | 1,466666667     |
| LRRC7                                                                                    | 0,402043166 | -0,081152518 | 0,025 | 0,05  | 1         | 0,945302177   | 1,057862792     | 0,5             |
| DZIP1                                                                                    | 0,015547261 | -0,081173946 | 0,188 | 0,06  | 1         | 0,945288136   | 1,057878505     | 3,133333333     |
| DZIP1L                                                                                   | 0,539438221 | -0,081313627 | 0,075 | 0,05  | 1         | 0,945196618   | 1,057980933     | 1,5             |
| ZNF548                                                                                   | 0,960483369 | -0,081557407 | 0,05  | 0,05  | 1         | 0,945036917   | 1,058159721     | 1               |
| SERP1                                                                                    | 0,168561094 | -0,081698048 | 0,787 | 0,47  | 1         | 0,944944794   | 1,05826288      | 1,674468085     |
| USP15                                                                                    | 0,010295327 | -0,081720074 | 0,412 | 0,18  | 1         | 0,944930368   | 1,058279037     | 2,288888889     |
| LONP1                                                                                    | 0,024271833 | -0,081802495 | 0,212 | 0,08  | 1         | 0,944876386   | 1,058339498     | 2,65            |
| FGF14-AS2                                                                                | 0,777311081 | -0,081807828 | 0,062 | 0,05  | 1         | 0,944872893   | 1,058343411     | 1,24            |
| TMEM218                                                                                  | 0,005686216 | -0,081827091 | 0,338 | 0,13  | 1         | 0,944860277   | 1,058357542     | 2,6             |
| ZNF799                                                                                   | 0,423434047 | -0,081927005 | 0,013 | 0,03  | 1         | 0,944794843   | 1,058430841     | 0,433333333     |
| ABI3BP                                                                                   | 0,081579256 | -0,082048422 | 0,112 | 0,04  | 1         | 0,944715332   | 1,058519922     | 2,8             |
| SLC16A4                                                                                  | 0,043226804 | -0,082049351 | 0,162 | 0,06  | 1         | 0,944714724   | 1,058520604     | 2,7             |
| GDF10                                                                                    | 0,527578779 | -0,082081686 | 0,05  | 0,03  | 1         | 0,944693551   | 1,058544328     | 1,666666667     |
| UTP25                                                                                    | 0,136751946 | -0,082110929 | 0,1   | 0,04  | 1         | 0,944674402   | 1,058565785     | 2,5             |
| GUCY1A2                                                                                  | 0,820013192 | -0,082120734 | 0,025 | 0,03  | 1         | 0,944667982   | 1,058572979     | 0,833333333     |
| MTCL1                                                                                    | 0,423434047 | -0,082230475 | 0,013 | 0,03  | 1         | 0,944596127   | 1,058653504     | 0,433333333     |
| CAPN2                                                                                    | 0,030522753 | -0,082258005 | 0,613 | 0,31  | 1         | 0,944578102   | 1,058673706     | 1,977419355     |
| DISP1                                                                                    | 0,816980451 | -0,082381124 | 0,038 | 0,03  | 1         | 0,944497495   | 1,058764057     | 1,266666667     |
| ZNHIT2                                                                                   | 0,379500814 | -0,082388148 | 0,088 | 0,05  | 1         | 0,944492897   | 1,058769212     | 1,76            |
| ZC3H7A                                                                                   | 0,008350455 | -0,082392799 | 0,475 | 0,21  | 1         | 0,944489852   | 1,058772625     | 2,261904762     |

Supplementary Table 4

| Differentially expressed genes_keloid-CCD_ comparing SC-Keloid vs. (SC-Myel, SC-Nonmyel) |             |              |       |       |           |               |                 |                 |
|------------------------------------------------------------------------------------------|-------------|--------------|-------|-------|-----------|---------------|-----------------|-----------------|
| gene                                                                                     | p_val       | avg_log2FC   | pct.1 | pct.2 | p_val_adj | Foldchange_UP | Foldchange_DOWN | Ratio_pct1_pct2 |
| TMEM164                                                                                  | 0,54451599  | -0,082408039 | 0,062 | 0,04  | 1         | 0,944479875   | 1,05878381      | 1,55            |
| IRF4                                                                                     | 0,692138165 | -0,082423729 | 0,013 | 0,02  | 1         | 0,944469603   | 1,058795324     | 0,65            |
| AHDC1                                                                                    | 0,054716305 | -0,08242753  | 0,425 | 0,22  | 1         | 0,944467115   | 1,058798114     | 1,931818182     |
| ZNF764                                                                                   | 0,527578779 | -0,08247137  | 0,05  | 0,03  | 1         | 0,944438416   | 1,058830288     | 1,666666667     |
| AMN1                                                                                     | 0,212080942 | -0,08251717  | 0,15  | 0,08  | 1         | 0,944408434   | 1,058863903     | 1,875           |
| GBA2                                                                                     | 0,099225142 | -0,082548602 | 0,125 | 0,05  | 1         | 0,944387858   | 1,058886972     | 2,5             |
| GALNT1                                                                                   | 0,001594151 | -0,08260801  | 0,362 | 0,12  | 1         | 0,944348971   | 1,058930577     | 3,016666667     |
| C1orf216                                                                                 | 0,087349671 | -0,082676082 | 0,162 | 0,07  | 1         | 0,944304413   | 1,058980543     | 2,314285714     |
| SUGP1                                                                                    | 0,566262724 | -0,082724754 | 0,1   | 0,07  | 1         | 0,944272556   | 1,05901627      | 1,428571429     |
| DUSP12                                                                                   | 0,028816691 | -0,082990575 | 0,362 | 0,17  | 1         | 0,944098587   | 1,059211415     | 2,129411765     |
| LEMD3                                                                                    | 0,197507075 | -0,083007477 | 0,225 | 0,13  | 1         | 0,944087526   | 1,059223824     | 1,730769231     |
| PRMT2                                                                                    | 0,042425675 | -0,08302091  | 0,787 | 0,43  | 1         | 0,944078736   | 1,059233687     | 1,830232558     |
| TOP1MT                                                                                   | 0,173281996 | -0,083038362 | 0,125 | 0,06  | 1         | 0,944067316   | 1,0592465       | 2,083333333     |
| RBMS3-AS3                                                                                | 0,423434047 | -0,083087577 | 0,013 | 0,03  | 1         | 0,944035111   | 1,059282635     | 0,433333333     |
| ARRDC2                                                                                   | 0,25008975  | -0,083089698 | 0,112 | 0,06  | 1         | 0,944033723   | 1,059284192     | 1,866666667     |
| DAZAP1                                                                                   | 0,010606039 | -0,08310297  | 0,462 | 0,2   | 1         | 0,944025039   | 1,059293937     | 2,31            |
| SMARCC1                                                                                  | 0,044522006 | -0,083132627 | 0,388 | 0,19  | 1         | 0,944005633   | 1,059315713     | 2,042105263     |
| FAM227B                                                                                  | 0,423434047 | -0,083149735 | 0,013 | 0,03  | 1         | 0,943994438   | 1,059328275     | 0,433333333     |
| NUDT17                                                                                   | 0,820013192 | -0,083153722 | 0,025 | 0,03  | 1         | 0,943991829   | 1,059331203     | 0,833333333     |
| XRRA1                                                                                    | 0,402154152 | -0,083180247 | 0,125 | 0,08  | 1         | 0,943974474   | 1,059350679     | 1,5625          |
| MARCHF8                                                                                  | 0,663300924 | -0,083200723 | 0,038 | 0,05  | 1         | 0,943961076   | 1,059365714     | 0,76            |
| ADAMTS10                                                                                 | 0,820013192 | -0,083343736 | 0,025 | 0,03  | 1         | 0,943867507   | 1,059470734     | 0,833333333     |
| SREBF2                                                                                   | 0,098519846 | -0,083348303 | 0,175 | 0,08  | 1         | 0,943864519   | 1,059474087     | 2,1875          |
| CLCN5                                                                                    | 0,377043193 | -0,083363645 | 0,1   | 0,06  | 1         | 0,943854482   | 1,059485355     | 1,666666667     |
| CMPK2                                                                                    | 0,692138165 | -0,083459124 | 0,013 | 0,02  | 1         | 0,943792018   | 1,059555475     | 0,65            |
| RABL2B                                                                                   | 0,221005633 | -0,083466013 | 0,088 | 0,04  | 1         | 0,943787512   | 1,059560534     | 2,2             |
| DNAJA2                                                                                   | 0,109661353 | -0,08360794  | 0,55  | 0,31  | 1         | 0,94369467    | 1,059664775     | 1,774193548     |
| LINC00115                                                                                | 0,816980451 | -0,083625119 | 0,038 | 0,03  | 1         | 0,943683433   | 1,059677393     | 1,266666667     |
| SBF2                                                                                     | 0,142905766 | -0,083671674 | 0,212 | 0,11  | 1         | 0,943652981   | 1,059711589     | 1,927272727     |
| MTREX                                                                                    | 0,334386894 | -0,083703369 | 0,162 | 0,1   | 1         | 0,94363225    | 1,05973487      | 1,62            |

Supplementary Table 4

| Differentially expressed genes_keloid-CCD_ comparing SC-Keloid vs. (SC-Myel, SC-Nonmyel) |             |              |       |       |           |               |                 |                 |
|------------------------------------------------------------------------------------------|-------------|--------------|-------|-------|-----------|---------------|-----------------|-----------------|
| gene                                                                                     | p_val       | avg_log2FC   | pct.1 | pct.2 | p_val_adj | Foldchange_UP | Foldchange_DOWN | Ratio_pct1_pct2 |
| TMEM205                                                                                  | 0,032316754 | -0,083708471 | 0,6   | 0,3   | 1         | 0,943628913   | 1,059738618     | 2               |
| RSAD1                                                                                    | 0,173130631 | -0,083742422 | 0,188 | 0,1   | 1         | 0,943606707   | 1,059763557     | 1,88            |
| PTGER3                                                                                   | 0,886527564 | -0,083792105 | 0,013 | 0,01  | 1         | 0,943574212   | 1,059800053     | 1,3             |
| GK                                                                                       | 0,246922691 | -0,083831131 | 0,1   | 0,05  | 1         | 0,943548688   | 1,059828722     | 2               |
| IFIH1                                                                                    | 0,894021778 | -0,083915507 | 0,038 | 0,04  | 1         | 0,943493506   | 1,059890708     | 0,95            |
| AC144831.1                                                                               | 0,692138165 | -0,083942027 | 0,013 | 0,02  | 1         | 0,943476163   | 1,059910191     | 0,65            |
| ITGA10                                                                                   | 0,816980451 | -0,084024647 | 0,038 | 0,03  | 1         | 0,943422133   | 1,059970892     | 1,266666667     |
| CEP120                                                                                   | 0,027302098 | -0,084034959 | 0,138 | 0,04  | 1         | 0,94341539    | 1,059978468     | 3,45            |
| SPRYD3                                                                                   | 0,045508871 | -0,084095396 | 0,162 | 0,06  | 1         | 0,943375869   | 1,060022874     | 2,7             |
| NXT2                                                                                     | 0,180764063 | -0,084116709 | 0,125 | 0,06  | 1         | 0,943361933   | 1,060038534     | 2,083333333     |
| NAV3                                                                                     | 0,437187509 | -0,084168293 | 0,125 | 0,08  | 1         | 0,943328203   | 1,060076436     | 1,5625          |
| C4orf33                                                                                  | 0,425605922 | -0,084190526 | 0,138 | 0,09  | 1         | 0,943313666   | 1,060092773     | 1,533333333     |
| MPP1                                                                                     | 0,799526327 | -0,084232119 | 0,05  | 0,04  | 1         | 0,943286471   | 1,060123336     | 1,25            |
| IRF2BPL                                                                                  | 0,031577249 | -0,0843354   | 0,325 | 0,15  | 1         | 0,943218944   | 1,060199232     | 2,166666667     |
| GPCPD1                                                                                   | 0,108155171 | -0,084389402 | 0,212 | 0,11  | 1         | 0,943183639   | 1,060238917     | 1,927272727     |
| HUS1                                                                                     | 0,002612979 | -0,084414208 | 0,25  | 0,07  | 1         | 0,943167422   | 1,060257147     | 3,571428571     |
| ZNF30                                                                                    | 0,423434047 | -0,084566022 | 0,013 | 0,03  | 1         | 0,943068178   | 1,060368723     | 0,433333333     |
| SIX1                                                                                     | 0,072136391 | -0,084667003 | 0     | 0,04  | 1         | 0,943002171   | 1,060442946     | 0               |
| CNPY4                                                                                    | 0,028547421 | -0,084676403 | 0,225 | 0,09  | 1         | 0,942996026   | 1,060449856     | 2,5             |
| CFAP91                                                                                   | 0,820013192 | -0,084757807 | 0,025 | 0,03  | 1         | 0,94294282    | 1,060509693     | 0,833333333     |
| PSRC1                                                                                    | 0,015387523 | -0,084839217 | 0,15  | 0,04  | 1         | 0,942889612   | 1,060569538     | 3,75            |
| ZNF621                                                                                   | 0,319690695 | -0,084882158 | 0,162 | 0,1   | 1         | 0,942861548   | 1,060601106     | 1,62            |
| KLRG1                                                                                    | 0,423434047 | -0,084888136 | 0,013 | 0,03  | 1         | 0,94285764    | 1,060605501     | 0,433333333     |
| BABAM2                                                                                   | 0,03680357  | -0,084953746 | 0,2   | 0,08  | 1         | 0,942814763   | 1,060653735     | 2,5             |
| WDR17                                                                                    | 0,692138165 | -0,084954615 | 0,013 | 0,02  | 1         | 0,942814195   | 1,060654374     | 0,65            |
| S1PR2                                                                                    | 0,014008811 | -0,084966404 | 0,262 | 0,1   | 1         | 0,94280649    | 1,060663042     | 2,62            |
| ARHGEF10L                                                                                | 0,08867837  | -0,084991862 | 0,225 | 0,11  | 1         | 0,942789854   | 1,060681758     | 2,045454545     |
| AZIN2                                                                                    | 0,069310146 | -0,085004279 | 0,25  | 0,12  | 1         | 0,942781739   | 1,060690888     | 2,083333333     |
| SOX15                                                                                    | 0,369110746 | -0,085045866 | 0,025 | 0,05  | 1         | 0,942754564   | 1,060721463     | 0,5             |
| UPF1                                                                                     | 0,006678664 | -0,085098194 | 0,225 | 0,07  | 1         | 0,942720369   | 1,060759938     | 3,214285714     |

Supplementary Table 4

| Differentially expressed genes_keloid-CCD_ comparing SC-Keloid vs. (SC-Myel, SC-Nonmyel) |             |              |       |       |           |               |                 |                 |
|------------------------------------------------------------------------------------------|-------------|--------------|-------|-------|-----------|---------------|-----------------|-----------------|
| gene                                                                                     | p_val       | avg_log2FC   | pct.1 | pct.2 | p_val_adj | Foldchange_UP | Foldchange_DOWN | Ratio_pct1_pct2 |
| CNOT11                                                                                   | 0,54451599  | -0,085131648 | 0,062 | 0,04  | 1         | 0,94269851    | 1,060784535     | 1,55            |
| SMAD9                                                                                    | 0,377102913 | -0,085164589 | 0     | 0,01  | 1         | 0,942676985   | 1,060808756     | 0               |
| RRAGB                                                                                    | 0,568521789 | -0,085325943 | 0,112 | 0,08  | 1         | 0,94257156    | 1,060927406     | 1,4             |
| LRBA                                                                                     | 0,711142928 | -0,085423545 | 0,1   | 0,08  | 1         | 0,942507795   | 1,060999183     | 1,25            |
| NLRX1                                                                                    | 0,820013192 | -0,08543017  | 0,025 | 0,03  | 1         | 0,942503466   | 1,061004055     | 0,833333333     |
| C9orf64                                                                                  | 0,086377611 | -0,085441368 | 0,162 | 0,07  | 1         | 0,942496151   | 1,061012291     | 2,314285714     |
| KIAA1671                                                                                 | 0,787095147 | -0,08547181  | 0,05  | 0,04  | 1         | 0,942476264   | 1,061034679     | 1,25            |
| KDM3B                                                                                    | 0,008686338 | -0,08567357  | 0,275 | 0,1   | 1         | 0,942344468   | 1,061183074     | 2,75            |
| PAN3                                                                                     | 0,091921423 | -0,085694308 | 0,438 | 0,24  | 1         | 0,942330923   | 1,061198328     | 1,825           |
| OCLN                                                                                     | 0,259519439 | -0,085694547 | 0,013 | 0,04  | 1         | 0,942330767   | 1,061198504     | 0,325           |
| ST3GAL5                                                                                  | 0,104675576 | -0,085708971 | 0,188 | 0,09  | 1         | 0,942321346   | 1,061209114     | 2,088888889     |
| MAP1LC3B2                                                                                | 0,207484841 | -0,085722569 | 0     | 0,02  | 1         | 0,942312464   | 1,061219116     | 0               |
| ZNF622                                                                                   | 0,127235361 | -0,085787559 | 0,3   | 0,16  | 1         | 0,942270015   | 1,061266923     | 1,875           |
| TTC30B                                                                                   | 0,820013192 | -0,085799829 | 0,025 | 0,03  | 1         | 0,942262002   | 1,061275949     | 0,833333333     |
| PLAU                                                                                     | 0,390582533 | -0,085801646 | 0,1   | 0,06  | 1         | 0,942260815   | 1,061277286     | 1,666666667     |
| RPUSD2                                                                                   | 0,78287608  | -0,085817191 | 0,062 | 0,05  | 1         | 0,942250663   | 1,06128872      | 1,24            |
| ANKS1A                                                                                   | 0,368764775 | -0,085845166 | 0,088 | 0,05  | 1         | 0,942232391   | 1,0613093       | 1,76            |
| KANTR                                                                                    | 0,387170302 | -0,085871622 | 0,1   | 0,06  | 1         | 0,942215113   | 1,061328763     | 1,666666667     |
| ZNF582                                                                                   | 0,207484841 | -0,085926363 | 0     | 0,02  | 1         | 0,942179363   | 1,061369034     | 0               |
| PCGF2                                                                                    | 0,064176808 | -0,086013037 | 0,25  | 0,12  | 1         | 0,94212276    | 1,061432801     | 2,083333333     |
| NDUFS1                                                                                   | 0,012455492 | -0,0860226   | 0,4   | 0,17  | 1         | 0,942116516   | 1,061439836     | 2,352941176     |
| KLHL3                                                                                    | 0,548643101 | -0,086048866 | 0,05  | 0,07  | 1         | 0,942099363   | 1,061459162     | 0,714285714     |
| SMCR8                                                                                    | 0,249550622 | -0,086061449 | 0,1   | 0,05  | 1         | 0,942091146   | 1,061468419     | 2               |
| PGAP3                                                                                    | 0,379500814 | -0,086109774 | 0,088 | 0,05  | 1         | 0,942059591   | 1,061503975     | 1,76            |
| CYP27C1                                                                                  | 0,379500814 | -0,086155951 | 0,088 | 0,05  | 1         | 0,942029438   | 1,061537952     | 1,76            |
| SH3GLB2                                                                                  | 0,104068581 | -0,086195374 | 0,55  | 0,31  | 1         | 0,942003696   | 1,06156696      | 1,774193548     |
| SGSH                                                                                     | 0,557924866 | -0,086289785 | 0,075 | 0,05  | 1         | 0,941942053   | 1,061636432     | 1,5             |
| CD8A                                                                                     | 0,207484841 | -0,08631304  | 0     | 0,02  | 1         | 0,94192687    | 1,061653544     | 0               |
| RASA3                                                                                    | 0,003404663 | -0,086335299 | 0,412 | 0,16  | 1         | 0,941912337   | 1,061669924     | 2,575           |
| PRPS1                                                                                    | 0,030227918 | -0,086411096 | 0,312 | 0,14  | 1         | 0,941862852   | 1,061725705     | 2,228571429     |

Supplementary Table 4

| Differentially expressed genes_keloid-CCD_ comparing SC-Keloid vs. (SC-Myel, SC-Nonmyel) |             |              |       |       |           |               |                 |                 |
|------------------------------------------------------------------------------------------|-------------|--------------|-------|-------|-----------|---------------|-----------------|-----------------|
| gene                                                                                     | p_val       | avg_log2FC   | pct.1 | pct.2 | p_val_adj | Foldchange_UP | Foldchange_DOWN | Ratio_pct1_pct2 |
| SNX21                                                                                    | 0,052137428 | -0,086626806 | 0,225 | 0,1   | 1         | 0,941722036   | 1,061884464     | 2,25            |
| PEX3                                                                                     | 0,063616753 | -0,086627544 | 0,1   | 0,03  | 1         | 0,941721554   | 1,061885008     | 3,333333333     |
| KIAA0100                                                                                 | 0,279748933 | -0,086630889 | 0,125 | 0,07  | 1         | 0,941719371   | 1,061887469     | 1,785714286     |
| DNAJB5                                                                                   | 0,270425091 | -0,086725528 | 0,112 | 0,06  | 1         | 0,941657597   | 1,061957131     | 1,866666667     |
| ZNF433                                                                                   | 0,787095147 | -0,086758374 | 0,05  | 0,04  | 1         | 0,941636159   | 1,061981309     | 1,25            |
| CCDC30                                                                                   | 0,35516371  | -0,086808031 | 0,075 | 0,04  | 1         | 0,941603749   | 1,062017862     | 1,875           |
| TMEM11                                                                                   | 0,052844959 | -0,086920782 | 0,362 | 0,18  | 1         | 0,941530162   | 1,062100865     | 2,011111111     |
| LSM14B                                                                                   | 0,292563852 | -0,0869512   | 0,125 | 0,07  | 1         | 0,941510311   | 1,062123259     | 1,785714286     |
| WLS                                                                                      | 0,102314916 | -0,08695539  | 0,525 | 0,3   | 1         | 0,941507576   | 1,062126344     | 1,75            |
| STX5                                                                                     | 0,019328294 | -0,087009727 | 0,4   | 0,18  | 1         | 0,941472117   | 1,062166348     | 2,222222222     |
| CHST7                                                                                    | 0,578520911 | -0,087076256 | 0,1   | 0,07  | 1         | 0,941428702   | 1,06221533      | 1,428571429     |
| CAPN10                                                                                   | 0,249550622 | -0,087083932 | 0,1   | 0,05  | 1         | 0,941423693   | 1,062220982     | 2               |
| ZNF74                                                                                    | 0,966558966 | -0,087172828 | 0,05  | 0,05  | 1         | 0,941365687   | 1,062286435     | 1               |
| ZNF521                                                                                   | 0,383013985 | -0,087239161 | 0,025 | 0,05  | 1         | 0,941322405   | 1,062335279     | 0,5             |
| MICAL3                                                                                   | 0,017705938 | -0,087265661 | 0,325 | 0,14  | 1         | 0,941305115   | 1,062354793     | 2,321428571     |
| YTHDF1                                                                                   | 0,215224371 | -0,087348205 | 0,238 | 0,14  | 1         | 0,941251259   | 1,062415578     | 1,7             |
| ADAR                                                                                     | 0,160693949 | -0,08736818  | 0,462 | 0,27  | 1         | 0,941238227   | 1,062430287     | 1,711111111     |
| DPP8                                                                                     | 0,011553207 | -0,087407828 | 0,25  | 0,09  | 1         | 0,94121236    | 1,062459485     | 2,777777778     |
| FAM110B                                                                                  | 0,072136391 | -0,087537436 | 0     | 0,04  | 1         | 0,941127808   | 1,062554938     | 0               |
| PGBD5                                                                                    | 0,84359211  | -0,087580476 | 0,025 | 0,02  | 1         | 0,941099732   | 1,062586638     | 1,25            |
| PSMD6                                                                                    | 0,032808465 | -0,087585849 | 0,55  | 0,28  | 1         | 0,941096227   | 1,062590595     | 1,964285714     |
| DMC1                                                                                     | 0,692138165 | -0,087592924 | 0,013 | 0,02  | 1         | 0,941091612   | 1,062595806     | 0,65            |
| NSMCE3                                                                                   | 0,014416454 | -0,087622973 | 0,325 | 0,13  | 1         | 0,94107201    | 1,062617939     | 2,5             |
| ZBTB17                                                                                   | 0,30635456  | -0,087623817 | 0,138 | 0,08  | 1         | 0,94107146    | 1,06261856      | 1,725           |
| AZU1                                                                                     | 0,207484841 | -0,08768222  | 0     | 0,02  | 1         | 0,941033364   | 1,062661578     | 0               |
| FAM241B                                                                                  | 0,207484841 | -0,087683978 | 0     | 0,02  | 1         | 0,941032218   | 1,062662873     | 0               |
| ESS2                                                                                     | 0,23407396  | -0,087741321 | 0,1   | 0,05  | 1         | 0,940994815   | 1,062705112     | 2               |
| CDC5L                                                                                    | 0,024872471 | -0,087753216 | 0,6   | 0,29  | 1         | 0,940987056   | 1,062713874     | 2,068965517     |
| SLC39A14                                                                                 | 0,054804787 | -0,087884707 | 0,238 | 0,11  | 1         | 0,940901296   | 1,062810737     | 2,163636364     |
| TNFRSF1B                                                                                 | 0,692138165 | -0,087958592 | 0,013 | 0,02  | 1         | 0,940853111   | 1,062865168     | 0,65            |

Supplementary Table 4

| Differentially expressed genes_keloid-CCD_ comparing SC-Keloid vs. (SC-Myel, SC-Nonmyel) |             |              |       |       |           |               |                 |                 |
|------------------------------------------------------------------------------------------|-------------|--------------|-------|-------|-----------|---------------|-----------------|-----------------|
| gene                                                                                     | p_val       | avg_log2FC   | pct.1 | pct.2 | p_val_adj | Foldchange_UP | Foldchange_DOWN | Ratio_pct1_pct2 |
| SECISBP2                                                                                 | 0,004571519 | -0,088006772 | 0,388 | 0,15  | 1         | 0,940821691   | 1,062900664     | 2,586666667     |
| EGFL8                                                                                    | 0,115368355 | -0,088062162 | 0,138 | 0,06  | 1         | 0,940785571   | 1,062941473     | 2,3             |
| C12orf4                                                                                  | 0,54403098  | -0,088085871 | 0,075 | 0,05  | 1         | 0,94077011    | 1,062958941     | 1,5             |
| BMI1                                                                                     | 0,065456956 | -0,088121247 | 0,262 | 0,13  | 1         | 0,940747042   | 1,062985006     | 2,015384615     |
| LNX2                                                                                     | 0,556644247 | -0,088265998 | 0,025 | 0,04  | 1         | 0,940652658   | 1,063091665     | 0,625           |
| HLA-DPA1                                                                                 | 0,715492362 | -0,088304907 | 0,1   | 0,08  | 1         | 0,940627289   | 1,063120337     | 1,25            |
| YWHAG                                                                                    | 0,306518853 | -0,088384039 | 0,688 | 0,43  | 1         | 0,940575697   | 1,06317865      | 1,6             |
| GTF2IRD1                                                                                 | 0,56588856  | -0,088396601 | 0,088 | 0,06  | 1         | 0,940567507   | 1,063187908     | 1,466666667     |
| AUH                                                                                      | 0,379500814 | -0,088473547 | 0,088 | 0,05  | 1         | 0,940517343   | 1,063244614     | 1,76            |
| HNRNPUL2                                                                                 | 0,056538268 | -0,088607514 | 0,312 | 0,15  | 1         | 0,940430012   | 1,06334335      | 2,08            |
| WDR45B                                                                                   | 0,013422487 | -0,088629577 | 0,562 | 0,26  | 1         | 0,94041563    | 1,063359612     | 2,161538462     |
| C1orf174                                                                                 | 0,043788058 | -0,088670805 | 0,162 | 0,06  | 1         | 0,940388757   | 1,06339         | 2,7             |
| PRPF40A                                                                                  | 0,380039256 | -0,088784251 | 0,812 | 0,51  | 1         | 0,940314812   | 1,063473623     | 1,592156863     |
| RPAP3                                                                                    | 0,002162859 | -0,088841518 | 0,275 | 0,08  | 1         | 0,940277487   | 1,063515838     | 3,4375          |
| TBX3                                                                                     | 0,230447453 | -0,088895583 | 0,162 | 0,09  | 1         | 0,940242251   | 1,063555694     | 1,8             |
| NCBP3                                                                                    | 0,182018225 | -0,088931503 | 0,362 | 0,21  | 1         | 0,940218842   | 1,063582175     | 1,723809524     |
| TTC32                                                                                    | 0,061257259 | -0,089028181 | 0,238 | 0,11  | 1         | 0,940155837   | 1,06365345      | 2,163636364     |
| GCLM                                                                                     | 0,075380872 | -0,089047752 | 0,162 | 0,07  | 1         | 0,940143084   | 1,063667879     | 2,314285714     |
| NIT1                                                                                     | 0,287391344 | -0,089058658 | 0,125 | 0,07  | 1         | 0,940135977   | 1,06367592      | 1,785714286     |
| CUEDC1                                                                                   | 0,000203617 | -0,089063213 | 0,438 | 0,14  | 1         | 0,940133009   | 1,063679278     | 3,128571429     |
| CCDC6                                                                                    | 0,171345481 | -0,089081287 | 0,25  | 0,14  | 1         | 0,940121231   | 1,063692603     | 1,785714286     |
| EAF1                                                                                     | 0,187128905 | -0,089114738 | 0,188 | 0,1   | 1         | 0,940099433   | 1,063717267     | 1,88            |
| GATB                                                                                     | 0,262670353 | -0,089124721 | 0,112 | 0,06  | 1         | 0,940092928   | 1,063724628     | 1,866666667     |
| IQSEC1                                                                                   | 0,007938912 | -0,089125962 | 0,35  | 0,14  | 1         | 0,940092119   | 1,063725543     | 2,5             |
| A2M-AS1                                                                                  | 0,207484841 | -0,089136999 | 0     | 0,02  | 1         | 0,940084928   | 1,06373368      | 0               |
| BRD3                                                                                     | 0,008952362 | -0,089242423 | 0,45  | 0,19  | 1         | 0,940016234   | 1,063811415     | 2,368421053     |
| VRK3                                                                                     | 0,080462265 | -0,089313087 | 0,112 | 0,04  | 1         | 0,939970192   | 1,063863523     | 2,8             |
| SNX30                                                                                    | 0,54451599  | -0,08948672  | 0,062 | 0,04  | 1         | 0,93985707    | 1,06399157      | 1,55            |
| SMARCA5                                                                                  | 0,033880042 | -0,089525437 | 0,725 | 0,38  | 1         | 0,939831849   | 1,064020124     | 1,907894737     |
| C1orf167                                                                                 | 0,84359211  | -0,08952868  | 0,025 | 0,02  | 1         | 0,939829736   | 1,064022516     | 1,25            |

Supplementary Table 4

| Differentially expressed genes_keloid-CCD_comparing SC-Keloid vs. (SC-Myel, SC-Nonmyel) |             |              |       |       |             |               |                 |                 |
|-----------------------------------------------------------------------------------------|-------------|--------------|-------|-------|-------------|---------------|-----------------|-----------------|
| gene                                                                                    | p_val       | avg_log2FC   | pct.1 | pct.2 | p_val_adj   | Foldchange_UP | Foldchange_DOWN | Ratio_pct1_pct2 |
| SS18L2                                                                                  | 0,002695532 | -0,089617636 | 0,388 | 0,14  | 1           | 0,939771788   | 1,064088125     | 2,771428571     |
| ZFP1                                                                                    | 0,027302098 | -0,089623878 | 0,138 | 0,04  | 1           | 0,939767722   | 1,064092729     | 3,45            |
| MIIP                                                                                    | 0,035608435 | -0,089642247 | 0,275 | 0,12  | 1           | 0,939755757   | 1,064106278     | 2,291666667     |
| NPM1                                                                                    | 0,987365086 | -0,089655962 | 0,988 | 0,88  | 1           | 0,939746823   | 1,064116394     | 1,122727273     |
| BOLA1                                                                                   | 0,043376169 | -0,089694177 | 0,212 | 0,09  | 1           | 0,93972193    | 1,064144581     | 2,355555556     |
| ZNF117                                                                                  | 0,553274445 | -0,089707184 | 0,075 | 0,05  | 1           | 0,939713458   | 1,064154175     | 1,5             |
| SLC43A2                                                                                 | 0,552939414 | -0,089716982 | 0,088 | 0,06  | 1           | 0,939707076   | 1,064161402     | 1,466666667     |
| PLXNB3                                                                                  | 0,120814239 | -0,089810899 | 0     | 0,03  | 1           | 0,939645905   | 1,06423068      | 0               |
| CEP126                                                                                  | 0,595756728 | -0,089834626 | 0,112 | 0,08  | 1           | 0,939630452   | 1,064248182     | 1,4             |
| NPIP15                                                                                  | 0,556644247 | -0,089996564 | 0,025 | 0,04  | 1           | 0,939524987   | 1,064367647     | 0,625           |
| DYNC2H1                                                                                 | 0,096474278 | -0,090009337 | 0,175 | 0,08  | 1           | 0,939516669   | 1,064377071     | 2,1875          |
| CCDC184                                                                                 | 0,556644247 | -0,090042619 | 0,025 | 0,04  | 1           | 0,939494995   | 1,064401626     | 0,625           |
| FBXL12                                                                                  | 0,199100998 | -0,090102085 | 0,212 | 0,12  | 1           | 0,939456271   | 1,06444455      | 1,766666667     |
| VPS26A                                                                                  | 0,012023036 | -0,090239465 | 0,525 | 0,24  | 1           | 0,939366816   | 1,064546866     | 2,1875          |
| CAPN10-DT                                                                               | 0,54451599  | -0,090387645 | 0,062 | 0,04  | 1           | 0,939270338   | 1,064656212     | 1,55            |
| TPBG                                                                                    | 0,894021778 | -0,090419386 | 0,038 | 0,04  | 1           | 0,939249674   | 1,064679635     | 0,95            |
| LNP1                                                                                    | 0,423434047 | -0,090473844 | 0,013 | 0,03  | 1           | 0,939214219   | 1,064719826     | 0,433333333     |
| ENDOD1                                                                                  | 0,071389578 | -0,090499377 | 0,637 | 0,35  | 1           | 0,939197598   | 1,064738669     | 1,82            |
| DGKG                                                                                    | 0,556644247 | -0,090511993 | 0,025 | 0,04  | 1           | 0,939189384   | 1,06474798      | 0,625           |
| ENDOG                                                                                   | 0,006426337 | -0,09056896  | 0,438 | 0,18  | 1           | 0,9391523     | 1,064790024     | 2,433333333     |
| ZNF620                                                                                  | 0,423434047 | -0,090571842 | 0,013 | 0,03  | 1           | 0,939150424   | 1,064792151     | 0,433333333     |
| GPHN                                                                                    | 0,193718766 | -0,090575497 | 0,075 | 0,03  | 1           | 0,939148044   | 1,064794849     | 2,5             |
| SLC25A16                                                                                | 0,201458433 | -0,090625577 | 0,138 | 0,07  | 1           | 0,939115445   | 1,064831811     | 1,971428571     |
| LY6G6C                                                                                  | 0,84359211  | -0,090685437 | 0,025 | 0,02  | 1           | 0,93907648    | 1,064875994     | 1,25            |
| RSAD2                                                                                   | 0,207484841 | -0,090691974 | 0     | 0,02  | 1           | 0,939072225   | 1,064880819     | 0               |
| MATN4                                                                                   | 0,207484841 | -0,090701619 | 0     | 0,02  | 1           | 0,939065947   | 1,064887938     | 0               |
| GTPBP1                                                                                  | 0,051807603 | -0,090710414 | 0,212 | 0,09  | 1           | 0,939060222   | 1,06489443      | 2,355555556     |
| METTL2B                                                                                 | 0,241246991 | -0,090823797 | 0,175 | 0,1   | 1           | 0,938986423   | 1,064978125     | 1,75            |
| SNAPIN                                                                                  | 1,20094E-06 | -0,090877731 | 0,4   | 0,07  | 0,025341068 | 0,938951321   | 1,065017939     | 5,714285714     |
| DUSP22                                                                                  | 0,295173407 | -0,090881767 | 0,125 | 0,07  | 1           | 0,938948694   | 1,065020918     | 1,785714286     |



Supplementary Table 4

| Differentially expressed genes_keloid-CCD_ comparing SC-Keloid vs. (SC-Myel, SC-Nonmyel) |             |              |       |       |           |               |                 |                 |
|------------------------------------------------------------------------------------------|-------------|--------------|-------|-------|-----------|---------------|-----------------|-----------------|
| gene                                                                                     | p_val       | avg_log2FC   | pct.1 | pct.2 | p_val_adj | Foldchange_UP | Foldchange_DOWN | Ratio_pct1_pct2 |
| ATP7A                                                                                    | 0,414238845 | -0,090988205 | 0,112 | 0,07  | 1         | 0,938879423   | 1,065099496     | 1,6             |
| CTSV                                                                                     | 0,501283468 | -0,091124813 | 0,038 | 0,02  | 1         | 0,938790525   | 1,065200354     | 1,9             |
| FAM27C                                                                                   | 0,816980451 | -0,091176288 | 0,038 | 0,03  | 1         | 0,93875703    | 1,065238361     | 1,266666667     |
| FAM168B                                                                                  | 0,35790565  | -0,091332155 | 0,225 | 0,15  | 1         | 0,938655613   | 1,065353454     | 1,5             |
| RRAS2                                                                                    | 0,013285257 | -0,091359123 | 0,25  | 0,09  | 1         | 0,938638068   | 1,065373368     | 2,777777778     |
| FRYL                                                                                     | 0,092309077 | -0,091445851 | 0,3   | 0,16  | 1         | 0,938581643   | 1,065437416     | 1,875           |
| POU6F1                                                                                   | 0,207484841 | -0,091533961 | 0     | 0,02  | 1         | 0,938524322   | 1,065502488     | 0               |
| SVIP                                                                                     | 0,011433879 | -0,091551279 | 0,438 | 0,2   | 1         | 0,938513056   | 1,065515278     | 2,19            |
| ANKIB1                                                                                   | 0,007514457 | -0,091583852 | 0,3   | 0,11  | 1         | 0,938491867   | 1,065539335     | 2,727272727     |
| PTGFRN                                                                                   | 0,347667268 | -0,091621311 | 0,075 | 0,04  | 1         | 0,9384675     | 1,065567001     | 1,875           |
| AKAP10                                                                                   | 0,578520911 | -0,09167819  | 0,1   | 0,07  | 1         | 0,938430501   | 1,065609013     | 1,428571429     |
| EGLN1                                                                                    | 0,020398022 | -0,091701478 | 0,288 | 0,12  | 1         | 0,938415353   | 1,065626214     | 2,4             |
| ERCC6                                                                                    | 0,900822541 | -0,091731043 | 0,038 | 0,04  | 1         | 0,938396122   | 1,065648053     | 0,95            |
| ADGRL1                                                                                   | 0,900822541 | -0,091803388 | 0,038 | 0,04  | 1         | 0,938349067   | 1,065701491     | 0,95            |
| RALGAPB                                                                                  | 0,303809155 | -0,091828019 | 0,138 | 0,08  | 1         | 0,938333047   | 1,065719686     | 1,725           |
| FZD4                                                                                     | 0,240774098 | -0,091845122 | 0,025 | 0,06  | 1         | 0,938321923   | 1,06573232      | 0,416666667     |
| HAT1                                                                                     | 0,004178647 | -0,091944507 | 0,525 | 0,22  | 1         | 0,938257285   | 1,06580574      | 2,386363636     |
| LYPD3                                                                                    | 0,556644247 | -0,091949534 | 0,025 | 0,04  | 1         | 0,938254016   | 1,065809453     | 0,625           |
| EED                                                                                      | 0,04995926  | -0,091961205 | 0,262 | 0,12  | 1         | 0,938246426   | 1,065818075     | 2,183333333     |
| IL17D                                                                                    | 0,799526327 | -0,091978907 | 0,05  | 0,04  | 1         | 0,938234914   | 1,065831153     | 1,25            |
| NFKBIE                                                                                   | 0,103922346 | -0,092010462 | 0,338 | 0,18  | 1         | 0,938214393   | 1,065854465     | 1,877777778     |
| UGDH                                                                                     | 0,100465772 | -0,092137085 | 0,4   | 0,22  | 1         | 0,938132051   | 1,065948018     | 1,818181818     |
| TRAF4                                                                                    | 0,242895857 | -0,092204865 | 0,188 | 0,11  | 1         | 0,938087977   | 1,065998099     | 1,709090909     |
| TMEM81                                                                                   | 0,259519439 | -0,092289553 | 0,013 | 0,04  | 1         | 0,938032912   | 1,066060676     | 0,325           |
| CKS2                                                                                     | 0,338324351 | -0,092325587 | 0,475 | 0,34  | 1         | 0,938009483   | 1,066087303     | 1,397058824     |
| LRRTM3                                                                                   | 0,207484841 | -0,092437069 | 0     | 0,02  | 1         | 0,937937003   | 1,066169686     | 0               |
| PUM3                                                                                     | 0,005281946 | -0,092451987 | 0,362 | 0,14  | 1         | 0,937927304   | 1,066180711     | 2,585714286     |
| RPL7L1                                                                                   | 0,032258041 | -0,092466564 | 0,5   | 0,25  | 1         | 0,937917827   | 1,066191484     | 2               |
| LPIN3                                                                                    | 0,907630591 | -0,092488676 | 0,038 | 0,04  | 1         | 0,937903452   | 1,066207826     | 0,95            |
| MRPL50                                                                                   | 0,023335894 | -0,092526519 | 0,375 | 0,17  | 1         | 0,93787885    | 1,066235793     | 2,205882353     |

Supplementary Table 4

| Differentially expressed genes_keloid-CCD_ comparing SC-Keloid vs. (SC-Myel, SC-Nonmyel) |             |              |       |       |           |               |                 |                 |
|------------------------------------------------------------------------------------------|-------------|--------------|-------|-------|-----------|---------------|-----------------|-----------------|
| gene                                                                                     | p_val       | avg_log2FC   | pct.1 | pct.2 | p_val_adj | Foldchange_UP | Foldchange_DOWN | Ratio_pct1_pct2 |
| FAM3A                                                                                    | 0,018058465 | -0,092554982 | 0,362 | 0,16  | 1         | 0,937860347   | 1,066256829     | 2,2625          |
| SEPHS1                                                                                   | 0,001891091 | -0,092618288 | 0,275 | 0,08  | 1         | 0,937819194   | 1,066303618     | 3,4375          |
| ZKSCAN1                                                                                  | 0,027291937 | -0,092618914 | 0,262 | 0,11  | 1         | 0,937818787   | 1,066304081     | 2,381818182     |
| ANKRD13B                                                                                 | 0,976971284 | -0,092648306 | 0,075 | 0,07  | 1         | 0,937799681   | 1,066325805     | 1,071428571     |
| PABIR2                                                                                   | 0,155050367 | -0,092656471 | 0,175 | 0,09  | 1         | 0,937794374   | 1,06633184      | 1,944444444     |
| ARMH3                                                                                    | 0,40839555  | -0,092662319 | 0,125 | 0,08  | 1         | 0,937790572   | 1,066336162     | 1,5625          |
| SAMD5                                                                                    | 0,21401991  | -0,092685047 | 0,15  | 0,08  | 1         | 0,937775799   | 1,066352961     | 1,875           |
| TMEM127                                                                                  | 0,073627148 | -0,09271619  | 0,15  | 0,06  | 1         | 0,937755556   | 1,06637598      | 2,5             |
| ZNF143                                                                                   | 0,770781378 | -0,092794527 | 0,088 | 0,07  | 1         | 0,937704637   | 1,066433886     | 1,257142857     |
| FAN1                                                                                     | 0,954410066 | -0,092890883 | 0,05  | 0,05  | 1         | 0,937642012   | 1,066505114     | 1               |
| CNTN2                                                                                    | 0,207484841 | -0,092893679 | 0     | 0,02  | 1         | 0,937640195   | 1,06650718      | 0               |
| GLIPR1L2                                                                                 | 0,692138165 | -0,092928291 | 0,013 | 0,02  | 1         | 0,9376177     | 1,066532768     | 0,65            |
| INAFM1                                                                                   | 0,062495522 | -0,092968402 | 0,238 | 0,11  | 1         | 0,937591631   | 1,066562421     | 2,163636364     |
| CLK3                                                                                     | 0,241246991 | -0,092989601 | 0,175 | 0,1   | 1         | 0,937577854   | 1,066578093     | 1,75            |
| YJU2B                                                                                    | 0,031153457 | -0,093001511 | 0,312 | 0,14  | 1         | 0,937570115   | 1,066586898     | 2,228571429     |
| CYP4V2                                                                                   | 0,037691762 | -0,093089429 | 0,2   | 0,08  | 1         | 0,937512981   | 1,066651898     | 2,5             |
| GLG1                                                                                     | 0,118360673 | -0,093147732 | 0,775 | 0,43  | 1         | 0,937475094   | 1,066695005     | 1,802325581     |
| RNF208                                                                                   | 0,282280906 | -0,09322978  | 0,125 | 0,07  | 1         | 0,93742178    | 1,066755671     | 1,785714286     |
| MAK                                                                                      | 0,207484841 | -0,093269572 | 0     | 0,02  | 1         | 0,937395925   | 1,066785094     | 0               |
| ZBTB40                                                                                   | 0,98616928  | -0,093369818 | 0,062 | 0,06  | 1         | 0,937330792   | 1,066859223     | 1,033333333     |
| CCNJL                                                                                    | 0,351402824 | -0,093448045 | 0,075 | 0,04  | 1         | 0,937279969   | 1,066917072     | 1,875           |
| PLCD3                                                                                    | 0,042671641 | -0,093461668 | 0,162 | 0,06  | 1         | 0,937271118   | 1,066927147     | 2,7             |
| HUS1B                                                                                    | 0,207484841 | -0,093471715 | 0     | 0,02  | 1         | 0,937264591   | 1,066934577     | 0               |
| TCF4                                                                                     | 0,2444484   | -0,093507588 | 0,85  | 0,54  | 1         | 0,937241286   | 1,066961107     | 1,574074074     |
| RNF38                                                                                    | 0,016388293 | -0,093524178 | 0,262 | 0,1   | 1         | 0,937230509   | 1,066973376     | 2,62            |
| RLIM                                                                                     | 0,232420437 | -0,093577279 | 0,162 | 0,09  | 1         | 0,937196012   | 1,067012649     | 1,8             |
| ZNF431                                                                                   | 0,073627148 | -0,093588916 | 0,15  | 0,06  | 1         | 0,937188453   | 1,067021256     | 2,5             |
| PCDHB2                                                                                   | 0,692138165 | -0,093664351 | 0,013 | 0,02  | 1         | 0,937139451   | 1,06707705      | 0,65            |
| ZNF189                                                                                   | 0,657460147 | -0,093669559 | 0,038 | 0,05  | 1         | 0,937136068   | 1,067080901     | 0,76            |
| UGT8                                                                                     | 0,325316267 | -0,093720029 | 0,062 | 0,03  | 1         | 0,937103284   | 1,067118232     | 2,066666667     |

Supplementary Table 4

| Differentially expressed genes_keloid-CCD_ comparing SC-Keloid vs. (SC-Myel, SC-Nonmyel) |             |              |       |       |           |               |                 |                 |
|------------------------------------------------------------------------------------------|-------------|--------------|-------|-------|-----------|---------------|-----------------|-----------------|
| gene                                                                                     | p_val       | avg_log2FC   | pct.1 | pct.2 | p_val_adj | Foldchange_UP | Foldchange_DOWN | Ratio_pct1_pct2 |
| FBH1                                                                                     | 0,458522483 | -0,093861127 | 0,15  | 0,1   | 1         | 0,937011638   | 1,067222603     | 1,5             |
| IARS1                                                                                    | 0,068088326 | -0,093915512 | 0,312 | 0,16  | 1         | 0,936976317   | 1,067262834     | 1,95            |
| NLK                                                                                      | 1           | -0,094033698 | 0,062 | 0,06  | 1         | 0,936899563   | 1,067350269     | 1,033333333     |
| CDK5RAP1                                                                                 | 0,221903616 | -0,09403601  | 0,15  | 0,08  | 1         | 0,936898062   | 1,067351979     | 1,875           |
| LTA4H                                                                                    | 0,54451599  | -0,094040323 | 0,062 | 0,04  | 1         | 0,936895261   | 1,06735517      | 1,55            |
| GM2A                                                                                     | 0,006902615 | -0,094047603 | 0,188 | 0,05  | 1         | 0,936890533   | 1,067360556     | 3,76            |
| GNAI2                                                                                    | 0,827711092 | -0,094085533 | 0,95  | 0,79  | 1         | 0,936865901   | 1,067388618     | 1,202531646     |
| RETSAT                                                                                   | 0,982087794 | -0,094157252 | 0,075 | 0,07  | 1         | 0,936819329   | 1,067441681     | 1,071428571     |
| GRK4                                                                                     | 0,228486406 | -0,094159816 | 0,162 | 0,09  | 1         | 0,936817664   | 1,067443579     | 1,8             |
| POLR2A                                                                                   | 0,022913478 | -0,094188781 | 0,525 | 0,26  | 1         | 0,936798856   | 1,06746501      | 2,019230769     |
| NCMAP                                                                                    | 0,377102913 | -0,094204152 | 0     | 0,01  | 1         | 0,936788875   | 1,067476383     | 0               |
| C8orf58                                                                                  | 0,223632981 | -0,094313436 | 0,088 | 0,04  | 1         | 0,936717916   | 1,067557247     | 2,2             |
| TCF25                                                                                    | 0,284798701 | -0,094406428 | 0,9   | 0,54  | 1         | 0,93665754    | 1,067626061     | 1,666666667     |
| GPRC5A                                                                                   | 0,521976935 | -0,094416604 | 0,05  | 0,03  | 1         | 0,936650933   | 1,067633592     | 1,666666667     |
| SAMD12                                                                                   | 0,940155952 | -0,09445488  | 0,088 | 0,08  | 1         | 0,936626083   | 1,067661918     | 1,1             |
| BOLA3-AS1                                                                                | 0,820013192 | -0,094466464 | 0,025 | 0,03  | 1         | 0,936618563   | 1,06767049      | 0,833333333     |
| HERC5                                                                                    | 0,120814239 | -0,094466825 | 0     | 0,03  | 1         | 0,936618328   | 1,067670757     | 0               |
| ZNF92                                                                                    | 0,296257455 | -0,094486642 | 0,138 | 0,08  | 1         | 0,936605463   | 1,067685423     | 1,725           |
| SMNDC1                                                                                   | 0,017758691 | -0,094564088 | 0,412 | 0,19  | 1         | 0,936555186   | 1,067742739     | 2,168421053     |
| ZNF10                                                                                    | 0,966558966 | -0,094687795 | 0,05  | 0,05  | 1         | 0,936474883   | 1,067834299     | 1               |
| TMEM150A                                                                                 | 0,244314206 | -0,094716171 | 0,1   | 0,05  | 1         | 0,936456463   | 1,067855303     | 2               |
| RPP21                                                                                    | 0,155050367 | -0,094754283 | 0,175 | 0,09  | 1         | 0,936431725   | 1,067883513     | 1,944444444     |
| LSM14A                                                                                   | 0,054873903 | -0,09476729  | 0,525 | 0,27  | 1         | 0,936423282   | 1,067893141     | 1,944444444     |
| RHPN1                                                                                    | 0,566262724 | -0,094860593 | 0,1   | 0,07  | 1         | 0,936362723   | 1,067962206     | 1,428571429     |
| SIAH2                                                                                    | 0,031124172 | -0,094886799 | 0,262 | 0,11  | 1         | 0,936345715   | 1,067981606     | 2,381818182     |
| KANK1                                                                                    | 0,767025058 | -0,094941751 | 0,075 | 0,06  | 1         | 0,936310051   | 1,068022285     | 1,25            |
| ZNF184                                                                                   | 0,991701302 | -0,095120226 | 0,062 | 0,06  | 1         | 0,936194227   | 1,068154418     | 1,033333333     |
| ZNF84                                                                                    | 0,284828372 | -0,095243622 | 0,125 | 0,07  | 1         | 0,936114156   | 1,068245783     | 1,785714286     |
| TOM1                                                                                     | 0,557924866 | -0,095299378 | 0,075 | 0,05  | 1         | 0,936077979   | 1,068287068     | 1,5             |
| BORCS6                                                                                   | 0,330339657 | -0,095500726 | 0,15  | 0,09  | 1         | 0,935947346   | 1,068436173     | 1,666666667     |

Supplementary Table 4

| Differentially expressed genes_keloid-CCD_ comparing SC-Keloid vs. (SC-Myel, SC-Nonmyel) |             |              |       |       |           |               |                 |                 |
|------------------------------------------------------------------------------------------|-------------|--------------|-------|-------|-----------|---------------|-----------------|-----------------|
| gene                                                                                     | p_val       | avg_log2FC   | pct.1 | pct.2 | p_val_adj | Foldchange_UP | Foldchange_DOWN | Ratio_pct1_pct2 |
| VPS53                                                                                    | 0,157546415 | -0,095585512 | 0,112 | 0,05  | 1         | 0,935892342   | 1,068498966     | 2,24            |
| C21orf91                                                                                 | 0,223632981 | -0,095611564 | 0,088 | 0,04  | 1         | 0,935875442   | 1,068518261     | 2,2             |
| TAF6L                                                                                    | 0,894021778 | -0,095661725 | 0,038 | 0,04  | 1         | 0,935842903   | 1,068555413     | 0,95            |
| ARNT                                                                                     | 0,073627148 | -0,095685124 | 0,15  | 0,06  | 1         | 0,935827725   | 1,068572744     | 2,5             |
| PLEKHA7                                                                                  | 0,207484841 | -0,095716958 | 0     | 0,02  | 1         | 0,935807075   | 1,068596323     | 0               |
| CPSF6                                                                                    | 0,02420741  | -0,095719003 | 0,438 | 0,2   | 1         | 0,935805749   | 1,068597837     | 2,19            |
| MGAT3                                                                                    | 0,562875304 | -0,095772185 | 0,025 | 0,04  | 1         | 0,935771253   | 1,06863723      | 0,625           |
| FIZ1                                                                                     | 0,561556035 | -0,095858131 | 0,088 | 0,06  | 1         | 0,935715508   | 1,068700894     | 1,466666667     |
| CPT1A                                                                                    | 0,94227175  | -0,09588153  | 0,05  | 0,05  | 1         | 0,935700332   | 1,068718227     | 1               |
| NCOA2                                                                                    | 0,292563852 | -0,095886187 | 0,125 | 0,07  | 1         | 0,935697311   | 1,068721677     | 1,785714286     |
| LINC01003                                                                                | 0,151352208 | -0,095928643 | 0,225 | 0,12  | 1         | 0,935669776   | 1,068753129     | 1,875           |
| PSD4                                                                                     | 0,948339409 | -0,096129316 | 0,05  | 0,05  | 1         | 0,935539637   | 1,068901798     | 1               |
| ZNF664                                                                                   | 0,018243186 | -0,09613406  | 0,425 | 0,19  | 1         | 0,935536561   | 1,068905313     | 2,236842105     |
| RCC1                                                                                     | 0,037245412 | -0,096136515 | 0,2   | 0,08  | 1         | 0,935534969   | 1,068907132     | 2,5             |
| SH3BGR                                                                                   | 0,005279552 | -0,096161098 | 0,412 | 0,17  | 1         | 0,935519028   | 1,068925346     | 2,423529412     |
| UPF3A                                                                                    | 0,013756102 | -0,096249855 | 0,675 | 0,32  | 1         | 0,935461475   | 1,06899111      | 2,109375        |
| PPT2                                                                                     | 0,032753346 | -0,096359585 | 0,275 | 0,12  | 1         | 0,935390327   | 1,069072419     | 2,291666667     |
| SCRIB                                                                                    | 0,042193602 | -0,096383921 | 0,288 | 0,13  | 1         | 0,935374548   | 1,069090453     | 2,215384615     |
| OBSL1                                                                                    | 0,14460532  | -0,096529705 | 0,162 | 0,08  | 1         | 0,935280034   | 1,06919849      | 2,025           |
| AHCYL1                                                                                   | 0,281638582 | -0,096541681 | 0,537 | 0,33  | 1         | 0,93527227    | 1,069207365     | 1,627272727     |
| DLAT                                                                                     | 0,049580658 | -0,096575768 | 0,212 | 0,09  | 1         | 0,935250172   | 1,069232628     | 2,355555556     |
| ZNF100                                                                                   | 0,325316267 | -0,096598401 | 0,062 | 0,03  | 1         | 0,9352355     | 1,069249403     | 2,066666667     |
| CLDN11                                                                                   | 0,289969834 | -0,096656423 | 0,125 | 0,07  | 1         | 0,935197888   | 1,069292406     | 1,785714286     |
| LRRC24                                                                                   | 0,94227175  | -0,096661051 | 0,05  | 0,05  | 1         | 0,935194888   | 1,069295836     | 1               |
| UBALD2                                                                                   | 0,104548113 | -0,096758171 | 0,713 | 0,4   | 1         | 0,935131934   | 1,069367822     | 1,7825          |
| TGFB1                                                                                    | 0,010010111 | -0,096818838 | 0,675 | 0,32  | 1         | 0,935092611   | 1,069412792     | 2,109375        |
| METTL18                                                                                  | 0,373709887 | -0,096841191 | 0,025 | 0,05  | 1         | 0,935078123   | 1,069429361     | 0,5             |
| PTPRU                                                                                    | 0,207484841 | -0,096945523 | 0     | 0,02  | 1         | 0,935010503   | 1,069506702     | 0               |
| OTUD6B-AS1                                                                               | 0,015222348 | -0,097008121 | 0,5   | 0,24  | 1         | 0,934969935   | 1,069553108     | 2,083333333     |
| ARHGEF37                                                                                 | 0,120814239 | -0,097120495 | 0     | 0,03  | 1         | 0,934897111   | 1,069636421     | 0               |

Supplementary Table 4

| Differentially expressed genes_keloid-CCD_ comparing SC-Keloid vs. (SC-Myel, SC-Nonmyel) |             |              |       |       |           |               |                 |                 |
|------------------------------------------------------------------------------------------|-------------|--------------|-------|-------|-----------|---------------|-----------------|-----------------|
| gene                                                                                     | p_val       | avg_log2FC   | pct.1 | pct.2 | p_val_adj | Foldchange_UP | Foldchange_DOWN | Ratio_pct1_pct2 |
| CYP1B1                                                                                   | 0,799526327 | -0,097143159 | 0,05  | 0,04  | 1         | 0,934882425   | 1,069653224     | 1,25            |
| TTY14                                                                                    | 0,771757484 | -0,097143238 | 0,062 | 0,05  | 1         | 0,934882373   | 1,069653283     | 1,24            |
| ABTB2                                                                                    | 0,372322273 | -0,097167418 | 0,088 | 0,05  | 1         | 0,934866704   | 1,069671211     | 1,76            |
| TNKS                                                                                     | 0,023019688 | -0,097178178 | 0,288 | 0,12  | 1         | 0,934859732   | 1,069679189     | 2,4             |
| KLF15                                                                                    | 0,207484841 | -0,097218814 | 0     | 0,02  | 1         | 0,9348334     | 1,069709319     | 0               |
| SETD6                                                                                    | 0,782321833 | -0,097276301 | 0,075 | 0,06  | 1         | 0,934796151   | 1,069751944     | 1,25            |
| ZNF821                                                                                   | 0,401029352 | -0,097292464 | 0,112 | 0,07  | 1         | 0,934785678   | 1,069763929     | 1,6             |
| WIPI1                                                                                    | 0,132758116 | -0,097418256 | 0,15  | 0,07  | 1         | 0,934704176   | 1,069857208     | 2,142857143     |
| TSR2                                                                                     | 0,014127768 | -0,097470791 | 0,3   | 0,12  | 1         | 0,93467014    | 1,069896167     | 2,5             |
| LARP4B                                                                                   | 0,00900317  | -0,097538121 | 0,35  | 0,14  | 1         | 0,93462652    | 1,0699461       | 2,5             |
| CPE                                                                                      | 0,54403098  | -0,097543279 | 0,075 | 0,05  | 1         | 0,934623178   | 1,069949926     | 1,5             |
| NR1H2                                                                                    | 0,009055259 | -0,0975827   | 0,475 | 0,21  | 1         | 0,934597641   | 1,069979162     | 2,261904762     |
| STT3B                                                                                    | 0,111187605 | -0,097650865 | 0,4   | 0,22  | 1         | 0,934553483   | 1,070029718     | 1,818181818     |
| NAA25                                                                                    | 0,049580658 | -0,097700961 | 0,212 | 0,09  | 1         | 0,934521032   | 1,070066874     | 2,355555556     |
| NOL11                                                                                    | 0,036396632 | -0,097715549 | 0,338 | 0,16  | 1         | 0,934511583   | 1,070077694     | 2,1125          |
| TMCO4                                                                                    | 0,582634513 | -0,097739974 | 0,1   | 0,07  | 1         | 0,934495762   | 1,070095811     | 1,428571429     |
| MIER1                                                                                    | 0,07588115  | -0,097779239 | 0,512 | 0,28  | 1         | 0,934470328   | 1,070124936     | 1,828571429     |
| ALG14                                                                                    | 0,003096404 | -0,097795734 | 0,412 | 0,16  | 1         | 0,934459645   | 1,07013717      | 2,575           |
| PISD                                                                                     | 0,273044537 | -0,097814031 | 0,112 | 0,06  | 1         | 0,934447793   | 1,070150743     | 1,866666667     |
| ATRN                                                                                     | 0,35516371  | -0,09783326  | 0,075 | 0,04  | 1         | 0,934435338   | 1,070165006     | 1,875           |
| SLTM                                                                                     | 0,035693631 | -0,097833427 | 0,675 | 0,36  | 1         | 0,93443523    | 1,070165131     | 1,875           |
| UHRF2                                                                                    | 0,00310553  | -0,097853512 | 0,3   | 0,1   | 1         | 0,934422221   | 1,070180029     | 3               |
| SLC7A8                                                                                   | 0,259519439 | -0,097882744 | 0,013 | 0,04  | 1         | 0,934403288   | 1,070201714     | 0,325           |
| DICER1-AS1                                                                               | 0,54451599  | -0,09805873  | 0,062 | 0,04  | 1         | 0,934289313   | 1,070332269     | 1,55            |
| PGBD4                                                                                    | 0,556644247 | -0,098075492 | 0,025 | 0,04  | 1         | 0,934278458   | 1,070344705     | 0,625           |
| GLI1                                                                                     | 0,423434047 | -0,098161998 | 0,013 | 0,03  | 1         | 0,934222438   | 1,070408887     | 0,433333333     |
| MYO19                                                                                    | 0,788452212 | -0,09818143  | 0,062 | 0,05  | 1         | 0,934209856   | 1,070423304     | 1,24            |
| SNX33                                                                                    | 0,94227175  | -0,098185608 | 0,05  | 0,05  | 1         | 0,93420715    | 1,070426404     | 1               |
| MSN                                                                                      | 0,311828258 | -0,098207793 | 0,812 | 0,59  | 1         | 0,934192784   | 1,070442864     | 1,376271186     |
| SLC25A53                                                                                 | 0,762397813 | -0,098265775 | 0,05  | 0,04  | 1         | 0,93415524    | 1,070485887     | 1,25            |

Supplementary Table 4

| Differentially expressed genes_keloid-CCD_ comparing SC-Keloid vs. (SC-Myel, SC-Nonmyel) |             |              |       |       |           |               |                 |                 |
|------------------------------------------------------------------------------------------|-------------|--------------|-------|-------|-----------|---------------|-----------------|-----------------|
| gene                                                                                     | p_val       | avg_log2FC   | pct.1 | pct.2 | p_val_adj | Foldchange_UP | Foldchange_DOWN | Ratio_pct1_pct2 |
| ZNF844                                                                                   | 0,651640212 | -0,098374653 | 0,038 | 0,05  | 1         | 0,934084743   | 1,070566678     | 0,76            |
| NUDT21                                                                                   | 0,000312973 | -0,098382822 | 0,438 | 0,14  | 1         | 0,934079454   | 1,070572739     | 3,128571429     |
| PRMT9                                                                                    | 0,766215557 | -0,098465907 | 0,062 | 0,05  | 1         | 0,934025662   | 1,070634395     | 1,24            |
| KATNAL1                                                                                  | 0,021090711 | -0,098498347 | 0,462 | 0,22  | 1         | 0,93400466    | 1,07065847      | 2,1             |
| ROBO3                                                                                    | 0,262670353 | -0,09851324  | 0,112 | 0,06  | 1         | 0,933995018   | 1,070669522     | 1,866666667     |
| CDK14                                                                                    | 0,059607897 | -0,098561804 | 0,138 | 0,05  | 1         | 0,933963578   | 1,070705564     | 2,76            |
| DUBR                                                                                     | 0,799526327 | -0,09873054  | 0,05  | 0,04  | 1         | 0,93385435    | 1,070830799     | 1,25            |
| CEP20                                                                                    | 0,029571887 | -0,098857032 | 0,225 | 0,09  | 1         | 0,933772475   | 1,070924692     | 2,5             |
| SLC25A5                                                                                  | 0,991936037 | -0,098899816 | 0,925 | 0,73  | 1         | 0,933744784   | 1,070956451     | 1,267123288     |
| MLLT3                                                                                    | 0,423434047 | -0,098993192 | 0,013 | 0,03  | 1         | 0,933684351   | 1,071025769     | 0,433333333     |
| PUM2                                                                                     | 0,008765774 | -0,099013552 | 0,438 | 0,19  | 1         | 0,933671174   | 1,071040884     | 2,305263158     |
| MIR4500HG                                                                                | 0,120814239 | -0,09903776  | 0     | 0,03  | 1         | 0,933655508   | 1,071058856     | 0               |
| MAF                                                                                      | 0,038375363 | -0,099153511 | 0,725 | 0,4   | 1         | 0,933580602   | 1,071144793     | 1,8125          |
| UBE2Z                                                                                    | 0,069642826 | -0,099176446 | 0,588 | 0,31  | 1         | 0,93356576    | 1,071161821     | 1,896774194     |
| PPP6R3                                                                                   | 0,099957672 | -0,099276462 | 0,338 | 0,18  | 1         | 0,933501042   | 1,071236083     | 1,877777778     |
| CLIP3                                                                                    | 0,45301972  | -0,099370583 | 0,162 | 0,11  | 1         | 0,933440142   | 1,071305973     | 1,472727273     |
| TMEM74                                                                                   | 0,423434047 | -0,099520824 | 0,013 | 0,03  | 1         | 0,93334294    | 1,071417543     | 0,433333333     |
| UNC13B                                                                                   | 0,09439712  | -0,099528853 | 0,125 | 0,05  | 1         | 0,933337746   | 1,071423506     | 2,5             |
| BTBD7                                                                                    | 0,049213438 | -0,099530531 | 0,425 | 0,22  | 1         | 0,93333666    | 1,071424752     | 1,931818182     |
| DNAJB14                                                                                  | 0,013574167 | -0,099538759 | 0,438 | 0,19  | 1         | 0,933331337   | 1,071430863     | 2,305263158     |
| HECTD3                                                                                   | 0,777311081 | -0,099542252 | 0,062 | 0,05  | 1         | 0,933329078   | 1,071433457     | 1,24            |
| REC8                                                                                     | 0,249550622 | -0,099779949 | 0,1   | 0,05  | 1         | 0,933175316   | 1,07161         | 2               |
| ARL6IP5                                                                                  | 0,26874227  | -0,09980357  | 0,838 | 0,53  | 1         | 0,933160037   | 1,071627545     | 1,581132075     |
| PDE9A                                                                                    | 0,120814239 | -0,099808954 | 0     | 0,03  | 1         | 0,933156555   | 1,071631545     | 0               |
| TBCEL                                                                                    | 0,260119902 | -0,099898031 | 0,112 | 0,06  | 1         | 0,93309894    | 1,071697713     | 1,866666667     |
| TGFB3                                                                                    | 0,556644247 | -0,10002926  | 0,025 | 0,04  | 1         | 0,933014069   | 1,0717952       | 0,625           |
| SRP54                                                                                    | 0,02230735  | -0,100111089 | 0,537 | 0,26  | 1         | 0,93296115    | 1,071855993     | 2,065384615     |
| L2HGDH                                                                                   | 0,423434047 | -0,100130495 | 0,013 | 0,03  | 1         | 0,9329486     | 1,071870412     | 0,433333333     |
| ACTR6                                                                                    | 0,029992036 | -0,1002711   | 0,35  | 0,16  | 1         | 0,93285768    | 1,071974881     | 2,1875          |
| ATP6V0D1                                                                                 | 0,13304907  | -0,100294946 | 0,65  | 0,35  | 1         | 0,932842261   | 1,071992599     | 1,857142857     |

Supplementary Table 4

| Differentially expressed genes_keloid-CCD_comparing SC-Keloid vs. (SC-Myel, SC-Nonmyel) |             |              |       |       |           |               |                 |                 |
|-----------------------------------------------------------------------------------------|-------------|--------------|-------|-------|-----------|---------------|-----------------|-----------------|
| gene                                                                                    | p_val       | avg_log2FC   | pct.1 | pct.2 | p_val_adj | Foldchange_UP | Foldchange_DOWN | Ratio_pct1_pct2 |
| EPB41L4B                                                                                | 0,207484841 | -0,100296213 | 0     | 0,02  | 1         | 0,932841441   | 1,071993541     | 0               |
| PPP1R3C                                                                                 | 0,816980451 | -0,10035815  | 0,038 | 0,03  | 1         | 0,932801394   | 1,072039564     | 1,266666667     |
| MAST4                                                                                   | 0,112247794 | -0,10037323  | 0,088 | 0,03  | 1         | 0,932791644   | 1,07205077      | 2,933333333     |
| TPD52                                                                                   | 0,423434047 | -0,100404476 | 0,013 | 0,03  | 1         | 0,932771442   | 1,072073988     | 0,433333333     |
| FZD1                                                                                    | 0,61908997  | -0,100437501 | 0,062 | 0,08  | 1         | 0,93275009    | 1,07209853      | 0,775           |
| ZFP90                                                                                   | 0,042122519 | -0,100492566 | 0,162 | 0,06  | 1         | 0,932714489   | 1,072139451     | 2,7             |
| COPS4                                                                                   | 0,001226474 | -0,100498456 | 0,512 | 0,19  | 1         | 0,932710681   | 1,072143828     | 2,694736842     |
| NUP93                                                                                   | 0,026068555 | -0,100532959 | 0,138 | 0,04  | 1         | 0,932688375   | 1,072169469     | 3,45            |
| GPR176                                                                                  | 0,548655551 | -0,100541187 | 0,088 | 0,06  | 1         | 0,932683056   | 1,072175584     | 1,466666667     |
| WNK3                                                                                    | 0,249550622 | -0,100587865 | 0,1   | 0,05  | 1         | 0,93265288    | 1,072210274     | 2               |
| CENPT                                                                                   | 0,010275884 | -0,100634168 | 0,312 | 0,12  | 1         | 0,932622946   | 1,072244688     | 2,6             |
| TNS3                                                                                    | 0,055384334 | -0,10070612  | 0,713 | 0,38  | 1         | 0,932576435   | 1,072298165     | 1,876315789     |
| NOL9                                                                                    | 0,071432528 | -0,100746923 | 0,2   | 0,09  | 1         | 0,93255006    | 1,072328493     | 2,222222222     |
| LRIG1                                                                                   | 0,247167114 | -0,100773328 | 0,175 | 0,1   | 1         | 0,932532992   | 1,072348119     | 1,75            |
| CFDP1                                                                                   | 0,052445096 | -0,100839535 | 0,562 | 0,29  | 1         | 0,932490198   | 1,072397332     | 1,937931034     |
| RAB2A                                                                                   | 0,70710568  | -0,100855483 | 0,938 | 0,6   | 1         | 0,93247989    | 1,072409187     | 1,563333333     |
| ZNF205                                                                                  | 0,032459669 | -0,100865271 | 0,225 | 0,09  | 1         | 0,932473563   | 1,072416462     | 2,5             |
| CCDC9B                                                                                  | 0,310228526 | -0,100920132 | 0,15  | 0,09  | 1         | 0,932438105   | 1,072457244     | 1,666666667     |
| THAP7-AS1                                                                               | 0,820013192 | -0,100963479 | 0,025 | 0,03  | 1         | 0,93241009    | 1,072489467     | 0,833333333     |
| KMT2B                                                                                   | 0,077793862 | -0,100965257 | 0,3   | 0,15  | 1         | 0,932408941   | 1,072490789     | 2               |
| LDHA                                                                                    | 0,121419549 | -0,10099244  | 0,85  | 0,6   | 1         | 0,932391373   | 1,072510996     | 1,416666667     |
| BRI3                                                                                    | 0,596115231 | -0,101203188 | 0,812 | 0,57  | 1         | 0,932255179   | 1,07266768      | 1,424561404     |
| SEC16A                                                                                  | 0,054387037 | -0,101275578 | 0,225 | 0,1   | 1         | 0,932208403   | 1,072721504     | 2,25            |
| PYCARD-AS1                                                                              | 0,820013192 | -0,101319666 | 0,025 | 0,03  | 1         | 0,932179915   | 1,072754287     | 0,833333333     |
| SYNGR1                                                                                  | 0,191866182 | -0,101363498 | 0,637 | 0,37  | 1         | 0,932151594   | 1,07278688      | 1,721621622     |
| TNFSF9                                                                                  | 0,777311081 | -0,101389623 | 0,062 | 0,05  | 1         | 0,932134714   | 1,072806307     | 1,24            |
| AGAP6                                                                                   | 0,663300924 | -0,101421609 | 0,038 | 0,05  | 1         | 0,932114049   | 1,072830091     | 0,76            |
| COG3                                                                                    | 0,277232442 | -0,101427206 | 0,125 | 0,07  | 1         | 0,932110432   | 1,072834254     | 1,785714286     |
| RAD51D                                                                                  | 0,086377611 | -0,101446083 | 0,162 | 0,07  | 1         | 0,932098236   | 1,072848292     | 2,314285714     |
| IGBP1                                                                                   | 0,05916428  | -0,101668326 | 0,525 | 0,27  | 1         | 0,93195466    | 1,073013573     | 1,944444444     |

Supplementary Table 4

| Differentially expressed genes_keloid-CCD_ comparing SC-Keloid vs. (SC-Myel, SC-Nonmyel) |             |              |       |       |           |               |                 |                 |
|------------------------------------------------------------------------------------------|-------------|--------------|-------|-------|-----------|---------------|-----------------|-----------------|
| gene                                                                                     | p_val       | avg_log2FC   | pct.1 | pct.2 | p_val_adj | Foldchange_UP | Foldchange_DOWN | Ratio_pct1_pct2 |
| CLASRP                                                                                   | 0,341895761 | -0,101672108 | 0,162 | 0,1   | 1         | 0,931952217   | 1,073016386     | 1,62            |
| OSER1-DT                                                                                 | 0,730495711 | -0,101680491 | 0,05  | 0,06  | 1         | 0,931946801   | 1,073022622     | 0,833333333     |
| CACNA2D2                                                                                 | 0,207484841 | -0,101702085 | 0     | 0,02  | 1         | 0,931932853   | 1,073038682     | 0               |
| RAB5B                                                                                    | 0,070590553 | -0,101837406 | 0,288 | 0,14  | 1         | 0,931845444   | 1,073139335     | 2,057142857     |
| ZNF646                                                                                   | 0,259519439 | -0,101858479 | 0,013 | 0,04  | 1         | 0,931831833   | 1,07315501      | 0,325           |
| MRPS18B                                                                                  | 0,093001495 | -0,101893008 | 0,425 | 0,23  | 1         | 0,931809531   | 1,073180695     | 1,847826087     |
| ACOX1                                                                                    | 0,064591925 | -0,10189382  | 0,275 | 0,13  | 1         | 0,931809006   | 1,073181299     | 2,115384615     |
| ARID3A                                                                                   | 0,978438529 | -0,101932688 | 0,088 | 0,08  | 1         | 0,931783903   | 1,073210212     | 1,1             |
| ALDH1A1                                                                                  | 0,423434047 | -0,10207899  | 0,013 | 0,03  | 1         | 0,931689416   | 1,073319051     | 0,433333333     |
| LEO1                                                                                     | 0,013767783 | -0,102112037 | 0,338 | 0,14  | 1         | 0,931668075   | 1,073343637     | 2,414285714     |
| ALPK3                                                                                    | 0,556644247 | -0,102116138 | 0,025 | 0,04  | 1         | 0,931665427   | 1,073346688     | 0,625           |
| GK-AS1                                                                                   | 0,207484841 | -0,102154884 | 0     | 0,02  | 1         | 0,931640406   | 1,073375515     | 0               |
| ARSB                                                                                     | 0,157546415 | -0,102190247 | 0,112 | 0,05  | 1         | 0,93161757    | 1,073401825     | 2,24            |
| BTBD9                                                                                    | 0,788452212 | -0,102197441 | 0,062 | 0,05  | 1         | 0,931612924   | 1,073407178     | 1,24            |
| NFIC                                                                                     | 0,471341607 | -0,102215838 | 0,938 | 0,62  | 1         | 0,931601045   | 1,073420866     | 1,512903226     |
| FCRLA                                                                                    | 0,569139823 | -0,10234239  | 0,025 | 0,04  | 1         | 0,931519329   | 1,07351503      | 0,625           |
| INTS4                                                                                    | 0,17887143  | -0,102433587 | 0,125 | 0,06  | 1         | 0,931460446   | 1,073582892     | 2,083333333     |
| FGF18                                                                                    | 0,379500814 | -0,102505826 | 0,088 | 0,05  | 1         | 0,931413807   | 1,07363665      | 1,76            |
| CASKIN1                                                                                  | 0,120814239 | -0,102509466 | 0     | 0,03  | 1         | 0,931411458   | 1,073639359     | 0               |
| ARHGEF7                                                                                  | 0,029092623 | -0,102551725 | 0,362 | 0,17  | 1         | 0,931384175   | 1,073670808     | 2,129411765     |
| TTPA                                                                                     | 0,120814239 | -0,102558842 | 0     | 0,03  | 1         | 0,931379581   | 1,073676104     | 0               |
| TMED2                                                                                    | 0,506033518 | -0,102561846 | 0,713 | 0,48  | 1         | 0,931377641   | 1,07367834      | 1,485416667     |
| DAGLA                                                                                    | 0,098000042 | -0,102611453 | 0,125 | 0,05  | 1         | 0,931345616   | 1,07371526      | 2,5             |
| ARAF                                                                                     | 0,119647686 | -0,102616338 | 0,2   | 0,1   | 1         | 0,931342463   | 1,073718895     | 2               |
| SCLY                                                                                     | 0,820013192 | -0,102621856 | 0,025 | 0,03  | 1         | 0,931338901   | 1,073723002     | 0,833333333     |
| IFT57                                                                                    | 0,239333511 | -0,102701642 | 0,613 | 0,36  | 1         | 0,931287396   | 1,073782384     | 1,702777778     |
| ERBB2                                                                                    | 0,069392584 | -0,102845631 | 0,425 | 0,22  | 1         | 0,931194453   | 1,073889559     | 1,931818182     |
| MRPS28                                                                                   | 0,015514047 | -0,102858372 | 0,338 | 0,14  | 1         | 0,931186229   | 1,073899043     | 2,414285714     |
| SEMA3D                                                                                   | 0,948339409 | -0,102898862 | 0,05  | 0,05  | 1         | 0,931160095   | 1,073929183     | 1               |
| B9D2                                                                                     | 0,249550622 | -0,102923404 | 0,1   | 0,05  | 1         | 0,931144255   | 1,073947452     | 2               |



Supplementary Table 4

| Differentially expressed genes_keloid-CCD_ comparing SC-Keloid vs. (SC-Myel, SC-Nonmyel) |             |              |       |       |           |               |                 |                 |
|------------------------------------------------------------------------------------------|-------------|--------------|-------|-------|-----------|---------------|-----------------|-----------------|
| gene                                                                                     | p_val       | avg_log2FC   | pct.1 | pct.2 | p_val_adj | Foldchange_UP | Foldchange_DOWN | Ratio_pct1_pct2 |
| GTF3C1                                                                                   | 0,070683419 | -0,102977424 | 0,2   | 0,09  | 1         | 0,93110939    | 1,073987665     | 2,222222222     |
| DHX40                                                                                    | 0,074770934 | -0,102980389 | 0,212 | 0,1   | 1         | 0,931107477   | 1,073989872     | 2,12            |
| APTR                                                                                     | 0,390582533 | -0,10326168  | 0,1   | 0,06  | 1         | 0,930925951   | 1,074199295     | 1,666666667     |
| ZMYND11                                                                                  | 0,182462539 | -0,103307796 | 0,425 | 0,26  | 1         | 0,930896194   | 1,074233633     | 1,634615385     |
| EID2B                                                                                    | 0,809797238 | -0,103324256 | 0,038 | 0,03  | 1         | 0,930885573   | 1,074245889     | 1,266666667     |
| MTMR4                                                                                    | 0,012429073 | -0,103606299 | 0,112 | 0,02  | 1         | 0,930703605   | 1,074455922     | 5,6             |
| GBX1                                                                                     | 0,377102913 | -0,103611995 | 0     | 0,01  | 1         | 0,930699931   | 1,074460164     | 0               |
| TUBB4A                                                                                   | 0,377102913 | -0,103611995 | 0     | 0,01  | 1         | 0,930699931   | 1,074460164     | 0               |
| CCNYL1                                                                                   | 0,315178881 | -0,103636775 | 0,15  | 0,09  | 1         | 0,930683945   | 1,074478619     | 1,666666667     |
| NRIP3                                                                                    | 0,24172513  | -0,103674677 | 0,1   | 0,05  | 1         | 0,930659494   | 1,074506848     | 2               |
| NEK3                                                                                     | 0,246922691 | -0,10368563  | 0,1   | 0,05  | 1         | 0,930652429   | 1,074515005     | 2               |
| BDH2                                                                                     | 0,099753733 | -0,103696092 | 0,425 | 0,24  | 1         | 0,930645681   | 1,074522797     | 1,770833333     |
| KLHDC10                                                                                  | 0,030788068 | -0,103768889 | 0,262 | 0,11  | 1         | 0,930598722   | 1,074577018     | 2,381818182     |
| DNAL1                                                                                    | 0,109192206 | -0,103816739 | 0,288 | 0,15  | 1         | 0,930567857   | 1,07461266      | 1,92            |
| NELFA                                                                                    | 0,210339451 | -0,103850426 | 0,212 | 0,12  | 1         | 0,930546128   | 1,074637752     | 1,766666667     |
| SPG7                                                                                     | 0,018665877 | -0,10388701  | 0,512 | 0,24  | 1         | 0,930522532   | 1,074665003     | 2,133333333     |
| EBLN2                                                                                    | 0,159376137 | -0,103908042 | 0,112 | 0,05  | 1         | 0,930508967   | 1,07468067      | 2,24            |
| AMIGO1                                                                                   | 0,207484841 | -0,103927921 | 0     | 0,02  | 1         | 0,930496145   | 1,074695478     | 0               |
| AMMECR1L                                                                                 | 0,949717105 | -0,103982902 | 0,088 | 0,08  | 1         | 0,930460685   | 1,074736436     | 1,1             |
| BDNF-AS                                                                                  | 0,378344325 | -0,104000754 | 0,025 | 0,05  | 1         | 0,930449171   | 1,074749734     | 0,5             |
| CREB3L2                                                                                  | 0,298558165 | -0,104037664 | 0,812 | 0,5   | 1         | 0,930425367   | 1,074777232     | 1,624           |
| PHF12                                                                                    | 0,019537146 | -0,104097136 | 0,2   | 0,07  | 1         | 0,930387013   | 1,074821537     | 2,857142857     |
| PLCB3                                                                                    | 0,292563852 | -0,10413071  | 0,125 | 0,07  | 1         | 0,930365362   | 1,074846551     | 1,785714286     |
| KATNBL1                                                                                  | 0,043227377 | -0,104178715 | 0,5   | 0,26  | 1         | 0,930334405   | 1,074882317     | 1,923076923     |
| ARHGEF3                                                                                  | 0,461984728 | -0,104189267 | 0,038 | 0,06  | 1         | 0,9303276     | 1,074890178     | 0,633333333     |
| ATXN3                                                                                    | 0,186363823 | -0,104237803 | 0,275 | 0,16  | 1         | 0,930296302   | 1,074926341     | 1,71875         |
| EDRF1                                                                                    | 0,770781378 | -0,104327789 | 0,088 | 0,07  | 1         | 0,930238278   | 1,07499339      | 1,257142857     |
| BHLHE41                                                                                  | 0,157415062 | -0,104408328 | 0,062 | 0,02  | 1         | 0,930186349   | 1,075053404     | 3,1             |
| ABHD8                                                                                    | 0,580120923 | -0,104454308 | 0,112 | 0,08  | 1         | 0,930156703   | 1,075087667     | 1,4             |
| PLPBP                                                                                    | 0,450535664 | -0,104463731 | 0,138 | 0,09  | 1         | 0,930150628   | 1,075094689     | 1,533333333     |

Supplementary Table 4

| Differentially expressed genes_keloid-CCD_ comparing SC-Keloid vs. (SC-Myel, SC-Nonmyel) |             |              |       |       |           |               |                 |                 |
|------------------------------------------------------------------------------------------|-------------|--------------|-------|-------|-----------|---------------|-----------------|-----------------|
| gene                                                                                     | p_val       | avg_log2FC   | pct.1 | pct.2 | p_val_adj | Foldchange_UP | Foldchange_DOWN | Ratio_pct1_pct2 |
| TAF5L                                                                                    | 0,284828372 | -0,104522411 | 0,125 | 0,07  | 1         | 0,930112796   | 1,075138418     | 1,785714286     |
| MAST2                                                                                    | 0,098519846 | -0,104636642 | 0,175 | 0,08  | 1         | 0,930039154   | 1,07522355      | 2,1875          |
| MTERF2                                                                                   | 0,582336511 | -0,104637041 | 0,138 | 0,1   | 1         | 0,930038896   | 1,075223847     | 1,38            |
| FNDC4                                                                                    | 0,109990974 | -0,10474035  | 0,188 | 0,09  | 1         | 0,9299723     | 1,075300845     | 2,08888889      |
| RTN4RL2                                                                                  | 0,207484841 | -0,104773639 | 0     | 0,02  | 1         | 0,929950842   | 1,075325657     | 0               |
| STON1-GTF2A1L                                                                            | 0,377102913 | -0,104931369 | 0     | 0,01  | 1         | 0,929849176   | 1,075443229     | 0               |
| PEX5L                                                                                    | 0,207484841 | -0,104952455 | 0     | 0,02  | 1         | 0,929835585   | 1,075458947     | 0               |
| WWC3                                                                                     | 0,006704797 | -0,105010594 | 0,288 | 0,1   | 1         | 0,929798115   | 1,075502288     | 2,88            |
| DLST                                                                                     | 0,031510821 | -0,105017255 | 0,3   | 0,13  | 1         | 0,929793822   | 1,075507254     | 2,307692308     |
| PCGF1                                                                                    | 0,289969834 | -0,105207904 | 0,125 | 0,07  | 1         | 0,92967096    | 1,075649389     | 1,785714286     |
| MYO1B                                                                                    | 0,227823552 | -0,105226156 | 0,175 | 0,1   | 1         | 0,929659198   | 1,075662998     | 1,75            |
| GCFC2                                                                                    | 0,225950237 | -0,105252977 | 0,175 | 0,1   | 1         | 0,929641916   | 1,075682995     | 1,75            |
| MAP1S                                                                                    | 0,026867238 | -0,105264752 | 0,175 | 0,06  | 1         | 0,929634328   | 1,075691775     | 2,916666667     |
| KIF3A                                                                                    | 0,134392272 | -0,105274169 | 0,212 | 0,11  | 1         | 0,92962826    | 1,075698796     | 1,927272727     |
| ARSA                                                                                     | 0,008797135 | -0,105291781 | 0,275 | 0,1   | 1         | 0,929616911   | 1,075711928     | 2,75            |
| ROCK1                                                                                    | 0,143262206 | -0,105294438 | 0,725 | 0,43  | 1         | 0,929615199   | 1,07571391      | 1,686046512     |
| ZNF136                                                                                   | 0,424249303 | -0,105354662 | 0,125 | 0,08  | 1         | 0,929576394   | 1,075758815     | 1,5625          |
| KBTBD6                                                                                   | 0,379500814 | -0,105389874 | 0,088 | 0,05  | 1         | 0,929553706   | 1,075785071     | 1,76            |
| SLC12A9                                                                                  | 0,073627148 | -0,10542156  | 0,15  | 0,06  | 1         | 0,92953329    | 1,075808699     | 2,5             |
| BUD13                                                                                    | 0,557924866 | -0,105462701 | 0,075 | 0,05  | 1         | 0,929506783   | 1,075839378     | 1,5             |
| RBL2                                                                                     | 0,044355454 | -0,105507931 | 0,162 | 0,06  | 1         | 0,929477643   | 1,075873107     | 2,7             |
| FRA10AC1                                                                                 | 0,025823328 | -0,10556967  | 0,212 | 0,08  | 1         | 0,929437867   | 1,07591915      | 2,65            |
| LINC00327                                                                                | 0,207484841 | -0,105578953 | 0     | 0,02  | 1         | 0,929431887   | 1,075926073     | 0               |
| DGCR2                                                                                    | 0,171624919 | -0,105581426 | 0,188 | 0,1   | 1         | 0,929430294   | 1,075927917     | 1,88            |
| RPRD2                                                                                    | 0,440457202 | -0,105595819 | 0,125 | 0,08  | 1         | 0,929421021   | 1,075938651     | 1,5625          |
| CAVIN4                                                                                   | 0,894021778 | -0,10561015  | 0,038 | 0,04  | 1         | 0,929411789   | 1,075949339     | 0,95            |
| RO60                                                                                     | 0,212277094 | -0,105655355 | 0,688 | 0,42  | 1         | 0,929382668   | 1,075983052     | 1,638095238     |
| ADAMTS13                                                                                 | 0,207484841 | -0,105673621 | 0     | 0,02  | 1         | 0,929370901   | 1,075996676     | 0               |
| WDR37                                                                                    | 0,94227175  | -0,105753828 | 0,05  | 0,05  | 1         | 0,929319234   | 1,076056498     | 1               |
| SERTAD4-AS1                                                                              | 0,120814239 | -0,105828347 | 0     | 0,03  | 1         | 0,929271233   | 1,076112081     | 0               |

Supplementary Table 4

| Differentially expressed genes_keloid-CCD_ comparing SC-Keloid vs. (SC-Myel, SC-Nonmyel) |             |              |       |       |           |               |                 |                 |
|------------------------------------------------------------------------------------------|-------------|--------------|-------|-------|-----------|---------------|-----------------|-----------------|
| gene                                                                                     | p_val       | avg_log2FC   | pct.1 | pct.2 | p_val_adj | Foldchange_UP | Foldchange_DOWN | Ratio_pct1_pct2 |
| SEPTIN3                                                                                  | 0,120814239 | -0,105837117 | 0     | 0,03  | 1         | 0,929265584   | 1,076118622     | 0               |
| MPHOSPH6                                                                                 | 0,223632981 | -0,105918284 | 0,088 | 0,04  | 1         | 0,929213304   | 1,076179167     | 2,2             |
| LINC00462                                                                                | 0,120814239 | -0,105947971 | 0     | 0,03  | 1         | 0,929194184   | 1,076201312     | 0               |
| MARK1                                                                                    | 0,98616928  | -0,105983067 | 0,062 | 0,06  | 1         | 0,92917158    | 1,076227493     | 1,033333333     |
| CSNK1A1                                                                                  | 0,804266932 | -0,106067538 | 0,912 | 0,64  | 1         | 0,929117178   | 1,076290509     | 1,425           |
| OGT                                                                                      | 0,026427677 | -0,106212717 | 0,3   | 0,13  | 1         | 0,929023685   | 1,076398822     | 2,307692308     |
| SYBU                                                                                     | 0,423434047 | -0,106324267 | 0,013 | 0,03  | 1         | 0,928951855   | 1,076482053     | 0,433333333     |
| CIART                                                                                    | 0,378344325 | -0,106325523 | 0,025 | 0,05  | 1         | 0,928951046   | 1,07648299      | 0,5             |
| ZNF599                                                                                   | 0,766045137 | -0,106366951 | 0,088 | 0,07  | 1         | 0,928924371   | 1,076513902     | 1,257142857     |
| NR6A1                                                                                    | 0,221005633 | -0,106477566 | 0,088 | 0,04  | 1         | 0,928853151   | 1,076596445     | 2,2             |
| FHOD3                                                                                    | 0,58376991  | -0,106495283 | 0,125 | 0,09  | 1         | 0,928841745   | 1,076609665     | 1,388888889     |
| NAP1L2                                                                                   | 0,423434047 | -0,106502551 | 0,013 | 0,03  | 1         | 0,928837065   | 1,07661509      | 0,433333333     |
| GRAMD1A                                                                                  | 0,065196986 | -0,1065164   | 0,275 | 0,13  | 1         | 0,928828149   | 1,076625424     | 2,115384615     |
| WDR44                                                                                    | 0,136266726 | -0,10665067  | 0,162 | 0,08  | 1         | 0,928741708   | 1,07672563      | 2,025           |
| RGL1                                                                                     | 0,57023707  | -0,106661826 | 0,088 | 0,06  | 1         | 0,928734526   | 1,076733955     | 1,466666667     |
| ZXDB                                                                                     | 0,120814239 | -0,106680892 | 0     | 0,03  | 1         | 0,928722253   | 1,076748185     | 0               |
| GJA4                                                                                     | 0,84359211  | -0,106694837 | 0,025 | 0,02  | 1         | 0,928713276   | 1,076758593     | 1,25            |
| UTP4                                                                                     | 0,143189031 | -0,106730061 | 0,162 | 0,08  | 1         | 0,928690601   | 1,076784883     | 2,025           |
| IGIP                                                                                     | 0,94227175  | -0,106799482 | 0,05  | 0,05  | 1         | 0,928645914   | 1,076836698     | 1               |
| GPR37L1                                                                                  | 0,207484841 | -0,106869193 | 0     | 0,02  | 1         | 0,928601043   | 1,076888732     | 0               |
| PPARD                                                                                    | 0,557239614 | -0,107170848 | 0,088 | 0,06  | 1         | 0,928406901   | 1,077113924     | 1,466666667     |
| VWA8                                                                                     | 0,35516371  | -0,107174306 | 0,075 | 0,04  | 1         | 0,928404676   | 1,077116505     | 1,875           |
| DDX39B                                                                                   | 0,068248006 | -0,107197321 | 0,388 | 0,2   | 1         | 0,928389866   | 1,077133688     | 1,94            |
| COL27A1                                                                                  | 0,008319654 | -0,107296473 | 0,438 | 0,19  | 1         | 0,928326062   | 1,077207719     | 2,305263158     |
| PUS3                                                                                     | 0,157546415 | -0,107305233 | 0,112 | 0,05  | 1         | 0,928320426   | 1,077214259     | 2,24            |
| WHRN                                                                                     | 0,651640212 | -0,107340257 | 0,038 | 0,05  | 1         | 0,928297889   | 1,077240411     | 0,76            |
| GOLGA8B                                                                                  | 0,755038102 | -0,107385324 | 0,1   | 0,08  | 1         | 0,928268891   | 1,077274063     | 1,25            |
| LRRC57                                                                                   | 0,580002352 | -0,107586863 | 0,15  | 0,11  | 1         | 0,928139225   | 1,077424565     | 1,363636364     |
| C6orf120                                                                                 | 0,400928338 | -0,107621387 | 0,1   | 0,06  | 1         | 0,928117015   | 1,077450347     | 1,666666667     |
| GPR83                                                                                    | 0,207484841 | -0,107798849 | 0     | 0,02  | 1         | 0,928002856   | 1,077582891     | 0               |

Supplementary Table 4

| Differentially expressed genes_keloid-CCD_ comparing SC-Keloid vs. (SC-Myel, SC-Nonmyel) |             |              |       |       |           |               |                 |                 |
|------------------------------------------------------------------------------------------|-------------|--------------|-------|-------|-----------|---------------|-----------------|-----------------|
| gene                                                                                     | p_val       | avg_log2FC   | pct.1 | pct.2 | p_val_adj | Foldchange_UP | Foldchange_DOWN | Ratio_pct1_pct2 |
| NOM1                                                                                     | 0,120771062 | -0,107814556 | 0,2   | 0,1   | 1         | 0,927992753   | 1,077594622     | 2               |
| GREM1                                                                                    | 0,816980451 | -0,108029132 | 0,038 | 0,03  | 1         | 0,92785474    | 1,077754908     | 1,266666667     |
| ZNF397                                                                                   | 0,375900964 | -0,108070256 | 0,088 | 0,05  | 1         | 0,927828292   | 1,07778563      | 1,76            |
| B4GALT4                                                                                  | 0,168642935 | -0,108109065 | 0,188 | 0,1   | 1         | 0,927803333   | 1,077814623     | 1,88            |
| UBR7                                                                                     | 0,136266726 | -0,108220504 | 0,162 | 0,08  | 1         | 0,927731669   | 1,07789788      | 2,025           |
| TLR1                                                                                     | 0,072136391 | -0,108279751 | 0     | 0,04  | 1         | 0,927693571   | 1,077942147     | 0               |
| EIF4EBP3                                                                                 | 0,259519439 | -0,10834629  | 0,013 | 0,04  | 1         | 0,927650786   | 1,077991864     | 0,325           |
| APOOL                                                                                    | 0,427462694 | -0,108505457 | 0,125 | 0,08  | 1         | 0,927548447   | 1,078110802     | 1,5625          |
| ZNF496                                                                                   | 0,568521789 | -0,108579487 | 0,112 | 0,08  | 1         | 0,927500853   | 1,078166124     | 1,4             |
| PDE4A                                                                                    | 0,006902615 | -0,108686946 | 0,188 | 0,05  | 1         | 0,92743177    | 1,078246435     | 3,76            |
| SNX12                                                                                    | 0,231603324 | -0,108787419 | 0,175 | 0,1   | 1         | 0,927367184   | 1,07832153      | 1,75            |
| TEX41                                                                                    | 0,556644247 | -0,108884254 | 0,025 | 0,04  | 1         | 0,92730494    | 1,07839391      | 0,625           |
| TMEM38B                                                                                  | 0,113281194 | -0,108938934 | 0,188 | 0,09  | 1         | 0,927269795   | 1,078434783     | 2,088888889     |
| LINC01006                                                                                | 0,755038102 | -0,1090212   | 0,1   | 0,08  | 1         | 0,927216921   | 1,07849628      | 1,25            |
| NECTIN1                                                                                  | 0,397461587 | -0,109023526 | 0,1   | 0,06  | 1         | 0,927215426   | 1,078498019     | 1,666666667     |
| GPR137                                                                                   | 0,093838244 | -0,109096148 | 0,312 | 0,16  | 1         | 0,927168754   | 1,078552309     | 1,95            |
| TJAP1                                                                                    | 0,21401991  | -0,109190837 | 0,15  | 0,08  | 1         | 0,927107902   | 1,078623101     | 1,875           |
| LY6D                                                                                     | 0,692138165 | -0,109238739 | 0,013 | 0,02  | 1         | 0,92707712    | 1,078658915     | 0,65            |
| ELOVL3                                                                                   | 0,120814239 | -0,109391517 | 0     | 0,03  | 1         | 0,92697895    | 1,078773148     | 0               |
| LARP7                                                                                    | 0,014234461 | -0,109454099 | 0,588 | 0,29  | 1         | 0,92693874    | 1,078819945     | 2,027586207     |
| NPIP4                                                                                    | 0,894021778 | -0,1094794   | 0,038 | 0,04  | 1         | 0,926922484   | 1,078838865     | 0,95            |
| NCEH1                                                                                    | 0,35516371  | -0,109486965 | 0,075 | 0,04  | 1         | 0,926917624   | 1,078844521     | 1,875           |
| USP6NL                                                                                   | 0,248853164 | -0,109528735 | 0,212 | 0,13  | 1         | 0,926890787   | 1,078875758     | 1,630769231     |
| SOS1                                                                                     | 0,098519846 | -0,10954499  | 0,175 | 0,08  | 1         | 0,926880343   | 1,078887914     | 2,1875          |
| SLC35F1                                                                                  | 0,135820238 | -0,109573647 | 0,537 | 0,3   | 1         | 0,926861933   | 1,078909344     | 1,79            |
| NUMBL                                                                                    | 0,128634778 | -0,109745302 | 0,15  | 0,07  | 1         | 0,926751659   | 1,079037723     | 2,142857143     |
| C4orf3                                                                                   | 0,274487321 | -0,109827713 | 0,912 | 0,55  | 1         | 0,926698722   | 1,079099363     | 1,658181818     |
| SRC                                                                                      | 0,222674651 | -0,109841527 | 0,162 | 0,09  | 1         | 0,926689848   | 1,079109695     | 1,8             |
| OLFML2B                                                                                  | 0,375900964 | -0,10993226  | 0,088 | 0,05  | 1         | 0,92663157    | 1,079177564     | 1,76            |
| CAVIN2                                                                                   | 0,799526327 | -0,110019855 | 0,05  | 0,04  | 1         | 0,92657531    | 1,079243089     | 1,25            |

Supplementary Table 4

| Differentially expressed genes_keloid-CCD_ comparing SC-Keloid vs. (SC-Myel, SC-Nonmyel) |             |              |       |       |           |               |                 |                 |
|------------------------------------------------------------------------------------------|-------------|--------------|-------|-------|-----------|---------------|-----------------|-----------------|
| gene                                                                                     | p_val       | avg_log2FC   | pct.1 | pct.2 | p_val_adj | Foldchange_UP | Foldchange_DOWN | Ratio_pct1_pct2 |
| SMIM1                                                                                    | 0,556644247 | -0,110034486 | 0,025 | 0,04  | 1         | 0,926565913   | 1,079254034     | 0,625           |
| ZNF532                                                                                   | 0,126158422 | -0,110061446 | 0,25  | 0,13  | 1         | 0,926548599   | 1,079274203     | 1,923076923     |
| CYFIP2                                                                                   | 0,930603417 | -0,110299196 | 0,088 | 0,08  | 1         | 0,92639592    | 1,079452077     | 1,1             |
| ARL6IP6                                                                                  | 0,016785313 | -0,110387761 | 0,5   | 0,23  | 1         | 0,926339051   | 1,079518346     | 2,173913043     |
| GPR89A                                                                                   | 0,0405109   | -0,11044418  | 0,162 | 0,06  | 1         | 0,926302826   | 1,079560563     | 2,7             |
| CTBP2                                                                                    | 0,074009884 | -0,110468555 | 0,375 | 0,19  | 1         | 0,926287176   | 1,079578802     | 1,973684211     |
| VCPKMT                                                                                   | 0,026867238 | -0,110512512 | 0,175 | 0,06  | 1         | 0,926258954   | 1,079611696     | 2,916666667     |
| ZNF354A                                                                                  | 0,397461587 | -0,110529758 | 0,1   | 0,06  | 1         | 0,926247881   | 1,079624602     | 1,666666667     |
| CXCL3                                                                                    | 0,208241149 | -0,110531639 | 0,15  | 0,08  | 1         | 0,926246673   | 1,07962601      | 1,875           |
| RHPN2                                                                                    | 0,072136391 | -0,110619345 | 0     | 0,04  | 1         | 0,926190366   | 1,079691645     | 0               |
| LRRC75A                                                                                  | 0,115707496 | -0,110696281 | 0,262 | 0,14  | 1         | 0,926140975   | 1,079749225     | 1,871428571     |
| CCDC138                                                                                  | 0,539465965 | -0,110708114 | 0,062 | 0,04  | 1         | 0,926133379   | 1,079758081     | 1,55            |
| ZNF317                                                                                   | 0,894021778 | -0,11073442  | 0,038 | 0,04  | 1         | 0,926116492   | 1,07977777      | 0,95            |
| UBE2Q2L                                                                                  | 0,645841423 | -0,110736076 | 0,038 | 0,05  | 1         | 0,926115429   | 1,079779009     | 0,76            |
| ZNF436                                                                                   | 0,98616928  | -0,1107714   | 0,062 | 0,06  | 1         | 0,926092753   | 1,079805447     | 1,033333333     |
| TCF20                                                                                    | 0,799526327 | -0,110805896 | 0,05  | 0,04  | 1         | 0,92607061    | 1,079831267     | 1,25            |
| PPP3CC                                                                                   | 0,021432695 | -0,110865395 | 0,238 | 0,09  | 1         | 0,926032418   | 1,079875801     | 2,644444444     |
| PPP2R5E                                                                                  | 0,002800618 | -0,11100035  | 0,525 | 0,22  | 1         | 0,925945798   | 1,079976822     | 2,386363636     |
| USP37                                                                                    | 0,570334915 | -0,111007337 | 0,1   | 0,07  | 1         | 0,925941313   | 1,079982053     | 1,428571429     |
| SMIM13                                                                                   | 0,177098321 | -0,11104336  | 0,325 | 0,19  | 1         | 0,925918194   | 1,080009019     | 1,710526316     |
| KDM7A                                                                                    | 0,30635456  | -0,111121697 | 0,138 | 0,08  | 1         | 0,925867918   | 1,080067664     | 1,725           |
| IRF2BP1                                                                                  | 0,045876736 | -0,111140679 | 0,212 | 0,09  | 1         | 0,925855737   | 1,080081875     | 2,355555556     |
| MTSS1                                                                                    | 0,423434047 | -0,111230676 | 0,013 | 0,03  | 1         | 0,925797983   | 1,080149254     | 0,433333333     |
| SESN1                                                                                    | 0,14603232  | -0,111244404 | 0,162 | 0,08  | 1         | 0,925789173   | 1,080159532     | 2,025           |
| RAP1GDS1                                                                                 | 0,094572554 | -0,1112592   | 0,575 | 0,31  | 1         | 0,925779678   | 1,08017061      | 1,85483871      |
| USF2                                                                                     | 0,015024438 | -0,111274262 | 0,613 | 0,28  | 1         | 0,925770013   | 1,080181887     | 2,189285714     |
| AC083843.3                                                                               | 0,692138165 | -0,111295561 | 0,013 | 0,02  | 1         | 0,925756346   | 1,080197834     | 0,65            |
| ATXN7L1                                                                                  | 0,19376311  | -0,111300402 | 0,138 | 0,07  | 1         | 0,92575324    | 1,080201459     | 1,971428571     |
| PRKD3                                                                                    | 0,003431287 | -0,11130871  | 0,425 | 0,16  | 1         | 0,925747909   | 1,080207679     | 2,65625         |
| MFSD14B                                                                                  | 0,016645653 | -0,111320557 | 0,375 | 0,16  | 1         | 0,925740306   | 1,08021655      | 2,34375         |

Supplementary Table 4

| Differentially expressed genes_keloid-CCD_ comparing SC-Keloid vs. (SC-Myel, SC-Nonmyel) |             |              |       |       |           |               |                 |                 |
|------------------------------------------------------------------------------------------|-------------|--------------|-------|-------|-----------|---------------|-----------------|-----------------|
| gene                                                                                     | p_val       | avg_log2FC   | pct.1 | pct.2 | p_val_adj | Foldchange_UP | Foldchange_DOWN | Ratio_pct1_pct2 |
| SPSB2                                                                                    | 0,975107496 | -0,111351206 | 0,062 | 0,06  | 1         | 0,92572064    | 1,080239499     | 1,033333333     |
| BMERB1                                                                                   | 0,035240319 | -0,111366105 | 0,275 | 0,12  | 1         | 0,92571108    | 1,080250654     | 2,291666667     |
| ZNF600                                                                                   | 0,423434047 | -0,111371835 | 0,013 | 0,03  | 1         | 0,925707403   | 1,080254945     | 0,433333333     |
| ZNF823                                                                                   | 0,820013192 | -0,111402053 | 0,025 | 0,03  | 1         | 0,925688014   | 1,080277572     | 0,833333333     |
| MAU2                                                                                     | 0,097492774 | -0,111470076 | 0,175 | 0,08  | 1         | 0,925644369   | 1,080328508     | 2,1875          |
| SORCS2                                                                                   | 0,267822926 | -0,111490439 | 0,112 | 0,06  | 1         | 0,925631304   | 1,080343757     | 1,866666667     |
| ADM                                                                                      | 0,911771084 | -0,111621981 | 0,088 | 0,09  | 1         | 0,925546911   | 1,080442264     | 0,977777778     |
| STRN4                                                                                    | 0,59568146  | -0,11162969  | 0,175 | 0,13  | 1         | 0,925541965   | 1,080448038     | 1,346153846     |
| TMCO3                                                                                    | 0,062010094 | -0,111690122 | 0,325 | 0,16  | 1         | 0,925503197   | 1,080493297     | 2,03125         |
| SFRP2                                                                                    | 0,039185507 | -0,111810912 | 0,238 | 0,1   | 1         | 0,925425712   | 1,080583765     | 2,38            |
| FAM178B                                                                                  | 0,816980451 | -0,111830139 | 0,038 | 0,03  | 1         | 0,925413378   | 1,080598167     | 1,266666667     |
| EEF1G                                                                                    | 0,100599901 | -0,112209196 | 0,175 | 0,08  | 1         | 0,925170265   | 1,080882122     | 2,1875          |
| IRF9                                                                                     | 0,333924134 | -0,112337528 | 0,188 | 0,12  | 1         | 0,925087972   | 1,080978275     | 1,566666667     |
| IL10RB                                                                                   | 0,78027938  | -0,112339947 | 0,088 | 0,07  | 1         | 0,925086421   | 1,080980087     | 1,257142857     |
| ENO2                                                                                     | 0,034858598 | -0,112348945 | 0,188 | 0,07  | 1         | 0,925080651   | 1,080986829     | 2,685714286     |
| SCD                                                                                      | 0,030436505 | -0,112364497 | 0,55  | 0,26  | 1         | 0,925070679   | 1,080998482     | 2,115384615     |
| PTPN11                                                                                   | 0,007135701 | -0,112530563 | 0,488 | 0,21  | 1         | 0,924964202   | 1,081122921     | 2,323809524     |
| YAE1                                                                                     | 0,095464312 | -0,112630191 | 0,175 | 0,08  | 1         | 0,924900329   | 1,081197582     | 2,1875          |
| SLC25A14                                                                                 | 0,112247794 | -0,112642009 | 0,088 | 0,03  | 1         | 0,924892753   | 1,081206439     | 2,933333333     |
| SPHK1                                                                                    | 0,089544639 | -0,112653212 | 0,713 | 0,39  | 1         | 0,924885571   | 1,081214835     | 1,828205128     |
| RHEBL1                                                                                   | 0,556644247 | -0,112661726 | 0,025 | 0,04  | 1         | 0,924880113   | 1,081221216     | 0,625           |
| LRRC37A2                                                                                 | 0,120814239 | -0,112692116 | 0     | 0,03  | 1         | 0,924860631   | 1,081243991     | 0               |
| ACSM5                                                                                    | 0,120814239 | -0,112732513 | 0     | 0,03  | 1         | 0,924834734   | 1,081274269     | 0               |
| MOK                                                                                      | 0,29729086  | -0,112758475 | 0,212 | 0,13  | 1         | 0,924818091   | 1,081293726     | 1,630769231     |
| POLR2M                                                                                   | 0,252526099 | -0,112830235 | 0,188 | 0,11  | 1         | 0,924772092   | 1,081347511     | 1,709090909     |
| NAIP                                                                                     | 0,556644247 | -0,112894513 | 0,025 | 0,04  | 1         | 0,92473089    | 1,081395691     | 0,625           |
| PREX2                                                                                    | 0,120814239 | -0,112895342 | 0     | 0,03  | 1         | 0,924730359   | 1,081396312     | 0               |
| COPA                                                                                     | 0,128682398 | -0,113031496 | 0,525 | 0,29  | 1         | 0,924643092   | 1,081498374     | 1,810344828     |
| POR                                                                                      | 0,000574333 | -0,113067315 | 0,4   | 0,13  | 1         | 0,924620135   | 1,081525225     | 3,076923077     |
| CXorf38                                                                                  | 0,103007193 | -0,113110661 | 0,225 | 0,11  | 1         | 0,924592355   | 1,081557721     | 2,045454545     |

Supplementary Table 4

| Differentially expressed genes_keloid-CCD_ comparing SC-Keloid vs. (SC-Myel, SC-Nonmyel) |             |              |       |       |           |               |                 |                 |
|------------------------------------------------------------------------------------------|-------------|--------------|-------|-------|-----------|---------------|-----------------|-----------------|
| gene                                                                                     | p_val       | avg_log2FC   | pct.1 | pct.2 | p_val_adj | Foldchange_UP | Foldchange_DOWN | Ratio_pct1_pct2 |
| RAB8A                                                                                    | 0,013865941 | -0,113114822 | 0,425 | 0,19  | 1         | 0,924589689   | 1,08156084      | 2,236842105     |
| RNASE1                                                                                   | 0,298760607 | -0,113166401 | 0,138 | 0,08  | 1         | 0,924556633   | 1,081599508     | 1,725           |
| GCC2                                                                                     | 0,028878458 | -0,113186447 | 0,512 | 0,26  | 1         | 0,924543787   | 1,081614537     | 1,969230769     |
| ZNF608                                                                                   | 0,151848267 | -0,11318883  | 0,162 | 0,08  | 1         | 0,924542259   | 1,081616324     | 2,025           |
| SULT1C4                                                                                  | 0,207484841 | -0,113198707 | 0     | 0,02  | 1         | 0,92453593    | 1,081623729     | 0               |
| KDM1B                                                                                    | 0,401029352 | -0,113293924 | 0,112 | 0,07  | 1         | 0,924474913   | 1,081695117     | 1,6             |
| CAMK2N1                                                                                  | 0,117066949 | -0,113315799 | 0,688 | 0,41  | 1         | 0,924460896   | 1,081711519     | 1,67804878      |
| PPP1R13B                                                                                 | 0,162161236 | -0,113353596 | 0,013 | 0,05  | 1         | 0,924436676   | 1,081739859     | 0,26            |
| PRDM2                                                                                    | 0,079062628 | -0,113366412 | 0,488 | 0,26  | 1         | 0,924428465   | 1,081749468     | 1,876923077     |
| SGF29                                                                                    | 0,560851138 | -0,113374773 | 0,112 | 0,08  | 1         | 0,924423107   | 1,081755738     | 1,4             |
| DHX37                                                                                    | 0,072136391 | -0,113430784 | 0     | 0,04  | 1         | 0,924387218   | 1,081797737     | 0               |
| DEDD                                                                                     | 0,407602202 | -0,113484892 | 0,112 | 0,07  | 1         | 0,92435255    | 1,08183831      | 1,6             |
| PANK2                                                                                    | 0,17913775  | -0,113576378 | 0,262 | 0,15  | 1         | 0,924293935   | 1,081906915     | 1,746666667     |
| ARPIN                                                                                    | 0,232420437 | -0,113618581 | 0,162 | 0,09  | 1         | 0,924266897   | 1,081938564     | 1,8             |
| TMEM201                                                                                  | 0,270425091 | -0,113661568 | 0,112 | 0,06  | 1         | 0,924239358   | 1,081970802     | 1,866666667     |
| ACP6                                                                                     | 0,223632981 | -0,113673525 | 0,088 | 0,04  | 1         | 0,924231698   | 1,08197977      | 2,2             |
| CHST14                                                                                   | 0,045144897 | -0,113723543 | 0,3   | 0,14  | 1         | 0,924199655   | 1,082017283     | 2,142857143     |
| ZFYVE28                                                                                  | 0,980637923 | -0,113798155 | 0,062 | 0,06  | 1         | 0,92415186    | 1,082073243     | 1,033333333     |
| C1orf159                                                                                 | 0,527578779 | -0,113845583 | 0,05  | 0,03  | 1         | 0,92412148    | 1,082108816     | 1,666666667     |
| VHL                                                                                      | 0,017630001 | -0,113867657 | 0,238 | 0,09  | 1         | 0,92410734    | 1,082125373     | 2,644444444     |
| ZNF714                                                                                   | 0,975107496 | -0,113941411 | 0,062 | 0,06  | 1         | 0,924060098   | 1,082180695     | 1,033333333     |
| TEAD3                                                                                    | 0,094462831 | -0,113944587 | 0,175 | 0,08  | 1         | 0,924058064   | 1,082183078     | 2,1875          |
| ZNF274                                                                                   | 0,54451599  | -0,11396341  | 0,062 | 0,04  | 1         | 0,924046008   | 1,082197197     | 1,55            |
| ITGAV                                                                                    | 0,020500438 | -0,113967459 | 0,787 | 0,41  | 1         | 0,924043414   | 1,082200235     | 1,919512195     |
| C3orf52                                                                                  | 0,249550622 | -0,113971932 | 0,1   | 0,05  | 1         | 0,92404055    | 1,08220359      | 2               |
| EDIL3                                                                                    | 0,793304172 | -0,113974633 | 0,05  | 0,04  | 1         | 0,92403882    | 1,082205616     | 1,25            |
| SLC27A5                                                                                  | 0,76702568  | -0,114033892 | 0,075 | 0,06  | 1         | 0,924000865   | 1,082250069     | 1,25            |
| LDLR                                                                                     | 0,404307785 | -0,11408142  | 0,112 | 0,07  | 1         | 0,923970426   | 1,082285723     | 1,6             |
| HK2                                                                                      | 0,259519439 | -0,114101391 | 0,013 | 0,04  | 1         | 0,923957636   | 1,082300704     | 0,325           |
| ALDOA                                                                                    | 0,568521789 | -0,114129083 | 0,112 | 0,08  | 1         | 0,923939901   | 1,082321479     | 1,4             |

Supplementary Table 4

| Differentially expressed genes_keloid-CCD_ comparing SC-Keloid vs. (SC-Myel, SC-Nonmyel) |             |              |       |       |           |               |                 |                 |
|------------------------------------------------------------------------------------------|-------------|--------------|-------|-------|-----------|---------------|-----------------|-----------------|
| gene                                                                                     | p_val       | avg_log2FC   | pct.1 | pct.2 | p_val_adj | Foldchange_UP | Foldchange_DOWN | Ratio_pct1_pct2 |
| TRMT11                                                                                   | 0,020112788 | -0,114200825 | 0,325 | 0,14  | 1         | 0,923893956   | 1,082375302     | 2,321428571     |
| PIK3R2                                                                                   | 0,249550622 | -0,114203738 | 0,1   | 0,05  | 1         | 0,923892091   | 1,082377487     | 2               |
| MALSU1                                                                                   | 0,033373425 | -0,114211682 | 0,4   | 0,19  | 1         | 0,923887003   | 1,082383448     | 2,105263158     |
| TIMM44                                                                                   | 0,007673306 | -0,114233426 | 0,362 | 0,14  | 1         | 0,923873079   | 1,082399761     | 2,585714286     |
| ARHGEF11                                                                                 | 0,00819759  | -0,114313756 | 0,2   | 0,06  | 1         | 0,923821639   | 1,082460031     | 3,333333333     |
| DDX42                                                                                    | 0,006272998 | -0,114348393 | 0,525 | 0,22  | 1         | 0,923799459   | 1,08248602      | 2,386363636     |
| DNAJC8                                                                                   | 0,625578341 | -0,114367602 | 0,713 | 0,47  | 1         | 0,923787159   | 1,082500433     | 1,517021277     |
| ZNF444                                                                                   | 0,29523991  | -0,114487573 | 0,212 | 0,13  | 1         | 0,923710343   | 1,082590455     | 1,630769231     |
| SNAPC3                                                                                   | 0,26523802  | -0,114496166 | 0,112 | 0,06  | 1         | 0,923704841   | 1,082596903     | 1,866666667     |
| TAF4                                                                                     | 0,045399153 | -0,114501805 | 0,088 | 0,02  | 1         | 0,92370123    | 1,082601135     | 4,4             |
| FAM76A                                                                                   | 0,008310142 | -0,114529826 | 0,238 | 0,08  | 1         | 0,92368329    | 1,082622162     | 2,975           |
| HSPA4L                                                                                   | 0,645841423 | -0,114671804 | 0,038 | 0,05  | 1         | 0,923592393   | 1,08272871      | 0,76            |
| RAB11FIP5                                                                                | 0,975107496 | -0,114678446 | 0,062 | 0,06  | 1         | 0,923588141   | 1,082733695     | 1,033333333     |
| TSC2                                                                                     | 0,024279869 | -0,114774545 | 0,338 | 0,15  | 1         | 0,923526622   | 1,082805818     | 2,253333333     |
| PRDM11                                                                                   | 0,120814239 | -0,114823318 | 0     | 0,03  | 1         | 0,923495401   | 1,082842426     | 0               |
| COL15A1                                                                                  | 0,191340232 | -0,114857321 | 0,625 | 0,38  | 1         | 0,923473636   | 1,082867947     | 1,644736842     |
| ZNF234                                                                                   | 0,369110746 | -0,11489808  | 0,025 | 0,05  | 1         | 0,923447546   | 1,082898541     | 0,5             |
| AFG1L                                                                                    | 0,423434047 | -0,114945384 | 0,013 | 0,03  | 1         | 0,923417268   | 1,082934048     | 0,433333333     |
| MTHFR                                                                                    | 0,267822926 | -0,115064781 | 0,112 | 0,06  | 1         | 0,923340849   | 1,083023675     | 1,866666667     |
| FBXO44                                                                                   | 0,975107496 | -0,115074288 | 0,062 | 0,06  | 1         | 0,923334765   | 1,083030812     | 1,033333333     |
| AKTIP                                                                                    | 0,425485075 | -0,115241891 | 0,15  | 0,1   | 1         | 0,923227504   | 1,083156639     | 1,5             |
| GLS                                                                                      | 0,026030148 | -0,115279449 | 0,662 | 0,33  | 1         | 0,923203469   | 1,083184838     | 2,006060606     |
| LRPPRC                                                                                   | 0,015129144 | -0,115310304 | 0,3   | 0,12  | 1         | 0,923183725   | 1,083208004     | 2,5             |
| SLC35A5                                                                                  | 0,580120923 | -0,115357651 | 0,112 | 0,08  | 1         | 0,923153428   | 1,083243554     | 1,4             |
| VBP1                                                                                     | 0,01216146  | -0,115368978 | 0,588 | 0,27  | 1         | 0,92314618    | 1,083252058     | 2,177777778     |
| ZDHHC2                                                                                   | 0,94227175  | -0,11552636  | 0,05  | 0,05  | 1         | 0,923045481   | 1,083370235     | 1               |
| WBP2                                                                                     | 0,044522006 | -0,115550951 | 0,388 | 0,19  | 1         | 0,923029748   | 1,083388702     | 2,042105263     |
| MMP1                                                                                     | 0,556644247 | -0,115558536 | 0,025 | 0,04  | 1         | 0,923024895   | 1,083394398     | 0,625           |
| PHTF1                                                                                    | 0,095041076 | -0,115569603 | 0,238 | 0,12  | 1         | 0,923017814   | 1,083402709     | 1,983333333     |
| ZFR                                                                                      | 0,062971416 | -0,115571581 | 0,438 | 0,23  | 1         | 0,923016549   | 1,083404194     | 1,904347826     |



Supplementary Table 4

| Differentially expressed genes_keloid-CCD_ comparing SC-Keloid vs. (SC-Myel, SC-Nonmyel) |             |              |       |       |           |               |                 |                 |
|------------------------------------------------------------------------------------------|-------------|--------------|-------|-------|-----------|---------------|-----------------|-----------------|
| gene                                                                                     | p_val       | avg_log2FC   | pct.1 | pct.2 | p_val_adj | Foldchange_UP | Foldchange_DOWN | Ratio_pct1_pct2 |
| TMEM186                                                                                  | 0,900822541 | -0,115596283 | 0,038 | 0,04  | 1         | 0,923000745   | 1,083422744     | 0,95            |
| PRPF3                                                                                    | 0,226537271 | -0,115605647 | 0,162 | 0,09  | 1         | 0,922994754   | 1,083429777     | 1,8             |
| B3GNT2                                                                                   | 0,163880441 | -0,115655087 | 0,175 | 0,09  | 1         | 0,922963124   | 1,083466906     | 1,944444444     |
| GCA                                                                                      | 0,045508871 | -0,115703739 | 0,162 | 0,06  | 1         | 0,922932      | 1,083503444     | 2,7             |
| MOCS2                                                                                    | 0,021686044 | -0,115816229 | 0,688 | 0,35  | 1         | 0,922860039   | 1,08358793      | 1,965714286     |
| HES7                                                                                     | 0,501283468 | -0,11603729  | 0,038 | 0,02  | 1         | 0,922718642   | 1,083753979     | 1,9             |
| UBR4                                                                                     | 0,074315962 | -0,116126518 | 0,838 | 0,45  | 1         | 0,922661576   | 1,083821009     | 1,862222222     |
| RNASEK                                                                                   | 0,428792605 | -0,116396142 | 0,338 | 0,23  | 1         | 0,922489157   | 1,084023582     | 1,469565217     |
| TP53RK                                                                                   | 0,052377718 | -0,116449718 | 0,325 | 0,16  | 1         | 0,922454899   | 1,084063839     | 2,03125         |
| API5                                                                                     | 0,013527847 | -0,116513617 | 0,375 | 0,16  | 1         | 0,922414043   | 1,084111855     | 2,34375         |
| CTH                                                                                      | 0,94227175  | -0,116521334 | 0,05  | 0,05  | 1         | 0,92240911    | 1,084117654     | 1               |
| ZNF800                                                                                   | 0,063407232 | -0,116620221 | 0,375 | 0,19  | 1         | 0,922345887   | 1,084191965     | 1,973684211     |
| KIAA0040                                                                                 | 0,043652221 | -0,116657978 | 0     | 0,05  | 1         | 0,922321749   | 1,08422034      | 0               |
| GPC6                                                                                     | 0,259519439 | -0,116660012 | 0,013 | 0,04  | 1         | 0,922320448   | 1,084221869     | 0,325           |
| DDX18                                                                                    | 0,377213573 | -0,116700311 | 0,713 | 0,45  | 1         | 0,922294685   | 1,084252155     | 1,584444444     |
| CYB561                                                                                   | 0,147470072 | -0,116766274 | 0,162 | 0,08  | 1         | 0,922252517   | 1,084301731     | 2,025           |
| FAM221A                                                                                  | 0,975107496 | -0,116827464 | 0,062 | 0,06  | 1         | 0,922213402   | 1,084347721     | 1,033333333     |
| SMIM14                                                                                   | 0,090982269 | -0,116849964 | 0,425 | 0,23  | 1         | 0,922199019   | 1,084364632     | 1,847826087     |
| TMEM39B                                                                                  | 0,025192728 | -0,116862544 | 0,212 | 0,08  | 1         | 0,922190978   | 1,084374088     | 2,65            |
| ST3GAL1                                                                                  | 0,784879574 | -0,116979108 | 0,062 | 0,07  | 1         | 0,922116471   | 1,084461704     | 0,885714286     |
| PALM                                                                                     | 0,452756248 | -0,117088242 | 0,038 | 0,06  | 1         | 0,92204672    | 1,084543743     | 0,633333333     |
| PSMC3IP                                                                                  | 0,055710507 | -0,117125356 | 0,175 | 0,07  | 1         | 0,922023      | 1,084571643     | 2,5             |
| PDPN                                                                                     | 0,570334915 | -0,117128629 | 0,1   | 0,07  | 1         | 0,922020908   | 1,084574104     | 1,428571429     |
| KBTBD7                                                                                   | 0,136751946 | -0,117146786 | 0,1   | 0,04  | 1         | 0,922009304   | 1,084587754     | 2,5             |
| ZNF519                                                                                   | 0,390582533 | -0,11718867  | 0,1   | 0,06  | 1         | 0,921982537   | 1,084619242     | 1,666666667     |
| TMEM88                                                                                   | 0,553274445 | -0,117292607 | 0,075 | 0,05  | 1         | 0,921916116   | 1,084697384     | 1,5             |
| SUZ12                                                                                    | 0,023432075 | -0,117311429 | 0,5   | 0,23  | 1         | 0,921904089   | 1,084711536     | 2,173913043     |
| MIGA1                                                                                    | 0,069940765 | -0,117383987 | 0,2   | 0,09  | 1         | 0,921857724   | 1,084766091     | 2,222222222     |
| ARHGEF40                                                                                 | 0,113830631 | -0,117418861 | 0,6   | 0,33  | 1         | 0,921835441   | 1,084792313     | 1,818181818     |
| NUDT7                                                                                    | 0,562875304 | -0,1174491   | 0,025 | 0,04  | 1         | 0,921816119   | 1,084815051     | 0,625           |

Supplementary Table 4

| Differentially expressed genes_keloid-CCD_ comparing SC-Keloid vs. (SC-Myel, SC-Nonmyel) |             |              |       |       |           |               |                 |                 |
|------------------------------------------------------------------------------------------|-------------|--------------|-------|-------|-----------|---------------|-----------------|-----------------|
| gene                                                                                     | p_val       | avg_log2FC   | pct.1 | pct.2 | p_val_adj | Foldchange_UP | Foldchange_DOWN | Ratio_pct1_pct2 |
| ZNF585A                                                                                  | 0,263816781 | -0,117481256 | 0,013 | 0,04  | 1         | 0,921795573   | 1,084839231     | 0,325           |
| RHBDD1                                                                                   | 0,193718766 | -0,117482978 | 0,075 | 0,03  | 1         | 0,921794473   | 1,084840525     | 2,5             |
| IQGAP1                                                                                   | 0,161537873 | -0,117535174 | 0,662 | 0,39  | 1         | 0,921761123   | 1,084879775     | 1,697435897     |
| SRP68                                                                                    | 0,049463005 | -0,117553641 | 0,262 | 0,12  | 1         | 0,921749324   | 1,084893662     | 2,183333333     |
| TMEM74B                                                                                  | 0,423434047 | -0,117567041 | 0,013 | 0,03  | 1         | 0,921740763   | 1,084903739     | 0,433333333     |
| SLC44A2                                                                                  | 0,134047011 | -0,117580849 | 0,325 | 0,18  | 1         | 0,921731941   | 1,084914122     | 1,805555556     |
| DHDDS                                                                                    | 0,01645261  | -0,117599861 | 0,188 | 0,06  | 1         | 0,921719794   | 1,08492842      | 3,133333333     |
| WDR73                                                                                    | 0,002877542 | -0,117637397 | 0,288 | 0,09  | 1         | 0,921695813   | 1,084956648     | 3,2             |
| FAM120AOS                                                                                | 0,001494816 | -0,117643292 | 0,4   | 0,14  | 1         | 0,921692048   | 1,084961081     | 2,857142857     |
| CCNE1                                                                                    | 0,980637923 | -0,11783837  | 0,062 | 0,06  | 1         | 0,921567427   | 1,085107797     | 1,033333333     |
| ALDH6A1                                                                                  | 0,17887143  | -0,117844894 | 0,125 | 0,06  | 1         | 0,921563259   | 1,085112704     | 2,083333333     |
| COBL1                                                                                    | 0,09037644  | -0,11786191  | 0,225 | 0,11  | 1         | 0,92155239    | 1,085125502     | 2,045454545     |
| TLK2                                                                                     | 0,090059147 | -0,118004235 | 0,312 | 0,16  | 1         | 0,921461481   | 1,085232558     | 1,95            |
| SETD7                                                                                    | 0,05912955  | -0,118019131 | 0,225 | 0,1   | 1         | 0,921451967   | 1,085243763     | 2,25            |
| PARVA                                                                                    | 0,082714144 | -0,118044568 | 0,425 | 0,22  | 1         | 0,921435721   | 1,085262897     | 1,931818182     |
| YES1                                                                                     | 0,027843343 | -0,11817375  | 0,3   | 0,13  | 1         | 0,921353217   | 1,085360078     | 2,307692308     |
| PLSCR1                                                                                   | 0,047963631 | -0,118176732 | 0,212 | 0,09  | 1         | 0,921351313   | 1,085362322     | 2,355555556     |
| NOP16                                                                                    | 0,033603221 | -0,118182182 | 0,225 | 0,09  | 1         | 0,921347832   | 1,085366422     | 2,5             |
| TSPAN7                                                                                   | 0,801768127 | -0,118209599 | 0,075 | 0,08  | 1         | 0,921330323   | 1,085387049     | 0,9375          |
| ARL5B                                                                                    | 0,134940671 | -0,118224229 | 0,4   | 0,23  | 1         | 0,92132098    | 1,085398055     | 1,739130435     |
| CDK2AP2                                                                                  | 0,043770435 | -0,118236363 | 0,713 | 0,38  | 1         | 0,921313231   | 1,085407184     | 1,876315789     |
| ARHGAP36                                                                                 | 0,207484841 | -0,118440791 | 0     | 0,02  | 1         | 0,921182691   | 1,085560996     | 0               |
| ZNF275                                                                                   | 0,811368091 | -0,118515887 | 0,075 | 0,08  | 1         | 0,921134743   | 1,085617504     | 0,9375          |
| ZNF415                                                                                   | 0,820013192 | -0,118608495 | 0,025 | 0,03  | 1         | 0,921075616   | 1,085687193     | 0,833333333     |
| ZNF76                                                                                    | 0,437968774 | -0,118629901 | 0,138 | 0,09  | 1         | 0,92106195    | 1,085703302     | 1,533333333     |
| ZNF224                                                                                   | 0,317673416 | -0,118708434 | 0,15  | 0,09  | 1         | 0,921011813   | 1,085762404     | 1,666666667     |
| PRKAA1                                                                                   | 0,056596999 | -0,118726885 | 0,275 | 0,13  | 1         | 0,921000034   | 1,08577629      | 2,115384615     |
| JHY                                                                                      | 0,423434047 | -0,118789308 | 0,013 | 0,03  | 1         | 0,920960185   | 1,08582327      | 0,433333333     |
| TIMM10B                                                                                  | 0,228486406 | -0,118832945 | 0,162 | 0,09  | 1         | 0,920932329   | 1,085856114     | 1,8             |
| ITM2A                                                                                    | 0,907630591 | -0,118841146 | 0,038 | 0,04  | 1         | 0,920927094   | 1,085862286     | 0,95            |

Supplementary Table 4

| Differentially expressed genes_keloid-CCD_ comparing SC-Keloid vs. (SC-Myel, SC-Nonmyel) |             |              |       |       |           |               |                 |                 |
|------------------------------------------------------------------------------------------|-------------|--------------|-------|-------|-----------|---------------|-----------------|-----------------|
| gene                                                                                     | p_val       | avg_log2FC   | pct.1 | pct.2 | p_val_adj | Foldchange_UP | Foldchange_DOWN | Ratio_pct1_pct2 |
| PCIF1                                                                                    | 0,02913554  | -0,118926355 | 0,35  | 0,16  | 1         | 0,920872704   | 1,085926422     | 2,1875          |
| CASP4                                                                                    | 0,112025533 | -0,119038946 | 0,25  | 0,13  | 1         | 0,92080084    | 1,086011173     | 1,923076923     |
| SLC39A1                                                                                  | 0,165140129 | -0,119069789 | 0,725 | 0,42  | 1         | 0,920781154   | 1,086034391     | 1,726190476     |
| METTL16                                                                                  | 0,177707002 | -0,119200574 | 0,188 | 0,1   | 1         | 0,920697686   | 1,086132848     | 1,88            |
| SNRNP70                                                                                  | 0,011233752 | -0,119261115 | 0,725 | 0,35  | 1         | 0,920659051   | 1,086178427     | 2,071428571     |
| HEXIM2                                                                                   | 0,471317277 | -0,11931248  | 0,038 | 0,06  | 1         | 0,920626273   | 1,0862171       | 0,633333333     |
| SYNPO                                                                                    | 0,129706591 | -0,119324285 | 0,212 | 0,11  | 1         | 0,92061874    | 1,086225988     | 1,927272727     |
| AHCTF1                                                                                   | 0,116624124 | -0,119448841 | 0,312 | 0,17  | 1         | 0,920539261   | 1,086319772     | 1,835294118     |
| TRPV3                                                                                    | 0,714199457 | -0,11953522  | 0,05  | 0,06  | 1         | 0,920484147   | 1,086384815     | 0,833333333     |
| NTRK3                                                                                    | 0,092485138 | -0,119819824 | 0,175 | 0,08  | 1         | 0,920302578   | 1,086599151     | 2,1875          |
| CDC23                                                                                    | 0,006465621 | -0,119848717 | 0,262 | 0,09  | 1         | 0,920284148   | 1,086620912     | 2,911111111     |
| C10orf67                                                                                 | 0,159398678 | -0,119870531 | 0,013 | 0,05  | 1         | 0,920270233   | 1,086637342     | 0,26            |
| SH3RF3                                                                                   | 0,748411721 | -0,119875881 | 0,112 | 0,09  | 1         | 0,92026682    | 1,086641372     | 1,244444444     |
| LINC00685                                                                                | 0,56588856  | -0,119950678 | 0,088 | 0,06  | 1         | 0,92021911    | 1,086697711     | 1,466666667     |
| NDP                                                                                      | 0,645841423 | -0,120109484 | 0,038 | 0,05  | 1         | 0,920117822   | 1,086817336     | 0,76            |
| ELK4                                                                                     | 0,055018268 | -0,120111001 | 0,312 | 0,15  | 1         | 0,920116854   | 1,086818479     | 2,08            |
| ABCB7                                                                                    | 0,110952483 | -0,120217594 | 0,2   | 0,1   | 1         | 0,920048874   | 1,086898781     | 2               |
| PRKAB2                                                                                   | 0,102606878 | -0,120246585 | 0,188 | 0,09  | 1         | 0,920030386   | 1,086920623     | 2,088888889     |
| TMEM165                                                                                  | 0,019904875 | -0,120499005 | 0,7   | 0,34  | 1         | 0,919869427   | 1,087110812     | 2,058823529     |
| CAMK2G                                                                                   | 0,289969834 | -0,120586271 | 0,125 | 0,07  | 1         | 0,919813788   | 1,087176571     | 1,785714286     |
| MSL2                                                                                     | 0,10363738  | -0,120587299 | 0,188 | 0,09  | 1         | 0,919813133   | 1,087177346     | 2,088888889     |
| ARPP19                                                                                   | 0,296293396 | -0,120677827 | 0,762 | 0,47  | 1         | 0,919755417   | 1,087245567     | 1,621276596     |
| ZNF37A                                                                                   | 0,314887306 | -0,121310909 | 0,162 | 0,1   | 1         | 0,919351899   | 1,087722776     | 1,62            |
| BMP7                                                                                     | 0,072136391 | -0,121409645 | 0     | 0,04  | 1         | 0,919288982   | 1,087797221     | 0               |
| ATAD3C                                                                                   | 0,816980451 | -0,121426617 | 0,038 | 0,03  | 1         | 0,919278168   | 1,087810018     | 1,266666667     |
| FTO                                                                                      | 0,260419539 | -0,121649253 | 0,188 | 0,11  | 1         | 0,919136316   | 1,087977901     | 1,709090909     |
| FMNL3                                                                                    | 0,075143083 | -0,12165092  | 0,475 | 0,25  | 1         | 0,919135254   | 1,087979159     | 1,9             |
| SETD3                                                                                    | 0,301251116 | -0,121784575 | 0,2   | 0,12  | 1         | 0,919050107   | 1,088079956     | 1,666666667     |
| GTF2E2                                                                                   | 0,063395703 | -0,121970746 | 0,275 | 0,13  | 1         | 0,918931517   | 1,088220375     | 2,115384615     |
| ZEB1                                                                                     | 0,042724921 | -0,122065461 | 0,425 | 0,22  | 1         | 0,91887119    | 1,088291821     | 1,931818182     |

Supplementary Table 4

| Differentially expressed genes_keloid-CCD_ comparing SC-Keloid vs. (SC-Myel, SC-Nonmyel) |             |              |       |       |           |               |                 |                 |
|------------------------------------------------------------------------------------------|-------------|--------------|-------|-------|-----------|---------------|-----------------|-----------------|
| gene                                                                                     | p_val       | avg_log2FC   | pct.1 | pct.2 | p_val_adj | Foldchange_UP | Foldchange_DOWN | Ratio_pct1_pct2 |
| GATAD2A                                                                                  | 0,045549626 | -0,122176052 | 0,375 | 0,19  | 1         | 0,918800756   | 1,088375248     | 1,973684211     |
| TUBGCP4                                                                                  | 0,199514022 | -0,122405975 | 0,138 | 0,07  | 1         | 0,918654338   | 1,088548716     | 1,971428571     |
| GIMAP6                                                                                   | 0,556644247 | -0,122460072 | 0,025 | 0,04  | 1         | 0,918619891   | 1,088589535     | 0,625           |
| FTSJ3                                                                                    | 0,100599901 | -0,122509899 | 0,175 | 0,08  | 1         | 0,918588165   | 1,088627133     | 2,1875          |
| PPP1R16A                                                                                 | 0,245182539 | -0,122567599 | 0,175 | 0,1   | 1         | 0,918551427   | 1,088670673     | 1,75            |
| LRP1                                                                                     | 0,035051064 | -0,122798658 | 0,575 | 0,29  | 1         | 0,918404326   | 1,088845046     | 1,982758621     |
| C17orf67                                                                                 | 0,556644247 | -0,122845251 | 0,025 | 0,04  | 1         | 0,918374665   | 1,088880212     | 0,625           |
| PUM1                                                                                     | 0,361640739 | -0,122891824 | 0,488 | 0,32  | 1         | 0,918345019   | 1,088915364     | 1,525           |
| CTDNBP1                                                                                  | 0,176931646 | -0,122912681 | 0,637 | 0,36  | 1         | 0,918331742   | 1,088931106     | 1,769444444     |
| PAK2                                                                                     | 0,042696724 | -0,122934439 | 0,9   | 0,49  | 1         | 0,918317893   | 1,088947529     | 1,836734694     |
| PLD2                                                                                     | 0,372322273 | -0,123085399 | 0,088 | 0,05  | 1         | 0,918221807   | 1,089061479     | 1,76            |
| USPL1                                                                                    | 0,335496445 | -0,123118613 | 0,15  | 0,09  | 1         | 0,918200668   | 1,089086553     | 1,666666667     |
| DIXDC1                                                                                   | 0,127793196 | -0,123329472 | 0,412 | 0,23  | 1         | 0,918066477   | 1,089245741     | 1,791304348     |
| ZNF439                                                                                   | 0,112247794 | -0,12336074  | 0,088 | 0,03  | 1         | 0,91804658    | 1,089269349     | 2,933333333     |
| CCL3                                                                                     | 0,120814239 | -0,123411094 | 0     | 0,03  | 1         | 0,918014538   | 1,089307368     | 0               |
| UBQLN1                                                                                   | 0,087224919 | -0,123413629 | 0,412 | 0,22  | 1         | 0,918012925   | 1,089309282     | 1,872727273     |
| THAP2                                                                                    | 0,078471401 | -0,123450578 | 0,2   | 0,09  | 1         | 0,917989414   | 1,089337181     | 2,222222222     |
| NKD2                                                                                     | 0,423434047 | -0,123520505 | 0,013 | 0,03  | 1         | 0,91794492    | 1,089389982     | 0,433333333     |
| AKR1C1                                                                                   | 0,162161236 | -0,123536389 | 0,013 | 0,05  | 1         | 0,917934814   | 1,089401976     | 0,26            |
| IPCEF1                                                                                   | 0,259519439 | -0,123714864 | 0,013 | 0,04  | 1         | 0,917821264   | 1,089536753     | 0,325           |
| CHURC1                                                                                   | 0,183238904 | -0,123721743 | 0,8   | 0,46  | 1         | 0,917816887   | 1,089541949     | 1,739130435     |
| BROX                                                                                     | 0,180770945 | -0,12372417  | 0,325 | 0,19  | 1         | 0,917815344   | 1,089543781     | 1,710526316     |
| HYLS1                                                                                    | 0,249550622 | -0,123742349 | 0,1   | 0,05  | 1         | 0,917803779   | 1,08955751      | 2               |
| TBCE                                                                                     | 0,390582533 | -0,123742441 | 0,1   | 0,06  | 1         | 0,91780372    | 1,08955758      | 1,666666667     |
| EPOR                                                                                     | 0,221005633 | -0,123951429 | 0,088 | 0,04  | 1         | 0,917670777   | 1,089715425     | 2,2             |
| SERGEF                                                                                   | 0,946204603 | -0,124075799 | 0,112 | 0,1   | 1         | 0,917591671   | 1,089809369     | 1,12            |
| TNK2                                                                                     | 0,582634513 | -0,124089583 | 0,1   | 0,07  | 1         | 0,917582904   | 1,089819781     | 1,428571429     |
| HEBP2                                                                                    | 0,058300234 | -0,124092753 | 0,338 | 0,17  | 1         | 0,917580888   | 1,089822176     | 1,988235294     |
| IDS                                                                                      | 0,014747006 | -0,124125076 | 0,688 | 0,32  | 1         | 0,91756033    | 1,089846594     | 2,15            |
| NUP42                                                                                    | 0,070672894 | -0,12412919  | 0,3   | 0,15  | 1         | 0,917557713   | 1,089849702     | 2               |

Supplementary Table 4

| Differentially expressed genes_keloid-CCD_ comparing SC-Keloid vs. (SC-Myel, SC-Nonmyel) |             |              |       |       |           |               |                 |                 |
|------------------------------------------------------------------------------------------|-------------|--------------|-------|-------|-----------|---------------|-----------------|-----------------|
| gene                                                                                     | p_val       | avg_log2FC   | pct.1 | pct.2 | p_val_adj | Foldchange_UP | Foldchange_DOWN | Ratio_pct1_pct2 |
| ZNF345                                                                                   | 0,94227175  | -0,124132436 | 0,05  | 0,05  | 1         | 0,917555649   | 1,089852154     | 1               |
| RAPGEF6                                                                                  | 0,772114645 | -0,124163471 | 0,075 | 0,06  | 1         | 0,917535911   | 1,089875598     | 1,25            |
| S100B                                                                                    | 0,419382033 | -0,124168478 | 1     | 0,99  | 1         | 0,917532727   | 1,089879381     | 1,01010101      |
| KIF19                                                                                    | 0,377102913 | -0,124286456 | 0     | 0,01  | 1         | 0,917457697   | 1,089968511     | 0               |
| PHLPP1                                                                                   | 0,740044706 | -0,12433456  | 0,112 | 0,09  | 1         | 0,917427107   | 1,090004854     | 1,244444444     |
| DNAJC28                                                                                  | 0,120814239 | -0,124464518 | 0     | 0,03  | 1         | 0,917344469   | 1,090103047     | 0               |
| UBAP1L                                                                                   | 0,556644247 | -0,124557014 | 0,025 | 0,04  | 1         | 0,917285657   | 1,090172938     | 0,625           |
| CLOCK                                                                                    | 0,028768456 | -0,124682129 | 0,338 | 0,15  | 1         | 0,91720611    | 1,090267486     | 2,253333333     |
| IFI35                                                                                    | 0,029628398 | -0,124814431 | 0,3   | 0,13  | 1         | 0,917122002   | 1,090367473     | 2,307692308     |
| WASHC2C                                                                                  | 0,131256313 | -0,124847422 | 0,2   | 0,1   | 1         | 0,91710103    | 1,090392407     | 2               |
| RNF220                                                                                   | 0,051473134 | -0,124876946 | 0,262 | 0,12  | 1         | 0,917082262   | 1,090414722     | 2,183333333     |
| CBFA2T2                                                                                  | 0,289969834 | -0,124897178 | 0,125 | 0,07  | 1         | 0,917069401   | 1,090430014     | 1,785714286     |
| PHF20                                                                                    | 0,028840237 | -0,124916969 | 0,525 | 0,26  | 1         | 0,917056821   | 1,090444973     | 2,019230769     |
| WDR83                                                                                    | 0,26645055  | -0,124925393 | 0,188 | 0,11  | 1         | 0,917051466   | 1,09045134      | 1,709090909     |
| LUZP1                                                                                    | 0,055535814 | -0,125005506 | 0,588 | 0,32  | 1         | 0,917000543   | 1,090511895     | 1,8375          |
| SOCS5                                                                                    | 0,030455085 | -0,125026925 | 0,262 | 0,11  | 1         | 0,916986929   | 1,090528085     | 2,381818182     |
| TEAD4                                                                                    | 0,316677143 | -0,125164912 | 0,138 | 0,08  | 1         | 0,916899228   | 1,090632394     | 1,725           |
| CCL8                                                                                     | 0,120814239 | -0,125251849 | 0     | 0,03  | 1         | 0,916843978   | 1,090698117     | 0               |
| C1D                                                                                      | 0,022168435 | -0,125310305 | 0,637 | 0,3   | 1         | 0,916806829   | 1,090742312     | 2,123333333     |
| ZSWIM4                                                                                   | 0,604011909 | -0,125354758 | 0,15  | 0,11  | 1         | 0,91677858    | 1,090775921     | 1,363636364     |
| P4HA1                                                                                    | 0,033756905 | -0,125360663 | 0,613 | 0,29  | 1         | 0,916774828   | 1,090780385     | 2,113793103     |
| OSBPL11                                                                                  | 0,124190753 | -0,125445771 | 0,2   | 0,1   | 1         | 0,916720747   | 1,090844735     | 2               |
| NBPF12                                                                                   | 0,78027938  | -0,125564465 | 0,088 | 0,07  | 1         | 0,916645329   | 1,090934485     | 1,257142857     |
| SERPINB8                                                                                 | 0,170029609 | -0,125567291 | 0,25  | 0,14  | 1         | 0,916643533   | 1,090936623     | 1,785714286     |
| ALDH2                                                                                    | 0,458522483 | -0,125689849 | 0,15  | 0,1   | 1         | 0,916565667   | 1,091029302     | 1,5             |
| ASXL2                                                                                    | 0,303809155 | -0,125817288 | 0,138 | 0,08  | 1         | 0,916484706   | 1,091125682     | 1,725           |
| FGFBP2                                                                                   | 0,207484841 | -0,125843097 | 0     | 0,02  | 1         | 0,916468311   | 1,091145201     | 0               |
| KCNS3                                                                                    | 0,144596578 | -0,125849315 | 0,45  | 0,26  | 1         | 0,916464362   | 1,091149904     | 1,730769231     |
| DDX56                                                                                    | 0,011992293 | -0,126105164 | 0,288 | 0,11  | 1         | 0,91630185    | 1,091343426     | 2,618181818     |
| SOX7                                                                                     | 0,777213432 | -0,126119776 | 0,075 | 0,06  | 1         | 0,916292569   | 1,09135448      | 1,25            |

Supplementary Table 4

| Differentially expressed genes_keloid-CCD_ comparing SC-Keloid vs. (SC-Myel, SC-Nonmyel) |             |              |       |       |           |               |                 |                 |
|------------------------------------------------------------------------------------------|-------------|--------------|-------|-------|-----------|---------------|-----------------|-----------------|
| gene                                                                                     | p_val       | avg_log2FC   | pct.1 | pct.2 | p_val_adj | Foldchange_UP | Foldchange_DOWN | Ratio_pct1_pct2 |
| TUBG2                                                                                    | 0,332911605 | -0,126160475 | 0,15  | 0,09  | 1         | 0,91626672    | 1,091385268     | 1,666666667     |
| PTGES3                                                                                   | 0,702140438 | -0,126211191 | 0,912 | 0,65  | 1         | 0,916234511   | 1,091423635     | 1,403076923     |
| SINHCAF                                                                                  | 0,132758116 | -0,12625226  | 0,15  | 0,07  | 1         | 0,916208429   | 1,091454704     | 2,142857143     |
| ZNF585B                                                                                  | 0,894021778 | -0,126396528 | 0,038 | 0,04  | 1         | 0,916116813   | 1,091563855     | 0,95            |
| TTC39B                                                                                   | 0,501283468 | -0,12655468  | 0,038 | 0,02  | 1         | 0,916016391   | 1,091683522     | 1,9             |
| ELP1                                                                                     | 0,806564466 | -0,126564842 | 0,075 | 0,08  | 1         | 0,91600994    | 1,091691211     | 0,9375          |
| KCTD7                                                                                    | 0,466638056 | -0,12656706  | 0,038 | 0,06  | 1         | 0,916008531   | 1,091692889     | 0,633333333     |
| CFH                                                                                      | 0,57023707  | -0,126601259 | 0,088 | 0,06  | 1         | 0,915986818   | 1,091718768     | 1,466666667     |
| ARGLU1                                                                                   | 0,880238203 | -0,126658942 | 0,825 | 0,57  | 1         | 0,915950194   | 1,091762419     | 1,447368421     |
| FAAH                                                                                     | 0,120814239 | -0,126752471 | 0     | 0,03  | 1         | 0,915890816   | 1,091833199     | 0               |
| CD79B                                                                                    | 0,369110746 | -0,126762452 | 0,025 | 0,05  | 1         | 0,915884479   | 1,091840753     | 0,5             |
| PCDH7                                                                                    | 0,894021778 | -0,126809744 | 0,038 | 0,04  | 1         | 0,915854457   | 1,091876545     | 0,95            |
| TASP1                                                                                    | 0,050604224 | -0,126831353 | 0,362 | 0,18  | 1         | 0,915840739   | 1,091892899     | 2,011111111     |
| PPP4R3A                                                                                  | 0,115925375 | -0,126836253 | 0,45  | 0,25  | 1         | 0,915837629   | 1,091896608     | 1,8             |
| AP3S1                                                                                    | 0,007825248 | -0,126846545 | 0,65  | 0,29  | 1         | 0,915831095   | 1,091904397     | 2,24137931      |
| RARG                                                                                     | 0,578520911 | -0,126885413 | 0,1   | 0,07  | 1         | 0,915806422   | 1,091933814     | 1,428571429     |
| ZNF93                                                                                    | 0,788452212 | -0,126943773 | 0,062 | 0,05  | 1         | 0,915769377   | 1,091977987     | 1,24            |
| IFT27                                                                                    | 0,093073558 | -0,127457943 | 0,362 | 0,19  | 1         | 0,915443059   | 1,092367232     | 1,905263158     |
| SHQ1                                                                                     | 0,54451599  | -0,127563729 | 0,062 | 0,04  | 1         | 0,915375936   | 1,092447333     | 1,55            |
| ZNF529                                                                                   | 0,586816454 | -0,127574062 | 0,15  | 0,11  | 1         | 0,91536938    | 1,092455158     | 1,363636364     |
| TSHZ3                                                                                    | 0,361699145 | -0,127650933 | 0,175 | 0,11  | 1         | 0,915320608   | 1,092513368     | 1,590909091     |
| KLHL20                                                                                   | 0,031510821 | -0,127697399 | 0,3   | 0,13  | 1         | 0,915291127   | 1,092548557     | 2,307692308     |
| IDH3B                                                                                    | 0,024548059 | -0,127777928 | 0,525 | 0,26  | 1         | 0,915240039   | 1,092609542     | 2,019230769     |
| ASAH1                                                                                    | 0,041601699 | -0,127882538 | 0,775 | 0,41  | 1         | 0,915173677   | 1,09268877      | 1,890243902     |
| ULK4                                                                                     | 0,770781378 | -0,127926179 | 0,088 | 0,07  | 1         | 0,915145994   | 1,092721824     | 1,257142857     |
| WASHC2A                                                                                  | 0,421050079 | -0,12804375  | 0,125 | 0,08  | 1         | 0,915071418   | 1,092810878     | 1,5625          |
| MME                                                                                      | 0,207484841 | -0,128215674 | 0     | 0,02  | 1         | 0,914962377   | 1,092941115     | 0               |
| WDR20                                                                                    | 0,075483326 | -0,128245488 | 0,25  | 0,12  | 1         | 0,914943469   | 1,092963701     | 2,083333333     |
| IQCB1                                                                                    | 0,975107496 | -0,128264502 | 0,062 | 0,06  | 1         | 0,91493141    | 1,092978106     | 1,033333333     |
| CERS6                                                                                    | 0,074494291 | -0,128412094 | 0,2   | 0,09  | 1         | 0,914837815   | 1,093089927     | 2,22222222      |

Supplementary Table 4

| Differentially expressed genes_keloid-CCD_ comparing SC-Keloid vs. (SC-Myel, SC-Nonmyel) |             |              |       |       |           |               |                 |                 |
|------------------------------------------------------------------------------------------|-------------|--------------|-------|-------|-----------|---------------|-----------------|-----------------|
| gene                                                                                     | p_val       | avg_log2FC   | pct.1 | pct.2 | p_val_adj | Foldchange_UP | Foldchange_DOWN | Ratio_pct1_pct2 |
| PGF                                                                                      | 0,987205041 | -0,128518661 | 0,075 | 0,07  | 1         | 0,914770242   | 1,093170672     | 1,071428571     |
| FBXO28                                                                                   | 0,2296854   | -0,128646304 | 0,225 | 0,13  | 1         | 0,914689311   | 1,093267395     | 1,730769231     |
| CALCOCO1                                                                                 | 0,464840503 | -0,128713707 | 0,162 | 0,11  | 1         | 0,914646577   | 1,093318474     | 1,472727273     |
| MTA1                                                                                     | 0,013663066 | -0,128724273 | 0,288 | 0,11  | 1         | 0,914639878   | 1,093326482     | 2,618181818     |
| MRFAP1L1                                                                                 | 0,09588886  | -0,128742473 | 0,325 | 0,17  | 1         | 0,91462834    | 1,093340274     | 1,911764706     |
| OSBPL9                                                                                   | 0,044768141 | -0,128794093 | 0,45  | 0,22  | 1         | 0,914595615   | 1,093379395     | 2,045454545     |
| RNF185                                                                                   | 0,78027938  | -0,128803033 | 0,088 | 0,07  | 1         | 0,914589948   | 1,09338617      | 1,257142857     |
| TNFRSF10D                                                                                | 0,954410066 | -0,128808799 | 0,05  | 0,05  | 1         | 0,914586292   | 1,09339054      | 1               |
| C1orf56                                                                                  | 0,111940508 | -0,128848463 | 0,412 | 0,23  | 1         | 0,914561147   | 1,093420602     | 1,791304348     |
| OSMR                                                                                     | 0,35516371  | -0,12892385  | 0,075 | 0,04  | 1         | 0,914513359   | 1,093477738     | 1,875           |
| TULP3                                                                                    | 0,102170514 | -0,128992573 | 0,425 | 0,23  | 1         | 0,914469797   | 1,093529828     | 1,847826087     |
| VAPB                                                                                     | 0,166072177 | -0,129037502 | 0,388 | 0,22  | 1         | 0,914441319   | 1,093563884     | 1,763636364     |
| CSNK1G1                                                                                  | 0,361699145 | -0,129194853 | 0,175 | 0,11  | 1         | 0,914341589   | 1,093683162     | 1,590909091     |
| CLN8                                                                                     | 0,746061822 | -0,129239898 | 0,138 | 0,11  | 1         | 0,91431304    | 1,093717311     | 1,254545455     |
| OR2A1-AS1                                                                                | 0,816980451 | -0,129247823 | 0,038 | 0,03  | 1         | 0,914308018   | 1,093723318     | 1,266666667     |
| TIMM23B                                                                                  | 0,58376991  | -0,129265526 | 0,125 | 0,09  | 1         | 0,914296799   | 1,093736739     | 1,388888889     |
| SLFN12                                                                                   | 0,742233962 | -0,129359388 | 0,138 | 0,11  | 1         | 0,914237316   | 1,093807901     | 1,254545455     |
| CDK12                                                                                    | 0,02719318  | -0,129589483 | 0,412 | 0,19  | 1         | 0,914091517   | 1,093982366     | 2,168421053     |
| TBC1D12                                                                                  | 0,02583629  | -0,129599959 | 0,25  | 0,1   | 1         | 0,91408488    | 1,093990309     | 2,5             |
| SFR1                                                                                     | 0,775526182 | -0,129642296 | 0,088 | 0,07  | 1         | 0,914058055   | 1,094022414     | 1,257142857     |
| HEPN1                                                                                    | 0,377102913 | -0,129651177 | 0     | 0,01  | 1         | 0,914052428   | 1,094029149     | 0               |
| CYP27A1                                                                                  | 0,107808177 | -0,129909803 | 0,238 | 0,12  | 1         | 0,913888584   | 1,094225289     | 1,983333333     |
| MAPK9                                                                                    | 0,192049609 | -0,129942414 | 0,2   | 0,11  | 1         | 0,913867927   | 1,094250023     | 1,818181818     |
| STX6                                                                                     | 0,476562724 | -0,12998144  | 0,2   | 0,14  | 1         | 0,913843207   | 1,094279623     | 1,428571429     |
| MFHAS1                                                                                   | 0,274731417 | -0,130016478 | 0,125 | 0,07  | 1         | 0,913821013   | 1,0943062       | 1,785714286     |
| AACS                                                                                     | 0,173281996 | -0,13018318  | 0,125 | 0,06  | 1         | 0,913715428   | 1,094432653     | 2,083333333     |
| NFIX                                                                                     | 0,125602533 | -0,130280541 | 0,662 | 0,36  | 1         | 0,913653767   | 1,094506514     | 1,838888889     |
| SS18L1                                                                                   | 0,387170302 | -0,130358461 | 0,1   | 0,06  | 1         | 0,913604422   | 1,09456563      | 1,666666667     |
| SEC23A                                                                                   | 0,031360011 | -0,130363008 | 0,475 | 0,23  | 1         | 0,913601542   | 1,09456908      | 2,065217391     |
| ARHGEF16                                                                                 | 0,072136391 | -0,130414214 | 0     | 0,04  | 1         | 0,913569117   | 1,09460793      | 0               |

Supplementary Table 4

| Differentially expressed genes_keloid-CCD_ comparing SC-Keloid vs. (SC-Myel, SC-Nonmyel) |             |              |       |       |           |               |                 |                 |
|------------------------------------------------------------------------------------------|-------------|--------------|-------|-------|-----------|---------------|-----------------|-----------------|
| gene                                                                                     | p_val       | avg_log2FC   | pct.1 | pct.2 | p_val_adj | Foldchange_UP | Foldchange_DOWN | Ratio_pct1_pct2 |
| TNRC6A                                                                                   | 0,068322626 | -0,130563931 | 0,425 | 0,22  | 1         | 0,913474315   | 1,094721531     | 1,931818182     |
| NUAK2                                                                                    | 0,467776152 | -0,130617094 | 0,15  | 0,1   | 1         | 0,913440654   | 1,094761871     | 1,5             |
| KMT5C                                                                                    | 0,74525199  | -0,130682809 | 0,162 | 0,13  | 1         | 0,913399048   | 1,094811739     | 1,246153846     |
| SUMF1                                                                                    | 0,042193602 | -0,130695406 | 0,288 | 0,13  | 1         | 0,913391073   | 1,094821298     | 2,215384615     |
| MADD                                                                                     | 0,8246177   | -0,130735528 | 0,088 | 0,09  | 1         | 0,913365671   | 1,094851746     | 0,977777778     |
| PWWP2A                                                                                   | 0,073395478 | -0,130754336 | 0,338 | 0,17  | 1         | 0,913353764   | 1,094866019     | 1,988235294     |
| MBD4                                                                                     | 0,004401787 | -0,130809023 | 0,412 | 0,16  | 1         | 0,913319143   | 1,094907523     | 2,575           |
| ANKZF1                                                                                   | 0,375900964 | -0,130840167 | 0,088 | 0,05  | 1         | 0,913299427   | 1,094931159     | 1,76            |
| MCU                                                                                      | 0,180764063 | -0,130920125 | 0,125 | 0,06  | 1         | 0,913248811   | 1,094991845     | 2,083333333     |
| SLC25A44                                                                                 | 0,245182539 | -0,130968967 | 0,175 | 0,1   | 1         | 0,913217894   | 1,095028916     | 1,75            |
| SLC2A8                                                                                   | 0,132463628 | -0,131068976 | 0,2   | 0,1   | 1         | 0,91315459    | 1,095104827     | 2               |
| TENM4                                                                                    | 0,556644247 | -0,131186848 | 0,025 | 0,04  | 1         | 0,913079987   | 1,095194304     | 0,625           |
| ZNHIT6                                                                                   | 0,00892789  | -0,131227336 | 0,3   | 0,11  | 1         | 0,913054362   | 1,095225039     | 2,727272727     |
| KRT17                                                                                    | 0,772114645 | -0,131287036 | 0,075 | 0,06  | 1         | 0,91301658    | 1,095270362     | 1,25            |
| TTF1                                                                                     | 0,197532019 | -0,131288469 | 0,212 | 0,12  | 1         | 0,913015673   | 1,09527145      | 1,766666667     |
| C12orf76                                                                                 | 0,050122327 | -0,13128906  | 0,3   | 0,14  | 1         | 0,913015299   | 1,095271899     | 2,142857143     |
| C9orf85                                                                                  | 0,116684893 | -0,131546175 | 0,138 | 0,06  | 1         | 0,912852597   | 1,095467114     | 2,3             |
| PCMTD1                                                                                   | 0,135475738 | -0,131550245 | 0,45  | 0,26  | 1         | 0,912850022   | 1,095470205     | 1,730769231     |
| APH1B                                                                                    | 0,757573928 | -0,13171206  | 0,125 | 0,1   | 1         | 0,912747641   | 1,095593081     | 1,25            |
| ATP6VOA1                                                                                 | 0,634779817 | -0,131718735 | 0,175 | 0,13  | 1         | 0,912743418   | 1,09559815      | 1,346153846     |
| KIF1C                                                                                    | 0,215293939 | -0,131808032 | 0,212 | 0,12  | 1         | 0,912686925   | 1,095665965     | 1,766666667     |
| CSE1L                                                                                    | 0,002068527 | -0,131812694 | 0,275 | 0,08  | 1         | 0,912683975   | 1,095669506     | 3,4375          |
| GPX4                                                                                     | 0,83690405  | -0,131901486 | 1     | 0,89  | 1         | 0,912627805   | 1,095736941     | 1,123595506     |
| HACD2                                                                                    | 0,083471342 | -0,131975838 | 0,212 | 0,1   | 1         | 0,912580772   | 1,095793414     | 2,12            |
| ITPK1-AS1                                                                                | 0,730495711 | -0,131986592 | 0,05  | 0,06  | 1         | 0,91257397    | 1,095801582     | 0,833333333     |
| RPS11                                                                                    | 0,657466886 | -0,132034033 | 1     | 0,87  | 1         | 0,912543961   | 1,095837617     | 1,149425287     |
| TTL                                                                                      | 0,004905346 | -0,132082332 | 0,4   | 0,16  | 1         | 0,912513412   | 1,095874304     | 2,5             |
| SLC12A2                                                                                  | 0,061343122 | -0,132146172 | 0,375 | 0,19  | 1         | 0,912473033   | 1,095922798     | 1,973684211     |
| ATG3                                                                                     | 0,074011236 | -0,132201568 | 0,438 | 0,23  | 1         | 0,912437997   | 1,09596488      | 1,904347826     |
| UBR2                                                                                     | 0,172668962 | -0,132333331 | 0,25  | 0,14  | 1         | 0,912354667   | 1,09606498      | 1,785714286     |



Supplementary Table 4

| Differentially expressed genes_keloid-CCD_ comparing SC-Keloid vs. (SC-Myel, SC-Nonmyel) |             |              |       |       |           |               |                 |                 |
|------------------------------------------------------------------------------------------|-------------|--------------|-------|-------|-----------|---------------|-----------------|-----------------|
| gene                                                                                     | p_val       | avg_log2FC   | pct.1 | pct.2 | p_val_adj | Foldchange_UP | Foldchange_DOWN | Ratio_pct1_pct2 |
| RBM15                                                                                    | 0,719617502 | -0,132412048 | 0,05  | 0,06  | 1         | 0,912304888   | 1,096124786     | 0,833333333     |
| ATG4B                                                                                    | 0,036510779 | -0,13253267  | 0,312 | 0,14  | 1         | 0,912228614   | 1,096216435     | 2,228571429     |
| DEPTOR                                                                                   | 0,378344325 | -0,132605702 | 0,025 | 0,05  | 1         | 0,912182437   | 1,09627193      | 0,5             |
| CCDC47                                                                                   | 0,089532427 | -0,132608042 | 0,7   | 0,37  | 1         | 0,912180958   | 1,096273707     | 1,891891892     |
| TOX4                                                                                     | 0,006023104 | -0,132610207 | 0,575 | 0,25  | 1         | 0,912179588   | 1,096275353     | 2,3             |
| AKAP8                                                                                    | 0,059745805 | -0,132892518 | 0,225 | 0,1   | 1         | 0,912001108   | 1,096489896     | 2,25            |
| UBE2G2                                                                                   | 0,049432277 | -0,132951328 | 0,5   | 0,26  | 1         | 0,911963932   | 1,096534594     | 1,923076923     |
| HS3ST3B1                                                                                 | 0,259519439 | -0,133101176 | 0,013 | 0,04  | 1         | 0,911869214   | 1,096648494     | 0,325           |
| CCNC                                                                                     | 0,001722223 | -0,133261948 | 0,4   | 0,14  | 1         | 0,911767602   | 1,096770709     | 2,857142857     |
| VPS13D                                                                                   | 0,430690217 | -0,133438129 | 0,125 | 0,08  | 1         | 0,911656265   | 1,096904654     | 1,5625          |
| SLC24A4                                                                                  | 0,120814239 | -0,133562992 | 0     | 0,03  | 1         | 0,911577366   | 1,096999594     | 0               |
| KIF16B                                                                                   | 0,284828372 | -0,133626407 | 0,125 | 0,07  | 1         | 0,911537297   | 1,097047815     | 1,785714286     |
| CYP19A1                                                                                  | 0,120814239 | -0,133689547 | 0     | 0,03  | 1         | 0,911497404   | 1,097095829     | 0               |
| CERS4                                                                                    | 0,137400427 | -0,133746279 | 0,262 | 0,14  | 1         | 0,911461562   | 1,097138971     | 1,871428571     |
| TST                                                                                      | 0,102271795 | -0,133774708 | 0,275 | 0,14  | 1         | 0,911443601   | 1,097160591     | 1,964285714     |
| ZDHHC6                                                                                   | 0,13799162  | -0,13377779  | 0,212 | 0,11  | 1         | 0,911441654   | 1,097162935     | 1,927272727     |
| NAV2-AS3                                                                                 | 0,369110746 | -0,133927813 | 0,025 | 0,05  | 1         | 0,91134688    | 1,097277032     | 0,5             |
| GPR161                                                                                   | 0,557924866 | -0,134066443 | 0,075 | 0,05  | 1         | 0,911259312   | 1,097382476     | 1,5             |
| LAMTOR3                                                                                  | 0,073497584 | -0,134283343 | 0,35  | 0,18  | 1         | 0,91112232    | 1,097547473     | 1,944444444     |
| KIAA0586                                                                                 | 0,127685525 | -0,134313891 | 0,2   | 0,1   | 1         | 0,911103028   | 1,097570713     | 2               |
| UPRT                                                                                     | 0,772829449 | -0,134359781 | 0,1   | 0,08  | 1         | 0,911074047   | 1,097605626     | 1,25            |
| AFF4                                                                                     | 0,03555789  | -0,134577244 | 0,65  | 0,32  | 1         | 0,910936728   | 1,097771084     | 2,03125         |
| C18orf32                                                                                 | 0,175701606 | -0,134580889 | 0,3   | 0,17  | 1         | 0,910934427   | 1,097773858     | 1,764705882     |
| PLEKHM2                                                                                  | 0,080125972 | -0,13461949  | 0,312 | 0,16  | 1         | 0,910910054   | 1,097803231     | 1,95            |
| RCC1L                                                                                    | 0,030822746 | -0,134866831 | 0,288 | 0,13  | 1         | 0,910753898   | 1,097991458     | 2,215384615     |
| PHRF1                                                                                    | 0,267822926 | -0,134939045 | 0,112 | 0,06  | 1         | 0,910708311   | 1,09804642      | 1,866666667     |
| NT5C2                                                                                    | 0,750610084 | -0,135061294 | 0,1   | 0,08  | 1         | 0,910631144   | 1,098139468     | 1,25            |
| CCDC120                                                                                  | 0,072136391 | -0,135103239 | 0     | 0,04  | 1         | 0,910604669   | 1,098171396     | 0               |
| RASGEF1A                                                                                 | 0,422547341 | -0,135155776 | 0,138 | 0,09  | 1         | 0,910571509   | 1,098211388     | 1,533333333     |
| G2E3                                                                                     | 0,326985175 | -0,135172201 | 0,162 | 0,1   | 1         | 0,910561142   | 1,098223891     | 1,62            |

Supplementary Table 4

| Differentially expressed genes_keloid-CCD_ comparing SC-Keloid vs. (SC-Myel, SC-Nonmyel) |             |              |       |       |           |               |                 |                 |
|------------------------------------------------------------------------------------------|-------------|--------------|-------|-------|-----------|---------------|-----------------|-----------------|
| gene                                                                                     | p_val       | avg_log2FC   | pct.1 | pct.2 | p_val_adj | Foldchange_UP | Foldchange_DOWN | Ratio_pct1_pct2 |
| ATXN1L                                                                                   | 0,590237357 | -0,135174656 | 0,15  | 0,11  | 1         | 0,910559592   | 1,09822576      | 1,363636364     |
| BMF                                                                                      | 0,316940453 | -0,135211309 | 0,038 | 0,07  | 1         | 0,910536459   | 1,098253661     | 0,542857143     |
| NSMAF                                                                                    | 0,407602202 | -0,135217115 | 0,112 | 0,07  | 1         | 0,910532795   | 1,098258081     | 1,6             |
| FXYD6                                                                                    | 0,143189031 | -0,135231867 | 0,162 | 0,08  | 1         | 0,910523484   | 1,098269311     | 2,025           |
| DMAC2L                                                                                   | 0,084975235 | -0,135280775 | 0,312 | 0,16  | 1         | 0,910492618   | 1,098306544     | 1,95            |
| TMEM185B                                                                                 | 0,180764063 | -0,135403017 | 0,125 | 0,06  | 1         | 0,910415474   | 1,098399609     | 2,083333333     |
| LPCAT3                                                                                   | 0,108911171 | -0,135412333 | 0,188 | 0,09  | 1         | 0,910409594   | 1,098406702     | 2,088888889     |
| PIP4P1                                                                                   | 0,072686409 | -0,135487123 | 0,25  | 0,12  | 1         | 0,9103624     | 1,098463645     | 2,083333333     |
| CCDC91                                                                                   | 0,300278349 | -0,135672004 | 0,475 | 0,3   | 1         | 0,910245745   | 1,098604422     | 1,583333333     |
| KLHL15                                                                                   | 0,779340817 | -0,135732836 | 0,15  | 0,12  | 1         | 0,910207364   | 1,098650747     | 1,25            |
| WDTC1                                                                                    | 0,915022375 | -0,135831227 | 0,138 | 0,12  | 1         | 0,910145291   | 1,098725676     | 1,15            |
| PRKCD                                                                                    | 0,015994304 | -0,135854953 | 0,188 | 0,06  | 1         | 0,910130323   | 1,098743745     | 3,133333333     |
| CARD8                                                                                    | 0,557924866 | -0,136073204 | 0,075 | 0,05  | 1         | 0,909992649   | 1,098909976     | 1,5             |
| TAF1A                                                                                    | 0,94227175  | -0,13630365  | 0,05  | 0,05  | 1         | 0,909847305   | 1,099085522     | 1               |
| ARHGAP10                                                                                 | 0,140432162 | -0,136624712 | 0,212 | 0,11  | 1         | 0,909644846   | 1,099330144     | 1,927272727     |
| MPZL1                                                                                    | 0,580120923 | -0,136672672 | 0,112 | 0,08  | 1         | 0,909614608   | 1,09936669      | 1,4             |
| ATF7IP2                                                                                  | 0,779340817 | -0,136742542 | 0,15  | 0,12  | 1         | 0,909570556   | 1,099419933     | 1,25            |
| NUDT4                                                                                    | 0,250702492 | -0,136758836 | 0,812 | 0,5   | 1         | 0,909560283   | 1,09943235      | 1,624           |
| ZXDA                                                                                     | 0,072136391 | -0,136780616 | 0     | 0,04  | 1         | 0,909546552   | 1,099448949     | 0               |
| PPP3R1                                                                                   | 0,017874712 | -0,136903703 | 0,362 | 0,16  | 1         | 0,909468955   | 1,099542755     | 2,2625          |
| EIF4E3                                                                                   | 0,384878062 | -0,136974918 | 0,112 | 0,07  | 1         | 0,909424063   | 1,099597032     | 1,6             |
| SYNGAP1                                                                                  | 0,424249303 | -0,136981378 | 0,125 | 0,08  | 1         | 0,909419991   | 1,099601956     | 1,5625          |
| POM121                                                                                   | 0,759550473 | -0,137007103 | 0,162 | 0,13  | 1         | 0,909403774   | 1,099621563     | 1,246153846     |
| VIRMA                                                                                    | 0,103620317 | -0,137170457 | 0,25  | 0,13  | 1         | 0,90930081    | 1,099746078     | 1,923076923     |
| ANAPC13                                                                                  | 0,044749764 | -0,137306438 | 0,362 | 0,18  | 1         | 0,909215108   | 1,09984974      | 2,011111111     |
| DNM1L                                                                                    | 0,035876747 | -0,137346475 | 0,438 | 0,21  | 1         | 0,909189876   | 1,099880263     | 2,085714286     |
| GLIS2                                                                                    | 0,399676527 | -0,137347924 | 0,05  | 0,08  | 1         | 0,909188963   | 1,099881368     | 0,625           |
| TFRC                                                                                     | 0,266010223 | -0,137439978 | 0,225 | 0,14  | 1         | 0,909130952   | 1,09995155      | 1,607142857     |
| ZNF875                                                                                   | 0,816178828 | -0,137617119 | 0,075 | 0,08  | 1         | 0,909019332   | 1,100086616     | 0,9375          |
| FCHO2                                                                                    | 0,316677143 | -0,137962907 | 0,138 | 0,08  | 1         | 0,908801482   | 1,100350318     | 1,725           |

Supplementary Table 4

| Differentially expressed genes_keloid-CCD_ comparing SC-Keloid vs. (SC-Myel, SC-Nonmyel) |             |              |       |       |           |               |                 |                 |
|------------------------------------------------------------------------------------------|-------------|--------------|-------|-------|-----------|---------------|-----------------|-----------------|
| gene                                                                                     | p_val       | avg_log2FC   | pct.1 | pct.2 | p_val_adj | Foldchange_UP | Foldchange_DOWN | Ratio_pct1_pct2 |
| YRDC                                                                                     | 0,16831921  | -0,138020229 | 0,3   | 0,17  | 1         | 0,908765374   | 1,100394038     | 1,764705882     |
| RND1                                                                                     | 0,240774098 | -0,138054285 | 0,025 | 0,06  | 1         | 0,908743922   | 1,100420015     | 0,416666667     |
| BAG4                                                                                     | 0,190475413 | -0,13833202  | 0,2   | 0,11  | 1         | 0,908568995   | 1,100631878     | 1,818181818     |
| PTPRE                                                                                    | 0,130168369 | -0,138402863 | 0,525 | 0,3   | 1         | 0,908524382   | 1,100685926     | 1,75            |
| RCAN3                                                                                    | 0,096200318 | -0,138537053 | 0,3   | 0,16  | 1         | 0,908439881   | 1,100788309     | 1,875           |
| RNF152                                                                                   | 0,771757484 | -0,13857722  | 0,062 | 0,05  | 1         | 0,908414588   | 1,100818957     | 1,24            |
| ARHGAP12                                                                                 | 0,07179435  | -0,13859725  | 0,438 | 0,23  | 1         | 0,908401976   | 1,100834241     | 1,904347826     |
| CDKN2B                                                                                   | 0,031715962 | -0,138609783 | 0,225 | 0,09  | 1         | 0,908394085   | 1,100843804     | 2,5             |
| CCDC174                                                                                  | 0,097431952 | -0,13878147  | 0,225 | 0,11  | 1         | 0,908285989   | 1,100974817     | 2,045454545     |
| ETV1                                                                                     | 0,583377297 | -0,138784399 | 0,062 | 0,08  | 1         | 0,908284144   | 1,100977052     | 0,775           |
| KCNK12                                                                                   | 0,83477988  | -0,138906348 | 0,025 | 0,02  | 1         | 0,908207372   | 1,10107012      | 1,25            |
| ZNF587                                                                                   | 0,549439969 | -0,138979595 | 0,112 | 0,08  | 1         | 0,908161262   | 1,101126024     | 1,4             |
| HELZ                                                                                     | 0,004998674 | -0,13900731  | 0,462 | 0,19  | 1         | 0,908143816   | 1,101147178     | 2,431578947     |
| CPLANE1                                                                                  | 0,339380907 | -0,139013902 | 0,162 | 0,1   | 1         | 0,908139667   | 1,101152209     | 1,62            |
| COMP                                                                                     | 0,968859771 | -0,139110912 | 0,088 | 0,08  | 1         | 0,908078603   | 1,101226256     | 1,1             |
| GGA1                                                                                     | 0,044821556 | -0,139116679 | 0,25  | 0,11  | 1         | 0,908074974   | 1,101230657     | 2,272727273     |
| ZNRF3                                                                                    | 0,975107496 | -0,139214723 | 0,062 | 0,06  | 1         | 0,908013264   | 1,101305498     | 1,033333333     |
| MICU3                                                                                    | 0,470814625 | -0,139279128 | 0,162 | 0,11  | 1         | 0,907972729   | 1,101354664     | 1,472727273     |
| C18orf25                                                                                 | 0,193633351 | -0,139291987 | 0,2   | 0,11  | 1         | 0,907964636   | 1,101364481     | 1,818181818     |
| FBXO2                                                                                    | 0,259519439 | -0,139319093 | 0,013 | 0,04  | 1         | 0,907947577   | 1,101385174     | 0,325           |
| C1orf43                                                                                  | 0,010565891 | -0,139403776 | 0,738 | 0,34  | 1         | 0,907894284   | 1,101449825     | 2,170588235     |
| EID2                                                                                     | 0,099262928 | -0,139408335 | 0,225 | 0,11  | 1         | 0,907891415   | 1,101453305     | 2,045454545     |
| NPC1                                                                                     | 0,453709    | -0,13941699  | 0,138 | 0,09  | 1         | 0,907885968   | 1,101459913     | 1,533333333     |
| THBD                                                                                     | 0,793304172 | -0,1394929   | 0,05  | 0,04  | 1         | 0,907838199   | 1,10151787      | 1,25            |
| LMBR1L                                                                                   | 0,651385102 | -0,140022491 | 0,175 | 0,13  | 1         | 0,907505008   | 1,101922294     | 1,346153846     |
| CCDC88B                                                                                  | 0,527578779 | -0,14003356  | 0,05  | 0,03  | 1         | 0,907498045   | 1,101930749     | 1,666666667     |
| KBTBD4                                                                                   | 0,59120503  | -0,140055902 | 0,125 | 0,09  | 1         | 0,907483991   | 1,101947814     | 1,388888889     |
| MAP3K7CL                                                                                 | 0,421050079 | -0,140100959 | 0,125 | 0,08  | 1         | 0,90745565    | 1,101982229     | 1,5625          |
| NDEL1                                                                                    | 0,108843766 | -0,140104109 | 0,338 | 0,18  | 1         | 0,907453669   | 1,101984635     | 1,877777778     |
| HOMER1                                                                                   | 0,085981454 | -0,140107821 | 0,212 | 0,1   | 1         | 0,907451334   | 1,10198747      | 2,12            |

Supplementary Table 4

| Differentially expressed genes_keloid-CCD_ comparing SC-Keloid vs. (SC-Myel, SC-Nonmyel) |             |              |       |       |           |               |                 |                 |
|------------------------------------------------------------------------------------------|-------------|--------------|-------|-------|-----------|---------------|-----------------|-----------------|
| gene                                                                                     | p_val       | avg_log2FC   | pct.1 | pct.2 | p_val_adj | Foldchange_UP | Foldchange_DOWN | Ratio_pct1_pct2 |
| CYRIA                                                                                    | 0,772114645 | -0,140149424 | 0,075 | 0,06  | 1         | 0,907425166   | 1,102019249     | 1,25            |
| SCAPER                                                                                   | 0,322701203 | -0,140175073 | 0,15  | 0,09  | 1         | 0,907409033   | 1,102038842     | 1,666666667     |
| TSPYL4                                                                                   | 0,623582215 | -0,140246611 | 0,162 | 0,12  | 1         | 0,907364039   | 1,102093489     | 1,35            |
| ABI1                                                                                     | 0,03201651  | -0,140278782 | 0,462 | 0,22  | 1         | 0,907343806   | 1,102118065     | 2,1             |
| SLC48A1                                                                                  | 0,253950987 | -0,140324328 | 0,025 | 0,06  | 1         | 0,907315162   | 1,10215286      | 0,416666667     |
| ARHGEF25                                                                                 | 0,772114645 | -0,140326233 | 0,075 | 0,06  | 1         | 0,907313963   | 1,102154315     | 1,25            |
| GIT1                                                                                     | 0,045918588 | -0,140436686 | 0,425 | 0,21  | 1         | 0,907244502   | 1,102238699     | 2,023809524     |
| TARS1                                                                                    | 0,007797617 | -0,140510181 | 0,6   | 0,26  | 1         | 0,907198286   | 1,102294852     | 2,307692308     |
| TPRA1                                                                                    | 0,750610084 | -0,140523796 | 0,1   | 0,08  | 1         | 0,907189724   | 1,102305255     | 1,25            |
| ASCC2                                                                                    | 0,020669575 | -0,140547552 | 0,238 | 0,09  | 1         | 0,907174786   | 1,102323406     | 2,644444444     |
| RBM17                                                                                    | 0,29007948  | -0,14067481  | 0,713 | 0,43  | 1         | 0,907094769   | 1,102420645     | 1,658139535     |
| CEP162                                                                                   | 0,219913458 | -0,140720107 | 0,15  | 0,08  | 1         | 0,907066289   | 1,102455258     | 1,875           |
| TP53INP1                                                                                 | 0,57023707  | -0,140756183 | 0,062 | 0,08  | 1         | 0,907043608   | 1,102482826     | 0,775           |
| ZNF358                                                                                   | 0,131343112 | -0,140772558 | 0,412 | 0,23  | 1         | 0,907033312   | 1,10249534      | 1,791304348     |
| AIDA                                                                                     | 0,008090733 | -0,140800525 | 0,512 | 0,22  | 1         | 0,907015729   | 1,102516713     | 2,327272727     |
| GGCX                                                                                     | 0,060645788 | -0,140807043 | 0,238 | 0,11  | 1         | 0,907011631   | 1,102521694     | 2,163636364     |
| C2orf49                                                                                  | 0,014626144 | -0,140917281 | 0,225 | 0,08  | 1         | 0,906942328   | 1,102605942     | 2,8125          |
| RBAK                                                                                     | 0,387170302 | -0,140938974 | 0,1   | 0,06  | 1         | 0,906928691   | 1,102622521     | 1,666666667     |
| RNF19B                                                                                   | 0,199100998 | -0,140963298 | 0,212 | 0,12  | 1         | 0,906913401   | 1,102641112     | 1,766666667     |
| PELP1                                                                                    | 0,284499401 | -0,140964987 | 0,2   | 0,12  | 1         | 0,906912338   | 1,102642403     | 1,666666667     |
| SETD9                                                                                    | 0,33687795  | -0,140966771 | 0,162 | 0,1   | 1         | 0,906911217   | 1,102643766     | 1,62            |
| AASDH                                                                                    | 0,458908782 | -0,140982223 | 0,162 | 0,11  | 1         | 0,906901504   | 1,102655576     | 1,472727273     |
| ANGPTL1                                                                                  | 0,424249303 | -0,141016154 | 0,125 | 0,08  | 1         | 0,906880174   | 1,10268151      | 1,5625          |
| MPP7                                                                                     | 0,072136391 | -0,141236417 | 0     | 0,04  | 1         | 0,906741727   | 1,102849874     | 0               |
| DYNC1L1                                                                                  | 0,020873987 | -0,14130253  | 0,5   | 0,23  | 1         | 0,906700176   | 1,102900415     | 2,173913043     |
| GABRB1                                                                                   | 0,774132462 | -0,141438654 | 0,038 | 0,03  | 1         | 0,906614629   | 1,103004483     | 1,266666667     |
| KLHL7                                                                                    | 0,036510779 | -0,141576276 | 0,312 | 0,14  | 1         | 0,906528149   | 1,103109706     | 2,228571429     |
| CTNND1                                                                                   | 0,044723908 | -0,141637941 | 0,525 | 0,26  | 1         | 0,906489403   | 1,103156857     | 2,019230769     |
| HIC2                                                                                     | 0,756599002 | -0,141689499 | 0,088 | 0,07  | 1         | 0,906457008   | 1,103196281     | 1,257142857     |
| SAP130                                                                                   | 0,761946743 | -0,141729034 | 0,075 | 0,06  | 1         | 0,906432167   | 1,103226514     | 1,25            |

Supplementary Table 4

| Differentially expressed genes_keloid-CCD_ comparing SC-Keloid vs. (SC-Myel, SC-Nonmyel) |             |              |       |       |           |               |                 |                 |
|------------------------------------------------------------------------------------------|-------------|--------------|-------|-------|-----------|---------------|-----------------|-----------------|
| gene                                                                                     | p_val       | avg_log2FC   | pct.1 | pct.2 | p_val_adj | Foldchange_UP | Foldchange_DOWN | Ratio_pct1_pct2 |
| ATP2B1-AS1                                                                               | 0,557924866 | -0,14175337  | 0,075 | 0,05  | 1         | 0,906416878   | 1,103245123     | 1,5             |
| HMGCR                                                                                    | 0,133208758 | -0,141760102 | 0,212 | 0,11  | 1         | 0,906412648   | 1,103250271     | 1,927272727     |
| SRGN                                                                                     | 0,601113876 | -0,141801441 | 0,062 | 0,08  | 1         | 0,906386676   | 1,103281884     | 0,775           |
| CAHM                                                                                     | 0,842824122 | -0,141985731 | 0,088 | 0,09  | 1         | 0,906270902   | 1,103422826     | 0,977777778     |
| PHYKPL                                                                                   | 0,458309153 | -0,142038192 | 0,175 | 0,12  | 1         | 0,906237948   | 1,103462951     | 1,458333333     |
| ACSL1                                                                                    | 0,400928338 | -0,142290839 | 0,1   | 0,06  | 1         | 0,906079259   | 1,103656208     | 1,666666667     |
| JUP                                                                                      | 0,309977712 | -0,142464829 | 0,038 | 0,07  | 1         | 0,905969992   | 1,103789318     | 0,542857143     |
| ABHD17B                                                                                  | 0,143189031 | -0,14250754  | 0,162 | 0,08  | 1         | 0,905943171   | 1,103821996     | 2,025           |
| DIAPH2                                                                                   | 0,561556035 | -0,142521445 | 0,088 | 0,06  | 1         | 0,90593444    | 1,103832635     | 1,466666667     |
| GAS6                                                                                     | 0,57023707  | -0,14252916  | 0,088 | 0,06  | 1         | 0,905929595   | 1,103838538     | 1,466666667     |
| DTNA                                                                                     | 0,159376137 | -0,142546544 | 0,112 | 0,05  | 1         | 0,905918679   | 1,103851839     | 2,24            |
| PIGK                                                                                     | 0,003235468 | -0,14260239  | 0,425 | 0,16  | 1         | 0,905883612   | 1,10389457      | 2,65625         |
| E2F5                                                                                     | 0,04965159  | -0,142628365 | 0,3   | 0,14  | 1         | 0,905867302   | 1,103914445     | 2,142857143     |
| UBE2D2                                                                                   | 0,816384995 | -0,142645579 | 0,825 | 0,59  | 1         | 0,905856494   | 1,103927616     | 1,398305085     |
| SLITRK5                                                                                  | 0,383013985 | -0,142680849 | 0,025 | 0,05  | 1         | 0,905834348   | 1,103954605     | 0,5             |
| SCGB1D2                                                                                  | 0,120814239 | -0,1427643   | 0     | 0,03  | 1         | 0,905781953   | 1,104018464     | 0               |
| RASA2                                                                                    | 0,595756728 | -0,142878811 | 0,112 | 0,08  | 1         | 0,905710061   | 1,104106097     | 1,4             |
| SNRNP27                                                                                  | 0,011386446 | -0,142952987 | 0,475 | 0,21  | 1         | 0,905663495   | 1,104162866     | 2,261904762     |
| SYNGR2                                                                                   | 0,034858598 | -0,143027152 | 0,188 | 0,07  | 1         | 0,905616939   | 1,104219629     | 2,685714286     |
| ZDHHC17                                                                                  | 0,061873827 | -0,143047155 | 0,238 | 0,11  | 1         | 0,905604383   | 1,104234939     | 2,163636364     |
| LINC00672                                                                                | 0,708795782 | -0,143148952 | 0,05  | 0,06  | 1         | 0,905540485   | 1,104312857     | 0,833333333     |
| EFNA4                                                                                    | 0,799526327 | -0,143267135 | 0,05  | 0,04  | 1         | 0,905466308   | 1,104403324     | 1,25            |
| CPEB4                                                                                    | 0,13202834  | -0,143339025 | 0,338 | 0,19  | 1         | 0,905421189   | 1,104458358     | 1,778947368     |
| ABCA5                                                                                    | 0,556644247 | -0,143409834 | 0,025 | 0,04  | 1         | 0,905376751   | 1,104512568     | 0,625           |
| DCAF1                                                                                    | 0,997233723 | -0,143411353 | 0,062 | 0,06  | 1         | 0,905375798   | 1,10451373      | 1,033333333     |
| VPS9D1                                                                                   | 0,134155073 | -0,143438669 | 0,15  | 0,07  | 1         | 0,905358656   | 1,104534643     | 2,142857143     |
| PURB                                                                                     | 0,061508803 | -0,143613381 | 0,562 | 0,3   | 1         | 0,905249023   | 1,104668412     | 1,873333333     |
| ANKHD1                                                                                   | 0,165388252 | -0,143704676 | 0,175 | 0,09  | 1         | 0,90519174    | 1,104738318     | 1,944444444     |
| WTIP                                                                                     | 0,159083509 | -0,143812319 | 0,225 | 0,12  | 1         | 0,905124203   | 1,104820749     | 1,875           |
| CREBZF                                                                                   | 0,202002705 | -0,143932531 | 0,3   | 0,18  | 1         | 0,905048787   | 1,104912811     | 1,666666667     |

Supplementary Table 4

| Differentially expressed genes_keloid-CCD_ comparing SC-Keloid vs. (SC-Myel, SC-Nonmyel) |             |              |       |       |           |               |                 |                 |
|------------------------------------------------------------------------------------------|-------------|--------------|-------|-------|-----------|---------------|-----------------|-----------------|
| gene                                                                                     | p_val       | avg_log2FC   | pct.1 | pct.2 | p_val_adj | Foldchange_UP | Foldchange_DOWN | Ratio_pct1_pct2 |
| ACSS3                                                                                    | 0,820013192 | -0,144056725 | 0,025 | 0,03  | 1         | 0,90497088    | 1,105007931     | 0,833333333     |
| IKBKB                                                                                    | 0,807094574 | -0,144099181 | 0,175 | 0,14  | 1         | 0,904944248   | 1,105040451     | 1,25            |
| PNN                                                                                      | 0,303926502 | -0,144341739 | 0,75  | 0,48  | 1         | 0,904792115   | 1,105226254     | 1,5625          |
| KCNK5                                                                                    | 0,556644247 | -0,144430232 | 0,025 | 0,04  | 1         | 0,904736617   | 1,10529405      | 0,625           |
| ZNF207                                                                                   | 0,188779452 | -0,144505638 | 0,762 | 0,43  | 1         | 0,90468933    | 1,105351823     | 1,772093023     |
| ARSJ                                                                                     | 0,582634513 | -0,144541362 | 0,1   | 0,07  | 1         | 0,904666929   | 1,105379193     | 1,428571429     |
| ZFC3H1                                                                                   | 0,304936112 | -0,144598405 | 0,225 | 0,14  | 1         | 0,90463116    | 1,1054229       | 1,607142857     |
| DNAJC10                                                                                  | 0,064785224 | -0,14469222  | 0,362 | 0,18  | 1         | 0,904572336   | 1,105494785     | 2,011111111     |
| DYNLT2                                                                                   | 0,072136391 | -0,144838694 | 0     | 0,04  | 1         | 0,904480501   | 1,10560703      | 0               |
| SENP2                                                                                    | 0,219913458 | -0,144879065 | 0,15  | 0,08  | 1         | 0,904455191   | 1,105637969     | 1,875           |
| CDKAL1                                                                                   | 0,708795782 | -0,144898919 | 0,05  | 0,06  | 1         | 0,904442744   | 1,105653184     | 0,833333333     |
| BZW1                                                                                     | 0,605074269 | -0,145050985 | 0,75  | 0,51  | 1         | 0,904347417   | 1,105769731     | 1,470588235     |
| ZNF559                                                                                   | 0,853031596 | -0,145149065 | 0,1   | 0,1   | 1         | 0,904285938   | 1,105844908     | 1               |
| MYH14                                                                                    | 0,324004993 | -0,145157982 | 0,038 | 0,07  | 1         | 0,904280349   | 1,105851743     | 0,542857143     |
| SPTY2D1                                                                                  | 0,093607079 | -0,145228295 | 0,325 | 0,17  | 1         | 0,904236278   | 1,10590564      | 1,911764706     |
| ZFY                                                                                      | 0,155273405 | -0,145323212 | 0,238 | 0,13  | 1         | 0,904176789   | 1,105978401     | 1,830769231     |
| USP25                                                                                    | 0,400617752 | -0,145356659 | 0,175 | 0,12  | 1         | 0,904155827   | 1,106004043     | 1,458333333     |
| FGFRL1                                                                                   | 0,259519439 | -0,145433354 | 0,013 | 0,04  | 1         | 0,904107763   | 1,10606284      | 0,325           |
| TMEM70                                                                                   | 0,082361656 | -0,145539166 | 0,35  | 0,18  | 1         | 0,904041455   | 1,106143966     | 1,944444444     |
| TFPI2                                                                                    | 0,000395783 | -0,145639594 | 0,262 | 0,06  | 1         | 0,903978525   | 1,106220969     | 4,366666667     |
| NOC2L                                                                                    | 0,053532491 | -0,14567944  | 0,312 | 0,15  | 1         | 0,903953559   | 1,106251522     | 2,08            |
| ALMS1                                                                                    | 0,397461587 | -0,145720917 | 0,1   | 0,06  | 1         | 0,903927571   | 1,106283327     | 1,666666667     |
| UBR3                                                                                     | 0,022759346 | -0,145837114 | 0,25  | 0,1   | 1         | 0,90385477    | 1,106372432     | 2,5             |
| TTI2                                                                                     | 0,938943315 | -0,145841775 | 0,1   | 0,09  | 1         | 0,90385185    | 1,106376007     | 1,111111111     |
| ADAL                                                                                     | 0,947974804 | -0,146006182 | 0,1   | 0,09  | 1         | 0,903748854   | 1,106502094     | 1,111111111     |
| EIF3E                                                                                    | 0,998836598 | -0,146008556 | 0,875 | 0,57  | 1         | 0,903747367   | 1,106503915     | 1,535087719     |
| DHH                                                                                      | 0,442085721 | -0,14607461  | 0,062 | 0,09  | 1         | 0,90370599    | 1,106554578     | 0,688888889     |
| C4orf46                                                                                  | 0,201458433 | -0,146190747 | 0,138 | 0,07  | 1         | 0,903633244   | 1,106643659     | 1,971428571     |
| RAB40B                                                                                   | 0,367396668 | -0,146361204 | 0,188 | 0,12  | 1         | 0,903526485   | 1,106774419     | 1,566666667     |
| EFR3A                                                                                    | 0,129220518 | -0,146369772 | 0,3   | 0,16  | 1         | 0,903521119   | 1,106780992     | 1,875           |

Supplementary Table 4

| Differentially expressed genes_keloid-CCD_ comparing SC-Keloid vs. (SC-Myel, SC-Nonmyel) |             |              |       |       |           |               |                 |                 |
|------------------------------------------------------------------------------------------|-------------|--------------|-------|-------|-----------|---------------|-----------------|-----------------|
| gene                                                                                     | p_val       | avg_log2FC   | pct.1 | pct.2 | p_val_adj | Foldchange_UP | Foldchange_DOWN | Ratio_pct1_pct2 |
| NIPSNAP2                                                                                 | 0,277290709 | -0,146528438 | 0,325 | 0,21  | 1         | 0,903421756   | 1,106902721     | 1,547619048     |
| SURF1                                                                                    | 0,007311623 | -0,146545837 | 0,438 | 0,18  | 1         | 0,903410861   | 1,10691607      | 2,433333333     |
| AP1G2                                                                                    | 0,369110746 | -0,146709415 | 0,025 | 0,05  | 1         | 0,903308435   | 1,107041584     | 0,5             |
| SCHIP1                                                                                   | 0,847389289 | -0,146830372 | 0,088 | 0,09  | 1         | 0,903232704   | 1,107134403     | 0,977777778     |
| RNF2                                                                                     | 0,163879797 | -0,146967538 | 0,175 | 0,09  | 1         | 0,903146832   | 1,10723967      | 1,944444444     |
| SMAD3                                                                                    | 0,369110746 | -0,14722408  | 0,025 | 0,05  | 1         | 0,902986247   | 1,107436579     | 0,5             |
| SF3B1                                                                                    | 0,631084772 | -0,147317484 | 0,85  | 0,67  | 1         | 0,902927787   | 1,10750828      | 1,268656716     |
| PAPSS2                                                                                   | 0,259519439 | -0,147411994 | 0,013 | 0,04  | 1         | 0,902868639   | 1,107580834     | 0,325           |
| HMGXB4                                                                                   | 0,022681557 | -0,147418333 | 0,462 | 0,22  | 1         | 0,902864672   | 1,1075857       | 2,1             |
| ZNF227                                                                                   | 0,452754618 | -0,147620989 | 0,038 | 0,06  | 1         | 0,902737855   | 1,107741294     | 0,633333333     |
| CHDH                                                                                     | 0,159398678 | -0,147663464 | 0,013 | 0,05  | 1         | 0,902711277   | 1,107773909     | 0,26            |
| MCMBP                                                                                    | 0,044162313 | -0,147740282 | 0,325 | 0,15  | 1         | 0,902663213   | 1,107832895     | 2,166666667     |
| WDR33                                                                                    | 0,103633433 | -0,147741527 | 0,475 | 0,25  | 1         | 0,902662434   | 1,107833851     | 1,9             |
| SCMH1                                                                                    | 0,772829449 | -0,147799026 | 0,1   | 0,08  | 1         | 0,902626459   | 1,107878005     | 1,25            |
| HNRNPAB                                                                                  | 0,258981362 | -0,147956558 | 0,875 | 0,52  | 1         | 0,902527904   | 1,107998984     | 1,682692308     |
| CABLES1                                                                                  | 0,072136391 | -0,148216393 | 0     | 0,04  | 1         | 0,902365369   | 1,108198557     | 0               |
| CRY2                                                                                     | 0,452756248 | -0,148348298 | 0,038 | 0,06  | 1         | 0,90228287    | 1,108299883     | 0,633333333     |
| TTC7A                                                                                    | 0,788452212 | -0,14854404  | 0,062 | 0,05  | 1         | 0,902160459   | 1,108450265     | 1,24            |
| TET1                                                                                     | 0,779340817 | -0,148598121 | 0,15  | 0,12  | 1         | 0,902126641   | 1,108491818     | 1,25            |
| L1TD1                                                                                    | 0,043652221 | -0,148730131 | 0     | 0,05  | 1         | 0,902044098   | 1,108593252     | 0               |
| CCDC7                                                                                    | 0,651640212 | -0,148839226 | 0,038 | 0,05  | 1         | 0,901975889   | 1,108677086     | 0,76            |
| ENTPD3-AS1                                                                               | 0,240774098 | -0,148910005 | 0,025 | 0,06  | 1         | 0,901931639   | 1,108731479     | 0,416666667     |
| THBS1                                                                                    | 0,190049883 | -0,148971078 | 0,5   | 0,31  | 1         | 0,901893459   | 1,108778415     | 1,612903226     |
| BBS2                                                                                     | 0,289969834 | -0,149039411 | 0,125 | 0,07  | 1         | 0,901850742   | 1,108830934     | 1,785714286     |
| WRN                                                                                      | 0,078471401 | -0,149100939 | 0,2   | 0,09  | 1         | 0,901812281   | 1,108878224     | 2,222222222     |
| BCL9L                                                                                    | 0,063307568 | -0,149112234 | 0,288 | 0,14  | 1         | 0,90180522    | 1,108886906     | 2,057142857     |
| VANGL2                                                                                   | 0,758027222 | -0,149119186 | 0,175 | 0,14  | 1         | 0,901800875   | 1,108892249     | 1,25            |
| SEC62                                                                                    | 0,454101374 | -0,14916049  | 0,95  | 0,63  | 1         | 0,901775056   | 1,108923997     | 1,507936508     |
| CELF1                                                                                    | 0,04935731  | -0,149236145 | 0,488 | 0,24  | 1         | 0,901727768   | 1,108982151     | 2,033333333     |
| SUB1                                                                                     | 0,420994107 | -0,149381836 | 0,938 | 0,7   | 1         | 0,901636712   | 1,109094147     | 1,34            |

Supplementary Table 4

| Differentially expressed genes_keloid-CCD_ comparing SC-Keloid vs. (SC-Myel, SC-Nonmyel) |             |              |       |       |           |               |                 |                 |
|------------------------------------------------------------------------------------------|-------------|--------------|-------|-------|-----------|---------------|-----------------|-----------------|
| gene                                                                                     | p_val       | avg_log2FC   | pct.1 | pct.2 | p_val_adj | Foldchange_UP | Foldchange_DOWN | Ratio_pct1_pct2 |
| CMSS1                                                                                    | 0,000828134 | -0,149622107 | 0,55  | 0,21  | 1         | 0,901486563   | 1,109278874     | 2,619047619     |
| ADAMTS7                                                                                  | 0,058562765 | -0,149671964 | 0,362 | 0,18  | 1         | 0,90145541    | 1,10931721      | 2,011111111     |
| ZNF703                                                                                   | 0,598897429 | -0,149684302 | 0,175 | 0,13  | 1         | 0,901447701   | 1,109326697     | 1,346153846     |
| ESPN                                                                                     | 0,120814239 | -0,149834633 | 0     | 0,03  | 1         | 0,901353773   | 1,109442296     | 0               |
| ID1                                                                                      | 0,015917587 | -0,149952967 | 0,688 | 0,37  | 1         | 0,901279845   | 1,1095333       | 1,859459459     |
| DEXI                                                                                     | 0,061469136 | -0,149989109 | 0,325 | 0,16  | 1         | 0,901257266   | 1,109561096     | 2,03125         |
| INSR                                                                                     | 0,452756248 | -0,150025588 | 0,038 | 0,06  | 1         | 0,901234478   | 1,109589152     | 0,633333333     |
| PLBD2                                                                                    | 0,007994399 | -0,150068046 | 0,3   | 0,11  | 1         | 0,901207955   | 1,109621807     | 2,727272727     |
| SBNO1                                                                                    | 0,143045068 | -0,150098141 | 0,438 | 0,24  | 1         | 0,901189156   | 1,109644954     | 1,825           |
| FRAT2                                                                                    | 0,548643101 | -0,150302511 | 0,075 | 0,05  | 1         | 0,901061504   | 1,109802156     | 1,5             |
| ZBTB11                                                                                   | 0,171102229 | -0,150344161 | 0,312 | 0,18  | 1         | 0,901035491   | 1,109834196     | 1,733333333     |
| ZNF669                                                                                   | 0,770781378 | -0,150553992 | 0,088 | 0,07  | 1         | 0,900904451   | 1,109995626     | 1,257142857     |
| PEBP1                                                                                    | 0,72650655  | -0,150566109 | 1     | 0,94  | 1         | 0,900896884   | 1,110004949     | 1,063829787     |
| KDM5B                                                                                    | 0,050568332 | -0,150581215 | 0,4   | 0,2   | 1         | 0,900887451   | 1,110016572     | 2               |
| GNA13                                                                                    | 0,103002223 | -0,150617566 | 0,325 | 0,17  | 1         | 0,900864752   | 1,110044541     | 1,911764706     |
| TSSC4                                                                                    | 0,054873903 | -0,15105627  | 0,525 | 0,27  | 1         | 0,900590853   | 1,110382142     | 1,944444444     |
| UBN2                                                                                     | 0,104801472 | -0,151081541 | 0,288 | 0,15  | 1         | 0,900575078   | 1,110401592     | 1,92            |
| DNM2                                                                                     | 0,05398973  | -0,15110367  | 0,338 | 0,16  | 1         | 0,900561264   | 1,110418624     | 2,1125          |
| CRTC2                                                                                    | 0,524816327 | -0,151216337 | 0,088 | 0,11  | 1         | 0,900490938   | 1,110505345     | 0,8             |
| MICA                                                                                     | 0,040487527 | -0,151291841 | 0,238 | 0,1   | 1         | 0,900443812   | 1,110563465     | 2,38            |
| ADRA2A                                                                                   | 0,369110746 | -0,151386349 | 0,025 | 0,05  | 1         | 0,900384827   | 1,110636219     | 0,5             |
| PI4KB                                                                                    | 0,154934868 | -0,151436998 | 0,35  | 0,2   | 1         | 0,900353218   | 1,110675211     | 1,75            |
| GTF2IRD2                                                                                 | 0,276364478 | -0,15144508  | 0,2   | 0,12  | 1         | 0,900348174   | 1,110681432     | 1,666666667     |
| CDC14B                                                                                   | 0,01698539  | -0,151522523 | 0,262 | 0,1   | 1         | 0,900299845   | 1,110741055     | 2,62            |
| PTPN3                                                                                    | 0,369110746 | -0,15157905  | 0,025 | 0,05  | 1         | 0,900264571   | 1,110784576     | 0,5             |
| CRK                                                                                      | 0,063522786 | -0,151588577 | 0,613 | 0,32  | 1         | 0,900258626   | 1,110791912     | 1,915625        |
| OLFM2                                                                                    | 0,580120923 | -0,151590886 | 0,112 | 0,08  | 1         | 0,900257185   | 1,110793689     | 1,4             |
| SEPTIN8                                                                                  | 0,427462694 | -0,151618129 | 0,125 | 0,08  | 1         | 0,900240185   | 1,110814665     | 1,5625          |
| HNRNPA3                                                                                  | 0,876762827 | -0,151623961 | 0,887 | 0,66  | 1         | 0,900236546   | 1,110819156     | 1,343939394     |
| RAB11A                                                                                   | 0,045236612 | -0,151923838 | 0,637 | 0,31  | 1         | 0,900049444   | 1,111050073     | 2,05483871      |



Supplementary Table 4

| Differentially expressed genes_keloid-CCD_ comparing SC-Keloid vs. (SC-Myel, SC-Nonmyel) |             |              |       |       |           |               |                 |                 |
|------------------------------------------------------------------------------------------|-------------|--------------|-------|-------|-----------|---------------|-----------------|-----------------|
| gene                                                                                     | p_val       | avg_log2FC   | pct.1 | pct.2 | p_val_adj | Foldchange_UP | Foldchange_DOWN | Ratio_pct1_pct2 |
| HECTD1                                                                                   | 0,124893054 | -0,152014368 | 0,45  | 0,25  | 1         | 0,899992967   | 1,111119794     | 1,8             |
| ANP32E                                                                                   | 0,289315307 | -0,152117024 | 0,438 | 0,29  | 1         | 0,899928929   | 1,111198859     | 1,510344828     |
| TACSTD2                                                                                  | 0,84359211  | -0,152202958 | 0,025 | 0,02  | 1         | 0,899875327   | 1,11126505      | 1,25            |
| AC016831.7                                                                               | 0,799526327 | -0,152244929 | 0,05  | 0,04  | 1         | 0,899849148   | 1,111297379     | 1,25            |
| SLC1A4                                                                                   | 0,954410066 | -0,152291737 | 0,05  | 0,05  | 1         | 0,899819953   | 1,111333436     | 1               |
| NPLOC4                                                                                   | 0,100552673 | -0,152346204 | 0,275 | 0,14  | 1         | 0,899785982   | 1,111375394     | 1,964285714     |
| TMCC3                                                                                    | 0,369110746 | -0,152378903 | 0,025 | 0,05  | 1         | 0,899765588   | 1,111400584     | 0,5             |
| EIF2S2                                                                                   | 0,232209719 | -0,152400661 | 0,887 | 0,51  | 1         | 0,899752018   | 1,111417346     | 1,739215686     |
| UVRAG                                                                                    | 0,165150393 | -0,152447947 | 0,2   | 0,11  | 1         | 0,899722529   | 1,111453774     | 1,818181818     |
| COQ10A                                                                                   | 0,55816045  | -0,152458909 | 0,1   | 0,07  | 1         | 0,899715692   | 1,111462219     | 1,428571429     |
| ZCCHC14                                                                                  | 0,119617561 | -0,152528753 | 0,262 | 0,14  | 1         | 0,899672136   | 1,111516029     | 1,871428571     |
| SLC16A1-AS1                                                                              | 0,044922833 | -0,152593609 | 0,125 | 0,04  | 1         | 0,899631692   | 1,111565998     | 3,125           |
| MICALL2                                                                                  | 0,050734051 | -0,152903377 | 0,625 | 0,32  | 1         | 0,899438549   | 1,111804693     | 1,953125        |
| SLF2                                                                                     | 0,017515648 | -0,152964519 | 0,3   | 0,12  | 1         | 0,899400431   | 1,111851813     | 2,5             |
| MARCHF9                                                                                  | 0,037795883 | -0,152969195 | 0,362 | 0,17  | 1         | 0,899397516   | 1,111855416     | 2,129411765     |
| PON2                                                                                     | 0,214899948 | -0,152997753 | 0,675 | 0,41  | 1         | 0,899379713   | 1,111877426     | 1,646341463     |
| DENND5A                                                                                  | 0,025707788 | -0,153014057 | 0,462 | 0,23  | 1         | 0,899369549   | 1,111889991     | 2,008695652     |
| TBC1D17                                                                                  | 0,787424549 | -0,153019543 | 0,075 | 0,08  | 1         | 0,899366129   | 1,111894219     | 0,9375          |
| COQ9                                                                                     | 0,06163574  | -0,153103863 | 0,275 | 0,13  | 1         | 0,899313566   | 1,111959207     | 2,115384615     |
| HS6ST1                                                                                   | 0,180764063 | -0,15342512  | 0,125 | 0,06  | 1         | 0,899113331   | 1,112206844     | 2,083333333     |
| PCDHB4                                                                                   | 0,072136391 | -0,153435218 | 0     | 0,04  | 1         | 0,899107038   | 1,112214629     | 0               |
| ZHX1                                                                                     | 0,064992473 | -0,153504661 | 0,375 | 0,19  | 1         | 0,899063761   | 1,112268166     | 1,973684211     |
| HYPK                                                                                     | 0,447374936 | -0,153528508 | 0,138 | 0,09  | 1         | 0,8990489     | 1,112286551     | 1,533333333     |
| POGLUT3                                                                                  | 0,023526569 | -0,153559185 | 0,288 | 0,12  | 1         | 0,899029783   | 1,112310203     | 2,4             |
| NXF1                                                                                     | 0,008914194 | -0,153771542 | 0,312 | 0,12  | 1         | 0,89889746    | 1,112473941     | 2,6             |
| FBXO34                                                                                   | 0,927992019 | -0,153836853 | 0,125 | 0,11  | 1         | 0,898856768   | 1,112524304     | 1,136363636     |
| AKAP17A                                                                                  | 0,005604488 | -0,154155281 | 0,362 | 0,14  | 1         | 0,898658397   | 1,112769884     | 2,585714286     |
| ACBD4                                                                                    | 0,708795782 | -0,154224316 | 0,05  | 0,06  | 1         | 0,898615396   | 1,112823133     | 0,833333333     |
| FAM89A                                                                                   | 0,046391154 | -0,15431806  | 0,212 | 0,09  | 1         | 0,898557006   | 1,112895445     | 2,355555556     |
| CCDC117                                                                                  | 0,40204505  | -0,154418271 | 0,212 | 0,14  | 1         | 0,898494595   | 1,11297275      | 1,514285714     |

Supplementary Table 4

| Differentially expressed genes_keloid-CCD_ comparing SC-Keloid vs. (SC-Myel, SC-Nonmyel) |             |              |       |       |           |               |                 |                 |
|------------------------------------------------------------------------------------------|-------------|--------------|-------|-------|-----------|---------------|-----------------|-----------------|
| gene                                                                                     | p_val       | avg_log2FC   | pct.1 | pct.2 | p_val_adj | Foldchange_UP | Foldchange_DOWN | Ratio_pct1_pct2 |
| KAT5                                                                                     | 0,187273034 | -0,154435266 | 0,262 | 0,15  | 1         | 0,89848401    | 1,112985862     | 1,746666667     |
| USP47                                                                                    | 0,436550703 | -0,154443929 | 0,575 | 0,36  | 1         | 0,898478615   | 1,112992545     | 1,597222222     |
| PRELP                                                                                    | 0,072136391 | -0,154548599 | 0     | 0,04  | 1         | 0,898413431   | 1,113073297     | 0               |
| SESTD1                                                                                   | 0,475609891 | -0,154554737 | 0,175 | 0,12  | 1         | 0,898409609   | 1,113078033     | 1,458333333     |
| NSD3                                                                                     | 0,219980294 | -0,154720218 | 0,662 | 0,38  | 1         | 0,898306565   | 1,113205713     | 1,742105263     |
| ZFHX2                                                                                    | 0,240774098 | -0,154731856 | 0,025 | 0,06  | 1         | 0,898299318   | 1,113214694     | 0,416666667     |
| OPHN1                                                                                    | 0,997440903 | -0,154775861 | 0,075 | 0,07  | 1         | 0,898271919   | 1,113248649     | 1,071428571     |
| TXN                                                                                      | 0,541352705 | -0,15488319  | 0,9   | 0,63  | 1         | 0,898205095   | 1,113331472     | 1,428571429     |
| MIS12                                                                                    | 0,944420389 | -0,154977033 | 0,125 | 0,11  | 1         | 0,898146671   | 1,113403893     | 1,136363636     |
| LRMDA                                                                                    | 0,336907397 | -0,155034333 | 0,262 | 0,17  | 1         | 0,898111      | 1,113448116     | 1,541176471     |
| CEP95                                                                                    | 0,066993503 | -0,155116186 | 0,238 | 0,11  | 1         | 0,898060046   | 1,11351129      | 2,163636364     |
| WASF1                                                                                    | 0,894021778 | -0,155122797 | 0,038 | 0,04  | 1         | 0,89805593    | 1,113516393     | 0,95            |
| OCEL1                                                                                    | 0,198442087 | -0,155186026 | 0,2   | 0,11  | 1         | 0,898016572   | 1,113565196     | 1,818181818     |
| ARMH4                                                                                    | 0,259519439 | -0,155267431 | 0,013 | 0,04  | 1         | 0,897965903   | 1,113628031     | 0,325           |
| CFAP20                                                                                   | 0,022861543 | -0,155286136 | 0,613 | 0,29  | 1         | 0,89795426    | 1,11364247      | 2,113793103     |
| ENTPD1                                                                                   | 0,457357417 | -0,15540489  | 0,038 | 0,06  | 1         | 0,897880349   | 1,113734142     | 0,633333333     |
| MDK                                                                                      | 0,143162878 | -0,155429693 | 0,562 | 0,33  | 1         | 0,897864913   | 1,113753289     | 1,703030303     |
| RNF214                                                                                   | 0,056717055 | -0,155471202 | 0,225 | 0,1   | 1         | 0,89783908    | 1,113785335     | 2,25            |
| HAUS8                                                                                    | 0,78287608  | -0,155667429 | 0,062 | 0,05  | 1         | 0,897716969   | 1,113936836     | 1,24            |
| BARD1                                                                                    | 0,152777774 | -0,155670026 | 0,238 | 0,13  | 1         | 0,897715353   | 1,113938841     | 1,830769231     |
| NRARP                                                                                    | 0,657460147 | -0,155860422 | 0,038 | 0,05  | 1         | 0,897596887   | 1,11408586      | 0,76            |
| SP100                                                                                    | 0,047791172 | -0,155905261 | 0,537 | 0,27  | 1         | 0,89756899    | 1,114120486     | 1,988888889     |
| TMEM98                                                                                   | 0,048497645 | -0,155993065 | 0,212 | 0,09  | 1         | 0,897514365   | 1,114188295     | 2,355555556     |
| ODR4                                                                                     | 0,134122184 | -0,156013076 | 0,262 | 0,14  | 1         | 0,897501916   | 1,114203749     | 1,871428571     |
| TNFRSF25                                                                                 | 0,556644247 | -0,156014405 | 0,025 | 0,04  | 1         | 0,897501089   | 1,114204776     | 0,625           |
| EPDR1                                                                                    | 0,86959804  | -0,156192856 | 0,175 | 0,15  | 1         | 0,897390082   | 1,114342604     | 1,166666667     |
| ARHGAP42                                                                                 | 0,111306152 | -0,156229275 | 0,3   | 0,16  | 1         | 0,897367428   | 1,114370734     | 1,875           |
| NCOR1                                                                                    | 0,147788851 | -0,15625755  | 0,713 | 0,4   | 1         | 0,897349842   | 1,114392574     | 1,7825          |
| KANSL2                                                                                   | 0,114395004 | -0,156328604 | 0,188 | 0,09  | 1         | 0,897305647   | 1,114447461     | 2,088888889     |
| RENBP                                                                                    | 0,240774098 | -0,156399546 | 0,025 | 0,06  | 1         | 0,897261525   | 1,114502263     | 0,416666667     |

Supplementary Table 4

| Differentially expressed genes_keloid-CCD_ comparing SC-Keloid vs. (SC-Myel, SC-Nonmyel) |             |              |       |       |           |               |                 |                 |
|------------------------------------------------------------------------------------------|-------------|--------------|-------|-------|-----------|---------------|-----------------|-----------------|
| gene                                                                                     | p_val       | avg_log2FC   | pct.1 | pct.2 | p_val_adj | Foldchange_UP | Foldchange_DOWN | Ratio_pct1_pct2 |
| RPL31                                                                                    | 0,9340227   | -0,156664094 | 0,863 | 0,64  | 1         | 0,897097008   | 1,114706649     | 1,3484375       |
| CYP46A1                                                                                  | 0,423434047 | -0,156696255 | 0,013 | 0,03  | 1         | 0,89707701    | 1,114731499     | 0,433333333     |
| YWHAQ                                                                                    | 0,841021692 | -0,156712656 | 0,925 | 0,75  | 1         | 0,897066812   | 1,114744171     | 1,233333333     |
| TET2                                                                                     | 0,159953433 | -0,156797471 | 0,262 | 0,15  | 1         | 0,897014076   | 1,114809708     | 1,746666667     |
| XAF1                                                                                     | 0,833709766 | -0,156866579 | 0,088 | 0,09  | 1         | 0,896971108   | 1,114863111     | 0,977777778     |
| PFDN1                                                                                    | 0,767906305 | -0,156892163 | 0,812 | 0,54  | 1         | 0,896955202   | 1,114882882     | 1,503703704     |
| PLEKHF2                                                                                  | 0,245017897 | -0,157037468 | 0,238 | 0,14  | 1         | 0,896864867   | 1,114995176     | 1,7             |
| STAG1                                                                                    | 0,273311642 | -0,157088893 | 0,362 | 0,22  | 1         | 0,896832899   | 1,115034921     | 1,645454545     |
| PRCP                                                                                     | 0,190001807 | -0,157140277 | 0,4   | 0,24  | 1         | 0,896800957   | 1,115074635     | 1,666666667     |
| PORCN                                                                                    | 0,045399153 | -0,157162137 | 0,088 | 0,02  | 1         | 0,896787369   | 1,115091531     | 4,4             |
| TMED4                                                                                    | 0,075619154 | -0,157213882 | 0,613 | 0,32  | 1         | 0,896755204   | 1,115131527     | 1,915625        |
| UBB                                                                                      | 0,003256295 | -0,157488978 | 1     | 0,6   | 1         | 0,896584225   | 1,115344183     | 1,666666667     |
| FBLN2                                                                                    | 0,106382952 | -0,157587938 | 0,462 | 0,27  | 1         | 0,896522728   | 1,115420691     | 1,711111111     |
| MLLT6                                                                                    | 0,280411902 | -0,157618822 | 0,2   | 0,12  | 1         | 0,896503536   | 1,115444569     | 1,666666667     |
| URGCP                                                                                    | 0,57023707  | -0,15765631  | 0,088 | 0,06  | 1         | 0,896480241   | 1,115473554     | 1,466666667     |
| SP1                                                                                      | 0,115691837 | -0,157734147 | 0,238 | 0,12  | 1         | 0,896431874   | 1,115533738     | 1,983333333     |
| SOX6                                                                                     | 0,065468103 | -0,157758102 | 0,438 | 0,23  | 1         | 0,89641699    | 1,115552261     | 1,904347826     |
| DYNLRB1                                                                                  | 0,314727473 | -0,157772259 | 0,975 | 0,73  | 1         | 0,896408193   | 1,115563208     | 1,335616438     |
| MGST1                                                                                    | 0,159398678 | -0,15805428  | 0,013 | 0,05  | 1         | 0,896232979   | 1,115781302     | 0,26            |
| OSGIN2                                                                                   | 0,614614008 | -0,158390852 | 0,138 | 0,1   | 1         | 0,896023918   | 1,116041637     | 1,38            |
| COIL                                                                                     | 0,027602607 | -0,158397233 | 0,175 | 0,06  | 1         | 0,896019955   | 1,116046573     | 2,916666667     |
| AP1G1                                                                                    | 0,066067735 | -0,158632425 | 0,375 | 0,19  | 1         | 0,895873895   | 1,116228529     | 1,973684211     |
| THUMPD1                                                                                  | 0,180133727 | -0,158729903 | 0,425 | 0,25  | 1         | 0,895813366   | 1,116303952     | 1,7             |
| HUNK                                                                                     | 0,78027938  | -0,15880576  | 0,088 | 0,07  | 1         | 0,895766265   | 1,116362648     | 1,257142857     |
| PBRM1                                                                                    | 0,169032409 | -0,158866191 | 0,575 | 0,33  | 1         | 0,895728745   | 1,116409411     | 1,742424242     |
| TSPAN31                                                                                  | 0,008901407 | -0,158903481 | 0,35  | 0,14  | 1         | 0,895705592   | 1,116438268     | 2,5             |
| SLC25A28                                                                                 | 0,361699145 | -0,159027458 | 0,175 | 0,11  | 1         | 0,895628624   | 1,116534212     | 1,590909091     |
| EIF4G2                                                                                   | 0,7305671   | -0,159265141 | 0,963 | 0,8   | 1         | 0,895481082   | 1,116718175     | 1,20375         |
| NCKAP5L                                                                                  | 0,041518589 | -0,159422002 | 0,388 | 0,19  | 1         | 0,895383723   | 1,116839601     | 2,042105263     |
| UBE2E3                                                                                   | 0,6337167   | -0,159498088 | 0,762 | 0,51  | 1         | 0,895336503   | 1,116898503     | 1,494117647     |

Supplementary Table 4

| Differentially expressed genes_keloid-CCD_ comparing SC-Keloid vs. (SC-Myel, SC-Nonmyel) |             |              |       |       |           |               |                 |                 |
|------------------------------------------------------------------------------------------|-------------|--------------|-------|-------|-----------|---------------|-----------------|-----------------|
| gene                                                                                     | p_val       | avg_log2FC   | pct.1 | pct.2 | p_val_adj | Foldchange_UP | Foldchange_DOWN | Ratio_pct1_pct2 |
| IPO7                                                                                     | 0,080543709 | -0,159535395 | 0,475 | 0,26  | 1         | 0,895313351   | 1,116927385     | 1,826923077     |
| ZNF562                                                                                   | 0,988020397 | -0,159578022 | 0,088 | 0,08  | 1         | 0,895286898   | 1,116960388     | 1,1             |
| PTHLH                                                                                    | 0,252571592 | -0,159664864 | 0,112 | 0,06  | 1         | 0,895233008   | 1,117027624     | 1,866666667     |
| AEBP2                                                                                    | 0,17913775  | -0,159678794 | 0,262 | 0,15  | 1         | 0,895224364   | 1,11703841      | 1,746666667     |
| SMARCA2                                                                                  | 0,025105754 | -0,159739716 | 0,288 | 0,12  | 1         | 0,895186562   | 1,117085581     | 2,4             |
| DPYD                                                                                     | 0,197583358 | -0,159741551 | 0,138 | 0,07  | 1         | 0,895185423   | 1,117087001     | 1,971428571     |
| ABCA2                                                                                    | 0,727551928 | -0,159827148 | 0,112 | 0,09  | 1         | 0,895132312   | 1,117153282     | 1,244444444     |
| TCP11L2                                                                                  | 0,707546132 | -0,159904395 | 0,1   | 0,11  | 1         | 0,895084385   | 1,1172131       | 0,909090909     |
| GLCC1                                                                                    | 0,782321833 | -0,160131274 | 0,075 | 0,06  | 1         | 0,894943634   | 1,117388807     | 1,25            |
| NOD1                                                                                     | 0,525777494 | -0,160216212 | 0,05  | 0,07  | 1         | 0,894890946   | 1,117454595     | 0,714285714     |
| ZNF768                                                                                   | 0,78027938  | -0,160270946 | 0,088 | 0,07  | 1         | 0,894856996   | 1,117496991     | 1,257142857     |
| PIAS4                                                                                    | 0,591829794 | -0,160351003 | 0,112 | 0,08  | 1         | 0,894807341   | 1,117559004     | 1,4             |
| ANKRD44                                                                                  | 0,131961359 | -0,160379853 | 0,275 | 0,15  | 1         | 0,894789447   | 1,117581352     | 1,833333333     |
| ZBTB5                                                                                    | 0,833709766 | -0,160407758 | 0,088 | 0,09  | 1         | 0,89477214    | 1,117602969     | 0,977777778     |
| RING1                                                                                    | 0,162828767 | -0,160487008 | 0,312 | 0,18  | 1         | 0,89472299    | 1,117664362     | 1,733333333     |
| IPO9                                                                                     | 0,076914382 | -0,160500874 | 0,25  | 0,12  | 1         | 0,894714391   | 1,117675105     | 2,083333333     |
| PARP12                                                                                   | 0,427462694 | -0,160672516 | 0,125 | 0,08  | 1         | 0,89460795    | 1,117808085     | 1,5625          |
| PRXL2C                                                                                   | 0,003750976 | -0,160718491 | 0,575 | 0,24  | 1         | 0,894579441   | 1,117843708     | 2,395833333     |
| PKD2                                                                                     | 0,634944317 | -0,160750785 | 0,2   | 0,15  | 1         | 0,894559417   | 1,11786873      | 1,333333333     |
| DOCK8                                                                                    | 0,098032255 | -0,160771477 | 0,013 | 0,06  | 1         | 0,894546587   | 1,117884764     | 0,216666667     |
| ST6GALNAC5                                                                               | 0,043652221 | -0,160796263 | 0     | 0,05  | 1         | 0,894531218   | 1,11790397      | 0               |
| GPKOW                                                                                    | 0,582634513 | -0,160885313 | 0,1   | 0,07  | 1         | 0,894476005   | 1,117972974     | 1,428571429     |
| FAM117A                                                                                  | 0,788452212 | -0,16105141  | 0,062 | 0,05  | 1         | 0,894373031   | 1,118101693     | 1,24            |
| CAPRN2                                                                                   | 0,28114898  | -0,161132793 | 0,212 | 0,13  | 1         | 0,89432258    | 1,118164768     | 1,630769231     |
| ZC3H8                                                                                    | 0,770781378 | -0,161134045 | 0,088 | 0,07  | 1         | 0,894321804   | 1,118165738     | 1,257142857     |
| WHAMM                                                                                    | 0,312697251 | -0,161148239 | 0,15  | 0,09  | 1         | 0,894313005   | 1,118176739     | 1,666666667     |
| H2AW                                                                                     | 0,528261596 | -0,161313395 | 0,212 | 0,15  | 1         | 0,894210632   | 1,118304753     | 1,413333333     |
| RILP                                                                                     | 0,847389289 | -0,161374231 | 0,088 | 0,09  | 1         | 0,894172926   | 1,118351911     | 0,977777778     |
| PCSK1N                                                                                   | 0,259519439 | -0,161419063 | 0,013 | 0,04  | 1         | 0,89414514    | 1,118386664     | 0,325           |
| ZNF574                                                                                   | 0,861714631 | -0,161500152 | 0,1   | 0,1   | 1         | 0,894094884   | 1,118449527     | 1               |

Supplementary Table 4

| Differentially expressed genes_keloid-CCD_ comparing SC-Keloid vs. (SC-Myel, SC-Nonmyel) |             |              |       |       |           |               |                 |                 |
|------------------------------------------------------------------------------------------|-------------|--------------|-------|-------|-----------|---------------|-----------------|-----------------|
| gene                                                                                     | p_val       | avg_log2FC   | pct.1 | pct.2 | p_val_adj | Foldchange_UP | Foldchange_DOWN | Ratio_pct1_pct2 |
| TMEM170A                                                                                 | 0,147969173 | -0,161516733 | 0,375 | 0,21  | 1         | 0,894084608   | 1,118462381     | 1,785714286     |
| CACUL1                                                                                   | 0,009141212 | -0,161632707 | 0,375 | 0,15  | 1         | 0,894012739   | 1,118552294     | 2,5             |
| RBBP5                                                                                    | 0,240432156 | -0,161742101 | 0,162 | 0,09  | 1         | 0,893944951   | 1,118637114     | 1,8             |
| TNFRSF19                                                                                 | 0,18626954  | -0,16183725  | 0,412 | 0,25  | 1         | 0,893885995   | 1,118710893     | 1,648           |
| SMIM4                                                                                    | 0,06117553  | -0,161941727 | 0,35  | 0,17  | 1         | 0,893821265   | 1,11879191      | 2,058823529     |
| ZNF609                                                                                   | 0,289969834 | -0,16225907  | 0,125 | 0,07  | 1         | 0,893624676   | 1,119038033     | 1,785714286     |
| CAMK2D                                                                                   | 0,064246657 | -0,162265254 | 0,362 | 0,18  | 1         | 0,893620846   | 1,11904283      | 2,011111111     |
| CYGB                                                                                     | 0,799526327 | -0,162348012 | 0,05  | 0,04  | 1         | 0,893569587   | 1,119107023     | 1,25            |
| GID4                                                                                     | 0,992322814 | -0,162621964 | 0,075 | 0,07  | 1         | 0,893399923   | 1,11931955      | 1,071428571     |
| GCC1                                                                                     | 0,645841423 | -0,162687259 | 0,038 | 0,05  | 1         | 0,89335949    | 1,11937021      | 0,76            |
| SIRT2                                                                                    | 0,155675443 | -0,162776197 | 0,7   | 0,39  | 1         | 0,893304418   | 1,119439219     | 1,794871795     |
| P2RY1                                                                                    | 0,359832279 | -0,162778337 | 0,162 | 0,1   | 1         | 0,893303094   | 1,119440879     | 1,62            |
| YAP1                                                                                     | 0,402113906 | -0,16284485  | 0,325 | 0,22  | 1         | 0,89326191    | 1,11949249      | 1,477272727     |
| NUMA1                                                                                    | 0,04886311  | -0,162904693 | 0,375 | 0,18  | 1         | 0,893224859   | 1,119538927     | 2,083333333     |
| RIOK3                                                                                    | 0,152180052 | -0,162949614 | 0,488 | 0,28  | 1         | 0,893197046   | 1,119573787     | 1,742857143     |
| TRRAP                                                                                    | 0,354188038 | -0,162967878 | 0,175 | 0,11  | 1         | 0,893185739   | 1,119587961     | 1,590909091     |
| CDR1                                                                                     | 0,423434047 | -0,163055926 | 0,013 | 0,03  | 1         | 0,89313123    | 1,119656291     | 0,433333333     |
| STAU1                                                                                    | 0,28049562  | -0,163339073 | 0,662 | 0,38  | 1         | 0,892955959   | 1,119876059     | 1,742105263     |
| FOSL1                                                                                    | 0,369864999 | -0,163499644 | 0,188 | 0,12  | 1         | 0,892856579   | 1,120000708     | 1,566666667     |
| MIB2                                                                                     | 0,427069697 | -0,163558603 | 0,212 | 0,14  | 1         | 0,892820091   | 1,12004648      | 1,514285714     |
| OARD1                                                                                    | 0,232420437 | -0,163715717 | 0,162 | 0,09  | 1         | 0,892722865   | 1,120168464     | 1,8             |
| TPT1                                                                                     | 0,037533844 | -0,163850061 | 1     | 1     | 1         | 0,892639738   | 1,120272779     | 1               |
| CAT                                                                                      | 0,097608138 | -0,163872486 | 0,4   | 0,21  | 1         | 0,892625863   | 1,120290192     | 1,904761905     |
| PDZD2                                                                                    | 0,155137097 | -0,16402037  | 0,025 | 0,07  | 1         | 0,892534369   | 1,120405034     | 0,357142857     |
| SPSB1                                                                                    | 0,058250268 | -0,164082045 | 0,238 | 0,11  | 1         | 0,892496214   | 1,120452932     | 2,163636364     |
| IQCJ-SCHIP1                                                                              | 0,295173407 | -0,164130192 | 0,125 | 0,07  | 1         | 0,89246643    | 1,120490325     | 1,785714286     |
| ATP6V1A                                                                                  | 0,054616207 | -0,164216218 | 0,262 | 0,12  | 1         | 0,892413215   | 1,12055714      | 2,183333333     |
| FBXL15                                                                                   | 0,15898437  | -0,164320914 | 0,338 | 0,19  | 1         | 0,892348455   | 1,120638462     | 1,778947368     |
| ZNF335                                                                                   | 0,296257455 | -0,164352451 | 0,138 | 0,08  | 1         | 0,892328948   | 1,12066296      | 1,725           |
| LATS1                                                                                    | 0,344327725 | -0,164448424 | 0,175 | 0,11  | 1         | 0,89226959    | 1,120737512     | 1,590909091     |

Supplementary Table 4

| Differentially expressed genes_keloid-CCD_ comparing SC-Keloid vs. (SC-Myel, SC-Nonmyel) |             |              |       |       |           |               |                 |                 |
|------------------------------------------------------------------------------------------|-------------|--------------|-------|-------|-----------|---------------|-----------------|-----------------|
| gene                                                                                     | p_val       | avg_log2FC   | pct.1 | pct.2 | p_val_adj | Foldchange_UP | Foldchange_DOWN | Ratio_pct1_pct2 |
| ATP2B2                                                                                   | 0,250610641 | -0,164665277 | 0,025 | 0,06  | 1         | 0,892135482   | 1,120905984     | 0,416666667     |
| RRAD                                                                                     | 0,301570476 | -0,164668855 | 0,525 | 0,35  | 1         | 0,892133269   | 1,120908764     | 1,5             |
| FAR1                                                                                     | 0,036768125 | -0,164679961 | 0,362 | 0,17  | 1         | 0,892126402   | 1,120917393     | 2,129411765     |
| EIF5A2                                                                                   | 0,453709    | -0,164824045 | 0,138 | 0,09  | 1         | 0,892037308   | 1,121029346     | 1,533333333     |
| CFL2                                                                                     | 0,07435354  | -0,164829909 | 0,438 | 0,22  | 1         | 0,892033682   | 1,121033903     | 1,990909091     |
| CAMSAP1                                                                                  | 0,180807571 | -0,164883778 | 0,188 | 0,1   | 1         | 0,892000375   | 1,121075762     | 1,88            |
| RNF167                                                                                   | 0,191441548 | -0,164895144 | 0,262 | 0,15  | 1         | 0,891993348   | 1,121084594     | 1,746666667     |
| DTX3L                                                                                    | 0,582634513 | -0,165038638 | 0,1   | 0,07  | 1         | 0,891904632   | 1,121196105     | 1,428571429     |
| STMN3                                                                                    | 0,110087567 | -0,165136724 | 0,288 | 0,15  | 1         | 0,891843995   | 1,121272336     | 1,92            |
| FAM172A                                                                                  | 0,003529641 | -0,16516416  | 0,438 | 0,17  | 1         | 0,891827035   | 1,12129366      | 2,576470588     |
| SDE2                                                                                     | 0,047963631 | -0,165335517 | 0,212 | 0,09  | 1         | 0,891721114   | 1,12142685      | 2,355555556     |
| AMZ2                                                                                     | 0,099701433 | -0,165370497 | 0,275 | 0,14  | 1         | 0,891699494   | 1,12145404      | 1,964285714     |
| AQP11                                                                                    | 0,788452212 | -0,165404596 | 0,062 | 0,05  | 1         | 0,891678418   | 1,121480547     | 1,24            |
| EPS15                                                                                    | 0,226502582 | -0,165467948 | 0,338 | 0,2   | 1         | 0,891639263   | 1,121529795     | 1,69            |
| ZNF592                                                                                   | 0,992812065 | -0,165471407 | 0,088 | 0,08  | 1         | 0,891637126   | 1,121532484     | 1,1             |
| DYRK3                                                                                    | 0,105059654 | -0,165502665 | 0,025 | 0,08  | 1         | 0,891617807   | 1,121556783     | 0,3125          |
| CPEB2                                                                                    | 0,422058966 | -0,165596833 | 0,2   | 0,13  | 1         | 0,891559611   | 1,121629993     | 1,538461538     |
| YPEL4                                                                                    | 0,043652221 | -0,165739774 | 0     | 0,05  | 1         | 0,891471281   | 1,121741128     | 0               |
| TICAM1                                                                                   | 0,651933786 | -0,165805916 | 0,088 | 0,1   | 1         | 0,891430411   | 1,121792557     | 0,88            |
| PREX1                                                                                    | 0,369110746 | -0,16587732  | 0,025 | 0,05  | 1         | 0,891386292   | 1,12184808      | 0,5             |
| TNPO2                                                                                    | 0,299121949 | -0,166001736 | 0,2   | 0,12  | 1         | 0,891309423   | 1,12194483      | 1,666666667     |
| ZNF766                                                                                   | 0,373709887 | -0,166069887 | 0,025 | 0,05  | 1         | 0,89126732    | 1,121997831     | 0,5             |
| MLLT1                                                                                    | 0,242464775 | -0,166086743 | 0,25  | 0,15  | 1         | 0,891256907   | 1,12201094      | 1,666666667     |
| SEMA4A                                                                                   | 0,874770255 | -0,166120136 | 0,1   | 0,1   | 1         | 0,891236278   | 1,122036911     | 1               |
| SPOPL                                                                                    | 0,114682274 | -0,16622056  | 0,238 | 0,12  | 1         | 0,891174242   | 1,122115017     | 1,983333333     |
| XPC                                                                                      | 0,08169145  | -0,166312838 | 0,262 | 0,13  | 1         | 0,891117243   | 1,122186792     | 2,015384615     |
| SLC30A1                                                                                  | 0,200064246 | -0,166498328 | 0,2   | 0,11  | 1         | 0,891002678   | 1,122331083     | 1,818181818     |
| RAB3IP                                                                                   | 0,7858269   | -0,166540027 | 0,125 | 0,1   | 1         | 0,890976925   | 1,122363523     | 1,25            |
| SUMO2                                                                                    | 0,269575941 | -0,166737623 | 1     | 0,93  | 1         | 0,890854902   | 1,122517256     | 1,075268817     |
| JAG1                                                                                     | 0,694143245 | -0,166860495 | 0,575 | 0,4   | 1         | 0,890779032   | 1,122612863     | 1,4375          |

Supplementary Table 4

| Differentially expressed genes_keloid-CCD_ comparing SC-Keloid vs. (SC-Myel, SC-Nonmyel) |             |              |       |       |           |               |                 |                 |
|------------------------------------------------------------------------------------------|-------------|--------------|-------|-------|-----------|---------------|-----------------|-----------------|
| gene                                                                                     | p_val       | avg_log2FC   | pct.1 | pct.2 | p_val_adj | Foldchange_UP | Foldchange_DOWN | Ratio_pct1_pct2 |
| ATG10                                                                                    | 0,221903616 | -0,166871855 | 0,15  | 0,08  | 1         | 0,890772018   | 1,122621703     | 1,875           |
| DYNLT3                                                                                   | 0,042567802 | -0,166957882 | 0,688 | 0,36  | 1         | 0,890718904   | 1,122688646     | 1,911111111     |
| CNNM4                                                                                    | 0,829160873 | -0,166980212 | 0,088 | 0,09  | 1         | 0,890705117   | 1,122706023     | 0,977777778     |
| PHLDB2                                                                                   | 0,792612874 | -0,167092175 | 0,288 | 0,23  | 1         | 0,890635995   | 1,122793156     | 1,252173913     |
| PKNOX1                                                                                   | 0,564753457 | -0,167114275 | 0,138 | 0,1   | 1         | 0,890622352   | 1,122810356     | 1,38            |
| IL17RC                                                                                   | 0,09553318  | -0,167545947 | 0,275 | 0,14  | 1         | 0,890355907   | 1,123146365     | 1,964285714     |
| SGPP1                                                                                    | 0,043652221 | -0,167566829 | 0     | 0,05  | 1         | 0,89034302    | 1,123162621     | 0               |
| IRF2                                                                                     | 0,058100188 | -0,167610022 | 0,35  | 0,17  | 1         | 0,890316364   | 1,123196248     | 2,058823529     |
| DVL2                                                                                     | 0,060994302 | -0,167774932 | 0,225 | 0,1   | 1         | 0,8902146     | 1,123324645     | 2,25            |
| THOC1                                                                                    | 0,132463628 | -0,168006052 | 0,2   | 0,1   | 1         | 0,890071999   | 1,123504616     | 2               |
| YIPF4                                                                                    | 0,392009109 | -0,16803867  | 0,362 | 0,24  | 1         | 0,890051876   | 1,123530018     | 1,508333333     |
| PAQR8                                                                                    | 0,557924866 | -0,168128256 | 0,075 | 0,05  | 1         | 0,889996609   | 1,123599787     | 1,5             |
| CCN2                                                                                     | 0,427772032 | -0,168326588 | 0,787 | 0,54  | 1         | 0,889874266   | 1,123754263     | 1,457407407     |
| EPS8                                                                                     | 0,041647302 | -0,168442216 | 0,4   | 0,19  | 1         | 0,889802949   | 1,123844332     | 2,105263158     |
| SPATA6                                                                                   | 0,078624514 | -0,16848401  | 0,75  | 0,4   | 1         | 0,889777171   | 1,12387689      | 1,875           |
| FLCN                                                                                     | 0,437968774 | -0,168496573 | 0,138 | 0,09  | 1         | 0,889769424   | 1,123886676     | 1,533333333     |
| ITFG1                                                                                    | 0,20593513  | -0,168583018 | 0,462 | 0,27  | 1         | 0,889716111   | 1,12395402      | 1,711111111     |
| APBA1                                                                                    | 0,072136391 | -0,168672981 | 0     | 0,04  | 1         | 0,889660632   | 1,12402411      | 0               |
| ANKRD50                                                                                  | 0,246753499 | -0,168715451 | 0,238 | 0,14  | 1         | 0,889634443   | 1,124057199     | 1,7             |
| MUCL1                                                                                    | 0,788452212 | -0,168759401 | 0,062 | 0,05  | 1         | 0,889607342   | 1,124091443     | 1,24            |
| LRRTM4                                                                                   | 0,452756248 | -0,168941228 | 0,038 | 0,06  | 1         | 0,889495229   | 1,124233124     | 0,633333333     |
| HVCN1                                                                                    | 0,026616038 | -0,169094026 | 0     | 0,06  | 1         | 0,889401026   | 1,1243522       | 0               |
| AC011043.1                                                                               | 0,128867295 | -0,169099262 | 0,2   | 0,1   | 1         | 0,889397798   | 1,12435628      | 2               |
| SNHG10                                                                                   | 0,150386432 | -0,169102944 | 0,112 | 0,05  | 1         | 0,889395528   | 1,12435915      | 2,24            |
| ECEL1                                                                                    | 0,043652221 | -0,169296859 | 0     | 0,05  | 1         | 0,889275991   | 1,124510287     | 0               |
| PRICKLE3                                                                                 | 0,820013192 | -0,169447229 | 0,025 | 0,03  | 1         | 0,889183308   | 1,124627499     | 0,833333333     |
| DKK1                                                                                     | 0,207484841 | -0,169516928 | 0     | 0,02  | 1         | 0,889140351   | 1,124681833     | 0               |
| PLEKHA8                                                                                  | 0,768369996 | -0,169619224 | 0,1   | 0,08  | 1         | 0,889077308   | 1,124761583     | 1,25            |
| MAX                                                                                      | 0,124225581 | -0,169714829 | 0,375 | 0,21  | 1         | 0,889018392   | 1,124836121     | 1,785714286     |
| APOLD1                                                                                   | 0,548643101 | -0,169777715 | 0,075 | 0,05  | 1         | 0,888979641   | 1,124885153     | 1,5             |

Supplementary Table 4

| Differentially expressed genes_keloid-CCD_ comparing SC-Keloid vs. (SC-Myel, SC-Nonmyel) |             |              |       |       |           |               |                 |                 |
|------------------------------------------------------------------------------------------|-------------|--------------|-------|-------|-----------|---------------|-----------------|-----------------|
| gene                                                                                     | p_val       | avg_log2FC   | pct.1 | pct.2 | p_val_adj | Foldchange_UP | Foldchange_DOWN | Ratio_pct1_pct2 |
| CSNK2A1                                                                                  | 0,036261436 | -0,170023711 | 0,562 | 0,28  | 1         | 0,888828073   | 1,125076976     | 2,007142857     |
| REV3L                                                                                    | 0,21401991  | -0,170172485 | 0,15  | 0,08  | 1         | 0,88873642    | 1,125193002     | 1,875           |
| BRMS1L                                                                                   | 0,761017704 | -0,17046979  | 0,112 | 0,09  | 1         | 0,888553291   | 1,125424901     | 1,244444444     |
| ELOVL4                                                                                   | 0,980637923 | -0,170509675 | 0,062 | 0,06  | 1         | 0,888528726   | 1,125456015     | 1,033333333     |
| ATN1                                                                                     | 0,347637898 | -0,170518438 | 0,45  | 0,29  | 1         | 0,88852333    | 1,125462851     | 1,551724138     |
| BOD1                                                                                     | 0,182392377 | -0,170563311 | 0,45  | 0,27  | 1         | 0,888495693   | 1,125497858     | 1,666666667     |
| HMG20A                                                                                   | 0,591829794 | -0,17075695  | 0,112 | 0,08  | 1         | 0,888376448   | 1,125648932     | 1,4             |
| ODF2L                                                                                    | 0,012927543 | -0,171036818 | 0,475 | 0,21  | 1         | 0,888204128   | 1,125867319     | 2,261904762     |
| C22orf39                                                                                 | 0,44634996  | -0,171089317 | 0,225 | 0,15  | 1         | 0,888171808   | 1,125908288     | 1,5             |
| PTDSS1                                                                                   | 0,576242237 | -0,171120396 | 0,112 | 0,08  | 1         | 0,888152674   | 1,125932544     | 1,4             |
| SLC41A1                                                                                  | 0,909603257 | -0,171188447 | 0,162 | 0,14  | 1         | 0,888110782   | 1,125985654     | 1,157142857     |
| CCDC102A                                                                                 | 0,780784386 | -0,171402634 | 0,138 | 0,11  | 1         | 0,88797894    | 1,126152834     | 1,254545455     |
| ABCC8                                                                                    | 0,120814239 | -0,171481318 | 0     | 0,03  | 1         | 0,887930511   | 1,126214256     | 0               |
| PPWD1                                                                                    | 0,78027938  | -0,17152932  | 0,088 | 0,07  | 1         | 0,887900968   | 1,126251728     | 1,257142857     |
| TOMM7                                                                                    | 0,485796574 | -0,171678264 | 0,975 | 0,84  | 1         | 0,887809306   | 1,126368009     | 1,160714286     |
| TIA1                                                                                     | 0,149217904 | -0,171706921 | 0,338 | 0,19  | 1         | 0,887791671   | 1,126390383     | 1,778947368     |
| SNX9                                                                                     | 0,48288899  | -0,171806794 | 0,162 | 0,11  | 1         | 0,887730214   | 1,126468361     | 1,472727273     |
| RNF146                                                                                   | 0,092856238 | -0,17182693  | 0,325 | 0,17  | 1         | 0,887717824   | 1,126484084     | 1,911764706     |
| ADNP2                                                                                    | 0,631984607 | -0,172027487 | 0,15  | 0,11  | 1         | 0,887594426   | 1,126640693     | 1,363636364     |
| BCORL1                                                                                   | 0,521263547 | -0,17207132  | 0,05  | 0,07  | 1         | 0,887567459   | 1,126674924     | 0,714285714     |
| ROPN1                                                                                    | 0,816980451 | -0,172083904 | 0,038 | 0,03  | 1         | 0,887559717   | 1,126684752     | 1,266666667     |
| PEX2                                                                                     | 0,076417262 | -0,172124886 | 0,375 | 0,19  | 1         | 0,887534505   | 1,126716758     | 1,973684211     |
| ATAD1                                                                                    | 0,063750894 | -0,172127068 | 0,412 | 0,21  | 1         | 0,887533162   | 1,126718462     | 1,961904762     |
| ARMC8                                                                                    | 0,173862124 | -0,172137477 | 0,262 | 0,15  | 1         | 0,887526759   | 1,126726591     | 1,746666667     |
| SARS1                                                                                    | 0,004649195 | -0,172302508 | 0,7   | 0,3   | 1         | 0,88742524    | 1,126855485     | 2,333333333     |
| FAM120C                                                                                  | 0,975104768 | -0,172449244 | 0,1   | 0,09  | 1         | 0,887334985   | 1,126970104     | 1,111111111     |
| TMEM248                                                                                  | 0,026772124 | -0,172463692 | 0,525 | 0,24  | 1         | 0,887326099   | 1,12698139      | 2,1875          |
| BIN3                                                                                     | 0,425875403 | -0,172531835 | 0,312 | 0,21  | 1         | 0,887284189   | 1,127034622     | 1,485714286     |
| CCM2                                                                                     | 0,01974507  | -0,172696678 | 0,537 | 0,26  | 1         | 0,887182813   | 1,127163404     | 2,065384615     |
| UBE2E1                                                                                   | 0,00892789  | -0,172702241 | 0,3   | 0,11  | 1         | 0,887179392   | 1,127167751     | 2,727272727     |



Supplementary Table 4

| Differentially expressed genes_keloid-CCD_ comparing SC-Keloid vs. (SC-Myel, SC-Nonmyel) |             |              |       |       |           |               |                 |                 |
|------------------------------------------------------------------------------------------|-------------|--------------|-------|-------|-----------|---------------|-----------------|-----------------|
| gene                                                                                     | p_val       | avg_log2FC   | pct.1 | pct.2 | p_val_adj | Foldchange_UP | Foldchange_DOWN | Ratio_pct1_pct2 |
| DCAF8                                                                                    | 0,238282551 | -0,172786671 | 0,225 | 0,13  | 1         | 0,887127473   | 1,127233718     | 1,730769231     |
| SATB1                                                                                    | 0,04979276  | -0,17286837  | 0,388 | 0,19  | 1         | 0,887077237   | 1,127297554     | 2,042105263     |
| ITPKB                                                                                    | 0,787424549 | -0,172974357 | 0,075 | 0,08  | 1         | 0,887012071   | 1,127380373     | 0,9375          |
| BEND7                                                                                    | 0,975107496 | -0,172984723 | 0,062 | 0,06  | 1         | 0,887005698   | 1,127388474     | 1,033333333     |
| INPP5F                                                                                   | 0,093310235 | -0,173049357 | 0,475 | 0,25  | 1         | 0,88696596    | 1,127438983     | 1,9             |
| GGT7                                                                                     | 0,019482029 | -0,173074691 | 0,312 | 0,13  | 1         | 0,886950385   | 1,127458782     | 2,4             |
| RNF24                                                                                    | 0,056120777 | -0,173115775 | 0,362 | 0,18  | 1         | 0,886925128   | 1,127490888     | 2,011111111     |
| WBP1L                                                                                    | 0,051242668 | -0,17319447  | 0,175 | 0,07  | 1         | 0,886876749   | 1,127552392     | 2,5             |
| FRMD8                                                                                    | 0,183533164 | -0,173207876 | 0,25  | 0,14  | 1         | 0,886868508   | 1,12756287      | 1,785714286     |
| KANK4                                                                                    | 0,259519439 | -0,173349795 | 0,013 | 0,04  | 1         | 0,88678127    | 1,127673794     | 0,325           |
| AGO1                                                                                     | 0,133208758 | -0,173756645 | 0,212 | 0,11  | 1         | 0,886531227   | 1,127991851     | 1,927272727     |
| AKT1S1                                                                                   | 0,150645974 | -0,173837603 | 0,325 | 0,18  | 1         | 0,88648148    | 1,128055151     | 1,805555556     |
| PHF20L1                                                                                  | 0,120112192 | -0,173901292 | 0,637 | 0,35  | 1         | 0,886442347   | 1,128104951     | 1,82            |
| KIAA1109                                                                                 | 0,085454592 | -0,17398692  | 0,262 | 0,13  | 1         | 0,886389736   | 1,128171909     | 2,015384615     |
| MAP6                                                                                     | 0,098981434 | -0,173994576 | 0,025 | 0,08  | 1         | 0,886385032   | 1,128177896     | 0,3125          |
| INTS13                                                                                   | 0,334386894 | -0,17399945  | 0,162 | 0,1   | 1         | 0,886382037   | 1,128181708     | 1,62            |
| SARNP                                                                                    | 0,1355839   | -0,174102113 | 0,212 | 0,11  | 1         | 0,886318964   | 1,128261992     | 1,927272727     |
| ZNF672                                                                                   | 0,86591923  | -0,174140896 | 0,112 | 0,11  | 1         | 0,886295138   | 1,128292323     | 1,018181818     |
| PACSIN2                                                                                  | 0,030929941 | -0,174241166 | 0,438 | 0,21  | 1         | 0,886233541   | 1,128370744     | 2,085714286     |
| RBM6                                                                                     | 0,064935597 | -0,174267644 | 0,537 | 0,28  | 1         | 0,886217276   | 1,128391453     | 1,917857143     |
| CHRAC1                                                                                   | 0,026042167 | -0,17432449  | 0,438 | 0,2   | 1         | 0,886182357   | 1,128435916     | 2,19            |
| LZTS3                                                                                    | 0,309977712 | -0,174359416 | 0,038 | 0,07  | 1         | 0,886160904   | 1,128463234     | 0,542857143     |
| MAP2K4                                                                                   | 0,528261596 | -0,174593849 | 0,212 | 0,15  | 1         | 0,886016918   | 1,128646621     | 1,413333333     |
| SUCO                                                                                     | 0,180770945 | -0,174767703 | 0,325 | 0,19  | 1         | 0,885910153   | 1,128782638     | 1,710526316     |
| AFTPH                                                                                    | 0,082067672 | -0,174845211 | 0,375 | 0,19  | 1         | 0,88586256    | 1,128843283     | 1,973684211     |
| SDC4                                                                                     | 0,081659842 | -0,175018258 | 0,375 | 0,2   | 1         | 0,885756309   | 1,128978692     | 1,875           |
| SUMO4                                                                                    | 0,576609269 | -0,175157175 | 0,15  | 0,11  | 1         | 0,885671024   | 1,129087407     | 1,363636364     |
| TENT4A                                                                                   | 0,149235989 | -0,175229546 | 0,212 | 0,11  | 1         | 0,885626596   | 1,129144048     | 1,927272727     |
| VPS35                                                                                    | 0,335408567 | -0,175332491 | 0,525 | 0,32  | 1         | 0,885563404   | 1,129224622     | 1,640625        |
| DNAJC27                                                                                  | 0,98415605  | -0,175391901 | 0,1   | 0,09  | 1         | 0,885526938   | 1,129271124     | 1,111111111     |

Supplementary Table 4

| Differentially expressed genes_keloid-CCD_ comparing SC-Keloid vs. (SC-Myel, SC-Nonmyel) |             |              |       |       |           |               |                 |                 |
|------------------------------------------------------------------------------------------|-------------|--------------|-------|-------|-----------|---------------|-----------------|-----------------|
| gene                                                                                     | p_val       | avg_log2FC   | pct.1 | pct.2 | p_val_adj | Foldchange_UP | Foldchange_DOWN | Ratio_pct1_pct2 |
| SERTAD3                                                                                  | 0,181019946 | -0,175424376 | 0,475 | 0,27  | 1         | 0,885507004   | 1,129296544     | 1,759259259     |
| SHPRH                                                                                    | 0,340983366 | -0,175505369 | 0,262 | 0,17  | 1         | 0,885457293   | 1,129359945     | 1,541176471     |
| DDX28                                                                                    | 0,101572036 | -0,175602099 | 0,013 | 0,06  | 1         | 0,885397927   | 1,129435669     | 0,216666667     |
| FGGY                                                                                     | 0,730495711 | -0,175738784 | 0,05  | 0,06  | 1         | 0,885314046   | 1,12954268      | 0,833333333     |
| DENND5B                                                                                  | 0,313446358 | -0,175747025 | 0,038 | 0,07  | 1         | 0,885308989   | 1,129549132     | 0,542857143     |
| MAP1LC3A                                                                                 | 0,23941227  | -0,175806401 | 0,8   | 0,48  | 1         | 0,885272554   | 1,129595621     | 1,666666667     |
| CDK7                                                                                     | 0,740044706 | -0,175841565 | 0,112 | 0,09  | 1         | 0,885250977   | 1,129623154     | 1,244444444     |
| DUSP6                                                                                    | 0,531067445 | -0,175897956 | 0,238 | 0,17  | 1         | 0,885216375   | 1,129667308     | 1,4             |
| PTER                                                                                     | 0,782321833 | -0,176070027 | 0,075 | 0,06  | 1         | 0,885110801   | 1,129802053     | 1,25            |
| MAP2K7                                                                                   | 0,260108429 | -0,176236495 | 0,312 | 0,19  | 1         | 0,885008677   | 1,129932424     | 1,642105263     |
| CSRNP2                                                                                   | 0,399041491 | -0,176273118 | 0,2   | 0,13  | 1         | 0,884986211   | 1,129961108     | 1,538461538     |
| TRIP11                                                                                   | 0,01930521  | -0,176293267 | 0,5   | 0,24  | 1         | 0,884973851   | 1,12997689      | 2,083333333     |
| FAM135A                                                                                  | 0,645841423 | -0,176342212 | 0,038 | 0,05  | 1         | 0,884943828   | 1,130015226     | 0,76            |
| MAF1                                                                                     | 0,385746605 | -0,176361311 | 0,637 | 0,4   | 1         | 0,884932113   | 1,130030186     | 1,5925          |
| ZNF302                                                                                   | 0,897335015 | -0,17644381  | 0,125 | 0,12  | 1         | 0,88488151    | 1,130094808     | 1,041666667     |
| KIF13B                                                                                   | 0,167233364 | -0,176512458 | 0,475 | 0,27  | 1         | 0,884839406   | 1,130148582     | 1,759259259     |
| TBCCD1                                                                                   | 0,181587071 | -0,176557695 | 0,05  | 0,1   | 1         | 0,884811661   | 1,13018402      | 0,5             |
| FBXL20                                                                                   | 0,168721326 | -0,176619493 | 0,25  | 0,14  | 1         | 0,884773761   | 1,130232432     | 1,785714286     |
| CTDSPL                                                                                   | 0,203223572 | -0,176692511 | 0,312 | 0,18  | 1         | 0,884728982   | 1,130289637     | 1,733333333     |
| OSMR-DT                                                                                  | 0,072136391 | -0,176728071 | 0     | 0,04  | 1         | 0,884707175   | 1,130317497     | 0               |
| ZNF25                                                                                    | 0,308914059 | -0,177062658 | 0,138 | 0,08  | 1         | 0,884502019   | 1,130579669     | 1,725           |
| TMEM71                                                                                   | 0,98322916  | -0,177181974 | 0,088 | 0,08  | 1         | 0,884428871   | 1,130673175     | 1,1             |
| FBXO33                                                                                   | 0,163059514 | -0,177211667 | 0,225 | 0,12  | 1         | 0,884410668   | 1,130696447     | 1,875           |
| ABHD12                                                                                   | 0,31165357  | -0,177307408 | 0,488 | 0,3   | 1         | 0,884351979   | 1,130771485     | 1,626666667     |
| ABCC5                                                                                    | 0,338094174 | -0,177312805 | 0,15  | 0,09  | 1         | 0,88434867    | 1,130775715     | 1,666666667     |
| LRRCC1                                                                                   | 0,323538308 | -0,177371974 | 0,475 | 0,29  | 1         | 0,884312401   | 1,130822093     | 1,637931034     |
| AXIN2                                                                                    | 0,980637923 | -0,177389514 | 0,062 | 0,06  | 1         | 0,88430165    | 1,130835841     | 1,033333333     |
| NKAPD1                                                                                   | 0,251193864 | -0,177481501 | 0,325 | 0,2   | 1         | 0,884245268   | 1,130907946     | 1,625           |
| SNHG18                                                                                   | 0,578520911 | -0,1774949   | 0,1   | 0,07  | 1         | 0,884237056   | 1,130918449     | 1,428571429     |
| NAALADL2                                                                                 | 0,970307235 | -0,177596037 | 0,138 | 0,12  | 1         | 0,884175071   | 1,130997732     | 1,15            |

Supplementary Table 4

| Differentially expressed genes_keloid-CCD_ comparing SC-Keloid vs. (SC-Myel, SC-Nonmyel) |             |              |       |       |           |               |                 |                 |
|------------------------------------------------------------------------------------------|-------------|--------------|-------|-------|-----------|---------------|-----------------|-----------------|
| gene                                                                                     | p_val       | avg_log2FC   | pct.1 | pct.2 | p_val_adj | Foldchange_UP | Foldchange_DOWN | Ratio_pct1_pct2 |
| CCDC66                                                                                   | 0,075254292 | -0,177673612 | 0,338 | 0,17  | 1         | 0,884127529   | 1,131058549     | 1,988235294     |
| SPATS2                                                                                   | 0,099341486 | -0,177779602 | 0,312 | 0,16  | 1         | 0,884062577   | 1,131141647     | 1,95            |
| CWF19L2                                                                                  | 0,034875456 | -0,177857411 | 0,275 | 0,12  | 1         | 0,884014899   | 1,131202655     | 2,291666667     |
| VKORC1L1                                                                                 | 0,295541305 | -0,177902964 | 0,325 | 0,2   | 1         | 0,883986986   | 1,131238373     | 1,625           |
| PARL                                                                                     | 0,080826193 | -0,178029361 | 0,4   | 0,21  | 1         | 0,883909542   | 1,131337487     | 1,904761905     |
| PCDH10                                                                                   | 0,098981434 | -0,17805421  | 0,025 | 0,08  | 1         | 0,883894318   | 1,131356973     | 0,3125          |
| TMEM140                                                                                  | 0,155137097 | -0,178080711 | 0,025 | 0,07  | 1         | 0,883878081   | 1,131377756     | 0,357142857     |
| PRIMPOL                                                                                  | 0,786827279 | -0,178108065 | 0,15  | 0,12  | 1         | 0,883861323   | 1,131399207     | 1,25            |
| ZNF331                                                                                   | 0,549439969 | -0,17813954  | 0,112 | 0,08  | 1         | 0,88384204    | 1,131423891     | 1,4             |
| PDE5A                                                                                    | 0,369110746 | -0,178140565 | 0,025 | 0,05  | 1         | 0,883841412   | 1,131424695     | 0,5             |
| GALT                                                                                     | 0,8246177   | -0,178171861 | 0,088 | 0,09  | 1         | 0,883822239   | 1,131449239     | 0,977777778     |
| NISCH                                                                                    | 0,13799162  | -0,178308585 | 0,212 | 0,11  | 1         | 0,883738484   | 1,131556471     | 1,927272727     |
| EPHB3                                                                                    | 0,959285503 | -0,17833223  | 0,088 | 0,08  | 1         | 0,883724      | 1,131575017     | 1,1             |
| SHMT1                                                                                    | 0,379500814 | -0,178396866 | 0,088 | 0,05  | 1         | 0,883684408   | 1,131625715     | 1,76            |
| TFAP2B                                                                                   | 0,162161236 | -0,178667673 | 0,013 | 0,05  | 1         | 0,883518548   | 1,131838151     | 0,26            |
| CMTM5                                                                                    | 0,087034824 | -0,178729442 | 0,625 | 0,34  | 1         | 0,883480721   | 1,131886612     | 1,838235294     |
| SRSF1                                                                                    | 0,036826967 | -0,178769624 | 0,537 | 0,26  | 1         | 0,883456114   | 1,131918138     | 2,065384615     |
| EGR2                                                                                     | 0,806564466 | -0,178953671 | 0,075 | 0,08  | 1         | 0,883343418   | 1,132062548     | 0,9375          |
| SMN2                                                                                     | 0,259519439 | -0,179091579 | 0,013 | 0,04  | 1         | 0,883258982   | 1,132170768     | 0,325           |
| NAB2                                                                                     | 0,03414397  | -0,179245924 | 0,325 | 0,15  | 1         | 0,883164493   | 1,132291898     | 2,166666667     |
| DSE                                                                                      | 0,440457202 | -0,179328241 | 0,125 | 0,08  | 1         | 0,883114103   | 1,132356506     | 1,5625          |
| PRKCE                                                                                    | 0,369110746 | -0,179338533 | 0,025 | 0,05  | 1         | 0,883107803   | 1,132364584     | 0,5             |
| ARHGAP31                                                                                 | 0,602438582 | -0,17946944  | 0,125 | 0,09  | 1         | 0,883027675   | 1,132467337     | 1,388888889     |
| BRPF1                                                                                    | 0,54403098  | -0,179480714 | 0,075 | 0,05  | 1         | 0,883020775   | 1,132476187     | 1,5             |
| RUFY3                                                                                    | 0,948461203 | -0,179668703 | 0,15  | 0,13  | 1         | 0,882905721   | 1,132623763     | 1,153846154     |
| DRAM2                                                                                    | 0,246099159 | -0,179705764 | 0,262 | 0,16  | 1         | 0,882883041   | 1,132652858     | 1,6375          |
| SHISA9                                                                                   | 0,788452212 | -0,179727829 | 0,062 | 0,05  | 1         | 0,882869538   | 1,132670182     | 1,24            |
| JAK1                                                                                     | 0,277745642 | -0,17979134  | 0,475 | 0,3   | 1         | 0,882830673   | 1,132720045     | 1,583333333     |
| NIM1K                                                                                    | 0,262983184 | -0,179880134 | 0,05  | 0,09  | 1         | 0,882776339   | 1,132789763     | 0,555555556     |
| FMR1                                                                                     | 0,119700981 | -0,180109744 | 0,35  | 0,19  | 1         | 0,882635853   | 1,132970066     | 1,842105263     |

Supplementary Table 4

| Differentially expressed genes_keloid-CCD_ comparing SC-Keloid vs. (SC-Myel, SC-Nonmyel) |             |              |       |       |           |               |                 |                 |
|------------------------------------------------------------------------------------------|-------------|--------------|-------|-------|-----------|---------------|-----------------|-----------------|
| gene                                                                                     | p_val       | avg_log2FC   | pct.1 | pct.2 | p_val_adj | Foldchange_UP | Foldchange_DOWN | Ratio_pct1_pct2 |
| TMEM30A                                                                                  | 0,704902125 | -0,180131185 | 0,562 | 0,4   | 1         | 0,882622735   | 1,132986904     | 1,405           |
| UBE2E2                                                                                   | 0,322701203 | -0,180138487 | 0,15  | 0,09  | 1         | 0,882618268   | 1,132992638     | 1,666666667     |
| MXRA7                                                                                    | 0,139380562 | -0,180165457 | 0,738 | 0,4   | 1         | 0,882601768   | 1,133013819     | 1,845           |
| HDAC5                                                                                    | 0,194257763 | -0,180249421 | 0,262 | 0,15  | 1         | 0,882550403   | 1,133079762     | 1,746666667     |
| C11orf58                                                                                 | 0,753363576 | -0,180260041 | 0,912 | 0,66  | 1         | 0,882543907   | 1,133088102     | 1,381818182     |
| DDAH2                                                                                    | 0,459056223 | -0,180302295 | 0,887 | 0,54  | 1         | 0,882518058   | 1,133121289     | 1,642592593     |
| DNAJC21                                                                                  | 0,027891632 | -0,180320139 | 0,637 | 0,32  | 1         | 0,882507143   | 1,133135304     | 1,990625        |
| GXYLT1                                                                                   | 0,180807571 | -0,18039163  | 0,188 | 0,1   | 1         | 0,882463413   | 1,133191457     | 1,88            |
| ODF3L1                                                                                   | 0,84359211  | -0,180518382 | 0,025 | 0,02  | 1         | 0,882385885   | 1,13329102      | 1,25            |
| PIK3C3                                                                                   | 0,946204603 | -0,180523597 | 0,112 | 0,1   | 1         | 0,882382695   | 1,133295117     | 1,12            |
| TRIM23                                                                                   | 0,197583358 | -0,180619165 | 0,138 | 0,07  | 1         | 0,882324246   | 1,133370193     | 1,971428571     |
| SNAPC1                                                                                   | 0,133208758 | -0,180932112 | 0,212 | 0,11  | 1         | 0,882132874   | 1,133616068     | 1,927272727     |
| GTDC1                                                                                    | 0,165566109 | -0,180969663 | 0,238 | 0,13  | 1         | 0,882109914   | 1,133645574     | 1,830769231     |
| B4GALT1                                                                                  | 0,198597244 | -0,181061756 | 0,412 | 0,24  | 1         | 0,882053607   | 1,133717942     | 1,716666667     |
| SGMS2                                                                                    | 0,647481942 | -0,181089827 | 0,162 | 0,12  | 1         | 0,882036445   | 1,133740001     | 1,35            |
| UACA                                                                                     | 0,05916428  | -0,181095776 | 0,512 | 0,28  | 1         | 0,882032808   | 1,133744676     | 1,828571429     |
| SGCD                                                                                     | 0,287391344 | -0,181223862 | 0,125 | 0,07  | 1         | 0,881954502   | 1,133845337     | 1,785714286     |
| HNRNPLL                                                                                  | 0,315230407 | -0,181232104 | 0,225 | 0,14  | 1         | 0,881949464   | 1,133851815     | 1,607142857     |
| DIP2C                                                                                    | 0,154193073 | -0,181378143 | 0,275 | 0,15  | 1         | 0,881860191   | 1,133966597     | 1,833333333     |
| NT5C3A                                                                                   | 0,130828337 | -0,181553005 | 0,312 | 0,17  | 1         | 0,881753312   | 1,134104047     | 1,835294118     |
| PDE1C                                                                                    | 0,181955859 | -0,181685869 | 0,238 | 0,13  | 1         | 0,881672111   | 1,134208497     | 1,830769231     |
| RPL23                                                                                    | 0,481367189 | -0,181710106 | 0,975 | 0,86  | 1         | 0,881657299   | 1,134227552     | 1,13372093      |
| RANBP10                                                                                  | 0,343957066 | -0,181749015 | 0,075 | 0,04  | 1         | 0,881633522   | 1,134258142     | 1,875           |
| REG                                                                                      | 0,320459999 | -0,181863569 | 0,038 | 0,07  | 1         | 0,881563521   | 1,134348208     | 0,542857143     |
| ZNF264                                                                                   | 0,259310772 | -0,182054583 | 0,175 | 0,1   | 1         | 0,881446808   | 1,134498407     | 1,75            |
| MAN2A2                                                                                   | 0,609702351 | -0,182194041 | 0,188 | 0,14  | 1         | 0,881361608   | 1,134608078     | 1,342857143     |
| CUL1                                                                                     | 0,12885238  | -0,182348252 | 0,275 | 0,15  | 1         | 0,881267403   | 1,134729364     | 1,833333333     |
| MAP3K7                                                                                   | 0,040356262 | -0,182375608 | 0,25  | 0,11  | 1         | 0,881250693   | 1,134750881     | 2,272727273     |
| GJA1                                                                                     | 0,997440903 | -0,182556332 | 0,075 | 0,07  | 1         | 0,881140307   | 1,134893038     | 1,071428571     |
| FSD1L                                                                                    | 0,8246177   | -0,182681764 | 0,088 | 0,09  | 1         | 0,881063701   | 1,134991713     | 0,977777778     |

Supplementary Table 4

| Differentially expressed genes_keloid-CCD_ comparing SC-Keloid vs. (SC-Myel, SC-Nonmyel) |             |              |       |       |           |               |                 |                 |
|------------------------------------------------------------------------------------------|-------------|--------------|-------|-------|-----------|---------------|-----------------|-----------------|
| gene                                                                                     | p_val       | avg_log2FC   | pct.1 | pct.2 | p_val_adj | Foldchange_UP | Foldchange_DOWN | Ratio_pct1_pct2 |
| SHOC2                                                                                    | 0,285048406 | -0,182843325 | 0,338 | 0,21  | 1         | 0,880965041   | 1,135118823     | 1,60952381      |
| BMP4                                                                                     | 0,061423181 | -0,183049448 | 0,013 | 0,07  | 1         | 0,880839183   | 1,135281013     | 0,185714286     |
| GAS1                                                                                     | 0,54451599  | -0,183156569 | 0,062 | 0,04  | 1         | 0,880773783   | 1,135365311     | 1,55            |
| CD200                                                                                    | 0,374832486 | -0,183255647 | 0,188 | 0,12  | 1         | 0,880713297   | 1,135443286     | 1,566666667     |
| ELP5                                                                                     | 0,090729879 | -0,183315858 | 0,462 | 0,25  | 1         | 0,880676541   | 1,135490674     | 1,848           |
| RBMS2                                                                                    | 0,755038102 | -0,183372401 | 0,1   | 0,08  | 1         | 0,880642026   | 1,135535179     | 1,25            |
| GAL3ST1                                                                                  | 0,371512477 | -0,183414361 | 0,075 | 0,11  | 1         | 0,880616413   | 1,135568206     | 0,681818182     |
| DDX51                                                                                    | 0,185533477 | -0,1835998   | 0,188 | 0,1   | 1         | 0,880503229   | 1,135714177     | 1,88            |
| ATP11B                                                                                   | 0,127159848 | -0,183702238 | 0,4   | 0,22  | 1         | 0,880440712   | 1,135794821     | 1,818181818     |
| UBA2                                                                                     | 0,181534236 | -0,183875662 | 0,55  | 0,31  | 1         | 0,880334881   | 1,135931361     | 1,774193548     |
| ATP8A1                                                                                   | 0,159398678 | -0,183954103 | 0,013 | 0,05  | 1         | 0,880287018   | 1,135993124     | 0,26            |
| RAD21                                                                                    | 0,43775413  | -0,183956112 | 0,675 | 0,44  | 1         | 0,880285792   | 1,135994706     | 1,534090909     |
| KPNA3                                                                                    | 0,218031514 | -0,183994395 | 0,338 | 0,2   | 1         | 0,880262434   | 1,136024851     | 1,69            |
| NKAIN2                                                                                   | 0,043652221 | -0,184088426 | 0     | 0,05  | 1         | 0,880205062   | 1,136098897     | 0               |
| TYW3                                                                                     | 0,019906417 | -0,184444293 | 0,312 | 0,13  | 1         | 0,87998797    | 1,136379171     | 2,4             |
| GYG1                                                                                     | 0,419468588 | -0,184656462 | 0,212 | 0,14  | 1         | 0,879858565   | 1,136546304     | 1,514285714     |
| MFF                                                                                      | 0,026637265 | -0,184797253 | 0,55  | 0,26  | 1         | 0,879772705   | 1,136657224     | 2,115384615     |
| AK9                                                                                      | 0,754347587 | -0,184837646 | 0,062 | 0,07  | 1         | 0,879748073   | 1,136689049     | 0,885714286     |
| GCH1                                                                                     | 0,708795782 | -0,184905696 | 0,05  | 0,06  | 1         | 0,879706577   | 1,136742666     | 0,833333333     |
| MIER3                                                                                    | 0,477132378 | -0,184961324 | 0,15  | 0,1   | 1         | 0,879672658   | 1,136786498     | 1,5             |
| NLRP1                                                                                    | 0,386121915 | -0,18497552  | 0,575 | 0,37  | 1         | 0,879664002   | 1,136797684     | 1,554054054     |
| KCTD15                                                                                   | 0,931136168 | -0,18532661  | 0,2   | 0,18  | 1         | 0,879449956   | 1,137074365     | 1,111111111     |
| EIF4EBP2                                                                                 | 0,423762976 | -0,185330106 | 0,225 | 0,15  | 1         | 0,879447825   | 1,137077121     | 1,5             |
| TRIM41                                                                                   | 0,857370956 | -0,185343765 | 0,1   | 0,1   | 1         | 0,879439499   | 1,137087886     | 1               |
| DDX52                                                                                    | 0,267019037 | -0,185431584 | 0,362 | 0,22  | 1         | 0,879385967   | 1,137157105     | 1,645454545     |
| USP34                                                                                    | 0,100689774 | -0,185575441 | 0,562 | 0,3   | 1         | 0,879298284   | 1,137270501     | 1,873333333     |
| ILKAP                                                                                    | 0,132667515 | -0,18574642  | 0,388 | 0,21  | 1         | 0,879194082   | 1,137405291     | 1,847619048     |
| SSH2                                                                                     | 0,128867295 | -0,185774028 | 0,2   | 0,1   | 1         | 0,879177257   | 1,137427057     | 2               |
| DLGAP1-AS1                                                                               | 0,94227175  | -0,185791756 | 0,05  | 0,05  | 1         | 0,879166454   | 1,137441034     | 1               |
| HDAC4                                                                                    | 0,592215116 | -0,185795244 | 0,062 | 0,08  | 1         | 0,879164328   | 1,137443784     | 0,775           |

Supplementary Table 4

| Differentially expressed genes_keloid-CCD_ comparing SC-Keloid vs. (SC-Myel, SC-Nonmyel) |             |              |       |       |           |               |                 |                 |
|------------------------------------------------------------------------------------------|-------------|--------------|-------|-------|-----------|---------------|-----------------|-----------------|
| gene                                                                                     | p_val       | avg_log2FC   | pct.1 | pct.2 | p_val_adj | Foldchange_UP | Foldchange_DOWN | Ratio_pct1_pct2 |
| TMBIM1                                                                                   | 0,045684804 | -0,185894556 | 0,4   | 0,2   | 1         | 0,879103811   | 1,137522085     | 2               |
| VAMP3                                                                                    | 0,249241725 | -0,185952465 | 0,562 | 0,33  | 1         | 0,879068525   | 1,137567745     | 1,703030303     |
| GOLPH3                                                                                   | 0,126075627 | -0,186175381 | 0,425 | 0,23  | 1         | 0,878932707   | 1,137743529     | 1,847826087     |
| LINC01588                                                                                | 0,787424549 | -0,186202683 | 0,075 | 0,08  | 1         | 0,878916074   | 1,13776506      | 0,9375          |
| WFDC2                                                                                    | 0,208200632 | -0,186344902 | 0,038 | 0,08  | 1         | 0,878829436   | 1,137877226     | 0,475           |
| IRS1                                                                                     | 0,320459999 | -0,186355626 | 0,038 | 0,07  | 1         | 0,878822903   | 1,137885684     | 0,542857143     |
| LINC00844                                                                                | 0,244022269 | -0,186390678 | 0,025 | 0,06  | 1         | 0,878801552   | 1,13791333      | 0,416666667     |
| NUP54                                                                                    | 0,035265235 | -0,186485715 | 0,35  | 0,16  | 1         | 0,878743663   | 1,137988292     | 2,1875          |
| C6orf62                                                                                  | 0,665797969 | -0,186504715 | 0,637 | 0,41  | 1         | 0,87873209    | 1,138003279     | 1,553658537     |
| KCNJ14                                                                                   | 0,259519439 | -0,18665897  | 0,013 | 0,04  | 1         | 0,878638139   | 1,138124963     | 0,325           |
| ARRB2                                                                                    | 0,240432156 | -0,186728588 | 0,162 | 0,09  | 1         | 0,878595741   | 1,138179885     | 1,8             |
| HSBP1L1                                                                                  | 0,609980615 | -0,186829434 | 0,125 | 0,09  | 1         | 0,878534329   | 1,138259448     | 1,388888889     |
| ASB3                                                                                     | 0,61602397  | -0,186834315 | 0,075 | 0,09  | 1         | 0,878531356   | 1,138263299     | 0,833333333     |
| CLU                                                                                      | 0,242362686 | -0,186941594 | 0,55  | 0,35  | 1         | 0,878466032   | 1,138347943     | 1,571428571     |
| KCNH8                                                                                    | 0,534864963 | -0,186955342 | 0,05  | 0,07  | 1         | 0,87845766    | 1,138358791     | 0,714285714     |
| DAB2IP                                                                                   | 0,796979246 | -0,187155322 | 0,075 | 0,08  | 1         | 0,8783359     | 1,138516597     | 0,9375          |
| SH3BP2                                                                                   | 0,302904331 | -0,187257929 | 0,225 | 0,14  | 1         | 0,878273434   | 1,138597572     | 1,607142857     |
| TLE4                                                                                     | 0,001514195 | -0,187267593 | 0,45  | 0,17  | 1         | 0,878267551   | 1,1386052       | 2,647058824     |
| IGF1R                                                                                    | 0,775526182 | -0,187375545 | 0,088 | 0,07  | 1         | 0,878201835   | 1,138690401     | 1,257142857     |
| ARL5A                                                                                    | 0,238212718 | -0,187445071 | 0,412 | 0,25  | 1         | 0,878159514   | 1,138745278     | 1,648           |
| METAP1                                                                                   | 0,0161934   | -0,187549128 | 0,262 | 0,1   | 1         | 0,878096178   | 1,138827415     | 2,62            |
| GSK3A                                                                                    | 0,276169507 | -0,18776788  | 0,388 | 0,24  | 1         | 0,877963044   | 1,139000105     | 1,616666667     |
| PPP4R1                                                                                   | 0,006108134 | -0,188012656 | 0,488 | 0,21  | 1         | 0,877814097   | 1,139193371     | 2,323809524     |
| GLUD1                                                                                    | 0,039761817 | -0,188017897 | 0,438 | 0,21  | 1         | 0,877810908   | 1,13919751      | 2,085714286     |
| HCCS                                                                                     | 0,180807571 | -0,188032944 | 0,188 | 0,1   | 1         | 0,877801753   | 1,13920939      | 1,88            |
| UAP1L1                                                                                   | 0,570334915 | -0,188073167 | 0,1   | 0,07  | 1         | 0,877777279   | 1,139241153     | 1,428571429     |
| PHC3                                                                                     | 0,387461813 | -0,188249825 | 0,212 | 0,14  | 1         | 0,877669802   | 1,139380662     | 1,514285714     |
| USP36                                                                                    | 0,051587349 | -0,188257333 | 0,225 | 0,1   | 1         | 0,877665235   | 1,139386591     | 2,25            |
| AUTS2                                                                                    | 0,394711483 | -0,188264353 | 0,225 | 0,15  | 1         | 0,877660964   | 1,139392135     | 1,5             |
| ENOPH1                                                                                   | 0,48183304  | -0,188334059 | 0,5   | 0,31  | 1         | 0,877618559   | 1,139447188     | 1,612903226     |

Supplementary Table 4

| Differentially expressed genes_keloid-CCD_ comparing SC-Keloid vs. (SC-Myel, SC-Nonmyel) |             |              |       |       |           |               |                 |                 |
|------------------------------------------------------------------------------------------|-------------|--------------|-------|-------|-----------|---------------|-----------------|-----------------|
| gene                                                                                     | p_val       | avg_log2FC   | pct.1 | pct.2 | p_val_adj | Foldchange_UP | Foldchange_DOWN | Ratio_pct1_pct2 |
| BMP2K                                                                                    | 0,038832121 | -0,188802975 | 0,375 | 0,18  | 1         | 0,877333355   | 1,139817601     | 2,083333333     |
| RAB35                                                                                    | 0,201696066 | -0,188853283 | 0,2   | 0,11  | 1         | 0,877302763   | 1,139857348     | 1,818181818     |
| HACL1                                                                                    | 0,992812065 | -0,188886945 | 0,088 | 0,08  | 1         | 0,877282293   | 1,139883943     | 1,1             |
| NKD1                                                                                     | 0,159398678 | -0,189269715 | 0,013 | 0,05  | 1         | 0,877049567   | 1,140186413     | 0,26            |
| AC093323.1                                                                               | 0,773687452 | -0,189282253 | 0,112 | 0,09  | 1         | 0,877041945   | 1,140196322     | 1,244444444     |
| LONRF3                                                                                   | 0,259519439 | -0,189760786 | 0,013 | 0,04  | 1         | 0,876751084   | 1,140574581     | 0,325           |
| DCAF7                                                                                    | 0,066829766 | -0,189833178 | 0,4   | 0,2   | 1         | 0,876707091   | 1,140631815     | 2               |
| FYTTD1                                                                                   | 0,056576417 | -0,190105891 | 0,625 | 0,32  | 1         | 0,876541383   | 1,140847449     | 1,953125        |
| LCA5                                                                                     | 0,960872433 | -0,190182859 | 0,125 | 0,11  | 1         | 0,87649462    | 1,140908315     | 1,136363636     |
| ATXN2                                                                                    | 0,200718479 | -0,190303252 | 0,562 | 0,33  | 1         | 0,876421479   | 1,141003528     | 1,703030303     |
| CCDC186                                                                                  | 0,192574261 | -0,190319926 | 0,412 | 0,24  | 1         | 0,87641135    | 1,141016715     | 1,716666667     |
| INTS8                                                                                    | 0,035392992 | -0,190444226 | 0,112 | 0,03  | 1         | 0,876335843   | 1,141115027     | 3,733333333     |
| RAB24                                                                                    | 0,218400487 | -0,190830488 | 0,038 | 0,08  | 1         | 0,876101248   | 1,141420586     | 0,475           |
| FBXL4                                                                                    | 0,116684893 | -0,19094804  | 0,138 | 0,06  | 1         | 0,876029865   | 1,141513594     | 2,3             |
| RTF1                                                                                     | 0,71786857  | -0,191037624 | 0,838 | 0,56  | 1         | 0,87597547    | 1,141584478     | 1,496428571     |
| ESYT2                                                                                    | 0,065193866 | -0,191060101 | 0,425 | 0,22  | 1         | 0,875961823   | 1,141602264     | 1,931818182     |
| PROSER2                                                                                  | 0,438413571 | -0,191130862 | 0,062 | 0,09  | 1         | 0,87591886    | 1,141658259     | 0,688888889     |
| CDC37L1                                                                                  | 0,383399916 | -0,191401606 | 0,412 | 0,27  | 1         | 0,875754496   | 1,141872528     | 1,525925926     |
| CBLL1                                                                                    | 0,104920995 | -0,19156983  | 0,225 | 0,11  | 1         | 0,875652385   | 1,142005683     | 2,045454545     |
| SFT2D2                                                                                   | 0,227992786 | -0,191577614 | 0,225 | 0,13  | 1         | 0,875647661   | 1,142011844     | 1,730769231     |
| TMEM91                                                                                   | 0,992812065 | -0,191712979 | 0,088 | 0,08  | 1         | 0,875565504   | 1,142119002     | 1,1             |
| FBXO21                                                                                   | 0,209814665 | -0,191969312 | 0,35  | 0,21  | 1         | 0,875409951   | 1,142321948     | 1,666666667     |
| LRATD2                                                                                   | 0,369110746 | -0,192010742 | 0,025 | 0,05  | 1         | 0,875384812   | 1,142354752     | 0,5             |
| CAPZA2                                                                                   | 0,066130002 | -0,192054587 | 0,7   | 0,38  | 1         | 0,875358208   | 1,142389471     | 1,842105263     |
| PSEN1                                                                                    | 0,268578087 | -0,192434439 | 0,25  | 0,15  | 1         | 0,875127763   | 1,142690293     | 1,666666667     |
| TDRP                                                                                     | 0,556644247 | -0,192446963 | 0,025 | 0,04  | 1         | 0,875120165   | 1,142700214     | 0,625           |
| MTMR3                                                                                    | 0,98415605  | -0,192482107 | 0,1   | 0,09  | 1         | 0,875098848   | 1,14272805      | 1,111111111     |
| TMEM9                                                                                    | 0,109671813 | -0,192490771 | 0,325 | 0,17  | 1         | 0,875093593   | 1,142734912     | 1,911764706     |
| ZFAND2A                                                                                  | 0,736493671 | -0,192516329 | 0,475 | 0,34  | 1         | 0,87507809    | 1,142755157     | 1,397058824     |
| PPP2R5C                                                                                  | 0,263936258 | -0,192559564 | 0,338 | 0,21  | 1         | 0,875051866   | 1,142789404     | 1,60952381      |

Supplementary Table 4

| Differentially expressed genes_keloid-CCD_ comparing SC-Keloid vs. (SC-Myel, SC-Nonmyel) |             |              |       |       |           |               |                 |                 |
|------------------------------------------------------------------------------------------|-------------|--------------|-------|-------|-----------|---------------|-----------------|-----------------|
| gene                                                                                     | p_val       | avg_log2FC   | pct.1 | pct.2 | p_val_adj | Foldchange_UP | Foldchange_DOWN | Ratio_pct1_pct2 |
| EHBP1L1                                                                                  | 0,096741019 | -0,19276108  | 0,262 | 0,13  | 1         | 0,874929647   | 1,14294904      | 2,015384615     |
| DGKB                                                                                     | 0,156473881 | -0,192885165 | 0,225 | 0,12  | 1         | 0,874854398   | 1,143047348     | 1,875           |
| GON4L                                                                                    | 0,093682509 | -0,192885613 | 0,425 | 0,23  | 1         | 0,874854127   | 1,143047703     | 1,847826087     |
| PTPN2                                                                                    | 0,619185505 | -0,192921154 | 0,188 | 0,14  | 1         | 0,874832575   | 1,143075862     | 1,342857143     |
| CCDC93                                                                                   | 0,642614654 | -0,192996518 | 0,15  | 0,11  | 1         | 0,874786876   | 1,143135577     | 1,363636364     |
| CCNE2                                                                                    | 0,574601445 | -0,19301693  | 0,062 | 0,08  | 1         | 0,874774499   | 1,14315175      | 0,775           |
| SDR39U1                                                                                  | 0,082861266 | -0,193060898 | 0,25  | 0,12  | 1         | 0,87474784    | 1,14318659      | 2,083333333     |
| INAFM2                                                                                   | 0,853031596 | -0,193076039 | 0,1   | 0,1   | 1         | 0,87473866    | 1,143198587     | 1               |
| MFAP3L                                                                                   | 0,369110746 | -0,193141755 | 0,025 | 0,05  | 1         | 0,874698816   | 1,143250662     | 0,5             |
| LRR42                                                                                    | 0,100552673 | -0,193197438 | 0,275 | 0,14  | 1         | 0,874665056   | 1,143294789     | 1,964285714     |
| ANXA7                                                                                    | 0,165652039 | -0,193245838 | 0,613 | 0,33  | 1         | 0,874635713   | 1,143333145     | 1,857575758     |
| AGFG1                                                                                    | 0,290078323 | -0,193263775 | 0,338 | 0,21  | 1         | 0,874624838   | 1,14334736      | 1,60952381      |
| SAP30L                                                                                   | 0,332276253 | -0,193542307 | 0,238 | 0,15  | 1         | 0,874455997   | 1,14356812      | 1,586666667     |
| TGFB2                                                                                    | 0,046017564 | -0,193848487 | 0,3   | 0,14  | 1         | 0,874270432   | 1,143810843     | 2,142857143     |
| CNBD2                                                                                    | 0,75188944  | -0,19392591  | 0,088 | 0,07  | 1         | 0,874223515   | 1,143872228     | 1,257142857     |
| ZNF330                                                                                   | 0,507295223 | -0,194117584 | 0,2   | 0,14  | 1         | 0,874107375   | 1,144024211     | 1,428571429     |
| OXR1                                                                                     | 0,203442678 | -0,194263297 | 0,3   | 0,17  | 1         | 0,874019094   | 1,144139764     | 1,764705882     |
| CYP7B1                                                                                   | 0,217936139 | -0,194334157 | 0,15  | 0,08  | 1         | 0,873976167   | 1,144195961     | 1,875           |
| SRGAP3                                                                                   | 0,155137097 | -0,19438245  | 0,025 | 0,07  | 1         | 0,873946911   | 1,144234263     | 0,357142857     |
| MCC                                                                                      | 0,236402297 | -0,194391225 | 0,162 | 0,09  | 1         | 0,873941596   | 1,144241223     | 1,8             |
| RSL24D1                                                                                  | 0,761841165 | -0,19441477  | 0,825 | 0,56  | 1         | 0,873927333   | 1,144259897     | 1,473214286     |
| KRT1                                                                                     | 0,788452212 | -0,19465101  | 0,062 | 0,05  | 1         | 0,87378424    | 1,144447284     | 1,24            |
| PCNX4                                                                                    | 0,174742847 | -0,194676664 | 0,312 | 0,18  | 1         | 0,873768702   | 1,144467635     | 1,733333333     |
| FCGR2A                                                                                   | 0,774662824 | -0,194759846 | 0,062 | 0,07  | 1         | 0,873718325   | 1,144533623     | 0,885714286     |
| EMSY                                                                                     | 0,006130779 | -0,194803968 | 0,25  | 0,08  | 1         | 0,873691604   | 1,144568627     | 3,125           |
| TRPS1                                                                                    | 0,224853187 | -0,194815067 | 0,3   | 0,18  | 1         | 0,873684883   | 1,144577433     | 1,666666667     |
| CRTC3                                                                                    | 0,275856362 | -0,194856268 | 0,25  | 0,15  | 1         | 0,873659932   | 1,14461012      | 1,666666667     |
| UROD                                                                                     | 0,204465244 | -0,194880589 | 0,362 | 0,21  | 1         | 0,873645204   | 1,144629416     | 1,723809524     |
| CYB5D1                                                                                   | 0,975107496 | -0,194881211 | 0,062 | 0,06  | 1         | 0,873644827   | 1,14462991      | 1,033333333     |
| ESCO1                                                                                    | 0,767311984 | -0,194899824 | 0,2   | 0,16  | 1         | 0,873633556   | 1,144644678     | 1,25            |



Supplementary Table 4

| Differentially expressed genes_keloid-CCD_ comparing SC-Keloid vs. (SC-Myel, SC-Nonmyel) |             |              |       |       |           |               |                 |                 |
|------------------------------------------------------------------------------------------|-------------|--------------|-------|-------|-----------|---------------|-----------------|-----------------|
| gene                                                                                     | p_val       | avg_log2FC   | pct.1 | pct.2 | p_val_adj | Foldchange_UP | Foldchange_DOWN | Ratio_pct1_pct2 |
| FRS2                                                                                     | 0,366165637 | -0,194937331 | 0,4   | 0,26  | 1         | 0,873610844   | 1,144674436     | 1,538461538     |
| RPL13A                                                                                   | 0,656425927 | -0,195085167 | 1     | 0,87  | 1         | 0,873521328   | 1,144791739     | 1,149425287     |
| ZDHHC20                                                                                  | 0,972273643 | -0,195314929 | 0,162 | 0,14  | 1         | 0,873382223   | 1,144974072     | 1,157142857     |
| CA11                                                                                     | 0,788452212 | -0,195742375 | 0,062 | 0,05  | 1         | 0,873123493   | 1,145313359     | 1,24            |
| CNN1                                                                                     | 0,825820939 | -0,195778292 | 0,075 | 0,08  | 1         | 0,873101756   | 1,145341873     | 0,9375          |
| MLIP                                                                                     | 0,072136391 | -0,195810395 | 0     | 0,04  | 1         | 0,873082328   | 1,145367359     | 0               |
| RIPK4                                                                                    | 0,556644247 | -0,195870609 | 0,025 | 0,04  | 1         | 0,873045889   | 1,145415164     | 0,625           |
| ILF2                                                                                     | 0,600868651 | -0,195889211 | 0,838 | 0,54  | 1         | 0,873034632   | 1,145429933     | 1,551851852     |
| CNPPD1                                                                                   | 0,037886699 | -0,19588958  | 0,275 | 0,12  | 1         | 0,873034408   | 1,145430227     | 2,291666667     |
| CBX7                                                                                     | 0,164186676 | -0,195898209 | 0,025 | 0,07  | 1         | 0,873029186   | 1,145437078     | 0,357142857     |
| KHSRP                                                                                    | 0,067004906 | -0,196332004 | 0,438 | 0,23  | 1         | 0,87276672    | 1,145781543     | 1,904347826     |
| SOX13                                                                                    | 0,080588934 | -0,196426263 | 0,25  | 0,12  | 1         | 0,8727097     | 1,145856406     | 2,083333333     |
| TRIM58                                                                                   | 0,915690467 | -0,196434133 | 0,125 | 0,11  | 1         | 0,872704939   | 1,145862657     | 1,136363636     |
| LSMEM1                                                                                   | 0,25914837  | -0,196480807 | 0,238 | 0,14  | 1         | 0,872676706   | 1,145899728     | 1,7             |
| PHF13                                                                                    | 0,178424696 | -0,196578576 | 0,388 | 0,22  | 1         | 0,872617568   | 1,145977387     | 1,763636364     |
| SUCLA2                                                                                   | 0,14972815  | -0,196598362 | 0,35  | 0,19  | 1         | 0,8726056     | 1,145993104     | 1,842105263     |
| OTUD4                                                                                    | 0,060931852 | -0,196734797 | 0,325 | 0,16  | 1         | 0,872523082   | 1,146101485     | 2,03125         |
| ACSS1                                                                                    | 0,769645162 | -0,196749926 | 0,125 | 0,1   | 1         | 0,872513933   | 1,146113503     | 1,25            |
| SLC10A7                                                                                  | 0,223632981 | -0,196871088 | 0,088 | 0,04  | 1         | 0,872440659   | 1,146209762     | 2,2             |
| TAOK3                                                                                    | 0,016933633 | -0,196875618 | 0,525 | 0,24  | 1         | 0,87243792    | 1,146213361     | 2,1875          |
| GNRH1                                                                                    | 0,213256546 | -0,19689612  | 0,038 | 0,08  | 1         | 0,872425521   | 1,14622965      | 0,475           |
| YAF2                                                                                     | 0,064773978 | -0,196930662 | 0,412 | 0,21  | 1         | 0,872404633   | 1,146257094     | 1,961904762     |
| TBCK                                                                                     | 0,782321833 | -0,197050755 | 0,075 | 0,06  | 1         | 0,872332016   | 1,146352514     | 1,25            |
| CTDSP2                                                                                   | 0,082145331 | -0,197096167 | 0,525 | 0,28  | 1         | 0,872304558   | 1,146388599     | 1,875           |
| SKP1                                                                                     | 0,707123689 | -0,19718352  | 1     | 0,89  | 1         | 0,872251743   | 1,146458013     | 1,123595506     |
| ARL8A                                                                                    | 0,349864878 | -0,197206218 | 0,575 | 0,35  | 1         | 0,872238019   | 1,146476051     | 1,642857143     |
| PDXDC1                                                                                   | 0,43018274  | -0,197225416 | 0,25  | 0,17  | 1         | 0,872226413   | 1,146491307     | 1,470588235     |
| ZNF3                                                                                     | 0,779340817 | -0,197279235 | 0,15  | 0,12  | 1         | 0,872193875   | 1,146534077     | 1,25            |
| GGPS1                                                                                    | 0,038338272 | -0,197427988 | 0,312 | 0,14  | 1         | 0,87210395    | 1,1466523       | 2,228571429     |
| TRIM3                                                                                    | 0,607373353 | -0,197459229 | 0,138 | 0,1   | 1         | 0,872085065   | 1,14667713      | 1,38            |

Supplementary Table 4

| Differentially expressed genes_keloid-CCD_ comparing SC-Keloid vs. (SC-Myel, SC-Nonmyel) |             |              |       |       |           |               |                 |                 |
|------------------------------------------------------------------------------------------|-------------|--------------|-------|-------|-----------|---------------|-----------------|-----------------|
| gene                                                                                     | p_val       | avg_log2FC   | pct.1 | pct.2 | p_val_adj | Foldchange_UP | Foldchange_DOWN | Ratio_pct1_pct2 |
| APBB1                                                                                    | 0,8246177   | -0,197504293 | 0,088 | 0,09  | 1         | 0,872057825   | 1,146712948     | 0,977777778     |
| SRRM2                                                                                    | 0,695223101 | -0,197602598 | 0,9   | 0,71  | 1         | 0,871998406   | 1,146791087     | 1,267605634     |
| KRAS                                                                                     | 0,343866666 | -0,197711811 | 0,662 | 0,39  | 1         | 0,871932397   | 1,146877904     | 1,697435897     |
| TMEM106B                                                                                 | 0,024253566 | -0,197786957 | 0,562 | 0,27  | 1         | 0,871886982   | 1,146937643     | 2,081481481     |
| SMIM5                                                                                    | 0,301020509 | -0,198227366 | 0,325 | 0,21  | 1         | 0,871620863   | 1,14728782      | 1,547619048     |
| RXRB                                                                                     | 0,495677083 | -0,198384506 | 0,238 | 0,16  | 1         | 0,87152593    | 1,147412791     | 1,4875          |
| PDE4D                                                                                    | 0,309977712 | -0,198469951 | 0,038 | 0,07  | 1         | 0,871474315   | 1,147480749     | 0,542857143     |
| CASD1                                                                                    | 0,034162828 | -0,198571462 | 0,288 | 0,13  | 1         | 0,871412998   | 1,147561492     | 2,215384615     |
| GFPT1                                                                                    | 0,073455554 | -0,198583729 | 0,412 | 0,21  | 1         | 0,871405588   | 1,14757125      | 1,961904762     |
| FKBPL                                                                                    | 0,065942542 | -0,198607489 | 0,188 | 0,08  | 1         | 0,871391238   | 1,147590149     | 2,35            |
| EFS                                                                                      | 0,028180084 | -0,198627225 | 0,5   | 0,25  | 1         | 0,871379317   | 1,147605848     | 2               |
| SMCHD1                                                                                   | 0,088139097 | -0,198646957 | 0,362 | 0,19  | 1         | 0,871367399   | 1,147621544     | 1,905263158     |
| ELL2                                                                                     | 0,257909868 | -0,198847971 | 0,25  | 0,15  | 1         | 0,871245998   | 1,147781456     | 1,666666667     |
| GMFB                                                                                     | 0,004593857 | -0,198856576 | 0,488 | 0,2   | 1         | 0,871240802   | 1,147788302     | 2,44            |
| TNS1                                                                                     | 0,63513191  | -0,198961721 | 0,188 | 0,14  | 1         | 0,871177307   | 1,147871957     | 1,342857143     |
| ZNF581                                                                                   | 0,765615049 | -0,199067465 | 0,125 | 0,1   | 1         | 0,871113455   | 1,147956095     | 1,25            |
| MBD1                                                                                     | 0,625545592 | -0,199285381 | 0,138 | 0,1   | 1         | 0,870981885   | 1,148129504     | 1,38            |
| C8orf88                                                                                  | 0,111079219 | -0,199576904 | 0,188 | 0,09  | 1         | 0,870805905   | 1,148361528     | 2,088888889     |
| FLRT1                                                                                    | 0,359832279 | -0,199650511 | 0,162 | 0,1   | 1         | 0,870761477   | 1,14842012      | 1,62            |
| ZNF775                                                                                   | 0,647481942 | -0,199758541 | 0,162 | 0,12  | 1         | 0,870696277   | 1,148506117     | 1,35            |
| SYNM                                                                                     | 0,157799385 | -0,199787177 | 0,238 | 0,13  | 1         | 0,870678994   | 1,148528915     | 1,830769231     |
| DSTYK                                                                                    | 0,596584402 | -0,199789613 | 0,138 | 0,1   | 1         | 0,870677524   | 1,148530854     | 1,38            |
| FAM20C                                                                                   | 0,119026579 | -0,199905037 | 0,362 | 0,2   | 1         | 0,870607868   | 1,148622746     | 1,81            |
| DDX21                                                                                    | 0,569869251 | -0,200075064 | 0,775 | 0,48  | 1         | 0,87050527    | 1,148758124     | 1,614583333     |
| BCAR3                                                                                    | 0,041792483 | -0,20016119  | 0,3   | 0,14  | 1         | 0,870453304   | 1,148826704     | 2,142857143     |
| FZD2                                                                                     | 0,369110746 | -0,200179235 | 0,025 | 0,05  | 1         | 0,870442416   | 1,148841074     | 0,5             |
| CLDN5                                                                                    | 0,159398678 | -0,20027468  | 0,013 | 0,05  | 1         | 0,870384832   | 1,148917081     | 0,26            |
| TXNRD2                                                                                   | 0,093400937 | -0,200480901 | 0,262 | 0,13  | 1         | 0,870260426   | 1,149081321     | 2,015384615     |
| FAR2                                                                                     | 0,009998483 | -0,200547978 | 0     | 0,08  | 1         | 0,870219965   | 1,149134748     | 0               |
| TRIP12                                                                                   | 0,146850903 | -0,200642987 | 0,438 | 0,24  | 1         | 0,870162658   | 1,149210427     | 1,825           |

Supplementary Table 4

| Differentially expressed genes_keloid-CCD_ comparing SC-Keloid vs. (SC-Myel, SC-Nonmyel) |             |              |       |       |           |               |                 |                 |
|------------------------------------------------------------------------------------------|-------------|--------------|-------|-------|-----------|---------------|-----------------|-----------------|
| gene                                                                                     | p_val       | avg_log2FC   | pct.1 | pct.2 | p_val_adj | Foldchange_UP | Foldchange_DOWN | Ratio_pct1_pct2 |
| H2AC6                                                                                    | 0,963404212 | -0,200745514 | 0,112 | 0,1   | 1         | 0,870100822   | 1,149292099     | 1,12            |
| CFLAR                                                                                    | 0,301874914 | -0,200751094 | 0,362 | 0,23  | 1         | 0,870097456   | 1,149296545     | 1,573913043     |
| HAUS3                                                                                    | 0,294893811 | -0,20095245  | 0,2   | 0,12  | 1         | 0,869976026   | 1,149456963     | 1,666666667     |
| TBC1D20                                                                                  | 0,318543654 | -0,2010779   | 0,288 | 0,18  | 1         | 0,86990038    | 1,149556918     | 1,6             |
| UTP18                                                                                    | 0,404008853 | -0,201117016 | 0,25  | 0,16  | 1         | 0,869876795   | 1,149588086     | 1,5625          |
| MMADHC                                                                                   | 0,102560644 | -0,201148344 | 0,412 | 0,22  | 1         | 0,869857906   | 1,14961305      | 1,872727273     |
| OGFRL1                                                                                   | 0,410912567 | -0,20118813  | 0,112 | 0,07  | 1         | 0,869833917   | 1,149644754     | 1,6             |
| RASL11A                                                                                  | 0,098032255 | -0,201254884 | 0,013 | 0,06  | 1         | 0,869793671   | 1,14969795      | 0,216666667     |
| MERTK                                                                                    | 0,060312926 | -0,201346957 | 0,013 | 0,07  | 1         | 0,869738162   | 1,149771326     | 0,185714286     |
| TM9SF1                                                                                   | 0,98415605  | -0,201573301 | 0,1   | 0,09  | 1         | 0,86960172    | 1,149951727     | 1,111111111     |
| EVA1C                                                                                    | 0,811023975 | -0,20160636  | 0,088 | 0,09  | 1         | 0,869581794   | 1,149978078     | 0,977777778     |
| TEX10                                                                                    | 0,33687795  | -0,201826009 | 0,162 | 0,1   | 1         | 0,869449411   | 1,150153175     | 1,62            |
| KCTD6                                                                                    | 0,478592611 | -0,20185249  | 0,075 | 0,1   | 1         | 0,869433452   | 1,150174287     | 0,75            |
| ANKRD49                                                                                  | 0,357234345 | -0,201867858 | 0,162 | 0,1   | 1         | 0,86942419    | 1,150186539     | 1,62            |
| DPM3                                                                                     | 0,139930642 | -0,20221913  | 0,537 | 0,29  | 1         | 0,869212526   | 1,150466623     | 1,851724138     |
| POLK                                                                                     | 0,110259666 | -0,20228198  | 0,35  | 0,19  | 1         | 0,86917466    | 1,150516744     | 1,842105263     |
| TNKS1BP1                                                                                 | 0,340753443 | -0,202512799 | 0,238 | 0,15  | 1         | 0,86903561    | 1,150700832     | 1,586666667     |
| FNBP4                                                                                    | 0,20106872  | -0,202610623 | 0,438 | 0,26  | 1         | 0,868976686   | 1,150778859     | 1,684615385     |
| ATF5                                                                                     | 0,022277155 | -0,20272836  | 0,288 | 0,12  | 1         | 0,868905773   | 1,150872777     | 2,4             |
| C1QTNF4                                                                                  | 0,58588356  | -0,202765131 | 0,138 | 0,1   | 1         | 0,868883627   | 1,150902111     | 1,38            |
| FSTL5                                                                                    | 0,026616038 | -0,202898926 | 0     | 0,06  | 1         | 0,868803051   | 1,15100885      | 0               |
| MAP3K1                                                                                   | 0,664262251 | -0,20295675  | 0,188 | 0,14  | 1         | 0,868768229   | 1,151054984     | 1,342857143     |
| LIMS2                                                                                    | 0,499224199 | -0,203056909 | 0,175 | 0,12  | 1         | 0,868707917   | 1,151134898     | 1,458333333     |
| SENP1                                                                                    | 0,966056691 | -0,20311237  | 0,1   | 0,09  | 1         | 0,868674523   | 1,151179152     | 1,111111111     |
| FAM219B                                                                                  | 0,561208484 | -0,203446863 | 0,238 | 0,17  | 1         | 0,868473141   | 1,151446087     | 1,4             |
| NABP1                                                                                    | 0,874227192 | -0,20386364  | 0,112 | 0,11  | 1         | 0,868222286   | 1,151778774     | 1,018181818     |
| ARFIP1                                                                                   | 0,160674792 | -0,203879118 | 0,388 | 0,22  | 1         | 0,868212971   | 1,151791131     | 1,763636364     |
| RDH14                                                                                    | 0,366098344 | -0,203923479 | 0,262 | 0,17  | 1         | 0,868186275   | 1,151826547     | 1,541176471     |
| FBXL17                                                                                   | 0,299121949 | -0,203996131 | 0,2   | 0,12  | 1         | 0,868142556   | 1,151884553     | 1,666666667     |
| PDZD4                                                                                    | 0,366993983 | -0,204104533 | 0,05  | 0,08  | 1         | 0,868077327   | 1,151971108     | 0,625           |

Supplementary Table 4

| Differentially expressed genes_keloid-CCD_ comparing SC-Keloid vs. (SC-Myel, SC-Nonmyel) |             |              |       |       |           |               |                 |                 |
|------------------------------------------------------------------------------------------|-------------|--------------|-------|-------|-----------|---------------|-----------------|-----------------|
| gene                                                                                     | p_val       | avg_log2FC   | pct.1 | pct.2 | p_val_adj | Foldchange_UP | Foldchange_DOWN | Ratio_pct1_pct2 |
| CAND1                                                                                    | 0,228330236 | -0,204411921 | 0,65  | 0,37  | 1         | 0,86789239    | 1,152216579     | 1,756756757     |
| NEIL1                                                                                    | 0,060312926 | -0,204915523 | 0,013 | 0,07  | 1         | 0,867589487   | 1,152618853     | 0,185714286     |
| RRN3                                                                                     | 0,479854721 | -0,204942401 | 0,162 | 0,11  | 1         | 0,867573324   | 1,152640327     | 1,472727273     |
| GNL1                                                                                     | 0,053161388 | -0,205018195 | 0,5   | 0,25  | 1         | 0,867527746   | 1,152700884     | 2               |
| KLHL8                                                                                    | 0,556644247 | -0,205076613 | 0,025 | 0,04  | 1         | 0,867492618   | 1,152747561     | 0,625           |
| DTWD1                                                                                    | 0,249493209 | -0,20518689  | 0,3   | 0,18  | 1         | 0,867426311   | 1,152835678     | 1,666666667     |
| CASC3                                                                                    | 0,229972517 | -0,205295303 | 0,388 | 0,23  | 1         | 0,86736113    | 1,152922312     | 1,686956522     |
| C10orf82                                                                                 | 0,208200632 | -0,205296822 | 0,038 | 0,08  | 1         | 0,867360217   | 1,152923526     | 0,475           |
| TSLP                                                                                     | 0,155137097 | -0,20529841  | 0,025 | 0,07  | 1         | 0,867359262   | 1,152924796     | 0,357142857     |
| ZFX3                                                                                     | 0,158841429 | -0,205324322 | 0,3   | 0,17  | 1         | 0,867343684   | 1,152945503     | 1,764705882     |
| SMAD2                                                                                    | 0,300313345 | -0,20545509  | 0,575 | 0,34  | 1         | 0,86726507    | 1,153050013     | 1,691176471     |
| DOT1L                                                                                    | 0,416952671 | -0,205537248 | 0,212 | 0,14  | 1         | 0,867215683   | 1,153115678     | 1,514285714     |
| PCYOX1                                                                                   | 0,066483395 | -0,20568779  | 0,325 | 0,16  | 1         | 0,867125195   | 1,153236009     | 2,03125         |
| FAM120A                                                                                  | 0,051367466 | -0,205694823 | 0,438 | 0,22  | 1         | 0,867120968   | 1,153241631     | 1,990909091     |
| SMU1                                                                                     | 0,103770394 | -0,205717736 | 0,35  | 0,19  | 1         | 0,867107197   | 1,153259947     | 1,842105263     |
| ERN1                                                                                     | 0,044881092 | -0,205868995 | 0,312 | 0,15  | 1         | 0,86701629    | 1,153380866     | 2,08            |
| TCF7L1                                                                                   | 0,516769632 | -0,20590005  | 0,05  | 0,07  | 1         | 0,866997627   | 1,153405695     | 0,714285714     |
| AC007952.4                                                                               | 0,78027938  | -0,205982534 | 0,088 | 0,07  | 1         | 0,866948059   | 1,15347164      | 1,257142857     |
| USP39                                                                                    | 0,461595582 | -0,206026859 | 0,15  | 0,1   | 1         | 0,866921423   | 1,15350708      | 1,5             |
| ADAMTS9-AS2                                                                              | 0,244022269 | -0,206079024 | 0,025 | 0,06  | 1         | 0,866890078   | 1,153548789     | 0,416666667     |
| EP400                                                                                    | 0,377331621 | -0,206210321 | 0,188 | 0,12  | 1         | 0,866811188   | 1,153653776     | 1,566666667     |
| CFD                                                                                      | 0,274640379 | -0,206339485 | 0,188 | 0,11  | 1         | 0,866733586   | 1,153757067     | 1,709090909     |
| MIR181A2HG                                                                               | 0,039215525 | -0,206411119 | 0,013 | 0,08  | 1         | 0,866690551   | 1,153814356     | 0,1625          |
| USP9X                                                                                    | 0,179015188 | -0,206476303 | 0,425 | 0,25  | 1         | 0,866651393   | 1,153866489     | 1,7             |
| SNX24                                                                                    | 0,894021778 | -0,206532171 | 0,038 | 0,04  | 1         | 0,866617833   | 1,153911173     | 0,95            |
| LGMN                                                                                     | 0,050077094 | -0,206560923 | 0,35  | 0,17  | 1         | 0,866600562   | 1,15393417      | 2,058823529     |
| AIF1L                                                                                    | 0,679227562 | -0,206595841 | 0,2   | 0,15  | 1         | 0,866579588   | 1,153962099     | 1,333333333     |
| LHFPL2                                                                                   | 0,077123248 | -0,206598102 | 0,3   | 0,15  | 1         | 0,86657823    | 1,153963908     | 2               |
| PITPNA                                                                                   | 0,483887016 | -0,206705917 | 0,412 | 0,27  | 1         | 0,866513471   | 1,154050149     | 1,525925926     |
| TMEM100                                                                                  | 0,982087794 | -0,207041585 | 0,075 | 0,07  | 1         | 0,866311885   | 1,15431869      | 1,071428571     |

Supplementary Table 4

| Differentially expressed genes_keloid-CCD_ comparing SC-Keloid vs. (SC-Myel, SC-Nonmyel) |             |              |       |       |           |               |                 |                 |
|------------------------------------------------------------------------------------------|-------------|--------------|-------|-------|-----------|---------------|-----------------|-----------------|
| gene                                                                                     | p_val       | avg_log2FC   | pct.1 | pct.2 | p_val_adj | Foldchange_UP | Foldchange_DOWN | Ratio_pct1_pct2 |
| MAP2K1                                                                                   | 0,197532019 | -0,207043894 | 0,212 | 0,12  | 1         | 0,866310499   | 1,154320537     | 1,766666667     |
| WDR74                                                                                    | 0,305589718 | -0,207172188 | 0,212 | 0,13  | 1         | 0,866233464   | 1,154423192     | 1,630769231     |
| SLC11A2                                                                                  | 0,472701791 | -0,207501304 | 0,175 | 0,12  | 1         | 0,866035876   | 1,154686575     | 1,458333333     |
| ZNF430                                                                                   | 0,364224873 | -0,20752331  | 0,175 | 0,11  | 1         | 0,866022666   | 1,154704188     | 1,590909091     |
| ZNF665                                                                                   | 0,457357417 | -0,207584601 | 0,038 | 0,06  | 1         | 0,865985875   | 1,154753246     | 0,633333333     |
| L1CAM                                                                                    | 0,783491852 | -0,207668668 | 0,812 | 0,59  | 1         | 0,865935415   | 1,154820536     | 1,376271186     |
| IFNGR1                                                                                   | 0,186189487 | -0,207713629 | 0,4   | 0,23  | 1         | 0,865908429   | 1,154856526     | 1,739130435     |
| OFD1                                                                                     | 0,106540644 | -0,207836337 | 0,288 | 0,15  | 1         | 0,865834782   | 1,154954756     | 1,92            |
| STON1                                                                                    | 0,210717619 | -0,207945584 | 0,038 | 0,08  | 1         | 0,86576922    | 1,155042218     | 0,475           |
| APPBP2                                                                                   | 0,114010703 | -0,208019617 | 0,325 | 0,17  | 1         | 0,865724794   | 1,155101491     | 1,911764706     |
| SLAIN2                                                                                   | 0,094337477 | -0,208080203 | 0,45  | 0,24  | 1         | 0,865688439   | 1,15515         | 1,875           |
| IDUA                                                                                     | 0,574601445 | -0,208116979 | 0,062 | 0,08  | 1         | 0,865666371   | 1,155179447     | 0,775           |
| TMX4                                                                                     | 0,105461612 | -0,208125304 | 0,613 | 0,33  | 1         | 0,865661376   | 1,155186113     | 1,857575758     |
| RNF44                                                                                    | 0,092208146 | -0,20822367  | 0,038 | 0,1   | 1         | 0,865602355   | 1,155264879     | 0,38            |
| PLEKHM1                                                                                  | 0,58376991  | -0,208375535 | 0,125 | 0,09  | 1         | 0,865511243   | 1,155386494     | 1,388888889     |
| SESN2                                                                                    | 0,78674158  | -0,208448103 | 0,188 | 0,15  | 1         | 0,865467708   | 1,155444611     | 1,253333333     |
| RANBP3                                                                                   | 0,245182539 | -0,208504678 | 0,175 | 0,1   | 1         | 0,86543377    | 1,155489923     | 1,75            |
| XIST                                                                                     | 0,072136391 | -0,208720678 | 0     | 0,04  | 1         | 0,865304207   | 1,155662936     | 0               |
| PLEKHG3                                                                                  | 0,155137097 | -0,208721492 | 0,025 | 0,07  | 1         | 0,865303719   | 1,155663587     | 0,357142857     |
| LAMC1                                                                                    | 0,256588988 | -0,208844579 | 0,713 | 0,41  | 1         | 0,865229896   | 1,15576219      | 1,73902439      |
| MT-ND4                                                                                   | 0,056496848 | -0,209271965 | 1     | 0,99  | 1         | 0,864973617   | 1,156104625     | 1,01010101      |
| CDH13                                                                                    | 0,136502224 | -0,209310284 | 0,35  | 0,19  | 1         | 0,864950644   | 1,156135332     | 1,842105263     |
| CLIP4                                                                                    | 0,86177074  | -0,209429468 | 0,112 | 0,11  | 1         | 0,864879191   | 1,156230847     | 1,018181818     |
| NEPRO                                                                                    | 0,338621268 | -0,209460639 | 0,238 | 0,15  | 1         | 0,864860505   | 1,156255829     | 1,586666667     |
| PAFAH1B1                                                                                 | 0,522192118 | -0,209549995 | 0,787 | 0,5   | 1         | 0,864806939   | 1,156327447     | 1,574           |
| JAM2                                                                                     | 0,366993983 | -0,209699756 | 0,05  | 0,08  | 1         | 0,864717172   | 1,156447487     | 0,625           |
| CEP57                                                                                    | 0,045576718 | -0,210002859 | 0,488 | 0,24  | 1         | 0,864535518   | 1,156690476     | 2,033333333     |
| FOXJ1                                                                                    | 0,043652221 | -0,210043162 | 0     | 0,05  | 1         | 0,864511367   | 1,156722789     | 0               |
| NINJ1                                                                                    | 0,363499158 | -0,210178973 | 0,75  | 0,46  | 1         | 0,864429988   | 1,156831686     | 1,630434783     |
| MBD5                                                                                     | 0,51988086  | -0,210320413 | 0,188 | 0,13  | 1         | 0,864345245   | 1,156945105     | 1,446153846     |

Supplementary Table 4

| Differentially expressed genes_keloid-CCD_ comparing SC-Keloid vs. (SC-Myel, SC-Nonmyel) |             |              |       |       |           |               |                 |                 |
|------------------------------------------------------------------------------------------|-------------|--------------|-------|-------|-----------|---------------|-----------------|-----------------|
| gene                                                                                     | p_val       | avg_log2FC   | pct.1 | pct.2 | p_val_adj | Foldchange_UP | Foldchange_DOWN | Ratio_pct1_pct2 |
| RNF10                                                                                    | 0,058444233 | -0,210537465 | 0,45  | 0,23  | 1         | 0,864215215   | 1,15711918      | 1,956521739     |
| BASP1                                                                                    | 0,997233723 | -0,21060261  | 0,062 | 0,06  | 1         | 0,864176192   | 1,157171431     | 1,033333333     |
| ZNF791                                                                                   | 0,17126824  | -0,210656745 | 0,262 | 0,15  | 1         | 0,864143765   | 1,157214853     | 1,746666667     |
| PPID                                                                                     | 0,17114305  | -0,21071408  | 0,325 | 0,18  | 1         | 0,864109424   | 1,157260843     | 1,805555556     |
| ADAMTS4                                                                                  | 0,093099767 | -0,210959366 | 0,275 | 0,14  | 1         | 0,863962521   | 1,157457617     | 1,964285714     |
| RHOBTB1                                                                                  | 0,96770709  | -0,21097397  | 0,112 | 0,1   | 1         | 0,863953775   | 1,157469333     | 1,12            |
| CCNH                                                                                     | 0,257909868 | -0,211137676 | 0,25  | 0,15  | 1         | 0,863855746   | 1,157600681     | 1,666666667     |
| ZNF292                                                                                   | 0,048305466 | -0,211158761 | 0,412 | 0,21  | 1         | 0,863843121   | 1,1576176       | 1,961904762     |
| PITHD1                                                                                   | 0,197640496 | -0,211293069 | 0,675 | 0,39  | 1         | 0,863762705   | 1,157725373     | 1,730769231     |
| NR1D1                                                                                    | 0,216357796 | -0,211412729 | 0,262 | 0,15  | 1         | 0,863691066   | 1,157821401     | 1,746666667     |
| ZFAND6                                                                                   | 0,342798203 | -0,211421975 | 0,5   | 0,3   | 1         | 0,86368553    | 1,157828822     | 1,666666667     |
| MED21                                                                                    | 0,1604001   | -0,212136613 | 0,225 | 0,12  | 1         | 0,86325781    | 1,158402494     | 1,875           |
| STMN1                                                                                    | 0,74894945  | -0,212179056 | 0,938 | 0,79  | 1         | 0,863232414   | 1,158436573     | 1,187341772     |
| MAML2                                                                                    | 0,121202152 | -0,212300332 | 0,462 | 0,26  | 1         | 0,863159852   | 1,158533958     | 1,776923077     |
| NFASC                                                                                    | 0,120814239 | -0,212409447 | 0     | 0,03  | 1         | 0,863094572   | 1,158621584     | 0               |
| ETV6                                                                                     | 0,13799162  | -0,212459532 | 0,212 | 0,11  | 1         | 0,863064609   | 1,158661808     | 1,927272727     |
| MBNL1-AS1                                                                                | 0,714199457 | -0,212621217 | 0,05  | 0,06  | 1         | 0,862967889   | 1,158791668     | 0,833333333     |
| AC012368.1                                                                               | 0,162161236 | -0,212627981 | 0,013 | 0,05  | 1         | 0,862963843   | 1,158797101     | 0,26            |
| ADGRG6                                                                                   | 0,435142137 | -0,212740548 | 0,438 | 0,29  | 1         | 0,862896513   | 1,15888752      | 1,510344828     |
| DNAJB2                                                                                   | 0,596640652 | -0,212758449 | 0,512 | 0,33  | 1         | 0,862885806   | 1,1589019       | 1,551515152     |
| HSF2                                                                                     | 0,274355776 | -0,213011669 | 0,2   | 0,12  | 1         | 0,862734367   | 1,159105327     | 1,666666667     |
| CHADL                                                                                    | 0,63734541  | -0,213063039 | 0,212 | 0,16  | 1         | 0,862703647   | 1,1591466       | 1,325           |
| AKAP1                                                                                    | 0,759474185 | -0,213413331 | 0,1   | 0,08  | 1         | 0,862494205   | 1,15942808      | 1,25            |
| PLCB1                                                                                    | 0,34951164  | -0,213593112 | 0,162 | 0,1   | 1         | 0,862386732   | 1,15957257      | 1,62            |
| RBM12B                                                                                   | 0,587482027 | -0,213595481 | 0,125 | 0,09  | 1         | 0,862385317   | 1,159574474     | 1,388888889     |
| NUTM2A-AS1                                                                               | 0,548223221 | -0,21361327  | 0,212 | 0,15  | 1         | 0,862374683   | 1,159588773     | 1,413333333     |
| WDR47                                                                                    | 0,363962378 | -0,213735812 | 0,262 | 0,17  | 1         | 0,862301436   | 1,159687272     | 1,541176471     |
| REXO1                                                                                    | 0,715807256 | -0,214014942 | 0,112 | 0,12  | 1         | 0,862134616   | 1,159911668     | 0,933333333     |
| QRICH1                                                                                   | 0,038338272 | -0,214163828 | 0,312 | 0,14  | 1         | 0,862045648   | 1,160031377     | 2,228571429     |
| SUPT5H                                                                                   | 0,409068244 | -0,214223658 | 0,325 | 0,21  | 1         | 0,862009899   | 1,160079485     | 1,547619048     |

Supplementary Table 4

| Differentially expressed genes_keloid-CCD_ comparing SC-Keloid vs. (SC-Myel, SC-Nonmyel) |             |              |       |       |           |               |                 |                 |
|------------------------------------------------------------------------------------------|-------------|--------------|-------|-------|-----------|---------------|-----------------|-----------------|
| gene                                                                                     | p_val       | avg_log2FC   | pct.1 | pct.2 | p_val_adj | Foldchange_UP | Foldchange_DOWN | Ratio_pct1_pct2 |
| HMOX1                                                                                    | 0,377698246 | -0,214548037 | 0,05  | 0,08  | 1         | 0,861816105   | 1,160340349     | 0,625           |
| TM7SF3                                                                                   | 0,033800162 | -0,214590802 | 0,275 | 0,12  | 1         | 0,861790559   | 1,160374745     | 2,291666667     |
| IDH3A                                                                                    | 0,136300461 | -0,214700248 | 0,262 | 0,14  | 1         | 0,861725184   | 1,160462777     | 1,871428571     |
| RASL12                                                                                   | 0,506041503 | -0,214724351 | 0,138 | 0,16  | 1         | 0,861710787   | 1,160482165     | 0,8625          |
| FGD4                                                                                     | 0,891259862 | -0,214740268 | 0,162 | 0,14  | 1         | 0,86170128    | 1,160494968     | 1,157142857     |
| INPP5K                                                                                   | 0,395111724 | -0,214774661 | 0,188 | 0,12  | 1         | 0,861680738   | 1,160522634     | 1,566666667     |
| WDR82                                                                                    | 0,311455307 | -0,214796328 | 0,512 | 0,32  | 1         | 0,861667797   | 1,160540064     | 1,6             |
| PER3                                                                                     | 0,345894104 | -0,21484389  | 0,35  | 0,22  | 1         | 0,86163939    | 1,160578325     | 1,590909091     |
| DONSON                                                                                   | 0,800033309 | -0,215049189 | 0,175 | 0,14  | 1         | 0,861516786   | 1,16074349      | 1,25            |
| ARSK                                                                                     | 0,168435158 | -0,215063026 | 0,175 | 0,09  | 1         | 0,861508523   | 1,160754623     | 1,944444444     |
| YTHDF2                                                                                   | 0,646797573 | -0,21512635  | 0,512 | 0,35  | 1         | 0,861470709   | 1,160805572     | 1,462857143     |
| BCAM                                                                                     | 0,975107496 | -0,215185229 | 0,062 | 0,06  | 1         | 0,861435552   | 1,160852948     | 1,033333333     |
| DYRK1A                                                                                   | 0,366006065 | -0,215234709 | 0,275 | 0,18  | 1         | 0,861406008   | 1,160892762     | 1,527777778     |
| SERBP1                                                                                   | 0,547904524 | -0,216323356 | 0,85  | 0,71  | 1         | 0,860756242   | 1,161769094     | 1,197183099     |
| TWSG1                                                                                    | 0,227818564 | -0,21640156  | 0,488 | 0,29  | 1         | 0,860709585   | 1,161832071     | 1,682758621     |
| RAB3GAP2                                                                                 | 0,687597822 | -0,216515863 | 0,225 | 0,17  | 1         | 0,860641395   | 1,161924126     | 1,323529412     |
| GNAI3                                                                                    | 0,200998947 | -0,21658166  | 0,65  | 0,37  | 1         | 0,860602144   | 1,161977118     | 1,756756757     |
| SLC23A2                                                                                  | 0,074224167 | -0,216748344 | 0,312 | 0,16  | 1         | 0,860502719   | 1,162111377     | 1,95            |
| BRWD1                                                                                    | 0,182018225 | -0,216969642 | 0,362 | 0,21  | 1         | 0,860370735   | 1,16228965      | 1,723809524     |
| MAP4K3                                                                                   | 0,846248052 | -0,217069113 | 0,212 | 0,17  | 1         | 0,860311416   | 1,16236979      | 1,247058824     |
| EXOSC10                                                                                  | 0,145558438 | -0,21710694  | 0,35  | 0,19  | 1         | 0,860288859   | 1,162400267     | 1,842105263     |
| DNAJC18                                                                                  | 0,7005631   | -0,217177336 | 0,188 | 0,14  | 1         | 0,860246883   | 1,162456988     | 1,342857143     |
| RNF216                                                                                   | 0,119363398 | -0,217207175 | 0,288 | 0,15  | 1         | 0,860229091   | 1,162481031     | 1,92            |
| APIP                                                                                     | 0,277676083 | -0,217508632 | 0,3   | 0,18  | 1         | 0,860049361   | 1,162723961     | 1,666666667     |
| LRRC1                                                                                    | 0,164186676 | -0,217529373 | 0,025 | 0,07  | 1         | 0,860036996   | 1,162740678     | 0,357142857     |
| AP1AR                                                                                    | 0,210339451 | -0,217540025 | 0,212 | 0,12  | 1         | 0,860030646   | 1,162749263     | 1,766666667     |
| ACAP1                                                                                    | 0,556644247 | -0,217858999 | 0,025 | 0,04  | 1         | 0,859840518   | 1,16300637      | 0,625           |
| TTC3                                                                                     | 0,857332612 | -0,218038185 | 0,825 | 0,58  | 1         | 0,859733731   | 1,163150827     | 1,422413793     |
| DMKN                                                                                     | 0,309977712 | -0,218053586 | 0,038 | 0,07  | 1         | 0,859724553   | 1,163163244     | 0,542857143     |
| RNF145                                                                                   | 0,090244498 | -0,218100076 | 0,575 | 0,31  | 1         | 0,859696849   | 1,163200727     | 1,85483871      |

Supplementary Table 4

| Differentially expressed genes_keloid-CCD_ comparing SC-Keloid vs. (SC-Myel, SC-Nonmyel) |             |              |       |       |           |               |                 |                 |
|------------------------------------------------------------------------------------------|-------------|--------------|-------|-------|-----------|---------------|-----------------|-----------------|
| gene                                                                                     | p_val       | avg_log2FC   | pct.1 | pct.2 | p_val_adj | Foldchange_UP | Foldchange_DOWN | Ratio_pct1_pct2 |
| MEG8                                                                                     | 0,053025215 | -0,218265285 | 0,262 | 0,12  | 1         | 0,859598407   | 1,163333938     | 2,183333333     |
| NMRK1                                                                                    | 0,805628417 | -0,218299063 | 0,15  | 0,12  | 1         | 0,859578282   | 1,163361175     | 1,25            |
| USP32                                                                                    | 0,654727359 | -0,218660926 | 0,175 | 0,13  | 1         | 0,859362706   | 1,163653011     | 1,346153846     |
| SREK1                                                                                    | 0,44895726  | -0,218851416 | 0,8   | 0,47  | 1         | 0,859249245   | 1,163806667     | 1,70212766      |
| DAB1                                                                                     | 0,108207949 | -0,219013466 | 0,025 | 0,08  | 1         | 0,859152736   | 1,163937398     | 0,3125          |
| BBS12                                                                                    | 0,060312926 | -0,219252564 | 0,013 | 0,07  | 1         | 0,85901036    | 1,164130314     | 0,185714286     |
| SNW1                                                                                     | 0,191866182 | -0,219338048 | 0,637 | 0,37  | 1         | 0,858959462   | 1,164199294     | 1,721621622     |
| NRTN                                                                                     | 0,01629666  | -0,219438912 | 0     | 0,07  | 1         | 0,858899412   | 1,164280691     | 0               |
| ZNF639                                                                                   | 0,069204031 | -0,219456729 | 0,338 | 0,17  | 1         | 0,858888804   | 1,164295069     | 1,988235294     |
| CA2                                                                                      | 0,420317856 | -0,219462562 | 0,062 | 0,09  | 1         | 0,858885332   | 1,164299776     | 0,688888889     |
| RASD1                                                                                    | 0,133208758 | -0,219503043 | 0,212 | 0,11  | 1         | 0,858861233   | 1,164332446     | 1,927272727     |
| WWP1                                                                                     | 0,1355839   | -0,219712059 | 0,212 | 0,11  | 1         | 0,858736811   | 1,164501146     | 1,927272727     |
| FBXO25                                                                                   | 0,796508759 | -0,219959285 | 0,175 | 0,14  | 1         | 0,858589667   | 1,164700716     | 1,25            |
| CLIP2                                                                                    | 0,647481942 | -0,220008131 | 0,162 | 0,12  | 1         | 0,858560598   | 1,164740151     | 1,35            |
| CRISPLD2                                                                                 | 0,766731003 | -0,220175161 | 0,162 | 0,13  | 1         | 0,858461203   | 1,164875008     | 1,246153846     |
| SASH1                                                                                    | 0,976063954 | -0,220272042 | 0,338 | 0,28  | 1         | 0,858403556   | 1,164953235     | 1,207142857     |
| ZBED5                                                                                    | 0,542482072 | -0,220382962 | 0,212 | 0,15  | 1         | 0,858337561   | 1,165042805     | 1,413333333     |
| DDI2                                                                                     | 0,602438582 | -0,220568847 | 0,125 | 0,09  | 1         | 0,858226976   | 1,165192925     | 1,388888889     |
| TRIR                                                                                     | 0,192882315 | -0,220611616 | 0,925 | 0,7   | 1         | 0,858201534   | 1,165227468     | 1,321428571     |
| RBM10                                                                                    | 0,068708284 | -0,22069352  | 0,288 | 0,14  | 1         | 0,858152813   | 1,165293622     | 2,057142857     |
| COPB2                                                                                    | 0,164185804 | -0,221022399 | 0,537 | 0,3   | 1         | 0,85795721    | 1,165559294     | 1,79            |
| PXK                                                                                      | 0,651249389 | -0,221053201 | 0,188 | 0,14  | 1         | 0,857938892   | 1,16558418      | 1,342857143     |
| SEC63                                                                                    | 0,127704474 | -0,221111758 | 0,637 | 0,35  | 1         | 0,85790407    | 1,16563149      | 1,82            |
| FBXO3                                                                                    | 0,089938214 | -0,2211626   | 0,3   | 0,15  | 1         | 0,857873838   | 1,165672569     | 2               |
| TFDP2                                                                                    | 0,071047597 | -0,221247963 | 0,362 | 0,19  | 1         | 0,85782308    | 1,165741542     | 1,905263158     |
| NRXN3                                                                                    | 0,470883549 | -0,221324989 | 0,15  | 0,1   | 1         | 0,857777281   | 1,165803784     | 1,5             |
| KHDC4                                                                                    | 0,809498638 | -0,221534085 | 0,225 | 0,18  | 1         | 0,857652969   | 1,165972761     | 1,25            |
| MTSS2                                                                                    | 0,382212252 | -0,221669081 | 0,175 | 0,11  | 1         | 0,857572721   | 1,166081868     | 1,590909091     |
| MT-ATP6                                                                                  | 0,009453385 | -0,221770735 | 1     | 0,99  | 1         | 0,857512297   | 1,166164035     | 1,01010101      |
| PRR14                                                                                    | 0,049812701 | -0,222123874 | 0,338 | 0,16  | 1         | 0,857302423   | 1,16644952      | 2,1125          |



Supplementary Table 4

| Differentially expressed genes_keloid-CCD_ comparing SC-Keloid vs. (SC-Myel, SC-Nonmyel) |             |              |       |       |           |               |                 |                 |
|------------------------------------------------------------------------------------------|-------------|--------------|-------|-------|-----------|---------------|-----------------|-----------------|
| gene                                                                                     | p_val       | avg_log2FC   | pct.1 | pct.2 | p_val_adj | Foldchange_UP | Foldchange_DOWN | Ratio_pct1_pct2 |
| UTP11                                                                                    | 0,671308357 | -0,222253222 | 0,475 | 0,32  | 1         | 0,857225563   | 1,166554106     | 1,484375        |
| ERP44                                                                                    | 0,39740994  | -0,222401863 | 0,6   | 0,37  | 1         | 0,857137248   | 1,166674302     | 1,621621622     |
| EBAG9                                                                                    | 0,327725311 | -0,222469633 | 0,312 | 0,2   | 1         | 0,857096985   | 1,166729107     | 1,56            |
| PANK3                                                                                    | 0,068332687 | -0,222594937 | 0,438 | 0,22  | 1         | 0,857022545   | 1,166830447     | 1,990909091     |
| SETD5                                                                                    | 0,392742425 | -0,222678838 | 0,662 | 0,39  | 1         | 0,856972706   | 1,166898307     | 1,697435897     |
| REV1                                                                                     | 0,230639585 | -0,222725926 | 0,288 | 0,17  | 1         | 0,856944736   | 1,166936393     | 1,694117647     |
| MAP1A                                                                                    | 0,03285471  | -0,222768359 | 0,462 | 0,22  | 1         | 0,856919532   | 1,166970716     | 2,1             |
| FNBP1                                                                                    | 0,533193313 | -0,222862287 | 0,2   | 0,14  | 1         | 0,856863743   | 1,167046696     | 1,428571429     |
| TRIM33                                                                                   | 0,71110582  | -0,222961086 | 0,262 | 0,2   | 1         | 0,856805065   | 1,16712662      | 1,31            |
| KRTDAP                                                                                   | 0,452756248 | -0,222979133 | 0,038 | 0,06  | 1         | 0,856794347   | 1,167141221     | 0,633333333     |
| ARG2                                                                                     | 0,962856666 | -0,222982274 | 0,175 | 0,16  | 1         | 0,856792482   | 1,167143761     | 1,09375         |
| ATXN1                                                                                    | 0,489544471 | -0,223051028 | 0,25  | 0,17  | 1         | 0,856751651   | 1,167199385     | 1,470588235     |
| STOX2                                                                                    | 0,123434762 | -0,223128653 | 0,05  | 0,11  | 1         | 0,856705554   | 1,167262189     | 0,454545455     |
| EAPP                                                                                     | 0,020574975 | -0,223164849 | 0,562 | 0,26  | 1         | 0,856684061   | 1,167291474     | 2,161538462     |
| CREBL2                                                                                   | 0,240789682 | -0,22317637  | 0,25  | 0,15  | 1         | 0,856677219   | 1,167300796     | 1,666666667     |
| THUMPD3-AS1                                                                              | 0,617488072 | -0,223252755 | 0,438 | 0,32  | 1         | 0,856631863   | 1,167362602     | 1,36875         |
| MAD2L1BP                                                                                 | 0,081020912 | -0,223387606 | 0,212 | 0,1   | 1         | 0,856551796   | 1,167471722     | 2,12            |
| CERS1                                                                                    | 0,240004298 | -0,223504245 | 0,288 | 0,17  | 1         | 0,856482548   | 1,167566113     | 1,694117647     |
| RNF115                                                                                   | 0,348264688 | -0,223594204 | 0,438 | 0,28  | 1         | 0,856429144   | 1,167638919     | 1,564285714     |
| CAMSAP2                                                                                  | 0,09591823  | -0,22362978  | 0,425 | 0,22  | 1         | 0,856408025   | 1,167667713     | 1,931818182     |
| NEK6                                                                                     | 0,973819052 | -0,223675141 | 0,188 | 0,16  | 1         | 0,856381099   | 1,167704427     | 1,175           |
| LETMD1                                                                                   | 0,082433126 | -0,223807267 | 0,262 | 0,13  | 1         | 0,856302673   | 1,167811373     | 2,015384615     |
| NIPBL                                                                                    | 0,043876782 | -0,223869921 | 0,537 | 0,27  | 1         | 0,856265485   | 1,167862091     | 1,988888889     |
| ZDHHC21                                                                                  | 0,504458992 | -0,224154306 | 0,2   | 0,14  | 1         | 0,856096714   | 1,168092323     | 1,428571429     |
| SPTLC1                                                                                   | 0,208661412 | -0,2243093   | 0,388 | 0,23  | 1         | 0,856004746   | 1,168217822     | 1,686956522     |
| STXBP1                                                                                   | 0,866062491 | -0,224544751 | 0,1   | 0,1   | 1         | 0,855865055   | 1,168408493     | 1               |
| ZNF790                                                                                   | 0,42093899  | -0,224662931 | 0,112 | 0,07  | 1         | 0,855794949   | 1,168504209     | 1,6             |
| MED30                                                                                    | 0,399804018 | -0,224853153 | 0,35  | 0,23  | 1         | 0,855682118   | 1,168658288     | 1,52173913      |
| SCAMP1                                                                                   | 0,073688366 | -0,224912844 | 0,325 | 0,16  | 1         | 0,855646715   | 1,168706643     | 2,03125         |
| PBXIP1                                                                                   | 0,641400506 | -0,225008051 | 0,175 | 0,13  | 1         | 0,855590251   | 1,168783771     | 1,346153846     |

Supplementary Table 4

| Differentially expressed genes_keloid-CCD_ comparing SC-Keloid vs. (SC-Myel, SC-Nonmyel) |             |              |       |       |           |               |                 |                 |
|------------------------------------------------------------------------------------------|-------------|--------------|-------|-------|-----------|---------------|-----------------|-----------------|
| gene                                                                                     | p_val       | avg_log2FC   | pct.1 | pct.2 | p_val_adj | Foldchange_UP | Foldchange_DOWN | Ratio_pct1_pct2 |
| HAS2                                                                                     | 0,907500453 | -0,225411636 | 0,125 | 0,11  | 1         | 0,855350938   | 1,169110777     | 1,136363636     |
| DPF2                                                                                     | 0,372593594 | -0,225510226 | 0,312 | 0,2   | 1         | 0,855292488   | 1,169190674     | 1,56            |
| BCO2                                                                                     | 0,159613383 | -0,225749362 | 0,025 | 0,07  | 1         | 0,855150729   | 1,169384491     | 0,357142857     |
| ZNF677                                                                                   | 0,940310804 | -0,225830064 | 0,125 | 0,11  | 1         | 0,855102895   | 1,169449905     | 1,136363636     |
| DEK                                                                                      | 0,981449618 | -0,226025139 | 0,863 | 0,63  | 1         | 0,854987279   | 1,169608045     | 1,36984127      |
| DENND4A                                                                                  | 0,81386775  | -0,226071423 | 0,162 | 0,13  | 1         | 0,854959851   | 1,169645567     | 1,246153846     |
| DCUN1D1                                                                                  | 0,229330367 | -0,226202622 | 0,325 | 0,19  | 1         | 0,854882104   | 1,16975194      | 1,710526316     |
| ANKRD11                                                                                  | 0,904468389 | -0,226295325 | 0,775 | 0,49  | 1         | 0,854827174   | 1,169827107     | 1,581632653     |
| GBP4                                                                                     | 0,043652221 | -0,226304951 | 0     | 0,05  | 1         | 0,85482147    | 1,169834913     | 0               |
| NAA15                                                                                    | 0,198134968 | -0,226471576 | 0,438 | 0,25  | 1         | 0,854722747   | 1,169970032     | 1,752           |
| RFX2                                                                                     | 0,82484874  | -0,226581386 | 0,162 | 0,13  | 1         | 0,854657693   | 1,170059087     | 1,246153846     |
| STARD9                                                                                   | 0,757573928 | -0,226768112 | 0,125 | 0,1   | 1         | 0,854547083   | 1,170210536     | 1,25            |
| MORC4                                                                                    | 0,801768127 | -0,226840973 | 0,075 | 0,08  | 1         | 0,854503927   | 1,170269637     | 0,9375          |
| NLGN3                                                                                    | 0,817524131 | -0,22694678  | 0,162 | 0,13  | 1         | 0,85444126    | 1,170355467     | 1,246153846     |
| MRNIP                                                                                    | 0,598683385 | -0,227059716 | 0,125 | 0,09  | 1         | 0,854374376   | 1,170447088     | 1,388888889     |
| BZW2                                                                                     | 0,040258957 | -0,227392842 | 0,613 | 0,3   | 1         | 0,854177119   | 1,170717381     | 2,043333333     |
| EPAS1                                                                                    | 0,437043885 | -0,227659802 | 0,1   | 0,13  | 1         | 0,854019075   | 1,170934034     | 0,769230769     |
| OGA                                                                                      | 0,470534637 | -0,227792779 | 0,45  | 0,3   | 1         | 0,853940361   | 1,171041967     | 1,5             |
| SS18                                                                                     | 0,170470658 | -0,227978315 | 0,375 | 0,21  | 1         | 0,853830548   | 1,171192577     | 1,785714286     |
| TMEM41A                                                                                  | 0,46468015  | -0,227989383 | 0,15  | 0,1   | 1         | 0,853823998   | 1,171201562     | 1,5             |
| EIF1AD                                                                                   | 0,286558196 | -0,228154256 | 0,2   | 0,12  | 1         | 0,853726427   | 1,171335416     | 1,666666667     |
| RASGEF1C                                                                                 | 0,708877906 | -0,228440557 | 0,412 | 0,35  | 1         | 0,853557023   | 1,17156789      | 1,177142857     |
| SDHA                                                                                     | 0,15704844  | -0,228554391 | 0,45  | 0,25  | 1         | 0,853489677   | 1,171660334     | 1,8             |
| WNK1                                                                                     | 0,494530296 | -0,228565054 | 0,662 | 0,4   | 1         | 0,853483369   | 1,171668994     | 1,655           |
| LCOR                                                                                     | 0,4841321   | -0,228773667 | 0,35  | 0,24  | 1         | 0,853359965   | 1,171838429     | 1,458333333     |
| CRELD1                                                                                   | 0,454028574 | -0,228820963 | 0,225 | 0,15  | 1         | 0,853331989   | 1,171876846     | 1,5             |
| ETF1                                                                                     | 0,183900264 | -0,229058507 | 0,575 | 0,32  | 1         | 0,853191497   | 1,172069815     | 1,796875        |
| UHRF1BP1L                                                                                | 0,029324253 | -0,229061319 | 0,3   | 0,13  | 1         | 0,853189834   | 1,172072099     | 2,307692308     |
| KATNA1                                                                                   | 0,331393156 | -0,229194844 | 0,338 | 0,22  | 1         | 0,853110873   | 1,172180583     | 1,536363636     |
| STARD10                                                                                  | 0,48594818  | -0,229260688 | 0,088 | 0,11  | 1         | 0,853071938   | 1,172234081     | 0,8             |

Supplementary Table 4

| Differentially expressed genes_keloid-CCD_ comparing SC-Keloid vs. (SC-Myel, SC-Nonmyel) |             |              |       |       |           |               |                 |                 |
|------------------------------------------------------------------------------------------|-------------|--------------|-------|-------|-----------|---------------|-----------------|-----------------|
| gene                                                                                     | p_val       | avg_log2FC   | pct.1 | pct.2 | p_val_adj | Foldchange_UP | Foldchange_DOWN | Ratio_pct1_pct2 |
| INTS6L                                                                                   | 0,098981434 | -0,229481546 | 0,025 | 0,08  | 1         | 0,852941354   | 1,172413549     | 0,3125          |
| TBL1X                                                                                    | 0,671759233 | -0,229491234 | 0,1   | 0,11  | 1         | 0,852935626   | 1,172421422     | 0,909090909     |
| GDI2                                                                                     | 0,617542152 | -0,229648238 | 0,7   | 0,55  | 1         | 0,852842809   | 1,17254902      | 1,272727273     |
| CBR3                                                                                     | 0,236747679 | -0,229875855 | 0,325 | 0,19  | 1         | 0,852708265   | 1,17273403      | 1,710526316     |
| SUN2                                                                                     | 0,004820368 | -0,229929896 | 0,588 | 0,25  | 1         | 0,852676324   | 1,17277796      | 2,352           |
| CLCN3                                                                                    | 0,125992967 | -0,230011399 | 0,438 | 0,24  | 1         | 0,852628155   | 1,172844216     | 1,825           |
| NAA60                                                                                    | 0,029628398 | -0,230051866 | 0,3   | 0,13  | 1         | 0,852604239   | 1,172877115     | 2,307692308     |
| ABCA8                                                                                    | 0,761094326 | -0,230169086 | 0,138 | 0,14  | 1         | 0,852534967   | 1,172972415     | 0,985714286     |
| SKI                                                                                      | 0,503231557 | -0,230615246 | 0,438 | 0,29  | 1         | 0,852271358   | 1,173335218     | 1,510344828     |
| RIPOR1                                                                                   | 0,370094388 | -0,230878432 | 0,25  | 0,16  | 1         | 0,852115895   | 1,173549286     | 1,5625          |
| KDM2A                                                                                    | 0,321461505 | -0,230931875 | 0,55  | 0,34  | 1         | 0,85208433    | 1,173592759     | 1,617647059     |
| CALCOCO2                                                                                 | 0,13641461  | -0,231138874 | 0,388 | 0,21  | 1         | 0,851962081   | 1,173761159     | 1,847619048     |
| SOX10                                                                                    | 0,203194189 | -0,231578465 | 0,838 | 0,48  | 1         | 0,851702527   | 1,174118861     | 1,745833333     |
| CELF2                                                                                    | 0,141568097 | -0,231718627 | 0,65  | 0,37  | 1         | 0,851619786   | 1,174232935     | 1,756756757     |
| TMEM59                                                                                   | 0,096275123 | -0,231723873 | 0,988 | 0,84  | 1         | 0,851616689   | 1,174237204     | 1,176190476     |
| FADS1                                                                                    | 0,90421718  | -0,232136762 | 0,188 | 0,16  | 1         | 0,851372997   | 1,174573311     | 1,175           |
| MAP3K4                                                                                   | 0,74881861  | -0,232407562 | 0,162 | 0,13  | 1         | 0,851213206   | 1,174793804     | 1,246153846     |
| NUP98                                                                                    | 0,523447233 | -0,232641884 | 0,175 | 0,12  | 1         | 0,851074963   | 1,174984629     | 1,458333333     |
| HNRNPDL                                                                                  | 0,288722479 | -0,232688102 | 0,9   | 0,76  | 1         | 0,851047699   | 1,175022271     | 1,184210526     |
| GALNT18                                                                                  | 0,026616038 | -0,232917388 | 0     | 0,06  | 1         | 0,850912453   | 1,175209032     | 0               |
| HSPA5                                                                                    | 0,244148997 | -0,232968828 | 0,975 | 0,89  | 1         | 0,850882114   | 1,175250934     | 1,095505618     |
| AKAP7                                                                                    | 0,773027647 | -0,233306749 | 0,138 | 0,11  | 1         | 0,850682836   | 1,175526245     | 1,254545455     |
| USP42                                                                                    | 0,684999087 | -0,233439678 | 0,238 | 0,18  | 1         | 0,850604459   | 1,175634562     | 1,322222222     |
| THAP5                                                                                    | 0,053523305 | -0,233464294 | 0,3   | 0,14  | 1         | 0,850589945   | 1,175654622     | 2,142857143     |
| NID2                                                                                     | 0,874891879 | -0,233491585 | 0,175 | 0,16  | 1         | 0,850573855   | 1,175676861     | 1,09375         |
| CA13                                                                                     | 0,782321833 | -0,23356068  | 0,075 | 0,06  | 1         | 0,850533119   | 1,17573317      | 1,25            |
| CXCL2                                                                                    | 0,582634513 | -0,233735545 | 0,1   | 0,07  | 1         | 0,850430035   | 1,175875685     | 1,428571429     |
| GIGYF1                                                                                   | 0,74525199  | -0,233906344 | 0,162 | 0,13  | 1         | 0,850329359   | 1,176014904     | 1,246153846     |
| GATD3A                                                                                   | 0,787424549 | -0,233938812 | 0,075 | 0,08  | 1         | 0,850310223   | 1,17604137      | 0,9375          |
| DCUN1D4                                                                                  | 0,255217793 | -0,234351015 | 0,175 | 0,1   | 1         | 0,850067309   | 1,176377434     | 1,75            |

Supplementary Table 4

| Differentially expressed genes_keloid-CCD_ comparing SC-Keloid vs. (SC-Myel, SC-Nonmyel) |             |              |       |       |           |               |                 |                 |
|------------------------------------------------------------------------------------------|-------------|--------------|-------|-------|-----------|---------------|-----------------|-----------------|
| gene                                                                                     | p_val       | avg_log2FC   | pct.1 | pct.2 | p_val_adj | Foldchange_UP | Foldchange_DOWN | Ratio_pct1_pct2 |
| HELB                                                                                     | 0,453621677 | -0,234356965 | 0,075 | 0,1   | 1         | 0,850063804   | 1,176382285     | 0,75            |
| ADIPOR2                                                                                  | 0,320872028 | -0,234534762 | 0,275 | 0,17  | 1         | 0,849959048   | 1,176527272     | 1,617647059     |
| ING3                                                                                     | 0,559794814 | -0,234628864 | 0,212 | 0,15  | 1         | 0,84990361    | 1,176604015     | 1,413333333     |
| RIOK1                                                                                    | 0,290705906 | -0,234632253 | 0,2   | 0,12  | 1         | 0,849901614   | 1,176606779     | 1,666666667     |
| IRAK2                                                                                    | 0,591829794 | -0,234688969 | 0,112 | 0,08  | 1         | 0,849868203   | 1,176653035     | 1,4             |
| SLC9A1                                                                                   | 0,811023975 | -0,234721026 | 0,088 | 0,09  | 1         | 0,849849318   | 1,176679181     | 0,977777778     |
| PLAGL2                                                                                   | 0,366993983 | -0,234789422 | 0,05  | 0,08  | 1         | 0,849809029   | 1,176734967     | 0,625           |
| DBP                                                                                      | 0,786827279 | -0,235291545 | 0,15  | 0,12  | 1         | 0,849513309   | 1,177144595     | 1,25            |
| P2RX7                                                                                    | 0,87094902  | -0,235436554 | 0,15  | 0,14  | 1         | 0,849427926   | 1,177262919     | 1,071428571     |
| MX2                                                                                      | 0,651640212 | -0,235588443 | 0,038 | 0,05  | 1         | 0,849338502   | 1,177386869     | 0,76            |
| DENND2B                                                                                  | 0,349636635 | -0,235798407 | 0,362 | 0,23  | 1         | 0,849214902   | 1,177558234     | 1,573913043     |
| CMPK1                                                                                    | 0,406154984 | -0,235926345 | 0,7   | 0,4   | 1         | 0,849139597   | 1,177662664     | 1,75            |
| TBX2                                                                                     | 0,647849813 | -0,235973921 | 0,088 | 0,1   | 1         | 0,849111596   | 1,1777015       | 0,88            |
| NUP160                                                                                   | 0,495129612 | -0,236129253 | 0,162 | 0,11  | 1         | 0,849020178   | 1,177828308     | 1,472727273     |
| TRIM28                                                                                   | 0,038904263 | -0,236208944 | 0,613 | 0,31  | 1         | 0,848973282   | 1,17789337      | 1,977419355     |
| IL1RAPL2                                                                                 | 0,073060928 | -0,236234479 | 0,025 | 0,09  | 1         | 0,848958255   | 1,177914219     | 0,277777778     |
| IKZF5                                                                                    | 0,625545592 | -0,236377804 | 0,138 | 0,1   | 1         | 0,84887392    | 1,178031245     | 1,38            |
| FEZ1                                                                                     | 0,600463501 | -0,236521692 | 0,775 | 0,48  | 1         | 0,848789261   | 1,178148742     | 1,614583333     |
| TLCD2                                                                                    | 0,775526182 | -0,236576325 | 0,088 | 0,07  | 1         | 0,848757119   | 1,178193358     | 1,257142857     |
| UBQLN4                                                                                   | 0,733391963 | -0,236697973 | 0,15  | 0,15  | 1         | 0,848685555   | 1,178292708     | 1               |
| MPHOSPH8                                                                                 | 0,31118662  | -0,236698231 | 0,713 | 0,43  | 1         | 0,848685403   | 1,178292918     | 1,658139535     |
| PYURF                                                                                    | 0,865782677 | -0,236828908 | 0,8   | 0,54  | 1         | 0,848608534   | 1,178399651     | 1,481481481     |
| ZSCAN18                                                                                  | 0,457143319 | -0,236873344 | 0,075 | 0,1   | 1         | 0,848582397   | 1,178435947     | 0,75            |
| PSAP                                                                                     | 0,058173431 | -0,236908617 | 0,988 | 0,91  | 1         | 0,848561649   | 1,17846476      | 1,085714286     |
| GOLGA4                                                                                   | 0,381204683 | -0,237082761 | 0,65  | 0,41  | 1         | 0,848459228   | 1,178607017     | 1,585365854     |
| MALAT1                                                                                   | 0,003761763 | -0,23718382  | 1     | 1     | 1         | 0,848399796   | 1,17868958      | 1               |
| MFAP1                                                                                    | 0,189742956 | -0,237190173 | 0,35  | 0,2   | 1         | 0,84839606    | 1,178694771     | 1,75            |
| RNF11                                                                                    | 0,225895473 | -0,237420847 | 0,462 | 0,27  | 1         | 0,848260421   | 1,178883248     | 1,711111111     |
| PAPPA                                                                                    | 0,861114948 | -0,237468076 | 0,088 | 0,09  | 1         | 0,848232652   | 1,178921842     | 0,977777778     |
| PTBP1                                                                                    | 0,965076225 | -0,237574599 | 0,65  | 0,47  | 1         | 0,848170024   | 1,179008892     | 1,382978723     |

Supplementary Table 4

| Differentially expressed genes_keloid-CCD_ comparing SC-Keloid vs. (SC-Myel, SC-Nonmyel) |             |              |       |       |           |               |                 |                 |
|------------------------------------------------------------------------------------------|-------------|--------------|-------|-------|-----------|---------------|-----------------|-----------------|
| gene                                                                                     | p_val       | avg_log2FC   | pct.1 | pct.2 | p_val_adj | Foldchange_UP | Foldchange_DOWN | Ratio_pct1_pct2 |
| GKAP1                                                                                    | 0,099789628 | -0,237615004 | 0,013 | 0,06  | 1         | 0,84814627    | 1,179041912     | 0,216666667     |
| FAM76B                                                                                   | 0,590719108 | -0,237706813 | 0,35  | 0,24  | 1         | 0,848092298   | 1,179116946     | 1,458333333     |
| GATAD1                                                                                   | 0,221537566 | -0,237832501 | 0,288 | 0,17  | 1         | 0,848018415   | 1,179219675     | 1,694117647     |
| MEF2D                                                                                    | 0,646888668 | -0,237922057 | 0,288 | 0,21  | 1         | 0,847965776   | 1,179292878     | 1,371428571     |
| AZGP1                                                                                    | 0,525777494 | -0,237937297 | 0,05  | 0,07  | 1         | 0,847956818   | 1,179305335     | 0,714285714     |
| FBXO32                                                                                   | 0,40204505  | -0,237972276 | 0,212 | 0,14  | 1         | 0,847936259   | 1,179333929     | 1,514285714     |
| TBC1D10A                                                                                 | 0,315259225 | -0,23817358  | 0,388 | 0,24  | 1         | 0,847817952   | 1,179498497     | 1,616666667     |
| PPARG                                                                                    | 0,072136391 | -0,23827117  | 0     | 0,04  | 1         | 0,847760604   | 1,179578286     | 0               |
| EIF3J-DT                                                                                 | 0,857444576 | -0,238459897 | 0,125 | 0,12  | 1         | 0,847649711   | 1,179732603     | 1,041666667     |
| SLC66A3                                                                                  | 0,817524131 | -0,238472348 | 0,162 | 0,13  | 1         | 0,847642395   | 1,179742785     | 1,246153846     |
| PER2                                                                                     | 0,76159127  | -0,238561155 | 0,125 | 0,1   | 1         | 0,847590219   | 1,179815408     | 1,25            |
| VPS4B                                                                                    | 0,152749571 | -0,238780798 | 0,488 | 0,27  | 1         | 0,847461188   | 1,179995042     | 1,807407407     |
| GLA                                                                                      | 0,020489583 | -0,23878183  | 0,4   | 0,18  | 1         | 0,847460582   | 1,179995886     | 2,222222222     |
| PALM2AKAP2                                                                               | 0,143129348 | -0,238818586 | 0,312 | 0,17  | 1         | 0,847438991   | 1,18002595      | 1,835294118     |
| SLC26A11                                                                                 | 0,366993983 | -0,238972735 | 0,05  | 0,08  | 1         | 0,847348448   | 1,18015204      | 0,625           |
| NLN                                                                                      | 0,614614008 | -0,239069793 | 0,138 | 0,1   | 1         | 0,847291445   | 1,180231438     | 1,38            |
| GPC4                                                                                     | 0,026616038 | -0,239109475 | 0     | 0,06  | 1         | 0,84726814    | 1,180263901     | 0               |
| ARMCX2                                                                                   | 0,621430091 | -0,239340069 | 0,15  | 0,11  | 1         | 0,847132727   | 1,180452564     | 1,363636364     |
| WRNIP1                                                                                   | 0,371502667 | -0,239349724 | 0,238 | 0,15  | 1         | 0,847127058   | 1,180460464     | 1,586666667     |
| ZBTB38                                                                                   | 0,073512867 | -0,239420914 | 0,488 | 0,26  | 1         | 0,847085257   | 1,180518716     | 1,876923077     |
| MDGA1                                                                                    | 0,94227175  | -0,239468199 | 0,05  | 0,05  | 1         | 0,847057494   | 1,180557409     | 1               |
| HOXC6                                                                                    | 0,076196114 | -0,2395617   | 0,25  | 0,12  | 1         | 0,847002598   | 1,180633922     | 2,083333333     |
| WDR48                                                                                    | 0,241147577 | -0,239593036 | 0,275 | 0,16  | 1         | 0,846984201   | 1,180659567     | 1,71875         |
| ATG14                                                                                    | 0,389980727 | -0,239658241 | 0,188 | 0,12  | 1         | 0,846945921   | 1,18071293      | 1,566666667     |
| SIN3A                                                                                    | 0,18857444  | -0,239790546 | 0,375 | 0,22  | 1         | 0,846868254   | 1,180821215     | 1,704545455     |
| SNRPN                                                                                    | 0,137893931 | -0,23985004  | 0,7   | 0,39  | 1         | 0,846833332   | 1,18086991      | 1,794871795     |
| HNRNPUL1                                                                                 | 0,047912497 | -0,23991028  | 0,6   | 0,3   | 1         | 0,846797972   | 1,180919219     | 2               |
| HHEX                                                                                     | 0,670807151 | -0,239935005 | 0,188 | 0,14  | 1         | 0,84678346    | 1,180939458     | 1,342857143     |
| SLC44A3                                                                                  | 0,098032255 | -0,239938925 | 0,013 | 0,06  | 1         | 0,846781159   | 1,180942667     | 0,216666667     |
| ORMDL1                                                                                   | 0,080017984 | -0,239977024 | 0,625 | 0,33  | 1         | 0,846758797   | 1,180973854     | 1,893939394     |

Supplementary Table 4

| Differentially expressed genes_keloid-CCD_ comparing SC-Keloid vs. (SC-Myel, SC-Nonmyel) |             |              |       |       |           |               |                 |                 |
|------------------------------------------------------------------------------------------|-------------|--------------|-------|-------|-----------|---------------|-----------------|-----------------|
| gene                                                                                     | p_val       | avg_log2FC   | pct.1 | pct.2 | p_val_adj | Foldchange_UP | Foldchange_DOWN | Ratio_pct1_pct2 |
| NFKBID                                                                                   | 0,806564466 | -0,240119915 | 0,075 | 0,08  | 1         | 0,846674935   | 1,181090828     | 0,9375          |
| PPP6C                                                                                    | 0,191523652 | -0,240299225 | 0,425 | 0,24  | 1         | 0,84656971    | 1,181237633     | 1,770833333     |
| MYCBP2                                                                                   | 0,034818489 | -0,240721661 | 0,412 | 0,2   | 1         | 0,846321861   | 1,181583562     | 2,06            |
| STRN3                                                                                    | 0,138671774 | -0,241094675 | 0,412 | 0,23  | 1         | 0,84610307    | 1,181889104     | 1,791304348     |
| TXNRD1                                                                                   | 0,084911822 | -0,241120812 | 0,325 | 0,17  | 1         | 0,846087742   | 1,181910517     | 1,911764706     |
| TSPAN14                                                                                  | 0,83218863  | -0,241180115 | 0,162 | 0,13  | 1         | 0,846052963   | 1,181959101     | 1,246153846     |
| DCK                                                                                      | 0,292794831 | -0,241278361 | 0,2   | 0,12  | 1         | 0,84599535    | 1,182039594     | 1,666666667     |
| MAP3K3                                                                                   | 0,556890841 | -0,241324292 | 0,212 | 0,15  | 1         | 0,845968417   | 1,182077227     | 1,413333333     |
| TXNL4B                                                                                   | 0,61180457  | -0,241352997 | 0,075 | 0,09  | 1         | 0,845951585   | 1,182100747     | 0,833333333     |
| CCDC173                                                                                  | 0,141196013 | -0,241487044 | 0,038 | 0,09  | 1         | 0,845872987   | 1,182210586     | 0,422222222     |
| PIAS1                                                                                    | 0,272200574 | -0,241491543 | 0,25  | 0,15  | 1         | 0,84587035    | 1,182214272     | 1,666666667     |
| FYN                                                                                      | 0,026582561 | -0,24164011  | 0,65  | 0,32  | 1         | 0,845783247   | 1,182336022     | 2,03125         |
| NUB1                                                                                     | 0,216941057 | -0,241763526 | 0,45  | 0,26  | 1         | 0,845710898   | 1,182437169     | 1,730769231     |
| NORAD                                                                                    | 0,945362879 | -0,241813003 | 0,863 | 0,58  | 1         | 0,845681895   | 1,182477722     | 1,487931034     |
| SCRN1                                                                                    | 0,414238845 | -0,242165997 | 0,112 | 0,07  | 1         | 0,845475001   | 1,182767082     | 1,6             |
| TTC39C                                                                                   | 0,038759478 | -0,24216999  | 0,238 | 0,1   | 1         | 0,845472661   | 1,182770356     | 2,38            |
| WDR26                                                                                    | 0,175042059 | -0,242307599 | 0,288 | 0,16  | 1         | 0,845392021   | 1,182883178     | 1,8             |
| MOB2                                                                                     | 0,026862107 | -0,242365709 | 0,55  | 0,26  | 1         | 0,845357971   | 1,182930823     | 2,115384615     |
| GINS3                                                                                    | 0,642614654 | -0,242398546 | 0,15  | 0,11  | 1         | 0,84533873    | 1,182957748     | 1,363636364     |
| GAA                                                                                      | 0,204000817 | -0,242445228 | 0,325 | 0,19  | 1         | 0,845311377   | 1,182996027     | 1,710526316     |
| UNC45A                                                                                   | 0,846432179 | -0,242722125 | 0,238 | 0,19  | 1         | 0,845149151   | 1,183223101     | 1,252631579     |
| LTBP3                                                                                    | 0,393401856 | -0,242998862 | 0,512 | 0,32  | 1         | 0,844987051   | 1,183450088     | 1,6             |
| PDPK1                                                                                    | 0,562732711 | -0,243429294 | 0,2   | 0,14  | 1         | 0,844734984   | 1,183803227     | 1,428571429     |
| BHLHE40                                                                                  | 0,383090506 | -0,243452993 | 0,45  | 0,29  | 1         | 0,844721108   | 1,183822673     | 1,551724138     |
| MALT1                                                                                    | 0,754347587 | -0,243459161 | 0,062 | 0,07  | 1         | 0,844717497   | 1,183827734     | 0,885714286     |
| TOX                                                                                      | 0,01629666  | -0,2436957   | 0     | 0,07  | 1         | 0,844579011   | 1,184021846     | 0               |
| SNX2                                                                                     | 0,26546158  | -0,243732029 | 0,362 | 0,22  | 1         | 0,844557744   | 1,184051661     | 1,645454545     |
| PPP1R9A                                                                                  | 0,849623158 | -0,244149643 | 0,2   | 0,19  | 1         | 0,844313307   | 1,184394457     | 1,052631579     |
| HABP4                                                                                    | 0,203513912 | -0,244340552 | 0,412 | 0,24  | 1         | 0,844201588   | 1,184551195     | 1,716666667     |
| C11orf54                                                                                 | 0,470883549 | -0,2444156   | 0,15  | 0,1   | 1         | 0,844157674   | 1,184612817     | 1,5             |

Supplementary Table 4

| Differentially expressed genes_keloid-CCD_ comparing SC-Keloid vs. (SC-Myel, SC-Nonmyel) |             |              |       |       |           |               |                 |                 |
|------------------------------------------------------------------------------------------|-------------|--------------|-------|-------|-----------|---------------|-----------------|-----------------|
| gene                                                                                     | p_val       | avg_log2FC   | pct.1 | pct.2 | p_val_adj | Foldchange_UP | Foldchange_DOWN | Ratio_pct1_pct2 |
| VCL                                                                                      | 0,824370199 | -0,244503191 | 0,8   | 0,54  | 1         | 0,844106424   | 1,18468474      | 1,481481481     |
| PHACTR2                                                                                  | 0,941817101 | -0,244680181 | 0,15  | 0,14  | 1         | 0,844002875   | 1,184830087     | 1,071428571     |
| OAZ1                                                                                     | 0,329821854 | -0,24479177  | 1     | 0,95  | 1         | 0,843937596   | 1,184921734     | 1,052631579     |
| KMT5B                                                                                    | 0,396967957 | -0,244810422 | 0,375 | 0,24  | 1         | 0,843926686   | 1,184937053     | 1,5625          |
| SCAF4                                                                                    | 0,257909868 | -0,24497591  | 0,25  | 0,15  | 1         | 0,843829886   | 1,185072983     | 1,666666667     |
| ELOVL5                                                                                   | 0,326748811 | -0,245242456 | 0,275 | 0,17  | 1         | 0,843673999   | 1,185291951     | 1,617647059     |
| PLK3                                                                                     | 0,519009503 | -0,245909012 | 0,288 | 0,2   | 1         | 0,843284293   | 1,185839708     | 1,44            |
| IFIT1                                                                                    | 0,213256546 | -0,246017031 | 0,038 | 0,08  | 1         | 0,843221156   | 1,185928499     | 0,475           |
| EPC2                                                                                     | 0,829011659 | -0,246137515 | 0,275 | 0,24  | 1         | 0,843150739   | 1,186027544     | 1,145833333     |
| PI4K2A                                                                                   | 0,609356609 | -0,246184814 | 0,238 | 0,17  | 1         | 0,843123096   | 1,186066429     | 1,4             |
| DRAM1                                                                                    | 0,501113728 | -0,24622672  | 0,1   | 0,12  | 1         | 0,843098607   | 1,186100881     | 0,833333333     |
| DVL3                                                                                     | 0,337168252 | -0,246971027 | 0,312 | 0,2   | 1         | 0,842663752   | 1,186712965     | 1,56            |
| DIPK2A                                                                                   | 0,479052381 | -0,24723976  | 0,088 | 0,11  | 1         | 0,842506803   | 1,186934036     | 0,8             |
| BRWD3                                                                                    | 0,46820885  | -0,247394066 | 0,125 | 0,15  | 1         | 0,842416695   | 1,187060994     | 0,833333333     |
| NCL                                                                                      | 0,124488739 | -0,247482272 | 0,9   | 0,84  | 1         | 0,842365192   | 1,187133573     | 1,071428571     |
| SEC22C                                                                                   | 0,024879918 | -0,24771204  | 0,362 | 0,16  | 1         | 0,842231045   | 1,187322654     | 2,2625          |
| ABCF1                                                                                    | 0,042799107 | -0,247873314 | 0,625 | 0,3   | 1         | 0,8421369     | 1,187455389     | 2,083333333     |
| NPR3                                                                                     | 0,039215525 | -0,247937852 | 0,013 | 0,08  | 1         | 0,842099229   | 1,18750851      | 0,1625          |
| PITPNB                                                                                   | 0,481371001 | -0,248004635 | 0,6   | 0,38  | 1         | 0,842060248   | 1,187563481     | 1,578947368     |
| ZNF22                                                                                    | 0,012132713 | -0,248178277 | 0,562 | 0,26  | 1         | 0,841958904   | 1,187706424     | 2,161538462     |
| SLITRK6                                                                                  | 0,318736578 | -0,248358902 | 0,588 | 0,37  | 1         | 0,841853498   | 1,187855135     | 1,589189189     |
| LRRC40                                                                                   | 0,082861266 | -0,248483848 | 0,25  | 0,12  | 1         | 0,841780592   | 1,187958014     | 2,083333333     |
| E2F6                                                                                     | 0,536111605 | -0,249089536 | 0,2   | 0,14  | 1         | 0,84142726    | 1,18845686      | 1,428571429     |
| STAG2                                                                                    | 0,119004482 | -0,249154242 | 0,65  | 0,34  | 1         | 0,841389523   | 1,188510164     | 1,911764706     |
| KIAA1217                                                                                 | 0,666322177 | -0,24920353  | 0,112 | 0,12  | 1         | 0,841360778   | 1,18855077      | 0,933333333     |
| BAZ2B                                                                                    | 0,306956434 | -0,249252867 | 0,362 | 0,23  | 1         | 0,841332006   | 1,188591416     | 1,573913043     |
| RAP1A                                                                                    | 0,474600819 | -0,249262334 | 0,812 | 0,61  | 1         | 0,841326485   | 1,188599216     | 1,331147541     |
| GPBP1L1                                                                                  | 0,556037053 | -0,249279919 | 0,3   | 0,21  | 1         | 0,84131623    | 1,188613703     | 1,428571429     |
| TDG                                                                                      | 0,387889341 | -0,249566172 | 0,5   | 0,3   | 1         | 0,841149317   | 1,188849566     | 1,666666667     |
| EPM2AIP1                                                                                 | 0,810533432 | -0,249742973 | 0,2   | 0,16  | 1         | 0,841046241   | 1,188995267     | 1,25            |

Supplementary Table 4

| Differentially expressed genes_keloid-CCD_comparing SC-Keloid vs. (SC-Myel, SC-Nonmyel) |             |              |       |       |           |               |                 |                 |
|-----------------------------------------------------------------------------------------|-------------|--------------|-------|-------|-----------|---------------|-----------------|-----------------|
| gene                                                                                    | p_val       | avg_log2FC   | pct.1 | pct.2 | p_val_adj | Foldchange_UP | Foldchange_DOWN | Ratio_pct1_pct2 |
| FREM2                                                                                   | 0,731288812 | -0,249884826 | 0,112 | 0,12  | 1         | 0,840963549   | 1,189112182     | 0,933333333     |
| AHI1                                                                                    | 0,160901167 | -0,250068602 | 0,575 | 0,32  | 1         | 0,84085643    | 1,189263665     | 1,796875        |
| TMEM263                                                                                 | 0,017233583 | -0,250199306 | 0,662 | 0,31  | 1         | 0,840780255   | 1,189371413     | 2,135483871     |
| PIK3R1                                                                                  | 0,661185398 | -0,250321726 | 0,7   | 0,53  | 1         | 0,840708913   | 1,189472342     | 1,320754717     |
| APCDD1                                                                                  | 0,525777494 | -0,250716061 | 0,05  | 0,07  | 1         | 0,840479152   | 1,189797508     | 0,714285714     |
| FBXO11                                                                                  | 0,268310167 | -0,25076286  | 0,45  | 0,27  | 1         | 0,840451888   | 1,189836104     | 1,666666667     |
| SOCS1                                                                                   | 0,973222796 | -0,250780638 | 0,125 | 0,11  | 1         | 0,840441532   | 1,189850766     | 1,136363636     |
| PFKFB2                                                                                  | 0,175582854 | -0,250796801 | 0,05  | 0,1   | 1         | 0,840432116   | 1,189864096     | 0,5             |
| TRIM9                                                                                   | 0,754347587 | -0,251299929 | 0,062 | 0,07  | 1         | 0,840139074   | 1,190279123     | 0,885714286     |
| RBM5                                                                                    | 0,421087235 | -0,251321476 | 0,5   | 0,31  | 1         | 0,840126526   | 1,190296901     | 1,612903226     |
| GIT2                                                                                    | 0,970307235 | -0,251553576 | 0,138 | 0,12  | 1         | 0,839991377   | 1,190488411     | 1,15            |
| PLEKHB2                                                                                 | 0,186541372 | -0,251570875 | 0,475 | 0,27  | 1         | 0,839981305   | 1,190502686     | 1,759259259     |
| SCPEP1                                                                                  | 0,274507778 | -0,251759683 | 0,412 | 0,25  | 1         | 0,839871383   | 1,190658499     | 1,648           |
| SENP7                                                                                   | 0,280882741 | -0,251761078 | 0,262 | 0,16  | 1         | 0,839870571   | 1,19065965      | 1,6375          |
| AAMP                                                                                    | 0,253041948 | -0,251836207 | 0,45  | 0,26  | 1         | 0,839826835   | 1,190721656     | 1,730769231     |
| TMEM183A                                                                                | 0,076514722 | -0,251920139 | 0,338 | 0,17  | 1         | 0,839777978   | 1,190790931     | 1,988235294     |
| RFK                                                                                     | 0,011252508 | -0,251924368 | 0,362 | 0,15  | 1         | 0,839775516   | 1,190794421     | 2,413333333     |
| SRF                                                                                     | 0,654727359 | -0,252432485 | 0,175 | 0,13  | 1         | 0,839479799   | 1,191213893     | 1,346153846     |
| GFOD1                                                                                   | 0,303003786 | -0,252833291 | 0,062 | 0,1   | 1         | 0,83924661    | 1,191544879     | 0,62            |
| ERRFI1                                                                                  | 0,524201744 | -0,252879883 | 0,275 | 0,19  | 1         | 0,839219506   | 1,191583361     | 1,447368421     |
| FUNDC2                                                                                  | 0,359644549 | -0,252900904 | 0,738 | 0,44  | 1         | 0,839207279   | 1,191600723     | 1,677272727     |
| ZMAT1                                                                                   | 0,173614722 | -0,252949707 | 0,05  | 0,1   | 1         | 0,839178891   | 1,191641032     | 0,5             |
| NSRP1                                                                                   | 0,086376598 | -0,252996074 | 0,512 | 0,27  | 1         | 0,839151921   | 1,191679331     | 1,896296296     |
| MARCHF7                                                                                 | 0,367119808 | -0,253188576 | 0,388 | 0,24  | 1         | 0,839039958   | 1,19183835      | 1,616666667     |
| SQOR                                                                                    | 0,607598011 | -0,253197346 | 0,075 | 0,09  | 1         | 0,839034858   | 1,191845595     | 0,833333333     |
| CASKIN2                                                                                 | 0,217936139 | -0,253289042 | 0,15  | 0,08  | 1         | 0,838981532   | 1,19192135      | 1,875           |
| HEATR5A                                                                                 | 0,933685367 | -0,253317204 | 0,175 | 0,15  | 1         | 0,838965154   | 1,191944618     | 1,166666667     |
| MOSPD1                                                                                  | 0,382212252 | -0,253444375 | 0,175 | 0,11  | 1         | 0,838891204   | 1,19204969      | 1,590909091     |
| RRM2B                                                                                   | 0,034513824 | -0,253652881 | 0,275 | 0,12  | 1         | 0,838769972   | 1,192221984     | 2,291666667     |
| SHB                                                                                     | 0,666322177 | -0,253937064 | 0,112 | 0,12  | 1         | 0,838604767   | 1,192456852     | 0,933333333     |



Supplementary Table 4

| Differentially expressed genes_keloid-CCD_ comparing SC-Keloid vs. (SC-Myel, SC-Nonmyel) |             |              |       |       |           |               |                 |                 |
|------------------------------------------------------------------------------------------|-------------|--------------|-------|-------|-----------|---------------|-----------------|-----------------|
| gene                                                                                     | p_val       | avg_log2FC   | pct.1 | pct.2 | p_val_adj | Foldchange_UP | Foldchange_DOWN | Ratio_pct1_pct2 |
| SYT14                                                                                    | 0,01629666  | -0,254575818 | 0     | 0,07  | 1         | 0,838233556   | 1,192984929     | 0               |
| C1GALT1                                                                                  | 0,640614856 | -0,254708257 | 0,162 | 0,12  | 1         | 0,83815661    | 1,19309445      | 1,35            |
| SDHD                                                                                     | 0,215884581 | -0,254992595 | 0,438 | 0,26  | 1         | 0,837991436   | 1,193329618     | 1,684615385     |
| RCHY1                                                                                    | 0,495129612 | -0,255254592 | 0,162 | 0,11  | 1         | 0,837839268   | 1,193546349     | 1,472727273     |
| ATF4                                                                                     | 0,645595362 | -0,25549408  | 0,9   | 0,63  | 1         | 0,837700198   | 1,193744495     | 1,428571429     |
| VPS13A                                                                                   | 0,614436593 | -0,255826191 | 0,15  | 0,11  | 1         | 0,83750738    | 1,194019329     | 1,363636364     |
| SEMA4B                                                                                   | 0,975107496 | -0,255889466 | 0,062 | 0,06  | 1         | 0,837470649   | 1,194071699     | 1,033333333     |
| WAPL                                                                                     | 0,386971272 | -0,256127927 | 0,312 | 0,2   | 1         | 0,837332236   | 1,194269081     | 1,56            |
| TTC21B                                                                                   | 0,530375301 | -0,25621297  | 0,112 | 0,13  | 1         | 0,837282879   | 1,194339482     | 0,861538462     |
| SAP30                                                                                    | 0,386107477 | -0,256231835 | 0,388 | 0,25  | 1         | 0,837271931   | 1,194355099     | 1,552           |
| PM20D2                                                                                   | 0,106207588 | -0,25631872  | 0,088 | 0,16  | 1         | 0,837221508   | 1,19442703      | 0,55            |
| FAM241A                                                                                  | 0,460093343 | -0,256329415 | 0,138 | 0,09  | 1         | 0,837215301   | 1,194435886     | 1,533333333     |
| PSMD12                                                                                   | 0,508748489 | -0,256397384 | 0,525 | 0,33  | 1         | 0,837175859   | 1,194492159     | 1,590909091     |
| H2AX                                                                                     | 0,933299132 | -0,257241681 | 0,613 | 0,46  | 1         | 0,836686069   | 1,195191407     | 1,332608696     |
| CERT1                                                                                    | 0,594763023 | -0,257300625 | 0,3   | 0,21  | 1         | 0,836651885   | 1,19524024      | 1,428571429     |
| LRRK2                                                                                    | 0,060312926 | -0,257310481 | 0,013 | 0,07  | 1         | 0,83664617    | 1,195248405     | 0,185714286     |
| FBLN5                                                                                    | 0,366993983 | -0,257456838 | 0,05  | 0,08  | 1         | 0,836561298   | 1,195369666     | 0,625           |
| HSPB2                                                                                    | 0,829005304 | -0,257461307 | 0,525 | 0,39  | 1         | 0,836558707   | 1,195373368     | 1,346153846     |
| CNST                                                                                     | 0,240028894 | -0,257594668 | 0,225 | 0,13  | 1         | 0,83648138    | 1,195483873     | 1,730769231     |
| LRRC8B                                                                                   | 0,293746322 | -0,258541471 | 0,1   | 0,14  | 1         | 0,8359326     | 1,196268695     | 0,714285714     |
| TOP2B                                                                                    | 0,026696426 | -0,258546734 | 0,412 | 0,19  | 1         | 0,83592955    | 1,196273059     | 2,168421053     |
| DDX58                                                                                    | 0,03798271  | -0,258660693 | 0,038 | 0,12  | 1         | 0,835863522   | 1,196367557     | 0,316666667     |
| ZFAND1                                                                                   | 0,983362042 | -0,258671563 | 0,162 | 0,14  | 1         | 0,835857224   | 1,196376571     | 1,157142857     |
| ACTR1B                                                                                   | 0,683698954 | -0,258719778 | 0,212 | 0,16  | 1         | 0,83582929    | 1,196416555     | 1,325           |
| TUBB2A                                                                                   | 0,868927899 | -0,258965259 | 0,8   | 0,61  | 1         | 0,835687083   | 1,196620147     | 1,31147541      |
| B3GALNT2                                                                                 | 0,216392995 | -0,259350901 | 0,225 | 0,13  | 1         | 0,835463727   | 1,196940055     | 1,730769231     |
| MBD2                                                                                     | 0,258163927 | -0,259445196 | 0,425 | 0,26  | 1         | 0,835409123   | 1,19701829      | 1,634615385     |
| TNFRSF1A                                                                                 | 0,00227052  | -0,25977919  | 0,637 | 0,27  | 1         | 0,835215743   | 1,19729544      | 2,359259259     |
| SAMD8                                                                                    | 0,506598769 | -0,260371793 | 0,362 | 0,25  | 1         | 0,834872739   | 1,197787343     | 1,448           |
| ANKRD33B                                                                                 | 0,139405247 | -0,260645549 | 0,038 | 0,09  | 1         | 0,834714334   | 1,198014649     | 0,422222222     |

Supplementary Table 4

| Differentially expressed genes_keloid-CCD_ comparing SC-Keloid vs. (SC-Myel, SC-Nonmyel) |             |              |       |       |           |               |                 |                 |
|------------------------------------------------------------------------------------------|-------------|--------------|-------|-------|-----------|---------------|-----------------|-----------------|
| gene                                                                                     | p_val       | avg_log2FC   | pct.1 | pct.2 | p_val_adj | Foldchange_UP | Foldchange_DOWN | Ratio_pct1_pct2 |
| SGTB                                                                                     | 0,641197673 | -0,260655844 | 0,25  | 0,18  | 1         | 0,834708378   | 1,198023198     | 1,388888889     |
| DERL1                                                                                    | 0,152302116 | -0,260774227 | 0,462 | 0,26  | 1         | 0,834639887   | 1,198121508     | 1,776923077     |
| BAZ1A                                                                                    | 0,229581041 | -0,260926963 | 0,625 | 0,37  | 1         | 0,83455153    | 1,198248358     | 1,689189189     |
| CCDC28A                                                                                  | 0,424527118 | -0,260981827 | 0,212 | 0,14  | 1         | 0,834519793   | 1,198293927     | 1,514285714     |
| TTYH1                                                                                    | 0,744402054 | -0,26123651  | 0,375 | 0,29  | 1         | 0,834372486   | 1,198505484     | 1,293103448     |
| GPSM2                                                                                    | 0,05874719  | -0,261352842 | 0,488 | 0,26  | 1         | 0,834305209   | 1,198602129     | 1,876923077     |
| PXDC1                                                                                    | 0,613826672 | -0,261536474 | 0,775 | 0,5   | 1         | 0,834199022   | 1,198754702     | 1,55            |
| CSNK1G3                                                                                  | 0,320941167 | -0,261715853 | 0,312 | 0,19  | 1         | 0,834095307   | 1,19890376      | 1,642105263     |
| STK32A                                                                                   | 0,061423181 | -0,261857395 | 0,013 | 0,07  | 1         | 0,834013479   | 1,199021389     | 0,185714286     |
| STX16                                                                                    | 0,593149253 | -0,261931893 | 0,412 | 0,28  | 1         | 0,833970413   | 1,199083306     | 1,471428571     |
| ZNF566                                                                                   | 0,516769632 | -0,262023009 | 0,05  | 0,07  | 1         | 0,833917744   | 1,199159039     | 0,714285714     |
| NFYB                                                                                     | 0,29418871  | -0,262145643 | 0,375 | 0,23  | 1         | 0,833846861   | 1,199260976     | 1,630434783     |
| HMGCS1                                                                                   | 0,775554615 | -0,262420924 | 0,3   | 0,23  | 1         | 0,83368777    | 1,199489829     | 1,304347826     |
| ATP1B2                                                                                   | 0,831403993 | -0,262503306 | 0,1   | 0,1   | 1         | 0,833640165   | 1,199558325     | 1               |
| PPM1D                                                                                    | 0,609356609 | -0,2625196   | 0,238 | 0,17  | 1         | 0,83363075    | 1,199571873     | 1,4             |
| TARDBP                                                                                   | 0,11376215  | -0,262565924 | 0,4   | 0,21  | 1         | 0,833603983   | 1,199610391     | 1,904761905     |
| USF3                                                                                     | 0,817524131 | -0,262625846 | 0,162 | 0,13  | 1         | 0,83356936    | 1,199660218     | 1,246153846     |
| RAB6A                                                                                    | 0,56159795  | -0,26276103  | 0,688 | 0,42  | 1         | 0,833491257   | 1,199772634     | 1,638095238     |
| EFHC1                                                                                    | 0,096446656 | -0,262919275 | 0,425 | 0,23  | 1         | 0,833399838   | 1,199904241     | 1,847826087     |
| PIM2                                                                                     | 0,175582854 | -0,262955197 | 0,05  | 0,1   | 1         | 0,833379087   | 1,199934118     | 0,5             |
| CYBRD1                                                                                   | 0,392336069 | -0,26315199  | 0,262 | 0,17  | 1         | 0,833265417   | 1,200097808     | 1,541176471     |
| CHKA                                                                                     | 0,58646948  | -0,263240104 | 0,238 | 0,17  | 1         | 0,833214526   | 1,200171107     | 1,4             |
| U2AF1L4                                                                                  | 0,828516813 | -0,263648731 | 0,162 | 0,13  | 1         | 0,832978561   | 1,20051109      | 1,246153846     |
| LINC00472                                                                                | 0,240774098 | -0,26377532  | 0,025 | 0,06  | 1         | 0,832905474   | 1,200616433     | 0,416666667     |
| ATP11A                                                                                   | 0,144830522 | -0,263799526 | 0,038 | 0,09  | 1         | 0,8328915     | 1,200636578     | 0,422222222     |
| ZNF148                                                                                   | 0,211054137 | -0,263821421 | 0,412 | 0,24  | 1         | 0,832878859   | 1,2006548       | 1,716666667     |
| SCML1                                                                                    | 0,45318222  | -0,264009612 | 0,3   | 0,2   | 1         | 0,832770222   | 1,200811428     | 1,5             |
| CNKS2                                                                                    | 0,037088726 | -0,264230455 | 0,013 | 0,08  | 1         | 0,832642755   | 1,200995258     | 0,1625          |
| IRF2BP2                                                                                  | 0,522200053 | -0,264326684 | 0,475 | 0,31  | 1         | 0,832587218   | 1,201075368     | 1,532258065     |
| FAM98C                                                                                   | 0,857505295 | -0,264435088 | 0,225 | 0,2   | 1         | 0,83252466    | 1,201165621     | 1,125           |

Supplementary Table 4

| Differentially expressed genes_keloid-CCD_ comparing SC-Keloid vs. (SC-Myel, SC-Nonmyel) |             |              |       |       |           |               |                 |                 |
|------------------------------------------------------------------------------------------|-------------|--------------|-------|-------|-----------|---------------|-----------------|-----------------|
| gene                                                                                     | p_val       | avg_log2FC   | pct.1 | pct.2 | p_val_adj | Foldchange_UP | Foldchange_DOWN | Ratio_pct1_pct2 |
| GARRE1                                                                                   | 0,765615049 | -0,264552083 | 0,125 | 0,1   | 1         | 0,832457149   | 1,201263033     | 1,25            |
| MARK2                                                                                    | 0,283468475 | -0,264560149 | 0,275 | 0,17  | 1         | 0,832452496   | 1,201269749     | 1,617647059     |
| TYRO3                                                                                    | 0,078696762 | -0,264763259 | 0,05  | 0,12  | 1         | 0,832335307   | 1,201438882     | 0,416666667     |
| PSMC6                                                                                    | 0,246702033 | -0,265297369 | 0,637 | 0,38  | 1         | 0,832027219   | 1,201883756     | 1,676315789     |
| NDN                                                                                      | 0,96767157  | -0,265575712 | 0,2   | 0,17  | 1         | 0,83186671    | 1,202115662     | 1,176470588     |
| FAM111A                                                                                  | 0,133823903 | -0,265927109 | 0,312 | 0,17  | 1         | 0,831664117   | 1,202408496     | 1,835294118     |
| NR2C2                                                                                    | 0,827320099 | -0,266228568 | 0,2   | 0,16  | 1         | 0,831490354   | 1,202659773     | 1,25            |
| SFSWAP                                                                                   | 0,62363758  | -0,266335775 | 0,5   | 0,33  | 1         | 0,831428568   | 1,202749146     | 1,515151515     |
| LMO7                                                                                     | 0,479302051 | -0,266344835 | 0,188 | 0,13  | 1         | 0,831423347   | 1,202756699     | 1,446153846     |
| ARMCX4                                                                                   | 0,062632651 | -0,266808084 | 0,025 | 0,09  | 1         | 0,83115642    | 1,203142966     | 0,277777778     |
| NAA16                                                                                    | 0,478527776 | -0,266950395 | 0,175 | 0,12  | 1         | 0,831074437   | 1,203261653     | 1,458333333     |
| PABIR1                                                                                   | 0,244405995 | -0,267112628 | 0,075 | 0,12  | 1         | 0,830980986   | 1,203396969     | 0,625           |
| HSPA9                                                                                    | 0,202087119 | -0,267158635 | 0,675 | 0,36  | 1         | 0,830954487   | 1,203435345     | 1,875           |
| MLXIP                                                                                    | 0,230409801 | -0,267344313 | 0,5   | 0,29  | 1         | 0,830847548   | 1,20359024      | 1,724137931     |
| FZD5                                                                                     | 0,260257508 | -0,267935109 | 0,05  | 0,09  | 1         | 0,830507378   | 1,204083222     | 0,555555556     |
| GATAD2B                                                                                  | 0,190935229 | -0,268005145 | 0,4   | 0,23  | 1         | 0,830467063   | 1,204141675     | 1,739130435     |
| CCN5                                                                                     | 0,16651002  | -0,268006116 | 0,025 | 0,07  | 1         | 0,830466503   | 1,204142486     | 0,357142857     |
| SIK2                                                                                     | 0,781151744 | -0,268301786 | 0,162 | 0,13  | 1         | 0,830296323   | 1,204389291     | 1,246153846     |
| APOA1                                                                                    | 0,060312926 | -0,268706145 | 0,013 | 0,07  | 1         | 0,830063639   | 1,204726906     | 0,185714286     |
| WBP11                                                                                    | 0,713176474 | -0,268917286 | 0,637 | 0,41  | 1         | 0,829942167   | 1,204903233     | 1,553658537     |
| NCOA4                                                                                    | 0,036397947 | -0,269023289 | 0,462 | 0,22  | 1         | 0,829881189   | 1,204991767     | 2,1             |
| FOXN2                                                                                    | 0,147606314 | -0,269108158 | 0,262 | 0,14  | 1         | 0,829832371   | 1,205062655     | 1,871428571     |
| YOD1                                                                                     | 0,360221401 | -0,269131329 | 0,088 | 0,12  | 1         | 0,829819043   | 1,205082009     | 0,733333333     |
| HDGFL3                                                                                   | 0,399334797 | -0,269186909 | 0,288 | 0,19  | 1         | 0,829787075   | 1,205128436     | 1,515789474     |
| C7orf61                                                                                  | 0,060312926 | -0,269275871 | 0,013 | 0,07  | 1         | 0,829735909   | 1,205202751     | 0,185714286     |
| PDE12                                                                                    | 0,303390351 | -0,269328893 | 0,2   | 0,12  | 1         | 0,829705415   | 1,205247045     | 1,666666667     |
| THSD7B                                                                                   | 0,026616038 | -0,269398821 | 0     | 0,06  | 1         | 0,8296652     | 1,205305465     | 0               |
| BCAS1                                                                                    | 0,120814239 | -0,269794591 | 0     | 0,03  | 1         | 0,829437631   | 1,205636159     | 0               |
| CDH7                                                                                     | 0,120814239 | -0,269794591 | 0     | 0,03  | 1         | 0,829437631   | 1,205636159     | 0               |
| SLC12A4                                                                                  | 0,241278638 | -0,269981068 | 0,325 | 0,19  | 1         | 0,829330429   | 1,205792005     | 1,710526316     |

Supplementary Table 4

| Differentially expressed genes_keloid-CCD_ comparing SC-Keloid vs. (SC-Myel, SC-Nonmyel) |             |              |       |       |           |               |                 |                 |
|------------------------------------------------------------------------------------------|-------------|--------------|-------|-------|-----------|---------------|-----------------|-----------------|
| gene                                                                                     | p_val       | avg_log2FC   | pct.1 | pct.2 | p_val_adj | Foldchange_UP | Foldchange_DOWN | Ratio_pct1_pct2 |
| ARRDC4                                                                                   | 0,564733986 | -0,270252725 | 0,312 | 0,22  | 1         | 0,829174282   | 1,206019075     | 1,418181818     |
| TFPI                                                                                     | 0,305831808 | -0,270426953 | 0,062 | 0,1   | 1         | 0,829074152   | 1,206164729     | 0,62            |
| UNC50                                                                                    | 0,490339185 | -0,270603931 | 0,412 | 0,27  | 1         | 0,828972455   | 1,2063127       | 1,525925926     |
| JADE1                                                                                    | 0,070469605 | -0,271006913 | 0,388 | 0,2   | 1         | 0,828740934   | 1,206649701     | 1,94            |
| H2BC11                                                                                   | 0,366993983 | -0,271483758 | 0,05  | 0,08  | 1         | 0,82846706    | 1,207048594     | 0,625           |
| PIK3C2A                                                                                  | 0,208074748 | -0,271633295 | 0,325 | 0,19  | 1         | 0,828381193   | 1,207173712     | 1,710526316     |
| PLIN2                                                                                    | 0,242465135 | -0,271729229 | 0,162 | 0,09  | 1         | 0,82832611    | 1,207253988     | 1,8             |
| ZC3H14                                                                                   | 0,282265224 | -0,271740529 | 0,338 | 0,2   | 1         | 0,828319623   | 1,207263444     | 1,69            |
| SIGIRR                                                                                   | 0,876393314 | -0,272083998 | 0,637 | 0,43  | 1         | 0,828122444   | 1,207550896     | 1,481395349     |
| SH3BP5                                                                                   | 0,751475829 | -0,272544943 | 0,525 | 0,36  | 1         | 0,827857899   | 1,207936774     | 1,458333333     |
| C11orf68                                                                                 | 0,638311988 | -0,272769709 | 0,25  | 0,18  | 1         | 0,827728932   | 1,20812498      | 1,388888889     |
| STARD3NL                                                                                 | 0,060069866 | -0,273134221 | 0,362 | 0,18  | 1         | 0,827519824   | 1,208430264     | 2,011111111     |
| ATP11C                                                                                   | 0,516924734 | -0,273258789 | 0,188 | 0,13  | 1         | 0,827448376   | 1,208534609     | 1,446153846     |
| ZBED1                                                                                    | 0,715271924 | -0,273261471 | 0,125 | 0,13  | 1         | 0,827446837   | 1,208536857     | 0,961538462     |
| KCNIP4                                                                                   | 0,01629666  | -0,273360505 | 0     | 0,07  | 1         | 0,827390039   | 1,20861982      | 0               |
| SPRED1                                                                                   | 0,936062401 | -0,273481443 | 0,312 | 0,25  | 1         | 0,827320684   | 1,208721139     | 1,248           |
| TEX2                                                                                     | 0,574423817 | -0,273636087 | 0,212 | 0,15  | 1         | 0,827232007   | 1,208850711     | 1,413333333     |
| TAOK1                                                                                    | 0,381849593 | -0,273785794 | 0,688 | 0,42  | 1         | 0,827146171   | 1,208976158     | 1,638095238     |
| CELSR2                                                                                   | 0,631984607 | -0,273786642 | 0,15  | 0,11  | 1         | 0,827145685   | 1,208976869     | 1,363636364     |
| PCGF5                                                                                    | 0,227834443 | -0,273985333 | 0,3   | 0,18  | 1         | 0,827031777   | 1,209143383     | 1,666666667     |
| KPNA5                                                                                    | 0,539037915 | -0,274049127 | 0,2   | 0,14  | 1         | 0,826995207   | 1,209196851     | 1,428571429     |
| KLF3                                                                                     | 0,511983037 | -0,274238476 | 0,588 | 0,4   | 1         | 0,826886673   | 1,209355565     | 1,47            |
| CSDE1                                                                                    | 0,415200444 | -0,274444177 | 0,887 | 0,62  | 1         | 0,826768784   | 1,209528008     | 1,430645161     |
| SMARCD3                                                                                  | 0,075276258 | -0,274553671 | 0,2   | 0,09  | 1         | 0,826706038   | 1,209619809     | 2,222222222     |
| MEPCE                                                                                    | 0,590126887 | -0,274792182 | 0,25  | 0,18  | 1         | 0,826569376   | 1,209819804     | 1,388888889     |
| ERBB3                                                                                    | 0,968572506 | -0,274804672 | 0,85  | 0,58  | 1         | 0,82656222    | 1,209830278     | 1,465517241     |
| BACE2                                                                                    | 0,324579644 | -0,274895254 | 0,562 | 0,34  | 1         | 0,826510324   | 1,209906242     | 1,652941176     |
| CDC14A                                                                                   | 0,377476254 | -0,274999218 | 0,088 | 0,12  | 1         | 0,826450766   | 1,209993433     | 0,733333333     |
| MT-ND1                                                                                   | 0,009734105 | -0,275006387 | 1     | 0,99  | 1         | 0,826446659   | 1,209999446     | 1,01010101      |
| PPP2R5A                                                                                  | 0,486986103 | -0,275156638 | 0,25  | 0,17  | 1         | 0,826360592   | 1,21012547      | 1,470588235     |

Supplementary Table 4

| Differentially expressed genes_keloid-CCD_ comparing SC-Keloid vs. (SC-Myel, SC-Nonmyel) |             |              |       |       |           |               |                 |                 |
|------------------------------------------------------------------------------------------|-------------|--------------|-------|-------|-----------|---------------|-----------------|-----------------|
| gene                                                                                     | p_val       | avg_log2FC   | pct.1 | pct.2 | p_val_adj | Foldchange_UP | Foldchange_DOWN | Ratio_pct1_pct2 |
| ZNF670                                                                                   | 0,659988904 | -0,275167213 | 0,1   | 0,11  | 1         | 0,826354536   | 1,210134339     | 0,909090909     |
| GLTP                                                                                     | 0,486144088 | -0,275218867 | 0,338 | 0,23  | 1         | 0,826324949   | 1,210177668     | 1,469565217     |
| SLC30A4                                                                                  | 0,060312926 | -0,275238307 | 0,013 | 0,07  | 1         | 0,826313815   | 1,210193975     | 0,185714286     |
| RIN2                                                                                     | 0,806564466 | -0,275255827 | 0,075 | 0,08  | 1         | 0,82630378    | 1,210208672     | 0,9375          |
| FIBIN                                                                                    | 0,106757145 | -0,275444241 | 0,588 | 0,33  | 1         | 0,826195873   | 1,210366734     | 1,781818182     |
| CNOT2                                                                                    | 0,129338038 | -0,275511793 | 0,537 | 0,31  | 1         | 0,826157189   | 1,210423408     | 1,732258065     |
| CITED4                                                                                   | 0,765234025 | -0,275618751 | 0,112 | 0,09  | 1         | 0,826095941   | 1,21051315      | 1,244444444     |
| RAB11FIP2                                                                                | 0,518643875 | -0,275706254 | 0,162 | 0,18  | 1         | 0,826045838   | 1,210586572     | 0,9             |
| CNTN1                                                                                    | 0,259519439 | -0,275728276 | 0,013 | 0,04  | 1         | 0,826033229   | 1,210605051     | 0,325           |
| MXD1                                                                                     | 0,983645631 | -0,276215571 | 0,288 | 0,24  | 1         | 0,82575427    | 1,211014023     | 1,2             |
| DNTTIP2                                                                                  | 0,099400181 | -0,276434198 | 0,475 | 0,25  | 1         | 0,825629144   | 1,211197555     | 1,9             |
| DYNLL1                                                                                   | 0,184467207 | -0,276716405 | 1     | 0,95  | 1         | 0,825467657   | 1,211434502     | 1,052631579     |
| FA2H                                                                                     | 0,259519439 | -0,27674112  | 0,013 | 0,04  | 1         | 0,825453516   | 1,211455255     | 0,325           |
| ZNRF2                                                                                    | 0,144785252 | -0,276761379 | 0,512 | 0,29  | 1         | 0,825441925   | 1,211472267     | 1,765517241     |
| GAPVD1                                                                                   | 0,359666372 | -0,277014962 | 0,388 | 0,24  | 1         | 0,825296849   | 1,211685227     | 1,616666667     |
| POLR1C                                                                                   | 0,696619079 | -0,277020182 | 0,112 | 0,12  | 1         | 0,825293863   | 1,211689611     | 0,933333333     |
| C10orf90                                                                                 | 0,026616038 | -0,277156861 | 0     | 0,06  | 1         | 0,82521568    | 1,21180441      | 0               |
| DUSP16                                                                                   | 0,853102583 | -0,277245743 | 0,138 | 0,13  | 1         | 0,825164841   | 1,211879069     | 1,061538462     |
| ASTN2                                                                                    | 0,08696236  | -0,277344789 | 0,05  | 0,12  | 1         | 0,825108193   | 1,211962272     | 0,416666667     |
| ALAS1                                                                                    | 0,864582938 | -0,277390672 | 0,138 | 0,13  | 1         | 0,825081952   | 1,212000817     | 1,061538462     |
| NCK1                                                                                     | 0,393905151 | -0,277681479 | 0,362 | 0,23  | 1         | 0,824915655   | 1,212245148     | 1,573913043     |
| SWAP70                                                                                   | 0,79564814  | -0,277788923 | 0,162 | 0,13  | 1         | 0,824854222   | 1,212335433     | 1,246153846     |
| TRIM26                                                                                   | 0,717298573 | -0,277805083 | 0,162 | 0,16  | 1         | 0,824844983   | 1,212349012     | 1,0125          |
| ZCCHC7                                                                                   | 0,297575643 | -0,277873606 | 0,262 | 0,16  | 1         | 0,824805807   | 1,212406596     | 1,6375          |
| CAVIN1                                                                                   | 0,600067736 | -0,27797593  | 0,85  | 0,65  | 1         | 0,824747309   | 1,212492589     | 1,307692308     |
| EFCAB14                                                                                  | 0,098981833 | -0,277987819 | 0,362 | 0,19  | 1         | 0,824740512   | 1,212502582     | 1,905263158     |
| PDS5B                                                                                    | 0,429994286 | -0,278404376 | 0,4   | 0,26  | 1         | 0,824502415   | 1,212852725     | 1,538461538     |
| ADCY6                                                                                    | 0,482493585 | -0,27843606  | 0,088 | 0,11  | 1         | 0,824484308   | 1,212879361     | 0,8             |
| ANKRD13A                                                                                 | 1           | -0,27869021  | 0,175 | 0,15  | 1         | 0,824339076   | 1,213093045     | 1,166666667     |
| TMEM132B                                                                                 | 0,00613773  | -0,278823048 | 0     | 0,09  | 1         | 0,824263178   | 1,213204747     | 0               |

Supplementary Table 4

| Differentially expressed genes_keloid-CCD_ comparing SC-Keloid vs. (SC-Myel, SC-Nonmyel) |             |              |       |       |           |               |                 |                 |
|------------------------------------------------------------------------------------------|-------------|--------------|-------|-------|-----------|---------------|-----------------|-----------------|
| gene                                                                                     | p_val       | avg_log2FC   | pct.1 | pct.2 | p_val_adj | Foldchange_UP | Foldchange_DOWN | Ratio_pct1_pct2 |
| SMURF1                                                                                   | 0,431761706 | -0,279061356 | 0,138 | 0,09  | 1         | 0,824127035   | 1,213405164     | 1,533333333     |
| CLIP1                                                                                    | 0,101026878 | -0,27925973  | 0,475 | 0,26  | 1         | 0,824013723   | 1,213572022     | 1,826923077     |
| SERPINB9                                                                                 | 0,788452212 | -0,279737961 | 0,062 | 0,05  | 1         | 0,823740621   | 1,213974368     | 1,24            |
| GALNT11                                                                                  | 0,87042042  | -0,279866092 | 0,262 | 0,21  | 1         | 0,823667465   | 1,21408219      | 1,247619048     |
| FGFR1OP2                                                                                 | 0,241429114 | -0,28009055  | 0,537 | 0,31  | 1         | 0,823539327   | 1,214271095     | 1,732258065     |
| ETNK1                                                                                    | 0,834660686 | -0,280598264 | 0,388 | 0,28  | 1         | 0,823249557   | 1,214698497     | 1,385714286     |
| RFLNA                                                                                    | 0,00613773  | -0,28065501  | 0     | 0,09  | 1         | 0,823217177   | 1,214746276     | 0               |
| NFATC4                                                                                   | 0,327702143 | -0,280776447 | 0,075 | 0,11  | 1         | 0,823147886   | 1,21484853      | 0,681818182     |
| DNAJA4                                                                                   | 0,781151744 | -0,281083677 | 0,162 | 0,13  | 1         | 0,822972611   | 1,215107267     | 1,246153846     |
| STXBP3                                                                                   | 0,060561878 | -0,281250418 | 0,475 | 0,24  | 1         | 0,822877501   | 1,215247712     | 1,979166667     |
| PHACTR1                                                                                  | 0,615680259 | -0,281297695 | 0,388 | 0,28  | 1         | 0,822850535   | 1,215287537     | 1,385714286     |
| NMT1                                                                                     | 0,083964192 | -0,281398938 | 0,425 | 0,22  | 1         | 0,822792793   | 1,215372824     | 1,931818182     |
| PNMA1                                                                                    | 0,209230521 | -0,281645492 | 0,462 | 0,26  | 1         | 0,822652191   | 1,215580547     | 1,776923077     |
| KIF13A                                                                                   | 0,841807645 | -0,281790813 | 0,188 | 0,15  | 1         | 0,822569331   | 1,215702997     | 1,253333333     |
| SLC7A2                                                                                   | 0,56588856  | -0,282200244 | 0,062 | 0,08  | 1         | 0,822335922   | 1,216048057     | 0,775           |
| BMPR1A                                                                                   | 0,297400058 | -0,282494102 | 0,062 | 0,1   | 1         | 0,82216844    | 1,216295776     | 0,62            |
| PARD3B                                                                                   | 0,024013059 | -0,282536115 | 0,038 | 0,13  | 1         | 0,822144497   | 1,216331196     | 0,292307692     |
| MSANTD3                                                                                  | 0,306400944 | -0,282592392 | 0,35  | 0,22  | 1         | 0,822112428   | 1,216378643     | 1,590909091     |
| TLNRD1                                                                                   | 0,264837351 | -0,283052251 | 0,262 | 0,16  | 1         | 0,821850422   | 1,216766426     | 1,6375          |
| ZNF131                                                                                   | 0,441692976 | -0,283231248 | 0,338 | 0,22  | 1         | 0,821748459   | 1,216917402     | 1,536363636     |
| CHD6                                                                                     | 0,443701629 | -0,283313927 | 0,425 | 0,28  | 1         | 0,821701368   | 1,216987143     | 1,517857143     |
| KIN                                                                                      | 0,42306216  | -0,283451065 | 0,275 | 0,18  | 1         | 0,821623263   | 1,217102832     | 1,527777778     |
| NUDC                                                                                     | 0,888957582 | -0,283631043 | 0,825 | 0,52  | 1         | 0,821520771   | 1,217254676     | 1,586538462     |
| FGD5-AS1                                                                                 | 0,391772808 | -0,284193831 | 0,588 | 0,37  | 1         | 0,821200362   | 1,217729614     | 1,589189189     |
| MOB1A                                                                                    | 0,081169213 | -0,28463467  | 0,637 | 0,34  | 1         | 0,82094947    | 1,218101768     | 1,873529412     |
| GOLGA2                                                                                   | 0,897352001 | -0,284673213 | 0,575 | 0,4   | 1         | 0,820927537   | 1,218134311     | 1,4375          |
| PIK3R3                                                                                   | 0,958439341 | -0,284697666 | 0,138 | 0,12  | 1         | 0,820913623   | 1,218154958     | 1,15            |
| RBBP4                                                                                    | 0,461206275 | -0,284751384 | 0,512 | 0,32  | 1         | 0,820883057   | 1,218200316     | 1,6             |
| LAMA4                                                                                    | 0,29069698  | -0,284794727 | 0,637 | 0,38  | 1         | 0,820858396   | 1,218236915     | 1,676315789     |
| SYDE2                                                                                    | 0,058665095 | -0,284868739 | 0,038 | 0,11  | 1         | 0,820816286   | 1,218299414     | 0,345454545     |

Supplementary Table 4

| Differentially expressed genes_keloid-CCD_ comparing SC-Keloid vs. (SC-Myel, SC-Nonmyel) |             |              |       |       |           |               |                 |                 |
|------------------------------------------------------------------------------------------|-------------|--------------|-------|-------|-----------|---------------|-----------------|-----------------|
| gene                                                                                     | p_val       | avg_log2FC   | pct.1 | pct.2 | p_val_adj | Foldchange_UP | Foldchange_DOWN | Ratio_pct1_pct2 |
| CLASP2                                                                                   | 0,965917611 | -0,285232122 | 0,175 | 0,15  | 1         | 0,820609567   | 1,218606315     | 1,166666667     |
| RPL36AL                                                                                  | 0,084249407 | -0,285323174 | 0,975 | 0,85  | 1         | 0,820557778   | 1,218683227     | 1,147058824     |
| TAX1BP1                                                                                  | 0,691242379 | -0,285651767 | 0,65  | 0,43  | 1         | 0,820370906   | 1,21896083      | 1,511627907     |
| PCDHB14                                                                                  | 0,024553368 | -0,286105948 | 0,025 | 0,11  | 1         | 0,820112682   | 1,219344637     | 0,227272727     |
| PTP4A1                                                                                   | 0,977558347 | -0,286151441 | 0,562 | 0,39  | 1         | 0,820086821   | 1,219383087     | 1,441025641     |
| MAPRE1                                                                                   | 0,719493892 | -0,286252176 | 0,637 | 0,42  | 1         | 0,820029562   | 1,219468232     | 1,516666667     |
| SLK                                                                                      | 0,058242378 | -0,286346985 | 0,488 | 0,25  | 1         | 0,819975674   | 1,219548374     | 1,952           |
| TNFRSF14                                                                                 | 0,731276496 | -0,286348991 | 0,212 | 0,16  | 1         | 0,819974533   | 1,219550071     | 1,325           |
| LPIN2                                                                                    | 0,682435767 | -0,286658639 | 0,2   | 0,15  | 1         | 0,81979856    | 1,219811852     | 1,333333333     |
| CYB5A                                                                                    | 0,146319626 | -0,286765495 | 0,512 | 0,28  | 1         | 0,819737842   | 1,219902203     | 1,828571429     |
| TP53BP2                                                                                  | 0,224960157 | -0,286772648 | 0,325 | 0,19  | 1         | 0,819733778   | 1,219908252     | 1,710526316     |
| AFMID                                                                                    | 0,56588856  | -0,286919268 | 0,062 | 0,08  | 1         | 0,819650473   | 1,220032237     | 0,775           |
| DUOX1                                                                                    | 0,098981434 | -0,28700445  | 0,025 | 0,08  | 1         | 0,819602079   | 1,220104274     | 0,3125          |
| IQCIN                                                                                    | 0,308677275 | -0,287190325 | 0,062 | 0,1   | 1         | 0,81949649    | 1,220261481     | 0,62            |
| PNP                                                                                      | 0,359713881 | -0,287374968 | 0,262 | 0,17  | 1         | 0,819391613   | 1,220417666     | 1,541176471     |
| FOXN3                                                                                    | 0,465277388 | -0,287725824 | 0,125 | 0,15  | 1         | 0,819192366   | 1,220714501     | 0,833333333     |
| G3BP1                                                                                    | 0,48577686  | -0,287755771 | 0,7   | 0,4   | 1         | 0,819175361   | 1,220739841     | 1,75            |
| FBXO17                                                                                   | 0,713596568 | -0,288009102 | 0,275 | 0,2   | 1         | 0,819031531   | 1,220954216     | 1,375           |
| PTP4A2                                                                                   | 0,618673703 | -0,288046922 | 0,787 | 0,56  | 1         | 0,81901006    | 1,220986223     | 1,405357143     |
| ITSN2                                                                                    | 0,520072938 | -0,288087557 | 0,3   | 0,2   | 1         | 0,818986992   | 1,221020614     | 1,5             |
| C1orf53                                                                                  | 0,055334082 | -0,288425443 | 0,062 | 0,01  | 1         | 0,818795204   | 1,221306617     | 6,2             |
| VCPIP1                                                                                   | 0,889364971 | -0,288495516 | 0,212 | 0,17  | 1         | 0,818755435   | 1,221365938     | 1,247058824     |
| MT-ND5                                                                                   | 0,054965522 | -0,288543432 | 1     | 0,86  | 1         | 0,818728242   | 1,221406504     | 1,162790698     |
| SNHG7                                                                                    | 0,526988744 | -0,288801691 | 0,675 | 0,45  | 1         | 0,818581694   | 1,221625169     | 1,5             |
| SAT2                                                                                     | 0,873721043 | -0,289048593 | 0,875 | 0,57  | 1         | 0,818441614   | 1,221834255     | 1,535087719     |
| MAPK1IP1L                                                                                | 0,062906399 | -0,289412531 | 0,512 | 0,25  | 1         | 0,818235178   | 1,222142517     | 2,048           |
| SNAI1                                                                                    | 0,329196618 | -0,289427943 | 0,212 | 0,13  | 1         | 0,818226437   | 1,222155573     | 1,630769231     |
| CD55                                                                                     | 0,842824122 | -0,289457349 | 0,088 | 0,09  | 1         | 0,81820976    | 1,222180484     | 0,977777778     |
| PRPSAP1                                                                                  | 0,498950768 | -0,289490505 | 0,438 | 0,29  | 1         | 0,818190956   | 1,222208572     | 1,510344828     |
| SYNPO2                                                                                   | 0,191930521 | -0,289644881 | 0,05  | 0,1   | 1         | 0,818103409   | 1,222339362     | 0,5             |

Supplementary Table 4

| Differentially expressed genes_keloid-CCD_ comparing SC-Keloid vs. (SC-Myel, SC-Nonmyel) |             |              |       |       |           |               |                 |                 |
|------------------------------------------------------------------------------------------|-------------|--------------|-------|-------|-----------|---------------|-----------------|-----------------|
| gene                                                                                     | p_val       | avg_log2FC   | pct.1 | pct.2 | p_val_adj | Foldchange_UP | Foldchange_DOWN | Ratio_pct1_pct2 |
| LRP12                                                                                    | 0,123417626 | -0,289811755 | 0,375 | 0,2   | 1         | 0,818008786   | 1,222480757     | 1,875           |
| AKAP9                                                                                    | 0,131789811 | -0,290169614 | 0,575 | 0,32  | 1         | 0,817805905   | 1,222784029     | 1,796875        |
| FZD3                                                                                     | 0,771734375 | -0,290243568 | 0,162 | 0,16  | 1         | 0,817763985   | 1,222846712     | 1,0125          |
| CCSAP                                                                                    | 0,327702143 | -0,2903701   | 0,075 | 0,11  | 1         | 0,817692266   | 1,222953966     | 0,681818182     |
| PAR6B                                                                                    | 0,953805937 | -0,290404027 | 0,162 | 0,14  | 1         | 0,817673037   | 1,222982727     | 1,157142857     |
| RBFOX2                                                                                   | 0,960519411 | -0,290476726 | 0,388 | 0,3   | 1         | 0,817631834   | 1,223044356     | 1,293333333     |
| FXR1                                                                                     | 0,80163669  | -0,290492363 | 0,713 | 0,44  | 1         | 0,817622973   | 1,223057611     | 1,620454545     |
| HEG1                                                                                     | 0,317316352 | -0,290704785 | 0,225 | 0,14  | 1         | 0,817502595   | 1,223237708     | 1,607142857     |
| TAF5                                                                                     | 0,003765792 | -0,290799885 | 0     | 0,1   | 1         | 0,817448708   | 1,223318344     | 0               |
| ZC3H12C                                                                                  | 0,100511066 | -0,290946027 | 0,062 | 0,13  | 1         | 0,817365907   | 1,223442269     | 0,476923077     |
| FAM171A1                                                                                 | 0,703460316 | -0,291120903 | 0,138 | 0,14  | 1         | 0,817266836   | 1,223590578     | 0,985714286     |
| RAP1GAP2                                                                                 | 0,208200632 | -0,291225673 | 0,038 | 0,08  | 1         | 0,817207487   | 1,22367944      | 0,475           |
| MORC3                                                                                    | 0,513676394 | -0,291263837 | 0,262 | 0,18  | 1         | 0,81718587    | 1,223711811     | 1,455555556     |
| TASOR2                                                                                   | 0,412744151 | -0,291549225 | 0,262 | 0,17  | 1         | 0,817024233   | 1,223953904     | 1,541176471     |
| RSBN1                                                                                    | 0,566998161 | -0,291582074 | 0,338 | 0,23  | 1         | 0,81700563    | 1,223981773     | 1,469565217     |
| KLHL26                                                                                   | 0,145568838 | -0,291615044 | 0,062 | 0,12  | 1         | 0,81698696    | 1,224009745     | 0,516666667     |
| NOP2                                                                                     | 0,815549105 | -0,291780497 | 0,088 | 0,09  | 1         | 0,81689327    | 1,224150127     | 0,977777778     |
| ZNF12                                                                                    | 0,865396949 | -0,291809161 | 0,125 | 0,12  | 1         | 0,81687704    | 1,224174448     | 1,041666667     |
| EFNB1                                                                                    | 0,933222072 | -0,291925693 | 0,15  | 0,13  | 1         | 0,816811061   | 1,224273333     | 1,153846154     |
| SMTN                                                                                     | 0,096441167 | -0,292087478 | 0,288 | 0,15  | 1         | 0,816719468   | 1,224410633     | 1,92            |
| NRXN2                                                                                    | 0,947430005 | -0,292164134 | 0,212 | 0,19  | 1         | 0,816676073   | 1,224475692     | 1,115789474     |
| DYNLL2                                                                                   | 0,946362044 | -0,292295797 | 0,375 | 0,29  | 1         | 0,816601545   | 1,224587445     | 1,293103448     |
| TNPO1                                                                                    | 0,185427248 | -0,292727396 | 0,475 | 0,27  | 1         | 0,816357286   | 1,224953849     | 1,759259259     |
| CCNT2                                                                                    | 0,913249376 | -0,292794882 | 0,238 | 0,19  | 1         | 0,816319099   | 1,225011151     | 1,252631579     |
| CDC42SE1                                                                                 | 0,646534723 | -0,292852065 | 0,537 | 0,37  | 1         | 0,816286744   | 1,225059707     | 1,451351351     |
| LPIN1                                                                                    | 0,582634513 | -0,292917408 | 0,1   | 0,07  | 1         | 0,816249774   | 1,225115194     | 1,428571429     |
| MFSD14C                                                                                  | 0,236402297 | -0,292990183 | 0,162 | 0,09  | 1         | 0,8162086     | 1,225176995     | 1,8             |
| KLC1                                                                                     | 0,270659169 | -0,29313355  | 0,512 | 0,3   | 1         | 0,816127494   | 1,225298752     | 1,706666667     |
| PHLDB1                                                                                   | 0,386529241 | -0,293167908 | 0,637 | 0,37  | 1         | 0,816108058   | 1,225327933     | 1,721621622     |
| YPEL3                                                                                    | 0,987084579 | -0,293319026 | 0,325 | 0,26  | 1         | 0,816022578   | 1,225456289     | 1,25            |



Supplementary Table 4

| Differentially expressed genes_keloid-CCD_ comparing SC-Keloid vs. (SC-Myel, SC-Nonmyel) |             |              |       |       |           |               |                 |                 |
|------------------------------------------------------------------------------------------|-------------|--------------|-------|-------|-----------|---------------|-----------------|-----------------|
| gene                                                                                     | p_val       | avg_log2FC   | pct.1 | pct.2 | p_val_adj | Foldchange_UP | Foldchange_DOWN | Ratio_pct1_pct2 |
| TRIM56                                                                                   | 0,502219168 | -0,293440723 | 0,175 | 0,12  | 1         | 0,815953746   | 1,225559666     | 1,458333333     |
| GALR1                                                                                    | 0,522912207 | -0,293497585 | 0,425 | 0,38  | 1         | 0,815921586   | 1,225607971     | 1,118421053     |
| CLCF1                                                                                    | 0,41320422  | -0,293627438 | 0,062 | 0,09  | 1         | 0,815848151   | 1,225718289     | 0,688888889     |
| AVPI1                                                                                    | 0,372343608 | -0,293679865 | 0,188 | 0,12  | 1         | 0,815818504   | 1,225762832     | 1,566666667     |
| CCNG1                                                                                    | 0,982471481 | -0,293751139 | 0,238 | 0,2   | 1         | 0,815778201   | 1,22582339      | 1,19            |
| RAB11FIP1                                                                                | 0,566957555 | -0,294384972 | 0,125 | 0,14  | 1         | 0,815419876   | 1,226362062     | 0,892857143     |
| MYO1C                                                                                    | 0,985986827 | -0,294678494 | 0,5   | 0,37  | 1         | 0,815253992   | 1,226611595     | 1,351351351     |
| FER                                                                                      | 0,902627089 | -0,294712865 | 0,25  | 0,22  | 1         | 0,81523457    | 1,226640819     | 1,136363636     |
| UBE2W                                                                                    | 0,376895094 | -0,295303657 | 0,262 | 0,17  | 1         | 0,814900795   | 1,227143238     | 1,541176471     |
| PPFIBP2                                                                                  | 0,090974834 | -0,295549402 | 0,038 | 0,1   | 1         | 0,814761999   | 1,227352284     | 0,38            |
| ID3                                                                                      | 0,99654813  | -0,295633562 | 0,938 | 0,77  | 1         | 0,814714471   | 1,227423884     | 1,218181818     |
| IP6K2                                                                                    | 0,088102812 | -0,295830466 | 0,488 | 0,25  | 1         | 0,814603283   | 1,227591418     | 1,952           |
| TMEM259                                                                                  | 0,674292105 | -0,295853238 | 0,637 | 0,42  | 1         | 0,814590425   | 1,227610795     | 1,516666667     |
| MAG                                                                                      | 0,120814239 | -0,296461268 | 0     | 0,03  | 1         | 0,814247185   | 1,228128287     | 0               |
| CEBPZ                                                                                    | 0,427969852 | -0,296729015 | 0,4   | 0,26  | 1         | 0,814096085   | 1,228356233     | 1,538461538     |
| SFN                                                                                      | 0,158548126 | -0,297187952 | 0,062 | 0,12  | 1         | 0,813837153   | 1,228747049     | 0,516666667     |
| MXD4                                                                                     | 0,750948271 | -0,29758276  | 0,625 | 0,46  | 1         | 0,813614469   | 1,229083354     | 1,358695652     |
| ZNF267                                                                                   | 0,44891287  | -0,297771296 | 0,35  | 0,24  | 1         | 0,81350815    | 1,229243986     | 1,458333333     |
| KPNA4                                                                                    | 0,430839241 | -0,297778507 | 0,55  | 0,34  | 1         | 0,813504084   | 1,22925013      | 1,617647059     |
| NBEA                                                                                     | 0,026616038 | -0,297863183 | 0     | 0,06  | 1         | 0,813456338   | 1,22932228      | 0               |
| RAB3GAP1                                                                                 | 0,566776308 | -0,29848734  | 0,238 | 0,17  | 1         | 0,813104486   | 1,22985424      | 1,4             |
| TANK                                                                                     | 0,441749763 | -0,298614545 | 0,4   | 0,25  | 1         | 0,813032797   | 1,229962683     | 1,6             |
| RHEB                                                                                     | 0,137947911 | -0,298638256 | 0,825 | 0,68  | 1         | 0,813019434   | 1,229982898     | 1,213235294     |
| CKAP4                                                                                    | 0,423660524 | -0,29865314  | 0,288 | 0,19  | 1         | 0,813011047   | 1,229995588     | 1,515789474     |
| ANGPTL4                                                                                  | 0,474002304 | -0,298743402 | 0,15  | 0,1   | 1         | 0,812960182   | 1,230072544     | 1,5             |
| CCDC115                                                                                  | 0,532938243 | -0,298884314 | 0,338 | 0,23  | 1         | 0,812880782   | 1,230192695     | 1,469565217     |
| NPDC1                                                                                    | 0,348505979 | -0,299075969 | 0,338 | 0,35  | 1         | 0,812772802   | 1,230356131     | 0,965714286     |
| TENT2                                                                                    | 0,568550534 | -0,299232799 | 0,212 | 0,15  | 1         | 0,812684453   | 1,230489885     | 1,413333333     |
| HNRNPM                                                                                   | 0,590006412 | -0,299375723 | 0,838 | 0,66  | 1         | 0,812603947   | 1,230611793     | 1,26969697      |
| TANC1                                                                                    | 0,559612544 | -0,299539581 | 0,338 | 0,23  | 1         | 0,812511659   | 1,230751571     | 1,469565217     |

Supplementary Table 4

| Differentially expressed genes_keloid-CCD_ comparing SC-Keloid vs. (SC-Myel, SC-Nonmyel) |             |              |       |       |           |               |                 |                 |
|------------------------------------------------------------------------------------------|-------------|--------------|-------|-------|-----------|---------------|-----------------|-----------------|
| gene                                                                                     | p_val       | avg_log2FC   | pct.1 | pct.2 | p_val_adj | Foldchange_UP | Foldchange_DOWN | Ratio_pct1_pct2 |
| SORBS2                                                                                   | 0,702159929 | -0,299638877 | 0,5   | 0,34  | 1         | 0,812455738   | 1,230836283     | 1,470588235     |
| CHIC1                                                                                    | 0,754347587 | -0,299926618 | 0,062 | 0,07  | 1         | 0,812293712   | 1,231081794     | 0,885714286     |
| PLAT                                                                                     | 0,295117189 | -0,299965667 | 0,963 | 0,75  | 1         | 0,812271726   | 1,231115115     | 1,284           |
| NMT2                                                                                     | 0,303390351 | -0,300224978 | 0,2   | 0,12  | 1         | 0,812125741   | 1,231336417     | 1,666666667     |
| NBEAL1                                                                                   | 0,571004643 | -0,300675081 | 0,35  | 0,24  | 1         | 0,811872408   | 1,231720638     | 1,458333333     |
| ATP2B4                                                                                   | 0,505572427 | -0,300794477 | 0,412 | 0,27  | 1         | 0,811805221   | 1,231822578     | 1,525925926     |
| ANKRD10                                                                                  | 0,23561589  | -0,301056541 | 0,925 | 0,82  | 1         | 0,81165777    | 1,232046358     | 1,12804878      |
| RNF139                                                                                   | 0,577990742 | -0,301093091 | 0,238 | 0,17  | 1         | 0,811637208   | 1,232077571     | 1,4             |
| GABARAP                                                                                  | 0,149809754 | -0,301179735 | 0,462 | 0,25  | 1         | 0,811588465   | 1,232151569     | 1,848           |
| PLAC9                                                                                    | 0,427670833 | -0,301357863 | 0,688 | 0,57  | 1         | 0,811488265   | 1,232303711     | 1,207017544     |
| TVP23B                                                                                   | 0,639063024 | -0,301736885 | 0,15  | 0,11  | 1         | 0,8112751     | 1,232627501     | 1,363636364     |
| SMIM10                                                                                   | 0,9838519   | -0,301799534 | 0,175 | 0,15  | 1         | 0,811239871   | 1,23268103      | 1,166666667     |
| PIAS2                                                                                    | 0,9677544   | -0,301895244 | 0,262 | 0,22  | 1         | 0,811186055   | 1,232762809     | 1,190909091     |
| SEMA5A                                                                                   | 0,057841954 | -0,301929117 | 0,038 | 0,11  | 1         | 0,811167009   | 1,232791754     | 0,345454545     |
| NIP7                                                                                     | 0,135953058 | -0,3023105   | 0,25  | 0,13  | 1         | 0,810952602   | 1,233117691     | 1,923076923     |
| TCEAL7                                                                                   | 0,001831985 | -0,302472392 | 0,438 | 0,16  | 1         | 0,810861606   | 1,233256073     | 2,7375          |
| ACKR3                                                                                    | 0,062632651 | -0,30249717  | 0,025 | 0,09  | 1         | 0,810847679   | 1,233277255     | 0,277777778     |
| UBAP1                                                                                    | 0,492110056 | -0,3025527   | 0,25  | 0,17  | 1         | 0,81081647    | 1,233324725     | 1,470588235     |
| FAM13B                                                                                   | 0,838427261 | -0,302644152 | 0,25  | 0,22  | 1         | 0,810765074   | 1,233402907     | 1,136363636     |
| PRDM16-DT                                                                                | 0,205689194 | -0,302672877 | 0,062 | 0,11  | 1         | 0,810748932   | 1,233427466     | 0,563636364     |
| ZNF451                                                                                   | 0,636336295 | -0,302824271 | 0,412 | 0,28  | 1         | 0,810663858   | 1,233556906     | 1,471428571     |
| BCOR                                                                                     | 0,418835999 | -0,30294392  | 0,225 | 0,15  | 1         | 0,810596628   | 1,233659215     | 1,5             |
| MED13L                                                                                   | 0,960471804 | -0,303148304 | 0,438 | 0,33  | 1         | 0,810481801   | 1,233833997     | 1,327272727     |
| SLC5A3                                                                                   | 0,553675182 | -0,303562766 | 0,225 | 0,16  | 1         | 0,810248996   | 1,234188508     | 1,40625         |
| WWC2                                                                                     | 0,510139807 | -0,303973338 | 0,2   | 0,14  | 1         | 0,810018443   | 1,234539792     | 1,428571429     |
| TOX2                                                                                     | 0,864417722 | -0,304160215 | 0,175 | 0,16  | 1         | 0,809913526   | 1,234699716     | 1,09375         |
| BNIP3                                                                                    | 0,702220199 | -0,30422417  | 0,15  | 0,15  | 1         | 0,809877623   | 1,234754452     | 1               |
| FOXP4                                                                                    | 0,696832148 | -0,304370101 | 0,125 | 0,13  | 1         | 0,809795706   | 1,234879355     | 0,961538462     |
| AGO2                                                                                     | 0,183397011 | -0,304499286 | 0,425 | 0,24  | 1         | 0,809723197   | 1,234989937     | 1,770833333     |
| TMBIM6                                                                                   | 0,105797188 | -0,30483833  | 0,95  | 0,85  | 1         | 0,809532929   | 1,235280202     | 1,117647059     |

Supplementary Table 4

| Differentially expressed genes_keloid-CCD_ comparing SC-Keloid vs. (SC-Myel, SC-Nonmyel) |             |              |       |       |           |               |                 |                 |
|------------------------------------------------------------------------------------------|-------------|--------------|-------|-------|-----------|---------------|-----------------|-----------------|
| gene                                                                                     | p_val       | avg_log2FC   | pct.1 | pct.2 | p_val_adj | Foldchange_UP | Foldchange_DOWN | Ratio_pct1_pct2 |
| TAF4B                                                                                    | 0,496391762 | -0,305189811 | 0,088 | 0,11  | 1         | 0,809335728   | 1,235581188     | 0,8             |
| NUMB                                                                                     | 0,921324088 | -0,305247849 | 0,3   | 0,23  | 1         | 0,80930317    | 1,235630895     | 1,304347826     |
| NECTIN2                                                                                  | 0,532002894 | -0,305515399 | 0,6   | 0,37  | 1         | 0,809153097   | 1,235860066     | 1,621621622     |
| SAMD4B                                                                                   | 0,128158442 | -0,305633976 | 0,588 | 0,31  | 1         | 0,809086594   | 1,235961647     | 1,896774194     |
| MBOAT2                                                                                   | 0,159274096 | -0,306153545 | 0,35  | 0,2   | 1         | 0,808795264   | 1,236406844     | 1,75            |
| ESF1                                                                                     | 0,25294756  | -0,306326359 | 0,488 | 0,29  | 1         | 0,808698388   | 1,236554956     | 1,682758621     |
| HECA                                                                                     | 0,685852828 | -0,306337957 | 0,125 | 0,13  | 1         | 0,808691887   | 1,236564897     | 0,961538462     |
| SIPA1L1                                                                                  | 0,305539659 | -0,306606945 | 0,2   | 0,12  | 1         | 0,808541122   | 1,236795474     | 1,666666667     |
| TMEM245                                                                                  | 0,009345289 | -0,306702743 | 0,375 | 0,15  | 1         | 0,808487435   | 1,236877602     | 2,5             |
| SAP30BP                                                                                  | 0,592764624 | -0,306876993 | 0,6   | 0,39  | 1         | 0,808389791   | 1,237027003     | 1,538461538     |
| FAXDC2                                                                                   | 0,022780083 | -0,307036546 | 0,013 | 0,09  | 1         | 0,808300393   | 1,237163818     | 0,144444444     |
| HNRNPL                                                                                   | 0,553596531 | -0,307871749 | 0,537 | 0,34  | 1         | 0,807832588   | 1,237880243     | 1,579411765     |
| ISCU                                                                                     | 0,504203349 | -0,308090466 | 0,625 | 0,39  | 1         | 0,807710127   | 1,238067923     | 1,602564103     |
| RYR1                                                                                     | 0,003765792 | -0,308177357 | 0     | 0,1   | 1         | 0,807661482   | 1,238142492     | 0               |
| NEK1                                                                                     | 0,715399575 | -0,308611932 | 0,225 | 0,17  | 1         | 0,807418231   | 1,238515507     | 1,323529412     |
| HSPA4                                                                                    | 0,1757534   | -0,308811019 | 0,512 | 0,28  | 1         | 0,807306818   | 1,238686429     | 1,828571429     |
| TSC1                                                                                     | 0,354581591 | -0,309145194 | 0,088 | 0,12  | 1         | 0,807119841   | 1,238973383     | 0,733333333     |
| FIP1L1                                                                                   | 0,282265224 | -0,30914988  | 0,338 | 0,2   | 1         | 0,80711722    | 1,238977407     | 1,69            |
| SEPHS2                                                                                   | 0,278301215 | -0,309219231 | 0,312 | 0,19  | 1         | 0,807078422   | 1,239036967     | 1,642105263     |
| PRDM16                                                                                   | 0,009998483 | -0,309301463 | 0     | 0,08  | 1         | 0,807032421   | 1,239107593     | 0               |
| TRIM2                                                                                    | 0,556890841 | -0,309441122 | 0,212 | 0,15  | 1         | 0,8069543     | 1,239227549     | 1,413333333     |
| CNOT6L                                                                                   | 0,409452825 | -0,309859408 | 0,275 | 0,18  | 1         | 0,806720371   | 1,239586895     | 1,527777778     |
| SAFB                                                                                     | 0,697766651 | -0,309865427 | 0,325 | 0,24  | 1         | 0,806717005   | 1,239592067     | 1,354166667     |
| GALNT17                                                                                  | 0,311723274 | -0,30989921  | 0,312 | 0,19  | 1         | 0,806698115   | 1,239621094     | 1,642105263     |
| BAIAP2                                                                                   | 0,364784663 | -0,310276945 | 0,338 | 0,21  | 1         | 0,806486928   | 1,239945702     | 1,60952381      |
| PCMT1                                                                                    | 0,592831457 | -0,310411171 | 0,85  | 0,6   | 1         | 0,806411898   | 1,240061069     | 1,416666667     |
| DAZAP2                                                                                   | 0,984149424 | -0,310607993 | 0,625 | 0,43  | 1         | 0,806301889   | 1,240230259     | 1,453488372     |
| TIMP3                                                                                    | 0,020084993 | -0,310705725 | 0,938 | 0,85  | 1         | 0,80624727    | 1,240314278     | 1,103529412     |
| TM2D1                                                                                    | 0,619535195 | -0,311139586 | 0,375 | 0,26  | 1         | 0,806004844   | 1,240687333     | 1,442307692     |
| OLFML2A                                                                                  | 0,782990134 | -0,311352145 | 0,775 | 0,54  | 1         | 0,8058861     | 1,240870142     | 1,435185185     |

Supplementary Table 4

| Differentially expressed genes_keloid-CCD_ comparing SC-Keloid vs. (SC-Myel, SC-Nonmyel) |             |              |       |       |           |               |                 |                 |
|------------------------------------------------------------------------------------------|-------------|--------------|-------|-------|-----------|---------------|-----------------|-----------------|
| gene                                                                                     | p_val       | avg_log2FC   | pct.1 | pct.2 | p_val_adj | Foldchange_UP | Foldchange_DOWN | Ratio_pct1_pct2 |
| MRPS24                                                                                   | 0,173614722 | -0,311870876 | 0,05  | 0,1   | 1         | 0,80559639    | 1,241316387     | 0,5             |
| SEC14L1                                                                                  | 0,656344044 | -0,312139128 | 0,35  | 0,25  | 1         | 0,805446613   | 1,241547216     | 1,4             |
| POLR3E                                                                                   | 0,666322177 | -0,312580224 | 0,112 | 0,12  | 1         | 0,80520039    | 1,24192687      | 0,933333333     |
| PPP2R3A                                                                                  | 0,540401985 | -0,312622011 | 0,325 | 0,22  | 1         | 0,805177068   | 1,241962843     | 1,477272727     |
| ZCCHC10                                                                                  | 0,365862855 | -0,312632671 | 0,425 | 0,26  | 1         | 0,805171119   | 1,241972019     | 1,634615385     |
| CHPT1                                                                                    | 0,693420458 | -0,312840067 | 0,275 | 0,2   | 1         | 0,805055379   | 1,242150573     | 1,375           |
| TFE3                                                                                     | 0,879828793 | -0,313053992 | 0,188 | 0,17  | 1         | 0,804936013   | 1,242334775     | 1,105882353     |
| PTPRZ1                                                                                   | 0,372727831 | -0,313069334 | 0,863 | 0,62  | 1         | 0,804927453   | 1,242347986     | 1,391935484     |
| RPS6KA3                                                                                  | 0,336645171 | -0,313076975 | 0,35  | 0,22  | 1         | 0,80492319    | 1,242354565     | 1,590909091     |
| YIPF6                                                                                    | 0,880021785 | -0,313160162 | 0,35  | 0,26  | 1         | 0,804876779   | 1,242426203     | 1,346153846     |
| PLA2G4C                                                                                  | 0,089754822 | -0,313209325 | 0,038 | 0,1   | 1         | 0,804849351   | 1,242468542     | 0,38            |
| FOXO3                                                                                    | 0,762481269 | -0,313623727 | 0,25  | 0,23  | 1         | 0,804618198   | 1,242825482     | 1,086956522     |
| VGLL4                                                                                    | 0,348468767 | -0,313908027 | 0,812 | 0,62  | 1         | 0,804459654   | 1,24307042      | 1,309677419     |
| CDKN2C                                                                                   | 0,561945637 | -0,314197969 | 0,438 | 0,31  | 1         | 0,804297996   | 1,243320267     | 1,412903226     |
| HIBCH                                                                                    | 0,714825442 | -0,31422794  | 0,2   | 0,15  | 1         | 0,804281288   | 1,243346097     | 1,333333333     |
| CMTM6                                                                                    | 0,533947303 | -0,314592916 | 0,662 | 0,4   | 1         | 0,804077844   | 1,243660682     | 1,655           |
| CCNI                                                                                     | 0,158156488 | -0,31470015  | 0,963 | 0,85  | 1         | 0,80401808    | 1,243753125     | 1,132941176     |
| MINDY2                                                                                   | 0,608555968 | -0,314837845 | 0,462 | 0,31  | 1         | 0,803941347   | 1,243871838     | 1,490322581     |
| GNAQ                                                                                     | 0,943108238 | -0,315411136 | 0,288 | 0,23  | 1         | 0,803621944   | 1,244366219     | 1,252173913     |
| PLBD1                                                                                    | 0,205689194 | -0,315577378 | 0,062 | 0,11  | 1         | 0,803529348   | 1,244509616     | 0,563636364     |
| ZNF711                                                                                   | 0,673847896 | -0,315623219 | 0,112 | 0,12  | 1         | 0,803503816   | 1,244549161     | 0,933333333     |
| ZNF516                                                                                   | 0,057841954 | -0,315785859 | 0,038 | 0,11  | 1         | 0,80341324    | 1,244689471     | 0,345454545     |
| CREB1                                                                                    | 0,261916005 | -0,316357035 | 0,35  | 0,21  | 1         | 0,803095224   | 1,245182352     | 1,666666667     |
| UBE3A                                                                                    | 0,866182617 | -0,316698992 | 0,438 | 0,33  | 1         | 0,802904892   | 1,245477528     | 1,327272727     |
| ST13                                                                                     | 0,312865228 | -0,316927393 | 0,875 | 0,69  | 1         | 0,802777789   | 1,245674723     | 1,268115942     |
| SYAP1                                                                                    | 0,201132084 | -0,316961998 | 0,425 | 0,24  | 1         | 0,802758534   | 1,245704602     | 1,770833333     |
| MT-CYB                                                                                   | 0,002677242 | -0,317083117 | 1     | 0,99  | 1         | 0,802691142   | 1,245809187     | 1,01010101      |
| RASSF1                                                                                   | 0,832187953 | -0,317142617 | 0,512 | 0,39  | 1         | 0,802658039   | 1,245860568     | 1,312820513     |
| SLC16A1                                                                                  | 0,681987017 | -0,317167953 | 0,275 | 0,2   | 1         | 0,802643943   | 1,245882448     | 1,375           |
| RALGAPA1                                                                                 | 0,664973596 | -0,317178385 | 0,275 | 0,2   | 1         | 0,802638139   | 1,245891457     | 1,375           |

Supplementary Table 4

| Differentially expressed genes_keloid-CCD_ comparing SC-Keloid vs. (SC-Myel, SC-Nonmyel) |             |              |       |       |           |               |                 |                 |
|------------------------------------------------------------------------------------------|-------------|--------------|-------|-------|-----------|---------------|-----------------|-----------------|
| gene                                                                                     | p_val       | avg_log2FC   | pct.1 | pct.2 | p_val_adj | Foldchange_UP | Foldchange_DOWN | Ratio_pct1_pct2 |
| RBM27                                                                                    | 0,631620652 | -0,317235354 | 0,088 | 0,1   | 1         | 0,802606445   | 1,245940655     | 0,88            |
| FBXO30                                                                                   | 0,860752852 | -0,317241177 | 0,138 | 0,13  | 1         | 0,802603205   | 1,245945684     | 1,061538462     |
| GJC3                                                                                     | 0,423434047 | -0,318265804 | 0,013 | 0,03  | 1         | 0,802033385   | 1,246830891     | 0,433333333     |
| GNAI1                                                                                    | 0,137632016 | -0,318416564 | 0,038 | 0,09  | 1         | 0,801949578   | 1,24696119      | 0,422222222     |
| PKN2                                                                                     | 0,598357326 | -0,318639436 | 0,4   | 0,28  | 1         | 0,8018257     | 1,24715384      | 1,428571429     |
| ATG2A                                                                                    | 0,982181708 | -0,318792996 | 0,138 | 0,12  | 1         | 0,801740358   | 1,247286593     | 1,15            |
| ARC                                                                                      | 0,18471922  | -0,318804415 | 0,412 | 0,23  | 1         | 0,801734012   | 1,247296466     | 1,791304348     |
| PATL1                                                                                    | 0,429901086 | -0,318936731 | 0,2   | 0,13  | 1         | 0,801660485   | 1,247410866     | 1,538461538     |
| RAB38                                                                                    | 0,828370675 | -0,318955307 | 0,175 | 0,14  | 1         | 0,801650163   | 1,247426928     | 1,25            |
| CEP97                                                                                    | 0,788589009 | -0,319039796 | 0,35  | 0,26  | 1         | 0,801603217   | 1,247499983     | 1,346153846     |
| TMEM123                                                                                  | 0,426659238 | -0,319204631 | 0,5   | 0,32  | 1         | 0,801511636   | 1,247642524     | 1,5625          |
| PLEKHO2                                                                                  | 0,534231312 | -0,319206869 | 0,138 | 0,15  | 1         | 0,801510392   | 1,247644459     | 0,92            |
| EIF5B                                                                                    | 0,487108096 | -0,319807747 | 0,725 | 0,47  | 1         | 0,801176635   | 1,248164208     | 1,542553191     |
| DCAF6                                                                                    | 0,642260686 | -0,320393105 | 0,325 | 0,23  | 1         | 0,800851632   | 1,24867074      | 1,413043478     |
| FUBP3                                                                                    | 0,754259903 | -0,320700596 | 0,288 | 0,21  | 1         | 0,80068096    | 1,248936905     | 1,371428571     |
| RCOR3                                                                                    | 0,2014323   | -0,320712248 | 0,262 | 0,15  | 1         | 0,800674493   | 1,248946992     | 1,746666667     |
| TENT4B                                                                                   | 0,318002754 | -0,320982379 | 0,438 | 0,26  | 1         | 0,800524588   | 1,249180868     | 1,684615385     |
| NTM                                                                                      | 0,310944438 | -0,321154189 | 0,975 | 0,77  | 1         | 0,80042926    | 1,249329641     | 1,266233766     |
| HIVEP2                                                                                   | 0,22129208  | -0,321620242 | 0,4   | 0,23  | 1         | 0,800170728   | 1,249733295     | 1,739130435     |
| TAMALIN                                                                                  | 0,838765176 | -0,321760766 | 0,5   | 0,36  | 1         | 0,800092792   | 1,249855029     | 1,388888889     |
| EZH1                                                                                     | 0,060340572 | -0,321762354 | 0,038 | 0,11  | 1         | 0,800091912   | 1,249856404     | 0,345454545     |
| KCTD1                                                                                    | 0,374565595 | -0,321820324 | 0,088 | 0,12  | 1         | 0,800059763   | 1,249906627     | 0,733333333     |
| GBE1                                                                                     | 0,71851291  | -0,321974431 | 0,225 | 0,17  | 1         | 0,799974306   | 1,250040148     | 1,323529412     |
| ING2                                                                                     | 0,603275353 | -0,322361022 | 0,412 | 0,29  | 1         | 0,79975997    | 1,250375159     | 1,420689655     |
| HIPK2                                                                                    | 0,81386775  | -0,323118428 | 0,162 | 0,13  | 1         | 0,799340211   | 1,251031771     | 1,246153846     |
| UBR5                                                                                     | 0,728071435 | -0,323369801 | 0,362 | 0,26  | 1         | 0,799200948   | 1,251249767     | 1,392307692     |
| ZMIZ1                                                                                    | 0,785322539 | -0,323622049 | 0,262 | 0,2   | 1         | 0,799061223   | 1,251468562     | 1,31            |
| TAB2                                                                                     | 0,166716093 | -0,32383253  | 0,512 | 0,29  | 1         | 0,798944654   | 1,251651157     | 1,765517241     |
| FERMT2                                                                                   | 0,566447222 | -0,324142968 | 0,812 | 0,65  | 1         | 0,798772756   | 1,251920515     | 1,249230769     |
| UBE2H                                                                                    | 0,814426674 | -0,324409809 | 0,775 | 0,52  | 1         | 0,798625028   | 1,252152092     | 1,490384615     |

Supplementary Table 4

| Differentially expressed genes_keloid-CCD_ comparing SC-Keloid vs. (SC-Myel, SC-Nonmyel) |             |              |       |       |           |               |                 |                 |
|------------------------------------------------------------------------------------------|-------------|--------------|-------|-------|-----------|---------------|-----------------|-----------------|
| gene                                                                                     | p_val       | avg_log2FC   | pct.1 | pct.2 | p_val_adj | Foldchange_UP | Foldchange_DOWN | Ratio_pct1_pct2 |
| FAM222A                                                                                  | 0,133321936 | -0,324440198 | 0,075 | 0,14  | 1         | 0,798608206   | 1,252178467     | 0,535714286     |
| NXT1                                                                                     | 0,807600587 | -0,32482328  | 0,537 | 0,37  | 1         | 0,798396178   | 1,252511006     | 1,451351351     |
| NOP53                                                                                    | 0,382876484 | -0,324890708 | 0,838 | 0,59  | 1         | 0,798358864   | 1,252569546     | 1,420338983     |
| AFAP1L2                                                                                  | 0,666724499 | -0,325279193 | 0,613 | 0,46  | 1         | 0,798143913   | 1,25290688      | 1,332608696     |
| ELP2                                                                                     | 0,523409171 | -0,325455383 | 0,325 | 0,22  | 1         | 0,798046445   | 1,253059902     | 1,477272727     |
| TSPAN3                                                                                   | 0,449730451 | -0,325571892 | 0,6   | 0,37  | 1         | 0,797981999   | 1,2531611       | 1,621621622     |
| SPON2                                                                                    | 0,137632016 | -0,325666606 | 0,038 | 0,09  | 1         | 0,797929613   | 1,253243374     | 0,422222222     |
| PPP1CC                                                                                   | 0,722918206 | -0,325712527 | 0,662 | 0,42  | 1         | 0,797904215   | 1,253283265     | 1,576190476     |
| MSL1                                                                                     | 0,301601464 | -0,32574832  | 0,5   | 0,31  | 1         | 0,79788442    | 1,253314359     | 1,612903226     |
| RBP1                                                                                     | 0,028946756 | -0,325945266 | 0,025 | 0,11  | 1         | 0,797775506   | 1,253485464     | 0,227272727     |
| IER5L                                                                                    | 0,226559124 | -0,325989509 | 0,65  | 0,42  | 1         | 0,797751041   | 1,253523905     | 1,547619048     |
| UBXN2A                                                                                   | 0,717992286 | -0,326066119 | 0,488 | 0,34  | 1         | 0,79770868    | 1,253590472     | 1,435294118     |
| ADGRL3                                                                                   | 0,062632651 | -0,326122545 | 0,025 | 0,09  | 1         | 0,797677481   | 1,253639503     | 0,277777778     |
| CIC                                                                                      | 0,431871372 | -0,326305761 | 0,388 | 0,25  | 1         | 0,797576186   | 1,253798719     | 1,552           |
| RNMT                                                                                     | 0,472187573 | -0,326415108 | 0,475 | 0,31  | 1         | 0,797515737   | 1,253893752     | 1,532258065     |
| BCLAF1                                                                                   | 0,529908044 | -0,326483927 | 0,738 | 0,54  | 1         | 0,797477695   | 1,253953567     | 1,366666667     |
| PALLD                                                                                    | 0,742518455 | -0,326794162 | 0,738 | 0,53  | 1         | 0,797306225   | 1,254223244     | 1,39245283      |
| PANX1                                                                                    | 0,994616967 | -0,326870566 | 0,175 | 0,15  | 1         | 0,797264001   | 1,254289669     | 1,166666667     |
| SENP5                                                                                    | 0,953542528 | -0,327188057 | 0,262 | 0,21  | 1         | 0,797088568   | 1,254565728     | 1,247619048     |
| TFIP11                                                                                   | 0,857626058 | -0,327278893 | 0,112 | 0,11  | 1         | 0,797038383   | 1,254644722     | 1,018181818     |
| LRRC58                                                                                   | 0,237348089 | -0,32729251  | 0,425 | 0,25  | 1         | 0,79703086    | 1,254656564     | 1,7             |
| MID1IP1                                                                                  | 0,578602644 | -0,327579156 | 0,475 | 0,32  | 1         | 0,796872515   | 1,254905873     | 1,484375        |
| CDC42EP5                                                                                 | 0,427771783 | -0,327641155 | 0,725 | 0,59  | 1         | 0,796838271   | 1,254959803     | 1,228813559     |
| CLDN19                                                                                   | 0,259519439 | -0,327896127 | 0,013 | 0,04  | 1         | 0,796697456   | 1,255181616     | 0,325           |
| KTN1                                                                                     | 0,447105853 | -0,32794134  | 0,85  | 0,58  | 1         | 0,796672488   | 1,255220953     | 1,465517241     |
| RABGAP1L                                                                                 | 0,621892414 | -0,327992179 | 0,138 | 0,1   | 1         | 0,796644415   | 1,255265186     | 1,38            |
| KDM6A                                                                                    | 0,479052381 | -0,328119151 | 0,088 | 0,11  | 1         | 0,796574305   | 1,255375667     | 0,8             |
| TRABD2B                                                                                  | 0,479052381 | -0,328314744 | 0,088 | 0,11  | 1         | 0,796466317   | 1,255545876     | 0,8             |
| PHLPP2                                                                                   | 0,482493585 | -0,328348399 | 0,088 | 0,11  | 1         | 0,796447737   | 1,255575166     | 0,8             |
| EFNA1                                                                                    | 0,992322814 | -0,328622849 | 0,075 | 0,07  | 1         | 0,796296241   | 1,255814041     | 1,071428571     |

Supplementary Table 4

| Differentially expressed genes_keloid-CCD_ comparing SC-Keloid vs. (SC-Myel, SC-Nonmyel) |             |              |       |       |           |               |                 |                 |
|------------------------------------------------------------------------------------------|-------------|--------------|-------|-------|-----------|---------------|-----------------|-----------------|
| gene                                                                                     | p_val       | avg_log2FC   | pct.1 | pct.2 | p_val_adj | Foldchange_UP | Foldchange_DOWN | Ratio_pct1_pct2 |
| SLC6A8                                                                                   | 0,698561998 | -0,328654835 | 0,175 | 0,17  | 1         | 0,796278586   | 1,255841884     | 1,029411765     |
| LYST                                                                                     | 0,898675406 | -0,32889215  | 0,35  | 0,29  | 1         | 0,796147613   | 1,25604848      | 1,206896552     |
| DLX2                                                                                     | 0,602438582 | -0,329781277 | 0,125 | 0,09  | 1         | 0,795657102   | 1,256822817     | 1,388888889     |
| ARIH2                                                                                    | 0,656345258 | -0,329971335 | 0,45  | 0,3   | 1         | 0,79555229    | 1,256988399     | 1,5             |
| ELOC                                                                                     | 0,552880034 | -0,330093779 | 0,85  | 0,59  | 1         | 0,795484773   | 1,257095087     | 1,440677966     |
| AK5                                                                                      | 0,00613773  | -0,330211071 | 0     | 0,09  | 1         | 0,795420103   | 1,257197293     | 0               |
| FBXW7                                                                                    | 0,649386162 | -0,330761528 | 0,425 | 0,29  | 1         | 0,79511667    | 1,257677065     | 1,465517241     |
| MT-ND4L                                                                                  | 0,849050558 | -0,330910466 | 0,838 | 0,55  | 1         | 0,795034589   | 1,25780691      | 1,523636364     |
| KDM3A                                                                                    | 0,65372576  | -0,331207452 | 0,275 | 0,2   | 1         | 0,794870945   | 1,258065862     | 1,375           |
| OXR1                                                                                     | 0,222079933 | -0,331403761 | 0,325 | 0,19  | 1         | 0,794762793   | 1,25823706      | 1,710526316     |
| KANK2                                                                                    | 0,51553591  | -0,33173281  | 0,488 | 0,33  | 1         | 0,794581544   | 1,258524071     | 1,478787879     |
| ST6GALNAC3                                                                               | 0,173614722 | -0,331764033 | 0,05  | 0,1   | 1         | 0,794564348   | 1,258551308     | 0,5             |
| LMBRD1                                                                                   | 0,493523947 | -0,33178006  | 0,45  | 0,29  | 1         | 0,794555522   | 1,258565289     | 1,551724138     |
| ARNTL                                                                                    | 0,705807067 | -0,331912587 | 0,225 | 0,21  | 1         | 0,794482537   | 1,258680907     | 1,071428571     |
| ATP6V1G1                                                                                 | 0,119389694 | -0,332565847 | 0,887 | 0,69  | 1         | 0,794122872   | 1,259250974     | 1,285507246     |
| VPS37B                                                                                   | 0,352308712 | -0,332829565 | 0,388 | 0,24  | 1         | 0,793977723   | 1,25948118      | 1,616666667     |
| WNT2B                                                                                    | 0,303003786 | -0,332876978 | 0,062 | 0,1   | 1         | 0,79395163    | 1,259522573     | 0,62            |
| COL20A1                                                                                  | 0,634726592 | -0,332960291 | 0,15  | 0,12  | 1         | 0,793905782   | 1,25959531      | 1,25            |
| ARHGAP19                                                                                 | 0,119106912 | -0,33300969  | 0,05  | 0,11  | 1         | 0,793878599   | 1,25963844      | 0,454545455     |
| KAT6A                                                                                    | 0,940155226 | -0,333244314 | 0,262 | 0,22  | 1         | 0,793749501   | 1,259843311     | 1,190909091     |
| HIVEP1                                                                                   | 0,572674783 | -0,333458365 | 0,325 | 0,22  | 1         | 0,793631743   | 1,260030246     | 1,477272727     |
| UBQLN2                                                                                   | 0,422058966 | -0,333467071 | 0,2   | 0,13  | 1         | 0,793626953   | 1,26003785      | 1,538461538     |
| PPP2CB                                                                                   | 0,743122499 | -0,333856427 | 0,812 | 0,49  | 1         | 0,793412798   | 1,260377956     | 1,657142857     |
| CHML                                                                                     | 0,562732711 | -0,333858625 | 0,2   | 0,14  | 1         | 0,793411589   | 1,260379876     | 1,428571429     |
| CNOT1                                                                                    | 0,248965249 | -0,333907597 | 0,325 | 0,19  | 1         | 0,793384657   | 1,26042266      | 1,710526316     |
| RDX                                                                                      | 0,971240574 | -0,334240406 | 0,95  | 0,76  | 1         | 0,793201656   | 1,260713455     | 1,25            |
| CPNE3                                                                                    | 0,550790027 | -0,335177929 | 0,425 | 0,29  | 1         | 0,792686368   | 1,261532985     | 1,465517241     |
| CCDC12                                                                                   | 0,465453357 | -0,335552451 | 0,5   | 0,32  | 1         | 0,792480614   | 1,26186052      | 1,5625          |
| MT1X                                                                                     | 0,002415434 | -0,335611116 | 0,588 | 0,24  | 1         | 0,79244839    | 1,261911833     | 2,45            |
| PPP1R18                                                                                  | 0,85391269  | -0,335636794 | 0,625 | 0,45  | 1         | 0,792434285   | 1,261934294     | 1,388888889     |

Supplementary Table 4

| Differentially expressed genes_keloid-CCD_comparing SC-Keloid vs. (SC-Myel, SC-Nonmyel) |             |              |       |       |           |               |                 |                 |
|-----------------------------------------------------------------------------------------|-------------|--------------|-------|-------|-----------|---------------|-----------------|-----------------|
| gene                                                                                    | p_val       | avg_log2FC   | pct.1 | pct.2 | p_val_adj | Foldchange_UP | Foldchange_DOWN | Ratio_pct1_pct2 |
| FEM1C                                                                                   | 0,949776693 | -0,336044842 | 0,275 | 0,22  | 1         | 0,792210187   | 1,262291266     | 1,25            |
| RASAL2                                                                                  | 0,525819825 | -0,336421142 | 0,325 | 0,22  | 1         | 0,792003581   | 1,262620554     | 1,477272727     |
| RCOR1                                                                                   | 0,869416171 | -0,336992876 | 0,212 | 0,17  | 1         | 0,791689775   | 1,263121025     | 1,247058824     |
| TBL1XR1                                                                                 | 0,993586051 | -0,337073303 | 0,488 | 0,36  | 1         | 0,791645641   | 1,263191443     | 1,355555556     |
| SOCS2                                                                                   | 0,115326996 | -0,337557026 | 0,725 | 0,39  | 1         | 0,791380254   | 1,263615051     | 1,858974359     |
| RGS2                                                                                    | 0,423179546 | -0,338774143 | 0,2   | 0,22  | 1         | 0,790712894   | 1,264681539     | 0,909090909     |
| PPP1R2                                                                                  | 0,598899862 | -0,33968313  | 0,613 | 0,4   | 1         | 0,790214854   | 1,265478617     | 1,5325          |
| EWSR1                                                                                   | 0,86088673  | -0,34039556  | 0,5   | 0,35  | 1         | 0,789824727   | 1,266103689     | 1,428571429     |
| GULP1                                                                                   | 0,342579045 | -0,340652047 | 0,75  | 0,47  | 1         | 0,789684322   | 1,2663288       | 1,595744681     |
| PPP2R2B                                                                                 | 0,003765792 | -0,340717091 | 0     | 0,1   | 1         | 0,78964872    | 1,266385894     | 0               |
| KIDINS220                                                                               | 0,727699176 | -0,341380689 | 0,488 | 0,34  | 1         | 0,789285587   | 1,266968529     | 1,435294118     |
| H1-10                                                                                   | 0,40206258  | -0,34155653  | 0,7   | 0,43  | 1         | 0,789189393   | 1,267122961     | 1,627906977     |
| HNRNPA2B1                                                                               | 0,02201719  | -0,341663471 | 1     | 0,96  | 1         | 0,789130896   | 1,267216891     | 1,041666667     |
| PPIG                                                                                    | 0,381640155 | -0,341897374 | 0,762 | 0,55  | 1         | 0,789002965   | 1,267422361     | 1,385454545     |
| GTF2I                                                                                   | 0,220818349 | -0,342576405 | 0,775 | 0,61  | 1         | 0,788631693   | 1,268019037     | 1,270491803     |
| ABCD3                                                                                   | 0,084977171 | -0,344317071 | 0,412 | 0,21  | 1         | 0,787680753   | 1,269549873     | 1,961904762     |
| ZNF654                                                                                  | 0,853102583 | -0,344499434 | 0,138 | 0,13  | 1         | 0,787581193   | 1,26971036      | 1,061538462     |
| PKIB                                                                                    | 0,039345205 | -0,34453873  | 0,025 | 0,1   | 1         | 0,787559741   | 1,269744945     | 0,25            |
| EIF4B                                                                                   | 0,868526695 | -0,344743265 | 0,525 | 0,39  | 1         | 0,787448094   | 1,269924973     | 1,346153846     |
| GDNF                                                                                    | 0,01629666  | -0,3451187   | 0     | 0,07  | 1         | 0,787243202   | 1,27025549      | 0               |
| ZNF649                                                                                  | 0,254864966 | -0,345257356 | 0,05  | 0,09  | 1         | 0,787167545   | 1,27037758      | 0,555555556     |
| ZNF394                                                                                  | 0,395696839 | -0,345658189 | 0,15  | 0,18  | 1         | 0,786948872   | 1,270730585     | 0,833333333     |
| RSF1                                                                                    | 0,311335541 | -0,346235892 | 0,725 | 0,55  | 1         | 0,786633814   | 1,27123953      | 1,318181818     |
| EFNB2                                                                                   | 0,58861907  | -0,346600883 | 0,15  | 0,16  | 1         | 0,786434827   | 1,271561185     | 0,9375          |
| RC3H1                                                                                   | 0,558844311 | -0,347100551 | 0,35  | 0,24  | 1         | 0,786162497   | 1,272001658     | 1,458333333     |
| MAP3K11                                                                                 | 0,081605313 | -0,347109967 | 0,438 | 0,23  | 1         | 0,786157366   | 1,27200996      | 1,904347826     |
| B4GALNT1                                                                                | 0,120536116 | -0,347270226 | 0,05  | 0,11  | 1         | 0,786070042   | 1,272151266     | 0,454545455     |
| SRSF4                                                                                   | 0,76465831  | -0,347387433 | 0,713 | 0,44  | 1         | 0,786006183   | 1,272254623     | 1,620454545     |
| PTAR1                                                                                   | 0,565052003 | -0,347566493 | 0,362 | 0,25  | 1         | 0,785908634   | 1,272412538     | 1,448           |
| RABGAP1                                                                                 | 0,79051385  | -0,347711589 | 0,25  | 0,19  | 1         | 0,785829597   | 1,272540515     | 1,315789474     |



Supplementary Table 4

| Differentially expressed genes_keloid-CCD_ comparing SC-Keloid vs. (SC-Myel, SC-Nonmyel) |             |              |       |       |             |               |                 |                 |
|------------------------------------------------------------------------------------------|-------------|--------------|-------|-------|-------------|---------------|-----------------|-----------------|
| gene                                                                                     | p_val       | avg_log2FC   | pct.1 | pct.2 | p_val_adj   | Foldchange_UP | Foldchange_DOWN | Ratio_pct1_pct2 |
| KRT14                                                                                    | 0,538754027 | -0,347777751 | 0,1   | 0,12  | 1           | 0,78579356    | 1,272598875     | 0,833333333     |
| H1-0                                                                                     | 0,14782312  | -0,347901617 | 0,4   | 0,22  | 1           | 0,785726097   | 1,272708141     | 1,818181818     |
| BAG1                                                                                     | 0,417449003 | -0,34814509  | 0,662 | 0,48  | 1           | 0,785593506   | 1,272922945     | 1,379166667     |
| MEX3C                                                                                    | 0,590316067 | -0,348267673 | 0,425 | 0,28  | 1           | 0,785526759   | 1,273031107     | 1,517857143     |
| KLHL36                                                                                   | 0,67744427  | -0,348279231 | 0,188 | 0,18  | 1           | 0,785520466   | 1,273041306     | 1,044444444     |
| RNF169                                                                                   | 0,547407877 | -0,348786819 | 0,288 | 0,27  | 1           | 0,785244142   | 1,273489284     | 1,066666667     |
| KLHL5                                                                                    | 0,798093809 | -0,348910939 | 0,15  | 0,12  | 1           | 0,785176588   | 1,273598851     | 1,25            |
| MEG3                                                                                     | 0,176671128 | -0,348929109 | 0,8   | 0,48  | 1           | 0,785166699   | 1,273614891     | 1,666666667     |
| EHBP1                                                                                    | 0,275921821 | -0,348940127 | 0,575 | 0,34  | 1           | 0,785160703   | 1,273624618     | 1,691176471     |
| KCTD3                                                                                    | 0,989339843 | -0,349217674 | 0,275 | 0,22  | 1           | 0,785009667   | 1,273869663     | 1,25            |
| CEP85L                                                                                   | 0,182257235 | -0,349467829 | 0,425 | 0,24  | 1           | 0,784873563   | 1,274090563     | 1,770833333     |
| DHX15                                                                                    | 0,6547013   | -0,349483049 | 0,338 | 0,24  | 1           | 0,784865283   | 1,274104004     | 1,408333333     |
| PHF23                                                                                    | 0,452389852 | -0,349686366 | 0,35  | 0,23  | 1           | 0,784754681   | 1,274283575     | 1,52173913      |
| RBPJ                                                                                     | 0,839070916 | -0,349811674 | 0,575 | 0,41  | 1           | 0,784686522   | 1,27439426      | 1,402439024     |
| PLCE1                                                                                    | 0,59520323  | -0,349993507 | 0,212 | 0,15  | 1           | 0,784587629   | 1,274554891     | 1,413333333     |
| TFG                                                                                      | 0,989216167 | -0,35034274  | 0,7   | 0,46  | 1           | 0,784397727   | 1,27486346      | 1,52173913      |
| TOB2                                                                                     | 0,898341315 | -0,350391759 | 0,438 | 0,32  | 1           | 0,784371076   | 1,274906777     | 1,36875         |
| CDK13                                                                                    | 0,527637455 | -0,350572952 | 0,45  | 0,3   | 1           | 0,78427257    | 1,275066907     | 1,5             |
| HMGB2                                                                                    | 0,411603664 | -0,350646142 | 0,412 | 0,4   | 1           | 0,784232784   | 1,275131594     | 1,03            |
| TARS3                                                                                    | 0,759780304 | -0,350718322 | 0,338 | 0,25  | 1           | 0,784193548   | 1,275195393     | 1,352           |
| EEF1A1                                                                                   | 4,01596E-05 | -0,350738835 | 1     | 1     | 0,847407879 | 0,784182399   | 1,275213524     | 1               |
| SPOP                                                                                     | 0,47038166  | -0,351031531 | 0,375 | 0,25  | 1           | 0,784023318   | 1,275472268     | 1,5             |
| ATP1B3                                                                                   | 0,733561097 | -0,351116059 | 0,6   | 0,38  | 1           | 0,783977384   | 1,275547        | 1,578947368     |
| FDX1                                                                                     | 0,187213582 | -0,351193273 | 0,7   | 0,37  | 1           | 0,783935426   | 1,27561527      | 1,891891892     |
| SPTAN1                                                                                   | 0,381536327 | -0,351374332 | 0,7   | 0,53  | 1           | 0,783837048   | 1,275775371     | 1,320754717     |
| MKLN1                                                                                    | 0,564872344 | -0,351532143 | 0,225 | 0,22  | 1           | 0,783751312   | 1,27591493      | 1,022727273     |
| SCD5                                                                                     | 0,022780083 | -0,351634914 | 0,013 | 0,09  | 1           | 0,783695482   | 1,276005825     | 0,144444444     |
| DYNC1H1                                                                                  | 0,898039238 | -0,352051521 | 0,8   | 0,52  | 1           | 0,783469207   | 1,276374349     | 1,538461538     |
| RNF114                                                                                   | 0,581031176 | -0,352091753 | 0,55  | 0,36  | 1           | 0,783447359   | 1,276409944     | 1,527777778     |
| SLBP                                                                                     | 0,445996129 | -0,352307982 | 0,5   | 0,31  | 1           | 0,783329946   | 1,276601265     | 1,612903226     |

Supplementary Table 4

| Differentially expressed genes_keloid-CCD_ comparing SC-Keloid vs. (SC-Myel, SC-Nonmyel) |             |              |       |       |           |               |                 |                 |
|------------------------------------------------------------------------------------------|-------------|--------------|-------|-------|-----------|---------------|-----------------|-----------------|
| gene                                                                                     | p_val       | avg_log2FC   | pct.1 | pct.2 | p_val_adj | Foldchange_UP | Foldchange_DOWN | Ratio_pct1_pct2 |
| CLTB                                                                                     | 0,513062369 | -0,352483297 | 0,7   | 0,51  | 1         | 0,783234763   | 1,276756405     | 1,37254902      |
| RAP2B                                                                                    | 0,631708508 | -0,35251285  | 0,288 | 0,2   | 1         | 0,783218718   | 1,27678256      | 1,44            |
| ATP13A3                                                                                  | 0,733447585 | -0,352537868 | 0,462 | 0,32  | 1         | 0,783205137   | 1,276804701     | 1,44375         |
| RFTN2                                                                                    | 0,469607029 | -0,352776504 | 0,175 | 0,19  | 1         | 0,783075597   | 1,277015914     | 0,921052632     |
| LNPEP                                                                                    | 0,807146957 | -0,353572156 | 0,225 | 0,2   | 1         | 0,782643847   | 1,277720388     | 1,125           |
| NDFIP1                                                                                   | 0,797284893 | -0,353708093 | 0,738 | 0,55  | 1         | 0,782570106   | 1,277840786     | 1,341818182     |
| PEG3                                                                                     | 0,452756248 | -0,353899759 | 0,038 | 0,06  | 1         | 0,782466147   | 1,278010562     | 0,633333333     |
| DOK5                                                                                     | 0,237748085 | -0,35410094  | 0,075 | 0,12  | 1         | 0,782357041   | 1,27818879      | 0,625           |
| LPL                                                                                      | 0,003765792 | -0,354115515 | 0     | 0,1   | 1         | 0,782349137   | 1,278201703     | 0               |
| ARID1A                                                                                   | 0,295411248 | -0,354300584 | 0,462 | 0,28  | 1         | 0,782248784   | 1,278365681     | 1,65            |
| MGP                                                                                      | 0,136752643 | -0,354374244 | 0,225 | 0,12  | 1         | 0,782208845   | 1,278430953     | 1,875           |
| PDCD7                                                                                    | 0,575355106 | -0,354679942 | 0,537 | 0,35  | 1         | 0,782043118   | 1,278701873     | 1,534285714     |
| SYNE3                                                                                    | 0,878125521 | -0,354726795 | 0,2   | 0,16  | 1         | 0,782017721   | 1,278743401     | 1,25            |
| CSGALNACT2                                                                               | 0,756779942 | -0,355145544 | 0,438 | 0,3   | 1         | 0,78179077    | 1,279114616     | 1,46            |
| TMEM64                                                                                   | 0,546641459 | -0,355174877 | 0,188 | 0,19  | 1         | 0,781774874   | 1,279140624     | 0,989473684     |
| NAA35                                                                                    | 0,847985424 | -0,355380957 | 0,162 | 0,15  | 1         | 0,78166321    | 1,279323354     | 1,08            |
| ITSN1                                                                                    | 0,722306167 | -0,355651016 | 0,275 | 0,2   | 1         | 0,781516904   | 1,279562854     | 1,375           |
| ATP1B1                                                                                   | 0,42148212  | -0,35568113  | 0,762 | 0,63  | 1         | 0,781500592   | 1,279589562     | 1,20952381      |
| ST3GAL6                                                                                  | 0,10125731  | -0,355919954 | 0,125 | 0,2   | 1         | 0,781371232   | 1,279801404     | 0,625           |
| CD47                                                                                     | 0,378645448 | -0,356380366 | 0,562 | 0,34  | 1         | 0,781121911   | 1,280209896     | 1,652941176     |
| ZC3H12A                                                                                  | 0,776241164 | -0,356518593 | 0,338 | 0,29  | 1         | 0,781047073   | 1,280332561     | 1,165517241     |
| TOGARAM1                                                                                 | 0,748106362 | -0,357146181 | 0,275 | 0,24  | 1         | 0,780707384   | 1,28088964      | 1,145833333     |
| ZNF830                                                                                   | 0,647368961 | -0,357547351 | 0,238 | 0,17  | 1         | 0,780490322   | 1,281245867     | 1,4             |
| RHOQ                                                                                     | 0,864055121 | -0,357660063 | 0,613 | 0,4   | 1         | 0,780429348   | 1,28134597      | 1,5325          |
| CTNNB1                                                                                   | 0,674989938 | -0,358095266 | 0,762 | 0,56  | 1         | 0,78019396    | 1,281732558     | 1,360714286     |
| PRKD1                                                                                    | 0,089754822 | -0,358619106 | 0,038 | 0,1   | 1         | 0,779910724   | 1,282198038     | 0,38            |
| MYO6                                                                                     | 0,049955767 | -0,358673219 | 0,05  | 0,13  | 1         | 0,779881471   | 1,282246132     | 0,384615385     |
| SRSF6                                                                                    | 0,246793203 | -0,359711296 | 0,588 | 0,36  | 1         | 0,779320518   | 1,283169091     | 1,633333333     |
| PHF3                                                                                     | 0,582690872 | -0,359793941 | 0,388 | 0,26  | 1         | 0,779275875   | 1,2832426       | 1,492307692     |
| ABHD3                                                                                    | 0,089754822 | -0,359919024 | 0,038 | 0,1   | 1         | 0,779208314   | 1,283353863     | 0,38            |

Supplementary Table 4

| Differentially expressed genes_keloid-CCD_ comparing SC-Keloid vs. (SC-Myel, SC-Nonmyel) |             |              |       |       |           |               |                 |                 |
|------------------------------------------------------------------------------------------|-------------|--------------|-------|-------|-----------|---------------|-----------------|-----------------|
| gene                                                                                     | p_val       | avg_log2FC   | pct.1 | pct.2 | p_val_adj | Foldchange_UP | Foldchange_DOWN | Ratio_pct1_pct2 |
| EZH2                                                                                     | 0,8821324   | -0,359948515 | 0,35  | 0,29  | 1         | 0,779192386   | 1,283380097     | 1,206896552     |
| AK1                                                                                      | 0,036096258 | -0,360303702 | 0,362 | 0,17  | 1         | 0,779000575   | 1,2836961       | 2,129411765     |
| NGF                                                                                      | 0,997440903 | -0,361130214 | 0,075 | 0,07  | 1         | 0,778554417   | 1,284431733     | 1,071428571     |
| EIF3J                                                                                    | 0,466950812 | -0,361179396 | 0,738 | 0,45  | 1         | 0,778527877   | 1,284475521     | 1,64            |
| SSPN                                                                                     | 0,976028847 | -0,36145023  | 0,288 | 0,23  | 1         | 0,778381739   | 1,284716676     | 1,252173913     |
| PRKCI                                                                                    | 0,552548692 | -0,361627057 | 0,175 | 0,18  | 1         | 0,778286341   | 1,284874149     | 0,972222222     |
| SP3                                                                                      | 0,620958797 | -0,361982023 | 0,438 | 0,29  | 1         | 0,778094872   | 1,285190323     | 1,510344828     |
| OAZ2                                                                                     | 0,131073984 | -0,362482575 | 0,488 | 0,27  | 1         | 0,777824954   | 1,285636305     | 1,807407407     |
| PALS1                                                                                    | 0,4425104   | -0,362735201 | 0,212 | 0,14  | 1         | 0,777688763   | 1,285861449     | 1,514285714     |
| PAF1                                                                                     | 0,683653075 | -0,362972402 | 0,262 | 0,19  | 1         | 0,77756091    | 1,286072882     | 1,378947368     |
| CBL                                                                                      | 0,343246649 | -0,36302029  | 0,388 | 0,24  | 1         | 0,7775351     | 1,286115571     | 1,616666667     |
| ARL6IP1                                                                                  | 0,185448208 | -0,363025082 | 0,762 | 0,63  | 1         | 0,777532518   | 1,286119843     | 1,20952381      |
| TERF2IP                                                                                  | 0,61110439  | -0,363098407 | 0,812 | 0,56  | 1         | 0,777493001   | 1,286185212     | 1,45            |
| HLA-E                                                                                    | 0,358854506 | -0,363193732 | 0,863 | 0,62  | 1         | 0,77744163    | 1,286270198     | 1,391935484     |
| TCEAL9                                                                                   | 0,675311081 | -0,363286724 | 0,8   | 0,54  | 1         | 0,77739152    | 1,28635311      | 1,481481481     |
| SERINC5                                                                                  | 0,207078538 | -0,363567499 | 0,362 | 0,21  | 1         | 0,77724024    | 1,286603483     | 1,723809524     |
| TRA2A                                                                                    | 0,842070509 | -0,363594832 | 0,537 | 0,37  | 1         | 0,777225515   | 1,286627859     | 1,451351351     |
| MOSPD2                                                                                   | 0,403423503 | -0,363983276 | 0,125 | 0,15  | 1         | 0,777016276   | 1,286974328     | 0,833333333     |
| TFEB                                                                                     | 0,049955767 | -0,364008847 | 0,05  | 0,13  | 1         | 0,777002504   | 1,28699714      | 0,384615385     |
| SEMA3G                                                                                   | 0,002307447 | -0,364145391 | 0     | 0,11  | 1         | 0,776928968   | 1,287118953     | 0               |
| FHL1                                                                                     | 0,660023269 | -0,364438262 | 0,388 | 0,28  | 1         | 0,776771265   | 1,287380269     | 1,385714286     |
| U2AF1                                                                                    | 0,280009358 | -0,36450412  | 0,1   | 0,14  | 1         | 0,776735807   | 1,287439038     | 0,714285714     |
| SYF2                                                                                     | 0,724003955 | -0,365163074 | 0,738 | 0,51  | 1         | 0,776381112   | 1,288027213     | 1,447058824     |
| VSIR                                                                                     | 0,009198586 | -0,365239174 | 0,038 | 0,15  | 1         | 0,77634016    | 1,288095156     | 0,253333333     |
| NDFIP2                                                                                   | 0,597408779 | -0,365367369 | 0,438 | 0,29  | 1         | 0,776271179   | 1,288209619     | 1,510344828     |
| RNF138                                                                                   | 0,888354171 | -0,365834599 | 0,2   | 0,16  | 1         | 0,776019818   | 1,288626884     | 1,25            |
| USP53                                                                                    | 0,865728969 | -0,366365286 | 0,425 | 0,31  | 1         | 0,775734416   | 1,289100986     | 1,370967742     |
| RMND5A                                                                                   | 0,669292482 | -0,366706921 | 0,2   | 0,19  | 1         | 0,775550741   | 1,289406285     | 1,052631579     |
| SEC24A                                                                                   | 0,844568054 | -0,368081122 | 0,312 | 0,23  | 1         | 0,774812363   | 1,29063506      | 1,356521739     |
| SELENOK                                                                                  | 0,137375098 | -0,368192012 | 0,912 | 0,71  | 1         | 0,77475281    | 1,290734266     | 1,284507042     |

Supplementary Table 4

| Differentially expressed genes_keloid-CCD_ comparing SC-Keloid vs. (SC-Myel, SC-Nonmyel) |             |              |       |       |           |               |                 |                 |
|------------------------------------------------------------------------------------------|-------------|--------------|-------|-------|-----------|---------------|-----------------|-----------------|
| gene                                                                                     | p_val       | avg_log2FC   | pct.1 | pct.2 | p_val_adj | Foldchange_UP | Foldchange_DOWN | Ratio_pct1_pct2 |
| ZMYM2                                                                                    | 0,779302333 | -0,36821687  | 0,375 | 0,32  | 1         | 0,774739461   | 1,290756506     | 1,171875        |
| MTR                                                                                      | 0,574854686 | -0,368304479 | 0,312 | 0,22  | 1         | 0,774692416   | 1,290834891     | 1,418181818     |
| KBTBD2                                                                                   | 0,887006711 | -0,368355092 | 0,325 | 0,26  | 1         | 0,774665238   | 1,290880177     | 1,25            |
| SERPING1                                                                                 | 0,156879371 | -0,368663081 | 0,062 | 0,12  | 1         | 0,774499879   | 1,291155786     | 0,516666667     |
| IRF7                                                                                     | 0,661545066 | -0,368726305 | 0,25  | 0,18  | 1         | 0,774465939   | 1,29121237      | 1,388888889     |
| SPART                                                                                    | 0,971966758 | -0,368966447 | 0,3   | 0,24  | 1         | 0,774337037   | 1,291427315     | 1,25            |
| RBMS1                                                                                    | 0,823502126 | -0,369845117 | 0,662 | 0,47  | 1         | 0,773865572   | 1,292214095     | 1,408510638     |
| FMNL2                                                                                    | 0,83218863  | -0,370262977 | 0,162 | 0,13  | 1         | 0,773641463   | 1,292588424     | 1,246153846     |
| MAP7D1                                                                                   | 0,983921188 | -0,370592661 | 0,575 | 0,41  | 1         | 0,773464691   | 1,29288384      | 1,402439024     |
| RNF5                                                                                     | 0,616780522 | -0,371468126 | 0,5   | 0,33  | 1         | 0,772995475   | 1,293668634     | 1,515151515     |
| CDC73                                                                                    | 0,755939473 | -0,371629009 | 0,488 | 0,37  | 1         | 0,772909279   | 1,293812906     | 1,318918919     |
| TRPM3                                                                                    | 0,00613773  | -0,371658284 | 0     | 0,09  | 1         | 0,772893595   | 1,29383916      | 0               |
| RND3                                                                                     | 0,885742368 | -0,372745608 | 0,688 | 0,49  | 1         | 0,772311304   | 1,294814662     | 1,404081633     |
| BCAS2                                                                                    | 0,360289754 | -0,372810243 | 0,537 | 0,32  | 1         | 0,772276704   | 1,294872674     | 1,678125        |
| GRIK3                                                                                    | 0,003765792 | -0,373303294 | 0     | 0,1   | 1         | 0,772012818   | 1,295315281     | 0               |
| NEK7                                                                                     | 0,929267363 | -0,373382978 | 0,238 | 0,19  | 1         | 0,771970179   | 1,295386827     | 1,252631579     |
| SRSF2                                                                                    | 0,271092504 | -0,37382277  | 0,912 | 0,78  | 1         | 0,771734887   | 1,295781773     | 1,169230769     |
| ALDH3A2                                                                                  | 0,326814843 | -0,374268508 | 0,162 | 0,19  | 1         | 0,771496487   | 1,296182183     | 0,852631579     |
| CCND3                                                                                    | 0,787133346 | -0,374410818 | 0,362 | 0,26  | 1         | 0,771420389   | 1,296310047     | 1,392307692     |
| MORF4L2                                                                                  | 0,272591951 | -0,374423215 | 0,887 | 0,66  | 1         | 0,77141376    | 1,296321186     | 1,343939394     |
| SEMA6D                                                                                   | 0,859426941 | -0,374694702 | 0,188 | 0,17  | 1         | 0,771268609   | 1,296565151     | 1,105882353     |
| UPF2                                                                                     | 0,718357918 | -0,37478011  | 0,475 | 0,33  | 1         | 0,77122295    | 1,296641911     | 1,439393939     |
| MYO9A                                                                                    | 0,85036292  | -0,374847997 | 0,312 | 0,23  | 1         | 0,771186661   | 1,296702926     | 1,356521739     |
| PTPN1                                                                                    | 0,783964045 | -0,375295245 | 0,425 | 0,3   | 1         | 0,770947624   | 1,297104978     | 1,416666667     |
| PYGL                                                                                     | 0,878132601 | -0,375422498 | 0,275 | 0,23  | 1         | 0,770879625   | 1,297219394     | 1,195652174     |
| SLITRK2                                                                                  | 0,003765792 | -0,375680574 | 0     | 0,1   | 1         | 0,770741739   | 1,297451468     | 0               |
| ASAP2                                                                                    | 0,233131297 | -0,37602161  | 0,537 | 0,46  | 1         | 0,770559566   | 1,297758206     | 1,167391304     |
| KANSL1                                                                                   | 0,341134272 | -0,376254353 | 0,5   | 0,3   | 1         | 0,770435266   | 1,297967584     | 1,666666667     |
| GNG2                                                                                     | 0,845893818 | -0,37685879  | 0,75  | 0,5   | 1         | 0,770112549   | 1,298511499     | 1,5             |
| SPIRE1                                                                                   | 0,894074668 | -0,377128124 | 0,238 | 0,19  | 1         | 0,769968791   | 1,298753938     | 1,252631579     |

Supplementary Table 4

| Differentially expressed genes_keloid-CCD_ comparing SC-Keloid vs. (SC-Myel, SC-Nonmyel) |             |              |       |       |           |               |                 |                 |
|------------------------------------------------------------------------------------------|-------------|--------------|-------|-------|-----------|---------------|-----------------|-----------------|
| gene                                                                                     | p_val       | avg_log2FC   | pct.1 | pct.2 | p_val_adj | Foldchange_UP | Foldchange_DOWN | Ratio_pct1_pct2 |
| FBLN1                                                                                    | 0,249481491 | -0,377147244 | 0,125 | 0,17  | 1         | 0,769958587   | 1,298771151     | 0,735294118     |
| SCAF11                                                                                   | 0,86215792  | -0,377343938 | 0,688 | 0,44  | 1         | 0,76985362    | 1,298948235     | 1,563636364     |
| RNF19A                                                                                   | 0,933207718 | -0,377475558 | 0,525 | 0,38  | 1         | 0,769783387   | 1,299066746     | 1,381578947     |
| WASL                                                                                     | 0,922395258 | -0,377505328 | 0,6   | 0,4   | 1         | 0,769767503   | 1,299093553     | 1,5             |
| SERINC3                                                                                  | 0,975264376 | -0,378485074 | 0,462 | 0,34  | 1         | 0,769244925   | 1,299976077     | 1,358823529     |
| RGS10                                                                                    | 0,714825442 | -0,378595911 | 0,175 | 0,17  | 1         | 0,769185829   | 1,300075953     | 1,029411765     |
| C1orf52                                                                                  | 0,949641122 | -0,378911703 | 0,388 | 0,3   | 1         | 0,76901748    | 1,300360559     | 1,293333333     |
| CTR9                                                                                     | 0,679512298 | -0,379324213 | 0,325 | 0,23  | 1         | 0,768797626   | 1,300732424     | 1,413043478     |
| FRMD6                                                                                    | 0,443290488 | -0,379369973 | 0,725 | 0,47  | 1         | 0,768773242   | 1,300773681     | 1,542553191     |
| FND3B                                                                                    | 0,844693098 | -0,380155885 | 0,588 | 0,42  | 1         | 0,768354565   | 1,301482474     | 1,4             |
| ERV3-1                                                                                   | 0,339043402 | -0,380561546 | 0,075 | 0,11  | 1         | 0,768138547   | 1,30184848      | 0,681818182     |
| ZFAS1                                                                                    | 0,062894078 | -0,381355452 | 0,975 | 0,8   | 1         | 0,767715961   | 1,302565077     | 1,21875         |
| KCMF1                                                                                    | 0,909342542 | -0,381831529 | 0,613 | 0,41  | 1         | 0,767462664   | 1,302994983     | 1,495121951     |
| NR4A3                                                                                    | 0,036883336 | -0,381846009 | 0,038 | 0,12  | 1         | 0,76745496    | 1,303008061     | 0,316666667     |
| ARID2                                                                                    | 0,909574988 | -0,38219825  | 0,262 | 0,22  | 1         | 0,767267605   | 1,303326236     | 1,190909091     |
| FAM102A                                                                                  | 0,831422843 | -0,38256352  | 0,2   | 0,18  | 1         | 0,767073369   | 1,303656261     | 1,111111111     |
| ZNF667-AS1                                                                               | 0,208200632 | -0,383485532 | 0,038 | 0,08  | 1         | 0,766583296   | 1,304489681     | 0,475           |
| PCF11                                                                                    | 0,89483757  | -0,383495776 | 0,45  | 0,35  | 1         | 0,766577853   | 1,304498944     | 1,285714286     |
| NGDN                                                                                     | 0,574430175 | -0,383580221 | 0,288 | 0,27  | 1         | 0,766532985   | 1,304575302     | 1,066666667     |
| ZC3H6                                                                                    | 0,686834487 | -0,383893118 | 0,188 | 0,18  | 1         | 0,766366754   | 1,304858274     | 1,044444444     |
| BCL7B                                                                                    | 0,897761165 | -0,383921308 | 0,525 | 0,37  | 1         | 0,76635178    | 1,304883771     | 1,418918919     |
| PAQR6                                                                                    | 0,140917042 | -0,384008866 | 0,062 | 0,12  | 1         | 0,766305271   | 1,304962967     | 0,516666667     |
| MGAT4C                                                                                   | 0,003765792 | -0,384167314 | 0     | 0,1   | 1         | 0,766221114   | 1,305106296     | 0               |
| SLC22A17                                                                                 | 0,837057914 | -0,384325742 | 0,575 | 0,42  | 1         | 0,766136977   | 1,305249623     | 1,369047619     |
| IER2                                                                                     | 0,774858919 | -0,384719656 | 0,8   | 0,56  | 1         | 0,765927819   | 1,305606058     | 1,428571429     |
| MED17                                                                                    | 0,179143683 | -0,386727959 | 0,238 | 0,13  | 1         | 0,764862351   | 1,307424791     | 1,830769231     |
| SRSF3                                                                                    | 0,095250854 | -0,386835898 | 0,912 | 0,85  | 1         | 0,764805128   | 1,307522614     | 1,072941176     |
| KIF5B                                                                                    | 0,178880569 | -0,386857089 | 0,875 | 0,77  | 1         | 0,764793894   | 1,30754182      | 1,136363636     |
| SORT1                                                                                    | 0,839969465 | -0,388067451 | 0,35  | 0,25  | 1         | 0,764152533   | 1,308639254     | 1,4             |
| TSPYL1                                                                                   | 1           | -0,388678706 | 0,188 | 0,16  | 1         | 0,763828838   | 1,309193828     | 1,175           |

Supplementary Table 4

| Differentially expressed genes_keloid-CCD_ comparing SC-Keloid vs. (SC-Myel, SC-Nonmyel) |             |              |       |       |           |               |                 |                 |
|------------------------------------------------------------------------------------------|-------------|--------------|-------|-------|-----------|---------------|-----------------|-----------------|
| gene                                                                                     | p_val       | avg_log2FC   | pct.1 | pct.2 | p_val_adj | Foldchange_UP | Foldchange_DOWN | Ratio_pct1_pct2 |
| TAPT1                                                                                    | 0,228509972 | -0,389001681 | 0,112 | 0,16  | 1         | 0,763657859   | 1,309486949     | 0,7             |
| ARID1B                                                                                   | 0,874581776 | -0,389166572 | 0,55  | 0,4   | 1         | 0,763570583   | 1,309636624     | 1,375           |
| RFX3                                                                                     | 0,846292343 | -0,389338714 | 0,238 | 0,21  | 1         | 0,763479479   | 1,309792898     | 1,133333333     |
| TMF1                                                                                     | 0,616371571 | -0,389720389 | 0,438 | 0,36  | 1         | 0,763277522   | 1,310139459     | 1,216666667     |
| MAP2K3                                                                                   | 0,730181036 | -0,391845466 | 0,4   | 0,28  | 1         | 0,762154049   | 1,312070705     | 1,428571429     |
| ATF1                                                                                     | 0,927914696 | -0,392009116 | 0,388 | 0,3   | 1         | 0,7620676     | 1,312219546     | 1,293333333     |
| NARF                                                                                     | 0,311423872 | -0,392964985 | 0,325 | 0,2   | 1         | 0,761562853   | 1,313089255     | 1,625           |
| ZBTB4                                                                                    | 0,45951512  | -0,393859947 | 0,188 | 0,2   | 1         | 0,761090571   | 1,313904071     | 0,94            |
| ARHGEF10                                                                                 | 0,450115392 | -0,394448911 | 0,075 | 0,1   | 1         | 0,760779928   | 1,314440567     | 0,75            |
| CLEC2B                                                                                   | 0,474979985 | -0,394456577 | 0,075 | 0,1   | 1         | 0,760775886   | 1,314447551     | 0,75            |
| RAB5A                                                                                    | 0,688564523 | -0,394568251 | 0,575 | 0,36  | 1         | 0,760716999   | 1,314549302     | 1,597222222     |
| ZRANB1                                                                                   | 0,994006366 | -0,396160256 | 0,288 | 0,23  | 1         | 0,759878015   | 1,3160007       | 1,252173913     |
| SRSF5                                                                                    | 0,019993725 | -0,396519264 | 0,838 | 0,71  | 1         | 0,759688947   | 1,316328221     | 1,18028169      |
| DDHD1                                                                                    | 0,937092475 | -0,396581227 | 0,262 | 0,22  | 1         | 0,75965632    | 1,316384757     | 1,190909091     |
| ATF7IP                                                                                   | 0,753197782 | -0,397306219 | 0,312 | 0,23  | 1         | 0,759274668   | 1,317046442     | 1,356521739     |
| TP53INP2                                                                                 | 0,172934671 | -0,397440661 | 0,15  | 0,2   | 1         | 0,759203916   | 1,31716918      | 0,75            |
| TOM1L2                                                                                   | 0,74358406  | -0,397920283 | 0,225 | 0,17  | 1         | 0,758951562   | 1,317607145     | 1,323529412     |
| IL34                                                                                     | 0,022780083 | -0,398691461 | 0,013 | 0,09  | 1         | 0,75854598    | 1,318311647     | 0,144444444     |
| DEGS1                                                                                    | 0,406147629 | -0,398953387 | 0,762 | 0,55  | 1         | 0,758408276   | 1,318551012     | 1,385454545     |
| TRAK1                                                                                    | 0,692389194 | -0,399228153 | 0,262 | 0,19  | 1         | 0,758263849   | 1,318802158     | 1,378947368     |
| FAM53C                                                                                   | 0,469281447 | -0,399696268 | 0,2   | 0,21  | 1         | 0,758017853   | 1,319230143     | 0,952380952     |
| SPAG9                                                                                    | 0,313026017 | -0,400342023 | 0,713 | 0,53  | 1         | 0,757678638   | 1,319820766     | 1,345283019     |
| ISG20L2                                                                                  | 0,296560465 | -0,400394236 | 0,175 | 0,21  | 1         | 0,757651216   | 1,319868534     | 0,833333333     |
| EPB41L4A-AS1                                                                             | 0,714894567 | -0,400473241 | 0,512 | 0,35  | 1         | 0,757609727   | 1,319940814     | 1,462857143     |
| USP51                                                                                    | 0,796979246 | -0,400520253 | 0,075 | 0,08  | 1         | 0,75758504    | 1,319983827     | 0,9375          |
| GGNBP2                                                                                   | 0,695735916 | -0,401045963 | 0,65  | 0,43  | 1         | 0,75730903    | 1,320464909     | 1,511627907     |
| TNFAIP2                                                                                  | 0,444216253 | -0,401831442 | 0,225 | 0,16  | 1         | 0,756896824   | 1,321184036     | 1,40625         |
| IST1                                                                                     | 0,918489913 | -0,401968965 | 0,375 | 0,28  | 1         | 0,756824677   | 1,321309982     | 1,339285714     |
| COPS3                                                                                    | 0,717013399 | -0,402899103 | 0,525 | 0,35  | 1         | 0,756336892   | 1,322162134     | 1,5             |
| CTNNA1                                                                                   | 0,015522096 | -0,403045123 | 0,912 | 0,82  | 1         | 0,756260345   | 1,322295962     | 1,112195122     |

Supplementary Table 4

| Differentially expressed genes_keloid-CCD_ comparing SC-Keloid vs. (SC-Myel, SC-Nonmyel) |             |              |       |       |           |               |                 |                 |
|------------------------------------------------------------------------------------------|-------------|--------------|-------|-------|-----------|---------------|-----------------|-----------------|
| gene                                                                                     | p_val       | avg_log2FC   | pct.1 | pct.2 | p_val_adj | Foldchange_UP | Foldchange_DOWN | Ratio_pct1_pct2 |
| FZD7                                                                                     | 0,204775794 | -0,403723493 | 0,1   | 0,15  | 1         | 0,755904827   | 1,322917865     | 0,666666667     |
| TMEM65                                                                                   | 0,392336547 | -0,403882617 | 0,262 | 0,17  | 1         | 0,755821458   | 1,323063786     | 1,541176471     |
| IP6K1                                                                                    | 0,607940089 | -0,404074545 | 0,262 | 0,24  | 1         | 0,755720915   | 1,323239811     | 1,091666667     |
| ETFHD                                                                                    | 0,248630236 | -0,404527373 | 0,138 | 0,18  | 1         | 0,755483749   | 1,32365521      | 0,766666667     |
| TERF1                                                                                    | 0,597334916 | -0,404661501 | 0,55  | 0,35  | 1         | 0,755413514   | 1,323778276     | 1,571428571     |
| CCNDBP1                                                                                  | 0,652066296 | -0,404878715 | 0,375 | 0,26  | 1         | 0,755299787   | 1,323977602     | 1,442307692     |
| VWA1                                                                                     | 0,063893614 | -0,405004827 | 0,975 | 0,88  | 1         | 0,755233766   | 1,324093341     | 1,107954545     |
| PHF1                                                                                     | 0,441020783 | -0,405011906 | 0,25  | 0,25  | 1         | 0,75523006    | 1,324099838     | 1               |
| KLHL28                                                                                   | 0,957803463 | -0,405246979 | 0,25  | 0,21  | 1         | 0,755107013   | 1,324315604     | 1,19047619      |
| AKAP8L                                                                                   | 0,428693427 | -0,405827559 | 0,4   | 0,35  | 1         | 0,754803198   | 1,324848652     | 1,142857143     |
| SOS2                                                                                     | 0,42619859  | -0,406119336 | 0,562 | 0,33  | 1         | 0,754650559   | 1,325116623     | 1,703030303     |
| GPNMB                                                                                    | 0,173082809 | -0,406480137 | 0,125 | 0,18  | 1         | 0,754461853   | 1,32544806      | 0,694444444     |
| GFRA2                                                                                    | 0,654727359 | -0,406764665 | 0,175 | 0,13  | 1         | 0,754313073   | 1,325709491     | 1,346153846     |
| TCEAL1                                                                                   | 0,886944795 | -0,406792015 | 0,225 | 0,18  | 1         | 0,754298773   | 1,325734623     | 1,25            |
| EIF2AK3                                                                                  | 0,620043923 | -0,407126628 | 0,238 | 0,22  | 1         | 0,754123844   | 1,326042145     | 1,081818182     |
| NPTX2                                                                                    | 0,001961202 | -0,407903059 | 0,013 | 0,14  | 1         | 0,753718099   | 1,326755987     | 0,092857143     |
| ATXN2L                                                                                   | 0,450214102 | -0,408144789 | 0,35  | 0,23  | 1         | 0,75359182    | 1,32697831      | 1,52173913      |
| WAC                                                                                      | 0,403726279 | -0,409234827 | 0,613 | 0,49  | 1         | 0,753022654   | 1,327981296     | 1,251020408     |
| GAB1                                                                                     | 0,789561541 | -0,409444027 | 0,35  | 0,29  | 1         | 0,752913469   | 1,328173876     | 1,206896552     |
| STX11                                                                                    | 0,724646597 | -0,409456301 | 0,175 | 0,17  | 1         | 0,752907063   | 1,328185176     | 1,029411765     |
| GNL3                                                                                     | 0,34084416  | -0,409656332 | 0,588 | 0,35  | 1         | 0,752802679   | 1,328369342     | 1,68            |
| MECP2                                                                                    | 0,528830809 | -0,410298818 | 0,275 | 0,27  | 1         | 0,752467503   | 1,328961046     | 1,018518519     |
| GRPEL1                                                                                   | 0,97107077  | -0,410905427 | 0,275 | 0,22  | 1         | 0,75215118    | 1,329519951     | 1,25            |
| SNN                                                                                      | 0,418363623 | -0,411084953 | 0,2   | 0,21  | 1         | 0,75205759    | 1,329685404     | 0,952380952     |
| ZNF638                                                                                   | 0,877317006 | -0,411515489 | 0,375 | 0,28  | 1         | 0,75183319    | 1,330082274     | 1,339285714     |
| SPRING1                                                                                  | 0,472231865 | -0,411605388 | 0,175 | 0,19  | 1         | 0,751786342   | 1,330165159     | 0,921052632     |
| BACH2                                                                                    | 0,456989901 | -0,411765755 | 0,188 | 0,2   | 1         | 0,75170278    | 1,330313026     | 0,94            |
| TPST1                                                                                    | 0,54771146  | -0,412100667 | 0,262 | 0,18  | 1         | 0,751528298   | 1,330621885     | 1,455555556     |
| PPTC7                                                                                    | 0,973174384 | -0,412284635 | 0,25  | 0,2   | 1         | 0,751432471   | 1,330791572     | 1,25            |
| INSIG1                                                                                   | 0,168836582 | -0,413283898 | 0,175 | 0,23  | 1         | 0,750912182   | 1,331713646     | 0,760869565     |

Supplementary Table 4

| Differentially expressed genes_keloid-CCD_ comparing SC-Keloid vs. (SC-Myel, SC-Nonmyel) |             |              |       |       |             |               |                 |                 |
|------------------------------------------------------------------------------------------|-------------|--------------|-------|-------|-------------|---------------|-----------------|-----------------|
| gene                                                                                     | p_val       | avg_log2FC   | pct.1 | pct.2 | p_val_adj   | Foldchange_UP | Foldchange_DOWN | Ratio_pct1_pct2 |
| HNRNPU                                                                                   | 0,010687508 | -0,413638837 | 0,8   | 0,75  | 1           | 0,750727462   | 1,332041321     | 1,066666667     |
| AGO3                                                                                     | 0,856555678 | -0,413973486 | 0,3   | 0,23  | 1           | 0,750553342   | 1,332350339     | 1,304347826     |
| BBC3                                                                                     | 0,64758621  | -0,41459352  | 0,362 | 0,26  | 1           | 0,750230843   | 1,332923073     | 1,392307692     |
| CCSER2                                                                                   | 0,842852507 | -0,415038939 | 0,438 | 0,33  | 1           | 0,749999252   | 1,333334664     | 1,327272727     |
| PTMA                                                                                     | 1,80353E-05 | -0,415179692 | 1     | 1     | 0,380562051 | 0,749926083   | 1,333464754     | 1               |
| ZFP91                                                                                    | 0,324159162 | -0,415305703 | 0,325 | 0,2   | 1           | 0,749860585   | 1,333581229     | 1,625           |
| TLE3                                                                                     | 0,951462726 | -0,415315736 | 0,45  | 0,33  | 1           | 0,74985537    | 1,333590503     | 1,363636364     |
| TMEM87A                                                                                  | 0,720799544 | -0,415364213 | 0,438 | 0,36  | 1           | 0,749830174   | 1,333635315     | 1,216666667     |
| EFNA5                                                                                    | 0,050621736 | -0,415751345 | 0,05  | 0,13  | 1           | 0,749628992   | 1,33399323      | 0,384615385     |
| USP38                                                                                    | 0,797786505 | -0,416075079 | 0,225 | 0,2   | 1           | 0,749460798   | 1,334292605     | 1,125           |
| PAXBP1                                                                                   | 0,799821223 | -0,416686076 | 0,362 | 0,3   | 1           | 0,74914346    | 1,334857813     | 1,206666667     |
| ARL4D                                                                                    | 0,148986473 | -0,417390903 | 0,375 | 0,21  | 1           | 0,748777556   | 1,335510115     | 1,785714286     |
| DPYSL2                                                                                   | 0,564531105 | -0,417498342 | 0,288 | 0,27  | 1           | 0,748721796   | 1,335609576     | 1,066666667     |
| ARHGAP5                                                                                  | 0,586372745 | -0,418005146 | 0,5   | 0,39  | 1           | 0,748458824   | 1,336078844     | 1,282051282     |
| SIK3                                                                                     | 0,351520436 | -0,418220061 | 0,275 | 0,28  | 1           | 0,748347336   | 1,336277891     | 0,982142857     |
| MAG1                                                                                     | 0,009653657 | -0,419201479 | 0,038 | 0,15  | 1           | 0,747838433   | 1,337187227     | 0,253333333     |
| CGRRF1                                                                                   | 0,801956707 | -0,419438798 | 0,2   | 0,18  | 1           | 0,747715426   | 1,337407208     | 1,111111111     |
| DDX24                                                                                    | 0,688575024 | -0,419480893 | 0,7   | 0,51  | 1           | 0,747693609   | 1,337446232     | 1,37254902      |
| SMAD4                                                                                    | 0,816818419 | -0,419509611 | 0,375 | 0,3   | 1           | 0,747678726   | 1,337472855     | 1,25            |
| BEX4                                                                                     | 0,998464078 | -0,419773023 | 0,262 | 0,22  | 1           | 0,747542225   | 1,337717077     | 1,190909091     |
| DUSP5                                                                                    | 0,90209082  | -0,41984005  | 0,3   | 0,25  | 1           | 0,747507495   | 1,337779228     | 1,2             |
| RBM11                                                                                    | 0,337942689 | -0,420517869 | 0,125 | 0,16  | 1           | 0,747156377   | 1,338407902     | 0,78125         |
| SERINC1                                                                                  | 0,408416181 | -0,420980838 | 0,738 | 0,55  | 1           | 0,746916649   | 1,338837474     | 1,341818182     |
| DUSP1                                                                                    | 0,593676664 | -0,421289536 | 0,7   | 0,49  | 1           | 0,746756846   | 1,33912398      | 1,428571429     |
| DEPDC7                                                                                   | 0,07782619  | -0,421693673 | 0,1   | 0,18  | 1           | 0,746547689   | 1,339499157     | 0,555555556     |
| PHACTR4                                                                                  | 0,748987569 | -0,422089843 | 0,412 | 0,33  | 1           | 0,746342712   | 1,339867039     | 1,248484848     |
| HCFC1R1                                                                                  | 0,307600183 | -0,422358527 | 0,625 | 0,5   | 1           | 0,746203728   | 1,340116596     | 1,25            |
| ZNF704                                                                                   | 0,01396673  | -0,423630647 | 0,013 | 0,1   | 1           | 0,745546041   | 1,341298787     | 0,13            |
| ARRDC3                                                                                   | 0,915487195 | -0,423904707 | 0,325 | 0,26  | 1           | 0,745404427   | 1,34155361      | 1,25            |
| CUL3                                                                                     | 0,833855934 | -0,424452592 | 0,488 | 0,35  | 1           | 0,745121403   | 1,342063181     | 1,394285714     |



Supplementary Table 4

| Differentially expressed genes_keloid-CCD_ comparing SC-Keloid vs. (SC-Myel, SC-Nonmyel) |             |              |       |       |           |               |                 |                 |
|------------------------------------------------------------------------------------------|-------------|--------------|-------|-------|-----------|---------------|-----------------|-----------------|
| gene                                                                                     | p_val       | avg_log2FC   | pct.1 | pct.2 | p_val_adj | Foldchange_UP | Foldchange_DOWN | Ratio_pct1_pct2 |
| RAP2A                                                                                    | 0,396561626 | -0,424917308 | 0,35  | 0,22  | 1         | 0,744881425   | 1,342495552     | 1,590909091     |
| PRKAR1A                                                                                  | 0,654736981 | -0,425288946 | 0,725 | 0,51  | 1         | 0,744689569   | 1,342841423     | 1,421568627     |
| NFKBIB                                                                                   | 0,835389306 | -0,425323913 | 0,225 | 0,2   | 1         | 0,74467152    | 1,34287397      | 1,125           |
| CREBBP                                                                                   | 0,98797867  | -0,42553658  | 0,425 | 0,31  | 1         | 0,744561756   | 1,343071937     | 1,370967742     |
| CYTH3                                                                                    | 0,441272227 | -0,425889484 | 0,175 | 0,19  | 1         | 0,744379648   | 1,343400512     | 0,921052632     |
| PRIMA1                                                                                   | 0,003705344 | -0,426619528 | 0,025 | 0,15  | 1         | 0,744003066   | 1,344080482     | 0,166666667     |
| LG1                                                                                      | 0,959903244 | -0,427150729 | 0,15  | 0,13  | 1         | 0,743729174   | 1,344575465     | 1,153846154     |
| NEDD4L                                                                                   | 0,045089569 | -0,427279564 | 0,088 | 0,18  | 1         | 0,743662761   | 1,344695543     | 0,488888889     |
| ANKRD28                                                                                  | 0,599196653 | -0,428224326 | 0,35  | 0,3   | 1         | 0,743175926   | 1,345576417     | 1,166666667     |
| FAM133B                                                                                  | 0,170766461 | -0,428346898 | 0,725 | 0,59  | 1         | 0,743112788   | 1,345690742     | 1,228813559     |
| PPT1                                                                                     | 0,368522196 | -0,428558289 | 0,613 | 0,36  | 1         | 0,743003912   | 1,345887934     | 1,702777778     |
| HNRNPH2                                                                                  | 0,752060747 | -0,428693361 | 0,338 | 0,28  | 1         | 0,742934351   | 1,346013949     | 1,207142857     |
| MAP3K8                                                                                   | 0,887096898 | -0,428774129 | 0,288 | 0,22  | 1         | 0,74289276    | 1,346089306     | 1,309090909     |
| TMED5                                                                                    | 0,223384317 | -0,429787751 | 0,525 | 0,3   | 1         | 0,742370995   | 1,347035386     | 1,75            |
| NCOA1                                                                                    | 0,750954517 | -0,429790053 | 0,275 | 0,24  | 1         | 0,74236981    | 1,347037536     | 1,145833333     |
| TRIM13                                                                                   | 0,907954846 | -0,429907864 | 0,25  | 0,21  | 1         | 0,742309191   | 1,34714754      | 1,19047619      |
| GOSR1                                                                                    | 0,542563145 | -0,430771239 | 0,288 | 0,27  | 1         | 0,741865091   | 1,347953977     | 1,066666667     |
| SARAF                                                                                    | 0,014711002 | -0,430835921 | 0,963 | 0,8   | 1         | 0,741831831   | 1,348014412     | 1,20375         |
| CDADC1                                                                                   | 0,418899732 | -0,430928482 | 0,25  | 0,25  | 1         | 0,741784238   | 1,348100901     | 1               |
| MPRIIP                                                                                   | 0,355975555 | -0,431677324 | 0,388 | 0,24  | 1         | 0,741399309   | 1,348800825     | 1,616666667     |
| SLFN11                                                                                   | 0,74358406  | -0,431778712 | 0,225 | 0,17  | 1         | 0,741347208   | 1,348895618     | 1,323529412     |
| RNF149                                                                                   | 0,06354833  | -0,432157201 | 0,112 | 0,2   | 1         | 0,741152742   | 1,349249545     | 0,56            |
| UBE2B                                                                                    | 0,084997688 | -0,4324204   | 0,9   | 0,66  | 1         | 0,741017542   | 1,349495719     | 1,363636364     |
| B4GALT5                                                                                  | 0,92940026  | -0,432596179 | 0,225 | 0,18  | 1         | 0,740927261   | 1,349660152     | 1,25            |
| MX1                                                                                      | 0,528034014 | -0,433206806 | 0,125 | 0,14  | 1         | 0,740613727   | 1,350231523     | 0,892857143     |
| LAMB1                                                                                    | 0,736146624 | -0,433228445 | 0,588 | 0,45  | 1         | 0,740602618   | 1,350251776     | 1,306666667     |
| ATP1A1                                                                                   | 0,920475213 | -0,433424116 | 0,662 | 0,45  | 1         | 0,740502178   | 1,35043492      | 1,471111111     |
| KAT2B                                                                                    | 0,402999791 | -0,433426672 | 0,112 | 0,14  | 1         | 0,740500866   | 1,350437313     | 0,8             |
| PDE8A                                                                                    | 0,817493013 | -0,434031701 | 0,212 | 0,19  | 1         | 0,740190384   | 1,35100377      | 1,115789474     |
| DUSP3                                                                                    | 0,674139771 | -0,434082267 | 0,325 | 0,23  | 1         | 0,740164441   | 1,351051123     | 1,413043478     |

Supplementary Table 4

| Differentially expressed genes_keloid-CCD_ comparing SC-Keloid vs. (SC-Myel, SC-Nonmyel) |             |              |       |       |           |               |                 |                 |
|------------------------------------------------------------------------------------------|-------------|--------------|-------|-------|-----------|---------------|-----------------|-----------------|
| gene                                                                                     | p_val       | avg_log2FC   | pct.1 | pct.2 | p_val_adj | Foldchange_UP | Foldchange_DOWN | Ratio_pct1_pct2 |
| AHSA1                                                                                    | 0,671512893 | -0,434570266 | 0,562 | 0,36  | 1         | 0,739914119   | 1,351508201     | 1,561111111     |
| B4GALNT4                                                                                 | 0,030285711 | -0,434612766 | 0,062 | 0,16  | 1         | 0,739892323   | 1,351548015     | 0,3875          |
| SRSF10                                                                                   | 0,420528867 | -0,434631295 | 0,65  | 0,53  | 1         | 0,73988282    | 1,351565374     | 1,226415094     |
| ZNF219                                                                                   | 0,045089569 | -0,435058234 | 0,088 | 0,18  | 1         | 0,739663898   | 1,351965403     | 0,488888889     |
| RIF1                                                                                     | 0,978271032 | -0,435281077 | 0,5   | 0,36  | 1         | 0,739549656   | 1,352174248     | 1,388888889     |
| JMY                                                                                      | 0,473087064 | -0,43552348  | 0,25  | 0,25  | 1         | 0,739425407   | 1,352401461     | 1               |
| FBXL3                                                                                    | 0,696361223 | -0,435579871 | 0,55  | 0,39  | 1         | 0,739396505   | 1,352454324     | 1,41025641      |
| CD46                                                                                     | 0,521930026 | -0,435925883 | 0,537 | 0,43  | 1         | 0,739219191   | 1,352778732     | 1,248837209     |
| COBL                                                                                     | 0,893124972 | -0,436281901 | 0,462 | 0,33  | 1         | 0,739036794   | 1,353112602     | 1,4             |
| PTGS2                                                                                    | 0,024908063 | -0,436389294 | 0,05  | 0,15  | 1         | 0,738981784   | 1,35321333      | 0,333333333     |
| KLF13                                                                                    | 0,466369872 | -0,43742366  | 0,438 | 0,28  | 1         | 0,738452147   | 1,354183889     | 1,564285714     |
| FUS                                                                                      | 0,05375585  | -0,43790251  | 0,938 | 0,79  | 1         | 0,738207085   | 1,354633435     | 1,187341772     |
| SLC25A29                                                                                 | 0,326531211 | -0,437968905 | 0,212 | 0,23  | 1         | 0,738173113   | 1,354695779     | 0,92173913      |
| ADAM23                                                                                   | 0,015108289 | -0,43913032  | 0,05  | 0,16  | 1         | 0,737579099   | 1,355786791     | 0,3125          |
| SYPL1                                                                                    | 0,319021892 | -0,439740426 | 0,762 | 0,57  | 1         | 0,737267248   | 1,356360265     | 1,336842105     |
| GFRA1                                                                                    | 0,932846232 | -0,439749747 | 0,25  | 0,21  | 1         | 0,737262485   | 1,356369028     | 1,19047619      |
| MAP4                                                                                     | 0,009491448 | -0,439822183 | 0,925 | 0,79  | 1         | 0,737225469   | 1,356437132     | 1,170886076     |
| GLI3                                                                                     | 0,784873022 | -0,439869124 | 0,238 | 0,21  | 1         | 0,737201482   | 1,356481267     | 1,133333333     |
| SELE                                                                                     | 0,976971284 | -0,439909243 | 0,075 | 0,07  | 1         | 0,737180982   | 1,356518989     | 1,071428571     |
| NCOA3                                                                                    | 0,4425104   | -0,440547852 | 0,162 | 0,18  | 1         | 0,736854741   | 1,357119585     | 0,9             |
| CYCS                                                                                     | 0,228211337 | -0,441310515 | 0,8   | 0,64  | 1         | 0,736465315   | 1,357837199     | 1,25            |
| CRY1                                                                                     | 0,899183535 | -0,441592337 | 0,312 | 0,24  | 1         | 0,736321465   | 1,35810247      | 1,3             |
| CASC15                                                                                   | 0,993224631 | -0,441673562 | 0,4   | 0,3   | 1         | 0,73628001    | 1,358178935     | 1,333333333     |
| KMT2C                                                                                    | 0,73716191  | -0,44246252  | 0,462 | 0,37  | 1         | 0,735877475   | 1,358921878     | 1,248648649     |
| EHD1                                                                                     | 0,328715867 | -0,442557813 | 0,138 | 0,17  | 1         | 0,735828871   | 1,35901164      | 0,811764706     |
| PTBP2                                                                                    | 0,23160048  | -0,44265961  | 0,212 | 0,25  | 1         | 0,735776952   | 1,359107536     | 0,848           |
| ADNP                                                                                     | 0,618585907 | -0,442762601 | 0,388 | 0,33  | 1         | 0,735724428   | 1,359204563     | 1,175757576     |
| TMOD2                                                                                    | 0,839625284 | -0,443320164 | 0,325 | 0,24  | 1         | 0,735440145   | 1,359729961     | 1,354166667     |
| TRA2B                                                                                    | 0,40828924  | -0,44344582  | 0,688 | 0,52  | 1         | 0,735376093   | 1,359848396     | 1,323076923     |
| CEBPG                                                                                    | 0,866514259 | -0,44352247  | 0,475 | 0,33  | 1         | 0,735337023   | 1,359920646     | 1,439393939     |

Supplementary Table 4

| Differentially expressed genes_keloid-CCD_ comparing SC-Keloid vs. (SC-Myel, SC-Nonmyel) |             |              |       |       |           |               |                 |                 |
|------------------------------------------------------------------------------------------|-------------|--------------|-------|-------|-----------|---------------|-----------------|-----------------|
| gene                                                                                     | p_val       | avg_log2FC   | pct.1 | pct.2 | p_val_adj | Foldchange_UP | Foldchange_DOWN | Ratio_pct1_pct2 |
| HNRNPK                                                                                   | 0,043043153 | -0,443527575 | 0,938 | 0,81  | 1         | 0,735334421   | 1,359925459     | 1,158024691     |
| OSBPL1A                                                                                  | 0,840841215 | -0,443673387 | 0,162 | 0,15  | 1         | 0,735260105   | 1,360062912     | 1,08            |
| TBC1D15                                                                                  | 0,304169637 | -0,444556822 | 0,375 | 0,23  | 1         | 0,734810006   | 1,360896002     | 1,630434783     |
| A2M                                                                                      | 0,018453387 | -0,445134924 | 0,1   | 0,23  | 1         | 0,73451562    | 1,361441436     | 0,434782609     |
| IFIT3                                                                                    | 0,106098163 | -0,445354581 | 0,1   | 0,17  | 1         | 0,734403795   | 1,361648737     | 0,588235294     |
| RSBN1L                                                                                   | 0,730971616 | -0,445556248 | 0,462 | 0,32  | 1         | 0,734301144   | 1,361839088     | 1,44375         |
| CASK                                                                                     | 0,268578087 | -0,445671395 | 0,175 | 0,21  | 1         | 0,734242539   | 1,361947786     | 0,833333333     |
| ZC3HAV1                                                                                  | 0,971954947 | -0,446154814 | 0,425 | 0,31  | 1         | 0,73399655    | 1,362404225     | 1,370967742     |
| EP300                                                                                    | 0,804084376 | -0,446874585 | 0,312 | 0,26  | 1         | 0,733630445   | 1,363084107     | 1,2             |
| IFITM2                                                                                   | 0,457001475 | -0,447175459 | 0,775 | 0,54  | 1         | 0,733477462   | 1,363368408     | 1,435185185     |
| FGFR1                                                                                    | 0,171197379 | -0,447263129 | 0,075 | 0,13  | 1         | 0,733432891   | 1,36345126      | 0,576923077     |
| HLA-DPB1                                                                                 | 0,051519506 | -0,447284392 | 0,15  | 0,24  | 1         | 0,733422082   | 1,363471356     | 0,625           |
| SRRM1                                                                                    | 0,1749169   | -0,447323088 | 0,912 | 0,72  | 1         | 0,73340241    | 1,363507928     | 1,266666667     |
| NR1D2                                                                                    | 0,247485197 | -0,447773736 | 0,312 | 0,32  | 1         | 0,733173356   | 1,363933906     | 0,975           |
| CWC25                                                                                    | 0,850548064 | -0,447833685 | 0,45  | 0,34  | 1         | 0,733142891   | 1,363990584     | 1,323529412     |
| RALGPS2                                                                                  | 0,324833956 | -0,448358108 | 0,225 | 0,24  | 1         | 0,73287644    | 1,364486488     | 0,9375          |
| MAGEH1                                                                                   | 0,874582653 | -0,44886736  | 0,375 | 0,28  | 1         | 0,732617791   | 1,364968218     | 1,339285714     |
| INPP1                                                                                    | 0,769709446 | -0,449204306 | 0,238 | 0,21  | 1         | 0,732446705   | 1,365287049     | 1,133333333     |
| SQLE                                                                                     | 0,712615422 | -0,449437117 | 0,425 | 0,3   | 1         | 0,732328518   | 1,365507385     | 1,416666667     |
| UBE2S                                                                                    | 0,00628687  | -0,449479988 | 0,875 | 0,78  | 1         | 0,732306757   | 1,365547963     | 1,121794872     |
| GRAMD2B                                                                                  | 0,655798315 | -0,449552242 | 0,325 | 0,28  | 1         | 0,732270081   | 1,365616356     | 1,160714286     |
| MORF4L1                                                                                  | 0,007489269 | -0,44963212  | 0,95  | 0,86  | 1         | 0,732229539   | 1,365691968     | 1,104651163     |
| STAT3                                                                                    | 0,913360172 | -0,4500497   | 0,562 | 0,41  | 1         | 0,73201763    | 1,366087317     | 1,370731707     |
| CHD2                                                                                     | 0,830513524 | -0,450713936 | 0,362 | 0,27  | 1         | 0,731680677   | 1,366716426     | 1,340740741     |
| CSF1                                                                                     | 0,424527118 | -0,450983305 | 0,162 | 0,18  | 1         | 0,731544076   | 1,366971633     | 0,9             |
| CHMP1B                                                                                   | 0,757245201 | -0,451449626 | 0,388 | 0,31  | 1         | 0,731307658   | 1,36741355      | 1,251612903     |
| YTHDC1                                                                                   | 0,917876219 | -0,451560163 | 0,537 | 0,36  | 1         | 0,731251628   | 1,367518322     | 1,491666667     |
| IFNAR2                                                                                   | 0,873881147 | -0,451654329 | 0,262 | 0,2   | 1         | 0,7312039     | 1,367607585     | 1,31            |
| LGALS3                                                                                   | 0,004918927 | -0,451873691 | 0,988 | 0,84  | 1         | 0,731092729   | 1,367815545     | 1,176190476     |
| DEDD2                                                                                    | 0,434523547 | -0,452002281 | 0,4   | 0,35  | 1         | 0,731027569   | 1,367937466     | 1,142857143     |

Supplementary Table 4

| Differentially expressed genes_keloid-CCD_ comparing SC-Keloid vs. (SC-Myel, SC-Nonmyel) |             |              |       |       |           |               |                 |                 |
|------------------------------------------------------------------------------------------|-------------|--------------|-------|-------|-----------|---------------|-----------------|-----------------|
| gene                                                                                     | p_val       | avg_log2FC   | pct.1 | pct.2 | p_val_adj | Foldchange_UP | Foldchange_DOWN | Ratio_pct1_pct2 |
| KIF1B                                                                                    | 0,52807378  | -0,452361591 | 0,55  | 0,43  | 1         | 0,730845525   | 1,3682782       | 1,279069767     |
| SRCIN1                                                                                   | 0,000860865 | -0,452363853 | 0     | 0,13  | 1         | 0,730844379   | 1,368280346     | 0               |
| RAB4A                                                                                    | 0,973410862 | -0,452612743 | 0,438 | 0,31  | 1         | 0,730718307   | 1,368516418     | 1,412903226     |
| GDF11                                                                                    | 0,859627541 | -0,45317289  | 0,325 | 0,24  | 1         | 0,73043465    | 1,369047867     | 1,354166667     |
| MKNK1                                                                                    | 0,840841215 | -0,453193703 | 0,162 | 0,15  | 1         | 0,730424113   | 1,369067618     | 1,08            |
| MARCHF5                                                                                  | 0,416512728 | -0,453223799 | 0,35  | 0,31  | 1         | 0,730408876   | 1,369096178     | 1,129032258     |
| IL11RA                                                                                   | 0,645508535 | -0,454198863 | 0,262 | 0,24  | 1         | 0,729915386   | 1,370021813     | 1,091666667     |
| CIRBP                                                                                    | 0,002353984 | -0,454252226 | 0,988 | 0,94  | 1         | 0,729888388   | 1,370072488     | 1,05106383      |
| CIT                                                                                      | 0,526831748 | -0,455582548 | 0,525 | 0,34  | 1         | 0,729215662   | 1,371336427     | 1,544117647     |
| ROCK2                                                                                    | 0,376630957 | -0,455846497 | 0,7   | 0,39  | 1         | 0,72908226    | 1,371587343     | 1,794871795     |
| TMPRSS5                                                                                  | 0,094913323 | -0,456324021 | 0,062 | 0,13  | 1         | 0,728840977   | 1,372041407     | 0,476923077     |
| HERC4                                                                                    | 0,425608445 | -0,456863418 | 0,35  | 0,22  | 1         | 0,728568528   | 1,372554483     | 1,590909091     |
| MOB4                                                                                     | 0,885364135 | -0,457735752 | 0,6   | 0,39  | 1         | 0,728128128   | 1,373384658     | 1,538461538     |
| RAB2B                                                                                    | 0,537798922 | -0,458262842 | 0,188 | 0,13  | 1         | 0,727862154   | 1,373886517     | 1,446153846     |
| PAPOLA                                                                                   | 0,92196558  | -0,458424815 | 0,675 | 0,46  | 1         | 0,727780441   | 1,374040773     | 1,467391304     |
| CCNG2                                                                                    | 0,546300741 | -0,458952804 | 0,225 | 0,22  | 1         | 0,727514141   | 1,374543728     | 1,022727273     |
| POU3F1                                                                                   | 0,613384856 | -0,458981224 | 0,7   | 0,47  | 1         | 0,72749981    | 1,374570806     | 1,489361702     |
| NAV2                                                                                     | 0,927909985 | -0,459453062 | 0,262 | 0,22  | 1         | 0,727261918   | 1,375020437     | 1,190909091     |
| KIAA2026                                                                                 | 0,643239175 | -0,459988527 | 0,338 | 0,29  | 1         | 0,72699204    | 1,37553088      | 1,165517241     |
| NEU1                                                                                     | 0,714628792 | -0,460154879 | 0,525 | 0,35  | 1         | 0,726908218   | 1,375689496     | 1,5             |
| SLU7                                                                                     | 0,945281133 | -0,46020632  | 0,388 | 0,29  | 1         | 0,7268823     | 1,375738549     | 1,337931034     |
| TOR1AIP1                                                                                 | 0,336163865 | -0,460469383 | 0,262 | 0,27  | 1         | 0,726749771   | 1,375989426     | 0,97037037      |
| MAPK8IP1                                                                                 | 0,076733472 | -0,460615518 | 0,05  | 0,12  | 1         | 0,72667616    | 1,37612881      | 0,416666667     |
| RB1CC1                                                                                   | 0,942012608 | -0,460771327 | 0,537 | 0,37  | 1         | 0,726597684   | 1,376277439     | 1,451351351     |
| YPEL2                                                                                    | 0,611027459 | -0,460869611 | 0,288 | 0,26  | 1         | 0,726548186   | 1,376371201     | 1,107692308     |
| RASEF                                                                                    | 0,003170304 | -0,461322042 | 0,013 | 0,13  | 1         | 0,726320375   | 1,376802901     | 0,1             |
| TFAP2C                                                                                   | 1           | -0,46142925  | 0,175 | 0,15  | 1         | 0,726266404   | 1,376905216     | 1,166666667     |
| CDC34                                                                                    | 0,902586941 | -0,461586885 | 0,462 | 0,34  | 1         | 0,726187054   | 1,37705567      | 1,358823529     |
| ZBTB1                                                                                    | 0,458136814 | -0,461790357 | 0,375 | 0,33  | 1         | 0,726084642   | 1,377249899     | 1,136363636     |
| ANK2                                                                                     | 0,990811805 | -0,461852223 | 0,45  | 0,33  | 1         | 0,726053506   | 1,37730896      | 1,363636364     |

Supplementary Table 4

| Differentially expressed genes_keloid-CCD_ comparing SC-Keloid vs. (SC-Myel, SC-Nonmyel) |             |              |       |       |           |               |                 |                 |
|------------------------------------------------------------------------------------------|-------------|--------------|-------|-------|-----------|---------------|-----------------|-----------------|
| gene                                                                                     | p_val       | avg_log2FC   | pct.1 | pct.2 | p_val_adj | Foldchange_UP | Foldchange_DOWN | Ratio_pct1_pct2 |
| PPP3CA                                                                                   | 0,894024557 | -0,46229255  | 0,55  | 0,39  | 1         | 0,725831941   | 1,377729395     | 1,41025641      |
| LIMCH1                                                                                   | 0,675367647 | -0,462327438 | 0,3   | 0,22  | 1         | 0,725814388   | 1,377762712     | 1,363636364     |
| HTRA1                                                                                    | 0,144536828 | -0,46250622  | 0,713 | 0,55  | 1         | 0,725724449   | 1,377933458     | 1,296363636     |
| NRIP1                                                                                    | 0,505231898 | -0,462786296 | 0,475 | 0,31  | 1         | 0,725583575   | 1,378200988     | 1,532258065     |
| GAN                                                                                      | 0,260953592 | -0,463091926 | 0,238 | 0,14  | 1         | 0,72542988    | 1,378492985     | 1,7             |
| ARFGAP2                                                                                  | 0,953932811 | -0,463404798 | 0,3   | 0,23  | 1         | 0,725272575   | 1,378791966     | 1,304347826     |
| PAPSS1                                                                                   | 0,848025842 | -0,46366385  | 0,438 | 0,33  | 1         | 0,725142356   | 1,379039567     | 1,327272727     |
| ACVR1                                                                                    | 0,537028079 | -0,463702218 | 0,112 | 0,13  | 1         | 0,725123071   | 1,379076242     | 0,861538462     |
| DCUN1D3                                                                                  | 0,095833093 | -0,463803914 | 0,125 | 0,2   | 1         | 0,725071959   | 1,379173456     | 0,625           |
| TSC22D1                                                                                  | 0,649609452 | -0,463804587 | 0,775 | 0,5   | 1         | 0,725071621   | 1,3791741       | 1,55            |
| BACH1                                                                                    | 0,787099739 | -0,4649899   | 0,7   | 0,5   | 1         | 0,724476149   | 1,38030769      | 1,4             |
| DCTN6                                                                                    | 0,703984072 | -0,465097416 | 0,65  | 0,5   | 1         | 0,72442216    | 1,38041056      | 1,3             |
| LEPROT                                                                                   | 0,150311082 | -0,465695773 | 0,625 | 0,54  | 1         | 0,724121769   | 1,380983204     | 1,157407407     |
| PPP4R3B                                                                                  | 0,447447903 | -0,466097133 | 0,325 | 0,3   | 1         | 0,723920345   | 1,381367449     | 1,083333333     |
| KCNG1                                                                                    | 0,523136538 | -0,466277989 | 0,312 | 0,21  | 1         | 0,7238296     | 1,381540628     | 1,485714286     |
| NAA50                                                                                    | 0,590746417 | -0,466335477 | 0,55  | 0,35  | 1         | 0,723800757   | 1,38159568      | 1,571428571     |
| EHD4                                                                                     | 0,965097297 | -0,466450502 | 0,562 | 0,39  | 1         | 0,723743052   | 1,381705838     | 1,441025641     |
| TCP1                                                                                     | 0,392777277 | -0,46670975  | 0,713 | 0,53  | 1         | 0,723613009   | 1,381954149     | 1,345283019     |
| SGCE                                                                                     | 0,025130594 | -0,46689787  | 0,887 | 0,76  | 1         | 0,72351866    | 1,38213436      | 1,167105263     |
| CHMP4B                                                                                   | 0,916164741 | -0,467514727 | 0,488 | 0,34  | 1         | 0,723209369   | 1,38272545      | 1,435294118     |
| ICAM1                                                                                    | 0,565648439 | -0,468344894 | 0,138 | 0,15  | 1         | 0,722793334   | 1,383521337     | 0,92            |
| PCDH17                                                                                   | 0,005755872 | -0,468696174 | 0,025 | 0,14  | 1         | 0,722617363   | 1,38385825      | 0,178571429     |
| DPM1                                                                                     | 0,835118846 | -0,468885829 | 0,362 | 0,29  | 1         | 0,722522375   | 1,384040183     | 1,248275862     |
| DUSP8                                                                                    | 0,391883649 | -0,468927582 | 0,35  | 0,32  | 1         | 0,722501465   | 1,384080238     | 1,09375         |
| SEMA3C                                                                                   | 0,00228592  | -0,468976595 | 0,912 | 0,81  | 1         | 0,72247692    | 1,384127261     | 1,125925926     |
| MOAP1                                                                                    | 0,098069222 | -0,469631637 | 0,1   | 0,17  | 1         | 0,722148961   | 1,384755853     | 0,588235294     |
| SH3D19                                                                                   | 0,439544632 | -0,4700034   | 0,212 | 0,22  | 1         | 0,721962896   | 1,385112732     | 0,963636364     |
| C1orf21                                                                                  | 0,99041691  | -0,470325124 | 0,375 | 0,3   | 1         | 0,721801915   | 1,38542165      | 1,25            |
| HSPE1                                                                                    | 0,423678462 | -0,471565566 | 0,925 | 0,67  | 1         | 0,72118157    | 1,38661336      | 1,380597015     |
| MB21D2                                                                                   | 0,699430114 | -0,472109398 | 0,188 | 0,18  | 1         | 0,720909768   | 1,38713615      | 1,044444444     |

Supplementary Table 4

| Differentially expressed genes_keloid-CCD_ comparing SC-Keloid vs. (SC-Myel, SC-Nonmyel) |             |              |       |       |           |               |                 |                 |
|------------------------------------------------------------------------------------------|-------------|--------------|-------|-------|-----------|---------------|-----------------|-----------------|
| gene                                                                                     | p_val       | avg_log2FC   | pct.1 | pct.2 | p_val_adj | Foldchange_UP | Foldchange_DOWN | Ratio_pct1_pct2 |
| TGFBR2                                                                                   | 0,679657177 | -0,472346681 | 0,662 | 0,47  | 1         | 0,720791208   | 1,387364314     | 1,408510638     |
| LRCH3                                                                                    | 0,80681184  | -0,472376846 | 0,5   | 0,33  | 1         | 0,720776138   | 1,387393322     | 1,515151515     |
| AOPEP                                                                                    | 0,226096659 | -0,472535042 | 0,738 | 0,54  | 1         | 0,720697107   | 1,387545462     | 1,366666667     |
| RBMXL1                                                                                   | 0,245691437 | -0,472905331 | 0,125 | 0,17  | 1         | 0,720512152   | 1,387901643     | 0,735294118     |
| C12orf57                                                                                 | 0,10852433  | -0,473162541 | 0,838 | 0,66  | 1         | 0,720383708   | 1,388149106     | 1,26969697      |
| ZNF24                                                                                    | 0,498189686 | -0,47326278  | 0,412 | 0,35  | 1         | 0,720333657   | 1,388245558     | 1,177142857     |
| RBM25                                                                                    | 0,007155655 | -0,473672577 | 0,925 | 0,78  | 1         | 0,720129076   | 1,388639945     | 1,185897436     |
| ZFYVE21                                                                                  | 0,551792984 | -0,47446788  | 0,312 | 0,28  | 1         | 0,719732205   | 1,389405661     | 1,114285714     |
| ENPP2                                                                                    | 0,143129625 | -0,475735578 | 0,1   | 0,16  | 1         | 0,719100053   | 1,39062707      | 0,625           |
| SGK1                                                                                     | 0,613974058 | -0,47591632  | 0,225 | 0,22  | 1         | 0,71900997    | 1,390801299     | 1,022727273     |
| PABPN1                                                                                   | 0,258805883 | -0,476189441 | 0,7   | 0,52  | 1         | 0,718873864   | 1,391064621     | 1,346153846     |
| ADGRB3                                                                                   | 0,000743114 | -0,476339763 | 0,013 | 0,16  | 1         | 0,718798965   | 1,391209571     | 0,08125         |
| EGR3                                                                                     | 0,287024009 | -0,476668999 | 0,175 | 0,21  | 1         | 0,718634948   | 1,391527094     | 0,833333333     |
| IDI1                                                                                     | 0,463894291 | -0,476972748 | 0,588 | 0,35  | 1         | 0,71848366    | 1,3918201       | 1,68            |
| RBMX                                                                                     | 0,170624798 | -0,477324087 | 0,8   | 0,62  | 1         | 0,718308709   | 1,392159091     | 1,290322581     |
| AEBP1                                                                                    | 0,080004161 | -0,477456232 | 0,637 | 0,56  | 1         | 0,718242918   | 1,392286613     | 1,1375          |
| STAM                                                                                     | 0,39597508  | -0,477728765 | 0,3   | 0,29  | 1         | 0,718107251   | 1,392549649     | 1,034482759     |
| STIP1                                                                                    | 0,545077262 | -0,4793162   | 0,537 | 0,34  | 1         | 0,717317533   | 1,394082751     | 1,579411765     |
| RIPK2                                                                                    | 0,921573609 | -0,479363931 | 0,312 | 0,25  | 1         | 0,717293802   | 1,394128874     | 1,248           |
| ZBTB2                                                                                    | 0,219975341 | -0,479393098 | 0,188 | 0,23  | 1         | 0,7172793     | 1,39415706      | 0,817391304     |
| TNRC6B                                                                                   | 0,832638437 | -0,480067572 | 0,575 | 0,43  | 1         | 0,716944043   | 1,394808994     | 1,337209302     |
| PLPP3                                                                                    | 0,162962619 | -0,480162869 | 0,225 | 0,27  | 1         | 0,716896687   | 1,394901131     | 0,833333333     |
| HEY1                                                                                     | 0,142802269 | -0,480692589 | 0,15  | 0,21  | 1         | 0,71663351    | 1,395413397     | 0,714285714     |
| SFXN5                                                                                    | 0,574854686 | -0,482095393 | 0,275 | 0,25  | 1         | 0,71593703    | 1,396770886     | 1,1             |
| CBX4                                                                                     | 0,798538016 | -0,482314334 | 0,288 | 0,25  | 1         | 0,715828389   | 1,396982873     | 1,152           |
| CRBN                                                                                     | 0,978331829 | -0,482435159 | 0,325 | 0,25  | 1         | 0,715768441   | 1,397099876     | 1,3             |
| RBM23                                                                                    | 0,93590671  | -0,482592867 | 0,338 | 0,26  | 1         | 0,715690202   | 1,397252607     | 1,3             |
| SPRY2                                                                                    | 0,671423776 | -0,482617613 | 0,388 | 0,32  | 1         | 0,715677925   | 1,397276574     | 1,2125          |
| NMB                                                                                      | 0,354157792 | -0,483467156 | 0,225 | 0,14  | 1         | 0,715256617   | 1,398099614     | 1,607142857     |
| PAG1                                                                                     | 0,002140241 | -0,483579644 | 0,038 | 0,18  | 1         | 0,71520085    | 1,39820863      | 0,211111111     |

Supplementary Table 4

| Differentially expressed genes_keloid-CCD_ comparing SC-Keloid vs. (SC-Myel, SC-Nonmyel) |             |              |       |       |           |               |                 |                 |
|------------------------------------------------------------------------------------------|-------------|--------------|-------|-------|-----------|---------------|-----------------|-----------------|
| gene                                                                                     | p_val       | avg_log2FC   | pct.1 | pct.2 | p_val_adj | Foldchange_UP | Foldchange_DOWN | Ratio_pct1_pct2 |
| RBPM5                                                                                    | 0,256530512 | -0,483831212 | 0,212 | 0,24  | 1         | 0,715076148   | 1,398452462     | 0,883333333     |
| ARIH1                                                                                    | 0,358374513 | -0,48401009  | 0,425 | 0,38  | 1         | 0,714987493   | 1,398625865     | 1,118421053     |
| DHR53                                                                                    | 0,008543722 | -0,484238018 | 0,013 | 0,11  | 1         | 0,714874543   | 1,398846847     | 0,118181818     |
| DOK6                                                                                     | 0,001160836 | -0,484510417 | 0,013 | 0,15  | 1         | 0,714739578   | 1,399110993     | 0,086666667     |
| TRIM47                                                                                   | 0,809672254 | -0,484544002 | 0,475 | 0,32  | 1         | 0,714722939   | 1,399143563     | 1,484375        |
| PDP1                                                                                     | 0,888847117 | -0,485705915 | 0,3   | 0,23  | 1         | 0,71414755    | 1,400270855     | 1,304347826     |
| UBE2D1                                                                                   | 0,680796158 | -0,485877731 | 0,412 | 0,28  | 1         | 0,714062504   | 1,400437629     | 1,471428571     |
| CTTNBP2NL                                                                                | 0,875821031 | -0,486048542 | 0,338 | 0,27  | 1         | 0,713977966   | 1,400603446     | 1,251851852     |
| SPTSSA                                                                                   | 0,444073112 | -0,486220544 | 0,925 | 0,67  | 1         | 0,713892849   | 1,40077044      | 1,380597015     |
| USP12                                                                                    | 0,848859046 | -0,486811759 | 0,275 | 0,21  | 1         | 0,713600356   | 1,401344592     | 1,30952381      |
| SLC9A3R1                                                                                 | 0,121264871 | -0,487147677 | 0,125 | 0,19  | 1         | 0,713434221   | 1,401670919     | 0,657894737     |
| CHD1                                                                                     | 0,647696173 | -0,48734321  | 0,562 | 0,41  | 1         | 0,713337533   | 1,401860906     | 1,370731707     |
| SKIL                                                                                     | 0,570547675 | -0,487634285 | 0,625 | 0,48  | 1         | 0,713193627   | 1,40214377      | 1,302083333     |
| COL21A1                                                                                  | 0,001411118 | -0,487641045 | 0     | 0,12  | 1         | 0,713190285   | 1,40215034      | 0               |
| RLF                                                                                      | 0,995722529 | -0,487790223 | 0,338 | 0,26  | 1         | 0,713116543   | 1,402295333     | 1,3             |
| ZNF536                                                                                   | 0,833804773 | -0,488075386 | 0,275 | 0,21  | 1         | 0,712975602   | 1,402572538     | 1,30952381      |
| TFAP2A                                                                                   | 0,318220454 | -0,488506005 | 0,512 | 0,31  | 1         | 0,712762823   | 1,402991244     | 1,651612903     |
| FAM174A                                                                                  | 0,734093988 | -0,489022239 | 0,388 | 0,3   | 1         | 0,712507824   | 1,403493361     | 1,293333333     |
| GINM1                                                                                    | 0,294107048 | -0,489812086 | 0,525 | 0,44  | 1         | 0,712117846   | 1,404261956     | 1,193181818     |
| NUDT3                                                                                    | 0,905810918 | -0,489890166 | 0,425 | 0,32  | 1         | 0,712079307   | 1,404337958     | 1,328125        |
| SHF                                                                                      | 0,115256598 | -0,490054194 | 0,075 | 0,14  | 1         | 0,711998352   | 1,404497633     | 0,535714286     |
| MARCKS                                                                                   | 5,46923E-05 | -0,490312603 | 1     | 0,96  | 1         | 0,711870833   | 1,404749224     | 1,041666667     |
| SAMHD1                                                                                   | 0,194692589 | -0,490896013 | 0,275 | 0,3   | 1         | 0,711583019   | 1,405317404     | 0,916666667     |
| GLDN                                                                                     | 0,120814239 | -0,491087993 | 0     | 0,03  | 1         | 0,711488334   | 1,405504422     | 0               |
| MED13                                                                                    | 0,687113866 | -0,49125299  | 0,537 | 0,4   | 1         | 0,711406968   | 1,405665175     | 1,3425          |
| KPNA2                                                                                    | 0,092026614 | -0,491438348 | 0,512 | 0,51  | 1         | 0,711315572   | 1,405845787     | 1,003921569     |
| RPGR                                                                                     | 0,565146594 | -0,491477487 | 0,325 | 0,22  | 1         | 0,711296275   | 1,405883927     | 1,477272727     |
| ZCCHC3                                                                                   | 0,117003145 | -0,491552597 | 0,125 | 0,19  | 1         | 0,711259244   | 1,405957122     | 0,657894737     |
| KANSL1L                                                                                  | 0,137385055 | -0,493040281 | 0,138 | 0,2   | 1         | 0,710526183   | 1,40740767      | 0,69            |
| LMNA                                                                                     | 0,01027544  | -0,493161986 | 1     | 0,99  | 1         | 0,710466246   | 1,407526404     | 1,01010101      |

Supplementary Table 4

| Differentially expressed genes_keloid-CCD_ comparing SC-Keloid vs. (SC-Myel, SC-Nonmyel) |             |              |       |       |           |               |                 |                 |
|------------------------------------------------------------------------------------------|-------------|--------------|-------|-------|-----------|---------------|-----------------|-----------------|
| gene                                                                                     | p_val       | avg_log2FC   | pct.1 | pct.2 | p_val_adj | Foldchange_UP | Foldchange_DOWN | Ratio_pct1_pct2 |
| ZNF462                                                                                   | 0,719733381 | -0,494406726 | 0,288 | 0,25  | 1         | 0,709853528   | 1,408741325     | 1,152           |
| SPIN1                                                                                    | 0,922490839 | -0,494441461 | 0,4   | 0,29  | 1         | 0,709836438   | 1,408775243     | 1,379310345     |
| ADAMTS8                                                                                  | 0,041155255 | -0,495635909 | 0,062 | 0,15  | 1         | 0,709248988   | 1,40994209      | 0,413333333     |
| GPR137B                                                                                  | 0,799190278 | -0,49585193  | 0,35  | 0,28  | 1         | 0,709142796   | 1,410153223     | 1,25            |
| PLPP1                                                                                    | 0,114511267 | -0,495963434 | 0,95  | 0,79  | 1         | 0,70908799    | 1,410262216     | 1,202531646     |
| CLDND1                                                                                   | 0,830108121 | -0,495995625 | 0,637 | 0,44  | 1         | 0,709072168   | 1,410293684     | 1,447727273     |
| RERE                                                                                     | 0,847385974 | -0,497259335 | 0,325 | 0,26  | 1         | 0,708451337   | 1,411529554     | 1,25            |
| TAF7                                                                                     | 0,898128997 | -0,497316849 | 0,588 | 0,42  | 1         | 0,708423095   | 1,411585826     | 1,4             |
| GBP1                                                                                     | 0,330989881 | -0,497701224 | 0,3   | 0,19  | 1         | 0,708234376   | 1,411961962     | 1,578947368     |
| JMJD6                                                                                    | 0,265862956 | -0,498339137 | 0,338 | 0,32  | 1         | 0,707921287   | 1,412586425     | 1,05625         |
| AC009041.2                                                                               | 0,001282601 | -0,498443303 | 0,025 | 0,17  | 1         | 0,707870175   | 1,412688421     | 0,147058824     |
| SCCPDH                                                                                   | 0,056298747 | -0,499209639 | 0,863 | 0,68  | 1         | 0,707494266   | 1,413439017     | 1,269117647     |
| TXLNG                                                                                    | 0,174300354 | -0,499210338 | 0,15  | 0,2   | 1         | 0,707493923   | 1,413439702     | 0,75            |
| MTHFD2                                                                                   | 0,510091673 | -0,500042526 | 0,4   | 0,35  | 1         | 0,707085938   | 1,41425525      | 1,142857143     |
| PRX                                                                                      | 0,098032255 | -0,501400867 | 0,013 | 0,06  | 1         | 0,706420509   | 1,41558744      | 0,216666667     |
| GNG12                                                                                    | 0,244006253 | -0,501879147 | 0,75  | 0,56  | 1         | 0,706186356   | 1,416056811     | 1,339285714     |
| PRPF38B                                                                                  | 0,26772943  | -0,502900152 | 0,662 | 0,49  | 1         | 0,70568676    | 1,417059319     | 1,351020408     |
| EIF1AX                                                                                   | 0,341573573 | -0,503018721 | 0,75  | 0,55  | 1         | 0,705628765   | 1,417175786     | 1,363636364     |
| MED28                                                                                    | 0,108161494 | -0,503652765 | 0,3   | 0,33  | 1         | 0,705318719   | 1,417798752     | 0,909090909     |
| HNRNPF                                                                                   | 0,219002156 | -0,504114294 | 0,825 | 0,61  | 1         | 0,705093119   | 1,418252389     | 1,352459016     |
| TJP1                                                                                     | 0,817520933 | -0,504277331 | 0,5   | 0,34  | 1         | 0,705013442   | 1,418412673     | 1,470588235     |
| STOM                                                                                     | 0,896277603 | -0,504581249 | 0,3   | 0,25  | 1         | 0,704864939   | 1,418711506     | 1,2             |
| MAPK8                                                                                    | 0,730707235 | -0,504680695 | 0,238 | 0,21  | 1         | 0,704816354   | 1,418809303     | 1,133333333     |
| C1S                                                                                      | 0,083175612 | -0,505014195 | 0,075 | 0,15  | 1         | 0,704653445   | 1,419137319     | 0,5             |
| SRSF11                                                                                   | 0,029534035 | -0,505088898 | 0,863 | 0,7   | 1         | 0,704616958   | 1,419210804     | 1,232857143     |
| CDC42EP4                                                                                 | 0,790752958 | -0,505242509 | 0,4   | 0,31  | 1         | 0,704541938   | 1,419361923     | 1,290322581     |
| LURAP1L                                                                                  | 0,008884256 | -0,505288911 | 0,013 | 0,11  | 1         | 0,704519278   | 1,419407576     | 0,118181818     |
| ATP6V1C1                                                                                 | 0,742639249 | -0,506131987 | 0,238 | 0,21  | 1         | 0,704107694   | 1,420237285     | 1,133333333     |
| OAT                                                                                      | 0,089130145 | -0,50681371  | 0,613 | 0,53  | 1         | 0,703775058   | 1,420908554     | 1,156603774     |
| MRPS6                                                                                    | 0,678975533 | -0,507084144 | 0,3   | 0,26  | 1         | 0,703643147   | 1,42117493      | 1,153846154     |



Supplementary Table 4

| Differentially expressed genes_keloid-CCD_ comparing SC-Keloid vs. (SC-Myel, SC-Nonmyel) |             |              |       |       |           |               |                 |                 |
|------------------------------------------------------------------------------------------|-------------|--------------|-------|-------|-----------|---------------|-----------------|-----------------|
| gene                                                                                     | p_val       | avg_log2FC   | pct.1 | pct.2 | p_val_adj | Foldchange_UP | Foldchange_DOWN | Ratio_pct1_pct2 |
| CECR2                                                                                    | 0,008007404 | -0,507234926 | 0,05  | 0,17  | 1         | 0,70356961    | 1,42132347      | 0,294117647     |
| ERO1B                                                                                    | 0,131529733 | -0,507308985 | 0,15  | 0,21  | 1         | 0,703533494   | 1,421396434     | 0,714285714     |
| UBXN7                                                                                    | 0,73610303  | -0,508425477 | 0,438 | 0,33  | 1         | 0,702989245   | 1,422496869     | 1,327272727     |
| EVI5                                                                                     | 0,367519273 | -0,508809568 | 0,575 | 0,45  | 1         | 0,702802112   | 1,422875633     | 1,277777778     |
| CEP350                                                                                   | 0,581725998 | -0,508906125 | 0,488 | 0,38  | 1         | 0,702755076   | 1,422970866     | 1,284210526     |
| SECISBP2L                                                                                | 0,988923919 | -0,508917321 | 0,6   | 0,41  | 1         | 0,702749623   | 1,42298191      | 1,463414634     |
| SNTB2                                                                                    | 0,976676697 | -0,50925433  | 0,175 | 0,15  | 1         | 0,702585482   | 1,423314352     | 1,166666667     |
| REST                                                                                     | 0,88021378  | -0,509737385 | 0,525 | 0,37  | 1         | 0,702350276   | 1,423790998     | 1,418918919     |
| ASXL1                                                                                    | 0,555746993 | -0,510645333 | 0,525 | 0,42  | 1         | 0,701908396   | 1,424687331     | 1,25            |
| CDKN2AIP                                                                                 | 0,864412579 | -0,510798571 | 0,312 | 0,24  | 1         | 0,701833846   | 1,424838664     | 1,3             |
| LAMP2                                                                                    | 0,258194135 | -0,512058737 | 0,838 | 0,61  | 1         | 0,701221076   | 1,426083777     | 1,373770492     |
| AKIRIN2                                                                                  | 0,126148666 | -0,512156624 | 0,338 | 0,36  | 1         | 0,701173499   | 1,42618054      | 0,938888889     |
| CLK4                                                                                     | 0,611973729 | -0,512419266 | 0,4   | 0,33  | 1         | 0,701045863   | 1,426440199     | 1,212121212     |
| QKI                                                                                      | 0,073243739 | -0,512944683 | 0,95  | 0,72  | 1         | 0,700790594   | 1,426959791     | 1,319444444     |
| ARHGAP39                                                                                 | 0,003382129 | -0,514312587 | 0,05  | 0,19  | 1         | 0,700126448   | 1,428313418     | 0,263157895     |
| SOD1                                                                                     | 0,000866307 | -0,515038414 | 0,938 | 0,88  | 1         | 0,6997743     | 1,42903219      | 1,065909091     |
| RBM8A                                                                                    | 0,054606124 | -0,515573716 | 0,875 | 0,72  | 1         | 0,699514702   | 1,42956252      | 1,215277778     |
| ARID4A                                                                                   | 0,893124902 | -0,516143263 | 0,462 | 0,33  | 1         | 0,699238602   | 1,430126995     | 1,4             |
| DIP2B                                                                                    | 0,922476428 | -0,516719642 | 0,3   | 0,25  | 1         | 0,698959301   | 1,430698466     | 1,2             |
| METRNL                                                                                   | 0,804837053 | -0,516748423 | 0,488 | 0,33  | 1         | 0,698945357   | 1,430727008     | 1,478787879     |
| ZNF652                                                                                   | 0,52558364  | -0,5167842   | 0,262 | 0,25  | 1         | 0,698928024   | 1,430762489     | 1,048           |
| SNHG32                                                                                   | 0,692423683 | -0,51739203  | 0,637 | 0,46  | 1         | 0,698633617   | 1,431365419     | 1,384782609     |
| FSTL1                                                                                    | 0,176666811 | -0,517473055 | 0,588 | 0,47  | 1         | 0,698594381   | 1,43144581      | 1,25106383      |
| SIRT1                                                                                    | 0,976028826 | -0,517581452 | 0,288 | 0,23  | 1         | 0,698541894   | 1,431553366     | 1,252173913     |
| PRPF4B                                                                                   | 0,746471844 | -0,517618397 | 0,588 | 0,39  | 1         | 0,698524007   | 1,431590025     | 1,507692308     |
| ZNFX1                                                                                    | 0,378925999 | -0,518688918 | 0,225 | 0,23  | 1         | 0,698005874   | 1,432652701     | 0,97826087      |
| FNIP1                                                                                    | 0,447167966 | -0,519862598 | 0,562 | 0,45  | 1         | 0,697438254   | 1,433818685     | 1,248888889     |
| CST3                                                                                     | 0,000159685 | -0,520151464 | 1     | 0,98  | 1         | 0,697298622   | 1,434105802     | 1,020408163     |
| MFSD2A                                                                                   | 0,429901086 | -0,520764126 | 0,15  | 0,17  | 1         | 0,697002567   | 1,434714946     | 0,882352941     |
| PNPLA8                                                                                   | 0,164745828 | -0,521590308 | 0,362 | 0,35  | 1         | 0,696603531   | 1,435536794     | 1,034285714     |

Supplementary Table 4

| Differentially expressed genes_keloid-CCD_ comparing SC-Keloid vs. (SC-Myel, SC-Nonmyel) |             |              |       |       |           |               |                 |                 |
|------------------------------------------------------------------------------------------|-------------|--------------|-------|-------|-----------|---------------|-----------------|-----------------|
| gene                                                                                     | p_val       | avg_log2FC   | pct.1 | pct.2 | p_val_adj | Foldchange_UP | Foldchange_DOWN | Ratio_pct1_pct2 |
| SRSF7                                                                                    | 0,260152072 | -0,521866249 | 0,863 | 0,71  | 1         | 0,696470307   | 1,435811391     | 1,215492958     |
| NFKB1                                                                                    | 0,513130599 | -0,524805034 | 0,625 | 0,4   | 1         | 0,695053033   | 1,438739136     | 1,5625          |
| BPTF                                                                                     | 0,473539851 | -0,525136045 | 0,588 | 0,48  | 1         | 0,694893579   | 1,439069277     | 1,225           |
| CTSL                                                                                     | 0,848547415 | -0,525666093 | 0,4   | 0,31  | 1         | 0,694638321   | 1,43959809      | 1,290322581     |
| KMT2A                                                                                    | 0,395917487 | -0,525885682 | 0,575 | 0,45  | 1         | 0,6945326     | 1,439817224     | 1,277777778     |
| C1R                                                                                      | 0,393989074 | -0,526240008 | 0,3   | 0,29  | 1         | 0,694362044   | 1,440170887     | 1,034482759     |
| LUC7L3                                                                                   | 0,343932152 | -0,526722717 | 0,787 | 0,6   | 1         | 0,694129757   | 1,440652832     | 1,311666667     |
| CBX6                                                                                     | 0,527151434 | -0,527243045 | 0,45  | 0,36  | 1         | 0,693879454   | 1,441172517     | 1,25            |
| MAFK                                                                                     | 0,001306961 | -0,528594163 | 0,025 | 0,17  | 1         | 0,693229924   | 1,442522841     | 0,147058824     |
| CRIM1                                                                                    | 0,01020975  | -0,528685266 | 0,075 | 0,2   | 1         | 0,69318615    | 1,442613936     | 0,375           |
| SLC44A1                                                                                  | 0,627651198 | -0,529005385 | 0,388 | 0,32  | 1         | 0,693032356   | 1,442934072     | 1,2125          |
| MIDN                                                                                     | 0,415465677 | -0,529114496 | 0,588 | 0,47  | 1         | 0,692979944   | 1,443043206     | 1,25106383      |
| IL6                                                                                      | 0,224950798 | -0,529614611 | 0,1   | 0,15  | 1         | 0,692739762   | 1,443543528     | 0,666666667     |
| SLC39A6                                                                                  | 0,957379154 | -0,530422146 | 0,488 | 0,34  | 1         | 0,692352116   | 1,444351764     | 1,435294118     |
| CLMN                                                                                     | 0,072430572 | -0,531382486 | 0,1   | 0,18  | 1         | 0,6918914     | 1,445313527     | 0,555555556     |
| PRKCA                                                                                    | 0,412722362 | -0,531716189 | 0,475 | 0,39  | 1         | 0,691731381   | 1,445647874     | 1,217948718     |
| SHC4                                                                                     | 0,239761584 | -0,531722314 | 0,238 | 0,26  | 1         | 0,691728444   | 1,445654012     | 0,915384615     |
| LGI4                                                                                     | 0,055444693 | -0,532151314 | 0,475 | 0,47  | 1         | 0,691522782   | 1,446083956     | 1,010638298     |
| RNF103                                                                                   | 0,575466512 | -0,532377367 | 0,288 | 0,26  | 1         | 0,691414437   | 1,446310557     | 1,107692308     |
| CNBP                                                                                     | 0,014141484 | -0,534777884 | 0,863 | 0,68  | 1         | 0,690264941   | 1,448719093     | 1,269117647     |
| OLFM1                                                                                    | 0,276357324 | -0,535043659 | 0,2   | 0,23  | 1         | 0,690137792   | 1,448986003     | 0,869565217     |
| KLF5                                                                                     | 0,504867845 | -0,535635324 | 0,512 | 0,4   | 1         | 0,689854816   | 1,44958037      | 1,28            |
| HNRNPH1                                                                                  | 0,011202498 | -0,535729002 | 0,938 | 0,81  | 1         | 0,689810024   | 1,449674498     | 1,158024691     |
| SBSPON                                                                                   | 0,041681864 | -0,535781097 | 0,062 | 0,15  | 1         | 0,689785116   | 1,449726846     | 0,413333333     |
| TBPL1                                                                                    | 0,44891287  | -0,535783576 | 0,3   | 0,28  | 1         | 0,68978393    | 1,449729337     | 1,071428571     |
| CCDC82                                                                                   | 0,377250234 | -0,536200127 | 0,525 | 0,42  | 1         | 0,689584797   | 1,450147979     | 1,25            |
| RGS11                                                                                    | 0,002067391 | -0,536253652 | 0,038 | 0,18  | 1         | 0,689559213   | 1,450201783     | 0,211111111     |
| EMP1                                                                                     | 0,189365103 | -0,536497088 | 0,838 | 0,63  | 1         | 0,689442869   | 1,450446505     | 1,33015873      |
| ARMCX3                                                                                   | 0,348518203 | -0,537472821 | 0,7   | 0,53  | 1         | 0,688976738   | 1,451427813     | 1,320754717     |
| DUSP14                                                                                   | 0,99610888  | -0,53749297  | 0,475 | 0,34  | 1         | 0,688967115   | 1,451448084     | 1,397058824     |

Supplementary Table 4

| Differentially expressed genes_keloid-CCD_ comparing SC-Keloid vs. (SC-Myel, SC-Nonmyel) |             |              |       |       |           |               |                 |                 |
|------------------------------------------------------------------------------------------|-------------|--------------|-------|-------|-----------|---------------|-----------------|-----------------|
| gene                                                                                     | p_val       | avg_log2FC   | pct.1 | pct.2 | p_val_adj | Foldchange_UP | Foldchange_DOWN | Ratio_pct1_pct2 |
| ISCA1                                                                                    | 0,610290649 | -0,537504657 | 0,525 | 0,33  | 1         | 0,688961535   | 1,451459841     | 1,590909091     |
| ADAM17                                                                                   | 0,437116751 | -0,537842541 | 0,575 | 0,44  | 1         | 0,688800196   | 1,451799819     | 1,306818182     |
| ITGA1                                                                                    | 0,690332906 | -0,538694021 | 0,7   | 0,5   | 1         | 0,688393786   | 1,452656925     | 1,4             |
| HES4                                                                                     | 0,56246719  | -0,53930883  | 0,138 | 0,15  | 1         | 0,688100487   | 1,453276111     | 0,92            |
| RAB9A                                                                                    | 1           | -0,539729301 | 0,588 | 0,39  | 1         | 0,687899971   | 1,453699728     | 1,507692308     |
| SF1                                                                                      | 0,195680172 | -0,54089083  | 0,812 | 0,56  | 1         | 0,687346358   | 1,454870588     | 1,45            |
| PAIP2                                                                                    | 0,232701284 | -0,542179314 | 0,688 | 0,52  | 1         | 0,686732757   | 1,456170526     | 1,323076923     |
| TBC1D23                                                                                  | 0,50288659  | -0,542267901 | 0,3   | 0,2   | 1         | 0,68669059    | 1,456259944     | 1,5             |
| NUFIP2                                                                                   | 0,08715275  | -0,542387666 | 0,588 | 0,52  | 1         | 0,686633587   | 1,45638084      | 1,130769231     |
| MAT2A                                                                                    | 0,352480982 | -0,542710472 | 0,338 | 0,32  | 1         | 0,686479968   | 1,456706745     | 1,05625         |
| RAPGEF5                                                                                  | 0,024553368 | -0,543099873 | 0,025 | 0,11  | 1         | 0,686294704   | 1,457099981     | 0,227272727     |
| EIF3A                                                                                    | 0,064740602 | -0,54347537  | 0,825 | 0,66  | 1         | 0,686116102   | 1,457479276     | 1,25            |
| RELT                                                                                     | 0,53548035  | -0,54551183  | 0,188 | 0,19  | 1         | 0,685148287   | 1,459538058     | 0,989473684     |
| GHITM                                                                                    | 0,173167504 | -0,545807339 | 0,662 | 0,51  | 1         | 0,685007961   | 1,459837048     | 1,298039216     |
| CTSF                                                                                     | 0,137806819 | -0,546234802 | 0,188 | 0,24  | 1         | 0,684805027   | 1,460269654     | 0,783333333     |
| FAM181B                                                                                  | 0,016555125 | -0,546696263 | 0,075 | 0,19  | 1         | 0,68458602    | 1,460736811     | 0,394736842     |
| LRR8A                                                                                    | 0,938749568 | -0,549422681 | 0,338 | 0,26  | 1         | 0,683293505   | 1,463499934     | 1,3             |
| PFKFB3                                                                                   | 0,203329468 | -0,549667738 | 0,15  | 0,2   | 1         | 0,68317745    | 1,463748546     | 0,75            |
| GADD45G                                                                                  | 0,473997065 | -0,550367981 | 0,138 | 0,16  | 1         | 0,682845936   | 1,46445918      | 0,8625          |
| CPPED1                                                                                   | 0,561128721 | -0,551023259 | 0,262 | 0,24  | 1         | 0,682535855   | 1,465124495     | 1,091666667     |
| PTPDC1                                                                                   | 0,220289901 | -0,551775689 | 0,125 | 0,17  | 1         | 0,682179975   | 1,465888822     | 0,735294118     |
| PELO                                                                                     | 0,520063164 | -0,553504262 | 0,425 | 0,35  | 1         | 0,681363107   | 1,467646238     | 1,214285714     |
| SGMS1                                                                                    | 0,153648381 | -0,553988295 | 0,112 | 0,17  | 1         | 0,681134544   | 1,468138724     | 0,658823529     |
| RORB                                                                                     | 0,001160836 | -0,554099914 | 0,013 | 0,15  | 1         | 0,681081847   | 1,468252317     | 0,086666667     |
| ERBIN                                                                                    | 0,782036651 | -0,555419647 | 0,562 | 0,41  | 1         | 0,680459099   | 1,469596043     | 1,370731707     |
| RP2                                                                                      | 0,528938892 | -0,555894144 | 0,35  | 0,3   | 1         | 0,680235336   | 1,470079467     | 1,166666667     |
| RRAGC                                                                                    | 0,062945024 | -0,556410544 | 0,25  | 0,31  | 1         | 0,679991895   | 1,470605763     | 0,806451613     |
| VEZF1                                                                                    | 0,607859949 | -0,557059247 | 0,575 | 0,41  | 1         | 0,679686208   | 1,471267165     | 1,402439024     |
| MARCHF6                                                                                  | 0,650147937 | -0,558728118 | 0,5   | 0,38  | 1         | 0,678900419   | 1,472970073     | 1,315789474     |
| TEAD1                                                                                    | 0,283050874 | -0,558820118 | 0,388 | 0,36  | 1         | 0,678857128   | 1,473064006     | 1,077777778     |

Supplementary Table 4

| Differentially expressed genes_keloid-CCD_ comparing SC-Keloid vs. (SC-Myel, SC-Nonmyel) |             |              |       |       |           |               |                 |                 |
|------------------------------------------------------------------------------------------|-------------|--------------|-------|-------|-----------|---------------|-----------------|-----------------|
| gene                                                                                     | p_val       | avg_log2FC   | pct.1 | pct.2 | p_val_adj | Foldchange_UP | Foldchange_DOWN | Ratio_pct1_pct2 |
| INO80D                                                                                   | 0,264848117 | -0,559303958 | 0,238 | 0,26  | 1         | 0,678629496   | 1,473558114     | 0,915384615     |
| KIAA1191                                                                                 | 0,583270941 | -0,559574119 | 0,362 | 0,24  | 1         | 0,678502427   | 1,47383408      | 1,508333333     |
| MIDEAS                                                                                   | 0,199995277 | -0,559803059 | 0,375 | 0,36  | 1         | 0,678394765   | 1,47406798      | 1,041666667     |
| POLR1F                                                                                   | 0,690528522 | -0,559916323 | 0,475 | 0,32  | 1         | 0,678341507   | 1,474183712     | 1,484375        |
| VGLL3                                                                                    | 0,005465601 | -0,559929173 | 0,075 | 0,21  | 1         | 0,678335465   | 1,474196842     | 0,357142857     |
| ZBTB21                                                                                   | 0,154193498 | -0,560666041 | 0,175 | 0,23  | 1         | 0,677989088   | 1,474949992     | 0,760869565     |
| ZMYM5                                                                                    | 0,236752947 | -0,560804311 | 0,412 | 0,38  | 1         | 0,677924112   | 1,47509136      | 1,084210526     |
| RBMS3                                                                                    | 0,010454448 | -0,562958603 | 0,088 | 0,21  | 1         | 0,676912563   | 1,477295674     | 0,419047619     |
| ASPH                                                                                     | 0,75007682  | -0,563302826 | 0,588 | 0,41  | 1         | 0,676751073   | 1,477648194     | 1,434146341     |
| SLC25A4                                                                                  | 0,715438892 | -0,563877883 | 0,35  | 0,29  | 1         | 0,676481374   | 1,4782373       | 1,206896552     |
| SLC25A36                                                                                 | 0,576353143 | -0,564562734 | 0,462 | 0,36  | 1         | 0,676160323   | 1,47893919      | 1,283333333     |
| CCDC59                                                                                   | 0,947976142 | -0,565455162 | 0,525 | 0,36  | 1         | 0,67574219    | 1,479854322     | 1,458333333     |
| FGF7                                                                                     | 0,002207458 | -0,567013127 | 0,025 | 0,16  | 1         | 0,675012851   | 1,481453278     | 0,15625         |
| LACTB                                                                                    | 0,755220253 | -0,567702895 | 0,3   | 0,26  | 1         | 0,674690197   | 1,482161746     | 1,153846154     |
| C16orf72                                                                                 | 0,55258303  | -0,568178284 | 0,475 | 0,31  | 1         | 0,674467913   | 1,48265022      | 1,532258065     |
| PABPC1                                                                                   | 0,004874796 | -0,568476147 | 0,887 | 0,73  | 1         | 0,674328675   | 1,482956363     | 1,215068493     |
| ASH1L                                                                                    | 0,31165656  | -0,56967229  | 0,713 | 0,52  | 1         | 0,673769819   | 1,484186398     | 1,371153846     |
| PSD3                                                                                     | 0,305759162 | -0,570890127 | 0,125 | 0,16  | 1         | 0,673201302   | 1,485439788     | 0,78125         |
| TCF7                                                                                     | 0,06292865  | -0,571155337 | 0,188 | 0,26  | 1         | 0,67307756    | 1,48571288      | 0,723076923     |
| UAP1                                                                                     | 0,523948887 | -0,572106247 | 0,575 | 0,34  | 1         | 0,672634066   | 1,486692468     | 1,691176471     |
| PPP2R2D                                                                                  | 0,295541305 | -0,572803738 | 0,25  | 0,26  | 1         | 0,672308951   | 1,487411403     | 0,961538462     |
| MARCHF3                                                                                  | 0,250522893 | -0,573104237 | 0,238 | 0,26  | 1         | 0,67216893    | 1,487721249     | 0,915384615     |
| SH3RF1                                                                                   | 0,514233481 | -0,573915666 | 0,312 | 0,28  | 1         | 0,671790982   | 1,488558237     | 1,114285714     |
| YBX3                                                                                     | 0,65675074  | -0,574979793 | 0,4   | 0,28  | 1         | 0,671295654   | 1,489656598     | 1,428571429     |
| ALKBH5                                                                                   | 0,409818561 | -0,575843472 | 0,412 | 0,36  | 1         | 0,670893898   | 1,490548658     | 1,144444444     |
| NUP153                                                                                   | 0,479645541 | -0,576672031 | 0,238 | 0,23  | 1         | 0,670508706   | 1,491404945     | 1,034782609     |
| ARHGEF2                                                                                  | 0,940985635 | -0,577411659 | 0,45  | 0,33  | 1         | 0,670165044   | 1,492169742     | 1,363636364     |
| TAF1D                                                                                    | 0,021340912 | -0,578171159 | 0,812 | 0,65  | 1         | 0,669812331   | 1,492955494     | 1,249230769     |
| NEGR1                                                                                    | 0,042997563 | -0,57974723  | 0,125 | 0,22  | 1         | 0,669080995   | 1,494587364     | 0,568181818     |
| NET1                                                                                     | 0,092423786 | -0,582072502 | 0,225 | 0,29  | 1         | 0,668003468   | 1,496998215     | 0,775862069     |

Supplementary Table 4

| Differentially expressed genes_keloid-CCD_ comparing SC-Keloid vs. (SC-Myel, SC-Nonmyel) |             |              |       |       |             |               |                 |                 |
|------------------------------------------------------------------------------------------|-------------|--------------|-------|-------|-------------|---------------|-----------------|-----------------|
| gene                                                                                     | p_val       | avg_log2FC   | pct.1 | pct.2 | p_val_adj   | Foldchange_UP | Foldchange_DOWN | Ratio_pct1_pct2 |
| NFATC1                                                                                   | 0,002140241 | -0,582098702 | 0,038 | 0,18  | 1           | 0,667991337   | 1,497025402     | 0,211111111     |
| MOSMO                                                                                    | 0,759122484 | -0,582222251 | 0,3   | 0,25  | 1           | 0,667934134   | 1,49715361      | 1,2             |
| ANKRD37                                                                                  | 0,089762199 | -0,582494354 | 0,175 | 0,24  | 1           | 0,667808169   | 1,49743601      | 0,729166667     |
| CREM                                                                                     | 0,571379229 | -0,582626813 | 0,3   | 0,21  | 1           | 0,667746858   | 1,497573502     | 1,428571429     |
| MAPKAPK2                                                                                 | 0,694981252 | -0,582763742 | 0,312 | 0,27  | 1           | 0,667683483   | 1,497715646     | 1,155555556     |
| TXNIP                                                                                    | 0,737162917 | -0,582913534 | 0,65  | 0,44  | 1           | 0,667614163   | 1,497871159     | 1,477272727     |
| RBM7                                                                                     | 0,280504922 | -0,58467834  | 0,288 | 0,29  | 1           | 0,66679799    | 1,499704581     | 0,993103448     |
| CLK1                                                                                     | 0,579611859 | -0,585974396 | 0,588 | 0,43  | 1           | 0,666199235   | 1,501052458     | 1,36744186      |
| DYNC1L12                                                                                 | 0,025388247 | -0,586853978 | 0,725 | 0,6   | 1           | 0,665793191   | 1,501967898     | 1,208333333     |
| TRIM8                                                                                    | 0,362025719 | -0,588032848 | 0,613 | 0,46  | 1           | 0,665249374   | 1,503195703     | 1,332608696     |
| PCNP                                                                                     | 0,044749254 | -0,588920524 | 0,675 | 0,54  | 1           | 0,664840178   | 1,50412089      | 1,25            |
| NFAT5                                                                                    | 0,819516591 | -0,589120086 | 0,562 | 0,39  | 1           | 0,66474822    | 1,504328962     | 1,441025641     |
| MT-ND2                                                                                   | 3,1515E-07  | -0,589307418 | 1     | 0,96  | 0,006649989 | 0,664661909   | 1,50452431      | 1,041666667     |
| SOD3                                                                                     | 0,21228794  | -0,589744113 | 0,112 | 0,16  | 1           | 0,66446075    | 1,50497979      | 0,7             |
| MKRN1                                                                                    | 0,126008346 | -0,589882085 | 0,262 | 0,3   | 1           | 0,664397208   | 1,505123724     | 0,873333333     |
| PGRMC1                                                                                   | 0,006408421 | -0,590936824 | 0,825 | 0,71  | 1           | 0,663911651   | 1,506224508     | 1,161971831     |
| ZBTB43                                                                                   | 0,714209235 | -0,591037531 | 0,3   | 0,22  | 1           | 0,663865309   | 1,506329652     | 1,363636364     |
| KIF21A                                                                                   | 0,039174854 | -0,592156461 | 0,112 | 0,21  | 1           | 0,663350626   | 1,507498389     | 0,533333333     |
| SPATA13                                                                                  | 0,171930584 | -0,592217009 | 0,138 | 0,19  | 1           | 0,663322786   | 1,507561659     | 0,726315789     |
| SCN9A                                                                                    | 0,457275916 | -0,593369417 | 0,45  | 0,37  | 1           | 0,662793143   | 1,508766362     | 1,216216216     |
| CNOT4                                                                                    | 0,069252274 | -0,594631579 | 0,338 | 0,36  | 1           | 0,662213543   | 1,510086906     | 0,938888889     |
| EPC1                                                                                     | 0,012285894 | -0,59480435  | 0,613 | 0,57  | 1           | 0,662134244   | 1,510267758     | 1,075438596     |
| AMOTL2                                                                                   | 0,524333541 | -0,596593736 | 0,2   | 0,2   | 1           | 0,661313503   | 1,512142117     | 1               |
| ANTXR2                                                                                   | 0,096318356 | -0,596820161 | 0,15  | 0,22  | 1           | 0,66120972    | 1,51237946      | 0,681818182     |
| EPHA2                                                                                    | 0,040352861 | -0,598774495 | 0,188 | 0,28  | 1           | 0,660314625   | 1,514429579     | 0,671428571     |
| BIRC2                                                                                    | 0,141411225 | -0,599456454 | 0,675 | 0,53  | 1           | 0,660002569   | 1,515145617     | 1,273584906     |
| HDGF                                                                                     | 0,055549581 | -0,599653756 | 0,662 | 0,54  | 1           | 0,659912314   | 1,515352841     | 1,225925926     |
| FRMD3                                                                                    | 0,000108243 | -0,601294913 | 0,025 | 0,22  | 1           | 0,659162049   | 1,517077632     | 0,113636364     |
| CAMLG                                                                                    | 0,082475494 | -0,602662248 | 0,725 | 0,58  | 1           | 0,658537614   | 1,518516146     | 1,25            |
| SLIT2                                                                                    | 0,03808203  | -0,603956775 | 0,138 | 0,23  | 1           | 0,657946975   | 1,519879319     | 0,6             |

Supplementary Table 4

| Differentially expressed genes_keloid-CCD_ comparing SC-Keloid vs. (SC-Myel, SC-Nonmyel) |             |              |       |       |           |               |                 |                 |
|------------------------------------------------------------------------------------------|-------------|--------------|-------|-------|-----------|---------------|-----------------|-----------------|
| gene                                                                                     | p_val       | avg_log2FC   | pct.1 | pct.2 | p_val_adj | Foldchange_UP | Foldchange_DOWN | Ratio_pct1_pct2 |
| PER1                                                                                     | 0,343556384 | -0,60430405  | 0,325 | 0,31  | 1         | 0,657788618   | 1,520245216     | 1,048387097     |
| ITPRID2                                                                                  | 0,535098385 | -0,604826722 | 0,5   | 0,39  | 1         | 0,657550352   | 1,520796084     | 1,282051282     |
| PPP2R2A                                                                                  | 0,087650385 | -0,604885913 | 0,562 | 0,49  | 1         | 0,657523374   | 1,52085848      | 1,146938776     |
| FAM214A                                                                                  | 0,020890906 | -0,605950038 | 0,15  | 0,26  | 1         | 0,657038567   | 1,521980673     | 0,576923077     |
| SPECC1                                                                                   | 0,112679847 | -0,607266265 | 0,338 | 0,35  | 1         | 0,656439398   | 1,523369868     | 0,965714286     |
| PROS1                                                                                    | 0,477371824 | -0,607458002 | 0,488 | 0,38  | 1         | 0,656352162   | 1,52357234      | 1,284210526     |
| TOP1                                                                                     | 0,688660914 | -0,607852708 | 0,613 | 0,42  | 1         | 0,656172616   | 1,523989231     | 1,45952381      |
| RAPGEF2                                                                                  | 0,332459973 | -0,608233832 | 0,262 | 0,27  | 1         | 0,655999294   | 1,524391884     | 0,97037037      |
| FNDC3A                                                                                   | 0,04099346  | -0,608430714 | 0,575 | 0,52  | 1         | 0,655909777   | 1,524599929     | 1,105769231     |
| PCID2                                                                                    | 0,95779907  | -0,608588437 | 0,4   | 0,29  | 1         | 0,655838074   | 1,524766616     | 1,379310345     |
| PTPN13                                                                                   | 0,09603758  | -0,609754286 | 0,175 | 0,24  | 1         | 0,655308302   | 1,525999285     | 0,729166667     |
| IFITM3                                                                                   | 0,009210518 | -0,610292236 | 1     | 0,89  | 1         | 0,655063997   | 1,526568403     | 1,123595506     |
| PDZRN3                                                                                   | 0,048577894 | -0,610596501 | 0,112 | 0,2   | 1         | 0,654925858   | 1,526890391     | 0,56            |
| HIPK3                                                                                    | 0,089239168 | -0,611238664 | 0,275 | 0,32  | 1         | 0,654634407   | 1,527570182     | 0,859375        |
| PDLIM3                                                                                   | 0,498491465 | -0,61331826  | 0,525 | 0,33  | 1         | 0,653691453   | 1,529773711     | 1,590909091     |
| GALNT2                                                                                   | 0,573309398 | -0,613822787 | 0,588 | 0,43  | 1         | 0,65346289    | 1,530308784     | 1,36744186      |
| SRGAP1                                                                                   | 0,686382787 | -0,614595562 | 0,275 | 0,24  | 1         | 0,653112958   | 1,531128708     | 1,145833333     |
| PPP1R15B                                                                                 | 0,300959796 | -0,614627862 | 0,325 | 0,31  | 1         | 0,653098336   | 1,531162988     | 1,048387097     |
| CAMTA1                                                                                   | 0,032644597 | -0,614684693 | 0,838 | 0,66  | 1         | 0,65307261    | 1,531223306     | 1,26969697      |
| ATOX8                                                                                    | 0,01396673  | -0,615324287 | 0,013 | 0,1   | 1         | 0,652783146   | 1,531902297     | 0,13            |
| OTUD1                                                                                    | 0,032425262 | -0,615394476 | 0,162 | 0,26  | 1         | 0,652751387   | 1,531976828     | 0,623076923     |
| HERPUD2                                                                                  | 0,994762908 | -0,616185083 | 0,188 | 0,16  | 1         | 0,652393773   | 1,532816592     | 1,175           |
| PNPLA2                                                                                   | 0,345131768 | -0,619081558 | 0,4   | 0,35  | 1         | 0,651085287   | 1,535897094     | 1,142857143     |
| STX3                                                                                     | 0,017327469 | -0,619331839 | 0,088 | 0,2   | 1         | 0,650972345   | 1,536163567     | 0,44            |
| PDCD4                                                                                    | 0,304048248 | -0,621979884 | 0,35  | 0,32  | 1         | 0,649778591   | 1,538985762     | 1,09375         |
| ELF2                                                                                     | 0,124632821 | -0,623165516 | 0,35  | 0,36  | 1         | 0,649244811   | 1,540251047     | 0,972222222     |
| YWHAH                                                                                    | 0,180700154 | -0,624001143 | 0,7   | 0,53  | 1         | 0,648868869   | 1,541143438     | 1,320754717     |
| DCP1A                                                                                    | 0,135278832 | -0,624649218 | 0,438 | 0,4   | 1         | 0,648577455   | 1,541835893     | 1,095           |
| FADS3                                                                                    | 0,98832701  | -0,625156839 | 0,475 | 0,34  | 1         | 0,64834929    | 1,542378492     | 1,397058824     |
| ABCA1                                                                                    | 0,249628549 | -0,62599519  | 0,262 | 0,28  | 1         | 0,647972643   | 1,54327503      | 0,935714286     |

Supplementary Table 4

| Differentially expressed genes_keloid-CCD_ comparing SC-Keloid vs. (SC-Myel, SC-Nonmyel) |             |              |       |       |           |               |                 |                 |
|------------------------------------------------------------------------------------------|-------------|--------------|-------|-------|-----------|---------------|-----------------|-----------------|
| gene                                                                                     | p_val       | avg_log2FC   | pct.1 | pct.2 | p_val_adj | Foldchange_UP | Foldchange_DOWN | Ratio_pct1_pct2 |
| BLOC1S6                                                                                  | 0,532421627 | -0,627601944 | 0,488 | 0,38  | 1         | 0,647251387   | 1,544994759     | 1,284210526     |
| SEPTIN10                                                                                 | 0,16686164  | -0,62763718  | 0,662 | 0,52  | 1         | 0,647235579   | 1,545032493     | 1,273076923     |
| FAM126A                                                                                  | 0,383321697 | -0,628399766 | 0,5   | 0,41  | 1         | 0,64689355    | 1,54584939      | 1,219512195     |
| SESN3                                                                                    | 0,126141931 | -0,628611116 | 0,25  | 0,29  | 1         | 0,64679879    | 1,546075868     | 0,862068966     |
| NR2F2                                                                                    | 0,125047301 | -0,628898448 | 0,662 | 0,53  | 1         | 0,646669984   | 1,546383821     | 1,249056604     |
| CXCL8                                                                                    | 0,966056691 | -0,62921135  | 0,1   | 0,09  | 1         | 0,646529745   | 1,546719247     | 1,111111111     |
| PTPN12                                                                                   | 0,054436425 | -0,629354018 | 0,637 | 0,54  | 1         | 0,646465812   | 1,54687221      | 1,17962963      |
| PLEKHA3                                                                                  | 0,314444843 | -0,629491656 | 0,512 | 0,41  | 1         | 0,64640414    | 1,547019794     | 1,248780488     |
| PCM1                                                                                     | 0,029379447 | -0,629637703 | 0,725 | 0,58  | 1         | 0,646338707   | 1,54717641      | 1,25            |
| BRD4                                                                                     | 0,014035603 | -0,63193839  | 0,7   | 0,63  | 1         | 0,645308802   | 1,549645683     | 1,111111111     |
| TRIP10                                                                                   | 0,742767303 | -0,632350803 | 0,25  | 0,22  | 1         | 0,645124359   | 1,550088732     | 1,136363636     |
| DDX17                                                                                    | 0,007009369 | -0,632372995 | 0,875 | 0,7   | 1         | 0,645114436   | 1,550112577     | 1,25            |
| MRPL18                                                                                   | 0,506498539 | -0,63274152  | 0,787 | 0,51  | 1         | 0,644949667   | 1,550508592     | 1,543137255     |
| CD44                                                                                     | 0,066023638 | -0,633890386 | 0,65  | 0,58  | 1         | 0,644436277   | 1,551743805     | 1,120689655     |
| TNRC6C                                                                                   | 0,059605642 | -0,635122289 | 0,188 | 0,27  | 1         | 0,643886234   | 1,553069389     | 0,696296296     |
| PCBP1                                                                                    | 0,005791105 | -0,636271236 | 0,825 | 0,68  | 1         | 0,643373654   | 1,55430673      | 1,213235294     |
| RNF130                                                                                   | 0,090461757 | -0,638257628 | 0,425 | 0,41  | 1         | 0,642488427   | 1,55644827      | 1,036585366     |
| SELENOW                                                                                  | 0,000113073 | -0,638763207 | 0,925 | 0,82  | 1         | 0,642263312   | 1,556993808     | 1,12804878      |
| NFIL3                                                                                    | 0,154168112 | -0,638956938 | 0,662 | 0,51  | 1         | 0,642177072   | 1,557202901     | 1,298039216     |
| MTUS1                                                                                    | 0,001394626 | -0,639482547 | 0,1   | 0,28  | 1         | 0,641943154   | 1,557770332     | 0,357142857     |
| GPATCH8                                                                                  | 0,168437179 | -0,640954543 | 0,3   | 0,32  | 1         | 0,641288507   | 1,559360551     | 0,9375          |
| PLSCR4                                                                                   | 0,041747119 | -0,641771659 | 0,138 | 0,23  | 1         | 0,640925396   | 1,560243995     | 0,6             |
| DDX3Y                                                                                    | 0,142349981 | -0,642758557 | 0,4   | 0,39  | 1         | 0,640487111   | 1,56131167      | 1,025641026     |
| SNHG12                                                                                   | 0,547257681 | -0,643296065 | 0,35  | 0,3   | 1         | 0,640248527   | 1,561893479     | 1,166666667     |
| OTUD7B                                                                                   | 0,588727387 | -0,643613984 | 0,438 | 0,35  | 1         | 0,640107455   | 1,562237703     | 1,251428571     |
| FCGRT                                                                                    | 0,017842921 | -0,644860127 | 0,55  | 0,53  | 1         | 0,639554794   | 1,563587685     | 1,037735849     |
| SOCS3                                                                                    | 0,50886881  | -0,645846956 | 0,35  | 0,32  | 1         | 0,639117477   | 1,564657572     | 1,09375         |
| BRAF                                                                                     | 0,089943034 | -0,645958314 | 0,312 | 0,34  | 1         | 0,639068147   | 1,564778349     | 0,917647059     |
| ATP6V1B2                                                                                 | 0,209790589 | -0,645963744 | 0,25  | 0,27  | 1         | 0,639065742   | 1,564784238     | 0,925925926     |
| JMJD1C                                                                                   | 0,144025691 | -0,646244215 | 0,762 | 0,56  | 1         | 0,638941514   | 1,565088475     | 1,360714286     |

Supplementary Table 4

| Differentially expressed genes_keloid-CCD_ comparing SC-Keloid vs. (SC-Myel, SC-Nonmyel) |             |              |       |       |             |               |                 |                 |
|------------------------------------------------------------------------------------------|-------------|--------------|-------|-------|-------------|---------------|-----------------|-----------------|
| gene                                                                                     | p_val       | avg_log2FC   | pct.1 | pct.2 | p_val_adj   | Foldchange_UP | Foldchange_DOWN | Ratio_pct1_pct2 |
| BCL3                                                                                     | 0,23467011  | -0,647044307 | 0,188 | 0,22  | 1           | 0,638587268   | 1,565956684     | 0,854545455     |
| NR2F1                                                                                    | 0,083077451 | -0,647787789 | 0,212 | 0,27  | 1           | 0,638258261   | 1,566763896     | 0,785185185     |
| IGSF1                                                                                    | 0,000698486 | -0,648126078 | 0,013 | 0,16  | 1           | 0,638108617   | 1,567131321     | 0,08125         |
| FOXD3                                                                                    | 0,129688719 | -0,649053392 | 0,812 | 0,63  | 1           | 0,637698595   | 1,568138941     | 1,288888889     |
| PLXDC2                                                                                   | 0,146592436 | -0,649309107 | 0,238 | 0,28  | 1           | 0,637585574   | 1,568416915     | 0,85            |
| BORCS7                                                                                   | 0,269175139 | -0,650543119 | 0,525 | 0,43  | 1           | 0,637040447   | 1,569759038     | 1,220930233     |
| POGZ                                                                                     | 0,095203999 | -0,652219395 | 0,438 | 0,42  | 1           | 0,636300696   | 1,571584011     | 1,042857143     |
| MBNL1                                                                                    | 0,005504253 | -0,652675666 | 0,65  | 0,58  | 1           | 0,63609949    | 1,572081123     | 1,120689655     |
| TMEM41B                                                                                  | 0,300773687 | -0,653292114 | 0,25  | 0,26  | 1           | 0,635827749   | 1,572753        | 0,961538462     |
| NKAIN3                                                                                   | 0,00119888  | -0,653731418 | 0,05  | 0,21  | 1           | 0,635634168   | 1,573231979     | 0,238095238     |
| LUC7L                                                                                    | 0,184552988 | -0,654590934 | 0,462 | 0,4   | 1           | 0,635255588   | 1,574169546     | 1,155           |
| MAPK6                                                                                    | 0,619827251 | -0,655054832 | 0,462 | 0,3   | 1           | 0,635051355   | 1,5746758       | 1,54            |
| GABARAPL1                                                                                | 0,005601337 | -0,65515362  | 0,125 | 0,27  | 1           | 0,635007871   | 1,57478363      | 0,462962963     |
| NPC2                                                                                     | 0,168958508 | -0,65532247  | 0,525 | 0,44  | 1           | 0,634933555   | 1,57496795      | 1,193181818     |
| VAMP2                                                                                    | 0,000536033 | -0,656706423 | 0,825 | 0,73  | 1           | 0,634324766   | 1,576479515     | 1,130136986     |
| TMEM50B                                                                                  | 0,361804116 | -0,656807649 | 0,412 | 0,35  | 1           | 0,634280261   | 1,576590132     | 1,177142857     |
| PAX3                                                                                     | 0,11376215  | -0,656856784 | 0,275 | 0,31  | 1           | 0,634258659   | 1,576643827     | 0,887096774     |
| EGFLAM                                                                                   | 8,77724E-05 | -0,658052959 | 0,013 | 0,2   | 1           | 0,633732997   | 1,577951605     | 0,065           |
| C16orf87                                                                                 | 0,176020058 | -0,659155661 | 0,462 | 0,42  | 1           | 0,633248798   | 1,579158149     | 1,1             |
| CEMIP2                                                                                   | 0,075080213 | -0,659505676 | 0,112 | 0,19  | 1           | 0,633095183   | 1,579541318     | 0,589473684     |
| HBEGF                                                                                    | 0,071762694 | -0,65969801  | 0,85  | 0,7   | 1           | 0,633010787   | 1,57975191      | 1,214285714     |
| HNRNPC                                                                                   | 1,31843E-05 | -0,660830633 | 0,838 | 0,83  | 0,278202906 | 0,632514022   | 1,58099262      | 1,009638554     |
| RAB7A                                                                                    | 0,000674334 | -0,660935722 | 0,85  | 0,72  | 1           | 0,63246795    | 1,581107787     | 1,180555556     |
| RAB1A                                                                                    | 0,218790742 | -0,661062029 | 0,637 | 0,49  | 1           | 0,63241258    | 1,581246218     | 1,3             |
| TUBB4B                                                                                   | 0,005414139 | -0,662386261 | 0,912 | 0,83  | 1           | 0,631832363   | 1,58269829      | 1,098795181     |
| PHIP                                                                                     | 0,927954314 | -0,663163508 | 0,537 | 0,36  | 1           | 0,631492057   | 1,583551194     | 1,491666667     |
| ADI1                                                                                     | 0,539993828 | -0,663281463 | 0,613 | 0,44  | 1           | 0,631440428   | 1,58368067      | 1,393181818     |
| KLF2                                                                                     | 0,563796394 | -0,663337836 | 0,725 | 0,45  | 1           | 0,631415755   | 1,583742553     | 1,611111111     |
| HMGNS5                                                                                   | 0,197775801 | -0,663859639 | 0,1   | 0,15  | 1           | 0,631187422   | 1,584315474     | 0,666666667     |
| PPIL4                                                                                    | 0,644943489 | -0,666457419 | 0,588 | 0,41  | 1           | 0,630051901   | 1,587170832     | 1,434146341     |



Supplementary Table 4

| Differentially expressed genes_keloid-CCD_ comparing SC-Keloid vs. (SC-Myel, SC-Nonmyel) |             |              |       |       |             |               |                 |                 |
|------------------------------------------------------------------------------------------|-------------|--------------|-------|-------|-------------|---------------|-----------------|-----------------|
| gene                                                                                     | p_val       | avg_log2FC   | pct.1 | pct.2 | p_val_adj   | Foldchange_UP | Foldchange_DOWN | Ratio_pct1_pct2 |
| INSC                                                                                     | 0,047179944 | -0,666850745 | 0,188 | 0,27  | 1           | 0,629880151   | 1,587603607     | 0,696296296     |
| AK3                                                                                      | 0,107684447 | -0,669382421 | 0,425 | 0,4   | 1           | 0,628775792   | 1,590392017     | 1,0625          |
| NR3C1                                                                                    | 0,014416765 | -0,670118153 | 0,688 | 0,62  | 1           | 0,628455216   | 1,591203278     | 1,109677419     |
| EMP2                                                                                     | 0,034119762 | -0,670571802 | 0,8   | 0,67  | 1           | 0,628257632   | 1,591703703     | 1,194029851     |
| ZBTB7A                                                                                   | 0,273243861 | -0,672124645 | 0,625 | 0,5   | 1           | 0,627581772   | 1,593417854     | 1,25            |
| SLC25A25                                                                                 | 0,006527866 | -0,672772292 | 0,162 | 0,3   | 1           | 0,627300105   | 1,594133322     | 0,54            |
| RFX1                                                                                     | 0,276612403 | -0,674055431 | 0,238 | 0,25  | 1           | 0,626742429   | 1,595551782     | 0,952           |
| ART3                                                                                     | 0,000191892 | -0,675105266 | 0     | 0,16  | 1           | 0,626286521   | 1,596713272     | 0               |
| ZNF326                                                                                   | 0,021633492 | -0,675907175 | 0,5   | 0,49  | 1           | 0,625938502   | 1,597601038     | 1,020408163     |
| ZFP36                                                                                    | 0,037534828 | -0,676242712 | 0,55  | 0,54  | 1           | 0,62579294    | 1,597972645     | 1,018518519     |
| ZEB2                                                                                     | 2,29731E-05 | -0,676880826 | 0,875 | 0,84  | 0,484756107 | 0,625516209   | 1,598679596     | 1,041666667     |
| LUC7L2                                                                                   | 0,182329805 | -0,677158803 | 0,462 | 0,41  | 1           | 0,625395697   | 1,598987657     | 1,126829268     |
| MAP3K2                                                                                   | 0,261043881 | -0,677438728 | 0,537 | 0,44  | 1           | 0,625274363   | 1,599297938     | 1,220454545     |
| BBX                                                                                      | 0,219697911 | -0,67953159  | 0,425 | 0,38  | 1           | 0,62436796    | 1,601619661     | 1,118421053     |
| KLHL21                                                                                   | 0,196992297 | -0,679683488 | 0,3   | 0,31  | 1           | 0,624302225   | 1,601788301     | 0,967741935     |
| ITM2B                                                                                    | 1,54928E-07 | -0,680745748 | 0,975 | 0,97  | 0,003269131 | 0,623842719   | 1,602968136     | 1,005154639     |
| TLE1                                                                                     | 0,031728651 | -0,682631701 | 0,5   | 0,48  | 1           | 0,623027737   | 1,605064975     | 1,041666667     |
| BCL6                                                                                     | 0,050747365 | -0,682857494 | 0,188 | 0,27  | 1           | 0,622930236   | 1,6053162       | 0,696296296     |
| PRDX1                                                                                    | 0,012664901 | -0,684694632 | 0,825 | 0,72  | 1           | 0,622137498   | 1,607361723     | 1,145833333     |
| RDH10                                                                                    | 0,088147564 | -0,685964952 | 0,312 | 0,36  | 1           | 0,621589935   | 1,608777659     | 0,866666667     |
| RIT1                                                                                     | 0,07727818  | -0,68603192  | 0,312 | 0,36  | 1           | 0,621561082   | 1,608852338     | 0,866666667     |
| ZNF106                                                                                   | 0,940833468 | -0,686697899 | 0,488 | 0,35  | 1           | 0,621274222   | 1,60959519      | 1,394285714     |
| COPS2                                                                                    | 0,040614404 | -0,688027289 | 0,613 | 0,52  | 1           | 0,620702005   | 1,611079056     | 1,178846154     |
| COL3A1                                                                                   | 1,26505E-08 | -0,689115636 | 0,675 | 0,76  | 0,000266938 | 0,620233933   | 1,612294888     | 0,888157895     |
| REL                                                                                      | 0,118830188 | -0,689262497 | 0,325 | 0,34  | 1           | 0,620170799   | 1,612459022     | 0,955882353     |
| MYADM                                                                                    | 0,095564089 | -0,690114272 | 0,575 | 0,48  | 1           | 0,619804755   | 1,613411307     | 1,197916667     |
| ARL13B                                                                                   | 0,74263685  | -0,690945482 | 0,525 | 0,37  | 1           | 0,619447757   | 1,614341144     | 1,418918919     |
| MID1                                                                                     | 0,000769073 | -0,691215875 | 0,025 | 0,18  | 1           | 0,619331669   | 1,614643735     | 0,138888889     |
| PPP4R2                                                                                   | 0,704916074 | -0,692667465 | 0,725 | 0,46  | 1           | 0,618708832   | 1,616269152     | 1,576086957     |
| GTF2B                                                                                    | 0,201331491 | -0,692799811 | 0,425 | 0,39  | 1           | 0,618652078   | 1,616417428     | 1,08974359      |

Supplementary Table 4

| Differentially expressed genes_keloid-CCD_ comparing SC-Keloid vs. (SC-Myel, SC-Nonmyel) |             |              |       |       |             |               |                 |                 |
|------------------------------------------------------------------------------------------|-------------|--------------|-------|-------|-------------|---------------|-----------------|-----------------|
| gene                                                                                     | p_val       | avg_log2FC   | pct.1 | pct.2 | p_val_adj   | Foldchange_UP | Foldchange_DOWN | Ratio_pct1_pct2 |
| CADM4                                                                                    | 0,156693003 | -0,693893909 | 0,45  | 0,41  | 1           | 0,618183088   | 1,617643736     | 1,097560976     |
| MT-ND3                                                                                   | 5,36741E-06 | -0,694439524 | 1     | 1     | 0,113257746 | 0,617949341   | 1,61825563      | 1               |
| SSBP2                                                                                    | 0,329719536 | -0,698230037 | 0,25  | 0,26  | 1           | 0,616327882   | 1,622512999     | 0,961538462     |
| BTG2                                                                                     | 0,00893568  | -0,698531335 | 0,188 | 0,32  | 1           | 0,616199179   | 1,622851886     | 0,5875          |
| NCOA7                                                                                    | 0,126870837 | -0,698823805 | 0,2   | 0,25  | 1           | 0,616074273   | 1,623180913     | 0,8             |
| LRRFIP2                                                                                  | 0,737784166 | -0,699034688 | 0,55  | 0,38  | 1           | 0,615984226   | 1,623418195     | 1,447368421     |
| TSPYL2                                                                                   | 0,055301316 | -0,700673259 | 0,3   | 0,35  | 1           | 0,615285006   | 1,625263073     | 0,857142857     |
| GSTM3                                                                                    | 0,219242602 | -0,700881623 | 0,338 | 0,33  | 1           | 0,615196149   | 1,625497822     | 1,024242424     |
| TGIF2                                                                                    | 0,246979004 | -0,702378564 | 0,275 | 0,28  | 1           | 0,614558152   | 1,627185315     | 0,982142857     |
| MEGF9                                                                                    | 0,384919418 | -0,703226142 | 0,388 | 0,34  | 1           | 0,614197208   | 1,628141561     | 1,141176471     |
| ERF                                                                                      | 0,024026304 | -0,704101295 | 0,562 | 0,52  | 1           | 0,613824742   | 1,629129507     | 1,080769231     |
| ADAMTS1                                                                                  | 0,801748976 | -0,706829466 | 0,637 | 0,44  | 1           | 0,612665082   | 1,632213145     | 1,447727273     |
| ARAP2                                                                                    | 0,001562211 | -0,709200108 | 0,062 | 0,22  | 1           | 0,611659175   | 1,634897408     | 0,281818182     |
| CRYL1                                                                                    | 0,004347418 | -0,711002259 | 0,125 | 0,27  | 1           | 0,610895594   | 1,636940926     | 0,462962963     |
| PPM1B                                                                                    | 0,213846293 | -0,712599575 | 0,262 | 0,28  | 1           | 0,6102196     | 1,63875431      | 0,935714286     |
| GABARAPL2                                                                                | 2,25957E-05 | -0,713708386 | 0,938 | 0,85  | 0,476792313 | 0,609750784   | 1,640014291     | 1,103529412     |
| CCDC126                                                                                  | 0,003373332 | -0,715290462 | 0,112 | 0,26  | 1           | 0,609082491   | 1,641813735     | 0,430769231     |
| HNRNPA1                                                                                  | 3,72288E-07 | -0,715621692 | 0,975 | 0,95  | 0,007855658 | 0,608942667   | 1,642190725     | 1,026315789     |
| PTEN                                                                                     | 0,082781731 | -0,715946665 | 0,625 | 0,49  | 1           | 0,608805516   | 1,642560676     | 1,275510204     |
| N4BP2L1                                                                                  | 0,032775854 | -0,716465053 | 0,188 | 0,28  | 1           | 0,6085868     | 1,643150986     | 0,671428571     |
| MLF1                                                                                     | 0,300830446 | -0,719318326 | 0,35  | 0,32  | 1           | 0,607384364   | 1,646403924     | 1,09375         |
| TOPORS                                                                                   | 0,028410221 | -0,723333538 | 0,325 | 0,38  | 1           | 0,605696282   | 1,650992468     | 0,855263158     |
| YY1                                                                                      | 0,000714614 | -0,723911141 | 0,725 | 0,68  | 1           | 0,605453832   | 1,651653597     | 1,066176471     |
| PELI1                                                                                    | 0,012927543 | -0,724721056 | 0,275 | 0,37  | 1           | 0,605114032   | 1,65258108      | 0,743243243     |
| RELB                                                                                     | 0,138490885 | -0,725353644 | 0,275 | 0,31  | 1           | 0,604848761   | 1,653305857     | 0,887096774     |
| FCGR2B                                                                                   | 0,003584775 | -0,726764024 | 0,038 | 0,17  | 1           | 0,60425775    | 1,654922921     | 0,223529412     |
| HLA-DRA                                                                                  | 0,255466116 | -0,728415262 | 0,112 | 0,16  | 1           | 0,603566542   | 1,656818148     | 0,7             |
| FOXP1                                                                                    | 0,208256035 | -0,728914006 | 0,7   | 0,53  | 1           | 0,603357923   | 1,657391015     | 1,320754717     |
| ARID4B                                                                                   | 0,005827068 | -0,730774756 | 0,738 | 0,64  | 1           | 0,60258023    | 1,659530053     | 1,153125        |
| NLGN4X                                                                                   | 0,003260268 | -0,730824586 | 0,15  | 0,3   | 1           | 0,602559417   | 1,659587374     | 0,5             |

Supplementary Table 4

| Differentially expressed genes_keloid-CCD_ comparing SC-Keloid vs. (SC-Myel, SC-Nonmyel) |             |              |       |       |             |               |                 |                 |
|------------------------------------------------------------------------------------------|-------------|--------------|-------|-------|-------------|---------------|-----------------|-----------------|
| gene                                                                                     | p_val       | avg_log2FC   | pct.1 | pct.2 | p_val_adj   | Foldchange_UP | Foldchange_DOWN | Ratio_pct1_pct2 |
| JDP2                                                                                     | 0,130127188 | -0,73182469  | 0,275 | 0,31  | 1           | 0,602141856   | 1,66073823      | 0,887096774     |
| TIFA                                                                                     | 0,009789541 | -0,731892359 | 0,112 | 0,24  | 1           | 0,602113613   | 1,660816128     | 0,466666667     |
| KCTD9                                                                                    | 0,068025462 | -0,736216684 | 0,462 | 0,43  | 1           | 0,600311544   | 1,665801716     | 1,074418605     |
| RAB21                                                                                    | 0,090318919 | -0,737221493 | 0,35  | 0,36  | 1           | 0,599893584   | 1,666962319     | 0,972222222     |
| DST                                                                                      | 1,09534E-05 | -0,737849062 | 0,925 | 0,81  | 0,231127165 | 0,599632689   | 1,667687601     | 1,141975309     |
| RHOBTB3                                                                                  | 0,913459088 | -0,738121922 | 0,388 | 0,28  | 1           | 0,59951929    | 1,668003044     | 1,385714286     |
| HNRNPA0                                                                                  | 0,000200631 | -0,738418307 | 0,825 | 0,74  | 1           | 0,599396138   | 1,668345751     | 1,114864865     |
| TOB1                                                                                     | 0,229356474 | -0,738719159 | 0,562 | 0,46  | 1           | 0,599271156   | 1,668693696     | 1,22173913      |
| IGFBP7                                                                                   | 0,020485953 | -0,739863061 | 0,938 | 0,86  | 1           | 0,598796187   | 1,670017315     | 1,090697674     |
| DMD                                                                                      | 0,004686671 | -0,740484424 | 0,162 | 0,3   | 1           | 0,598538343   | 1,67073674      | 0,54            |
| SMC5                                                                                     | 0,46043083  | -0,741478958 | 0,613 | 0,44  | 1           | 0,598125878   | 1,671888873     | 1,393181818     |
| RSPO3                                                                                    | 0,000924298 | -0,741892239 | 0,112 | 0,29  | 1           | 0,59795456    | 1,672367879     | 0,386206897     |
| SDCBP                                                                                    | 0,004875251 | -0,74243701  | 0,537 | 0,57  | 1           | 0,597728812   | 1,672999495     | 0,942105263     |
| PRNP                                                                                     | 3,02762E-05 | -0,742467039 | 0,975 | 0,97  | 0,638857911 | 0,59771637    | 1,673034318     | 1,005154639     |
| KCTD11                                                                                   | 0,048066995 | -0,743204141 | 0,112 | 0,2   | 1           | 0,597411063   | 1,673889323     | 0,56            |
| UBE2R2                                                                                   | 0,061393377 | -0,743368466 | 0,6   | 0,51  | 1           | 0,597343021   | 1,674079992     | 1,176470588     |
| S1PR3                                                                                    | 0,012981341 | -0,743740327 | 0,212 | 0,32  | 1           | 0,597189073   | 1,67451155      | 0,6625          |
| MCL1                                                                                     | 0,029274128 | -0,747762102 | 0,7   | 0,56  | 1           | 0,595526618   | 1,679186068     | 1,25            |
| RPS6KA5                                                                                  | 0,002369197 | -0,748672539 | 0,15  | 0,31  | 1           | 0,595150919   | 1,680246081     | 0,483870968     |
| SLC25A33                                                                                 | 0,240367814 | -0,749372641 | 0,288 | 0,3   | 1           | 0,594862178   | 1,681061658     | 0,96            |
| AATK                                                                                     | 0,043308584 | -0,752149325 | 0,212 | 0,29  | 1           | 0,593718377   | 1,684300231     | 0,731034483     |
| CCND2                                                                                    | 0,003407216 | -0,754065756 | 0,038 | 0,17  | 1           | 0,592930224   | 1,686539088     | 0,223529412     |
| BRD2                                                                                     | 0,008532684 | -0,754233231 | 0,787 | 0,7   | 1           | 0,592861398   | 1,686734882     | 1,124285714     |
| IFIT2                                                                                    | 0,001921845 | -0,754958695 | 0,013 | 0,14  | 1           | 0,592563351   | 1,687583275     | 0,092857143     |
| AZIN1                                                                                    | 0,120081129 | -0,755844705 | 0,475 | 0,42  | 1           | 0,592199548   | 1,688619998     | 1,130952381     |
| RBM39                                                                                    | 3,22935E-08 | -0,756549126 | 0,963 | 0,89  | 0,000681425 | 0,591910467   | 1,689444697     | 1,082022472     |
| SDC2                                                                                     | 0,00141003  | -0,757214841 | 0,162 | 0,33  | 1           | 0,5916374     | 1,690224452     | 0,490909091     |
| KCNQ1OT1                                                                                 | 0,093778149 | -0,759368478 | 0,438 | 0,46  | 1           | 0,59075487    | 1,692749483     | 0,952173913     |
| TTR                                                                                      | 0,057431879 | -0,759591289 | 0,075 | 0,16  | 1           | 0,59066364    | 1,693010932     | 0,46875         |
| PLAAT3                                                                                   | 0,049390946 | -0,760150728 | 0,713 | 0,55  | 1           | 0,590434641   | 1,693667564     | 1,296363636     |

Supplementary Table 4

| Differentially expressed genes_keloid-CCD_ comparing SC-Keloid vs. (SC-Myel, SC-Nonmyel) |             |              |       |       |             |               |                 |                 |
|------------------------------------------------------------------------------------------|-------------|--------------|-------|-------|-------------|---------------|-----------------|-----------------|
| gene                                                                                     | p_val       | avg_log2FC   | pct.1 | pct.2 | p_val_adj   | Foldchange_UP | Foldchange_DOWN | Ratio_pct1_pct2 |
| COQ10B                                                                                   | 0,052579556 | -0,760381251 | 0,438 | 0,43  | 1           | 0,590340305   | 1,693938211     | 1,018604651     |
| HTATIP2                                                                                  | 0,295575183 | -0,762449286 | 0,238 | 0,25  | 1           | 0,589494686   | 1,696368132     | 0,952           |
| NCAM1                                                                                    | 0,667080374 | -0,762614111 | 0,362 | 0,29  | 1           | 0,589427341   | 1,69656195      | 1,248275862     |
| DDX6                                                                                     | 0,03454322  | -0,763727729 | 0,562 | 0,5   | 1           | 0,588972537   | 1,697872034     | 1,124           |
| NDRG1                                                                                    | 0,045550628 | -0,763747798 | 0,262 | 0,33  | 1           | 0,588964345   | 1,697895652     | 0,793939394     |
| OSER1                                                                                    | 0,075814891 | -0,76436886  | 0,288 | 0,33  | 1           | 0,588710857   | 1,698626732     | 0,872727273     |
| C1orf198                                                                                 | 0,076523356 | -0,764664268 | 0,562 | 0,48  | 1           | 0,588590324   | 1,698974581     | 1,170833333     |
| CLEC14A                                                                                  | 0,000495504 | -0,76984028  | 0,025 | 0,19  | 1           | 0,5864824     | 1,705081004     | 0,131578947     |
| PLEKHA4                                                                                  | 0,008939837 | -0,770674694 | 0,825 | 0,66  | 1           | 0,586143293   | 1,70606746      | 1,25            |
| CLIC4                                                                                    | 2,53449E-05 | -0,770817957 | 0,95  | 0,81  | 0,534803538 | 0,586085091   | 1,706236886     | 1,172839506     |
| INTS6                                                                                    | 0,046923051 | -0,772693169 | 0,713 | 0,57  | 1           | 0,585323794   | 1,70845609      | 1,250877193     |
| ODC1                                                                                     | 0,62134361  | -0,772766332 | 0,688 | 0,49  | 1           | 0,585294111   | 1,708542733     | 1,404081633     |
| TSPAN15                                                                                  | 0,000366078 | -0,772865677 | 0,2   | 0,39  | 1           | 0,585253808   | 1,708660389     | 0,512820513     |
| CHIC2                                                                                    | 0,130007583 | -0,776140248 | 0,338 | 0,34  | 1           | 0,583926929   | 1,712543042     | 0,994117647     |
| STK17A                                                                                   | 0,093126033 | -0,777230376 | 0,863 | 0,61  | 1           | 0,58348587    | 1,713837561     | 1,414754098     |
| PMP22                                                                                    | 1,18632E-05 | -0,778087247 | 1     | 0,95  | 0,250324897 | 0,583139419   | 1,714855776     | 1,052631579     |
| ZBTB10                                                                                   | 0,02381098  | -0,778295257 | 0,212 | 0,31  | 1           | 0,583055347   | 1,715103044     | 0,683870968     |
| PPM1K                                                                                    | 0,082945994 | -0,779739208 | 0,25  | 0,3   | 1           | 0,582472076   | 1,7168205       | 0,833333333     |
| CNN3                                                                                     | 2,83144E-07 | -0,781413016 | 1     | 0,95  | 0,005974629 | 0,581796686   | 1,718813503     | 1,052631579     |
| PNRC2                                                                                    | 0,01145271  | -0,78300214  | 0,338 | 0,42  | 1           | 0,581156192   | 1,720707813     | 0,804761905     |
| IGSF11                                                                                   | 3,31313E-05 | -0,787343508 | 0,025 | 0,24  | 0,699103926 | 0,579410001   | 1,725893578     | 0,104166667     |
| APLP2                                                                                    | 0,006401227 | -0,787535104 | 0,775 | 0,63  | 1           | 0,579333058   | 1,726122799     | 1,23015873      |
| FGF2                                                                                     | 0,162403666 | -0,790967935 | 0,625 | 0,5   | 1           | 0,577956199   | 1,730234924     | 1,25            |
| FILIP1L                                                                                  | 0,437284787 | -0,794891025 | 0,288 | 0,28  | 1           | 0,57638671    | 1,734946318     | 1,028571429     |
| XBP1                                                                                     | 0,027218945 | -0,797313548 | 0,713 | 0,6   | 1           | 0,575419673   | 1,737862027     | 1,188333333     |
| KLHL24                                                                                   | 0,039068902 | -0,797983643 | 0,262 | 0,33  | 1           | 0,575152468   | 1,738669408     | 0,793939394     |
| DOCK5                                                                                    | 0,074094469 | -0,800369762 | 0,288 | 0,33  | 1           | 0,574201991   | 1,741547428     | 0,872727273     |
| ASPA                                                                                     | 0,036238124 | -0,80629715  | 0,525 | 0,48  | 1           | 0,571847692   | 1,748717385     | 1,09375         |
| NFKB2                                                                                    | 0,044467971 | -0,806589517 | 0,3   | 0,35  | 1           | 0,571731816   | 1,749071805     | 0,857142857     |
| TGIF1                                                                                    | 0,00413451  | -0,809442305 | 0,425 | 0,5   | 1           | 0,57060239    | 1,752533843     | 0,85            |

Supplementary Table 4

| Differentially expressed genes_keloid-CCD_ comparing SC-Keloid vs. (SC-Myel, SC-Nonmyel) |             |              |       |       |             |               |                 |                 |
|------------------------------------------------------------------------------------------|-------------|--------------|-------|-------|-------------|---------------|-----------------|-----------------|
| gene                                                                                     | p_val       | avg_log2FC   | pct.1 | pct.2 | p_val_adj   | Foldchange_UP | Foldchange_DOWN | Ratio_pct1_pct2 |
| RNF13                                                                                    | 0,022404721 | -0,811543456 | 0,462 | 0,46  | 1           | 0,569771966   | 1,755088106     | 1,004347826     |
| PLEKHA1                                                                                  | 0,030627423 | -0,812712766 | 0,637 | 0,56  | 1           | 0,569310351   | 1,756511188     | 1,1375          |
| LGALS1                                                                                   | 0,000137919 | -0,812764256 | 0,05  | 0,25  | 1           | 0,569290032   | 1,75657388      | 0,2             |
| LATS2                                                                                    | 0,000135826 | -0,813943737 | 0,15  | 0,36  | 1           | 0,568824797   | 1,758010561     | 0,416666667     |
| RHOB                                                                                     | 0,162365947 | -0,814271208 | 0,988 | 0,81  | 1           | 0,568695697   | 1,758409649     | 1,219753086     |
| ITPR1                                                                                    | 0,001269495 | -0,815827625 | 0,112 | 0,28  | 1           | 0,568082504   | 1,760307691     | 0,4             |
| AKIRIN1                                                                                  | 0,006205331 | -0,817596555 | 0,35  | 0,43  | 1           | 0,567386388   | 1,762467379     | 0,813953488     |
| EPB41L2                                                                                  | 0,002419108 | -0,820745999 | 0,338 | 0,46  | 1           | 0,566149118   | 1,766319098     | 0,734782609     |
| PURA                                                                                     | 0,005191867 | -0,821096411 | 0,688 | 0,58  | 1           | 0,566011625   | 1,766748166     | 1,186206897     |
| CHMP2B                                                                                   | 0,043185136 | -0,821156923 | 0,412 | 0,43  | 1           | 0,565987885   | 1,766822271     | 0,958139535     |
| SYNE2                                                                                    | 0,043448476 | -0,821517709 | 0,275 | 0,34  | 1           | 0,565846361   | 1,76726417      | 0,808823529     |
| IER5                                                                                     | 0,449153946 | -0,821725309 | 0,575 | 0,45  | 1           | 0,565764943   | 1,767518493     | 1,277777778     |
| KCTD12                                                                                   | 0,0834881   | -0,823356125 | 0,575 | 0,48  | 1           | 0,565125767   | 1,769517617     | 1,197916667     |
| NEDD9                                                                                    | 0,000583504 | -0,823845432 | 0,25  | 0,42  | 1           | 0,56493413    | 1,770117872     | 0,595238095     |
| AHNAK                                                                                    | 4,22202E-06 | -0,824241217 | 0,9   | 0,86  | 0,089088854 | 0,564779169   | 1,770603547     | 1,046511628     |
| TM4SF1                                                                                   | 0,038754827 | -0,825428893 | 0,112 | 0,21  | 1           | 0,564314415   | 1,772061769     | 0,533333333     |
| ZNF644                                                                                   | 0,003698637 | -0,827691376 | 0,55  | 0,54  | 1           | 0,563430131   | 1,774842956     | 1,018518519     |
| NASP                                                                                     | 0,001491211 | -0,828206542 | 0,762 | 0,69  | 1           | 0,563228974   | 1,775476841     | 1,104347826     |
| MT3                                                                                      | 0,001411118 | -0,829708381 | 0     | 0,12  | 1           | 0,562642961   | 1,777326067     | 0               |
| N4BP2L2                                                                                  | 0,063655873 | -0,830156929 | 0,688 | 0,55  | 1           | 0,562468057   | 1,77787874      | 1,250909091     |
| HNRNPH3                                                                                  | 0,008411101 | -0,831779768 | 0,8   | 0,66  | 1           | 0,561835711   | 1,779879741     | 1,212121212     |
| MYC                                                                                      | 0,708316726 | -0,833708792 | 0,312 | 0,27  | 1           | 0,561084984   | 1,782261207     | 1,155555556     |
| F3                                                                                       | 0,00077652  | -0,835783308 | 0,112 | 0,29  | 1           | 0,560278754   | 1,784825843     | 0,386206897     |
| ARHGEF26                                                                                 | 0,022022629 | -0,836885671 | 0,312 | 0,38  | 1           | 0,559850809   | 1,786190149     | 0,821052632     |
| NFKBIZ                                                                                   | 0,206916987 | -0,844424846 | 0,45  | 0,39  | 1           | 0,556932795   | 1,795548778     | 1,153846154     |
| HEXIM1                                                                                   | 0,00140848  | -0,845300268 | 0,575 | 0,61  | 1           | 0,556594953   | 1,796638641     | 0,942622951     |
| DDX3X                                                                                    | 0,010233343 | -0,845378994 | 0,825 | 0,66  | 1           | 0,556564581   | 1,796736683     | 1,25            |
| RXRG                                                                                     | 2,59961E-06 | -0,846179317 | 0,038 | 0,31  | 0,054854429 | 0,556255917   | 1,797733685     | 0,122580645     |
| CDKN1A                                                                                   | 0,018964481 | -0,846340836 | 0,362 | 0,41  | 1           | 0,556193644   | 1,797934964     | 0,882926829     |
| GBP2                                                                                     | 0,00703293  | -0,847053919 | 0,138 | 0,27  | 1           | 0,555918802   | 1,798823852     | 0,511111111     |

Supplementary Table 4

| Differentially expressed genes_keloid-CCD_ comparing SC-Keloid vs. (SC-Myel, SC-Nonmyel) |             |              |       |       |             |               |                 |                 |
|------------------------------------------------------------------------------------------|-------------|--------------|-------|-------|-------------|---------------|-----------------|-----------------|
| gene                                                                                     | p_val       | avg_log2FC   | pct.1 | pct.2 | p_val_adj   | Foldchange_UP | Foldchange_DOWN | Ratio_pct1_pct2 |
| PMAIP1                                                                                   | 0,026485278 | -0,849365258 | 0,162 | 0,26  | 1           | 0,555028878   | 1,801708054     | 0,623076923     |
| VASN                                                                                     | 0,000573236 | -0,854745305 | 0,088 | 0,27  | 1           | 0,552962939   | 1,808439463     | 0,325925926     |
| EGR1                                                                                     | 0,376054656 | -0,85648187  | 0,537 | 0,44  | 1           | 0,55229774    | 1,810617584     | 1,220454545     |
| KHDRBS3                                                                                  | 8,59428E-05 | -0,85676408  | 0,725 | 0,72  | 1           | 0,552189714   | 1,810971799     | 1,006944444     |
| ABLIM1                                                                                   | 0,027874504 | -0,858024218 | 0,162 | 0,26  | 1           | 0,551707609   | 1,812554303     | 0,623076923     |
| SOX2                                                                                     | 0,053874671 | -0,858405453 | 0,488 | 0,46  | 1           | 0,551561838   | 1,813033338     | 1,060869565     |
| BAG3                                                                                     | 0,012961151 | -0,858796626 | 0,388 | 0,43  | 1           | 0,551412307   | 1,813524991     | 0,902325581     |
| MIR22HG                                                                                  | 0,047048645 | -0,861818601 | 0,5   | 0,47  | 1           | 0,550258488   | 1,817327715     | 1,063829787     |
| IGFBP4                                                                                   | 0,039269186 | -0,862530122 | 0,362 | 0,4   | 1           | 0,549987173   | 1,818224221     | 0,905           |
| FAM3C                                                                                    | 0,000637652 | -0,863544154 | 0,787 | 0,69  | 1           | 0,549600738   | 1,819502652     | 1,14057971      |
| GPBP1                                                                                    | 2,60095E-06 | -0,86371873  | 0,75  | 0,77  | 0,054882594 | 0,549534236   | 1,819722837     | 0,974025974     |
| KCNE4                                                                                    | 0,178996593 | -0,864627813 | 0,138 | 0,19  | 1           | 0,549188068   | 1,820869858     | 0,726315789     |
| SELENOM                                                                                  | 1,35577E-05 | -0,867809631 | 0,912 | 0,85  | 0,286081475 | 0,547978186   | 1,82489016      | 1,072941176     |
| FOXO1                                                                                    | 0,003273797 | -0,868586837 | 0,2   | 0,34  | 1           | 0,54768306    | 1,825873526     | 0,588235294     |
| HSP90AB1                                                                                 | 1,33594E-05 | -0,86901587  | 1     | 0,99  | 0,281897485 | 0,547520213   | 1,82641659      | 1,01010101      |
| CDKN1B                                                                                   | 0,00499401  | -0,870344624 | 0,35  | 0,44  | 1           | 0,547016166   | 1,828099536     | 0,795454545     |
| CDC42EP3                                                                                 | 0,010206614 | -0,870407114 | 0,637 | 0,58  | 1           | 0,546992473   | 1,828178722     | 1,098275862     |
| PNISR                                                                                    | 2,33019E-06 | -0,870627821 | 0,925 | 0,82  | 0,049169385 | 0,546908799   | 1,828458422     | 1,12804878      |
| DCD                                                                                      | 0,00189507  | -0,871575505 | 0,162 | 0,33  | 1           | 0,546549661   | 1,829659903     | 0,490909091     |
| CD74                                                                                     | 0,00143499  | -0,873782553 | 0,1   | 0,28  | 1           | 0,545714184   | 1,832461075     | 0,357142857     |
| TSC22D4                                                                                  | 0,076749689 | -0,876359076 | 0,262 | 0,31  | 1           | 0,544740457   | 1,835736609     | 0,84516129      |
| UGCG                                                                                     | 0,249936272 | -0,876504017 | 0,425 | 0,37  | 1           | 0,544685733   | 1,835921046     | 1,148648649     |
| CNKS3                                                                                    | 0,075619154 | -0,878945368 | 0,462 | 0,44  | 1           | 0,543764786   | 1,83903045      | 1,05            |
| MXI1                                                                                     | 0,000400538 | -0,879600385 | 0,188 | 0,37  | 1           | 0,543517961   | 1,839865602     | 0,508108108     |
| SIPA1L2                                                                                  | 0,038956528 | -0,879973228 | 0,55  | 0,49  | 1           | 0,543377515   | 1,840341149     | 1,12244898      |
| PPP2CA                                                                                   | 0,005959466 | -0,880052256 | 0,625 | 0,59  | 1           | 0,54334775    | 1,840441963     | 1,059322034     |
| EIF4E                                                                                    | 0,269028297 | -0,881493204 | 0,662 | 0,49  | 1           | 0,542805331   | 1,842281095     | 1,351020408     |
| PCDH9                                                                                    | 0,103260673 | -0,882293162 | 0,15  | 0,22  | 1           | 0,542504436   | 1,843302901     | 0,681818182     |
| SOX8                                                                                     | 1,83267E-05 | -0,882703998 | 0,025 | 0,25  | 0,386711511 | 0,542349969   | 1,843827893     | 0,1             |
| ING1                                                                                     | 0,002988847 | -0,883683585 | 0,5   | 0,55  | 1           | 0,541981839   | 1,845080274     | 0,909090909     |

Supplementary Table 4

| Differentially expressed genes_keloid-CCD_ comparing SC-Keloid vs. (SC-Myel, SC-Nonmyel) |             |              |       |       |             |               |                 |                 |
|------------------------------------------------------------------------------------------|-------------|--------------|-------|-------|-------------|---------------|-----------------|-----------------|
| gene                                                                                     | p_val       | avg_log2FC   | pct.1 | pct.2 | p_val_adj   | Foldchange_UP | Foldchange_DOWN | Ratio_pct1_pct2 |
| JUNB                                                                                     | 6,46845E-05 | -0,883730507 | 0,938 | 0,92  | 1           | 0,541964212   | 1,845140284     | 1,019565217     |
| CITED2                                                                                   | 0,038873964 | -0,884371798 | 0,188 | 0,28  | 1           | 0,541723357   | 1,845960648     | 0,671428571     |
| TSC22D3                                                                                  | 0,660166695 | -0,884789299 | 0,425 | 0,33  | 1           | 0,541566611   | 1,846494927     | 1,287878788     |
| IFI16                                                                                    | 0,012035301 | -0,885503587 | 0,675 | 0,59  | 1           | 0,541298544   | 1,847409366     | 1,144067797     |
| PRRG4                                                                                    | 0,000712518 | -0,886273546 | 0,075 | 0,25  | 1           | 0,541009733   | 1,848395581     | 0,3             |
| EIF1                                                                                     | 2,82293E-18 | -0,887025371 | 1     | 1     | 5,95667E-14 | 0,540727873   | 1,849359078     | 1               |
| MAP4K5                                                                                   | 0,003461028 | -0,889955306 | 0,512 | 0,52  | 1           | 0,539630836   | 1,853118714     | 0,984615385     |
| RTN4                                                                                     | 1,2135E-05  | -0,890994738 | 0,887 | 0,85  | 0,256060413 | 0,539242183   | 1,854454329     | 1,043529412     |
| CADM3                                                                                    | 4,75511E-05 | -0,893482214 | 0,05  | 0,27  | 1           | 0,538313229   | 1,857654514     | 0,185185185     |
| SIAH1                                                                                    | 0,014311777 | -0,893952549 | 0,488 | 0,49  | 1           | 0,538137762   | 1,858260229     | 0,995918367     |
| CHORDC1                                                                                  | 0,140913861 | -0,894397841 | 0,4   | 0,37  | 1           | 0,53797169    | 1,858833874     | 1,081081081     |
| ARF6                                                                                     | 0,00132474  | -0,89473545  | 0,625 | 0,59  | 1           | 0,537845812   | 1,859268916     | 1,059322034     |
| AKAP13                                                                                   | 3,858E-05   | -0,897315613 | 0,863 | 0,74  | 0,814076133 | 0,536884771   | 1,862597069     | 1,166216216     |
| SNHG8                                                                                    | 0,000304715 | -0,897391173 | 0,8   | 0,68  | 1           | 0,536856652   | 1,862694623     | 1,176470588     |
| PHLDA1                                                                                   | 0,006930129 | -0,900545591 | 0,588 | 0,55  | 1           | 0,535684111   | 1,866771816     | 1,069090909     |
| TNFAIP3                                                                                  | 0,133851034 | -0,900555682 | 0,462 | 0,43  | 1           | 0,535680364   | 1,866784873     | 1,074418605     |
| YPEL5                                                                                    | 0,003853732 | -0,903786469 | 0,5   | 0,53  | 1           | 0,534482097   | 1,870970056     | 0,943396226     |
| MAP1LC3B                                                                                 | 0,000606834 | -0,904950593 | 0,787 | 0,71  | 1           | 0,534050993   | 1,872480368     | 1,108450704     |
| ARHGAP24                                                                                 | 0,000516274 | -0,905115917 | 0,188 | 0,38  | 1           | 0,533989797   | 1,872694956     | 0,494736842     |
| RBBP6                                                                                    | 0,002802462 | -0,905380173 | 0,637 | 0,6   | 1           | 0,533891997   | 1,873038005     | 1,061666667     |
| MYOT                                                                                     | 0,018178371 | -0,905866609 | 0,613 | 0,55  | 1           | 0,533712013   | 1,873669647     | 1,114545455     |
| GLUL                                                                                     | 0,009751801 | -0,909785925 | 0,338 | 0,42  | 1           | 0,532264066   | 1,878766696     | 0,804761905     |
| SAV1                                                                                     | 0,008357172 | -0,909862842 | 0,312 | 0,39  | 1           | 0,532235689   | 1,878866864     | 0,8             |
| NFIA                                                                                     | 9,18753E-05 | -0,911238289 | 0,112 | 0,33  | 1           | 0,531728504   | 1,880659006     | 0,339393939     |
| ZBTB44                                                                                   | 0,0045      | -0,912849488 | 0,3   | 0,4   | 1           | 0,531135002   | 1,882760496     | 0,75            |
| KMT2E                                                                                    | 5,92118E-06 | -0,913314436 | 0,863 | 0,77  | 0,124942787 | 0,530963857   | 1,883367365     | 1,120779221     |
| VMP1                                                                                     | 0,00141099  | -0,916996407 | 0,775 | 0,66  | 1           | 0,529610486   | 1,888180136     | 1,174242424     |
| SON                                                                                      | 3,47146E-09 | -0,917828685 | 0,9   | 0,87  | 7,32513E-05 | 0,529305047   | 1,889269725     | 1,034482759     |
| HSPA8                                                                                    | 4,86973E-06 | -0,918724654 | 0,975 | 0,93  | 0,102756225 | 0,52897643    | 1,890443398     | 1,048387097     |
| PIM3                                                                                     | 0,003167224 | -0,921363486 | 0,5   | 0,53  | 1           | 0,528009764   | 1,89390437      | 0,943396226     |

Supplementary Table 4

| Differentially expressed genes_keloid-CCD_comparing SC-Keloid vs. (SC-Myel, SC-Nonmyel) |             |              |       |       |             |               |                 |                 |
|-----------------------------------------------------------------------------------------|-------------|--------------|-------|-------|-------------|---------------|-----------------|-----------------|
| gene                                                                                    | p_val       | avg_log2FC   | pct.1 | pct.2 | p_val_adj   | Foldchange_UP | Foldchange_DOWN | Ratio_pct1_pct2 |
| CACYBP                                                                                  | 0,112704703 | -0,921637281 | 0,675 | 0,52  | 1           | 0,527909568   | 1,89426383      | 1,298076923     |
| SYNE1                                                                                   | 0,002229833 | -0,921775823 | 0,238 | 0,38  | 1           | 0,527858875   | 1,894445745     | 0,626315789     |
| AP1S2                                                                                   | 5,59453E-06 | -0,922123002 | 0,875 | 0,82  | 0,118050244 | 0,527731863   | 1,89490169      | 1,067073171     |
| GATM                                                                                    | 0,047860816 | -0,923639228 | 0,3   | 0,35  | 1           | 0,527177525   | 1,896894218     | 0,857142857     |
| RSRC2                                                                                   | 3,12937E-06 | -0,926630702 | 0,838 | 0,8   | 0,06603276  | 0,526085539   | 1,900831569     | 1,0475          |
| RSRP1                                                                                   | 1,62899E-07 | -0,927517816 | 0,85  | 0,83  | 0,003437337 | 0,525762148   | 1,902000752     | 1,024096386     |
| RYBP                                                                                    | 0,000487483 | -0,928095794 | 0,475 | 0,54  | 1           | 0,525551557   | 1,902762891     | 0,87962963      |
| MTRFR                                                                                   | 0,009720008 | -0,93032549  | 0,125 | 0,25  | 1           | 0,524739941   | 1,905705898     | 0,5             |
| CCNL1                                                                                   | 0,002161557 | -0,930888337 | 0,8   | 0,64  | 1           | 0,524535261   | 1,906449527     | 1,25            |
| SAP18                                                                                   | 8,48613E-07 | -0,936828813 | 0,938 | 0,91  | 0,017906576 | 0,522379862   | 1,914315755     | 1,030769231     |
| ALCAM                                                                                   | 0,000534167 | -0,937290382 | 0,3   | 0,45  | 1           | 0,522212761   | 1,914928309     | 0,666666667     |
| VAPA                                                                                    | 1,25644E-11 | -0,940732674 | 0,938 | 0,92  | 2,65121E-07 | 0,520968239   | 1,919502813     | 1,019565217     |
| HSPD1                                                                                   | 0,019744091 | -0,94164429  | 0,838 | 0,67  | 1           | 0,520639151   | 1,9207161       | 1,250746269     |
| GAS2L3                                                                                  | 0,002395622 | -0,943714721 | 0,125 | 0,28  | 1           | 0,519892511   | 1,923474523     | 0,446428571     |
| NEAT1                                                                                   | 5,97975E-07 | -0,943926308 | 0,988 | 0,95  | 0,012617879 | 0,519816269   | 1,923756643     | 1,04            |
| DNAJB9                                                                                  | 0,002459996 | -0,944136242 | 0,4   | 0,48  | 1           | 0,519740633   | 1,924036598     | 0,833333333     |
| CYLD                                                                                    | 0,003977181 | -0,944342505 | 0,55  | 0,56  | 1           | 0,519666331   | 1,924311699     | 0,982142857     |
| ARHGAP15                                                                                | 0,010397406 | -0,945760612 | 0,2   | 0,31  | 1           | 0,519155772   | 1,926204144     | 0,64516129      |
| RASGEF1B                                                                                | 0,000313295 | -0,947178407 | 0,112 | 0,31  | 1           | 0,518645828   | 1,928098033     | 0,361290323     |
| FLRT3                                                                                   | 0,003583404 | -0,949830625 | 0,162 | 0,31  | 1           | 0,517693237   | 1,931645865     | 0,522580645     |
| IVNS1ABP                                                                                | 0,00026693  | -0,952178954 | 0,325 | 0,47  | 1           | 0,516851253   | 1,934792639     | 0,691489362     |
| FIGN                                                                                    | 0,017056337 | -0,953154502 | 0,388 | 0,42  | 1           | 0,516501877   | 1,936101386     | 0,923809524     |
| SFPQ                                                                                    | 3,27121E-09 | -0,953787157 | 0,925 | 0,88  | 6,90257E-05 | 0,516275429   | 1,936950597     | 1,051136364     |
| CD59                                                                                    | 2,02804E-09 | -0,95383976  | 0,95  | 0,94  | 4,27937E-05 | 0,516256605   | 1,937021222     | 1,010638298     |
| ELF1                                                                                    | 0,058851062 | -0,955246596 | 0,6   | 0,5   | 1           | 0,515753426   | 1,938911018     | 1,2             |
| EDNRB                                                                                   | 0,000154369 | -0,956149263 | 0,537 | 0,61  | 1           | 0,515430829   | 1,940124538     | 0,880327869     |
| FKBP4                                                                                   | 0,001150019 | -0,957936052 | 0,225 | 0,38  | 1           | 0,51479286    | 1,942528885     | 0,592105263     |
| UBL3                                                                                    | 0,001851484 | -0,963066194 | 0,625 | 0,61  | 1           | 0,512965536   | 1,949448704     | 1,024590164     |
| GLIS3                                                                                   | 0,098230649 | -0,963243564 | 0,45  | 0,42  | 1           | 0,512902474   | 1,949688391     | 1,071428571     |
| KLF10                                                                                   | 0,001151625 | -0,966350731 | 0,675 | 0,62  | 1           | 0,511799013   | 1,953892007     | 1,088709677     |



Supplementary Table 4

| Differentially expressed genes_keloid-CCD_ comparing SC-Keloid vs. (SC-Myel, SC-Nonmyel) |             |              |       |       |             |               |                 |                 |
|------------------------------------------------------------------------------------------|-------------|--------------|-------|-------|-------------|---------------|-----------------|-----------------|
| gene                                                                                     | p_val       | avg_log2FC   | pct.1 | pct.2 | p_val_adj   | Foldchange_UP | Foldchange_DOWN | Ratio_pct1_pct2 |
| ATP1A2                                                                                   | 5,92704E-08 | -0,96982022  | 0,013 | 0,33  | 0,001250664 | 0,510569683   | 1,958596511     | 0,039393939     |
| ANKRD12                                                                                  | 0,000407986 | -0,970756952 | 0,662 | 0,63  | 1           | 0,510238281   | 1,959868628     | 1,050793651     |
| DDIT4                                                                                    | 0,56973868  | -0,974405092 | 0,45  | 0,37  | 1           | 0,508949673   | 1,964830814     | 1,216216216     |
| KCNMB4                                                                                   | 0,007627813 | -0,975532784 | 0,512 | 0,51  | 1           | 0,508552004   | 1,966367237     | 1,003921569     |
| KDM6B                                                                                    | 0,001474365 | -0,97847165  | 0,488 | 0,53  | 1           | 0,507517104   | 1,970376942     | 0,920754717     |
| CD83                                                                                     | 0,002473542 | -0,981066407 | 0,312 | 0,43  | 1           | 0,50660513    | 1,97392395      | 0,725581395     |
| MAL                                                                                      | 0,000154238 | -0,984347722 | 0,4   | 0,55  | 1           | 0,5054542     | 1,978418619     | 0,727272727     |
| MYLIP                                                                                    | 0,001590434 | -0,985149198 | 0,212 | 0,36  | 1           | 0,505173477   | 1,979518017     | 0,588888889     |
| MKNK2                                                                                    | 0,000118775 | -0,987082747 | 0,225 | 0,42  | 1           | 0,50449688    | 1,982172812     | 0,535714286     |
| MSX1                                                                                     | 0,044188104 | -0,988242285 | 0,412 | 0,43  | 1           | 0,504091564   | 1,983766586     | 0,958139535     |
| CADM1                                                                                    | 5,81388E-08 | -0,989544453 | 0,925 | 0,89  | 0,001226787 | 0,503636779   | 1,985557931     | 1,039325843     |
| IRS2                                                                                     | 0,001209658 | -0,995240588 | 0,238 | 0,39  | 1           | 0,50165221    | 1,993412925     | 0,61025641      |
| ISG20                                                                                    | 0,00118208  | -0,996658808 | 0,112 | 0,28  | 1           | 0,501159311   | 1,995373484     | 0,4             |
| H3-3B                                                                                    | 8,90705E-15 | -0,998312738 | 1     | 0,98  | 1,87948E-10 | 0,500585103   | 1,997662325     | 1,020408163     |
| ABHD5                                                                                    | 0,026784999 | -0,99939819  | 0,425 | 0,43  | 1           | 0,500208615   | 1,999165888     | 0,988372093     |
| MAPRE2                                                                                   | 0,002549366 | -1,000646308 | 0,338 | 0,44  | 1           | 0,499776057   | 2,000896174     | 0,768181818     |
| PPP1R12B                                                                                 | 0,002978532 | -1,002142975 | 0,162 | 0,31  | 1           | 0,499257853   | 2,002973002     | 0,522580645     |
| SELENOP                                                                                  | 8,58953E-05 | -1,002921148 | 0,05  | 0,26  | 1           | 0,498988632   | 2,004053673     | 0,192307692     |
| SPTBN1                                                                                   | 7,03218E-08 | -1,006824854 | 0,938 | 0,82  | 0,001483861 | 0,497640272   | 2,00948367      | 1,143902439     |
| SOX4                                                                                     | 2,77847E-06 | -1,007486428 | 0,975 | 0,87  | 0,058628526 | 0,497412122   | 2,010405368     | 1,120689655     |
| LMO4                                                                                     | 6,65366E-07 | -1,009406438 | 0,838 | 0,78  | 0,014039881 | 0,496750582   | 2,013082696     | 1,074358974     |
| DNAJB6                                                                                   | 3,13073E-06 | -1,010725152 | 0,863 | 0,77  | 0,066061614 | 0,496296728   | 2,014923621     | 1,120779221     |
| EIF4A3                                                                                   | 0,001292744 | -1,012452115 | 0,662 | 0,6   | 1           | 0,495702997   | 2,017337008     | 1,103333333     |
| BTG3                                                                                     | 3,20745E-05 | -1,016163301 | 0,825 | 0,74  | 0,676803269 | 0,49442949    | 2,022533082     | 1,114864865     |
| YME1L1                                                                                   | 0,000171325 | -1,016852484 | 0,688 | 0,65  | 1           | 0,494193355   | 2,023499488     | 1,058461538     |
| GEM                                                                                      | 0,026540661 | -1,021569483 | 0,325 | 0,39  | 1           | 0,492580191   | 2,030126298     | 0,833333333     |
| CREBRF                                                                                   | 0,000807967 | -1,023312289 | 0,488 | 0,57  | 1           | 0,491985503   | 2,032580215     | 0,856140351     |
| HSPA12A                                                                                  | 0,00010831  | -1,031649346 | 0,562 | 0,63  | 1           | 0,489150613   | 2,044360109     | 0,892063492     |
| NIBAN1                                                                                   | 0,00096701  | -1,032823636 | 0,188 | 0,35  | 1           | 0,488752628   | 2,046024806     | 0,537142857     |
| RAB32                                                                                    | 0,009033346 | -1,033053625 | 0,637 | 0,54  | 1           | 0,488674719   | 2,046351        | 1,17962963      |

Supplementary Table 4

| Differentially expressed genes_keloid-CCD_ comparing SC-Keloid vs. (SC-Myel, SC-Nonmyel) |             |              |       |       |             |               |                 |                 |
|------------------------------------------------------------------------------------------|-------------|--------------|-------|-------|-------------|---------------|-----------------|-----------------|
| gene                                                                                     | p_val       | avg_log2FC   | pct.1 | pct.2 | p_val_adj   | Foldchange_UP | Foldchange_DOWN | Ratio_pct1_pct2 |
| CAB39L                                                                                   | 3,61063E-05 | -1,033632188 | 0,062 | 0,29  | 0,761879183 | 0,488478785   | 2,047171812     | 0,213793103     |
| NR4A1                                                                                    | 0,000287495 | -1,034470141 | 0,725 | 0,69  | 1           | 0,488195147   | 2,048361206     | 1,050724638     |
| GFRA3                                                                                    | 0,000422022 | -1,03660518  | 0,838 | 0,71  | 1           | 0,487473203   | 2,051394812     | 1,18028169      |
| CTSC                                                                                     | 0,015788167 | -1,03786762  | 0,713 | 0,58  | 1           | 0,487046823   | 2,053190684     | 1,229310345     |
| SORCS1                                                                                   | 5,75626E-07 | -1,038844783 | 0,088 | 0,39  | 0,012146281 | 0,486717049   | 2,054581818     | 0,225641026     |
| ZSWIM6                                                                                   | 0,001027277 | -1,039196903 | 0,288 | 0,42  | 1           | 0,48659827    | 2,055083343     | 0,685714286     |
| CDKN1C                                                                                   | 0,222826914 | -1,042500129 | 0,4   | 0,37  | 1           | 0,485485419   | 2,059794097     | 1,081081081     |
| ARL4A                                                                                    | 0,010712745 | -1,043223993 | 0,55  | 0,51  | 1           | 0,48524189    | 2,060827847     | 1,078431373     |
| TIPARP                                                                                   | 0,000121678 | -1,044482329 | 0,2   | 0,41  | 1           | 0,484818841   | 2,062626109     | 0,487804878     |
| TGFBR3                                                                                   | 2,32024E-05 | -1,044939675 | 0,062 | 0,3   | 0,489594241 | 0,484665174   | 2,063280082     | 0,206666667     |
| ITIH5                                                                                    | 0,014262535 | -1,047331469 | 0,662 | 0,59  | 1           | 0,48386233    | 2,06670356      | 1,122033898     |
| SNHG15                                                                                   | 0,027668166 | -1,052231624 | 0,525 | 0,48  | 1           | 0,482221666   | 2,073735112     | 1,09375         |
| CD9                                                                                      | 6,77188E-13 | -1,053776837 | 1     | 0,99  | 1,42893E-08 | 0,481705454   | 2,075957397     | 1,01010101      |
| UBE2D3                                                                                   | 2,55288E-06 | -1,056762281 | 0,812 | 0,75  | 0,053868334 | 0,480709666   | 2,080257732     | 1,082666667     |
| NAMPT                                                                                    | 0,001002334 | -1,057002765 | 0,537 | 0,56  | 1           | 0,480629543   | 2,080604521     | 0,958928571     |
| NFKBIA                                                                                   | 1,97458E-10 | -1,059527328 | 0,812 | 0,98  | 4,16657E-06 | 0,479789228   | 2,084248545     | 0,828571429     |
| SOWAHC                                                                                   | 0,001903633 | -1,069604205 | 0,288 | 0,41  | 1           | 0,476449692   | 2,098857479     | 0,702439024     |
| PDK4                                                                                     | 3,38712E-06 | -1,07400597  | 0,013 | 0,26  | 0,07147162  | 0,474998226   | 2,105271022     | 0,05            |
| RETREG1                                                                                  | 1,45466E-05 | -1,076706739 | 0,075 | 0,32  | 0,306948489 | 0,474109846   | 2,109215844     | 0,234375        |
| STARD13                                                                                  | 0,002214482 | -1,080710526 | 0,338 | 0,44  | 1           | 0,472795915   | 2,115077498     | 0,768181818     |
| ARMCX1                                                                                   | 9,77851E-05 | -1,081975964 | 0,238 | 0,43  | 1           | 0,47238139    | 2,116933521     | 0,553488372     |
| ITGB4                                                                                    | 0,002516329 | -1,08217942  | 0,275 | 0,4   | 1           | 0,472314778   | 2,117232082     | 0,6875          |
| GJC1                                                                                     | 0,000472471 | -1,082912012 | 0,288 | 0,44  | 1           | 0,472075      | 2,118307472     | 0,654545455     |
| ID2                                                                                      | 0,010220163 | -1,087065727 | 0,412 | 0,49  | 1           | 0,470717787   | 2,124415156     | 0,840816327     |
| ITGB8                                                                                    | 0,000847131 | -1,091080662 | 0,738 | 0,66  | 1           | 0,469409628   | 2,130335512     | 1,118181818     |
| BNIP3L                                                                                   | 0,001054371 | -1,099839742 | 0,412 | 0,51  | 1           | 0,46656832    | 2,143308828     | 0,807843137     |
| SBDS                                                                                     | 1,21466E-09 | -1,100913206 | 0,875 | 0,88  | 2,56305E-05 | 0,466221291   | 2,14490419      | 0,994318182     |
| MAFB                                                                                     | 0,017888543 | -1,114765126 | 0,362 | 0,42  | 1           | 0,461766326   | 2,165597498     | 0,861904762     |
| PLLP                                                                                     | 4,88314E-05 | -1,115716243 | 0,075 | 0,3   | 1           | 0,461462      | 2,16702567      | 0,25            |
| CSRNP1                                                                                   | 1,33505E-05 | -1,116380117 | 0,45  | 0,61  | 0,281708669 | 0,461249702   | 2,168023083     | 0,737704918     |

Supplementary Table 4

| Differentially expressed genes_keloid-CCD_ comparing SC-Keloid vs. (SC-Myel, SC-Nonmyel) |             |              |       |       |             |               |                 |                 |
|------------------------------------------------------------------------------------------|-------------|--------------|-------|-------|-------------|---------------|-----------------|-----------------|
| gene                                                                                     | p_val       | avg_log2FC   | pct.1 | pct.2 | p_val_adj   | Foldchange_UP | Foldchange_DOWN | Ratio_pct1_pct2 |
| JUND                                                                                     | 1,10247E-11 | -1,123872557 | 1     | 1     | 2,32631E-07 | 0,458860474   | 2,179311702     | 1               |
| PTK2                                                                                     | 0,000566503 | -1,126007092 | 0,6   | 0,6   | 1           | 0,45818207    | 2,182538484     | 1               |
| WSB1                                                                                     | 4,40759E-08 | -1,126437685 | 0,838 | 0,83  | 0,000930045 | 0,45804534    | 2,183189989     | 1,009638554     |
| LRR4C                                                                                    | 3,58342E-07 | -1,126753037 | 0,112 | 0,42  | 0,007561385 | 0,457945228   | 2,183667256     | 0,266666667     |
| ZNF503                                                                                   | 0,000555535 | -1,129876984 | 0,488 | 0,55  | 1           | 0,456954687   | 2,188400793     | 0,887272727     |
| HLA-DRB1                                                                                 | 0,000498439 | -1,130978402 | 0,062 | 0,25  | 1           | 0,456605961   | 2,190072155     | 0,248           |
| SPRY1                                                                                    | 0,024496185 | -1,133260816 | 0,225 | 0,31  | 1           | 0,455884159   | 2,193539698     | 0,725806452     |
| FOSL2                                                                                    | 0,000138668 | -1,136046442 | 0,3   | 0,47  | 1           | 0,455004765   | 2,197779182     | 0,638297872     |
| CADM2                                                                                    | 1,09723E-06 | -1,138613727 | 0,013 | 0,28  | 0,023152592 | 0,454195801   | 2,201693627     | 0,046428571     |
| LAMP5                                                                                    | 3,32526E-08 | -1,150726115 | 0,013 | 0,34  | 0,000701664 | 0,450398487   | 2,220256128     | 0,038235294     |
| PLEKHA5                                                                                  | 9,29868E-05 | -1,155933964 | 0,175 | 0,39  | 1           | 0,448775566   | 2,228285305     | 0,448717949     |
| LPAR1                                                                                    | 2,65321E-06 | -1,15697021  | 0,212 | 0,47  | 0,055985356 | 0,44845334    | 2,229886393     | 0,45106383      |
| IQGAP2                                                                                   | 5,22449E-07 | -1,15765776  | 0,375 | 0,6   | 0,01102419  | 0,44823967    | 2,230949351     | 0,625           |
| FSTL3                                                                                    | 4,84373E-06 | -1,159764737 | 0,863 | 0,83  | 0,102207499 | 0,447585518   | 2,23420991      | 1,039759036     |
| DNAJB4                                                                                   | 0,087710379 | -1,159819024 | 0,45  | 0,42  | 1           | 0,447568676   | 2,234293982     | 1,071428571     |
| KDSR                                                                                     | 0,000209844 | -1,161733972 | 0,45  | 0,54  | 1           | 0,446974994   | 2,23726162      | 0,833333333     |
| FAM107B                                                                                  | 0,013411973 | -1,163326896 | 0,488 | 0,48  | 1           | 0,446481748   | 2,239733214     | 1,016666667     |
| ZFAND5                                                                                   | 9,86124E-05 | -1,16363376  | 0,588 | 0,62  | 1           | 0,44638679    | 2,24020966      | 0,948387097     |
| HSPB1                                                                                    | 6,12117E-06 | -1,164722464 | 0,975 | 0,88  | 0,129162722 | 0,44605006    | 2,241900833     | 1,107954545     |
| MAFG                                                                                     | 4,12616E-07 | -1,16793342  | 0,388 | 0,62  | 0,008706613 | 0,445058405   | 2,246896111     | 0,625806452     |
| FNIP2                                                                                    | 0,001324685 | -1,16852278  | 0,2   | 0,36  | 1           | 0,44487663    | 2,247814185     | 0,555555556     |
| EIF1B                                                                                    | 2,06725E-05 | -1,168798291 | 0,863 | 0,74  | 0,436209473 | 0,444791681   | 2,248243489     | 1,166216216     |
| SAMD4A                                                                                   | 1,28213E-05 | -1,178261743 | 0,275 | 0,48  | 0,270542287 | 0,441883589   | 2,263039464     | 0,572916667     |
| SLC38A2                                                                                  | 5,51047E-09 | -1,189093142 | 0,625 | 0,77  | 0,000116276 | 0,438578458   | 2,280093746     | 0,811688312     |
| FTH1                                                                                     | 1,10397E-19 | -1,195604944 | 1     | 1     | 2,32949E-15 | 0,436603335   | 2,290408522     | 1               |
| WTAP                                                                                     | 8,28594E-06 | -1,203962022 | 0,625 | 0,68  | 0,174841553 | 0,434081541   | 2,30371464      | 0,919117647     |
| PLK2                                                                                     | 0,047108217 | -1,209596302 | 0,262 | 0,33  | 1           | 0,432389591   | 2,312729125     | 0,793939394     |
| KLF6                                                                                     | 2,07598E-06 | -1,221485828 | 0,825 | 0,81  | 0,043805312 | 0,428840829   | 2,331867521     | 1,018518519     |
| AMD1                                                                                     | 6,18813E-05 | -1,227138011 | 0,512 | 0,58  | 1           | 0,427164005   | 2,341021218     | 0,882758621     |
| HERPUD1                                                                                  | 2,4582E-09  | -1,22799305  | 0,825 | 0,83  | 5,18706E-05 | 0,426910914   | 2,342409077     | 0,993975904     |

Supplementary Table 4

| Differentially expressed genes_keloid-CCD_ comparing SC-Keloid vs. (SC-Myel, SC-Nonmyel) |             |              |       |       |             |               |                 |                 |
|------------------------------------------------------------------------------------------|-------------|--------------|-------|-------|-------------|---------------|-----------------|-----------------|
| gene                                                                                     | p_val       | avg_log2FC   | pct.1 | pct.2 | p_val_adj   | Foldchange_UP | Foldchange_DOWN | Ratio_pct1_pct2 |
| PPP1R10                                                                                  | 3,70128E-07 | -1,228269384 | 0,525 | 0,66  | 0,007810066 | 0,426829151   | 2,342857786     | 0,795454545     |
| ADD3                                                                                     | 4,22347E-05 | -1,230309268 | 0,3   | 0,48  | 0,891195408 | 0,426226067   | 2,34617279      | 0,625           |
| IL6ST                                                                                    | 4,38056E-07 | -1,235743705 | 0,588 | 0,67  | 0,009243419 | 0,424623551   | 2,355027171     | 0,87761194      |
| UBC                                                                                      | 1,09313E-15 | -1,243491218 | 1     | 0,99  | 2,3066E-11  | 0,422349363   | 2,367708079     | 1,01010101      |
| TENT5A                                                                                   | 0,002763106 | -1,263984422 | 0,65  | 0,61  | 1           | 0,416392382   | 2,401580922     | 1,06557377      |
| C2orf88                                                                                  | 1,83796E-07 | -1,267776608 | 0,025 | 0,33  | 0,003878273 | 0,415299314   | 2,407901885     | 0,075757576     |
| DDIT3                                                                                    | 0,000469482 | -1,268475021 | 0,45  | 0,54  | 1           | 0,415098314   | 2,40906784      | 0,833333333     |
| BTG1                                                                                     | 7,95639E-14 | -1,298178091 | 0,963 | 0,93  | 1,67888E-09 | 0,406639399   | 2,459181286     | 1,035483871     |
| SORBS1                                                                                   | 5,48643E-07 | -1,303397438 | 0,312 | 0,56  | 0,011576918 | 0,405170927   | 2,468094165     | 0,557142857     |
| HSPA2                                                                                    | 0,048247142 | -1,309670549 | 0,325 | 0,36  | 1           | 0,403412992   | 2,47884927      | 0,902777778     |
| SERTAD2                                                                                  | 2,86925E-07 | -1,314428641 | 0,45  | 0,63  | 0,006054399 | 0,402084704   | 2,487038155     | 0,714285714     |
| GPR155                                                                                   | 1,11242E-06 | -1,316866296 | 0,412 | 0,61  | 0,023473218 | 0,401405893   | 2,491243941     | 0,675409836     |
| THSD7A                                                                                   | 2,52298E-09 | -1,322659765 | 0,112 | 0,5   | 5,32374E-05 | 0,399797189   | 2,501268209     | 0,224           |
| BCL2                                                                                     | 5,31134E-07 | -1,331018995 | 0,062 | 0,36  | 0,011207456 | 0,397487392   | 2,515803067     | 0,172222222     |
| CHL1                                                                                     | 9,56721E-09 | -1,340425948 | 0,013 | 0,36  | 0,000201878 | 0,394904045   | 2,532260714     | 0,036111111     |
| GADD45A                                                                                  | 0,002436393 | -1,34270852  | 0,625 | 0,6   | 1           | 0,394279739   | 2,536270323     | 1,041666667     |
| SERTAD1                                                                                  | 2,47196E-10 | -1,344968445 | 0,637 | 0,83  | 5,21608E-06 | 0,393662598   | 2,540246404     | 0,76746988      |
| FTL                                                                                      | 4,40143E-17 | -1,345098909 | 1     | 1     | 9,28745E-13 | 0,393627001   | 2,54047613      | 1               |
| PGM2L1                                                                                   | 1,00208E-06 | -1,346304787 | 0,613 | 0,69  | 0,021144905 | 0,393298125   | 2,542600478     | 0,888405797     |
| MBNL2                                                                                    | 3,40191E-09 | -1,354035293 | 0,512 | 0,69  | 7,17838E-05 | 0,391196321   | 2,55626126      | 0,742028986     |
| NFIB                                                                                     | 1,27534E-07 | -1,357581366 | 0,088 | 0,41  | 0,002691085 | 0,39023596    | 2,562552152     | 0,214634146     |
| C11orf96                                                                                 | 0,019291205 | -1,386589898 | 0,438 | 0,48  | 1           | 0,382467775   | 2,614599363     | 0,9125          |
| EIF5                                                                                     | 1,06352E-15 | -1,388512299 | 0,963 | 0,94  | 2,24413E-11 | 0,381958473   | 2,618085656     | 1,024468085     |
| GPM6B                                                                                    | 3,69383E-19 | -1,413774675 | 1     | 1     | 7,79434E-15 | 0,37532839    | 2,664333492     | 1               |
| EIF4A2                                                                                   | 1,87305E-12 | -1,415847821 | 0,812 | 0,84  | 3,95231E-08 | 0,374789432   | 2,668164879     | 0,966666667     |
| HSPA1B                                                                                   | 0,056424244 | -1,417281184 | 0,85  | 0,67  | 1           | 0,374417252   | 2,670817104     | 1,268656716     |
| HES1                                                                                     | 0,005587436 | -1,418960997 | 0,525 | 0,53  | 1           | 0,37398155    | 2,673928701     | 0,990566038     |
| MTURN                                                                                    | 1,36004E-06 | -1,422875123 | 0,362 | 0,57  | 0,028698161 | 0,372968289   | 2,681193094     | 0,635087719     |
| NR4A2                                                                                    | 2,42639E-07 | -1,43455364  | 0,475 | 0,67  | 0,005119927 | 0,369961323   | 2,702985252     | 0,708955224     |
| DDX5                                                                                     | 7,17044E-17 | -1,435678883 | 0,988 | 0,96  | 1,51304E-12 | 0,369672881   | 2,705094291     | 1,029166667     |

Supplementary Table 4

| Differentially expressed genes_keloid-CCD_ comparing SC-Keloid vs. (SC-Myel, SC-Nonmyel) |             |              |       |       |             |               |                 |                 |
|------------------------------------------------------------------------------------------|-------------|--------------|-------|-------|-------------|---------------|-----------------|-----------------|
| gene                                                                                     | p_val       | avg_log2FC   | pct.1 | pct.2 | p_val_adj   | Foldchange_UP | Foldchange_DOWN | Ratio_pct1_pct2 |
| TCIM                                                                                     | 0,000124772 | -1,443242941 | 0,575 | 0,61  | 1           | 0,367739756   | 2,719314361     | 0,942622951     |
| ZFP36L1                                                                                  | 9,9542E-09  | -1,459866339 | 0,662 | 0,79  | 0,000210044 | 0,363526807   | 2,750828769     | 0,837974684     |
| ETS1                                                                                     | 5,74144E-10 | -1,472632256 | 0,525 | 0,73  | 1,2115E-05  | 0,360324272   | 2,775277927     | 0,719178082     |
| TSC22D2                                                                                  | 2,24367E-06 | -1,474360343 | 0,5   | 0,63  | 0,047343699 | 0,359892928   | 2,778604198     | 0,793650794     |
| ARID5A                                                                                   | 2,90542E-06 | -1,477523714 | 0,188 | 0,45  | 0,06130725  | 0,359104662   | 2,784703478     | 0,417777778     |
| IFRD1                                                                                    | 1,40512E-07 | -1,490284369 | 0,637 | 0,72  | 0,00296495  | 0,355942382   | 2,809443465     | 0,884722222     |
| RELN                                                                                     | 5,5409E-11  | -1,504034777 | 0,013 | 0,44  | 1,16919E-06 | 0,352565991   | 2,836348442     | 0,029545455     |
| CEBPD                                                                                    | 0,000501594 | -1,508914764 | 0,212 | 0,4   | 1           | 0,351375434   | 2,845958776     | 0,53            |
| FST                                                                                      | 8,32756E-07 | -1,511015585 | 0,325 | 0,56  | 0,017571989 | 0,350864141   | 2,850106017     | 0,580357143     |
| PMP2                                                                                     | 6,70525E-05 | -1,513321932 | 0,537 | 0,6   | 1           | 0,350303685   | 2,854665948     | 0,895           |
| CREB5                                                                                    | 1,23499E-07 | -1,514227268 | 0,662 | 0,69  | 0,002605953 | 0,350083927   | 2,856457903     | 0,95942029      |
| MBP                                                                                      | 0,024553368 | -1,526089339 | 0,025 | 0,11  | 1           | 0,347217282   | 2,880040977     | 0,227272727     |
| FOS                                                                                      | 0,004470372 | -1,527479332 | 0,863 | 0,78  | 1           | 0,34688291    | 2,882817148     | 1,106410256     |
| HBP1                                                                                     | 9,96448E-10 | -1,53028464  | 0,438 | 0,69  | 2,1026E-05  | 0,346209054   | 2,888428215     | 0,634782609     |
| COL28A1                                                                                  | 8,73553E-10 | -1,537316869 | 0     | 0,38  | 1,84328E-05 | 0,344525609   | 2,902541851     | 0               |
| ID4                                                                                      | 2,68042E-07 | -1,546711434 | 0,55  | 0,7   | 0,005655955 | 0,342289411   | 2,921504342     | 0,785714286     |
| RGCC                                                                                     | 0,000220554 | -1,549510795 | 0,4   | 0,55  | 1           | 0,341625887   | 2,927178644     | 0,727272727     |
| LITAF                                                                                    | 7,05045E-09 | -1,552267538 | 0,512 | 0,68  | 0,000148772 | 0,340973722   | 2,932777327     | 0,752941176     |
| LTBP4                                                                                    | 1,57235E-09 | -1,554307812 | 0,312 | 0,63  | 3,31783E-05 | 0,340491854   | 2,936927824     | 0,495238095     |
| CTNNAL1                                                                                  | 5,81675E-07 | -1,571532918 | 0,525 | 0,64  | 0,012273926 | 0,336450713   | 2,972203542     | 0,8203125       |
| KLF9                                                                                     | 1,65787E-07 | -1,574089656 | 0,5   | 0,67  | 0,003498277 | 0,335854984   | 2,977475539     | 0,746268657     |
| SLC3A2                                                                                   | 2,34592E-11 | -1,58197993  | 0,812 | 0,85  | 4,95013E-07 | 0,334023166   | 2,993804325     | 0,955294118     |
| PTX3                                                                                     | 0,000468402 | -1,589031684 | 0,388 | 0,5   | 1           | 0,332394477   | 3,008473573     | 0,776           |
| TUBB2B                                                                                   | 3,47152E-09 | -1,590007135 | 0,362 | 0,65  | 7,32526E-05 | 0,332169811   | 3,010508384     | 0,556923077     |
| HSP90AA1                                                                                 | 5,72942E-11 | -1,597900924 | 1     | 0,99  | 1,20897E-06 | 0,330357288   | 3,0270257       | 1,01010101      |
| BGN                                                                                      | 3,04115E-08 | -1,608236217 | 0,138 | 0,48  | 0,000641713 | 0,327999105   | 3,048788808     | 0,2875          |
| NFATC2                                                                                   | 1,06296E-06 | -1,630499305 | 0,35  | 0,57  | 0,022429618 | 0,322976409   | 3,096201372     | 0,614035088     |
| MAFF                                                                                     | 9,6892E-10  | -1,640358129 | 0,525 | 0,71  | 2,04452E-05 | 0,320776836   | 3,117432081     | 0,73943662      |
| IER3                                                                                     | 8,67641E-13 | -1,642198154 | 0,925 | 0,96  | 1,83081E-08 | 0,320367976   | 3,121410616     | 0,963541667     |
| FOSB                                                                                     | 4,47856E-08 | -1,64314706  | 0,7   | 0,78  | 0,000945021 | 0,320157329   | 3,123464341     | 0,897435897     |

Supplementary Table 4

| Differentially expressed genes_keloid-CCD_ comparing SC-Keloid vs. (SC-Myel, SC-Nonmyel) |             |              |       |       |             |               |                 |                 |
|------------------------------------------------------------------------------------------|-------------|--------------|-------|-------|-------------|---------------|-----------------|-----------------|
| gene                                                                                     | p_val       | avg_log2FC   | pct.1 | pct.2 | p_val_adj   | Foldchange_UP | Foldchange_DOWN | Ratio_pct1_pct2 |
| IRF1                                                                                     | 2,48033E-08 | -1,65010723  | 0,575 | 0,72  | 0,000523375 | 0,318616474   | 3,138569662     | 0,798611111     |
| BIRC3                                                                                    | 1,02807E-07 | -1,654633077 | 0,212 | 0,54  | 0,002169341 | 0,317618516   | 3,148431058     | 0,392592593     |
| NFE2L2                                                                                   | 7,22565E-10 | -1,65509326  | 0,762 | 0,78  | 1,52468E-05 | 0,31751722    | 3,149435487     | 0,976923077     |
| DLC1                                                                                     | 4,9601E-11  | -1,667808343 | 0,537 | 0,74  | 1,04663E-06 | 0,314731102   | 3,177315477     | 0,725675676     |
| SFRP1                                                                                    | 6,03222E-10 | -1,673527364 | 0,05  | 0,45  | 1,27286E-05 | 0,313485938   | 3,189935744     | 0,111111111     |
| ARID5B                                                                                   | 6,97656E-06 | -1,690994106 | 0,637 | 0,67  | 0,147212292 | 0,30971344    | 3,228791107     | 0,950746269     |
| ZBTB20                                                                                   | 2,86451E-11 | -1,697886737 | 0,725 | 0,81  | 6,0444E-07  | 0,308237279   | 3,244253913     | 0,895061728     |
| ANK3                                                                                     | 1,04503E-09 | -1,70564406  | 0,125 | 0,51  | 2,20512E-05 | 0,306584346   | 3,26174514      | 0,245098039     |
| XKR4                                                                                     | 1,1486E-09  | -1,708632205 | 0,088 | 0,48  | 2,42366E-05 | 0,305949998   | 3,268507946     | 0,183333333     |
| ZFP36L2                                                                                  | 1,7285E-12  | -1,723516913 | 0,825 | 0,87  | 3,6473E-08  | 0,30280965    | 3,302404663     | 0,948275862     |
| NNMT                                                                                     | 0,000261614 | -1,725080525 | 0,15  | 0,35  | 1           | 0,302481639   | 3,305985794     | 0,428571429     |
| DKK3                                                                                     | 1,63454E-08 | -1,732552908 | 0,175 | 0,51  | 0,000344905 | 0,300918997   | 3,323153439     | 0,343137255     |
| NRN1                                                                                     | 9,67739E-08 | -1,737686179 | 0,55  | 0,67  | 0,002042027 | 0,299850196   | 3,334998655     | 0,820895522     |
| AHR                                                                                      | 2,36003E-07 | -1,760257484 | 0,5   | 0,64  | 0,004979905 | 0,295195476   | 3,387585792     | 0,78125         |
| HSPA1A                                                                                   | 0,000136444 | -1,761387492 | 0,963 | 0,86  | 1           | 0,294964351   | 3,390240198     | 1,119767442     |
| HSPH1                                                                                    | 4,5248E-08  | -1,77578003  | 0,662 | 0,72  | 0,000954777 | 0,292036372   | 3,424231001     | 0,919444444     |
| SOD2                                                                                     | 0,000292516 | -1,803957867 | 0,4   | 0,51  | 1           | 0,286387838   | 3,491768388     | 0,784313725     |
| ABL2                                                                                     | 1,04515E-08 | -1,820376996 | 0,75  | 0,75  | 0,000220538 | 0,283146971   | 3,531734755     | 1               |
| FXYD1                                                                                    | 7,04359E-14 | -1,86644646  | 0,637 | 0,83  | 1,48627E-09 | 0,274248102   | 3,646333352     | 0,76746988      |
| BPGM                                                                                     | 5,18449E-10 | -1,869680544 | 0,525 | 0,72  | 1,09398E-05 | 0,273634009   | 3,654516492     | 0,729166667     |
| KLF4                                                                                     | 2,8418E-11  | -1,877420065 | 0,338 | 0,69  | 5,99649E-07 | 0,272169995   | 3,674174291     | 0,489855072     |
| DNAJA1                                                                                   | 1,59987E-18 | -1,903692188 | 0,925 | 0,96  | 3,37588E-14 | 0,267258514   | 3,741695582     | 0,963541667     |
| TMEM176B                                                                                 | 1,20185E-13 | -1,910449201 | 0,112 | 0,66  | 2,53603E-09 | 0,266009707   | 3,759261307     | 0,16969697      |
| TMEM176A                                                                                 | 3,79621E-12 | -1,922442407 | 0,075 | 0,56  | 8,01039E-08 | 0,26380752    | 3,790642516     | 0,133928571     |
| MATN2                                                                                    | 3,0838E-11  | -1,93034428  | 0,475 | 0,73  | 6,50713E-07 | 0,262366553   | 3,811461439     | 0,650684932     |
| NDRG2                                                                                    | 1,97048E-15 | -1,943723717 | 0,262 | 0,76  | 4,15791E-11 | 0,259944635   | 3,846973034     | 0,344736842     |
| ADIRF                                                                                    | 1,0258E-08  | -1,966033759 | 0,188 | 0,56  | 0,000216455 | 0,255955736   | 3,906925535     | 0,335714286     |
| GADD45B                                                                                  | 4,2373E-16  | -1,966987673 | 0,938 | 0,96  | 8,94112E-12 | 0,255786553   | 3,909509662     | 0,977083333     |
| PLP1                                                                                     | 8,3954E-15  | -1,985991254 | 0,812 | 0,9   | 1,77151E-10 | 0,252439355   | 3,961347473     | 0,902222222     |
| PPP1R15A                                                                                 | 4,56786E-21 | -1,98646498  | 0,9   | 0,98  | 9,63864E-17 | 0,252356477   | 3,962648442     | 0,918367347     |

Supplementary Table 4

| Differentially expressed genes_keloid-CCD_comparing SC-Keloid vs. (SC-Myel, SC-Nonmyel) |             |              |       |       |             |               |                 |                 |
|-----------------------------------------------------------------------------------------|-------------|--------------|-------|-------|-------------|---------------|-----------------|-----------------|
| gene                                                                                    | p_val       | avg_log2FC   | pct.1 | pct.2 | p_val_adj   | Foldchange_UP | Foldchange_DOWN | Ratio_pct1_pct2 |
| DNAJB1                                                                                  | 9,18538E-10 | -2,035382916 | 0,912 | 0,85  | 1,93821E-05 | 0,243943185   | 4,099315176     | 1,072941176     |
| CEBPB                                                                                   | 4,51803E-16 | -2,070787152 | 0,662 | 0,85  | 9,53349E-12 | 0,238029592   | 4,201158313     | 0,778823529     |
| PCSK2                                                                                   | 8,76227E-12 | -2,100076909 | 0,062 | 0,52  | 1,84893E-07 | 0,233245813   | 4,287322397     | 0,119230769     |
| JUN                                                                                     | 6,91071E-11 | -2,12178532  | 0,95  | 0,93  | 1,45823E-06 | 0,229762408   | 4,352322072     | 1,021505376     |
| SAT1                                                                                    | 3,38296E-09 | -2,171044453 | 0,338 | 0,64  | 7,13839E-05 | 0,222049857   | 4,503493105     | 0,528125        |
| COL14A1                                                                                 | 3,2086E-10  | -2,178134304 | 0,4   | 0,67  | 6,77047E-06 | 0,220961312   | 4,525679137     | 0,597014925     |
| PNRC1                                                                                   | 1,25799E-24 | -2,179077907 | 0,625 | 0,98  | 2,65449E-20 | 0,220816838   | 4,528640153     | 0,637755102     |
| CDH19                                                                                   | 4,21925E-19 | -2,180287694 | 0,863 | 0,96  | 8,90305E-15 | 0,220631748   | 4,532439285     | 0,898958333     |
| SNCA                                                                                    | 1,46996E-18 | -2,192390172 | 0,2   | 0,77  | 3,10177E-14 | 0,218788654   | 4,57062093      | 0,25974026      |
| ATF3                                                                                    | 3,18937E-17 | -2,285905338 | 0,475 | 0,87  | 6,72989E-13 | 0,205056682   | 4,876700381     | 0,545977011     |
| SQSTM1                                                                                  | 1,58625E-18 | -2,320762997 | 0,8   | 0,9   | 3,34715E-14 | 0,200161582   | 4,995963708     | 0,888888889     |
| CCN1                                                                                    | 4,45772E-15 | -2,348545231 | 0,588 | 0,88  | 9,40623E-11 | 0,196343912   | 5,093104189     | 0,668181818     |
| SCN7A                                                                                   | 6,96678E-16 | -2,352813764 | 0,15  | 0,7   | 1,47006E-11 | 0,195763843   | 5,108195582     | 0,214285714     |
| FGL2                                                                                    | 6,76994E-09 | -2,362073629 | 0,062 | 0,43  | 0,000142853 | 0,194511367   | 5,141087722     | 0,144186047     |
| CRYAB                                                                                   | 2,76929E-19 | -2,418639612 | 0,988 | 0,96  | 5,84348E-15 | 0,187032435   | 5,346666208     | 1,029166667     |
| MPZ                                                                                     | 3,32148E-10 | -2,437901849 | 0,225 | 0,65  | 7,00866E-06 | 0,184551856   | 5,418531257     | 0,346153846     |
| RARRES2                                                                                 | 8,12371E-18 | -2,451708736 | 0,05  | 0,68  | 1,71418E-13 | 0,182794081   | 5,470636643     | 0,073529412     |
| HSPA6                                                                                   | 0,67744427  | -2,480886601 | 0,188 | 0,18  | 1           | 0,179134286   | 5,58240425      | 1,044444444     |
| NRXN1                                                                                   | 4,94836E-24 | -3,109310154 | 0,212 | 0,89  | 1,04415E-19 | 0,115878904   | 8,629698489     | 0,238202247     |
| CCL2                                                                                    | 2,51312E-07 | -3,560195593 | 0,162 | 0,48  | 0,005302933 | 0,084776276   | 11,79575284     | 0,3375          |

Supplementary Table 5

| Differentially expressed genes_total calculation_ comparing SC-Keloid vs. (SC-Myel, SC-Nonmyel) |             |             |       |       |             |               |                 |                 |
|-------------------------------------------------------------------------------------------------|-------------|-------------|-------|-------|-------------|---------------|-----------------|-----------------|
| gene                                                                                            | p_val       | avg_log2FC  | pct.1 | pct.2 | p_val_adj   | Foldchange_UP | Foldchange_DOWN | Ratio_pct1_pct2 |
| TGFBI                                                                                           | 5,4254E-157 | 3,9142699   | 0,689 | 0,031 | 1,1448E-152 | 15,07692072   | 0,066326541     | 22,22580645     |
| IGFBP3                                                                                          | 2,1896E-125 | 3,623292358 | 0,596 | 0,028 | 4,6202E-121 | 12,32309178   | 0,081148466     | 21,28571429     |
| IBSP                                                                                            | 7,03777E-47 | 3,041607221 | 0,256 | 0,005 | 1,48504E-42 | 8,234078603   | 0,121446497     | 51,2            |
| IGFBP5                                                                                          | 8,3086E-213 | 2,938763044 | 0,986 | 0,569 | 1,7532E-208 | 7,667536046   | 0,130419993     | 1,732864675     |
| COL1A1                                                                                          | 2,2691E-135 | 2,504172227 | 0,858 | 0,505 | 4,788E-131  | 5,673237367   | 0,176266201     | 1,699009901     |
| CCN3                                                                                            | 3,72269E-82 | 2,458134656 | 0,568 | 0,129 | 7,85525E-78 | 5,495057797   | 0,181981707     | 4,403100775     |
| TAGLN                                                                                           | 3,88557E-60 | 2,38256811  | 0,428 | 0,08  | 8,19895E-56 | 5,214641635   | 0,191767732     | 5,35            |
| COL7A1                                                                                          | 4,3247E-77  | 2,35507468  | 0,482 | 0,071 | 9,12554E-73 | 5,116207155   | 0,195457293     | 6,788732394     |
| ELN                                                                                             | 3,6153E-57  | 2,230519265 | 0,447 | 0,11  | 7,62865E-53 | 4,693028642   | 0,213082015     | 4,063636364     |
| ATOX1                                                                                           | 7,35647E-70 | 2,21901903  | 0,567 | 0,193 | 1,55229E-65 | 4,655767549   | 0,214787356     | 2,937823834     |
| SPARCL1                                                                                         | 2,04561E-89 | 2,217783107 | 0,757 | 0,365 | 4,31644E-85 | 4,651780771   | 0,214971438     | 2,073972603     |
| S100A4                                                                                          | 2,2655E-101 | 2,208559288 | 0,896 | 0,665 | 4,78052E-97 | 4,622134648   | 0,216350253     | 1,347368421     |
| S100A6                                                                                          | 1,1638E-225 | 2,182991865 | 0,999 | 0,974 | 2,4558E-221 | 4,540942804   | 0,220218585     | 1,025667351     |
| PTN                                                                                             | 2,1761E-126 | 2,126556702 | 0,874 | 0,56  | 4,5918E-122 | 4,366740206   | 0,229003777     | 1,560714286     |
| TPM2                                                                                            | 2,07177E-49 | 2,103962793 | 0,414 | 0,106 | 4,37165E-45 | 4,298885823   | 0,232618413     | 3,905660377     |
| ITGB1                                                                                           | 3,6323E-133 | 2,100228278 | 0,891 | 0,73  | 7,6646E-129 | 4,287772252   | 0,233221342     | 1,220547945     |
| PPP1R14B                                                                                        | 5,36656E-67 | 2,099050849 | 0,61  | 0,275 | 1,1324E-62  | 4,284274294   | 0,233411759     | 2,218181818     |
| MYL6                                                                                            | 1,24E-144   | 2,097600275 | 0,905 | 0,78  | 2,6165E-140 | 4,279968786   | 0,233646564     | 1,16025641      |
| CSRP2                                                                                           | 1,18306E-50 | 2,087842339 | 0,399 | 0,088 | 2,49638E-46 | 4,2511181     | 0,235232232     | 4,534090909     |
| S100A13                                                                                         | 4,91823E-64 | 2,069656286 | 0,622 | 0,313 | 1,0378E-59  | 4,197866498   | 0,238216246     | 1,987220447     |
| LSM7                                                                                            | 1,42662E-63 | 2,043179313 | 0,607 | 0,28  | 3,01031E-59 | 4,121528048   | 0,242628459     | 2,167857143     |
| FABP5                                                                                           | 1,3676E-55  | 2,018973627 | 0,542 | 0,206 | 2,88576E-51 | 4,05295351    | 0,246733647     | 2,631067961     |
| COL12A1                                                                                         | 2,10651E-49 | 2,010125868 | 0,504 | 0,197 | 4,44495E-45 | 4,028173622   | 0,248251464     | 2,558375635     |
| S100A16                                                                                         | 5,46546E-63 | 2,007756015 | 0,577 | 0,252 | 1,15327E-58 | 4,021562147   | 0,248659591     | 2,28968254      |
| TNC                                                                                             | 1,20429E-67 | 1,964017745 | 0,639 | 0,293 | 2,54118E-63 | 3,901469834   | 0,256313657     | 2,180887372     |
| COL8A1                                                                                          | 2,42012E-60 | 1,958983909 | 0,522 | 0,168 | 5,1067E-56  | 3,887880589   | 0,257209546     | 3,107142857     |
| COL6A1                                                                                          | 2,01681E-83 | 1,904860859 | 0,78  | 0,536 | 4,25567E-79 | 3,744727811   | 0,267042106     | 1,455223881     |
| POSTN                                                                                           | 3,83097E-28 | 1,892523488 | 0,277 | 0,075 | 8,08373E-24 | 3,712840882   | 0,269335539     | 3,693333333     |
| SEM1                                                                                            | 9,7043E-63  | 1,879455604 | 0,644 | 0,336 | 2,0477E-58  | 3,679361946   | 0,271786254     | 1,916666667     |
| NES                                                                                             | 1,82782E-57 | 1,872988698 | 0,559 | 0,235 | 3,85689E-53 | 3,662906051   | 0,273007275     | 2,378723404     |



Supplementary Table 5

| Differentially expressed genes_total calculation_ comparing SC-Keloid vs. (SC-Myel, SC-Nonmyel) |             |             |       |       |             |               |                 |                 |
|-------------------------------------------------------------------------------------------------|-------------|-------------|-------|-------|-------------|---------------|-----------------|-----------------|
| gene                                                                                            | p_val       | avg_log2FC  | pct.1 | pct.2 | p_val_adj   | Foldchange_UP | Foldchange_DOWN | Ratio_pct1_pct2 |
| TMSB10                                                                                          | 2,8643E-174 | 1,872289085 | 0,985 | 0,931 | 6,044E-170  | 3,661130211   | 0,273139698     | 1,058002148     |
| ATP5F1E                                                                                         | 1,3437E-111 | 1,865767165 | 0,845 | 0,636 | 2,8354E-107 | 3,644616874   | 0,274377262     | 1,328616352     |
| PMEPA1                                                                                          | 2,83317E-97 | 1,845875787 | 0,803 | 0,459 | 5,97827E-93 | 3,594710995   | 0,27818648      | 1,749455338     |
| CDH6                                                                                            | 1,05234E-45 | 1,802766902 | 0,426 | 0,121 | 2,22053E-41 | 3,488887075   | 0,286624353     | 3,520661157     |
| ENC1                                                                                            | 8,87847E-52 | 1,7984831   | 0,34  | 0,038 | 1,87345E-47 | 3,478542868   | 0,287476693     | 8,947368421     |
| CALB2                                                                                           | 1,14779E-48 | 1,788951916 | 0,254 | 0     | 2,42195E-44 | 3,455637574   | 0,289382199     | #DIV/0!         |
| FN1                                                                                             | 3,37652E-52 | 1,786284914 | 0,66  | 0,431 | 7,1248E-48  | 3,449255297   | 0,289917653     | 1,531322506     |
| DYNLT1                                                                                          | 3,46251E-46 | 1,778609139 | 0,438 | 0,136 | 7,30625E-42 | 3,430952467   | 0,291464254     | 3,220588235     |
| COL6A3                                                                                          | 1,28336E-37 | 1,770590414 | 0,251 | 0,026 | 2,70802E-33 | 3,411935595   | 0,293088768     | 9,653846154     |
| PSMA7                                                                                           | 4,80704E-55 | 1,758435368 | 0,666 | 0,411 | 1,01433E-50 | 3,383309991   | 0,295568542     | 1,620437956     |
| CYTL1                                                                                           | 5,39023E-50 | 1,739533845 | 0,334 | 0,039 | 1,13739E-45 | 3,339272539   | 0,299466422     | 8,564102564     |
| TNFAIP6                                                                                         | 1,83396E-48 | 1,729405711 | 0,654 | 0,429 | 3,86984E-44 | 3,315911979   | 0,30157616      | 1,524475524     |
| PPIB                                                                                            | 2,56566E-74 | 1,718194903 | 0,758 | 0,562 | 5,41381E-70 | 3,290244745   | 0,303928758     | 1,348754448     |
| TXNDC17                                                                                         | 6,95269E-41 | 1,677305596 | 0,397 | 0,117 | 1,46709E-36 | 3,198300724   | 0,312666033     | 3,393162393     |
| PHLDA2                                                                                          | 4,49561E-44 | 1,663866484 | 0,413 | 0,117 | 9,48619E-40 | 3,168645983   | 0,315592214     | 3,52991453      |
| TNFRSF12A                                                                                       | 2,1923E-57  | 1,659613097 | 0,673 | 0,379 | 4,62597E-53 | 3,159317866   | 0,316524023     | 1,775725594     |
| SEC61G                                                                                          | 4,72705E-33 | 1,654804981 | 0,569 | 0,376 | 9,97454E-29 | 3,148806231   | 0,317580672     | 1,513297872     |
| LOXL2                                                                                           | 6,47717E-50 | 1,653804419 | 0,312 | 0,027 | 1,36675E-45 | 3,146623177   | 0,317801002     | 11,55555556     |
| PLCG2                                                                                           | 1,74879E-23 | 1,645007852 | 0,196 | 0,035 | 3,69013E-19 | 3,127495594   | 0,319744655     | 5,6             |
| TPM4                                                                                            | 2,67702E-52 | 1,638875882 | 0,671 | 0,46  | 5,64878E-48 | 3,11423083    | 0,321106576     | 1,458695652     |
| PHPT1                                                                                           | 1,93024E-37 | 1,636819793 | 0,533 | 0,29  | 4,073E-33   | 3,109795674   | 0,321564535     | 1,837931034     |
| MYL12A                                                                                          | 1,28482E-57 | 1,608633787 | 0,707 | 0,548 | 2,71111E-53 | 3,049629092   | 0,327908729     | 1,290145985     |
| SH3BGR13                                                                                        | 2,03909E-30 | 1,600883406 | 0,482 | 0,284 | 4,30268E-26 | 3,033289941   | 0,329675046     | 1,697183099     |
| NDUFA4                                                                                          | 1,01987E-73 | 1,568945627 | 0,775 | 0,559 | 2,15203E-69 | 2,966878048   | 0,337054636     | 1,386404293     |
| COL1A2                                                                                          | 6,22127E-76 | 1,568115838 | 0,832 | 0,673 | 1,31275E-71 | 2,965172091   | 0,337248554     | 1,236255572     |
| COL5A2                                                                                          | 1,53972E-36 | 1,557039366 | 0,524 | 0,284 | 3,24896E-32 | 2,94249378    | 0,339847787     | 1,845070423     |
| S100A11                                                                                         | 1,57634E-86 | 1,550398805 | 0,861 | 0,712 | 3,32624E-82 | 2,92898094    | 0,341415673     | 1,209269663     |
| CDH2                                                                                            | 8,22634E-43 | 1,528656083 | 0,366 | 0,081 | 1,73584E-38 | 2,885169511   | 0,346600086     | 4,518518519     |
| MMP15                                                                                           | 2,23606E-41 | 1,524944099 | 0,312 | 0,052 | 4,71832E-37 | 2,877755651   | 0,347493019     | 6               |
| PLS3                                                                                            | 9,36298E-35 | 1,496820746 | 0,441 | 0,183 | 1,97568E-30 | 2,822201009   | 0,354333372     | 2,409836066     |

Supplementary Table 5

| Differentially expressed genes_total calculation_ comparing SC-Keloid vs. (SC-Myel, SC-Nonmyel) |             |             |       |       |             |               |                 |                 |
|-------------------------------------------------------------------------------------------------|-------------|-------------|-------|-------|-------------|---------------|-----------------|-----------------|
| gene                                                                                            | p_val       | avg_log2FC  | pct.1 | pct.2 | p_val_adj   | Foldchange_UP | Foldchange_DOWN | Ratio_pct1_pct2 |
| COX7A2                                                                                          | 6,22933E-41 | 1,495930917 | 0,634 | 0,44  | 1,31445E-36 | 2,820460861   | 0,354551986     | 1,440909091     |
| NDUFB2                                                                                          | 3,93373E-31 | 1,473754555 | 0,536 | 0,328 | 8,30055E-27 | 2,777437708   | 0,360044078     | 1,634146341     |
| PDLIM7                                                                                          | 5,41625E-35 | 1,464756939 | 0,374 | 0,123 | 1,14288E-30 | 2,760169642   | 0,362296572     | 3,040650407     |
| DNAJC15                                                                                         | 4,27122E-36 | 1,456628954 | 0,381 | 0,113 | 9,0127E-32  | 2,744662873   | 0,364343472     | 3,371681416     |
| S100A10                                                                                         | 2,5316E-131 | 1,435622217 | 0,978 | 0,919 | 5,3419E-127 | 2,704988043   | 0,369687401     | 1,064200218     |
| ANAPC11                                                                                         | 7,1166E-28  | 1,426044456 | 0,441 | 0,221 | 1,50167E-23 | 2,687089652   | 0,372149846     | 1,995475113     |
| RPS26                                                                                           | 3,60778E-42 | 1,422413676 | 0,685 | 0,526 | 7,61277E-38 | 2,68033565    | 0,373087602     | 1,302281369     |
| FKBP2                                                                                           | 2,88061E-22 | 1,420254644 | 0,36  | 0,167 | 6,07838E-18 | 2,676327456   | 0,373646356     | 2,155688623     |
| CCND1                                                                                           | 5,09012E-23 | 1,416075458 | 0,464 | 0,301 | 1,07407E-18 | 2,668585912   | 0,3747303       | 1,541528239     |
| CALD1                                                                                           | 9,91355E-34 | 1,402492994 | 0,614 | 0,471 | 2,09186E-29 | 2,643580014   | 0,378274913     | 1,303609342     |
| EMP3                                                                                            | 7,51445E-43 | 1,390010909 | 0,673 | 0,491 | 1,58562E-38 | 2,620806626   | 0,381561917     | 1,370672098     |
| C4orf48                                                                                         | 7,72039E-24 | 1,384553782 | 0,353 | 0,149 | 1,62908E-19 | 2,610911908   | 0,383007943     | 2,369127517     |
| SEC61B                                                                                          | 1,54859E-34 | 1,38430555  | 0,63  | 0,469 | 3,26768E-30 | 2,610462709   | 0,38307385      | 1,343283582     |
| COX6C                                                                                           | 2,35615E-37 | 1,377732493 | 0,667 | 0,501 | 4,97171E-33 | 2,598596245   | 0,384823153     | 1,331337325     |
| LYPD1                                                                                           | 2,63286E-39 | 1,37531459  | 0,283 | 0,038 | 5,5556E-35  | 2,594244742   | 0,385468643     | 7,447368421     |
| COL5A1                                                                                          | 5,14997E-29 | 1,350883283 | 0,419 | 0,183 | 1,08669E-24 | 2,55068242    | 0,392051944     | 2,289617486     |
| SCRG1                                                                                           | 9,89767E-16 | 1,348515859 | 0,263 | 0,115 | 2,08851E-11 | 2,54650025    | 0,392695818     | 2,286956522     |
| ELOB                                                                                            | 1,28757E-37 | 1,343784033 | 0,646 | 0,491 | 2,7169E-33  | 2,538161788   | 0,393985917     | 1,315682281     |
| HMCN2                                                                                           | 1,73176E-42 | 1,343152098 | 0,248 | 0,011 | 3,65419E-38 | 2,537050257   | 0,39415853      | 22,54545455     |
| PRRX1                                                                                           | 9,95244E-31 | 1,334699306 | 0,276 | 0,058 | 2,10006E-26 | 2,522229066   | 0,396474695     | 4,75862069      |
| MGST3                                                                                           | 2,34342E-27 | 1,327495127 | 0,555 | 0,369 | 4,94485E-23 | 2,509665569   | 0,398459465     | 1,504065041     |
| NID1                                                                                            | 2,04832E-21 | 1,31820662  | 0,313 | 0,125 | 4,32217E-17 | 2,493559485   | 0,401033144     | 2,504           |
| PRDX4                                                                                           | 2,56556E-22 | 1,311166826 | 0,373 | 0,178 | 5,41359E-18 | 2,481421518   | 0,402994813     | 2,095505618     |
| RPS27L                                                                                          | 5,89758E-16 | 1,303320304 | 0,517 | 0,398 | 1,24445E-11 | 2,46796221    | 0,40519259      | 1,298994975     |
| NDUFS5                                                                                          | 6,22494E-30 | 1,301422649 | 0,617 | 0,476 | 1,31352E-25 | 2,4647181     | 0,405725912     | 1,296218487     |
| ADAMTS16                                                                                        | 2,65168E-36 | 1,288555253 | 0,228 | 0,016 | 5,5953E-32  | 2,442833023   | 0,409360767     | 14,25           |
| ACTB                                                                                            | 2,96152E-76 | 1,288251538 | 0,902 | 0,881 | 6,24911E-72 | 2,442318813   | 0,409446955     | 1,023836549     |
| IL1RAP                                                                                          | 1,77119E-22 | 1,27389977  | 0,306 | 0,113 | 3,73738E-18 | 2,418143347   | 0,413540414     | 2,707964602     |
| ABHD2                                                                                           | 9,2272E-28  | 1,261886094 | 0,341 | 0,114 | 1,94703E-23 | 2,398090482   | 0,416998444     | 2,99122807      |
| UQCRCQ                                                                                          | 1,37028E-18 | 1,26004869  | 0,477 | 0,319 | 2,89143E-14 | 2,395038239   | 0,417529868     | 1,495297806     |

Supplementary Table 5

| Differentially expressed genes_total calculation_ comparing SC-Keloid vs. (SC-Myel, SC-Nonmyel) |             |             |       |       |             |               |                 |                 |
|-------------------------------------------------------------------------------------------------|-------------|-------------|-------|-------|-------------|---------------|-----------------|-----------------|
| gene                                                                                            | p_val       | avg_log2FC  | pct.1 | pct.2 | p_val_adj   | Foldchange_UP | Foldchange_DOWN | Ratio_pct1_pct2 |
| ISLR                                                                                            | 1,49131E-36 | 1,254767693 | 0,219 | 0,011 | 3,1468E-32  | 2,386287208   | 0,41906104      | 19,90909091     |
| IGFBP2                                                                                          | 7,80927E-10 | 1,254363611 | 0,225 | 0,121 | 1,64783E-05 | 2,385618931   | 0,419178431     | 1,859504132     |
| CYTOR                                                                                           | 2,55005E-25 | 1,253372794 | 0,327 | 0,119 | 5,38087E-21 | 2,383981093   | 0,419466414     | 2,74789916      |
| CRLF1                                                                                           | 1,04654E-21 | 1,249467123 | 0,213 | 0,052 | 2,20831E-17 | 2,377535895   | 0,420603534     | 4,096153846     |
| OSTC                                                                                            | 2,64766E-17 | 1,239020341 | 0,388 | 0,224 | 5,58684E-13 | 2,360381966   | 0,423660244     | 1,732142857     |
| POMP                                                                                            | 3,21312E-20 | 1,23426089  | 0,494 | 0,33  | 6,78001E-16 | 2,352607897   | 0,425060207     | 1,496969697     |
| VCAN                                                                                            | 9,33532E-26 | 1,232737692 | 0,261 | 0,066 | 1,96985E-21 | 2,350125323   | 0,425509223     | 3,954545455     |
| HSBP1                                                                                           | 9,97239E-22 | 1,225520639 | 0,563 | 0,438 | 2,10427E-17 | 2,338398225   | 0,427643157     | 1,285388128     |
| DSEL                                                                                            | 2,8591E-23  | 1,194958014 | 0,293 | 0,098 | 6,03299E-19 | 2,289381694   | 0,43679916      | 2,989795918     |
| MYLK                                                                                            | 4,78758E-30 | 1,18547429  | 0,211 | 0,023 | 1,01023E-25 | 2,274381533   | 0,439679968     | 9,173913043     |
| NDUFAB1                                                                                         | 1,90484E-14 | 1,183246127 | 0,383 | 0,233 | 4,0194E-10  | 2,270871587   | 0,440359554     | 1,643776824     |
| ARPC5                                                                                           | 4,81327E-23 | 1,181312191 | 0,59  | 0,48  | 1,01565E-18 | 2,267829518   | 0,440950253     | 1,229166667     |
| TXNL4A                                                                                          | 3,58684E-20 | 1,180096456 | 0,342 | 0,157 | 7,56859E-16 | 2,265919261   | 0,441321991     | 2,178343949     |
| RPS4Y1                                                                                          | 1,05327E-13 | 1,178499874 | 0,255 | 0,121 | 2,2225E-09  | 2,263413031   | 0,441810658     | 2,107438017     |
| TMEM167A                                                                                        | 1,9282E-19  | 1,177944243 | 0,331 | 0,147 | 4,0687E-15  | 2,262541481   | 0,441980847     | 2,25170068      |
| KRT10                                                                                           | 1,21024E-24 | 1,17542589  | 0,603 | 0,472 | 2,55374E-20 | 2,258595459   | 0,442753038     | 1,277542373     |
| MRPL52                                                                                          | 3,5676E-17  | 1,166335154 | 0,328 | 0,159 | 7,528E-13   | 2,244408301   | 0,445551729     | 2,062893082     |
| MIR4435-2HG                                                                                     | 3,45132E-22 | 1,16439485  | 0,233 | 0,06  | 7,28262E-18 | 2,241391789   | 0,446151362     | 3,883333333     |
| CALU                                                                                            | 1,41268E-20 | 1,164322345 | 0,553 | 0,431 | 2,98089E-16 | 2,241279147   | 0,446173785     | 1,283062645     |
| SDCCAG8                                                                                         | 5,15328E-19 | 1,162384304 | 0,282 | 0,109 | 1,08739E-14 | 2,238270352   | 0,446773554     | 2,587155963     |
| ANXA5                                                                                           | 3,033E-50   | 1,151087802 | 0,773 | 0,697 | 6,39994E-46 | 2,220812822   | 0,450285585     | 1,109038737     |
| AP2S1                                                                                           | 2,60241E-18 | 1,148957529 | 0,35  | 0,179 | 5,49134E-14 | 2,217536005   | 0,450950964     | 1,955307263     |
| OST4                                                                                            | 2,12044E-21 | 1,144930692 | 0,553 | 0,461 | 4,47434E-17 | 2,211355069   | 0,452211413     | 1,199566161     |
| ATP5PF                                                                                          | 5,42767E-15 | 1,142823472 | 0,512 | 0,421 | 1,14529E-10 | 2,208127492   | 0,452872402     | 1,216152019     |
| CD151                                                                                           | 9,49193E-21 | 1,140366314 | 0,518 | 0,398 | 2,00289E-16 | 2,204369871   | 0,453644378     | 1,301507538     |
| ABI2                                                                                            | 2,82482E-11 | 1,135677026 | 0,304 | 0,175 | 5,96065E-07 | 2,197216492   | 0,455121288     | 1,737142857     |
| PSMB1                                                                                           | 3,60159E-17 | 1,133114369 | 0,48  | 0,341 | 7,59971E-13 | 2,193317044   | 0,455930438     | 1,407624633     |
| SLIRP                                                                                           | 4,65933E-12 | 1,132995811 | 0,338 | 0,206 | 9,83164E-08 | 2,193136809   | 0,455967907     | 1,640776699     |
| ATP5MC3                                                                                         | 4,70053E-15 | 1,132169064 | 0,48  | 0,349 | 9,91859E-11 | 2,191880376   | 0,456229277     | 1,375358166     |
| SSBP1                                                                                           | 2,84725E-15 | 1,131707629 | 0,377 | 0,22  | 6,00798E-11 | 2,191179432   | 0,456375222     | 1,713636364     |

Supplementary Table 5

| Differentially expressed genes_total calculation_ comparing SC-Keloid vs. (SC-Myel, SC-Nonmyel) |             |             |       |       |             |               |                 |                 |
|-------------------------------------------------------------------------------------------------|-------------|-------------|-------|-------|-------------|---------------|-----------------|-----------------|
| gene                                                                                            | p_val       | avg_log2FC  | pct.1 | pct.2 | p_val_adj   | Foldchange_UP | Foldchange_DOWN | Ratio_pct1_pct2 |
| APRT                                                                                            | 3,17896E-18 | 1,130630138 | 0,392 | 0,22  | 6,70792E-14 | 2,189543539   | 0,456716198     | 1,781818182     |
| SERPINE2                                                                                        | 1,49393E-18 | 1,129131945 | 0,35  | 0,17  | 3,15234E-14 | 2,187270947   | 0,457190729     | 2,058823529     |
| PDGFC                                                                                           | 1,56E-23    | 1,128475275 | 0,236 | 0,057 | 3,29175E-19 | 2,186275597   | 0,457398876     | 4,140350877     |
| VAMP5                                                                                           | 3,28945E-16 | 1,123250079 | 0,399 | 0,248 | 6,94108E-12 | 2,1783716     | 0,4590585       | 1,608870968     |
| PDCD5                                                                                           | 4,62336E-16 | 1,118502686 | 0,392 | 0,235 | 9,75574E-12 | 2,17121514    | 0,460571586     | 1,668085106     |
| GNG5                                                                                            | 3,27554E-20 | 1,114130984 | 0,567 | 0,463 | 6,91171E-16 | 2,164645811   | 0,461969341     | 1,22462203      |
| RPL22L1                                                                                         | 7,17272E-10 | 1,109723241 | 0,438 | 0,342 | 1,51351E-05 | 2,158042446   | 0,463382915     | 1,280701754     |
| RAPH1                                                                                           | 2,66236E-18 | 1,10794623  | 0,207 | 0,058 | 5,61784E-14 | 2,155385956   | 0,46395403      | 3,568965517     |
| MMP14                                                                                           | 3,03422E-15 | 1,106597933 | 0,368 | 0,209 | 6,40252E-11 | 2,153372542   | 0,464387829     | 1,76076555      |
| SH3GLB1                                                                                         | 1,72012E-14 | 1,098588424 | 0,384 | 0,231 | 3,62962E-10 | 2,14145064    | 0,466973173     | 1,662337662     |
| TMEM160                                                                                         | 2,86185E-17 | 1,097295975 | 0,298 | 0,132 | 6,03879E-13 | 2,139533065   | 0,467391702     | 2,257575758     |
| ATP5MF                                                                                          | 9,06246E-17 | 1,094216718 | 0,455 | 0,315 | 1,91227E-12 | 2,134971362   | 0,468390358     | 1,444444444     |
| PLAC9                                                                                           | 2,60124E-11 | 1,093416229 | 0,357 | 0,231 | 5,48888E-07 | 2,133787088   | 0,468650319     | 1,545454545     |
| ADAMTSL1                                                                                        | 6,14767E-27 | 1,090272456 | 0,256 | 0,057 | 1,29722E-22 | 2,12914242    | 0,469672668     | 4,49122807      |
| NDUFA1                                                                                          | 1,75653E-12 | 1,088827348 | 0,492 | 0,393 | 3,70645E-08 | 2,127010785   | 0,470143361     | 1,251908397     |
| GADD45GIP1                                                                                      | 1,94725E-12 | 1,088469002 | 0,363 | 0,228 | 4,10888E-08 | 2,126482529   | 0,470260153     | 1,592105263     |
| SNRPD1                                                                                          | 1,09659E-13 | 1,086480849 | 0,341 | 0,193 | 2,31392E-09 | 2,123554078   | 0,470908657     | 1,766839378     |
| LGALS1                                                                                          | 1,61636E-61 | 1,083467954 | 0,937 | 0,923 | 3,41067E-57 | 2,11912392    | 0,471893121     | 1,015167931     |
| VDAC1                                                                                           | 1,00832E-13 | 1,077002104 | 0,353 | 0,206 | 2,12766E-09 | 2,10964771    | 0,474012791     | 1,713592233     |
| CALR                                                                                            | 2,85934E-16 | 1,071320372 | 0,542 | 0,483 | 6,03349E-12 | 2,101355674   | 0,475883266     | 1,122153209     |
| PPFIBP1                                                                                         | 1,06476E-15 | 1,070339161 | 0,456 | 0,313 | 2,24676E-11 | 2,099926978   | 0,476207035     | 1,45686901      |
| CLIC1                                                                                           | 3,65205E-22 | 1,068138608 | 0,579 | 0,493 | 7,70618E-18 | 2,096726386   | 0,476933951     | 1,174442191     |
| ARPC3                                                                                           | 2,61664E-13 | 1,067758775 | 0,455 | 0,349 | 5,52138E-09 | 2,096174432   | 0,477059535     | 1,303724928     |
| ROMO1                                                                                           | 3,48597E-12 | 1,066964293 | 0,411 | 0,278 | 7,35575E-08 | 2,095020402   | 0,477322321     | 1,478417266     |
| COL11A1                                                                                         | 6,52114E-23 | 1,066286727 | 0,173 | 0,023 | 1,37603E-18 | 2,094036699   | 0,477546549     | 7,52173913      |
| FRMD4A                                                                                          | 3,1872E-16  | 1,062662714 | 0,382 | 0,213 | 6,72532E-12 | 2,088783134   | 0,478747642     | 1,79342723      |
| MYH9                                                                                            | 1,46554E-14 | 1,062596263 | 0,305 | 0,156 | 3,09244E-10 | 2,088686927   | 0,478769694     | 1,955128205     |
| DBI                                                                                             | 6,72558E-20 | 1,054704421 | 0,611 | 0,502 | 1,41917E-15 | 2,077292567   | 0,48139584      | 1,217131474     |
| CIAO2B                                                                                          | 6,35288E-11 | 1,05448934  | 0,452 | 0,36  | 1,34052E-06 | 2,076982902   | 0,481467613     | 1,255555556     |
| BEX3                                                                                            | 1,03406E-13 | 1,050555264 | 0,485 | 0,383 | 2,18197E-09 | 2,071326906   | 0,482782316     | 1,266318538     |

Supplementary Table 5

| Differentially expressed genes_total calculation_ comparing SC-Keloid vs. (SC-Myel, SC-Nonmyel) |             |             |       |       |             |               |                 |                 |
|-------------------------------------------------------------------------------------------------|-------------|-------------|-------|-------|-------------|---------------|-----------------|-----------------|
| gene                                                                                            | p_val       | avg_log2FC  | pct.1 | pct.2 | p_val_adj   | Foldchange_UP | Foldchange_DOWN | Ratio_pct1_pct2 |
| CALM1                                                                                           | 2,57932E-44 | 1,050027739 | 0,793 | 0,748 | 5,44262E-40 | 2,070569658   | 0,482958878     | 1,060160428     |
| SEC11A                                                                                          | 2,89532E-12 | 1,049410246 | 0,481 | 0,379 | 6,10941E-08 | 2,069683616   | 0,483165636     | 1,269129288     |
| NDUFA12                                                                                         | 1,12972E-15 | 1,048470645 | 0,386 | 0,225 | 2,38382E-11 | 2,068336108   | 0,483480415     | 1,715555556     |
| RAB13                                                                                           | 1,86212E-16 | 1,042474363 | 0,414 | 0,271 | 3,92926E-12 | 2,05975731    | 0,485494089     | 1,527675277     |
| PDIA4                                                                                           | 1,31272E-16 | 1,042369396 | 0,32  | 0,152 | 2,76997E-12 | 2,059607453   | 0,485529414     | 2,105263158     |
| UQCR11                                                                                          | 1,17119E-13 | 1,03469031  | 0,444 | 0,324 | 2,47134E-09 | 2,048673829   | 0,48812065      | 1,37037037      |
| PTPRZ1                                                                                          | 7,28635E-18 | 1,031010373 | 0,537 | 0,368 | 1,53749E-13 | 2,043454857   | 0,489367307     | 1,45923913      |
| COX17                                                                                           | 6,67778E-08 | 1,025388179 | 0,321 | 0,221 | 0,001409078 | 2,035506994   | 0,491278096     | 1,452488688     |
| CTHRC1                                                                                          | 3,00029E-21 | 1,022765491 | 0,177 | 0,03  | 6,33091E-17 | 2,03180999    | 0,492172007     | 5,9             |
| ACTR2                                                                                           | 3,9999E-12  | 1,021686536 | 0,341 | 0,205 | 8,44018E-08 | 2,030291019   | 0,492540227     | 1,663414634     |
| RPL12                                                                                           | 1,62385E-67 | 1,021619248 | 0,91  | 0,882 | 3,42649E-63 | 2,030196327   | 0,4925632       | 1,031746032     |
| MMP2                                                                                            | 8,95608E-20 | 1,019701049 | 0,261 | 0,09  | 1,88982E-15 | 2,027498784   | 0,493218545     | 2,9             |
| TIMM8B                                                                                          | 9,92927E-16 | 1,009355481 | 0,322 | 0,157 | 2,09518E-11 | 2,013011594   | 0,496768128     | 2,050955414     |
| SWI5                                                                                            | 4,94454E-17 | 1,006489188 | 0,25  | 0,092 | 1,04335E-12 | 2,009016187   | 0,497756069     | 2,717391304     |
| TBCA                                                                                            | 6,88281E-10 | 1,001535433 | 0,518 | 0,467 | 1,45234E-05 | 2,002129695   | 0,499468143     | 1,109207709     |
| KCNMA1                                                                                          | 4,30743E-19 | 1,001367615 | 0,268 | 0,094 | 9,08911E-15 | 2,001896816   | 0,499526245     | 2,85106383      |
| CCN2                                                                                            | 1,00578E-15 | 0,999775746 | 0,324 | 0,157 | 2,12231E-11 | 1,999689142   | 0,500077727     | 2,063694268     |
| NOP10                                                                                           | 2,46518E-12 | 0,998021672 | 0,336 | 0,195 | 5,20177E-08 | 1,997259335   | 0,500686106     | 1,723076923     |
| SSR4                                                                                            | 9,34992E-14 | 0,996679998 | 0,513 | 0,441 | 1,97293E-09 | 1,995402792   | 0,50115195      | 1,163265306     |
| GPC1                                                                                            | 1,9069E-11  | 0,99168356  | 0,434 | 0,342 | 4,02375E-07 | 1,988504131   | 0,502890582     | 1,269005848     |
| P3H2                                                                                            | 5,61103E-26 | 0,987779366 | 0,204 | 0,03  | 1,18398E-21 | 1,983130155   | 0,504253338     | 6,8             |
| LIF                                                                                             | 3,71211E-17 | 0,987734458 | 0,133 | 0,019 | 7,83292E-13 | 1,983068424   | 0,504269035     | 7               |
| FKBP3                                                                                           | 5,79472E-17 | 0,987177914 | 0,271 | 0,109 | 1,22274E-12 | 1,98230357    | 0,504463602     | 2,486238532     |
| THBS2                                                                                           | 9,58363E-18 | 0,98519679  | 0,246 | 0,087 | 2,02224E-13 | 1,979583318   | 0,505156813     | 2,827586207     |
| COX7B                                                                                           | 5,7598E-09  | 0,98275648  | 0,469 | 0,398 | 0,000121538 | 1,976237695   | 0,506012006     | 1,17839196      |
| PLOD1                                                                                           | 1,21982E-21 | 0,981405473 | 0,233 | 0,061 | 2,57394E-17 | 1,974387921   | 0,506486081     | 3,819672131     |
| RNF7                                                                                            | 6,79662E-13 | 0,981168099 | 0,317 | 0,175 | 1,43416E-08 | 1,974063091   | 0,506569422     | 1,811428571     |
| KIRREL3                                                                                         | 1,17254E-17 | 0,97987388  | 0,239 | 0,081 | 2,47417E-13 | 1,972292984   | 0,507024062     | 2,950617284     |
| NDUFB1                                                                                          | 2,8593E-09  | 0,978407917 | 0,39  | 0,277 | 6,0334E-05  | 1,9702899     | 0,507539525     | 1,407942238     |
| NDUFS6                                                                                          | 6,36903E-10 | 0,977765322 | 0,39  | 0,282 | 1,34393E-05 | 1,969412502   | 0,50776564      | 1,382978723     |

Supplementary Table 5

| Differentially expressed genes_total calculation_ comparing SC-Keloid vs. (SC-Myel, SC-Nonmyel) |             |             |       |       |             |               |                 |                 |
|-------------------------------------------------------------------------------------------------|-------------|-------------|-------|-------|-------------|---------------|-----------------|-----------------|
| gene                                                                                            | p_val       | avg_log2FC  | pct.1 | pct.2 | p_val_adj   | Foldchange_UP | Foldchange_DOWN | Ratio_pct1_pct2 |
| SPCS3                                                                                           | 2,8956E-09  | 0,977478674 | 0,289 | 0,174 | 6,11001E-05 | 1,96902124    | 0,507866538     | 1,66091954      |
| TIMM13                                                                                          | 1,75848E-11 | 0,977045219 | 0,335 | 0,205 | 3,71057E-07 | 1,96842974    | 0,508019148     | 1,634146341     |
| CMYA5                                                                                           | 2,51398E-11 | 0,976583351 | 0,229 | 0,106 | 5,30475E-07 | 1,967799664   | 0,508181813     | 2,160377358     |
| TIMP1                                                                                           | 2,34983E-24 | 0,971940018 | 0,702 | 0,657 | 4,95839E-20 | 1,961476455   | 0,509820038     | 1,068493151     |
| COL6A2                                                                                          | 1,51528E-11 | 0,971230335 | 0,526 | 0,516 | 3,19739E-07 | 1,960511813   | 0,510070887     | 1,019379845     |
| MEF2C                                                                                           | 7,66057E-14 | 0,971123887 | 0,37  | 0,213 | 1,61646E-09 | 1,960367164   | 0,510108524     | 1,737089202     |
| PARK7                                                                                           | 8,48926E-17 | 0,968671253 | 0,532 | 0,41  | 1,79132E-12 | 1,9570373     | 0,510976464     | 1,297560976     |
| SPCS1                                                                                           | 3,11305E-10 | 0,968647969 | 0,445 | 0,353 | 6,56886E-06 | 1,957005715   | 0,510984711     | 1,260623229     |
| MTPN                                                                                            | 1,9862E-11  | 0,962982917 | 0,328 | 0,194 | 4,19109E-07 | 1,949336179   | 0,512995147     | 1,690721649     |
| RPS23                                                                                           | 1,34011E-60 | 0,955017416 | 0,916 | 0,883 | 2,82776E-56 | 1,938603037   | 0,515835362     | 1,037372593     |
| RPL11                                                                                           | 3,72917E-64 | 0,955004833 | 0,931 | 0,917 | 7,86893E-60 | 1,938586128   | 0,515839862     | 1,015267176     |
| MRPL41                                                                                          | 2,93531E-13 | 0,9514451   | 0,369 | 0,22  | 6,19379E-09 | 1,933808721   | 0,517114226     | 1,677272727     |
| BBLN                                                                                            | 1,102E-11   | 0,944949665 | 0,362 | 0,233 | 2,32532E-07 | 1,925121719   | 0,519447675     | 1,553648069     |
| NAA38                                                                                           | 9,12883E-11 | 0,943829228 | 0,34  | 0,214 | 1,92628E-06 | 1,923627196   | 0,519851249     | 1,588785047     |
| UQCRH                                                                                           | 1,99992E-10 | 0,942596253 | 0,477 | 0,407 | 4,22004E-06 | 1,921983903   | 0,520295721     | 1,171990172     |
| RNASEH2C                                                                                        | 2,36953E-09 | 0,941270468 | 0,272 | 0,156 | 4,99994E-05 | 1,92021848    | 0,520774074     | 1,743589744     |
| DCBLD2                                                                                          | 5,26569E-09 | 0,938952734 | 0,288 | 0,175 | 0,000111111 | 1,917136067   | 0,521611386     | 1,645714286     |
| COX6A1                                                                                          | 1,2636E-10  | 0,936082979 | 0,504 | 0,436 | 2,66631E-06 | 1,913326361   | 0,522649988     | 1,155963303     |
| PSMA4                                                                                           | 2,43701E-10 | 0,932658838 | 0,367 | 0,244 | 5,14234E-06 | 1,908790592   | 0,523891937     | 1,504098361     |
| AKAP12                                                                                          | 1,60688E-11 | 0,931987942 | 0,278 | 0,148 | 3,39068E-07 | 1,907903155   | 0,524135618     | 1,878378378     |
| HSP90B1                                                                                         | 1,24936E-21 | 0,931966457 | 0,673 | 0,624 | 2,63626E-17 | 1,907874741   | 0,524143424     | 1,078525641     |
| ATP5MJ                                                                                          | 2,39818E-10 | 0,931169358 | 0,371 | 0,251 | 5,06041E-06 | 1,90682092    | 0,524433097     | 1,478087649     |
| MYDGF                                                                                           | 7,25194E-09 | 0,9299357   | 0,386 | 0,296 | 0,000153023 | 1,905191081   | 0,524881735     | 1,304054054     |
| FHDC1                                                                                           | 1,41128E-18 | 0,922483087 | 0,192 | 0,046 | 2,97793E-14 | 1,895374702   | 0,527600162     | 4,173913043     |
| PDIA6                                                                                           | 7,81694E-10 | 0,920902136 | 0,46  | 0,372 | 1,64945E-05 | 1,893298828   | 0,52817864      | 1,23655914      |
| MICOS13                                                                                         | 1,12229E-09 | 0,920298561 | 0,328 | 0,209 | 2,36814E-05 | 1,892506901   | 0,528399659     | 1,56937799      |
| GUK1                                                                                            | 2,35883E-11 | 0,91599462  | 0,485 | 0,419 | 4,97736E-07 | 1,886869466   | 0,529978368     | 1,1575179       |
| MTRNR2L12                                                                                       | 1,89253E-06 | 0,915267065 | 0,094 | 0,037 | 0,039934346 | 1,885918152   | 0,530245705     | 2,540540541     |
| SEPTIN7                                                                                         | 3,62894E-14 | 0,914221305 | 0,594 | 0,535 | 7,65743E-10 | 1,884551611   | 0,530630201     | 1,110280374     |
| UQCC2                                                                                           | 1,10462E-12 | 0,912590142 | 0,253 | 0,115 | 2,33086E-08 | 1,882422072   | 0,53123049      | 2,2             |

Supplementary Table 5

| Differentially expressed genes_total calculation_ comparing SC-Keloid vs. (SC-Myel, SC-Nonmyel) |             |             |       |       |             |               |                 |                 |
|-------------------------------------------------------------------------------------------------|-------------|-------------|-------|-------|-------------|---------------|-----------------|-----------------|
| gene                                                                                            | p_val       | avg_log2FC  | pct.1 | pct.2 | p_val_adj   | Foldchange_UP | Foldchange_DOWN | Ratio_pct1_pct2 |
| IFI27L2                                                                                         | 8,10502E-11 | 0,912109766 | 0,393 | 0,271 | 1,71024E-06 | 1,881795384   | 0,531407404     | 1,450184502     |
| LOXL3                                                                                           | 1,82345E-20 | 0,911640265 | 0,249 | 0,075 | 3,84767E-16 | 1,881183085   | 0,53158037      | 3,32            |
| COL5A3                                                                                          | 8,12689E-09 | 0,910240081 | 0,364 | 0,258 | 0,000171485 | 1,879358219   | 0,532096537     | 1,410852713     |
| ACTN1                                                                                           | 2,14753E-13 | 0,908737831 | 0,333 | 0,182 | 4,53151E-09 | 1,877402299   | 0,532650887     | 1,82967033      |
| RPS7                                                                                            | 2,65271E-42 | 0,908265324 | 0,857 | 0,859 | 5,59747E-38 | 1,876787518   | 0,532825368     | 0,997671711     |
| HINT1                                                                                           | 5,13207E-13 | 0,9070638   | 0,561 | 0,501 | 1,08292E-08 | 1,875225119   | 0,533269307     | 1,119760479     |
| TIMP4                                                                                           | 3,40124E-16 | 0,905717811 | 0,249 | 0,095 | 7,17696E-12 | 1,873476409   | 0,533767063     | 2,621052632     |
| SCX                                                                                             | 3,28893E-17 | 0,905587057 | 0,147 | 0,026 | 6,93996E-13 | 1,873306619   | 0,533815441     | 5,653846154     |
| BAX                                                                                             | 1,56423E-09 | 0,901745754 | 0,296 | 0,178 | 3,30069E-05 | 1,868325411   | 0,535238666     | 1,662921348     |
| RCN2                                                                                            | 1,93424E-08 | 0,901561969 | 0,371 | 0,267 | 0,000408144 | 1,868087419   | 0,535306854     | 1,389513109     |
| CBX3                                                                                            | 1,75463E-06 | 0,897068298 | 0,376 | 0,297 | 0,037024429 | 1,862277799   | 0,536976814     | 1,265993266     |
| SHTN1                                                                                           | 8,46056E-17 | 0,896750874 | 0,176 | 0,043 | 1,78526E-12 | 1,861868103   | 0,537094974     | 4,093023256     |
| POLR2L                                                                                          | 3,17067E-10 | 0,890933358 | 0,469 | 0,398 | 6,69044E-06 | 1,854375432   | 0,539265125     | 1,17839196      |
| FABP7                                                                                           | 2,31295E-18 | 0,887240717 | 0,149 | 0,023 | 4,88057E-14 | 1,849635146   | 0,540647166     | 6,47826087      |
| MXRA5                                                                                           | 5,85431E-21 | 0,886519505 | 0,15  | 0,016 | 1,23532E-16 | 1,848710733   | 0,540917507     | 9,375           |
| RPL26L1                                                                                         | 1,21856E-11 | 0,878457769 | 0,239 | 0,111 | 2,57127E-07 | 1,838409004   | 0,543948598     | 2,153153153     |
| LRRFIP1                                                                                         | 2,7829E-13  | 0,878375311 | 0,246 | 0,109 | 5,8722E-09  | 1,838303932   | 0,543979688     | 2,256880734     |
| SNRPD2                                                                                          | 4,66489E-07 | 0,877626676 | 0,38  | 0,289 | 0,009843393 | 1,837350257   | 0,544262041     | 1,314878893     |
| UBL5                                                                                            | 2,43965E-12 | 0,872894302 | 0,574 | 0,522 | 5,14791E-08 | 1,831333197   | 0,546050277     | 1,099616858     |
| COX4I1                                                                                          | 8,30311E-14 | 0,87267649  | 0,589 | 0,54  | 1,75204E-09 | 1,831056731   | 0,546132724     | 1,090740741     |
| NDUFB10                                                                                         | 3,72075E-10 | 0,870713623 | 0,416 | 0,299 | 7,85117E-06 | 1,82856717    | 0,546876274     | 1,391304348     |
| SERPINE1                                                                                        | 8,12636E-17 | 0,870136959 | 0,197 | 0,056 | 1,71474E-12 | 1,827836414   | 0,547094911     | 3,517857143     |
| LIMA1                                                                                           | 2,90927E-09 | 0,869021743 | 0,338 | 0,218 | 6,13884E-05 | 1,826424025   | 0,547517984     | 1,550458716     |
| MRPL20                                                                                          | 5,38787E-10 | 0,866521029 | 0,325 | 0,201 | 1,13689E-05 | 1,823260912   | 0,548467854     | 1,616915423     |
| STX8                                                                                            | 1,40545E-13 | 0,863469012 | 0,24  | 0,103 | 2,96563E-09 | 1,819407887   | 0,549629364     | 2,330097087     |
| COL4A1                                                                                          | 1,87268E-16 | 0,863419292 | 0,661 | 0,655 | 3,95155E-12 | 1,819345185   | 0,549648307     | 1,009160305     |
| NDUFB3                                                                                          | 8,86053E-11 | 0,859203243 | 0,284 | 0,153 | 1,86966E-06 | 1,814036196   | 0,551256917     | 1,85620915      |
| GLIPR1                                                                                          | 8,3528E-25  | 0,844079785 | 0,162 | 0,012 | 1,76252E-20 | 1,795119374   | 0,557066017     | 13,5            |
| PRELID1                                                                                         | 1,87042E-08 | 0,84370435  | 0,314 | 0,205 | 0,000394677 | 1,794652288   | 0,557211002     | 1,531707317     |
| TMEM208                                                                                         | 1,59311E-10 | 0,842514506 | 0,234 | 0,115 | 3,36162E-06 | 1,793172781   | 0,557670745     | 2,034782609     |

Supplementary Table 5

| Differentially expressed genes_total calculation_ comparing SC-Keloid vs. (SC-Myel, SC-Nonmyel) |             |             |       |       |             |               |                 |                 |
|-------------------------------------------------------------------------------------------------|-------------|-------------|-------|-------|-------------|---------------|-----------------|-----------------|
| gene                                                                                            | p_val       | avg_log2FC  | pct.1 | pct.2 | p_val_adj   | Foldchange_UP | Foldchange_DOWN | Ratio_pct1_pct2 |
| MRPL51                                                                                          | 7,16574E-09 | 0,840324742 | 0,389 | 0,28  | 0,000151204 | 1,790453117   | 0,558517836     | 1,389285714     |
| MT-CO1                                                                                          | 2,14045E-29 | 0,839854453 | 0,861 | 0,79  | 4,51657E-25 | 1,78986956    | 0,558699931     | 1,089873418     |
| NDUFC1                                                                                          | 1,10293E-06 | 0,839681354 | 0,446 | 0,373 | 0,023272879 | 1,78965482    | 0,558766969     | 1,195710456     |
| STMP1                                                                                           | 8,124E-12   | 0,838209102 | 0,312 | 0,172 | 1,71425E-07 | 1,787829431   | 0,559337475     | 1,813953488     |
| CD276                                                                                           | 5,6763E-19  | 0,837780494 | 0,248 | 0,081 | 1,19776E-14 | 1,787298366   | 0,559503673     | 3,061728395     |
| SF3B5                                                                                           | 7,46747E-09 | 0,83769593  | 0,356 | 0,246 | 0,000157571 | 1,787193607   | 0,559536469     | 1,447154472     |
| RPL7A                                                                                           | 8,71957E-42 | 0,837486708 | 0,861 | 0,858 | 1,83992E-37 | 1,786934443   | 0,55961762      | 1,003496503     |
| MRPS34                                                                                          | 7,63347E-08 | 0,836224893 | 0,241 | 0,141 | 0,001610739 | 1,785372233   | 0,560107288     | 1,709219858     |
| TPST2                                                                                           | 1,82922E-22 | 0,832908712 | 0,194 | 0,035 | 3,85983E-18 | 1,781273086   | 0,561396233     | 5,542857143     |
| NIFK                                                                                            | 2,13485E-09 | 0,830606758 | 0,214 | 0,107 | 4,50475E-05 | 1,778433166   | 0,562292708     | 2               |
| ANGPTL2                                                                                         | 4,48555E-13 | 0,828028032 | 0,25  | 0,111 | 9,46495E-09 | 1,775257168   | 0,563298669     | 2,252252252     |
| PDGFA                                                                                           | 2,83237E-06 | 0,827322029 | 0,467 | 0,417 | 0,059765853 | 1,774388633   | 0,563574395     | 1,119904077     |
| RPL39                                                                                           | 1,21334E-38 | 0,827011843 | 0,893 | 0,837 | 2,56027E-34 | 1,774007173   | 0,563695579     | 1,066905615     |
| CCDC50                                                                                          | 1,56178E-08 | 0,823992864 | 0,224 | 0,118 | 0,000329551 | 1,770298772   | 0,564876401     | 1,898305085     |
| ATP5MC2                                                                                         | 3,68824E-08 | 0,822103902 | 0,505 | 0,465 | 0,000778255 | 1,767982386   | 0,565616495     | 1,086021505     |
| TMCO1                                                                                           | 1,36921E-07 | 0,821376625 | 0,347 | 0,244 | 0,002889172 | 1,767091354   | 0,565901699     | 1,422131148     |
| ATP5MC1                                                                                         | 9,16956E-07 | 0,820073495 | 0,36  | 0,277 | 0,019348693 | 1,76549593    | 0,566413087     | 1,299638989     |
| MACF1                                                                                           | 9,53737E-08 | 0,819281652 | 0,311 | 0,204 | 0,00201248  | 1,764527179   | 0,566724056     | 1,524509804     |
| NCS1                                                                                            | 1,7326E-19  | 0,819178095 | 0,205 | 0,052 | 3,65596E-15 | 1,764400526   | 0,566764737     | 3,942307692     |
| OCIAD2                                                                                          | 3,8685E-23  | 0,818193784 | 0,148 | 0,009 | 8,16292E-19 | 1,763197134   | 0,567151557     | 16,44444444     |
| NDUFAF8                                                                                         | 7,32947E-12 | 0,817538591 | 0,26  | 0,128 | 1,54659E-07 | 1,762396568   | 0,567409185     | 2,03125         |
| MICOS10                                                                                         | 7,22625E-07 | 0,816682208 | 0,339 | 0,246 | 0,015248107 | 1,761350721   | 0,567746099     | 1,37804878      |
| ATP6VOB                                                                                         | 2,92779E-06 | 0,814891725 | 0,407 | 0,343 | 0,061779315 | 1,759166121   | 0,568451148     | 1,186588921     |
| P4HA2                                                                                           | 7,44191E-08 | 0,813320312 | 0,326 | 0,225 | 0,001570316 | 1,757251044   | 0,569070654     | 1,448888889     |
| FLNA                                                                                            | 1,01496E-05 | 0,810304207 | 0,455 | 0,436 | 0,214166351 | 1,753581164   | 0,5702616       | 1,043577982     |
| GTF3C6                                                                                          | 1,28112E-13 | 0,807667046 | 0,226 | 0,09  | 2,70329E-09 | 1,750378649   | 0,571304958     | 2,511111111     |
| RPS8                                                                                            | 5,18997E-45 | 0,805844614 | 0,935 | 0,917 | 1,09514E-40 | 1,748168943   | 0,572027094     | 1,019629226     |
| MYL12B                                                                                          | 4,01461E-14 | 0,802835724 | 0,624 | 0,628 | 8,47124E-10 | 1,744526755   | 0,573221361     | 0,993630573     |
| MYL9                                                                                            | 7,39127E-11 | 0,802071523 | 0,496 | 0,418 | 1,55963E-06 | 1,743602918   | 0,573525078     | 1,186602871     |
| TRAF1                                                                                           | 5,92976E-19 | 0,799326042 | 0,178 | 0,037 | 1,25124E-14 | 1,740287958   | 0,574617549     | 4,810810811     |



Supplementary Table 5

| Differentially expressed genes_total calculation_ comparing SC-Keloid vs. (SC-Myel, SC-Nonmyel) |             |             |       |       |             |               |                 |                 |
|-------------------------------------------------------------------------------------------------|-------------|-------------|-------|-------|-------------|---------------|-----------------|-----------------|
| gene                                                                                            | p_val       | avg_log2FC  | pct.1 | pct.2 | p_val_adj   | Foldchange_UP | Foldchange_DOWN | Ratio_pct1_pct2 |
| PLGRKT                                                                                          | 7,735E-13   | 0,797223019 | 0,172 | 0,057 | 1,63216E-08 | 1,73775298    | 0,575455782     | 3,01754386      |
| ADARB1                                                                                          | 6,58082E-21 | 0,792873111 | 0,172 | 0,027 | 1,38862E-16 | 1,732521326   | 0,577193472     | 6,37037037      |
| CDKN2A                                                                                          | 3,87477E-17 | 0,790643159 | 0,137 | 0,02  | 8,17615E-13 | 1,729845463   | 0,578086321     | 6,85            |
| NME1                                                                                            | 8,91259E-08 | 0,790352996 | 0,262 | 0,161 | 0,001880645 | 1,729497582   | 0,578202601     | 1,627329193     |
| RRBP1                                                                                           | 1,10902E-05 | 0,790087623 | 0,317 | 0,237 | 0,234013274 | 1,729179483   | 0,578308967     | 1,337552743     |
| GTF2H5                                                                                          | 1,62976E-08 | 0,789966186 | 0,346 | 0,231 | 0,000343895 | 1,729033937   | 0,578357647     | 1,497835498     |
| CCDC167                                                                                         | 8,76895E-16 | 0,787342008 | 0,178 | 0,049 | 1,85034E-11 | 1,725891784   | 0,579410603     | 3,632653061     |
| ADAMTS2                                                                                         | 2,4727E-18  | 0,787162269 | 0,139 | 0,018 | 5,21764E-14 | 1,725676776   | 0,579482794     | 7,722222222     |
| NDUFB4                                                                                          | 8,1798E-07  | 0,786429199 | 0,435 | 0,369 | 0,017260201 | 1,724800139   | 0,579777319     | 1,178861789     |
| OPRD1                                                                                           | 1,18845E-21 | 0,78598252  | 0,123 | 0,003 | 2,50775E-17 | 1,724266199   | 0,579956854     | 41              |
| MRC2                                                                                            | 3,21897E-20 | 0,78129902  | 0,128 | 0,008 | 6,79234E-16 | 1,718677694   | 0,581842659     | 16              |
| UQCR10                                                                                          | 0,000148835 | 0,779092588 | 0,374 | 0,318 | 1           | 1,716051189   | 0,5827332       | 1,176100629     |
| ARL4C                                                                                           | 3,46939E-18 | 0,778660324 | 0,206 | 0,056 | 7,32075E-14 | 1,715537098   | 0,582907826     | 3,678571429     |
| SCAND1                                                                                          | 5,87052E-06 | 0,777179086 | 0,315 | 0,229 | 0,123873792 | 1,713776633   | 0,583506614     | 1,375545852     |
| NDUFA6                                                                                          | 0,000147764 | 0,774708676 | 0,283 | 0,212 | 1           | 1,710844545   | 0,584506642     | 1,33490566      |
| GAPDH                                                                                           | 5,94849E-14 | 0,774680242 | 0,683 | 0,73  | 1,25519E-09 | 1,710810826   | 0,584518162     | 0,935616438     |
| IKBIP                                                                                           | 4,18569E-15 | 0,773867081 | 0,183 | 0,054 | 8,83223E-11 | 1,709846816   | 0,584847713     | 3,388888889     |
| MRPL54                                                                                          | 1,31894E-11 | 0,772615227 | 0,244 | 0,114 | 2,78309E-07 | 1,708363793   | 0,585355417     | 2,140350877     |
| TMED9                                                                                           | 4,32071E-06 | 0,769305899 | 0,364 | 0,301 | 0,091171384 | 1,704449551   | 0,586699676     | 1,209302326     |
| ATP5MG                                                                                          | 6,38791E-07 | 0,766591468 | 0,506 | 0,48  | 0,013479125 | 1,701245645   | 0,587804591     | 1,054166667     |
| PRKACB                                                                                          | 1,78738E-14 | 0,76650591  | 0,163 | 0,043 | 3,77154E-10 | 1,701144756   | 0,587839451     | 3,790697674     |
| PGLS                                                                                            | 2,38423E-09 | 0,764671654 | 0,274 | 0,157 | 5,03097E-05 | 1,698983279   | 0,588587311     | 1,74522293      |
| NAA10                                                                                           | 3,4046E-08  | 0,764173593 | 0,261 | 0,156 | 0,000718404 | 1,698396841   | 0,588790544     | 1,673076923     |
| CSTB                                                                                            | 6,10786E-06 | 0,763626681 | 0,363 | 0,278 | 0,128881971 | 1,697753117   | 0,589013791     | 1,305755396     |
| COMMD6                                                                                          | 4,40245E-06 | 0,760646543 | 0,48  | 0,425 | 0,092896009 | 1,694249731   | 0,59023176      | 1,129411765     |
| COL4A2                                                                                          | 9,32227E-15 | 0,760315487 | 0,655 | 0,674 | 1,96709E-10 | 1,693860996   | 0,590367216     | 0,971810089     |
| DSTN                                                                                            | 4,28801E-05 | 0,758709533 | 0,434 | 0,393 | 0,904812316 | 1,691976502   | 0,591024756     | 1,1043257       |
| C19orf53                                                                                        | 0,000219753 | 0,757735292 | 0,381 | 0,33  | 1           | 1,69083431    | 0,591424006     | 1,154545455     |
| SNRPG                                                                                           | 6,78201E-05 | 0,757562608 | 0,366 | 0,304 | 1           | 1,690631936   | 0,591494801     | 1,203947368     |
| TENM3                                                                                           | 1,0858E-11  | 0,757524152 | 0,298 | 0,161 | 2,29115E-07 | 1,690586872   | 0,591510567     | 1,850931677     |

Supplementary Table 5

| Differentially expressed genes_total calculation_ comparing SC-Keloid vs. (SC-Myel, SC-Nonmyel) |             |             |       |       |             |               |                 |                 |
|-------------------------------------------------------------------------------------------------|-------------|-------------|-------|-------|-------------|---------------|-----------------|-----------------|
| gene                                                                                            | p_val       | avg_log2FC  | pct.1 | pct.2 | p_val_adj   | Foldchange_UP | Foldchange_DOWN | Ratio_pct1_pct2 |
| SNRPE                                                                                           | 7,41387E-07 | 0,756979031 | 0,31  | 0,213 | 0,015644016 | 1,689948206   | 0,591734111     | 1,455399061     |
| LAMTOR4                                                                                         | 8,11758E-05 | 0,753772757 | 0,378 | 0,322 | 1           | 1,686196602   | 0,593050655     | 1,173913043     |
| ZNHIT1                                                                                          | 3,37693E-05 | 0,753435136 | 0,324 | 0,254 | 0,712566706 | 1,685802043   | 0,593189458     | 1,275590551     |
| MORN2                                                                                           | 5,51928E-14 | 0,753086779 | 0,186 | 0,06  | 1,16462E-09 | 1,685395034   | 0,593332708     | 3,1             |
| CBX5                                                                                            | 0,000379995 | 0,752217505 | 0,348 | 0,293 | 1           | 1,68437983    | 0,59369032      | 1,187713311     |
| GLRX2                                                                                           | 2,90582E-09 | 0,752140433 | 0,177 | 0,077 | 6,13158E-05 | 1,684289849   | 0,593722037     | 2,298701299     |
| MRPL27                                                                                          | 2,27637E-05 | 0,751492907 | 0,185 | 0,113 | 0,480337346 | 1,683534058   | 0,593988577     | 1,637168142     |
| RBX1                                                                                            | 1,47813E-06 | 0,750807175 | 0,51  | 0,474 | 0,031189967 | 1,682734042   | 0,594270975     | 1,075949367     |
| MRPL57                                                                                          | 3,9404E-08  | 0,75033651  | 0,257 | 0,151 | 0,000831465 | 1,682185156   | 0,594464882     | 1,701986755     |
| SMARCD1                                                                                         | 2,55499E-09 | 0,750025065 | 0,201 | 0,095 | 5,39128E-05 | 1,681822049   | 0,594593227     | 2,115789474     |
| NDUFB11                                                                                         | 6,93124E-05 | 0,749037803 | 0,371 | 0,309 | 1           | 1,680671543   | 0,595000257     | 1,200647249     |
| RPL36AL                                                                                         | 1,19349E-09 | 0,747855174 | 0,618 | 0,594 | 2,51838E-05 | 1,6792944     | 0,5954882       | 1,04040404      |
| TUSC3                                                                                           | 1,28536E-22 | 0,747781242 | 0,148 | 0,011 | 2,71224E-18 | 1,679208346   | 0,595518717     | 13,45454545     |
| DNPH1                                                                                           | 1,86642E-08 | 0,747079849 | 0,241 | 0,133 | 0,000393832 | 1,678392166   | 0,59580831      | 1,812030075     |
| DGUOK                                                                                           | 6,50187E-07 | 0,745732218 | 0,278 | 0,178 | 0,0137196   | 1,676825101   | 0,596365119     | 1,561797753     |
| MTLN                                                                                            | 2,0716E-12  | 0,745447344 | 0,205 | 0,08  | 4,37128E-08 | 1,676494028   | 0,596482888     | 2,5625          |
| TRUB2                                                                                           | 8,60869E-22 | 0,742888369 | 0,179 | 0,028 | 1,81652E-17 | 1,673522989   | 0,597541836     | 6,392857143     |
| BMP1                                                                                            | 1,00152E-15 | 0,742370864 | 0,222 | 0,077 | 2,11331E-11 | 1,672922792   | 0,597756217     | 2,883116883     |
| CMC1                                                                                            | 6,17509E-09 | 0,742149037 | 0,176 | 0,079 | 0,0001303   | 1,672665585   | 0,597848135     | 2,227848101     |
| ERLEC1                                                                                          | 1,81791E-07 | 0,741746277 | 0,22  | 0,122 | 0,003835964 | 1,672198689   | 0,598015061     | 1,803278689     |
| ANO4                                                                                            | 9,47648E-23 | 0,740521557 | 0,146 | 0,009 | 1,99963E-18 | 1,670779743   | 0,598522938     | 16,22222222     |
| VCL                                                                                             | 0,000246186 | 0,73871379  | 0,398 | 0,349 | 1           | 1,668687486   | 0,599273386     | 1,140401146     |
| TCEA1                                                                                           | 0,000554351 | 0,73834037  | 0,356 | 0,303 | 1           | 1,668255627   | 0,599428519     | 1,174917492     |
| DDT                                                                                             | 0,000208195 | 0,736556244 | 0,292 | 0,221 | 1           | 1,666193833   | 0,600170268     | 1,321266968     |
| SELENOH                                                                                         | 8,42121E-06 | 0,735831866 | 0,322 | 0,24  | 0,177695852 | 1,665357447   | 0,600471689     | 1,341666667     |
| NDUFB7                                                                                          | 4,29835E-05 | 0,735242897 | 0,383 | 0,323 | 0,90699577  | 1,664677717   | 0,600716877     | 1,185758514     |
| HOXB2                                                                                           | 2,20958E-15 | 0,735228637 | 0,185 | 0,054 | 4,66244E-11 | 1,664661262   | 0,600722815     | 3,425925926     |
| SH3PXD2A                                                                                        | 1,31415E-05 | 0,731376255 | 0,444 | 0,383 | 0,277298029 | 1,6602221     | 0,60232905      | 1,15926893      |
| ABRACL                                                                                          | 1,56472E-14 | 0,730790514 | 0,132 | 0,026 | 3,30172E-10 | 1,65954818    | 0,602573648     | 5,076923077     |
| NUCB2                                                                                           | 5,28611E-07 | 0,72717247  | 0,278 | 0,183 | 0,01115423  | 1,655391518   | 0,6040867       | 1,519125683     |

Supplementary Table 5

| Differentially expressed genes_total calculation_ comparing SC-Keloid vs. (SC-Myel, SC-Nonmyel) |             |             |       |       |             |               |                 |                 |
|-------------------------------------------------------------------------------------------------|-------------|-------------|-------|-------|-------------|---------------|-----------------|-----------------|
| gene                                                                                            | p_val       | avg_log2FC  | pct.1 | pct.2 | p_val_adj   | Foldchange_UP | Foldchange_DOWN | Ratio_pct1_pct2 |
| RPS13                                                                                           | 5,01168E-31 | 0,723418813 | 0,874 | 0,874 | 1,05751E-26 | 1,651090057   | 0,605660482     | 1               |
| MRPS33                                                                                          | 1,4836E-09  | 0,723333925 | 0,176 | 0,075 | 3,13054E-05 | 1,65099291    | 0,60569612      | 2,346666667     |
| ARPC2                                                                                           | 8,93461E-07 | 0,723326908 | 0,454 | 0,415 | 0,018852911 | 1,65098488    | 0,605699066     | 1,093975904     |
| SPCS2                                                                                           | 1,24433E-05 | 0,721773204 | 0,499 | 0,468 | 0,262565532 | 1,649207816   | 0,606351722     | 1,066239316     |
| TPM3                                                                                            | 0,001589377 | 0,721265791 | 0,389 | 0,35  | 1           | 1,648627873   | 0,606565021     | 1,111428571     |
| COPS9                                                                                           | 6,62385E-05 | 0,72118757  | 0,378 | 0,326 | 1           | 1,648538488   | 0,606597909     | 1,159509202     |
| NEDD8                                                                                           | 6,2067E-05  | 0,718314713 | 0,421 | 0,379 | 1           | 1,645259      | 0,607807038     | 1,110817942     |
| PLXNA4                                                                                          | 7,61529E-11 | 0,717853477 | 0,123 | 0,034 | 1,6069E-06  | 1,644733087   | 0,608001388     | 3,617647059     |
| ZCRB1                                                                                           | 9,58538E-08 | 0,717748522 | 0,253 | 0,147 | 0,002022612 | 1,644613438   | 0,608045621     | 1,721088435     |
| MANF                                                                                            | 1,10874E-07 | 0,716299669 | 0,297 | 0,193 | 0,002339545 | 1,642962634   | 0,608656569     | 1,538860104     |
| PSMA5                                                                                           | 3,41347E-07 | 0,715981111 | 0,271 | 0,171 | 0,007202758 | 1,642599895   | 0,60879098      | 1,584795322     |
| RASSF8                                                                                          | 0,000904107 | 0,714651673 | 0,267 | 0,204 | 1           | 1,641086943   | 0,609352237     | 1,308823529     |
| UBE2L3                                                                                          | 0,000122594 | 0,712900364 | 0,291 | 0,22  | 1           | 1,639096012   | 0,610092388     | 1,322727273     |
| PSMD8                                                                                           | 7,83378E-05 | 0,712021492 | 0,343 | 0,289 | 1           | 1,638097799   | 0,610464162     | 1,186851211     |
| CHMP2A                                                                                          | 7,53493E-06 | 0,708726669 | 0,361 | 0,277 | 0,158994505 | 1,634360984   | 0,611859932     | 1,303249097     |
| FAM114A1                                                                                        | 8,03754E-07 | 0,707355045 | 0,302 | 0,202 | 0,016960008 | 1,632807874   | 0,612441926     | 1,495049505     |
| RPLP1                                                                                           | 1,35209E-59 | 0,707205533 | 0,979 | 0,976 | 2,85305E-55 | 1,632638669   | 0,6125054       | 1,00307377      |
| RTRAF                                                                                           | 0,000396747 | 0,707018363 | 0,371 | 0,323 | 1           | 1,63242687    | 0,612584869     | 1,148606811     |
| CYBA                                                                                            | 1,53835E-05 | 0,705809082 | 0,391 | 0,33  | 0,324607583 | 1,631059128   | 0,613098558     | 1,184848485     |
| NUDT1                                                                                           | 1,27536E-10 | 0,705113339 | 0,211 | 0,095 | 2,69115E-06 | 1,630272735   | 0,613394298     | 2,221052632     |
| PSMB6                                                                                           | 2,16685E-05 | 0,705000174 | 0,334 | 0,261 | 0,457225968 | 1,630144861   | 0,613442415     | 1,279693487     |
| MRPL13                                                                                          | 6,33578E-09 | 0,70458023  | 0,177 | 0,08  | 0,000133691 | 1,629670423   | 0,613621003     | 2,2125          |
| RBIS                                                                                            | 0,000104879 | 0,703754189 | 0,37  | 0,308 | 1           | 1,628737593   | 0,613972443     | 1,201298701     |
| ITGA1                                                                                           | 1,06434E-06 | 0,703526034 | 0,339 | 0,24  | 0,022458641 | 1,628480037   | 0,614069548     | 1,4125          |
| ATP5PD                                                                                          | 5,45819E-05 | 0,70313656  | 0,343 | 0,273 | 1           | 1,628040467   | 0,614235346     | 1,256410256     |
| RSU1                                                                                            | 5,57877E-11 | 0,702704981 | 0,232 | 0,107 | 1,17718E-06 | 1,627553515   | 0,614419121     | 2,168224299     |
| EID1                                                                                            | 1,65482E-15 | 0,701836426 | 0,655 | 0,604 | 3,49184E-11 | 1,626573963   | 0,614789135     | 1,084437086     |
| DTYMK                                                                                           | 1,97466E-13 | 0,70162218  | 0,176 | 0,056 | 4,16672E-09 | 1,626332428   | 0,614880441     | 3,142857143     |
| GSTO1                                                                                           | 8,10628E-06 | 0,701515403 | 0,296 | 0,208 | 0,171050554 | 1,626212065   | 0,614925951     | 1,423076923     |
| ATP6VOE1                                                                                        | 0,008159109 | 0,700784959 | 0,396 | 0,369 | 1           | 1,625388914   | 0,61523737      | 1,073170732     |

Supplementary Table 5

| Differentially expressed genes_total calculation_ comparing SC-Keloid vs. (SC-Myel, SC-Nonmyel) |             |             |       |       |             |               |                 |                 |
|-------------------------------------------------------------------------------------------------|-------------|-------------|-------|-------|-------------|---------------|-----------------|-----------------|
| gene                                                                                            | p_val       | avg_log2FC  | pct.1 | pct.2 | p_val_adj   | Foldchange_UP | Foldchange_DOWN | Ratio_pct1_pct2 |
| DBNDD1                                                                                          | 4,46613E-27 | 0,700331761 | 0,159 | 0,005 | 9,42399E-23 | 1,624878406   | 0,615430666     | 31,8            |
| LAMTOR2                                                                                         | 1,05006E-07 | 0,699734907 | 0,24  | 0,137 | 0,002215736 | 1,62420632    | 0,615685327     | 1,751824818     |
| SERF2                                                                                           | 3,42856E-26 | 0,698562235 | 0,783 | 0,83  | 7,2346E-22  | 1,622886646   | 0,616185981     | 0,943373494     |
| MRPL36                                                                                          | 4,95449E-07 | 0,696405551 | 0,186 | 0,099 | 0,010454475 | 1,620462406   | 0,617107806     | 1,878787879     |
| NDUFS8                                                                                          | 1,99283E-07 | 0,696299089 | 0,254 | 0,156 | 0,004205073 | 1,62034283    | 0,617153347     | 1,628205128     |
| TCEAL4                                                                                          | 4,76586E-05 | 0,695507853 | 0,39  | 0,316 | 1           | 1,619454408   | 0,617491913     | 1,234177215     |
| NT5E                                                                                            | 8,10971E-22 | 0,694984314 | 0,134 | 0,007 | 1,71123E-17 | 1,618866831   | 0,617716035     | 19,14285714     |
| ATP5F1C                                                                                         | 0,000453655 | 0,693918683 | 0,362 | 0,315 | 1           | 1,617671515   | 0,618172472     | 1,149206349     |
| PIN4                                                                                            | 0,001897531 | 0,693043707 | 0,224 | 0,168 | 1           | 1,616690716   | 0,6185475       | 1,333333333     |
| CD63                                                                                            | 1,86242E-29 | 0,692233929 | 0,828 | 0,849 | 3,9299E-25  | 1,615783529   | 0,618894785     | 0,975265018     |
| SLFN5                                                                                           | 4,58015E-09 | 0,692163445 | 0,13  | 0,046 | 9,66457E-05 | 1,615704591   | 0,618925022     | 2,826086957     |
| YWHAZ                                                                                           | 0,000105076 | 0,691351636 | 0,516 | 0,517 | 1           | 1,614795684   | 0,619273392     | 0,998065764     |
| KRTDAP                                                                                          | 0,000434382 | 0,690398628 | 0,093 | 0,05  | 1           | 1,613729343   | 0,619682603     | 1,86            |
| TRAPPC1                                                                                         | 1,26704E-12 | 0,689665651 | 0,215 | 0,085 | 2,67359E-08 | 1,612909678   | 0,61999752      | 2,529411765     |
| WLS                                                                                             | 4,70638E-05 | 0,689342587 | 0,237 | 0,159 | 0,993093421 | 1,612548538   | 0,620136372     | 1,490566038     |
| ACTG1                                                                                           | 1,6419E-15  | 0,689001734 | 0,774 | 0,889 | 3,46458E-11 | 1,612167601   | 0,620282903     | 0,87064117      |
| KDELR2                                                                                          | 0,000102802 | 0,684826207 | 0,349 | 0,286 | 1           | 1,607508323   | 0,62208076      | 1,22027972      |
| SLC15A3                                                                                         | 3,52382E-11 | 0,684438966 | 0,25  | 0,123 | 7,43561E-07 | 1,607076901   | 0,622247759     | 2,032520325     |
| APOD                                                                                            | 6,09508E-43 | 0,684052882 | 0,449 | 0,151 | 1,28612E-38 | 1,606646884   | 0,622414303     | 2,973509934     |
| HMG3                                                                                            | 0,012682444 | 0,683533468 | 0,414 | 0,407 | 1           | 1,606068546   | 0,622638431     | 1,017199017     |
| TCF4                                                                                            | 1,08637E-05 | 0,683487253 | 0,381 | 0,296 | 0,229235427 | 1,606017098   | 0,622658377     | 1,287162162     |
| CHCHD1                                                                                          | 9,06601E-13 | 0,682974108 | 0,18  | 0,061 | 1,91302E-08 | 1,605445964   | 0,622879886     | 2,950819672     |
| NDUFC2                                                                                          | 7,50789E-06 | 0,682244323 | 0,431 | 0,362 | 0,158424042 | 1,604634058   | 0,623195049     | 1,190607735     |
| TAF10                                                                                           | 1,46226E-10 | 0,680494848 | 0,215 | 0,099 | 3,08551E-06 | 1,602689388   | 0,623951221     | 2,171717172     |
| PDLIM1                                                                                          | 1,29889E-12 | 0,678998654 | 0,208 | 0,083 | 2,74079E-08 | 1,601028128   | 0,624598645     | 2,506024096     |
| IFI44                                                                                           | 4,192E-10   | 0,678977429 | 0,173 | 0,069 | 8,84555E-06 | 1,601004574   | 0,624607835     | 2,507246377     |
| RABAC1                                                                                          | 0,00022791  | 0,678824183 | 0,448 | 0,44  | 1           | 1,60083452    | 0,624674186     | 1,018181818     |
| SELENOS                                                                                         | 3,51305E-05 | 0,678577579 | 0,334 | 0,254 | 0,741289153 | 1,600560908   | 0,624780972     | 1,31496063      |
| YWHAZ                                                                                           | 2,25201E-05 | 0,678206136 | 0,471 | 0,455 | 0,475195652 | 1,600148873   | 0,624941852     | 1,035164835     |
| TRAPPC2L                                                                                        | 5,82461E-11 | 0,675808227 | 0,198 | 0,081 | 1,22905E-06 | 1,59749147    | 0,625981433     | 2,444444444     |

Supplementary Table 5

| Differentially expressed genes_total calculation_ comparing SC-Keloid vs. (SC-Myel, SC-Nonmyel) |             |             |       |       |             |               |                 |                 |
|-------------------------------------------------------------------------------------------------|-------------|-------------|-------|-------|-------------|---------------|-----------------|-----------------|
| gene                                                                                            | p_val       | avg_log2FC  | pct.1 | pct.2 | p_val_adj   | Foldchange_UP | Foldchange_DOWN | Ratio_pct1_pct2 |
| GTF3A                                                                                           | 1,31379E-08 | 0,67522426  | 0,246 | 0,134 | 0,000277223 | 1,596844975   | 0,626234867     | 1,835820896     |
| EVA1B                                                                                           | 3,52612E-09 | 0,67474113  | 0,212 | 0,103 | 7,44046E-05 | 1,596310313   | 0,626444615     | 2,058252427     |
| DENR                                                                                            | 3,22619E-06 | 0,674600871 | 0,196 | 0,113 | 0,06807578  | 1,596155128   | 0,626505521     | 1,734513274     |
| AURKAIP1                                                                                        | 7,78328E-06 | 0,674477126 | 0,305 | 0,217 | 0,164234897 | 1,596018225   | 0,626559261     | 1,405529954     |
| ATP5ME                                                                                          | 0,000238878 | 0,671920738 | 0,53  | 0,537 | 1           | 1,593192659   | 0,627670479     | 0,986964618     |
| COX5A                                                                                           | 5,48684E-06 | 0,670543486 | 0,274 | 0,185 | 0,115777841 | 1,591672463   | 0,628269963     | 1,481081081     |
| COX7A1                                                                                          | 0,001708312 | 0,669031123 | 0,253 | 0,194 | 1           | 1,590004802   | 0,628928918     | 1,304123711     |
| CHCHD5                                                                                          | 5,48019E-09 | 0,668431349 | 0,191 | 0,09  | 0,000115638 | 1,589343924   | 0,629190438     | 2,122222222     |
| FNBP1L                                                                                          | 1,42793E-11 | 0,667130164 | 0,137 | 0,039 | 3,01307E-07 | 1,587911121   | 0,629758169     | 3,512820513     |
| SF3B6                                                                                           | 0,003999754 | 0,666928186 | 0,38  | 0,347 | 1           | 1,587688828   | 0,629846342     | 1,095100865     |
| LRRC75A                                                                                         | 7,23606E-07 | 0,66628146  | 0,133 | 0,06  | 0,015268805 | 1,586977265   | 0,63012875      | 2,216666667     |
| IL7R                                                                                            | 9,82133E-17 | 0,663341291 | 0,106 | 0,007 | 2,0724E-12  | 1,583746346   | 0,631414243     | 15,14285714     |
| PFDN5                                                                                           | 9,86003E-09 | 0,663063678 | 0,629 | 0,672 | 0,000208056 | 1,583441621   | 0,631535755     | 0,936011905     |
| PET100                                                                                          | 0,001683432 | 0,662451338 | 0,302 | 0,244 | 1           | 1,582769684   | 0,631803863     | 1,237704918     |
| COX7A2L                                                                                         | 2,43133E-05 | 0,662310186 | 0,29  | 0,205 | 0,513035768 | 1,582614835   | 0,631865681     | 1,414634146     |
| LSM3                                                                                            | 8,36772E-05 | 0,661260033 | 0,282 | 0,204 | 1           | 1,581463252   | 0,63232579      | 1,382352941     |
| NPL                                                                                             | 1,75507E-20 | 0,660633844 | 0,142 | 0,014 | 3,70336E-16 | 1,580776982   | 0,632600305     | 10,14285714     |
| TMEM14C                                                                                         | 6,46958E-05 | 0,659124037 | 0,291 | 0,21  | 1           | 1,579123535   | 0,633262679     | 1,385714286     |
| NOL7                                                                                            | 0,000174987 | 0,658627404 | 0,328 | 0,258 | 1           | 1,578580031   | 0,633480711     | 1,271317829     |
| DRAP1                                                                                           | 0,000450496 | 0,656474024 | 0,399 | 0,353 | 1           | 1,576225585   | 0,634426956     | 1,130311615     |
| EIF4E2                                                                                          | 1,56237E-09 | 0,655598347 | 0,179 | 0,077 | 3,29675E-05 | 1,575269148   | 0,634812153     | 2,324675325     |
| TMA7                                                                                            | 4,77867E-06 | 0,65553658  | 0,608 | 0,677 | 0,10083481  | 1,575201707   | 0,634839332     | 0,898079764     |
| TMEM126A                                                                                        | 7,00841E-08 | 0,654811105 | 0,175 | 0,084 | 0,001478845 | 1,574409798   | 0,635158649     | 2,083333333     |
| ATP5F1D                                                                                         | 0,001547488 | 0,653152621 | 0,357 | 0,328 | 1           | 1,572600939   | 0,63588923      | 1,088414634     |
| MRPS21                                                                                          | 0,000257699 | 0,652812076 | 0,32  | 0,247 | 1           | 1,572229774   | 0,636039348     | 1,295546559     |
| REX1BD                                                                                          | 0,000973219 | 0,651663547 | 0,299 | 0,236 | 1           | 1,570978621   | 0,6365459       | 1,266949153     |
| MCRIP1                                                                                          | 0,000268341 | 0,650482716 | 0,288 | 0,224 | 1           | 1,569693316   | 0,63706712      | 1,285714286     |
| SNRPB2                                                                                          | 0,000975055 | 0,649492013 | 0,32  | 0,258 | 1           | 1,568615774   | 0,637504746     | 1,240310078     |
| ALDH1A3                                                                                         | 3,34588E-09 | 0,648587074 | 0,19  | 0,085 | 7,06013E-05 | 1,567632159   | 0,63790475      | 2,235294118     |
| PFDN2                                                                                           | 0,061177444 | 0,648407297 | 0,382 | 0,377 | 1           | 1,567436825   | 0,637984245     | 1,013262599     |

Supplementary Table 5

| Differentially expressed genes_total calculation_ comparing SC-Keloid vs. (SC-Myel, SC-Nonmyel) |             |             |       |       |             |               |                 |                 |
|-------------------------------------------------------------------------------------------------|-------------|-------------|-------|-------|-------------|---------------|-----------------|-----------------|
| gene                                                                                            | p_val       | avg_log2FC  | pct.1 | pct.2 | p_val_adj   | Foldchange_UP | Foldchange_DOWN | Ratio_pct1_pct2 |
| EPB41L3                                                                                         | 2,45157E-06 | 0,647709461 | 0,184 | 0,102 | 0,051730677 | 1,566678834   | 0,638292915     | 1,803921569     |
| SNRPF                                                                                           | 0,000214547 | 0,647073988 | 0,318 | 0,248 | 1           | 1,565988901   | 0,63857413      | 1,282258065     |
| FIBP                                                                                            | 1,17079E-06 | 0,64544673  | 0,207 | 0,119 | 0,024704871 | 1,564223573   | 0,639294802     | 1,739495798     |
| EEF1B2                                                                                          | 0,000118249 | 0,64422712  | 0,515 | 0,537 | 1           | 1,562901784   | 0,639835471     | 0,959031657     |
| UQCRB                                                                                           | 0,02570942  | 0,641849943 | 0,459 | 0,491 | 1           | 1,56032866    | 0,640890619     | 0,934826884     |
| SDF2L1                                                                                          | 1,99543E-08 | 0,641228924 | 0,222 | 0,118 | 0,000421056 | 1,559657149   | 0,641166554     | 1,881355932     |
| COX7C                                                                                           | 0,000111403 | 0,640779987 | 0,526 | 0,524 | 1           | 1,559171891   | 0,641366103     | 1,003816794     |
| PRKDC                                                                                           | 5,54396E-05 | 0,64037561  | 0,242 | 0,166 | 1           | 1,558734927   | 0,641545899     | 1,457831325     |
| FAM210B                                                                                         | 4,84848E-06 | 0,638669008 | 0,281 | 0,187 | 0,102307807 | 1,556892149   | 0,642305249     | 1,502673797     |
| MSI2                                                                                            | 7,86373E-10 | 0,637600326 | 0,128 | 0,041 | 1,65933E-05 | 1,555739303   | 0,642781215     | 3,12195122      |
| BOLA3                                                                                           | 3,23816E-11 | 0,636645581 | 0,168 | 0,06  | 6,83284E-07 | 1,554710088   | 0,643206735     | 2,8             |
| MT-ND6                                                                                          | 6,19287E-05 | 0,636614042 | 0,066 | 0,024 | 1           | 1,5546761     | 0,643220797     | 2,75            |
| GNG11                                                                                           | 5,22544E-05 | 0,636268921 | 0,29  | 0,208 | 1           | 1,554304235   | 0,643374686     | 1,394230769     |
| GALR1                                                                                           | 5,6696E-05  | 0,635898246 | 0,221 | 0,147 | 1           | 1,553904936   | 0,643540011     | 1,503401361     |
| ITGB5                                                                                           | 3,25257E-11 | 0,633469473 | 0,126 | 0,034 | 6,86325E-07 | 1,551291142   | 0,644624322     | 3,705882353     |
| MFAP2                                                                                           | 4,86524E-20 | 0,632528653 | 0,125 | 0,007 | 1,02661E-15 | 1,550279833   | 0,645044836     | 17,85714286     |
| COX5B                                                                                           | 0,001133968 | 0,632318464 | 0,411 | 0,385 | 1           | 1,550053987   | 0,64513882      | 1,067532468     |
| CTSZ                                                                                            | 0,00052134  | 0,631305829 | 0,285 | 0,221 | 1           | 1,548966378   | 0,645591805     | 1,28959276      |
| ZYX                                                                                             | 7,22092E-09 | 0,631187845 | 0,187 | 0,088 | 0,000152369 | 1,548839708   | 0,645644604     | 2,125           |
| PDIA3                                                                                           | 1,25274E-05 | 0,630102132 | 0,483 | 0,463 | 0,2643414   | 1,547674553   | 0,646130673     | 1,043196544     |
| RPL30                                                                                           | 1,9604E-31  | 0,628381638 | 0,924 | 0,91  | 4,13664E-27 | 1,545829965   | 0,646901679     | 1,015384615     |
| MRPL17                                                                                          | 2,35604E-12 | 0,627577187 | 0,171 | 0,057 | 4,97147E-08 | 1,544968247   | 0,647262494     | 3               |
| SELENON                                                                                         | 3,03708E-11 | 0,626975141 | 0,217 | 0,094 | 6,40853E-07 | 1,544323656   | 0,647532657     | 2,308510638     |
| RPL19                                                                                           | 1,91376E-27 | 0,626174331 | 0,88  | 0,905 | 4,03823E-23 | 1,543466672   | 0,647892189     | 0,972375691     |
| NDUFB6                                                                                          | 0,004278885 | 0,626147472 | 0,286 | 0,232 | 1           | 1,543437937   | 0,647904251     | 1,232758621     |
| SNF8                                                                                            | 5,86642E-06 | 0,625548872 | 0,247 | 0,159 | 0,123787393 | 1,54279767    | 0,648173133     | 1,553459119     |
| GNG7                                                                                            | 1,64716E-10 | 0,625471141 | 0,133 | 0,041 | 3,47568E-06 | 1,542714548   | 0,648208057     | 3,243902439     |
| CDC26                                                                                           | 5,21308E-06 | 0,625450626 | 0,17  | 0,092 | 0,110001115 | 1,54269261    | 0,648217275     | 1,847826087     |
| RPA3                                                                                            | 1,25866E-08 | 0,624649758 | 0,146 | 0,058 | 0,00026559  | 1,541836469   | 0,648577213     | 2,517241379     |
| RPS24                                                                                           | 1,68152E-34 | 0,624627348 | 0,887 | 0,891 | 3,54819E-30 | 1,54181252    | 0,648587287     | 0,995510662     |

Supplementary Table 5

| Differentially expressed genes_total calculation_ comparing SC-Keloid vs. (SC-Myel, SC-Nonmyel) |             |             |       |       |             |               |                 |                 |
|-------------------------------------------------------------------------------------------------|-------------|-------------|-------|-------|-------------|---------------|-----------------|-----------------|
| gene                                                                                            | p_val       | avg_log2FC  | pct.1 | pct.2 | p_val_adj   | Foldchange_UP | Foldchange_DOWN | Ratio_pct1_pct2 |
| RPL28                                                                                           | 1,19641E-21 | 0,623595519 | 0,796 | 0,893 | 2,52454E-17 | 1,540710195   | 0,649051329     | 0,89137738      |
| GTF2A2                                                                                          | 0,000773257 | 0,622796786 | 0,297 | 0,233 | 1           | 1,539857433   | 0,649410769     | 1,274678112     |
| C1QBP                                                                                           | 9,16555E-06 | 0,622663186 | 0,271 | 0,185 | 0,193402234 | 1,539714842   | 0,64947091      | 1,464864865     |
| SMAP2                                                                                           | 4,34876E-13 | 0,622280767 | 0,136 | 0,033 | 9,17633E-09 | 1,53930676    | 0,64964309      | 4,121212121     |
| MRPL40                                                                                          | 4,54583E-08 | 0,622132906 | 0,218 | 0,114 | 0,000959216 | 1,539149006   | 0,649709675     | 1,912280702     |
| GSTP1                                                                                           | 0,001025446 | 0,622075638 | 0,484 | 0,503 | 1           | 1,53908791    | 0,649735466     | 0,96222664      |
| DAD1                                                                                            | 0,000341178 | 0,621318506 | 0,54  | 0,596 | 1           | 1,538280403   | 0,650076539     | 0,906040268     |
| H3-3A                                                                                           | 4,38415E-24 | 0,621253969 | 0,82  | 0,821 | 9,251E-20   | 1,538211591   | 0,65010562      | 0,998781973     |
| PRDX5                                                                                           | 0,000446189 | 0,621018643 | 0,369 | 0,324 | 1           | 1,537960705   | 0,650211671     | 1,138888889     |
| RUNX1                                                                                           | 2,07505E-05 | 0,620891262 | 0,268 | 0,18  | 0,437857184 | 1,537824919   | 0,650269083     | 1,488888889     |
| GAP43                                                                                           | 5,8239E-09  | 0,620166191 | 0,144 | 0,056 | 0,00012289  | 1,537052232   | 0,650595978     | 2,571428571     |
| PDGFB                                                                                           | 5,29858E-13 | 0,619594489 | 0,208 | 0,077 | 1,11805E-08 | 1,536443259   | 0,650853843     | 2,701298701     |
| PSMD12                                                                                          | 0,015428187 | 0,619096647 | 0,206 | 0,164 | 1           | 1,535913158   | 0,651078477     | 1,256097561     |
| APOE                                                                                            | 0,222622442 | 0,61711478  | 0,093 | 0,115 | 1           | 1,533804683   | 0,651973495     | 0,808695652     |
| P4HB                                                                                            | 0,000501275 | 0,616354884 | 0,382 | 0,357 | 1           | 1,532997011   | 0,652316993     | 1,070028011     |
| SNRPD3                                                                                          | 8,51779E-05 | 0,616032397 | 0,296 | 0,217 | 1           | 1,532654376   | 0,652462822     | 1,3640553       |
| MAP1B                                                                                           | 0,000484646 | 0,615727173 | 0,478 | 0,475 | 1           | 1,532330155   | 0,652600875     | 1,006315789     |
| ATP5MK                                                                                          | 0,001292003 | 0,615571138 | 0,468 | 0,461 | 1           | 1,532164434   | 0,652671461     | 1,015184382     |
| COMMD1                                                                                          | 7,1046E-05  | 0,615516951 | 0,201 | 0,129 | 1           | 1,532106888   | 0,652695976     | 1,558139535     |
| A1BG                                                                                            | 3,1689E-05  | 0,615268042 | 0,249 | 0,166 | 0,668670204 | 1,531842575   | 0,652808595     | 1,5             |
| FAM204A                                                                                         | 0,000807785 | 0,614913916 | 0,242 | 0,179 | 1           | 1,531466613   | 0,652968855     | 1,351955307     |
| PSMA3                                                                                           | 0,031044621 | 0,614522082 | 0,297 | 0,263 | 1           | 1,531050726   | 0,653146224     | 1,129277567     |
| PTMS                                                                                            | 2,26701E-06 | 0,614375382 | 0,573 | 0,624 | 0,047836157 | 1,530895049   | 0,653212642     | 0,918269231     |
| ARHGAP21                                                                                        | 2,21617E-13 | 0,61313693  | 0,194 | 0,066 | 4,67635E-09 | 1,529581448   | 0,65377362      | 2,939393939     |
| ZSWIM7                                                                                          | 7,12371E-07 | 0,611706035 | 0,183 | 0,095 | 0,01503174  | 1,528065129   | 0,654422368     | 1,926315789     |
| ST8SIA2                                                                                         | 6,34256E-16 | 0,610060165 | 0,128 | 0,019 | 1,33834E-11 | 1,52632286    | 0,655169379     | 6,736842105     |
| EPRS1                                                                                           | 5,60664E-06 | 0,608519356 | 0,184 | 0,104 | 0,118305708 | 1,524693606   | 0,655869478     | 1,769230769     |
| RPL36                                                                                           | 4,60826E-21 | 0,60734307  | 0,785 | 0,824 | 9,72389E-17 | 1,523450971   | 0,656404452     | 0,952669903     |
| MACIR                                                                                           | 1,25761E-08 | 0,606887505 | 0,144 | 0,057 | 0,000265368 | 1,52296998    | 0,65661176      | 2,526315789     |
| PCDHGC3                                                                                         | 6,45727E-14 | 0,606636921 | 0,119 | 0,02  | 1,36255E-09 | 1,522705476   | 0,656725818     | 5,95            |

Supplementary Table 5

| Differentially expressed genes_total calculation_ comparing SC-Keloid vs. (SC-Myel, SC-Nonmyel) |             |             |       |       |             |               |                 |                 |
|-------------------------------------------------------------------------------------------------|-------------|-------------|-------|-------|-------------|---------------|-----------------|-----------------|
| gene                                                                                            | p_val       | avg_log2FC  | pct.1 | pct.2 | p_val_adj   | Foldchange_UP | Foldchange_DOWN | Ratio_pct1_pct2 |
| RNASEH2B                                                                                        | 5,63774E-10 | 0,606010196 | 0,176 | 0,071 | 1,18962E-05 | 1,522044138   | 0,65701117      | 2,478873239     |
| C1orf122                                                                                        | 5,59598E-05 | 0,60556522  | 0,296 | 0,217 | 1           | 1,52157476    | 0,657213846     | 1,3640553       |
| MPG                                                                                             | 3,38799E-05 | 0,603883771 | 0,283 | 0,202 | 0,714899841 | 1,51980241    | 0,65798027      | 1,400990099     |
| PXDN                                                                                            | 9,20127E-08 | 0,603137353 | 0,184 | 0,091 | 0,001941561 | 1,519016302   | 0,658320782     | 2,021978022     |
| FIS1                                                                                            | 0,000781698 | 0,602416183 | 0,419 | 0,379 | 1           | 1,518257171   | 0,658649944     | 1,105540897     |
| EDF1                                                                                            | 0,000872896 | 0,601677781 | 0,478 | 0,506 | 1           | 1,517480293   | 0,658987141     | 0,944664032     |
| ADH5                                                                                            | 0,004690656 | 0,600047428 | 0,229 | 0,176 | 1           | 1,515766396   | 0,659732266     | 1,301136364     |
| GASK1B                                                                                          | 8,36799E-06 | 0,599908305 | 0,143 | 0,073 | 0,176572869 | 1,515620233   | 0,65979589      | 1,95890411      |
| NDUFA3                                                                                          | 2,22966E-05 | 0,598253146 | 0,231 | 0,148 | 0,470480727 | 1,513882407   | 0,660553287     | 1,560810811     |
| FKBP10                                                                                          | 1,53587E-06 | 0,597088524 | 0,213 | 0,122 | 0,032408452 | 1,512660812   | 0,661086737     | 1,745901639     |
| SFRP2                                                                                           | 0,001228842 | 0,596985907 | 0,083 | 0,043 | 1           | 1,512553222   | 0,661133761     | 1,930232558     |
| MRPL33                                                                                          | 0,011868066 | 0,596576185 | 0,393 | 0,365 | 1           | 1,512123721   | 0,661321548     | 1,076712329     |
| PSMC5                                                                                           | 0,000270542 | 0,596542736 | 0,254 | 0,185 | 1           | 1,512088663   | 0,661336881     | 1,372972973     |
| CHCHD2                                                                                          | 0,000334505 | 0,595772499 | 0,509 | 0,547 | 1           | 1,511281593   | 0,661690055     | 0,930530165     |
| EIF4EBP1                                                                                        | 3,16838E-11 | 0,595643123 | 0,157 | 0,053 | 6,68559E-07 | 1,511146073   | 0,661749395     | 2,962264151     |
| ANXA1                                                                                           | 4,49735E-28 | 0,595143766 | 0,772 | 0,647 | 9,48985E-24 | 1,510623113   | 0,661978485     | 1,193199382     |
| PERP                                                                                            | 2,79288E-09 | 0,593751139 | 0,229 | 0,115 | 5,89325E-05 | 1,509165619   | 0,662617798     | 1,991304348     |
| LEPROTL1                                                                                        | 2,96724E-07 | 0,593088258 | 0,203 | 0,109 | 0,00626118  | 1,508472355   | 0,662922324     | 1,862385321     |
| TPRKB                                                                                           | 7,45373E-09 | 0,592913044 | 0,168 | 0,072 | 0,000157281 | 1,508289164   | 0,66300284      | 2,333333333     |
| SFXN3                                                                                           | 9,05287E-09 | 0,592454451 | 0,149 | 0,058 | 0,000191025 | 1,507809797   | 0,663213624     | 2,568965517     |
| RPLP0                                                                                           | 9,22852E-11 | 0,592145178 | 0,667 | 0,725 | 1,94731E-06 | 1,507486599   | 0,663355814     | 0,92            |
| C14orf132                                                                                       | 2,26184E-10 | 0,591303041 | 0,112 | 0,028 | 4,7727E-06  | 1,506606899   | 0,663743144     | 4               |
| NDUFAF2                                                                                         | 1,41815E-05 | 0,591216397 | 0,198 | 0,119 | 0,299244675 | 1,506516419   | 0,663783008     | 1,663865546     |
| CAMK2N1                                                                                         | 2,66531E-05 | 0,591050962 | 0,251 | 0,171 | 0,562407202 | 1,506343676   | 0,663859128     | 1,467836257     |
| NDUFB8                                                                                          | 0,022122892 | 0,590752081 | 0,354 | 0,332 | 1           | 1,506031641   | 0,663996674     | 1,06626506      |
| EMC6                                                                                            | 3,487E-06   | 0,590241156 | 0,197 | 0,113 | 0,073579245 | 1,505498381   | 0,664231867     | 1,743362832     |
| TMEM14B                                                                                         | 0,002631331 | 0,589437792 | 0,257 | 0,197 | 1           | 1,504660278   | 0,664601847     | 1,304568528     |
| NSA2                                                                                            | 6,69174E-05 | 0,589313234 | 0,322 | 0,243 | 1           | 1,504530375   | 0,66465923      | 1,325102881     |
| TMEM141                                                                                         | 5,17363E-06 | 0,588941978 | 0,176 | 0,096 | 0,109168679 | 1,504143257   | 0,664830291     | 1,833333333     |
| PPP1CA                                                                                          | 9,00028E-10 | 0,588350837 | 0,199 | 0,088 | 1,89915E-05 | 1,503527064   | 0,66510276      | 2,261363636     |



Supplementary Table 5

| Differentially expressed genes_total calculation_ comparing SC-Keloid vs. (SC-Myel, SC-Nonmyel) |             |             |       |       |             |               |                 |                 |
|-------------------------------------------------------------------------------------------------|-------------|-------------|-------|-------|-------------|---------------|-----------------|-----------------|
| gene                                                                                            | p_val       | avg_log2FC  | pct.1 | pct.2 | p_val_adj   | Foldchange_UP | Foldchange_DOWN | Ratio_pct1_pct2 |
| GNB1                                                                                            | 0,097049336 | 0,587804236 | 0,369 | 0,37  | 1           | 1,502957523   | 0,665354798     | 0,997297297     |
| ITPA                                                                                            | 2,26347E-07 | 0,585173697 | 0,208 | 0,113 | 0,004776155 | 1,500219601   | 0,66656908      | 1,840707965     |
| CHST3                                                                                           | 5,80596E-08 | 0,584818856 | 0,213 | 0,111 | 0,001225116 | 1,499850657   | 0,666733048     | 1,918918919     |
| SSB                                                                                             | 0,000456065 | 0,583009341 | 0,345 | 0,278 | 1           | 1,497970633   | 0,667569829     | 1,241007194     |
| ANO6                                                                                            | 3,30871E-06 | 0,582907628 | 0,143 | 0,071 | 0,069817099 | 1,497865027   | 0,667616896     | 2,014084507     |
| S100A8                                                                                          | 0,001529833 | 0,582867982 | 0,051 | 0,022 | 1           | 1,497823866   | 0,667635243     | 2,318181818     |
| ATP2B1                                                                                          | 1,04446E-05 | 0,582250199 | 0,225 | 0,138 | 0,220392374 | 1,497182613   | 0,667921195     | 1,630434783     |
| COX6B1                                                                                          | 0,007225255 | 0,581268885 | 0,435 | 0,452 | 1           | 1,496164582   | 0,668375666     | 0,962389381     |
| MYO10                                                                                           | 3,11632E-06 | 0,581031467 | 0,17  | 0,091 | 0,065757421 | 1,495918385   | 0,668485667     | 1,868131868     |
| FAAP20                                                                                          | 3,34358E-05 | 0,580748376 | 0,253 | 0,17  | 0,705529403 | 1,49562488    | 0,668616853     | 1,488235294     |
| KDEL3                                                                                           | 7,2589E-15  | 0,580654765 | 0,171 | 0,046 | 1,5317E-10  | 1,495527838   | 0,668660238     | 3,717391304     |
| IL11                                                                                            | 8,39603E-13 | 0,580336149 | 0,095 | 0,012 | 1,77165E-08 | 1,49519759    | 0,668807926     | 7,916666667     |
| PRTFDC1                                                                                         | 2,60361E-18 | 0,580200037 | 0,112 | 0,005 | 5,49388E-14 | 1,495056532   | 0,668871029     | 22,4            |
| PLPP4                                                                                           | 3,69043E-19 | 0,580168373 | 0,116 | 0,005 | 7,78719E-15 | 1,495023718   | 0,668885709     | 23,2            |
| PFKFB4                                                                                          | 2,95414E-15 | 0,579907845 | 0,113 | 0,014 | 6,23353E-11 | 1,494753765   | 0,66900651      | 8,071428571     |
| PDLIM4                                                                                          | 0,000341828 | 0,579719901 | 0,504 | 0,537 | 1           | 1,494559052   | 0,669093669     | 0,938547486     |
| RAB31                                                                                           | 1,77591E-05 | 0,577840013 | 0,207 | 0,128 | 0,374735049 | 1,492612852   | 0,669966093     | 1,6171875       |
| ACSL3                                                                                           | 0,016926652 | 0,577581857 | 0,185 | 0,145 | 1           | 1,492345787   | 0,670085987     | 1,275862069     |
| PGAM1                                                                                           | 0,000182442 | 0,577557958 | 0,27  | 0,201 | 1           | 1,492321066   | 0,670097087     | 1,343283582     |
| H2AJ                                                                                            | 0,025817883 | 0,577083977 | 0,434 | 0,414 | 1           | 1,491830861   | 0,670317277     | 1,048309179     |
| PSMB5                                                                                           | 0,00837957  | 0,57600259  | 0,274 | 0,227 | 1           | 1,490713063   | 0,670819908     | 1,207048458     |
| NGFR                                                                                            | 0,000774674 | 0,575929767 | 0,427 | 0,414 | 1           | 1,490637818   | 0,67085377      | 1,031400966     |
| HOXB7                                                                                           | 5,31624E-18 | 0,575027278 | 0,137 | 0,018 | 1,12178E-13 | 1,48970563    | 0,671273559     | 7,611111111     |
| DNM1                                                                                            | 2,07133E-14 | 0,574989102 | 0,102 | 0,011 | 4,37072E-10 | 1,489666211   | 0,671291322     | 9,272727273     |
| VPS29                                                                                           | 0,02569497  | 0,574924337 | 0,283 | 0,243 | 1           | 1,489599338   | 0,671321459     | 1,164609053     |
| MRPS18C                                                                                         | 0,000989488 | 0,573295044 | 0,172 | 0,117 | 1           | 1,487918024   | 0,672080036     | 1,47008547      |
| SRP14                                                                                           | 1,65722E-10 | 0,571260303 | 0,71  | 0,771 | 3,49691E-06 | 1,48582098    | 0,67302859      | 0,920881971     |
| CCDC90B                                                                                         | 0,001843347 | 0,570167399 | 0,218 | 0,159 | 1           | 1,484695833   | 0,673538632     | 1,371069182     |
| TSPO                                                                                            | 0,000669092 | 0,569447857 | 0,463 | 0,449 | 1           | 1,483955528   | 0,673874642     | 1,031180401     |
| PSMB9                                                                                           | 7,03877E-06 | 0,569059992 | 0,205 | 0,122 | 0,148525008 | 1,483556624   | 0,674055836     | 1,680327869     |

Supplementary Table 5

| Differentially expressed genes_total calculation_ comparing SC-Keloid vs. (SC-Myel, SC-Nonmyel) |             |             |       |       |             |               |                 |                 |
|-------------------------------------------------------------------------------------------------|-------------|-------------|-------|-------|-------------|---------------|-----------------|-----------------|
| gene                                                                                            | p_val       | avg_log2FC  | pct.1 | pct.2 | p_val_adj   | Foldchange_UP | Foldchange_DOWN | Ratio_pct1_pct2 |
| TRAPPC4                                                                                         | 6,26663E-07 | 0,568659162 | 0,172 | 0,088 | 0,013223225 | 1,483144498   | 0,674243138     | 1,954545455     |
| RER1                                                                                            | 0,000204325 | 0,568543503 | 0,276 | 0,202 | 1           | 1,483025601   | 0,674297193     | 1,366336634     |
| DEF8                                                                                            | 1,85635E-09 | 0,566638457 | 0,151 | 0,057 | 3,91708E-05 | 1,481068592   | 0,675188175     | 2,649122807     |
| CXCL12                                                                                          | 9,63703E-07 | 0,566221898 | 0,221 | 0,126 | 0,020335107 | 1,480641014   | 0,675383155     | 1,753968254     |
| PKM                                                                                             | 0,044938645 | 0,566194022 | 0,326 | 0,326 | 1           | 1,480612406   | 0,675396205     | 1               |
| TMEM47                                                                                          | 8,06138E-05 | 0,56597388  | 0,269 | 0,191 | 1           | 1,480386496   | 0,675499272     | 1,408376963     |
| ST6GAL2                                                                                         | 4,07085E-14 | 0,564843433 | 0,075 | 0     | 8,5899E-10  | 1,479226969   | 0,676028778     | #DIV/0!         |
| TXNDC9                                                                                          | 4,20424E-07 | 0,564151107 | 0,133 | 0,057 | 0,008871356 | 1,478517282   | 0,676353271     | 2,333333333     |
| DYRK2                                                                                           | 6,20481E-10 | 0,563917178 | 0,172 | 0,068 | 1,30928E-05 | 1,478277564   | 0,676462949     | 2,529411765     |
| LBH                                                                                             | 1,80683E-08 | 0,561685349 | 0,166 | 0,073 | 0,000381258 | 1,475992458   | 0,677510237     | 2,273972603     |
| NDUFA8                                                                                          | 3,04914E-06 | 0,56152766  | 0,184 | 0,1   | 0,0643398   | 1,475831137   | 0,677584294     | 1,84            |
| MZT2B                                                                                           | 0,015407136 | 0,559767787 | 0,417 | 0,417 | 1           | 1,474031942   | 0,67841135      | 1               |
| SKP1                                                                                            | 4,82648E-05 | 0,55959029  | 0,623 | 0,692 | 1           | 1,4738506     | 0,678494822     | 0,900289017     |
| BRK1                                                                                            | 0,003291178 | 0,559349129 | 0,41  | 0,391 | 1           | 1,473604252   | 0,678608248     | 1,04859335      |
| COX8A                                                                                           | 0,019628634 | 0,558930619 | 0,41  | 0,408 | 1           | 1,473176837   | 0,678805134     | 1,004901961     |
| AGA                                                                                             | 2,26307E-06 | 0,558517402 | 0,161 | 0,081 | 0,047753    | 1,47275495    | 0,678999585     | 1,987654321     |
| SEPTIN9                                                                                         | 8,18218E-05 | 0,557575587 | 0,277 | 0,202 | 1           | 1,471793825   | 0,679442992     | 1,371287129     |
| FAT1                                                                                            | 0,022567686 | 0,556346921 | 0,172 | 0,133 | 1           | 1,470540911   | 0,680021883     | 1,293233083     |
| CNN2                                                                                            | 9,18672E-17 | 0,555192816 | 0,109 | 0,008 | 1,93849E-12 | 1,469365      | 0,680566095     | 13,625          |
| FIBIN                                                                                           | 0,001995974 | 0,555126259 | 0,236 | 0,178 | 1           | 1,469297215   | 0,680597493     | 1,325842697     |
| NRXN2                                                                                           | 2,89151E-05 | 0,555052217 | 0,143 | 0,077 | 0,61013693  | 1,469221809   | 0,680632423     | 1,857142857     |
| NME4                                                                                            | 2,47677E-06 | 0,553130009 | 0,197 | 0,113 | 0,052262275 | 1,467265562   | 0,681539883     | 1,743362832     |
| UBA52                                                                                           | 8,52661E-11 | 0,552551381 | 0,672 | 0,731 | 1,7992E-06  | 1,466677197   | 0,681813287     | 0,919288646     |
| REXO2                                                                                           | 5,3634E-05  | 0,552458918 | 0,243 | 0,164 | 1           | 1,4665832     | 0,681856986     | 1,481707317     |
| MLEC                                                                                            | 0,010520197 | 0,549997514 | 0,231 | 0,18  | 1           | 1,464083173   | 0,683021306     | 1,283333333     |
| UXT                                                                                             | 0,005291421 | 0,549595258 | 0,244 | 0,19  | 1           | 1,46367501    | 0,683211774     | 1,284210526     |
| SSNA1                                                                                           | 0,000933292 | 0,549116821 | 0,22  | 0,157 | 1           | 1,463189697   | 0,683438383     | 1,401273885     |
| UBXN4                                                                                           | 0,110604811 | 0,548834542 | 0,364 | 0,354 | 1           | 1,462903436   | 0,683572118     | 1,028248588     |
| MRPL14                                                                                          | 0,002762625 | 0,548712718 | 0,235 | 0,175 | 1           | 1,46277991    | 0,683629843     | 1,342857143     |
| TNIK                                                                                            | 3,85121E-13 | 0,548651478 | 0,098 | 0,012 | 8,12643E-09 | 1,462717819   | 0,683658862     | 8,166666667     |

Supplementary Table 5

| Differentially expressed genes_total calculation_ comparing SC-Keloid vs. (SC-Myel, SC-Nonmyel) |             |             |       |       |             |               |                 |                 |
|-------------------------------------------------------------------------------------------------|-------------|-------------|-------|-------|-------------|---------------|-----------------|-----------------|
| gene                                                                                            | p_val       | avg_log2FC  | pct.1 | pct.2 | p_val_adj   | Foldchange_UP | Foldchange_DOWN | Ratio_pct1_pct2 |
| THOC7                                                                                           | 0,000716824 | 0,548100376 | 0,211 | 0,147 | 1           | 1,462159175   | 0,683920067     | 1,43537415      |
| LOXL1                                                                                           | 1,45783E-18 | 0,548092165 | 0,137 | 0,016 | 3,07616E-14 | 1,462150853   | 0,683923959     | 8,5625          |
| SNU13                                                                                           | 0,030260266 | 0,546466012 | 0,357 | 0,331 | 1           | 1,460503699   | 0,684695288     | 1,078549849     |
| MRPS26                                                                                          | 5,74986E-05 | 0,546400389 | 0,22  | 0,142 | 1           | 1,460437267   | 0,684726433     | 1,549295775     |
| ERH                                                                                             | 0,158661073 | 0,545317453 | 0,345 | 0,343 | 1           | 1,459341425   | 0,685240604     | 1,005830904     |
| CAVIN3                                                                                          | 7,42283E-05 | 0,545310154 | 0,558 | 0,589 | 1           | 1,459334042   | 0,685244071     | 0,947368421     |
| GPR17                                                                                           | 7,78285E-16 | 0,545125141 | 0,157 | 0,034 | 1,64226E-11 | 1,459146906   | 0,685331954     | 4,617647059     |
| SPARC                                                                                           | 6,97714E-30 | 0,54497785  | 0,948 | 0,939 | 1,47225E-25 | 1,458997943   | 0,685401926     | 1,009584665     |
| TPGS1                                                                                           | 1,17748E-05 | 0,542828931 | 0,21  | 0,126 | 0,24846092  | 1,45682636    | 0,686423604     | 1,666666667     |
| TLN1                                                                                            | 0,062853369 | 0,542517365 | 0,364 | 0,349 | 1           | 1,456511776   | 0,686571861     | 1,042979943     |
| SET                                                                                             | 0,006009695 | 0,542328348 | 0,546 | 0,601 | 1           | 1,456320961   | 0,686661819     | 0,908485857     |
| EIF3K                                                                                           | 0,100054409 | 0,541853247 | 0,396 | 0,4   | 1           | 1,455841451   | 0,686887985     | 0,99            |
| HMCN1                                                                                           | 2,61245E-11 | 0,541688072 | 0,111 | 0,024 | 5,51253E-07 | 1,45567478    | 0,686966631     | 4,625           |
| ADAM19                                                                                          | 1,4579E-08  | 0,539910702 | 0,203 | 0,098 | 0,000307631 | 1,453882524   | 0,687813481     | 2,071428571     |
| TNFRSF19                                                                                        | 0,001568931 | 0,538895669 | 0,208 | 0,148 | 1           | 1,45285998    | 0,688297574     | 1,405405405     |
| SAR1B                                                                                           | 0,000180511 | 0,537453024 | 0,173 | 0,109 | 1           | 1,451407897   | 0,688986192     | 1,587155963     |
| GCSH                                                                                            | 0,050581896 | 0,537348506 | 0,249 | 0,21  | 1           | 1,451302751   | 0,689036109     | 1,185714286     |
| C2orf74                                                                                         | 7,59286E-06 | 0,536420231 | 0,073 | 0,024 | 0,160216951 | 1,450369238   | 0,689479599     | 3,041666667     |
| RPS3A                                                                                           | 3,63484E-19 | 0,536334528 | 0,851 | 0,853 | 7,66988E-15 | 1,450283082   | 0,689520558     | 0,997655334     |
| RWDD1                                                                                           | 0,017150147 | 0,536113438 | 0,315 | 0,274 | 1           | 1,450060846   | 0,689626234     | 1,149635036     |
| SUB1                                                                                            | 0,179701692 | 0,536006321 | 0,455 | 0,484 | 1           | 1,449953186   | 0,689677439     | 0,940082645     |
| TP53I3                                                                                          | 9,16835E-09 | 0,53543666  | 0,155 | 0,062 | 0,000193461 | 1,449380772   | 0,689949818     | 2,5             |
| RPLP2                                                                                           | 5,53196E-17 | 0,534716415 | 0,786 | 0,859 | 1,1673E-12  | 1,448657369   | 0,690294352     | 0,915017462     |
| CSPG4                                                                                           | 7,57789E-07 | 0,534716171 | 0,184 | 0,096 | 0,015990097 | 1,448657124   | 0,690294469     | 1,916666667     |
| RPL10                                                                                           | 3,6332E-26  | 0,534663253 | 0,941 | 0,954 | 7,66642E-22 | 1,448603989   | 0,690319789     | 0,986373166     |
| DECR1                                                                                           | 0,062916701 | 0,533707241 | 0,205 | 0,172 | 1           | 1,447644379   | 0,690777386     | 1,191860465     |
| REEP3                                                                                           | 0,005644026 | 0,532308208 | 0,277 | 0,225 | 1           | 1,446241227   | 0,691447582     | 1,231111111     |
| CIB1                                                                                            | 0,024186952 | 0,531851167 | 0,26  | 0,218 | 1           | 1,445783135   | 0,691666665     | 1,19266055      |
| MICAL2                                                                                          | 1,96858E-12 | 0,531683645 | 0,091 | 0,011 | 4,15389E-08 | 1,445615264   | 0,691746985     | 8,272727273     |
| MRPL3                                                                                           | 4,6404E-08  | 0,531606614 | 0,163 | 0,073 | 0,000979171 | 1,445538079   | 0,691783921     | 2,232876712     |

Supplementary Table 5

| Differentially expressed genes_total calculation_ comparing SC-Keloid vs. (SC-Myel, SC-Nonmyel) |             |             |       |       |             |               |                 |                 |
|-------------------------------------------------------------------------------------------------|-------------|-------------|-------|-------|-------------|---------------|-----------------|-----------------|
| gene                                                                                            | p_val       | avg_log2FC  | pct.1 | pct.2 | p_val_adj   | Foldchange_UP | Foldchange_DOWN | Ratio_pct1_pct2 |
| PTP4A1                                                                                          | 0,001007977 | 0,531547316 | 0,111 | 0,065 | 1           | 1,445478666   | 0,691812355     | 1,707692308     |
| STK32B                                                                                          | 2,56524E-15 | 0,530388087 | 0,113 | 0,014 | 5,4129E-11  | 1,444317667   | 0,692368461     | 8,071428571     |
| TUBB                                                                                            | 0,202529367 | 0,529102839 | 0,445 | 0,517 | 1           | 1,443031546   | 0,692985543     | 0,86073501      |
| ACTA2                                                                                           | 1,33956E-05 | 0,528679856 | 0,063 | 0,019 | 0,282661177 | 1,442608526   | 0,693188749     | 3,315789474     |
| CCDC25                                                                                          | 2,31725E-05 | 0,527358923 | 0,151 | 0,083 | 0,488963371 | 1,441288278   | 0,693823724     | 1,819277108     |
| MYL6B                                                                                           | 2,25115E-06 | 0,52721718  | 0,182 | 0,098 | 0,047501432 | 1,44114668    | 0,693891895     | 1,857142857     |
| ACP1                                                                                            | 1,03874E-05 | 0,526790421 | 0,204 | 0,121 | 0,219184418 | 1,440720442   | 0,694097183     | 1,685950413     |
| RPS14                                                                                           | 9,65704E-16 | 0,526756264 | 0,818 | 0,89  | 2,03773E-11 | 1,440686332   | 0,694113617     | 0,919101124     |
| GIPC1                                                                                           | 1,72742E-08 | 0,525969596 | 0,206 | 0,102 | 0,000364504 | 1,439900973   | 0,694492204     | 2,019607843     |
| MCTS1                                                                                           | 3,44262E-07 | 0,525685637 | 0,169 | 0,083 | 0,007264279 | 1,439617592   | 0,694628911     | 2,036144578     |
| CWC15                                                                                           | 0,058697662 | 0,525518224 | 0,196 | 0,161 | 1           | 1,439450546   | 0,694709521     | 1,217391304     |
| ACTR3                                                                                           | 0,00219854  | 0,525397763 | 0,257 | 0,195 | 1           | 1,439330361   | 0,69476753      | 1,317948718     |
| GLDC                                                                                            | 3,702E-15   | 0,523998324 | 0,104 | 0,009 | 7,8116E-11  | 1,437934863   | 0,695441794     | 11,55555556     |
| ERCC1                                                                                           | 4,5277E-07  | 0,52381675  | 0,206 | 0,111 | 0,009553903 | 1,437753899   | 0,695529326     | 1,855855856     |
| LSM4                                                                                            | 0,000100766 | 0,523718634 | 0,206 | 0,133 | 1           | 1,437656122   | 0,695576629     | 1,54887218      |
| HM13                                                                                            | 0,009877866 | 0,523702901 | 0,225 | 0,178 | 1           | 1,437640444   | 0,695584215     | 1,264044944     |
| CD82                                                                                            | 0,000346981 | 0,521038778 | 0,217 | 0,149 | 1           | 1,434988105   | 0,696869888     | 1,456375839     |
| TAGLN2                                                                                          | 4,94735E-07 | 0,51999658  | 0,589 | 0,638 | 0,010439404 | 1,433951849   | 0,697373486     | 0,923197492     |
| MRPS23                                                                                          | 9,13709E-07 | 0,519985503 | 0,146 | 0,068 | 0,019280167 | 1,433940839   | 0,697378841     | 2,147058824     |
| METAP2                                                                                          | 0,0125384   | 0,519620582 | 0,265 | 0,217 | 1           | 1,433578178   | 0,697555261     | 1,221198157     |
| LPGAT1                                                                                          | 0,006732637 | 0,518368875 | 0,213 | 0,163 | 1           | 1,432334921   | 0,698160734     | 1,306748466     |
| PSMD1                                                                                           | 3,06879E-05 | 0,517935005 | 0,193 | 0,117 | 0,647545475 | 1,431904231   | 0,698370728     | 1,64957265      |
| LAMTOR5                                                                                         | 0,318918238 | 0,517691902 | 0,391 | 0,412 | 1           | 1,431662966   | 0,698488418     | 0,949029126     |
| EIF2S2                                                                                          | 0,037550434 | 0,517052217 | 0,341 | 0,308 | 1           | 1,431028313   | 0,698798193     | 1,107142857     |
| PSMB3                                                                                           | 0,019073758 | 0,516861546 | 0,284 | 0,246 | 1           | 1,430839197   | 0,698890554     | 1,154471545     |
| MRPL47                                                                                          | 0,000196473 | 0,516519585 | 0,182 | 0,115 | 1           | 1,430500087   | 0,699056232     | 1,582608696     |
| BCAP29                                                                                          | 0,032937679 | 0,516354404 | 0,247 | 0,208 | 1           | 1,430336312   | 0,699136274     | 1,1875          |
| NDUFS2                                                                                          | 6,62767E-07 | 0,514740776 | 0,212 | 0,117 | 0,013985037 | 1,428737401   | 0,699918683     | 1,811965812     |
| PGM3                                                                                            | 3,7033E-05  | 0,513430506 | 0,214 | 0,136 | 0,781433491 | 1,427440396   | 0,700554645     | 1,573529412     |
| RPS12                                                                                           | 3,07454E-23 | 0,512583995 | 0,893 | 0,897 | 6,48759E-19 | 1,426603082   | 0,700965821     | 0,995540691     |

Supplementary Table 5

| Differentially expressed genes_total calculation_ comparing SC-Keloid vs. (SC-Myel, SC-Nonmyel) |             |             |       |       |             |               |                 |                 |
|-------------------------------------------------------------------------------------------------|-------------|-------------|-------|-------|-------------|---------------|-----------------|-----------------|
| gene                                                                                            | p_val       | avg_log2FC  | pct.1 | pct.2 | p_val_adj   | Foldchange_UP | Foldchange_DOWN | Ratio_pct1_pct2 |
| PFN1                                                                                            | 0,221786573 | 0,512503352 | 0,434 | 0,541 | 1           | 1,42652334    | 0,701005004     | 0,802218115     |
| FAU                                                                                             | 1,50498E-15 | 0,511839473 | 0,852 | 0,878 | 3,17565E-11 | 1,425867054   | 0,701327657     | 0,970387244     |
| MESD                                                                                            | 1,89698E-05 | 0,510670228 | 0,197 | 0,117 | 0,400281798 | 1,424711915   | 0,701896285     | 1,683760684     |
| CISD2                                                                                           | 0,00130833  | 0,509962761 | 0,156 | 0,102 | 1           | 1,424013438   | 0,702240564     | 1,529411765     |
| FAM136A                                                                                         | 5,54665E-10 | 0,509699193 | 0,123 | 0,037 | 1,1704E-05  | 1,423753307   | 0,702368869     | 3,324324324     |
| CDC42                                                                                           | 0,077369904 | 0,508640751 | 0,49  | 0,535 | 1           | 1,422709144   | 0,702884355     | 0,91588785      |
| KCNN4                                                                                           | 4,61417E-14 | 0,5083438   | 0,133 | 0,027 | 9,73635E-10 | 1,422416338   | 0,703029045     | 4,925925926     |
| GANAB                                                                                           | 0,001489188 | 0,508183481 | 0,219 | 0,157 | 1           | 1,422258281   | 0,703107174     | 1,394904459     |
| RPE65                                                                                           | 1,05817E-14 | 0,507541462 | 0,081 | 0,001 | 2,23284E-10 | 1,421625497   | 0,703420136     | 81              |
| CLTA                                                                                            | 0,049421325 | 0,506976009 | 0,373 | 0,36  | 1           | 1,421068412   | 0,70369589      | 1,036111111     |
| PTRHD1                                                                                          | 1,75633E-07 | 0,506968846 | 0,134 | 0,056 | 0,003706042 | 1,421061356   | 0,703699383     | 2,392857143     |
| HMGB1                                                                                           | 4,69339E-14 | 0,505928197 | 0,799 | 0,862 | 9,90352E-10 | 1,420036681   | 0,704207161     | 0,926914153     |
| LSM5                                                                                            | 0,000851013 | 0,505878699 | 0,179 | 0,119 | 1           | 1,419987962   | 0,704231322     | 1,504201681     |
| DHRS7                                                                                           | 0,000157934 | 0,505198859 | 0,237 | 0,163 | 1           | 1,419318979   | 0,704563255     | 1,45398773      |
| HMGNI                                                                                           | 0,17969629  | 0,504206248 | 0,377 | 0,395 | 1           | 1,418342787   | 0,705048179     | 0,95443038      |
| VPS28                                                                                           | 0,049251314 | 0,503085528 | 0,318 | 0,285 | 1           | 1,417241413   | 0,70559609      | 1,115789474     |
| ADGRL4                                                                                          | 1,00302E-14 | 0,502866728 | 0,107 | 0,012 | 2,11648E-10 | 1,417026489   | 0,70570311      | 8,916666667     |
| CTNNB1                                                                                          | 0,58379872  | 0,502688798 | 0,345 | 0,381 | 1           | 1,416851736   | 0,70579015      | 0,905511811     |
| PLEKHG1                                                                                         | 4,52453E-05 | 0,502293812 | 0,148 | 0,083 | 0,954721225 | 1,416463879   | 0,70598341      | 1,78313253      |
| ZNF593                                                                                          | 9,00713E-09 | 0,501540506 | 0,144 | 0,056 | 0,000190059 | 1,415724462   | 0,706352137     | 2,571428571     |
| BLOC1S1                                                                                         | 0,000308307 | 0,501072735 | 0,371 | 0,299 | 1           | 1,41526551    | 0,706581198     | 1,240802676     |
| GLRX5                                                                                           | 0,000484615 | 0,499091626 | 0,205 | 0,14  | 1           | 1,413323402   | 0,707552142     | 1,464285714     |
| SRA1                                                                                            | 1,99398E-05 | 0,4975675   | 0,151 | 0,081 | 0,420750183 | 1,411831094   | 0,708300026     | 1,864197531     |
| LIMS1                                                                                           | 0,006549019 | 0,49746688  | 0,374 | 0,341 | 1           | 1,41173263    | 0,708349427     | 1,096774194     |
| LPP                                                                                             | 0,002451297 | 0,497131979 | 0,263 | 0,201 | 1           | 1,411404954   | 0,70851388      | 1,308457711     |
| BTC                                                                                             | 3,64029E-12 | 0,496535067 | 0,086 | 0,009 | 7,68137E-08 | 1,410821109   | 0,708807086     | 9,555555556     |
| METTL5                                                                                          | 1,6415E-05  | 0,496213352 | 0,19  | 0,111 | 0,346372603 | 1,410506537   | 0,708965165     | 1,711711712     |
| MRPS12                                                                                          | 4,0227E-12  | 0,494758567 | 0,155 | 0,047 | 8,4883E-08  | 1,409084927   | 0,709680432     | 3,29787234      |
| C12orf75                                                                                        | 3,91877E-10 | 0,494120484 | 0,129 | 0,039 | 8,26899E-06 | 1,408461847   | 0,709994383     | 3,307692308     |
| MAGOHB                                                                                          | 4,88588E-06 | 0,494117484 | 0,121 | 0,056 | 0,103096856 | 1,408458918   | 0,709995859     | 2,160714286     |

Supplementary Table 5

| Differentially expressed genes_total calculation_ comparing SC-Keloid vs. (SC-Myel, SC-Nonmyel) |             |             |       |       |             |               |                 |                 |
|-------------------------------------------------------------------------------------------------|-------------|-------------|-------|-------|-------------|---------------|-----------------|-----------------|
| gene                                                                                            | p_val       | avg_log2FC  | pct.1 | pct.2 | p_val_adj   | Foldchange_UP | Foldchange_DOWN | Ratio_pct1_pct2 |
| RPL41                                                                                           | 1,50477E-27 | 0,493130104 | 0,969 | 0,902 | 3,17521E-23 | 1,4074953     | 0,710481946     | 1,074279379     |
| PSMD13                                                                                          | 0,00061624  | 0,493111152 | 0,204 | 0,137 | 1           | 1,407477169   | 0,710491099     | 1,489051095     |
| CNIH4                                                                                           | 0,000623419 | 0,493035497 | 0,206 | 0,141 | 1           | 1,407403003   | 0,710528539     | 1,460992908     |
| TIMM10                                                                                          | 2,57329E-08 | 0,492534039 | 0,161 | 0,069 | 0,000542991 | 1,406913898   | 0,71077555      | 2,333333333     |
| EFEMP2                                                                                          | 6,80252E-07 | 0,492239983 | 0,199 | 0,107 | 0,014353994 | 1,406627164   | 0,710920438     | 1,859813084     |
| MSRB2                                                                                           | 7,94208E-05 | 0,492194309 | 0,143 | 0,08  | 1           | 1,406582632   | 0,710942946     | 1,7875          |
| NRAS                                                                                            | 6,56822E-08 | 0,491649974 | 0,111 | 0,038 | 0,001385959 | 1,406052022   | 0,711211238     | 2,921052632     |
| RTTN                                                                                            | 5,49475E-09 | 0,491382224 | 0,093 | 0,023 | 0,000115945 | 1,405791098   | 0,711343244     | 4,043478261     |
| RHOA                                                                                            | 0,000329385 | 0,491200115 | 0,583 | 0,659 | 1           | 1,405613658   | 0,711433041     | 0,884673748     |
| NDUFV2                                                                                          | 0,030177305 | 0,490230863 | 0,298 | 0,259 | 1           | 1,404669636   | 0,711911167     | 1,150579151     |
| TMEM54                                                                                          | 5,0796E-14  | 0,490099684 | 0,1   | 0,011 | 1,07185E-09 | 1,40454192    | 0,711975902     | 9,090909091     |
| ARL6IP4                                                                                         | 0,084323729 | 0,48970689  | 0,391 | 0,403 | 1           | 1,404159566   | 0,712169774     | 0,970223325     |
| MAD2L2                                                                                          | 6,91399E-05 | 0,489665692 | 0,192 | 0,118 | 1           | 1,404119469   | 0,71219011      | 1,627118644     |
| XRCC5                                                                                           | 0,280542371 | 0,489219973 | 0,324 | 0,315 | 1           | 1,403685734   | 0,712410175     | 1,028571429     |
| MRPL21                                                                                          | 0,000818753 | 0,48892208  | 0,191 | 0,129 | 1           | 1,403395926   | 0,712557291     | 1,480620155     |
| SMAP1                                                                                           | 0,006311529 | 0,488831076 | 0,141 | 0,096 | 1           | 1,403307405   | 0,71260224      | 1,46875         |
| ZCCHC17                                                                                         | 0,001465005 | 0,485824981 | 0,199 | 0,14  | 1           | 1,400386424   | 0,714088613     | 1,421428571     |
| RPS27A                                                                                          | 3,52784E-18 | 0,485510739 | 0,907 | 0,932 | 7,4441E-14  | 1,400081431   | 0,71424417      | 0,973175966     |
| RFC1                                                                                            | 0,087074103 | 0,485128963 | 0,17  | 0,141 | 1           | 1,399710981   | 0,714433204     | 1,205673759     |
| PLOD3                                                                                           | 1,53993E-05 | 0,48510567  | 0,236 | 0,151 | 0,324941682 | 1,399688382   | 0,714444738     | 1,562913907     |
| PLN                                                                                             | 9,22486E-11 | 0,484909997 | 0,069 | 0,005 | 1,94654E-06 | 1,399498554   | 0,714541646     | 13,8            |
| NOPCHAP1                                                                                        | 5,18612E-06 | 0,484876024 | 0,127 | 0,06  | 0,109432416 | 1,3994656     | 0,714558472     | 2,116666667     |
| LAGE3                                                                                           | 7,45261E-07 | 0,484613414 | 0,166 | 0,081 | 0,015725755 | 1,399210881   | 0,714688553     | 2,049382716     |
| ITGAE                                                                                           | 2,65085E-05 | 0,484469527 | 0,18  | 0,106 | 0,559356489 | 1,399071338   | 0,714759836     | 1,698113208     |
| RPL5                                                                                            | 5,32923E-09 | 0,482712441 | 0,785 | 0,82  | 0,000112452 | 1,397368419   | 0,715630886     | 0,957317073     |
| COX20                                                                                           | 0,015862395 | 0,481272477 | 0,281 | 0,232 | 1           | 1,395974393   | 0,716345518     | 1,211206897     |
| FAM207A                                                                                         | 7,14837E-10 | 0,480388138 | 0,104 | 0,026 | 1,50838E-05 | 1,395118954   | 0,716784757     | 4               |
| NUDT5                                                                                           | 1,43344E-05 | 0,480166056 | 0,155 | 0,083 | 0,302469742 | 1,394904213   | 0,716895104     | 1,86746988      |
| ARL1                                                                                            | 0,073282573 | 0,479859142 | 0,229 | 0,195 | 1           | 1,394607497   | 0,71704763      | 1,174358974     |
| DCTN3                                                                                           | 0,008781206 | 0,479728256 | 0,251 | 0,202 | 1           | 1,39448098    | 0,717112685     | 1,242574257     |

Supplementary Table 5

| Differentially expressed genes_total calculation_ comparing SC-Keloid vs. (SC-Myel, SC-Nonmyel) |             |             |       |       |             |               |                 |                 |
|-------------------------------------------------------------------------------------------------|-------------|-------------|-------|-------|-------------|---------------|-----------------|-----------------|
| gene                                                                                            | p_val       | avg_log2FC  | pct.1 | pct.2 | p_val_adj   | Foldchange_UP | Foldchange_DOWN | Ratio_pct1_pct2 |
| PHB                                                                                             | 0,013038675 | 0,479331813 | 0,236 | 0,189 | 1           | 1,394097838   | 0,71730977      | 1,248677249     |
| RAB14                                                                                           | 0,177790746 | 0,478978444 | 0,285 | 0,263 | 1           | 1,393756414   | 0,717485487     | 1,08365019      |
| RMDN1                                                                                           | 2,74719E-05 | 0,477670245 | 0,135 | 0,071 | 0,579684215 | 1,392493164   | 0,71813638      | 1,901408451     |
| PSMB2                                                                                           | 0,000522234 | 0,477191498 | 0,247 | 0,176 | 1           | 1,392031153   | 0,718374727     | 1,403409091     |
| MAGED2                                                                                          | 0,049356685 | 0,477043414 | 0,383 | 0,403 | 1           | 1,391888277   | 0,718448468     | 0,950372208     |
| YIF1A                                                                                           | 0,00174755  | 0,477014845 | 0,217 | 0,156 | 1           | 1,391860714   | 0,718462695     | 1,391025641     |
| ARPC4                                                                                           | 0,000132777 | 0,476711372 | 0,221 | 0,147 | 1           | 1,391567965   | 0,718613841     | 1,503401361     |
| PRKAR1B                                                                                         | 9,78833E-10 | 0,476608892 | 0,14  | 0,047 | 2,06543E-05 | 1,39146912    | 0,718664889     | 2,978723404     |
| SCARB2                                                                                          | 0,352773198 | 0,47658053  | 0,407 | 0,444 | 1           | 1,391441765   | 0,718679017     | 0,916666667     |
| ZNF706                                                                                          | 0,193799361 | 0,475762677 | 0,416 | 0,426 | 1           | 1,390653191   | 0,719086546     | 0,976525822     |
| EFHD2                                                                                           | 2,64145E-05 | 0,47382809  | 0,176 | 0,1   | 0,557373026 | 1,388789639   | 0,720051455     | 1,76            |
| RPL22                                                                                           | 2,48387E-08 | 0,473374735 | 0,745 | 0,799 | 0,000524121 | 1,388353292   | 0,720277761     | 0,932415519     |
| C1orf56                                                                                         | 0,905442695 | 0,473160014 | 0,178 | 0,18  | 1           | 1,388146674   | 0,72038497      | 0,988888889     |
| S100B                                                                                           | 3,64884E-10 | 0,472857451 | 0,888 | 0,874 | 7,69941E-06 | 1,387855581   | 0,720536065     | 1,016018307     |
| RPS19BP1                                                                                        | 0,033211724 | 0,47272368  | 0,274 | 0,232 | 1           | 1,387726902   | 0,720602878     | 1,181034483     |
| TMEM50A                                                                                         | 0,255333355 | 0,472479025 | 0,36  | 0,36  | 1           | 1,387491588   | 0,72072509      | 1               |
| MICU1                                                                                           | 0,012412456 | 0,471607077 | 0,166 | 0,122 | 1           | 1,386653258   | 0,72116082      | 1,360655738     |
| TOMM7                                                                                           | 0,059077238 | 0,470472236 | 0,581 | 0,672 | 1           | 1,385562929   | 0,721728317     | 0,864583333     |
| GOLT1B                                                                                          | 0,000105824 | 0,470398689 | 0,186 | 0,115 | 1           | 1,385492296   | 0,72176511      | 1,617391304     |
| ANTKMT                                                                                          | 0,000230985 | 0,469799694 | 0,217 | 0,142 | 1           | 1,384917171   | 0,722064843     | 1,528169014     |
| NDUFA2                                                                                          | 0,032112043 | 0,469364588 | 0,248 | 0,209 | 1           | 1,384499553   | 0,722282646     | 1,186602871     |
| EIF6                                                                                            | 0,000299742 | 0,468905651 | 0,218 | 0,148 | 1           | 1,384059199   | 0,722512448     | 1,472972973     |
| USP8                                                                                            | 0,038651275 | 0,468901437 | 0,169 | 0,133 | 1           | 1,384055156   | 0,722514558     | 1,270676692     |
| UFM1                                                                                            | 0,370665089 | 0,468341605 | 0,233 | 0,22  | 1           | 1,383518183   | 0,722794982     | 1,059090909     |
| ATP5F1A                                                                                         | 0,071290364 | 0,467730285 | 0,293 | 0,263 | 1           | 1,382932063   | 0,72310132      | 1,114068441     |
| CARD19                                                                                          | 0,003653717 | 0,466598237 | 0,204 | 0,148 | 1           | 1,381847335   | 0,723668943     | 1,378378378     |
| RGS16                                                                                           | 1,15019E-09 | 0,465713065 | 0,393 | 0,271 | 2,42701E-05 | 1,380999756   | 0,72411309      | 1,450184502     |
| CCL4                                                                                            | 0,002060585 | 0,465647328 | 0,013 | 0     | 1           | 1,380936832   | 0,724146084     | #DIV/0!         |
| EEF1E1                                                                                          | 1,57234E-08 | 0,465529485 | 0,168 | 0,072 | 0,00033178  | 1,380824038   | 0,724205237     | 2,333333333     |
| ABLIM3                                                                                          | 1,54695E-10 | 0,464406957 | 0,139 | 0,043 | 3,26421E-06 | 1,379750068   | 0,724768944     | 3,23255814      |

Supplementary Table 5

| Differentially expressed genes_total calculation_ comparing SC-Keloid vs. (SC-Myel, SC-Nonmyel) |             |             |       |       |             |               |                 |                 |
|-------------------------------------------------------------------------------------------------|-------------|-------------|-------|-------|-------------|---------------|-----------------|-----------------|
| gene                                                                                            | p_val       | avg_log2FC  | pct.1 | pct.2 | p_val_adj   | Foldchange_UP | Foldchange_DOWN | Ratio_pct1_pct2 |
| ZNF385A                                                                                         | 1,22077E-14 | 0,464067966 | 0,109 | 0,014 | 2,57596E-10 | 1,379425906   | 0,724939263     | 7,785714286     |
| CIBAR1                                                                                          | 6,16918E-06 | 0,463672191 | 0,126 | 0,058 | 0,130175818 | 1,379047539   | 0,725138163     | 2,172413793     |
| DAG1                                                                                            | 0,014158556 | 0,463367457 | 0,455 | 0,44  | 1           | 1,37875628    | 0,725291347     | 1,034090909     |
| SYT11                                                                                           | 0,013282908 | 0,46305036  | 0,284 | 0,235 | 1           | 1,378453269   | 0,72545078      | 1,208510638     |
| LYRM2                                                                                           | 0,00054127  | 0,462960775 | 0,153 | 0,095 | 1           | 1,378367677   | 0,725495829     | 1,610526316     |
| DYNLL1                                                                                          | 1,36283E-10 | 0,462861359 | 0,718 | 0,693 | 2,87571E-06 | 1,378272696   | 0,725545825     | 1,036075036     |
| LMAN1                                                                                           | 0,287961786 | 0,462478225 | 0,297 | 0,282 | 1           | 1,377906719   | 0,725738532     | 1,053191489     |
| COQ4                                                                                            | 2,90744E-06 | 0,462386086 | 0,179 | 0,096 | 0,061349919 | 1,377818721   | 0,725784883     | 1,864583333     |
| KCTD20                                                                                          | 0,004204908 | 0,462340435 | 0,157 | 0,109 | 1           | 1,377775123   | 0,72580785      | 1,440366972     |
| MAP9                                                                                            | 0,000279508 | 0,461930385 | 0,126 | 0,071 | 1           | 1,377383582   | 0,726014172     | 1,774647887     |
| RPL18                                                                                           | 1,16586E-11 | 0,461786887 | 0,807 | 0,887 | 2,46009E-07 | 1,377246587   | 0,726086388     | 0,909808343     |
| HIKESHI                                                                                         | 0,003827958 | 0,461031345 | 0,213 | 0,156 | 1           | 1,376525509   | 0,726466741     | 1,365384615     |
| YBX1                                                                                            | 2,62154E-06 | 0,459654872 | 0,657 | 0,678 | 0,055317141 | 1,375212795   | 0,727160192     | 0,969026549     |
| RPL6                                                                                            | 1,0004E-11  | 0,459074029 | 0,759 | 0,841 | 2,11094E-07 | 1,374659231   | 0,727453013     | 0,902497027     |
| GMFG                                                                                            | 1,88773E-09 | 0,458843424 | 0,055 | 0,003 | 3,98329E-05 | 1,37443952    | 0,727569301     | 18,33333333     |
| CFL1                                                                                            | 4,2155E-05  | 0,458652619 | 0,638 | 0,782 | 0,889512047 | 1,374257753   | 0,727665533     | 0,815856777     |
| CLDN4                                                                                           | 5,79312E-12 | 0,458160768 | 0,097 | 0,015 | 1,22241E-07 | 1,373789314   | 0,727913654     | 6,466666667     |
| AP1S1                                                                                           | 3,35826E-10 | 0,457983243 | 0,164 | 0,061 | 7,08626E-06 | 1,373620278   | 0,72800323      | 2,68852459      |
| PTS                                                                                             | 0,000700107 | 0,457480766 | 0,148 | 0,092 | 1           | 1,373141943   | 0,728256831     | 1,608695652     |
| TMSB4X                                                                                          | 1,45251E-26 | 0,457404241 | 0,901 | 0,89  | 3,06494E-22 | 1,373069109   | 0,728295461     | 1,012359551     |
| FHL3                                                                                            | 7,69986E-10 | 0,454075041 | 0,147 | 0,052 | 1,62475E-05 | 1,369904233   | 0,729978035     | 2,826923077     |
| DYNLT2B                                                                                         | 2,91415E-10 | 0,45400953  | 0,123 | 0,035 | 6,14915E-06 | 1,369842028   | 0,730011183     | 3,514285714     |
| SMIM15                                                                                          | 2,95066E-08 | 0,45394245  | 0,165 | 0,072 | 0,00062262  | 1,369778338   | 0,730045127     | 2,291666667     |
| PSMC1                                                                                           | 0,014018266 | 0,453869382 | 0,203 | 0,156 | 1           | 1,369708965   | 0,730082102     | 1,301282051     |
| COTL1                                                                                           | 0,068132033 | 0,453495667 | 0,299 | 0,275 | 1           | 1,369354201   | 0,730271247     | 1,087272727     |
| CHMP5                                                                                           | 0,752310895 | 0,452540781 | 0,299 | 0,303 | 1           | 1,368448158   | 0,730754756     | 0,98679868      |
| MXRA7                                                                                           | 0,094268723 | 0,452126826 | 0,234 | 0,197 | 1           | 1,368055564   | 0,730964463     | 1,187817259     |
| IARS2                                                                                           | 1,84755E-05 | 0,451990296 | 0,125 | 0,061 | 0,389852165 | 1,367926102   | 0,731033642     | 2,049180328     |
| UBE2Q2                                                                                          | 2,07561E-05 | 0,451390007 | 0,19  | 0,111 | 0,437974856 | 1,367357043   | 0,731337879     | 1,711711712     |
| HINT2                                                                                           | 4,96871E-05 | 0,451263232 | 0,207 | 0,128 | 1           | 1,367236893   | 0,731402148     | 1,6171875       |



Supplementary Table 5

| Differentially expressed genes_total calculation_ comparing SC-Keloid vs. (SC-Myel, SC-Nonmyel) |             |             |       |       |             |               |                 |                 |
|-------------------------------------------------------------------------------------------------|-------------|-------------|-------|-------|-------------|---------------|-----------------|-----------------|
| gene                                                                                            | p_val       | avg_log2FC  | pct.1 | pct.2 | p_val_adj   | Foldchange_UP | Foldchange_DOWN | Ratio_pct1_pct2 |
| NAV1                                                                                            | 1,57217E-06 | 0,451011463 | 0,154 | 0,075 | 0,033174331 | 1,366998314   | 0,731529798     | 2,053333333     |
| OSTM1                                                                                           | 0,000783329 | 0,450080168 | 0,144 | 0,09  | 1           | 1,366116168   | 0,732002171     | 1,6             |
| UQCC3                                                                                           | 4,05039E-06 | 0,449803656 | 0,164 | 0,085 | 0,085467374 | 1,365854358   | 0,732142482     | 1,929411765     |
| FHL2                                                                                            | 2,01821E-13 | 0,449686651 | 0,116 | 0,02  | 4,25862E-09 | 1,365743589   | 0,732201863     | 5,8             |
| ITPRIPL2                                                                                        | 0,001933574 | 0,449152065 | 0,168 | 0,113 | 1           | 1,365237611   | 0,732473228     | 1,486725664     |
| SSR3                                                                                            | 0,068645761 | 0,449108455 | 0,319 | 0,294 | 1           | 1,365196343   | 0,73249537      | 1,085034014     |
| ACTR6                                                                                           | 0,000279102 | 0,448695102 | 0,132 | 0,076 | 1           | 1,364805251   | 0,73270527      | 1,736842105     |
| CMSS1                                                                                           | 2,46477E-05 | 0,448495312 | 0,169 | 0,095 | 0,520091299 | 1,364616261   | 0,732806745     | 1,778947368     |
| C3orf70                                                                                         | 5,68133E-05 | 0,448345464 | 0,148 | 0,081 | 1           | 1,364474529   | 0,732882863     | 1,827160494     |
| HDDC2                                                                                           | 0,000462688 | 0,448186833 | 0,143 | 0,085 | 1           | 1,364324508   | 0,732963451     | 1,682352941     |
| TULP4                                                                                           | 0,036714614 | 0,44764157  | 0,161 | 0,123 | 1           | 1,363808961   | 0,733240526     | 1,308943089     |
| NACA                                                                                            | 3,19312E-12 | 0,446399631 | 0,817 | 0,871 | 6,73781E-08 | 1,362635436   | 0,733872005     | 0,938002296     |
| PFDN4                                                                                           | 0,06291492  | 0,445188693 | 0,184 | 0,149 | 1           | 1,361492177   | 0,734488245     | 1,234899329     |
| MRPS16                                                                                          | 8,98663E-10 | 0,444186598 | 0,144 | 0,05  | 1,89627E-05 | 1,360546814   | 0,734998597     | 2,88            |
| LSM10                                                                                           | 0,000151226 | 0,444053453 | 0,172 | 0,104 | 1           | 1,360421256   | 0,735066433     | 1,653846154     |
| CISD1                                                                                           | 1,53602E-05 | 0,443292192 | 0,108 | 0,049 | 0,324116473 | 1,359703598   | 0,735454405     | 2,204081633     |
| CFAP36                                                                                          | 0,000320843 | 0,443042024 | 0,176 | 0,111 | 1           | 1,359467841   | 0,735581946     | 1,585585586     |
| ANXA6                                                                                           | 5,88619E-05 | 0,442971951 | 0,207 | 0,13  | 1           | 1,359401812   | 0,735617675     | 1,592307692     |
| ACTG2                                                                                           | 1,19684E-09 | 0,442487862 | 0,049 | 0     | 2,52545E-05 | 1,358945748   | 0,735864549     | #DIV/0!         |
| DDOST                                                                                           | 0,003389697 | 0,441933257 | 0,235 | 0,178 | 1           | 1,358423438   | 0,736147487     | 1,320224719     |
| CKLF                                                                                            | 0,001993654 | 0,441515674 | 0,182 | 0,125 | 1           | 1,358030305   | 0,736360593     | 1,456           |
| CDK6                                                                                            | 0,007207293 | 0,441396375 | 0,217 | 0,164 | 1           | 1,357918012   | 0,736421486     | 1,323170732     |
| MAGOH                                                                                           | 0,057073522 | 0,440984881 | 0,211 | 0,175 | 1           | 1,357530753   | 0,736631563     | 1,205714286     |
| MELTF                                                                                           | 3,30866E-12 | 0,440683009 | 0,098 | 0,015 | 6,98161E-08 | 1,357246731   | 0,736785713     | 6,533333333     |
| FAM174C                                                                                         | 9,73932E-06 | 0,440323015 | 0,162 | 0,087 | 0,205509481 | 1,356908101   | 0,736969585     | 1,862068966     |
| RBM3                                                                                            | 0,049804184 | 0,44023244  | 0,454 | 0,49  | 1           | 1,356822915   | 0,737015855     | 0,926530612     |
| CAPG                                                                                            | 1,82654E-15 | 0,439978002 | 0,111 | 0,012 | 3,85419E-11 | 1,356583642   | 0,737145849     | 9,25            |
| SEC11C                                                                                          | 0,112843543 | 0,439890368 | 0,185 | 0,156 | 1           | 1,356501241   | 0,737190627     | 1,185897436     |
| HACD3                                                                                           | 0,000111596 | 0,438328285 | 0,175 | 0,106 | 1           | 1,35503328    | 0,737989255     | 1,650943396     |
| ATP5IF1                                                                                         | 0,199050243 | 0,437824557 | 0,406 | 0,404 | 1           | 1,354560242   | 0,738246974     | 1,004950495     |

Supplementary Table 5

| Differentially expressed genes_total calculation_ comparing SC-Keloid vs. (SC-Myel, SC-Nonmyel) |             |             |       |       |             |               |                 |                 |
|-------------------------------------------------------------------------------------------------|-------------|-------------|-------|-------|-------------|---------------|-----------------|-----------------|
| gene                                                                                            | p_val       | avg_log2FC  | pct.1 | pct.2 | p_val_adj   | Foldchange_UP | Foldchange_DOWN | Ratio_pct1_pct2 |
| BTF3L4                                                                                          | 0,000686238 | 0,437610561 | 0,204 | 0,137 | 1           | 1,354359335   | 0,738356487     | 1,489051095     |
| ZBTB8OS                                                                                         | 7,90755E-06 | 0,43760838  | 0,147 | 0,075 | 0,166857119 | 1,354357287   | 0,738357603     | 1,96            |
| MACROH2A1                                                                                       | 0,073938891 | 0,437490472 | 0,205 | 0,171 | 1           | 1,354246603   | 0,73841795      | 1,198830409     |
| RPS5                                                                                            | 7,10007E-06 | 0,436857745 | 0,672 | 0,741 | 0,149818496 | 1,353652797   | 0,738741871     | 0,906882591     |
| SEC61A1                                                                                         | 0,002330028 | 0,436550344 | 0,177 | 0,121 | 1           | 1,353364399   | 0,738899295     | 1,462809917     |
| PTPN14                                                                                          | 0,004284656 | 0,436520163 | 0,175 | 0,125 | 1           | 1,353336088   | 0,738914752     | 1,4             |
| RECQL                                                                                           | 0,012791441 | 0,435536903 | 0,157 | 0,115 | 1           | 1,352414044   | 0,739418527     | 1,365217391     |
| RALA                                                                                            | 0,003411482 | 0,434336671 | 0,184 | 0,129 | 1           | 1,351289388   | 0,740033933     | 1,426356589     |
| CBX1                                                                                            | 0,008718787 | 0,434214819 | 0,144 | 0,1   | 1           | 1,351175261   | 0,74009644      | 1,44            |
| CILK1                                                                                           | 8,62548E-05 | 0,43389503  | 0,097 | 0,045 | 1           | 1,350875791   | 0,740260508     | 2,155555556     |
| ANXA2                                                                                           | 4,94936E-08 | 0,433851993 | 0,773 | 0,872 | 0,001044365 | 1,350835494   | 0,740282591     | 0,88646789      |
| RAMP1                                                                                           | 4,91162E-07 | 0,433788968 | 0,105 | 0,038 | 0,010364005 | 1,350776484   | 0,740314932     | 2,763157895     |
| ABCC3                                                                                           | 1,21103E-12 | 0,433326268 | 0,07  | 0,001 | 2,5554E-08  | 1,350343333   | 0,740552403     | 70              |
| ANAPC15                                                                                         | 9,91453E-11 | 0,432977016 | 0,137 | 0,042 | 2,09207E-06 | 1,350016478   | 0,7407317       | 3,261904762     |
| GOLIM4                                                                                          | 0,018090603 | 0,432792314 | 0,193 | 0,148 | 1           | 1,349843652   | 0,740826538     | 1,304054054     |
| POLE4                                                                                           | 0,00166325  | 0,431958526 | 0,158 | 0,104 | 1           | 1,349063752   | 0,741254814     | 1,519230769     |
| TRIM44                                                                                          | 0,100873811 | 0,431643102 | 0,164 | 0,134 | 1           | 1,348768831   | 0,741416896     | 1,223880597     |
| DIRC3                                                                                           | 1,87041E-10 | 0,431622951 | 0,064 | 0,004 | 3,94674E-06 | 1,348749992   | 0,741427252     | 16              |
| COA6                                                                                            | 0,000258348 | 0,430910149 | 0,121 | 0,066 | 1           | 1,348083771   | 0,741793664     | 1,833333333     |
| DUSP10                                                                                          | 2,84693E-08 | 0,430837265 | 0,105 | 0,033 | 0,00060073  | 1,348015668   | 0,74183114      | 3,181818182     |
| MED4                                                                                            | 0,019725939 | 0,430562978 | 0,19  | 0,144 | 1           | 1,347759406   | 0,741972192     | 1,319444444     |
| SSR2                                                                                            | 0,200289349 | 0,430124485 | 0,377 | 0,411 | 1           | 1,347349829   | 0,742197741     | 0,917274939     |
| RAD51C                                                                                          | 8,17708E-06 | 0,427841829 | 0,088 | 0,034 | 0,172544605 | 1,345219716   | 0,743372988     | 2,588235294     |
| SUMO1                                                                                           | 0,707177961 | 0,427254484 | 0,278 | 0,282 | 1           | 1,344672167   | 0,743675689     | 0,985815603     |
| CACNA1D                                                                                         | 2,68806E-08 | 0,426567186 | 0,051 | 0,004 | 0,000567207 | 1,344031719   | 0,744030059     | 12,75           |
| SCARA3                                                                                          | 0,000353471 | 0,426487745 | 0,179 | 0,115 | 1           | 1,343957713   | 0,74407103      | 1,556521739     |
| SH2B3                                                                                           | 7,87425E-08 | 0,425415536 | 0,127 | 0,049 | 0,001661546 | 1,342959256   | 0,744624229     | 2,591836735     |
| LAMTOR1                                                                                         | 0,120185795 | 0,425073813 | 0,272 | 0,244 | 1           | 1,342641195   | 0,744800624     | 1,114754098     |
| ECM1                                                                                            | 1,64914E-05 | 0,424923056 | 0,236 | 0,147 | 0,347985378 | 1,342500901   | 0,744878458     | 1,605442177     |
| GLT8D1                                                                                          | 0,003501857 | 0,424770587 | 0,19  | 0,134 | 1           | 1,342359028   | 0,744957183     | 1,417910448     |

Supplementary Table 5

| Differentially expressed genes_total calculation_ comparing SC-Keloid vs. (SC-Myel, SC-Nonmyel) |             |             |       |       |             |               |                 |                 |
|-------------------------------------------------------------------------------------------------|-------------|-------------|-------|-------|-------------|---------------|-----------------|-----------------|
| gene                                                                                            | p_val       | avg_log2FC  | pct.1 | pct.2 | p_val_adj   | Foldchange_UP | Foldchange_DOWN | Ratio_pct1_pct2 |
| VTI1B                                                                                           | 0,00306977  | 0,424408752 | 0,15  | 0,1   | 1           | 1,3420224     | 0,745144045     | 1,5             |
| UFC1                                                                                            | 0,008389768 | 0,424366666 | 0,233 | 0,178 | 1           | 1,341983251   | 0,745165783     | 1,308988764     |
| EEF1D                                                                                           | 0,00726133  | 0,42422439  | 0,586 | 0,659 | 1           | 1,341850914   | 0,745239273     | 0,8892261       |
| RGS20                                                                                           | 7,05763E-11 | 0,423404564 | 0,066 | 0,004 | 1,48923E-06 | 1,34108861    | 0,745662884     | 16,5            |
| ST6GAL1                                                                                         | 3,10365E-05 | 0,423299254 | 0,157 | 0,085 | 0,654901812 | 1,34099072    | 0,745717315     | 1,847058824     |
| SEMA3C                                                                                          | 0,085160379 | 0,423294176 | 0,43  | 0,425 | 1           | 1,340986001   | 0,74571994      | 1,011764706     |
| METTL23                                                                                         | 6,66831E-06 | 0,422190305 | 0,144 | 0,072 | 0,140708085 | 1,339960344   | 0,746290742     | 2               |
| RANBP1                                                                                          | 0,287076806 | 0,421861985 | 0,282 | 0,267 | 1           | 1,339655439   | 0,746460598     | 1,056179775     |
| ZNF365                                                                                          | 1,19034E-12 | 0,421340908 | 0,073 | 0,003 | 2,51174E-08 | 1,339171665   | 0,746730256     | 24,33333333     |
| POLE3                                                                                           | 0,001534795 | 0,421062837 | 0,172 | 0,114 | 1           | 1,338913573   | 0,746874197     | 1,50877193      |
| MAPKAP1                                                                                         | 0,002291508 | 0,418847355 | 0,119 | 0,073 | 1           | 1,336859041   | 0,74802202      | 1,630136986     |
| NUDCD2                                                                                          | 0,18575871  | 0,418286865 | 0,213 | 0,187 | 1           | 1,33633977    | 0,748312684     | 1,139037433     |
| CCT8                                                                                            | 0,296869999 | 0,418158137 | 0,231 | 0,21  | 1           | 1,336220537   | 0,748379457     | 1,1             |
| PDCD6                                                                                           | 0,289271061 | 0,418129967 | 0,278 | 0,259 | 1           | 1,336194446   | 0,74839407      | 1,073359073     |
| MRPS15                                                                                          | 6,45565E-05 | 0,418076704 | 0,168 | 0,098 | 1           | 1,336145116   | 0,748421701     | 1,714285714     |
| ARL3                                                                                            | 0,584003528 | 0,418053892 | 0,257 | 0,254 | 1           | 1,336123989   | 0,748433535     | 1,011811024     |
| LSM1                                                                                            | 0,001793299 | 0,417928954 | 0,18  | 0,121 | 1           | 1,336008285   | 0,748498352     | 1,487603306     |
| SPPL2A                                                                                          | 0,211656049 | 0,417661796 | 0,386 | 0,395 | 1           | 1,335760906   | 0,748636972     | 0,97721519      |
| LDHB                                                                                            | 0,204557022 | 0,417381638 | 0,307 | 0,294 | 1           | 1,335501538   | 0,748782365     | 1,044217687     |
| COA3                                                                                            | 3,21448E-08 | 0,417129139 | 0,159 | 0,068 | 0,000678287 | 1,335267821   | 0,748913427     | 2,338235294     |
| SRPX2                                                                                           | 2,79438E-10 | 0,416190893 | 0,114 | 0,03  | 5,89642E-06 | 1,334399722   | 0,749400636     | 3,8             |
| PSMB8                                                                                           | 0,007238864 | 0,415911563 | 0,204 | 0,152 | 1           | 1,334141385   | 0,749545746     | 1,342105263     |
| ITIH5                                                                                           | 0,801266362 | 0,415367428 | 0,285 | 0,301 | 1           | 1,333638287   | 0,749828503     | 0,946843854     |
| THRAP3                                                                                          | 0,239961637 | 0,4152692   | 0,261 | 0,242 | 1           | 1,333547487   | 0,749879558     | 1,078512397     |
| AASDHPPT                                                                                        | 0,000961642 | 0,415088711 | 0,135 | 0,083 | 1           | 1,333380664   | 0,749973377     | 1,626506024     |
| ERGIC1                                                                                          | 1,44236E-05 | 0,414964761 | 0,168 | 0,092 | 0,304352863 | 1,333266111   | 0,750037815     | 1,826086957     |
| SLC39A3                                                                                         | 1,00058E-10 | 0,414648417 | 0,129 | 0,037 | 2,11133E-06 | 1,332973793   | 0,750202296     | 3,486486486     |
| ZMPSTE24                                                                                        | 0,000193893 | 0,414573331 | 0,144 | 0,083 | 1           | 1,33290442    | 0,750241341     | 1,734939759     |
| RNF128                                                                                          | 2,38574E-14 | 0,414493878 | 0,09  | 0,005 | 5,03414E-10 | 1,332831015   | 0,75028266      | 18              |
| PARVB                                                                                           | 2,5593E-12  | 0,413300101 | 0,14  | 0,037 | 5,40037E-08 | 1,331728603   | 0,750903749     | 3,783783784     |

Supplementary Table 5

| Differentially expressed genes_total calculation_ comparing SC-Keloid vs. (SC-Myel, SC-Nonmyel) |             |             |       |       |             |               |                 |                 |
|-------------------------------------------------------------------------------------------------|-------------|-------------|-------|-------|-------------|---------------|-----------------|-----------------|
| gene                                                                                            | p_val       | avg_log2FC  | pct.1 | pct.2 | p_val_adj   | Foldchange_UP | Foldchange_DOWN | Ratio_pct1_pct2 |
| RPL39L                                                                                          | 5,55212E-09 | 0,412859617 | 0,139 | 0,05  | 0,000117155 | 1,331322062   | 0,751133305     | 2,78            |
| ERP29                                                                                           | 0,033705154 | 0,411675163 | 0,219 | 0,176 | 1           | 1,330229493   | 0,751749984     | 1,244318182     |
| C1orf131                                                                                        | 4,95947E-05 | 0,41143735  | 0,088 | 0,038 | 1           | 1,330010237   | 0,751873912     | 2,315789474     |
| DHX30                                                                                           | 0,016626437 | 0,41036478  | 0,121 | 0,084 | 1           | 1,32902181    | 0,7524331       | 1,44047619      |
| SLC25A24                                                                                        | 3,96111E-05 | 0,409966429 | 0,101 | 0,046 | 0,835833663 | 1,328654896   | 0,752640887     | 2,195652174     |
| ARPC5L                                                                                          | 0,035702538 | 0,409789552 | 0,18  | 0,141 | 1           | 1,328492011   | 0,752733168     | 1,276595745     |
| DDX52                                                                                           | 0,004636062 | 0,409662571 | 0,118 | 0,075 | 1           | 1,328375087   | 0,752799424     | 1,573333333     |
| RPL24                                                                                           | 6,92933E-11 | 0,409037901 | 0,789 | 0,837 | 1,46216E-06 | 1,327800041   | 0,753125448     | 0,94265233      |
| TOMM22                                                                                          | 1,93162E-05 | 0,409008446 | 0,163 | 0,09  | 0,407590491 | 1,327772931   | 0,753140824     | 1,811111111     |
| APEX1                                                                                           | 0,010332207 | 0,408216156 | 0,244 | 0,191 | 1           | 1,327043954   | 0,753554543     | 1,277486911     |
| PPM1G                                                                                           | 0,001319532 | 0,407978651 | 0,187 | 0,128 | 1           | 1,326825506   | 0,753678608     | 1,4609375       |
| DPY30                                                                                           | 0,014707991 | 0,407465725 | 0,189 | 0,141 | 1           | 1,326353859   | 0,753946613     | 1,340425532     |
| TTC3                                                                                            | 0,587706831 | 0,407241406 | 0,356 | 0,396 | 1           | 1,326147646   | 0,75406385      | 0,898989899     |
| CCT5                                                                                            | 0,061369696 | 0,406775559 | 0,239 | 0,204 | 1           | 1,325719501   | 0,754307377     | 1,171568627     |
| ZBED5                                                                                           | 0,040443166 | 0,406331589 | 0,092 | 0,065 | 1           | 1,325311591   | 0,754539541     | 1,415384615     |
| CCL4L2                                                                                          | 0,005346706 | 0,406299558 | 0,01  | 0     | 1           | 1,325282167   | 0,754556294     | #DIV/0!         |
| MMADHC                                                                                          | 0,008008663 | 0,40590937  | 0,127 | 0,085 | 1           | 1,324923783   | 0,754760397     | 1,494117647     |
| TXNL1                                                                                           | 0,541835134 | 0,405767559 | 0,239 | 0,229 | 1           | 1,324793555   | 0,75483459      | 1,043668122     |
| EMC10                                                                                           | 0,047284809 | 0,405390999 | 0,279 | 0,248 | 1           | 1,324447813   | 0,755031637     | 1,125           |
| GPX7                                                                                            | 1,2621E-10  | 0,405088559 | 0,091 | 0,016 | 2,66316E-06 | 1,324170191   | 0,755189934     | 5,6875          |
| ZMAT3                                                                                           | 0,0173332   | 0,405077321 | 0,109 | 0,075 | 1           | 1,324159876   | 0,755195817     | 1,453333333     |
| TSTD1                                                                                           | 0,035040812 | 0,404063077 | 0,065 | 0,042 | 1           | 1,323229293   | 0,755726922     | 1,547619048     |
| PFDN6                                                                                           | 0,00059589  | 0,403777375 | 0,14  | 0,084 | 1           | 1,322967275   | 0,755876596     | 1,666666667     |
| IAH1                                                                                            | 0,748892243 | 0,403542459 | 0,282 | 0,284 | 1           | 1,322751871   | 0,755999686     | 0,992957746     |
| AGK                                                                                             | 1,28958E-06 | 0,403091107 | 0,093 | 0,033 | 0,027211331 | 1,322338109   | 0,75623624      | 2,818181818     |
| PCMTD1                                                                                          | 0,955798202 | 0,402462619 | 0,158 | 0,161 | 1           | 1,321762178   | 0,756565755     | 0,98136646      |
| SLC20A1                                                                                         | 0,021700459 | 0,402028747 | 0,179 | 0,137 | 1           | 1,321364735   | 0,756793317     | 1,306569343     |
| DCUN1D5                                                                                         | 1,57916E-05 | 0,401745353 | 0,141 | 0,072 | 0,333218339 | 1,321105199   | 0,756941991     | 1,958333333     |
| STAMPB                                                                                          | 0,001660268 | 0,401542459 | 0,156 | 0,102 | 1           | 1,320919419   | 0,757048451     | 1,529411765     |
| SEMA4D                                                                                          | 0,006287224 | 0,401407432 | 0,097 | 0,06  | 1           | 1,320795795   | 0,757119309     | 1,616666667     |

Supplementary Table 5

| Differentially expressed genes_total calculation_ comparing SC-Keloid vs. (SC-Myel, SC-Nonmyel) |             |             |       |       |             |               |                 |                 |
|-------------------------------------------------------------------------------------------------|-------------|-------------|-------|-------|-------------|---------------|-----------------|-----------------|
| gene                                                                                            | p_val       | avg_log2FC  | pct.1 | pct.2 | p_val_adj   | Foldchange_UP | Foldchange_DOWN | Ratio_pct1_pct2 |
| NAP1L4                                                                                          | 0,008099245 | 0,401226873 | 0,217 | 0,161 | 1           | 1,320630503   | 0,757214072     | 1,347826087     |
| UQCRC1                                                                                          | 1,8442E-05  | 0,400175473 | 0,196 | 0,114 | 0,389144963 | 1,319668411   | 0,757766111     | 1,719298246     |
| ECHDC1                                                                                          | 0,083664174 | 0,399659693 | 0,171 | 0,14  | 1           | 1,319196698   | 0,75803707      | 1,221428571     |
| RPS15A                                                                                          | 3,54202E-11 | 0,399098015 | 0,815 | 0,867 | 7,47402E-07 | 1,318683202   | 0,758332251     | 0,940023068     |
| MRPL15                                                                                          | 1,36107E-10 | 0,3990631   | 0,109 | 0,026 | 2,87199E-06 | 1,318651288   | 0,758350603     | 4,192307692     |
| POLR2K                                                                                          | 0,715896528 | 0,398593555 | 0,26  | 0,255 | 1           | 1,318222184   | 0,758597459     | 1,019607843     |
| FHOD1                                                                                           | 1,90464E-09 | 0,397941648 | 0,116 | 0,034 | 4,01898E-05 | 1,317626657   | 0,758940322     | 3,411764706     |
| LARS1                                                                                           | 0,096555296 | 0,397629378 | 0,197 | 0,166 | 1           | 1,317341489   | 0,759104612     | 1,186746988     |
| PSMA1                                                                                           | 0,100685528 | 0,396260496 | 0,272 | 0,242 | 1           | 1,31609214    | 0,75982522      | 1,123966942     |
| SPOCD1                                                                                          | 1,8254E-10  | 0,395313443 | 0,073 | 0,008 | 3,85178E-06 | 1,315228478   | 0,760324169     | 9,125           |
| PPCS                                                                                            | 0,000115852 | 0,395304485 | 0,143 | 0,08  | 1           | 1,315220312   | 0,76032889      | 1,7875          |
| MRPL34                                                                                          | 0,001282778 | 0,395296602 | 0,192 | 0,129 | 1           | 1,315213126   | 0,760333044     | 1,488372093     |
| SRPX                                                                                            | 5,02545E-07 | 0,395156995 | 0,177 | 0,088 | 0,01060421  | 1,315085861   | 0,760406624     | 2,011363636     |
| OSBPL8                                                                                          | 0,365171573 | 0,394956431 | 0,228 | 0,213 | 1           | 1,31490305    | 0,760512343     | 1,070422535     |
| PDAP1                                                                                           | 0,015199732 | 0,393906921 | 0,274 | 0,223 | 1           | 1,313946851   | 0,761065791     | 1,228699552     |
| SYNCRIP                                                                                         | 0,191956394 | 0,393833527 | 0,261 | 0,237 | 1           | 1,313880009   | 0,761104509     | 1,101265823     |
| PAFAH1B3                                                                                        | 1,43569E-09 | 0,39356374  | 0,122 | 0,038 | 3,02946E-05 | 1,313634334   | 0,761246851     | 3,210526316     |
| PYGB                                                                                            | 2,5952E-06  | 0,393538543 | 0,158 | 0,079 | 0,054761344 | 1,313611391   | 0,761260146     | 2               |
| TMEM242                                                                                         | 0,110076154 | 0,392850453 | 0,109 | 0,085 | 1           | 1,312985017   | 0,761623314     | 1,282352941     |
| PSENE1                                                                                          | 0,000269904 | 0,392653331 | 0,172 | 0,107 | 1           | 1,31280563    | 0,761727385     | 1,607476636     |
| HDLBP                                                                                           | 0,060569511 | 0,392360184 | 0,274 | 0,236 | 1           | 1,312538903   | 0,76188218      | 1,161016949     |
| DNM3                                                                                            | 6,5912E-08  | 0,391621481 | 0,125 | 0,046 | 0,001390809 | 1,311867015   | 0,762272386     | 2,717391304     |
| PSMG3                                                                                           | 0,001769504 | 0,391595838 | 0,136 | 0,085 | 1           | 1,311843698   | 0,762285935     | 1,6             |
| CNIH3                                                                                           | 1,84909E-13 | 0,391230093 | 0,1   | 0,012 | 3,90177E-09 | 1,311511168   | 0,762479211     | 8,333333333     |
| SUCLG1                                                                                          | 0,000341905 | 0,389997289 | 0,147 | 0,087 | 1           | 1,310390942   | 0,763131038     | 1,689655172     |
| SNRNP200                                                                                        | 0,113756046 | 0,389889611 | 0,139 | 0,113 | 1           | 1,310293142   | 0,763187998     | 1,230088496     |
| IFT22                                                                                           | 1,51205E-09 | 0,389856997 | 0,128 | 0,041 | 3,19057E-05 | 1,310263521   | 0,763205251     | 3,12195122      |
| PAICS                                                                                           | 0,000310574 | 0,389686676 | 0,108 | 0,057 | 1           | 1,310108844   | 0,763295359     | 1,894736842     |
| MAP3K12                                                                                         | 0,020259402 | 0,389610157 | 0,08  | 0,052 | 1           | 1,310039359   | 0,763335844     | 1,538461538     |
| TMEM59L                                                                                         | 4,04442E-06 | 0,389370924 | 0,137 | 0,065 | 0,085341336 | 1,309822142   | 0,763462434     | 2,107692308     |

Supplementary Table 5

| Differentially expressed genes_total calculation_ comparing SC-Keloid vs. (SC-Myel, SC-Nonmyel) |             |             |       |       |             |               |                 |                 |
|-------------------------------------------------------------------------------------------------|-------------|-------------|-------|-------|-------------|---------------|-----------------|-----------------|
| gene                                                                                            | p_val       | avg_log2FC  | pct.1 | pct.2 | p_val_adj   | Foldchange_UP | Foldchange_DOWN | Ratio_pct1_pct2 |
| GGH                                                                                             | 3,05368E-05 | 0,389261001 | 0,106 | 0,049 | 0,644357344 | 1,309722347   | 0,763520606     | 2,163265306     |
| PRICKLE2                                                                                        | 0,013254866 | 0,389092953 | 0,118 | 0,08  | 1           | 1,309569796   | 0,763609548     | 1,475           |
| POLR2J                                                                                          | 0,156762372 | 0,388765835 | 0,241 | 0,214 | 1           | 1,309272897   | 0,763782709     | 1,126168224     |
| ISG15                                                                                           | 0,001646751 | 0,388329206 | 0,277 | 0,208 | 1           | 1,308876707   | 0,764013902     | 1,331730769     |
| TCEAL8                                                                                          | 0,008033961 | 0,388302133 | 0,221 | 0,168 | 1           | 1,308852146   | 0,764028239     | 1,31547619      |
| ACLY                                                                                            | 0,002259072 | 0,388085112 | 0,111 | 0,066 | 1           | 1,308655273   | 0,764143178     | 1,681818182     |
| RGS3                                                                                            | 4,05749E-05 | 0,38761844  | 0,257 | 0,172 | 0,856170099 | 1,308232028   | 0,764390398     | 1,494186047     |
| PTBP3                                                                                           | 0,004738068 | 0,387498447 | 0,123 | 0,08  | 1           | 1,308123223   | 0,764453977     | 1,5375          |
| COMMD8                                                                                          | 6,33723E-05 | 0,387165501 | 0,104 | 0,049 | 1           | 1,307821368   | 0,764630418     | 2,12244898      |
| HS2ST1                                                                                          | 0,000498049 | 0,386533951 | 0,093 | 0,047 | 1           | 1,307248986   | 0,764965214     | 1,978723404     |
| PBDC1                                                                                           | 8,40673E-05 | 0,386370456 | 0,153 | 0,087 | 1           | 1,307100849   | 0,765051909     | 1,75862069      |
| WSB2                                                                                            | 0,002105946 | 0,386266384 | 0,154 | 0,1   | 1           | 1,307006562   | 0,7651071       | 1,54            |
| DAAM1                                                                                           | 0,007711633 | 0,385829848 | 0,168 | 0,119 | 1           | 1,306611143   | 0,765338644     | 1,411764706     |
| BCL2L13                                                                                         | 0,000101491 | 0,385041762 | 0,093 | 0,043 | 1           | 1,305897588   | 0,765756832     | 2,162790698     |
| BZW1                                                                                            | 0,942021697 | 0,384829082 | 0,32  | 0,341 | 1           | 1,305705089   | 0,765869727     | 0,938416422     |
| GARS1                                                                                           | 1,14007E-05 | 0,384369352 | 0,142 | 0,072 | 0,240567148 | 1,305289079   | 0,766113818     | 1,972222222     |
| COPZ2                                                                                           | 0,00153417  | 0,384100384 | 0,213 | 0,148 | 1           | 1,30504575    | 0,766256662     | 1,439189189     |
| TMOD3                                                                                           | 0,025367021 | 0,382525578 | 0,147 | 0,109 | 1           | 1,303621976   | 0,767093543     | 1,348623853     |
| HNRNPAB                                                                                         | 0,509691795 | 0,38229976  | 0,307 | 0,3   | 1           | 1,303417942   | 0,767213622     | 1,023333333     |
| NENF                                                                                            | 0,512627107 | 0,382154051 | 0,298 | 0,29  | 1           | 1,303286307   | 0,767291112     | 1,027586207     |
| KRR1                                                                                            | 0,169909982 | 0,381972957 | 0,162 | 0,137 | 1           | 1,303122723   | 0,767387432     | 1,182481752     |
| BRI3                                                                                            | 0,664039007 | 0,381923229 | 0,291 | 0,313 | 1           | 1,303077806   | 0,767413884     | 0,92971246      |
| GNAI2                                                                                           | 0,498505202 | 0,381916778 | 0,411 | 0,461 | 1           | 1,303071979   | 0,767417315     | 0,89154013      |
| TIMP2                                                                                           | 0,932686733 | 0,381457629 | 0,459 | 0,554 | 1           | 1,302657332   | 0,767661591     | 0,828519856     |
| SRSF9                                                                                           | 0,577179502 | 0,380822922 | 0,279 | 0,275 | 1           | 1,30208436    | 0,767999394     | 1,014545455     |
| GABRA2                                                                                          | 0,570329829 | 0,380820556 | 0,222 | 0,209 | 1           | 1,302082225   | 0,768000654     | 1,062200957     |
| NME3                                                                                            | 0,464482705 | 0,380773221 | 0,311 | 0,307 | 1           | 1,302039504   | 0,768025852     | 1,013029316     |
| POP5                                                                                            | 3,59545E-05 | 0,380599929 | 0,141 | 0,075 | 0,758676332 | 1,301883117   | 0,76811811      | 1,88            |
| MTX2                                                                                            | 1,20453E-05 | 0,380202084 | 0,134 | 0,065 | 0,254168818 | 1,301524152   | 0,76832996      | 2,061538462     |
| SMDT1                                                                                           | 0,018005243 | 0,380177781 | 0,269 | 0,225 | 1           | 1,301502228   | 0,768342903     | 1,195555556     |

Supplementary Table 5

| Differentially expressed genes_total calculation_ comparing SC-Keloid vs. (SC-Myel, SC-Nonmyel) |             |             |       |       |             |               |                 |                 |
|-------------------------------------------------------------------------------------------------|-------------|-------------|-------|-------|-------------|---------------|-----------------|-----------------|
| gene                                                                                            | p_val       | avg_log2FC  | pct.1 | pct.2 | p_val_adj   | Foldchange_UP | Foldchange_DOWN | Ratio_pct1_pct2 |
| FSCN1                                                                                           | 0,002700541 | 0,380174366 | 0,211 | 0,152 | 1           | 1,301499147   | 0,768344722     | 1,388157895     |
| MSRB3                                                                                           | 0,000347053 | 0,37991757  | 0,077 | 0,035 | 1           | 1,301267504   | 0,768481497     | 2,2             |
| NARS1                                                                                           | 0,09589305  | 0,379834182 | 0,192 | 0,16  | 1           | 1,301192293   | 0,768525917     | 1,2             |
| ACTN4                                                                                           | 0,540243942 | 0,379621053 | 0,334 | 0,353 | 1           | 1,301000082   | 0,76863946      | 0,946175637     |
| CDC5L                                                                                           | 0,020763232 | 0,379526642 | 0,187 | 0,142 | 1           | 1,300914946   | 0,768689762     | 1,316901408     |
| EIF2AK1                                                                                         | 0,00134317  | 0,379239144 | 0,129 | 0,079 | 1           | 1,300655728   | 0,76884296      | 1,632911392     |
| CBFB                                                                                            | 0,04781946  | 0,379064915 | 0,199 | 0,157 | 1           | 1,300498662   | 0,768935816     | 1,267515924     |
| RAP1B                                                                                           | 0,507908663 | 0,378827963 | 0,34  | 0,339 | 1           | 1,300285082   | 0,769062118     | 1,002949853     |
| DMAC1                                                                                           | 0,000132015 | 0,378268097 | 0,141 | 0,079 | 1           | 1,299780579   | 0,769360626     | 1,784810127     |
| SSBP4                                                                                           | 1,93176E-05 | 0,377717436 | 0,169 | 0,094 | 0,407620357 | 1,299284562   | 0,769654339     | 1,79787234      |
| C11orf58                                                                                        | 0,907641864 | 0,377677696 | 0,395 | 0,429 | 1           | 1,299248772   | 0,76967554      | 0,920745921     |
| RTN1                                                                                            | 6,11761E-15 | 0,377397728 | 0,083 | 0,001 | 1,29088E-10 | 1,298996666   | 0,769824917     | 83              |
| PPP1R7                                                                                          | 0,000374727 | 0,377218533 | 0,187 | 0,121 | 1           | 1,298835329   | 0,769920541     | 1,545454545     |
| ARHGAP18                                                                                        | 2,07519E-06 | 0,376940836 | 0,085 | 0,028 | 0,043788618 | 1,298585347   | 0,770068754     | 3,035714286     |
| EML1                                                                                            | 0,00085204  | 0,376149567 | 0,076 | 0,037 | 1           | 1,297873313   | 0,770491226     | 2,054054054     |
| NDUFB9                                                                                          | 0,050616722 | 0,375765915 | 0,249 | 0,21  | 1           | 1,297528219   | 0,770696148     | 1,185714286     |
| ATP6V1G1                                                                                        | 0,823217343 | 0,375643915 | 0,369 | 0,399 | 1           | 1,297418499   | 0,770761324     | 0,92481203      |
| HDAC9                                                                                           | 5,09759E-07 | 0,375366273 | 0,076 | 0,02  | 0,010756422 | 1,297168839   | 0,770909669     | 3,8             |
| TASP1                                                                                           | 1,92971E-05 | 0,374892793 | 0,112 | 0,052 | 0,407187607 | 1,296743189   | 0,771162716     | 2,153846154     |
| JPT1                                                                                            | 0,000168742 | 0,374778289 | 0,144 | 0,083 | 1           | 1,296640274   | 0,771223924     | 1,734939759     |
| WDR1                                                                                            | 0,187498103 | 0,374569288 | 0,262 | 0,246 | 1           | 1,296452445   | 0,771335658     | 1,06504065      |
| KCND3                                                                                           | 4,42914E-10 | 0,374443754 | 0,093 | 0,019 | 9,34593E-06 | 1,296339641   | 0,771402778     | 4,894736842     |
| KLHL4                                                                                           | 4,97284E-10 | 0,374087364 | 0,055 | 0,001 | 1,04932E-05 | 1,296019445   | 0,771593361     | 55              |
| RGMB                                                                                            | 0,140843332 | 0,373942866 | 0,201 | 0,174 | 1           | 1,295889644   | 0,771670647     | 1,155172414     |
| RASSF4                                                                                          | 0,087020544 | 0,373658485 | 0,298 | 0,267 | 1           | 1,295634226   | 0,771822772     | 1,116104869     |
| UROS                                                                                            | 2,14971E-08 | 0,37352623  | 0,143 | 0,056 | 0,000453609 | 1,295515458   | 0,77189353      | 2,553571429     |
| HADHA                                                                                           | 0,135390431 | 0,373365308 | 0,253 | 0,224 | 1           | 1,295370961   | 0,771979633     | 1,129464286     |
| NAA20                                                                                           | 0,022296167 | 0,373334165 | 0,179 | 0,134 | 1           | 1,295342999   | 0,771996298     | 1,335820896     |
| RCC2                                                                                            | 0,013752069 | 0,372740928 | 0,164 | 0,119 | 1           | 1,294810462   | 0,772313809     | 1,378151261     |
| MTCH2                                                                                           | 0,000231433 | 0,372214485 | 0,14  | 0,08  | 1           | 1,294338069   | 0,77259568      | 1,75            |

Supplementary Table 5

| Differentially expressed genes_total calculation_ comparing SC-Keloid vs. (SC-Myel, SC-Nonmyel) |             |             |       |       |             |               |                 |                 |
|-------------------------------------------------------------------------------------------------|-------------|-------------|-------|-------|-------------|---------------|-----------------|-----------------|
| gene                                                                                            | p_val       | avg_log2FC  | pct.1 | pct.2 | p_val_adj   | Foldchange_UP | Foldchange_DOWN | Ratio_pct1_pct2 |
| PSMD14                                                                                          | 2,59434E-05 | 0,372136206 | 0,158 | 0,085 | 0,54743258  | 1,294267841   | 0,772637601     | 1,858823529     |
| DTWD1                                                                                           | 0,450431123 | 0,372136092 | 0,132 | 0,121 | 1           | 1,29426774    | 0,772637662     | 1,090909091     |
| SCG5                                                                                            | 7,41001E-10 | 0,371379899 | 0,084 | 0,015 | 1,56359E-05 | 1,293589523   | 0,773042748     | 5,6             |
| LIMK1                                                                                           | 3,14681E-08 | 0,371059073 | 0,088 | 0,023 | 0,000664008 | 1,293301887   | 0,773214676     | 3,826086957     |
| ATP5PB                                                                                          | 0,013923554 | 0,370665052 | 0,221 | 0,172 | 1           | 1,292948715   | 0,773425882     | 1,284883721     |
| C14orf119                                                                                       | 1,55321E-05 | 0,370444259 | 0,126 | 0,061 | 0,327742262 | 1,292750855   | 0,773544258     | 2,06557377      |
| FMN1                                                                                            | 2,95969E-06 | 0,3703335   | 0,036 | 0,003 | 0,062452486 | 1,292651611   | 0,773603646     | 12              |
| ZNF428                                                                                          | 0,907073099 | 0,370266864 | 0,331 | 0,345 | 1           | 1,292591907   | 0,773639379     | 0,95942029      |
| UBE2I                                                                                           | 0,76788354  | 0,369507674 | 0,269 | 0,267 | 1           | 1,291911885   | 0,774046598     | 1,007490637     |
| ASPN                                                                                            | 0,012771468 | 0,369255649 | 0,042 | 0,02  | 1           | 1,29168622    | 0,774181829     | 2,1             |
| EEA1                                                                                            | 0,31585315  | 0,368698218 | 0,254 | 0,237 | 1           | 1,291187232   | 0,774481016     | 1,071729958     |
| COMMD10                                                                                         | 4,91001E-06 | 0,368049685 | 0,093 | 0,035 | 0,103606039 | 1,290606937   | 0,774829246     | 2,657142857     |
| KIFAP3                                                                                          | 6,24337E-06 | 0,367362141 | 0,156 | 0,08  | 0,131741383 | 1,28999202    | 0,775198594     | 1,95            |
| TMEM33                                                                                          | 0,034571877 | 0,367088901 | 0,136 | 0,102 | 1           | 1,289747725   | 0,775345427     | 1,333333333     |
| COL18A1                                                                                         | 3,99415E-07 | 0,366086668 | 0,711 | 0,763 | 0,008428062 | 1,288852054   | 0,775884243     | 0,931847969     |
| NBEAL1                                                                                          | 0,722751551 | 0,365359783 | 0,183 | 0,197 | 1           | 1,288202845   | 0,776275261     | 0,92893401      |
| WDR61                                                                                           | 0,001010714 | 0,365346709 | 0,177 | 0,115 | 1           | 1,288191171   | 0,776282296     | 1,539130435     |
| EIF2S1                                                                                          | 0,133995233 | 0,364958669 | 0,146 | 0,121 | 1           | 1,287844734   | 0,77649112      | 1,20661157      |
| BLOC1S2                                                                                         | 0,000175796 | 0,364841759 | 0,158 | 0,092 | 1           | 1,287740377   | 0,776554046     | 1,717391304     |
| SPATS2L                                                                                         | 0,377481586 | 0,364744384 | 0,268 | 0,254 | 1           | 1,287653463   | 0,776606462     | 1,05511811      |
| CISD3                                                                                           | 2,33389E-06 | 0,364546183 | 0,13  | 0,058 | 0,049247311 | 1,287476575   | 0,776713161     | 2,24137931      |
| SH3KBP1                                                                                         | 1,36975E-05 | 0,364109759 | 0,168 | 0,091 | 0,289031903 | 1,287087164   | 0,776948157     | 1,846153846     |
| RAB2A                                                                                           | 0,70638759  | 0,363910971 | 0,396 | 0,419 | 1           | 1,286909829   | 0,77705522      | 0,945107399     |
| VPS25                                                                                           | 5,36522E-10 | 0,363822578 | 0,141 | 0,046 | 1,13211E-05 | 1,286830983   | 0,777102831     | 3,065217391     |
| PDCL3                                                                                           | 0,000209146 | 0,363801508 | 0,119 | 0,064 | 1           | 1,28681219    | 0,77711418      | 1,859375        |
| FAM89B                                                                                          | 0,000313197 | 0,363369529 | 0,171 | 0,106 | 1           | 1,286426944   | 0,777346902     | 1,613207547     |
| ODF2L                                                                                           | 0,000164766 | 0,363270253 | 0,127 | 0,069 | 1           | 1,286338424   | 0,777400396     | 1,84057971      |
| TTYH3                                                                                           | 3,35155E-05 | 0,363219369 | 0,098 | 0,043 | 0,707210926 | 1,286293056   | 0,777427815     | 2,279069767     |
| GPX8                                                                                            | 6,21696E-05 | 0,363199092 | 0,171 | 0,1   | 1           | 1,286274977   | 0,777438742     | 1,71            |
| GSTZ1                                                                                           | 3,05277E-06 | 0,362180657 | 0,133 | 0,061 | 0,064416462 | 1,285367283   | 0,777987749     | 2,180327869     |



Supplementary Table 5

| Differentially expressed genes_total calculation_ comparing SC-Keloid vs. (SC-Myel, SC-Nonmyel) |             |             |       |       |             |               |                 |                 |
|-------------------------------------------------------------------------------------------------|-------------|-------------|-------|-------|-------------|---------------|-----------------|-----------------|
| gene                                                                                            | p_val       | avg_log2FC  | pct.1 | pct.2 | p_val_adj   | Foldchange_UP | Foldchange_DOWN | Ratio_pct1_pct2 |
| COA4                                                                                            | 0,050702092 | 0,361499665 | 0,184 | 0,147 | 1           | 1,284760698   | 0,778355068     | 1,25170068      |
| RPL35                                                                                           | 1,13987E-05 | 0,36135842  | 0,723 | 0,847 | 0,240524886 | 1,284634921   | 0,778431275     | 0,853600945     |
| PSMD4                                                                                           | 0,070673076 | 0,361306095 | 0,22  | 0,183 | 1           | 1,28458833    | 0,778459508     | 1,202185792     |
| NRBF2                                                                                           | 3,99806E-05 | 0,361274086 | 0,15  | 0,081 | 0,843630041 | 1,284559829   | 0,778476781     | 1,851851852     |
| MAP2K2                                                                                          | 0,083062844 | 0,361225218 | 0,25  | 0,218 | 1           | 1,284516318   | 0,77850315      | 1,146788991     |
| CHPF                                                                                            | 8,52655E-05 | 0,361139393 | 0,196 | 0,119 | 1           | 1,284439905   | 0,778549464     | 1,647058824     |
| SMC6                                                                                            | 4,17411E-06 | 0,360703407 | 0,126 | 0,057 | 0,088077976 | 1,284051803   | 0,778784779     | 2,210526316     |
| RAMAC                                                                                           | 2,90348E-05 | 0,360620871 | 0,091 | 0,038 | 0,612662768 | 1,283978345   | 0,778829334     | 2,394736842     |
| MAP7D3                                                                                          | 5,72211E-06 | 0,36046896  | 0,102 | 0,042 | 0,120742238 | 1,283843153   | 0,778911347     | 2,428571429     |
| IFT43                                                                                           | 0,00066034  | 0,359793582 | 0,115 | 0,065 | 1           | 1,283242281   | 0,779276069     | 1,769230769     |
| PSME2                                                                                           | 0,05645251  | 0,359620146 | 0,241 | 0,204 | 1           | 1,283088023   | 0,779369757     | 1,181372549     |
| WAC-AS1                                                                                         | 1,25411E-05 | 0,359590384 | 0,072 | 0,024 | 0,264629201 | 1,283061554   | 0,779385835     | 3               |
| APC                                                                                             | 0,012333287 | 0,359290466 | 0,153 | 0,11  | 1           | 1,28279485    | 0,779547876     | 1,390909091     |
| AMOTL1                                                                                          | 0,420256819 | 0,35916212  | 0,123 | 0,111 | 1           | 1,282680733   | 0,77961723      | 1,108108108     |
| MRPS36                                                                                          | 0,169614677 | 0,358888807 | 0,184 | 0,156 | 1           | 1,282437758   | 0,779764939     | 1,179487179     |
| RPL8                                                                                            | 8,66977E-06 | 0,358496106 | 0,74  | 0,841 | 0,182940732 | 1,282088726   | 0,77997722      | 0,879904875     |
| NREP                                                                                            | 0,002307481 | 0,35809906  | 0,15  | 0,098 | 1           | 1,281735929   | 0,780191908     | 1,530612245     |
| PRDX6                                                                                           | 0,969950973 | 0,357370196 | 0,352 | 0,379 | 1           | 1,281088547   | 0,780586168     | 0,928759894     |
| FAM50A                                                                                          | 0,012081275 | 0,356970479 | 0,2   | 0,152 | 1           | 1,280733654   | 0,780802469     | 1,315789474     |
| RUFY1                                                                                           | 0,001931691 | 0,356874902 | 0,085 | 0,046 | 1           | 1,280648809   | 0,780854199     | 1,847826087     |
| DBN1                                                                                            | 5,53892E-07 | 0,356556519 | 0,157 | 0,073 | 0,011687667 | 1,280366219   | 0,781026541     | 2,150684932     |
| PNKD                                                                                            | 0,864410296 | 0,356464279 | 0,206 | 0,206 | 1           | 1,28028436    | 0,781076479     | 1               |
| SRP9                                                                                            | 0,896810268 | 0,356398213 | 0,303 | 0,318 | 1           | 1,280225733   | 0,781112248     | 0,952830189     |
| EMC7                                                                                            | 0,649337045 | 0,356055799 | 0,27  | 0,263 | 1           | 1,279921917   | 0,781297661     | 1,02661597      |
| TMEM134                                                                                         | 0,005647019 | 0,355660548 | 0,155 | 0,106 | 1           | 1,279571308   | 0,78151174      | 1,462264151     |
| ZNF827                                                                                          | 7,92904E-07 | 0,355613748 | 0,079 | 0,023 | 0,016731076 | 1,2795298     | 0,781537093     | 3,434782609     |
| DNAJC1                                                                                          | 0,020222623 | 0,355305931 | 0,183 | 0,138 | 1           | 1,279256825   | 0,781703861     | 1,326086957     |
| CCT2                                                                                            | 0,81441247  | 0,355240318 | 0,321 | 0,332 | 1           | 1,279198647   | 0,781739414     | 0,96686747      |
| TAF11                                                                                           | 0,004070126 | 0,355174147 | 0,142 | 0,094 | 1           | 1,279139976   | 0,78177527      | 1,510638298     |
| CAPZA1                                                                                          | 0,127981569 | 0,355083706 | 0,2   | 0,168 | 1           | 1,279059791   | 0,78182428      | 1,19047619      |

Supplementary Table 5

| Differentially expressed genes_total calculation_ comparing SC-Keloid vs. (SC-Myel, SC-Nonmyel) |             |             |       |       |             |               |                 |                 |
|-------------------------------------------------------------------------------------------------|-------------|-------------|-------|-------|-------------|---------------|-----------------|-----------------|
| gene                                                                                            | p_val       | avg_log2FC  | pct.1 | pct.2 | p_val_adj   | Foldchange_UP | Foldchange_DOWN | Ratio_pct1_pct2 |
| ACSBG1                                                                                          | 7,87209E-09 | 0,354908704 | 0,121 | 0,039 | 0,000166109 | 1,278904647   | 0,781919123     | 3,102564103     |
| ADAM12                                                                                          | 5,87128E-09 | 0,354868025 | 0,076 | 0,014 | 0,00012389  | 1,278868587   | 0,781941171     | 5,428571429     |
| NCBP2                                                                                           | 0,005908074 | 0,354729749 | 0,148 | 0,1   | 1           | 1,278746019   | 0,78201612      | 1,48            |
| RARS1                                                                                           | 2,01599E-05 | 0,354596148 | 0,106 | 0,047 | 0,425394989 | 1,278627606   | 0,782088542     | 2,255319149     |
| RTKN2                                                                                           | 1,61839E-08 | 0,354245664 | 0,068 | 0,011 | 0,000341496 | 1,278317019   | 0,782278563     | 6,181818182     |
| DRAXIN                                                                                          | 2,69597E-10 | 0,354184154 | 0,109 | 0,027 | 5,68876E-06 | 1,278262518   | 0,782311916     | 4,037037037     |
| FRG1                                                                                            | 0,09764902  | 0,353526596 | 0,157 | 0,128 | 1           | 1,277680038   | 0,782668564     | 1,2265625       |
| RALB                                                                                            | 1,42264E-05 | 0,353477347 | 0,109 | 0,049 | 0,300190761 | 1,277636423   | 0,782695281     | 2,224489796     |
| PPIH                                                                                            | 0,00030204  | 0,352958094 | 0,112 | 0,06  | 1           | 1,277176661   | 0,782977039     | 1,866666667     |
| PARP1                                                                                           | 0,044685154 | 0,352893055 | 0,166 | 0,13  | 1           | 1,277119085   | 0,783012338     | 1,276923077     |
| EMC3                                                                                            | 0,001088823 | 0,352043555 | 0,158 | 0,1   | 1           | 1,276367302   | 0,783473534     | 1,58            |
| XYL1                                                                                            | 0,000569485 | 0,351875683 | 0,098 | 0,052 | 1           | 1,276218792   | 0,783564704     | 1,884615385     |
| ACOT13                                                                                          | 0,024708824 | 0,351596038 | 0,105 | 0,072 | 1           | 1,27597144    | 0,783716601     | 1,458333333     |
| SLN                                                                                             | 5,0002E-07  | 0,3514916   | 0,037 | 0,001 | 0,010550931 | 1,275879075   | 0,783773337     | 37              |
| THUMP3                                                                                          | 1,70345E-05 | 0,351085711 | 0,102 | 0,045 | 0,359444643 | 1,275520169   | 0,783993875     | 2,266666667     |
| POLR2G                                                                                          | 0,005196041 | 0,350743609 | 0,236 | 0,176 | 1           | 1,275217744   | 0,784179803     | 1,340909091     |
| CAPRIN1                                                                                         | 0,427598513 | 0,350549701 | 0,189 | 0,176 | 1           | 1,275046358   | 0,78428521      | 1,073863636     |
| EDEM3                                                                                           | 0,004735084 | 0,35016331  | 0,1   | 0,061 | 1           | 1,274704913   | 0,784495289     | 1,639344262     |
| NME7                                                                                            | 0,000384861 | 0,350022189 | 0,079 | 0,037 | 1           | 1,274580231   | 0,784572031     | 2,135135135     |
| SRP54                                                                                           | 0,854309245 | 0,34995284  | 0,144 | 0,142 | 1           | 1,274518964   | 0,784609745     | 1,014084507     |
| SNRNP25                                                                                         | 3,78146E-05 | 0,349569229 | 0,106 | 0,049 | 0,797926741 | 1,274180116   | 0,7848184       | 2,163265306     |
| PDHA1                                                                                           | 0,001324022 | 0,349524329 | 0,112 | 0,065 | 1           | 1,274140461   | 0,784842826     | 1,723076923     |
| ETFRF1                                                                                          | 0,54970531  | 0,348698638 | 0,185 | 0,175 | 1           | 1,273411447   | 0,78529214      | 1,057142857     |
| PCDH20                                                                                          | 0,111223408 | 0,348151921 | 0,182 | 0,153 | 1           | 1,272928972   | 0,785589787     | 1,189542484     |
| PRKAR1A                                                                                         | 0,114460966 | 0,347919862 | 0,281 | 0,327 | 1           | 1,272724237   | 0,78571616      | 0,859327217     |
| CTSK                                                                                            | 0,022304385 | 0,347006651 | 0,114 | 0,08  | 1           | 1,271918871   | 0,786213667     | 1,425           |
| UBE2V2                                                                                          | 0,563706878 | 0,346939097 | 0,179 | 0,168 | 1           | 1,271859314   | 0,786250483     | 1,06547619      |
| RPS28                                                                                           | 1,57567E-07 | 0,346916253 | 0,829 | 0,889 | 0,00332482  | 1,271839175   | 0,786262933     | 0,932508436     |
| HYAL2                                                                                           | 3,66639E-06 | 0,346669607 | 0,136 | 0,064 | 0,077364526 | 1,271621758   | 0,786397365     | 2,125           |
| PIN1                                                                                            | 0,120863205 | 0,346300637 | 0,243 | 0,21  | 1           | 1,271296582   | 0,786598512     | 1,157142857     |

Supplementary Table 5

| Differentially expressed genes_total calculation_ comparing SC-Keloid vs. (SC-Myel, SC-Nonmyel) |             |             |       |       |             |               |                 |                 |
|-------------------------------------------------------------------------------------------------|-------------|-------------|-------|-------|-------------|---------------|-----------------|-----------------|
| gene                                                                                            | p_val       | avg_log2FC  | pct.1 | pct.2 | p_val_adj   | Foldchange_UP | Foldchange_DOWN | Ratio_pct1_pct2 |
| LDLRAP1                                                                                         | 0,000109649 | 0,345966534 | 0,092 | 0,042 | 1           | 1,271002205   | 0,786780696     | 2,19047619      |
| TWF1                                                                                            | 0,002351308 | 0,345938637 | 0,126 | 0,077 | 1           | 1,270977629   | 0,78679591      | 1,636363636     |
| SMURF2                                                                                          | 0,053681813 | 0,345712209 | 0,139 | 0,106 | 1           | 1,270778167   | 0,786919406     | 1,311320755     |
| MPC2                                                                                            | 0,110728442 | 0,345570727 | 0,232 | 0,197 | 1           | 1,270653551   | 0,786996581     | 1,177664975     |
| TMEM178B                                                                                        | 2,68032E-05 | 0,345107148 | 0,068 | 0,023 | 0,565574078 | 1,270245319   | 0,787249506     | 2,956521739     |
| SERBP1                                                                                          | 0,873666533 | 0,344810141 | 0,396 | 0,434 | 1           | 1,269983841   | 0,787411593     | 0,912442396     |
| HSPB3                                                                                           | 1,68882E-06 | 0,344501961 | 0,041 | 0,004 | 0,035635884 | 1,269712584   | 0,787579814     | 10,25           |
| CLINT1                                                                                          | 0,434752532 | 0,344322565 | 0,132 | 0,119 | 1           | 1,269554707   | 0,787677754     | 1,109243697     |
| CAP1                                                                                            | 0,549747758 | 0,344094542 | 0,369 | 0,403 | 1           | 1,269354066   | 0,787802258     | 0,915632754     |
| MCAM                                                                                            | 0,085328617 | 0,343961614 | 0,435 | 0,44  | 1           | 1,269237115   | 0,787874849     | 0,988636364     |
| ACTL6A                                                                                          | 0,000845303 | 0,343812341 | 0,116 | 0,066 | 1           | 1,269105796   | 0,787956373     | 1,757575758     |
| NHP2                                                                                            | 0,012145927 | 0,343380147 | 0,2   | 0,151 | 1           | 1,268725662   | 0,788192459     | 1,324503311     |
| SRI                                                                                             | 0,659803157 | 0,343297179 | 0,292 | 0,293 | 1           | 1,2686527     | 0,788237789     | 0,996587031     |
| DPCD                                                                                            | 3,85294E-10 | 0,343110396 | 0,099 | 0,022 | 8,13009E-06 | 1,268488461   | 0,788339847     | 4,5             |
| EAPP                                                                                            | 0,9100558   | 0,343089351 | 0,191 | 0,19  | 1           | 1,268469957   | 0,788351347     | 1,005263158     |
| BCHE                                                                                            | 0,025224632 | 0,343007538 | 0,092 | 0,062 | 1           | 1,268398027   | 0,788396055     | 1,483870968     |
| CRTAP                                                                                           | 0,35087582  | 0,343004556 | 0,2   | 0,18  | 1           | 1,268395405   | 0,788397684     | 1,111111111     |
| SLC6A6                                                                                          | 0,000615905 | 0,342528193 | 0,073 | 0,034 | 1           | 1,267976663   | 0,788658048     | 2,147058824     |
| CCDC28B                                                                                         | 1,8953E-08  | 0,342508734 | 0,101 | 0,03  | 0,000399927 | 1,26795956    | 0,788668686     | 3,366666667     |
| ITGA3                                                                                           | 2,27834E-05 | 0,342391705 | 0,205 | 0,122 | 0,480752505 | 1,26785671    | 0,788732664     | 1,680327869     |
| AAMDC                                                                                           | 0,111483149 | 0,342384522 | 0,166 | 0,136 | 1           | 1,267850398   | 0,788736591     | 1,220588235     |
| HSPB11                                                                                          | 0,011250866 | 0,341747265 | 0,166 | 0,119 | 1           | 1,267290495   | 0,789085063     | 1,394957983     |
| ENY2                                                                                            | 0,506453379 | 0,341196669 | 0,333 | 0,365 | 1           | 1,266806934   | 0,78938627      | 0,912328767     |
| AGRN                                                                                            | 0,002829697 | 0,340925623 | 0,254 | 0,189 | 1           | 1,266568955   | 0,78953459      | 1,343915344     |
| ALKBH7                                                                                          | 0,723187329 | 0,340722354 | 0,22  | 0,213 | 1           | 1,266390514   | 0,789645839     | 1,03286385      |
| UBR4                                                                                            | 0,003963413 | 0,340490765 | 0,196 | 0,138 | 1           | 1,266187243   | 0,789772607     | 1,420289855     |
| FDPS                                                                                            | 0,071103331 | 0,339715939 | 0,219 | 0,182 | 1           | 1,265507396   | 0,790196883     | 1,203296703     |
| TGFB1I1                                                                                         | 0,00297378  | 0,339658495 | 0,244 | 0,186 | 1           | 1,265457008   | 0,790228347     | 1,311827957     |
| APLNR                                                                                           | 3,02555E-07 | 0,339454176 | 0,042 | 0,003 | 0,006384222 | 1,265277803   | 0,79034027      | 14              |
| COPE                                                                                            | 0,735014797 | 0,339322175 | 0,3   | 0,32  | 1           | 1,26516204    | 0,790412586     | 0,9375          |

Supplementary Table 5

| Differentially expressed genes_total calculation_ comparing SC-Keloid vs. (SC-Myel, SC-Nonmyel) |             |             |       |       |             |               |                 |                 |
|-------------------------------------------------------------------------------------------------|-------------|-------------|-------|-------|-------------|---------------|-----------------|-----------------|
| gene                                                                                            | p_val       | avg_log2FC  | pct.1 | pct.2 | p_val_adj   | Foldchange_UP | Foldchange_DOWN | Ratio_pct1_pct2 |
| ATP6V1D                                                                                         | 0,035529866 | 0,339274044 | 0,176 | 0,136 | 1           | 1,265119833   | 0,790438956     | 1,294117647     |
| RPL27                                                                                           | 0,008307892 | 0,339239471 | 0,629 | 0,763 | 1           | 1,265089516   | 0,790457898     | 0,824377457     |
| PTPMT1                                                                                          | 4,33337E-05 | 0,337915765 | 0,134 | 0,069 | 0,91438519  | 1,263929299   | 0,791183495     | 1,942028986     |
| SNRNP35                                                                                         | 0,000250718 | 0,337794818 | 0,083 | 0,038 | 1           | 1,263823343   | 0,791249826     | 2,184210526     |
| SLC25A11                                                                                        | 0,000687409 | 0,337674578 | 0,146 | 0,088 | 1           | 1,263718016   | 0,791315774     | 1,659090909     |
| PMM2                                                                                            | 0,000145174 | 0,337657241 | 0,066 | 0,026 | 1           | 1,263702829   | 0,791325284     | 2,538461538     |
| VMA21                                                                                           | 0,386625222 | 0,337371965 | 0,15  | 0,134 | 1           | 1,263452972   | 0,791481774     | 1,119402985     |
| RAB1B                                                                                           | 0,021097949 | 0,337090087 | 0,169 | 0,125 | 1           | 1,263206139   | 0,791636432     | 1,352           |
| PAK2                                                                                            | 0,846405483 | 0,336798409 | 0,321 | 0,327 | 1           | 1,262950774   | 0,791796498     | 0,981651376     |
| MRPL11                                                                                          | 0,000585614 | 0,336753859 | 0,154 | 0,094 | 1           | 1,262911776   | 0,791820948     | 1,638297872     |
| MARCKSL1                                                                                        | 0,050254206 | 0,336540706 | 0,282 | 0,248 | 1           | 1,262725198   | 0,791937946     | 1,137096774     |
| HIGD2A                                                                                          | 0,030791049 | 0,33595259  | 0,203 | 0,157 | 1           | 1,262210553   | 0,792260846     | 1,292993631     |
| PSMC3                                                                                           | 0,27572823  | 0,335463942 | 0,241 | 0,221 | 1           | 1,261783108   | 0,792529234     | 1,090497738     |
| HP1BP3                                                                                          | 0,328755316 | 0,334918872 | 0,341 | 0,388 | 1           | 1,261306479   | 0,792828719     | 0,878865979     |
| PDE4B                                                                                           | 4,13566E-06 | 0,334649402 | 0,052 | 0,011 | 0,087266657 | 1,261070911   | 0,792976819     | 4,727272727     |
| CD2BP2                                                                                          | 0,003993157 | 0,334552731 | 0,126 | 0,08  | 1           | 1,260986413   | 0,793029956     | 1,575           |
| CHST11                                                                                          | 5,25769E-09 | 0,333341072 | 0,076 | 0,014 | 0,000110942 | 1,259927808   | 0,793696269     | 5,428571429     |
| CENPW                                                                                           | 4,07085E-14 | 0,332937698 | 0,075 | 0     | 8,5899E-10  | 1,259575585   | 0,793918215     | #DIV/0!         |
| SPTSSA                                                                                          | 0,368902622 | 0,332589862 | 0,367 | 0,422 | 1           | 1,259271936   | 0,794109653     | 0,869668246     |
| CCDC88A                                                                                         | 1,33925E-05 | 0,332370027 | 0,104 | 0,045 | 0,282595113 | 1,259080065   | 0,794230667     | 2,311111111     |
| SHC1                                                                                            | 1,09779E-05 | 0,332184176 | 0,158 | 0,083 | 0,231643668 | 1,258917878   | 0,794332988     | 1,903614458     |
| FAM229B                                                                                         | 0,108542225 | 0,332150679 | 0,127 | 0,1   | 1           | 1,258888649   | 0,794351431     | 1,27            |
| METTL26                                                                                         | 0,556117988 | 0,332085486 | 0,242 | 0,229 | 1           | 1,258831762   | 0,794387328     | 1,056768559     |
| FAM32A                                                                                          | 0,002778779 | 0,331912506 | 0,144 | 0,094 | 1           | 1,258680837   | 0,794482581     | 1,531914894     |
| JOSD2                                                                                           | 0,0606057   | 0,331763588 | 0,244 | 0,202 | 1           | 1,25855092    | 0,794564593     | 1,207920792     |
| RANBP9                                                                                          | 0,043804194 | 0,331211715 | 0,14  | 0,104 | 1           | 1,258069579   | 0,794868596     | 1,346153846     |
| RPL7L1                                                                                          | 0,078080465 | 0,331203077 | 0,169 | 0,134 | 1           | 1,258062047   | 0,794873355     | 1,26119403      |
| PDZD11                                                                                          | 1,49576E-05 | 0,331149838 | 0,13  | 0,064 | 0,315621324 | 1,258015622   | 0,794902688     | 2,03125         |
| FBN1                                                                                            | 0,00127195  | 0,331105781 | 0,143 | 0,09  | 1           | 1,257977206   | 0,794926963     | 1,588888889     |
| MGMT                                                                                            | 0,008809843 | 0,330964093 | 0,161 | 0,114 | 1           | 1,257853665   | 0,795005037     | 1,412280702     |

Supplementary Table 5

| Differentially expressed genes_total calculation_ comparing SC-Keloid vs. (SC-Myel, SC-Nonmyel) |             |             |       |       |             |               |                 |                 |
|-------------------------------------------------------------------------------------------------|-------------|-------------|-------|-------|-------------|---------------|-----------------|-----------------|
| gene                                                                                            | p_val       | avg_log2FC  | pct.1 | pct.2 | p_val_adj   | Foldchange_UP | Foldchange_DOWN | Ratio_pct1_pct2 |
| DCTPP1                                                                                          | 3,12952E-05 | 0,330873144 | 0,108 | 0,05  | 0,660361053 | 1,257774371   | 0,795055157     | 2,16            |
| EVA1A                                                                                           | 4,55033E-10 | 0,330517582 | 0,062 | 0,004 | 9,60165E-06 | 1,257464423   | 0,795251128     | 15,5            |
| CYB5R3                                                                                          | 0,190381746 | 0,330033382 | 0,275 | 0,252 | 1           | 1,25704246    | 0,795518076     | 1,091269841     |
| NONO                                                                                            | 0,879130425 | 0,329956608 | 0,246 | 0,242 | 1           | 1,256975568   | 0,795560411     | 1,016528926     |
| TOR1A                                                                                           | 3,55898E-07 | 0,329667877 | 0,105 | 0,037 | 0,007509813 | 1,256724031   | 0,795719645     | 2,837837838     |
| ARHGEF12                                                                                        | 0,917991237 | 0,329450786 | 0,269 | 0,274 | 1           | 1,256534938   | 0,795839391     | 0,981751825     |
| CHID1                                                                                           | 0,004687368 | 0,329173908 | 0,172 | 0,119 | 1           | 1,256293811   | 0,795992141     | 1,445378151     |
| CTSB                                                                                            | 0,000121516 | 0,329068262 | 0,171 | 0,102 | 1           | 1,256201817   | 0,796050432     | 1,676470588     |
| HYI                                                                                             | 0,000280499 | 0,328614235 | 0,189 | 0,121 | 1           | 1,255806543   | 0,796300995     | 1,561983471     |
| RPN2                                                                                            | 0,230112597 | 0,328509217 | 0,307 | 0,296 | 1           | 1,255715133   | 0,796358962     | 1,037162162     |
| APP                                                                                             | 0,520097289 | 0,32844437  | 0,406 | 0,486 | 1           | 1,255658692   | 0,796394758     | 0,835390947     |
| ASNSD1                                                                                          | 0,396774483 | 0,327897012 | 0,091 | 0,08  | 1           | 1,255182386   | 0,796696967     | 1,1375          |
| COA8                                                                                            | 0,001673583 | 0,327881025 | 0,151 | 0,096 | 1           | 1,255168477   | 0,796705796     | 1,572916667     |
| GPSM2                                                                                           | 0,136264021 | 0,327639658 | 0,146 | 0,119 | 1           | 1,254958502   | 0,796839098     | 1,226890756     |
| SUMF2                                                                                           | 0,540121607 | 0,327483641 | 0,165 | 0,155 | 1           | 1,254822794   | 0,796925275     | 1,064516129     |
| GAR1                                                                                            | 0,000159905 | 0,327281045 | 0,095 | 0,046 | 1           | 1,254646593   | 0,797037194     | 2,065217391     |
| PLAUR                                                                                           | 0,002468658 | 0,327139221 | 0,224 | 0,163 | 1           | 1,254523261   | 0,797115551     | 1,374233129     |
| HAUS1                                                                                           | 2,3345E-05  | 0,327005445 | 0,079 | 0,03  | 0,492603797 | 1,254406939   | 0,797189468     | 2,633333333     |
| PHACTR1                                                                                         | 0,034046611 | 0,326687753 | 0,14  | 0,103 | 1           | 1,25413074    | 0,797365034     | 1,359223301     |
| GPX4                                                                                            | 0,614637623 | 0,326557465 | 0,475 | 0,545 | 1           | 1,254017486   | 0,797437046     | 0,871559633     |
| DNTTIP1                                                                                         | 4,84217E-05 | 0,326187338 | 0,107 | 0,05  | 1           | 1,253695806   | 0,797641657     | 2,14            |
| NDUFS4                                                                                          | 0,367758185 | 0,325206246 | 0,278 | 0,308 | 1           | 1,252843531   | 0,798184271     | 0,902597403     |
| GNAS                                                                                            | 0,003232645 | 0,324923786 | 0,643 | 0,756 | 1           | 1,252598265   | 0,79834056      | 0,850529101     |
| AQP1                                                                                            | 0,057438679 | 0,324865155 | 0,225 | 0,191 | 1           | 1,252547361   | 0,798373005     | 1,178010471     |
| POP7                                                                                            | 0,000161993 | 0,324508769 | 0,133 | 0,073 | 1           | 1,252237985   | 0,798570249     | 1,821917808     |
| PCMTD2                                                                                          | 0,070462494 | 0,324330582 | 0,139 | 0,109 | 1           | 1,252083331   | 0,798668887     | 1,275229358     |
| MCUR1                                                                                           | 0,060312766 | 0,324236976 | 0,168 | 0,132 | 1           | 1,252002095   | 0,798720708     | 1,272727273     |
| SCG2                                                                                            | 8,02724E-10 | 0,32389423  | 0,057 | 0,003 | 1,69383E-05 | 1,251704688   | 0,798910486     | 19              |
| EIF1AY                                                                                          | 5,16748E-06 | 0,323594583 | 0,066 | 0,019 | 0,109039054 | 1,251444736   | 0,799076437     | 3,473684211     |
| CASP3                                                                                           | 0,017045437 | 0,322214963 | 0,111 | 0,075 | 1           | 1,250248577   | 0,799840943     | 1,48            |

Supplementary Table 5

| Differentially expressed genes_total calculation_ comparing SC-Keloid vs. (SC-Myel, SC-Nonmyel) |             |             |       |       |             |               |                 |                 |
|-------------------------------------------------------------------------------------------------|-------------|-------------|-------|-------|-------------|---------------|-----------------|-----------------|
| gene                                                                                            | p_val       | avg_log2FC  | pct.1 | pct.2 | p_val_adj   | Foldchange_UP | Foldchange_DOWN | Ratio_pct1_pct2 |
| FBLIM1                                                                                          | 5,71128E-07 | 0,321879097 | 0,063 | 0,014 | 0,012051379 | 1,249957548   | 0,80002717      | 4,5             |
| PSMG1                                                                                           | 0,000411424 | 0,321777733 | 0,088 | 0,043 | 1           | 1,249869728   | 0,800083383     | 2,046511628     |
| RUVBL1                                                                                          | 0,000274173 | 0,321643993 | 0,094 | 0,046 | 1           | 1,249753869   | 0,800157555     | 2,043478261     |
| APMAP                                                                                           | 9,69004E-05 | 0,321445175 | 0,134 | 0,072 | 1           | 1,249581652   | 0,800267832     | 1,861111111     |
| RRP36                                                                                           | 0,000148802 | 0,321138072 | 0,113 | 0,058 | 1           | 1,249315685   | 0,800438202     | 1,948275862     |
| SPAG7                                                                                           | 0,047300227 | 0,321082477 | 0,155 | 0,118 | 1           | 1,249267543   | 0,800469048     | 1,313559322     |
| NNT                                                                                             | 6,23783E-09 | 0,320948273 | 0,086 | 0,019 | 0,000131624 | 1,249151337   | 0,800543513     | 4,526315789     |
| COL9A2                                                                                          | 2,41207E-05 | 0,32083238  | 0,079 | 0,03  | 0,508970573 | 1,249050996   | 0,800607824     | 2,633333333     |
| ITGB1BP1                                                                                        | 0,782539144 | 0,320736885 | 0,257 | 0,254 | 1           | 1,248968322   | 0,80066082      | 1,011811024     |
| F2R                                                                                             | 0,01619739  | 0,320626062 | 0,1   | 0,066 | 1           | 1,248872383   | 0,800722326     | 1,515151515     |
| IFNAR1                                                                                          | 0,555018056 | 0,320531735 | 0,186 | 0,172 | 1           | 1,248790732   | 0,800774681     | 1,081395349     |
| AKR7A2                                                                                          | 0,000468881 | 0,320493619 | 0,154 | 0,092 | 1           | 1,248757739   | 0,800795838     | 1,673913043     |
| PHTF2                                                                                           | 0,002481875 | 0,320325108 | 0,064 | 0,031 | 1           | 1,248611889   | 0,800889379     | 2,064516129     |
| P4HA1                                                                                           | 0,227927461 | 0,319907327 | 0,146 | 0,123 | 1           | 1,248250364   | 0,801121337     | 1,18699187      |
| STOML2                                                                                          | 0,053693411 | 0,319726584 | 0,171 | 0,134 | 1           | 1,248093991   | 0,801221709     | 1,276119403     |
| UFD1                                                                                            | 0,006547618 | 0,319615891 | 0,173 | 0,122 | 1           | 1,247998233   | 0,801283186     | 1,418032787     |
| CERCAM                                                                                          | 2,96889E-06 | 0,319609456 | 0,132 | 0,06  | 0,062646585 | 1,247992666   | 0,80128676      | 2,2             |
| BBIP1                                                                                           | 0,026382306 | 0,319534693 | 0,146 | 0,107 | 1           | 1,247927994   | 0,801328285     | 1,364485981     |
| EIF3J                                                                                           | 0,849719408 | 0,31944656  | 0,247 | 0,258 | 1           | 1,247851762   | 0,801377239     | 0,957364341     |
| CFAP410                                                                                         | 0,02613317  | 0,319353476 | 0,161 | 0,119 | 1           | 1,247771252   | 0,801428946     | 1,352941176     |
| SNX6                                                                                            | 0,966739266 | 0,319172418 | 0,24  | 0,244 | 1           | 1,247614667   | 0,801529532     | 0,983606557     |
| BUD31                                                                                           | 0,839620037 | 0,318989389 | 0,265 | 0,265 | 1           | 1,247456397   | 0,801631226     | 1               |
| MRPS18A                                                                                         | 7,8194E-05  | 0,318649083 | 0,085 | 0,037 | 1           | 1,247162179   | 0,801820338     | 2,297297297     |
| PPFIA1                                                                                          | 0,048451331 | 0,318165291 | 0,147 | 0,114 | 1           | 1,246744027   | 0,802089265     | 1,289473684     |
| RPS15                                                                                           | 1,31611E-09 | 0,317893186 | 0,884 | 0,929 | 2,77713E-05 | 1,246508902   | 0,80224056      | 0,951560818     |
| PSMD7                                                                                           | 0,170807691 | 0,317791011 | 0,242 | 0,218 | 1           | 1,246420624   | 0,802297379     | 1,110091743     |
| PIGP                                                                                            | 0,026767687 | 0,317012937 | 0,172 | 0,129 | 1           | 1,245748586   | 0,802730191     | 1,333333333     |
| FAM98A                                                                                          | 0,023147318 | 0,316976521 | 0,105 | 0,072 | 1           | 1,245717142   | 0,802750453     | 1,458333333     |
| LEF1                                                                                            | 0,000124075 | 0,316902111 | 0,081 | 0,035 | 1           | 1,245652893   | 0,802791858     | 2,314285714     |
| FAM118A                                                                                         | 0,01938834  | 0,316321721 | 0,083 | 0,053 | 1           | 1,245151873   | 0,803114882     | 1,566037736     |

Supplementary Table 5

| Differentially expressed genes_total calculation_ comparing SC-Keloid vs. (SC-Myel, SC-Nonmyel) |             |             |       |       |             |               |                 |                 |
|-------------------------------------------------------------------------------------------------|-------------|-------------|-------|-------|-------------|---------------|-----------------|-----------------|
| gene                                                                                            | p_val       | avg_log2FC  | pct.1 | pct.2 | p_val_adj   | Foldchange_UP | Foldchange_DOWN | Ratio_pct1_pct2 |
| UBTD1                                                                                           | 2,4851E-09  | 0,315600866 | 0,129 | 0,042 | 5,24382E-05 | 1,244529878   | 0,803516265     | 3,071428571     |
| MRPS7                                                                                           | 0,00229155  | 0,31534107  | 0,144 | 0,092 | 1           | 1,244305787   | 0,803660973     | 1,565217391     |
| LINC00623                                                                                       | 9,38085E-06 | 0,31521991  | 0,163 | 0,085 | 0,197945219 | 1,244201292   | 0,803728469     | 1,917647059     |
| NKAP                                                                                            | 0,025942073 | 0,314775973 | 0,132 | 0,095 | 1           | 1,243818493   | 0,803975826     | 1,389473684     |
| CTSA                                                                                            | 8,50335E-06 | 0,314745539 | 0,172 | 0,092 | 0,179429131 | 1,243792255   | 0,803992786     | 1,869565217     |
| CCDC66                                                                                          | 0,284887036 | 0,31474429  | 0,115 | 0,099 | 1           | 1,243791179   | 0,803993481     | 1,161616162     |
| STK17A                                                                                          | 0,2235714   | 0,314495867 | 0,29  | 0,262 | 1           | 1,243577024   | 0,804131936     | 1,106870229     |
| HPF1                                                                                            | 0,022332116 | 0,313994276 | 0,139 | 0,1   | 1           | 1,243144736   | 0,804411563     | 1,39            |
| MNAT1                                                                                           | 0,036655348 | 0,31360882  | 0,119 | 0,085 | 1           | 1,242812641   | 0,804626512     | 1,4             |
| POLR2F                                                                                          | 0,893597616 | 0,313450445 | 0,347 | 0,357 | 1           | 1,242676216   | 0,804714846     | 0,971988796     |
| SHISA4                                                                                          | 0,008276256 | 0,312910831 | 0,194 | 0,142 | 1           | 1,242211502   | 0,805015892     | 1,366197183     |
| EIF2AK4                                                                                         | 0,000346474 | 0,312733732 | 0,142 | 0,083 | 1           | 1,242059023   | 0,805114718     | 1,710843373     |
| GOPC                                                                                            | 0,022130495 | 0,312498837 | 0,164 | 0,122 | 1           | 1,241856811   | 0,805245815     | 1,344262295     |
| ARHGDI1                                                                                         | 0,7895945   | 0,312368653 | 0,302 | 0,315 | 1           | 1,241744755   | 0,805318481     | 0,958730159     |
| FKBP11                                                                                          | 0,000694224 | 0,312343376 | 0,084 | 0,042 | 1           | 1,241722999   | 0,805332591     | 2               |
| MED8                                                                                            | 0,000563025 | 0,312314133 | 0,094 | 0,049 | 1           | 1,24169783    | 0,805348915     | 1,918367347     |
| RPS19                                                                                           | 4,27887E-06 | 0,312208978 | 0,786 | 0,868 | 0,090288372 | 1,241607328   | 0,805407617     | 0,905529954     |
| PTTG1IP                                                                                         | 0,437705458 | 0,312198279 | 0,276 | 0,263 | 1           | 1,241598121   | 0,80541359      | 1,049429658     |
| WDR11                                                                                           | 0,002146696 | 0,31213252  | 0,091 | 0,05  | 1           | 1,241541529   | 0,805450302     | 1,82            |
| COL9A3                                                                                          | 0,692847523 | 0,312035383 | 0,368 | 0,426 | 1           | 1,241457938   | 0,805504536     | 0,863849765     |
| KLF3                                                                                            | 0,36548098  | 0,311832262 | 0,182 | 0,164 | 1           | 1,241283163   | 0,805617952     | 1,109756098     |
| ECHS1                                                                                           | 0,077783041 | 0,311822798 | 0,197 | 0,163 | 1           | 1,24127502    | 0,805623238     | 1,208588957     |
| PUS7L                                                                                           | 0,009391856 | 0,311296841 | 0,085 | 0,052 | 1           | 1,240822577   | 0,805916993     | 1,634615385     |
| C12orf57                                                                                        | 0,178675496 | 0,311172823 | 0,364 | 0,426 | 1           | 1,240715916   | 0,805986275     | 0,854460094     |
| FAM162A                                                                                         | 0,003860782 | 0,310749862 | 0,189 | 0,13  | 1           | 1,240352224   | 0,806222604     | 1,453846154     |
| AIMP1                                                                                           | 0,366239118 | 0,310108582 | 0,196 | 0,175 | 1           | 1,239801008   | 0,806581051     | 1,12            |
| SHROOM4                                                                                         | 0,000804196 | 0,309790967 | 0,075 | 0,035 | 1           | 1,239528091   | 0,806758643     | 2,142857143     |
| USB1                                                                                            | 2,5852E-05  | 0,309697362 | 0,098 | 0,042 | 0,545503608 | 1,23944767    | 0,806810988     | 2,333333333     |
| SEPTIN2                                                                                         | 0,293663474 | 0,309696152 | 0,395 | 0,48  | 1           | 1,239446631   | 0,806811665     | 0,822916667     |
| PPP4C                                                                                           | 0,007026874 | 0,309560803 | 0,187 | 0,134 | 1           | 1,239330355   | 0,806887361     | 1,395522388     |

Supplementary Table 5

| Differentially expressed genes_total calculation_ comparing SC-Keloid vs. (SC-Myel, SC-Nonmyel) |             |             |       |       |             |               |                 |                 |
|-------------------------------------------------------------------------------------------------|-------------|-------------|-------|-------|-------------|---------------|-----------------|-----------------|
| gene                                                                                            | p_val       | avg_log2FC  | pct.1 | pct.2 | p_val_adj   | Foldchange_UP | Foldchange_DOWN | Ratio_pct1_pct2 |
| GDI2                                                                                            | 0,659903931 | 0,309393293 | 0,272 | 0,289 | 1           | 1,239186466   | 0,806981054     | 0,941176471     |
| CRIP1                                                                                           | 0,548110444 | 0,309119863 | 0,123 | 0,114 | 1           | 1,238951629   | 0,807134013     | 1,078947368     |
| SMS                                                                                             | 0,026246043 | 0,308921771 | 0,207 | 0,163 | 1           | 1,238781524   | 0,807244846     | 1,26993865      |
| MSL3                                                                                            | 0,021542551 | 0,308734343 | 0,099 | 0,066 | 1           | 1,238620598   | 0,807349725     | 1,5             |
| MRPS25                                                                                          | 0,003705969 | 0,308342897 | 0,092 | 0,053 | 1           | 1,238284569   | 0,807568813     | 1,735849057     |
| RPL32                                                                                           | 4,735E-09   | 0,308294411 | 0,884 | 0,954 | 9,99132E-05 | 1,238242954   | 0,807595954     | 0,926624738     |
| TRIAP1                                                                                          | 0,000195327 | 0,3079516   | 0,105 | 0,053 | 1           | 1,237948759   | 0,807787877     | 1,981132075     |
| UBLCP1                                                                                          | 0,00038016  | 0,307789924 | 0,121 | 0,066 | 1           | 1,237810036   | 0,807878407     | 1,833333333     |
| PFDN1                                                                                           | 0,231615612 | 0,307536666 | 0,284 | 0,261 | 1           | 1,237592763   | 0,808020239     | 1,088122605     |
| STX2                                                                                            | 0,236580225 | 0,307507326 | 0,147 | 0,126 | 1           | 1,237567595   | 0,808036671     | 1,166666667     |
| MRPL22                                                                                          | 0,51091988  | 0,307323102 | 0,184 | 0,171 | 1           | 1,237409575   | 0,80813986      | 1,076023392     |
| CMTM3                                                                                           | 0,038474732 | 0,307306877 | 0,234 | 0,191 | 1           | 1,237395659   | 0,808148948     | 1,22513089      |
| SUMO2                                                                                           | 0,277781313 | 0,306781052 | 0,537 | 0,646 | 1           | 1,236944742   | 0,808443551     | 0,83126935      |
| DPY19L1                                                                                         | 0,002732628 | 0,306699791 | 0,095 | 0,054 | 1           | 1,236875071   | 0,808489089     | 1,759259259     |
| GRB10                                                                                           | 0,004754106 | 0,306585677 | 0,135 | 0,088 | 1           | 1,236777241   | 0,808553041     | 1,534090909     |
| CLTC                                                                                            | 0,37930099  | 0,306486941 | 0,196 | 0,178 | 1           | 1,236692601   | 0,80860838      | 1,101123596     |
| COMMD3                                                                                          | 0,005024202 | 0,306412985 | 0,159 | 0,109 | 1           | 1,236629207   | 0,808649831     | 1,458715596     |
| SH3GL1                                                                                          | 0,006892628 | 0,306327123 | 0,173 | 0,119 | 1           | 1,236555611   | 0,80869796      | 1,453781513     |
| COA5                                                                                            | 0,071974856 | 0,306288566 | 0,107 | 0,08  | 1           | 1,236522564   | 0,808719573     | 1,3375          |
| SEC62                                                                                           | 0,356650327 | 0,306206541 | 0,441 | 0,509 | 1           | 1,236452262   | 0,808765555     | 0,866404715     |
| SACS                                                                                            | 0,000457645 | 0,306103752 | 0,08  | 0,038 | 1           | 1,236364172   | 0,808823179     | 2,105263158     |
| QPCT                                                                                            | 1,92119E-09 | 0,305846915 | 0,139 | 0,047 | 4,0539E-05  | 1,236144087   | 0,808967183     | 2,957446809     |
| MED11                                                                                           | 0,003764837 | 0,305839144 | 0,083 | 0,046 | 1           | 1,236137428   | 0,808971541     | 1,804347826     |
| PRSS23                                                                                          | 0,349131647 | 0,305556449 | 0,348 | 0,35  | 1           | 1,235895231   | 0,809130074     | 0,994285714     |
| MT-CO3                                                                                          | 4,61189E-07 | 0,30532632  | 0,824 | 0,826 | 0,009731547 | 1,235698105   | 0,809259151     | 0,997578692     |
| SEC31A                                                                                          | 0,89975641  | 0,30437857  | 0,239 | 0,237 | 1           | 1,234886605   | 0,809790953     | 1,008438819     |
| PURB                                                                                            | 0,655734526 | 0,304132871 | 0,179 | 0,17  | 1           | 1,234676315   | 0,809928876     | 1,052941176     |
| TWF2                                                                                            | 3,25913E-08 | 0,30386934  | 0,132 | 0,049 | 0,000687708 | 1,234450802   | 0,810076836     | 2,693877551     |
| ZMAT2                                                                                           | 0,023154614 | 0,303579774 | 0,139 | 0,099 | 1           | 1,234203057   | 0,810239445     | 1,404040404     |
| TMEM219                                                                                         | 0,133658215 | 0,30317365  | 0,257 | 0,224 | 1           | 1,233855674   | 0,810467562     | 1,147321429     |



Supplementary Table 5

| Differentially expressed genes_total calculation_ comparing SC-Keloid vs. (SC-Myel, SC-Nonmyel) |             |             |       |       |             |               |                 |                 |
|-------------------------------------------------------------------------------------------------|-------------|-------------|-------|-------|-------------|---------------|-----------------|-----------------|
| gene                                                                                            | p_val       | avg_log2FC  | pct.1 | pct.2 | p_val_adj   | Foldchange_UP | Foldchange_DOWN | Ratio_pct1_pct2 |
| FBXO22                                                                                          | 0,000107472 | 0,302733547 | 0,109 | 0,054 | 1           | 1,233479336   | 0,810714838     | 2,018518519     |
| MAPRE3                                                                                          | 9,85704E-05 | 0,302168476 | 0,098 | 0,046 | 1           | 1,232996305   | 0,811032439     | 2,130434783     |
| TPGS2                                                                                           | 1,27073E-06 | 0,302006634 | 0,115 | 0,046 | 0,026813762 | 1,232857995   | 0,811123426     | 2,5             |
| ADGRG1                                                                                          | 0,000175465 | 0,301709504 | 0,158 | 0,091 | 1           | 1,232604108   | 0,811290498     | 1,736263736     |
| PIH1D1                                                                                          | 0,147119198 | 0,30134369  | 0,123 | 0,099 | 1           | 1,232291605   | 0,811496237     | 1,242424242     |
| HOXC9                                                                                           | 4,4186E-08  | 0,30129602  | 0,133 | 0,05  | 0,00093237  | 1,232250887   | 0,811523051     | 2,66            |
| UBFD1                                                                                           | 0,000858841 | 0,301253597 | 0,087 | 0,045 | 1           | 1,232214653   | 0,811546915     | 1,933333333     |
| PLOD2                                                                                           | 6,52132E-06 | 0,300912459 | 0,077 | 0,026 | 0,137606433 | 1,231923319   | 0,811738835     | 2,961538462     |
| DCTN2                                                                                           | 0,045251677 | 0,300763517 | 0,237 | 0,194 | 1           | 1,231796144   | 0,811822642     | 1,221649485     |
| HIF1A                                                                                           | 0,285183957 | 0,300473497 | 0,141 | 0,125 | 1           | 1,231548545   | 0,811985856     | 1,128           |
| POLR3K                                                                                          | 2,56585E-05 | 0,300439668 | 0,085 | 0,034 | 0,541419933 | 1,231519668   | 0,812004896     | 2,5             |
| KCNMB1                                                                                          | 4,48189E-12 | 0,300417639 | 0,07  | 0,003 | 9,45724E-08 | 1,231500863   | 0,812017295     | 23,33333333     |
| SEC13                                                                                           | 0,007254041 | 0,300028935 | 0,149 | 0,102 | 1           | 1,231169106   | 0,812236106     | 1,460784314     |
| SUGT1                                                                                           | 0,2511519   | 0,299973383 | 0,194 | 0,168 | 1           | 1,231121699   | 0,812267382     | 1,154761905     |
| NAT14                                                                                           | 0,000830165 | 0,299741138 | 0,191 | 0,123 | 1           | 1,23092353    | 0,812398151     | 1,552845528     |
| VBP1                                                                                            | 0,229250099 | 0,299392559 | 0,182 | 0,157 | 1           | 1,230626154   | 0,812594464     | 1,159235669     |
| SIVA1                                                                                           | 0,21265319  | 0,299389013 | 0,261 | 0,296 | 1           | 1,230623129   | 0,812596461     | 0,881756757     |
| SMARCB1                                                                                         | 0,000497894 | 0,29902906  | 0,165 | 0,102 | 1           | 1,230316126   | 0,81279923      | 1,617647059     |
| SRPRB                                                                                           | 8,23559E-07 | 0,298976797 | 0,114 | 0,045 | 0,017377913 | 1,230271558   | 0,812828675     | 2,533333333     |
| PCBD1                                                                                           | 0,004066892 | 0,298712008 | 0,123 | 0,077 | 1           | 1,230045777   | 0,812977873     | 1,597402597     |
| SLC22A18                                                                                        | 1,15175E-07 | 0,298347366 | 0,08  | 0,02  | 0,00243031  | 1,229734922   | 0,81318338      | 4               |
| TM9SF3                                                                                          | 0,394922364 | 0,298329845 | 0,282 | 0,313 | 1           | 1,229719988   | 0,813193255     | 0,900958466     |
| ZNHIT6                                                                                          | 0,391777167 | 0,298298972 | 0,071 | 0,061 | 1           | 1,229693672   | 0,813210658     | 1,163934426     |
| PPP1CB                                                                                          | 0,422696651 | 0,298175592 | 0,312 | 0,351 | 1           | 1,229588512   | 0,813280207     | 0,888888889     |
| TMED1                                                                                           | 0,004004711 | 0,297839735 | 0,129 | 0,083 | 1           | 1,2293023     | 0,813469559     | 1,554216867     |
| GOLM1                                                                                           | 0,028161916 | 0,297620143 | 0,071 | 0,045 | 1           | 1,229115203   | 0,813593386     | 1,577777778     |
| ZFPM1                                                                                           | 0,017552666 | 0,297575398 | 0,088 | 0,057 | 1           | 1,229077082   | 0,813618621     | 1,543859649     |
| RPS3                                                                                            | 0,000394356 | 0,297566374 | 0,753 | 0,84  | 1           | 1,229069394   | 0,81362371      | 0,896428571     |
| LRPAP1                                                                                          | 0,280156953 | 0,297316389 | 0,254 | 0,289 | 1           | 1,228856444   | 0,813764703     | 0,878892734     |
| SURF2                                                                                           | 0,000111601 | 0,297026647 | 0,125 | 0,065 | 1           | 1,228609673   | 0,813928151     | 1,923076923     |

Supplementary Table 5

| Differentially expressed genes_total calculation_ comparing SC-Keloid vs. (SC-Myel, SC-Nonmyel) |             |             |       |       |             |               |                 |                 |
|-------------------------------------------------------------------------------------------------|-------------|-------------|-------|-------|-------------|---------------|-----------------|-----------------|
| gene                                                                                            | p_val       | avg_log2FC  | pct.1 | pct.2 | p_val_adj   | Foldchange_UP | Foldchange_DOWN | Ratio_pct1_pct2 |
| DERL2                                                                                           | 0,000584052 | 0,296810993 | 0,146 | 0,087 | 1           | 1,228426034   | 0,814049827     | 1,67816092      |
| COA1                                                                                            | 0,002395376 | 0,29645377  | 0,139 | 0,088 | 1           | 1,228121904   | 0,814251417     | 1,579545455     |
| WIPF1                                                                                           | 0,280975322 | 0,296421088 | 0,228 | 0,206 | 1           | 1,228094082   | 0,814269863     | 1,106796117     |
| NSRP1                                                                                           | 0,282599126 | 0,295662286 | 0,158 | 0,138 | 1           | 1,227448322   | 0,81469825      | 1,144927536     |
| PYCR1                                                                                           | 2,62269E-11 | 0,295596554 | 0,081 | 0,009 | 5,53414E-07 | 1,227392399   | 0,81473537      | 9               |
| IFI44L                                                                                          | 1,52805E-05 | 0,29555134  | 0,109 | 0,049 | 0,322434676 | 1,227353933   | 0,814760904     | 2,224489796     |
| CTTN                                                                                            | 0,517961848 | 0,295479958 | 0,286 | 0,27  | 1           | 1,227293207   | 0,814801218     | 1,059259259     |
| CLPP                                                                                            | 1,08264E-05 | 0,295478517 | 0,133 | 0,064 | 0,22844884  | 1,227291981   | 0,814802032     | 2,078125        |
| DPM2                                                                                            | 1,12943E-06 | 0,294873396 | 0,153 | 0,072 | 0,02383211  | 1,226777316   | 0,815143863     | 2,125           |
| CD320                                                                                           | 0,002609205 | 0,294775447 | 0,133 | 0,084 | 1           | 1,226694029   | 0,815199207     | 1,583333333     |
| MRGBP                                                                                           | 0,000398281 | 0,294081914 | 0,079 | 0,037 | 1           | 1,226104475   | 0,815591184     | 2,135135135     |
| ARID3B                                                                                          | 1,64213E-05 | 0,29349051  | 0,065 | 0,02  | 0,346506193 | 1,225601961   | 0,815925588     | 3,25            |
| TMEM121                                                                                         | 0,000258937 | 0,293258942 | 0,079 | 0,035 | 1           | 1,225405254   | 0,816056563     | 2,257142857     |
| APPL2                                                                                           | 0,006623019 | 0,292806192 | 0,075 | 0,042 | 1           | 1,225020755   | 0,8163127       | 1,785714286     |
| CDC37L1                                                                                         | 0,069039865 | 0,292645084 | 0,122 | 0,094 | 1           | 1,224883962   | 0,816403864     | 1,29787234      |
| MAML2                                                                                           | 0,410807826 | 0,291510314 | 0,206 | 0,193 | 1           | 1,223920893   | 0,81704627      | 1,067357513     |
| USE1                                                                                            | 0,043283255 | 0,291235698 | 0,121 | 0,09  | 1           | 1,223687943   | 0,817201808     | 1,344444444     |
| EXOSC7                                                                                          | 0,024115423 | 0,291114819 | 0,088 | 0,058 | 1           | 1,223585418   | 0,817270282     | 1,517241379     |
| INSYN2A                                                                                         | 7,52773E-10 | 0,290987339 | 0,05  | 0     | 1,58843E-05 | 1,223477304   | 0,817342501     | #DIV/0!         |
| ATRAID                                                                                          | 0,620263883 | 0,290614804 | 0,284 | 0,284 | 1           | 1,223161416   | 0,817553584     | 1               |
| C5orf15                                                                                         | 0,07689604  | 0,290493265 | 0,2   | 0,161 | 1           | 1,223058376   | 0,817622461     | 1,242236025     |
| TM9SF2                                                                                          | 0,129451543 | 0,290027837 | 0,172 | 0,142 | 1           | 1,222663869   | 0,817886277     | 1,211267606     |
| TMEM223                                                                                         | 2,73367E-05 | 0,289948364 | 0,087 | 0,035 | 0,576830807 | 1,222596518   | 0,817931333     | 2,485714286     |
| NUDT9                                                                                           | 0,123155371 | 0,289896222 | 0,094 | 0,072 | 1           | 1,222552332   | 0,817960895     | 1,305555556     |
| SPRYD7                                                                                          | 0,002094741 | 0,289850731 | 0,099 | 0,057 | 1           | 1,222513783   | 0,817986687     | 1,736842105     |
| MAP3K13                                                                                         | 0,045145099 | 0,289612609 | 0,137 | 0,103 | 1           | 1,22231202    | 0,81812171      | 1,330097087     |
| TXNDC15                                                                                         | 0,429134092 | 0,289193358 | 0,196 | 0,178 | 1           | 1,221956864   | 0,818359493     | 1,101123596     |
| PRPS2                                                                                           | 0,005061719 | 0,288907304 | 0,092 | 0,054 | 1           | 1,221714601   | 0,818521772     | 1,703703704     |
| COMMD2                                                                                          | 0,164273948 | 0,288133635 | 0,12  | 0,098 | 1           | 1,221059612   | 0,818960835     | 1,224489796     |
| EPN2                                                                                            | 0,440776831 | 0,28809056  | 0,148 | 0,134 | 1           | 1,221023156   | 0,818985287     | 1,104477612     |

Supplementary Table 5

| Differentially expressed genes_total calculation_ comparing SC-Keloid vs. (SC-Myel, SC-Nonmyel) |             |             |       |       |             |               |                 |                 |
|-------------------------------------------------------------------------------------------------|-------------|-------------|-------|-------|-------------|---------------|-----------------|-----------------|
| gene                                                                                            | p_val       | avg_log2FC  | pct.1 | pct.2 | p_val_adj   | Foldchange_UP | Foldchange_DOWN | Ratio_pct1_pct2 |
| AMPH                                                                                            | 2,0334E-10  | 0,287851691 | 0,057 | 0,001 | 4,29068E-06 | 1,220821006   | 0,819120899     | 57              |
| RASL11B                                                                                         | 2,19984E-05 | 0,287667087 | 0,05  | 0,012 | 0,464189139 | 1,220664802   | 0,819225719     | 4,166666667     |
| MRPS10                                                                                          | 0,007948846 | 0,286878622 | 0,126 | 0,084 | 1           | 1,219997864   | 0,819673566     | 1,5             |
| B4GALT6                                                                                         | 0,012426108 | 0,286864955 | 0,102 | 0,066 | 1           | 1,219986307   | 0,819681331     | 1,545454545     |
| CBY1                                                                                            | 0,143184243 | 0,286859377 | 0,113 | 0,09  | 1           | 1,21998159    | 0,8196845       | 1,255555556     |
| P3H1                                                                                            | 8,15379E-05 | 0,286543286 | 0,141 | 0,076 | 1           | 1,219714324   | 0,819864111     | 1,855263158     |
| PITPNM3                                                                                         | 5,11303E-09 | 0,286511364 | 0,049 | 0,001 | 0,00010789  | 1,219687336   | 0,819882252     | 49              |
| COPZ1                                                                                           | 0,000877182 | 0,286509276 | 0,151 | 0,094 | 1           | 1,219685571   | 0,819883439     | 1,606382979     |
| DNAJC19                                                                                         | 0,200009854 | 0,286218471 | 0,21  | 0,183 | 1           | 1,219439743   | 0,82004872      | 1,147540984     |
| SAMM50                                                                                          | 0,004584063 | 0,286182599 | 0,101 | 0,061 | 1           | 1,219409422   | 0,82006911      | 1,655737705     |
| UTP11                                                                                           | 0,394542606 | 0,286140978 | 0,143 | 0,128 | 1           | 1,219374243   | 0,820092769     | 1,1171875       |
| NDUFA5                                                                                          | 0,653108601 | 0,28609094  | 0,222 | 0,233 | 1           | 1,219331952   | 0,820121214     | 0,9527897       |
| AKT1                                                                                            | 0,136252686 | 0,285951007 | 0,206 | 0,172 | 1           | 1,21921369    | 0,820200764     | 1,197674419     |
| PNO1                                                                                            | 0,02291505  | 0,285931595 | 0,093 | 0,062 | 1           | 1,219197284   | 0,820211801     | 1,5             |
| MCEE                                                                                            | 0,026220734 | 0,285697112 | 0,068 | 0,042 | 1           | 1,218999143   | 0,820345121     | 1,619047619     |
| FXYS5                                                                                           | 0,00293597  | 0,285620521 | 0,206 | 0,148 | 1           | 1,21893443    | 0,820388673     | 1,391891892     |
| AP3B1                                                                                           | 0,010664569 | 0,28538995  | 0,097 | 0,061 | 1           | 1,218739636   | 0,820519798     | 1,590163934     |
| C1QL1                                                                                           | 0,000788575 | 0,285115454 | 0,179 | 0,117 | 1           | 1,218507773   | 0,82067593      | 1,52991453      |
| LHFPL6                                                                                          | 0,467127856 | 0,28487761  | 0,143 | 0,132 | 1           | 1,218306905   | 0,820811239     | 1,083333333     |
| MIER1                                                                                           | 0,458064296 | 0,284832126 | 0,148 | 0,134 | 1           | 1,218268496   | 0,820837117     | 1,104477612     |
| HK1                                                                                             | 0,034822484 | 0,284828564 | 0,134 | 0,098 | 1           | 1,218265488   | 0,820839144     | 1,367346939     |
| UBE2J1                                                                                          | 0,024226585 | 0,284759668 | 0,121 | 0,085 | 1           | 1,218207311   | 0,820878344     | 1,423529412     |
| RABL6                                                                                           | 0,001680372 | 0,284509495 | 0,162 | 0,104 | 1           | 1,217996084   | 0,821020702     | 1,557692308     |
| ANAPC16                                                                                         | 0,793054189 | 0,284419021 | 0,268 | 0,263 | 1           | 1,217919704   | 0,821072191     | 1,019011407     |
| ORAI2                                                                                           | 7,36065E-06 | 0,284355084 | 0,077 | 0,026 | 0,155317013 | 1,21786573    | 0,82110858      | 2,961538462     |
| DNAJC8                                                                                          | 0,261649238 | 0,284134416 | 0,26  | 0,29  | 1           | 1,217679465   | 0,821234182     | 0,896551724     |
| GNS                                                                                             | 0,092767498 | 0,284006042 | 0,091 | 0,068 | 1           | 1,217571118   | 0,821307261     | 1,338235294     |
| NANS                                                                                            | 0,071666118 | 0,283969016 | 0,148 | 0,115 | 1           | 1,21753987    | 0,82132834      | 1,286956522     |
| HLA-A                                                                                           | 0,40336226  | 0,283416398 | 0,559 | 0,696 | 1           | 1,217073586   | 0,821643006     | 0,80316092      |
| IFT57                                                                                           | 0,661373373 | 0,283406099 | 0,163 | 0,153 | 1           | 1,217064898   | 0,821648872     | 1,065359477     |

Supplementary Table 5

| Differentially expressed genes_total calculation_ comparing SC-Keloid vs. (SC-Myel, SC-Nonmyel) |             |             |       |       |             |               |                 |                 |
|-------------------------------------------------------------------------------------------------|-------------|-------------|-------|-------|-------------|---------------|-----------------|-----------------|
| gene                                                                                            | p_val       | avg_log2FC  | pct.1 | pct.2 | p_val_adj   | Foldchange_UP | Foldchange_DOWN | Ratio_pct1_pct2 |
| PHF6                                                                                            | 0,089105724 | 0,283326883 | 0,081 | 0,06  | 1           | 1,216998073   | 0,821693988     | 1,35            |
| NOTCH3                                                                                          | 8,51652E-06 | 0,28332133  | 0,048 | 0,009 | 0,179707104 | 1,216993388   | 0,821697151     | 5,333333333     |
| NUDT22                                                                                          | 7,35622E-05 | 0,283241443 | 0,104 | 0,049 | 1           | 1,216926001   | 0,821742653     | 2,12244898      |
| COPS6                                                                                           | 0,296430644 | 0,282854218 | 0,226 | 0,205 | 1           | 1,216599417   | 0,821963241     | 1,102439024     |
| TATDN1                                                                                          | 0,007676296 | 0,282753793 | 0,122 | 0,08  | 1           | 1,216514733   | 0,82202046      | 1,525           |
| KNOP1                                                                                           | 0,024062954 | 0,282560217 | 0,088 | 0,058 | 1           | 1,216351517   | 0,822130763     | 1,517241379     |
| PTPRK                                                                                           | 0,00352602  | 0,281266291 | 0,121 | 0,076 | 1           | 1,215261083   | 0,822868447     | 1,592105263     |
| NPM3                                                                                            | 1,49548E-05 | 0,280525597 | 0,072 | 0,024 | 0,31556125  | 1,214637315   | 0,823291025     | 3               |
| TCAF1                                                                                           | 0,034306116 | 0,2803908   | 0,125 | 0,09  | 1           | 1,214523832   | 0,823367952     | 1,388888889     |
| XRN2                                                                                            | 0,181318372 | 0,280200499 | 0,193 | 0,167 | 1           | 1,214363639   | 0,823476567     | 1,155688623     |
| YBEY                                                                                            | 2,15246E-05 | 0,280182637 | 0,116 | 0,054 | 0,454190202 | 1,214348605   | 0,823486762     | 2,148148148     |
| AC147651.4                                                                                      | 0,00116151  | 0,280077916 | 0,097 | 0,053 | 1           | 1,214260462   | 0,823546538     | 1,830188679     |
| TRPV2                                                                                           | 7,8555E-10  | 0,279320522 | 0,07  | 0,008 | 1,65759E-05 | 1,21362316    | 0,823979002     | 8,75            |
| BCL7C                                                                                           | 0,377490692 | 0,278956588 | 0,222 | 0,205 | 1           | 1,21331705    | 0,824186885     | 1,082926829     |
| OXLD1                                                                                           | 1,4783E-05  | 0,278793646 | 0,075 | 0,026 | 0,311935509 | 1,213180023   | 0,824279976     | 2,884615385     |
| YIPF5                                                                                           | 0,046091027 | 0,278741028 | 0,132 | 0,099 | 1           | 1,213135776   | 0,82431004      | 1,333333333     |
| ARL16                                                                                           | 0,006259559 | 0,278728253 | 0,12  | 0,077 | 1           | 1,213125034   | 0,824317339     | 1,558441558     |
| GAS8                                                                                            | 4,50178E-07 | 0,278317978 | 0,066 | 0,015 | 0,009499204 | 1,212780093   | 0,824551793     | 4,4             |
| MTIF3                                                                                           | 0,01238658  | 0,278295844 | 0,156 | 0,111 | 1           | 1,212761487   | 0,824564443     | 1,405405405     |
| KRCC1                                                                                           | 0,028606687 | 0,278125864 | 0,157 | 0,117 | 1           | 1,212618606   | 0,8246616       | 1,341880342     |
| ACBD3                                                                                           | 0,219687067 | 0,278033097 | 0,189 | 0,161 | 1           | 1,212540635   | 0,824714629     | 1,173913043     |
| NDUFA9                                                                                          | 0,026982111 | 0,277783044 | 0,114 | 0,08  | 1           | 1,212330492   | 0,824857584     | 1,425           |
| EBPL                                                                                            | 0,004471193 | 0,277688413 | 0,141 | 0,092 | 1           | 1,212250974   | 0,82491169      | 1,532608696     |
| R3HCC1                                                                                          | 0,000304248 | 0,27762075  | 0,132 | 0,073 | 1           | 1,21219412    | 0,82495038      | 1,808219178     |
| TMEM51                                                                                          | 8,23713E-08 | 0,277220741 | 0,055 | 0,007 | 0,001738117 | 1,211858068   | 0,825179141     | 7,857142857     |
| CCT6A                                                                                           | 0,386292187 | 0,277112459 | 0,218 | 0,199 | 1           | 1,211767114   | 0,825241078     | 1,095477387     |
| DCTN1                                                                                           | 0,087097169 | 0,276853011 | 0,148 | 0,115 | 1           | 1,211549216   | 0,825389499     | 1,286956522     |
| FYTTD1                                                                                          | 0,913233361 | 0,27675715  | 0,199 | 0,201 | 1           | 1,211468715   | 0,825444345     | 0,990049751     |
| PLXND1                                                                                          | 0,275353008 | 0,27620882  | 0,171 | 0,149 | 1           | 1,211008356   | 0,825758133     | 1,147651007     |
| ANAPC5                                                                                          | 0,109570228 | 0,276202247 | 0,207 | 0,172 | 1           | 1,211002839   | 0,825761896     | 1,203488372     |

Supplementary Table 5

| Differentially expressed genes_total calculation_ comparing SC-Keloid vs. (SC-Myel, SC-Nonmyel) |             |             |       |       |             |               |                 |                 |
|-------------------------------------------------------------------------------------------------|-------------|-------------|-------|-------|-------------|---------------|-----------------|-----------------|
| gene                                                                                            | p_val       | avg_log2FC  | pct.1 | pct.2 | p_val_adj   | Foldchange_UP | Foldchange_DOWN | Ratio_pct1_pct2 |
| DNAJC21                                                                                         | 0,828072921 | 0,276089744 | 0,172 | 0,176 | 1           | 1,210908407   | 0,825826292     | 0,977272727     |
| PPP1R2                                                                                          | 0,10993284  | 0,276058137 | 0,193 | 0,16  | 1           | 1,210881878   | 0,825844385     | 1,20625         |
| CASD1                                                                                           | 0,051702637 | 0,27596543  | 0,094 | 0,066 | 1           | 1,21080407    | 0,825897455     | 1,424242424     |
| MRPL19                                                                                          | 0,077610775 | 0,275873682 | 0,149 | 0,117 | 1           | 1,210727072   | 0,82594998      | 1,273504274     |
| TRIO                                                                                            | 0,121896992 | 0,275741275 | 0,139 | 0,111 | 1           | 1,210615959   | 0,826025787     | 1,252252252     |
| RAB34                                                                                           | 0,960216681 | 0,275723598 | 0,224 | 0,224 | 1           | 1,210601126   | 0,826035908     | 1               |
| GLB1                                                                                            | 0,005019905 | 0,275608538 | 0,078 | 0,043 | 1           | 1,21050458    | 0,82610179      | 1,813953488     |
| IQSEC1                                                                                          | 0,114332703 | 0,275188786 | 0,104 | 0,08  | 1           | 1,210152435   | 0,826342179     | 1,3             |
| ATP5PO                                                                                          | 0,240535443 | 0,275155232 | 0,285 | 0,322 | 1           | 1,21012429    | 0,826361398     | 0,885093168     |
| HRAS                                                                                            | 0,410568892 | 0,275060957 | 0,162 | 0,147 | 1           | 1,210045215   | 0,8264154       | 1,102040816     |
| TMED3                                                                                           | 4,81952E-06 | 0,27492538  | 0,171 | 0,09  | 0,101696653 | 1,209931506   | 0,826493066     | 1,9             |
| CARD8                                                                                           | 0,019832712 | 0,274722028 | 0,044 | 0,023 | 1           | 1,209760975   | 0,82660957      | 1,913043478     |
| PRMT2                                                                                           | 0,302749914 | 0,2747115   | 0,281 | 0,313 | 1           | 1,209752147   | 0,826615603     | 0,897763578     |
| MTHFD1L                                                                                         | 2,10881E-07 | 0,274529795 | 0,073 | 0,018 | 0,004449798 | 1,209599791   | 0,82671972      | 4,055555556     |
| NT5C                                                                                            | 0,955097276 | 0,274479893 | 0,21  | 0,209 | 1           | 1,209557952   | 0,826748316     | 1,004784689     |
| UBE2K                                                                                           | 0,612344234 | 0,274420079 | 0,172 | 0,183 | 1           | 1,209507805   | 0,826782594     | 0,93989071      |
| IMMT                                                                                            | 0,01875051  | 0,2742364   | 0,133 | 0,094 | 1           | 1,209353824   | 0,826887864     | 1,414893617     |
| TMEM18                                                                                          | 0,05295405  | 0,274017279 | 0,133 | 0,1   | 1           | 1,209170157   | 0,827013464     | 1,33            |
| GPATCH11                                                                                        | 0,016395253 | 0,273612992 | 0,073 | 0,045 | 1           | 1,208831359   | 0,82724525      | 1,622222222     |
| ETFB                                                                                            | 0,509957489 | 0,272984944 | 0,208 | 0,194 | 1           | 1,208305233   | 0,827605453     | 1,072164948     |
| NPTN                                                                                            | 0,031455954 | 0,272827543 | 0,228 | 0,18  | 1           | 1,208173412   | 0,827695751     | 1,266666667     |
| AC011043.1                                                                                      | 0,019084368 | 0,272744956 | 0,054 | 0,03  | 1           | 1,208104252   | 0,827743134     | 1,8             |
| UBA5                                                                                            | 0,047695894 | 0,27272182  | 0,079 | 0,054 | 1           | 1,208084878   | 0,827756408     | 1,462962963     |
| ARF5                                                                                            | 0,989682173 | 0,27252775  | 0,25  | 0,254 | 1           | 1,207922379   | 0,827867765     | 0,984251969     |
| LMAN2                                                                                           | 0,690061662 | 0,272216972 | 0,207 | 0,198 | 1           | 1,207662203   | 0,828046119     | 1,045454545     |
| PPP1R12A                                                                                        | 0,741237564 | 0,27195558  | 0,288 | 0,305 | 1           | 1,207443414   | 0,828196161     | 0,944262295     |
| LSM2                                                                                            | 0,615218238 | 0,27188866  | 0,208 | 0,195 | 1           | 1,207387408   | 0,828234578     | 1,066666667     |
| UCN2                                                                                            | 2,18359E-09 | 0,271740483 | 0,064 | 0,007 | 4,6076E-05  | 1,207263405   | 0,828319649     | 9,142857143     |
| MTAP                                                                                            | 0,179396792 | 0,271660795 | 0,092 | 0,073 | 1           | 1,207196724   | 0,828365403     | 1,260273973     |
| KIF9                                                                                            | 0,00125397  | 0,271659537 | 0,09  | 0,047 | 1           | 1,20719567    | 0,828366125     | 1,914893617     |

Supplementary Table 5

| Differentially expressed genes_total calculation_ comparing SC-Keloid vs. (SC-Myel, SC-Nonmyel) |             |             |       |       |             |               |                 |                 |
|-------------------------------------------------------------------------------------------------|-------------|-------------|-------|-------|-------------|---------------|-----------------|-----------------|
| gene                                                                                            | p_val       | avg_log2FC  | pct.1 | pct.2 | p_val_adj   | Foldchange_UP | Foldchange_DOWN | Ratio_pct1_pct2 |
| RCAN1                                                                                           | 0,832042297 | 0,271381504 | 0,466 | 0,535 | 1           | 1,206963045   | 0,828525781     | 0,871028037     |
| PSMD10                                                                                          | 0,053749873 | 0,27126317  | 0,088 | 0,062 | 1           | 1,20686405    | 0,828593743     | 1,419354839     |
| TSEN15                                                                                          | 0,00047601  | 0,271103694 | 0,083 | 0,039 | 1           | 1,206730651   | 0,82868534      | 2,128205128     |
| ARL14EP                                                                                         | 0,139132647 | 0,2708948   | 0,068 | 0,05  | 1           | 1,206555935   | 0,828805338     | 1,36            |
| GLCE                                                                                            | 0,009499681 | 0,27073421  | 0,051 | 0,026 | 1           | 1,206421638   | 0,8288976       | 1,961538462     |
| MED10                                                                                           | 0,311447214 | 0,270703684 | 0,197 | 0,174 | 1           | 1,206396112   | 0,828915138     | 1,132183908     |
| MAZ                                                                                             | 0,080523413 | 0,270585196 | 0,218 | 0,182 | 1           | 1,206297035   | 0,82898322      | 1,197802198     |
| COPS7A                                                                                          | 0,003810606 | 0,270362271 | 0,102 | 0,061 | 1           | 1,206110653   | 0,829111324     | 1,672131148     |
| ITGA5                                                                                           | 9,93165E-05 | 0,269722576 | 0,086 | 0,038 | 1           | 1,205575979   | 0,829479035     | 2,263157895     |
| TMEM230                                                                                         | 0,334282037 | 0,269643495 | 0,246 | 0,224 | 1           | 1,205509897   | 0,829524505     | 1,098214286     |
| LNPEP                                                                                           | 0,709517133 | 0,269616685 | 0,116 | 0,111 | 1           | 1,205487495   | 0,82953992      | 1,045045045     |
| SETX                                                                                            | 0,537562232 | 0,269524827 | 0,137 | 0,126 | 1           | 1,205410742   | 0,82959274      | 1,087301587     |
| SH3YL1                                                                                          | 0,147548729 | 0,268815368 | 0,12  | 0,096 | 1           | 1,204818116   | 0,8300008       | 1,25            |
| TTL                                                                                             | 0,033045525 | 0,268808852 | 0,105 | 0,073 | 1           | 1,204812674   | 0,830004549     | 1,438356164     |
| SPAG16                                                                                          | 0,751452484 | 0,268284227 | 0,075 | 0,071 | 1           | 1,204374633   | 0,830306428     | 1,056338028     |
| CCPG1                                                                                           | 0,186307762 | 0,267437137 | 0,208 | 0,179 | 1           | 1,203667683   | 0,830794092     | 1,162011173     |
| POMC                                                                                            | 0,001614657 | 0,267307018 | 0,03  | 0,008 | 1           | 1,203559127   | 0,830869026     | 3,75            |
| DCTD                                                                                            | 0,292259718 | 0,267236713 | 0,134 | 0,115 | 1           | 1,203500476   | 0,830909518     | 1,165217391     |
| TBC1D8B                                                                                         | 0,000485385 | 0,267160365 | 0,048 | 0,016 | 1           | 1,203436788   | 0,830953491     | 3               |
| VPS26C                                                                                          | 0,100193005 | 0,266582797 | 0,075 | 0,054 | 1           | 1,202955102   | 0,831286221     | 1,388888889     |
| NMI                                                                                             | 0,019139225 | 0,266486767 | 0,1   | 0,066 | 1           | 1,202875032   | 0,831341556     | 1,515151515     |
| EPHA3                                                                                           | 0,000102511 | 0,266298906 | 0,041 | 0,009 | 1           | 1,20271841    | 0,831449816     | 4,555555556     |
| LTBP1                                                                                           | 1,34641E-06 | 0,266259908 | 0,078 | 0,023 | 0,028410695 | 1,202685899   | 0,831472291     | 3,391304348     |
| ZFPL1                                                                                           | 0,009332477 | 0,266247079 | 0,077 | 0,045 | 1           | 1,202675204   | 0,831479685     | 1,711111111     |
| LEO1                                                                                            | 0,000563    | 0,266104125 | 0,087 | 0,043 | 1           | 1,202556039   | 0,831562079     | 2,023255814     |
| TUBB3                                                                                           | 2,11615E-05 | 0,265941152 | 0,101 | 0,045 | 0,446528748 | 1,202420201   | 0,831656021     | 2,244444444     |
| NLRP1                                                                                           | 0,003717015 | 0,265355627 | 0,125 | 0,079 | 1           | 1,201932292   | 0,831993621     | 1,582278481     |
| CDC42SE1                                                                                        | 0,077491493 | 0,265235296 | 0,236 | 0,286 | 1           | 1,201832046   | 0,832063019     | 0,825174825     |
| CLNS1A                                                                                          | 0,120594767 | 0,264950464 | 0,179 | 0,145 | 1           | 1,201594791   | 0,832227309     | 1,234482759     |
| CFDP1                                                                                           | 0,960864083 | 0,264908848 | 0,197 | 0,198 | 1           | 1,20156013    | 0,832251316     | 0,994949495     |

Supplementary Table 5

| Differentially expressed genes_total calculation_ comparing SC-Keloid vs. (SC-Myel, SC-Nonmyel) |             |             |       |       |             |               |                 |                 |
|-------------------------------------------------------------------------------------------------|-------------|-------------|-------|-------|-------------|---------------|-----------------|-----------------|
| gene                                                                                            | p_val       | avg_log2FC  | pct.1 | pct.2 | p_val_adj   | Foldchange_UP | Foldchange_DOWN | Ratio_pct1_pct2 |
| GFUS                                                                                            | 6,94909E-05 | 0,264594987 | 0,112 | 0,054 | 1           | 1,201298758   | 0,832432393     | 2,074074074     |
| NDUFB5                                                                                          | 0,083153968 | 0,264271689 | 0,187 | 0,151 | 1           | 1,201029584   | 0,832618957     | 1,238410596     |
| LAP3                                                                                            | 0,007640964 | 0,263431569 | 0,122 | 0,08  | 1           | 1,200330396   | 0,833103955     | 1,525           |
| SERPINH1                                                                                        | 0,931867033 | 0,263081583 | 0,354 | 0,374 | 1           | 1,200039241   | 0,833306083     | 0,946524064     |
| ALG5                                                                                            | 0,213529012 | 0,262956587 | 0,151 | 0,128 | 1           | 1,199935274   | 0,833378284     | 1,1796875       |
| TPM1                                                                                            | 0,117656489 | 0,26282149  | 0,143 | 0,115 | 1           | 1,199822915   | 0,833456327     | 1,243478261     |
| NUTF2                                                                                           | 0,005180764 | 0,262635631 | 0,153 | 0,102 | 1           | 1,199668354   | 0,833563707     | 1,5             |
| AP3S1                                                                                           | 0,127289656 | 0,262397729 | 0,179 | 0,148 | 1           | 1,199470544   | 0,833701174     | 1,209459459     |
| PDHB                                                                                            | 0,010140229 | 0,262247464 | 0,151 | 0,104 | 1           | 1,199345618   | 0,833788013     | 1,451923077     |
| SLC39A10                                                                                        | 0,003075078 | 0,262224301 | 0,139 | 0,09  | 1           | 1,199326362   | 0,8338014       | 1,544444444     |
| ST3GAL2                                                                                         | 0,000435418 | 0,26215683  | 0,063 | 0,026 | 1           | 1,199270275   | 0,833840395     | 2,423076923     |
| KATNAL1                                                                                         | 0,137200781 | 0,262147721 | 0,132 | 0,106 | 1           | 1,199262703   | 0,83384566      | 1,245283019     |
| TUBB6                                                                                           | 0,129973287 | 0,262064461 | 0,172 | 0,144 | 1           | 1,199193494   | 0,833893784     | 1,194444444     |
| OXTR                                                                                            | 1,21061E-08 | 0,261996799 | 0,043 | 0     | 0,000255451 | 1,199137254   | 0,833932894     | #DIV/0!         |
| CHMP3                                                                                           | 0,954196016 | 0,261966775 | 0,239 | 0,24  | 1           | 1,199112298   | 0,83395025      | 0,995833333     |
| HOOK3                                                                                           | 0,789363162 | 0,261764321 | 0,226 | 0,235 | 1           | 1,198944038   | 0,834067286     | 0,961702128     |
| RAP1GDS1                                                                                        | 0,912451567 | 0,261080318 | 0,176 | 0,172 | 1           | 1,198375736   | 0,834462823     | 1,023255814     |
| SYNC                                                                                            | 0,060368849 | 0,261070796 | 0,078 | 0,054 | 1           | 1,198367826   | 0,834468331     | 1,444444444     |
| B3GALT6                                                                                         | 6,57478E-09 | 0,260940234 | 0,086 | 0,019 | 0,000138735 | 1,19825938    | 0,834543853     | 4,526315789     |
| CLUAP1                                                                                          | 0,001753452 | 0,260869185 | 0,088 | 0,047 | 1           | 1,198200371   | 0,834584953     | 1,872340426     |
| GRN                                                                                             | 0,107847329 | 0,260480767 | 0,217 | 0,182 | 1           | 1,197877821   | 0,834809679     | 1,192307692     |
| MED31                                                                                           | 0,004147438 | 0,260438916 | 0,1   | 0,06  | 1           | 1,197843073   | 0,834833897     | 1,666666667     |
| MMP11                                                                                           | 1,21554E-10 | 0,260006968 | 0,065 | 0,004 | 2,5649E-06  | 1,197484488   | 0,835083886     | 16,25           |
| DCBLD1                                                                                          | 9,05856E-07 | 0,259903758 | 0,059 | 0,012 | 0,019114464 | 1,197398824   | 0,83514363      | 4,916666667     |
| SRPK1                                                                                           | 0,945479901 | 0,259856922 | 0,079 | 0,079 | 1           | 1,197359952   | 0,835170743     | 1               |
| RAB22A                                                                                          | 0,37942577  | 0,259508115 | 0,146 | 0,129 | 1           | 1,197070496   | 0,83537269      | 1,131782946     |
| ZNF720                                                                                          | 0,07424333  | 0,25946633  | 0,077 | 0,054 | 1           | 1,197035825   | 0,835396885     | 1,425925926     |
| LYPLA1                                                                                          | 1,7051E-05  | 0,259431601 | 0,109 | 0,049 | 0,359793364 | 1,19700701    | 0,835416996     | 2,224489796     |
| PAFAH1B1                                                                                        | 0,565336363 | 0,259419062 | 0,276 | 0,296 | 1           | 1,196996607   | 0,835424256     | 0,932432432     |
| B4GALT2                                                                                         | 2,78388E-05 | 0,259345247 | 0,098 | 0,042 | 0,58742678  | 1,196935364   | 0,835467002     | 2,333333333     |

Supplementary Table 5

| Differentially expressed genes_total calculation_ comparing SC-Keloid vs. (SC-Myel, SC-Nonmyel) |             |             |       |       |             |               |                 |                 |
|-------------------------------------------------------------------------------------------------|-------------|-------------|-------|-------|-------------|---------------|-----------------|-----------------|
| gene                                                                                            | p_val       | avg_log2FC  | pct.1 | pct.2 | p_val_adj   | Foldchange_UP | Foldchange_DOWN | Ratio_pct1_pct2 |
| C5orf51                                                                                         | 0,046019876 | 0,259180975 | 0,055 | 0,034 | 1           | 1,196799083   | 0,835562137     | 1,617647059     |
| GALNT11                                                                                         | 0,261917571 | 0,259119886 | 0,107 | 0,09  | 1           | 1,196748408   | 0,835597519     | 1,188888889     |
| FUCA2                                                                                           | 0,005305908 | 0,258998131 | 0,128 | 0,083 | 1           | 1,196647413   | 0,835668041     | 1,542168675     |
| ZDHHC5                                                                                          | 0,000554628 | 0,258635324 | 0,093 | 0,047 | 1           | 1,19634652    | 0,835878221     | 1,978723404     |
| COP5                                                                                            | 0,147525408 | 0,258303822 | 0,142 | 0,115 | 1           | 1,196071655   | 0,83607031      | 1,234782609     |
| PITPNA-AS1                                                                                      | 0,001914898 | 0,258082208 | 0,071 | 0,035 | 1           | 1,195887939   | 0,83619875      | 2,028571429     |
| LZIC                                                                                            | 0,131428438 | 0,258045812 | 0,133 | 0,107 | 1           | 1,19585777    | 0,836219846     | 1,242990654     |
| ZNRD2                                                                                           | 0,001847516 | 0,257769532 | 0,119 | 0,071 | 1           | 1,195628782   | 0,836379999     | 1,676056338     |
| LARP7                                                                                           | 0,041806529 | 0,257629025 | 0,192 | 0,152 | 1           | 1,195512343   | 0,83646146      | 1,263157895     |
| IFI27L1                                                                                         | 1,52205E-05 | 0,257552366 | 0,118 | 0,054 | 0,321167129 | 1,19544882    | 0,836505908     | 2,185185185     |
| ZFYVE16                                                                                         | 0,537374449 | 0,257420463 | 0,172 | 0,159 | 1           | 1,195339527   | 0,836582391     | 1,081761006     |
| FAHD1                                                                                           | 9,47896E-05 | 0,256770974 | 0,062 | 0,022 | 1           | 1,194801516   | 0,836959099     | 2,818181818     |
| MMP16                                                                                           | 3,06174E-07 | 0,256736665 | 0,035 | 0     | 0,006460576 | 1,194773103   | 0,836979002     | #DIV/0!         |
| TCTN1                                                                                           | 0,000115127 | 0,256653236 | 0,092 | 0,042 | 1           | 1,194704013   | 0,837027405     | 2,19047619      |
| PAFAH1B2                                                                                        | 0,752194726 | 0,256396143 | 0,178 | 0,17  | 1           | 1,194491132   | 0,837176579     | 1,047058824     |
| ZNF160                                                                                          | 0,100442182 | 0,255912039 | 0,049 | 0,033 | 1           | 1,194090381   | 0,837457546     | 1,484848485     |
| STT3A                                                                                           | 0,005146991 | 0,255737563 | 0,088 | 0,052 | 1           | 1,193945979   | 0,837558832     | 1,692307692     |
| PDCL                                                                                            | 0,011253118 | 0,254912578 | 0,09  | 0,056 | 1           | 1,193263433   | 0,838037915     | 1,607142857     |
| S100A7                                                                                          | 0,553179177 | 0,254796356 | 0,024 | 0,02  | 1           | 1,193167309   | 0,838105429     | 1,2             |
| PTGR1                                                                                           | 0,000605791 | 0,254380298 | 0,135 | 0,079 | 1           | 1,192823262   | 0,838347165     | 1,708860759     |
| KHDRBS1                                                                                         | 0,626354098 | 0,254053273 | 0,274 | 0,289 | 1           | 1,192552908   | 0,83853722      | 0,948096886     |
| KIN                                                                                             | 0,635406219 | 0,253951269 | 0,086 | 0,08  | 1           | 1,192468592   | 0,83859651      | 1,075           |
| AFAP1L1                                                                                         | 2,64515E-05 | 0,253889313 | 0,09  | 0,037 | 0,558152066 | 1,192417384   | 0,838632524     | 2,432432432     |
| UBE2G2                                                                                          | 0,936082783 | 0,253877474 | 0,159 | 0,16  | 1           | 1,192407598   | 0,838639406     | 0,99375         |
| CHTF8                                                                                           | 5,26146E-06 | 0,253832609 | 0,041 | 0,005 | 0,111022052 | 1,192370518   | 0,838665486     | 8,2             |
| IMMP1L                                                                                          | 0,002987952 | 0,253710973 | 0,099 | 0,057 | 1           | 1,192269991   | 0,838736198     | 1,736842105     |
| ELMOD2                                                                                          | 0,001662646 | 0,253631999 | 0,087 | 0,046 | 1           | 1,192204728   | 0,838782113     | 1,891304348     |
| GSPT1                                                                                           | 0,682460915 | 0,253520557 | 0,169 | 0,16  | 1           | 1,192112638   | 0,838846908     | 1,05625         |
| LIMD2                                                                                           | 5,80708E-06 | 0,253415866 | 0,098 | 0,038 | 0,12253521  | 1,192026134   | 0,838907782     | 2,578947368     |
| ADGRG6                                                                                          | 0,303700772 | 0,253370504 | 0,164 | 0,144 | 1           | 1,191988654   | 0,83893416      | 1,138888889     |



Supplementary Table 5

| Differentially expressed genes_total calculation_ comparing SC-Keloid vs. (SC-Myel, SC-Nonmyel) |             |             |       |       |             |               |                 |                 |
|-------------------------------------------------------------------------------------------------|-------------|-------------|-------|-------|-------------|---------------|-----------------|-----------------|
| gene                                                                                            | p_val       | avg_log2FC  | pct.1 | pct.2 | p_val_adj   | Foldchange_UP | Foldchange_DOWN | Ratio_pct1_pct2 |
| NCBP2AS2                                                                                        | 0,065029529 | 0,253283998 | 0,108 | 0,08  | 1           | 1,191917183   | 0,838984465     | 1,35            |
| SVBP                                                                                            | 0,105160041 | 0,252857323 | 0,106 | 0,081 | 1           | 1,191564728   | 0,83923263      | 1,308641975     |
| CREB3L1                                                                                         | 1,30972E-09 | 0,252400521 | 0,056 | 0,003 | 2,76364E-05 | 1,191187501   | 0,839498399     | 18,66666667     |
| ICE1                                                                                            | 0,097912742 | 0,252396992 | 0,128 | 0,1   | 1           | 1,191184587   | 0,839500453     | 1,28            |
| RPL23                                                                                           | 0,808967257 | 0,25226745  | 0,541 | 0,665 | 1           | 1,191077633   | 0,839575836     | 0,813533835     |
| RASSF8-AS1                                                                                      | 0,081730274 | 0,252005394 | 0,136 | 0,106 | 1           | 1,190861302   | 0,839728353     | 1,283018868     |
| PA2G4                                                                                           | 0,286733    | 0,251851681 | 0,295 | 0,326 | 1           | 1,190734428   | 0,839817827     | 0,904907975     |
| ZNF226                                                                                          | 9,51442E-05 | 0,251776639 | 0,075 | 0,03  | 1           | 1,190672493   | 0,839861512     | 2,5             |
| HAX1                                                                                            | 0,035792616 | 0,251631462 | 0,165 | 0,125 | 1           | 1,190552682   | 0,839946031     | 1,32            |
| FMNL3                                                                                           | 0,033274714 | 0,251426229 | 0,134 | 0,098 | 1           | 1,190383331   | 0,840065527     | 1,367346939     |
| TASOR                                                                                           | 0,718987372 | 0,251116048 | 0,098 | 0,092 | 1           | 1,190127424   | 0,840246161     | 1,065217391     |
| MVP                                                                                             | 0,004131149 | 0,250867618 | 0,13  | 0,083 | 1           | 1,189922504   | 0,840390863     | 1,56626506      |
| HSPA4                                                                                           | 0,544305072 | 0,250864783 | 0,135 | 0,123 | 1           | 1,189920165   | 0,840392515     | 1,097560976     |
| MYEOV                                                                                           | 1,93797E-11 | 0,250705452 | 0,063 | 0,001 | 4,0893E-07  | 1,189788759   | 0,840485332     | 63              |
| ZNHIT3                                                                                          | 0,039946006 | 0,250660962 | 0,123 | 0,09  | 1           | 1,189752068   | 0,840511252     | 1,366666667     |
| PHACTR2                                                                                         | 0,232581268 | 0,250601901 | 0,076 | 0,094 | 1           | 1,189703362   | 0,840545662     | 0,808510638     |
| IER3IP1                                                                                         | 0,106955808 | 0,250389849 | 0,184 | 0,148 | 1           | 1,189528509   | 0,840669216     | 1,243243243     |
| RP9                                                                                             | 0,00610524  | 0,250153391 | 0,105 | 0,065 | 1           | 1,189333561   | 0,840807014     | 1,615384615     |
| GART                                                                                            | 0,001125614 | 0,250107125 | 0,079 | 0,039 | 1           | 1,189295421   | 0,840833978     | 2,025641026     |
| C15orf61                                                                                        | 0,00809723  | 0,250100388 | 0,088 | 0,053 | 1           | 1,189289867   | 0,840837905     | 1,660377358     |
| SLF2                                                                                            | 0,585765608 | 0,250054015 | 0,109 | 0,1   | 1           | 1,18925164    | 0,840864933     | 1,09            |
| LAMA2                                                                                           | 0,830088255 | 0,249953018 | 0,136 | 0,132 | 1           | 1,189168388   | 0,8409238       | 1,03030303      |
| PHAX                                                                                            | 0,059251557 | 0,249613153 | 0,123 | 0,092 | 1           | 1,188888282   | 0,841121925     | 1,336956522     |
| NUDT15                                                                                          | 0,018304675 | 0,24940455  | 0,05  | 0,027 | 1           | 1,18871639    | 0,841243554     | 1,851851852     |
| HMGXB4                                                                                          | 0,207666747 | 0,249193849 | 0,109 | 0,09  | 1           | 1,188542794   | 0,841366423     | 1,211111111     |
| HS3ST1                                                                                          | 5,45036E-08 | 0,249134526 | 0,072 | 0,015 | 0,001150082 | 1,188493922   | 0,841401021     | 4,8             |
| DCAF13                                                                                          | 0,078090212 | 0,249049971 | 0,122 | 0,094 | 1           | 1,188424268   | 0,841450336     | 1,29787234      |
| CCL21                                                                                           | 0,578814735 | 0,248281664 | 0,009 | 0,012 | 1           | 1,187791542   | 0,84189857      | 0,75            |
| LSM6                                                                                            | 0,097639723 | 0,248082823 | 0,123 | 0,095 | 1           | 1,187627844   | 0,842014613     | 1,294736842     |
| SPNS1                                                                                           | 5,00151E-06 | 0,247987094 | 0,108 | 0,045 | 0,10553696  | 1,187549043   | 0,842070486     | 2,4             |

Supplementary Table 5

| Differentially expressed genes_total calculation_ comparing SC-Keloid vs. (SC-Myel, SC-Nonmyel) |             |             |       |       |             |               |                 |                 |
|-------------------------------------------------------------------------------------------------|-------------|-------------|-------|-------|-------------|---------------|-----------------|-----------------|
| gene                                                                                            | p_val       | avg_log2FC  | pct.1 | pct.2 | p_val_adj   | Foldchange_UP | Foldchange_DOWN | Ratio_pct1_pct2 |
| H2AZ2                                                                                           | 0,078764134 | 0,247898594 | 0,296 | 0,35  | 1           | 1,187476196   | 0,842122144     | 0,845714286     |
| SEC23A                                                                                          | 0,337142359 | 0,247467319 | 0,127 | 0,11  | 1           | 1,187121269   | 0,842373923     | 1,154545455     |
| CYB561D2                                                                                        | 2,96228E-05 | 0,24743516  | 0,075 | 0,027 | 0,625069713 | 1,187094807   | 0,8423927       | 2,777777778     |
| TMEM267                                                                                         | 0,014224657 | 0,247253995 | 0,068 | 0,039 | 1           | 1,186945748   | 0,842498489     | 1,743589744     |
| CIB2                                                                                            | 3,49541E-09 | 0,247064092 | 0,063 | 0,007 | 7,37566E-05 | 1,18678952    | 0,842609395     | 9               |
| NDUFS3                                                                                          | 0,042582786 | 0,246995514 | 0,204 | 0,16  | 1           | 1,186733108   | 0,84264945      | 1,275           |
| UTP23                                                                                           | 0,001371783 | 0,246975464 | 0,078 | 0,039 | 1           | 1,186716615   | 0,842661161     | 2               |
| ACBD6                                                                                           | 0,184476215 | 0,246826434 | 0,144 | 0,119 | 1           | 1,186594034   | 0,842748212     | 1,210084034     |
| RRP7A                                                                                           | 0,007175032 | 0,246766394 | 0,099 | 0,061 | 1           | 1,186544653   | 0,842783285     | 1,62295082      |
| ZNF322                                                                                          | 0,488713044 | 0,246496188 | 0,097 | 0,087 | 1           | 1,186322443   | 0,842941146     | 1,114942529     |
| KIFC3                                                                                           | 3,38484E-05 | 0,246349317 | 0,14  | 0,072 | 0,714235798 | 1,186201677   | 0,843026965     | 1,944444444     |
| ACOT7                                                                                           | 3,33357E-06 | 0,246300741 | 0,134 | 0,061 | 0,070341615 | 1,186161738   | 0,843055351     | 2,196721311     |
| GCC2                                                                                            | 0,528498981 | 0,246284915 | 0,201 | 0,217 | 1           | 1,186148727   | 0,843064598     | 0,926267281     |
| SMIM7                                                                                           | 0,337742488 | 0,246024113 | 0,217 | 0,195 | 1           | 1,185934321   | 0,843217016     | 1,112820513     |
| PLEKHG4                                                                                         | 2,02403E-07 | 0,245670027 | 0,069 | 0,015 | 0,0042709   | 1,185643288   | 0,843423996     | 4,6             |
| PAM                                                                                             | 0,001784747 | 0,245572227 | 0,083 | 0,043 | 1           | 1,185562917   | 0,843481173     | 1,930232558     |
| TCF12                                                                                           | 0,003854023 | 0,245337681 | 0,139 | 0,09  | 1           | 1,185370189   | 0,843618313     | 1,544444444     |
| PLA2G4A                                                                                         | 0,008938189 | 0,245157931 | 0,057 | 0,03  | 1           | 1,185222509   | 0,843723429     | 1,9             |
| MAN1B1                                                                                          | 0,010885038 | 0,245096323 | 0,161 | 0,114 | 1           | 1,185171897   | 0,84375946      | 1,412280702     |
| PHC2                                                                                            | 0,03895493  | 0,244952518 | 0,197 | 0,153 | 1           | 1,185053767   | 0,843843569     | 1,287581699     |
| TMEM147                                                                                         | 0,05699142  | 0,244922135 | 0,193 | 0,151 | 1           | 1,185028811   | 0,84386134      | 1,278145695     |
| WDR83OS                                                                                         | 0,202860689 | 0,244893835 | 0,367 | 0,434 | 1           | 1,185005566   | 0,843877893     | 0,84562212      |
| MRPL42                                                                                          | 0,906286819 | 0,244798257 | 0,186 | 0,19  | 1           | 1,184927062   | 0,843933801     | 0,978947368     |
| SLC9A3R2                                                                                        | 0,080045435 | 0,244728995 | 0,246 | 0,21  | 1           | 1,184870177   | 0,843974319     | 1,171428571     |
| CNPY2                                                                                           | 0,238981805 | 0,244237435 | 0,343 | 0,408 | 1           | 1,184466532   | 0,84426193      | 0,840686275     |
| MFN1                                                                                            | 2,18389E-05 | 0,243223656 | 0,092 | 0,038 | 0,460822743 | 1,183634502   | 0,844855399     | 2,421052632     |
| ZBTB14                                                                                          | 0,000357977 | 0,243142287 | 0,04  | 0,011 | 1           | 1,183567746   | 0,844903051     | 3,636363636     |
| HMOX2                                                                                           | 0,023857219 | 0,242905259 | 0,125 | 0,087 | 1           | 1,183373307   | 0,845041876     | 1,436781609     |
| SDHAF3                                                                                          | 0,002285482 | 0,242473672 | 0,125 | 0,076 | 1           | 1,183019351   | 0,845294711     | 1,644736842     |
| EEF1AKMT1                                                                                       | 0,012392217 | 0,242449391 | 0,059 | 0,033 | 1           | 1,18299944    | 0,845308937     | 1,787878788     |

Supplementary Table 5

| Differentially expressed genes_total calculation_ comparing SC-Keloid vs. (SC-Myel, SC-Nonmyel) |             |             |       |       |             |               |                 |                 |
|-------------------------------------------------------------------------------------------------|-------------|-------------|-------|-------|-------------|---------------|-----------------|-----------------|
| gene                                                                                            | p_val       | avg_log2FC  | pct.1 | pct.2 | p_val_adj   | Foldchange_UP | Foldchange_DOWN | Ratio_pct1_pct2 |
| TARS1                                                                                           | 0,974305227 | 0,242298084 | 0,165 | 0,164 | 1           | 1,182875376   | 0,845397597     | 1,006097561     |
| CANX                                                                                            | 0,154588217 | 0,242296029 | 0,392 | 0,478 | 1           | 1,182873691   | 0,845398801     | 0,820083682     |
| ELP5                                                                                            | 0,2442882   | 0,242134514 | 0,122 | 0,102 | 1           | 1,182741272   | 0,845493451     | 1,196078431     |
| KLHL9                                                                                           | 0,044554614 | 0,24210301  | 0,062 | 0,039 | 1           | 1,182715444   | 0,845511915     | 1,58974359      |
| MYEF2                                                                                           | 0,025087832 | 0,241994622 | 0,081 | 0,053 | 1           | 1,182626592   | 0,845575439     | 1,528301887     |
| BTBD10                                                                                          | 0,005923447 | 0,241869097 | 0,079 | 0,045 | 1           | 1,182523699   | 0,845649014     | 1,755555556     |
| TAOK3                                                                                           | 0,264316284 | 0,241730739 | 0,139 | 0,118 | 1           | 1,182410297   | 0,845730118     | 1,177966102     |
| FKBP9                                                                                           | 0,035015802 | 0,241714102 | 0,182 | 0,138 | 1           | 1,182396662   | 0,845739871     | 1,31884058      |
| CHD9                                                                                            | 0,67082464  | 0,241377875 | 0,293 | 0,311 | 1           | 1,182121131   | 0,845936997     | 0,942122186     |
| NFE2L3                                                                                          | 0,002879796 | 0,241305522 | 0,056 | 0,026 | 1           | 1,182061847   | 0,845979423     | 2,153846154     |
| ATG12                                                                                           | 0,496481168 | 0,241279705 | 0,136 | 0,148 | 1           | 1,182040695   | 0,845994562     | 0,918918919     |
| PLPP5                                                                                           | 0,021201093 | 0,241258616 | 0,105 | 0,071 | 1           | 1,182023416   | 0,846006929     | 1,478873239     |
| MT1F                                                                                            | 3,56145E-05 | 0,241063695 | 0,122 | 0,06  | 0,751501968 | 1,181863725   | 0,84612124      | 2,033333333     |
| DDR1                                                                                            | 0,370631787 | 0,240986307 | 0,156 | 0,137 | 1           | 1,18180033    | 0,846166628     | 1,138686131     |
| B3GALT2                                                                                         | 0,010869862 | 0,240961179 | 0,043 | 0,02  | 1           | 1,181779746   | 0,846181366     | 2,15            |
| HOXD-AS2                                                                                        | 3,78178E-08 | 0,24054502  | 0,081 | 0,019 | 0,000797993 | 1,1814389     | 0,84642549      | 4,263157895     |
| DNAJC3                                                                                          | 0,15161568  | 0,240501925 | 0,232 | 0,265 | 1           | 1,181403609   | 0,846450774     | 0,875471698     |
| PSME3IP1                                                                                        | 0,038714266 | 0,240420117 | 0,119 | 0,085 | 1           | 1,18133662    | 0,846498774     | 1,4             |
| GPATCH4                                                                                         | 0,001938278 | 0,240181624 | 0,084 | 0,045 | 1           | 1,181141349   | 0,84663872      | 1,866666667     |
| CARNMT1                                                                                         | 0,154893932 | 0,240141115 | 0,043 | 0,03  | 1           | 1,181108184   | 0,846662494     | 1,433333333     |
| PTRH1                                                                                           | 0,00041319  | 0,240136637 | 0,073 | 0,033 | 1           | 1,181104518   | 0,846665121     | 2,212121212     |
| LAYN                                                                                            | 0,000214196 | 0,239763382 | 0,084 | 0,038 | 1           | 1,180798981   | 0,846884199     | 2,210526316     |
| EBAG9                                                                                           | 0,458915549 | 0,239755246 | 0,087 | 0,076 | 1           | 1,180792322   | 0,846888976     | 1,144736842     |
| GEMIN6                                                                                          | 0,000489865 | 0,239160187 | 0,048 | 0,016 | 1           | 1,180305389   | 0,847238358     | 3               |
| POLR1H                                                                                          | 0,021435528 | 0,239010567 | 0,097 | 0,064 | 1           | 1,180182987   | 0,847326229     | 1,515625        |
| POLR3G                                                                                          | 6,09328E-07 | 0,238432834 | 0,078 | 0,022 | 0,012857422 | 1,179710473   | 0,847665612     | 3,545454545     |
| EIF2B3                                                                                          | 0,024317601 | 0,238214258 | 0,073 | 0,046 | 1           | 1,179531754   | 0,847794047     | 1,586956522     |
| CD58                                                                                            | 0,006043428 | 0,238095326 | 0,132 | 0,085 | 1           | 1,17943452    | 0,847863941     | 1,552941176     |
| IRAK1                                                                                           | 0,000543128 | 0,238002793 | 0,092 | 0,046 | 1           | 1,179358876   | 0,847918323     | 2               |
| SLC25A13                                                                                        | 0,013314916 | 0,237996092 | 0,092 | 0,058 | 1           | 1,179353398   | 0,847922261     | 1,586206897     |

Supplementary Table 5

| Differentially expressed genes_total calculation_ comparing SC-Keloid vs. (SC-Myel, SC-Nonmyel) |             |             |       |       |             |               |                 |                 |
|-------------------------------------------------------------------------------------------------|-------------|-------------|-------|-------|-------------|---------------|-----------------|-----------------|
| gene                                                                                            | p_val       | avg_log2FC  | pct.1 | pct.2 | p_val_adj   | Foldchange_UP | Foldchange_DOWN | Ratio_pct1_pct2 |
| TGOLN2                                                                                          | 0,61461166  | 0,237767165 | 0,275 | 0,288 | 1           | 1,179166273   | 0,84805682      | 0,954861111     |
| DCTN5                                                                                           | 0,067864825 | 0,237739372 | 0,059 | 0,039 | 1           | 1,179143557   | 0,848073158     | 1,512820513     |
| GRSF1                                                                                           | 0,008994792 | 0,237681024 | 0,112 | 0,072 | 1           | 1,179095869   | 0,848107458     | 1,555555556     |
| FKBP14                                                                                          | 0,102864531 | 0,237507343 | 0,087 | 0,065 | 1           | 1,17895393    | 0,848209565     | 1,338461538     |
| ADAMTS12                                                                                        | 1,20976E-06 | 0,237465684 | 0,038 | 0,003 | 0,025527082 | 1,178919887   | 0,848234058     | 12,66666667     |
| SMIM26                                                                                          | 0,941447935 | 0,237146052 | 0,211 | 0,21  | 1           | 1,178658724   | 0,848422007     | 1,004761905     |
| NUDT16                                                                                          | 0,008694907 | 0,236938704 | 0,083 | 0,049 | 1           | 1,178489336   | 0,848543953     | 1,693877551     |
| TAF12                                                                                           | 0,036953777 | 0,23693638  | 0,12  | 0,087 | 1           | 1,178487438   | 0,84854532      | 1,379310345     |
| PDCD10                                                                                          | 0,769130148 | 0,236919801 | 0,171 | 0,176 | 1           | 1,178473895   | 0,848555071     | 0,971590909     |
| JAG1                                                                                            | 0,379297776 | 0,236662844 | 0,192 | 0,172 | 1           | 1,178264017   | 0,84870622      | 1,11627907      |
| SRM                                                                                             | 0,05655146  | 0,236599061 | 0,189 | 0,151 | 1           | 1,178211926   | 0,848743743     | 1,251655629     |
| DUSP23                                                                                          | 0,002362974 | 0,236397572 | 0,161 | 0,104 | 1           | 1,178047386   | 0,848862288     | 1,548076923     |
| BAD                                                                                             | 0,591020998 | 0,236169338 | 0,178 | 0,166 | 1           | 1,177861035   | 0,848996588     | 1,072289157     |
| ICAM3                                                                                           | 0,000227624 | 0,235862105 | 0,068 | 0,027 | 1           | 1,177610226   | 0,849177409     | 2,518518519     |
| SLC4A7                                                                                          | 0,347104748 | 0,235654959 | 0,069 | 0,057 | 1           | 1,177441154   | 0,849299344     | 1,210526316     |
| SPA17                                                                                           | 2,16469E-06 | 0,23565275  | 0,043 | 0,005 | 0,045677026 | 1,177439352   | 0,849300644     | 8,6             |
| EXOSC4                                                                                          | 0,009833691 | 0,235379449 | 0,084 | 0,05  | 1           | 1,17721632    | 0,84946155      | 1,68            |
| MRTO4                                                                                           | 0,002411708 | 0,235204392 | 0,098 | 0,056 | 1           | 1,177073486   | 0,84956463      | 1,75            |
| RPF1                                                                                            | 0,003250475 | 0,235138351 | 0,104 | 0,061 | 1           | 1,177019605   | 0,84960352      | 1,704918033     |
| NIBAN2                                                                                          | 0,793175424 | 0,234589347 | 0,284 | 0,3   | 1           | 1,176571787   | 0,84992689      | 0,946666667     |
| DNAJC10                                                                                         | 0,064481362 | 0,234385953 | 0,139 | 0,106 | 1           | 1,176405923   | 0,850046723     | 1,311320755     |
| RFLNB                                                                                           | 6,9605E-06  | 0,234306166 | 0,054 | 0,012 | 0,146873462 | 1,176340865   | 0,850093736     | 4,5             |
| MSC                                                                                             | 4,46965E-11 | 0,234066965 | 0,071 | 0,005 | 9,43141E-07 | 1,176145842   | 0,850234694     | 14,2            |
| TTI2                                                                                            | 0,060390923 | 0,2338197   | 0,04  | 0,023 | 1           | 1,175944279   | 0,850380429     | 1,739130435     |
| DAB2                                                                                            | 0,001657363 | 0,233684229 | 0,03  | 0,008 | 1           | 1,175833861   | 0,850460285     | 3,75            |
| STUB1                                                                                           | 0,745802435 | 0,233280549 | 0,237 | 0,246 | 1           | 1,175504897   | 0,850698285     | 0,963414634     |
| UHMK1                                                                                           | 0,053355092 | 0,232980033 | 0,099 | 0,071 | 1           | 1,175260063   | 0,850875505     | 1,394366197     |
| SCFD1                                                                                           | 0,185575325 | 0,232978142 | 0,147 | 0,121 | 1           | 1,175258522   | 0,850876621     | 1,214876033     |
| ATP6VOA2                                                                                        | 0,778769123 | 0,232678812 | 0,049 | 0,046 | 1           | 1,175014705   | 0,851053179     | 1,065217391     |
| CNIH1                                                                                           | 0,025720516 | 0,23264497  | 0,163 | 0,119 | 1           | 1,174987143   | 0,851073143     | 1,369747899     |

Supplementary Table 5

| Differentially expressed genes_total calculation_ comparing SC-Keloid vs. (SC-Myel, SC-Nonmyel) |             |             |       |       |             |               |                 |                 |
|-------------------------------------------------------------------------------------------------|-------------|-------------|-------|-------|-------------|---------------|-----------------|-----------------|
| gene                                                                                            | p_val       | avg_log2FC  | pct.1 | pct.2 | p_val_adj   | Foldchange_UP | Foldchange_DOWN | Ratio_pct1_pct2 |
| AKT2                                                                                            | 0,106282204 | 0,232439083 | 0,109 | 0,084 | 1           | 1,174819472   | 0,851194608     | 1,297619048     |
| NDUFA11                                                                                         | 0,133781271 | 0,232144495 | 0,311 | 0,366 | 1           | 1,174579607   | 0,851368434     | 0,849726776     |
| ATP6V1E1                                                                                        | 0,724357061 | 0,231681304 | 0,161 | 0,153 | 1           | 1,174202558   | 0,851641817     | 1,052287582     |
| TRAK2                                                                                           | 0,109391994 | 0,231078496 | 0,084 | 0,062 | 1           | 1,173712038   | 0,851997737     | 1,35483871      |
| CDC123                                                                                          | 0,001077197 | 0,23103997  | 0,141 | 0,085 | 1           | 1,173680695   | 0,852020489     | 1,658823529     |
| AP2B1                                                                                           | 0,093827791 | 0,231038206 | 0,176 | 0,142 | 1           | 1,17367926    | 0,852021531     | 1,23943662      |
| TIMM17A                                                                                         | 0,08166761  | 0,230909075 | 0,156 | 0,122 | 1           | 1,173574212   | 0,852097796     | 1,278688525     |
| TMEM39A                                                                                         | 0,343347813 | 0,230684241 | 0,075 | 0,062 | 1           | 1,173391333   | 0,8522306       | 1,209677419     |
| USO1                                                                                            | 0,239232676 | 0,230474145 | 0,137 | 0,115 | 1           | 1,173220467   | 0,852354718     | 1,191304348     |
| PSMC2                                                                                           | 0,164874166 | 0,230199628 | 0,133 | 0,109 | 1           | 1,172997247   | 0,85251692      | 1,220183486     |
| FARP1                                                                                           | 0,0001016   | 0,22998034  | 0,059 | 0,02  | 1           | 1,172818967   | 0,852646511     | 2,95            |
| NUCKS1                                                                                          | 0,394894155 | 0,229813458 | 0,575 | 0,71  | 1           | 1,17268331    | 0,852745145     | 0,809859155     |
| RNF40                                                                                           | 0,031809007 | 0,229701753 | 0,079 | 0,052 | 1           | 1,172592515   | 0,852811175     | 1,519230769     |
| MEAF6                                                                                           | 0,23683475  | 0,229424737 | 0,211 | 0,185 | 1           | 1,172367384   | 0,852974941     | 1,140540541     |
| MTCO2P12                                                                                        | 9,28493E-05 | 0,22887639  | 0,764 | 0,771 | 1           | 1,17192187    | 0,853299205     | 0,990920882     |
| FAM184B                                                                                         | 0,000765844 | 0,228680824 | 0,035 | 0,009 | 1           | 1,171763019   | 0,853414883     | 3,888888889     |
| CYREN                                                                                           | 0,000975513 | 0,228505001 | 0,058 | 0,024 | 1           | 1,171620223   | 0,853518897     | 2,416666667     |
| ZNF217                                                                                          | 0,613287171 | 0,228471269 | 0,077 | 0,071 | 1           | 1,17159283    | 0,853538853     | 1,084507042     |
| UNC5B                                                                                           | 3,07418E-05 | 0,228442415 | 0,075 | 0,027 | 0,648682066 | 1,171569398   | 0,853555924     | 2,777777778     |
| LTBP2                                                                                           | 2,62996E-06 | 0,228433055 | 0,1   | 0,038 | 0,055494721 | 1,171561797   | 0,853561462     | 2,631578947     |
| CS                                                                                              | 0,249660335 | 0,228342004 | 0,083 | 0,066 | 1           | 1,17148786    | 0,853615333     | 1,257575758     |
| SERP1                                                                                           | 0,21514383  | 0,228175895 | 0,283 | 0,322 | 1           | 1,171352985   | 0,853713623     | 0,878881988     |
| MESP1                                                                                           | 0,019041401 | 0,227939946 | 0,029 | 0,012 | 1           | 1,171161429   | 0,853853256     | 2,416666667     |
| SOX11                                                                                           | 4,54891E-05 | 0,227881897 | 0,043 | 0,009 | 0,959864642 | 1,171114307   | 0,853887613     | 4,777777778     |
| CUL5                                                                                            | 0,376574253 | 0,227202214 | 0,106 | 0,092 | 1           | 1,170562701   | 0,854289992     | 1,152173913     |
| ALKBH2                                                                                          | 0,125477623 | 0,22709389  | 0,072 | 0,053 | 1           | 1,170474813   | 0,854354138     | 1,358490566     |
| OXCT1                                                                                           | 0,046905669 | 0,226950382 | 0,065 | 0,042 | 1           | 1,170358389   | 0,854439127     | 1,547619048     |
| SLC26A2                                                                                         | 0,991463726 | 0,226886194 | 0,052 | 0,053 | 1           | 1,170306319   | 0,854477143     | 0,981132075     |
| NECAP2                                                                                          | 0,000519035 | 0,22665548  | 0,12  | 0,066 | 1           | 1,17011918    | 0,854613801     | 1,818181818     |
| PGP                                                                                             | 0,064064081 | 0,226626958 | 0,159 | 0,123 | 1           | 1,170096047   | 0,854630697     | 1,292682927     |

Supplementary Table 5

| Differentially expressed genes_total calculation_ comparing SC-Keloid vs. (SC-Myel, SC-Nonmyel) |             |             |       |       |             |               |                 |                 |
|-------------------------------------------------------------------------------------------------|-------------|-------------|-------|-------|-------------|---------------|-----------------|-----------------|
| gene                                                                                            | p_val       | avg_log2FC  | pct.1 | pct.2 | p_val_adj   | Foldchange_UP | Foldchange_DOWN | Ratio_pct1_pct2 |
| AFAP1                                                                                           | 0,025183954 | 0,226611807 | 0,101 | 0,068 | 1           | 1,170083759   | 0,854639672     | 1,485294118     |
| DR1                                                                                             | 0,285765352 | 0,226514695 | 0,123 | 0,104 | 1           | 1,170005      | 0,854697202     | 1,182692308     |
| ROCK1                                                                                           | 0,524926295 | 0,22640006  | 0,212 | 0,228 | 1           | 1,169912036   | 0,854765118     | 0,929824561     |
| RFXANK                                                                                          | 0,003769991 | 0,226381036 | 0,118 | 0,072 | 1           | 1,169896609   | 0,85477639      | 1,638888889     |
| ERLIN2                                                                                          | 0,14344611  | 0,226200289 | 0,071 | 0,053 | 1           | 1,169750049   | 0,854883486     | 1,339622642     |
| SNW1                                                                                            | 0,756654113 | 0,226090829 | 0,187 | 0,18  | 1           | 1,169661301   | 0,854948351     | 1,038888889     |
| DESI1                                                                                           | 5,42808E-05 | 0,225676657 | 0,101 | 0,046 | 1           | 1,16932556    | 0,855193826     | 2,195652174     |
| ARNTL                                                                                           | 0,416089796 | 0,225584787 | 0,085 | 0,073 | 1           | 1,169251101   | 0,855248286     | 1,164383562     |
| DGKI                                                                                            | 1,21744E-07 | 0,225507909 | 0,037 | 0     | 0,002568928 | 1,169188796   | 0,855293862     | #DIV/0!         |
| GOT2                                                                                            | 0,000456108 | 0,225480128 | 0,063 | 0,026 | 1           | 1,169166282   | 0,855310332     | 2,423076923     |
| GATAD1                                                                                          | 0,769013192 | 0,225372849 | 0,115 | 0,121 | 1           | 1,169079346   | 0,855373935     | 0,950413223     |
| GLOD4                                                                                           | 0,000731947 | 0,22535825  | 0,134 | 0,079 | 1           | 1,169067515   | 0,855382591     | 1,696202532     |
| ABR                                                                                             | 0,000270853 | 0,225096073 | 0,097 | 0,047 | 1           | 1,168855084   | 0,855538051     | 2,063829787     |
| CYRIB                                                                                           | 0,034700398 | 0,224598164 | 0,088 | 0,06  | 1           | 1,168451752   | 0,855833369     | 1,466666667     |
| RPL35A                                                                                          | 0,000262951 | 0,224488031 | 0,835 | 0,89  | 1           | 1,168362558   | 0,855898705     | 0,938202247     |
| MRPL4                                                                                           | 0,180029893 | 0,224436288 | 0,148 | 0,123 | 1           | 1,168320655   | 0,855929402     | 1,203252033     |
| RANBP6                                                                                          | 0,097691946 | 0,223842971 | 0,041 | 0,026 | 1           | 1,167840275   | 0,856281481     | 1,576923077     |
| NCK2                                                                                            | 4,17677E-06 | 0,223747796 | 0,109 | 0,045 | 0,08813399  | 1,167763235   | 0,856337972     | 2,422222222     |
| AIFM1                                                                                           | 0,000732773 | 0,223678887 | 0,057 | 0,023 | 1           | 1,167707459   | 0,856378875     | 2,47826087      |
| HMGB3                                                                                           | 0,092189238 | 0,223040639 | 0,077 | 0,056 | 1           | 1,16719098    | 0,85675782      | 1,375           |
| SMIM30                                                                                          | 0,052142222 | 0,222910063 | 0,108 | 0,079 | 1           | 1,167085344   | 0,856835368     | 1,367088608     |
| HPCAL1                                                                                          | 0,273057821 | 0,222839464 | 0,158 | 0,137 | 1           | 1,167028233   | 0,856877299     | 1,153284672     |
| ATG5                                                                                            | 0,208052152 | 0,222419455 | 0,088 | 0,071 | 1           | 1,166688528   | 0,857126796     | 1,23943662      |
| TTC19                                                                                           | 0,20502759  | 0,222323466 | 0,118 | 0,096 | 1           | 1,166610906   | 0,857183826     | 1,229166667     |
| TMX3                                                                                            | 0,129629743 | 0,222276667 | 0,17  | 0,138 | 1           | 1,166573064   | 0,857211632     | 1,231884058     |
| CCDC6                                                                                           | 0,228866174 | 0,222200806 | 0,088 | 0,072 | 1           | 1,166511723   | 0,857256708     | 1,222222222     |
| RPAIN                                                                                           | 0,614707947 | 0,2220606   | 0,198 | 0,183 | 1           | 1,166398363   | 0,857340024     | 1,081967213     |
| COL20A1                                                                                         | 0,002284975 | 0,222016534 | 0,057 | 0,026 | 1           | 1,166362737   | 0,85736621      | 2,192307692     |
| SURF4                                                                                           | 0,120708408 | 0,22195289  | 0,221 | 0,187 | 1           | 1,166311284   | 0,857404034     | 1,181818182     |
| EXTL2                                                                                           | 0,050750577 | 0,221947672 | 0,093 | 0,065 | 1           | 1,166307066   | 0,857407135     | 1,430769231     |

Supplementary Table 5

| Differentially expressed genes_total calculation_ comparing SC-Keloid vs. (SC-Myel, SC-Nonmyel) |             |             |       |       |             |               |                 |                 |
|-------------------------------------------------------------------------------------------------|-------------|-------------|-------|-------|-------------|---------------|-----------------|-----------------|
| gene                                                                                            | p_val       | avg_log2FC  | pct.1 | pct.2 | p_val_adj   | Foldchange_UP | Foldchange_DOWN | Ratio_pct1_pct2 |
| TBX3                                                                                            | 0,027125717 | 0,221783683 | 0,043 | 0,023 | 1           | 1,166174501   | 0,857504601     | 1,869565217     |
| RTCB                                                                                            | 0,01126257  | 0,221384323 | 0,107 | 0,069 | 1           | 1,165851731   | 0,857742004     | 1,550724638     |
| RO60                                                                                            | 0,969109153 | 0,221369296 | 0,251 | 0,255 | 1           | 1,165839588   | 0,857750938     | 0,984313725     |
| GON7                                                                                            | 0,001512631 | 0,22134339  | 0,052 | 0,022 | 1           | 1,165818653   | 0,857766341     | 2,363636364     |
| FAIM                                                                                            | 0,138956128 | 0,221253191 | 0,079 | 0,06  | 1           | 1,165745767   | 0,857819971     | 1,316666667     |
| MFSD12                                                                                          | 0,326102319 | 0,221010055 | 0,183 | 0,16  | 1           | 1,165549321   | 0,857964551     | 1,14375         |
| FAM104A                                                                                         | 0,00073203  | 0,220937347 | 0,077 | 0,037 | 1           | 1,165490582   | 0,858007791     | 2,081081081     |
| COPB1                                                                                           | 0,213487533 | 0,220809468 | 0,166 | 0,141 | 1           | 1,165387279   | 0,858083847     | 1,177304965     |
| RAD17                                                                                           | 0,005649649 | 0,220727608 | 0,054 | 0,026 | 1           | 1,165321156   | 0,858132537     | 2,076923077     |
| TFPT                                                                                            | 0,00071742  | 0,220689002 | 0,068 | 0,03  | 1           | 1,165289973   | 0,858155501     | 2,266666667     |
| CELSR1                                                                                          | 1,22293E-06 | 0,220396365 | 0,038 | 0,003 | 0,025805081 | 1,165053628   | 0,858329587     | 12,66666667     |
| C12orf76                                                                                        | 0,170502472 | 0,220324823 | 0,111 | 0,088 | 1           | 1,164995856   | 0,858372152     | 1,261363636     |
| FBXO4                                                                                           | 0,067048047 | 0,220087283 | 0,066 | 0,045 | 1           | 1,164804055   | 0,858513495     | 1,466666667     |
| STON2                                                                                           | 0,037595264 | 0,220081314 | 0,059 | 0,037 | 1           | 1,164799236   | 0,858517047     | 1,594594595     |
| SLC35G1                                                                                         | 3,15203E-05 | 0,220051138 | 0,036 | 0,005 | 0,665110863 | 1,164774872   | 0,858535004     | 7,2             |
| TNFSF4                                                                                          | 9,23633E-05 | 0,219999848 | 0,03  | 0,004 | 1           | 1,164733463   | 0,858565527     | 7,5             |
| RPS4X                                                                                           | 0,000668831 | 0,219961998 | 0,817 | 0,902 | 1           | 1,164702907   | 0,858588052     | 0,905764967     |
| GOLGA3                                                                                          | 0,937720418 | 0,219888609 | 0,106 | 0,103 | 1           | 1,16464366    | 0,858631729     | 1,029126214     |
| SPOCK1                                                                                          | 6,95736E-08 | 0,219853609 | 0,058 | 0,008 | 0,001468073 | 1,164615406   | 0,85865256      | 7,25            |
| RABIF                                                                                           | 0,002175347 | 0,219809529 | 0,071 | 0,035 | 1           | 1,164579823   | 0,858678796     | 2,028571429     |
| TCF3                                                                                            | 0,01455393  | 0,219711424 | 0,112 | 0,073 | 1           | 1,164500633   | 0,858737189     | 1,534246575     |
| SPG11                                                                                           | 0,018804323 | 0,219467697 | 0,063 | 0,037 | 1           | 1,16430392    | 0,858882275     | 1,702702703     |
| BCAT1                                                                                           | 5,1423E-06  | 0,219455014 | 0,031 | 0,001 | 0,108507766 | 1,164293685   | 0,858889826     | 31              |
| MCM3                                                                                            | 0,154701194 | 0,219441551 | 0,061 | 0,045 | 1           | 1,16428282    | 0,85889784      | 1,355555556     |
| NSD2                                                                                            | 0,049130229 | 0,219337561 | 0,063 | 0,041 | 1           | 1,164198901   | 0,858959753     | 1,536585366     |
| PRRC1                                                                                           | 0,090463392 | 0,219328091 | 0,087 | 0,064 | 1           | 1,164191259   | 0,858965391     | 1,359375        |
| MAP4K4                                                                                          | 0,8527961   | 0,219212056 | 0,243 | 0,244 | 1           | 1,164097628   | 0,85903448      | 0,995901639     |
| UBE4A                                                                                           | 0,217878661 | 0,219055254 | 0,094 | 0,076 | 1           | 1,163971113   | 0,85912785      | 1,236842105     |
| MVB12A                                                                                          | 0,029624955 | 0,219029238 | 0,155 | 0,113 | 1           | 1,163950123   | 0,859143343     | 1,371681416     |
| GTF2F2                                                                                          | 0,785222645 | 0,219017698 | 0,142 | 0,134 | 1           | 1,163940813   | 0,859150215     | 1,059701493     |

Supplementary Table 5

| Differentially expressed genes_total calculation_ comparing SC-Keloid vs. (SC-Myel, SC-Nonmyel) |             |             |       |       |             |               |                 |                 |
|-------------------------------------------------------------------------------------------------|-------------|-------------|-------|-------|-------------|---------------|-----------------|-----------------|
| gene                                                                                            | p_val       | avg_log2FC  | pct.1 | pct.2 | p_val_adj   | Foldchange_UP | Foldchange_DOWN | Ratio_pct1_pct2 |
| TMEM263                                                                                         | 0,678539337 | 0,218929061 | 0,177 | 0,182 | 1           | 1,163869304   | 0,859203002     | 0,972527473     |
| CINP                                                                                            | 0,022937849 | 0,218753529 | 0,072 | 0,045 | 1           | 1,163727705   | 0,859307547     | 1,6             |
| LIG3                                                                                            | 0,008160075 | 0,218444939 | 0,036 | 0,015 | 1           | 1,163478813   | 0,859491371     | 2,4             |
| OS9                                                                                             | 0,815286419 | 0,218407772 | 0,237 | 0,242 | 1           | 1,163448839   | 0,859513514     | 0,979338843     |
| SNAPC5                                                                                          | 0,001866264 | 0,218284533 | 0,093 | 0,052 | 1           | 1,163349459   | 0,859586939     | 1,788461538     |
| GTF3C1                                                                                          | 0,035157906 | 0,218137029 | 0,093 | 0,064 | 1           | 1,163230522   | 0,859674829     | 1,453125        |
| SRBD1                                                                                           | 0,104358608 | 0,218128918 | 0,049 | 0,033 | 1           | 1,163223982   | 0,859679663     | 1,484848485     |
| MDM2                                                                                            | 0,440485759 | 0,217970511 | 0,086 | 0,076 | 1           | 1,163096267   | 0,85977406      | 1,131578947     |
| CALHM2                                                                                          | 0,001435301 | 0,21764834  | 0,055 | 0,023 | 1           | 1,162836563   | 0,859966079     | 2,391304348     |
| SLC16A3                                                                                         | 5,12093E-10 | 0,217436563 | 0,058 | 0,003 | 1,08057E-05 | 1,16266588    | 0,860092325     | 19,33333333     |
| SLC35B2                                                                                         | 0,032339322 | 0,216990665 | 0,136 | 0,099 | 1           | 1,162306587   | 0,860358198     | 1,373737374     |
| MRPS11                                                                                          | 0,027014707 | 0,21698811  | 0,109 | 0,075 | 1           | 1,162304528   | 0,860359721     | 1,453333333     |
| MMGT1                                                                                           | 0,09312223  | 0,216801403 | 0,1   | 0,075 | 1           | 1,162154118   | 0,860471072     | 1,333333333     |
| GK5                                                                                             | 0,048277136 | 0,216652672 | 0,063 | 0,041 | 1           | 1,162034315   | 0,860559785     | 1,536585366     |
| GBP3                                                                                            | 0,033046065 | 0,216634895 | 0,072 | 0,046 | 1           | 1,162019996   | 0,860570389     | 1,565217391     |
| RPP38                                                                                           | 0,124462693 | 0,216616685 | 0,056 | 0,039 | 1           | 1,162005329   | 0,860581251     | 1,435897436     |
| MLX                                                                                             | 0,001608919 | 0,216563204 | 0,111 | 0,064 | 1           | 1,161962254   | 0,860613154     | 1,734375        |
| MTREX                                                                                           | 0,756051484 | 0,216404206 | 0,069 | 0,073 | 1           | 1,161834203   | 0,860708006     | 0,945205479     |
| POPDC3                                                                                          | 2,36528E-05 | 0,216378886 | 0,069 | 0,023 | 0,499097476 | 1,161813812   | 0,860723112     | 3               |
| NDUFAF5                                                                                         | 0,001359369 | 0,216238198 | 0,063 | 0,028 | 1           | 1,16170052    | 0,860807052     | 2,25            |
| ZADH2                                                                                           | 0,000513945 | 0,215910638 | 0,069 | 0,03  | 1           | 1,161436789   | 0,861002518     | 2,3             |
| TRIM24                                                                                          | 0,079025918 | 0,215892124 | 0,109 | 0,083 | 1           | 1,161421884   | 0,861013568     | 1,313253012     |
| SNRPC                                                                                           | 0,002801512 | 0,215859821 | 0,142 | 0,09  | 1           | 1,16139588    | 0,861032846     | 1,577777778     |
| TEN1                                                                                            | 0,000295044 | 0,215743754 | 0,079 | 0,035 | 1           | 1,161302448   | 0,86110212      | 2,257142857     |
| ECE1                                                                                            | 0,977788855 | 0,215646247 | 0,218 | 0,214 | 1           | 1,161223961   | 0,861160322     | 1,018691589     |
| SPDL1                                                                                           | 0,107567849 | 0,215409529 | 0,042 | 0,027 | 1           | 1,161033443   | 0,861301633     | 1,555555556     |
| MGST2                                                                                           | 0,027156243 | 0,215401292 | 0,05  | 0,028 | 1           | 1,161026814   | 0,86130655      | 1,785714286     |
| ARMC9                                                                                           | 9,78677E-05 | 0,215268932 | 0,038 | 0,008 | 1           | 1,160920301   | 0,861385574     | 4,75            |
| MRPL55                                                                                          | 0,017257758 | 0,215245036 | 0,17  | 0,123 | 1           | 1,160901072   | 0,861399842     | 1,382113821     |
| ARF3                                                                                            | 0,022824521 | 0,215237649 | 0,139 | 0,098 | 1           | 1,160895128   | 0,861404253     | 1,418367347     |



Supplementary Table 5

| Differentially expressed genes_total calculation_ comparing SC-Keloid vs. (SC-Myel, SC-Nonmyel) |             |             |       |       |             |               |                 |                 |
|-------------------------------------------------------------------------------------------------|-------------|-------------|-------|-------|-------------|---------------|-----------------|-----------------|
| gene                                                                                            | p_val       | avg_log2FC  | pct.1 | pct.2 | p_val_adj   | Foldchange_UP | Foldchange_DOWN | Ratio_pct1_pct2 |
| S100A1                                                                                          | 0,417275794 | 0,214983144 | 0,105 | 0,092 | 1           | 1,160690353   | 0,861556226     | 1,141304348     |
| SNX7                                                                                            | 0,030792453 | 0,21480554  | 0,141 | 0,102 | 1           | 1,160547474   | 0,861662295     | 1,382352941     |
| STAM2                                                                                           | 0,08774813  | 0,214583367 | 0,071 | 0,05  | 1           | 1,160368766   | 0,861795        | 1,42            |
| PWP1                                                                                            | 0,016310416 | 0,214505343 | 0,13  | 0,09  | 1           | 1,160306012   | 0,861841609     | 1,444444444     |
| SEMA6A                                                                                          | 0,000440879 | 0,214402263 | 0,055 | 0,02  | 1           | 1,160223112   | 0,861903189     | 2,75            |
| DDX50                                                                                           | 0,366030734 | 0,214316931 | 0,099 | 0,085 | 1           | 1,160154489   | 0,86195417      | 1,164705882     |
| MZT1                                                                                            | 0,566178644 | 0,214205322 | 0,122 | 0,111 | 1           | 1,160064742   | 0,862020855     | 1,099099099     |
| SOCS4                                                                                           | 0,270226857 | 0,214107951 | 0,077 | 0,062 | 1           | 1,159986448   | 0,862079037     | 1,241935484     |
| ABHD17A                                                                                         | 0,459979226 | 0,214065375 | 0,194 | 0,176 | 1           | 1,159952216   | 0,862104478     | 1,102272727     |
| PCDHGA10                                                                                        | 0,002781924 | 0,213963724 | 0,042 | 0,016 | 1           | 1,159870489   | 0,862165224     | 2,625           |
| METTL9                                                                                          | 0,510139487 | 0,213749983 | 0,175 | 0,159 | 1           | 1,159698663   | 0,862292966     | 1,100628931     |
| ROGDI                                                                                           | 1,2164E-06  | 0,213635416 | 0,058 | 0,012 | 0,025667203 | 1,159606573   | 0,862361445     | 4,833333333     |
| BCCIP                                                                                           | 0,15701597  | 0,213455968 | 0,083 | 0,064 | 1           | 1,159462345   | 0,862468716     | 1,296875        |
| NPTXR                                                                                           | 1,61724E-05 | 0,21326233  | 0,051 | 0,012 | 0,341253221 | 1,159306733   | 0,862584484     | 4,25            |
| CDK5                                                                                            | 1,56901E-06 | 0,213122154 | 0,063 | 0,015 | 0,033107741 | 1,159194098   | 0,862668299     | 4,2             |
| LSM12                                                                                           | 0,26561785  | 0,213039235 | 0,143 | 0,121 | 1           | 1,159127475   | 0,862717882     | 1,181818182     |
| GDE1                                                                                            | 0,002369313 | 0,212916959 | 0,121 | 0,073 | 1           | 1,159029237   | 0,862791005     | 1,657534247     |
| DGCR6L                                                                                          | 0,001504588 | 0,212766899 | 0,161 | 0,102 | 1           | 1,158908688   | 0,862880752     | 1,578431373     |
| EFR3A                                                                                           | 0,932289477 | 0,212711238 | 0,094 | 0,095 | 1           | 1,158863977   | 0,862914043     | 0,989473684     |
| ATAD1                                                                                           | 0,857762341 | 0,212632682 | 0,142 | 0,138 | 1           | 1,158800877   | 0,862961031     | 1,028985507     |
| SMIM20                                                                                          | 0,012565106 | 0,21244393  | 0,093 | 0,058 | 1           | 1,158649278   | 0,863073942     | 1,603448276     |
| KLHL42                                                                                          | 0,297929869 | 0,212288109 | 0,114 | 0,096 | 1           | 1,158524142   | 0,863167165     | 1,1875          |
| CANT1                                                                                           | 0,00017585  | 0,212078796 | 0,049 | 0,015 | 1           | 1,158356071   | 0,863292406     | 3,266666667     |
| ZNF480                                                                                          | 0,000514724 | 0,211894377 | 0,043 | 0,014 | 1           | 1,158208008   | 0,863402768     | 3,071428571     |
| DDX1                                                                                            | 0,403364541 | 0,211687913 | 0,158 | 0,142 | 1           | 1,158042269   | 0,863526338     | 1,112676056     |
| CLPTM1L                                                                                         | 0,03244711  | 0,211322932 | 0,101 | 0,069 | 1           | 1,157749338   | 0,863744825     | 1,463768116     |
| FAM91A1                                                                                         | 0,073011985 | 0,211322659 | 0,064 | 0,043 | 1           | 1,157749119   | 0,863744989     | 1,488372093     |
| ZBTB6                                                                                           | 0,007812324 | 0,211068066 | 0,026 | 0,008 | 1           | 1,157544829   | 0,863897428     | 3,25            |
| SEC14L2                                                                                         | 0,008731879 | 0,210834258 | 0,076 | 0,043 | 1           | 1,157357248   | 0,864037446     | 1,76744186      |
| ADSS2                                                                                           | 0,108241904 | 0,210830004 | 0,109 | 0,084 | 1           | 1,157353836   | 0,864039993     | 1,297619048     |

Supplementary Table 5

| Differentially expressed genes_total calculation_ comparing SC-Keloid vs. (SC-Myel, SC-Nonmyel) |             |             |       |       |             |               |                 |                 |
|-------------------------------------------------------------------------------------------------|-------------|-------------|-------|-------|-------------|---------------|-----------------|-----------------|
| gene                                                                                            | p_val       | avg_log2FC  | pct.1 | pct.2 | p_val_adj   | Foldchange_UP | Foldchange_DOWN | Ratio_pct1_pct2 |
| CPD                                                                                             | 0,143600598 | 0,210742652 | 0,087 | 0,066 | 1           | 1,157283762   | 0,864092311     | 1,318181818     |
| MOSPD1                                                                                          | 0,041079773 | 0,210667143 | 0,061 | 0,038 | 1           | 1,157223193   | 0,864137537     | 1,605263158     |
| NUS1                                                                                            | 0,27784704  | 0,210651176 | 0,092 | 0,076 | 1           | 1,157210385   | 0,864147101     | 1,210526316     |
| DCSTAMP                                                                                         | 1,22515E-05 | 0,210569771 | 0,026 | 0     | 0,258519095 | 1,157145091   | 0,864195863     | #DIV/0!         |
| TSR3                                                                                            | 0,003155248 | 0,210442692 | 0,14  | 0,088 | 1           | 1,157043169   | 0,864271988     | 1,590909091     |
| COMMD7                                                                                          | 0,001532083 | 0,210413402 | 0,153 | 0,096 | 1           | 1,157019678   | 0,864289535     | 1,59375         |
| FUNDC1                                                                                          | 0,001204759 | 0,210309833 | 0,079 | 0,039 | 1           | 1,156936621   | 0,864351583     | 2,025641026     |
| SYAP1                                                                                           | 0,728081677 | 0,210197775 | 0,158 | 0,152 | 1           | 1,156846762   | 0,864418723     | 1,039473684     |
| C8orf33                                                                                         | 0,063082877 | 0,209839828 | 0,113 | 0,083 | 1           | 1,156559772   | 0,86463322      | 1,361445783     |
| CTNBL1                                                                                          | 0,226212093 | 0,209770244 | 0,086 | 0,069 | 1           | 1,156503991   | 0,864674924     | 1,246376812     |
| NTAN1                                                                                           | 0,082760472 | 0,209756144 | 0,112 | 0,084 | 1           | 1,156492687   | 0,864683375     | 1,333333333     |
| EEF2KMT                                                                                         | 2,97856E-05 | 0,209515833 | 0,044 | 0,009 | 0,628504916 | 1,156300066   | 0,864827418     | 4,888888889     |
| MTMR6                                                                                           | 0,379568768 | 0,209496879 | 0,07  | 0,058 | 1           | 1,156284874   | 0,86483878      | 1,206896552     |
| COMP                                                                                            | 0,452591405 | 0,20948646  | 0,024 | 0,019 | 1           | 1,156276524   | 0,864845026     | 1,263157895     |
| MANEA                                                                                           | 0,002269703 | 0,209442201 | 0,081 | 0,043 | 1           | 1,156241052   | 0,864871558     | 1,88372093      |
| ALYREF                                                                                          | 0,072673084 | 0,208874652 | 0,14  | 0,107 | 1           | 1,155786282   | 0,865211861     | 1,308411215     |
| MYO5A                                                                                           | 0,200193611 | 0,208617446 | 0,115 | 0,094 | 1           | 1,155580245   | 0,865366126     | 1,223404255     |
| WWC1                                                                                            | 2,2249E-06  | 0,20860724  | 0,043 | 0,005 | 0,046947707 | 1,15557207    | 0,865372248     | 8,6             |
| ZNF22                                                                                           | 0,901101141 | 0,208450461 | 0,177 | 0,172 | 1           | 1,1554465     | 0,865466294     | 1,029069767     |
| PRKAG1                                                                                          | 0,008816733 | 0,208417192 | 0,072 | 0,041 | 1           | 1,155419855   | 0,865486252     | 1,756097561     |
| RALBP1                                                                                          | 0,75695092  | 0,208292678 | 0,246 | 0,252 | 1           | 1,155320139   | 0,865560952     | 0,976190476     |
| MTRNR2L8                                                                                        | 0,010275484 | 0,207972543 | 0,015 | 0,003 | 1           | 1,155063801   | 0,865753042     | 5               |
| SIL1                                                                                            | 0,047539246 | 0,207875981 | 0,148 | 0,11  | 1           | 1,154986494   | 0,86581099      | 1,345454545     |
| DCPS                                                                                            | 0,013482273 | 0,207845933 | 0,113 | 0,075 | 1           | 1,154962438   | 0,865829023     | 1,506666667     |
| LIX1L                                                                                           | 0,093310124 | 0,207840137 | 0,097 | 0,072 | 1           | 1,154957798   | 0,865832502     | 1,347222222     |
| SLC35C2                                                                                         | 0,005142434 | 0,207792598 | 0,084 | 0,047 | 1           | 1,154919741   | 0,865861033     | 1,787234043     |
| ENSA                                                                                            | 0,364893213 | 0,207772818 | 0,187 | 0,204 | 1           | 1,154903907   | 0,865872904     | 0,916666667     |
| PIGT                                                                                            | 0,019894583 | 0,207425891 | 0,17  | 0,125 | 1           | 1,154626219   | 0,866081147     | 1,36            |
| PPIP5K2                                                                                         | 0,043444417 | 0,20734205  | 0,111 | 0,079 | 1           | 1,15455912    | 0,86613148      | 1,405063291     |
| CAAP1                                                                                           | 0,000227324 | 0,207307422 | 0,065 | 0,026 | 1           | 1,154531409   | 0,866152269     | 2,5             |

Supplementary Table 5

| Differentially expressed genes_total calculation_ comparing SC-Keloid vs. (SC-Myel, SC-Nonmyel) |             |             |       |       |             |               |                 |                 |
|-------------------------------------------------------------------------------------------------|-------------|-------------|-------|-------|-------------|---------------|-----------------|-----------------|
| gene                                                                                            | p_val       | avg_log2FC  | pct.1 | pct.2 | p_val_adj   | Foldchange_UP | Foldchange_DOWN | Ratio_pct1_pct2 |
| PITPNA                                                                                          | 0,847010721 | 0,206948056 | 0,121 | 0,117 | 1           | 1,154243858   | 0,866368049     | 1,034188034     |
| SDF4                                                                                            | 0,904654546 | 0,206799506 | 0,24  | 0,24  | 1           | 1,154125016   | 0,866457261     | 1               |
| FAM220A                                                                                         | 0,001079253 | 0,206744302 | 0,021 | 0,003 | 1           | 1,154080855   | 0,866490416     | 7               |
| DRG2                                                                                            | 0,002063054 | 0,206489127 | 0,087 | 0,047 | 1           | 1,153876745   | 0,86664369      | 1,85106383      |
| EIF3I                                                                                           | 0,896870731 | 0,206379321 | 0,237 | 0,233 | 1           | 1,153788925   | 0,866709654     | 1,017167382     |
| PCSK7                                                                                           | 0,050003298 | 0,206355724 | 0,113 | 0,083 | 1           | 1,153770054   | 0,86672383      | 1,361445783     |
| ZC3H15                                                                                          | 0,042995433 | 0,206343086 | 0,228 | 0,281 | 1           | 1,153759947   | 0,866731422     | 0,8113879       |
| KARS1                                                                                           | 0,012749102 | 0,206258903 | 0,105 | 0,068 | 1           | 1,153692626   | 0,866781999     | 1,544117647     |
| ATXN7L3B                                                                                        | 0,527341908 | 0,206132323 | 0,135 | 0,123 | 1           | 1,153591407   | 0,866858052     | 1,097560976     |
| ALDH18A1                                                                                        | 9,50722E-05 | 0,206086362 | 0,066 | 0,024 | 1           | 1,153554657   | 0,866885669     | 2,75            |
| CCDC85B                                                                                         | 0,122209502 | 0,205824396 | 0,262 | 0,303 | 1           | 1,153345212   | 0,867043093     | 0,864686469     |
| NDRG4                                                                                           | 1,57595E-05 | 0,20563998  | 0,035 | 0,004 | 0,332541519 | 1,153197792   | 0,867153932     | 8,75            |
| AARD                                                                                            | 1,31075E-05 | 0,205629816 | 0,038 | 0,005 | 0,276582224 | 1,153189668   | 0,867160041     | 7,6             |
| PUSL1                                                                                           | 2,38796E-07 | 0,205491338 | 0,061 | 0,011 | 0,005038828 | 1,153078984   | 0,86724328      | 5,545454545     |
| NAGK                                                                                            | 0,387916163 | 0,205228696 | 0,142 | 0,123 | 1           | 1,152869085   | 0,867401176     | 1,154471545     |
| CCDC47                                                                                          | 0,074277008 | 0,205154239 | 0,232 | 0,273 | 1           | 1,152809588   | 0,867445943     | 0,84981685      |
| UBE2M                                                                                           | 0,835906151 | 0,204848654 | 0,222 | 0,217 | 1           | 1,152565431   | 0,867629701     | 1,023041475     |
| ALDH1L2                                                                                         | 0,000240879 | 0,204728246 | 0,055 | 0,019 | 1           | 1,152469241   | 0,867702117     | 2,894736842     |
| SMAD1                                                                                           | 0,003411449 | 0,204535611 | 0,054 | 0,024 | 1           | 1,152315368   | 0,867817984     | 2,25            |
| CHPF2                                                                                           | 0,001398293 | 0,204479639 | 0,075 | 0,037 | 1           | 1,152270663   | 0,867851653     | 2,027027027     |
| SNX17                                                                                           | 0,013709478 | 0,204429215 | 0,158 | 0,111 | 1           | 1,152230391   | 0,867881986     | 1,423423423     |
| TRAM2                                                                                           | 0,076430934 | 0,204225123 | 0,119 | 0,09  | 1           | 1,152067401   | 0,868004771     | 1,322222222     |
| PGK1                                                                                            | 0,560118262 | 0,204116003 | 0,222 | 0,208 | 1           | 1,151980266   | 0,868070426     | 1,067307692     |
| CRLS1                                                                                           | 0,003248322 | 0,204110557 | 0,099 | 0,057 | 1           | 1,151975917   | 0,868073703     | 1,736842105     |
| DARS1                                                                                           | 0,096232331 | 0,204024231 | 0,118 | 0,09  | 1           | 1,151906989   | 0,868125647     | 1,311111111     |
| EIF3M                                                                                           | 0,951948587 | 0,203957286 | 0,189 | 0,189 | 1           | 1,151853539   | 0,868165931     | 1               |
| ZC3H13                                                                                          | 0,510930663 | 0,203926826 | 0,189 | 0,199 | 1           | 1,151829219   | 0,868184261     | 0,949748744     |
| KRT10-AS1                                                                                       | 0,055344781 | 0,203858265 | 0,049 | 0,03  | 1           | 1,151774482   | 0,868225521     | 1,633333333     |
| FILIP1L                                                                                         | 0,761832158 | 0,203754382 | 0,105 | 0,11  | 1           | 1,151691551   | 0,86828804      | 0,954545455     |
| RBM8A                                                                                           | 0,135246481 | 0,203721213 | 0,39  | 0,463 | 1           | 1,151665072   | 0,868308004     | 0,842332613     |

Supplementary Table 5

| Differentially expressed genes_total calculation_ comparing SC-Keloid vs. (SC-Myel, SC-Nonmyel) |             |             |       |       |             |               |                 |                 |
|-------------------------------------------------------------------------------------------------|-------------|-------------|-------|-------|-------------|---------------|-----------------|-----------------|
| gene                                                                                            | p_val       | avg_log2FC  | pct.1 | pct.2 | p_val_adj   | Foldchange_UP | Foldchange_DOWN | Ratio_pct1_pct2 |
| SHROOM2                                                                                         | 9,81277E-08 | 0,203716154 | 0,051 | 0,005 | 0,002070593 | 1,151661034   | 0,868311048     | 10,2            |
| DYNLT3                                                                                          | 0,622111388 | 0,203695859 | 0,203 | 0,213 | 1           | 1,151644833   | 0,868323263     | 0,953051643     |
| CERK                                                                                            | 0,00082568  | 0,203569859 | 0,055 | 0,022 | 1           | 1,151544257   | 0,868399103     | 2,5             |
| PSMB4                                                                                           | 0,629837574 | 0,203549815 | 0,242 | 0,232 | 1           | 1,151528258   | 0,868411168     | 1,043103448     |
| ACAD8                                                                                           | 0,000811862 | 0,203493777 | 0,065 | 0,028 | 1           | 1,15148353    | 0,8684449       | 2,321428571     |
| MITD1                                                                                           | 0,285052656 | 0,203450839 | 0,094 | 0,079 | 1           | 1,151449261   | 0,868470747     | 1,189873418     |
| POP4                                                                                            | 0,007649101 | 0,203141988 | 0,071 | 0,039 | 1           | 1,151202785   | 0,868656689     | 1,820512821     |
| POLDIP2                                                                                         | 5,41251E-05 | 0,203023421 | 0,087 | 0,037 | 1           | 1,151108179   | 0,868728082     | 2,351351351     |
| DLG1                                                                                            | 0,330323531 | 0,202838411 | 0,141 | 0,157 | 1           | 1,150960571   | 0,868839494     | 0,898089172     |
| CBR1                                                                                            | 0,668142305 | 0,202773071 | 0,277 | 0,271 | 1           | 1,150908445   | 0,868878845     | 1,022140221     |
| SRP19                                                                                           | 0,099200798 | 0,202652208 | 0,177 | 0,142 | 1           | 1,15081203    | 0,868951639     | 1,246478873     |
| DPT                                                                                             | 0,042115803 | 0,202526108 | 0,024 | 0,011 | 1           | 1,150711447   | 0,869027594     | 2,181818182     |
| MIEN1                                                                                           | 0,228831706 | 0,202513309 | 0,176 | 0,149 | 1           | 1,150701239   | 0,869035303     | 1,181208054     |
| LIMD1                                                                                           | 0,000715612 | 0,202481857 | 0,047 | 0,016 | 1           | 1,150676153   | 0,869054249     | 2,9375          |
| VDAC3                                                                                           | 0,740266025 | 0,201941046 | 0,189 | 0,18  | 1           | 1,150244889   | 0,869380086     | 1,05            |
| TSFM                                                                                            | 0,000703599 | 0,201878596 | 0,059 | 0,024 | 1           | 1,150195099   | 0,869417719     | 2,458333333     |
| PHKG1                                                                                           | 0,034685688 | 0,201735311 | 0,063 | 0,039 | 1           | 1,15008087    | 0,869504072     | 1,615384615     |
| CPNE8                                                                                           | 0,075709115 | 0,201478575 | 0,049 | 0,031 | 1           | 1,149876225   | 0,869658819     | 1,580645161     |
| CCS                                                                                             | 0,167564046 | 0,201447082 | 0,135 | 0,11  | 1           | 1,149851125   | 0,869677803     | 1,227272727     |
| UGGT2                                                                                           | 0,014382752 | 0,201427156 | 0,113 | 0,075 | 1           | 1,149835243   | 0,869689815     | 1,506666667     |
| PARN                                                                                            | 0,248612799 | 0,201404947 | 0,05  | 0,038 | 1           | 1,149817543   | 0,869703203     | 1,315789474     |
| TMEM60                                                                                          | 0,000980407 | 0,201372519 | 0,064 | 0,028 | 1           | 1,149791698   | 0,869722752     | 2,285714286     |
| GALNT7                                                                                          | 0,007588849 | 0,201311157 | 0,052 | 0,026 | 1           | 1,149742795   | 0,869759745     | 2               |
| FAM210A                                                                                         | 0,054292835 | 0,201083852 | 0,049 | 0,03  | 1           | 1,14956166    | 0,869896792     | 1,633333333     |
| GNA12                                                                                           | 0,00972536  | 0,200852955 | 0,121 | 0,079 | 1           | 1,149377693   | 0,870036025     | 1,53164557      |
| VPS36                                                                                           | 0,349821974 | 0,200820849 | 0,093 | 0,08  | 1           | 1,149352115   | 0,870055388     | 1,1625          |
| TRUB1                                                                                           | 0,039736005 | 0,200797493 | 0,04  | 0,022 | 1           | 1,149333508   | 0,870069474     | 1,818181818     |
| HNRNPR                                                                                          | 0,078601105 | 0,200615184 | 0,305 | 0,364 | 1           | 1,14918828    | 0,870179428     | 0,837912088     |
| BANF1                                                                                           | 0,944611358 | 0,200553369 | 0,267 | 0,274 | 1           | 1,149139041   | 0,870216714     | 0,974452555     |
| ANKH                                                                                            | 0,001204096 | 0,200519747 | 0,111 | 0,062 | 1           | 1,149112261   | 0,870236994     | 1,790322581     |

Supplementary Table 5

| Differentially expressed genes_total calculation_ comparing SC-Keloid vs. (SC-Myel, SC-Nonmyel) |             |             |       |       |             |               |                 |                 |
|-------------------------------------------------------------------------------------------------|-------------|-------------|-------|-------|-------------|---------------|-----------------|-----------------|
| gene                                                                                            | p_val       | avg_log2FC  | pct.1 | pct.2 | p_val_adj   | Foldchange_UP | Foldchange_DOWN | Ratio_pct1_pct2 |
| ACYP2                                                                                           | 0,008985112 | 0,200516229 | 0,094 | 0,058 | 1           | 1,149109459   | 0,870239117     | 1,620689655     |
| NOC3L                                                                                           | 0,082600898 | 0,200274257 | 0,091 | 0,066 | 1           | 1,148916744   | 0,870385087     | 1,378787879     |
| CDR2L                                                                                           | 2,70161E-06 | 0,200214412 | 0,071 | 0,02  | 0,057006598 | 1,148869086   | 0,870421192     | 3,55            |
| NNT-AS1                                                                                         | 0,027701767 | 0,200169184 | 0,066 | 0,041 | 1           | 1,14883307    | 0,870448481     | 1,609756098     |
| WNT16                                                                                           | 1,22515E-05 | 0,200062258 | 0,026 | 0     | 0,258519095 | 1,148747927   | 0,870512997     | #DIV/0!         |
| BOP1                                                                                            | 0,000254411 | 0,199688664 | 0,081 | 0,037 | 1           | 1,14845049    | 0,87073845      | 2,189189189     |
| ZNF407-AS1                                                                                      | 0,12746326  | 0,19959062  | 0,048 | 0,033 | 1           | 1,148372446   | 0,870797627     | 1,454545455     |
| FXD3                                                                                            | 0,259264951 | 0,199533472 | 0,087 | 0,072 | 1           | 1,148326958   | 0,870832121     | 1,208333333     |
| CHURC1                                                                                          | 0,630631686 | 0,199454847 | 0,286 | 0,301 | 1           | 1,148264377   | 0,870879582     | 0,950166113     |
| PMVK                                                                                            | 0,360820092 | 0,19927257  | 0,161 | 0,14  | 1           | 1,148119309   | 0,87098962      | 1,15            |
| RPAP3                                                                                           | 0,121386391 | 0,199218831 | 0,064 | 0,046 | 1           | 1,148076543   | 0,871022064     | 1,391304348     |
| AGTRAP                                                                                          | 0,000419667 | 0,199010312 | 0,118 | 0,064 | 1           | 1,147910619   | 0,871147966     | 1,84375         |
| EMB                                                                                             | 1,18429E-05 | 0,198909027 | 0,033 | 0,003 | 0,24989684  | 1,147830032   | 0,871209127     | 11              |
| CALML5                                                                                          | 0,079210689 | 0,198839479 | 0,022 | 0,011 | 1           | 1,1477747     | 0,871251126     | 2               |
| STRN3                                                                                           | 0,655916976 | 0,198837054 | 0,128 | 0,134 | 1           | 1,147772771   | 0,871252591     | 0,955223881     |
| CCDC112                                                                                         | 0,18138913  | 0,198689366 | 0,114 | 0,092 | 1           | 1,147655279   | 0,871341785     | 1,239130435     |
| RAB2B                                                                                           | 0,705177008 | 0,198495475 | 0,054 | 0,058 | 1           | 1,147501051   | 0,871458897     | 0,931034483     |
| ETV5                                                                                            | 0,006370739 | 0,198314095 | 0,061 | 0,031 | 1           | 1,147356792   | 0,871568466     | 1,967741935     |
| SANBR                                                                                           | 0,06869651  | 0,198252305 | 0,048 | 0,03  | 1           | 1,147307653   | 0,871605796     | 1,6             |
| RAB23                                                                                           | 0,000869207 | 0,198239534 | 0,071 | 0,033 | 1           | 1,147297497   | 0,871613511     | 2,151515152     |
| EXTL1                                                                                           | 0,007689805 | 0,198190121 | 0,065 | 0,035 | 1           | 1,147258202   | 0,871643365     | 1,857142857     |
| ARCN1                                                                                           | 0,408423801 | 0,19779624  | 0,165 | 0,148 | 1           | 1,146945024   | 0,871881371     | 1,114864865     |
| SMARCA4                                                                                         | 0,057038178 | 0,197449259 | 0,116 | 0,085 | 1           | 1,146669206   | 0,872091092     | 1,364705882     |
| TMX1                                                                                            | 0,303971749 | 0,197323183 | 0,172 | 0,149 | 1           | 1,146569004   | 0,872167307     | 1,154362416     |
| DNAAF4                                                                                          | 0,013352691 | 0,196824896 | 0,044 | 0,022 | 1           | 1,146173063   | 0,872468593     | 2               |
| TES                                                                                             | 0,000299638 | 0,196679918 | 0,058 | 0,022 | 1           | 1,146057889   | 0,872556273     | 2,636363636     |
| RMDN3                                                                                           | 0,84120854  | 0,196416135 | 0,072 | 0,075 | 1           | 1,145848362   | 0,872715826     | 0,96            |
| HAGH                                                                                            | 0,188903144 | 0,196056936 | 0,162 | 0,133 | 1           | 1,145563107   | 0,87293314      | 1,218045113     |
| BLOC1S4                                                                                         | 0,006845418 | 0,195886142 | 0,07  | 0,038 | 1           | 1,145427497   | 0,873036489     | 1,842105263     |
| SEPTIN11                                                                                        | 0,161170207 | 0,195738895 | 0,15  | 0,123 | 1           | 1,145310596   | 0,873125599     | 1,219512195     |

Supplementary Table 5

| Differentially expressed genes_total calculation_ comparing SC-Keloid vs. (SC-Myel, SC-Nonmyel) |             |             |       |       |           |               |                 |                 |
|-------------------------------------------------------------------------------------------------|-------------|-------------|-------|-------|-----------|---------------|-----------------|-----------------|
| gene                                                                                            | p_val       | avg_log2FC  | pct.1 | pct.2 | p_val_adj | Foldchange_UP | Foldchange_DOWN | Ratio_pct1_pct2 |
| VHL                                                                                             | 0,050035406 | 0,195474688 | 0,07  | 0,046 | 1         | 1,14510087    | 0,873285512     | 1,52173913      |
| ISCA1                                                                                           | 0,806937811 | 0,195219226 | 0,147 | 0,151 | 1         | 1,144898121   | 0,873440162     | 0,973509934     |
| PITPNB                                                                                          | 0,301826469 | 0,195115214 | 0,199 | 0,216 | 1         | 1,144815582   | 0,873503135     | 0,921296296     |
| FKBP15                                                                                          | 0,001463827 | 0,195077413 | 0,052 | 0,022 | 1         | 1,144785586   | 0,873526023     | 2,363636364     |
| UCK2                                                                                            | 0,000345467 | 0,195009647 | 0,08  | 0,037 | 1         | 1,144731815   | 0,873567054     | 2,162162162     |
| OSBPL10                                                                                         | 0,032501423 | 0,194830316 | 0,055 | 0,033 | 1         | 1,144589531   | 0,873675648     | 1,666666667     |
| ARHGAP12                                                                                        | 0,604189874 | 0,194785453 | 0,149 | 0,157 | 1         | 1,144553938   | 0,873702817     | 0,949044586     |
| NDUFA10                                                                                         | 0,472167905 | 0,194366859 | 0,191 | 0,202 | 1         | 1,144221898   | 0,873956356     | 0,945544554     |
| ENDOV                                                                                           | 0,025926292 | 0,194161571 | 0,086 | 0,056 | 1         | 1,144059092   | 0,874080724     | 1,535714286     |
| PSMB10                                                                                          | 0,003183058 | 0,19410933  | 0,086 | 0,047 | 1         | 1,144017665   | 0,874112376     | 1,829787234     |
| ANKRD44                                                                                         | 0,373058622 | 0,19389562  | 0,088 | 0,076 | 1         | 1,143848212   | 0,87424187      | 1,157894737     |
| APOM                                                                                            | 0,012958265 | 0,193786382 | 0,033 | 0,014 | 1         | 1,143761605   | 0,874308068     | 2,357142857     |
| SNAPC2                                                                                          | 9,77957E-05 | 0,193565781 | 0,119 | 0,06  | 1         | 1,143586727   | 0,874441768     | 1,983333333     |
| DNMT1                                                                                           | 0,269781354 | 0,193545408 | 0,165 | 0,142 | 1         | 1,143570579   | 0,874454117     | 1,161971831     |
| RC3H2                                                                                           | 0,487929071 | 0,19322483  | 0,086 | 0,096 | 1         | 1,143316496   | 0,874648449     | 0,895833333     |
| C1D                                                                                             | 0,760083142 | 0,193196006 | 0,169 | 0,159 | 1         | 1,143293654   | 0,874665924     | 1,062893082     |
| AGPS                                                                                            | 9,71904E-05 | 0,193144224 | 0,098 | 0,045 | 1         | 1,143252619   | 0,874697318     | 2,177777778     |
| MRPL58                                                                                          | 0,000281284 | 0,193092925 | 0,071 | 0,03  | 1         | 1,143211968   | 0,874728421     | 2,366666667     |
| EFCAB11                                                                                         | 0,004405945 | 0,192909486 | 0,036 | 0,014 | 1         | 1,143066618   | 0,87483965      | 2,571428571     |
| KMT5B                                                                                           | 0,65384457  | 0,19272242  | 0,112 | 0,103 | 1         | 1,142918413   | 0,874953093     | 1,087378641     |
| MRPL35                                                                                          | 0,000438112 | 0,192630753 | 0,068 | 0,028 | 1         | 1,142845795   | 0,875008688     | 2,428571429     |
| RIOK2                                                                                           | 0,200741219 | 0,192348889 | 0,068 | 0,052 | 1         | 1,142622535   | 0,875179658     | 1,307692308     |
| KDEL1                                                                                           | 0,87610658  | 0,19233132  | 0,253 | 0,256 | 1         | 1,142608621   | 0,875190316     | 0,98828125      |
| AUP1                                                                                            | 0,204198726 | 0,192286092 | 0,179 | 0,152 | 1         | 1,142572801   | 0,875217753     | 1,177631579     |
| GNB4                                                                                            | 0,318709808 | 0,192284046 | 0,144 | 0,125 | 1         | 1,14257118    | 0,875218995     | 1,152           |
| NSF                                                                                             | 0,038080127 | 0,192237561 | 0,059 | 0,037 | 1         | 1,142534367   | 0,875247195     | 1,594594595     |
| SERPINB8                                                                                        | 0,18248592  | 0,192228166 | 0,076 | 0,058 | 1         | 1,142526926   | 0,875252895     | 1,310344828     |
| POLR3H                                                                                          | 0,021923857 | 0,192176938 | 0,061 | 0,035 | 1         | 1,142486358   | 0,875283975     | 1,742857143     |
| HUWE1                                                                                           | 0,879962198 | 0,19170414  | 0,151 | 0,153 | 1         | 1,142112004   | 0,875570869     | 0,986928105     |
| UPF3A                                                                                           | 0,999809456 | 0,191502203 | 0,191 | 0,189 | 1         | 1,141952152   | 0,875693432     | 1,010582011     |

Supplementary Table 5

| Differentially expressed genes_total calculation_ comparing SC-Keloid vs. (SC-Myel, SC-Nonmyel) |             |             |       |       |             |               |                 |                 |
|-------------------------------------------------------------------------------------------------|-------------|-------------|-------|-------|-------------|---------------|-----------------|-----------------|
| gene                                                                                            | p_val       | avg_log2FC  | pct.1 | pct.2 | p_val_adj   | Foldchange_UP | Foldchange_DOWN | Ratio_pct1_pct2 |
| MAML3                                                                                           | 0,168422439 | 0,191400366 | 0,069 | 0,052 | 1           | 1,141871547   | 0,875755248     | 1,326923077     |
| CTNNBIP1                                                                                        | 0,00080156  | 0,19137665  | 0,101 | 0,054 | 1           | 1,141852776   | 0,875769645     | 1,87037037      |
| BEND6                                                                                           | 0,020194836 | 0,19122504  | 0,054 | 0,03  | 1           | 1,141732787   | 0,875861682     | 1,8             |
| CCT7                                                                                            | 0,570746915 | 0,191048355 | 0,201 | 0,185 | 1           | 1,141592969   | 0,875968955     | 1,086486486     |
| RSL1D1                                                                                          | 0,061687241 | 0,190983136 | 0,207 | 0,246 | 1           | 1,141541363   | 0,876008555     | 0,841463415     |
| COPRS                                                                                           | 0,685269987 | 0,190974379 | 0,169 | 0,174 | 1           | 1,141534435   | 0,876013872     | 0,971264368     |
| FAM177A1                                                                                        | 0,388857366 | 0,190821879 | 0,25  | 0,269 | 1           | 1,141413775   | 0,876106476     | 0,92936803      |
| PSMB7                                                                                           | 0,604902445 | 0,190552029 | 0,232 | 0,221 | 1           | 1,141200298   | 0,876270363     | 1,049773756     |
| POLR2I                                                                                          | 0,623461011 | 0,190418356 | 0,247 | 0,233 | 1           | 1,141094565   | 0,876351558     | 1,060085837     |
| CCT3                                                                                            | 0,487232591 | 0,190267018 | 0,237 | 0,248 | 1           | 1,140974871   | 0,876443492     | 0,955645161     |
| GUF1                                                                                            | 0,004505388 | 0,190214283 | 0,047 | 0,02  | 1           | 1,140933166   | 0,876475529     | 2,35            |
| PRPF19                                                                                          | 0,001896752 | 0,190140514 | 0,073 | 0,037 | 1           | 1,140874828   | 0,876520347     | 1,972972973     |
| PTPRE                                                                                           | 0,455491045 | 0,190032255 | 0,172 | 0,156 | 1           | 1,140789221   | 0,876586123     | 1,102564103     |
| DHX29                                                                                           | 0,097146494 | 0,19001985  | 0,156 | 0,125 | 1           | 1,140779412   | 0,87659366      | 1,248           |
| RPAP2                                                                                           | 0,542454803 | 0,189807001 | 0,058 | 0,052 | 1           | 1,140611119   | 0,876722999     | 1,115384615     |
| B3GAT3                                                                                          | 0,047239051 | 0,189517674 | 0,154 | 0,115 | 1           | 1,140382396   | 0,87689884      | 1,339130435     |
| ABI1                                                                                            | 0,358454238 | 0,189237562 | 0,139 | 0,155 | 1           | 1,140161003   | 0,877069114     | 0,896774194     |
| SCP2                                                                                            | 0,535928728 | 0,188993987 | 0,268 | 0,281 | 1           | 1,139968521   | 0,877217205     | 0,953736655     |
| NABP2                                                                                           | 0,001212755 | 0,1889174   | 0,092 | 0,049 | 1           | 1,139908006   | 0,877263774     | 1,87755102      |
| IFT20                                                                                           | 0,017710113 | 0,188915506 | 0,14  | 0,098 | 1           | 1,13990651    | 0,877264926     | 1,428571429     |
| PRKACA                                                                                          | 0,0895867   | 0,188867482 | 0,104 | 0,077 | 1           | 1,139868566   | 0,877294129     | 1,350649351     |
| PSMG4                                                                                           | 0,678558694 | 0,188642384 | 0,079 | 0,073 | 1           | 1,139690731   | 0,87743102      | 1,082191781     |
| SLC15A4                                                                                         | 0,003152549 | 0,188532868 | 0,083 | 0,045 | 1           | 1,139604219   | 0,877497629     | 1,844444444     |
| DOCK2                                                                                           | 1,60138E-05 | 0,188423816 | 0,035 | 0,004 | 0,337908245 | 1,13951808    | 0,877563961     | 8,75            |
| SDHC                                                                                            | 0,001657612 | 0,188151782 | 0,179 | 0,117 | 1           | 1,139303234   | 0,877729449     | 1,52991453      |
| MSRA                                                                                            | 1,12369E-05 | 0,188029511 | 0,078 | 0,027 | 0,237109202 | 1,13920668    | 0,877803841     | 2,888888889     |
| FAHD2B                                                                                          | 0,021864742 | 0,187984094 | 0,048 | 0,026 | 1           | 1,139170817   | 0,877831476     | 1,846153846     |
| CCDC124                                                                                         | 0,120560241 | 0,187951799 | 0,178 | 0,142 | 1           | 1,139145317   | 0,877851127     | 1,253521127     |
| INHBA                                                                                           | 0,014878444 | 0,187710276 | 0,028 | 0,011 | 1           | 1,138954628   | 0,877998101     | 2,545454545     |
| RFC4                                                                                            | 0,000157237 | 0,187679477 | 0,04  | 0,009 | 1           | 1,138930313   | 0,878016845     | 4,444444444     |

Supplementary Table 5

| Differentially expressed genes_total calculation_ comparing SC-Keloid vs. (SC-Myel, SC-Nonmyel) |             |             |       |       |           |               |                 |                 |
|-------------------------------------------------------------------------------------------------|-------------|-------------|-------|-------|-----------|---------------|-----------------|-----------------|
| gene                                                                                            | p_val       | avg_log2FC  | pct.1 | pct.2 | p_val_adj | Foldchange_UP | Foldchange_DOWN | Ratio_pct1_pct2 |
| SSRP1                                                                                           | 0,026623579 | 0,187602581 | 0,136 | 0,096 | 1         | 1,13886961    | 0,878063644     | 1,416666667     |
| CDR1                                                                                            | 0,19432594  | 0,187539699 | 0,015 | 0,008 | 1         | 1,138819971   | 0,878101917     | 1,875           |
| SPATA33                                                                                         | 0,019257531 | 0,187510741 | 0,063 | 0,037 | 1         | 1,138797113   | 0,878119543     | 1,702702703     |
| IFRD2                                                                                           | 0,000497066 | 0,187370201 | 0,113 | 0,061 | 1         | 1,138686183   | 0,878205088     | 1,852459016     |
| DDX18                                                                                           | 0,703722288 | 0,186984065 | 0,272 | 0,282 | 1         | 1,138381456   | 0,878440171     | 0,964539007     |
| KIAA1143                                                                                        | 0,120636585 | 0,186976209 | 0,106 | 0,081 | 1         | 1,138375256   | 0,878444954     | 1,308641975     |
| PIEZO1                                                                                          | 0,002489148 | 0,186783574 | 0,128 | 0,079 | 1         | 1,138223266   | 0,878562256     | 1,620253165     |
| TRIP12                                                                                          | 0,30479181  | 0,186538408 | 0,132 | 0,147 | 1         | 1,138029857   | 0,878711568     | 0,897959184     |
| VIM-AS1                                                                                         | 0,375439498 | 0,186208735 | 0,017 | 0,012 | 1         | 1,137769833   | 0,878912387     | 1,416666667     |
| YEATS4                                                                                          | 0,027659995 | 0,186086412 | 0,1   | 0,068 | 1         | 1,137673368   | 0,878986911     | 1,470588235     |
| GNPNAT1                                                                                         | 0,082998549 | 0,185906498 | 0,073 | 0,052 | 1         | 1,137531501   | 0,879096534     | 1,403846154     |
| RBM18                                                                                           | 0,011422537 | 0,185882464 | 0,062 | 0,034 | 1         | 1,137512551   | 0,879111179     | 1,823529412     |
| BDNF                                                                                            | 0,000985931 | 0,185815528 | 0,027 | 0,005 | 1         | 1,137459776   | 0,879151968     | 5,4             |
| BCL10                                                                                           | 0,135563264 | 0,185811216 | 0,1   | 0,077 | 1         | 1,137456376   | 0,879154595     | 1,298701299     |
| LACC1                                                                                           | 0,011605359 | 0,185754496 | 0,024 | 0,008 | 1         | 1,137411657   | 0,87918916      | 3               |
| SMUG1                                                                                           | 5,90927E-05 | 0,185694199 | 0,055 | 0,016 | 1         | 1,13736412    | 0,879225907     | 3,4375          |
| URM1                                                                                            | 0,003544882 | 0,185390355 | 0,155 | 0,103 | 1         | 1,137124607   | 0,879411098     | 1,504854369     |
| TCHP                                                                                            | 0,015805944 | 0,18523749  | 0,055 | 0,03  | 1         | 1,137004126   | 0,879504284     | 1,833333333     |
| TNFAIP8                                                                                         | 0,000154452 | 0,185177182 | 0,061 | 0,022 | 1         | 1,136956598   | 0,87954105      | 2,772727273     |
| SAMD12                                                                                          | 0,070019457 | 0,185142738 | 0,059 | 0,039 | 1         | 1,136929454   | 0,879562049     | 1,512820513     |
| SSR1                                                                                            | 0,853643668 | 0,185085266 | 0,19  | 0,183 | 1         | 1,136884163   | 0,879597088     | 1,038251366     |
| HOXB3                                                                                           | 0,000972331 | 0,185082863 | 0,027 | 0,005 | 1         | 1,13688227    | 0,879598554     | 5,4             |
| NDUFAF3                                                                                         | 0,079675973 | 0,184993653 | 0,274 | 0,318 | 1         | 1,136811972   | 0,879652946     | 0,86163522      |
| ERGIC3                                                                                          | 0,589951532 | 0,184824558 | 0,194 | 0,18  | 1         | 1,136678737   | 0,879756054     | 1,077777778     |
| DBNL                                                                                            | 0,010151546 | 0,184793204 | 0,147 | 0,1   | 1         | 1,136654034   | 0,879775174     | 1,47            |
| BID                                                                                             | 0,000111673 | 0,184726297 | 0,055 | 0,018 | 1         | 1,136601321   | 0,879815975     | 3,055555556     |
| CDKN2B                                                                                          | 0,008551698 | 0,184556411 | 0,056 | 0,028 | 1         | 1,136467487   | 0,879919585     | 2               |
| JKAMP                                                                                           | 0,049115561 | 0,184459377 | 0,147 | 0,11  | 1         | 1,136391052   | 0,87997877      | 1,336363636     |
| CAPNS1                                                                                          | 0,875831838 | 0,184283642 | 0,246 | 0,247 | 1         | 1,136252637   | 0,880085967     | 0,995951417     |
| MRPL16                                                                                          | 0,009939556 | 0,184117953 | 0,12  | 0,079 | 1         | 1,136122149   | 0,880187047     | 1,518987342     |



Supplementary Table 5

| Differentially expressed genes_total calculation_ comparing SC-Keloid vs. (SC-Myel, SC-Nonmyel) |             |             |       |       |             |               |                 |                 |
|-------------------------------------------------------------------------------------------------|-------------|-------------|-------|-------|-------------|---------------|-----------------|-----------------|
| gene                                                                                            | p_val       | avg_log2FC  | pct.1 | pct.2 | p_val_adj   | Foldchange_UP | Foldchange_DOWN | Ratio_pct1_pct2 |
| PXN-AS1                                                                                         | 0,008332736 | 0,18407391  | 0,044 | 0,02  | 1           | 1,136087466   | 0,880213919     | 2,2             |
| CHCHD3                                                                                          | 0,7515323   | 0,183988404 | 0,108 | 0,102 | 1           | 1,136020134   | 0,880266089     | 1,058823529     |
| PHB2                                                                                            | 0,824656733 | 0,183896117 | 0,219 | 0,21  | 1           | 1,135947466   | 0,8803224       | 1,042857143     |
| GGCT                                                                                            | 0,75070275  | 0,183820717 | 0,139 | 0,132 | 1           | 1,1358881     | 0,88036841      | 1,053030303     |
| ESCO1                                                                                           | 0,057612754 | 0,183788401 | 0,064 | 0,042 | 1           | 1,135862657   | 0,88038813      | 1,523809524     |
| MEGF8                                                                                           | 0,061529313 | 0,183605301 | 0,107 | 0,079 | 1           | 1,135718508   | 0,880499872     | 1,35443038      |
| CAPZB                                                                                           | 0,257461898 | 0,183573066 | 0,274 | 0,305 | 1           | 1,135693132   | 0,880519545     | 0,898360656     |
| SNX5                                                                                            | 0,801486374 | 0,183533929 | 0,144 | 0,144 | 1           | 1,135662323   | 0,880543432     | 1               |
| TMEM181                                                                                         | 0,081285026 | 0,183524537 | 0,061 | 0,041 | 1           | 1,13565493    | 0,880549164     | 1,487804878     |
| RPL14                                                                                           | 0,162229421 | 0,18346663  | 0,717 | 0,851 | 1           | 1,135609348   | 0,880584509     | 0,84253819      |
| PLRG1                                                                                           | 0,177034781 | 0,183420306 | 0,097 | 0,076 | 1           | 1,135572885   | 0,880612785     | 1,276315789     |
| CMPK1                                                                                           | 0,140488345 | 0,18336527  | 0,21  | 0,242 | 1           | 1,135529566   | 0,880646379     | 0,867768595     |
| KCNC2                                                                                           | 3,24331E-06 | 0,183226115 | 0,033 | 0,001 | 0,068437155 | 1,135420044   | 0,880731325     | 33              |
| MRPL28                                                                                          | 0,029204466 | 0,183207794 | 0,143 | 0,103 | 1           | 1,135405625   | 0,88074251      | 1,388349515     |
| PRELID3B                                                                                        | 0,674866642 | 0,183034496 | 0,1   | 0,092 | 1           | 1,135269247   | 0,880848312     | 1,086956522     |
| FLNC                                                                                            | 1,79454E-05 | 0,182803407 | 0,056 | 0,015 | 0,378666084 | 1,135087416   | 0,880989416     | 3,733333333     |
| PRPF6                                                                                           | 0,631575757 | 0,182794397 | 0,134 | 0,125 | 1           | 1,135080327   | 0,880994918     | 1,072           |
| SLC19A1                                                                                         | 0,087845057 | 0,182416329 | 0,029 | 0,016 | 1           | 1,13478291    | 0,881225819     | 1,8125          |
| PCDHGA12                                                                                        | 2,90045E-05 | 0,182302236 | 0,03  | 0,003 | 0,612024839 | 1,134693172   | 0,881295512     | 10              |
| RNF217                                                                                          | 0,141429731 | 0,182169978 | 0,065 | 0,047 | 1           | 1,134589154   | 0,881376308     | 1,382978723     |
| LINC00900                                                                                       | 0,006610798 | 0,18199337  | 0,016 | 0,003 | 1           | 1,134450272   | 0,881484209     | 5,333333333     |
| TSN                                                                                             | 0,99151402  | 0,181876778 | 0,106 | 0,104 | 1           | 1,134358594   | 0,881555449     | 1,019230769     |
| BLVRA                                                                                           | 0,836210133 | 0,181789344 | 0,099 | 0,095 | 1           | 1,134289848   | 0,881608877     | 1,042105263     |
| AKT3                                                                                            | 0,471910162 | 0,18172901  | 0,151 | 0,161 | 1           | 1,134242413   | 0,881645747     | 0,937888199     |
| UBP1                                                                                            | 0,609706553 | 0,181698903 | 0,065 | 0,058 | 1           | 1,134218743   | 0,881664146     | 1,120689655     |
| GSS                                                                                             | 0,000186516 | 0,181325175 | 0,085 | 0,038 | 1           | 1,133924964   | 0,881892569     | 2,236842105     |
| ACTR8                                                                                           | 0,009360921 | 0,181124681 | 0,048 | 0,023 | 1           | 1,133767391   | 0,882015136     | 2,086956522     |
| DNMT3A                                                                                          | 0,101921622 | 0,181033486 | 0,085 | 0,062 | 1           | 1,133695726   | 0,882070892     | 1,370967742     |
| SLC35B4                                                                                         | 0,008668815 | 0,181030567 | 0,05  | 0,024 | 1           | 1,133693432   | 0,882072676     | 2,083333333     |
| NUP50                                                                                           | 0,423031489 | 0,180973671 | 0,075 | 0,064 | 1           | 1,133648724   | 0,882107463     | 1,171875        |

Supplementary Table 5

| Differentially expressed genes_total calculation_ comparing SC-Keloid vs. (SC-Myel, SC-Nonmyel) |             |             |       |       |             |               |                 |                 |
|-------------------------------------------------------------------------------------------------|-------------|-------------|-------|-------|-------------|---------------|-----------------|-----------------|
| gene                                                                                            | p_val       | avg_log2FC  | pct.1 | pct.2 | p_val_adj   | Foldchange_UP | Foldchange_DOWN | Ratio_pct1_pct2 |
| URI1                                                                                            | 0,550436572 | 0,180912649 | 0,205 | 0,187 | 1           | 1,133600774   | 0,882144775     | 1,096256684     |
| MED7                                                                                            | 0,019562984 | 0,180631032 | 0,047 | 0,024 | 1           | 1,133379515   | 0,882316988     | 1,958333333     |
| TRIM37                                                                                          | 0,201345379 | 0,180615664 | 0,061 | 0,046 | 1           | 1,133367442   | 0,882326387     | 1,326086957     |
| NTN1                                                                                            | 0,003097475 | 0,180556012 | 0,05  | 0,022 | 1           | 1,133320581   | 0,88236287      | 2,272727273     |
| USP14                                                                                           | 0,30256879  | 0,180243719 | 0,147 | 0,126 | 1           | 1,133075283   | 0,882553891     | 1,166666667     |
| REEP5                                                                                           | 0,290135261 | 0,180200431 | 0,253 | 0,278 | 1           | 1,133041286   | 0,882580372     | 0,910071942     |
| TYW5                                                                                            | 0,477911293 | 0,180148523 | 0,026 | 0,02  | 1           | 1,13300052    | 0,882612128     | 1,3             |
| LRIF1                                                                                           | 0,017269766 | 0,180132405 | 0,065 | 0,038 | 1           | 1,132987862   | 0,882621989     | 1,710526316     |
| CALM2                                                                                           | 0,010063591 | 0,179909412 | 0,771 | 0,875 | 1           | 1,132812753   | 0,882758424     | 0,881142857     |
| TOR4A                                                                                           | 3,26563E-06 | 0,179869264 | 0,033 | 0,001 | 0,068907955 | 1,132781229   | 0,88278299      | 33              |
| FAM174B                                                                                         | 0,007764489 | 0,179868742 | 0,052 | 0,026 | 1           | 1,132780819   | 0,882783309     | 2               |
| KLHL29                                                                                          | 0,185133293 | 0,17986638  | 0,085 | 0,066 | 1           | 1,132778965   | 0,882784754     | 1,287878788     |
| PLP2                                                                                            | 0,474488195 | 0,179645729 | 0,196 | 0,214 | 1           | 1,132605726   | 0,882919781     | 0,91588785      |
| HLCS                                                                                            | 0,033873688 | 0,179638816 | 0,035 | 0,018 | 1           | 1,1326003     | 0,882924012     | 1,944444444     |
| TMED2                                                                                           | 0,235074612 | 0,179523726 | 0,234 | 0,263 | 1           | 1,132509951   | 0,882994449     | 0,88973384      |
| RSRC1                                                                                           | 0,810629146 | 0,179467811 | 0,13  | 0,133 | 1           | 1,132466058   | 0,883028673     | 0,977443609     |
| CRELD2                                                                                          | 0,319835411 | 0,179433103 | 0,15  | 0,13  | 1           | 1,132438814   | 0,883049916     | 1,153846154     |
| VKORC1                                                                                          | 0,680898741 | 0,178997563 | 0,24  | 0,248 | 1           | 1,13209699    | 0,883316544     | 0,967741935     |
| SH3BGRL                                                                                         | 0,235427551 | 0,178817949 | 0,302 | 0,334 | 1           | 1,131956053   | 0,883426523     | 0,904191617     |
| AGAP2-AS1                                                                                       | 8,70043E-05 | 0,178771723 | 0,071 | 0,027 | 1           | 1,131919784   | 0,883454829     | 2,62962963      |
| ARMT1                                                                                           | 0,08030256  | 0,178660026 | 0,042 | 0,026 | 1           | 1,131832152   | 0,883523231     | 1,615384615     |
| RPN1                                                                                            | 0,509519018 | 0,178631896 | 0,162 | 0,148 | 1           | 1,131810084   | 0,883540458     | 1,094594595     |
| SEC24D                                                                                          | 0,073540729 | 0,178088313 | 0,122 | 0,091 | 1           | 1,131383717   | 0,883873424     | 1,340659341     |
| C17orf75                                                                                        | 0,019093587 | 0,178006243 | 0,047 | 0,024 | 1           | 1,131319358   | 0,883923706     | 1,958333333     |
| INTS1                                                                                           | 0,390186965 | 0,177867462 | 0,077 | 0,065 | 1           | 1,131210536   | 0,88400874      | 1,184615385     |
| TTC1                                                                                            | 0,283297479 | 0,177854912 | 0,171 | 0,149 | 1           | 1,131200696   | 0,88401643      | 1,147651007     |
| RILPL2                                                                                          | 0,098379006 | 0,177758899 | 0,059 | 0,041 | 1           | 1,131125415   | 0,884075264     | 1,43902439      |
| BICD1                                                                                           | 0,401086244 | 0,177611124 | 0,201 | 0,217 | 1           | 1,13100956    | 0,884165824     | 0,926267281     |
| ARNT2                                                                                           | 0,000145934 | 0,177556788 | 0,058 | 0,02  | 1           | 1,130966964   | 0,884199125     | 2,9             |
| ARPC1A                                                                                          | 0,400363495 | 0,177457468 | 0,218 | 0,197 | 1           | 1,130889107   | 0,884259999     | 1,106598985     |

Supplementary Table 5

| Differentially expressed genes_total calculation_ comparing SC-Keloid vs. (SC-Myel, SC-Nonmyel) |             |             |       |       |             |               |                 |                 |
|-------------------------------------------------------------------------------------------------|-------------|-------------|-------|-------|-------------|---------------|-----------------|-----------------|
| gene                                                                                            | p_val       | avg_log2FC  | pct.1 | pct.2 | p_val_adj   | Foldchange_UP | Foldchange_DOWN | Ratio_pct1_pct2 |
| CRABP1                                                                                          | 3,94382E-05 | 0,177364832 | 0,033 | 0,004 | 0,8321848   | 1,130816494   | 0,884316779     | 8,25            |
| LARP6                                                                                           | 0,749407898 | 0,177107556 | 0,099 | 0,094 | 1           | 1,130614853   | 0,884474494     | 1,053191489     |
| PPP2R3C                                                                                         | 0,00350607  | 0,17696501  | 0,116 | 0,072 | 1           | 1,130503149   | 0,884561888     | 1,611111111     |
| PGRMC2                                                                                          | 0,487919265 | 0,176845687 | 0,189 | 0,201 | 1           | 1,130409651   | 0,884635052     | 0,940298507     |
| UBE3C                                                                                           | 0,094698552 | 0,176660873 | 0,095 | 0,071 | 1           | 1,13026485    | 0,884748384     | 1,338028169     |
| FAM168A                                                                                         | 0,476895943 | 0,176642085 | 0,102 | 0,091 | 1           | 1,130250131   | 0,884759906     | 1,120879121     |
| MRPS35                                                                                          | 0,004470644 | 0,176591009 | 0,095 | 0,056 | 1           | 1,130210118   | 0,88479123      | 1,696428571     |
| MYG1                                                                                            | 0,33987122  | 0,176566788 | 0,123 | 0,104 | 1           | 1,130191143   | 0,884806085     | 1,182692308     |
| FOXS1                                                                                           | 5,89089E-05 | 0,176302374 | 0,031 | 0,004 | 1           | 1,129984022   | 0,884968265     | 7,75            |
| MEA1                                                                                            | 0,088755318 | 0,17617365  | 0,106 | 0,079 | 1           | 1,129883204   | 0,88504723      | 1,341772152     |
| PPIL1                                                                                           | 0,001351624 | 0,176107189 | 0,057 | 0,024 | 1           | 1,129831156   | 0,885088002     | 2,375           |
| PUS7                                                                                            | 0,001547082 | 0,176096834 | 0,042 | 0,015 | 1           | 1,129823046   | 0,885094355     | 2,8             |
| VAMP3                                                                                           | 0,054463385 | 0,175962089 | 0,19  | 0,229 | 1           | 1,129717528   | 0,885177025     | 0,829694323     |
| ATMIN                                                                                           | 0,004353694 | 0,175945373 | 0,079 | 0,043 | 1           | 1,129704438   | 0,885187281     | 1,837209302     |
| COIL                                                                                            | 0,456298125 | 0,175865171 | 0,062 | 0,053 | 1           | 1,129641638   | 0,885236491     | 1,169811321     |
| CENPJ                                                                                           | 0,072087235 | 0,175820369 | 0,037 | 0,022 | 1           | 1,129606558   | 0,885263982     | 1,681818182     |
| NOSIP                                                                                           | 0,478623788 | 0,175771444 | 0,114 | 0,1   | 1           | 1,129568251   | 0,885294005     | 1,14            |
| SUCLA2                                                                                          | 0,656791313 | 0,175734567 | 0,106 | 0,111 | 1           | 1,129539378   | 0,885316634     | 0,954954955     |
| ETFA                                                                                            | 0,25046387  | 0,175706944 | 0,169 | 0,144 | 1           | 1,129517751   | 0,885333585     | 1,173611111     |
| SCOC                                                                                            | 0,994323231 | 0,175621071 | 0,206 | 0,202 | 1           | 1,129450521   | 0,885386284     | 1,01980198      |
| TBC1D7                                                                                          | 0,009107817 | 0,175584597 | 0,097 | 0,06  | 1           | 1,129421967   | 0,885408668     | 1,616666667     |
| TRIM38                                                                                          | 0,183415053 | 0,17516606  | 0,057 | 0,042 | 1           | 1,129094361   | 0,88566557      | 1,357142857     |
| MTDH                                                                                            | 0,116359917 | 0,175046048 | 0,352 | 0,412 | 1           | 1,12900044    | 0,885739248     | 0,854368932     |
| LCTL                                                                                            | 0,000176714 | 0,174812605 | 0,049 | 0,015 | 1           | 1,128817771   | 0,885882581     | 3,266666667     |
| EXOSC8                                                                                          | 0,71132218  | 0,174560138 | 0,128 | 0,121 | 1           | 1,128620249   | 0,886037621     | 1,05785124      |
| ENDOG                                                                                           | 0,028757492 | 0,174363732 | 0,095 | 0,064 | 1           | 1,12846661    | 0,886158253     | 1,484375        |
| DNAJC16                                                                                         | 0,018496669 | 0,174353577 | 0,031 | 0,014 | 1           | 1,128458667   | 0,886164491     | 2,214285714     |
| MGP                                                                                             | 0,652837244 | 0,174167383 | 0,084 | 0,079 | 1           | 1,128313038   | 0,886278866     | 1,063291139     |
| OLA1                                                                                            | 0,155602555 | 0,174055002 | 0,156 | 0,129 | 1           | 1,128225149   | 0,886347907     | 1,209302326     |
| SCUBE3                                                                                          | 1,28392E-05 | 0,174023056 | 0,029 | 0,001 | 0,270920947 | 1,128200167   | 0,886367534     | 29              |

Supplementary Table 5

| Differentially expressed genes_total calculation_ comparing SC-Keloid vs. (SC-Myel, SC-Nonmyel) |             |             |       |       |             |               |                 |                 |
|-------------------------------------------------------------------------------------------------|-------------|-------------|-------|-------|-------------|---------------|-----------------|-----------------|
| gene                                                                                            | p_val       | avg_log2FC  | pct.1 | pct.2 | p_val_adj   | Foldchange_UP | Foldchange_DOWN | Ratio_pct1_pct2 |
| TGFBR1                                                                                          | 0,736953229 | 0,173611795 | 0,078 | 0,073 | 1           | 1,127878604   | 0,886620241     | 1,068493151     |
| RCN3                                                                                            | 0,044152002 | 0,173447045 | 0,133 | 0,098 | 1           | 1,127749812   | 0,886721496     | 1,357142857     |
| LNPB                                                                                            | 0,136385157 | 0,173445782 | 0,087 | 0,066 | 1           | 1,127748824   | 0,886722273     | 1,318181818     |
| CPSF2                                                                                           | 0,04718453  | 0,17339851  | 0,073 | 0,049 | 1           | 1,127711872   | 0,886751328     | 1,489795918     |
| MORF4L1                                                                                         | 0,080351874 | 0,173180735 | 0,549 | 0,711 | 1           | 1,127541657   | 0,886885193     | 0,772151899     |
| AIDA                                                                                            | 0,860823599 | 0,17315145  | 0,129 | 0,13  | 1           | 1,127518769   | 0,886903196     | 0,992307692     |
| B9D1                                                                                            | 2,40293E-05 | 0,173001879 | 0,04  | 0,007 | 0,507043014 | 1,12740188    | 0,88699515      | 5,714285714     |
| TRIB2                                                                                           | 0,245623829 | 0,172995759 | 0,108 | 0,09  | 1           | 1,127397098   | 0,886998913     | 1,2             |
| HDAC2                                                                                           | 0,895498169 | 0,172900966 | 0,18  | 0,182 | 1           | 1,127323024   | 0,887057195     | 0,989010989     |
| SKIL                                                                                            | 0,344655478 | 0,172501413 | 0,237 | 0,258 | 1           | 1,127010856   | 0,887302899     | 0,918604651     |
| VPS41                                                                                           | 0,015087678 | 0,172447422 | 0,084 | 0,052 | 1           | 1,126968681   | 0,887336105     | 1,615384615     |
| NUP43                                                                                           | 0,001657363 | 0,172429959 | 0,03  | 0,008 | 1           | 1,126955039   | 0,887346847     | 3,75            |
| UBXN6                                                                                           | 0,036473816 | 0,172183337 | 0,104 | 0,072 | 1           | 1,126762408   | 0,887498547     | 1,444444444     |
| LRRTM2                                                                                          | 0,410476476 | 0,172155007 | 0,054 | 0,045 | 1           | 1,126740282   | 0,887515975     | 1,2             |
| MCUB                                                                                            | 0,037762534 | 0,172047215 | 0,042 | 0,023 | 1           | 1,1266561     | 0,887582289     | 1,826086957     |
| XPOT                                                                                            | 0,788368677 | 0,172002484 | 0,094 | 0,09  | 1           | 1,126621168   | 0,887609809     | 1,044444444     |
| POLR3GL                                                                                         | 0,396150306 | 0,171988068 | 0,128 | 0,111 | 1           | 1,126609911   | 0,887618679     | 1,153153153     |
| ZNF107                                                                                          | 0,033385998 | 0,171965305 | 0,023 | 0,009 | 1           | 1,126592135   | 0,887632683     | 2,555555556     |
| MRPS14                                                                                          | 0,147012914 | 0,171925201 | 0,095 | 0,073 | 1           | 1,126560818   | 0,887657358     | 1,301369863     |
| KCTD10                                                                                          | 0,039867756 | 0,171785972 | 0,052 | 0,031 | 1           | 1,126452104   | 0,887743027     | 1,677419355     |
| NFU1                                                                                            | 0,58404859  | 0,171742193 | 0,13  | 0,118 | 1           | 1,126417921   | 0,887769966     | 1,101694915     |
| HDDC3                                                                                           | 0,004175917 | 0,171621781 | 0,049 | 0,022 | 1           | 1,126323911   | 0,887844065     | 2,227272727     |
| RAB12                                                                                           | 0,197044529 | 0,171621587 | 0,068 | 0,052 | 1           | 1,12632376    | 0,887844185     | 1,307692308     |
| PARP14                                                                                          | 0,702073656 | 0,171502326 | 0,111 | 0,103 | 1           | 1,126230656   | 0,887917582     | 1,077669903     |
| COL22A1                                                                                         | 4,69194E-05 | 0,171470481 | 0,029 | 0,003 | 0,990047121 | 1,126205796   | 0,887937181     | 9,666666667     |
| ADGRE5                                                                                          | 0,202719718 | 0,171425567 | 0,121 | 0,099 | 1           | 1,126170736   | 0,887964825     | 1,222222222     |
| RINL                                                                                            | 0,0527598   | 0,171171653 | 0,026 | 0,012 | 1           | 1,125972547   | 0,88812112      | 2,166666667     |
| SPAST                                                                                           | 0,329517683 | 0,170957199 | 0,062 | 0,05  | 1           | 1,125805186   | 0,888253148     | 1,24            |
| SDSL                                                                                            | 1,60138E-05 | 0,17094691  | 0,035 | 0,004 | 0,337908245 | 1,125797157   | 0,888259482     | 8,75            |
| MTRES1                                                                                          | 0,02548861  | 0,170896633 | 0,049 | 0,027 | 1           | 1,125757924   | 0,888290438     | 1,814814815     |

Supplementary Table 5

| Differentially expressed genes_total calculation_ comparing SC-Keloid vs. (SC-Myel, SC-Nonmyel) |             |             |       |       |             |               |                 |                 |
|-------------------------------------------------------------------------------------------------|-------------|-------------|-------|-------|-------------|---------------|-----------------|-----------------|
| gene                                                                                            | p_val       | avg_log2FC  | pct.1 | pct.2 | p_val_adj   | Foldchange_UP | Foldchange_DOWN | Ratio_pct1_pct2 |
| CENPK                                                                                           | 0,000135835 | 0,170882143 | 0,035 | 0,007 | 1           | 1,125746618   | 0,88829936      | 5               |
| SDF2                                                                                            | 0,061577445 | 0,17076782  | 0,146 | 0,11  | 1           | 1,125657414   | 0,888369754     | 1,327272727     |
| ADAM10                                                                                          | 0,652732201 | 0,170650499 | 0,212 | 0,22  | 1           | 1,125565878   | 0,888442        | 0,963636364     |
| HIVEP3                                                                                          | 0,003147411 | 0,170584116 | 0,068 | 0,034 | 1           | 1,125514089   | 0,888482881     | 2               |
| TMEM250                                                                                         | 0,000450152 | 0,170494989 | 0,055 | 0,02  | 1           | 1,125444558   | 0,888537772     | 2,75            |
| KMT5A                                                                                           | 0,033498281 | 0,170406921 | 0,121 | 0,085 | 1           | 1,125375859   | 0,888592013     | 1,423529412     |
| C4orf3                                                                                          | 0,017934488 | 0,170257945 | 0,356 | 0,445 | 1           | 1,125259656   | 0,888683776     | 0,8             |
| STX4                                                                                            | 0,29759859  | 0,170136382 | 0,114 | 0,096 | 1           | 1,125164844   | 0,88875866      | 1,1875          |
| ATIC                                                                                            | 0,000665542 | 0,170081321 | 0,064 | 0,027 | 1           | 1,125121903   | 0,888792581     | 2,37037037      |
| UTP14C                                                                                          | 0,00075685  | 0,170037455 | 0,033 | 0,008 | 1           | 1,125087693   | 0,888819606     | 4,125           |
| SLC27A4                                                                                         | 1,12004E-07 | 0,169881953 | 0,073 | 0,016 | 0,002363399 | 1,124966431   | 0,888915413     | 4,5625          |
| ZNF281                                                                                          | 0,03905657  | 0,169880484 | 0,063 | 0,039 | 1           | 1,124965286   | 0,888916318     | 1,615384615     |
| SMC2                                                                                            | 0,045191293 | 0,169853013 | 0,095 | 0,066 | 1           | 1,124943866   | 0,888933244     | 1,439393939     |
| EIF4G2                                                                                          | 0,241330554 | 0,169707113 | 0,442 | 0,548 | 1           | 1,124830106   | 0,889023147     | 0,806569343     |
| ETAA1                                                                                           | 0,010668501 | 0,169589142 | 0,029 | 0,011 | 1           | 1,12473813    | 0,889095847     | 2,636363636     |
| RAB18                                                                                           | 0,52329144  | 0,169558705 | 0,171 | 0,18  | 1           | 1,124714402   | 0,889114604     | 0,95            |
| SLC35F6                                                                                         | 0,000876071 | 0,169537436 | 0,055 | 0,022 | 1           | 1,124697821   | 0,889127712     | 2,5             |
| ZNF544                                                                                          | 0,002947257 | 0,169500003 | 0,042 | 0,016 | 1           | 1,124668639   | 0,889150782     | 2,625           |
| SLC35B1                                                                                         | 0,024993652 | 0,169384333 | 0,137 | 0,098 | 1           | 1,124578471   | 0,889222074     | 1,397959184     |
| ITGA6                                                                                           | 0,382826737 | 0,169321901 | 0,444 | 0,514 | 1           | 1,124529806   | 0,889260556     | 0,86381323      |
| NAE1                                                                                            | 0,033073132 | 0,169296253 | 0,116 | 0,081 | 1           | 1,124509815   | 0,889276364     | 1,432098765     |
| TRIQK                                                                                           | 0,2968039   | 0,169221547 | 0,088 | 0,073 | 1           | 1,124451587   | 0,889322414     | 1,205479452     |
| FZD6                                                                                            | 0,000116789 | 0,168904643 | 0,033 | 0,005 | 1           | 1,124204615   | 0,889517786     | 6,6             |
| MDH1                                                                                            | 0,211307811 | 0,168817855 | 0,203 | 0,227 | 1           | 1,124136989   | 0,889571298     | 0,894273128     |
| RRM2B                                                                                           | 0,764852045 | 0,16881326  | 0,059 | 0,056 | 1           | 1,124133409   | 0,889574131     | 1,053571429     |
| TPPP3                                                                                           | 0,129213495 | 0,168568281 | 0,184 | 0,155 | 1           | 1,123942539   | 0,889725199     | 1,187096774     |
| BEND5                                                                                           | 0,017552601 | 0,168424799 | 0,049 | 0,026 | 1           | 1,123830764   | 0,889813691     | 1,884615385     |
| MSANTD4                                                                                         | 0,000457348 | 0,168412714 | 0,057 | 0,022 | 1           | 1,12382135    | 0,889821144     | 2,590909091     |
| ZFP90                                                                                           | 0,193374505 | 0,168309784 | 0,05  | 0,037 | 1           | 1,123741174   | 0,889884631     | 1,351351351     |
| PTPN9                                                                                           | 0,019343968 | 0,168274786 | 0,066 | 0,039 | 1           | 1,123713913   | 0,889906219     | 1,692307692     |

Supplementary Table 5

| Differentially expressed genes_total calculation_ comparing SC-Keloid vs. (SC-Myel, SC-Nonmyel) |             |             |       |       |             |               |                 |                 |
|-------------------------------------------------------------------------------------------------|-------------|-------------|-------|-------|-------------|---------------|-----------------|-----------------|
| gene                                                                                            | p_val       | avg_log2FC  | pct.1 | pct.2 | p_val_adj   | Foldchange_UP | Foldchange_DOWN | Ratio_pct1_pct2 |
| TUSC2                                                                                           | 0,000466264 | 0,168190714 | 0,097 | 0,049 | 1           | 1,123648431   | 0,889958079     | 1,979591837     |
| USP22                                                                                           | 0,593794343 | 0,168184731 | 0,217 | 0,201 | 1           | 1,123643771   | 0,88996177      | 1,07960199      |
| PEMT                                                                                            | 0,009058825 | 0,168120234 | 0,09  | 0,054 | 1           | 1,123593539   | 0,890001558     | 1,666666667     |
| MICALL1                                                                                         | 5,42893E-07 | 0,16807562  | 0,058 | 0,011 | 0,011455586 | 1,123558794   | 0,89002908      | 5,272727273     |
| VEGFB                                                                                           | 0,389629954 | 0,167965429 | 0,151 | 0,132 | 1           | 1,123472981   | 0,890097062     | 1,143939394     |
| GTF2H2                                                                                          | 0,070298643 | 0,16788801  | 0,037 | 0,022 | 1           | 1,123412694   | 0,890144828     | 1,681818182     |
| MUC12                                                                                           | 0,000363875 | 0,167881952 | 0,049 | 0,016 | 1           | 1,123407977   | 0,890148566     | 3,0625          |
| CENPB                                                                                           | 0,126415954 | 0,167860459 | 0,121 | 0,095 | 1           | 1,123391241   | 0,890161828     | 1,273684211     |
| ELK3                                                                                            | 0,152389503 | 0,167715288 | 0,15  | 0,123 | 1           | 1,123278205   | 0,890251405     | 1,219512195     |
| TMEM30A                                                                                         | 0,307586733 | 0,167713068 | 0,243 | 0,267 | 1           | 1,123276476   | 0,890252775     | 0,91011236      |
| ABHD6                                                                                           | 0,000258431 | 0,167314562 | 0,043 | 0,012 | 1           | 1,122966245   | 0,890498717     | 3,583333333     |
| SV2A                                                                                            | 0,000229269 | 0,167288805 | 0,036 | 0,008 | 1           | 1,122946196   | 0,890514615     | 4,5             |
| RPL34                                                                                           | 0,000439524 | 0,167137038 | 0,844 | 0,901 | 1           | 1,122828072   | 0,8906083       | 0,936736959     |
| ZNF697                                                                                          | 0,330170107 | 0,167133891 | 0,033 | 0,024 | 1           | 1,122825622   | 0,890610243     | 1,375           |
| RRP15                                                                                           | 0,271605628 | 0,166960517 | 0,12  | 0,1   | 1           | 1,122690697   | 0,890717277     | 1,2             |
| LFNG                                                                                            | 0,00612323  | 0,166924648 | 0,037 | 0,015 | 1           | 1,122662784   | 0,890739423     | 2,466666667     |
| CRCP                                                                                            | 0,495443738 | 0,166885774 | 0,065 | 0,057 | 1           | 1,122632533   | 0,890763425     | 1,140350877     |
| UCHL3                                                                                           | 0,092555921 | 0,166841878 | 0,114 | 0,085 | 1           | 1,122598377   | 0,890790527     | 1,341176471     |
| SLC52A2                                                                                         | 4,05881E-06 | 0,166813231 | 0,114 | 0,047 | 0,085644953 | 1,122576085   | 0,890808216     | 2,425531915     |
| QSOX2                                                                                           | 0,00670398  | 0,166660336 | 0,035 | 0,014 | 1           | 1,122457122   | 0,890902628     | 2,5             |
| HOXB6                                                                                           | 1,76323E-06 | 0,166532424 | 0,041 | 0,004 | 0,03720601  | 1,122357608   | 0,89098162      | 10,25           |
| SSU72                                                                                           | 0,78329802  | 0,166517855 | 0,203 | 0,193 | 1           | 1,122346274   | 0,890990617     | 1,051813472     |
| GUSB                                                                                            | 0,200431335 | 0,166494273 | 0,155 | 0,129 | 1           | 1,122327929   | 0,891005182     | 1,201550388     |
| BMERB1                                                                                          | 0,018171511 | 0,166491363 | 0,094 | 0,061 | 1           | 1,122325665   | 0,891006979     | 1,540983607     |
| BRAP                                                                                            | 0,103395575 | 0,166431429 | 0,034 | 0,02  | 1           | 1,122279041   | 0,891043995     | 1,7             |
| WDR41                                                                                           | 0,001999843 | 0,166419366 | 0,083 | 0,043 | 1           | 1,122269657   | 0,891051445     | 1,930232558     |
| CFAP97                                                                                          | 0,451852869 | 0,166384601 | 0,242 | 0,256 | 1           | 1,122242614   | 0,891072917     | 0,9453125       |
| PGGT1B                                                                                          | 0,150665632 | 0,166093511 | 0,076 | 0,057 | 1           | 1,122016204   | 0,891252726     | 1,333333333     |
| GSN-AS1                                                                                         | 0,006585628 | 0,16588187  | 0,016 | 0,003 | 1           | 1,121851618   | 0,891383481     | 5,333333333     |
| VIM                                                                                             | 0,001343456 | 0,165818993 | 0,984 | 0,991 | 1           | 1,121802725   | 0,891422331     | 0,992936428     |

Supplementary Table 5

| Differentially expressed genes_total calculation_ comparing SC-Keloid vs. (SC-Myel, SC-Nonmyel) |             |             |       |       |             |               |                 |                 |
|-------------------------------------------------------------------------------------------------|-------------|-------------|-------|-------|-------------|---------------|-----------------|-----------------|
| gene                                                                                            | p_val       | avg_log2FC  | pct.1 | pct.2 | p_val_adj   | Foldchange_UP | Foldchange_DOWN | Ratio_pct1_pct2 |
| CCNC                                                                                            | 0,056942399 | 0,165784122 | 0,079 | 0,054 | 1           | 1,121775611   | 0,891443877     | 1,462962963     |
| FEZ2                                                                                            | 0,604127437 | 0,165714783 | 0,205 | 0,213 | 1           | 1,121721698   | 0,891486723     | 0,962441315     |
| LYRM4                                                                                           | 0,037134887 | 0,165388755 | 0,129 | 0,094 | 1           | 1,121468233   | 0,891688209     | 1,372340426     |
| DNAH14                                                                                          | 0,000124027 | 0,165348088 | 0,02  | 0     | 1           | 1,121436621   | 0,891713345     | #DIV/0!         |
| MFSD8                                                                                           | 0,038352167 | 0,165301858 | 0,033 | 0,016 | 1           | 1,121400687   | 0,891741919     | 2,0625          |
| ORC4                                                                                            | 0,465732029 | 0,165190719 | 0,071 | 0,061 | 1           | 1,121314302   | 0,891810617     | 1,163934426     |
| USP16                                                                                           | 0,309150399 | 0,16513061  | 0,185 | 0,204 | 1           | 1,121267584   | 0,891847775     | 0,906862745     |
| UCHL5                                                                                           | 0,072818498 | 0,164733751 | 0,084 | 0,06  | 1           | 1,120959187   | 0,892093139     | 1,4             |
| ERVMER34-1                                                                                      | 7,72141E-06 | 0,164689952 | 0,027 | 0     | 0,162929489 | 1,120925155   | 0,892120224     | #DIV/0!         |
| COPG1                                                                                           | 0,006480875 | 0,164637592 | 0,083 | 0,047 | 1           | 1,120884474   | 0,892152602     | 1,765957447     |
| RPGRIP1L                                                                                        | 0,001715705 | 0,164474599 | 0,035 | 0,011 | 1           | 1,120757846   | 0,892253401     | 3,181818182     |
| FAM114A2                                                                                        | 0,02980455  | 0,164319649 | 0,047 | 0,026 | 1           | 1,12063748    | 0,892349237     | 1,807692308     |
| TMC7                                                                                            | 0,033422722 | 0,164152972 | 0,048 | 0,027 | 1           | 1,120508018   | 0,892452338     | 1,777777778     |
| TAF15                                                                                           | 0,32470434  | 0,164128539 | 0,144 | 0,125 | 1           | 1,120489041   | 0,892467452     | 1,152           |
| POLR2B                                                                                          | 0,669840693 | 0,164114196 | 0,129 | 0,119 | 1           | 1,120477901   | 0,892476325     | 1,084033613     |
| UBE2H                                                                                           | 0,079667984 | 0,164071293 | 0,269 | 0,309 | 1           | 1,120444581   | 0,892502866     | 0,870550162     |
| PIGX                                                                                            | 0,008255922 | 0,163830584 | 0,081 | 0,047 | 1           | 1,120257654   | 0,89265179      | 1,723404255     |
| ALG8                                                                                            | 0,139410994 | 0,163716715 | 0,061 | 0,043 | 1           | 1,120169238   | 0,892722248     | 1,418604651     |
| RASA1                                                                                           | 0,000619115 | 0,163491049 | 0,078 | 0,037 | 1           | 1,119994035   | 0,892861898     | 2,108108108     |
| EPST11                                                                                          | 0,000124027 | 0,163467733 | 0,02  | 0     | 1           | 1,119975935   | 0,892876328     | #DIV/0!         |
| CHSY1                                                                                           | 0,259113914 | 0,163445681 | 0,073 | 0,058 | 1           | 1,119958816   | 0,892889976     | 1,25862069      |
| SYNJ2                                                                                           | 0,003656886 | 0,163309407 | 0,028 | 0,008 | 1           | 1,119853032   | 0,89297432      | 3,5             |
| TOPBP1                                                                                          | 0,019663392 | 0,163230392 | 0,066 | 0,039 | 1           | 1,1197917     | 0,893023229     | 1,692307692     |
| ATP6V1F                                                                                         | 0,856011758 | 0,163194449 | 0,255 | 0,25  | 1           | 1,119763802   | 0,893045478     | 1,02            |
| METRNL                                                                                          | 0,111863301 | 0,1625817   | 0,374 | 0,437 | 1           | 1,119288312   | 0,893424857     | 0,85583524      |
| CRIP2                                                                                           | 0,191252051 | 0,162334944 | 0,364 | 0,448 | 1           | 1,119096886   | 0,893577681     | 0,8125          |
| HSDL1                                                                                           | 0,131888382 | 0,162249685 | 0,033 | 0,02  | 1           | 1,119030753   | 0,89363049      | 1,65            |
| UTP20                                                                                           | 0,275402352 | 0,162057203 | 0,057 | 0,045 | 1           | 1,118881464   | 0,893749724     | 1,266666667     |
| THAP1                                                                                           | 0,029430063 | 0,162051745 | 0,047 | 0,026 | 1           | 1,118877231   | 0,893753106     | 1,807692308     |
| RBM15B                                                                                          | 0,478439698 | 0,16200153  | 0,062 | 0,053 | 1           | 1,118838288   | 0,893784214     | 1,169811321     |

Supplementary Table 5

| Differentially expressed genes_total calculation_ comparing SC-Keloid vs. (SC-Myel, SC-Nonmyel) |             |             |       |       |             |               |                 |                 |
|-------------------------------------------------------------------------------------------------|-------------|-------------|-------|-------|-------------|---------------|-----------------|-----------------|
| gene                                                                                            | p_val       | avg_log2FC  | pct.1 | pct.2 | p_val_adj   | Foldchange_UP | Foldchange_DOWN | Ratio_pct1_pct2 |
| ECD                                                                                             | 0,275982598 | 0,161854147 | 0,061 | 0,047 | 1           | 1,118723995   | 0,893875526     | 1,29787234      |
| GORASP2                                                                                         | 0,625632252 | 0,161831835 | 0,114 | 0,104 | 1           | 1,118706694   | 0,893889351     | 1,096153846     |
| TMEM209                                                                                         | 0,216147572 | 0,161782695 | 0,038 | 0,027 | 1           | 1,11866859    | 0,893919798     | 1,407407407     |
| RNMT                                                                                            | 0,107966428 | 0,1617616   | 0,163 | 0,195 | 1           | 1,118652233   | 0,893932869     | 0,835897436     |
| NFIX                                                                                            | 0,202318189 | 0,161761092 | 0,253 | 0,284 | 1           | 1,118651839   | 0,893933184     | 0,89084507      |
| LKAAEAR1                                                                                        | 1,21744E-07 | 0,161731584 | 0,037 | 0     | 0,002568928 | 1,118628958   | 0,893951468     | #DIV/0!         |
| WWTR1                                                                                           | 0,383699425 | 0,161667044 | 0,227 | 0,242 | 1           | 1,118578917   | 0,893991461     | 0,938016529     |
| THOC2                                                                                           | 0,471503554 | 0,161560771 | 0,157 | 0,167 | 1           | 1,118496522   | 0,894057317     | 0,94011976      |
| THADA                                                                                           | 0,555457362 | 0,161486026 | 0,035 | 0,03  | 1           | 1,118438576   | 0,894103639     | 1,166666667     |
| CFAP298                                                                                         | 0,158347573 | 0,161463403 | 0,14  | 0,113 | 1           | 1,118421037   | 0,894117659     | 1,238938053     |
| TMEM179B                                                                                        | 0,537269878 | 0,161349145 | 0,176 | 0,159 | 1           | 1,118332464   | 0,894188474     | 1,106918239     |
| NORAD                                                                                           | 0,012307433 | 0,161266658 | 0,356 | 0,446 | 1           | 1,118268525   | 0,894239601     | 0,798206278     |
| GXYLT2                                                                                          | 0,000149027 | 0,161239313 | 0,063 | 0,023 | 1           | 1,118247329   | 0,894256551     | 2,739130435     |
| TUBGCP2                                                                                         | 0,009766879 | 0,161227801 | 0,112 | 0,072 | 1           | 1,118238407   | 0,894263687     | 1,555555556     |
| RNF150                                                                                          | 0,000560183 | 0,161226551 | 0,038 | 0,011 | 1           | 1,118237437   | 0,894264462     | 3,454545455     |
| ST3GAL4                                                                                         | 0,348738212 | 0,161136618 | 0,172 | 0,151 | 1           | 1,118167733   | 0,894320209     | 1,139072848     |
| MRTFB                                                                                           | 0,168781549 | 0,160916212 | 0,043 | 0,03  | 1           | 1,117996918   | 0,894456848     | 1,433333333     |
| SMAD5                                                                                           | 0,185914983 | 0,160914058 | 0,148 | 0,172 | 1           | 1,117995249   | 0,894458184     | 0,860465116     |
| TTC37                                                                                           | 0,02219021  | 0,16077029  | 0,143 | 0,102 | 1           | 1,117883844   | 0,894547323     | 1,401960784     |
| SRP72                                                                                           | 0,791779971 | 0,160755493 | 0,206 | 0,208 | 1           | 1,117872379   | 0,894556498     | 0,990384615     |
| GREB1                                                                                           | 0,017282134 | 0,160745621 | 0,023 | 0,008 | 1           | 1,117864729   | 0,894562619     | 2,875           |
| VAMP7                                                                                           | 0,346666234 | 0,160643294 | 0,077 | 0,064 | 1           | 1,117785444   | 0,894626071     | 1,203125        |
| TMPO                                                                                            | 0,828197059 | 0,160640236 | 0,065 | 0,062 | 1           | 1,117783076   | 0,894627967     | 1,048387097     |
| PXDC1                                                                                           | 0,235574216 | 0,160580646 | 0,218 | 0,242 | 1           | 1,117736906   | 0,89466492      | 0,900826446     |
| CD99                                                                                            | 0,331177928 | 0,160515292 | 0,445 | 0,541 | 1           | 1,117686275   | 0,894705449     | 0,822550832     |
| SUPT16H                                                                                         | 0,876581227 | 0,16048437  | 0,175 | 0,17  | 1           | 1,117662319   | 0,894724626     | 1,029411765     |
| SQLE                                                                                            | 0,738901393 | 0,160365378 | 0,134 | 0,128 | 1           | 1,117570139   | 0,894798425     | 1,046875        |
| IDH2                                                                                            | 0,000754915 | 0,160337108 | 0,085 | 0,042 | 1           | 1,11754824    | 0,894815959     | 2,023809524     |
| YWHAE                                                                                           | 0,511385728 | 0,1601336   | 0,579 | 0,708 | 1           | 1,117390608   | 0,894942192     | 0,81779661      |
| GOLGA5                                                                                          | 0,037980876 | 0,160080059 | 0,066 | 0,042 | 1           | 1,117349141   | 0,894975405     | 1,571428571     |



Supplementary Table 5

| Differentially expressed genes_total calculation_ comparing SC-Keloid vs. (SC-Myel, SC-Nonmyel) |             |             |       |       |           |               |                 |                 |
|-------------------------------------------------------------------------------------------------|-------------|-------------|-------|-------|-----------|---------------|-----------------|-----------------|
| gene                                                                                            | p_val       | avg_log2FC  | pct.1 | pct.2 | p_val_adj | Foldchange_UP | Foldchange_DOWN | Ratio_pct1_pct2 |
| CRYZ                                                                                            | 0,021950109 | 0,15979864  | 0,044 | 0,023 | 1         | 1,117131207   | 0,89515         | 1,913043478     |
| CYB5B                                                                                           | 0,199769938 | 0,1597868   | 0,101 | 0,081 | 1         | 1,117122039   | 0,895157347     | 1,24691358      |
| TRPT1                                                                                           | 0,034453307 | 0,159592074 | 0,098 | 0,066 | 1         | 1,116971267   | 0,895278178     | 1,484848485     |
| CZIB                                                                                            | 0,022087987 | 0,159254641 | 0,186 | 0,138 | 1         | 1,116710048   | 0,895487599     | 1,347826087     |
| GOLM2                                                                                           | 0,63440674  | 0,15921058  | 0,173 | 0,179 | 1         | 1,116675943   | 0,895514949     | 0,966480447     |
| ACAA2                                                                                           | 0,015045346 | 0,159199319 | 0,109 | 0,072 | 1         | 1,116667227   | 0,895521938     | 1,513888889     |
| POU5F2                                                                                          | 0,005219424 | 0,159188256 | 0,022 | 0,005 | 1         | 1,116658664   | 0,895528806     | 4,4             |
| MAN2A1                                                                                          | 0,124721514 | 0,159002779 | 0,115 | 0,09  | 1         | 1,116515112   | 0,895643945     | 1,277777778     |
| DPH3                                                                                            | 0,20005286  | 0,158563902 | 0,108 | 0,087 | 1         | 1,116175513   | 0,895916447     | 1,24137931      |
| SMARCA1                                                                                         | 0,761469478 | 0,158556193 | 0,098 | 0,092 | 1         | 1,116169549   | 0,895921234     | 1,065217391     |
| STARD4-AS1                                                                                      | 0,337486198 | 0,158507978 | 0,024 | 0,018 | 1         | 1,116132248   | 0,895951176     | 1,333333333     |
| TNFAIP1                                                                                         | 0,011755544 | 0,158234856 | 0,068 | 0,038 | 1         | 1,115920968   | 0,896120808     | 1,789473684     |
| N6AMT1                                                                                          | 0,053757047 | 0,157978138 | 0,035 | 0,019 | 1         | 1,115722415   | 0,896280282     | 1,842105263     |
| ZNF557                                                                                          | 0,046823747 | 0,157923507 | 0,022 | 0,009 | 1         | 1,115680166   | 0,896314222     | 2,444444444     |
| KPNA6                                                                                           | 0,630689975 | 0,157858941 | 0,099 | 0,106 | 1         | 1,115630237   | 0,896354336     | 0,933962264     |
| SMG6                                                                                            | 0,667018988 | 0,15772455  | 0,065 | 0,071 | 1         | 1,115526317   | 0,896437838     | 0,915492958     |
| PACS1                                                                                           | 0,156911591 | 0,15772245  | 0,066 | 0,049 | 1         | 1,115524693   | 0,896439143     | 1,346938776     |
| BECN1                                                                                           | 0,14998683  | 0,157588441 | 0,098 | 0,076 | 1         | 1,11542108    | 0,896522415     | 1,289473684     |
| BRD7                                                                                            | 0,697520809 | 0,157575341 | 0,154 | 0,159 | 1         | 1,115410951   | 0,896530556     | 0,968553459     |
| SMC4                                                                                            | 0,685725432 | 0,157375718 | 0,091 | 0,084 | 1         | 1,115256625   | 0,896654616     | 1,083333333     |
| ARFRP1                                                                                          | 0,548986124 | 0,157189555 | 0,127 | 0,114 | 1         | 1,115112723   | 0,896770326     | 1,114035088     |
| VEGFC                                                                                           | 0,000180217 | 0,157166076 | 0,031 | 0,005 | 1         | 1,115094576   | 0,89678492      | 6,2             |
| TUBG1                                                                                           | 0,002287345 | 0,157127338 | 0,057 | 0,026 | 1         | 1,115064634   | 0,896809        | 2,192307692     |
| ENTR1                                                                                           | 0,146515298 | 0,156915788 | 0,073 | 0,054 | 1         | 1,114901138   | 0,896940514     | 1,351851852     |
| SFT2D3                                                                                          | 0,003292051 | 0,156805597 | 0,037 | 0,014 | 1         | 1,114815988   | 0,897009023     | 2,642857143     |
| NXPH3                                                                                           | 5,7129E-05  | 0,156779534 | 0,037 | 0,007 | 1         | 1,114795848   | 0,897025228     | 5,285714286     |
| TRAPPC6A                                                                                        | 0,080900682 | 0,156468165 | 0,077 | 0,054 | 1         | 1,114555274   | 0,897218849     | 1,425925926     |
| DDX46                                                                                           | 0,709696482 | 0,156441839 | 0,214 | 0,22  | 1         | 1,114534935   | 0,897235222     | 0,972727273     |
| PLPBP                                                                                           | 0,111915815 | 0,156439421 | 0,055 | 0,075 | 1         | 1,114533068   | 0,897236725     | 0,733333333     |
| ITGB3                                                                                           | 0,000321516 | 0,156184435 | 0,021 | 0,001 | 1         | 1,114336099   | 0,89739532      | 21              |

Supplementary Table 5

| Differentially expressed genes_total calculation_ comparing SC-Keloid vs. (SC-Myel, SC-Nonmyel) |             |             |       |       |             |               |                 |                 |
|-------------------------------------------------------------------------------------------------|-------------|-------------|-------|-------|-------------|---------------|-----------------|-----------------|
| gene                                                                                            | p_val       | avg_log2FC  | pct.1 | pct.2 | p_val_adj   | Foldchange_UP | Foldchange_DOWN | Ratio_pct1_pct2 |
| MIA3                                                                                            | 0,987375255 | 0,156164068 | 0,15  | 0,148 | 1           | 1,114320368   | 0,897407989     | 1,013513514     |
| WDR36                                                                                           | 0,329025383 | 0,156013458 | 0,047 | 0,037 | 1           | 1,114204044   | 0,897501678     | 1,27027027      |
| CAND1                                                                                           | 0,459114557 | 0,155964248 | 0,178 | 0,16  | 1           | 1,11416604    | 0,897532293     | 1,1125          |
| CORO2A                                                                                          | 0,000360579 | 0,155849316 | 0,027 | 0,004 | 1           | 1,114077284   | 0,897603797     | 6,75            |
| RNF170                                                                                          | 0,026668046 | 0,155834516 | 0,049 | 0,027 | 1           | 1,114065855   | 0,897613005     | 1,814814815     |
| PTK7                                                                                            | 0,0053322   | 0,155769071 | 0,031 | 0,011 | 1           | 1,114015318   | 0,897653725     | 2,818181818     |
| C11orf49                                                                                        | 0,00012834  | 0,155706185 | 0,068 | 0,026 | 1           | 1,11396676    | 0,897692854     | 2,615384615     |
| CD109                                                                                           | 0,001135163 | 0,155623217 | 0,043 | 0,015 | 1           | 1,113902699   | 0,897744448     | 2,866666667     |
| SAE1                                                                                            | 0,014075555 | 0,155594342 | 0,104 | 0,066 | 1           | 1,113880405   | 0,897762449     | 1,575757576     |
| EREG                                                                                            | 0,004908286 | 0,155545427 | 0,02  | 0,004 | 1           | 1,11384264    | 0,897792888     | 5               |
| DDR2                                                                                            | 0,235752503 | 0,155538014 | 0,132 | 0,109 | 1           | 1,113836916   | 0,897797501     | 1,211009174     |
| SLC35A4                                                                                         | 0,004286062 | 0,155535211 | 0,076 | 0,041 | 1           | 1,113834752   | 0,897799245     | 1,853658537     |
| ZDHHC20                                                                                         | 0,56439563  | 0,155525917 | 0,077 | 0,084 | 1           | 1,113827576   | 0,89780503      | 0,916666667     |
| ERI1                                                                                            | 0,000367212 | 0,155507587 | 0,04  | 0,011 | 1           | 1,113813425   | 0,897816437     | 3,636363636     |
| TBC1D23                                                                                         | 0,314204934 | 0,155457959 | 0,093 | 0,109 | 1           | 1,113775111   | 0,897847321     | 0,853211009     |
| SNAP23                                                                                          | 0,7391969   | 0,155455552 | 0,097 | 0,091 | 1           | 1,113773253   | 0,897848819     | 1,065934066     |
| XIAP                                                                                            | 0,306275041 | 0,155381348 | 0,137 | 0,155 | 1           | 1,113715968   | 0,897895001     | 0,883870968     |
| PRPF40A                                                                                         | 0,218714031 | 0,155296    | 0,224 | 0,25  | 1           | 1,113650084   | 0,89794812      | 0,896           |
| EPS8L1                                                                                          | 1,92962E-05 | 0,155062849 | 0,031 | 0,003 | 0,407168881 | 1,113470124   | 0,898093248     | 10,33333333     |
| CPSF3                                                                                           | 0,162240129 | 0,155007256 | 0,047 | 0,033 | 1           | 1,113427218   | 0,898127856     | 1,424242424     |
| MTX3                                                                                            | 0,781714621 | 0,154877355 | 0,049 | 0,046 | 1           | 1,113326969   | 0,898208728     | 1,065217391     |
| SOCS2                                                                                           | 0,9439896   | 0,154868849 | 0,254 | 0,254 | 1           | 1,113320405   | 0,898214023     | 1               |
| HARS1                                                                                           | 0,095562856 | 0,15468673  | 0,104 | 0,077 | 1           | 1,113179874   | 0,898327416     | 1,350649351     |
| CCDC136                                                                                         | 0,002042347 | 0,154570151 | 0,016 | 0,001 | 1           | 1,113089926   | 0,89840001      | 16              |
| DPAGT1                                                                                          | 0,002469228 | 0,154535882 | 0,049 | 0,02  | 1           | 1,113063485   | 0,898421351     | 2,45            |
| NUDT8                                                                                           | 0,002133178 | 0,154529806 | 0,043 | 0,016 | 1           | 1,113058798   | 0,898425134     | 2,6875          |
| NIP7                                                                                            | 0,077879287 | 0,154330531 | 0,064 | 0,043 | 1           | 1,112905065   | 0,898549239     | 1,488372093     |
| VPS45                                                                                           | 0,040386033 | 0,154273652 | 0,068 | 0,043 | 1           | 1,112861189   | 0,898584666     | 1,581395349     |
| PCDHGB6                                                                                         | 0,003691772 | 0,154228859 | 0,026 | 0,007 | 1           | 1,112826638   | 0,898612566     | 3,714285714     |
| UNC93B1                                                                                         | 0,005704059 | 0,154024849 | 0,059 | 0,03  | 1           | 1,112669285   | 0,898739647     | 1,966666667     |

Supplementary Table 5

| Differentially expressed genes_total calculation_ comparing SC-Keloid vs. (SC-Myel, SC-Nonmyel) |             |             |       |       |           |               |                 |                 |
|-------------------------------------------------------------------------------------------------|-------------|-------------|-------|-------|-----------|---------------|-----------------|-----------------|
| gene                                                                                            | p_val       | avg_log2FC  | pct.1 | pct.2 | p_val_adj | Foldchange_UP | Foldchange_DOWN | Ratio_pct1_pct2 |
| GAS7                                                                                            | 0,195692156 | 0,153947048 | 0,504 | 0,611 | 1         | 1,112609283   | 0,898788115     | 0,82487725      |
| OTUD6B                                                                                          | 0,127465284 | 0,153796815 | 0,055 | 0,038 | 1         | 1,112493429   | 0,898881713     | 1,447368421     |
| B3GAT2                                                                                          | 0,030539521 | 0,15371632  | 0,026 | 0,011 | 1         | 1,11243136    | 0,898931868     | 2,363636364     |
| ZNF814                                                                                          | 0,015346089 | 0,153608248 | 0,028 | 0,011 | 1         | 1,112348031   | 0,898999209     | 2,545454545     |
| TADA3                                                                                           | 0,001694116 | 0,153508795 | 0,149 | 0,092 | 1         | 1,112271353   | 0,899061184     | 1,619565217     |
| MMP17                                                                                           | 0,02120728  | 0,153497114 | 0,194 | 0,145 | 1         | 1,112262347   | 0,899068464     | 1,337931034     |
| RPL31                                                                                           | 0,014137657 | 0,153496765 | 0,455 | 0,588 | 1         | 1,112262078   | 0,899068681     | 0,773809524     |
| CEBPZ                                                                                           | 0,218473805 | 0,153440963 | 0,15  | 0,174 | 1         | 1,112219058   | 0,899103457     | 0,862068966     |
| SPRY4                                                                                           | 0,030578358 | 0,153216301 | 0,031 | 0,015 | 1         | 1,112045872   | 0,89924348      | 2,066666667     |
| SH3BGR                                                                                          | 0,022758463 | 0,153183728 | 0,119 | 0,081 | 1         | 1,112020765   | 0,899263783     | 1,469135802     |
| SEL1L                                                                                           | 0,899000344 | 0,153118173 | 0,154 | 0,149 | 1         | 1,111970237   | 0,899304646     | 1,033557047     |
| HGS                                                                                             | 0,053157966 | 0,153060983 | 0,112 | 0,08  | 1         | 1,111926158   | 0,899340296     | 1,4             |
| SNAPIN                                                                                          | 0,142981469 | 0,15297846  | 0,091 | 0,069 | 1         | 1,111862557   | 0,899391741     | 1,31884058      |
| LMF2                                                                                            | 0,048947411 | 0,152938238 | 0,136 | 0,099 | 1         | 1,111831559   | 0,899416816     | 1,373737374     |
| TPMT                                                                                            | 0,514668962 | 0,152792272 | 0,075 | 0,065 | 1         | 1,111719074   | 0,89950782      | 1,153846154     |
| TRAPPC2                                                                                         | 0,03372366  | 0,152646386 | 0,048 | 0,027 | 1         | 1,111606662   | 0,899598783     | 1,777777778     |
| SEZ6L2                                                                                          | 0,003327297 | 0,152556522 | 0,056 | 0,026 | 1         | 1,111537424   | 0,899654819     | 2,153846154     |
| MEAK7                                                                                           | 0,007696829 | 0,152526383 | 0,03  | 0,011 | 1         | 1,111514203   | 0,899673614     | 2,727272727     |
| PPIL2                                                                                           | 0,082384862 | 0,152367206 | 0,061 | 0,041 | 1         | 1,111391572   | 0,899772884     | 1,487804878     |
| MAPKAPK5-AS1                                                                                    | 0,458127132 | 0,152263316 | 0,07  | 0,06  | 1         | 1,111311543   | 0,899837679     | 1,166666667     |
| CCDC137                                                                                         | 0,016757996 | 0,152101993 | 0,058 | 0,033 | 1         | 1,111187282   | 0,899938306     | 1,757575758     |
| MTX1                                                                                            | 0,009670726 | 0,152098843 | 0,108 | 0,069 | 1         | 1,111184856   | 0,89994027      | 1,565217391     |
| ITGA2                                                                                           | 0,046454175 | 0,152058604 | 0,139 | 0,103 | 1         | 1,111153864   | 0,899965372     | 1,349514563     |
| LRP12                                                                                           | 0,188764733 | 0,152014691 | 0,076 | 0,094 | 1         | 1,111120043   | 0,899992765     | 0,808510638     |
| RNF181                                                                                          | 0,994335459 | 0,152002205 | 0,197 | 0,191 | 1         | 1,111110427   | 0,900000554     | 1,031413613     |
| VAR51                                                                                           | 0,02842753  | 0,151969113 | 0,08  | 0,052 | 1         | 1,111084941   | 0,900021198     | 1,538461538     |
| PSMD2                                                                                           | 0,923021351 | 0,151822137 | 0,185 | 0,18  | 1         | 1,110971754   | 0,900112894     | 1,027777778     |
| LINC00592                                                                                       | 0,00019746  | 0,151598315 | 0,019 | 0     | 1         | 1,11079941    | 0,900252549     | #DIV/0!         |
| GSTT2B                                                                                          | 0,009423231 | 0,151519366 | 0,083 | 0,049 | 1         | 1,110738624   | 0,900301816     | 1,693877551     |
| MAD2L1                                                                                          | 0,01651679  | 0,151443558 | 0,04  | 0,019 | 1         | 1,110680261   | 0,900349124     | 2,105263158     |

Supplementary Table 5

| Differentially expressed genes_total calculation_ comparing SC-Keloid vs. (SC-Myel, SC-Nonmyel) |             |             |       |       |           |               |                 |                 |
|-------------------------------------------------------------------------------------------------|-------------|-------------|-------|-------|-----------|---------------|-----------------|-----------------|
| gene                                                                                            | p_val       | avg_log2FC  | pct.1 | pct.2 | p_val_adj | Foldchange_UP | Foldchange_DOWN | Ratio_pct1_pct2 |
| FAP                                                                                             | 0,026597644 | 0,151375278 | 0,015 | 0,004 | 1         | 1,110627696   | 0,900391737     | 3,75            |
| HOMER3                                                                                          | 0,054449651 | 0,15135654  | 0,141 | 0,104 | 1         | 1,110613271   | 0,900403431     | 1,355769231     |
| EXOC5                                                                                           | 0,698658046 | 0,151106239 | 0,101 | 0,094 | 1         | 1,110420601   | 0,900559661     | 1,074468085     |
| WDR12                                                                                           | 0,009085365 | 0,15108704  | 0,042 | 0,019 | 1         | 1,110405824   | 0,900571646     | 2,210526316     |
| EFCAB2                                                                                          | 0,487283812 | 0,150790711 | 0,052 | 0,045 | 1         | 1,110177771   | 0,900756641     | 1,155555556     |
| TMEM127                                                                                         | 0,054827234 | 0,15078759  | 0,052 | 0,033 | 1         | 1,110175369   | 0,90075859      | 1,575757576     |
| PEG10                                                                                           | 0,235269532 | 0,150675956 | 0,283 | 0,261 | 1         | 1,110089468   | 0,900828293     | 1,084291188     |
| DHRS7B                                                                                          | 0,033885115 | 0,150619451 | 0,079 | 0,052 | 1         | 1,110045991   | 0,900863575     | 1,519230769     |
| SKAP1                                                                                           | 8,1064E-05  | 0,150569886 | 0,024 | 0,001 | 1         | 1,110007855   | 0,900894525     | 24              |
| VPS53                                                                                           | 0,505394223 | 0,150539012 | 0,049 | 0,042 | 1         | 1,109984101   | 0,900913805     | 1,166666667     |
| RNASEH1-AS1                                                                                     | 0,020565527 | 0,150340367 | 0,041 | 0,02  | 1         | 1,109831278   | 0,90103786      | 2,05            |
| TSPAN6                                                                                          | 0,296947131 | 0,150311471 | 0,068 | 0,054 | 1         | 1,109809049   | 0,901055908     | 1,259259259     |
| TMTC2                                                                                           | 0,460714209 | 0,150191712 | 0,05  | 0,042 | 1         | 1,109716926   | 0,901130708     | 1,19047619      |
| PIGC                                                                                            | 0,150733279 | 0,150175977 | 0,119 | 0,094 | 1         | 1,109704823   | 0,901140537     | 1,265957447     |
| RASSF3                                                                                          | 0,24283391  | 0,14988975  | 0,045 | 0,034 | 1         | 1,109484683   | 0,901319338     | 1,323529412     |
| PCYT1A                                                                                          | 0,000170199 | 0,14969915  | 0,101 | 0,049 | 1         | 1,109338114   | 0,901438423     | 2,06122449      |
| SLC36A4                                                                                         | 0,808733646 | 0,149666806 | 0,043 | 0,041 | 1         | 1,109313244   | 0,901458633     | 1,048780488     |
| BMPER                                                                                           | 0,003278775 | 0,149585164 | 0,015 | 0,001 | 1         | 1,10925047    | 0,901509647     | 15              |
| KIAA0895L                                                                                       | 0,007895872 | 0,149574568 | 0,028 | 0,009 | 1         | 1,109242323   | 0,901516269     | 3,111111111     |
| PYCARD                                                                                          | 0,316474014 | 0,149461431 | 0,041 | 0,031 | 1         | 1,109155338   | 0,901586969     | 1,322580645     |
| PTPN11                                                                                          | 0,494467445 | 0,149410903 | 0,144 | 0,155 | 1         | 1,109116493   | 0,901618546     | 0,929032258     |
| C12orf43                                                                                        | 0,004413407 | 0,149365194 | 0,038 | 0,015 | 1         | 1,109081353   | 0,901647113     | 2,533333333     |
| VTI1A                                                                                           | 0,136730542 | 0,14935285  | 0,052 | 0,037 | 1         | 1,109071864   | 0,901654827     | 1,405405405     |
| IFTAP                                                                                           | 0,059944273 | 0,149341267 | 0,09  | 0,062 | 1         | 1,10906296    | 0,901662066     | 1,451612903     |
| S1PR2                                                                                           | 0,033304551 | 0,149162529 | 0,057 | 0,034 | 1         | 1,108925564   | 0,901773782     | 1,676470588     |
| MFSD1                                                                                           | 0,807146248 | 0,149050733 | 0,075 | 0,071 | 1         | 1,108839636   | 0,901843664     | 1,056338028     |
| RNF121                                                                                          | 0,014371548 | 0,149042556 | 0,063 | 0,035 | 1         | 1,108833351   | 0,901848776     | 1,8             |
| ARAP3                                                                                           | 0,086324238 | 0,148958541 | 0,05  | 0,033 | 1         | 1,10876878    | 0,901901296     | 1,515151515     |
| ESD                                                                                             | 0,983006249 | 0,148865875 | 0,243 | 0,242 | 1         | 1,108697565   | 0,901959228     | 1,004132231     |
| CCDC107                                                                                         | 0,546007559 | 0,148821154 | 0,192 | 0,201 | 1         | 1,108663198   | 0,901987188     | 0,955223881     |

Supplementary Table 5

| Differentially expressed genes_total calculation_ comparing SC-Keloid vs. (SC-Myel, SC-Nonmyel) |             |             |       |       |             |               |                 |                 |
|-------------------------------------------------------------------------------------------------|-------------|-------------|-------|-------|-------------|---------------|-----------------|-----------------|
| gene                                                                                            | p_val       | avg_log2FC  | pct.1 | pct.2 | p_val_adj   | Foldchange_UP | Foldchange_DOWN | Ratio_pct1_pct2 |
| SLC17A9                                                                                         | 0,000905982 | 0,148660808 | 0,055 | 0,022 | 1           | 1,108539984   | 0,902087443     | 2,5             |
| LINC00920                                                                                       | 8,91048E-06 | 0,148646934 | 0,063 | 0,018 | 0,188020095 | 1,108529324   | 0,902096118     | 3,5             |
| PGAP6                                                                                           | 0,00044155  | 0,148623147 | 0,09  | 0,043 | 1           | 1,108511046   | 0,902110992     | 2,093023256     |
| GSTCD                                                                                           | 0,134700317 | 0,148600709 | 0,033 | 0,02  | 1           | 1,108493806   | 0,902125023     | 1,65            |
| PHTF1                                                                                           | 0,112912155 | 0,148451528 | 0,057 | 0,039 | 1           | 1,108379189   | 0,902218311     | 1,461538462     |
| CLDN12                                                                                          | 0,007568199 | 0,148317174 | 0,03  | 0,011 | 1           | 1,108275974   | 0,902302336     | 2,727272727     |
| JTB                                                                                             | 0,142767691 | 0,148308043 | 0,246 | 0,277 | 1           | 1,108268959   | 0,902308047     | 0,888086643     |
| WDHD1                                                                                           | 0,004250953 | 0,148269883 | 0,017 | 0,003 | 1           | 1,108239645   | 0,902331914     | 5,666666667     |
| GTPBP3                                                                                          | 0,007552872 | 0,148101748 | 0,041 | 0,018 | 1           | 1,108110496   | 0,90243708      | 2,277777778     |
| LCLAT1                                                                                          | 0,031642077 | 0,148068853 | 0,031 | 0,015 | 1           | 1,10808523    | 0,902457656     | 2,066666667     |
| G3BP2                                                                                           | 0,626481974 | 0,147873152 | 0,125 | 0,13  | 1           | 1,107934929   | 0,902580083     | 0,961538462     |
| ARMC1                                                                                           | 0,378823345 | 0,147836946 | 0,084 | 0,071 | 1           | 1,107907125   | 0,902602734     | 1,183098592     |
| C16orf91                                                                                        | 0,184675113 | 0,147825862 | 0,075 | 0,057 | 1           | 1,107898613   | 0,902609669     | 1,315789474     |
| ADAM9                                                                                           | 0,507675158 | 0,147824017 | 0,116 | 0,103 | 1           | 1,107897196   | 0,902610823     | 1,126213592     |
| SMIM19                                                                                          | 0,89423754  | 0,147780707 | 0,206 | 0,201 | 1           | 1,107863937   | 0,90263792      | 1,024875622     |
| RPL29                                                                                           | 0,241087    | 0,147722553 | 0,708 | 0,882 | 1           | 1,107819281   | 0,902674306     | 0,802721088     |
| LZTS1                                                                                           | 0,005044207 | 0,147705044 | 0,044 | 0,019 | 1           | 1,107805836   | 0,902685261     | 2,315789474     |
| ANP32A                                                                                          | 0,973761183 | 0,147665478 | 0,189 | 0,186 | 1           | 1,107775455   | 0,902710018     | 1,016129032     |
| LBR                                                                                             | 0,223206171 | 0,147441213 | 0,078 | 0,061 | 1           | 1,107603266   | 0,902850353     | 1,278688525     |
| DPP3                                                                                            | 4,85015E-06 | 0,147440564 | 0,055 | 0,012 | 0,102342938 | 1,107602768   | 0,902850759     | 4,583333333     |
| TRNT1                                                                                           | 0,013846201 | 0,14729248  | 0,05  | 0,026 | 1           | 1,107489085   | 0,902943436     | 1,923076923     |
| THTPA                                                                                           | 0,036517581 | 0,147095078 | 0,038 | 0,02  | 1           | 1,107337559   | 0,903066993     | 1,9             |
| ANO10                                                                                           | 0,109844652 | 0,147023932 | 0,073 | 0,053 | 1           | 1,107282952   | 0,903111529     | 1,377358491     |
| DUT                                                                                             | 0,11782508  | 0,146989137 | 0,253 | 0,292 | 1           | 1,107256247   | 0,903133331     | 0,866438356     |
| NOL3                                                                                            | 0,009596122 | 0,146874375 | 0,042 | 0,019 | 1           | 1,107168172   | 0,903205155     | 2,210526316     |
| HBS1L                                                                                           | 0,311223885 | 0,146832171 | 0,083 | 0,068 | 1           | 1,107135784   | 0,903231577     | 1,220588235     |
| UFL1                                                                                            | 0,642943571 | 0,146825405 | 0,123 | 0,13  | 1           | 1,107130592   | 0,903235813     | 0,946153846     |
| TRIM13                                                                                          | 0,015553024 | 0,146621245 | 0,088 | 0,128 | 1           | 1,106973929   | 0,903363642     | 0,6875          |
| POGLUT2                                                                                         | 1,45092E-05 | 0,146469815 | 0,047 | 0,009 | 0,306159331 | 1,106857743   | 0,903458467     | 5,222222222     |
| TRPV4                                                                                           | 1,98453E-06 | 0,146392014 | 0,037 | 0,003 | 0,041875528 | 1,106798055   | 0,90350719      | 12,33333333     |

Supplementary Table 5

| Differentially expressed genes_total calculation_ comparing SC-Keloid vs. (SC-Myel, SC-Nonmyel) |             |             |       |       |             |               |                 |                 |
|-------------------------------------------------------------------------------------------------|-------------|-------------|-------|-------|-------------|---------------|-----------------|-----------------|
| gene                                                                                            | p_val       | avg_log2FC  | pct.1 | pct.2 | p_val_adj   | Foldchange_UP | Foldchange_DOWN | Ratio_pct1_pct2 |
| SMARCA5                                                                                         | 0,114569565 | 0,146369534 | 0,231 | 0,267 | 1           | 1,106780809   | 0,903521268     | 0,865168539     |
| GPI                                                                                             | 0,493698857 | 0,14632187  | 0,1   | 0,088 | 1           | 1,106744244   | 0,903551119     | 1,136363636     |
| GPALPP1                                                                                         | 0,428126778 | 0,146174776 | 0,059 | 0,05  | 1           | 1,106631408   | 0,903643248     | 1,18            |
| PCOLCE                                                                                          | 0,363867807 | 0,145928762 | 0,047 | 0,057 | 1           | 1,106442717   | 0,903797354     | 0,824561404     |
| EFTUD2                                                                                          | 0,002499645 | 0,145824243 | 0,075 | 0,038 | 1           | 1,106362561   | 0,903862834     | 1,973684211     |
| DOK1                                                                                            | 1,68736E-05 | 0,145768155 | 0,092 | 0,037 | 0,356049258 | 1,10631955    | 0,903897974     | 2,486486486     |
| TMEM63B                                                                                         | 0,393452485 | 0,145728553 | 0,057 | 0,047 | 1           | 1,106289182   | 0,903922786     | 1,212765957     |
| BOLA1                                                                                           | 0,234014239 | 0,145694826 | 0,052 | 0,039 | 1           | 1,10626332    | 0,903943918     | 1,333333333     |
| BPHL                                                                                            | 0,275129057 | 0,14557789  | 0,061 | 0,047 | 1           | 1,106173657   | 0,904017189     | 1,29787234      |
| YIPF2                                                                                           | 0,101929019 | 0,145476485 | 0,092 | 0,068 | 1           | 1,106095908   | 0,904080734     | 1,352941176     |
| C15orf40                                                                                        | 0,092091818 | 0,145349866 | 0,07  | 0,049 | 1           | 1,105998835   | 0,904160085     | 1,428571429     |
| IFT27                                                                                           | 0,063961751 | 0,145337008 | 0,101 | 0,073 | 1           | 1,105988978   | 0,904168143     | 1,383561644     |
| CPSF6                                                                                           | 0,822741786 | 0,145233933 | 0,123 | 0,125 | 1           | 1,105909962   | 0,904232744     | 0,984           |
| MOCS2                                                                                           | 0,6314227   | 0,145045052 | 0,19  | 0,195 | 1           | 1,105765183   | 0,904351136     | 0,974358974     |
| RACK1                                                                                           | 0,768127945 | 0,144989042 | 0,605 | 0,788 | 1           | 1,105722255   | 0,904386247     | 0,767766497     |
| COQ3                                                                                            | 0,055026358 | 0,144983096 | 0,038 | 0,022 | 1           | 1,105717698   | 0,904389974     | 1,727272727     |
| AC005523.2                                                                                      | 0,294168653 | 0,144853646 | 0,019 | 0,012 | 1           | 1,105618488   | 0,904471127     | 1,583333333     |
| JAM3                                                                                            | 0,846751431 | 0,144752266 | 0,203 | 0,201 | 1           | 1,105540798   | 0,904534688     | 1,009950249     |
| IFT81                                                                                           | 0,066366747 | 0,144423816 | 0,062 | 0,041 | 1           | 1,105289134   | 0,904740641     | 1,512195122     |
| P3H4                                                                                            | 0,00243657  | 0,14441968  | 0,063 | 0,03  | 1           | 1,105285966   | 0,904743235     | 2,1             |
| CUL4B                                                                                           | 0,177146954 | 0,144398561 | 0,075 | 0,057 | 1           | 1,105269786   | 0,904756479     | 1,315789474     |
| PRR16                                                                                           | 1,36112E-05 | 0,14435343  | 0,062 | 0,018 | 0,287210025 | 1,105235211   | 0,904784783     | 3,444444444     |
| LMLN                                                                                            | 0,000261859 | 0,144333067 | 0,043 | 0,012 | 1           | 1,105219611   | 0,904797553     | 3,583333333     |
| PRPF38A                                                                                         | 0,85748293  | 0,144203977 | 0,088 | 0,084 | 1           | 1,105120722   | 0,904878517     | 1,047619048     |
| SAMD9                                                                                           | 0,427320293 | 0,144145549 | 0,043 | 0,035 | 1           | 1,105075967   | 0,904915164     | 1,228571429     |
| MDFIC                                                                                           | 0,0455692   | 0,144072114 | 0,068 | 0,043 | 1           | 1,105019719   | 0,904961227     | 1,581395349     |
| SF3A3                                                                                           | 0,076924229 | 0,144039358 | 0,114 | 0,084 | 1           | 1,104994629   | 0,904981774     | 1,357142857     |
| PARP8                                                                                           | 0,675437324 | 0,14401472  | 0,052 | 0,057 | 1           | 1,104975759   | 0,904997229     | 0,912280702     |
| TNS3                                                                                            | 0,477024213 | 0,143762411 | 0,276 | 0,299 | 1           | 1,10478253    | 0,905155515     | 0,923076923     |
| PRMT1                                                                                           | 0,085439884 | 0,143730778 | 0,268 | 0,316 | 1           | 1,104758306   | 0,905175362     | 0,848101266     |

Supplementary Table 5

| Differentially expressed genes_total calculation_ comparing SC-Keloid vs. (SC-Myel, SC-Nonmyel) |             |             |       |       |             |               |                 |                 |
|-------------------------------------------------------------------------------------------------|-------------|-------------|-------|-------|-------------|---------------|-----------------|-----------------|
| gene                                                                                            | p_val       | avg_log2FC  | pct.1 | pct.2 | p_val_adj   | Foldchange_UP | Foldchange_DOWN | Ratio_pct1_pct2 |
| MICU2                                                                                           | 0,544558266 | 0,143715539 | 0,113 | 0,121 | 1           | 1,104746637   | 0,905184923     | 0,933884298     |
| PGM2                                                                                            | 0,000259537 | 0,143688954 | 0,05  | 0,016 | 1           | 1,10472628    | 0,905201604     | 3,125           |
| TASOR2                                                                                          | 0,48402272  | 0,143471635 | 0,081 | 0,091 | 1           | 1,104559883   | 0,905337968     | 0,89010989      |
| HDGFL3                                                                                          | 0,524259135 | 0,143402956 | 0,087 | 0,077 | 1           | 1,104507301   | 0,905381068     | 1,12987013      |
| LRRC28                                                                                          | 0,002648651 | 0,143300241 | 0,07  | 0,035 | 1           | 1,104428667   | 0,90544553      | 2               |
| HSD17B4                                                                                         | 0,309356956 | 0,143296866 | 0,102 | 0,085 | 1           | 1,104426084   | 0,905447648     | 1,2             |
| LCMT1                                                                                           | 0,00217354  | 0,143219335 | 0,08  | 0,042 | 1           | 1,104366733   | 0,905496309     | 1,904761905     |
| TOMM5                                                                                           | 0,774687146 | 0,14321567  | 0,172 | 0,175 | 1           | 1,104363928   | 0,905498609     | 0,982857143     |
| HELLS                                                                                           | 0,185120178 | 0,143104519 | 0,063 | 0,047 | 1           | 1,104278846   | 0,905568375     | 1,340425532     |
| MTERF3                                                                                          | 0,055753872 | 0,14298254  | 0,049 | 0,03  | 1           | 1,104185484   | 0,905644944     | 1,633333333     |
| CYB5D2                                                                                          | 0,189077347 | 0,142712155 | 0,057 | 0,042 | 1           | 1,103978561   | 0,905814692     | 1,357142857     |
| MRPS5                                                                                           | 0,947658588 | 0,142506807 | 0,122 | 0,121 | 1           | 1,103821435   | 0,905943632     | 1,008264463     |
| FKBP1B                                                                                          | 0,031836328 | 0,142438702 | 0,041 | 0,022 | 1           | 1,103769329   | 0,905986399     | 1,863636364     |
| KCTD15                                                                                          | 0,122021972 | 0,142363192 | 0,068 | 0,049 | 1           | 1,10371156    | 0,90603382      | 1,387755102     |
| DHRX                                                                                            | 0,00104936  | 0,142325557 | 0,058 | 0,024 | 1           | 1,103682767   | 0,906057456     | 2,416666667     |
| SRPRA                                                                                           | 0,224171515 | 0,141935934 | 0,135 | 0,111 | 1           | 1,103384741   | 0,906302184     | 1,216216216     |
| SYCP2                                                                                           | 0,140754472 | 0,141917207 | 0,044 | 0,03  | 1           | 1,103370418   | 0,906313948     | 1,466666667     |
| HOXB5                                                                                           | 7,72141E-06 | 0,141896943 | 0,027 | 0     | 0,162929489 | 1,10335492    | 0,906326678     | #DIV/0!         |
| CCDC32                                                                                          | 0,494870545 | 0,141869457 | 0,057 | 0,049 | 1           | 1,1033339     | 0,906343946     | 1,163265306     |
| UBB                                                                                             | 7,87342E-07 | 0,141667054 | 0,525 | 0,425 | 0,0166137   | 1,103179119   | 0,90647111      | 1,235294118     |
| POLR3F                                                                                          | 0,098077337 | 0,141619101 | 0,023 | 0,012 | 1           | 1,103142451   | 0,90650124      | 1,916666667     |
| RAD23B                                                                                          | 0,160029696 | 0,141587085 | 0,166 | 0,193 | 1           | 1,10311797    | 0,906521357     | 0,860103627     |
| UBA6                                                                                            | 0,931541288 | 0,141513003 | 0,12  | 0,119 | 1           | 1,103061327   | 0,906567908     | 1,008403361     |
| TYW1                                                                                            | 0,003110897 | 0,141437567 | 0,05  | 0,022 | 1           | 1,103003652   | 0,906615312     | 2,272727273     |
| CHST1                                                                                           | 3,58652E-06 | 0,141390456 | 0,042 | 0,005 | 0,075679152 | 1,102967634   | 0,906644918     | 8,4             |
| IBTK                                                                                            | 0,247306771 | 0,14137421  | 0,106 | 0,087 | 1           | 1,102955213   | 0,906655128     | 1,218390805     |
| NIT2                                                                                            | 0,466986248 | 0,141336965 | 0,149 | 0,133 | 1           | 1,10292674    | 0,906678535     | 1,120300752     |
| VPS8                                                                                            | 0,31727539  | 0,141274989 | 0,061 | 0,049 | 1           | 1,10287936    | 0,906717485     | 1,244897959     |
| BCS1L                                                                                           | 0,00674956  | 0,141191617 | 0,07  | 0,038 | 1           | 1,102815628   | 0,906769885     | 1,842105263     |
| C3orf38                                                                                         | 0,466195191 | 0,141147565 | 0,071 | 0,061 | 1           | 1,102781955   | 0,906797573     | 1,163934426     |

Supplementary Table 5

| Differentially expressed genes_total calculation_ comparing SC-Keloid vs. (SC-Myel, SC-Nonmyel) |             |             |       |       |            |               |                 |                 |
|-------------------------------------------------------------------------------------------------|-------------|-------------|-------|-------|------------|---------------|-----------------|-----------------|
| gene                                                                                            | p_val       | avg_log2FC  | pct.1 | pct.2 | p_val_adj  | Foldchange_UP | Foldchange_DOWN | Ratio_pct1_pct2 |
| MARS1                                                                                           | 0,017297403 | 0,141138953 | 0,062 | 0,035 | 1          | 1,102775372   | 0,906802986     | 1,771428571     |
| KCTD17                                                                                          | 0,000532426 | 0,141063088 | 0,071 | 0,031 | 1          | 1,102717383   | 0,906850672     | 2,290322581     |
| RNF19A                                                                                          | 0,115349786 | 0,141060028 | 0,168 | 0,195 | 1          | 1,102715044   | 0,906852595     | 0,861538462     |
| LRRC15                                                                                          | 0,002090734 | 0,141012601 | 0,022 | 0,004 | 1          | 1,102678794   | 0,906882408     | 5,5             |
| CHCHD7                                                                                          | 0,773969274 | 0,141006078 | 0,079 | 0,075 | 1          | 1,102673808   | 0,906886508     | 1,053333333     |
| DALRD3                                                                                          | 0,020623585 | 0,141003778 | 0,076 | 0,046 | 1          | 1,10267205    | 0,906887954     | 1,652173913     |
| BRMS1                                                                                           | 0,009476749 | 0,140946717 | 0,109 | 0,069 | 1          | 1,102628439   | 0,906923824     | 1,579710145     |
| OSR1                                                                                            | 0,000183715 | 0,140873585 | 0,026 | 0,003 | 1          | 1,102572546   | 0,906969798     | 8,666666667     |
| SAYSD1                                                                                          | 0,156869055 | 0,140716858 | 0,05  | 0,035 | 1          | 1,102452776   | 0,907068332     | 1,428571429     |
| C2orf27A                                                                                        | 2,16815E-06 | 0,140661603 | 0,077 | 0,023 | 0,04575023 | 1,102410553   | 0,907103073     | 3,347826087     |
| DCAF12                                                                                          | 0,13511498  | 0,140623287 | 0,072 | 0,053 | 1          | 1,102381274   | 0,907127165     | 1,358490566     |
| GALK1                                                                                           | 0,007818571 | 0,140554923 | 0,087 | 0,052 | 1          | 1,102329038   | 0,907170151     | 1,673076923     |
| SLC25A40                                                                                        | 0,154214561 | 0,140522174 | 0,023 | 0,014 | 1          | 1,102304015   | 0,907190744     | 1,642857143     |
| RREB1                                                                                           | 0,853387842 | 0,140508021 | 0,062 | 0,064 | 1          | 1,102293201   | 0,907199644     | 0,96875         |
| MCFD2                                                                                           | 0,968806546 | 0,140499346 | 0,118 | 0,115 | 1          | 1,102286574   | 0,907205099     | 1,026086957     |
| DYNC1L1                                                                                         | 0,539855241 | 0,140497015 | 0,149 | 0,157 | 1          | 1,102284793   | 0,907206565     | 0,949044586     |
| WDR46                                                                                           | 0,101677102 | 0,140338474 | 0,084 | 0,061 | 1          | 1,102163666   | 0,907306265     | 1,37704918      |
| HUS1                                                                                            | 0,063427377 | 0,140318487 | 0,062 | 0,041 | 1          | 1,102148397   | 0,907318835     | 1,512195122     |
| SLC12A4                                                                                         | 0,230844423 | 0,140111114 | 0,1   | 0,08  | 1          | 1,101989986   | 0,907449262     | 1,25            |
| SUGP2                                                                                           | 0,958880956 | 0,140026634 | 0,133 | 0,13  | 1          | 1,101925458   | 0,907502402     | 1,023076923     |
| LASP1                                                                                           | 0,742799809 | 0,139965908 | 0,13  | 0,134 | 1          | 1,101879077   | 0,907540601     | 0,970149254     |
| INTS12                                                                                          | 0,103567018 | 0,139921373 | 0,071 | 0,05  | 1          | 1,101845063   | 0,907568617     | 1,42            |
| DMTF1                                                                                           | 0,993233909 | 0,139886277 | 0,064 | 0,064 | 1          | 1,10181826    | 0,907590695     | 1               |
| NAPG                                                                                            | 0,111444539 | 0,139785218 | 0,077 | 0,056 | 1          | 1,101741081   | 0,907654273     | 1,375           |
| IPO9                                                                                            | 0,4743852   | 0,139733181 | 0,068 | 0,058 | 1          | 1,101701343   | 0,907687012     | 1,172413793     |
| TMED8                                                                                           | 0,130233891 | 0,139694886 | 0,043 | 0,028 | 1          | 1,1016721     | 0,907711106     | 1,535714286     |
| TFDP1                                                                                           | 0,188130495 | 0,139635893 | 0,101 | 0,08  | 1          | 1,101627053   | 0,907748224     | 1,2625          |
| NOL8                                                                                            | 0,19119754  | 0,13957152  | 0,062 | 0,046 | 1          | 1,101577899   | 0,907788728     | 1,347826087     |
| DGAT1                                                                                           | 0,011415845 | 0,139479529 | 0,071 | 0,041 | 1          | 1,101507661   | 0,907846614     | 1,731707317     |
| GMFB                                                                                            | 0,284204222 | 0,139368035 | 0,14  | 0,157 | 1          | 1,101422538   | 0,907916776     | 0,891719745     |



Supplementary Table 5

| Differentially expressed genes_total calculation_ comparing SC-Keloid vs. (SC-Myel, SC-Nonmyel) |             |             |       |       |            |               |                 |                 |
|-------------------------------------------------------------------------------------------------|-------------|-------------|-------|-------|------------|---------------|-----------------|-----------------|
| gene                                                                                            | p_val       | avg_log2FC  | pct.1 | pct.2 | p_val_adj  | Foldchange_UP | Foldchange_DOWN | Ratio_pct1_pct2 |
| EPDR1                                                                                           | 0,254004184 | 0,139268923 | 0,09  | 0,107 | 1          | 1,101346874   | 0,907979152     | 0,841121495     |
| COL19A1                                                                                         | 0,065513527 | 0,139246702 | 0,021 | 0,009 | 1          | 1,10132991    | 0,907993137     | 2,333333333     |
| PIAS2                                                                                           | 0,888576671 | 0,139223043 | 0,087 | 0,088 | 1          | 1,101311849   | 0,908008027     | 0,988636364     |
| CPNE2                                                                                           | 0,012773543 | 0,139164525 | 0,121 | 0,08  | 1          | 1,101267179   | 0,908044859     | 1,5125          |
| UBXN2B                                                                                          | 0,004848206 | 0,139141603 | 0,02  | 0,004 | 1          | 1,101249682   | 0,908059286     | 5               |
| EMC8                                                                                            | 0,061376316 | 0,139115341 | 0,102 | 0,073 | 1          | 1,101229636   | 0,908075816     | 1,397260274     |
| SMU1                                                                                            | 0,839574625 | 0,139111612 | 0,121 | 0,123 | 1          | 1,10122679    | 0,908078163     | 0,983739837     |
| SMIM12                                                                                          | 0,616528336 | 0,139010602 | 0,099 | 0,09  | 1          | 1,10114969    | 0,908141744     | 1,1             |
| BBS7                                                                                            | 0,152249399 | 0,138987992 | 0,058 | 0,042 | 1          | 1,101132433   | 0,908155977     | 1,380952381     |
| MPV17                                                                                           | 0,148757872 | 0,13894682  | 0,122 | 0,096 | 1          | 1,101101009   | 0,908181894     | 1,270833333     |
| XPO1                                                                                            | 0,279247756 | 0,138894504 | 0,185 | 0,204 | 1          | 1,101061081   | 0,908214828     | 0,906862745     |
| UBQLN1                                                                                          | 0,281259113 | 0,13884507  | 0,127 | 0,144 | 1          | 1,101023354   | 0,908245948     | 0,881944444     |
| COG2                                                                                            | 0,576066761 | 0,138774791 | 0,035 | 0,03  | 1          | 1,10096972    | 0,908290193     | 1,166666667     |
| TIAM1                                                                                           | 0,032863194 | 0,138713623 | 0,023 | 0,009 | 1          | 1,100923042   | 0,908328704     | 2,555555556     |
| ACSL4                                                                                           | 0,00679293  | 0,138514086 | 0,093 | 0,056 | 1          | 1,100770785   | 0,908454343     | 1,660714286     |
| NIPA2                                                                                           | 0,09020214  | 0,138465686 | 0,099 | 0,073 | 1          | 1,100733857   | 0,90848482      | 1,356164384     |
| TRAPPC6B                                                                                        | 0,304565019 | 0,138371159 | 0,086 | 0,071 | 1          | 1,100661738   | 0,908544347     | 1,211267606     |
| NUDT16L1                                                                                        | 0,010437208 | 0,138362115 | 0,091 | 0,056 | 1          | 1,100654838   | 0,908550042     | 1,625           |
| YKT6                                                                                            | 0,065634723 | 0,138351984 | 0,1   | 0,072 | 1          | 1,100647109   | 0,908556423     | 1,388888889     |
| RPA2                                                                                            | 0,278334989 | 0,13833173  | 0,062 | 0,049 | 1          | 1,100631657   | 0,908569178     | 1,265306122     |
| ISOC2                                                                                           | 0,503523133 | 0,138324334 | 0,158 | 0,142 | 1          | 1,100626015   | 0,908573836     | 1,112676056     |
| BRIX1                                                                                           | 0,874630256 | 0,138222929 | 0,126 | 0,121 | 1          | 1,100548656   | 0,9086377       | 1,041322314     |
| FADD                                                                                            | 0,000699473 | 0,13821441  | 0,051 | 0,019 | 1          | 1,100542157   | 0,908643066     | 2,684210526     |
| SDC1                                                                                            | 1,04821E-05 | 0,138193297 | 0,05  | 0,011 | 0,22118229 | 1,100526052   | 0,908656363     | 4,545454545     |
| ZNF605                                                                                          | 0,00461447  | 0,138119446 | 0,038 | 0,015 | 1          | 1,100469718   | 0,908702878     | 2,533333333     |
| SNRPA1                                                                                          | 0,582980857 | 0,137976669 | 0,12  | 0,128 | 1          | 1,100360814   | 0,908792813     | 0,9375          |
| EHD2                                                                                            | 0,01914359  | 0,137960908 | 0,097 | 0,062 | 1          | 1,100348794   | 0,908802741     | 1,564516129     |
| CDCA4                                                                                           | 0,000279165 | 0,137932288 | 0,03  | 0,005 | 1          | 1,100326965   | 0,90882077      | 6               |
| CUL2                                                                                            | 0,066848249 | 0,137878037 | 0,077 | 0,053 | 1          | 1,100285589   | 0,908854946     | 1,452830189     |
| TRIM22                                                                                          | 0,104293671 | 0,137845774 | 0,034 | 0,02  | 1          | 1,100260984   | 0,908875271     | 1,7             |

Supplementary Table 5

| Differentially expressed genes_total calculation_ comparing SC-Keloid vs. (SC-Myel, SC-Nonmyel) |             |             |       |       |           |               |                 |                 |
|-------------------------------------------------------------------------------------------------|-------------|-------------|-------|-------|-----------|---------------|-----------------|-----------------|
| gene                                                                                            | p_val       | avg_log2FC  | pct.1 | pct.2 | p_val_adj | Foldchange_UP | Foldchange_DOWN | Ratio_pct1_pct2 |
| MNS1                                                                                            | 0,132299935 | 0,137718191 | 0,048 | 0,033 | 1         | 1,100163688   | 0,90895565      | 1,454545455     |
| MRPL12                                                                                          | 0,002383013 | 0,137652402 | 0,108 | 0,062 | 1         | 1,10011352    | 0,908997101     | 1,741935484     |
| ATF6                                                                                            | 0,715669855 | 0,137594614 | 0,091 | 0,084 | 1         | 1,100069455   | 0,909033512     | 1,083333333     |
| PKIA                                                                                            | 0,233495272 | 0,13757517  | 0,076 | 0,06  | 1         | 1,100054629   | 0,909045763     | 1,266666667     |
| TIPRL                                                                                           | 0,84378922  | 0,137450164 | 0,136 | 0,13  | 1         | 1,099959316   | 0,909124533     | 1,046153846     |
| NF2                                                                                             | 0,108144821 | 0,137429039 | 0,061 | 0,042 | 1         | 1,099943209   | 0,909137846     | 1,452380952     |
| DHX33                                                                                           | 0,046846655 | 0,136991266 | 0,054 | 0,033 | 1         | 1,099609492   | 0,909413757     | 1,636363636     |
| GCNT1                                                                                           | 0,000319295 | 0,136969864 | 0,033 | 0,007 | 1         | 1,09959318    | 0,909427248     | 4,714285714     |
| TYMS                                                                                            | 0,000456945 | 0,136926026 | 0,031 | 0,007 | 1         | 1,099559768   | 0,909454882     | 4,428571429     |
| KDM5A                                                                                           | 0,96752038  | 0,136877781 | 0,143 | 0,141 | 1         | 1,099522998   | 0,909485296     | 1,014184397     |
| GTF2F1                                                                                          | 0,665885155 | 0,136691743 | 0,098 | 0,09  | 1         | 1,099381222   | 0,909602584     | 1,088888889     |
| L3HYPDH                                                                                         | 0,074590956 | 0,136670522 | 0,059 | 0,039 | 1         | 1,099365051   | 0,909615963     | 1,512820513     |
| LANCL1                                                                                          | 0,090774006 | 0,136634201 | 0,058 | 0,039 | 1         | 1,099337374   | 0,909638864     | 1,487179487     |
| ASAP1                                                                                           | 0,949280865 | 0,136627584 | 0,077 | 0,077 | 1         | 1,099332332   | 0,909643036     | 1               |
| LINC01137                                                                                       | 0,000320927 | 0,136431472 | 0,033 | 0,007 | 1         | 1,099182905   | 0,909766696     | 4,714285714     |
| SMCR5                                                                                           | 0,182015248 | 0,136289272 | 0,012 | 0,005 | 1         | 1,099074569   | 0,909856372     | 2,4             |
| CTSO                                                                                            | 0,562876785 | 0,13625106  | 0,069 | 0,061 | 1         | 1,099045458   | 0,909880472     | 1,131147541     |
| ELOC                                                                                            | 0,013946764 | 0,136041209 | 0,289 | 0,351 | 1         | 1,098885605   | 0,91001283      | 0,823361823     |
| NUDCD1                                                                                          | 0,83570595  | 0,135994491 | 0,055 | 0,057 | 1         | 1,098850021   | 0,910042299     | 0,964912281     |
| MRPS30                                                                                          | 0,447509849 | 0,135921675 | 0,064 | 0,054 | 1         | 1,098794562   | 0,910088232     | 1,185185185     |
| DNAJB11                                                                                         | 0,771714976 | 0,135889605 | 0,184 | 0,172 | 1         | 1,098770137   | 0,910108463     | 1,069767442     |
| TIMM8A                                                                                          | 0,192128278 | 0,135813274 | 0,029 | 0,019 | 1         | 1,098712004   | 0,910156617     | 1,526315789     |
| TRDMT1                                                                                          | 0,892700505 | 0,135746117 | 0,048 | 0,046 | 1         | 1,09866086    | 0,910198985     | 1,043478261     |
| STYX                                                                                            | 0,075570194 | 0,135727069 | 0,041 | 0,024 | 1         | 1,098646354   | 0,910211003     | 1,708333333     |
| PAQR3                                                                                           | 0,302040805 | 0,135647089 | 0,049 | 0,061 | 1         | 1,09858545    | 0,910261464     | 0,803278689     |
| TMEM169                                                                                         | 0,00172469  | 0,135599884 | 0,02  | 0,003 | 1         | 1,098549504   | 0,910291249     | 6,666666667     |
| DNM3OS                                                                                          | 0,092379569 | 0,135554272 | 0,012 | 0,004 | 1         | 1,098514773   | 0,910320029     | 3               |
| RGS5                                                                                            | 0,836926266 | 0,1355062   | 0,01  | 0,009 | 1         | 1,098478171   | 0,910350362     | 1,111111111     |
| UBE2A                                                                                           | 0,605807041 | 0,13524213  | 0,19  | 0,193 | 1         | 1,098277124   | 0,910517007     | 0,984455959     |
| GLRX                                                                                            | 0,210775471 | 0,135125428 | 0,03  | 0,02  | 1         | 1,098188286   | 0,910590664     | 1,5             |

Supplementary Table 5

| Differentially expressed genes_total calculation_ comparing SC-Keloid vs. (SC-Myel, SC-Nonmyel) |             |             |       |       |             |               |                 |                 |
|-------------------------------------------------------------------------------------------------|-------------|-------------|-------|-------|-------------|---------------|-----------------|-----------------|
| gene                                                                                            | p_val       | avg_log2FC  | pct.1 | pct.2 | p_val_adj   | Foldchange_UP | Foldchange_DOWN | Ratio_pct1_pct2 |
| PRELID2                                                                                         | 0,79819437  | 0,135039642 | 0,022 | 0,02  | 1           | 1,098122987   | 0,910644811     | 1,1             |
| CNPY3                                                                                           | 0,005973135 | 0,134988507 | 0,101 | 0,061 | 1           | 1,098084066   | 0,910677088     | 1,655737705     |
| ATP11B                                                                                          | 0,686252582 | 0,134956312 | 0,113 | 0,104 | 1           | 1,098059562   | 0,910697411     | 1,086538462     |
| CDK18                                                                                           | 0,091849573 | 0,134913728 | 0,093 | 0,068 | 1           | 1,098027151   | 0,910724293     | 1,367647059     |
| MCAT                                                                                            | 0,000209556 | 0,134901426 | 0,034 | 0,007 | 1           | 1,098017787   | 0,910732059     | 4,857142857     |
| CACNA2D4                                                                                        | 5,33E-07    | 0,134878233 | 0,066 | 0,015 | 0,011246841 | 1,098000136   | 0,9107467       | 4,4             |
| FBXO32                                                                                          | 0,212256164 | 0,134862566 | 0,051 | 0,038 | 1           | 1,097988212   | 0,91075659      | 1,342105263     |
| CRISPLD1                                                                                        | 0,418332836 | 0,134831983 | 0,028 | 0,022 | 1           | 1,097964936   | 0,910775897     | 1,272727273     |
| MPHOSPH9                                                                                        | 0,155454919 | 0,134788037 | 0,042 | 0,028 | 1           | 1,097931492   | 0,91080364      | 1,5             |
| GMPPB                                                                                           | 1,74507E-05 | 0,134744586 | 0,051 | 0,012 | 0,368228219 | 1,097898425   | 0,910831072     | 4,25            |
| TMEM234                                                                                         | 0,000384421 | 0,134724909 | 0,044 | 0,014 | 1           | 1,097883451   | 0,910843495     | 3,142857143     |
| ARMCX6                                                                                          | 0,737262725 | 0,13461615  | 0,113 | 0,104 | 1           | 1,097800689   | 0,910912163     | 1,086538462     |
| DCK                                                                                             | 0,730006115 | 0,134275575 | 0,056 | 0,052 | 1           | 1,097541564   | 0,911127226     | 1,076923077     |
| TCEAL7                                                                                          | 0,14237818  | 0,134216957 | 0,129 | 0,103 | 1           | 1,09749697    | 0,911164247     | 1,252427184     |
| CHRAC1                                                                                          | 0,954065709 | 0,13400653  | 0,115 | 0,114 | 1           | 1,097336905   | 0,911297156     | 1,00877193      |
| DFFA                                                                                            | 0,526114868 | 0,133821783 | 0,059 | 0,052 | 1           | 1,097196392   | 0,911413861     | 1,134615385     |
| UBAP2L                                                                                          | 0,129156039 | 0,133771632 | 0,107 | 0,083 | 1           | 1,097158252   | 0,911445544     | 1,289156627     |
| JMJD4                                                                                           | 0,00312151  | 0,133610236 | 0,042 | 0,016 | 1           | 1,097035518   | 0,911547515     | 2,625           |
| SLC41A2                                                                                         | 0,609748293 | 0,133583895 | 0,037 | 0,033 | 1           | 1,097015489   | 0,911564158     | 1,121212121     |
| CLPX                                                                                            | 0,440540778 | 0,133542257 | 0,075 | 0,064 | 1           | 1,096983828   | 0,911590467     | 1,171875        |
| MLPH                                                                                            | 8,01571E-05 | 0,133524062 | 0,024 | 0,001 | 1           | 1,096969993   | 0,911601964     | 24              |
| ARHGAP1                                                                                         | 0,003261078 | 0,133482445 | 0,108 | 0,064 | 1           | 1,096938349   | 0,911628261     | 1,6875          |
| WDFY1                                                                                           | 0,860810929 | 0,133311411 | 0,076 | 0,073 | 1           | 1,096808313   | 0,911736342     | 1,04109589      |
| CENPP                                                                                           | 0,005352941 | 0,133177612 | 0,022 | 0,005 | 1           | 1,096706597   | 0,911820903     | 4,4             |
| PLEC                                                                                            | 0,169312439 | 0,133145052 | 0,321 | 0,374 | 1           | 1,096681846   | 0,911841482     | 0,85828877      |
| DCAF16                                                                                          | 0,583288235 | 0,133015564 | 0,054 | 0,06  | 1           | 1,096583419   | 0,911923327     | 0,9             |
| POMGNT1                                                                                         | 0,001868974 | 0,132995213 | 0,104 | 0,058 | 1           | 1,09656795    | 0,911936191     | 1,793103448     |
| ECI1                                                                                            | 0,837137115 | 0,132944308 | 0,157 | 0,149 | 1           | 1,096529259   | 0,911968369     | 1,053691275     |
| RAI14                                                                                           | 0,059447795 | 0,132852538 | 0,087 | 0,061 | 1           | 1,096459511   | 0,912026382     | 1,426229508     |
| COPS4                                                                                           | 0,002625977 | 0,132727335 | 0,106 | 0,061 | 1           | 1,096364359   | 0,912105535     | 1,737704918     |

Supplementary Table 5

| Differentially expressed genes_total calculation_ comparing SC-Keloid vs. (SC-Myel, SC-Nonmyel) |             |             |       |       |           |               |                 |                 |
|-------------------------------------------------------------------------------------------------|-------------|-------------|-------|-------|-----------|---------------|-----------------|-----------------|
| gene                                                                                            | p_val       | avg_log2FC  | pct.1 | pct.2 | p_val_adj | Foldchange_UP | Foldchange_DOWN | Ratio_pct1_pct2 |
| CCDC43                                                                                          | 0,26340227  | 0,13271239  | 0,087 | 0,071 | 1         | 1,096353002   | 0,912114983     | 1,225352113     |
| RNF8                                                                                            | 0,244170698 | 0,132688706 | 0,063 | 0,049 | 1         | 1,096335004   | 0,912129957     | 1,285714286     |
| LPAR4                                                                                           | 4,9051E-05  | 0,132650051 | 0,022 | 0     | 1         | 1,09630563    | 0,912154396     | #DIV/0!         |
| GMCL1                                                                                           | 0,751946405 | 0,132628245 | 0,08  | 0,084 | 1         | 1,096289059   | 0,912168184     | 0,952380952     |
| ANXA11                                                                                          | 0,097059067 | 0,132616359 | 0,156 | 0,122 | 1         | 1,096280028   | 0,912175699     | 1,278688525     |
| EYA3                                                                                            | 0,013338517 | 0,132379432 | 0,033 | 0,014 | 1         | 1,096100006   | 0,912325513     | 2,357142857     |
| GALNS                                                                                           | 0,174161295 | 0,13236016  | 0,048 | 0,034 | 1         | 1,096085363   | 0,912337701     | 1,411764706     |
| BPNT1                                                                                           | 0,102116681 | 0,132235077 | 0,037 | 0,023 | 1         | 1,095990336   | 0,912416804     | 1,608695652     |
| ATL3                                                                                            | 0,668933577 | 0,132091069 | 0,123 | 0,114 | 1         | 1,095880941   | 0,912507885     | 1,078947368     |
| SRRD                                                                                            | 0,002694661 | 0,132013047 | 0,061 | 0,028 | 1         | 1,095821676   | 0,912557236     | 2,178571429     |
| CST6                                                                                            | 0,000512102 | 0,131973851 | 0,02  | 0,001 | 1         | 1,095791905   | 0,912582029     | 20              |
| CTPS1                                                                                           | 0,001089429 | 0,131947544 | 0,045 | 0,016 | 1         | 1,095771924   | 0,91259867      | 2,8125          |
| NIPSNAP3A                                                                                       | 0,000847312 | 0,131936812 | 0,085 | 0,042 | 1         | 1,095763773   | 0,912605458     | 2,023809524     |
| BEX1                                                                                            | 0,268817951 | 0,131892761 | 0,065 | 0,052 | 1         | 1,095730315   | 0,912633324     | 1,25            |
| ZNF776                                                                                          | 0,126414966 | 0,131803361 | 0,019 | 0,009 | 1         | 1,095662418   | 0,912689879     | 2,111111111     |
| THAP11                                                                                          | 0,005008889 | 0,131754673 | 0,083 | 0,046 | 1         | 1,095625442   | 0,912720682     | 1,804347826     |
| EIF5A                                                                                           | 0,020616443 | 0,131703996 | 0,308 | 0,385 | 1         | 1,095586957   | 0,912752743     | 0,8             |
| ARSB                                                                                            | 0,009436305 | 0,131602578 | 0,042 | 0,019 | 1         | 1,095509943   | 0,912816909     | 2,210526316     |
| AVEN                                                                                            | 0,016885548 | 0,131483315 | 0,04  | 0,019 | 1         | 1,095419384   | 0,912892372     | 2,105263158     |
| YARS2                                                                                           | 0,023468632 | 0,131355079 | 0,044 | 0,023 | 1         | 1,09532202    | 0,91297352      | 1,913043478     |
| POGLUT3                                                                                         | 0,396637006 | 0,13100315  | 0,071 | 0,06  | 1         | 1,095054862   | 0,913196256     | 1,183333333     |
| GINS2                                                                                           | 0,0003565   | 0,130802687 | 0,027 | 0,004 | 1         | 1,094902714   | 0,913323154     | 6,75            |
| RFC5                                                                                            | 0,000999277 | 0,130723776 | 0,048 | 0,018 | 1         | 1,094842828   | 0,913373111     | 2,666666667     |
| PLEKHO1                                                                                         | 0,991014963 | 0,130707528 | 0,221 | 0,22  | 1         | 1,094830498   | 0,913383398     | 1,004545455     |
| CXXC5                                                                                           | 0,313654682 | 0,130646914 | 0,328 | 0,385 | 1         | 1,0947845     | 0,913421774     | 0,851948052     |
| C12orf73                                                                                        | 0,001074744 | 0,130478029 | 0,066 | 0,03  | 1         | 1,094656349   | 0,913528708     | 2,2             |
| RAB5C                                                                                           | 0,33130538  | 0,130441321 | 0,215 | 0,232 | 1         | 1,094628497   | 0,913551952     | 0,926724138     |
| ZNF785                                                                                          | 0,047403842 | 0,130435884 | 0,022 | 0,009 | 1         | 1,094624372   | 0,913555394     | 2,444444444     |
| BET1                                                                                            | 0,014475307 | 0,13030033  | 0,063 | 0,035 | 1         | 1,094521527   | 0,913641235     | 1,8             |
| H1-5                                                                                            | 0,005346706 | 0,130291283 | 0,01  | 0     | 1         | 1,094514664   | 0,913646964     | #DIV/0!         |

Supplementary Table 5

| Differentially expressed genes_total calculation_ comparing SC-Keloid vs. (SC-Myel, SC-Nonmyel) |             |             |       |       |           |               |                 |                 |
|-------------------------------------------------------------------------------------------------|-------------|-------------|-------|-------|-----------|---------------|-----------------|-----------------|
| gene                                                                                            | p_val       | avg_log2FC  | pct.1 | pct.2 | p_val_adj | Foldchange_UP | Foldchange_DOWN | Ratio_pct1_pct2 |
| PICALM                                                                                          | 0,805034515 | 0,130291066 | 0,141 | 0,142 | 1         | 1,094514499   | 0,913647102     | 0,992957746     |
| HMGCR                                                                                           | 0,812888104 | 0,130226392 | 0,049 | 0,052 | 1         | 1,094465434   | 0,913688061     | 0,942307692     |
| TIMM22                                                                                          | 0,001403393 | 0,129976328 | 0,065 | 0,03  | 1         | 1,094275746   | 0,913846444     | 2,166666667     |
| RPS6KC1                                                                                         | 0,00955799  | 0,129852933 | 0,054 | 0,027 | 1         | 1,094182155   | 0,91392461      | 2               |
| HLTF                                                                                            | 0,096156558 | 0,129829412 | 0,084 | 0,061 | 1         | 1,094164317   | 0,913939511     | 1,37704918      |
| GOLGA2                                                                                          | 0,391174408 | 0,129819626 | 0,196 | 0,208 | 1         | 1,094156895   | 0,91394571      | 0,942307692     |
| CAPS                                                                                            | 0,206251961 | 0,129817549 | 0,184 | 0,157 | 1         | 1,094155319   | 0,913947026     | 1,171974522     |
| NOP14                                                                                           | 0,665143934 | 0,129749625 | 0,041 | 0,037 | 1         | 1,094103807   | 0,913990056     | 1,108108108     |
| TMTC3                                                                                           | 0,151165237 | 0,129603915 | 0,075 | 0,056 | 1         | 1,093993309   | 0,914082373     | 1,339285714     |
| B4GALT1                                                                                         | 0,721381162 | 0,129537842 | 0,118 | 0,11  | 1         | 1,093943207   | 0,914124237     | 1,072727273     |
| RBFA                                                                                            | 0,604200329 | 0,129519355 | 0,095 | 0,087 | 1         | 1,09392919    | 0,914135951     | 1,091954023     |
| ZDHHC21                                                                                         | 0,059323712 | 0,129411219 | 0,071 | 0,047 | 1         | 1,093847198   | 0,914204472     | 1,510638298     |
| METTL13                                                                                         | 0,038089773 | 0,129407125 | 0,033 | 0,016 | 1         | 1,093844094   | 0,914207066     | 2,0625          |
| SHMT2                                                                                           | 0,012091109 | 0,129351775 | 0,095 | 0,06  | 1         | 1,093802129   | 0,914242141     | 1,583333333     |
| MAK16                                                                                           | 0,034836317 | 0,129231538 | 0,044 | 0,024 | 1         | 1,093710973   | 0,914318339     | 1,833333333     |
| PHF5A                                                                                           | 0,466033005 | 0,129206416 | 0,072 | 0,081 | 1         | 1,093691928   | 0,91433426      | 0,888888889     |
| POLR3E                                                                                          | 0,703745598 | 0,12908145  | 0,05  | 0,054 | 1         | 1,093597197   | 0,914413463     | 0,925925926     |
| SACM1L                                                                                          | 0,539176525 | 0,129060274 | 0,061 | 0,053 | 1         | 1,093581145   | 0,914426885     | 1,150943396     |
| CDK5R1                                                                                          | 0,001114392 | 0,129054954 | 0,029 | 0,007 | 1         | 1,093577112   | 0,914430257     | 4,142857143     |
| MYO19                                                                                           | 0,101517872 | 0,128963558 | 0,041 | 0,026 | 1         | 1,093507836   | 0,914488189     | 1,576923077     |
| HNRNPA3                                                                                         | 0,004203734 | 0,128961242 | 0,441 | 0,571 | 1         | 1,09350608    | 0,914489657     | 0,772329247     |
| TMEM45A                                                                                         | 0,012389389 | 0,128858858 | 0,075 | 0,043 | 1         | 1,09342848    | 0,914554558     | 1,744186047     |
| PRDX3                                                                                           | 0,230166727 | 0,128703768 | 0,158 | 0,178 | 1         | 1,093310943   | 0,914652878     | 0,887640449     |
| EMILIN1                                                                                         | 0,007712163 | 0,128615429 | 0,098 | 0,06  | 1         | 1,093243999   | 0,914708886     | 1,633333333     |
| MMAB                                                                                            | 0,012710441 | 0,128566497 | 0,069 | 0,039 | 1         | 1,09320692    | 0,914739911     | 1,769230769     |
| C1QTNF1                                                                                         | 0,006262168 | 0,12852092  | 0,037 | 0,015 | 1         | 1,093172384   | 0,914768809     | 2,466666667     |
| ABCF1                                                                                           | 0,933277425 | 0,128508522 | 0,133 | 0,129 | 1         | 1,09316299    | 0,91477667      | 1,031007752     |
| NCOR2                                                                                           | 0,756349588 | 0,128493097 | 0,177 | 0,167 | 1         | 1,093151302   | 0,914786451     | 1,05988024      |
| ATP10B                                                                                          | 0,48565669  | 0,128392626 | 0,021 | 0,016 | 1         | 1,093075176   | 0,91485016      | 1,3125          |
| CCDC34                                                                                          | 0,001113847 | 0,128342486 | 0,064 | 0,028 | 1         | 1,093037188   | 0,914881956     | 2,285714286     |

Supplementary Table 5

| Differentially expressed genes_total calculation_ comparing SC-Keloid vs. (SC-Myel, SC-Nonmyel) |             |             |       |       |            |               |                 |                 |
|-------------------------------------------------------------------------------------------------|-------------|-------------|-------|-------|------------|---------------|-----------------|-----------------|
| gene                                                                                            | p_val       | avg_log2FC  | pct.1 | pct.2 | p_val_adj  | Foldchange_UP | Foldchange_DOWN | Ratio_pct1_pct2 |
| RUNX2                                                                                           | 0,033133185 | 0,128243262 | 0,061 | 0,037 | 1          | 1,092962015   | 0,914944881     | 1,648648649     |
| DIRAS1                                                                                          | 1,40085E-07 | 0,128217808 | 0,054 | 0,007 | 0,00295593 | 1,092942732   | 0,914961023     | 7,714285714     |
| RAD1                                                                                            | 0,480142779 | 0,128214081 | 0,051 | 0,043 | 1          | 1,092939908   | 0,914963387     | 1,186046512     |
| MRPL2                                                                                           | 0,334365935 | 0,128196201 | 0,107 | 0,09  | 1          | 1,092926363   | 0,914974726     | 1,188888889     |
| PPME1                                                                                           | 0,708247195 | 0,128158555 | 0,061 | 0,056 | 1          | 1,092897844   | 0,914998603     | 1,089285714     |
| PRKAR2B                                                                                         | 0,009555591 | 0,12787121  | 0,034 | 0,014 | 1          | 1,092680191   | 0,915180863     | 2,428571429     |
| XRCC4                                                                                           | 0,002311587 | 0,127858901 | 0,051 | 0,022 | 1          | 1,092670868   | 0,915188671     | 2,318181818     |
| SS18                                                                                            | 0,740226277 | 0,127762244 | 0,107 | 0,111 | 1          | 1,092597664   | 0,915249989     | 0,963963964     |
| C6orf226                                                                                        | 0,522958326 | 0,127684304 | 0,075 | 0,065 | 1          | 1,092538639   | 0,915299436     | 1,153846154     |
| FCF1                                                                                            | 0,329336212 | 0,127597696 | 0,047 | 0,037 | 1          | 1,092473054   | 0,915354384     | 1,27027027      |
| LAPTM4B                                                                                         | 0,233200211 | 0,127554137 | 0,102 | 0,083 | 1          | 1,09244007    | 0,915382022     | 1,228915663     |
| ZFP62                                                                                           | 0,062428477 | 0,127070123 | 0,033 | 0,018 | 1          | 1,092073625   | 0,915689178     | 1,833333333     |
| ANKRD54                                                                                         | 0,042588696 | 0,126967897 | 0,088 | 0,06  | 1          | 1,091996246   | 0,915754064     | 1,466666667     |
| SEPHS1                                                                                          | 0,488018435 | 0,126945869 | 0,047 | 0,039 | 1          | 1,091979573   | 0,915768046     | 1,205128205     |
| MPLKIP                                                                                          | 0,529120137 | 0,126890659 | 0,13  | 0,14  | 1          | 1,091937785   | 0,915803092     | 0,928571429     |
| PGM1                                                                                            | 0,029402147 | 0,12687518  | 0,043 | 0,023 | 1          | 1,09192607    | 0,915812918     | 1,869565217     |
| KIF4A                                                                                           | 0,678601926 | 0,126868939 | 0,017 | 0,015 | 1          | 1,091921346   | 0,91581688      | 1,133333333     |
| SPTLC2                                                                                          | 0,03891746  | 0,126681555 | 0,073 | 0,047 | 1          | 1,091779532   | 0,915935838     | 1,553191489     |
| RB1                                                                                             | 0,593161659 | 0,126578234 | 0,106 | 0,096 | 1          | 1,091701345   | 0,916001436     | 1,104166667     |
| EIPR1                                                                                           | 0,035377623 | 0,126535447 | 0,048 | 0,027 | 1          | 1,091668968   | 0,916028603     | 1,777777778     |
| H4C3                                                                                            | 0,10304663  | 0,126463071 | 0,098 | 0,125 | 1          | 1,091614204   | 0,916074559     | 0,784           |
| MIX23                                                                                           | 0,410373378 | 0,126441371 | 0,042 | 0,034 | 1          | 1,091597784   | 0,916088338     | 1,235294118     |
| TIPIN                                                                                           | 0,46774516  | 0,126379877 | 0,03  | 0,024 | 1          | 1,091551257   | 0,916127387     | 1,25            |
| SRR                                                                                             | 0,001163502 | 0,126273224 | 0,041 | 0,014 | 1          | 1,091470565   | 0,916195115     | 2,928571429     |
| MEDAG                                                                                           | 0,026246826 | 0,126203268 | 0,02  | 0,007 | 1          | 1,091417641   | 0,916239543     | 2,857142857     |
| KLHL12                                                                                          | 0,920081051 | 0,126136788 | 0,021 | 0,02  | 1          | 1,091367349   | 0,916281764     | 1,05            |
| CHDH                                                                                            | 0,838078162 | 0,126094824 | 0,017 | 0,016 | 1          | 1,091335605   | 0,916308416     | 1,0625          |
| UBE2D4                                                                                          | 0,010736535 | 0,126047236 | 0,077 | 0,045 | 1          | 1,091299607   | 0,916338642     | 1,711111111     |
| HCG18                                                                                           | 0,708632474 | 0,125952606 | 0,071 | 0,076 | 1          | 1,091228028   | 0,916398749     | 0,934210526     |
| DHRS4-AS1                                                                                       | 0,000125187 | 0,1259436   | 0,045 | 0,012 | 1          | 1,091221216   | 0,91640447      | 3,75            |

Supplementary Table 5

| Differentially expressed genes_total calculation_ comparing SC-Keloid vs. (SC-Myel, SC-Nonmyel) |             |             |       |       |           |               |                 |                 |
|-------------------------------------------------------------------------------------------------|-------------|-------------|-------|-------|-----------|---------------|-----------------|-----------------|
| gene                                                                                            | p_val       | avg_log2FC  | pct.1 | pct.2 | p_val_adj | Foldchange_UP | Foldchange_DOWN | Ratio_pct1_pct2 |
| RPF2                                                                                            | 0,233819216 | 0,125817972 | 0,104 | 0,084 | 1         | 1,091126198   | 0,916484272     | 1,238095238     |
| MARCHF7                                                                                         | 0,1834507   | 0,125794229 | 0,098 | 0,118 | 1         | 1,091108241   | 0,916499356     | 0,830508475     |
| NPHP1                                                                                           | 0,063425245 | 0,125609127 | 0,036 | 0,02  | 1         | 1,090968258   | 0,916616953     | 1,8             |
| DESI2                                                                                           | 0,903517045 | 0,12551555  | 0,118 | 0,114 | 1         | 1,090897498   | 0,916676408     | 1,035087719     |
| DNAL1                                                                                           | 0,534410972 | 0,125462469 | 0,063 | 0,071 | 1         | 1,090857361   | 0,916710137     | 0,887323944     |
| SEC16A                                                                                          | 0,405698557 | 0,125445865 | 0,062 | 0,052 | 1         | 1,090844806   | 0,916720687     | 1,192307692     |
| SLC35C1                                                                                         | 0,000996246 | 0,125345089 | 0,027 | 0,005 | 1         | 1,09076861    | 0,916784725     | 5,4             |
| TRMT10B                                                                                         | 0,639979303 | 0,125274132 | 0,033 | 0,028 | 1         | 1,090714964   | 0,916829816     | 1,178571429     |
| IDE                                                                                             | 0,007686503 | 0,125268828 | 0,041 | 0,018 | 1         | 1,090710954   | 0,916833187     | 2,277777778     |
| YTHDF3-DT                                                                                       | 0,294795678 | 0,125151984 | 0,03  | 0,022 | 1         | 1,090622621   | 0,916907444     | 1,363636364     |
| RARS2                                                                                           | 0,106124201 | 0,125117946 | 0,08  | 0,058 | 1         | 1,09059689    | 0,916929077     | 1,379310345     |
| RAD18                                                                                           | 0,250849356 | 0,125100374 | 0,024 | 0,016 | 1         | 1,090583606   | 0,916940246     | 1,5             |
| CBARP                                                                                           | 0,082542844 | 0,124998915 | 0,031 | 0,018 | 1         | 1,090506912   | 0,917004733     | 1,722222222     |
| ENTPD4                                                                                          | 0,43950503  | 0,124997701 | 0,079 | 0,068 | 1         | 1,090505995   | 0,917005504     | 1,161764706     |
| AGPAT2                                                                                          | 0,044569054 | 0,124986799 | 0,133 | 0,096 | 1         | 1,090497754   | 0,917012434     | 1,385416667     |
| APPL1                                                                                           | 0,677707033 | 0,124916287 | 0,134 | 0,125 | 1         | 1,090444458   | 0,917057254     | 1,072           |
| ZNF469                                                                                          | 0,000203783 | 0,12489429  | 0,022 | 0,001 | 1         | 1,090427831   | 0,917071237     | 22              |
| SNAP29                                                                                          | 0,059150166 | 0,124665976 | 0,076 | 0,052 | 1         | 1,090255279   | 0,917216379     | 1,461538462     |
| COQ9                                                                                            | 0,003721678 | 0,124637739 | 0,069 | 0,035 | 1         | 1,090233941   | 0,917234332     | 1,971428571     |
| AGPAT1                                                                                          | 0,106740683 | 0,124559988 | 0,139 | 0,109 | 1         | 1,090175186   | 0,917283766     | 1,275229358     |
| TRAM2-AS1                                                                                       | 0,472514823 | 0,124521284 | 0,041 | 0,034 | 1         | 1,09014594    | 0,917308375     | 1,205882353     |
| LYPLA2                                                                                          | 0,033303106 | 0,124514818 | 0,068 | 0,042 | 1         | 1,090141053   | 0,917312486     | 1,619047619     |
| ALKBH8                                                                                          | 0,152348455 | 0,124486524 | 0,023 | 0,014 | 1         | 1,090119674   | 0,917330477     | 1,642857143     |
| ZFX                                                                                             | 0,01260997  | 0,124482445 | 0,109 | 0,151 | 1         | 1,090116592   | 0,91733307      | 0,721854305     |
| AKR1A1                                                                                          | 0,601777722 | 0,124389471 | 0,136 | 0,125 | 1         | 1,090046342   | 0,917392189     | 1,088           |
| GMDS                                                                                            | 0,028610987 | 0,124295044 | 0,04  | 0,02  | 1         | 1,089974999   | 0,917452236     | 2               |
| BVES                                                                                            | 0,017697641 | 0,124256294 | 0,04  | 0,019 | 1         | 1,089945723   | 0,917476879     | 2,105263158     |
| MOB1B                                                                                           | 0,161766447 | 0,124148923 | 0,055 | 0,039 | 1         | 1,089864608   | 0,917545164     | 1,41025641      |
| PSMD5                                                                                           | 0,837852421 | 0,124101859 | 0,038 | 0,037 | 1         | 1,089829055   | 0,917575097     | 1,027027027     |
| RTCA                                                                                            | 0,369695038 | 0,124069342 | 0,058 | 0,047 | 1         | 1,089804492   | 0,917595778     | 1,234042553     |

Supplementary Table 5

| Differentially expressed genes_total calculation_ comparing SC-Keloid vs. (SC-Myel, SC-Nonmyel) |             |             |       |       |             |               |                 |                 |
|-------------------------------------------------------------------------------------------------|-------------|-------------|-------|-------|-------------|---------------|-----------------|-----------------|
| gene                                                                                            | p_val       | avg_log2FC  | pct.1 | pct.2 | p_val_adj   | Foldchange_UP | Foldchange_DOWN | Ratio_pct1_pct2 |
| CDK4                                                                                            | 0,124802788 | 0,123965196 | 0,157 | 0,125 | 1           | 1,089725823   | 0,91766202      | 1,256           |
| SEPSECS                                                                                         | 0,73038662  | 0,123902763 | 0,026 | 0,023 | 1           | 1,089678666   | 0,917701733     | 1,130434783     |
| ATP7A                                                                                           | 0,737631998 | 0,123764773 | 0,045 | 0,042 | 1           | 1,089574446   | 0,917789513     | 1,071428571     |
| ZDHHC12                                                                                         | 0,000271919 | 0,123760435 | 0,076 | 0,033 | 1           | 1,089571169   | 0,917792273     | 2,303030303     |
| KIF2A                                                                                           | 0,380594278 | 0,123610026 | 0,098 | 0,11  | 1           | 1,089457581   | 0,917887963     | 0,890909091     |
| TENT2                                                                                           | 0,387701878 | 0,123500868 | 0,077 | 0,065 | 1           | 1,089375154   | 0,917957415     | 1,184615385     |
| GLRX3                                                                                           | 0,123657395 | 0,123488425 | 0,137 | 0,109 | 1           | 1,089365758   | 0,917965332     | 1,256880734     |
| ZNF675                                                                                          | 0,260947622 | 0,123419055 | 0,021 | 0,014 | 1           | 1,089313379   | 0,918009472     | 1,5             |
| BICC1                                                                                           | 0,048055948 | 0,123381679 | 0,028 | 0,014 | 1           | 1,089285158   | 0,918033256     | 2               |
| LRRC23                                                                                          | 0,076009012 | 0,123249962 | 0,059 | 0,039 | 1           | 1,089185712   | 0,918117075     | 1,512820513     |
| PPP6R1                                                                                          | 0,02653108  | 0,123224485 | 0,076 | 0,047 | 1           | 1,089166478   | 0,918133288     | 1,617021277     |
| RND2                                                                                            | 1,16185E-05 | 0,123122758 | 0,052 | 0,012 | 0,245162686 | 1,089089681   | 0,91819803      | 4,333333333     |
| PPIC                                                                                            | 0,277112655 | 0,123102328 | 0,023 | 0,033 | 1           | 1,089074259   | 0,918211033     | 0,696969697     |
| TRIM73                                                                                          | 0,81497242  | 0,123079175 | 0,016 | 0,015 | 1           | 1,089056781   | 0,918225768     | 1,066666667     |
| IMP4                                                                                            | 0,324713582 | 0,123007399 | 0,102 | 0,085 | 1           | 1,0890026     | 0,918271453     | 1,2             |
| FAF2                                                                                            | 0,394643799 | 0,122905643 | 0,077 | 0,065 | 1           | 1,088925793   | 0,918336223     | 1,184615385     |
| NCLN                                                                                            | 0,036844034 | 0,122891512 | 0,079 | 0,052 | 1           | 1,088915128   | 0,918345218     | 1,519230769     |
| RNF141                                                                                          | 0,285065048 | 0,122878883 | 0,071 | 0,057 | 1           | 1,088905596   | 0,918353256     | 1,245614035     |
| DNAAF5                                                                                          | 0,030426975 | 0,122791254 | 0,043 | 0,023 | 1           | 1,088839458   | 0,918409039     | 1,869565217     |
| MRM3                                                                                            | 0,754315883 | 0,122747285 | 0,038 | 0,035 | 1           | 1,088806274   | 0,91843703      | 1,085714286     |
| DDX60L                                                                                          | 0,005353433 | 0,122612474 | 0,031 | 0,011 | 1           | 1,088704536   | 0,918522856     | 2,818181818     |
| LINC00926                                                                                       | 3,0691E-06  | 0,122477031 | 0,029 | 0     | 0,064760982 | 1,088602332   | 0,918609093     | #DIV/0!         |
| CTXN1                                                                                           | 3,29859E-09 | 0,122457769 | 0,05  | 0,001 | 6,96035E-05 | 1,088587797   | 0,918621357     | 50              |
| TMEM67                                                                                          | 0,640032785 | 0,122404601 | 0,054 | 0,058 | 1           | 1,08854768    | 0,918655212     | 0,931034483     |
| SPATC1L                                                                                         | 0,000320195 | 0,12235897  | 0,091 | 0,043 | 1           | 1,088513251   | 0,918684269     | 2,11627907      |
| RNASEH1                                                                                         | 0,212392703 | 0,122285813 | 0,077 | 0,06  | 1           | 1,088458055   | 0,918730855     | 1,283333333     |
| AMMECR1                                                                                         | 0,374984813 | 0,122277324 | 0,026 | 0,019 | 1           | 1,08845165    | 0,918736261     | 1,368421053     |
| NEDD4                                                                                           | 0,237285107 | 0,122219594 | 0,044 | 0,033 | 1           | 1,088408097   | 0,918773026     | 1,333333333     |
| NINL                                                                                            | 0,103340381 | 0,121977925 | 0,017 | 0,008 | 1           | 1,088225791   | 0,918926944     | 2,125           |
| ARFGAP3                                                                                         | 0,333810193 | 0,121970039 | 0,183 | 0,198 | 1           | 1,088219842   | 0,918931967     | 0,924242424     |



Supplementary Table 5

| Differentially expressed genes_total calculation_ comparing SC-Keloid vs. (SC-Myel, SC-Nonmyel) |             |             |       |       |           |               |                 |                 |
|-------------------------------------------------------------------------------------------------|-------------|-------------|-------|-------|-----------|---------------|-----------------|-----------------|
| gene                                                                                            | p_val       | avg_log2FC  | pct.1 | pct.2 | p_val_adj | Foldchange_UP | Foldchange_DOWN | Ratio_pct1_pct2 |
| MRPL1                                                                                           | 0,224330013 | 0,12192958  | 0,078 | 0,061 | 1         | 1,088189324   | 0,918957738     | 1,278688525     |
| RPAP1                                                                                           | 0,035918775 | 0,121789592 | 0,029 | 0,014 | 1         | 1,08808374    | 0,919046911     | 2,071428571     |
| NOL9                                                                                            | 0,087942802 | 0,121757795 | 0,054 | 0,035 | 1         | 1,088059759   | 0,919067167     | 1,542857143     |
| KIAA2013                                                                                        | 0,042640695 | 0,121695938 | 0,112 | 0,079 | 1         | 1,088013108   | 0,919106574     | 1,417721519     |
| CDC42BPB                                                                                        | 0,362675295 | 0,121666237 | 0,114 | 0,098 | 1         | 1,087990709   | 0,919125496     | 1,163265306     |
| ZXDC                                                                                            | 0,372816129 | 0,121533234 | 0,04  | 0,049 | 1         | 1,087890412   | 0,919210234     | 0,816326531     |
| EXTL3                                                                                           | 0,101881449 | 0,121529339 | 0,041 | 0,026 | 1         | 1,087887474   | 0,919212716     | 1,576923077     |
| UBE2Q1                                                                                          | 0,508101801 | 0,121520541 | 0,085 | 0,075 | 1         | 1,08788084    | 0,919218321     | 1,133333333     |
| TACO1                                                                                           | 0,0003776   | 0,121469903 | 0,047 | 0,015 | 1         | 1,087842656   | 0,919250587     | 3,133333333     |
| ZNF32                                                                                           | 0,123755976 | 0,121458557 | 0,125 | 0,096 | 1         | 1,087834102   | 0,919257816     | 1,302083333     |
| GET3                                                                                            | 0,077100072 | 0,121444109 | 0,141 | 0,107 | 1         | 1,087823207   | 0,919267022     | 1,317757009     |
| NR2C2AP                                                                                         | 0,006406892 | 0,121327142 | 0,063 | 0,033 | 1         | 1,087735015   | 0,919341555     | 1,909090909     |
| SLC30A7                                                                                         | 0,340398175 | 0,121284723 | 0,08  | 0,066 | 1         | 1,087703033   | 0,919368586     | 1,212121212     |
| TRIM5                                                                                           | 0,369989309 | 0,121228442 | 0,026 | 0,019 | 1         | 1,087660602   | 0,919404452     | 1,368421053     |
| RWDD4                                                                                           | 0,428104141 | 0,121201575 | 0,095 | 0,083 | 1         | 1,087640347   | 0,919421575     | 1,144578313     |
| RIC8A                                                                                           | 0,013348762 | 0,121170289 | 0,104 | 0,066 | 1         | 1,087616761   | 0,919441513     | 1,575757576     |
| ORMDL2                                                                                          | 0,001707073 | 0,120980288 | 0,087 | 0,046 | 1         | 1,087473533   | 0,91956261      | 1,891304348     |
| POLR2H                                                                                          | 0,544866354 | 0,120977898 | 0,168 | 0,174 | 1         | 1,087471731   | 0,919564133     | 0,965517241     |
| EIF5B                                                                                           | 0,086799292 | 0,120826595 | 0,295 | 0,345 | 1         | 1,087357688   | 0,919660578     | 0,855072464     |
| ETV3                                                                                            | 0,838121004 | 0,120805887 | 0,07  | 0,066 | 1         | 1,08734208    | 0,919673779     | 1,060606061     |
| PPIG                                                                                            | 0,158235908 | 0,120803996 | 0,256 | 0,289 | 1         | 1,087340655   | 0,919674984     | 0,885813149     |
| LGALS8                                                                                          | 0,501721377 | 0,120775778 | 0,054 | 0,046 | 1         | 1,087319388   | 0,919692973     | 1,173913043     |
| NTMT1                                                                                           | 0,3949715   | 0,120730878 | 0,14  | 0,153 | 1         | 1,087285548   | 0,919721596     | 0,91503268      |
| FAM76A                                                                                          | 0,650006925 | 0,120701132 | 0,064 | 0,058 | 1         | 1,087263131   | 0,919740559     | 1,103448276     |
| VDAC2                                                                                           | 0,087943386 | 0,120644644 | 0,293 | 0,343 | 1         | 1,08722056    | 0,919776572     | 0,854227405     |
| FURIN                                                                                           | 0,096352959 | 0,12064163  | 0,113 | 0,084 | 1         | 1,087218289   | 0,919778494     | 1,345238095     |
| TRPM7                                                                                           | 0,968693786 | 0,120276585 | 0,122 | 0,119 | 1         | 1,086943225   | 0,920011255     | 1,025210084     |
| MZT2A                                                                                           | 0,316124672 | 0,120210614 | 0,156 | 0,133 | 1         | 1,086893523   | 0,920053325     | 1,172932331     |
| CIAPIN1                                                                                         | 0,000485015 | 0,12020193  | 0,097 | 0,049 | 1         | 1,086886981   | 0,920058863     | 1,979591837     |
| LLPH                                                                                            | 0,360885849 | 0,120196963 | 0,092 | 0,077 | 1         | 1,086883239   | 0,920062031     | 1,194805195     |

Supplementary Table 5

| Differentially expressed genes_total calculation_ comparing SC-Keloid vs. (SC-Myel, SC-Nonmyel) |             |             |       |       |           |               |                 |                 |
|-------------------------------------------------------------------------------------------------|-------------|-------------|-------|-------|-----------|---------------|-----------------|-----------------|
| gene                                                                                            | p_val       | avg_log2FC  | pct.1 | pct.2 | p_val_adj | Foldchange_UP | Foldchange_DOWN | Ratio_pct1_pct2 |
| PLAGL1                                                                                          | 0,001138215 | 0,12015152  | 0,031 | 0,008 | 1         | 1,086849004   | 0,920091012     | 3,875           |
| ZNF43                                                                                           | 0,686428885 | 0,120131509 | 0,036 | 0,033 | 1         | 1,086833928   | 0,920103775     | 1,090909091     |
| PPID                                                                                            | 0,725940095 | 0,120121566 | 0,068 | 0,062 | 1         | 1,086826438   | 0,920110116     | 1,096774194     |
| DIP2C-AS1                                                                                       | 0,778483297 | 0,120086125 | 0,015 | 0,014 | 1         | 1,08679974    | 0,920132719     | 1,071428571     |
| VAC14                                                                                           | 0,002830988 | 0,120074151 | 0,047 | 0,019 | 1         | 1,08679072    | 0,920140356     | 2,473684211     |
| BAG1                                                                                            | 0,012090456 | 0,119974814 | 0,187 | 0,24  | 1         | 1,086715891   | 0,920203715     | 0,779166667     |
| PLCB3                                                                                           | 0,028006863 | 0,119920953 | 0,04  | 0,02  | 1         | 1,086675321   | 0,92023807      | 2               |
| FH                                                                                              | 0,825250533 | 0,119887012 | 0,097 | 0,091 | 1         | 1,086649756   | 0,92025972      | 1,065934066     |
| BACE1                                                                                           | 0,065012426 | 0,119857818 | 0,111 | 0,08  | 1         | 1,086627767   | 0,920278342     | 1,3875          |
| MRPL46                                                                                          | 0,029247147 | 0,119719646 | 0,043 | 0,023 | 1         | 1,086523702   | 0,920366485     | 1,869565217     |
| CREB3                                                                                           | 0,220129042 | 0,11970645  | 0,133 | 0,109 | 1         | 1,086513764   | 0,920374903     | 1,220183486     |
| METTL16                                                                                         | 0,677462544 | 0,119693113 | 0,052 | 0,057 | 1         | 1,086503719   | 0,920383412     | 0,912280702     |
| QSOX1                                                                                           | 0,003226121 | 0,119685787 | 0,135 | 0,084 | 1         | 1,086498202   | 0,920388085     | 1,607142857     |
| CHMP7                                                                                           | 0,021587198 | 0,11968512  | 0,05  | 0,027 | 1         | 1,0864977     | 0,920388511     | 1,851851852     |
| SRFBP1                                                                                          | 0,430157663 | 0,119650905 | 0,078 | 0,088 | 1         | 1,086471932   | 0,920410339     | 0,886363636     |
| TMEM237                                                                                         | 0,035458884 | 0,119650249 | 0,044 | 0,024 | 1         | 1,086471438   | 0,920410758     | 1,833333333     |
| LGI1                                                                                            | 0,705733027 | 0,119625556 | 0,069 | 0,064 | 1         | 1,086452843   | 0,920426512     | 1,078125        |
| PCED1A                                                                                          | 0,734779808 | 0,119551128 | 0,057 | 0,053 | 1         | 1,086396794   | 0,920473997     | 1,075471698     |
| S100A9                                                                                          | 0,264331183 | 0,119431673 | 0,017 | 0,011 | 1         | 1,086306845   | 0,920550215     | 1,545454545     |
| MTPAP                                                                                           | 0,306645178 | 0,119402412 | 0,027 | 0,019 | 1         | 1,086284812   | 0,920568886     | 1,421052632     |
| TXLNA                                                                                           | 0,164513029 | 0,119340803 | 0,095 | 0,075 | 1         | 1,086238425   | 0,920608199     | 1,266666667     |
| COX14                                                                                           | 0,93551872  | 0,119284736 | 0,18  | 0,178 | 1         | 1,086196211   | 0,920643977     | 1,011235955     |
| U2SURP                                                                                          | 0,418000822 | 0,11922021  | 0,224 | 0,239 | 1         | 1,086147631   | 0,920685155     | 0,937238494     |
| NPB                                                                                             | 0,296779462 | 0,119095399 | 0,035 | 0,026 | 1         | 1,08605367    | 0,920764809     | 1,346153846     |
| PSMD11                                                                                          | 0,157698921 | 0,119062122 | 0,186 | 0,212 | 1         | 1,086028619   | 0,920786048     | 0,877358491     |
| CSNK1A1                                                                                         | 0,002379274 | 0,118917078 | 0,371 | 0,484 | 1         | 1,085919439   | 0,920878625     | 0,766528926     |
| CXADR                                                                                           | 0,083993195 | 0,118829985 | 0,022 | 0,011 | 1         | 1,085853886   | 0,920934219     | 2               |
| HTATSF1                                                                                         | 0,199089155 | 0,118722006 | 0,123 | 0,1   | 1         | 1,085772618   | 0,921003149     | 1,23            |
| VPS35                                                                                           | 0,268713797 | 0,118684026 | 0,146 | 0,163 | 1         | 1,085744035   | 0,921027395     | 0,895705521     |
| BAALC                                                                                           | 0,000117571 | 0,118534305 | 0,027 | 0,003 | 1         | 1,085631364   | 0,921122983     | 9               |

Supplementary Table 5

| Differentially expressed genes_total calculation_ comparing SC-Keloid vs. (SC-Myel, SC-Nonmyel) |             |             |       |       |           |               |                 |                 |
|-------------------------------------------------------------------------------------------------|-------------|-------------|-------|-------|-----------|---------------|-----------------|-----------------|
| gene                                                                                            | p_val       | avg_log2FC  | pct.1 | pct.2 | p_val_adj | Foldchange_UP | Foldchange_DOWN | Ratio_pct1_pct2 |
| COP1                                                                                            | 0,02431939  | 0,11851903  | 0,048 | 0,026 | 1         | 1,085619869   | 0,921132736     | 1,846153846     |
| ZNF354A                                                                                         | 0,504424177 | 0,118336329 | 0,026 | 0,031 | 1         | 1,085482396   | 0,921249395     | 0,838709677     |
| N4BP2                                                                                           | 0,253893571 | 0,118322851 | 0,033 | 0,023 | 1         | 1,085472255   | 0,921258001     | 1,434782609     |
| DOCK8                                                                                           | 0,133188214 | 0,118280355 | 0,033 | 0,02  | 1         | 1,085440282   | 0,921285138     | 1,65            |
| SLC30A5                                                                                         | 0,237902145 | 0,118274256 | 0,084 | 0,066 | 1         | 1,085435693   | 0,921289033     | 1,272727273     |
| USP5                                                                                            | 0,010184723 | 0,11823219  | 0,073 | 0,042 | 1         | 1,085404045   | 0,921315896     | 1,738095238     |
| PRKCSH                                                                                          | 0,214325239 | 0,118222325 | 0,15  | 0,125 | 1         | 1,085396623   | 0,921322196     | 1,2             |
| CLCN3                                                                                           | 0,782102869 | 0,118055011 | 0,135 | 0,137 | 1         | 1,085270754   | 0,921429051     | 0,98540146      |
| SLX4                                                                                            | 0,038307177 | 0,11787899  | 0,019 | 0,007 | 1         | 1,085138349   | 0,92154148      | 2,714285714     |
| CCDC191                                                                                         | 0,092932425 | 0,117800784 | 0,029 | 0,016 | 1         | 1,085079527   | 0,921591436     | 1,8125          |
| SLC30A9                                                                                         | 0,180843184 | 0,117779181 | 0,086 | 0,066 | 1         | 1,08506328    | 0,921605236     | 1,303030303     |
| TMA16                                                                                           | 0,224805905 | 0,117757302 | 0,09  | 0,072 | 1         | 1,085046824   | 0,921619213     | 1,25            |
| MFSD3                                                                                           | 0,00012542  | 0,1175796   | 0,052 | 0,016 | 1         | 1,084913183   | 0,921732739     | 3,25            |
| KCNA2                                                                                           | 0,39346966  | 0,11754045  | 0,056 | 0,046 | 1         | 1,084883742   | 0,921757752     | 1,217391304     |
| SNX14                                                                                           | 0,151203715 | 0,117485472 | 0,097 | 0,075 | 1         | 1,084842401   | 0,921792879     | 1,293333333     |
| ARMC10                                                                                          | 0,706338435 | 0,117402101 | 0,109 | 0,102 | 1         | 1,084779712   | 0,921846149     | 1,068627451     |
| TTC9C                                                                                           | 0,397994647 | 0,117398875 | 0,041 | 0,033 | 1         | 1,084777286   | 0,921848211     | 1,242424242     |
| OPA3                                                                                            | 0,281390826 | 0,117398374 | 0,038 | 0,028 | 1         | 1,084776909   | 0,921848531     | 1,357142857     |
| PSMC4                                                                                           | 0,765297806 | 0,117391866 | 0,164 | 0,164 | 1         | 1,084772016   | 0,921852689     | 1               |
| TOR3A                                                                                           | 0,015509238 | 0,11736311  | 0,077 | 0,046 | 1         | 1,084750394   | 0,921871064     | 1,673913043     |
| OTUD5                                                                                           | 0,666001089 | 0,117295558 | 0,073 | 0,066 | 1         | 1,084699603   | 0,921914231     | 1,106060606     |
| HEXB                                                                                            | 0,22723978  | 0,117216811 | 0,141 | 0,117 | 1         | 1,084640398   | 0,921964553     | 1,205128205     |
| PNKP                                                                                            | 0,019049242 | 0,117049281 | 0,069 | 0,041 | 1         | 1,084514454   | 0,922071621     | 1,682926829     |
| ATAD2B                                                                                          | 0,430386924 | 0,117026073 | 0,043 | 0,052 | 1         | 1,084497008   | 0,922086453     | 0,826923077     |
| COX10                                                                                           | 0,07741537  | 0,116894361 | 0,028 | 0,015 | 1         | 1,084398003   | 0,92217064      | 1,866666667     |
| SYF2                                                                                            | 0,001966767 | 0,116745659 | 0,242 | 0,316 | 1         | 1,084286237   | 0,922265695     | 0,765822785     |
| WDR55                                                                                           | 0,05998502  | 0,116726959 | 0,049 | 0,03  | 1         | 1,084272183   | 0,922277649     | 1,633333333     |
| B2M                                                                                             | 0,000195988 | 0,116579201 | 0,977 | 0,995 | 1         | 1,084161139   | 0,922372112     | 0,981909548     |
| ZDHHC3                                                                                          | 0,041927305 | 0,11653368  | 0,078 | 0,052 | 1         | 1,084126932   | 0,922401216     | 1,5             |
| TM9SF4                                                                                          | 0,259596805 | 0,116502296 | 0,071 | 0,056 | 1         | 1,084103348   | 0,922421282     | 1,267857143     |

Supplementary Table 5

| Differentially expressed genes_total calculation_ comparing SC-Keloid vs. (SC-Myel, SC-Nonmyel) |             |             |       |       |           |               |                 |                 |
|-------------------------------------------------------------------------------------------------|-------------|-------------|-------|-------|-----------|---------------|-----------------|-----------------|
| gene                                                                                            | p_val       | avg_log2FC  | pct.1 | pct.2 | p_val_adj | Foldchange_UP | Foldchange_DOWN | Ratio_pct1_pct2 |
| CDKN2AIPNL                                                                                      | 0,019539524 | 0,116497612 | 0,059 | 0,034 | 1         | 1,084099828   | 0,922424277     | 1,735294118     |
| PRPF31                                                                                          | 0,082879784 | 0,116482647 | 0,144 | 0,11  | 1         | 1,084088583   | 0,922433845     | 1,309090909     |
| CHMP4A                                                                                          | 0,756952487 | 0,116424157 | 0,156 | 0,157 | 1         | 1,084044632   | 0,922471243     | 0,993630573     |
| CCDC127                                                                                         | 0,519083993 | 0,116397293 | 0,065 | 0,057 | 1         | 1,084024447   | 0,922488421     | 1,140350877     |
| HYOU1                                                                                           | 0,156232239 | 0,116332381 | 0,106 | 0,083 | 1         | 1,083975674   | 0,922529928     | 1,277108434     |
| ZFY                                                                                             | 0,117906433 | 0,116331003 | 0,028 | 0,016 | 1         | 1,083974639   | 0,922530809     | 1,75            |
| LIG4                                                                                            | 0,002422346 | 0,116309095 | 0,036 | 0,012 | 1         | 1,083958179   | 0,922544818     | 3               |
| ZNF518B                                                                                         | 0,352166176 | 0,116242058 | 0,024 | 0,018 | 1         | 1,083907812   | 0,922587686     | 1,333333333     |
| TMEM254                                                                                         | 0,020182347 | 0,116241565 | 0,029 | 0,012 | 1         | 1,083907441   | 0,922588001     | 2,416666667     |
| RNF34                                                                                           | 0,003769694 | 0,116206712 | 0,08  | 0,043 | 1         | 1,083881257   | 0,92261029      | 1,860465116     |
| LATS1                                                                                           | 0,594277826 | 0,116188027 | 0,068 | 0,075 | 1         | 1,083867219   | 0,922622239     | 0,906666667     |
| TLL1                                                                                            | 0,039920092 | 0,115912457 | 0,033 | 0,016 | 1         | 1,083660208   | 0,922798487     | 2,0625          |
| OAF                                                                                             | 0,530469048 | 0,115890294 | 0,17  | 0,179 | 1         | 1,08364356    | 0,922812663     | 0,94972067      |
| CEP78                                                                                           | 0,239070498 | 0,115886419 | 0,031 | 0,022 | 1         | 1,083640651   | 0,922815141     | 1,409090909     |
| LRRC59                                                                                          | 0,894414062 | 0,115853575 | 0,149 | 0,144 | 1         | 1,08361598    | 0,922836151     | 1,034722222     |
| RBMX2                                                                                           | 0,092483474 | 0,115717305 | 0,086 | 0,062 | 1         | 1,083513632   | 0,922923321     | 1,387096774     |
| R3HDM1                                                                                          | 0,003757515 | 0,115631436 | 0,057 | 0,027 | 1         | 1,083449144   | 0,922978255     | 2,111111111     |
| SLC35A3                                                                                         | 0,318246314 | 0,115484517 | 0,075 | 0,061 | 1         | 1,083338814   | 0,923072253     | 1,229508197     |
| FUT8                                                                                            | 0,478927274 | 0,115386186 | 0,106 | 0,094 | 1         | 1,083264979   | 0,923135169     | 1,127659574     |
| NDE1                                                                                            | 0,742321144 | 0,115363161 | 0,07  | 0,065 | 1         | 1,083247691   | 0,923149902     | 1,076923077     |
| ZNF35                                                                                           | 0,00835211  | 0,115206351 | 0,023 | 0,007 | 1         | 1,083129957   | 0,923250247     | 3,285714286     |
| ATG7                                                                                            | 0,068945463 | 0,115189843 | 0,065 | 0,043 | 1         | 1,083117563   | 0,923260812     | 1,511627907     |
| MYH10                                                                                           | 0,861641737 | 0,11516684  | 0,061 | 0,058 | 1         | 1,083100293   | 0,923275533     | 1,051724138     |
| CYP27C1                                                                                         | 0,099000059 | 0,115129601 | 0,051 | 0,034 | 1         | 1,083072336   | 0,923299365     | 1,5             |
| CDKL1                                                                                           | 0,523540414 | 0,114999358 | 0,022 | 0,027 | 1         | 1,082974564   | 0,923382722     | 0,814814815     |
| CSTF2                                                                                           | 0,066034118 | 0,114879382 | 0,021 | 0,009 | 1         | 1,082884506   | 0,923459514     | 2,333333333     |
| ZDHHC24                                                                                         | 0,00470214  | 0,114791282 | 0,07  | 0,037 | 1         | 1,082818381   | 0,923515908     | 1,891891892     |
| ANKRD39                                                                                         | 0,080492119 | 0,114730804 | 0,083 | 0,058 | 1         | 1,08277299    | 0,923554623     | 1,431034483     |
| CHRN1                                                                                           | 0,052173389 | 0,114679097 | 0,044 | 0,026 | 1         | 1,082734183   | 0,923587725     | 1,692307692     |
| MRPS27                                                                                          | 0,619812931 | 0,114620744 | 0,054 | 0,047 | 1         | 1,08269039    | 0,923625082     | 1,14893617      |

Supplementary Table 5

| Differentially expressed genes_total calculation_ comparing SC-Keloid vs. (SC-Myel, SC-Nonmyel) |             |             |       |       |            |               |                 |                 |
|-------------------------------------------------------------------------------------------------|-------------|-------------|-------|-------|------------|---------------|-----------------|-----------------|
| gene                                                                                            | p_val       | avg_log2FC  | pct.1 | pct.2 | p_val_adj  | Foldchange_UP | Foldchange_DOWN | Ratio_pct1_pct2 |
| TBK1                                                                                            | 0,334104364 | 0,11457038  | 0,054 | 0,065 | 1          | 1,082652594   | 0,923657326     | 0,830769231     |
| MTERF4                                                                                          | 0,33085617  | 0,114569014 | 0,066 | 0,054 | 1          | 1,082651569   | 0,9236582       | 1,222222222     |
| GSKIP                                                                                           | 0,600271278 | 0,114480644 | 0,057 | 0,05  | 1          | 1,082585255   | 0,923714779     | 1,14            |
| HOXB4                                                                                           | 3,29125E-05 | 0,114447464 | 0,036 | 0,005 | 0,69448744 | 1,082560357   | 0,923736024     | 7,2             |
| TRAPPC9                                                                                         | 0,010477616 | 0,114393584 | 0,031 | 0,012 | 1          | 1,082519928   | 0,923770523     | 2,583333333     |
| LIMK2                                                                                           | 0,158493308 | 0,114289388 | 0,038 | 0,026 | 1          | 1,082441748   | 0,923837243     | 1,461538462     |
| UPP1                                                                                            | 0,729453549 | 0,114260265 | 0,17  | 0,171 | 1          | 1,082419898   | 0,923855892     | 0,994152047     |
| MYCBP                                                                                           | 0,003594905 | 0,114224007 | 0,035 | 0,012 | 1          | 1,082392695   | 0,923879111     | 2,916666667     |
| DYNC1I2                                                                                         | 0,057701076 | 0,114204872 | 0,284 | 0,338 | 1          | 1,082378338   | 0,923891365     | 0,840236686     |
| MOGS                                                                                            | 0,014966342 | 0,114195042 | 0,076 | 0,045 | 1          | 1,082370963   | 0,92389766      | 1,688888889     |
| SERP2                                                                                           | 0,004114302 | 0,114178162 | 0,049 | 0,022 | 1          | 1,0823583     | 0,92390847      | 2,227272727     |
| CCDC9B                                                                                          | 0,553624492 | 0,114145969 | 0,08  | 0,088 | 1          | 1,082334147   | 0,923929087     | 0,909090909     |
| PCGF3                                                                                           | 0,496849889 | 0,114043178 | 0,095 | 0,084 | 1          | 1,082257035   | 0,923994918     | 1,130952381     |
| BUD23                                                                                           | 0,238718993 | 0,114012622 | 0,17  | 0,142 | 1          | 1,082234113   | 0,924014488     | 1,197183099     |
| C9orf78                                                                                         | 0,789674014 | 0,113938899 | 0,173 | 0,163 | 1          | 1,082178811   | 0,924061707     | 1,061349693     |
| RBM33                                                                                           | 0,292411925 | 0,11393806  | 0,132 | 0,148 | 1          | 1,082178182   | 0,924062245     | 0,891891892     |
| CEP170                                                                                          | 0,582884142 | 0,113906905 | 0,224 | 0,232 | 1          | 1,082154813   | 0,9240822       | 0,965517241     |
| LENG1                                                                                           | 0,922877181 | 0,113814418 | 0,064 | 0,062 | 1          | 1,082085441   | 0,924141442     | 1,032258065     |
| TPX2                                                                                            | 0,017352177 | 0,11361333  | 0,023 | 0,008 | 1          | 1,081934626   | 0,924270262     | 2,875           |
| DNAJC2                                                                                          | 0,233903497 | 0,113574504 | 0,104 | 0,084 | 1          | 1,081905509   | 0,924295136     | 1,238095238     |
| DIMT1                                                                                           | 0,032423962 | 0,113524222 | 0,081 | 0,053 | 1          | 1,081867803   | 0,924327351     | 1,528301887     |
| SORCS2                                                                                          | 0,789581377 | 0,113501927 | 0,043 | 0,046 | 1          | 1,081851084   | 0,924341635     | 0,934782609     |
| PRAF2                                                                                           | 0,134319727 | 0,113292959 | 0,107 | 0,083 | 1          | 1,081694394   | 0,924475532     | 1,289156627     |
| CCDC88B                                                                                         | 0,018256768 | 0,113191378 | 0,019 | 0,005 | 1          | 1,081618234   | 0,924540627     | 3,8             |
| TEX264                                                                                          | 0,196470446 | 0,113101612 | 0,106 | 0,084 | 1          | 1,081550937   | 0,924598154     | 1,261904762     |
| SPON2                                                                                           | 0,214029015 | 0,11307013  | 0,033 | 0,045 | 1          | 1,081527336   | 0,924618331     | 0,733333333     |
| TGS1                                                                                            | 0,158250998 | 0,112959795 | 0,078 | 0,098 | 1          | 1,081444625   | 0,924689047     | 0,795918367     |
| SLC38A6                                                                                         | 0,630943035 | 0,112786946 | 0,027 | 0,023 | 1          | 1,081315065   | 0,92479984      | 1,173913043     |
| NDUFAF1                                                                                         | 0,001537616 | 0,112748841 | 0,063 | 0,028 | 1          | 1,081286506   | 0,924824267     | 2,25            |
| C8orf76                                                                                         | 0,053626662 | 0,112686712 | 0,044 | 0,026 | 1          | 1,081239942   | 0,924864095     | 1,692307692     |

Supplementary Table 5

| Differentially expressed genes_total calculation_ comparing SC-Keloid vs. (SC-Myel, SC-Nonmyel) |             |             |       |       |           |               |                 |                 |
|-------------------------------------------------------------------------------------------------|-------------|-------------|-------|-------|-----------|---------------|-----------------|-----------------|
| gene                                                                                            | p_val       | avg_log2FC  | pct.1 | pct.2 | p_val_adj | Foldchange_UP | Foldchange_DOWN | Ratio_pct1_pct2 |
| HEBP2                                                                                           | 0,584981362 | 0,112588506 | 0,119 | 0,109 | 1         | 1,081166343   | 0,924927053     | 1,091743119     |
| SMIM4                                                                                           | 0,688003166 | 0,112582243 | 0,092 | 0,096 | 1         | 1,081161649   | 0,924931069     | 0,958333333     |
| DLGAP4                                                                                          | 0,53151748  | 0,112563219 | 0,248 | 0,262 | 1         | 1,081147392   | 0,924943266     | 0,946564885     |
| S100PBP                                                                                         | 0,244905214 | 0,112546284 | 0,054 | 0,041 | 1         | 1,081134702   | 0,924954123     | 1,317073171     |
| ZBTB37                                                                                          | 0,466001744 | 0,112490523 | 0,05  | 0,042 | 1         | 1,081092916   | 0,924989874     | 1,19047619      |
| COQ2                                                                                            | 0,001011906 | 0,112371591 | 0,027 | 0,005 | 1         | 1,081003798   | 0,92506613      | 5,4             |
| LOXL1-AS1                                                                                       | 0,000696974 | 0,112364788 | 0,022 | 0,003 | 1         | 1,0809987     | 0,925070493     | 7,333333333     |
| PDZD8                                                                                           | 0,183880914 | 0,112348339 | 0,084 | 0,102 | 1         | 1,080986375   | 0,92508104      | 0,823529412     |
| CGGBP1                                                                                          | 0,058771489 | 0,112323266 | 0,203 | 0,24  | 1         | 1,080967588   | 0,925097118     | 0,845833333     |
| FANCL                                                                                           | 0,868565187 | 0,112254589 | 0,04  | 0,038 | 1         | 1,080916132   | 0,925141156     | 1,052631579     |
| TMEM42                                                                                          | 0,40033877  | 0,112140916 | 0,045 | 0,037 | 1         | 1,080830967   | 0,925214053     | 1,216216216     |
| PTRH2                                                                                           | 0,975604413 | 0,112140304 | 0,052 | 0,052 | 1         | 1,080830509   | 0,925214446     | 1               |
| UTRN                                                                                            | 0,004328947 | 0,112111224 | 0,296 | 0,377 | 1         | 1,080808723   | 0,925233095     | 0,785145889     |
| FBXW5                                                                                           | 0,561821725 | 0,112057202 | 0,127 | 0,114 | 1         | 1,080768253   | 0,925267741     | 1,114035088     |
| UEVLD                                                                                           | 0,114694952 | 0,111904615 | 0,042 | 0,027 | 1         | 1,080653951   | 0,925365607     | 1,555555556     |
| NAPEPLD                                                                                         | 0,419394811 | 0,111899526 | 0,052 | 0,043 | 1         | 1,08065014    | 0,925368871     | 1,209302326     |
| NSMCE1                                                                                          | 0,068738362 | 0,111791415 | 0,113 | 0,083 | 1         | 1,080569162   | 0,925438218     | 1,361445783     |
| GCFC2                                                                                           | 0,102468578 | 0,111779612 | 0,064 | 0,045 | 1         | 1,080560322   | 0,925445789     | 1,422222222     |
| ELP6                                                                                            | 0,148078614 | 0,11176507  | 0,078 | 0,058 | 1         | 1,08054943    | 0,925455118     | 1,344827586     |
| ARHGDI1                                                                                         | 0,006785778 | 0,111738945 | 0,035 | 0,014 | 1         | 1,080529863   | 0,925471877     | 2,5             |
| RAP2C                                                                                           | 0,192007181 | 0,111647055 | 0,075 | 0,057 | 1         | 1,080461043   | 0,925530825     | 1,315789474     |
| RNF182                                                                                          | 0,006623415 | 0,111637794 | 0,016 | 0,003 | 1         | 1,080454107   | 0,925536766     | 5,333333333     |
| COLGALT1                                                                                        | 0,755181483 | 0,111557624 | 0,083 | 0,077 | 1         | 1,080394068   | 0,925588199     | 1,077922078     |
| PCNX4                                                                                           | 0,702436888 | 0,111529106 | 0,079 | 0,073 | 1         | 1,080372712   | 0,925606496     | 1,082191781     |
| APOC2                                                                                           | 0,003541582 | 0,111521379 | 0,065 | 0,033 | 1         | 1,080366926   | 0,925611453     | 1,96969697      |
| CLSPN                                                                                           | 0,042738922 | 0,111402767 | 0,024 | 0,011 | 1         | 1,080278107   | 0,925687556     | 2,181818182     |
| ARL15                                                                                           | 0,322650301 | 0,111391624 | 0,028 | 0,02  | 1         | 1,080269763   | 0,925694706     | 1,4             |
| ALG3                                                                                            | 0,000178667 | 0,111389819 | 0,071 | 0,028 | 1         | 1,080268411   | 0,925695864     | 2,535714286     |
| CSTF3                                                                                           | 0,802972853 | 0,111358161 | 0,056 | 0,053 | 1         | 1,080244706   | 0,925716177     | 1,056603774     |
| SLITRK6                                                                                         | 0,533311512 | 0,11132064  | 0,219 | 0,202 | 1         | 1,080216612   | 0,925740253     | 1,084158416     |

Supplementary Table 5

| Differentially expressed genes_total calculation_ comparing SC-Keloid vs. (SC-Myel, SC-Nonmyel) |             |             |       |       |           |               |                 |                 |
|-------------------------------------------------------------------------------------------------|-------------|-------------|-------|-------|-----------|---------------|-----------------|-----------------|
| gene                                                                                            | p_val       | avg_log2FC  | pct.1 | pct.2 | p_val_adj | Foldchange_UP | Foldchange_DOWN | Ratio_pct1_pct2 |
| ZBED4                                                                                           | 0,133142708 | 0,111288652 | 0,04  | 0,026 | 1         | 1,080192661   | 0,92576078      | 1,538461538     |
| AGPAT4                                                                                          | 0,05529101  | 0,111272477 | 0,075 | 0,05  | 1         | 1,08018055    | 0,925771159     | 1,5             |
| UBA6-DT                                                                                         | 0,019204571 | 0,111245499 | 0,037 | 0,018 | 1         | 1,080160352   | 0,92578847      | 2,055555556     |
| METTL21A                                                                                        | 0,023071139 | 0,111117296 | 0,057 | 0,033 | 1         | 1,080064369   | 0,925870743     | 1,727272727     |
| MAPKAPK3                                                                                        | 0,000379144 | 0,111055175 | 0,047 | 0,015 | 1         | 1,080017864   | 0,925910611     | 3,133333333     |
| ACAT2                                                                                           | 0,745301438 | 0,110924208 | 0,069 | 0,064 | 1         | 1,079919824   | 0,925994669     | 1,078125        |
| NDUFA7                                                                                          | 0,036055413 | 0,110832526 | 0,133 | 0,095 | 1         | 1,079851199   | 0,926053517     | 1,4             |
| CASP6                                                                                           | 0,036616695 | 0,110815416 | 0,038 | 0,02  | 1         | 1,079838392   | 0,926064499     | 1,9             |
| VPS33A                                                                                          | 0,137508922 | 0,110756159 | 0,029 | 0,018 | 1         | 1,07979404    | 0,926102537     | 1,611111111     |
| ZBTB41                                                                                          | 0,951453458 | 0,110637182 | 0,065 | 0,064 | 1         | 1,079704995   | 0,926178914     | 1,015625        |
| RWDD2A                                                                                          | 0,005374741 | 0,110515454 | 0,031 | 0,011 | 1         | 1,079613898   | 0,926257065     | 2,818181818     |
| MYL5                                                                                            | 0,016203738 | 0,110464347 | 0,051 | 0,027 | 1         | 1,079575654   | 0,926289877     | 1,888888889     |
| ING4                                                                                            | 0,468078013 | 0,110400513 | 0,065 | 0,056 | 1         | 1,079527887   | 0,926330863     | 1,160714286     |
| LMO4                                                                                            | 0,020092545 | 0,110318572 | 0,393 | 0,479 | 1         | 1,079466575   | 0,926383478     | 0,82045929      |
| UBE2T                                                                                           | 0,003656724 | 0,110048231 | 0,033 | 0,011 | 1         | 1,079264317   | 0,926557085     | 3               |
| ANKFY1                                                                                          | 0,095928019 | 0,110044533 | 0,078 | 0,056 | 1         | 1,079261551   | 0,92655946      | 1,392857143     |
| PGD                                                                                             | 0,032552036 | 0,109976044 | 0,078 | 0,05  | 1         | 1,079210316   | 0,926603448     | 1,56            |
| ATP6AP1                                                                                         | 0,148352989 | 0,109854289 | 0,175 | 0,198 | 1         | 1,079119241   | 0,926681651     | 0,883838384     |
| POLR1A                                                                                          | 0,01158663  | 0,109852996 | 0,027 | 0,009 | 1         | 1,079118273   | 0,926682482     | 3               |
| MCM4                                                                                            | 0,015464769 | 0,109798349 | 0,048 | 0,024 | 1         | 1,079077399   | 0,926717584     | 2               |
| UBL7-DT                                                                                         | 0,152700786 | 0,109572902 | 0,027 | 0,016 | 1         | 1,078908787   | 0,926862412     | 1,6875          |
| PRPF4                                                                                           | 0,110847826 | 0,109562272 | 0,049 | 0,033 | 1         | 1,078900838   | 0,92686924      | 1,484848485     |
| GFPT1                                                                                           | 0,923654435 | 0,109493216 | 0,09  | 0,087 | 1         | 1,078849196   | 0,926913607     | 1,034482759     |
| NUDT2                                                                                           | 0,032646499 | 0,109351675 | 0,081 | 0,053 | 1         | 1,078743357   | 0,92700455      | 1,528301887     |
| NUP155                                                                                          | 0,345444036 | 0,10925834  | 0,024 | 0,018 | 1         | 1,07867357    | 0,927064524     | 1,333333333     |
| C3orf14                                                                                         | 0,000401523 | 0,109224181 | 0,09  | 0,043 | 1         | 1,07864803    | 0,927086475     | 2,093023256     |
| AKIP1                                                                                           | 0,066297091 | 0,109201946 | 0,057 | 0,037 | 1         | 1,078631406   | 0,927100764     | 1,540540541     |
| DPH6                                                                                            | 0,414846941 | 0,109188117 | 0,052 | 0,043 | 1         | 1,078621067   | 0,92710965      | 1,209302326     |
| TSR1                                                                                            | 0,191290127 | 0,109130037 | 0,052 | 0,038 | 1         | 1,078577645   | 0,927146974     | 1,368421053     |
| TLCD5                                                                                           | 0,634245736 | 0,109097684 | 0,033 | 0,037 | 1         | 1,078553458   | 0,927167766     | 0,891891892     |

Supplementary Table 5

| Differentially expressed genes_total calculation_ comparing SC-Keloid vs. (SC-Myel, SC-Nonmyel) |             |             |       |       |           |               |                 |                 |
|-------------------------------------------------------------------------------------------------|-------------|-------------|-------|-------|-----------|---------------|-----------------|-----------------|
| gene                                                                                            | p_val       | avg_log2FC  | pct.1 | pct.2 | p_val_adj | Foldchange_UP | Foldchange_DOWN | Ratio_pct1_pct2 |
| ABHD18                                                                                          | 0,155019618 | 0,109059937 | 0,023 | 0,014 | 1         | 1,078525238   | 0,927192025     | 1,642857143     |
| RAC2                                                                                            | 0,000288167 | 0,108963861 | 0,024 | 0,003 | 1         | 1,078453416   | 0,927253774     | 8               |
| CCDC74A                                                                                         | 0,000640958 | 0,10892654  | 0,028 | 0,005 | 1         | 1,078425519   | 0,927277761     | 5,6             |
| ZNF780A                                                                                         | 0,532931953 | 0,108900929 | 0,017 | 0,014 | 1         | 1,078406374   | 0,927294222     | 1,214285714     |
| MAFG-DT                                                                                         | 0,025530206 | 0,108831066 | 0,022 | 0,008 | 1         | 1,078354153   | 0,927339128     | 2,75            |
| RIOX2                                                                                           | 0,093184337 | 0,1088098   | 0,04  | 0,024 | 1         | 1,078338258   | 0,927352798     | 1,666666667     |
| GRPEL2                                                                                          | 0,293337224 | 0,108780761 | 0,022 | 0,015 | 1         | 1,078316553   | 0,927371464     | 1,466666667     |
| BBS10                                                                                           | 0,490887934 | 0,108667156 | 0,021 | 0,016 | 1         | 1,078231644   | 0,927444493     | 1,3125          |
| KDM1B                                                                                           | 0,205366277 | 0,108431734 | 0,034 | 0,023 | 1         | 1,07805571    | 0,927595847     | 1,47826087      |
| XPNPEP3                                                                                         | 0,33048072  | 0,108208176 | 0,051 | 0,041 | 1         | 1,07788867    | 0,927739597     | 1,243902439     |
| YES1                                                                                            | 0,73390141  | 0,10798942  | 0,076 | 0,071 | 1         | 1,077725241   | 0,927880281     | 1,070422535     |
| ILRUN                                                                                           | 0,930489012 | 0,107806629 | 0,065 | 0,064 | 1         | 1,077588701   | 0,927997852     | 1,015625        |
| CFAP20DC                                                                                        | 0,000286992 | 0,107804291 | 0,024 | 0,003 | 1         | 1,077586955   | 0,927999356     | 8               |
| ACTR10                                                                                          | 0,793482512 | 0,107801629 | 0,214 | 0,21  | 1         | 1,077584966   | 0,928001068     | 1,019047619     |
| STXBP6                                                                                          | 0,008289488 | 0,107747019 | 0,094 | 0,057 | 1         | 1,077544177   | 0,928036196     | 1,649122807     |
| POGLUT1                                                                                         | 0,086050313 | 0,107708421 | 0,057 | 0,038 | 1         | 1,07751535    | 0,928061025     | 1,5             |
| UBE2F                                                                                           | 0,399610401 | 0,107630026 | 0,099 | 0,084 | 1         | 1,077456799   | 0,928111457     | 1,178571429     |
| PAIP1                                                                                           | 0,551129476 | 0,107563148 | 0,15  | 0,156 | 1         | 1,077406854   | 0,928154481     | 0,961538462     |
| KRT80                                                                                           | 0,000185232 | 0,107379367 | 0,026 | 0,003 | 1         | 1,077269615   | 0,928272724     | 8,666666667     |
| ZNF25                                                                                           | 0,600132134 | 0,107308241 | 0,052 | 0,046 | 1         | 1,077216506   | 0,92831849      | 1,130434783     |
| SIPA1L3                                                                                         | 0,019638829 | 0,107280821 | 0,037 | 0,018 | 1         | 1,077196033   | 0,928336134     | 2,055555556     |
| GOLGA7B                                                                                         | 0,000236556 | 0,107245266 | 0,028 | 0,004 | 1         | 1,077169486   | 0,928359013     | 7               |
| SEC23IP                                                                                         | 0,343999832 | 0,107216628 | 0,047 | 0,037 | 1         | 1,077148104   | 0,928377441     | 1,27027027      |
| ORA1                                                                                            | 0,343841756 | 0,107204379 | 0,137 | 0,117 | 1         | 1,077138958   | 0,928385324     | 1,170940171     |
| RUNX1T1                                                                                         | 0,276309732 | 0,107172381 | 0,026 | 0,018 | 1         | 1,077115068   | 0,928405915     | 1,444444444     |
| TOP3B                                                                                           | 0,080361671 | 0,107161908 | 0,031 | 0,018 | 1         | 1,077107249   | 0,928412655     | 1,722222222     |
| B4GALNT3                                                                                        | 0,003334029 | 0,107133093 | 0,056 | 0,026 | 1         | 1,077085736   | 0,928431198     | 2,153846154     |
| ZNF260                                                                                          | 0,51023314  | 0,107101637 | 0,052 | 0,045 | 1         | 1,077062252   | 0,928451441     | 1,155555556     |
| GFM1                                                                                            | 0,300643746 | 0,106979691 | 0,045 | 0,057 | 1         | 1,076971216   | 0,928529923     | 0,789473684     |
| KCNS3                                                                                           | 0,677185008 | 0,106906273 | 0,159 | 0,148 | 1         | 1,076916411   | 0,928577177     | 1,074324324     |



Supplementary Table 5

| Differentially expressed genes_total calculation_ comparing SC-Keloid vs. (SC-Myel, SC-Nonmyel) |             |             |       |       |           |               |                 |                 |
|-------------------------------------------------------------------------------------------------|-------------|-------------|-------|-------|-----------|---------------|-----------------|-----------------|
| gene                                                                                            | p_val       | avg_log2FC  | pct.1 | pct.2 | p_val_adj | Foldchange_UP | Foldchange_DOWN | Ratio_pct1_pct2 |
| EPB41L4A                                                                                        | 0,067898367 | 0,106853083 | 0,03  | 0,016 | 1         | 1,076876707   | 0,928611413     | 1,875           |
| P4HA3                                                                                           | 0,018035291 | 0,106601051 | 0,021 | 0,007 | 1         | 1,076688598   | 0,928773651     | 3               |
| CEP68                                                                                           | 0,69669161  | 0,106553498 | 0,041 | 0,045 | 1         | 1,076653109   | 0,928804265     | 0,911111111     |
| BLOC1S6                                                                                         | 0,017326707 | 0,106020762 | 0,171 | 0,217 | 1         | 1,076255613   | 0,929147303     | 0,788018433     |
| SLC16A4                                                                                         | 0,258306231 | 0,105842137 | 0,058 | 0,072 | 1         | 1,076122366   | 0,929262351     | 0,805555556     |
| LRRC40                                                                                          | 0,366290986 | 0,105811501 | 0,052 | 0,042 | 1         | 1,076099515   | 0,929282084     | 1,238095238     |
| HPRT1                                                                                           | 0,116081483 | 0,105727909 | 0,09  | 0,066 | 1         | 1,076037166   | 0,929335929     | 1,363636364     |
| CHMP6                                                                                           | 0,070666946 | 0,10570326  | 0,084 | 0,058 | 1         | 1,076018782   | 0,929351808     | 1,448275862     |
| IDH3B                                                                                           | 0,795455784 | 0,105661684 | 0,142 | 0,133 | 1         | 1,075987773   | 0,929378591     | 1,067669173     |
| SCO1                                                                                            | 0,004637205 | 0,105607428 | 0,052 | 0,024 | 1         | 1,075947309   | 0,929413543     | 2,166666667     |
| PFN2                                                                                            | 0,02977711  | 0,105601517 | 0,132 | 0,094 | 1         | 1,075942901   | 0,92941735      | 1,404255319     |
| TMEM177                                                                                         | 0,00055453  | 0,105594121 | 0,036 | 0,009 | 1         | 1,075937385   | 0,929422115     | 4               |
| ZNF626                                                                                          | 0,450011267 | 0,105530377 | 0,024 | 0,019 | 1         | 1,075889846   | 0,929463182     | 1,263157895     |
| MTIF2                                                                                           | 0,052630902 | 0,105505887 | 0,048 | 0,028 | 1         | 1,075871583   | 0,92947896      | 1,714285714     |
| LRRC27                                                                                          | 0,079528275 | 0,10548285  | 0,028 | 0,015 | 1         | 1,075854404   | 0,929493802     | 1,866666667     |
| STYXL1                                                                                          | 0,000998094 | 0,105444661 | 0,05  | 0,019 | 1         | 1,075825926   | 0,929518406     | 2,631578947     |
| TUFM                                                                                            | 0,301584259 | 0,105439156 | 0,242 | 0,265 | 1         | 1,075821821   | 0,929521953     | 0,913207547     |
| EXOSC9                                                                                          | 0,176511022 | 0,105319172 | 0,073 | 0,056 | 1         | 1,075732352   | 0,929599261     | 1,303571429     |
| ZFP69B                                                                                          | 0,061696105 | 0,105304788 | 0,013 | 0,004 | 1         | 1,075721626   | 0,92960853      | 3,25            |
| PBRM1                                                                                           | 0,1292664   | 0,105287336 | 0,173 | 0,201 | 1         | 1,075708614   | 0,929619775     | 0,860696517     |
| REEP4                                                                                           | 0,64473591  | 0,105249161 | 0,027 | 0,023 | 1         | 1,07568015    | 0,929644374     | 1,173913043     |
| ATF7                                                                                            | 0,893507086 | 0,105239874 | 0,102 | 0,103 | 1         | 1,075673226   | 0,929650359     | 0,990291262     |
| ANKRD35                                                                                         | 0,139186321 | 0,105235229 | 0,01  | 0,004 | 1         | 1,075669762   | 0,929653352     | 2,5             |
| ARF4                                                                                            | 0,019433328 | 0,105214605 | 0,326 | 0,41  | 1         | 1,075654385   | 0,929666642     | 0,795121951     |
| LAMB2                                                                                           | 0,97165555  | 0,105214065 | 0,186 | 0,182 | 1         | 1,075653982   | 0,92966699      | 1,021978022     |
| PTCD2                                                                                           | 0,144542918 | 0,105181378 | 0,016 | 0,008 | 1         | 1,075629612   | 0,929688053     | 2               |
| BTBD1                                                                                           | 0,251255589 | 0,10506797  | 0,076 | 0,06  | 1         | 1,075545061   | 0,929761138     | 1,266666667     |
| NRSN2                                                                                           | 0,018474101 | 0,104945765 | 0,062 | 0,035 | 1         | 1,075453961   | 0,929839897     | 1,771428571     |
| CLEC11A                                                                                         | 0,758472139 | 0,104899315 | 0,137 | 0,13  | 1         | 1,075419335   | 0,929869836     | 1,053846154     |
| LENG8                                                                                           | 0,157337876 | 0,10487797  | 0,135 | 0,161 | 1         | 1,075403424   | 0,929883593     | 0,838509317     |

Supplementary Table 5

| Differentially expressed genes_total calculation_ comparing SC-Keloid vs. (SC-Myel, SC-Nonmyel) |             |             |       |       |             |               |                 |                 |
|-------------------------------------------------------------------------------------------------|-------------|-------------|-------|-------|-------------|---------------|-----------------|-----------------|
| gene                                                                                            | p_val       | avg_log2FC  | pct.1 | pct.2 | p_val_adj   | Foldchange_UP | Foldchange_DOWN | Ratio_pct1_pct2 |
| SUDS3                                                                                           | 0,057345659 | 0,104865254 | 0,101 | 0,13  | 1           | 1,075393945   | 0,929891789     | 0,776923077     |
| FLYWCH2                                                                                         | 0,36237942  | 0,104840029 | 0,135 | 0,115 | 1           | 1,075375143   | 0,929908048     | 1,173913043     |
| IMPACT                                                                                          | 0,54386605  | 0,104826239 | 0,08  | 0,071 | 1           | 1,075364864   | 0,929916937     | 1,126760563     |
| FAM78B                                                                                          | 0,065038491 | 0,10471614  | 0,05  | 0,031 | 1           | 1,0752828     | 0,929987906     | 1,612903226     |
| PLAT                                                                                            | 0,133074593 | 0,104679357 | 0,416 | 0,503 | 1           | 1,075255385   | 0,930011618     | 0,827037773     |
| TRIP11                                                                                          | 0,807475177 | 0,104639399 | 0,133 | 0,134 | 1           | 1,075225605   | 0,930037376     | 0,992537313     |
| BRD9                                                                                            | 0,502154297 | 0,104622402 | 0,126 | 0,111 | 1           | 1,075212937   | 0,930048333     | 1,135135135     |
| HSPA13                                                                                          | 0,614556004 | 0,104562099 | 0,155 | 0,159 | 1           | 1,075167996   | 0,930087209     | 0,974842767     |
| WDR54                                                                                           | 0,005942895 | 0,104552777 | 0,069 | 0,037 | 1           | 1,075161048   | 0,930093219     | 1,864864865     |
| SOX5                                                                                            | 0,730709802 | 0,104505978 | 0,109 | 0,114 | 1           | 1,075126172   | 0,93012339      | 0,956140351     |
| PLEK2                                                                                           | 3,25798E-05 | 0,10448466  | 0,027 | 0,001 | 0,687466042 | 1,075110285   | 0,930137135     | 27              |
| DCTN4                                                                                           | 0,4211494   | 0,104416187 | 0,054 | 0,062 | 1           | 1,07505926    | 0,930181282     | 0,870967742     |
| MUS81                                                                                           | 0,35422475  | 0,104399034 | 0,076 | 0,062 | 1           | 1,075046478   | 0,930192341     | 1,225806452     |
| EPS15                                                                                           | 0,403706979 | 0,104347374 | 0,115 | 0,126 | 1           | 1,075007983   | 0,93022565      | 0,912698413     |
| ZNF7                                                                                            | 0,43611589  | 0,104317952 | 0,043 | 0,035 | 1           | 1,07498606    | 0,930244621     | 1,228571429     |
| E2F3                                                                                            | 0,558047933 | 0,104242855 | 0,029 | 0,024 | 1           | 1,074930105   | 0,930293045     | 1,208333333     |
| RARRES1                                                                                         | 0,480464091 | 0,104237978 | 0,012 | 0,008 | 1           | 1,074926471   | 0,930296189     | 1,5             |
| DHCR7                                                                                           | 0,00051324  | 0,104014275 | 0,02  | 0,001 | 1           | 1,074759807   | 0,930440451     | 20              |
| METTL14                                                                                         | 0,477356067 | 0,103897359 | 0,034 | 0,041 | 1           | 1,074672712   | 0,930515857     | 0,829268293     |
| SULF1                                                                                           | 0,006343897 | 0,103756322 | 0,037 | 0,015 | 1           | 1,074567658   | 0,930606828     | 2,466666667     |
| ELOVL1                                                                                          | 0,001452497 | 0,103751903 | 0,115 | 0,066 | 1           | 1,074564367   | 0,930609678     | 1,742424242     |
| MED19                                                                                           | 0,830269823 | 0,103601639 | 0,078 | 0,08  | 1           | 1,074452451   | 0,930706612     | 0,975           |
| WDR83                                                                                           | 0,603560701 | 0,103517244 | 0,042 | 0,037 | 1           | 1,074389599   | 0,930761058     | 1,135135135     |
| COPA                                                                                            | 0,347470507 | 0,103513669 | 0,158 | 0,174 | 1           | 1,074386937   | 0,930763364     | 0,908045977     |
| NIN                                                                                             | 0,274175891 | 0,103438697 | 0,075 | 0,09  | 1           | 1,074331106   | 0,930811734     | 0,833333333     |
| PRR13                                                                                           | 0,104133909 | 0,10342575  | 0,095 | 0,071 | 1           | 1,074321465   | 0,930820087     | 1,338028169     |
| DUSP12                                                                                          | 0,477493383 | 0,103242939 | 0,08  | 0,069 | 1           | 1,074185341   | 0,930938044     | 1,15942029      |
| TAF2                                                                                            | 0,620520394 | 0,103208158 | 0,054 | 0,047 | 1           | 1,074159445   | 0,930960487     | 1,14893617      |
| LRRC45                                                                                          | 0,034036225 | 0,103202122 | 0,041 | 0,022 | 1           | 1,07415495    | 0,930964383     | 1,863636364     |
| SELENOF                                                                                         | 0,005147825 | 0,10311369  | 0,307 | 0,395 | 1           | 1,07408911    | 0,931021449     | 0,77721519      |

Supplementary Table 5

| Differentially expressed genes_total calculation_ comparing SC-Keloid vs. (SC-Myel, SC-Nonmyel) |             |             |       |       |           |               |                 |                 |
|-------------------------------------------------------------------------------------------------|-------------|-------------|-------|-------|-----------|---------------|-----------------|-----------------|
| gene                                                                                            | p_val       | avg_log2FC  | pct.1 | pct.2 | p_val_adj | Foldchange_UP | Foldchange_DOWN | Ratio_pct1_pct2 |
| MDC1                                                                                            | 0,389370776 | 0,103090287 | 0,036 | 0,028 | 1         | 1,074071688   | 0,931036551     | 1,285714286     |
| CYFIP1                                                                                          | 0,487620687 | 0,103044942 | 0,108 | 0,118 | 1         | 1,074037929   | 0,931065815     | 0,915254237     |
| IPP                                                                                             | 0,57003857  | 0,103031459 | 0,035 | 0,03  | 1         | 1,074027891   | 0,931074517     | 1,166666667     |
| SHARPIN                                                                                         | 0,201660943 | 0,103016269 | 0,129 | 0,104 | 1         | 1,074016583   | 0,93108432      | 1,240384615     |
| RPL13                                                                                           | 0,065449437 | 0,102996221 | 0,863 | 0,946 | 1         | 1,074001658   | 0,931097259     | 0,912262156     |
| SLC35F2                                                                                         | 0,038513743 | 0,102918216 | 0,019 | 0,007 | 1         | 1,07394359    | 0,931147604     | 2,714285714     |
| ZNF765                                                                                          | 0,055769227 | 0,102872946 | 0,017 | 0,007 | 1         | 1,073909891   | 0,931176822     | 2,428571429     |
| GEN1                                                                                            | 0,092426252 | 0,102809389 | 0,02  | 0,009 | 1         | 1,073862582   | 0,931217845     | 2,222222222     |
| APEH                                                                                            | 0,002544735 | 0,102619126 | 0,08  | 0,042 | 1         | 1,07372097    | 0,931340663     | 1,904761905     |
| UMPS                                                                                            | 0,009211063 | 0,102542765 | 0,036 | 0,015 | 1         | 1,07366414    | 0,931389959     | 2,4             |
| ISCA2                                                                                           | 0,91176207  | 0,102539497 | 0,055 | 0,053 | 1         | 1,073661708   | 0,931392069     | 1,037735849     |
| PRLR                                                                                            | 0,111520552 | 0,102441005 | 0,065 | 0,046 | 1         | 1,073588412   | 0,931455657     | 1,413043478     |
| HIF1AN                                                                                          | 0,153952199 | 0,102396473 | 0,03  | 0,019 | 1         | 1,073555274   | 0,931484409     | 1,578947368     |
| TMED10                                                                                          | 0,000502947 | 0,102390165 | 0,384 | 0,513 | 1         | 1,07355058    | 0,931488482     | 0,748538012     |
| EPB41                                                                                           | 0,153372101 | 0,102329068 | 0,03  | 0,019 | 1         | 1,073505117   | 0,93152793      | 1,578947368     |
| DZIP1L                                                                                          | 0,689609423 | 0,102312758 | 0,023 | 0,02  | 1         | 1,073492981   | 0,931538462     | 1,15            |
| TAF9                                                                                            | 0,163741102 | 0,102196042 | 0,126 | 0,1   | 1         | 1,073406137   | 0,931613828     | 1,26            |
| TRAF3IP2                                                                                        | 0,025272967 | 0,102161781 | 0,013 | 0,003 | 1         | 1,073380647   | 0,931635951     | 4,333333333     |
| VPS39                                                                                           | 0,168051174 | 0,102057136 | 0,051 | 0,037 | 1         | 1,073302792   | 0,93170353      | 1,378378378     |
| CAMK1D                                                                                          | 0,009263499 | 0,101987347 | 0,065 | 0,035 | 1         | 1,073250873   | 0,931748601     | 1,857142857     |
| FTX                                                                                             | 0,336667152 | 0,101947802 | 0,1   | 0,115 | 1         | 1,073221455   | 0,931774141     | 0,869565217     |
| NAT10                                                                                           | 0,205635425 | 0,101932407 | 0,034 | 0,023 | 1         | 1,073210003   | 0,931784084     | 1,47826087      |
| GLO1                                                                                            | 0,69471182  | 0,101858793 | 0,163 | 0,164 | 1         | 1,073155244   | 0,93183163      | 0,993902439     |
| NLGN4Y                                                                                          | 0,005346706 | 0,101845081 | 0,01  | 0     | 1         | 1,073145044   | 0,931840486     | #DIV/0!         |
| UQCRFS1                                                                                         | 0,893116665 | 0,101801251 | 0,151 | 0,144 | 1         | 1,073112442   | 0,931868797     | 1,048611111     |
| ASB7                                                                                            | 0,223309899 | 0,101799068 | 0,027 | 0,018 | 1         | 1,073110818   | 0,931870207     | 1,5             |
| SYCE1L                                                                                          | 0,000285822 | 0,10176773  | 0,024 | 0,003 | 1         | 1,073087508   | 0,931890449     | 8               |
| HMGXB3                                                                                          | 0,583547872 | 0,101747793 | 0,092 | 0,083 | 1         | 1,073072679   | 0,931903327     | 1,108433735     |
| ARHGAP42                                                                                        | 0,394504715 | 0,101742548 | 0,076 | 0,064 | 1         | 1,073068778   | 0,931906715     | 1,1875          |
| VRK2                                                                                            | 0,131249228 | 0,101566855 | 0,04  | 0,026 | 1         | 1,072938107   | 0,932020211     | 1,538461538     |

Supplementary Table 5

| Differentially expressed genes_total calculation_ comparing SC-Keloid vs. (SC-Myel, SC-Nonmyel) |             |             |       |       |             |               |                 |                 |
|-------------------------------------------------------------------------------------------------|-------------|-------------|-------|-------|-------------|---------------|-----------------|-----------------|
| gene                                                                                            | p_val       | avg_log2FC  | pct.1 | pct.2 | p_val_adj   | Foldchange_UP | Foldchange_DOWN | Ratio_pct1_pct2 |
| ASNS                                                                                            | 0,005501391 | 0,101527646 | 0,042 | 0,018 | 1           | 1,072908947   | 0,932045541     | 2,333333333     |
| ADAT1                                                                                           | 0,29610486  | 0,101479805 | 0,035 | 0,026 | 1           | 1,072873369   | 0,932076449     | 1,346153846     |
| RAB8A                                                                                           | 0,569846922 | 0,101464927 | 0,1   | 0,09  | 1           | 1,072862305   | 0,932086061     | 1,111111111     |
| TRIM14                                                                                          | 0,005452289 | 0,101447299 | 0,05  | 0,023 | 1           | 1,072849196   | 0,93209745      | 2,173913043     |
| ERG28                                                                                           | 0,023992115 | 0,101391536 | 0,068 | 0,041 | 1           | 1,072807729   | 0,932133478     | 1,658536585     |
| HGSNAT                                                                                          | 0,914247778 | 0,101281614 | 0,114 | 0,11  | 1           | 1,072725993   | 0,932204502     | 1,036363636     |
| INPPL1                                                                                          | 0,062877699 | 0,101242748 | 0,099 | 0,071 | 1           | 1,072697094   | 0,932229616     | 1,394366197     |
| CSMD2                                                                                           | 0,013571373 | 0,101228081 | 0,033 | 0,014 | 1           | 1,072686189   | 0,932239093     | 2,357142857     |
| RNH1                                                                                            | 0,021692782 | 0,101226493 | 0,298 | 0,364 | 1           | 1,072685007   | 0,93224012      | 0,818681319     |
| ARSI                                                                                            | 0,009048836 | 0,101200593 | 0,044 | 0,02  | 1           | 1,072665751   | 0,932256856     | 2,2             |
| DDX10                                                                                           | 0,638791241 | 0,10119072  | 0,062 | 0,056 | 1           | 1,07265841    | 0,932263236     | 1,107142857     |
| SETD4                                                                                           | 0,541236089 | 0,101159932 | 0,044 | 0,038 | 1           | 1,072635519   | 0,932283131     | 1,157894737     |
| GTF2E2                                                                                          | 0,998946153 | 0,101156123 | 0,075 | 0,073 | 1           | 1,072632687   | 0,932285593     | 1,02739726      |
| TRADD                                                                                           | 4,6496E-05  | 0,10114245  | 0,083 | 0,033 | 0,981112377 | 1,072622521   | 0,932294428     | 2,515151515     |
| C6orf47                                                                                         | 0,011661239 | 0,100861513 | 0,037 | 0,016 | 1           | 1,072413669   | 0,932475992     | 2,3125          |
| ASS1                                                                                            | 0,007869743 | 0,100788493 | 0,021 | 0,005 | 1           | 1,072359391   | 0,932523189     | 4,2             |
| ARL6                                                                                            | 0,000289938 | 0,100596784 | 0,024 | 0,003 | 1           | 1,072216903   | 0,932647114     | 8               |
| C1orf53                                                                                         | 0,003314026 | 0,100583737 | 0,012 | 0     | 1           | 1,072207207   | 0,932655548     | #DIV/0!         |
| ANKRD6                                                                                          | 0,006537357 | 0,10055294  | 0,057 | 0,028 | 1           | 1,072184319   | 0,932675457     | 2,035714286     |
| TEFM                                                                                            | 0,901676874 | 0,100474529 | 0,034 | 0,033 | 1           | 1,072126047   | 0,93272615      | 1,03030303      |
| COX15                                                                                           | 0,586780533 | 0,100355037 | 0,042 | 0,037 | 1           | 1,072037251   | 0,932803407     | 1,135135135     |
| VKORC1L1                                                                                        | 0,981566863 | 0,100319419 | 0,085 | 0,083 | 1           | 1,072010784   | 0,932826437     | 1,024096386     |
| DDX54                                                                                           | 0,131931133 | 0,100301443 | 0,083 | 0,061 | 1           | 1,071997427   | 0,93283806      | 1,360655738     |
| APOOL                                                                                           | 0,668182186 | 0,100231277 | 0,047 | 0,042 | 1           | 1,071945291   | 0,93288343      | 1,119047619     |
| MYD88                                                                                           | 0,011039695 | 0,100222474 | 0,029 | 0,011 | 1           | 1,07193875    | 0,932889122     | 2,636363636     |
| TRAF7                                                                                           | 0,967113633 | 0,100220393 | 0,078 | 0,076 | 1           | 1,071937204   | 0,932890468     | 1,026315789     |
| PPP2R1A                                                                                         | 0,428936543 | 0,100200148 | 0,178 | 0,157 | 1           | 1,071922162   | 0,932903559     | 1,133757962     |
| FAM216A                                                                                         | 0,098268762 | 0,100173481 | 0,023 | 0,012 | 1           | 1,071902348   | 0,932920803     | 1,916666667     |
| STK19                                                                                           | 0,077089067 | 0,100094293 | 0,073 | 0,05  | 1           | 1,071843515   | 0,932972012     | 1,46            |
| HLA-B                                                                                           | 0,977179204 | 0,100066725 | 0,619 | 0,765 | 1           | 1,071823033   | 0,93298984      | 0,809150327     |

Supplementary Table 5

| Differentially expressed genes_total calculation_ comparing SC-Keloid vs. (SC-Myel, SC-Nonmyel) |             |             |       |       |             |               |                 |                 |
|-------------------------------------------------------------------------------------------------|-------------|-------------|-------|-------|-------------|---------------|-----------------|-----------------|
| gene                                                                                            | p_val       | avg_log2FC  | pct.1 | pct.2 | p_val_adj   | Foldchange_UP | Foldchange_DOWN | Ratio_pct1_pct2 |
| PKP1                                                                                            | 8,32111E-07 | 0,100035652 | 0,068 | 0,016 | 0,017558382 | 1,071799948   | 0,933009935     | 4,25            |
| ETV2                                                                                            | 0,001109841 | 0,099994685 | 0,021 | 0,003 | 1           | 1,071769514   | 0,933036429     | 7               |
| PIP5K1C                                                                                         | 0,180866523 | 0,099850671 | 0,056 | 0,041 | 1           | 1,071662532   | 0,933129572     | 1,365853659     |
| BOLA3-AS1                                                                                       | 0,398655599 | 0,099812906 | 0,022 | 0,016 | 1           | 1,07163448    | 0,933153998     | 1,375           |
| ZNF641                                                                                          | 0,542510154 | 0,099712932 | 0,028 | 0,023 | 1           | 1,071560222   | 0,933218665     | 1,217391304     |
| ACP2                                                                                            | 0,030829231 | 0,099575555 | 0,043 | 0,023 | 1           | 1,07145819    | 0,933307533     | 1,869565217     |
| PIGF                                                                                            | 0,702069315 | 0,09955511  | 0,095 | 0,099 | 1           | 1,071443006   | 0,933320759     | 0,95959596      |
| PI4KA                                                                                           | 0,811122788 | 0,099533324 | 0,051 | 0,053 | 1           | 1,071426826   | 0,933334854     | 0,962264151     |
| DTX3L                                                                                           | 0,582831434 | 0,09946186  | 0,043 | 0,049 | 1           | 1,071373755   | 0,933381087     | 0,87755102      |
| RBCK1                                                                                           | 0,136362805 | 0,099454458 | 0,149 | 0,118 | 1           | 1,071368258   | 0,933385876     | 1,262711864     |
| PMPCB                                                                                           | 0,933211699 | 0,099419725 | 0,115 | 0,111 | 1           | 1,071342465   | 0,933408348     | 1,036036036     |
| DNAJC24                                                                                         | 0,361583416 | 0,099404794 | 0,075 | 0,085 | 1           | 1,071331377   | 0,933418008     | 0,882352941     |
| SGCB                                                                                            | 0,080885487 | 0,099396404 | 0,286 | 0,332 | 1           | 1,071325147   | 0,933423436     | 0,861445783     |
| DACT1                                                                                           | 0,114960097 | 0,09939613  | 0,045 | 0,03  | 1           | 1,071324943   | 0,933423614     | 1,5             |
| TP53                                                                                            | 0,194038035 | 0,099238794 | 0,093 | 0,073 | 1           | 1,071208114   | 0,933525416     | 1,273972603     |
| RTL6                                                                                            | 0,031320844 | 0,099127691 | 0,037 | 0,019 | 1           | 1,071125623   | 0,93359731      | 1,947368421     |
| ELAVL1                                                                                          | 0,486446421 | 0,098885023 | 0,156 | 0,14  | 1           | 1,07094547    | 0,933754359     | 1,114285714     |
| DHX32                                                                                           | 0,19959156  | 0,098773388 | 0,045 | 0,033 | 1           | 1,070862604   | 0,933826615     | 1,363636364     |
| RHNO1                                                                                           | 0,001231666 | 0,098686207 | 0,036 | 0,011 | 1           | 1,070797894   | 0,933883047     | 3,272727273     |
| BMS1                                                                                            | 0,178704424 | 0,098679291 | 0,087 | 0,068 | 1           | 1,070792761   | 0,933887523     | 1,279411765     |
| MAGED1                                                                                          | 0,111008892 | 0,098602519 | 0,127 | 0,098 | 1           | 1,070735781   | 0,933937221     | 1,295918367     |
| MGAT2                                                                                           | 0,000399754 | 0,098583275 | 0,047 | 0,015 | 1           | 1,070721499   | 0,933949679     | 3,133333333     |
| GFM2                                                                                            | 0,007787026 | 0,098563545 | 0,03  | 0,011 | 1           | 1,070706856   | 0,933962452     | 2,727272727     |
| CBL                                                                                             | 0,324949995 | 0,098551634 | 0,116 | 0,132 | 1           | 1,070698016   | 0,933970162     | 0,878787879     |
| AIP                                                                                             | 0,287705412 | 0,098544771 | 0,18  | 0,195 | 1           | 1,070692922   | 0,933974606     | 0,923076923     |
| SMARCD1                                                                                         | 0,216840227 | 0,09843419  | 0,055 | 0,041 | 1           | 1,070610858   | 0,934046196     | 1,341463415     |
| HEATR3                                                                                          | 0,061927005 | 0,098430422 | 0,033 | 0,018 | 1           | 1,070608062   | 0,934048636     | 1,833333333     |
| ZFP37                                                                                           | 0,018368385 | 0,098404766 | 0,019 | 0,005 | 1           | 1,070589023   | 0,934065247     | 3,8             |
| FUBP1                                                                                           | 0,098363789 | 0,098380177 | 0,132 | 0,16  | 1           | 1,070570776   | 0,934081167     | 0,825           |
| ILK                                                                                             | 0,814736302 | 0,098365938 | 0,235 | 0,237 | 1           | 1,07056021    | 0,934090386     | 0,991561181     |

Supplementary Table 5

| Differentially expressed genes_total calculation_ comparing SC-Keloid vs. (SC-Myel, SC-Nonmyel) |             |             |       |       |             |               |                 |                 |
|-------------------------------------------------------------------------------------------------|-------------|-------------|-------|-------|-------------|---------------|-----------------|-----------------|
| gene                                                                                            | p_val       | avg_log2FC  | pct.1 | pct.2 | p_val_adj   | Foldchange_UP | Foldchange_DOWN | Ratio_pct1_pct2 |
| ARFIP1                                                                                          | 0,491496313 | 0,098348473 | 0,122 | 0,132 | 1           | 1,070547251   | 0,934101694     | 0,924242424     |
| KEAP1                                                                                           | 0,062047169 | 0,098242369 | 0,071 | 0,047 | 1           | 1,070468519   | 0,934170395     | 1,510638298     |
| TIGAR                                                                                           | 0,157172539 | 0,098228208 | 0,045 | 0,031 | 1           | 1,070458012   | 0,934179565     | 1,451612903     |
| ZNF431                                                                                          | 0,647685374 | 0,098224781 | 0,052 | 0,047 | 1           | 1,070455469   | 0,934181784     | 1,106382979     |
| ZNF512                                                                                          | 0,50688595  | 0,098222341 | 0,036 | 0,03  | 1           | 1,070453659   | 0,934183364     | 1,2             |
| MBD3                                                                                            | 0,109175929 | 0,098022968 | 0,102 | 0,076 | 1           | 1,070305738   | 0,934312472     | 1,342105263     |
| HOGA1                                                                                           | 1,22515E-05 | 0,097955514 | 0,026 | 0     | 0,258519095 | 1,070255696   | 0,934356158     | #DIV/0!         |
| DTD1                                                                                            | 0,415885561 | 0,097911106 | 0,157 | 0,137 | 1           | 1,070222753   | 0,934384919     | 1,145985401     |
| DDA1                                                                                            | 0,024250146 | 0,097881988 | 0,119 | 0,081 | 1           | 1,070201153   | 0,934403778     | 1,469135802     |
| COA7                                                                                            | 0,406605176 | 0,097873963 | 0,014 | 0,009 | 1           | 1,0701952     | 0,934408975     | 1,555555556     |
| SLC7A6OS                                                                                        | 0,579698057 | 0,09775179  | 0,035 | 0,03  | 1           | 1,070104575   | 0,934488108     | 1,166666667     |
| TFDP2                                                                                           | 0,552017268 | 0,097709844 | 0,106 | 0,114 | 1           | 1,070073463   | 0,934515278     | 0,929824561     |
| ENAH                                                                                            | 0,007159945 | 0,097699848 | 0,055 | 0,027 | 1           | 1,070066048   | 0,934521754     | 2,037037037     |
| PMM1                                                                                            | 0,006177552 | 0,09767263  | 0,109 | 0,068 | 1           | 1,07004586    | 0,934539385     | 1,602941176     |
| XPO5                                                                                            | 0,167208561 | 0,097655972 | 0,035 | 0,023 | 1           | 1,070033506   | 0,934550175     | 1,52173913      |
| PNPT1                                                                                           | 0,514097515 | 0,097639255 | 0,073 | 0,064 | 1           | 1,070021107   | 0,934561004     | 1,140625        |
| VPS4B                                                                                           | 0,316614567 | 0,097631303 | 0,121 | 0,136 | 1           | 1,070015209   | 0,934566155     | 0,889705882     |
| ZNF568                                                                                          | 0,169276263 | 0,097616943 | 0,035 | 0,023 | 1           | 1,070004559   | 0,934575458     | 1,52173913      |
| LINC00665                                                                                       | 0,004936968 | 0,097578763 | 0,047 | 0,02  | 1           | 1,069976242   | 0,934600191     | 2,35            |
| DDX27                                                                                           | 0,942116643 | 0,097497008 | 0,106 | 0,104 | 1           | 1,06991561    | 0,934653154     | 1,019230769     |
| MPHOSPH10                                                                                       | 0,982548063 | 0,097473616 | 0,113 | 0,111 | 1           | 1,069898262   | 0,934668309     | 1,018018018     |
| SARS1                                                                                           | 0,046433847 | 0,097346602 | 0,2   | 0,239 | 1           | 1,069804074   | 0,9347506       | 0,836820084     |
| ELOVL6                                                                                          | 0,052245972 | 0,097324908 | 0,02  | 0,008 | 1           | 1,069787987   | 0,934764657     | 2,5             |
| MAPKAPK5                                                                                        | 0,274711633 | 0,097291113 | 0,07  | 0,056 | 1           | 1,069762927   | 0,934786554     | 1,25            |
| ELAVL4                                                                                          | 0,00019746  | 0,097205216 | 0,019 | 0     | 1           | 1,069699237   | 0,934842212     | #DIV/0!         |
| SND1                                                                                            | 0,446995431 | 0,097199199 | 0,13  | 0,14  | 1           | 1,069694775   | 0,934846111     | 0,928571429     |
| ZNF655                                                                                          | 0,52145071  | 0,097131758 | 0,092 | 0,081 | 1           | 1,069644771   | 0,934889813     | 1,135802469     |
| ANAPC4                                                                                          | 0,840972201 | 0,096901369 | 0,044 | 0,042 | 1           | 1,06947397    | 0,93503912      | 1,047619048     |
| ADGRA3                                                                                          | 0,33693501  | 0,096816469 | 0,033 | 0,024 | 1           | 1,069411035   | 0,935094148     | 1,375           |
| MUL1                                                                                            | 0,002420654 | 0,096770001 | 0,051 | 0,022 | 1           | 1,069376591   | 0,935124266     | 2,318181818     |

Supplementary Table 5

| Differentially expressed genes_total calculation_ comparing SC-Keloid vs. (SC-Myel, SC-Nonmyel) |             |             |       |       |             |               |                 |                 |
|-------------------------------------------------------------------------------------------------|-------------|-------------|-------|-------|-------------|---------------|-----------------|-----------------|
| gene                                                                                            | p_val       | avg_log2FC  | pct.1 | pct.2 | p_val_adj   | Foldchange_UP | Foldchange_DOWN | Ratio_pct1_pct2 |
| G6PC3                                                                                           | 0,009854454 | 0,096694621 | 0,09  | 0,054 | 1           | 1,069320718   | 0,935173127     | 1,666666667     |
| ALG14                                                                                           | 0,58028397  | 0,096627366 | 0,115 | 0,104 | 1           | 1,06927087    | 0,935216724     | 1,105769231     |
| PEX2                                                                                            | 0,808528292 | 0,096590157 | 0,109 | 0,111 | 1           | 1,069243293   | 0,935240844     | 0,981981982     |
| SPATA7                                                                                          | 0,22234535  | 0,096587137 | 0,027 | 0,018 | 1           | 1,069241054   | 0,935242803     | 1,5             |
| E2F7                                                                                            | 0,003788918 | 0,096420262 | 0,028 | 0,008 | 1           | 1,069117384   | 0,935350987     | 3,5             |
| PDRG1                                                                                           | 0,69307935  | 0,096411577 | 0,077 | 0,071 | 1           | 1,069110947   | 0,935356618     | 1,084507042     |
| TMEM241                                                                                         | 0,038152871 | 0,09638743  | 0,019 | 0,007 | 1           | 1,069093053   | 0,935372274     | 2,714285714     |
| ZNF599                                                                                          | 0,226872175 | 0,096345342 | 0,027 | 0,018 | 1           | 1,069061865   | 0,935399562     | 1,5             |
| PDHX                                                                                            | 0,137352685 | 0,096330817 | 0,033 | 0,02  | 1           | 1,069051101   | 0,93540898      | 1,65            |
| AZIN2                                                                                           | 0,07832437  | 0,096303849 | 0,063 | 0,042 | 1           | 1,069031118   | 0,935426465     | 1,5             |
| TMEM53                                                                                          | 9,19702E-05 | 0,096258168 | 0,036 | 0,007 | 1           | 1,06899727    | 0,935456084     | 5,142857143     |
| CDH11                                                                                           | 0,292274804 | 0,096248687 | 0,022 | 0,015 | 1           | 1,068990245   | 0,935462232     | 1,466666667     |
| ITGA7                                                                                           | 0,96655593  | 0,096152719 | 0,097 | 0,094 | 1           | 1,068919137   | 0,935524461     | 1,031914894     |
| M6PR                                                                                            | 0,54974001  | 0,096118119 | 0,116 | 0,104 | 1           | 1,068893502   | 0,935546898     | 1,115384615     |
| ZNF84                                                                                           | 0,423013196 | 0,096085506 | 0,037 | 0,03  | 1           | 1,068869339   | 0,935568047     | 1,233333333     |
| SS18L2                                                                                          | 0,912957481 | 0,09604     | 0,097 | 0,096 | 1           | 1,068835625   | 0,935597557     | 1,010416667     |
| CCNQ                                                                                            | 0,02307114  | 0,09603614  | 0,057 | 0,033 | 1           | 1,068832765   | 0,935600061     | 1,727272727     |
| B4GALT7                                                                                         | 6,01649E-06 | 0,095981385 | 0,09  | 0,033 | 0,126954014 | 1,0687922     | 0,935635571     | 2,727272727     |
| STK40                                                                                           | 0,701861599 | 0,095932734 | 0,071 | 0,065 | 1           | 1,068756159   | 0,935667123     | 1,092307692     |
| POMGNT2                                                                                         | 0,001194378 | 0,095921577 | 0,038 | 0,012 | 1           | 1,068747894   | 0,935674358     | 3,166666667     |
| EXOSC10                                                                                         | 0,354808057 | 0,095842947 | 0,105 | 0,118 | 1           | 1,068689646   | 0,935725356     | 0,889830508     |
| GNB5                                                                                            | 0,03792617  | 0,095831147 | 0,038 | 0,02  | 1           | 1,068680905   | 0,93573301      | 1,9             |
| STX18                                                                                           | 0,178969404 | 0,095794601 | 0,078 | 0,06  | 1           | 1,068653834   | 0,935756714     | 1,3             |
| RIPK1                                                                                           | 0,201294563 | 0,095787151 | 0,045 | 0,033 | 1           | 1,068648316   | 0,935761546     | 1,363636364     |
| C1GALT1C1                                                                                       | 0,044769592 | 0,095766745 | 0,098 | 0,068 | 1           | 1,0686332     | 0,935774782     | 1,441176471     |
| CNEP1R1                                                                                         | 0,724814865 | 0,095756129 | 0,03  | 0,027 | 1           | 1,068625337   | 0,935781668     | 1,111111111     |
| MAN1C1                                                                                          | 0,03224828  | 0,095746582 | 0,037 | 0,019 | 1           | 1,068618265   | 0,93578786      | 1,947368421     |
| BPNT2                                                                                           | 0,62975643  | 0,095664526 | 0,158 | 0,145 | 1           | 1,068557488   | 0,935841086     | 1,089655172     |
| CAPN5                                                                                           | 0,327529228 | 0,095607812 | 0,069 | 0,056 | 1           | 1,068515482   | 0,935877876     | 1,232142857     |
| TTN                                                                                             | 0,093058931 | 0,095581332 | 0,012 | 0,004 | 1           | 1,06849587    | 0,935895054     | 3               |

Supplementary Table 5

| Differentially expressed genes_total calculation_ comparing SC-Keloid vs. (SC-Myel, SC-Nonmyel) |             |             |       |       |           |               |                 |                 |
|-------------------------------------------------------------------------------------------------|-------------|-------------|-------|-------|-----------|---------------|-----------------|-----------------|
| gene                                                                                            | p_val       | avg_log2FC  | pct.1 | pct.2 | p_val_adj | Foldchange_UP | Foldchange_DOWN | Ratio_pct1_pct2 |
| B3GALT4                                                                                         | 0,018608799 | 0,095510213 | 0,049 | 0,026 | 1         | 1,068443199   | 0,935941191     | 1,884615385     |
| STARD4                                                                                          | 0,018368385 | 0,095489774 | 0,019 | 0,005 | 1         | 1,068428063   | 0,93595445      | 3,8             |
| STIM2                                                                                           | 0,83958388  | 0,095453004 | 0,054 | 0,056 | 1         | 1,068400832   | 0,935978305     | 0,964285714     |
| DDB1                                                                                            | 0,844795505 | 0,095330437 | 0,146 | 0,145 | 1         | 1,068310067   | 0,936057827     | 1,006896552     |
| NT5C3A                                                                                          | 0,261413422 | 0,095308426 | 0,112 | 0,129 | 1         | 1,068293769   | 0,936072108     | 0,868217054     |
| NPEPL1                                                                                          | 0,207400332 | 0,095284943 | 0,106 | 0,084 | 1         | 1,06827638    | 0,936087345     | 1,261904762     |
| SPTLC1                                                                                          | 0,363346348 | 0,095235921 | 0,123 | 0,137 | 1         | 1,068240081   | 0,936119153     | 0,897810219     |
| GORAB                                                                                           | 0,047098108 | 0,095160396 | 0,047 | 0,027 | 1         | 1,06818416    | 0,93616816      | 1,740740741     |
| IFITM10                                                                                         | 0,00115594  | 0,095105002 | 0,043 | 0,015 | 1         | 1,068143146   | 0,936204106     | 2,866666667     |
| YIF1B                                                                                           | 0,021518256 | 0,095104767 | 0,087 | 0,056 | 1         | 1,068142973   | 0,936204259     | 1,553571429     |
| RAB15                                                                                           | 0,005346706 | 0,095067793 | 0,01  | 0     | 1         | 1,068115598   | 0,936228253     | #DIV/0!         |
| CEBPZOS                                                                                         | 0,783814384 | 0,094984167 | 0,098 | 0,092 | 1         | 1,068053686   | 0,936282523     | 1,065217391     |
| FASTKD2                                                                                         | 0,923226851 | 0,094917556 | 0,037 | 0,038 | 1         | 1,068004374   | 0,936325753     | 0,973684211     |
| OPA1                                                                                            | 0,668509489 | 0,094856879 | 0,069 | 0,062 | 1         | 1,067959457   | 0,936365134     | 1,112903226     |
| ANO8                                                                                            | 0,720211211 | 0,09481547  | 0,024 | 0,022 | 1         | 1,067928804   | 0,936392011     | 1,090909091     |
| CETN2                                                                                           | 0,047691057 | 0,094798915 | 0,12  | 0,085 | 1         | 1,06791655    | 0,936402756     | 1,411764706     |
| MON1A                                                                                           | 0,157312862 | 0,09478817  | 0,027 | 0,016 | 1         | 1,067908596   | 0,93640973      | 1,6875          |
| THUMPD1                                                                                         | 0,678827098 | 0,094767901 | 0,126 | 0,132 | 1         | 1,067893592   | 0,936422886     | 0,954545455     |
| TPD5L2                                                                                          | 0,80951357  | 0,094753834 | 0,115 | 0,115 | 1         | 1,06788318    | 0,936432016     | 1               |
| C11orf1                                                                                         | 0,454931055 | 0,094611594 | 0,049 | 0,041 | 1         | 1,067777899   | 0,936524347     | 1,195121951     |
| COPS8                                                                                           | 0,314347328 | 0,094517739 | 0,163 | 0,14  | 1         | 1,067708437   | 0,936585275     | 1,164285714     |
| VSTM4                                                                                           | 0,000867436 | 0,094512872 | 0,024 | 0,004 | 1         | 1,067704835   | 0,936588434     | 6               |
| DIP2C                                                                                           | 0,00307516  | 0,094405197 | 0,094 | 0,144 | 1         | 1,06762515    | 0,936658339     | 0,652777778     |
| COPG2                                                                                           | 0,15488522  | 0,09440377  | 0,023 | 0,014 | 1         | 1,067624094   | 0,936659266     | 1,642857143     |
| ARMCS                                                                                           | 0,458032642 | 0,094385353 | 0,02  | 0,015 | 1         | 1,067610465   | 0,936671223     | 1,333333333     |
| BBS9                                                                                            | 0,337096717 | 0,094203293 | 0,037 | 0,028 | 1         | 1,067475747   | 0,936789433     | 1,321428571     |
| ITPK1-AS1                                                                                       | 0,539711392 | 0,094188666 | 0,02  | 0,024 | 1         | 1,067464925   | 0,936798931     | 0,833333333     |
| LRWD1                                                                                           | 0,000439494 | 0,094165438 | 0,062 | 0,024 | 1         | 1,067447738   | 0,936814014     | 2,583333333     |
| RPUSD3                                                                                          | 0,821247273 | 0,094154124 | 0,052 | 0,054 | 1         | 1,067439367   | 0,93682136      | 0,962962963     |
| THAP12                                                                                          | 0,092921025 | 0,094137385 | 0,078 | 0,056 | 1         | 1,067426982   | 0,93683223      | 1,392857143     |



Supplementary Table 5

| Differentially expressed genes_total calculation_ comparing SC-Keloid vs. (SC-Myel, SC-Nonmyel) |             |             |       |       |             |               |                 |                 |
|-------------------------------------------------------------------------------------------------|-------------|-------------|-------|-------|-------------|---------------|-----------------|-----------------|
| gene                                                                                            | p_val       | avg_log2FC  | pct.1 | pct.2 | p_val_adj   | Foldchange_UP | Foldchange_DOWN | Ratio_pct1_pct2 |
| IL32                                                                                            | 0,014023592 | 0,094135861 | 0,054 | 0,028 | 1           | 1,067425855   | 0,936833219     | 1,928571429     |
| POLR3D                                                                                          | 0,146668648 | 0,094083144 | 0,075 | 0,056 | 1           | 1,067386851   | 0,936867452     | 1,339285714     |
| RGS19                                                                                           | 2,39696E-06 | 0,094060356 | 0,049 | 0,008 | 0,050578229 | 1,067369991   | 0,936882251     | 6,125           |
| QTRT2                                                                                           | 0,723317117 | 0,094015749 | 0,043 | 0,039 | 1           | 1,067336989   | 0,936911219     | 1,102564103     |
| NFKBIL1                                                                                         | 0,353297636 | 0,093963054 | 0,062 | 0,05  | 1           | 1,067298006   | 0,936945441     | 1,24            |
| CIAO2A                                                                                          | 0,031545549 | 0,093947477 | 0,08  | 0,052 | 1           | 1,067286481   | 0,936955557     | 1,538461538     |
| NCAM2                                                                                           | 0,062356197 | 0,093900514 | 0,081 | 0,109 | 1           | 1,067251739   | 0,936986058     | 0,743119266     |
| COMMD9                                                                                          | 0,002867056 | 0,093882415 | 0,084 | 0,045 | 1           | 1,06723835    | 0,936997813     | 1,866666667     |
| RIDA                                                                                            | 0,104742877 | 0,093872547 | 0,037 | 0,023 | 1           | 1,067231051   | 0,937004221     | 1,608695652     |
| DIS3L                                                                                           | 0,300848647 | 0,093822061 | 0,035 | 0,026 | 1           | 1,067193705   | 0,937037012     | 1,346153846     |
| INTS8                                                                                           | 0,513068269 | 0,093785319 | 0,031 | 0,026 | 1           | 1,067166526   | 0,937060876     | 1,192307692     |
| SLC25A26                                                                                        | 0,100348755 | 0,093664179 | 0,075 | 0,053 | 1           | 1,067076922   | 0,937139563     | 1,41509434      |
| ITGA4                                                                                           | 0,956337286 | 0,093491926 | 0,023 | 0,023 | 1           | 1,066949524   | 0,937251461     | 1               |
| HKDC1                                                                                           | 0,000466961 | 0,093373149 | 0,055 | 0,02  | 1           | 1,066861686   | 0,937328627     | 2,75            |
| RRP1B                                                                                           | 0,074544065 | 0,093371339 | 0,059 | 0,039 | 1           | 1,066860348   | 0,937329804     | 1,512820513     |
| NKAPD1                                                                                          | 0,403656447 | 0,093219574 | 0,087 | 0,075 | 1           | 1,066748125   | 0,937428412     | 1,16            |
| SATB1                                                                                           | 0,549953132 | 0,093166718 | 0,099 | 0,088 | 1           | 1,066709043   | 0,937462757     | 1,125           |
| LRR1                                                                                            | 0,186813645 | 0,093083316 | 0,036 | 0,024 | 1           | 1,066647378   | 0,937516953     | 1,5             |
| GPATCH2                                                                                         | 0,456410144 | 0,093045235 | 0,125 | 0,11  | 1           | 1,066619224   | 0,9375417       | 1,136363636     |
| BTN3A2                                                                                          | 0,778899665 | 0,093039425 | 0,04  | 0,037 | 1           | 1,066614928   | 0,937545476     | 1,081081081     |
| ERI2                                                                                            | 0,082949165 | 0,093026169 | 0,022 | 0,011 | 1           | 1,066605128   | 0,93755409      | 2               |
| DAPL1                                                                                           | 0,338127727 | 0,092996502 | 0,02  | 0,014 | 1           | 1,066583195   | 0,93757337      | 1,428571429     |
| LINC01116                                                                                       | 0,287210394 | 0,092899982 | 0,134 | 0,113 | 1           | 1,06651184    | 0,937636098     | 1,185840708     |
| TERF2                                                                                           | 0,553853313 | 0,092834307 | 0,044 | 0,038 | 1           | 1,066463291   | 0,937678782     | 1,157894737     |
| MLST8                                                                                           | 0,014210609 | 0,092831181 | 0,072 | 0,042 | 1           | 1,06646098    | 0,937680814     | 1,714285714     |
| LINC00839                                                                                       | 0,001247559 | 0,092828553 | 0,036 | 0,011 | 1           | 1,066459038   | 0,937682522     | 3,272727273     |
| TRAPPC13                                                                                        | 0,523433703 | 0,092808373 | 0,052 | 0,045 | 1           | 1,06644412    | 0,937695638     | 1,155555556     |
| ATG16L1                                                                                         | 0,552037109 | 0,09275282  | 0,028 | 0,023 | 1           | 1,066403056   | 0,937731746     | 1,217391304     |
| GPC2                                                                                            | 0,116115787 | 0,092733154 | 0,015 | 0,007 | 1           | 1,06638852    | 0,937744529     | 2,142857143     |
| RPS18                                                                                           | 0,190698131 | 0,092637935 | 0,843 | 0,947 | 1           | 1,066318139   | 0,937806423     | 0,890179514     |

Supplementary Table 5

| Differentially expressed genes_total calculation_ comparing SC-Keloid vs. (SC-Myel, SC-Nonmyel) |             |             |       |       |           |               |                 |                 |
|-------------------------------------------------------------------------------------------------|-------------|-------------|-------|-------|-----------|---------------|-----------------|-----------------|
| gene                                                                                            | p_val       | avg_log2FC  | pct.1 | pct.2 | p_val_adj | Foldchange_UP | Foldchange_DOWN | Ratio_pct1_pct2 |
| SUPT7L                                                                                          | 0,277937626 | 0,092577889 | 0,051 | 0,039 | 1         | 1,066273759   | 0,937845456     | 1,307692308     |
| REP15                                                                                           | 0,000128648 | 0,092553252 | 0,023 | 0,001 | 1         | 1,066255551   | 0,937861472     | 23              |
| DGKZ                                                                                            | 0,077252209 | 0,092508631 | 0,084 | 0,06  | 1         | 1,066222573   | 0,937890479     | 1,4             |
| TSHZ3                                                                                           | 0,065241094 | 0,092482043 | 0,04  | 0,023 | 1         | 1,066202924   | 0,937907764     | 1,739130435     |
| ELK1                                                                                            | 0,812684024 | 0,092401783 | 0,036 | 0,038 | 1         | 1,06614361    | 0,937959943     | 0,947368421     |
| MRPL9                                                                                           | 0,372246277 | 0,092295172 | 0,081 | 0,068 | 1         | 1,066064828   | 0,938029258     | 1,191176471     |
| FUT11                                                                                           | 0,059767313 | 0,092284998 | 0,049 | 0,03  | 1         | 1,06605731    | 0,938035874     | 1,633333333     |
| HMBS                                                                                            | 0,000502379 | 0,09221966  | 0,052 | 0,019 | 1         | 1,066009031   | 0,938078357     | 2,736842105     |
| SNX8                                                                                            | 0,036548232 | 0,092201723 | 0,044 | 0,024 | 1         | 1,065995777   | 0,93809002      | 1,833333333     |
| INPP5F                                                                                          | 0,134074511 | 0,092180568 | 0,168 | 0,195 | 1         | 1,065980146   | 0,938103776     | 0,861538462     |
| WDR82                                                                                           | 0,393566758 | 0,091993034 | 0,132 | 0,144 | 1         | 1,06584159    | 0,938225727     | 0,916666667     |
| WDR24                                                                                           | 0,100199472 | 0,091984162 | 0,023 | 0,012 | 1         | 1,065835035   | 0,938231497     | 1,916666667     |
| PSTK                                                                                            | 0,86517561  | 0,091929042 | 0,024 | 0,026 | 1         | 1,065794314   | 0,938267344     | 0,923076923     |
| GEMIN7                                                                                          | 0,001231097 | 0,091856149 | 0,038 | 0,012 | 1         | 1,065740466   | 0,938314751     | 3,166666667     |
| WDR43                                                                                           | 0,31456225  | 0,091848597 | 0,102 | 0,118 | 1         | 1,065734887   | 0,938319663     | 0,86440678      |
| NDUFAF7                                                                                         | 0,990009518 | 0,091823286 | 0,034 | 0,034 | 1         | 1,06571619    | 0,938336125     | 1               |
| GRHPR                                                                                           | 0,246785996 | 0,091734216 | 0,193 | 0,212 | 1         | 1,065650396   | 0,938394058     | 0,910377358     |
| STN1                                                                                            | 0,012229558 | 0,091676903 | 0,049 | 0,024 | 1         | 1,065608062   | 0,938431338     | 2,041666667     |
| METTL1                                                                                          | 0,011081639 | 0,091628257 | 0,029 | 0,011 | 1         | 1,065572132   | 0,938462982     | 2,636363636     |
| SLC25A6                                                                                         | 0,000427157 | 0,091605904 | 0,355 | 0,472 | 1         | 1,065555622   | 0,938477522     | 0,752118644     |
| BCL2L1                                                                                          | 0,108056912 | 0,091479611 | 0,079 | 0,057 | 1         | 1,065462348   | 0,93855968      | 1,385964912     |
| VASH1                                                                                           | 0,021774083 | 0,091423681 | 0,066 | 0,039 | 1         | 1,065421043   | 0,938596067     | 1,692307692     |
| HYKK                                                                                            | 0,114739006 | 0,091393321 | 0,021 | 0,011 | 1         | 1,065398623   | 0,938615818     | 1,909090909     |
| PRAG1                                                                                           | 0,00389216  | 0,091358785 | 0,045 | 0,019 | 1         | 1,065373119   | 0,938638287     | 2,368421053     |
| PIK3CA                                                                                          | 0,911273538 | 0,091349903 | 0,079 | 0,08  | 1         | 1,06536656    | 0,938644066     | 0,9875          |
| DUSP2                                                                                           | 0,195767901 | 0,091332987 | 0,016 | 0,026 | 1         | 1,065354068   | 0,938655072     | 0,615384615     |
| ASB2                                                                                            | 0,002060585 | 0,091332893 | 0,013 | 0     | 1         | 1,065353999   | 0,938655134     | #DIV/0!         |
| ZDHC13                                                                                          | 0,012174386 | 0,091273808 | 0,022 | 0,007 | 1         | 1,065310369   | 0,938693576     | 3,142857143     |
| AP2A1                                                                                           | 0,317725084 | 0,091181202 | 0,097 | 0,08  | 1         | 1,065241989   | 0,938753833     | 1,2125          |
| ZNF268                                                                                          | 0,352842915 | 0,0911705   | 0,024 | 0,018 | 1         | 1,065234087   | 0,938760797     | 1,333333333     |

Supplementary Table 5

| Differentially expressed genes_total calculation_ comparing SC-Keloid vs. (SC-Myel, SC-Nonmyel) |             |             |       |       |             |               |                 |                 |
|-------------------------------------------------------------------------------------------------|-------------|-------------|-------|-------|-------------|---------------|-----------------|-----------------|
| gene                                                                                            | p_val       | avg_log2FC  | pct.1 | pct.2 | p_val_adj   | Foldchange_UP | Foldchange_DOWN | Ratio_pct1_pct2 |
| TEX9                                                                                            | 0,026613143 | 0,091089635 | 0,02  | 0,007 | 1           | 1,065174381   | 0,938813417     | 2,857142857     |
| LUM                                                                                             | 0,295695823 | 0,091082904 | 0,065 | 0,053 | 1           | 1,065169411   | 0,938817797     | 1,226415094     |
| FKBP7                                                                                           | 0,270448842 | 0,090997448 | 0,126 | 0,103 | 1           | 1,065106319   | 0,938873408     | 1,223300971     |
| GALNT5                                                                                          | 0,006686827 | 0,09095633  | 0,016 | 0,003 | 1           | 1,065075963   | 0,938900167     | 5,333333333     |
| PRPF8                                                                                           | 0,182063045 | 0,090926402 | 0,128 | 0,149 | 1           | 1,065053869   | 0,938919645     | 0,859060403     |
| CWF19L1                                                                                         | 0,38866533  | 0,090926088 | 0,017 | 0,012 | 1           | 1,065053637   | 0,938919849     | 1,416666667     |
| ARID1B                                                                                          | 0,013736629 | 0,090911544 | 0,2   | 0,25  | 1           | 1,065042901   | 0,938929314     | 0,8             |
| PUM3                                                                                            | 0,741467908 | 0,090877733 | 0,105 | 0,109 | 1           | 1,06501794    | 0,938951319     | 0,963302752     |
| TRMT13                                                                                          | 0,823600821 | 0,090710349 | 0,045 | 0,047 | 1           | 1,064894382   | 0,939060264     | 0,957446809     |
| SHLD2                                                                                           | 0,683879007 | 0,090694167 | 0,049 | 0,053 | 1           | 1,064882438   | 0,939070797     | 0,924528302     |
| SEMA3E                                                                                          | 0,01845249  | 0,090674526 | 0,019 | 0,005 | 1           | 1,064867941   | 0,939083582     | 3,8             |
| PPWD1                                                                                           | 0,107532703 | 0,09057238  | 0,051 | 0,071 | 1           | 1,064792549   | 0,939150073     | 0,718309859     |
| MAD1L1                                                                                          | 0,066648569 | 0,090510948 | 0,064 | 0,042 | 1           | 1,064747209   | 0,939190065     | 1,523809524     |
| WDR18                                                                                           | 0,022927973 | 0,09045043  | 0,102 | 0,068 | 1           | 1,064702546   | 0,939229463     | 1,5             |
| RALYL                                                                                           | 3,03792E-05 | 0,090333112 | 0,03  | 0,003 | 0,641032045 | 1,064615969   | 0,939305842     | 10              |
| POMT2                                                                                           | 0,260454479 | 0,090332402 | 0,054 | 0,041 | 1           | 1,064615445   | 0,939306305     | 1,317073171     |
| ACYP1                                                                                           | 0,692803732 | 0,089968491 | 0,058 | 0,053 | 1           | 1,064346936   | 0,939543269     | 1,094339623     |
| DPYSL3                                                                                          | 0,007398855 | 0,089891551 | 0,055 | 0,027 | 1           | 1,064290175   | 0,939593377     | 2,037037037     |
| ELMOD1                                                                                          | 0,000314694 | 0,089835205 | 0,017 | 0     | 1           | 1,064248609   | 0,939630074     | #DIV/0!         |
| ABHD4                                                                                           | 0,194038598 | 0,089756446 | 0,041 | 0,028 | 1           | 1,064190512   | 0,939681372     | 1,464285714     |
| AIMP2                                                                                           | 0,098461221 | 0,089719858 | 0,055 | 0,037 | 1           | 1,064163523   | 0,939705203     | 1,486486486     |
| SFI1                                                                                            | 0,048401724 | 0,089679192 | 0,028 | 0,014 | 1           | 1,064133528   | 0,939731692     | 2               |
| RSPH9                                                                                           | 0,030969523 | 0,089675207 | 0,026 | 0,011 | 1           | 1,064130589   | 0,939734287     | 2,363636364     |
| ZNF93                                                                                           | 0,45977596  | 0,089641659 | 0,02  | 0,015 | 1           | 1,064105844   | 0,93975614      | 1,333333333     |
| SLC25A3                                                                                         | 0,01090139  | 0,089598318 | 0,406 | 0,551 | 1           | 1,064073877   | 0,939784372     | 0,736842105     |
| CUL4A                                                                                           | 0,723973353 | 0,089497437 | 0,076 | 0,069 | 1           | 1,063999474   | 0,939850089     | 1,101449275     |
| CUTC                                                                                            | 0,747345164 | 0,089452928 | 0,068 | 0,071 | 1           | 1,063966649   | 0,939879085     | 0,957746479     |
| TECPR2                                                                                          | 0,524953418 | 0,089432307 | 0,043 | 0,037 | 1           | 1,063951441   | 0,939892519     | 1,162162162     |
| ZBTB24                                                                                          | 0,240303084 | 0,089087981 | 0,04  | 0,028 | 1           | 1,063697539   | 0,940116869     | 1,428571429     |
| ELOF1                                                                                           | 0,253207328 | 0,088922885 | 0,123 | 0,102 | 1           | 1,063575821   | 0,940224458     | 1,205882353     |

Supplementary Table 5

| Differentially expressed genes_total calculation_ comparing SC-Keloid vs. (SC-Myel, SC-Nonmyel) |             |             |       |       |           |               |                 |                 |
|-------------------------------------------------------------------------------------------------|-------------|-------------|-------|-------|-----------|---------------|-----------------|-----------------|
| gene                                                                                            | p_val       | avg_log2FC  | pct.1 | pct.2 | p_val_adj | Foldchange_UP | Foldchange_DOWN | Ratio_pct1_pct2 |
| NAA25                                                                                           | 0,194796029 | 0,088820943 | 0,054 | 0,069 | 1         | 1,06350067    | 0,940290898     | 0,782608696     |
| YAE1                                                                                            | 0,388427306 | 0,088718522 | 0,049 | 0,039 | 1         | 1,063425173   | 0,940357654     | 1,256410256     |
| KRBOX1                                                                                          | 0,220425209 | 0,088642146 | 0,027 | 0,018 | 1         | 1,063368876   | 0,940407438     | 1,5             |
| FRY                                                                                             | 0,8374195   | 0,088637036 | 0,01  | 0,009 | 1         | 1,06336511    | 0,940410768     | 1,111111111     |
| MAML1                                                                                           | 0,494246366 | 0,088573786 | 0,047 | 0,039 | 1         | 1,063318491   | 0,940451998     | 1,205128205     |
| SLC37A4                                                                                         | 0,122102548 | 0,088520508 | 0,031 | 0,019 | 1         | 1,063279224   | 0,940486729     | 1,631578947     |
| UBE3D                                                                                           | 0,115150912 | 0,088516881 | 0,015 | 0,007 | 1         | 1,063276551   | 0,940489094     | 2,142857143     |
| LARP1B                                                                                          | 0,708849948 | 0,088434465 | 0,107 | 0,099 | 1         | 1,063215812   | 0,940542822     | 1,080808081     |
| NUP214                                                                                          | 0,559940657 | 0,088416391 | 0,044 | 0,05  | 1         | 1,063202492   | 0,940554605     | 0,88            |
| VRK1                                                                                            | 0,431826533 | 0,088393965 | 0,038 | 0,031 | 1         | 1,063185965   | 0,940569226     | 1,225806452     |
| ICA1L                                                                                           | 0,977993791 | 0,088370975 | 0,023 | 0,023 | 1         | 1,063169023   | 0,940584214     | 1               |
| COX18                                                                                           | 0,011601906 | 0,088203467 | 0,027 | 0,009 | 1         | 1,063045588   | 0,94069343      | 3               |
| TUBGCP5                                                                                         | 0,052875097 | 0,088191742 | 0,044 | 0,026 | 1         | 1,063036948   | 0,940701075     | 1,692307692     |
| SERPINB6                                                                                        | 0,058582403 | 0,088011874 | 0,226 | 0,265 | 1         | 1,062904422   | 0,940818364     | 0,852830189     |
| ANKRA2                                                                                          | 0,687992481 | 0,088008675 | 0,041 | 0,037 | 1         | 1,062902066   | 0,94082045      | 1,108108108     |
| EXOC6                                                                                           | 0,241770612 | 0,088008431 | 0,028 | 0,019 | 1         | 1,062901886   | 0,940820609     | 1,473684211     |
| OGFOD3                                                                                          | 0,15663697  | 0,08785293  | 0,08  | 0,061 | 1         | 1,062787327   | 0,940922021     | 1,31147541      |
| NINJ2                                                                                           | 0,094291883 | 0,087738022 | 0,012 | 0,004 | 1         | 1,062702681   | 0,940996967     | 3               |
| ELAC2                                                                                           | 0,041395187 | 0,087735752 | 0,052 | 0,031 | 1         | 1,062701009   | 0,940998448     | 1,677419355     |
| ARMC7                                                                                           | 0,036968971 | 0,08770672  | 0,021 | 0,008 | 1         | 1,062679624   | 0,941017384     | 2,625           |
| PRKAA1                                                                                          | 0,608113781 | 0,087704428 | 0,064 | 0,057 | 1         | 1,062677936   | 0,941018879     | 1,122807018     |
| EHMT1                                                                                           | 0,568444712 | 0,087672774 | 0,066 | 0,058 | 1         | 1,06265462    | 0,941039526     | 1,137931034     |
| SLC31A2                                                                                         | 0,043135962 | 0,087606333 | 0,036 | 0,019 | 1         | 1,062605682   | 0,941082865     | 1,894736842     |
| CKAP2                                                                                           | 0,900778651 | 0,087522942 | 0,041 | 0,039 | 1         | 1,062544263   | 0,941137263     | 1,051282051     |
| TRIM27                                                                                          | 0,861483684 | 0,08746323  | 0,058 | 0,06  | 1         | 1,062500287   | 0,941176217     | 0,966666667     |
| ZDHHC9                                                                                          | 0,517986888 | 0,087448975 | 0,027 | 0,022 | 1         | 1,062489788   | 0,941185516     | 1,227272727     |
| DNAJC4                                                                                          | 0,127006668 | 0,087423524 | 0,109 | 0,084 | 1         | 1,062471044   | 0,94120212      | 1,297619048     |
| FRMPD4                                                                                          | 0,005346706 | 0,087409678 | 0,01  | 0     | 1         | 1,062460847   | 0,941211154     | #DIV/0!         |
| PROCR                                                                                           | 0,000663869 | 0,087045605 | 0,028 | 0,005 | 1         | 1,062192763   | 0,941448704     | 5,6             |
| CHN1                                                                                            | 0,045724097 | 0,086873559 | 0,083 | 0,056 | 1         | 1,0620661     | 0,941560982     | 1,482142857     |

Supplementary Table 5

| Differentially expressed genes_total calculation_ comparing SC-Keloid vs. (SC-Myel, SC-Nonmyel) |             |             |       |       |             |               |                 |                 |
|-------------------------------------------------------------------------------------------------|-------------|-------------|-------|-------|-------------|---------------|-----------------|-----------------|
| gene                                                                                            | p_val       | avg_log2FC  | pct.1 | pct.2 | p_val_adj   | Foldchange_UP | Foldchange_DOWN | Ratio_pct1_pct2 |
| DHODH                                                                                           | 0,254147594 | 0,086851475 | 0,024 | 0,016 | 1           | 1,062049843   | 0,941575394     | 1,5             |
| PLBD2                                                                                           | 0,414972929 | 0,086778658 | 0,061 | 0,05  | 1           | 1,06199624    | 0,94162292      | 1,22            |
| LENG8-AS1                                                                                       | 0,623064972 | 0,086753688 | 0,01  | 0,008 | 1           | 1,061977859   | 0,941639218     | 1,25            |
| ZDHHC4                                                                                          | 0,092788361 | 0,086736916 | 0,077 | 0,054 | 1           | 1,061965513   | 0,941650164     | 1,425925926     |
| EDEM2                                                                                           | 0,018906017 | 0,086695467 | 0,076 | 0,046 | 1           | 1,061935003   | 0,941677219     | 1,652173913     |
| DRAM2                                                                                           | 0,423193663 | 0,086665336 | 0,072 | 0,061 | 1           | 1,061912824   | 0,941696886     | 1,180327869     |
| CIT                                                                                             | 0,061220941 | 0,086576954 | 0,176 | 0,213 | 1           | 1,061847772   | 0,941754578     | 0,82629108      |
| SLC25A46                                                                                        | 0,219157539 | 0,086464103 | 0,069 | 0,053 | 1           | 1,061764715   | 0,941828247     | 1,301886792     |
| PPM1L                                                                                           | 0,094016768 | 0,086406482 | 0,012 | 0,004 | 1           | 1,061722309   | 0,941865864     | 3               |
| NAGPA                                                                                           | 0,187422908 | 0,086395477 | 0,036 | 0,024 | 1           | 1,06171421    | 0,941873049     | 1,5             |
| UTY                                                                                             | 0,172312066 | 0,086335921 | 0,017 | 0,009 | 1           | 1,061670382   | 0,941911931     | 1,888888889     |
| FICD                                                                                            | 0,198450557 | 0,086322247 | 0,029 | 0,019 | 1           | 1,06166032    | 0,941920858     | 1,526315789     |
| SNX3                                                                                            | 0,003504642 | 0,086255545 | 0,356 | 0,456 | 1           | 1,061611236   | 0,941964409     | 0,780701754     |
| MPI                                                                                             | 0,011740193 | 0,086238598 | 0,027 | 0,009 | 1           | 1,061598765   | 0,941975474     | 3               |
| IQCG                                                                                            | 0,681216943 | 0,086147832 | 0,047 | 0,042 | 1           | 1,061531978   | 0,942034739     | 1,119047619     |
| PAK1IP1                                                                                         | 0,183819313 | 0,08613895  | 0,087 | 0,068 | 1           | 1,061525442   | 0,942040539     | 1,279411765     |
| PGBD1                                                                                           | 0,157453937 | 0,08613576  | 0,023 | 0,014 | 1           | 1,061523095   | 0,942042622     | 1,642857143     |
| FAM234A                                                                                         | 0,798619825 | 0,086046054 | 0,147 | 0,138 | 1           | 1,061457092   | 0,942101199     | 1,065217391     |
| SLC1A4                                                                                          | 0,497491372 | 0,08604213  | 0,028 | 0,034 | 1           | 1,061454206   | 0,942103762     | 0,823529412     |
| ATE1                                                                                            | 0,476918209 | 0,086034131 | 0,071 | 0,061 | 1           | 1,06144832    | 0,942108985     | 1,163934426     |
| RESF1                                                                                           | 0,811220848 | 0,086009541 | 0,049 | 0,046 | 1           | 1,061430229   | 0,942125043     | 1,065217391     |
| METTL8                                                                                          | 0,244761282 | 0,08600451  | 0,036 | 0,026 | 1           | 1,061426527   | 0,942128329     | 1,384615385     |
| HOXB8                                                                                           | 7,32793E-07 | 0,085889356 | 0,043 | 0,004 | 0,015462673 | 1,061341809   | 0,942203531     | 10,75           |
| ZDHHC16                                                                                         | 0,014688368 | 0,085867273 | 0,038 | 0,018 | 1           | 1,061325563   | 0,942217953     | 2,111111111     |
| ICA1                                                                                            | 0,062546361 | 0,085599847 | 0,013 | 0,004 | 1           | 1,061128848   | 0,942392624     | 3,25            |
| ZSCAN16                                                                                         | 0,060051896 | 0,085533595 | 0,015 | 0,005 | 1           | 1,061080119   | 0,942435903     | 3               |
| SEPTIN6                                                                                         | 0,234242706 | 0,085420137 | 0,016 | 0,009 | 1           | 1,060996677   | 0,942510021     | 1,777777778     |
| BLM                                                                                             | 0,127979002 | 0,085054462 | 0,013 | 0,005 | 1           | 1,060727783   | 0,942748947     | 2,6             |
| RALGAPB                                                                                         | 0,088988916 | 0,085030438 | 0,047 | 0,066 | 1           | 1,06071012    | 0,942764645     | 0,712121212     |
| CBWD1                                                                                           | 0,321094397 | 0,084965327 | 0,094 | 0,077 | 1           | 1,06066225    | 0,942807195     | 1,220779221     |

Supplementary Table 5

| Differentially expressed genes_total calculation_ comparing SC-Keloid vs. (SC-Myel, SC-Nonmyel) |             |             |       |       |           |               |                 |                 |
|-------------------------------------------------------------------------------------------------|-------------|-------------|-------|-------|-----------|---------------|-----------------|-----------------|
| gene                                                                                            | p_val       | avg_log2FC  | pct.1 | pct.2 | p_val_adj | Foldchange_UP | Foldchange_DOWN | Ratio_pct1_pct2 |
| ABCB8                                                                                           | 0,028220074 | 0,084899281 | 0,049 | 0,027 | 1         | 1,060613694   | 0,942850357     | 1,814814815     |
| TRNP1                                                                                           | 0,103653104 | 0,08488857  | 0,086 | 0,062 | 1         | 1,060605819   | 0,942857357     | 1,387096774     |
| NBL1                                                                                            | 0,291445186 | 0,08474082  | 0,043 | 0,033 | 1         | 1,060497206   | 0,942953922     | 1,303030303     |
| ADAMTS6                                                                                         | 0,002711077 | 0,084729917 | 0,019 | 0,003 | 1         | 1,060489191   | 0,942961049     | 6,333333333     |
| LCA5L                                                                                           | 0,061790103 | 0,084724808 | 0,013 | 0,004 | 1         | 1,060485436   | 0,942964388     | 3,25            |
| APTX                                                                                            | 0,018071424 | 0,084637249 | 0,075 | 0,045 | 1         | 1,060421076   | 0,943021619     | 1,666666667     |
| CARM1                                                                                           | 0,176183741 | 0,084626784 | 0,077 | 0,058 | 1         | 1,060413384   | 0,94302846      | 1,327586207     |
| ZNF74                                                                                           | 0,334939922 | 0,084596395 | 0,02  | 0,014 | 1         | 1,060391047   | 0,943048324     | 1,428571429     |
| NSUN3                                                                                           | 0,199304891 | 0,084475145 | 0,029 | 0,019 | 1         | 1,060301931   | 0,943127585     | 1,526315789     |
| ZCCHC9                                                                                          | 0,045835037 | 0,084441217 | 0,068 | 0,043 | 1         | 1,060276997   | 0,943149765     | 1,581395349     |
| SNX27                                                                                           | 0,703714785 | 0,084428556 | 0,122 | 0,126 | 1         | 1,060267692   | 0,943158042     | 0,968253968     |
| YARS1                                                                                           | 0,473484152 | 0,084422383 | 0,083 | 0,072 | 1         | 1,060263155   | 0,943162077     | 1,152777778     |
| PDXK                                                                                            | 0,677605594 | 0,084412759 | 0,091 | 0,096 | 1         | 1,060256082   | 0,943168369     | 0,947916667     |
| TSPAN4                                                                                          | 0,329477937 | 0,084382282 | 0,105 | 0,118 | 1         | 1,060233684   | 0,943188294     | 0,889830508     |
| RXYLT1                                                                                          | 0,127690496 | 0,084100214 | 0,104 | 0,079 | 1         | 1,060026414   | 0,943372719     | 1,316455696     |
| TAF9B                                                                                           | 0,017534778 | 0,084050434 | 0,045 | 0,023 | 1         | 1,059989838   | 0,94340527      | 1,956521739     |
| CEP89                                                                                           | 0,024688738 | 0,083999906 | 0,068 | 0,041 | 1         | 1,059952714   | 0,943438313     | 1,658536585     |
| ZNF684                                                                                          | 0,349691836 | 0,083870111 | 0,024 | 0,018 | 1         | 1,059857358   | 0,943523195     | 1,333333333     |
| TPK1                                                                                            | 0,08807384  | 0,083848455 | 0,014 | 0,005 | 1         | 1,059841448   | 0,943537358     | 2,8             |
| C2orf69                                                                                         | 0,826824752 | 0,083845266 | 0,023 | 0,022 | 1         | 1,059839106   | 0,943539443     | 1,045454545     |
| UVSSA                                                                                           | 0,971604252 | 0,083843961 | 0,045 | 0,045 | 1         | 1,059838147   | 0,943540297     | 1               |
| VCP                                                                                             | 0,230468985 | 0,083792828 | 0,197 | 0,216 | 1         | 1,059800585   | 0,943573739     | 0,912037037     |
| SEMA6D                                                                                          | 0,842796203 | 0,083699338 | 0,07  | 0,066 | 1         | 1,059731909   | 0,943634887     | 1,060606061     |
| ENKD1                                                                                           | 0,581378202 | 0,083668759 | 0,045 | 0,039 | 1         | 1,059709447   | 0,943654888     | 1,153846154     |
| SIKE1                                                                                           | 0,299196204 | 0,083571174 | 0,068 | 0,054 | 1         | 1,05963777    | 0,94371872      | 1,259259259     |
| PAPOLG                                                                                          | 0,121389089 | 0,083526159 | 0,026 | 0,039 | 1         | 1,059604708   | 0,943748166     | 0,666666667     |
| ZFAND3                                                                                          | 0,607444519 | 0,083487446 | 0,126 | 0,13  | 1         | 1,059576276   | 0,94377349      | 0,969230769     |
| EXOSC5                                                                                          | 0,460159355 | 0,083345353 | 0,064 | 0,054 | 1         | 1,059471921   | 0,943866449     | 1,185185185     |
| PHACTR3                                                                                         | 0,005213592 | 0,083333208 | 0,014 | 0,001 | 1         | 1,059463003   | 0,943874394     | 14              |
| TMX4                                                                                            | 0,403495237 | 0,083099349 | 0,173 | 0,185 | 1         | 1,059291279   | 0,944027408     | 0,935135135     |

Supplementary Table 5

| Differentially expressed genes_total calculation_ comparing SC-Keloid vs. (SC-Myel, SC-Nonmyel) |             |             |       |       |           |               |                 |                 |
|-------------------------------------------------------------------------------------------------|-------------|-------------|-------|-------|-----------|---------------|-----------------|-----------------|
| gene                                                                                            | p_val       | avg_log2FC  | pct.1 | pct.2 | p_val_adj | Foldchange_UP | Foldchange_DOWN | Ratio_pct1_pct2 |
| PIGW                                                                                            | 0,001560525 | 0,083090276 | 0,026 | 0,005 | 1         | 1,059284617   | 0,944033345     | 5,2             |
| SH3BP1                                                                                          | 0,001215343 | 0,08305892  | 0,034 | 0,009 | 1         | 1,059261594   | 0,944053863     | 3,777777778     |
| NKAIN4                                                                                          | 0,252467975 | 0,083030859 | 0,044 | 0,033 | 1         | 1,059240991   | 0,944072225     | 1,333333333     |
| RNF14                                                                                           | 0,024026949 | 0,082983306 | 0,064 | 0,038 | 1         | 1,059206078   | 0,944103343     | 1,684210526     |
| CDC42SE2                                                                                        | 0,432043255 | 0,082830686 | 0,078 | 0,066 | 1         | 1,059094033   | 0,944203224     | 1,181818182     |
| CUTA                                                                                            | 0,068960633 | 0,082803926 | 0,261 | 0,315 | 1         | 1,059074388   | 0,944220738     | 0,828571429     |
| TBC1D22A                                                                                        | 0,073360756 | 0,082799411 | 0,044 | 0,027 | 1         | 1,059071073   | 0,944223693     | 1,62962963      |
| FAM89A                                                                                          | 0,088629158 | 0,082734042 | 0,057 | 0,038 | 1         | 1,059023088   | 0,944266477     | 1,5             |
| TIMM10B                                                                                         | 0,186329747 | 0,082683741 | 0,054 | 0,069 | 1         | 1,058986164   | 0,9442994       | 0,782608696     |
| GNPDA2                                                                                          | 0,374918974 | 0,08265449  | 0,069 | 0,057 | 1         | 1,058964694   | 0,944318546     | 1,210526316     |
| CEP57L1                                                                                         | 0,298332911 | 0,082639246 | 0,057 | 0,045 | 1         | 1,058953504   | 0,944328524     | 1,266666667     |
| ADCY1                                                                                           | 0,056570468 | 0,082621476 | 0,017 | 0,007 | 1         | 1,058940461   | 0,944340156     | 2,428571429     |
| DCAF11                                                                                          | 0,483352523 | 0,08249402  | 0,055 | 0,046 | 1         | 1,058846912   | 0,944423588     | 1,195652174     |
| SAAL1                                                                                           | 0,239690971 | 0,082438258 | 0,031 | 0,022 | 1         | 1,058805987   | 0,944460092     | 1,409090909     |
| TYMP                                                                                            | 0,916432101 | 0,082433834 | 0,05  | 0,049 | 1         | 1,05880274    | 0,944462988     | 1,020408163     |
| MLYCD                                                                                           | 0,466831082 | 0,082406395 | 0,029 | 0,023 | 1         | 1,058782603   | 0,944480951     | 1,260869565     |
| RTL10                                                                                           | 0,269561029 | 0,082393923 | 0,017 | 0,011 | 1         | 1,05877345    | 0,944489116     | 1,545454545     |
| IFIT5                                                                                           | 0,21234302  | 0,082359491 | 0,031 | 0,043 | 1         | 1,058748181   | 0,944511658     | 0,720930233     |
| SMYD2                                                                                           | 0,027630426 | 0,082337002 | 0,062 | 0,037 | 1         | 1,058731677   | 0,944526381     | 1,675675676     |
| SGO2                                                                                            | 0,093013753 | 0,08227486  | 0,029 | 0,016 | 1         | 1,058686075   | 0,944567066     | 1,8125          |
| HIGD1A                                                                                          | 0,777482253 | 0,082179621 | 0,157 | 0,147 | 1         | 1,058616188   | 0,944629424     | 1,068027211     |
| NIPAL3                                                                                          | 0,404167923 | 0,082156166 | 0,027 | 0,034 | 1         | 1,058598978   | 0,944644781     | 0,794117647     |
| SPACA9                                                                                          | 0,015945039 | 0,082107321 | 0,036 | 0,016 | 1         | 1,058563138   | 0,944676764     | 2,25            |
| NFATC3                                                                                          | 0,359957209 | 0,082055592 | 0,048 | 0,038 | 1         | 1,058525183   | 0,944710637     | 1,263157895     |
| AP4E1                                                                                           | 0,020991859 | 0,082038356 | 0,029 | 0,012 | 1         | 1,058512536   | 0,944721924     | 2,416666667     |
| RABL3                                                                                           | 0,09626269  | 0,08194133  | 0,04  | 0,024 | 1         | 1,058441351   | 0,944785462     | 1,666666667     |
| BEX4                                                                                            | 0,00148387  | 0,081898474 | 0,097 | 0,149 | 1         | 1,05840991    | 0,944813527     | 0,651006711     |
| TRMT61B                                                                                         | 0,265379251 | 0,08189797  | 0,045 | 0,034 | 1         | 1,058409539   | 0,944813858     | 1,323529412     |
| NACA2                                                                                           | 0,437220897 | 0,081841861 | 0,01  | 0,015 | 1         | 1,058368377   | 0,944850604     | 0,666666667     |
| FAM200A                                                                                         | 0,018424419 | 0,081762554 | 0,021 | 0,007 | 1         | 1,058310199   | 0,944902545     | 3               |

Supplementary Table 5

| Differentially expressed genes_total calculation_ comparing SC-Keloid vs. (SC-Myel, SC-Nonmyel) |             |             |       |       |           |               |                 |                 |
|-------------------------------------------------------------------------------------------------|-------------|-------------|-------|-------|-----------|---------------|-----------------|-----------------|
| gene                                                                                            | p_val       | avg_log2FC  | pct.1 | pct.2 | p_val_adj | Foldchange_UP | Foldchange_DOWN | Ratio_pct1_pct2 |
| CARD6                                                                                           | 0,002055812 | 0,081651299 | 0,016 | 0,001 | 1         | 1,058228589   | 0,944975415     | 16              |
| ZSCAN16-AS1                                                                                     | 0,572756754 | 0,081581842 | 0,13  | 0,118 | 1         | 1,058177643   | 0,945020911     | 1,101694915     |
| GEMIN2                                                                                          | 0,05262654  | 0,081498754 | 0,044 | 0,026 | 1         | 1,058116702   | 0,945075339     | 1,692307692     |
| ARMCX5                                                                                          | 0,487270907 | 0,081491985 | 0,03  | 0,024 | 1         | 1,058111738   | 0,945079772     | 1,25            |
| SSX2IP                                                                                          | 0,137638458 | 0,081454748 | 0,026 | 0,015 | 1         | 1,058084427   | 0,945104166     | 1,733333333     |
| NEK5                                                                                            | 0,039654921 | 0,081439054 | 0,012 | 0,003 | 1         | 1,058072917   | 0,945114448     | 4               |
| C19orf25                                                                                        | 0,058701244 | 0,081366165 | 0,085 | 0,058 | 1         | 1,058019461   | 0,945162198     | 1,465517241     |
| DUSP4                                                                                           | 0,05247227  | 0,081199569 | 0,048 | 0,028 | 1         | 1,057897293   | 0,945271348     | 1,714285714     |
| NFXL1                                                                                           | 0,385963379 | 0,081182098 | 0,035 | 0,027 | 1         | 1,057884482   | 0,945282795     | 1,296296296     |
| AP5S1                                                                                           | 0,121634458 | 0,08114277  | 0,028 | 0,016 | 1         | 1,057855645   | 0,945308564     | 1,75            |
| GNE                                                                                             | 0,750383249 | 0,081138048 | 0,026 | 0,023 | 1         | 1,057852182   | 0,945311658     | 1,130434783     |
| URB2                                                                                            | 0,577372428 | 0,081132026 | 0,014 | 0,011 | 1         | 1,057847767   | 0,945315604     | 1,272727273     |
| SZRD1                                                                                           | 0,496621622 | 0,081067897 | 0,156 | 0,163 | 1         | 1,057800745   | 0,945357625     | 0,957055215     |
| COG6                                                                                            | 0,097784867 | 0,080994905 | 0,065 | 0,045 | 1         | 1,057747228   | 0,945405455     | 1,444444444     |
| WDR53                                                                                           | 0,719611653 | 0,080980447 | 0,013 | 0,011 | 1         | 1,057736628   | 0,94541493      | 1,181818182     |
| DHRS4                                                                                           | 0,164953579 | 0,080977832 | 0,047 | 0,033 | 1         | 1,057734711   | 0,945416644     | 1,424242424     |
| CD68                                                                                            | 0,23031017  | 0,080859904 | 0,027 | 0,018 | 1         | 1,057648254   | 0,945493926     | 1,5             |
| ABCC10                                                                                          | 0,300744682 | 0,080787569 | 0,019 | 0,012 | 1         | 1,057595225   | 0,945541334     | 1,583333333     |
| WNK1                                                                                            | 0,022093058 | 0,080646797 | 0,2   | 0,248 | 1         | 1,057492035   | 0,9456336       | 0,806451613     |
| KIF3B                                                                                           | 0,040642151 | 0,080605901 | 0,059 | 0,037 | 1         | 1,057462058   | 0,945660406     | 1,594594595     |
| DYNC2I2                                                                                         | 0,008396468 | 0,080512421 | 0,107 | 0,066 | 1         | 1,057393542   | 0,945721683     | 1,621212121     |
| MMS19                                                                                           | 0,016356709 | 0,080466979 | 0,057 | 0,031 | 1         | 1,057360237   | 0,945751471     | 1,838709677     |
| MACO1                                                                                           | 0,754782772 | 0,080456348 | 0,097 | 0,09  | 1         | 1,057352446   | 0,94575844      | 1,077777778     |
| EEF1AKMT3                                                                                       | 0,060302649 | 0,080351093 | 0,015 | 0,005 | 1         | 1,057275307   | 0,945827443     | 3               |
| SYNRG                                                                                           | 0,630329277 | 0,080238006 | 0,076 | 0,081 | 1         | 1,057192434   | 0,945901586     | 0,938271605     |
| TSTD2                                                                                           | 0,707543254 | 0,080169362 | 0,041 | 0,045 | 1         | 1,057142134   | 0,945946593     | 0,911111111     |
| CCNT2                                                                                           | 0,06332994  | 0,080111399 | 0,081 | 0,109 | 1         | 1,057099662   | 0,945984599     | 0,743119266     |
| TTC12                                                                                           | 0,08830934  | 0,080098341 | 0,014 | 0,005 | 1         | 1,057090094   | 0,945993161     | 2,8             |
| ZSCAN5A                                                                                         | 0,271920453 | 0,080066202 | 0,014 | 0,008 | 1         | 1,057066546   | 0,946014235     | 1,75            |
| TP53INP1                                                                                        | 0,424044629 | 0,080060769 | 0,033 | 0,026 | 1         | 1,057062565   | 0,946017798     | 1,269230769     |



Supplementary Table 5

| Differentially expressed genes_total calculation_ comparing SC-Keloid vs. (SC-Myel, SC-Nonmyel) |             |             |       |       |             |               |                 |                 |
|-------------------------------------------------------------------------------------------------|-------------|-------------|-------|-------|-------------|---------------|-----------------|-----------------|
| gene                                                                                            | p_val       | avg_log2FC  | pct.1 | pct.2 | p_val_adj   | Foldchange_UP | Foldchange_DOWN | Ratio_pct1_pct2 |
| C11orf80                                                                                        | 0,229056638 | 0,080031199 | 0,038 | 0,027 | 1           | 1,057040899   | 0,946037188     | 1,407407407     |
| GLI4                                                                                            | 0,50063974  | 0,079942088 | 0,057 | 0,049 | 1           | 1,056975611   | 0,946095624     | 1,163265306     |
| ZNF287                                                                                          | 0,008122861 | 0,079843718 | 0,028 | 0,009 | 1           | 1,056903544   | 0,946160135     | 3,111111111     |
| ACADM                                                                                           | 0,89306021  | 0,079837638 | 0,086 | 0,087 | 1           | 1,05689909    | 0,946164123     | 0,988505747     |
| DYNC1LI2                                                                                        | 4,4865E-05  | 0,07980634  | 0,295 | 0,406 | 0,946696901 | 1,056876161   | 0,946184649     | 0,726600985     |
| RGS8                                                                                            | 0,000802422 | 0,079739137 | 0,015 | 0     | 1           | 1,056826931   | 0,946228725     | #DIV/0!         |
| C11orf54                                                                                        | 0,029869608 | 0,079621178 | 0,051 | 0,079 | 1           | 1,056740526   | 0,946306095     | 0,64556962      |
| COG8                                                                                            | 0,04395915  | 0,079614198 | 0,024 | 0,011 | 1           | 1,056735413   | 0,946310673     | 2,181818182     |
| STXBP4                                                                                          | 0,056186822 | 0,079226275 | 0,035 | 0,019 | 1           | 1,056451308   | 0,946565159     | 1,842105263     |
| MIA2                                                                                            | 0,640484626 | 0,079156894 | 0,043 | 0,038 | 1           | 1,056400503   | 0,946610681     | 1,131578947     |
| C17orf58                                                                                        | 0,054740412 | 0,079150692 | 0,026 | 0,012 | 1           | 1,056395962   | 0,946614751     | 2,166666667     |
| MRPL37                                                                                          | 0,002157701 | 0,079126063 | 0,101 | 0,057 | 1           | 1,056377928   | 0,946630911     | 1,771929825     |
| ADAMTS15                                                                                        | 0,123452433 | 0,079094334 | 0,031 | 0,019 | 1           | 1,056354695   | 0,94665173      | 1,631578947     |
| ACAP2                                                                                           | 0,504804417 | 0,079035469 | 0,161 | 0,17  | 1           | 1,056311595   | 0,946690357     | 0,947058824     |
| MORN4                                                                                           | 0,002197872 | 0,079010868 | 0,043 | 0,016 | 1           | 1,056293582   | 0,9467065       | 2,6875          |
| DIDO1                                                                                           | 0,355841379 | 0,078969549 | 0,061 | 0,072 | 1           | 1,056263331   | 0,946733614     | 0,847222222     |
| RAB11B-AS1                                                                                      | 0,178902794 | 0,078912285 | 0,021 | 0,012 | 1           | 1,056221405   | 0,946771193     | 1,75            |
| SEMA7A                                                                                          | 0,545036749 | 0,078744424 | 0,038 | 0,033 | 1           | 1,056098519   | 0,946881358     | 1,151515152     |
| RPS6                                                                                            | 0,075158869 | 0,07871732  | 0,725 | 0,868 | 1           | 1,056078679   | 0,946899147     | 0,835253456     |
| SEMA3A                                                                                          | 0,134737482 | 0,078622493 | 0,022 | 0,012 | 1           | 1,056009266   | 0,946961388     | 1,833333333     |
| PCNX2                                                                                           | 0,000399204 | 0,078535148 | 0,042 | 0,012 | 1           | 1,055945333   | 0,947018722     | 3,5             |
| ATP2C1                                                                                          | 0,647128482 | 0,078494103 | 0,114 | 0,104 | 1           | 1,055915292   | 0,947045665     | 1,096153846     |
| LYSMD4                                                                                          | 0,003220404 | 0,078411663 | 0,021 | 0,004 | 1           | 1,055854955   | 0,947099784     | 5,25            |
| PES1                                                                                            | 0,094988662 | 0,078380878 | 0,05  | 0,033 | 1           | 1,055832426   | 0,947119993     | 1,515151515     |
| FOXRED2                                                                                         | 0,233375539 | 0,078364612 | 0,016 | 0,009 | 1           | 1,055820522   | 0,947130672     | 1,777777778     |
| NAALADL1                                                                                        | 0,567187927 | 0,078357913 | 0,034 | 0,028 | 1           | 1,055815619   | 0,94713507      | 1,214285714     |
| H1-3                                                                                            | 0,670674876 | 0,078331252 | 0,012 | 0,009 | 1           | 1,055796108   | 0,947152573     | 1,333333333     |
| PPM1M                                                                                           | 0,472376455 | 0,078325994 | 0,04  | 0,033 | 1           | 1,055792259   | 0,947156025     | 1,212121212     |
| BTN3A1                                                                                          | 0,024042296 | 0,078279718 | 0,024 | 0,009 | 1           | 1,055758394   | 0,947186407     | 2,666666667     |
| HAUS6                                                                                           | 0,387978345 | 0,078240899 | 0,044 | 0,035 | 1           | 1,055729987   | 0,947211893     | 1,257142857     |

Supplementary Table 5

| Differentially expressed genes_total calculation_ comparing SC-Keloid vs. (SC-Myel, SC-Nonmyel) |             |             |       |       |           |               |                 |                 |
|-------------------------------------------------------------------------------------------------|-------------|-------------|-------|-------|-----------|---------------|-----------------|-----------------|
| gene                                                                                            | p_val       | avg_log2FC  | pct.1 | pct.2 | p_val_adj | Foldchange_UP | Foldchange_DOWN | Ratio_pct1_pct2 |
| TBC1D12                                                                                         | 0,858341176 | 0,078191264 | 0,057 | 0,054 | 1         | 1,055693666   | 0,947244482     | 1,055555556     |
| APCDD1L                                                                                         | 0,00019746  | 0,078038517 | 0,019 | 0     | 1         | 1,055581899   | 0,947344778     | #DIV/0!         |
| ANKRD10                                                                                         | 0,004042601 | 0,078021225 | 0,412 | 0,56  | 1         | 1,055569247   | 0,947356133     | 0,735714286     |
| DFFB                                                                                            | 0,093090888 | 0,077952232 | 0,008 | 0,018 | 1         | 1,055518768   | 0,947401439     | 0,444444444     |
| FAM193A                                                                                         | 0,729524948 | 0,077948483 | 0,078 | 0,072 | 1         | 1,055516026   | 0,947403901     | 1,083333333     |
| RSPH3                                                                                           | 0,529278077 | 0,077839397 | 0,017 | 0,014 | 1         | 1,055436218   | 0,947475539     | 1,214285714     |
| PIGM                                                                                            | 0,344389611 | 0,077797572 | 0,037 | 0,028 | 1         | 1,055405621   | 0,947503007     | 1,321428571     |
| HBB                                                                                             | 0,263879743 | 0,077739143 | 0,017 | 0,011 | 1         | 1,055362878   | 0,947541382     | 1,545454545     |
| DHX8                                                                                            | 0,804472447 | 0,077701145 | 0,054 | 0,056 | 1         | 1,055335082   | 0,947566339     | 0,964285714     |
| TOR1AIP2                                                                                        | 0,61972126  | 0,077693433 | 0,148 | 0,153 | 1         | 1,055329441   | 0,947571404     | 0,967320261     |
| CNPY4                                                                                           | 0,058927803 | 0,0775904   | 0,056 | 0,035 | 1         | 1,055254074   | 0,94763908      | 1,6             |
| TDP2                                                                                            | 0,727629293 | 0,077568201 | 0,047 | 0,05  | 1         | 1,055237837   | 0,947653661     | 0,94            |
| CTU2                                                                                            | 0,018161578 | 0,077565856 | 0,051 | 0,027 | 1         | 1,055236122   | 0,947655202     | 1,888888889     |
| TMCO3                                                                                           | 0,832006181 | 0,077461977 | 0,085 | 0,087 | 1         | 1,055160144   | 0,947723439     | 0,977011494     |
| HOMER1                                                                                          | 0,464256294 | 0,077362474 | 0,055 | 0,046 | 1         | 1,055087372   | 0,947788805     | 1,195652174     |
| NLE1                                                                                            | 0,000288327 | 0,077269201 | 0,03  | 0,005 | 1         | 1,055019161   | 0,947850084     | 6               |
| SELENOK                                                                                         | 0,01294852  | 0,077231009 | 0,391 | 0,486 | 1         | 1,054991232   | 0,947875176     | 0,804526749     |
| SGPL1                                                                                           | 0,952946686 | 0,077215246 | 0,051 | 0,05  | 1         | 1,054979705   | 0,947885533     | 1,02            |
| DNAJC13                                                                                         | 0,295640958 | 0,077176181 | 0,052 | 0,041 | 1         | 1,054951139   | 0,9479112       | 1,268292683     |
| BHLHB9                                                                                          | 0,039865372 | 0,077160594 | 0,012 | 0,003 | 1         | 1,054939741   | 0,947921441     | 4               |
| MCCC2                                                                                           | 0,885188233 | 0,077135652 | 0,047 | 0,047 | 1         | 1,054921503   | 0,947937829     | 1               |
| H2BC5                                                                                           | 0,911756383 | 0,077073001 | 0,013 | 0,012 | 1         | 1,054875693   | 0,947978996     | 1,083333333     |
| ABCC1                                                                                           | 0,926399456 | 0,077068456 | 0,021 | 0,02  | 1         | 1,05487237    | 0,947981982     | 1,05            |
| STARD3NL                                                                                        | 0,812989441 | 0,077062095 | 0,088 | 0,083 | 1         | 1,054867719   | 0,947986162     | 1,060240964     |
| AVL9                                                                                            | 0,833362081 | 0,077027869 | 0,043 | 0,041 | 1         | 1,054842694   | 0,948008652     | 1,048780488     |
| IKBKG                                                                                           | 0,025528932 | 0,076989792 | 0,051 | 0,028 | 1         | 1,054814853   | 0,948033673     | 1,821428571     |
| ANP32B                                                                                          | 0,041293522 | 0,076984922 | 0,265 | 0,322 | 1         | 1,054811293   | 0,948036873     | 0,822981366     |
| ALG1                                                                                            | 0,000867543 | 0,076965305 | 0,042 | 0,014 | 1         | 1,05479695    | 0,948049764     | 3               |
| MRPL23                                                                                          | 0,815065675 | 0,076899934 | 0,164 | 0,166 | 1         | 1,054749157   | 0,948092723     | 0,987951807     |
| CD200                                                                                           | 0,409294061 | 0,07668746  | 0,065 | 0,075 | 1         | 1,054593829   | 0,948232364     | 0,866666667     |

Supplementary Table 5

| Differentially expressed genes_total calculation_ comparing SC-Keloid vs. (SC-Myel, SC-Nonmyel) |             |             |       |       |           |               |                 |                 |
|-------------------------------------------------------------------------------------------------|-------------|-------------|-------|-------|-----------|---------------|-----------------|-----------------|
| gene                                                                                            | p_val       | avg_log2FC  | pct.1 | pct.2 | p_val_adj | Foldchange_UP | Foldchange_DOWN | Ratio_pct1_pct2 |
| RNPEPL1                                                                                         | 0,025812141 | 0,076624883 | 0,118 | 0,08  | 1         | 1,054548087   | 0,948273495     | 1,475           |
| FIGNL1                                                                                          | 0,849145646 | 0,076601673 | 0,017 | 0,016 | 1         | 1,054531122   | 0,948288751     | 1,0625          |
| DGUOK-AS1                                                                                       | 0,102259144 | 0,07659166  | 0,023 | 0,012 | 1         | 1,054523802   | 0,948295333     | 1,916666667     |
| MCM8                                                                                            | 0,201189508 | 0,076533298 | 0,015 | 0,008 | 1         | 1,054481144   | 0,948333695     | 1,875           |
| CCNJL                                                                                           | 0,026754723 | 0,076456764 | 0,03  | 0,014 | 1         | 1,054425206   | 0,948384005     | 2,142857143     |
| E2F1                                                                                            | 0,005690822 | 0,07643966  | 0,027 | 0,008 | 1         | 1,054412706   | 0,948395249     | 3,375           |
| BBOX1                                                                                           | 0,067161154 | 0,07642022  | 0,021 | 0,009 | 1         | 1,054398498   | 0,948408028     | 2,333333333     |
| PLEKHJ1                                                                                         | 0,059424375 | 0,076405665 | 0,111 | 0,079 | 1         | 1,05438786    | 0,948417596     | 1,405063291     |
| FAM86C1P                                                                                        | 0,012269426 | 0,07637536  | 0,02  | 0,005 | 1         | 1,054365712   | 0,948437519     | 4               |
| INIP                                                                                            | 0,278686305 | 0,076358447 | 0,063 | 0,076 | 1         | 1,054353352   | 0,948448637     | 0,828947368     |
| ST7                                                                                             | 0,135991    | 0,076236309 | 0,022 | 0,012 | 1         | 1,054264094   | 0,948528936     | 1,833333333     |
| ELK4                                                                                            | 0,153144496 | 0,076147551 | 0,128 | 0,152 | 1         | 1,054199235   | 0,948587294     | 0,842105263     |
| BACH1                                                                                           | 0,117418131 | 0,076138123 | 0,275 | 0,315 | 1         | 1,054192346   | 0,948593493     | 0,873015873     |
| XXYL1                                                                                           | 0,005357481 | 0,076131959 | 0,044 | 0,019 | 1         | 1,054187842   | 0,948597546     | 2,315789474     |
| PGAP3                                                                                           | 0,978993837 | 0,076084898 | 0,023 | 0,023 | 1         | 1,054153455   | 0,94862849      | 1               |
| SHISAL1                                                                                         | 0,00051324  | 0,076068689 | 0,02  | 0,001 | 1         | 1,054141611   | 0,948639148     | 20              |
| PXYLP1                                                                                          | 0,061340198 | 0,076064057 | 0,023 | 0,011 | 1         | 1,054138227   | 0,948642194     | 2,090909091     |
| RPIA                                                                                            | 0,474094648 | 0,076055435 | 0,059 | 0,05  | 1         | 1,054131927   | 0,948647863     | 1,18            |
| GTF3C3                                                                                          | 0,147846711 | 0,076046718 | 0,052 | 0,037 | 1         | 1,054125558   | 0,948653595     | 1,405405405     |
| RPE                                                                                             | 0,264730738 | 0,076046336 | 0,054 | 0,041 | 1         | 1,054125279   | 0,948653846     | 1,317073171     |
| ZNF354C                                                                                         | 0,38724499  | 0,076028582 | 0,017 | 0,012 | 1         | 1,054112307   | 0,948665521     | 1,416666667     |
| CEP44                                                                                           | 0,250460902 | 0,076017741 | 0,04  | 0,052 | 1         | 1,054104386   | 0,948672649     | 0,769230769     |
| TRIM16                                                                                          | 0,006867825 | 0,075976256 | 0,051 | 0,024 | 1         | 1,054074075   | 0,948699929     | 2,125           |
| MTMR2                                                                                           | 0,117518794 | 0,075946318 | 0,068 | 0,047 | 1         | 1,054052202   | 0,948719616     | 1,446808511     |
| TYW3                                                                                            | 0,734551036 | 0,075904778 | 0,092 | 0,085 | 1         | 1,054021852   | 0,948746933     | 1,082352941     |
| WDR81                                                                                           | 0,156097986 | 0,075886196 | 0,023 | 0,014 | 1         | 1,054008277   | 0,948759153     | 1,642857143     |
| GET1                                                                                            | 0,63579851  | 0,07586683  | 0,091 | 0,096 | 1         | 1,053994129   | 0,948771889     | 0,947916667     |
| SYNGR1                                                                                          | 0,034138065 | 0,075804511 | 0,171 | 0,209 | 1         | 1,0539486     | 0,948812873     | 0,818181818     |
| TBC1D22B                                                                                        | 0,70232671  | 0,075689117 | 0,014 | 0,016 | 1         | 1,053864304   | 0,948888767     | 0,875           |
| PTPRG                                                                                           | 0,834269087 | 0,075660896 | 0,016 | 0,018 | 1         | 1,05384369    | 0,948907328     | 0,888888889     |

Supplementary Table 5

| Differentially expressed genes_total calculation_ comparing SC-Keloid vs. (SC-Myel, SC-Nonmyel) |             |             |       |       |           |               |                 |                 |
|-------------------------------------------------------------------------------------------------|-------------|-------------|-------|-------|-----------|---------------|-----------------|-----------------|
| gene                                                                                            | p_val       | avg_log2FC  | pct.1 | pct.2 | p_val_adj | Foldchange_UP | Foldchange_DOWN | Ratio_pct1_pct2 |
| PLAA                                                                                            | 0,430907532 | 0,075614198 | 0,037 | 0,03  | 1         | 1,053809578   | 0,948938044     | 1,233333333     |
| BABAM1                                                                                          | 0,845775826 | 0,075545027 | 0,111 | 0,104 | 1         | 1,053759054   | 0,948983543     | 1,067307692     |
| TPRN                                                                                            | 0,045958248 | 0,075408375 | 0,043 | 0,024 | 1         | 1,053659247   | 0,949073434     | 1,791666667     |
| EIF4G1                                                                                          | 0,120878245 | 0,07539552  | 0,151 | 0,178 | 1         | 1,053649858   | 0,949081891     | 0,848314607     |
| ROPN1B                                                                                          | 0,135739579 | 0,075359242 | 0,022 | 0,012 | 1         | 1,053623364   | 0,949105757     | 1,833333333     |
| ULBP2                                                                                           | 0,000830919 | 0,075269968 | 0,035 | 0,009 | 1         | 1,053558167   | 0,949164449     | 3,888888889     |
| BEAN1                                                                                           | 0,041249853 | 0,075237922 | 0,014 | 0,004 | 1         | 1,053534765   | 0,949185573     | 3,5             |
| TIMM9                                                                                           | 0,759708818 | 0,075206843 | 0,084 | 0,077 | 1         | 1,05351207    | 0,949206021     | 1,090909091     |
| MINPP1                                                                                          | 0,011763509 | 0,075156158 | 0,037 | 0,016 | 1         | 1,053475058   | 0,949239369     | 2,3125          |
| BRI3BP                                                                                          | 0,522480249 | 0,075046263 | 0,027 | 0,022 | 1         | 1,053394815   | 0,949311679     | 1,227272727     |
| HNRNPD                                                                                          | 7,63218E-05 | 0,075003063 | 0,296 | 0,407 | 1         | 1,053363273   | 0,949340105     | 0,727272727     |
| CDC73                                                                                           | 0,03999318  | 0,07492385  | 0,162 | 0,201 | 1         | 1,053305438   | 0,949392231     | 0,805970149     |
| ZC3H8                                                                                           | 0,72630249  | 0,074906905 | 0,037 | 0,034 | 1         | 1,053293066   | 0,949403383     | 1,088235294     |
| CEP126                                                                                          | 0,527044936 | 0,074833872 | 0,037 | 0,043 | 1         | 1,053239747   | 0,949451445     | 0,860465116     |
| CEP162                                                                                          | 0,499054298 | 0,074813926 | 0,036 | 0,03  | 1         | 1,053225186   | 0,949464572     | 1,2             |
| RBBP9                                                                                           | 0,027420353 | 0,074778014 | 0,017 | 0,005 | 1         | 1,053198969   | 0,949488207     | 3,4             |
| ABT1                                                                                            | 0,428250103 | 0,074762533 | 0,047 | 0,038 | 1         | 1,053187667   | 0,949498395     | 1,236842105     |
| ATP8B2                                                                                          | 0,207405643 | 0,074761041 | 0,063 | 0,079 | 1         | 1,053186578   | 0,949499377     | 0,797468354     |
| RRAS                                                                                            | 0,644485396 | 0,074742165 | 0,212 | 0,214 | 1         | 1,053172798   | 0,9495118       | 0,990654206     |
| ACAP3                                                                                           | 0,794082336 | 0,074645316 | 0,088 | 0,083 | 1         | 1,053102101   | 0,949575544     | 1,060240964     |
| HHAT                                                                                            | 0,200372972 | 0,074621099 | 0,015 | 0,008 | 1         | 1,053084423   | 0,949591484     | 1,875           |
| RAE1                                                                                            | 0,393289649 | 0,074583838 | 0,065 | 0,054 | 1         | 1,053057226   | 0,949616009     | 1,203703704     |
| GEMIN4                                                                                          | 0,617024715 | 0,074511666 | 0,015 | 0,012 | 1         | 1,053004547   | 0,949663516     | 1,25            |
| SLC39A13                                                                                        | 0,554185845 | 0,074503472 | 0,108 | 0,096 | 1         | 1,052998566   | 0,94966891      | 1,125           |
| DSCC1                                                                                           | 0,003615411 | 0,074438405 | 0,023 | 0,005 | 1         | 1,052951076   | 0,949711742     | 4,6             |
| NHLRC2                                                                                          | 0,572882535 | 0,074437718 | 0,065 | 0,072 | 1         | 1,052950575   | 0,949712194     | 0,902777778     |
| DKC1                                                                                            | 0,518812734 | 0,07440855  | 0,072 | 0,062 | 1         | 1,052929287   | 0,949731395     | 1,161290323     |
| SMARCC1                                                                                         | 0,304242857 | 0,074344685 | 0,099 | 0,113 | 1         | 1,052882676   | 0,949773439     | 0,876106195     |
| SLC25A14                                                                                        | 0,283765736 | 0,074311885 | 0,026 | 0,018 | 1         | 1,052858739   | 0,949795032     | 1,444444444     |
| MCM5                                                                                            | 0,664236188 | 0,074272746 | 0,045 | 0,041 | 1         | 1,052830177   | 0,949820799     | 1,097560976     |

Supplementary Table 5

| Differentially expressed genes_total calculation_ comparing SC-Keloid vs. (SC-Myel, SC-Nonmyel) |             |             |       |       |           |               |                 |                 |
|-------------------------------------------------------------------------------------------------|-------------|-------------|-------|-------|-----------|---------------|-----------------|-----------------|
| gene                                                                                            | p_val       | avg_log2FC  | pct.1 | pct.2 | p_val_adj | Foldchange_UP | Foldchange_DOWN | Ratio_pct1_pct2 |
| MRPL24                                                                                          | 0,030657089 | 0,074258873 | 0,098 | 0,065 | 1         | 1,052820053   | 0,949829933     | 1,507692308     |
| UGGT1                                                                                           | 0,045687189 | 0,074174801 | 0,068 | 0,043 | 1         | 1,052758702   | 0,949885285     | 1,581395349     |
| ZNF48                                                                                           | 0,012389662 | 0,074171115 | 0,022 | 0,007 | 1         | 1,052756012   | 0,949887712     | 3,142857143     |
| ANAPC10                                                                                         | 0,528254215 | 0,074140128 | 0,075 | 0,065 | 1         | 1,052733401   | 0,949908115     | 1,153846154     |
| GPATCH1                                                                                         | 0,744044153 | 0,074127812 | 0,02  | 0,018 | 1         | 1,052724414   | 0,949916223     | 1,111111111     |
| TEX30                                                                                           | 0,118274417 | 0,074095793 | 0,042 | 0,027 | 1         | 1,05270105    | 0,949937306     | 1,555555556     |
| IQCK                                                                                            | 0,172647808 | 0,074078032 | 0,035 | 0,023 | 1         | 1,05268809    | 0,949949001     | 1,52173913      |
| ACBD5                                                                                           | 0,420492853 | 0,074067126 | 0,105 | 0,091 | 1         | 1,052680133   | 0,949956182     | 1,153846154     |
| ZWINT                                                                                           | 0,002693591 | 0,074049084 | 0,031 | 0,009 | 1         | 1,052666968   | 0,949968062     | 3,444444444     |
| AP5M1                                                                                           | 0,025633944 | 0,074000588 | 0,051 | 0,028 | 1         | 1,052631584   | 0,949999996     | 1,821428571     |
| SUMF1                                                                                           | 0,615542589 | 0,073818759 | 0,069 | 0,061 | 1         | 1,052498925   | 0,950119735     | 1,131147541     |
| ABHD12                                                                                          | 0,993835378 | 0,073764901 | 0,136 | 0,132 | 1         | 1,052459634   | 0,950155206     | 1,03030303      |
| OSCP1                                                                                           | 0,01043103  | 0,073752934 | 0,015 | 0,003 | 1         | 1,052450904   | 0,950163087     | 5               |
| ALKBH4                                                                                          | 0,455363144 | 0,073736777 | 0,029 | 0,023 | 1         | 1,052439117   | 0,950173729     | 1,260869565     |
| PSORS1C1                                                                                        | 0,074560769 | 0,073733354 | 0,019 | 0,008 | 1         | 1,05243662    | 0,950175983     | 2,375           |
| PRECSIT                                                                                         | 0,016081693 | 0,073693805 | 0,028 | 0,011 | 1         | 1,05240777    | 0,950202031     | 2,545454545     |
| DTX2                                                                                            | 0,11067846  | 0,073674536 | 0,03  | 0,018 | 1         | 1,052393714   | 0,950214722     | 1,666666667     |
| STK10                                                                                           | 0,122629947 | 0,073665925 | 0,07  | 0,05  | 1         | 1,052387432   | 0,950220394     | 1,4             |
| SUSD1                                                                                           | 0,08830934  | 0,073648318 | 0,014 | 0,005 | 1         | 1,052374589   | 0,95023199      | 2,8             |
| POC1A                                                                                           | 0,001296146 | 0,073636498 | 0,017 | 0,001 | 1         | 1,052365966   | 0,950239776     | 17              |
| RNASE1                                                                                          | 0,019479563 | 0,073624617 | 0,02  | 0,039 | 1         | 1,0523573     | 0,950247601     | 0,512820513     |
| CYBC1                                                                                           | 0,142345636 | 0,073621343 | 0,071 | 0,052 | 1         | 1,052354912   | 0,950249757     | 1,365384615     |
| SLAIN2                                                                                          | 0,046484669 | 0,073612712 | 0,146 | 0,183 | 1         | 1,052348616   | 0,950255442     | 0,797814208     |
| ZNF264                                                                                          | 0,254353281 | 0,073609214 | 0,04  | 0,052 | 1         | 1,052346065   | 0,950257746     | 0,769230769     |
| CCDC138                                                                                         | 0,150999964 | 0,073548996 | 0,02  | 0,011 | 1         | 1,052302141   | 0,950297411     | 1,818181818     |
| RPS2                                                                                            | 0,472915523 | 0,073512782 | 0,708 | 0,912 | 1         | 1,052275727   | 0,950321265     | 0,776315789     |
| METTL17                                                                                         | 0,828148333 | 0,073461511 | 0,07  | 0,072 | 1         | 1,052238331   | 0,950355039     | 0,972222222     |
| XPNPEP1                                                                                         | 0,388507234 | 0,07336578  | 0,058 | 0,047 | 1         | 1,052168511   | 0,950418103     | 1,234042553     |
| TDP1                                                                                            | 0,353294531 | 0,073359825 | 0,024 | 0,018 | 1         | 1,052164168   | 0,950422025     | 1,333333333     |
| LINC00973                                                                                       | 0,061871786 | 0,073358992 | 0,01  | 0,003 | 1         | 1,052163561   | 0,950422574     | 3,333333333     |

Supplementary Table 5

| Differentially expressed genes_total calculation_ comparing SC-Keloid vs. (SC-Myel, SC-Nonmyel) |             |             |       |       |           |               |                 |                 |
|-------------------------------------------------------------------------------------------------|-------------|-------------|-------|-------|-----------|---------------|-----------------|-----------------|
| gene                                                                                            | p_val       | avg_log2FC  | pct.1 | pct.2 | p_val_adj | Foldchange_UP | Foldchange_DOWN | Ratio_pct1_pct2 |
| BTBD3                                                                                           | 0,569763846 | 0,073357608 | 0,062 | 0,068 | 1         | 1,052162552   | 0,950423486     | 0,911764706     |
| NOC2L                                                                                           | 0,614400284 | 0,073345638 | 0,085 | 0,091 | 1         | 1,052153822   | 0,950431371     | 0,934065934     |
| CCZ1B                                                                                           | 0,889647445 | 0,073330086 | 0,047 | 0,047 | 1         | 1,05214248    | 0,950441617     | 1               |
| MYT1                                                                                            | 0,01342148  | 0,073316471 | 0,012 | 0,001 | 1         | 1,052132551   | 0,950450587     | 12              |
| BET1L                                                                                           | 0,332178933 | 0,073263643 | 0,05  | 0,039 | 1         | 1,052094025   | 0,95048539      | 1,282051282     |
| METTL25                                                                                         | 0,727361838 | 0,073209923 | 0,024 | 0,027 | 1         | 1,05205485    | 0,950520783     | 0,888888889     |
| FOXC2                                                                                           | 0,018293901 | 0,073104095 | 0,021 | 0,007 | 1         | 1,05197768    | 0,950590511     | 3               |
| DNAAF9                                                                                          | 0,912847907 | 0,073034748 | 0,063 | 0,061 | 1         | 1,051927115   | 0,950636204     | 1,032786885     |
| PPP4R1                                                                                          | 0,815742305 | 0,073010755 | 0,114 | 0,107 | 1         | 1,051909621   | 0,950652014     | 1,065420561     |
| PCDHGA6                                                                                         | 0,153319521 | 0,072990796 | 0,02  | 0,011 | 1         | 1,051895068   | 0,950665166     | 1,818181818     |
| TRAPPC12                                                                                        | 0,266920327 | 0,072988277 | 0,076 | 0,06  | 1         | 1,051893231   | 0,950666826     | 1,266666667     |
| ZNF746                                                                                          | 0,411251303 | 0,07292112  | 0,022 | 0,016 | 1         | 1,051844268   | 0,95071108      | 1,375           |
| GOLPH3L                                                                                         | 0,532361145 | 0,07290618  | 0,021 | 0,026 | 1         | 1,051833375   | 0,950720926     | 0,807692308     |
| TLK1                                                                                            | 0,449402365 | 0,072667786 | 0,078 | 0,066 | 1         | 1,051659582   | 0,950878038     | 1,181818182     |
| RUFY2                                                                                           | 0,626341356 | 0,072606118 | 0,064 | 0,069 | 1         | 1,05161463    | 0,950918684     | 0,927536232     |
| FER                                                                                             | 0,016043174 | 0,072573037 | 0,086 | 0,123 | 1         | 1,051590517   | 0,950940489     | 0,699186992     |
| CCNA2                                                                                           | 0,093605303 | 0,072559774 | 0,012 | 0,004 | 1         | 1,051580849   | 0,950949231     | 3               |
| NACC1                                                                                           | 0,00209505  | 0,072557028 | 0,045 | 0,018 | 1         | 1,051578848   | 0,950951041     | 2,5             |
| TMED4                                                                                           | 0,090147847 | 0,072491776 | 0,214 | 0,246 | 1         | 1,051531287   | 0,950994053     | 0,869918699     |
| SNAI2                                                                                           | 0,005766056 | 0,07247553  | 0,042 | 0,018 | 1         | 1,051519446   | 0,951004762     | 2,333333333     |
| TOR2A                                                                                           | 0,027583377 | 0,072424046 | 0,017 | 0,005 | 1         | 1,051481922   | 0,9510387       | 3,4             |
| USP46-DT                                                                                        | 0,093058931 | 0,072414213 | 0,012 | 0,004 | 1         | 1,051474755   | 0,951045182     | 3               |
| PDE6D                                                                                           | 0,879194403 | 0,07240862  | 0,051 | 0,049 | 1         | 1,051470679   | 0,951048869     | 1,040816327     |
| ARNT                                                                                            | 0,254227067 | 0,072385495 | 0,04  | 0,052 | 1         | 1,051453825   | 0,951064114     | 0,769230769     |
| METTL15                                                                                         | 0,955849175 | 0,072331396 | 0,05  | 0,049 | 1         | 1,051414398   | 0,951099778     | 1,020408163     |
| CCDC113                                                                                         | 0,002086953 | 0,07229113  | 0,022 | 0,004 | 1         | 1,051385053   | 0,951126323     | 5,5             |
| CUL7                                                                                            | 0,274848766 | 0,072261428 | 0,029 | 0,02  | 1         | 1,051363408   | 0,951145905     | 1,45            |
| HNRNPLL                                                                                         | 0,283734971 | 0,072252094 | 0,058 | 0,071 | 1         | 1,051356606   | 0,951152059     | 0,816901408     |
| RSL24D1                                                                                         | 0,016006937 | 0,072215534 | 0,282 | 0,341 | 1         | 1,051329963   | 0,951176163     | 0,826979472     |
| PRKRA                                                                                           | 0,811008929 | 0,072156713 | 0,133 | 0,123 | 1         | 1,051287099   | 0,951214945     | 1,081300813     |

Supplementary Table 5

| Differentially expressed genes_total calculation_ comparing SC-Keloid vs. (SC-Myel, SC-Nonmyel) |             |             |       |       |           |               |                 |                 |
|-------------------------------------------------------------------------------------------------|-------------|-------------|-------|-------|-----------|---------------|-----------------|-----------------|
| gene                                                                                            | p_val       | avg_log2FC  | pct.1 | pct.2 | p_val_adj | Foldchange_UP | Foldchange_DOWN | Ratio_pct1_pct2 |
| METTL6                                                                                          | 0,024207306 | 0,07214655  | 0,033 | 0,015 | 1         | 1,051279694   | 0,951221645     | 2,2             |
| CTDSPL2                                                                                         | 0,203797045 | 0,072072803 | 0,073 | 0,091 | 1         | 1,051225956   | 0,951270271     | 0,802197802     |
| FGF5                                                                                            | 0,00498652  | 0,072026878 | 0,02  | 0,004 | 1         | 1,051192493   | 0,951300553     | 5               |
| CDC27                                                                                           | 0,991683786 | 0,072003896 | 0,102 | 0,099 | 1         | 1,051175748   | 0,951315707     | 1,03030303      |
| EVL                                                                                             | 0,032413799 | 0,071969913 | 0,084 | 0,054 | 1         | 1,051150988   | 0,951338116     | 1,555555556     |
| FOXM1                                                                                           | 0,008321582 | 0,071906796 | 0,013 | 0,001 | 1         | 1,051105001   | 0,951379737     | 13              |
| ZNF521                                                                                          | 0,690723472 | 0,071903866 | 0,016 | 0,019 | 1         | 1,051102867   | 0,95138167      | 0,842105263     |
| GCAT                                                                                            | 0,337636031 | 0,071876889 | 0,02  | 0,014 | 1         | 1,051083212   | 0,95139946      | 1,428571429     |
| CTIF                                                                                            | 0,8572578   | 0,071855215 | 0,024 | 0,023 | 1         | 1,051067422   | 0,951413753     | 1,043478261     |
| CASP8                                                                                           | 0,021510388 | 0,071843304 | 0,01  | 0,001 | 1         | 1,051058744   | 0,951421608     | 10              |
| CC2D1B                                                                                          | 0,623897405 | 0,071842177 | 0,036 | 0,041 | 1         | 1,051057922   | 0,951422351     | 0,87804878      |
| ZNF484                                                                                          | 0,181767048 | 0,071834283 | 0,024 | 0,015 | 1         | 1,051052172   | 0,951427557     | 1,6             |
| PEX3                                                                                            | 0,569591792 | 0,071715647 | 0,029 | 0,024 | 1         | 1,050965745   | 0,951505798     | 1,208333333     |
| FAM151B                                                                                         | 0,039795117 | 0,071661139 | 0,012 | 0,003 | 1         | 1,050926038   | 0,951541749     | 4               |
| LRCH2                                                                                           | 0,228336684 | 0,071542223 | 0,013 | 0,007 | 1         | 1,050839417   | 0,951620184     | 1,857142857     |
| SPG21                                                                                           | 0,438425419 | 0,071518995 | 0,092 | 0,079 | 1         | 1,050822499   | 0,951635506     | 1,164556962     |
| TUT7                                                                                            | 0,893230685 | 0,071494618 | 0,056 | 0,057 | 1         | 1,050804743   | 0,951651586     | 0,98245614      |
| C2orf76                                                                                         | 0,80710215  | 0,071484986 | 0,066 | 0,062 | 1         | 1,050797728   | 0,951657939     | 1,064516129     |
| DEPDC5                                                                                          | 0,989679588 | 0,071471801 | 0,017 | 0,018 | 1         | 1,050788124   | 0,951666636     | 0,944444444     |
| TIMM23                                                                                          | 0,124099486 | 0,071409721 | 0,042 | 0,027 | 1         | 1,050742909   | 0,951707588     | 1,555555556     |
| ZNF805                                                                                          | 0,02229619  | 0,071408885 | 0,035 | 0,016 | 1         | 1,0507423     | 0,95170814      | 2,1875          |
| ZNF573                                                                                          | 0,235547733 | 0,071369302 | 0,016 | 0,009 | 1         | 1,050713472   | 0,951734252     | 1,777777778     |
| AC093157.1                                                                                      | 0,433766757 | 0,071352263 | 0,028 | 0,022 | 1         | 1,050701062   | 0,951745493     | 1,272727273     |
| CENPH                                                                                           | 0,374301164 | 0,071327593 | 0,026 | 0,019 | 1         | 1,050683096   | 0,951761767     | 1,368421053     |
| KDM1A                                                                                           | 0,75593171  | 0,071276575 | 0,075 | 0,069 | 1         | 1,050645941   | 0,951795425     | 1,086956522     |
| PIGO                                                                                            | 0,490179916 | 0,071275253 | 0,026 | 0,02  | 1         | 1,050644978   | 0,951796297     | 1,3             |
| SPATA17                                                                                         | 0,021420005 | 0,071274974 | 0,01  | 0,001 | 1         | 1,050644775   | 0,951796481     | 10              |
| GRWD1                                                                                           | 0,211524733 | 0,071236307 | 0,05  | 0,037 | 1         | 1,050616616   | 0,951821991     | 1,351351351     |
| MICAL3                                                                                          | 0,255144675 | 0,07122436  | 0,111 | 0,129 | 1         | 1,050607916   | 0,951829874     | 0,860465116     |
| IRAK1BP1                                                                                        | 0,137287369 | 0,071140671 | 0,026 | 0,015 | 1         | 1,050546974   | 0,951885089     | 1,733333333     |

Supplementary Table 5

| Differentially expressed genes_total calculation_ comparing SC-Keloid vs. (SC-Myel, SC-Nonmyel) |             |             |       |       |           |               |                 |                 |
|-------------------------------------------------------------------------------------------------|-------------|-------------|-------|-------|-----------|---------------|-----------------|-----------------|
| gene                                                                                            | p_val       | avg_log2FC  | pct.1 | pct.2 | p_val_adj | Foldchange_UP | Foldchange_DOWN | Ratio_pct1_pct2 |
| ZKSCAN8                                                                                         | 0,988624971 | 0,07113755  | 0,024 | 0,024 | 1         | 1,050544701   | 0,951887149     | 1               |
| TRMT5                                                                                           | 0,663750992 | 0,07108106  | 0,028 | 0,024 | 1         | 1,050503566   | 0,951924422     | 1,166666667     |
| PRCP                                                                                            | 0,28609885  | 0,070999756 | 0,126 | 0,142 | 1         | 1,050444366   | 0,951978069     | 0,887323944     |
| EBP                                                                                             | 0,009573148 | 0,070867677 | 0,088 | 0,053 | 1         | 1,050348202   | 0,952065227     | 1,660377358     |
| DNAJC5                                                                                          | 0,15577052  | 0,070835359 | 0,057 | 0,041 | 1         | 1,050324673   | 0,952086555     | 1,390243902     |
| SLC35E4                                                                                         | 0,13304931  | 0,070834913 | 0,058 | 0,041 | 1         | 1,050324349   | 0,952086849     | 1,414634146     |
| USP18                                                                                           | 0,43272835  | 0,070775895 | 0,023 | 0,018 | 1         | 1,050281383   | 0,952125798     | 1,277777778     |
| UBTD2                                                                                           | 0,48588967  | 0,070774248 | 0,083 | 0,091 | 1         | 1,050280184   | 0,952126885     | 0,912087912     |
| BCL2L12                                                                                         | 0,005950783 | 0,070671654 | 0,062 | 0,031 | 1         | 1,050205498   | 0,952194596     | 2               |
| UPRT                                                                                            | 0,779506815 | 0,070637245 | 0,033 | 0,03  | 1         | 1,050180451   | 0,952217306     | 1,1             |
| LRRC57                                                                                          | 0,987784885 | 0,07061126  | 0,049 | 0,049 | 1         | 1,050161536   | 0,952234457     | 1               |
| ZMYND11                                                                                         | 0,030983135 | 0,07059041  | 0,118 | 0,153 | 1         | 1,050146359   | 0,952248219     | 0,77124183      |
| CSK                                                                                             | 0,004537449 | 0,070571248 | 0,081 | 0,045 | 1         | 1,050132411   | 0,952260867     | 1,8             |
| MRPL44                                                                                          | 0,212715597 | 0,070557045 | 0,059 | 0,045 | 1         | 1,050122073   | 0,952270242     | 1,311111111     |
| GNPDA1                                                                                          | 0,082404351 | 0,070512133 | 0,058 | 0,08  | 1         | 1,050089382   | 0,952299887     | 0,725           |
| NECAB1                                                                                          | 0,74188331  | 0,070494993 | 0,012 | 0,014 | 1         | 1,050076907   | 0,952311201     | 0,857142857     |
| SEC61A2                                                                                         | 0,273703161 | 0,070463575 | 0,017 | 0,011 | 1         | 1,050054039   | 0,95233194      | 1,545454545     |
| TBL2                                                                                            | 0,042561188 | 0,070411716 | 0,045 | 0,026 | 1         | 1,050016295   | 0,952366173     | 1,730769231     |
| HSPBP1                                                                                          | 0,007797959 | 0,070411468 | 0,086 | 0,05  | 1         | 1,050016114   | 0,952366337     | 1,72            |
| FBXW2                                                                                           | 0,857270245 | 0,070400178 | 0,087 | 0,088 | 1         | 1,050007897   | 0,95237379      | 0,988636364     |
| ARHGAP22                                                                                        | 0,000151793 | 0,070364352 | 0,037 | 0,008 | 1         | 1,049981822   | 0,95239744      | 4,625           |
| ZBTB46                                                                                          | 0,7274433   | 0,070330766 | 0,019 | 0,016 | 1         | 1,049957379   | 0,952419612     | 1,1875          |
| TK1                                                                                             | 0,012193065 | 0,070274513 | 0,02  | 0,005 | 1         | 1,04991644    | 0,952456749     | 4               |
| PPP2R5C                                                                                         | 0,942035138 | 0,070221225 | 0,116 | 0,115 | 1         | 1,049877661   | 0,95249193      | 1,008695652     |
| CCDC8                                                                                           | 0,025733719 | 0,070196718 | 0,013 | 0,003 | 1         | 1,049859827   | 0,952508111     | 4,333333333     |
| FMNL1                                                                                           | 0,092626609 | 0,070173533 | 0,02  | 0,009 | 1         | 1,049842955   | 0,952523418     | 2,222222222     |
| GPSM3                                                                                           | 0,000574966 | 0,070018527 | 0,052 | 0,019 | 1         | 1,049730164   | 0,952625764     | 2,736842105     |
| PIBF1                                                                                           | 0,043822588 | 0,069997904 | 0,062 | 0,088 | 1         | 1,049715158   | 0,952639382     | 0,704545455     |
| MLLT11                                                                                          | 0,026745074 | 0,069952126 | 0,075 | 0,046 | 1         | 1,049681851   | 0,95266961      | 1,630434783     |
| SLC30A6                                                                                         | 0,571564587 | 0,06989453  | 0,019 | 0,015 | 1         | 1,049639945   | 0,952707644     | 1,266666667     |



Supplementary Table 5

| Differentially expressed genes_total calculation_ comparing SC-Keloid vs. (SC-Myel, SC-Nonmyel) |             |             |       |       |           |               |                 |                 |
|-------------------------------------------------------------------------------------------------|-------------|-------------|-------|-------|-----------|---------------|-----------------|-----------------|
| gene                                                                                            | p_val       | avg_log2FC  | pct.1 | pct.2 | p_val_adj | Foldchange_UP | Foldchange_DOWN | Ratio_pct1_pct2 |
| CCDC181                                                                                         | 0,01159271  | 0,069821824 | 0,017 | 0,004 | 1         | 1,04958705    | 0,952755658     | 4,25            |
| LAPTM5                                                                                          | 0,13972144  | 0,069688399 | 0,016 | 0,027 | 1         | 1,049489985   | 0,952843776     | 0,592592593     |
| PPP1R37                                                                                         | 0,053368663 | 0,069683116 | 0,041 | 0,023 | 1         | 1,049486141   | 0,952847266     | 1,782608696     |
| MTHFD2                                                                                          | 0,818343307 | 0,069682367 | 0,099 | 0,094 | 1         | 1,049485597   | 0,95284776      | 1,053191489     |
| CDK1                                                                                            | 0,232294785 | 0,069670108 | 0,016 | 0,009 | 1         | 1,049476679   | 0,952855857     | 1,777777778     |
| THOC3                                                                                           | 0,108252949 | 0,069646804 | 0,044 | 0,028 | 1         | 1,049459727   | 0,952871248     | 1,571428571     |
| DHRS4L2                                                                                         | 0,778148292 | 0,069579333 | 0,087 | 0,081 | 1         | 1,049410648   | 0,952915812     | 1,074074074     |
| PCDHGB7                                                                                         | 0,046878736 | 0,069535705 | 0,022 | 0,009 | 1         | 1,049378913   | 0,95294463      | 2,444444444     |
| IRAK4                                                                                           | 0,383239379 | 0,069522126 | 0,044 | 0,035 | 1         | 1,049369036   | 0,952953599     | 1,257142857     |
| GPR107                                                                                          | 0,282874603 | 0,069496936 | 0,069 | 0,054 | 1         | 1,049350714   | 0,952970239     | 1,277777778     |
| PABPC1L                                                                                         | 0,248019554 | 0,069477328 | 0,031 | 0,022 | 1         | 1,049336452   | 0,952983191     | 1,409090909     |
| PCLAF                                                                                           | 0,04821486  | 0,069406631 | 0,022 | 0,009 | 1         | 1,049285032   | 0,953029891     | 2,444444444     |
| ANKRD52                                                                                         | 0,006515325 | 0,069380399 | 0,045 | 0,02  | 1         | 1,049265954   | 0,95304722      | 2,25            |
| PSMC3IP                                                                                         | 0,966229077 | 0,069271445 | 0,027 | 0,027 | 1         | 1,049186715   | 0,953119197     | 1               |
| HAUS2                                                                                           | 0,701001354 | 0,069269599 | 0,038 | 0,042 | 1         | 1,049185372   | 0,953120417     | 0,904761905     |
| PPP3CB                                                                                          | 0,301962741 | 0,069194478 | 0,106 | 0,087 | 1         | 1,049130743   | 0,953170048     | 1,218390805     |
| ZNF584                                                                                          | 0,017719811 | 0,069163093 | 0,034 | 0,015 | 1         | 1,04910792    | 0,953190783     | 2,266666667     |
| NCAPG2                                                                                          | 0,204925157 | 0,069134864 | 0,022 | 0,014 | 1         | 1,049087393   | 0,953209434     | 1,571428571     |
| ESYT1                                                                                           | 0,023453964 | 0,068996525 | 0,073 | 0,045 | 1         | 1,048986801   | 0,953300841     | 1,622222222     |
| B3GNTL1                                                                                         | 0,010489895 | 0,068968628 | 0,015 | 0,003 | 1         | 1,048966517   | 0,953319276     | 5               |
| NUBPL                                                                                           | 0,948803872 | 0,068966787 | 0,028 | 0,028 | 1         | 1,048965178   | 0,953320492     | 1               |
| RNFT1                                                                                           | 0,122130537 | 0,068950098 | 0,035 | 0,022 | 1         | 1,048953044   | 0,95333152      | 1,590909091     |
| ZMYM1                                                                                           | 0,490179916 | 0,068884502 | 0,026 | 0,02  | 1         | 1,048905352   | 0,953374867     | 1,3             |
| DOP1A                                                                                           | 0,943662141 | 0,068802698 | 0,028 | 0,028 | 1         | 1,048845878   | 0,953428927     | 1               |
| HRH1                                                                                            | 0,006686827 | 0,068801398 | 0,016 | 0,003 | 1         | 1,048844933   | 0,953429786     | 5,333333333     |
| BTN2A2                                                                                          | 0,186084462 | 0,06878709  | 0,036 | 0,024 | 1         | 1,048834531   | 0,953439241     | 1,5             |
| TIMELESS                                                                                        | 0,010391948 | 0,068747964 | 0,015 | 0,003 | 1         | 1,048806087   | 0,953465099     | 5               |
| TMBIM4                                                                                          | 0,230333121 | 0,068706897 | 0,302 | 0,334 | 1         | 1,048776233   | 0,95349224      | 0,904191617     |
| DEAF1                                                                                           | 0,115557542 | 0,068663996 | 0,072 | 0,052 | 1         | 1,048745046   | 0,953520595     | 1,384615385     |
| APOO                                                                                            | 0,657353153 | 0,068500665 | 0,038 | 0,034 | 1         | 1,048626322   | 0,953628551     | 1,117647059     |

Supplementary Table 5

| Differentially expressed genes_total calculation_ comparing SC-Keloid vs. (SC-Myel, SC-Nonmyel) |             |             |       |       |           |               |                 |                 |
|-------------------------------------------------------------------------------------------------|-------------|-------------|-------|-------|-----------|---------------|-----------------|-----------------|
| gene                                                                                            | p_val       | avg_log2FC  | pct.1 | pct.2 | p_val_adj | Foldchange_UP | Foldchange_DOWN | Ratio_pct1_pct2 |
| SLC29A1                                                                                         | 0,287641699 | 0,068374697 | 0,026 | 0,018 | 1         | 1,048534765   | 0,95371182      | 1,444444444     |
| CCNY                                                                                            | 0,175424158 | 0,068112447 | 0,109 | 0,085 | 1         | 1,048344183   | 0,9538852       | 1,282352941     |
| SETD7                                                                                           | 0,548816661 | 0,068112085 | 0,068 | 0,075 | 1         | 1,04834392    | 0,953885439     | 0,906666667     |
| ZNF587                                                                                          | 0,106551551 | 0,068091619 | 0,03  | 0,018 | 1         | 1,048329048   | 0,953898971     | 1,666666667     |
| TMEM251                                                                                         | 0,636443101 | 0,06802858  | 0,061 | 0,054 | 1         | 1,048283242   | 0,953940653     | 1,12962963      |
| JOSD1                                                                                           | 0,395627489 | 0,068021475 | 0,109 | 0,121 | 1         | 1,048278079   | 0,953945351     | 0,900826446     |
| GTF2H3                                                                                          | 0,008834394 | 0,068001403 | 0,071 | 0,039 | 1         | 1,048263495   | 0,953958623     | 1,820512821     |
| SPEF2                                                                                           | 0,687849585 | 0,067900948 | 0,029 | 0,026 | 1         | 1,048190507   | 0,954025049     | 1,115384615     |
| LMBR1                                                                                           | 0,341684922 | 0,067854717 | 0,033 | 0,024 | 1         | 1,048156918   | 0,954055621     | 1,375           |
| DBF4                                                                                            | 0,85175544  | 0,067854068 | 0,024 | 0,023 | 1         | 1,048156447   | 0,95405605      | 1,043478261     |
| NGLY1                                                                                           | 0,568189722 | 0,067835468 | 0,055 | 0,061 | 1         | 1,048142933   | 0,954068351     | 0,901639344     |
| NACAD                                                                                           | 0,775918575 | 0,067773302 | 0,051 | 0,047 | 1         | 1,04809777    | 0,954109463     | 1,085106383     |
| ARNTL2                                                                                          | 0,002132736 | 0,067704079 | 0,022 | 0,004 | 1         | 1,048047481   | 0,954155244     | 5,5             |
| ADAR                                                                                            | 0,24408882  | 0,067536877 | 0,143 | 0,163 | 1         | 1,047926024   | 0,954265833     | 0,877300613     |
| ZC3H7B                                                                                          | 0,055645748 | 0,06748299  | 0,071 | 0,098 | 1         | 1,047886884   | 0,954301476     | 0,724489796     |
| SAMD9L                                                                                          | 0,547106227 | 0,067482534 | 0,044 | 0,038 | 1         | 1,047886552   | 0,954301778     | 1,157894737     |
| GAL3ST4                                                                                         | 0,00127447  | 0,067476155 | 0,036 | 0,011 | 1         | 1,047881919   | 0,954305997     | 3,272727273     |
| SAC3D1                                                                                          | 0,038510415 | 0,067347829 | 0,051 | 0,03  | 1         | 1,047788715   | 0,954390886     | 1,7             |
| DHX16                                                                                           | 0,850221866 | 0,067325554 | 0,043 | 0,045 | 1         | 1,047772538   | 0,954405621     | 0,955555556     |
| MSANTD2                                                                                         | 0,249244752 | 0,06732514  | 0,044 | 0,033 | 1         | 1,047772237   | 0,954405896     | 1,333333333     |
| SLF1                                                                                            | 0,096676592 | 0,067312679 | 0,058 | 0,039 | 1         | 1,047763187   | 0,954414139     | 1,487179487     |
| ZNF570                                                                                          | 0,873355888 | 0,067287362 | 0,019 | 0,018 | 1         | 1,047744801   | 0,954430887     | 1,055555556     |
| PIGH                                                                                            | 0,474801813 | 0,067210058 | 0,076 | 0,065 | 1         | 1,047688661   | 0,95448203      | 1,169230769     |
| PPP3CA                                                                                          | 0,007156687 | 0,067207441 | 0,2   | 0,256 | 1         | 1,04768676    | 0,954483762     | 0,78125         |
| STX12                                                                                           | 0,292871089 | 0,067204419 | 0,153 | 0,167 | 1         | 1,047684565   | 0,954485761     | 0,916167665     |
| MGAT5                                                                                           | 0,819366538 | 0,067204093 | 0,028 | 0,03  | 1         | 1,047684329   | 0,954485977     | 0,933333333     |
| RMI1                                                                                            | 0,000325842 | 0,067182602 | 0,021 | 0,001 | 1         | 1,047668723   | 0,954500195     | 21              |
| B3GNT7                                                                                          | 0,004015458 | 0,067131486 | 0,045 | 0,019 | 1         | 1,047631603   | 0,954534015     | 2,368421053     |
| SOCS7                                                                                           | 0,32695083  | 0,067126971 | 0,029 | 0,038 | 1         | 1,047628325   | 0,954537002     | 0,763157895     |
| POLI                                                                                            | 0,252176028 | 0,066969431 | 0,041 | 0,053 | 1         | 1,047513931   | 0,954641242     | 0,773584906     |

Supplementary Table 5

| Differentially expressed genes_total calculation_ comparing SC-Keloid vs. (SC-Myel, SC-Nonmyel) |             |             |       |       |           |               |                 |                 |
|-------------------------------------------------------------------------------------------------|-------------|-------------|-------|-------|-----------|---------------|-----------------|-----------------|
| gene                                                                                            | p_val       | avg_log2FC  | pct.1 | pct.2 | p_val_adj | Foldchange_UP | Foldchange_DOWN | Ratio_pct1_pct2 |
| C9orf85                                                                                         | 0,923563508 | 0,066959752 | 0,049 | 0,047 | 1         | 1,047506904   | 0,954647646     | 1,042553191     |
| AC002454.1                                                                                      | 0,00019746  | 0,066837157 | 0,019 | 0     | 1         | 1,047417894   | 0,954728772     | #DIV/0!         |
| MAT2B                                                                                           | 0,97041123  | 0,066704262 | 0,052 | 0,052 | 1         | 1,047321414   | 0,954816722     | 1               |
| MCM2                                                                                            | 0,260779581 | 0,066663772 | 0,01  | 0,005 | 1         | 1,047292021   | 0,95484352      | 2               |
| FANCF                                                                                           | 0,23210965  | 0,06657603  | 0,023 | 0,015 | 1         | 1,047228329   | 0,954901593     | 1,533333333     |
| TBC1D1                                                                                          | 0,288598802 | 0,066572612 | 0,038 | 0,028 | 1         | 1,047225848   | 0,954903856     | 1,357142857     |
| TTC4                                                                                            | 0,186813645 | 0,066550391 | 0,036 | 0,024 | 1         | 1,047209718   | 0,954918564     | 1,5             |
| RAMP2                                                                                           | 0,414188987 | 0,066528442 | 0,014 | 0,009 | 1         | 1,047193786   | 0,954933092     | 1,555555556     |
| TIMM29                                                                                          | 0,61908729  | 0,066473645 | 0,058 | 0,052 | 1         | 1,047154012   | 0,954969363     | 1,115384615     |
| TIGD5                                                                                           | 0,502349636 | 0,066436709 | 0,026 | 0,02  | 1         | 1,047127203   | 0,954993812     | 1,3             |
| LDAH                                                                                            | 0,204085222 | 0,066372862 | 0,022 | 0,014 | 1         | 1,047080863   | 0,955036077     | 1,571428571     |
| FABP4                                                                                           | 0,84729735  | 0,066350225 | 0,01  | 0,009 | 1         | 1,047064434   | 0,955051063     | 1,111111111     |
| MRPL50                                                                                          | 0,831694969 | 0,066336829 | 0,09  | 0,091 | 1         | 1,047054711   | 0,955059931     | 0,989010989     |
| MR1                                                                                             | 0,075719518 | 0,06631036  | 0,024 | 0,012 | 1         | 1,047035502   | 0,955077453     | 2               |
| ANTXR1                                                                                          | 0,8006534   | 0,06626881  | 0,121 | 0,115 | 1         | 1,047005347   | 0,95510496      | 1,052173913     |
| NELFE                                                                                           | 0,05407641  | 0,066253778 | 0,144 | 0,107 | 1         | 1,046994438   | 0,955114912     | 1,345794393     |
| LYSMD3                                                                                          | 0,959401022 | 0,066252187 | 0,065 | 0,064 | 1         | 1,046993283   | 0,955115965     | 1,015625        |
| CPT2                                                                                            | 0,114624771 | 0,066228469 | 0,021 | 0,011 | 1         | 1,046976071   | 0,955131667     | 1,909090909     |
| GATC                                                                                            | 0,812895835 | 0,066219802 | 0,035 | 0,033 | 1         | 1,046969781   | 0,955137405     | 1,060606061     |
| ERCC2                                                                                           | 0,114510627 | 0,066208024 | 0,021 | 0,011 | 1         | 1,046961234   | 0,955145203     | 1,909090909     |
| HTT                                                                                             | 0,121274749 | 0,066201745 | 0,081 | 0,103 | 1         | 1,046956677   | 0,95514936      | 0,786407767     |
| SEC31B                                                                                          | 0,263758112 | 0,0661897   | 0,01  | 0,005 | 1         | 1,046947936   | 0,955157334     | 2               |
| PELP1                                                                                           | 0,886339068 | 0,066148953 | 0,056 | 0,057 | 1         | 1,046918367   | 0,955184312     | 0,98245614      |
| ATG10                                                                                           | 0,862449081 | 0,066116657 | 0,042 | 0,043 | 1         | 1,046894931   | 0,955205695     | 0,976744186     |
| AFF2                                                                                            | 0,041078792 | 0,066041606 | 0,016 | 0,005 | 1         | 1,046840472   | 0,955255387     | 3,2             |
| WDPCP                                                                                           | 0,374738064 | 0,065968607 | 0,021 | 0,015 | 1         | 1,046787504   | 0,955303724     | 1,4             |
| FAM219A                                                                                         | 0,565348898 | 0,06593688  | 0,04  | 0,034 | 1         | 1,046764484   | 0,955324732     | 1,176470588     |
| EIF1AD                                                                                          | 0,703627773 | 0,06591541  | 0,041 | 0,037 | 1         | 1,046748905   | 0,95533895      | 1,108108108     |
| ATAT1                                                                                           | 0,175375319 | 0,065882651 | 0,043 | 0,03  | 1         | 1,046725138   | 0,955360642     | 1,433333333     |
| GPN1                                                                                            | 0,209851286 | 0,065873688 | 0,045 | 0,033 | 1         | 1,046718634   | 0,955366578     | 1,363636364     |

Supplementary Table 5

| Differentially expressed genes_total calculation_ comparing SC-Keloid vs. (SC-Myel, SC-Nonmyel) |             |             |       |       |           |               |                 |                 |
|-------------------------------------------------------------------------------------------------|-------------|-------------|-------|-------|-----------|---------------|-----------------|-----------------|
| gene                                                                                            | p_val       | avg_log2FC  | pct.1 | pct.2 | p_val_adj | Foldchange_UP | Foldchange_DOWN | Ratio_pct1_pct2 |
| SMARCE1                                                                                         | 0,804734771 | 0,065853205 | 0,18  | 0,168 | 1         | 1,046703774   | 0,955380142     | 1,071428571     |
| RMDN2                                                                                           | 0,207120743 | 0,065852229 | 0,022 | 0,014 | 1         | 1,046703065   | 0,955380788     | 1,571428571     |
| PSMG3-AS1                                                                                       | 0,053709581 | 0,065718652 | 0,031 | 0,016 | 1         | 1,046606157   | 0,95546925      | 1,9375          |
| IREB2                                                                                           | 0,936624286 | 0,065714089 | 0,064 | 0,062 | 1         | 1,046602847   | 0,955472272     | 1,032258065     |
| MYNN                                                                                            | 0,631459554 | 0,065649689 | 0,037 | 0,033 | 1         | 1,046556129   | 0,955514924     | 1,121212121     |
| CNFN                                                                                            | 0,001119864 | 0,065647788 | 0,029 | 0,007 | 1         | 1,046554751   | 0,955516183     | 4,142857143     |
| LONP1                                                                                           | 0,166672381 | 0,065641442 | 0,062 | 0,045 | 1         | 1,046550147   | 0,955520386     | 1,377777778     |
| SOX18                                                                                           | 0,087838847 | 0,065630867 | 0,014 | 0,005 | 1         | 1,046542476   | 0,95552739      | 2,8             |
| PTGES2                                                                                          | 0,17668875  | 0,065587869 | 0,079 | 0,06  | 1         | 1,046511285   | 0,955555868     | 1,316666667     |
| TRPS1                                                                                           | 0,457097336 | 0,065557915 | 0,104 | 0,113 | 1         | 1,046489557   | 0,955575708     | 0,920353982     |
| TIGD7                                                                                           | 0,618544856 | 0,065535484 | 0,015 | 0,012 | 1         | 1,046473287   | 0,955590566     | 1,25            |
| RNF6                                                                                            | 0,977756527 | 0,065528173 | 0,064 | 0,064 | 1         | 1,046467983   | 0,955595409     | 1               |
| DPM1                                                                                            | 0,670035225 | 0,065485807 | 0,111 | 0,115 | 1         | 1,046437254   | 0,955623471     | 0,965217391     |
| CDK2AP1                                                                                         | 0,125763462 | 0,065475074 | 0,203 | 0,24  | 1         | 1,046429468   | 0,95563058      | 0,845833333     |
| POLR1B                                                                                          | 0,350829602 | 0,065449193 | 0,016 | 0,011 | 1         | 1,046410696   | 0,955647724     | 1,454545455     |
| PMS1                                                                                            | 0,282360303 | 0,065416159 | 0,051 | 0,039 | 1         | 1,046386737   | 0,955669606     | 1,307692308     |
| MTHFS                                                                                           | 0,022017433 | 0,065260397 | 0,056 | 0,031 | 1         | 1,046273768   | 0,955772791     | 1,806451613     |
| ST7-AS1                                                                                         | 0,056790644 | 0,065235776 | 0,017 | 0,007 | 1         | 1,046255913   | 0,955789103     | 2,428571429     |
| UROD                                                                                            | 0,296117309 | 0,065233378 | 0,095 | 0,079 | 1         | 1,046254174   | 0,955790691     | 1,202531646     |
| PIGS                                                                                            | 0,287260774 | 0,065195211 | 0,071 | 0,057 | 1         | 1,046226495   | 0,955815977     | 1,245614035     |
| PPAT                                                                                            | 0,789495721 | 0,065185324 | 0,03  | 0,033 | 1         | 1,046219325   | 0,955822527     | 0,909090909     |
| SPOUT1                                                                                          | 0,050032495 | 0,065166925 | 0,037 | 0,02  | 1         | 1,046205983   | 0,955834717     | 1,85            |
| NTAQ1                                                                                           | 0,017855307 | 0,065165242 | 0,034 | 0,015 | 1         | 1,046204762   | 0,955835832     | 2,266666667     |
| PARG                                                                                            | 0,567747669 | 0,065128793 | 0,029 | 0,024 | 1         | 1,046178331   | 0,955859982     | 1,208333333     |
| NFX1                                                                                            | 0,835515991 | 0,065113449 | 0,05  | 0,047 | 1         | 1,046167204   | 0,955870148     | 1,063829787     |
| FAM120B                                                                                         | 0,982517599 | 0,065045949 | 0,034 | 0,034 | 1         | 1,046118257   | 0,955914872     | 1               |
| CDKL5                                                                                           | 0,510649568 | 0,064939829 | 0,031 | 0,026 | 1         | 1,046041311   | 0,955985188     | 1,192307692     |
| HOXC8                                                                                           | 0,004924601 | 0,064851195 | 0,064 | 0,033 | 1         | 1,045977048   | 0,956043922     | 1,939393939     |
| H4C5                                                                                            | 0,944801427 | 0,064841727 | 0,01  | 0,011 | 1         | 1,045970184   | 0,956050197     | 0,909090909     |
| ZNF621                                                                                          | 0,361300156 | 0,064771576 | 0,043 | 0,053 | 1         | 1,045919325   | 0,956096686     | 0,811320755     |

Supplementary Table 5

| Differentially expressed genes_total calculation_ comparing SC-Keloid vs. (SC-Myel, SC-Nonmyel) |             |             |       |       |           |               |                 |                 |
|-------------------------------------------------------------------------------------------------|-------------|-------------|-------|-------|-----------|---------------|-----------------|-----------------|
| gene                                                                                            | p_val       | avg_log2FC  | pct.1 | pct.2 | p_val_adj | Foldchange_UP | Foldchange_DOWN | Ratio_pct1_pct2 |
| FO XK2                                                                                          | 0,33379428  | 0,064701988 | 0,062 | 0,073 | 1         | 1,045868877   | 0,956142804     | 0,849315068     |
| HDAC1                                                                                           | 0,217893177 | 0,064582152 | 0,094 | 0,075 | 1         | 1,045782006   | 0,956222228     | 1,253333333     |
| ZNF664                                                                                          | 0,29931305  | 0,064569453 | 0,098 | 0,113 | 1         | 1,045772801   | 0,956230645     | 0,867256637     |
| WIPF2                                                                                           | 0,229900067 | 0,064430711 | 0,099 | 0,115 | 1         | 1,045672235   | 0,956322609     | 0,860869565     |
| ZNF254                                                                                          | 0,364615751 | 0,064299678 | 0,038 | 0,047 | 1         | 1,045577266   | 0,956409471     | 0,808510638     |
| SNX11                                                                                           | 0,530473138 | 0,064292784 | 0,022 | 0,018 | 1         | 1,045572227   | 0,956414041     | 1,222222222     |
| FARSA                                                                                           | 0,05264032  | 0,064286543 | 0,065 | 0,042 | 1         | 1,045567746   | 0,956418179     | 1,547619048     |
| BR SK1                                                                                          | 0,545540349 | 0,064199463 | 0,088 | 0,079 | 1         | 1,045504639   | 0,956475909     | 1,113924051     |
| HHLA3                                                                                           | 0,115196838 | 0,064160958 | 0,021 | 0,011 | 1         | 1,045476735   | 0,956501438     | 1,909090909     |
| NBN                                                                                             | 0,48524823  | 0,064129678 | 0,127 | 0,137 | 1         | 1,045454068   | 0,956522176     | 0,927007299     |
| MORC4                                                                                           | 0,004564341 | 0,064090365 | 0,035 | 0,066 | 1         | 1,045425579   | 0,956548242     | 0,53030303      |
| FLOT2                                                                                           | 0,901176619 | 0,063924165 | 0,063 | 0,064 | 1         | 1,045305153   | 0,956658443     | 0,984375        |
| INTS2                                                                                           | 0,694251255 | 0,063875529 | 0,035 | 0,031 | 1         | 1,045269914   | 0,956690695     | 1,129032258     |
| TMEM59                                                                                          | 0,000107952 | 0,063853747 | 0,431 | 0,604 | 1         | 1,045254133   | 0,956705139     | 0,713576159     |
| SNX12                                                                                           | 0,630752856 | 0,063836191 | 0,044 | 0,049 | 1         | 1,045241413   | 0,956716781     | 0,897959184     |
| CSTF2T                                                                                          | 0,69753581  | 0,063689759 | 0,023 | 0,02  | 1         | 1,045135327   | 0,956813892     | 1,15            |
| CSNK1G1                                                                                         | 0,89964943  | 0,063681122 | 0,04  | 0,038 | 1         | 1,045129071   | 0,95681962      | 1,052631579     |
| ZNF736                                                                                          | 0,845614286 | 0,063613273 | 0,024 | 0,023 | 1         | 1,04507992    | 0,956864619     | 1,043478261     |
| LRRC8E                                                                                          | 0,005346706 | 0,063585247 | 0,01  | 0     | 1         | 1,045059618   | 0,956883208     | #DIV/0!         |
| R3HDM4                                                                                          | 0,037357928 | 0,063582584 | 0,097 | 0,065 | 1         | 1,045057689   | 0,956884974     | 1,492307692     |
| SLC39A7                                                                                         | 0,479704503 | 0,063508444 | 0,171 | 0,179 | 1         | 1,045003985   | 0,95693415      | 0,955307263     |
| ZNF195                                                                                          | 0,655439187 | 0,063478233 | 0,033 | 0,028 | 1         | 1,044982102   | 0,956954189     | 1,178571429     |
| CDCA7                                                                                           | 0,021420005 | 0,063354619 | 0,01  | 0,001 | 1         | 1,044892569   | 0,957036187     | 10              |
| C4orf33                                                                                         | 0,987177625 | 0,063213293 | 0,038 | 0,038 | 1         | 1,044790217   | 0,957129942     | 1               |
| NKX6-1                                                                                          | 0,005030469 | 0,063206286 | 0,02  | 0,004 | 1         | 1,044785142   | 0,957134591     | 5               |
| CACNA1C                                                                                         | 0,001284512 | 0,062979107 | 0,014 | 0     | 1         | 1,044620635   | 0,957285321     | #DIV/0!         |
| PJA1                                                                                            | 0,604232427 | 0,062949575 | 0,086 | 0,092 | 1         | 1,044599251   | 0,957304917     | 0,934782609     |
| KSR2                                                                                            | 0,00328592  | 0,062934935 | 0,015 | 0,001 | 1         | 1,044588651   | 0,957314632     | 15              |
| MRPS9                                                                                           | 0,392792824 | 0,062811243 | 0,059 | 0,049 | 1         | 1,044499096   | 0,957396712     | 1,204081633     |
| GOSR2                                                                                           | 0,459514103 | 0,062770489 | 0,064 | 0,054 | 1         | 1,044469591   | 0,957423757     | 1,185185185     |

Supplementary Table 5

| Differentially expressed genes_total calculation_ comparing SC-Keloid vs. (SC-Myel, SC-Nonmyel) |             |             |       |       |           |               |                 |                 |
|-------------------------------------------------------------------------------------------------|-------------|-------------|-------|-------|-----------|---------------|-----------------|-----------------|
| gene                                                                                            | p_val       | avg_log2FC  | pct.1 | pct.2 | p_val_adj | Foldchange_UP | Foldchange_DOWN | Ratio_pct1_pct2 |
| RSPRY1                                                                                          | 0,792188967 | 0,062724104 | 0,071 | 0,066 | 1         | 1,044436009   | 0,957454541     | 1,075757576     |
| ZC2HC1A                                                                                         | 0,416838135 | 0,062651519 | 0,104 | 0,115 | 1         | 1,044383463   | 0,957502714     | 0,904347826     |
| NEPRO                                                                                           | 0,215797663 | 0,062629669 | 0,064 | 0,079 | 1         | 1,044367646   | 0,957517215     | 0,810126582     |
| MT-CYB                                                                                          | 0,492274559 | 0,062625077 | 0,788 | 0,852 | 1         | 1,044364321   | 0,957520263     | 0,924882629     |
| PCCB                                                                                            | 0,004281166 | 0,062595386 | 0,063 | 0,031 | 1         | 1,044342829   | 0,957539969     | 2,032258065     |
| TMEM222                                                                                         | 0,77841763  | 0,062571531 | 0,09  | 0,083 | 1         | 1,044325561   | 0,957555802     | 1,084337349     |
| SENP5                                                                                           | 0,169658951 | 0,062551951 | 0,09  | 0,11  | 1         | 1,044311387   | 0,957568798     | 0,818181818     |
| ABHD11                                                                                          | 0,001213257 | 0,062531522 | 0,056 | 0,023 | 1         | 1,044296599   | 0,957582358     | 2,434782609     |
| MFSD5                                                                                           | 0,464594055 | 0,062514027 | 0,034 | 0,027 | 1         | 1,044283936   | 0,95759397      | 1,259259259     |
| AGTPBP1                                                                                         | 0,725096789 | 0,062509326 | 0,03  | 0,027 | 1         | 1,044280533   | 0,95759709      | 1,111111111     |
| STK39                                                                                           | 0,253932649 | 0,062502066 | 0,021 | 0,03  | 1         | 1,044275278   | 0,957601909     | 0,7             |
| MRPS2                                                                                           | 0,013850603 | 0,062480593 | 0,071 | 0,041 | 1         | 1,044259735   | 0,957616163     | 1,731707317     |
| POLR2D                                                                                          | 0,105387343 | 0,062468312 | 0,041 | 0,026 | 1         | 1,044250845   | 0,957624314     | 1,576923077     |
| STXBP3                                                                                          | 0,632852291 | 0,06246763  | 0,122 | 0,111 | 1         | 1,044250352   | 0,957624767     | 1,099099099     |
| GOLGB1                                                                                          | 0,027330067 | 0,062405119 | 0,19  | 0,236 | 1         | 1,044205107   | 0,957666261     | 0,805084746     |
| CCDC61                                                                                          | 0,07113082  | 0,062403853 | 0,03  | 0,016 | 1         | 1,04420419    | 0,957667101     | 1,875           |
| SLC9A7                                                                                          | 7,49086E-05 | 0,062296622 | 0,028 | 0,003 | 1         | 1,044126581   | 0,957738284     | 9,333333333     |
| AC004637.1                                                                                      | 0,000325117 | 0,062296583 | 0,021 | 0,001 | 1         | 1,044126553   | 0,95773831      | 21              |
| L1TD1                                                                                           | 0,318028144 | 0,062091587 | 0,01  | 0,016 | 1         | 1,043978201   | 0,957874407     | 0,625           |
| POLR3A                                                                                          | 0,956942382 | 0,062032771 | 0,027 | 0,027 | 1         | 1,04393564    | 0,957913459     | 1               |
| KIF13B                                                                                          | 0,697499226 | 0,061950794 | 0,142 | 0,144 | 1         | 1,043876323   | 0,957967891     | 0,986111111     |
| ZNF146                                                                                          | 0,873098486 | 0,061809834 | 0,079 | 0,076 | 1         | 1,043774335   | 0,958061495     | 1,039473684     |
| UTP15                                                                                           | 0,321688554 | 0,061762912 | 0,031 | 0,023 | 1         | 1,043740389   | 0,958092655     | 1,347826087     |
| ARMC6                                                                                           | 0,124661095 | 0,061760685 | 0,05  | 0,034 | 1         | 1,043738777   | 0,958094134     | 1,470588235     |
| SHCBP1                                                                                          | 0,005224884 | 0,061736937 | 0,014 | 0,001 | 1         | 1,043721597   | 0,958109905     | 14              |
| YRDC                                                                                            | 0,600232932 | 0,061735567 | 0,052 | 0,046 | 1         | 1,043720605   | 0,958110815     | 1,130434783     |
| PKN3                                                                                            | 0,412864085 | 0,061666861 | 0,014 | 0,009 | 1         | 1,043670901   | 0,958156445     | 1,555555556     |
| CRAT                                                                                            | 0,007557585 | 0,061665908 | 0,07  | 0,038 | 1         | 1,043670212   | 0,958157078     | 1,842105263     |
| SPRYD3                                                                                          | 0,741332627 | 0,061599709 | 0,049 | 0,045 | 1         | 1,043622323   | 0,958201044     | 1,088888889     |
| PUS3                                                                                            | 0,964376383 | 0,061592781 | 0,022 | 0,022 | 1         | 1,043617311   | 0,958205646     | 1               |

Supplementary Table 5

| Differentially expressed genes_total calculation_ comparing SC-Keloid vs. (SC-Myel, SC-Nonmyel) |             |             |       |       |           |               |                 |                 |
|-------------------------------------------------------------------------------------------------|-------------|-------------|-------|-------|-----------|---------------|-----------------|-----------------|
| gene                                                                                            | p_val       | avg_log2FC  | pct.1 | pct.2 | p_val_adj | Foldchange_UP | Foldchange_DOWN | Ratio_pct1_pct2 |
| CCNK                                                                                            | 0,003669265 | 0,061534709 | 0,05  | 0,087 | 1         | 1,043575305   | 0,958244216     | 0,574712644     |
| ERCC3                                                                                           | 0,848481702 | 0,061520928 | 0,05  | 0,052 | 1         | 1,043565336   | 0,95825337      | 0,961538462     |
| MED16                                                                                           | 0,034639754 | 0,061356739 | 0,057 | 0,034 | 1         | 1,043446578   | 0,958362432     | 1,676470588     |
| TRMT11                                                                                          | 0,958743875 | 0,061353437 | 0,072 | 0,071 | 1         | 1,043444189   | 0,958364626     | 1,014084507     |
| AMMECR1L                                                                                        | 0,196661334 | 0,061333116 | 0,04  | 0,053 | 1         | 1,043429492   | 0,958378125     | 0,754716981     |
| MIB1                                                                                            | 0,35230919  | 0,061201678 | 0,12  | 0,133 | 1         | 1,043334434   | 0,958465443     | 0,902255639     |
| CLCC1                                                                                           | 0,471860209 | 0,061201571 | 0,056 | 0,064 | 1         | 1,043334357   | 0,958465514     | 0,875           |
| THBS3                                                                                           | 0,38059156  | 0,061167037 | 0,049 | 0,039 | 1         | 1,043309382   | 0,958488457     | 1,256410256     |
| IL4R                                                                                            | 0,210017586 | 0,061144256 | 0,022 | 0,014 | 1         | 1,043292908   | 0,958503592     | 1,571428571     |
| NAV2-AS3                                                                                        | 0,031502319 | 0,061136821 | 0,014 | 0,03  | 1         | 1,043287531   | 0,958508532     | 0,466666667     |
| MCM6                                                                                            | 0,368938344 | 0,061123738 | 0,021 | 0,015 | 1         | 1,04327807    | 0,958517225     | 1,4             |
| SRD5A1                                                                                          | 0,001774042 | 0,061064341 | 0,04  | 0,014 | 1         | 1,043235118   | 0,958556688     | 2,857142857     |
| MIOS                                                                                            | 0,641503495 | 0,061024806 | 0,035 | 0,039 | 1         | 1,04320653    | 0,958582956     | 0,897435897     |
| MIS18BP1                                                                                        | 0,058621756 | 0,060986604 | 0,063 | 0,041 | 1         | 1,043178908   | 0,958608339     | 1,536585366     |
| RHOBTB2                                                                                         | 0,024132359 | 0,060979726 | 0,024 | 0,009 | 1         | 1,043173934   | 0,95861291      | 2,666666667     |
| BICRAL                                                                                          | 0,21789376  | 0,060926555 | 0,029 | 0,041 | 1         | 1,043135488   | 0,95864824      | 0,707317073     |
| CTSS                                                                                            | 0,904221741 | 0,060912954 | 0,013 | 0,014 | 1         | 1,043125654   | 0,958657278     | 0,928571429     |
| ALG13                                                                                           | 0,1080025   | 0,060899075 | 0,079 | 0,057 | 1         | 1,043115619   | 0,958666501     | 1,385964912     |
| IRGQ                                                                                            | 0,765223662 | 0,060895891 | 0,04  | 0,037 | 1         | 1,043113317   | 0,958668616     | 1,081081081     |
| SFXN1                                                                                           | 0,2697193   | 0,060792431 | 0,05  | 0,038 | 1         | 1,043038515   | 0,958737368     | 1,315789474     |
| NEIL2                                                                                           | 0,016098474 | 0,060684275 | 0,036 | 0,016 | 1         | 1,042960323   | 0,958809245     | 2,25            |
| SLC35A5                                                                                         | 0,162899541 | 0,060672042 | 0,037 | 0,052 | 1         | 1,04295148    | 0,958817375     | 0,711538462     |
| USP48                                                                                           | 0,155601977 | 0,060614226 | 0,113 | 0,134 | 1         | 1,042909684   | 0,958855801     | 0,843283582     |
| PRR5                                                                                            | 0,024881852 | 0,060605218 | 0,033 | 0,015 | 1         | 1,042903172   | 0,958861788     | 2,2             |
| FAM167B                                                                                         | 0,003264526 | 0,060572811 | 0,015 | 0,001 | 1         | 1,042879746   | 0,958883326     | 15              |
| FAM131A                                                                                         | 0,965986357 | 0,060495109 | 0,042 | 0,042 | 1         | 1,042823579   | 0,958934972     | 1               |
| RAB32                                                                                           | 0,741403011 | 0,060473774 | 0,171 | 0,16  | 1         | 1,042808158   | 0,958949153     | 1,06875         |
| DSG2                                                                                            | 0,003300254 | 0,060443531 | 0,015 | 0,001 | 1         | 1,042786298   | 0,958969256     | 15              |
| SOAT1                                                                                           | 0,816415111 | 0,060397281 | 0,061 | 0,057 | 1         | 1,042752868   | 0,958999999     | 1,070175439     |
| DNAL4                                                                                           | 0,001119351 | 0,060364062 | 0,061 | 0,026 | 1         | 1,042728859   | 0,959022081     | 2,346153846     |

Supplementary Table 5

| Differentially expressed genes_total calculation_ comparing SC-Keloid vs. (SC-Myel, SC-Nonmyel) |             |             |       |       |           |               |                 |                 |
|-------------------------------------------------------------------------------------------------|-------------|-------------|-------|-------|-----------|---------------|-----------------|-----------------|
| gene                                                                                            | p_val       | avg_log2FC  | pct.1 | pct.2 | p_val_adj | Foldchange_UP | Foldchange_DOWN | Ratio_pct1_pct2 |
| TBCB                                                                                            | 0,014857648 | 0,060358126 | 0,31  | 0,37  | 1         | 1,042724568   | 0,959026027     | 0,837837838     |
| TMEM120B                                                                                        | 0,299712126 | 0,060278862 | 0,03  | 0,022 | 1         | 1,042667281   | 0,959078719     | 1,363636364     |
| LYPD6                                                                                           | 0,025640992 | 0,06019529  | 0,013 | 0,003 | 1         | 1,042606884   | 0,959134278     | 4,333333333     |
| AP3M2                                                                                           | 0,708856477 | 0,060120722 | 0,038 | 0,042 | 1         | 1,042552996   | 0,959183854     | 0,904761905     |
| OPRL1                                                                                           | 0,021465155 | 0,060097215 | 0,01  | 0,001 | 1         | 1,042536009   | 0,959199482     | 10              |
| FHIP2A                                                                                          | 0,89991204  | 0,060067101 | 0,03  | 0,031 | 1         | 1,042514248   | 0,959219504     | 0,967741935     |
| VTA1                                                                                            | 0,799595695 | 0,060057446 | 0,072 | 0,075 | 1         | 1,042507271   | 0,959225923     | 0,96            |
| ANKRD17                                                                                         | 0,169986842 | 0,060034821 | 0,113 | 0,134 | 1         | 1,042490922   | 0,959240967     | 0,843283582     |
| MFSD6                                                                                           | 0,270677587 | 0,059947667 | 0,042 | 0,031 | 1         | 1,042427946   | 0,959298917     | 1,35483871      |
| PNPO                                                                                            | 0,435585412 | 0,059847203 | 0,023 | 0,018 | 1         | 1,042355358   | 0,959365721     | 1,277777778     |
| MPDZ                                                                                            | 0,375740998 | 0,059838629 | 0,098 | 0,11  | 1         | 1,042349163   | 0,959371423     | 0,890909091     |
| TACC2                                                                                           | 0,671393937 | 0,059825097 | 0,057 | 0,052 | 1         | 1,042339387   | 0,959380421     | 1,096153846     |
| TTY14                                                                                           | 0,316694025 | 0,059797605 | 0,012 | 0,007 | 1         | 1,042319524   | 0,959398704     | 1,714285714     |
| IGSF3                                                                                           | 0,428065644 | 0,05979696  | 0,02  | 0,026 | 1         | 1,042319058   | 0,959399132     | 0,769230769     |
| FADS1                                                                                           | 0,402301851 | 0,05969918  | 0,086 | 0,098 | 1         | 1,042248416   | 0,959464159     | 0,87755102      |
| TMEM218                                                                                         | 0,191644628 | 0,059695272 | 0,069 | 0,052 | 1         | 1,042245593   | 0,959466758     | 1,326923077     |
| METTL27                                                                                         | 0,001350218 | 0,059694734 | 0,023 | 0,004 | 1         | 1,042245204   | 0,959467116     | 5,75            |
| PIF1                                                                                            | 0,041509715 | 0,059663685 | 0,014 | 0,004 | 1         | 1,042222774   | 0,959487765     | 3,5             |
| DLGAP1-AS1                                                                                      | 0,77158232  | 0,059609862 | 0,021 | 0,023 | 1         | 1,042183892   | 0,959523562     | 0,913043478     |
| PRR7                                                                                            | 0,198861502 | 0,059584698 | 0,052 | 0,038 | 1         | 1,042165714   | 0,959540298     | 1,368421053     |
| DPY19L3                                                                                         | 0,377812645 | 0,05955653  | 0,078 | 0,065 | 1         | 1,042145367   | 0,959559033     | 1,2             |
| SKA2                                                                                            | 0,273943783 | 0,059542801 | 0,189 | 0,208 | 1         | 1,042135449   | 0,959568165     | 0,908653846     |
| GMNN                                                                                            | 0,13499325  | 0,059524043 | 0,043 | 0,028 | 1         | 1,042121899   | 0,959580641     | 1,535714286     |
| F11R                                                                                            | 0,062641429 | 0,0594113   | 0,013 | 0,004 | 1         | 1,042040464   | 0,959655632     | 3,25            |
| CHST6                                                                                           | 0,972377714 | 0,059407761 | 0,015 | 0,015 | 1         | 1,042037907   | 0,959657987     | 1               |
| FASTKD3                                                                                         | 0,392659126 | 0,059407503 | 0,017 | 0,012 | 1         | 1,042037721   | 0,959658158     | 1,416666667     |
| CKMT2-AS1                                                                                       | 0,757500147 | 0,059404755 | 0,023 | 0,026 | 1         | 1,042035736   | 0,959659986     | 0,884615385     |
| C10orf88                                                                                        | 0,726723975 | 0,059378669 | 0,019 | 0,016 | 1         | 1,042016895   | 0,959677338     | 1,1875          |
| NTHL1                                                                                           | 0,54436867  | 0,059315284 | 0,109 | 0,117 | 1         | 1,041971115   | 0,959719503     | 0,931623932     |
| GYPC                                                                                            | 0,581331686 | 0,059302508 | 0,009 | 0,012 | 1         | 1,041961888   | 0,959728001     | 0,75            |



Supplementary Table 5

| Differentially expressed genes_total calculation_ comparing SC-Keloid vs. (SC-Myel, SC-Nonmyel) |             |             |       |       |           |               |                 |                 |
|-------------------------------------------------------------------------------------------------|-------------|-------------|-------|-------|-----------|---------------|-----------------|-----------------|
| gene                                                                                            | p_val       | avg_log2FC  | pct.1 | pct.2 | p_val_adj | Foldchange_UP | Foldchange_DOWN | Ratio_pct1_pct2 |
| CDH15                                                                                           | 0,43793108  | 0,059288876 | 0,023 | 0,018 | 1         | 1,041952042   | 0,959737071     | 1,277777778     |
| THG1L                                                                                           | 0,27534941  | 0,059280747 | 0,037 | 0,027 | 1         | 1,041946171   | 0,959742478     | 1,37037037      |
| SAMD5                                                                                           | 0,310210249 | 0,059239497 | 0,061 | 0,073 | 1         | 1,04191638    | 0,959769919     | 0,835616438     |
| TATDN3                                                                                          | 0,275790459 | 0,05921171  | 0,017 | 0,011 | 1         | 1,041896312   | 0,959788406     | 1,545454545     |
| USP13                                                                                           | 0,323379476 | 0,059139999 | 0,031 | 0,023 | 1         | 1,041844525   | 0,959836114     | 1,347826087     |
| NUF2                                                                                            | 0,263160536 | 0,059114624 | 0,01  | 0,005 | 1         | 1,0418262     | 0,959852996     | 2               |
| NOL6                                                                                            | 0,024516638 | 0,059100279 | 0,033 | 0,015 | 1         | 1,041815841   | 0,95986254      | 2,2             |
| CRNKL1                                                                                          | 0,48851044  | 0,059083357 | 0,054 | 0,061 | 1         | 1,041803621   | 0,959873799     | 0,885245902     |
| ZNF579                                                                                          | 0,014852279 | 0,059026239 | 0,044 | 0,022 | 1         | 1,041762376   | 0,959911802     | 2               |
| GLE1                                                                                            | 0,263278595 | 0,059004442 | 0,024 | 0,016 | 1         | 1,041746636   | 0,959926306     | 1,5             |
| LRRC41                                                                                          | 0,828887278 | 0,058988078 | 0,072 | 0,068 | 1         | 1,04173482    | 0,959937194     | 1,058823529     |
| MILR1                                                                                           | 0,021465155 | 0,058973396 | 0,01  | 0,001 | 1         | 1,041724219   | 0,959946963     | 10              |
| CMIP                                                                                            | 0,130272924 | 0,058874875 | 0,075 | 0,054 | 1         | 1,041653083   | 0,960012519     | 1,388888889     |
| CENPS                                                                                           | 0,016180755 | 0,058832218 | 0,028 | 0,011 | 1         | 1,041622284   | 0,960040905     | 2,545454545     |
| TMSB15A                                                                                         | 0,603813704 | 0,058808701 | 0,02  | 0,016 | 1         | 1,041605304   | 0,960056555     | 1,25            |
| RBM12                                                                                           | 0,610476976 | 0,058805786 | 0,051 | 0,057 | 1         | 1,0416032     | 0,960058494     | 0,894736842     |
| ERFE                                                                                            | 0,001299001 | 0,058796922 | 0,017 | 0,001 | 1         | 1,041596801   | 0,960064393     | 17              |
| ELOA                                                                                            | 0,929002137 | 0,058735603 | 0,056 | 0,054 | 1         | 1,04155253    | 0,9601052       | 1,037037037     |
| ZMYND19                                                                                         | 0,052716118 | 0,058648981 | 0,041 | 0,023 | 1         | 1,041489996   | 0,960162848     | 1,782608696     |
| SMCO4                                                                                           | 0,525929812 | 0,058646508 | 0,027 | 0,022 | 1         | 1,04148821    | 0,960164494     | 1,227272727     |
| SLC36A1                                                                                         | 0,061473115 | 0,058642852 | 0,023 | 0,011 | 1         | 1,041485571   | 0,960166927     | 2,090909091     |
| IPPK                                                                                            | 0,485584714 | 0,058489893 | 0,012 | 0,008 | 1         | 1,041375155   | 0,960268732     | 1,5             |
| B3GLCT                                                                                          | 0,049250177 | 0,058481169 | 0,028 | 0,014 | 1         | 1,041368858   | 0,960274539     | 2               |
| WDR7                                                                                            | 0,929560425 | 0,058469228 | 0,021 | 0,02  | 1         | 1,041360239   | 0,960282487     | 1,05            |
| DOK4                                                                                            | 0,735732665 | 0,058412875 | 0,019 | 0,016 | 1         | 1,041319563   | 0,960319997     | 1,1875          |
| CHUK                                                                                            | 0,369325531 | 0,058403391 | 0,038 | 0,03  | 1         | 1,041312718   | 0,96032631      | 1,266666667     |
| SCYL2                                                                                           | 0,410733956 | 0,058397182 | 0,056 | 0,065 | 1         | 1,041308236   | 0,960330443     | 0,861538462     |
| ZNF880                                                                                          | 0,882622202 | 0,058369621 | 0,031 | 0,03  | 1         | 1,041288344   | 0,960348789     | 1,033333333     |
| YJU2                                                                                            | 0,242658048 | 0,058306227 | 0,04  | 0,028 | 1         | 1,041242589   | 0,960390989     | 1,428571429     |
| DYRK1B                                                                                          | 0,223661101 | 0,058276274 | 0,03  | 0,02  | 1         | 1,041220971   | 0,960410929     | 1,5             |

Supplementary Table 5

| Differentially expressed genes_total calculation_ comparing SC-Keloid vs. (SC-Myel, SC-Nonmyel) |             |             |       |       |           |               |                 |                 |
|-------------------------------------------------------------------------------------------------|-------------|-------------|-------|-------|-----------|---------------|-----------------|-----------------|
| gene                                                                                            | p_val       | avg_log2FC  | pct.1 | pct.2 | p_val_adj | Foldchange_UP | Foldchange_DOWN | Ratio_pct1_pct2 |
| ILVBL                                                                                           | 0,914674333 | 0,058264859 | 0,068 | 0,065 | 1         | 1,041212733   | 0,960418528     | 1,046153846     |
| ERCC8                                                                                           | 0,010515985 | 0,058237201 | 0,031 | 0,012 | 1         | 1,041192772   | 0,96043694      | 2,583333333     |
| NUP133                                                                                          | 0,986575798 | 0,058203512 | 0,033 | 0,033 | 1         | 1,041168459   | 0,960459368     | 1               |
| OSBPL3                                                                                          | 0,179185705 | 0,058189453 | 0,028 | 0,018 | 1         | 1,041158312   | 0,960468728     | 1,555555556     |
| GINS1                                                                                           | 0,021374938 | 0,058076634 | 0,01  | 0,001 | 1         | 1,041076897   | 0,96054384      | 10              |
| ARSD                                                                                            | 0,731876675 | 0,058056033 | 0,054 | 0,057 | 1         | 1,041062031   | 0,960557556     | 0,947368421     |
| IL27RA                                                                                          | 0,022712957 | 0,058027375 | 0,027 | 0,011 | 1         | 1,041041351   | 0,960576637     | 2,454545455     |
| MGAT4B                                                                                          | 0,502705122 | 0,058014519 | 0,18  | 0,16  | 1         | 1,041032074   | 0,960585197     | 1,125           |
| PIDD1                                                                                           | 0,721695472 | 0,057962777 | 0,019 | 0,016 | 1         | 1,040994739   | 0,960619649     | 1,1875          |
| ERMARD                                                                                          | 0,903992584 | 0,057938705 | 0,027 | 0,026 | 1         | 1,040977369   | 0,960635677     | 1,038461538     |
| ZNF524                                                                                          | 0,278732693 | 0,057935017 | 0,072 | 0,057 | 1         | 1,040974708   | 0,960638133     | 1,263157895     |
| AACS                                                                                            | 0,978660485 | 0,057931866 | 0,023 | 0,023 | 1         | 1,040972435   | 0,960640231     | 1               |
| CCDC92                                                                                          | 0,80909688  | 0,057910994 | 0,058 | 0,054 | 1         | 1,040957375   | 0,960654129     | 1,074074074     |
| TOP2A                                                                                           | 0,428807202 | 0,057795447 | 0,01  | 0,007 | 1         | 1,040874007   | 0,960731072     | 1,428571429     |
| ZNF837                                                                                          | 0,003300254 | 0,057731917 | 0,015 | 0,001 | 1         | 1,040828172   | 0,960773379     | 15              |
| ZNF75D                                                                                          | 0,717876998 | 0,057673593 | 0,013 | 0,011 | 1         | 1,040786095   | 0,960812221     | 1,181818182     |
| MCRS1                                                                                           | 0,082783096 | 0,057589546 | 0,086 | 0,061 | 1         | 1,040725464   | 0,960868197     | 1,409836066     |
| ABCC5                                                                                           | 0,282195612 | 0,057562785 | 0,047 | 0,058 | 1         | 1,040706159   | 0,960886021     | 0,810344828     |
| FITM2                                                                                           | 0,684729548 | 0,057251301 | 0,016 | 0,019 | 1         | 1,040481491   | 0,961093502     | 0,842105263     |
| CEP63                                                                                           | 0,721791963 | 0,057155514 | 0,092 | 0,085 | 1         | 1,040412411   | 0,961157316     | 1,082352941     |
| RANGRF                                                                                          | 0,20843383  | 0,057149446 | 0,083 | 0,064 | 1         | 1,040408035   | 0,961161358     | 1,296875        |
| ZYG11B                                                                                          | 0,982898034 | 0,057111158 | 0,081 | 0,08  | 1         | 1,040380728   | 0,961186586     | 1,0125          |
| ZC3HC1                                                                                          | 0,011436713 | 0,05709128  | 0,029 | 0,011 | 1         | 1,040366089   | 0,961200111     | 2,636363636     |
| TMEM161B                                                                                        | 0,007881906 | 0,05708618  | 0,047 | 0,022 | 1         | 1,040362411   | 0,961203509     | 2,136363636     |
| ZBTB33                                                                                          | 0,913458801 | 0,057063126 | 0,021 | 0,022 | 1         | 1,040345786   | 0,961218869     | 0,954545455     |
| CLIP1                                                                                           | 0,543441421 | 0,056945149 | 0,13  | 0,138 | 1         | 1,040260715   | 0,961297476     | 0,942028986     |
| DDX49                                                                                           | 0,181571183 | 0,056832241 | 0,092 | 0,071 | 1         | 1,040179306   | 0,961372712     | 1,295774648     |
| NSUN5                                                                                           | 0,068836925 | 0,056805087 | 0,054 | 0,034 | 1         | 1,040159728   | 0,961390807     | 1,588235294     |
| MPC1                                                                                            | 0,092078807 | 0,056706485 | 0,206 | 0,232 | 1         | 1,04008864    | 0,961456516     | 0,887931034     |
| CPSF4                                                                                           | 0,375752433 | 0,056692298 | 0,021 | 0,015 | 1         | 1,040078412   | 0,961465971     | 1,4             |

Supplementary Table 5

| Differentially expressed genes_total calculation_ comparing SC-Keloid vs. (SC-Myel, SC-Nonmyel) |             |             |       |       |           |               |                 |                 |
|-------------------------------------------------------------------------------------------------|-------------|-------------|-------|-------|-----------|---------------|-----------------|-----------------|
| gene                                                                                            | p_val       | avg_log2FC  | pct.1 | pct.2 | p_val_adj | Foldchange_UP | Foldchange_DOWN | Ratio_pct1_pct2 |
| CIRBP-AS1                                                                                       | 0,005346706 | 0,056622332 | 0,01  | 0     | 1         | 1,040027973   | 0,9615126       | #DIV/0!         |
| BICD2                                                                                           | 0,556510783 | 0,056619    | 0,112 | 0,118 | 1         | 1,040025571   | 0,961514821     | 0,949152542     |
| PLA2G15                                                                                         | 0,00935033  | 0,056493378 | 0,044 | 0,02  | 1         | 1,039935015   | 0,961598547     | 2,2             |
| PAXIP1                                                                                          | 0,857693435 | 0,056474561 | 0,015 | 0,016 | 1         | 1,039921452   | 0,961611089     | 0,9375          |
| C9orf64                                                                                         | 0,639990848 | 0,056424612 | 0,037 | 0,033 | 1         | 1,039885448   | 0,961644383     | 1,121212121     |
| INO80C                                                                                          | 0,240549308 | 0,056409522 | 0,048 | 0,035 | 1         | 1,039874571   | 0,961654441     | 1,371428571     |
| CMAS                                                                                            | 0,111019704 | 0,056393343 | 0,085 | 0,062 | 1         | 1,039862909   | 0,961665226     | 1,370967742     |
| CCDC57                                                                                          | 0,913916048 | 0,056387014 | 0,034 | 0,033 | 1         | 1,039858348   | 0,961669445     | 1,03030303      |
| CCDC121                                                                                         | 0,576124614 | 0,056321494 | 0,01  | 0,014 | 1         | 1,039811124   | 0,96171312      | 0,714285714     |
| KRBA2                                                                                           | 0,274266501 | 0,05625622  | 0,014 | 0,008 | 1         | 1,039764079   | 0,961756633     | 1,75            |
| ZSCAN29                                                                                         | 0,237514907 | 0,056226957 | 0,016 | 0,009 | 1         | 1,039742989   | 0,961776141     | 1,777777778     |
| HSCB                                                                                            | 0,645276207 | 0,05619913  | 0,049 | 0,043 | 1         | 1,039722934   | 0,961794692     | 1,139534884     |
| TNIP1                                                                                           | 0,275695467 | 0,056140949 | 0,135 | 0,111 | 1         | 1,039681006   | 0,96183348      | 1,216216216     |
| RIN3                                                                                            | 0,027420353 | 0,056112067 | 0,017 | 0,005 | 1         | 1,039660191   | 0,961852736     | 3,4             |
| CHCHD6                                                                                          | 0,123043586 | 0,056044701 | 0,054 | 0,037 | 1         | 1,039611646   | 0,961897651     | 1,459459459     |
| KLHL35                                                                                          | 0,117644843 | 0,056033425 | 0,015 | 0,007 | 1         | 1,039603521   | 0,961905168     | 2,142857143     |
| CERS5                                                                                           | 0,204607967 | 0,056002977 | 0,084 | 0,065 | 1         | 1,03958158    | 0,96192547      | 1,292307692     |
| SASS6                                                                                           | 0,494923011 | 0,0559904   | 0,026 | 0,02  | 1         | 1,039572518   | 0,961933855     | 1,3             |
| KLHDC10                                                                                         | 0,945111229 | 0,055976887 | 0,071 | 0,071 | 1         | 1,039562781   | 0,961942865     | 1               |
| TSPAN9                                                                                          | 0,027442524 | 0,055918116 | 0,064 | 0,038 | 1         | 1,039520433   | 0,961982053     | 1,684210526     |
| DYNC1H1                                                                                         | 0,000585917 | 0,055891969 | 0,315 | 0,417 | 1         | 1,039501593   | 0,961999488     | 0,755395683     |
| MSH2                                                                                            | 0,065905356 | 0,0558266   | 0,057 | 0,037 | 1         | 1,039454494   | 0,962043077     | 1,540540541     |
| DNAJC17                                                                                         | 0,03512942  | 0,055790704 | 0,057 | 0,034 | 1         | 1,039428632   | 0,962067014     | 1,676470588     |
| PPM1F                                                                                           | 0,581279879 | 0,055784149 | 0,062 | 0,068 | 1         | 1,039423909   | 0,962071386     | 0,911764706     |
| APAF1                                                                                           | 0,841445831 | 0,055701864 | 0,043 | 0,041 | 1         | 1,039364626   | 0,96212626      | 1,048780488     |
| FBXL5                                                                                           | 0,69313158  | 0,055661685 | 0,095 | 0,088 | 1         | 1,03933568    | 0,962153055     | 1,079545455     |
| TP53TG1                                                                                         | 0,13276056  | 0,055634614 | 0,076 | 0,056 | 1         | 1,039316178   | 0,96217111      | 1,357142857     |
| C20orf27                                                                                        | 0,007081436 | 0,055617797 | 0,085 | 0,049 | 1         | 1,039304063   | 0,962182325     | 1,734693878     |
| UBR1                                                                                            | 0,934662383 | 0,055287117 | 0,058 | 0,058 | 1         | 1,039065871   | 0,962402892     | 1               |
| AC023590.1                                                                                      | 0,628144197 | 0,055276029 | 0,01  | 0,008 | 1         | 1,039057886   | 0,962410289     | 1,25            |

Supplementary Table 5

| Differentially expressed genes_total calculation_ comparing SC-Keloid vs. (SC-Myel, SC-Nonmyel) |             |             |       |       |           |               |                 |                 |
|-------------------------------------------------------------------------------------------------|-------------|-------------|-------|-------|-----------|---------------|-----------------|-----------------|
| gene                                                                                            | p_val       | avg_log2FC  | pct.1 | pct.2 | p_val_adj | Foldchange_UP | Foldchange_DOWN | Ratio_pct1_pct2 |
| KIAA0232                                                                                        | 0,324577804 | 0,055184332 | 0,115 | 0,129 | 1         | 1,038991846   | 0,962471461     | 0,891472868     |
| INPP5B                                                                                          | 0,235631202 | 0,05516637  | 0,02  | 0,012 | 1         | 1,03897891    | 0,962483444     | 1,666666667     |
| CCDC186                                                                                         | 0,420429386 | 0,055046524 | 0,104 | 0,115 | 1         | 1,038892605   | 0,962563402     | 0,904347826     |
| LEMD2                                                                                           | 0,550474321 | 0,055020999 | 0,062 | 0,068 | 1         | 1,038874224   | 0,962580432     | 0,911764706     |
| EIF3B                                                                                           | 0,631755571 | 0,054976641 | 0,128 | 0,133 | 1         | 1,038842283   | 0,962610029     | 0,962406015     |
| SHFL                                                                                            | 0,43606258  | 0,054900174 | 0,136 | 0,145 | 1         | 1,038787223   | 0,962661051     | 0,937931034     |
| ABAT                                                                                            | 0,529744532 | 0,054878389 | 0,013 | 0,009 | 1         | 1,038771537   | 0,962675588     | 1,444444444     |
| NSL1                                                                                            | 0,840697004 | 0,054810492 | 0,107 | 0,107 | 1         | 1,038722651   | 0,962720895     | 1               |
| SPIDR                                                                                           | 0,30448866  | 0,054783567 | 0,04  | 0,05  | 1         | 1,038703266   | 0,962738862     | 0,8             |
| TMEM101                                                                                         | 0,215054406 | 0,054779091 | 0,068 | 0,052 | 1         | 1,038700043   | 0,962741849     | 1,307692308     |
| WWC3                                                                                            | 0,131033674 | 0,054771003 | 0,066 | 0,085 | 1         | 1,03869422    | 0,962747247     | 0,776470588     |
| ATP10D                                                                                          | 0,415002883 | 0,054769992 | 0,059 | 0,069 | 1         | 1,038693492   | 0,962747921     | 0,855072464     |
| AGER                                                                                            | 0,897666581 | 0,054623592 | 0,013 | 0,014 | 1         | 1,038588094   | 0,962845622     | 0,928571429     |
| TIA1                                                                                            | 0,523681542 | 0,054548086 | 0,119 | 0,128 | 1         | 1,038533739   | 0,962896016     | 0,9296875       |
| VAMP4                                                                                           | 0,515333382 | 0,054520439 | 0,062 | 0,053 | 1         | 1,038513837   | 0,962914469     | 1,169811321     |
| PRMT7                                                                                           | 0,322815193 | 0,054516294 | 0,031 | 0,023 | 1         | 1,038510854   | 0,962917235     | 1,347826087     |
| TXN2                                                                                            | 0,086496638 | 0,054464989 | 0,132 | 0,099 | 1         | 1,038473923   | 0,962951479     | 1,333333333     |
| LBX2                                                                                            | 0,128797564 | 0,054462896 | 0,013 | 0,005 | 1         | 1,038472416   | 0,962952876     | 2,6             |
| PLAAT1                                                                                          | 0,002042347 | 0,054422473 | 0,016 | 0,001 | 1         | 1,038443319   | 0,962979858     | 16              |
| TBC1D19                                                                                         | 0,205976888 | 0,05441886  | 0,037 | 0,026 | 1         | 1,038440719   | 0,962982269     | 1,423076923     |
| MRS2                                                                                            | 0,055113581 | 0,054377428 | 0,044 | 0,026 | 1         | 1,038410897   | 0,963009925     | 1,692307692     |
| LINC01060                                                                                       | 0,00329308  | 0,054322499 | 0,015 | 0,001 | 1         | 1,038371361   | 0,963046591     | 15              |
| ULK2                                                                                            | 0,874453288 | 0,054294543 | 0,047 | 0,045 | 1         | 1,038351241   | 0,963065253     | 1,044444444     |
| RIC1                                                                                            | 0,543844683 | 0,054267673 | 0,033 | 0,027 | 1         | 1,038331901   | 0,96308319      | 1,222222222     |
| DNASE1                                                                                          | 0,081147433 | 0,054255909 | 0,012 | 0,023 | 1         | 1,038323435   | 0,963091043     | 0,52173913      |
| NFYB                                                                                            | 0,012259858 | 0,054243269 | 0,101 | 0,142 | 1         | 1,038314338   | 0,963099481     | 0,711267606     |
| WIZ                                                                                             | 0,428998497 | 0,054213974 | 0,051 | 0,042 | 1         | 1,038293254   | 0,963119038     | 1,214285714     |
| ANPEP                                                                                           | 0,001024244 | 0,054205644 | 0,027 | 0,005 | 1         | 1,038287259   | 0,963124599     | 5,4             |
| ANKIB1                                                                                          | 0,594373406 | 0,054197034 | 0,098 | 0,088 | 1         | 1,038281063   | 0,963130347     | 1,113636364     |
| APEX2                                                                                           | 0,016022512 | 0,054192023 | 0,028 | 0,011 | 1         | 1,038277456   | 0,963133693     | 2,545454545     |

Supplementary Table 5

| Differentially expressed genes_total calculation_ comparing SC-Keloid vs. (SC-Myel, SC-Nonmyel) |             |             |       |       |           |               |                 |                 |
|-------------------------------------------------------------------------------------------------|-------------|-------------|-------|-------|-----------|---------------|-----------------|-----------------|
| gene                                                                                            | p_val       | avg_log2FC  | pct.1 | pct.2 | p_val_adj | Foldchange_UP | Foldchange_DOWN | Ratio_pct1_pct2 |
| POLA1                                                                                           | 0,815499509 | 0,054178661 | 0,019 | 0,02  | 1         | 1,03826784    | 0,963142613     | 0,95            |
| ZNF333                                                                                          | 0,8733988   | 0,054156716 | 0,033 | 0,034 | 1         | 1,038252047   | 0,963157263     | 0,970588235     |
| KCTD5                                                                                           | 0,259735216 | 0,054132207 | 0,063 | 0,049 | 1         | 1,038234409   | 0,963173626     | 1,285714286     |
| ARHGEF40                                                                                        | 0,012665171 | 0,054128723 | 0,185 | 0,236 | 1         | 1,038231902   | 0,963175952     | 0,783898305     |
| ZNF770                                                                                          | 0,19698548  | 0,054072787 | 0,065 | 0,049 | 1         | 1,038191648   | 0,963213297     | 1,326530612     |
| DIAPH1                                                                                          | 0,315082042 | 0,054046632 | 0,094 | 0,077 | 1         | 1,038172826   | 0,963230759     | 1,220779221     |
| RAI1                                                                                            | 0,797627864 | 0,054016488 | 0,047 | 0,049 | 1         | 1,038151135   | 0,963250885     | 0,959183673     |
| DIRAS3                                                                                          | 0,000868587 | 0,053946802 | 0,04  | 0,012 | 1         | 1,038100991   | 0,963297414     | 3,333333333     |
| EPM2A                                                                                           | 0,465906734 | 0,053910437 | 0,02  | 0,015 | 1         | 1,038074824   | 0,963321696     | 1,333333333     |
| CYP20A1                                                                                         | 0,563267138 | 0,053825817 | 0,09  | 0,08  | 1         | 1,038013939   | 0,9633782       | 1,125           |
| TRIM61                                                                                          | 0,013364494 | 0,053720233 | 0,012 | 0,001 | 1         | 1,037937975   | 0,963448707     | 12              |
| TSPAN17                                                                                         | 0,007130607 | 0,053702133 | 0,035 | 0,014 | 1         | 1,037924952   | 0,963460795     | 2,5             |
| GPR39                                                                                           | 0,005346706 | 0,053701354 | 0,01  | 0     | 1         | 1,037924392   | 0,963461315     | #DIV/0!         |
| IWS1                                                                                            | 0,546482545 | 0,053695207 | 0,064 | 0,056 | 1         | 1,03791997    | 0,96346542      | 1,142857143     |
| ADA2                                                                                            | 0,027021185 | 0,05369359  | 0,02  | 0,007 | 1         | 1,037918807   | 0,9634665       | 2,857142857     |
| STK32C                                                                                          | 0,636920013 | 0,053685565 | 0,055 | 0,049 | 1         | 1,037913033   | 0,96347186      | 1,12244898      |
| DHX40                                                                                           | 0,880686643 | 0,05368278  | 0,062 | 0,062 | 1         | 1,037911029   | 0,96347372      | 1               |
| LTC4S                                                                                           | 0,136873807 | 0,053664801 | 0,022 | 0,012 | 1         | 1,037898095   | 0,963485726     | 1,833333333     |
| BCOR                                                                                            | 0,827273329 | 0,053662031 | 0,078 | 0,08  | 1         | 1,037896102   | 0,963487576     | 0,975           |
| HSD11B1L                                                                                        | 0,157438962 | 0,053613651 | 0,027 | 0,016 | 1         | 1,037861298   | 0,963519887     | 1,6875          |
| UTP6                                                                                            | 0,579954387 | 0,053592993 | 0,07  | 0,076 | 1         | 1,037846436   | 0,963533684     | 0,921052632     |
| RCN1                                                                                            | 0,133803847 | 0,053581229 | 0,198 | 0,225 | 1         | 1,037837974   | 0,96354154      | 0,88            |
| TMEM199                                                                                         | 0,009985401 | 0,053571645 | 0,042 | 0,019 | 1         | 1,037831079   | 0,963547942     | 2,210526316     |
| DARS2                                                                                           | 0,272700937 | 0,053541238 | 0,014 | 0,008 | 1         | 1,037809205   | 0,96356825      | 1,75            |
| GTF2A1                                                                                          | 0,886326834 | 0,053479332 | 0,099 | 0,099 | 1         | 1,037764674   | 0,963609598     | 1               |
| UTP25                                                                                           | 0,66518037  | 0,053441138 | 0,019 | 0,022 | 1         | 1,037737201   | 0,963635108     | 0,863636364     |
| STK16                                                                                           | 0,026101236 | 0,053427637 | 0,064 | 0,038 | 1         | 1,037727489   | 0,963644127     | 1,684210526     |
| TMEM203                                                                                         | 0,096019958 | 0,053380152 | 0,077 | 0,054 | 1         | 1,037693334   | 0,963675844     | 1,425925926     |
| VAV3                                                                                            | 0,141340214 | 0,053369932 | 0,01  | 0,004 | 1         | 1,037685983   | 0,963682671     | 2,5             |
| GBF1                                                                                            | 0,795504858 | 0,053331315 | 0,058 | 0,054 | 1         | 1,037658207   | 0,963708467     | 1,074074074     |

Supplementary Table 5

| Differentially expressed genes_total calculation_ comparing SC-Keloid vs. (SC-Myel, SC-Nonmyel) |             |             |       |       |           |               |                 |                 |
|-------------------------------------------------------------------------------------------------|-------------|-------------|-------|-------|-----------|---------------|-----------------|-----------------|
| gene                                                                                            | p_val       | avg_log2FC  | pct.1 | pct.2 | p_val_adj | Foldchange_UP | Foldchange_DOWN | Ratio_pct1_pct2 |
| ELOVL4                                                                                          | 0,999024965 | 0,053305217 | 0,024 | 0,024 | 1         | 1,037639436   | 0,9637259       | 1               |
| VPS35L                                                                                          | 0,600889289 | 0,05324173  | 0,036 | 0,031 | 1         | 1,037593776   | 0,96376831      | 1,161290323     |
| ANKRD27                                                                                         | 0,330643284 | 0,053237527 | 0,017 | 0,024 | 1         | 1,037590753   | 0,963771118     | 0,708333333     |
| LOXL4                                                                                           | 0,001592789 | 0,053210782 | 0,026 | 0,005 | 1         | 1,037571518   | 0,963788985     | 5,2             |
| TSPAN3                                                                                          | 0,056272591 | 0,053159525 | 0,213 | 0,252 | 1         | 1,037534655   | 0,963823228     | 0,845238095     |
| ECI2                                                                                            | 0,895870297 | 0,053142841 | 0,097 | 0,092 | 1         | 1,037522656   | 0,963834374     | 1,054347826     |
| ACSS2                                                                                           | 0,061005327 | 0,053095348 | 0,021 | 0,037 | 1         | 1,037488502   | 0,963866103     | 0,567567568     |
| APH1A                                                                                           | 0,833793989 | 0,053018628 | 0,162 | 0,16  | 1         | 1,037433332   | 0,963917362     | 1,0125          |
| LRFN4                                                                                           | 0,102846387 | 0,052999915 | 0,086 | 0,062 | 1         | 1,037419875   | 0,963929865     | 1,387096774     |
| MCPH1                                                                                           | 0,724964227 | 0,052980714 | 0,035 | 0,038 | 1         | 1,037406068   | 0,963942694     | 0,921052632     |
| SLC38A9                                                                                         | 0,555780765 | 0,052842366 | 0,023 | 0,019 | 1         | 1,03730659    | 0,964035136     | 1,210526316     |
| RASSF7                                                                                          | 0,007677179 | 0,052818812 | 0,019 | 0,004 | 1         | 1,037289655   | 0,964050875     | 4,75            |
| TRMT6                                                                                           | 0,217191994 | 0,052816155 | 0,038 | 0,027 | 1         | 1,037287745   | 0,96405265      | 1,407407407     |
| TAF6                                                                                            | 0,155475142 | 0,052815245 | 0,057 | 0,041 | 1         | 1,037287091   | 0,964053259     | 1,390243902     |
| CHAF1A                                                                                          | 0,024771033 | 0,052789666 | 0,024 | 0,009 | 1         | 1,037268699   | 0,964070352     | 2,666666667     |
| MPV17L2                                                                                         | 0,075689556 | 0,052767488 | 0,034 | 0,019 | 1         | 1,037252754   | 0,964085172     | 1,789473684     |
| DUSP11                                                                                          | 0,612596169 | 0,052743014 | 0,058 | 0,052 | 1         | 1,037235158   | 0,964101527     | 1,115384615     |
| ZNF711                                                                                          | 0,963102915 | 0,052701949 | 0,034 | 0,034 | 1         | 1,037205635   | 0,96412897      | 1               |
| SUPT20H                                                                                         | 0,573046312 | 0,052676685 | 0,1   | 0,09  | 1         | 1,037187472   | 0,964145853     | 1,111111111     |
| ZNF224                                                                                          | 0,478675237 | 0,052663179 | 0,044 | 0,052 | 1         | 1,037177762   | 0,964154879     | 0,846153846     |
| PHETA2                                                                                          | 0,046983692 | 0,052649794 | 0,04  | 0,022 | 1         | 1,037168139   | 0,964163825     | 1,818181818     |
| FOCAD                                                                                           | 0,128789325 | 0,052612866 | 0,019 | 0,009 | 1         | 1,037141592   | 0,964188504     | 2,111111111     |
| CCR1                                                                                            | 0,025456406 | 0,052579642 | 0,013 | 0,003 | 1         | 1,037117708   | 0,964210709     | 4,333333333     |
| PHAF1                                                                                           | 0,261584718 | 0,05256187  | 0,024 | 0,016 | 1         | 1,037104932   | 0,964222587     | 1,5             |
| GABRB1                                                                                          | 0,000802422 | 0,052554771 | 0,015 | 0     | 1         | 1,037099829   | 0,964227331     | #DIV/0!         |
| INVS                                                                                            | 0,32934756  | 0,052488345 | 0,014 | 0,02  | 1         | 1,037052079   | 0,964271728     | 0,7             |
| ZUP1                                                                                            | 0,725221184 | 0,052479763 | 0,024 | 0,022 | 1         | 1,037045909   | 0,964277464     | 1,090909091     |
| XKR8                                                                                            | 0,010529307 | 0,052478486 | 0,015 | 0,003 | 1         | 1,037044992   | 0,964278318     | 5               |
| H2AC20                                                                                          | 0,492825638 | 0,052435268 | 0,03  | 0,024 | 1         | 1,037013926   | 0,964307205     | 1,25            |
| SENP1                                                                                           | 0,661057485 | 0,05241445  | 0,022 | 0,019 | 1         | 1,036998962   | 0,964321119     | 1,157894737     |

Supplementary Table 5

| Differentially expressed genes_total calculation_ comparing SC-Keloid vs. (SC-Myel, SC-Nonmyel) |             |             |       |       |           |               |                 |                 |
|-------------------------------------------------------------------------------------------------|-------------|-------------|-------|-------|-----------|---------------|-----------------|-----------------|
| gene                                                                                            | p_val       | avg_log2FC  | pct.1 | pct.2 | p_val_adj | Foldchange_UP | Foldchange_DOWN | Ratio_pct1_pct2 |
| TRIB3                                                                                           | 0,014064017 | 0,052396194 | 0,033 | 0,014 | 1         | 1,03698584    | 0,964333322     | 2,357142857     |
| DSN1                                                                                            | 0,060554269 | 0,052374211 | 0,015 | 0,005 | 1         | 1,036970039   | 0,964348016     | 3               |
| ZNF251                                                                                          | 0,120604851 | 0,052372064 | 0,024 | 0,014 | 1         | 1,036968495   | 0,964349452     | 1,714285714     |
| COL3A1                                                                                          | 0,009934271 | 0,052309168 | 0,477 | 0,579 | 1         | 1,036923289   | 0,964391495     | 0,823834197     |
| SHLD1                                                                                           | 0,180814576 | 0,052300783 | 0,028 | 0,018 | 1         | 1,036917262   | 0,964397099     | 1,555555556     |
| PTPRA                                                                                           | 0,157164814 | 0,052298573 | 0,178 | 0,202 | 1         | 1,036915674   | 0,964398577     | 0,881188119     |
| SCNM1                                                                                           | 0,571613955 | 0,052291504 | 0,071 | 0,062 | 1         | 1,036910593   | 0,964403302     | 1,14516129      |
| TRIP13                                                                                          | 0,061871786 | 0,052284467 | 0,01  | 0,003 | 1         | 1,036905535   | 0,964408006     | 3,333333333     |
| ATPAF1                                                                                          | 0,473412604 | 0,052264377 | 0,04  | 0,033 | 1         | 1,036891096   | 0,964421436     | 1,212121212     |
| KLHL7                                                                                           | 0,939039047 | 0,052186086 | 0,066 | 0,066 | 1         | 1,036834829   | 0,964473774     | 1               |
| PNN                                                                                             | 0,00171422  | 0,052113209 | 0,26  | 0,335 | 1         | 1,036782454   | 0,964522495     | 0,776119403     |
| DOLK                                                                                            | 0,012700408 | 0,052094621 | 0,022 | 0,007 | 1         | 1,036769097   | 0,964534922     | 3,142857143     |
| PSKH1                                                                                           | 0,140928241 | 0,052064283 | 0,029 | 0,018 | 1         | 1,036747295   | 0,964555205     | 1,611111111     |
| CEP290                                                                                          | 0,902972114 | 0,052055765 | 0,084 | 0,081 | 1         | 1,036741173   | 0,964560901     | 1,037037037     |
| LINC00662                                                                                       | 0,545240211 | 0,052019453 | 0,059 | 0,052 | 1         | 1,03671508    | 0,964585178     | 1,134615385     |
| GGCX                                                                                            | 0,800709265 | 0,051991963 | 0,068 | 0,071 | 1         | 1,036695325   | 0,964603558     | 0,957746479     |
| TELO2                                                                                           | 0,020720888 | 0,051950986 | 0,052 | 0,028 | 1         | 1,036665881   | 0,964630957     | 1,857142857     |
| WRAP73                                                                                          | 0,550004397 | 0,051945936 | 0,048 | 0,041 | 1         | 1,036662252   | 0,964634333     | 1,170731707     |
| TADA2A                                                                                          | 0,939127262 | 0,051938065 | 0,028 | 0,028 | 1         | 1,036656596   | 0,964639596     | 1               |
| GAS2L1                                                                                          | 0,429547064 | 0,05193632  | 0,071 | 0,06  | 1         | 1,036655343   | 0,964640762     | 1,183333333     |
| PEX11B                                                                                          | 0,082216163 | 0,051889577 | 0,028 | 0,015 | 1         | 1,036621756   | 0,964672017     | 1,866666667     |
| NUFIP1                                                                                          | 0,656762854 | 0,051862508 | 0,033 | 0,037 | 1         | 1,036602306   | 0,964690118     | 0,891891892     |
| CCAR1                                                                                           | 0,950588166 | 0,05185126  | 0,134 | 0,132 | 1         | 1,036594224   | 0,964697639     | 1,015151515     |
| FNDC10                                                                                          | 0,025687319 | 0,051835812 | 0,013 | 0,003 | 1         | 1,036583125   | 0,964707968     | 4,333333333     |
| PYROXD1                                                                                         | 0,300872921 | 0,051759675 | 0,048 | 0,037 | 1         | 1,036528421   | 0,964758882     | 1,297297297     |
| RFTN1                                                                                           | 0,869626148 | 0,051741609 | 0,014 | 0,015 | 1         | 1,036515441   | 0,964770963     | 0,933333333     |
| AFG3L2                                                                                          | 0,779790015 | 0,051595326 | 0,094 | 0,096 | 1         | 1,036410349   | 0,964868791     | 0,979166667     |
| SLC66A2                                                                                         | 0,855040725 | 0,051275957 | 0,085 | 0,085 | 1         | 1,036180944   | 0,965082407     | 1               |
| ZDHHC1                                                                                          | 0,003127573 | 0,051273618 | 0,044 | 0,018 | 1         | 1,036179264   | 0,965083972     | 2,444444444     |
| SNAPC1                                                                                          | 0,91595843  | 0,051224598 | 0,055 | 0,053 | 1         | 1,036144058   | 0,965116764     | 1,037735849     |

Supplementary Table 5

| Differentially expressed genes_total calculation_ comparing SC-Keloid vs. (SC-Myel, SC-Nonmyel) |             |             |       |       |           |               |                 |                 |
|-------------------------------------------------------------------------------------------------|-------------|-------------|-------|-------|-----------|---------------|-----------------|-----------------|
| gene                                                                                            | p_val       | avg_log2FC  | pct.1 | pct.2 | p_val_adj | Foldchange_UP | Foldchange_DOWN | Ratio_pct1_pct2 |
| ZNF738                                                                                          | 0,482468322 | 0,051207759 | 0,03  | 0,024 | 1         | 1,036131964   | 0,965128029     | 1,25            |
| CRYBG3                                                                                          | 0,231884967 | 0,051185181 | 0,051 | 0,065 | 1         | 1,036115748   | 0,965143133     | 0,784615385     |
| URB1                                                                                            | 0,873743136 | 0,0511394   | 0,051 | 0,049 | 1         | 1,03608287    | 0,965173761     | 1,040816327     |
| CAMKK2                                                                                          | 0,216112113 | 0,051062461 | 0,076 | 0,058 | 1         | 1,036027617   | 0,965225235     | 1,310344828     |
| ZNF407                                                                                          | 0,38998836  | 0,050910831 | 0,03  | 0,038 | 1         | 1,035918734   | 0,965326687     | 0,789473684     |
| GNB1L                                                                                           | 0,17590113  | 0,050834435 | 0,017 | 0,009 | 1         | 1,03586388    | 0,965377806     | 1,888888889     |
| WDR77                                                                                           | 0,011325484 | 0,050834078 | 0,051 | 0,026 | 1         | 1,035863624   | 0,965378045     | 1,961538462     |
| ASPCR1                                                                                          | 0,127630807 | 0,050765346 | 0,078 | 0,057 | 1         | 1,035814275   | 0,965424038     | 1,368421053     |
| EIF4ENIF1                                                                                       | 0,90896877  | 0,050763332 | 0,021 | 0,022 | 1         | 1,035812829   | 0,965425386     | 0,954545455     |
| CCDC77                                                                                          | 0,23443277  | 0,05067886  | 0,023 | 0,015 | 1         | 1,035752182   | 0,965481914     | 1,533333333     |
| GDAP1                                                                                           | 0,79186063  | 0,05066528  | 0,034 | 0,031 | 1         | 1,035742433   | 0,965491003     | 1,096774194     |
| CEP135                                                                                          | 0,437756032 | 0,050636769 | 0,033 | 0,026 | 1         | 1,035721964   | 0,965510083     | 1,269230769     |
| ZNF566                                                                                          | 0,142305686 | 0,050631929 | 0,017 | 0,028 | 1         | 1,03571849    | 0,965513322     | 0,607142857     |
| SLC2A6                                                                                          | 0,003278339 | 0,050587284 | 0,021 | 0,004 | 1         | 1,035686439   | 0,965543201     | 5,25            |
| AGPAT5                                                                                          | 0,48353131  | 0,050576615 | 0,055 | 0,046 | 1         | 1,03567878    | 0,965550342     | 1,195652174     |
| ADPRS                                                                                           | 0,396608651 | 0,050560099 | 0,068 | 0,056 | 1         | 1,035666924   | 0,965561395     | 1,214285714     |
| FDXR                                                                                            | 0,853979956 | 0,050427467 | 0,023 | 0,022 | 1         | 1,035571715   | 0,965650167     | 1,045454545     |
| HACE1                                                                                           | 0,756337992 | 0,050426087 | 0,02  | 0,018 | 1         | 1,035570725   | 0,96565109      | 1,111111111     |
| NUP88                                                                                           | 0,306849208 | 0,050421939 | 0,035 | 0,026 | 1         | 1,035567748   | 0,965653867     | 1,346153846     |
| SETD6                                                                                           | 0,856531562 | 0,050399686 | 0,03  | 0,028 | 1         | 1,035551775   | 0,965668762     | 1,071428571     |
| PIGZ                                                                                            | 0,972101573 | 0,050358724 | 0,017 | 0,018 | 1         | 1,035522373   | 0,96569618      | 0,944444444     |
| STRN                                                                                            | 0,397287421 | 0,050344949 | 0,069 | 0,079 | 1         | 1,035512486   | 0,965705401     | 0,873417722     |
| MBTPS1                                                                                          | 0,434493471 | 0,050269721 | 0,144 | 0,156 | 1         | 1,035458491   | 0,965755758     | 0,923076923     |
| FBXO28                                                                                          | 0,471162136 | 0,050233545 | 0,045 | 0,053 | 1         | 1,035432527   | 0,965779975     | 0,849056604     |
| STAT5B                                                                                          | 0,019581864 | 0,050219734 | 0,035 | 0,06  | 1         | 1,035422615   | 0,96578922      | 0,583333333     |
| RABEPK                                                                                          | 0,1383473   | 0,050179438 | 0,051 | 0,035 | 1         | 1,035393695   | 0,965816196     | 1,457142857     |
| ADAL                                                                                            | 0,52939098  | 0,050131962 | 0,027 | 0,022 | 1         | 1,035359623   | 0,965847979     | 1,227272727     |
| PAFAH2                                                                                          | 0,355865884 | 0,050131532 | 0,016 | 0,011 | 1         | 1,035359314   | 0,965848268     | 1,454545455     |
| TCTN2                                                                                           | 0,082918715 | 0,050067703 | 0,016 | 0,007 | 1         | 1,035313508   | 0,965891001     | 2,285714286     |
| C5orf63                                                                                         | 0,027133402 | 0,050059183 | 0,02  | 0,007 | 1         | 1,035307394   | 0,965896704     | 2,857142857     |



Supplementary Table 5

| Differentially expressed genes_total calculation_ comparing SC-Keloid vs. (SC-Myel, SC-Nonmyel) |             |             |       |       |           |               |                 |                 |
|-------------------------------------------------------------------------------------------------|-------------|-------------|-------|-------|-----------|---------------|-----------------|-----------------|
| gene                                                                                            | p_val       | avg_log2FC  | pct.1 | pct.2 | p_val_adj | Foldchange_UP | Foldchange_DOWN | Ratio_pct1_pct2 |
| TRIM66                                                                                          | 0,758922006 | 0,050050814 | 0,014 | 0,012 | 1         | 1,035301388   | 0,965902308     | 1,166666667     |
| NANP                                                                                            | 0,626295151 | 0,050027871 | 0,01  | 0,008 | 1         | 1,035284924   | 0,965917668     | 1,25            |
| COMMD5                                                                                          | 0,277266184 | 0,05002051  | 0,072 | 0,057 | 1         | 1,035279642   | 0,965922597     | 1,263157895     |
| FMR1                                                                                            | 0,012982556 | 0,049999965 | 0,088 | 0,126 | 1         | 1,035264899   | 0,965936352     | 0,698412698     |
| KHDC4                                                                                           | 0,016704092 | 0,049987633 | 0,088 | 0,125 | 1         | 1,03525605    | 0,965944609     | 0,704           |
| GTF3C4                                                                                          | 0,493472648 | 0,049930004 | 0,056 | 0,047 | 1         | 1,035214696   | 0,965983195     | 1,191489362     |
| LPCAT2                                                                                          | 0,716916013 | 0,049896535 | 0,133 | 0,136 | 1         | 1,035190681   | 0,966005605     | 0,977941176     |
| GTPBP6                                                                                          | 0,116185652 | 0,049844114 | 0,102 | 0,123 | 1         | 1,035153068   | 0,966040706     | 0,829268293     |
| ILDR2                                                                                           | 0,751928618 | 0,049840086 | 0,023 | 0,026 | 1         | 1,035150178   | 0,966043403     | 0,884615385     |
| TCIRG1                                                                                          | 0,005291416 | 0,0498026   | 0,064 | 0,033 | 1         | 1,035123281   | 0,966068504     | 1,939393939     |
| DLD                                                                                             | 0,432596624 | 0,049761865 | 0,079 | 0,066 | 1         | 1,035094055   | 0,966095782     | 1,196969697     |
| FBL                                                                                             | 0,09140954  | 0,049724054 | 0,135 | 0,16  | 1         | 1,035066927   | 0,966121102     | 0,84375         |
| PTDSS2                                                                                          | 0,199510765 | 0,049642706 | 0,073 | 0,056 | 1         | 1,035008565   | 0,96617558      | 1,303571429     |
| C2orf72                                                                                         | 0,061977988 | 0,049639932 | 0,01  | 0,003 | 1         | 1,035006575   | 0,966177437     | 3,333333333     |
| TEAD4                                                                                           | 0,71560283  | 0,049622939 | 0,026 | 0,028 | 1         | 1,034994384   | 0,966188818     | 0,928571429     |
| NEURL1B                                                                                         | 0,024639636 | 0,049595518 | 0,023 | 0,043 | 1         | 1,034974712   | 0,966207182     | 0,534883721     |
| PTGER1                                                                                          | 0,025181683 | 0,049544153 | 0,013 | 0,003 | 1         | 1,034937864   | 0,966241583     | 4,333333333     |
| KATNB1                                                                                          | 0,000886939 | 0,049536016 | 0,04  | 0,012 | 1         | 1,034932026   | 0,966247033     | 3,333333333     |
| C8orf88                                                                                         | 0,412057364 | 0,049528579 | 0,031 | 0,024 | 1         | 1,034926691   | 0,966252014     | 1,291666667     |
| TAF6L                                                                                           | 0,09495587  | 0,049505803 | 0,02  | 0,009 | 1         | 1,034910353   | 0,966267268     | 2,222222222     |
| NDUFS7                                                                                          | 0,181860158 | 0,049448838 | 0,199 | 0,221 | 1         | 1,03486949    | 0,966305422     | 0,900452489     |
| GLTP                                                                                            | 0,042136428 | 0,049410355 | 0,105 | 0,137 | 1         | 1,034841886   | 0,966331198     | 0,766423358     |
| LIN7B                                                                                           | 0,307885289 | 0,049383636 | 0,04  | 0,03  | 1         | 1,034822721   | 0,966349095     | 1,333333333     |
| TMEM161A                                                                                        | 0,219488436 | 0,049352623 | 0,068 | 0,052 | 1         | 1,034800476   | 0,966369869     | 1,307692308     |
| MPDU1                                                                                           | 0,006718605 | 0,049240126 | 0,101 | 0,061 | 1         | 1,034719789   | 0,966445226     | 1,655737705     |
| LOX                                                                                             | 0,654658684 | 0,049175091 | 0,016 | 0,014 | 1         | 1,034673146   | 0,966488793     | 1,142857143     |
| LRRCC1                                                                                          | 0,892754219 | 0,049108244 | 0,14  | 0,138 | 1         | 1,034625206   | 0,966533576     | 1,014492754     |
| DNAJB5                                                                                          | 0,45647304  | 0,049095457 | 0,031 | 0,038 | 1         | 1,034616035   | 0,966542143     | 0,815789474     |
| TSNAX                                                                                           | 0,951968122 | 0,049087759 | 0,107 | 0,103 | 1         | 1,034610515   | 0,9665473       | 1,038834951     |
| C18orf54                                                                                        | 0,649625425 | 0,049076974 | 0,021 | 0,024 | 1         | 1,03460278    | 0,966554526     | 0,875           |

Supplementary Table 5

| Differentially expressed genes_total calculation_ comparing SC-Keloid vs. (SC-Myel, SC-Nonmyel) |             |             |       |       |           |               |                 |                 |
|-------------------------------------------------------------------------------------------------|-------------|-------------|-------|-------|-----------|---------------|-----------------|-----------------|
| gene                                                                                            | p_val       | avg_log2FC  | pct.1 | pct.2 | p_val_adj | Foldchange_UP | Foldchange_DOWN | Ratio_pct1_pct2 |
| MOCS3                                                                                           | 0,317955932 | 0,049075213 | 0,012 | 0,007 | 1         | 1,034601518   | 0,966555705     | 1,714285714     |
| MAP1S                                                                                           | 0,287367385 | 0,049066762 | 0,034 | 0,024 | 1         | 1,034595457   | 0,966561368     | 1,416666667     |
| ACP6                                                                                            | 0,603682585 | 0,049055545 | 0,035 | 0,03  | 1         | 1,034587413   | 0,966568883     | 1,166666667     |
| OLFML3                                                                                          | 0,833760796 | 0,049050336 | 0,023 | 0,022 | 1         | 1,034583677   | 0,966572373     | 1,045454545     |
| ZNF248                                                                                          | 0,519041672 | 0,048855066 | 0,042 | 0,049 | 1         | 1,034443655   | 0,966703208     | 0,857142857     |
| PIGB                                                                                            | 0,105105347 | 0,048841294 | 0,017 | 0,008 | 1         | 1,034433781   | 0,966712436     | 2,125           |
| ST8SIA4                                                                                         | 0,010529307 | 0,048808664 | 0,015 | 0,003 | 1         | 1,034410385   | 0,966734301     | 5               |
| PDCD2                                                                                           | 0,257204073 | 0,048784703 | 0,105 | 0,084 | 1         | 1,034393205   | 0,966750357     | 1,25            |
| MEIS3                                                                                           | 0,809446277 | 0,048732949 | 0,028 | 0,03  | 1         | 1,034356098   | 0,966785038     | 0,933333333     |
| ZBED5-AS1                                                                                       | 0,551509743 | 0,048703414 | 0,015 | 0,019 | 1         | 1,034334924   | 0,96680483      | 0,789473684     |
| ZNF85                                                                                           | 0,116232214 | 0,048701001 | 0,021 | 0,011 | 1         | 1,034333193   | 0,966806447     | 1,909090909     |
| TPP1                                                                                            | 0,249755694 | 0,048693018 | 0,101 | 0,117 | 1         | 1,03432747    | 0,966811797     | 0,863247863     |
| FAM47E                                                                                          | 0,010529307 | 0,048558911 | 0,015 | 0,003 | 1         | 1,034231328   | 0,966901672     | 5               |
| CXorf38                                                                                         | 0,980859581 | 0,048500115 | 0,063 | 0,062 | 1         | 1,034189179   | 0,966941078     | 1,016129032     |
| FERMT3                                                                                          | 0,179679555 | 0,048460572 | 0,031 | 0,02  | 1         | 1,034160833   | 0,966967582     | 1,55            |
| DDB2                                                                                            | 0,784583397 | 0,048442161 | 0,065 | 0,068 | 1         | 1,034147636   | 0,966979922     | 0,955882353     |
| RMI2                                                                                            | 0,001284512 | 0,048343371 | 0,014 | 0     | 1         | 1,034076824   | 0,967046139     | #DIV/0!         |
| TEAD2                                                                                           | 0,487030166 | 0,048270227 | 0,03  | 0,024 | 1         | 1,034024398   | 0,967095169     | 1,25            |
| ZNF485                                                                                          | 0,062927351 | 0,048222645 | 0,013 | 0,004 | 1         | 1,033990296   | 0,967127065     | 3,25            |
| GTPBP2                                                                                          | 0,109142027 | 0,048202686 | 0,041 | 0,026 | 1         | 1,033975991   | 0,967140445     | 1,576923077     |
| SLC25A45                                                                                        | 0,754251212 | 0,048199406 | 0,022 | 0,024 | 1         | 1,03397364    | 0,967142644     | 0,916666667     |
| ZNF175                                                                                          | 0,793092672 | 0,04818212  | 0,015 | 0,014 | 1         | 1,033961251   | 0,967154232     | 1,071428571     |
| STAT1                                                                                           | 0,114232701 | 0,048110092 | 0,08  | 0,058 | 1         | 1,033909631   | 0,96720252      | 1,379310345     |
| SRSF6                                                                                           | 0,105703642 | 0,048083033 | 0,185 | 0,213 | 1         | 1,033890239   | 0,96722066      | 0,868544601     |
| KPNA3                                                                                           | 0,527762501 | 0,048045607 | 0,085 | 0,092 | 1         | 1,033863419   | 0,967245752     | 0,923913043     |
| ZNF611                                                                                          | 0,749980338 | 0,048025446 | 0,01  | 0,012 | 1         | 1,033848971   | 0,967259269     | 0,833333333     |
| CENPM                                                                                           | 0,01342148  | 0,048011621 | 0,012 | 0,001 | 1         | 1,033839064   | 0,967268538     | 12              |
| CCDC82                                                                                          | 0,007166043 | 0,048011331 | 0,183 | 0,235 | 1         | 1,033838856   | 0,967268733     | 0,778723404     |
| SDK1                                                                                            | 0,224924126 | 0,047995016 | 0,027 | 0,018 | 1         | 1,033827165   | 0,967279671     | 1,5             |
| WASHC3                                                                                          | 0,944366175 | 0,047983214 | 0,129 | 0,123 | 1         | 1,033818707   | 0,967287584     | 1,048780488     |

Supplementary Table 5

| Differentially expressed genes_total calculation_ comparing SC-Keloid vs. (SC-Myel, SC-Nonmyel) |             |             |       |       |           |               |                 |                 |
|-------------------------------------------------------------------------------------------------|-------------|-------------|-------|-------|-----------|---------------|-----------------|-----------------|
| gene                                                                                            | p_val       | avg_log2FC  | pct.1 | pct.2 | p_val_adj | Foldchange_UP | Foldchange_DOWN | Ratio_pct1_pct2 |
| TAX1BP1                                                                                         | 0,045013242 | 0,047941668 | 0,228 | 0,27  | 1         | 1,033788936   | 0,96731544      | 0,844444444     |
| HIRA                                                                                            | 0,808008365 | 0,047893695 | 0,034 | 0,031 | 1         | 1,033754561   | 0,967347606     | 1,096774194     |
| PCBP4                                                                                           | 0,17517126  | 0,047878299 | 0,243 | 0,273 | 1         | 1,033743529   | 0,967357929     | 0,89010989      |
| JAGN1                                                                                           | 0,134779643 | 0,04786767  | 0,1   | 0,076 | 1         | 1,033735913   | 0,967365057     | 1,315789474     |
| SCFD2                                                                                           | 0,005074769 | 0,047819856 | 0,02  | 0,004 | 1         | 1,033701654   | 0,967397118     | 5               |
| KAT14                                                                                           | 0,945164687 | 0,047816392 | 0,014 | 0,014 | 1         | 1,033699172   | 0,96739944      | 1               |
| MCRIP2                                                                                          | 0,58902236  | 0,047815004 | 0,04  | 0,034 | 1         | 1,033698177   | 0,967400371     | 1,176470588     |
| BNIP1                                                                                           | 0,228700237 | 0,047753072 | 0,043 | 0,031 | 1         | 1,033653804   | 0,9674419       | 1,387096774     |
| LYST                                                                                            | 0,059945965 | 0,047734844 | 0,144 | 0,178 | 1         | 1,033640743   | 0,967454124     | 0,808988764     |
| PRR14L                                                                                          | 0,879334267 | 0,047727258 | 0,04  | 0,038 | 1         | 1,033635309   | 0,967459211     | 1,052631579     |
| ARMCX3                                                                                          | 0,015684817 | 0,047720741 | 0,248 | 0,3   | 1         | 1,033630639   | 0,967463581     | 0,826666667     |
| ZNF317                                                                                          | 0,5369325   | 0,047681596 | 0,017 | 0,014 | 1         | 1,033602594   | 0,967489832     | 1,214285714     |
| SLC12A2                                                                                         | 0,122383541 | 0,047637431 | 0,086 | 0,107 | 1         | 1,033570953   | 0,96751945      | 0,803738318     |
| IQCE                                                                                            | 0,319119623 | 0,047637243 | 0,044 | 0,034 | 1         | 1,033570819   | 0,967519576     | 1,294117647     |
| ZNF134                                                                                          | 0,622352348 | 0,047637165 | 0,015 | 0,012 | 1         | 1,033570763   | 0,967519628     | 1,25            |
| NEK8                                                                                            | 0,062451412 | 0,047519675 | 0,013 | 0,004 | 1         | 1,033486594   | 0,967598424     | 3,25            |
| TOP3A                                                                                           | 0,982660941 | 0,047491256 | 0,023 | 0,023 | 1         | 1,033466236   | 0,967617485     | 1               |
| SLC25A17                                                                                        | 0,663927249 | 0,047439667 | 0,038 | 0,034 | 1         | 1,033429281   | 0,967652086     | 1,117647059     |
| TTC8                                                                                            | 0,108742198 | 0,047438776 | 0,037 | 0,023 | 1         | 1,033428643   | 0,967652684     | 1,608695652     |
| MED6                                                                                            | 0,663945744 | 0,047430666 | 0,073 | 0,066 | 1         | 1,033422834   | 0,967658123     | 1,106060606     |
| KIF5A                                                                                           | 0,327436799 | 0,04738814  | 0,023 | 0,016 | 1         | 1,033392373   | 0,967686647     | 1,4375          |
| RPRD1A                                                                                          | 0,061968206 | 0,047373762 | 0,079 | 0,106 | 1         | 1,033382073   | 0,967696291     | 0,745283019     |
| PANK3                                                                                           | 0,698601828 | 0,047368962 | 0,115 | 0,106 | 1         | 1,033378635   | 0,967699511     | 1,08490566      |
| ERLIN1                                                                                          | 0,792697453 | 0,047359844 | 0,052 | 0,049 | 1         | 1,033372104   | 0,967705627     | 1,06122449      |
| TTC26                                                                                           | 0,27416607  | 0,047354967 | 0,017 | 0,011 | 1         | 1,033368611   | 0,967708898     | 1,545454545     |
| ZNF439                                                                                          | 0,25141353  | 0,047350693 | 0,036 | 0,026 | 1         | 1,03336555    | 0,967711765     | 1,384615385     |
| CEP43                                                                                           | 0,982994334 | 0,047289953 | 0,023 | 0,023 | 1         | 1,033322044   | 0,967752508     | 1               |
| PDCD1LG2                                                                                        | 0,001284512 | 0,047201176 | 0,014 | 0     | 1         | 1,03325846    | 0,967812062     | #DIV/0!         |
| FAF1                                                                                            | 0,436284171 | 0,047197967 | 0,081 | 0,069 | 1         | 1,033256161   | 0,967814214     | 1,173913043     |
| TRIM41                                                                                          | 0,540364638 | 0,047154436 | 0,034 | 0,039 | 1         | 1,033224985   | 0,967843417     | 0,871794872     |

Supplementary Table 5

| Differentially expressed genes_total calculation_ comparing SC-Keloid vs. (SC-Myel, SC-Nonmyel) |             |             |       |       |           |               |                 |                 |
|-------------------------------------------------------------------------------------------------|-------------|-------------|-------|-------|-----------|---------------|-----------------|-----------------|
| gene                                                                                            | p_val       | avg_log2FC  | pct.1 | pct.2 | p_val_adj | Foldchange_UP | Foldchange_DOWN | Ratio_pct1_pct2 |
| NT5M                                                                                            | 0,581628741 | 0,047118562 | 0,014 | 0,011 | 1         | 1,033199293   | 0,967867484     | 1,272727273     |
| FBXW8                                                                                           | 0,30621915  | 0,047109938 | 0,019 | 0,012 | 1         | 1,033193117   | 0,967873269     | 1,583333333     |
| GTF3C2                                                                                          | 0,405476896 | 0,047063751 | 0,044 | 0,035 | 1         | 1,033160041   | 0,967904255     | 1,257142857     |
| CDK16                                                                                           | 0,585919894 | 0,046970986 | 0,107 | 0,095 | 1         | 1,033093611   | 0,967966494     | 1,126315789     |
| CNOT8                                                                                           | 0,436239786 | 0,046956141 | 0,071 | 0,06  | 1         | 1,033082981   | 0,967976454     | 1,183333333     |
| ATAD2                                                                                           | 0,428065644 | 0,046940195 | 0,02  | 0,026 | 1         | 1,033071562   | 0,967987152     | 0,769230769     |
| MFAP3                                                                                           | 0,435798933 | 0,046893605 | 0,019 | 0,014 | 1         | 1,033038201   | 0,968018413     | 1,357142857     |
| SCN1B                                                                                           | 0,275153212 | 0,046846962 | 0,064 | 0,05  | 1         | 1,033004803   | 0,96804971      | 1,28            |
| RNF214                                                                                          | 0,783298086 | 0,046827354 | 0,049 | 0,052 | 1         | 1,032990763   | 0,968062867     | 0,942307692     |
| ERCC6                                                                                           | 0,668770267 | 0,046811244 | 0,019 | 0,022 | 1         | 1,032979228   | 0,968073677     | 0,863636364     |
| MPZL1                                                                                           | 0,331122177 | 0,046768468 | 0,033 | 0,042 | 1         | 1,032948601   | 0,968102381     | 0,785714286     |
| EARS2                                                                                           | 0,041612665 | 0,046765999 | 0,016 | 0,005 | 1         | 1,032946833   | 0,968104038     | 3,2             |
| MED1                                                                                            | 0,389046158 | 0,046749752 | 0,064 | 0,053 | 1         | 1,032935201   | 0,96811494      | 1,20754717      |
| NME6                                                                                            | 0,121698769 | 0,046712215 | 0,024 | 0,014 | 1         | 1,032908325   | 0,96814013      | 1,714285714     |
| WNT10A                                                                                          | 0,001284512 | 0,046704505 | 0,014 | 0     | 1         | 1,032902805   | 0,968145304     | #DIV/0!         |
| BANP                                                                                            | 0,767347574 | 0,04668812  | 0,033 | 0,03  | 1         | 1,032891074   | 0,968156299     | 1,1             |
| ZPR1                                                                                            | 0,425339584 | 0,046677202 | 0,062 | 0,052 | 1         | 1,032883258   | 0,968163626     | 1,192307692     |
| CD6                                                                                             | 0,00329308  | 0,046661199 | 0,015 | 0,001 | 1         | 1,032871801   | 0,968174365     | 15              |
| CCDC180                                                                                         | 0,185351104 | 0,046634076 | 0,012 | 0,005 | 1         | 1,032852383   | 0,968192567     | 2,4             |
| HPS1                                                                                            | 0,786587961 | 0,04657095  | 0,057 | 0,053 | 1         | 1,032807191   | 0,968234932     | 1,075471698     |
| SUFU                                                                                            | 0,73068323  | 0,046536816 | 0,019 | 0,016 | 1         | 1,032782755   | 0,968257841     | 1,1875          |
| PGPEP1                                                                                          | 0,811277108 | 0,046530007 | 0,035 | 0,033 | 1         | 1,032777881   | 0,96826241      | 1,060606061     |
| SPATS2                                                                                          | 0,265547159 | 0,046491805 | 0,052 | 0,065 | 1         | 1,032750533   | 0,96828805      | 0,8             |
| PGAM5                                                                                           | 0,57991817  | 0,04644115  | 0,029 | 0,024 | 1         | 1,032714273   | 0,968322049     | 1,208333333     |
| AAGAB                                                                                           | 0,017933141 | 0,046352358 | 0,034 | 0,015 | 1         | 1,032650715   | 0,968381647     | 2,266666667     |
| ZNF771                                                                                          | 0,904087688 | 0,046320776 | 0,033 | 0,031 | 1         | 1,032628109   | 0,968402846     | 1,064516129     |
| RNASEL                                                                                          | 0,088643746 | 0,04632032  | 0,026 | 0,014 | 1         | 1,032627783   | 0,968403152     | 1,857142857     |
| PCYT2                                                                                           | 0,798111724 | 0,046312572 | 0,052 | 0,049 | 1         | 1,032622237   | 0,968408353     | 1,06122449      |
| DAP3                                                                                            | 0,202220871 | 0,046308326 | 0,106 | 0,084 | 1         | 1,032619199   | 0,968411203     | 1,261904762     |
| SASH1                                                                                           | 0,112553295 | 0,046256293 | 0,113 | 0,138 | 1         | 1,032581956   | 0,96844613      | 0,81884058      |

Supplementary Table 5

| Differentially expressed genes_total calculation_ comparing SC-Keloid vs. (SC-Myel, SC-Nonmyel) |             |             |       |       |           |               |                 |                 |
|-------------------------------------------------------------------------------------------------|-------------|-------------|-------|-------|-----------|---------------|-----------------|-----------------|
| gene                                                                                            | p_val       | avg_log2FC  | pct.1 | pct.2 | p_val_adj | Foldchange_UP | Foldchange_DOWN | Ratio_pct1_pct2 |
| VCPIP1                                                                                          | 0,165885412 | 0,046176105 | 0,056 | 0,072 | 1         | 1,032524565   | 0,96849996      | 0,777777778     |
| GMPPA                                                                                           | 0,04030001  | 0,046156101 | 0,055 | 0,033 | 1         | 1,032510248   | 0,96851339      | 1,666666667     |
| FREM1                                                                                           | 0,021465155 | 0,046103181 | 0,01  | 0,001 | 1         | 1,032472375   | 0,968548916     | 10              |
| SLC39A9                                                                                         | 0,31056827  | 0,046099426 | 0,044 | 0,034 | 1         | 1,032469687   | 0,968551438     | 1,294117647     |
| CHFR                                                                                            | 0,048211559 | 0,046091047 | 0,047 | 0,027 | 1         | 1,032463691   | 0,968557062     | 1,740740741     |
| ANP32E                                                                                          | 0,001984109 | 0,046066864 | 0,116 | 0,17  | 1         | 1,032446385   | 0,968573298     | 0,682352941     |
| CDC23                                                                                           | 0,796240861 | 0,045995025 | 0,058 | 0,054 | 1         | 1,032394975   | 0,968621529     | 1,074074074     |
| H1-4                                                                                            | 0,493310257 | 0,045959603 | 0,03  | 0,024 | 1         | 1,032369628   | 0,968645312     | 1,25            |
| PROSER1                                                                                         | 0,363265962 | 0,045929584 | 0,029 | 0,022 | 1         | 1,032348147   | 0,968665467     | 1,318181818     |
| VDR                                                                                             | 0,315284259 | 0,045923109 | 0,015 | 0,009 | 1         | 1,032343513   | 0,968669815     | 1,666666667     |
| L3MBTL2                                                                                         | 0,261958256 | 0,04589138  | 0,054 | 0,041 | 1         | 1,03232081    | 0,968691119     | 1,317073171     |
| EDC3                                                                                            | 0,7274433   | 0,045883498 | 0,019 | 0,016 | 1         | 1,032315169   | 0,968696411     | 1,1875          |
| MEOX1                                                                                           | 0,917138954 | 0,045828768 | 0,013 | 0,012 | 1         | 1,032276008   | 0,968733161     | 1,083333333     |
| GABPB1                                                                                          | 0,869805552 | 0,045746987 | 0,033 | 0,034 | 1         | 1,032217494   | 0,968788076     | 0,970588235     |
| NHLRC3                                                                                          | 0,922396258 | 0,045741696 | 0,052 | 0,053 | 1         | 1,032213708   | 0,968791629     | 0,981132075     |
| UHRF1BP1L                                                                                       | 0,064368594 | 0,045661212 | 0,058 | 0,081 | 1         | 1,032156126   | 0,968845676     | 0,716049383     |
| SMIM27                                                                                          | 0,872454398 | 0,045652137 | 0,057 | 0,054 | 1         | 1,032149633   | 0,968851771     | 1,055555556     |
| ZBTB8A                                                                                          | 0,383262177 | 0,045617307 | 0,04  | 0,031 | 1         | 1,032124715   | 0,968875161     | 1,290322581     |
| BIVM                                                                                            | 0,94673381  | 0,045598962 | 0,027 | 0,027 | 1         | 1,032111591   | 0,968887482     | 1               |
| NIPA1                                                                                           | 0,081838498 | 0,045458185 | 0,028 | 0,015 | 1         | 1,032010884   | 0,968982029     | 1,866666667     |
| SLC41A3                                                                                         | 0,4083716   | 0,045282819 | 0,07  | 0,058 | 1         | 1,031885445   | 0,969099821     | 1,206896552     |
| LRTOMT                                                                                          | 0,535612379 | 0,045279332 | 0,013 | 0,009 | 1         | 1,031882952   | 0,969102163     | 1,444444444     |
| EXOSC1                                                                                          | 0,382537065 | 0,045235554 | 0,068 | 0,056 | 1         | 1,03185164    | 0,96913157      | 1,214285714     |
| TRIM62                                                                                          | 0,02437396  | 0,045140929 | 0,024 | 0,009 | 1         | 1,031783964   | 0,969195137     | 2,666666667     |
| LTO1                                                                                            | 0,989401757 | 0,045130851 | 0,033 | 0,033 | 1         | 1,031776756   | 0,969201907     | 1               |
| KPNA5                                                                                           | 0,902233728 | 0,045126405 | 0,055 | 0,056 | 1         | 1,031773577   | 0,969204894     | 0,982142857     |
| TRAF3                                                                                           | 0,694191737 | 0,045104662 | 0,047 | 0,05  | 1         | 1,031758027   | 0,969219501     | 0,94            |
| ZNF775                                                                                          | 0,766293193 | 0,045099006 | 0,05  | 0,046 | 1         | 1,031753982   | 0,969223301     | 1,086956522     |
| FAM227A                                                                                         | 0,26465623  | 0,045073073 | 0,01  | 0,005 | 1         | 1,031735436   | 0,969240723     | 2               |
| CAMKMT                                                                                          | 0,648980029 | 0,045059788 | 0,02  | 0,023 | 1         | 1,031725935   | 0,969249649     | 0,869565217     |

Supplementary Table 5

| Differentially expressed genes_total calculation_ comparing SC-Keloid vs. (SC-Myel, SC-Nonmyel) |             |             |       |       |           |               |                 |                 |
|-------------------------------------------------------------------------------------------------|-------------|-------------|-------|-------|-----------|---------------|-----------------|-----------------|
| gene                                                                                            | p_val       | avg_log2FC  | pct.1 | pct.2 | p_val_adj | Foldchange_UP | Foldchange_DOWN | Ratio_pct1_pct2 |
| UBXN2A                                                                                          | 0,02829788  | 0,045039694 | 0,166 | 0,209 | 1         | 1,031711565   | 0,969263148     | 0,794258373     |
| C9orf40                                                                                         | 0,056937824 | 0,044995099 | 0,017 | 0,007 | 1         | 1,031679675   | 0,969293109     | 2,428571429     |
| C7orf50                                                                                         | 0,53150843  | 0,044983954 | 0,215 | 0,221 | 1         | 1,031671705   | 0,969300598     | 0,972850679     |
| FASTKD1                                                                                         | 0,26233662  | 0,044847383 | 0,024 | 0,016 | 1         | 1,031574047   | 0,96939236      | 1,5             |
| AQP7                                                                                            | 0,052824651 | 0,044812072 | 0,02  | 0,008 | 1         | 1,031548799   | 0,969416086     | 2,5             |
| SLC25A16                                                                                        | 0,812086371 | 0,044704726 | 0,035 | 0,033 | 1         | 1,031472048   | 0,96948822      | 1,060606061     |
| DHRS1                                                                                           | 0,631677394 | 0,044610089 | 0,059 | 0,053 | 1         | 1,031404388   | 0,969551818     | 1,113207547     |
| PSMG2                                                                                           | 0,889733254 | 0,044577573 | 0,169 | 0,164 | 1         | 1,031381142   | 0,969573671     | 1,030487805     |
| GPR153                                                                                          | 0,310131767 | 0,044555985 | 0,05  | 0,061 | 1         | 1,031365709   | 0,969588179     | 0,819672131     |
| FAM168B                                                                                         | 0,007487228 | 0,044548331 | 0,084 | 0,125 | 1         | 1,031360238   | 0,969593323     | 0,672           |
| CLBA1                                                                                           | 0,026983868 | 0,0445322   | 0,02  | 0,007 | 1         | 1,031348706   | 0,969604165     | 2,857142857     |
| ARPP19                                                                                          | 0,000996573 | 0,044496205 | 0,268 | 0,345 | 1         | 1,031322975   | 0,969628356     | 0,776811594     |
| HSDL2                                                                                           | 0,859309393 | 0,044456895 | 0,057 | 0,054 | 1         | 1,031294874   | 0,969654776     | 1,055555556     |
| THAP6                                                                                           | 0,601582355 | 0,044372822 | 0,027 | 0,031 | 1         | 1,031234777   | 0,969711285     | 0,870967742     |
| SMPDL3A                                                                                         | 0,030056795 | 0,04436562  | 0,034 | 0,016 | 1         | 1,031229628   | 0,969716126     | 2,125           |
| SNX13                                                                                           | 0,040344835 | 0,044343633 | 0,09  | 0,119 | 1         | 1,031213913   | 0,969730904     | 0,756302521     |
| DUS1L                                                                                           | 0,502831245 | 0,04430564  | 0,092 | 0,08  | 1         | 1,031186756   | 0,969756442     | 1,15            |
| ZFP1                                                                                            | 0,932198175 | 0,044295608 | 0,028 | 0,027 | 1         | 1,031179586   | 0,969763186     | 1,037037037     |
| UBAC2                                                                                           | 0,870093844 | 0,044283197 | 0,076 | 0,072 | 1         | 1,031170715   | 0,969771528     | 1,055555556     |
| SFMBT2                                                                                          | 0,436556604 | 0,04423426  | 0,015 | 0,02  | 1         | 1,031135737   | 0,969804424     | 0,75            |
| ZNF701                                                                                          | 0,847489243 | 0,044209963 | 0,026 | 0,027 | 1         | 1,031118372   | 0,969820757     | 0,962962963     |
| RILPL1                                                                                          | 0,20965886  | 0,044198674 | 0,078 | 0,06  | 1         | 1,031110303   | 0,969828346     | 1,3             |
| ZNF567                                                                                          | 0,583390213 | 0,044114544 | 0,027 | 0,031 | 1         | 1,031050177   | 0,969884902     | 0,870967742     |
| PSMA2                                                                                           | 0,010025388 | 0,044062642 | 0,212 | 0,263 | 1         | 1,031013085   | 0,969919795     | 0,80608365      |
| TUBGCP4                                                                                         | 0,961439653 | 0,044052463 | 0,034 | 0,034 | 1         | 1,031005811   | 0,969926638     | 1               |
| RAB5IF                                                                                          | 0,862053134 | 0,044012574 | 0,156 | 0,148 | 1         | 1,030977305   | 0,969953456     | 1,054054054     |
| ZNF16                                                                                           | 0,883740888 | 0,043943985 | 0,012 | 0,011 | 1         | 1,030928291   | 0,969999571     | 1,090909091     |
| MMRN2                                                                                           | 0,156607823 | 0,043935767 | 0,005 | 0,011 | 1         | 1,030922418   | 0,970005097     | 0,454545455     |
| PUS10                                                                                           | 0,678284028 | 0,043934674 | 0,012 | 0,009 | 1         | 1,030921637   | 0,970005832     | 1,333333333     |
| MARK3                                                                                           | 0,201844987 | 0,043837382 | 0,176 | 0,197 | 1         | 1,030852116   | 0,970071249     | 0,893401015     |

Supplementary Table 5

| Differentially expressed genes_total calculation_ comparing SC-Keloid vs. (SC-Myel, SC-Nonmyel) |             |             |       |       |           |               |                 |                 |
|-------------------------------------------------------------------------------------------------|-------------|-------------|-------|-------|-----------|---------------|-----------------|-----------------|
| gene                                                                                            | p_val       | avg_log2FC  | pct.1 | pct.2 | p_val_adj | Foldchange_UP | Foldchange_DOWN | Ratio_pct1_pct2 |
| HEATR6                                                                                          | 0,175761221 | 0,043834028 | 0,031 | 0,02  | 1         | 1,03084972    | 0,970073504     | 1,55            |
| TCN2                                                                                            | 0,431962332 | 0,04383055  | 0,01  | 0,007 | 1         | 1,030847235   | 0,970075843     | 1,428571429     |
| MFSD4B                                                                                          | 0,325371159 | 0,043820676 | 0,016 | 0,023 | 1         | 1,03084018    | 0,970082482     | 0,695652174     |
| ZNF783                                                                                          | 0,815396373 | 0,043810907 | 0,022 | 0,02  | 1         | 1,030833199   | 0,970089051     | 1,1             |
| PLPP1                                                                                           | 0,033738135 | 0,043810038 | 0,456 | 0,577 | 1         | 1,030832578   | 0,970089635     | 0,790294627     |
| IK                                                                                              | 0,115440546 | 0,043799009 | 0,189 | 0,213 | 1         | 1,030824698   | 0,970097051     | 0,887323944     |
| PARP11                                                                                          | 0,889146463 | 0,043729149 | 0,019 | 0,018 | 1         | 1,030774783   | 0,970144028     | 1,055555556     |
| RTP4                                                                                            | 0,262265926 | 0,043712564 | 0,01  | 0,005 | 1         | 1,030762934   | 0,97015518      | 2               |
| FBXW11                                                                                          | 0,024247619 | 0,043618536 | 0,126 | 0,166 | 1         | 1,030695756   | 0,970218413     | 0,759036145     |
| FAM111B                                                                                         | 0,039654921 | 0,043575634 | 0,012 | 0,003 | 1         | 1,030665106   | 0,970247265     | 4               |
| TPR                                                                                             | 0,143955252 | 0,043462953 | 0,211 | 0,24  | 1         | 1,03058461    | 0,970323048     | 0,879166667     |
| VSIG10                                                                                          | 0,698623684 | 0,043459989 | 0,029 | 0,026 | 1         | 1,030582492   | 0,970325042     | 1,115384615     |
| DNAJC14                                                                                         | 0,488559096 | 0,043457211 | 0,035 | 0,028 | 1         | 1,030580508   | 0,97032691      | 1,25            |
| MECR                                                                                            | 0,056559997 | 0,043443463 | 0,048 | 0,028 | 1         | 1,030570687   | 0,970336157     | 1,714285714     |
| NME5                                                                                            | 0,062546361 | 0,043342531 | 0,013 | 0,004 | 1         | 1,03049859    | 0,970404045     | 3,25            |
| GSPT2                                                                                           | 0,008122861 | 0,043306224 | 0,028 | 0,009 | 1         | 1,030472657   | 0,970428466     | 3,111111111     |
| DAP                                                                                             | 0,884238745 | 0,043301583 | 0,186 | 0,185 | 1         | 1,030469342   | 0,970431588     | 1,005405405     |
| OTUB1                                                                                           | 0,542576707 | 0,043288655 | 0,118 | 0,104 | 1         | 1,030460108   | 0,970440284     | 1,134615385     |
| ANLN                                                                                            | 0,016180755 | 0,04321468  | 0,028 | 0,011 | 1         | 1,030407272   | 0,970490045     | 2,545454545     |
| CLK2                                                                                            | 0,199304891 | 0,043189026 | 0,029 | 0,019 | 1         | 1,030388949   | 0,970507303     | 1,526315789     |
| FBXO38                                                                                          | 0,991329959 | 0,04318452  | 0,023 | 0,023 | 1         | 1,030385731   | 0,970510334     | 1               |
| MTERF1                                                                                          | 0,833504293 | 0,043166498 | 0,016 | 0,015 | 1         | 1,03037286    | 0,970522457     | 1,066666667     |
| PHETA1                                                                                          | 0,01850312  | 0,043122571 | 0,021 | 0,007 | 1         | 1,030341488   | 0,970552008     | 3               |
| RFWD3                                                                                           | 0,060654292 | 0,043098011 | 0,029 | 0,015 | 1         | 1,030323947   | 0,970568531     | 1,933333333     |
| FBXO9                                                                                           | 0,505878943 | 0,043097388 | 0,118 | 0,125 | 1         | 1,030323502   | 0,97056895      | 0,944           |
| STX10                                                                                           | 0,820831979 | 0,043002792 | 0,129 | 0,128 | 1         | 1,030255948   | 0,970632591     | 1,0078125       |
| FAM199X                                                                                         | 0,738213207 | 0,042944616 | 0,084 | 0,087 | 1         | 1,030214404   | 0,970671732     | 0,965517241     |
| SLC46A1                                                                                         | 0,431567206 | 0,042882831 | 0,01  | 0,007 | 1         | 1,030170284   | 0,970713303     | 1,428571429     |
| ZNF121                                                                                          | 0,647577753 | 0,042847691 | 0,034 | 0,038 | 1         | 1,030145193   | 0,970736947     | 0,894736842     |
| TMEM214                                                                                         | 0,071975523 | 0,042825607 | 0,069 | 0,046 | 1         | 1,030129424   | 0,970751807     | 1,5             |

Supplementary Table 5

| Differentially expressed genes_total calculation_ comparing SC-Keloid vs. (SC-Myel, SC-Nonmyel) |             |             |       |       |           |               |                 |                 |
|-------------------------------------------------------------------------------------------------|-------------|-------------|-------|-------|-----------|---------------|-----------------|-----------------|
| gene                                                                                            | p_val       | avg_log2FC  | pct.1 | pct.2 | p_val_adj | Foldchange_UP | Foldchange_DOWN | Ratio_pct1_pct2 |
| RDH11                                                                                           | 0,937447136 | 0,042791716 | 0,121 | 0,119 | 1         | 1,030105225   | 0,970774612     | 1,016806723     |
| SLC25A32                                                                                        | 0,982729558 | 0,042744439 | 0,044 | 0,043 | 1         | 1,030071469   | 0,970806424     | 1,023255814     |
| CLCN5                                                                                           | 0,065192806 | 0,042663215 | 0,023 | 0,039 | 1         | 1,030013478   | 0,970861083     | 0,58974359      |
| ADO                                                                                             | 0,387690999 | 0,04250485  | 0,03  | 0,038 | 1         | 1,029900419   | 0,97096766      | 0,789473684     |
| TFB2M                                                                                           | 0,409463736 | 0,042491711 | 0,031 | 0,024 | 1         | 1,029891039   | 0,970976503     | 1,291666667     |
| RETREG2                                                                                         | 0,390833795 | 0,042482139 | 0,092 | 0,077 | 1         | 1,029884206   | 0,970982946     | 1,194805195     |
| STRAP                                                                                           | 0,023835843 | 0,042462314 | 0,218 | 0,263 | 1         | 1,029870054   | 0,970996288     | 0,828897338     |
| ZNF420                                                                                          | 0,926354502 | 0,042446597 | 0,02  | 0,02  | 1         | 1,029858834   | 0,971006867     | 1               |
| RBBP4                                                                                           | 0,145735602 | 0,042348239 | 0,169 | 0,194 | 1         | 1,029788624   | 0,971073069     | 0,871134021     |
| ZNF101                                                                                          | 0,094085476 | 0,042271155 | 0,012 | 0,004 | 1         | 1,029733604   | 0,971124955     | 3               |
| FBXL15                                                                                          | 0,879275065 | 0,042263832 | 0,073 | 0,073 | 1         | 1,029728377   | 0,971129885     | 1               |
| FAM135A                                                                                         | 0,202514869 | 0,042254529 | 0,022 | 0,033 | 1         | 1,029721737   | 0,971136147     | 0,666666667     |
| ALG10B                                                                                          | 0,52899102  | 0,042174406 | 0,022 | 0,027 | 1         | 1,029664551   | 0,971190082     | 0,814814815     |
| ASB13                                                                                           | 0,140750264 | 0,042165966 | 0,01  | 0,004 | 1         | 1,029658527   | 0,971195764     | 2,5             |
| BIRC5                                                                                           | 0,021510388 | 0,042131247 | 0,01  | 0,001 | 1         | 1,029633748   | 0,971219137     | 10              |
| RRS1                                                                                            | 0,439955664 | 0,042094869 | 0,033 | 0,026 | 1         | 1,029607786   | 0,971243626     | 1,269230769     |
| GTF2E1                                                                                          | 0,146576668 | 0,042055121 | 0,016 | 0,008 | 1         | 1,02957942    | 0,971270385     | 2               |
| SIMC1                                                                                           | 0,678732658 | 0,042052806 | 0,012 | 0,009 | 1         | 1,029577768   | 0,971271944     | 1,333333333     |
| CTPS2                                                                                           | 0,433170052 | 0,04203926  | 0,019 | 0,014 | 1         | 1,0295681     | 0,971281064     | 1,357142857     |
| DERL1                                                                                           | 0,575617253 | 0,041945592 | 0,102 | 0,091 | 1         | 1,029501258   | 0,971344127     | 1,120879121     |
| COPB2                                                                                           | 0,233386653 | 0,041858225 | 0,141 | 0,159 | 1         | 1,029438914   | 0,971402952     | 0,886792453     |
| PCNX1                                                                                           | 0,244933078 | 0,041818173 | 0,056 | 0,069 | 1         | 1,029410336   | 0,97142992      | 0,811594203     |
| ZKSCAN1                                                                                         | 0,341742475 | 0,041765442 | 0,094 | 0,107 | 1         | 1,029372711   | 0,971465427     | 0,878504673     |
| ZMIZ2                                                                                           | 0,590551085 | 0,041720228 | 0,062 | 0,054 | 1         | 1,029340451   | 0,971495873     | 1,148148148     |
| ATRX                                                                                            | 0,013011139 | 0,041597669 | 0,278 | 0,339 | 1         | 1,029253011   | 0,971578406     | 0,820058997     |
| PEX26                                                                                           | 0,102398588 | 0,041578567 | 0,051 | 0,034 | 1         | 1,029239383   | 0,971591271     | 1,5             |
| NOTCH2                                                                                          | 0,094262242 | 0,041574614 | 0,066 | 0,088 | 1         | 1,029236563   | 0,971593933     | 0,75            |
| MROH1                                                                                           | 0,555799111 | 0,04153927  | 0,014 | 0,018 | 1         | 1,029211349   | 0,971617736     | 0,777777778     |
| VPS50                                                                                           | 0,460122073 | 0,041495959 | 0,029 | 0,023 | 1         | 1,029180451   | 0,971646905     | 1,260869565     |
| SCRN3                                                                                           | 0,957841029 | 0,04149039  | 0,036 | 0,035 | 1         | 1,029176478   | 0,971650656     | 1,028571429     |



Supplementary Table 5

| Differentially expressed genes_total calculation_ comparing SC-Keloid vs. (SC-Myel, SC-Nonmyel) |             |             |       |       |           |               |                 |                 |
|-------------------------------------------------------------------------------------------------|-------------|-------------|-------|-------|-----------|---------------|-----------------|-----------------|
| gene                                                                                            | p_val       | avg_log2FC  | pct.1 | pct.2 | p_val_adj | Foldchange_UP | Foldchange_DOWN | Ratio_pct1_pct2 |
| PLPP6                                                                                           | 0,094291883 | 0,041442597 | 0,012 | 0,004 | 1         | 1,029142385   | 0,971682845     | 3               |
| FAM172A                                                                                         | 0,650780804 | 0,041418995 | 0,116 | 0,121 | 1         | 1,029125548   | 0,971698741     | 0,958677686     |
| DHTKD1                                                                                          | 0,333065804 | 0,04141656  | 0,017 | 0,024 | 1         | 1,029123812   | 0,971700381     | 0,708333333     |
| CAMKK1                                                                                          | 0,140750264 | 0,041397977 | 0,01  | 0,004 | 1         | 1,029110556   | 0,971712898     | 2,5             |
| VIPAS39                                                                                         | 0,096420663 | 0,041294448 | 0,036 | 0,022 | 1         | 1,029036708   | 0,971782631     | 1,636363636     |
| GOLGA1                                                                                          | 0,658413613 | 0,041294006 | 0,044 | 0,039 | 1         | 1,029036393   | 0,971782929     | 1,128205128     |
| FAM189B                                                                                         | 0,933707497 | 0,041217295 | 0,034 | 0,033 | 1         | 1,028981679   | 0,971834602     | 1,03030303      |
| SP110                                                                                           | 0,329455747 | 0,041070348 | 0,049 | 0,06  | 1         | 1,028876876   | 0,971933594     | 0,816666667     |
| PRICKLE1                                                                                        | 0,254168417 | 0,041038153 | 0,041 | 0,03  | 1         | 1,028853916   | 0,971955284     | 1,366666667     |
| TNFRSF10B                                                                                       | 0,348438744 | 0,041032163 | 0,041 | 0,05  | 1         | 1,028849645   | 0,971959319     | 0,82            |
| FAM104B                                                                                         | 0,179664303 | 0,041017299 | 0,072 | 0,054 | 1         | 1,028839045   | 0,971969333     | 1,333333333     |
| VPS37C                                                                                          | 0,264255906 | 0,040993853 | 0,044 | 0,033 | 1         | 1,028822325   | 0,971985129     | 1,333333333     |
| RAD54L2                                                                                         | 0,549945004 | 0,040985697 | 0,064 | 0,071 | 1         | 1,028816508   | 0,971990624     | 0,901408451     |
| DYSF                                                                                            | 0,005346706 | 0,040982329 | 0,01  | 0     | 1         | 1,028814106   | 0,971992894     | #DIV/0!         |
| FUCA1                                                                                           | 0,495543839 | 0,040952097 | 0,035 | 0,028 | 1         | 1,028792547   | 0,972013262     | 1,25            |
| WASHC5                                                                                          | 0,59310382  | 0,040914135 | 0,035 | 0,03  | 1         | 1,028765477   | 0,972038839     | 1,166666667     |
| PEX13                                                                                           | 0,016428349 | 0,040906809 | 0,042 | 0,02  | 1         | 1,028760253   | 0,972043775     | 2,1             |
| SETD1B                                                                                          | 0,406870294 | 0,040866376 | 0,027 | 0,034 | 1         | 1,028731422   | 0,972071018     | 0,794117647     |
| ZNF883                                                                                          | 0,460857724 | 0,040838493 | 0,015 | 0,011 | 1         | 1,028711539   | 0,972089806     | 1,363636364     |
| RRP8                                                                                            | 0,808620258 | 0,040833647 | 0,047 | 0,043 | 1         | 1,028708084   | 0,972093071     | 1,093023256     |
| TMEM243                                                                                         | 0,661450587 | 0,040791277 | 0,087 | 0,091 | 1         | 1,028677873   | 0,97212162      | 0,956043956     |
| EIF2B2                                                                                          | 0,326784521 | 0,040764262 | 0,083 | 0,068 | 1         | 1,02865861    | 0,972139824     | 1,220588235     |
| BCL2A1                                                                                          | 0,006750784 | 0,040670219 | 0,016 | 0,003 | 1         | 1,028591559   | 0,972203195     | 5,333333333     |
| AGPAT3                                                                                          | 0,273555299 | 0,040660686 | 0,077 | 0,061 | 1         | 1,028584762   | 0,972209619     | 1,262295082     |
| MORC2-AS1                                                                                       | 0,314739599 | 0,040659772 | 0,015 | 0,009 | 1         | 1,028584111   | 0,972210235     | 1,666666667     |
| FASTKD5                                                                                         | 0,429969467 | 0,040541089 | 0,014 | 0,019 | 1         | 1,028499498   | 0,972290217     | 0,736842105     |
| HPS3                                                                                            | 0,838355736 | 0,040523942 | 0,035 | 0,037 | 1         | 1,028487273   | 0,972301774     | 0,945945946     |
| FAM171B                                                                                         | 0,91983168  | 0,040493331 | 0,013 | 0,012 | 1         | 1,028465452   | 0,972322404     | 1,083333333     |
| FKTN                                                                                            | 0,699915797 | 0,040456492 | 0,036 | 0,033 | 1         | 1,02843919    | 0,972347232     | 1,090909091     |
| HOMEZ                                                                                           | 0,942850782 | 0,040448888 | 0,01  | 0,011 | 1         | 1,028433769   | 0,972352357     | 0,909090909     |

Supplementary Table 5

| Differentially expressed genes_total calculation_ comparing SC-Keloid vs. (SC-Myel, SC-Nonmyel) |             |             |       |       |           |               |                 |                 |
|-------------------------------------------------------------------------------------------------|-------------|-------------|-------|-------|-----------|---------------|-----------------|-----------------|
| gene                                                                                            | p_val       | avg_log2FC  | pct.1 | pct.2 | p_val_adj | Foldchange_UP | Foldchange_DOWN | Ratio_pct1_pct2 |
| ARPIN                                                                                           | 0,932313279 | 0,040405855 | 0,041 | 0,039 | 1         | 1,028403093   | 0,972381361     | 1,051282051     |
| FAM214B                                                                                         | 0,515402194 | 0,040401155 | 0,086 | 0,075 | 1         | 1,028399743   | 0,972384529     | 1,146666667     |
| TCEANC2                                                                                         | 0,53718265  | 0,04038079  | 0,013 | 0,009 | 1         | 1,028385226   | 0,972398256     | 1,444444444     |
| CCDC189                                                                                         | 0,017878207 | 0,040256198 | 0,016 | 0,004 | 1         | 1,028296418   | 0,972482236     | 4               |
| DNLZ                                                                                            | 0,42959567  | 0,040208336 | 0,031 | 0,024 | 1         | 1,028262304   | 0,972514499     | 1,291666667     |
| TMEM186                                                                                         | 0,710008011 | 0,040178292 | 0,014 | 0,016 | 1         | 1,028240891   | 0,972534752     | 0,875           |
| DNAJB14                                                                                         | 0,062705337 | 0,040154494 | 0,135 | 0,166 | 1         | 1,02822393    | 0,972550794     | 0,813253012     |
| FYCO1                                                                                           | 0,365811746 | 0,040135264 | 0,034 | 0,026 | 1         | 1,028210225   | 0,972563758     | 1,307692308     |
| STK4                                                                                            | 0,357360356 | 0,040132139 | 0,091 | 0,103 | 1         | 1,028207998   | 0,972565864     | 0,883495146     |
| GMEB2                                                                                           | 0,722650772 | 0,040065357 | 0,013 | 0,011 | 1         | 1,028160404   | 0,972610885     | 1,181818182     |
| ARL10                                                                                           | 0,754093806 | 0,040046111 | 0,026 | 0,023 | 1         | 1,028146688   | 0,97262386      | 1,130434783     |
| ATP9A                                                                                           | 0,419729133 | 0,040033872 | 0,008 | 0,012 | 1         | 1,028137965   | 0,972632112     | 0,666666667     |
| FBXO16                                                                                          | 0,00430878  | 0,040017644 | 0,017 | 0,003 | 1         | 1,028126401   | 0,972643052     | 5,666666667     |
| C19orf73                                                                                        | 0,012559569 | 0,040008659 | 0,02  | 0,005 | 1         | 1,028119998   | 0,972649109     | 4               |
| TMCC1                                                                                           | 0,627004855 | 0,039936393 | 0,054 | 0,047 | 1         | 1,028068499   | 0,972697832     | 1,14893617      |
| EOGT                                                                                            | 0,834295017 | 0,039884207 | 0,016 | 0,015 | 1         | 1,028031312   | 0,972733017     | 1,066666667     |
| LYPLAL1                                                                                         | 0,372835909 | 0,039881847 | 0,083 | 0,069 | 1         | 1,02802963    | 0,972734608     | 1,202898551     |
| GAB2                                                                                            | 0,070405285 | 0,039840521 | 0,016 | 0,03  | 1         | 1,028000183   | 0,972762473     | 0,533333333     |
| PABIR1                                                                                          | 0,049897885 | 0,039797003 | 0,026 | 0,043 | 1         | 1,027969174   | 0,972791816     | 0,604651163     |
| PACC1                                                                                           | 0,267822619 | 0,039793042 | 0,041 | 0,03  | 1         | 1,027966352   | 0,972794487     | 1,366666667     |
| NEK3                                                                                            | 0,993075698 | 0,039775686 | 0,033 | 0,033 | 1         | 1,027953985   | 0,97280619      | 1               |
| ZCCHC7                                                                                          | 0,644295424 | 0,03975799  | 0,073 | 0,079 | 1         | 1,027941376   | 0,972818123     | 0,924050633     |
| CYP2R1                                                                                          | 0,201598686 | 0,039718881 | 0,015 | 0,008 | 1         | 1,027913511   | 0,972844495     | 1,875           |
| RPL18A                                                                                          | 0,528425611 | 0,039587118 | 0,745 | 0,868 | 1         | 1,027819635   | 0,972933349     | 0,858294931     |
| NAA35                                                                                           | 0,144414733 | 0,039557092 | 0,045 | 0,061 | 1         | 1,027798243   | 0,972953599     | 0,737704918     |
| PXMP4                                                                                           | 0,834824204 | 0,039509289 | 0,035 | 0,033 | 1         | 1,027764189   | 0,972985837     | 1,060606061     |
| SNCG                                                                                            | 0,307405988 | 0,039469097 | 0,009 | 0,015 | 1         | 1,027735557   | 0,973012944     | 0,6             |
| ZZEF1                                                                                           | 0,564385349 | 0,039440858 | 0,043 | 0,049 | 1         | 1,02771544    | 0,97303199      | 0,87755102      |
| PHEX                                                                                            | 0,005346706 | 0,039394251 | 0,01  | 0     | 1         | 1,02768224    | 0,973063425     | #DIV/0!         |
| LBX2-AS1                                                                                        | 0,082064928 | 0,039369541 | 0,028 | 0,015 | 1         | 1,027664638   | 0,973080091     | 1,866666667     |

Supplementary Table 5

| Differentially expressed genes_total calculation_ comparing SC-Keloid vs. (SC-Myel, SC-Nonmyel) |             |             |       |       |           |               |                 |                 |
|-------------------------------------------------------------------------------------------------|-------------|-------------|-------|-------|-----------|---------------|-----------------|-----------------|
| gene                                                                                            | p_val       | avg_log2FC  | pct.1 | pct.2 | p_val_adj | Foldchange_UP | Foldchange_DOWN | Ratio_pct1_pct2 |
| DNAJC30                                                                                         | 0,373939326 | 0,039269398 | 0,038 | 0,03  | 1         | 1,027593307   | 0,973147639     | 1,266666667     |
| SHISA5                                                                                          | 0,320712089 | 0,039268681 | 0,112 | 0,125 | 1         | 1,027592796   | 0,973148122     | 0,896           |
| ZNF8                                                                                            | 0,436384376 | 0,03922632  | 0,014 | 0,019 | 1         | 1,027562623   | 0,973176697     | 0,736842105     |
| KLC4                                                                                            | 0,723519899 | 0,039030587 | 0,013 | 0,011 | 1         | 1,027423222   | 0,973308739     | 1,181818182     |
| SBF1                                                                                            | 0,481413185 | 0,039019439 | 0,044 | 0,037 | 1         | 1,027415283   | 0,97331626      | 1,189189189     |
| TMEM43                                                                                          | 0,227681879 | 0,039012263 | 0,113 | 0,13  | 1         | 1,027410173   | 0,973321101     | 0,869230769     |
| AGL                                                                                             | 0,981121291 | 0,03900872  | 0,037 | 0,037 | 1         | 1,027407649   | 0,973323491     | 1               |
| THUMPD2                                                                                         | 0,297913497 | 0,038949337 | 0,062 | 0,049 | 1         | 1,027365361   | 0,973363555     | 1,265306122     |
| DNAJC9                                                                                          | 0,147252824 | 0,038927715 | 0,069 | 0,05  | 1         | 1,027349963   | 0,973378143     | 1,38            |
| EXOC2                                                                                           | 0,441128169 | 0,038926449 | 0,028 | 0,022 | 1         | 1,027349062   | 0,973378997     | 1,272727273     |
| HPS4                                                                                            | 0,940648149 | 0,038922681 | 0,062 | 0,06  | 1         | 1,027346379   | 0,973381539     | 1,033333333     |
| GATD1                                                                                           | 0,508417042 | 0,038919723 | 0,057 | 0,049 | 1         | 1,027344272   | 0,973383535     | 1,163265306     |
| MTRF1                                                                                           | 0,919163015 | 0,038902195 | 0,012 | 0,012 | 1         | 1,027331791   | 0,973395362     | 1               |
| NR2C2                                                                                           | 0,250629591 | 0,038853115 | 0,058 | 0,072 | 1         | 1,027296842   | 0,973428477     | 0,805555556     |
| VPS33B                                                                                          | 0,08925642  | 0,038842185 | 0,014 | 0,005 | 1         | 1,027289059   | 0,973435851     | 2,8             |
| TTLL7                                                                                           | 0,872228817 | 0,038838181 | 0,149 | 0,147 | 1         | 1,027286208   | 0,973438553     | 1,013605442     |
| GRK6                                                                                            | 0,585809039 | 0,038803221 | 0,04  | 0,034 | 1         | 1,027261315   | 0,973462142     | 1,176470588     |
| TINF2                                                                                           | 0,573554214 | 0,038767608 | 0,08  | 0,071 | 1         | 1,027235957   | 0,973486172     | 1,126760563     |
| TTC13                                                                                           | 0,044705309 | 0,038693495 | 0,024 | 0,011 | 1         | 1,027183188   | 0,973536183     | 2,181818182     |
| VWA8                                                                                            | 0,529539224 | 0,038671308 | 0,02  | 0,024 | 1         | 1,027167391   | 0,973551155     | 0,833333333     |
| DUSP14                                                                                          | 0,426410291 | 0,038670556 | 0,104 | 0,113 | 1         | 1,027166856   | 0,973551663     | 0,920353982     |
| KNSTRN                                                                                          | 0,657646239 | 0,038667441 | 0,016 | 0,014 | 1         | 1,027164638   | 0,973553765     | 1,142857143     |
| RGMB-AS1                                                                                        | 0,061765735 | 0,038626579 | 0,01  | 0,003 | 1         | 1,027135545   | 0,973581339     | 3,333333333     |
| CEP55                                                                                           | 0,093879452 | 0,038620149 | 0,012 | 0,004 | 1         | 1,027130967   | 0,973585679     | 3               |
| ELAC1                                                                                           | 0,515007517 | 0,038612534 | 0,031 | 0,026 | 1         | 1,027125546   | 0,973590818     | 1,192307692     |
| NEMP2                                                                                           | 0,269994685 | 0,038611746 | 0,021 | 0,014 | 1         | 1,027124986   | 0,973591349     | 1,5             |
| GPN3                                                                                            | 0,789627614 | 0,038610349 | 0,092 | 0,095 | 1         | 1,027123991   | 0,973592292     | 0,968421053     |
| NRM                                                                                             | 0,223874924 | 0,038599138 | 0,059 | 0,045 | 1         | 1,027116009   | 0,973599857     | 1,311111111     |
| DZIP1                                                                                           | 0,730020694 | 0,038598556 | 0,036 | 0,033 | 1         | 1,027115595   | 0,97360025      | 1,090909091     |
| FNTB                                                                                            | 0,261236071 | 0,038533837 | 0,063 | 0,049 | 1         | 1,02706952    | 0,973643927     | 1,285714286     |

Supplementary Table 5

| Differentially expressed genes_total calculation_ comparing SC-Keloid vs. (SC-Myel, SC-Nonmyel) |             |             |       |       |             |               |                 |                 |
|-------------------------------------------------------------------------------------------------|-------------|-------------|-------|-------|-------------|---------------|-----------------|-----------------|
| gene                                                                                            | p_val       | avg_log2FC  | pct.1 | pct.2 | p_val_adj   | Foldchange_UP | Foldchange_DOWN | Ratio_pct1_pct2 |
| TTN-AS1                                                                                         | 0,409709516 | 0,038528163 | 0,022 | 0,028 | 1           | 1,02706548    | 0,973647756     | 0,785714286     |
| FAM229A                                                                                         | 0,111616835 | 0,038507719 | 0,034 | 0,02  | 1           | 1,027050926   | 0,973661553     | 1,7             |
| TNPO3                                                                                           | 0,6738977   | 0,038494007 | 0,056 | 0,05  | 1           | 1,027041164   | 0,973670808     | 1,12            |
| IQGAP1                                                                                          | 0,02150564  | 0,03841663  | 0,227 | 0,277 | 1           | 1,026986082   | 0,97372303      | 0,819494585     |
| TEP1                                                                                            | 0,303830882 | 0,038409373 | 0,019 | 0,012 | 1           | 1,026980916   | 0,973727929     | 1,583333333     |
| CCDC157                                                                                         | 0,618925147 | 0,038405189 | 0,015 | 0,012 | 1           | 1,026977938   | 0,973730752     | 1,25            |
| TWINK                                                                                           | 0,010509586 | 0,038404992 | 0,015 | 0,003 | 1           | 1,026977797   | 0,973730886     | 5               |
| RELA                                                                                            | 0,43111836  | 0,038361855 | 0,092 | 0,102 | 1           | 1,026947091   | 0,97376         | 0,901960784     |
| PABIR3                                                                                          | 0,431962332 | 0,03835469  | 0,01  | 0,007 | 1           | 1,026941991   | 0,973764836     | 1,428571429     |
| SUV39H2                                                                                         | 0,012645074 | 0,038344567 | 0,022 | 0,007 | 1           | 1,026934785   | 0,97377167      | 3,142857143     |
| DHX34                                                                                           | 0,041249853 | 0,038342858 | 0,014 | 0,004 | 1           | 1,026933569   | 0,973772823     | 3,5             |
| SP140L                                                                                          | 0,607210758 | 0,038307454 | 0,051 | 0,045 | 1           | 1,026908368   | 0,97379672      | 1,133333333     |
| DEXI                                                                                            | 0,738638301 | 0,038274983 | 0,083 | 0,085 | 1           | 1,026885255   | 0,973818638     | 0,976470588     |
| NELFB                                                                                           | 0,921049616 | 0,038247328 | 0,083 | 0,079 | 1           | 1,026865571   | 0,973837305     | 1,050632911     |
| UGDH-AS1                                                                                        | 0,41150307  | 0,038186676 | 0,007 | 0,011 | 1           | 1,026822402   | 0,973878246     | 0,636363636     |
| RUNDC1                                                                                          | 0,504478992 | 0,038148562 | 0,023 | 0,028 | 1           | 1,026795275   | 0,973903975     | 0,821428571     |
| C1QTNF3                                                                                         | 0,158955772 | 0,038074425 | 0,023 | 0,014 | 1           | 1,026742512   | 0,973954023     | 1,642857143     |
| PTPRF                                                                                           | 0,925183205 | 0,038054503 | 0,118 | 0,113 | 1           | 1,026728333   | 0,973967473     | 1,044247788     |
| KICS2                                                                                           | 0,318794249 | 0,038043476 | 0,012 | 0,018 | 1           | 1,026720486   | 0,973974917     | 0,666666667     |
| TMEM154                                                                                         | 0,060554269 | 0,03799958  | 0,015 | 0,005 | 1           | 1,026689247   | 0,974004552     | 3               |
| S100A3                                                                                          | 2,05879E-05 | 0,037981871 | 0,058 | 0,016 | 0,434425927 | 1,026676644   | 0,974016508     | 3,625           |
| RIC8B                                                                                           | 0,264924286 | 0,037958855 | 0,045 | 0,057 | 1           | 1,026660265   | 0,974032047     | 0,789473684     |
| FDX2                                                                                            | 0,175880952 | 0,037900336 | 0,066 | 0,049 | 1           | 1,026618623   | 0,974071557     | 1,346938776     |
| EXOSC3                                                                                          | 0,377465597 | 0,037892076 | 0,048 | 0,057 | 1           | 1,026612745   | 0,974077134     | 0,842105263     |
| EXOC4                                                                                           | 0,386968854 | 0,037858284 | 0,058 | 0,047 | 1           | 1,026588699   | 0,97409995      | 1,234042553     |
| PYM1                                                                                            | 0,339827269 | 0,037834042 | 0,055 | 0,043 | 1           | 1,026571449   | 0,974116318     | 1,279069767     |
| ANAPC7                                                                                          | 0,603452433 | 0,037809002 | 0,055 | 0,06  | 1           | 1,026553632   | 0,974133225     | 0,916666667     |
| LGALS7B                                                                                         | 0,022174993 | 0,037730038 | 0,02  | 0,039 | 1           | 1,026497446   | 0,974186545     | 0,512820513     |
| TSPYL5                                                                                          | 0,752856318 | 0,037699182 | 0,026 | 0,023 | 1           | 1,026475492   | 0,974207381     | 1,130434783     |
| ZNF140                                                                                          | 0,425252675 | 0,037670132 | 0,017 | 0,023 | 1           | 1,026454823   | 0,974226997     | 0,739130435     |

Supplementary Table 5

| Differentially expressed genes_total calculation_ comparing SC-Keloid vs. (SC-Myel, SC-Nonmyel) |             |             |       |       |           |               |                 |                 |
|-------------------------------------------------------------------------------------------------|-------------|-------------|-------|-------|-----------|---------------|-----------------|-----------------|
| gene                                                                                            | p_val       | avg_log2FC  | pct.1 | pct.2 | p_val_adj | Foldchange_UP | Foldchange_DOWN | Ratio_pct1_pct2 |
| SLC7A5                                                                                          | 0,123773475 | 0,037566328 | 0,035 | 0,022 | 1         | 1,026380971   | 0,974297097     | 1,590909091     |
| ZNF747                                                                                          | 0,114624771 | 0,037488961 | 0,021 | 0,011 | 1         | 1,026325931   | 0,974349347     | 1,909090909     |
| SPRYD4                                                                                          | 0,634169684 | 0,037430775 | 0,01  | 0,008 | 1         | 1,026284539   | 0,974388644     | 1,25            |
| BTBD6                                                                                           | 0,950183725 | 0,037409355 | 0,092 | 0,088 | 1         | 1,026269301   | 0,974403111     | 1,045454545     |
| SLC35G2                                                                                         | 0,238785491 | 0,037394312 | 0,02  | 0,012 | 1         | 1,0262586     | 0,974413272     | 1,666666667     |
| CCDC86                                                                                          | 0,26922485  | 0,037373638 | 0,033 | 0,023 | 1         | 1,026243894   | 0,974427235     | 1,434782609     |
| TMEM229B                                                                                        | 0,208821236 | 0,037308355 | 0,022 | 0,014 | 1         | 1,026197457   | 0,97447133      | 1,571428571     |
| STK17B                                                                                          | 0,377722521 | 0,037299417 | 0,033 | 0,041 | 1         | 1,026191099   | 0,974477367     | 0,804878049     |
| PTDSS1                                                                                          | 0,88591087  | 0,037281722 | 0,038 | 0,037 | 1         | 1,026178513   | 0,974489319     | 1,027027027     |
| FLVCR1                                                                                          | 0,606950512 | 0,037277734 | 0,03  | 0,026 | 1         | 1,026175676   | 0,974492013     | 1,153846154     |
| G2E3                                                                                            | 0,064400027 | 0,037269156 | 0,038 | 0,058 | 1         | 1,026169575   | 0,974497807     | 0,655172414     |
| RABEP1                                                                                          | 0,156183048 | 0,037255574 | 0,129 | 0,149 | 1         | 1,026159914   | 0,974506981     | 0,865771812     |
| SLC27A5                                                                                         | 0,592375399 | 0,03724848  | 0,024 | 0,02  | 1         | 1,026154868   | 0,974511773     | 1,2             |
| ST3GAL5                                                                                         | 0,731553177 | 0,037245014 | 0,066 | 0,061 | 1         | 1,026152403   | 0,974514114     | 1,081967213     |
| TMEM217                                                                                         | 0,010529307 | 0,037184804 | 0,015 | 0,003 | 1         | 1,026109578   | 0,974554786     | 5               |
| G6PD                                                                                            | 0,728767657 | 0,037166884 | 0,043 | 0,039 | 1         | 1,026096832   | 0,974566892     | 1,102564103     |
| FASTK                                                                                           | 0,636992629 | 0,037114058 | 0,114 | 0,103 | 1         | 1,026059261   | 0,974602577     | 1,106796117     |
| FAM118B                                                                                         | 0,030757356 | 0,03707922  | 0,034 | 0,016 | 1         | 1,026034485   | 0,974626111     | 2,125           |
| IARS1                                                                                           | 0,331907661 | 0,037054166 | 0,078 | 0,091 | 1         | 1,026016666   | 0,974643037     | 0,857142857     |
| MPP3                                                                                            | 0,283865216 | 0,037007915 | 0,007 | 0,012 | 1         | 1,025983774   | 0,974674284     | 0,583333333     |
| ZNF846                                                                                          | 0,968826906 | 0,036991064 | 0,022 | 0,022 | 1         | 1,02597179    | 0,974685668     | 1               |
| PBK                                                                                             | 0,005346706 | 0,036961136 | 0,01  | 0     | 1         | 1,025950508   | 0,974705887     | #DIV/0!         |
| SINHCAF                                                                                         | 0,52977025  | 0,036867881 | 0,037 | 0,043 | 1         | 1,025884193   | 0,974768894     | 0,860465116     |
| MED24                                                                                           | 0,311741747 | 0,036813378 | 0,049 | 0,038 | 1         | 1,025845437   | 0,97480572      | 1,289473684     |
| MAN2B2                                                                                          | 0,191151631 | 0,036803678 | 0,065 | 0,049 | 1         | 1,02583854    | 0,974812274     | 1,326530612     |
| TRIT1                                                                                           | 0,472206666 | 0,036750493 | 0,024 | 0,019 | 1         | 1,025800723   | 0,974848211     | 1,263157895     |
| CEPT1                                                                                           | 0,63506202  | 0,036721421 | 0,021 | 0,024 | 1         | 1,025780052   | 0,974867856     | 0,875           |
| TIMM23B                                                                                         | 0,543356062 | 0,03670292  | 0,033 | 0,027 | 1         | 1,025766897   | 0,974880358     | 1,222222222     |
| ALG9                                                                                            | 0,443169608 | 0,036663883 | 0,023 | 0,018 | 1         | 1,025739142   | 0,974906737     | 1,277777778     |
| SLC7A6                                                                                          | 0,917699606 | 0,036645576 | 0,027 | 0,026 | 1         | 1,025726126   | 0,974919108     | 1,038461538     |

Supplementary Table 5

| Differentially expressed genes_total calculation_ comparing SC-Keloid vs. (SC-Myel, SC-Nonmyel) |             |             |       |       |           |               |                 |                 |
|-------------------------------------------------------------------------------------------------|-------------|-------------|-------|-------|-----------|---------------|-----------------|-----------------|
| gene                                                                                            | p_val       | avg_log2FC  | pct.1 | pct.2 | p_val_adj | Foldchange_UP | Foldchange_DOWN | Ratio_pct1_pct2 |
| D2HGDH                                                                                          | 0,519136331 | 0,036615582 | 0,036 | 0,042 | 1         | 1,025704802   | 0,974939377     | 0,857142857     |
| DNAH5                                                                                           | 0,005346706 | 0,03661333  | 0,01  | 0     | 1         | 1,0257032     | 0,974940899     | #DIV/0!         |
| CAMK2N2                                                                                         | 0,000202873 | 0,036602437 | 0,022 | 0,001 | 1         | 1,025695456   | 0,97494826      | 22              |
| BAK1                                                                                            | 0,005130769 | 0,036588695 | 0,047 | 0,02  | 1         | 1,025685686   | 0,974957547     | 2,35            |
| ZNF445                                                                                          | 0,573071536 | 0,036522463 | 0,029 | 0,034 | 1         | 1,025638599   | 0,975002307     | 0,852941176     |
| WDR90                                                                                           | 0,554773592 | 0,036519669 | 0,015 | 0,019 | 1         | 1,025636613   | 0,975004195     | 0,789473684     |
| NCAPD2                                                                                          | 0,572559772 | 0,036471515 | 0,019 | 0,015 | 1         | 1,02560238    | 0,975036739     | 1,266666667     |
| ERGIC2                                                                                          | 0,033826978 | 0,036461178 | 0,182 | 0,221 | 1         | 1,025595032   | 0,975043725     | 0,823529412     |
| SLC25A35                                                                                        | 0,62999558  | 0,036425063 | 0,01  | 0,008 | 1         | 1,025569358   | 0,975068134     | 1,25            |
| HES6                                                                                            | 0,923325645 | 0,036371391 | 0,122 | 0,117 | 1         | 1,025531205   | 0,97510441      | 1,042735043     |
| CTDNEP1                                                                                         | 0,921843274 | 0,036342976 | 0,185 | 0,178 | 1         | 1,025511006   | 0,975123615     | 1,039325843     |
| PPP4R3B                                                                                         | 0,005262773 | 0,036323635 | 0,094 | 0,138 | 1         | 1,025497258   | 0,975136688     | 0,68115942      |
| UQCRC2                                                                                          | 0,591249072 | 0,036310894 | 0,13  | 0,136 | 1         | 1,025488202   | 0,975145299     | 0,955882353     |
| WDR91                                                                                           | 0,83299369  | 0,036292639 | 0,029 | 0,027 | 1         | 1,025475226   | 0,975157638     | 1,074074074     |
| ADGRE2                                                                                          | 0,005346706 | 0,036232758 | 0,01  | 0     | 1         | 1,025432664   | 0,975198115     | #DIV/0!         |
| TMEM150A                                                                                        | 0,653999956 | 0,036222562 | 0,027 | 0,023 | 1         | 1,025425416   | 0,975205007     | 1,173913043     |
| NEK4                                                                                            | 0,549280743 | 0,036171245 | 0,017 | 0,022 | 1         | 1,025388942   | 0,975239695     | 0,772727273     |
| THAP9                                                                                           | 0,185575091 | 0,036168081 | 0,012 | 0,005 | 1         | 1,025386694   | 0,975241834     | 2,4             |
| MAP3K1                                                                                          | 0,548841855 | 0,036130826 | 0,076 | 0,083 | 1         | 1,025360215   | 0,975267018     | 0,915662651     |
| FPGT                                                                                            | 0,60148502  | 0,036110733 | 0,024 | 0,02  | 1         | 1,025345935   | 0,975280601     | 1,2             |
| DRD2                                                                                            | 0,006737948 | 0,036062078 | 0,016 | 0,003 | 1         | 1,025311355   | 0,975313494     | 5,333333333     |
| AAR2                                                                                            | 0,044355782 | 0,036055264 | 0,024 | 0,011 | 1         | 1,025306512   | 0,9753181       | 2,181818182     |
| PDIK1L                                                                                          | 0,374231514 | 0,036024246 | 0,021 | 0,015 | 1         | 1,025284469   | 0,97533907      | 1,4             |
| C6orf89                                                                                         | 0,736007362 | 0,035963886 | 0,088 | 0,081 | 1         | 1,025241573   | 0,975379877     | 1,086419753     |
| COMTD1                                                                                          | 0,151362556 | 0,035962108 | 0,068 | 0,049 | 1         | 1,02524031    | 0,975381079     | 1,387755102     |
| ZNF500                                                                                          | 0,569674025 | 0,035915731 | 0,012 | 0,015 | 1         | 1,025207353   | 0,975412435     | 0,8             |
| HS3ST3A1                                                                                        | 0,414338408 | 0,035845723 | 0,055 | 0,045 | 1         | 1,025157605   | 0,975459768     | 1,222222222     |
| B3GNT9                                                                                          | 0,069011427 | 0,035822809 | 0,027 | 0,014 | 1         | 1,025141323   | 0,975475262     | 1,928571429     |
| ATRNL                                                                                           | 0,163359615 | 0,035788458 | 0,04  | 0,054 | 1         | 1,025116914   | 0,975498488     | 0,740740741     |
| CHD8                                                                                            | 0,662774925 | 0,035784904 | 0,08  | 0,085 | 1         | 1,025114389   | 0,975500891     | 0,941176471     |

Supplementary Table 5

| Differentially expressed genes_total calculation_ comparing SC-Keloid vs. (SC-Myel, SC-Nonmyel) |             |             |       |       |             |               |                 |                 |
|-------------------------------------------------------------------------------------------------|-------------|-------------|-------|-------|-------------|---------------|-----------------|-----------------|
| gene                                                                                            | p_val       | avg_log2FC  | pct.1 | pct.2 | p_val_adj   | Foldchange_UP | Foldchange_DOWN | Ratio_pct1_pct2 |
| ARSK                                                                                            | 0,93971019  | 0,035718826 | 0,044 | 0,045 | 1           | 1,025067438   | 0,975545572     | 0,977777778     |
| BCAR1                                                                                           | 0,102153972 | 0,035696389 | 0,128 | 0,152 | 1           | 1,025051496   | 0,975560744     | 0,842105263     |
| APH1B                                                                                           | 0,078302557 | 0,035618547 | 0,037 | 0,056 | 1           | 1,02499619    | 0,975613383     | 0,660714286     |
| NEMP1                                                                                           | 0,322910491 | 0,035611807 | 0,012 | 0,018 | 1           | 1,024991402   | 0,97561794      | 0,666666667     |
| CHST8                                                                                           | 0,003314026 | 0,03560372  | 0,012 | 0     | 1           | 1,024985656   | 0,975623409     | #DIV/0!         |
| DLAT                                                                                            | 0,80493065  | 0,035560748 | 0,04  | 0,037 | 1           | 1,024955126   | 0,97565247      | 1,081081081     |
| PEA15                                                                                           | 0,022419398 | 0,03555671  | 0,276 | 0,335 | 1           | 1,024952258   | 0,9756552       | 0,823880597     |
| TRO                                                                                             | 0,276255773 | 0,035546536 | 0,017 | 0,011 | 1           | 1,02494503    | 0,97566208      | 1,545454545     |
| ZNF629                                                                                          | 0,102457047 | 0,035521885 | 0,023 | 0,012 | 1           | 1,024927517   | 0,975678752     | 1,916666667     |
| ESS2                                                                                            | 0,610939922 | 0,03549523  | 0,03  | 0,026 | 1           | 1,02490858    | 0,975696778     | 1,153846154     |
| PRMT6                                                                                           | 0,037486875 | 0,035399934 | 0,021 | 0,008 | 1           | 1,024840883   | 0,97576123      | 2,625           |
| CNOT3                                                                                           | 0,328506548 | 0,035328975 | 0,056 | 0,066 | 1           | 1,024790478   | 0,975809223     | 0,848484848     |
| UTP3                                                                                            | 0,8865472   | 0,03524318  | 0,052 | 0,05  | 1           | 1,024729536   | 0,975867255     | 1,04            |
| KIAA1586                                                                                        | 0,759639155 | 0,035197245 | 0,038 | 0,035 | 1           | 1,02469691    | 0,975898327     | 1,085714286     |
| CHD1L                                                                                           | 0,222151969 | 0,035172053 | 0,03  | 0,02  | 1           | 1,024679017   | 0,975915368     | 1,5             |
| IFT80                                                                                           | 0,987890044 | 0,035104584 | 0,04  | 0,039 | 1           | 1,024631098   | 0,975961009     | 1,025641026     |
| SP2                                                                                             | 0,777863453 | 0,035078909 | 0,047 | 0,049 | 1           | 1,024612863   | 0,975978378     | 0,959183673     |
| TSHZ1                                                                                           | 0,48042316  | 0,035073362 | 0,044 | 0,037 | 1           | 1,024608924   | 0,97598213      | 1,189189189     |
| LRRC14                                                                                          | 0,77158232  | 0,03506964  | 0,021 | 0,023 | 1           | 1,024606281   | 0,975984648     | 0,913043478     |
| RALGPS2                                                                                         | 0,040482677 | 0,035006857 | 0,073 | 0,102 | 1           | 1,024561693   | 0,976027122     | 0,715686275     |
| CDKAL1                                                                                          | 0,464012388 | 0,034915642 | 0,031 | 0,038 | 1           | 1,024496916   | 0,976088833     | 0,815789474     |
| WARS2                                                                                           | 0,971337557 | 0,034898133 | 0,017 | 0,018 | 1           | 1,024484483   | 0,97610068      | 0,944444444     |
| GFOD2                                                                                           | 0,341780968 | 0,034865208 | 0,041 | 0,031 | 1           | 1,024461102   | 0,976122957     | 1,322580645     |
| KIF23                                                                                           | 0,018086526 | 0,034767789 | 0,016 | 0,004 | 1           | 1,024391927   | 0,976188872     | 4               |
| GLIPR2                                                                                          | 0,375493702 | 0,034733139 | 0,092 | 0,077 | 1           | 1,024367324   | 0,976212318     | 1,194805195     |
| TMEM102                                                                                         | 0,001284512 | 0,034681191 | 0,014 | 0     | 1           | 1,02433044    | 0,97624747      | #DIV/0!         |
| CD2AP                                                                                           | 0,404402075 | 0,034618816 | 0,088 | 0,075 | 1           | 1,024286154   | 0,976289679     | 1,173333333     |
| FBXO7                                                                                           | 0,198230214 | 0,034588742 | 0,153 | 0,171 | 1           | 1,024264802   | 0,97631003      | 0,894736842     |
| NUDT21                                                                                          | 0,652454002 | 0,034587827 | 0,093 | 0,096 | 1           | 1,024264152   | 0,97631065      | 0,96875         |
| NEK7                                                                                            | 4,17787E-07 | 0,034566199 | 0,063 | 0,14  | 0,008815722 | 1,024248798   | 0,976325286     | 0,45            |

Supplementary Table 5

| Differentially expressed genes_total calculation_ comparing SC-Keloid vs. (SC-Myel, SC-Nonmyel) |             |             |       |       |           |               |                 |                 |
|-------------------------------------------------------------------------------------------------|-------------|-------------|-------|-------|-----------|---------------|-----------------|-----------------|
| gene                                                                                            | p_val       | avg_log2FC  | pct.1 | pct.2 | p_val_adj | Foldchange_UP | Foldchange_DOWN | Ratio_pct1_pct2 |
| ZNF33A                                                                                          | 0,700882578 | 0,034543612 | 0,042 | 0,038 | 1         | 1,024232762   | 0,976340572     | 1,105263158     |
| OXSM                                                                                            | 0,470356316 | 0,034479843 | 0,024 | 0,019 | 1         | 1,02418749    | 0,976383728     | 1,263157895     |
| KIAA0753                                                                                        | 0,498497314 | 0,034462268 | 0,021 | 0,016 | 1         | 1,024175014   | 0,976395622     | 1,3125          |
| PCBD2                                                                                           | 0,393518165 | 0,034392264 | 0,017 | 0,012 | 1         | 1,024125319   | 0,976443001     | 1,416666667     |
| TP53BP1                                                                                         | 0,888861881 | 0,034387823 | 0,068 | 0,068 | 1         | 1,024122167   | 0,976446007     | 1               |
| TRMT10A                                                                                         | 0,326485857 | 0,034383351 | 0,017 | 0,024 | 1         | 1,024118992   | 0,976449034     | 0,708333333     |
| BTN3A3                                                                                          | 0,094567643 | 0,034185605 | 0,012 | 0,004 | 1         | 1,023978628   | 0,976582882     | 3               |
| CBLL1                                                                                           | 0,365234287 | 0,034174361 | 0,036 | 0,045 | 1         | 1,023970648   | 0,976590493     | 0,8             |
| ZNF468                                                                                          | 0,166886441 | 0,03408983  | 0,014 | 0,007 | 1         | 1,023910653   | 0,976647716     | 2               |
| ETV4                                                                                            | 0,000147781 | 0,03401872  | 0,029 | 0,004 | 1         | 1,023860185   | 0,976695856     | 7,25            |
| PDE1C                                                                                           | 0,653556022 | 0,034011315 | 0,063 | 0,068 | 1         | 1,023854931   | 0,976700869     | 0,926470588     |
| ATXN1                                                                                           | 0,235444402 | 0,034008046 | 0,108 | 0,126 | 1         | 1,023852611   | 0,976703082     | 0,857142857     |
| CARD10                                                                                          | 0,625395602 | 0,033974028 | 0,037 | 0,033 | 1         | 1,023828469   | 0,976726112     | 1,121212121     |
| SLC35B3                                                                                         | 0,422563681 | 0,03392129  | 0,065 | 0,054 | 1         | 1,023791043   | 0,976761817     | 1,203703704     |
| CD34                                                                                            | 0,286509551 | 0,033910367 | 0,007 | 0,012 | 1         | 1,023783292   | 0,976769212     | 0,583333333     |
| LRIG3                                                                                           | 0,499163056 | 0,033885532 | 0,023 | 0,028 | 1         | 1,023765668   | 0,976786027     | 0,821428571     |
| KRI1                                                                                            | 0,841339117 | 0,033853715 | 0,026 | 0,027 | 1         | 1,023743091   | 0,976807569     | 0,962962963     |
| NKIRAS1                                                                                         | 0,877526209 | 0,033851541 | 0,014 | 0,015 | 1         | 1,023741548   | 0,976809041     | 0,933333333     |
| LZTFL1                                                                                          | 0,419677553 | 0,03372222  | 0,031 | 0,024 | 1         | 1,023649786   | 0,976896605     | 1,291666667     |
| FPGS                                                                                            | 0,033205554 | 0,033674582 | 0,059 | 0,035 | 1         | 1,023615985   | 0,976928862     | 1,685714286     |
| UBN1                                                                                            | 0,940901445 | 0,033663234 | 0,081 | 0,079 | 1         | 1,023607933   | 0,976936547     | 1,025316456     |
| METTL2A                                                                                         | 0,070347034 | 0,033631045 | 0,043 | 0,026 | 1         | 1,023585095   | 0,976958345     | 1,653846154     |
| AEN                                                                                             | 0,123697253 | 0,033567834 | 0,03  | 0,045 | 1         | 1,023540248   | 0,977001151     | 0,666666667     |
| FGFR4                                                                                           | 0,021374938 | 0,033565544 | 0,01  | 0,001 | 1         | 1,023538623   | 0,977002701     | 10              |
| ACAD10                                                                                          | 0,130928827 | 0,033513525 | 0,019 | 0,009 | 1         | 1,023501719   | 0,977037929     | 2,111111111     |
| CHST14                                                                                          | 0,078223498 | 0,033453935 | 0,073 | 0,05  | 1         | 1,023459444   | 0,977078286     | 1,46            |
| LRP6                                                                                            | 0,003255345 | 0,033448842 | 0,108 | 0,157 | 1         | 1,023455831   | 0,977081736     | 0,687898089     |
| ACACA                                                                                           | 0,107308572 | 0,03342607  | 0,041 | 0,026 | 1         | 1,023439677   | 0,977097159     | 1,576923077     |
| PLAG1                                                                                           | 0,430648938 | 0,033396746 | 0,015 | 0,02  | 1         | 1,023418875   | 0,977117019     | 0,75            |
| SLC10A3                                                                                         | 0,24310405  | 0,033350267 | 0,056 | 0,042 | 1         | 1,023385904   | 0,977148499     | 1,333333333     |



Supplementary Table 5

| Differentially expressed genes_total calculation_ comparing SC-Keloid vs. (SC-Myel, SC-Nonmyel) |             |             |       |       |           |               |                 |                 |
|-------------------------------------------------------------------------------------------------|-------------|-------------|-------|-------|-----------|---------------|-----------------|-----------------|
| gene                                                                                            | p_val       | avg_log2FC  | pct.1 | pct.2 | p_val_adj | Foldchange_UP | Foldchange_DOWN | Ratio_pct1_pct2 |
| TMEM104                                                                                         | 0,012469865 | 0,033239591 | 0,024 | 0,008 | 1         | 1,023307398   | 0,977223464     | 3               |
| FGF10                                                                                           | 0,025640992 | 0,033226638 | 0,013 | 0,003 | 1         | 1,023298211   | 0,977232237     | 4,333333333     |
| NSMCE2                                                                                          | 0,924225035 | 0,03321087  | 0,07  | 0,069 | 1         | 1,023287026   | 0,977242919     | 1,014492754     |
| SMIM10                                                                                          | 0,42873214  | 0,0331513   | 0,062 | 0,052 | 1         | 1,023244775   | 0,97728327      | 1,192307692     |
| MAP2                                                                                            | 0,971361    | 0,033054241 | 0,03  | 0,03  | 1         | 1,023175937   | 0,977349021     | 1               |
| EIF5AL1                                                                                         | 0,160803731 | 0,032957218 | 0,03  | 0,019 | 1         | 1,02310713    | 0,97741475      | 1,578947368     |
| JAK2                                                                                            | 0,969493144 | 0,032956285 | 0,015 | 0,015 | 1         | 1,023106468   | 0,977415383     | 1               |
| SPATA22                                                                                         | 0,369386718 | 0,032935918 | 0,013 | 0,008 | 1         | 1,023092025   | 0,977429181     | 1,625           |
| CMTR2                                                                                           | 0,090918256 | 0,032862291 | 0,064 | 0,043 | 1         | 1,023039814   | 0,977479065     | 1,488372093     |
| ANKRD9                                                                                          | 0,020649553 | 0,032856789 | 0,043 | 0,022 | 1         | 1,023035912   | 0,977482793     | 1,954545455     |
| ASTE1                                                                                           | 0,275051581 | 0,032815369 | 0,014 | 0,008 | 1         | 1,023006541   | 0,977510857     | 1,75            |
| MGRN1                                                                                           | 0,838030998 | 0,032794246 | 0,072 | 0,073 | 1         | 1,022991563   | 0,977525169     | 0,98630137      |
| CDK7                                                                                            | 0,462042335 | 0,032767278 | 0,038 | 0,031 | 1         | 1,02297244    | 0,977543442     | 1,225806452     |
| LRR37B                                                                                          | 0,575882984 | 0,032741902 | 0,019 | 0,015 | 1         | 1,022954447   | 0,977560636     | 1,266666667     |
| CCNB1                                                                                           | 0,057529719 | 0,032675625 | 0,017 | 0,007 | 1         | 1,022907454   | 0,977605546     | 2,428571429     |
| MINDY4                                                                                          | 0,062927351 | 0,032645513 | 0,013 | 0,004 | 1         | 1,022886104   | 0,977625951     | 3,25            |
| TIMM50                                                                                          | 0,145557564 | 0,032636731 | 0,084 | 0,062 | 1         | 1,022879877   | 0,977631902     | 1,35483871      |
| USP3                                                                                            | 0,053020088 | 0,032601569 | 0,027 | 0,045 | 1         | 1,022854947   | 0,97765573      | 0,6             |
| ZNF615                                                                                          | 0,882330489 | 0,032594664 | 0,012 | 0,011 | 1         | 1,022850052   | 0,977660409     | 1,090909091     |
| MRPL32                                                                                          | 0,315127852 | 0,032576403 | 0,137 | 0,151 | 1         | 1,022837106   | 0,977672783     | 0,907284768     |
| ZNF250                                                                                          | 0,537631281 | 0,032566367 | 0,016 | 0,02  | 1         | 1,02282999    | 0,977679585     | 0,8             |
| NUBP1                                                                                           | 0,460027791 | 0,032562892 | 0,068 | 0,057 | 1         | 1,022827526   | 0,97768194      | 1,192982456     |
| MYBL2                                                                                           | 0,005346706 | 0,032536838 | 0,01  | 0     | 1         | 1,022809055   | 0,977699596     | #DIV/0!         |
| ABCF3                                                                                           | 0,51342363  | 0,032450026 | 0,036 | 0,03  | 1         | 1,022747511   | 0,977758429     | 1,2             |
| ZFP28                                                                                           | 0,315360335 | 0,032422286 | 0,01  | 0,016 | 1         | 1,022727846   | 0,97777723      | 0,625           |
| ZSCAN30                                                                                         | 0,495059891 | 0,032420073 | 0,045 | 0,038 | 1         | 1,022726277   | 0,97777873      | 1,184210526     |
| ZNF124                                                                                          | 0,574552607 | 0,03238322  | 0,019 | 0,015 | 1         | 1,022700152   | 0,977803707     | 1,266666667     |
| TTC31                                                                                           | 0,383594139 | 0,032289881 | 0,035 | 0,027 | 1         | 1,022633988   | 0,97786697      | 1,296296296     |
| LRCH1                                                                                           | 0,922109923 | 0,032254909 | 0,055 | 0,056 | 1         | 1,022609199   | 0,977890675     | 0,982142857     |
| FARS2                                                                                           | 0,575536348 | 0,032253824 | 0,038 | 0,043 | 1         | 1,02260843    | 0,97789141      | 0,88372093      |

Supplementary Table 5

| Differentially expressed genes_total calculation_ comparing SC-Keloid vs. (SC-Myel, SC-Nonmyel) |             |             |       |       |           |               |                 |                 |
|-------------------------------------------------------------------------------------------------|-------------|-------------|-------|-------|-----------|---------------|-----------------|-----------------|
| gene                                                                                            | p_val       | avg_log2FC  | pct.1 | pct.2 | p_val_adj | Foldchange_UP | Foldchange_DOWN | Ratio_pct1_pct2 |
| DAGLA                                                                                           | 0,413140911 | 0,032228857 | 0,031 | 0,024 | 1         | 1,022590733   | 0,977908334     | 1,291666667     |
| FAH                                                                                             | 0,53860384  | 0,032189081 | 0,017 | 0,014 | 1         | 1,02256254    | 0,977935296     | 1,214285714     |
| TUBD1                                                                                           | 0,731025747 | 0,032112386 | 0,03  | 0,027 | 1         | 1,022508181   | 0,977987285     | 1,111111111     |
| CHEK1                                                                                           | 0,005502919 | 0,032099397 | 0,022 | 0,005 | 1         | 1,022498975   | 0,97799609      | 4,4             |
| TAPBP                                                                                           | 0,046499419 | 0,032079005 | 0,228 | 0,267 | 1         | 1,022484522   | 0,978009914     | 0,853932584     |
| GNA13                                                                                           | 0,305799398 | 0,032073052 | 0,078 | 0,091 | 1         | 1,022480304   | 0,978013949     | 0,857142857     |
| ALPK3                                                                                           | 0,631385644 | 0,032004061 | 0,01  | 0,008 | 1         | 1,022431409   | 0,97806072      | 1,25            |
| SYNGAP1                                                                                         | 0,252575831 | 0,031983151 | 0,022 | 0,031 | 1         | 1,02241659    | 0,978074896     | 0,709677419     |
| R3HDM2                                                                                          | 0,405986529 | 0,031904861 | 0,151 | 0,163 | 1         | 1,022361109   | 0,978127974     | 0,926380368     |
| ZNF91                                                                                           | 0,049443847 | 0,031903222 | 0,057 | 0,081 | 1         | 1,022359947   | 0,978129085     | 0,703703704     |
| AMACR                                                                                           | 0,057233135 | 0,031902965 | 0,017 | 0,007 | 1         | 1,022359765   | 0,97812926      | 2,428571429     |
| UTP14A                                                                                          | 0,469481538 | 0,03177959  | 0,029 | 0,023 | 1         | 1,022272339   | 0,97821291      | 1,260869565     |
| WDR5B                                                                                           | 0,117505188 | 0,031768424 | 0,015 | 0,007 | 1         | 1,022264427   | 0,978220481     | 2,142857143     |
| CBX2                                                                                            | 0,354462364 | 0,031707955 | 0,016 | 0,011 | 1         | 1,022221581   | 0,978261483     | 1,454545455     |
| ZNF789                                                                                          | 0,798794077 | 0,031701876 | 0,015 | 0,014 | 1         | 1,022217274   | 0,978265605     | 1,071428571     |
| ABHD13                                                                                          | 0,886694163 | 0,031679611 | 0,038 | 0,037 | 1         | 1,022201498   | 0,978280703     | 1,027027027     |
| CCDC174                                                                                         | 0,441534995 | 0,03162848  | 0,064 | 0,073 | 1         | 1,022165271   | 0,978315375     | 0,876712329     |
| ZNF662                                                                                          | 0,630922144 | 0,031532416 | 0,01  | 0,008 | 1         | 1,022097211   | 0,978380519     | 1,25            |
| SPRED3                                                                                          | 0,018086526 | 0,031531753 | 0,016 | 0,004 | 1         | 1,022096741   | 0,978380969     | 4               |
| GPAA1                                                                                           | 0,82102213  | 0,031499268 | 0,169 | 0,167 | 1         | 1,022073727   | 0,978403        | 1,011976048     |
| USP46                                                                                           | 0,331036553 | 0,031481905 | 0,062 | 0,073 | 1         | 1,022061426   | 0,978414775     | 0,849315068     |
| COPS7B                                                                                          | 0,52069574  | 0,031367197 | 0,056 | 0,062 | 1         | 1,021980166   | 0,978492571     | 0,903225806     |
| CMTM8                                                                                           | 0,231276108 | 0,031258222 | 0,013 | 0,007 | 1         | 1,021902972   | 0,978566485     | 1,857142857     |
| HOXD8                                                                                           | 0,026494211 | 0,031225051 | 0,03  | 0,014 | 1         | 1,021879477   | 0,978588985     | 2,142857143     |
| INPP4B                                                                                          | 0,875593489 | 0,031205883 | 0,023 | 0,024 | 1         | 1,0218659     | 0,978601987     | 0,958333333     |
| FAM71E1                                                                                         | 0,061871786 | 0,031183104 | 0,01  | 0,003 | 1         | 1,021849766   | 0,978617438     | 3,333333333     |
| DYNC2H1                                                                                         | 0,978088489 | 0,031142301 | 0,052 | 0,052 | 1         | 1,021820866   | 0,978645116     | 1               |
| CLN6                                                                                            | 0,427573051 | 0,031138729 | 0,015 | 0,02  | 1         | 1,021818336   | 0,978647539     | 0,75            |
| FANCA                                                                                           | 0,129454981 | 0,031117296 | 0,019 | 0,009 | 1         | 1,021803155   | 0,978662079     | 2,111111111     |
| MBLAC1                                                                                          | 0,082200953 | 0,031074511 | 0,016 | 0,007 | 1         | 1,021772853   | 0,978691103     | 2,285714286     |

Supplementary Table 5

| Differentially expressed genes_total calculation_ comparing SC-Keloid vs. (SC-Myel, SC-Nonmyel) |             |             |       |       |           |               |                 |                 |
|-------------------------------------------------------------------------------------------------|-------------|-------------|-------|-------|-----------|---------------|-----------------|-----------------|
| gene                                                                                            | p_val       | avg_log2FC  | pct.1 | pct.2 | p_val_adj | Foldchange_UP | Foldchange_DOWN | Ratio_pct1_pct2 |
| ASB8                                                                                            | 0,394656943 | 0,031060189 | 0,064 | 0,053 | 1         | 1,02176271    | 0,978700818     | 1,20754717      |
| RIN1                                                                                            | 0,005828668 | 0,031036744 | 0,029 | 0,009 | 1         | 1,021746105   | 0,978716723     | 3,222222222     |
| ZNF598                                                                                          | 0,684047749 | 0,031006185 | 0,056 | 0,05  | 1         | 1,021724463   | 0,978737454     | 1,12            |
| FBXO46                                                                                          | 0,687720481 | 0,030985306 | 0,015 | 0,018 | 1         | 1,021709677   | 0,978751619     | 0,833333333     |
| NDUFV1                                                                                          | 0,342116009 | 0,030925275 | 0,165 | 0,176 | 1         | 1,021667164   | 0,978792346     | 0,9375          |
| SDC3                                                                                            | 0,019832693 | 0,030916514 | 0,332 | 0,406 | 1         | 1,021660959   | 0,97879829      | 0,81773399      |
| PSPH                                                                                            | 0,141785813 | 0,030909738 | 0,026 | 0,015 | 1         | 1,021656161   | 0,978802887     | 1,733333333     |
| PGBD2                                                                                           | 0,369386718 | 0,030880065 | 0,013 | 0,008 | 1         | 1,021635148   | 0,978823019     | 1,625           |
| CASTOR3                                                                                         | 0,21293445  | 0,030878987 | 0,026 | 0,016 | 1         | 1,021634384   | 0,978823751     | 1,625           |
| UNK                                                                                             | 0,754765478 | 0,030823956 | 0,08  | 0,083 | 1         | 1,021595415   | 0,978861088     | 0,963855422     |
| NAGLU                                                                                           | 0,045631124 | 0,03081617  | 0,07  | 0,045 | 1         | 1,021589902   | 0,978866371     | 1,555555556     |
| MRM1                                                                                            | 0,061978454 | 0,030801405 | 0,013 | 0,004 | 1         | 1,021579447   | 0,978876389     | 3,25            |
| ANKLE2                                                                                          | 0,241973009 | 0,030797175 | 0,122 | 0,14  | 1         | 1,021576451   | 0,978879259     | 0,871428571     |
| SLCO3A1                                                                                         | 0,7983091   | 0,030790533 | 0,047 | 0,043 | 1         | 1,021571748   | 0,978883766     | 1,093023256     |
| E2F4                                                                                            | 0,5348523   | 0,030684518 | 0,065 | 0,072 | 1         | 1,021496682   | 0,978955701     | 0,902777778     |
| ZNF227                                                                                          | 0,197740656 | 0,030674468 | 0,02  | 0,03  | 1         | 1,021489566   | 0,97896252      | 0,666666667     |
| INPP4A                                                                                          | 0,898620614 | 0,030622578 | 0,034 | 0,033 | 1         | 1,021452826   | 0,978997732     | 1,03030303      |
| MSRB1                                                                                           | 0,026661215 | 0,030563964 | 0,051 | 0,028 | 1         | 1,021411327   | 0,979037507     | 1,821428571     |
| METTL22                                                                                         | 0,08549042  | 0,030539848 | 0,022 | 0,011 | 1         | 1,021394254   | 0,979053873     | 2               |
| USP15                                                                                           | 0,027079847 | 0,030529338 | 0,121 | 0,159 | 1         | 1,021386813   | 0,979061005     | 0,761006289     |
| SURF6                                                                                           | 0,810861618 | 0,030528949 | 0,065 | 0,061 | 1         | 1,021386538   | 0,979061269     | 1,06557377      |
| DUS4L                                                                                           | 0,884577631 | 0,030520786 | 0,013 | 0,014 | 1         | 1,021380758   | 0,979066809     | 0,928571429     |
| PARP3                                                                                           | 0,00263381  | 0,030492866 | 0,036 | 0,012 | 1         | 1,021360993   | 0,979085756     | 3               |
| RANBP17                                                                                         | 0,186023667 | 0,030491937 | 0,012 | 0,005 | 1         | 1,021360335   | 0,979086387     | 2,4             |
| ZMYND10                                                                                         | 0,013450053 | 0,030475958 | 0,012 | 0,001 | 1         | 1,021349022   | 0,979097231     | 12              |
| KIAA0825                                                                                        | 0,686989301 | 0,030448181 | 0,015 | 0,018 | 1         | 1,021329358   | 0,979116083     | 0,833333333     |
| PHF20L1                                                                                         | 0,082781739 | 0,030445525 | 0,163 | 0,193 | 1         | 1,021327478   | 0,979117885     | 0,844559585     |
| GTSE1                                                                                           | 0,094705765 | 0,030422734 | 0,012 | 0,004 | 1         | 1,021311343   | 0,979133353     | 3               |
| ETNK2                                                                                           | 0,331889104 | 0,030405053 | 0,023 | 0,016 | 1         | 1,021298827   | 0,979145353     | 1,4375          |
| EXOSC2                                                                                          | 0,725703471 | 0,030382981 | 0,012 | 0,014 | 1         | 1,021283202   | 0,979160333     | 0,857142857     |

Supplementary Table 5

| Differentially expressed genes_total calculation_ comparing SC-Keloid vs. (SC-Myel, SC-Nonmyel) |             |             |       |       |           |               |                 |                 |
|-------------------------------------------------------------------------------------------------|-------------|-------------|-------|-------|-----------|---------------|-----------------|-----------------|
| gene                                                                                            | p_val       | avg_log2FC  | pct.1 | pct.2 | p_val_adj | Foldchange_UP | Foldchange_DOWN | Ratio_pct1_pct2 |
| DCAF17                                                                                          | 0,719318001 | 0,030341345 | 0,024 | 0,027 | 1         | 1,021253728   | 0,979188592     | 0,888888889     |
| HAUS5                                                                                           | 0,307658066 | 0,030297491 | 0,019 | 0,012 | 1         | 1,021222686   | 0,979218357     | 1,583333333     |
| ATP13A2                                                                                         | 0,012101402 | 0,030269125 | 0,037 | 0,016 | 1         | 1,021202607   | 0,97923761      | 2,3125          |
| TMEM216                                                                                         | 0,275556805 | 0,030256851 | 0,029 | 0,02  | 1         | 1,021193918   | 0,979245942     | 1,45            |
| METTL25B                                                                                        | 0,056310347 | 0,030218346 | 0,026 | 0,012 | 1         | 1,021166663   | 0,979272077     | 2,166666667     |
| ZBTB1                                                                                           | 0,000850125 | 0,03018875  | 0,1   | 0,156 | 1         | 1,021145715   | 0,979292167     | 0,641025641     |
| ZNF780B                                                                                         | 0,501014682 | 0,030174799 | 0,016 | 0,012 | 1         | 1,02113584    | 0,979301637     | 1,333333333     |
| YWHAH                                                                                           | 0,003786113 | 0,030158106 | 0,255 | 0,322 | 1         | 1,021124025   | 0,979312968     | 0,791925466     |
| TRIM35                                                                                          | 0,700028193 | 0,030156469 | 0,014 | 0,016 | 1         | 1,021122867   | 0,979314079     | 0,875           |
| MDH2                                                                                            | 0,712409969 | 0,030056219 | 0,192 | 0,195 | 1         | 1,021051914   | 0,979382132     | 0,984615385     |
| C15orf65                                                                                        | 0,947741388 | 0,0300108   | 0,014 | 0,014 | 1         | 1,021019769   | 0,979412966     | 1               |
| ZNF10                                                                                           | 0,940456406 | 0,029950059 | 0,021 | 0,02  | 1         | 1,020976783   | 0,979454202     | 1,05            |
| C1orf109                                                                                        | 0,578039327 | 0,029898363 | 0,04  | 0,034 | 1         | 1,020940198   | 0,9794893       | 1,176470588     |
| ZFP14                                                                                           | 0,907708495 | 0,029893518 | 0,03  | 0,031 | 1         | 1,02093677    | 0,979492589     | 0,967741935     |
| SKP2                                                                                            | 0,682325785 | 0,029889978 | 0,012 | 0,009 | 1         | 1,020934265   | 0,979494992     | 1,333333333     |
| MRPL10                                                                                          | 0,064063536 | 0,029853516 | 0,049 | 0,03  | 1         | 1,020908463   | 0,979519748     | 1,633333333     |
| TBP                                                                                             | 0,685081591 | 0,029829138 | 0,016 | 0,019 | 1         | 1,020891212   | 0,9795363       | 0,842105263     |
| KCNK6                                                                                           | 0,018508747 | 0,029827343 | 0,019 | 0,005 | 1         | 1,020889941   | 0,979537519     | 3,8             |
| RABEP2                                                                                          | 0,024280722 | 0,029808046 | 0,054 | 0,03  | 1         | 1,020876287   | 0,97955062      | 1,8             |
| TMEM107                                                                                         | 0,941243866 | 0,029806279 | 0,085 | 0,084 | 1         | 1,020875036   | 0,97955182      | 1,011904762     |
| CUX1                                                                                            | 0,237965729 | 0,029794708 | 0,191 | 0,21  | 1         | 1,020866849   | 0,979559676     | 0,90952381      |
| SCAF8                                                                                           | 0,856220932 | 0,029787189 | 0,063 | 0,06  | 1         | 1,020861528   | 0,979564782     | 1,05            |
| TMEM44                                                                                          | 0,089733018 | 0,029720862 | 0,014 | 0,005 | 1         | 1,020814595   | 0,979609818     | 2,8             |
| ZNF12                                                                                           | 0,129478857 | 0,029717261 | 0,036 | 0,052 | 1         | 1,020812048   | 0,979612263     | 0,692307692     |
| PRUNE1                                                                                          | 0,457843219 | 0,029657905 | 0,015 | 0,011 | 1         | 1,02077005    | 0,979652567     | 1,363636364     |
| ZNF563                                                                                          | 0,294759745 | 0,0296519   | 0,008 | 0,014 | 1         | 1,020765801   | 0,979656645     | 0,571428571     |
| TBC1D20                                                                                         | 0,373807681 | 0,029577082 | 0,065 | 0,076 | 1         | 1,020712866   | 0,979707451     | 0,855263158     |
| TWIST1                                                                                          | 0,91983168  | 0,029565354 | 0,013 | 0,012 | 1         | 1,020704568   | 0,979715416     | 1,083333333     |
| AGBL3                                                                                           | 0,844331401 | 0,029553614 | 0,01  | 0,009 | 1         | 1,020696262   | 0,979723388     | 1,111111111     |
| FBXL6                                                                                           | 0,129458459 | 0,02953928  | 0,054 | 0,037 | 1         | 1,020686121   | 0,979733122     | 1,459459459     |

Supplementary Table 5

| Differentially expressed genes_total calculation_ comparing SC-Keloid vs. (SC-Myel, SC-Nonmyel) |             |             |       |       |           |               |                 |                 |
|-------------------------------------------------------------------------------------------------|-------------|-------------|-------|-------|-----------|---------------|-----------------|-----------------|
| gene                                                                                            | p_val       | avg_log2FC  | pct.1 | pct.2 | p_val_adj | Foldchange_UP | Foldchange_DOWN | Ratio_pct1_pct2 |
| DERA                                                                                            | 0,612347573 | 0,029384842 | 0,086 | 0,077 | 1         | 1,020576864   | 0,979838006     | 1,116883117     |
| POLR3B                                                                                          | 0,0622975   | 0,029364512 | 0,01  | 0,003 | 1         | 1,020562483   | 0,979851814     | 3,333333333     |
| CCDC18                                                                                          | 0,574937864 | 0,029352131 | 0,01  | 0,014 | 1         | 1,020553724   | 0,979860223     | 0,714285714     |
| ABITRAM                                                                                         | 0,23423031  | 0,029321757 | 0,035 | 0,024 | 1         | 1,020532238   | 0,979880853     | 1,458333333     |
| KCTD14                                                                                          | 0,039935732 | 0,02927176  | 0,012 | 0,003 | 1         | 1,020496872   | 0,979914811     | 4               |
| WWP2                                                                                            | 0,988689216 | 0,029270606 | 0,03  | 0,03  | 1         | 1,020496055   | 0,979915596     | 1               |
| FBXO8                                                                                           | 0,557824184 | 0,029225018 | 0,055 | 0,047 | 1         | 1,020463809   | 0,979946561     | 1,170212766     |
| USP19                                                                                           | 0,158264062 | 0,029128724 | 0,028 | 0,041 | 1         | 1,020395699   | 0,98001197      | 0,682926829     |
| ATAD3A                                                                                          | 0,061850028 | 0,029108628 | 0,063 | 0,041 | 1         | 1,020381486   | 0,980025622     | 1,536585366     |
| NCEH1                                                                                           | 0,969905201 | 0,029055407 | 0,015 | 0,015 | 1         | 1,020343845   | 0,980061775     | 1               |
| IRAK3                                                                                           | 0,854910383 | 0,029048745 | 0,015 | 0,016 | 1         | 1,020339133   | 0,980066301     | 0,9375          |
| HDHD5                                                                                           | 0,069909747 | 0,029004684 | 0,057 | 0,037 | 1         | 1,020307972   | 0,980096233     | 1,540540541     |
| TSIX                                                                                            | 0,000824525 | 0,028958647 | 0,029 | 0,065 | 1         | 1,020275414   | 0,980127509     | 0,446153846     |
| USP37                                                                                           | 0,004809395 | 0,028905155 | 0,031 | 0,061 | 1         | 1,020237585   | 0,980163851     | 0,508196721     |
| DNAJC11                                                                                         | 0,342066406 | 0,028891242 | 0,037 | 0,028 | 1         | 1,020227746   | 0,980173303     | 1,321428571     |
| MEN1                                                                                            | 0,752029561 | 0,028880338 | 0,022 | 0,024 | 1         | 1,020220035   | 0,980180712     | 0,916666667     |
| ACAD9                                                                                           | 0,161760098 | 0,028876718 | 0,042 | 0,028 | 1         | 1,020217475   | 0,980183171     | 1,5             |
| LARS2                                                                                           | 0,487562021 | 0,028875743 | 0,012 | 0,008 | 1         | 1,020216786   | 0,980183833     | 1,5             |
| FAM222B                                                                                         | 0,618925147 | 0,028848637 | 0,015 | 0,012 | 1         | 1,020197617   | 0,98020225      | 1,25            |
| APOC1                                                                                           | 0,115701494 | 0,028848088 | 0,015 | 0,007 | 1         | 1,02019723    | 0,980202622     | 2,142857143     |
| PPP2R5D                                                                                         | 0,998953231 | 0,028842623 | 0,038 | 0,038 | 1         | 1,020193365   | 0,980206336     | 1               |
| SLC25A39                                                                                        | 0,717623699 | 0,028828302 | 0,092 | 0,084 | 1         | 1,020183238   | 0,980216066     | 1,095238095     |
| PROSER3                                                                                         | 0,238389583 | 0,028808398 | 0,02  | 0,012 | 1         | 1,020169163   | 0,980229589     | 1,666666667     |
| TMEM260                                                                                         | 0,94319744  | 0,028807494 | 0,028 | 0,027 | 1         | 1,020168524   | 0,980230204     | 1,037037037     |
| CHMP1A                                                                                          | 0,098882404 | 0,028797657 | 0,099 | 0,072 | 1         | 1,020161568   | 0,980236887     | 1,375           |
| ZNF550                                                                                          | 0,657272494 | 0,028767082 | 0,016 | 0,014 | 1         | 1,020139948   | 0,980257662     | 1,142857143     |
| CEP250                                                                                          | 0,221099924 | 0,028754808 | 0,03  | 0,02  | 1         | 1,020131269   | 0,980266002     | 1,5             |
| PALB2                                                                                           | 0,094291883 | 0,028666559 | 0,012 | 0,004 | 1         | 1,02006887    | 0,980325966     | 3               |
| LPCAT1                                                                                          | 0,223509859 | 0,028636129 | 0,03  | 0,02  | 1         | 1,020047354   | 0,980346644     | 1,5             |
| RBM4B                                                                                           | 0,568734962 | 0,028632204 | 0,04  | 0,034 | 1         | 1,020044579   | 0,980349311     | 1,176470588     |

Supplementary Table 5

| Differentially expressed genes_total calculation_ comparing SC-Keloid vs. (SC-Myel, SC-Nonmyel) |             |             |       |       |           |               |                 |                 |
|-------------------------------------------------------------------------------------------------|-------------|-------------|-------|-------|-----------|---------------|-----------------|-----------------|
| gene                                                                                            | p_val       | avg_log2FC  | pct.1 | pct.2 | p_val_adj | Foldchange_UP | Foldchange_DOWN | Ratio_pct1_pct2 |
| POLH                                                                                            | 0,630922144 | 0,028614793 | 0,01  | 0,008 | 1         | 1,020032269   | 0,980361142     | 1,25            |
| FGD5-AS1                                                                                        | 0,000730789 | 0,028599559 | 0,191 | 0,263 | 1         | 1,020021498   | 0,980371494     | 0,726235741     |
| FDX1                                                                                            | 0,094165961 | 0,028551664 | 0,17  | 0,195 | 1         | 1,019987635   | 0,980404041     | 0,871794872     |
| MAPK14                                                                                          | 0,573017282 | 0,028549901 | 0,041 | 0,046 | 1         | 1,019986389   | 0,980405239     | 0,891304348     |
| CHIC1                                                                                           | 0,272915692 | 0,028512481 | 0,026 | 0,035 | 1         | 1,019959934   | 0,980430669     | 0,742857143     |
| UBXN1                                                                                           | 0,001637954 | 0,028509412 | 0,261 | 0,336 | 1         | 1,019957764   | 0,980432755     | 0,776785714     |
| TFAM                                                                                            | 0,913126153 | 0,028447582 | 0,097 | 0,096 | 1         | 1,019914053   | 0,980474774     | 1,010416667     |
| BIN1                                                                                            | 0,826201874 | 0,028415642 | 0,142 | 0,14  | 1         | 1,019891473   | 0,980496481     | 1,014285714     |
| CFAP251                                                                                         | 0,039935732 | 0,028356464 | 0,012 | 0,003 | 1         | 1,019849639   | 0,980536701     | 4               |
| FAM98B                                                                                          | 0,890600572 | 0,028339242 | 0,045 | 0,043 | 1         | 1,019837464   | 0,980548406     | 1,046511628     |
| CPE                                                                                             | 0,087300575 | 0,028311178 | 0,013 | 0,024 | 1         | 1,019817626   | 0,98056748      | 0,541666667     |
| JADE2                                                                                           | 0,857456837 | 0,028265574 | 0,037 | 0,035 | 1         | 1,01978539    | 0,980598477     | 1,057142857     |
| MON2                                                                                            | 0,688888964 | 0,02825878  | 0,083 | 0,087 | 1         | 1,019780587   | 0,980603095     | 0,954022989     |
| SDHAF4                                                                                          | 0,592478152 | 0,028240991 | 0,029 | 0,024 | 1         | 1,019768013   | 0,980615186     | 1,208333333     |
| GDPD5                                                                                           | 0,094291883 | 0,028198558 | 0,012 | 0,004 | 1         | 1,01973802    | 0,980644029     | 3               |
| DENND3                                                                                          | 0,370040606 | 0,028172808 | 0,013 | 0,008 | 1         | 1,019719819   | 0,980661532     | 1,625           |
| SIDT2                                                                                           | 0,016451736 | 0,028167299 | 0,057 | 0,031 | 1         | 1,019715925   | 0,980665277     | 1,838709677     |
| FSD1                                                                                            | 0,005048147 | 0,028166215 | 0,02  | 0,004 | 1         | 1,019715159   | 0,980666013     | 5               |
| SF3A1                                                                                           | 0,19545088  | 0,02812121  | 0,075 | 0,091 | 1         | 1,019683349   | 0,980696606     | 0,824175824     |
| DOCK6                                                                                           | 0,241934227 | 0,028106694 | 0,048 | 0,035 | 1         | 1,01967309    | 0,980706473     | 1,371428571     |
| ISY1                                                                                            | 0,209584961 | 0,028060723 | 0,062 | 0,046 | 1         | 1,019640599   | 0,980737724     | 1,347826087     |
| CHAMP1                                                                                          | 0,684988119 | 0,027982724 | 0,028 | 0,024 | 1         | 1,019585474   | 0,980790749     | 1,166666667     |
| WDR3                                                                                            | 0,370230948 | 0,027904089 | 0,029 | 0,022 | 1         | 1,019529902   | 0,980844209     | 1,318181818     |
| CATSPER1                                                                                        | 0,000802422 | 0,027889959 | 0,015 | 0     | 1         | 1,019519916   | 0,980853816     | #DIV/0!         |
| PTPA                                                                                            | 0,103311908 | 0,02782937  | 0,122 | 0,092 | 1         | 1,0194771     | 0,98089501      | 1,326086957     |
| MTHFD2L                                                                                         | 0,307761398 | 0,027780003 | 0,048 | 0,037 | 1         | 1,019442216   | 0,980928574     | 1,297297297     |
| ZNF138                                                                                          | 0,588700859 | 0,02776418  | 0,035 | 0,03  | 1         | 1,019431035   | 0,980939333     | 1,166666667     |
| NRP1                                                                                            | 0,582642204 | 0,027758773 | 0,119 | 0,107 | 1         | 1,019427215   | 0,980943009     | 1,112149533     |
| NLRX1                                                                                           | 0,681426824 | 0,027710267 | 0,012 | 0,009 | 1         | 1,01939294    | 0,980975991     | 1,333333333     |
| HIP1                                                                                            | 0,270836827 | 0,027709882 | 0,063 | 0,076 | 1         | 1,019392668   | 0,980976253     | 0,828947368     |

Supplementary Table 5

| Differentially expressed genes_total calculation_ comparing SC-Keloid vs. (SC-Myel, SC-Nonmyel) |             |             |       |       |           |               |                 |                 |
|-------------------------------------------------------------------------------------------------|-------------|-------------|-------|-------|-----------|---------------|-----------------|-----------------|
| gene                                                                                            | p_val       | avg_log2FC  | pct.1 | pct.2 | p_val_adj | Foldchange_UP | Foldchange_DOWN | Ratio_pct1_pct2 |
| CDT1                                                                                            | 0,001307601 | 0,027642571 | 0,017 | 0,001 | 1         | 1,019345108   | 0,981022023     | 17              |
| RPP30                                                                                           | 0,484911299 | 0,027608439 | 0,085 | 0,073 | 1         | 1,019320992   | 0,981045233     | 1,164383562     |
| POLR2E                                                                                          | 0,913157452 | 0,027567566 | 0,178 | 0,174 | 1         | 1,019292114   | 0,981073027     | 1,022988506     |
| TMEM63A                                                                                         | 0,552717689 | 0,027559947 | 0,038 | 0,033 | 1         | 1,019286731   | 0,981078208     | 1,151515152     |
| BRCA2                                                                                           | 0,186023667 | 0,027557261 | 0,012 | 0,005 | 1         | 1,019284834   | 0,981080035     | 2,4             |
| TRAF3IP2-AS1                                                                                    | 0,717291348 | 0,027551982 | 0,035 | 0,038 | 1         | 1,019281104   | 0,981083625     | 0,921052632     |
| PSMC6                                                                                           | 0,072299123 | 0,02755042  | 0,159 | 0,19  | 1         | 1,01928       | 0,981084687     | 0,836842105     |
| STX1A                                                                                           | 0,265556453 | 0,02754782  | 0,01  | 0,005 | 1         | 1,019278163   | 0,981086455     | 2               |
| ZMYM4                                                                                           | 0,997535703 | 0,027545412 | 0,09  | 0,088 | 1         | 1,019276462   | 0,981088093     | 1,022727273     |
| PCCA                                                                                            | 0,440889593 | 0,027507898 | 0,028 | 0,022 | 1         | 1,019249958   | 0,981113604     | 1,272727273     |
| ZFAND2B                                                                                         | 0,886469738 | 0,027422243 | 0,081 | 0,077 | 1         | 1,019189446   | 0,981171856     | 1,051948052     |
| NSMCE3                                                                                          | 0,417555816 | 0,027418325 | 0,088 | 0,075 | 1         | 1,019186678   | 0,98117452      | 1,173333333     |
| TM2D2                                                                                           | 0,452821896 | 0,027330271 | 0,088 | 0,076 | 1         | 1,019124474   | 0,981234408     | 1,157894737     |
| CC2D2A                                                                                          | 0,443930939 | 0,027219718 | 0,033 | 0,026 | 1         | 1,019046382   | 0,981309602     | 1,269230769     |
| DOP1B                                                                                           | 0,99781965  | 0,027211789 | 0,016 | 0,016 | 1         | 1,019040782   | 0,981314995     | 1               |
| AVIL                                                                                            | 0,14248739  | 0,027129493 | 0,009 | 0,018 | 1         | 1,018982654   | 0,981370975     | 0,5             |
| NADSYN1                                                                                         | 0,458719919 | 0,027111347 | 0,038 | 0,031 | 1         | 1,018969838   | 0,981383318     | 1,225806452     |
| MYO1B                                                                                           | 0,980113058 | 0,027068893 | 0,042 | 0,042 | 1         | 1,018939853   | 0,981412197     | 1               |
| RFXAP                                                                                           | 0,329851063 | 0,026779734 | 0,019 | 0,026 | 1         | 1,018735647   | 0,981608922     | 0,730769231     |
| NPW                                                                                             | 0,904136606 | 0,026759817 | 0,021 | 0,022 | 1         | 1,018721584   | 0,981622473     | 0,954545455     |
| LRP11                                                                                           | 0,080328476 | 0,026756034 | 0,02  | 0,034 | 1         | 1,018718912   | 0,981625047     | 0,588235294     |
| MAN1A2                                                                                          | 0,403894379 | 0,026740213 | 0,157 | 0,167 | 1         | 1,018707741   | 0,981635811     | 0,94011976      |
| C2orf81                                                                                         | 0,238587479 | 0,026715506 | 0,02  | 0,012 | 1         | 1,018690295   | 0,981652623     | 1,666666667     |
| LINC00672                                                                                       | 0,728882671 | 0,026670283 | 0,019 | 0,016 | 1         | 1,018658363   | 0,981683394     | 1,1875          |
| NIF3L1                                                                                          | 0,144072502 | 0,026662247 | 0,029 | 0,018 | 1         | 1,018652689   | 0,981688863     | 1,611111111     |
| KLF12                                                                                           | 0,207799731 | 0,02662656  | 0,022 | 0,014 | 1         | 1,018627492   | 0,981713146     | 1,571428571     |
| SH3BP4                                                                                          | 0,003528308 | 0,026580346 | 0,04  | 0,015 | 1         | 1,018594863   | 0,981744594     | 2,666666667     |
| PUS1                                                                                            | 0,992524837 | 0,026575364 | 0,024 | 0,024 | 1         | 1,018591345   | 0,981747984     | 1               |
| KDM4A                                                                                           | 0,505749075 | 0,026568616 | 0,023 | 0,028 | 1         | 1,018586581   | 0,981752576     | 0,821428571     |
| VILL                                                                                            | 0,53836187  | 0,026519786 | 0,013 | 0,009 | 1         | 1,018552106   | 0,981785806     | 1,444444444     |

Supplementary Table 5

| Differentially expressed genes_total calculation_ comparing SC-Keloid vs. (SC-Myel, SC-Nonmyel) |             |             |       |       |           |               |                 |                 |
|-------------------------------------------------------------------------------------------------|-------------|-------------|-------|-------|-----------|---------------|-----------------|-----------------|
| gene                                                                                            | p_val       | avg_log2FC  | pct.1 | pct.2 | p_val_adj | Foldchange_UP | Foldchange_DOWN | Ratio_pct1_pct2 |
| TAF1A                                                                                           | 0,889809637 | 0,026488511 | 0,013 | 0,014 | 1         | 1,018530026   | 0,981807089     | 0,928571429     |
| SULF2                                                                                           | 0,760162385 | 0,026480153 | 0,009 | 0,011 | 1         | 1,018524125   | 0,981812777     | 0,818181818     |
| MCC                                                                                             | 0,897802353 | 0,02645785  | 0,037 | 0,038 | 1         | 1,018508379   | 0,981827956     | 0,973684211     |
| PREPL                                                                                           | 0,024572892 | 0,026452593 | 0,07  | 0,1   | 1         | 1,018504669   | 0,981831533     | 0,7             |
| CDC16                                                                                           | 0,125525132 | 0,026444287 | 0,07  | 0,05  | 1         | 1,018498804   | 0,981837186     | 1,4             |
| CAPZA2                                                                                          | 0,010773759 | 0,026430649 | 0,217 | 0,27  | 1         | 1,018489177   | 0,981846467     | 0,803703704     |
| RIOK1                                                                                           | 0,830841779 | 0,026346542 | 0,052 | 0,054 | 1         | 1,018429802   | 0,981903709     | 0,962962963     |
| CHTF18                                                                                          | 0,948195926 | 0,026336964 | 0,021 | 0,02  | 1         | 1,018423041   | 0,981910228     | 1,05            |
| POP1                                                                                            | 0,630458789 | 0,02627933  | 0,01  | 0,008 | 1         | 1,018382356   | 0,981949455     | 1,25            |
| GSDMD                                                                                           | 0,459605163 | 0,02625994  | 0,118 | 0,102 | 1         | 1,018368669   | 0,981962653     | 1,156862745     |
| PFAS                                                                                            | 0,02637664  | 0,026241718 | 0,022 | 0,008 | 1         | 1,018355807   | 0,981975055     | 2,75            |
| RBM41                                                                                           | 0,157392793 | 0,026191634 | 0,022 | 0,034 | 1         | 1,018320455   | 0,982009145     | 0,647058824     |
| C18orf21                                                                                        | 0,571352496 | 0,026121591 | 0,029 | 0,034 | 1         | 1,018271016   | 0,982056824     | 0,852941176     |
| DAGLB                                                                                           | 0,542896693 | 0,026111292 | 0,022 | 0,018 | 1         | 1,018263747   | 0,982063834     | 1,222222222     |
| SLC46A3                                                                                         | 0,041770962 | 0,026075944 | 0,014 | 0,004 | 1         | 1,018238799   | 0,982087896     | 3,5             |
| PKN1                                                                                            | 0,954663101 | 0,026040731 | 0,164 | 0,16  | 1         | 1,018213946   | 0,982111867     | 1,025           |
| NRG2                                                                                            | 0,397830406 | 0,02591969  | 0,017 | 0,012 | 1         | 1,018128522   | 0,982194269     | 1,416666667     |
| TBL1XR1                                                                                         | 0,00141095  | 0,025913207 | 0,165 | 0,227 | 1         | 1,018123948   | 0,982198683     | 0,726872247     |
| CDK8                                                                                            | 0,675839006 | 0,025910294 | 0,029 | 0,033 | 1         | 1,018121892   | 0,982200666     | 0,878787879     |
| AP1S2                                                                                           | 0,001049728 | 0,025905038 | 0,448 | 0,585 | 1         | 1,018118183   | 0,982204244     | 0,765811966     |
| AC007364.1                                                                                      | 0,32427814  | 0,025839127 | 0,013 | 0,019 | 1         | 1,01807167    | 0,982249118     | 0,684210526     |
| NCDN                                                                                            | 0,408661741 | 0,025779122 | 0,022 | 0,016 | 1         | 1,018029326   | 0,982289974     | 1,375           |
| ETS2                                                                                            | 0,944903939 | 0,025751039 | 0,083 | 0,083 | 1         | 1,01800951    | 0,982309094     | 1               |
| AIFM2                                                                                           | 0,265633815 | 0,025723104 | 0,041 | 0,03  | 1         | 1,017989799   | 0,982328115     | 1,366666667     |
| BRF2                                                                                            | 0,161575348 | 0,025690468 | 0,023 | 0,014 | 1         | 1,01796677    | 0,982350337     | 1,642857143     |
| TLCD3A                                                                                          | 0,01140758  | 0,025646572 | 0,04  | 0,018 | 1         | 1,017935798   | 0,982380227     | 2,222222222     |
| C3orf62                                                                                         | 0,699826662 | 0,025634002 | 0,017 | 0,015 | 1         | 1,017926929   | 0,982388786     | 1,133333333     |
| H4-16                                                                                           | 0,245997463 | 0,025611722 | 0,015 | 0,023 | 1         | 1,017911209   | 0,982403958     | 0,652173913     |
| PRMT9                                                                                           | 0,389335061 | 0,025588792 | 0,028 | 0,035 | 1         | 1,01789503    | 0,982419572     | 0,8             |
| AQR                                                                                             | 0,654584495 | 0,025565419 | 0,056 | 0,05  | 1         | 1,01787854    | 0,982435488     | 1,12            |



Supplementary Table 5

| Differentially expressed genes_total calculation_ comparing SC-Keloid vs. (SC-Myel, SC-Nonmyel) |             |             |       |       |           |               |                 |                 |
|-------------------------------------------------------------------------------------------------|-------------|-------------|-------|-------|-----------|---------------|-----------------|-----------------|
| gene                                                                                            | p_val       | avg_log2FC  | pct.1 | pct.2 | p_val_adj | Foldchange_UP | Foldchange_DOWN | Ratio_pct1_pct2 |
| OGG1                                                                                            | 0,562586007 | 0,02550398  | 0,054 | 0,046 | 1         | 1,017835193   | 0,982477327     | 1,173913043     |
| SORT1                                                                                           | 0,031524026 | 0,025474667 | 0,112 | 0,147 | 1         | 1,017814513   | 0,98249729      | 0,761904762     |
| YDJC                                                                                            | 0,056841918 | 0,025457338 | 0,026 | 0,012 | 1         | 1,017802287   | 0,982509091     | 2,166666667     |
| HEMK1                                                                                           | 0,536666833 | 0,025399508 | 0,022 | 0,018 | 1         | 1,017761489   | 0,982548476     | 1,222222222     |
| MOB1A                                                                                           | 0,04684653  | 0,025374294 | 0,18  | 0,216 | 1         | 1,017743702   | 0,982565648     | 0,833333333     |
| PI4K2B                                                                                          | 0,757394676 | 0,025370136 | 0,02  | 0,018 | 1         | 1,017740769   | 0,98256848      | 1,111111111     |
| DYNC1I1                                                                                         | 0,317324567 | 0,025221122 | 0,012 | 0,007 | 1         | 1,017635653   | 0,982669973     | 1,714285714     |
| VIRMA                                                                                           | 0,888292459 | 0,025206329 | 0,051 | 0,049 | 1         | 1,017625219   | 0,982680049     | 1,040816327     |
| DIP2A                                                                                           | 0,554026064 | 0,02514912  | 0,107 | 0,114 | 1         | 1,017584867   | 0,982719017     | 0,938596491     |
| THAP4                                                                                           | 0,494135844 | 0,02511214  | 0,059 | 0,05  | 1         | 1,017558783   | 0,982744207     | 1,18            |
| TCTA                                                                                            | 0,297507844 | 0,025109846 | 0,059 | 0,046 | 1         | 1,017557165   | 0,98274577      | 1,282608696     |
| CLOCK                                                                                           | 0,723302159 | 0,025022961 | 0,077 | 0,08  | 1         | 1,017495885   | 0,982804957     | 0,9625          |
| U2AF2                                                                                           | 0,017776802 | 0,024951047 | 0,106 | 0,142 | 1         | 1,017445168   | 0,982853948     | 0,746478873     |
| ZSCAN21                                                                                         | 0,183197988 | 0,024899917 | 0,021 | 0,012 | 1         | 1,01740911    | 0,982888781     | 1,75            |
| ZCWPW1                                                                                          | 0,327724091 | 0,024871258 | 0,019 | 0,026 | 1         | 1,017388899   | 0,982908307     | 0,730769231     |
| SUPT3H                                                                                          | 0,746587737 | 0,024813135 | 0,049 | 0,052 | 1         | 1,017347912   | 0,982947906     | 0,942307692     |
| C1QTNF6                                                                                         | 0,035417557 | 0,024807573 | 0,041 | 0,022 | 1         | 1,017343989   | 0,982951696     | 1,863636364     |
| ANO1                                                                                            | 0,504378447 | 0,024805853 | 0,016 | 0,012 | 1         | 1,017342777   | 0,982952868     | 1,333333333     |
| TMEM138                                                                                         | 0,144907973 | 0,02473667  | 0,033 | 0,02  | 1         | 1,017293992   | 0,983000006     | 1,65            |
| MIS18A                                                                                          | 0,96251856  | 0,024714067 | 0,035 | 0,035 | 1         | 1,017278054   | 0,983015406     | 1               |
| SLC33A1                                                                                         | 0,781591185 | 0,024609805 | 0,073 | 0,076 | 1         | 1,017204539   | 0,983086451     | 0,960526316     |
| PCYOX1                                                                                          | 0,97561264  | 0,024604098 | 0,099 | 0,098 | 1         | 1,017200516   | 0,983090339     | 1,010204082     |
| CYFIP2                                                                                          | 0,744129381 | 0,024562033 | 0,034 | 0,037 | 1         | 1,017170857   | 0,983119005     | 0,918918919     |
| ZEB1                                                                                            | 0,753233702 | 0,024536955 | 0,111 | 0,113 | 1         | 1,017153176   | 0,983136093     | 0,982300885     |
| LRFN3                                                                                           | 0,542289947 | 0,024492165 | 0,017 | 0,014 | 1         | 1,017121598   | 0,983166617     | 1,214285714     |
| CIAO3                                                                                           | 0,722771819 | 0,024485936 | 0,034 | 0,037 | 1         | 1,017117206   | 0,983170861     | 0,918918919     |
| RNF135                                                                                          | 0,236330587 | 0,024464833 | 0,043 | 0,031 | 1         | 1,017102329   | 0,983185243     | 1,387096774     |
| TBC1D4                                                                                          | 0,9184852   | 0,024411766 | 0,013 | 0,012 | 1         | 1,017064917   | 0,983221408     | 1,083333333     |
| MINDY3                                                                                          | 0,429885476 | 0,024367303 | 0,047 | 0,038 | 1         | 1,017033572   | 0,983251711     | 1,236842105     |
| BCAP31                                                                                          | 0,2419901   | 0,024299314 | 0,184 | 0,201 | 1         | 1,016985644   | 0,983298049     | 0,915422886     |

Supplementary Table 5

| Differentially expressed genes_total calculation_ comparing SC-Keloid vs. (SC-Myel, SC-Nonmyel) |             |             |       |       |           |               |                 |                 |
|-------------------------------------------------------------------------------------------------|-------------|-------------|-------|-------|-----------|---------------|-----------------|-----------------|
| gene                                                                                            | p_val       | avg_log2FC  | pct.1 | pct.2 | p_val_adj | Foldchange_UP | Foldchange_DOWN | Ratio_pct1_pct2 |
| TLR3                                                                                            | 0,186023667 | 0,02423295  | 0,012 | 0,005 | 1         | 1,016938864   | 0,983343282     | 2,4             |
| C5orf34                                                                                         | 0,016470291 | 0,024174214 | 0,014 | 0,003 | 1         | 1,016897462   | 0,983383317     | 4,666666667     |
| TANC2                                                                                           | 0,068076916 | 0,024099004 | 0,108 | 0,137 | 1         | 1,016844451   | 0,983434584     | 0,788321168     |
| PLXNA1                                                                                          | 0,94209634  | 0,024077286 | 0,027 | 0,027 | 1         | 1,016829144   | 0,983449389     | 1               |
| MAP3K10                                                                                         | 0,591136072 | 0,024036589 | 0,029 | 0,024 | 1         | 1,01680046    | 0,983477131     | 1,208333333     |
| IPO4                                                                                            | 0,022784255 | 0,023947875 | 0,035 | 0,016 | 1         | 1,016737937   | 0,983537609     | 2,1875          |
| GPRASP2                                                                                         | 0,021555704 | 0,023937806 | 0,01  | 0,001 | 1         | 1,016730842   | 0,983544473     | 10              |
| KIRREL1                                                                                         | 0,252507204 | 0,023924855 | 0,101 | 0,117 | 1         | 1,016721714   | 0,983553303     | 0,863247863     |
| ENDOD1                                                                                          | 0,039474775 | 0,023799984 | 0,21  | 0,247 | 1         | 1,016633717   | 0,983638437     | 0,850202429     |
| PLEKHA8                                                                                         | 0,202007502 | 0,02373985  | 0,033 | 0,045 | 1         | 1,016591343   | 0,983679437     | 0,733333333     |
| RITA1                                                                                           | 0,003295904 | 0,023721038 | 0,021 | 0,004 | 1         | 1,016578087   | 0,983692264     | 5,25            |
| MACROD1                                                                                         | 0,051361521 | 0,023700752 | 0,057 | 0,035 | 1         | 1,016563793   | 0,983706096     | 1,628571429     |
| HMGCL                                                                                           | 0,867709318 | 0,023660622 | 0,057 | 0,054 | 1         | 1,016535516   | 0,983733459     | 1,055555556     |
| PLEKHS1                                                                                         | 0,094844049 | 0,023649007 | 0,012 | 0,004 | 1         | 1,016527333   | 0,983741379     | 3               |
| CYP4V2                                                                                          | 0,078443363 | 0,023646224 | 0,041 | 0,024 | 1         | 1,016525371   | 0,983743277     | 1,708333333     |
| CBX8                                                                                            | 0,884211103 | 0,023568624 | 0,012 | 0,011 | 1         | 1,016470696   | 0,983796192     | 1,090909091     |
| RINT1                                                                                           | 0,762773745 | 0,023537725 | 0,026 | 0,023 | 1         | 1,016448926   | 0,983817263     | 1,130434783     |
| CACNG4                                                                                          | 0,021374938 | 0,023423099 | 0,01  | 0,001 | 1         | 1,01636817    | 0,983895433     | 10              |
| PPP2R2D                                                                                         | 0,038353102 | 0,023388596 | 0,081 | 0,111 | 1         | 1,016343863   | 0,983918964     | 0,72972973      |
| PRMT3                                                                                           | 0,483078997 | 0,023387327 | 0,026 | 0,031 | 1         | 1,016342968   | 0,983919829     | 0,838709677     |
| SMYD4                                                                                           | 0,519001759 | 0,023318302 | 0,021 | 0,026 | 1         | 1,016294344   | 0,983966905     | 0,807692308     |
| APOL6                                                                                           | 0,583817948 | 0,02330507  | 0,051 | 0,057 | 1         | 1,016285022   | 0,98397593      | 0,894736842     |
| DIAPH2                                                                                          | 0,497652267 | 0,023303935 | 0,024 | 0,03  | 1         | 1,016284223   | 0,983976704     | 0,8             |
| STK36                                                                                           | 0,488750488 | 0,023287248 | 0,012 | 0,008 | 1         | 1,016272468   | 0,983988086     | 1,5             |
| TTC27                                                                                           | 0,239181862 | 0,023283349 | 0,02  | 0,012 | 1         | 1,016269721   | 0,983990745     | 1,666666667     |
| IFT74                                                                                           | 0,451646773 | 0,023256492 | 0,048 | 0,056 | 1         | 1,016250803   | 0,984009062     | 0,857142857     |
| SHQ1                                                                                            | 0,826662679 | 0,023235654 | 0,016 | 0,018 | 1         | 1,016236124   | 0,984023276     | 0,888888889     |
| SLC17A5                                                                                         | 0,440174306 | 0,023231492 | 0,028 | 0,022 | 1         | 1,016233193   | 0,984026114     | 1,272727273     |
| NBR1                                                                                            | 0,701671216 | 0,023216414 | 0,094 | 0,098 | 1         | 1,016222572   | 0,984036399     | 0,959183673     |
| C9orf116                                                                                        | 0,130115717 | 0,023208049 | 0,013 | 0,005 | 1         | 1,01621668    | 0,984042104     | 2,6             |

Supplementary Table 5

| Differentially expressed genes_total calculation_ comparing SC-Keloid vs. (SC-Myel, SC-Nonmyel) |             |             |       |       |           |               |                 |                 |
|-------------------------------------------------------------------------------------------------|-------------|-------------|-------|-------|-----------|---------------|-----------------|-----------------|
| gene                                                                                            | p_val       | avg_log2FC  | pct.1 | pct.2 | p_val_adj | Foldchange_UP | Foldchange_DOWN | Ratio_pct1_pct2 |
| ZRANB2                                                                                          | 0,00913067  | 0,023136739 | 0,196 | 0,248 | 1         | 1,016166451   | 0,984090746     | 0,790322581     |
| CPOX                                                                                            | 0,895486063 | 0,023127876 | 0,026 | 0,024 | 1         | 1,016160209   | 0,984096791     | 1,083333333     |
| SETMAR                                                                                          | 0,542961498 | 0,023081398 | 0,017 | 0,014 | 1         | 1,016127472   | 0,984128495     | 1,214285714     |
| ZNF589                                                                                          | 0,419001932 | 0,023038036 | 0,008 | 0,012 | 1         | 1,016096932   | 0,984158075     | 0,666666667     |
| ACVR1                                                                                           | 0,909664092 | 0,023032829 | 0,045 | 0,046 | 1         | 1,016093264   | 0,984161627     | 0,97826087      |
| GLRB                                                                                            | 0,027434616 | 0,022969212 | 0,02  | 0,007 | 1         | 1,01604846    | 0,984205025     | 2,857142857     |
| DLG5                                                                                            | 0,564444379 | 0,022969062 | 0,042 | 0,047 | 1         | 1,016048354   | 0,984205128     | 0,893617021     |
| MARK4                                                                                           | 0,685858581 | 0,022944425 | 0,038 | 0,042 | 1         | 1,016031003   | 0,984221935     | 0,904761905     |
| ATXN7L3                                                                                         | 0,987672924 | 0,022835617 | 0,045 | 0,045 | 1         | 1,015954377   | 0,984296168     | 1               |
| DCAKD                                                                                           | 0,88809167  | 0,022767207 | 0,03  | 0,031 | 1         | 1,015906203   | 0,984342843     | 0,967741935     |
| SLC9A5                                                                                          | 0,018206517 | 0,022740927 | 0,016 | 0,004 | 1         | 1,015887698   | 0,984360773     | 4               |
| PIK3CD                                                                                          | 0,321125095 | 0,022724089 | 0,012 | 0,007 | 1         | 1,015875841   | 0,984372262     | 1,714285714     |
| URGCP                                                                                           | 0,04072839  | 0,022665703 | 0,029 | 0,049 | 1         | 1,01583473    | 0,984412101     | 0,591836735     |
| TMEM106C                                                                                        | 0,57982732  | 0,022651256 | 0,105 | 0,094 | 1         | 1,015824557   | 0,984421959     | 1,117021277     |
| PAR6A                                                                                           | 0,152575093 | 0,02260214  | 0,037 | 0,024 | 1         | 1,015789974   | 0,984455473     | 1,541666667     |
| TRIM52                                                                                          | 0,566679149 | 0,022569417 | 0,028 | 0,033 | 1         | 1,015766935   | 0,984477803     | 0,848484848     |
| MYLK-AS1                                                                                        | 0,485584714 | 0,022565701 | 0,012 | 0,008 | 1         | 1,015764318   | 0,984480339     | 1,5             |
| SPNS2                                                                                           | 0,395527011 | 0,022542083 | 0,017 | 0,012 | 1         | 1,01574769    | 0,984496455     | 1,416666667     |
| PWWP2A                                                                                          | 0,286812481 | 0,022387308 | 0,102 | 0,117 | 1         | 1,015638724   | 0,98460208      | 0,871794872     |
| DDX60                                                                                           | 0,849662431 | 0,022321114 | 0,023 | 0,022 | 1         | 1,015592125   | 0,984647257     | 1,045454545     |
| TEDC1                                                                                           | 0,09870786  | 0,022253406 | 0,05  | 0,033 | 1         | 1,015544463   | 0,984693469     | 1,515151515     |
| TMEM238                                                                                         | 0,886092371 | 0,022247629 | 0,012 | 0,011 | 1         | 1,015540397   | 0,984697412     | 1,090909091     |
| RABL2A                                                                                          | 0,428969593 | 0,022236434 | 0,015 | 0,02  | 1         | 1,015532516   | 0,984705053     | 0,75            |
| TCEAL9                                                                                          | 0,075346956 | 0,022213835 | 0,355 | 0,41  | 1         | 1,015516609   | 0,984720478     | 0,865853659     |
| RAB6A                                                                                           | 0,106013192 | 0,022208716 | 0,212 | 0,237 | 1         | 1,015513006   | 0,984723971     | 0,894514768     |
| MRPL48                                                                                          | 0,636987788 | 0,022153327 | 0,061 | 0,065 | 1         | 1,015474018   | 0,984761778     | 0,938461538     |
| CKAP5                                                                                           | 0,272813411 | 0,02214036  | 0,083 | 0,066 | 1         | 1,015464891   | 0,98477063      | 1,257575758     |
| MRPL45                                                                                          | 0,049857784 | 0,022094903 | 0,061 | 0,038 | 1         | 1,015432895   | 0,984801659     | 1,605263158     |
| HAS2-AS1                                                                                        | 0,564066982 | 0,022056166 | 0,012 | 0,015 | 1         | 1,015405631   | 0,984828101     | 0,8             |
| RTN2                                                                                            | 0,049467605 | 0,022045175 | 0,022 | 0,009 | 1         | 1,015397895   | 0,984835605     | 2,444444444     |

Supplementary Table 5

| Differentially expressed genes_total calculation_ comparing SC-Keloid vs. (SC-Myel, SC-Nonmyel) |             |             |       |       |             |               |                 |                 |
|-------------------------------------------------------------------------------------------------|-------------|-------------|-------|-------|-------------|---------------|-----------------|-----------------|
| gene                                                                                            | p_val       | avg_log2FC  | pct.1 | pct.2 | p_val_adj   | Foldchange_UP | Foldchange_DOWN | Ratio_pct1_pct2 |
| ITGA11                                                                                          | 0,082405512 | 0,022024942 | 0,016 | 0,007 | 1           | 1,015383655   | 0,984849416     | 2,285714286     |
| SLC35D1                                                                                         | 0,76092022  | 0,021980079 | 0,02  | 0,018 | 1           | 1,01535208    | 0,984880042     | 1,111111111     |
| AHCY                                                                                            | 0,193986078 | 0,021973736 | 0,111 | 0,087 | 1           | 1,015347616   | 0,984884373     | 1,275862069     |
| BTBD19                                                                                          | 0,132144353 | 0,021950257 | 0,019 | 0,009 | 1           | 1,015331092   | 0,984900401     | 2,111111111     |
| TBC1D9                                                                                          | 0,563694126 | 0,021860478 | 0,012 | 0,015 | 1           | 1,01526791    | 0,984961693     | 0,8             |
| ADPRH                                                                                           | 0,08925642  | 0,02180674  | 0,014 | 0,005 | 1           | 1,015230094   | 0,984998382     | 2,8             |
| ZNF347                                                                                          | 0,253236362 | 0,021798413 | 0,023 | 0,033 | 1           | 1,015224234   | 0,985004067     | 0,696969697     |
| CRLF3                                                                                           | 0,15724539  | 0,021783041 | 0,01  | 0,019 | 1           | 1,015213417   | 0,985014563     | 0,526315789     |
| ANKRD13C                                                                                        | 0,663655475 | 0,021773883 | 0,071 | 0,064 | 1           | 1,015206973   | 0,985020815     | 1,109375        |
| ACOX3                                                                                           | 0,026171315 | 0,021741334 | 0,022 | 0,008 | 1           | 1,015184069   | 0,985043039     | 2,75            |
| TRAPPC3                                                                                         | 0,425041783 | 0,02174059  | 0,113 | 0,123 | 1           | 1,015183545   | 0,985043547     | 0,918699187     |
| CDK20                                                                                           | 0,239975997 | 0,02173835  | 0,02  | 0,012 | 1           | 1,015181969   | 0,985045077     | 1,666666667     |
| MRPL39                                                                                          | 0,971266722 | 0,021725788 | 0,048 | 0,047 | 1           | 1,01517313    | 0,985053653     | 1,021276596     |
| DTWD2                                                                                           | 0,433461696 | 0,021666798 | 0,019 | 0,014 | 1           | 1,015131621   | 0,985093932     | 1,357142857     |
| DCAF4                                                                                           | 0,315284259 | 0,021644611 | 0,015 | 0,009 | 1           | 1,01511601    | 0,985109082     | 1,666666667     |
| KDM2B                                                                                           | 0,982226786 | 0,021586995 | 0,03  | 0,03  | 1           | 1,01507547    | 0,985148424     | 1               |
| CPXM1                                                                                           | 0,218998341 | 0,021571465 | 0,034 | 0,023 | 1           | 1,015064543   | 0,985159029     | 1,47826087      |
| SLC35F5                                                                                         | 0,677808753 | 0,02155569  | 0,04  | 0,043 | 1           | 1,015053445   | 0,985169801     | 0,930232558     |
| ZNF385D                                                                                         | 0,576721194 | 0,02154352  | 0,009 | 0,012 | 1           | 1,015044882   | 0,985178111     | 0,75            |
| ATP13A1                                                                                         | 0,197179767 | 0,021531493 | 0,044 | 0,031 | 1           | 1,01503642    | 0,985186324     | 1,419354839     |
| DDX56                                                                                           | 0,595382251 | 0,02147624  | 0,058 | 0,064 | 1           | 1,014997546   | 0,985224057     | 0,90625         |
| TMUB2                                                                                           | 0,944445803 | 0,021473123 | 0,054 | 0,052 | 1           | 1,014995353   | 0,985226185     | 1,038461538     |
| ARGLU1                                                                                          | 1,21205E-07 | 0,02144465  | 0,331 | 0,482 | 0,002557548 | 1,014975322   | 0,985245629     | 0,686721992     |
| IKZF2                                                                                           | 0,486770577 | 0,021437544 | 0,012 | 0,008 | 1           | 1,014970323   | 0,985250482     | 1,5             |
| GGA1                                                                                            | 0,873724688 | 0,021405205 | 0,07  | 0,071 | 1           | 1,014947572   | 0,985272568     | 0,985915493     |
| ABRAXAS2                                                                                        | 0,345900111 | 0,02133858  | 0,033 | 0,024 | 1           | 1,014900701   | 0,98531807      | 1,375           |
| CLDN1                                                                                           | 0,688817798 | 0,021332403 | 0,015 | 0,018 | 1           | 1,014896356   | 0,985322288     | 0,833333333     |
| CHD4                                                                                            | 0,066649324 | 0,021305283 | 0,254 | 0,294 | 1           | 1,014877278   | 0,985340811     | 0,863945578     |
| NECAP1                                                                                          | 0,463412375 | 0,021297588 | 0,057 | 0,065 | 1           | 1,014871865   | 0,985346067     | 0,876923077     |
| H4C8                                                                                            | 0,734204444 | 0,021237858 | 0,012 | 0,014 | 1           | 1,014829848   | 0,985386862     | 0,857142857     |

Supplementary Table 5

| Differentially expressed genes_total calculation_ comparing SC-Keloid vs. (SC-Myel, SC-Nonmyel) |             |             |       |       |           |               |                 |                 |
|-------------------------------------------------------------------------------------------------|-------------|-------------|-------|-------|-----------|---------------|-----------------|-----------------|
| gene                                                                                            | p_val       | avg_log2FC  | pct.1 | pct.2 | p_val_adj | Foldchange_UP | Foldchange_DOWN | Ratio_pct1_pct2 |
| ZNF451                                                                                          | 0,074582836 | 0,021227362 | 0,088 | 0,113 | 1         | 1,014822465   | 0,985394031     | 0,778761062     |
| USP11                                                                                           | 0,028013416 | 0,021205921 | 0,153 | 0,189 | 1         | 1,014807383   | 0,985408676     | 0,80952381      |
| EPN1                                                                                            | 0,56204549  | 0,02116627  | 0,12  | 0,106 | 1         | 1,014779493   | 0,985435759     | 1,132075472     |
| CDIN1                                                                                           | 0,273743966 | 0,021077035 | 0,014 | 0,008 | 1         | 1,014716728   | 0,985496713     | 1,75            |
| MTMR14                                                                                          | 0,086333747 | 0,020968419 | 0,049 | 0,031 | 1         | 1,014640336   | 0,985570911     | 1,580645161     |
| IDH1                                                                                            | 0,153313808 | 0,020923816 | 0,065 | 0,047 | 1         | 1,014608967   | 0,985601382     | 1,382978723     |
| PKNOX1                                                                                          | 0,414403632 | 0,020921909 | 0,038 | 0,046 | 1         | 1,014607626   | 0,985602685     | 0,826086957     |
| CKAP4                                                                                           | 0,270647157 | 0,020910498 | 0,094 | 0,11  | 1         | 1,014599601   | 0,98561048      | 0,854545455     |
| PDE4A                                                                                           | 0,321861038 | 0,02090433  | 0,041 | 0,031 | 1         | 1,014595263   | 0,985614695     | 1,322580645     |
| RABL2B                                                                                          | 0,565956662 | 0,020904085 | 0,03  | 0,035 | 1         | 1,014595091   | 0,985614862     | 0,857142857     |
| ANKS6                                                                                           | 0,54430584  | 0,020879125 | 0,017 | 0,014 | 1         | 1,014577537   | 0,985631914     | 1,214285714     |
| KIAA0513                                                                                        | 0,414654321 | 0,020876259 | 0,008 | 0,012 | 1         | 1,014575522   | 0,985633872     | 0,666666667     |
| IL1R1                                                                                           | 0,055417381 | 0,020854415 | 0,012 | 0,024 | 1         | 1,01456016    | 0,985648796     | 0,5             |
| SLC5A6                                                                                          | 0,665139005 | 0,020846224 | 0,016 | 0,014 | 1         | 1,0145544     | 0,985654392     | 1,142857143     |
| XPO4                                                                                            | 0,398521141 | 0,020813781 | 0,024 | 0,031 | 1         | 1,014531585   | 0,985676557     | 0,774193548     |
| ZNF529                                                                                          | 0,155209615 | 0,020801544 | 0,028 | 0,041 | 1         | 1,01452298    | 0,985684918     | 0,682926829     |
| C19orf54                                                                                        | 0,766074761 | 0,020777582 | 0,014 | 0,012 | 1         | 1,014506129   | 0,98570129      | 1,166666667     |
| KLHL13                                                                                          | 0,674242901 | 0,020743764 | 0,022 | 0,019 | 1         | 1,014482349   | 0,985724395     | 1,157894737     |
| ZNF45                                                                                           | 0,166135477 | 0,020724504 | 0,014 | 0,007 | 1         | 1,014468806   | 0,985737555     | 2               |
| GPATCH3                                                                                         | 0,768693819 | 0,0207078   | 0,02  | 0,018 | 1         | 1,01445706    | 0,985748968     | 1,111111111     |
| USP31                                                                                           | 0,471148832 | 0,020704569 | 0,024 | 0,019 | 1         | 1,014454788   | 0,985751175     | 1,263157895     |
| DDI2                                                                                            | 0,964592414 | 0,020692135 | 0,036 | 0,035 | 1         | 1,014446045   | 0,985759672     | 1,028571429     |
| NARS2                                                                                           | 0,248489469 | 0,020680864 | 0,019 | 0,027 | 1         | 1,01443812    | 0,985767373     | 0,703703704     |
| ERMAP                                                                                           | 0,666345763 | 0,02043373  | 0,017 | 0,02  | 1         | 1,014264361   | 0,985936249     | 0,85            |
| PLA2R1                                                                                          | 0,276100739 | 0,020339774 | 0,014 | 0,008 | 1         | 1,014198309   | 0,986000461     | 1,75            |
| RNF157                                                                                          | 0,504615749 | 0,020305063 | 0,026 | 0,02  | 1         | 1,014173908   | 0,986024184     | 1,3             |
| ZFYVE9                                                                                          | 0,740334333 | 0,02022742  | 0,037 | 0,034 | 1         | 1,014119328   | 0,986077252     | 1,088235294     |
| ANKRD16                                                                                         | 0,116232214 | 0,020182239 | 0,021 | 0,011 | 1         | 1,01408757    | 0,986108133     | 1,909090909     |
| PRIM1                                                                                           | 0,431713535 | 0,020169117 | 0,014 | 0,019 | 1         | 1,014078346   | 0,986117102     | 0,736842105     |
| NATD1                                                                                           | 0,372334874 | 0,020149334 | 0,013 | 0,008 | 1         | 1,01406444    | 0,986130625     | 1,625           |

Supplementary Table 5

| Differentially expressed genes_total calculation_ comparing SC-Keloid vs. (SC-Myel, SC-Nonmyel) |             |             |       |       |           |               |                 |                 |
|-------------------------------------------------------------------------------------------------|-------------|-------------|-------|-------|-----------|---------------|-----------------|-----------------|
| gene                                                                                            | p_val       | avg_log2FC  | pct.1 | pct.2 | p_val_adj | Foldchange_UP | Foldchange_DOWN | Ratio_pct1_pct2 |
| ATF6B                                                                                           | 0,973839197 | 0,020116901 | 0,093 | 0,091 | 1         | 1,014041644   | 0,986152793     | 1,021978022     |
| CWC27                                                                                           | 0,946909262 | 0,020108241 | 0,073 | 0,071 | 1         | 1,014035557   | 0,986158713     | 1,028169014     |
| DDX42                                                                                           | 0,126506182 | 0,020100315 | 0,122 | 0,144 | 1         | 1,014029986   | 0,986164131     | 0,847222222     |
| VAX2                                                                                            | 0,025826735 | 0,020012034 | 0,013 | 0,003 | 1         | 1,013967938   | 0,986224478     | 4,333333333     |
| SLC31A1                                                                                         | 0,320205018 | 0,019999716 | 0,04  | 0,03  | 1         | 1,01395928    | 0,986232898     | 1,333333333     |
| ZNF682                                                                                          | 0,369060043 | 0,019945226 | 0,013 | 0,008 | 1         | 1,013920984   | 0,986270149     | 1,625           |
| ADRM1                                                                                           | 0,195169483 | 0,019890065 | 0,18  | 0,202 | 1         | 1,013882218   | 0,98630786      | 0,891089109     |
| CABLES1                                                                                         | 0,714754337 | 0,019839704 | 0,013 | 0,015 | 1         | 1,013846826   | 0,98634229      | 0,866666667     |
| ARV1                                                                                            | 0,18215939  | 0,019800073 | 0,043 | 0,03  | 1         | 1,013818976   | 0,986369385     | 1,433333333     |
| VANGL1                                                                                          | 0,029927197 | 0,019790473 | 0,028 | 0,012 | 1         | 1,01381223    | 0,986375949     | 2,333333333     |
| P2RY1                                                                                           | 0,496963287 | 0,01976302  | 0,051 | 0,058 | 1         | 1,013792939   | 0,986394718     | 0,879310345     |
| ATG4C                                                                                           | 0,730557194 | 0,019731703 | 0,024 | 0,022 | 1         | 1,013770932   | 0,986416131     | 1,090909091     |
| ZNF180                                                                                          | 0,281528611 | 0,019718336 | 0,007 | 0,012 | 1         | 1,013761539   | 0,98642527      | 0,583333333     |
| ASPHD2                                                                                          | 0,062736617 | 0,019717674 | 0,013 | 0,004 | 1         | 1,013761074   | 0,986425723     | 3,25            |
| ARHGEF19                                                                                        | 0,801934928 | 0,019694147 | 0,027 | 0,024 | 1         | 1,013744542   | 0,986441809     | 1,125           |
| A1BG-AS1                                                                                        | 0,663637743 | 0,019638126 | 0,016 | 0,014 | 1         | 1,013705178   | 0,986480114     | 1,142857143     |
| SNAPC4                                                                                          | 0,459516576 | 0,019637646 | 0,015 | 0,011 | 1         | 1,013704841   | 0,986480442     | 1,363636364     |
| SPOP                                                                                            | 0,268463492 | 0,019627895 | 0,115 | 0,13  | 1         | 1,013697989   | 0,98648711      | 0,884615385     |
| RAD51AP1                                                                                        | 0,131063456 | 0,019591377 | 0,019 | 0,009 | 1         | 1,013672331   | 0,986512081     | 2,111111111     |
| RBFOX2                                                                                          | 0,42378773  | 0,019565396 | 0,113 | 0,122 | 1         | 1,013654076   | 0,986529846     | 0,926229508     |
| GPATCH2L                                                                                        | 0,287884303 | 0,019550227 | 0,092 | 0,106 | 1         | 1,013643418   | 0,986540219     | 0,867924528     |
| MTMR10                                                                                          | 0,099532454 | 0,019493294 | 0,037 | 0,054 | 1         | 1,013603418   | 0,986579151     | 0,685185185     |
| ORMDL3                                                                                          | 0,09671808  | 0,019474405 | 0,061 | 0,041 | 1         | 1,013590147   | 0,986592069     | 1,487804878     |
| LRRK1                                                                                           | 0,676301311 | 0,019413579 | 0,016 | 0,019 | 1         | 1,013547413   | 0,986633666     | 0,842105263     |
| RBM26                                                                                           | 0,522835625 | 0,019393592 | 0,121 | 0,129 | 1         | 1,013533372   | 0,986647335     | 0,937984496     |
| POLR2C                                                                                          | 0,497386105 | 0,019392401 | 0,101 | 0,109 | 1         | 1,013532535   | 0,98664815      | 0,926605505     |
| DDX55                                                                                           | 0,918736249 | 0,019384559 | 0,047 | 0,045 | 1         | 1,013527026   | 0,986653513     | 1,044444444     |
| YIPF1                                                                                           | 0,099286275 | 0,019347719 | 0,036 | 0,022 | 1         | 1,013501145   | 0,986678707     | 1,636363636     |
| NT5C2                                                                                           | 0,998847829 | 0,019317602 | 0,031 | 0,031 | 1         | 1,013479988   | 0,986699305     | 1               |
| ARSA                                                                                            | 0,793003542 | 0,019303032 | 0,064 | 0,06  | 1         | 1,013469753   | 0,98670927      | 1,066666667     |

Supplementary Table 5

| Differentially expressed genes_total calculation_ comparing SC-Keloid vs. (SC-Myel, SC-Nonmyel) |             |             |       |       |           |               |                 |                 |
|-------------------------------------------------------------------------------------------------|-------------|-------------|-------|-------|-----------|---------------|-----------------|-----------------|
| gene                                                                                            | p_val       | avg_log2FC  | pct.1 | pct.2 | p_val_adj | Foldchange_UP | Foldchange_DOWN | Ratio_pct1_pct2 |
| MORC2                                                                                           | 0,918323265 | 0,019301847 | 0,027 | 0,026 | 1         | 1,01346892    | 0,986710081     | 1,038461538     |
| BCAS4                                                                                           | 0,008389415 | 0,019271883 | 0,028 | 0,009 | 1         | 1,013447872   | 0,986730574     | 3,111111111     |
| COG5                                                                                            | 0,216679395 | 0,019239846 | 0,048 | 0,061 | 1         | 1,013425366   | 0,986752486     | 0,786885246     |
| CEP83                                                                                           | 0,883314325 | 0,019235547 | 0,038 | 0,039 | 1         | 1,013422347   | 0,986755426     | 0,974358974     |
| SYTL2                                                                                           | 0,026275799 | 0,019234439 | 0,102 | 0,068 | 1         | 1,013421568   | 0,986756185     | 1,5             |
| EMC1                                                                                            | 0,575173513 | 0,01914143  | 0,065 | 0,057 | 1         | 1,013356237   | 0,986819801     | 1,140350877     |
| ST20-AS1                                                                                        | 0,062511264 | 0,019049843 | 0,01  | 0,003 | 1         | 1,013291907   | 0,98688245      | 3,333333333     |
| PARP4                                                                                           | 0,821465039 | 0,019027858 | 0,055 | 0,052 | 1         | 1,013276466   | 0,986897489     | 1,057692308     |
| EXOC6B                                                                                          | 0,045046797 | 0,01899456  | 0,022 | 0,039 | 1         | 1,013253079   | 0,986920268     | 0,564102564     |
| HDAC6                                                                                           | 0,731979559 | 0,018932273 | 0,044 | 0,047 | 1         | 1,013209334   | 0,986962877     | 0,936170213     |
| MAP3K7                                                                                          | 0,860339055 | 0,018897646 | 0,068 | 0,064 | 1         | 1,013185016   | 0,986986566     | 1,0625          |
| UHRF2                                                                                           | 0,499347163 | 0,018867795 | 0,083 | 0,091 | 1         | 1,013164052   | 0,987006989     | 0,912087912     |
| EEF2K                                                                                           | 0,397449055 | 0,018864754 | 0,024 | 0,031 | 1         | 1,013161916   | 0,987009069     | 0,774193548     |
| ABCD1                                                                                           | 0,470019012 | 0,018813688 | 0,02  | 0,015 | 1         | 1,013126055   | 0,987044006     | 1,333333333     |
| AGO1                                                                                            | 0,627860507 | 0,018761887 | 0,055 | 0,06  | 1         | 1,013089679   | 0,987079447     | 0,916666667     |
| SLC10A7                                                                                         | 0,888834394 | 0,018740415 | 0,022 | 0,023 | 1         | 1,013074601   | 0,987094138     | 0,956521739     |
| RTL8C                                                                                           | 0,112809259 | 0,018728015 | 0,186 | 0,213 | 1         | 1,013065893   | 0,987102623     | 0,873239437     |
| PIGL                                                                                            | 0,84104102  | 0,018721065 | 0,023 | 0,022 | 1         | 1,013061013   | 0,987107378     | 1,045454545     |
| PLD3                                                                                            | 0,283338887 | 0,018713961 | 0,185 | 0,201 | 1         | 1,013056024   | 0,987112239     | 0,92039801      |
| SUCLG2                                                                                          | 0,212283116 | 0,018705888 | 0,123 | 0,141 | 1         | 1,013050356   | 0,987117762     | 0,872340426     |
| CYB5R4                                                                                          | 0,25694717  | 0,018680116 | 0,044 | 0,033 | 1         | 1,013032259   | 0,987135396     | 1,333333333     |
| SLC16A2                                                                                         | 0,529124325 | 0,01854724  | 0,027 | 0,022 | 1         | 1,01293896    | 0,987226318     | 1,227272727     |
| NR2F6                                                                                           | 0,17564827  | 0,018492705 | 0,104 | 0,08  | 1         | 1,012900671   | 0,987263637     | 1,3             |
| TET3                                                                                            | 0,913339583 | 0,018442625 | 0,043 | 0,043 | 1         | 1,012865511   | 0,987297908     | 1               |
| PPP1R14A                                                                                        | 0,314297339 | 0,018423844 | 0,01  | 0,016 | 1         | 1,012852325   | 0,987310761     | 0,625           |
| TUBGCP3                                                                                         | 0,058570896 | 0,01842051  | 0,048 | 0,028 | 1         | 1,012849985   | 0,987313042     | 1,714285714     |
| TLCD1                                                                                           | 0,003314026 | 0,018358366 | 0,012 | 0     | 1         | 1,012806358   | 0,987355572     | #DIV/0!         |
| RUVBL2                                                                                          | 0,14100527  | 0,018341902 | 0,098 | 0,073 | 1         | 1,0127948     | 0,987366839     | 1,342465753     |
| OBI1                                                                                            | 0,454893214 | 0,018266361 | 0,043 | 0,035 | 1         | 1,01274177    | 0,98741854      | 1,228571429     |
| ATP6V0A1                                                                                        | 0,05761115  | 0,018106609 | 0,069 | 0,094 | 1         | 1,012629633   | 0,987527885     | 0,734042553     |

Supplementary Table 5

| Differentially expressed genes_total calculation_ comparing SC-Keloid vs. (SC-Myel, SC-Nonmyel) |             |             |       |       |           |               |                 |                 |
|-------------------------------------------------------------------------------------------------|-------------|-------------|-------|-------|-----------|---------------|-----------------|-----------------|
| gene                                                                                            | p_val       | avg_log2FC  | pct.1 | pct.2 | p_val_adj | Foldchange_UP | Foldchange_DOWN | Ratio_pct1_pct2 |
| STIM1                                                                                           | 0,359326066 | 0,018103971 | 0,079 | 0,065 | 1         | 1,012627782   | 0,98752969      | 1,215384615     |
| CABCOC1                                                                                         | 0,105937144 | 0,018103689 | 0,017 | 0,008 | 1         | 1,012627584   | 0,987529883     | 2,125           |
| PLCXD1                                                                                          | 0,633241093 | 0,018103623 | 0,01  | 0,008 | 1         | 1,012627538   | 0,987529928     | 1,25            |
| SHKBP1                                                                                          | 0,325491859 | 0,018100533 | 0,065 | 0,052 | 1         | 1,012625369   | 0,987532044     | 1,25            |
| ALDH1B1                                                                                         | 0,186698033 | 0,018099623 | 0,012 | 0,005 | 1         | 1,01262473    | 0,987532666     | 2,4             |
| TRIM39                                                                                          | 0,301670005 | 0,018061322 | 0,009 | 0,015 | 1         | 1,012597847   | 0,987558884     | 0,6             |
| GTPBP10                                                                                         | 0,911457911 | 0,018016919 | 0,02  | 0,019 | 1         | 1,012566682   | 0,98758928      | 1,052631579     |
| BLCAP                                                                                           | 0,085958806 | 0,017974568 | 0,065 | 0,087 | 1         | 1,012536958   | 0,987618271     | 0,747126437     |
| BAG2                                                                                            | 0,322122679 | 0,01794516  | 0,027 | 0,019 | 1         | 1,012516318   | 0,987638403     | 1,421052632     |
| IVD                                                                                             | 0,676309098 | 0,017904113 | 0,075 | 0,079 | 1         | 1,012487511   | 0,987666503     | 0,949367089     |
| TM2D3                                                                                           | 0,120056317 | 0,0178841   | 0,111 | 0,132 | 1         | 1,012473466   | 0,987680204     | 0,840909091     |
| GBA                                                                                             | 0,15006479  | 0,017845936 | 0,052 | 0,037 | 1         | 1,012446683   | 0,987706332     | 1,405405405     |
| MRPL30                                                                                          | 0,514577771 | 0,017768128 | 0,047 | 0,039 | 1         | 1,012392081   | 0,987759603     | 1,205128205     |
| EHD3                                                                                            | 0,318271923 | 0,017765343 | 0,012 | 0,007 | 1         | 1,012390127   | 0,98776151      | 1,714285714     |
| TRAPPC11                                                                                        | 0,911435996 | 0,017764206 | 0,029 | 0,03  | 1         | 1,012389329   | 0,987762288     | 0,966666667     |
| HARS2                                                                                           | 0,984327933 | 0,017693968 | 0,023 | 0,023 | 1         | 1,012340042   | 0,987810378     | 1               |
| COG3                                                                                            | 0,266555173 | 0,017678313 | 0,044 | 0,056 | 1         | 1,012329056   | 0,987821098     | 0,785714286     |
| MIPEP                                                                                           | 0,181279672 | 0,01766537  | 0,021 | 0,012 | 1         | 1,012319975   | 0,98782996      | 1,75            |
| MFSD9                                                                                           | 0,141932062 | 0,01761655  | 0,01  | 0,004 | 1         | 1,012285719   | 0,987863388     | 2,5             |
| CASP2                                                                                           | 0,430871734 | 0,017499736 | 0,037 | 0,045 | 1         | 1,012203758   | 0,987943378     | 0,822222222     |
| EXOC3-AS1                                                                                       | 0,23985655  | 0,0174592   | 0,023 | 0,015 | 1         | 1,012175318   | 0,987971137     | 1,533333333     |
| PSMB8-AS1                                                                                       | 0,312001628 | 0,017450247 | 0,019 | 0,012 | 1         | 1,012169037   | 0,987977268     | 1,583333333     |
| MTHFSD                                                                                          | 0,207858655 | 0,017398415 | 0,026 | 0,016 | 1         | 1,012132673   | 0,988012764     | 1,625           |
| THNSL1                                                                                          | 0,140554036 | 0,017334502 | 0,01  | 0,004 | 1         | 1,012087836   | 0,988056535     | 2,5             |
| TIMMDC1                                                                                         | 0,015428885 | 0,017305834 | 0,162 | 0,204 | 1         | 1,012067724   | 0,988076169     | 0,794117647     |
| XRCC6                                                                                           | 0,000299291 | 0,01728175  | 0,192 | 0,263 | 1         | 1,01205083    | 0,988092664     | 0,730038023     |
| SPIN3                                                                                           | 0,885621993 | 0,017179873 | 0,012 | 0,011 | 1         | 1,011979365   | 0,988162442     | 1,090909091     |
| TRAM1L1                                                                                         | 0,433544926 | 0,017104991 | 0,01  | 0,007 | 1         | 1,01192684    | 0,988213733     | 1,428571429     |
| BLOC1S5                                                                                         | 0,996011185 | 0,017098063 | 0,037 | 0,037 | 1         | 1,011921981   | 0,988218478     | 1               |
| ZNF839                                                                                          | 0,705011756 | 0,017080641 | 0,014 | 0,016 | 1         | 1,011909761   | 0,988230412     | 0,875           |



Supplementary Table 5

| Differentially expressed genes_total calculation_ comparing SC-Keloid vs. (SC-Myel, SC-Nonmyel) |             |             |       |       |           |               |                 |                 |
|-------------------------------------------------------------------------------------------------|-------------|-------------|-------|-------|-----------|---------------|-----------------|-----------------|
| gene                                                                                            | p_val       | avg_log2FC  | pct.1 | pct.2 | p_val_adj | Foldchange_UP | Foldchange_DOWN | Ratio_pct1_pct2 |
| APLF                                                                                            | 0,061229514 | 0,017021804 | 0,015 | 0,005 | 1         | 1,011868494   | 0,988270715     | 3               |
| GLYCTK                                                                                          | 0,241070956 | 0,017013768 | 0,02  | 0,012 | 1         | 1,011862858   | 0,98827622      | 1,666666667     |
| TRIP4                                                                                           | 0,775918575 | 0,016998269 | 0,051 | 0,047 | 1         | 1,011851987   | 0,988286837     | 1,085106383     |
| RPTOR                                                                                           | 0,982270181 | 0,016979765 | 0,015 | 0,015 | 1         | 1,011839009   | 0,988299513     | 1               |
| GRIK4                                                                                           | 0,319854962 | 0,016944051 | 0,012 | 0,007 | 1         | 1,011813961   | 0,988323979     | 1,714285714     |
| FAM110B                                                                                         | 0,283865216 | 0,016934858 | 0,007 | 0,012 | 1         | 1,011807514   | 0,988330277     | 0,583333333     |
| ZNF583                                                                                          | 0,679415975 | 0,016881633 | 0,022 | 0,019 | 1         | 1,011770186   | 0,988366739     | 1,157894737     |
| AREG                                                                                            | 0,524433586 | 0,016829016 | 0,021 | 0,026 | 1         | 1,011733286   | 0,988402787     | 0,807692308     |
| IL15                                                                                            | 0,902225948 | 0,016813911 | 0,04  | 0,038 | 1         | 1,011722693   | 0,988413136     | 1,052631579     |
| TOR1B                                                                                           | 0,451940415 | 0,01666079  | 0,028 | 0,022 | 1         | 1,01161532    | 0,988518047     | 1,272727273     |
| PPA2                                                                                            | 0,349827361 | 0,016626329 | 0,064 | 0,052 | 1         | 1,011591156   | 0,988541659     | 1,230769231     |
| MYOF                                                                                            | 0,563280269 | 0,016605837 | 0,098 | 0,087 | 1         | 1,011576787   | 0,988555701     | 1,126436782     |
| DHCR24                                                                                          | 0,348308716 | 0,016568975 | 0,02  | 0,014 | 1         | 1,011550941   | 0,988580959     | 1,428571429     |
| PECR                                                                                            | 0,86599392  | 0,016524627 | 0,017 | 0,016 | 1         | 1,011519847   | 0,988611349     | 1,0625          |
| ZNF362                                                                                          | 0,2457418   | 0,016509894 | 0,075 | 0,058 | 1         | 1,011509517   | 0,988621444     | 1,293103448     |
| AP1M1                                                                                           | 0,017898019 | 0,016508465 | 0,073 | 0,043 | 1         | 1,011508515   | 0,988622424     | 1,697674419     |
| TMEM14A                                                                                         | 0,41321559  | 0,016442536 | 0,163 | 0,172 | 1         | 1,011462292   | 0,988667604     | 0,947674419     |
| HMGN2                                                                                           | 0,001322707 | 0,016401348 | 0,302 | 0,389 | 1         | 1,011433416   | 0,98869583      | 0,776349614     |
| RGL3                                                                                            | 0,575048936 | 0,016396493 | 0,009 | 0,012 | 1         | 1,011430012   | 0,988699157     | 0,75            |
| AP001816.1                                                                                      | 0,52214585  | 0,016323438 | 0,041 | 0,034 | 1         | 1,011378797   | 0,988749224     | 1,205882353     |
| VEZT                                                                                            | 0,240751646 | 0,01627773  | 0,102 | 0,118 | 1         | 1,011346754   | 0,98878055      | 0,86440678      |
| SUPT6H                                                                                          | 0,604751949 | 0,016273851 | 0,079 | 0,084 | 1         | 1,011344035   | 0,988783209     | 0,94047619      |
| ERAP2                                                                                           | 0,781941329 | 0,016187393 | 0,047 | 0,049 | 1         | 1,011283429   | 0,988842466     | 0,959183673     |
| TRIM58                                                                                          | 0,931294102 | 0,016168724 | 0,041 | 0,039 | 1         | 1,011270343   | 0,988855262     | 1,051282051     |
| EDEM1                                                                                           | 0,687871733 | 0,015999458 | 0,048 | 0,052 | 1         | 1,011151701   | 0,988971288     | 0,923076923     |
| PHF21A                                                                                          | 0,006467584 | 0,015995583 | 0,056 | 0,091 | 1         | 1,011148985   | 0,988973944     | 0,615384615     |
| ARSL                                                                                            | 0,810159827 | 0,015856895 | 0,052 | 0,054 | 1         | 1,011051787   | 0,98906902      | 0,962962963     |
| SLC26A6                                                                                         | 0,765653452 | 0,015815277 | 0,014 | 0,012 | 1         | 1,011022621   | 0,989097552     | 1,166666667     |
| NIPSNAP1                                                                                        | 0,306507307 | 0,015790711 | 0,022 | 0,015 | 1         | 1,011005406   | 0,989114395     | 1,466666667     |
| C15orf48                                                                                        | 0,416462575 | 0,015775802 | 0,008 | 0,012 | 1         | 1,010994958   | 0,989124617     | 0,666666667     |

Supplementary Table 5

| Differentially expressed genes_total calculation_ comparing SC-Keloid vs. (SC-Myel, SC-Nonmyel) |             |             |       |       |           |               |                 |                 |
|-------------------------------------------------------------------------------------------------|-------------|-------------|-------|-------|-----------|---------------|-----------------|-----------------|
| gene                                                                                            | p_val       | avg_log2FC  | pct.1 | pct.2 | p_val_adj | Foldchange_UP | Foldchange_DOWN | Ratio_pct1_pct2 |
| HIPK1                                                                                           | 0,057442141 | 0,015771844 | 0,112 | 0,142 | 1         | 1,010992184   | 0,98912733      | 0,788732394     |
| SLC25A51                                                                                        | 0,420974688 | 0,015771723 | 0,019 | 0,024 | 1         | 1,0109921     | 0,989127413     | 0,791666667     |
| ATG13                                                                                           | 0,710206314 | 0,01575019  | 0,063 | 0,057 | 1         | 1,01097701    | 0,989142177     | 1,105263158     |
| SYT1                                                                                            | 0,04183649  | 0,015743744 | 0,014 | 0,004 | 1         | 1,010972493   | 0,989146596     | 3,5             |
| MIER2                                                                                           | 0,982682437 | 0,015734274 | 0,015 | 0,015 | 1         | 1,010965857   | 0,989153089     | 1               |
| CEP19                                                                                           | 0,663262638 | 0,015685088 | 0,016 | 0,014 | 1         | 1,010931391   | 0,989186813     | 1,142857143     |
| KLHDC8B                                                                                         | 0,691351129 | 0,015682618 | 0,028 | 0,024 | 1         | 1,010929659   | 0,989188507     | 1,166666667     |
| ZNF319                                                                                          | 0,623878186 | 0,015664835 | 0,015 | 0,012 | 1         | 1,010917199   | 0,989200699     | 1,25            |
| PIGN                                                                                            | 0,976940191 | 0,015654537 | 0,03  | 0,03  | 1         | 1,010909983   | 0,989207761     | 1               |
| MIPOL1                                                                                          | 0,401185582 | 0,015650657 | 0,029 | 0,037 | 1         | 1,010907264   | 0,989210421     | 0,783783784     |
| DCAF10                                                                                          | 0,134392839 | 0,015643405 | 0,056 | 0,073 | 1         | 1,010902182   | 0,989215394     | 0,767123288     |
| PIP5K1A                                                                                         | 0,233146564 | 0,015576661 | 0,061 | 0,075 | 1         | 1,010855416   | 0,989261159     | 0,813333333     |
| WDR89                                                                                           | 0,434337479 | 0,015548097 | 0,01  | 0,007 | 1         | 1,010835402   | 0,989280745     | 1,428571429     |
| EIF4E3                                                                                          | 0,198681353 | 0,01551898  | 0,03  | 0,042 | 1         | 1,010815001   | 0,989300712     | 0,714285714     |
| TRMT112                                                                                         | 7,30162E-05 | 0,015490933 | 0,314 | 0,433 | 1         | 1,010795351   | 0,989319944     | 0,72517321      |
| B9D2                                                                                            | 0,86455097  | 0,015482914 | 0,023 | 0,024 | 1         | 1,010789732   | 0,989325443     | 0,958333333     |
| THOP1                                                                                           | 0,384368708 | 0,015465842 | 0,043 | 0,034 | 1         | 1,010777771   | 0,989337151     | 1,264705882     |
| NSMCE4A                                                                                         | 0,678426171 | 0,01546165  | 0,072 | 0,076 | 1         | 1,010774834   | 0,989340025     | 0,947368421     |
| NOM1                                                                                            | 0,712119887 | 0,015443653 | 0,045 | 0,049 | 1         | 1,010762225   | 0,989352367     | 0,918367347     |
| BRCA1                                                                                           | 0,887515681 | 0,015434744 | 0,03  | 0,031 | 1         | 1,010755983   | 0,989358477     | 0,967741935     |
| CD93                                                                                            | 0,267061507 | 0,015429757 | 0,006 | 0,011 | 1         | 1,01075249    | 0,989361897     | 0,545454545     |
| FDFT1                                                                                           | 0,625983641 | 0,015384944 | 0,07  | 0,062 | 1         | 1,010721094   | 0,989392629     | 1,129032258     |
| C21orf91                                                                                        | 0,206351368 | 0,01536178  | 0,023 | 0,034 | 1         | 1,010704866   | 0,989408515     | 0,676470588     |
| ABCA3                                                                                           | 0,816742264 | 0,015335466 | 0,045 | 0,047 | 1         | 1,010686431   | 0,989426561     | 0,957446809     |
| NCBP3                                                                                           | 0,719029069 | 0,015335034 | 0,112 | 0,115 | 1         | 1,010686129   | 0,989426857     | 0,973913043     |
| NAA40                                                                                           | 0,377277164 | 0,015329819 | 0,021 | 0,015 | 1         | 1,010682475   | 0,989430434     | 1,4             |
| ALG2                                                                                            | 0,747831468 | 0,015268562 | 0,043 | 0,039 | 1         | 1,010639563   | 0,989472446     | 1,102564103     |
| VPS11                                                                                           | 0,899764767 | 0,015239853 | 0,038 | 0,037 | 1         | 1,010619452   | 0,989492136     | 1,027027027     |
| EXO5                                                                                            | 0,061314356 | 0,015224003 | 0,015 | 0,005 | 1         | 1,010608349   | 0,989503007     | 3               |
| ATL2                                                                                            | 0,52661738  | 0,015211743 | 0,057 | 0,064 | 1         | 1,01059976    | 0,989511416     | 0,890625        |

Supplementary Table 5

| Differentially expressed genes_total calculation_ comparing SC-Keloid vs. (SC-Myel, SC-Nonmyel) |             |             |       |       |           |               |                 |                 |
|-------------------------------------------------------------------------------------------------|-------------|-------------|-------|-------|-----------|---------------|-----------------|-----------------|
| gene                                                                                            | p_val       | avg_log2FC  | pct.1 | pct.2 | p_val_adj | Foldchange_UP | Foldchange_DOWN | Ratio_pct1_pct2 |
| NDC80                                                                                           | 0,040147446 | 0,015191112 | 0,012 | 0,003 | 1         | 1,010585309   | 0,989525567     | 4               |
| FXN                                                                                             | 0,377277164 | 0,01516899  | 0,021 | 0,015 | 1         | 1,010569812   | 0,98954074      | 1,4             |
| ANAPC1                                                                                          | 0,827250304 | 0,015118102 | 0,035 | 0,037 | 1         | 1,010534167   | 0,989575645     | 0,945945946     |
| STK38L                                                                                          | 0,040856708 | 0,015117509 | 0,02  | 0,037 | 1         | 1,010533752   | 0,989576051     | 0,540540541     |
| TESK1                                                                                           | 0,914915035 | 0,015117221 | 0,047 | 0,045 | 1         | 1,010533551   | 0,989576249     | 1,044444444     |
| CDR2                                                                                            | 0,497265848 | 0,015072553 | 0,077 | 0,084 | 1         | 1,010502263   | 0,989606888     | 0,916666667     |
| ZFTA                                                                                            | 0,395744264 | 0,015068271 | 0,023 | 0,03  | 1         | 1,010499264   | 0,989609825     | 0,766666667     |
| CYB561                                                                                          | 0,658361007 | 0,015058609 | 0,027 | 0,023 | 1         | 1,010492496   | 0,989616453     | 1,173913043     |
| MELTF-AS1                                                                                       | 0,327618114 | 0,015057694 | 0,016 | 0,023 | 1         | 1,010491856   | 0,98961708      | 0,695652174     |
| POLA2                                                                                           | 0,319114208 | 0,014846504 | 0,015 | 0,009 | 1         | 1,010343945   | 0,989761957     | 1,666666667     |
| EMSY                                                                                            | 0,478862632 | 0,014835733 | 0,054 | 0,061 | 1         | 1,010336402   | 0,989769347     | 0,885245902     |
| SPRED2                                                                                          | 0,931921085 | 0,014832063 | 0,042 | 0,041 | 1         | 1,010333832   | 0,989771864     | 1,024390244     |
| ZNF92                                                                                           | 0,53314211  | 0,014788927 | 0,033 | 0,038 | 1         | 1,010303624   | 0,989801458     | 0,868421053     |
| PMPCA                                                                                           | 0,603332045 | 0,014722665 | 0,083 | 0,073 | 1         | 1,010257222   | 0,98984692      | 1,136986301     |
| RNF20                                                                                           | 0,059529512 | 0,014710186 | 0,063 | 0,041 | 1         | 1,010248483   | 0,989855483     | 1,536585366     |
| CEP20                                                                                           | 0,38764953  | 0,014699428 | 0,048 | 0,057 | 1         | 1,01024095    | 0,989862864     | 0,842105263     |
| ZBTB42                                                                                          | 0,106534475 | 0,014690389 | 0,017 | 0,008 | 1         | 1,010234621   | 0,989869065     | 2,125           |
| MVK                                                                                             | 0,659817287 | 0,014664267 | 0,027 | 0,023 | 1         | 1,01021633    | 0,989886988     | 1,173913043     |
| VAMP8                                                                                           | 0,993062601 | 0,014659072 | 0,016 | 0,016 | 1         | 1,010212691   | 0,989890553     | 1               |
| INTS9                                                                                           | 0,794720531 | 0,014614812 | 0,015 | 0,014 | 1         | 1,0101817     | 0,989920922     | 1,071428571     |
| RHOJ                                                                                            | 0,127162892 | 0,014519469 | 0,073 | 0,094 | 1         | 1,010114942   | 0,989986345     | 0,776595745     |
| NOL10                                                                                           | 0,689926463 | 0,01446477  | 0,054 | 0,057 | 1         | 1,010076646   | 0,99002388      | 0,947368421     |
| LPCAT4                                                                                          | 0,940860006 | 0,014451209 | 0,027 | 0,027 | 1         | 1,010067151   | 0,990033186     | 1               |
| TRPM8                                                                                           | 0,021555704 | 0,014448438 | 0,01  | 0,001 | 1         | 1,010065211   | 0,990035088     | 10              |
| ZNF100                                                                                          | 0,735371609 | 0,014441374 | 0,019 | 0,016 | 1         | 1,010060265   | 0,990039936     | 1,1875          |
| RCOR3                                                                                           | 0,065538085 | 0,014412621 | 0,072 | 0,098 | 1         | 1,010040135   | 0,990059667     | 0,734693878     |
| SDHAF2                                                                                          | 0,575215016 | 0,014395297 | 0,087 | 0,077 | 1         | 1,010028007   | 0,990071556     | 1,12987013      |
| KANSL1-AS1                                                                                      | 0,501551117 | 0,014378137 | 0,026 | 0,02  | 1         | 1,010015992   | 0,990083333     | 1,3             |
| KRT8                                                                                            | 0,683675072 | 0,014361694 | 0,012 | 0,009 | 1         | 1,010004481   | 0,990094617     | 1,333333333     |
| MIEF1                                                                                           | 0,208803621 | 0,014330437 | 0,026 | 0,016 | 1         | 1,009982599   | 0,990116069     | 1,625           |

Supplementary Table 5

| Differentially expressed genes_total calculation_ comparing SC-Keloid vs. (SC-Myel, SC-Nonmyel) |             |             |       |       |           |               |                 |                 |
|-------------------------------------------------------------------------------------------------|-------------|-------------|-------|-------|-----------|---------------|-----------------|-----------------|
| gene                                                                                            | p_val       | avg_log2FC  | pct.1 | pct.2 | p_val_adj | Foldchange_UP | Foldchange_DOWN | Ratio_pct1_pct2 |
| KCTD7                                                                                           | 0,88682669  | 0,014319049 | 0,022 | 0,023 | 1         | 1,009974627   | 0,990123884     | 0,956521739     |
| STK38                                                                                           | 0,202152003 | 0,014298048 | 0,028 | 0,039 | 1         | 1,009959925   | 0,990138297     | 0,717948718     |
| ZNF346                                                                                          | 0,948487846 | 0,014256658 | 0,019 | 0,019 | 1         | 1,00993095    | 0,990166704     | 1               |
| C17orf100                                                                                       | 0,319537943 | 0,014199591 | 0,012 | 0,007 | 1         | 1,009891002   | 0,990205871     | 1,714285714     |
| RAB29                                                                                           | 0,244695643 | 0,014192586 | 0,031 | 0,022 | 1         | 1,009886099   | 0,990210679     | 1,409090909     |
| ZNF18                                                                                           | 0,491529638 | 0,01417423  | 0,012 | 0,008 | 1         | 1,009873249   | 0,990223279     | 1,5             |
| RRP1                                                                                            | 0,103304834 | 0,014152996 | 0,062 | 0,042 | 1         | 1,009858386   | 0,990237853     | 1,476190476     |
| MFSD10                                                                                          | 0,285302485 | 0,014094389 | 0,194 | 0,208 | 1         | 1,009817363   | 0,99027808      | 0,932692308     |
| AP4M1                                                                                           | 0,231505246 | 0,014035442 | 0,051 | 0,038 | 1         | 1,009776104   | 0,990318543     | 1,342105263     |
| CHML                                                                                            | 0,017469205 | 0,014008371 | 0,055 | 0,085 | 1         | 1,009757156   | 0,990337126     | 0,647058824     |
| SLC22A15                                                                                        | 0,282111535 | 0,013948172 | 0,007 | 0,012 | 1         | 1,009715024   | 0,99037845      | 0,583333333     |
| RBL1                                                                                            | 0,871368367 | 0,013939975 | 0,023 | 0,024 | 1         | 1,009709287   | 0,990384077     | 0,958333333     |
| SMG9                                                                                            | 0,640811483 | 0,01387708  | 0,07  | 0,062 | 1         | 1,009665269   | 0,990427254     | 1,129032258     |
| PRKAB2                                                                                          | 0,834776732 | 0,013873765 | 0,044 | 0,046 | 1         | 1,009662949   | 0,99042953      | 0,956521739     |
| PPP1R26                                                                                         | 0,827042619 | 0,013812743 | 0,016 | 0,018 | 1         | 1,009620244   | 0,990471424     | 0,888888889     |
| TRMT2A                                                                                          | 0,394072439 | 0,013811211 | 0,054 | 0,043 | 1         | 1,009619172   | 0,990472475     | 1,255813953     |
| C5orf24                                                                                         | 0,021988556 | 0,01379365  | 0,217 | 0,263 | 1         | 1,009606882   | 0,990484532     | 0,825095057     |
| ZSWIM4                                                                                          | 0,301564693 | 0,013715408 | 0,035 | 0,045 | 1         | 1,009552129   | 0,99053825      | 0,777777778     |
| MRPL53                                                                                          | 0,745693354 | 0,013628698 | 0,022 | 0,024 | 1         | 1,009491455   | 0,990597786     | 0,916666667     |
| BZW2                                                                                            | 0,54167858  | 0,013615763 | 0,135 | 0,14  | 1         | 1,009482404   | 0,990606668     | 0,964285714     |
| PAQR7                                                                                           | 0,464438591 | 0,013535662 | 0,038 | 0,031 | 1         | 1,009426357   | 0,99066167      | 1,225806452     |
| IFFO2                                                                                           | 0,775481416 | 0,013525271 | 0,072 | 0,075 | 1         | 1,009419086   | 0,990668805     | 0,96            |
| NDOR1                                                                                           | 0,486770577 | 0,013489851 | 0,012 | 0,008 | 1         | 1,009394304   | 0,990693127     | 1,5             |
| NOP16                                                                                           | 0,101113423 | 0,013467043 | 0,041 | 0,058 | 1         | 1,009378347   | 0,99070879      | 0,706896552     |
| ZNF714                                                                                          | 0,673500822 | 0,013457044 | 0,016 | 0,019 | 1         | 1,009371351   | 0,990715656     | 0,842105263     |
| F8A1                                                                                            | 0,080016349 | 0,013405119 | 0,044 | 0,027 | 1         | 1,009335022   | 0,990751314     | 1,62962963      |
| TRMT12                                                                                          | 0,624259898 | 0,013398925 | 0,015 | 0,012 | 1         | 1,009330689   | 0,990755568     | 1,25            |
| LINC00511                                                                                       | 0,258630772 | 0,013370898 | 0,166 | 0,183 | 1         | 1,009311081   | 0,990774815     | 0,907103825     |
| PTPN4                                                                                           | 0,861416055 | 0,013274602 | 0,037 | 0,035 | 1         | 1,009243714   | 0,990840949     | 1,057142857     |
| BCL7A                                                                                           | 0,503948689 | 0,013273941 | 0,021 | 0,026 | 1         | 1,009243252   | 0,990841403     | 0,807692308     |

Supplementary Table 5

| Differentially expressed genes_total calculation_ comparing SC-Keloid vs. (SC-Myel, SC-Nonmyel) |             |             |       |       |           |               |                 |                 |
|-------------------------------------------------------------------------------------------------|-------------|-------------|-------|-------|-----------|---------------|-----------------|-----------------|
| gene                                                                                            | p_val       | avg_log2FC  | pct.1 | pct.2 | p_val_adj | Foldchange_UP | Foldchange_DOWN | Ratio_pct1_pct2 |
| IPO11                                                                                           | 0,500007886 | 0,013232711 | 0,016 | 0,012 | 1         | 1,00921441    | 0,99086972      | 1,333333333     |
| CYB5A                                                                                           | 0,011779905 | 0,013220284 | 0,159 | 0,208 | 1         | 1,009205717   | 0,990878256     | 0,764423077     |
| PEX7                                                                                            | 0,456835512 | 0,013174478 | 0,03  | 0,037 | 1         | 1,009173675   | 0,990909717     | 0,810810811     |
| DHRS11                                                                                          | 0,178535344 | 0,013139533 | 0,031 | 0,02  | 1         | 1,009149231   | 0,990933719     | 1,55            |
| ZBTB34                                                                                          | 0,224425312 | 0,013082504 | 0,01  | 0,018 | 1         | 1,00910934    | 0,990972891     | 0,555555556     |
| CRABP2                                                                                          | 0,25691322  | 0,013081803 | 0,024 | 0,034 | 1         | 1,009108851   | 0,990973372     | 0,705882353     |
| RUFY3                                                                                           | 0,032457427 | 0,01306167  | 0,061 | 0,088 | 1         | 1,009094768   | 0,990987201     | 0,693181818     |
| SLC25A23                                                                                        | 0,744637622 | 0,013060823 | 0,03  | 0,027 | 1         | 1,009094175   | 0,990987783     | 1,111111111     |
| GPR176                                                                                          | 0,560695111 | 0,012963936 | 0,03  | 0,035 | 1         | 1,00902641    | 0,991054337     | 0,857142857     |
| RBM45                                                                                           | 0,49588722  | 0,012956768 | 0,023 | 0,028 | 1         | 1,009021397   | 0,991059261     | 0,821428571     |
| RPP25                                                                                           | 0,977901987 | 0,012955049 | 0,022 | 0,022 | 1         | 1,009020195   | 0,991060442     | 1               |
| STIL                                                                                            | 0,141537286 | 0,012949161 | 0,01  | 0,004 | 1         | 1,009016077   | 0,991064487     | 2,5             |
| SLC12A6                                                                                         | 0,089579527 | 0,012899268 | 0,014 | 0,026 | 1         | 1,008981182   | 0,991098762     | 0,538461538     |
| POLM                                                                                            | 0,825896716 | 0,012879511 | 0,022 | 0,02  | 1         | 1,008967365   | 0,991112334     | 1,1             |
| KBTBD3                                                                                          | 0,396843291 | 0,012878788 | 0,027 | 0,034 | 1         | 1,008966859   | 0,991112831     | 0,794117647     |
| ZNF71                                                                                           | 0,266308589 | 0,012877302 | 0,024 | 0,016 | 1         | 1,00896582    | 0,991113852     | 1,5             |
| NUDT18                                                                                          | 0,0279946   | 0,012865207 | 0,017 | 0,005 | 1         | 1,008957361   | 0,991122161     | 3,4             |
| PYCR3                                                                                           | 0,010827466 | 0,012863565 | 0,031 | 0,012 | 1         | 1,008956213   | 0,991123289     | 2,583333333     |
| DDX39A                                                                                          | 0,146640212 | 0,012837873 | 0,129 | 0,149 | 1         | 1,008938245   | 0,991140939     | 0,865771812     |
| SNX1                                                                                            | 0,008131326 | 0,012766357 | 0,105 | 0,148 | 1         | 1,008888232   | 0,991190073     | 0,709459459     |
| UNG                                                                                             | 0,419510062 | 0,012715636 | 0,036 | 0,028 | 1         | 1,008852763   | 0,991224921     | 1,285714286     |
| ZNF384                                                                                          | 0,064017503 | 0,012713567 | 0,049 | 0,03  | 1         | 1,008851317   | 0,991226342     | 1,633333333     |
| ATXN2                                                                                           | 0,011578732 | 0,012712791 | 0,135 | 0,179 | 1         | 1,008850773   | 0,991226875     | 0,754189944     |
| MATN3                                                                                           | 0,539516189 | 0,012663215 | 0,015 | 0,019 | 1         | 1,008816107   | 0,991260938     | 0,789473684     |
| DNAJB12                                                                                         | 0,303118813 | 0,012649826 | 0,078 | 0,062 | 1         | 1,008806744   | 0,991270138     | 1,258064516     |
| MFAP5                                                                                           | 0,192201062 | 0,012617498 | 0,007 | 0,014 | 1         | 1,008784139   | 0,99129235      | 0,5             |
| LGALS3                                                                                          | 0,065571875 | 0,012581086 | 0,561 | 0,657 | 1         | 1,008758679   | 0,991317369     | 0,853881279     |
| RIPOR3                                                                                          | 0,231522268 | 0,012539871 | 0,013 | 0,007 | 1         | 1,008729861   | 0,99134569      | 1,857142857     |
| CLSTN3                                                                                          | 0,078628769 | 0,012539318 | 0,012 | 0,023 | 1         | 1,008729474   | 0,99134607      | 0,52173913      |
| TRAPPC14                                                                                        | 0,185131306 | 0,012531529 | 0,021 | 0,012 | 1         | 1,008724028   | 0,991351422     | 1,75            |

Supplementary Table 5

| Differentially expressed genes_total calculation_ comparing SC-Keloid vs. (SC-Myel, SC-Nonmyel) |             |             |       |       |           |               |                 |                 |
|-------------------------------------------------------------------------------------------------|-------------|-------------|-------|-------|-----------|---------------|-----------------|-----------------|
| gene                                                                                            | p_val       | avg_log2FC  | pct.1 | pct.2 | p_val_adj | Foldchange_UP | Foldchange_DOWN | Ratio_pct1_pct2 |
| TMEM258                                                                                         | 0,000734003 | 0,012500105 | 0,425 | 0,574 | 1         | 1,008702057   | 0,991373015     | 0,740418118     |
| ZNF75A                                                                                          | 0,6914691   | 0,012483497 | 0,037 | 0,041 | 1         | 1,008690445   | 0,991384428     | 0,902439024     |
| CDKN3                                                                                           | 0,117784628 | 0,01235938  | 0,015 | 0,007 | 1         | 1,00860367    | 0,991469722     | 2,142857143     |
| ATRIP                                                                                           | 0,57296252  | 0,012351954 | 0,01  | 0,014 | 1         | 1,008598478   | 0,991474825     | 0,714285714     |
| SLC2A13                                                                                         | 0,194295821 | 0,012338003 | 0,057 | 0,072 | 1         | 1,008588725   | 0,991484413     | 0,791666667     |
| MTF1                                                                                            | 0,392344547 | 0,012299599 | 0,027 | 0,034 | 1         | 1,008561878   | 0,991510806     | 0,794117647     |
| ZNF581                                                                                          | 0,691160449 | 0,012169477 | 0,047 | 0,05  | 1         | 1,008470915   | 0,991600238     | 0,94            |
| IFT52                                                                                           | 0,299727954 | 0,012168597 | 0,087 | 0,071 | 1         | 1,0084703     | 0,991600843     | 1,225352113     |
| JMJD8                                                                                           | 0,22715747  | 0,012165954 | 0,115 | 0,092 | 1         | 1,008468453   | 0,991602659     | 1,25            |
| CAMK1                                                                                           | 0,155904227 | 0,012162752 | 0,068 | 0,049 | 1         | 1,008466215   | 0,99160486      | 1,387755102     |
| ZNF512B                                                                                         | 0,951760027 | 0,012150955 | 0,028 | 0,027 | 1         | 1,008457968   | 0,991612969     | 1,037037037     |
| CCDC71                                                                                          | 0,214852591 | 0,012067999 | 0,022 | 0,014 | 1         | 1,008399983   | 0,991669989     | 1,571428571     |
| NUDT19                                                                                          | 0,919382827 | 0,012032005 | 0,013 | 0,012 | 1         | 1,008374825   | 0,99169473      | 1,083333333     |
| ORC6                                                                                            | 0,72428091  | 0,011999902 | 0,024 | 0,022 | 1         | 1,008352386   | 0,991716798     | 1,090909091     |
| MKRN2                                                                                           | 0,99093698  | 0,011966055 | 0,064 | 0,062 | 1         | 1,00832873    | 0,991740065     | 1,032258065     |
| HEATR1                                                                                          | 0,522093756 | 0,011963876 | 0,042 | 0,035 | 1         | 1,008327207   | 0,991741563     | 1,2             |
| PABPC5                                                                                          | 0,813496783 | 0,011955206 | 0,017 | 0,019 | 1         | 1,008321147   | 0,991747523     | 0,894736842     |
| CTBP1-DT                                                                                        | 0,443958464 | 0,011894808 | 0,023 | 0,018 | 1         | 1,008278935   | 0,991789043     | 1,277777778     |
| CENPN                                                                                           | 0,435506382 | 0,011888713 | 0,019 | 0,014 | 1         | 1,008274675   | 0,991793233     | 1,357142857     |
| SPATA5L1                                                                                        | 0,837855337 | 0,011858748 | 0,016 | 0,015 | 1         | 1,008253733   | 0,991813833     | 1,066666667     |
| MEX3A                                                                                           | 0,620734229 | 0,01179018  | 0,047 | 0,041 | 1         | 1,008205814   | 0,991860973     | 1,146341463     |
| PIK3R4                                                                                          | 0,414467847 | 0,011790095 | 0,019 | 0,024 | 1         | 1,008205755   | 0,991861031     | 0,791666667     |
| API5                                                                                            | 0,459031267 | 0,011763929 | 0,083 | 0,091 | 1         | 1,00818747    | 0,99187902      | 0,912087912     |
| RFX7                                                                                            | 0,766590279 | 0,011752031 | 0,031 | 0,034 | 1         | 1,008179155   | 0,991887201     | 0,911764706     |
| PRRT2                                                                                           | 0,9899249   | 0,011750371 | 0,024 | 0,024 | 1         | 1,008177995   | 0,991888342     | 1               |
| OAS3                                                                                            | 0,668704445 | 0,011744266 | 0,017 | 0,02  | 1         | 1,008173729   | 0,991892539     | 0,85            |
| UBE2J2                                                                                          | 0,846575287 | 0,011690255 | 0,102 | 0,096 | 1         | 1,008135986   | 0,991929674     | 1,0625          |
| RIF1                                                                                            | 0,003540847 | 0,011677966 | 0,158 | 0,213 | 1         | 1,008127399   | 0,991938123     | 0,741784038     |
| UBE3B                                                                                           | 0,077153158 | 0,011675067 | 0,048 | 0,03  | 1         | 1,008125373   | 0,991940116     | 1,6             |
| NAA50                                                                                           | 0,000110055 | 0,011580529 | 0,126 | 0,194 | 1         | 1,008059314   | 0,99200512      | 0,649484536     |

Supplementary Table 5

| Differentially expressed genes_total calculation_ comparing SC-Keloid vs. (SC-Myel, SC-Nonmyel) |             |             |       |       |           |               |                 |                 |
|-------------------------------------------------------------------------------------------------|-------------|-------------|-------|-------|-----------|---------------|-----------------|-----------------|
| gene                                                                                            | p_val       | avg_log2FC  | pct.1 | pct.2 | p_val_adj | Foldchange_UP | Foldchange_DOWN | Ratio_pct1_pct2 |
| KCNH1                                                                                           | 0,005346706 | 0,01149949  | 0,01  | 0     | 1         | 1,008002691   | 0,992060844     | #DIV/0!         |
| SLC2A10                                                                                         | 0,836668191 | 0,011491346 | 0,016 | 0,015 | 1         | 1,007997001   | 0,992066444     | 1,066666667     |
| FAM8A1                                                                                          | 0,230363311 | 0,011426131 | 0,042 | 0,054 | 1         | 1,007951437   | 0,99211129      | 0,777777778     |
| RASA4                                                                                           | 0,42911507  | 0,011362173 | 0,009 | 0,014 | 1         | 1,007906753   | 0,992155274     | 0,642857143     |
| FO XK1                                                                                          | 0,262159741 | 0,011359692 | 0,051 | 0,064 | 1         | 1,00790502    | 0,992156979     | 0,796875        |
| ALK                                                                                             | 0,435527877 | 0,011284599 | 0,01  | 0,007 | 1         | 1,007852559   | 0,992208623     | 1,428571429     |
| MAP3K7CL                                                                                        | 0,738743354 | 0,011241717 | 0,024 | 0,022 | 1         | 1,007822602   | 0,992238116     | 1,090909091     |
| DOLPP1                                                                                          | 0,294114797 | 0,011241189 | 0,026 | 0,018 | 1         | 1,007822234   | 0,992238479     | 1,444444444     |
| EFNA4                                                                                           | 0,806926113 | 0,011233337 | 0,017 | 0,019 | 1         | 1,007816748   | 0,992243879     | 0,894736842     |
| JCAD                                                                                            | 0,412656453 | 0,011218035 | 0,007 | 0,011 | 1         | 1,007806059   | 0,992254403     | 0,636363636     |
| ABRAXAS1                                                                                        | 0,641015685 | 0,011170861 | 0,034 | 0,038 | 1         | 1,007773106   | 0,992286849     | 0,894736842     |
| RNF123                                                                                          | 0,471413168 | 0,011074795 | 0,024 | 0,019 | 1         | 1,007706003   | 0,992352926     | 1,263157895     |
| GIGYF2                                                                                          | 0,294845083 | 0,011068018 | 0,07  | 0,083 | 1         | 1,007701269   | 0,992357588     | 0,843373494     |
| CLYBL                                                                                           | 0,081207132 | 0,010934078 | 0,007 | 0,016 | 1         | 1,007607718   | 0,992449723     | 0,4375          |
| CNOT6                                                                                           | 0,011469533 | 0,010899776 | 0,047 | 0,077 | 1         | 1,007583761   | 0,992473319     | 0,61038961      |
| NMRAL1                                                                                          | 0,435132841 | 0,010851231 | 0,056 | 0,046 | 1         | 1,007549858   | 0,992506716     | 1,217391304     |
| FRMD5                                                                                           | 0,442839142 | 0,01085033  | 0,112 | 0,096 | 1         | 1,007549228   | 0,992507335     | 1,166666667     |
| ARRB2                                                                                           | 0,869635026 | 0,01080573  | 0,031 | 0,033 | 1         | 1,007518081   | 0,992538018     | 0,939393939     |
| POLR1C                                                                                          | 0,355286117 | 0,010729131 | 0,035 | 0,043 | 1         | 1,007464589   | 0,992590718     | 0,813953488     |
| NKIRAS2                                                                                         | 0,811238029 | 0,010727365 | 0,07  | 0,065 | 1         | 1,007463356   | 0,992591933     | 1,076923077     |
| A4GALT                                                                                          | 0,057987514 | 0,010695147 | 0,005 | 0,014 | 1         | 1,007440858   | 0,9926141       | 0,357142857     |
| PCDH7                                                                                           | 0,010652906 | 0,010657369 | 0,031 | 0,058 | 1         | 1,007414478   | 0,992640092     | 0,534482759     |
| TCP11L1                                                                                         | 0,94209634  | 0,010634996 | 0,027 | 0,027 | 1         | 1,007398855   | 0,992655486     | 1               |
| RHBDF2                                                                                          | 0,099720642 | 0,010612751 | 0,043 | 0,027 | 1         | 1,007383321   | 0,992670792     | 1,592592593     |
| ZNF576                                                                                          | 0,506736708 | 0,010516096 | 0,03  | 0,024 | 1         | 1,007315833   | 0,992737299     | 1,25            |
| FBXW9                                                                                           | 0,047953194 | 0,010484614 | 0,04  | 0,022 | 1         | 1,007293852   | 0,992758963     | 1,818181818     |
| TFB1M                                                                                           | 0,348308716 | 0,010443677 | 0,02  | 0,014 | 1         | 1,00726527    | 0,992787133     | 1,428571429     |
| DPF1                                                                                            | 0,003314026 | 0,010436379 | 0,012 | 0     | 1         | 1,007260175   | 0,992792155     | #DIV/0!         |
| LXN                                                                                             | 0,328272176 | 0,010386157 | 0,013 | 0,019 | 1         | 1,007225112   | 0,992826716     | 0,684210526     |
| CSNK2A1                                                                                         | 0,384263244 | 0,010363695 | 0,144 | 0,156 | 1         | 1,007209429   | 0,992842174     | 0,923076923     |

Supplementary Table 5

| Differentially expressed genes_total calculation_ comparing SC-Keloid vs. (SC-Myel, SC-Nonmyel) |             |              |       |       |           |               |                 |                 |
|-------------------------------------------------------------------------------------------------|-------------|--------------|-------|-------|-----------|---------------|-----------------|-----------------|
| gene                                                                                            | p_val       | avg_log2FC   | pct.1 | pct.2 | p_val_adj | Foldchange_UP | Foldchange_DOWN | Ratio_pct1_pct2 |
| ZBTB25                                                                                          | 0,152037844 | 0,010336802  | 0,023 | 0,035 | 1         | 1,007190655   | 0,992860681     | 0,657142857     |
| MTMR11                                                                                          | 0,145208394 | 0,010314303  | 0,029 | 0,018 | 1         | 1,007174947   | 0,992876166     | 1,611111111     |
| SCRN2                                                                                           | 0,593884425 | 0,01031352   | 0,057 | 0,062 | 1         | 1,007174401   | 0,992876704     | 0,919354839     |
| MRTFA                                                                                           | 0,809653503 | 0,0102754    | 0,051 | 0,047 | 1         | 1,007147789   | 0,992902939     | 1,085106383     |
| LINC01560                                                                                       | 0,145975284 | 0,010259752  | 0,009 | 0,018 | 1         | 1,007136865   | 0,992913709     | 0,5             |
| TSPYL4                                                                                          | 0,323969195 | 0,010234716  | 0,047 | 0,057 | 1         | 1,007119388   | 0,99293094      | 0,824561404     |
| KRBA1                                                                                           | 0,736970816 | 0,010228306  | 0,03  | 0,027 | 1         | 1,007114913   | 0,992935351     | 1,111111111     |
| PMS2                                                                                            | 0,930644562 | 0,010190139  | 0,036 | 0,037 | 1         | 1,00708827    | 0,99296162      | 0,972972973     |
| OTUD3                                                                                           | 0,784402117 | 0,010180754  | 0,029 | 0,031 | 1         | 1,007081719   | 0,992968079     | 0,935483871     |
| OSBPL6                                                                                          | 0,140946704 | 0,010137113  | 0,01  | 0,004 | 1         | 1,007051255   | 0,992998117     | 2,5             |
| TMEM19                                                                                          | 0,125135596 | 0,010133095  | 0,035 | 0,05  | 1         | 1,007048451   | 0,993000882     | 0,7             |
| ST6GALNAC4                                                                                      | 0,014652761 | 0,010124767  | 0,047 | 0,023 | 1         | 1,007042637   | 0,993006615     | 2,043478261     |
| DLG4                                                                                            | 0,127613095 | 0,010089179  | 0,038 | 0,024 | 1         | 1,007017796   | 0,99303111      | 1,583333333     |
| C8orf48                                                                                         | 0,902066755 | 0,010082306  | 0,021 | 0,022 | 1         | 1,007012999   | 0,993035841     | 0,954545455     |
| DCAF7                                                                                           | 0,044187498 | 0,010072737  | 0,094 | 0,123 | 1         | 1,007006319   | 0,993042428     | 0,764227642     |
| C22orf39                                                                                        | 0,735529586 | 0,010042861  | 0,078 | 0,081 | 1         | 1,006985466   | 0,993062992     | 0,962962963     |
| SNRNP40                                                                                         | 0,855934271 | 0,01000931   | 0,084 | 0,084 | 1         | 1,006962048   | 0,993086087     | 1               |
| TMEM184B                                                                                        | 0,282191234 | -0,010013125 | 0,093 | 0,107 | 1         | 0,993083461   | 1,006964711     | 0,869158879     |
| IDNK                                                                                            | 0,328702297 | -0,010085705 | 0,02  | 0,027 | 1         | 0,993033501   | 1,007015371     | 0,740740741     |
| SERINC3                                                                                         | 0,000206761 | -0,010109083 | 0,164 | 0,236 | 1         | 0,99301741    | 1,00703169      | 0,694915254     |
| ASPHD1                                                                                          | 0,71527958  | -0,01022677  | 0,023 | 0,026 | 1         | 0,992936408   | 1,007113841     | 0,884615385     |
| SLC35A2                                                                                         | 0,909130257 | -0,010232864 | 0,071 | 0,068 | 1         | 0,992932214   | 1,007118095     | 1,044117647     |
| SCAI                                                                                            | 0,960541247 | -0,010242608 | 0,036 | 0,035 | 1         | 0,992925508   | 1,007124897     | 1,028571429     |
| CCAR2                                                                                           | 0,512723717 | -0,010307491 | 0,034 | 0,039 | 1         | 0,992880854   | 1,007170192     | 0,871794872     |
| ZNF721                                                                                          | 0,38954801  | -0,010320527 | 0,062 | 0,072 | 1         | 0,992871882   | 1,007179293     | 0,861111111     |
| GK                                                                                              | 0,311357744 | -0,010323131 | 0,027 | 0,035 | 1         | 0,99287009    | 1,007181111     | 0,771428571     |
| OSBPL9                                                                                          | 0,009943843 | -0,01035604  | 0,156 | 0,201 | 1         | 0,992847442   | 1,007204086     | 0,776119403     |
| MCM9                                                                                            | 0,769492294 | -0,010360482 | 0,02  | 0,022 | 1         | 0,992844385   | 1,007207186     | 0,909090909     |
| C2orf92                                                                                         | 0,740963258 | -0,010379326 | 0,01  | 0,012 | 1         | 0,992831418   | 1,007220342     | 0,833333333     |
| IGF2R                                                                                           | 0,119897405 | -0,010448298 | 0,035 | 0,05  | 1         | 0,992783953   | 1,007268496     | 0,7             |



Supplementary Table 5

| Differentially expressed genes_total calculation_ comparing SC-Keloid vs. (SC-Myel, SC-Nonmyel) |             |              |       |       |           |               |                 |                 |
|-------------------------------------------------------------------------------------------------|-------------|--------------|-------|-------|-----------|---------------|-----------------|-----------------|
| gene                                                                                            | p_val       | avg_log2FC   | pct.1 | pct.2 | p_val_adj | Foldchange_UP | Foldchange_DOWN | Ratio_pct1_pct2 |
| FAM27C                                                                                          | 0,088768323 | -0,010465953 | 0,008 | 0,018 | 1         | 0,992771804   | 1,007280823     | 0,444444444     |
| PGBD4                                                                                           | 0,202218365 | -0,01050687  | 0,008 | 0,015 | 1         | 0,992743648   | 1,007309391     | 0,533333333     |
| SPICE1                                                                                          | 0,615917605 | -0,010512787 | 0,022 | 0,026 | 1         | 0,992739577   | 1,007313523     | 0,846153846     |
| ODF3L1                                                                                          | 0,153227685 | -0,010536173 | 0,005 | 0,011 | 1         | 0,992723484   | 1,007329852     | 0,454545455     |
| ZNF596                                                                                          | 0,910881399 | -0,010549557 | 0,012 | 0,012 | 1         | 0,992714275   | 1,007339196     | 1               |
| TMEM9B                                                                                          | 0,670170486 | -0,010561313 | 0,149 | 0,149 | 1         | 0,992706186   | 1,007347405     | 1               |
| CUBN                                                                                            | 0,386256272 | -0,010578877 | 0,029 | 0,037 | 1         | 0,9926941     | 1,007359669     | 0,783783784     |
| HIC2                                                                                            | 0,888806247 | -0,010595795 | 0,026 | 0,024 | 1         | 0,992682459   | 1,007371482     | 1,083333333     |
| ADPRM                                                                                           | 0,63144284  | -0,010600373 | 0,021 | 0,024 | 1         | 0,992679309   | 1,007374679     | 0,875           |
| KIF3A                                                                                           | 0,08876693  | -0,01061905  | 0,055 | 0,075 | 1         | 0,992666458   | 1,00738772      | 0,733333333     |
| MYCN                                                                                            | 0,261373418 | -0,01065424  | 0,006 | 0,011 | 1         | 0,992642245   | 1,007412293     | 0,545454545     |
| TRIM33                                                                                          | 0,022157615 | -0,010672631 | 0,078 | 0,11  | 1         | 0,992629592   | 1,007425135     | 0,709090909     |
| PNPLA4                                                                                          | 0,409955306 | -0,010687854 | 0,022 | 0,016 | 1         | 0,992619117   | 1,007435765     | 1,375           |
| DHX36                                                                                           | 0,000261122 | -0,010721095 | 0,221 | 0,303 | 1         | 0,992596247   | 1,007458977     | 0,729372937     |
| PLCG1                                                                                           | 0,888379687 | -0,010757186 | 0,031 | 0,03  | 1         | 0,992571416   | 1,00748418      | 1,033333333     |
| HLA-DMB                                                                                         | 0,045325212 | -0,010768091 | 0,003 | 0,012 | 1         | 0,992563914   | 1,007491796     | 0,25            |
| PLD1                                                                                            | 0,109233385 | -0,010791203 | 0,006 | 0,014 | 1         | 0,992548013   | 1,007507936     | 0,428571429     |
| ASCC3                                                                                           | 0,498260163 | -0,010811457 | 0,075 | 0,083 | 1         | 0,992534079   | 1,007522081     | 0,903614458     |
| TGDS                                                                                            | 0,627897729 | -0,010811576 | 0,036 | 0,031 | 1         | 0,992533997   | 1,007522164     | 1,161290323     |
| REV3L                                                                                           | 0,023097776 | -0,010883671 | 0,041 | 0,066 | 1         | 0,992484399   | 1,007572513     | 0,621212121     |
| ACTR5                                                                                           | 0,316221328 | -0,010885039 | 0,014 | 0,02  | 1         | 0,992483458   | 1,007573469     | 0,7             |
| ZNF33B                                                                                          | 0,058435096 | -0,010897783 | 0,005 | 0,014 | 1         | 0,99247469    | 1,007582369     | 0,357142857     |
| PTPRS                                                                                           | 0,580193799 | -0,010914966 | 0,041 | 0,046 | 1         | 0,99246287    | 1,00759437      | 0,891304348     |
| ZNF737                                                                                          | 0,417804675 | -0,010962021 | 0,016 | 0,022 | 1         | 0,9924305     | 1,007627234     | 0,727272727     |
| BOLA2B                                                                                          | 0,181855698 | -0,01101072  | 0,031 | 0,02  | 1         | 0,992397001   | 1,007661248     | 1,55            |
| ZNF692                                                                                          | 0,905997724 | -0,011034078 | 0,026 | 0,024 | 1         | 0,992380933   | 1,007677563     | 1,083333333     |
| PDK2                                                                                            | 0,829706682 | -0,011041785 | 0,041 | 0,038 | 1         | 0,992375632   | 1,007682946     | 1,078947368     |
| KLHL11                                                                                          | 0,734223643 | -0,011067719 | 0,01  | 0,012 | 1         | 0,992357793   | 1,00770106      | 0,833333333     |
| SCPEP1                                                                                          | 0,4955014   | -0,011089298 | 0,108 | 0,115 | 1         | 0,99234295    | 1,007716133     | 0,939130435     |
| VPS51                                                                                           | 0,157530256 | -0,011159833 | 0,114 | 0,133 | 1         | 0,992294435   | 1,007765402     | 0,857142857     |

Supplementary Table 5

| Differentially expressed genes_total calculation_ comparing SC-Keloid vs. (SC-Myel, SC-Nonmyel) |             |              |       |       |           |               |                 |                 |
|-------------------------------------------------------------------------------------------------|-------------|--------------|-------|-------|-----------|---------------|-----------------|-----------------|
| gene                                                                                            | p_val       | avg_log2FC   | pct.1 | pct.2 | p_val_adj | Foldchange_UP | Foldchange_DOWN | Ratio_pct1_pct2 |
| SLC38A7                                                                                         | 0,745693354 | -0,011203889 | 0,024 | 0,022 | 1         | 0,992264133   | 1,007796177     | 1,090909091     |
| CHCHD4                                                                                          | 0,4196031   | -0,011219461 | 0,022 | 0,016 | 1         | 0,992253423   | 1,007807055     | 1,375           |
| ATP6V1H                                                                                         | 0,622811511 | -0,011224497 | 0,058 | 0,062 | 1         | 0,992249959   | 1,007810573     | 0,935483871     |
| PRKAG2                                                                                          | 0,017611144 | -0,01129653  | 0,009 | 0,024 | 1         | 0,992200418   | 1,007860894     | 0,375           |
| SPIN4                                                                                           | 0,721888957 | -0,011318244 | 0,012 | 0,014 | 1         | 0,992185485   | 1,007876063     | 0,857142857     |
| ZNF562                                                                                          | 0,899941409 | -0,011331897 | 0,029 | 0,03  | 1         | 0,992176095   | 1,007885601     | 0,966666667     |
| ZNF449                                                                                          | 0,985980641 | -0,011336127 | 0,015 | 0,015 | 1         | 0,992173186   | 1,007888556     | 1               |
| TRIM2                                                                                           | 0,021114596 | -0,011402357 | 0,059 | 0,09  | 1         | 0,992127639   | 1,007934827     | 0,655555556     |
| TTL12                                                                                           | 0,077881295 | -0,011428319 | 0,024 | 0,012 | 1         | 0,992109785   | 1,007952966     | 2               |
| TRAF5                                                                                           | 0,446329838 | -0,011439944 | 0,023 | 0,018 | 1         | 0,992101791   | 1,007961087     | 1,277777778     |
| NCAPD3                                                                                          | 0,155897504 | -0,011455398 | 0,038 | 0,053 | 1         | 0,992091164   | 1,007971884     | 0,716981132     |
| CRPPA                                                                                           | 0,423609662 | -0,011461634 | 0,014 | 0,019 | 1         | 0,992086876   | 1,007976241     | 0,736842105     |
| TCEA2                                                                                           | 0,073287624 | -0,011470216 | 0,155 | 0,185 | 1         | 0,992080974   | 1,007982237     | 0,837837838     |
| AK2                                                                                             | 0,687462795 | -0,011515449 | 0,133 | 0,134 | 1         | 0,99204987    | 1,008013841     | 0,992537313     |
| C19orf12                                                                                        | 0,168427528 | -0,011547709 | 0,052 | 0,068 | 1         | 0,992027687   | 1,008036382     | 0,764705882     |
| MEMO1                                                                                           | 0,40629     | -0,011587368 | 0,022 | 0,028 | 1         | 0,992000417   | 1,008064092     | 0,785714286     |
| OARD1                                                                                           | 0,05993439  | -0,011695538 | 0,056 | 0,079 | 1         | 0,991926042   | 1,008139677     | 0,708860759     |
| BST1                                                                                            | 0,117391192 | -0,011706748 | 0,021 | 0,011 | 1         | 0,991918334   | 1,008147511     | 1,909090909     |
| PDIA5                                                                                           | 0,111963049 | -0,011739613 | 0,034 | 0,02  | 1         | 0,991895738   | 1,008170477     | 1,7             |
| DDX28                                                                                           | 0,07598693  | -0,011750173 | 0,003 | 0,011 | 1         | 0,991888478   | 1,008177857     | 0,272727273     |
| GCHFR                                                                                           | 0,010086398 | -0,011779637 | 0,001 | 0,011 | 1         | 0,991868221   | 1,008198447     | 0,090909091     |
| ZNF594                                                                                          | 0,417187178 | -0,011790671 | 0,008 | 0,012 | 1         | 0,991860635   | 1,008206158     | 0,666666667     |
| ZNF57                                                                                           | 0,014805176 | -0,011814096 | 0,003 | 0,015 | 1         | 0,991844531   | 1,008222528     | 0,2             |
| MFSD13A                                                                                         | 0,415681232 | -0,011818367 | 0,009 | 0,014 | 1         | 0,991841594   | 1,008225513     | 0,642857143     |
| INO80E                                                                                          | 0,799686792 | -0,011923061 | 0,068 | 0,069 | 1         | 0,99176962    | 1,008298681     | 0,985507246     |
| ZNF415                                                                                          | 0,530298977 | -0,011948301 | 0,017 | 0,022 | 1         | 0,99175227    | 1,008316321     | 0,772727273     |
| ACIN1                                                                                           | 0,010260264 | -0,011949582 | 0,106 | 0,147 | 1         | 0,991751389   | 1,008317217     | 0,721088435     |
| FAS                                                                                             | 0,618953395 | -0,011965134 | 0,03  | 0,026 | 1         | 0,991740698   | 1,008328086     | 1,153846154     |
| GAN                                                                                             | 0,963241918 | -0,011991929 | 0,036 | 0,035 | 1         | 0,991722279   | 1,008346814     | 1,028571429     |
| PJKV                                                                                            | 0,571069991 | -0,012116251 | 0,008 | 0,011 | 1         | 0,991636822   | 1,00843371      | 0,727272727     |

Supplementary Table 5

| Differentially expressed genes_total calculation_ comparing SC-Keloid vs. (SC-Myel, SC-Nonmyel) |             |              |       |       |           |               |                 |                 |
|-------------------------------------------------------------------------------------------------|-------------|--------------|-------|-------|-----------|---------------|-----------------|-----------------|
| gene                                                                                            | p_val       | avg_log2FC   | pct.1 | pct.2 | p_val_adj | Foldchange_UP | Foldchange_DOWN | Ratio_pct1_pct2 |
| CSRP1                                                                                           | 0,000425694 | -0,012141059 | 0,373 | 0,516 | 1         | 0,991619771   | 1,008451051     | 0,722868217     |
| ANKMY1                                                                                          | 0,094291883 | -0,012144926 | 0,005 | 0,012 | 1         | 0,991617113   | 1,008453754     | 0,416666667     |
| ICE2                                                                                            | 0,066697015 | -0,012174959 | 0,052 | 0,075 | 1         | 0,991596471   | 1,008474747     | 0,693333333     |
| DCUN1D2                                                                                         | 0,422191065 | -0,01217699  | 0,014 | 0,009 | 1         | 0,991595075   | 1,008476167     | 1,555555556     |
| CSNK2A2                                                                                         | 0,150414833 | -0,012210875 | 0,126 | 0,145 | 1         | 0,991571784   | 1,008499854     | 0,868965517     |
| TMEM187                                                                                         | 0,317365052 | -0,012235265 | 0,013 | 0,019 | 1         | 0,991555022   | 1,008516903     | 0,684210526     |
| STAP2                                                                                           | 0,373320825 | -0,012255417 | 0,013 | 0,008 | 1         | 0,991541171   | 1,008530991     | 1,625           |
| NCKIPSD                                                                                         | 0,19266443  | -0,012263693 | 0,024 | 0,035 | 1         | 0,991535483   | 1,008536777     | 0,685714286     |
| PIP4K2C                                                                                         | 0,763055069 | -0,012318689 | 0,021 | 0,023 | 1         | 0,991497686   | 1,008575223     | 0,913043478     |
| SLC27A3                                                                                         | 0,3195765   | -0,012363543 | 0,013 | 0,019 | 1         | 0,991466861   | 1,00860658      | 0,684210526     |
| MTRFR1L                                                                                         | 0,986804612 | -0,012404834 | 0,087 | 0,085 | 1         | 0,991438485   | 1,008635448     | 1,023529412     |
| CTSD                                                                                            | 0,001171232 | -0,012462098 | 0,314 | 0,422 | 1         | 0,991399133   | 1,008675484     | 0,744075829     |
| RCBTB1                                                                                          | 0,331442121 | -0,0124891   | 0,023 | 0,016 | 1         | 0,991380578   | 1,008694363     | 1,4375          |
| TSGA10                                                                                          | 0,090369937 | -0,012502741 | 0,008 | 0,018 | 1         | 0,991371204   | 1,0087039       | 0,444444444     |
| ENPP1                                                                                           | 0,40304252  | -0,012514299 | 0,017 | 0,012 | 1         | 0,991363261   | 1,008711982     | 1,416666667     |
| FBXL17                                                                                          | 0,869378372 | -0,012548209 | 0,063 | 0,064 | 1         | 0,99133996    | 1,008735691     | 0,984375        |
| CPM                                                                                             | 0,043244985 | -0,012568069 | 0,006 | 0,016 | 1         | 0,991326314   | 1,008749577     | 0,375           |
| HMGN3-AS1                                                                                       | 0,921627343 | -0,012592934 | 0,013 | 0,012 | 1         | 0,991309229   | 1,008766963     | 1,083333333     |
| E2F6                                                                                            | 0,428826112 | -0,012649932 | 0,036 | 0,043 | 1         | 0,991270065   | 1,008806818     | 0,837209302     |
| KDM4C                                                                                           | 0,480948141 | -0,012659093 | 0,026 | 0,031 | 1         | 0,99126377    | 1,008813224     | 0,838709677     |
| UBAC1                                                                                           | 0,961155586 | -0,012660242 | 0,079 | 0,076 | 1         | 0,99126298    | 1,008814028     | 1,039473684     |
| C2CD2L                                                                                          | 0,862153852 | -0,012684386 | 0,014 | 0,015 | 1         | 0,991246391   | 1,008830911     | 0,933333333     |
| RSKR                                                                                            | 0,848286483 | -0,012725475 | 0,01  | 0,009 | 1         | 0,99121816    | 1,008859644     | 1,111111111     |
| RBM19                                                                                           | 0,331227806 | -0,012746778 | 0,043 | 0,053 | 1         | 0,991203524   | 1,008874541     | 0,811320755     |
| MIA                                                                                             | 0,169379449 | -0,012752974 | 0,44  | 0,528 | 1         | 0,991199267   | 1,008878874     | 0,833333333     |
| CDC7                                                                                            | 0,42301124  | -0,01282046  | 0,01  | 0,015 | 1         | 0,991152903   | 1,008926067     | 0,666666667     |
| WDR76                                                                                           | 0,077967977 | -0,01282113  | 0,012 | 0,023 | 1         | 0,991152442   | 1,008926536     | 0,52173913      |
| METAP1                                                                                          | 0,473826171 | -0,012855535 | 0,056 | 0,064 | 1         | 0,991128806   | 1,008950597     | 0,875           |
| UAP1                                                                                            | 0,653083312 | -0,012861679 | 0,142 | 0,144 | 1         | 0,991124585   | 1,008954894     | 0,986111111     |
| NAXE                                                                                            | 0,411771974 | -0,012880678 | 0,101 | 0,085 | 1         | 0,991111532   | 1,008968181     | 1,188235294     |

Supplementary Table 5

| Differentially expressed genes_total calculation_ comparing SC-Keloid vs. (SC-Myel, SC-Nonmyel) |             |              |       |       |           |               |                 |                 |
|-------------------------------------------------------------------------------------------------|-------------|--------------|-------|-------|-----------|---------------|-----------------|-----------------|
| gene                                                                                            | p_val       | avg_log2FC   | pct.1 | pct.2 | p_val_adj | Foldchange_UP | Foldchange_DOWN | Ratio_pct1_pct2 |
| TARS2                                                                                           | 0,963317111 | -0,012933033 | 0,017 | 0,018 | 1         | 0,991075566   | 1,009004797     | 0,944444444     |
| ZBTB40                                                                                          | 0,75418031  | -0,012960078 | 0,031 | 0,034 | 1         | 0,991056987   | 1,009023712     | 0,911764706     |
| EXOSC6                                                                                          | 0,872869901 | -0,012982174 | 0,088 | 0,088 | 1         | 0,991041808   | 1,009039166     | 1               |
| NTPCR                                                                                           | 0,820682275 | -0,013075144 | 0,093 | 0,087 | 1         | 0,990977946   | 1,009104193     | 1,068965517     |
| PTCD1                                                                                           | 0,239492235 | -0,013079815 | 0,023 | 0,015 | 1         | 0,990974738   | 1,00910746      | 1,533333333     |
| SNX16                                                                                           | 0,563318086 | -0,013092411 | 0,028 | 0,033 | 1         | 0,990966086   | 1,00911627      | 0,848484848     |
| TMEM39B                                                                                         | 0,749490175 | -0,013094809 | 0,03  | 0,033 | 1         | 0,990964438   | 1,009117947     | 0,909090909     |
| NAP1L3                                                                                          | 0,633701855 | -0,013143254 | 0,02  | 0,023 | 1         | 0,990931163   | 1,009151833     | 0,869565217     |
| IFT122                                                                                          | 0,327125389 | -0,013236041 | 0,022 | 0,03  | 1         | 0,990867433   | 1,00921674      | 0,733333333     |
| ZNF90                                                                                           | 0,736467937 | -0,01334696  | 0,01  | 0,012 | 1         | 0,990791255   | 1,009294334     | 0,833333333     |
| H2BC9                                                                                           | 0,589794908 | -0,013409347 | 0,014 | 0,011 | 1         | 0,990748411   | 1,009337981     | 1,272727273     |
| GULP1                                                                                           | 0,004076162 | -0,013413023 | 0,247 | 0,309 | 1         | 0,990745886   | 1,009340553     | 0,799352751     |
| ANGEL2                                                                                          | 0,3272379   | -0,013414091 | 0,044 | 0,054 | 1         | 0,990745153   | 1,009341299     | 0,814814815     |
| PLVAP                                                                                           | 0,420743892 | -0,013494436 | 0,012 | 0,016 | 1         | 0,990689979   | 1,009397512     | 0,75            |
| CSTF1                                                                                           | 0,239674344 | -0,013507539 | 0,023 | 0,015 | 1         | 0,990680981   | 1,00940668      | 1,533333333     |
| LRRC8D                                                                                          | 0,112246468 | -0,01351242  | 0,012 | 0,022 | 1         | 0,990677629   | 1,009410095     | 0,545454545     |
| GRAMD4                                                                                          | 0,771594136 | -0,013565103 | 0,038 | 0,035 | 1         | 0,990641453   | 1,009446957     | 1,085714286     |
| ENTPD1                                                                                          | 0,026565728 | -0,013581549 | 0,017 | 0,035 | 1         | 0,990630161   | 1,009458464     | 0,485714286     |
| PPIL6                                                                                           | 0,278356312 | -0,01360803  | 0,017 | 0,011 | 1         | 0,990611978   | 1,009476992     | 1,545454545     |
| NFS1                                                                                            | 0,898180779 | -0,013628181 | 0,031 | 0,03  | 1         | 0,990598141   | 1,009491093     | 1,033333333     |
| BATF3                                                                                           | 0,424488933 | -0,013656963 | 0,016 | 0,022 | 1         | 0,990578379   | 1,009511232     | 0,727272727     |
| H2AZ1                                                                                           | 0,098834057 | -0,013657313 | 0,494 | 0,579 | 1         | 0,990578138   | 1,009511477     | 0,853195164     |
| CENPU                                                                                           | 0,869831868 | -0,013675076 | 0,017 | 0,016 | 1         | 0,990565942   | 1,009523907     | 1,0625          |
| SLC45A4                                                                                         | 0,85620802  | -0,013716897 | 0,01  | 0,009 | 1         | 0,990537228   | 1,009553171     | 1,111111111     |
| EIF2B1                                                                                          | 0,465792398 | -0,013746302 | 0,087 | 0,075 | 1         | 0,990517039   | 1,009573749     | 1,16            |
| EBF1                                                                                            | 0,044934789 | -0,013781526 | 0,003 | 0,012 | 1         | 0,990492855   | 1,009598398     | 0,25            |
| PRIMPOL                                                                                         | 0,830965787 | -0,013783978 | 0,041 | 0,038 | 1         | 0,990491172   | 1,009600114     | 1,078947368     |
| NDUFAF4                                                                                         | 0,417870565 | -0,013802245 | 0,073 | 0,083 | 1         | 0,990478631   | 1,009612897     | 0,879518072     |
| IL1RAPL1                                                                                        | 0,180830264 | -0,013827681 | 0,058 | 0,075 | 1         | 0,990461168   | 1,009630698     | 0,773333333     |
| ULK3                                                                                            | 0,572027847 | -0,01383625  | 0,05  | 0,056 | 1         | 0,990455285   | 1,009636694     | 0,892857143     |

Supplementary Table 5

| Differentially expressed genes_total calculation_ comparing SC-Keloid vs. (SC-Myel, SC-Nonmyel) |             |              |       |       |             |               |                 |                 |
|-------------------------------------------------------------------------------------------------|-------------|--------------|-------|-------|-------------|---------------|-----------------|-----------------|
| gene                                                                                            | p_val       | avg_log2FC   | pct.1 | pct.2 | p_val_adj   | Foldchange_UP | Foldchange_DOWN | Ratio_pct1_pct2 |
| GM2A                                                                                            | 0,616481289 | -0,013856985 | 0,034 | 0,038 | 1           | 0,99044105    | 1,009651206     | 0,894736842     |
| FBXL7                                                                                           | 0,141653415 | -0,01386315  | 0,019 | 0,03  | 1           | 0,990436817   | 1,00965552      | 0,633333333     |
| POLR3C                                                                                          | 0,989662729 | -0,013865733 | 0,023 | 0,023 | 1           | 0,990435045   | 1,009657327     | 1               |
| LIN9                                                                                            | 0,560787827 | -0,013922506 | 0,01  | 0,014 | 1           | 0,990396069   | 1,009697061     | 0,714285714     |
| SSC5D                                                                                           | 0,720578464 | -0,013994034 | 0,146 | 0,133 | 1           | 0,990346967   | 1,009747122     | 1,097744361     |
| FLII                                                                                            | 0,031517223 | -0,013996818 | 0,073 | 0,102 | 1           | 0,990345056   | 1,009749071     | 0,715686275     |
| APOBEC3C                                                                                        | 0,992318961 | -0,014045455 | 0,085 | 0,083 | 1           | 0,99031167    | 1,009783112     | 1,024096386     |
| ETV6                                                                                            | 0,055576602 | -0,014106856 | 0,066 | 0,091 | 1           | 0,990269523   | 1,00982609      | 0,725274725     |
| CEP128                                                                                          | 0,200746996 | -0,014116617 | 0,008 | 0,015 | 1           | 0,990262823   | 1,009832922     | 0,533333333     |
| NBPF1                                                                                           | 0,771504212 | -0,014123969 | 0,037 | 0,034 | 1           | 0,990257776   | 1,009838068     | 1,088235294     |
| MANBA                                                                                           | 0,826292062 | -0,014132147 | 0,028 | 0,026 | 1           | 0,990252163   | 1,009843792     | 1,076923077     |
| TMCO6                                                                                           | 0,9099618   | -0,01423555  | 0,012 | 0,012 | 1           | 0,990181191   | 1,009916174     | 1               |
| ROR1                                                                                            | 0,094016768 | -0,014254236 | 0,005 | 0,012 | 1           | 0,990168366   | 1,009929255     | 0,416666667     |
| NAIF1                                                                                           | 0,186664461 | -0,014305033 | 0,007 | 0,014 | 1           | 0,990133503   | 1,009964814     | 0,5             |
| TRIM36                                                                                          | 0,304316522 | -0,014323371 | 0,01  | 0,016 | 1           | 0,990120918   | 1,009977652     | 0,625           |
| TTI1                                                                                            | 0,241705871 | -0,014362015 | 0,016 | 0,009 | 1           | 0,990094397   | 1,010004706     | 1,777777778     |
| AC144652.1                                                                                      | 0,852740515 | -0,014397001 | 0,01  | 0,009 | 1           | 0,990070387   | 1,010029199     | 1,111111111     |
| AGAP9                                                                                           | 0,418416459 | -0,014416866 | 0,009 | 0,014 | 1           | 0,990056755   | 1,010043107     | 0,642857143     |
| AGGF1                                                                                           | 0,920209004 | -0,014426468 | 0,043 | 0,043 | 1           | 0,990050165   | 1,010049829     | 1               |
| BTBD7                                                                                           | 0,071571109 | -0,014435825 | 0,111 | 0,138 | 1           | 0,990043744   | 1,01005638      | 0,804347826     |
| ARL17A                                                                                          | 0,064571146 | -0,014487916 | 0,009 | 0,02  | 1           | 0,990007997   | 1,010092851     | 0,45            |
| DENND6B                                                                                         | 0,880310305 | -0,01451739  | 0,024 | 0,023 | 1           | 0,989987771   | 1,010113487     | 1,043478261     |
| ZNF766                                                                                          | 0,327511884 | -0,014532158 | 0,019 | 0,026 | 1           | 0,989977638   | 1,010123827     | 0,730769231     |
| MTG2                                                                                            | 0,763218742 | -0,014533508 | 0,055 | 0,05  | 1           | 0,989976711   | 1,010124772     | 1,1             |
| RAP2C-AS1                                                                                       | 0,833899634 | -0,014570144 | 0,015 | 0,016 | 1           | 0,989951572   | 1,010150424     | 0,9375          |
| AGFG1                                                                                           | 0,042685461 | -0,014580522 | 0,105 | 0,136 | 1           | 0,989944451   | 1,01015769      | 0,772058824     |
| TFCP2                                                                                           | 0,470372553 | -0,014612159 | 0,041 | 0,047 | 1           | 0,989922743   | 1,010179842     | 0,872340426     |
| GTF2I                                                                                           | 1,88918E-07 | -0,014640991 | 0,295 | 0,436 | 0,003986357 | 0,989902959   | 1,010200031     | 0,676605505     |
| CTDP1                                                                                           | 0,978758293 | -0,014650338 | 0,022 | 0,022 | 1           | 0,989896546   | 1,010206576     | 1               |
| ZNF283                                                                                          | 0,419788037 | -0,014676609 | 0,009 | 0,014 | 1           | 0,989878521   | 1,010224971     | 0,642857143     |

Supplementary Table 5

| Differentially expressed genes_total calculation_ comparing SC-Keloid vs. (SC-Myel, SC-Nonmyel) |             |              |       |       |             |               |                 |                 |
|-------------------------------------------------------------------------------------------------|-------------|--------------|-------|-------|-------------|---------------|-----------------|-----------------|
| gene                                                                                            | p_val       | avg_log2FC   | pct.1 | pct.2 | p_val_adj   | Foldchange_UP | Foldchange_DOWN | Ratio_pct1_pct2 |
| PAIP2                                                                                           | 6,14193E-06 | -0,014728247 | 0,243 | 0,349 | 0,129600922 | 0,98984309    | 1,010261131     | 0,696275072     |
| TTC33                                                                                           | 0,652504983 | -0,014733596 | 0,049 | 0,053 | 1           | 0,98983942    | 1,010264877     | 0,924528302     |
| ZNF213                                                                                          | 0,935957263 | -0,014738412 | 0,019 | 0,019 | 1           | 0,989836116   | 1,010268249     | 1               |
| ZNF764                                                                                          | 0,210314796 | -0,014798355 | 0,009 | 0,016 | 1           | 0,98979499    | 1,010310226     | 0,5625          |
| DHDDS                                                                                           | 0,897671548 | -0,014801499 | 0,038 | 0,037 | 1           | 0,989792833   | 1,010312428     | 1,027027027     |
| PCDHB6                                                                                          | 0,031852646 | -0,014843546 | 0,002 | 0,011 | 1           | 0,989763986   | 1,010341873     | 0,181818182     |
| CCDC102A                                                                                        | 0,761764821 | -0,014907971 | 0,03  | 0,027 | 1           | 0,989719788   | 1,010386992     | 1,111111111     |
| ARIH2                                                                                           | 0,086057729 | -0,014946377 | 0,108 | 0,133 | 1           | 0,989693441   | 1,01041389      | 0,812030075     |
| NUDT4                                                                                           | 0,352569933 | -0,014947217 | 0,268 | 0,288 | 1           | 0,989692865   | 1,010414478     | 0,930555556     |
| TUFT1                                                                                           | 0,144191866 | -0,01496893  | 0,036 | 0,023 | 1           | 0,98967797    | 1,010429685     | 1,565217391     |
| BRMS1L                                                                                          | 0,152921012 | -0,014975005 | 0,033 | 0,046 | 1           | 0,989673803   | 1,01043394      | 0,717391304     |
| EME2                                                                                            | 0,574213668 | -0,014993363 | 0,009 | 0,012 | 1           | 0,989661209   | 1,010446798     | 0,75            |
| ZNF234                                                                                          | 0,05943173  | -0,015028954 | 0,008 | 0,019 | 1           | 0,989636795   | 1,010471726     | 0,421052632     |
| RAVER2                                                                                          | 0,076997588 | -0,015042696 | 0,003 | 0,011 | 1           | 0,989627369   | 1,010481351     | 0,272727273     |
| PXMP2                                                                                           | 0,884196439 | -0,015113784 | 0,051 | 0,049 | 1           | 0,989578606   | 1,010531143     | 1,040816327     |
| BGLAP                                                                                           | 0,424878428 | -0,015191872 | 0,014 | 0,009 | 1           | 0,989525046   | 1,010585841     | 1,555555556     |
| TXN                                                                                             | 0,053870484 | -0,01521891  | 0,449 | 0,558 | 1           | 0,9895065     | 1,010604781     | 0,804659498     |
| PDGFRL                                                                                          | 0,026343539 | -0,015241446 | 0,003 | 0,014 | 1           | 0,989491044   | 1,010620567     | 0,214285714     |
| MASTL                                                                                           | 0,617651588 | -0,015241691 | 0,021 | 0,024 | 1           | 0,989490876   | 1,010620739     | 0,875           |
| SKIV2L                                                                                          | 0,844340379 | -0,015249835 | 0,035 | 0,033 | 1           | 0,98948529    | 1,010626444     | 1,060606061     |
| LANCL2                                                                                          | 0,819451613 | -0,015276043 | 0,016 | 0,018 | 1           | 0,989467315   | 1,010644803     | 0,888888889     |
| FMC1                                                                                            | 0,297717767 | -0,01527644  | 0,135 | 0,148 | 1           | 0,989467043   | 1,010645081     | 0,912162162     |
| GCC1                                                                                            | 0,534838533 | -0,015293344 | 0,016 | 0,02  | 1           | 0,98945545    | 1,010656923     | 0,8             |
| MFGE8                                                                                           | 0,08867493  | -0,015318642 | 0,295 | 0,341 | 1           | 0,989438099   | 1,010674645     | 0,865102639     |
| SAP130                                                                                          | 0,250230225 | -0,015323743 | 0,019 | 0,027 | 1           | 0,989434601   | 1,010678219     | 0,703703704     |
| LRFN5                                                                                           | 0,009588809 | -0,015326928 | 0,002 | 0,014 | 1           | 0,989432417   | 1,01068045      | 0,142857143     |
| LURAP1                                                                                          | 0,145643505 | -0,015427176 | 0,021 | 0,033 | 1           | 0,989363667   | 1,010750681     | 0,636363636     |
| ZCCHC24                                                                                         | 0,193668335 | -0,015429218 | 0,224 | 0,244 | 1           | 0,989362266   | 1,010752112     | 0,918032787     |
| EFR3B                                                                                           | 0,612149567 | -0,015440601 | 0,022 | 0,026 | 1           | 0,98935446    | 1,010760086     | 0,846153846     |
| MDFI                                                                                            | 0,521600026 | -0,015460565 | 0,036 | 0,03  | 1           | 0,989340769   | 1,010774074     | 1,2             |

Supplementary Table 5

| Differentially expressed genes_total calculation_ comparing SC-Keloid vs. (SC-Myel, SC-Nonmyel) |             |              |       |       |           |               |                 |                 |
|-------------------------------------------------------------------------------------------------|-------------|--------------|-------|-------|-----------|---------------|-----------------|-----------------|
| gene                                                                                            | p_val       | avg_log2FC   | pct.1 | pct.2 | p_val_adj | Foldchange_UP | Foldchange_DOWN | Ratio_pct1_pct2 |
| TLL9                                                                                            | 0,044547205 | -0,015511106 | 0,003 | 0,012 | 1         | 0,989306111   | 1,010809484     | 0,25            |
| CAP2                                                                                            | 0,076238574 | -0,015587557 | 0,003 | 0,011 | 1         | 0,989253688   | 1,01086305      | 0,272727273     |
| SHC2                                                                                            | 0,044316012 | -0,015630594 | 0,003 | 0,012 | 1         | 0,989224177   | 1,010893206     | 0,25            |
| KBTBD8                                                                                          | 0,031536193 | -0,01563221  | 0,002 | 0,011 | 1         | 0,98922307    | 1,010894338     | 0,181818182     |
| NAP1L5                                                                                          | 0,937992275 | -0,015646275 | 0,027 | 0,026 | 1         | 0,989213425   | 1,010904193     | 1,038461538     |
| TLCD2                                                                                           | 0,180928279 | -0,015764707 | 0,016 | 0,026 | 1         | 0,989132224   | 1,010987183     | 0,615384615     |
| SETDB1                                                                                          | 0,705176329 | -0,015786691 | 0,023 | 0,02  | 1         | 0,989117151   | 1,011002588     | 1,15            |
| PLBD1                                                                                           | 0,11354004  | -0,015867504 | 0,023 | 0,037 | 1         | 0,989061747   | 1,011059222     | 0,621621622     |
| TIMM21                                                                                          | 0,423166485 | -0,015879325 | 0,027 | 0,02  | 1         | 0,989053643   | 1,011067506     | 1,35            |
| KPNB1                                                                                           | 0,003807001 | -0,015882041 | 0,199 | 0,258 | 1         | 0,989051781   | 1,011069409     | 0,771317829     |
| MAGEE1                                                                                          | 0,076997588 | -0,015886497 | 0,003 | 0,011 | 1         | 0,989048726   | 1,011072532     | 0,272727273     |
| TKT                                                                                             | 0,249395358 | -0,01589245  | 0,18  | 0,197 | 1         | 0,989044645   | 1,011076704     | 0,913705584     |
| RFK                                                                                             | 0,234757621 | -0,015928569 | 0,07  | 0,084 | 1         | 0,989019884   | 1,011102018     | 0,833333333     |
| NOB1                                                                                            | 0,345986568 | -0,015929964 | 0,058 | 0,068 | 1         | 0,989018927   | 1,011102996     | 0,852941176     |
| LACTB2                                                                                          | 0,768913378 | -0,015933177 | 0,037 | 0,034 | 1         | 0,989016725   | 1,011105247     | 1,088235294     |
| TEX10                                                                                           | 0,246085745 | -0,015979398 | 0,033 | 0,043 | 1         | 0,988985039   | 1,011137641     | 0,76744186      |
| CRACD                                                                                           | 0,07598693  | -0,016085376 | 0,003 | 0,011 | 1         | 0,988912393   | 1,011211921     | 0,272727273     |
| ZNF300                                                                                          | 0,839042853 | -0,016096042 | 0,015 | 0,016 | 1         | 0,988905081   | 1,011219397     | 0,9375          |
| ZNF337                                                                                          | 0,601012146 | -0,016133006 | 0,024 | 0,028 | 1         | 0,988879745   | 1,011245306     | 0,857142857     |
| CNPPD1                                                                                          | 0,936985827 | -0,016171658 | 0,083 | 0,079 | 1         | 0,988853252   | 1,011272399     | 1,050632911     |
| CDK5RAP3                                                                                        | 0,761616614 | -0,01617764  | 0,111 | 0,102 | 1         | 0,988849151   | 1,011276592     | 1,088235294     |
| UTP4                                                                                            | 0,801193212 | -0,016238358 | 0,033 | 0,03  | 1         | 0,988807535   | 1,011319155     | 1,1             |
| RAB20                                                                                           | 0,85469387  | -0,01624654  | 0,014 | 0,015 | 1         | 0,988801927   | 1,01132489      | 0,933333333     |
| SARS2                                                                                           | 0,728243751 | -0,016330264 | 0,023 | 0,026 | 1         | 0,988744546   | 1,011383582     | 0,884615385     |
| FRS3                                                                                            | 0,419745846 | -0,016359674 | 0,01  | 0,015 | 1         | 0,988724389   | 1,0114042       | 0,666666667     |
| ADGRB2                                                                                          | 0,752001868 | -0,01636968  | 0,009 | 0,011 | 1         | 0,988717532   | 1,011411214     | 0,818181818     |
| C17orf80                                                                                        | 0,328634977 | -0,016457268 | 0,026 | 0,034 | 1         | 0,988657508   | 1,01147262      | 0,764705882     |
| CHP1                                                                                            | 0,132968289 | -0,016477894 | 0,112 | 0,133 | 1         | 0,988643373   | 1,011487082     | 0,842105263     |
| POFUT1                                                                                          | 0,886911753 | -0,016495372 | 0,038 | 0,039 | 1         | 0,988631396   | 1,011499336     | 0,974358974     |
| GEMIN5                                                                                          | 0,162688029 | -0,016497058 | 0,023 | 0,014 | 1         | 0,988630241   | 1,011500517     | 1,642857143     |

Supplementary Table 5

| Differentially expressed genes_total calculation_ comparing SC-Keloid vs. (SC-Myel, SC-Nonmyel) |             |              |       |       |           |               |                 |                 |
|-------------------------------------------------------------------------------------------------|-------------|--------------|-------|-------|-----------|---------------|-----------------|-----------------|
| gene                                                                                            | p_val       | avg_log2FC   | pct.1 | pct.2 | p_val_adj | Foldchange_UP | Foldchange_DOWN | Ratio_pct1_pct2 |
| USP21                                                                                           | 0,109233385 | -0,016497225 | 0,006 | 0,014 | 1         | 0,988630126   | 1,011500635     | 0,428571429     |
| ZBTB45                                                                                          | 0,233994104 | -0,016507784 | 0,013 | 0,007 | 1         | 0,98862289    | 1,011508038     | 1,857142857     |
| LTB4R                                                                                           | 0,122431829 | -0,016536157 | 0,007 | 0,015 | 1         | 0,988603448   | 1,011527931     | 0,466666667     |
| EOLA1                                                                                           | 0,85469387  | -0,01654262  | 0,014 | 0,015 | 1         | 0,988599019   | 1,011532462     | 0,933333333     |
| KDM4B                                                                                           | 0,787591489 | -0,016546535 | 0,054 | 0,056 | 1         | 0,988596337   | 1,011535207     | 0,964285714     |
| BRF1                                                                                            | 0,873564535 | -0,016597117 | 0,04  | 0,041 | 1         | 0,988561676   | 1,011570673     | 0,975609756     |
| WWOX                                                                                            | 0,366471351 | -0,016606621 | 0,033 | 0,041 | 1         | 0,988555164   | 1,011577337     | 0,804878049     |
| RAP2B                                                                                           | 0,083486772 | -0,016662363 | 0,08  | 0,104 | 1         | 0,988516969   | 1,011616422     | 0,769230769     |
| KRT19                                                                                           | 0,407290399 | -0,016684111 | 0,007 | 0,011 | 1         | 0,988502068   | 1,011631673     | 0,636363636     |
| SHPRH                                                                                           | 0,002015564 | -0,016708207 | 0,073 | 0,118 | 1         | 0,988485558   | 1,011648569     | 0,618644068     |
| INKA1                                                                                           | 0,772825043 | -0,016739465 | 0,014 | 0,012 | 1         | 0,988464141   | 1,011670488     | 1,166666667     |
| LSG1                                                                                            | 0,350128638 | -0,016817442 | 0,037 | 0,046 | 1         | 0,988410717   | 1,011725169     | 0,804347826     |
| METTL4                                                                                          | 0,496835126 | -0,016877645 | 0,037 | 0,043 | 1         | 0,988369472   | 1,011767389     | 0,860465116     |
| PDP2                                                                                            | 0,032150893 | -0,016904788 | 0,01  | 0,024 | 1         | 0,988350876   | 1,011786425     | 0,416666667     |
| CRYBB2                                                                                          | 0,294667643 | -0,016926943 | 0,009 | 0,015 | 1         | 0,988335699   | 1,011801963     | 0,6             |
| ZNF253                                                                                          | 0,15803979  | -0,016951416 | 0,012 | 0,02  | 1         | 0,988318934   | 1,011819126     | 0,6             |
| VPS13C                                                                                          | 0,001829422 | -0,017054965 | 0,191 | 0,254 | 1         | 0,988248      | 1,011891752     | 0,751968504     |
| TST                                                                                             | 0,054287345 | -0,017145016 | 0,04  | 0,06  | 1         | 0,988186317   | 1,011954915     | 0,666666667     |
| PTPN3                                                                                           | 0,314204723 | -0,017225508 | 0,012 | 0,018 | 1         | 0,988131184   | 1,012011376     | 0,666666667     |
| MPND                                                                                            | 0,113809132 | -0,017238267 | 0,03  | 0,018 | 1         | 0,988122445   | 1,012020327     | 1,666666667     |
| TBC1D32                                                                                         | 0,851589731 | -0,017293303 | 0,024 | 0,026 | 1         | 0,988084751   | 1,012058934     | 0,923076923     |
| TTC38                                                                                           | 0,858967147 | -0,01736963  | 0,023 | 0,022 | 1         | 0,988032477   | 1,012112479     | 1,045454545     |
| PLXNB3                                                                                          | 0,057100896 | -0,017370568 | 0,005 | 0,014 | 1         | 0,988031835   | 1,012113137     | 0,357142857     |
| CTDSP2                                                                                          | 0,001035251 | -0,017371553 | 0,144 | 0,205 | 1         | 0,98803116    | 1,012113828     | 0,702439024     |
| EDN1                                                                                            | 0,571956352 | -0,017402855 | 0,008 | 0,011 | 1         | 0,988009723   | 1,012135788     | 0,727272727     |
| VPS26A                                                                                          | 0,014025533 | -0,017414975 | 0,151 | 0,191 | 1         | 0,988001423   | 1,012144291     | 0,790575916     |
| ROBO1                                                                                           | 0,892072105 | -0,017424346 | 0,021 | 0,022 | 1         | 0,987995005   | 1,012150866     | 0,954545455     |
| SMCR8                                                                                           | 0,556632523 | -0,017439452 | 0,012 | 0,015 | 1         | 0,987984661   | 1,012161463     | 0,8             |
| PCNA                                                                                            | 0,843844237 | -0,017469833 | 0,094 | 0,09  | 1         | 0,987963855   | 1,012182778     | 1,044444444     |
| ZFP30                                                                                           | 0,280074878 | -0,017507031 | 0,007 | 0,012 | 1         | 0,987938383   | 1,012208876     | 0,583333333     |



Supplementary Table 5

| Differentially expressed genes_total calculation_ comparing SC-Keloid vs. (SC-Myel, SC-Nonmyel) |             |              |       |       |           |               |                 |                 |
|-------------------------------------------------------------------------------------------------|-------------|--------------|-------|-------|-----------|---------------|-----------------|-----------------|
| gene                                                                                            | p_val       | avg_log2FC   | pct.1 | pct.2 | p_val_adj | Foldchange_UP | Foldchange_DOWN | Ratio_pct1_pct2 |
| AHCYL1                                                                                          | 0,000327451 | -0,017513828 | 0,147 | 0,21  | 1         | 0,987933728   | 1,012213645     | 0,7             |
| NFYC                                                                                            | 0,132509267 | -0,017524467 | 0,061 | 0,079 | 1         | 0,987926442   | 1,01222111      | 0,772151899     |
| CACNA1A                                                                                         | 0,323286488 | -0,017531022 | 0,019 | 0,026 | 1         | 0,987921954   | 1,012225709     | 0,730769231     |
| ASMTL                                                                                           | 0,737255745 | -0,017561638 | 0,069 | 0,071 | 1         | 0,987900989   | 1,01224719      | 0,971830986     |
| KIAA0895                                                                                        | 0,057956681 | -0,01757682  | 0,008 | 0,019 | 1         | 0,987890593   | 1,012257842     | 0,421052632     |
| GDF10                                                                                           | 0,570462087 | -0,017593847 | 0,009 | 0,012 | 1         | 0,987878934   | 1,012269789     | 0,75            |
| PDSS1                                                                                           | 0,130944865 | -0,017601666 | 0,013 | 0,005 | 1         | 0,98787358    | 1,012275275     | 2,6             |
| NDUFS1                                                                                          | 0,404062137 | -0,017622874 | 0,107 | 0,117 | 1         | 0,987859058   | 1,012290156     | 0,914529915     |
| ANAPC13                                                                                         | 0,282855289 | -0,017628962 | 0,107 | 0,121 | 1         | 0,987854889   | 1,012294428     | 0,884297521     |
| RCC1                                                                                            | 0,568258901 | -0,017634232 | 0,027 | 0,031 | 1         | 0,987851281   | 1,012298126     | 0,870967742     |
| EHD4                                                                                            | 0,408612759 | -0,01770606  | 0,165 | 0,175 | 1         | 0,9878021     | 1,012348526     | 0,942857143     |
| MAP1LC3B2                                                                                       | 0,026343539 | -0,017727628 | 0,003 | 0,014 | 1         | 0,987787332   | 1,012363661     | 0,214285714     |
| MTMR9                                                                                           | 0,1778499   | -0,01773755  | 0,05  | 0,065 | 1         | 0,987780539   | 1,012370624     | 0,769230769     |
| KRT18                                                                                           | 0,443444954 | -0,017744906 | 0,019 | 0,014 | 1         | 0,987775502   | 1,012375785     | 1,357142857     |
| HOXB-AS1                                                                                        | 0,551530168 | -0,017793894 | 0,031 | 0,037 | 1         | 0,987741962   | 1,012410162     | 0,837837838     |
| SMPD1                                                                                           | 0,822269406 | -0,01780753  | 0,064 | 0,06  | 1         | 0,987732626   | 1,012419731     | 1,066666667     |
| PEX11A                                                                                          | 0,571956352 | -0,017818008 | 0,008 | 0,011 | 1         | 0,987725452   | 1,012427085     | 0,727272727     |
| PTPN18                                                                                          | 0,736137725 | -0,017910079 | 0,049 | 0,052 | 1         | 0,987662419   | 1,012491699     | 0,942307692     |
| BDH1                                                                                            | 0,121397267 | -0,017930163 | 0,007 | 0,015 | 1         | 0,987648669   | 1,012505794     | 0,466666667     |
| DSC3                                                                                            | 0,020961785 | -0,017972043 | 0,01  | 0,026 | 1         | 0,987619999   | 1,012535186     | 0,384615385     |
| WFS1                                                                                            | 0,694675691 | -0,018009274 | 0,014 | 0,016 | 1         | 0,987594513   | 1,012561316     | 0,875           |
| DGKQ                                                                                            | 0,633451055 | -0,018074203 | 0,015 | 0,012 | 1         | 0,987550067   | 1,012606888     | 1,25            |
| RFC3                                                                                            | 0,33933086  | -0,018085211 | 0,044 | 0,054 | 1         | 0,987542532   | 1,012614615     | 0,814814815     |
| ZNF211                                                                                          | 0,670006569 | -0,018209709 | 0,016 | 0,019 | 1         | 0,987457315   | 1,012702003     | 0,842105263     |
| DCAF15                                                                                          | 0,479218128 | -0,018322444 | 0,043 | 0,035 | 1         | 0,987380156   | 1,01278114      | 1,228571429     |
| SGTB                                                                                            | 0,004639246 | -0,018342579 | 0,043 | 0,076 | 1         | 0,987366376   | 1,012795275     | 0,565789474     |
| RNF208                                                                                          | 0,861760229 | -0,018356368 | 0,031 | 0,033 | 1         | 0,987356939   | 1,012804955     | 0,939393939     |
| AL137026.1                                                                                      | 0,687278102 | -0,018372645 | 0,012 | 0,009 | 1         | 0,987345799   | 1,012816382     | 1,333333333     |
| INSIG2                                                                                          | 0,654370838 | -0,018380515 | 0,041 | 0,045 | 1         | 0,987340413   | 1,012821907     | 0,911111111     |
| BRWD3                                                                                           | 0,016403306 | -0,018385108 | 0,052 | 0,081 | 1         | 0,98733727    | 1,012825131     | 0,641975309     |

Supplementary Table 5

| Differentially expressed genes_total calculation_ comparing SC-Keloid vs. (SC-Myel, SC-Nonmyel) |             |              |       |       |           |               |                 |                 |
|-------------------------------------------------------------------------------------------------|-------------|--------------|-------|-------|-----------|---------------|-----------------|-----------------|
| gene                                                                                            | p_val       | avg_log2FC   | pct.1 | pct.2 | p_val_adj | Foldchange_UP | Foldchange_DOWN | Ratio_pct1_pct2 |
| C18orf25                                                                                        | 0,597611113 | -0,018400405 | 0,049 | 0,054 | 1         | 0,987326801   | 1,012835871     | 0,907407407     |
| KIAA1191                                                                                        | 0,065025906 | -0,018439535 | 0,098 | 0,123 | 1         | 0,987300022   | 1,012863342     | 0,796747967     |
| KIF22                                                                                           | 0,224972211 | -0,018462923 | 0,058 | 0,072 | 1         | 0,987284017   | 1,012879762     | 0,805555556     |
| B3GNT2                                                                                          | 0,026292044 | -0,018501597 | 0,041 | 0,065 | 1         | 0,987257552   | 1,012906914     | 0,630769231     |
| LINC00052                                                                                       | 0,010086398 | -0,018528334 | 0,001 | 0,011 | 1         | 0,987239255   | 1,012925686     | 0,090909091     |
| C1QTNF4                                                                                         | 0,032561837 | -0,018643209 | 0,035 | 0,057 | 1         | 0,987160649   | 1,013006344     | 0,614035088     |
| TRIM25                                                                                          | 0,496390447 | -0,018644894 | 0,023 | 0,028 | 1         | 0,987159496   | 1,013007527     | 0,821428571     |
| MRPS22                                                                                          | 0,802775261 | -0,018647364 | 0,086 | 0,087 | 1         | 0,987157806   | 1,013009261     | 0,988505747     |
| SYN3                                                                                            | 0,573731033 | -0,018723568 | 0,008 | 0,011 | 1         | 0,987105665   | 1,013062771     | 0,727272727     |
| CYHR1                                                                                           | 0,10140574  | -0,018780982 | 0,121 | 0,144 | 1         | 0,987066383   | 1,013103088     | 0,840277778     |
| ETFBKMT                                                                                         | 0,14384452  | -0,018783335 | 0,009 | 0,018 | 1         | 0,987064773   | 1,01310474      | 0,5             |
| LTV1                                                                                            | 0,401747263 | -0,018790212 | 0,069 | 0,057 | 1         | 0,987060068   | 1,013109569     | 1,210526316     |
| TMEM128                                                                                         | 0,070884903 | -0,018823506 | 0,065 | 0,088 | 1         | 0,987037289   | 1,01313295      | 0,738636364     |
| WBP4                                                                                            | 0,050692601 | -0,01887111  | 0,137 | 0,17  | 1         | 0,98700472    | 1,01316638      | 0,805882353     |
| HECTD4                                                                                          | 0,01414282  | -0,018916034 | 0,048 | 0,077 | 1         | 0,986973987   | 1,013197929     | 0,623376623     |
| XPA                                                                                             | 0,196214716 | -0,018970721 | 0,097 | 0,114 | 1         | 0,986936575   | 1,013236337     | 0,850877193     |
| ATG4B                                                                                           | 0,617814955 | -0,018975356 | 0,078 | 0,083 | 1         | 0,986933404   | 1,013239592     | 0,939759036     |
| TLR1                                                                                            | 0,042866094 | -0,018998717 | 0,006 | 0,016 | 1         | 0,986917424   | 1,013255999     | 0,375           |
| ANKAR                                                                                           | 0,065211695 | -0,019031552 | 0,015 | 0,028 | 1         | 0,986894962   | 1,013279061     | 0,535714286     |
| ITGA10                                                                                          | 0,07776275  | -0,019047185 | 0,003 | 0,011 | 1         | 0,986884268   | 1,01329004      | 0,272727273     |
| C6orf120                                                                                        | 0,246027258 | -0,019088107 | 0,02  | 0,028 | 1         | 0,986856275   | 1,013318783     | 0,714285714     |
| RPS6KA4                                                                                         | 0,150714259 | -0,019148447 | 0,048 | 0,033 | 1         | 0,986815002   | 1,013361165     | 1,454545455     |
| ITGB3BP                                                                                         | 0,70743864  | -0,019185091 | 0,08  | 0,073 | 1         | 0,986789937   | 1,013386905     | 1,095890411     |
| ZFYVE19                                                                                         | 0,905786604 | -0,019230066 | 0,038 | 0,037 | 1         | 0,986759175   | 1,013418497     | 1,027027027     |
| MED14OS                                                                                         | 0,706918617 | -0,01924836  | 0,013 | 0,015 | 1         | 0,986746663   | 1,013431347     | 0,866666667     |
| ODR4                                                                                            | 0,033368117 | -0,019264448 | 0,07  | 0,098 | 1         | 0,986735659   | 1,013442649     | 0,714285714     |
| CCDC24                                                                                          | 0,107254793 | -0,019270583 | 0,017 | 0,008 | 1         | 0,986731463   | 1,013446958     | 2,125           |
| FN3KRP                                                                                          | 0,504623418 | -0,019289232 | 0,045 | 0,038 | 1         | 0,986718708   | 1,013460059     | 1,184210526     |
| EIF3G                                                                                           | 9,40956E-05 | -0,019295102 | 0,257 | 0,349 | 1         | 0,986714694   | 1,013464182     | 0,736389685     |
| TRMO                                                                                            | 0,40932387  | -0,019307217 | 0,035 | 0,027 | 1         | 0,986706408   | 1,013472693     | 1,296296296     |

Supplementary Table 5

| Differentially expressed genes_total calculation_ comparing SC-Keloid vs. (SC-Myel, SC-Nonmyel) |             |              |       |       |             |               |                 |                 |
|-------------------------------------------------------------------------------------------------|-------------|--------------|-------|-------|-------------|---------------|-----------------|-----------------|
| gene                                                                                            | p_val       | avg_log2FC   | pct.1 | pct.2 | p_val_adj   | Foldchange_UP | Foldchange_DOWN | Ratio_pct1_pct2 |
| MIS12                                                                                           | 0,152758887 | -0,019324716 | 0,035 | 0,049 | 1           | 0,98669444    | 1,013484986     | 0,714285714     |
| NSUN4                                                                                           | 0,552067768 | -0,019325746 | 0,014 | 0,018 | 1           | 0,986693735   | 1,013485709     | 0,777777778     |
| CD81                                                                                            | 0,327136704 | -0,019351333 | 0,644 | 0,794 | 1           | 0,986676236   | 1,013503684     | 0,811083123     |
| BRME1                                                                                           | 0,172381095 | -0,01938685  | 0,006 | 0,012 | 1           | 0,986651946   | 1,013528635     | 0,5             |
| ZNF513                                                                                          | 0,352414112 | -0,019392466 | 0,035 | 0,043 | 1           | 0,986648105   | 1,013532581     | 0,813953488     |
| ORC2                                                                                            | 0,72969672  | -0,01940381  | 0,034 | 0,037 | 1           | 0,986640347   | 1,01354055      | 0,918918919     |
| USF3                                                                                            | 0,05970101  | -0,019422502 | 0,043 | 0,064 | 1           | 0,986627564   | 1,013553682     | 0,671875        |
| GRPEL1                                                                                          | 0,016938728 | -0,019429805 | 0,087 | 0,122 | 1           | 0,98662257    | 1,013558813     | 0,713114754     |
| TBC1D5                                                                                          | 0,242553266 | -0,019447985 | 0,108 | 0,123 | 1           | 0,986610137   | 1,013571585     | 0,87804878      |
| HDHD3                                                                                           | 0,322860268 | -0,019494126 | 0,014 | 0,02  | 1           | 0,986578583   | 1,013604002     | 0,7             |
| PTP4A3                                                                                          | 0,188143359 | -0,019497037 | 0,007 | 0,014 | 1           | 0,986576592   | 1,013606047     | 0,5             |
| NT5DC1                                                                                          | 0,800042821 | -0,019514298 | 0,021 | 0,019 | 1           | 0,986564788   | 1,013618175     | 1,105263158     |
| FCSK                                                                                            | 0,567972886 | -0,019557258 | 0,008 | 0,011 | 1           | 0,986535411   | 1,013648358     | 0,727272727     |
| RAB27A                                                                                          | 0,678965777 | -0,019570112 | 0,015 | 0,018 | 1           | 0,986526621   | 1,01365739      | 0,833333333     |
| ZHX3                                                                                            | 0,581106966 | -0,01960563  | 0,026 | 0,03  | 1           | 0,986502334   | 1,013682345     | 0,866666667     |
| LPXN                                                                                            | 0,265556453 | -0,019609873 | 0,006 | 0,011 | 1           | 0,986499433   | 1,013685327     | 0,545454545     |
| PAPOLA                                                                                          | 1,05426E-05 | -0,0196206   | 0,237 | 0,338 | 0,222460396 | 0,986492098   | 1,013692864     | 0,701183432     |
| TPD52L1                                                                                         | 0,031473227 | -0,019705903 | 0,002 | 0,011 | 1           | 0,986433771   | 1,013752803     | 0,181818182     |
| ZNF799                                                                                          | 0,152391384 | -0,019706877 | 0,005 | 0,011 | 1           | 0,986433105   | 1,013753487     | 0,454545455     |
| BEX5                                                                                            | 0,930180469 | -0,019752709 | 0,01  | 0,011 | 1           | 0,986401768   | 1,013785693     | 0,909090909     |
| MTMR1                                                                                           | 0,27891557  | -0,019756755 | 0,007 | 0,012 | 1           | 0,986399002   | 1,013788536     | 0,583333333     |
| SEC23B                                                                                          | 0,641904138 | -0,01982465  | 0,04  | 0,043 | 1           | 0,986352581   | 1,013836248     | 0,930232558     |
| GPD1L                                                                                           | 0,06556958  | -0,019916321 | 0,009 | 0,02  | 1           | 0,986289909   | 1,01390067      | 0,45            |
| JAKMIP2                                                                                         | 0,461102374 | -0,019933945 | 0,033 | 0,039 | 1           | 0,986277861   | 1,013913056     | 0,846153846     |
| PIGQ                                                                                            | 0,369342571 | -0,019965241 | 0,056 | 0,045 | 1           | 0,986256466   | 1,013935051     | 1,244444444     |
| BAZ1B                                                                                           | 0,08378235  | -0,019984893 | 0,136 | 0,164 | 1           | 0,986243032   | 1,013948862     | 0,829268293     |
| KIF27                                                                                           | 0,800732958 | -0,020045579 | 0,017 | 0,019 | 1           | 0,986201547   | 1,013991514     | 0,894736842     |
| PLCD1                                                                                           | 0,216702542 | -0,020067358 | 0,01  | 0,018 | 1           | 0,986186659   | 1,014006822     | 0,555555556     |
| PEX1                                                                                            | 0,499505676 | -0,020077279 | 0,036 | 0,042 | 1           | 0,986179878   | 1,014013795     | 0,857142857     |
| TSPAN31                                                                                         | 0,863585407 | -0,020087434 | 0,086 | 0,081 | 1           | 0,986172936   | 1,014020932     | 1,061728395     |

Supplementary Table 5

| Differentially expressed genes_total calculation_ comparing SC-Keloid vs. (SC-Myel, SC-Nonmyel) |             |              |       |       |           |               |                 |                 |
|-------------------------------------------------------------------------------------------------|-------------|--------------|-------|-------|-----------|---------------|-----------------|-----------------|
| gene                                                                                            | p_val       | avg_log2FC   | pct.1 | pct.2 | p_val_adj | Foldchange_UP | Foldchange_DOWN | Ratio_pct1_pct2 |
| DTNBP1                                                                                          | 0,717802759 | -0,020108227 | 0,043 | 0,046 | 1         | 0,986158723   | 1,014035547     | 0,934782609     |
| ZNF398                                                                                          | 0,226831192 | -0,020116327 | 0,012 | 0,019 | 1         | 0,986153186   | 1,01404124      | 0,631578947     |
| MIR155HG                                                                                        | 0,034680977 | -0,020116329 | 0,005 | 0,015 | 1         | 0,986153185   | 1,014041242     | 0,333333333     |
| MAP2K6                                                                                          | 0,532690769 | -0,02011768  | 0,017 | 0,022 | 1         | 0,986152261   | 1,014042191     | 0,772727273     |
| TCF19                                                                                           | 0,41918926  | -0,020261103 | 0,012 | 0,016 | 1         | 0,986054229   | 1,014143006     | 0,75            |
| MBNL3                                                                                           | 0,554041793 | -0,020265603 | 0,012 | 0,015 | 1         | 0,986051153   | 1,014146169     | 0,8             |
| MOXD1                                                                                           | 0,177941703 | -0,020284127 | 0,052 | 0,068 | 1         | 0,986038493   | 1,014159191     | 0,764705882     |
| ALPK1                                                                                           | 0,247204885 | -0,020294365 | 0,02  | 0,028 | 1         | 0,986031496   | 1,014166388     | 0,714285714     |
| MFAP1                                                                                           | 0,22652494  | -0,020300302 | 0,064 | 0,079 | 1         | 0,986027438   | 1,014170561     | 0,810126582     |
| UNC119B                                                                                         | 0,134501776 | -0,020414333 | 0,05  | 0,034 | 1         | 0,985949505   | 1,014250725     | 1,470588235     |
| TMEM184C                                                                                        | 0,93330529  | -0,020474339 | 0,027 | 0,026 | 1         | 0,985908497   | 1,014292911     | 1,038461538     |
| CEP41                                                                                           | 0,604437035 | -0,020541058 | 0,024 | 0,02  | 1         | 0,985862904   | 1,014339819     | 1,2             |
| IL1RAPL2                                                                                        | 0,253728742 | -0,020544374 | 0,03  | 0,041 | 1         | 0,985860638   | 1,014342151     | 0,731707317     |
| HINT3                                                                                           | 0,218539685 | -0,020582778 | 0,04  | 0,052 | 1         | 0,985834395   | 1,014369153     | 0,769230769     |
| ZFAT                                                                                            | 0,922974354 | -0,020733955 | 0,013 | 0,012 | 1         | 0,985731097   | 1,014475452     | 1,083333333     |
| BMT2                                                                                            | 0,152008486 | -0,020763038 | 0,027 | 0,039 | 1         | 0,985711226   | 1,014495902     | 0,692307692     |
| BCDIN3D                                                                                         | 0,168206762 | -0,02082323  | 0,014 | 0,007 | 1         | 0,985670101   | 1,01453823      | 2               |
| CDCA2                                                                                           | 0,094429682 | -0,020843173 | 0,005 | 0,012 | 1         | 0,985656476   | 1,014552254     | 0,416666667     |
| CACNA2D1                                                                                        | 0,450490842 | -0,02089213  | 0,03  | 0,037 | 1         | 0,985623029   | 1,014586683     | 0,810810811     |
| ECH1                                                                                            | 0,662913126 | -0,020916209 | 0,173 | 0,174 | 1         | 0,985606579   | 1,014603617     | 0,994252874     |
| LINC00663                                                                                       | 0,922525325 | -0,020931565 | 0,013 | 0,012 | 1         | 0,985596088   | 1,014614416     | 1,083333333     |
| KRT16                                                                                           | 0,066556535 | -0,021029776 | 0,015 | 0,028 | 1         | 0,985528996   | 1,014683489     | 0,535714286     |
| SLC1A5                                                                                          | 0,518831448 | -0,021047388 | 0,086 | 0,075 | 1         | 0,985516965   | 1,014695875     | 1,146666667     |
| PARL                                                                                            | 0,288762875 | -0,02109117  | 0,1   | 0,114 | 1         | 0,985487058   | 1,014726669     | 0,877192982     |
| IRF3                                                                                            | 0,486494253 | -0,021109844 | 0,115 | 0,1   | 1         | 0,985474302   | 1,014739804     | 1,15            |
| ATG4D                                                                                           | 0,351758554 | -0,021134594 | 0,028 | 0,02  | 1         | 0,985457396   | 1,014757212     | 1,4             |
| NAA60                                                                                           | 0,900307414 | -0,021148643 | 0,069 | 0,065 | 1         | 0,9854478     | 1,014767094     | 1,061538462     |
| VASP                                                                                            | 0,949391509 | -0,021175367 | 0,105 | 0,1   | 1         | 0,985429545   | 1,014785892     | 1,05            |
| ELP3                                                                                            | 0,604164184 | -0,021260902 | 0,023 | 0,027 | 1         | 0,985371123   | 1,014846058     | 0,851851852     |
| RNGTT                                                                                           | 0,788473341 | -0,021266356 | 0,038 | 0,035 | 1         | 0,985367398   | 1,014849895     | 1,085714286     |

Supplementary Table 5

| Differentially expressed genes_total calculation_ comparing SC-Keloid vs. (SC-Myel, SC-Nonmyel) |             |              |       |       |           |               |                 |                 |
|-------------------------------------------------------------------------------------------------|-------------|--------------|-------|-------|-----------|---------------|-----------------|-----------------|
| gene                                                                                            | p_val       | avg_log2FC   | pct.1 | pct.2 | p_val_adj | Foldchange_UP | Foldchange_DOWN | Ratio_pct1_pct2 |
| SLC66A1                                                                                         | 0,850143653 | -0,021269056 | 0,016 | 0,015 | 1         | 0,985365554   | 1,014851794     | 1,066666667     |
| STAT6                                                                                           | 0,036872764 | -0,021273064 | 0,064 | 0,091 | 1         | 0,985362816   | 1,014854614     | 0,703296703     |
| FAM72A                                                                                          | 0,781712517 | -0,021307316 | 0,019 | 0,02  | 1         | 0,985339422   | 1,014878708     | 0,95            |
| SIRT5                                                                                           | 0,351577102 | -0,021315304 | 0,02  | 0,014 | 1         | 0,985333967   | 1,014884328     | 1,428571429     |
| C9orf50                                                                                         | 0,773977507 | -0,02132787  | 0,026 | 0,023 | 1         | 0,985325384   | 1,014893167     | 1,130434783     |
| KHK                                                                                             | 0,313846588 | -0,021351043 | 0,023 | 0,031 | 1         | 0,985309558   | 1,014909469     | 0,741935484     |
| ZNF862                                                                                          | 0,67210227  | -0,02135896  | 0,016 | 0,019 | 1         | 0,985304151   | 1,014915038     | 0,842105263     |
| TRIM65                                                                                          | 0,848683716 | -0,021426544 | 0,023 | 0,024 | 1         | 0,985257995   | 1,014962584     | 0,958333333     |
| INTS5                                                                                           | 0,716813693 | -0,021443012 | 0,012 | 0,014 | 1         | 0,985246748   | 1,014974169     | 0,857142857     |
| EGFL7                                                                                           | 0,588235379 | -0,021602152 | 0,014 | 0,011 | 1         | 0,985138074   | 1,015086135     | 1,272727273     |
| ACADSB                                                                                          | 0,15539891  | -0,021604941 | 0,023 | 0,035 | 1         | 0,98513617    | 1,015088097     | 0,657142857     |
| FKBP1A                                                                                          | 0,001770636 | -0,021615575 | 0,261 | 0,341 | 1         | 0,985128909   | 1,015095579     | 0,765395894     |
| MEST                                                                                            | 0,01743744  | -0,021685572 | 0,002 | 0,012 | 1         | 0,985081113   | 1,015144831     | 0,166666667     |
| TEX2                                                                                            | 0,034741309 | -0,021695938 | 0,063 | 0,09  | 1         | 0,985074035   | 1,015152125     | 0,7             |
| TRIM45                                                                                          | 0,40538408  | -0,021749116 | 0,007 | 0,011 | 1         | 0,985037725   | 1,015189545     | 0,636363636     |
| UHRF1BP1                                                                                        | 0,416164951 | -0,021839839 | 0,014 | 0,019 | 1         | 0,984975784   | 1,015253386     | 0,736842105     |
| LYSMD2                                                                                          | 0,244721622 | -0,021851705 | 0,056 | 0,069 | 1         | 0,984967683   | 1,015261736     | 0,811594203     |
| COMMD4                                                                                          | 0,764010663 | -0,021867808 | 0,154 | 0,141 | 1         | 0,984956689   | 1,015273068     | 1,092198582     |
| BMP8B                                                                                           | 0,350735514 | -0,021903664 | 0,136 | 0,148 | 1         | 0,984932209   | 1,015298302     | 0,918918919     |
| FOXD1                                                                                           | 0,159837991 | -0,02190773  | 0,02  | 0,011 | 1         | 0,984929433   | 1,015301164     | 1,818181818     |
| CLDN5                                                                                           | 0,291384325 | -0,021963972 | 0,008 | 0,014 | 1         | 0,984891038   | 1,015340745     | 0,571428571     |
| OASL                                                                                            | 0,407290399 | -0,022039775 | 0,007 | 0,011 | 1         | 0,98483929    | 1,015394095     | 0,636363636     |
| HPS6                                                                                            | 0,989279084 | -0,022151461 | 0,015 | 0,015 | 1         | 0,984763053   | 1,015472704     | 1               |
| RAB11A                                                                                          | 0,001031685 | -0,022239268 | 0,159 | 0,216 | 1         | 0,984703118   | 1,015534511     | 0,736111111     |
| PARP16                                                                                          | 0,079762897 | -0,02225022  | 0,007 | 0,016 | 1         | 0,984695643   | 1,01554222      | 0,4375          |
| COQ8B                                                                                           | 0,669195371 | -0,022263231 | 0,048 | 0,052 | 1         | 0,984686763   | 1,015551379     | 0,923076923     |
| CDS2                                                                                            | 0,144266003 | -0,022295381 | 0,064 | 0,081 | 1         | 0,98466482    | 1,015574011     | 0,790123457     |
| ARHGAP20                                                                                        | 0,210314796 | -0,022322041 | 0,009 | 0,016 | 1         | 0,984646624   | 1,015592778     | 0,5625          |
| RACGAP1                                                                                         | 0,262265926 | -0,022340386 | 0,006 | 0,011 | 1         | 0,984634103   | 1,015605692     | 0,545454545     |
| B4GALT4                                                                                         | 0,044149975 | -0,022342922 | 0,038 | 0,06  | 1         | 0,984632373   | 1,015607477     | 0,633333333     |

Supplementary Table 5

| Differentially expressed genes_total calculation_ comparing SC-Keloid vs. (SC-Myel, SC-Nonmyel) |             |              |       |       |           |               |                 |                 |
|-------------------------------------------------------------------------------------------------|-------------|--------------|-------|-------|-----------|---------------|-----------------|-----------------|
| gene                                                                                            | p_val       | avg_log2FC   | pct.1 | pct.2 | p_val_adj | Foldchange_UP | Foldchange_DOWN | Ratio_pct1_pct2 |
| MDN1                                                                                            | 0,162005834 | -0,02235856  | 0,036 | 0,05  | 1         | 0,9846217     | 1,015618486     | 0,72            |
| GCNA                                                                                            | 0,227683241 | -0,02236172  | 0,013 | 0,02  | 1         | 0,984619543   | 1,015620711     | 0,65            |
| KLHL2                                                                                           | 0,505148159 | -0,022404321 | 0,022 | 0,027 | 1         | 0,984590469   | 1,015650701     | 0,814814815     |
| TAF1B                                                                                           | 0,410768703 | -0,022537428 | 0,04  | 0,047 | 1         | 0,984499632   | 1,015744412     | 0,85106383      |
| HNRNPUL2                                                                                        | 0,033018507 | -0,022543742 | 0,088 | 0,119 | 1         | 0,984495323   | 1,015748858     | 0,739495798     |
| MTMR4                                                                                           | 0,899941409 | -0,022571179 | 0,029 | 0,03  | 1         | 0,9844766     | 1,015768175     | 0,966666667     |
| ZWILCH                                                                                          | 0,128299797 | -0,022595321 | 0,028 | 0,016 | 1         | 0,984460127   | 1,015785173     | 1,75            |
| TUBE1                                                                                           | 0,096835236 | -0,022610452 | 0,033 | 0,049 | 1         | 0,984449802   | 1,015795827     | 0,673469388     |
| CNOT2                                                                                           | 0,005470873 | -0,022613286 | 0,142 | 0,191 | 1         | 0,984447868   | 1,015797822     | 0,743455497     |
| PTPRM                                                                                           | 0,44649566  | -0,022627039 | 0,045 | 0,053 | 1         | 0,984438483   | 1,015807506     | 0,849056604     |
| MTRF1L                                                                                          | 0,694600121 | -0,022694408 | 0,054 | 0,057 | 1         | 0,984392514   | 1,015854941     | 0,947368421     |
| RAD51D                                                                                          | 0,552610514 | -0,022707384 | 0,03  | 0,035 | 1         | 0,98438366    | 1,015864079     | 0,857142857     |
| SERPINA5                                                                                        | 0,566722226 | -0,022712941 | 0,009 | 0,012 | 1         | 0,984379869   | 1,015867991     | 0,75            |
| CSNK1D                                                                                          | 0,008447565 | -0,022721511 | 0,105 | 0,147 | 1         | 0,984374021   | 1,015874026     | 0,714285714     |
| ZNF575                                                                                          | 0,152391384 | -0,022728742 | 0,005 | 0,011 | 1         | 0,984369088   | 1,015879118     | 0,454545455     |
| RALY                                                                                            | 0,549096449 | -0,022748787 | 0,171 | 0,174 | 1         | 0,984355411   | 1,015893233     | 0,982758621     |
| SLC9B2                                                                                          | 0,981567748 | -0,022761794 | 0,016 | 0,016 | 1         | 0,984346536   | 1,015902391     | 1               |
| ZNHIT2                                                                                          | 0,843400192 | -0,022783423 | 0,016 | 0,015 | 1         | 0,984331779   | 1,015917622     | 1,066666667     |
| TBCEL                                                                                           | 0,192514959 | -0,022832003 | 0,023 | 0,034 | 1         | 0,984298634   | 1,015951832     | 0,676470588     |
| SIAE                                                                                            | 0,572843367 | -0,022882868 | 0,008 | 0,011 | 1         | 0,984263931   | 1,015987652     | 0,727272727     |
| FUBP3                                                                                           | 0,003095979 | -0,022912963 | 0,078 | 0,121 | 1         | 0,984243399   | 1,016008846     | 0,644628099     |
| SOGA1                                                                                           | 0,42275197  | -0,022956732 | 0,1   | 0,11  | 1         | 0,984213539   | 1,016039671     | 0,909090909     |
| RBM48                                                                                           | 0,148347948 | -0,02298151  | 0,022 | 0,034 | 1         | 0,984196636   | 1,016057121     | 0,647058824     |
| MAP3K2                                                                                          | 0,002734322 | -0,023057908 | 0,159 | 0,217 | 1         | 0,984144519   | 1,016110928     | 0,732718894     |
| PHKB                                                                                            | 0,481898019 | -0,023178445 | 0,054 | 0,061 | 1         | 0,984062297   | 1,016195827     | 0,885245902     |
| ACTR1B                                                                                          | 0,637001131 | -0,02319732  | 0,076 | 0,08  | 1         | 0,984049423   | 1,016209122     | 0,95            |
| TMEM25                                                                                          | 0,306922418 | -0,023228641 | 0,01  | 0,016 | 1         | 0,984028059   | 1,016231184     | 0,625           |
| SMAD9                                                                                           | 0,263160536 | -0,02325468  | 0,006 | 0,011 | 1         | 0,984010299   | 1,016249526     | 0,545454545     |
| POLN                                                                                            | 0,169639922 | -0,023393296 | 0,006 | 0,012 | 1         | 0,983915758   | 1,016347174     | 0,5             |
| TRMT10C                                                                                         | 0,046893687 | -0,023409431 | 0,059 | 0,084 | 1         | 0,983904754   | 1,016358541     | 0,702380952     |

Supplementary Table 5

| Differentially expressed genes_total calculation_ comparing SC-Keloid vs. (SC-Myel, SC-Nonmyel) |             |              |       |       |           |               |                 |                 |
|-------------------------------------------------------------------------------------------------|-------------|--------------|-------|-------|-----------|---------------|-----------------|-----------------|
| gene                                                                                            | p_val       | avg_log2FC   | pct.1 | pct.2 | p_val_adj | Foldchange_UP | Foldchange_DOWN | Ratio_pct1_pct2 |
| ZNF582                                                                                          | 0,017581739 | -0,023450662 | 0,002 | 0,012 | 1         | 0,983876635   | 1,016387588     | 0,166666667     |
| BRD3OS                                                                                          | 0,87803268  | -0,023461309 | 0,024 | 0,023 | 1         | 0,983869375   | 1,016395088     | 1,043478261     |
| PEAK1                                                                                           | 0,044590083 | -0,023481802 | 0,073 | 0,1   | 1         | 0,983855399   | 1,016409526     | 0,73            |
| SOCS6                                                                                           | 0,087959644 | -0,023525998 | 0,041 | 0,058 | 1         | 0,98382526    | 1,016440664     | 0,706896552     |
| ARID3A                                                                                          | 0,672790545 | -0,023571885 | 0,015 | 0,018 | 1         | 0,983793968   | 1,016472994     | 0,833333333     |
| ARMH3                                                                                           | 0,027178889 | -0,023581259 | 0,02  | 0,038 | 1         | 0,983787576   | 1,016479598     | 0,526315789     |
| GOT1                                                                                            | 0,55527592  | -0,02358442  | 0,037 | 0,031 | 1         | 0,98378542    | 1,016481826     | 1,193548387     |
| RPS6KL1                                                                                         | 0,412850717 | -0,023622996 | 0,008 | 0,012 | 1         | 0,983759116   | 1,016509005     | 0,666666667     |
| DTNA                                                                                            | 0,15051459  | -0,023623037 | 0,028 | 0,041 | 1         | 0,983759088   | 1,016509034     | 0,682926829     |
| CHST10                                                                                          | 0,23359257  | -0,023663574 | 0,015 | 0,023 | 1         | 0,983731446   | 1,016537596     | 0,652173913     |
| ZNF334                                                                                          | 0,209492554 | -0,023681131 | 0,009 | 0,016 | 1         | 0,983719475   | 1,016549967     | 0,5625          |
| C1orf216                                                                                        | 0,569319979 | -0,023751002 | 0,026 | 0,03  | 1         | 0,983671834   | 1,016599201     | 0,866666667     |
| ZNF436                                                                                          | 0,149496363 | -0,02375178  | 0,01  | 0,019 | 1         | 0,983671303   | 1,016599749     | 0,526315789     |
| C2CD2                                                                                           | 0,118337227 | -0,023783005 | 0,013 | 0,023 | 1         | 0,983650013   | 1,016621752     | 0,565217391     |
| PPP1R11                                                                                         | 0,573277968 | -0,023791579 | 0,081 | 0,087 | 1         | 0,983644167   | 1,016627794     | 0,931034483     |
| PISD                                                                                            | 0,478114981 | -0,023850013 | 0,026 | 0,031 | 1         | 0,983604327   | 1,016668972     | 0,838709677     |
| DDX19A                                                                                          | 0,75975771  | -0,023856104 | 0,066 | 0,061 | 1         | 0,983600175   | 1,016673264     | 1,081967213     |
| CD164                                                                                           | 0,003837505 | -0,023891138 | 0,231 | 0,292 | 1         | 0,983576289   | 1,016697953     | 0,79109589      |
| GRK5                                                                                            | 0,310917224 | -0,023947634 | 0,012 | 0,018 | 1         | 0,983537773   | 1,016737767     | 0,666666667     |
| GSTM4                                                                                           | 0,357798216 | -0,023959246 | 0,033 | 0,041 | 1         | 0,983529857   | 1,016745951     | 0,804878049     |
| MTM1                                                                                            | 0,46103965  | -0,02397238  | 0,028 | 0,034 | 1         | 0,983520903   | 1,016755208     | 0,823529412     |
| WASHC2C                                                                                         | 0,90612835  | -0,02400247  | 0,029 | 0,03  | 1         | 0,98350039    | 1,016776414     | 0,966666667     |
| STOML1                                                                                          | 0,140422562 | -0,024010447 | 0,047 | 0,031 | 1         | 0,983494952   | 1,016782036     | 1,516129032     |
| RPS6KB2                                                                                         | 0,387155383 | -0,024017636 | 0,076 | 0,062 | 1         | 0,983490051   | 1,016787103     | 1,225806452     |
| ZSCAN9                                                                                          | 0,720195829 | -0,024035911 | 0,012 | 0,014 | 1         | 0,983477593   | 1,016799983     | 0,857142857     |
| SLC50A1                                                                                         | 0,656060093 | -0,024078811 | 0,057 | 0,061 | 1         | 0,983448349   | 1,016830219     | 0,93442623      |
| ULK4                                                                                            | 0,548011291 | -0,024150904 | 0,017 | 0,014 | 1         | 0,983399206   | 1,016881032     | 1,214285714     |
| MMD                                                                                             | 0,192537417 | -0,024196787 | 0,024 | 0,035 | 1         | 0,983367931   | 1,016913374     | 0,685714286     |
| ZNF555                                                                                          | 0,435130869 | -0,024205839 | 0,01  | 0,007 | 1         | 0,983361761   | 1,016919754     | 1,428571429     |
| RBSN                                                                                            | 0,587225187 | -0,024212526 | 0,037 | 0,042 | 1         | 0,983357203   | 1,016924467     | 0,880952381     |

Supplementary Table 5

| Differentially expressed genes_total calculation_ comparing SC-Keloid vs. (SC-Myel, SC-Nonmyel) |             |              |       |       |           |               |                 |                 |
|-------------------------------------------------------------------------------------------------|-------------|--------------|-------|-------|-----------|---------------|-----------------|-----------------|
| gene                                                                                            | p_val       | avg_log2FC   | pct.1 | pct.2 | p_val_adj | Foldchange_UP | Foldchange_DOWN | Ratio_pct1_pct2 |
| ARHGEF9                                                                                         | 0,027553097 | -0,024232148 | 0,069 | 0,098 | 1         | 0,983343829   | 1,016938298     | 0,704081633     |
| LINC01117                                                                                       | 0,691791889 | -0,024274804 | 0,012 | 0,009 | 1         | 0,983314755   | 1,016968367     | 1,333333333     |
| CHD3                                                                                            | 0,103452229 | -0,024316709 | 0,15  | 0,176 | 1         | 0,983286194   | 1,016997906     | 0,852272727     |
| DVL1                                                                                            | 0,338017243 | -0,024335501 | 0,091 | 0,102 | 1         | 0,983273385   | 1,017011154     | 0,892156863     |
| CLSTN2                                                                                          | 0,000893891 | -0,024401632 | 0,002 | 0,019 | 1         | 0,983228315   | 1,017057773     | 0,105263158     |
| TEX261                                                                                          | 0,369066108 | -0,024409363 | 0,059 | 0,047 | 1         | 0,983223046   | 1,017063223     | 1,255319149     |
| CPTP                                                                                            | 0,005152363 | -0,024441599 | 0,049 | 0,022 | 1         | 0,983201077   | 1,017085948     | 2,227272727     |
| CEP104                                                                                          | 0,291455642 | -0,024446732 | 0,036 | 0,046 | 1         | 0,983197579   | 1,017089567     | 0,782608696     |
| SDHB                                                                                            | 0,199370383 | -0,024450121 | 0,143 | 0,16  | 1         | 0,983195269   | 1,017091957     | 0,89375         |
| RBBP8                                                                                           | 0,073960746 | -0,024470772 | 0,036 | 0,054 | 1         | 0,983181196   | 1,017106516     | 0,666666667     |
| PDCD11                                                                                          | 0,88084986  | -0,024520964 | 0,047 | 0,047 | 1         | 0,983146991   | 1,017141901     | 1               |
| PSME4                                                                                           | 0,000612598 | -0,024539401 | 0,062 | 0,109 | 1         | 0,983134427   | 1,0171549       | 0,568807339     |
| ATXN10                                                                                          | 0,377666361 | -0,024551227 | 0,129 | 0,138 | 1         | 0,983126368   | 1,017163238     | 0,934782609     |
| ZNF841                                                                                          | 0,415681232 | -0,024585906 | 0,009 | 0,014 | 1         | 0,983102736   | 1,017187689     | 0,642857143     |
| OR7C1                                                                                           | 0,268269766 | -0,024593218 | 0,01  | 0,005 | 1         | 0,983097753   | 1,017192844     | 2               |
| NUP93                                                                                           | 0,954793047 | -0,02463462  | 0,042 | 0,041 | 1         | 0,983069541   | 1,017222035     | 1,024390244     |
| ZNF674-AS1                                                                                      | 0,279494816 | -0,024642549 | 0,007 | 0,012 | 1         | 0,983064138   | 1,017227627     | 0,583333333     |
| XKR6                                                                                            | 0,26495607  | -0,024675674 | 0,006 | 0,011 | 1         | 0,983041567   | 1,017250983     | 0,545454545     |
| MVB12B                                                                                          | 0,049470195 | -0,024705854 | 0,058 | 0,083 | 1         | 0,983021003   | 1,017272263     | 0,698795181     |
| CIPC                                                                                            | 0,029527729 | -0,024707447 | 0,014 | 0,03  | 1         | 0,983019917   | 1,017273386     | 0,466666667     |
| ZNF329                                                                                          | 0,403862872 | -0,024755302 | 0,007 | 0,011 | 1         | 0,98298731    | 1,017307131     | 0,636363636     |
| LSR                                                                                             | 0,503681994 | -0,024781292 | 0,021 | 0,026 | 1         | 0,982969603   | 1,017325457     | 0,807692308     |
| AHCYL2                                                                                          | 0,024801857 | -0,024791476 | 0,017 | 0,035 | 1         | 0,982962663   | 1,017332639     | 0,485714286     |
| WDR27                                                                                           | 0,532690769 | -0,024799263 | 0,017 | 0,022 | 1         | 0,982957358   | 1,01733813      | 0,772727273     |
| BAG5                                                                                            | 0,155857623 | -0,024808381 | 0,104 | 0,123 | 1         | 0,982951146   | 1,017344559     | 0,845528455     |
| FECH                                                                                            | 0,984738461 | -0,024837998 | 0,016 | 0,016 | 1         | 0,982930967   | 1,017365444     | 1               |
| ACAA1                                                                                           | 0,1824535   | -0,024907199 | 0,102 | 0,119 | 1         | 0,982883821   | 1,017414245     | 0,857142857     |
| NSMF                                                                                            | 0,693205361 | -0,024975937 | 0,038 | 0,034 | 1         | 0,982836991   | 1,017462722     | 1,117647059     |
| PCAT6                                                                                           | 0,732667065 | -0,02499167  | 0,013 | 0,011 | 1         | 0,982826273   | 1,017473817     | 1,181818182     |
| DYNC2LI1                                                                                        | 0,038395195 | -0,024992107 | 0,044 | 0,024 | 1         | 0,982825976   | 1,017474126     | 1,833333333     |



Supplementary Table 5

| Differentially expressed genes_total calculation_ comparing SC-Keloid vs. (SC-Myel, SC-Nonmyel) |             |              |       |       |           |               |                 |                 |
|-------------------------------------------------------------------------------------------------|-------------|--------------|-------|-------|-----------|---------------|-----------------|-----------------|
| gene                                                                                            | p_val       | avg_log2FC   | pct.1 | pct.2 | p_val_adj | Foldchange_UP | Foldchange_DOWN | Ratio_pct1_pct2 |
| KTI12                                                                                           | 0,933895978 | -0,02501809  | 0,02  | 0,019 | 1         | 0,982808275   | 1,017492451     | 1,052631579     |
| BCLAF3                                                                                          | 0,058544588 | -0,025072512 | 0,041 | 0,061 | 1         | 0,982771202   | 1,017530833     | 0,672131148     |
| MAP6                                                                                            | 0,116272191 | -0,025096653 | 0,027 | 0,041 | 1         | 0,982754757   | 1,017547861     | 0,658536585     |
| TRPV3                                                                                           | 0,191731739 | -0,025154863 | 0,031 | 0,043 | 1         | 0,982715106   | 1,017588917     | 0,720930233     |
| ABHD8                                                                                           | 0,474314301 | -0,025161186 | 0,024 | 0,03  | 1         | 0,982710798   | 1,017593377     | 0,8             |
| CREB1                                                                                           | 0,008800514 | -0,025166406 | 0,104 | 0,145 | 1         | 0,982707243   | 1,017597059     | 0,717241379     |
| STX5                                                                                            | 0,979444932 | -0,025203834 | 0,094 | 0,091 | 1         | 0,982681749   | 1,017623459     | 1,032967033     |
| LPP-AS2                                                                                         | 0,423869497 | -0,02520981  | 0,014 | 0,009 | 1         | 0,982677678   | 1,017627674     | 1,555555556     |
| RHBDD3                                                                                          | 0,72870561  | -0,025233411 | 0,029 | 0,026 | 1         | 0,982661602   | 1,017644322     | 1,115384615     |
| TOM1L1                                                                                          | 0,376848837 | -0,025235316 | 0,029 | 0,022 | 1         | 0,982660305   | 1,017645666     | 1,318181818     |
| WDR17                                                                                           | 0,000767842 | -0,025258727 | 0,008 | 0,031 | 1         | 0,982644359   | 1,017662179     | 0,258064516     |
| GALK2                                                                                           | 0,06063519  | -0,025260918 | 0,048 | 0,069 | 1         | 0,982642867   | 1,017663725     | 0,695652174     |
| CALCOCO1                                                                                        | 0,044764595 | -0,02526954  | 0,059 | 0,084 | 1         | 0,982636995   | 1,017669806     | 0,702380952     |
| CNOT9                                                                                           | 0,754762528 | -0,025301764 | 0,066 | 0,068 | 1         | 0,982615046   | 1,017692538     | 0,970588235     |
| SDCBP2                                                                                          | 0,02541044  | -0,025317536 | 0,003 | 0,014 | 1         | 0,982604305   | 1,017703663     | 0,214285714     |
| VPS26B                                                                                          | 0,252540678 | -0,025329912 | 0,069 | 0,053 | 1         | 0,982595875   | 1,017712394     | 1,301886792     |
| SLX1A                                                                                           | 0,267665168 | -0,025334426 | 0,01  | 0,005 | 1         | 0,982592801   | 1,017715578     | 2               |
| AHNAK2                                                                                          | 0,03514464  | -0,025390708 | 0,047 | 0,026 | 1         | 0,982554469   | 1,017755282     | 1,807692308     |
| ADM5                                                                                            | 0,740963258 | -0,025437268 | 0,01  | 0,012 | 1         | 0,98252276    | 1,017788128     | 0,833333333     |
| NOP14-AS1                                                                                       | 0,526126504 | -0,02546196  | 0,017 | 0,022 | 1         | 0,982505944   | 1,017805548     | 0,772727273     |
| C14orf93                                                                                        | 0,555891712 | -0,025534471 | 0,012 | 0,015 | 1         | 0,982456563   | 1,017856705     | 0,8             |
| CREM                                                                                            | 0,105124471 | -0,025556267 | 0,09  | 0,113 | 1         | 0,98244172    | 1,017872083     | 0,796460177     |
| NIT1                                                                                            | 0,247975423 | -0,025634124 | 0,033 | 0,043 | 1         | 0,982388703   | 1,017927015     | 0,76744186      |
| TBC1D24                                                                                         | 0,420737133 | -0,025643918 | 0,014 | 0,019 | 1         | 0,982382034   | 1,017933925     | 0,736842105     |
| PLAAT4                                                                                          | 0,004993614 | -0,025659198 | 0,013 | 0,034 | 1         | 0,98237163    | 1,017944706     | 0,382352941     |
| RRP9                                                                                            | 0,549420367 | -0,025722312 | 0,042 | 0,035 | 1         | 0,982328655   | 1,017989239     | 1,2             |
| PRRT3-AS1                                                                                       | 0,046823747 | -0,025811508 | 0,01  | 0,023 | 1         | 0,982267923   | 1,01805218      | 0,434782609     |
| FAM24B                                                                                          | 0,570045967 | -0,025858156 | 0,009 | 0,012 | 1         | 0,982236163   | 1,018085098     | 0,75            |
| PPP1R3B                                                                                         | 0,010976979 | -0,025859464 | 0,009 | 0,026 | 1         | 0,982235272   | 1,018086021     | 0,346153846     |
| C19orf48                                                                                        | 0,888314649 | -0,025905499 | 0,066 | 0,062 | 1         | 0,982203931   | 1,018118508     | 1,064516129     |

Supplementary Table 5

| Differentially expressed genes_total calculation_ comparing SC-Keloid vs. (SC-Myel, SC-Nonmyel) |             |              |       |       |             |               |                 |                 |
|-------------------------------------------------------------------------------------------------|-------------|--------------|-------|-------|-------------|---------------|-----------------|-----------------|
| gene                                                                                            | p_val       | avg_log2FC   | pct.1 | pct.2 | p_val_adj   | Foldchange_UP | Foldchange_DOWN | Ratio_pct1_pct2 |
| POLE                                                                                            | 0,822486028 | -0,025917245 | 0,016 | 0,018 | 1           | 0,982195934   | 1,018126797     | 0,888888889     |
| GHDC                                                                                            | 0,425906859 | -0,025976118 | 0,041 | 0,033 | 1           | 0,982155853   | 1,018168345     | 1,242424242     |
| NOP9                                                                                            | 0,568234878 | -0,025989973 | 0,01  | 0,014 | 1           | 0,982146421   | 1,018178123     | 0,714285714     |
| GBE1                                                                                            | 0,620626333 | -0,025994855 | 0,071 | 0,076 | 1           | 0,982143098   | 1,018181568     | 0,934210526     |
| PBLD                                                                                            | 0,736161795 | -0,02602462  | 0,013 | 0,011 | 1           | 0,982122835   | 1,018202576     | 1,181818182     |
| LIPA                                                                                            | 0,968033203 | -0,026073548 | 0,08  | 0,077 | 1           | 0,982089528   | 1,018237107     | 1,038961039     |
| ADAM15                                                                                          | 0,785524994 | -0,026115274 | 0,078 | 0,072 | 1           | 0,982061124   | 1,018266558     | 1,083333333     |
| EXD2                                                                                            | 0,743690535 | -0,026133315 | 0,019 | 0,016 | 1           | 0,982048843   | 1,018279292     | 1,1875          |
| PSEN2                                                                                           | 0,31589634  | -0,026163102 | 0,019 | 0,012 | 1           | 0,982028567   | 1,018300316     | 1,583333333     |
| TNKS2                                                                                           | 0,046161553 | -0,02618667  | 0,101 | 0,13  | 1           | 0,982012525   | 1,018316951     | 0,776923077     |
| MZF1                                                                                            | 0,690643935 | -0,026203205 | 0,027 | 0,03  | 1           | 0,98200127    | 1,018328622     | 0,9             |
| LRP2BP                                                                                          | 0,03200274  | -0,026257135 | 0,007 | 0,019 | 1           | 0,981964562   | 1,01836669      | 0,368421053     |
| NAV3                                                                                            | 0,122386872 | -0,026265153 | 0,038 | 0,054 | 1           | 0,981959105   | 1,018372349     | 0,703703704     |
| TLE5                                                                                            | 1,88493E-05 | -0,026324344 | 0,319 | 0,452 | 0,397738363 | 0,981918817   | 1,018414132     | 0,705752212     |
| LTBR                                                                                            | 0,630824343 | -0,026398308 | 0,114 | 0,118 | 1           | 0,981868478   | 1,018466345     | 0,966101695     |
| WDR25                                                                                           | 0,687098506 | -0,02639895  | 0,026 | 0,028 | 1           | 0,981868041   | 1,018466798     | 0,928571429     |
| NEURL4                                                                                          | 0,550928842 | -0,026429212 | 0,013 | 0,016 | 1           | 0,981847445   | 1,018488162     | 0,8125          |
| STEEP1                                                                                          | 0,104349416 | -0,026502432 | 0,017 | 0,03  | 1           | 0,981797615   | 1,018539854     | 0,566666667     |
| RNF11                                                                                           | 0,000396459 | -0,026526537 | 0,136 | 0,199 | 1           | 0,981781212   | 1,018556872     | 0,683417085     |
| PTCH2                                                                                           | 0,088345111 | -0,026557513 | 0,008 | 0,018 | 1           | 0,981760132   | 1,018578742     | 0,444444444     |
| PPP1R9B                                                                                         | 0,678883626 | -0,026558589 | 0,049 | 0,043 | 1           | 0,9817594     | 1,018579501     | 1,139534884     |
| EDRF1                                                                                           | 0,10844472  | -0,02658172  | 0,022 | 0,035 | 1           | 0,981743659   | 1,018595832     | 0,628571429     |
| BAIAP2-DT                                                                                       | 0,563815415 | -0,02660939  | 0,028 | 0,033 | 1           | 0,98172483    | 1,018615369     | 0,848484848     |
| CIZ1                                                                                            | 0,734768189 | -0,026611126 | 0,066 | 0,069 | 1           | 0,981723649   | 1,018616595     | 0,956521739     |
| F2RL2                                                                                           | 0,010086398 | -0,026624409 | 0,001 | 0,011 | 1           | 0,98171461    | 1,018625973     | 0,090909091     |
| RPP40                                                                                           | 0,658772142 | -0,026672918 | 0,021 | 0,018 | 1           | 0,981681602   | 1,018660224     | 1,166666667     |
| ZNF408                                                                                          | 0,844602059 | -0,026715791 | 0,022 | 0,02  | 1           | 0,981652429   | 1,018690496     | 1,1             |
| AKNA                                                                                            | 0,885449289 | -0,026814617 | 0,013 | 0,014 | 1           | 0,981585187   | 1,01876028      | 0,928571429     |
| ZCCHC18                                                                                         | 0,568382935 | -0,02682334  | 0,009 | 0,012 | 1           | 0,981579252   | 1,01876644      | 0,75            |
| CRADD                                                                                           | 0,395319078 | -0,026842815 | 0,054 | 0,062 | 1           | 0,981566002   | 1,018780192     | 0,870967742     |

Supplementary Table 5

| Differentially expressed genes_total calculation_ comparing SC-Keloid vs. (SC-Myel, SC-Nonmyel) |             |              |       |       |           |               |                 |                 |
|-------------------------------------------------------------------------------------------------|-------------|--------------|-------|-------|-----------|---------------|-----------------|-----------------|
| gene                                                                                            | p_val       | avg_log2FC   | pct.1 | pct.2 | p_val_adj | Foldchange_UP | Foldchange_DOWN | Ratio_pct1_pct2 |
| CEP70                                                                                           | 0,034625284 | -0,026853267 | 0,017 | 0,034 | 1         | 0,98155889    | 1,018787573     | 0,5             |
| SPRING1                                                                                         | 0,102783245 | -0,026912346 | 0,062 | 0,081 | 1         | 0,981518696   | 1,018829293     | 0,765432099     |
| KLHDC2                                                                                          | 0,207117058 | -0,027064897 | 0,108 | 0,126 | 1         | 0,981414916   | 1,01893703      | 0,857142857     |
| GINM1                                                                                           | 0,002837665 | -0,027148866 | 0,159 | 0,214 | 1         | 0,981357796   | 1,018996337     | 0,742990654     |
| CTF1                                                                                            | 0,121250032 | -0,027165746 | 0,007 | 0,015 | 1         | 0,981346314   | 1,01900826      | 0,466666667     |
| SEC22A                                                                                          | 0,159418746 | -0,027190806 | 0,037 | 0,024 | 1         | 0,981329268   | 1,019025961     | 1,541666667     |
| DYM                                                                                             | 0,77738483  | -0,027209109 | 0,055 | 0,057 | 1         | 0,981316818   | 1,019038889     | 0,964912281     |
| PFKM                                                                                            | 0,489120376 | -0,027257567 | 0,023 | 0,028 | 1         | 0,981283858   | 1,019073117     | 0,821428571     |
| RGMA                                                                                            | 0,261670687 | -0,027287017 | 0,006 | 0,011 | 1         | 0,981263827   | 1,01909392      | 0,545454545     |
| STX18-AS1                                                                                       | 0,057631503 | -0,027310988 | 0,005 | 0,014 | 1         | 0,981247523   | 1,019110853     | 0,357142857     |
| RMC1                                                                                            | 0,252919813 | -0,027368498 | 0,029 | 0,039 | 1         | 0,981208408   | 1,019151479     | 0,743589744     |
| TBC1D10B                                                                                        | 0,602972471 | -0,027370997 | 0,063 | 0,068 | 1         | 0,981206708   | 1,019153244     | 0,926470588     |
| C1orf112                                                                                        | 0,560006684 | -0,027427249 | 0,01  | 0,014 | 1         | 0,981168451   | 1,019192982     | 0,714285714     |
| RGL1                                                                                            | 0,006159548 | -0,027431631 | 0,015 | 0,037 | 1         | 0,981165471   | 1,019196078     | 0,405405405     |
| CACUL1                                                                                          | 0,148375125 | -0,027482398 | 0,085 | 0,104 | 1         | 0,981130945   | 1,019231943     | 0,817307692     |
| AASDH                                                                                           | 0,056524271 | -0,027518512 | 0,037 | 0,057 | 1         | 0,981106386   | 1,019257457     | 0,649122807     |
| HECTD2                                                                                          | 0,666880799 | -0,027534617 | 0,049 | 0,043 | 1         | 0,981095434   | 1,019268835     | 1,139534884     |
| RDH13                                                                                           | 0,510463093 | -0,027541792 | 0,016 | 0,012 | 1         | 0,981090555   | 1,019273904     | 1,333333333     |
| DENND1A                                                                                         | 0,845778953 | -0,027552781 | 0,016 | 0,015 | 1         | 0,981083081   | 1,019281668     | 1,066666667     |
| CFAP44                                                                                          | 0,152809099 | -0,02757036  | 0,005 | 0,011 | 1         | 0,981071127   | 1,019294089     | 0,454545455     |
| TIGD6                                                                                           | 0,738264993 | -0,027631231 | 0,01  | 0,012 | 1         | 0,981029734   | 1,019337096     | 0,833333333     |
| SART3                                                                                           | 0,419776044 | -0,027718463 | 0,061 | 0,069 | 1         | 0,980970419   | 1,019398731     | 0,884057971     |
| C2orf68                                                                                         | 0,018140345 | -0,027804589 | 0,026 | 0,047 | 1         | 0,980911858   | 1,019459589     | 0,553191489     |
| POLD1                                                                                           | 0,542301959 | -0,027822113 | 0,013 | 0,009 | 1         | 0,980899943   | 1,019471972     | 1,444444444     |
| GOLGA8N                                                                                         | 0,094705765 | -0,027851639 | 0,005 | 0,012 | 1         | 0,980879868   | 1,019492837     | 0,416666667     |
| AR                                                                                              | 0,170690326 | -0,027856597 | 0,006 | 0,012 | 1         | 0,980876498   | 1,019496341     | 0,5             |
| ARIH2OS                                                                                         | 0,501251724 | -0,027877189 | 0,022 | 0,027 | 1         | 0,980862497   | 1,019510892     | 0,814814815     |
| YTHDC2                                                                                          | 0,114307499 | -0,027953593 | 0,07  | 0,09  | 1         | 0,980810553   | 1,019564886     | 0,777777778     |
| ZCWPW2                                                                                          | 0,992165375 | -0,02796116  | 0,015 | 0,015 | 1         | 0,980805409   | 1,019570234     | 1               |
| FGD6                                                                                            | 0,568856953 | -0,027988596 | 0,008 | 0,011 | 1         | 0,980786757   | 1,019589623     | 0,727272727     |

Supplementary Table 5

| Differentially expressed genes_total calculation_ comparing SC-Keloid vs. (SC-Myel, SC-Nonmyel) |             |              |       |       |             |               |                 |                 |
|-------------------------------------------------------------------------------------------------|-------------|--------------|-------|-------|-------------|---------------|-----------------|-----------------|
| gene                                                                                            | p_val       | avg_log2FC   | pct.1 | pct.2 | p_val_adj   | Foldchange_UP | Foldchange_DOWN | Ratio_pct1_pct2 |
| EVI5L                                                                                           | 0,534838533 | -0,028041278 | 0,016 | 0,02  | 1           | 0,980750943   | 1,019626856     | 0,8             |
| TMEM131L                                                                                        | 0,109811515 | -0,028045962 | 0,006 | 0,014 | 1           | 0,980747758   | 1,019630166     | 0,428571429     |
| RETSAT                                                                                          | 0,0713091   | -0,028049246 | 0,033 | 0,05  | 1           | 0,980745526   | 1,019632487     | 0,66            |
| MN1                                                                                             | 0,017921556 | -0,028062184 | 0,009 | 0,024 | 1           | 0,980736731   | 1,019641632     | 0,375           |
| HSD17B8                                                                                         | 0,872620193 | -0,0280865   | 0,03  | 0,028 | 1           | 0,980720201   | 1,019658817     | 1,071428571     |
| C6orf136                                                                                        | 0,13128914  | -0,028096955 | 0,031 | 0,019 | 1           | 0,980713094   | 1,019666206     | 1,631578947     |
| PPARD                                                                                           | 0,193716954 | -0,028121303 | 0,028 | 0,039 | 1           | 0,980696543   | 1,019683415     | 0,717948718     |
| MARK1                                                                                           | 0,063209444 | -0,028153372 | 0,009 | 0,02  | 1           | 0,980674744   | 1,019706081     | 0,45            |
| ZNF526                                                                                          | 0,132791722 | -0,028198503 | 0,008 | 0,016 | 1           | 0,980644066   | 1,019737981     | 0,5             |
| ADCK1                                                                                           | 0,23573548  | -0,028246701 | 0,013 | 0,007 | 1           | 0,980611305   | 1,019772049     | 1,857142857     |
| ZNF607                                                                                          | 0,092244176 | -0,028337566 | 0,005 | 0,012 | 1           | 0,980549545   | 1,01983628      | 0,416666667     |
| MINK1                                                                                           | 0,19838718  | -0,02835052  | 0,026 | 0,037 | 1           | 0,980540741   | 1,019845436     | 0,702702703     |
| GSK3B                                                                                           | 0,102742225 | -0,028355707 | 0,115 | 0,14  | 1           | 0,980537215   | 1,019849103     | 0,821428571     |
| ZNF830                                                                                          | 0,130788064 | -0,028365053 | 0,049 | 0,065 | 1           | 0,980530864   | 1,01985571      | 0,753846154     |
| VPS72                                                                                           | 0,838503433 | -0,028368149 | 0,077 | 0,072 | 1           | 0,980528759   | 1,019857899     | 1,069444444     |
| KRBOX4                                                                                          | 0,30803012  | -0,028410937 | 0,024 | 0,033 | 1           | 0,980499679   | 1,019888147     | 0,727272727     |
| CHRD1                                                                                           | 3,72051E-05 | -0,028504507 | 0,001 | 0,023 | 0,785065488 | 0,980436088   | 1,019954296     | 0,043478261     |
| EXT2                                                                                            | 0,461700334 | -0,028550282 | 0,091 | 0,077 | 1           | 0,98040498    | 1,019986659     | 1,181818182     |
| NLGN1                                                                                           | 0,234506736 | -0,028560519 | 0,014 | 0,022 | 1           | 0,980398024   | 1,019993896     | 0,636363636     |
| THAP2                                                                                           | 0,238514344 | -0,028575435 | 0,034 | 0,045 | 1           | 0,980387887   | 1,020004442     | 0,755555556     |
| TRIB1                                                                                           | 0,519859431 | -0,028603205 | 0,054 | 0,06  | 1           | 0,980369016   | 1,020024076     | 0,9             |
| ZGRF1                                                                                           | 0,16766543  | -0,028605336 | 0,013 | 0,022 | 1           | 0,980367568   | 1,020025583     | 0,590909091     |
| PHLPP2                                                                                          | 0,001920397 | -0,028621636 | 0,02  | 0,047 | 1           | 0,980356492   | 1,020037107     | 0,425531915     |
| ZNF552                                                                                          | 0,153437305 | -0,028626258 | 0,005 | 0,011 | 1           | 0,980353351   | 1,020040376     | 0,454545455     |
| LSP1                                                                                            | 0,062429817 | -0,028673441 | 0,014 | 0,027 | 1           | 0,980321289   | 1,020073736     | 0,518518519     |
| UNC119                                                                                          | 0,914954926 | -0,028682988 | 0,02  | 0,02  | 1           | 0,980314802   | 1,020080486     | 1               |
| STAC2                                                                                           | 0,010086398 | -0,028708607 | 0,001 | 0,011 | 1           | 0,980297394   | 1,020098601     | 0,090909091     |
| LRRC37A2                                                                                        | 0,026201714 | -0,028745192 | 0,003 | 0,014 | 1           | 0,980272535   | 1,020124469     | 0,214285714     |
| TEC                                                                                             | 0,042116728 | -0,028852706 | 0,006 | 0,016 | 1           | 0,980199485   | 1,020200495     | 0,375           |
| RYK                                                                                             | 0,267614327 | -0,028881104 | 0,077 | 0,09  | 1           | 0,980180191   | 1,020220577     | 0,855555556     |

Supplementary Table 5

| Differentially expressed genes_total calculation_ comparing SC-Keloid vs. (SC-Myel, SC-Nonmyel) |             |              |       |       |           |               |                 |                 |
|-------------------------------------------------------------------------------------------------|-------------|--------------|-------|-------|-----------|---------------|-----------------|-----------------|
| gene                                                                                            | p_val       | avg_log2FC   | pct.1 | pct.2 | p_val_adj | Foldchange_UP | Foldchange_DOWN | Ratio_pct1_pct2 |
| HOXC5                                                                                           | 0,5466526   | -0,028907318 | 0,013 | 0,009 | 1         | 0,980162381   | 1,020239115     | 1,444444444     |
| CABIN1                                                                                          | 0,355733387 | -0,028929392 | 0,051 | 0,061 | 1         | 0,980147384   | 1,020254725     | 0,836065574     |
| BLMH                                                                                            | 0,520920603 | -0,028951367 | 0,061 | 0,052 | 1         | 0,980132455   | 1,020270266     | 1,173076923     |
| PGAP2                                                                                           | 0,835219308 | -0,028958335 | 0,024 | 0,026 | 1         | 0,980127721   | 1,020275194     | 0,923076923     |
| TFAP4                                                                                           | 0,880656914 | -0,02895841  | 0,013 | 0,014 | 1         | 0,98012767    | 1,020275246     | 0,928571429     |
| SCAMP3                                                                                          | 0,4749008   | -0,029017755 | 0,087 | 0,075 | 1         | 0,980087353   | 1,020317216     | 1,16            |
| SPRTN                                                                                           | 0,742458327 | -0,029029843 | 0,041 | 0,043 | 1         | 0,980079141   | 1,020325765     | 0,953488372     |
| CD79B                                                                                           | 0,069011188 | -0,029035027 | 0,006 | 0,015 | 1         | 0,98007562    | 1,020329431     | 0,4             |
| SH3BP5L                                                                                         | 0,247102976 | -0,029062121 | 0,019 | 0,027 | 1         | 0,980057214   | 1,020348594     | 0,703703704     |
| GIN1                                                                                            | 0,977045707 | -0,029062229 | 0,022 | 0,022 | 1         | 0,98005714    | 1,02034867      | 1               |
| ZNF212                                                                                          | 0,736467937 | -0,029089478 | 0,01  | 0,012 | 1         | 0,98003863    | 1,020367942     | 0,833333333     |
| TMEM170B                                                                                        | 0,003276301 | -0,02910838  | 0,006 | 0,023 | 1         | 0,980025789   | 1,020381311     | 0,260869565     |
| ACOT9                                                                                           | 0,98612735  | -0,029121997 | 0,099 | 0,095 | 1         | 0,98001654    | 1,020390942     | 1,042105263     |
| ZFYVE26                                                                                         | 0,320954219 | -0,029129412 | 0,014 | 0,02  | 1         | 0,980011503   | 1,020396186     | 0,7             |
| HAUS8                                                                                           | 0,083032232 | -0,029138286 | 0,013 | 0,024 | 1         | 0,980005475   | 1,020402463     | 0,541666667     |
| APBA1                                                                                           | 0,025743368 | -0,029203167 | 0,006 | 0,018 | 1         | 0,979961403   | 1,020448354     | 0,333333333     |
| ZFAND4                                                                                          | 0,069397831 | -0,029226827 | 0,006 | 0,015 | 1         | 0,979945332   | 1,020465089     | 0,4             |
| PANK4                                                                                           | 0,99835058  | -0,029301402 | 0,015 | 0,015 | 1         | 0,979894679   | 1,020517839     | 1               |
| PRKD2                                                                                           | 0,880538001 | -0,029308018 | 0,03  | 0,028 | 1         | 0,979890185   | 1,020522519     | 1,071428571     |
| TIPARP-AS1                                                                                      | 0,031473227 | -0,029317594 | 0,002 | 0,011 | 1         | 0,97988368    | 1,020529293     | 0,181818182     |
| DNALI1                                                                                          | 0,749490175 | -0,029334326 | 0,03  | 0,033 | 1         | 0,979872316   | 1,020541129     | 0,909090909     |
| ELOVL7                                                                                          | 0,017401528 | -0,029338568 | 0,002 | 0,012 | 1         | 0,979869435   | 1,02054413      | 0,166666667     |
| FAM117B                                                                                         | 0,185508592 | -0,02935377  | 0,017 | 0,027 | 1         | 0,97985911    | 1,020554884     | 0,62962963      |
| RXRA                                                                                            | 0,274176639 | -0,02936826  | 0,1   | 0,114 | 1         | 0,979849269   | 1,020565134     | 0,877192982     |
| MAP3K6                                                                                          | 0,952715105 | -0,029374981 | 0,035 | 0,034 | 1         | 0,979844704   | 1,020569888     | 1,029411765     |
| ENGASE                                                                                          | 0,101177943 | -0,029375711 | 0,017 | 0,03  | 1         | 0,979844208   | 1,020570405     | 0,566666667     |
| VPS18                                                                                           | 0,802917369 | -0,029425184 | 0,017 | 0,019 | 1         | 0,979810608   | 1,020605403     | 0,894736842     |
| ACO1                                                                                            | 0,685124265 | -0,029450757 | 0,036 | 0,039 | 1         | 0,97979324    | 1,020623494     | 0,923076923     |
| RAB11FIP4                                                                                       | 0,009988906 | -0,029452744 | 0,001 | 0,011 | 1         | 0,979791891   | 1,020624899     | 0,090909091     |
| DYNC2I1                                                                                         | 0,022460902 | -0,029464384 | 0,095 | 0,129 | 1         | 0,979783985   | 1,020633135     | 0,736434109     |

Supplementary Table 5

| Differentially expressed genes_total calculation_ comparing SC-Keloid vs. (SC-Myel, SC-Nonmyel) |             |              |       |       |           |               |                 |                 |
|-------------------------------------------------------------------------------------------------|-------------|--------------|-------|-------|-----------|---------------|-----------------|-----------------|
| gene                                                                                            | p_val       | avg_log2FC   | pct.1 | pct.2 | p_val_adj | Foldchange_UP | Foldchange_DOWN | Ratio_pct1_pct2 |
| ADSL                                                                                            | 0,379687684 | -0,029502277 | 0,061 | 0,049 | 1         | 0,979758251   | 1,020659942     | 1,244897959     |
| CMTR1                                                                                           | 0,927784749 | -0,029509335 | 0,04  | 0,038 | 1         | 0,979753458   | 1,020664936     | 1,052631579     |
| H2AC11                                                                                          | 0,02541044  | -0,029512274 | 0,003 | 0,014 | 1         | 0,979751462   | 1,020667015     | 0,214285714     |
| CCDC91                                                                                          | 0,973921537 | -0,029512476 | 0,116 | 0,113 | 1         | 0,979751325   | 1,020667158     | 1,026548673     |
| NBEAL2                                                                                          | 0,127001914 | -0,029514538 | 0,015 | 0,026 | 1         | 0,979749925   | 1,020668616     | 0,576923077     |
| TRMT1L                                                                                          | 0,526721542 | -0,029517377 | 0,017 | 0,022 | 1         | 0,979747997   | 1,020670625     | 0,772727273     |
| SEH1L                                                                                           | 0,010577108 | -0,02954114  | 0,042 | 0,071 | 1         | 0,979731859   | 1,020687437     | 0,591549296     |
| RFX5                                                                                            | 0,118337227 | -0,029577376 | 0,013 | 0,023 | 1         | 0,979707251   | 1,020713074     | 0,565217391     |
| ZNF232                                                                                          | 0,932128677 | -0,029647193 | 0,01  | 0,011 | 1         | 0,979659841   | 1,020762471     | 0,909090909     |
| STK11IP                                                                                         | 0,195833277 | -0,029649547 | 0,029 | 0,041 | 1         | 0,979658243   | 1,020764136     | 0,707317073     |
| COQ5                                                                                            | 0,411070613 | -0,029665175 | 0,058 | 0,047 | 1         | 0,979647631   | 1,020775194     | 1,234042553     |
| ALDH16A1                                                                                        | 0,777390606 | -0,029710225 | 0,037 | 0,039 | 1         | 0,97961704    | 1,020807069     | 0,948717949     |
| ALDH4A1                                                                                         | 0,749128238 | -0,029784291 | 0,009 | 0,011 | 1         | 0,97956675    | 1,020859477     | 0,818181818     |
| ZBTB11-AS1                                                                                      | 0,184775662 | -0,029796423 | 0,007 | 0,014 | 1         | 0,979558512   | 1,020868062     | 0,5             |
| TIAL1                                                                                           | 0,009291436 | -0,029801924 | 0,171 | 0,214 | 1         | 0,979554777   | 1,020871955     | 0,799065421     |
| CYGB                                                                                            | 0,108657664 | -0,029805753 | 0,006 | 0,014 | 1         | 0,979552177   | 1,020874664     | 0,428571429     |
| FNDC4                                                                                           | 0,157613513 | -0,029811882 | 0,041 | 0,027 | 1         | 0,979548016   | 1,020879001     | 1,518518519     |
| GSDMB                                                                                           | 0,057012858 | -0,029822218 | 0,005 | 0,014 | 1         | 0,979540998   | 1,020886315     | 0,357142857     |
| TEPSIN                                                                                          | 0,910328706 | -0,029826033 | 0,02  | 0,02  | 1         | 0,979538408   | 1,020889015     | 1               |
| RPL15                                                                                           | 0,86803051  | -0,029829235 | 0,753 | 0,891 | 1         | 0,979536234   | 1,020891281     | 0,845117845     |
| SLC38A10                                                                                        | 0,408404411 | -0,029940588 | 0,104 | 0,087 | 1         | 0,979460632   | 1,02097008      | 1,195402299     |
| FAR2                                                                                            | 0,03105144  | -0,029963675 | 0,015 | 0,031 | 1         | 0,979444958   | 1,020986419     | 0,483870968     |
| TYSND1                                                                                          | 0,759474232 | -0,030007204 | 0,03  | 0,027 | 1         | 0,979415407   | 1,021017224     | 1,111111111     |
| AGFG2                                                                                           | 0,031599267 | -0,030019315 | 0,002 | 0,011 | 1         | 0,979407185   | 1,021025795     | 0,181818182     |
| TTC23                                                                                           | 0,188858232 | -0,030033157 | 0,037 | 0,05  | 1         | 0,979397788   | 1,021035592     | 0,74            |
| ZNF22-AS1                                                                                       | 0,186875205 | -0,030102188 | 0,007 | 0,014 | 1         | 0,979350927   | 1,021084448     | 0,5             |
| OSER1-DT                                                                                        | 0,181546725 | -0,030155419 | 0,017 | 0,027 | 1         | 0,979314792   | 1,021122124     | 0,62962963      |
| FOXP1                                                                                           | 0,04113358  | -0,03021234  | 0,24  | 0,284 | 1         | 0,979276154   | 1,021162412     | 0,845070423     |
| XRN1                                                                                            | 0,039566028 | -0,030231066 | 0,1   | 0,13  | 1         | 0,979263444   | 1,021175667     | 0,769230769     |
| LRMDA                                                                                           | 0,487837666 | -0,030244886 | 0,081 | 0,09  | 1         | 0,979254063   | 1,021185449     | 0,9             |

Supplementary Table 5

| Differentially expressed genes_total calculation_ comparing SC-Keloid vs. (SC-Myel, SC-Nonmyel) |             |              |       |       |           |               |                 |                 |
|-------------------------------------------------------------------------------------------------|-------------|--------------|-------|-------|-----------|---------------|-----------------|-----------------|
| gene                                                                                            | p_val       | avg_log2FC   | pct.1 | pct.2 | p_val_adj | Foldchange_UP | Foldchange_DOWN | Ratio_pct1_pct2 |
| TTC7B                                                                                           | 0,308344835 | -0,030288862 | 0,028 | 0,037 | 1         | 0,979224214   | 1,021216577     | 0,756756757     |
| ZSCAN31                                                                                         | 0,261670687 | -0,030304669 | 0,006 | 0,011 | 1         | 0,979213485   | 1,021227766     | 0,545454545     |
| SENP3                                                                                           | 0,057774453 | -0,030420225 | 0,008 | 0,019 | 1         | 0,979135056   | 1,021309567     | 0,421052632     |
| SLC9A1                                                                                          | 0,246228777 | -0,03044377  | 0,027 | 0,037 | 1         | 0,979119076   | 1,021326235     | 0,72972973      |
| P4HTM                                                                                           | 0,161103393 | -0,030502301 | 0,125 | 0,144 | 1         | 0,979079354   | 1,021367672     | 0,868055556     |
| ZKSCAN5                                                                                         | 0,421272719 | -0,030567444 | 0,016 | 0,022 | 1         | 0,979035145   | 1,021413792     | 0,727272727     |
| LMBRD2                                                                                          | 0,235242884 | -0,030614511 | 0,037 | 0,049 | 1         | 0,979003205   | 1,021447115     | 0,755102041     |
| HGH1                                                                                            | 0,144563055 | -0,030705147 | 0,026 | 0,015 | 1         | 0,978941703   | 1,021511289     | 1,733333333     |
| MAP3K20                                                                                         | 0,093603144 | -0,030743997 | 0,035 | 0,052 | 1         | 0,978915341   | 1,021538797     | 0,673076923     |
| KCNE4                                                                                           | 0,15833231  | -0,030829788 | 0,043 | 0,058 | 1         | 0,978857131   | 1,021599545     | 0,74137931      |
| INSYN1                                                                                          | 0,186453893 | -0,030849857 | 0,007 | 0,014 | 1         | 0,978843514   | 1,021613757     | 0,5             |
| UBTF                                                                                            | 0,340303418 | -0,030915521 | 0,161 | 0,171 | 1         | 0,978798964   | 1,021660256     | 0,941520468     |
| KIAA1217                                                                                        | 0,006717805 | -0,030933993 | 0,07  | 0,109 | 1         | 0,978786432   | 1,021673337     | 0,642201835     |
| CAMTA2                                                                                          | 0,991625997 | -0,030943346 | 0,038 | 0,038 | 1         | 0,978780086   | 1,021679961     | 1               |
| EFEMP1                                                                                          | 0,045325212 | -0,030966054 | 0,003 | 0,012 | 1         | 0,97876468    | 1,021696042     | 0,25            |
| RNPS1                                                                                           | 0,027408008 | -0,030967286 | 0,205 | 0,244 | 1         | 0,978763844   | 1,021696915     | 0,840163934     |
| SLC2A4RG                                                                                        | 0,742297703 | -0,030995208 | 0,151 | 0,14  | 1         | 0,978744902   | 1,021716689     | 1,078571429     |
| ZSCAN25                                                                                         | 0,903987401 | -0,031009949 | 0,012 | 0,012 | 1         | 0,978734901   | 1,021727129     | 1               |
| ADAMTS10                                                                                        | 0,034625111 | -0,031023829 | 0,005 | 0,015 | 1         | 0,978725485   | 1,021736959     | 0,333333333     |
| RAB3GAP2                                                                                        | 0,083403557 | -0,031025304 | 0,069 | 0,091 | 1         | 0,978724484   | 1,021738003     | 0,758241758     |
| ZNF519                                                                                          | 0,311673856 | -0,031036987 | 0,012 | 0,018 | 1         | 0,978716558   | 1,021746278     | 0,666666667     |
| ZKSCAN4                                                                                         | 0,189186159 | -0,031048723 | 0,012 | 0,005 | 1         | 0,978708597   | 1,021754589     | 2,4             |
| SLC9A3                                                                                          | 0,261670687 | -0,031109912 | 0,006 | 0,011 | 1         | 0,978667088   | 1,021797925     | 0,545454545     |
| CTBS                                                                                            | 0,514509545 | -0,031131265 | 0,086 | 0,075 | 1         | 0,978652602   | 1,021813049     | 1,146666667     |
| LINC01006                                                                                       | 0,042971099 | -0,03113437  | 0,041 | 0,062 | 1         | 0,978650496   | 1,021815248     | 0,661290323     |
| CRNDE                                                                                           | 0,829818353 | -0,031143938 | 0,043 | 0,045 | 1         | 0,978644006   | 1,021822025     | 0,955555556     |
| GFPT2                                                                                           | 0,637740402 | -0,031154306 | 0,02  | 0,023 | 1         | 0,978636973   | 1,021829368     | 0,869565217     |
| ARFGAP1                                                                                         | 0,429874726 | -0,03120047  | 0,08  | 0,088 | 1         | 0,978605658   | 1,021862066     | 0,909090909     |
| GPBP1L1                                                                                         | 0,005031978 | -0,031202086 | 0,09  | 0,133 | 1         | 0,978604562   | 1,021863211     | 0,676691729     |
| ZNF280D                                                                                         | 0,156362221 | -0,031274768 | 0,078 | 0,096 | 1         | 0,978555263   | 1,021914692     | 0,8125          |

Supplementary Table 5

| Differentially expressed genes_total calculation_ comparing SC-Keloid vs. (SC-Myel, SC-Nonmyel) |             |              |       |       |           |               |                 |                 |
|-------------------------------------------------------------------------------------------------|-------------|--------------|-------|-------|-----------|---------------|-----------------|-----------------|
| gene                                                                                            | p_val       | avg_log2FC   | pct.1 | pct.2 | p_val_adj | Foldchange_UP | Foldchange_DOWN | Ratio_pct1_pct2 |
| CCDC85C                                                                                         | 0,078744138 | -0,031288372 | 0,007 | 0,016 | 1         | 0,978546035   | 1,021924329     | 0,4375          |
| PEX19                                                                                           | 0,405595038 | -0,031320036 | 0,041 | 0,049 | 1         | 0,978524558   | 1,021946758     | 0,836734694     |
| NIPSNAP2                                                                                        | 0,143461758 | -0,0313426   | 0,106 | 0,126 | 1         | 0,978509254   | 1,021962742     | 0,841269841     |
| FAM83H                                                                                          | 0,057738071 | -0,03136509  | 0,008 | 0,019 | 1         | 0,978494      | 1,021978673     | 0,421052632     |
| TMEM248                                                                                         | 0,010617192 | -0,031379766 | 0,127 | 0,167 | 1         | 0,978484046   | 1,021989069     | 0,760479042     |
| ZNF786                                                                                          | 0,076743902 | -0,031391922 | 0,003 | 0,011 | 1         | 0,978475802   | 1,021997681     | 0,272727273     |
| ZNF181                                                                                          | 0,134858449 | -0,031412793 | 0,017 | 0,028 | 1         | 0,978461647   | 1,022012465     | 0,607142857     |
| FAM110A                                                                                         | 0,295470003 | -0,031448404 | 0,009 | 0,015 | 1         | 0,978437495   | 1,022037693     | 0,6             |
| TTC14                                                                                           | 0,083533482 | -0,031505164 | 0,072 | 0,095 | 1         | 0,978399001   | 1,022077903     | 0,757894737     |
| DUSP18                                                                                          | 0,671845713 | -0,031528143 | 0,033 | 0,028 | 1         | 0,978383417   | 1,022094183     | 1,178571429     |
| TRABD2A                                                                                         | 0,403483104 | -0,031536314 | 0,007 | 0,011 | 1         | 0,978377876   | 1,022099972     | 0,636363636     |
| HPGD                                                                                            | 0,009772919 | -0,03153635  | 0,002 | 0,014 | 1         | 0,978377852   | 1,022099998     | 0,142857143     |
| ZNF668                                                                                          | 0,181829737 | -0,031551612 | 0,017 | 0,009 | 1         | 0,978367502   | 1,02211081      | 1,888888889     |
| ZC3H4                                                                                           | 0,201528099 | -0,031554855 | 0,055 | 0,069 | 1         | 0,978365303   | 1,022113108     | 0,797101449     |
| TLL2                                                                                            | 0,031410369 | -0,031569816 | 0,002 | 0,011 | 1         | 0,978355156   | 1,022123708     | 0,181818182     |
| E2F5                                                                                            | 0,882241705 | -0,031576408 | 0,058 | 0,058 | 1         | 0,978350686   | 1,022128378     | 1               |
| CSNK2B                                                                                          | 0,002906992 | -0,031621436 | 0,197 | 0,254 | 1         | 0,978320151   | 1,02216028      | 0,775590551     |
| INTS14                                                                                          | 0,587682465 | -0,031718078 | 0,024 | 0,028 | 1         | 0,978254619   | 1,022228754     | 0,857142857     |
| TMEM69                                                                                          | 0,98050123  | -0,031776294 | 0,024 | 0,024 | 1         | 0,978215145   | 1,022270004     | 1               |
| ARHGAP26                                                                                        | 0,001851717 | -0,031781848 | 0,035 | 0,069 | 1         | 0,978211379   | 1,02227394      | 0,507246377     |
| KCTD18                                                                                          | 0,316117359 | -0,031801043 | 0,021 | 0,028 | 1         | 0,978198364   | 1,022287541     | 0,75            |
| PRKCZ                                                                                           | 0,41794799  | -0,031804109 | 0,012 | 0,016 | 1         | 0,978196286   | 1,022289713     | 0,75            |
| HSD3B7                                                                                          | 0,902150202 | -0,031811971 | 0,012 | 0,012 | 1         | 0,978190955   | 1,022295284     | 1               |
| NLN                                                                                             | 0,268908829 | -0,031832175 | 0,043 | 0,054 | 1         | 0,978177255   | 1,022309601     | 0,796296296     |
| FUOM                                                                                            | 0,296038205 | -0,031880189 | 0,05  | 0,061 | 1         | 0,978144701   | 1,022343625     | 0,819672131     |
| SLC36A2                                                                                         | 0,002214594 | -0,031890835 | 0     | 0,011 | 1         | 0,978137484   | 1,022351169     | 0               |
| ANKRD40                                                                                         | 0,08218559  | -0,031911766 | 0,156 | 0,182 | 1         | 0,978123293   | 1,022366002     | 0,857142857     |
| MANSC1                                                                                          | 0,008433259 | -0,03192961  | 0,003 | 0,016 | 1         | 0,978111195   | 1,022378647     | 0,1875          |
| PPP5C                                                                                           | 0,273349124 | -0,031938829 | 0,049 | 0,037 | 1         | 0,978104944   | 1,02238518      | 1,324324324     |
| CAND2                                                                                           | 0,290824291 | -0,031942895 | 0,008 | 0,014 | 1         | 0,978102188   | 1,022388061     | 0,571428571     |



Supplementary Table 5

| Differentially expressed genes_total calculation_ comparing SC-Keloid vs. (SC-Myel, SC-Nonmyel) |             |              |       |       |           |               |                 |                 |
|-------------------------------------------------------------------------------------------------|-------------|--------------|-------|-------|-----------|---------------|-----------------|-----------------|
| gene                                                                                            | p_val       | avg_log2FC   | pct.1 | pct.2 | p_val_adj | Foldchange_UP | Foldchange_DOWN | Ratio_pct1_pct2 |
| LOH12CR2                                                                                        | 0,008417081 | -0,03194524  | 0,003 | 0,016 | 1         | 0,978100599   | 1,022389723     | 0,1875          |
| ZNF667                                                                                          | 0,002343588 | -0,031964343 | 0,005 | 0,022 | 1         | 0,978087647   | 1,022403261     | 0,227272727     |
| AZI2                                                                                            | 0,592596877 | -0,032024788 | 0,097 | 0,1   | 1         | 0,978046669   | 1,022446098     | 0,97            |
| CAST                                                                                            | 0,00269579  | -0,03204099  | 0,25  | 0,32  | 1         | 0,978035685   | 1,02245758      | 0,78125         |
| ZNF511                                                                                          | 0,430620656 | -0,032056029 | 0,095 | 0,081 | 1         | 0,97802549    | 1,022468239     | 1,172839506     |
| NFYA                                                                                            | 0,064571146 | -0,032068429 | 0,009 | 0,02  | 1         | 0,978017084   | 1,022477027     | 0,45            |
| OSTF1                                                                                           | 0,023378216 | -0,032082362 | 0,143 | 0,18  | 1         | 0,978007639   | 1,022486901     | 0,794444444     |
| TMEM233                                                                                         | 0,435130869 | -0,032127244 | 0,01  | 0,007 | 1         | 0,977977213   | 1,022518712     | 1,428571429     |
| AP3M1                                                                                           | 0,84369443  | -0,032137806 | 0,056 | 0,057 | 1         | 0,977970053   | 1,022526198     | 0,98245614      |
| TINCR                                                                                           | 0,002214594 | -0,032162943 | 0     | 0,011 | 1         | 0,977953014   | 1,022544014     | 0               |
| KMT2D                                                                                           | 0,372620065 | -0,032184184 | 0,029 | 0,037 | 1         | 0,977938615   | 1,022559069     | 0,783783784     |
| MON1B                                                                                           | 0,759570151 | -0,032216935 | 0,04  | 0,042 | 1         | 0,977916415   | 1,022582282     | 0,952380952     |
| FAXC                                                                                            | 0,838251135 | -0,032316999 | 0,015 | 0,016 | 1         | 0,97784859    | 1,022653211     | 0,9375          |
| PRADC1                                                                                          | 0,258358805 | -0,032359785 | 0,052 | 0,039 | 1         | 0,97781959    | 1,02268354      | 1,333333333     |
| BBOF1                                                                                           | 0,867624844 | -0,03237015  | 0,023 | 0,022 | 1         | 0,977812566   | 1,022690887     | 1,045454545     |
| SCHIP1                                                                                          | 0,117747768 | -0,032445985 | 0,035 | 0,05  | 1         | 0,977761168   | 1,022744646     | 0,7             |
| CASC3                                                                                           | 0,000956471 | -0,032446346 | 0,118 | 0,175 | 1         | 0,977760923   | 1,022744902     | 0,674285714     |
| ELP4                                                                                            | 0,363625    | -0,032480165 | 0,033 | 0,041 | 1         | 0,977738003   | 1,022768877     | 0,804878049     |
| CNKSRI                                                                                          | 0,094016768 | -0,032509424 | 0,005 | 0,012 | 1         | 0,977718175   | 1,02278962      | 0,416666667     |
| ZNF182                                                                                          | 0,030975977 | -0,032548744 | 0,007 | 0,019 | 1         | 0,977691528   | 1,022817496     | 0,368421053     |
| VPS52                                                                                           | 0,907747639 | -0,032550623 | 0,028 | 0,028 | 1         | 0,977690254   | 1,022818828     | 1               |
| NACC2                                                                                           | 0,826025781 | -0,032590718 | 0,065 | 0,066 | 1         | 0,977663083   | 1,022847254     | 0,984848485     |
| NPRL3                                                                                           | 0,744111484 | -0,032595966 | 0,056 | 0,058 | 1         | 0,977659527   | 1,022850975     | 0,965517241     |
| HIBCH                                                                                           | 0,052414057 | -0,032609279 | 0,078 | 0,104 | 1         | 0,977650505   | 1,022860414     | 0,75            |
| SHPK                                                                                            | 0,287201727 | -0,032675107 | 0,008 | 0,014 | 1         | 0,977605897   | 1,022907086     | 0,571428571     |
| C2orf49                                                                                         | 0,559059629 | -0,032708398 | 0,059 | 0,065 | 1         | 0,977583339   | 1,022930691     | 0,907692308     |
| ARHGEF18                                                                                        | 0,288591401 | -0,032743147 | 0,008 | 0,014 | 1         | 0,977559793   | 1,02295533      | 0,571428571     |
| LGI2                                                                                            | 0,031473227 | -0,032757246 | 0,002 | 0,011 | 1         | 0,977550239   | 1,022965327     | 0,181818182     |
| SLC7A8                                                                                          | 0,110392061 | -0,032828939 | 0,006 | 0,014 | 1         | 0,977501662   | 1,023016163     | 0,428571429     |
| HDAC8                                                                                           | 0,337470002 | -0,032857684 | 0,04  | 0,03  | 1         | 0,977482186   | 1,023036546     | 1,333333333     |

Supplementary Table 5

| Differentially expressed genes_total calculation_ comparing SC-Keloid vs. (SC-Myel, SC-Nonmyel) |             |              |       |       |            |               |                 |                 |
|-------------------------------------------------------------------------------------------------|-------------|--------------|-------|-------|------------|---------------|-----------------|-----------------|
| gene                                                                                            | p_val       | avg_log2FC   | pct.1 | pct.2 | p_val_adj  | Foldchange_UP | Foldchange_DOWN | Ratio_pct1_pct2 |
| ETV1                                                                                            | 0,246799891 | -0,03291936  | 0,035 | 0,046 | 1          | 0,977440399   | 1,023080283     | 0,760869565     |
| SAMD8                                                                                           | 0,002838722 | -0,032949838 | 0,097 | 0,144 | 1          | 0,97741975    | 1,023101896     | 0,673611111     |
| COG4                                                                                            | 0,550380601 | -0,032954438 | 0,057 | 0,049 | 1          | 0,977416634   | 1,023105158     | 1,163265306     |
| CCDC152                                                                                         | 0,291454361 | -0,033002691 | 0,037 | 0,047 | 1          | 0,977383943   | 1,023139378     | 0,787234043     |
| WASF2                                                                                           | 3,77534E-05 | -0,033098069 | 0,275 | 0,379 | 0,79663357 | 0,97731933    | 1,023207021     | 0,725593668     |
| TMEM240                                                                                         | 0,090585231 | -0,033154347 | 0,008 | 0,018 | 1          | 0,977281207   | 1,023246936     | 0,444444444     |
| C16orf86                                                                                        | 0,404271802 | -0,0331857   | 0,02  | 0,026 | 1          | 0,977259968   | 1,023269174     | 0,769230769     |
| FLVCR1-DT                                                                                       | 0,197827727 | -0,033189438 | 0,008 | 0,015 | 1          | 0,977257436   | 1,023271825     | 0,533333333     |
| GFER                                                                                            | 0,359875076 | -0,033316462 | 0,064 | 0,052 | 1          | 0,977171396   | 1,023361924     | 1,230769231     |
| CEP85                                                                                           | 0,151558561 | -0,033345735 | 0,005 | 0,011 | 1          | 0,977151569   | 1,023382689     | 0,454545455     |
| DOCK1                                                                                           | 0,009207035 | -0,033348062 | 0,113 | 0,155 | 1          | 0,977149992   | 1,02338434      | 0,729032258     |
| ZNF441                                                                                          | 0,239091064 | -0,033358848 | 0,015 | 0,023 | 1          | 0,977142687   | 1,023391991     | 0,652173913     |
| TBX19                                                                                           | 0,078845535 | -0,033361696 | 0,007 | 0,016 | 1          | 0,977140758   | 1,023394011     | 0,4375          |
| ANKRD49                                                                                         | 0,15269339  | -0,033369625 | 0,037 | 0,052 | 1          | 0,977135388   | 1,023399636     | 0,711538462     |
| TNFRSF10D                                                                                       | 0,131897027 | -0,033370024 | 0,008 | 0,016 | 1          | 0,977135118   | 1,023399919     | 0,5             |
| NDUFA13                                                                                         | 5,1949E-05  | -0,033371716 | 0,317 | 0,456 | 1          | 0,977133972   | 1,023401119     | 0,695175439     |
| SLC25A21-AS1                                                                                    | 0,104193889 | -0,033452653 | 0,01  | 0,02  | 1          | 0,977079154   | 1,023458535     | 0,5             |
| EIF4EBP3                                                                                        | 0,407499518 | -0,033518603 | 0,017 | 0,023 | 1          | 0,977034491   | 1,023505321     | 0,739130435     |
| RAB30-DT                                                                                        | 0,174804934 | -0,03355693  | 0,063 | 0,079 | 1          | 0,977008534   | 1,023532512     | 0,797468354     |
| ZFHX4                                                                                           | 0,078339511 | -0,033640601 | 0,035 | 0,053 | 1          | 0,976951873   | 1,023591875     | 0,660377358     |
| DENND4B                                                                                         | 0,47674093  | -0,033681369 | 0,04  | 0,046 | 1          | 0,976924267   | 1,023620801     | 0,869565217     |
| KANSL1                                                                                          | 0,211375003 | -0,033681592 | 0,148 | 0,164 | 1          | 0,976924116   | 1,023620958     | 0,902439024     |
| TCF25                                                                                           | 0,000672493 | -0,033697791 | 0,31  | 0,4   | 1          | 0,976913147   | 1,023632452     | 0,775           |
| GFAP                                                                                            | 0,044392964 | -0,033708688 | 0,003 | 0,012 | 1          | 0,976905768   | 1,023640184     | 0,25            |
| SERPINB1                                                                                        | 0,580844376 | -0,033725623 | 0,091 | 0,096 | 1          | 0,976894301   | 1,0236522       | 0,947916667     |
| MEF2A                                                                                           | 0,004795438 | -0,033825505 | 0,186 | 0,242 | 1          | 0,97682667    | 1,023723073     | 0,768595041     |
| ZSCAN32                                                                                         | 0,906284623 | -0,033915328 | 0,012 | 0,012 | 1          | 0,976765854   | 1,023786813     | 1               |
| TRIM16L                                                                                         | 0,420397737 | -0,033937514 | 0,01  | 0,015 | 1          | 0,976750833   | 1,023802557     | 0,666666667     |
| GAMT                                                                                            | 0,808665591 | -0,033968613 | 0,085 | 0,079 | 1          | 0,976729778   | 1,023824626     | 1,075949367     |
| IBA57                                                                                           | 0,550928842 | -0,033979483 | 0,013 | 0,016 | 1          | 0,976722419   | 1,02383234      | 0,8125          |

Supplementary Table 5

| Differentially expressed genes_total calculation_ comparing SC-Keloid vs. (SC-Myel, SC-Nonmyel) |             |              |       |       |           |               |                 |                 |
|-------------------------------------------------------------------------------------------------|-------------|--------------|-------|-------|-----------|---------------|-----------------|-----------------|
| gene                                                                                            | p_val       | avg_log2FC   | pct.1 | pct.2 | p_val_adj | Foldchange_UP | Foldchange_DOWN | Ratio_pct1_pct2 |
| ADK                                                                                             | 0,037695357 | -0,034033526 | 0,183 | 0,221 | 1         | 0,976685832   | 1,023870693     | 0,828054299     |
| PAXIP1-AS2                                                                                      | 0,570627055 | -0,034048526 | 0,008 | 0,011 | 1         | 0,976675677   | 1,023881339     | 0,727272727     |
| THSD1                                                                                           | 0,056924932 | -0,034150467 | 0,005 | 0,014 | 1         | 0,976606667   | 1,023953689     | 0,357142857     |
| PRIM2                                                                                           | 0,717013709 | -0,034197073 | 0,023 | 0,02  | 1         | 0,976575119   | 1,023986768     | 1,15            |
| HMG20A                                                                                          | 0,047897256 | -0,03420472  | 0,045 | 0,068 | 1         | 0,976569943   | 1,023992196     | 0,661764706     |
| DGKE                                                                                            | 0,025941713 | -0,03421289  | 0,006 | 0,018 | 1         | 0,976564412   | 1,023997995     | 0,333333333     |
| RHOC                                                                                            | 0,000162019 | -0,034213182 | 0,364 | 0,518 | 1         | 0,976564215   | 1,023998202     | 0,702702703     |
| SLC9A6                                                                                          | 0,072323874 | -0,034219898 | 0,019 | 0,033 | 1         | 0,976559669   | 1,024002969     | 0,575757576     |
| PKP4                                                                                            | 0,147242906 | -0,03422003  | 0,034 | 0,047 | 1         | 0,976559579   | 1,024003062     | 0,723404255     |
| SIRT6                                                                                           | 0,742333738 | -0,034229006 | 0,047 | 0,042 | 1         | 0,976553504   | 1,024009433     | 1,119047619     |
| SPTY2D1                                                                                         | 0,089359204 | -0,034238237 | 0,077 | 0,099 | 1         | 0,976547255   | 1,024015985     | 0,777777778     |
| IFT140                                                                                          | 0,409615968 | -0,034254937 | 0,008 | 0,012 | 1         | 0,976535951   | 1,024027839     | 0,666666667     |
| REM1                                                                                            | 0,450828718 | -0,034263605 | 0,023 | 0,018 | 1         | 0,976530084   | 1,024033992     | 1,277777778     |
| STK24                                                                                           | 0,03449704  | -0,034266922 | 0,051 | 0,076 | 1         | 0,976527839   | 1,024036346     | 0,671052632     |
| ADAT3                                                                                           | 0,567972886 | -0,034393868 | 0,008 | 0,011 | 1         | 0,976441916   | 1,024126457     | 0,727272727     |
| TIMP3                                                                                           | 0,000698023 | -0,034422718 | 0,556 | 0,707 | 1         | 0,97642239    | 1,024146937     | 0,786421499     |
| SIGMAR1                                                                                         | 0,318318163 | -0,034442407 | 0,065 | 0,052 | 1         | 0,976409064   | 1,024160914     | 1,25            |
| FIG4                                                                                            | 0,456793538 | -0,034514303 | 0,028 | 0,022 | 1         | 0,976360406   | 1,024211954     | 1,272727273     |
| C1orf35                                                                                         | 0,008937069 | -0,03454536  | 0,102 | 0,145 | 1         | 0,976339389   | 1,024234003     | 0,703448276     |
| LIPT1                                                                                           | 0,096773433 | -0,034579376 | 0,009 | 0,019 | 1         | 0,976316368   | 1,024258153     | 0,473684211     |
| CHP2                                                                                            | 0,002214594 | -0,034589859 | 0     | 0,011 | 1         | 0,976309274   | 1,024265595     | 0               |
| IFT88                                                                                           | 0,012114676 | -0,034635035 | 0,047 | 0,076 | 1         | 0,976278703   | 1,024297669     | 0,618421053     |
| PDE7B                                                                                           | 0,057012858 | -0,034639567 | 0,005 | 0,014 | 1         | 0,976275636   | 1,024300887     | 0,357142857     |
| DCAF5                                                                                           | 0,010606635 | -0,034641997 | 0,064 | 0,098 | 1         | 0,976273992   | 1,024302612     | 0,653061224     |
| PBXIP1                                                                                          | 0,469211969 | -0,034645795 | 0,063 | 0,071 | 1         | 0,976271422   | 1,024305309     | 0,887323944     |
| PKDCC                                                                                           | 0,521687925 | -0,034661184 | 0,043 | 0,049 | 1         | 0,976261008   | 1,024316235     | 0,87755102      |
| PAN3                                                                                            | 0,027137793 | -0,03466435  | 0,111 | 0,144 | 1         | 0,976258866   | 1,024318482     | 0,770833333     |
| ATP9B                                                                                           | 0,004882926 | -0,034675301 | 0,05  | 0,085 | 1         | 0,976251455   | 1,024326258     | 0,588235294     |
| CBWD2                                                                                           | 0,653280907 | -0,034739623 | 0,042 | 0,037 | 1         | 0,97620793    | 1,024371928     | 1,135135135     |
| RPUSD1                                                                                          | 0,0636315   | -0,034746178 | 0,042 | 0,024 | 1         | 0,976203495   | 1,024376582     | 1,75            |

Supplementary Table 5

| Differentially expressed genes_total calculation_ comparing SC-Keloid vs. (SC-Myel, SC-Nonmyel) |             |              |       |       |             |               |                 |                 |
|-------------------------------------------------------------------------------------------------|-------------|--------------|-------|-------|-------------|---------------|-----------------|-----------------|
| gene                                                                                            | p_val       | avg_log2FC   | pct.1 | pct.2 | p_val_adj   | Foldchange_UP | Foldchange_DOWN | Ratio_pct1_pct2 |
| MSTO1                                                                                           | 0,679058213 | -0,034757226 | 0,027 | 0,03  | 1           | 0,976196019   | 1,024384427     | 0,9             |
| BIRC6                                                                                           | 0,048018487 | -0,034778825 | 0,106 | 0,137 | 1           | 0,976181404   | 1,024399764     | 0,773722628     |
| MTCL1                                                                                           | 0,149903322 | -0,034819    | 0,005 | 0,011 | 1           | 0,976154221   | 1,02442829      | 0,454545455     |
| DNAAF2                                                                                          | 0,477170769 | -0,034823607 | 0,05  | 0,057 | 1           | 0,976151104   | 1,024431562     | 0,877192982     |
| HCG11                                                                                           | 0,153561129 | -0,034846873 | 0,026 | 0,038 | 1           | 0,976135362   | 1,024448083     | 0,684210526     |
| ASF1A                                                                                           | 0,821184132 | -0,034872199 | 0,057 | 0,058 | 1           | 0,976118226   | 1,024466067     | 0,982758621     |
| TMTC4                                                                                           | 0,054610109 | -0,034877904 | 0,013 | 0,026 | 1           | 0,976114366   | 1,024470118     | 0,5             |
| USP7                                                                                            | 0,234994725 | -0,034911826 | 0,122 | 0,137 | 1           | 0,976091415   | 1,024494207     | 0,890510949     |
| CUL9                                                                                            | 0,239831039 | -0,034938206 | 0,015 | 0,023 | 1           | 0,976073567   | 1,02451294      | 0,652173913     |
| C1RL-AS1                                                                                        | 0,044316012 | -0,03494805  | 0,003 | 0,012 | 1           | 0,976066907   | 1,02451993      | 0,25            |
| ZNF777                                                                                          | 0,490619808 | -0,034950125 | 0,023 | 0,028 | 1           | 0,976065503   | 1,024521404     | 0,821428571     |
| ELP1                                                                                            | 0,083514605 | -0,034977786 | 0,022 | 0,037 | 1           | 0,976046789   | 1,024541048     | 0,594594595     |
| MAGEF1                                                                                          | 0,266682843 | -0,035022822 | 0,107 | 0,121 | 1           | 0,976016321   | 1,024573031     | 0,884297521     |
| OTUD7A                                                                                          | 0,107798587 | -0,035034455 | 0,006 | 0,014 | 1           | 0,976008451   | 1,024581292     | 0,428571429     |
| KIAA1614                                                                                        | 0,163327725 | -0,035104478 | 0,012 | 0,02  | 1           | 0,975961081   | 1,024631023     | 0,6             |
| OCIAD1                                                                                          | 0,008580801 | -0,035183249 | 0,248 | 0,305 | 1           | 0,975907794   | 1,024686969     | 0,813114754     |
| TTC32                                                                                           | 0,068808706 | -0,035195919 | 0,061 | 0,083 | 1           | 0,975899224   | 1,024695968     | 0,734939759     |
| PDS5A                                                                                           | 0,347226636 | -0,035198774 | 0,077 | 0,088 | 1           | 0,975897292   | 1,024697996     | 0,875           |
| MTFP1                                                                                           | 0,848487096 | -0,035240856 | 0,014 | 0,015 | 1           | 0,975868828   | 1,024727885     | 0,933333333     |
| ZC3H18                                                                                          | 0,299916618 | -0,035247231 | 0,062 | 0,073 | 1           | 0,975864515   | 1,024732414     | 0,849315068     |
| DHX35                                                                                           | 0,159086869 | -0,035255918 | 0,012 | 0,02  | 1           | 0,975858639   | 1,024738584     | 0,6             |
| ACTR3B                                                                                          | 0,241489952 | -0,035278935 | 0,017 | 0,026 | 1           | 0,97584307    | 1,024754933     | 0,653846154     |
| ASCC2                                                                                           | 0,906531604 | -0,035300314 | 0,051 | 0,049 | 1           | 0,975828609   | 1,024770119     | 1,040816327     |
| GNPAT                                                                                           | 0,912460243 | -0,03531983  | 0,071 | 0,068 | 1           | 0,975815409   | 1,024783981     | 1,044117647     |
| PIK3C3                                                                                          | 0,677008977 | -0,035382337 | 0,045 | 0,049 | 1           | 0,975773131   | 1,024828383     | 0,918367347     |
| CYP26B1                                                                                         | 0,014558441 | -0,03541045  | 0,003 | 0,015 | 1           | 0,975754117   | 1,024848353     | 0,2             |
| TNNC1                                                                                           | 0,00116827  | -0,03543158  | 0     | 0,012 | 1           | 0,975739826   | 1,024863364     | 0               |
| ZNF429                                                                                          | 0,025743368 | -0,035454996 | 0,006 | 0,018 | 1           | 0,975723989   | 1,024879998     | 0,333333333     |
| GZF1                                                                                            | 0,185955359 | -0,035523879 | 0,02  | 0,03  | 1           | 0,975677403   | 1,024928933     | 0,666666667     |
| TOMM20                                                                                          | 6,98876E-06 | -0,035639453 | 0,36  | 0,498 | 0,147469919 | 0,975599245   | 1,025011043     | 0,722891566     |

Supplementary Table 5

| Differentially expressed genes_total calculation_ comparing SC-Keloid vs. (SC-Myel, SC-Nonmyel) |             |              |       |       |           |               |                 |                 |
|-------------------------------------------------------------------------------------------------|-------------|--------------|-------|-------|-----------|---------------|-----------------|-----------------|
| gene                                                                                            | p_val       | avg_log2FC   | pct.1 | pct.2 | p_val_adj | Foldchange_UP | Foldchange_DOWN | Ratio_pct1_pct2 |
| KLHL25                                                                                          | 0,088768323 | -0,035679816 | 0,008 | 0,018 | 1         | 0,975571951   | 1,025039721     | 0,444444444     |
| PPP1R35                                                                                         | 0,439419957 | -0,035707844 | 0,081 | 0,09  | 1         | 0,975552998   | 1,025059635     | 0,9             |
| RABGAP1                                                                                         | 0,013882223 | -0,035710871 | 0,069 | 0,102 | 1         | 0,975550951   | 1,025061786     | 0,676470588     |
| RADX                                                                                            | 0,509767189 | -0,035723625 | 0,02  | 0,024 | 1         | 0,975542327   | 1,025070848     | 0,833333333     |
| OGFOD2                                                                                          | 0,090211663 | -0,035757392 | 0,014 | 0,005 | 1         | 0,975519494   | 1,025094841     | 2,8             |
| PRPF18                                                                                          | 0,545641453 | -0,035762966 | 0,059 | 0,065 | 1         | 0,975515725   | 1,025098801     | 0,907692308     |
| PORCN                                                                                           | 0,841815143 | -0,035822365 | 0,015 | 0,016 | 1         | 0,975475562   | 1,025141007     | 0,9375          |
| UBE2D1                                                                                          | 0,919362445 | -0,035827421 | 0,106 | 0,1   | 1         | 0,975472143   | 1,0251446       | 1,06            |
| BBS12                                                                                           | 0,124436746 | -0,035831018 | 0,014 | 0,024 | 1         | 0,975469711   | 1,025147156     | 0,583333333     |
| FBXO45                                                                                          | 0,569639878 | -0,035878327 | 0,043 | 0,037 | 1         | 0,975437724   | 1,025180773     | 1,162162162     |
| ORC5                                                                                            | 0,720065651 | -0,035900721 | 0,029 | 0,026 | 1         | 0,975422583   | 1,025196687     | 1,115384615     |
| PLEKHH2                                                                                         | 0,005396928 | -0,035933285 | 0,002 | 0,015 | 1         | 0,975400566   | 1,025219827     | 0,133333333     |
| PCDHB11                                                                                         | 0,076238574 | -0,036025878 | 0,003 | 0,011 | 1         | 0,975337966   | 1,025285629     | 0,272727273     |
| TMEM41B                                                                                         | 0,004971086 | -0,036035613 | 0,085 | 0,126 | 1         | 0,975331385   | 1,025292547     | 0,674603175     |
| MFF                                                                                             | 0,019336108 | -0,036055453 | 0,132 | 0,168 | 1         | 0,975317972   | 1,025306647     | 0,785714286     |
| CXCL16                                                                                          | 0,093402418 | -0,036117779 | 0,04  | 0,057 | 1         | 0,975275839   | 1,025350942     | 0,701754386     |
| ZNF558                                                                                          | 0,411236856 | -0,036173541 | 0,019 | 0,024 | 1         | 0,975238144   | 1,025390574     | 0,791666667     |
| AGO4                                                                                            | 0,069294457 | -0,036184515 | 0,016 | 0,03  | 1         | 0,975230725   | 1,025398374     | 0,533333333     |
| DAZAP2                                                                                          | 0,017166722 | -0,036189847 | 0,194 | 0,237 | 1         | 0,975227121   | 1,025402164     | 0,818565401     |
| RNF115                                                                                          | 0,037733759 | -0,036197312 | 0,118 | 0,151 | 1         | 0,975222075   | 1,02540747      | 0,781456954     |
| ATP2B2                                                                                          | 0,700002831 | -0,036240011 | 0,026 | 0,028 | 1         | 0,975193212   | 1,025437819     | 0,928571429     |
| TSLP                                                                                            | 0,031108278 | -0,036387958 | 0,007 | 0,019 | 1         | 0,975093212   | 1,025542982     | 0,368421053     |
| SPSB1                                                                                           | 0,665958953 | -0,036403177 | 0,045 | 0,049 | 1         | 0,975082926   | 1,0255538       | 0,918367347     |
| STT3B                                                                                           | 0,114517881 | -0,036478028 | 0,094 | 0,115 | 1         | 0,975032337   | 1,02560701      | 0,817391304     |
| PIAS3                                                                                           | 0,177428453 | -0,03648859  | 0,043 | 0,057 | 1         | 0,975025199   | 1,025614518     | 0,754385965     |
| MCTP1                                                                                           | 0,289985599 | -0,036518973 | 0,008 | 0,014 | 1         | 0,975004666   | 1,025636118     | 0,571428571     |
| PLA2G12A                                                                                        | 0,395541087 | -0,036529943 | 0,068 | 0,077 | 1         | 0,974997251   | 1,025643917     | 0,883116883     |
| NMNAT3                                                                                          | 0,03166245  | -0,036543309 | 0,002 | 0,011 | 1         | 0,974988218   | 1,025653419     | 0,181818182     |
| PCSK5                                                                                           | 0,045698741 | -0,036559302 | 0,024 | 0,042 | 1         | 0,97497741    | 1,025664789     | 0,571428571     |
| ZNF569                                                                                          | 0,572399778 | -0,036583971 | 0,008 | 0,011 | 1         | 0,974960739   | 1,025682327     | 0,727272727     |

Supplementary Table 5

| Differentially expressed genes_total calculation_ comparing SC-Keloid vs. (SC-Myel, SC-Nonmyel) |             |              |       |       |           |               |                 |                 |
|-------------------------------------------------------------------------------------------------|-------------|--------------|-------|-------|-----------|---------------|-----------------|-----------------|
| gene                                                                                            | p_val       | avg_log2FC   | pct.1 | pct.2 | p_val_adj | Foldchange_UP | Foldchange_DOWN | Ratio_pct1_pct2 |
| LAG3                                                                                            | 0,259003671 | -0,036750739 | 0,006 | 0,011 | 1         | 0,974848045   | 1,025800898     | 0,545454545     |
| GBA2                                                                                            | 0,905080676 | -0,036761957 | 0,044 | 0,045 | 1         | 0,974840465   | 1,025808874     | 0,977777778     |
| TBRG1                                                                                           | 0,109419451 | -0,036764264 | 0,1   | 0,122 | 1         | 0,974838907   | 1,025810514     | 0,819672131     |
| THAP7-AS1                                                                                       | 0,242541728 | -0,036831571 | 0,017 | 0,026 | 1         | 0,974793427   | 1,025858374     | 0,653846154     |
| ECSIT                                                                                           | 0,552321441 | -0,036869667 | 0,068 | 0,058 | 1         | 0,974767687   | 1,025885463     | 1,172413793     |
| MAN1A1                                                                                          | 0,031760918 | -0,036906576 | 0,01  | 0,024 | 1         | 0,97474275    | 1,025911709     | 0,416666667     |
| IGIP                                                                                            | 0,154249675 | -0,03690728  | 0,027 | 0,039 | 1         | 0,974742274   | 1,025912209     | 0,692307692     |
| PSPC1                                                                                           | 0,031387293 | -0,036947901 | 0,072 | 0,1   | 1         | 0,97471483    | 1,025941096     | 0,72            |
| FOXO6                                                                                           | 0,000869923 | -0,036959802 | 0,002 | 0,019 | 1         | 0,974706789   | 1,025949559     | 0,105263158     |
| AKAP6                                                                                           | 0,006441385 | -0,037000188 | 0,012 | 0,031 | 1         | 0,974679504   | 1,025978279     | 0,387096774     |
| RPS11                                                                                           | 0,020227383 | -0,037074769 | 0,639 | 0,836 | 1         | 0,974629119   | 1,026031319     | 0,764354067     |
| TRAPPC10                                                                                        | 0,15798909  | -0,037086079 | 0,055 | 0,071 | 1         | 0,974621478   | 1,026039363     | 0,774647887     |
| CEP152                                                                                          | 0,06587716  | -0,03710103  | 0,027 | 0,043 | 1         | 0,974611378   | 1,026049996     | 0,627906977     |
| TSSC4                                                                                           | 0,276226062 | -0,037185269 | 0,126 | 0,138 | 1         | 0,974554472   | 1,026109909     | 0,913043478     |
| LINC00526                                                                                       | 0,880594165 | -0,037189329 | 0,017 | 0,016 | 1         | 0,974551729   | 1,026112796     | 1,0625          |
| CDC20                                                                                           | 0,149903322 | -0,037198672 | 0,005 | 0,011 | 1         | 0,974545418   | 1,026119442     | 0,454545455     |
| SURF1                                                                                           | 0,469282879 | -0,037278666 | 0,121 | 0,129 | 1         | 0,974491383   | 1,026176339     | 0,937984496     |
| MROH8                                                                                           | 0,184357856 | -0,037322703 | 0,007 | 0,014 | 1         | 0,974461638   | 1,026207663     | 0,5             |
| PCDHB16                                                                                         | 0,011855812 | -0,037381005 | 0,005 | 0,018 | 1         | 0,974422259   | 1,026249134     | 0,277777778     |
| MMP24OS                                                                                         | 0,630071366 | -0,037441775 | 0,146 | 0,13  | 1         | 0,974381215   | 1,026292364     | 1,123076923     |
| ZNF282                                                                                          | 0,495451532 | -0,037467751 | 0,021 | 0,026 | 1         | 0,974363671   | 1,026310842     | 0,807692308     |
| TCERG1                                                                                          | 0,291433066 | -0,037555313 | 0,098 | 0,111 | 1         | 0,974304535   | 1,026373134     | 0,882882883     |
| CAD                                                                                             | 0,55365959  | -0,03758782  | 0,022 | 0,018 | 1         | 0,974282583   | 1,026396261     | 1,222222222     |
| TMUB1                                                                                           | 0,523538777 | -0,037593484 | 0,08  | 0,069 | 1         | 0,974278758   | 1,02640029      | 1,15942029      |
| CCR10                                                                                           | 0,068434545 | -0,037605171 | 0,006 | 0,015 | 1         | 0,974270865   | 1,026408605     | 0,4             |
| KAZALD1                                                                                         | 0,106661526 | -0,037607199 | 0,006 | 0,014 | 1         | 0,974269496   | 1,026410048     | 0,428571429     |
| PANK2                                                                                           | 0,009561615 | -0,037608978 | 0,063 | 0,096 | 1         | 0,974268294   | 1,026411314     | 0,65625         |
| UBOX5                                                                                           | 0,261670687 | -0,037694212 | 0,006 | 0,011 | 1         | 0,974210736   | 1,026471956     | 0,545454545     |
| UBE2Q2L                                                                                         | 0,001346613 | -0,037698221 | 0,005 | 0,023 | 1         | 0,974208029   | 1,026474808     | 0,217391304     |
| PLEKHG5                                                                                         | 0,002588225 | -0,037764272 | 0,007 | 0,026 | 1         | 0,974163429   | 1,026521804     | 0,269230769     |

Supplementary Table 5

| Differentially expressed genes_total calculation_ comparing SC-Keloid vs. (SC-Myel, SC-Nonmyel) |             |              |       |       |           |               |                 |                 |
|-------------------------------------------------------------------------------------------------|-------------|--------------|-------|-------|-----------|---------------|-----------------|-----------------|
| gene                                                                                            | p_val       | avg_log2FC   | pct.1 | pct.2 | p_val_adj | Foldchange_UP | Foldchange_DOWN | Ratio_pct1_pct2 |
| ZNF483                                                                                          | 0,009388736 | -0,037825452 | 0,006 | 0,02  | 1         | 0,974122118   | 1,026565337     | 0,3             |
| MMUT                                                                                            | 0,134853067 | -0,037880509 | 0,044 | 0,06  | 1         | 0,974084944   | 1,026604514     | 0,733333333     |
| PTCH1                                                                                           | 0,057447656 | -0,037881394 | 0,008 | 0,019 | 1         | 0,974084346   | 1,026605144     | 0,421052632     |
| OSBPL2                                                                                          | 0,401085062 | -0,037901589 | 0,038 | 0,046 | 1         | 0,974070711   | 1,026619514     | 0,826086957     |
| NPRL2                                                                                           | 0,300049021 | -0,037930155 | 0,03  | 0,039 | 1         | 0,974051424   | 1,026639842     | 0,769230769     |
| CDC6                                                                                            | 0,411411186 | -0,037932815 | 0,008 | 0,012 | 1         | 0,974049628   | 1,026641735     | 0,666666667     |
| NUDT17                                                                                          | 0,546706967 | -0,037939681 | 0,013 | 0,016 | 1         | 0,974044993   | 1,026646621     | 0,8125          |
| RECQL5                                                                                          | 0,530298977 | -0,03795936  | 0,017 | 0,022 | 1         | 0,974031706   | 1,026660625     | 0,772727273     |
| NOTCH2NLA                                                                                       | 0,016544814 | -0,037961042 | 0,017 | 0,037 | 1         | 0,97403057    | 1,026661822     | 0,459459459     |
| SMO                                                                                             | 0,068147712 | -0,037969166 | 0,006 | 0,015 | 1         | 0,974025086   | 1,026667603     | 0,4             |
| ZNF503-AS1                                                                                      | 0,025664397 | -0,038052731 | 0,006 | 0,018 | 1         | 0,973968669   | 1,026727072     | 0,333333333     |
| TFAP2B                                                                                          | 0,019127017 | -0,038105349 | 0,036 | 0,061 | 1         | 0,973933147   | 1,02676452      | 0,590163934     |
| KLF8                                                                                            | 0,002890943 | -0,038112452 | 0,002 | 0,016 | 1         | 0,973928352   | 1,026769575     | 0,125           |
| FES                                                                                             | 0,078796416 | -0,038159452 | 0,022 | 0,037 | 1         | 0,973896624   | 1,026803025     | 0,594594595     |
| CALHM5                                                                                          | 0,303278289 | -0,038221999 | 0,01  | 0,016 | 1         | 0,973854402   | 1,026847543     | 0,625           |
| SNIP1                                                                                           | 0,187333123 | -0,038237356 | 0,04  | 0,053 | 1         | 0,973844036   | 1,026858473     | 0,754716981     |
| NETO2                                                                                           | 0,07498712  | -0,038283376 | 0,003 | 0,011 | 1         | 0,973812972   | 1,026891229     | 0,272727273     |
| RPS20                                                                                           | 0,001888506 | -0,038284698 | 0,506 | 0,657 | 1         | 0,97381208    | 1,02689217      | 0,770167428     |
| C9orf72                                                                                         | 0,082865079 | -0,038287112 | 0,013 | 0,024 | 1         | 0,973810451   | 1,026893888     | 0,541666667     |
| CCNB1IP1                                                                                        | 0,19128859  | -0,038290806 | 0,097 | 0,113 | 1         | 0,973807957   | 1,026896518     | 0,85840708      |
| TRPM4                                                                                           | 0,234320479 | -0,03832298  | 0,015 | 0,023 | 1         | 0,97378624    | 1,026919419     | 0,652173913     |
| ZNF724                                                                                          | 0,092108942 | -0,038371874 | 0,005 | 0,012 | 1         | 0,973753238   | 1,026954223     | 0,416666667     |
| GOLPH3                                                                                          | 0,014047527 | -0,038403206 | 0,099 | 0,136 | 1         | 0,973732091   | 1,026976526     | 0,727941176     |
| TRAF3IP1                                                                                        | 0,458003564 | -0,038436639 | 0,041 | 0,047 | 1         | 0,973709526   | 1,027000325     | 0,872340426     |
| WDTC1                                                                                           | 0,480219169 | -0,038488292 | 0,04  | 0,046 | 1         | 0,973674664   | 1,027037096     | 0,869565217     |
| LNX2                                                                                            | 0,112022002 | -0,038500367 | 0,012 | 0,022 | 1         | 0,973666515   | 1,027045692     | 0,545454545     |
| GMDS-DT                                                                                         | 0,296273824 | -0,038556574 | 0,009 | 0,015 | 1         | 0,973628582   | 1,027085707     | 0,6             |
| GDI1                                                                                            | 0,069413279 | -0,038565594 | 0,198 | 0,228 | 1         | 0,973622495   | 1,027092128     | 0,868421053     |
| PIK3CB                                                                                          | 0,001896444 | -0,038571373 | 0,013 | 0,037 | 1         | 0,973618595   | 1,027096242     | 0,351351351     |
| PHGDH                                                                                           | 0,870632618 | -0,038582063 | 0,062 | 0,058 | 1         | 0,973611381   | 1,027103853     | 1,068965517     |

Supplementary Table 5

| Differentially expressed genes_total calculation_ comparing SC-Keloid vs. (SC-Myel, SC-Nonmyel) |             |              |       |       |           |               |                 |                 |
|-------------------------------------------------------------------------------------------------|-------------|--------------|-------|-------|-----------|---------------|-----------------|-----------------|
| gene                                                                                            | p_val       | avg_log2FC   | pct.1 | pct.2 | p_val_adj | Foldchange_UP | Foldchange_DOWN | Ratio_pct1_pct2 |
| ZNF274                                                                                          | 0,034282166 | -0,038621103 | 0,017 | 0,034 | 1         | 0,973585035   | 1,027131647     | 0,5             |
| ME2                                                                                             | 0,034284234 | -0,038663376 | 0,133 | 0,167 | 1         | 0,973556508   | 1,027161744     | 0,796407186     |
| SLTM                                                                                            | 0,00020398  | -0,03867592  | 0,193 | 0,271 | 1         | 0,973548043   | 1,027170675     | 0,712177122     |
| TANGO2                                                                                          | 0,841194236 | -0,038691608 | 0,022 | 0,02  | 1         | 0,973537456   | 1,027181844     | 1,1             |
| ZNF506                                                                                          | 0,088267011 | -0,038703927 | 0,059 | 0,08  | 1         | 0,973529143   | 1,027190616     | 0,7375          |
| IQSEC2                                                                                          | 0,847762329 | -0,038713238 | 0,016 | 0,015 | 1         | 0,97352286    | 1,027197245     | 1,066666667     |
| HNRNPA1L2                                                                                       | 0,682243796 | -0,038715777 | 0,015 | 0,018 | 1         | 0,973521147   | 1,027199053     | 0,833333333     |
| RCCD1                                                                                           | 0,24707885  | -0,038750478 | 0,022 | 0,031 | 1         | 0,973497731   | 1,02722376      | 0,709677419     |
| ZNF350                                                                                          | 0,995876465 | -0,038781194 | 0,015 | 0,015 | 1         | 0,973477005   | 1,027245631     | 1               |
| GDPD3                                                                                           | 0,057100896 | -0,038824972 | 0,005 | 0,014 | 1         | 0,973447466   | 1,027276803     | 0,357142857     |
| RPL37                                                                                           | 0,249765595 | -0,038853203 | 0,735 | 0,898 | 1         | 0,973428417   | 1,027296905     | 0,818485523     |
| DDX20                                                                                           | 0,271861427 | -0,038872942 | 0,024 | 0,016 | 1         | 0,973415099   | 1,02731096      | 1,5             |
| USP35                                                                                           | 0,409615968 | -0,038892971 | 0,008 | 0,012 | 1         | 0,973401585   | 1,027325223     | 0,666666667     |
| CHAC1                                                                                           | 0,02598154  | -0,038903624 | 0,006 | 0,018 | 1         | 0,973394398   | 1,027332808     | 0,333333333     |
| DENND4C                                                                                         | 0,097614286 | -0,038906625 | 0,036 | 0,053 | 1         | 0,973392372   | 1,027334946     | 0,679245283     |
| ING5                                                                                            | 0,195585448 | -0,03897026  | 0,061 | 0,076 | 1         | 0,973349439   | 1,027380261     | 0,802631579     |
| ESF1                                                                                            | 0,981082487 | -0,039005266 | 0,173 | 0,17  | 1         | 0,973325822   | 1,027405189     | 1,017647059     |
| PIWIL4                                                                                          | 0,411051769 | -0,039038919 | 0,008 | 0,012 | 1         | 0,973303117   | 1,027429156     | 0,666666667     |
| RASA2                                                                                           | 0,002584279 | -0,03905918  | 0,034 | 0,066 | 1         | 0,973289449   | 1,027443585     | 0,515151515     |
| MOB3A                                                                                           | 0,544296861 | -0,039108424 | 0,031 | 0,026 | 1         | 0,973256228   | 1,027478655     | 1,192307692     |
| RPS6KB1                                                                                         | 0,029183369 | -0,039121426 | 0,056 | 0,083 | 1         | 0,973247456   | 1,027487916     | 0,674698795     |
| PEDS1                                                                                           | 0,513281755 | -0,039140832 | 0,085 | 0,073 | 1         | 0,973234365   | 1,027501736     | 1,164383562     |
| STAT5A                                                                                          | 0,036757931 | -0,039160518 | 0,019 | 0,035 | 1         | 0,973221085   | 1,027515757     | 0,542857143     |
| LINC00847                                                                                       | 0,543901312 | -0,03916637  | 0,013 | 0,016 | 1         | 0,973217138   | 1,027519925     | 0,8125          |
| MDP1                                                                                            | 0,620907042 | -0,039216174 | 0,062 | 0,054 | 1         | 0,973183541   | 1,027555397     | 1,148148148     |
| BCAS2                                                                                           | 0,195579295 | -0,039272171 | 0,119 | 0,137 | 1         | 0,973145768   | 1,027595282     | 0,868613139     |
| CASTOR1                                                                                         | 0,593646265 | -0,039337182 | 0,019 | 0,015 | 1         | 0,973101917   | 1,027641588     | 1,266666667     |
| MED9                                                                                            | 0,222882856 | -0,039356432 | 0,012 | 0,019 | 1         | 0,973088934   | 1,0276553       | 0,631578947     |
| CEP57                                                                                           | 0,153647661 | -0,039466258 | 0,109 | 0,129 | 1         | 0,973014859   | 1,027733534     | 0,84496124      |
| PHF14                                                                                           | 0,538372987 | -0,039499897 | 0,163 | 0,17  | 1         | 0,972992172   | 1,027757498     | 0,958823529     |



Supplementary Table 5

| Differentially expressed genes_total calculation_ comparing SC-Keloid vs. (SC-Myel, SC-Nonmyel) |             |              |       |       |           |               |                 |                 |
|-------------------------------------------------------------------------------------------------|-------------|--------------|-------|-------|-----------|---------------|-----------------|-----------------|
| gene                                                                                            | p_val       | avg_log2FC   | pct.1 | pct.2 | p_val_adj | Foldchange_UP | Foldchange_DOWN | Ratio_pct1_pct2 |
| TARBP2                                                                                          | 0,190111604 | -0,039503564 | 0,028 | 0,018 | 1         | 0,972989699   | 1,02776011      | 1,555555556     |
| AKAP1                                                                                           | 0,387996493 | -0,039515936 | 0,026 | 0,033 | 1         | 0,972981355   | 1,027768924     | 0,787878788     |
| GNPTAB                                                                                          | 0,741019724 | -0,03953204  | 0,058 | 0,061 | 1         | 0,972970494   | 1,027780396     | 0,950819672     |
| TRMT1                                                                                           | 0,038213186 | -0,039601733 | 0,033 | 0,053 | 1         | 0,972923493   | 1,027830047     | 0,622641509     |
| RFC2                                                                                            | 0,08958874  | -0,039658894 | 0,043 | 0,061 | 1         | 0,972884946   | 1,027870771     | 0,704918033     |
| WDR35                                                                                           | 0,904920079 | -0,039762647 | 0,035 | 0,035 | 1         | 0,972814982   | 1,027944695     | 1               |
| HSD17B14                                                                                        | 0,031097692 | -0,039794591 | 0,002 | 0,011 | 1         | 0,972793443   | 1,027967456     | 0,181818182     |
| THAP7                                                                                           | 0,227491301 | -0,039794881 | 0,078 | 0,092 | 1         | 0,972793247   | 1,027967662     | 0,847826087     |
| COG1                                                                                            | 0,447127529 | -0,039797878 | 0,03  | 0,037 | 1         | 0,972791226   | 1,027969798     | 0,810810811     |
| OSGEP                                                                                           | 0,856133516 | -0,039937272 | 0,1   | 0,094 | 1         | 0,972697239   | 1,028069125     | 1,063829787     |
| CCDC22                                                                                          | 0,500837607 | -0,039943515 | 0,044 | 0,037 | 1         | 0,97269303    | 1,028073575     | 1,189189189     |
| ACSF3                                                                                           | 0,745305732 | -0,039984223 | 0,042 | 0,038 | 1         | 0,972665584   | 1,028102584     | 1,105263158     |
| TMSB15B                                                                                         | 0,56664802  | -0,040081246 | 0,008 | 0,011 | 1         | 0,972600174   | 1,028171727     | 0,727272727     |
| LINC00462                                                                                       | 0,002214594 | -0,040092766 | 0     | 0,011 | 1         | 0,972592407   | 1,028179937     | 0               |
| REEP2                                                                                           | 0,555514597 | -0,040112365 | 0,042 | 0,035 | 1         | 0,972579194   | 1,028193905     | 1,2             |
| SLC44A4                                                                                         | 0,009487867 | -0,040112847 | 0,002 | 0,014 | 1         | 0,97257887    | 1,028194248     | 0,142857143     |
| SRPK3                                                                                           | 0,299503732 | -0,040132208 | 0,009 | 0,015 | 1         | 0,972565818   | 1,028208047     | 0,6             |
| RECQL4                                                                                          | 0,07598693  | -0,040133406 | 0,003 | 0,011 | 1         | 0,97256501    | 1,028208901     | 0,272727273     |
| NPM1                                                                                            | 0,001295687 | -0,04015801  | 0,481 | 0,64  | 1         | 0,972548424   | 1,028226436     | 0,7515625       |
| GATB                                                                                            | 0,309573541 | -0,040234726 | 0,023 | 0,031 | 1         | 0,97249671    | 1,028281114     | 0,741935484     |
| RAB11FIP2                                                                                       | 0,052846802 | -0,040236717 | 0,051 | 0,075 | 1         | 0,972495367   | 1,028282533     | 0,68            |
| ANKRD13D                                                                                        | 0,626228947 | -0,040253868 | 0,098 | 0,087 | 1         | 0,972483806   | 1,028294758     | 1,126436782     |
| GAK                                                                                             | 0,414031694 | -0,040274359 | 0,059 | 0,068 | 1         | 0,972469994   | 1,028309363     | 0,867647059     |
| PUDP                                                                                            | 0,133540884 | -0,040319112 | 0,008 | 0,016 | 1         | 0,972439828   | 1,028341262     | 0,5             |
| PDSS2                                                                                           | 0,868543155 | -0,040332667 | 0,03  | 0,031 | 1         | 0,972430691   | 1,028350924     | 0,967741935     |
| GRIPAP1                                                                                         | 0,530526538 | -0,040344153 | 0,043 | 0,049 | 1         | 0,972422949   | 1,028359111     | 0,87755102      |
| C16orf46                                                                                        | 0,960417608 | -0,040349364 | 0,014 | 0,014 | 1         | 0,972419437   | 1,028362825     | 1               |
| DXO                                                                                             | 0,329520584 | -0,040371191 | 0,037 | 0,046 | 1         | 0,972404725   | 1,028378384     | 0,804347826     |
| SMARCAL1                                                                                        | 0,671220173 | -0,040435428 | 0,027 | 0,023 | 1         | 0,972361429   | 1,028424175     | 1,173913043     |
| SLC4A3                                                                                          | 0,042379497 | -0,040452645 | 0,009 | 0,022 | 1         | 0,972349825   | 1,028436447     | 0,409090909     |

Supplementary Table 5

| Differentially expressed genes_total calculation_ comparing SC-Keloid vs. (SC-Myel, SC-Nonmyel) |             |              |       |       |             |               |                 |                 |
|-------------------------------------------------------------------------------------------------|-------------|--------------|-------|-------|-------------|---------------|-----------------|-----------------|
| gene                                                                                            | p_val       | avg_log2FC   | pct.1 | pct.2 | p_val_adj   | Foldchange_UP | Foldchange_DOWN | Ratio_pct1_pct2 |
| CEACAM19                                                                                        | 0,07598693  | -0,040458991 | 0,003 | 0,011 | 1           | 0,972345548   | 1,028440972     | 0,272727273     |
| PLEKHH1                                                                                         | 0,764766914 | -0,040464896 | 0,02  | 0,022 | 1           | 0,972341568   | 1,028445181     | 0,909090909     |
| HECTD3                                                                                          | 0,549519769 | -0,04051929  | 0,013 | 0,016 | 1           | 0,972304909   | 1,028483957     | 0,8125          |
| PRXL2A                                                                                          | 8,01146E-05 | -0,040537325 | 0,024 | 0,065 | 1           | 0,972292754   | 1,028496814     | 0,369230769     |
| HOMER2                                                                                          | 0,07498712  | -0,040555768 | 0,003 | 0,011 | 1           | 0,972280325   | 1,028509962     | 0,272727273     |
| PHOSPHO2                                                                                        | 0,961922294 | -0,040559518 | 0,014 | 0,014 | 1           | 0,972277797   | 1,028512636     | 1               |
| FBXL19                                                                                          | 0,835481417 | -0,040639011 | 0,015 | 0,016 | 1           | 0,972224226   | 1,028569308     | 0,9375          |
| ASB6                                                                                            | 0,57769394  | -0,040662079 | 0,038 | 0,033 | 1           | 0,972208681   | 1,028585755     | 1,151515152     |
| HIBADH                                                                                          | 0,849468608 | -0,040699913 | 0,047 | 0,043 | 1           | 0,972183185   | 1,02861273      | 1,093023256     |
| EFHC1                                                                                           | 0,21912446  | -0,040742519 | 0,113 | 0,129 | 1           | 0,972154475   | 1,028643108     | 0,875968992     |
| PPP1R3F                                                                                         | 0,079095259 | -0,040750053 | 0,013 | 0,024 | 1           | 0,972149398   | 1,028648479     | 0,541666667     |
| RAB3GAP1                                                                                        | 0,001533637 | -0,040750205 | 0,085 | 0,133 | 1           | 0,972149296   | 1,028648587     | 0,639097744     |
| RPP25L                                                                                          | 0,184220746 | -0,040756654 | 0,023 | 0,034 | 1           | 0,972144951   | 1,028653185     | 0,676470588     |
| RTN4IP1                                                                                         | 0,017081228 | -0,040898402 | 0,002 | 0,012 | 1           | 0,97204944    | 1,028754258     | 0,166666667     |
| EIF3E                                                                                           | 1,85224E-05 | -0,040926629 | 0,292 | 0,398 | 0,390841789 | 0,972030421   | 1,028774386     | 0,733668342     |
| FBXO21                                                                                          | 0,347655842 | -0,040948085 | 0,092 | 0,103 | 1           | 0,972015965   | 1,028789687     | 0,893203883     |
| ZDHHC17                                                                                         | 0,036942952 | -0,041011476 | 0,069 | 0,096 | 1           | 0,971973256   | 1,028834892     | 0,71875         |
| GDAP2                                                                                           | 0,648345477 | -0,041035257 | 0,029 | 0,033 | 1           | 0,971957235   | 1,028851851     | 0,878787879     |
| KIAA0586                                                                                        | 0,179371445 | -0,041092361 | 0,045 | 0,06  | 1           | 0,971918764   | 1,028892575     | 0,75            |
| CCNDBP1                                                                                         | 0,345482642 | -0,041099452 | 0,107 | 0,118 | 1           | 0,971913987   | 1,028897633     | 0,906779661     |
| RPS6KA1                                                                                         | 0,897912449 | -0,041110346 | 0,024 | 0,023 | 1           | 0,971906648   | 1,028905402     | 1,043478261     |
| SUCO                                                                                            | 0,142158196 | -0,04113059  | 0,066 | 0,084 | 1           | 0,97189301    | 1,02891984      | 0,785714286     |
| NT5C3B                                                                                          | 0,421596591 | -0,041138332 | 0,092 | 0,102 | 1           | 0,971887795   | 1,028925361     | 0,901960784     |
| ZNF609                                                                                          | 0,017709256 | -0,041146874 | 0,035 | 0,06  | 1           | 0,97188204    | 1,028931453     | 0,583333333     |
| TDRD7                                                                                           | 0,067115976 | -0,041162287 | 0,016 | 0,03  | 1           | 0,971871657   | 1,028942446     | 0,533333333     |
| H2AC16                                                                                          | 0,020172327 | -0,041180624 | 0,005 | 0,016 | 1           | 0,971859305   | 1,028955524     | 0,3125          |
| ZNF510                                                                                          | 0,542625671 | -0,041289971 | 0,014 | 0,018 | 1           | 0,971785647   | 1,029033515     | 0,777777778     |
| UCHL1                                                                                           | 0,956288614 | -0,041392797 | 0,069 | 0,068 | 1           | 0,971716386   | 1,029106861     | 1,014705882     |
| PRORP                                                                                           | 0,543633462 | -0,04144281  | 0,014 | 0,018 | 1           | 0,971682701   | 1,029142537     | 0,777777778     |
| SMG8                                                                                            | 0,153018283 | -0,041543315 | 0,005 | 0,011 | 1           | 0,971615011   | 1,029214234     | 0,454545455     |

Supplementary Table 5

| Differentially expressed genes_total calculation_ comparing SC-Keloid vs. (SC-Myel, SC-Nonmyel) |             |              |       |       |           |               |                 |                 |
|-------------------------------------------------------------------------------------------------|-------------|--------------|-------|-------|-----------|---------------|-----------------|-----------------|
| gene                                                                                            | p_val       | avg_log2FC   | pct.1 | pct.2 | p_val_adj | Foldchange_UP | Foldchange_DOWN | Ratio_pct1_pct2 |
| MFSD4A                                                                                          | 0,009588809 | -0,041590389 | 0,002 | 0,014 | 1         | 0,971583309   | 1,029247818     | 0,142857143     |
| ZBTB48                                                                                          | 0,387275253 | -0,041626734 | 0,023 | 0,03  | 1         | 0,971558833   | 1,029273746     | 0,766666667     |
| AP5Z1                                                                                           | 0,960761971 | -0,04163496  | 0,038 | 0,038 | 1         | 0,971553293   | 1,029279616     | 1               |
| PEX5                                                                                            | 0,548749855 | -0,041654863 | 0,029 | 0,034 | 1         | 0,97153989    | 1,029293815     | 0,852941176     |
| TMEM200B                                                                                        | 0,001538315 | -0,041661101 | 0,001 | 0,015 | 1         | 0,971535689   | 1,029298266     | 0,066666667     |
| SLC4A5                                                                                          | 0,420397737 | -0,041690952 | 0,01  | 0,015 | 1         | 0,971515587   | 1,029319563     | 0,666666667     |
| POLD3                                                                                           | 0,383003223 | -0,041692057 | 0,028 | 0,035 | 1         | 0,971514843   | 1,029320352     | 0,8             |
| MPHOSPH8                                                                                        | 0,000781182 | -0,041724454 | 0,247 | 0,327 | 1         | 0,971493027   | 1,029343467     | 0,755351682     |
| ZNF580                                                                                          | 0,780979747 | -0,041726596 | 0,137 | 0,136 | 1         | 0,971491585   | 1,029344994     | 1,007352941     |
| ERI3                                                                                            | 0,696911683 | -0,041851277 | 0,095 | 0,098 | 1         | 0,97140763    | 1,029433957     | 0,969387755     |
| RRM1                                                                                            | 0,302230133 | -0,041918083 | 0,056 | 0,043 | 1         | 0,971362649   | 1,029481627     | 1,302325581     |
| FAM241B                                                                                         | 0,001538315 | -0,041923728 | 0,001 | 0,015 | 1         | 0,971358848   | 1,029485655     | 0,066666667     |
| DNM1L                                                                                           | 0,883980676 | -0,04194513  | 0,115 | 0,114 | 1         | 0,971344438   | 1,029500928     | 1,00877193      |
| TOMM40                                                                                          | 0,62624511  | -0,041957598 | 0,121 | 0,109 | 1         | 0,971336043   | 1,029509825     | 1,110091743     |
| FOLH1                                                                                           | 0,001496476 | -0,041959879 | 0,001 | 0,015 | 1         | 0,971334508   | 1,029511453     | 0,066666667     |
| PLEKHA2                                                                                         | 0,105624989 | -0,042030898 | 0,021 | 0,034 | 1         | 0,971286693   | 1,029562133     | 0,617647059     |
| HBEGF                                                                                           | 0,009209884 | -0,042071207 | 0,367 | 0,461 | 1         | 0,971259556   | 1,029590899     | 0,796095445     |
| ATG4A                                                                                           | 0,18909479  | -0,04209276  | 0,022 | 0,033 | 1         | 0,971245046   | 1,029606282     | 0,666666667     |
| RBM23                                                                                           | 0,009221265 | -0,042139698 | 0,093 | 0,132 | 1         | 0,971213447   | 1,02963978      | 0,704545455     |
| FXR2                                                                                            | 0,114005448 | -0,042156114 | 0,061 | 0,079 | 1         | 0,971202396   | 1,029651496     | 0,772151899     |
| TMEM126B                                                                                        | 0,006139843 | -0,042213328 | 0,139 | 0,183 | 1         | 0,971163881   | 1,029692331     | 0,759562842     |
| SEC24C                                                                                          | 0,808303374 | -0,042326504 | 0,05  | 0,052 | 1         | 0,971087699   | 1,029773111     | 0,961538462     |
| C3orf18                                                                                         | 0,546706967 | -0,042347184 | 0,013 | 0,016 | 1         | 0,971073779   | 1,029787872     | 0,8125          |
| ALG6                                                                                            | 0,399274342 | -0,042348406 | 0,052 | 0,042 | 1         | 0,971072957   | 1,029788744     | 1,238095238     |
| GOLGA6L9                                                                                        | 0,151350898 | -0,042390859 | 0,005 | 0,011 | 1         | 0,971044382   | 1,029819047     | 0,454545455     |
| NKD2                                                                                            | 0,002214594 | -0,042395375 | 0     | 0,011 | 1         | 0,971041342   | 1,029822271     | 0               |
| SOBP                                                                                            | 0,002214593 | -0,042469672 | 0     | 0,011 | 1         | 0,970991336   | 1,029875307     | 0               |
| FAM161A                                                                                         | 0,191082626 | -0,042475527 | 0,028 | 0,039 | 1         | 0,970987395   | 1,029879486     | 0,717948718     |
| FANCG                                                                                           | 0,315859884 | -0,042478957 | 0,015 | 0,022 | 1         | 0,970985087   | 1,029881935     | 0,681818182     |
| IL20RB                                                                                          | 0,009892254 | -0,042538362 | 0,001 | 0,011 | 1         | 0,970945106   | 1,029924343     | 0,090909091     |

Supplementary Table 5

| Differentially expressed genes_total calculation_ comparing SC-Keloid vs. (SC-Myel, SC-Nonmyel) |             |              |       |       |             |               |                 |                 |
|-------------------------------------------------------------------------------------------------|-------------|--------------|-------|-------|-------------|---------------|-----------------|-----------------|
| gene                                                                                            | p_val       | avg_log2FC   | pct.1 | pct.2 | p_val_adj   | Foldchange_UP | Foldchange_DOWN | Ratio_pct1_pct2 |
| CDC42BPA                                                                                        | 0,225932291 | -0,042583618 | 0,129 | 0,145 | 1           | 0,970914649   | 1,029956651     | 0,889655172     |
| ZNF133                                                                                          | 0,423996941 | -0,042689506 | 0,013 | 0,018 | 1           | 0,970843391   | 1,030032248     | 0,722222222     |
| CCDC106                                                                                         | 0,846681128 | -0,0427054   | 0,058 | 0,054 | 1           | 0,970832695   | 1,030043596     | 1,074074074     |
| ALG12                                                                                           | 0,426294328 | -0,042706012 | 0,041 | 0,033 | 1           | 0,970832283   | 1,030044033     | 1,242424242     |
| USP25                                                                                           | 0,01117746  | -0,042738329 | 0,038 | 0,066 | 1           | 0,970810536   | 1,030067107     | 0,575757576     |
| MAP2K4                                                                                          | 0,139311365 | -0,04276887  | 0,042 | 0,057 | 1           | 0,970789985   | 1,030088913     | 0,736842105     |
| KCNK1                                                                                           | 0,010086398 | -0,042861531 | 0,001 | 0,011 | 1           | 0,970727635   | 1,030155076     | 0,090909091     |
| AC097532.2                                                                                      | 0,009588806 | -0,042865091 | 0,002 | 0,014 | 1           | 0,97072524    | 1,030157617     | 0,142857143     |
| SCGB1B2P                                                                                        | 0,168803095 | -0,042871995 | 0,006 | 0,012 | 1           | 0,970720594   | 1,030162547     | 0,5             |
| TTF1                                                                                            | 0,371027824 | -0,042874026 | 0,058 | 0,068 | 1           | 0,970719228   | 1,030163997     | 0,852941176     |
| PRXL2B                                                                                          | 0,639719629 | -0,042877451 | 0,041 | 0,045 | 1           | 0,970716923   | 1,030166443     | 0,911111111     |
| THAP10                                                                                          | 0,000822944 | -0,042888905 | 0,001 | 0,016 | 1           | 0,970709216   | 1,030174622     | 0,0625          |
| RMRP                                                                                            | 0,786615848 | -0,04290494  | 0,019 | 0,02  | 1           | 0,970698427   | 1,030186072     | 0,95            |
| DGKB                                                                                            | 0,723306274 | -0,042908772 | 0,083 | 0,085 | 1           | 0,970695849   | 1,030188808     | 0,976470588     |
| USF1                                                                                            | 0,409534922 | -0,042920882 | 0,017 | 0,023 | 1           | 0,970687701   | 1,030197456     | 0,739130435     |
| LEPROT                                                                                          | 1,67863E-06 | -0,042926664 | 0,263 | 0,383 | 0,035420792 | 0,970683811   | 1,030201585     | 0,686684073     |
| DPP7                                                                                            | 0,073641549 | -0,042931626 | 0,184 | 0,213 | 1           | 0,970680472   | 1,030205128     | 0,863849765     |
| ZNF565                                                                                          | 0,08898054  | -0,042946493 | 0,008 | 0,018 | 1           | 0,970670469   | 1,030215744     | 0,444444444     |
| CDK14                                                                                           | 0,150207803 | -0,042992646 | 0,026 | 0,038 | 1           | 0,970639418   | 1,030248702     | 0,684210526     |
| SIK1                                                                                            | 0,01475003  | -0,04301189  | 0,003 | 0,015 | 1           | 0,97062647    | 1,030262444     | 0,2             |
| AL035681.1                                                                                      | 0,008417081 | -0,043055454 | 0,003 | 0,016 | 1           | 0,970597162   | 1,030293555     | 0,1875          |
| ZNF713                                                                                          | 0,050383891 | -0,043122533 | 0,007 | 0,018 | 1           | 0,970552034   | 1,03034146      | 0,388888889     |
| RAI2                                                                                            | 0,002214594 | -0,043185641 | 0     | 0,011 | 1           | 0,97050958    | 1,030386532     | 0               |
| TRIM26                                                                                          | 0,334508438 | -0,043249673 | 0,042 | 0,052 | 1           | 0,970466506   | 1,030432265     | 0,807692308     |
| GUCY1B1                                                                                         | 0,182901044 | -0,043326532 | 0,007 | 0,014 | 1           | 0,970414806   | 1,030487162     | 0,5             |
| NBAS                                                                                            | 0,18430568  | -0,04333363  | 0,05  | 0,065 | 1           | 0,970410032   | 1,030492232     | 0,769230769     |
| BHLHE41                                                                                         | 0,137345108 | -0,04333423  | 0,019 | 0,03  | 1           | 0,970409628   | 1,030492661     | 0,633333333     |
| NTF3                                                                                            | 0,300044325 | -0,043334338 | 0,009 | 0,015 | 1           | 0,970409556   | 1,030492738     | 0,6             |
| MBLAC2                                                                                          | 0,687854416 | -0,043336319 | 0,022 | 0,019 | 1           | 0,970408223   | 1,030494153     | 1,157894737     |
| TPP2                                                                                            | 0,036840627 | -0,043336752 | 0,054 | 0,079 | 1           | 0,970407932   | 1,030494462     | 0,683544304     |

Supplementary Table 5

| Differentially expressed genes_total calculation_ comparing SC-Keloid vs. (SC-Myel, SC-Nonmyel) |             |              |       |       |           |               |                 |                 |
|-------------------------------------------------------------------------------------------------|-------------|--------------|-------|-------|-----------|---------------|-----------------|-----------------|
| gene                                                                                            | p_val       | avg_log2FC   | pct.1 | pct.2 | p_val_adj | Foldchange_UP | Foldchange_DOWN | Ratio_pct1_pct2 |
| TCEANC                                                                                          | 0,093058931 | -0,04335016  | 0,005 | 0,012 | 1         | 0,970398913   | 1,030504039     | 0,416666667     |
| INO80                                                                                           | 0,059705745 | -0,043396188 | 0,073 | 0,098 | 1         | 0,970367954   | 1,030536917     | 0,744897959     |
| LEMD3                                                                                           | 0,005025623 | -0,043409219 | 0,051 | 0,085 | 1         | 0,970359189   | 1,030546226     | 0,6             |
| AIG1                                                                                            | 0,139283875 | -0,043489795 | 0,123 | 0,144 | 1         | 0,970304995   | 1,030603784     | 0,854166667     |
| MAPK1                                                                                           | 0,091992142 | -0,043493376 | 0,194 | 0,221 | 1         | 0,970302587   | 1,030606342     | 0,877828054     |
| NUDT12                                                                                          | 0,049741344 | -0,043530714 | 0,03  | 0,049 | 1         | 0,970277475   | 1,030633016     | 0,612244898     |
| DMAC2L                                                                                          | 0,120261403 | -0,043590448 | 0,083 | 0,103 | 1         | 0,970237302   | 1,030675689     | 0,805825243     |
| ZBTB7B                                                                                          | 0,420503901 | -0,043618949 | 0,034 | 0,041 | 1         | 0,970218135   | 1,03069605      | 0,829268293     |
| AC093323.1                                                                                      | 0,574228798 | -0,043705942 | 0,036 | 0,041 | 1         | 0,970159634   | 1,030758202     | 0,87804878      |
| LIPC                                                                                            | 0,002834179 | -0,043718282 | 0,002 | 0,016 | 1         | 0,970151336   | 1,030767019     | 0,125           |
| SIPA1L1                                                                                         | 0,003912532 | -0,04373229  | 0,057 | 0,095 | 1         | 0,970141916   | 1,030777027     | 0,6             |
| CETN3                                                                                           | 0,147409686 | -0,043757936 | 0,048 | 0,064 | 1         | 0,97012467    | 1,030795351     | 0,75            |
| TUBGCP6                                                                                         | 0,413206733 | -0,0438106   | 0,015 | 0,02  | 1         | 0,970089257   | 1,03083298      | 0,75            |
| SELPLG                                                                                          | 0,05558943  | -0,04389961  | 0,008 | 0,019 | 1         | 0,970029408   | 1,030896581     | 0,421052632     |
| CHM                                                                                             | 0,333442122 | -0,04391199  | 0,073 | 0,084 | 1         | 0,970021083   | 1,030905428     | 0,869047619     |
| AKR1B1                                                                                          | 0,488237972 | -0,043922282 | 0,136 | 0,142 | 1         | 0,970014164   | 1,030912782     | 0,957746479     |
| TTC7A                                                                                           | 0,040890009 | -0,043928863 | 0,014 | 0,028 | 1         | 0,970009739   | 1,030917484     | 0,5             |
| SLC2A9                                                                                          | 0,002873058 | -0,043934346 | 0,001 | 0,014 | 1         | 0,970006052   | 1,030921403     | 0,071428571     |
| KBTBD4                                                                                          | 0,560090616 | -0,04396001  | 0,028 | 0,033 | 1         | 0,969988797   | 1,030939742     | 0,848484848     |
| TNNI3K                                                                                          | 0,00116827  | -0,043973334 | 0     | 0,012 | 1         | 0,969979838   | 1,030949263     | 0               |
| RNF216                                                                                          | 0,237529819 | -0,043975571 | 0,081 | 0,096 | 1         | 0,969978335   | 1,030950862     | 0,84375         |
| TMEM220                                                                                         | 0,200014199 | -0,044079939 | 0,027 | 0,038 | 1         | 0,969908167   | 1,031025446     | 0,710526316     |
| NADK                                                                                            | 0,810862924 | -0,04408186  | 0,056 | 0,052 | 1         | 0,969906875   | 1,031026818     | 1,076923077     |
| TIMM17B                                                                                         | 0,862137183 | -0,044116562 | 0,105 | 0,103 | 1         | 0,969883546   | 1,031051619     | 1,019417476     |
| NBPF20                                                                                          | 0,640219519 | -0,04415892  | 0,01  | 0,008 | 1         | 0,96985507    | 1,031081892     | 1,25            |
| NPLOC4                                                                                          | 0,22266405  | -0,044164427 | 0,075 | 0,09  | 1         | 0,969851368   | 1,031085827     | 0,833333333     |
| HLA-C                                                                                           | 0,006469192 | -0,044216642 | 0,537 | 0,741 | 1         | 0,969816267   | 1,031123146     | 0,724696356     |
| GID4                                                                                            | 0,100051739 | -0,044223513 | 0,017 | 0,03  | 1         | 0,969811648   | 1,031128056     | 0,566666667     |
| MVD                                                                                             | 0,25026807  | -0,044273112 | 0,069 | 0,053 | 1         | 0,969778307   | 1,031163507     | 1,301886792     |
| BUD13                                                                                           | 0,595010493 | -0,044337697 | 0,024 | 0,028 | 1         | 0,969734895   | 1,031209669     | 0,857142857     |

Supplementary Table 5

| Differentially expressed genes_total calculation_ comparing SC-Keloid vs. (SC-Myel, SC-Nonmyel) |             |              |       |       |             |               |                 |                 |
|-------------------------------------------------------------------------------------------------|-------------|--------------|-------|-------|-------------|---------------|-----------------|-----------------|
| gene                                                                                            | p_val       | avg_log2FC   | pct.1 | pct.2 | p_val_adj   | Foldchange_UP | Foldchange_DOWN | Ratio_pct1_pct2 |
| VPS4A                                                                                           | 0,161712707 | -0,044375328 | 0,092 | 0,11  | 1           | 0,969709601   | 1,031236568     | 0,836363636     |
| KIAA1549                                                                                        | 0,057720335 | -0,044421732 | 0,005 | 0,014 | 1           | 0,96967841    | 1,031269738     | 0,357142857     |
| ALS2CL                                                                                          | 0,005376673 | -0,044454793 | 0,001 | 0,012 | 1           | 0,969656189   | 1,031293371     | 0,083333333     |
| GRAMD1B                                                                                         | 0,000175145 | -0,044526658 | 0     | 0,016 | 1           | 0,969607889   | 1,031344744     | 0               |
| PLEKHM1                                                                                         | 0,068952545 | -0,044550808 | 0,029 | 0,046 | 1           | 0,969591658   | 1,031362009     | 0,630434783     |
| KLHL17                                                                                          | 0,976415982 | -0,044567446 | 0,016 | 0,016 | 1           | 0,969580476   | 1,031373903     | 1               |
| CPT1B                                                                                           | 0,056486996 | -0,044568847 | 0,005 | 0,014 | 1           | 0,969579535   | 1,031374904     | 0,357142857     |
| C7orf26                                                                                         | 0,717094257 | -0,044573571 | 0,042 | 0,045 | 1           | 0,96957636    | 1,031378282     | 0,933333333     |
| PIGG                                                                                            | 0,317965352 | -0,044595595 | 0,044 | 0,054 | 1           | 0,969561559   | 1,031394027     | 0,814814815     |
| KDM5C                                                                                           | 0,015979529 | -0,044635105 | 0,059 | 0,091 | 1           | 0,969535006   | 1,031422273     | 0,648351648     |
| RNF4                                                                                            | 0,422642038 | -0,044663352 | 0,059 | 0,068 | 1           | 0,969516024   | 1,031442468     | 0,867647059     |
| ZNF514                                                                                          | 0,681285818 | -0,044689471 | 0,027 | 0,03  | 1           | 0,969498471   | 1,031461142     | 0,9             |
| HEPACAM                                                                                         | 0,002873058 | -0,04472375  | 0,001 | 0,014 | 1           | 0,969475436   | 1,03148565      | 0,071428571     |
| LINC01011                                                                                       | 0,056399746 | -0,044770222 | 0,005 | 0,014 | 1           | 0,969444208   | 1,031518876     | 0,357142857     |
| PITPNM2                                                                                         | 0,017365681 | -0,044843154 | 0,002 | 0,012 | 1           | 0,969395202   | 1,031571023     | 0,166666667     |
| SYS1                                                                                            | 0,660913766 | -0,044884611 | 0,047 | 0,05  | 1           | 0,969367345   | 1,031600667     | 0,94            |
| EEFSEC                                                                                          | 0,920791661 | -0,044918783 | 0,027 | 0,027 | 1           | 0,969344385   | 1,031625102     | 1               |
| KLHL36                                                                                          | 0,064659559 | -0,044919639 | 0,061 | 0,083 | 1           | 0,96934381    | 1,031625714     | 0,734939759     |
| CDK10                                                                                           | 0,894918094 | -0,045016613 | 0,068 | 0,064 | 1           | 0,969278655   | 1,031695059     | 1,0625          |
| TRIM34                                                                                          | 0,030973371 | -0,045022072 | 0,002 | 0,011 | 1           | 0,969274988   | 1,031698963     | 0,181818182     |
| CDK3                                                                                            | 0,159837991 | -0,045046747 | 0,012 | 0,02  | 1           | 0,96925841    | 1,031716609     | 0,6             |
| RNF26                                                                                           | 0,998332653 | -0,045109515 | 0,023 | 0,023 | 1           | 0,969216241   | 1,031761497     | 1               |
| CSDE1                                                                                           | 5,30439E-08 | -0,045135483 | 0,315 | 0,457 | 0,001119279 | 0,969198796   | 1,031780069     | 0,689277899     |
| GPRC5B                                                                                          | 0,00840093  | -0,045149953 | 0,003 | 0,016 | 1           | 0,969189075   | 1,031790417     | 0,1875          |
| DDRGK1                                                                                          | 0,380186819 | -0,045162066 | 0,135 | 0,144 | 1           | 0,969180937   | 1,031799081     | 0,9375          |
| NXT2                                                                                            | 0,712089113 | -0,045164188 | 0,023 | 0,026 | 1           | 0,969179512   | 1,031800598     | 0,884615385     |
| SPINT1                                                                                          | 0,002837596 | -0,045287501 | 0,001 | 0,014 | 1           | 0,969096676   | 1,031888794     | 0,071428571     |
| ALDH3B1                                                                                         | 0,432263321 | -0,045323122 | 0,031 | 0,024 | 1           | 0,969072748   | 1,031914272     | 1,291666667     |
| TENT5C                                                                                          | 0,047320606 | -0,045351083 | 0,01  | 0,023 | 1           | 0,969053967   | 1,031934272     | 0,434782609     |
| ASB16-AS1                                                                                       | 0,289148537 | -0,045359849 | 0,008 | 0,014 | 1           | 0,969048079   | 1,031940542     | 0,571428571     |

Supplementary Table 5

| Differentially expressed genes_total calculation_ comparing SC-Keloid vs. (SC-Myel, SC-Nonmyel) |             |              |       |       |           |               |                 |                 |
|-------------------------------------------------------------------------------------------------|-------------|--------------|-------|-------|-----------|---------------|-----------------|-----------------|
| gene                                                                                            | p_val       | avg_log2FC   | pct.1 | pct.2 | p_val_adj | Foldchange_UP | Foldchange_DOWN | Ratio_pct1_pct2 |
| WDR45B                                                                                          | 0,011524715 | -0,045499687 | 0,159 | 0,205 | 1         | 0,968954155   | 1,032040572     | 0,775609756     |
| GOSR1                                                                                           | 0,014768947 | -0,045502276 | 0,116 | 0,156 | 1         | 0,968952416   | 1,032042424     | 0,743589744     |
| CCDC51                                                                                          | 0,908229653 | -0,045532432 | 0,026 | 0,024 | 1         | 0,968932163   | 1,032063996     | 1,083333333     |
| DENND11                                                                                         | 0,057086347 | -0,045558253 | 0,008 | 0,019 | 1         | 0,968914822   | 1,032082468     | 0,421052632     |
| SHC3                                                                                            | 0,093058931 | -0,045603785 | 0,005 | 0,012 | 1         | 0,968884242   | 1,032115041     | 0,416666667     |
| THAP8                                                                                           | 0,784310258 | -0,045616185 | 0,02  | 0,018 | 1         | 0,968875915   | 1,032123912     | 1,111111111     |
| MPP2                                                                                            | 0,151143452 | -0,045616974 | 0,005 | 0,011 | 1         | 0,968875385   | 1,032124477     | 0,454545455     |
| CDC37                                                                                           | 0,000298063 | -0,045624633 | 0,24  | 0,322 | 1         | 0,968870241   | 1,032129957     | 0,745341615     |
| SNX19                                                                                           | 0,907705488 | -0,045707958 | 0,036 | 0,037 | 1         | 0,968814284   | 1,03218957      | 0,972972973     |
| ERP44                                                                                           | 0,028351708 | -0,045720645 | 0,151 | 0,186 | 1         | 0,968805765   | 1,032198647     | 0,811827957     |
| MARCHF10                                                                                        | 0,017401528 | -0,045779423 | 0,002 | 0,012 | 1         | 0,968766295   | 1,032240702     | 0,166666667     |
| SOX3                                                                                            | 0,002214594 | -0,045781061 | 0     | 0,011 | 1         | 0,968765195   | 1,032241874     | 0               |
| RHCE                                                                                            | 0,002214594 | -0,045916776 | 0     | 0,011 | 1         | 0,968674067   | 1,032338982     | 0               |
| ZBTB5                                                                                           | 0,143183122 | -0,045990506 | 0,024 | 0,037 | 1         | 0,968624564   | 1,032391741     | 0,648648649     |
| RICTOR                                                                                          | 0,001722185 | -0,04600016  | 0,077 | 0,122 | 1         | 0,968618082   | 1,03239865      | 0,631147541     |
| EAF1                                                                                            | 0,26917404  | -0,046181122 | 0,038 | 0,049 | 1         | 0,968496592   | 1,032528155     | 0,775510204     |
| CSPG5                                                                                           | 0,075485673 | -0,046198645 | 0,003 | 0,011 | 1         | 0,968484829   | 1,032540697     | 0,272727273     |
| SECISBP2                                                                                        | 0,110624133 | -0,046321246 | 0,102 | 0,125 | 1         | 0,96840253    | 1,032628446     | 0,816           |
| TSPOAP1-AS1                                                                                     | 0,010061946 | -0,046341654 | 0,001 | 0,011 | 1         | 0,968388831   | 1,032643054     | 0,090909091     |
| LMOD1                                                                                           | 0,017545566 | -0,046364773 | 0,002 | 0,012 | 1         | 0,968373314   | 1,032659601     | 0,166666667     |
| RAB5A                                                                                           | 0,002446701 | -0,046394424 | 0,177 | 0,233 | 1         | 0,968353411   | 1,032680825     | 0,759656652     |
| CFB                                                                                             | 0,000618779 | -0,046397055 | 0     | 0,014 | 1         | 0,968351645   | 1,032682708     | 0               |
| STARD7                                                                                          | 0,013853202 | -0,046413066 | 0,094 | 0,13  | 1         | 0,968340899   | 1,032694169     | 0,723076923     |
| PAXBP1-AS1                                                                                      | 0,092922739 | -0,046431472 | 0,005 | 0,012 | 1         | 0,968328544   | 1,032707345     | 0,416666667     |
| NANOS3                                                                                          | 0,548238926 | -0,046454557 | 0,013 | 0,009 | 1         | 0,96831305    | 1,03272387      | 1,444444444     |
| NHSL1                                                                                           | 0,078845535 | -0,046519698 | 0,007 | 0,016 | 1         | 0,968269329   | 1,032770501     | 0,4375          |
| MTHFD1                                                                                          | 0,902749989 | -0,046521182 | 0,05  | 0,047 | 1         | 0,968268333   | 1,032771563     | 1,063829787     |
| PTGER4                                                                                          | 0,014888236 | -0,046521758 | 0,003 | 0,015 | 1         | 0,968267947   | 1,032771975     | 0,2             |
| TMEM165                                                                                         | 0,005448362 | -0,046607171 | 0,196 | 0,247 | 1         | 0,968210623   | 1,032833121     | 0,793522267     |
| LIN7C                                                                                           | 0,002969121 | -0,046616917 | 0,095 | 0,141 | 1         | 0,968204083   | 1,032840099     | 0,673758865     |

Supplementary Table 5

| Differentially expressed genes_total calculation_ comparing SC-Keloid vs. (SC-Myel, SC-Nonmyel) |             |              |       |       |             |               |                 |                 |
|-------------------------------------------------------------------------------------------------|-------------|--------------|-------|-------|-------------|---------------|-----------------|-----------------|
| gene                                                                                            | p_val       | avg_log2FC   | pct.1 | pct.2 | p_val_adj   | Foldchange_UP | Foldchange_DOWN | Ratio_pct1_pct2 |
| AMDHD2                                                                                          | 0,300599246 | -0,046634803 | 0,028 | 0,037 | 1           | 0,96819208    | 1,032852903     | 0,756756757     |
| PDE7A                                                                                           | 0,305126728 | -0,046641062 | 0,027 | 0,035 | 1           | 0,968187879   | 1,032857384     | 0,771428571     |
| TMCC2                                                                                           | 0,009892254 | -0,046666707 | 0,001 | 0,011 | 1           | 0,968170669   | 1,032875744     | 0,090909091     |
| NICN1                                                                                           | 0,149903322 | -0,046699422 | 0,005 | 0,011 | 1           | 0,968148715   | 1,032899166     | 0,454545455     |
| IL16                                                                                            | 1,41537E-05 | -0,046748104 | 0,003 | 0,031 | 0,298658123 | 0,968116046   | 1,03293402      | 0,096774194     |
| AP2M1                                                                                           | 0,00237992  | -0,046785532 | 0,254 | 0,331 | 1           | 0,96809093    | 1,032960819     | 0,767371601     |
| ZNF606                                                                                          | 0,27891557  | -0,046822146 | 0,007 | 0,012 | 1           | 0,968066362   | 1,032987034     | 0,583333333     |
| TBC1D15                                                                                         | 0,010768559 | -0,046835058 | 0,098 | 0,137 | 1           | 0,968057698   | 1,032996279     | 0,715328467     |
| TMEM185A                                                                                        | 0,902608643 | -0,046854096 | 0,058 | 0,058 | 1           | 0,968044923   | 1,033009911     | 1               |
| TSEN2                                                                                           | 0,316140815 | -0,046880107 | 0,013 | 0,019 | 1           | 0,96802747    | 1,033028535     | 0,684210526     |
| MYBBP1A                                                                                         | 0,689943914 | -0,047026437 | 0,027 | 0,03  | 1           | 0,96792929    | 1,033133319     | 0,9             |
| AMBRA1                                                                                          | 0,052432374 | -0,04704363  | 0,019 | 0,034 | 1           | 0,967917755   | 1,033145632     | 0,558823529     |
| FADS2                                                                                           | 0,191731742 | -0,0470692   | 0,031 | 0,043 | 1           | 0,9679006     | 1,033163943     | 0,720930233     |
| PACSIN2                                                                                         | 0,075271478 | -0,047079031 | 0,129 | 0,156 | 1           | 0,967894004   | 1,033170983     | 0,826923077     |
| SLC12A7                                                                                         | 0,033145516 | -0,047114969 | 0,005 | 0,015 | 1           | 0,967869894   | 1,03319672      | 0,333333333     |
| SGSH                                                                                            | 0,321466422 | -0,047139294 | 0,022 | 0,03  | 1           | 0,967853575   | 1,033214141     | 0,733333333     |
| ZNF618                                                                                          | 0,001526252 | -0,047164884 | 0,007 | 0,027 | 1           | 0,967836407   | 1,033232468     | 0,259259259     |
| MALSU1                                                                                          | 0,420255196 | -0,047178858 | 0,105 | 0,114 | 1           | 0,967827033   | 1,033242476     | 0,921052632     |
| KLHDC1                                                                                          | 0,104304082 | -0,047242913 | 0,01  | 0,02  | 1           | 0,967784063   | 1,033288352     | 0,5             |
| ZNF14                                                                                           | 0,01464028  | -0,047248844 | 0,003 | 0,015 | 1           | 0,967780085   | 1,0332926       | 0,2             |
| WFIKKN1                                                                                         | 0,067577011 | -0,047252846 | 0,006 | 0,015 | 1           | 0,9677774     | 1,033295466     | 0,4             |
| SPTLC3                                                                                          | 0,01155016  | -0,047310162 | 0,005 | 0,018 | 1           | 0,967738952   | 1,033336519     | 0,277777778     |
| PRKAA2                                                                                          | 0,00116827  | -0,047331374 | 0     | 0,012 | 1           | 0,967724724   | 1,033351712     | 0               |
| DUSP28                                                                                          | 0,606372592 | -0,047341554 | 0,022 | 0,026 | 1           | 0,967717896   | 1,033359003     | 0,846153846     |
| MOCS1                                                                                           | 0,810742868 | -0,047344912 | 0,016 | 0,018 | 1           | 0,967715643   | 1,033361409     | 0,888888889     |
| BBS1                                                                                            | 0,145211541 | -0,047348101 | 0,009 | 0,018 | 1           | 0,967713504   | 1,033363693     | 0,5             |
| STIMATE                                                                                         | 0,972576124 | -0,047390044 | 0,028 | 0,027 | 1           | 0,96768537    | 1,033393736     | 1,037037037     |
| SAT2                                                                                            | 2,35656E-05 | -0,047399501 | 0,275 | 0,374 | 0,497258603 | 0,967679027   | 1,03340051      | 0,735294118     |
| USP10                                                                                           | 0,105811913 | -0,047402053 | 0,09  | 0,111 | 1           | 0,967677315   | 1,033402338     | 0,810810811     |
| EYA2                                                                                            | 0,000443078 | -0,047475856 | 0,001 | 0,018 | 1           | 0,967627814   | 1,033455205     | 0,055555556     |



Supplementary Table 5

| Differentially expressed genes_total calculation_ comparing SC-Keloid vs. (SC-Myel, SC-Nonmyel) |             |              |       |       |           |               |                 |                 |
|-------------------------------------------------------------------------------------------------|-------------|--------------|-------|-------|-----------|---------------|-----------------|-----------------|
| gene                                                                                            | p_val       | avg_log2FC   | pct.1 | pct.2 | p_val_adj | Foldchange_UP | Foldchange_DOWN | Ratio_pct1_pct2 |
| PAIP2B                                                                                          | 0,027781371 | -0,04747769  | 0,009 | 0,023 | 1         | 0,967626583   | 1,033456518     | 0,391304348     |
| MRM2                                                                                            | 0,417707123 | -0,0474863   | 0,044 | 0,035 | 1         | 0,967620809   | 1,033462686     | 1,257142857     |
| CORO7                                                                                           | 0,094854157 | -0,047511827 | 0,033 | 0,049 | 1         | 0,967603688   | 1,033480972     | 0,673469388     |
| C6orf62                                                                                         | 0,000909232 | -0,04753454  | 0,156 | 0,217 | 1         | 0,967588454   | 1,033497243     | 0,718894009     |
| CDON                                                                                            | 0,291104217 | -0,047549269 | 0,008 | 0,014 | 1         | 0,967578576   | 1,033507794     | 0,571428571     |
| ZCCHC14                                                                                         | 0,072128613 | -0,047551363 | 0,073 | 0,096 | 1         | 0,967577172   | 1,033509295     | 0,760416667     |
| UNKL                                                                                            | 0,005036716 | -0,047583579 | 0,017 | 0,041 | 1         | 0,967555566   | 1,033532373     | 0,414634146     |
| ZC4H2                                                                                           | 0,230761849 | -0,047611137 | 0,013 | 0,02  | 1         | 0,967537084   | 1,033552115     | 0,65            |
| SCYL3                                                                                           | 0,158487898 | -0,047675884 | 0,012 | 0,02  | 1         | 0,967493663   | 1,033598502     | 0,6             |
| BCKDK                                                                                           | 0,316687644 | -0,047733132 | 0,081 | 0,065 | 1         | 0,967455272   | 1,033639517     | 1,246153846     |
| SLC16A5                                                                                         | 0,07498712  | -0,047770307 | 0,003 | 0,011 | 1         | 0,967430343   | 1,033666152     | 0,272727273     |
| LYRM1                                                                                           | 0,361684826 | -0,047775782 | 0,03  | 0,038 | 1         | 0,967426671   | 1,033670075     | 0,789473684     |
| METAP1D                                                                                         | 0,45731144  | -0,04778431  | 0,042 | 0,049 | 1         | 0,967420953   | 1,033676185     | 0,857142857     |
| USP28                                                                                           | 0,236697275 | -0,047785195 | 0,015 | 0,023 | 1         | 0,96742036    | 1,033676819     | 0,652173913     |
| AC104695.3                                                                                      | 0,00517985  | -0,047797774 | 0,002 | 0,015 | 1         | 0,967411925   | 1,033685832     | 0,133333333     |
| DONSON                                                                                          | 0,407843707 | -0,047799805 | 0,036 | 0,043 | 1         | 0,967410563   | 1,033687287     | 0,837209302     |
| CDK12                                                                                           | 0,080732236 | -0,047841328 | 0,101 | 0,126 | 1         | 0,96738272    | 1,033717038     | 0,801587302     |
| FAM20B                                                                                          | 0,261227509 | -0,047873207 | 0,044 | 0,056 | 1         | 0,967361343   | 1,033739881     | 0,785714286     |
| SLC26A11                                                                                        | 0,001289638 | -0,047920007 | 0,016 | 0,043 | 1         | 0,967329963   | 1,033773415     | 0,372093023     |
| PSD2                                                                                            | 0,04400933  | -0,047939216 | 0,003 | 0,012 | 1         | 0,967317084   | 1,03378718      | 0,25            |
| TBC1D16                                                                                         | 0,059688308 | -0,047954487 | 0,045 | 0,066 | 1         | 0,967306845   | 1,033798122     | 0,681818182     |
| RNASEH2A                                                                                        | 0,900313526 | -0,048065748 | 0,012 | 0,012 | 1         | 0,967232249   | 1,033877852     | 1               |
| GIT2                                                                                            | 0,300875885 | -0,048104325 | 0,031 | 0,041 | 1         | 0,967206386   | 1,033905498     | 0,756097561     |
| FAM149B1                                                                                        | 0,986979929 | -0,048119864 | 0,022 | 0,022 | 1         | 0,967195968   | 1,033916634     | 1               |
| ZMYM6                                                                                           | 0,282670363 | -0,048222594 | 0,036 | 0,046 | 1         | 0,9671271     | 1,033990259     | 0,782608696     |
| KNTC1                                                                                           | 0,542289947 | -0,048257326 | 0,014 | 0,018 | 1         | 0,967103817   | 1,034015152     | 0,777777778     |
| BLZF1                                                                                           | 0,621097505 | -0,048305064 | 0,052 | 0,057 | 1         | 0,967071817   | 1,034049367     | 0,912280702     |
| TCAIM                                                                                           | 0,719296815 | -0,048346977 | 0,035 | 0,031 | 1         | 0,967043721   | 1,034079409     | 1,129032258     |
| GNPTG                                                                                           | 0,00139109  | -0,048359026 | 0,101 | 0,151 | 1         | 0,967035646   | 1,034088045     | 0,668874172     |
| FAHD2A                                                                                          | 0,169931632 | -0,048408989 | 0,045 | 0,06  | 1         | 0,967002155   | 1,034123858     | 0,75            |

Supplementary Table 5

| Differentially expressed genes_total calculation_ comparing SC-Keloid vs. (SC-Myel, SC-Nonmyel) |             |              |       |       |           |               |                 |                 |
|-------------------------------------------------------------------------------------------------|-------------|--------------|-------|-------|-----------|---------------|-----------------|-----------------|
| gene                                                                                            | p_val       | avg_log2FC   | pct.1 | pct.2 | p_val_adj | Foldchange_UP | Foldchange_DOWN | Ratio_pct1_pct2 |
| GNAZ                                                                                            | 0,089512873 | -0,04844788  | 0,008 | 0,018 | 1         | 0,966976089   | 1,034151735     | 0,444444444     |
| ZNF433                                                                                          | 0,688577148 | -0,048455667 | 0,014 | 0,016 | 1         | 0,966970869   | 1,034157318     | 0,875           |
| PEX5L                                                                                           | 0,000146568 | -0,048497891 | 0,002 | 0,023 | 1         | 0,966942569   | 1,034187585     | 0,086956522     |
| CALM3                                                                                           | 0,001547735 | -0,048501157 | 0,148 | 0,204 | 1         | 0,96694038    | 1,034189926     | 0,725490196     |
| FAM53C                                                                                          | 0,004912483 | -0,048545057 | 0,062 | 0,099 | 1         | 0,966910957   | 1,034221396     | 0,626262626     |
| SMARCA2                                                                                         | 0,092492121 | -0,04856263  | 0,07  | 0,091 | 1         | 0,966899179   | 1,034233994     | 0,769230769     |
| SCD                                                                                             | 0,00049237  | -0,048571221 | 0,212 | 0,286 | 1         | 0,966893422   | 1,034240152     | 0,741258741     |
| FBXO34                                                                                          | 0,017486352 | -0,048576962 | 0,034 | 0,058 | 1         | 0,966889574   | 1,034244268     | 0,586206897     |
| ZNF699                                                                                          | 0,631531497 | -0,04859052  | 0,015 | 0,012 | 1         | 0,966880488   | 1,034253987     | 1,25            |
| CNNM2                                                                                           | 0,159988537 | -0,048600585 | 0,012 | 0,02  | 1         | 0,966873742   | 1,034261203     | 0,6             |
| KYAT3                                                                                           | 0,150095366 | -0,048637751 | 0,059 | 0,076 | 1         | 0,966848834   | 1,034287848     | 0,776315789     |
| RPUSD2                                                                                          | 0,054610109 | -0,048638376 | 0,013 | 0,026 | 1         | 0,966848416   | 1,034288296     | 0,5             |
| ZFP64                                                                                           | 0,302760056 | -0,048707961 | 0,01  | 0,016 | 1         | 0,966801783   | 1,034338183     | 0,625           |
| ZBED3-AS1                                                                                       | 0,00162268  | -0,048709144 | 0,002 | 0,018 | 1         | 0,96680099    | 1,034339031     | 0,111111111     |
| LRP5                                                                                            | 0,004769166 | -0,048730178 | 0,003 | 0,018 | 1         | 0,966786894   | 1,034354112     | 0,166666667     |
| ZNF688                                                                                          | 0,098494825 | -0,048737655 | 0,076 | 0,053 | 1         | 0,966781884   | 1,034359473     | 1,433962264     |
| RRAS2                                                                                           | 0,620585128 | -0,048770807 | 0,041 | 0,045 | 1         | 0,966759669   | 1,034383242     | 0,911111111     |
| SCAMP4                                                                                          | 0,87071756  | -0,048785382 | 0,079 | 0,079 | 1         | 0,966749902   | 1,034393692     | 1               |
| TTC17                                                                                           | 0,014776481 | -0,048797238 | 0,093 | 0,129 | 1         | 0,966741957   | 1,034402192     | 0,720930233     |
| MFHAS1                                                                                          | 0,867124919 | -0,048929515 | 0,022 | 0,023 | 1         | 0,966653323   | 1,034497038     | 0,956521739     |
| SUMO4                                                                                           | 0,46281495  | -0,048933434 | 0,028 | 0,034 | 1         | 0,966650697   | 1,034499849     | 0,823529412     |
| LCA5                                                                                            | 0,114296004 | -0,048992925 | 0,033 | 0,047 | 1         | 0,966610838   | 1,034542508     | 0,70212766      |
| FLRT2                                                                                           | 0,002739524 | -0,04901683  | 0,003 | 0,019 | 1         | 0,966594821   | 1,03455965      | 0,157894737     |
| TBC1D13                                                                                         | 0,891712916 | -0,049126337 | 0,024 | 0,023 | 1         | 0,966521455   | 1,034638181     | 1,043478261     |
| LRP4                                                                                            | 0,000865986 | -0,04914613  | 0,002 | 0,019 | 1         | 0,966508195   | 1,034652376     | 0,105263158     |
| C7orf31                                                                                         | 0,009892254 | -0,049211341 | 0,001 | 0,011 | 1         | 0,966464509   | 1,034699144     | 0,090909091     |
| MPV17L                                                                                          | 0,001144792 | -0,049254956 | 0,006 | 0,026 | 1         | 0,966435291   | 1,034730425     | 0,230769231     |
| PIP4K2A                                                                                         | 0,048759351 | -0,049263086 | 0,062 | 0,087 | 1         | 0,966429846   | 1,034736256     | 0,712643678     |
| UGDH                                                                                            | 0,074564847 | -0,049290878 | 0,109 | 0,136 | 1         | 0,966411229   | 1,034756189     | 0,801470588     |
| SFXN5                                                                                           | 0,028167996 | -0,049313478 | 0,075 | 0,104 | 1         | 0,96639609    | 1,034772399     | 0,721153846     |

Supplementary Table 5

| Differentially expressed genes_total calculation_ comparing SC-Keloid vs. (SC-Myel, SC-Nonmyel) |             |              |       |       |             |               |                 |                 |
|-------------------------------------------------------------------------------------------------|-------------|--------------|-------|-------|-------------|---------------|-----------------|-----------------|
| gene                                                                                            | p_val       | avg_log2FC   | pct.1 | pct.2 | p_val_adj   | Foldchange_UP | Foldchange_DOWN | Ratio_pct1_pct2 |
| PRC1                                                                                            | 0,4175386   | -0,0493386   | 0,016 | 0,022 | 1           | 0,966379262   | 1,034790418     | 0,727272727     |
| SMOC2                                                                                           | 0,017329899 | -0,049342893 | 0,002 | 0,012 | 1           | 0,966376386   | 1,034793497     | 0,166666667     |
| GPHN                                                                                            | 0,182456275 | -0,049377601 | 0,02  | 0,03  | 1           | 0,966353138   | 1,034818392     | 0,666666667     |
| CLHC1                                                                                           | 0,319663819 | -0,049388109 | 0,015 | 0,009 | 1           | 0,966346099   | 1,034825929     | 1,666666667     |
| RPUSD4                                                                                          | 0,073954569 | -0,049408094 | 0,02  | 0,034 | 1           | 0,966332713   | 1,034840264     | 0,588235294     |
| ZC3H10                                                                                          | 0,163793818 | -0,049410951 | 0,013 | 0,022 | 1           | 0,966330799   | 1,034842314     | 0,590909091     |
| GPAM                                                                                            | 0,721522907 | -0,049478651 | 0,023 | 0,026 | 1           | 0,966285454   | 1,034890876     | 0,884615385     |
| TMTC1                                                                                           | 0,002214594 | -0,049482002 | 0     | 0,011 | 1           | 0,966283209   | 1,03489328      | 0               |
| PHF8                                                                                            | 0,020983239 | -0,049492188 | 0,022 | 0,042 | 1           | 0,966276387   | 1,034900587     | 0,523809524     |
| MCM3AP                                                                                          | 0,339658121 | -0,049543606 | 0,052 | 0,062 | 1           | 0,96624195    | 1,034937471     | 0,838709677     |
| FGFBP1                                                                                          | 0,025826735 | -0,049554885 | 0,003 | 0,014 | 1           | 0,966234396   | 1,034945562     | 0,214285714     |
| HSPB8                                                                                           | 0,07498712  | -0,049597811 | 0,003 | 0,011 | 1           | 0,966205646   | 1,034976357     | 0,272727273     |
| VAPB                                                                                            | 0,067343896 | -0,049615012 | 0,101 | 0,126 | 1           | 0,966194127   | 1,034988696     | 0,801587302     |
| PCDHB15                                                                                         | 0,020003409 | -0,049633599 | 0,005 | 0,016 | 1           | 0,966181679   | 1,035002031     | 0,3125          |
| PKNOX2                                                                                          | 0,534234314 | -0,049635652 | 0,031 | 0,037 | 1           | 0,966180304   | 1,035003504     | 0,837837838     |
| SLC27A6                                                                                         | 0,000328784 | -0,049665646 | 0     | 0,015 | 1           | 0,966160217   | 1,035025022     | 0               |
| RBM5                                                                                            | 3,34531E-05 | -0,049681374 | 0,141 | 0,217 | 0,705893472 | 0,966149684   | 1,035036306     | 0,649769585     |
| PLA2G6                                                                                          | 0,041328051 | -0,049718988 | 0,014 | 0,028 | 1           | 0,966124495   | 1,035063292     | 0,5             |
| NOL4L                                                                                           | 0,252592713 | -0,049796852 | 0,044 | 0,056 | 1           | 0,966072354   | 1,035119157     | 0,785714286     |
| OCLN                                                                                            | 0,557003109 | -0,049872589 | 0,012 | 0,015 | 1           | 0,966021639   | 1,035173499     | 0,8             |
| OXNAD1                                                                                          | 0,41609015  | -0,049922503 | 0,012 | 0,016 | 1           | 0,965988218   | 1,035209314     | 0,75            |
| SCARF2                                                                                          | 0,070322712 | -0,049933569 | 0,01  | 0,022 | 1           | 0,965980808   | 1,035217255     | 0,454545455     |
| GUCD1                                                                                           | 0,516044323 | -0,049954922 | 0,059 | 0,05  | 1           | 0,965966511   | 1,035232577     | 1,18            |
| CYTH2                                                                                           | 0,718908156 | -0,049959481 | 0,137 | 0,137 | 1           | 0,965963458   | 1,035235848     | 1               |
| CPEB4                                                                                           | 0,000385405 | -0,050017576 | 0,072 | 0,125 | 1           | 0,965924562   | 1,035277536     | 0,576           |
| KCNJ10                                                                                          | 0,00116827  | -0,050028545 | 0     | 0,012 | 1           | 0,965917217   | 1,035285408     | 0               |
| PHRF1                                                                                           | 0,020592022 | -0,050071662 | 0,03  | 0,053 | 1           | 0,96588835    | 1,035316349     | 0,566037736     |
| FBXL4                                                                                           | 0,590788022 | -0,050089843 | 0,037 | 0,042 | 1           | 0,965876178   | 1,035329396     | 0,880952381     |
| PDE12                                                                                           | 0,086367169 | -0,050094589 | 0,033 | 0,049 | 1           | 0,965873      | 1,035332802     | 0,673469388     |
| ZSWIM9                                                                                          | 0,02213373  | -0,050117203 | 0,012 | 0,027 | 1           | 0,965857861   | 1,035349031     | 0,444444444     |

Supplementary Table 5

| Differentially expressed genes_total calculation_ comparing SC-Keloid vs. (SC-Myel, SC-Nonmyel) |             |              |       |       |           |               |                 |                 |
|-------------------------------------------------------------------------------------------------|-------------|--------------|-------|-------|-----------|---------------|-----------------|-----------------|
| gene                                                                                            | p_val       | avg_log2FC   | pct.1 | pct.2 | p_val_adj | Foldchange_UP | Foldchange_DOWN | Ratio_pct1_pct2 |
| CBLB                                                                                            | 0,055499319 | -0,050126693 | 0,033 | 0,052 | 1         | 0,965851507   | 1,035355842     | 0,634615385     |
| DDX23                                                                                           | 0,197136333 | -0,050148068 | 0,054 | 0,068 | 1         | 0,965837197   | 1,035371182     | 0,794117647     |
| SFSWAP                                                                                          | 0,000905317 | -0,050156849 | 0,151 | 0,21  | 1         | 0,965831318   | 1,035377484     | 0,719047619     |
| RFFL                                                                                            | 0,014631149 | -0,05021259  | 0,012 | 0,028 | 1         | 0,965794003   | 1,035417488     | 0,428571429     |
| MBD4                                                                                            | 0,608307192 | -0,050228749 | 0,08  | 0,085 | 1         | 0,965783185   | 1,035429085     | 0,941176471     |
| SEMA6C                                                                                          | 0,159837991 | -0,050238617 | 0,012 | 0,02  | 1         | 0,965776579   | 1,035436168     | 0,6             |
| GGT7                                                                                            | 0,619613382 | -0,050341178 | 0,051 | 0,056 | 1         | 0,965707925   | 1,035509779     | 0,910714286     |
| PIP4K2B                                                                                         | 0,276928507 | -0,050385673 | 0,059 | 0,072 | 1         | 0,965678142   | 1,035541716     | 0,819444444     |
| SYTL1                                                                                           | 0,009528129 | -0,050385802 | 0,002 | 0,014 | 1         | 0,965678055   | 1,035541809     | 0,142857143     |
| ZNF646                                                                                          | 0,009250531 | -0,050412459 | 0,006 | 0,02  | 1         | 0,965660212   | 1,035560943     | 0,3             |
| PRR4                                                                                            | 0,06691617  | -0,050426411 | 0,006 | 0,015 | 1         | 0,965650874   | 1,035570957     | 0,4             |
| NPHP4                                                                                           | 0,046702607 | -0,050444467 | 0,016 | 0,031 | 1         | 0,965638788   | 1,035583918     | 0,516129032     |
| KIFC2                                                                                           | 0,393178127 | -0,050464781 | 0,024 | 0,031 | 1         | 0,965625191   | 1,0355985       | 0,774193548     |
| PTPRJ                                                                                           | 0,000419049 | -0,050471687 | 0,073 | 0,125 | 1         | 0,965620569   | 1,035603457     | 0,584           |
| ZNF660                                                                                          | 0,702404604 | -0,050474555 | 0,017 | 0,015 | 1         | 0,965618649   | 1,035605516     | 1,133333333     |
| TFRC                                                                                            | 0,373848177 | -0,050475156 | 0,045 | 0,054 | 1         | 0,965618247   | 1,035605948     | 0,833333333     |
| SMIM1                                                                                           | 0,056399746 | -0,050527952 | 0,005 | 0,014 | 1         | 0,965582911   | 1,035643847     | 0,357142857     |
| TMEM143                                                                                         | 0,121102937 | -0,050557728 | 0,007 | 0,015 | 1         | 0,965562982   | 1,035665222     | 0,466666667     |
| UPF3B                                                                                           | 0,497779697 | -0,050567609 | 0,073 | 0,08  | 1         | 0,965556369   | 1,035672315     | 0,9125          |
| FANCM                                                                                           | 0,416546951 | -0,05059263  | 0,013 | 0,018 | 1         | 0,965539623   | 1,035690277     | 0,722222222     |
| ZNF345                                                                                          | 0,063284467 | -0,050641189 | 0,009 | 0,02  | 1         | 0,965507125   | 1,035725137     | 0,45            |
| BCKDHB                                                                                          | 0,281171853 | -0,050657292 | 0,051 | 0,062 | 1         | 0,965496349   | 1,035736698     | 0,822580645     |
| NUDT3                                                                                           | 0,000611379 | -0,05067941  | 0,148 | 0,214 | 1         | 0,965481547   | 1,035752577     | 0,691588785     |
| PLCD3                                                                                           | 0,084944728 | -0,050690201 | 0,028 | 0,043 | 1         | 0,965474325   | 1,035760324     | 0,651162791     |
| SNUPN                                                                                           | 0,543731891 | -0,05074022  | 0,063 | 0,069 | 1         | 0,965440852   | 1,035796235     | 0,913043478     |
| CDC25B                                                                                          | 0,545625865 | -0,050829444 | 0,029 | 0,034 | 1         | 0,965381146   | 1,035860297     | 0,852941176     |
| FBXL18                                                                                          | 0,41068193  | -0,050835049 | 0,01  | 0,015 | 1         | 0,965377396   | 1,035864321     | 0,666666667     |
| RBMS2                                                                                           | 0,250855406 | -0,050885352 | 0,063 | 0,076 | 1         | 0,965343736   | 1,035900439     | 0,828947368     |
| RAB35                                                                                           | 0,623288994 | -0,050921368 | 0,059 | 0,064 | 1         | 0,965319636   | 1,035926301     | 0,921875        |
| GPER1                                                                                           | 0,407110505 | -0,050926936 | 0,008 | 0,012 | 1         | 0,965315911   | 1,035930298     | 0,666666667     |

Supplementary Table 5

| Differentially expressed genes_total calculation_ comparing SC-Keloid vs. (SC-Myel, SC-Nonmyel) |             |              |       |       |           |               |                 |                 |
|-------------------------------------------------------------------------------------------------|-------------|--------------|-------|-------|-----------|---------------|-----------------|-----------------|
| gene                                                                                            | p_val       | avg_log2FC   | pct.1 | pct.2 | p_val_adj | Foldchange_UP | Foldchange_DOWN | Ratio_pct1_pct2 |
| HYPK                                                                                            | 0,021794725 | -0,050941447 | 0,031 | 0,054 | 1         | 0,965306202   | 1,035940718     | 0,574074074     |
| DNAJC27-AS1                                                                                     | 0,042116728 | -0,050948405 | 0,006 | 0,016 | 1         | 0,965301546   | 1,035945714     | 0,375           |
| DSG1                                                                                            | 0,097207797 | -0,050959435 | 0,009 | 0,019 | 1         | 0,965294166   | 1,035953635     | 0,473684211     |
| HLA-DOA                                                                                         | 0,005376673 | -0,050986273 | 0,001 | 0,012 | 1         | 0,965276209   | 1,035972906     | 0,083333333     |
| SLC9A8                                                                                          | 0,312012981 | -0,05101455  | 0,015 | 0,022 | 1         | 0,96525729    | 1,035993212     | 0,681818182     |
| OCRL                                                                                            | 0,302760056 | -0,051045999 | 0,01  | 0,016 | 1         | 0,965236249   | 1,036015795     | 0,625           |
| TPCN2                                                                                           | 0,469058421 | -0,05110509  | 0,028 | 0,034 | 1         | 0,965196714   | 1,03605823      | 0,823529412     |
| TBCD                                                                                            | 0,182606723 | -0,051253    | 0,034 | 0,046 | 1         | 0,965097764   | 1,036164456     | 0,739130435     |
| XPO6                                                                                            | 0,315354721 | -0,051294034 | 0,069 | 0,08  | 1         | 0,965070315   | 1,036193928     | 0,8625          |
| ZNF189                                                                                          | 0,534210138 | -0,051328887 | 0,015 | 0,019 | 1         | 0,965047001   | 1,03621896      | 0,789473684     |
| MTRNR2L1                                                                                        | 0,244721788 | -0,051351494 | 0,023 | 0,033 | 1         | 0,965031878   | 1,036235198     | 0,696969697     |
| KDM3B                                                                                           | 0,092781731 | -0,051419962 | 0,037 | 0,054 | 1         | 0,964986081   | 1,036284377     | 0,685185185     |
| PCDH1                                                                                           | 0,702099477 | -0,051445524 | 0,094 | 0,096 | 1         | 0,964968983   | 1,036302739     | 0,979166667     |
| ZNF318                                                                                          | 0,015175391 | -0,051456462 | 0,012 | 0,028 | 1         | 0,964961667   | 1,036310596     | 0,428571429     |
| KLC2                                                                                            | 0,517507871 | -0,05147689  | 0,035 | 0,028 | 1         | 0,964948004   | 1,036325269     | 1,25            |
| HELQ                                                                                            | 0,398591945 | -0,051497839 | 0,023 | 0,03  | 1         | 0,964933992   | 1,036340318     | 0,766666667     |
| LINC00115                                                                                       | 0,002583908 | -0,051504491 | 0,007 | 0,026 | 1         | 0,964929543   | 1,036345096     | 0,269230769     |
| MAPRE1                                                                                          | 0,00055493  | -0,051511993 | 0,204 | 0,27  | 1         | 0,964924526   | 1,036350485     | 0,755555556     |
| NAA30                                                                                           | 0,120577028 | -0,051526578 | 0,038 | 0,054 | 1         | 0,964914771   | 1,036360962     | 0,703703704     |
| AFG1L                                                                                           | 0,151350898 | -0,051542687 | 0,005 | 0,011 | 1         | 0,964903996   | 1,036372534     | 0,454545455     |
| TNRC6A                                                                                          | 0,019188748 | -0,051543954 | 0,13  | 0,168 | 1         | 0,964903149   | 1,036373444     | 0,773809524     |
| MIGA2                                                                                           | 0,242366208 | -0,051576349 | 0,017 | 0,026 | 1         | 0,964881483   | 1,036396716     | 0,653846154     |
| TNFAIP8L1                                                                                       | 0,029614651 | -0,051640817 | 0,01  | 0,024 | 1         | 0,964838367   | 1,036443029     | 0,416666667     |
| ADSS1                                                                                           | 0,041992917 | -0,051698532 | 0,006 | 0,016 | 1         | 0,96479977    | 1,036484493     | 0,375           |
| DENND10                                                                                         | 0,163054273 | -0,051734758 | 0,051 | 0,066 | 1         | 0,964775544   | 1,036510519     | 0,772727273     |
| ECT2                                                                                            | 0,369022147 | -0,051819271 | 0,029 | 0,037 | 1         | 0,964719029   | 1,03657124      | 0,783783784     |
| MAMSTR                                                                                          | 0,030973371 | -0,051828562 | 0,002 | 0,011 | 1         | 0,964712816   | 1,036577915     | 0,181818182     |
| SPPL3                                                                                           | 0,207975282 | -0,051854336 | 0,121 | 0,137 | 1         | 0,964695582   | 1,036596434     | 0,883211679     |
| SCAP                                                                                            | 0,723575617 | -0,051867593 | 0,049 | 0,052 | 1         | 0,964686717   | 1,036605959     | 0,942307692     |
| INKA2                                                                                           | 0,275744639 | -0,051886307 | 0,036 | 0,046 | 1         | 0,964674204   | 1,036619406     | 0,782608696     |

Supplementary Table 5

| Differentially expressed genes_total calculation_ comparing SC-Keloid vs. (SC-Myel, SC-Nonmyel) |             |              |       |       |           |               |                 |                 |
|-------------------------------------------------------------------------------------------------|-------------|--------------|-------|-------|-----------|---------------|-----------------|-----------------|
| gene                                                                                            | p_val       | avg_log2FC   | pct.1 | pct.2 | p_val_adj | Foldchange_UP | Foldchange_DOWN | Ratio_pct1_pct2 |
| GNAI3                                                                                           | 0,174364965 | -0,051932072 | 0,179 | 0,197 | 1         | 0,964643603   | 1,03665229      | 0,908629442     |
| DCAF1                                                                                           | 0,050668654 | -0,051987278 | 0,019 | 0,034 | 1         | 0,964606691   | 1,036691959     | 0,558823529     |
| MYBL1                                                                                           | 0,362207024 | -0,052004502 | 0,033 | 0,041 | 1         | 0,964595174   | 1,036704336     | 0,804878049     |
| SYPL2                                                                                           | 0,005297926 | -0,052006848 | 0,001 | 0,012 | 1         | 0,964593606   | 1,036706022     | 0,083333333     |
| BTRC                                                                                            | 0,505684019 | -0,052090887 | 0,021 | 0,026 | 1         | 0,964537419   | 1,036766413     | 0,807692308     |
| CYB561A3                                                                                        | 0,788023059 | -0,052096082 | 0,055 | 0,05  | 1         | 0,964533946   | 1,036770146     | 1,1             |
| SMC3                                                                                            | 0,029052221 | -0,052098857 | 0,185 | 0,224 | 1         | 0,964532091   | 1,03677214      | 0,825892857     |
| LAMB3                                                                                           | 0,674967546 | -0,052113457 | 0,015 | 0,018 | 1         | 0,96452233    | 1,036782633     | 0,833333333     |
| ZC3H14                                                                                          | 0,003388954 | -0,052135413 | 0,079 | 0,121 | 1         | 0,964507651   | 1,036798411     | 0,652892562     |
| TAB1                                                                                            | 0,490173642 | -0,052173157 | 0,038 | 0,031 | 1         | 0,964482417   | 1,036825537     | 1,225806452     |
| FZD8                                                                                            | 0,403113874 | -0,052195245 | 0,022 | 0,028 | 1         | 0,964467651   | 1,036841411     | 0,785714286     |
| NUDCD3                                                                                          | 0,336893647 | -0,052211356 | 0,063 | 0,073 | 1         | 0,964456881   | 1,036852989     | 0,863013699     |
| VPS54                                                                                           | 0,03034031  | -0,052255514 | 0,034 | 0,056 | 1         | 0,964427361   | 1,036884726     | 0,607142857     |
| PRKCI                                                                                           | 0,006307185 | -0,052270986 | 0,062 | 0,098 | 1         | 0,964417018   | 1,036895846     | 0,632653061     |
| POC1B                                                                                           | 0,051506853 | -0,052342045 | 0,029 | 0,047 | 1         | 0,964369518   | 1,036946919     | 0,617021277     |
| TRMT2B                                                                                          | 0,077251957 | -0,05234514  | 0,003 | 0,011 | 1         | 0,964367448   | 1,036949144     | 0,272727273     |
| ZFHX2                                                                                           | 0,011651258 | -0,052392485 | 0,005 | 0,018 | 1         | 0,964335801   | 1,036983174     | 0,277777778     |
| CD302                                                                                           | 0,914100183 | -0,05240789  | 0,036 | 0,037 | 1         | 0,964325505   | 1,036994246     | 0,972972973     |
| SERTAD4-AS1                                                                                     | 0,000873875 | -0,052506003 | 0,002 | 0,019 | 1         | 0,964259926   | 1,037064772     | 0,105263158     |
| KPTN                                                                                            | 0,994664525 | -0,052510404 | 0,023 | 0,023 | 1         | 0,964256984   | 1,037067935     | 1               |
| C2orf42                                                                                         | 0,557276845 | -0,052544635 | 0,01  | 0,014 | 1         | 0,964234106   | 1,037092542     | 0,714285714     |
| EPB41L5                                                                                         | 0,048709274 | -0,052689975 | 0,017 | 0,033 | 1         | 0,964136972   | 1,037197026     | 0,515151515     |
| CCDC120                                                                                         | 0,017401528 | -0,052755244 | 0,002 | 0,012 | 1         | 0,964093354   | 1,037243951     | 0,166666667     |
| IL17RE                                                                                          | 0,145315247 | -0,052769211 | 0,029 | 0,042 | 1         | 0,964084021   | 1,037253993     | 0,69047619      |
| DCLRE1C                                                                                         | 0,877310739 | -0,05289066  | 0,03  | 0,028 | 1         | 0,964002866   | 1,037341314     | 1,071428571     |
| PPIL3                                                                                           | 0,897427546 | -0,052923422 | 0,057 | 0,057 | 1         | 0,963980974   | 1,037364872     | 1               |
| CENPF                                                                                           | 0,974510667 | -0,052926806 | 0,029 | 0,028 | 1         | 0,963978714   | 1,037367305     | 1,035714286     |
| C16orf87                                                                                        | 0,00565757  | -0,052967163 | 0,15  | 0,201 | 1         | 0,963951748   | 1,037396324     | 0,746268657     |
| EIF4G3                                                                                          | 0,061966665 | -0,05297989  | 0,099 | 0,126 | 1         | 0,963943245   | 1,037405476     | 0,785714286     |
| BLVRB                                                                                           | 0,211959534 | -0,053001181 | 0,158 | 0,176 | 1         | 0,963929019   | 1,037420786     | 0,897727273     |

Supplementary Table 5

| Differentially expressed genes_total calculation_ comparing SC-Keloid vs. (SC-Myel, SC-Nonmyel) |             |              |       |       |           |               |                 |                 |
|-------------------------------------------------------------------------------------------------|-------------|--------------|-------|-------|-----------|---------------|-----------------|-----------------|
| gene                                                                                            | p_val       | avg_log2FC   | pct.1 | pct.2 | p_val_adj | Foldchange_UP | Foldchange_DOWN | Ratio_pct1_pct2 |
| HIP1R                                                                                           | 0,399697203 | -0,05300367  | 0,007 | 0,011 | 1         | 0,963927356   | 1,037422576     | 0,636363636     |
| TESK2                                                                                           | 0,003904931 | -0,053028285 | 0,005 | 0,02  | 1         | 0,963910909   | 1,037440276     | 0,25            |
| TRPV1                                                                                           | 0,041021006 | -0,053029043 | 0,014 | 0,028 | 1         | 0,963910403   | 1,037440821     | 0,5             |
| ARMC8                                                                                           | 0,092719139 | -0,053070382 | 0,076 | 0,098 | 1         | 0,963882784   | 1,037470548     | 0,775510204     |
| QPRT                                                                                            | 0,006701262 | -0,053086427 | 0,009 | 0,027 | 1         | 0,963872064   | 1,037482087     | 0,333333333     |
| BMP1A                                                                                           | 0,000379605 | -0,05308992  | 0,033 | 0,072 | 1         | 0,96386973    | 1,037484599     | 0,458333333     |
| HACD1                                                                                           | 0,679467275 | -0,05316173  | 0,016 | 0,014 | 1         | 0,963821755   | 1,037536241     | 1,142857143     |
| VAT1                                                                                            | 0,015858166 | -0,053167156 | 0,157 | 0,195 | 1         | 0,96381813    | 1,037540143     | 0,805128205     |
| MFS11                                                                                           | 0,175509602 | -0,053226226 | 0,063 | 0,079 | 1         | 0,963778668   | 1,037582625     | 0,797468354     |
| RCOR1                                                                                           | 0,043347086 | -0,05335194  | 0,054 | 0,077 | 1         | 0,963694689   | 1,037673042     | 0,701298701     |
| CEBPG                                                                                           | 0,050846399 | -0,053372206 | 0,097 | 0,123 | 1         | 0,963681152   | 1,037687618     | 0,788617886     |
| GMEB1                                                                                           | 0,15146407  | -0,053376705 | 0,03  | 0,043 | 1         | 0,963678147   | 1,037690854     | 0,697674419     |
| DPY19L4                                                                                         | 0,165855653 | -0,053410823 | 0,07  | 0,087 | 1         | 0,963655358   | 1,037715395     | 0,804597701     |
| PHF7                                                                                            | 0,132941293 | -0,053510713 | 0,008 | 0,016 | 1         | 0,963588637   | 1,037787248     | 0,5             |
| EID2                                                                                            | 0,103562215 | -0,053515142 | 0,044 | 0,061 | 1         | 0,963585679   | 1,037790434     | 0,721311475     |
| IL17RA                                                                                          | 0,553089912 | -0,05353313  | 0,029 | 0,034 | 1         | 0,963573666   | 1,037803373     | 0,852941176     |
| LINC00702                                                                                       | 0,561178587 | -0,053555327 | 0,01  | 0,014 | 1         | 0,96355884    | 1,037819341     | 0,714285714     |
| HEXD                                                                                            | 0,450419885 | -0,053564845 | 0,043 | 0,05  | 1         | 0,963552483   | 1,037826188     | 0,86            |
| PTOV1                                                                                           | 0,239067861 | -0,053570598 | 0,164 | 0,179 | 1         | 0,963548641   | 1,037830326     | 0,916201117     |
| MPP1                                                                                            | 0,083309151 | -0,05357403  | 0,014 | 0,026 | 1         | 0,963546348   | 1,037832795     | 0,538461538     |
| TMEM205                                                                                         | 0,001909365 | -0,053575844 | 0,143 | 0,195 | 1         | 0,963545137   | 1,0378341       | 0,733333333     |
| GRK4                                                                                            | 0,760453348 | -0,053591583 | 0,029 | 0,031 | 1         | 0,963534626   | 1,037845422     | 0,935483871     |
| DNAH10OS                                                                                        | 0,005258945 | -0,053657235 | 0,001 | 0,012 | 1         | 0,963490779   | 1,037892652     | 0,083333333     |
| BEGAIN                                                                                          | 0,000430864 | -0,053675447 | 0,001 | 0,018 | 1         | 0,963478617   | 1,037905754     | 0,055555556     |
| NDP                                                                                             | 0,406787944 | -0,053725256 | 0,019 | 0,024 | 1         | 0,963445354   | 1,037941588     | 0,791666667     |
| SEC16B                                                                                          | 0,009407797 | -0,053736528 | 0,002 | 0,014 | 1         | 0,963437826   | 1,037949698     | 0,142857143     |
| ZNF836                                                                                          | 0,085607176 | -0,053741016 | 0,014 | 0,026 | 1         | 0,963434829   | 1,037952926     | 0,538461538     |
| ATP2B1-AS1                                                                                      | 0,575266276 | -0,053745008 | 0,04  | 0,045 | 1         | 0,963432163   | 1,037955799     | 0,888888889     |
| EFNA3                                                                                           | 0,41684346  | -0,053760219 | 0,013 | 0,018 | 1         | 0,963422005   | 1,037966742     | 0,722222222     |
| CIITA                                                                                           | 0,001538315 | -0,053798366 | 0,001 | 0,015 | 1         | 0,963396531   | 1,037994188     | 0,066666667     |

Supplementary Table 5

| Differentially expressed genes_total calculation_ comparing SC-Keloid vs. (SC-Myel, SC-Nonmyel) |             |              |       |       |           |               |                 |                 |
|-------------------------------------------------------------------------------------------------|-------------|--------------|-------|-------|-----------|---------------|-----------------|-----------------|
| gene                                                                                            | p_val       | avg_log2FC   | pct.1 | pct.2 | p_val_adj | Foldchange_UP | Foldchange_DOWN | Ratio_pct1_pct2 |
| HCG25                                                                                           | 0,009568544 | -0,053813026 | 0,002 | 0,014 | 1         | 0,963386741   | 1,038004736     | 0,142857143     |
| ITIH4                                                                                           | 0,000618779 | -0,053860329 | 0     | 0,014 | 1         | 0,963355155   | 1,03803877      | 0               |
| ZNF354B                                                                                         | 0,037425922 | -0,053917708 | 0,02  | 0,037 | 1         | 0,96331684    | 1,038080056     | 0,540540541     |
| TMEM185B                                                                                        | 0,778512129 | -0,053924386 | 0,037 | 0,034 | 1         | 0,963312382   | 1,038084861     | 1,088235294     |
| IDI1                                                                                            | 0,046056327 | -0,053984012 | 0,144 | 0,176 | 1         | 0,963272569   | 1,038127766     | 0,818181818     |
| VPS16                                                                                           | 0,387349578 | -0,053987599 | 0,048 | 0,038 | 1         | 0,963270174   | 1,038130347     | 1,263157895     |
| FEN1                                                                                            | 0,43574939  | -0,054001849 | 0,033 | 0,039 | 1         | 0,96326066    | 1,038140601     | 0,846153846     |
| EPPK1                                                                                           | 0,017294181 | -0,054028294 | 0,002 | 0,012 | 1         | 0,963243003   | 1,038159631     | 0,166666667     |
| REEP6                                                                                           | 0,618994905 | -0,054061241 | 0,024 | 0,02  | 1         | 0,963221005   | 1,03818334      | 1,2             |
| TFIP11                                                                                          | 0,107920637 | -0,054082709 | 0,026 | 0,039 | 1         | 0,963206672   | 1,038198788     | 0,666666667     |
| DLX1                                                                                            | 0,124891445 | -0,054092928 | 0,014 | 0,024 | 1         | 0,96319985    | 1,038206142     | 0,583333333     |
| NOG                                                                                             | 0,276319076 | -0,054105055 | 0,007 | 0,012 | 1         | 0,963191753   | 1,038214869     | 0,583333333     |
| THUMPD3-AS1                                                                                     | 0,029038766 | -0,054139832 | 0,126 | 0,163 | 1         | 0,963168535   | 1,038239896     | 0,773006135     |
| KIF20B                                                                                          | 0,356161509 | -0,054199043 | 0,034 | 0,042 | 1         | 0,963129005   | 1,038282509     | 0,80952381      |
| ZNF17                                                                                           | 0,107798587 | -0,054204419 | 0,006 | 0,014 | 1         | 0,963125417   | 1,038286377     | 0,428571429     |
| C11orf71                                                                                        | 0,066267053 | -0,05421002  | 0,017 | 0,031 | 1         | 0,963121677   | 1,038290409     | 0,548387097     |
| DET1                                                                                            | 0,29734786  | -0,05422065  | 0,009 | 0,015 | 1         | 0,963114581   | 1,038298059     | 0,6             |
| DZIP3                                                                                           | 0,737013195 | -0,05422785  | 0,041 | 0,043 | 1         | 0,963109775   | 1,038303241     | 0,953488372     |
| DNPEP                                                                                           | 0,509613036 | -0,054233787 | 0,071 | 0,077 | 1         | 0,963105811   | 1,038307514     | 0,922077922     |
| XPO7                                                                                            | 0,040778219 | -0,054237254 | 0,047 | 0,069 | 1         | 0,963103497   | 1,038310009     | 0,68115942      |
| PPHLN1                                                                                          | 0,44332687  | -0,054343955 | 0,101 | 0,109 | 1         | 0,963032269   | 1,038386804     | 0,926605505     |
| TMEM253                                                                                         | 0,15072921  | -0,054364244 | 0,005 | 0,011 | 1         | 0,963018725   | 1,038401408     | 0,454545455     |
| BTBD9                                                                                           | 0,078934571 | -0,054395618 | 0,013 | 0,024 | 1         | 0,962997783   | 1,038423989     | 0,541666667     |
| ZNF177                                                                                          | 0,149903322 | -0,054410501 | 0,005 | 0,011 | 1         | 0,962987849   | 1,038434702     | 0,454545455     |
| OSBPL7                                                                                          | 0,40882202  | -0,054417247 | 0,02  | 0,026 | 1         | 0,962983346   | 1,038439558     | 0,769230769     |
| ESAM                                                                                            | 0,010037547 | -0,05444155  | 0,001 | 0,011 | 1         | 0,962967124   | 1,038457052     | 0,090909091     |
| STK35                                                                                           | 0,129071498 | -0,054471829 | 0,016 | 0,027 | 1         | 0,962946914   | 1,038478846     | 0,592592593     |
| MYCL                                                                                            | 0,017151955 | -0,054482393 | 0,002 | 0,012 | 1         | 0,962939863   | 1,038486451     | 0,166666667     |
| CASZ1                                                                                           | 0,00116827  | -0,054489187 | 0     | 0,012 | 1         | 0,962935328   | 1,038491341     | 0               |
| TFPI                                                                                            | 0,00590234  | -0,054528407 | 0,019 | 0,042 | 1         | 0,96290915    | 1,038519573     | 0,452380952     |



Supplementary Table 5

| Differentially expressed genes_total calculation_ comparing SC-Keloid vs. (SC-Myel, SC-Nonmyel) |             |              |       |       |           |               |                 |                 |
|-------------------------------------------------------------------------------------------------|-------------|--------------|-------|-------|-----------|---------------|-----------------|-----------------|
| gene                                                                                            | p_val       | avg_log2FC   | pct.1 | pct.2 | p_val_adj | Foldchange_UP | Foldchange_DOWN | Ratio_pct1_pct2 |
| IGHMBP2                                                                                         | 0,304379597 | -0,054618455 | 0,026 | 0,034 | 1         | 0,962849051   | 1,038584396     | 0,764705882     |
| ST3GAL3                                                                                         | 0,837600109 | -0,054644175 | 0,041 | 0,042 | 1         | 0,962831886   | 1,038602912     | 0,976190476     |
| PDK1                                                                                            | 0,304162112 | -0,054657115 | 0,012 | 0,018 | 1         | 0,96282325    | 1,038612227     | 0,666666667     |
| PYCARD-AS1                                                                                      | 0,00116827  | -0,054661786 | 0     | 0,012 | 1         | 0,962820133   | 1,03861559      | 0               |
| ZNF136                                                                                          | 0,039100059 | -0,054666678 | 0,022 | 0,039 | 1         | 0,962816867   | 1,038619112     | 0,564102564     |
| FLAD1                                                                                           | 0,874187015 | -0,05466843  | 0,043 | 0,041 | 1         | 0,962815698   | 1,038620373     | 1,048780488     |
| AKAP10                                                                                          | 0,023325739 | -0,054685331 | 0,033 | 0,056 | 1         | 0,962804419   | 1,038632541     | 0,589285714     |
| SLC25A1                                                                                         | 0,598443228 | -0,054758402 | 0,061 | 0,065 | 1         | 0,962755655   | 1,038685148     | 0,938461538     |
| FAM117A                                                                                         | 0,209956431 | -0,054782656 | 0,01  | 0,018 | 1         | 0,96273947    | 1,038702609     | 0,555555556     |
| KAZN                                                                                            | 0,271177708 | -0,054846388 | 0,04  | 0,05  | 1         | 0,962696941   | 1,038748496     | 0,8             |
| GLIPR1L2                                                                                        | 0,121692156 | -0,054878109 | 0,007 | 0,015 | 1         | 0,962675775   | 1,038771336     | 0,466666667     |
| LRCH4                                                                                           | 0,387376905 | -0,054896324 | 0,026 | 0,033 | 1         | 0,96266362    | 1,038784451     | 0,787878788     |
| CCNE2                                                                                           | 0,007156661 | -0,054962271 | 0,007 | 0,023 | 1         | 0,962619617   | 1,038831936     | 0,304347826     |
| ZNF23                                                                                           | 0,995876465 | -0,054980957 | 0,015 | 0,015 | 1         | 0,962607149   | 1,038845391     | 1               |
| CSE1L                                                                                           | 0,353575798 | -0,054999391 | 0,071 | 0,081 | 1         | 0,96259485    | 1,038858665     | 0,87654321      |
| PRMT5                                                                                           | 0,210577871 | -0,055005058 | 0,041 | 0,053 | 1         | 0,962591068   | 1,038862746     | 0,773584906     |
| GPD2                                                                                            | 0,004238781 | -0,055013092 | 0,031 | 0,061 | 1         | 0,962585708   | 1,038868531     | 0,508196721     |
| NSUN2                                                                                           | 0,818772493 | -0,055037681 | 0,041 | 0,042 | 1         | 0,962569302   | 1,038886237     | 0,976190476     |
| PBX2                                                                                            | 0,012824983 | -0,05504407  | 0,078 | 0,113 | 1         | 0,962565039   | 1,038890838     | 0,690265487     |
| APBB3                                                                                           | 0,672946786 | -0,055075051 | 0,027 | 0,03  | 1         | 0,962544369   | 1,038913147     | 0,9             |
| STAU2                                                                                           | 0,920243925 | -0,055096361 | 0,051 | 0,049 | 1         | 0,962530152   | 1,038928493     | 1,040816327     |
| TNFRSF21                                                                                        | 0,025045287 | -0,055109482 | 0,003 | 0,014 | 1         | 0,962521397   | 1,038937942     | 0,214285714     |
| ZNF749                                                                                          | 0,917863319 | -0,055127358 | 0,019 | 0,018 | 1         | 0,962509471   | 1,038950816     | 1,055555556     |
| OLFM2                                                                                           | 0,584663397 | -0,055160859 | 0,023 | 0,027 | 1         | 0,962487121   | 1,038974941     | 0,851851852     |
| ZNF442                                                                                          | 0,000838303 | -0,055169809 | 0,003 | 0,022 | 1         | 0,96248115    | 1,038981387     | 0,136363636     |
| ADIPOR1                                                                                         | 0,720383769 | -0,055173083 | 0,115 | 0,115 | 1         | 0,962478965   | 1,038983745     | 1               |
| DUBR                                                                                            | 0,04880251  | -0,05519113  | 0,017 | 0,033 | 1         | 0,962466926   | 1,038996742     | 0,515151515     |
| TNFSF10                                                                                         | 0,219930602 | -0,055193715 | 0,01  | 0,018 | 1         | 0,962465201   | 1,038998603     | 0,555555556     |
| C16orf74                                                                                        | 0,002615574 | -0,055204562 | 0,003 | 0,019 | 1         | 0,962457965   | 1,039006415     | 0,157894737     |
| ABCA6                                                                                           | 0,001538315 | -0,055231374 | 0,001 | 0,015 | 1         | 0,962440078   | 1,039025725     | 0,066666667     |

Supplementary Table 5

| Differentially expressed genes_total calculation_ comparing SC-Keloid vs. (SC-Myel, SC-Nonmyel) |             |              |       |       |           |               |                 |                 |
|-------------------------------------------------------------------------------------------------|-------------|--------------|-------|-------|-----------|---------------|-----------------|-----------------|
| gene                                                                                            | p_val       | avg_log2FC   | pct.1 | pct.2 | p_val_adj | Foldchange_UP | Foldchange_DOWN | Ratio_pct1_pct2 |
| LDLRAD3                                                                                         | 0,218110598 | -0,055270422 | 0,01  | 0,018 | 1         | 0,962414029   | 1,039053848     | 0,555555556     |
| CDYL                                                                                            | 0,030857648 | -0,055322769 | 0,08  | 0,11  | 1         | 0,962379109   | 1,039091549     | 0,727272727     |
| GOLGA6L10                                                                                       | 0,273168031 | -0,055347074 | 0,007 | 0,012 | 1         | 0,962362896   | 1,039109055     | 0,583333333     |
| AP1B1                                                                                           | 0,638741182 | -0,055389263 | 0,04  | 0,043 | 1         | 0,962334754   | 1,039139443     | 0,930232558     |
| LIG1                                                                                            | 0,885213457 | -0,055457834 | 0,017 | 0,016 | 1         | 0,962289016   | 1,039188834     | 1,0625          |
| AC003102.1                                                                                      | 0,103644312 | -0,055462976 | 0,01  | 0,02  | 1         | 0,962285586   | 1,039192538     | 0,5             |
| H1-2                                                                                            | 0,013301285 | -0,055479376 | 0,059 | 0,092 | 1         | 0,962274647   | 1,039204351     | 0,641304348     |
| SV2C                                                                                            | 0,000825022 | -0,055504944 | 0,001 | 0,016 | 1         | 0,962257594   | 1,039222768     | 0,0625          |
| ZNF395                                                                                          | 0,013131974 | -0,055525314 | 0,015 | 0,034 | 1         | 0,962244007   | 1,039237441     | 0,441176471     |
| MCOLN2                                                                                          | 0,009940476 | -0,055540179 | 0,001 | 0,011 | 1         | 0,962234092   | 1,03924815      | 0,090909091     |
| CNOT7                                                                                           | 0,117619325 | -0,055570845 | 0,066 | 0,085 | 1         | 0,96221364    | 1,03927024      | 0,776470588     |
| PCGF6                                                                                           | 0,947358132 | -0,05557312  | 0,041 | 0,039 | 1         | 0,962212122   | 1,039271879     | 1,051282051     |
| CTNS                                                                                            | 0,245189483 | -0,055584379 | 0,023 | 0,033 | 1         | 0,962204613   | 1,03927999      | 0,696969697     |
| PRPSAP2                                                                                         | 0,380318832 | -0,055597048 | 0,059 | 0,069 | 1         | 0,962196163   | 1,039289116     | 0,855072464     |
| POLG                                                                                            | 0,388300049 | -0,055638319 | 0,042 | 0,05  | 1         | 0,962168639   | 1,039318847     | 0,84            |
| FAM107A                                                                                         | 0,00116827  | -0,055640709 | 0     | 0,012 | 1         | 0,962167044   | 1,039320569     | 0               |
| VEGFA                                                                                           | 0,002580002 | -0,055685135 | 0,193 | 0,251 | 1         | 0,962137416   | 1,039352574     | 0,768924303     |
| TBC1D8                                                                                          | 0,001496476 | -0,055721525 | 0,001 | 0,015 | 1         | 0,962113148   | 1,039378791     | 0,066666667     |
| SETD3                                                                                           | 0,00030848  | -0,05572685  | 0,056 | 0,104 | 1         | 0,962109596   | 1,039382627     | 0,538461538     |
| USP40                                                                                           | 0,191734145 | -0,055736793 | 0,069 | 0,052 | 1         | 0,962102966   | 1,03938979      | 1,326923077     |
| ITFG2                                                                                           | 0,309506464 | -0,055757408 | 0,031 | 0,041 | 1         | 0,962089218   | 1,039404643     | 0,756097561     |
| BCO2                                                                                            | 0,049302167 | -0,055786674 | 0,007 | 0,018 | 1         | 0,962069702   | 1,039425728     | 0,388888889     |
| TERF2IP                                                                                         | 7,61827E-05 | -0,0558253   | 0,277 | 0,372 | 1         | 0,962043944   | 1,039453557     | 0,744623656     |
| LDHD                                                                                            | 0,005202323 | -0,055825792 | 0,002 | 0,015 | 1         | 0,962043616   | 1,039453912     | 0,133333333     |
| SLC45A3                                                                                         | 0,262563895 | -0,055829206 | 0,006 | 0,011 | 1         | 0,96204134    | 1,039456371     | 0,545454545     |
| WRAP53                                                                                          | 0,38397331  | -0,055843556 | 0,029 | 0,022 | 1         | 0,962031771   | 1,039466711     | 1,318181818     |
| HTRA2                                                                                           | 0,217647901 | -0,055850588 | 0,083 | 0,098 | 1         | 0,962027082   | 1,039471777     | 0,846938776     |
| SSUH2                                                                                           | 0,191226442 | -0,055889026 | 0,029 | 0,041 | 1         | 0,96200145    | 1,039499472     | 0,707317073     |
| PACRG                                                                                           | 0,122877316 | -0,055933063 | 0,007 | 0,015 | 1         | 0,961972087   | 1,039531203     | 0,466666667     |
| GNAL                                                                                            | 0,000418592 | -0,055962613 | 0,005 | 0,026 | 1         | 0,961952383   | 1,039552495     | 0,192307692     |

Supplementary Table 5

| Differentially expressed genes_total calculation_ comparing SC-Keloid vs. (SC-Myel, SC-Nonmyel) |             |              |       |       |           |               |                 |                 |
|-------------------------------------------------------------------------------------------------|-------------|--------------|-------|-------|-----------|---------------|-----------------|-----------------|
| gene                                                                                            | p_val       | avg_log2FC   | pct.1 | pct.2 | p_val_adj | Foldchange_UP | Foldchange_DOWN | Ratio_pct1_pct2 |
| PAXIP1-DT                                                                                       | 0,068092166 | -0,05599105  | 0,029 | 0,046 | 1         | 0,961933422   | 1,039572986     | 0,630434783     |
| VAR52                                                                                           | 0,621344245 | -0,055998552 | 0,02  | 0,023 | 1         | 0,96192842    | 1,039578392     | 0,869565217     |
| PKHD1                                                                                           | 0,002214594 | -0,056029992 | 0     | 0,011 | 1         | 0,961907457   | 1,039601047     | 0               |
| BANK1                                                                                           | 0,014477005 | -0,056050507 | 0,003 | 0,015 | 1         | 0,96189378    | 1,03961583      | 0,2             |
| UBA3                                                                                            | 0,361951011 | -0,056074564 | 0,09  | 0,1   | 1         | 0,96187774    | 1,039633166     | 0,9             |
| NCK1                                                                                            | 0,045178646 | -0,056104581 | 0,106 | 0,136 | 1         | 0,961857727   | 1,039654797     | 0,779411765     |
| ZNF816                                                                                          | 0,108370705 | -0,056136341 | 0,006 | 0,014 | 1         | 0,961836553   | 1,039677685     | 0,428571429     |
| PLEKHG2                                                                                         | 0,223006738 | -0,056179966 | 0,045 | 0,058 | 1         | 0,961807469   | 1,039709123     | 0,775862069     |
| BOD1L1                                                                                          | 0,030955045 | -0,056227029 | 0,196 | 0,231 | 1         | 0,961776093   | 1,039743041     | 0,848484848     |
| ZNF266                                                                                          | 0,505365471 | -0,056247769 | 0,02  | 0,024 | 1         | 0,961762267   | 1,039757988     | 0,833333333     |
| RAD52                                                                                           | 0,304056742 | -0,056254913 | 0,01  | 0,016 | 1         | 0,961757504   | 1,039763137     | 0,625           |
| UBR7                                                                                            | 0,11150493  | -0,056259803 | 0,043 | 0,06  | 1         | 0,961754245   | 1,039766661     | 0,716666667     |
| CLIC2                                                                                           | 0,00116827  | -0,056264967 | 0     | 0,012 | 1         | 0,961750802   | 1,039770383     | 0               |
| ZNF710                                                                                          | 0,554781399 | -0,056273843 | 0,012 | 0,015 | 1         | 0,961744885   | 1,03977678      | 0,8             |
| C3                                                                                              | 0,167761421 | -0,056294145 | 0,006 | 0,012 | 1         | 0,961731351   | 1,039791412     | 0,5             |
| SLK                                                                                             | 0,124066363 | -0,056295198 | 0,122 | 0,144 | 1         | 0,961730649   | 1,039792171     | 0,847222222     |
| SNX4                                                                                            | 0,668980047 | -0,056309729 | 0,085 | 0,088 | 1         | 0,961720962   | 1,039802644     | 0,965909091     |
| RNF220                                                                                          | 0,834960751 | -0,056348326 | 0,056 | 0,057 | 1         | 0,961695234   | 1,039830463     | 0,98245614      |
| HES7                                                                                            | 0,274024959 | -0,056365128 | 0,007 | 0,012 | 1         | 0,961684034   | 1,039842573     | 0,583333333     |
| CA11                                                                                            | 0,114849279 | -0,056464306 | 0,03  | 0,045 | 1         | 0,961617925   | 1,039914059     | 0,666666667     |
| AUH                                                                                             | 0,002539969 | -0,056485253 | 0,028 | 0,058 | 1         | 0,961603963   | 1,039929158     | 0,482758621     |
| CBWD3                                                                                           | 0,136440079 | -0,05648748  | 0,022 | 0,034 | 1         | 0,961602478   | 1,039930764     | 0,647058824     |
| SFRP4                                                                                           | 0,011131228 | -0,056495451 | 0,013 | 0,031 | 1         | 0,961597166   | 1,039936509     | 0,419354839     |
| ATR                                                                                             | 0,733911725 | -0,056496492 | 0,036 | 0,033 | 1         | 0,961596472   | 1,03993726      | 1,090909091     |
| HPDL                                                                                            | 0,009387874 | -0,056592414 | 0,002 | 0,014 | 1         | 0,96153254    | 1,040006405     | 0,142857143     |
| STXBP5                                                                                          | 0,551556039 | -0,056617539 | 0,04  | 0,045 | 1         | 0,961515794   | 1,040024518     | 0,888888889     |
| DNAJC25                                                                                         | 0,57219068  | -0,056643536 | 0,026 | 0,03  | 1         | 0,961498468   | 1,040043259     | 0,866666667     |
| MRI1                                                                                            | 0,95663795  | -0,056690569 | 0,033 | 0,033 | 1         | 0,961467123   | 1,040077166     | 1               |
| PET117                                                                                          | 0,609766976 | -0,056700947 | 0,024 | 0,02  | 1         | 0,961460206   | 1,040084648     | 1,2             |
| C1QTNF2                                                                                         | 0,005580659 | -0,056709225 | 0,006 | 0,022 | 1         | 0,96145469    | 1,040090615     | 0,272727273     |

Supplementary Table 5

| Differentially expressed genes_total calculation_ comparing SC-Keloid vs. (SC-Myel, SC-Nonmyel) |             |              |       |       |           |               |                 |                 |
|-------------------------------------------------------------------------------------------------|-------------|--------------|-------|-------|-----------|---------------|-----------------|-----------------|
| gene                                                                                            | p_val       | avg_log2FC   | pct.1 | pct.2 | p_val_adj | Foldchange_UP | Foldchange_DOWN | Ratio_pct1_pct2 |
| SPR                                                                                             | 0,710908332 | -0,056741442 | 0,012 | 0,014 | 1         | 0,96143322    | 1,040113842     | 0,857142857     |
| REXO4                                                                                           | 0,852081266 | -0,056755144 | 0,055 | 0,056 | 1         | 0,961424089   | 1,04012372      | 0,982142857     |
| ANKRD26                                                                                         | 0,488521431 | -0,056791241 | 0,057 | 0,064 | 1         | 0,961400033   | 1,040149745     | 0,890625        |
| AK4                                                                                             | 0,00840093  | -0,05680925  | 0,003 | 0,016 | 1         | 0,961388033   | 1,040162729     | 0,1875          |
| ABHD14A                                                                                         | 0,781207776 | -0,05690134  | 0,079 | 0,073 | 1         | 0,961326667   | 1,040229127     | 1,082191781     |
| AC002451.1                                                                                      | 0,002214594 | -0,056947926 | 0     | 0,011 | 1         | 0,961295626   | 1,040262718     | 0               |
| PRH1                                                                                            | 0,77357041  | -0,056993753 | 0,043 | 0,039 | 1         | 0,961265091   | 1,040295762     | 1,102564103     |
| KRT7                                                                                            | 0,932615794 | -0,057028422 | 0,01  | 0,011 | 1         | 0,961241991   | 1,040320761     | 0,909090909     |
| L2HGDH                                                                                          | 0,025782931 | -0,057039543 | 0,006 | 0,018 | 1         | 0,961234581   | 1,040328781     | 0,333333333     |
| HOXC-AS1                                                                                        | 0,535263772 | -0,057047099 | 0,014 | 0,018 | 1         | 0,961229547   | 1,040334229     | 0,777777778     |
| C14orf28                                                                                        | 0,611696793 | -0,057066029 | 0,024 | 0,02  | 1         | 0,961216935   | 1,04034788      | 1,2             |
| CDAN1                                                                                           | 0,00473174  | -0,057100913 | 0,003 | 0,018 | 1         | 0,961193693   | 1,040373036     | 0,166666667     |
| NPIP15                                                                                          | 0,000518488 | -0,05711226  | 0,016 | 0,046 | 1         | 0,961186133   | 1,040381218     | 0,347826087     |
| RBM26-AS1                                                                                       | 0,001538315 | -0,057113642 | 0,001 | 0,015 | 1         | 0,961185213   | 1,040382214     | 0,066666667     |
| ATAD3C                                                                                          | 0,026342323 | -0,057149326 | 0,009 | 0,023 | 1         | 0,961161438   | 1,040407948     | 0,391304348     |
| ZBTB17                                                                                          | 0,085438746 | -0,05719577  | 0,035 | 0,052 | 1         | 0,961130497   | 1,040441442     | 0,673076923     |
| RELL1                                                                                           | 0,032653275 | -0,057197546 | 0,016 | 0,033 | 1         | 0,961129314   | 1,040442723     | 0,484848485     |
| ZNF700                                                                                          | 0,03591161  | -0,057206442 | 0,008 | 0,02  | 1         | 0,961123387   | 1,040449139     | 0,4             |
| TADA2B                                                                                          | 0,814526469 | -0,057260259 | 0,016 | 0,018 | 1         | 0,961087535   | 1,040487951     | 0,888888889     |
| OR2A1-AS1                                                                                       | 0,309101452 | -0,057278663 | 0,013 | 0,019 | 1         | 0,961075275   | 1,040501224     | 0,684210526     |
| KATNIP                                                                                          | 0,764429719 | -0,057359806 | 0,02  | 0,022 | 1         | 0,961021221   | 1,040559748     | 0,909090909     |
| GABPB2                                                                                          | 0,147058302 | -0,057420959 | 0,022 | 0,034 | 1         | 0,960980486   | 1,040603856     | 0,647058824     |
| ANKRD46                                                                                         | 0,007307317 | -0,05743203  | 0,022 | 0,046 | 1         | 0,960973112   | 1,040611842     | 0,47826087      |
| GLMN                                                                                            | 0,054274274 | -0,057444771 | 0,02  | 0,035 | 1         | 0,960964625   | 1,040621032     | 0,571428571     |
| LRP3                                                                                            | 0,000257964 | -0,057484842 | 0,008 | 0,034 | 1         | 0,960937934   | 1,040649936     | 0,235294118     |
| CREB3L4                                                                                         | 0,305878291 | -0,057498912 | 0,01  | 0,016 | 1         | 0,960928563   | 1,040660085     | 0,625           |
| ZNF337-AS1                                                                                      | 0,009892254 | -0,057520386 | 0,001 | 0,011 | 1         | 0,96091426    | 1,040675575     | 0,090909091     |
| NYNRIN                                                                                          | 0,067482278 | -0,057523655 | 0,006 | 0,015 | 1         | 0,960912083   | 1,040677932     | 0,4             |
| SGTA                                                                                            | 0,087047178 | -0,057557319 | 0,094 | 0,117 | 1         | 0,960889661   | 1,040702216     | 0,803418803     |
| CR1                                                                                             | 0,00116827  | -0,057635239 | 0     | 0,012 | 1         | 0,960837764   | 1,040758427     | 0               |

Supplementary Table 5

| Differentially expressed genes_total calculation_ comparing SC-Keloid vs. (SC-Myel, SC-Nonmyel) |             |              |       |       |           |               |                 |                 |
|-------------------------------------------------------------------------------------------------|-------------|--------------|-------|-------|-----------|---------------|-----------------|-----------------|
| gene                                                                                            | p_val       | avg_log2FC   | pct.1 | pct.2 | p_val_adj | Foldchange_UP | Foldchange_DOWN | Ratio_pct1_pct2 |
| ARHGEF11                                                                                        | 0,170176409 | -0,057672535 | 0,075 | 0,091 | 1         | 0,960812926   | 1,040785332     | 0,824175824     |
| ITPKB                                                                                           | 0,044072812 | -0,057699453 | 0,038 | 0,06  | 1         | 0,960794999   | 1,040804751     | 0,633333333     |
| RHOBTB1                                                                                         | 0,230580927 | -0,057702315 | 0,028 | 0,038 | 1         | 0,960793093   | 1,040806816     | 0,736842105     |
| HEYL                                                                                            | 0,011842237 | -0,057710024 | 0,007 | 0,022 | 1         | 0,960787959   | 1,040812377     | 0,318181818     |
| GPR146                                                                                          | 0,005324058 | -0,057761422 | 0,001 | 0,012 | 1         | 0,96075373    | 1,040849458     | 0,083333333     |
| AXL                                                                                             | 0,147989104 | -0,05776564  | 0,154 | 0,172 | 1         | 0,960750922   | 1,040852502     | 0,895348837     |
| DMPK                                                                                            | 0,070349689 | -0,057787307 | 0,058 | 0,08  | 1         | 0,960736492   | 1,040868134     | 0,725           |
| MIR4458HG                                                                                       | 0,205102569 | -0,057836939 | 0,048 | 0,061 | 1         | 0,960703442   | 1,040903942     | 0,786885246     |
| UBE4B                                                                                           | 0,164337474 | -0,05786178  | 0,049 | 0,064 | 1         | 0,9606869     | 1,040921866     | 0,765625        |
| NUB1                                                                                            | 0,047084869 | -0,057917273 | 0,118 | 0,148 | 1         | 0,960649948   | 1,040961905     | 0,797297297     |
| RALGAPA2                                                                                        | 0,128085831 | -0,057950469 | 0,016 | 0,027 | 1         | 0,960627844   | 1,040985857     | 0,592592593     |
| USP27X                                                                                          | 0,27345347  | -0,057958781 | 0,007 | 0,012 | 1         | 0,96062231    | 1,040991855     | 0,583333333     |
| ECHDC3                                                                                          | 0,313141204 | -0,057962919 | 0,015 | 0,022 | 1         | 0,960619554   | 1,040994841     | 0,681818182     |
| CTNNA2                                                                                          | 0,002214594 | -0,058020742 | 0     | 0,011 | 1         | 0,960581054   | 1,041036565     | 0               |
| MKNK1                                                                                           | 0,208809606 | -0,058095006 | 0,048 | 0,061 | 1         | 0,960531608   | 1,041090155     | 0,786885246     |
| MTSS1                                                                                           | 0,012024777 | -0,058097002 | 0,007 | 0,022 | 1         | 0,960530279   | 1,041091595     | 0,318181818     |
| KANTR                                                                                           | 0,038745907 | -0,058101142 | 0,02  | 0,037 | 1         | 0,960527522   | 1,041094583     | 0,540540541     |
| GGPS1                                                                                           | 0,079811209 | -0,058155546 | 0,065 | 0,087 | 1         | 0,960491302   | 1,041133843     | 0,747126437     |
| FBXO5                                                                                           | 0,173567314 | -0,058164041 | 0,015 | 0,024 | 1         | 0,960485646   | 1,041139973     | 0,625           |
| TMEM86B                                                                                         | 0,120223297 | -0,058316431 | 0,007 | 0,015 | 1         | 0,960384196   | 1,041249954     | 0,466666667     |
| SERHL2                                                                                          | 0,18373246  | -0,05837598  | 0,007 | 0,014 | 1         | 0,960344557   | 1,041292933     | 0,5             |
| DHX37                                                                                           | 0,046659105 | -0,058455606 | 0,01  | 0,023 | 1         | 0,960291554   | 1,041350406     | 0,434782609     |
| PDPK1                                                                                           | 0,005064686 | -0,058484301 | 0,055 | 0,09  | 1         | 0,960272454   | 1,041371119     | 0,611111111     |
| TMEM87B                                                                                         | 0,552463358 | -0,058513775 | 0,042 | 0,035 | 1         | 0,960252836   | 1,041392394     | 1,2             |
| TOP2B                                                                                           | 0,006128308 | -0,05852331  | 0,115 | 0,16  | 1         | 0,96024649    | 1,041399277     | 0,71875         |
| NVL                                                                                             | 0,748121938 | -0,058639037 | 0,03  | 0,033 | 1         | 0,960169466   | 1,041482817     | 0,909090909     |
| C8orf58                                                                                         | 0,534930341 | -0,058647298 | 0,014 | 0,018 | 1         | 0,960163968   | 1,041488781     | 0,777777778     |
| ZNF444                                                                                          | 0,166925153 | -0,058672447 | 0,059 | 0,075 | 1         | 0,96014723    | 1,041506936     | 0,786666667     |
| AKNAD1                                                                                          | 0,263758112 | -0,058763299 | 0,006 | 0,011 | 1         | 0,960086768   | 1,041572526     | 0,545454545     |
| NIFK-AS1                                                                                        | 0,308058769 | -0,058847463 | 0,027 | 0,035 | 1         | 0,96003076    | 1,041633291     | 0,771428571     |

Supplementary Table 5

| Differentially expressed genes_total calculation_ comparing SC-Keloid vs. (SC-Myel, SC-Nonmyel) |             |              |       |       |           |               |                 |                 |
|-------------------------------------------------------------------------------------------------|-------------|--------------|-------|-------|-----------|---------------|-----------------|-----------------|
| gene                                                                                            | p_val       | avg_log2FC   | pct.1 | pct.2 | p_val_adj | Foldchange_UP | Foldchange_DOWN | Ratio_pct1_pct2 |
| PRPF38B                                                                                         | 0,000227956 | -0,058886733 | 0,191 | 0,263 | 1         | 0,960004629   | 1,041661644     | 0,726235741     |
| FRRS1L                                                                                          | 0,002214594 | -0,058965302 | 0     | 0,011 | 1         | 0,959952349   | 1,041718374     | 0               |
| SCLY                                                                                            | 0,16232281  | -0,05897784  | 0,013 | 0,022 | 1         | 0,959944006   | 1,041727428     | 0,590909091     |
| TMEM115                                                                                         | 0,303871534 | -0,059029059 | 0,068 | 0,053 | 1         | 0,959909926   | 1,041764412     | 1,283018868     |
| ZNF296                                                                                          | 0,139802645 | -0,059044762 | 0,009 | 0,018 | 1         | 0,959899478   | 1,041775751     | 0,5             |
| AC132192.1                                                                                      | 0,009174538 | -0,059064733 | 0,006 | 0,02  | 1         | 0,95988619    | 1,041790173     | 0,3             |
| DOK5                                                                                            | 0,073011111 | -0,059088991 | 0,038 | 0,057 | 1         | 0,959870051   | 1,04180769      | 0,666666667     |
| AADAT                                                                                           | 0,312200558 | -0,059178751 | 0,021 | 0,028 | 1         | 0,959810333   | 1,04187251      | 0,75            |
| MGST1                                                                                           | 0,00259979  | -0,059248873 | 0,003 | 0,019 | 1         | 0,959763682   | 1,041923151     | 0,157894737     |
| JRKL                                                                                            | 0,367542306 | -0,05928013  | 0,033 | 0,041 | 1         | 0,959742888   | 1,041945726     | 0,804878049     |
| ADI1                                                                                            | 0,002396929 | -0,059298844 | 0,2   | 0,265 | 1         | 0,959730439   | 1,041959241     | 0,754716981     |
| DLL1                                                                                            | 0,05683712  | -0,059301988 | 0,005 | 0,014 | 1         | 0,959728348   | 1,041961512     | 0,357142857     |
| LRRC24                                                                                          | 0,120956482 | -0,059355184 | 0,014 | 0,024 | 1         | 0,95969296    | 1,041999932     | 0,583333333     |
| CHMP1B                                                                                          | 0,152398275 | -0,05937774  | 0,105 | 0,123 | 1         | 0,959677956   | 1,042016224     | 0,853658537     |
| LINC00324                                                                                       | 0,220927238 | -0,059407056 | 0,012 | 0,019 | 1         | 0,959658456   | 1,042037398     | 0,631578947     |
| C19orf81                                                                                        | 0,15803979  | -0,059450664 | 0,012 | 0,02  | 1         | 0,959629448   | 1,042068896     | 0,6             |
| VCPKMT                                                                                          | 0,287488139 | -0,059494004 | 0,034 | 0,043 | 1         | 0,959600621   | 1,042100201     | 0,790697674     |
| MLH1                                                                                            | 0,907211622 | -0,059527416 | 0,043 | 0,043 | 1         | 0,959578397   | 1,042124336     | 1               |
| TMC6                                                                                            | 0,316581647 | -0,059541277 | 0,024 | 0,033 | 1         | 0,959569178   | 1,042134349     | 0,727272727     |
| QRSL1                                                                                           | 0,560384486 | -0,059600704 | 0,027 | 0,031 | 1         | 0,959529652   | 1,042177277     | 0,870967742     |
| TYK2                                                                                            | 0,712213399 | -0,059627705 | 0,065 | 0,068 | 1         | 0,959511695   | 1,042196781     | 0,955882353     |
| FHIT                                                                                            | 0,000800396 | -0,059641199 | 0,001 | 0,016 | 1         | 0,95950272    | 1,04220653      | 0,0625          |
| DNAAF10                                                                                         | 0,321606324 | -0,059659495 | 0,019 | 0,026 | 1         | 0,959490551   | 1,042219747     | 0,730769231     |
| C1orf174                                                                                        | 0,087884091 | -0,059661783 | 0,034 | 0,05  | 1         | 0,95948903    | 1,0422214       | 0,68            |
| BORCS8                                                                                          | 0,909263042 | -0,059678431 | 0,056 | 0,056 | 1         | 0,959477958   | 1,042233426     | 1               |
| CA13                                                                                            | 0,241846148 | -0,059749737 | 0,026 | 0,035 | 1         | 0,959430536   | 1,042284941     | 0,742857143     |
| MPST                                                                                            | 0,007422458 | -0,059752585 | 0,104 | 0,144 | 1         | 0,959428643   | 1,042286998     | 0,722222222     |
| SERAC1                                                                                          | 0,185008172 | -0,059765231 | 0,027 | 0,038 | 1         | 0,959420232   | 1,042296135     | 0,710526316     |
| RTF1                                                                                            | 0,036562815 | -0,059767596 | 0,235 | 0,274 | 1         | 0,95941866    | 1,042297844     | 0,857664234     |
| TMEM184A                                                                                        | 0,002873058 | -0,05981459  | 0,001 | 0,014 | 1         | 0,959387409   | 1,042331795     | 0,071428571     |

Supplementary Table 5

| Differentially expressed genes_total calculation_ comparing SC-Keloid vs. (SC-Myel, SC-Nonmyel) |             |              |       |       |           |               |                 |                 |
|-------------------------------------------------------------------------------------------------|-------------|--------------|-------|-------|-----------|---------------|-----------------|-----------------|
| gene                                                                                            | p_val       | avg_log2FC   | pct.1 | pct.2 | p_val_adj | Foldchange_UP | Foldchange_DOWN | Ratio_pct1_pct2 |
| PRRG2                                                                                           | 0,717658709 | -0,059817658 | 0,012 | 0,014 | 1         | 0,959385368   | 1,042334012     | 0,857142857     |
| UBL7                                                                                            | 0,306500605 | -0,059851811 | 0,038 | 0,028 | 1         | 0,959362657   | 1,042358687     | 1,357142857     |
| CSGALNACT1                                                                                      | 7,22701E-05 | -0,059871291 | 0,006 | 0,033 | 1         | 0,959349703   | 1,042372762     | 0,181818182     |
| URB1-AS1                                                                                        | 0,239066752 | -0,059907969 | 0,019 | 0,027 | 1         | 0,959325314   | 1,042399263     | 0,703703704     |
| L3MBTL1                                                                                         | 0,215301039 | -0,059963079 | 0,01  | 0,018 | 1         | 0,959288669   | 1,042439083     | 0,555555556     |
| ERAP1                                                                                           | 0,19348848  | -0,0599818   | 0,054 | 0,068 | 1         | 0,959276221   | 1,04245261      | 0,794117647     |
| DAXX                                                                                            | 0,529480368 | -0,05998217  | 0,059 | 0,065 | 1         | 0,959275974   | 1,042452878     | 0,907692308     |
| ICAM2                                                                                           | 0,309658867 | -0,059994237 | 0,012 | 0,018 | 1         | 0,959267951   | 1,042461597     | 0,666666667     |
| CDC42BPG                                                                                        | 0,004621053 | -0,060028786 | 0,003 | 0,018 | 1         | 0,959244979   | 1,042486561     | 0,166666667     |
| FSIP1                                                                                           | 0,014477005 | -0,06003962  | 0,003 | 0,015 | 1         | 0,959237776   | 1,04249439      | 0,2             |
| SC5D                                                                                            | 0,143207446 | -0,060041488 | 0,03  | 0,043 | 1         | 0,959236534   | 1,04249574      | 0,697674419     |
| KIAA0100                                                                                        | 0,181631929 | -0,060071952 | 0,05  | 0,065 | 1         | 0,959216279   | 1,042517753     | 0,769230769     |
| GTF2H1                                                                                          | 0,042103433 | -0,060083767 | 0,052 | 0,076 | 1         | 0,959208424   | 1,042526291     | 0,684210526     |
| GCDH                                                                                            | 0,878561421 | -0,060094395 | 0,044 | 0,045 | 1         | 0,959201357   | 1,042533971     | 0,977777778     |
| THAP5                                                                                           | 0,034539939 | -0,060107891 | 0,08  | 0,11  | 1         | 0,959192384   | 1,042543724     | 0,727272727     |
| CCDC171                                                                                         | 0,007145898 | -0,06010935  | 0,016 | 0,038 | 1         | 0,959191414   | 1,042544778     | 0,421052632     |
| RGS9                                                                                            | 0,013494715 | -0,060109961 | 0,02  | 0,041 | 1         | 0,959191008   | 1,04254522      | 0,487804878     |
| TSNARE1                                                                                         | 0,011610725 | -0,060141712 | 0,005 | 0,018 | 1         | 0,959169898   | 1,042568164     | 0,277777778     |
| C4orf46                                                                                         | 0,187650508 | -0,060172449 | 0,028 | 0,039 | 1         | 0,959149463   | 1,042590377     | 0,717948718     |
| SPAG8                                                                                           | 0,078037318 | -0,060204628 | 0,007 | 0,016 | 1         | 0,95912807    | 1,042613632     | 0,4375          |
| NEK11                                                                                           | 0,946525356 | -0,060209462 | 0,017 | 0,018 | 1         | 0,959124856   | 1,042617125     | 0,944444444     |
| KIF1C                                                                                           | 0,118983273 | -0,060218568 | 0,064 | 0,083 | 1         | 0,959118802   | 1,042623706     | 0,771084337     |
| TALDO1                                                                                          | 0,011206359 | -0,060252235 | 0,264 | 0,326 | 1         | 0,95909642    | 1,042648037     | 0,809815951     |
| NBPF9                                                                                           | 0,858686513 | -0,060252579 | 0,01  | 0,009 | 1         | 0,959096191   | 1,042648286     | 1,111111111     |
| ESRRA                                                                                           | 0,319489684 | -0,06030753  | 0,052 | 0,062 | 1         | 0,959059661   | 1,042688        | 0,838709677     |
| SLIT3                                                                                           | 0,004066163 | -0,060375671 | 0,005 | 0,02  | 1         | 0,959014364   | 1,042737249     | 0,25            |
| PITPNC1                                                                                         | 0,056084726 | -0,060380695 | 0,008 | 0,019 | 1         | 0,959011024   | 1,042740881     | 0,421052632     |
| GTPBP4                                                                                          | 0,191110568 | -0,060427759 | 0,07  | 0,085 | 1         | 0,95897974    | 1,042774897     | 0,823529412     |
| LIME1                                                                                           | 0,288313104 | -0,060516854 | 0,008 | 0,014 | 1         | 0,958920519   | 1,042839298     | 0,571428571     |
| ZNF460                                                                                          | 0,088273623 | -0,0605369   | 0,028 | 0,043 | 1         | 0,958907195   | 1,042853787     | 0,651162791     |

Supplementary Table 5

| Differentially expressed genes_total calculation_ comparing SC-Keloid vs. (SC-Myel, SC-Nonmyel) |             |              |       |       |           |               |                 |                 |
|-------------------------------------------------------------------------------------------------|-------------|--------------|-------|-------|-----------|---------------|-----------------|-----------------|
| gene                                                                                            | p_val       | avg_log2FC   | pct.1 | pct.2 | p_val_adj | Foldchange_UP | Foldchange_DOWN | Ratio_pct1_pct2 |
| THEM4                                                                                           | 0,201999543 | -0,060542509 | 0,065 | 0,08  | 1         | 0,958903467   | 1,042857842     | 0,8125          |
| C2CD5                                                                                           | 0,585519243 | -0,060618522 | 0,024 | 0,028 | 1         | 0,958852945   | 1,04291279      | 0,857142857     |
| RCAN3                                                                                           | 0,018908341 | -0,060674957 | 0,094 | 0,13  | 1         | 0,958815438   | 1,042953587     | 0,723076923     |
| RBM12B                                                                                          | 0,099993644 | -0,060738378 | 0,038 | 0,056 | 1         | 0,958773289   | 1,042999436     | 0,678571429     |
| ALG11                                                                                           | 0,816419899 | -0,060762984 | 0,016 | 0,018 | 1         | 0,958756937   | 1,043017226     | 0,888888889     |
| PTPN1                                                                                           | 0,160395739 | -0,060777908 | 0,1   | 0,119 | 1         | 0,958747019   | 1,043028015     | 0,840336134     |
| RNF139-AS1                                                                                      | 0,015150772 | -0,060783539 | 0,006 | 0,019 | 1         | 0,958743277   | 1,043032086     | 0,315789474     |
| QDPR                                                                                            | 0,088606711 | -0,060792403 | 0,115 | 0,138 | 1         | 0,958737386   | 1,043038494     | 0,833333333     |
| KANK3                                                                                           | 9,34934E-05 | -0,060798428 | 0     | 0,018 | 1         | 0,958733382   | 1,043042851     | 0               |
| TMEM231                                                                                         | 0,100337959 | -0,060827328 | 0,019 | 0,031 | 1         | 0,958714177   | 1,043063745     | 0,612903226     |
| RBBP5                                                                                           | 0,293636393 | -0,060880554 | 0,033 | 0,042 | 1         | 0,958678808   | 1,043102227     | 0,785714286     |
| MEX3B                                                                                           | 0,945909435 | -0,060949501 | 0,055 | 0,054 | 1         | 0,958632993   | 1,043152079     | 1,018518519     |
| AL592183.1                                                                                      | 0,167365195 | -0,061011029 | 0,013 | 0,022 | 1         | 0,95859211    | 1,043196568     | 0,590909091     |
| IFT46                                                                                           | 0,483933295 | -0,061024327 | 0,037 | 0,043 | 1         | 0,958583275   | 1,043206184     | 0,860465116     |
| MAPK6                                                                                           | 0,001190388 | -0,061039286 | 0,116 | 0,168 | 1         | 0,958573335   | 1,043217001     | 0,69047619      |
| TCP11L2                                                                                         | 0,099535335 | -0,061119091 | 0,017 | 0,03  | 1         | 0,958520312   | 1,04327471      | 0,566666667     |
| UBE2E1                                                                                          | 0,09094455  | -0,061145574 | 0,079 | 0,102 | 1         | 0,958502717   | 1,043293861     | 0,774509804     |
| GLI1                                                                                            | 0,001496476 | -0,061149884 | 0,001 | 0,015 | 1         | 0,958499853   | 1,043296978     | 0,066666667     |
| RBMS3-AS3                                                                                       | 0,055942839 | -0,061257765 | 0,008 | 0,019 | 1         | 0,958428182   | 1,043374996     | 0,421052632     |
| PSMD3                                                                                           | 0,922221085 | -0,061324672 | 0,13  | 0,126 | 1         | 0,958383734   | 1,043423385     | 1,031746032     |
| HELZ                                                                                            | 0,010905701 | -0,061356239 | 0,099 | 0,138 | 1         | 0,958362764   | 1,043446216     | 0,717391304     |
| SLC35E2B                                                                                        | 0,797373436 | -0,061371418 | 0,044 | 0,046 | 1         | 0,958352681   | 1,043457194     | 0,956521739     |
| KCNJ14                                                                                          | 0,010061946 | -0,061393404 | 0,001 | 0,011 | 1         | 0,958338076   | 1,043473096     | 0,090909091     |
| TAMM41                                                                                          | 0,311518415 | -0,061405745 | 0,021 | 0,028 | 1         | 0,958329879   | 1,043482022     | 0,75            |
| FAM43A                                                                                          | 0,195555896 | -0,061421679 | 0,008 | 0,015 | 1         | 0,958319295   | 1,043493547     | 0,533333333     |
| FTSJ3                                                                                           | 0,378111373 | -0,06142629  | 0,041 | 0,049 | 1         | 0,958316232   | 1,043496882     | 0,836734694     |
| ZNF669                                                                                          | 0,059158733 | -0,061445614 | 0,014 | 0,027 | 1         | 0,958303396   | 1,043510859     | 0,518518519     |
| ARHGAP6                                                                                         | 0,002214594 | -0,061470692 | 0     | 0,011 | 1         | 0,958286738   | 1,043528999     | 0               |
| CROT                                                                                            | 0,552245725 | -0,061512209 | 0,042 | 0,035 | 1         | 0,958259161   | 1,043559029     | 1,2             |
| ACAP1                                                                                           | 0,000169951 | -0,061663821 | 0,013 | 0,043 | 1         | 0,958158464   | 1,043668702     | 0,302325581     |



Supplementary Table 5

| Differentially expressed genes_total calculation_ comparing SC-Keloid vs. (SC-Myel, SC-Nonmyel) |             |              |       |       |           |               |                 |                 |
|-------------------------------------------------------------------------------------------------|-------------|--------------|-------|-------|-----------|---------------|-----------------|-----------------|
| gene                                                                                            | p_val       | avg_log2FC   | pct.1 | pct.2 | p_val_adj | Foldchange_UP | Foldchange_DOWN | Ratio_pct1_pct2 |
| RCE1                                                                                            | 0,03892916  | -0,061701362 | 0,041 | 0,022 | 1         | 0,958133531   | 1,04369586      | 1,863636364     |
| SEC14L5                                                                                         | 0,000175145 | -0,061701575 | 0     | 0,016 | 1         | 0,958133339   | 1,043696014     | 0               |
| SLC13A3                                                                                         | 0,002837595 | -0,061744347 | 0,001 | 0,014 | 1         | 0,958104984   | 1,043726958     | 0,071428571     |
| CES4A                                                                                           | 0,000618779 | -0,061806018 | 0     | 0,014 | 1         | 0,958064029   | 1,043771574     | 0               |
| EML4                                                                                            | 0,045608425 | -0,061815364 | 0,065 | 0,091 | 1         | 0,958057823   | 1,043778336     | 0,714285714     |
| UBAP2                                                                                           | 0,00084847  | -0,061850974 | 0,069 | 0,117 | 1         | 0,958034175   | 1,0438041       | 0,58974359      |
| DZANK1                                                                                          | 0,025364545 | -0,061862058 | 0,003 | 0,014 | 1         | 0,958026814   | 1,04381212      | 0,214285714     |
| ENTPD1-AS1                                                                                      | 0,700936531 | -0,061877962 | 0,028 | 0,024 | 1         | 0,958016254   | 1,043823626     | 1,166666667     |
| CLASP1                                                                                          | 0,307487682 | -0,06188321  | 0,058 | 0,069 | 1         | 0,958012769   | 1,043827423     | 0,84057971      |
| OCEL1                                                                                           | 0,98564963  | -0,061916249 | 0,057 | 0,056 | 1         | 0,957990829   | 1,043851328     | 1,017857143     |
| ZNF490                                                                                          | 0,029323636 | -0,06195926  | 0,01  | 0,024 | 1         | 0,95796227    | 1,043882449     | 0,416666667     |
| PINLYP                                                                                          | 0,019971811 | -0,061966048 | 0,01  | 0,026 | 1         | 0,957957763   | 1,04388736      | 0,384615385     |
| H6PD                                                                                            | 0,181781355 | -0,061985202 | 0,049 | 0,064 | 1         | 0,957945044   | 1,04390122      | 0,765625        |
| ZNF718                                                                                          | 0,04400933  | -0,062078819 | 0,003 | 0,012 | 1         | 0,957882884   | 1,043968961     | 0,25            |
| ZNF548                                                                                          | 0,029945009 | -0,062097949 | 0,01  | 0,024 | 1         | 0,957870183   | 1,043982804     | 0,416666667     |
| LARGE1                                                                                          | 0,016001093 | -0,062112471 | 0,068 | 0,099 | 1         | 0,957860542   | 1,043993313     | 0,686868687     |
| PLCL1                                                                                           | 0,009528129 | -0,062119819 | 0,002 | 0,014 | 1         | 0,957855663   | 1,04399863      | 0,142857143     |
| RNF19B                                                                                          | 0,793053116 | -0,06217821  | 0,049 | 0,045 | 1         | 0,957816896   | 1,044040885     | 1,088888889     |
| SOSTDC1                                                                                         | 0,002214594 | -0,062209408 | 0     | 0,011 | 1         | 0,957796184   | 1,044063463     | 0               |
| ZBTB4                                                                                           | 0,000816349 | -0,062220095 | 0,065 | 0,111 | 1         | 0,957789089   | 1,044071197     | 0,585585586     |
| SPHK2                                                                                           | 0,187100894 | -0,062343682 | 0,03  | 0,042 | 1         | 0,957707044   | 1,04416064      | 0,714285714     |
| KIAA1522                                                                                        | 0,014155199 | -0,062379964 | 0,008 | 0,023 | 1         | 0,957682959   | 1,0441869       | 0,347826087     |
| TIAM2                                                                                           | 0,069618449 | -0,062416007 | 0,01  | 0,022 | 1         | 0,957659034   | 1,044212987     | 0,454545455     |
| TLN2                                                                                            | 0,17549667  | -0,062508285 | 0,087 | 0,104 | 1         | 0,957597781   | 1,04427978      | 0,836538462     |
| MYOZ1                                                                                           | 0,004630187 | -0,062536733 | 0,003 | 0,018 | 1         | 0,957578899   | 1,044300371     | 0,166666667     |
| POLR1D                                                                                          | 0,000493167 | -0,062574901 | 0,197 | 0,265 | 1         | 0,957553565   | 1,044328        | 0,743396226     |
| RNF215                                                                                          | 0,798687189 | -0,062614056 | 0,027 | 0,028 | 1         | 0,957527578   | 1,044356344     | 0,964285714     |
| PIK3C2B                                                                                         | 0,002334796 | -0,062626516 | 0,005 | 0,022 | 1         | 0,957519308   | 1,044365363     | 0,227272727     |
| ZNF649                                                                                          | 0,067240634 | -0,062682786 | 0,029 | 0,046 | 1         | 0,957481962   | 1,044406098     | 0,630434783     |
| SLC35F1                                                                                         | 0,00016014  | -0,06270748  | 0,159 | 0,232 | 1         | 0,957465574   | 1,044423975     | 0,685344828     |

Supplementary Table 5

| Differentially expressed genes_total calculation_ comparing SC-Keloid vs. (SC-Myel, SC-Nonmyel) |             |              |       |       |             |               |                 |                 |
|-------------------------------------------------------------------------------------------------|-------------|--------------|-------|-------|-------------|---------------|-----------------|-----------------|
| gene                                                                                            | p_val       | avg_log2FC   | pct.1 | pct.2 | p_val_adj   | Foldchange_UP | Foldchange_DOWN | Ratio_pct1_pct2 |
| SCO2                                                                                            | 0,8985654   | -0,062718827 | 0,024 | 0,023 | 1           | 0,957458043   | 1,044432189     | 1,043478261     |
| LINC00882                                                                                       | 0,005310976 | -0,062738484 | 0,001 | 0,012 | 1           | 0,957444997   | 1,04444642      | 0,083333333     |
| SYDE1                                                                                           | 0,352731228 | -0,062779705 | 0,069 | 0,056 | 1           | 0,957417641   | 1,044476263     | 1,232142857     |
| TPRG1L                                                                                          | 0,830451274 | -0,062847236 | 0,041 | 0,042 | 1           | 0,957372827   | 1,044525154     | 0,976190476     |
| ROM1                                                                                            | 0,009144297 | -0,06286547  | 0,006 | 0,02  | 1           | 0,957360727   | 1,044538356     | 0,3             |
| CTBP1                                                                                           | 0,330756043 | -0,06287049  | 0,129 | 0,14  | 1           | 0,957357396   | 1,044541991     | 0,921428571     |
| RIT1                                                                                            | 2,41174E-05 | -0,062987227 | 0,149 | 0,232 | 0,508900484 | 0,957279934   | 1,044626514     | 0,642241379     |
| LRRC37A3                                                                                        | 0,182072419 | -0,063003179 | 0,007 | 0,014 | 1           | 0,957269349   | 1,044638065     | 0,5             |
| ZCCHC10                                                                                         | 0,455010231 | -0,063009714 | 0,091 | 0,099 | 1           | 0,957265012   | 1,044642797     | 0,919191919     |
| LY6D                                                                                            | 0,006137657 | -0,06303592  | 0,012 | 0,031 | 1           | 0,957247625   | 1,044661772     | 0,387096774     |
| ARL2BP                                                                                          | 0,498819546 | -0,063060974 | 0,185 | 0,193 | 1           | 0,957231001   | 1,044679914     | 0,958549223     |
| ATP23                                                                                           | 0,024732979 | -0,063096683 | 0,006 | 0,018 | 1           | 0,957207308   | 1,044705772     | 0,333333333     |
| PCYOX1L                                                                                         | 0,8985654   | -0,063197195 | 0,024 | 0,023 | 1           | 0,957140622   | 1,044778559     | 1,043478261     |
| TRIP6                                                                                           | 0,130908151 | -0,063240148 | 0,142 | 0,161 | 1           | 0,957112126   | 1,044809665     | 0,881987578     |
| RALGPS1                                                                                         | 0,310917224 | -0,063247985 | 0,012 | 0,018 | 1           | 0,957106927   | 1,044815341     | 0,666666667     |
| AFF4                                                                                            | 2,92288E-06 | -0,06333106  | 0,194 | 0,292 | 0,061675745 | 0,957051815   | 1,044875506     | 0,664383562     |
| RAB40C                                                                                          | 0,710933404 | -0,063442064 | 0,033 | 0,035 | 1           | 0,95697818    | 1,044955905     | 0,942857143     |
| ABCB10                                                                                          | 0,415163061 | -0,063470065 | 0,012 | 0,016 | 1           | 0,956959607   | 1,044976186     | 0,75            |
| SUOX                                                                                            | 0,295202387 | -0,063478867 | 0,009 | 0,015 | 1           | 0,956953768   | 1,044982561     | 0,6             |
| LGMN                                                                                            | 0,198500357 | -0,063567284 | 0,086 | 0,102 | 1           | 0,956895122   | 1,045046607     | 0,843137255     |
| NUAK2                                                                                           | 0,179720334 | -0,063581335 | 0,022 | 0,033 | 1           | 0,956885803   | 1,045056785     | 0,666666667     |
| IGBP1                                                                                           | 0,141830143 | -0,063661583 | 0,127 | 0,145 | 1           | 0,956832578   | 1,045114916     | 0,875862069     |
| AMPD2                                                                                           | 0,375743368 | -0,063667092 | 0,04  | 0,047 | 1           | 0,956828925   | 1,045118906     | 0,85106383      |
| USP36                                                                                           | 0,000526942 | -0,063691697 | 0,05  | 0,094 | 1           | 0,956812607   | 1,045136731     | 0,531914894     |
| FZD2                                                                                            | 0,093776191 | -0,063730297 | 0,009 | 0,019 | 1           | 0,956787007   | 1,045164695     | 0,473684211     |
| SUGCT                                                                                           | 0,009916339 | -0,063760167 | 0,001 | 0,011 | 1           | 0,956767197   | 1,045186335     | 0,090909091     |
| STRADA                                                                                          | 0,222500111 | -0,063776018 | 0,038 | 0,05  | 1           | 0,956756685   | 1,045197818     | 0,76            |
| LAMTOR3                                                                                         | 0,201357662 | -0,063799978 | 0,076 | 0,091 | 1           | 0,956740796   | 1,045215176     | 0,835164835     |
| PINK1                                                                                           | 0,283249815 | -0,063851742 | 0,081 | 0,094 | 1           | 0,956706469   | 1,04525268      | 0,861702128     |
| FIZ1                                                                                            | 0,520374064 | -0,06390538  | 0,016 | 0,02  | 1           | 0,9566709     | 1,045291542     | 0,8             |

Supplementary Table 5

| Differentially expressed genes_total calculation_ comparing SC-Keloid vs. (SC-Myel, SC-Nonmyel) |             |              |       |       |           |               |                 |                 |
|-------------------------------------------------------------------------------------------------|-------------|--------------|-------|-------|-----------|---------------|-----------------|-----------------|
| gene                                                                                            | p_val       | avg_log2FC   | pct.1 | pct.2 | p_val_adj | Foldchange_UP | Foldchange_DOWN | Ratio_pct1_pct2 |
| DPP8                                                                                            | 0,063146192 | -0,063929585 | 0,062 | 0,084 | 1         | 0,956654849   | 1,045309079     | 0,738095238     |
| SMN2                                                                                            | 0,010689232 | -0,064002247 | 0,009 | 0,026 | 1         | 0,956606668   | 1,045361728     | 0,346153846     |
| SHANK3                                                                                          | 0,025687319 | -0,064012071 | 0,003 | 0,014 | 1         | 0,956600155   | 1,045368846     | 0,214285714     |
| TMEM97                                                                                          | 0,190319656 | -0,0641626   | 0,023 | 0,034 | 1         | 0,956500349   | 1,045477925     | 0,676470588     |
| C2CD4B                                                                                          | 0,274024959 | -0,064175823 | 0,007 | 0,012 | 1         | 0,956491582   | 1,045487507     | 0,583333333     |
| TRIM29                                                                                          | 0,008979557 | -0,064191111 | 0,006 | 0,02  | 1         | 0,956481447   | 1,045498586     | 0,3             |
| C19orf44                                                                                        | 0,188983351 | -0,064255297 | 0,028 | 0,018 | 1         | 0,956438893   | 1,045545102     | 1,555555556     |
| LINC01550                                                                                       | 0,057447656 | -0,064265935 | 0,008 | 0,019 | 1         | 0,956431841   | 1,045552811     | 0,421052632     |
| RNF43                                                                                           | 0,009387874 | -0,064278366 | 0,002 | 0,014 | 1         | 0,956423599   | 1,045561821     | 0,142857143     |
| TCOF1                                                                                           | 0,840410919 | -0,064279677 | 0,052 | 0,049 | 1         | 0,95642273    | 1,045562771     | 1,06122449      |
| DVL3                                                                                            | 0,140990491 | -0,064311373 | 0,073 | 0,092 | 1         | 0,956401718   | 1,045585742     | 0,793478261     |
| CDCA7L                                                                                          | 0,114107794 | -0,064318384 | 0,013 | 0,023 | 1         | 0,95639707    | 1,045590823     | 0,565217391     |
| EP400                                                                                           | 0,00417587  | -0,064320824 | 0,056 | 0,092 | 1         | 0,956395453   | 1,045592591     | 0,608695652     |
| TAP2                                                                                            | 0,246277652 | -0,06432233  | 0,063 | 0,076 | 1         | 0,956394455   | 1,045593683     | 0,828947368     |
| HFE                                                                                             | 0,14384452  | -0,06432429  | 0,009 | 0,018 | 1         | 0,956393155   | 1,045595103     | 0,5             |
| FZD1                                                                                            | 0,240942394 | -0,06433732  | 0,021 | 0,03  | 1         | 0,956384518   | 1,045604547     | 0,7             |
| MST1                                                                                            | 0,022425069 | -0,064340353 | 0,008 | 0,022 | 1         | 0,956382506   | 1,045606745     | 0,363636364     |
| GSTM2                                                                                           | 0,002219031 | -0,064425825 | 0,005 | 0,022 | 1         | 0,956325848   | 1,045668693     | 0,227272727     |
| STK25                                                                                           | 0,487789663 | -0,064431743 | 0,095 | 0,102 | 1         | 0,956321925   | 1,045672983     | 0,931372549     |
| HIVEP1                                                                                          | 0,001459569 | -0,064450184 | 0,088 | 0,137 | 1         | 0,956309701   | 1,045686349     | 0,642335766     |
| PHF19                                                                                           | 0,366546165 | -0,064520756 | 0,098 | 0,109 | 1         | 0,956262923   | 1,045737502     | 0,899082569     |
| GCH1                                                                                            | 0,002274097 | -0,064535003 | 0,005 | 0,022 | 1         | 0,956253479   | 1,045747829     | 0,227272727     |
| PRDM4                                                                                           | 0,142518017 | -0,064543312 | 0,027 | 0,039 | 1         | 0,956247972   | 1,045753852     | 0,692307692     |
| HILPDA                                                                                          | 0,135971073 | -0,064645321 | 0,044 | 0,06  | 1         | 0,956180361   | 1,045827797     | 0,733333333     |
| MCOLN3                                                                                          | 0,005258945 | -0,064672912 | 0,001 | 0,012 | 1         | 0,956162074   | 1,045847798     | 0,083333333     |
| PGBD5                                                                                           | 0,005258945 | -0,064750015 | 0,001 | 0,012 | 1         | 0,956110975   | 1,045903694     | 0,083333333     |
| F10                                                                                             | 0,001496476 | -0,064764896 | 0,001 | 0,015 | 1         | 0,956101113   | 1,045914482     | 0,066666667     |
| BROX                                                                                            | 0,010458541 | -0,064803471 | 0,106 | 0,147 | 1         | 0,956075549   | 1,045942448     | 0,721088435     |
| SSH3                                                                                            | 0,115209092 | -0,064814079 | 0,013 | 0,023 | 1         | 0,956068519   | 1,045950139     | 0,565217391     |
| NUMB                                                                                            | 0,014193456 | -0,064853156 | 0,105 | 0,142 | 1         | 0,956042623   | 1,04597847      | 0,73943662      |

Supplementary Table 5

| Differentially expressed genes_total calculation_ comparing SC-Keloid vs. (SC-Myel, SC-Nonmyel) |             |              |       |       |             |               |                 |                 |
|-------------------------------------------------------------------------------------------------|-------------|--------------|-------|-------|-------------|---------------|-----------------|-----------------|
| gene                                                                                            | p_val       | avg_log2FC   | pct.1 | pct.2 | p_val_adj   | Foldchange_UP | Foldchange_DOWN | Ratio_pct1_pct2 |
| GPR157                                                                                          | 0,025194963 | -0,06485988  | 0,006 | 0,018 | 1           | 0,956038167   | 1,045983345     | 0,333333333     |
| RAB10                                                                                           | 1,11818E-05 | -0,064873747 | 0,235 | 0,332 | 0,235947736 | 0,956028978   | 1,045993399     | 0,707831325     |
| LY96                                                                                            | 0,068338824 | -0,064887865 | 0,006 | 0,015 | 1           | 0,956019622   | 1,046003635     | 0,4             |
| HDAC3                                                                                           | 0,073521545 | -0,064959107 | 0,07  | 0,092 | 1           | 0,955972414   | 1,046055289     | 0,760869565     |
| TMEM191C                                                                                        | 0,040952912 | -0,064966448 | 0,006 | 0,016 | 1           | 0,95596755    | 1,046060612     | 0,375           |
| MT-ND4                                                                                          | 0,221740487 | -0,065009223 | 0,785 | 0,875 | 1           | 0,955939206   | 1,046091628     | 0,897142857     |
| SLC22A5                                                                                         | 0,006890242 | -0,065142461 | 0,005 | 0,019 | 1           | 0,955850926   | 1,046188242     | 0,263157895     |
| NAALAD2                                                                                         | 0,009892254 | -0,065160521 | 0,001 | 0,011 | 1           | 0,955838961   | 1,046201338     | 0,090909091     |
| BIN3                                                                                            | 0,266169248 | -0,065219213 | 0,071 | 0,083 | 1           | 0,955800076   | 1,046243901     | 0,855421687     |
| ADHFE1                                                                                          | 0,000268017 | -0,065226459 | 0,002 | 0,022 | 1           | 0,955795275   | 1,046249156     | 0,090909091     |
| ANXA2R                                                                                          | 0,141438657 | -0,06526911  | 0,009 | 0,018 | 1           | 0,955767019   | 1,046280087     | 0,5             |
| CNOT10                                                                                          | 0,969344992 | -0,065270701 | 0,04  | 0,039 | 1           | 0,955765965   | 1,046281241     | 1,025641026     |
| ALKBH1                                                                                          | 0,229640442 | -0,065377472 | 0,014 | 0,022 | 1           | 0,955695234   | 1,046358677     | 0,636363636     |
| CORO6                                                                                           | 0,000328784 | -0,065379436 | 0     | 0,015 | 1           | 0,955693933   | 1,046360101     | 0               |
| RTN4R                                                                                           | 0,002214594 | -0,065446481 | 0     | 0,011 | 1           | 0,95564952    | 1,046408729     | 0               |
| SRSF4                                                                                           | 8,78687E-05 | -0,065479254 | 0,192 | 0,27  | 1           | 0,955627812   | 1,0464325       | 0,711111111     |
| GRIA2                                                                                           | 0,000800396 | -0,065518259 | 0,001 | 0,016 | 1           | 0,955601975   | 1,046460792     | 0,0625          |
| TICAM1                                                                                          | 0,372091031 | -0,065544616 | 0,027 | 0,034 | 1           | 0,955584517   | 1,04647991      | 0,794117647     |
| FRZB                                                                                            | 0,001496476 | -0,065583822 | 0,001 | 0,015 | 1           | 0,955558549   | 1,04650835      | 0,066666667     |
| EXOC8                                                                                           | 0,101901132 | -0,065631026 | 0,01  | 0,02  | 1           | 0,955527284   | 1,046542591     | 0,5             |
| PARP9                                                                                           | 0,274090172 | -0,065665865 | 0,041 | 0,052 | 1           | 0,95550421    | 1,046567864     | 0,788461538     |
| IPO5                                                                                            | 0,022142754 | -0,065697175 | 0,119 | 0,153 | 1           | 0,955483473   | 1,046590578     | 0,777777778     |
| PRKX                                                                                            | 0,002760233 | -0,06572378  | 0,024 | 0,053 | 1           | 0,955465854   | 1,046609877     | 0,452830189     |
| ACCS                                                                                            | 0,542625671 | -0,065727618 | 0,014 | 0,018 | 1           | 0,955463312   | 1,046612662     | 0,777777778     |
| GALM                                                                                            | 0,139229377 | -0,0657689   | 0,021 | 0,033 | 1           | 0,955435972   | 1,046642611     | 0,636363636     |
| SALL2                                                                                           | 0,275457253 | -0,06578249  | 0,007 | 0,012 | 1           | 0,955426972   | 1,04665247      | 0,583333333     |
| ARG2                                                                                            | 0,018105972 | -0,065817351 | 0,028 | 0,05  | 1           | 0,955403885   | 1,046677761     | 0,56            |
| ANKRD42                                                                                         | 0,006962149 | -0,065820226 | 0,022 | 0,046 | 1           | 0,955401982   | 1,046679847     | 0,47826087      |
| FRMD1                                                                                           | 9,34934E-05 | -0,06582171  | 0     | 0,018 | 1           | 0,955400999   | 1,046680924     | 0               |
| ZNF592                                                                                          | 0,0490392   | -0,065842042 | 0,027 | 0,045 | 1           | 0,955387534   | 1,046695675     | 0,6             |

Supplementary Table 5

| Differentially expressed genes_total calculation_ comparing SC-Keloid vs. (SC-Myel, SC-Nonmyel) |             |              |       |       |           |               |                 |                 |
|-------------------------------------------------------------------------------------------------|-------------|--------------|-------|-------|-----------|---------------|-----------------|-----------------|
| gene                                                                                            | p_val       | avg_log2FC   | pct.1 | pct.2 | p_val_adj | Foldchange_UP | Foldchange_DOWN | Ratio_pct1_pct2 |
| PCDH18                                                                                          | 0,033361241 | -0,06587904  | 0,005 | 0,015 | 1         | 0,955363033   | 1,046722518     | 0,333333333     |
| FMOD                                                                                            | 0,419420124 | -0,06588218  | 0,01  | 0,015 | 1         | 0,955360954   | 1,046724796     | 0,666666667     |
| TRIM32                                                                                          | 0,00869503  | -0,065904049 | 0,008 | 0,024 | 1         | 0,955346473   | 1,046740663     | 0,333333333     |
| MALT1                                                                                           | 0,24239822  | -0,065937822 | 0,021 | 0,03  | 1         | 0,955324109   | 1,046765167     | 0,7             |
| PELI3                                                                                           | 0,008068115 | -0,065968725 | 0,003 | 0,016 | 1         | 0,955303646   | 1,046787589     | 0,1875          |
| ADGRL2                                                                                          | 0,009427758 | -0,066013398 | 0,002 | 0,014 | 1         | 0,955274065   | 1,046820004     | 0,142857143     |
| SNX2                                                                                            | 0,181201877 | -0,066032683 | 0,085 | 0,102 | 1         | 0,955261296   | 1,046833997     | 0,833333333     |
| ZNF687                                                                                          | 0,01399331  | -0,0660727   | 0,008 | 0,023 | 1         | 0,955234799   | 1,046863034     | 0,347826087     |
| SLFN13                                                                                          | 0,215301039 | -0,0662074   | 0,01  | 0,018 | 1         | 0,955145616   | 1,046960781     | 0,555555556     |
| NLRC5                                                                                           | 0,531807045 | -0,066279581 | 0,015 | 0,019 | 1         | 0,955097829   | 1,047013164     | 0,789473684     |
| COQ6                                                                                            | 0,80026152  | -0,066332636 | 0,043 | 0,045 | 1         | 0,955062707   | 1,047051668     | 0,955555556     |
| TRMT61A                                                                                         | 0,648976259 | -0,06639354  | 0,072 | 0,064 | 1         | 0,955022389   | 1,047095871     | 1,125           |
| TBC1D10A                                                                                        | 0,138133119 | -0,066412335 | 0,087 | 0,106 | 1         | 0,955009947   | 1,047109512     | 0,820754717     |
| LMOD3                                                                                           | 0,131599836 | -0,066455492 | 0,008 | 0,016 | 1         | 0,954981379   | 1,047140836     | 0,5             |
| C12orf29                                                                                        | 0,027510346 | -0,066478855 | 0,071 | 0,1   | 1         | 0,954965914   | 1,047157794     | 0,71            |
| YEATS2                                                                                          | 0,008752134 | -0,066514333 | 0,031 | 0,058 | 1         | 0,95494243    | 1,047183546     | 0,534482759     |
| ZNF768                                                                                          | 0,006831861 | -0,066521435 | 0,028 | 0,054 | 1         | 0,95493773    | 1,0471887       | 0,518518519     |
| ATG3                                                                                            | 0,042838405 | -0,066650899 | 0,121 | 0,152 | 1         | 0,95485204    | 1,047282677     | 0,796052632     |
| CCDC12                                                                                          | 0,005471285 | -0,066666174 | 0,136 | 0,182 | 1         | 0,95484193    | 1,047293765     | 0,747252747     |
| LDAF1                                                                                           | 0,037202496 | -0,066706663 | 0,033 | 0,053 | 1         | 0,954815133   | 1,047323157     | 0,622641509     |
| CYB5D1                                                                                          | 0,055136718 | -0,066741965 | 0,013 | 0,026 | 1         | 0,95479177    | 1,047348785     | 0,5             |
| LEAP2                                                                                           | 0,036090387 | -0,066751973 | 0,019 | 0,035 | 1         | 0,954785146   | 1,047356051     | 0,542857143     |
| FCHSD1                                                                                          | 0,308406235 | -0,066800065 | 0,016 | 0,023 | 1         | 0,954753319   | 1,047390965     | 0,695652174     |
| ERAL1                                                                                           | 0,540577346 | -0,06688458  | 0,041 | 0,034 | 1         | 0,95469739    | 1,047452324     | 1,205882353     |
| MAPK7                                                                                           | 0,306941149 | -0,066928796 | 0,022 | 0,03  | 1         | 0,95466813    | 1,047484428     | 0,733333333     |
| COPS3                                                                                           | 0,01407842  | -0,066992363 | 0,121 | 0,157 | 1         | 0,954626067   | 1,047530582     | 0,770700637     |
| GEMIN8                                                                                          | 0,055390425 | -0,067145743 | 0,041 | 0,061 | 1         | 0,954524582   | 1,047641956     | 0,672131148     |
| MSH6                                                                                            | 0,000242732 | -0,067153748 | 0,056 | 0,104 | 1         | 0,954519286   | 1,047647769     | 0,538461538     |
| MFN2                                                                                            | 0,704397895 | -0,067173463 | 0,043 | 0,046 | 1         | 0,954506242   | 1,047662085     | 0,934782609     |
| C11orf68                                                                                        | 0,009156383 | -0,067182269 | 0,075 | 0,11  | 1         | 0,954500416   | 1,04766848      | 0,681818182     |

Supplementary Table 5

| Differentially expressed genes_total calculation_ comparing SC-Keloid vs. (SC-Myel, SC-Nonmyel) |             |              |       |       |             |               |                 |                 |
|-------------------------------------------------------------------------------------------------|-------------|--------------|-------|-------|-------------|---------------|-----------------|-----------------|
| gene                                                                                            | p_val       | avg_log2FC   | pct.1 | pct.2 | p_val_adj   | Foldchange_UP | Foldchange_DOWN | Ratio_pct1_pct2 |
| FAM161B                                                                                         | 0,041013479 | -0,067187312 | 0,006 | 0,016 | 1           | 0,954497079   | 1,047672143     | 0,375           |
| ERCC4                                                                                           | 0,510500327 | -0,067223473 | 0,035 | 0,041 | 1           | 0,954473155   | 1,047698403     | 0,853658537     |
| CYC1                                                                                            | 0,015397819 | -0,067252281 | 0,19  | 0,232 | 1           | 0,954454096   | 1,047719323     | 0,818965517     |
| PREP                                                                                            | 0,716344182 | -0,067258225 | 0,023 | 0,026 | 1           | 0,954450164   | 1,04772364      | 0,884615385     |
| LPCAT3                                                                                          | 0,064339091 | -0,067265562 | 0,03  | 0,047 | 1           | 0,95444531    | 1,047728969     | 0,638297872     |
| LY6G5B                                                                                          | 0,009892254 | -0,067272097 | 0,001 | 0,011 | 1           | 0,954440986   | 1,047733715     | 0,090909091     |
| NDFIP2                                                                                          | 0,305297047 | -0,067289552 | 0,118 | 0,13  | 1           | 0,954429439   | 1,047746391     | 0,907692308     |
| IDH3G                                                                                           | 0,224540645 | -0,067294982 | 0,13  | 0,145 | 1           | 0,954425847   | 1,047750334     | 0,896551724     |
| UQCC1                                                                                           | 0,308249098 | -0,06742498  | 0,026 | 0,034 | 1           | 0,954339849   | 1,047844749     | 0,764705882     |
| TADA1                                                                                           | 0,058259217 | -0,067432192 | 0,014 | 0,027 | 1           | 0,954335079   | 1,047849987     | 0,518518519     |
| ARHGAP33                                                                                        | 0,406183979 | -0,067443559 | 0,02  | 0,026 | 1           | 0,95432756    | 1,047858243     | 0,769230769     |
| TMEM8B                                                                                          | 0,844537732 | -0,067552895 | 0,047 | 0,047 | 1           | 0,954255238   | 1,047937659     | 1               |
| AP3D1                                                                                           | 0,191549665 | -0,067574974 | 0,099 | 0,115 | 1           | 0,954240634   | 1,047953697     | 0,860869565     |
| PPP1R9A                                                                                         | 4,02565E-05 | -0,067583196 | 0,08  | 0,145 | 0,849452987 | 0,954235195   | 1,04795967      | 0,551724138     |
| CRBN                                                                                            | 0,003575321 | -0,067595489 | 0,1   | 0,145 | 1           | 0,954227064   | 1,047968599     | 0,689655172     |
| MTFR1                                                                                           | 0,442670811 | -0,067604869 | 0,029 | 0,035 | 1           | 0,954220861   | 1,047975412     | 0,828571429     |
| NUDT7                                                                                           | 0,000878809 | -0,067605    | 0,007 | 0,028 | 1           | 0,954220774   | 1,047975508     | 0,25            |
| CCDC80                                                                                          | 0,060804293 | -0,067719463 | 0,235 | 0,191 | 1           | 0,954145069   | 1,048058657     | 1,230366492     |
| WASHC2A                                                                                         | 0,142061728 | -0,067725482 | 0,037 | 0,052 | 1           | 0,954141089   | 1,048063029     | 0,711538462     |
| AAAS                                                                                            | 0,79199905  | -0,067766918 | 0,044 | 0,046 | 1           | 0,954113685   | 1,048093132     | 0,956521739     |
| MRAS                                                                                            | 0,004238471 | -0,067773257 | 0,026 | 0,053 | 1           | 0,954109493   | 1,048097737     | 0,490566038     |
| PYGO1                                                                                           | 0,031064124 | -0,067832096 | 0,007 | 0,019 | 1           | 0,954070581   | 1,048140484     | 0,368421053     |
| ARL6IP5                                                                                         | 0,000250849 | -0,067855814 | 0,291 | 0,387 | 1           | 0,954054896   | 1,048157716     | 0,751937984     |
| CAB39                                                                                           | 0,039823085 | -0,067906594 | 0,078 | 0,106 | 1           | 0,954021316   | 1,048194609     | 0,735849057     |
| ALDH5A1                                                                                         | 0,002802534 | -0,067910731 | 0,001 | 0,014 | 1           | 0,95401858    | 1,048197614     | 0,071428571     |
| MKKS                                                                                            | 0,231830558 | -0,067930949 | 0,035 | 0,046 | 1           | 0,954005211   | 1,048212304     | 0,760869565     |
| TNK1                                                                                            | 0,009507979 | -0,067945704 | 0,002 | 0,014 | 1           | 0,953995453   | 1,048223025     | 0,142857143     |
| HYLS1                                                                                           | 0,049503493 | -0,067981638 | 0,007 | 0,018 | 1           | 0,953971692   | 1,048249134     | 0,388888889     |
| ZNF184                                                                                          | 0,236276066 | -0,068161631 | 0,016 | 0,024 | 1           | 0,95385268    | 1,048379923     | 0,666666667     |
| WASF1                                                                                           | 0,001966055 | -0,068261975 | 0,006 | 0,024 | 1           | 0,953786339   | 1,048452844     | 0,25            |

Supplementary Table 5

| Differentially expressed genes_total calculation_ comparing SC-Keloid vs. (SC-Myel, SC-Nonmyel) |             |              |       |       |             |               |                 |                 |
|-------------------------------------------------------------------------------------------------|-------------|--------------|-------|-------|-------------|---------------|-----------------|-----------------|
| gene                                                                                            | p_val       | avg_log2FC   | pct.1 | pct.2 | p_val_adj   | Foldchange_UP | Foldchange_DOWN | Ratio_pct1_pct2 |
| CLIP2                                                                                           | 0,002004783 | -0,068308843 | 0,049 | 0,087 | 1           | 0,953755355   | 1,048486905     | 0,563218391     |
| CEP295                                                                                          | 0,106787101 | -0,06833712  | 0,024 | 0,038 | 1           | 0,953736661   | 1,048507456     | 0,631578947     |
| PROX1                                                                                           | 0,002334796 | -0,068386774 | 0,005 | 0,022 | 1           | 0,953703836   | 1,048543543     | 0,227272727     |
| TBCK                                                                                            | 0,3116154   | -0,06845462  | 0,02  | 0,027 | 1           | 0,953658987   | 1,048592855     | 0,740740741     |
| NEDD1                                                                                           | 0,136005019 | -0,068513983 | 0,056 | 0,073 | 1           | 0,953619748   | 1,048636002     | 0,767123288     |
| ERMP1                                                                                           | 0,056225583 | -0,068539728 | 0,005 | 0,014 | 1           | 0,95360273    | 1,048654716     | 0,357142857     |
| TOE1                                                                                            | 0,620664703 | -0,068550256 | 0,02  | 0,016 | 1           | 0,953595772   | 1,048662368     | 1,25            |
| FGFR3                                                                                           | 0,017329899 | -0,06856183  | 0,002 | 0,012 | 1           | 0,953588122   | 1,048670781     | 0,166666667     |
| PHF11                                                                                           | 0,120017902 | -0,068613061 | 0,064 | 0,083 | 1           | 0,95355426    | 1,04870802      | 0,771084337     |
| EFS                                                                                             | 0,131386559 | -0,068652904 | 0,148 | 0,168 | 1           | 0,953527926   | 1,048736983     | 0,880952381     |
| LRRC61                                                                                          | 0,637555953 | -0,068656913 | 0,03  | 0,026 | 1           | 0,953525276   | 1,048739897     | 1,153846154     |
| TAF5                                                                                            | 0,208059236 | -0,068676414 | 0,009 | 0,016 | 1           | 0,953512387   | 1,048754073     | 0,5625          |
| PGF                                                                                             | 0,009225378 | -0,068762313 | 0,012 | 0,03  | 1           | 0,953455616   | 1,048816519     | 0,4             |
| KAT8                                                                                            | 0,006222017 | -0,068770507 | 0,062 | 0,096 | 1           | 0,953450201   | 1,048822475     | 0,645833333     |
| CATSPERG                                                                                        | 0,002039467 | -0,068773734 | 0,01  | 0,033 | 1           | 0,953448068   | 1,048824822     | 0,303030303     |
| CRTC1                                                                                           | 0,707271741 | -0,068782019 | 0,035 | 0,038 | 1           | 0,953442593   | 1,048830845     | 0,921052632     |
| ST3GAL1                                                                                         | 0,01073818  | -0,068793814 | 0,022 | 0,045 | 1           | 0,953434798   | 1,04883942      | 0,488888889     |
| TMEM88                                                                                          | 0,02500157  | -0,068814285 | 0,006 | 0,018 | 1           | 0,953421269   | 1,048854302     | 0,333333333     |
| MMP19                                                                                           | 0,981475989 | -0,068827403 | 0,024 | 0,024 | 1           | 0,9534126     | 1,048863839     | 1               |
| TECPR1                                                                                          | 0,05043417  | -0,068893812 | 0,019 | 0,034 | 1           | 0,953368714   | 1,048912121     | 0,558823529     |
| MED23                                                                                           | 0,302805955 | -0,068952171 | 0,026 | 0,034 | 1           | 0,95333015    | 1,048954551     | 0,764705882     |
| DTD2                                                                                            | 0,064327647 | -0,06896571  | 0,015 | 0,028 | 1           | 0,953321204   | 1,048964395     | 0,535714286     |
| MTOR                                                                                            | 0,229028247 | -0,068968788 | 0,038 | 0,05  | 1           | 0,95331917    | 1,048966633     | 0,76            |
| PJA2                                                                                            | 8,19146E-07 | -0,069091502 | 0,285 | 0,411 | 0,017284804 | 0,953238085   | 1,049055861     | 0,693430657     |
| ZNF875                                                                                          | 0,188270381 | -0,069117235 | 0,023 | 0,034 | 1           | 0,953221083   | 1,049074573     | 0,676470588     |
| NBPF15                                                                                          | 0,86096194  | -0,069121864 | 0,029 | 0,027 | 1           | 0,953218024   | 1,049077939     | 1,074074074     |
| DDX5                                                                                            | 0,000775506 | -0,06912241  | 0,674 | 0,82  | 1           | 0,953217663   | 1,049078337     | 0,82195122      |
| MAST4                                                                                           | 0,41727262  | -0,069143554 | 0,016 | 0,022 | 1           | 0,953203693   | 1,049093711     | 0,727272727     |
| SLFN12                                                                                          | 0,02602678  | -0,0691678   | 0,047 | 0,072 | 1           | 0,953187673   | 1,049111343     | 0,652777778     |
| CX3CL1                                                                                          | 0,017258528 | -0,069193789 | 0,002 | 0,012 | 1           | 0,953170503   | 1,049130242     | 0,166666667     |

Supplementary Table 5

| Differentially expressed genes_total calculation_ comparing SC-Keloid vs. (SC-Myel, SC-Nonmyel) |             |              |       |       |           |               |                 |                 |
|-------------------------------------------------------------------------------------------------|-------------|--------------|-------|-------|-----------|---------------|-----------------|-----------------|
| gene                                                                                            | p_val       | avg_log2FC   | pct.1 | pct.2 | p_val_adj | Foldchange_UP | Foldchange_DOWN | Ratio_pct1_pct2 |
| TP53I13                                                                                         | 0,182140027 | -0,069200981 | 0,133 | 0,152 | 1         | 0,953165751   | 1,049135472     | 0,875           |
| EIF3D                                                                                           | 0,190273173 | -0,069245975 | 0,172 | 0,191 | 1         | 0,953136025   | 1,049168192     | 0,90052356      |
| YAP1                                                                                            | 8,09865E-05 | -0,069250512 | 0,099 | 0,164 | 1         | 0,953133027   | 1,049171491     | 0,603658537     |
| MAPK8                                                                                           | 0,034106835 | -0,06926818  | 0,062 | 0,088 | 1         | 0,953121355   | 1,04918434      | 0,704545455     |
| PRCC                                                                                            | 0,867144226 | -0,069282221 | 0,086 | 0,08  | 1         | 0,953112079   | 1,049194552     | 1,075           |
| SLC25A5                                                                                         | 0,00028738  | -0,069341168 | 0,354 | 0,464 | 1         | 0,953073136   | 1,049237422     | 0,762931034     |
| ABCF2                                                                                           | 0,9486823   | -0,069413076 | 0,033 | 0,031 | 1         | 0,953025634   | 1,04928972      | 1,064516129     |
| TMEM139                                                                                         | 0,004639337 | -0,069427907 | 0,003 | 0,018 | 1         | 0,953015836   | 1,049300507     | 0,166666667     |
| OGT                                                                                             | 0,012921878 | -0,069514592 | 0,099 | 0,137 | 1         | 0,952958576   | 1,049363556     | 0,722627737     |
| UBE2O                                                                                           | 0,080506888 | -0,069520653 | 0,023 | 0,038 | 1         | 0,952954572   | 1,049367965     | 0,605263158     |
| HMGNA4                                                                                          | 0,336775281 | -0,069531636 | 0,052 | 0,041 | 1         | 0,952947318   | 1,049375953     | 1,268292683     |
| STRIP1                                                                                          | 0,283034971 | -0,069542126 | 0,031 | 0,041 | 1         | 0,952940389   | 1,049383584     | 0,756097561     |
| MAP4K2                                                                                          | 0,009189692 | -0,069578644 | 0,006 | 0,02  | 1         | 0,952916268   | 1,049410146     | 0,3             |
| TRAPPC8                                                                                         | 0,071109659 | -0,069583889 | 0,033 | 0,05  | 1         | 0,952912803   | 1,049413962     | 0,66            |
| FCHSD2                                                                                          | 0,057158457 | -0,069592865 | 0,008 | 0,019 | 1         | 0,952906875   | 1,04942049      | 0,421052632     |
| RNF113A                                                                                         | 0,222007254 | -0,069616463 | 0,037 | 0,049 | 1         | 0,952891288   | 1,049437656     | 0,755102041     |
| ZNF823                                                                                          | 0,019569988 | -0,069699347 | 0,005 | 0,016 | 1         | 0,952836545   | 1,049497949     | 0,3125          |
| PGS1                                                                                            | 0,074784026 | -0,06969967  | 0,02  | 0,034 | 1         | 0,952836332   | 1,049498184     | 0,588235294     |
| ABTB2                                                                                           | 0,058199655 | -0,069739138 | 0,014 | 0,027 | 1         | 0,952810266   | 1,049526895     | 0,518518519     |
| MYSM1                                                                                           | 0,159892028 | -0,069769225 | 0,081 | 0,099 | 1         | 0,952790395   | 1,049548783     | 0,818181818     |
| DOCK11                                                                                          | 0,026342323 | -0,069843762 | 0,009 | 0,023 | 1         | 0,95274117    | 1,04960301      | 0,391304348     |
| MAMDC2                                                                                          | 0,238208693 | -0,069874918 | 0,022 | 0,031 | 1         | 0,952720596   | 1,049625677     | 0,709677419     |
| DGCR8                                                                                           | 0,244176006 | -0,069905684 | 0,027 | 0,037 | 1         | 0,952700279   | 1,049648061     | 0,72972973      |
| DHFR                                                                                            | 0,78304934  | -0,069967282 | 0,028 | 0,03  | 1         | 0,952659602   | 1,049692878     | 0,933333333     |
| CCDC102B                                                                                        | 0,135823427 | -0,07002859  | 0,019 | 0,03  | 1         | 0,95261912    | 1,049737486     | 0,633333333     |
| BFAR                                                                                            | 0,613342722 | -0,070104439 | 0,087 | 0,091 | 1         | 0,952569038   | 1,049792677     | 0,956043956     |
| PDLIM2                                                                                          | 0,021175043 | -0,070156586 | 0,114 | 0,149 | 1         | 0,952534607   | 1,049830623     | 0,765100671     |
| PTCD3                                                                                           | 0,159791895 | -0,070168277 | 0,059 | 0,076 | 1         | 0,952526888   | 1,049839131     | 0,776315789     |
| TTC9                                                                                            | 0,000434164 | -0,070210259 | 0,001 | 0,018 | 1         | 0,95249917    | 1,049869681     | 0,055555556     |
| MAGI3                                                                                           | 0,022630483 | -0,070231431 | 0,024 | 0,045 | 1         | 0,952485192   | 1,049885088     | 0,533333333     |



Supplementary Table 5

| Differentially expressed genes_total calculation_ comparing SC-Keloid vs. (SC-Myel, SC-Nonmyel) |             |              |       |       |             |               |                 |                 |
|-------------------------------------------------------------------------------------------------|-------------|--------------|-------|-------|-------------|---------------|-----------------|-----------------|
| gene                                                                                            | p_val       | avg_log2FC   | pct.1 | pct.2 | p_val_adj   | Foldchange_UP | Foldchange_DOWN | Ratio_pct1_pct2 |
| TOP1MT                                                                                          | 0,232393932 | -0,07024995  | 0,027 | 0,037 | 1           | 0,952472966   | 1,049898565     | 0,72972973      |
| UBIAD1                                                                                          | 0,011911946 | -0,070263169 | 0,026 | 0,049 | 1           | 0,952464239   | 1,049908185     | 0,530612245     |
| SAR1A                                                                                           | 0,001491374 | -0,070264444 | 0,219 | 0,285 | 1           | 0,952463397   | 1,049909113     | 0,768421053     |
| STX7                                                                                            | 0,035059264 | -0,070300041 | 0,092 | 0,122 | 1           | 0,952439896   | 1,049935018     | 0,754098361     |
| ARSG                                                                                            | 0,008720925 | -0,070333482 | 0,008 | 0,024 | 1           | 0,952417819   | 1,049959356     | 0,333333333     |
| SLC35E2A                                                                                        | 0,543201019 | -0,070356664 | 0,013 | 0,016 | 1           | 0,952402515   | 1,049976227     | 0,8125          |
| MPRIP-AS1                                                                                       | 4,17713E-05 | -0,070365397 | 0,021 | 0,061 | 0,881415272 | 0,95239675    | 1,049982583     | 0,344262295     |
| RGL2                                                                                            | 0,849777604 | -0,070482735 | 0,085 | 0,084 | 1           | 0,952319292   | 1,050067985     | 1,011904762     |
| HEPN1                                                                                           | 0,000618779 | -0,070486351 | 0     | 0,014 | 1           | 0,952316905   | 1,050070617     | 0               |
| ARHGAP35                                                                                        | 0,153996496 | -0,070549668 | 0,092 | 0,111 | 1           | 0,952275111   | 1,050116703     | 0,828828829     |
| SGF29                                                                                           | 0,238521037 | -0,070728502 | 0,027 | 0,037 | 1           | 0,952157077   | 1,050246881     | 0,72972973      |
| YPEL1                                                                                           | 0,823253939 | -0,070760075 | 0,026 | 0,027 | 1           | 0,952136239   | 1,050269866     | 0,962962963     |
| POLG2                                                                                           | 0,431441743 | -0,070795244 | 0,031 | 0,038 | 1           | 0,952113028   | 1,050295469     | 0,815789474     |
| HDAC10                                                                                          | 0,88846777  | -0,070823364 | 0,03  | 0,028 | 1           | 0,952094471   | 1,050315941     | 1,071428571     |
| DICER1-AS1                                                                                      | 0,010452141 | -0,070852286 | 0,009 | 0,026 | 1           | 0,952075384   | 1,050336997     | 0,346153846     |
| SLC25A19                                                                                        | 0,147568513 | -0,070866045 | 0,01  | 0,019 | 1           | 0,952066304   | 1,050347014     | 0,526315789     |
| DDX59                                                                                           | 0,361853068 | -0,070872605 | 0,033 | 0,041 | 1           | 0,952061975   | 1,05035179      | 0,804878049     |
| PYGO2                                                                                           | 0,795717508 | -0,070905038 | 0,035 | 0,037 | 1           | 0,952040572   | 1,050375403     | 0,945945946     |
| MYO6                                                                                            | 0,000838267 | -0,07098726  | 0,036 | 0,073 | 1           | 0,951986315   | 1,050435268     | 0,493150685     |
| CIDEB                                                                                           | 0,005394299 | -0,07102342  | 0,006 | 0,022 | 1           | 0,951962455   | 1,050461596     | 0,272727273     |
| CAPN15                                                                                          | 0,181872782 | -0,071030267 | 0,026 | 0,037 | 1           | 0,951957936   | 1,050466582     | 0,702702703     |
| TXNRD3                                                                                          | 0,002834179 | -0,071096335 | 0,002 | 0,016 | 1           | 0,951914343   | 1,050514689     | 0,125           |
| PDCD7                                                                                           | 0,033019084 | -0,071309292 | 0,104 | 0,134 | 1           | 0,951773841   | 1,050669767     | 0,776119403     |
| EID2B                                                                                           | 0,116096135 | -0,071311011 | 0,013 | 0,023 | 1           | 0,951772707   | 1,05067102      | 0,565217391     |
| PKP2                                                                                            | 0,000238222 | -0,071366163 | 0,001 | 0,019 | 1           | 0,951736323   | 1,050711186     | 0,052631579     |
| UNC13D                                                                                          | 0,002802534 | -0,071385879 | 0,001 | 0,014 | 1           | 0,951723316   | 1,050725545     | 0,071428571     |
| FBF1                                                                                            | 0,131451435 | -0,071387296 | 0,008 | 0,016 | 1           | 0,951722381   | 1,050726577     | 0,5             |
| ABCB4                                                                                           | 0,241140074 | -0,071460107 | 0,017 | 0,026 | 1           | 0,951674351   | 1,050779607     | 0,653846154     |
| TRNAU1AP                                                                                        | 0,53854594  | -0,071514337 | 0,075 | 0,08  | 1           | 0,951638578   | 1,050819106     | 0,9375          |
| KIAA1549L                                                                                       | 6,0816E-06  | -0,071524778 | 0,008 | 0,043 | 0,128327907 | 0,951631691   | 1,050826711     | 0,186046512     |

Supplementary Table 5

| Differentially expressed genes_total calculation_ comparing SC-Keloid vs. (SC-Myel, SC-Nonmyel) |             |              |       |       |             |               |                 |                 |
|-------------------------------------------------------------------------------------------------|-------------|--------------|-------|-------|-------------|---------------|-----------------|-----------------|
| gene                                                                                            | p_val       | avg_log2FC   | pct.1 | pct.2 | p_val_adj   | Foldchange_UP | Foldchange_DOWN | Ratio_pct1_pct2 |
| RABGEF1                                                                                         | 0,924920358 | -0,071527273 | 0,045 | 0,043 | 1           | 0,951630045   | 1,050828528     | 1,046511628     |
| CHEK2                                                                                           | 0,017305455 | -0,071561904 | 0,009 | 0,024 | 1           | 0,951607202   | 1,050853753     | 0,375           |
| TBC1D25                                                                                         | 0,482510388 | -0,071603525 | 0,024 | 0,03  | 1           | 0,951579749   | 1,05088407      | 0,8             |
| STARD5                                                                                          | 0,027384862 | -0,071710768 | 0,014 | 0,03  | 1           | 0,951509016   | 1,050962191     | 0,466666667     |
| ZC3H3                                                                                           | 0,054435507 | -0,071728788 | 0,013 | 0,026 | 1           | 0,951497131   | 1,050975318     | 0,5             |
| PPP1R3E                                                                                         | 0,0059371   | -0,071749326 | 0,015 | 0,037 | 1           | 0,951483586   | 1,05099028      | 0,405405405     |
| SPINT2                                                                                          | 0,041317453 | -0,071760368 | 0,006 | 0,016 | 1           | 0,951476303   | 1,050998324     | 0,375           |
| CDKL3                                                                                           | 0,048454899 | -0,071828629 | 0,019 | 0,034 | 1           | 0,951431286   | 1,051048052     | 0,558823529     |
| FAM13A-AS1                                                                                      | 0,002214594 | -0,071851024 | 0     | 0,011 | 1           | 0,951416516   | 1,051064368     | 0               |
| TGFBRAP1                                                                                        | 0,843523796 | -0,071852679 | 0,035 | 0,033 | 1           | 0,951415426   | 1,051065574     | 1,060606061     |
| ZGPAT                                                                                           | 0,082742521 | -0,071904977 | 0,014 | 0,026 | 1           | 0,951380937   | 1,051103676     | 0,538461538     |
| ENHO                                                                                            | 0,000458425 | -0,072024052 | 0,003 | 0,023 | 1           | 0,951302417   | 1,051190434     | 0,130434783     |
| ALAD                                                                                            | 0,055021763 | -0,072027289 | 0,04  | 0,06  | 1           | 0,951300282   | 1,051192792     | 0,666666667     |
| GPR89B                                                                                          | 0,410773753 | -0,072038028 | 0,014 | 0,019 | 1           | 0,951293201   | 1,051200617     | 0,736842105     |
| C3orf52                                                                                         | 0,220302043 | -0,072043587 | 0,013 | 0,02  | 1           | 0,951289536   | 1,051204668     | 0,65            |
| CDK5RAP2                                                                                        | 0,446010187 | -0,072049528 | 0,054 | 0,061 | 1           | 0,951285618   | 1,051208996     | 0,885245902     |
| ARHGAP4                                                                                         | 0,014359884 | -0,07205281  | 0,008 | 0,023 | 1           | 0,951283454   | 1,051211388     | 0,347826087     |
| TOM1                                                                                            | 0,625749631 | -0,072097152 | 0,03  | 0,034 | 1           | 0,951254216   | 1,051243698     | 0,882352941     |
| LRP1                                                                                            | 1,04172E-05 | -0,072126394 | 0,219 | 0,322 | 0,219813033 | 0,951234935   | 1,051265006     | 0,680124224     |
| CYP4F11                                                                                         | 0,00116827  | -0,07214988  | 0     | 0,012 | 1           | 0,95121945    | 1,05128212      | 0               |
| EPB41L1                                                                                         | 0,519308336 | -0,072167792 | 0,017 | 0,022 | 1           | 0,95120764    | 1,051295172     | 0,772727273     |
| NBPF3                                                                                           | 0,015078228 | -0,072170823 | 0,006 | 0,019 | 1           | 0,951205641   | 1,051297381     | 0,315789474     |
| SLC25A10                                                                                        | 0,672790545 | -0,07217155  | 0,015 | 0,018 | 1           | 0,951205163   | 1,051297911     | 0,833333333     |
| TUBB4A                                                                                          | 0,000128199 | -0,072247262 | 0,001 | 0,02  | 1           | 0,951155245   | 1,051353084     | 0,05            |
| CCL28                                                                                           | 0,150992355 | -0,072280159 | 0,01  | 0,019 | 1           | 0,951133557   | 1,051377058     | 0,526315789     |
| PPP1R12C                                                                                        | 0,023717923 | -0,072403786 | 0,058 | 0,085 | 1           | 0,951052055   | 1,051467156     | 0,682352941     |
| SYNPO                                                                                           | 0,529372352 | -0,072434514 | 0,09  | 0,096 | 1           | 0,951031799   | 1,051489551     | 0,9375          |
| ANGPTL1                                                                                         | 0,002275389 | -0,072445016 | 0,019 | 0,045 | 1           | 0,951024876   | 1,051497206     | 0,422222222     |
| CUL3                                                                                            | 0,000317803 | -0,0724501   | 0,127 | 0,189 | 1           | 0,951021525   | 1,051500911     | 0,671957672     |
| ZNF324                                                                                          | 0,000560068 | -0,072532653 | 0,012 | 0,038 | 1           | 0,950967108   | 1,051561081     | 0,315789474     |

Supplementary Table 5

| Differentially expressed genes_total calculation_ comparing SC-Keloid vs. (SC-Myel, SC-Nonmyel) |             |              |       |       |             |               |                 |                 |
|-------------------------------------------------------------------------------------------------|-------------|--------------|-------|-------|-------------|---------------|-----------------|-----------------|
| gene                                                                                            | p_val       | avg_log2FC   | pct.1 | pct.2 | p_val_adj   | Foldchange_UP | Foldchange_DOWN | Ratio_pct1_pct2 |
| NISCH                                                                                           | 0,026514052 | -0,072548014 | 0,07  | 0,099 | 1           | 0,950956982   | 1,051572278     | 0,707070707     |
| SULT1A2                                                                                         | 0,002214594 | -0,072585972 | 0     | 0,011 | 1           | 0,950931962   | 1,051599946     | 0               |
| CCDC173                                                                                         | 0,002202335 | -0,072608216 | 0,005 | 0,022 | 1           | 0,950917301   | 1,051616159     | 0,227272727     |
| RPL7                                                                                            | 0,062648007 | -0,072646963 | 0,651 | 0,811 | 1           | 0,950891762   | 1,051644404     | 0,8027127       |
| PHF20                                                                                           | 0,002590923 | -0,072690987 | 0,112 | 0,16  | 1           | 0,950862746   | 1,051676495     | 0,7             |
| LINC00598                                                                                       | 9,34934E-05 | -0,072725427 | 0     | 0,018 | 1           | 0,950840048   | 1,051701601     | 0               |
| CELF1                                                                                           | 0,000516957 | -0,072777836 | 0,151 | 0,214 | 1           | 0,950805507   | 1,051739807     | 0,705607477     |
| TMEM192                                                                                         | 0,115779514 | -0,07282248  | 0,036 | 0,052 | 1           | 0,950776085   | 1,051772353     | 0,692307692     |
| EIF3C                                                                                           | 0,307750196 | -0,072855123 | 0,015 | 0,022 | 1           | 0,950754572   | 1,051796152     | 0,681818182     |
| TKFC                                                                                            | 0,171325344 | -0,072858937 | 0,016 | 0,026 | 1           | 0,950752059   | 1,051798932     | 0,615384615     |
| TECR                                                                                            | 0,000712495 | -0,072863723 | 0,261 | 0,346 | 1           | 0,950748905   | 1,051802421     | 0,75433526      |
| SIN3B                                                                                           | 0,061180392 | -0,07294202  | 0,056 | 0,079 | 1           | 0,950697308   | 1,051859506     | 0,708860759     |
| ANKRD20A1                                                                                       | 0,024732979 | -0,073001732 | 0,006 | 0,018 | 1           | 0,95065796    | 1,051903042     | 0,333333333     |
| PCNT                                                                                            | 0,052738787 | -0,073004759 | 0,033 | 0,052 | 1           | 0,950655966   | 1,051905249     | 0,634615385     |
| MTA3                                                                                            | 0,297798629 | -0,073017849 | 0,048 | 0,058 | 1           | 0,950647339   | 1,051914794     | 0,827586207     |
| TMEM62                                                                                          | 0,543901312 | -0,073053843 | 0,013 | 0,016 | 1           | 0,950623622   | 1,051941038     | 0,8125          |
| ZBED1                                                                                           | 0,01103205  | -0,073084947 | 0,043 | 0,072 | 1           | 0,950603128   | 1,051963718     | 0,597222222     |
| FTO                                                                                             | 0,205519495 | -0,073099717 | 0,047 | 0,06  | 1           | 0,950593395   | 1,051974488     | 0,783333333     |
| TMCC3                                                                                           | 0,001860303 | -0,073199568 | 0,006 | 0,024 | 1           | 0,950527606   | 1,052047299     | 0,25            |
| MCCC1                                                                                           | 0,056876546 | -0,073211212 | 0,022 | 0,038 | 1           | 0,950519934   | 1,05205579      | 0,578947368     |
| DCST2                                                                                           | 0,009916339 | -0,073225305 | 0,001 | 0,011 | 1           | 0,950510649   | 1,052066067     | 0,090909091     |
| MTG1                                                                                            | 0,579866261 | -0,073234163 | 0,045 | 0,05  | 1           | 0,950504813   | 1,052072526     | 0,9             |
| MTFMT                                                                                           | 0,582500279 | -0,073245146 | 0,038 | 0,043 | 1           | 0,950497577   | 1,052080536     | 0,88372093      |
| EPOR                                                                                            | 0,025117451 | -0,073291162 | 0,006 | 0,018 | 1           | 0,95046726    | 1,052114093     | 0,333333333     |
| LRRC3                                                                                           | 0,030973371 | -0,073302442 | 0,002 | 0,011 | 1           | 0,950459829   | 1,05212232      | 0,181818182     |
| KLHL18                                                                                          | 0,833407747 | -0,073315741 | 0,041 | 0,042 | 1           | 0,950451067   | 1,052132018     | 0,976190476     |
| RAB5B                                                                                           | 0,045151709 | -0,073378116 | 0,064 | 0,09  | 1           | 0,950409976   | 1,052177508     | 0,711111111     |
| TMF1                                                                                            | 1,56909E-05 | -0,073412345 | 0,108 | 0,185 | 0,331094351 | 0,950387427   | 1,052202472     | 0,583783784     |
| ZBED6                                                                                           | 0,00710028  | -0,073531352 | 0,007 | 0,023 | 1           | 0,950309033   | 1,052289272     | 0,304347826     |
| MEF2B                                                                                           | 0,085736761 | -0,073633653 | 0,008 | 0,018 | 1           | 0,95024165    | 1,052363891     | 0,444444444     |

Supplementary Table 5

| Differentially expressed genes_total calculation_ comparing SC-Keloid vs. (SC-Myel, SC-Nonmyel) |             |              |       |       |           |               |                 |                 |
|-------------------------------------------------------------------------------------------------|-------------|--------------|-------|-------|-----------|---------------|-----------------|-----------------|
| gene                                                                                            | p_val       | avg_log2FC   | pct.1 | pct.2 | p_val_adj | Foldchange_UP | Foldchange_DOWN | Ratio_pct1_pct2 |
| ZNF740                                                                                          | 0,313909862 | -0,073646052 | 0,019 | 0,026 | 1         | 0,950233483   | 1,052372936     | 0,730769231     |
| PPARG                                                                                           | 0,004639337 | -0,073683372 | 0,003 | 0,018 | 1         | 0,950208902   | 1,05240016      | 0,166666667     |
| GTF2H2C                                                                                         | 0,589372327 | -0,073700527 | 0,023 | 0,027 | 1         | 0,950197604   | 1,052412673     | 0,851851852     |
| NR3C2                                                                                           | 0,000476407 | -0,073762802 | 0,002 | 0,02  | 1         | 0,950156588   | 1,052458102     | 0,1             |
| BRD1                                                                                            | 0,0376908   | -0,073784584 | 0,081 | 0,11  | 1         | 0,950142242   | 1,052473993     | 0,736363636     |
| FAM217B                                                                                         | 0,982356099 | -0,07384216  | 0,045 | 0,045 | 1         | 0,950104325   | 1,052515996     | 1               |
| INTS4                                                                                           | 0,493029335 | -0,073843124 | 0,035 | 0,041 | 1         | 0,95010369    | 1,0525167       | 0,853658537     |
| PLAGL2                                                                                          | 0,040878357 | -0,073854229 | 0,009 | 0,022 | 1         | 0,950096377   | 1,052524801     | 0,409090909     |
| ZNF532                                                                                          | 0,000231984 | -0,073901656 | 0,073 | 0,129 | 1         | 0,950065143   | 1,052559403     | 0,565891473     |
| TAOK2                                                                                           | 0,255183603 | -0,073963009 | 0,049 | 0,061 | 1         | 0,950024741   | 1,052604165     | 0,803278689     |
| SOX1-OT                                                                                         | 0,000175145 | -0,074003223 | 0     | 0,016 | 1         | 0,94999826    | 1,052633507     | 0               |
| ZNF302                                                                                          | 0,143247629 | -0,074060428 | 0,058 | 0,076 | 1         | 0,949960592   | 1,052675246     | 0,763157895     |
| HEXIM2                                                                                          | 0,385766957 | -0,074063709 | 0,023 | 0,03  | 1         | 0,949958432   | 1,05267764      | 0,766666667     |
| UVRAG                                                                                           | 0,08958721  | -0,074080159 | 0,052 | 0,072 | 1         | 0,9499476     | 1,052689643     | 0,722222222     |
| DAZAP1                                                                                          | 0,005286997 | -0,07417293  | 0,108 | 0,152 | 1         | 0,949886517   | 1,052757337     | 0,710526316     |
| DDX47                                                                                           | 0,078374255 | -0,074328789 | 0,013 | 0,024 | 1         | 0,949783903   | 1,052871076     | 0,541666667     |
| TBRG4                                                                                           | 0,523057829 | -0,074373747 | 0,043 | 0,049 | 1         | 0,949754306   | 1,052903886     | 0,87755102      |
| PIKFYVE                                                                                         | 0,118603537 | -0,074380581 | 0,041 | 0,057 | 1         | 0,949749807   | 1,052908874     | 0,719298246     |
| MAPK3                                                                                           | 0,387504404 | -0,074405448 | 0,084 | 0,069 | 1         | 0,949733437   | 1,052927022     | 1,217391304     |
| TRAFD1                                                                                          | 0,612736718 | -0,074452414 | 0,042 | 0,046 | 1         | 0,94970252    | 1,0529613       | 0,913043478     |
| TRIM23                                                                                          | 0,097770733 | -0,074566765 | 0,037 | 0,054 | 1         | 0,949627247   | 1,053044764     | 0,685185185     |
| MAEA                                                                                            | 0,588898998 | -0,074578499 | 0,077 | 0,081 | 1         | 0,949619524   | 1,053053328     | 0,950617284     |
| DUSP22                                                                                          | 0,005699087 | -0,074582622 | 0,031 | 0,06  | 1         | 0,949616809   | 1,053056338     | 0,516666667     |
| MAP2K5                                                                                          | 0,13898618  | -0,074596733 | 0,022 | 0,034 | 1         | 0,949607521   | 1,053066638     | 0,647058824     |
| TMEM95                                                                                          | 0,00116827  | -0,074631023 | 0     | 0,012 | 1         | 0,949584952   | 1,053091667     | 0               |
| SLC25A30-AS1                                                                                    | 0,009892254 | -0,074705082 | 0,001 | 0,011 | 1         | 0,949536207   | 1,053145728     | 0,090909091     |
| ZNF595                                                                                          | 0,067104437 | -0,074711783 | 0,006 | 0,015 | 1         | 0,949531797   | 1,05315062      | 0,4             |
| RAB33A                                                                                          | 0,009114145 | -0,074739556 | 0,006 | 0,02  | 1         | 0,949513518   | 1,053170894     | 0,3             |
| SLC25A42                                                                                        | 0,242080006 | -0,074754334 | 0,024 | 0,034 | 1         | 0,949503791   | 1,053181682     | 0,705882353     |
| DRG1                                                                                            | 0,600835836 | -0,074769657 | 0,062 | 0,066 | 1         | 0,949493706   | 1,053192868     | 0,939393939     |

Supplementary Table 5

| Differentially expressed genes_total calculation_ comparing SC-Keloid vs. (SC-Myel, SC-Nonmyel) |             |              |       |       |             |               |                 |                 |
|-------------------------------------------------------------------------------------------------|-------------|--------------|-------|-------|-------------|---------------|-----------------|-----------------|
| gene                                                                                            | p_val       | avg_log2FC   | pct.1 | pct.2 | p_val_adj   | Foldchange_UP | Foldchange_DOWN | Ratio_pct1_pct2 |
| HELB                                                                                            | 2,95183E-05 | -0,074772979 | 0,016 | 0,054 | 0,622866312 | 0,94949152    | 1,053195293     | 0,296296296     |
| TPRA1                                                                                           | 0,064796311 | -0,074823814 | 0,035 | 0,053 | 1           | 0,949458065   | 1,053232404     | 0,660377358     |
| FHIP2B                                                                                          | 0,399487153 | -0,074847822 | 0,05  | 0,058 | 1           | 0,949442265   | 1,053249931     | 0,862068966     |
| ATM                                                                                             | 0,093143407 | -0,074860972 | 0,105 | 0,129 | 1           | 0,94943361    | 1,053259532     | 0,813953488     |
| ACBD4                                                                                           | 0,043684055 | -0,074924889 | 0,015 | 0,03  | 1           | 0,949391548   | 1,053306196     | 0,5             |
| DOCK10                                                                                          | 4,23962E-05 | -0,07495461  | 0,006 | 0,034 | 0,894601247 | 0,949371989   | 1,053327896     | 0,176470588     |
| ZNF426                                                                                          | 0,390519402 | -0,075013132 | 0,023 | 0,03  | 1           | 0,94933348    | 1,053370624     | 0,766666667     |
| CASTOR2                                                                                         | 0,301701051 | -0,075019339 | 0,022 | 0,03  | 1           | 0,949329396   | 1,053375156     | 0,733333333     |
| PDK3                                                                                            | 0,000248853 | -0,075134471 | 0,015 | 0,046 | 1           | 0,949253639   | 1,053459223     | 0,326086957     |
| ZDHHC7                                                                                          | 0,810244666 | -0,075140319 | 0,051 | 0,053 | 1           | 0,949249791   | 1,053463493     | 0,962264151     |
| FAM185A                                                                                         | 0,012288903 | -0,075170491 | 0,01  | 0,027 | 1           | 0,949229939   | 1,053485525     | 0,37037037      |
| MTARC2                                                                                          | 0,238222161 | -0,075215989 | 0,02  | 0,028 | 1           | 0,949200004   | 1,053518748     | 0,714285714     |
| MTMR12                                                                                          | 0,055935772 | -0,075226049 | 0,035 | 0,054 | 1           | 0,949193385   | 1,053526095     | 0,648148148     |
| CMPK2                                                                                           | 0,092515122 | -0,075239647 | 0,005 | 0,012 | 1           | 0,949184438   | 1,053536025     | 0,416666667     |
| PPP1R13B                                                                                        | 0,003241629 | -0,075254943 | 0,008 | 0,027 | 1           | 0,949174374   | 1,053547195     | 0,296296296     |
| FBXW4                                                                                           | 0,031975604 | -0,075348253 | 0,035 | 0,057 | 1           | 0,949112986   | 1,053615338     | 0,614035088     |
| GRIK5                                                                                           | 0,002214594 | -0,075394607 | 0     | 0,011 | 1           | 0,949082492   | 1,053649191     | 0               |
| UBE2B                                                                                           | 6,08538E-07 | -0,075404293 | 0,302 | 0,431 | 0,01284075  | 0,94907612    | 1,053656266     | 0,700696056     |
| NAALADL2                                                                                        | 0,014589632 | -0,075422202 | 0,044 | 0,072 | 1           | 0,949064339   | 1,053669345     | 0,611111111     |
| MUTYH                                                                                           | 0,027361545 | -0,075434037 | 0,021 | 0,039 | 1           | 0,949056553   | 1,053677989     | 0,538461538     |
| VRK3                                                                                            | 0,072196235 | -0,075443302 | 0,019 | 0,033 | 1           | 0,949050458   | 1,053684756     | 0,575757576     |
| SLC49A4                                                                                         | 0,635989938 | -0,075472837 | 0,017 | 0,02  | 1           | 0,949031029   | 1,053706327     | 0,85            |
| SIRT3                                                                                           | 0,074652044 | -0,0754811   | 0,012 | 0,023 | 1           | 0,949025594   | 1,053712362     | 0,52173913      |
| DCLK2                                                                                           | 0,008396067 | -0,075481539 | 0,02  | 0,042 | 1           | 0,949025305   | 1,053712682     | 0,476190476     |
| ZNF487                                                                                          | 0,128195064 | -0,075483559 | 0,016 | 0,027 | 1           | 0,949023976   | 1,053714158     | 0,592592593     |
| TCFL5                                                                                           | 0,068303505 | -0,075488042 | 0,017 | 0,031 | 1           | 0,949021027   | 1,053717432     | 0,548387097     |
| MFSD14B                                                                                         | 0,109697779 | -0,075511892 | 0,071 | 0,091 | 1           | 0,949005338   | 1,053734852     | 0,78021978      |
| ATG101                                                                                          | 0,036174091 | -0,075545123 | 0,172 | 0,206 | 1           | 0,948983479   | 1,053759124     | 0,834951456     |
| P2RX4                                                                                           | 0,455799701 | -0,075583631 | 0,05  | 0,041 | 1           | 0,94895815    | 1,053787251     | 1,219512195     |
| ZCCHC4                                                                                          | 0,102009393 | -0,075672617 | 0,01  | 0,02  | 1           | 0,948899619   | 1,053852251     | 0,5             |

Supplementary Table 5

| Differentially expressed genes_total calculation_ comparing SC-Keloid vs. (SC-Myel, SC-Nonmyel) |             |              |       |       |             |               |                 |                 |
|-------------------------------------------------------------------------------------------------|-------------|--------------|-------|-------|-------------|---------------|-----------------|-----------------|
| gene                                                                                            | p_val       | avg_log2FC   | pct.1 | pct.2 | p_val_adj   | Foldchange_UP | Foldchange_DOWN | Ratio_pct1_pct2 |
| CUL1                                                                                            | 0,058119266 | -0,075788114 | 0,054 | 0,076 | 1           | 0,948823657   | 1,053936622     | 0,710526316     |
| POLR2A                                                                                          | 0,017665141 | -0,075852381 | 0,112 | 0,149 | 1           | 0,948781391   | 1,053983573     | 0,751677852     |
| STAM                                                                                            | 0,000382064 | -0,075885781 | 0,073 | 0,125 | 1           | 0,948759426   | 1,054007974     | 0,584           |
| AHRR                                                                                            | 0,000328784 | -0,075931619 | 0     | 0,015 | 1           | 0,948729282   | 1,054041462     | 0               |
| CDRT4                                                                                           | 0,149903322 | -0,075931625 | 0,005 | 0,011 | 1           | 0,948729278   | 1,054041467     | 0,454545455     |
| KAT6B                                                                                           | 0,07821434  | -0,075981209 | 0,104 | 0,128 | 1           | 0,948696672   | 1,054077694     | 0,8125          |
| UCP2                                                                                            | 0,000800396 | -0,076008462 | 0,001 | 0,016 | 1           | 0,948678751   | 1,054097606     | 0,0625          |
| TEF                                                                                             | 0,065368877 | -0,076049409 | 0,029 | 0,046 | 1           | 0,948651825   | 1,054127524     | 0,630434783     |
| TET2                                                                                            | 0,000944516 | -0,076060405 | 0,073 | 0,121 | 1           | 0,948644595   | 1,054135559     | 0,603305785     |
| MAGT1                                                                                           | 0,025989274 | -0,07610554  | 0,12  | 0,153 | 1           | 0,948614917   | 1,054168538     | 0,784313725     |
| MUC20                                                                                           | 0,000440833 | -0,076178139 | 0,001 | 0,018 | 1           | 0,948567182   | 1,054221587     | 0,055555556     |
| MFS14C                                                                                          | 0,0121874   | -0,076217064 | 0,047 | 0,076 | 1           | 0,94854159    | 1,054250031     | 0,618421053     |
| FAM120AOS                                                                                       | 0,022639691 | -0,076255203 | 0,077 | 0,107 | 1           | 0,948516514   | 1,054277902     | 0,719626168     |
| NHEJ1                                                                                           | 0,119785357 | -0,076261146 | 0,007 | 0,015 | 1           | 0,948512607   | 1,054282244     | 0,466666667     |
| CPSF1                                                                                           | 0,237478899 | -0,076286069 | 0,034 | 0,045 | 1           | 0,948496221   | 1,054300458     | 0,755555556     |
| OSGIN1                                                                                          | 0,035390592 | -0,076303169 | 0,008 | 0,02  | 1           | 0,948484979   | 1,054312954     | 0,4             |
| ADAMTSL4                                                                                        | 0,004639337 | -0,076305964 | 0,003 | 0,018 | 1           | 0,948483142   | 1,054314996     | 0,166666667     |
| PCGF1                                                                                           | 0,291765984 | -0,076343847 | 0,03  | 0,039 | 1           | 0,948458236   | 1,054342682     | 0,769230769     |
| AL445989.1                                                                                      | 0,092786707 | -0,07650334  | 0,005 | 0,012 | 1           | 0,948353387   | 1,054459248     | 0,416666667     |
| TTF2                                                                                            | 0,401889172 | -0,076504302 | 0,02  | 0,026 | 1           | 0,948352755   | 1,054459951     | 0,769230769     |
| PRKD3                                                                                           | 1,66665E-05 | -0,076516666 | 0,105 | 0,178 | 0,351678916 | 0,948344628   | 1,054468988     | 0,58988764      |
| DGKG                                                                                            | 0,001261386 | -0,076553678 | 0,005 | 0,023 | 1           | 0,948320299   | 1,05449604      | 0,217391304     |
| ZNF436-AS1                                                                                      | 0,000424012 | -0,076588466 | 0,008 | 0,033 | 1           | 0,948297432   | 1,054521468     | 0,242424242     |
| MED25                                                                                           | 0,522871505 | -0,076642094 | 0,042 | 0,047 | 1           | 0,948262182   | 1,054560667     | 0,893617021     |
| TNPO2                                                                                           | 0,293212744 | -0,076648112 | 0,058 | 0,069 | 1           | 0,948258227   | 1,054565066     | 0,84057971      |
| SMNDC1                                                                                          | 0,021338857 | -0,076704515 | 0,092 | 0,125 | 1           | 0,948221155   | 1,054606296     | 0,736           |
| TP53RK                                                                                          | 0,259542506 | -0,076742799 | 0,058 | 0,071 | 1           | 0,948195993   | 1,054634282     | 0,816901408     |
| HEXA                                                                                            | 0,04498515  | -0,076776991 | 0,119 | 0,148 | 1           | 0,94817352    | 1,054659278     | 0,804054054     |
| ST7L                                                                                            | 0,043148243 | -0,076846827 | 0,041 | 0,062 | 1           | 0,948127624   | 1,054710331     | 0,661290323     |
| USP30                                                                                           | 0,094624848 | -0,076864395 | 0,009 | 0,019 | 1           | 0,948116079   | 1,054723174     | 0,473684211     |

Supplementary Table 5

| Differentially expressed genes_total calculation_ comparing SC-Keloid vs. (SC-Myel, SC-Nonmyel) |             |              |       |       |           |               |                 |                 |
|-------------------------------------------------------------------------------------------------|-------------|--------------|-------|-------|-----------|---------------|-----------------|-----------------|
| gene                                                                                            | p_val       | avg_log2FC   | pct.1 | pct.2 | p_val_adj | Foldchange_UP | Foldchange_DOWN | Ratio_pct1_pct2 |
| SLC25A27                                                                                        | 0,005202323 | -0,076874133 | 0,002 | 0,015 | 1         | 0,948109679   | 1,054730294     | 0,133333333     |
| CEP170B                                                                                         | 0,10554115  | -0,076920072 | 0,023 | 0,037 | 1         | 0,948079489   | 1,054763879     | 0,621621622     |
| SCNN1D                                                                                          | 0,005571205 | -0,076935954 | 0,006 | 0,022 | 1         | 0,948069052   | 1,054775491     | 0,272727273     |
| QSER1                                                                                           | 0,025961817 | -0,076962789 | 0,08  | 0,111 | 1         | 0,948051418   | 1,054795111     | 0,720720721     |
| ZNF37A                                                                                          | 0,182046091 | -0,077017515 | 0,045 | 0,06  | 1         | 0,948015456   | 1,054835123     | 0,75            |
| NDST2                                                                                           | 0,283884964 | -0,077054239 | 0,008 | 0,014 | 1         | 0,947991324   | 1,054861974     | 0,571428571     |
| ADAT2                                                                                           | 0,028425946 | -0,0770894   | 0,022 | 0,041 | 1         | 0,94796822    | 1,054887683     | 0,536585366     |
| CHST7                                                                                           | 0,134829563 | -0,077145891 | 0,022 | 0,034 | 1         | 0,947931102   | 1,05492899      | 0,647058824     |
| SETD1A                                                                                          | 0,003911163 | -0,077158646 | 0,024 | 0,052 | 1         | 0,947922721   | 1,054938317     | 0,461538462     |
| RHEBL1                                                                                          | 0,009024221 | -0,077204407 | 0,006 | 0,02  | 1         | 0,947892655   | 1,054971779     | 0,3             |
| COASY                                                                                           | 0,679260365 | -0,077204663 | 0,052 | 0,056 | 1         | 0,947892486   | 1,054971966     | 0,928571429     |
| HMGA2                                                                                           | 0,000328784 | -0,077237315 | 0     | 0,015 | 1         | 0,947871033   | 1,054995843     | 0               |
| EHMT2                                                                                           | 0,024680758 | -0,077239276 | 0,041 | 0,065 | 1         | 0,947869745   | 1,054997277     | 0,630769231     |
| CTH                                                                                             | 0,00321618  | -0,077249012 | 0,008 | 0,027 | 1         | 0,947863348   | 1,055004397     | 0,296296296     |
| SMIM43                                                                                          | 0,002214594 | -0,07733085  | 0     | 0,011 | 1         | 0,947809581   | 1,055064245     | 0               |
| FRS2                                                                                            | 0,001814864 | -0,07733159  | 0,113 | 0,164 | 1         | 0,947809095   | 1,055064786     | 0,68902439      |
| HERC3                                                                                           | 0,000264353 | -0,077366317 | 0,008 | 0,034 | 1         | 0,947786281   | 1,055090183     | 0,235294118     |
| CTDSP1                                                                                          | 0,415782365 | -0,07741852  | 0,114 | 0,122 | 1         | 0,947751986   | 1,055128361     | 0,93442623      |
| UBE2D2                                                                                          | 8,37032E-05 | -0,077578662 | 0,254 | 0,345 | 1         | 0,94764679    | 1,055245489     | 0,736231884     |
| EIF2AK2                                                                                         | 0,331432331 | -0,077623519 | 0,136 | 0,149 | 1         | 0,947617325   | 1,0552783       | 0,912751678     |
| HK2                                                                                             | 0,001172881 | -0,077636533 | 0,008 | 0,03  | 1         | 0,947608777   | 1,055287819     | 0,266666667     |
| ECRG4                                                                                           | 0,111043206 | -0,07771003  | 0,03  | 0,018 | 1         | 0,947560503   | 1,055341581     | 1,666666667     |
| NOCT                                                                                            | 0,000494703 | -0,077710358 | 0,007 | 0,03  | 1         | 0,947560288   | 1,055341821     | 0,233333333     |
| GNL2                                                                                            | 0,192584534 | -0,07776091  | 0,069 | 0,084 | 1         | 0,947527086   | 1,055378801     | 0,821428571     |
| PDPR                                                                                            | 0,190738294 | -0,07780536  | 0,026 | 0,037 | 1         | 0,947497893   | 1,055411318     | 0,702702703     |
| SEC24A                                                                                          | 0,016065654 | -0,077822749 | 0,071 | 0,103 | 1         | 0,947486473   | 1,055424039     | 0,689320388     |
| NOD1                                                                                            | 0,001477406 | -0,077873839 | 0,007 | 0,027 | 1         | 0,94745292    | 1,055461416     | 0,259259259     |
| ACSS3                                                                                           | 0,025596929 | -0,077903163 | 0,019 | 0,037 | 1         | 0,947433662   | 1,055482869     | 0,513513514     |
| ADGRL1                                                                                          | 0,123683997 | -0,077997495 | 0,015 | 0,026 | 1         | 0,947371715   | 1,055551885     | 0,576923077     |
| LIN37                                                                                           | 0,001174822 | -0,078019197 | 0,008 | 0,03  | 1         | 0,947357465   | 1,055567763     | 0,266666667     |

Supplementary Table 5

| Differentially expressed genes_total calculation_ comparing SC-Keloid vs. (SC-Myel, SC-Nonmyel) |             |              |       |       |             |               |                 |                 |
|-------------------------------------------------------------------------------------------------|-------------|--------------|-------|-------|-------------|---------------|-----------------|-----------------|
| gene                                                                                            | p_val       | avg_log2FC   | pct.1 | pct.2 | p_val_adj   | Foldchange_UP | Foldchange_DOWN | Ratio_pct1_pct2 |
| DDX31                                                                                           | 0,138181234 | -0,07810937  | 0,009 | 0,018 | 1           | 0,947298254   | 1,055633742     | 0,5             |
| IZUMO4                                                                                          | 0,001457178 | -0,078133651 | 0,003 | 0,02  | 1           | 0,94728231    | 1,055651509     | 0,15            |
| ADCY3                                                                                           | 0,005405683 | -0,078182107 | 0,029 | 0,057 | 1           | 0,947250494   | 1,055686966     | 0,50877193      |
| C12orf4                                                                                         | 0,039314803 | -0,078198328 | 0,021 | 0,038 | 1           | 0,947239844   | 1,055698835     | 0,552631579     |
| CPNE3                                                                                           | 0,000738506 | -0,078202708 | 0,164 | 0,229 | 1           | 0,947236968   | 1,05570204      | 0,716157205     |
| NUP160                                                                                          | 0,000175026 | -0,078216459 | 0,052 | 0,102 | 1           | 0,94722794    | 1,055712103     | 0,509803922     |
| INTU                                                                                            | 0,017340091 | -0,078265311 | 0,035 | 0,06  | 1           | 0,947195866   | 1,055747851     | 0,583333333     |
| EBLN2                                                                                           | 0,019110613 | -0,07826838  | 0,02  | 0,039 | 1           | 0,947193851   | 1,055750097     | 0,512820513     |
| TAPBPL                                                                                          | 0,35081471  | -0,078287623 | 0,033 | 0,041 | 1           | 0,947181217   | 1,055764179     | 0,804878049     |
| ACOT2                                                                                           | 0,468667884 | -0,07842664  | 0,047 | 0,053 | 1           | 0,947089951   | 1,055865917     | 0,886792453     |
| ZNF330                                                                                          | 0,001373789 | -0,07855102  | 0,062 | 0,104 | 1           | 0,947008303   | 1,05595695      | 0,596153846     |
| GNL3L                                                                                           | 0,779652559 | -0,078554151 | 0,044 | 0,046 | 1           | 0,947006248   | 1,055959242     | 0,956521739     |
| TNKS1BP1                                                                                        | 0,0616339   | -0,078586625 | 0,061 | 0,083 | 1           | 0,946984932   | 1,055983011     | 0,734939759     |
| TNKS                                                                                            | 0,008207699 | -0,078630216 | 0,079 | 0,117 | 1           | 0,946956319   | 1,056014918     | 0,675213675     |
| ABCA5                                                                                           | 0,00281314  | -0,07866318  | 0,013 | 0,035 | 1           | 0,946934682   | 1,056039048     | 0,371428571     |
| VCAM1                                                                                           | 0,043932941 | -0,078665572 | 0,003 | 0,012 | 1           | 0,946933113   | 1,056040798     | 0,25            |
| LINC00639                                                                                       | 0,002214594 | -0,07871014  | 0     | 0,011 | 1           | 0,94690386    | 1,056073423     | 0               |
| CIART                                                                                           | 0,008746889 | -0,078747469 | 0,008 | 0,024 | 1           | 0,94687936    | 1,056100748     | 0,333333333     |
| COX19                                                                                           | 0,0135581   | -0,078846275 | 0,057 | 0,088 | 1           | 0,946814513   | 1,05617308      | 0,647727273     |
| PITRM1                                                                                          | 0,223661528 | -0,078920754 | 0,037 | 0,049 | 1           | 0,946765635   | 1,056227606     | 0,755102041     |
| AP5B1                                                                                           | 0,049699772 | -0,078975721 | 0,012 | 0,024 | 1           | 0,946729564   | 1,056267849     | 0,5             |
| NSG1                                                                                            | 0,017151955 | -0,078987333 | 0,002 | 0,012 | 1           | 0,946721944   | 1,056276351     | 0,166666667     |
| WDR73                                                                                           | 0,356858818 | -0,079004249 | 0,048 | 0,057 | 1           | 0,946710843   | 1,056288736     | 0,842105263     |
| YTHDF3                                                                                          | 0,060689076 | -0,079008802 | 0,092 | 0,118 | 1           | 0,946707855   | 1,05629207      | 0,779661017     |
| LIPE-AS1                                                                                        | 0,000250621 | -0,079011543 | 0,008 | 0,034 | 1           | 0,946706057   | 1,056294077     | 0,235294118     |
| KANK2                                                                                           | 0,002023713 | -0,079044745 | 0,172 | 0,233 | 1           | 0,946684269   | 1,056318387     | 0,738197425     |
| NRDC                                                                                            | 0,012217983 | -0,079053026 | 0,156 | 0,198 | 1           | 0,946678836   | 1,05632445      | 0,787878788     |
| GLS                                                                                             | 4,64938E-05 | -0,079078648 | 0,176 | 0,256 | 0,981066283 | 0,946662023   | 1,05634321      | 0,6875          |
| SPTBN4                                                                                          | 0,001548229 | -0,079108104 | 0,002 | 0,018 | 1           | 0,946642695   | 1,056364778     | 0,111111111     |
| CREBL2                                                                                          | 0,055557769 | -0,079145379 | 0,055 | 0,077 | 1           | 0,946618237   | 1,056392071     | 0,714285714     |



Supplementary Table 5

| Differentially expressed genes_total calculation_ comparing SC-Keloid vs. (SC-Myel, SC-Nonmyel) |             |              |       |       |           |               |                 |                 |
|-------------------------------------------------------------------------------------------------|-------------|--------------|-------|-------|-----------|---------------|-----------------|-----------------|
| gene                                                                                            | p_val       | avg_log2FC   | pct.1 | pct.2 | p_val_adj | Foldchange_UP | Foldchange_DOWN | Ratio_pct1_pct2 |
| AARS2                                                                                           | 0,033469554 | -0,079160612 | 0,005 | 0,015 | 1         | 0,946608242   | 1,056403226     | 0,333333333     |
| VMAC                                                                                            | 0,122182592 | -0,079174646 | 0,014 | 0,024 | 1         | 0,946599033   | 1,056413502     | 0,583333333     |
| ZHX2                                                                                            | 0,00696659  | -0,079175419 | 0,007 | 0,023 | 1         | 0,946598526   | 1,056414068     | 0,304347826     |
| PLEKHF2                                                                                         | 0,001213917 | -0,079219954 | 0,076 | 0,122 | 1         | 0,946569306   | 1,05644668      | 0,62295082      |
| CFAP91                                                                                          | 4,99915E-05 | -0,079231641 | 0     | 0,019 | 1         | 0,946561638   | 1,056455238     | 0               |
| AAMP                                                                                            | 0,015791526 | -0,079245184 | 0,107 | 0,142 | 1         | 0,946552752   | 1,056465155     | 0,753521127     |
| ARVCF                                                                                           | 0,003780197 | -0,079309612 | 0,012 | 0,033 | 1         | 0,946510482   | 1,056512336     | 0,363636364     |
| FAM219B                                                                                         | 0,109134264 | -0,07932129  | 0,054 | 0,072 | 1         | 0,946502821   | 1,056520887     | 0,75            |
| SH2B1                                                                                           | 0,053051482 | -0,079326418 | 0,047 | 0,068 | 1         | 0,946499456   | 1,056524643     | 0,691176471     |
| TMEM167B                                                                                        | 0,122332783 | -0,079362478 | 0,056 | 0,073 | 1         | 0,946475799   | 1,056551051     | 0,767123288     |
| WNT2B                                                                                           | 0,003902641 | -0,079362798 | 0,012 | 0,033 | 1         | 0,946475589   | 1,056551285     | 0,363636364     |
| NOMO1                                                                                           | 0,703085761 | -0,079386677 | 0,05  | 0,045 | 1         | 0,946459924   | 1,056568773     | 1,111111111     |
| NF1                                                                                             | 0,298618722 | -0,079408567 | 0,129 | 0,141 | 1         | 0,946445563   | 1,056584804     | 0,914893617     |
| CREB3L2                                                                                         | 0,002618514 | -0,079480679 | 0,233 | 0,296 | 1         | 0,946398257   | 1,056637619     | 0,787162162     |
| OAZ1                                                                                            | 0,000856566 | -0,079482648 | 0,568 | 0,779 | 1         | 0,946396965   | 1,056639061     | 0,729139923     |
| H2BC18                                                                                          | 0,008920312 | -0,079559042 | 0,006 | 0,02  | 1         | 0,946346853   | 1,056695013     | 0,3             |
| PPP2R5B                                                                                         | 0,770468649 | -0,079602982 | 0,049 | 0,045 | 1         | 0,94631803    | 1,056727198     | 1,088888889     |
| CBR4                                                                                            | 0,033258687 | -0,079606428 | 0,045 | 0,069 | 1         | 0,94631577    | 1,056729722     | 0,652173913     |
| MAOB                                                                                            | 6,62501E-05 | -0,079705038 | 0,001 | 0,022 | 1         | 0,94625109    | 1,056801953     | 0,045454545     |
| SPIN1                                                                                           | 0,000156961 | -0,079757768 | 0,09  | 0,149 | 1         | 0,946216505   | 1,05684058      | 0,604026846     |
| IKZF5                                                                                           | 0,0003937   | -0,079775265 | 0,042 | 0,084 | 1         | 0,94620503    | 1,056853397     | 0,5             |
| NAB1                                                                                            | 0,197426823 | -0,079821839 | 0,061 | 0,075 | 1         | 0,946174484   | 1,056887516     | 0,813333333     |
| CRAMP1                                                                                          | 0,024720438 | -0,079838623 | 0,027 | 0,047 | 1         | 0,946163477   | 1,056899811     | 0,574468085     |
| TNIP2                                                                                           | 0,055287863 | -0,079897452 | 0,084 | 0,11  | 1         | 0,946124896   | 1,05694291      | 0,763636364     |
| NBPF14                                                                                          | 0,414173879 | -0,079966411 | 0,014 | 0,019 | 1         | 0,946079673   | 1,056993431     | 0,736842105     |
| AMZ2                                                                                            | 0,530431395 | -0,07999139  | 0,069 | 0,075 | 1         | 0,946063293   | 1,057011733     | 0,92            |
| MAPK8IP3                                                                                        | 0,094732695 | -0,080004204 | 0,043 | 0,061 | 1         | 0,94605489    | 1,05702112      | 0,704918033     |
| PLPP2                                                                                           | 0,002821704 | -0,080050671 | 0,002 | 0,016 | 1         | 0,946024419   | 1,057055167     | 0,125           |
| SLC2A8                                                                                          | 0,029671279 | -0,080102258 | 0,058 | 0,084 | 1         | 0,945990593   | 1,057092964     | 0,69047619      |
| LGALS7                                                                                          | 0,000822944 | -0,080104596 | 0,001 | 0,016 | 1         | 0,94598906    | 1,057094677     | 0,0625          |

Supplementary Table 5

| Differentially expressed genes_total calculation_ comparing SC-Keloid vs. (SC-Myel, SC-Nonmyel) |             |              |       |       |             |               |                 |                 |
|-------------------------------------------------------------------------------------------------|-------------|--------------|-------|-------|-------------|---------------|-----------------|-----------------|
| gene                                                                                            | p_val       | avg_log2FC   | pct.1 | pct.2 | p_val_adj   | Foldchange_UP | Foldchange_DOWN | Ratio_pct1_pct2 |
| IDO1                                                                                            | 0,009916339 | -0,080186719 | 0,001 | 0,011 | 1           | 0,945935212   | 1,057154853     | 0,090909091     |
| PDE4DIP                                                                                         | 0,008129449 | -0,080429236 | 0,056 | 0,09  | 1           | 0,945776214   | 1,057332575     | 0,622222222     |
| POLDIP3                                                                                         | 0,021750907 | -0,08044364  | 0,08  | 0,111 | 1           | 0,945766771   | 1,057343132     | 0,720720721     |
| SDAD1                                                                                           | 0,598808247 | -0,080467061 | 0,063 | 0,068 | 1           | 0,945751418   | 1,057360297     | 0,926470588     |
| SP1                                                                                             | 0,035347266 | -0,080534037 | 0,051 | 0,076 | 1           | 0,945707513   | 1,057409385     | 0,671052632     |
| PRRC2C                                                                                          | 1,73921E-05 | -0,080586271 | 0,32  | 0,431 | 0,366991673 | 0,945673273   | 1,057447671     | 0,742459397     |
| FAM98C                                                                                          | 0,30043142  | -0,080678844 | 0,069 | 0,08  | 1           | 0,945612595   | 1,057515526     | 0,8625          |
| NCKAP5L                                                                                         | 0,347767868 | -0,08067926  | 0,056 | 0,065 | 1           | 0,945612322   | 1,057515831     | 0,861538462     |
| RTF2                                                                                            | 0,005604222 | -0,080696001 | 0,163 | 0,213 | 1           | 0,945601349   | 1,057528102     | 0,765258216     |
| CDK5RAP1                                                                                        | 0,141229752 | -0,080730012 | 0,037 | 0,052 | 1           | 0,945579057   | 1,057553033     | 0,711538462     |
| GRIN2C                                                                                          | 0,009892254 | -0,08073037  | 0,001 | 0,011 | 1           | 0,945578823   | 1,057553295     | 0,090909091     |
| RNF25                                                                                           | 0,238834721 | -0,080741934 | 0,022 | 0,031 | 1           | 0,945571243   | 1,057561773     | 0,709677419     |
| SDHAF1                                                                                          | 0,359622912 | -0,080830054 | 0,055 | 0,064 | 1           | 0,94551349    | 1,05762637      | 0,859375        |
| EPS15L1                                                                                         | 0,708589782 | -0,081024787 | 0,044 | 0,039 | 1           | 0,945385874   | 1,057769137     | 1,128205128     |
| BCAT2                                                                                           | 0,922569472 | -0,081025106 | 0,056 | 0,053 | 1           | 0,945385665   | 1,057769371     | 1,056603774     |
| NCOA5                                                                                           | 0,128632701 | -0,081027082 | 0,016 | 0,027 | 1           | 0,94538437    | 1,05777082      | 0,592592593     |
| DYNLT2                                                                                          | 0,000800396 | -0,081116336 | 0,001 | 0,016 | 1           | 0,945325884   | 1,057836262     | 0,0625          |
| RABGAP1L                                                                                        | 0,003811614 | -0,081117367 | 0,047 | 0,081 | 1           | 0,945325209   | 1,057837018     | 0,580246914     |
| TTC5                                                                                            | 0,429985527 | -0,081133069 | 0,034 | 0,041 | 1           | 0,94531492    | 1,057848531     | 0,829268293     |
| LINC01001                                                                                       | 0,033253229 | -0,081143508 | 0,005 | 0,015 | 1           | 0,94530808    | 1,057856186     | 0,333333333     |
| KATNA1                                                                                          | 0,011102873 | -0,081172822 | 0,073 | 0,107 | 1           | 0,945288872   | 1,057877681     | 0,682242991     |
| CDC42EP2                                                                                        | 0,035015734 | -0,081178609 | 0,008 | 0,02  | 1           | 0,945285081   | 1,057881923     | 0,4             |
| KLHL34                                                                                          | 0,001258956 | -0,081210297 | 0,005 | 0,023 | 1           | 0,945264318   | 1,05790516      | 0,217391304     |
| SLC12A9                                                                                         | 0,080401308 | -0,081228969 | 0,024 | 0,039 | 1           | 0,945252085   | 1,057918852     | 0,615384615     |
| ARL17B                                                                                          | 0,007928701 | -0,081251314 | 0,01  | 0,028 | 1           | 0,945237444   | 1,057935237     | 0,357142857     |
| PPP4R3A                                                                                         | 0,001496679 | -0,081412696 | 0,104 | 0,153 | 1           | 0,945131714   | 1,058053586     | 0,679738562     |
| PON3                                                                                            | 0,000258257 | -0,081508794 | 0,002 | 0,022 | 1           | 0,945068762   | 1,058124065     | 0,090909091     |
| ACOX2                                                                                           | 0,005660001 | -0,08151792  | 0,012 | 0,031 | 1           | 0,945062783   | 1,058130759     | 0,387096774     |
| FAM81A                                                                                          | 0,002802534 | -0,081616074 | 0,001 | 0,014 | 1           | 0,944998488   | 1,058202751     | 0,071428571     |
| HERPUD2                                                                                         | 0,156361982 | -0,081682492 | 0,051 | 0,066 | 1           | 0,944954983   | 1,05825147      | 0,772727273     |

Supplementary Table 5

| Differentially expressed genes_total calculation_ comparing SC-Keloid vs. (SC-Myel, SC-Nonmyel) |             |              |       |       |           |               |                 |                 |
|-------------------------------------------------------------------------------------------------|-------------|--------------|-------|-------|-----------|---------------|-----------------|-----------------|
| gene                                                                                            | p_val       | avg_log2FC   | pct.1 | pct.2 | p_val_adj | Foldchange_UP | Foldchange_DOWN | Ratio_pct1_pct2 |
| LRP1B                                                                                           | 0,02538965  | -0,081742077 | 0,006 | 0,018 | 1         | 0,944915957   | 1,058295177     | 0,333333333     |
| EIF2A                                                                                           | 0,029043702 | -0,081771059 | 0,143 | 0,175 | 1         | 0,944896975   | 1,058316437     | 0,817142857     |
| MTERF2                                                                                          | 0,11156936  | -0,081806201 | 0,043 | 0,06  | 1         | 0,944873959   | 1,058342217     | 0,716666667     |
| AMOT                                                                                            | 0,005207739 | -0,081944594 | 0,01  | 0,03  | 1         | 0,944783324   | 1,058443745     | 0,333333333     |
| CCNYL1                                                                                          | 0,01509848  | -0,081973722 | 0,022 | 0,043 | 1         | 0,94476425    | 1,058465115     | 0,511627907     |
| HSD17B7                                                                                         | 0,101912102 | -0,08199844  | 0,021 | 0,034 | 1         | 0,944748063   | 1,05848325      | 0,617647059     |
| TRIM9                                                                                           | 0,022906551 | -0,082097237 | 0,023 | 0,043 | 1         | 0,944683368   | 1,058555738     | 0,534883721     |
| UCK1                                                                                            | 0,570427704 | -0,082146172 | 0,056 | 0,061 | 1         | 0,944651325   | 1,058591645     | 0,918032787     |
| EIF2S3                                                                                          | 0,00057227  | -0,082221452 | 0,162 | 0,227 | 1         | 0,944602034   | 1,058646884     | 0,713656388     |
| PUM2                                                                                            | 0,054874636 | -0,082319948 | 0,102 | 0,129 | 1         | 0,944537546   | 1,058719162     | 0,790697674     |
| MED27                                                                                           | 0,309652163 | -0,082392564 | 0,055 | 0,065 | 1         | 0,944490006   | 1,058772452     | 0,846153846     |
| ASRGL1                                                                                          | 0,000267902 | -0,082412694 | 0,013 | 0,042 | 1         | 0,944476827   | 1,058787226     | 0,30952381      |
| ZNF708                                                                                          | 0,000152733 | -0,082416415 | 0,028 | 0,068 | 1         | 0,944474391   | 1,058789957     | 0,411764706     |
| TRMU                                                                                            | 0,445322915 | -0,082447324 | 0,04  | 0,046 | 1         | 0,944454157   | 1,058812641     | 0,869565217     |
| LRP10                                                                                           | 0,002594908 | -0,082547709 | 0,159 | 0,21  | 1         | 0,944388443   | 1,058886317     | 0,757142857     |
| UFSP2                                                                                           | 0,57877311  | -0,082554661 | 0,127 | 0,13  | 1         | 0,944383892   | 1,05889142      | 0,976923077     |
| AJAP1                                                                                           | 0,000123354 | -0,082562823 | 0,001 | 0,02  | 1         | 0,944378549   | 1,058897411     | 0,05            |
| EPOP                                                                                            | 0,015175021 | -0,082565383 | 0,006 | 0,019 | 1         | 0,944376873   | 1,058899289     | 0,315789474     |
| MSMO1                                                                                           | 0,332703278 | -0,082605643 | 0,081 | 0,094 | 1         | 0,94435052    | 1,05892884      | 0,861702128     |
| GAPVD1                                                                                          | 0,084973942 | -0,08261113  | 0,113 | 0,137 | 1         | 0,944346928   | 1,058932867     | 0,824817518     |
| ARFGF2                                                                                          | 0,03010131  | -0,082660752 | 0,022 | 0,041 | 1         | 0,944314448   | 1,05896929      | 0,536585366     |
| WDR4                                                                                            | 0,260186678 | -0,08267401  | 0,006 | 0,011 | 1         | 0,94430577    | 1,058979021     | 0,545454545     |
| SETDB2                                                                                          | 0,077904664 | -0,082719652 | 0,022 | 0,037 | 1         | 0,944275895   | 1,059012525     | 0,594594595     |
| GTF3C5                                                                                          | 0,212521333 | -0,082807892 | 0,042 | 0,054 | 1         | 0,944218142   | 1,0590773       | 0,777777778     |
| HLA-F                                                                                           | 0,054550478 | -0,082880883 | 0,078 | 0,103 | 1         | 0,944170372   | 1,059130883     | 0,757281553     |
| PNPLA7                                                                                          | 4,99915E-05 | -0,082914668 | 0     | 0,019 | 1         | 0,944148262   | 1,059155686     | 0               |
| C7orf25                                                                                         | 0,156823811 | -0,082921415 | 0,013 | 0,022 | 1         | 0,944143846   | 1,05916064      | 0,590909091     |
| FAM227B                                                                                         | 0,056902048 | -0,08301181  | 0,014 | 0,027 | 1         | 0,944084691   | 1,059227006     | 0,518518519     |
| OTULIN                                                                                          | 0,132155168 | -0,083012652 | 0,054 | 0,071 | 1         | 0,94408414    | 1,059227624     | 0,76056338      |
| PICK1                                                                                           | 0,067503672 | -0,083056163 | 0,034 | 0,052 | 1         | 0,944055667   | 1,05925957      | 0,653846154     |

Supplementary Table 5

| Differentially expressed genes_total calculation_ comparing SC-Keloid vs. (SC-Myel, SC-Nonmyel) |             |              |       |       |             |               |                 |                 |
|-------------------------------------------------------------------------------------------------|-------------|--------------|-------|-------|-------------|---------------|-----------------|-----------------|
| gene                                                                                            | p_val       | avg_log2FC   | pct.1 | pct.2 | p_val_adj   | Foldchange_UP | Foldchange_DOWN | Ratio_pct1_pct2 |
| FAM133B                                                                                         | 0,000154563 | -0,083114312 | 0,268 | 0,355 | 1           | 0,944017617   | 1,059302265     | 0,754929577     |
| RHOU                                                                                            | 0,000462334 | -0,083131429 | 0,003 | 0,023 | 1           | 0,944006417   | 1,059314833     | 0,130434783     |
| CWC22                                                                                           | 0,066469633 | -0,083196238 | 0,057 | 0,079 | 1           | 0,94396401    | 1,059362422     | 0,721518987     |
| CNTROB                                                                                          | 0,019401376 | -0,083282402 | 0,02  | 0,039 | 1           | 0,943907635   | 1,059425693     | 0,512820513     |
| PCNX3                                                                                           | 0,627270245 | -0,083291049 | 0,03  | 0,034 | 1           | 0,943901977   | 1,059432043     | 0,882352941     |
| ZNF653                                                                                          | 0,411525367 | -0,083330446 | 0,013 | 0,018 | 1           | 0,943876202   | 1,059460974     | 0,722222222     |
| LSM14B                                                                                          | 0,02478512  | -0,083336269 | 0,027 | 0,047 | 1           | 0,943872392   | 1,05946525      | 0,574468085     |
| THOC6                                                                                           | 0,236556511 | -0,08334251  | 0,061 | 0,073 | 1           | 0,943868309   | 1,059469834     | 0,835616438     |
| CASP9                                                                                           | 0,140585729 | -0,083364189 | 0,024 | 0,037 | 1           | 0,943854126   | 1,059485754     | 0,648648649     |
| DMXL2                                                                                           | 0,039193718 | -0,083402492 | 0,031 | 0,052 | 1           | 0,943829067   | 1,059513883     | 0,596153846     |
| MRPS31                                                                                          | 0,005368888 | -0,083424601 | 0,05  | 0,084 | 1           | 0,943814603   | 1,05953012      | 0,595238095     |
| GNL1                                                                                            | 0,280330658 | -0,083497371 | 0,102 | 0,115 | 1           | 0,943766998   | 1,059583565     | 0,886956522     |
| SPOPL                                                                                           | 0,024562229 | -0,083510537 | 0,047 | 0,072 | 1           | 0,943758386   | 1,059593234     | 0,652777778     |
| ABCE1                                                                                           | 0,036079456 | -0,083557833 | 0,12  | 0,151 | 1           | 0,943727447   | 1,059627971     | 0,794701987     |
| DCTN6                                                                                           | 0,000114325 | -0,083568533 | 0,198 | 0,277 | 1           | 0,943720447   | 1,059635831     | 0,714801444     |
| HUS1B                                                                                           | 0,001496476 | -0,083623445 | 0,001 | 0,015 | 1           | 0,943684528   | 1,059676163     | 0,066666667     |
| SYT8                                                                                            | 0,002214594 | -0,083739652 | 0     | 0,011 | 1           | 0,943608519   | 1,059761522     | 0               |
| TNFRSF1B                                                                                        | 0,000251908 | -0,08378981  | 0,005 | 0,027 | 1           | 0,943575713   | 1,059798367     | 0,185185185     |
| PDLIM5                                                                                          | 0,015743645 | -0,083836295 | 0,085 | 0,119 | 1           | 0,943545311   | 1,059832515     | 0,714285714     |
| CHST15                                                                                          | 0,005146305 | -0,083836695 | 0,002 | 0,015 | 1           | 0,943545049   | 1,05983281      | 0,133333333     |
| LRRC4B                                                                                          | 0,000458156 | -0,083881363 | 0,002 | 0,02  | 1           | 0,943515836   | 1,059865624     | 0,1             |
| SAP30L                                                                                          | 0,018456709 | -0,083967611 | 0,07  | 0,1   | 1           | 0,943459432   | 1,059928987     | 0,7             |
| BAZ2B                                                                                           | 0,000680871 | -0,084047622 | 0,107 | 0,163 | 1           | 0,943407109   | 1,059987772     | 0,656441718     |
| PRKCE                                                                                           | 1,8295E-05  | -0,084068666 | 0,008 | 0,041 | 0,386041879 | 0,943393348   | 1,060003234     | 0,195121951     |
| SUSD6                                                                                           | 0,023001855 | -0,084073951 | 0,041 | 0,065 | 1           | 0,943389892   | 1,060007117     | 0,630769231     |
| NINJ1                                                                                           | 0,020659195 | -0,084095249 | 0,182 | 0,221 | 1           | 0,943375966   | 1,060022765     | 0,823529412     |
| LAMC1                                                                                           | 3,39259E-06 | -0,084097271 | 0,241 | 0,35  | 0,071587099 | 0,943374644   | 1,060024251     | 0,688571429     |
| NOP2                                                                                            | 0,05515537  | -0,084286644 | 0,022 | 0,038 | 1           | 0,943250821   | 1,060163402     | 0,578947368     |
| HAUS3                                                                                           | 0,416400902 | -0,084433967 | 0,047 | 0,054 | 1           | 0,943154505   | 1,060271668     | 0,87037037      |
| GLMP                                                                                            | 0,48302573  | -0,084453622 | 0,066 | 0,056 | 1           | 0,943141655   | 1,060286113     | 1,178571429     |

Supplementary Table 5

| Differentially expressed genes_total calculation_ comparing SC-Keloid vs. (SC-Myel, SC-Nonmyel) |             |              |       |       |             |               |                 |                 |
|-------------------------------------------------------------------------------------------------|-------------|--------------|-------|-------|-------------|---------------|-----------------|-----------------|
| gene                                                                                            | p_val       | avg_log2FC   | pct.1 | pct.2 | p_val_adj   | Foldchange_UP | Foldchange_DOWN | Ratio_pct1_pct2 |
| STS                                                                                             | 0,008340754 | -0,08455014  | 0,01  | 0,028 | 1           | 0,94307856    | 1,06035705      | 0,357142857     |
| DCUN1D4                                                                                         | 0,010922961 | -0,084583428 | 0,041 | 0,069 | 1           | 0,9430568     | 1,060381516     | 0,594202899     |
| EIF3J-DT                                                                                        | 0,001280342 | -0,084635053 | 0,036 | 0,072 | 1           | 0,943023055   | 1,060419461     | 0,5             |
| GABRB3                                                                                          | 7,69825E-06 | -0,084674133 | 0     | 0,023 | 0,162440745 | 0,94299751    | 1,060448187     | 0               |
| OPCML                                                                                           | 0,000328784 | -0,084716473 | 0     | 0,015 | 1           | 0,942969836   | 1,060479309     | 0               |
| NAPB                                                                                            | 0,000404042 | -0,084779003 | 0,008 | 0,033 | 1           | 0,942928966   | 1,060525274     | 0,242424242     |
| APOL2                                                                                           | 0,106826365 | -0,084785767 | 0,034 | 0,049 | 1           | 0,942924545   | 1,060530247     | 0,693877551     |
| PLIN3                                                                                           | 0,318968813 | -0,084796544 | 0,148 | 0,159 | 1           | 0,942917502   | 1,060538168     | 0,93081761      |
| PPOX                                                                                            | 0,061300651 | -0,084803712 | 0,027 | 0,043 | 1           | 0,942912816   | 1,060543438     | 0,627906977     |
| ME1                                                                                             | 0,076046282 | -0,084807683 | 0,007 | 0,016 | 1           | 0,942910221   | 1,060546357     | 0,4375          |
| GCA                                                                                             | 0,004840602 | -0,0849277   | 0,038 | 0,069 | 1           | 0,942831784   | 1,060634587     | 0,550724638     |
| PABIR2                                                                                          | 0,46581807  | -0,08497008  | 0,04  | 0,046 | 1           | 0,942804088   | 1,060665744     | 0,869565217     |
| LMO2                                                                                            | 0,149903322 | -0,084980544 | 0,005 | 0,011 | 1           | 0,94279725    | 1,060673437     | 0,454545455     |
| WDR5                                                                                            | 0,697165372 | -0,085122458 | 0,043 | 0,046 | 1           | 0,942704515   | 1,060777778     | 0,934782609     |
| TNXB                                                                                            | 0,122877316 | -0,085149225 | 0,007 | 0,015 | 1           | 0,942687024   | 1,060797459     | 0,466666667     |
| TMEM140                                                                                         | 0,00885559  | -0,085153207 | 0,015 | 0,035 | 1           | 0,942684422   | 1,060800387     | 0,428571429     |
| NADK2                                                                                           | 0,060132083 | -0,085216394 | 0,026 | 0,042 | 1           | 0,942643136   | 1,060846849     | 0,619047619     |
| ADPGK                                                                                           | 0,388368391 | -0,085331893 | 0,073 | 0,083 | 1           | 0,942567673   | 1,060931781     | 0,879518072     |
| LONP2                                                                                           | 0,093982013 | -0,085476908 | 0,071 | 0,092 | 1           | 0,942472933   | 1,061038428     | 0,77173913      |
| DENND2C                                                                                         | 0,17170214  | -0,085511666 | 0,015 | 0,024 | 1           | 0,942450227   | 1,061063992     | 0,625           |
| IRX5                                                                                            | 0,043476948 | -0,085551087 | 0,003 | 0,012 | 1           | 0,942424476   | 1,061092985     | 0,25            |
| MSI1                                                                                            | 0,000175145 | -0,085557178 | 0     | 0,016 | 1           | 0,942420497   | 1,061097465     | 0               |
| CCDC71L                                                                                         | 0,474385307 | -0,08559328  | 0,086 | 0,094 | 1           | 0,942396914   | 1,061124018     | 0,914893617     |
| KIAA0040                                                                                        | 0,000606498 | -0,085595573 | 0,006 | 0,027 | 1           | 0,942395416   | 1,061125704     | 0,222222222     |
| GRAMD2A                                                                                         | 0,05613867  | -0,085809575 | 0,005 | 0,014 | 1           | 0,942255637   | 1,061283118     | 0,357142857     |
| SELENOO                                                                                         | 0,843533626 | -0,085814948 | 0,031 | 0,033 | 1           | 0,942252127   | 1,061287071     | 0,939393939     |
| GSAP                                                                                            | 0,162029809 | -0,085860238 | 0,013 | 0,022 | 1           | 0,942222548   | 1,061320388     | 0,590909091     |
| HEPH                                                                                            | 0,006555008 | -0,085862104 | 0,027 | 0,053 | 1           | 0,942221329   | 1,06132176      | 0,509433962     |
| POT1                                                                                            | 0,006767185 | -0,085878844 | 0,013 | 0,033 | 1           | 0,942210396   | 1,061334076     | 0,393939394     |
| UST                                                                                             | 0,004960035 | -0,085897311 | 0,01  | 0,03  | 1           | 0,942198336   | 1,061347661     | 0,333333333     |

Supplementary Table 5

| Differentially expressed genes_total calculation_ comparing SC-Keloid vs. (SC-Myel, SC-Nonmyel) |             |              |       |       |           |               |                 |                 |
|-------------------------------------------------------------------------------------------------|-------------|--------------|-------|-------|-----------|---------------|-----------------|-----------------|
| gene                                                                                            | p_val       | avg_log2FC   | pct.1 | pct.2 | p_val_adj | Foldchange_UP | Foldchange_DOWN | Ratio_pct1_pct2 |
| SP100                                                                                           | 0,000783941 | -0,085929985 | 0,143 | 0,202 | 1         | 0,942176998   | 1,061371698     | 0,707920792     |
| RPL37A                                                                                          | 0,003716072 | -0,085955811 | 0,768 | 0,908 | 1         | 0,942160131   | 1,061390699     | 0,845814978     |
| HEY2                                                                                            | 0,000416926 | -0,085976278 | 0,005 | 0,026 | 1         | 0,942146765   | 1,061405757     | 0,192307692     |
| IMMP2L                                                                                          | 0,007699989 | -0,086031294 | 0,019 | 0,041 | 1         | 0,942110838   | 1,061446233     | 0,463414634     |
| IFT172                                                                                          | 0,062910089 | -0,086097687 | 0,009 | 0,02  | 1         | 0,942067483   | 1,061495082     | 0,45            |
| MIGA1                                                                                           | 0,046635415 | -0,086143695 | 0,066 | 0,092 | 1         | 0,942037441   | 1,061528934     | 0,717391304     |
| INPP5A                                                                                          | 0,465627695 | -0,086153231 | 0,04  | 0,046 | 1         | 0,942031214   | 1,06153595      | 0,869565217     |
| FGF18                                                                                           | 0,159121713 | -0,086223388 | 0,013 | 0,022 | 1         | 0,941985405   | 1,061587573     | 0,590909091     |
| GJB6                                                                                            | 9,34934E-05 | -0,08626338  | 0     | 0,018 | 1         | 0,941959293   | 1,061617001     | 0               |
| CDC14A                                                                                          | 0,001385829 | -0,086399981 | 0,021 | 0,05  | 1         | 0,941870108   | 1,061717525     | 0,42            |
| ZNF507                                                                                          | 0,007998048 | -0,08646891  | 0,033 | 0,06  | 1         | 0,941825109   | 1,061768252     | 0,55            |
| GKAP1                                                                                           | 0,000865986 | -0,086484603 | 0,002 | 0,019 | 1         | 0,941814864   | 1,061779802     | 0,105263158     |
| PMF1                                                                                            | 0,244937835 | -0,086501601 | 0,098 | 0,111 | 1         | 0,941803768   | 1,061792312     | 0,882882883     |
| RAB3D                                                                                           | 0,035959298 | -0,086519634 | 0,008 | 0,02  | 1         | 0,941791995   | 1,061805585     | 0,4             |
| RPRD1B                                                                                          | 0,27672688  | -0,086615807 | 0,036 | 0,046 | 1         | 0,941729216   | 1,061876369     | 0,782608696     |
| BTD                                                                                             | 0,016472245 | -0,086662133 | 0,042 | 0,068 | 1         | 0,941698977   | 1,061910467     | 0,617647059     |
| LTN1                                                                                            | 0,049558513 | -0,086836639 | 0,093 | 0,121 | 1         | 0,941585077   | 1,062038921     | 0,768595041     |
| ZNF76                                                                                           | 0,014279321 | -0,086837073 | 0,023 | 0,045 | 1         | 0,941584794   | 1,062039241     | 0,511111111     |
| SULT1C4                                                                                         | 0,006902596 | -0,086921835 | 0,005 | 0,019 | 1         | 0,941529475   | 1,062101641     | 0,263157895     |
| FAM3A                                                                                           | 0,987034948 | -0,087032506 | 0,084 | 0,08  | 1         | 0,941457252   | 1,062183119     | 1,05            |
| DUOX1                                                                                           | 0,00023661  | -0,087033031 | 0,005 | 0,027 | 1         | 0,941456909   | 1,062183505     | 0,185185185     |
| ZNF438                                                                                          | 0,143240133 | -0,087058838 | 0,009 | 0,018 | 1         | 0,941440069   | 1,062202506     | 0,5             |
| CDK17                                                                                           | 0,02731249  | -0,087116172 | 0,043 | 0,068 | 1         | 0,941402656   | 1,062244719     | 0,632352941     |
| SPG7                                                                                            | 0,054923568 | -0,087140547 | 0,111 | 0,138 | 1         | 0,94138675    | 1,062262667     | 0,804347826     |
| TDRD3                                                                                           | 0,034379198 | -0,08714297  | 0,066 | 0,094 | 1         | 0,94138517    | 1,062264451     | 0,70212766      |
| ZNF275                                                                                          | 0,049459243 | -0,087235205 | 0,019 | 0,034 | 1         | 0,941324986   | 1,062332366     | 0,558823529     |
| LIAS                                                                                            | 0,389730865 | -0,087296546 | 0,04  | 0,047 | 1         | 0,941284963   | 1,062377536     | 0,85106383      |
| DGLUCY                                                                                          | 0,009039154 | -0,087317705 | 0,006 | 0,02  | 1         | 0,941271159   | 1,062393117     | 0,3             |
| HHIPL1                                                                                          | 0,010794454 | -0,087320448 | 0,009 | 0,026 | 1         | 0,941269369   | 1,062395137     | 0,346153846     |
| BRD3                                                                                            | 0,018937083 | -0,087336057 | 0,118 | 0,153 | 1         | 0,941259185   | 1,062406632     | 0,77124183      |

Supplementary Table 5

| Differentially expressed genes_total calculation_ comparing SC-Keloid vs. (SC-Myel, SC-Nonmyel) |             |              |       |       |             |               |                 |                 |
|-------------------------------------------------------------------------------------------------|-------------|--------------|-------|-------|-------------|---------------|-----------------|-----------------|
| gene                                                                                            | p_val       | avg_log2FC   | pct.1 | pct.2 | p_val_adj   | Foldchange_UP | Foldchange_DOWN | Ratio_pct1_pct2 |
| WDR33                                                                                           | 0,013641074 | -0,087477144 | 0,128 | 0,167 | 1           | 0,94116714    | 1,062510534     | 0,766467066     |
| UBE2Z                                                                                           | 0,161884702 | -0,087501491 | 0,136 | 0,155 | 1           | 0,941151257   | 1,062528465     | 0,877419355     |
| APLP1                                                                                           | 0,002375308 | -0,087507831 | 0,009 | 0,03  | 1           | 0,941147121   | 1,062533134     | 0,3             |
| PDCD4                                                                                           | 6,74081E-07 | -0,087520237 | 0,087 | 0,17  | 0,014223778 | 0,941139028   | 1,062542271     | 0,511764706     |
| SLC22A4                                                                                         | 0,29786623  | -0,087582412 | 0,01  | 0,016 | 1           | 0,941098469   | 1,062588064     | 0,625           |
| FSD1L                                                                                           | 0,000735792 | -0,087591758 | 0,016 | 0,045 | 1           | 0,941092373   | 1,062594947     | 0,355555556     |
| RFX3                                                                                            | 0,00433169  | -0,087595141 | 0,051 | 0,087 | 1           | 0,941090166   | 1,062597439     | 0,586206897     |
| BRPF3                                                                                           | 0,002941625 | -0,087598279 | 0,033 | 0,064 | 1           | 0,941088119   | 1,06259975      | 0,515625        |
| CKS2                                                                                            | 0,001063196 | -0,08764768  | 0,105 | 0,159 | 1           | 0,941055895   | 1,062636136     | 0,660377358     |
| FRAS1                                                                                           | 0,000618779 | -0,087710743 | 0     | 0,014 | 1           | 0,94101476    | 1,062682587     | 0               |
| HPR                                                                                             | 4,99915E-05 | -0,087718619 | 0     | 0,019 | 1           | 0,941009623   | 1,062688389     | 0               |
| MADD                                                                                            | 0,014115028 | -0,087793554 | 0,022 | 0,043 | 1           | 0,940960747   | 1,062743588     | 0,511627907     |
| AC016831.7                                                                                      | 3,74406E-05 | -0,087796748 | 0,006 | 0,034 | 0,790033773 | 0,940958664   | 1,06274594      | 0,176470588     |
| GSTA4                                                                                           | 0,686815512 | -0,087812978 | 0,093 | 0,095 | 1           | 0,940948078   | 1,062757896     | 0,978947368     |
| RASL11A                                                                                         | 6,71109E-05 | -0,087840389 | 0,001 | 0,022 | 1           | 0,940930201   | 1,062778088     | 0,045454545     |
| UBALD1                                                                                          | 0,468007331 | -0,087841752 | 0,061 | 0,05  | 1           | 0,940929312   | 1,062779093     | 1,22            |
| RSAD2                                                                                           | 0,000885835 | -0,087863773 | 0,002 | 0,019 | 1           | 0,94091495    | 1,062795315     | 0,105263158     |
| WASL                                                                                            | 4,42105E-05 | -0,087876057 | 0,154 | 0,227 | 0,932885736 | 0,940906938   | 1,062804364     | 0,678414097     |
| C1RL                                                                                            | 0,079256212 | -0,088065718 | 0,013 | 0,024 | 1           | 0,940783252   | 1,062944093     | 0,541666667     |
| DLX5                                                                                            | 0,90105071  | -0,088077463 | 0,036 | 0,037 | 1           | 0,940775593   | 1,062952746     | 0,972972973     |
| HABP4                                                                                           | 0,002909128 | -0,088121267 | 0,107 | 0,152 | 1           | 0,940747029   | 1,062985021     | 0,703947368     |
| CNNM3                                                                                           | 0,008958861 | -0,088125093 | 0,02  | 0,042 | 1           | 0,940744534   | 1,06298784      | 0,476190476     |
| SEPTIN4                                                                                         | 6,62501E-05 | -0,088163957 | 0,001 | 0,022 | 1           | 0,940719192   | 1,063016476     | 0,045454545     |
| RAB31L1                                                                                         | 0,000712332 | -0,088196086 | 0,005 | 0,024 | 1           | 0,940698242   | 1,063040149     | 0,208333333     |
| FEM1A                                                                                           | 0,131125685 | -0,088239476 | 0,019 | 0,03  | 1           | 0,940669951   | 1,063072121     | 0,633333333     |
| GFOD1                                                                                           | 8,14256E-05 | -0,088352436 | 0,012 | 0,043 | 1           | 0,940596301   | 1,063155361     | 0,279069767     |
| MNT                                                                                             | 0,006340776 | -0,088423655 | 0,035 | 0,064 | 1           | 0,940549869   | 1,063207845     | 0,546875        |
| CYP46A1                                                                                         | 0,00025702  | -0,088451001 | 0,003 | 0,024 | 1           | 0,940532042   | 1,063227998     | 0,125           |
| RAB43                                                                                           | 0,048924847 | -0,088508418 | 0,012 | 0,024 | 1           | 0,940494611   | 1,063270314     | 0,5             |
| BORCS6                                                                                          | 0,133247255 | -0,088556339 | 0,03  | 0,043 | 1           | 0,940463372   | 1,063305632     | 0,697674419     |

Supplementary Table 5

| Differentially expressed genes_total calculation_ comparing SC-Keloid vs. (SC-Myel, SC-Nonmyel) |             |              |       |       |           |               |                 |                 |
|-------------------------------------------------------------------------------------------------|-------------|--------------|-------|-------|-----------|---------------|-----------------|-----------------|
| gene                                                                                            | p_val       | avg_log2FC   | pct.1 | pct.2 | p_val_adj | Foldchange_UP | Foldchange_DOWN | Ratio_pct1_pct2 |
| ZXDB                                                                                            | 0,004521655 | -0,088559924 | 0,003 | 0,018 | 1         | 0,940461034   | 1,063308275     | 0,166666667     |
| RNF122                                                                                          | 0,066353977 | -0,088596479 | 0,006 | 0,015 | 1         | 0,940437206   | 1,063335217     | 0,4             |
| LZTS3                                                                                           | 0,03445336  | -0,088665661 | 0,017 | 0,034 | 1         | 0,940392109   | 1,063386209     | 0,5             |
| RAB33B                                                                                          | 0,001514791 | -0,088685953 | 0,051 | 0,091 | 1         | 0,940378883   | 1,063401165     | 0,56043956      |
| PAK4                                                                                            | 0,231729906 | -0,088824156 | 0,023 | 0,033 | 1         | 0,940288804   | 1,063503039     | 0,696969697     |
| GLYR1                                                                                           | 0,071162468 | -0,08883319  | 0,072 | 0,095 | 1         | 0,940282915   | 1,063509699     | 0,757894737     |
| CRTC3                                                                                           | 0,024612813 | -0,088884587 | 0,087 | 0,118 | 1         | 0,940249418   | 1,063547588     | 0,737288136     |
| RGS7                                                                                            | 0,000175145 | -0,088892293 | 0     | 0,016 | 1         | 0,940244396   | 1,063553268     | 0               |
| HOXC4                                                                                           | 0,291450504 | -0,088908413 | 0,03  | 0,039 | 1         | 0,94023389    | 1,063565152     | 0,769230769     |
| EPG5                                                                                            | 0,968806813 | -0,088930523 | 0,024 | 0,024 | 1         | 0,94021948    | 1,063581452     | 1               |
| NOXA1                                                                                           | 0,000800396 | -0,088944546 | 0,001 | 0,016 | 1         | 0,940210341   | 1,06359179      | 0,0625          |
| DAPK3                                                                                           | 0,278381274 | -0,089065342 | 0,081 | 0,094 | 1         | 0,940131622   | 1,063680847     | 0,861702128     |
| TSEN54                                                                                          | 0,98810391  | -0,08907356  | 0,036 | 0,035 | 1         | 0,940126266   | 1,063686907     | 1,028571429     |
| ARRDC1                                                                                          | 0,278081571 | -0,08913304  | 0,034 | 0,043 | 1         | 0,940087507   | 1,063730762     | 0,790697674     |
| MAST2                                                                                           | 0,107906614 | -0,08917597  | 0,036 | 0,052 | 1         | 0,940059533   | 1,063762416     | 0,692307692     |
| ZNF528                                                                                          | 0,244794063 | -0,089339287 | 0,028 | 0,038 | 1         | 0,939953122   | 1,063882843     | 0,736842105     |
| TENT5B                                                                                          | 0,018852466 | -0,089365234 | 0,01  | 0,026 | 1         | 0,939936218   | 1,063901977     | 0,384615385     |
| MAMLD1                                                                                          | 0,217970009 | -0,089389804 | 0,041 | 0,053 | 1         | 0,939920209   | 1,063920097     | 0,773584906     |
| TMEM65                                                                                          | 0,092326164 | -0,08941855  | 0,069 | 0,09  | 1         | 0,939901481   | 1,063941296     | 0,766666667     |
| LTA4H                                                                                           | 0,011415505 | -0,08943044  | 0,03  | 0,056 | 1         | 0,939893736   | 1,063950064     | 0,535714286     |
| LAT                                                                                             | 0,006611533 | -0,089468989 | 0,005 | 0,019 | 1         | 0,939868622   | 1,063978493     | 0,263157895     |
| UMAD1                                                                                           | 0,903232425 | -0,08948457  | 0,028 | 0,028 | 1         | 0,939858471   | 1,063989984     | 1               |
| AC083843.3                                                                                      | 0,000428678 | -0,089544052 | 0,001 | 0,018 | 1         | 0,939819722   | 1,064033853     | 0,055555556     |
| H2BC11                                                                                          | 0,000117492 | -0,089545412 | 0,006 | 0,031 | 1         | 0,939818836   | 1,064034856     | 0,193548387     |
| ACER3                                                                                           | 0,001133169 | -0,089552538 | 0,04  | 0,077 | 1         | 0,939814194   | 1,064040111     | 0,519480519     |
| ATP2A2                                                                                          | 0,000283398 | -0,089569653 | 0,141 | 0,206 | 1         | 0,939803045   | 1,064052735     | 0,684466019     |
| RNASET2                                                                                         | 0,00258512  | -0,089608142 | 0,02  | 0,046 | 1         | 0,939777973   | 1,064081122     | 0,434782609     |
| PIP                                                                                             | 0,017222939 | -0,08974292  | 0,002 | 0,012 | 1         | 0,939690181   | 1,064180535     | 0,166666667     |
| CCDC142                                                                                         | 0,04424738  | -0,089745817 | 0,01  | 0,023 | 1         | 0,939688295   | 1,064182672     | 0,434782609     |
| XYLT2                                                                                           | 0,05399987  | -0,08974932  | 0,021 | 0,037 | 1         | 0,939686013   | 1,064185256     | 0,567567568     |



Supplementary Table 5

| Differentially expressed genes_total calculation_ comparing SC-Keloid vs. (SC-Myel, SC-Nonmyel) |             |              |       |       |             |               |                 |                 |
|-------------------------------------------------------------------------------------------------|-------------|--------------|-------|-------|-------------|---------------|-----------------|-----------------|
| gene                                                                                            | p_val       | avg_log2FC   | pct.1 | pct.2 | p_val_adj   | Foldchange_UP | Foldchange_DOWN | Ratio_pct1_pct2 |
| CYP2J2                                                                                          | 0,000838303 | -0,089773399 | 0,003 | 0,022 | 1           | 0,93967033    | 1,064203017     | 0,136363636     |
| BSG                                                                                             | 4,28216E-05 | -0,089789716 | 0,313 | 0,453 | 0,903579069 | 0,939659702   | 1,064215053     | 0,690949227     |
| ICMT                                                                                            | 0,782745395 | -0,089812128 | 0,059 | 0,061 | 1           | 0,939645105   | 1,064231586     | 0,967213115     |
| AURKB                                                                                           | 0,00129088  | -0,08981553  | 0,005 | 0,023 | 1           | 0,939642889   | 1,064234095     | 0,217391304     |
| TRAM1                                                                                           | 0,000792269 | -0,089835379 | 0,219 | 0,284 | 1           | 0,939629961   | 1,064248737     | 0,771126761     |
| HIRIP3                                                                                          | 0,087584624 | -0,089886835 | 0,05  | 0,069 | 1           | 0,939596448   | 1,064286696     | 0,724637681     |
| AFMID                                                                                           | 0,016294389 | -0,089895158 | 0,031 | 0,056 | 1           | 0,939591028   | 1,064292836     | 0,553571429     |
| EGFR                                                                                            | 0,000800396 | -0,089935199 | 0,001 | 0,016 | 1           | 0,939564951   | 1,064322375     | 0,0625          |
| PIGA                                                                                            | 0,007296901 | -0,08995229  | 0,017 | 0,039 | 1           | 0,93955382    | 1,064334984     | 0,435897436     |
| RRAGA                                                                                           | 0,330639587 | -0,089984913 | 0,146 | 0,155 | 1           | 0,939532574   | 1,064359052     | 0,941935484     |
| H2AC19                                                                                          | 0,000472595 | -0,089985213 | 0,002 | 0,02  | 1           | 0,939532379   | 1,064359273     | 0,1             |
| ZNF623                                                                                          | 0,081848635 | -0,089999526 | 0,024 | 0,039 | 1           | 0,939523058   | 1,064369833     | 0,615384615     |
| SFMBT1                                                                                          | 0,000675307 | -0,090006987 | 0,013 | 0,039 | 1           | 0,939518199   | 1,064375337     | 0,333333333     |
| LMCD1-AS1                                                                                       | 0,001258956 | -0,09004994  | 0,005 | 0,023 | 1           | 0,939490227   | 1,064407027     | 0,217391304     |
| AJUBA                                                                                           | 0,008541097 | -0,090066009 | 0,008 | 0,024 | 1           | 0,939479764   | 1,064418882     | 0,333333333     |
| NCAPH2                                                                                          | 0,430473934 | -0,09009908  | 0,054 | 0,061 | 1           | 0,939458228   | 1,064443282     | 0,885245902     |
| GPC3                                                                                            | 0,010037547 | -0,090214724 | 0,001 | 0,011 | 1           | 0,939382926   | 1,06452861      | 0,090909091     |
| TMEM158                                                                                         | 0,006759287 | -0,090221024 | 0,022 | 0,046 | 1           | 0,939378823   | 1,064533259     | 0,47826087      |
| POU2F1                                                                                          | 0,000685368 | -0,09023516  | 0,071 | 0,119 | 1           | 0,939369619   | 1,06454369      | 0,596638655     |
| SOX17                                                                                           | 0,107228862 | -0,090236096 | 0,006 | 0,014 | 1           | 0,939369009   | 1,06454438      | 0,428571429     |
| AS3MT                                                                                           | 0,000430864 | -0,090268581 | 0,001 | 0,018 | 1           | 0,939347858   | 1,064568351     | 0,055555556     |
| RAD50                                                                                           | 0,5122334   | -0,090313625 | 0,058 | 0,064 | 1           | 0,93931853    | 1,064601589     | 0,90625         |
| PHF2                                                                                            | 0,015793993 | -0,090403327 | 0,063 | 0,094 | 1           | 0,939260129   | 1,064667784     | 0,670212766     |
| ORMDL1                                                                                          | 0,000122539 | -0,09040336  | 0,18  | 0,256 | 1           | 0,939260107   | 1,064667809     | 0,703125        |
| PHLPP1                                                                                          | 0,025167524 | -0,090461054 | 0,028 | 0,049 | 1           | 0,939222546   | 1,064710386     | 0,571428571     |
| GRK3                                                                                            | 0,000259459 | -0,090612126 | 0,002 | 0,022 | 1           | 0,9391242     | 1,064821884     | 0,090909091     |
| RBM24                                                                                           | 2,67675E-05 | -0,090660208 | 0     | 0,02  | 0,56482021  | 0,939092902   | 1,064857372     | 0               |
| ANKRD30B                                                                                        | 0,000175145 | -0,090718413 | 0     | 0,016 | 1           | 0,939055016   | 1,064900334     | 0               |
| FAM76B                                                                                          | 0,002880115 | -0,090721625 | 0,097 | 0,142 | 1           | 0,939052924   | 1,064902706     | 0,683098592     |
| C8orf82                                                                                         | 0,497879698 | -0,090738371 | 0,093 | 0,099 | 1           | 0,939042025   | 1,064915066     | 0,939393939     |

Supplementary Table 5

| Differentially expressed genes_total calculation_ comparing SC-Keloid vs. (SC-Myel, SC-Nonmyel) |             |              |       |       |           |               |                 |                 |
|-------------------------------------------------------------------------------------------------|-------------|--------------|-------|-------|-----------|---------------|-----------------|-----------------|
| gene                                                                                            | p_val       | avg_log2FC   | pct.1 | pct.2 | p_val_adj | Foldchange_UP | Foldchange_DOWN | Ratio_pct1_pct2 |
| TSEN34                                                                                          | 0,370198916 | -0,090744759 | 0,093 | 0,102 | 1         | 0,939037867   | 1,064919782     | 0,911764706     |
| MAP2K1                                                                                          | 0,006543023 | -0,090848872 | 0,051 | 0,084 | 1         | 0,938970103   | 1,064996635     | 0,607142857     |
| RNF167                                                                                          | 0,012099087 | -0,090891553 | 0,064 | 0,096 | 1         | 0,938942324   | 1,065028143     | 0,666666667     |
| LRCH3                                                                                           | 0,000408818 | -0,090900031 | 0,14  | 0,204 | 1         | 0,938936807   | 1,065034401     | 0,68627451      |
| TVP23B                                                                                          | 0,040744896 | -0,091172687 | 0,04  | 0,061 | 1         | 0,938759373   | 1,065235702     | 0,655737705     |
| ROPN1                                                                                           | 0,395414272 | -0,091273416 | 0,017 | 0,023 | 1         | 0,938693831   | 1,06531008      | 0,739130435     |
| NQO1                                                                                            | 0,809016554 | -0,091302562 | 0,033 | 0,03  | 1         | 0,938674868   | 1,065331601     | 1,1             |
| IKBKB                                                                                           | 0,002866774 | -0,09132147  | 0,05  | 0,087 | 1         | 0,938662565   | 1,065345564     | 0,574712644     |
| NAF1                                                                                            | 0,0339618   | -0,091380671 | 0,031 | 0,052 | 1         | 0,938624048   | 1,065389281     | 0,596153846     |
| ACAT1                                                                                           | 0,003273126 | -0,091409297 | 0,063 | 0,102 | 1         | 0,938605424   | 1,065410421     | 0,617647059     |
| PRDM11                                                                                          | 0,001903998 | -0,091481037 | 0,006 | 0,024 | 1         | 0,938558752   | 1,065463401     | 0,25            |
| ZNF600                                                                                          | 0,011644285 | -0,091656451 | 0,007 | 0,022 | 1         | 0,938444642   | 1,065592956     | 0,318181818     |
| R3HCC1L                                                                                         | 0,021892189 | -0,091703855 | 0,012 | 0,027 | 1         | 0,938413807   | 1,06562797      | 0,444444444     |
| NOC4L                                                                                           | 0,676183322 | -0,091713399 | 0,051 | 0,054 | 1         | 0,938407599   | 1,06563502      | 0,944444444     |
| YIPF3                                                                                           | 0,15459746  | -0,091837055 | 0,159 | 0,178 | 1         | 0,93832717    | 1,065726361     | 0,893258427     |
| NRIP1                                                                                           | 0,045668367 | -0,091871254 | 0,106 | 0,136 | 1         | 0,938304927   | 1,065751624     | 0,779411765     |
| HERC6                                                                                           | 0,068380728 | -0,091918399 | 0,01  | 0,022 | 1         | 0,938274265   | 1,065786452     | 0,454545455     |
| HEATR5B                                                                                         | 0,038521522 | -0,091923221 | 0,034 | 0,054 | 1         | 0,938271129   | 1,065790014     | 0,62962963      |
| TCEA3                                                                                           | 5,67411E-05 | -0,092010113 | 0,007 | 0,035 | 1         | 0,93821462    | 1,065854207     | 0,2             |
| NEK6                                                                                            | 0,041059089 | -0,092025282 | 0,048 | 0,071 | 1         | 0,938204755   | 1,065865414     | 0,676056338     |
| CCDC30                                                                                          | 0,074652044 | -0,092163639 | 0,012 | 0,023 | 1         | 0,938114784   | 1,065967638     | 0,52173913      |
| AC018742.1                                                                                      | 0,000258257 | -0,092166462 | 0,002 | 0,022 | 1         | 0,938112949   | 1,065969723     | 0,090909091     |
| CEP164                                                                                          | 0,358630197 | -0,092189018 | 0,057 | 0,066 | 1         | 0,938098282   | 1,065986389     | 0,863636364     |
| PI16                                                                                            | 0,000428678 | -0,092191409 | 0,001 | 0,018 | 1         | 0,938096727   | 1,065988156     | 0,055555556     |
| CLN5                                                                                            | 0,011889011 | -0,092197889 | 0,12  | 0,157 | 1         | 0,938092513   | 1,065992944     | 0,76433121      |
| LRRC4                                                                                           | 0,000313666 | -0,092202692 | 0,007 | 0,031 | 1         | 0,93808939    | 1,065996493     | 0,225806452     |
| DGCR6                                                                                           | 0,100711    | -0,092262661 | 0,02  | 0,033 | 1         | 0,938050397   | 1,066040805     | 0,606060606     |
| SARM1                                                                                           | 0,236330509 | -0,092457957 | 0,015 | 0,023 | 1         | 0,937923422   | 1,066185124     | 0,652173913     |
| CCDC146                                                                                         | 0,000866584 | -0,092482856 | 0,007 | 0,028 | 1         | 0,937907236   | 1,066203524     | 0,25            |
| HTRA1                                                                                           | 0,000771908 | -0,092538623 | 0,248 | 0,318 | 1         | 0,937870982   | 1,066244739     | 0,779874214     |

Supplementary Table 5

| Differentially expressed genes_total calculation_ comparing SC-Keloid vs. (SC-Myel, SC-Nonmyel) |             |              |       |       |             |               |                 |                 |
|-------------------------------------------------------------------------------------------------|-------------|--------------|-------|-------|-------------|---------------|-----------------|-----------------|
| gene                                                                                            | p_val       | avg_log2FC   | pct.1 | pct.2 | p_val_adj   | Foldchange_UP | Foldchange_DOWN | Ratio_pct1_pct2 |
| PRR14                                                                                           | 0,178420081 | -0,092549303 | 0,09  | 0,106 | 1           | 0,937864039   | 1,066252632     | 0,849056604     |
| FKRP                                                                                            | 0,058047859 | -0,092619085 | 0,023 | 0,039 | 1           | 0,937818676   | 1,066304207     | 0,58974359      |
| MALINC1                                                                                         | 0,005157465 | -0,092619473 | 0,002 | 0,015 | 1           | 0,937818424   | 1,066304494     | 0,133333333     |
| ORC3                                                                                            | 0,16167585  | -0,092661081 | 0,05  | 0,065 | 1           | 0,937791378   | 1,066335247     | 0,769230769     |
| FOXC1                                                                                           | 0,733668152 | -0,092668074 | 0,03  | 0,033 | 1           | 0,937786832   | 1,066340416     | 0,909090909     |
| PCIF1                                                                                           | 0,202268356 | -0,092767184 | 0,062 | 0,076 | 1           | 0,93772241    | 1,066413673     | 0,815789474     |
| GPRC5A                                                                                          | 0,004521655 | -0,092787952 | 0,003 | 0,018 | 1           | 0,937708911   | 1,066429025     | 0,166666667     |
| TCF7                                                                                            | 0,003812029 | -0,092850399 | 0,041 | 0,073 | 1           | 0,937668323   | 1,066475186     | 0,561643836     |
| SUPV3L1                                                                                         | 0,083047986 | -0,092941197 | 0,042 | 0,06  | 1           | 0,937609312   | 1,066542309     | 0,7             |
| BIRC7                                                                                           | 3,7109E-05  | -0,092957512 | 0,001 | 0,023 | 0,783036608 | 0,937598709   | 1,06655437      | 0,043478261     |
| MCU                                                                                             | 0,042822608 | -0,093010276 | 0,023 | 0,041 | 1           | 0,937564418   | 1,066593378     | 0,56097561      |
| REPIN1                                                                                          | 0,05151739  | -0,093051671 | 0,085 | 0,11  | 1           | 0,937537517   | 1,066623982     | 0,772727273     |
| NDN                                                                                             | 0,006986204 | -0,093097785 | 0,063 | 0,098 | 1           | 0,93750755    | 1,066658076     | 0,642857143     |
| UBE2N                                                                                           | 0,000450201 | -0,093121241 | 0,199 | 0,265 | 1           | 0,937492308   | 1,066675419     | 0,750943396     |
| ARHGEF25                                                                                        | 0,001475015 | -0,093140174 | 0,012 | 0,035 | 1           | 0,937480005   | 1,066689417     | 0,342857143     |
| ABL1                                                                                            | 0,022903716 | -0,09321162  | 0,063 | 0,091 | 1           | 0,93743358    | 1,066742244     | 0,692307692     |
| TRERF1                                                                                          | 0,00116827  | -0,093243204 | 0     | 0,012 | 1           | 0,937413058   | 1,066765597     | 0               |
| NOTCH4                                                                                          | 0,020809925 | -0,093255347 | 0,034 | 0,057 | 1           | 0,937405168   | 1,066774576     | 0,596491228     |
| EML2                                                                                            | 0,280065008 | -0,093291152 | 0,033 | 0,042 | 1           | 0,937381903   | 1,066801051     | 0,785714286     |
| CDHR3                                                                                           | 0,003586287 | -0,093483948 | 0,019 | 0,043 | 1           | 0,937256643   | 1,066943624     | 0,441860465     |
| PPP1R13L                                                                                        | 0,0509952   | -0,093565843 | 0,012 | 0,024 | 1           | 0,937203442   | 1,067004191     | 0,5             |
| ARHGEF37                                                                                        | 6,7802E-07  | -0,093589497 | 0,005 | 0,041 | 0,014306909 | 0,937188075   | 1,067021686     | 0,12195122      |
| TUT1                                                                                            | 0,112362975 | -0,093632587 | 0,013 | 0,023 | 1           | 0,937160085   | 1,067053555     | 0,565217391     |
| RBM22                                                                                           | 0,015561749 | -0,093692885 | 0,107 | 0,144 | 1           | 0,937120916   | 1,067098154     | 0,743055556     |
| FBXL19-AS1                                                                                      | 0,001496476 | -0,093696162 | 0,001 | 0,015 | 1           | 0,937118788   | 1,067100578     | 0,066666667     |
| FAM111A                                                                                         | 0,015887049 | -0,093704637 | 0,073 | 0,106 | 1           | 0,937113283   | 1,067106847     | 0,688679245     |
| PODN                                                                                            | 0,000268306 | -0,0937396   | 0,003 | 0,024 | 1           | 0,937090572   | 1,067132708     | 0,125           |
| DPF2                                                                                            | 0,003458321 | -0,093805678 | 0,069 | 0,109 | 1           | 0,937047653   | 1,067181586     | 0,633027523     |
| FBXO48                                                                                          | 0,003200999 | -0,093812018 | 0,008 | 0,027 | 1           | 0,937043535   | 1,067186275     | 0,296296296     |
| UTP18                                                                                           | 0,001342074 | -0,093815408 | 0,042 | 0,079 | 1           | 0,937041333   | 1,067188783     | 0,53164557      |

Supplementary Table 5

| Differentially expressed genes_total calculation_ comparing SC-Keloid vs. (SC-Myel, SC-Nonmyel) |             |              |       |       |             |               |                 |                 |
|-------------------------------------------------------------------------------------------------|-------------|--------------|-------|-------|-------------|---------------|-----------------|-----------------|
| gene                                                                                            | p_val       | avg_log2FC   | pct.1 | pct.2 | p_val_adj   | Foldchange_UP | Foldchange_DOWN | Ratio_pct1_pct2 |
| PPP1R1C                                                                                         | 0,000814126 | -0,093895086 | 0,003 | 0,022 | 1           | 0,936989583   | 1,067247724     | 0,136363636     |
| AP3S2                                                                                           | 0,050503687 | -0,093929424 | 0,03  | 0,049 | 1           | 0,936967282   | 1,067273126     | 0,612244898     |
| COL23A1                                                                                         | 4,99915E-05 | -0,093947961 | 0     | 0,019 | 1           | 0,936955243   | 1,06728684      | 0               |
| CLN3                                                                                            | 0,535083151 | -0,093998787 | 0,028 | 0,033 | 1           | 0,936922235   | 1,06732444      | 0,848484848     |
| TAP1                                                                                            | 0,044975281 | -0,094045579 | 0,106 | 0,134 | 1           | 0,936891847   | 1,067359059     | 0,791044776     |
| RTN3                                                                                            | 0,004820755 | -0,094061617 | 0,156 | 0,204 | 1           | 0,936881432   | 1,067370924     | 0,764705882     |
| MED28                                                                                           | 0,000812691 | -0,094127599 | 0,083 | 0,132 | 1           | 0,936838585   | 1,067419742     | 0,628787879     |
| ENPP4                                                                                           | 0,296273824 | -0,094140987 | 0,009 | 0,015 | 1           | 0,936829891   | 1,067429648     | 0,6             |
| DDX19B                                                                                          | 0,430468161 | -0,094148026 | 0,054 | 0,043 | 1           | 0,93682532    | 1,067434855     | 1,255813953     |
| AP2A2                                                                                           | 0,713794422 | -0,094174069 | 0,094 | 0,096 | 1           | 0,936808409   | 1,067454125     | 0,979166667     |
| YJEFN3                                                                                          | 0,022331994 | -0,094292955 | 0,008 | 0,022 | 1           | 0,936731214   | 1,067542092     | 0,363636364     |
| DNM2                                                                                            | 0,115391371 | -0,094330138 | 0,085 | 0,104 | 1           | 0,936707072   | 1,067569606     | 0,817307692     |
| ARRB1                                                                                           | 0,000465591 | -0,09436211  | 0,002 | 0,02  | 1           | 0,936686313   | 1,067593266     | 0,1             |
| MRPL43                                                                                          | 0,139328759 | -0,094468139 | 0,184 | 0,202 | 1           | 0,936617476   | 1,067671729     | 0,910891089     |
| CMBL                                                                                            | 0,004539582 | -0,094489777 | 0,003 | 0,018 | 1           | 0,936603428   | 1,067687743     | 0,166666667     |
| B3GAT1                                                                                          | 4,22731E-05 | -0,094496275 | 0,003 | 0,028 | 0,892004351 | 0,936599209   | 1,067692552     | 0,107142857     |
| ZMYM3                                                                                           | 0,083279332 | -0,094528422 | 0,026 | 0,041 | 1           | 0,93657834    | 1,067716343     | 0,634146341     |
| NELFA                                                                                           | 0,187260885 | -0,094573324 | 0,058 | 0,073 | 1           | 0,936549191   | 1,067749575     | 0,794520548     |
| CCL14                                                                                           | 0,065798831 | -0,094659193 | 0,016 | 0,03  | 1           | 0,936493449   | 1,067813129     | 0,533333333     |
| PIR                                                                                             | 0,000135341 | -0,094662774 | 0,002 | 0,023 | 1           | 0,936491124   | 1,06781578      | 0,086956522     |
| PATJ                                                                                            | 0,002441006 | -0,094685822 | 0,007 | 0,026 | 1           | 0,936476163   | 1,067832839     | 0,269230769     |
| ZBTB49                                                                                          | 0,712593827 | -0,094687199 | 0,012 | 0,014 | 1           | 0,936475269   | 1,067833859     | 0,857142857     |
| EFCAB14                                                                                         | 0,020661099 | -0,094727592 | 0,099 | 0,133 | 1           | 0,93644905    | 1,067863756     | 0,744360902     |
| THBD                                                                                            | 0,003345271 | -0,09479355  | 0,008 | 0,027 | 1           | 0,936406238   | 1,067912579     | 0,296296296     |
| ANKS1B                                                                                          | 3,72051E-05 | -0,094801448 | 0,001 | 0,023 | 0,785065488 | 0,936401111   | 1,067918425     | 0,043478261     |
| GLG1                                                                                            | 0,000315823 | -0,09481494  | 0,254 | 0,332 | 1           | 0,936392355   | 1,067928412     | 0,765060241     |
| SPATA20                                                                                         | 0,038979744 | -0,094817197 | 0,048 | 0,071 | 1           | 0,936390889   | 1,067930083     | 0,676056338     |
| TSPOAP1                                                                                         | 0,000804452 | -0,094878683 | 0,001 | 0,016 | 1           | 0,936350983   | 1,067975597     | 0,0625          |
| ZNF496                                                                                          | 0,039456741 | -0,094959124 | 0,033 | 0,053 | 1           | 0,936298776   | 1,068035147     | 0,622641509     |
| LETMD1                                                                                          | 0,068217677 | -0,094975688 | 0,056 | 0,077 | 1           | 0,936288026   | 1,068047409     | 0,727272727     |

Supplementary Table 5

| Differentially expressed genes_total calculation_ comparing SC-Keloid vs. (SC-Myel, SC-Nonmyel) |             |              |       |       |             |               |                 |                 |
|-------------------------------------------------------------------------------------------------|-------------|--------------|-------|-------|-------------|---------------|-----------------|-----------------|
| gene                                                                                            | p_val       | avg_log2FC   | pct.1 | pct.2 | p_val_adj   | Foldchange_UP | Foldchange_DOWN | Ratio_pct1_pct2 |
| CREBZF                                                                                          | 2,1309E-07  | -0,094976491 | 0,101 | 0,191 | 0,004496419 | 0,936287504   | 1,068048004     | 0,528795812     |
| SOCS5                                                                                           | 0,054321348 | -0,095049106 | 0,045 | 0,066 | 1           | 0,93624038    | 1,068101763     | 0,681818182     |
| LSMEM2                                                                                          | 0,000123354 | -0,095052006 | 0,001 | 0,02  | 1           | 0,936238497   | 1,06810391      | 0,05            |
| DDX58                                                                                           | 0,003763878 | -0,095119012 | 0,023 | 0,05  | 1           | 0,936195015   | 1,06815352      | 0,46            |
| FUZ                                                                                             | 0,221897141 | -0,09523755  | 0,031 | 0,042 | 1           | 0,936118096   | 1,068241287     | 0,738095238     |
| TMX2                                                                                            | 0,249879075 | -0,095283467 | 0,097 | 0,11  | 1           | 0,936088303   | 1,068275287     | 0,881818182     |
| SRSF12                                                                                          | 0,012135494 | -0,095397351 | 0,007 | 0,022 | 1           | 0,936014413   | 1,068359618     | 0,318181818     |
| POLR2M                                                                                          | 0,008097624 | -0,095435324 | 0,055 | 0,087 | 1           | 0,935989776   | 1,068387738     | 0,632183908     |
| GPR161                                                                                          | 0,023285082 | -0,095478046 | 0,017 | 0,035 | 1           | 0,935962059   | 1,068419376     | 0,485714286     |
| BTN2A1                                                                                          | 0,121039687 | -0,095546761 | 0,061 | 0,079 | 1           | 0,935917481   | 1,068470266     | 0,772151899     |
| ZNF628                                                                                          | 0,691560246 | -0,09555198  | 0,024 | 0,027 | 1           | 0,935914095   | 1,068474132     | 0,888888889     |
| PRKN                                                                                            | 0,005276197 | -0,095560147 | 0,006 | 0,022 | 1           | 0,935908797   | 1,06848018      | 0,272727273     |
| RAP1A                                                                                           | 7,27826E-06 | -0,09565325  | 0,26  | 0,364 | 0,153578649 | 0,935848401   | 1,068549136     | 0,714285714     |
| CLEC16A                                                                                         | 0,012272558 | -0,095764086 | 0,01  | 0,027 | 1           | 0,935776506   | 1,068631231     | 0,37037037      |
| LPIN2                                                                                           | 0,000550006 | -0,095767896 | 0,041 | 0,081 | 1           | 0,935774035   | 1,068634053     | 0,50617284      |
| TBKBP1                                                                                          | 0,003180613 | -0,095800744 | 0,006 | 0,023 | 1           | 0,935752729   | 1,068658384     | 0,260869565     |
| MTARC1                                                                                          | 2,67675E-05 | -0,095873867 | 0     | 0,02  | 0,56482021  | 0,935705302   | 1,068712551     | 0               |
| HLF                                                                                             | 0,000453582 | -0,095966844 | 0,003 | 0,023 | 1           | 0,935645      | 1,068781428     | 0,130434783     |
| TSTD3                                                                                           | 0,071882759 | -0,096000137 | 0,02  | 0,034 | 1           | 0,935623409   | 1,068806093     | 0,588235294     |
| IRF8                                                                                            | 2,43874E-05 | -0,096004042 | 0,003 | 0,03  | 0,514598411 | 0,935620877   | 1,068808986     | 0,1             |
| LRSAM1                                                                                          | 0,007745567 | -0,096082177 | 0,01  | 0,028 | 1           | 0,935570206   | 1,068866873     | 0,357142857     |
| POMZP3                                                                                          | 0,026342323 | -0,096140143 | 0,009 | 0,023 | 1           | 0,935532616   | 1,06890982      | 0,391304348     |
| NPIP4                                                                                           | 0,000856296 | -0,096147783 | 0,012 | 0,037 | 1           | 0,935527662   | 1,068915481     | 0,324324324     |
| SCN5A                                                                                           | 1,43484E-05 | -0,09616858  | 0     | 0,022 | 0,302765143 | 0,935514176   | 1,068930889     | 0               |
| GCN1                                                                                            | 0,109208091 | -0,096189102 | 0,03  | 0,045 | 1           | 0,935500869   | 1,068946094     | 0,666666667     |
| GRK2                                                                                            | 0,213679368 | -0,096194798 | 0,078 | 0,094 | 1           | 0,935497175   | 1,068950315     | 0,829787234     |
| ASCC1                                                                                           | 0,051810004 | -0,096204065 | 0,049 | 0,071 | 1           | 0,935491166   | 1,068957181     | 0,690140845     |
| ATG14                                                                                           | 0,001366199 | -0,096269759 | 0,048 | 0,087 | 1           | 0,935448569   | 1,069005858     | 0,551724138     |
| AMY2B                                                                                           | 0,001288398 | -0,096288613 | 0,005 | 0,023 | 1           | 0,935436344   | 1,069019829     | 0,217391304     |
| CACNB1                                                                                          | 0,013027428 | -0,096305194 | 0,01  | 0,027 | 1           | 0,935425593   | 1,069032115     | 0,37037037      |

Supplementary Table 5

| Differentially expressed genes_total calculation_ comparing SC-Keloid vs. (SC-Myel, SC-Nonmyel) |             |              |       |       |           |               |                 |                 |
|-------------------------------------------------------------------------------------------------|-------------|--------------|-------|-------|-----------|---------------|-----------------|-----------------|
| gene                                                                                            | p_val       | avg_log2FC   | pct.1 | pct.2 | p_val_adj | Foldchange_UP | Foldchange_DOWN | Ratio_pct1_pct2 |
| USP20                                                                                           | 0,014338305 | -0,096307488 | 0,012 | 0,028 | 1         | 0,935424106   | 1,069033815     | 0,428571429     |
| NDST1                                                                                           | 0,007236575 | -0,096573553 | 0,059 | 0,094 | 1         | 0,935251608   | 1,069230987     | 0,627659574     |
| SHB                                                                                             | 0,019021531 | -0,096593135 | 0,022 | 0,042 | 1         | 0,935238914   | 1,0692455       | 0,523809524     |
| CLIP3                                                                                           | 0,028506227 | -0,096700213 | 0,04  | 0,062 | 1         | 0,935169502   | 1,069324863     | 0,64516129      |
| DCP2                                                                                            | 0,099352708 | -0,096719512 | 0,051 | 0,069 | 1         | 0,935156993   | 1,069339168     | 0,739130435     |
| FBXO33                                                                                          | 0,064233796 | -0,096751057 | 0,04  | 0,058 | 1         | 0,935136546   | 1,069362549     | 0,689655172     |
| UBQLN4                                                                                          | 0,027022154 | -0,096791172 | 0,054 | 0,08  | 1         | 0,935110544   | 1,069392283     | 0,675           |
| ATG16L2                                                                                         | 0,059363273 | -0,096880138 | 0,023 | 0,039 | 1         | 0,935052881   | 1,069458231     | 0,58974359      |
| RBAK                                                                                            | 0,028349437 | -0,096998506 | 0,015 | 0,031 | 1         | 0,934976166   | 1,069545981     | 0,483870968     |
| STAU1                                                                                           | 0,006961614 | -0,097250257 | 0,169 | 0,216 | 1         | 0,934813027   | 1,069732633     | 0,782407407     |
| FKBP5                                                                                           | 0,001086414 | -0,09726235  | 0,041 | 0,079 | 1         | 0,934805191   | 1,0697416       | 0,518987342     |
| ZXDA                                                                                            | 0,000123672 | -0,097283542 | 0,001 | 0,02  | 1         | 0,934791459   | 1,069757313     | 0,05            |
| APOL3                                                                                           | 0,040651213 | -0,097332209 | 0,006 | 0,016 | 1         | 0,934759926   | 1,0697934       | 0,375           |
| MED26                                                                                           | 0,011041534 | -0,097336794 | 0,019 | 0,039 | 1         | 0,934756956   | 1,0697968       | 0,487179487     |
| BMF                                                                                             | 0,004226495 | -0,097361357 | 0,016 | 0,039 | 1         | 0,93474104    | 1,069815015     | 0,41025641      |
| CLCN2                                                                                           | 0,088774839 | -0,09739901  | 0,016 | 0,028 | 1         | 0,934716645   | 1,069842937     | 0,571428571     |
| ZNF665                                                                                          | 0,000866584 | -0,097423009 | 0,007 | 0,028 | 1         | 0,934701096   | 1,069860733     | 0,25            |
| SNAP47                                                                                          | 0,993826448 | -0,097498491 | 0,042 | 0,041 | 1         | 0,934652194   | 1,06991671      | 1,024390244     |
| PUF60                                                                                           | 0,00020691  | -0,097692364 | 0,251 | 0,332 | 1         | 0,934526601   | 1,070060498     | 0,756024096     |
| NTNG2                                                                                           | 0,000238222 | -0,097696426 | 0,001 | 0,019 | 1         | 0,93452397    | 1,07006351      | 0,052631579     |
| PIP4P2                                                                                          | 0,054429142 | -0,097719212 | 0,088 | 0,114 | 1         | 0,93450921    | 1,070080411     | 0,771929825     |
| RNF185                                                                                          | 0,184415493 | -0,097726286 | 0,034 | 0,046 | 1         | 0,934504628   | 1,070085658     | 0,739130435     |
| NECTIN3                                                                                         | 0,158130775 | -0,097927779 | 0,05  | 0,065 | 1         | 0,93437412    | 1,070235122     | 0,769230769     |
| FAM72D                                                                                          | 0,008052565 | -0,098006275 | 0,003 | 0,016 | 1         | 0,934323283   | 1,070293354     | 0,1875          |
| FOXP4                                                                                           | 0,026779599 | -0,098012579 | 0,029 | 0,05  | 1         | 0,9343192     | 1,070298031     | 0,58            |
| ZNF263                                                                                          | 0,010749388 | -0,09803728  | 0,023 | 0,046 | 1         | 0,934303203   | 1,070316356     | 0,5             |
| MBD1                                                                                            | 0,056646343 | -0,098048493 | 0,042 | 0,062 | 1         | 0,934295942   | 1,070324675     | 0,677419355     |
| CTCF                                                                                            | 0,080777282 | -0,098070634 | 0,095 | 0,119 | 1         | 0,934281604   | 1,0703411       | 0,798319328     |
| DEFB1                                                                                           | 0,000428678 | -0,098122496 | 0,001 | 0,018 | 1         | 0,934248019   | 1,070379578     | 0,055555556     |
| RSAD1                                                                                           | 0,415905352 | -0,098137427 | 0,047 | 0,054 | 1         | 0,93423835    | 1,070390656     | 0,87037037      |

Supplementary Table 5

| Differentially expressed genes_total calculation_ comparing SC-Keloid vs. (SC-Myel, SC-Nonmyel) |             |              |       |       |             |               |                 |                 |
|-------------------------------------------------------------------------------------------------|-------------|--------------|-------|-------|-------------|---------------|-----------------|-----------------|
| gene                                                                                            | p_val       | avg_log2FC   | pct.1 | pct.2 | p_val_adj   | Foldchange_UP | Foldchange_DOWN | Ratio_pct1_pct2 |
| SYBU                                                                                            | 0,000143189 | -0,098150949 | 0,003 | 0,026 | 1           | 0,934229594   | 1,070400688     | 0,115384615     |
| SMG5                                                                                            | 0,636035292 | -0,098159249 | 0,04  | 0,043 | 1           | 0,934224219   | 1,070406846     | 0,930232558     |
| RAP1GAP2                                                                                        | 0,104977151 | -0,098160137 | 0,024 | 0,038 | 1           | 0,934223644   | 1,070407505     | 0,631578947     |
| CEP192                                                                                          | 0,005922531 | -0,098206059 | 0,015 | 0,037 | 1           | 0,934193907   | 1,070441578     | 0,405405405     |
| PHF10                                                                                           | 0,000434242 | -0,098220064 | 0,098 | 0,153 | 1           | 0,934184838   | 1,070451969     | 0,640522876     |
| LUZP1                                                                                           | 0,014415395 | -0,098284284 | 0,13  | 0,171 | 1           | 0,934143255   | 1,07049962      | 0,760233918     |
| CTSH                                                                                            | 0,001293367 | -0,098294636 | 0,005 | 0,023 | 1           | 0,934136553   | 1,070507301     | 0,217391304     |
| MAP1LC3A                                                                                        | 0,000159917 | -0,098345427 | 0,237 | 0,32  | 1           | 0,934103666   | 1,07054499      | 0,740625        |
| OXA1L                                                                                           | 0,985773452 | -0,098373464 | 0,113 | 0,107 | 1           | 0,934085513   | 1,070565795     | 1,056074766     |
| ZNF267                                                                                          | 0,095164215 | -0,098410624 | 0,071 | 0,092 | 1           | 0,934061454   | 1,07059337      | 0,77173913      |
| CLP1                                                                                            | 0,100502052 | -0,098487787 | 0,01  | 0,02  | 1           | 0,934011497   | 1,070650633     | 0,5             |
| DEK                                                                                             | 1,64136E-05 | -0,098577307 | 0,291 | 0,4   | 0,346343811 | 0,933953543   | 1,070717069     | 0,7275          |
| TRPC4AP                                                                                         | 0,055015942 | -0,098622119 | 0,084 | 0,109 | 1           | 0,933924533   | 1,070750328     | 0,770642202     |
| TMEFF1                                                                                          | 2,17337E-05 | -0,09872801  | 0,002 | 0,027 | 0,458602809 | 0,933855987   | 1,070828922     | 0,074074074     |
| KREMEN1                                                                                         | 0,00151668  | -0,09876635  | 0,009 | 0,031 | 1           | 0,93383117    | 1,07085738      | 0,290322581     |
| JPX                                                                                             | 0,000103019 | -0,09879581  | 0,118 | 0,185 | 1           | 0,933812101   | 1,070879247     | 0,637837838     |
| HCFC2                                                                                           | 0,011934632 | -0,098807476 | 0,051 | 0,081 | 1           | 0,93380455    | 1,070887907     | 0,62962963      |
| TNS4                                                                                            | 0,002802534 | -0,098812087 | 0,001 | 0,014 | 1           | 0,933801566   | 1,070891329     | 0,071428571     |
| FEM1B                                                                                           | 0,07080827  | -0,098853121 | 0,066 | 0,088 | 1           | 0,933775007   | 1,070921788     | 0,75            |
| POU6F1                                                                                          | 0,076416708 | -0,098855976 | 0,012 | 0,023 | 1           | 0,933773159   | 1,070923908     | 0,52173913      |
| CPNE1                                                                                           | 0,013171644 | -0,09886276  | 0,156 | 0,194 | 1           | 0,933768768   | 1,070928943     | 0,804123711     |
| DMXL1                                                                                           | 0,001049383 | -0,098924162 | 0,058 | 0,102 | 1           | 0,933729027   | 1,070974524     | 0,568627451     |
| DENND5A                                                                                         | 0,008838807 | -0,098987434 | 0,118 | 0,157 | 1           | 0,933688077   | 1,071021494     | 0,751592357     |
| C17orf67                                                                                        | 5,65186E-06 | -0,098999187 | 0,008 | 0,043 | 0,119259913 | 0,933680471   | 1,07103022      | 0,186046512     |
| SLC25A43                                                                                        | 0,069254715 | -0,099017666 | 0,02  | 0,034 | 1           | 0,933668512   | 1,071043938     | 0,588235294     |
| LAMA3                                                                                           | 0,000818801 | -0,09902933  | 0,001 | 0,016 | 1           | 0,933660963   | 1,071052598     | 0,0625          |
| GLCC1                                                                                           | 0,092041582 | -0,099138553 | 0,017 | 0,03  | 1           | 0,933590281   | 1,071133688     | 0,566666667     |
| IQCB1                                                                                           | 0,187300938 | -0,099173351 | 0,026 | 0,037 | 1           | 0,933567763   | 1,071159523     | 0,702702703     |
| USP33                                                                                           | 0,002597029 | -0,09918283  | 0,079 | 0,122 | 1           | 0,933561629   | 1,071166561     | 0,647540984     |
| MDM4                                                                                            | 4,11088E-05 | -0,099213144 | 0,169 | 0,25  | 0,867436543 | 0,933542013   | 1,071189069     | 0,676           |

Supplementary Table 5

| Differentially expressed genes_total calculation_ comparing SC-Keloid vs. (SC-Myel, SC-Nonmyel) |             |              |       |       |             |               |                 |                 |
|-------------------------------------------------------------------------------------------------|-------------|--------------|-------|-------|-------------|---------------|-----------------|-----------------|
| gene                                                                                            | p_val       | avg_log2FC   | pct.1 | pct.2 | p_val_adj   | Foldchange_UP | Foldchange_DOWN | Ratio_pct1_pct2 |
| APPBP2                                                                                          | 0,040344015 | -0,099250557 | 0,073 | 0,1   | 1           | 0,933517804   | 1,071216848     | 0,73            |
| ZNF787                                                                                          | 0,373680626 | -0,09936002  | 0,062 | 0,071 | 1           | 0,933446977   | 1,071298129     | 0,873239437     |
| GRINA                                                                                           | 0,116828009 | -0,099390778 | 0,111 | 0,132 | 1           | 0,933427077   | 1,071320969     | 0,840909091     |
| PCSK1N                                                                                          | 0,000250464 | -0,099510935 | 0,003 | 0,024 | 1           | 0,933349337   | 1,0714102       | 0,125           |
| NKRF                                                                                            | 0,005926576 | -0,099511332 | 0,021 | 0,045 | 1           | 0,933349081   | 1,071410494     | 0,466666667     |
| LZTR1                                                                                           | 0,719260866 | -0,099556797 | 0,049 | 0,052 | 1           | 0,933319668   | 1,071444259     | 0,942307692     |
| SF3B3                                                                                           | 0,070989159 | -0,0995993   | 0,05  | 0,071 | 1           | 0,933292172   | 1,071475825     | 0,704225352     |
| AC011752.1                                                                                      | 2,67675E-05 | -0,099642373 | 0     | 0,02  | 0,56482021  | 0,933264308   | 1,071507816     | 0               |
| LLGL2                                                                                           | 0,004621053 | -0,099652415 | 0,003 | 0,018 | 1           | 0,933257812   | 1,071515274     | 0,166666667     |
| SCMH1                                                                                           | 0,0022455   | -0,099700799 | 0,027 | 0,057 | 1           | 0,933226514   | 1,07155121      | 0,473684211     |
| RPS21                                                                                           | 0,003459757 | -0,099724813 | 0,574 | 0,744 | 1           | 0,93321098    | 1,071569046     | 0,771505376     |
| WDR20                                                                                           | 0,019965821 | -0,09973765  | 0,055 | 0,083 | 1           | 0,933202677   | 1,071578581     | 0,662650602     |
| KIF7                                                                                            | 0,003941056 | -0,099765804 | 0,005 | 0,02  | 1           | 0,933184465   | 1,071599493     | 0,25            |
| TMEM74                                                                                          | 0,000135341 | -0,099820305 | 0,002 | 0,023 | 1           | 0,933149213   | 1,071639976     | 0,086956522     |
| ALDH3A1                                                                                         | 0,00116827  | -0,09993239  | 0     | 0,012 | 1           | 0,933076718   | 1,071723237     | 0               |
| BCL9                                                                                            | 0,053303884 | -0,099982165 | 0,034 | 0,053 | 1           | 0,933044526   | 1,071760213     | 0,641509434     |
| RNF41                                                                                           | 0,22985379  | -0,100022324 | 0,051 | 0,064 | 1           | 0,933018554   | 1,071790047     | 0,796875        |
| ARHGDI3                                                                                         | 0,000472053 | -0,100035744 | 0,002 | 0,02  | 1           | 0,933009875   | 1,071800017     | 0,1             |
| HHEX                                                                                            | 0,133703361 | -0,100073388 | 0,023 | 0,035 | 1           | 0,932985531   | 1,071827983     | 0,657142857     |
| TTL4                                                                                            | 0,094569863 | -0,100080061 | 0,017 | 0,03  | 1           | 0,932981215   | 1,071832941     | 0,566666667     |
| PQBP1                                                                                           | 0,028793282 | -0,10014876  | 0,121 | 0,153 | 1           | 0,932936789   | 1,071883982     | 0,790849673     |
| SMIM14                                                                                          | 0,005296798 | -0,100214076 | 0,106 | 0,151 | 1           | 0,932894552   | 1,071932511     | 0,701986755     |
| FOXJ2                                                                                           | 0,066411574 | -0,100229723 | 0,033 | 0,05  | 1           | 0,932884435   | 1,071944136     | 0,66            |
| CNTF                                                                                            | 1,43484E-05 | -0,100232479 | 0     | 0,022 | 0,302765291 | 0,932882653   | 1,071946184     | 0               |
| ARID2                                                                                           | 0,002418957 | -0,100255663 | 0,077 | 0,121 | 1           | 0,932867661   | 1,071963411     | 0,636363636     |
| SAP25                                                                                           | 0,011671572 | -0,100319055 | 0,005 | 0,018 | 1           | 0,932826672   | 1,072010514     | 0,277777778     |
| TXNDC16                                                                                         | 0,010463208 | -0,100344573 | 0,023 | 0,046 | 1           | 0,932810173   | 1,072029475     | 0,5             |
| CORO1B                                                                                          | 0,621729542 | -0,100411649 | 0,142 | 0,126 | 1           | 0,932766804   | 1,072079319     | 1,126984127     |
| CES2                                                                                            | 0,296941067 | -0,100452259 | 0,028 | 0,037 | 1           | 0,932740548   | 1,072109497     | 0,756756757     |
| CARF                                                                                            | 0,309758518 | -0,1004662   | 0,023 | 0,031 | 1           | 0,932731535   | 1,072119857     | 0,741935484     |



Supplementary Table 5

| Differentially expressed genes_total calculation_ comparing SC-Keloid vs. (SC-Myel, SC-Nonmyel) |             |              |       |       |             |               |                 |                 |
|-------------------------------------------------------------------------------------------------|-------------|--------------|-------|-------|-------------|---------------|-----------------|-----------------|
| gene                                                                                            | p_val       | avg_log2FC   | pct.1 | pct.2 | p_val_adj   | Foldchange_UP | Foldchange_DOWN | Ratio_pct1_pct2 |
| EXOC7                                                                                           | 0,071943199 | -0,100607928 | 0,088 | 0,113 | 1           | 0,932639909   | 1,072225186     | 0,778761062     |
| PER2                                                                                            | 0,01076012  | -0,100651174 | 0,023 | 0,046 | 1           | 0,932611953   | 1,072257327     | 0,5             |
| WHRN                                                                                            | 0,07821476  | -0,100746803 | 0,013 | 0,024 | 1           | 0,932550137   | 1,072328404     | 0,541666667     |
| HDX                                                                                             | 0,006723528 | -0,100929754 | 0,013 | 0,033 | 1           | 0,932431886   | 1,072464396     | 0,393939394     |
| RAB8B                                                                                           | 0,000719812 | -0,100960052 | 0,143 | 0,204 | 1           | 0,932412304   | 1,07248692      | 0,700980392     |
| PGAP1                                                                                           | 0,014441249 | -0,100961477 | 0,047 | 0,075 | 1           | 0,932411383   | 1,072487979     | 0,626666667     |
| RAPGEF1                                                                                         | 0,000508508 | -0,10104978  | 0,024 | 0,058 | 1           | 0,932354315   | 1,072553624     | 0,413793103     |
| WWP1                                                                                            | 8,94066E-05 | -0,101055345 | 0,048 | 0,098 | 1           | 0,932350719   | 1,072557762     | 0,489795918     |
| PHKG2                                                                                           | 0,963513462 | -0,101163803 | 0,045 | 0,045 | 1           | 0,93228063    | 1,072638397     | 1               |
| RAB11FIP3                                                                                       | 0,767592782 | -0,101167582 | 0,044 | 0,046 | 1           | 0,932278188   | 1,072641207     | 0,956521739     |
| AIF1L                                                                                           | 0,068753113 | -0,10116962  | 0,077 | 0,1   | 1           | 0,932276871   | 1,072642722     | 0,77            |
| BDP1                                                                                            | 0,018501302 | -0,101185196 | 0,157 | 0,198 | 1           | 0,932266806   | 1,072654302     | 0,792929293     |
| PIK3R1                                                                                          | 1,33715E-09 | -0,101186033 | 0,305 | 0,474 | 2,82153E-05 | 0,932266264   | 1,072654925     | 0,643459916     |
| SLC24A4                                                                                         | 0,000229849 | -0,101209948 | 0,001 | 0,019 | 1           | 0,932250811   | 1,072672706     | 0,052631579     |
| CROCC                                                                                           | 0,048005787 | -0,101293542 | 0,029 | 0,047 | 1           | 0,932196795   | 1,072734862     | 0,617021277     |
| MED15                                                                                           | 0,011535935 | -0,10133853  | 0,157 | 0,198 | 1           | 0,932167727   | 1,072768314     | 0,792929293     |
| GOLGA6L4                                                                                        | 0,005114354 | -0,101384195 | 0,008 | 0,026 | 1           | 0,932138222   | 1,07280227      | 0,307692308     |
| PHC1                                                                                            | 0,005868953 | -0,10143944  | 0,061 | 0,096 | 1           | 0,932102528   | 1,072843352     | 0,635416667     |
| FGFBP3                                                                                          | 0,004810132 | -0,101498852 | 0,014 | 0,035 | 1           | 0,932064144   | 1,072887533     | 0,4             |
| MRPS18B                                                                                         | 0,017544631 | -0,101514099 | 0,092 | 0,125 | 1           | 0,932054293   | 1,072898872     | 0,736           |
| THEM6                                                                                           | 0,010537357 | -0,101592784 | 0,036 | 0,062 | 1           | 0,93200346    | 1,07295739      | 0,580645161     |
| BABAM2                                                                                          | 0,570604636 | -0,101631458 | 0,045 | 0,05  | 1           | 0,931978477   | 1,072986153     | 0,9             |
| HMCES                                                                                           | 0,142205085 | -0,101688795 | 0,028 | 0,041 | 1           | 0,931941437   | 1,073028798     | 0,682926829     |
| IQCJ-SCHIP1                                                                                     | 0,363884223 | -0,101790087 | 0,026 | 0,033 | 1           | 0,931876008   | 1,073104137     | 0,787878788     |
| NDC1                                                                                            | 0,013773381 | -0,101796778 | 0,008 | 0,023 | 1           | 0,931871686   | 1,073109115     | 0,347826087     |
| CAPN3                                                                                           | 0,000257659 | -0,101802424 | 0,002 | 0,022 | 1           | 0,931868039   | 1,073113314     | 0,090909091     |
| STEAP1B                                                                                         | 0,00101362  | -0,101941093 | 0,037 | 0,075 | 1           | 0,931778474   | 1,073216465     | 0,493333333     |
| CNTRL                                                                                           | 0,089767324 | -0,101952749 | 0,051 | 0,071 | 1           | 0,931770946   | 1,073225136     | 0,718309859     |
| CLCN7                                                                                           | 0,222946456 | -0,102019777 | 0,066 | 0,08  | 1           | 0,931727657   | 1,073274999     | 0,825           |
| SMPD4                                                                                           | 0,067416069 | -0,102077012 | 0,056 | 0,077 | 1           | 0,931690694   | 1,073317579     | 0,727272727     |

Supplementary Table 5

| Differentially expressed genes_total calculation_ comparing SC-Keloid vs. (SC-Myel, SC-Nonmyel) |             |              |       |       |             |               |                 |                 |
|-------------------------------------------------------------------------------------------------|-------------|--------------|-------|-------|-------------|---------------|-----------------|-----------------|
| gene                                                                                            | p_val       | avg_log2FC   | pct.1 | pct.2 | p_val_adj   | Foldchange_UP | Foldchange_DOWN | Ratio_pct1_pct2 |
| SNX33                                                                                           | 0,007570428 | -0,102195581 | 0,014 | 0,034 | 1           | 0,931614125   | 1,073405794     | 0,411764706     |
| CASKIN1                                                                                         | 4,99915E-05 | -0,102218316 | 0     | 0,019 | 1           | 0,931599444   | 1,07342271      | 0               |
| OGFRL1                                                                                          | 0,012700421 | -0,102223415 | 0,027 | 0,05  | 1           | 0,931596152   | 1,073426504     | 0,54            |
| ELMO2                                                                                           | 0,005198811 | -0,102228591 | 0,019 | 0,042 | 1           | 0,93159281    | 1,073430355     | 0,452380952     |
| SLU7                                                                                            | 0,001622578 | -0,102287422 | 0,113 | 0,164 | 1           | 0,931554821   | 1,073474129     | 0,68902439      |
| TOR1AIP1                                                                                        | 0,007058152 | -0,10229608  | 0,071 | 0,107 | 1           | 0,931549231   | 1,073480571     | 0,663551402     |
| PBX4                                                                                            | 0,03548484  | -0,102474729 | 0,008 | 0,02  | 1           | 0,931433884   | 1,073613509     | 0,4             |
| KAT7                                                                                            | 0,032266859 | -0,102545565 | 0,048 | 0,072 | 1           | 0,931388152   | 1,073666224     | 0,666666667     |
| CAMSAP1                                                                                         | 0,030526897 | -0,102564684 | 0,041 | 0,064 | 1           | 0,931375809   | 1,073680453     | 0,640625        |
| INTS13                                                                                          | 0,13875895  | -0,102611578 | 0,034 | 0,047 | 1           | 0,931345536   | 1,073715352     | 0,723404255     |
| TOLLIP                                                                                          | 0,033041283 | -0,102722164 | 0,104 | 0,133 | 1           | 0,931274148   | 1,073797659     | 0,781954887     |
| PLA2G4C                                                                                         | 4,61555E-06 | -0,102734838 | 0,019 | 0,064 | 0,097392767 | 0,931265967   | 1,073807092     | 0,296875        |
| FZD3                                                                                            | 0,034678106 | -0,102734907 | 0,055 | 0,08  | 1           | 0,931265923   | 1,073807143     | 0,6875          |
| IGSF9B                                                                                          | 0,091960073 | -0,102792553 | 0,016 | 0,028 | 1           | 0,931228713   | 1,07385005      | 0,571428571     |
| LINS1                                                                                           | 0,308751903 | -0,102838028 | 0,024 | 0,033 | 1           | 0,93119936    | 1,0738839       | 0,727272727     |
| CCDC149                                                                                         | 0,000245366 | -0,102956234 | 0,026 | 0,062 | 1           | 0,931123066   | 1,073971891     | 0,419354839     |
| ZDHHC14                                                                                         | 0,053972179 | -0,102987961 | 0,013 | 0,026 | 1           | 0,93110259    | 1,073995509     | 0,5             |
| KBTBD6                                                                                          | 0,037250518 | -0,103062182 | 0,02  | 0,037 | 1           | 0,931054689   | 1,074050764     | 0,540540541     |
| GSK3A                                                                                           | 0,15805256  | -0,103066931 | 0,085 | 0,102 | 1           | 0,931051625   | 1,074054299     | 0,833333333     |
| GLIS3                                                                                           | 0,002153892 | -0,103105868 | 0,184 | 0,243 | 1           | 0,931026496   | 1,074083287     | 0,757201646     |
| KLHL20                                                                                          | 0,388243848 | -0,10313825  | 0,052 | 0,061 | 1           | 0,9310056     | 1,074107396     | 0,852459016     |
| FILIP1                                                                                          | 7,07752E-06 | -0,103204265 | 0,002 | 0,03  | 0,149342765 | 0,930963      | 1,074156546     | 0,066666667     |
| LDOC1                                                                                           | 0,016738349 | -0,103262403 | 0,019 | 0,038 | 1           | 0,930925484   | 1,074199834     | 0,5             |
| CGRRF1                                                                                          | 0,000646118 | -0,103343487 | 0,052 | 0,096 | 1           | 0,930873165   | 1,074260209     | 0,541666667     |
| COQ7                                                                                            | 0,057843832 | -0,103344448 | 0,024 | 0,041 | 1           | 0,930872545   | 1,074260924     | 0,585365854     |
| DUS3L                                                                                           | 0,05694651  | -0,103605442 | 0,023 | 0,039 | 1           | 0,930704158   | 1,074455283     | 0,58974359      |
| TVP23C                                                                                          | 0,231381779 | -0,103636595 | 0,019 | 0,027 | 1           | 0,930684061   | 1,074478485     | 0,703703704     |
| ANKS1A                                                                                          | 0,000401382 | -0,103638483 | 0,017 | 0,049 | 1           | 0,930682843   | 1,074479891     | 0,346938776     |
| ENTPD3-AS1                                                                                      | 0,079113448 | -0,103682999 | 0,023 | 0,038 | 1           | 0,930654127   | 1,074513046     | 0,605263158     |
| MTO1                                                                                            | 0,242547491 | -0,103703658 | 0,023 | 0,033 | 1           | 0,9306408     | 1,074528433     | 0,696969697     |

Supplementary Table 5

| Differentially expressed genes_total calculation_ comparing SC-Keloid vs. (SC-Myel, SC-Nonmyel) |             |              |       |       |             |               |                 |                 |
|-------------------------------------------------------------------------------------------------|-------------|--------------|-------|-------|-------------|---------------|-----------------|-----------------|
| gene                                                                                            | p_val       | avg_log2FC   | pct.1 | pct.2 | p_val_adj   | Foldchange_UP | Foldchange_DOWN | Ratio_pct1_pct2 |
| SEPHS2                                                                                          | 0,386693653 | -0,103739777 | 0,08  | 0,09  | 1           | 0,9306175     | 1,074555335     | 0,888888889     |
| PRDM5                                                                                           | 0,003625735 | -0,103753625 | 0,012 | 0,033 | 1           | 0,930608568   | 1,074565649     | 0,363636364     |
| RNF138                                                                                          | 0,006926522 | -0,103862083 | 0,03  | 0,057 | 1           | 0,93053861    | 1,074646435     | 0,526315789     |
| USP4                                                                                            | 0,087529751 | -0,103863195 | 0,038 | 0,056 | 1           | 0,930537893   | 1,074647263     | 0,678571429     |
| AATF                                                                                            | 0,383543675 | -0,103871493 | 0,08  | 0,09  | 1           | 0,93053254    | 1,074653445     | 0,888888889     |
| RRAGD                                                                                           | 1,75718E-07 | -0,103907595 | 0,002 | 0,038 | 0,003707833 | 0,930509255   | 1,074680337     | 0,052631579     |
| NDFIP1                                                                                          | 6,37313E-07 | -0,103927408 | 0,241 | 0,358 | 0,013447951 | 0,930496476   | 1,074695096     | 0,673184358     |
| IPCEF1                                                                                          | 0,001462283 | -0,10392921  | 0,007 | 0,027 | 1           | 0,930495314   | 1,074696438     | 0,259259259     |
| EGLN1                                                                                           | 0,172749938 | -0,103985309 | 0,072 | 0,088 | 1           | 0,930459133   | 1,074738229     | 0,818181818     |
| SLC2A1                                                                                          | 0,003707986 | -0,104006539 | 0,026 | 0,053 | 1           | 0,93044544    | 1,074754044     | 0,490566038     |
| NCOA6                                                                                           | 0,069356043 | -0,104008049 | 0,047 | 0,066 | 1           | 0,930444466   | 1,074755169     | 0,712121212     |
| ACY1                                                                                            | 0,031992933 | -0,104026075 | 0,017 | 0,034 | 1           | 0,930432841   | 1,074768598     | 0,5             |
| MIER3                                                                                           | 0,019532591 | -0,104035031 | 0,023 | 0,043 | 1           | 0,930427065   | 1,07477527      | 0,534883721     |
| NKTR                                                                                            | 0,000263574 | -0,104229318 | 0,219 | 0,292 | 1           | 0,930301773   | 1,074920019     | 0,75            |
| BCL7B                                                                                           | 0,294587204 | -0,104332613 | 0,132 | 0,142 | 1           | 0,930235167   | 1,074996985     | 0,929577465     |
| GPR89A                                                                                          | 0,93346464  | -0,104366568 | 0,026 | 0,024 | 1           | 0,930213274   | 1,075022286     | 1,083333333     |
| MITF                                                                                            | 6,6514E-05  | -0,104444641 | 0,009 | 0,039 | 1           | 0,930162936   | 1,075080464     | 0,230769231     |
| JHY                                                                                             | 0,218016925 | -0,104522461 | 0,012 | 0,019 | 1           | 0,930112764   | 1,075138455     | 0,631578947     |
| DDX51                                                                                           | 0,055981172 | -0,104590039 | 0,024 | 0,041 | 1           | 0,930069196   | 1,075188818     | 0,585365854     |
| HSF1                                                                                            | 0,376446009 | -0,104614808 | 0,087 | 0,096 | 1           | 0,930053229   | 1,075207277     | 0,90625         |
| GORASP1                                                                                         | 0,065174374 | -0,104620813 | 0,029 | 0,046 | 1           | 0,930049358   | 1,075211753     | 0,630434783     |
| OSBP                                                                                            | 0,00131978  | -0,104629954 | 0,069 | 0,113 | 1           | 0,930043465   | 1,075218565     | 0,610619469     |
| KLHDC4                                                                                          | 0,602901428 | -0,10475564  | 0,033 | 0,037 | 1           | 0,929962444   | 1,075312242     | 0,891891892     |
| TENM4                                                                                           | 0,000370968 | -0,104790008 | 0,006 | 0,028 | 1           | 0,92994029    | 1,075337858     | 0,214285714     |
| ATF2                                                                                            | 0,010254571 | -0,104842779 | 0,102 | 0,14  | 1           | 0,929906276   | 1,075377193     | 0,728571429     |
| AFDN                                                                                            | 0,011950885 | -0,104871139 | 0,02  | 0,041 | 1           | 0,929887996   | 1,075398332     | 0,487804878     |
| ZNF367                                                                                          | 0,000910581 | -0,104997264 | 0,012 | 0,037 | 1           | 0,929806706   | 1,075492351     | 0,324324324     |
| ABCC8                                                                                           | 3,57874E-05 | -0,105005046 | 0,001 | 0,023 | 0,755149842 | 0,92980169    | 1,075498152     | 0,043478261     |
| RSPO3                                                                                           | 0,00099482  | -0,105032933 | 0,065 | 0,111 | 1           | 0,929783718   | 1,075518942     | 0,585585586     |
| LSS                                                                                             | 0,324662192 | -0,105119693 | 0,036 | 0,045 | 1           | 0,929727805   | 1,075583622     | 0,8             |

Supplementary Table 5

| Differentially expressed genes_total calculation_ comparing SC-Keloid vs. (SC-Myel, SC-Nonmyel) |             |              |       |       |             |               |                 |                 |
|-------------------------------------------------------------------------------------------------|-------------|--------------|-------|-------|-------------|---------------|-----------------|-----------------|
| gene                                                                                            | p_val       | avg_log2FC   | pct.1 | pct.2 | p_val_adj   | Foldchange_UP | Foldchange_DOWN | Ratio_pct1_pct2 |
| FGF1                                                                                            | 0,029285823 | -0,105175374 | 0,03  | 0,052 | 1           | 0,929691922   | 1,075625136     | 0,576923077     |
| GRIN2B                                                                                          | 2,67675E-05 | -0,105198473 | 0     | 0,02  | 0,56482021  | 0,929677037   | 1,075642357     | 0               |
| KANK1                                                                                           | 0,003975096 | -0,105232442 | 0,015 | 0,038 | 1           | 0,929655148   | 1,075667684     | 0,394736842     |
| TXNDC11                                                                                         | 0,274897003 | -0,105309149 | 0,034 | 0,043 | 1           | 0,92960572    | 1,075724878     | 0,790697674     |
| EMC4                                                                                            | 0,044302524 | -0,105326467 | 0,186 | 0,216 | 1           | 0,929594561   | 1,075737792     | 0,861111111     |
| UBA2                                                                                            | 0,007027151 | -0,105402115 | 0,123 | 0,166 | 1           | 0,929545819   | 1,075794199     | 0,740963855     |
| KLK6                                                                                            | 0,027958858 | -0,10548459  | 0,033 | 0,054 | 1           | 0,929492681   | 1,075855701     | 0,611111111     |
| EGLN3                                                                                           | 0,001427484 | -0,105494395 | 0,003 | 0,02  | 1           | 0,929486364   | 1,075863013     | 0,15            |
| ZFYVE27                                                                                         | 0,221342226 | -0,105520773 | 0,034 | 0,045 | 1           | 0,929469369   | 1,075882684     | 0,755555556     |
| MBTPS2                                                                                          | 0,179667452 | -0,105570469 | 0,029 | 0,041 | 1           | 0,929437353   | 1,075919745     | 0,707317073     |
| GALNT1                                                                                          | 0,156233404 | -0,105590707 | 0,072 | 0,09  | 1           | 0,929424315   | 1,075934839     | 0,8             |
| WNK3                                                                                            | 0,019139907 | -0,105601177 | 0,021 | 0,041 | 1           | 0,92941757    | 1,075942647     | 0,512195122     |
| NMD3                                                                                            | 0,188643387 | -0,105646707 | 0,069 | 0,084 | 1           | 0,929388239   | 1,075976603     | 0,821428571     |
| WDR13                                                                                           | 0,028915713 | -0,10567893  | 0,156 | 0,187 | 1           | 0,929367481   | 1,076000636     | 0,834224599     |
| MTF2                                                                                            | 0,04475993  | -0,105696556 | 0,068 | 0,092 | 1           | 0,929356126   | 1,076013782     | 0,739130435     |
| PABPN1                                                                                          | 8,10845E-07 | -0,105701634 | 0,212 | 0,318 | 0,017109644 | 0,929352855   | 1,076017569     | 0,666666667     |
| B4GALT3                                                                                         | 0,627460338 | -0,10570934  | 0,047 | 0,05  | 1           | 0,929347891   | 1,076023317     | 0,94            |
| DLG2                                                                                            | 2,72394E-06 | -0,105712933 | 0,009 | 0,047 | 0,057477755 | 0,929345577   | 1,076025996     | 0,191489362     |
| TMEM201                                                                                         | 0,058127624 | -0,105750804 | 0,024 | 0,041 | 1           | 0,929321181   | 1,076054243     | 0,585365854     |
| ELMOD3                                                                                          | 0,042416838 | -0,105768899 | 0,023 | 0,041 | 1           | 0,929309525   | 1,076067739     | 0,56097561      |
| ACOX1                                                                                           | 0,194589994 | -0,105787307 | 0,049 | 0,062 | 1           | 0,929297668   | 1,076081469     | 0,790322581     |
| TRABD                                                                                           | 0,381833087 | -0,105792819 | 0,063 | 0,072 | 1           | 0,929294117   | 1,076085581     | 0,875           |
| AEBP1                                                                                           | 4,49972E-06 | -0,105812052 | 0,243 | 0,351 | 0,094948661 | 0,929281729   | 1,076099926     | 0,692307692     |
| LIN7A                                                                                           | 0,241002762 | -0,105877421 | 0,023 | 0,033 | 1           | 0,929239624   | 1,076148686     | 0,696969697     |
| CPPED1                                                                                          | 0,283824108 | -0,105953193 | 0,085 | 0,098 | 1           | 0,929190821   | 1,076205207     | 0,867346939     |
| AMIGO2                                                                                          | 0,015078228 | -0,106091481 | 0,006 | 0,019 | 1           | 0,929101758   | 1,076308371     | 0,315789474     |
| IRF6                                                                                            | 0,067387654 | -0,106169518 | 0,006 | 0,015 | 1           | 0,929051503   | 1,076366592     | 0,4             |
| MDM1                                                                                            | 0,052033711 | -0,106189562 | 0,035 | 0,054 | 1           | 0,929038596   | 1,076381546     | 0,648148148     |
| SERGEF                                                                                          | 0,006676407 | -0,10621039  | 0,038 | 0,068 | 1           | 0,929025183   | 1,076397086     | 0,558823529     |
| RAPGEFL1                                                                                        | 0,008037042 | -0,106223792 | 0,003 | 0,016 | 1           | 0,929016553   | 1,076407085     | 0,1875          |

Supplementary Table 5

| Differentially expressed genes_total calculation_ comparing SC-Keloid vs. (SC-Myel, SC-Nonmyel) |             |              |       |       |             |               |                 |                 |
|-------------------------------------------------------------------------------------------------|-------------|--------------|-------|-------|-------------|---------------|-----------------|-----------------|
| gene                                                                                            | p_val       | avg_log2FC   | pct.1 | pct.2 | p_val_adj   | Foldchange_UP | Foldchange_DOWN | Ratio_pct1_pct2 |
| MBIP                                                                                            | 0,026597794 | -0,106242534 | 0,062 | 0,09  | 1           | 0,929004485   | 1,076421069     | 0,688888889     |
| ACVR2B                                                                                          | 0,007751785 | -0,10626683  | 0,019 | 0,041 | 1           | 0,92898884    | 1,076439196     | 0,463414634     |
| EID3                                                                                            | 0,00418716  | -0,10641929  | 0,021 | 0,046 | 1           | 0,928890672   | 1,076552957     | 0,456521739     |
| RANBP2                                                                                          | 0,000496324 | -0,106439702 | 0,102 | 0,16  | 1           | 0,928877529   | 1,07656819      | 0,6375          |
| SERPINB5                                                                                        | 0,011573034 | -0,10646615  | 0,007 | 0,022 | 1           | 0,928860501   | 1,076587926     | 0,318181818     |
| ILF3                                                                                            | 0,003018293 | -0,106500552 | 0,198 | 0,254 | 1           | 0,928838352   | 1,076613598     | 0,779527559     |
| FLT3LG                                                                                          | 0,077651392 | -0,106501148 | 0,022 | 0,037 | 1           | 0,928837969   | 1,076614042     | 0,594594595     |
| DEPTOR                                                                                          | 0,00236538  | -0,106514244 | 0,012 | 0,034 | 1           | 0,928829537   | 1,076623816     | 0,352941176     |
| HEG1                                                                                            | 0,013709696 | -0,10652025  | 0,03  | 0,054 | 1           | 0,92882567    | 1,076628298     | 0,555555556     |
| USP2                                                                                            | 7,69825E-06 | -0,106526862 | 0     | 0,023 | 0,162440745 | 0,928821413   | 1,076633232     | 0               |
| MAPKBP1                                                                                         | 0,033696909 | -0,106539295 | 0,026 | 0,045 | 1           | 0,928813409   | 1,07664251      | 0,577777778     |
| THBS1                                                                                           | 3,42842E-05 | -0,106600435 | 0,17  | 0,255 | 0,723431402 | 0,928774048   | 1,076688138     | 0,666666667     |
| C1orf50                                                                                         | 0,17990318  | -0,106608523 | 0,024 | 0,035 | 1           | 0,928768841   | 1,076694174     | 0,685714286     |
| ERO1A                                                                                           | 0,050928785 | -0,106610556 | 0,047 | 0,068 | 1           | 0,928767532   | 1,076695691     | 0,691176471     |
| GTF2IRD1                                                                                        | 0,04906351  | -0,106624306 | 0,03  | 0,049 | 1           | 0,92875868    | 1,076705953     | 0,612244898     |
| TAF4                                                                                            | 0,003783921 | -0,106646192 | 0,015 | 0,038 | 1           | 0,928744591   | 1,076722287     | 0,394736842     |
| HVCN1                                                                                           | 0,003247889 | -0,106656434 | 0,006 | 0,023 | 1           | 0,928737998   | 1,076729931     | 0,260869565     |
| TCF20                                                                                           | 0,002937871 | -0,106683847 | 0,021 | 0,047 | 1           | 0,92872035    | 1,076750391     | 0,446808511     |
| BAP1                                                                                            | 0,240647569 | -0,106711936 | 0,047 | 0,058 | 1           | 0,928702269   | 1,076771355     | 0,810344828     |
| NOL12                                                                                           | 0,084110663 | -0,106816484 | 0,04  | 0,057 | 1           | 0,928634971   | 1,076849388     | 0,701754386     |
| NAAA                                                                                            | 0,023044272 | -0,106835389 | 0,017 | 0,035 | 1           | 0,928622802   | 1,076863499     | 0,485714286     |
| CSRNP2                                                                                          | 0,000668046 | -0,106882837 | 0,033 | 0,069 | 1           | 0,928592261   | 1,076898916     | 0,47826087      |
| SPTBN5                                                                                          | 0,000520862 | -0,106901295 | 0,014 | 0,042 | 1           | 0,928580381   | 1,076912694     | 0,333333333     |
| DNAJC18                                                                                         | 0,079122888 | -0,106908227 | 0,027 | 0,042 | 1           | 0,928575919   | 1,076917869     | 0,642857143     |
| MSX2                                                                                            | 0,035202737 | -0,106964144 | 0,008 | 0,02  | 1           | 0,92853993    | 1,076959609     | 0,4             |
| FCHO2                                                                                           | 0,326408228 | -0,107018415 | 0,061 | 0,072 | 1           | 0,928505001   | 1,077000123     | 0,847222222     |
| YJU2B                                                                                           | 0,072803346 | -0,107067866 | 0,083 | 0,106 | 1           | 0,928473175   | 1,07703704      | 0,783018868     |
| ANAPC2                                                                                          | 0,232385203 | -0,107105053 | 0,024 | 0,034 | 1           | 0,928449243   | 1,077064802     | 0,705882353     |
| TDRP                                                                                            | 5,58816E-05 | -0,10712942  | 0,007 | 0,035 | 1           | 0,928433561   | 1,077082994     | 0,2             |
| WASHC4                                                                                          | 0,180762127 | -0,107161028 | 0,121 | 0,138 | 1           | 0,928413221   | 1,077106592     | 0,876811594     |

Supplementary Table 5

| Differentially expressed genes_total calculation_ comparing SC-Keloid vs. (SC-Myel, SC-Nonmyel) |             |              |       |       |             |               |                 |                 |
|-------------------------------------------------------------------------------------------------|-------------|--------------|-------|-------|-------------|---------------|-----------------|-----------------|
| gene                                                                                            | p_val       | avg_log2FC   | pct.1 | pct.2 | p_val_adj   | Foldchange_UP | Foldchange_DOWN | Ratio_pct1_pct2 |
| NAA15                                                                                           | 0,002299506 | -0,107177662 | 0,09  | 0,134 | 1           | 0,928402517   | 1,077119011     | 0,671641791     |
| MATN1-AS1                                                                                       | 0,008336606 | -0,107208222 | 0,003 | 0,016 | 1           | 0,928382851   | 1,077141827     | 0,1875          |
| CWF19L2                                                                                         | 0,000179816 | -0,107376547 | 0,098 | 0,159 | 1           | 0,928274539   | 1,077267509     | 0,616352201     |
| POLL                                                                                            | 0,464782882 | -0,107414055 | 0,026 | 0,031 | 1           | 0,928250405   | 1,077295517     | 0,838709677     |
| TRMT9B                                                                                          | 0,001424545 | -0,107477384 | 0,003 | 0,02  | 1           | 0,92820966    | 1,077342807     | 0,15            |
| CHTOP                                                                                           | 0,007269665 | -0,107530532 | 0,128 | 0,171 | 1           | 0,928175465   | 1,077382497     | 0,748538012     |
| PEX6                                                                                            | 0,177338033 | -0,10756029  | 0,022 | 0,033 | 1           | 0,92815632    | 1,07740472      | 0,666666667     |
| ACACB                                                                                           | 0,002898931 | -0,107717356 | 0,013 | 0,035 | 1           | 0,928055278   | 1,077522023     | 0,371428571     |
| FRMD4B                                                                                          | 4,31423E-05 | -0,107734118 | 0,005 | 0,031 | 0,910345014 | 0,928044495   | 1,077534542     | 0,161290323     |
| C1orf159                                                                                        | 0,015661583 | -0,107734938 | 0,017 | 0,037 | 1           | 0,928043968   | 1,077535154     | 0,459459459     |
| CFH                                                                                             | 0,001411959 | -0,107767691 | 0,014 | 0,039 | 1           | 0,928022899   | 1,077559618     | 0,358974359     |
| RHOQ                                                                                            | 0,000766803 | -0,107786349 | 0,205 | 0,271 | 1           | 0,928010897   | 1,077573553     | 0,756457565     |
| SHISA9                                                                                          | 0,046288965 | -0,107856204 | 0,016 | 0,031 | 1           | 0,927965964   | 1,077625731     | 0,516129032     |
| PTGFRN                                                                                          | 0,006935415 | -0,107920396 | 0,013 | 0,033 | 1           | 0,927924675   | 1,07767368      | 0,393939394     |
| TMEM38B                                                                                         | 0,000160564 | -0,10793178  | 0,048 | 0,095 | 1           | 0,927917353   | 1,077682184     | 0,505263158     |
| SGK3                                                                                            | 0,000192658 | -0,107944984 | 0,009 | 0,037 | 1           | 0,927908861   | 1,077692047     | 0,243243243     |
| EPHA10                                                                                          | 0,000618779 | -0,108041824 | 0     | 0,014 | 1           | 0,927846578   | 1,077764389     | 0               |
| NMRK1                                                                                           | 0,039796622 | -0,108082793 | 0,07  | 0,096 | 1           | 0,927820229   | 1,077794996     | 0,729166667     |
| PEPD                                                                                            | 0,005246221 | -0,108132493 | 0,171 | 0,218 | 1           | 0,927788267   | 1,077832125     | 0,78440367      |
| EIF2D                                                                                           | 0,4468573   | -0,108159    | 0,069 | 0,076 | 1           | 0,927771221   | 1,077851929     | 0,907894737     |
| ARHGAP10                                                                                        | 0,001974564 | -0,108165017 | 0,058 | 0,099 | 1           | 0,927767351   | 1,077856424     | 0,585858586     |
| BCL2L2                                                                                          | 0,04948417  | -0,108170673 | 0,031 | 0,05  | 1           | 0,927763714   | 1,07786065      | 0,62            |
| FRA10AC1                                                                                        | 0,005462047 | -0,108267603 | 0,058 | 0,094 | 1           | 0,927701383   | 1,077933071     | 0,617021277     |
| TMEM161B-DT                                                                                     | 0,123141225 | -0,108324216 | 0,035 | 0,05  | 1           | 0,927664979   | 1,077975371     | 0,7             |
| NUCB1                                                                                           | 0,000520647 | -0,108397018 | 0,218 | 0,288 | 1           | 0,927618168   | 1,078029769     | 0,756944444     |
| DGKD                                                                                            | 0,022451688 | -0,108420249 | 0,017 | 0,035 | 1           | 0,927603232   | 1,078047128     | 0,485714286     |
| DENND6A                                                                                         | 0,02516785  | -0,108566532 | 0,044 | 0,069 | 1           | 0,927509181   | 1,078156444     | 0,637681159     |
| YLPM1                                                                                           | 0,000208874 | -0,10856787  | 0,058 | 0,109 | 1           | 0,927508321   | 1,078157443     | 0,532110092     |
| ZNF292                                                                                          | 0,091924716 | -0,108644401 | 0,101 | 0,125 | 1           | 0,927459121   | 1,078214638     | 0,808           |
| PIGU                                                                                            | 0,136890381 | -0,108668995 | 0,038 | 0,053 | 1           | 0,92744331    | 1,078233019     | 0,716981132     |

Supplementary Table 5

| Differentially expressed genes_total calculation_ comparing SC-Keloid vs. (SC-Myel, SC-Nonmyel) |             |              |       |       |             |               |                 |                 |
|-------------------------------------------------------------------------------------------------|-------------|--------------|-------|-------|-------------|---------------|-----------------|-----------------|
| gene                                                                                            | p_val       | avg_log2FC   | pct.1 | pct.2 | p_val_adj   | Foldchange_UP | Foldchange_DOWN | Ratio_pct1_pct2 |
| ORAI3                                                                                           | 0,810799088 | -0,108707713 | 0,024 | 0,026 | 1           | 0,92741842    | 1,078261956     | 0,923076923     |
| DGCR2                                                                                           | 0,06233693  | -0,108748012 | 0,057 | 0,079 | 1           | 0,927392515   | 1,078292076     | 0,721518987     |
| SETD2                                                                                           | 8,04741E-06 | -0,108777593 | 0,102 | 0,176 | 0,169808418 | 0,9273735     | 1,078314185     | 0,579545455     |
| LIPE                                                                                            | 0,000836554 | -0,108789934 | 0,003 | 0,022 | 1           | 0,927365567   | 1,078323409     | 0,136363636     |
| NEFM                                                                                            | 0,140258679 | -0,108880171 | 0,075 | 0,054 | 1           | 0,927307564   | 1,078390858     | 1,388888889     |
| TSG101                                                                                          | 0,340654102 | -0,108977066 | 0,139 | 0,149 | 1           | 0,927245286   | 1,078463288     | 0,932885906     |
| C1GALT1                                                                                         | 0,000106616 | -0,109010179 | 0,054 | 0,104 | 1           | 0,927224004   | 1,078488041     | 0,519230769     |
| CARS2                                                                                           | 0,334318961 | -0,109021301 | 0,077 | 0,087 | 1           | 0,927216856   | 1,078496355     | 0,885057471     |
| SPATA2                                                                                          | 0,013764266 | -0,109053577 | 0,016 | 0,035 | 1           | 0,927196113   | 1,078520484     | 0,457142857     |
| RNF144A                                                                                         | 0,005290195 | -0,109083574 | 0,008 | 0,026 | 1           | 0,927176834   | 1,078542909     | 0,307692308     |
| IQCIN                                                                                           | 0,101145867 | -0,109141979 | 0,01  | 0,02  | 1           | 0,9271393     | 1,078586572     | 0,5             |
| PHLDB3                                                                                          | 0,00542189  | -0,10924917  | 0,006 | 0,022 | 1           | 0,927070417   | 1,078666714     | 0,272727273     |
| RGS12                                                                                           | 0,000599048 | -0,109275389 | 0,042 | 0,083 | 1           | 0,927053569   | 1,078686317     | 0,506024096     |
| ASAH1                                                                                           | 0,004553086 | -0,109305774 | 0,222 | 0,277 | 1           | 0,927034044   | 1,078709036     | 0,801444043     |
| YPEL4                                                                                           | 0,001418685 | -0,109352086 | 0,003 | 0,02  | 1           | 0,927004286   | 1,078743664     | 0,15            |
| SMARCD3                                                                                         | 0,038819266 | -0,109384028 | 0,041 | 0,062 | 1           | 0,926983762   | 1,078767548     | 0,661290323     |
| MYRF                                                                                            | 0,000175145 | -0,109404607 | 0     | 0,016 | 1           | 0,926970539   | 1,078782936     | 0               |
| ACSL1                                                                                           | 8,39074E-05 | -0,109414168 | 0,027 | 0,068 | 1           | 0,926964396   | 1,078790086     | 0,397058824     |
| CEP120                                                                                          | 0,13356536  | -0,109551115 | 0,019 | 0,03  | 1           | 0,926876409   | 1,078892494     | 0,633333333     |
| TINAGL1                                                                                         | 0,004741072 | -0,109602583 | 0,003 | 0,018 | 1           | 0,926843343   | 1,078930984     | 0,166666667     |
| CLCN6                                                                                           | 0,004592461 | -0,109639357 | 0,017 | 0,041 | 1           | 0,926819718   | 1,078958486     | 0,414634146     |
| ABHD16A                                                                                         | 0,161129626 | -0,109679003 | 0,047 | 0,061 | 1           | 0,926794249   | 1,078988137     | 0,770491803     |
| GJB1                                                                                            | 0,000128215 | -0,109684609 | 0,005 | 0,028 | 1           | 0,926790648   | 1,07899233      | 0,178571429     |
| ZNF326                                                                                          | 0,000125592 | -0,109695132 | 0,133 | 0,199 | 1           | 0,926783887   | 1,0790002       | 0,668341709     |
| NPR2                                                                                            | 0,306432123 | -0,109721195 | 0,014 | 0,02  | 1           | 0,926767145   | 1,079019693     | 0,7             |
| TPD52                                                                                           | 7,77087E-08 | -0,109784498 | 0,001 | 0,037 | 0,001639731 | 0,926726481   | 1,079067039     | 0,027027027     |
| EBF4                                                                                            | 0,024038268 | -0,109857544 | 0,013 | 0,028 | 1           | 0,926679561   | 1,079121675     | 0,464285714     |
| NAP1L2                                                                                          | 0,000143178 | -0,1098596   | 0,002 | 0,023 | 1           | 0,92667824    | 1,079123213     | 0,086956522     |
| TLNRD1                                                                                          | 0,017277588 | -0,109870574 | 0,062 | 0,091 | 1           | 0,926671191   | 1,079131422     | 0,681318681     |
| ZBTB20-AS2                                                                                      | 0,015296782 | -0,109899154 | 0,006 | 0,019 | 1           | 0,926652834   | 1,0791528       | 0,315789474     |

Supplementary Table 5

| Differentially expressed genes_total calculation_ comparing SC-Keloid vs. (SC-Myel, SC-Nonmyel) |             |              |       |       |             |               |                 |                 |
|-------------------------------------------------------------------------------------------------|-------------|--------------|-------|-------|-------------|---------------|-----------------|-----------------|
| gene                                                                                            | p_val       | avg_log2FC   | pct.1 | pct.2 | p_val_adj   | Foldchange_UP | Foldchange_DOWN | Ratio_pct1_pct2 |
| CXCR4                                                                                           | 0,000948944 | -0,109926998 | 0,031 | 0,066 | 1           | 0,92663495    | 1,079173627     | 0,46969697      |
| THNSL2                                                                                          | 0,068263075 | -0,110007463 | 0,04  | 0,058 | 1           | 0,926583269   | 1,079233819     | 0,689655172     |
| LINC01023                                                                                       | 0,011239846 | -0,11001144  | 0,007 | 0,022 | 1           | 0,926580714   | 1,079236795     | 0,318181818     |
| DUSP15                                                                                          | 0,676251877 | -0,110060265 | 0,044 | 0,047 | 1           | 0,926549357   | 1,079273319     | 0,936170213     |
| ASAP2                                                                                           | 3,71524E-06 | -0,110202623 | 0,173 | 0,269 | 0,078395295 | 0,926457934   | 1,079379822     | 0,643122677     |
| POLRMT                                                                                          | 0,065099375 | -0,110330211 | 0,03  | 0,047 | 1           | 0,926376004   | 1,079475284     | 0,638297872     |
| IMP3                                                                                            | 0,009571061 | -0,110367611 | 0,107 | 0,148 | 1           | 0,926351989   | 1,079503268     | 0,722972973     |
| KIF3C                                                                                           | 0,001556228 | -0,110445007 | 0,022 | 0,052 | 1           | 0,926302295   | 1,079561181     | 0,423076923     |
| ABHD14B                                                                                         | 0,29552833  | -0,110446793 | 0,075 | 0,085 | 1           | 0,926301148   | 1,079562518     | 0,882352941     |
| DDX21                                                                                           | 0,000669116 | -0,110484739 | 0,232 | 0,301 | 1           | 0,926276785   | 1,079590913     | 0,77076412      |
| ZNF3                                                                                            | 0,226508582 | -0,110517223 | 0,031 | 0,042 | 1           | 0,926255929   | 1,079615222     | 0,738095238     |
| SWT1                                                                                            | 0,033028846 | -0,110550301 | 0,012 | 0,026 | 1           | 0,926234692   | 1,079639976     | 0,461538462     |
| PATZ1                                                                                           | 0,116269102 | -0,110629691 | 0,037 | 0,053 | 1           | 0,926183723   | 1,079699389     | 0,698113208     |
| ABHD10                                                                                          | 0,053662096 | -0,11064495  | 0,022 | 0,038 | 1           | 0,926173928   | 1,079710808     | 0,578947368     |
| ACTR1A                                                                                          | 0,521750425 | -0,110766537 | 0,105 | 0,11  | 1           | 0,926095875   | 1,079801808     | 0,954545455     |
| RWDD3                                                                                           | 0,50960333  | -0,110810714 | 0,041 | 0,046 | 1           | 0,926067517   | 1,079834873     | 0,891304348     |
| CCHCR1                                                                                          | 0,269028785 | -0,110823552 | 0,034 | 0,043 | 1           | 0,926059277   | 1,079844482     | 0,790697674     |
| ZC3H7A                                                                                          | 0,001472093 | -0,110868335 | 0,094 | 0,142 | 1           | 0,926030531   | 1,079878002     | 0,661971831     |
| DTX3                                                                                            | 0,280439217 | -0,110958197 | 0,062 | 0,073 | 1           | 0,925972853   | 1,079945267     | 0,849315068     |
| ANKRD29                                                                                         | 7,92722E-05 | -0,111028552 | 0,003 | 0,027 | 1           | 0,925927698   | 1,079997933     | 0,111111111     |
| SORD                                                                                            | 0,00131151  | -0,111250666 | 0,017 | 0,045 | 1           | 0,925785155   | 1,080164221     | 0,377777778     |
| IRAK2                                                                                           | 0,137759522 | -0,11139525  | 0,022 | 0,034 | 1           | 0,925692379   | 1,080272478     | 0,647058824     |
| LIN54                                                                                           | 0,001064708 | -0,111533587 | 0,02  | 0,049 | 1           | 0,925603621   | 1,080376067     | 0,408163265     |
| LMF1                                                                                            | 0,13480644  | -0,111843519 | 0,043 | 0,058 | 1           | 0,925404796   | 1,080608188     | 0,74137931      |
| TMEM116                                                                                         | 0,169852008 | -0,11190279  | 0,015 | 0,024 | 1           | 0,925366778   | 1,080652584     | 0,625           |
| VWC2                                                                                            | 1,43484E-05 | -0,11198551  | 0     | 0,022 | 0,302765291 | 0,925313722   | 1,080714547     | 0               |
| DTX4                                                                                            | 1,12803E-06 | -0,11202902  | 0,002 | 0,034 | 0,023802562 | 0,925285816   | 1,080747141     | 0,058823529     |
| NRDE2                                                                                           | 0,021749569 | -0,112070142 | 0,061 | 0,09  | 1           | 0,925259442   | 1,080777947     | 0,677777778     |
| NSMAF                                                                                           | 0,000988971 | -0,112147395 | 0,026 | 0,058 | 1           | 0,925209898   | 1,080835821     | 0,448275862     |
| TGFB2                                                                                           | 0,050639263 | -0,112268929 | 0,05  | 0,072 | 1           | 0,92513196    | 1,080926876     | 0,694444444     |



Supplementary Table 5

| Differentially expressed genes_total calculation_ comparing SC-Keloid vs. (SC-Myel, SC-Nonmyel) |             |              |       |       |             |               |                 |                 |
|-------------------------------------------------------------------------------------------------|-------------|--------------|-------|-------|-------------|---------------|-----------------|-----------------|
| gene                                                                                            | p_val       | avg_log2FC   | pct.1 | pct.2 | p_val_adj   | Foldchange_UP | Foldchange_DOWN | Ratio_pct1_pct2 |
| PFKP                                                                                            | 0,066576427 | -0,112304904 | 0,043 | 0,062 | 1           | 0,925108892   | 1,080953831     | 0,693548387     |
| FAM13B                                                                                          | 5,08747E-05 | -0,112321775 | 0,07  | 0,13  | 1           | 0,925098074   | 1,080966471     | 0,538461538     |
| CAMLG                                                                                           | 0,001245405 | -0,112402843 | 0,214 | 0,275 | 1           | 0,925046092   | 1,081027215     | 0,778181818     |
| ZNF143                                                                                          | 0,004087917 | -0,112437534 | 0,033 | 0,062 | 1           | 0,925023849   | 1,081053209     | 0,532258065     |
| CNTNAP1                                                                                         | 7,1553E-05  | -0,112443621 | 0,005 | 0,03  | 1           | 0,925019946   | 1,08105777      | 0,166666667     |
| POLK                                                                                            | 0,000964113 | -0,112498274 | 0,098 | 0,149 | 1           | 0,924984904   | 1,081098724     | 0,657718121     |
| ZBED3                                                                                           | 0,006047458 | -0,11254045  | 0,012 | 0,031 | 1           | 0,924957863   | 1,08113033      | 0,387096774     |
| RASGEF1C                                                                                        | 0,048326764 | -0,112578709 | 0,118 | 0,147 | 1           | 0,924933335   | 1,081159001     | 0,802721088     |
| PTHLH                                                                                           | 0,015899811 | -0,112761748 | 0,017 | 0,037 | 1           | 0,924815993   | 1,08129618      | 0,459459459     |
| MERTK                                                                                           | 6,54608E-07 | -0,112836877 | 0,003 | 0,038 | 0,013812889 | 0,924767834   | 1,08135249      | 0,078947368     |
| DHRS12                                                                                          | 0,355356235 | -0,112843742 | 0,044 | 0,053 | 1           | 0,924763434   | 1,081357636     | 0,830188679     |
| PRRC2B                                                                                          | 0,008678633 | -0,112861294 | 0,14  | 0,183 | 1           | 0,924752183   | 1,081370791     | 0,765027322     |
| TANK                                                                                            | 0,000328263 | -0,11289104  | 0,093 | 0,148 | 1           | 0,924733116   | 1,081393088     | 0,628378378     |
| SIRT7                                                                                           | 0,281591686 | -0,112962227 | 0,057 | 0,068 | 1           | 0,924687488   | 1,081446448     | 0,838235294     |
| EPS8L2                                                                                          | 0,032797145 | -0,112983006 | 0,012 | 0,026 | 1           | 0,92467417    | 1,081462025     | 0,461538462     |
| KIF16B                                                                                          | 0,000185622 | -0,113004232 | 0,03  | 0,071 | 1           | 0,924660566   | 1,081477936     | 0,422535211     |
| FAAH                                                                                            | 0,000328784 | -0,113021121 | 0     | 0,015 | 1           | 0,924649741   | 1,081490596     | 0               |
| BMP2                                                                                            | 0,034942777 | -0,113067463 | 0,028 | 0,047 | 1           | 0,92462004    | 1,081525336     | 0,595744681     |
| RCL1                                                                                            | 0,097988128 | -0,113071364 | 0,021 | 0,034 | 1           | 0,92461754    | 1,081528261     | 0,617647059     |
| DGKA                                                                                            | 0,068535558 | -0,113170719 | 0,02  | 0,034 | 1           | 0,924553866   | 1,081602746     | 0,588235294     |
| MOB3C                                                                                           | 0,011412986 | -0,11321587  | 0,014 | 0,033 | 1           | 0,924524931   | 1,081636597     | 0,424242424     |
| RHOF                                                                                            | 0,004832774 | -0,11329792  | 0,017 | 0,041 | 1           | 0,924472352   | 1,081698114     | 0,414634146     |
| PRICKLE3                                                                                        | 0,01608493  | -0,113298864 | 0,009 | 0,024 | 1           | 0,924471748   | 1,081698821     | 0,375           |
| RBP1                                                                                            | 3,32745E-05 | -0,113404396 | 0,022 | 0,064 | 0,702126053 | 0,924404126   | 1,08177795      | 0,34375         |
| SPSB2                                                                                           | 0,002864782 | -0,113428021 | 0,021 | 0,047 | 1           | 0,924388989   | 1,081795664     | 0,446808511     |
| PLEKHO2                                                                                         | 0,020395973 | -0,113434957 | 0,055 | 0,083 | 1           | 0,924384544   | 1,081800866     | 0,662650602     |
| IFIH1                                                                                           | 0,014202847 | -0,113508553 | 0,016 | 0,035 | 1           | 0,92433739    | 1,081856053     | 0,457142857     |
| ATP6AP2                                                                                         | 9,83557E-08 | -0,113588276 | 0,348 | 0,516 | 0,002075403 | 0,924286312   | 1,081915838     | 0,674418605     |
| ADAMTS5                                                                                         | 0,020206259 | -0,113593794 | 0,005 | 0,016 | 1           | 0,924282777   | 1,081919976     | 0,3125          |
| PGM5                                                                                            | 0,017294181 | -0,113612852 | 0,002 | 0,012 | 1           | 0,924270568   | 1,081934268     | 0,166666667     |

Supplementary Table 5

| Differentially expressed genes_total calculation_ comparing SC-Keloid vs. (SC-Myel, SC-Nonmyel) |             |              |       |       |             |               |                 |                 |
|-------------------------------------------------------------------------------------------------|-------------|--------------|-------|-------|-------------|---------------|-----------------|-----------------|
| gene                                                                                            | p_val       | avg_log2FC   | pct.1 | pct.2 | p_val_adj   | Foldchange_UP | Foldchange_DOWN | Ratio_pct1_pct2 |
| APC2                                                                                            | 0,000229849 | -0,113659898 | 0,001 | 0,019 | 1           | 0,924240428   | 1,08196955      | 0,052631579     |
| RMND5B                                                                                          | 0,378721889 | -0,113761626 | 0,048 | 0,056 | 1           | 0,92417526    | 1,082045845     | 0,857142857     |
| LMCD1                                                                                           | 0,054976285 | -0,113846401 | 0,077 | 0,102 | 1           | 0,924120955   | 1,08210943      | 0,754901961     |
| ADCK2                                                                                           | 0,683722104 | -0,113931741 | 0,034 | 0,037 | 1           | 0,924066292   | 1,082173442     | 0,918918919     |
| TUSC1                                                                                           | 0,115987654 | -0,114008307 | 0,108 | 0,128 | 1           | 0,924017252   | 1,082230876     | 0,84375         |
| CCNE1                                                                                           | 0,000495589 | -0,114146678 | 0,007 | 0,03  | 1           | 0,923928632   | 1,08233468      | 0,233333333     |
| RNF149                                                                                          | 4,41262E-06 | -0,114158662 | 0,05  | 0,113 | 0,093110781 | 0,923920957   | 1,08234367      | 0,442477876     |
| ZNF821                                                                                          | 0,003358574 | -0,114236081 | 0,037 | 0,069 | 1           | 0,923871379   | 1,082401753     | 0,536231884     |
| ASIC3                                                                                           | 0,009387874 | -0,114298343 | 0,002 | 0,014 | 1           | 0,923831509   | 1,082448467     | 0,142857143     |
| BDH2                                                                                            | 0,005736035 | -0,114305993 | 0,116 | 0,161 | 1           | 0,923826609   | 1,082454207     | 0,720496894     |
| FAM126B                                                                                         | 0,003185617 | -0,114333332 | 0,044 | 0,079 | 1           | 0,923809104   | 1,082474719     | 0,556962025     |
| NUP62                                                                                           | 0,708712145 | -0,11435337  | 0,056 | 0,058 | 1           | 0,923796273   | 1,082489754     | 0,965517241     |
| TAOK1                                                                                           | 1,04466E-06 | -0,114358057 | 0,233 | 0,339 | 0,022043338 | 0,923793271   | 1,082493271     | 0,687315634     |
| PSRC1                                                                                           | 0,107064639 | -0,114376796 | 0,012 | 0,022 | 1           | 0,923781272   | 1,082507332     | 0,545454545     |
| FRAT2                                                                                           | 0,011663378 | -0,11451782  | 0,014 | 0,033 | 1           | 0,923690977   | 1,082613152     | 0,424242424     |
| UBL4A                                                                                           | 0,434659257 | -0,114616857 | 0,068 | 0,056 | 1           | 0,92362757    | 1,082687473     | 1,214285714     |
| CCL27                                                                                           | 0,030844158 | -0,114643112 | 0,007 | 0,019 | 1           | 0,923610762   | 1,082707177     | 0,368421053     |
| NDRG3                                                                                           | 0,360451909 | -0,114677837 | 0,043 | 0,052 | 1           | 0,923588531   | 1,082733237     | 0,826923077     |
| SMARCC2                                                                                         | 5,21856E-06 | -0,114761019 | 0,085 | 0,157 | 0,110116787 | 0,923535281   | 1,082795667     | 0,541401274     |
| AL627171.1                                                                                      | 0,000104787 | -0,114870048 | 0,007 | 0,034 | 1           | 0,923465489   | 1,0828775       | 0,205882353     |
| TEX41                                                                                           | 0,000433061 | -0,114960519 | 0,001 | 0,018 | 1           | 0,923407581   | 1,082945409     | 0,055555556     |
| FAM221A                                                                                         | 0,015872346 | -0,114968264 | 0,036 | 0,061 | 1           | 0,923402623   | 1,082951223     | 0,590163934     |
| PPP2R5A                                                                                         | 0,419929345 | -0,115013937 | 0,052 | 0,06  | 1           | 0,923373391   | 1,082985507     | 0,866666667     |
| PFKFB2                                                                                          | 2,02475E-05 | -0,11502826  | 0,01  | 0,045 | 0,427242782 | 0,923364223   | 1,082996259     | 0,222222222     |
| SIPA1                                                                                           | 0,000909834 | -0,115057324 | 0,066 | 0,11  | 1           | 0,923345622   | 1,083018077     | 0,6             |
| ARSJ                                                                                            | 0,007732181 | -0,115252853 | 0,014 | 0,034 | 1           | 0,923220489   | 1,083164869     | 0,411764706     |
| KLHL8                                                                                           | 9,30203E-05 | -0,115289208 | 0,017 | 0,053 | 1           | 0,923197225   | 1,083192164     | 0,320754717     |
| HDGFL2                                                                                          | 0,113617756 | -0,115420052 | 0,081 | 0,102 | 1           | 0,9231135     | 1,083290408     | 0,794117647     |
| TAFAZZIN                                                                                        | 0,119592056 | -0,115439187 | 0,051 | 0,068 | 1           | 0,923101256   | 1,083304776     | 0,75            |
| NUP35                                                                                           | 0,056683124 | -0,115478532 | 0,022 | 0,038 | 1           | 0,923076082   | 1,083334321     | 0,578947368     |

Supplementary Table 5

| Differentially expressed genes_total calculation_ comparing SC-Keloid vs. (SC-Myel, SC-Nonmyel) |             |              |       |       |             |               |                 |                 |
|-------------------------------------------------------------------------------------------------|-------------|--------------|-------|-------|-------------|---------------|-----------------|-----------------|
| gene                                                                                            | p_val       | avg_log2FC   | pct.1 | pct.2 | p_val_adj   | Foldchange_UP | Foldchange_DOWN | Ratio_pct1_pct2 |
| FZD4                                                                                            | 0,008963092 | -0,115539403 | 0,012 | 0,03  | 1           | 0,923037136   | 1,08338003      | 0,4             |
| GARNL3                                                                                          | 0,000328784 | -0,115589625 | 0     | 0,015 | 1           | 0,923005005   | 1,083417744     | 0               |
| SENP7                                                                                           | 0,004499908 | -0,115599078 | 0,09  | 0,132 | 1           | 0,922998957   | 1,083424843     | 0,681818182     |
| PKD1                                                                                            | 0,144615703 | -0,115668846 | 0,1   | 0,119 | 1           | 0,922954322   | 1,083477239     | 0,840336134     |
| MED21                                                                                           | 0,0121257   | -0,115719489 | 0,072 | 0,106 | 1           | 0,922921924   | 1,083515273     | 0,679245283     |
| ENOPH1                                                                                          | 0,007637313 | -0,115722709 | 0,121 | 0,16  | 1           | 0,922919864   | 1,083517691     | 0,75625         |
| NUP188                                                                                          | 0,003603333 | -0,115928092 | 0,05  | 0,085 | 1           | 0,922788486   | 1,083671952     | 0,588235294     |
| KCNAB3                                                                                          | 0,010306347 | -0,116027963 | 0,009 | 0,026 | 1           | 0,922724608   | 1,083746972     | 0,346153846     |
| AARSD1                                                                                          | 0,209399731 | -0,11609221  | 0,038 | 0,05  | 1           | 0,922683518   | 1,083795235     | 0,76            |
| ZNF616                                                                                          | 0,006684654 | -0,116110695 | 0,007 | 0,023 | 1           | 0,922671695   | 1,083809122     | 0,304347826     |
| ADAMTS4                                                                                         | 0,000193339 | -0,116172059 | 0,069 | 0,122 | 1           | 0,922632451   | 1,083855222     | 0,56557377      |
| ADGRB1                                                                                          | 0,035816396 | -0,116274909 | 0,008 | 0,02  | 1           | 0,922566678   | 1,083932493     | 0,4             |
| CHERP                                                                                           | 0,002080543 | -0,116279114 | 0,042 | 0,077 | 1           | 0,92256399    | 1,083935652     | 0,545454545     |
| DDX3Y                                                                                           | 0,205543351 | -0,116540485 | 0,044 | 0,057 | 1           | 0,922396865   | 1,084132045     | 0,771929825     |
| PHYHD1                                                                                          | 0,109429452 | -0,116641983 | 0,03  | 0,045 | 1           | 0,922331974   | 1,08420832      | 0,666666667     |
| PIM1                                                                                            | 0,00521433  | -0,116669189 | 0,024 | 0,05  | 1           | 0,922314581   | 1,084228766     | 0,48            |
| FREM2                                                                                           | 0,001241095 | -0,116764444 | 0,051 | 0,092 | 1           | 0,922253686   | 1,084300356     | 0,554347826     |
| SNHG10                                                                                          | 0,00071576  | -0,116821155 | 0,023 | 0,056 | 1           | 0,922217434   | 1,084342979     | 0,410714286     |
| SYT10                                                                                           | 0,051260832 | -0,116952667 | 0,013 | 0,026 | 1           | 0,922133371   | 1,084441829     | 0,5             |
| DMAP1                                                                                           | 0,317246451 | -0,117014049 | 0,077 | 0,087 | 1           | 0,922094138   | 1,08448797      | 0,885057471     |
| DMWD                                                                                            | 0,506243438 | -0,11702839  | 0,092 | 0,098 | 1           | 0,922084972   | 1,08449875      | 0,93877551      |
| GARRE1                                                                                          | 9,85402E-07 | -0,117145646 | 0,044 | 0,109 | 0,020792965 | 0,922010032   | 1,084586897     | 0,403669725     |
| B3GNT5                                                                                          | 0,289591138 | -0,117149019 | 0,049 | 0,06  | 1           | 0,922007877   | 1,084589433     | 0,816666667     |
| HACD2                                                                                           | 0,008929432 | -0,117162829 | 0,055 | 0,087 | 1           | 0,921999051   | 1,084599814     | 0,632183908     |
| FAM83F                                                                                          | 0,000236404 | -0,117354641 | 0,001 | 0,019 | 1           | 0,921876476   | 1,084744026     | 0,052631579     |
| DOHH                                                                                            | 0,791411362 | -0,11735579  | 0,042 | 0,043 | 1           | 0,921875742   | 1,08474489      | 0,976744186     |
| BCR                                                                                             | 0,006205468 | -0,117381665 | 0,016 | 0,038 | 1           | 0,921859208   | 1,084764345     | 0,421052632     |
| IDS                                                                                             | 0,011760236 | -0,117403241 | 0,198 | 0,242 | 1           | 0,921845421   | 1,084780568     | 0,818181818     |
| ERN1                                                                                            | 0,04149533  | -0,117406712 | 0,049 | 0,072 | 1           | 0,921843204   | 1,084783178     | 0,680555556     |
| ZFAND1                                                                                          | 0,006859425 | -0,117442199 | 0,042 | 0,072 | 1           | 0,921820528   | 1,084809862     | 0,583333333     |

Supplementary Table 5

| Differentially expressed genes_total calculation_ comparing SC-Keloid vs. (SC-Myel, SC-Nonmyel) |             |              |       |       |             |               |                 |                 |
|-------------------------------------------------------------------------------------------------|-------------|--------------|-------|-------|-------------|---------------|-----------------|-----------------|
| gene                                                                                            | p_val       | avg_log2FC   | pct.1 | pct.2 | p_val_adj   | Foldchange_UP | Foldchange_DOWN | Ratio_pct1_pct2 |
| WIPI2                                                                                           | 0,269952763 | -0,117594017 | 0,113 | 0,126 | 1           | 0,921723528   | 1,084924025     | 0,896825397     |
| HSD17B11                                                                                        | 0,797336692 | -0,117636454 | 0,077 | 0,077 | 1           | 0,921696416   | 1,084955938     | 1               |
| HNRNPA2B1                                                                                       | 0,000117059 | -0,117655678 | 0,66  | 0,815 | 1           | 0,921684135   | 1,084970396     | 0,809815951     |
| PEG3                                                                                            | 0,000114764 | -0,117717198 | 0,006 | 0,031 | 1           | 0,921644833   | 1,085016662     | 0,193548387     |
| UBXN7                                                                                           | 0,001469496 | -0,117723417 | 0,108 | 0,159 | 1           | 0,92164086    | 1,085021339     | 0,679245283     |
| KIAA1671                                                                                        | 0,000319608 | -0,117911251 | 0,012 | 0,039 | 1           | 0,921520873   | 1,085162615     | 0,307692308     |
| NUP58                                                                                           | 0,017042638 | -0,117964819 | 0,075 | 0,107 | 1           | 0,921486657   | 1,085202909     | 0,700934579     |
| FAM72B                                                                                          | 0,045735314 | -0,117995731 | 0,01  | 0,023 | 1           | 0,921466913   | 1,08522616      | 0,434782609     |
| MAK                                                                                             | 0,00012689  | -0,118008782 | 0,001 | 0,02  | 1           | 0,921458577   | 1,085235978     | 0,05            |
| PXN                                                                                             | 0,073315404 | -0,118018792 | 0,087 | 0,111 | 1           | 0,921452184   | 1,085243508     | 0,783783784     |
| PPP2R3B                                                                                         | 0,085825033 | -0,118038908 | 0,038 | 0,056 | 1           | 0,921439336   | 1,085258639     | 0,678571429     |
| DHX58                                                                                           | 0,001231203 | -0,118098524 | 0,014 | 0,039 | 1           | 0,92140126    | 1,085303487     | 0,358974359     |
| MTA2                                                                                            | 0,031401309 | -0,118152531 | 0,026 | 0,045 | 1           | 0,921366768   | 1,085344116     | 0,577777778     |
| NUP107                                                                                          | 0,277900085 | -0,11815472  | 0,051 | 0,062 | 1           | 0,92136537    | 1,085345762     | 0,822580645     |
| CAMK2G                                                                                          | 0,180209726 | -0,118308444 | 0,036 | 0,049 | 1           | 0,921267201   | 1,085461416     | 0,734693878     |
| ANKMY2                                                                                          | 0,044406975 | -0,118328428 | 0,026 | 0,043 | 1           | 0,92125444    | 1,085476451     | 0,604651163     |
| PIM2                                                                                            | 0,001789581 | -0,118383716 | 0,01  | 0,033 | 1           | 0,921219136   | 1,08551805      | 0,303030303     |
| ZFPM2                                                                                           | 2,67675E-05 | -0,118434809 | 0     | 0,02  | 0,56482021  | 0,921186511   | 1,085556495     | 0               |
| MET                                                                                             | 0,003150863 | -0,118462354 | 0,008 | 0,027 | 1           | 0,921168923   | 1,085577222     | 0,296296296     |
| SLC8B1                                                                                          | 0,00653443  | -0,118494428 | 0,013 | 0,033 | 1           | 0,921148444   | 1,085601356     | 0,393939394     |
| SNX30                                                                                           | 0,001654065 | -0,118682435 | 0,023 | 0,053 | 1           | 0,921028411   | 1,085742837     | 0,433962264     |
| POM121C                                                                                         | 0,006537984 | -0,118807282 | 0,047 | 0,079 | 1           | 0,920948711   | 1,085836798     | 0,594936709     |
| PPP6R2                                                                                          | 0,060965122 | -0,118830742 | 0,065 | 0,088 | 1           | 0,920933736   | 1,085854456     | 0,738636364     |
| SLC4A1AP                                                                                        | 0,858173905 | -0,118907217 | 0,051 | 0,052 | 1           | 0,920884919   | 1,085912017     | 0,980769231     |
| SBF2                                                                                            | 3,29565E-06 | -0,119015547 | 0,049 | 0,111 | 0,069541484 | 0,920815774   | 1,085993559     | 0,441441441     |
| NCL                                                                                             | 5,49687E-08 | -0,119052584 | 0,389 | 0,559 | 0,001159894 | 0,920792135   | 1,086021439     | 0,69588551      |
| GLI3                                                                                            | 0,000415177 | -0,119188906 | 0,099 | 0,155 | 1           | 0,920705132   | 1,086124064     | 0,638709677     |
| SH3RF1                                                                                          | 0,010549349 | -0,11925824  | 0,091 | 0,128 | 1           | 0,920660886   | 1,086176263     | 0,7109375       |
| FYN                                                                                             | 0,00010893  | -0,119267829 | 0,189 | 0,265 | 1           | 0,920654766   | 1,086183482     | 0,713207547     |
| SLC16A1-AS1                                                                                     | 0,006570501 | -0,119285454 | 0,016 | 0,038 | 1           | 0,920643519   | 1,086196752     | 0,421052632     |

Supplementary Table 5

| Differentially expressed genes_total calculation_ comparing SC-Keloid vs. (SC-Myel, SC-Nonmyel) |             |              |       |       |             |               |                 |                 |
|-------------------------------------------------------------------------------------------------|-------------|--------------|-------|-------|-------------|---------------|-----------------|-----------------|
| gene                                                                                            | p_val       | avg_log2FC   | pct.1 | pct.2 | p_val_adj   | Foldchange_UP | Foldchange_DOWN | Ratio_pct1_pct2 |
| HAUS4                                                                                           | 0,110804193 | -0,119305872 | 0,04  | 0,056 | 1           | 0,92063049    | 1,086212124     | 0,714285714     |
| EVI5                                                                                            | 8,49932E-07 | -0,119454793 | 0,182 | 0,284 | 0,017934425 | 0,920535463   | 1,086324254     | 0,64084507      |
| MIR181A1HG                                                                                      | 0,166783819 | -0,119636227 | 0,035 | 0,047 | 1           | 0,920419703   | 1,086460879     | 0,744680851     |
| CPED1                                                                                           | 7,35764E-06 | -0,119657361 | 0,003 | 0,033 | 0,155253514 | 0,92040622    | 1,086476794     | 0,090909091     |
| NCOA3                                                                                           | 1,25638E-05 | -0,119707718 | 0,064 | 0,128 | 0,265108129 | 0,920374094   | 1,086514718     | 0,5             |
| ZNF865                                                                                          | 0,071387728 | -0,119747894 | 0,02  | 0,034 | 1           | 0,920348464   | 1,086544976     | 0,588235294     |
| ARFGAP2                                                                                         | 0,029098403 | -0,119894784 | 0,083 | 0,111 | 1           | 0,920254763   | 1,086655609     | 0,747747748     |
| ATG9A                                                                                           | 0,067119804 | -0,119934526 | 0,019 | 0,033 | 1           | 0,920229412   | 1,086685544     | 0,575757576     |
| GLA                                                                                             | 0,003985975 | -0,120046433 | 0,072 | 0,111 | 1           | 0,920158035   | 1,086769839     | 0,648648649     |
| SEPTIN3                                                                                         | 1,24631E-05 | -0,12010974  | 0,002 | 0,028 | 0,26298369  | 0,920117658   | 1,086817529     | 0,071428571     |
| SIGIRR                                                                                          | 0,001866793 | -0,120290852 | 0,187 | 0,242 | 1           | 0,920002157   | 1,086953974     | 0,772727273     |
| TRIM21                                                                                          | 0,212319835 | -0,12032003  | 0,01  | 0,018 | 1           | 0,91998355    | 1,086975958     | 0,555555556     |
| EDNRB                                                                                           | 2,84471E-06 | -0,120336157 | 0,201 | 0,307 | 0,060026305 | 0,919973266   | 1,086988108     | 0,654723127     |
| WDR70                                                                                           | 0,00361938  | -0,120356875 | 0,054 | 0,09  | 1           | 0,919960055   | 1,087003718     | 0,6             |
| SCAMP1                                                                                          | 0,004350815 | -0,120375717 | 0,085 | 0,125 | 1           | 0,91994804    | 1,087017915     | 0,68            |
| RCHY1                                                                                           | 0,00240158  | -0,120386364 | 0,038 | 0,072 | 1           | 0,919941251   | 1,087025937     | 0,527777778     |
| ACD                                                                                             | 0,23596187  | -0,120417732 | 0,048 | 0,06  | 1           | 0,919921249   | 1,087049572     | 0,8             |
| PREX2                                                                                           | 4,30133E-05 | -0,120422036 | 0,002 | 0,026 | 0,907622686 | 0,919918505   | 1,087052815     | 0,076923077     |
| DRAM1                                                                                           | 0,000532732 | -0,120496401 | 0,024 | 0,058 | 1           | 0,919871088   | 1,08710885      | 0,413793103     |
| CD47                                                                                            | 0,000213627 | -0,120575126 | 0,199 | 0,277 | 1           | 0,919820894   | 1,087168173     | 0,718411552     |
| TBC1D9B                                                                                         | 0,058518962 | -0,120579522 | 0,101 | 0,128 | 1           | 0,919818091   | 1,087171485     | 0,7890625       |
| ASAP3                                                                                           | 6,64214E-05 | -0,120725661 | 0,001 | 0,022 | 1           | 0,919724922   | 1,087281617     | 0,045454545     |
| TMEM70                                                                                          | 0,265405765 | -0,120768604 | 0,077 | 0,09  | 1           | 0,919697546   | 1,087313981     | 0,855555556     |
| PPIA                                                                                            | 7,53776E-06 | -0,120770944 | 0,494 | 0,771 | 0,159054315 | 0,919696054   | 1,087315745     | 0,640726329     |
| NUP205                                                                                          | 0,015263114 | -0,120786431 | 0,022 | 0,043 | 1           | 0,919686181   | 1,087327417     | 0,511627907     |
| STARD10                                                                                         | 0,000215128 | -0,120810696 | 0,017 | 0,05  | 1           | 0,919670714   | 1,087345705     | 0,34            |
| TMEM215                                                                                         | 1,43484E-05 | -0,120991849 | 0     | 0,022 | 0,302765291 | 0,919555242   | 1,087482247     | 0               |
| CDH1                                                                                            | 1,02949E-05 | -0,121197873 | 0,001 | 0,026 | 0,217232958 | 0,919423934   | 1,087637555     | 0,038461538     |
| DELE1                                                                                           | 0,857809499 | -0,121217438 | 0,065 | 0,061 | 1           | 0,919411465   | 1,087652305     | 1,06557377      |
| TRIM4                                                                                           | 0,000496907 | -0,121272463 | 0,029 | 0,065 | 1           | 0,919376399   | 1,08769379      | 0,446153846     |

Supplementary Table 5

| Differentially expressed genes_total calculation_ comparing SC-Keloid vs. (SC-Myel, SC-Nonmyel) |             |              |       |       |             |               |                 |                 |
|-------------------------------------------------------------------------------------------------|-------------|--------------|-------|-------|-------------|---------------|-----------------|-----------------|
| gene                                                                                            | p_val       | avg_log2FC   | pct.1 | pct.2 | p_val_adj   | Foldchange_UP | Foldchange_DOWN | Ratio_pct1_pct2 |
| AFAP1L2                                                                                         | 2,68241E-07 | -0,121278287 | 0,207 | 0,318 | 0,005660155 | 0,919372687   | 1,087698181     | 0,650943396     |
| GPCPD1                                                                                          | 0,004654235 | -0,121288401 | 0,05  | 0,084 | 1           | 0,919366242   | 1,087705807     | 0,595238095     |
| MRPS17                                                                                          | 0,820859509 | -0,121327638 | 0,041 | 0,042 | 1           | 0,919341239   | 1,087735389     | 0,976190476     |
| EXD3                                                                                            | 0,040225222 | -0,121457316 | 0,023 | 0,041 | 1           | 0,919258607   | 1,087833165     | 0,56097561      |
| ITGAV                                                                                           | 1,59042E-05 | -0,121479781 | 0,227 | 0,322 | 0,335594801 | 0,919244292   | 1,087850105     | 0,704968944     |
| IPO13                                                                                           | 0,709396739 | -0,121516493 | 0,038 | 0,034 | 1           | 0,919220901   | 1,087877787     | 1,117647059     |
| CFAP70                                                                                          | 0,000141179 | -0,121527231 | 0,002 | 0,023 | 1           | 0,919214059   | 1,087885884     | 0,086956522     |
| NUDT14                                                                                          | 0,023758247 | -0,1216676   | 0,019 | 0,037 | 1           | 0,919124627   | 1,087991737     | 0,513513514     |
| TRAF2                                                                                           | 0,360959616 | -0,122047136 | 0,029 | 0,037 | 1           | 0,918882861   | 1,088277998     | 0,783783784     |
| SMYD3                                                                                           | 0,280761867 | -0,122256379 | 0,031 | 0,041 | 1           | 0,9187496     | 1,088435849     | 0,756097561     |
| TXNDC5                                                                                          | 0,574289439 | -0,122266203 | 0,071 | 0,076 | 1           | 0,918743343   | 1,08844326      | 0,934210526     |
| CENPL                                                                                           | 0,052340172 | -0,122268365 | 0,021 | 0,037 | 1           | 0,918741966   | 1,088444892     | 0,567567568     |
| ADRA2A                                                                                          | 0,000123672 | -0,122348627 | 0,001 | 0,02  | 1           | 0,918690855   | 1,088505447     | 0,05            |
| GXYLT1                                                                                          | 0,003303352 | -0,122383297 | 0,03  | 0,06  | 1           | 0,918668778   | 1,088531605     | 0,5             |
| ME3                                                                                             | 0,229748608 | -0,122383831 | 0,051 | 0,064 | 1           | 0,918668438   | 1,088532009     | 0,796875        |
| DACT3                                                                                           | 0,105053276 | -0,122466504 | 0,033 | 0,047 | 1           | 0,918615796   | 1,088594388     | 0,70212766      |
| METTL7A                                                                                         | 6,90421E-05 | -0,122476984 | 0,001 | 0,022 | 1           | 0,918609123   | 1,088602296     | 0,045454545     |
| BDNF-AS                                                                                         | 0,016674142 | -0,122500315 | 0,013 | 0,03  | 1           | 0,918594267   | 1,088619901     | 0,433333333     |
| CYP19A1                                                                                         | 0,000138881 | -0,122507076 | 0,002 | 0,023 | 1           | 0,918589962   | 1,088625003     | 0,086956522     |
| LY6E                                                                                            | 0,962036026 | -0,122561312 | 0,201 | 0,194 | 1           | 0,91855543    | 1,088665928     | 1,036082474     |
| USP6NL                                                                                          | 9,16577E-05 | -0,122570636 | 0,056 | 0,109 | 1           | 0,918549493   | 1,088672965     | 0,513761468     |
| SRRT                                                                                            | 0,04585336  | -0,122589095 | 0,087 | 0,114 | 1           | 0,918537741   | 1,088686894     | 0,763157895     |
| RADIL                                                                                           | 0,000132947 | -0,122592528 | 0,003 | 0,026 | 1           | 0,918535555   | 1,088689485     | 0,115384615     |
| THOC1                                                                                           | 0,03258308  | -0,122620262 | 0,054 | 0,079 | 1           | 0,918517898   | 1,088710413     | 0,683544304     |
| SELENOI                                                                                         | 0,005234571 | -0,122620301 | 0,055 | 0,09  | 1           | 0,918517872   | 1,088710443     | 0,611111111     |
| MPHOSPH6                                                                                        | 0,000530032 | -0,122707452 | 0,012 | 0,038 | 1           | 0,918462388   | 1,088776212     | 0,315789474     |
| WDR48                                                                                           | 0,00235078  | -0,122761832 | 0,051 | 0,088 | 1           | 0,918427769   | 1,088817253     | 0,579545455     |
| DMKN                                                                                            | 0,000987096 | -0,122936013 | 0,028 | 0,062 | 1           | 0,918316891   | 1,088948717     | 0,451612903     |
| BRWD1                                                                                           | 0,000658234 | -0,122963192 | 0,09  | 0,141 | 1           | 0,918299591   | 1,088969231     | 0,638297872     |
| LGR4                                                                                            | 4,40003E-05 | -0,122984281 | 0,052 | 0,106 | 0,928450508 | 0,918286167   | 1,08898515      | 0,490566038     |

Supplementary Table 5

| Differentially expressed genes_total calculation_ comparing SC-Keloid vs. (SC-Myel, SC-Nonmyel) |             |              |       |       |             |               |                 |                 |
|-------------------------------------------------------------------------------------------------|-------------|--------------|-------|-------|-------------|---------------|-----------------|-----------------|
| gene                                                                                            | p_val       | avg_log2FC   | pct.1 | pct.2 | p_val_adj   | Foldchange_UP | Foldchange_DOWN | Ratio_pct1_pct2 |
| TBXA2R                                                                                          | 0,001794876 | -0,123033044 | 0,006 | 0,024 | 1           | 0,91825513    | 1,089021959     | 0,25            |
| LRRC75B                                                                                         | 0,010103165 | -0,123141741 | 0,031 | 0,057 | 1           | 0,918185948   | 1,089104012     | 0,543859649     |
| TSPAN13                                                                                         | 8,68703E-07 | -0,123176633 | 0,015 | 0,061 | 0,018330505 | 0,918163742   | 1,089130353     | 0,245901639     |
| CLPTM1                                                                                          | 0,055171433 | -0,123198553 | 0,134 | 0,16  | 1           | 0,918149792   | 1,0891469       | 0,8375          |
| HINFP                                                                                           | 0,060858143 | -0,123222256 | 0,016 | 0,03  | 1           | 0,918134707   | 1,089164795     | 0,533333333     |
| MAVS                                                                                            | 0,069812098 | -0,123235191 | 0,044 | 0,064 | 1           | 0,918126475   | 1,08917456      | 0,6875          |
| DKK1                                                                                            | 0,000328784 | -0,123247478 | 0     | 0,015 | 1           | 0,918118656   | 1,089183836     | 0               |
| BSDC1                                                                                           | 0,027242178 | -0,123304496 | 0,095 | 0,126 | 1           | 0,918082371   | 1,089226884     | 0,753968254     |
| SZT2                                                                                            | 0,313193918 | -0,123467784 | 0,022 | 0,03  | 1           | 0,917978466   | 1,089350172     | 0,733333333     |
| SGMS2                                                                                           | 0,000691193 | -0,123501953 | 0,028 | 0,062 | 1           | 0,917956725   | 1,089375973     | 0,451612903     |
| FAM184A                                                                                         | 7,32149E-05 | -0,123540859 | 0,003 | 0,027 | 1           | 0,91793197    | 1,089405351     | 0,111111111     |
| LRRN1                                                                                           | 1,84417E-05 | -0,123594174 | 0,01  | 0,045 | 0,389138972 | 0,917898048   | 1,089445611     | 0,222222222     |
| OGFR                                                                                            | 0,014856533 | -0,123619635 | 0,093 | 0,128 | 1           | 0,917881849   | 1,089464838     | 0,7265625       |
| CYS1                                                                                            | 1,91414E-05 | -0,123704418 | 0,001 | 0,024 | 0,403901779 | 0,91782791    | 1,089528864     | 0,041666667     |
| MOSMO                                                                                           | 0,00199086  | -0,123919397 | 0,072 | 0,114 | 1           | 0,917691152   | 1,08969123      | 0,631578947     |
| XRR1                                                                                            | 0,000268028 | -0,123925679 | 0,055 | 0,102 | 1           | 0,917687156   | 1,089695974     | 0,539215686     |
| APTR                                                                                            | 0,001388965 | -0,123982281 | 0,028 | 0,06  | 1           | 0,917651152   | 1,089738728     | 0,466666667     |
| TOX4                                                                                            | 0,025372416 | -0,124027473 | 0,129 | 0,163 | 1           | 0,917622408   | 1,089772864     | 0,791411043     |
| ELP2                                                                                            | 0,002332266 | -0,124076622 | 0,08  | 0,123 | 1           | 0,917591147   | 1,089809991     | 0,650406504     |
| NOP58                                                                                           | 0,026412597 | -0,124086032 | 0,094 | 0,126 | 1           | 0,917585163   | 1,089817099     | 0,746031746     |
| TMEM106B                                                                                        | 2,51907E-06 | -0,124110551 | 0,165 | 0,256 | 0,053154872 | 0,917569568   | 1,089835621     | 0,64453125      |
| ZNF276                                                                                          | 0,001773155 | -0,124185098 | 0,052 | 0,092 | 1           | 0,917522156   | 1,089891937     | 0,565217391     |
| NCKAP1                                                                                          | 0,077187984 | -0,124200564 | 0,141 | 0,166 | 1           | 0,91751232    | 1,089903621     | 0,84939759      |
| RAB3IP                                                                                          | 0,004474764 | -0,12420858  | 0,034 | 0,064 | 1           | 0,917507223   | 1,089909676     | 0,53125         |
| COL8A2                                                                                          | 1,03218E-05 | -0,124254676 | 0,001 | 0,026 | 0,217800979 | 0,917477908   | 1,089944501     | 0,038461538     |
| PPP1R21                                                                                         | 0,005753197 | -0,124319213 | 0,02  | 0,043 | 1           | 0,917436866   | 1,089993259     | 0,465116279     |
| FCGR2A                                                                                          | 0,004775894 | -0,124482839 | 0,017 | 0,041 | 1           | 0,917332819   | 1,09011689      | 0,414634146     |
| PEX14                                                                                           | 0,046848393 | -0,124557241 | 0,019 | 0,034 | 1           | 0,917285512   | 1,09017311      | 0,558823529     |
| TMEM94                                                                                          | 0,112545611 | -0,12468387  | 0,034 | 0,049 | 1           | 0,917205003   | 1,090268802     | 0,693877551     |
| ZNF277                                                                                          | 0,015630032 | -0,124834566 | 0,038 | 0,064 | 1           | 0,917109202   | 1,090382691     | 0,59375         |

Supplementary Table 5

| Differentially expressed genes_total calculation_ comparing SC-Keloid vs. (SC-Myel, SC-Nonmyel) |             |              |       |       |             |               |                 |                 |
|-------------------------------------------------------------------------------------------------|-------------|--------------|-------|-------|-------------|---------------|-----------------|-----------------|
| gene                                                                                            | p_val       | avg_log2FC   | pct.1 | pct.2 | p_val_adj   | Foldchange_UP | Foldchange_DOWN | Ratio_pct1_pct2 |
| CCDC144A                                                                                        | 0,002115522 | -0,12485518  | 0,021 | 0,049 | 1           | 0,917096098   | 1,090398272     | 0,428571429     |
| NELFCD                                                                                          | 0,223751984 | -0,124911592 | 0,107 | 0,122 | 1           | 0,917060239   | 1,090440908     | 0,87704918      |
| KANSL3                                                                                          | 0,138020784 | -0,124968397 | 0,037 | 0,052 | 1           | 0,917024131   | 1,090483845     | 0,711538462     |
| NAXD                                                                                            | 0,169651481 | -0,124988316 | 0,037 | 0,05  | 1           | 0,91701147    | 1,090498901     | 0,74            |
| SELENOT                                                                                         | 5,9857E-07  | -0,124998821 | 0,219 | 0,328 | 0,012630425 | 0,917004793   | 1,090506842     | 0,667682927     |
| ZNF585A                                                                                         | 0,140861137 | -0,125014822 | 0,023 | 0,035 | 1           | 0,916994622   | 1,090518937     | 0,657142857     |
| MRE11                                                                                           | 6,44711E-05 | -0,125035594 | 0,037 | 0,084 | 1           | 0,916981419   | 1,090534638     | 0,44047619      |
| TSPAN8                                                                                          | 9,34934E-05 | -0,125095805 | 0     | 0,018 | 1           | 0,91694315    | 1,090580152     | 0               |
| SCRIB                                                                                           | 0,036585803 | -0,125097932 | 0,064 | 0,09  | 1           | 0,916941798   | 1,09058176      | 0,711111111     |
| NPC1                                                                                            | 7,45006E-06 | -0,125129304 | 0,033 | 0,084 | 0,157203707 | 0,916921859   | 1,090605476     | 0,392857143     |
| TNFSF13                                                                                         | 0,003012655 | -0,125221473 | 0,006 | 0,023 | 1           | 0,916863282   | 1,090675153     | 0,260869565     |
| CD4                                                                                             | 0,071129378 | -0,125278578 | 0,043 | 0,062 | 1           | 0,916826991   | 1,090718325     | 0,693548387     |
| SMIM11A                                                                                         | 0,000328784 | -0,125336578 | 0     | 0,015 | 1           | 0,916790133   | 1,090762176     | 0               |
| CSNK1G2                                                                                         | 0,134405272 | -0,125385534 | 0,092 | 0,111 | 1           | 0,916759023   | 1,09079919      | 0,828828829     |
| RAB24                                                                                           | 0,103299515 | -0,125417004 | 0,026 | 0,039 | 1           | 0,916739026   | 1,090822985     | 0,666666667     |
| MBTD1                                                                                           | 0,013823201 | -0,125446561 | 0,029 | 0,053 | 1           | 0,916720245   | 1,090845332     | 0,547169811     |
| NUP85                                                                                           | 0,49502218  | -0,125459996 | 0,033 | 0,038 | 1           | 0,916711707   | 1,090855491     | 0,868421053     |
| NEK9                                                                                            | 0,00186183  | -0,125460507 | 0,038 | 0,073 | 1           | 0,916711383   | 1,090855878     | 0,520547945     |
| TAF1C                                                                                           | 0,015601818 | -0,125483672 | 0,024 | 0,046 | 1           | 0,916696663   | 1,090873393     | 0,52173913      |
| COL17A1                                                                                         | 0,000802281 | -0,125554887 | 0,003 | 0,022 | 1           | 0,916651415   | 1,090927243     | 0,136363636     |
| CDIP1                                                                                           | 0,001362745 | -0,125619274 | 0,012 | 0,035 | 1           | 0,916610505   | 1,090975931     | 0,342857143     |
| PTMA                                                                                            | 0,019490751 | -0,125633492 | 0,946 | 0,981 | 1           | 0,916601472   | 1,090986684     | 0,96432212      |
| PTPN21                                                                                          | 0,007168015 | -0,125676809 | 0,042 | 0,072 | 1           | 0,916573952   | 1,09101944      | 0,583333333     |
| L3MBTL3                                                                                         | 0,000199953 | -0,12582124  | 0,012 | 0,041 | 1           | 0,916482196   | 1,09112867      | 0,292682927     |
| HCFC1                                                                                           | 0,184364623 | -0,125890792 | 0,062 | 0,076 | 1           | 0,916438014   | 1,091181275     | 0,815789474     |
| DPM3                                                                                            | 0,075403059 | -0,125894431 | 0,155 | 0,18  | 1           | 0,916435702   | 1,091184027     | 0,861111111     |
| LYPD3                                                                                           | 9,46775E-05 | -0,125931879 | 0,007 | 0,034 | 1           | 0,916411914   | 1,091212351     | 0,205882353     |
| ISOC1                                                                                           | 0,078824028 | -0,125975444 | 0,036 | 0,053 | 1           | 0,916384242   | 1,091245303     | 0,679245283     |
| PPARA                                                                                           | 0,002052287 | -0,126075366 | 0,021 | 0,049 | 1           | 0,916320775   | 1,091320886     | 0,428571429     |
| LHFPL2                                                                                          | 0,048286057 | -0,126088991 | 0,065 | 0,09  | 1           | 0,916312122   | 1,091331192     | 0,722222222     |



Supplementary Table 5

| Differentially expressed genes_total calculation_ comparing SC-Keloid vs. (SC-Myel, SC-Nonmyel) |             |              |       |       |             |               |                 |                 |
|-------------------------------------------------------------------------------------------------|-------------|--------------|-------|-------|-------------|---------------|-----------------|-----------------|
| gene                                                                                            | p_val       | avg_log2FC   | pct.1 | pct.2 | p_val_adj   | Foldchange_UP | Foldchange_DOWN | Ratio_pct1_pct2 |
| NAT9                                                                                            | 0,03776647  | -0,126150771 | 0,05  | 0,073 | 1           | 0,916272883   | 1,091377927     | 0,684931507     |
| NLK                                                                                             | 0,033136931 | -0,126203774 | 0,024 | 0,043 | 1           | 0,916239221   | 1,091418024     | 0,558139535     |
| BCL2L11                                                                                         | 0,003846147 | -0,126335968 | 0,026 | 0,053 | 1           | 0,91615527    | 1,091518035     | 0,490566038     |
| SPIN2B                                                                                          | 0,030089427 | -0,12640365  | 0,016 | 0,033 | 1           | 0,916112291   | 1,091569243     | 0,484848485     |
| OTUD6B-AS1                                                                                      | 0,02679869  | -0,126458647 | 0,156 | 0,193 | 1           | 0,916077368   | 1,091610856     | 0,808290155     |
| HMGNS                                                                                           | 0,000323325 | -0,12646584  | 0,038 | 0,08  | 1           | 0,916072801   | 1,091616298     | 0,475           |
| ANO3                                                                                            | 3,60668E-05 | -0,126480883 | 0,001 | 0,023 | 0,761044998 | 0,916063249   | 1,091627681     | 0,043478261     |
| AKAP8                                                                                           | 0,004015534 | -0,12670232  | 0,048 | 0,081 | 1           | 0,915922655   | 1,091795246     | 0,592592593     |
| MRPL18                                                                                          | 0,075218499 | -0,126984625 | 0,193 | 0,218 | 1           | 0,915743446   | 1,092008908     | 0,885321101     |
| WRNIP1                                                                                          | 0,012156338 | -0,127013113 | 0,043 | 0,071 | 1           | 0,915725363   | 1,092030471     | 0,605633803     |
| TSPAN14                                                                                         | 0,000269026 | -0,127075942 | 0,055 | 0,103 | 1           | 0,915685485   | 1,09207803      | 0,533980583     |
| LINC00667                                                                                       | 0,065082553 | -0,127381284 | 0,093 | 0,118 | 1           | 0,915491703   | 1,092309189     | 0,788135593     |
| KIF5B                                                                                           | 7,86248E-07 | -0,127452491 | 0,35  | 0,497 | 0,016590613 | 0,915446518   | 1,092363104     | 0,704225352     |
| MBOAT7                                                                                          | 0,01694602  | -0,127455664 | 0,04  | 0,065 | 1           | 0,915444505   | 1,092365506     | 0,615384615     |
| MC1R                                                                                            | 0,400926231 | -0,127459611 | 0,017 | 0,023 | 1           | 0,915442      | 1,092368495     | 0,739130435     |
| PRDM8                                                                                           | 4,1333E-06  | -0,127501927 | 0     | 0,024 | 0,087216733 | 0,915415149   | 1,092400536     | 0               |
| TMEM170A                                                                                        | 0,024131342 | -0,127625921 | 0,081 | 0,111 | 1           | 0,915336476   | 1,092494428     | 0,72972973      |
| TMEM259                                                                                         | 1,70876E-07 | -0,127691004 | 0,192 | 0,296 | 0,003605662 | 0,915295185   | 1,092543713     | 0,648648649     |
| LIFR                                                                                            | 0,000312672 | -0,127743375 | 0,012 | 0,039 | 1           | 0,915261959   | 1,092583374     | 0,307692308     |
| RHOT1                                                                                           | 0,354346767 | -0,127743589 | 0,076 | 0,085 | 1           | 0,915261824   | 1,092583536     | 0,894117647     |
| GMPS                                                                                            | 0,079713446 | -0,127746548 | 0,087 | 0,11  | 1           | 0,915259946   | 1,092585778     | 0,790909091     |
| GRAMD1A                                                                                         | 0,078636007 | -0,127789377 | 0,071 | 0,092 | 1           | 0,915232776   | 1,092618213     | 0,77173913      |
| CCDC7                                                                                           | 0,01408632  | -0,127892939 | 0,012 | 0,028 | 1           | 0,915167079   | 1,092696648     | 0,428571429     |
| ARMH4                                                                                           | 0,00088653  | -0,127922936 | 0,007 | 0,028 | 1           | 0,915148051   | 1,092719368     | 0,25            |
| RASA3                                                                                           | 0,005096789 | -0,127940959 | 0,098 | 0,14  | 1           | 0,915136619   | 1,092733019     | 0,7             |
| MRPL49                                                                                          | 0,005512139 | -0,12800035  | 0,05  | 0,083 | 1           | 0,915098946   | 1,092778004     | 0,602409639     |
| TULP3                                                                                           | 0,001118831 | -0,128031922 | 0,128 | 0,182 | 1           | 0,91507892    | 1,092801919     | 0,703296703     |
| NAT8L                                                                                           | 6,42143E-06 | -0,128032339 | 0,002 | 0,03  | 0,135498557 | 0,915078656   | 1,092802235     | 0,066666667     |
| DDX41                                                                                           | 0,420710288 | -0,128084124 | 0,054 | 0,061 | 1           | 0,91504581    | 1,092841461     | 0,885245902     |
| C2CD3                                                                                           | 0,011988751 | -0,128110754 | 0,02  | 0,041 | 1           | 0,91502892    | 1,092861633     | 0,487804878     |

Supplementary Table 5

| Differentially expressed genes_total calculation_ comparing SC-Keloid vs. (SC-Myel, SC-Nonmyel) |             |              |       |       |             |               |                 |                 |
|-------------------------------------------------------------------------------------------------|-------------|--------------|-------|-------|-------------|---------------|-----------------|-----------------|
| gene                                                                                            | p_val       | avg_log2FC   | pct.1 | pct.2 | p_val_adj   | Foldchange_UP | Foldchange_DOWN | Ratio_pct1_pct2 |
| RNF187                                                                                          | 0,131078691 | -0,128148706 | 0,157 | 0,175 | 1           | 0,915004849   | 1,092890383     | 0,897142857     |
| TTBK2                                                                                           | 0,001868827 | -0,128206314 | 0,038 | 0,073 | 1           | 0,914968313   | 1,092934024     | 0,520547945     |
| PVR                                                                                             | 0,049183614 | -0,128299018 | 0,019 | 0,034 | 1           | 0,914909521   | 1,093004255     | 0,558823529     |
| ANKRD13A                                                                                        | 0,00188277  | -0,128434204 | 0,036 | 0,071 | 1           | 0,914823795   | 1,093106679     | 0,507042254     |
| OBSCN                                                                                           | 0,000428678 | -0,128563362 | 0,001 | 0,018 | 1           | 0,914741898   | 1,093204545     | 0,055555556     |
| LAS1L                                                                                           | 0,0122053   | -0,128609902 | 0,04  | 0,066 | 1           | 0,91471239    | 1,09323981      | 0,606060606     |
| IFFO1                                                                                           | 0,152370991 | -0,12865365  | 0,052 | 0,068 | 1           | 0,914684653   | 1,093272962     | 0,764705882     |
| KCNG1                                                                                           | 0,405710372 | -0,12869634  | 0,065 | 0,073 | 1           | 0,914657587   | 1,093305313     | 0,890410959     |
| NRF1                                                                                            | 0,040455907 | -0,128698754 | 0,014 | 0,028 | 1           | 0,914656057   | 1,093307143     | 0,5             |
| CCNH                                                                                            | 0,010520432 | -0,128939917 | 0,068 | 0,1   | 1           | 0,914503175   | 1,093489916     | 0,68            |
| SOX13                                                                                           | 0,017770596 | -0,128940301 | 0,076 | 0,107 | 1           | 0,914502931   | 1,093490208     | 0,710280374     |
| PTPRU                                                                                           | 0,000191024 | -0,128945288 | 0,009 | 0,037 | 1           | 0,91449977    | 1,093493988     | 0,243243243     |
| RAB30                                                                                           | 0,039249333 | -0,12903684  | 0,045 | 0,068 | 1           | 0,914441739   | 1,093563382     | 0,661764706     |
| ARHGAP23                                                                                        | 0,024650108 | -0,129083667 | 0,064 | 0,092 | 1           | 0,914412058   | 1,093598877     | 0,695652174     |
| GPRASP1                                                                                         | 0,00400081  | -0,129110312 | 0,009 | 0,028 | 1           | 0,91439517    | 1,093619075     | 0,321428571     |
| SRXN1                                                                                           | 0,005067323 | -0,129167521 | 0,008 | 0,026 | 1           | 0,914358911   | 1,093662442     | 0,307692308     |
| NTNG1                                                                                           | 0,008359696 | -0,129170399 | 0,02  | 0,042 | 1           | 0,914357087   | 1,093664624     | 0,476190476     |
| PWWP2B                                                                                          | 0,001354178 | -0,129225132 | 0,017 | 0,045 | 1           | 0,914322398   | 1,093706117     | 0,377777778     |
| MAT2A                                                                                           | 4,99233E-06 | -0,129392381 | 0,075 | 0,145 | 0,105343197 | 0,914216409   | 1,093832916     | 0,517241379     |
| ATP1B1                                                                                          | 0,056060377 | -0,12940536  | 0,302 | 0,346 | 1           | 0,914208185   | 1,093842756     | 0,87283237      |
| TJP1                                                                                            | 2,36645E-05 | -0,129407679 | 0,169 | 0,252 | 0,4993449   | 0,914206715   | 1,093844514     | 0,670634921     |
| ZC3H11A                                                                                         | 7,38657E-05 | -0,129477472 | 0,003 | 0,027 | 1           | 0,914162489   | 1,093897432     | 0,111111111     |
| GPT2                                                                                            | 0,004371352 | -0,129498214 | 0,022 | 0,047 | 1           | 0,914149347   | 1,093913159     | 0,468085106     |
| GJC2                                                                                            | 0,0001623   | -0,129562884 | 0,007 | 0,033 | 1           | 0,91410837    | 1,093962196     | 0,212121212     |
| SNTB1                                                                                           | 0,003821022 | -0,12962384  | 0,024 | 0,052 | 1           | 0,914069748   | 1,094008419     | 0,461538462     |
| LRPPRC                                                                                          | 0,160635909 | -0,129756573 | 0,085 | 0,103 | 1           | 0,913985655   | 1,094109076     | 0,825242718     |
| CACNA2D2                                                                                        | 0,000139492 | -0,129802308 | 0,003 | 0,026 | 1           | 0,913956681   | 1,094143761     | 0,115384615     |
| SEPTIN1                                                                                         | 0,017502021 | -0,129823116 | 0,044 | 0,071 | 1           | 0,913943499   | 1,094159542     | 0,61971831      |
| PRPF3                                                                                           | 0,000266996 | -0,129879633 | 0,035 | 0,076 | 1           | 0,913907696   | 1,094202406     | 0,460526316     |
| ADAMTS1                                                                                         | 0,113793427 | -0,130033981 | 0,262 | 0,293 | 1           | 0,913809926   | 1,094319476     | 0,894197952     |

Supplementary Table 5

| Differentially expressed genes_total calculation_ comparing SC-Keloid vs. (SC-Myel, SC-Nonmyel) |             |              |       |       |             |               |                 |                 |
|-------------------------------------------------------------------------------------------------|-------------|--------------|-------|-------|-------------|---------------|-----------------|-----------------|
| gene                                                                                            | p_val       | avg_log2FC   | pct.1 | pct.2 | p_val_adj   | Foldchange_UP | Foldchange_DOWN | Ratio_pct1_pct2 |
| ARHGAP36                                                                                        | 1,43484E-05 | -0,130121641 | 0     | 0,022 | 0,302765291 | 0,913754404   | 1,094385971     | 0               |
| MOK                                                                                             | 0,002898258 | -0,130163439 | 0,048 | 0,083 | 1           | 0,91372793    | 1,094417678     | 0,578313253     |
| ANOS1                                                                                           | 3,13243E-06 | -0,130222302 | 0,001 | 0,028 | 0,066097391 | 0,913690651   | 1,094462332     | 0,035714286     |
| REPS1                                                                                           | 0,017297889 | -0,130282492 | 0,027 | 0,049 | 1           | 0,913652532   | 1,094507994     | 0,551020408     |
| NAGA                                                                                            | 0,103227916 | -0,130499696 | 0,038 | 0,054 | 1           | 0,913514988   | 1,094672789     | 0,703703704     |
| TIMM44                                                                                          | 0,01455585  | -0,130606034 | 0,084 | 0,117 | 1           | 0,913447657   | 1,094753479     | 0,717948718     |
| CFLAR                                                                                           | 4,96621E-07 | -0,130662683 | 0,095 | 0,182 | 0,010479198 | 0,91341179    | 1,094796466     | 0,521978022     |
| HDHD2                                                                                           | 0,285340207 | -0,130666989 | 0,045 | 0,056 | 1           | 0,913409064   | 1,094799734     | 0,803571429     |
| SDK2                                                                                            | 6,98029E-06 | -0,13068092  | 0,003 | 0,033 | 0,147291116 | 0,913400244   | 1,094810305     | 0,090909091     |
| IDH3A                                                                                           | 0,033563528 | -0,130691661 | 0,065 | 0,091 | 1           | 0,913393443   | 1,094818457     | 0,714285714     |
| WWC2                                                                                            | 0,020529469 | -0,130697637 | 0,057 | 0,085 | 1           | 0,91338966    | 1,094822992     | 0,670588235     |
| TMEM129                                                                                         | 0,055566857 | -0,130808927 | 0,058 | 0,08  | 1           | 0,913319204   | 1,09490745      | 0,725           |
| RHAG                                                                                            | 2,22051E-06 | -0,130949314 | 0     | 0,026 | 0,046854929 | 0,913230334   | 1,095013999     | 0               |
| ZNF652                                                                                          | 0,000517301 | -0,131012255 | 0,098 | 0,153 | 1           | 0,913190493   | 1,095061773     | 0,640522876     |
| SNRNP48                                                                                         | 0,087216814 | -0,131064864 | 0,044 | 0,062 | 1           | 0,913157193   | 1,095101706     | 0,709677419     |
| DOCK7                                                                                           | 0,028190183 | -0,131069042 | 0,128 | 0,161 | 1           | 0,913154549   | 1,095104877     | 0,795031056     |
| SOGA3                                                                                           | 0,002793979 | -0,131115535 | 0,017 | 0,042 | 1           | 0,913125122   | 1,095140169     | 0,404761905     |
| FBXO30                                                                                          | 6,08495E-05 | -0,131155543 | 0,042 | 0,091 | 1           | 0,9130998     | 1,095170539     | 0,461538462     |
| PILRB                                                                                           | 0,110784762 | -0,131164853 | 0,033 | 0,047 | 1           | 0,913093907   | 1,095177606     | 0,70212766      |
| PEF1                                                                                            | 0,549391132 | -0,13118386  | 0,104 | 0,107 | 1           | 0,913081878   | 1,095192035     | 0,971962617     |
| OSMR-DT                                                                                         | 2,37382E-05 | -0,131203456 | 0,003 | 0,03  | 0,500899155 | 0,913069475   | 1,095206912     | 0,1             |
| RTL8B                                                                                           | 0,203444759 | -0,131320578 | 0,038 | 0,05  | 1           | 0,912995353   | 1,095295827     | 0,76            |
| SNX21                                                                                           | 0,211749319 | -0,131393988 | 0,038 | 0,05  | 1           | 0,912948898   | 1,095351561     | 0,76            |
| CIAO1                                                                                           | 0,098534258 | -0,131442697 | 0,093 | 0,114 | 1           | 0,912918074   | 1,095388544     | 0,815789474     |
| RAD9A                                                                                           | 0,091916795 | -0,131490669 | 0,052 | 0,071 | 1           | 0,912887719   | 1,095424968     | 0,732394366     |
| NUSAP1                                                                                          | 0,004804281 | -0,131533251 | 0,01  | 0,03  | 1           | 0,912860775   | 1,095457301     | 0,333333333     |
| CAPN2                                                                                           | 0,019580567 | -0,131648223 | 0,141 | 0,178 | 1           | 0,91278803    | 1,095544604     | 0,792134831     |
| SEPTIN8                                                                                         | 0,000139242 | -0,131731722 | 0,04  | 0,084 | 1           | 0,912735202   | 1,095608012     | 0,476190476     |
| SCAPER                                                                                          | 0,002039846 | -0,13180154  | 0,048 | 0,085 | 1           | 0,912691032   | 1,095661034     | 0,564705882     |
| ZNF394                                                                                          | 0,00094585  | -0,131812273 | 0,04  | 0,077 | 1           | 0,912684242   | 1,095669186     | 0,519480519     |

Supplementary Table 5

| Differentially expressed genes_total calculation_ comparing SC-Keloid vs. (SC-Myel, SC-Nonmyel) |             |              |       |       |             |               |                 |                 |
|-------------------------------------------------------------------------------------------------|-------------|--------------|-------|-------|-------------|---------------|-----------------|-----------------|
| gene                                                                                            | p_val       | avg_log2FC   | pct.1 | pct.2 | p_val_adj   | Foldchange_UP | Foldchange_DOWN | Ratio_pct1_pct2 |
| MAP2K7                                                                                          | 0,024456038 | -0,131860833 | 0,055 | 0,081 | 1           | 0,912653522   | 1,095706066     | 0,679012346     |
| AK9                                                                                             | 0,0001533   | -0,131870762 | 0,015 | 0,047 | 1           | 0,912647241   | 1,095713607     | 0,319148936     |
| SMN1                                                                                            | 0,001757726 | -0,132069254 | 0,016 | 0,042 | 1           | 0,912521684   | 1,09586437      | 0,380952381     |
| NRTN                                                                                            | 0,00231528  | -0,132071165 | 0,012 | 0,034 | 1           | 0,912520475   | 1,095865822     | 0,352941176     |
| IL6R                                                                                            | 2,11607E-06 | -0,13207966  | 0,014 | 0,057 | 0,044651137 | 0,912515101   | 1,095872275     | 0,245614035     |
| DENND1B                                                                                         | 0,016050311 | -0,132118927 | 0,019 | 0,038 | 1           | 0,912490266   | 1,095902102     | 0,5             |
| SLC39A14                                                                                        | 0,008531821 | -0,132125168 | 0,051 | 0,083 | 1           | 0,912486318   | 1,095906843     | 0,614457831     |
| RAB4B                                                                                           | 0,645719497 | -0,132175996 | 0,048 | 0,052 | 1           | 0,912454171   | 1,095945454     | 0,923076923     |
| PIP4P1                                                                                          | 0,000399888 | -0,132184694 | 0,041 | 0,081 | 1           | 0,912448669   | 1,095952061     | 0,50617284      |
| APOBEC3G                                                                                        | 0,824906016 | -0,132195135 | 0,064 | 0,06  | 1           | 0,912442066   | 1,095959993     | 1,066666667     |
| LNP1                                                                                            | 0,001223027 | -0,13221725  | 0,005 | 0,023 | 1           | 0,912428079   | 1,095976793     | 0,217391304     |
| BARD1                                                                                           | 0,003219793 | -0,132268376 | 0,055 | 0,092 | 1           | 0,912395745   | 1,096015632     | 0,597826087     |
| AC116407.2                                                                                      | 0,000503631 | -0,132344777 | 0,007 | 0,03  | 1           | 0,912347428   | 1,096073676     | 0,233333333     |
| ANKRD13B                                                                                        | 0,182452649 | -0,132394278 | 0,024 | 0,035 | 1           | 0,912316125   | 1,096111284     | 0,685714286     |
| TEAD3                                                                                           | 0,080025159 | -0,132415044 | 0,043 | 0,061 | 1           | 0,912302993   | 1,096127062     | 0,704918033     |
| TMEM11                                                                                          | 0,156992099 | -0,132503827 | 0,071 | 0,087 | 1           | 0,912246852   | 1,09619452      | 0,816091954     |
| PYGL                                                                                            | 5,59401E-05 | -0,132529883 | 0,057 | 0,111 | 1           | 0,912230377   | 1,096214318     | 0,513513514     |
| MOB2                                                                                            | 0,004619653 | -0,132655059 | 0,119 | 0,161 | 1           | 0,91215123    | 1,096309435     | 0,739130435     |
| RNPEP                                                                                           | 0,223314276 | -0,132738222 | 0,066 | 0,08  | 1           | 0,912098652   | 1,096372633     | 0,825           |
| TJAP1                                                                                           | 0,009430783 | -0,132798929 | 0,047 | 0,076 | 1           | 0,912060272   | 1,096418768     | 0,618421053     |
| EMD                                                                                             | 0,003273148 | -0,132813682 | 0,126 | 0,172 | 1           | 0,912050946   | 1,09642998      | 0,73255814      |
| COL11A2                                                                                         | 2,98006E-06 | -0,132976322 | 0,001 | 0,028 | 0,062882266 | 0,911948133   | 1,096553591     | 0,035714286     |
| ITIH3                                                                                           | 6,41652E-07 | -0,132993998 | 0     | 0,028 | 0,01353949  | 0,91193696    | 1,096567026     | 0               |
| RDH14                                                                                           | 0,004360451 | -0,133138009 | 0,071 | 0,11  | 1           | 0,911845934   | 1,096676492     | 0,645454545     |
| TTC39C                                                                                          | 1,67777E-05 | -0,133504392 | 0,047 | 0,102 | 0,35402638  | 0,911614393   | 1,096955037     | 0,460784314     |
| UIMC1                                                                                           | 0,003276299 | -0,133559316 | 0,047 | 0,081 | 1           | 0,911579688   | 1,096996799     | 0,580246914     |
| CYRIA                                                                                           | 0,009497355 | -0,133623875 | 0,022 | 0,045 | 1           | 0,911538897   | 1,09704589      | 0,488888889     |
| AQP11                                                                                           | 6,73808E-06 | -0,133651111 | 0,005 | 0,035 | 0,142180149 | 0,911521688   | 1,0970666       | 0,142857143     |
| KPNA4                                                                                           | 3,2843E-07  | -0,13383852  | 0,137 | 0,232 | 0,00693021  | 0,911403288   | 1,097209121     | 0,590517241     |
| MED30                                                                                           | 0,033097326 | -0,133843842 | 0,095 | 0,126 | 1           | 0,911399926   | 1,097213168     | 0,753968254     |

Supplementary Table 5

| Differentially expressed genes_total calculation_ comparing SC-Keloid vs. (SC-Myel, SC-Nonmyel) |             |              |       |       |             |               |                 |                 |
|-------------------------------------------------------------------------------------------------|-------------|--------------|-------|-------|-------------|---------------|-----------------|-----------------|
| gene                                                                                            | p_val       | avg_log2FC   | pct.1 | pct.2 | p_val_adj   | Foldchange_UP | Foldchange_DOWN | Ratio_pct1_pct2 |
| EDC4                                                                                            | 0,760332957 | -0,133887217 | 0,028 | 0,03  | 1           | 0,911372525   | 1,097246157     | 0,933333333     |
| POFUT2                                                                                          | 0,47722805  | -0,133926638 | 0,068 | 0,075 | 1           | 0,911347622   | 1,097276139     | 0,906666667     |
| ARHGAP29                                                                                        | 0,000452441 | -0,134032893 | 0,013 | 0,041 | 1           | 0,911280504   | 1,097356957     | 0,317073171     |
| PRDM2                                                                                           | 0,000141932 | -0,134048215 | 0,098 | 0,159 | 1           | 0,911270826   | 1,097368611     | 0,616352201     |
| TNPO1                                                                                           | 0,001510287 | -0,13412467  | 0,12  | 0,17  | 1           | 0,911222534   | 1,097426767     | 0,705882353     |
| MEGF10                                                                                          | 1,69921E-06 | -0,134296759 | 0,001 | 0,03  | 0,035855113 | 0,911113848   | 1,097557679     | 0,033333333     |
| ROCK2                                                                                           | 0,000307965 | -0,134333023 | 0,192 | 0,261 | 1           | 0,911090946   | 1,097585268     | 0,735632184     |
| ZDHHC6                                                                                          | 0,099830471 | -0,134585944 | 0,042 | 0,058 | 1           | 0,910931235   | 1,097777705     | 0,724137931     |
| ZBTB47                                                                                          | 0,001392576 | -0,134703551 | 0,019 | 0,046 | 1           | 0,91085698    | 1,097867198     | 0,413043478     |
| HSPA1L                                                                                          | 0,001878929 | -0,134750745 | 0,008 | 0,028 | 1           | 0,910827184   | 1,097903112     | 0,285714286     |
| GTF2H4                                                                                          | 0,023935661 | -0,134842453 | 0,029 | 0,05  | 1           | 0,910769287   | 1,097972905     | 0,58            |
| PLA2G4B                                                                                         | 0,000111001 | -0,134881321 | 0,006 | 0,031 | 1           | 0,91074475    | 1,098002486     | 0,193548387     |
| MLF1                                                                                            | 0,007766208 | -0,13488674  | 0,115 | 0,157 | 1           | 0,910741329   | 1,09800661      | 0,732484076     |
| PPP3CC                                                                                          | 0,011636373 | -0,134932341 | 0,042 | 0,069 | 1           | 0,910712543   | 1,098041317     | 0,608695652     |
| TMEM178A                                                                                        | 0,000457103 | -0,134987784 | 0,002 | 0,02  | 1           | 0,910677545   | 1,098083516     | 0,1             |
| RBM15                                                                                           | 0,000153185 | -0,134999242 | 0,01  | 0,039 | 1           | 0,910670312   | 1,098092237     | 0,256410256     |
| CAMK2B                                                                                          | 0,00032925  | -0,135053882 | 0,009 | 0,035 | 1           | 0,910635822   | 1,098133826     | 0,257142857     |
| LINC00685                                                                                       | 0,003695332 | -0,13523614  | 0,023 | 0,05  | 1           | 0,910520788   | 1,098272564     | 0,46            |
| SLC35E3                                                                                         | 0,005771154 | -0,135632336 | 0,052 | 0,087 | 1           | 0,910270773   | 1,098574215     | 0,597701149     |
| SERPINF1                                                                                        | 0,013720699 | -0,135634126 | 0,015 | 0,034 | 1           | 0,910269644   | 1,098575578     | 0,441176471     |
| CEP350                                                                                          | 2,49651E-05 | -0,135825773 | 0,133 | 0,21  | 0,526788909 | 0,910148732   | 1,098721522     | 0,633333333     |
| SEC63                                                                                           | 0,001026981 | -0,135832595 | 0,149 | 0,206 | 1           | 0,910144428   | 1,098726718     | 0,723300971     |
| ACVR1B                                                                                          | 0,131653088 | -0,136085807 | 0,019 | 0,03  | 1           | 0,909984699   | 1,098919576     | 0,633333333     |
| SENP2                                                                                           | 0,034298385 | -0,13621644  | 0,03  | 0,05  | 1           | 0,909902306   | 1,099019085     | 0,6             |
| HLA-DQA1                                                                                        | 9,12312E-05 | -0,136254695 | 0,008 | 0,037 | 1           | 0,909878179   | 1,099048228     | 0,216216216     |
| FBXO3                                                                                           | 0,001461818 | -0,136257266 | 0,075 | 0,119 | 1           | 0,909876557   | 1,099050187     | 0,630252101     |
| FARP2                                                                                           | 0,000239423 | -0,13629514  | 0,054 | 0,102 | 1           | 0,909852672   | 1,099079039     | 0,529411765     |
| DENND4A                                                                                         | 0,000217149 | -0,136410811 | 0,026 | 0,062 | 1           | 0,909779725   | 1,099167164     | 0,419354839     |
| PPP1R1B                                                                                         | 5,55295E-06 | -0,136414573 | 0,001 | 0,027 | 0,117172699 | 0,909777353   | 1,09917003      | 0,037037037     |
| ATP6V1E2                                                                                        | 0,001382815 | -0,136468148 | 0,022 | 0,052 | 1           | 0,909743568   | 1,099210849     | 0,423076923     |

Supplementary Table 5

| Differentially expressed genes_total calculation_ comparing SC-Keloid vs. (SC-Myel, SC-Nonmyel) |             |              |       |       |             |               |                 |                 |
|-------------------------------------------------------------------------------------------------|-------------|--------------|-------|-------|-------------|---------------|-----------------|-----------------|
| gene                                                                                            | p_val       | avg_log2FC   | pct.1 | pct.2 | p_val_adj   | Foldchange_UP | Foldchange_DOWN | Ratio_pct1_pct2 |
| COQ10A                                                                                          | 0,005181916 | -0,136505044 | 0,024 | 0,05  | 1           | 0,909720303   | 1,09923896      | 0,48            |
| BAZ1A                                                                                           | 0,020422885 | -0,136509034 | 0,146 | 0,183 | 1           | 0,909717787   | 1,099242001     | 0,797814208     |
| GRB2                                                                                            | 0,001894125 | -0,136669304 | 0,15  | 0,204 | 1           | 0,909616731   | 1,099364123     | 0,735294118     |
| FGGY                                                                                            | 0,05411839  | -0,136807012 | 0,021 | 0,037 | 1           | 0,90952991    | 1,099469065     | 0,567567568     |
| ANXA3                                                                                           | 3,43686E-05 | -0,136840494 | 0,024 | 0,066 | 0,725211947 | 0,909508803   | 1,099494581     | 0,363636364     |
| COQ8A                                                                                           | 6,58978E-06 | -0,136858963 | 0,006 | 0,038 | 0,139051011 | 0,909497159   | 1,099508657     | 0,157894737     |
| PHLDA3                                                                                          | 0,003982733 | -0,136890565 | 0,183 | 0,239 | 1           | 0,909477237   | 1,099532742     | 0,765690377     |
| LRATD2                                                                                          | 2,31575E-05 | -0,136895704 | 0,003 | 0,03  | 0,488646934 | 0,909473998   | 1,099536658     | 0,1             |
| SLC23A2                                                                                         | 0,003847402 | -0,13696297  | 0,073 | 0,113 | 1           | 0,909431594   | 1,099587926     | 0,646017699     |
| NQO2                                                                                            | 0,090282858 | -0,137019841 | 0,068 | 0,088 | 1           | 0,909395745   | 1,099631272     | 0,772727273     |
| SLC44A3                                                                                         | 0,000402207 | -0,137095456 | 0,005 | 0,026 | 1           | 0,909348083   | 1,099688908     | 0,192307692     |
| TAF13                                                                                           | 0,042315097 | -0,137184805 | 0,066 | 0,091 | 1           | 0,909291767   | 1,099757016     | 0,725274725     |
| PI4KB                                                                                           | 0,027574426 | -0,137188101 | 0,081 | 0,11  | 1           | 0,909289689   | 1,099759529     | 0,736363636     |
| KIAA0319L                                                                                       | 0,227465086 | -0,137193916 | 0,056 | 0,069 | 1           | 0,909286024   | 1,099763961     | 0,811594203     |
| PDCD6IP                                                                                         | 0,00325277  | -0,137216945 | 0,147 | 0,195 | 1           | 0,90927151    | 1,099781516     | 0,753846154     |
| GLIS2                                                                                           | 2,11825E-05 | -0,137229042 | 0,005 | 0,033 | 0,446970905 | 0,909263886   | 1,099790738     | 0,151515152     |
| LUC7L                                                                                           | 7,50074E-06 | -0,13728933  | 0,137 | 0,216 | 0,158273154 | 0,90922589    | 1,099836698     | 0,634259259     |
| PELO                                                                                            | 0,001226179 | -0,137508402 | 0,129 | 0,185 | 1           | 0,909087835   | 1,100003719     | 0,697297297     |
| FHIP1B                                                                                          | 0,048094718 | -0,137529175 | 0,033 | 0,052 | 1           | 0,909074745   | 1,100019559     | 0,634615385     |
| ABTB1                                                                                           | 0,003925417 | -0,137576433 | 0,02  | 0,045 | 1           | 0,909044968   | 1,100055592     | 0,444444444     |
| ACAD11                                                                                          | 0,027984792 | -0,137736917 | 0,015 | 0,031 | 1           | 0,908943852   | 1,100177968     | 0,483870968     |
| ARAF                                                                                            | 0,029995509 | -0,137844409 | 0,055 | 0,08  | 1           | 0,908876131   | 1,100259943     | 0,6875          |
| SLC22A23                                                                                        | 0,025607368 | -0,137859935 | 0,02  | 0,038 | 1           | 0,90886635    | 1,100271784     | 0,526315789     |
| SLC43A3                                                                                         | 0,024344075 | -0,137942104 | 0,063 | 0,091 | 1           | 0,908814587   | 1,100334452     | 0,692307692     |
| CHKA                                                                                            | 7,26484E-05 | -0,13806023  | 0,055 | 0,107 | 1           | 0,908740177   | 1,10042455      | 0,514018692     |
| TUBA1C                                                                                          | 0,005154562 | -0,138082044 | 0,204 | 0,258 | 1           | 0,908726437   | 1,100441188     | 0,790697674     |
| BCAR3                                                                                           | 0,008082287 | -0,138145462 | 0,081 | 0,117 | 1           | 0,908686492   | 1,100489562     | 0,692307692     |
| MED22                                                                                           | 0,124308245 | -0,138179469 | 0,016 | 0,027 | 1           | 0,908665073   | 1,100515503     | 0,592592593     |
| KLHL5                                                                                           | 0,012783941 | -0,138297131 | 0,045 | 0,073 | 1           | 0,908590968   | 1,100605262     | 0,616438356     |
| DIS3                                                                                            | 0,081010488 | -0,138459283 | 0,057 | 0,077 | 1           | 0,908488853   | 1,100728971     | 0,74025974      |

Supplementary Table 5

| Differentially expressed genes_total calculation_ comparing SC-Keloid vs. (SC-Myel, SC-Nonmyel) |             |              |       |       |             |               |                 |                 |
|-------------------------------------------------------------------------------------------------|-------------|--------------|-------|-------|-------------|---------------|-----------------|-----------------|
| gene                                                                                            | p_val       | avg_log2FC   | pct.1 | pct.2 | p_val_adj   | Foldchange_UP | Foldchange_DOWN | Ratio_pct1_pct2 |
| CEP131                                                                                          | 0,017856994 | -0,138532472 | 0,021 | 0,041 | 1           | 0,908442765   | 1,100784814     | 0,512195122     |
| CAPN1                                                                                           | 0,084455558 | -0,138553248 | 0,114 | 0,137 | 1           | 0,908429683   | 1,100800666     | 0,832116788     |
| MARCHF3                                                                                         | 0,038630369 | -0,138651819 | 0,041 | 0,062 | 1           | 0,908367617   | 1,10087588      | 0,661290323     |
| NFKBIE                                                                                          | 0,181620174 | -0,138702451 | 0,064 | 0,079 | 1           | 0,908335739   | 1,100914516     | 0,810126582     |
| MARCHF8                                                                                         | 0,003022262 | -0,138842049 | 0,01  | 0,031 | 1           | 0,90824785    | 1,101021048     | 0,322580645     |
| FAM13A                                                                                          | 0,087723132 | -0,138905284 | 0,031 | 0,047 | 1           | 0,908208042   | 1,101069308     | 0,659574468     |
| CDK13                                                                                           | 0,001806469 | -0,138964452 | 0,148 | 0,202 | 1           | 0,908170794   | 1,101114467     | 0,732673267     |
| NRIP2                                                                                           | 2,13401E-06 | -0,138976288 | 0,005 | 0,038 | 0,045029698 | 0,908163344   | 1,1011235       | 0,131578947     |
| LCORL                                                                                           | 0,00242961  | -0,139170586 | 0,054 | 0,091 | 1           | 0,908041043   | 1,101271806     | 0,593406593     |
| ZNF414                                                                                          | 0,048128968 | -0,139189023 | 0,042 | 0,062 | 1           | 0,908029439   | 1,10128588      | 0,677419355     |
| AXIN1                                                                                           | 0,039338625 | -0,139311222 | 0,043 | 0,065 | 1           | 0,90795253    | 1,101379165     | 0,661538462     |
| MAP4                                                                                            | 3,54464E-06 | -0,139313001 | 0,445 | 0,613 | 0,074795362 | 0,907951411   | 1,101380523     | 0,72593801      |
| ASXL2                                                                                           | 0,000195321 | -0,139353576 | 0,028 | 0,066 | 1           | 0,907925876   | 1,101411499     | 0,424242424     |
| LINC02693                                                                                       | 0,021415979 | -0,139501182 | 0,012 | 0,027 | 1           | 0,907832988   | 1,101524193     | 0,444444444     |
| RFNG                                                                                            | 0,297775194 | -0,13951302  | 0,106 | 0,117 | 1           | 0,907825539   | 1,101533232     | 0,905982906     |
| BRSK2                                                                                           | 6,41652E-07 | -0,139539746 | 0     | 0,028 | 0,01353949  | 0,907808721   | 1,101553638     | 0               |
| ANKDD1A                                                                                         | 0,00190824  | -0,139607929 | 0,05  | 0,088 | 1           | 0,907765819   | 1,1016057       | 0,568181818     |
| C16orf72                                                                                        | 3,90815E-05 | -0,139698036 | 0,094 | 0,16  | 0,824658794 | 0,907709124   | 1,101674505     | 0,5875          |
| CES1                                                                                            | 0,00484194  | -0,139701511 | 0,01  | 0,03  | 1           | 0,907706937   | 1,101677159     | 0,333333333     |
| GNB2                                                                                            | 2,93151E-07 | -0,13981667  | 0,271 | 0,4   | 0,006185785 | 0,907634485   | 1,101765101     | 0,6775          |
| AGAP3                                                                                           | 0,007089465 | -0,139874145 | 0,049 | 0,08  | 1           | 0,907598327   | 1,101808995     | 0,6125          |
| COX11                                                                                           | 0,008302992 | -0,139966989 | 0,085 | 0,121 | 1           | 0,907539921   | 1,101879903     | 0,702479339     |
| SNRPB                                                                                           | 8,84495E-09 | -0,140018878 | 0,271 | 0,417 | 0,000186637 | 0,90750728    | 1,101919535     | 0,649880096     |
| CA5B                                                                                            | 0,000447059 | -0,140060053 | 0,02  | 0,052 | 1           | 0,90748138    | 1,101950984     | 0,384615385     |
| PBX3                                                                                            | 0,137968065 | -0,140173142 | 0,063 | 0,08  | 1           | 0,907410248   | 1,102037367     | 0,7875          |
| NECTIN1                                                                                         | 0,000123545 | -0,140216135 | 0,012 | 0,042 | 1           | 0,907383207   | 1,102070208     | 0,285714286     |
| INTS6L                                                                                          | 0,000209084 | -0,14025217  | 0,014 | 0,045 | 1           | 0,907360543   | 1,102097736     | 0,311111111     |
| POM121                                                                                          | 0,009821739 | -0,140273873 | 0,045 | 0,075 | 1           | 0,907346893   | 1,102114315     | 0,6             |
| SREK1                                                                                           | 8,23219E-05 | -0,140274233 | 0,184 | 0,258 | 1           | 0,907346667   | 1,10211459      | 0,713178295     |
| RECK                                                                                            | 0,001110546 | -0,140306342 | 0,02  | 0,049 | 1           | 0,907326473   | 1,102139119     | 0,408163265     |

Supplementary Table 5

| Differentially expressed genes_total calculation_ comparing SC-Keloid vs. (SC-Myel, SC-Nonmyel) |             |              |       |       |             |               |                 |                 |
|-------------------------------------------------------------------------------------------------|-------------|--------------|-------|-------|-------------|---------------|-----------------|-----------------|
| gene                                                                                            | p_val       | avg_log2FC   | pct.1 | pct.2 | p_val_adj   | Foldchange_UP | Foldchange_DOWN | Ratio_pct1_pct2 |
| C11orf91                                                                                        | 0,000467114 | -0,140368941 | 0,007 | 0,03  | 1           | 0,907287104   | 1,102186943     | 0,233333333     |
| SFT2D2                                                                                          | 7,38508E-05 | -0,140417339 | 0,054 | 0,106 | 1           | 0,907256669   | 1,102223918     | 0,509433962     |
| ENOSF1                                                                                          | 0,106010175 | -0,140470536 | 0,029 | 0,043 | 1           | 0,907223216   | 1,102264562     | 0,674418605     |
| DIS3L2                                                                                          | 0,187067698 | -0,140617788 | 0,035 | 0,047 | 1           | 0,907130623   | 1,102377072     | 0,744680851     |
| WDR59                                                                                           | 0,039411635 | -0,140703319 | 0,037 | 0,058 | 1           | 0,907076844   | 1,10244243      | 0,637931034     |
| ARHGAP17                                                                                        | 0,004882243 | -0,140790054 | 0,035 | 0,065 | 1           | 0,907022312   | 1,102508711     | 0,538461538     |
| LRIG2                                                                                           | 0,007564315 | -0,140801963 | 0,022 | 0,046 | 1           | 0,907014825   | 1,102517811     | 0,47826087      |
| OSMR                                                                                            | 0,0001533   | -0,140861137 | 0,015 | 0,047 | 1           | 0,906977623   | 1,102563034     | 0,319148936     |
| TRAF4                                                                                           | 0,039321104 | -0,14090323  | 0,044 | 0,066 | 1           | 0,906951161   | 1,102595203     | 0,666666667     |
| ZBTB38                                                                                          | 3,70809E-06 | -0,141068178 | 0,162 | 0,252 | 0,078244304 | 0,906847472   | 1,102721274     | 0,642857143     |
| SOS2                                                                                            | 0,006911491 | -0,141142359 | 0,121 | 0,161 | 1           | 0,906800845   | 1,102777975     | 0,751552795     |
| PSMD6                                                                                           | 0,00494773  | -0,141169567 | 0,129 | 0,172 | 1           | 0,906783744   | 1,102798773     | 0,75            |
| MLLT3                                                                                           | 0,000435871 | -0,141265093 | 0,01  | 0,037 | 1           | 0,906723705   | 1,102871795     | 0,27027027      |
| DNAJA2                                                                                          | 6,32283E-06 | -0,141379184 | 0,129 | 0,209 | 0,133418021 | 0,906652002   | 1,102959016     | 0,61722488      |
| ATXN1L                                                                                          | 0,000177958 | -0,141396418 | 0,033 | 0,073 | 1           | 0,906641171   | 1,102972192     | 0,452054795     |
| PDPN                                                                                            | 0,009855449 | -0,141411716 | 0,022 | 0,045 | 1           | 0,906631558   | 1,102983887     | 0,488888889     |
| RIPOR1                                                                                          | 0,001419767 | -0,141425787 | 0,056 | 0,096 | 1           | 0,906622715   | 1,102994645     | 0,583333333     |
| ACO2                                                                                            | 0,047424498 | -0,141431273 | 0,075 | 0,099 | 1           | 0,906619268   | 1,10299884      | 0,757575758     |
| TTL5                                                                                            | 0,032542454 | -0,141521963 | 0,028 | 0,047 | 1           | 0,906562278   | 1,103068178     | 0,595744681     |
| GSE1                                                                                            | 0,022427273 | -0,141637586 | 0,034 | 0,057 | 1           | 0,906489625   | 1,103156586     | 0,596491228     |
| CAPN10                                                                                          | 0,425821057 | -0,141740392 | 0,03  | 0,037 | 1           | 0,906425031   | 1,103235199     | 0,810810811     |
| ETHE1                                                                                           | 0,011015596 | -0,141796635 | 0,081 | 0,115 | 1           | 0,906389695   | 1,103278209     | 0,704347826     |
| UNC45A                                                                                          | 0,0562391   | -0,141900634 | 0,059 | 0,081 | 1           | 0,906324359   | 1,103357744     | 0,728395062     |
| BST2                                                                                            | 0,000332873 | -0,141929125 | 0,012 | 0,039 | 1           | 0,906306461   | 1,103379533     | 0,307692308     |
| CCDC59                                                                                          | 0,000954343 | -0,141956411 | 0,144 | 0,204 | 1           | 0,90628932    | 1,103400402     | 0,705882353     |
| UBR2                                                                                            | 0,003308456 | -0,142006731 | 0,073 | 0,114 | 1           | 0,90625771    | 1,103438889     | 0,640350877     |
| BASP1                                                                                           | 0,000162712 | -0,142169161 | 0,013 | 0,043 | 1           | 0,906155682   | 1,103563129     | 0,302325581     |
| LINC01003                                                                                       | 0,004058673 | -0,14219448  | 0,04  | 0,071 | 1           | 0,90613978    | 1,103582496     | 0,563380282     |
| LINC00327                                                                                       | 0,000584517 | -0,14229002  | 0,012 | 0,038 | 1           | 0,906079774   | 1,103655582     | 0,315789474     |
| SVIP                                                                                            | 0,0637662   | -0,14237273  | 0,143 | 0,172 | 1           | 0,906027829   | 1,103718857     | 0,831395349     |



Supplementary Table 5

| Differentially expressed genes_total calculation_ comparing SC-Keloid vs. (SC-Myel, SC-Nonmyel) |             |              |       |       |             |               |                 |                 |
|-------------------------------------------------------------------------------------------------|-------------|--------------|-------|-------|-------------|---------------|-----------------|-----------------|
| gene                                                                                            | p_val       | avg_log2FC   | pct.1 | pct.2 | p_val_adj   | Foldchange_UP | Foldchange_DOWN | Ratio_pct1_pct2 |
| ZNF654                                                                                          | 0,000133332 | -0,142488688 | 0,036 | 0,08  | 1           | 0,905955009   | 1,103807573     | 0,45            |
| EIF4H                                                                                           | 4,58814E-07 | -0,142525414 | 0,237 | 0,345 | 0,009681427 | 0,905931947   | 1,103835672     | 0,686956522     |
| TOGARAM1                                                                                        | 0,000233492 | -0,142532013 | 0,083 | 0,137 | 1           | 0,905927804   | 1,103840721     | 0,605839416     |
| CC2D1A                                                                                          | 0,203669844 | -0,142542274 | 0,043 | 0,056 | 1           | 0,90592136    | 1,103848572     | 0,767857143     |
| MCOLN1                                                                                          | 0,077914844 | -0,142544756 | 0,044 | 0,062 | 1           | 0,905919802   | 1,103850471     | 0,709677419     |
| AFF1                                                                                            | 0,000359304 | -0,142573163 | 0,035 | 0,075 | 1           | 0,905901965   | 1,103872206     | 0,466666667     |
| GPR173                                                                                          | 0,000203161 | -0,142653189 | 0,012 | 0,041 | 1           | 0,905851716   | 1,103933439     | 0,292682927     |
| CDK11A                                                                                          | 0,021555327 | -0,142820411 | 0,048 | 0,073 | 1           | 0,905746725   | 1,104061403     | 0,657534247     |
| HOOK2                                                                                           | 0,014357606 | -0,142885948 | 0,035 | 0,06  | 1           | 0,905705581   | 1,104111558     | 0,583333333     |
| ATPCKMT                                                                                         | 0,231828024 | -0,143083236 | 0,017 | 0,026 | 1           | 0,905581734   | 1,104262556     | 0,653846154     |
| GOLGA8B                                                                                         | 0,016638636 | -0,143144033 | 0,029 | 0,052 | 1           | 0,905543573   | 1,104309091     | 0,557692308     |
| KLHL3                                                                                           | 0,097616008 | -0,143172968 | 0,02  | 0,033 | 1           | 0,905525411   | 1,10433124      | 0,606060606     |
| EIF2B4                                                                                          | 0,129258179 | -0,143188171 | 0,061 | 0,077 | 1           | 0,905515869   | 1,104342877     | 0,792207792     |
| MED12                                                                                           | 0,013864355 | -0,143406047 | 0,022 | 0,043 | 1           | 0,905379128   | 1,104509668     | 0,511627907     |
| NTN4                                                                                            | 0,004030773 | -0,143588557 | 0,009 | 0,028 | 1           | 0,905264599   | 1,104649404     | 0,321428571     |
| TNFSF9                                                                                          | 0,000875853 | -0,143588617 | 0,014 | 0,041 | 1           | 0,905264561   | 1,10464945      | 0,341463415     |
| FGFRL1                                                                                          | 1,34445E-07 | -0,143597447 | 0,001 | 0,035 | 0,002836929 | 0,905259021   | 1,104656211     | 0,028571429     |
| SLC25A44                                                                                        | 0,003274965 | -0,143694576 | 0,023 | 0,05  | 1           | 0,905198077   | 1,104730584     | 0,46            |
| RBBP7                                                                                           | 0,000574192 | -0,143942982 | 0,182 | 0,243 | 1           | 0,905042231   | 1,104920815     | 0,748971193     |
| EFNB1                                                                                           | 0,035992027 | -0,143980404 | 0,033 | 0,053 | 1           | 0,905018756   | 1,104949476     | 0,622641509     |
| CERS2                                                                                           | 0,001960092 | -0,144110506 | 0,163 | 0,217 | 1           | 0,904937145   | 1,105049125     | 0,751152074     |
| LINC00461                                                                                       | 0,00085501  | -0,14474084  | 0,012 | 0,037 | 1           | 0,904541851   | 1,105532042     | 0,324324324     |
| CAVIN2                                                                                          | 0,000826132 | -0,144999006 | 0,003 | 0,022 | 1           | 0,904380001   | 1,105729892     | 0,136363636     |
| PAPSS1                                                                                          | 1,72486E-05 | -0,145003983 | 0,116 | 0,187 | 0,363963174 | 0,904376881   | 1,105733706     | 0,620320856     |
| PTPRN2                                                                                          | 0,000451659 | -0,145043119 | 0,003 | 0,023 | 1           | 0,904352348   | 1,105763702     | 0,130434783     |
| AKAP8L                                                                                          | 3,89616E-06 | -0,145055206 | 0,107 | 0,185 | 0,082212921 | 0,904344771   | 1,105772966     | 0,578378378     |
| TSPAN7                                                                                          | 0,000412848 | -0,145060157 | 0,023 | 0,057 | 1           | 0,904341668   | 1,10577676      | 0,403508772     |
| JAK1                                                                                            | 0,000947031 | -0,145101339 | 0,144 | 0,204 | 1           | 0,904315854   | 1,105808326     | 0,705882353     |
| LAMA5                                                                                           | 0,112044635 | -0,145161481 | 0,064 | 0,083 | 1           | 0,904278156   | 1,105854424     | 0,771084337     |
| CLEC2D                                                                                          | 0,000759007 | -0,145214818 | 0,016 | 0,045 | 1           | 0,904244725   | 1,105895309     | 0,355555556     |

Supplementary Table 5

| Differentially expressed genes_total calculation_ comparing SC-Keloid vs. (SC-Myel, SC-Nonmyel) |             |              |       |       |             |               |                 |                 |
|-------------------------------------------------------------------------------------------------|-------------|--------------|-------|-------|-------------|---------------|-----------------|-----------------|
| gene                                                                                            | p_val       | avg_log2FC   | pct.1 | pct.2 | p_val_adj   | Foldchange_UP | Foldchange_DOWN | Ratio_pct1_pct2 |
| VOPP1                                                                                           | 0,235516726 | -0,14526411  | 0,043 | 0,054 | 1           | 0,904213831   | 1,105933095     | 0,796296296     |
| LRRC42                                                                                          | 0,002587481 | -0,145343584 | 0,05  | 0,085 | 1           | 0,904164021   | 1,105994019     | 0,588235294     |
| ERV3-1                                                                                          | 0,004924831 | -0,145343617 | 0,029 | 0,057 | 1           | 0,904164      | 1,105994045     | 0,50877193      |
| CMC4                                                                                            | 0,043975764 | -0,145364979 | 0,044 | 0,065 | 1           | 0,904150613   | 1,106010421     | 0,676923077     |
| ARL2                                                                                            | 2,49921E-05 | -0,145505691 | 0,243 | 0,338 | 0,527358041 | 0,904062432   | 1,1061183       | 0,718934911     |
| TK2                                                                                             | 0,015048444 | -0,145623049 | 0,058 | 0,088 | 1           | 0,903988893   | 1,106208282     | 0,659090909     |
| FBXO31                                                                                          | 0,001061011 | -0,145716031 | 0,024 | 0,056 | 1           | 0,903930632   | 1,10627958      | 0,428571429     |
| KRT6B                                                                                           | 0,0040699   | -0,145788707 | 0,007 | 0,024 | 1           | 0,903885098   | 1,10633531      | 0,291666667     |
| ARHGAP32                                                                                        | 7,27564E-05 | -0,145800538 | 0,005 | 0,03  | 1           | 0,903877685   | 1,106344383     | 0,166666667     |
| ARHGEF1                                                                                         | 0,36306401  | -0,145807304 | 0,078 | 0,087 | 1           | 0,903873446   | 1,106349572     | 0,896551724     |
| PC                                                                                              | 3,61939E-05 | -0,145856502 | 0,009 | 0,041 | 0,763728112 | 0,903842623   | 1,106387301     | 0,219512195     |
| SNX29                                                                                           | 0,141835097 | -0,145896822 | 0,038 | 0,053 | 1           | 0,903817363   | 1,106418222     | 0,716981132     |
| DNHD1                                                                                           | 0,0008408   | -0,146182659 | 0,002 | 0,019 | 1           | 0,90363831    | 1,106637455     | 0,105263158     |
| TFPI2                                                                                           | 0,57105035  | -0,146238722 | 0,033 | 0,027 | 1           | 0,903603196   | 1,10668046      | 1,222222222     |
| PRPSAP1                                                                                         | 0,000135187 | -0,146424211 | 0,122 | 0,185 | 1           | 0,903487026   | 1,106822756     | 0,659459459     |
| TWSG1                                                                                           | 0,001025982 | -0,146615095 | 0,111 | 0,161 | 1           | 0,903367493   | 1,10696921      | 0,689440994     |
| AGAP1                                                                                           | 0,0033567   | -0,146894391 | 0,116 | 0,164 | 1           | 0,903192624   | 1,107183533     | 0,707317073     |
| LAPTM4A                                                                                         | 7,49597E-08 | -0,147203211 | 0,467 | 0,664 | 0,001581725 | 0,902999309   | 1,107420559     | 0,703313253     |
| GRAMD2B                                                                                         | 3,54259E-06 | -0,147235764 | 0,108 | 0,189 | 0,074752179 | 0,902978934   | 1,107445547     | 0,571428571     |
| NHS                                                                                             | 6,62501E-05 | -0,147250145 | 0,001 | 0,022 | 1           | 0,902969933   | 1,107456587     | 0,045454545     |
| ZMYND8                                                                                          | 0,046153638 | -0,14741764  | 0,077 | 0,103 | 1           | 0,902865106   | 1,107585168     | 0,747572816     |
| ZNF335                                                                                          | 0,002672046 | -0,14743537  | 0,022 | 0,049 | 1           | 0,90285401    | 1,10759878      | 0,448979592     |
| MSANTD3                                                                                         | 0,001258326 | -0,147468575 | 0,09  | 0,137 | 1           | 0,90283323    | 1,107624273     | 0,656934307     |
| PARD6B                                                                                          | 0,002320635 | -0,147539117 | 0,03  | 0,061 | 1           | 0,902789086   | 1,107678433     | 0,491803279     |
| PPM1A                                                                                           | 0,000792218 | -0,147562665 | 0,102 | 0,153 | 1           | 0,902774351   | 1,107696513     | 0,666666667     |
| SLC25A38                                                                                        | 0,024077997 | -0,147613785 | 0,029 | 0,05  | 1           | 0,902742362   | 1,107735763     | 0,58            |
| EDA                                                                                             | 0,000785638 | -0,147642546 | 0,003 | 0,022 | 1           | 0,902724366   | 1,107757847     | 0,136363636     |
| AC019117.2                                                                                      | 0,002451261 | -0,147669836 | 0,007 | 0,026 | 1           | 0,90270729    | 1,107778801     | 0,269230769     |
| MAST3                                                                                           | 0,000156782 | -0,147671597 | 0,01  | 0,039 | 1           | 0,902706188   | 1,107780153     | 0,256410256     |
| UBE2W                                                                                           | 1,38229E-05 | -0,147707923 | 0,059 | 0,119 | 0,291677325 | 0,902683459   | 1,107808047     | 0,495798319     |

Supplementary Table 5

| Differentially expressed genes_total calculation_ comparing SC-Keloid vs. (SC-Myel, SC-Nonmyel) |             |              |       |       |             |               |                 |                 |
|-------------------------------------------------------------------------------------------------|-------------|--------------|-------|-------|-------------|---------------|-----------------|-----------------|
| gene                                                                                            | p_val       | avg_log2FC   | pct.1 | pct.2 | p_val_adj   | Foldchange_UP | Foldchange_DOWN | Ratio_pct1_pct2 |
| ZNF286A                                                                                         | 0,025346486 | -0,147708189 | 0,021 | 0,039 | 1           | 0,902683293   | 1,107808251     | 0,538461538     |
| DICER1                                                                                          | 0,000709548 | -0,147740717 | 0,139 | 0,198 | 1           | 0,902662941   | 1,107833228     | 0,702020202     |
| EPHB6                                                                                           | 0,000702595 | -0,147982378 | 0,005 | 0,024 | 1           | 0,902511751   | 1,108018814     | 0,208333333     |
| FAT4                                                                                            | 1,85597E-07 | -0,148021914 | 0     | 0,031 | 0,003916278 | 0,902487019   | 1,108049178     | 0               |
| MSL2                                                                                            | 0,006244655 | -0,148059968 | 0,037 | 0,066 | 1           | 0,902463214   | 1,108078406     | 0,560606061     |
| ST3GAL6-AS1                                                                                     | 0,000841954 | -0,148065396 | 0,017 | 0,046 | 1           | 0,902459819   | 1,108082575     | 0,369565217     |
| TNRC6C                                                                                          | 1,57755E-07 | -0,148114116 | 0,078 | 0,163 | 0,003328786 | 0,902429343   | 1,108119996     | 0,478527607     |
| RNF126                                                                                          | 0,004988916 | -0,148193114 | 0,119 | 0,161 | 1           | 0,90237993    | 1,108180675     | 0,739130435     |
| PPT2                                                                                            | 0,603761038 | -0,148268514 | 0,073 | 0,064 | 1           | 0,90233277    | 1,108238594     | 1,140625        |
| MB21D2                                                                                          | 0,000749184 | -0,148290519 | 0,036 | 0,073 | 1           | 0,902319007   | 1,108255498     | 0,493150685     |
| EPS8                                                                                            | 0,016077991 | -0,148294343 | 0,109 | 0,145 | 1           | 0,902316615   | 1,108258435     | 0,751724138     |
| ZNF148                                                                                          | 0,009621116 | -0,148551726 | 0,108 | 0,147 | 1           | 0,902155653   | 1,10845617      | 0,734693878     |
| LRBA                                                                                            | 0,105605158 | -0,148558694 | 0,038 | 0,054 | 1           | 0,902151295   | 1,108461524     | 0,703703704     |
| MGAT1                                                                                           | 0,015045437 | -0,148762139 | 0,113 | 0,148 | 1           | 0,902024085   | 1,108617847     | 0,763513514     |
| DPH7                                                                                            | 0,010515098 | -0,148845016 | 0,035 | 0,061 | 1           | 0,901972269   | 1,108681535     | 0,573770492     |
| PAQR8                                                                                           | 0,054062306 | -0,148850824 | 0,044 | 0,065 | 1           | 0,901968638   | 1,108685999     | 0,676923077     |
| PLEKHF1                                                                                         | 0,000143569 | -0,149175118 | 0,01  | 0,039 | 1           | 0,901765913   | 1,108935241     | 0,256410256     |
| ALMS1                                                                                           | 0,006525949 | -0,149197144 | 0,013 | 0,033 | 1           | 0,901752146   | 1,108952171     | 0,393939394     |
| HACL1                                                                                           | 1,50553E-06 | -0,149438411 | 0,022 | 0,072 | 0,031768185 | 0,901601355   | 1,109137641     | 0,305555556     |
| GON4L                                                                                           | 0,000309896 | -0,149461435 | 0,108 | 0,167 | 1           | 0,901586967   | 1,109155342     | 0,646706587     |
| TMEM44-AS1                                                                                      | 0,000642966 | -0,149498133 | 0,01  | 0,035 | 1           | 0,901564033   | 1,109183556     | 0,285714286     |
| SNORC                                                                                           | 2,67675E-05 | -0,149545939 | 0     | 0,02  | 0,56482021  | 0,901534159   | 1,109220311     | 0               |
| LYRM7                                                                                           | 0,03365832  | -0,14954863  | 0,042 | 0,065 | 1           | 0,901532477   | 1,10922238      | 0,646153846     |
| MTCH1                                                                                           | 4,5512E-06  | -0,149698133 | 0,249 | 0,351 | 0,096034838 | 0,901439058   | 1,109337332     | 0,709401709     |
| TLE2                                                                                            | 0,000943381 | -0,149716687 | 0,02  | 0,049 | 1           | 0,901427465   | 1,109351599     | 0,408163265     |
| EMP1                                                                                            | 0,050718052 | -0,14978999  | 0,417 | 0,468 | 1           | 0,901381665   | 1,109407966     | 0,891025641     |
| PRPS1                                                                                           | 0,00050398  | -0,149875923 | 0,054 | 0,098 | 1           | 0,901327977   | 1,109474049     | 0,551020408     |
| ABI3BP                                                                                          | 0,039825981 | -0,149970408 | 0,044 | 0,066 | 1           | 0,901268949   | 1,109546714     | 0,666666667     |
| SSBP3                                                                                           | 0,00503191  | -0,149990777 | 0,106 | 0,147 | 1           | 0,901256224   | 1,109562379     | 0,721088435     |
| THAP3                                                                                           | 0,003052798 | -0,150001244 | 0,036 | 0,068 | 1           | 0,901249685   | 1,109570429     | 0,529411765     |

Supplementary Table 5

| Differentially expressed genes_total calculation_ comparing SC-Keloid vs. (SC-Myel, SC-Nonmyel) |             |              |       |       |             |               |                 |                 |
|-------------------------------------------------------------------------------------------------|-------------|--------------|-------|-------|-------------|---------------|-----------------|-----------------|
| gene                                                                                            | p_val       | avg_log2FC   | pct.1 | pct.2 | p_val_adj   | Foldchange_UP | Foldchange_DOWN | Ratio_pct1_pct2 |
| RAPGEF6                                                                                         | 0,001501602 | -0,150025314 | 0,037 | 0,072 | 1           | 0,901234649   | 1,109588941     | 0,513888889     |
| HS6ST1                                                                                          | 9,6628E-05  | -0,150123634 | 0,019 | 0,054 | 1           | 0,901173232   | 1,109664562     | 0,351851852     |
| KLHL15                                                                                          | 0,000318986 | -0,150135447 | 0,024 | 0,06  | 1           | 0,901165853   | 1,109673649     | 0,4             |
| GDNF                                                                                            | 4,18017E-05 | -0,150167486 | 0,005 | 0,031 | 0,882057289 | 0,901145841   | 1,109698292     | 0,161290323     |
| TBL3                                                                                            | 0,952213499 | -0,150272436 | 0,031 | 0,031 | 1           | 0,901080288   | 1,109779021     | 1               |
| FAM200B                                                                                         | 0,012396765 | -0,150289227 | 0,106 | 0,144 | 1           | 0,901069801   | 1,109791938     | 0,736111111     |
| ALS2                                                                                            | 0,000245366 | -0,150330436 | 0,026 | 0,062 | 1           | 0,901044063   | 1,109823638     | 0,419354839     |
| CYP2U1                                                                                          | 0,000505588 | -0,150359958 | 0,021 | 0,053 | 1           | 0,901025625   | 1,109846349     | 0,396226415     |
| ZNF397                                                                                          | 0,000180289 | -0,150381834 | 0,05  | 0,099 | 1           | 0,901011963   | 1,109863178     | 0,505050505     |
| RPRD2                                                                                           | 0,002399379 | -0,150440889 | 0,036 | 0,069 | 1           | 0,900975082   | 1,109908609     | 0,52173913      |
| KLF11                                                                                           | 0,048621526 | -0,150459396 | 0,048 | 0,069 | 1           | 0,900963524   | 1,109922848     | 0,695652174     |
| PLIN2                                                                                           | 0,007437881 | -0,150465082 | 0,04  | 0,069 | 1           | 0,900959973   | 1,109927222     | 0,579710145     |
| TENT4A                                                                                          | 3,50108E-05 | -0,15072415  | 0,043 | 0,095 | 0,738763657 | 0,9007982     | 1,110126552     | 0,452631579     |
| USPL1                                                                                           | 0,00876296  | -0,1508222   | 0,041 | 0,069 | 1           | 0,900736981   | 1,110202002     | 0,594202899     |
| CAVIN4                                                                                          | 0,000135885 | -0,150983098 | 0,003 | 0,026 | 1           | 0,900636531   | 1,110325825     | 0,115384615     |
| PRKCD                                                                                           | 0,010208049 | -0,151004317 | 0,034 | 0,06  | 1           | 0,900623285   | 1,110342156     | 0,566666667     |
| DAB1                                                                                            | 9,04289E-07 | -0,151427034 | 0,014 | 0,06  | 0,019081399 | 0,900359436   | 1,11066754      | 0,233333333     |
| ACKR1                                                                                           | 0,000120412 | -0,151514876 | 0,02  | 0,056 | 1           | 0,900304618   | 1,110735167     | 0,357142857     |
| HERC4                                                                                           | 0,003152545 | -0,151701593 | 0,088 | 0,132 | 1           | 0,900188106   | 1,110878931     | 0,666666667     |
| RORA                                                                                            | 1,1964E-05  | -0,151755222 | 0,019 | 0,061 | 0,252453398 | 0,900154644   | 1,110920226     | 0,31147541      |
| PLXNB2                                                                                          | 0,209537142 | -0,151767032 | 0,119 | 0,134 | 1           | 0,900147275   | 1,11092932      | 0,888059701     |
| HSPA14                                                                                          | 3,94593E-05 | -0,151829396 | 0,016 | 0,053 | 0,832630259 | 0,900108364   | 1,110977344     | 0,301886792     |
| SMAD7                                                                                           | 0,161048202 | -0,151894721 | 0,044 | 0,058 | 1           | 0,900067609   | 1,11102765      | 0,75862069      |
| ASB3                                                                                            | 0,008165932 | -0,152034387 | 0,055 | 0,087 | 1           | 0,899980479   | 1,111135212     | 0,632183908     |
| LURAP1L                                                                                         | 4,45107E-05 | -0,152038003 | 0,012 | 0,045 | 0,939219564 | 0,899978223   | 1,111137997     | 0,266666667     |
| PELI2                                                                                           | 3,65645E-07 | -0,152050796 | 0,003 | 0,039 | 0,007715484 | 0,899970242   | 1,111147851     | 0,076923077     |
| SEMA3D                                                                                          | 0,000625777 | -0,152121773 | 0,019 | 0,049 | 1           | 0,899925967   | 1,111202518     | 0,387755102     |
| SF3B4                                                                                           | 0,02602482  | -0,15217164  | 0,079 | 0,109 | 1           | 0,899894861   | 1,111240927     | 0,724770642     |
| PLXNB1                                                                                          | 0,004141614 | -0,152195596 | 0,013 | 0,034 | 1           | 0,899879919   | 1,11125938      | 0,382352941     |
| CSPP1                                                                                           | 0,010725947 | -0,15224201  | 0,049 | 0,079 | 1           | 0,899850969   | 1,111295131     | 0,620253165     |

Supplementary Table 5

| Differentially expressed genes_total calculation_ comparing SC-Keloid vs. (SC-Myel, SC-Nonmyel) |             |              |       |       |             |               |                 |                 |
|-------------------------------------------------------------------------------------------------|-------------|--------------|-------|-------|-------------|---------------|-----------------|-----------------|
| gene                                                                                            | p_val       | avg_log2FC   | pct.1 | pct.2 | p_val_adj   | Foldchange_UP | Foldchange_DOWN | Ratio_pct1_pct2 |
| WRN                                                                                             | 0,004680367 | -0,152329875 | 0,045 | 0,079 | 1           | 0,899796166   | 1,111362815     | 0,569620253     |
| POMT1                                                                                           | 0,025560688 | -0,152499138 | 0,03  | 0,052 | 1           | 0,899690604   | 1,111493212     | 0,576923077     |
| POR                                                                                             | 0,017898992 | -0,1525325   | 0,064 | 0,092 | 1           | 0,899669799   | 1,111518916     | 0,695652174     |
| SETD9                                                                                           | 0,105411032 | -0,152550845 | 0,035 | 0,05  | 1           | 0,89965836    | 1,111533049     | 0,7             |
| MBNL1-AS1                                                                                       | 0,000381215 | -0,152604725 | 0,013 | 0,041 | 1           | 0,899624761   | 1,111574562     | 0,317073171     |
| NFRKB                                                                                           | 0,00023221  | -0,152636181 | 0,021 | 0,056 | 1           | 0,899605146   | 1,111598799     | 0,375           |
| FLYWCH1                                                                                         | 0,001374049 | -0,152747201 | 0,028 | 0,06  | 1           | 0,899535921   | 1,111684343     | 0,466666667     |
| ZNF131                                                                                          | 9,87528E-06 | -0,152831923 | 0,072 | 0,137 | 0,208378341 | 0,899483098   | 1,111749628     | 0,525547445     |
| ACADS                                                                                           | 0,086214582 | -0,152854688 | 0,054 | 0,072 | 1           | 0,899468905   | 1,111767171     | 0,75            |
| BCAS3                                                                                           | 0,081346062 | -0,153037628 | 0,027 | 0,042 | 1           | 0,899354855   | 1,111908158     | 0,642857143     |
| ETV7                                                                                            | 6,3785E-05  | -0,153062477 | 0,006 | 0,033 | 1           | 0,899339365   | 1,111927309     | 0,181818182     |
| RNF111                                                                                          | 0,004850016 | -0,153165303 | 0,03  | 0,058 | 1           | 0,899275268   | 1,112006563     | 0,517241379     |
| PATL1                                                                                           | 0,000317706 | -0,153299441 | 0,033 | 0,072 | 1           | 0,89919166    | 1,112109959     | 0,458333333     |
| TRIOBP                                                                                          | 0,037742548 | -0,153484816 | 0,085 | 0,113 | 1           | 0,899076128   | 1,112252866     | 0,752212389     |
| ITPKC                                                                                           | 0,014182179 | -0,153600459 | 0,023 | 0,045 | 1           | 0,899004063   | 1,112342025     | 0,511111111     |
| FZR1                                                                                            | 0,082683581 | -0,153618992 | 0,044 | 0,062 | 1           | 0,898992514   | 1,112356315     | 0,709677419     |
| WDR44                                                                                           | 0,045711291 | -0,153709466 | 0,031 | 0,05  | 1           | 0,898936138   | 1,112426075     | 0,62            |
| RANGAP1                                                                                         | 0,008936246 | -0,153713234 | 0,045 | 0,075 | 1           | 0,898933791   | 1,11242898      | 0,6             |
| SORCS3                                                                                          | 7,69825E-06 | -0,153755195 | 0     | 0,023 | 0,162440745 | 0,898907645   | 1,112461336     | 0               |
| ANXA7                                                                                           | 0,000846333 | -0,153810414 | 0,186 | 0,244 | 1           | 0,898873241   | 1,112503915     | 0,762295082     |
| UGP2                                                                                            | 0,039563709 | -0,153827862 | 0,108 | 0,138 | 1           | 0,89886237    | 1,112517371     | 0,782608696     |
| PDGFRB                                                                                          | 0,000419823 | -0,153871567 | 0,027 | 0,062 | 1           | 0,89883514    | 1,112551074     | 0,435483871     |
| CYP1B1                                                                                          | 0,000291149 | -0,153877169 | 0,007 | 0,031 | 1           | 0,89883165    | 1,112555393     | 0,225806452     |
| NP1PA1                                                                                          | 0,000103402 | -0,154044318 | 0,034 | 0,077 | 1           | 0,898727518   | 1,1126843       | 0,441558442     |
| GALNT4                                                                                          | 0,030106251 | -0,154055035 | 0,007 | 0,019 | 1           | 0,898720842   | 1,112692566     | 0,368421053     |
| PLEKHH3                                                                                         | 0,004965214 | -0,154131719 | 0,051 | 0,085 | 1           | 0,898673073   | 1,112751711     | 0,6             |
| MKRN1                                                                                           | 0,000120363 | -0,154241988 | 0,081 | 0,138 | 1           | 0,898604388   | 1,112836765     | 0,586956522     |
| VANGL2                                                                                          | 0,001561211 | -0,154299847 | 0,036 | 0,071 | 1           | 0,89856835    | 1,112881396     | 0,507042254     |
| BORCS5                                                                                          | 0,003416366 | -0,154364997 | 0,041 | 0,073 | 1           | 0,898527773   | 1,112931653     | 0,561643836     |
| ADAM33                                                                                          | 4,29612E-05 | -0,154426786 | 0,005 | 0,031 | 0,906524408 | 0,898489291   | 1,11297932      | 0,161290323     |

Supplementary Table 5

| Differentially expressed genes_total calculation_ comparing SC-Keloid vs. (SC-Myel, SC-Nonmyel) |             |              |       |       |             |               |                 |                 |
|-------------------------------------------------------------------------------------------------|-------------|--------------|-------|-------|-------------|---------------|-----------------|-----------------|
| gene                                                                                            | p_val       | avg_log2FC   | pct.1 | pct.2 | p_val_adj   | Foldchange_UP | Foldchange_DOWN | Ratio_pct1_pct2 |
| HSPA5                                                                                           | 0,229123345 | -0,154562324 | 0,499 | 0,619 | 1           | 0,898404884   | 1,113083886     | 0,806138934     |
| RUSF1                                                                                           | 0,125366284 | -0,154622393 | 0,047 | 0,062 | 1           | 0,898367478   | 1,113130233     | 0,758064516     |
| BCKDHA                                                                                          | 0,221883919 | -0,154680095 | 0,028 | 0,038 | 1           | 0,898331548   | 1,113174754     | 0,736842105     |
| TMEM41A                                                                                         | 0,009484773 | -0,154741222 | 0,029 | 0,054 | 1           | 0,898293486   | 1,113221921     | 0,537037037     |
| KHNYN                                                                                           | 0,000176995 | -0,154820647 | 0,031 | 0,072 | 1           | 0,898244034   | 1,113283208     | 0,430555556     |
| FGF14-AS2                                                                                       | 0,00023301  | -0,154844387 | 0,008 | 0,034 | 1           | 0,898229253   | 1,113301528     | 0,235294118     |
| NAB2                                                                                            | 0,16873834  | -0,154875013 | 0,073 | 0,09  | 1           | 0,898210185   | 1,113325162     | 0,811111111     |
| LDLR                                                                                            | 0,000589463 | -0,154915113 | 0,036 | 0,075 | 1           | 0,89818522    | 1,113356107     | 0,48            |
| SNTA1                                                                                           | 0,093534577 | -0,154922895 | 0,05  | 0,068 | 1           | 0,898180375   | 1,113362113     | 0,735294118     |
| ULK1                                                                                            | 0,042070085 | -0,154925553 | 0,069 | 0,095 | 1           | 0,89817872    | 1,113364164     | 0,726315789     |
| NR1H3                                                                                           | 0,00018699  | -0,154968297 | 0,012 | 0,041 | 1           | 0,898152109   | 1,113397151     | 0,292682927     |
| SIRPA                                                                                           | 2,27951E-05 | -0,155042001 | 0,003 | 0,03  | 0,48099913  | 0,898106226   | 1,113454034     | 0,1             |
| CARHSP1                                                                                         | 0,024741676 | -0,155048402 | 0,099 | 0,13  | 1           | 0,898102241   | 1,113458974     | 0,761538462     |
| ITPK1                                                                                           | 0,001730608 | -0,15510786  | 0,213 | 0,273 | 1           | 0,898065229   | 1,113504864     | 0,78021978      |
| ATF5                                                                                            | 0,09958266  | -0,155118687 | 0,04  | 0,056 | 1           | 0,898058489   | 1,113513221     | 0,714285714     |
| ABCD4                                                                                           | 0,183236816 | -0,155152276 | 0,085 | 0,1   | 1           | 0,89803758    | 1,113539146     | 0,85            |
| PYURF                                                                                           | 6,2828E-05  | -0,155180563 | 0,236 | 0,319 | 1           | 0,898019972   | 1,113560979     | 0,739811912     |
| LMO7DN                                                                                          | 7,69825E-06 | -0,155230553 | 0     | 0,023 | 0,162440745 | 0,897988856   | 1,113599565     | 0               |
| INO80D                                                                                          | 3,16564E-07 | -0,155297952 | 0,086 | 0,171 | 0,006679827 | 0,897946905   | 1,113651591     | 0,502923977     |
| HECTD1                                                                                          | 0,000965545 | -0,15535848  | 0,122 | 0,176 | 1           | 0,897909233   | 1,113698315     | 0,693181818     |
| AC144831.1                                                                                      | 0,000457103 | -0,155361625 | 0,002 | 0,02  | 1           | 0,897907276   | 1,113700743     | 0,1             |
| TNFRSF1A                                                                                        | 0,036415189 | -0,155477292 | 0,143 | 0,175 | 1           | 0,897835289   | 1,113790037     | 0,817142857     |
| MICU3                                                                                           | 0,036449496 | -0,155717944 | 0,041 | 0,062 | 1           | 0,897685537   | 1,11397584      | 0,661290323     |
| DSTYK                                                                                           | 0,000130967 | -0,155829017 | 0,048 | 0,096 | 1           | 0,897616427   | 1,114061608     | 0,5             |
| STXBP1                                                                                          | 0,001064767 | -0,156039081 | 0,035 | 0,071 | 1           | 0,897485738   | 1,114223834     | 0,492957746     |
| DISC1                                                                                           | 0,031567391 | -0,156044179 | 0,066 | 0,094 | 1           | 0,897482567   | 1,114227771     | 0,70212766      |
| TOX2                                                                                            | 0,000641058 | -0,156061983 | 0,041 | 0,08  | 1           | 0,897471491   | 1,114241521     | 0,5125          |
| DHX9                                                                                            | 0,00026656  | -0,156065048 | 0,149 | 0,212 | 1           | 0,897469585   | 1,114243888     | 0,702830189     |
| BACE2                                                                                           | 0,007281263 | -0,156096472 | 0,122 | 0,163 | 1           | 0,897450037   | 1,114268159     | 0,748466258     |
| KDM7A                                                                                           | 8,26961E-05 | -0,156369627 | 0,021 | 0,058 | 1           | 0,897280133   | 1,11447915      | 0,362068966     |

Supplementary Table 5

| Differentially expressed genes_total calculation_ comparing SC-Keloid vs. (SC-Myel, SC-Nonmyel) |             |              |       |       |             |               |                 |                 |
|-------------------------------------------------------------------------------------------------|-------------|--------------|-------|-------|-------------|---------------|-----------------|-----------------|
| gene                                                                                            | p_val       | avg_log2FC   | pct.1 | pct.2 | p_val_adj   | Foldchange_UP | Foldchange_DOWN | Ratio_pct1_pct2 |
| QRICH1                                                                                          | 0,233982649 | -0,156382451 | 0,044 | 0,056 | 1           | 0,897272157   | 1,114489057     | 0,785714286     |
| IGF1R                                                                                           | 0,000487089 | -0,156639013 | 0,031 | 0,069 | 1           | 0,897112604   | 1,11468727      | 0,449275362     |
| MOAP1                                                                                           | 3,91202E-06 | -0,156658263 | 0,041 | 0,098 | 0,082547466 | 0,897100634   | 1,114702144     | 0,418367347     |
| USF2                                                                                            | 0,000831136 | -0,156860231 | 0,156 | 0,212 | 1           | 0,896975055   | 1,114858205     | 0,735849057     |
| EXT1                                                                                            | 0,000896286 | -0,156861855 | 0,041 | 0,079 | 1           | 0,896974045   | 1,11485946      | 0,518987342     |
| PRRG1                                                                                           | 3,98528E-06 | -0,156922514 | 0,031 | 0,084 | 0,084093394 | 0,896936332   | 1,114906336     | 0,369047619     |
| PRRG3                                                                                           | 1,85597E-07 | -0,156937096 | 0     | 0,031 | 0,003916278 | 0,896927266   | 1,114917605     | 0               |
| ARHGEF28                                                                                        | 0,000767594 | -0,156943189 | 0,024 | 0,057 | 1           | 0,896923478   | 1,114922314     | 0,421052632     |
| PAPPA                                                                                           | 0,054731927 | -0,157300804 | 0,022 | 0,038 | 1           | 0,896701177   | 1,115198715     | 0,578947368     |
| NRCAM                                                                                           | 1,4296E-08  | -0,157334933 | 0,012 | 0,065 | 0,00030166  | 0,896679964   | 1,115225097     | 0,184615385     |
| MLLT10                                                                                          | 0,029093109 | -0,157767741 | 0,052 | 0,077 | 1           | 0,896411001   | 1,115559714     | 0,675324675     |
| TMEM255A                                                                                        | 5,66557E-05 | -0,157814125 | 0,015 | 0,05  | 1           | 0,896382181   | 1,115595581     | 0,3             |
| KIAA0408                                                                                        | 0,001072352 | -0,157852155 | 0,008 | 0,03  | 1           | 0,896358552   | 1,115624989     | 0,266666667     |
| CCNT1                                                                                           | 0,000896717 | -0,157963071 | 0,041 | 0,079 | 1           | 0,896289642   | 1,115710763     | 0,518987342     |
| DISP1                                                                                           | 1,02357E-05 | -0,158008796 | 0,007 | 0,039 | 0,215984466 | 0,896261235   | 1,115746125     | 0,179487179     |
| PHF12                                                                                           | 0,010193883 | -0,158229672 | 0,044 | 0,073 | 1           | 0,896124029   | 1,115916958     | 0,602739726     |
| TPST1                                                                                           | 0,001486442 | -0,15829867  | 0,048 | 0,085 | 1           | 0,896081172   | 1,115970329     | 0,564705882     |
| FNTA                                                                                            | 0,000114358 | -0,158323276 | 0,159 | 0,231 | 1           | 0,896065888   | 1,115989363     | 0,688311688     |
| RTL8A                                                                                           | 0,045345617 | -0,158372832 | 0,133 | 0,161 | 1           | 0,89603511    | 1,116027697     | 0,826086957     |
| FOXJ1                                                                                           | 2,67675E-05 | -0,158405284 | 0     | 0,02  | 0,56482021  | 0,896014954   | 1,116052801     | 0               |
| WNK2                                                                                            | 3,1489E-06  | -0,158459442 | 0,001 | 0,028 | 0,066444855 | 0,895981319   | 1,116094698     | 0,035714286     |
| ZDBF2                                                                                           | 0,000331651 | -0,158466396 | 0,006 | 0,028 | 1           | 0,895977      | 1,116100078     | 0,214285714     |
| RAB11FIP5                                                                                       | 1,03716E-07 | -0,158486378 | 0,012 | 0,06  | 0,00218852  | 0,895964591   | 1,116115537     | 0,2             |
| RIN2                                                                                            | 5,57851E-05 | -0,158594733 | 0,021 | 0,06  | 1           | 0,895897301   | 1,116199367     | 0,35            |
| CTR9                                                                                            | 0,01298794  | -0,158606231 | 0,054 | 0,083 | 1           | 0,895890161   | 1,116208262     | 0,65060241      |
| AGO2                                                                                            | 5,18791E-08 | -0,158674917 | 0,102 | 0,198 | 0,0010947   | 0,895847509   | 1,116261406     | 0,515151515     |
| IPO8                                                                                            | 0,015729956 | -0,158763494 | 0,041 | 0,066 | 1           | 0,895792508   | 1,116329943     | 0,621212121     |
| LSM14A                                                                                          | 0,000227338 | -0,15891836  | 0,136 | 0,201 | 1           | 0,895696355   | 1,116449782     | 0,676616915     |
| SLC35A1                                                                                         | 0,001728924 | -0,158978741 | 0,03  | 0,062 | 1           | 0,895658868   | 1,116496509     | 0,483870968     |
| MMP28                                                                                           | 0,026465623 | -0,159202136 | 0,054 | 0,08  | 1           | 0,89552019    | 1,116669407     | 0,675           |

Supplementary Table 5

| Differentially expressed genes_total calculation_ comparing SC-Keloid vs. (SC-Myel, SC-Nonmyel) |             |              |       |       |             |               |                 |                 |
|-------------------------------------------------------------------------------------------------|-------------|--------------|-------|-------|-------------|---------------|-----------------|-----------------|
| gene                                                                                            | p_val       | avg_log2FC   | pct.1 | pct.2 | p_val_adj   | Foldchange_UP | Foldchange_DOWN | Ratio_pct1_pct2 |
| TRIM3                                                                                           | 0,00613145  | -0,159230575 | 0,028 | 0,054 | 1           | 0,895502537   | 1,11669142      | 0,518518519     |
| C3orf33                                                                                         | 0,001405623 | -0,159317655 | 0,007 | 0,027 | 1           | 0,895448487   | 1,116758825     | 0,259259259     |
| CCM2                                                                                            | 0,015900124 | -0,15935217  | 0,111 | 0,145 | 1           | 0,895427065   | 1,116785542     | 0,765517241     |
| MORC3                                                                                           | 2,69677E-06 | -0,159390906 | 0,062 | 0,129 | 0,056904462 | 0,895403023   | 1,116815528     | 0,480620155     |
| ZMYM2                                                                                           | 2,35968E-06 | -0,159430888 | 0,132 | 0,218 | 0,049791628 | 0,895378208   | 1,11684648      | 0,605504587     |
| DHX38                                                                                           | 0,004721332 | -0,159492883 | 0,068 | 0,104 | 1           | 0,895339734   | 1,116894473     | 0,653846154     |
| GRB14                                                                                           | 0,000104618 | -0,159511247 | 0,015 | 0,049 | 1           | 0,895328337   | 1,11690869      | 0,306122449     |
| AKT1S1                                                                                          | 0,057754226 | -0,159555731 | 0,068 | 0,09  | 1           | 0,895300731   | 1,116943129     | 0,755555556     |
| NPHP3                                                                                           | 0,018963076 | -0,159598819 | 0,055 | 0,083 | 1           | 0,895273992   | 1,116976489     | 0,662650602     |
| FIP1L1                                                                                          | 0,014902123 | -0,159652612 | 0,083 | 0,115 | 1           | 0,895240611   | 1,117018138     | 0,72173913      |
| PAN2                                                                                            | 0,019139907 | -0,159662054 | 0,021 | 0,041 | 1           | 0,895234752   | 1,117025449     | 0,512195122     |
| TMEM183A                                                                                        | 0,000416233 | -0,159671994 | 0,073 | 0,123 | 1           | 0,895228584   | 1,117033145     | 0,593495935     |
| COL16A1                                                                                         | 0,002626407 | -0,159688229 | 0,248 | 0,309 | 1           | 0,895218509   | 1,117045715     | 0,802588997     |
| KLF15                                                                                           | 9,85448E-08 | -0,159698855 | 0,002 | 0,039 | 0,002079393 | 0,895211916   | 1,117053943     | 0,051282051     |
| LMTK2                                                                                           | 0,005249759 | -0,159865747 | 0,008 | 0,026 | 1           | 0,895108363   | 1,117183172     | 0,307692308     |
| ENO2                                                                                            | 0,001156286 | -0,160025454 | 0,037 | 0,073 | 1           | 0,89500928    | 1,117306851     | 0,506849315     |
| SLC48A1                                                                                         | 0,001408864 | -0,160195695 | 0,017 | 0,045 | 1           | 0,894903673   | 1,117438703     | 0,377777778     |
| CNST                                                                                            | 4,29905E-07 | -0,160552619 | 0,045 | 0,111 | 0,009071421 | 0,8946823     | 1,117715193     | 0,405405405     |
| FN3K                                                                                            | 3,75753E-06 | -0,160630224 | 0,005 | 0,037 | 0,079287614 | 0,894634175   | 1,117775318     | 0,135135135     |
| KIAA1109                                                                                        | 9,78145E-05 | -0,160678452 | 0,079 | 0,138 | 1           | 0,894604269   | 1,117812685     | 0,572463768     |
| GSTK1                                                                                           | 5,67598E-05 | -0,160679795 | 0,184 | 0,261 | 1           | 0,894603436   | 1,117813726     | 0,704980843     |
| LCOR                                                                                            | 0,000184499 | -0,160709138 | 0,086 | 0,142 | 1           | 0,894585241   | 1,117836461     | 0,605633803     |
| CDC42EP5                                                                                        | 1,45867E-05 | -0,160719941 | 0,26  | 0,364 | 0,307794282 | 0,894578542   | 1,117844832     | 0,714285714     |
| ELOVL5                                                                                          | 0,000139937 | -0,16075882  | 0,066 | 0,119 | 1           | 0,894554435   | 1,117874956     | 0,554621849     |
| LRRTM4                                                                                          | 1,92376E-06 | -0,160766042 | 0,006 | 0,041 | 0,040593286 | 0,894549957   | 1,117880553     | 0,146341463     |
| CDH13                                                                                           | 0,084356485 | -0,160789425 | 0,094 | 0,117 | 1           | 0,894535458   | 1,117898671     | 0,803418803     |
| MIF4GD                                                                                          | 0,333183642 | -0,160812224 | 0,068 | 0,077 | 1           | 0,894521322   | 1,117916337     | 0,883116883     |
| CERS6                                                                                           | 0,001645869 | -0,160833918 | 0,045 | 0,083 | 1           | 0,894507871   | 1,117933148     | 0,542168675     |
| CRTAC1                                                                                          | 1,06048E-06 | -0,160846748 | 0,002 | 0,034 | 0,022377147 | 0,894499916   | 1,11794309      | 0,058823529     |
| C17orf49                                                                                        | 0,039575979 | -0,160884497 | 0,091 | 0,119 | 1           | 0,894476511   | 1,117972342     | 0,764705882     |



Supplementary Table 5

| Differentially expressed genes_total calculation_ comparing SC-Keloid vs. (SC-Myel, SC-Nonmyel) |             |              |       |       |             |               |                 |                 |
|-------------------------------------------------------------------------------------------------|-------------|--------------|-------|-------|-------------|---------------|-----------------|-----------------|
| gene                                                                                            | p_val       | avg_log2FC   | pct.1 | pct.2 | p_val_adj   | Foldchange_UP | Foldchange_DOWN | Ratio_pct1_pct2 |
| MYO9A                                                                                           | 0,000263898 | -0,160897175 | 0,084 | 0,14  | 1           | 0,894468651   | 1,117982166     | 0,6             |
| RASGRF1                                                                                         | 2,67675E-05 | -0,161197528 | 0     | 0,02  | 0,56482021  | 0,894282452   | 1,118214942     | 0               |
| SOX9                                                                                            | 0,00674879  | -0,161230309 | 0,007 | 0,023 | 1           | 0,894262132   | 1,118240351     | 0,304347826     |
| TUBA4A                                                                                          | 0,001234635 | -0,161387286 | 0,017 | 0,045 | 1           | 0,894164834   | 1,118362031     | 0,377777778     |
| SFT2D1                                                                                          | 0,000356166 | -0,1616192   | 0,159 | 0,22  | 1           | 0,894021108   | 1,118541823     | 0,722727273     |
| LINC01588                                                                                       | 1,98942E-05 | -0,161790638 | 0,013 | 0,049 | 0,419788534 | 0,893914877   | 1,118674748     | 0,265306122     |
| MINDY1                                                                                          | 3,37316E-06 | -0,16194218  | 0,007 | 0,042 | 0,071177092 | 0,893820984   | 1,118792261     | 0,166666667     |
| FBXO17                                                                                          | 0,005983872 | -0,161968184 | 0,077 | 0,114 | 1           | 0,893804873   | 1,118812427     | 0,675438596     |
| IPO7                                                                                            | 1,72794E-06 | -0,162054631 | 0,127 | 0,213 | 0,036461268 | 0,893751318   | 1,118879469     | 0,596244131     |
| RTL5                                                                                            | 5,20063E-06 | -0,162073635 | 0,008 | 0,043 | 0,109738586 | 0,893739545   | 1,118894208     | 0,186046512     |
| BCORL1                                                                                          | 2,03297E-05 | -0,162127037 | 0,013 | 0,049 | 0,428977478 | 0,893706463   | 1,118935625     | 0,265306122     |
| KRT6A                                                                                           | 0,000590844 | -0,162329822 | 0,006 | 0,027 | 1           | 0,893580853   | 1,119092914     | 0,222222222     |
| ZNRF3                                                                                           | 0,003014416 | -0,162455016 | 0,014 | 0,037 | 1           | 0,893503313   | 1,11919003      | 0,378378378     |
| LONRF3                                                                                          | 3,45065E-07 | -0,162519162 | 0     | 0,03  | 0,007281215 | 0,893463587   | 1,119239793     | 0               |
| CPEB3                                                                                           | 0,000684717 | -0,16253514  | 0,008 | 0,031 | 1           | 0,893453691   | 1,119252189     | 0,258064516     |
| TAF4B                                                                                           | 0,000249547 | -0,162643479 | 0,019 | 0,052 | 1           | 0,8933866     | 1,119336243     | 0,365384615     |
| SUMO3                                                                                           | 0,041473189 | -0,162786979 | 0,166 | 0,195 | 1           | 0,893297742   | 1,119447585     | 0,851282051     |
| CADM1                                                                                           | 6,08863E-07 | -0,162889783 | 0,467 | 0,664 | 0,012847615 | 0,89323409    | 1,119527357     | 0,703313253     |
| POC5                                                                                            | 0,12248452  | -0,163095786 | 0,015 | 0,026 | 1           | 0,893106554   | 1,119687227     | 0,576923077     |
| TRIR                                                                                            | 3,17478E-09 | -0,1631677   | 0,311 | 0,467 | 6,69911E-05 | 0,893062036   | 1,119743041     | 0,665952891     |
| TOLLIP-DT                                                                                       | 0,001453665 | -0,163211644 | 0,009 | 0,031 | 1           | 0,893034834   | 1,119777149     | 0,290322581     |
| ANG                                                                                             | 0,001786895 | -0,163254502 | 0,01  | 0,033 | 1           | 0,893008305   | 1,119810414     | 0,303030303     |
| NUP98                                                                                           | 3,70979E-09 | -0,163411831 | 0,045 | 0,128 | 7,82802E-05 | 0,892910926   | 1,119932538     | 0,3515625       |
| ERICH1                                                                                          | 0,002586411 | -0,163485073 | 0,069 | 0,11  | 1           | 0,892865596   | 1,119989396     | 0,627272727     |
| STARD3                                                                                          | 0,058998847 | -0,163520614 | 0,079 | 0,103 | 1           | 0,892843601   | 1,120016988     | 0,766990291     |
| HSPA4L                                                                                          | 3,37837E-07 | -0,163703758 | 0,006 | 0,045 | 0,00712869  | 0,892730265   | 1,120159178     | 0,133333333     |
| REL                                                                                             | 1,09936E-06 | -0,163885673 | 0,076 | 0,153 | 0,023197654 | 0,892617704   | 1,120300432     | 0,496732026     |
| TM2D1                                                                                           | 0,000576757 | -0,163890856 | 0,079 | 0,13  | 1           | 0,892614498   | 1,120304457     | 0,607692308     |
| WDR6                                                                                            | 0,10681911  | -0,163997903 | 0,063 | 0,081 | 1           | 0,892548269   | 1,120387586     | 0,777777778     |
| SAMD1                                                                                           | 0,344778551 | -0,164141595 | 0,102 | 0,111 | 1           | 0,892459376   | 1,120499181     | 0,918918919     |

Supplementary Table 5

| Differentially expressed genes_total calculation_ comparing SC-Keloid vs. (SC-Myel, SC-Nonmyel) |             |              |       |       |             |               |                 |                 |
|-------------------------------------------------------------------------------------------------|-------------|--------------|-------|-------|-------------|---------------|-----------------|-----------------|
| gene                                                                                            | p_val       | avg_log2FC   | pct.1 | pct.2 | p_val_adj   | Foldchange_UP | Foldchange_DOWN | Ratio_pct1_pct2 |
| RBM10                                                                                           | 0,001382743 | -0,16414657  | 0,045 | 0,083 | 1           | 0,892456298   | 1,120503045     | 0,542168675     |
| GYG1                                                                                            | 0,034569053 | -0,164214126 | 0,051 | 0,075 | 1           | 0,892414509   | 1,120555516     | 0,68            |
| EIF3H                                                                                           | 1,57824E-06 | -0,164362746 | 0,243 | 0,351 | 0,03330242  | 0,892322581   | 1,120670957     | 0,692307692     |
| TMEM175                                                                                         | 0,044012798 | -0,164452345 | 0,052 | 0,075 | 1           | 0,892267165   | 1,120740558     | 0,693333333     |
| WIPI1                                                                                           | 4,60892E-05 | -0,16481808  | 0,035 | 0,081 | 0,972528967 | 0,892040996   | 1,121024711     | 0,432098765     |
| RTN4RL2                                                                                         | 3,56023E-05 | -0,164851732 | 0,001 | 0,023 | 0,751243855 | 0,892020189   | 1,12105086      | 0,043478261     |
| PPT1                                                                                            | 0,002514007 | -0,164931791 | 0,149 | 0,199 | 1           | 0,89197069    | 1,121113072     | 0,748743719     |
| UBA7                                                                                            | 0,035266427 | -0,165025366 | 0,02  | 0,037 | 1           | 0,891912837   | 1,121185791     | 0,540540541     |
| MBOAT1                                                                                          | 1,7833E-07  | -0,165049064 | 0,007 | 0,049 | 0,003762933 | 0,891898186   | 1,121204208     | 0,142857143     |
| AP1AR                                                                                           | 0,009570099 | -0,165057638 | 0,045 | 0,075 | 1           | 0,891892886   | 1,121210871     | 0,6             |
| SEC22C                                                                                          | 0,000895326 | -0,165080135 | 0,078 | 0,125 | 1           | 0,891878978   | 1,121228355     | 0,624           |
| FBXL12                                                                                          | 0,116034837 | -0,165145814 | 0,05  | 0,066 | 1           | 0,891838376   | 1,1212794       | 0,757575758     |
| NBEA                                                                                            | 6,10327E-08 | -0,165237291 | 0,003 | 0,043 | 0,001287852 | 0,891781829   | 1,1213505       | 0,069767442     |
| BMP4                                                                                            | 3,92087E-08 | -0,165313377 | 0,001 | 0,038 | 0,000827343 | 0,891734799   | 1,12140964      | 0,026315789     |
| SLC37A3                                                                                         | 0,016547529 | -0,165410827 | 0,042 | 0,068 | 1           | 0,891674567   | 1,121485391     | 0,617647059     |
| ISYNA1                                                                                          | 0,4593574   | -0,165474729 | 0,066 | 0,073 | 1           | 0,891635072   | 1,121535066     | 0,904109589     |
| USP54                                                                                           | 0,000106208 | -0,165937126 | 0,012 | 0,042 | 1           | 0,891349341   | 1,121894586     | 0,285714286     |
| DEGS1                                                                                           | 6,30994E-06 | -0,165964906 | 0,214 | 0,305 | 0,13314605  | 0,891332178   | 1,121916189     | 0,701639344     |
| SYMPK                                                                                           | 0,033790116 | -0,165978787 | 0,065 | 0,091 | 1           | 0,891323601   | 1,121926984     | 0,714285714     |
| WDR26                                                                                           | 5,69911E-06 | -0,165986666 | 0,075 | 0,144 | 0,120256831 | 0,891318734   | 1,121933111     | 0,520833333     |
| USP47                                                                                           | 2,00318E-05 | -0,166002292 | 0,149 | 0,227 | 0,422690878 | 0,89130908    | 1,121945263     | 0,656387665     |
| NLGN3                                                                                           | 0,001004196 | -0,166045448 | 0,04  | 0,077 | 1           | 0,891282418   | 1,121978825     | 0,519480519     |
| ZNF34                                                                                           | 0,008275721 | -0,166058108 | 0,026 | 0,05  | 1           | 0,891274597   | 1,121988671     | 0,52            |
| AKR1C2                                                                                          | 0,000154931 | -0,166235948 | 0,007 | 0,033 | 1           | 0,891164737   | 1,122126986     | 0,212121212     |
| HAT1                                                                                            | 0,002852659 | -0,166323857 | 0,114 | 0,16  | 1           | 0,891110437   | 1,122195363     | 0,7125          |
| DCAF6                                                                                           | 0,000346094 | -0,166328154 | 0,063 | 0,111 | 1           | 0,891107782   | 1,122198706     | 0,567567568     |
| DOT1L                                                                                           | 0,000334292 | -0,166697789 | 0,048 | 0,092 | 1           | 0,8908795     | 1,122486263     | 0,52173913      |
| CNR1                                                                                            | 0,000142256 | -0,166859744 | 0,003 | 0,026 | 1           | 0,890779497   | 1,122612278     | 0,115384615     |
| UBE2S                                                                                           | 0,008222363 | -0,166880616 | 0,271 | 0,326 | 1           | 0,890766609   | 1,12262852      | 0,831288344     |
| ARRDC1-AS1                                                                                      | 0,003968564 | -0,166894923 | 0,022 | 0,047 | 1           | 0,890757775   | 1,122639653     | 0,468085106     |

Supplementary Table 5

| Differentially expressed genes_total calculation_ comparing SC-Keloid vs. (SC-Myel, SC-Nonmyel) |             |              |       |       |             |               |                 |                 |
|-------------------------------------------------------------------------------------------------|-------------|--------------|-------|-------|-------------|---------------|-----------------|-----------------|
| gene                                                                                            | p_val       | avg_log2FC   | pct.1 | pct.2 | p_val_adj   | Foldchange_UP | Foldchange_DOWN | Ratio_pct1_pct2 |
| PLAU                                                                                            | 0,017214968 | -0,166908602 | 0,02  | 0,039 | 1           | 0,89074933    | 1,122650297     | 0,512820513     |
| SCAMP2                                                                                          | 0,005091607 | -0,167011983 | 0,09  | 0,129 | 1           | 0,890685502   | 1,122730748     | 0,697674419     |
| ZHX1                                                                                            | 4,11204E-06 | -0,167113006 | 0,071 | 0,138 | 0,08676812  | 0,890623136   | 1,122809368     | 0,514492754     |
| WAPL                                                                                            | 0,000643062 | -0,167126387 | 0,092 | 0,144 | 1           | 0,890614875   | 1,122819782     | 0,638888889     |
| ANKRD65                                                                                         | 0,112176862 | -0,167145213 | 0,056 | 0,073 | 1           | 0,890603253   | 1,122834434     | 0,767123288     |
| MOSPD3                                                                                          | 0,366042633 | -0,167151125 | 0,049 | 0,057 | 1           | 0,890599603   | 1,122839036     | 0,859649123     |
| NTM                                                                                             | 0,000378008 | -0,167171213 | 0,48  | 0,601 | 1           | 0,890587203   | 1,12285467      | 0,798668885     |
| PI4K2A                                                                                          | 0,044315581 | -0,167416097 | 0,059 | 0,083 | 1           | 0,890436047   | 1,12304528      | 0,710843373     |
| TXNL4B                                                                                          | 4,23761E-05 | -0,167422561 | 0,016 | 0,053 | 0,894179094 | 0,890432057   | 1,123050312     | 0,301886792     |
| ZFC3H1                                                                                          | 5,77751E-06 | -0,167510352 | 0,076 | 0,145 | 0,121911304 | 0,890377874   | 1,123118654     | 0,524137931     |
| AMT                                                                                             | 0,005130119 | -0,167514216 | 0,008 | 0,026 | 1           | 0,89037549    | 1,123121662     | 0,307692308     |
| ATAD3B                                                                                          | 0,034699967 | -0,167542624 | 0,036 | 0,057 | 1           | 0,890357958   | 1,123143777     | 0,631578947     |
| PALLD                                                                                           | 1,39173E-05 | -0,167544285 | 0,255 | 0,351 | 0,293669498 | 0,890356932   | 1,123145071     | 0,726495726     |
| TMED7                                                                                           | 0,000617859 | -0,167687094 | 0,15  | 0,208 | 1           | 0,890268803   | 1,123256254     | 0,721153846     |
| LPIN3                                                                                           | 0,000518632 | -0,168008625 | 0,009 | 0,034 | 1           | 0,890070412   | 1,12350662      | 0,264705882     |
| LMAN2L                                                                                          | 0,183731693 | -0,168065722 | 0,021 | 0,031 | 1           | 0,890035187   | 1,123551085     | 0,677419355     |
| FAM107B                                                                                         | 1,86204E-05 | -0,16808512  | 0,153 | 0,236 | 0,392909081 | 0,89002322    | 1,123566192     | 0,648305085     |
| PDP1                                                                                            | 0,000266832 | -0,168166556 | 0,061 | 0,11  | 1           | 0,889972982   | 1,123629616     | 0,554545455     |
| GPR37L1                                                                                         | 4,45676E-09 | -0,168252683 | 0,002 | 0,046 | 9,40422E-05 | 0,889919853   | 1,123696698     | 0,043478261     |
| USP44                                                                                           | 8,88413E-07 | -0,168874113 | 0,001 | 0,031 | 0,018746405 | 0,88953661    | 1,124180825     | 0,032258065     |
| UBE2E2                                                                                          | 5,44023E-05 | -0,168878957 | 0,033 | 0,077 | 1           | 0,889533623   | 1,1241846       | 0,428571429     |
| PIEZO2                                                                                          | 9,2083E-08  | -0,169034483 | 0,002 | 0,039 | 0,001943044 | 0,889437734   | 1,124305796     | 0,051282051     |
| YIPF4                                                                                           | 2,91173E-07 | -0,169154779 | 0,136 | 0,233 | 0,006144038 | 0,889363573   | 1,124399548     | 0,583690987     |
| KRT1                                                                                            | 7,05144E-05 | -0,169181068 | 0,05  | 0,104 | 1           | 0,889347368   | 1,124420037     | 0,480769231     |
| RGPD5                                                                                           | 5,60609E-06 | -0,169436657 | 0,023 | 0,071 | 0,118294157 | 0,889189824   | 1,124619258     | 0,323943662     |
| GNG12                                                                                           | 1,72171E-07 | -0,169476835 | 0,24  | 0,354 | 0,003632974 | 0,889165061   | 1,124650578     | 0,677966102     |
| SGCE                                                                                            | 9,57511E-10 | -0,169611978 | 0,333 | 0,509 | 2,02044E-05 | 0,889081773   | 1,124755933     | 0,654223969     |
| MFAP4                                                                                           | 5,98186E-05 | -0,169626577 | 0,019 | 0,056 | 1           | 0,889072777   | 1,124767315     | 0,339285714     |
| SNX24                                                                                           | 6,07378E-09 | -0,169767135 | 0,008 | 0,06  | 0,000128163 | 0,88898616    | 1,124876904     | 0,133333333     |
| SH3RF3                                                                                          | 0,014514707 | -0,169779214 | 0,033 | 0,057 | 1           | 0,888978717   | 1,124886322     | 0,578947368     |

Supplementary Table 5

| Differentially expressed genes_total calculation_ comparing SC-Keloid vs. (SC-Myel, SC-Nonmyel) |             |              |       |       |             |               |                 |                 |
|-------------------------------------------------------------------------------------------------|-------------|--------------|-------|-------|-------------|---------------|-----------------|-----------------|
| gene                                                                                            | p_val       | avg_log2FC   | pct.1 | pct.2 | p_val_adj   | Foldchange_UP | Foldchange_DOWN | Ratio_pct1_pct2 |
| RUSC1                                                                                           | 0,153813848 | -0,169986377 | 0,044 | 0,058 | 1           | 0,888851074   | 1,125047861     | 0,75862069      |
| AAK1                                                                                            | 0,000449498 | -0,16998815  | 0,144 | 0,206 | 1           | 0,888849982   | 1,125049244     | 0,699029126     |
| SLC30A4                                                                                         | 3,46318E-07 | -0,170200268 | 0,008 | 0,05  | 0,007307665 | 0,888719305   | 1,12521467      | 0,16            |
| KCTD6                                                                                           | 2,06191E-05 | -0,17031062  | 0,024 | 0,068 | 0,435083775 | 0,888651329   | 1,125300742     | 0,352941176     |
| TMEM91                                                                                          | 0,006540899 | -0,170436276 | 0,022 | 0,046 | 1           | 0,888573933   | 1,125398758     | 0,47826087      |
| CCNI                                                                                            | 1,55431E-08 | -0,170468035 | 0,375 | 0,562 | 0,000327974 | 0,888554372   | 1,125423532     | 0,667259786     |
| BAHD1                                                                                           | 0,000692269 | -0,170526487 | 0,016 | 0,045 | 1           | 0,888518372   | 1,125469131     | 0,355555556     |
| UNC50                                                                                           | 0,000900318 | -0,170545609 | 0,1   | 0,151 | 1           | 0,888506596   | 1,125484048     | 0,662251656     |
| ATP5F1B                                                                                         | 6,96126E-08 | -0,170696343 | 0,31  | 0,457 | 0,001468895 | 0,888413769   | 1,125601646     | 0,67833698      |
| CPT1A                                                                                           | 1,91839E-08 | -0,170858347 | 0,013 | 0,066 | 0,000404799 | 0,888314012   | 1,12572805      | 0,196969697     |
| MARCHF1                                                                                         | 1,79349E-07 | -0,170910739 | 0,014 | 0,064 | 0,003784435 | 0,888281753   | 1,125768932     | 0,21875         |
| YWHAQ                                                                                           | 8,41465E-08 | -0,171141433 | 0,34  | 0,509 | 0,001775576 | 0,888139724   | 1,125948962     | 0,667976424     |
| FANCB                                                                                           | 0,006622044 | -0,171155894 | 0,023 | 0,047 | 1           | 0,888130822   | 1,125960248     | 0,489361702     |
| WHAMM                                                                                           | 0,000338887 | -0,171283839 | 0,041 | 0,083 | 1           | 0,888052061   | 1,126060108     | 0,493975904     |
| JMY                                                                                             | 2,95329E-05 | -0,17138483  | 0,065 | 0,125 | 0,623174608 | 0,887989898   | 1,126138937     | 0,52            |
| RPS6KA2                                                                                         | 2,04609E-06 | -0,171479158 | 0,006 | 0,041 | 0,043174441 | 0,887931841   | 1,12621257      | 0,146341463     |
| GBP4                                                                                            | 4,57587E-07 | -0,171513116 | 0,01  | 0,054 | 0,009655536 | 0,887910941   | 1,126239079     | 0,185185185     |
| PAPSS2                                                                                          | 3,97324E-06 | -0,17153691  | 0,006 | 0,039 | 0,083839411 | 0,887896297   | 1,126257653     | 0,153846154     |
| GDF11                                                                                           | 0,008429001 | -0,171564388 | 0,055 | 0,087 | 1           | 0,887879386   | 1,126279105     | 0,632183908     |
| PINX1                                                                                           | 2,10529E-06 | -0,171715856 | 0,009 | 0,047 | 0,044423626 | 0,887786173   | 1,126397359     | 0,191489362     |
| RBPM5                                                                                           | 2,95742E-05 | -0,171735337 | 0,063 | 0,121 | 0,624044314 | 0,887774185   | 1,126412569     | 0,520661157     |
| SCAF1                                                                                           | 0,024423312 | -0,171751329 | 0,057 | 0,083 | 1           | 0,887764344   | 1,126425055     | 0,686746988     |
| ARRDC2                                                                                          | 0,002582075 | -0,171820323 | 0,02  | 0,046 | 1           | 0,88772189    | 1,126478925     | 0,434782609     |
| FAN1                                                                                            | 0,000994378 | -0,171903892 | 0,023 | 0,054 | 1           | 0,887670469   | 1,126544179     | 0,425925926     |
| SESN1                                                                                           | 0,001507507 | -0,172014452 | 0,034 | 0,068 | 1           | 0,887602446   | 1,126630514     | 0,5             |
| FLRT1                                                                                           | 0,084804342 | -0,17207308  | 0,041 | 0,058 | 1           | 0,887566376   | 1,126676299     | 0,706896552     |
| GPR137                                                                                          | 0,782459912 | -0,172140924 | 0,055 | 0,056 | 1           | 0,887524639   | 1,126729283     | 0,982142857     |
| CRY2                                                                                            | 0,000147443 | -0,172185707 | 0,01  | 0,039 | 1           | 0,887497089   | 1,126764259     | 0,256410256     |
| SPP1                                                                                            | 0,014359884 | -0,172249192 | 0,008 | 0,023 | 1           | 0,887458037   | 1,126813842     | 0,347826087     |
| NCOA2                                                                                           | 1,42569E-05 | -0,172463728 | 0,027 | 0,073 | 0,300835318 | 0,887326077   | 1,126981418     | 0,369863014     |

Supplementary Table 5

| Differentially expressed genes_total calculation_ comparing SC-Keloid vs. (SC-Myel, SC-Nonmyel) |             |              |       |       |             |               |                 |                 |
|-------------------------------------------------------------------------------------------------|-------------|--------------|-------|-------|-------------|---------------|-----------------|-----------------|
| gene                                                                                            | p_val       | avg_log2FC   | pct.1 | pct.2 | p_val_adj   | Foldchange_UP | Foldchange_DOWN | Ratio_pct1_pct2 |
| RGS10                                                                                           | 6,49889E-06 | -0,172481035 | 0,072 | 0,14  | 0,137133144 | 0,887315432   | 1,126994938     | 0,514285714     |
| CUEDC1                                                                                          | 0,066649126 | -0,172505346 | 0,099 | 0,122 | 1           | 0,88730048    | 1,127013929     | 0,81147541      |
| PRRX2                                                                                           | 0,000221736 | -0,172517689 | 0,005 | 0,027 | 1           | 0,887292889   | 1,127023571     | 0,185185185     |
| KIDINS220                                                                                       | 1,21506E-05 | -0,172611323 | 0,169 | 0,254 | 0,256390043 | 0,887235304   | 1,127096719     | 0,665354331     |
| NFKBID                                                                                          | 3,05158E-07 | -0,172774444 | 0,007 | 0,047 | 0,006439133 | 0,887134992   | 1,127224165     | 0,14893617      |
| MBD6                                                                                            | 0,015577503 | -0,1728275   | 0,061 | 0,091 | 1           | 0,887102368   | 1,127265619     | 0,67032967      |
| NPR3                                                                                            | 3,94149E-07 | -0,173089517 | 0,005 | 0,042 | 0,008316934 | 0,88694127    | 1,127470368     | 0,119047619     |
| FBH1                                                                                            | 0,001610127 | -0,173166987 | 0,041 | 0,076 | 1           | 0,886893644   | 1,127530912     | 0,539473684     |
| MED29                                                                                           | 0,090441543 | -0,173269641 | 0,079 | 0,1   | 1           | 0,88683054    | 1,127611144     | 0,79            |
| KIAA0930                                                                                        | 8,96908E-06 | -0,17328619  | 0,049 | 0,107 | 0,189256512 | 0,886820367   | 1,127624079     | 0,457943925     |
| PLD6                                                                                            | 1,65551E-07 | -0,173289429 | 0,007 | 0,049 | 0,003493302 | 0,886818376   | 1,127626611     | 0,142857143     |
| MPP7                                                                                            | 2,88858E-08 | -0,173343471 | 0     | 0,035 | 0,000609519 | 0,886785158   | 1,127668851     | 0               |
| ADNP2                                                                                           | 8,39467E-05 | -0,173352935 | 0,028 | 0,069 | 1           | 0,88677934    | 1,127676249     | 0,405797101     |
| SRGAP3                                                                                          | 1,72487E-05 | -0,173438237 | 0,012 | 0,047 | 0,363965341 | 0,88672691    | 1,127742926     | 0,255319149     |
| NR1H2                                                                                           | 0,083406851 | -0,173534998 | 0,092 | 0,113 | 1           | 0,886667439   | 1,127818566     | 0,814159292     |
| SP3                                                                                             | 3,29723E-05 | -0,173546882 | 0,108 | 0,178 | 0,695749309 | 0,886660135   | 1,127827857     | 0,606741573     |
| EPHA7                                                                                           | 1,85597E-07 | -0,173573413 | 0     | 0,031 | 0,003916278 | 0,88664383    | 1,127848597     | 0               |
| BTBD2                                                                                           | 0,597091083 | -0,173631007 | 0,064 | 0,068 | 1           | 0,886608435   | 1,127893623     | 0,941176471     |
| DOCK9                                                                                           | 3,65312E-06 | -0,173650609 | 0,006 | 0,039 | 0,077084549 | 0,886596389   | 1,127908948     | 0,153846154     |
| EIF2B5                                                                                          | 0,045472088 | -0,173746546 | 0,05  | 0,072 | 1           | 0,886537433   | 1,127983955     | 0,694444444     |
| CDK11B                                                                                          | 0,538986912 | -0,173799826 | 0,064 | 0,069 | 1           | 0,886504693   | 1,128025613     | 0,927536232     |
| ANKZF1                                                                                          | 0,007142855 | -0,174149347 | 0,023 | 0,047 | 1           | 0,886289946   | 1,128298933     | 0,489361702     |
| ARHGEF17                                                                                        | 0,00013873  | -0,174155044 | 0,041 | 0,085 | 1           | 0,886286447   | 1,128303387     | 0,482352941     |
| NFATC4                                                                                          | 1,91287E-06 | -0,174185229 | 0,015 | 0,06  | 0,040363411 | 0,886267903   | 1,128326995     | 0,25            |
| SGPP1                                                                                           | 0,000510849 | -0,174475941 | 0,012 | 0,038 | 1           | 0,886089333   | 1,128554383     | 0,315789474     |
| CERS1                                                                                           | 0,00037561  | -0,174731395 | 0,063 | 0,11  | 1           | 0,885932449   | 1,12875423      | 0,572727273     |
| EPC1                                                                                            | 1,97202E-05 | -0,174762148 | 0,187 | 0,27  | 0,416115541 | 0,885913565   | 1,128778292     | 0,692592593     |
| NFKBIB                                                                                          | 0,04873777  | -0,174798557 | 0,056 | 0,079 | 1           | 0,885891207   | 1,128806779     | 0,708860759     |
| PIGK                                                                                            | 0,004282051 | -0,174849712 | 0,091 | 0,132 | 1           | 0,885859796   | 1,128846805     | 0,689393939     |
| FOXJ3                                                                                           | 2,39E-05    | -0,175007857 | 0,091 | 0,157 | 0,504312913 | 0,885762695   | 1,128970553     | 0,579617834     |

Supplementary Table 5

| Differentially expressed genes_total calculation_ comparing SC-Keloid vs. (SC-Myel, SC-Nonmyel) |             |              |       |       |             |               |                 |                 |
|-------------------------------------------------------------------------------------------------|-------------|--------------|-------|-------|-------------|---------------|-----------------|-----------------|
| gene                                                                                            | p_val       | avg_log2FC   | pct.1 | pct.2 | p_val_adj   | Foldchange_UP | Foldchange_DOWN | Ratio_pct1_pct2 |
| MYO1E                                                                                           | 0,000698689 | -0,175052431 | 0,049 | 0,091 | 1           | 0,885735329   | 1,129005434     | 0,538461538     |
| CBR3                                                                                            | 7,58119E-05 | -0,175092691 | 0,058 | 0,111 | 1           | 0,885710612   | 1,129036942     | 0,522522523     |
| IGSF8                                                                                           | 0,008309513 | -0,175136374 | 0,12  | 0,159 | 1           | 0,885683794   | 1,129071128     | 0,754716981     |
| WTIP                                                                                            | 1,0086E-05  | -0,175219046 | 0,048 | 0,104 | 0,212825481 | 0,885633042   | 1,12913583      | 0,461538462     |
| ZNRF2                                                                                           | 6,6835E-05  | -0,175288917 | 0,146 | 0,217 | 1           | 0,885590151   | 1,129190516     | 0,67281106      |
| RARB                                                                                            | 0,003082079 | -0,175365125 | 0,006 | 0,023 | 1           | 0,885543373   | 1,129250166     | 0,260869565     |
| GATD3A                                                                                          | 0,000451731 | -0,175591094 | 0,014 | 0,042 | 1           | 0,885404681   | 1,129427054     | 0,333333333     |
| OAZ2                                                                                            | 0,000618266 | -0,175652724 | 0,112 | 0,166 | 1           | 0,885366858   | 1,129475302     | 0,674698795     |
| BEND7                                                                                           | 0,015326709 | -0,175662813 | 0,017 | 0,037 | 1           | 0,885360667   | 1,129483201     | 0,459459459     |
| PTBP1                                                                                           | 0,000191679 | -0,175776874 | 0,179 | 0,248 | 1           | 0,885290672   | 1,129572502     | 0,721774194     |
| B3GALNT2                                                                                        | 0,010568379 | -0,17577804  | 0,064 | 0,096 | 1           | 0,885289957   | 1,129573416     | 0,666666667     |
| RNF2                                                                                            | 0,011933962 | -0,17605908  | 0,038 | 0,065 | 1           | 0,885117517   | 1,12979348      | 0,584615385     |
| SMAD2                                                                                           | 0,000241523 | -0,176305502 | 0,132 | 0,193 | 1           | 0,884966346   | 1,129986473     | 0,683937824     |
| DENND2A                                                                                         | 8,68875E-06 | -0,176419061 | 0,021 | 0,065 | 0,183341414 | 0,88489669    | 1,130075421     | 0,323076923     |
| RALGAPA1                                                                                        | 0,000266095 | -0,176509446 | 0,086 | 0,141 | 1           | 0,884841253   | 1,130146223     | 0,609929078     |
| UBN2                                                                                            | 0,002420214 | -0,176658039 | 0,064 | 0,103 | 1           | 0,884750122   | 1,13026263      | 0,621359223     |
| ING3                                                                                            | 0,004204282 | -0,17678421  | 0,044 | 0,077 | 1           | 0,88467275    | 1,130361481     | 0,571428571     |
| FXYP7                                                                                           | 5,46155E-05 | -0,176809207 | 0,007 | 0,035 | 1           | 0,884657422   | 1,130381067     | 0,2             |
| RENBP                                                                                           | 1,57864E-06 | -0,176817246 | 0,008 | 0,046 | 0,03331095  | 0,884652492   | 1,130387365     | 0,173913043     |
| NAPRT                                                                                           | 0,196481737 | -0,176900712 | 0,071 | 0,085 | 1           | 0,884601312   | 1,130452766     | 0,835294118     |
| TLK2                                                                                            | 0,000973807 | -0,176901481 | 0,083 | 0,13  | 1           | 0,884600841   | 1,130453368     | 0,638461538     |
| RNF146                                                                                          | 0,000315512 | -0,177037906 | 0,116 | 0,174 | 1           | 0,884517195   | 1,130560271     | 0,666666667     |
| RNF139                                                                                          | 0,027243378 | -0,17706026  | 0,056 | 0,081 | 1           | 0,884503489   | 1,13057779      | 0,691358025     |
| SAP18                                                                                           | 8,19618E-07 | -0,177454294 | 0,418 | 0,574 | 0,017294765 | 0,884261944   | 1,130886619     | 0,728222997     |
| RNF31                                                                                           | 0,001638881 | -0,177556272 | 0,016 | 0,042 | 1           | 0,884199441   | 1,130966559     | 0,380952381     |
| MIB2                                                                                            | 0,017766159 | -0,177612742 | 0,051 | 0,079 | 1           | 0,884164833   | 1,131010828     | 0,64556962      |
| GMPR2                                                                                           | 0,02050941  | -0,177682515 | 0,044 | 0,069 | 1           | 0,884122073   | 1,131065529     | 0,637681159     |
| ZNF236                                                                                          | 0,000994264 | -0,17784724  | 0,036 | 0,072 | 1           | 0,884021131   | 1,13119468      | 0,5             |
| ZNF672                                                                                          | 0,000455393 | -0,177909953 | 0,026 | 0,06  | 1           | 0,883982704   | 1,131243853     | 0,433333333     |
| CDC34                                                                                           | 0,037548641 | -0,177991779 | 0,098 | 0,125 | 1           | 0,883932568   | 1,131308016     | 0,784           |

Supplementary Table 5

| Differentially expressed genes_total calculation_ comparing SC-Keloid vs. (SC-Myel, SC-Nonmyel) |             |              |       |       |             |               |                 |                 |
|-------------------------------------------------------------------------------------------------|-------------|--------------|-------|-------|-------------|---------------|-----------------|-----------------|
| gene                                                                                            | p_val       | avg_log2FC   | pct.1 | pct.2 | p_val_adj   | Foldchange_UP | Foldchange_DOWN | Ratio_pct1_pct2 |
| PLTP                                                                                            | 0,075109802 | -0,178019896 | 0,113 | 0,137 | 1           | 0,883915341   | 1,131330065     | 0,824817518     |
| GAS2                                                                                            | 6,6215E-06  | -0,178083703 | 0,003 | 0,033 | 0,139720183 | 0,883876248   | 1,131380102     | 0,090909091     |
| ARTN                                                                                            | 0,000127901 | -0,178110854 | 0,027 | 0,066 | 1           | 0,883859614   | 1,131401394     | 0,409090909     |
| RP2                                                                                             | 0,000142294 | -0,178161959 | 0,073 | 0,128 | 1           | 0,883828306   | 1,131441473     | 0,5703125       |
| EPC2                                                                                            | 0,002727351 | -0,178179599 | 0,088 | 0,13  | 1           | 0,883817499   | 1,131455307     | 0,676923077     |
| SULT1A1                                                                                         | 6,95391E-07 | -0,178356554 | 0,006 | 0,043 | 0,014673436 | 0,8837091     | 1,131594095     | 0,139534884     |
| RARA                                                                                            | 0,000183016 | -0,178376518 | 0,14  | 0,202 | 1           | 0,883696872   | 1,131609755     | 0,693069307     |
| TRIM11                                                                                          | 0,030909527 | -0,178605865 | 0,027 | 0,046 | 1           | 0,8835564     | 1,131789662     | 0,586956522     |
| PIK3R2                                                                                          | 0,213865823 | -0,178838119 | 0,031 | 0,042 | 1           | 0,883414171   | 1,131971879     | 0,738095238     |
| RAB11B                                                                                          | 0,040021921 | -0,17886575  | 0,171 | 0,199 | 1           | 0,883397252   | 1,13199356      | 0,859296482     |
| TMEM64                                                                                          | 0,001206598 | -0,179024639 | 0,058 | 0,1   | 1           | 0,883299966   | 1,132118237     | 0,58            |
| RARG                                                                                            | 0,000416716 | -0,179306355 | 0,041 | 0,081 | 1           | 0,8831275     | 1,132339328     | 0,50617284      |
| TOP1                                                                                            | 2,83226E-07 | -0,179335787 | 0,17  | 0,274 | 0,005976354 | 0,883109484   | 1,132362429     | 0,620437956     |
| CELSR2                                                                                          | 0,004987461 | -0,179352767 | 0,051 | 0,084 | 1           | 0,88309909    | 1,132375756     | 0,607142857     |
| ARMCX2                                                                                          | 0,007655    | -0,179357839 | 0,034 | 0,061 | 1           | 0,883095986   | 1,132379737     | 0,557377049     |
| GABBR1                                                                                          | 0,000206526 | -0,179429425 | 0,048 | 0,094 | 1           | 0,883052168   | 1,132435927     | 0,510638298     |
| CREG1                                                                                           | 0,048283078 | -0,179431154 | 0,041 | 0,061 | 1           | 0,88305111    | 1,132437284     | 0,672131148     |
| PAAF1                                                                                           | 0,000534594 | -0,179504141 | 0,037 | 0,076 | 1           | 0,883006437   | 1,132494576     | 0,486842105     |
| RPP21                                                                                           | 0,000257586 | -0,179567736 | 0,07  | 0,119 | 1           | 0,882967513   | 1,132544499     | 0,588235294     |
| NSD1                                                                                            | 0,007092146 | -0,179646835 | 0,112 | 0,153 | 1           | 0,882919104   | 1,132606595     | 0,732026144     |
| SYDE2                                                                                           | 8,43971E-08 | -0,17974523  | 0,013 | 0,062 | 0,001780863 | 0,882858889   | 1,132683843     | 0,209677419     |
| CHD7                                                                                            | 0,000496057 | -0,179752801 | 0,111 | 0,167 | 1           | 0,882854256   | 1,132689788     | 0,664670659     |
| RAVER1                                                                                          | 0,000286188 | -0,17977314  | 0,017 | 0,049 | 1           | 0,88284181    | 1,132705756     | 0,346938776     |
| MCMBP                                                                                           | 0,018006049 | -0,179799109 | 0,08  | 0,111 | 1           | 0,882825919   | 1,132726145     | 0,720720721     |
| TM9SF1                                                                                          | 0,060114194 | -0,179809625 | 0,068 | 0,09  | 1           | 0,882819484   | 1,132734402     | 0,755555556     |
| OPTN                                                                                            | 1,73162E-06 | -0,179837034 | 0,184 | 0,28  | 0,036538918 | 0,882802712   | 1,132755922     | 0,657142857     |
| UPF1                                                                                            | 0,001537086 | -0,179995726 | 0,047 | 0,084 | 1           | 0,882705611   | 1,132880529     | 0,55952381      |
| CHST12                                                                                          | 0,115093356 | -0,180075993 | 0,085 | 0,104 | 1           | 0,882656502   | 1,13294356      | 0,817307692     |
| SEC24B                                                                                          | 0,000104906 | -0,180180971 | 0,026 | 0,065 | 1           | 0,882592278   | 1,133026002     | 0,4             |
| DUSP3                                                                                           | 0,000225189 | -0,180235324 | 0,063 | 0,113 | 1           | 0,882559027   | 1,13306869      | 0,557522124     |

Supplementary Table 5

| Differentially expressed genes_total calculation_ comparing SC-Keloid vs. (SC-Myel, SC-Nonmyel) |             |              |       |       |             |               |                 |                 |
|-------------------------------------------------------------------------------------------------|-------------|--------------|-------|-------|-------------|---------------|-----------------|-----------------|
| gene                                                                                            | p_val       | avg_log2FC   | pct.1 | pct.2 | p_val_adj   | Foldchange_UP | Foldchange_DOWN | Ratio_pct1_pct2 |
| IPMK                                                                                            | 0,000410288 | -0,180243131 | 0,02  | 0,052 | 1           | 0,882554251   | 1,133074821     | 0,384615385     |
| PTP4A2                                                                                          | 3,23345E-07 | -0,180431629 | 0,226 | 0,338 | 0,006822897 | 0,882438946   | 1,133222875     | 0,668639053     |
| SRF                                                                                             | 0,002895829 | -0,180454115 | 0,048 | 0,083 | 1           | 0,882425193   | 1,133240538     | 0,578313253     |
| HEBP1                                                                                           | 1,8923E-05  | -0,180519626 | 0,013 | 0,049 | 0,399293363 | 0,882385124   | 1,133291998     | 0,265306122     |
| CDK2                                                                                            | 2,89182E-05 | -0,18059957  | 0,027 | 0,071 | 0,610203413 | 0,88233623    | 1,133354798     | 0,38028169      |
| PHYHIPL                                                                                         | 1,23492E-06 | -0,180911662 | 0,005 | 0,039 | 0,026058019 | 0,882145378   | 1,133599999     | 0,128205128     |
| OPHN1                                                                                           | 0,000150219 | -0,181191348 | 0,035 | 0,077 | 1           | 0,881974379   | 1,133819784     | 0,454545455     |
| CRKL                                                                                            | 0,031399194 | -0,181193541 | 0,061 | 0,085 | 1           | 0,881973039   | 1,133821507     | 0,717647059     |
| SLC25A28                                                                                        | 0,000293221 | -0,181207083 | 0,05  | 0,095 | 1           | 0,88196476    | 1,13383215      | 0,526315789     |
| FAM228B                                                                                         | 0,013815374 | -0,181207567 | 0,069 | 0,1   | 1           | 0,881964464   | 1,133832531     | 0,69            |
| TBPL1                                                                                           | 0,001306173 | -0,181247322 | 0,059 | 0,1   | 1           | 0,881940161   | 1,133863775     | 0,59            |
| PSAT1                                                                                           | 0,016828928 | -0,181254384 | 0,043 | 0,069 | 1           | 0,881935844   | 1,133869325     | 0,623188406     |
| HCN1                                                                                            | 2,88858E-08 | -0,181428548 | 0     | 0,035 | 0,000609519 | 0,881829382   | 1,134006216     | 0               |
| PCMT1                                                                                           | 7,81144E-07 | -0,181514921 | 0,257 | 0,366 | 0,016482909 | 0,881776589   | 1,134074109     | 0,702185792     |
| ATF1                                                                                            | 0,001104329 | -0,181787958 | 0,068 | 0,111 | 1           | 0,881609724   | 1,134288759     | 0,612612613     |
| C1orf43                                                                                         | 0,000492696 | -0,181811409 | 0,168 | 0,228 | 1           | 0,881595394   | 1,134307197     | 0,736842105     |
| RHOT2                                                                                           | 0,015720127 | -0,181875746 | 0,1   | 0,133 | 1           | 0,88155608    | 1,134357783     | 0,751879699     |
| BAG4                                                                                            | 7,29772E-05 | -0,181982413 | 0,051 | 0,102 | 1           | 0,881490904   | 1,134441655     | 0,5             |
| TARBP1                                                                                          | 0,063587383 | -0,182035011 | 0,045 | 0,065 | 1           | 0,881458767   | 1,134483016     | 0,692307692     |
| MYO18A                                                                                          | 0,006715543 | -0,182244487 | 0,03  | 0,057 | 1           | 0,88133079    | 1,134647752     | 0,526315789     |
| MSN                                                                                             | 5,55847E-05 | -0,182293795 | 0,295 | 0,398 | 1           | 0,881300669   | 1,134686533     | 0,74120603      |
| FASN                                                                                            | 0,071720846 | -0,182555456 | 0,057 | 0,077 | 1           | 0,881140842   | 1,134892349     | 0,74025974      |
| CAV1                                                                                            | 0,459778755 | -0,182948787 | 0,235 | 0,246 | 1           | 0,880900644   | 1,135201804     | 0,955284553     |
| MTMR3                                                                                           | 7,9089E-07  | -0,183023523 | 0,031 | 0,09  | 0,01668858  | 0,880855012   | 1,135260612     | 0,344444444     |
| HERC1                                                                                           | 0,0112783   | -0,183096305 | 0,065 | 0,098 | 1           | 0,880810575   | 1,135317886     | 0,663265306     |
| AKTIP                                                                                           | 0,038664696 | -0,183226326 | 0,047 | 0,069 | 1           | 0,880731197   | 1,135420209     | 0,68115942      |
| KDM6A                                                                                           | 4,39446E-06 | -0,183351621 | 0,035 | 0,09  | 0,092727598 | 0,880654711   | 1,135518823     | 0,388888889     |
| PHF3                                                                                            | 2,40925E-07 | -0,183496791 | 0,111 | 0,202 | 0,005083765 | 0,8805661     | 1,135633089     | 0,54950495      |
| STRN4                                                                                           | 0,00030256  | -0,184009624 | 0,061 | 0,109 | 1           | 0,880253141   | 1,136036843     | 0,559633028     |
| BOD1                                                                                            | 0,003812684 | -0,184072742 | 0,1   | 0,142 | 1           | 0,880214631   | 1,136086546     | 0,704225352     |



Supplementary Table 5

| Differentially expressed genes_total calculation_ comparing SC-Keloid vs. (SC-Myel, SC-Nonmyel) |             |              |       |       |             |               |                 |                 |
|-------------------------------------------------------------------------------------------------|-------------|--------------|-------|-------|-------------|---------------|-----------------|-----------------|
| gene                                                                                            | p_val       | avg_log2FC   | pct.1 | pct.2 | p_val_adj   | Foldchange_UP | Foldchange_DOWN | Ratio_pct1_pct2 |
| WDR86                                                                                           | 5,37019E-08 | -0,184134264 | 0     | 0,034 | 0,001133163 | 0,880177097   | 1,136134994     | 0               |
| H3-2                                                                                            | 5,25655E-05 | -0,18427627  | 0,007 | 0,035 | 1           | 0,880090464   | 1,136246831     | 0,2             |
| MYH14                                                                                           | 5,32541E-05 | -0,184357601 | 0,023 | 0,064 | 1           | 0,880040851   | 1,136310887     | 0,359375        |
| PBX1                                                                                            | 1,23318E-06 | -0,18462871  | 0,017 | 0,065 | 0,026021429 | 0,879875491   | 1,136524441     | 0,261538462     |
| MAFA                                                                                            | 4,64636E-06 | -0,184639818 | 0,008 | 0,043 | 0,098042898 | 0,879868716   | 1,136533192     | 0,186046512     |
| ZNF207                                                                                          | 2,21723E-06 | -0,184697925 | 0,211 | 0,304 | 0,046785832 | 0,879833279   | 1,136578968     | 0,694078947     |
| WDFY2                                                                                           | 0,013597843 | -0,184736708 | 0,073 | 0,106 | 1           | 0,879809627   | 1,136609523     | 0,688679245     |
| ARHGEF3                                                                                         | 1,75834E-08 | -0,184736801 | 0,005 | 0,049 | 0,000371027 | 0,87980957    | 1,136609596     | 0,102040816     |
| MAU2                                                                                            | 0,000496894 | -0,184868341 | 0,03  | 0,066 | 1           | 0,879729356   | 1,136713233     | 0,454545455     |
| SDE2                                                                                            | 0,000711002 | -0,1848892   | 0,037 | 0,075 | 1           | 0,879716636   | 1,136729668     | 0,493333333     |
| IFNAR2                                                                                          | 0,001529308 | -0,184930988 | 0,083 | 0,128 | 1           | 0,879691155   | 1,136762595     | 0,6484375       |
| COBLL1                                                                                          | 0,000283072 | -0,185077821 | 0,055 | 0,102 | 1           | 0,879601628   | 1,136878296     | 0,539215686     |
| FHL1                                                                                            | 0,002168722 | -0,185486038 | 0,122 | 0,172 | 1           | 0,879352776   | 1,137200027     | 0,709302326     |
| ATL1                                                                                            | 0,097160433 | -0,185582662 | 0,057 | 0,076 | 1           | 0,879293884   | 1,137276193     | 0,75            |
| HADHB                                                                                           | 0,001281121 | -0,185632593 | 0,17  | 0,227 | 1           | 0,879263452   | 1,137315554     | 0,748898678     |
| MAPK10                                                                                          | 5,68677E-08 | -0,185645383 | 0,007 | 0,052 | 0,001199966 | 0,879255657   | 1,137325637     | 0,134615385     |
| CNOT6L                                                                                          | 5,979E-05   | -0,185698207 | 0,058 | 0,113 | 1           | 0,879223464   | 1,137367281     | 0,513274336     |
| ADRB2                                                                                           | 1,73137E-07 | -0,185859944 | 0,003 | 0,041 | 0,003653373 | 0,879124902   | 1,137494795     | 0,073170732     |
| UBA1                                                                                            | 0,005224483 | -0,185886826 | 0,139 | 0,18  | 1           | 0,879108521   | 1,13751599      | 0,772222222     |
| WDFY3                                                                                           | 0,001829583 | -0,185944935 | 0,052 | 0,091 | 1           | 0,879073113   | 1,137561808     | 0,571428571     |
| MARCHF9                                                                                         | 0,26033551  | -0,186040043 | 0,077 | 0,088 | 1           | 0,879015163   | 1,137636803     | 0,875           |
| SPECC1L                                                                                         | 0,000425129 | -0,186100361 | 0,037 | 0,077 | 1           | 0,878978413   | 1,137684368     | 0,480519481     |
| KIAA1755                                                                                        | 0,000121952 | -0,186371384 | 0,049 | 0,098 | 1           | 0,878813304   | 1,137898112     | 0,5             |
| TRAF6                                                                                           | 3,28863E-06 | -0,18641662  | 0,01  | 0,049 | 0,069393311 | 0,878785749   | 1,137933792     | 0,204081633     |
| SLC43A2                                                                                         | 1,70379E-05 | -0,186429359 | 0,017 | 0,057 | 0,359516889 | 0,87877799    | 1,13794384      | 0,298245614     |
| ZC3HAV1                                                                                         | 0,001553438 | -0,186680073 | 0,098 | 0,147 | 1           | 0,878625288   | 1,138141611     | 0,666666667     |
| RBM14                                                                                           | 0,000114931 | -0,186690049 | 0,059 | 0,111 | 1           | 0,878619212   | 1,138149481     | 0,531531532     |
| H2AC6                                                                                           | 8,5364E-05  | -0,186701742 | 0,031 | 0,075 | 1           | 0,878612091   | 1,138158706     | 0,413333333     |
| CCDC93                                                                                          | 7,66538E-06 | -0,186757455 | 0,034 | 0,085 | 0,161747103 | 0,878578162   | 1,138202659     | 0,4             |
| ERC1                                                                                            | 0,000393034 | -0,18702484  | 0,07  | 0,119 | 1           | 0,878415344   | 1,13841363      | 0,588235294     |

Supplementary Table 5

| Differentially expressed genes_total calculation_ comparing SC-Keloid vs. (SC-Myel, SC-Nonmyel) |             |              |       |       |             |               |                 |                 |
|-------------------------------------------------------------------------------------------------|-------------|--------------|-------|-------|-------------|---------------|-----------------|-----------------|
| gene                                                                                            | p_val       | avg_log2FC   | pct.1 | pct.2 | p_val_adj   | Foldchange_UP | Foldchange_DOWN | Ratio_pct1_pct2 |
| CEP95                                                                                           | 0,00100742  | -0,187059831 | 0,045 | 0,084 | 1           | 0,878394039   | 1,138441241     | 0,535714286     |
| CLK3                                                                                            | 0,000344583 | -0,187118582 | 0,051 | 0,095 | 1           | 0,878358269   | 1,138487603     | 0,536842105     |
| SFR1                                                                                            | 3,20628E-06 | -0,187146089 | 0,028 | 0,079 | 0,067655678 | 0,878341522   | 1,13850931      | 0,35443038      |
| U2AF1L4                                                                                         | 0,00655306  | -0,187192031 | 0,035 | 0,062 | 1           | 0,878313552   | 1,138545566     | 0,564516129     |
| ITPRIP                                                                                          | 0,001285381 | -0,187233682 | 0,022 | 0,052 | 1           | 0,878288195   | 1,138578437     | 0,423076923     |
| PXK                                                                                             | 9,39181E-05 | -0,187317521 | 0,044 | 0,092 | 1           | 0,878237157   | 1,138644604     | 0,47826087      |
| PPRC1                                                                                           | 0,000560892 | -0,187597167 | 0,028 | 0,062 | 1           | 0,87806694    | 1,138865336     | 0,451612903     |
| IMPDH2                                                                                          | 0,109267315 | -0,187787868 | 0,151 | 0,172 | 1           | 0,877950881   | 1,139015886     | 0,877906977     |
| TLCD4                                                                                           | 0,000386957 | -0,188009431 | 0,008 | 0,033 | 1           | 0,877816059   | 1,139190824     | 0,242424242     |
| HSPB2                                                                                           | 0,000225314 | -0,188120093 | 0,14  | 0,204 | 1           | 0,877748729   | 1,139278209     | 0,68627451      |
| SLC25A37                                                                                        | 0,000588881 | -0,18812862  | 0,1   | 0,152 | 1           | 0,877743541   | 1,139284943     | 0,657894737     |
| NCSTN                                                                                           | 0,006886875 | -0,188134502 | 0,109 | 0,148 | 1           | 0,877739963   | 1,139289588     | 0,736486486     |
| PITPNM1                                                                                         | 0,002469069 | -0,188151558 | 0,036 | 0,068 | 1           | 0,877729585   | 1,139303057     | 0,529411765     |
| TBC1D14                                                                                         | 0,008404274 | -0,188172557 | 0,03  | 0,056 | 1           | 0,87771681    | 1,13931964      | 0,535714286     |
| PYCR2                                                                                           | 0,016354106 | -0,188639234 | 0,091 | 0,123 | 1           | 0,877432936   | 1,139688242     | 0,739837398     |
| MEPCE                                                                                           | 0,004603632 | -0,188642415 | 0,05  | 0,083 | 1           | 0,877431001   | 1,139690755     | 0,602409639     |
| GABRE                                                                                           | 5,02016E-08 | -0,188690551 | 0,002 | 0,041 | 0,001059305 | 0,877401726   | 1,139728782     | 0,048780488     |
| TMEM74B                                                                                         | 6,41652E-07 | -0,188699616 | 0     | 0,028 | 0,01353949  | 0,877396212   | 1,139735943     | 0               |
| NCOA4                                                                                           | 0,001939433 | -0,188712115 | 0,101 | 0,148 | 1           | 0,877388611   | 1,139745817     | 0,682432432     |
| TSPAN5                                                                                          | 0,007754121 | -0,188855995 | 0,158 | 0,202 | 1           | 0,877301114   | 1,13985949      | 0,782178218     |
| RAD21                                                                                           | 2,1497E-07  | -0,188996227 | 0,192 | 0,294 | 0,004536075 | 0,877215843   | 1,139970291     | 0,653061224     |
| BAMBI                                                                                           | 1,4694E-05  | -0,189019898 | 0,008 | 0,041 | 0,310059075 | 0,87720145    | 1,139988996     | 0,195121951     |
| ERO1B                                                                                           | 0,000571733 | -0,189073538 | 0,04  | 0,079 | 1           | 0,877168836   | 1,140031382     | 0,506329114     |
| ADCY6                                                                                           | 3,8701E-06  | -0,189104248 | 0,04  | 0,096 | 0,081662995 | 0,877150164   | 1,140055649     | 0,416666667     |
| E4F1                                                                                            | 0,011158875 | -0,189119332 | 0,027 | 0,05  | 1           | 0,877140993   | 1,140067569     | 0,54            |
| MDGA1                                                                                           | 2,49889E-07 | -0,189201874 | 0,001 | 0,034 | 0,005272903 | 0,87709081    | 1,140132799     | 0,029411765     |
| ALDH9A1                                                                                         | 0,032140307 | -0,189314278 | 0,091 | 0,119 | 1           | 0,877022476   | 1,140221633     | 0,764705882     |
| SRRM2                                                                                           | 2,14501E-09 | -0,189450646 | 0,38  | 0,55  | 4,52619E-05 | 0,876939582   | 1,140329415     | 0,690909091     |
| DSE                                                                                             | 0,002112979 | -0,189482892 | 0,022 | 0,05  | 1           | 0,876919981   | 1,140354903     | 0,44            |
| INPP5E                                                                                          | 0,07860738  | -0,189580264 | 0,029 | 0,045 | 1           | 0,876860797   | 1,140431872     | 0,644444444     |

Supplementary Table 5

| Differentially expressed genes_total calculation_ comparing SC-Keloid vs. (SC-Myel, SC-Nonmyel) |             |              |       |       |             |               |                 |                 |
|-------------------------------------------------------------------------------------------------|-------------|--------------|-------|-------|-------------|---------------|-----------------|-----------------|
| gene                                                                                            | p_val       | avg_log2FC   | pct.1 | pct.2 | p_val_adj   | Foldchange_UP | Foldchange_DOWN | Ratio_pct1_pct2 |
| PSEN1                                                                                           | 0,000319923 | -0,18991113  | 0,057 | 0,104 | 1           | 0,876659722   | 1,140693447     | 0,548076923     |
| OSGIN2                                                                                          | 5,7811E-06  | -0,190080155 | 0,04  | 0,095 | 0,121986896 | 0,876557019   | 1,140827098     | 0,421052632     |
| VAV2                                                                                            | 1,01548E-05 | -0,19014006  | 0,007 | 0,039 | 0,214276887 | 0,876520623   | 1,140874469     | 0,179487179     |
| IL17D                                                                                           | 1,0074E-07  | -0,190242223 | 0,003 | 0,042 | 0,002125719 | 0,876458555   | 1,140955261     | 0,071428571     |
| IRF2BP1                                                                                         | 0,002176803 | -0,190261527 | 0,033 | 0,064 | 1           | 0,876446827   | 1,140970529     | 0,515625        |
| COQ10B                                                                                          | 0,000492451 | -0,19028779  | 0,104 | 0,157 | 1           | 0,876430873   | 1,140991299     | 0,662420382     |
| SELENOW                                                                                         | 2,42861E-11 | -0,190750576 | 0,389 | 0,583 | 5,12462E-07 | 0,876149777   | 1,141357364     | 0,667238422     |
| KLHDC8A                                                                                         | 1,69109E-07 | -0,190959995 | 0,007 | 0,049 | 0,003568372 | 0,876022606   | 1,141523053     | 0,142857143     |
| UXS1                                                                                            | 0,14363526  | -0,190960545 | 0,104 | 0,123 | 1           | 0,876022273   | 1,141523488     | 0,845528455     |
| FBXO44                                                                                          | 1,73825E-05 | -0,190988909 | 0,026 | 0,071 | 0,366787666 | 0,876005049   | 1,141545932     | 0,366197183     |
| ST3GAL6                                                                                         | 8,30628E-05 | -0,191001174 | 0,061 | 0,114 | 1           | 0,875997602   | 1,141555636     | 0,535087719     |
| COX16                                                                                           | 0,021135829 | -0,191630835 | 0,116 | 0,151 | 1           | 0,875615359   | 1,142053974     | 0,768211921     |
| SERINC1                                                                                         | 1,11635E-14 | -0,191907853 | 0,29  | 0,487 | 2,35561E-10 | 0,875447244   | 1,142273286     | 0,595482546     |
| NCALD                                                                                           | 1,19345E-06 | -0,191971235 | 0     | 0,027 | 0,025182886 | 0,875408784   | 1,142323471     | 0               |
| SREBF2                                                                                          | 0,003129773 | -0,19197552  | 0,059 | 0,096 | 1           | 0,875406183   | 1,142326864     | 0,614583333     |
| CHCHD10                                                                                         | 0,00233157  | -0,192152678 | 0,17  | 0,221 | 1           | 0,875298694   | 1,142467145     | 0,769230769     |
| INTS10                                                                                          | 0,00144139  | -0,192311494 | 0,083 | 0,129 | 1           | 0,875202343   | 1,142592919     | 0,643410853     |
| HMG20B                                                                                          | 1,28502E-05 | -0,192329447 | 0,236 | 0,33  | 0,271151363 | 0,875191452   | 1,142607138     | 0,715151515     |
| PIAS1                                                                                           | 1,93512E-07 | -0,192409716 | 0,052 | 0,125 | 0,004083305 | 0,87514276    | 1,142670712     | 0,416           |
| TAF8                                                                                            | 0,013943318 | -0,192449377 | 0,034 | 0,058 | 1           | 0,875118702   | 1,142702125     | 0,586206897     |
| RBM17                                                                                           | 3,60079E-05 | -0,192547193 | 0,165 | 0,24  | 0,759801836 | 0,87505937    | 1,142779604     | 0,6875          |
| ZNF574                                                                                          | 0,002033229 | -0,192677793 | 0,023 | 0,052 | 1           | 0,874980158   | 1,142883059     | 0,442307692     |
| OTUD4                                                                                           | 0,000297616 | -0,192726249 | 0,072 | 0,123 | 1           | 0,874950771   | 1,142921446     | 0,585365854     |
| AGAP4                                                                                           | 0,000157254 | -0,192730342 | 0,007 | 0,033 | 1           | 0,874948289   | 1,142924688     | 0,212121212     |
| LARP4B                                                                                          | 0,000130383 | -0,192802144 | 0,064 | 0,117 | 1           | 0,874904744   | 1,142981573     | 0,547008547     |
| IFITM1                                                                                          | 8,91174E-07 | -0,192815149 | 0,009 | 0,05  | 0,018804659 | 0,874896857   | 1,142991876     | 0,18            |
| BNIP3                                                                                           | 8,73721E-07 | -0,192951596 | 0,054 | 0,121 | 0,018436392 | 0,874814115   | 1,143099983     | 0,446280992     |
| TNS2                                                                                            | 0,000355139 | -0,19303317  | 0,063 | 0,111 | 1           | 0,874764652   | 1,143164619     | 0,567567568     |
| PNPLA8                                                                                          | 2,73647E-07 | -0,193059282 | 0,126 | 0,221 | 0,005774231 | 0,87474882    | 1,14318531      | 0,570135747     |
| CENPT                                                                                           | 0,018666422 | -0,193084606 | 0,043 | 0,068 | 1           | 0,874733465   | 1,143205376     | 0,632352941     |

Supplementary Table 5

| Differentially expressed genes_total calculation_ comparing SC-Keloid vs. (SC-Myel, SC-Nonmyel) |             |              |       |       |             |               |                 |                 |
|-------------------------------------------------------------------------------------------------|-------------|--------------|-------|-------|-------------|---------------|-----------------|-----------------|
| gene                                                                                            | p_val       | avg_log2FC   | pct.1 | pct.2 | p_val_adj   | Foldchange_UP | Foldchange_DOWN | Ratio_pct1_pct2 |
| RERG                                                                                            | 3,67379E-07 | -0,193250569 | 0,003 | 0,039 | 0,007752054 | 0,874632844   | 1,143336895     | 0,076923077     |
| SRC                                                                                             | 0,044974687 | -0,19335548  | 0,052 | 0,075 | 1           | 0,874569245   | 1,143420039     | 0,693333333     |
| GPANK1                                                                                          | 0,026783466 | -0,193381577 | 0,063 | 0,09  | 1           | 0,874553425   | 1,143440723     | 0,7             |
| ST6GALNAC2                                                                                      | 3,34177E-07 | -0,193423061 | 0,003 | 0,039 | 0,007051467 | 0,874528277   | 1,143473603     | 0,076923077     |
| ZRSR2                                                                                           | 0,001186623 | -0,193497826 | 0,047 | 0,085 | 1           | 0,874482958   | 1,143532863     | 0,552941176     |
| MMP1                                                                                            | 9,27345E-05 | -0,193712503 | 0,007 | 0,034 | 1           | 0,874352842   | 1,143703036     | 0,205882353     |
| APBB2                                                                                           | 0,014330434 | -0,193727988 | 0,033 | 0,057 | 1           | 0,874343458   | 1,143715311     | 0,578947368     |
| TUBA1A                                                                                          | 0,022757034 | -0,193741698 | 0,61  | 0,742 | 1           | 0,874335149   | 1,14372618      | 0,822102426     |
| NOVA1                                                                                           | 0,057406716 | -0,193943431 | 0,092 | 0,117 | 1           | 0,874212898   | 1,14388612      | 0,786324786     |
| SLC25A4                                                                                         | 0,002074938 | -0,194095162 | 0,098 | 0,144 | 1           | 0,87412096    | 1,144006431     | 0,680555556     |
| MARCHF2                                                                                         | 0,059859058 | -0,194119001 | 0,081 | 0,104 | 1           | 0,874106517   | 1,144025334     | 0,778846154     |
| FKBPL                                                                                           | 0,02780682  | -0,194325284 | 0,037 | 0,06  | 1           | 0,873981542   | 1,144188924     | 0,616666667     |
| SLC41A1                                                                                         | 2,15062E-07 | -0,194369376 | 0,03  | 0,091 | 0,004538024 | 0,873954831   | 1,144223894     | 0,32967033      |
| CBFA2T2                                                                                         | 0,000118118 | -0,194596612 | 0,021 | 0,057 | 1           | 0,873817187   | 1,144404132     | 0,368421053     |
| RTKN                                                                                            | 0,000403179 | -0,194602618 | 0,101 | 0,153 | 1           | 0,873813549   | 1,144408897     | 0,660130719     |
| SMIM13                                                                                          | 0,000706999 | -0,194651626 | 0,058 | 0,102 | 1           | 0,873783867   | 1,144447772     | 0,568627451     |
| MYCBP2                                                                                          | 0,000940176 | -0,194653146 | 0,114 | 0,168 | 1           | 0,873782946   | 1,144448978     | 0,678571429     |
| RNF114                                                                                          | 8,92252E-08 | -0,194699166 | 0,154 | 0,255 | 0,001882742 | 0,873755074   | 1,144485485     | 0,603921569     |
| RFTN2                                                                                           | 1,37588E-05 | -0,194764493 | 0,062 | 0,123 | 0,290323477 | 0,873715511   | 1,14453731      | 0,504065041     |
| KAT2A                                                                                           | 0,000345822 | -0,194865466 | 0,027 | 0,062 | 1           | 0,873654362   | 1,144617418     | 0,435483871     |
| INTS11                                                                                          | 0,022908996 | -0,194989089 | 0,092 | 0,122 | 1           | 0,873579503   | 1,144715503     | 0,754098361     |
| SCYL1                                                                                           | 0,018356143 | -0,195203948 | 0,081 | 0,111 | 1           | 0,873449411   | 1,144885997     | 0,72972973      |
| TAF3                                                                                            | 0,009739896 | -0,195205667 | 0,059 | 0,091 | 1           | 0,87344837    | 1,144887362     | 0,648351648     |
| SYNJ2BP                                                                                         | 0,000854465 | -0,195218    | 0,071 | 0,117 | 1           | 0,873440904   | 1,144897149     | 0,606837607     |
| GLUD1                                                                                           | 0,000780353 | -0,1953531   | 0,088 | 0,137 | 1           | 0,873359115   | 1,145004367     | 0,642335766     |
| PRR12                                                                                           | 0,011741105 | -0,195483771 | 0,027 | 0,05  | 1           | 0,873280015   | 1,145108079     | 0,54            |
| FEZ1                                                                                            | 5,32346E-05 | -0,195559625 | 0,211 | 0,288 | 1           | 0,8732341     | 1,145168288     | 0,732638889     |
| NARF                                                                                            | 0,104363399 | -0,195679068 | 0,083 | 0,102 | 1           | 0,873161807   | 1,145263102     | 0,81372549      |
| ATG2B                                                                                           | 0,00037293  | -0,19578118  | 0,045 | 0,088 | 1           | 0,873100008   | 1,145344165     | 0,511363636     |
| OLFML2B                                                                                         | 1,71874E-05 | -0,195783496 | 0,02  | 0,061 | 0,362671656 | 0,873098606   | 1,145346004     | 0,327868852     |

Supplementary Table 5

| Differentially expressed genes_total calculation_ comparing SC-Keloid vs. (SC-Myel, SC-Nonmyel) |             |              |       |       |             |               |                 |                 |
|-------------------------------------------------------------------------------------------------|-------------|--------------|-------|-------|-------------|---------------|-----------------|-----------------|
| gene                                                                                            | p_val       | avg_log2FC   | pct.1 | pct.2 | p_val_adj   | Foldchange_UP | Foldchange_DOWN | Ratio_pct1_pct2 |
| PABPC4                                                                                          | 0,001785414 | -0,195861154 | 0,12  | 0,167 | 1           | 0,87305161    | 1,145407658     | 0,718562874     |
| DCLK3                                                                                           | 3,45065E-07 | -0,195896889 | 0     | 0,03  | 0,007281215 | 0,873029985   | 1,14543603      | 0               |
| SMAD3                                                                                           | 9,39695E-08 | -0,196136152 | 0,003 | 0,042 | 0,00198285  | 0,87288521    | 1,14562601      | 0,071428571     |
| APBB1                                                                                           | 0,006250745 | -0,196139404 | 0,029 | 0,056 | 1           | 0,872883243   | 1,145628592     | 0,517857143     |
| ZNF670                                                                                          | 2,17262E-05 | -0,196139492 | 0,014 | 0,05  | 0,458444046 | 0,872883189   | 1,145628662     | 0,28            |
| HCFC1R1                                                                                         | 5,55045E-07 | -0,196163548 | 0,219 | 0,324 | 0,011712011 | 0,872868634   | 1,145647765     | 0,675925926     |
| BRAT1                                                                                           | 0,009553798 | -0,19628444  | 0,034 | 0,06  | 1           | 0,872795495   | 1,145743769     | 0,566666667     |
| SLC19A2                                                                                         | 0,002498759 | -0,196536926 | 0,016 | 0,041 | 1           | 0,872642761   | 1,145944303     | 0,390243902     |
| PAGR1                                                                                           | 0,81837685  | -0,196581276 | 0,045 | 0,046 | 1           | 0,872615935   | 1,145979532     | 0,97826087      |
| WFDC2                                                                                           | 7,45459E-09 | -0,196710767 | 0,002 | 0,045 | 0,000157299 | 0,872537616   | 1,146082395     | 0,044444444     |
| SOX15                                                                                           | 4,99111E-06 | -0,196736178 | 0,012 | 0,05  | 0,105317513 | 0,872522247   | 1,146102582     | 0,24            |
| SIX5                                                                                            | 0,015483993 | -0,196751969 | 0,026 | 0,047 | 1           | 0,872512697   | 1,146115126     | 0,553191489     |
| CCZ1                                                                                            | 0,39477251  | -0,196815829 | 0,095 | 0,103 | 1           | 0,872474076   | 1,14616586      | 0,922330097     |
| ISG20L2                                                                                         | 0,048871368 | -0,196882173 | 0,043 | 0,064 | 1           | 0,872433956   | 1,146218569     | 0,671875        |
| PPP6C                                                                                           | 0,138289128 | -0,19703703  | 0,09  | 0,106 | 1           | 0,872340315   | 1,146341608     | 0,849056604     |
| LYRM9                                                                                           | 2,12319E-06 | -0,197042368 | 0,028 | 0,08  | 0,044801346 | 0,872337087   | 1,14634585      | 0,35            |
| CYTH1                                                                                           | 0,000217559 | -0,197180499 | 0,044 | 0,09  | 1           | 0,872253569   | 1,146455613     | 0,488888889     |
| BAG6                                                                                            | 0,338709995 | -0,197282256 | 0,127 | 0,136 | 1           | 0,872192049   | 1,146536478     | 0,933823529     |
| YPEL3                                                                                           | 0,000392914 | -0,197569101 | 0,119 | 0,176 | 1           | 0,872018652   | 1,146764462     | 0,676136364     |
| QTRT1                                                                                           | 0,032264946 | -0,198120535 | 0,094 | 0,122 | 1           | 0,871685408   | 1,147202867     | 0,770491803     |
| KMT2B                                                                                           | 0,005594556 | -0,198192182 | 0,054 | 0,087 | 1           | 0,87164212    | 1,147259841     | 0,620689655     |
| DDHD2                                                                                           | 0,000149452 | -0,198222285 | 0,062 | 0,114 | 1           | 0,871623933   | 1,14728378      | 0,543859649     |
| CIRBP                                                                                           | 2,99849E-08 | -0,198232656 | 0,499 | 0,71  | 0,000632711 | 0,871617667   | 1,147292027     | 0,702816901     |
| GALT                                                                                            | 0,00026027  | -0,198328513 | 0,031 | 0,071 | 1           | 0,871559756   | 1,14736826      | 0,436619718     |
| ERCC5                                                                                           | 0,000398164 | -0,198356153 | 0,024 | 0,058 | 1           | 0,871543058   | 1,147390242     | 0,413793103     |
| CEP97                                                                                           | 0,000283062 | -0,198445753 | 0,091 | 0,147 | 1           | 0,871488932   | 1,147461503     | 0,619047619     |
| ADCY9                                                                                           | 1,62311E-06 | -0,198503489 | 0,008 | 0,046 | 0,034249315 | 0,871454056   | 1,147507426     | 0,173913043     |
| UAP1L1                                                                                          | 0,000213403 | -0,19855741  | 0,022 | 0,057 | 1           | 0,871421486   | 1,147550314     | 0,385964912     |
| CERT1                                                                                           | 2,98867E-06 | -0,198874023 | 0,069 | 0,138 | 0,063064018 | 0,871230265   | 1,147802183     | 0,5             |
| XPC                                                                                             | 0,08913502  | -0,198904061 | 0,081 | 0,103 | 1           | 0,871212126   | 1,147826081     | 0,786407767     |

Supplementary Table 5

| Differentially expressed genes_total calculation_ comparing SC-Keloid vs. (SC-Myel, SC-Nonmyel) |             |              |       |       |             |               |                 |                 |
|-------------------------------------------------------------------------------------------------|-------------|--------------|-------|-------|-------------|---------------|-----------------|-----------------|
| gene                                                                                            | p_val       | avg_log2FC   | pct.1 | pct.2 | p_val_adj   | Foldchange_UP | Foldchange_DOWN | Ratio_pct1_pct2 |
| CASC15                                                                                          | 0,000293384 | -0,198924427 | 0,157 | 0,221 | 1           | 0,871199827   | 1,147842284     | 0,71040724      |
| TMEM87A                                                                                         | 1,54033E-05 | -0,198972294 | 0,154 | 0,233 | 0,325025    | 0,871170922   | 1,147880369     | 0,660944206     |
| PKD2                                                                                            | 0,000181754 | -0,19909023  | 0,076 | 0,13  | 1           | 0,87109971    | 1,147974209     | 0,584615385     |
| CCDC3                                                                                           | 2,26354E-05 | -0,199097124 | 0,009 | 0,042 | 0,477629208 | 0,871095547   | 1,147979694     | 0,214285714     |
| FBRS                                                                                            | 0,064006296 | -0,199137917 | 0,091 | 0,114 | 1           | 0,871070916   | 1,148012155     | 0,798245614     |
| BCL9L                                                                                           | 0,001486848 | -0,199204246 | 0,075 | 0,119 | 1           | 0,871030869   | 1,148064937     | 0,630252101     |
| AC087239.1                                                                                      | 1,98303E-06 | -0,199225543 | 0,01  | 0,05  | 0,04184383  | 0,871018011   | 1,148081885     | 0,2             |
| DOCK4                                                                                           | 1,1412E-06  | -0,199419468 | 0,003 | 0,037 | 0,024080463 | 0,870900938   | 1,148236218     | 0,081081081     |
| ADPRHL1                                                                                         | 4,49209E-09 | -0,199504248 | 0     | 0,039 | 9,47875E-05 | 0,870849761   | 1,148303697     | 0               |
| CNOT1                                                                                           | 1,45579E-06 | -0,199533468 | 0,09  | 0,168 | 0,030718673 | 0,870832123   | 1,148326955     | 0,535714286     |
| PCDHB4                                                                                          | 3,64545E-06 | -0,199656018 | 0,006 | 0,039 | 0,076922553 | 0,870758154   | 1,148424503     | 0,153846154     |
| SCAF11                                                                                          | 1,62671E-05 | -0,199794453 | 0,217 | 0,308 | 0,343252125 | 0,870674603   | 1,148534707     | 0,704545455     |
| MATR3                                                                                           | 2,22051E-06 | -0,200077931 | 0     | 0,026 | 0,046854929 | 0,87050354    | 1,148760406     | 0               |
| CNTN4                                                                                           | 1,40309E-06 | -0,200083274 | 0,009 | 0,049 | 0,029606559 | 0,870500316   | 1,148764661     | 0,183673469     |
| CMC2                                                                                            | 0,001038967 | -0,200216079 | 0,18  | 0,237 | 1           | 0,870420187   | 1,148870414     | 0,759493671     |
| SDR39U1                                                                                         | 0,003282727 | -0,200227054 | 0,066 | 0,104 | 1           | 0,870413565   | 1,148879154     | 0,634615385     |
| HADH                                                                                            | 0,079099761 | -0,200276177 | 0,034 | 0,05  | 1           | 0,870383929   | 1,148918273     | 0,68            |
| AKR1C3                                                                                          | 0,000716543 | -0,20028422  | 0,005 | 0,024 | 1           | 0,870379076   | 1,148924678     | 0,208333333     |
| MIR4500HG                                                                                       | 1,85597E-07 | -0,200491255 | 0     | 0,031 | 0,003916278 | 0,870254181   | 1,149089567     | 0               |
| SUPT5H                                                                                          | 2,95557E-06 | -0,200545429 | 0,09  | 0,164 | 0,062365465 | 0,870221503   | 1,149132717     | 0,548780488     |
| DIPK2A                                                                                          | 1,31627E-06 | -0,2005705   | 0,02  | 0,068 | 0,027774625 | 0,87020638    | 1,149152687     | 0,294117647     |
| HDAC5                                                                                           | 0,015301267 | -0,200658456 | 0,068 | 0,098 | 1           | 0,870153328   | 1,149222749     | 0,693877551     |
| GAA                                                                                             | 0,001833438 | -0,200927021 | 0,104 | 0,151 | 1           | 0,86999136    | 1,149436702     | 0,688741722     |
| OSBPL5                                                                                          | 3,52773E-05 | -0,200986223 | 0,024 | 0,066 | 0,744387316 | 0,86995566    | 1,149483871     | 0,363636364     |
| ATG2A                                                                                           | 9,74941E-06 | -0,201254921 | 0,02  | 0,062 | 0,205722262 | 0,869793649   | 1,149697979     | 0,322580645     |
| XAF1                                                                                            | 0,140436626 | -0,201296106 | 0,036 | 0,05  | 1           | 0,869768819   | 1,1497308       | 0,72            |
| CLIP4                                                                                           | 1,91915E-06 | -0,201914663 | 0,029 | 0,083 | 0,040495931 | 0,869395984   | 1,150223854     | 0,34939759      |
| MEX3C                                                                                           | 0,000370627 | -0,202120356 | 0,125 | 0,182 | 1           | 0,869272039   | 1,150387859     | 0,686813187     |
| DCXR                                                                                            | 0,000451594 | -0,202511811 | 0,1   | 0,153 | 1           | 0,869036206   | 1,150700044     | 0,653594771     |
| PLEKHA3                                                                                         | 3,58685E-05 | -0,202511989 | 0,133 | 0,205 | 0,756861168 | 0,869036098   | 1,150700186     | 0,648780488     |

Supplementary Table 5

| Differentially expressed genes_total calculation_ comparing SC-Keloid vs. (SC-Myel, SC-Nonmyel) |             |              |       |       |             |               |                 |                 |
|-------------------------------------------------------------------------------------------------|-------------|--------------|-------|-------|-------------|---------------|-----------------|-----------------|
| gene                                                                                            | p_val       | avg_log2FC   | pct.1 | pct.2 | p_val_adj   | Foldchange_UP | Foldchange_DOWN | Ratio_pct1_pct2 |
| CPEB2                                                                                           | 1,05523E-06 | -0,20270539  | 0,04  | 0,1   | 0,022266494 | 0,868919607   | 1,150854454     | 0,4             |
| RND1                                                                                            | 1,68989E-08 | -0,203069797 | 0,005 | 0,049 | 0,000356583 | 0,868700157   | 1,151145182     | 0,102040816     |
| THSD7B                                                                                          | 3,35025E-07 | -0,203168782 | 0,002 | 0,037 | 0,007069369 | 0,868640556   | 1,151224166     | 0,054054054     |
| CRISPLD2                                                                                        | 0,002096325 | -0,20318611  | 0,041 | 0,075 | 1           | 0,868630123   | 1,151237993     | 0,546666667     |
| KBTBD7                                                                                          | 0,000305809 | -0,203201838 | 0,017 | 0,049 | 1           | 0,868620653   | 1,151250544     | 0,346938776     |
| SNRNP27                                                                                         | 0,016050277 | -0,203245189 | 0,128 | 0,164 | 1           | 0,868594553   | 1,151285138     | 0,780487805     |
| ARAP1                                                                                           | 0,011845469 | -0,203330659 | 0,028 | 0,052 | 1           | 0,868543096   | 1,151353346     | 0,538461538     |
| ZCCHC8                                                                                          | 0,004758371 | -0,203427393 | 0,063 | 0,099 | 1           | 0,868484861   | 1,151430548     | 0,636363636     |
| BOC                                                                                             | 1,1412E-06  | -0,203899709 | 0,003 | 0,037 | 0,024080463 | 0,86820058    | 1,15180757      | 0,081081081     |
| PAM16                                                                                           | 0,051923818 | -0,203991443 | 0,059 | 0,081 | 1           | 0,868145377   | 1,151880811     | 0,728395062     |
| EIF2AK3                                                                                         | 1,36096E-07 | -0,204000955 | 0,063 | 0,14  | 0,002871763 | 0,868139653   | 1,151888405     | 0,45            |
| BMPR1B                                                                                          | 9,18797E-09 | -0,204095356 | 0,006 | 0,053 | 0,000193875 | 0,868082849   | 1,15196378      | 0,113207547     |
| ACSS1                                                                                           | 1,92154E-06 | -0,20410671  | 0,027 | 0,079 | 0,040546398 | 0,868076017   | 1,151972846     | 0,341772152     |
| ARL6IP6                                                                                         | 0,005995896 | -0,204338768 | 0,127 | 0,17  | 1           | 0,867936398   | 1,152158156     | 0,747058824     |
| KANSL2                                                                                          | 0,007858183 | -0,204373152 | 0,036 | 0,064 | 1           | 0,867915713   | 1,152185616     | 0,5625          |
| AEBP2                                                                                           | 0,000559275 | -0,204390179 | 0,098 | 0,151 | 1           | 0,86790547    | 1,152199214     | 0,649006623     |
| SHROOM3                                                                                         | 2,88858E-08 | -0,204587068 | 0     | 0,035 | 0,000609519 | 0,867787032   | 1,152356469     | 0               |
| USP24                                                                                           | 0,000805432 | -0,204636584 | 0,05  | 0,091 | 1           | 0,867757248   | 1,152396021     | 0,549450549     |
| PPP3R1                                                                                          | 6,56762E-05 | -0,204723082 | 0,088 | 0,148 | 1           | 0,867705223   | 1,152465116     | 0,594594595     |
| NMT2                                                                                            | 0,000123963 | -0,204794463 | 0,038 | 0,083 | 1           | 0,867662292   | 1,152522138     | 0,457831325     |
| ALDH7A1                                                                                         | 0,001892603 | -0,204836995 | 0,071 | 0,114 | 1           | 0,867636713   | 1,152556116     | 0,622807018     |
| CLTB                                                                                            | 4,24913E-08 | -0,205176116 | 0,189 | 0,294 | 0,000896609 | 0,867432789   | 1,152827069     | 0,642857143     |
| FOXO4                                                                                           | 8,15766E-06 | -0,205243095 | 0,012 | 0,049 | 0,172134706 | 0,867392519   | 1,152880592     | 0,244897959     |
| FMN2                                                                                            | 5,50172E-10 | -0,205353055 | 0,001 | 0,047 | 1,16092E-05 | 0,86732641    | 1,152968466     | 0,021276596     |
| FAR1                                                                                            | 1,09532E-06 | -0,20540863  | 0,069 | 0,141 | 0,023112317 | 0,867292999   | 1,153012881     | 0,489361702     |
| FBXO25                                                                                          | 2,76106E-07 | -0,205477985 | 0,051 | 0,122 | 0,005826102 | 0,867251307   | 1,153068311     | 0,418032787     |
| CAV2                                                                                            | 0,000394112 | -0,20575205  | 0,151 | 0,209 | 1           | 0,867086573   | 1,153287377     | 0,722488038     |
| NUDC                                                                                            | 8,58025E-07 | -0,205833726 | 0,226 | 0,33  | 0,018105191 | 0,867037486   | 1,153352671     | 0,684848485     |
| ADNP                                                                                            | 1,93959E-06 | -0,205904407 | 0,112 | 0,194 | 0,040927323 | 0,866995009   | 1,153409177     | 0,577319588     |
| N4BP2L2                                                                                         | 1,30592E-09 | -0,206055148 | 0,292 | 0,45  | 2,75562E-05 | 0,866904425   | 1,153529699     | 0,648888889     |

Supplementary Table 5

| Differentially expressed genes_total calculation_ comparing SC-Keloid vs. (SC-Myel, SC-Nonmyel) |             |              |       |       |             |               |                 |                 |
|-------------------------------------------------------------------------------------------------|-------------|--------------|-------|-------|-------------|---------------|-----------------|-----------------|
| gene                                                                                            | p_val       | avg_log2FC   | pct.1 | pct.2 | p_val_adj   | Foldchange_UP | Foldchange_DOWN | Ratio_pct1_pct2 |
| KIF5C                                                                                           | 5,95292E-07 | -0,206078663 | 0,006 | 0,043 | 0,012561248 | 0,866890295   | 1,153548501     | 0,139534884     |
| FAM222A                                                                                         | 5,81501E-06 | -0,206130781 | 0,016 | 0,058 | 0,122702564 | 0,866858979   | 1,153590174     | 0,275862069     |
| RING1                                                                                           | 0,003699655 | -0,206195076 | 0,086 | 0,126 | 1           | 0,866820347   | 1,153641586     | 0,682539683     |
| MOSPD2                                                                                          | 2,11453E-06 | -0,206223493 | 0,045 | 0,107 | 0,044618603 | 0,866803274   | 1,153664309     | 0,420560748     |
| MARK2                                                                                           | 0,00404979  | -0,20622653  | 0,063 | 0,099 | 1           | 0,866801449   | 1,153666738     | 0,636363636     |
| GPATCH8                                                                                         | 8,83489E-05 | -0,206377224 | 0,112 | 0,176 | 1           | 0,866710914   | 1,153787248     | 0,636363636     |
| HCCS                                                                                            | 1,39985E-05 | -0,206444996 | 0,033 | 0,081 | 0,295382692 | 0,8666702     | 1,15384145      | 0,407407407     |
| NR1D2                                                                                           | 1,39835E-09 | -0,206495153 | 0,073 | 0,171 | 2,95066E-05 | 0,86664007    | 1,153881565     | 0,426900585     |
| TSR2                                                                                            | 8,77636E-05 | -0,206507504 | 0,078 | 0,136 | 1           | 0,86663265    | 1,153891444     | 0,573529412     |
| PON2                                                                                            | 9,12423E-07 | -0,206540275 | 0,229 | 0,334 | 0,019253034 | 0,866612965   | 1,153917655     | 0,685628743     |
| TNK2                                                                                            | 0,018471391 | -0,206651692 | 0,058 | 0,087 | 1           | 0,86654604    | 1,154006774     | 0,666666667     |
| TMEM117                                                                                         | 7,69503E-07 | -0,2068612   | 0,009 | 0,05  | 0,016237282 | 0,86642021    | 1,15417437      | 0,18            |
| SEC14L1                                                                                         | 0,000107254 | -0,206866965 | 0,095 | 0,156 | 1           | 0,866416747   | 1,154178983     | 0,608974359     |
| HSD17B12                                                                                        | 0,005136848 | -0,207020592 | 0,123 | 0,166 | 1           | 0,866324491   | 1,154301893     | 0,740963855     |
| DDHD1                                                                                           | 0,0001775   | -0,207026229 | 0,068 | 0,119 | 1           | 0,866321106   | 1,154306403     | 0,571428571     |
| TMEM256                                                                                         | 5,40468E-05 | -0,207032614 | 0,154 | 0,227 | 1           | 0,866317272   | 1,154311512     | 0,678414097     |
| EZH1                                                                                            | 2,51937E-07 | -0,207087499 | 0,038 | 0,104 | 0,005316116 | 0,866284315   | 1,154355427     | 0,365384615     |
| CYSTM1                                                                                          | 1,46713E-05 | -0,207130098 | 0,271 | 0,364 | 0,309579358 | 0,866258736   | 1,154389512     | 0,744505495     |
| CDC14B                                                                                          | 0,000304302 | -0,207887948 | 0,066 | 0,115 | 1           | 0,865803809   | 1,154996074     | 0,573913043     |
| SGSM3                                                                                           | 0,09491625  | -0,208206604 | 0,058 | 0,076 | 1           | 0,865612595   | 1,155251212     | 0,763157895     |
| SPECC1                                                                                          | 0,002917381 | -0,208227967 | 0,087 | 0,129 | 1           | 0,865599777   | 1,155268319     | 0,674418605     |
| ARHGEF10L                                                                                       | 0,020972732 | -0,208307086 | 0,048 | 0,073 | 1           | 0,865552308   | 1,155331677     | 0,657534247     |
| CLEC2B                                                                                          | 2,09431E-07 | -0,208523522 | 0,026 | 0,084 | 0,0044192   | 0,865422466   | 1,155505015     | 0,30952381      |
| DNAJC27                                                                                         | 3,27357E-05 | -0,208639057 | 0,028 | 0,072 | 0,690756508 | 0,865353163   | 1,155597555     | 0,388888889     |
| PANX1                                                                                           | 2,52831E-05 | -0,20867252  | 0,036 | 0,084 | 0,533498739 | 0,865333092   | 1,155624359     | 0,428571429     |
| KCTD4                                                                                           | 8,93112E-07 | -0,208761882 | 0,001 | 0,031 | 0,018845559 | 0,865279494   | 1,155695942     | 0,032258065     |
| CYP27A1                                                                                         | 0,004333363 | -0,208884415 | 0,059 | 0,095 | 1           | 0,865206006   | 1,155794103     | 0,621052632     |
| RAB28                                                                                           | 0,054453934 | -0,208885734 | 0,051 | 0,072 | 1           | 0,865205215   | 1,15579516      | 0,708333333     |
| RBM43                                                                                           | 0,000866628 | -0,209196064 | 0,085 | 0,136 | 1           | 0,865019125   | 1,156043804     | 0,625           |
| BORCS7                                                                                          | 0,000338363 | -0,209328907 | 0,122 | 0,18  | 1           | 0,864939478   | 1,156150257     | 0,677777778     |



Supplementary Table 5

| Differentially expressed genes_total calculation_ comparing SC-Keloid vs. (SC-Myel, SC-Nonmyel) |             |              |       |       |             |               |                 |                 |
|-------------------------------------------------------------------------------------------------|-------------|--------------|-------|-------|-------------|---------------|-----------------|-----------------|
| gene                                                                                            | p_val       | avg_log2FC   | pct.1 | pct.2 | p_val_adj   | Foldchange_UP | Foldchange_DOWN | Ratio_pct1_pct2 |
| SPART                                                                                           | 9,07658E-06 | -0,209353006 | 0,084 | 0,152 | 0,191524925 | 0,86492503    | 1,15616957      | 0,552631579     |
| PGGHG                                                                                           | 6,52369E-05 | -0,209376037 | 0,009 | 0,039 | 1           | 0,864911223   | 1,156188027     | 0,230769231     |
| SLC20A2                                                                                         | 0,019037315 | -0,209657632 | 0,087 | 0,119 | 1           | 0,86474242    | 1,156413721     | 0,731092437     |
| CTDSPL                                                                                          | 0,000108289 | -0,210027164 | 0,078 | 0,133 | 1           | 0,864520953   | 1,156709963     | 0,586466165     |
| GTPBP1                                                                                          | 0,000724484 | -0,210033073 | 0,038 | 0,076 | 1           | 0,864517413   | 1,1567147       | 0,5             |
| ATP11C                                                                                          | 5,34464E-05 | -0,21039337  | 0,026 | 0,066 | 1           | 0,864301536   | 1,157003613     | 0,393939394     |
| MPPE1                                                                                           | 0,446337865 | -0,210487092 | 0,058 | 0,065 | 1           | 0,86424539    | 1,157078778     | 0,892307692     |
| PPP2CB                                                                                          | 1,80429E-08 | -0,210525222 | 0,269 | 0,395 | 0,000380723 | 0,864222548   | 1,15710936      | 0,681012658     |
| DVL2                                                                                            | 0,010890219 | -0,210672167 | 0,043 | 0,071 | 1           | 0,864134528   | 1,157227223     | 0,605633803     |
| ABCD3                                                                                           | 6,95553E-07 | -0,210893119 | 0,102 | 0,185 | 0,014676859 | 0,864002194   | 1,157404468     | 0,551351351     |
| ITFG1                                                                                           | 0,004365367 | -0,210998188 | 0,118 | 0,16  | 1           | 0,863939272   | 1,157488763     | 0,7375          |
| IDUA                                                                                            | 1,27851E-05 | -0,21106596  | 0,019 | 0,06  | 0,269777846 | 0,863898689   | 1,157543139     | 0,316666667     |
| RPP14                                                                                           | 0,000268308 | -0,211154105 | 0,016 | 0,047 | 1           | 0,863845909   | 1,157613864     | 0,340425532     |
| THAP9-AS1                                                                                       | 0,000145935 | -0,211308963 | 0,066 | 0,118 | 1           | 0,863753189   | 1,157738128     | 0,559322034     |
| NLGN2                                                                                           | 0,000457802 | -0,211429594 | 0,052 | 0,096 | 1           | 0,86368097    | 1,157834936     | 0,541666667     |
| HLA-DQB1                                                                                        | 0,005798516 | -0,211607146 | 0,034 | 0,062 | 1           | 0,863574683   | 1,15797744      | 0,548387097     |
| LYNX1                                                                                           | 1,04562E-10 | -0,211730068 | 0,002 | 0,054 | 2,20635E-06 | 0,863501107   | 1,158076107     | 0,037037037     |
| CFL2                                                                                            | 0,002070827 | -0,211757196 | 0,094 | 0,138 | 1           | 0,86348487    | 1,158097883     | 0,68115942      |
| SART1                                                                                           | 0,041069258 | -0,211795687 | 0,065 | 0,09  | 1           | 0,863461833   | 1,158128781     | 0,722222222     |
| CCSER2                                                                                          | 3,89336E-07 | -0,211817192 | 0,177 | 0,28  | 0,008215386 | 0,863448962   | 1,158146045     | 0,632142857     |
| CASK                                                                                            | 2,80272E-06 | -0,211943802 | 0,044 | 0,104 | 0,059140225 | 0,863373189   | 1,158247688     | 0,423076923     |
| PKIB                                                                                            | 1,10663E-08 | -0,212198901 | 0,007 | 0,056 | 0,000233511 | 0,86322054    | 1,158452508     | 0,125           |
| BUB3                                                                                            | 0,000110024 | -0,21230942  | 0,105 | 0,164 | 1           | 0,863154415   | 1,158541256     | 0,640243902     |
| SESN2                                                                                           | 8,29089E-06 | -0,212427954 | 0,024 | 0,071 | 0,174946047 | 0,8630835     | 1,158636447     | 0,338028169     |
| DUSP5                                                                                           | 0,000808847 | -0,212606535 | 0,056 | 0,098 | 1           | 0,862976671   | 1,158779876     | 0,571428571     |
| MCM7                                                                                            | 9,01575E-05 | -0,212617014 | 0,054 | 0,104 | 1           | 0,862970403   | 1,158788293     | 0,519230769     |
| HERC5                                                                                           | 1,0074E-07  | -0,212680162 | 0,003 | 0,042 | 0,002125719 | 0,862932631   | 1,158839015     | 0,071428571     |
| HELZ2                                                                                           | 0,010775627 | -0,213166497 | 0,037 | 0,064 | 1           | 0,862641784   | 1,159229727     | 0,578125        |
| ST6GALNAC3                                                                                      | 4,80658E-07 | -0,213283126 | 0,009 | 0,052 | 0,010142368 | 0,86257205    | 1,159323444     | 0,173076923     |
| IP6K1                                                                                           | 2,12453E-06 | -0,213347464 | 0,064 | 0,132 | 0,044829643 | 0,862533584   | 1,159375146     | 0,484848485     |

Supplementary Table 5

| Differentially expressed genes_total calculation_ comparing SC-Keloid vs. (SC-Myel, SC-Nonmyel) |             |              |       |       |             |               |                 |                 |
|-------------------------------------------------------------------------------------------------|-------------|--------------|-------|-------|-------------|---------------|-----------------|-----------------|
| gene                                                                                            | p_val       | avg_log2FC   | pct.1 | pct.2 | p_val_adj   | Foldchange_UP | Foldchange_DOWN | Ratio_pct1_pct2 |
| MXD4                                                                                            | 1,67917E-05 | -0,213492713 | 0,169 | 0,248 | 0,354321756 | 0,862446749   | 1,159491877     | 0,681451613     |
| STK3                                                                                            | 0,000260954 | -0,213515666 | 0,047 | 0,091 | 1           | 0,862433028   | 1,159510325     | 0,516483516     |
| ZNF24                                                                                           | 6,62848E-07 | -0,21377022  | 0,15  | 0,246 | 0,013986766 | 0,862280871   | 1,15971493      | 0,609756098     |
| USP39                                                                                           | 0,003914486 | -0,213975832 | 0,049 | 0,083 | 1           | 0,862157988   | 1,159880224     | 0,590361446     |
| CLCF1                                                                                           | 1,68985E-08 | -0,213982133 | 0,006 | 0,052 | 0,000356574 | 0,862154222   | 1,15988529      | 0,115384615     |
| RPL4                                                                                            | 1,90241E-09 | -0,21401814  | 0,386 | 0,611 | 4,01428E-05 | 0,862132705   | 1,159914239     | 0,631751227     |
| CAMK2D                                                                                          | 3,85951E-05 | -0,214063078 | 0,107 | 0,175 | 0,814394825 | 0,862105851   | 1,159950369     | 0,611428571     |
| ATF7IP                                                                                          | 2,90313E-05 | -0,214125067 | 0,108 | 0,179 | 0,612589819 | 0,862068809   | 1,16000021      | 0,603351955     |
| SESN3                                                                                           | 1,56281E-09 | -0,214238765 | 0,084 | 0,187 | 3,29769E-05 | 0,862000872   | 1,160091633     | 0,449197861     |
| HOXC6                                                                                           | 0,011877636 | -0,214252342 | 0,064 | 0,095 | 1           | 0,86199276    | 1,160102551     | 0,673684211     |
| SLC16A1                                                                                         | 0,00336476  | -0,214315087 | 0,044 | 0,077 | 1           | 0,861955272   | 1,160153006     | 0,571428571     |
| CNTFR                                                                                           | 5,51656E-10 | -0,214320968 | 0,001 | 0,047 | 1,16405E-05 | 0,861951758   | 1,160157736     | 0,021276596     |
| SGCD                                                                                            | 6,53264E-05 | -0,214578641 | 0,029 | 0,072 | 1           | 0,861797823   | 1,160364964     | 0,402777778     |
| ATP6V1C1                                                                                        | 2,51269E-06 | -0,214590563 | 0,056 | 0,119 | 0,053020216 | 0,861790701   | 1,160374553     | 0,470588235     |
| IRS1                                                                                            | 0,001185178 | -0,214664779 | 0,026 | 0,057 | 1           | 0,86174637    | 1,160434247     | 0,456140351     |
| ZSCAN18                                                                                         | 2,6832E-07  | -0,214763275 | 0,049 | 0,119 | 0,005661813 | 0,861687538   | 1,160513476     | 0,411764706     |
| SLC25A48                                                                                        | 2,88858E-08 | -0,214780412 | 0     | 0,035 | 0,000609519 | 0,861677303   | 1,160527261     | 0               |
| GNG10                                                                                           | 0,000296454 | -0,214918974 | 0,121 | 0,182 | 1           | 0,861594548   | 1,160638727     | 0,664835165     |
| TBCE                                                                                            | 3,27215E-05 | -0,214927716 | 0,021 | 0,061 | 0,690455899 | 0,861589327   | 1,160645761     | 0,344262295     |
| AP1G1                                                                                           | 0,000466682 | -0,21532131  | 0,085 | 0,137 | 1           | 0,861354302   | 1,16096245      | 0,620437956     |
| GPM6A                                                                                           | 2,88858E-08 | -0,215480492 | 0     | 0,035 | 0,000609519 | 0,861259268   | 1,161090553     | 0               |
| INAFM1                                                                                          | 0,001454766 | -0,215602879 | 0,062 | 0,103 | 1           | 0,861186209   | 1,161189055     | 0,601941748     |
| CACTIN                                                                                          | 0,008637616 | -0,215772144 | 0,031 | 0,057 | 1           | 0,861085175   | 1,1613253       | 0,543859649     |
| ATXN2L                                                                                          | 4,97235E-05 | -0,215788406 | 0,104 | 0,168 | 1           | 0,861075469   | 1,161338391     | 0,619047619     |
| KCNIP4                                                                                          | 3,13226E-07 | -0,215898287 | 0,002 | 0,037 | 0,006609373 | 0,861009889   | 1,161426846     | 0,054054054     |
| PSME1                                                                                           | 2,83772E-07 | -0,216143194 | 0,274 | 0,395 | 0,005987868 | 0,860863739   | 1,161624023     | 0,693670886     |
| NKD1                                                                                            | 8,85146E-07 | -0,216713414 | 0,009 | 0,05  | 0,018677459 | 0,860523554   | 1,162083241     | 0,18            |
| MANBAL                                                                                          | 0,808766349 | -0,216782984 | 0,112 | 0,11  | 1           | 0,860482058   | 1,162139281     | 1,018181818     |
| PARP6                                                                                           | 0,035018316 | -0,216809531 | 0,04  | 0,061 | 1           | 0,860466225   | 1,162160665     | 0,655737705     |
| CCDC159                                                                                         | 0,015672493 | -0,216939506 | 0,051 | 0,079 | 1           | 0,860388707   | 1,162265371     | 0,64556962      |

Supplementary Table 5

| Differentially expressed genes_total calculation_ comparing SC-Keloid vs. (SC-Myel, SC-Nonmyel) |             |              |       |       |             |               |                 |                 |
|-------------------------------------------------------------------------------------------------|-------------|--------------|-------|-------|-------------|---------------|-----------------|-----------------|
| gene                                                                                            | p_val       | avg_log2FC   | pct.1 | pct.2 | p_val_adj   | Foldchange_UP | Foldchange_DOWN | Ratio_pct1_pct2 |
| SOX12                                                                                           | 1,89439E-05 | -0,217160988 | 0,024 | 0,068 | 0,399736061 | 0,86025663    | 1,162443816     | 0,352941176     |
| SNRPA                                                                                           | 0,01987602  | -0,217204655 | 0,088 | 0,119 | 1           | 0,860230593   | 1,162479        | 0,739495798     |
| CTBP2                                                                                           | 3,57168E-05 | -0,217267074 | 0,094 | 0,159 | 0,753660304 | 0,860193375   | 1,162529297     | 0,591194969     |
| CHST9                                                                                           | 5,44285E-08 | -0,217306907 | 0,005 | 0,046 | 0,001148496 | 0,860169626   | 1,162561395     | 0,108695652     |
| MSL1                                                                                            | 9,10039E-07 | -0,217444861 | 0,143 | 0,235 | 0,019202741 | 0,860087378   | 1,162672567     | 0,608510638     |
| ZC3H6                                                                                           | 3,56468E-05 | -0,21744738  | 0,07  | 0,129 | 0,752182238 | 0,860085876   | 1,162674597     | 0,542635659     |
| CLASP2                                                                                          | 9,33292E-09 | -0,217555093 | 0,071 | 0,161 | 0,000196934 | 0,860021664   | 1,162761407     | 0,440993789     |
| SQOR                                                                                            | 1,32955E-08 | -0,217575218 | 0,01  | 0,062 | 0,000280549 | 0,860009667   | 1,162777627     | 0,161290323     |
| MTHFR                                                                                           | 1,03646E-06 | -0,21766896  | 0,026 | 0,079 | 0,021870345 | 0,859953788   | 1,162853183     | 0,329113924     |
| SYT14                                                                                           | 1,26066E-09 | -0,217758731 | 0,002 | 0,049 | 2,66011E-05 | 0,85990028    | 1,162925543     | 0,040816327     |
| NT5DC3                                                                                          | 0,000190472 | -0,217770842 | 0,03  | 0,069 | 1           | 0,859893061   | 1,162935306     | 0,434782609     |
| ATP6VOE2                                                                                        | 0,01581396  | -0,21792008  | 0,104 | 0,136 | 1           | 0,859804115   | 1,163055611     | 0,764705882     |
| RFLNA                                                                                           | 8,52719E-11 | -0,218172147 | 0,001 | 0,052 | 1,79932E-06 | 0,859653903   | 1,163258837     | 0,019230769     |
| SH3PXD2B                                                                                        | 0,00384979  | -0,21871014  | 0,071 | 0,11  | 1           | 0,859333391   | 1,163692707     | 0,645454545     |
| OXR1                                                                                            | 9,0815E-06  | -0,218776518 | 0,093 | 0,164 | 0,191628711 | 0,859293854   | 1,16374625      | 0,567073171     |
| ANKRD20A4P                                                                                      | 5,62437E-08 | -0,21885126  | 0,003 | 0,043 | 0,001186798 | 0,859249338   | 1,163806541     | 0,069767442     |
| ZFH3                                                                                            | 6,13167E-06 | -0,218909437 | 0,088 | 0,16  | 0,129384461 | 0,859214689   | 1,163853473     | 0,55            |
| MME                                                                                             | 5,37019E-08 | -0,219039447 | 0     | 0,034 | 0,001133163 | 0,859137264   | 1,16395836      | 0               |
| DNTTIP2                                                                                         | 1,78466E-06 | -0,219148009 | 0,087 | 0,164 | 0,037658076 | 0,859072616   | 1,16404595      | 0,530487805     |
| PRXL2C                                                                                          | 0,000222938 | -0,219426799 | 0,143 | 0,205 | 1           | 0,858906623   | 1,164270915     | 0,697560976     |
| SMCHD1                                                                                          | 2,84085E-06 | -0,219681925 | 0,108 | 0,187 | 0,059944831 | 0,858754747   | 1,164476823     | 0,577540107     |
| NTRK2                                                                                           | 1,6056E-07  | -0,219792452 | 0,002 | 0,038 | 0,003387983 | 0,85868896    | 1,164566038     | 0,052631579     |
| TMEM50B                                                                                         | 3,72925E-05 | -0,219927987 | 0,133 | 0,204 | 0,786908254 | 0,858608294   | 1,164675449     | 0,651960784     |
| DHPS                                                                                            | 0,00466518  | -0,220068048 | 0,101 | 0,141 | 1           | 0,858524941   | 1,164788525     | 0,716312057     |
| KIAA2026                                                                                        | 4,43984E-05 | -0,220315413 | 0,088 | 0,151 | 0,936849778 | 0,858377751   | 1,164988257     | 0,582781457     |
| NPIP11                                                                                          | 3,10573E-08 | -0,220326292 | 0,005 | 0,047 | 0,000655339 | 0,858371278   | 1,164997042     | 0,106382979     |
| NR3C1                                                                                           | 2,00487E-10 | -0,220608659 | 0,271 | 0,434 | 4,23047E-06 | 0,858203292   | 1,16522508      | 0,624423963     |
| NUMA1                                                                                           | 1,88627E-05 | -0,22067346  | 0,109 | 0,18  | 0,398021226 | 0,858164746   | 1,165277419     | 0,605555556     |
| PHYKPL                                                                                          | 0,000593226 | -0,221011317 | 0,05  | 0,092 | 1           | 0,8579638     | 1,165550341     | 0,543478261     |
| ZSWIM8                                                                                          | 0,003988116 | -0,221080013 | 0,052 | 0,087 | 1           | 0,857922948   | 1,165605842     | 0,597701149     |

Supplementary Table 5

| Differentially expressed genes_total calculation_ comparing SC-Keloid vs. (SC-Myel, SC-Nonmyel) |             |              |       |       |             |               |                 |                 |
|-------------------------------------------------------------------------------------------------|-------------|--------------|-------|-------|-------------|---------------|-----------------|-----------------|
| gene                                                                                            | p_val       | avg_log2FC   | pct.1 | pct.2 | p_val_adj   | Foldchange_UP | Foldchange_DOWN | Ratio_pct1_pct2 |
| POLB                                                                                            | 0,000141531 | -0,221362385 | 0,03  | 0,071 | 1           | 0,857755047   | 1,165834003     | 0,422535211     |
| TOB2                                                                                            | 2,46934E-10 | -0,221470624 | 0,104 | 0,216 | 5,21054E-06 | 0,857690696   | 1,165921473     | 0,481481481     |
| CLN8                                                                                            | 6,66569E-08 | -0,221542642 | 0,048 | 0,121 | 0,001406528 | 0,857647882   | 1,165979676     | 0,396694215     |
| ZNF622                                                                                          | 0,000193422 | -0,221557246 | 0,057 | 0,104 | 1           | 0,8576392     | 1,165991479     | 0,548076923     |
| RASSF1                                                                                          | 7,56063E-07 | -0,221734165 | 0,113 | 0,197 | 0,015953695 | 0,857534034   | 1,166134475     | 0,573604061     |
| HAUS7                                                                                           | 0,0081929   | -0,221860625 | 0,029 | 0,054 | 1           | 0,85745887    | 1,166236697     | 0,537037037     |
| SMIM29                                                                                          | 0,005188379 | -0,222099696 | 0,104 | 0,142 | 1           | 0,857316791   | 1,166429972     | 0,732394366     |
| KXD1                                                                                            | 0,017089682 | -0,222178667 | 0,112 | 0,145 | 1           | 0,857269864   | 1,166493822     | 0,772413793     |
| PODXL2                                                                                          | 2,90703E-07 | -0,222184891 | 0,007 | 0,047 | 0,006134127 | 0,857266166   | 1,166498854     | 0,14893617      |
| GNG2                                                                                            | 2,25301E-08 | -0,222296356 | 0,297 | 0,431 | 0,000475407 | 0,857199934   | 1,166588984     | 0,689095128     |
| PARVA                                                                                           | 0,000292388 | -0,222343503 | 0,113 | 0,171 | 1           | 0,857171921   | 1,166627108     | 0,660818713     |
| RBM27                                                                                           | 2,20243E-08 | -0,222544937 | 0,047 | 0,122 | 0,000464735 | 0,857052248   | 1,166790009     | 0,385245902     |
| CYB5R1                                                                                          | 0,032484525 | -0,222621454 | 0,057 | 0,081 | 1           | 0,857006794   | 1,166851894     | 0,703703704     |
| INSIG1                                                                                          | 1,39501E-06 | -0,223192458 | 0,05  | 0,114 | 0,029436206 | 0,856667666   | 1,167313813     | 0,438596491     |
| PITHD1                                                                                          | 9,11512E-05 | -0,223219352 | 0,17  | 0,239 | 1           | 0,856651697   | 1,167335574     | 0,711297071     |
| NOP56                                                                                           | 0,007764932 | -0,22334233  | 0,141 | 0,182 | 1           | 0,856578677   | 1,167435084     | 0,774725275     |
| EML3                                                                                            | 0,000475249 | -0,223615535 | 0,037 | 0,076 | 1           | 0,856416481   | 1,167656183     | 0,486842105     |
| RAB9A                                                                                           | 0,000108874 | -0,223757417 | 0,144 | 0,21  | 1           | 0,856332261   | 1,167771022     | 0,685714286     |
| HDAC4                                                                                           | 1,55614E-06 | -0,223797209 | 0,02  | 0,068 | 0,032836036 | 0,856308642   | 1,167803232     | 0,294117647     |
| FBXO2                                                                                           | 5,78917E-11 | -0,224006102 | 0     | 0,049 | 1,22157E-06 | 0,856184663   | 1,167972335     | 0               |
| SPRED1                                                                                          | 3,30588E-07 | -0,224029157 | 0,095 | 0,182 | 0,006975737 | 0,856170981   | 1,167991        | 0,521978022     |
| PCGF2                                                                                           | 0,009732798 | -0,224068604 | 0,071 | 0,104 | 1           | 0,856147571   | 1,168022936     | 0,682692308     |
| HUNK                                                                                            | 9,8946E-05  | -0,224224068 | 0,016 | 0,05  | 1           | 0,856055318   | 1,168148808     | 0,32            |
| TUBG2                                                                                           | 2,13064E-06 | -0,224240489 | 0,036 | 0,092 | 0,044958577 | 0,856045575   | 1,168162104     | 0,391304348     |
| CNRIP1                                                                                          | 0,001042084 | -0,224354026 | 0,057 | 0,098 | 1           | 0,855978209   | 1,16825404      | 0,581632653     |
| NSFL1C                                                                                          | 0,009313844 | -0,224371077 | 0,099 | 0,134 | 1           | 0,855968092   | 1,168267847     | 0,73880597      |
| MLF2                                                                                            | 0,000136702 | -0,22537521  | 0,203 | 0,274 | 1           | 0,855372535   | 1,169081259     | 0,740875912     |
| BICRA                                                                                           | 0,00043166  | -0,225437376 | 0,02  | 0,052 | 1           | 0,855335677   | 1,169131636     | 0,384615385     |
| SOS1                                                                                            | 0,002044367 | -0,225539721 | 0,044 | 0,08  | 1           | 0,855275002   | 1,169214577     | 0,55            |
| NKX6-2                                                                                          | 2,88858E-08 | -0,22564118  | 0     | 0,035 | 0,000609519 | 0,855214857   | 1,169296806     | 0               |

Supplementary Table 5

| Differentially expressed genes_total calculation_ comparing SC-Keloid vs. (SC-Myel, SC-Nonmyel) |             |              |       |       |             |               |                 |                 |
|-------------------------------------------------------------------------------------------------|-------------|--------------|-------|-------|-------------|---------------|-----------------|-----------------|
| gene                                                                                            | p_val       | avg_log2FC   | pct.1 | pct.2 | p_val_adj   | Foldchange_UP | Foldchange_DOWN | Ratio_pct1_pct2 |
| GPS2                                                                                            | 0,001426727 | -0,22567154  | 0,112 | 0,159 | 1           | 0,855196859   | 1,169321413     | 0,704402516     |
| MEX3D                                                                                           | 0,002253494 | -0,225671575 | 0,104 | 0,149 | 1           | 0,855196839   | 1,169321441     | 0,697986577     |
| BEST1                                                                                           | 7,8771E-07  | -0,225749321 | 0,009 | 0,05  | 0,016621462 | 0,855150754   | 1,169384457     | 0,18            |
| RXRB                                                                                            | 0,000294604 | -0,225989182 | 0,057 | 0,103 | 1           | 0,855008589   | 1,169578894     | 0,553398058     |
| PALM                                                                                            | 4,22196E-09 | -0,226020239 | 0,012 | 0,068 | 8,90876E-05 | 0,854990184   | 1,169604071     | 0,176470588     |
| ECPAS                                                                                           | 0,006120804 | -0,226053472 | 0,037 | 0,066 | 1           | 0,854970489   | 1,169631014     | 0,560606061     |
| GTF2IRD2B                                                                                       | 0,000154475 | -0,226471453 | 0,023 | 0,06  | 1           | 0,854722821   | 1,169969931     | 0,383333333     |
| PHF23                                                                                           | 1,2299E-05  | -0,226789121 | 0,062 | 0,122 | 0,259520802 | 0,854534639   | 1,170227576     | 0,508196721     |
| NBPF12                                                                                          | 7,89938E-05 | -0,226803449 | 0,015 | 0,049 | 1           | 0,854526152   | 1,170239199     | 0,306122449     |
| PKIG                                                                                            | 0,022887871 | -0,227211452 | 0,194 | 0,228 | 1           | 0,854284522   | 1,170570196     | 0,850877193     |
| INTS3                                                                                           | 0,001608126 | -0,227592329 | 0,054 | 0,092 | 1           | 0,854059017   | 1,170879272     | 0,586956522     |
| USP38                                                                                           | 5,52679E-07 | -0,2276438   | 0,051 | 0,118 | 0,011662073 | 0,854028547   | 1,170921046     | 0,43220339      |
| FBRSL1                                                                                          | 1,24087E-05 | -0,227730856 | 0,031 | 0,08  | 0,26183604  | 0,853977014   | 1,170991705     | 0,3875          |
| UBAP1                                                                                           | 1,06816E-06 | -0,227795228 | 0,063 | 0,133 | 0,022539315 | 0,853938911   | 1,171043955     | 0,473684211     |
| ZDHHC2                                                                                          | 2,45857E-07 | -0,227932609 | 0,019 | 0,071 | 0,005187838 | 0,853857599   | 1,171155473     | 0,267605634     |
| LMBR1L                                                                                          | 0,000734304 | -0,228120273 | 0,037 | 0,075 | 1           | 0,853746537   | 1,171307826     | 0,493333333     |
| MTR                                                                                             | 2,60802E-06 | -0,228129963 | 0,097 | 0,176 | 0,055031779 | 0,853740803   | 1,171315693     | 0,551136364     |
| CPSF7                                                                                           | 0,037290007 | -0,228254569 | 0,063 | 0,088 | 1           | 0,853667068   | 1,171416864     | 0,715909091     |
| CTNNA3                                                                                          | 1,5536E-08  | -0,228297479 | 0     | 0,037 | 0,000327825 | 0,853641678   | 1,171451706     | 0               |
| STX16                                                                                           | 2,27552E-05 | -0,228317014 | 0,121 | 0,193 | 0,48015712  | 0,853630119   | 1,171467568     | 0,626943005     |
| FOSL1                                                                                           | 5,49376E-07 | -0,228474162 | 0,02  | 0,071 | 0,011592383 | 0,853537142   | 1,171595179     | 0,281690141     |
| MAF                                                                                             | 9,0896E-06  | -0,228478859 | 0,247 | 0,346 | 0,191799708 | 0,853534363   | 1,171598993     | 0,713872832     |
| FGD4                                                                                            | 5,83088E-07 | -0,229211278 | 0,056 | 0,126 | 0,012303732 | 0,853101155   | 1,172193935     | 0,444444444     |
| MRPL38                                                                                          | 0,087162645 | -0,229238436 | 0,065 | 0,084 | 1           | 0,853085096   | 1,172216001     | 0,773809524     |
| AXIN2                                                                                           | 2,65197E-06 | -0,229242245 | 0,012 | 0,052 | 0,055959162 | 0,853082844   | 1,172219096     | 0,230769231     |
| BCAM                                                                                            | 8,92996E-07 | -0,229332908 | 0,012 | 0,054 | 0,01884311  | 0,853029236   | 1,172292764     | 0,222222222     |
| UBE3A                                                                                           | 0,000234863 | -0,22946731  | 0,135 | 0,198 | 1           | 0,85294977    | 1,172401981     | 0,681818182     |
| ADAP1                                                                                           | 0,00011004  | -0,229487195 | 0,024 | 0,062 | 1           | 0,852938014   | 1,17241814      | 0,387096774     |
| KLC1                                                                                            | 6,93546E-08 | -0,229945634 | 0,17  | 0,277 | 0,001463452 | 0,852667023   | 1,172790753     | 0,613718412     |
| NUMBL                                                                                           | 0,00071573  | -0,230000393 | 0,031 | 0,066 | 1           | 0,852634659   | 1,172835269     | 0,46969697      |

Supplementary Table 5

| Differentially expressed genes_total calculation_ comparing SC-Keloid vs. (SC-Myel, SC-Nonmyel) |             |              |       |       |             |               |                 |                 |
|-------------------------------------------------------------------------------------------------|-------------|--------------|-------|-------|-------------|---------------|-----------------|-----------------|
| gene                                                                                            | p_val       | avg_log2FC   | pct.1 | pct.2 | p_val_adj   | Foldchange_UP | Foldchange_DOWN | Ratio_pct1_pct2 |
| IL10RB                                                                                          | 0,002674928 | -0,230122419 | 0,029 | 0,058 | 1           | 0,852562545   | 1,172934474     | 0,5             |
| REST                                                                                            | 2,12843E-06 | -0,230142852 | 0,154 | 0,243 | 0,04491196  | 0,85255047    | 1,172951086     | 0,633744856     |
| SAFB                                                                                            | 1,52739E-06 | -0,230306411 | 0,078 | 0,152 | 0,032229488 | 0,852453822   | 1,173084071     | 0,513157895     |
| SLC30A1                                                                                         | 3,98135E-06 | -0,230424789 | 0,033 | 0,085 | 0,084010436 | 0,852383878   | 1,173180331     | 0,388235294     |
| SRP68                                                                                           | 6,32851E-06 | -0,230449062 | 0,042 | 0,096 | 0,133537987 | 0,852369537   | 1,17320007      | 0,4375          |
| SPATA6                                                                                          | 1,61536E-07 | -0,230615725 | 0,217 | 0,328 | 0,003408561 | 0,852271075   | 1,173335608     | 0,661585366     |
| NR2C1                                                                                           | 0,000664736 | -0,230733735 | 0,041 | 0,079 | 1           | 0,852201364   | 1,173431589     | 0,518987342     |
| RNF38                                                                                           | 0,005771456 | -0,23099244  | 0,062 | 0,096 | 1           | 0,85204856    | 1,173642028     | 0,645833333     |
| DPYD                                                                                            | 2,08786E-06 | -0,231353275 | 0,028 | 0,08  | 0,044055886 | 0,851835479   | 1,173935607     | 0,35            |
| BNIP2                                                                                           | 0,000191509 | -0,231479727 | 0,121 | 0,18  | 1           | 0,851760819   | 1,174038507     | 0,672222222     |
| TRAPPC5                                                                                         | 0,12862883  | -0,232050743 | 0,083 | 0,1   | 1           | 0,85142376    | 1,174503281     | 0,83            |
| MINDY2                                                                                          | 8,53989E-08 | -0,232123144 | 0,135 | 0,236 | 0,001802003 | 0,851381033   | 1,174562224     | 0,572033898     |
| RANBP3                                                                                          | 0,000694041 | -0,232151869 | 0,038 | 0,076 | 1           | 0,851364082   | 1,174585611     | 0,5             |
| GGNBP2                                                                                          | 1,89816E-05 | -0,232487801 | 0,158 | 0,235 | 0,400531227 | 0,851165865   | 1,174859145     | 0,672340426     |
| CHKB                                                                                            | 0,017450472 | -0,232683195 | 0,056 | 0,083 | 1           | 0,851050593   | 1,175018275     | 0,674698795     |
| FAM178B                                                                                         | 4,21802E-05 | -0,232884386 | 0,008 | 0,038 | 0,890044948 | 0,850931919   | 1,175182148     | 0,210526316     |
| STOX2                                                                                           | 2,54215E-09 | -0,23330215  | 0,031 | 0,106 | 5,3642E-05  | 0,850685548   | 1,175522497     | 0,29245283      |
| TTLL3                                                                                           | 0,000690304 | -0,233302852 | 0,044 | 0,084 | 1           | 0,850685134   | 1,17552307      | 0,523809524     |
| GTF2IRD2                                                                                        | 0,003945644 | -0,233593888 | 0,04  | 0,071 | 1           | 0,850513542   | 1,175760232     | 0,563380282     |
| PSMD9                                                                                           | 0,019698633 | -0,233675889 | 0,147 | 0,179 | 1           | 0,850465201   | 1,175827063     | 0,82122905      |
| SDHD                                                                                            | 1,79517E-08 | -0,23380432  | 0,122 | 0,224 | 0,000378798 | 0,850389495   | 1,175931742     | 0,544642857     |
| REC8                                                                                            | 2,59609E-05 | -0,23389512  | 0,023 | 0,065 | 0,547801163 | 0,850335975   | 1,176005755     | 0,353846154     |
| NEIL1                                                                                           | 3,03435E-08 | -0,233995028 | 0,005 | 0,047 | 0,000640278 | 0,850277091   | 1,176087197     | 0,106382979     |
| PDXP                                                                                            | 0,01862651  | -0,23405952  | 0,042 | 0,066 | 1           | 0,850239082   | 1,176139772     | 0,636363636     |
| DBP                                                                                             | 0,000292362 | -0,234314053 | 0,029 | 0,066 | 1           | 0,850089088   | 1,176347295     | 0,439393939     |
| DNAJA4                                                                                          | 0,001494413 | -0,234416533 | 0,04  | 0,075 | 1           | 0,850028706   | 1,176430859     | 0,533333333     |
| FNDC3A                                                                                          | 2,37141E-05 | -0,234443762 | 0,164 | 0,24  | 0,500390645 | 0,850012662   | 1,176453063     | 0,683333333     |
| EPHB3                                                                                           | 2,28397E-06 | -0,23465778  | 0,022 | 0,071 | 0,04819413  | 0,849886576   | 1,176627597     | 0,309859155     |
| ZCCHC3                                                                                          | 0,00013538  | -0,234674884 | 0,035 | 0,077 | 1           | 0,8498765     | 1,176641547     | 0,454545455     |
| MDK                                                                                             | 0,001335746 | -0,234812092 | 0,139 | 0,195 | 1           | 0,849795676   | 1,176753458     | 0,712820513     |

Supplementary Table 5

| Differentially expressed genes_total calculation_ comparing SC-Keloid vs. (SC-Myel, SC-Nonmyel) |             |              |       |       |             |               |                 |                 |
|-------------------------------------------------------------------------------------------------|-------------|--------------|-------|-------|-------------|---------------|-----------------|-----------------|
| gene                                                                                            | p_val       | avg_log2FC   | pct.1 | pct.2 | p_val_adj   | Foldchange_UP | Foldchange_DOWN | Ratio_pct1_pct2 |
| PPA1                                                                                            | 8,70682E-05 | -0,235178294 | 0,177 | 0,248 | 1           | 0,849579998   | 1,177052193     | 0,713709677     |
| DNAJC6                                                                                          | 2,75558E-10 | -0,23539347  | 0,007 | 0,064 | 5,81456E-06 | 0,849453294   | 1,177227762     | 0,109375        |
| TRIM56                                                                                          | 1,94815E-06 | -0,23636686  | 0,047 | 0,11  | 0,041107946 | 0,848880359   | 1,178022308     | 0,427272727     |
| EHBP1L1                                                                                         | 0,000600797 | -0,236638227 | 0,052 | 0,095 | 1           | 0,848720702   | 1,178243912     | 0,547368421     |
| TJP2                                                                                            | 1,844E-09   | -0,236698167 | 0,001 | 0,045 | 3,89103E-05 | 0,848685441   | 1,178292866     | 0,022222222     |
| PTBP2                                                                                           | 1,13676E-09 | -0,236957634 | 0,078 | 0,179 | 2,39868E-05 | 0,84853282    | 1,178504799     | 0,43575419      |
| RAP2A                                                                                           | 5,52749E-07 | -0,237045439 | 0,075 | 0,149 | 0,011663554 | 0,848481178   | 1,178576528     | 0,503355705     |
| AK3                                                                                             | 4,78035E-09 | -0,237156229 | 0,109 | 0,212 | 0,00010087  | 0,848416022   | 1,178667038     | 0,514150943     |
| RNF168                                                                                          | 6,90371E-05 | -0,237467895 | 0,068 | 0,122 | 1           | 0,848232758   | 1,178921694     | 0,557377049     |
| NANOS1                                                                                          | 1,50469E-08 | -0,237986657 | 0,003 | 0,046 | 0,000317504 | 0,847927807   | 1,179345685     | 0,065217391     |
| CENATAC                                                                                         | 7,56144E-06 | -0,238299438 | 0,043 | 0,099 | 0,159553861 | 0,847743993   | 1,179601399     | 0,434343434     |
| ALDOC                                                                                           | 0,000755744 | -0,238639518 | 0,017 | 0,046 | 1           | 0,847544182   | 1,179879493     | 0,369565217     |
| FLCN                                                                                            | 3,01238E-06 | -0,238892089 | 0,024 | 0,073 | 0,063564308 | 0,847395816   | 1,180086072     | 0,328767123     |
| FLNB                                                                                            | 0,010745316 | -0,238935726 | 0,072 | 0,106 | 1           | 0,847370186   | 1,180121766     | 0,679245283     |
| ANKRD18A                                                                                        | 6,41652E-07 | -0,239489706 | 0     | 0,028 | 0,01353949  | 0,847044866   | 1,180575008     | 0               |
| CXCL3                                                                                           | 7,6069E-05  | -0,239498069 | 0,017 | 0,053 | 1           | 0,847039957   | 1,180581851     | 0,320754717     |
| HSF2                                                                                            | 8,65823E-08 | -0,239524568 | 0,041 | 0,109 | 0,001826973 | 0,847024398   | 1,180603536     | 0,376146789     |
| ZNF800                                                                                          | 0,002355811 | -0,239635848 | 0,079 | 0,121 | 1           | 0,846959067   | 1,180694603     | 0,652892562     |
| PAX3                                                                                            | 5,41238E-06 | -0,239711913 | 0,075 | 0,141 | 0,114206627 | 0,846914413   | 1,180756856     | 0,531914894     |
| CTNNA1                                                                                          | 2,83653E-11 | -0,240027311 | 0,423 | 0,65  | 5,98536E-07 | 0,846729283   | 1,181015019     | 0,650769231     |
| PLK3                                                                                            | 0,001069049 | -0,240135673 | 0,056 | 0,096 | 1           | 0,846665687   | 1,181103729     | 0,583333333     |
| IRF2BPL                                                                                         | 2,3352E-05  | -0,240706522 | 0,099 | 0,167 | 0,492749858 | 0,846330743   | 1,181571163     | 0,592814371     |
| ATP8A1                                                                                          | 9,83537E-11 | -0,240776935 | 0,009 | 0,072 | 2,07536E-06 | 0,846289437   | 1,181628833     | 0,125           |
| ZNF704                                                                                          | 4,30207E-11 | -0,240859462 | 0,013 | 0,081 | 9,07779E-07 | 0,846241028   | 1,181696428     | 0,160493827     |
| DDX17                                                                                           | 6,95944E-10 | -0,240920372 | 0,411 | 0,592 | 1,46851E-05 | 0,846205301   | 1,18174632      | 0,694256757     |
| SP4                                                                                             | 2,02531E-07 | -0,241268921 | 0,014 | 0,062 | 0,004273606 | 0,846000886   | 1,182031859     | 0,225806452     |
| TMEM132A                                                                                        | 0,005136754 | -0,241699874 | 0,072 | 0,109 | 1           | 0,845748211   | 1,182385001     | 0,660550459     |
| AC012368.1                                                                                      | 6,15919E-10 | -0,241739779 | 0,002 | 0,05  | 1,29965E-05 | 0,845724818   | 1,182417707     | 0,04            |
| EXOC3                                                                                           | 0,001458065 | -0,241774453 | 0,069 | 0,11  | 1           | 0,845704492   | 1,182446125     | 0,627272727     |
| PALS1                                                                                           | 9,74298E-09 | -0,241830114 | 0,044 | 0,122 | 0,000205587 | 0,845671865   | 1,182491746     | 0,360655738     |

Supplementary Table 5

| Differentially expressed genes_total calculation_ comparing SC-Keloid vs. (SC-Myel, SC-Nonmyel) |             |              |       |       |             |               |                 |                 |
|-------------------------------------------------------------------------------------------------|-------------|--------------|-------|-------|-------------|---------------|-----------------|-----------------|
| gene                                                                                            | p_val       | avg_log2FC   | pct.1 | pct.2 | p_val_adj   | Foldchange_UP | Foldchange_DOWN | Ratio_pct1_pct2 |
| TCEAL1                                                                                          | 0,000438199 | -0,241966536 | 0,077 | 0,126 | 1           | 0,845591901   | 1,182603569     | 0,611111111     |
| GAL3ST1                                                                                         | 1,69662E-08 | -0,241973097 | 0,027 | 0,092 | 0,000358003 | 0,845588056   | 1,182608947     | 0,293478261     |
| SIK2                                                                                            | 3,73765E-09 | -0,24219981  | 0,027 | 0,096 | 7,88682E-05 | 0,845455186   | 1,182794803     | 0,28125         |
| PIK3R3                                                                                          | 4,03349E-05 | -0,24291367  | 0,035 | 0,081 | 0,851106705 | 0,845036949   | 1,183380207     | 0,432098765     |
| FAM241A                                                                                         | 2,52198E-07 | -0,242942532 | 0,021 | 0,075 | 0,005321629 | 0,845020044   | 1,183403881     | 0,28            |
| INO80B                                                                                          | 0,001889765 | -0,242942869 | 0,038 | 0,072 | 1           | 0,845019847   | 1,183404158     | 0,527777778     |
| SYNGR2                                                                                          | 5,41619E-07 | -0,243205071 | 0,033 | 0,091 | 0,011428705 | 0,844866283   | 1,183619255     | 0,362637363     |
| RBM11                                                                                           | 2,00813E-06 | -0,243255262 | 0,037 | 0,095 | 0,042373578 | 0,84483689    | 1,183660434     | 0,389473684     |
| DAAM2                                                                                           | 1,62714E-05 | -0,243641174 | 0,064 | 0,126 | 0,343342229 | 0,844610932   | 1,183977097     | 0,507936508     |
| CMTM7                                                                                           | 2,65585E-05 | -0,243651768 | 0,02  | 0,06  | 0,560409964 | 0,84460473    | 1,183985792     | 0,333333333     |
| PSMA6                                                                                           | 0,0093922   | -0,243662958 | 0,109 | 0,148 | 1           | 0,844598179   | 1,183994975     | 0,736486486     |
| PMAIP1                                                                                          | 0,001622321 | -0,244118546 | 0,033 | 0,065 | 1           | 0,844331506   | 1,184368927     | 0,507692308     |
| PPP2R3A                                                                                         | 0,000272687 | -0,244207337 | 0,079 | 0,133 | 1           | 0,844279543   | 1,184441822     | 0,593984962     |
| KIF13A                                                                                          | 0,00025173  | -0,244247968 | 0,049 | 0,094 | 1           | 0,844255766   | 1,18447518      | 0,521276596     |
| CCDC28A                                                                                         | 0,000293882 | -0,244415799 | 0,044 | 0,087 | 1           | 0,844157558   | 1,18461298      | 0,505747126     |
| ZEB2-AS1                                                                                        | 1,26933E-07 | -0,244935239 | 0,012 | 0,06  | 0,002678406 | 0,843853675   | 1,185039574     | 0,2             |
| HLA-DMA                                                                                         | 1,77174E-07 | -0,24494368  | 0,008 | 0,052 | 0,003738546 | 0,843848738   | 1,185046508     | 0,153846154     |
| CALCOCO2                                                                                        | 1,43278E-06 | -0,245196584 | 0,087 | 0,163 | 0,030233043 | 0,843700824   | 1,185254264     | 0,533742331     |
| ARHGEF6                                                                                         | 6,26647E-07 | -0,245342236 | 0,031 | 0,09  | 0,013222873 | 0,84361565    | 1,185373932     | 0,344444444     |
| UPK3BL1                                                                                         | 0,002359069 | -0,24542622  | 0,036 | 0,068 | 1           | 0,843566542   | 1,185442939     | 0,529411765     |
| MTA1                                                                                            | 0,003644036 | -0,246291851 | 0,078 | 0,117 | 1           | 0,843060545   | 1,186154429     | 0,666666667     |
| SRSF1                                                                                           | 2,27283E-06 | -0,246623821 | 0,146 | 0,232 | 0,047959085 | 0,842866576   | 1,186427399     | 0,629310345     |
| LRRC7                                                                                           | 9,366E-08   | -0,246673875 | 0,016 | 0,069 | 0,00197632  | 0,842837334   | 1,186468563     | 0,231884058     |
| SMG1                                                                                            | 5,75858E-09 | -0,24683841  | 0,141 | 0,258 | 0,000121512 | 0,842741216   | 1,186603884     | 0,546511628     |
| RBP7                                                                                            | 2,92751E-10 | -0,246845059 | 0,001 | 0,049 | 6,17734E-06 | 0,842737332   | 1,186609353     | 0,020408163     |
| TP53BP2                                                                                         | 1,37003E-06 | -0,246889368 | 0,071 | 0,144 | 0,028908966 | 0,84271145    | 1,186645797     | 0,493055556     |
| CLSTN1                                                                                          | 3,15193E-06 | -0,246973642 | 0,19  | 0,281 | 0,066508879 | 0,842662225   | 1,186715116     | 0,676156584     |
| CCDC9                                                                                           | 1,17115E-06 | -0,247132873 | 0,019 | 0,066 | 0,024712384 | 0,842569225   | 1,186846102     | 0,287878788     |
| OXSRI                                                                                           | 0,000121341 | -0,247446214 | 0,088 | 0,147 | 1           | 0,842386246   | 1,187103903     | 0,598639456     |
| SPINDOC                                                                                         | 1,31051E-05 | -0,247607587 | 0,023 | 0,066 | 0,276531536 | 0,842292026   | 1,187236694     | 0,348484848     |



Supplementary Table 5

| Differentially expressed genes_total calculation_ comparing SC-Keloid vs. (SC-Myel, SC-Nonmyel) |             |              |       |       |             |               |                 |                 |
|-------------------------------------------------------------------------------------------------|-------------|--------------|-------|-------|-------------|---------------|-----------------|-----------------|
| gene                                                                                            | p_val       | avg_log2FC   | pct.1 | pct.2 | p_val_adj   | Foldchange_UP | Foldchange_DOWN | Ratio_pct1_pct2 |
| STAG1                                                                                           | 1,33992E-06 | -0,247727044 | 0,095 | 0,174 | 0,028273597 | 0,842222286   | 1,187335003     | 0,545977011     |
| FZD5                                                                                            | 9,97975E-08 | -0,24791322  | 0,005 | 0,045 | 0,002105827 | 0,842113606   | 1,187488235     | 0,111111111     |
| ZRANB1                                                                                          | 0,000512349 | -0,248054577 | 0,066 | 0,113 | 1           | 0,842031099   | 1,187604592     | 0,584070796     |
| SSH1                                                                                            | 0,023642284 | -0,24816742  | 0,058 | 0,085 | 1           | 0,841965241   | 1,187697486     | 0,682352941     |
| MGAT3                                                                                           | 1,38249E-07 | -0,248194932 | 0,009 | 0,054 | 0,002917191 | 0,841949185   | 1,187720136     | 0,166666667     |
| NR6A1                                                                                           | 6,00509E-10 | -0,248479989 | 0,013 | 0,075 | 1,26713E-05 | 0,841782844   | 1,187954836     | 0,173333333     |
| TTC28                                                                                           | 9,85642E-07 | -0,248834863 | 0,02  | 0,069 | 0,020798032 | 0,841575807   | 1,188247086     | 0,289855072     |
| RAB38                                                                                           | 9,08304E-08 | -0,248872913 | 0,024 | 0,083 | 0,001916613 | 0,841553611   | 1,188278425     | 0,289156627     |
| COPS2                                                                                           | 9,98249E-10 | -0,248908954 | 0,198 | 0,328 | 2,1064E-05  | 0,841532588   | 1,188308111     | 0,603658537     |
| PDE8A                                                                                           | 0,000272167 | -0,249164329 | 0,084 | 0,138 | 1           | 0,84138364    | 1,188518474     | 0,608695652     |
| SELE                                                                                            | 6,09649E-06 | -0,249199044 | 0,02  | 0,064 | 0,128642126 | 0,841363394   | 1,188547074     | 0,3125          |
| CDKN2D                                                                                          | 0,000236838 | -0,249244234 | 0,084 | 0,138 | 1           | 0,84133704    | 1,188584304     | 0,608695652     |
| PRRT1                                                                                           | 7,30247E-06 | -0,249453602 | 0,023 | 0,069 | 0,154089357 | 0,841214952   | 1,188756807     | 0,333333333     |
| GABARAPL1                                                                                       | 4,66637E-10 | -0,249637966 | 0,045 | 0,132 | 9,8465E-06  | 0,841107459   | 1,188908729     | 0,340909091     |
| SNTB2                                                                                           | 1,48439E-06 | -0,249714862 | 0,056 | 0,122 | 0,031322057 | 0,841062628   | 1,188972101     | 0,459016393     |
| CGAS                                                                                            | 1,11942E-05 | -0,249777024 | 0,036 | 0,087 | 0,236209566 | 0,84102639    | 1,189023331     | 0,413793103     |
| DENND5B                                                                                         | 6,96697E-05 | -0,249828197 | 0,02  | 0,057 | 1           | 0,840996559   | 1,189065507     | 0,350877193     |
| SMG7                                                                                            | 0,000469772 | -0,249954378 | 0,05  | 0,094 | 1           | 0,840923007   | 1,189169509     | 0,531914894     |
| HR                                                                                              | 1,83249E-06 | -0,249955766 | 0,03  | 0,084 | 0,038667451 | 0,840922198   | 1,189170654     | 0,357142857     |
| PTAR1                                                                                           | 1,26356E-07 | -0,250229054 | 0,121 | 0,217 | 0,002666248 | 0,840762919   | 1,189395938     | 0,557603687     |
| IFI27                                                                                           | 0,03794149  | -0,250253101 | 0,18  | 0,223 | 1           | 0,840748904   | 1,189415763     | 0,807174888     |
| SUN1                                                                                            | 0,000122542 | -0,250293796 | 0,113 | 0,176 | 1           | 0,840725189   | 1,189449315     | 0,642045455     |
| CNNM4                                                                                           | 3,89031E-07 | -0,25033614  | 0,015 | 0,062 | 0,008208939 | 0,840700514   | 1,189484226     | 0,241935484     |
| ZNF141                                                                                          | 7,47014E-05 | -0,250405222 | 0,024 | 0,064 | 1           | 0,840660258   | 1,189541185     | 0,375           |
| TPI1                                                                                            | 7,09062E-10 | -0,250506212 | 0,346 | 0,528 | 1,49619E-05 | 0,840601414   | 1,189624457     | 0,65530303      |
| MAGI2                                                                                           | 3,80513E-05 | -0,250610806 | 0,054 | 0,109 | 0,8029199   | 0,840540473   | 1,189710706     | 0,495412844     |
| CHMP4B                                                                                          | 2,72729E-07 | -0,250991118 | 0,162 | 0,259 | 0,005754847 | 0,840318925   | 1,19002437      | 0,625482625     |
| CASP4                                                                                           | 0,05576291  | -0,251041688 | 0,059 | 0,081 | 1           | 0,840289471   | 1,190066084     | 0,728395062     |
| SLC2A3                                                                                          | 2,76832E-06 | -0,251164731 | 0,068 | 0,136 | 0,058414229 | 0,840217808   | 1,190167585     | 0,5             |
| HNRNPUL1                                                                                        | 0,000590131 | -0,251167638 | 0,168 | 0,227 | 1           | 0,840216115   | 1,190169984     | 0,740088106     |

Supplementary Table 5

| Differentially expressed genes_total calculation_ comparing SC-Keloid vs. (SC-Myel, SC-Nonmyel) |             |              |       |       |             |               |                 |                 |
|-------------------------------------------------------------------------------------------------|-------------|--------------|-------|-------|-------------|---------------|-----------------|-----------------|
| gene                                                                                            | p_val       | avg_log2FC   | pct.1 | pct.2 | p_val_adj   | Foldchange_UP | Foldchange_DOWN | Ratio_pct1_pct2 |
| SRPK2                                                                                           | 5,79054E-05 | -0,251188604 | 0,115 | 0,18  | 1           | 0,840203905   | 1,19018728      | 0,638888889     |
| ARF1                                                                                            | 2,72674E-11 | -0,251448472 | 0,356 | 0,559 | 5,7537E-07  | 0,840052575   | 1,190401683     | 0,636851521     |
| MT-ND5                                                                                          | 4,44596E-10 | -0,251474871 | 0,37  | 0,554 | 9,38141E-06 | 0,840037204   | 1,190423466     | 0,667870036     |
| YTHDF1                                                                                          | 1,32235E-05 | -0,251550634 | 0,05  | 0,106 | 0,279030001 | 0,83999309    | 1,190485983     | 0,471698113     |
| NXT1                                                                                            | 3,81321E-05 | -0,251607634 | 0,113 | 0,179 | 0,804624583 | 0,839959904   | 1,190533019     | 0,631284916     |
| SRGN                                                                                            | 1,79349E-08 | -0,251666293 | 0,023 | 0,087 | 0,000378444 | 0,839925752   | 1,190581427     | 0,264367816     |
| APOA1                                                                                           | 1,02412E-10 | -0,251728406 | 0,002 | 0,054 | 2,16099E-06 | 0,839889591   | 1,190632687     | 0,037037037     |
| CCDC126                                                                                         | 8,15828E-09 | -0,251783491 | 0,054 | 0,137 | 0,000172148 | 0,839857523   | 1,190678148     | 0,394160584     |
| SLC35D2                                                                                         | 0,008998233 | -0,251991801 | 0,056 | 0,087 | 1           | 0,839736265   | 1,190850082     | 0,643678161     |
| SHROOM1                                                                                         | 3,20961E-07 | -0,252107714 | 0,003 | 0,039 | 0,006772595 | 0,839668799   | 1,190945764     | 0,076923077     |
| SDC4                                                                                            | 0,000109657 | -0,252411615 | 0,087 | 0,145 | 1           | 0,839491943   | 1,191196661     | 0,6             |
| YTHDC1                                                                                          | 7,22492E-12 | -0,252769452 | 0,163 | 0,308 | 1,52453E-07 | 0,839283747   | 1,191492154     | 0,529220779     |
| AKAP17A                                                                                         | 2,7407E-06  | -0,252856402 | 0,069 | 0,136 | 0,057831454 | 0,839233166   | 1,191563967     | 0,507352941     |
| WARS1                                                                                           | 0,006130284 | -0,252984388 | 0,114 | 0,155 | 1           | 0,839158718   | 1,191669679     | 0,735483871     |
| RLIM                                                                                            | 1,93246E-05 | -0,253026387 | 0,049 | 0,104 | 0,407767421 | 0,839134289   | 1,191704371     | 0,471153846     |
| SDR42E2                                                                                         | 9,40223E-07 | -0,253059618 | 0,012 | 0,054 | 0,019839651 | 0,839114961   | 1,191731821     | 0,222222222     |
| PPFIBP2                                                                                         | 1,25555E-06 | -0,253138444 | 0,027 | 0,08  | 0,026493351 | 0,839069114   | 1,191796937     | 0,3375          |
| ANGPTL7                                                                                         | 0,010281572 | -0,253259193 | 0,056 | 0,088 | 1           | 0,83899889    | 1,19189669      | 0,636363636     |
| NOTCH1                                                                                          | 0,0001606   | -0,253264827 | 0,107 | 0,167 | 1           | 0,838995613   | 1,191901345     | 0,640718563     |
| RAB4A                                                                                           | 3,52456E-07 | -0,253578751 | 0,108 | 0,193 | 0,007437168 | 0,838813071   | 1,192160726     | 0,559585492     |
| SNX15                                                                                           | 0,005079779 | -0,253631431 | 0,015 | 0,037 | 1           | 0,838782443   | 1,192204258     | 0,405405405     |
| ARL8B                                                                                           | 0,000100132 | -0,253849195 | 0,085 | 0,141 | 1           | 0,838655845   | 1,192384226     | 0,602836879     |
| FRMD8                                                                                           | 2,50861E-06 | -0,254198261 | 0,063 | 0,129 | 0,052934251 | 0,838452953   | 1,192672763     | 0,488372093     |
| FEM1C                                                                                           | 9,43874E-08 | -0,254204682 | 0,095 | 0,183 | 0,001991668 | 0,838449221   | 1,192678071     | 0,519125683     |
| PTK2                                                                                            | 7,56928E-09 | -0,254238992 | 0,178 | 0,296 | 0,000159719 | 0,838429282   | 1,192706435     | 0,601351351     |
| ERBB3                                                                                           | 2,2434E-07  | -0,254292854 | 0,361 | 0,503 | 0,004733796 | 0,83839798    | 1,192750965     | 0,717693837     |
| TCTN3                                                                                           | 0,000111387 | -0,254337773 | 0,061 | 0,113 | 1           | 0,838371876   | 1,192788103     | 0,539823009     |
| WEE1                                                                                            | 1,76554E-07 | -0,254432804 | 0,07  | 0,148 | 0,003725461 | 0,838316655   | 1,192866675     | 0,472972973     |
| B4GALT5                                                                                         | 0,000264764 | -0,254691508 | 0,057 | 0,104 | 1           | 0,838166341   | 1,193080599     | 0,548076923     |
| CHIC2                                                                                           | 3,68175E-05 | -0,254840772 | 0,086 | 0,149 | 0,776886737 | 0,838079627   | 1,193204044     | 0,577181208     |

Supplementary Table 5

| Differentially expressed genes_total calculation_ comparing SC-Keloid vs. (SC-Myel, SC-Nonmyel) |             |              |       |       |             |               |                 |                 |
|-------------------------------------------------------------------------------------------------|-------------|--------------|-------|-------|-------------|---------------|-----------------|-----------------|
| gene                                                                                            | p_val       | avg_log2FC   | pct.1 | pct.2 | p_val_adj   | Foldchange_UP | Foldchange_DOWN | Ratio_pct1_pct2 |
| NR4A3                                                                                           | 1,65699E-09 | -0,254928399 | 0,007 | 0,06  | 3,49642E-05 | 0,838028725   | 1,193276519     | 0,116666667     |
| RFX2                                                                                            | 5,13241E-06 | -0,255069968 | 0,022 | 0,068 | 0,108298917 | 0,837946495   | 1,193393619     | 0,323529412     |
| UBE2G1                                                                                          | 0,000324314 | -0,25521236  | 0,093 | 0,145 | 1           | 0,837863795   | 1,193511411     | 0,64137931      |
| ERBIN                                                                                           | 2,10019E-06 | -0,255332496 | 0,15  | 0,239 | 0,044316099 | 0,837794027   | 1,193610802     | 0,627615063     |
| ERRFI1                                                                                          | 0,000416595 | -0,255513916 | 0,056 | 0,1   | 1           | 0,83768868    | 1,193760908     | 0,56            |
| OBSL1                                                                                           | 2,28928E-06 | -0,255555814 | 0,043 | 0,102 | 0,048306069 | 0,837664353   | 1,193795578     | 0,421568627     |
| TRHDE                                                                                           | 3,53636E-09 | -0,255910294 | 0,001 | 0,043 | 7,46207E-05 | 0,837458559   | 1,194088937     | 0,023255814     |
| SYP                                                                                             | 0,000104645 | -0,255922406 | 0,02  | 0,056 | 1           | 0,837451528   | 1,194098962     | 0,357142857     |
| CAPN7                                                                                           | 3,33159E-06 | -0,255935449 | 0,064 | 0,13  | 0,070299796 | 0,837443957   | 1,194109758     | 0,492307692     |
| VPS13A                                                                                          | 7,65421E-06 | -0,256311855 | 0,043 | 0,099 | 0,161511382 | 0,837225492   | 1,194421347     | 0,434343434     |
| RBM42                                                                                           | 6,83375E-05 | -0,256443983 | 0,123 | 0,189 | 1           | 0,837148819   | 1,194530742     | 0,650793651     |
| CRIM1                                                                                           | 1,36941E-06 | -0,256467302 | 0,049 | 0,114 | 0,028895817 | 0,837135288   | 1,19455005      | 0,429824561     |
| CA2                                                                                             | 6,20194E-05 | -0,25661019  | 0,012 | 0,043 | 1           | 0,83705238    | 1,194668367     | 0,279069767     |
| TMEM80                                                                                          | 0,000368333 | -0,256736926 | 0,052 | 0,096 | 1           | 0,836978851   | 1,194773319     | 0,541666667     |
| ILF3-DT                                                                                         | 5,33132E-05 | -0,25688309  | 0,045 | 0,095 | 1           | 0,836894058   | 1,194894372     | 0,473684211     |
| TARDBP                                                                                          | 8,75394E-10 | -0,256917321 | 0,101 | 0,209 | 1,84717E-05 | 0,836874201   | 1,194922723     | 0,483253589     |
| MICA                                                                                            | 1,2873E-05  | -0,256920514 | 0,061 | 0,119 | 0,271632606 | 0,836872349   | 1,194925368     | 0,512605042     |
| EPB41L4B                                                                                        | 2,44587E-11 | -0,257050777 | 0,001 | 0,054 | 5,16102E-07 | 0,83679679    | 1,195033264     | 0,018518519     |
| CARS1                                                                                           | 1,94885E-06 | -0,257053289 | 0,069 | 0,137 | 0,041122744 | 0,836795334   | 1,195035345     | 0,503649635     |
| DDX24                                                                                           | 9,21112E-11 | -0,257394468 | 0,263 | 0,411 | 1,94364E-06 | 0,836597465   | 1,19531799      | 0,639902676     |
| MT-ATP8                                                                                         | 2,20421E-05 | -0,257422899 | 0,063 | 0,121 | 0,465109342 | 0,836580979   | 1,195341546     | 0,520661157     |
| ZCCHC2                                                                                          | 2,14181E-09 | -0,257595805 | 0,012 | 0,069 | 4,51944E-05 | 0,836480721   | 1,195484815     | 0,173913043     |
| SLFN11                                                                                          | 1,89528E-05 | -0,257794201 | 0,052 | 0,109 | 0,399922132 | 0,836365698   | 1,195649227     | 0,47706422      |
| CCDC184                                                                                         | 2,30701E-11 | -0,257967103 | 0,007 | 0,069 | 4,86802E-07 | 0,836265468   | 1,19579253      | 0,101449275     |
| MAN2B1                                                                                          | 0,249396388 | -0,258088481 | 0,051 | 0,062 | 1           | 0,836195114   | 1,195893139     | 0,822580645     |
| ZNF844                                                                                          | 7,30008E-07 | -0,258377309 | 0,009 | 0,05  | 0,015403899 | 0,836027724   | 1,196132582     | 0,18            |
| TXNRD2                                                                                          | 0,000162476 | -0,25843771  | 0,048 | 0,094 | 1           | 0,835992723   | 1,196182661     | 0,510638298     |
| THY1                                                                                            | 0,13514285  | -0,25873291  | 0,069 | 0,087 | 1           | 0,835821683   | 1,196427445     | 0,793103448     |
| BMP7                                                                                            | 8,91726E-12 | -0,25922699  | 0     | 0,053 | 1,88163E-07 | 0,835535488   | 1,196837255     | 0               |
| KLF7                                                                                            | 9,55583E-05 | -0,259439742 | 0,058 | 0,11  | 1           | 0,835412281   | 1,197013765     | 0,527272727     |

Supplementary Table 5

| Differentially expressed genes_total calculation_ comparing SC-Keloid vs. (SC-Myel, SC-Nonmyel) |             |              |       |       |             |               |                 |                 |
|-------------------------------------------------------------------------------------------------|-------------|--------------|-------|-------|-------------|---------------|-----------------|-----------------|
| gene                                                                                            | p_val       | avg_log2FC   | pct.1 | pct.2 | p_val_adj   | Foldchange_UP | Foldchange_DOWN | Ratio_pct1_pct2 |
| ADIPOR2                                                                                         | 2,17529E-06 | -0,259989937 | 0,052 | 0,115 | 0,045900853 | 0,835093744   | 1,197470352     | 0,452173913     |
| PIAS4                                                                                           | 1,11208E-05 | -0,260090443 | 0,027 | 0,073 | 0,234660118 | 0,835035569   | 1,197553778     | 0,369863014     |
| NXPE3                                                                                           | 5,78604E-07 | -0,260343317 | 0,065 | 0,138 | 0,012209123 | 0,834889218   | 1,197763702     | 0,471014493     |
| LRR8C                                                                                           | 1,28836E-11 | -0,260464641 | 0,009 | 0,076 | 2,71858E-07 | 0,83481901    | 1,197864432     | 0,118421053     |
| CFAP20                                                                                          | 0,007008195 | -0,260641017 | 0,162 | 0,204 | 1           | 0,834716956   | 1,198010885     | 0,794117647     |
| BOLA2                                                                                           | 0,000467405 | -0,260801963 | 0,027 | 0,061 | 1           | 0,834623841   | 1,198144542     | 0,442622951     |
| MAP3K3                                                                                          | 1,75392E-05 | -0,260944058 | 0,042 | 0,094 | 0,370094755 | 0,834541641   | 1,198262557     | 0,446808511     |
| NT5DC2                                                                                          | 0,020214634 | -0,261007176 | 0,155 | 0,19  | 1           | 0,83450513    | 1,198314982     | 0,815789474     |
| AHDC1                                                                                           | 1,29144E-05 | -0,261020278 | 0,087 | 0,155 | 0,272507779 | 0,834497552   | 1,198325865     | 0,561290323     |
| RIMKLB                                                                                          | 2,71925E-06 | -0,261246893 | 0,03  | 0,083 | 0,057378802 | 0,834366481   | 1,198514109     | 0,361445783     |
| ILF2                                                                                            | 2,85345E-06 | -0,261387531 | 0,211 | 0,301 | 0,060210615 | 0,834285149   | 1,19863095      | 0,700996678     |
| PRRC2A                                                                                          | 4,97564E-05 | -0,26149945  | 0,112 | 0,176 | 1           | 0,83422043    | 1,198723939     | 0,636363636     |
| EPM2AIP1                                                                                        | 6,43737E-05 | -0,261579711 | 0,071 | 0,129 | 1           | 0,834174022   | 1,198790628     | 0,550387597     |
| TFG                                                                                             | 1,47152E-08 | -0,261606898 | 0,176 | 0,286 | 0,000310505 | 0,834158302   | 1,19881322      | 0,615384615     |
| MAP1A                                                                                           | 0,000215552 | -0,261765487 | 0,081 | 0,134 | 1           | 0,834066612   | 1,198945007     | 0,604477612     |
| LINC00342                                                                                       | 2,28665E-05 | -0,262332801 | 0,016 | 0,054 | 0,482505173 | 0,833738695   | 1,199416564     | 0,296296296     |
| PTPN23                                                                                          | 0,008604307 | -0,262400534 | 0,034 | 0,06  | 1           | 0,833699553   | 1,199472876     | 0,566666667     |
| TMEM9                                                                                           | 2,73306E-05 | -0,262669165 | 0,073 | 0,133 | 0,5767032   | 0,833544331   | 1,19969624      | 0,54887218      |
| LCAT                                                                                            | 0,002858618 | -0,262756486 | 0,058 | 0,095 | 1           | 0,833493881   | 1,199768855     | 0,610526316     |
| ABHD3                                                                                           | 3,26138E-06 | -0,263072511 | 0,024 | 0,073 | 0,068818314 | 0,833311323   | 1,200031696     | 0,328767123     |
| RIPK4                                                                                           | 2,97531E-08 | -0,263336475 | 0,003 | 0,045 | 0,000627821 | 0,83315887    | 1,20025128      | 0,066666667     |
| BCLAF1                                                                                          | 1,19009E-09 | -0,263366492 | 0,225 | 0,357 | 2,51122E-05 | 0,833141535   | 1,200276253     | 0,630252101     |
| TAB2                                                                                            | 5,67463E-08 | -0,263521597 | 0,108 | 0,202 | 0,001197404 | 0,833051968   | 1,200405302     | 0,534653465     |
| USP12                                                                                           | 3,59133E-08 | -0,26376796  | 0,063 | 0,144 | 0,000757806 | 0,832909723   | 1,200610308     | 0,4375          |
| TNRC6B                                                                                          | 5,9905E-10  | -0,264048668 | 0,237 | 0,381 | 1,26406E-05 | 0,832747678   | 1,200843937     | 0,622047244     |
| PDE4D                                                                                           | 4,67085E-07 | -0,264052289 | 0,023 | 0,077 | 0,009855967 | 0,832745589   | 1,20084695      | 0,298701299     |
| CCNG1                                                                                           | 7,09428E-06 | -0,264347283 | 0,035 | 0,087 | 0,14969637  | 0,832575331   | 1,201092517     | 0,402298851     |
| CITED4                                                                                          | 3,71797E-06 | -0,264352499 | 0,009 | 0,046 | 0,078452942 | 0,832572321   | 1,20109686      | 0,195652174     |
| BRD8                                                                                            | 0,000325288 | -0,264402043 | 0,061 | 0,109 | 1           | 0,832543729   | 1,201138108     | 0,559633028     |
| MGAT4C                                                                                          | 1,02243E-09 | -0,2646296   | 0,001 | 0,046 | 2,15742E-05 | 0,832412422   | 1,201327579     | 0,02173913      |

Supplementary Table 5

| Differentially expressed genes_total calculation_ comparing SC-Keloid vs. (SC-Myel, SC-Nonmyel) |             |              |       |       |             |               |                 |                 |
|-------------------------------------------------------------------------------------------------|-------------|--------------|-------|-------|-------------|---------------|-----------------|-----------------|
| gene                                                                                            | p_val       | avg_log2FC   | pct.1 | pct.2 | p_val_adj   | Foldchange_UP | Foldchange_DOWN | Ratio_pct1_pct2 |
| TMEM100                                                                                         | 0,00016446  | -0,264717593 | 0,019 | 0,053 | 1           | 0,832361653   | 1,201400853     | 0,358490566     |
| GRIK2                                                                                           | 0,001393547 | -0,264878608 | 0,056 | 0,096 | 1           | 0,832268761   | 1,201534945     | 0,583333333     |
| SNHG18                                                                                          | 6,54251E-10 | -0,264918464 | 0,017 | 0,083 | 1,38054E-05 | 0,832245769   | 1,201568139     | 0,204819277     |
| BSCL2                                                                                           | 0,002012943 | -0,265420318 | 0,049 | 0,084 | 1           | 0,831956315   | 1,201986188     | 0,583333333     |
| PPP1CC                                                                                          | 5,57712E-07 | -0,265529116 | 0,147 | 0,239 | 0,011768286 | 0,831893577   | 1,202076837     | 0,615062762     |
| PTGES3                                                                                          | 1,79474E-12 | -0,266313496 | 0,346 | 0,535 | 3,78709E-08 | 0,831441408   | 1,202730572     | 0,646728972     |
| TARS3                                                                                           | 4,39931E-07 | -0,266430874 | 0,1   | 0,185 | 0,009282986 | 0,831373764   | 1,202828431     | 0,540540541     |
| HDAC11                                                                                          | 2,16638E-09 | -0,266762568 | 0,036 | 0,113 | 4,57128E-05 | 0,831182642   | 1,203105009     | 0,318584071     |
| GATAD2B                                                                                         | 7,57252E-07 | -0,26679207  | 0,093 | 0,172 | 0,015978785 | 0,831165646   | 1,203129611     | 0,540697674     |
| EXOC1                                                                                           | 0,662309137 | -0,267011243 | 0,09  | 0,092 | 1           | 0,831039385   | 1,203312403     | 0,97826087      |
| PARP10                                                                                          | 0,002288484 | -0,267320657 | 0,052 | 0,088 | 1           | 0,830861172   | 1,203570505     | 0,590909091     |
| ITPR2                                                                                           | 2,42701E-05 | -0,267563853 | 0,024 | 0,068 | 0,5121244   | 0,830721125   | 1,203773408     | 0,352941176     |
| SHF                                                                                             | 1,79889E-07 | -0,26756738  | 0,012 | 0,058 | 0,00379583  | 0,830719094   | 1,203776352     | 0,206896552     |
| PRKD1                                                                                           | 2,35927E-07 | -0,268438411 | 0,009 | 0,053 | 0,004978306 | 0,830217696   | 1,204503354     | 0,169811321     |
| AQP3                                                                                            | 0,009040083 | -0,26844308  | 0,034 | 0,06  | 1           | 0,83021501    | 1,204507252     | 0,566666667     |
| CDKN2C                                                                                          | 1,36243E-06 | -0,268452114 | 0,105 | 0,186 | 0,028748578 | 0,830209811   | 1,204514795     | 0,564516129     |
| PACSIN3                                                                                         | 1,25705E-07 | -0,268454033 | 0,028 | 0,088 | 0,002652511 | 0,830208706   | 1,204516397     | 0,318181818     |
| MED17                                                                                           | 3,14051E-05 | -0,268455315 | 0,052 | 0,106 | 0,662678357 | 0,830207969   | 1,204517467     | 0,490566038     |
| REXO1                                                                                           | 0,00141169  | -0,268463179 | 0,049 | 0,087 | 1           | 0,830203443   | 1,204524033     | 0,563218391     |
| TIFA                                                                                            | 9,07109E-09 | -0,268583867 | 0,013 | 0,068 | 0,000191409 | 0,830133996   | 1,204624801     | 0,191176471     |
| SNHG9                                                                                           | 0,00402657  | -0,268676264 | 0,147 | 0,193 | 1           | 0,830080832   | 1,204701953     | 0,761658031     |
| SHMT1                                                                                           | 2,30951E-06 | -0,268800751 | 0,017 | 0,062 | 0,048732866 | 0,830009209   | 1,204805909     | 0,274193548     |
| PHLDB2                                                                                          | 2,50211E-05 | -0,26902206  | 0,092 | 0,157 | 0,527969788 | 0,829881896   | 1,204990741     | 0,585987261     |
| OSBPL11                                                                                         | 0,040479012 | -0,269376842 | 0,043 | 0,064 | 1           | 0,82967784    | 1,205287103     | 0,671875        |
| ZNF667-AS1                                                                                      | 2,70546E-07 | -0,269395524 | 0,027 | 0,084 | 0,005708794 | 0,829667096   | 1,205302711     | 0,321428571     |
| UBQLN2                                                                                          | 8,00557E-05 | -0,269783212 | 0,05  | 0,099 | 1           | 0,829444174   | 1,205626649     | 0,505050505     |
| CYP51A1                                                                                         | 3,0026E-06  | -0,269858706 | 0,033 | 0,085 | 0,063357888 | 0,829400771   | 1,20568974      | 0,388235294     |
| TNFRSF14                                                                                        | 2,39815E-05 | -0,270226458 | 0,052 | 0,107 | 0,506032844 | 0,829189379   | 1,205997117     | 0,485981308     |
| CCSAP                                                                                           | 5,81535E-09 | -0,270450768 | 0,015 | 0,073 | 0,00012271  | 0,829060467   | 1,206184639     | 0,205479452     |
| AKIRIN1                                                                                         | 2,31579E-09 | -0,270814787 | 0,086 | 0,185 | 4,88655E-05 | 0,828851306   | 1,206489021     | 0,464864865     |

Supplementary Table 5

| Differentially expressed genes_total calculation_ comparing SC-Keloid vs. (SC-Myel, SC-Nonmyel) |             |              |       |       |             |               |                 |                 |
|-------------------------------------------------------------------------------------------------|-------------|--------------|-------|-------|-------------|---------------|-----------------|-----------------|
| gene                                                                                            | p_val       | avg_log2FC   | pct.1 | pct.2 | p_val_adj   | Foldchange_UP | Foldchange_DOWN | Ratio_pct1_pct2 |
| TTR                                                                                             | 0,003876198 | -0,270834002 | 0,02  | 0,045 | 1           | 0,828840266   | 1,20650509      | 0,444444444     |
| ABHD17B                                                                                         | 5,70333E-07 | -0,270980845 | 0,021 | 0,072 | 0,012034604 | 0,828755908   | 1,206627899     | 0,291666667     |
| PDZD2                                                                                           | 6,40481E-12 | -0,27119957  | 0,005 | 0,066 | 1,35148E-07 | 0,828630271   | 1,206810848     | 0,075757576     |
| RIOK3                                                                                           | 7,96635E-07 | -0,27148273  | 0,143 | 0,235 | 0,016809785 | 0,82846765    | 1,207047734     | 0,608510638     |
| CCNG2                                                                                           | 1,01627E-07 | -0,271508091 | 0,051 | 0,125 | 0,002144424 | 0,828453087   | 1,207068953     | 0,408           |
| CXCL8                                                                                           | 1,976E-06   | -0,27151461  | 0,02  | 0,066 | 0,0416955   | 0,828449344   | 1,207074407     | 0,303030303     |
| TFE3                                                                                            | 0,001023737 | -0,271661149 | 0,055 | 0,095 | 1           | 0,8283652     | 1,207197019     | 0,578947368     |
| PM20D2                                                                                          | 4,08001E-09 | -0,271717172 | 0,021 | 0,085 | 8,60924E-05 | 0,828333033   | 1,207243898     | 0,247058824     |
| PTPN13                                                                                          | 2,25279E-10 | -0,271783788 | 0,068 | 0,167 | 4,7536E-06  | 0,828294786   | 1,207299644     | 0,407185629     |
| PALMD                                                                                           | 3,4478E-08  | -0,271837202 | 0,007 | 0,053 | 0,00072752  | 0,82826412    | 1,207344343     | 0,132075472     |
| TNRC18                                                                                          | 0,000119745 | -0,271902729 | 0,045 | 0,092 | 1           | 0,828226501   | 1,207399182     | 0,489130435     |
| ZNF462                                                                                          | 2,88132E-07 | -0,272611622 | 0,088 | 0,174 | 0,006079869 | 0,827819637   | 1,207992605     | 0,505747126     |
| PNRC2                                                                                           | 3,61502E-13 | -0,273328331 | 0,105 | 0,242 | 7,62804E-09 | 0,827408492   | 1,208592866     | 0,433884298     |
| RSBN1                                                                                           | 1,90722E-06 | -0,273362883 | 0,078 | 0,149 | 0,040244217 | 0,827388676   | 1,208621811     | 0,523489933     |
| BBC3                                                                                            | 5,3497E-06  | -0,27365404  | 0,068 | 0,132 | 0,112884007 | 0,827221714   | 1,208865753     | 0,515151515     |
| RPSA                                                                                            | 1,84996E-09 | -0,273849897 | 0,482 | 0,741 | 3,90361E-05 | 0,827109419   | 1,209029878     | 0,650472335     |
| TFAP2C                                                                                          | 2,83303E-07 | -0,274088741 | 0,037 | 0,1   | 0,005977981 | 0,826972499   | 1,209230054     | 0,37            |
| ARHGAP5-AS1                                                                                     | 1,08864E-05 | -0,27413917  | 0,015 | 0,054 | 0,229714309 | 0,826943593   | 1,209272323     | 0,277777778     |
| TNS1                                                                                            | 6,10545E-07 | -0,274169043 | 0,078 | 0,156 | 0,012883109 | 0,826926471   | 1,209297363     | 0,5             |
| SMURF1                                                                                          | 5,34228E-09 | -0,274310087 | 0,024 | 0,091 | 0,000112728 | 0,82684563    | 1,209415595     | 0,263736264     |
| CDK19                                                                                           | 7,45511E-08 | -0,27454843  | 0,041 | 0,11  | 0,001573102 | 0,826709041   | 1,209615415     | 0,372727273     |
| BRAF                                                                                            | 1,54703E-09 | -0,274767849 | 0,08  | 0,178 | 3,26438E-05 | 0,826583317   | 1,209799399     | 0,449438202     |
| TANC1                                                                                           | 4,62316E-10 | -0,274968283 | 0,113 | 0,227 | 9,75533E-06 | 0,826468487   | 1,209967489     | 0,497797357     |
| LARP4                                                                                           | 4,29854E-05 | -0,27502489  | 0,111 | 0,176 | 0,907035979 | 0,82643606    | 1,210014965     | 0,630681818     |
| SRCAP                                                                                           | 4,1311E-06  | -0,275030415 | 0,019 | 0,062 | 0,087170395 | 0,826432895   | 1,210019599     | 0,306451613     |
| GABARAPL2                                                                                       | 8,58745E-15 | -0,275276868 | 0,388 | 0,607 | 1,81204E-10 | 0,826291729   | 1,210226322     | 0,639209226     |
| ARIH1                                                                                           | 5,21383E-07 | -0,275342621 | 0,119 | 0,209 | 0,011001694 | 0,82625407    | 1,210281481     | 0,56937799      |
| EPAS1                                                                                           | 2,30085E-12 | -0,276127421 | 0,016 | 0,095 | 4,85502E-08 | 0,825804725   | 1,210940032     | 0,168421053     |
| EPHX1                                                                                           | 2,54858E-07 | -0,276137567 | 0,017 | 0,068 | 0,005377755 | 0,825798918   | 1,210948548     | 0,25            |
| H2BC15                                                                                          | 7,55747E-06 | -0,276721807 | 0,016 | 0,057 | 0,159470184 | 0,825464567   | 1,211439037     | 0,280701754     |

Supplementary Table 5

| Differentially expressed genes_total calculation_ comparing SC-Keloid vs. (SC-Myel, SC-Nonmyel) |             |              |       |       |             |               |                 |                 |
|-------------------------------------------------------------------------------------------------|-------------|--------------|-------|-------|-------------|---------------|-----------------|-----------------|
| gene                                                                                            | p_val       | avg_log2FC   | pct.1 | pct.2 | p_val_adj   | Foldchange_UP | Foldchange_DOWN | Ratio_pct1_pct2 |
| G3BP1                                                                                           | 9,81428E-08 | -0,276933608 | 0,192 | 0,297 | 0,002070912 | 0,825343389   | 1,211616901     | 0,646464646     |
| ZNF358                                                                                          | 0,000426023 | -0,277109029 | 0,084 | 0,133 | 1           | 0,82524304    | 1,211764234     | 0,631578947     |
| CAMTA1                                                                                          | 3,67264E-11 | -0,277382923 | 0,262 | 0,418 | 7,74965E-07 | 0,825086383   | 1,211994308     | 0,626794258     |
| KCNK5                                                                                           | 6,34815E-12 | -0,277393684 | 0,001 | 0,057 | 1,33952E-07 | 0,825080229   | 1,212003348     | 0,01754386      |
| GOLGA4                                                                                          | 1,26626E-08 | -0,277400581 | 0,212 | 0,338 | 0,000267193 | 0,825076285   | 1,212009142     | 0,627218935     |
| SOX7                                                                                            | 2,39236E-07 | -0,277568698 | 0,009 | 0,053 | 0,005048126 | 0,824980144   | 1,212150385     | 0,169811321     |
| MAX                                                                                             | 4,96335E-08 | -0,278171936 | 0,086 | 0,174 | 0,001047317 | 0,824635265   | 1,212657331     | 0,494252874     |
| CTTNBP2NL                                                                                       | 3,64309E-12 | -0,278938145 | 0,083 | 0,201 | 7,68729E-08 | 0,824197422   | 1,213301539     | 0,412935323     |
| TENT4B                                                                                          | 0,000271114 | -0,279136987 | 0,072 | 0,122 | 1           | 0,824083833   | 1,213468776     | 0,590163934     |
| HERC2                                                                                           | 6,96468E-06 | -0,279258871 | 0,101 | 0,174 | 0,146961796 | 0,824014214   | 1,213571299     | 0,58045977      |
| CNBD2                                                                                           | 0,001225958 | -0,279261122 | 0,035 | 0,069 | 1           | 0,824012929   | 1,213573192     | 0,507246377     |
| TBX2                                                                                            | 3,38133E-10 | -0,279263238 | 0,012 | 0,073 | 7,13494E-06 | 0,82401172    | 1,213574972     | 0,164383562     |
| NR2F2-AS1                                                                                       | 1,25799E-05 | -0,279718309 | 0,024 | 0,069 | 0,265447588 | 0,823751842   | 1,213957832     | 0,347826087     |
| PRPF39                                                                                          | 0,000231087 | -0,279725422 | 0,04  | 0,081 | 1           | 0,82374778    | 1,213963818     | 0,49382716      |
| TGIF2                                                                                           | 1,78681E-07 | -0,279774691 | 0,045 | 0,114 | 0,003770349 | 0,823719649   | 1,214005276     | 0,394736842     |
| ALDH2                                                                                           | 1,423E-08   | -0,280024678 | 0,03  | 0,098 | 0,000300267 | 0,823576929   | 1,214215654     | 0,306122449     |
| CKS1B                                                                                           | 3,77723E-11 | -0,280170756 | 0,116 | 0,239 | 7,97034E-07 | 0,823493544   | 1,214338604     | 0,485355649     |
| RAB11FIP1                                                                                       | 4,14894E-10 | -0,280471364 | 0,022 | 0,094 | 8,75467E-06 | 0,823321974   | 1,214591656     | 0,234042553     |
| SCCPDH                                                                                          | 4,20175E-07 | -0,280608604 | 0,293 | 0,411 | 0,008866112 | 0,823243657   | 1,214707203     | 0,712895377     |
| DUSP7                                                                                           | 0,000453742 | -0,280789804 | 0,051 | 0,094 | 1           | 0,823140266   | 1,214859778     | 0,542553191     |
| LRRTM1                                                                                          | 1,07906E-10 | -0,280944337 | 0     | 0,047 | 2,27692E-06 | 0,8230521     | 1,214989913     | 0               |
| SMOX                                                                                            | 4,74606E-05 | -0,281161697 | 0,061 | 0,114 | 1           | 0,822928107   | 1,21517298      | 0,535087719     |
| MRGPRF                                                                                          | 1,01869E-12 | -0,281469223 | 0,003 | 0,068 | 2,14953E-08 | 0,822752709   | 1,215432035     | 0,044117647     |
| NIM1K                                                                                           | 4,17562E-07 | -0,281523771 | 0,02  | 0,071 | 0,008810983 | 0,822721602   | 1,215477992     | 0,281690141     |
| CORO2B                                                                                          | 5,85234E-05 | -0,28155765  | 0,042 | 0,09  | 1           | 0,822702282   | 1,215506535     | 0,466666667     |
| PACS2                                                                                           | 0,000259159 | -0,281671561 | 0,081 | 0,134 | 1           | 0,822637326   | 1,215602512     | 0,604477612     |
| MAP3K8                                                                                          | 5,63438E-05 | -0,281738628 | 0,028 | 0,069 | 1           | 0,822599085   | 1,215659023     | 0,405797101     |
| CRK                                                                                             | 0,000161567 | -0,281840092 | 0,142 | 0,206 | 1           | 0,822541234   | 1,215744523     | 0,689320388     |
| PDE5A                                                                                           | 3,25502E-09 | -0,282275037 | 0,013 | 0,071 | 6,86841E-05 | 0,822293291   | 1,216111102     | 0,183098592     |
| BBS5                                                                                            | 4,66178E-05 | -0,282341829 | 0,031 | 0,076 | 0,983683106 | 0,822255222   | 1,216167405     | 0,407894737     |

Supplementary Table 5

| Differentially expressed genes_total calculation_ comparing SC-Keloid vs. (SC-Myel, SC-Nonmyel) |             |              |       |       |             |               |                 |                 |
|-------------------------------------------------------------------------------------------------|-------------|--------------|-------|-------|-------------|---------------|-----------------|-----------------|
| gene                                                                                            | p_val       | avg_log2FC   | pct.1 | pct.2 | p_val_adj   | Foldchange_UP | Foldchange_DOWN | Ratio_pct1_pct2 |
| CTNND1                                                                                          | 1,30975E-12 | -0,282356678 | 0,154 | 0,299 | 2,7637E-08  | 0,822246759   | 1,216179922     | 0,515050167     |
| XAB2                                                                                            | 3,8161E-05  | -0,282647121 | 0,027 | 0,069 | 0,805235047 | 0,822081242   | 1,216424788     | 0,391304348     |
| ZDHHC8                                                                                          | 3,21388E-06 | -0,282657669 | 0,057 | 0,121 | 0,067816037 | 0,822075231   | 1,216433682     | 0,47107438      |
| RPS25                                                                                           | 3,51769E-10 | -0,28286905  | 0,614 | 0,877 | 7,42269E-06 | 0,821954791   | 1,216611925     | 0,700114025     |
| ISCU                                                                                            | 7,38655E-09 | -0,283109916 | 0,207 | 0,33  | 0,000155864 | 0,821817572   | 1,216815062     | 0,627272727     |
| NFAT5                                                                                           | 3,13478E-11 | -0,283289515 | 0,122 | 0,248 | 6,61469E-07 | 0,821715272   | 1,216966551     | 0,491935484     |
| PAF1                                                                                            | 5,29966E-07 | -0,28353971  | 0,069 | 0,142 | 0,011182818 | 0,821572781   | 1,217177617     | 0,485915493     |
| REV1                                                                                            | 9,62668E-07 | -0,283574195 | 0,058 | 0,126 | 0,020313261 | 0,821553143   | 1,217206713     | 0,46031746      |
| KIF1B                                                                                           | 5,83036E-09 | -0,284244175 | 0,154 | 0,266 | 0,000123026 | 0,821171706   | 1,217772108     | 0,578947368     |
| ARL4D                                                                                           | 0,010461806 | -0,284306294 | 0,077 | 0,11  | 1           | 0,82113635    | 1,217824543     | 0,7             |
| LRRC8B                                                                                          | 6,79616E-10 | -0,284334701 | 0,036 | 0,117 | 1,43406E-05 | 0,821120181   | 1,217848523     | 0,307692308     |
| TRPM3                                                                                           | 1,13317E-10 | -0,284375761 | 0,002 | 0,054 | 2,39111E-06 | 0,821096812   | 1,217883184     | 0,037037037     |
| WBP11                                                                                           | 1,29914E-06 | -0,284499112 | 0,158 | 0,244 | 0,027413217 | 0,821026611   | 1,217987318     | 0,647540984     |
| ELF2                                                                                            | 9,78976E-09 | -0,284841349 | 0,098 | 0,195 | 0,000206574 | 0,820831869   | 1,218276284     | 0,502564103     |
| FAM171A1                                                                                        | 2,61949E-07 | -0,284854906 | 0,024 | 0,08  | 0,005527396 | 0,820824156   | 1,218287733     | 0,3             |
| MARVELD1                                                                                        | 0,001298792 | -0,284872277 | 0,171 | 0,225 | 1           | 0,820814273   | 1,218302401     | 0,76            |
| SLC11A2                                                                                         | 8,04609E-05 | -0,285448196 | 0,05  | 0,099 | 1           | 0,820486672   | 1,218788841     | 0,505050505     |
| ROBO3                                                                                           | 3,82504E-06 | -0,285790998 | 0,035 | 0,088 | 0,080712112 | 0,820291738   | 1,219078474     | 0,397727273     |
| DNAJB2                                                                                          | 2,42425E-09 | -0,285863479 | 0,15  | 0,261 | 5,11542E-05 | 0,820250527   | 1,219139723     | 0,574712644     |
| SIRT1                                                                                           | 2,49926E-07 | -0,286246258 | 0,056 | 0,128 | 0,00527369  | 0,820032925   | 1,219463231     | 0,4375          |
| NABP1                                                                                           | 5,06295E-11 | -0,28648887  | 0,014 | 0,083 | 1,06833E-06 | 0,819895035   | 1,219668319     | 0,168674699     |
| ATP11A                                                                                          | 2,28362E-09 | -0,287754563 | 0,019 | 0,083 | 4,81866E-05 | 0,819176048   | 1,220738818     | 0,228915663     |
| ZNF331                                                                                          | 9,34199E-09 | -0,288070377 | 0,029 | 0,098 | 0,000197125 | 0,818996745   | 1,221006074     | 0,295918367     |
| GTF2B                                                                                           | 2,68431E-07 | -0,288307308 | 0,107 | 0,197 | 0,005664164 | 0,818862254   | 1,221206614     | 0,543147208     |
| ADD1                                                                                            | 2,06906E-07 | -0,288326932 | 0,194 | 0,294 | 0,004365925 | 0,818851115   | 1,221223225     | 0,659863946     |
| JADE1                                                                                           | 2,75839E-05 | -0,288367066 | 0,07  | 0,129 | 0,582048612 | 0,818828336   | 1,221257199     | 0,542635659     |
| TSPAN11                                                                                         | 0,010327424 | -0,288573091 | 0,192 | 0,236 | 1           | 0,818711411   | 1,221431613     | 0,813559322     |
| SYPL1                                                                                           | 1,92828E-10 | -0,288842463 | 0,232 | 0,376 | 4,06886E-06 | 0,818558561   | 1,221659693     | 0,617021277     |
| C10orf90                                                                                        | 1,41552E-09 | -0,288899465 | 0,005 | 0,054 | 2,98688E-05 | 0,818526219   | 1,221707963     | 0,092592593     |
| NRG1                                                                                            | 1,56124E-10 | -0,289250355 | 0,001 | 0,05  | 3,29437E-06 | 0,818327162   | 1,222005142     | 0,02            |



Supplementary Table 5

| Differentially expressed genes_total calculation_ comparing SC-Keloid vs. (SC-Myel, SC-Nonmyel) |             |              |       |       |             |               |                 |                 |
|-------------------------------------------------------------------------------------------------|-------------|--------------|-------|-------|-------------|---------------|-----------------|-----------------|
| gene                                                                                            | p_val       | avg_log2FC   | pct.1 | pct.2 | p_val_adj   | Foldchange_UP | Foldchange_DOWN | Ratio_pct1_pct2 |
| LMO7                                                                                            | 3,44748E-08 | -0,289592471 | 0,027 | 0,09  | 0,000727452 | 0,81813313    | 1,222294958     | 0,3             |
| ETF1                                                                                            | 2,32455E-09 | -0,289668272 | 0,129 | 0,236 | 4,90504E-05 | 0,818090146   | 1,222359181     | 0,546610169     |
| RAC1                                                                                            | 3,52585E-13 | -0,289728318 | 0,445 | 0,723 | 7,43989E-09 | 0,818056097   | 1,222410057     | 0,61549101      |
| SRCIN1                                                                                          | 1,1704E-09  | -0,289743746 | 0,035 | 0,114 | 2,46966E-05 | 0,818047349   | 1,22242313      | 0,307017544     |
| CNKS2                                                                                           | 3,59042E-11 | -0,289789869 | 0,009 | 0,073 | 7,57614E-07 | 0,818021196   | 1,222462211     | 0,123287671     |
| ZNFX1                                                                                           | 1,58852E-08 | -0,289846717 | 0,043 | 0,118 | 0,000335193 | 0,817988964   | 1,222510382     | 0,36440678      |
| KRT15                                                                                           | 1,58159E-08 | -0,290247171 | 0,008 | 0,057 | 0,000333731 | 0,817761943   | 1,222849766     | 0,140350877     |
| S100A14                                                                                         | 4,0343E-07  | -0,290253056 | 0,009 | 0,052 | 0,008512775 | 0,817758607   | 1,222854754     | 0,173076923     |
| MAP4K3                                                                                          | 1,76875E-05 | -0,290444497 | 0,052 | 0,107 | 0,373224564 | 0,8176501     | 1,223017033     | 0,485981308     |
| AMFR                                                                                            | 1,69211E-06 | -0,290458972 | 0,077 | 0,149 | 0,035705207 | 0,817641896   | 1,223029305     | 0,516778523     |
| SPSB3                                                                                           | 2,13664E-06 | -0,290459024 | 0,121 | 0,202 | 0,045085137 | 0,817641867   | 1,223029348     | 0,599009901     |
| TRIM47                                                                                          | 0,000394558 | -0,29047859  | 0,097 | 0,148 | 1           | 0,817630778   | 1,223045935     | 0,655405405     |
| ELL                                                                                             | 1,64414E-05 | -0,290496236 | 0,021 | 0,062 | 0,346930224 | 0,817620778   | 1,223060895     | 0,338709677     |
| ARL5A                                                                                           | 8,67805E-06 | -0,290577282 | 0,13  | 0,205 | 0,183115501 | 0,817574848   | 1,223129605     | 0,634146341     |
| PDS5B                                                                                           | 7,87825E-10 | -0,290816471 | 0,12  | 0,233 | 1,66239E-05 | 0,817439311   | 1,223332408     | 0,515021459     |
| KLHL28                                                                                          | 4,50417E-06 | -0,290892766 | 0,055 | 0,115 | 0,095042436 | 0,817396082   | 1,223397104     | 0,47826087      |
| RAD23A                                                                                          | 3,07624E-05 | -0,291146376 | 0,169 | 0,24  | 0,649117495 | 0,817252406   | 1,223612183     | 0,704166667     |
| NPDC1                                                                                           | 1,10664E-09 | -0,291227258 | 0,142 | 0,256 | 2,33513E-05 | 0,817206589   | 1,223680784     | 0,5546875       |
| SMAD4                                                                                           | 4,47996E-07 | -0,291362193 | 0,111 | 0,198 | 0,009453153 | 0,81713016    | 1,22379524      | 0,560606061     |
| PPDPF                                                                                           | 3,34359E-10 | -0,291462084 | 0,475 | 0,723 | 7,05532E-06 | 0,817073584   | 1,223879978     | 0,656984786     |
| JUP                                                                                             | 3,81075E-07 | -0,292005674 | 0,016 | 0,065 | 0,00804107  | 0,816765779   | 1,224341208     | 0,246153846     |
| FAM193B                                                                                         | 0,003533003 | -0,292008208 | 0,061 | 0,096 | 1           | 0,816764344   | 1,224343358     | 0,635416667     |
| UBR3                                                                                            | 1,15303E-06 | -0,292152624 | 0,05  | 0,115 | 0,02433004  | 0,816682589   | 1,224465923     | 0,434782609     |
| RPS29                                                                                           | 9,21739E-08 | -0,292153516 | 0,658 | 0,855 | 0,001944962 | 0,816682084   | 1,224466668     | 0,769590643     |
| KRT17                                                                                           | 4,11699E-06 | -0,29215749  | 0,034 | 0,087 | 0,08687261  | 0,816679834   | 1,224470053     | 0,390804598     |
| CYB5R2                                                                                          | 0,000121084 | -0,292355555 | 0,066 | 0,118 | 1           | 0,816567722   | 1,22463817      | 0,559322034     |
| MXD1                                                                                            | 1,30077E-06 | -0,292583073 | 0,058 | 0,125 | 0,027447474 | 0,816438956   | 1,224831315     | 0,464           |
| STMN1                                                                                           | 6,04588E-13 | -0,292699876 | 0,367 | 0,574 | 1,27574E-08 | 0,816372859   | 1,224930483     | 0,639372822     |
| NSUN6                                                                                           | 0,00641793  | -0,292718193 | 0,054 | 0,085 | 1           | 0,816362493   | 1,224946036     | 0,635294118     |
| SCAF4                                                                                           | 4,51753E-06 | -0,292807397 | 0,058 | 0,119 | 0,095324301 | 0,816312018   | 1,225021778     | 0,487394958     |

Supplementary Table 5

| Differentially expressed genes_total calculation_ comparing SC-Keloid vs. (SC-Myel, SC-Nonmyel) |             |              |       |       |             |               |                 |                 |
|-------------------------------------------------------------------------------------------------|-------------|--------------|-------|-------|-------------|---------------|-----------------|-----------------|
| gene                                                                                            | p_val       | avg_log2FC   | pct.1 | pct.2 | p_val_adj   | Foldchange_UP | Foldchange_DOWN | Ratio_pct1_pct2 |
| WDR47                                                                                           | 6,42737E-07 | -0,292875582 | 0,061 | 0,13  | 0,013562404 | 0,816273438   | 1,225079677     | 0,469230769     |
| PAXX                                                                                            | 4,66229E-05 | -0,293103848 | 0,161 | 0,228 | 0,983790142 | 0,816144296   | 1,225273527     | 0,706140351     |
| UPF2                                                                                            | 1,28581E-08 | -0,293333026 | 0,139 | 0,248 | 0,00027132  | 0,816014659   | 1,225468181     | 0,560483871     |
| CAPRIN2                                                                                         | 9,73408E-08 | -0,293723314 | 0,056 | 0,13  | 0,002053989 | 0,815793935   | 1,225799749     | 0,430769231     |
| ZFR                                                                                             | 2,49588E-09 | -0,29395625  | 0,133 | 0,242 | 5,26656E-05 | 0,815662228   | 1,225997681     | 0,549586777     |
| AGO3                                                                                            | 6,56755E-10 | -0,294376819 | 0,061 | 0,153 | 1,38582E-05 | 0,815424484   | 1,226355131     | 0,39869281      |
| KMT2E-AS1                                                                                       | 1,06084E-07 | -0,29446596  | 0,024 | 0,083 | 0,002238489 | 0,815374102   | 1,226430908     | 0,289156627     |
| CBX6                                                                                            | 8,83156E-10 | -0,295070414 | 0,13  | 0,242 | 1,86355E-05 | 0,815032552   | 1,22694486      | 0,537190083     |
| DDAH2                                                                                           | 7,00248E-10 | -0,295203916 | 0,231 | 0,362 | 1,47759E-05 | 0,814957135   | 1,227058402     | 0,638121547     |
| SOCS1                                                                                           | 1,28453E-05 | -0,29523197  | 0,022 | 0,065 | 0,271047963 | 0,814941288   | 1,227082263     | 0,338461538     |
| MT-ATP6                                                                                         | 1,30447E-05 | -0,295471248 | 0,818 | 0,898 | 0,275256536 | 0,814806137   | 1,227285798     | 0,91091314      |
| HSBP1L1                                                                                         | 2,87275E-08 | -0,296081174 | 0,021 | 0,08  | 0,000606179 | 0,814461736   | 1,227804765     | 0,2625          |
| TSPYL1                                                                                          | 1,07905E-08 | -0,296216532 | 0,055 | 0,136 | 0,000227691 | 0,814385324   | 1,227919967     | 0,404411765     |
| KLHL26                                                                                          | 9,06914E-09 | -0,296220976 | 0,017 | 0,076 | 0,000191368 | 0,814382815   | 1,227923749     | 0,223684211     |
| NKAIN2                                                                                          | 1,01264E-14 | -0,296513882 | 0,002 | 0,075 | 2,13677E-10 | 0,814217491   | 1,228173076     | 0,026666667     |
| EFNB2                                                                                           | 1,11199E-07 | -0,296981821 | 0,033 | 0,096 | 0,00234642  | 0,813953441   | 1,2285715       | 0,34375         |
| ITSN2                                                                                           | 7,56434E-06 | -0,297241869 | 0,059 | 0,121 | 0,159615239 | 0,813806738   | 1,228792971     | 0,487603306     |
| TACC1                                                                                           | 0,000195841 | -0,297364441 | 0,184 | 0,248 | 1           | 0,8137376     | 1,228897374     | 0,741935484     |
| LAMP2                                                                                           | 4,24358E-12 | -0,297425271 | 0,34  | 0,528 | 8,95437E-08 | 0,81370329    | 1,228949191     | 0,643939394     |
| MALAT1                                                                                          | 9,79961E-10 | -0,297488709 | 0,991 | 0,996 | 2,06782E-05 | 0,813667511   | 1,229003232     | 0,99497992      |
| ZFAND2A                                                                                         | 0,001094364 | -0,297538142 | 0,084 | 0,129 | 1           | 0,813639632   | 1,229045343     | 0,651162791     |
| SLC27A1                                                                                         | 1,06596E-07 | -0,29778005  | 0,055 | 0,128 | 0,002249284 | 0,813503213   | 1,229251444     | 0,4296875       |
| NPIP5                                                                                           | 6,2614E-06  | -0,298007351 | 0,037 | 0,09  | 0,132121823 | 0,813375054   | 1,229445131     | 0,411111111     |
| IGF2BP2                                                                                         | 1,67633E-05 | -0,298345842 | 0,058 | 0,117 | 0,353723081 | 0,813184239   | 1,229733623     | 0,495726496     |
| EHD1                                                                                            | 3,83672E-07 | -0,298436981 | 0,024 | 0,079 | 0,008095872 | 0,813132869   | 1,229811311     | 0,303797468     |
| CENPC                                                                                           | 1,29993E-08 | -0,298615987 | 0,07  | 0,157 | 0,000274298 | 0,813031984   | 1,229963912     | 0,445859873     |
| MORF4L2                                                                                         | 4,59637E-13 | -0,29865803  | 0,271 | 0,45  | 9,69879E-09 | 0,813008291   | 1,229999756     | 0,602222222     |
| RPS6KA3                                                                                         | 2,07953E-07 | -0,298929899 | 0,058 | 0,13  | 0,004388008 | 0,812855098   | 1,230231566     | 0,446153846     |
| CLASRP                                                                                          | 2,72276E-06 | -0,299058288 | 0,036 | 0,091 | 0,057453059 | 0,812782763   | 1,230341053     | 0,395604396     |
| ALKBH5                                                                                          | 3,52836E-07 | -0,299167461 | 0,115 | 0,199 | 0,007445199 | 0,81272126    | 1,230434159     | 0,577889447     |

Supplementary Table 5

| Differentially expressed genes_total calculation_ comparing SC-Keloid vs. (SC-Myel, SC-Nonmyel) |             |              |       |       |             |               |                 |                 |
|-------------------------------------------------------------------------------------------------|-------------|--------------|-------|-------|-------------|---------------|-----------------|-----------------|
| gene                                                                                            | p_val       | avg_log2FC   | pct.1 | pct.2 | p_val_adj   | Foldchange_UP | Foldchange_DOWN | Ratio_pct1_pct2 |
| TYRO3                                                                                           | 4,38522E-11 | -0,29933552  | 0,014 | 0,083 | 9,25325E-07 | 0,812626592   | 1,230577501     | 0,168674699     |
| SIAH2                                                                                           | 3,15948E-05 | -0,29937602  | 0,059 | 0,114 | 0,666681692 | 0,81260378    | 1,230612046     | 0,51754386      |
| CDH7                                                                                            | 5,78917E-11 | -0,299572656 | 0     | 0,049 | 1,22157E-06 | 0,812493031   | 1,230779787     | 0               |
| TP53INP2                                                                                        | 1,1367E-08  | -0,299744351 | 0,031 | 0,1   | 0,000239855 | 0,812396342   | 1,230926271     | 0,31            |
| H2BC21                                                                                          | 5,128E-11   | -0,299961162 | 0,013 | 0,08  | 1,08206E-06 | 0,812274263   | 1,231111271     | 0,1625          |
| MLLT6                                                                                           | 3,90414E-14 | -0,300279662 | 0,063 | 0,187 | 8,23812E-10 | 0,812094959   | 1,23138309      | 0,336898396     |
| NFIC                                                                                            | 2,23002E-11 | -0,300511494 | 0,328 | 0,506 | 4,70557E-07 | 0,811964471   | 1,231580981     | 0,648221344     |
| CREBBP                                                                                          | 1,01023E-07 | -0,300683598 | 0,101 | 0,19  | 0,002131681 | 0,811867615   | 1,23172791      | 0,531578947     |
| ELL2                                                                                            | 0,002205531 | -0,301394158 | 0,045 | 0,08  | 1           | 0,81146785    | 1,232334713     | 0,5625          |
| ZNF410                                                                                          | 6,27432E-06 | -0,301450812 | 0,028 | 0,076 | 0,132394411 | 0,811435984   | 1,232383107     | 0,368421053     |
| RAP1GAP                                                                                         | 6,5442E-13  | -0,301856522 | 0,007 | 0,077 | 1,38089E-08 | 0,811207827   | 1,232729723     | 0,090909091     |
| CDADC1                                                                                          | 1,19263E-08 | -0,301891004 | 0,054 | 0,133 | 0,000251657 | 0,811188439   | 1,232759187     | 0,406015038     |
| RUSC2                                                                                           | 2,54463E-09 | -0,302200985 | 0,012 | 0,068 | 5,36942E-05 | 0,811014164   | 1,233024089     | 0,176470588     |
| INAFM2                                                                                          | 4,83459E-08 | -0,302375846 | 0,03  | 0,094 | 0,001020147 | 0,810915871   | 1,233173546     | 0,319148936     |
| MIIP                                                                                            | 0,000400387 | -0,302416651 | 0,049 | 0,091 | 1           | 0,810892935   | 1,233208425     | 0,538461538     |
| KITLG                                                                                           | 2,33947E-06 | -0,302569215 | 0,022 | 0,071 | 0,049365165 | 0,810807189   | 1,233338843     | 0,309859155     |
| KDM2A                                                                                           | 1,80462E-07 | -0,302990033 | 0,139 | 0,232 | 0,00380793  | 0,81057072    | 1,233698647     | 0,599137931     |
| NMT1                                                                                            | 0,001627652 | -0,303027608 | 0,114 | 0,161 | 1           | 0,810549609   | 1,233730779     | 0,708074534     |
| TBL1X                                                                                           | 1,98049E-11 | -0,303041039 | 0,02  | 0,096 | 4,17903E-07 | 0,810542063   | 1,233742265     | 0,208333333     |
| QKI                                                                                             | 1,8396E-11  | -0,303168295 | 0,506 | 0,715 | 3,88174E-07 | 0,81047057    | 1,233851094     | 0,707692308     |
| TACSTD2                                                                                         | 1,01374E-06 | -0,303189997 | 0,012 | 0,054 | 0,021390922 | 0,810458379   | 1,233869655     | 0,222222222     |
| NRARP                                                                                           | 7,23219E-08 | -0,303461129 | 0,014 | 0,065 | 0,001526065 | 0,81030608    | 1,234101563     | 0,215384615     |
| LRR8A                                                                                           | 2,36795E-06 | -0,303743895 | 0,081 | 0,152 | 0,049966055 | 0,810147277   | 1,234343468     | 0,532894737     |
| CERS4                                                                                           | 6,44185E-05 | -0,303958889 | 0,058 | 0,11  | 1           | 0,810026556   | 1,234527427     | 0,527272727     |
| ZNF703                                                                                          | 1,82732E-06 | -0,303970139 | 0,029 | 0,081 | 0,038558315 | 0,810020239   | 1,234537054     | 0,358024691     |
| SLC4A2                                                                                          | 0,002393324 | -0,305343197 | 0,078 | 0,118 | 1           | 0,809249685   | 1,235712561     | 0,661016949     |
| TSC1                                                                                            | 1,44977E-05 | -0,305902371 | 0,049 | 0,104 | 0,305915027 | 0,808936088   | 1,236191604     | 0,471153846     |
| CECR2                                                                                           | 1,50352E-10 | -0,305987174 | 0,027 | 0,104 | 3,17258E-06 | 0,808888539   | 1,23626427      | 0,259615385     |
| HIVEP2                                                                                          | 8,47954E-08 | -0,306033578 | 0,093 | 0,182 | 0,001789268 | 0,808862522   | 1,236304035     | 0,510989011     |
| ARRDC4                                                                                          | 8,35142E-07 | -0,306261335 | 0,069 | 0,141 | 0,01762233  | 0,808734838   | 1,236499225     | 0,489361702     |

Supplementary Table 5

| Differentially expressed genes_total calculation_ comparing SC-Keloid vs. (SC-Myel, SC-Nonmyel) |             |              |       |       |             |               |                 |                 |
|-------------------------------------------------------------------------------------------------|-------------|--------------|-------|-------|-------------|---------------|-----------------|-----------------|
| gene                                                                                            | p_val       | avg_log2FC   | pct.1 | pct.2 | p_val_adj   | Foldchange_UP | Foldchange_DOWN | Ratio_pct1_pct2 |
| CFD                                                                                             | 7,393E-12   | -0,306463875 | 0,027 | 0,111 | 1,56E-07    | 0,808621308   | 1,236672829     | 0,243243243     |
| KLF16                                                                                           | 8,15498E-05 | -0,306877746 | 0,071 | 0,126 | 1           | 0,808389369   | 1,237027648     | 0,563492063     |
| ITSN1                                                                                           | 6,19636E-10 | -0,306980005 | 0,059 | 0,152 | 1,30749E-05 | 0,808332072   | 1,237115332     | 0,388157895     |
| RASL12                                                                                          | 6,7181E-05  | -0,307497361 | 0,062 | 0,115 | 1           | 0,808042253   | 1,237559046     | 0,539130435     |
| GALNT17                                                                                         | 0,001542763 | -0,307891865 | 0,083 | 0,126 | 1           | 0,807821324   | 1,237897503     | 0,658730159     |
| SLC25A36                                                                                        | 1,91811E-09 | -0,307903667 | 0,115 | 0,224 | 4,0474E-05  | 0,807814716   | 1,237907629     | 0,513392857     |
| CCND3                                                                                           | 2,9691E-06  | -0,308216995 | 0,098 | 0,171 | 0,062650997 | 0,807639292   | 1,238176511     | 0,573099415     |
| FAM214A                                                                                         | 1,56755E-08 | -0,308555013 | 0,041 | 0,114 | 0,000330769 | 0,807450087   | 1,238466644     | 0,359649123     |
| SAP30BP                                                                                         | 2,61374E-06 | -0,308567107 | 0,158 | 0,243 | 0,055152609 | 0,807443318   | 1,238477027     | 0,650205761     |
| PFKL                                                                                            | 8,06482E-05 | -0,308641627 | 0,097 | 0,156 | 1           | 0,807401612   | 1,238541        | 0,621794872     |
| USP9X                                                                                           | 5,33201E-07 | -0,308725827 | 0,107 | 0,191 | 0,011251078 | 0,807354491   | 1,238613287     | 0,560209424     |
| PHACTR4                                                                                         | 1,67794E-10 | -0,309283277 | 0,137 | 0,265 | 3,54062E-06 | 0,807042594   | 1,239091973     | 0,516981132     |
| SRGAP2                                                                                          | 8,88515E-08 | -0,309578505 | 0,163 | 0,265 | 0,001874855 | 0,806877461   | 1,239345562     | 0,61509434      |
| SF3A2                                                                                           | 0,000207609 | -0,309711778 | 0,084 | 0,136 | 1           | 0,806802926   | 1,239460056     | 0,617647059     |
| ADGRA2                                                                                          | 6,37452E-05 | -0,309807008 | 0,041 | 0,088 | 1           | 0,806749672   | 1,239541873     | 0,465909091     |
| RGS2                                                                                            | 6,3378E-07  | -0,310006465 | 0,08  | 0,159 | 0,013373386 | 0,806638145   | 1,239713255     | 0,503144654     |
| MARCKS                                                                                          | 8,91349E-07 | -0,310085482 | 0,737 | 0,855 | 0,018808354 | 0,806593966   | 1,239781157     | 0,861988304     |
| PSMF1                                                                                           | 0,000124145 | -0,310203516 | 0,111 | 0,168 | 1           | 0,806527977   | 1,239882593     | 0,660714286     |
| MXRA8                                                                                           | 7,08085E-08 | -0,310254881 | 0,295 | 0,425 | 0,001494131 | 0,806499262   | 1,239926739     | 0,694117647     |
| RPS17                                                                                           | 7,22921E-13 | -0,310781544 | 0,281 | 0,46  | 1,52543E-08 | 0,8062049     | 1,240379463     | 0,610869565     |
| KAT5                                                                                            | 0,000222298 | -0,311081941 | 0,054 | 0,099 | 1           | 0,80603705    | 1,24063776      | 0,545454545     |
| SERPINB2                                                                                        | 1,65882E-07 | -0,311227283 | 0,002 | 0,038 | 0,003500279 | 0,805955851   | 1,240762753     | 0,052631579     |
| EZH2                                                                                            | 4,02965E-07 | -0,311372163 | 0,051 | 0,119 | 0,00850297  | 0,805874918   | 1,24088736      | 0,428571429     |
| HSPE1                                                                                           | 3,33195E-10 | -0,311554116 | 0,42  | 0,596 | 7,03076E-06 | 0,805773288   | 1,241043871     | 0,704697987     |
| ZNF644                                                                                          | 2,21194E-11 | -0,31167805  | 0,175 | 0,316 | 4,66742E-07 | 0,805704071   | 1,241150487     | 0,553797468     |
| PARD3B                                                                                          | 5,62817E-08 | -0,311689934 | 0,015 | 0,068 | 0,001187599 | 0,805697434   | 1,241160711     | 0,220588235     |
| KDM3A                                                                                           | 9,37353E-08 | -0,31325934  | 0,049 | 0,121 | 0,00197791  | 0,804821449   | 1,242511617     | 0,404958678     |
| LRRC58                                                                                          | 9,41819E-06 | -0,313354889 | 0,094 | 0,163 | 0,198733141 | 0,804768148   | 1,24259391      | 0,576687117     |
| GIT1                                                                                            | 4,24607E-08 | -0,313601332 | 0,109 | 0,205 | 0,000895963 | 0,804630689   | 1,24280619      | 0,531707317     |
| PNP                                                                                             | 0,000271692 | -0,313726933 | 0,036 | 0,076 | 1           | 0,80456064    | 1,242914393     | 0,473684211     |

Supplementary Table 5

| Differentially expressed genes_total calculation_ comparing SC-Keloid vs. (SC-Myel, SC-Nonmyel) |             |              |       |       |             |               |                 |                 |
|-------------------------------------------------------------------------------------------------|-------------|--------------|-------|-------|-------------|---------------|-----------------|-----------------|
| gene                                                                                            | p_val       | avg_log2FC   | pct.1 | pct.2 | p_val_adj   | Foldchange_UP | Foldchange_DOWN | Ratio_pct1_pct2 |
| RIPK2                                                                                           | 1,34896E-07 | -0,313969291 | 0,065 | 0,141 | 0,002846439 | 0,804425494   | 1,243123207     | 0,460992908     |
| APOLD1                                                                                          | 2,91646E-08 | -0,313980434 | 0,021 | 0,08  | 0,000615401 | 0,804419281   | 1,243132809     | 0,2625          |
| USP51                                                                                           | 1,36927E-05 | -0,314113871 | 0,026 | 0,071 | 0,288929008 | 0,804344882   | 1,243247794     | 0,366197183     |
| FXR1                                                                                            | 1,14923E-12 | -0,314222658 | 0,222 | 0,385 | 2,42498E-08 | 0,804284232   | 1,243341545     | 0,576623377     |
| NAPA                                                                                            | 1,11421E-06 | -0,314240325 | 0,13  | 0,212 | 0,023510854 | 0,804274383   | 1,243356771     | 0,613207547     |
| SESTD1                                                                                          | 1,02485E-08 | -0,314431173 | 0,041 | 0,115 | 0,000216253 | 0,804167996   | 1,24352126      | 0,356521739     |
| SYNPO2                                                                                          | 4,33654E-10 | -0,314479429 | 0,009 | 0,068 | 9,15054E-06 | 0,804141098   | 1,243562855     | 0,132352941     |
| RSBN1L                                                                                          | 5,72945E-07 | -0,314695798 | 0,144 | 0,236 | 0,012089723 | 0,804020506   | 1,243749373     | 0,610169492     |
| ATP13A3                                                                                         | 1,16666E-08 | -0,315181925 | 0,108 | 0,206 | 0,000246178 | 0,803749631   | 1,244168534     | 0,524271845     |
| TSC22D1                                                                                         | 0,011436114 | -0,315205786 | 0,214 | 0,266 | 1           | 0,803736338   | 1,244189112     | 0,804511278     |
| NCOA1                                                                                           | 3,88896E-08 | -0,315222872 | 0,068 | 0,151 | 0,00082061  | 0,803726819   | 1,244203847     | 0,450331126     |
| JARID2                                                                                          | 1,68885E-07 | -0,315226299 | 0,066 | 0,144 | 0,003563647 | 0,80372491    | 1,244206803     | 0,458333333     |
| DSP                                                                                             | 6,82624E-06 | -0,315307193 | 0,01  | 0,047 | 0,144040593 | 0,803679845   | 1,244276569     | 0,212765957     |
| KHSRP                                                                                           | 7,25511E-07 | -0,315814018 | 0,097 | 0,175 | 0,015308999 | 0,803397559   | 1,244713765     | 0,554285714     |
| RBM6                                                                                            | 6,37065E-09 | -0,316196266 | 0,154 | 0,262 | 0,000134427 | 0,803184723   | 1,245043601     | 0,58778626      |
| ARID4A                                                                                          | 3,25534E-09 | -0,316204781 | 0,099 | 0,201 | 6,8691E-05  | 0,803179983   | 1,245050949     | 0,492537313     |
| NMB                                                                                             | 7,37268E-08 | -0,316441621 | 0,04  | 0,107 | 0,001555709 | 0,803048139   | 1,24525536      | 0,373831776     |
| RUBCN                                                                                           | 5,3914E-07  | -0,3172636   | 0,047 | 0,111 | 0,011376385 | 0,802590731   | 1,24596505      | 0,423423423     |
| ARHGEF2                                                                                         | 2,84838E-06 | -0,318345212 | 0,132 | 0,213 | 0,060103763 | 0,801989241   | 1,24689952      | 0,61971831      |
| CPXM2                                                                                           | 3,56502E-14 | -0,318415223 | 0,002 | 0,072 | 7,52254E-10 | 0,801950323   | 1,246960031     | 0,027777778     |
| AZIN1                                                                                           | 3,39926E-10 | -0,318435868 | 0,141 | 0,258 | 7,17277E-06 | 0,801938848   | 1,246977875     | 0,546511628     |
| ARL5B                                                                                           | 5,45664E-09 | -0,318449824 | 0,08  | 0,174 | 0,00011514  | 0,80193109    | 1,246989938     | 0,459770115     |
| TM7SF3                                                                                          | 0,000209023 | -0,31872714  | 0,055 | 0,1   | 1           | 0,801776957   | 1,247229658     | 0,55            |
| RRAGC                                                                                           | 1,8761E-07  | -0,318806546 | 0,072 | 0,149 | 0,003958749 | 0,801732828   | 1,247298308     | 0,483221477     |
| METRNL                                                                                          | 3,49761E-11 | -0,318835882 | 0,098 | 0,212 | 7,38031E-07 | 0,801716526   | 1,247323671     | 0,462264151     |
| EIF3F                                                                                           | 4,50671E-08 | -0,319371953 | 0,227 | 0,342 | 0,00095096  | 0,801418682   | 1,247787233     | 0,66374269      |
| MBD2                                                                                            | 5,77686E-09 | -0,31947791  | 0,119 | 0,221 | 0,000121898 | 0,801359825   | 1,247878878     | 0,538461538     |
| TOPORS                                                                                          | 9,72554E-08 | -0,319588867 | 0,07  | 0,151 | 0,002052187 | 0,801298195   | 1,247974856     | 0,463576159     |
| TUBA1B                                                                                          | 5,95366E-09 | -0,319669141 | 0,533 | 0,776 | 0,000125628 | 0,801253611   | 1,248044297     | 0,68685567      |
| TAPT1                                                                                           | 1,4302E-07  | -0,320665045 | 0,041 | 0,107 | 0,003017868 | 0,80070069    | 1,24890613      | 0,38317757      |

Supplementary Table 5

| Differentially expressed genes_total calculation_ comparing SC-Keloid vs. (SC-Myel, SC-Nonmyel) |             |              |       |       |             |               |                 |                 |
|-------------------------------------------------------------------------------------------------|-------------|--------------|-------|-------|-------------|---------------|-----------------|-----------------|
| gene                                                                                            | p_val       | avg_log2FC   | pct.1 | pct.2 | p_val_adj   | Foldchange_UP | Foldchange_DOWN | Ratio_pct1_pct2 |
| NCOR1                                                                                           | 2,72271E-05 | -0,320786321 | 0,175 | 0,248 | 0,574518545 | 0,800633385   | 1,249011119     | 0,705645161     |
| PLEKHA7                                                                                         | 1,81294E-12 | -0,320805769 | 0,001 | 0,06  | 3,82548E-08 | 0,800622592   | 1,249027957     | 0,016666667     |
| RAB1A                                                                                           | 1,80644E-13 | -0,321206788 | 0,173 | 0,324 | 3,81177E-09 | 0,800400077   | 1,249375192     | 0,533950617     |
| NAA16                                                                                           | 5,91957E-10 | -0,321212341 | 0,029 | 0,104 | 1,24909E-05 | 0,800396997   | 1,24938         | 0,278846154     |
| MRFAP1                                                                                          | 6,97692E-13 | -0,321304307 | 0,314 | 0,497 | 1,4722E-08  | 0,800345976   | 1,249459646     | 0,631790744     |
| RHBDD2                                                                                          | 0,002950091 | -0,321368983 | 0,086 | 0,125 | 1           | 0,800310098   | 1,24951566      | 0,688           |
| COL15A1                                                                                         | 1,41636E-07 | -0,321409076 | 0,182 | 0,289 | 0,002988656 | 0,800287857   | 1,249550385     | 0,629757785     |
| TXLNG                                                                                           | 7,02936E-08 | -0,321461825 | 0,04  | 0,107 | 0,001483265 | 0,800258597   | 1,249596073     | 0,373831776     |
| NGDN                                                                                            | 1,01768E-05 | -0,321584549 | 0,063 | 0,123 | 0,214740886 | 0,800190525   | 1,249702375     | 0,512195122     |
| HDGF                                                                                            | 2,67806E-13 | -0,322041134 | 0,172 | 0,318 | 5,65097E-09 | 0,79993732    | 1,250097944     | 0,540880503     |
| ARL8A                                                                                           | 6,39641E-09 | -0,322361492 | 0,164 | 0,273 | 0,000134971 | 0,79975971    | 1,250375566     | 0,600732601     |
| IL6                                                                                             | 1,09371E-09 | -0,322671068 | 0,01  | 0,068 | 2,30784E-05 | 0,799588114   | 1,250643903     | 0,147058824     |
| STX11                                                                                           | 1,71033E-07 | -0,322997505 | 0,029 | 0,088 | 0,003608973 | 0,799407213   | 1,250926917     | 0,329545455     |
| SIRT2                                                                                           | 1,30991E-06 | -0,323612587 | 0,15  | 0,235 | 0,027640504 | 0,799066464   | 1,251460354     | 0,638297872     |
| GATAD2A                                                                                         | 1,36835E-08 | -0,323722512 | 0,088 | 0,18  | 0,000288736 | 0,799005583   | 1,251555711     | 0,488888889     |
| CTSL                                                                                            | 2,74604E-10 | -0,324014761 | 0,112 | 0,225 | 5,79442E-06 | 0,798843743   | 1,251809267     | 0,497777778     |
| TFEB                                                                                            | 3,93487E-12 | -0,324130338 | 0,019 | 0,098 | 8,30297E-08 | 0,798779749   | 1,251909555     | 0,193877551     |
| BMI1                                                                                            | 3,68776E-06 | -0,324202963 | 0,07  | 0,134 | 0,077815481 | 0,798739539   | 1,251972577     | 0,52238806      |
| FNBP1                                                                                           | 1,11204E-11 | -0,324564662 | 0,05  | 0,149 | 2,34652E-07 | 0,798539312   | 1,2522865       | 0,33557047      |
| FKBP8                                                                                           | 1,80198E-09 | -0,324757434 | 0,214 | 0,338 | 3,80235E-05 | 0,798432619   | 1,252453841     | 0,633136095     |
| EFNA5                                                                                           | 8,58742E-09 | -0,324865764 | 0,012 | 0,065 | 0,000181203 | 0,798372668   | 1,25254789      | 0,184615385     |
| PER3                                                                                            | 1,2179E-08  | -0,32492055  | 0,085 | 0,179 | 0,00025699  | 0,79834235    | 1,252595455     | 0,474860335     |
| ADAM17                                                                                          | 2,57178E-08 | -0,325228083 | 0,151 | 0,255 | 0,000542672 | 0,798172189   | 1,252862494     | 0,592156863     |
| DBNDD2                                                                                          | 3,39551E-08 | -0,325467926 | 0,023 | 0,083 | 0,000716486 | 0,798039507   | 1,253070796     | 0,277108434     |
| SPIRE1                                                                                          | 1,56043E-13 | -0,325474126 | 0,055 | 0,17  | 3,29266E-09 | 0,798036078   | 1,25307618      | 0,323529412     |
| CHPT1                                                                                           | 1,44996E-08 | -0,326053396 | 0,079 | 0,17  | 0,000305957 | 0,797715715   | 1,253579416     | 0,464705882     |
| MFSD14A                                                                                         | 4,38781E-09 | -0,326112248 | 0,023 | 0,088 | 9,25873E-05 | 0,797683174   | 1,253630555     | 0,261363636     |
| KSR1                                                                                            | 9,52217E-11 | -0,326277392 | 0,002 | 0,054 | 2,00927E-06 | 0,797591869   | 1,253774065     | 0,037037037     |
| EPHA2                                                                                           | 7,39396E-09 | -0,32639433  | 0,052 | 0,133 | 0,00015602  | 0,797527223   | 1,253875694     | 0,390977444     |
| KCNQ1OT1                                                                                        | 1,66368E-07 | -0,326514147 | 0,12  | 0,218 | 0,003510528 | 0,79746099    | 1,253979834     | 0,550458716     |

Supplementary Table 5

| Differentially expressed genes_total calculation_ comparing SC-Keloid vs. (SC-Myel, SC-Nonmyel) |             |              |       |       |             |               |                 |                 |
|-------------------------------------------------------------------------------------------------|-------------|--------------|-------|-------|-------------|---------------|-----------------|-----------------|
| gene                                                                                            | p_val       | avg_log2FC   | pct.1 | pct.2 | p_val_adj   | Foldchange_UP | Foldchange_DOWN | Ratio_pct1_pct2 |
| PPIL4                                                                                           | 7,82696E-10 | -0,326745025 | 0,162 | 0,281 | 1,65157E-05 | 0,797333381   | 1,254180527     | 0,576512456     |
| RNF145                                                                                          | 2,35287E-07 | -0,327197362 | 0,142 | 0,232 | 0,004964792 | 0,797083427   | 1,25457382      | 0,612068966     |
| TPCN1                                                                                           | 3,44393E-07 | -0,327532636 | 0,016 | 0,065 | 0,007267036 | 0,796898211   | 1,254865409     | 0,246153846     |
| VGLL4                                                                                           | 1,79282E-07 | -0,327879548 | 0,318 | 0,445 | 0,003783033 | 0,796706611   | 1,255167192     | 0,714606742     |
| SCD5                                                                                            | 3,43182E-11 | -0,327973862 | 0,01  | 0,076 | 7,24148E-07 | 0,796654529   | 1,255249249     | 0,131578947     |
| TBCC                                                                                            | 0,000938238 | -0,328157373 | 0,058 | 0,099 | 1           | 0,796553202   | 1,255408927     | 0,585858586     |
| SAFB2                                                                                           | 3,51747E-09 | -0,328369944 | 0,075 | 0,167 | 7,4222E-05  | 0,796435844   | 1,255593916     | 0,449101796     |
| ST6GALNAC5                                                                                      | 4,50033E-11 | -0,328652023 | 0,005 | 0,062 | 9,49615E-07 | 0,796280138   | 1,255839437     | 0,080645161     |
| POLR2J3                                                                                         | 5,13284E-06 | -0,328742627 | 0,034 | 0,085 | 0,108308036 | 0,796230132   | 1,255918309     | 0,4             |
| RPS9                                                                                            | 2,6455E-10  | -0,328952727 | 0,636 | 0,878 | 5,58227E-06 | 0,796114185   | 1,256101222     | 0,724373576     |
| ID3                                                                                             | 7,40202E-05 | -0,328972799 | 0,354 | 0,468 | 1           | 0,796103109   | 1,256118697     | 0,756410256     |
| ARPC1B                                                                                          | 4,05453E-09 | -0,329056956 | 0,361 | 0,539 | 8,55546E-05 | 0,796056671   | 1,256191973     | 0,669758813     |
| FBLN1                                                                                           | 1,78832E-08 | -0,329117559 | 0,03  | 0,098 | 0,000377354 | 0,796023232   | 1,256244743     | 0,306122449     |
| GALNT18                                                                                         | 2,41293E-11 | -0,329165896 | 0,001 | 0,054 | 5,09152E-07 | 0,795996562   | 1,256286834     | 0,018518519     |
| MEG3                                                                                            | 6,59498E-06 | -0,329354076 | 0,265 | 0,361 | 0,139160778 | 0,795892742   | 1,25645071      | 0,734072022     |
| RHPN1                                                                                           | 1,21557E-06 | -0,32948389  | 0,029 | 0,083 | 0,02564971  | 0,79582113    | 1,256563771     | 0,34939759      |
| DYRK3                                                                                           | 2,41663E-13 | -0,329516261 | 0,007 | 0,079 | 5,09932E-09 | 0,795803274   | 1,256591965     | 0,088607595     |
| CWC25                                                                                           | 1,14029E-05 | -0,329533722 | 0,076 | 0,138 | 0,24061234  | 0,795793642   | 1,256607175     | 0,550724638     |
| IRF2                                                                                            | 1,6382E-09  | -0,330091174 | 0,075 | 0,17  | 3,45677E-05 | 0,79548621    | 1,257092817     | 0,441176471     |
| WBP1                                                                                            | 4,18476E-06 | -0,330109369 | 0,037 | 0,091 | 0,088302719 | 0,795476177   | 1,257108671     | 0,406593407     |
| YOD1                                                                                            | 9,92913E-14 | -0,330215299 | 0,02  | 0,109 | 2,09515E-09 | 0,795417771   | 1,257200978     | 0,183486239     |
| TMEM71                                                                                          | 3,10645E-07 | -0,330477981 | 0,014 | 0,061 | 0,006554915 | 0,795272957   | 1,257429907     | 0,229508197     |
| FLRT3                                                                                           | 3,13992E-09 | -0,331777631 | 0,092 | 0,194 | 6,62554E-05 | 0,794556859   | 1,258563171     | 0,474226804     |
| SRSF10                                                                                          | 4,06161E-10 | -0,332246422 | 0,184 | 0,313 | 8,5704E-06  | 0,794298717   | 1,258972196     | 0,587859425     |
| EIF4B                                                                                           | 5,32571E-11 | -0,332345264 | 0,149 | 0,277 | 1,12378E-06 | 0,7942443     | 1,259058454     | 0,537906137     |
| P2RX7                                                                                           | 4,70744E-07 | -0,332471462 | 0,05  | 0,117 | 0,009933178 | 0,794174827   | 1,259168593     | 0,427350427     |
| RHOG                                                                                            | 5,95616E-05 | -0,33264606  | 0,106 | 0,167 | 1           | 0,79407872    | 1,25932099      | 0,634730539     |
| SNN                                                                                             | 1,43296E-10 | -0,332978678 | 0,034 | 0,114 | 3,02369E-06 | 0,793895664   | 1,259611363     | 0,298245614     |
| NFKB1                                                                                           | 2,68738E-05 | -0,333206748 | 0,126 | 0,193 | 0,56706469  | 0,79377017    | 1,259810506     | 0,652849741     |
| OFD1                                                                                            | 3,64642E-08 | -0,333257671 | 0,084 | 0,172 | 0,000769432 | 0,793742153   | 1,259854975     | 0,488372093     |

Supplementary Table 5

| Differentially expressed genes_total calculation_ comparing SC-Keloid vs. (SC-Myel, SC-Nonmyel) |             |              |       |       |             |               |                 |                 |
|-------------------------------------------------------------------------------------------------|-------------|--------------|-------|-------|-------------|---------------|-----------------|-----------------|
| gene                                                                                            | p_val       | avg_log2FC   | pct.1 | pct.2 | p_val_adj   | Foldchange_UP | Foldchange_DOWN | Ratio_pct1_pct2 |
| CHD6                                                                                            | 1,02129E-09 | -0,333267773 | 0,098 | 0,199 | 2,15502E-05 | 0,793736595   | 1,259863797     | 0,492462312     |
| ZMIZ1                                                                                           | 3,36133E-06 | -0,333377756 | 0,083 | 0,155 | 0,070927438 | 0,793676087   | 1,259959845     | 0,535483871     |
| SRRM1                                                                                           | 7,43902E-16 | -0,333521726 | 0,31  | 0,513 | 1,56971E-11 | 0,793596888   | 1,260085586     | 0,604288499     |
| C10orf82                                                                                        | 1,13753E-11 | -0,333833124 | 0,008 | 0,073 | 2,4003E-07  | 0,793425613   | 1,260357598     | 0,109589041     |
| CDC42EP3                                                                                        | 9,22081E-05 | -0,334139621 | 0,201 | 0,273 | 1           | 0,79325707    | 1,260625386     | 0,736263736     |
| SGMS1                                                                                           | 3,35096E-10 | -0,334667831 | 0,042 | 0,126 | 7,07086E-06 | 0,79296669    | 1,26108702      | 0,333333333     |
| GPX3                                                                                            | 1,60365E-06 | -0,334677582 | 0,001 | 0,03  | 0,033838516 | 0,79296133    | 1,261095544     | 0,033333333     |
| C11orf24                                                                                        | 0,000255408 | -0,335195679 | 0,098 | 0,152 | 1           | 0,792676615   | 1,261548507     | 0,644736842     |
| HDAC7                                                                                           | 5,43471E-06 | -0,335838806 | 0,061 | 0,123 | 0,114677919 | 0,792323333   | 1,262111007     | 0,495934959     |
| ITM2A                                                                                           | 3,11341E-12 | -0,335907057 | 0,003 | 0,065 | 6,56961E-08 | 0,792285851   | 1,262170717     | 0,046153846     |
| ATP6V1B2                                                                                        | 1,51098E-10 | -0,33592203  | 0,063 | 0,159 | 3,18831E-06 | 0,792277628   | 1,262183816     | 0,396226415     |
| UBE2V1                                                                                          | 2,33261E-09 | -0,336006732 | 0,113 | 0,22  | 4,92205E-05 | 0,792231114   | 1,262257922     | 0,513636364     |
| MICALL2                                                                                         | 2,49173E-06 | -0,336510508 | 0,18  | 0,267 | 0,052578086 | 0,791954523   | 1,262698768     | 0,674157303     |
| ESPN                                                                                            | 6,26551E-15 | -0,336784519 | 0,001 | 0,072 | 1,32209E-10 | 0,791804121   | 1,262938616     | 0,013888889     |
| ZNF608                                                                                          | 2,82056E-10 | -0,336956708 | 0,038 | 0,121 | 5,95167E-06 | 0,791709623   | 1,263089359     | 0,314049587     |
| CNN3                                                                                            | 9,34437E-11 | -0,337026987 | 0,6   | 0,798 | 1,97176E-06 | 0,791671057   | 1,26315089      | 0,751879699     |
| SDCBP                                                                                           | 8,51236E-07 | -0,337146924 | 0,176 | 0,269 | 0,01796194  | 0,791605245   | 1,263255905     | 0,654275093     |
| SH3BP2                                                                                          | 1,10283E-06 | -0,337337188 | 0,085 | 0,161 | 0,023270773 | 0,791500854   | 1,263422516     | 0,527950311     |
| C18orf32                                                                                        | 6,89194E-07 | -0,33734871  | 0,135 | 0,225 | 0,014542686 | 0,791494532   | 1,263432606     | 0,6             |
| CLDN11                                                                                          | 2,61694E-08 | -0,33737814  | 0,023 | 0,084 | 0,000552201 | 0,791478387   | 1,263458379     | 0,273809524     |
| CMTM6                                                                                           | 3,16476E-09 | -0,337418429 | 0,169 | 0,282 | 6,67796E-05 | 0,791456284   | 1,263493663     | 0,59929078      |
| KMT2C                                                                                           | 4,54745E-09 | -0,338131328 | 0,127 | 0,232 | 9,59558E-05 | 0,791065288   | 1,264118165     | 0,547413793     |
| RASEF                                                                                           | 1,1152E-13  | -0,338223853 | 0     | 0,062 | 2,35319E-09 | 0,791014556   | 1,26419924      | 0               |
| TCF7L1                                                                                          | 2,8048E-14  | -0,338834654 | 0,008 | 0,087 | 5,91841E-10 | 0,790679731   | 1,264734584     | 0,091954023     |
| HNRNPK                                                                                          | 5,91333E-17 | -0,338970816 | 0,399 | 0,662 | 1,24777E-12 | 0,790605109   | 1,264853956     | 0,602719033     |
| TMBIM6                                                                                          | 8,12307E-19 | -0,33898626  | 0,38  | 0,639 | 1,71405E-14 | 0,790596646   | 1,264867496     | 0,594679186     |
| USP42                                                                                           | 3,46102E-08 | -0,339059138 | 0,037 | 0,106 | 0,000730311 | 0,79055671    | 1,264931393     | 0,349056604     |
| ILKAP                                                                                           | 1,07914E-05 | -0,339536682 | 0,092 | 0,16  | 0,227709488 | 0,790295072   | 1,265350165     | 0,575           |
| PSD3                                                                                            | 5,78329E-11 | -0,339598306 | 0,026 | 0,104 | 1,22033E-06 | 0,790261316   | 1,265404215     | 0,25            |
| SIN3A                                                                                           | 8,20419E-10 | -0,339943954 | 0,064 | 0,156 | 1,73117E-05 | 0,790072004   | 1,265707423     | 0,41025641      |



Supplementary Table 5

| Differentially expressed genes_total calculation_ comparing SC-Keloid vs. (SC-Myel, SC-Nonmyel) |             |              |       |       |             |               |                 |                 |
|-------------------------------------------------------------------------------------------------|-------------|--------------|-------|-------|-------------|---------------|-----------------|-----------------|
| gene                                                                                            | p_val       | avg_log2FC   | pct.1 | pct.2 | p_val_adj   | Foldchange_UP | Foldchange_DOWN | Ratio_pct1_pct2 |
| SBNO2                                                                                           | 1,15955E-06 | -0,34030778  | 0,043 | 0,103 | 0,024467703 | 0,789872785   | 1,266026656     | 0,417475728     |
| CPQ                                                                                             | 1,73992E-05 | -0,340554856 | 0,13  | 0,204 | 0,367139801 | 0,789737523   | 1,266243493     | 0,637254902     |
| RPL23A                                                                                          | 7,2666E-11  | -0,340707543 | 0,637 | 0,891 | 1,53332E-06 | 0,789653946   | 1,266377513     | 0,714927048     |
| MAN2C1                                                                                          | 4,28952E-05 | -0,340782745 | 0,051 | 0,103 | 0,905131908 | 0,789612785   | 1,266443526     | 0,495145631     |
| SLC7A2                                                                                          | 7,92556E-11 | -0,34081112  | 0,014 | 0,081 | 1,67237E-06 | 0,789597255   | 1,266468435     | 0,172839506     |
| AKR1C1                                                                                          | 1,70802E-06 | -0,341184411 | 0,007 | 0,043 | 0,03604083  | 0,789392977   | 1,266796171     | 0,162790698     |
| TOX                                                                                             | 1,32866E-14 | -0,341851844 | 0,008 | 0,088 | 2,8036E-10  | 0,789027865   | 1,267382363     | 0,090909091     |
| ECHDC2                                                                                          | 1,29093E-10 | -0,341927477 | 0,015 | 0,083 | 2,724E-06   | 0,788986502   | 1,267448807     | 0,180722892     |
| MFAP3L                                                                                          | 3,0986E-12  | -0,342316973 | 0,006 | 0,071 | 6,53836E-08 | 0,788773521   | 1,267791036     | 0,084507042     |
| SPAG9                                                                                           | 1,26752E-13 | -0,342432035 | 0,232 | 0,4   | 2,6746E-09  | 0,788710615   | 1,267892153     | 0,58            |
| MRPS28                                                                                          | 0,01794073  | -0,342778387 | 0,084 | 0,115 | 1           | 0,78852129    | 1,268196576     | 0,730434783     |
| SERINC5                                                                                         | 2,54597E-07 | -0,342807218 | 0,102 | 0,189 | 0,005372246 | 0,788505532   | 1,26822192      | 0,53968254      |
| VEZF1                                                                                           | 3,54711E-08 | -0,342849243 | 0,156 | 0,259 | 0,000748475 | 0,788482564   | 1,268258863     | 0,602316602     |
| RNF5                                                                                            | 5,13557E-09 | -0,343017667 | 0,115 | 0,216 | 0,000108366 | 0,788390519   | 1,268406932     | 0,532407407     |
| RYR1                                                                                            | 7,41187E-17 | -0,343528643 | 0,001 | 0,081 | 1,56398E-12 | 0,788111335   | 1,268856258     | 0,012345679     |
| IL17B                                                                                           | 4,36596E-07 | -0,343529101 | 0,013 | 0,058 | 0,009212612 | 0,788111085   | 1,268856661     | 0,224137931     |
| IRF7                                                                                            | 8,71985E-05 | -0,343803326 | 0,058 | 0,109 | 1           | 0,787961297   | 1,269097866     | 0,532110092     |
| ZNF791                                                                                          | 2,00119E-06 | -0,343839547 | 0,044 | 0,104 | 0,042227034 | 0,787941514   | 1,269129729     | 0,423076923     |
| SSH2                                                                                            | 4,89886E-08 | -0,344028984 | 0,05  | 0,123 | 0,001033708 | 0,787838058   | 1,269296386     | 0,406504065     |
| KCNH8                                                                                           | 9,2072E-11  | -0,344091989 | 0,012 | 0,076 | 1,94281E-06 | 0,787803653   | 1,26935182      | 0,157894737     |
| BTA1                                                                                            | 3,23785E-09 | -0,344367982 | 0,034 | 0,107 | 6,83219E-05 | 0,787652957   | 1,269594675     | 0,317757009     |
| OTUD1                                                                                           | 2,29278E-09 | -0,344460402 | 0,04  | 0,117 | 4,83799E-05 | 0,787602501   | 1,269676009     | 0,341880342     |
| LZTS2                                                                                           | 0,000277788 | -0,344502456 | 0,071 | 0,119 | 1           | 0,787579543   | 1,269713019     | 0,596638655     |
| ELF1                                                                                            | 2,15377E-07 | -0,344558484 | 0,157 | 0,252 | 0,004544666 | 0,787548958   | 1,26976233      | 0,623015873     |
| SLITRK2                                                                                         | 1,00613E-15 | -0,344801704 | 0,009 | 0,098 | 2,12304E-11 | 0,787416198   | 1,269976414     | 0,091836735     |
| ARID1A                                                                                          | 1,21959E-07 | -0,344841012 | 0,122 | 0,216 | 0,002573451 | 0,787394744   | 1,270011017     | 0,564814815     |
| PDE9A                                                                                           | 1,69176E-14 | -0,345356139 | 0     | 0,066 | 3,56979E-10 | 0,787113648   | 1,270464567     | 0               |
| MEF2D                                                                                           | 9,03223E-09 | -0,345682082 | 0,09  | 0,185 | 0,000190589 | 0,786935839   | 1,270751631     | 0,486486486     |
| SBNO1                                                                                           | 4,99498E-07 | -0,346120752 | 0,093 | 0,172 | 0,010539916 | 0,786696597   | 1,271138077     | 0,540697674     |
| LINC00844                                                                                       | 2,91932E-08 | -0,346142674 | 0,019 | 0,076 | 0,000616005 | 0,786684643   | 1,271157393     | 0,25            |

Supplementary Table 5

| Differentially expressed genes_total calculation_ comparing SC-Keloid vs. (SC-Myel, SC-Nonmyel) |             |              |       |       |             |               |                 |                 |
|-------------------------------------------------------------------------------------------------|-------------|--------------|-------|-------|-------------|---------------|-----------------|-----------------|
| gene                                                                                            | p_val       | avg_log2FC   | pct.1 | pct.2 | p_val_adj   | Foldchange_UP | Foldchange_DOWN | Ratio_pct1_pct2 |
| PLXNA3                                                                                          | 2,8739E-05  | -0,34632203  | 0,078 | 0,14  | 0,606420711 | 0,786586848   | 1,271315433     | 0,557142857     |
| MAP1LC3B                                                                                        | 2,89257E-12 | -0,346399059 | 0,284 | 0,459 | 6,10361E-08 | 0,786544852   | 1,271383313     | 0,618736383     |
| ANKRD28                                                                                         | 1,36313E-07 | -0,346803751 | 0,086 | 0,171 | 0,002876346 | 0,786324248   | 1,271740001     | 0,502923977     |
| RELT                                                                                            | 6,71521E-10 | -0,346838316 | 0,02  | 0,087 | 1,41698E-05 | 0,786305409   | 1,27177047      | 0,229885057     |
| ST13                                                                                            | 5,50063E-14 | -0,347016098 | 0,289 | 0,475 | 1,16069E-09 | 0,786208519   | 1,271927199     | 0,608421053     |
| SCGB1D2                                                                                         | 0,001511568 | -0,347231237 | 0,001 | 0,015 | 1           | 0,786091286   | 1,272116887     | 0,066666667     |
| FUNDC2                                                                                          | 5,75348E-08 | -0,347307398 | 0,17  | 0,27  | 0,001214041 | 0,786049789   | 1,272184045     | 0,62962963      |
| NDEL1                                                                                           | 1,38544E-10 | -0,347694893 | 0,084 | 0,189 | 2,92341E-06 | 0,785838692   | 1,272525788     | 0,444444444     |
| RPS10                                                                                           | 4,08646E-15 | -0,347712219 | 0,448 | 0,767 | 8,62284E-11 | 0,785829254   | 1,27254107      | 0,584093872     |
| WAC                                                                                             | 4,10063E-15 | -0,347730145 | 0,177 | 0,342 | 8,65273E-11 | 0,78581949    | 1,272556882     | 0,51754386      |
| UBALD2                                                                                          | 1,40312E-06 | -0,348331019 | 0,177 | 0,265 | 0,029607271 | 0,785492269   | 1,273087005     | 0,667924528     |
| UCKL1                                                                                           | 2,50576E-06 | -0,348805639 | 0,07  | 0,137 | 0,052874095 | 0,785233899   | 1,273505896     | 0,510948905     |
| ZFYVE28                                                                                         | 1,96299E-08 | -0,349130854 | 0,015 | 0,071 | 0,000414211 | 0,78505691    | 1,273793005     | 0,211267606     |
| EP300                                                                                           | 7,18848E-08 | -0,349237133 | 0,088 | 0,175 | 0,001516842 | 0,784999079   | 1,273886844     | 0,502857143     |
| RAN                                                                                             | 2,7666E-10  | -0,34973947  | 0,347 | 0,518 | 5,8378E-06  | 0,784725796   | 1,27433048      | 0,66988417      |
| CDK9                                                                                            | 6,00388E-07 | -0,349916098 | 0,055 | 0,122 | 0,012668781 | 0,784629728   | 1,274486505     | 0,450819672     |
| ARHGAP5                                                                                         | 7,62363E-16 | -0,350326799 | 0,177 | 0,351 | 1,60866E-11 | 0,784406394   | 1,274849373     | 0,504273504     |
| SUN2                                                                                            | 1,48504E-06 | -0,350737926 | 0,147 | 0,232 | 0,031335764 | 0,784182892   | 1,275212721     | 0,63362069      |
| WDR74                                                                                           | 0,000468183 | -0,350812257 | 0,052 | 0,095 | 1           | 0,784142491   | 1,275278424     | 0,547368421     |
| GHITM                                                                                           | 1,53511E-08 | -0,350953352 | 0,187 | 0,296 | 0,000323924 | 0,784065806   | 1,275403152     | 0,631756757     |
| RBMX                                                                                            | 2,06288E-12 | -0,351496407 | 0,217 | 0,366 | 4,35289E-08 | 0,783770725   | 1,275883326     | 0,592896175     |
| EIF1AX                                                                                          | 1,22116E-13 | -0,353229566 | 0,272 | 0,45  | 2,57677E-09 | 0,78282972    | 1,27741701      | 0,604444444     |
| NGF                                                                                             | 7,49171E-07 | -0,353231743 | 0,015 | 0,061 | 0,015808261 | 0,782828539   | 1,277418937     | 0,245901639     |
| YY1AP1                                                                                          | 2,43542E-08 | -0,353250618 | 0,068 | 0,151 | 0,000513897 | 0,782818297   | 1,27743565      | 0,450331126     |
| GTDC1                                                                                           | 3,26483E-06 | -0,353618479 | 0,057 | 0,121 | 0,068891143 | 0,782618718   | 1,277761414     | 0,47107438      |
| NR1D1                                                                                           | 7,01022E-08 | -0,35386234  | 0,04  | 0,107 | 0,001479226 | 0,782486442   | 1,277977414     | 0,373831776     |
| TNFRSF25                                                                                        | 1,37751E-09 | -0,354045062 | 0,014 | 0,075 | 2,90669E-05 | 0,782387344   | 1,278139284     | 0,186666667     |
| DUSP16                                                                                          | 1,02256E-09 | -0,354097438 | 0,031 | 0,107 | 2,15769E-05 | 0,78235894    | 1,278185687     | 0,289719626     |
| SLC39A6                                                                                         | 1,97317E-08 | -0,354347309 | 0,105 | 0,198 | 0,000416358 | 0,78222345    | 1,278407085     | 0,53030303      |
| DNAJC3-DT                                                                                       | 3,34854E-07 | -0,354510641 | 0,021 | 0,073 | 0,007065755 | 0,782134897   | 1,278551826     | 0,287671233     |

Supplementary Table 5

| Differentially expressed genes_total calculation_ comparing SC-Keloid vs. (SC-Myel, SC-Nonmyel) |             |              |       |       |             |               |                 |                 |
|-------------------------------------------------------------------------------------------------|-------------|--------------|-------|-------|-------------|---------------|-----------------|-----------------|
| gene                                                                                            | p_val       | avg_log2FC   | pct.1 | pct.2 | p_val_adj   | Foldchange_UP | Foldchange_DOWN | Ratio_pct1_pct2 |
| NSD3                                                                                            | 1,00024E-11 | -0,354949259 | 0,203 | 0,343 | 2,1106E-07  | 0,781897143   | 1,278940599     | 0,591836735     |
| PDZD4                                                                                           | 8,88567E-09 | -0,354984289 | 0,026 | 0,091 | 0,000187497 | 0,781878158   | 1,278971653     | 0,285714286     |
| CASKIN2                                                                                         | 1,88011E-07 | -0,355599698 | 0,049 | 0,119 | 0,003967213 | 0,781544704   | 1,279517339     | 0,411764706     |
| RAB21                                                                                           | 1,7909E-13  | -0,355954382 | 0,129 | 0,274 | 3,77897E-09 | 0,781352586   | 1,279831945     | 0,47080292      |
| CRYZL1                                                                                          | 2,81714E-05 | -0,356109759 | 0,055 | 0,109 | 0,594445249 | 0,781268439   | 1,27996979      | 0,504587156     |
| MYO1C                                                                                           | 6,35101E-09 | -0,356371306 | 0,175 | 0,292 | 0,000134013 | 0,781126816   | 1,280201857     | 0,599315068     |
| HSPA9                                                                                           | 4,76339E-15 | -0,356498881 | 0,201 | 0,37  | 1,00512E-10 | 0,781057745   | 1,280315067     | 0,543243243     |
| DYNLL2                                                                                          | 1,04965E-08 | -0,356502865 | 0,104 | 0,201 | 0,000221487 | 0,781055588   | 1,280318603     | 0,517412935     |
| SAP30                                                                                           | 3,32739E-12 | -0,357259512 | 0,092 | 0,214 | 7,02112E-08 | 0,780646057   | 1,280990265     | 0,429906542     |
| BACH2                                                                                           | 7,59242E-09 | -0,357523273 | 0,043 | 0,119 | 0,000160208 | 0,780503349   | 1,281224484     | 0,361344538     |
| GPR137B                                                                                         | 1,11164E-07 | -0,357647577 | 0,109 | 0,197 | 0,002345676 | 0,780436103   | 1,28133488      | 0,553299492     |
| PPM1B                                                                                           | 5,24426E-10 | -0,357814973 | 0,087 | 0,19  | 1,10659E-05 | 0,780345554   | 1,281483562     | 0,457894737     |
| WBP1L                                                                                           | 1,88094E-05 | -0,357858732 | 0,038 | 0,088 | 0,396896116 | 0,780321885   | 1,281522432     | 0,431818182     |
| CCT4                                                                                            | 1,09164E-11 | -0,357970579 | 0,2   | 0,345 | 2,30347E-07 | 0,780261392   | 1,281621788     | 0,579710145     |
| ADM                                                                                             | 1,01078E-11 | -0,358003872 | 0,01  | 0,079 | 2,13284E-07 | 0,780243386   | 1,281651364     | 0,126582278     |
| INPP5K                                                                                          | 0,000390895 | -0,358434851 | 0,066 | 0,113 | 1           | 0,780010338   | 1,282034291     | 0,584070796     |
| SAMD4B                                                                                          | 6,82271E-07 | -0,358450124 | 0,154 | 0,242 | 0,014396609 | 0,78000208    | 1,282047863     | 0,636363636     |
| RASGEF1A                                                                                        | 1,6618E-08  | -0,35888625  | 0,022 | 0,083 | 0,000350656 | 0,779766321   | 1,282435484     | 0,265060241     |
| RNF169                                                                                          | 1,70998E-07 | -0,359028827 | 0,07  | 0,148 | 0,003608227 | 0,779689263   | 1,28256223      | 0,472972973     |
| CNN1                                                                                            | 2,97481E-07 | -0,359082174 | 0,026 | 0,081 | 0,00627715  | 0,779660433   | 1,282609657     | 0,320987654     |
| AVPI1                                                                                           | 8,02922E-08 | -0,359961578 | 0,051 | 0,123 | 0,001694245 | 0,779185331   | 1,283391718     | 0,414634146     |
| RALGDS                                                                                          | 4,19282E-06 | -0,360051666 | 0,055 | 0,115 | 0,088472593 | 0,779136677   | 1,28347186      | 0,47826087      |
| CSAD                                                                                            | 5,78343E-05 | -0,360074452 | 0,098 | 0,159 | 1           | 0,779124371   | 1,283492132     | 0,616352201     |
| CSGALNACT2                                                                                      | 2,09261E-09 | -0,360278499 | 0,097 | 0,197 | 4,41562E-05 | 0,779014184   | 1,283673675     | 0,492385787     |
| RNF10                                                                                           | 1,49779E-07 | -0,360561396 | 0,106 | 0,19  | 0,00316048  | 0,778861442   | 1,283925415     | 0,557894737     |
| GNAQ                                                                                            | 2,6621E-13  | -0,360916718 | 0,069 | 0,189 | 5,61729E-09 | 0,77866964    | 1,284241672     | 0,365079365     |
| GNRH1                                                                                           | 1,19824E-11 | -0,361048391 | 0,015 | 0,088 | 2,52841E-07 | 0,778598575   | 1,284358888     | 0,170454545     |
| CST3                                                                                            | 1,53528E-06 | -0,361178903 | 0,701 | 0,852 | 0,032395898 | 0,778528143   | 1,284475082     | 0,822769953     |
| UBE2E3                                                                                          | 2,36674E-10 | -0,361339773 | 0,192 | 0,318 | 4,99406E-06 | 0,778441337   | 1,284618317     | 0,603773585     |
| FAM53B                                                                                          | 1,54867E-10 | -0,362108372 | 0,023 | 0,098 | 3,26785E-06 | 0,778026731   | 1,285302883     | 0,234693878     |

Supplementary Table 5

| Differentially expressed genes_total calculation_ comparing SC-Keloid vs. (SC-Myel, SC-Nonmyel) |             |              |       |       |             |               |                 |                 |
|-------------------------------------------------------------------------------------------------|-------------|--------------|-------|-------|-------------|---------------|-----------------|-----------------|
| gene                                                                                            | p_val       | avg_log2FC   | pct.1 | pct.2 | p_val_adj   | Foldchange_UP | Foldchange_DOWN | Ratio_pct1_pct2 |
| RPL9                                                                                            | 3,81057E-14 | -0,362452661 | 0,62  | 0,877 | 8,04068E-10 | 0,777841082   | 1,285609648     | 0,70695553      |
| ATXN7                                                                                           | 9,65546E-08 | -0,363131235 | 0,021 | 0,076 | 0,002037399 | 0,777475309   | 1,286214479     | 0,276315789     |
| BBS2                                                                                            | 2,91368E-08 | -0,363231096 | 0,043 | 0,117 | 0,000614816 | 0,777421496   | 1,286303511     | 0,367521368     |
| RSF1                                                                                            | 7,63203E-15 | -0,363637719 | 0,194 | 0,362 | 1,61043E-10 | 0,777202411   | 1,286666106     | 0,535911602     |
| LGALS1                                                                                          | 1,24244E-12 | -0,363651206 | 0,012 | 0,085 | 2,62166E-08 | 0,777195145   | 1,286678135     | 0,141176471     |
| CYP7B1                                                                                          | 5,47445E-10 | -0,363956463 | 0,043 | 0,126 | 1,15516E-05 | 0,777030717   | 1,286950409     | 0,341269841     |
| CRTC2                                                                                           | 1,62357E-08 | -0,363973299 | 0,035 | 0,104 | 0,00034259  | 0,777021649   | 1,286965428     | 0,336538462     |
| FBLN5                                                                                           | 3,91736E-13 | -0,36468248  | 0,013 | 0,091 | 8,26603E-09 | 0,776639785   | 1,287598213     | 0,142857143     |
| ALDH6A1                                                                                         | 6,94296E-09 | -0,365093053 | 0,038 | 0,113 | 0,000146503 | 0,776418795   | 1,2879647       | 0,336283186     |
| STX3                                                                                            | 3,15873E-12 | -0,36516031  | 0,023 | 0,107 | 6,66523E-08 | 0,7763826     | 1,288024745     | 0,214953271     |
| GJA1                                                                                            | 9,53831E-14 | -0,36563157  | 0,024 | 0,119 | 2,01268E-09 | 0,776129034   | 1,28844555      | 0,201680672     |
| CD46                                                                                            | 1,74881E-11 | -0,36571825  | 0,203 | 0,345 | 3,69017E-07 | 0,776082404   | 1,288522965     | 0,588405797     |
| LMBRD1                                                                                          | 2,76187E-09 | -0,366258808 | 0,14  | 0,247 | 5,82783E-05 | 0,775791671   | 1,289005847     | 0,566801619     |
| KCMF1                                                                                           | 9,7175E-11  | -0,366894886 | 0,134 | 0,252 | 2,05049E-06 | 0,775449703   | 1,289574289     | 0,531746032     |
| MED13                                                                                           | 1,82464E-09 | -0,367340194 | 0,132 | 0,242 | 3,85017E-05 | 0,775210387   | 1,289972396     | 0,545454545     |
| RBM38                                                                                           | 1,09796E-05 | -0,367400627 | 0,047 | 0,1   | 0,231680569 | 0,775177915   | 1,290026433     | 0,47            |
| DYRK1A                                                                                          | 4,4003E-10  | -0,367878199 | 0,062 | 0,156 | 9,28508E-06 | 0,774921352   | 1,290453538     | 0,397435897     |
| HNRNPM                                                                                          | 2,40297E-12 | -0,368382017 | 0,296 | 0,472 | 5,07051E-08 | 0,774650781   | 1,290904269     | 0,627118644     |
| PCGF5                                                                                           | 2,76551E-07 | -0,368855078 | 0,081 | 0,16  | 0,005835496 | 0,774396814   | 1,291327627     | 0,50625         |
| FA2H                                                                                            | 1,44426E-14 | -0,368982289 | 0,002 | 0,073 | 3,04753E-10 | 0,774328534   | 1,291441496     | 0,02739726      |
| PNMA1                                                                                           | 5,02637E-06 | -0,36908768  | 0,129 | 0,205 | 0,106061415 | 0,77427197    | 1,291535841     | 0,629268293     |
| FBXL3                                                                                           | 6,15988E-08 | -0,369143762 | 0,136 | 0,231 | 0,001299796 | 0,774241872   | 1,291586048     | 0,588744589     |
| EVA1C                                                                                           | 9,45906E-12 | -0,369147646 | 0,019 | 0,095 | 1,99596E-07 | 0,774239788   | 1,291589525     | 0,2             |
| SARAF                                                                                           | 2,03714E-14 | -0,369265456 | 0,314 | 0,512 | 4,29858E-10 | 0,774176566   | 1,291695001     | 0,61328125      |
| A2M                                                                                             | 7,51025E-07 | -0,369368766 | 0,058 | 0,129 | 0,015847371 | 0,77412113    | 1,2917875       | 0,449612403     |
| ANTXR2                                                                                          | 1,63211E-11 | -0,369447078 | 0,05  | 0,149 | 3,44391E-07 | 0,774079111   | 1,291857623     | 0,33557047      |
| KCTD3                                                                                           | 1,14594E-07 | -0,369529169 | 0,057 | 0,13  | 0,00241805  | 0,774035066   | 1,291931133     | 0,438461538     |
| FAM3C                                                                                           | 1,2263E-11  | -0,36971866  | 0,268 | 0,417 | 2,58761E-07 | 0,773933407   | 1,292100834     | 0,642685851     |
| PTGS2                                                                                           | 1,48739E-07 | -0,371217417 | 0,008 | 0,052 | 0,003138543 | 0,773129817   | 1,293443841     | 0,153846154     |
| SNRNP70                                                                                         | 3,60784E-11 | -0,371526123 | 0,221 | 0,365 | 7,6129E-07  | 0,772964401   | 1,293720641     | 0,605479452     |

Supplementary Table 5

| Differentially expressed genes_total calculation_ comparing SC-Keloid vs. (SC-Myel, SC-Nonmyel) |             |              |       |       |             |               |                 |                 |
|-------------------------------------------------------------------------------------------------|-------------|--------------|-------|-------|-------------|---------------|-----------------|-----------------|
| gene                                                                                            | p_val       | avg_log2FC   | pct.1 | pct.2 | p_val_adj   | Foldchange_UP | Foldchange_DOWN | Ratio_pct1_pct2 |
| FAXDC2                                                                                          | 5,55758E-13 | -0,371580426 | 0,007 | 0,077 | 1,1727E-08  | 0,772935307   | 1,293769338     | 0,090909091     |
| TBC1D17                                                                                         | 1,69974E-07 | -0,37203469  | 0,033 | 0,094 | 0,003586623 | 0,77269197    | 1,294176773     | 0,35106383      |
| GPSM1                                                                                           | 1,72501E-07 | -0,372213647 | 0,09  | 0,17  | 0,003639939 | 0,772596129   | 1,294337317     | 0,529411765     |
| GSTM3                                                                                           | 2,83071E-10 | -0,372259713 | 0,097 | 0,206 | 5,97309E-06 | 0,772571459   | 1,294378647     | 0,470873786     |
| FBXW7                                                                                           | 2,18557E-07 | -0,372297325 | 0,119 | 0,208 | 0,004611781 | 0,772551318   | 1,294412392     | 0,572115385     |
| ZFYVE21                                                                                         | 1,23107E-12 | -0,372689293 | 0,113 | 0,243 | 2,59767E-08 | 0,772341451   | 1,294764121     | 0,465020576     |
| ETFDH                                                                                           | 8,86735E-11 | -0,372746931 | 0,043 | 0,13  | 1,8711E-06  | 0,772310595   | 1,29481585      | 0,330769231     |
| ST6GALNAC6                                                                                      | 2,49406E-08 | -0,373096706 | 0,03  | 0,095 | 0,000526272 | 0,772123375   | 1,295129811     | 0,315789474     |
| HECA                                                                                            | 5,81165E-13 | -0,374142882 | 0,028 | 0,119 | 1,22632E-08 | 0,77156367    | 1,296069319     | 0,235294118     |
| MPRIP                                                                                           | 1,37528E-09 | -0,374219407 | 0,137 | 0,25  | 2,90198E-05 | 0,771522744   | 1,296138069     | 0,548           |
| HLA-DPA1                                                                                        | 8,61254E-11 | -0,374804482 | 0,019 | 0,091 | 1,81733E-06 | 0,771209922   | 1,296663815     | 0,208791209     |
| MEGF6                                                                                           | 1,8347E-07  | -0,375656472 | 0,021 | 0,075 | 0,003871392 | 0,770754615   | 1,297429792     | 0,28            |
| RAB40B                                                                                          | 3,92293E-10 | -0,375930416 | 0,038 | 0,119 | 8,27778E-06 | 0,770608275   | 1,297676176     | 0,319327731     |
| STC1                                                                                            | 0,012890848 | -0,376546812 | 0,015 | 0,034 | 1           | 0,770279101   | 1,29823073      | 0,441176471     |
| MTRFR                                                                                           | 2,23439E-10 | -0,376829825 | 0,037 | 0,121 | 4,71478E-06 | 0,77012801    | 1,298485429     | 0,305785124     |
| TLE3                                                                                            | 1,12461E-10 | -0,376944634 | 0,15  | 0,277 | 2,37303E-06 | 0,770066726   | 1,298588766     | 0,541516245     |
| RPL10A                                                                                          | 2,50675E-13 | -0,376961679 | 0,529 | 0,832 | 5,2895E-09  | 0,770057628   | 1,298604109     | 0,635817308     |
| PLCB1                                                                                           | 9,6299E-10  | -0,377209178 | 0,062 | 0,153 | 2,032E-05   | 0,769925534   | 1,298826908     | 0,405228758     |
| TMED5                                                                                           | 3,37638E-09 | -0,377612617 | 0,109 | 0,212 | 7,12451E-05 | 0,76971026    | 1,299190165     | 0,514150943     |
| ANKRD36                                                                                         | 9,04951E-09 | -0,377666569 | 0,04  | 0,113 | 0,000190954 | 0,769681476   | 1,299238752     | 0,353982301     |
| KCTD1                                                                                           | 1,85213E-08 | -0,37776179  | 0,027 | 0,091 | 0,000390817 | 0,769630677   | 1,299324508     | 0,296703297     |
| DCP1A                                                                                           | 1,86381E-10 | -0,377903212 | 0,093 | 0,199 | 3,93282E-06 | 0,769555236   | 1,299451882     | 0,467336683     |
| NASP                                                                                            | 8,75152E-09 | -0,378043075 | 0,233 | 0,355 | 0,000184666 | 0,769480635   | 1,299577863     | 0,656338028     |
| MAPRE2                                                                                          | 6,27536E-13 | -0,378073886 | 0,148 | 0,296 | 1,32416E-08 | 0,769464202   | 1,299605619     | 0,5             |
| SRSF11                                                                                          | 1,23159E-15 | -0,378120371 | 0,313 | 0,517 | 2,59878E-11 | 0,769439409   | 1,299647494     | 0,605415861     |
| GALNT2                                                                                          | 1,2112E-07  | -0,379398422 | 0,201 | 0,301 | 0,002555758 | 0,768758082   | 1,300799333     | 0,667774086     |
| BAZ2A                                                                                           | 1,78272E-10 | -0,38012882  | 0,094 | 0,202 | 3,76173E-06 | 0,768368979   | 1,301458059     | 0,465346535     |
| MAFB                                                                                            | 0,000554609 | -0,38053491  | 0,149 | 0,212 | 1           | 0,768152729   | 1,301824445     | 0,702830189     |
| PRDX1                                                                                           | 2,76976E-13 | -0,381336834 | 0,349 | 0,544 | 5,84446E-09 | 0,767725869   | 1,302548267     | 0,641544118     |
| FZD7                                                                                            | 1,31451E-13 | -0,381626114 | 0,016 | 0,1   | 2,77375E-09 | 0,767571944   | 1,302809472     | 0,16            |

Supplementary Table 5

| Differentially expressed genes_total calculation_ comparing SC-Keloid vs. (SC-Myel, SC-Nonmyel) |             |              |       |       |             |               |                 |                 |
|-------------------------------------------------------------------------------------------------|-------------|--------------|-------|-------|-------------|---------------|-----------------|-----------------|
| gene                                                                                            | p_val       | avg_log2FC   | pct.1 | pct.2 | p_val_adj   | Foldchange_UP | Foldchange_DOWN | Ratio_pct1_pct2 |
| RASAL2                                                                                          | 1,25459E-07 | -0,382322321 | 0,058 | 0,133 | 0,002647315 | 0,767201624   | 1,303438326     | 0,436090226     |
| POLD4                                                                                           | 4,79886E-05 | -0,382561504 | 0,062 | 0,114 | 1           | 0,767074441   | 1,303654439     | 0,543859649     |
| HPS5                                                                                            | 5,97283E-11 | -0,382563299 | 0,044 | 0,136 | 1,26033E-06 | 0,767073487   | 1,303656061     | 0,323529412     |
| FAM126A                                                                                         | 7,38704E-10 | -0,382665709 | 0,146 | 0,265 | 1,55874E-05 | 0,767019037   | 1,303748605     | 0,550943396     |
| VPS37B                                                                                          | 8,66812E-09 | -0,382952804 | 0,1   | 0,195 | 0,000182906 | 0,766866417   | 1,304008075     | 0,512820513     |
| MARCHF5                                                                                         | 1,56825E-11 | -0,383772037 | 0,076 | 0,186 | 3,30916E-07 | 0,766431076   | 1,304748766     | 0,408602151     |
| ADAMTS9-AS2                                                                                     | 6,96481E-15 | -0,383850739 | 0,009 | 0,094 | 1,46964E-10 | 0,766389266   | 1,304819944     | 0,095744681     |
| H2AW                                                                                            | 4,7475E-09  | -0,38398909  | 0,047 | 0,125 | 0,000100177 | 0,766315775   | 1,304945079     | 0,376           |
| SWAP70                                                                                          | 2,65849E-13 | -0,384205194 | 0,012 | 0,09  | 5,60967E-09 | 0,766200996   | 1,305140564     | 0,133333333     |
| CLDND2                                                                                          | 1,12467E-11 | -0,385121216 | 0,008 | 0,073 | 2,37317E-07 | 0,76571466    | 1,305969511     | 0,109589041     |
| RNF103                                                                                          | 1,45442E-11 | -0,385164995 | 0,051 | 0,149 | 3,06898E-07 | 0,765691425   | 1,306009141     | 0,342281879     |
| MTSS2                                                                                           | 1,81219E-06 | -0,385372539 | 0,068 | 0,134 | 0,038239095 | 0,765581281   | 1,306197035     | 0,507462687     |
| TXNRD1                                                                                          | 0,002067559 | -0,385989059 | 0,087 | 0,133 | 1           | 0,765254188   | 1,306755344     | 0,654135338     |
| PKN2                                                                                            | 9,11138E-12 | -0,386586626 | 0,127 | 0,254 | 1,92259E-07 | 0,764937284   | 1,307296717     | 0,5             |
| FGFR1OP2                                                                                        | 2,93051E-10 | -0,386755986 | 0,116 | 0,228 | 6,18367E-06 | 0,764847493   | 1,307450191     | 0,50877193      |
| ZNF219                                                                                          | 1,36609E-12 | -0,387165422 | 0,05  | 0,155 | 2,8826E-08  | 0,76463046    | 1,307821297     | 0,322580645     |
| AFTPH                                                                                           | 1,10508E-06 | -0,38728429  | 0,075 | 0,145 | 0,023318279 | 0,764567462   | 1,307929057     | 0,517241379     |
| DAB2IP                                                                                          | 3,55711E-13 | -0,387287092 | 0,022 | 0,11  | 7,50586E-09 | 0,764565977   | 1,307931597     | 0,2             |
| TSC2                                                                                            | 1,93565E-05 | -0,387795902 | 0,095 | 0,16  | 0,408441102 | 0,764296378   | 1,30839296      | 0,59375         |
| FRYL                                                                                            | 1,63739E-09 | -0,387844381 | 0,085 | 0,185 | 3,45505E-05 | 0,764270695   | 1,308436927     | 0,459459459     |
| SERPINA3                                                                                        | 4,1433E-11  | -0,388347186 | 0,001 | 0,053 | 8,74277E-07 | 0,76400438    | 1,30889302      | 0,018867925     |
| PPP1R12B                                                                                        | 7,57748E-11 | -0,388617146 | 0,056 | 0,153 | 1,59892E-06 | 0,763861431   | 1,309137965     | 0,366013072     |
| TET1                                                                                            | 1,57345E-09 | -0,388626712 | 0,045 | 0,128 | 3,32013E-05 | 0,763856366   | 1,309146646     | 0,3515625       |
| STAG2                                                                                           | 7,57857E-12 | -0,388921525 | 0,155 | 0,289 | 1,59915E-07 | 0,763700289   | 1,309414196     | 0,53633218      |
| DCAF8                                                                                           | 2,21145E-08 | -0,388931179 | 0,072 | 0,156 | 0,000466638 | 0,763695179   | 1,309422958     | 0,461538462     |
| PSAP                                                                                            | 3,83466E-13 | -0,389088745 | 0,539 | 0,809 | 8,09152E-09 | 0,763611775   | 1,309565976     | 0,666254635     |
| ARHGAP39                                                                                        | 3,39524E-13 | -0,389515882 | 0,02  | 0,106 | 7,16431E-09 | 0,763385727   | 1,309953755     | 0,188679245     |
| CBX7                                                                                            | 2,07294E-10 | -0,389899187 | 0,016 | 0,084 | 4,37411E-06 | 0,763182932   | 1,310301839     | 0,19047619      |
| MEG8                                                                                            | 0,000945936 | -0,390141168 | 0,05  | 0,09  | 1           | 0,763054936   | 1,310521632     | 0,555555556     |
| DHX15                                                                                           | 8,06402E-10 | -0,390196974 | 0,092 | 0,193 | 1,70159E-05 | 0,76302542    | 1,310572327     | 0,476683938     |

Supplementary Table 5

| Differentially expressed genes_total calculation_ comparing SC-Keloid vs. (SC-Myel, SC-Nonmyel) |             |              |       |       |             |               |                 |                 |
|-------------------------------------------------------------------------------------------------|-------------|--------------|-------|-------|-------------|---------------|-----------------|-----------------|
| gene                                                                                            | p_val       | avg_log2FC   | pct.1 | pct.2 | p_val_adj   | Foldchange_UP | Foldchange_DOWN | Ratio_pct1_pct2 |
| MX2                                                                                             | 3,28879E-11 | -0,390861714 | 0,031 | 0,118 | 6,93967E-07 | 0,762673927   | 1,311176329     | 0,262711864     |
| YPEL2                                                                                           | 3,40225E-12 | -0,391410602 | 0,073 | 0,187 | 7,17909E-08 | 0,762383816   | 1,311675274     | 0,390374332     |
| SEPTIN10                                                                                        | 1,40714E-14 | -0,391545105 | 0,19  | 0,347 | 2,9692E-10  | 0,762312741   | 1,311797568     | 0,547550432     |
| PLEKHG3                                                                                         | 6,77898E-18 | -0,391789511 | 0,001 | 0,087 | 1,43043E-13 | 0,76218361    | 1,312019817     | 0,011494253     |
| SEMA4A                                                                                          | 2,77175E-12 | -0,391915572 | 0,009 | 0,079 | 5,84868E-08 | 0,762117014   | 1,312134465     | 0,113924051     |
| CHMP2B                                                                                          | 9,07198E-08 | -0,392388071 | 0,144 | 0,242 | 0,001914278 | 0,761867453   | 1,312564274     | 0,595041322     |
| GPNMB                                                                                           | 1,38983E-09 | -0,392417127 | 0,035 | 0,111 | 2,93269E-05 | 0,761852109   | 1,312590709     | 0,315315315     |
| C1orf52                                                                                         | 4,57853E-10 | -0,392747661 | 0,091 | 0,191 | 9,66115E-06 | 0,761677582   | 1,31289147      | 0,476439791     |
| FOXN2                                                                                           | 5,53714E-09 | -0,392799845 | 0,058 | 0,142 | 0,000116839 | 0,761650032   | 1,312938959     | 0,408450704     |
| ZNF83                                                                                           | 2,12819E-06 | -0,392839139 | 0,08  | 0,151 | 0,044906839 | 0,761629287   | 1,31297472      | 0,529801325     |
| BIRC2                                                                                           | 1,0296E-09  | -0,393005643 | 0,207 | 0,328 | 2,17257E-05 | 0,761541391   | 1,313126262     | 0,631097561     |
| TFAP2A                                                                                          | 3,16696E-07 | -0,393970216 | 0,157 | 0,247 | 0,006682599 | 0,761032401   | 1,3140045       | 0,63562753      |
| COMT                                                                                            | 1,45802E-15 | -0,394481087 | 0,37  | 0,612 | 3,07658E-11 | 0,760762961   | 1,314469883     | 0,604575163     |
| WNT6                                                                                            | 5,09563E-14 | -0,39477234  | 0,002 | 0,071 | 1,07523E-09 | 0,760609393   | 1,314735276     | 0,028169014     |
| ATP1B3                                                                                          | 4,82085E-08 | -0,395004034 | 0,143 | 0,24  | 0,001017247 | 0,76048725    | 1,314946437     | 0,595833333     |
| LRRC1                                                                                           | 1,61297E-13 | -0,395222636 | 0,015 | 0,099 | 3,40353E-09 | 0,760372027   | 1,315145697     | 0,151515152     |
| CSNK1E                                                                                          | 3,08513E-06 | -0,395330433 | 0,214 | 0,303 | 0,065099368 | 0,760315215   | 1,315243967     | 0,706270627     |
| DIO2                                                                                            | 1,3125E-11  | -0,395404664 | 0,001 | 0,056 | 2,76951E-07 | 0,760276096   | 1,315311642     | 0,017857143     |
| FBXO11                                                                                          | 1,08006E-10 | -0,395482655 | 0,095 | 0,204 | 2,27903E-06 | 0,760234997   | 1,315382749     | 0,465686275     |
| SNHG7                                                                                           | 3,72801E-12 | -0,395602828 | 0,18  | 0,323 | 7,86648E-08 | 0,760171674   | 1,315492322     | 0,557275542     |
| RB1CC1                                                                                          | 2,37025E-09 | -0,395892486 | 0,134 | 0,244 | 5,00146E-05 | 0,760019065   | 1,315756468     | 0,549180328     |
| SPTAN1                                                                                          | 1,38852E-14 | -0,396583701 | 0,264 | 0,449 | 2,92991E-10 | 0,759655017   | 1,316387015     | 0,587973274     |
| ANK2                                                                                            | 1,21695E-05 | -0,396906055 | 0,149 | 0,228 | 0,256788541 | 0,759485299   | 1,31668118      | 0,653508772     |
| NOLC1                                                                                           | 2,90345E-07 | -0,397148648 | 0,079 | 0,157 | 0,006126563 | 0,759357601   | 1,316902602     | 0,503184713     |
| NFASC                                                                                           | 1,81294E-12 | -0,397606376 | 0,001 | 0,06  | 3,82548E-08 | 0,759116715   | 1,317320486     | 0,016666667     |
| RDH5                                                                                            | 2,28083E-08 | -0,397789082 | 0,019 | 0,076 | 0,000481279 | 0,759020585   | 1,317487324     | 0,25            |
| PSIP1                                                                                           | 9,2209E-10  | -0,397797524 | 0,091 | 0,194 | 1,9457E-05  | 0,759016144   | 1,317495034     | 0,469072165     |
| RAB7A                                                                                           | 2,57877E-15 | -0,398240701 | 0,263 | 0,444 | 5,44145E-11 | 0,75878302    | 1,317899813     | 0,592342342     |
| SPRY2                                                                                           | 8,88466E-07 | -0,39825338  | 0,136 | 0,223 | 0,018747518 | 0,758776351   | 1,317911396     | 0,609865471     |
| TMBIM1                                                                                          | 9,69548E-09 | -0,398588414 | 0,095 | 0,189 | 0,000204584 | 0,758600163   | 1,318217487     | 0,502645503     |

Supplementary Table 5

| Differentially expressed genes_total calculation_ comparing SC-Keloid vs. (SC-Myel, SC-Nonmyel) |             |              |       |       |             |               |                 |                 |
|-------------------------------------------------------------------------------------------------|-------------|--------------|-------|-------|-------------|---------------|-----------------|-----------------|
| gene                                                                                            | p_val       | avg_log2FC   | pct.1 | pct.2 | p_val_adj   | Foldchange_UP | Foldchange_DOWN | Ratio_pct1_pct2 |
| NEGR1                                                                                           | 2,9073E-10  | -0,398606147 | 0,05  | 0,141 | 6,13469E-06 | 0,758590838   | 1,31823369      | 0,354609929     |
| KMT5C                                                                                           | 3,84257E-10 | -0,399114348 | 0,027 | 0,1   | 8,10822E-06 | 0,758323665   | 1,318698131     | 0,27            |
| ZFP91                                                                                           | 1,95136E-11 | -0,399254557 | 0,095 | 0,21  | 4,11757E-07 | 0,758249971   | 1,318826295     | 0,452380952     |
| COBL                                                                                            | 2,20454E-12 | -0,399398223 | 0,143 | 0,282 | 4,65179E-08 | 0,758174467   | 1,318957633     | 0,507092199     |
| GIGYF1                                                                                          | 1,89252E-07 | -0,399643296 | 0,044 | 0,111 | 0,003993409 | 0,758045686   | 1,319181705     | 0,396396396     |
| PHF1                                                                                            | 3,20485E-12 | -0,399735577 | 0,056 | 0,159 | 6,76255E-08 | 0,757997199   | 1,319266088     | 0,352201258     |
| RELB                                                                                            | 3,97394E-10 | -0,399911572 | 0,043 | 0,126 | 8,38542E-06 | 0,757904737   | 1,319427035     | 0,341269841     |
| AKAP13                                                                                          | 1,14105E-13 | -0,401130427 | 0,313 | 0,498 | 2,40774E-09 | 0,757264694   | 1,320542219     | 0,628514056     |
| VSIR                                                                                            | 2,01023E-15 | -0,401776093 | 0,01  | 0,098 | 4,2418E-11  | 0,756925862   | 1,32113335      | 0,102040816     |
| RBMXL1                                                                                          | 1,30061E-11 | -0,402132009 | 0,031 | 0,118 | 2,74441E-07 | 0,75673915    | 1,321459316     | 0,262711864     |
| INPP1                                                                                           | 3,44453E-12 | -0,402381419 | 0,063 | 0,17  | 7,26831E-08 | 0,756608338   | 1,321687786     | 0,370588235     |
| UGT8                                                                                            | 8,55615E-14 | -0,402600613 | 0,005 | 0,076 | 1,80543E-09 | 0,756493393   | 1,321888611     | 0,065789474     |
| RPL27A                                                                                          | 4,23061E-14 | -0,403447741 | 0,548 | 0,802 | 8,92702E-10 | 0,756049322   | 1,322665031     | 0,683291771     |
| SOX10                                                                                           | 2,03184E-10 | -0,404008791 | 0,286 | 0,434 | 4,28739E-06 | 0,755755359   | 1,323179503     | 0,658986175     |
| DYNLRB1                                                                                         | 1,28134E-16 | -0,404927237 | 0,339 | 0,555 | 2,70375E-12 | 0,755274384   | 1,324022131     | 0,610810811     |
| AOPEP                                                                                           | 7,417E-19   | -0,404938709 | 0,264 | 0,48  | 1,56506E-14 | 0,755268379   | 1,324032659     | 0,55            |
| SOX6                                                                                            | 1,46683E-09 | -0,405271642 | 0,126 | 0,236 | 3,09515E-05 | 0,755094105   | 1,324338243     | 0,533898305     |
| KBTBD2                                                                                          | 2,56188E-11 | -0,405495599 | 0,064 | 0,166 | 5,40582E-07 | 0,754976896   | 1,324543844     | 0,385542169     |
| LRRK2                                                                                           | 9,25053E-14 | -0,405803607 | 0,006 | 0,079 | 1,95195E-09 | 0,75481573    | 1,324826657     | 0,075949367     |
| DIXDC1                                                                                          | 2,07191E-09 | -0,405886464 | 0,085 | 0,183 | 4,37193E-05 | 0,75477238    | 1,324902747     | 0,464480874     |
| HMGA1                                                                                           | 0,005485434 | -0,406042205 | 0,168 | 0,216 | 1           | 0,754690906   | 1,32504578      | 0,777777778     |
| RMND5A                                                                                          | 2,82578E-14 | -0,406454349 | 0,042 | 0,149 | 5,96268E-10 | 0,754475339   | 1,325424368     | 0,281879195     |
| MFSD2A                                                                                          | 4,52661E-09 | -0,40662718  | 0,024 | 0,09  | 9,5516E-05  | 0,754384961   | 1,32558316      | 0,266666667     |
| ZBTB11                                                                                          | 2,07728E-12 | -0,406790612 | 0,066 | 0,176 | 4,38327E-08 | 0,754299507   | 1,325733333     | 0,375           |
| ZBTB2                                                                                           | 2,0767E-10  | -0,406918873 | 0,031 | 0,11  | 4,38205E-06 | 0,75423245    | 1,325851202     | 0,281818182     |
| CEMIP2                                                                                          | 7,07778E-13 | -0,406944952 | 0,023 | 0,111 | 1,49348E-08 | 0,754218816   | 1,325875169     | 0,207207207     |
| ZNF106                                                                                          | 2,40673E-13 | -0,406988645 | 0,135 | 0,284 | 5,07844E-09 | 0,754195974   | 1,325915325     | 0,475352113     |
| NPNT                                                                                            | 1,1152E-13  | -0,407113798 | 0     | 0,062 | 2,35319E-09 | 0,754130551   | 1,326030352     | 0               |
| SYNM                                                                                            | 8,19825E-15 | -0,407239918 | 0,041 | 0,152 | 1,72991E-10 | 0,754064628   | 1,326146278     | 0,269736842     |
| EDIL3                                                                                           | 1,05291E-13 | -0,407821256 | 0,035 | 0,138 | 2,22174E-09 | 0,753760837   | 1,32668076      | 0,253623188     |



Supplementary Table 5

| Differentially expressed genes_total calculation_ comparing SC-Keloid vs. (SC-Myel, SC-Nonmyel) |             |              |       |       |             |               |                 |                 |
|-------------------------------------------------------------------------------------------------|-------------|--------------|-------|-------|-------------|---------------|-----------------|-----------------|
| gene                                                                                            | p_val       | avg_log2FC   | pct.1 | pct.2 | p_val_adj   | Foldchange_UP | Foldchange_DOWN | Ratio_pct1_pct2 |
| NECTIN2                                                                                         | 5,79973E-10 | -0,408167279 | 0,12  | 0,225 | 1,2238E-05  | 0,753580073   | 1,326998996     | 0,533333333     |
| PREX1                                                                                           | 1,04797E-13 | -0,408381716 | 0,002 | 0,069 | 2,21133E-09 | 0,753468072   | 1,327196251     | 0,028985507     |
| CD99L2                                                                                          | 5,62759E-08 | -0,408418033 | 0,063 | 0,14  | 0,001187478 | 0,753449105   | 1,327229661     | 0,45            |
| CDK2AP2                                                                                         | 3,1904E-11  | -0,40948511  | 0,191 | 0,32  | 6,73205E-07 | 0,752892029   | 1,328211698     | 0,596875        |
| CXCL14                                                                                          | 0,000416167 | -0,409738178 | 0,048 | 0,092 | 1           | 0,752759973   | 1,328444705     | 0,52173913      |
| KLF5                                                                                            | 8,42501E-06 | -0,41001749  | 0,137 | 0,212 | 0,177776117 | 0,75261425    | 1,328701922     | 0,646226415     |
| KLHL24                                                                                          | 1,73863E-13 | -0,410336196 | 0,076 | 0,197 | 3,66868E-09 | 0,752448008   | 1,328995478     | 0,385786802     |
| PCBP1                                                                                           | 9,29479E-17 | -0,41056626  | 0,305 | 0,502 | 1,96129E-12 | 0,752328026   | 1,329207428     | 0,607569721     |
| MYO15B                                                                                          | 1,04199E-07 | -0,410901435 | 0,028 | 0,088 | 0,002198707 | 0,752153261   | 1,329516272     | 0,318181818     |
| USP32                                                                                           | 4,16074E-11 | -0,410909016 | 0,051 | 0,147 | 8,77957E-07 | 0,752149309   | 1,329523259     | 0,346938776     |
| DUSP6                                                                                           | 9,55467E-07 | -0,41128655  | 0,079 | 0,156 | 0,020161311 | 0,751952507   | 1,329871223     | 0,506410256     |
| GOS2                                                                                            | 8,54359E-09 | -0,411692824 | 0,006 | 0,053 | 0,000180278 | 0,751740781   | 1,330245778     | 0,113207547     |
| AC007952.4                                                                                      | 8,04164E-06 | -0,412563825 | 0,033 | 0,083 | 0,169686735 | 0,751287069   | 1,331049131     | 0,397590361     |
| BTF3                                                                                            | 1,84146E-17 | -0,413179361 | 0,453 | 0,744 | 3,88567E-13 | 0,750966595   | 1,331617154     | 0,608870968     |
| FNIP1                                                                                           | 9,2068E-12  | -0,413543517 | 0,134 | 0,261 | 1,94273E-07 | 0,750777064   | 1,331953315     | 0,513409962     |
| PHIP                                                                                            | 4,63852E-11 | -0,413731144 | 0,126 | 0,247 | 9,78775E-07 | 0,75067943    | 1,332126551     | 0,510121457     |
| SRSF2                                                                                           | 5,0485E-14  | -0,413818138 | 0,304 | 0,494 | 1,06528E-09 | 0,750634166   | 1,33220688      | 0,615384615     |
| CBX4                                                                                            | 7,39823E-07 | -0,414132522 | 0,065 | 0,134 | 0,015611004 | 0,75047061    | 1,332497219     | 0,485074627     |
| FND3B                                                                                           | 5,26139E-10 | -0,414678301 | 0,176 | 0,3   | 1,1102E-05  | 0,750186756   | 1,333001405     | 0,586666667     |
| JAM2                                                                                            | 6,33972E-14 | -0,414725176 | 0,012 | 0,092 | 1,33774E-09 | 0,750162382   | 1,333044717     | 0,130434783     |
| RDX                                                                                             | 2,70564E-16 | -0,414969356 | 0,359 | 0,604 | 5,70916E-12 | 0,750035426   | 1,333270357     | 0,594370861     |
| EIF3A                                                                                           | 1,07716E-12 | -0,415393278 | 0,232 | 0,388 | 2,27292E-08 | 0,749815067   | 1,333662184     | 0,597938144     |
| KDM5B                                                                                           | 1,08337E-05 | -0,415690019 | 0,093 | 0,16  | 0,228601572 | 0,749660858   | 1,333936526     | 0,58125         |
| EGLN2                                                                                           | 6,08399E-09 | -0,416009533 | 0,036 | 0,107 | 0,000128378 | 0,749494849   | 1,334231986     | 0,336448598     |
| SLC25A29                                                                                        | 3,62655E-12 | -0,41618556  | 0,04  | 0,133 | 7,65238E-08 | 0,749403406   | 1,334394789     | 0,30075188      |
| TMEM109                                                                                         | 6,11856E-08 | -0,416305881 | 0,144 | 0,236 | 0,001291078 | 0,749340908   | 1,334506083     | 0,610169492     |
| CAVIN1                                                                                          | 1,66339E-14 | -0,416539753 | 0,297 | 0,491 | 3,50993E-10 | 0,749219444   | 1,334722434     | 0,604887984     |
| PDZRN3                                                                                          | 2,99198E-13 | -0,41677274  | 0,033 | 0,129 | 6,31337E-09 | 0,749098459   | 1,334938002     | 0,255813953     |
| EGFLAM                                                                                          | 1,90518E-17 | -0,417324245 | 0,012 | 0,111 | 4,02012E-13 | 0,748812153   | 1,335448411     | 0,108108108     |
| RNF13                                                                                           | 1,4577E-11  | -0,417836509 | 0,163 | 0,293 | 3,0759E-07  | 0,748546316   | 1,335922679     | 0,556313993     |

Supplementary Table 5

| Differentially expressed genes_total calculation_ comparing SC-Keloid vs. (SC-Myel, SC-Nonmyel) |             |              |       |       |             |               |                 |                 |
|-------------------------------------------------------------------------------------------------|-------------|--------------|-------|-------|-------------|---------------|-----------------|-----------------|
| gene                                                                                            | p_val       | avg_log2FC   | pct.1 | pct.2 | p_val_adj   | Foldchange_UP | Foldchange_DOWN | Ratio_pct1_pct2 |
| RBPJ                                                                                            | 2,39485E-13 | -0,418040648 | 0,163 | 0,308 | 5,05338E-09 | 0,748440406   | 1,336111722     | 0,529220779     |
| MKLN1                                                                                           | 5,73648E-09 | -0,419529869 | 0,068 | 0,156 | 0,000121045 | 0,747668227   | 1,337491636     | 0,435897436     |
| CELF2                                                                                           | 4,04177E-14 | -0,420647874 | 0,194 | 0,36  | 8,52854E-10 | 0,747089052   | 1,338528515     | 0,538888889     |
| SLC66A3                                                                                         | 2,84898E-11 | -0,421039545 | 0,048 | 0,142 | 6,01164E-07 | 0,746886256   | 1,338891956     | 0,338028169     |
| RPL13A                                                                                          | 1,91739E-11 | -0,421854464 | 0,655 | 0,871 | 4,04589E-07 | 0,74646449    | 1,339648455     | 0,752009185     |
| KANK4                                                                                           | 2,78971E-13 | -0,422114775 | 0,006 | 0,076 | 5,88656E-09 | 0,746329814   | 1,339890194     | 0,078947368     |
| PPP1R16A                                                                                        | 8,51747E-10 | -0,422797485 | 0,048 | 0,132 | 1,79727E-05 | 0,745976721   | 1,340524405     | 0,363636364     |
| KCNMB4                                                                                          | 2,11276E-11 | -0,42296205  | 0,177 | 0,312 | 4,45814E-07 | 0,745891634   | 1,340677325     | 0,567307692     |
| CYBRD1                                                                                          | 5,21494E-09 | -0,422972342 | 0,066 | 0,152 | 0,00011004  | 0,745886313   | 1,340686889     | 0,434210526     |
| TAMALIN                                                                                         | 1,5856E-07  | -0,423264381 | 0,109 | 0,198 | 0,003345778 | 0,745735341   | 1,340958306     | 0,550505051     |
| CCNL2                                                                                           | 9,05171E-06 | -0,423499116 | 0,142 | 0,216 | 0,19100011  | 0,745614016   | 1,341176505     | 0,657407407     |
| SLITRK5                                                                                         | 7,93743E-11 | -0,424541911 | 0,016 | 0,087 | 1,67488E-06 | 0,745075273   | 1,342146272     | 0,183908046     |
| CNOT4                                                                                           | 1,02614E-13 | -0,424734219 | 0,119 | 0,258 | 2,16526E-09 | 0,744975962   | 1,34232519      | 0,46124031      |
| NEDD4L                                                                                          | 1,26365E-12 | -0,425567752 | 0,031 | 0,123 | 2,66643E-08 | 0,744545668   | 1,343100957     | 0,25203252      |
| CLK4                                                                                            | 2,51533E-11 | -0,425749276 | 0,068 | 0,17  | 5,3076E-07  | 0,744451994   | 1,343269961     | 0,4             |
| UACA                                                                                            | 1,48354E-07 | -0,425894679 | 0,129 | 0,225 | 0,00313042  | 0,744376967   | 1,34340535      | 0,573333333     |
| ZBTB43                                                                                          | 2,03175E-09 | -0,42606776  | 0,065 | 0,155 | 4,28719E-05 | 0,744287669   | 1,343566528     | 0,419354839     |
| POGZ                                                                                            | 2,86742E-11 | -0,426093173 | 0,135 | 0,261 | 6,05053E-07 | 0,744274559   | 1,343590195     | 0,517241379     |
| FHOD3                                                                                           | 1,53649E-10 | -0,426212088 | 0,026 | 0,1   | 3,24214E-06 | 0,744213214   | 1,343700947     | 0,26            |
| ADAMTS9                                                                                         | 1,67047E-09 | -0,426725789 | 0,057 | 0,145 | 3,52486E-05 | 0,743948269   | 1,344179484     | 0,393103448     |
| RHEB                                                                                            | 2,41733E-19 | -0,426962475 | 0,269 | 0,482 | 5,10082E-15 | 0,743826228   | 1,344400025     | 0,558091286     |
| AL627171.2                                                                                      | 2,32378E-09 | -0,42704644  | 0,038 | 0,115 | 4,90342E-05 | 0,743782939   | 1,344478272     | 0,330434783     |
| PRPF4B                                                                                          | 2,29086E-12 | -0,428445676 | 0,225 | 0,38  | 4,83395E-08 | 0,743061911   | 1,345782882     | 0,592105263     |
| POLR1F                                                                                          | 3,34848E-07 | -0,430861607 | 0,111 | 0,198 | 0,007065627 | 0,741818624   | 1,348038413     | 0,560606061     |
| PCNP                                                                                            | 3,20705E-15 | -0,431226    | 0,224 | 0,396 | 6,7672E-11  | 0,741631281   | 1,34837894      | 0,565656566     |
| HEY1                                                                                            | 2,35614E-09 | -0,432351788 | 0,044 | 0,123 | 4,97168E-05 | 0,741052784   | 1,34943154      | 0,357723577     |
| FSTL5                                                                                           | 1,33792E-14 | -0,432517068 | 0,001 | 0,071 | 2,82314E-10 | 0,740967891   | 1,349586145     | 0,014084507     |
| MLXIP                                                                                           | 3,20257E-09 | -0,433102301 | 0,111 | 0,213 | 6,75773E-05 | 0,740667377   | 1,350133719     | 0,521126761     |
| TNFAIP2                                                                                         | 2,8781E-06  | -0,433225676 | 0,037 | 0,092 | 0,060730748 | 0,74060404    | 1,350249184     | 0,402173913     |
| NPEPPS                                                                                          | 6,51646E-12 | -0,433247403 | 0,118 | 0,242 | 1,37504E-07 | 0,740592886   | 1,350269519     | 0,487603306     |

Supplementary Table 5

| Differentially expressed genes_total calculation_ comparing SC-Keloid vs. (SC-Myel, SC-Nonmyel) |             |              |       |       |             |               |                 |                 |
|-------------------------------------------------------------------------------------------------|-------------|--------------|-------|-------|-------------|---------------|-----------------|-----------------|
| gene                                                                                            | p_val       | avg_log2FC   | pct.1 | pct.2 | p_val_adj   | Foldchange_UP | Foldchange_DOWN | Ratio_pct1_pct2 |
| PCM1                                                                                            | 1,0687E-13  | -0,433322188 | 0,239 | 0,403 | 2,25506E-09 | 0,740554497   | 1,350339515     | 0,593052109     |
| HIPK2                                                                                           | 1,76721E-10 | -0,433367973 | 0,043 | 0,13  | 3,729E-06   | 0,740530995   | 1,350382369     | 0,330769231     |
| LUC7L2                                                                                          | 1,14481E-11 | -0,433686811 | 0,122 | 0,246 | 2,41565E-07 | 0,740367355   | 1,350680839     | 0,495934959     |
| ADAMTS7                                                                                         | 1,91414E-06 | -0,434246806 | 0,116 | 0,195 | 0,040390183 | 0,74008003    | 1,35120522      | 0,594871795     |
| ARID4B                                                                                          | 1,69648E-14 | -0,435095425 | 0,2   | 0,369 | 3,57974E-10 | 0,73964483    | 1,352000257     | 0,54200542      |
| AHCTF1                                                                                          | 1,70555E-10 | -0,435108007 | 0,059 | 0,153 | 3,59888E-06 | 0,73963838    | 1,352012047     | 0,385620915     |
| SLC6A8                                                                                          | 1,93193E-10 | -0,435448838 | 0,042 | 0,126 | 4,07657E-06 | 0,739463664   | 1,352331492     | 0,333333333     |
| CORO1C                                                                                          | 1,22002E-07 | -0,435516382 | 0,149 | 0,246 | 0,00257436  | 0,739429044   | 1,352394808     | 0,605691057     |
| VPS13D                                                                                          | 1,63625E-10 | -0,435588182 | 0,028 | 0,106 | 3,45265E-06 | 0,739392245   | 1,352462115     | 0,264150943     |
| IST1                                                                                            | 7,08485E-11 | -0,43561031  | 0,107 | 0,22  | 1,49497E-06 | 0,739380904   | 1,35248286      | 0,486363636     |
| LGALS3BP                                                                                        | 6,63491E-12 | -0,436481467 | 0,258 | 0,418 | 1,40003E-07 | 0,738934572   | 1,353299789     | 0,61722488      |
| NAV2                                                                                            | 3,77584E-11 | -0,437276653 | 0,073 | 0,18  | 7,9674E-07  | 0,738527397   | 1,354045908     | 0,405555556     |
| H1-0                                                                                            | 6,86282E-09 | -0,437660441 | 0,17  | 0,282 | 0,000144812 | 0,738330959   | 1,354406161     | 0,602836879     |
| IFNGR2                                                                                          | 1,25015E-09 | -0,437877787 | 0,242 | 0,374 | 2,63794E-05 | 0,738219736   | 1,354610222     | 0,647058824     |
| GOLGA7                                                                                          | 3,06659E-10 | -0,438740961 | 0,147 | 0,263 | 6,47081E-06 | 0,737778186   | 1,355420936     | 0,558935361     |
| MAGEH1                                                                                          | 1,64468E-05 | -0,439413951 | 0,105 | 0,171 | 0,347043407 | 0,737434107   | 1,356053362     | 0,614035088     |
| CREB5                                                                                           | 1,92254E-07 | -0,43969624  | 0,236 | 0,342 | 0,004056752 | 0,737289829   | 1,356318724     | 0,69005848      |
| ASPH                                                                                            | 1,27359E-14 | -0,43983695  | 0,182 | 0,341 | 2,68741E-10 | 0,737217923   | 1,356451016     | 0,53372434      |
| SLC9A3R1                                                                                        | 2,28338E-16 | -0,440049791 | 0,026 | 0,134 | 4,81815E-12 | 0,737109169   | 1,356651148     | 0,194029851     |
| AKAP7                                                                                           | 1,64242E-10 | -0,440218053 | 0,031 | 0,111 | 3,46567E-06 | 0,737023204   | 1,356809384     | 0,279279279     |
| PAXBP1                                                                                          | 1,74655E-12 | -0,440628395 | 0,134 | 0,27  | 3,68539E-08 | 0,736813605   | 1,357195353     | 0,496296296     |
| PPM1D                                                                                           | 7,90864E-11 | -0,441595598 | 0,038 | 0,123 | 1,6688E-06  | 0,7363198     | 1,35810554      | 0,308943089     |
| USP34                                                                                           | 3,97324E-11 | -0,441747537 | 0,15  | 0,275 | 8,38394E-07 | 0,736242258   | 1,358248578     | 0,545454545     |
| LACTB                                                                                           | 1,75236E-12 | -0,441845809 | 0,055 | 0,161 | 3,69766E-08 | 0,736192109   | 1,358341102     | 0,341614907     |
| NRP2                                                                                            | 2,46275E-09 | -0,441980355 | 0,154 | 0,27  | 5,19666E-05 | 0,736123455   | 1,358467786     | 0,57037037      |
| NKAIN3                                                                                          | 3,33067E-18 | -0,442969738 | 0,036 | 0,166 | 7,02806E-14 | 0,735618803   | 1,359399727     | 0,21686747      |
| FIGN                                                                                            | 3,9993E-16  | -0,443244751 | 0,179 | 0,36  | 8,43893E-12 | 0,73547859    | 1,359658886     | 0,497222222     |
| SEMA4B                                                                                          | 1,0596E-09  | -0,443316581 | 0,021 | 0,088 | 2,23586E-05 | 0,735441972   | 1,359726584     | 0,238636364     |
| TRABD2B                                                                                         | 2,25491E-13 | -0,44413928  | 0,016 | 0,099 | 4,75808E-09 | 0,735022704   | 1,360502191     | 0,161616162     |
| ARHGEF7                                                                                         | 2,51887E-10 | -0,445010097 | 0,095 | 0,201 | 5,31508E-06 | 0,734579175   | 1,361323644     | 0,472636816     |

Supplementary Table 5

| Differentially expressed genes_total calculation_ comparing SC-Keloid vs. (SC-Myel, SC-Nonmyel) |             |              |       |       |             |               |                 |                 |
|-------------------------------------------------------------------------------------------------|-------------|--------------|-------|-------|-------------|---------------|-----------------|-----------------|
| gene                                                                                            | p_val       | avg_log2FC   | pct.1 | pct.2 | p_val_adj   | Foldchange_UP | Foldchange_DOWN | Ratio_pct1_pct2 |
| SELENOM                                                                                         | 2,01866E-16 | -0,445290059 | 0,399 | 0,623 | 4,25958E-12 | 0,734436641   | 1,361587841     | 0,640449438     |
| GOLGA8A                                                                                         | 3,91632E-08 | -0,445400826 | 0,048 | 0,121 | 0,000826383 | 0,734380255   | 1,361692385     | 0,396694215     |
| PAQR6                                                                                           | 4,61617E-12 | -0,446911026 | 0,041 | 0,136 | 9,74059E-08 | 0,733611914   | 1,363118539     | 0,301470588     |
| IFIT1                                                                                           | 4,92649E-12 | -0,447535627 | 0,021 | 0,102 | 1,03954E-07 | 0,733294372   | 1,363708816     | 0,205882353     |
| KPNA2                                                                                           | 8,03163E-11 | -0,448229843 | 0,102 | 0,213 | 1,69475E-06 | 0,7329416     | 1,364365182     | 0,478873239     |
| RNPC3                                                                                           | 1,07215E-10 | -0,44890874  | 0,04  | 0,125 | 2,26234E-06 | 0,732596778   | 1,365007369     | 0,32            |
| TCP1                                                                                            | 3,62269E-13 | -0,449496914 | 0,207 | 0,361 | 7,64423E-09 | 0,732298165   | 1,365563984     | 0,573407202     |
| PCID2                                                                                           | 1,25664E-07 | -0,449990629 | 0,101 | 0,186 | 0,002651642 | 0,732047603   | 1,366031384     | 0,543010753     |
| PLEKHM2                                                                                         | 1,86143E-08 | -0,450060911 | 0,076 | 0,16  | 0,00039278  | 0,732011941   | 1,366097933     | 0,475           |
| BRD4                                                                                            | 1,50555E-15 | -0,450826028 | 0,182 | 0,347 | 3,17686E-11 | 0,73162383    | 1,366822619     | 0,524495677     |
| FGF2                                                                                            | 2,51079E-09 | -0,451065153 | 0,176 | 0,296 | 5,29802E-05 | 0,731502574   | 1,367049187     | 0,594594595     |
| DNAJB9                                                                                          | 7,96138E-11 | -0,451465997 | 0,09  | 0,197 | 1,67993E-06 | 0,731299359   | 1,367429066     | 0,456852792     |
| DEPP1                                                                                           | 5,39495E-06 | -0,451895702 | 0,047 | 0,104 | 0,113838844 | 0,731081575   | 1,367836414     | 0,451923077     |
| SORBS3                                                                                          | 3,36118E-13 | -0,451932903 | 0,065 | 0,178 | 7,09242E-09 | 0,731062724   | 1,367871685     | 0,365168539     |
| TNFSF12                                                                                         | 3,76399E-06 | -0,451950513 | 0,112 | 0,182 | 0,079423892 | 0,7310538     | 1,367888382     | 0,615384615     |
| LRIG1                                                                                           | 1,04189E-13 | -0,452784671 | 0,037 | 0,138 | 2,19849E-09 | 0,730631232   | 1,368679516     | 0,268115942     |
| DLX2                                                                                            | 2,803E-08   | -0,453338025 | 0,02  | 0,077 | 0,000591461 | 0,730351047   | 1,369204582     | 0,25974026      |
| KIF1A                                                                                           | 1,69176E-14 | -0,453448143 | 0     | 0,066 | 3,56979E-10 | 0,730295303   | 1,369309094     | 0               |
| PTPN12                                                                                          | 8,82888E-17 | -0,453477459 | 0,193 | 0,372 | 1,86298E-12 | 0,730280463   | 1,369336919     | 0,518817204     |
| CDC20B                                                                                          | 2,09345E-05 | -0,45384739  | 0,026 | 0,069 | 0,441738138 | 0,730093231   | 1,369688085     | 0,376811594     |
| ZC3H12A                                                                                         | 7,40785E-10 | -0,454133646 | 0,051 | 0,137 | 1,56313E-05 | 0,729948382   | 1,369959882     | 0,372262774     |
| KIF19                                                                                           | 5,95107E-14 | -0,454193397 | 0     | 0,064 | 1,25574E-09 | 0,729918151   | 1,370016622     | 0               |
| ENPP2                                                                                           | 7,51656E-15 | -0,454303012 | 0,027 | 0,128 | 1,58607E-10 | 0,729862695   | 1,370120719     | 0,2109375       |
| RBM25                                                                                           | 4,31009E-15 | -0,454490687 | 0,272 | 0,457 | 9,09473E-11 | 0,729767756   | 1,370298965     | 0,595185996     |
| AKIRIN2                                                                                         | 4,7888E-11  | -0,454577552 | 0,091 | 0,199 | 1,01049E-06 | 0,729723818   | 1,370381473     | 0,457286432     |
| ANKRD50                                                                                         | 4,88081E-12 | -0,455624743 | 0,073 | 0,185 | 1,0299E-07  | 0,729194334   | 1,371376536     | 0,394594595     |
| CAHM                                                                                            | 4,65355E-13 | -0,455968002 | 0,026 | 0,115 | 9,81946E-09 | 0,729020858   | 1,371702865     | 0,226086957     |
| LAMP5                                                                                           | 4,66911E-16 | -0,455979255 | 0,013 | 0,107 | 9,8523E-12  | 0,729015172   | 1,371713564     | 0,121495327     |
| SORBS2                                                                                          | 2,05463E-08 | -0,456183085 | 0,186 | 0,299 | 0,000433547 | 0,728912181   | 1,371907379     | 0,622073579     |
| AASS                                                                                            | 5,3886E-12  | -0,457052491 | 0,049 | 0,149 | 1,13705E-07 | 0,728473052   | 1,372734376     | 0,32885906      |

Supplementary Table 5

| Differentially expressed genes_total calculation_ comparing SC-Keloid vs. (SC-Myel, SC-Nonmyel) |             |              |       |       |             |               |                 |                 |
|-------------------------------------------------------------------------------------------------|-------------|--------------|-------|-------|-------------|---------------|-----------------|-----------------|
| gene                                                                                            | p_val       | avg_log2FC   | pct.1 | pct.2 | p_val_adj   | Foldchange_UP | Foldchange_DOWN | Ratio_pct1_pct2 |
| RBM7                                                                                            | 1,43076E-14 | -0,457088033 | 0,061 | 0,179 | 3,01904E-10 | 0,728455105   | 1,372768195     | 0,340782123     |
| SFN                                                                                             | 4,88992E-10 | -0,457139488 | 0,036 | 0,117 | 1,03182E-05 | 0,728429125   | 1,372817156     | 0,307692308     |
| ACADVL                                                                                          | 1,6875E-12  | -0,457545133 | 0,215 | 0,358 | 3,56079E-08 | 0,72822434    | 1,373203208     | 0,600558659     |
| PLCE1                                                                                           | 9,20137E-10 | -0,457909289 | 0,056 | 0,144 | 1,94158E-05 | 0,728040549   | 1,373549868     | 0,388888889     |
| KAT6A                                                                                           | 4,37427E-17 | -0,457981709 | 0,078 | 0,225 | 9,23015E-13 | 0,728004004   | 1,373618818     | 0,346666667     |
| C7orf61                                                                                         | 1,1939E-18  | -0,458020891 | 0,003 | 0,096 | 2,51924E-14 | 0,727984233   | 1,373656124     | 0,03125         |
| ANKRD11                                                                                         | 4,63059E-12 | -0,458357276 | 0,197 | 0,334 | 9,77101E-08 | 0,727814513   | 1,37397645      | 0,589820359     |
| CAT                                                                                             | 1,45749E-10 | -0,458736513 | 0,088 | 0,193 | 3,07545E-06 | 0,727623219   | 1,37433767      | 0,455958549     |
| IFI35                                                                                           | 3,52986E-08 | -0,45914247  | 0,062 | 0,141 | 0,000744836 | 0,727418504   | 1,374724447     | 0,439716312     |
| SH3GLB2                                                                                         | 1,98127E-10 | -0,459192382 | 0,126 | 0,236 | 4,18067E-06 | 0,727393338   | 1,374772007     | 0,533898305     |
| SEMA4C                                                                                          | 3,91725E-10 | -0,459883679 | 0,066 | 0,163 | 8,26578E-06 | 0,727044876   | 1,375430916     | 0,404907975     |
| PAG1                                                                                            | 1,82811E-19 | -0,460119539 | 0,01  | 0,118 | 3,8575E-15  | 0,726926024   | 1,375655798     | 0,084745763     |
| TMEM132B                                                                                        | 1,20724E-16 | -0,460185736 | 0,009 | 0,102 | 2,5474E-12  | 0,726892671   | 1,37571892      | 0,088235294     |
| CXCL2                                                                                           | 1,15567E-05 | -0,460568305 | 0,015 | 0,054 | 0,243857359 | 0,726699942   | 1,376083777     | 0,277777778     |
| CUEDC2                                                                                          | 0,000356759 | -0,460723355 | 0,173 | 0,233 | 1           | 0,726621846   | 1,376231676     | 0,74248927      |
| NFATC1                                                                                          | 9,37994E-21 | -0,460992985 | 0,01  | 0,125 | 1,97926E-16 | 0,726486057   | 1,376488909     | 0,08            |
| ARMCX4                                                                                          | 1,24054E-13 | -0,461008386 | 0,015 | 0,098 | 2,61767E-09 | 0,726478302   | 1,376503603     | 0,153061224     |
| MAPKAPK2                                                                                        | 6,93441E-08 | -0,461239483 | 0,078 | 0,159 | 0,00146323  | 0,726361941   | 1,376724115     | 0,490566038     |
| EIF4E                                                                                           | 3,67769E-12 | -0,461255801 | 0,171 | 0,307 | 7,7603E-08  | 0,726353725   | 1,376739687     | 0,557003257     |
| C1orf21                                                                                         | 6,64435E-11 | -0,461480875 | 0,161 | 0,293 | 1,40202E-06 | 0,726240416   | 1,376954488     | 0,549488055     |
| MAP7D1                                                                                          | 2,04353E-10 | -0,461597039 | 0,126 | 0,236 | 4,31205E-06 | 0,726181942   | 1,377065363     | 0,533898305     |
| MGLL                                                                                            | 4,36517E-11 | -0,461703539 | 0,013 | 0,08  | 9,21095E-07 | 0,726128338   | 1,377167021     | 0,1625          |
| FOXN3                                                                                           | 2,18119E-16 | -0,461712348 | 0,037 | 0,155 | 4,60252E-12 | 0,726123904   | 1,377175431     | 0,238709677     |
| BMP2K                                                                                           | 4,38318E-11 | -0,461977189 | 0,081 | 0,187 | 9,24896E-07 | 0,725990619   | 1,377428267     | 0,43315508      |
| MIR22HG                                                                                         | 9,91421E-08 | -0,46289562  | 0,075 | 0,153 | 0,002091998 | 0,725528594   | 1,378305428     | 0,490196078     |
| TUBB2A                                                                                          | 6,52811E-10 | -0,462924396 | 0,246 | 0,384 | 1,3775E-05  | 0,725514123   | 1,37833292      | 0,640625        |
| APCDD1                                                                                          | 1,16975E-13 | -0,463775838 | 0,017 | 0,104 | 2,4683E-09  | 0,72508607    | 1,379146617     | 0,163461538     |
| YPEL5                                                                                           | 2,59955E-14 | -0,463842334 | 0,146 | 0,297 | 5,48531E-10 | 0,72505265    | 1,379210185     | 0,491582492     |
| ALDH3A2                                                                                         | 3,28611E-13 | -0,463938096 | 0,061 | 0,172 | 6,93401E-09 | 0,725004525   | 1,379301737     | 0,354651163     |
| CDKN2AIP                                                                                        | 6,02131E-12 | -0,464216303 | 0,063 | 0,168 | 1,27056E-07 | 0,72486473    | 1,379567744     | 0,375           |

Supplementary Table 5

| Differentially expressed genes_total calculation_ comparing SC-Keloid vs. (SC-Myel, SC-Nonmyel) |             |              |       |       |             |               |                 |                 |
|-------------------------------------------------------------------------------------------------|-------------|--------------|-------|-------|-------------|---------------|-----------------|-----------------|
| gene                                                                                            | p_val       | avg_log2FC   | pct.1 | pct.2 | p_val_adj   | Foldchange_UP | Foldchange_DOWN | Ratio_pct1_pct2 |
| OTUD7B                                                                                          | 4,68443E-13 | -0,464292902 | 0,113 | 0,246 | 9,88461E-09 | 0,724826244   | 1,379640994     | 0,459349593     |
| OGA                                                                                             | 4,43717E-16 | -0,464578287 | 0,132 | 0,289 | 9,36288E-12 | 0,724682878   | 1,379913933     | 0,456747405     |
| MAPK8IP1                                                                                        | 2,90099E-11 | -0,465195653 | 0,024 | 0,103 | 6,12139E-07 | 0,724372834   | 1,38050456      | 0,233009709     |
| VAPA                                                                                            | 1,26932E-20 | -0,46607572  | 0,352 | 0,598 | 2,6784E-16  | 0,723931089   | 1,381346947     | 0,588628763     |
| AUTS2                                                                                           | 4,95259E-12 | -0,466135089 | 0,057 | 0,161 | 1,04505E-07 | 0,7239013     | 1,381403792     | 0,354037267     |
| PHLDB1                                                                                          | 3,94113E-09 | -0,466473901 | 0,196 | 0,311 | 8,31618E-05 | 0,723731313   | 1,381728248     | 0,63022508      |
| LPIN1                                                                                           | 2,48416E-12 | -0,467250939 | 0,03  | 0,121 | 5,24182E-08 | 0,723341616   | 1,38247265      | 0,247933884     |
| EEF2                                                                                            | 2,59672E-18 | -0,467479368 | 0,453 | 0,738 | 5,47934E-14 | 0,723227094   | 1,382691561     | 0,613821138     |
| CCDC115                                                                                         | 5,6331E-09  | -0,467509103 | 0,063 | 0,145 | 0,000118864 | 0,723212188   | 1,38272006      | 0,434482759     |
| GCLM                                                                                            | 3,19349E-05 | -0,468474706 | 0,034 | 0,08  | 0,673857301 | 0,722728301   | 1,383645831     | 0,425           |
| TTC21B                                                                                          | 6,15055E-12 | -0,468658662 | 0,031 | 0,119 | 1,29783E-07 | 0,722636152   | 1,383822269     | 0,260504202     |
| MAP4K5                                                                                          | 1,82553E-15 | -0,469017614 | 0,172 | 0,336 | 3,85206E-11 | 0,722456378   | 1,384166616     | 0,511904762     |
| FUS                                                                                             | 2,13656E-17 | -0,46991522  | 0,386 | 0,627 | 4,50835E-13 | 0,722007025   | 1,385028075     | 0,615629984     |
| SHC4                                                                                            | 2,39574E-13 | -0,469941171 | 0,088 | 0,214 | 5,05526E-09 | 0,721994038   | 1,385052988     | 0,411214953     |
| CAMSAP2                                                                                         | 9,00191E-15 | -0,47015544  | 0,086 | 0,218 | 1,89949E-10 | 0,721886815   | 1,385258712     | 0,394495413     |
| EWSR1                                                                                           | 1,46557E-15 | -0,470403803 | 0,155 | 0,313 | 3,09249E-11 | 0,721762552   | 1,385497207     | 0,495207668     |
| SSPN                                                                                            | 2,96102E-10 | -0,471753195 | 0,088 | 0,193 | 6,24805E-06 | 0,721087783   | 1,386793707     | 0,455958549     |
| NIPBL                                                                                           | 3,76403E-11 | -0,472623513 | 0,121 | 0,237 | 7,94247E-07 | 0,720652912   | 1,387630554     | 0,510548523     |
| PPP2R2A                                                                                         | 4,20603E-15 | -0,473710292 | 0,137 | 0,289 | 8,87514E-11 | 0,72011025    | 1,388676247     | 0,474048443     |
| ATP2B4                                                                                          | 5,53031E-12 | -0,474014357 | 0,133 | 0,265 | 1,16695E-07 | 0,719958495   | 1,388968958     | 0,501886792     |
| NGRN                                                                                            | 1,73668E-10 | -0,475202671 | 0,099 | 0,206 | 3,66456E-06 | 0,719365726   | 1,390113491     | 0,480582524     |
| ANKRD36C                                                                                        | 1,27614E-11 | -0,47538516  | 0,043 | 0,136 | 2,69277E-07 | 0,719274738   | 1,390289339     | 0,316176471     |
| SDHA                                                                                            | 8,98921E-10 | -0,475631315 | 0,099 | 0,197 | 1,89681E-05 | 0,719152024   | 1,390526573     | 0,502538071     |
| NUFIP2                                                                                          | 3,1039E-17  | -0,47622223  | 0,172 | 0,353 | 6,54954E-13 | 0,718857526   | 1,391096237     | 0,487252125     |
| ZNF638                                                                                          | 1,70959E-12 | -0,478098716 | 0,121 | 0,251 | 3,60741E-08 | 0,71792313    | 1,392906787     | 0,482071713     |
| UBR5                                                                                            | 4,35912E-14 | -0,478110485 | 0,08  | 0,206 | 9,19818E-10 | 0,717917273   | 1,39291815      | 0,388349515     |
| LSMEM1                                                                                          | 4,68659E-12 | -0,478261399 | 0,031 | 0,119 | 9,88918E-08 | 0,717842179   | 1,393063864     | 0,260504202     |
| MARCHF6                                                                                         | 3,00635E-15 | -0,478403177 | 0,144 | 0,299 | 6,3437E-11  | 0,717771638   | 1,393200772     | 0,481605351     |
| NUTM2A-AS1                                                                                      | 1,80689E-11 | -0,478898534 | 0,083 | 0,19  | 3,81272E-07 | 0,71752523    | 1,393679216     | 0,436842105     |
| HEATR5A                                                                                         | 1,57016E-12 | -0,47912043  | 0,052 | 0,155 | 3,31319E-08 | 0,717414878   | 1,39389359      | 0,335483871     |

Supplementary Table 5

| Differentially expressed genes_total calculation_ comparing SC-Keloid vs. (SC-Myel, SC-Nonmyel) |             |              |       |       |             |               |                 |                 |
|-------------------------------------------------------------------------------------------------|-------------|--------------|-------|-------|-------------|---------------|-----------------|-----------------|
| gene                                                                                            | p_val       | avg_log2FC   | pct.1 | pct.2 | p_val_adj   | Foldchange_UP | Foldchange_DOWN | Ratio_pct1_pct2 |
| IFNGR1                                                                                          | 1,98693E-14 | -0,480166929 | 0,086 | 0,214 | 4,19261E-10 | 0,71689467    | 1,394905056     | 0,401869159     |
| TTYH2                                                                                           | 9,65091E-15 | -0,480270892 | 0,019 | 0,111 | 2,03644E-10 | 0,716843011   | 1,39500558      | 0,171171171     |
| SERTAD3                                                                                         | 2,55789E-11 | -0,481358614 | 0,086 | 0,195 | 5,3974E-07  | 0,71630275    | 1,396057742     | 0,441025641     |
| ALDH1A1                                                                                         | 8,48601E-18 | -0,481938376 | 0     | 0,083 | 1,79063E-13 | 0,716014954   | 1,396618876     | 0               |
| CDC42EP1                                                                                        | 1,22937E-07 | -0,481976784 | 0,175 | 0,27  | 0,002594084 | 0,715995893   | 1,396656057     | 0,648148148     |
| PCDH17                                                                                          | 1,67499E-16 | -0,482046407 | 0,006 | 0,092 | 3,5344E-12  | 0,71596134    | 1,39672346      | 0,065217391     |
| RPL21                                                                                           | 3,54404E-16 | -0,482183531 | 0,593 | 0,855 | 7,47827E-12 | 0,715893293   | 1,396856221     | 0,693567251     |
| TRIM69                                                                                          | 4,17976E-10 | -0,483274224 | 0,042 | 0,125 | 8,81972E-06 | 0,715352275   | 1,397912658     | 0,336           |
| SF3B1                                                                                           | 4,14739E-19 | -0,483477525 | 0,247 | 0,464 | 8,75141E-15 | 0,715251476   | 1,398109663     | 0,532327586     |
| SRGAP1                                                                                          | 2,66215E-12 | -0,483579953 | 0,047 | 0,147 | 5,6174E-08  | 0,715200697   | 1,398208928     | 0,319727891     |
| ZBTB16                                                                                          | 9,70695E-13 | -0,483630638 | 0,001 | 0,061 | 2,04826E-08 | 0,715175571   | 1,398258052     | 0,016393443     |
| SREBF1                                                                                          | 9,72663E-09 | -0,484488371 | 0,09  | 0,183 | 0,000205242 | 0,7147505     | 1,399089612     | 0,491803279     |
| FCGR2B                                                                                          | 7,67627E-12 | -0,486312184 | 0,014 | 0,087 | 1,61977E-07 | 0,713847504   | 1,40085942      | 0,16091954      |
| PPP2CA                                                                                          | 2,39095E-15 | -0,486657961 | 0,201 | 0,372 | 5,04514E-11 | 0,713676434   | 1,401195209     | 0,540322581     |
| PTPDC1                                                                                          | 8,4719E-15  | -0,487812004 | 0,03  | 0,134 | 1,78766E-10 | 0,713105777   | 1,402316504     | 0,223880597     |
| SYNE3                                                                                           | 1,9599E-18  | -0,488066041 | 0,052 | 0,194 | 4,13558E-14 | 0,712980221   | 1,402563453     | 0,268041237     |
| AHI1                                                                                            | 3,66022E-10 | -0,488281462 | 0,13  | 0,243 | 7,72342E-06 | 0,712873767   | 1,402772897     | 0,534979424     |
| HNRNPH2                                                                                         | 6,97204E-14 | -0,488540768 | 0,097 | 0,225 | 1,47117E-09 | 0,712745649   | 1,40302505      | 0,431111111     |
| PIK3IP1                                                                                         | 1,88451E-14 | -0,488707322 | 0,036 | 0,142 | 3,97651E-10 | 0,71266337    | 1,403187034     | 0,253521127     |
| KTN1                                                                                            | 4,58744E-19 | -0,488834393 | 0,296 | 0,517 | 9,67996E-15 | 0,712600602   | 1,403310631     | 0,572533849     |
| SNRPN                                                                                           | 2,35847E-11 | -0,48940054  | 0,171 | 0,293 | 4,97661E-07 | 0,712321016   | 1,40386143      | 0,583617747     |
| NEK1                                                                                            | 2,70472E-11 | -0,48946022  | 0,048 | 0,141 | 5,70723E-07 | 0,71229155    | 1,403919505     | 0,340425532     |
| KANSL1L                                                                                         | 2,68396E-18 | -0,489814484 | 0,036 | 0,164 | 5,66342E-14 | 0,712116663   | 1,404264289     | 0,219512195     |
| FAM181B                                                                                         | 1,3629E-14  | -0,490210867 | 0,037 | 0,145 | 2,87587E-10 | 0,711921034   | 1,404650167     | 0,255172414     |
| TRA2A                                                                                           | 1,49409E-18 | -0,490239791 | 0,178 | 0,369 | 3,15268E-14 | 0,711906762   | 1,404678329     | 0,482384824     |
| NET1                                                                                            | 5,21378E-12 | -0,490339194 | 0,075 | 0,186 | 1,10016E-07 | 0,711857712   | 1,404775116     | 0,403225806     |
| RLF                                                                                             | 7,75179E-13 | -0,490435605 | 0,072 | 0,189 | 1,6357E-08  | 0,711810143   | 1,404868996     | 0,380952381     |
| UBL3                                                                                            | 9,67859E-12 | -0,490718964 | 0,168 | 0,3   | 2,04228E-07 | 0,71167035    | 1,405144953     | 0,56            |
| CLDN19                                                                                          | 1,18218E-14 | -0,491907169 | 0,001 | 0,071 | 2,49451E-10 | 0,711084459   | 1,406302708     | 0,014084507     |
| PUM1                                                                                            | 1,63053E-13 | -0,492086503 | 0,122 | 0,261 | 3,44057E-09 | 0,710996073   | 1,406477529     | 0,46743295      |

Supplementary Table 5

| Differentially expressed genes_total calculation_ comparing SC-Keloid vs. (SC-Myel, SC-Nonmyel) |             |              |       |       |             |               |                 |                 |
|-------------------------------------------------------------------------------------------------|-------------|--------------|-------|-------|-------------|---------------|-----------------|-----------------|
| gene                                                                                            | p_val       | avg_log2FC   | pct.1 | pct.2 | p_val_adj   | Foldchange_UP | Foldchange_DOWN | Ratio_pct1_pct2 |
| MID1IP1                                                                                         | 1,15349E-11 | -0,492801213 | 0,126 | 0,246 | 2,43397E-07 | 0,710643934   | 1,407174469     | 0,512195122     |
| NFIL3                                                                                           | 2,12277E-11 | -0,493240983 | 0,191 | 0,326 | 4,47925E-07 | 0,710427344   | 1,407603477     | 0,585889571     |
| IL34                                                                                            | 7,10814E-19 | -0,495409593 | 0,003 | 0,098 | 1,49989E-14 | 0,709360256   | 1,40972093      | 0,030612245     |
| LUC7L3                                                                                          | 3,88202E-15 | -0,495533526 | 0,268 | 0,449 | 8,19145E-11 | 0,709299322   | 1,409842035     | 0,59688196      |
| DEDD2                                                                                           | 5,58944E-11 | -0,497114905 | 0,078 | 0,18  | 1,17943E-06 | 0,708522265   | 1,411388251     | 0,433333333     |
| INSR                                                                                            | 6,07803E-13 | -0,49820899  | 0,019 | 0,102 | 1,28253E-08 | 0,707985152   | 1,412458999     | 0,18627451      |
| MAP3K11                                                                                         | 3,95591E-12 | -0,498502927 | 0,108 | 0,228 | 8,34736E-08 | 0,707840921   | 1,412746805     | 0,473684211     |
| RNF24                                                                                           | 2,09885E-12 | -0,498724082 | 0,069 | 0,178 | 4,42879E-08 | 0,707732422   | 1,412963386     | 0,387640449     |
| DOK6                                                                                            | 1,94658E-24 | -0,499062339 | 0,001 | 0,118 | 4,10747E-20 | 0,707566505   | 1,413294711     | 0,008474576     |
| ITM2C                                                                                           | 2,60211E-09 | -0,499138184 | 0,254 | 0,38  | 5,49071E-05 | 0,707529309   | 1,413369012     | 0,668421053     |
| EGR2                                                                                            | 1,49092E-10 | -0,499339767 | 0,027 | 0,103 | 3,14599E-06 | 0,707430455   | 1,413566512     | 0,262135922     |
| RRAD                                                                                            | 0,000292581 | -0,499384928 | 0,075 | 0,126 | 1           | 0,70740831    | 1,413610761     | 0,595238095     |
| PLEKHB1                                                                                         | 1,60535E-09 | -0,499881006 | 0,097 | 0,195 | 3,38744E-05 | 0,707165106   | 1,414096922     | 0,497435897     |
| SH3BP5                                                                                          | 1,18532E-14 | -0,499984306 | 0,119 | 0,261 | 2,50114E-10 | 0,707114473   | 1,414198178     | 0,455938697     |
| EHBP1                                                                                           | 3,39616E-16 | -0,500717962 | 0,191 | 0,362 | 7,16624E-12 | 0,706754975   | 1,414917526     | 0,527624309     |
| DRP2                                                                                            | 3,09945E-13 | -0,500826972 | 0,001 | 0,064 | 6,54016E-09 | 0,706701574   | 1,415024441     | 0,015625        |
| CNTN1                                                                                           | 4,32121E-18 | -0,50117314  | 0,002 | 0,091 | 9,11818E-14 | 0,706532025   | 1,41536401      | 0,021978022     |
| IFIT2                                                                                           | 3,46501E-14 | -0,50117606  | 0,024 | 0,122 | 7,31152E-10 | 0,706530595   | 1,415366875     | 0,196721311     |
| TERF1                                                                                           | 2,31102E-12 | -0,501608282 | 0,132 | 0,263 | 4,87649E-08 | 0,706318955   | 1,415790973     | 0,501901141     |
| RHBDF1                                                                                          | 2,72532E-08 | -0,501791716 | 0,158 | 0,255 | 0,000575069 | 0,706229154   | 1,415970998     | 0,619607843     |
| CIC                                                                                             | 3,61312E-12 | -0,501825685 | 0,09  | 0,205 | 7,62404E-08 | 0,706212526   | 1,416004338     | 0,43902439      |
| KLF13                                                                                           | 1,59248E-15 | -0,501950433 | 0,121 | 0,275 | 3,36028E-11 | 0,706151463   | 1,416126784     | 0,44            |
| SIAH1                                                                                           | 1,60015E-14 | -0,502171702 | 0,118 | 0,258 | 3,37647E-10 | 0,706043168   | 1,416343994     | 0,457364341     |
| CNBP                                                                                            | 4,41875E-19 | -0,50255966  | 0,312 | 0,531 | 9,32401E-15 | 0,70585333    | 1,416724917     | 0,587570621     |
| JMJD1C                                                                                          | 3,44858E-15 | -0,502803112 | 0,218 | 0,387 | 7,27684E-11 | 0,705734228   | 1,416964007     | 0,563307494     |
| TMEM245                                                                                         | 4,09088E-14 | -0,503025016 | 0,071 | 0,194 | 8,63217E-10 | 0,705625686   | 1,41718197      | 0,365979381     |
| U2AF1                                                                                           | 2,3068E-09  | -0,503046984 | 0,021 | 0,085 | 4,86758E-05 | 0,705614942   | 1,417203549     | 0,247058824     |
| MED13L                                                                                          | 8,9789E-15  | -0,503200007 | 0,136 | 0,286 | 1,89464E-10 | 0,705540103   | 1,417353877     | 0,475524476     |
| PROSER2                                                                                         | 5,67174E-21 | -0,503286851 | 0,009 | 0,122 | 1,19679E-16 | 0,705497634   | 1,417439198     | 0,073770492     |
| LINC00632                                                                                       | 9,48176E-15 | -0,503371168 | 0,051 | 0,171 | 2,00075E-10 | 0,705456403   | 1,417522041     | 0,298245614     |



Supplementary Table 5

| Differentially expressed genes_total calculation_ comparing SC-Keloid vs. (SC-Myel, SC-Nonmyel) |             |              |       |       |             |               |                 |                 |
|-------------------------------------------------------------------------------------------------|-------------|--------------|-------|-------|-------------|---------------|-----------------|-----------------|
| gene                                                                                            | p_val       | avg_log2FC   | pct.1 | pct.2 | p_val_adj   | Foldchange_UP | Foldchange_DOWN | Ratio_pct1_pct2 |
| ZC3H12C                                                                                         | 6,30082E-20 | -0,504259064 | 0,016 | 0,133 | 1,32954E-15 | 0,705022368   | 1,418394713     | 0,120300752     |
| JDP2                                                                                            | 5,39566E-12 | -0,504483513 | 0,079 | 0,193 | 1,13854E-07 | 0,704912692   | 1,418615399     | 0,409326425     |
| AKAP9                                                                                           | 4,74322E-13 | -0,504605344 | 0,141 | 0,28  | 1,00087E-08 | 0,704853167   | 1,418735201     | 0,503571429     |
| WBP2                                                                                            | 2,73068E-10 | -0,504953397 | 0,099 | 0,204 | 5,762E-06   | 0,70468314    | 1,419077515     | 0,485294118     |
| RPL3                                                                                            | 2,95268E-19 | -0,50559955  | 0,668 | 0,92  | 6,23044E-15 | 0,704367598   | 1,419713233     | 0,726086957     |
| CLDND1                                                                                          | 1,73882E-21 | -0,506299056 | 0,186 | 0,388 | 3,66909E-17 | 0,704026161   | 1,420401763     | 0,479381443     |
| LHPP                                                                                            | 5,00025E-12 | -0,507106742 | 0,047 | 0,144 | 1,0551E-07  | 0,703632126   | 1,42119719      | 0,326388889     |
| MAP2K3                                                                                          | 6,73707E-15 | -0,507225872 | 0,069 | 0,194 | 1,42159E-10 | 0,703574025   | 1,421314551     | 0,355670103     |
| ICAM1                                                                                           | 9,89893E-11 | -0,507262127 | 0,021 | 0,094 | 2,08877E-06 | 0,703556345   | 1,421350269     | 0,223404255     |
| MX1                                                                                             | 3,59021E-14 | -0,507743702 | 0,041 | 0,149 | 7,5757E-10  | 0,703321535   | 1,421824798     | 0,275167785     |
| ZMAT1                                                                                           | 4,54331E-14 | -0,508007487 | 0,023 | 0,117 | 9,58684E-10 | 0,70319295    | 1,422084791     | 0,196581197     |
| KAT2B                                                                                           | 5,205E-13   | -0,508559694 | 0,028 | 0,119 | 1,09831E-08 | 0,702923847   | 1,422629213     | 0,235294118     |
| CDC42EP4                                                                                        | 2,34641E-11 | -0,508840415 | 0,072 | 0,174 | 4,95117E-07 | 0,702787085   | 1,422906056     | 0,413793103     |
| FRMD3                                                                                           | 4,35401E-19 | -0,509578726 | 0,017 | 0,132 | 9,1874E-15  | 0,70242752    | 1,423634426     | 0,128787879     |
| MOB4                                                                                            | 3,14569E-14 | -0,510018948 | 0,122 | 0,258 | 6,63772E-10 | 0,702213215   | 1,424068899     | 0,472868217     |
| IP6K2                                                                                           | 7,09366E-11 | -0,510616473 | 0,125 | 0,24  | 1,49683E-06 | 0,701922438   | 1,424658832     | 0,520833333     |
| MAG                                                                                             | 2,55303E-15 | -0,510652522 | 0     | 0,071 | 5,38714E-11 | 0,701904899   | 1,42469443      | 0               |
| NPTX2                                                                                           | 5,38571E-16 | -0,511287896 | 0,009 | 0,098 | 1,13644E-11 | 0,701595842   | 1,425322015     | 0,091836735     |
| ZNF536                                                                                          | 8,67844E-15 | -0,511812041 | 0,071 | 0,198 | 1,83124E-10 | 0,701340993   | 1,425839942     | 0,358585859     |
| KCTD12                                                                                          | 1,98884E-15 | -0,511864587 | 0,173 | 0,338 | 4,19665E-11 | 0,701315449   | 1,425891875     | 0,51183432      |
| STARD9                                                                                          | 2,86018E-15 | -0,513133694 | 0,033 | 0,141 | 6,03528E-11 | 0,700698788   | 1,427146753     | 0,234042553     |
| PLSCR1                                                                                          | 8,22079E-11 | -0,513369633 | 0,036 | 0,119 | 1,73467E-06 | 0,700584205   | 1,427380168     | 0,302521008     |
| NCOA7                                                                                           | 7,63196E-14 | -0,513464744 | 0,057 | 0,172 | 1,61042E-09 | 0,70053802    | 1,427474272     | 0,331395349     |
| GBP1                                                                                            | 2,29066E-07 | -0,51435706  | 0,095 | 0,178 | 0,004833522 | 0,700104867   | 1,428357447     | 0,533707865     |
| SSBP2                                                                                           | 5,27747E-15 | -0,514439609 | 0,075 | 0,202 | 1,1136E-10  | 0,700064809   | 1,428439178     | 0,371287129     |
| CLMN                                                                                            | 1,77711E-16 | -0,514486375 | 0,042 | 0,164 | 3,74988E-12 | 0,700042116   | 1,428485483     | 0,256097561     |
| GAS6                                                                                            | 7,48804E-15 | -0,514525042 | 0,009 | 0,092 | 1,58005E-10 | 0,700023353   | 1,42852377      | 0,097826087     |
| ALDOA                                                                                           | 1,27538E-08 | -0,514996881 | 0,048 | 0,122 | 0,000269119 | 0,699794446   | 1,42899105      | 0,393442623     |
| TTYH1                                                                                           | 1,80605E-17 | -0,515063144 | 0,097 | 0,254 | 3,81095E-13 | 0,699762305   | 1,429056686     | 0,381889764     |
| TMEM98                                                                                          | 2,36829E-05 | -0,515187879 | 0,055 | 0,109 | 0,499732162 | 0,699701806   | 1,429180246     | 0,504587156     |

Supplementary Table 5

| Differentially expressed genes_total calculation_ comparing SC-Keloid vs. (SC-Myel, SC-Nonmyel) |             |              |       |       |             |               |                 |                 |
|-------------------------------------------------------------------------------------------------|-------------|--------------|-------|-------|-------------|---------------|-----------------|-----------------|
| gene                                                                                            | p_val       | avg_log2FC   | pct.1 | pct.2 | p_val_adj   | Foldchange_UP | Foldchange_DOWN | Ratio_pct1_pct2 |
| ARHGEF16                                                                                        | 2,92181E-21 | -0,515347135 | 0,001 | 0,103 | 6,16532E-17 | 0,699624572   | 1,429338019     | 0,009708738     |
| ASTN2                                                                                           | 7,60735E-14 | -0,517661904 | 0,029 | 0,126 | 1,60523E-09 | 0,698502941   | 1,431633198     | 0,23015873      |
| GNAI1                                                                                           | 3,69952E-23 | -0,51786933  | 0,012 | 0,138 | 7,80635E-19 | 0,69840252    | 1,431839049     | 0,086956522     |
| PURA                                                                                            | 3,16529E-17 | -0,518270016 | 0,189 | 0,365 | 6,67908E-13 | 0,698208577   | 1,432236775     | 0,517808219     |
| EIF1B                                                                                           | 1,60188E-19 | -0,519613461 | 0,282 | 0,502 | 3,38013E-15 | 0,697558704   | 1,433571102     | 0,561752988     |
| TMPRSS5                                                                                         | 7,92026E-18 | -0,520799091 | 0,009 | 0,107 | 1,67125E-13 | 0,696985674   | 1,434749718     | 0,08411215      |
| ZNF516                                                                                          | 9,0543E-22  | -0,520812964 | 0,023 | 0,156 | 1,91055E-17 | 0,696978972   | 1,434763515     | 0,147435897     |
| NXF1                                                                                            | 1,2922E-10  | -0,522378513 | 0,061 | 0,155 | 2,72667E-06 | 0,696223052   | 1,436321302     | 0,393548387     |
| RSRP1                                                                                           | 3,50427E-18 | -0,522610878 | 0,272 | 0,486 | 7,39436E-14 | 0,696110925   | 1,436552659     | 0,559670782     |
| PNPLA2                                                                                          | 5,22868E-14 | -0,522889293 | 0,111 | 0,242 | 1,1033E-09  | 0,6959766     | 1,436829916     | 0,458677686     |
| OSBPL1A                                                                                         | 5,99004E-16 | -0,523195591 | 0,04  | 0,156 | 1,26396E-11 | 0,695828854   | 1,437135        | 0,256410256     |
| MAN2A2                                                                                          | 1,98983E-22 | -0,524075066 | 0,066 | 0,237 | 4,19874E-18 | 0,695404802   | 1,438011353     | 0,278481013     |
| FRMD6                                                                                           | 2,09873E-11 | -0,524363077 | 0,211 | 0,349 | 4,42853E-07 | 0,695265989   | 1,438298457     | 0,604584527     |
| PPP2R2B                                                                                         | 2,71201E-20 | -0,52466455  | 0,01  | 0,122 | 5,72261E-16 | 0,695120718   | 1,438599044     | 0,081967213     |
| RAF1                                                                                            | 1,96309E-09 | -0,52519811  | 0,125 | 0,228 | 4,14231E-05 | 0,694863685   | 1,439131187     | 0,548245614     |
| CRY1                                                                                            | 2,17543E-07 | -0,526973029 | 0,073 | 0,148 | 0,004590368 | 0,694009334   | 1,440902811     | 0,493243243     |
| SNAI1                                                                                           | 1,08679E-09 | -0,52785068  | 0,043 | 0,123 | 2,29323E-05 | 0,693587268   | 1,441779638     | 0,349593496     |
| SCN9A                                                                                           | 1,39091E-19 | -0,528339922 | 0,148 | 0,336 | 2,93496E-15 | 0,6933521     | 1,442268653     | 0,44047619      |
| PLEKHA1                                                                                         | 4,63903E-12 | -0,528564154 | 0,166 | 0,301 | 9,78881E-08 | 0,693244344   | 1,442492836     | 0,551495017     |
| ERBB2                                                                                           | 3,83783E-11 | -0,528999216 | 0,115 | 0,231 | 8,09821E-07 | 0,693035319   | 1,442927903     | 0,497835498     |
| IGSF11                                                                                          | 4,47633E-23 | -0,529309283 | 0,01  | 0,136 | 9,44551E-19 | 0,692886387   | 1,443238053     | 0,073529412     |
| FXVD6                                                                                           | 0,000396629 | -0,529812395 | 0,052 | 0,095 | 1           | 0,692644798   | 1,443741442     | 0,547368421     |
| UBE2D3                                                                                          | 1,06936E-20 | -0,530326032 | 0,295 | 0,517 | 2,25645E-16 | 0,692398242   | 1,444255544     | 0,570599613     |
| MAP3K4                                                                                          | 1,50036E-19 | -0,531943848 | 0,031 | 0,161 | 3,16591E-15 | 0,691622233   | 1,445876017     | 0,192546584     |
| NPC2                                                                                            | 8,8932E-19  | -0,534182952 | 0,196 | 0,385 | 1,87655E-14 | 0,690549648   | 1,448121801     | 0,509090909     |
| FCGRT                                                                                           | 2,17619E-19 | -0,534995546 | 0,144 | 0,326 | 4,59198E-15 | 0,690160807   | 1,448937682     | 0,441717791     |
| LONRF1                                                                                          | 4,2432E-14  | -0,535930152 | 0,047 | 0,157 | 8,95357E-10 | 0,689713852   | 1,449876636     | 0,299363057     |
| ADGRL3                                                                                          | 1,33963E-23 | -0,536233988 | 0,002 | 0,118 | 2,82675E-19 | 0,689568612   | 1,450182016     | 0,016949153     |
| ETNK1                                                                                           | 1,27994E-20 | -0,537683026 | 0,1   | 0,274 | 2,70081E-16 | 0,688876359   | 1,451639306     | 0,364963504     |
| RPL38                                                                                           | 1,06056E-18 | -0,538988    | 0,575 | 0,839 | 2,2379E-14  | 0,688253525   | 1,452952964     | 0,68533969      |

Supplementary Table 5

| Differentially expressed genes_total calculation_ comparing SC-Keloid vs. (SC-Myel, SC-Nonmyel) |             |              |       |       |             |               |                 |                 |
|-------------------------------------------------------------------------------------------------|-------------|--------------|-------|-------|-------------|---------------|-----------------|-----------------|
| gene                                                                                            | p_val       | avg_log2FC   | pct.1 | pct.2 | p_val_adj   | Foldchange_UP | Foldchange_DOWN | Ratio_pct1_pct2 |
| EZR                                                                                             | 5,27025E-17 | -0,539055935 | 0,203 | 0,381 | 1,11208E-12 | 0,688221117   | 1,453021384     | 0,532808399     |
| GPC4                                                                                            | 2,67404E-20 | -0,539067586 | 0     | 0,095 | 5,64249E-16 | 0,688215559   | 1,453033118     | 0               |
| GNL3                                                                                            | 4,62818E-10 | -0,539413748 | 0,134 | 0,247 | 9,76592E-06 | 0,688050448   | 1,453381802     | 0,542510121     |
| NID2                                                                                            | 7,73772E-21 | -0,540803176 | 0,023 | 0,152 | 1,63274E-16 | 0,68738812    | 1,454782197     | 0,151315789     |
| BBX                                                                                             | 3,67527E-18 | -0,541914698 | 0,12  | 0,289 | 7,75518E-14 | 0,686858727   | 1,455903464     | 0,415224913     |
| OAT                                                                                             | 1,21847E-20 | -0,542132431 | 0,183 | 0,38  | 2,57109E-16 | 0,686755074   | 1,456123207     | 0,481578947     |
| TNFAIP3                                                                                         | 1,61096E-07 | -0,54319195  | 0,141 | 0,233 | 0,003399277 | 0,686250904   | 1,45719298      | 0,605150215     |
| HNRNPF                                                                                          | 4,38228E-18 | -0,543340038 | 0,239 | 0,43  | 9,24705E-14 | 0,686180466   | 1,457342564     | 0,555813953     |
| COL27A1                                                                                         | 4,43574E-11 | -0,54451442  | 0,111 | 0,231 | 9,35986E-07 | 0,685622129   | 1,458529352     | 0,480519481     |
| TRAK1                                                                                           | 4,33124E-12 | -0,546590389 | 0,094 | 0,21  | 9,13935E-08 | 0,684636261   | 1,460629617     | 0,447619048     |
| MAF1                                                                                            | 4,0819E-09  | -0,547729708 | 0,141 | 0,242 | 8,61321E-05 | 0,684095807   | 1,461783554     | 0,582644628     |
| IFIT3                                                                                           | 1,2013E-10  | -0,548153815 | 0,052 | 0,147 | 2,53486E-06 | 0,683894734   | 1,462213336     | 0,353741497     |
| HAS2                                                                                            | 8,62667E-06 | -0,548862221 | 0,07  | 0,134 | 0,182031363 | 0,683559003   | 1,462931503     | 0,52238806      |
| RNF213                                                                                          | 2,16831E-13 | -0,549084575 | 0,123 | 0,261 | 4,57534E-09 | 0,683453659   | 1,463156992     | 0,471264368     |
| AK5                                                                                             | 3,82351E-22 | -0,549385388 | 0,003 | 0,114 | 8,06799E-18 | 0,683311168   | 1,463462104     | 0,026315789     |
| PPM1K                                                                                           | 2,73091E-17 | -0,549443382 | 0,05  | 0,182 | 5,7625E-13  | 0,683283701   | 1,463520934     | 0,274725275     |
| SRSF5                                                                                           | 9,31807E-21 | -0,551233701 | 0,297 | 0,531 | 1,96621E-16 | 0,682436303   | 1,465338224     | 0,559322034     |
| SLC44A2                                                                                         | 9,44471E-13 | -0,551606202 | 0,106 | 0,231 | 1,99293E-08 | 0,682260122   | 1,46571662      | 0,458874459     |
| ZBTB21                                                                                          | 6,87514E-15 | -0,553197538 | 0,045 | 0,16  | 1,45072E-10 | 0,681507983   | 1,467334242     | 0,28125         |
| PPP4R2                                                                                          | 3,81926E-17 | -0,553634308 | 0,198 | 0,376 | 8,05903E-13 | 0,681301691   | 1,467778539     | 0,526595745     |
| SARNP                                                                                           | 1,258E-10   | -0,553636038 | 0,094 | 0,198 | 2,6545E-06  | 0,681300874   | 1,467780299     | 0,474747475     |
| MID1                                                                                            | 2,36832E-24 | -0,55544988  | 0,005 | 0,128 | 4,99739E-20 | 0,68044484    | 1,46962684      | 0,0390625       |
| SLC25A33                                                                                        | 6,3612E-13  | -0,55563531  | 0,052 | 0,157 | 1,34228E-08 | 0,680357388   | 1,469815744     | 0,331210191     |
| PLEKHB2                                                                                         | 7,20466E-12 | -0,556560566 | 0,114 | 0,233 | 1,52025E-07 | 0,679921188   | 1,470758696     | 0,489270386     |
| IRF9                                                                                            | 7,98764E-09 | -0,556707834 | 0,071 | 0,156 | 0,000168547 | 0,679851787   | 1,470908836     | 0,455128205     |
| INSC                                                                                            | 1,59201E-12 | -0,556866921 | 0,078 | 0,191 | 3,35929E-08 | 0,679776823   | 1,471071043     | 0,408376963     |
| ARF6                                                                                            | 7,10828E-17 | -0,556927278 | 0,19  | 0,36  | 1,49992E-12 | 0,679748384   | 1,471132588     | 0,527777778     |
| STK32A                                                                                          | 1,20516E-22 | -0,556992821 | 0,007 | 0,125 | 2,54301E-18 | 0,679717503   | 1,471199425     | 0,056           |
| DPYSL2                                                                                          | 3,09569E-12 | -0,557706006 | 0,125 | 0,258 | 6,53221E-08 | 0,679381573   | 1,471926881     | 0,484496124     |
| SOD1                                                                                            | 2,07297E-24 | -0,557762576 | 0,432 | 0,71  | 4,37416E-20 | 0,679354934   | 1,471984598     | 0,608450704     |

Supplementary Table 5

| Differentially expressed genes_total calculation_ comparing SC-Keloid vs. (SC-Myel, SC-Nonmyel) |             |              |       |       |             |               |                 |                 |
|-------------------------------------------------------------------------------------------------|-------------|--------------|-------|-------|-------------|---------------|-----------------|-----------------|
| gene                                                                                            | p_val       | avg_log2FC   | pct.1 | pct.2 | p_val_adj   | Foldchange_UP | Foldchange_DOWN | Ratio_pct1_pct2 |
| JMJD6                                                                                           | 1,234E-17   | -0,5591622   | 0,072 | 0,216 | 2,60387E-13 | 0,678696181   | 1,47341333      | 0,333333333     |
| BTG3                                                                                            | 4,20515E-15 | -0,559171557 | 0,239 | 0,407 | 8,87328E-11 | 0,678691779   | 1,473422887     | 0,587223587     |
| RNASE4                                                                                          | 2,95783E-19 | -0,56087288  | 0,017 | 0,13  | 6,24132E-15 | 0,677891892   | 1,47516147      | 0,130769231     |
| NRBP2                                                                                           | 1,12684E-13 | -0,561767978 | 0,109 | 0,244 | 2,37775E-09 | 0,677471435   | 1,476076996     | 0,446721311     |
| TAX1BP3                                                                                         | 3,66128E-11 | -0,561933127 | 0,271 | 0,425 | 7,72567E-07 | 0,677393887   | 1,476245976     | 0,637647059     |
| LDHA                                                                                            | 2,9576E-14  | -0,561993457 | 0,269 | 0,452 | 6,24083E-10 | 0,677365561   | 1,47630771      | 0,595132743     |
| SCML1                                                                                           | 6,76241E-18 | -0,563176328 | 0,068 | 0,213 | 1,42694E-13 | 0,676810414   | 1,477518637     | 0,319248826     |
| MIF                                                                                             | 2,59275E-20 | -0,563805103 | 0,297 | 0,539 | 5,47096E-16 | 0,676515501   | 1,47816273      | 0,551020408     |
| FST                                                                                             | 1,19195E-17 | -0,564592307 | 0,113 | 0,278 | 2,51513E-13 | 0,676146462   | 1,478969507     | 0,40647482      |
| RBMS1                                                                                           | 6,76812E-13 | -0,564700167 | 0,192 | 0,336 | 1,42814E-08 | 0,676095914   | 1,479080083     | 0,571428571     |
| DCN                                                                                             | 0,002741245 | -0,565273364 | 0,084 | 0,132 | 1           | 0,675827348   | 1,479667853     | 0,636363636     |
| PPTC7                                                                                           | 1,19274E-14 | -0,56609594  | 0,054 | 0,17  | 2,51681E-10 | 0,675442124   | 1,480511749     | 0,317647059     |
| YME1L1                                                                                          | 1,11264E-16 | -0,568172781 | 0,161 | 0,327 | 2,34779E-12 | 0,674470486   | 1,482644565     | 0,49235474      |
| H3-3B                                                                                           | 1,19408E-25 | -0,56843738  | 0,81  | 0,965 | 2,51963E-21 | 0,674346795   | 1,482916516     | 0,839378238     |
| BAIAP2                                                                                          | 4,69367E-18 | -0,569269078 | 0,056 | 0,191 | 9,90412E-14 | 0,673958154   | 1,483771647     | 0,293193717     |
| THRA                                                                                            | 1,55384E-13 | -0,569323584 | 0,055 | 0,166 | 3,27876E-09 | 0,673932692   | 1,483827706     | 0,331325301     |
| ELMO1                                                                                           | 1,46602E-17 | -0,569643536 | 0,006 | 0,098 | 3,09344E-13 | 0,673783248   | 1,484156817     | 0,06122449      |
| MECP2                                                                                           | 1,12412E-18 | -0,569765335 | 0,092 | 0,251 | 2,37201E-14 | 0,673726366   | 1,484282121     | 0,366533865     |
| MBOAT2                                                                                          | 3,40995E-17 | -0,571504613 | 0,079 | 0,223 | 7,19533E-13 | 0,672914628   | 1,486072614     | 0,35426009      |
| ATOX8                                                                                           | 1,25173E-18 | -0,571682256 | 0     | 0,087 | 2,64128E-14 | 0,672831775   | 1,48625561      | 0               |
| FSTL3                                                                                           | 3,84538E-06 | -0,571743132 | 0,247 | 0,341 | 0,081141309 | 0,672803385   | 1,486318326     | 0,724340176     |
| CDKN1B                                                                                          | 1,33461E-22 | -0,572820878 | 0,076 | 0,25  | 2,81616E-18 | 0,672300964   | 1,487429075     | 0,304           |
| SYNE1                                                                                           | 4,53012E-18 | -0,575955554 | 0,097 | 0,258 | 9,559E-14   | 0,670841779   | 1,490664462     | 0,375968992     |
| S100A2                                                                                          | 1,68233E-08 | -0,578436002 | 0,07  | 0,155 | 0,000354988 | 0,669689381   | 1,49322959      | 0,451612903     |
| ADAM23                                                                                          | 1,10191E-19 | -0,579378471 | 0,033 | 0,166 | 2,32514E-15 | 0,669252036   | 1,49420539      | 0,198795181     |
| HTATIP2                                                                                         | 9,52372E-21 | -0,579643024 | 0,049 | 0,197 | 2,0096E-16  | 0,669129324   | 1,494479413     | 0,248730964     |
| SPRY1                                                                                           | 7,60797E-09 | -0,57968589  | 0,099 | 0,198 | 0,000160536 | 0,669109443   | 1,494523819     | 0,5             |
| B4GALNT1                                                                                        | 1,81483E-22 | -0,580068841 | 0,023 | 0,161 | 3,82948E-18 | 0,668931857   | 1,49492058      | 0,142857143     |
| USP53                                                                                           | 3,50432E-16 | -0,580159997 | 0,147 | 0,308 | 7,39447E-12 | 0,668889592   | 1,495015039     | 0,477272727     |
| KCNK12                                                                                          | 6,6626E-14  | -0,580246748 | 0,003 | 0,073 | 1,40588E-09 | 0,668849372   | 1,495104939     | 0,04109589      |

Supplementary Table 5

| Differentially expressed genes_total calculation_ comparing SC-Keloid vs. (SC-Myel, SC-Nonmyel) |             |              |       |       |             |               |                 |                 |
|-------------------------------------------------------------------------------------------------|-------------|--------------|-------|-------|-------------|---------------|-----------------|-----------------|
| gene                                                                                            | p_val       | avg_log2FC   | pct.1 | pct.2 | p_val_adj   | Foldchange_UP | Foldchange_DOWN | Ratio_pct1_pct2 |
| FERMT2                                                                                          | 3,08719E-21 | -0,580707891 | 0,263 | 0,487 | 6,51428E-17 | 0,668635616   | 1,49558291      | 0,540041068     |
| TMEM123                                                                                         | 7,09052E-18 | -0,58229774  | 0,139 | 0,309 | 1,49617E-13 | 0,667899186   | 1,49723195      | 0,449838188     |
| SF1                                                                                             | 3,36134E-22 | -0,582973869 | 0,257 | 0,478 | 7,09277E-18 | 0,667586243   | 1,497933803     | 0,537656904     |
| SETD5                                                                                           | 9,54344E-14 | -0,58364299  | 0,155 | 0,299 | 2,01376E-09 | 0,667276689   | 1,498628705     | 0,518394649     |
| MIR99AHG                                                                                        | 6,75651E-14 | -0,583933466 | 0,023 | 0,115 | 1,42569E-09 | 0,667142351   | 1,498930473     | 0,2             |
| STON1                                                                                           | 2,33371E-20 | -0,584907874 | 0,009 | 0,119 | 4,92435E-16 | 0,66669191    | 1,499943204     | 0,075630252     |
| ID1                                                                                             | 0,000391769 | -0,585074105 | 0,105 | 0,157 | 1           | 0,666615097   | 1,500116042     | 0,668789809     |
| MKNK2                                                                                           | 4,35015E-22 | -0,585780211 | 0,052 | 0,21  | 9,17924E-18 | 0,666288911   | 1,500850432     | 0,247619048     |
| DHH                                                                                             | 9,54947E-20 | -0,586301244 | 0,022 | 0,144 | 2,01503E-15 | 0,666048323   | 1,501392565     | 0,152777778     |
| ASH1L                                                                                           | 7,82351E-21 | -0,586700574 | 0,159 | 0,351 | 1,65084E-16 | 0,66586399    | 1,5018082       | 0,452991453     |
| TOM1L2                                                                                          | 2,74712E-15 | -0,58685496  | 0,057 | 0,178 | 5,79669E-11 | 0,665792738   | 1,501968921     | 0,320224719     |
| TGIF1                                                                                           | 3,15701E-11 | -0,587119464 | 0,118 | 0,232 | 6,66162E-07 | 0,665670683   | 1,502244317     | 0,50862069      |
| RFX1                                                                                            | 7,74751E-17 | -0,588892851 | 0,043 | 0,164 | 1,6348E-12  | 0,664852931   | 1,504092039     | 0,262195122     |
| RND3                                                                                            | 1,03793E-09 | -0,589318704 | 0,319 | 0,474 | 2,19013E-05 | 0,664656709   | 1,50453608      | 0,672995781     |
| FGF7                                                                                            | 3,65797E-25 | -0,589987463 | 0,008 | 0,141 | 7,71869E-21 | 0,66434868    | 1,505233667     | 0,056737589     |
| ADAMTS8                                                                                         | 2,70652E-23 | -0,59278496  | 0,008 | 0,132 | 5,71102E-19 | 0,663061705   | 1,508155263     | 0,060606061     |
| CSF1                                                                                            | 6,69192E-16 | -0,593035601 | 0,029 | 0,136 | 1,41206E-11 | 0,662946521   | 1,508417299     | 0,213235294     |
| TRIM28                                                                                          | 4,61652E-12 | -0,593326167 | 0,148 | 0,274 | 9,74132E-08 | 0,662813013   | 1,508721132     | 0,540145985     |
| MYOT                                                                                            | 5,36584E-13 | -0,593391411 | 0,192 | 0,342 | 1,13225E-08 | 0,662783039   | 1,508789364     | 0,561403509     |
| CD83                                                                                            | 2,7743E-11  | -0,595033289 | 0,044 | 0,134 | 5,85406E-07 | 0,662029179   | 1,510507439     | 0,328358209     |
| PFKFB3                                                                                          | 3,16522E-22 | -0,596454448 | 0,028 | 0,168 | 6,67894E-18 | 0,661377354   | 1,511996131     | 0,166666667     |
| FNBP4                                                                                           | 7,57085E-17 | -0,597281928 | 0,129 | 0,289 | 1,59752E-12 | 0,660998119   | 1,512863608     | 0,446366782     |
| ZBTB44                                                                                          | 3,38534E-24 | -0,598217919 | 0,072 | 0,255 | 7,14341E-20 | 0,660569416   | 1,513845442     | 0,282352941     |
| FSTL1                                                                                           | 6,89939E-21 | -0,599012045 | 0,201 | 0,411 | 1,45584E-16 | 0,660205909   | 1,514678962     | 0,489051095     |
| GAB1                                                                                            | 1,42147E-19 | -0,601099405 | 0,095 | 0,262 | 2,99943E-15 | 0,659251382   | 1,516872058     | 0,36259542      |
| ARL13B                                                                                          | 2,44255E-13 | -0,60194616  | 0,106 | 0,233 | 5,15403E-09 | 0,658864564   | 1,517762611     | 0,454935622     |
| ANKRD37                                                                                         | 3,8352E-14  | -0,604460897 | 0,038 | 0,142 | 8,09265E-10 | 0,657717109   | 1,520410503     | 0,267605634     |
| NEU1                                                                                            | 9,75305E-15 | -0,607470184 | 0,093 | 0,225 | 2,05799E-10 | 0,65634662    | 1,523585205     | 0,413333333     |
| MT1X                                                                                            | 0,007431414 | -0,607867726 | 0,186 | 0,231 | 1           | 0,656165785   | 1,524005095     | 0,805194805     |
| KRT5                                                                                            | 1,41998E-19 | -0,60893209  | 0,021 | 0,142 | 2,9963E-15  | 0,65568187    | 1,525129861     | 0,147887324     |

Supplementary Table 5

| Differentially expressed genes_total calculation_ comparing SC-Keloid vs. (SC-Myel, SC-Nonmyel) |             |              |       |       |             |               |                 |                 |
|-------------------------------------------------------------------------------------------------|-------------|--------------|-------|-------|-------------|---------------|-----------------|-----------------|
| gene                                                                                            | p_val       | avg_log2FC   | pct.1 | pct.2 | p_val_adj   | Foldchange_UP | Foldchange_DOWN | Ratio_pct1_pct2 |
| AMOTL2                                                                                          | 1,81945E-13 | -0,609608053 | 0,043 | 0,145 | 3,83923E-09 | 0,655374728   | 1,525844616     | 0,296551724     |
| UGCG                                                                                            | 5,77181E-13 | -0,61014883  | 0,113 | 0,242 | 1,21791E-08 | 0,655129115   | 1,526416668     | 0,466942149     |
| IFI6                                                                                            | 1,58445E-06 | -0,61024692  | 0,2   | 0,292 | 0,033433465 | 0,655084573   | 1,526520454     | 0,684931507     |
| TGFBR2                                                                                          | 5,06331E-21 | -0,610331384 | 0,263 | 0,491 | 1,06841E-16 | 0,655046222   | 1,526609828     | 0,535641548     |
| HNRNPL                                                                                          | 8,11215E-18 | -0,611519547 | 0,141 | 0,304 | 1,71174E-13 | 0,654506967   | 1,527867618     | 0,463815789     |
| MBNL1                                                                                           | 1,66039E-22 | -0,611779109 | 0,254 | 0,482 | 3,50359E-18 | 0,654389222   | 1,528142529     | 0,526970954     |
| ANKRD12                                                                                         | 3,32856E-22 | -0,612002894 | 0,191 | 0,402 | 7,02359E-18 | 0,654287723   | 1,528379587     | 0,475124378     |
| RBM4                                                                                            | 4,00794E-13 | -0,612218748 | 0,105 | 0,227 | 8,45716E-09 | 0,654189837   | 1,528608277     | 0,462555066     |
| SH3D19                                                                                          | 7,84271E-20 | -0,61273384  | 0,073 | 0,232 | 1,65489E-15 | 0,65395631    | 1,529154141     | 0,314655172     |
| PLPP3                                                                                           | 2,43353E-22 | -0,614082414 | 0,037 | 0,185 | 5,135E-18   | 0,653345304   | 1,530584201     | 0,2             |
| SMC5                                                                                            | 2,45974E-16 | -0,614119642 | 0,146 | 0,304 | 5,1903E-12  | 0,653328444   | 1,530623699     | 0,480263158     |
| ITM2B                                                                                           | 2,45932E-31 | -0,615372398 | 0,533 | 0,858 | 5,18942E-27 | 0,652761377   | 1,531953384     | 0,621212121     |
| CLEC14A                                                                                         | 7,68276E-23 | -0,615999168 | 0,008 | 0,13  | 1,62114E-18 | 0,65247785    | 1,532619076     | 0,061538462     |
| ANKHD1                                                                                          | 2,93711E-19 | -0,616946765 | 0,048 | 0,186 | 6,1976E-15  | 0,652049428   | 1,533626068     | 0,258064516     |
| SFPQ                                                                                            | 4,35032E-29 | -0,617127588 | 0,319 | 0,597 | 9,1796E-25  | 0,651967707   | 1,5338183       | 0,534338358     |
| ARHGEF26                                                                                        | 2,84506E-19 | -0,617959157 | 0,095 | 0,263 | 6,00337E-15 | 0,651592021   | 1,534702647     | 0,36121673      |
| LRRFIP2                                                                                         | 6,3705E-16  | -0,618758036 | 0,135 | 0,29  | 1,34424E-11 | 0,651231308   | 1,53555271      | 0,465517241     |
| YY1                                                                                             | 2,48599E-26 | -0,61904379  | 0,231 | 0,478 | 5,24569E-22 | 0,651102332   | 1,535856887     | 0,483263598     |
| DEPDC7                                                                                          | 3,0879E-22  | -0,621040193 | 0,017 | 0,147 | 6,51577E-18 | 0,650201959   | 1,537983679     | 0,115646259     |
| SCRN1                                                                                           | 6,03568E-17 | -0,621656115 | 0,041 | 0,163 | 1,27359E-12 | 0,64992443    | 1,538640422     | 0,251533742     |
| S1PR3                                                                                           | 1,98681E-22 | -0,622397156 | 0,059 | 0,225 | 4,19237E-18 | 0,649590682   | 1,539430948     | 0,262222222     |
| RPS16                                                                                           | 6,86158E-26 | -0,622465558 | 0,539 | 0,852 | 1,44786E-21 | 0,649559884   | 1,539503938     | 0,632629108     |
| GRIK3                                                                                           | 1,67408E-23 | -0,625058306 | 0,006 | 0,128 | 3,53247E-19 | 0,648393572   | 1,542273154     | 0,046875        |
| LAMP1                                                                                           | 1,78795E-25 | -0,625180977 | 0,263 | 0,51  | 3,77276E-21 | 0,648338442   | 1,542404298     | 0,515686275     |
| TRIM8                                                                                           | 6,88816E-16 | -0,625528744 | 0,158 | 0,311 | 1,45347E-11 | 0,648182177   | 1,542776145     | 0,508038585     |
| KDSR                                                                                            | 3,96452E-24 | -0,625885219 | 0,156 | 0,372 | 8,36553E-20 | 0,648022037   | 1,543157397     | 0,419354839     |
| PDLIM3                                                                                          | 1,4048E-07  | -0,625975191 | 0,123 | 0,212 | 0,00296426  | 0,647981626   | 1,543253636     | 0,580188679     |
| GFRA1                                                                                           | 4,29424E-21 | -0,627283866 | 0,072 | 0,237 | 9,06129E-17 | 0,647394105   | 1,544654164     | 0,303797468     |
| STIP1                                                                                           | 2,27935E-21 | -0,628298875 | 0,135 | 0,318 | 4,80966E-17 | 0,646938791   | 1,545741289     | 0,424528302     |
| PRDM16                                                                                          | 4,23717E-22 | -0,629279478 | 0,008 | 0,125 | 8,94084E-18 | 0,646499214   | 1,54679229      | 0,064           |

Supplementary Table 5

| Differentially expressed genes_total calculation_ comparing SC-Keloid vs. (SC-Myel, SC-Nonmyel) |             |              |       |       |             |               |                 |                 |
|-------------------------------------------------------------------------------------------------|-------------|--------------|-------|-------|-------------|---------------|-----------------|-----------------|
| gene                                                                                            | p_val       | avg_log2FC   | pct.1 | pct.2 | p_val_adj   | Foldchange_UP | Foldchange_DOWN | Ratio_pct1_pct2 |
| OSER1                                                                                           | 2,60335E-19 | -0,630115369 | 0,061 | 0,208 | 5,49334E-15 | 0,646124744   | 1,547688754     | 0,293269231     |
| RSRC2                                                                                           | 3,75538E-18 | -0,630951809 | 0,328 | 0,537 | 7,92423E-14 | 0,645750245   | 1,548586327     | 0,610800745     |
| MIDEAS                                                                                          | 2,09957E-17 | -0,631852094 | 0,099 | 0,254 | 4,43031E-13 | 0,645347403   | 1,549552992     | 0,38976378      |
| SERPINB9                                                                                        | 5,22547E-19 | -0,63204186  | 0,005 | 0,102 | 1,10263E-14 | 0,645262523   | 1,549756827     | 0,049019608     |
| ABHD5                                                                                           | 1,08529E-14 | -0,632319245 | 0,062 | 0,18  | 2,29008E-10 | 0,645138471   | 1,550054826     | 0,344444444     |
| KMT2A                                                                                           | 1,80444E-19 | -0,632405888 | 0,177 | 0,366 | 3,80754E-15 | 0,645099727   | 1,550147919     | 0,483606557     |
| MIDN                                                                                            | 2,30426E-17 | -0,633195571 | 0,148 | 0,32  | 4,86221E-13 | 0,644746718   | 1,55099665      | 0,4625          |
| FOXO3                                                                                           | 1,46063E-20 | -0,633702967 | 0,079 | 0,242 | 3,08208E-16 | 0,64452       | 1,551542233     | 0,326446281     |
| BNIP3L                                                                                          | 4,10147E-20 | -0,634797731 | 0,118 | 0,293 | 8,6545E-16  | 0,644031103   | 1,55272004      | 0,402730375     |
| CNKS3                                                                                           | 8,99944E-15 | -0,636409282 | 0,135 | 0,284 | 1,89897E-10 | 0,643312095   | 1,554455463     | 0,475352113     |
| TOMM6                                                                                           | 4,48357E-13 | -0,637140948 | 0,093 | 0,214 | 9,46078E-09 | 0,64298592    | 1,555244008     | 0,434579439     |
| RBM39                                                                                           | 4,92099E-32 | -0,63788732  | 0,357 | 0,664 | 1,03838E-27 | 0,64265336    | 1,556048815     | 0,537650602     |
| GFRA2                                                                                           | 1,50474E-16 | -0,639570537 | 0,068 | 0,206 | 3,17516E-12 | 0,641904003   | 1,557865344     | 0,330097087     |
| RPS6KA5                                                                                         | 1,31384E-20 | -0,639877953 | 0,038 | 0,179 | 2,77232E-16 | 0,641767238   | 1,558197336     | 0,212290503     |
| DIP2B                                                                                           | 1,14346E-16 | -0,640083361 | 0,1   | 0,25  | 2,41282E-12 | 0,641675871   | 1,558419204     | 0,4             |
| TAF7                                                                                            | 1,76644E-18 | -0,640793496 | 0,18  | 0,361 | 3,72737E-14 | 0,641360097   | 1,559186491     | 0,498614958     |
| SMIM5                                                                                           | 1,21578E-11 | -0,643812366 | 0,098 | 0,213 | 2,56543E-07 | 0,640019441   | 1,562452538     | 0,460093897     |
| FGFR1                                                                                           | 5,85026E-23 | -0,644214314 | 0,026 | 0,168 | 1,23446E-18 | 0,639841151   | 1,562887912     | 0,154761905     |
| EEF1A1                                                                                          | 6,08032E-30 | -0,644861777 | 0,913 | 0,974 | 1,28301E-25 | 0,639554063   | 1,563589473     | 0,937371663     |
| CYCS                                                                                            | 7,92862E-15 | -0,646678108 | 0,233 | 0,393 | 1,67302E-10 | 0,63874938    | 1,565559249     | 0,592875318     |
| KMT2E                                                                                           | 3,28592E-22 | -0,648514491 | 0,277 | 0,505 | 6,93362E-18 | 0,637936844   | 1,567553292     | 0,548514851     |
| RPS27                                                                                           | 2,74898E-32 | -0,649993903 | 0,712 | 0,943 | 5,80063E-28 | 0,637283007   | 1,569161564     | 0,755037116     |
| EPB41L4A-AS1                                                                                    | 1,64327E-20 | -0,650222587 | 0,115 | 0,288 | 3,46747E-16 | 0,637181998   | 1,569410315     | 0,399305556     |
| HLA-DPB1                                                                                        | 1,39005E-17 | -0,651003019 | 0,047 | 0,176 | 2,93315E-13 | 0,636837405   | 1,570259523     | 0,267045455     |
| CRIP1                                                                                           | 1,15692E-12 | -0,651516939 | 0,217 | 0,372 | 2,44122E-08 | 0,63661059    | 1,570818985     | 0,583333333     |
| AK1                                                                                             | 9,20217E-10 | -0,652060092 | 0,098 | 0,193 | 1,94175E-05 | 0,636370961   | 1,571410485     | 0,507772021     |
| RBMS3                                                                                           | 1,60729E-26 | -0,653298523 | 0,023 | 0,183 | 3,39154E-22 | 0,635824925   | 1,572759986     | 0,12568306      |
| LMNA                                                                                            | 4,74233E-19 | -0,653571897 | 0,609 | 0,862 | 1,00068E-14 | 0,635704455   | 1,573058035     | 0,70649652      |
| ODC1                                                                                            | 1,18162E-14 | -0,654861031 | 0,126 | 0,269 | 2,49334E-10 | 0,635136669   | 1,574464284     | 0,468401487     |
| PLEKHA5                                                                                         | 4,86541E-16 | -0,655005697 | 0,091 | 0,237 | 1,02665E-11 | 0,635072983   | 1,574622171     | 0,383966245     |

Supplementary Table 5

| Differentially expressed genes_total calculation_ comparing SC-Keloid vs. (SC-Myel, SC-Nonmyel) |             |              |       |       |             |               |                 |                 |
|-------------------------------------------------------------------------------------------------|-------------|--------------|-------|-------|-------------|---------------|-----------------|-----------------|
| gene                                                                                            | p_val       | avg_log2FC   | pct.1 | pct.2 | p_val_adj   | Foldchange_UP | Foldchange_DOWN | Ratio_pct1_pct2 |
| INF2                                                                                            | 8,11961E-20 | -0,655704866 | 0,107 | 0,273 | 1,71332E-15 | 0,634765285   | 1,57538546      | 0,391941392     |
| HNRNPDL                                                                                         | 2,97765E-32 | -0,656158769 | 0,392 | 0,711 | 6,28314E-28 | 0,634565605   | 1,575881188     | 0,551336146     |
| PHF13                                                                                           | 9,40267E-14 | -0,656753602 | 0,068 | 0,182 | 1,98406E-09 | 0,634304023   | 1,57653107      | 0,373626374     |
| DDX39B                                                                                          | 7,11025E-15 | -0,657231216 | 0,139 | 0,282 | 1,50033E-10 | 0,634094067   | 1,577053077     | 0,492907801     |
| HIPK3                                                                                           | 3,5887E-20  | -0,658332186 | 0,097 | 0,262 | 7,57252E-16 | 0,633610353   | 1,57825704      | 0,370229008     |
| CHORDC1                                                                                         | 5,06529E-19 | -0,658645111 | 0,09  | 0,247 | 1,06883E-14 | 0,633472936   | 1,578599405     | 0,36437247      |
| SNHG12                                                                                          | 3,27794E-17 | -0,659029319 | 0,059 | 0,189 | 6,91678E-13 | 0,633304256   | 1,579019863     | 0,312169312     |
| HNRNPH1                                                                                         | 1,78515E-30 | -0,659061932 | 0,369 | 0,676 | 3,76685E-26 | 0,63328994    | 1,579055558     | 0,545857988     |
| CTSF                                                                                            | 1,26981E-20 | -0,659457324 | 0,061 | 0,213 | 2,67943E-16 | 0,633116402   | 1,57948838      | 0,286384977     |
| AHSA1                                                                                           | 6,79677E-16 | -0,659758656 | 0,154 | 0,307 | 1,43419E-11 | 0,632984178   | 1,579818319     | 0,501628664     |
| PRKCA                                                                                           | 1,20895E-21 | -0,660269226 | 0,143 | 0,334 | 2,55101E-17 | 0,632760204   | 1,580377516     | 0,428143713     |
| CNP                                                                                             | 3,12693E-20 | -0,660613864 | 0,254 | 0,464 | 6,59814E-16 | 0,632609066   | 1,580755089     | 0,547413793     |
| ZBTB10                                                                                          | 1,48183E-22 | -0,661571012 | 0,045 | 0,201 | 3,12682E-18 | 0,632189504   | 1,58180418      | 0,223880597     |
| ARHGAP19                                                                                        | 7,07717E-26 | -0,661684062 | 0,007 | 0,141 | 1,49335E-21 | 0,632139967   | 1,581928136     | 0,04964539      |
| KCTD11                                                                                          | 4,5768E-19  | -0,66212057  | 0,03  | 0,156 | 9,65751E-15 | 0,631948733   | 1,582406843     | 0,192307692     |
| SAV1                                                                                            | 9,84139E-20 | -0,664153278 | 0,065 | 0,216 | 2,07663E-15 | 0,631058966   | 1,584637971     | 0,300925926     |
| FGFBP2                                                                                          | 2,86497E-14 | -0,666409436 | 0,008 | 0,087 | 6,04537E-10 | 0,630072856   | 1,587118046     | 0,091954023     |
| TMEM35B                                                                                         | 5,41867E-18 | -0,666574797 | 0,048 | 0,175 | 1,14339E-13 | 0,630000641   | 1,587299971     | 0,274285714     |
| ZSWIM6                                                                                          | 2,44809E-27 | -0,667530483 | 0,08  | 0,284 | 5,16571E-23 | 0,629583448   | 1,588351796     | 0,281690141     |
| BPTF                                                                                            | 3,20775E-20 | -0,669306107 | 0,148 | 0,332 | 6,76868E-16 | 0,628809053   | 1,590307893     | 0,445783133     |
| SNHG8                                                                                           | 1,14871E-23 | -0,670689915 | 0,269 | 0,507 | 2,4239E-19  | 0,628206199   | 1,591834021     | 0,530571992     |
| NUP153                                                                                          | 7,3481E-24  | -0,672356329 | 0,044 | 0,206 | 1,55052E-19 | 0,627480996   | 1,593673763     | 0,213592233     |
| RASGEF1B                                                                                        | 2,6053E-25  | -0,672589958 | 0,03  | 0,187 | 5,49744E-21 | 0,62737939    | 1,593931863     | 0,160427807     |
| ATP1B2                                                                                          | 1,93269E-21 | -0,673006578 | 0,014 | 0,134 | 4,07818E-17 | 0,627198242   | 1,594392223     | 0,104477612     |
| EIF4A3                                                                                          | 4,1758E-17  | -0,673209279 | 0,155 | 0,315 | 8,81135E-13 | 0,627110126   | 1,594616253     | 0,492063492     |
| LINC00472                                                                                       | 1,48022E-24 | -0,673341777 | 0,012 | 0,145 | 3,12341E-20 | 0,627052535   | 1,59476271      | 0,082758621     |
| ATN1                                                                                            | 4,94289E-20 | -0,676253708 | 0,135 | 0,311 | 1,043E-15   | 0,625788171   | 1,597984825     | 0,434083601     |
| RNF130                                                                                          | 1,48396E-22 | -0,677217078 | 0,146 | 0,345 | 3,1313E-18  | 0,625370436   | 1,599052247     | 0,423188406     |
| ATF4                                                                                            | 1,3464E-31  | -0,677889588 | 0,299 | 0,602 | 2,84103E-27 | 0,625078988   | 1,599797816     | 0,496677741     |
| CEP85L                                                                                          | 2,56927E-18 | -0,680412744 | 0,079 | 0,228 | 5,42142E-14 | 0,623986731   | 1,602598181     | 0,346491228     |



Supplementary Table 5

| Differentially expressed genes_total calculation_ comparing SC-Keloid vs. (SC-Myel, SC-Nonmyel) |             |              |       |       |             |               |                 |                 |
|-------------------------------------------------------------------------------------------------|-------------|--------------|-------|-------|-------------|---------------|-----------------|-----------------|
| gene                                                                                            | p_val       | avg_log2FC   | pct.1 | pct.2 | p_val_adj   | Foldchange_UP | Foldchange_DOWN | Ratio_pct1_pct2 |
| EFNA1                                                                                           | 2,20324E-19 | -0,680779317 | 0,012 | 0,119 | 4,64905E-15 | 0,623828203   | 1,603005435     | 0,100840336     |
| GABARAP                                                                                         | 5,91776E-28 | -0,680907926 | 0,189 | 0,452 | 1,24871E-23 | 0,623772594   | 1,603148342     | 0,418141593     |
| CMTM5                                                                                           | 3,84256E-22 | -0,681652951 | 0,129 | 0,316 | 8,10819E-18 | 0,623450554   | 1,60397644      | 0,408227848     |
| TPT1                                                                                            | 2,55223E-33 | -0,682020247 | 0,745 | 0,948 | 5,38546E-29 | 0,623291849   | 1,604384849     | 0,785864979     |
| FNIP2                                                                                           | 3,0596E-20  | -0,684615058 | 0,054 | 0,202 | 6,45606E-16 | 0,622171813   | 1,607273069     | 0,267326733     |
| RAPGEF2                                                                                         | 1,17037E-21 | -0,688079325 | 0,061 | 0,22  | 2,4696E-17  | 0,620679618   | 1,611137166     | 0,277272727     |
| TCF7L2                                                                                          | 7,40235E-19 | -0,688287637 | 0,066 | 0,213 | 1,56197E-14 | 0,620590004   | 1,611369816     | 0,309859155     |
| PLXDC2                                                                                          | 6,117E-23   | -0,690097968 | 0,098 | 0,286 | 1,29075E-18 | 0,61981176    | 1,613393074     | 0,342657343     |
| LAMA4                                                                                           | 3,22905E-24 | -0,691635218 | 0,207 | 0,437 | 6,81362E-20 | 0,619151677   | 1,615113126     | 0,473684211     |
| LTBP3                                                                                           | 2,40927E-23 | -0,69194497  | 0,168 | 0,383 | 5,0838E-19  | 0,619018757   | 1,615459934     | 0,438642298     |
| XBP1                                                                                            | 1,00122E-14 | -0,693076233 | 0,183 | 0,339 | 2,11267E-10 | 0,618533555   | 1,616727164     | 0,539823009     |
| RBBP6                                                                                           | 3,02761E-17 | -0,693223142 | 0,151 | 0,316 | 6,38857E-13 | 0,618470573   | 1,616891804     | 0,477848101     |
| ZMYM5                                                                                           | 2,29317E-21 | -0,694006023 | 0,093 | 0,266 | 4,83882E-17 | 0,61813505    | 1,61776945      | 0,34962406      |
| SBDS                                                                                            | 3,60757E-31 | -0,69422593  | 0,334 | 0,626 | 7,61234E-27 | 0,618040836   | 1,618016063     | 0,533546326     |
| ANKRD33B                                                                                        | 1,13076E-23 | -0,694913693 | 0     | 0,111 | 2,38603E-19 | 0,617746273   | 1,618787588     | 0               |
| MXI1                                                                                            | 9,07008E-25 | -0,694953459 | 0,057 | 0,232 | 1,91388E-20 | 0,617729246   | 1,618832209     | 0,245689655     |
| KIF21A                                                                                          | 4,87279E-27 | -0,69598526  | 0,024 | 0,183 | 1,02821E-22 | 0,61728761    | 1,619990396     | 0,131147541     |
| SPHK1                                                                                           | 5,94561E-19 | -0,696545169 | 0,144 | 0,315 | 1,25458E-14 | 0,617048088   | 1,620619235     | 0,457142857     |
| CHD1                                                                                            | 5,00907E-22 | -0,696792857 | 0,121 | 0,309 | 1,05696E-17 | 0,616942159   | 1,620897494     | 0,391585761     |
| STOM                                                                                            | 1,379E-22   | -0,697022502 | 0,063 | 0,227 | 2,90983E-18 | 0,616843964   | 1,621155525     | 0,27753304      |
| FBLN2                                                                                           | 5,13669E-16 | -0,698571688 | 0,121 | 0,273 | 1,08389E-11 | 0,616181944   | 1,62289728      | 0,443223443     |
| GJC3                                                                                            | 6,3918E-17  | -0,699062246 | 0,003 | 0,088 | 1,34873E-12 | 0,61597246    | 1,623449205     | 0,034090909     |
| SOX4                                                                                            | 6,88854E-05 | -0,700306373 | 0,583 | 0,684 | 1           | 0,615441496   | 1,624849812     | 0,852339181     |
| PCF11                                                                                           | 3,53305E-24 | -0,700756431 | 0,114 | 0,313 | 7,4551E-20  | 0,615249536   | 1,625356773     | 0,364217252     |
| NEAT1                                                                                           | 9,60495E-19 | -0,701143777 | 0,676 | 0,883 | 2,02674E-14 | 0,615084371   | 1,62579322      | 0,765571914     |
| VAMP2                                                                                           | 6,77462E-27 | -0,701146629 | 0,239 | 0,478 | 1,42951E-22 | 0,615083155   | 1,625796434     | 0,5             |
| ARL4A                                                                                           | 5,01146E-19 | -0,702013916 | 0,105 | 0,269 | 1,05747E-14 | 0,614713504   | 1,626774087     | 0,390334572     |
| MRPS6                                                                                           | 1,08742E-21 | -0,70628018  | 0,075 | 0,244 | 2,29457E-17 | 0,61289839    | 1,63159182      | 0,307377049     |
| ISG20                                                                                           | 8,9241E-26  | -0,706630262 | 0,014 | 0,156 | 1,88307E-21 | 0,612749683   | 1,631987788     | 0,08974359      |
| N4BP2L1                                                                                         | 1,88388E-29 | -0,706776461 | 0,037 | 0,218 | 3,97517E-25 | 0,612687592   | 1,632153178     | 0,169724771     |

Supplementary Table 5

| Differentially expressed genes_total calculation_ comparing SC-Keloid vs. (SC-Myel, SC-Nonmyel) |             |              |       |       |             |               |                 |                 |
|-------------------------------------------------------------------------------------------------|-------------|--------------|-------|-------|-------------|---------------|-----------------|-----------------|
| gene                                                                                            | p_val       | avg_log2FC   | pct.1 | pct.2 | p_val_adj   | Foldchange_UP | Foldchange_DOWN | Ratio_pct1_pct2 |
| NME2                                                                                            | 1,48558E-28 | -0,706934125 | 0,158 | 0,422 | 3,13472E-24 | 0,612620638   | 1,632331556     | 0,374407583     |
| TXNIP                                                                                           | 5,66233E-18 | -0,708581127 | 0,246 | 0,448 | 1,19481E-13 | 0,61192166    | 1,634196115     | 0,549107143     |
| C1S                                                                                             | 4,62537E-24 | -0,709652904 | 0,02  | 0,163 | 9,76E-20    | 0,611467233   | 1,635410609     | 0,122699387     |
| MAGI1                                                                                           | 2,22367E-20 | -0,711070412 | 0,024 | 0,152 | 4,69216E-16 | 0,610866736   | 1,637018257     | 0,157894737     |
| PGM2L1                                                                                          | 2,25012E-12 | -0,711791376 | 0,196 | 0,334 | 4,74798E-08 | 0,610561542   | 1,637836535     | 0,586826347     |
| AZGP1                                                                                           | 8,00396E-17 | -0,713314074 | 0,012 | 0,107 | 1,68892E-12 | 0,609917462   | 1,63956611      | 0,112149533     |
| FAM102A                                                                                         | 3,97959E-26 | -0,716397319 | 0,064 | 0,247 | 8,39734E-22 | 0,608615373   | 1,643073843     | 0,259109312     |
| RGS11                                                                                           | 1,27017E-27 | -0,719322908 | 0,027 | 0,191 | 2,68019E-23 | 0,607382435   | 1,646409153     | 0,141361257     |
| PALM2AKAP2                                                                                      | 3,05368E-12 | -0,719470303 | 0,151 | 0,281 | 6,44356E-08 | 0,607320384   | 1,64657737      | 0,537366548     |
| PTTG1                                                                                           | 1,39684E-13 | -0,719663502 | 0,078 | 0,199 | 2,94746E-09 | 0,60723906    | 1,646797886     | 0,391959799     |
| HES4                                                                                            | 2,08742E-17 | -0,720166285 | 0,043 | 0,167 | 4,40467E-13 | 0,607027472   | 1,6473719       | 0,25748503      |
| RERE                                                                                            | 4,99076E-25 | -0,720348916 | 0,092 | 0,286 | 1,0531E-20  | 0,606950633   | 1,647580454     | 0,321678322     |
| PABPC1                                                                                          | 6,72296E-29 | -0,721372829 | 0,31  | 0,577 | 1,41861E-24 | 0,60652002    | 1,648750194     | 0,537261698     |
| LGI4                                                                                            | 1,32841E-21 | -0,722237716 | 0,219 | 0,436 | 2,80307E-17 | 0,606156524   | 1,649738906     | 0,502293578     |
| CRYL1                                                                                           | 1,15408E-26 | -0,723888543 | 0,041 | 0,214 | 2,43523E-22 | 0,605463316   | 1,651627727     | 0,191588785     |
| CITED2                                                                                          | 4,75424E-15 | -0,724946891 | 0,069 | 0,195 | 1,00319E-10 | 0,605019316   | 1,652839791     | 0,353846154     |
| NFKB2                                                                                           | 2,93428E-21 | -0,725433732 | 0,042 | 0,186 | 6,19162E-17 | 0,604815186   | 1,653397639     | 0,225806452     |
| HNRNPU                                                                                          | 6,77984E-25 | -0,727513955 | 0,354 | 0,612 | 1,43061E-20 | 0,60394373    | 1,655783394     | 0,578431373     |
| MTUS1                                                                                           | 6,71375E-31 | -0,72913769  | 0,041 | 0,237 | 1,41667E-26 | 0,603264382   | 1,657648006     | 0,172995781     |
| H2AX                                                                                            | 7,71757E-17 | -0,733242844 | 0,114 | 0,265 | 1,62849E-12 | 0,601550248   | 1,662371521     | 0,430188679     |
| ARRDC3                                                                                          | 1,12708E-15 | -0,735506052 | 0,095 | 0,235 | 2,37826E-11 | 0,600607314   | 1,66498139      | 0,404255319     |
| PRDM16-DT                                                                                       | 3,63897E-30 | -0,736625452 | 0,017 | 0,185 | 7,6786E-26  | 0,600141478   | 1,666273765     | 0,091891892     |
| SPEN                                                                                            | 2,42932E-22 | -0,737952919 | 0,102 | 0,286 | 5,12611E-18 | 0,599589524   | 1,66780766      | 0,356643357     |
| SDC2                                                                                            | 2,67413E-23 | -0,738206836 | 0,045 | 0,202 | 5,64269E-19 | 0,599484004   | 1,668101223     | 0,222772277     |
| CSKMT                                                                                           | 2,1633E-11  | -0,741450527 | 0,062 | 0,16  | 4,56479E-07 | 0,598137665   | 1,671855926     | 0,3875          |
| CACYBP                                                                                          | 2,17678E-18 | -0,741489453 | 0,179 | 0,351 | 4,59323E-14 | 0,598121527   | 1,671901036     | 0,50997151      |
| SFRP1                                                                                           | 4,60265E-27 | -0,742273896 | 0,036 | 0,212 | 9,71206E-23 | 0,597796396   | 1,672810353     | 0,169811321     |
| IVNS1ABP                                                                                        | 2,16523E-30 | -0,742570935 | 0,084 | 0,305 | 4,56885E-26 | 0,597673327   | 1,673154807     | 0,275409836     |
| LITAF                                                                                           | 7,49065E-24 | -0,743291381 | 0,164 | 0,369 | 1,5806E-19  | 0,597374938   | 1,673990547     | 0,444444444     |
| NFKBIZ                                                                                          | 7,7132E-21  | -0,743670215 | 0,101 | 0,275 | 1,62756E-16 | 0,597218096   | 1,674430174     | 0,367272727     |

Supplementary Table 5

| Differentially expressed genes_total calculation_ comparing SC-Keloid vs. (SC-Myel, SC-Nonmyel) |             |              |       |       |             |               |                 |                 |
|-------------------------------------------------------------------------------------------------|-------------|--------------|-------|-------|-------------|---------------|-----------------|-----------------|
| gene                                                                                            | p_val       | avg_log2FC   | pct.1 | pct.2 | p_val_adj   | Foldchange_UP | Foldchange_DOWN | Ratio_pct1_pct2 |
| RDH10                                                                                           | 4,79811E-24 | -0,744075198 | 0,066 | 0,246 | 1,01245E-19 | 0,597050472   | 1,674900274     | 0,268292683     |
| RASD1                                                                                           | 5,30749E-15 | -0,744132579 | 0,045 | 0,159 | 1,11993E-10 | 0,597026726   | 1,674966892     | 0,283018868     |
| POU3F1                                                                                          | 1,07521E-06 | -0,744178224 | 0,2   | 0,289 | 0,022687973 | 0,597007837   | 1,675019887     | 0,692041522     |
| IQGAP2                                                                                          | 4,54861E-24 | -0,747483121 | 0,14  | 0,35  | 9,59802E-20 | 0,595641789   | 1,678861388     | 0,4             |
| MT-ND1                                                                                          | 1,42796E-27 | -0,74879714  | 0,562 | 0,83  | 3,01313E-23 | 0,59509952    | 1,680391205     | 0,677108434     |
| ABCA8                                                                                           | 1,0534E-18  | -0,750690844 | 0,064 | 0,21  | 2,22278E-14 | 0,594318896   | 1,682598361     | 0,304761905     |
| IRF2BP2                                                                                         | 5,53192E-25 | -0,752016918 | 0,144 | 0,355 | 1,16729E-20 | 0,59377287    | 1,684145656     | 0,405633803     |
| ZBTB20                                                                                          | 9,35822E-29 | -0,752857068 | 0,288 | 0,563 | 1,97468E-24 | 0,593427189   | 1,6851267       | 0,511545293     |
| SLC44A1                                                                                         | 5,55053E-22 | -0,753244853 | 0,113 | 0,299 | 1,17122E-17 | 0,593267701   | 1,68557971      | 0,377926421     |
| TAF5                                                                                            | 5,06856E-34 | -0,755145284 | 0,006 | 0,176 | 1,06952E-29 | 0,592486717   | 1,687801551     | 0,034090909     |
| HNRNPC                                                                                          | 8,23096E-35 | -0,755506303 | 0,317 | 0,623 | 1,73682E-30 | 0,592338472   | 1,688223958     | 0,50882825      |
| IL11RA                                                                                          | 1,11462E-21 | -0,755960811 | 0,051 | 0,202 | 2,35196E-17 | 0,592151891   | 1,688755901     | 0,252475248     |
| GSN                                                                                             | 2,72362E-19 | -0,760064445 | 0,511 | 0,787 | 5,74712E-15 | 0,590469954   | 1,693566274     | 0,649301144     |
| PLAAT3                                                                                          | 4,77582E-23 | -0,763377801 | 0,168 | 0,37  | 1,00775E-18 | 0,589115411   | 1,697460262     | 0,454054054     |
| MSX1                                                                                            | 1,50654E-12 | -0,76444238  | 0,08  | 0,194 | 3,17896E-08 | 0,588680857   | 1,698713297     | 0,412371134     |
| CYTH3                                                                                           | 2,898E-27   | -0,76613118  | 0,063 | 0,252 | 6,11507E-23 | 0,587992158   | 1,700702953     | 0,25            |
| ZEB2                                                                                            | 8,37966E-37 | -0,766781527 | 0,433 | 0,775 | 1,76819E-32 | 0,587727159   | 1,701469779     | 0,558709677     |
| ARID5B                                                                                          | 3,59031E-12 | -0,767926321 | 0,214 | 0,355 | 7,57591E-08 | 0,587260977   | 1,702820449     | 0,602816901     |
| LIMS2                                                                                           | 1,32476E-17 | -0,768441404 | 0,04  | 0,163 | 2,79537E-13 | 0,587051345   | 1,703428513     | 0,245398773     |
| KCTD9                                                                                           | 3,9035E-27  | -0,768509754 | 0,104 | 0,313 | 8,23677E-23 | 0,587023533   | 1,703509218     | 0,332268371     |
| PTEN                                                                                            | 2,92128E-28 | -0,76942118  | 0,164 | 0,399 | 6,16419E-24 | 0,586652797   | 1,704585753     | 0,411027569     |
| SBSPON                                                                                          | 2,97317E-33 | -0,773134547 | 0,007 | 0,175 | 6,27369E-29 | 0,585144747   | 1,708978855     | 0,04            |
| SKI                                                                                             | 1,8785E-26  | -0,77828327  | 0,122 | 0,334 | 3,96383E-22 | 0,583060191   | 1,715088794     | 0,365269461     |
| RHOB                                                                                            | 3,93923E-11 | -0,779069912 | 0,501 | 0,673 | 8,31216E-07 | 0,582742359   | 1,716024217     | 0,744427935     |
| KHDRBS3                                                                                         | 2,07643E-22 | -0,779096434 | 0,229 | 0,44  | 4,38148E-18 | 0,582731646   | 1,716055764     | 0,520454545     |
| CADM4                                                                                           | 9,79395E-32 | -0,780070001 | 0,165 | 0,423 | 2,06662E-27 | 0,582338537   | 1,717214191     | 0,390070922     |
| DCUN1D3                                                                                         | 1,73866E-25 | -0,780506535 | 0,034 | 0,194 | 3,66875E-21 | 0,582162358   | 1,717733868     | 0,175257732     |
| PNISR                                                                                           | 1,90982E-36 | -0,783834236 | 0,331 | 0,654 | 4,02992E-32 | 0,580821098   | 1,721700543     | 0,506116208     |
| ARMCX1                                                                                          | 5,91391E-28 | -0,789334682 | 0,051 | 0,236 | 1,24789E-23 | 0,578610865   | 1,728277261     | 0,216101695     |
| ENTPD2                                                                                          | 2,22659E-27 | -0,789512321 | 0,006 | 0,144 | 4,69832E-23 | 0,578539625   | 1,728490076     | 0,041666667     |

Supplementary Table 5

| Differentially expressed genes_total calculation_ comparing SC-Keloid vs. (SC-Myel, SC-Nonmyel) |             |              |       |       |             |               |                 |                 |
|-------------------------------------------------------------------------------------------------|-------------|--------------|-------|-------|-------------|---------------|-----------------|-----------------|
| gene                                                                                            | p_val       | avg_log2FC   | pct.1 | pct.2 | p_val_adj   | Foldchange_UP | Foldchange_DOWN | Ratio_pct1_pct2 |
| LPAR1                                                                                           | 1,53582E-28 | -0,790396903 | 0,084 | 0,289 | 3,24074E-24 | 0,578185004   | 1,729550218     | 0,290657439     |
| CNTN2                                                                                           | 7,0666E-28  | -0,790690811 | 0,001 | 0,134 | 1,49112E-23 | 0,578067228   | 1,729902599     | 0,007462687     |
| UBE2R2                                                                                          | 2,55251E-24 | -0,791910977 | 0,169 | 0,374 | 5,38606E-20 | 0,577578531   | 1,731366292     | 0,451871658     |
| PPP1R18                                                                                         | 3,1384E-21  | -0,792278954 | 0,162 | 0,353 | 6,62233E-17 | 0,577431232   | 1,731807954     | 0,458923513     |
| WTAP                                                                                            | 1,80598E-21 | -0,793046701 | 0,182 | 0,379 | 3,81079E-17 | 0,577124027   | 1,732729801     | 0,480211082     |
| HSPA8                                                                                           | 4,05556E-26 | -0,794611329 | 0,453 | 0,75  | 8,55763E-22 | 0,576498465   | 1,734609996     | 0,604           |
| B4GALNT4                                                                                        | 2,98943E-25 | -0,795825116 | 0,043 | 0,21  | 6,308E-21   | 0,576013641   | 1,736069996     | 0,204761905     |
| MT-ND4L                                                                                         | 2,48269E-22 | -0,797547775 | 0,201 | 0,407 | 5,23872E-18 | 0,575326259   | 1,738144198     | 0,493857494     |
| CHADL                                                                                           | 1,28221E-20 | -0,798143485 | 0,076 | 0,232 | 2,70558E-16 | 0,575088748   | 1,738862052     | 0,327586207     |
| RHOBTB3                                                                                         | 5,29399E-13 | -0,801695636 | 0,084 | 0,204 | 1,11708E-08 | 0,573674527   | 1,74314869      | 0,411764706     |
| ING1                                                                                            | 9,66717E-25 | -0,804275068 | 0,127 | 0,328 | 2,03987E-20 | 0,572649756   | 1,746268098     | 0,387195122     |
| MYLIP                                                                                           | 2,0145E-27  | -0,804963316 | 0,035 | 0,204 | 4,25079E-23 | 0,572376634   | 1,747101367     | 0,171568627     |
| HNRNPA1                                                                                         | 2,85454E-38 | -0,805818178 | 0,389 | 0,733 | 6,02337E-34 | 0,572037576   | 1,74813691      | 0,530695771     |
| RORB                                                                                            | 4,10801E-29 | -0,808909175 | 0,013 | 0,168 | 8,66831E-25 | 0,570813288   | 1,751886336     | 0,077380952     |
| FKBP4                                                                                           | 5,69011E-26 | -0,814007661 | 0,061 | 0,24  | 1,20067E-21 | 0,568799593   | 1,758088458     | 0,254166667     |
| KDM6B                                                                                           | 1,03913E-26 | -0,816827584 | 0,099 | 0,304 | 2,19268E-22 | 0,567688891   | 1,761528216     | 0,325657895     |
| EIF5                                                                                            | 4,74839E-27 | -0,818532988 | 0,338 | 0,602 | 1,00196E-22 | 0,567018225   | 1,763611743     | 0,561461794     |
| STAT3                                                                                           | 1,29171E-33 | -0,820007194 | 0,165 | 0,427 | 2,72564E-29 | 0,566439118   | 1,765414796     | 0,386416862     |
| SLC5A3                                                                                          | 1,96421E-25 | -0,820009543 | 0,041 | 0,206 | 4,14468E-21 | 0,566438196   | 1,765417671     | 0,199029126     |
| GADD45G                                                                                         | 1,36384E-14 | -0,82110812  | 0,043 | 0,153 | 2,87784E-10 | 0,566007031   | 1,766762505     | 0,281045752     |
| MYADM                                                                                           | 3,91715E-20 | -0,821416866 | 0,185 | 0,373 | 8,26558E-16 | 0,565885915   | 1,767140643     | 0,495978552     |
| SON                                                                                             | 9,03473E-44 | -0,822331609 | 0,407 | 0,76  | 1,90642E-39 | 0,565527228   | 1,768261458     | 0,535526316     |
| PRIMA1                                                                                          | 3,34764E-27 | -0,8224399   | 0,02  | 0,176 | 7,06385E-23 | 0,56548478    | 1,768394191     | 0,113636364     |
| NCMAP                                                                                           | 5,71892E-17 | -0,823967456 | 0     | 0,079 | 1,20675E-12 | 0,56488635    | 1,770267595     | 0               |
| HNRNPH3                                                                                         | 4,59789E-32 | -0,8241129   | 0,264 | 0,529 | 9,70202E-28 | 0,564829404   | 1,770446072     | 0,49905482      |
| HNRNPA0                                                                                         | 2,3384E-32  | -0,824462586 | 0,272 | 0,547 | 4,93425E-28 | 0,564692515   | 1,770875252     | 0,49725777      |
| IFI16                                                                                           | 2,46541E-23 | -0,827529606 | 0,236 | 0,46  | 5,20226E-19 | 0,563493312   | 1,774643954     | 0,513043478     |
| ACKR3                                                                                           | 8,41016E-28 | -0,827836943 | 0,005 | 0,144 | 1,77463E-23 | 0,563373284   | 1,775022046     | 0,03472222      |
| SGK1                                                                                            | 3,20027E-15 | -0,828230588 | 0,041 | 0,152 | 6,75288E-11 | 0,563219587   | 1,775506434     | 0,269736842     |
| RPL36A                                                                                          | 3,06703E-49 | -0,828712878 | 0,281 | 0,692 | 6,47175E-45 | 0,563031335   | 1,776100081     | 0,406069364     |

Supplementary Table 5

| Differentially expressed genes_total calculation_ comparing SC-Keloid vs. (SC-Myel, SC-Nonmyel) |             |              |       |       |             |               |                 |                 |
|-------------------------------------------------------------------------------------------------|-------------|--------------|-------|-------|-------------|---------------|-----------------|-----------------|
| gene                                                                                            | p_val       | avg_log2FC   | pct.1 | pct.2 | p_val_adj   | Foldchange_UP | Foldchange_DOWN | Ratio_pct1_pct2 |
| TEAD1                                                                                           | 5,46486E-31 | -0,830087525 | 0,122 | 0,362 | 1,15314E-26 | 0,562495116   | 1,777793214     | 0,337016575     |
| SEMA3G                                                                                          | 6,99657E-39 | -0,832356289 | 0,006 | 0,199 | 1,47635E-34 | 0,561611238   | 1,780591149     | 0,030150754     |
| RXRG                                                                                            | 2,28866E-37 | -0,838792942 | 0,028 | 0,24  | 4,82931E-33 | 0,559111164   | 1,78855309      | 0,116666667     |
| IFITM2                                                                                          | 4,76362E-29 | -0,839819949 | 0,25  | 0,509 | 1,00517E-24 | 0,558713293   | 1,789826754     | 0,491159136     |
| SFRP5                                                                                           | 1,00774E-18 | -0,841433408 | 0,002 | 0,094 | 2,12642E-14 | 0,558088797   | 1,791829553     | 0,021276596     |
| F3                                                                                              | 7,42949E-29 | -0,845527346 | 0,031 | 0,209 | 1,5677E-24  | 0,556507353   | 1,796921451     | 0,148325359     |
| RC3H1                                                                                           | 1,13817E-29 | -0,848337628 | 0,076 | 0,286 | 2,40165E-25 | 0,555424365   | 1,800425157     | 0,265734266     |
| ARAP2                                                                                           | 1,36334E-31 | -0,84853645  | 0,013 | 0,182 | 2,87679E-27 | 0,555347826   | 1,800673296     | 0,071428571     |
| SECISBP2L                                                                                       | 6,00609E-23 | -0,850743255 | 0,191 | 0,4   | 1,26734E-18 | 0,554498993   | 1,803429786     | 0,4775          |
| ERF                                                                                             | 1,92167E-27 | -0,851815371 | 0,198 | 0,43  | 4,05491E-23 | 0,554087079   | 1,804770475     | 0,460465116     |
| CHD2                                                                                            | 1,79388E-23 | -0,85201401  | 0,102 | 0,289 | 3,78527E-19 | 0,554010794   | 1,805018983     | 0,352941176     |
| EGR3                                                                                            | 1,35319E-19 | -0,85244373  | 0,061 | 0,208 | 2,85536E-15 | 0,553845801   | 1,805556706     | 0,293269231     |
| CREBRF                                                                                          | 2,77965E-28 | -0,853639897 | 0,112 | 0,33  | 5,86533E-24 | 0,553386787   | 1,807054348     | 0,339393939     |
| SIK3                                                                                            | 1,28552E-31 | -0,855048714 | 0,066 | 0,28  | 2,71258E-27 | 0,552846659   | 1,808819831     | 0,235714286     |
| NOP53                                                                                           | 6,25002E-38 | -0,859709433 | 0,218 | 0,503 | 1,31882E-33 | 0,551063534   | 1,814672788     | 0,433399602     |
| ITPR1                                                                                           | 6,61061E-29 | -0,860124043 | 0,034 | 0,212 | 1,39491E-24 | 0,550905189   | 1,815194375     | 0,160377358     |
| MT-ND2                                                                                          | 2,28422E-35 | -0,862437672 | 0,524 | 0,826 | 4,81993E-31 | 0,550022418   | 1,81810771      | 0,634382567     |
| HBP1                                                                                            | 3,78577E-32 | -0,867009074 | 0,129 | 0,376 | 7,98835E-28 | 0,548282346   | 1,823877803     | 0,343085106     |
| SLC25A25                                                                                        | 1,70522E-31 | -0,867626952 | 0,042 | 0,236 | 3,59818E-27 | 0,548047577   | 1,824659101     | 0,177966102     |
| OLFM1                                                                                           | 9,86535E-31 | -0,86799432  | 0,05  | 0,247 | 2,08169E-26 | 0,54790804    | 1,825123792     | 0,20242915      |
| HLA-E                                                                                           | 2,94989E-32 | -0,869866696 | 0,262 | 0,524 | 6,22455E-28 | 0,547197409   | 1,827494034     | 0,5             |
| PRNP                                                                                            | 1,43871E-30 | -0,870371832 | 0,548 | 0,84  | 3,03583E-26 | 0,54700585    | 1,828134013     | 0,652380952     |
| FOSL2                                                                                           | 2,95138E-30 | -0,870577094 | 0,087 | 0,304 | 6,22772E-26 | 0,54692803    | 1,828394132     | 0,286184211     |
| DNAJB6                                                                                          | 4,39681E-36 | -0,871213003 | 0,234 | 0,516 | 9,27772E-32 | 0,546687009   | 1,829200227     | 0,453488372     |
| RTN4                                                                                            | 4,35943E-31 | -0,87512267  | 0,321 | 0,597 | 9,19883E-27 | 0,545207506   | 1,834164036     | 0,537688442     |
| APLP2                                                                                           | 8,33835E-36 | -0,875657554 | 0,258 | 0,556 | 1,75948E-31 | 0,545005406   | 1,834844185     | 0,464028777     |
| CLIC4                                                                                           | 5,08731E-40 | -0,876026954 | 0,414 | 0,744 | 1,07347E-35 | 0,544865876   | 1,835314054     | 0,556451613     |
| MUCL1                                                                                           | 0,001401899 | -0,877885981 | 0,009 | 0,031 | 1           | 0,544164226   | 1,837680525     | 0,290322581     |
| AC009041.2                                                                                      | 2,05641E-34 | -0,878040464 | 0,022 | 0,214 | 4,33923E-30 | 0,54410596    | 1,837877314     | 0,102803738     |
| BAG3                                                                                            | 3,0555E-25  | -0,878256834 | 0,09  | 0,28  | 6,44741E-21 | 0,544024363   | 1,838152973     | 0,321428571     |

Supplementary Table 5

| Differentially expressed genes_total calculation_ comparing SC-Keloid vs. (SC-Myel, SC-Nonmyel) |             |              |       |       |             |               |                 |                 |
|-------------------------------------------------------------------------------------------------|-------------|--------------|-------|-------|-------------|---------------|-----------------|-----------------|
| gene                                                                                            | p_val       | avg_log2FC   | pct.1 | pct.2 | p_val_adj   | Foldchange_UP | Foldchange_DOWN | Ratio_pct1_pct2 |
| MCL1                                                                                            | 1,89306E-31 | -0,879830991 | 0,236 | 0,495 | 3,99455E-27 | 0,543431089   | 1,840159718     | 0,476767677     |
| TRA2B                                                                                           | 3,87555E-41 | -0,880545817 | 0,239 | 0,554 | 8,17781E-37 | 0,543161897   | 1,841071705     | 0,431407942     |
| PTGDS                                                                                           | 5,37392E-16 | -0,881066475 | 0,016 | 0,113 | 1,13395E-11 | 0,542965909   | 1,841736254     | 0,14159292      |
| TSPYL2                                                                                          | 3,0402E-29  | -0,88182218  | 0,079 | 0,29  | 6,41513E-25 | 0,54268157    | 1,842701235     | 0,272413793     |
| BCL3                                                                                            | 1,07533E-26 | -0,883511419 | 0,03  | 0,19  | 2,26905E-22 | 0,542046521   | 1,844860102     | 0,157894737     |
| FMNL2                                                                                           | 3,02571E-40 | -0,884207648 | 0,024 | 0,244 | 6,38454E-36 | 0,541784998   | 1,845750626     | 0,098360656     |
| H1-10                                                                                           | 3,21226E-21 | -0,884887397 | 0,169 | 0,36  | 6,77818E-17 | 0,541529788   | 1,846620487     | 0,469444444     |
| BCAS1                                                                                           | 2,54059E-18 | -0,885076451 | 0,003 | 0,095 | 5,3609E-14  | 0,541458829   | 1,846862487     | 0,031578947     |
| IFITM3                                                                                          | 6,22659E-34 | -0,885303313 | 0,573 | 0,86  | 1,31387E-29 | 0,541373692   | 1,847152928     | 0,66627907      |
| CKB                                                                                             | 2,47976E-24 | -0,888889573 | 0,165 | 0,381 | 5,23254E-20 | 0,540029613   | 1,851750303     | 0,433070866     |
| NR2F1                                                                                           | 7,51167E-22 | -0,893117228 | 0,066 | 0,229 | 1,58504E-17 | 0,538449434   | 1,857184607     | 0,288209607     |
| SLC22A17                                                                                        | 4,87508E-29 | -0,894111704 | 0,164 | 0,396 | 1,02869E-24 | 0,538078399   | 1,858465239     | 0,414141414     |
| PGRMC1                                                                                          | 6,51254E-37 | -0,89526487  | 0,246 | 0,536 | 1,37421E-32 | 0,537648477   | 1,859951329     | 0,458955224     |
| ANGPTL4                                                                                         | 8,39762E-27 | -0,897771644 | 0,015 | 0,164 | 1,77198E-22 | 0,53671509    | 1,863185922     | 0,091463415     |
| KLF2                                                                                            | 1,11358E-09 | -0,898974094 | 0,206 | 0,323 | 2,34976E-05 | 0,536267938   | 1,864739488     | 0,637770898     |
| FOXD3                                                                                           | 2,87403E-24 | -0,899217106 | 0,289 | 0,539 | 6,06449E-20 | 0,536177615   | 1,865053617     | 0,536178108     |
| ABLIM1                                                                                          | 1,48929E-29 | -0,900858829 | 0,043 | 0,231 | 3,14255E-25 | 0,535567815   | 1,867177174     | 0,186147186     |
| RYBP                                                                                            | 8,46503E-29 | -0,900887911 | 0,146 | 0,376 | 1,78621E-24 | 0,53555702    | 1,867214812     | 0,388297872     |
| CYLD                                                                                            | 3,77859E-26 | -0,901086676 | 0,119 | 0,324 | 7,9732E-22  | 0,535483239   | 1,867472083     | 0,367283951     |
| ASPA                                                                                            | 3,47201E-34 | -0,903326719 | 0,151 | 0,408 | 7,32629E-30 | 0,534652451   | 1,87037392      | 0,370098039     |
| TSPAN15                                                                                         | 1,03402E-34 | -0,908279616 | 0,098 | 0,338 | 2,18188E-30 | 0,532820089   | 1,876806111     | 0,289940828     |
| MAFK                                                                                            | 1,60872E-33 | -0,909506356 | 0,03  | 0,225 | 3,39456E-29 | 0,532367219   | 1,878402659     | 0,133333333     |
| PCDH10                                                                                          | 2,25835E-27 | -0,910092312 | 0,019 | 0,172 | 4,76535E-23 | 0,53215104    | 1,879165734     | 0,110465116     |
| TGFBR3                                                                                          | 3,33158E-41 | -0,911372961 | 0,017 | 0,237 | 7,02996E-37 | 0,531678871   | 1,880834569     | 0,071729958     |
| DUSP8                                                                                           | 2,39842E-29 | -0,911880183 | 0,088 | 0,3   | 5,0609E-25  | 0,531491976   | 1,881495948     | 0,293333333     |
| TM4SF1                                                                                          | 3,54137E-23 | -0,912503836 | 0,064 | 0,232 | 7,47265E-19 | 0,531262271   | 1,882309464     | 0,275862069     |
| LRRC4C                                                                                          | 1,38187E-32 | -0,912749973 | 0,054 | 0,266 | 2,91588E-28 | 0,53117164    | 1,882630631     | 0,203007519     |
| VASN                                                                                            | 1,05524E-32 | -0,912788779 | 0,015 | 0,191 | 2,22665E-28 | 0,531157353   | 1,88268127      | 0,078534031     |
| SEMA5A                                                                                          | 2,73744E-30 | -0,913286937 | 0,012 | 0,172 | 5,77626E-26 | 0,530973977   | 1,883331467     | 0,069767442     |
| SRSF7                                                                                           | 1,51404E-33 | -0,913734372 | 0,27  | 0,552 | 3,19478E-29 | 0,530809328   | 1,883915651     | 0,489130435     |

Supplementary Table 5

| Differentially expressed genes_total calculation_ comparing SC-Keloid vs. (SC-Myel, SC-Nonmyel) |             |              |       |       |             |               |                 |                 |
|-------------------------------------------------------------------------------------------------|-------------|--------------|-------|-------|-------------|---------------|-----------------|-----------------|
| gene                                                                                            | p_val       | avg_log2FC   | pct.1 | pct.2 | p_val_adj   | Foldchange_UP | Foldchange_DOWN | Ratio_pct1_pct2 |
| IGSF1                                                                                           | 1,57231E-36 | -0,914905872 | 0,006 | 0,189 | 3,31772E-32 | 0,530378474   | 1,885446053     | 0,031746032     |
| LPL                                                                                             | 5,50674E-31 | -0,915441894 | 0,009 | 0,171 | 1,16198E-26 | 0,530181453   | 1,886146705     | 0,052631579     |
| ARID5A                                                                                          | 1,63435E-27 | -0,919070575 | 0,072 | 0,269 | 3,44864E-23 | 0,528849611   | 1,890896731     | 0,267657993     |
| PLSCR4                                                                                          | 9,52203E-37 | -0,919197725 | 0,042 | 0,262 | 2,00924E-32 | 0,528803003   | 1,89106339      | 0,160305344     |
| FOXO1                                                                                           | 6,28004E-38 | -0,920486867 | 0,062 | 0,303 | 1,32515E-33 | 0,528330694   | 1,892753934     | 0,204620462     |
| ZBTB7A                                                                                          | 8,33535E-27 | -0,92203643  | 0,153 | 0,366 | 1,75884E-22 | 0,527763532   | 1,894787987     | 0,418032787     |
| HERPUD1                                                                                         | 3,62233E-26 | -0,924422003 | 0,198 | 0,421 | 7,64347E-22 | 0,526891568   | 1,897923711     | 0,470308789     |
| GPR155                                                                                          | 3,98023E-34 | -0,927509911 | 0,17  | 0,448 | 8,39868E-30 | 0,525765029   | 1,90199033      | 0,379464286     |
| THSD7A                                                                                          | 9,6084E-43  | -0,927855627 | 0,035 | 0,28  | 2,02747E-38 | 0,525639054   | 1,902446162     | 0,125           |
| DHRS3                                                                                           | 7,24996E-38 | -0,934797117 | 0,002 | 0,185 | 1,52981E-33 | 0,523116029   | 1,911621789     | 0,010810811     |
| IGFBP4                                                                                          | 1,79364E-24 | -0,939943575 | 0,092 | 0,278 | 3,78476E-20 | 0,521253266   | 1,918453206     | 0,330935252     |
| ITGB8                                                                                           | 1,48255E-22 | -0,939994517 | 0,327 | 0,548 | 3,12832E-18 | 0,521234861   | 1,918520947     | 0,596715328     |
| NAMPT                                                                                           | 1,23148E-27 | -0,940327507 | 0,119 | 0,335 | 2,59855E-23 | 0,521114568   | 1,918963814     | 0,355223881     |
| ITPRID2                                                                                         | 1,46849E-37 | -0,941356831 | 0,133 | 0,404 | 3,09865E-33 | 0,5207429     | 1,920333432     | 0,329207921     |
| XIST                                                                                            | 3,41283E-48 | -0,941735563 | 0,299 | 0,699 | 7,20141E-44 | 0,520606214   | 1,920837618     | 0,427753934     |
| KRT14                                                                                           | 1,93089E-29 | -0,943244579 | 0,055 | 0,251 | 4,07437E-25 | 0,52006196    | 1,922847808     | 0,219123506     |
| SPATA13                                                                                         | 7,08229E-34 | -0,944400612 | 0,034 | 0,233 | 1,49443E-29 | 0,519645401   | 1,924389205     | 0,145922747     |
| PLK2                                                                                            | 4,40421E-23 | -0,945098142 | 0,08  | 0,256 | 9,29331E-19 | 0,519394218   | 1,925319855     | 0,3125          |
| HSP90AB1                                                                                        | 5,99557E-37 | -0,948277905 | 0,662 | 0,885 | 1,26512E-32 | 0,518250711   | 1,929568025     | 0,748022599     |
| PRELP                                                                                           | 5,92039E-30 | -0,957102717 | 0,005 | 0,153 | 1,24926E-25 | 0,515090302   | 1,941407159     | 0,032679739     |
| COL21A1                                                                                         | 4,80444E-35 | -0,959901705 | 0,003 | 0,175 | 1,01378E-30 | 0,514091939   | 1,94517736      | 0,017142857     |
| LIMCH1                                                                                          | 1,79506E-21 | -0,962890873 | 0,066 | 0,231 | 3,78776E-17 | 0,513027877   | 1,949211816     | 0,285714286     |
| HEXIM1                                                                                          | 1,64282E-19 | -0,963518698 | 0,161 | 0,339 | 3,46652E-15 | 0,512804669   | 1,950060248     | 0,474926254     |
| MT-ND3                                                                                          | 1,87356E-30 | -0,964701322 | 0,505 | 0,803 | 3,95341E-26 | 0,512384478   | 1,951659432     | 0,628891656     |
| EPB41L2                                                                                         | 1,55114E-46 | -0,966561909 | 0,115 | 0,434 | 3,27306E-42 | 0,511724102   | 1,954178034     | 0,264976959     |
| MLIP                                                                                            | 1,524E-22   | -0,967041504 | 0     | 0,106 | 3,2158E-18  | 0,511554018   | 1,954827769     | 0               |
| KLHL21                                                                                          | 6,49643E-24 | -0,967298563 | 0,057 | 0,224 | 1,37081E-19 | 0,511462878   | 1,955176111     | 0,254464286     |
| MYC                                                                                             | 2,06005E-24 | -0,971382898 | 0,051 | 0,216 | 4,34691E-20 | 0,510016951   | 1,960719146     | 0,236111111     |
| PCDH9                                                                                           | 6,98581E-23 | -0,971888408 | 0,071 | 0,244 | 1,47407E-18 | 0,509838276   | 1,961406288     | 0,290983607     |
| ARC                                                                                             | 2,02564E-14 | -0,972336034 | 0,073 | 0,193 | 4,27429E-10 | 0,509680113   | 1,962014949     | 0,378238342     |

Supplementary Table 5

| Differentially expressed genes_total calculation_ comparing SC-Keloid vs. (SC-Myel, SC-Nonmyel) |             |              |       |       |             |               |                 |                 |
|-------------------------------------------------------------------------------------------------|-------------|--------------|-------|-------|-------------|---------------|-----------------|-----------------|
| gene                                                                                            | p_val       | avg_log2FC   | pct.1 | pct.2 | p_val_adj   | Foldchange_UP | Foldchange_DOWN | Ratio_pct1_pct2 |
| KLF10                                                                                           | 1,55056E-31 | -0,973978025 | 0,15  | 0,391 | 3,27184E-27 | 0,509100354   | 1,964249271     | 0,383631714     |
| C1R                                                                                             | 2,32284E-25 | -0,97399133  | 0,083 | 0,27  | 4,90142E-21 | 0,509095659   | 1,964267386     | 0,307407407     |
| BTG1                                                                                            | 1,19135E-37 | -0,976503172 | 0,39  | 0,701 | 2,51388E-33 | 0,508210056   | 1,967690304     | 0,556348074     |
| PLEKHA4                                                                                         | 1,91178E-25 | -0,978040153 | 0,279 | 0,509 | 4,03405E-21 | 0,507668921   | 1,969787709     | 0,548133595     |
| TRIP10                                                                                          | 9,05158E-38 | -0,983187136 | 0,044 | 0,267 | 1,90997E-33 | 0,50586098    | 1,976827706     | 0,164794007     |
| SNHG15                                                                                          | 2,12266E-27 | -0,986549599 | 0,141 | 0,36  | 4,47902E-23 | 0,504683351   | 1,981440436     | 0,391666667     |
| IL6ST                                                                                           | 8,51588E-43 | -0,987342815 | 0,21  | 0,536 | 1,79694E-38 | 0,504405945   | 1,982530162     | 0,391791045     |
| HSPD1                                                                                           | 1,40815E-31 | -0,989919705 | 0,246 | 0,516 | 2,97134E-27 | 0,503505798   | 1,98607445      | 0,476744186     |
| MT1E                                                                                            | 1,50247E-07 | -0,9931865   | 0,165 | 0,263 | 0,003170356 | 0,502366964   | 1,990576753     | 0,627376426     |
| NEDD9                                                                                           | 4,63756E-27 | -0,993749491 | 0,076 | 0,27  | 9,78571E-23 | 0,502170961   | 1,991353698     | 0,281481481     |
| ARHGAP24                                                                                        | 2,13905E-40 | -0,994110235 | 0,087 | 0,355 | 4,51361E-36 | 0,502045409   | 1,991851696     | 0,245070423     |
| PER1                                                                                            | 5,81038E-34 | -0,994534945 | 0,072 | 0,299 | 1,22605E-29 | 0,501897636   | 1,992438157     | 0,240802676     |
| SIPA1L2                                                                                         | 2,6836E-32  | -0,994759393 | 0,184 | 0,438 | 5,66265E-28 | 0,501819559   | 1,992748155     | 0,420091324     |
| MT1A                                                                                            | 5,74986E-15 | -0,998593999 | 0,009 | 0,092 | 1,21328E-10 | 0,50048752    | 1,998051818     | 0,097826087     |
| SOX8                                                                                            | 2,15422E-39 | -1,00104888  | 0,02  | 0,232 | 4,54562E-35 | 0,499636618   | 2,001454585     | 0,086206897     |
| PIM3                                                                                            | 3,64905E-26 | -1,003902385 | 0,115 | 0,319 | 7,69986E-22 | 0,498649364   | 2,005417178     | 0,360501567     |
| NIBAN1                                                                                          | 1,22109E-37 | -1,004208147 | 0,069 | 0,318 | 2,57663E-33 | 0,498543692   | 2,005842247     | 0,216981132     |
| SAMD4A                                                                                          | 1,01298E-36 | -1,004229415 | 0,048 | 0,269 | 2,1375E-32  | 0,498536343   | 2,005871816     | 0,178438662     |
| EMP2                                                                                            | 6,44154E-42 | -1,005149034 | 0,26  | 0,578 | 1,35923E-37 | 0,498218662   | 2,007150829     | 0,44982699      |
| ATP1A1                                                                                          | 1,59749E-29 | -1,008599528 | 0,2   | 0,438 | 3,37085E-25 | 0,497028496   | 2,011957079     | 0,456621005     |
| PPP1R15B                                                                                        | 2,37732E-37 | -1,014851064 | 0,065 | 0,3   | 5,01639E-33 | 0,494879414   | 2,020694277     | 0,216666667     |
| SORBS1                                                                                          | 1,73097E-45 | -1,016554543 | 0,094 | 0,388 | 3,65251E-41 | 0,494295424   | 2,023081645     | 0,242268041     |
| CTSC                                                                                            | 2,437E-40   | -1,017172787 | 0,144 | 0,429 | 5,14232E-36 | 0,494083648   | 2,023948789     | 0,335664336     |
| NNMT                                                                                            | 6,88386E-23 | -1,017571978 | 0,023 | 0,163 | 1,45256E-18 | 0,493946954   | 2,02450889      | 0,141104294     |
| NLGN4X                                                                                          | 2,63749E-32 | -1,020008444 | 0,057 | 0,269 | 5,56536E-28 | 0,493113466   | 2,027930829     | 0,211895911     |
| WSB1                                                                                            | 1,52594E-46 | -1,020455269 | 0,277 | 0,628 | 3,21989E-42 | 0,492960765   | 2,028559008     | 0,441082803     |
| HMOX1                                                                                           | 1,7767E-12  | -1,022722921 | 0,007 | 0,075 | 3,74902E-08 | 0,49218653    | 2,031750037     | 0,093333333     |
| C1orf198                                                                                        | 2,49118E-41 | -1,029379679 | 0,19  | 0,494 | 5,25663E-37 | 0,489920757   | 2,041146423     | 0,384615385     |
| C11orf96                                                                                        | 3,42435E-17 | -1,030795524 | 0,105 | 0,259 | 7,22572E-13 | 0,48944019    | 2,043150565     | 0,405405405     |
| OLFML2A                                                                                         | 1,59602E-20 | -1,032330393 | 0,25  | 0,452 | 3,36776E-16 | 0,488919756   | 2,045325409     | 0,553097345     |



Supplementary Table 5

| Differentially expressed genes_total calculation_ comparing SC-Keloid vs. (SC-Myel, SC-Nonmyel) |             |              |       |       |             |               |                 |                 |
|-------------------------------------------------------------------------------------------------|-------------|--------------|-------|-------|-------------|---------------|-----------------|-----------------|
| gene                                                                                            | p_val       | avg_log2FC   | pct.1 | pct.2 | p_val_adj   | Foldchange_UP | Foldchange_DOWN | Ratio_pct1_pct2 |
| PELI1                                                                                           | 2,88483E-31 | -1,03241374  | 0,075 | 0,285 | 6,08728E-27 | 0,488891511   | 2,045443575     | 0,263157895     |
| TMOD2                                                                                           | 2,18348E-38 | -1,035627094 | 0,094 | 0,355 | 4,60737E-34 | 0,487803801   | 2,050004525     | 0,264788732     |
| ARHGAP15                                                                                        | 2,35051E-35 | -1,039180406 | 0,035 | 0,244 | 4,95982E-31 | 0,486603834   | 2,055059844     | 0,143442623     |
| MEGF9                                                                                           | 5,4593E-43  | -1,039984226 | 0,118 | 0,408 | 1,15197E-38 | 0,486332791   | 2,056205172     | 0,289215686     |
| HLA-DRA                                                                                         | 3,67954E-19 | -1,043632045 | 0,049 | 0,193 | 7,76419E-15 | 0,485104664   | 2,061410814     | 0,25388601      |
| SNHG32                                                                                          | 2,76851E-37 | -1,044027596 | 0,166 | 0,437 | 5,84184E-33 | 0,484971679   | 2,061976079     | 0,3798627       |
| GATM                                                                                            | 7,77066E-22 | -1,04599672  | 0,102 | 0,278 | 1,63969E-17 | 0,484310196   | 2,064792377     | 0,366906475     |
| IRS2                                                                                            | 1,99267E-39 | -1,046202098 | 0,055 | 0,293 | 4,20473E-35 | 0,484241256   | 2,065086335     | 0,187713311     |
| EIF4A1                                                                                          | 1,47867E-47 | -1,047653201 | 0,305 | 0,687 | 3,12013E-43 | 0,483754437   | 2,067164502     | 0,443959243     |
| SORCS1                                                                                          | 2,94819E-48 | -1,054096013 | 0,073 | 0,376 | 6,22097E-44 | 0,481598895   | 2,076416724     | 0,194148936     |
| TLE1                                                                                            | 8,64163E-39 | -1,059611096 | 0,165 | 0,441 | 1,82347E-34 | 0,47976137    | 2,084369567     | 0,37414966      |
| SLIT2                                                                                           | 2,47523E-43 | -1,060508039 | 0,017 | 0,242 | 5,22299E-39 | 0,479463189   | 2,085665851     | 0,070247934     |
| ABCA2                                                                                           | 2,51054E-32 | -1,062008075 | 0,038 | 0,232 | 5,29749E-28 | 0,478964928   | 2,087835541     | 0,163793103     |
| SRSF3                                                                                           | 1,23803E-51 | -1,063133219 | 0,345 | 0,72  | 2,61238E-47 | 0,478591534   | 2,089464459     | 0,479166667     |
| SPTBN1                                                                                          | 9,00984E-56 | -1,063353443 | 0,424 | 0,803 | 1,90117E-51 | 0,478518483   | 2,089783435     | 0,528019925     |
| HSPA12A                                                                                         | 5,54422E-48 | -1,064173988 | 0,198 | 0,548 | 1,16989E-43 | 0,478246399   | 2,090972355     | 0,361313869     |
| MT2A                                                                                            | 0,000431392 | -1,065716346 | 0,559 | 0,666 | 1           | 0,477735388   | 2,093208969     | 0,839339339     |
| ARL6IP1                                                                                         | 2,45637E-38 | -1,065968426 | 0,172 | 0,442 | 5,1832E-34  | 0,477651922   | 2,093574744     | 0,389140271     |
| DDIT3                                                                                           | 4,68468E-40 | -1,06690678  | 0,134 | 0,414 | 9,88514E-36 | 0,477341349   | 2,094936886     | 0,323671498     |
| SMTN                                                                                            | 2,25117E-36 | -1,068116972 | 0,045 | 0,265 | 4,75019E-32 | 0,476941104   | 2,096694942     | 0,169811321     |
| COL14A1                                                                                         | 1,42183E-40 | -1,069482009 | 0,183 | 0,486 | 3,0002E-36  | 0,476490049   | 2,098679713     | 0,37654321      |
| EEF1G                                                                                           | 5,46005E-45 | -1,077296915 | 0,14  | 0,474 | 1,15213E-40 | 0,473915938   | 2,110078856     | 0,29535865      |
| TLE4                                                                                            | 4,8541E-23  | -1,079577939 | 0,105 | 0,289 | 1,02426E-18 | 0,473167228   | 2,113417709     | 0,363321799     |
| AHNAK                                                                                           | 6,6052E-60  | -1,081466831 | 0,418 | 0,821 | 1,39376E-55 | 0,472548125   | 2,116186577     | 0,509135201     |
| RNASEK                                                                                          | 3,97887E-40 | -1,085552462 | 0,177 | 0,475 | 8,39582E-36 | 0,471211789   | 2,122187993     | 0,372631579     |
| STARD13                                                                                         | 2,93602E-42 | -1,087449582 | 0,139 | 0,436 | 6,19529E-38 | 0,47059256    | 2,124980471     | 0,318807339     |
| IER2                                                                                            | 1,19856E-33 | -1,091397481 | 0,302 | 0,593 | 2,52907E-29 | 0,469306556   | 2,13080339      | 0,509274874     |
| GJC1                                                                                            | 2,37289E-27 | -1,093853509 | 0,055 | 0,236 | 5,00703E-23 | 0,468508293   | 2,134433935     | 0,233050847     |
| FTL                                                                                             | 5,56872E-35 | -1,094980735 | 0,81  | 0,935 | 1,17505E-30 | 0,468142375   | 2,136102292     | 0,86631016      |
| DUSP1                                                                                           | 7,54407E-26 | -1,095656391 | 0,24  | 0,483 | 1,59187E-21 | 0,467923182   | 2,137102925     | 0,49689441      |

Supplementary Table 5

| Differentially expressed genes_total calculation_ comparing SC-Keloid vs. (SC-Myel, SC-Nonmyel) |             |              |       |       |             |               |                 |                 |
|-------------------------------------------------------------------------------------------------|-------------|--------------|-------|-------|-------------|---------------|-----------------|-----------------|
| gene                                                                                            | p_val       | avg_log2FC   | pct.1 | pct.2 | p_val_adj   | Foldchange_UP | Foldchange_DOWN | Ratio_pct1_pct2 |
| ARHGEF10                                                                                        | 4,01164E-42 | -1,098388869 | 0,049 | 0,3   | 8,46495E-38 | 0,46703777    | 2,141154453     | 0,163333333     |
| NFIB                                                                                            | 2,64037E-54 | -1,102435501 | 0,051 | 0,362 | 5,57145E-50 | 0,465729605   | 2,147168632     | 0,140883978     |
| HSPG2                                                                                           | 1,05801E-33 | -1,103447438 | 0,299 | 0,582 | 2,23251E-29 | 0,465403047   | 2,14867523      | 0,513745704     |
| ADGRB3                                                                                          | 7,54353E-45 | -1,104338124 | 0,009 | 0,232 | 1,59176E-40 | 0,465115807   | 2,150002183     | 0,038793103     |
| LATS2                                                                                           | 1,93298E-36 | -1,106799096 | 0,051 | 0,273 | 4,07878E-32 | 0,464323081   | 2,15367282      | 0,186813187     |
| CD44                                                                                            | 2,43353E-22 | -1,109280066 | 0,235 | 0,437 | 5,13499E-18 | 0,463525282   | 2,157379629     | 0,537757437     |
| SERTAD1                                                                                         | 2,24106E-40 | -1,110115686 | 0,179 | 0,478 | 4,72886E-36 | 0,463256882   | 2,158629561     | 0,374476987     |
| SYNE2                                                                                           | 8,97264E-43 | -1,117767753 | 0,081 | 0,36  | 1,89332E-38 | 0,460806268   | 2,170109369     | 0,225           |
| HMGB2                                                                                           | 2,63749E-40 | -1,11934301  | 0,075 | 0,331 | 5,56537E-36 | 0,460303396   | 2,172480172     | 0,226586103     |
| EIF1                                                                                            | 2,59821E-89 | -1,129997465 | 0,719 | 0,966 | 5,48248E-85 | 0,456916528   | 2,188583556     | 0,744306418     |
| C2orf88                                                                                         | 2,24197E-47 | -1,136602005 | 0,015 | 0,258 | 4,73079E-43 | 0,454829582   | 2,198625683     | 0,058139535     |
| CD55                                                                                            | 7,68114E-40 | -1,137711898 | 0,017 | 0,229 | 1,6208E-35  | 0,454479808   | 2,200317777     | 0,074235808     |
| PTX3                                                                                            | 9,3532E-12  | -1,140217117 | 0,092 | 0,204 | 1,97362E-07 | 0,453691295   | 2,204141918     | 0,450980392     |
| TSC22D3                                                                                         | 1,84903E-16 | -1,152846355 | 0,136 | 0,289 | 3,90165E-12 | 0,44973705    | 2,2235215       | 0,470588235     |
| ASXL1                                                                                           | 1,20198E-43 | -1,153838136 | 0,133 | 0,422 | 2,53629E-39 | 0,449427984   | 2,225050586     | 0,315165877     |
| ABCA1                                                                                           | 4,93396E-39 | -1,154997948 | 0,051 | 0,285 | 1,04112E-34 | 0,449066825   | 2,226840069     | 0,178947368     |
| BHLHE40                                                                                         | 5,44672E-36 | -1,156237656 | 0,15  | 0,414 | 1,14931E-31 | 0,448681108   | 2,228754416     | 0,362318841     |
| TUBB4B                                                                                          | 2,12394E-40 | -1,159540914 | 0,228 | 0,531 | 4,48174E-36 | 0,447654963   | 2,233863316     | 0,429378531     |
| NRXN3                                                                                           | 5,40892E-35 | -1,160083828 | 0,034 | 0,236 | 1,14134E-30 | 0,447486534   | 2,23470412      | 0,144067797     |
| SERPING1                                                                                        | 1,60448E-45 | -1,161328857 | 0,014 | 0,248 | 3,38561E-41 | 0,447100524   | 2,236633477     | 0,056451613     |
| ALCAM                                                                                           | 4,58683E-50 | -1,16235063  | 0,084 | 0,392 | 9,67867E-46 | 0,446783983   | 2,238218108     | 0,214285714     |
| ZNF503                                                                                          | 4,78112E-40 | -1,163754983 | 0,122 | 0,396 | 1,00886E-35 | 0,446349284   | 2,240397904     | 0,308080808     |
| FTH1                                                                                            | 1,8942E-48  | -1,165551978 | 0,878 | 0,982 | 3,99694E-44 | 0,445793666   | 2,243190241     | 0,894093686     |
| HLA-DRB1                                                                                        | 2,59268E-25 | -1,169381532 | 0,043 | 0,217 | 5,47082E-21 | 0,4446119     | 2,249152575     | 0,198156682     |
| CCND2                                                                                           | 6,33565E-51 | -1,174432792 | 0,015 | 0,273 | 1,33689E-46 | 0,443057917   | 2,257041259     | 0,054945055     |
| ID4                                                                                             | 3,03012E-37 | -1,174617313 | 0,125 | 0,391 | 6,39385E-33 | 0,443001254   | 2,257329955     | 0,319693095     |
| GLDN                                                                                            | 2,03028E-21 | -1,175274498 | 0     | 0,1   | 4,28409E-17 | 0,442799501   | 2,25835846      | 0               |
| GFRA3                                                                                           | 4,96163E-37 | -1,179059017 | 0,254 | 0,531 | 1,04695E-32 | 0,441639459   | 2,264290428     | 0,47834275      |
| ETS1                                                                                            | 4,43176E-38 | -1,179492916 | 0,213 | 0,501 | 9,35147E-34 | 0,441506653   | 2,26497153      | 0,425149701     |
| ATP6VOC                                                                                         | 3,35782E-48 | -1,181249649 | 0,119 | 0,433 | 7,08534E-44 | 0,440969369   | 2,267731207     | 0,27482679      |

Supplementary Table 5

| Differentially expressed genes_total calculation_ comparing SC-Keloid vs. (SC-Myel, SC-Nonmyel) |             |              |       |       |             |               |                 |                 |
|-------------------------------------------------------------------------------------------------|-------------|--------------|-------|-------|-------------|---------------|-----------------|-----------------|
| gene                                                                                            | p_val       | avg_log2FC   | pct.1 | pct.2 | p_val_adj   | Foldchange_UP | Foldchange_DOWN | Ratio_pct1_pct2 |
| VGLL3                                                                                           | 7,02351E-43 | -1,182579799 | 0,02  | 0,248 | 1,48203E-38 | 0,440562987   | 2,269822997     | 0,080645161     |
| GEM                                                                                             | 4,9128E-23  | -1,193114254 | 0,058 | 0,22  | 1,03665E-18 | 0,437357745   | 2,286457739     | 0,263636364     |
| GPBP1                                                                                           | 5,60042E-53 | -1,19444091  | 0,249 | 0,609 | 1,18175E-48 | 0,436955749   | 2,288561259     | 0,408866995     |
| CDKN1C                                                                                          | 7,8577E-33  | -1,195630444 | 0,107 | 0,345 | 1,65805E-28 | 0,436595618   | 2,290449007     | 0,310144928     |
| PRRG4                                                                                           | 3,24685E-52 | -1,1962305   | 0,01  | 0,266 | 6,85118E-48 | 0,436414064   | 2,291401864     | 0,037593985     |
| HSPA2                                                                                           | 1,36679E-34 | -1,197698187 | 0,041 | 0,244 | 2,88407E-30 | 0,435970315   | 2,293734148     | 0,168032787     |
| INTS6                                                                                           | 1,89593E-36 | -1,20416859  | 0,156 | 0,419 | 4,00059E-32 | 0,434019392   | 2,304044514     | 0,372315036     |
| SOWAHC                                                                                          | 2,22713E-33 | -1,210036278 | 0,055 | 0,263 | 4,69946E-29 | 0,432257746   | 2,31343454      | 0,209125475     |
| CLK1                                                                                            | 2,01725E-50 | -1,211541088 | 0,18  | 0,514 | 4,2566E-46  | 0,431807112   | 2,315848839     | 0,350194553     |
| MTURN                                                                                           | 1,06979E-40 | -1,211918133 | 0,098 | 0,369 | 2,25737E-36 | 0,431694276   | 2,316454159     | 0,265582656     |
| DOCK5                                                                                           | 1,23343E-45 | -1,219273375 | 0,107 | 0,406 | 2,60267E-41 | 0,429498984   | 2,328294214     | 0,263546798     |
| MAFG                                                                                            | 1,88341E-36 | -1,220580808 | 0,093 | 0,335 | 3,97418E-32 | 0,42910993    | 2,330405171     | 0,27761194      |
| TIPARP                                                                                          | 3,19529E-45 | -1,229766609 | 0,051 | 0,313 | 6,74238E-41 | 0,426386419   | 2,34529046      | 0,162939297     |
| ADD3                                                                                            | 9,6056E-53  | -1,237079702 | 0,076 | 0,385 | 2,02688E-48 | 0,424230513   | 2,357209037     | 0,197402597     |
| CAB39L                                                                                          | 1,93928E-58 | -1,237580012 | 0,016 | 0,304 | 4,09207E-54 | 0,424083421   | 2,358026632     | 0,052631579     |
| L1CAM                                                                                           | 5,20438E-42 | -1,238449767 | 0,288 | 0,594 | 1,09818E-37 | 0,423827831   | 2,359448639     | 0,484848485     |
| PPP1R10                                                                                         | 1,79312E-45 | -1,239392644 | 0,119 | 0,408 | 3,78367E-41 | 0,423550928   | 2,360991167     | 0,291666667     |
| ART3                                                                                            | 3,86069E-56 | -1,245475905 | 0,003 | 0,266 | 8,14645E-52 | 0,421768745   | 2,370967529     | 0,011278195     |
| SAMHD1                                                                                          | 1,68579E-42 | -1,247351727 | 0,075 | 0,341 | 3,55718E-38 | 0,421220709   | 2,374052316     | 0,219941349     |
| ATP1A2                                                                                          | 5,26421E-56 | -1,256996675 | 0,022 | 0,312 | 1,1108E-51  | 0,418414086   | 2,389976902     | 0,070512821     |
| MRPS24                                                                                          | 3,40564E-25 | -1,25863296  | 0,084 | 0,266 | 7,18625E-21 | 0,417939795   | 2,392689119     | 0,315789474     |
| GBP2                                                                                            | 6,84132E-36 | -1,259706635 | 0,047 | 0,265 | 1,44359E-31 | 0,417628874   | 2,394470456     | 0,177358491     |
| DLC1                                                                                            | 1,23618E-50 | -1,261324079 | 0,187 | 0,525 | 2,60847E-46 | 0,417160921   | 2,397156467     | 0,356190476     |
| VWA1                                                                                            | 8,55847E-52 | -1,262376342 | 0,325 | 0,696 | 1,80592E-47 | 0,416856766   | 2,398905525     | 0,466954023     |
| GAS2L3                                                                                          | 2,80185E-56 | -1,264199719 | 0,027 | 0,319 | 5,91218E-52 | 0,416330247   | 2,401939344     | 0,084639498     |
| DNAJB4                                                                                          | 2,48832E-40 | -1,265101815 | 0,12  | 0,393 | 5,25061E-36 | 0,416070003   | 2,403441711     | 0,305343511     |
| EGR1                                                                                            | 9,74163E-21 | -1,274827056 | 0,255 | 0,463 | 2,05558E-16 | 0,413274698   | 2,419698099     | 0,55075594      |
| RAPGEF5                                                                                         | 2,69062E-52 | -1,278481086 | 0,01  | 0,269 | 5,67747E-48 | 0,412229288   | 2,42583443      | 0,037174721     |
| SERTAD2                                                                                         | 5,96878E-50 | -1,282950923 | 0,1   | 0,406 | 1,25947E-45 | 0,410954073   | 2,433361939     | 0,246305419     |
| TOB1                                                                                            | 1,57677E-44 | -1,285678787 | 0,097 | 0,373 | 3,32714E-40 | 0,410177771   | 2,43796732      | 0,260053619     |

Supplementary Table 5

| Differentially expressed genes_total calculation_ comparing SC-Keloid vs. (SC-Myel, SC-Nonmyel) |             |              |       |       |             |               |                 |                 |
|-------------------------------------------------------------------------------------------------|-------------|--------------|-------|-------|-------------|---------------|-----------------|-----------------|
| gene                                                                                            | p_val       | avg_log2FC   | pct.1 | pct.2 | p_val_adj   | Foldchange_UP | Foldchange_DOWN | Ratio_pct1_pct2 |
| RELN                                                                                            | 1,56233E-65 | -1,289087044 | 0,029 | 0,365 | 3,29666E-61 | 0,409209901   | 2,443733639     | 0,079452055     |
| SLC3A2                                                                                          | 1,41323E-46 | -1,293939779 | 0,215 | 0,536 | 2,98207E-42 | 0,40783577    | 2,451967368     | 0,401119403     |
| LAMB1                                                                                           | 3,61256E-52 | -1,29556217  | 0,204 | 0,548 | 7,62286E-48 | 0,407377394   | 2,454726293     | 0,372262774     |
| IER5                                                                                            | 1,51887E-28 | -1,295657958 | 0,118 | 0,331 | 3,20497E-24 | 0,407350347   | 2,45488928      | 0,356495468     |
| SQSTM1                                                                                          | 3,40588E-49 | -1,2973013   | 0,255 | 0,59  | 7,18675E-45 | 0,406886607   | 2,457687184     | 0,43220339      |
| PMP2                                                                                            | 3,36319E-42 | -1,29912698  | 0,176 | 0,482 | 7,09667E-38 | 0,406372032   | 2,46079927      | 0,365145228     |
| CCN5                                                                                            | 1,23299E-17 | -1,299493609 | 0,01  | 0,109 | 2,60173E-13 | 0,406268775   | 2,461424706     | 0,091743119     |
| NCAM1                                                                                           | 3,32578E-49 | -1,304933332 | 0,081 | 0,385 | 7,01772E-45 | 0,404739811   | 2,470723097     | 0,21038961      |
| BGN                                                                                             | 6,62538E-53 | -1,305157617 | 0,055 | 0,362 | 1,39802E-48 | 0,404676894   | 2,471107232     | 0,151933702     |
| GADD45A                                                                                         | 4,25629E-27 | -1,314916117 | 0,155 | 0,372 | 8,98119E-23 | 0,401948865   | 2,487878648     | 0,416666667     |
| RETREG1                                                                                         | 6,14243E-54 | -1,318528612 | 0,049 | 0,35  | 1,29611E-49 | 0,400943648   | 2,49411608      | 0,14            |
| SCGB2A2                                                                                         | 3,85275E-07 | -1,319998727 | 0,013 | 0,058 | 0,008129682 | 0,400535292   | 2,496658895     | 0,224137931     |
| NDRG1                                                                                           | 1,06182E-59 | -1,321036557 | 0,094 | 0,446 | 2,24054E-55 | 0,400247263   | 2,49845556      | 0,210762332     |
| DDX3X                                                                                           | 9,4147E-54  | -1,329570307 | 0,249 | 0,598 | 1,98659E-49 | 0,397886731   | 2,513278081     | 0,41638796      |
| KLF6                                                                                            | 2,06243E-52 | -1,330088477 | 0,369 | 0,75  | 4,35193E-48 | 0,397743848   | 2,514180933     | 0,492           |
| ITGB4                                                                                           | 1,0841E-50  | -1,331312007 | 0,105 | 0,418 | 2,28755E-46 | 0,39740667    | 2,51631408      | 0,251196172     |
| TENT5A                                                                                          | 1,33038E-37 | -1,332177094 | 0,158 | 0,429 | 2,80723E-33 | 0,397168444   | 2,517823397     | 0,368298368     |
| NRN1                                                                                            | 3,56559E-54 | -1,375936436 | 0,186 | 0,533 | 7,52375E-50 | 0,38530253    | 2,595363181     | 0,348968105     |
| PLLP                                                                                            | 7,21517E-60 | -1,379588776 | 0,027 | 0,335 | 1,52247E-55 | 0,384328328   | 2,60194195      | 0,080597015     |
| NFE2L2                                                                                          | 6,22228E-58 | -1,38364462  | 0,239 | 0,596 | 1,31296E-53 | 0,383249384   | 2,609267075     | 0,401006711     |
| CD9                                                                                             | 1,1088E-77  | -1,389105729 | 0,54  | 0,898 | 2,33967E-73 | 0,381801393   | 2,619162786     | 0,601336303     |
| TMEM176A                                                                                        | 3,72061E-55 | -1,397762153 | 0,052 | 0,361 | 7,85085E-51 | 0,379517376   | 2,634925467     | 0,144044321     |
| UBC                                                                                             | 1,89074E-85 | -1,399959364 | 0,631 | 0,944 | 3,98965E-81 | 0,378939815   | 2,638941491     | 0,668432203     |
| GLUL                                                                                            | 2,84736E-48 | -1,400405824 | 0,072 | 0,362 | 6,00822E-44 | 0,378822566   | 2,639758269     | 0,198895028     |
| CADM3                                                                                           | 7,29644E-60 | -1,40218806  | 0,036 | 0,353 | 1,53962E-55 | 0,378354875   | 2,643021316     | 0,101983003     |
| AMD1                                                                                            | 9,52291E-61 | -1,404692134 | 0,121 | 0,475 | 2,00943E-56 | 0,377698737   | 2,64761277      | 0,254736842     |
| DNAJA1                                                                                          | 1,34776E-60 | -1,405149413 | 0,346 | 0,729 | 2,8439E-56  | 0,37757904    | 2,648452095     | 0,474622771     |
| MBNL2                                                                                           | 1,48624E-60 | -1,412052988 | 0,166 | 0,537 | 3,13611E-56 | 0,375776567   | 2,661155821     | 0,309124767     |
| NFATC2                                                                                          | 4,62738E-38 | -1,413893133 | 0,071 | 0,316 | 9,76423E-34 | 0,375297573   | 2,664552268     | 0,224683544     |
| BRD2                                                                                            | 6,25403E-55 | -1,415168174 | 0,205 | 0,56  | 1,31966E-50 | 0,374966035   | 2,666908215     | 0,366071429     |

Supplementary Table 5

| Differentially expressed genes_total calculation_ comparing SC-Keloid vs. (SC-Myel, SC-Nonmyel) |             |              |       |       |             |               |                 |                 |
|-------------------------------------------------------------------------------------------------|-------------|--------------|-------|-------|-------------|---------------|-----------------|-----------------|
| gene                                                                                            | p_val       | avg_log2FC   | pct.1 | pct.2 | p_val_adj   | Foldchange_UP | Foldchange_DOWN | Ratio_pct1_pct2 |
| FADS3                                                                                           | 1,40104E-52 | -1,417029789 | 0,102 | 0,408 | 2,95633E-48 | 0,374482501   | 2,670351744     | 0,25            |
| DMD                                                                                             | 4,0916E-63  | -1,423561111 | 0,045 | 0,38  | 8,63368E-59 | 0,372790988   | 2,682468278     | 0,118421053     |
| SOD3                                                                                            | 2,95909E-46 | -1,424151765 | 0,009 | 0,237 | 6,24398E-42 | 0,372638395   | 2,683566734     | 0,037974684     |
| CSRNP1                                                                                          | 2,34697E-52 | -1,42519731  | 0,119 | 0,437 | 4,95234E-48 | 0,372368435   | 2,685512265     | 0,272311213     |
| JUND                                                                                            | 7,38013E-73 | -1,431149469 | 0,602 | 0,887 | 1,55728E-68 | 0,370835312   | 2,696614828     | 0,678692221     |
| BCL6                                                                                            | 5,74192E-53 | -1,433264475 | 0,071 | 0,377 | 1,2116E-48  | 0,370292061   | 2,700570994     | 0,188328912     |
| EIF4A2                                                                                          | 6,10939E-77 | -1,438530527 | 0,24  | 0,67  | 1,28914E-72 | 0,368942904   | 2,710446493     | 0,358208955     |
| DST                                                                                             | 3,55367E-68 | -1,453193182 | 0,454 | 0,825 | 7,49861E-64 | 0,365212188   | 2,738134247     | 0,55030303      |
| RPL17                                                                                           | 9,58683E-79 | -1,457561194 | 0,228 | 0,704 | 2,02292E-74 | 0,364108116   | 2,746436992     | 0,323863636     |
| TUBB2B                                                                                          | 4,42719E-57 | -1,472340652 | 0,108 | 0,45  | 9,34181E-53 | 0,36039711    | 2,774717032     | 0,24            |
| VMP1                                                                                            | 1,78108E-44 | -1,476255446 | 0,284 | 0,605 | 3,75826E-40 | 0,359420488   | 2,78225653      | 0,469421488     |
| DDIT4                                                                                           | 1,25412E-40 | -1,478246165 | 0,128 | 0,408 | 2,64633E-36 | 0,35892488    | 2,786098309     | 0,31372549      |
| BPGM                                                                                            | 1,15895E-43 | -1,478605562 | 0,118 | 0,398 | 2,44551E-39 | 0,358835477   | 2,786792454     | 0,296482412     |
| NR2F2                                                                                           | 1,01792E-51 | -1,485314176 | 0,166 | 0,495 | 2,14792E-47 | 0,357170745   | 2,799781373     | 0,335353535     |
| NFIA                                                                                            | 4,22484E-77 | -1,491600763 | 0,027 | 0,395 | 8,91483E-73 | 0,355617749   | 2,812008124     | 0,06835443      |
| CDKN1A                                                                                          | 1,00195E-66 | -1,496317909 | 0,071 | 0,43  | 2,11421E-62 | 0,354456893   | 2,821217529     | 0,165116279     |
| ZFAS1                                                                                           | 1,32516E-52 | -1,498089652 | 0,333 | 0,682 | 2,79622E-48 | 0,354021859   | 2,824684335     | 0,488269795     |
| ZFAND5                                                                                          | 5,35582E-64 | -1,498138508 | 0,168 | 0,545 | 1,13013E-59 | 0,354009871   | 2,824779994     | 0,308256881     |
| SOX2                                                                                            | 8,47244E-48 | -1,503442136 | 0,149 | 0,467 | 1,78777E-43 | 0,352710851   | 2,835183545     | 0,319057816     |
| HSPH1                                                                                           | 4,8963E-44  | -1,507132576 | 0,176 | 0,467 | 1,03317E-39 | 0,351809763   | 2,84244528      | 0,376873662     |
| CDH19                                                                                           | 8,35713E-82 | -1,509190174 | 0,477 | 0,885 | 1,76344E-77 | 0,351308363   | 2,84650212      | 0,538983051     |
| PHLDA1                                                                                          | 2,6863E-38  | -1,516373181 | 0,166 | 0,436 | 5,66836E-34 | 0,349563588   | 2,860709856     | 0,380733945     |
| ABL2                                                                                            | 3,62354E-42 | -1,521661919 | 0,189 | 0,476 | 7,64603E-38 | 0,348284477   | 2,871216103     | 0,397058824     |
| MAFF                                                                                            | 1,14243E-61 | -1,521838254 | 0,104 | 0,456 | 2,41064E-57 | 0,348241911   | 2,87156706      | 0,228070175     |
| IER5L                                                                                           | 1,16387E-30 | -1,532750539 | 0,213 | 0,455 | 2,45589E-26 | 0,345617808   | 2,893369426     | 0,468131868     |
| ID2                                                                                             | 2,69847E-39 | -1,541684589 | 0,097 | 0,354 | 5,69405E-35 | 0,343484145   | 2,911342532     | 0,274011299     |
| SELENOP                                                                                         | 5,17791E-72 | -1,552275068 | 0,019 | 0,368 | 1,09259E-67 | 0,340971942   | 2,932792635     | 0,051630435     |
| IGFBP7                                                                                          | 1,7045E-39  | -1,554874456 | 0,47  | 0,777 | 3,59667E-35 | 0,340358146   | 2,938081581     | 0,604890605     |
| BTG2                                                                                            | 1,20641E-42 | -1,557908747 | 0,078 | 0,346 | 2,54565E-38 | 0,339643054   | 2,944267488     | 0,225433526     |
| IRF1                                                                                            | 8,13392E-46 | -1,564760734 | 0,12  | 0,419 | 1,71634E-41 | 0,338033765   | 2,958284356     | 0,286396181     |

Supplementary Table 5

| Differentially expressed genes_total calculation_ comparing SC-Keloid vs. (SC-Myel, SC-Nonmyel) |             |              |       |       |             |               |                 |                 |
|-------------------------------------------------------------------------------------------------|-------------|--------------|-------|-------|-------------|---------------|-----------------|-----------------|
| gene                                                                                            | p_val       | avg_log2FC   | pct.1 | pct.2 | p_val_adj   | Foldchange_UP | Foldchange_DOWN | Ratio_pct1_pct2 |
| TAF1D                                                                                           | 8,12239E-45 | -1,568346169 | 0,196 | 0,491 | 1,71391E-40 | 0,337194715   | 2,965645529     | 0,399185336     |
| TSC22D4                                                                                         | 9,58017E-54 | -1,588985508 | 0,05  | 0,342 | 2,02151E-49 | 0,332405116   | 3,008377284     | 0,14619883      |
| PNRC1                                                                                           | 6,75605E-89 | -1,589051636 | 0,289 | 0,764 | 1,42559E-84 | 0,33238988    | 3,00851518      | 0,378272251     |
| EGFL8                                                                                           | 1,17833E-57 | -1,596017839 | 0,15  | 0,516 | 2,48639E-53 | 0,33078877    | 3,023077237     | 0,290697674     |
| CD59                                                                                            | 1,38538E-84 | -1,59748698  | 0,369 | 0,836 | 2,92329E-80 | 0,330452089   | 3,026157297     | 0,44138756      |
| GPM6B                                                                                           | 2,9099E-122 | -1,597738427 | 0,51  | 0,947 | 6,1402E-118 | 0,330394499   | 3,026684773     | 0,538542767     |
| TSC22D2                                                                                         | 3,35017E-54 | -1,60058617  | 0,109 | 0,433 | 7,0692E-50  | 0,329742975   | 3,032665061     | 0,251732102     |
| YBX3                                                                                            | 6,25286E-46 | -1,614096814 | 0,118 | 0,41  | 1,31942E-41 | 0,326669391   | 3,06119896      | 0,287804878     |
| TMEM176B                                                                                        | 6,10302E-73 | -1,615901645 | 0,08  | 0,476 | 1,2878E-68  | 0,326260979   | 3,065030957     | 0,168067227     |
| CTNNA1                                                                                          | 1,79606E-71 | -1,626437385 | 0,1   | 0,486 | 3,78987E-67 | 0,323887033   | 3,087496252     | 0,205761317     |
| CCNL1                                                                                           | 2,17733E-73 | -1,640031196 | 0,2   | 0,6   | 4,59439E-69 | 0,320849537   | 3,116725711     | 0,333333333     |
| SNCA                                                                                            | 8,88517E-91 | -1,643208031 | 0,072 | 0,532 | 1,87486E-86 | 0,320143798   | 3,123596349     | 0,135338346     |
| IFRD1                                                                                           | 6,25518E-70 | -1,654051769 | 0,148 | 0,539 | 1,3199E-65  | 0,31774652    | 3,147162712     | 0,27458256      |
| TCIM                                                                                            | 5,48968E-44 | -1,657505317 | 0,24  | 0,558 | 1,15838E-39 | 0,316986803   | 3,154705468     | 0,430107527     |
| SOD2                                                                                            | 2,80405E-45 | -1,706245643 | 0,113 | 0,406 | 5,91684E-41 | 0,306456531   | 3,263105524     | 0,278325123     |
| BCL2                                                                                            | 5,86676E-80 | -1,71861086  | 0,022 | 0,4   | 1,23795E-75 | 0,303841142   | 3,291193523     | 0,055           |
| KLF9                                                                                            | 3,27812E-84 | -1,726622781 | 0,15  | 0,611 | 6,91716E-80 | 0,302158455   | 3,309521816     | 0,245499182     |
| SLC38A2                                                                                         | 4,67296E-80 | -1,728980692 | 0,18  | 0,621 | 9,86042E-76 | 0,301665017   | 3,314935252     | 0,289855072     |
| CHL1                                                                                            | 1,44646E-86 | -1,73293473  | 0,014 | 0,414 | 3,05217E-82 | 0,300839367   | 3,324033059     | 0,033816425     |
| MT3                                                                                             | 8,84408E-41 | -1,736424213 | 0,002 | 0,197 | 1,86619E-36 | 0,300112598   | 3,332082712     | 0,010152284     |
| ANK3                                                                                            | 8,39113E-85 | -1,739725756 | 0,068 | 0,505 | 1,77061E-80 | 0,299426589   | 3,339716766     | 0,134653465     |
| MT1M                                                                                            | 4,71247E-15 | -1,744334634 | 0,048 | 0,163 | 9,94379E-11 | 0,298471558   | 3,350402989     | 0,294478528     |
| KLF4                                                                                            | 1,83583E-70 | -1,769452367 | 0,126 | 0,516 | 3,87379E-66 | 0,293320058   | 3,409245205     | 0,244186047     |
| CLU                                                                                             | 5,31104E-72 | -1,863231755 | 0,184 | 0,597 | 1,12068E-67 | 0,27485988    | 3,638217406     | 0,308207705     |
| RARRES2                                                                                         | 5,6595E-105 | -1,881096407 | 0,05  | 0,554 | 1,1942E-100 | 0,271477322   | 3,683548932     | 0,090252708     |
| MAL                                                                                             | 1,57756E-88 | -1,883580974 | 0,104 | 0,547 | 3,3288E-84  | 0,271010194   | 3,689898097     | 0,190127971     |
| NR4A1                                                                                           | 1,12641E-71 | -1,88561688  | 0,268 | 0,678 | 2,37685E-67 | 0,270628019   | 3,695108893     | 0,395280236     |
| RGCC                                                                                            | 2,93544E-68 | -1,889014193 | 0,12  | 0,507 | 6,19407E-64 | 0,269991484   | 3,703820527     | 0,236686391     |
| AATK                                                                                            | 3,66129E-60 | -1,891722396 | 0,072 | 0,407 | 7,7257E-56  | 0,269485136   | 3,710779808     | 0,176904177     |
| DKK3                                                                                            | 6,40625E-85 | -1,903028136 | 0,069 | 0,493 | 1,35178E-80 | 0,267381557   | 3,739973728     | 0,139959432     |

Supplementary Table 5

| Differentially expressed genes_total calculation_ comparing SC-Keloid vs. (SC-Myel, SC-Nonmyel) |             |              |       |       |             |               |                 |                 |
|-------------------------------------------------------------------------------------------------|-------------|--------------|-------|-------|-------------|---------------|-----------------|-----------------|
| gene                                                                                            | p_val       | avg_log2FC   | pct.1 | pct.2 | p_val_adj   | Foldchange_UP | Foldchange_DOWN | Ratio_pct1_pct2 |
| XKR4                                                                                            | 1,00827E-87 | -1,905174024 | 0,038 | 0,459 | 2,12755E-83 | 0,266984145   | 3,745540765     | 0,082788671     |
| HSPA6                                                                                           | 9,53029E-09 | -1,908208649 | 0,059 | 0,141 | 0,000201099 | 0,26642315    | 3,753427585     | 0,418439716     |
| CEBPB                                                                                           | 4,70728E-75 | -1,931058072 | 0,217 | 0,626 | 9,93284E-71 | 0,262236776   | 3,813347676     | 0,346645367     |
| ZFP36L1                                                                                         | 5,6295E-99  | -1,952102703 | 0,261 | 0,752 | 1,18787E-94 | 0,258439286   | 3,869380763     | 0,347074468     |
| CD74                                                                                            | 1,06707E-34 | -1,955794422 | 0,055 | 0,277 | 2,25163E-30 | 0,25777881    | 3,879294818     | 0,198555957     |
| PMP22                                                                                           | 6,7629E-104 | -1,97161257  | 0,529 | 0,927 | 1,427E-99   | 0,254967882   | 3,922062619     | 0,570658037     |
| PRX                                                                                             | 7,13855E-23 | -1,991964897 | 0,003 | 0,117 | 1,50631E-18 | 0,251396262   | 3,977783887     | 0,025641026     |
| IER3                                                                                            | 6,83189E-76 | -1,995212884 | 0,291 | 0,729 | 1,4416E-71  | 0,250830922   | 3,986749292     | 0,399176955     |
| CADM2                                                                                           | 4,82561E-94 | -1,995430627 | 0,008 | 0,422 | 1,01825E-89 | 0,250793067   | 3,98735105      | 0,018957346     |
| NR4A2                                                                                           | 8,38085E-84 | -2,002677579 | 0,154 | 0,598 | 1,76844E-79 | 0,249536441   | 4,007430719     | 0,257525084     |
| CCN1                                                                                            | 4,97439E-71 | -2,007060416 | 0,27  | 0,678 | 1,04965E-66 | 0,248779512   | 4,019623609     | 0,398230088     |
| NDRG2                                                                                           | 2,8202E-108 | -2,009565792 | 0,133 | 0,646 | 5,951E-104  | 0,248347858   | 4,026610129     | 0,205882353     |
| FXD1                                                                                            | 8,6084E-119 | -2,029913364 | 0,243 | 0,784 | 1,8165E-114 | 0,244869779   | 4,083803258     | 0,30994898      |
| HSPB1                                                                                           | 1,4276E-67  | -2,049843241 | 0,463 | 0,82  | 3,01238E-63 | 0,241510323   | 4,140609766     | 0,564634146     |
| PLP1                                                                                            | 1,3111E-128 | -2,064978803 | 0,318 | 0,856 | 2,7665E-124 | 0,238989841   | 4,184278281     | 0,371495327     |
| HSP90AA1                                                                                        | 3,1182E-93  | -2,070287575 | 0,661 | 0,944 | 6,57971E-89 | 0,238112031   | 4,199703786     | 0,700211864     |
| SOCS3                                                                                           | 6,10238E-52 | -2,082397255 | 0,107 | 0,412 | 1,28766E-47 | 0,236121734   | 4,235103582     | 0,259708738     |
| LTBP4                                                                                           | 1,0821E-109 | -2,126960509 | 0,133 | 0,665 | 2,2833E-105 | 0,228939688   | 4,367962617     | 0,2             |
| FOSB                                                                                            | 7,17323E-77 | -2,133035035 | 0,24  | 0,669 | 1,51362E-72 | 0,227977755   | 4,386392874     | 0,358744395     |
| NFKBIA                                                                                          | 3,9238E-100 | -2,143623689 | 0,279 | 0,795 | 8,2797E-96  | 0,226310639   | 4,418705217     | 0,350943396     |
| DNAJB1                                                                                          | 1,68524E-74 | -2,161301548 | 0,332 | 0,731 | 3,55602E-70 | 0,223554494   | 4,473182278     | 0,454172367     |
| ZFP36L2                                                                                         | 5,59591E-83 | -2,165928325 | 0,271 | 0,699 | 1,18079E-78 | 0,222838695   | 4,487550968     | 0,38769671      |
| NRXN1                                                                                           | 3,5146E-137 | -2,222606565 | 0,217 | 0,829 | 7,4162E-133 | 0,21425391    | 4,667359407     | 0,261761158     |
| FOS                                                                                             | 2,91695E-78 | -2,294885151 | 0,421 | 0,822 | 6,15505E-74 | 0,203784305   | 4,90714925      | 0,51216545      |
| ADIRF                                                                                           | 7,7081E-118 | -2,353796372 | 0,064 | 0,608 | 1,6265E-113 | 0,195630556   | 5,111675918     | 0,105263158     |
| AHR                                                                                             | 3,8827E-117 | -2,367535879 | 0,194 | 0,729 | 8,1929E-113 | 0,193776311   | 5,160589513     | 0,26611797      |
| MATN2                                                                                           | 1,642E-106  | -2,377902159 | 0,141 | 0,646 | 3,4648E-102 | 0,19238895    | 5,197803731     | 0,218266254     |
| JUN                                                                                             | 1,6068E-136 | -2,412921156 | 0,463 | 0,935 | 3,3906E-132 | 0,187775253   | 5,325515404     | 0,495187166     |
| PPP1R15A                                                                                        | 1,618E-146  | -2,42823407  | 0,318 | 0,868 | 3,4141E-142 | 0,185792727   | 5,38234202      | 0,366359447     |
| COL28A1                                                                                         | 1,0852E-137 | -2,529040098 | 0,015 | 0,589 | 2,2899E-133 | 0,17325392    | 5,771875166     | 0,025466893     |

Supplementary Table 5

| Differentially expressed genes_total calculation_ comparing SC-Keloid vs. (SC-Myel, SC-Nonmyel) |             |              |       |       |             |               |                 |                 |
|-------------------------------------------------------------------------------------------------|-------------|--------------|-------|-------|-------------|---------------|-----------------|-----------------|
| gene                                                                                            | p_val       | avg_log2FC   | pct.1 | pct.2 | p_val_adj   | Foldchange_UP | Foldchange_DOWN | Ratio_pct1_pct2 |
| HES1                                                                                            | 1,6728E-109 | -2,557607803 | 0,207 | 0,729 | 3,5298E-105 | 0,169856955   | 5,887306765     | 0,283950617     |
| PCSK2                                                                                           | 1,6307E-114 | -2,574949529 | 0,023 | 0,518 | 3,441E-110  | 0,167827434   | 5,958501398     | 0,044401544     |
| DCD                                                                                             | 8,73127E-31 | -2,611565847 | 0,041 | 0,229 | 1,84238E-26 | 0,16362149    | 6,11166661      | 0,179039301     |
| JUNB                                                                                            | 2,5252E-124 | -2,667921114 | 0,325 | 0,852 | 5,3284E-120 | 0,157353251   | 6,355127694     | 0,381455399     |
| FGL2                                                                                            | 7,8292E-101 | -2,69297051  | 0,017 | 0,469 | 1,65204E-96 | 0,154644721   | 6,466434769     | 0,036247335     |
| PDK4                                                                                            | 3,4655E-104 | -2,730273656 | 0,006 | 0,455 | 7,3125E-100 | 0,150697391   | 6,635814955     | 0,013186813     |
| CRYAB                                                                                           | 1,9656E-168 | -2,769804712 | 0,519 | 0,962 | 4,1477E-164 | 0,146624215   | 6,820155871     | 0,53950104      |
| ZFP36                                                                                           | 1,7741E-100 | -2,803759887 | 0,203 | 0,697 | 3,74363E-96 | 0,143213571   | 6,982578497     | 0,291248207     |
| CEBPD                                                                                           | 1,053E-70   | -2,810997818 | 0,069 | 0,44  | 2,22193E-66 | 0,142496875   | 7,017697776     | 0,156818182     |
| GADD45B                                                                                         | 1,1388E-119 | -2,854092883 | 0,283 | 0,807 | 2,403E-115  | 0,138303265   | 7,230487307     | 0,350681537     |
| SAT1                                                                                            | 2,2716E-136 | -2,909645553 | 0,113 | 0,693 | 4,7933E-132 | 0,133078964   | 7,514335617     | 0,163059163     |
| SCN7A                                                                                           | 3,6201E-130 | -2,95834798  | 0,107 | 0,672 | 7,6388E-126 | 0,128661473   | 7,772334436     | 0,15922619      |
| BIRC3                                                                                           | 8,98045E-92 | -2,96076813  | 0,054 | 0,487 | 1,89497E-87 | 0,128445822   | 7,785383626     | 0,110882957     |
| ATF3                                                                                            | 2,6686E-154 | -2,98923115  | 0,153 | 0,768 | 5,631E-150  | 0,125936541   | 7,940507129     | 0,19921875      |
| MBP                                                                                             | 2,04957E-38 | -3,0055404   | 0,017 | 0,221 | 4,3248E-34  | 0,124520881   | 8,030781571     | 0,076923077     |
| HSPA1A                                                                                          | 1,119E-131  | -3,169384101 | 0,42  | 0,908 | 2,3613E-127 | 0,111152777   | 8,996626321     | 0,462555066     |
| MPZ                                                                                             | 1,77871E-92 | -3,44361809  | 0,147 | 0,632 | 3,75325E-88 | 0,091911036   | 10,88008626     | 0,232594937     |
| HSPA1B                                                                                          | 1,144E-127  | -3,455926452 | 0,297 | 0,824 | 2,414E-123  | 0,091130232   | 10,97330688     | 0,360436893     |
| CCL2                                                                                            | 2,01133E-85 | -3,887579528 | 0,028 | 0,426 | 4,24411E-81 | 0,067565027   | 14,80055661     | 0,0657277       |



Supplementary Table 6 – antibody information

| 1 <sup>st</sup> Antibodies |         |            |               |              |           |
|----------------------------|---------|------------|---------------|--------------|-----------|
| Antigen                    | Species | catalog No | company       | dilution     | comment   |
| S100                       | rabbit  | #Z0311     | DAKO          | ready to use | o.n., 4°C |
| NGFR                       | mouse   | #sc-13577  | SantaCruz     | 1:100        | o.n., 4°C |
| JUN                        | rabbit  | #9165S     | CellSignaling | 1:300        | o.n., 4°C |
| STAT3                      | rabbit  | #9132      | CellSignaling | 1:200        | o.n., 4°C |
| JUNB                       | rabbit  | #3753      | CellSignaling | 1:200        | o.n., 4°C |
| KLF4                       | rabbit  | ab151733   | abcam         | 1:200        | o.n., 4°C |
| EGR1                       | rabbit  | ab216964   | abcam         | 1:200        | o.n., 4°C |
| CCN3                       | rabbit  | ab137677   | abcam         | 1:200        | o.n., 4°C |
| ELN                        | rabbit  | ab21610    | abcam         | 1:200        | o.n., 4°C |
| 2 <sup>nd</sup> Antibodies |         |            |               |              |           |
| Antigen                    | Species | catalog No | company       | dilution     | comment   |
| α rb AF488                 | goat    | #A32731    | Invitrogen    | 1:400        | 1 hr, RT  |
| α ms AF594                 | donkey  | #A21203    | Invitrogen    | 1:400        | 1 hr, RT  |

Supplementary Table 7 – comparison\_methods & materials

| source           | Dissociation                                                                                                    |
|------------------|-----------------------------------------------------------------------------------------------------------------|
| TT <sup>1</sup>  | Whole Skin Dissociation Kit, human(Miltenyi Biotec, Germany) [37°C, 2h] + gentle MACS Octo Dissociator          |
| XL <sup>2</sup>  | Whole Skin Dissociation Kit, human (Miltenyi Biotec, Germany) [37°C, over night] + gentle MACS Octo Dissociator |
| CCD <sup>3</sup> | Dispase II (Sigma) [2h, 37°C] + epidermis peeled off + collagenase IV(YEASEN, China) [37°C, 2h]                 |
| MD <sup>4</sup>  | Whole Skin Dissociation Kit, human (Miltenyi Biotec, Germany) [37°C, 2.5h] + gentle MACS Octo Dissociator       |

| source           | filtration  | enrichment                                       | chemistry                                               |
|------------------|-------------|--------------------------------------------------|---------------------------------------------------------|
| TT <sup>1</sup>  | 2x 70µm     | No                                               | Chromium Single Cell 3' version 1 (10X Genomics, USA)   |
| XL <sup>2</sup>  | 100µm, 40µm | Dead Cell Removal Kit (Miltenyi Biotec, Germany) | Chromium Single Cell 3' version 3 (10X Genomics, USA)   |
| CCD <sup>3</sup> | 70µm        | No                                               | Chromium Single Cell 3' version2 (10X Genomics, USA)    |
| MD               | 100µm, 40µm | Dead Cell Removal Kit (Miltenyi Biotec, Germany) | Chromium Single Cell 3' version 3.1 (10X Genomics, USA) |

| source           | sequencing                          | cell ranger version                |
|------------------|-------------------------------------|------------------------------------|
| TT <sup>1</sup>  | NextSeq (Illumina, USA)             | NA                                 |
| XL <sup>2</sup>  | NovaSeq 6000 System (Illumina, USA) | Cell Ranger (v3.0.2, 10x Genomics) |
| CCD <sup>3</sup> | Hiseq X or Novaseq (Illumina, USA)  | Cell Ranger (v2.1.0, 10x Genomics) |
| MD <sup>4</sup>  | HiSeq 3000/4000 (Illumina, USA)     | Cell Ranger (v3.0.2, 10x Genomics) |

**Supplementary Table 7: Comparison\_methods & materials.**

1. Tabib, T.; Morse, C.; Wang, T.; Chen, W.; Lafyatis, R. SFRP2/DPP4 and FMO1/LSP1 Define Major Fibroblast Populations in Human Skin. *J Invest Dermatol* 2018, 138, 802-810.
2. Liu, X.; Chen, W.; Zeng, Q.; Ma, B.; Li, Z.; Meng, T.; Chen, J.; Yu, N.; Zhou, Z.; Long, X. Single-cell RNA-seq reveals lineage-specific regulatory changes of fibroblasts and vascular endothelial cells in keloids. *J Invest Dermatol* 2021.
3. Deng, C.C.; Hu, Y.F.; Zhu, D.H.; Cheng, Q.; Gu, J.J.; Feng, Q.L.; Zhang, L.X.; Xu, Y.P.; Wang, D.; Rong, Z.; et al. Single-cell RNA-seq reveals fibroblast heterogeneity and increased mesenchymal fibroblasts in human fibrotic skin diseases. *Nat Commun* 2021, 12, 3709.
4. Direder, M.; Weiss, T.; Copic, D.; Vorstandlechner, V.; Laggner, M.; Mildner, C.S.; Klas, K.; Bormann, D.; Haslik, W.; Radtke, C.; et al. Schwann cells contribute to keloid formation. *medRxiv* 2021, 2021.2008.2009.21261701.

Supplementary Table 8

|               |               | gene regulation in keloidal repair-like SCs compared to myelinating/nonmyelinating SCs |             |           |            |           | gene regulation after peripheral nerve lesion in rat compared to no lesion source: DOI: 10.1111/j.1471-4159.2005.03635.x |      |    |    |    |     |     |
|---------------|---------------|----------------------------------------------------------------------------------------|-------------|-----------|------------|-----------|--------------------------------------------------------------------------------------------------------------------------|------|----|----|----|-----|-----|
|               |               | rel. expression level                                                                  |             |           |            |           | rel. expression level                                                                                                    |      |    |    |    |     |     |
| GBN           | human homolog | category                                                                               | adj_Skin XL | Keloid XL | Keloid CCD | Keloid MD | Mean                                                                                                                     | 5-8h | 2d | 4d | 7d | 14d | 28d |
| M61875        | CD44          | A                                                                                      |             |           |            |           |                                                                                                                          |      |    |    |    |     |     |
| X61654        | CD63          | A                                                                                      |             |           |            |           |                                                                                                                          |      |    |    |    |     |     |
| AF049882      | CD82          | A                                                                                      |             |           |            |           |                                                                                                                          |      |    |    |    |     |     |
| X76489        | CD9           | A                                                                                      |             |           |            |           |                                                                                                                          |      |    |    |    |     |     |
| D83349        | CDH22         | A                                                                                      |             |           |            |           |                                                                                                                          |      |    |    |    |     |     |
| D25290        | CDH6          | A                                                                                      |             |           |            |           |                                                                                                                          |      |    |    |    |     |     |
| M92848        | CEACAM1       | A                                                                                      |             |           |            |           |                                                                                                                          |      |    |    |    |     |     |
| D87248        | CNTN6         | A                                                                                      |             |           |            |           |                                                                                                                          |      |    |    |    |     |     |
| L26525        | DDR1          | A                                                                                      |             |           |            |           |                                                                                                                          |      |    |    |    |     |     |
| U60096        | ITGB4         | A                                                                                      |             |           |            |           |                                                                                                                          |      |    |    |    |     |     |
| AF009133      | KLRD1         | A                                                                                      |             |           |            |           |                                                                                                                          |      |    |    |    |     |     |
| U41663        | NLGN3         | A                                                                                      |             |           |            |           |                                                                                                                          |      |    |    |    |     |     |
| D10831        | SELL          | A                                                                                      |             |           |            |           |                                                                                                                          |      |    |    |    |     |     |
| Y13714        | SPARC         | A                                                                                      |             |           |            |           |                                                                                                                          |      |    |    |    |     |     |
| U90448        | CXCL5         | A                                                                                      |             |           |            |           |                                                                                                                          |      |    |    |    |     |     |
| U54791        | CXCR4         | A                                                                                      |             |           |            |           |                                                                                                                          |      |    |    |    |     |     |
| U97142        | GFRA1         | A                                                                                      |             |           |            |           |                                                                                                                          |      |    |    |    |     |     |
| J04811        | GHR           | A                                                                                      |             |           |            |           |                                                                                                                          |      |    |    |    |     |     |
| M61177        | MAPK3         | A                                                                                      |             |           |            |           |                                                                                                                          |      |    |    |    |     |     |
| U66274        | NPY5R         | A                                                                                      |             |           |            |           |                                                                                                                          |      |    |    |    |     |     |
| M63837        | PDGFRA        | A                                                                                      |             |           |            |           |                                                                                                                          |      |    |    |    |     |     |
| D64045        | PIK3R1        | A                                                                                      |             |           |            |           |                                                                                                                          |      |    |    |    |     |     |
| M20637        | PLCD1         | A                                                                                      |             |           |            |           |                                                                                                                          |      |    |    |    |     |     |
| D38222        | PTPRN         | A                                                                                      |             |           |            |           |                                                                                                                          |      |    |    |    |     |     |
| L13151        | RASA1         | A                                                                                      |             |           |            |           |                                                                                                                          |      |    |    |    |     |     |
| AF084205      | TAOK1         | A                                                                                      |             |           |            |           |                                                                                                                          |      |    |    |    |     |     |
| D14014        | CCND1         | B                                                                                      |             |           |            |           |                                                                                                                          |      |    |    |    |     |     |
| D16308        | CCND2         | B                                                                                      |             |           |            |           |                                                                                                                          |      |    |    |    |     |     |
| D16309        | CCND3         | B                                                                                      |             |           |            |           |                                                                                                                          |      |    |    |    |     |     |
| U05341        | CDC20         | B                                                                                      |             |           |            |           |                                                                                                                          |      |    |    |    |     |     |
| L11007        | CDK4          | B                                                                                      |             |           |            |           |                                                                                                                          |      |    |    |    |     |     |
| D64085        | FGF5          | B                                                                                      |             |           |            |           |                                                                                                                          |      |    |    |    |     |     |
| L32591        | GADD45A       | B                                                                                      |             |           |            |           |                                                                                                                          |      |    |    |    |     |     |
| X76453        | PLAAT3        | B                                                                                      |             |           |            |           |                                                                                                                          |      |    |    |    |     |     |
| M31177        | THRA          | B                                                                                      |             |           |            |           |                                                                                                                          |      |    |    |    |     |     |
| U72350        | BCL2L1        | B                                                                                      |             |           |            |           |                                                                                                                          |      |    |    |    |     |     |
| D26112        | FAS           | B                                                                                      |             |           |            |           |                                                                                                                          |      |    |    |    |     |     |
| L12458        | LYZ           | B                                                                                      |             |           |            |           |                                                                                                                          |      |    |    |    |     |     |
| X05137        | NGFR          | B                                                                                      |             |           |            |           |                                                                                                                          |      |    |    |    |     |     |
| Z54212        | EMP1          | B                                                                                      |             |           |            |           |                                                                                                                          |      |    |    |    |     |     |
| D85760        | GNA12         | B                                                                                      |             |           |            |           |                                                                                                                          |      |    |    |    |     |     |
| <b>M31837</b> | <b>IGFBP3</b> | <b>B</b>                                                                               |             |           |            |           |                                                                                                                          |      |    |    |    |     |     |
| M69055        | IGFBP6        | B                                                                                      |             |           |            |           |                                                                                                                          |      |    |    |    |     |     |
| D50093        | PRNP          | B                                                                                      |             |           |            |           |                                                                                                                          |      |    |    |    |     |     |
| <b>V01217</b> | <b>ACTB</b>   | <b>B</b>                                                                               |             |           |            |           |                                                                                                                          |      |    |    |    |     |     |
| AF083269      | ARPC1B        | B                                                                                      |             |           |            |           |                                                                                                                          |      |    |    |    |     |     |
| L08505        | DYNC1H1       | B                                                                                      |             |           |            |           |                                                                                                                          |      |    |    |    |     |     |
| X67788        | EZR           | B                                                                                      |             |           |            |           |                                                                                                                          |      |    |    |    |     |     |
| U31367        | MAL           | B                                                                                      |             |           |            |           |                                                                                                                          |      |    |    |    |     |     |
| X60370        | MAP1B         | B                                                                                      |             |           |            |           |                                                                                                                          |      |    |    |    |     |     |
| U31463        | MYH9          | B                                                                                      |             |           |            |           |                                                                                                                          |      |    |    |    |     |     |
| X74815        | MYO1E         | B                                                                                      |             |           |            |           |                                                                                                                          |      |    |    |    |     |     |
| Z12152        | NEFM          | B                                                                                      |             |           |            |           |                                                                                                                          |      |    |    |    |     |     |
| X59601        | PLEC          | B                                                                                      |             |           |            |           |                                                                                                                          |      |    |    |    |     |     |
| X86789        | SNCG          | B                                                                                      |             |           |            |           |                                                                                                                          |      |    |    |    |     |     |

Supplementary Table 8

|               |               | gene regulation in keloidal repair-like SCs compared to myelinating/nonmyelinating SCs |             |           |            |           | gene regulation after peripheral nerve lesion in rat compared to no lesion source: DOI: 10.1111/j.1471-4159.2005.03635.x |      |    |    |    |     |     |
|---------------|---------------|----------------------------------------------------------------------------------------|-------------|-----------|------------|-----------|--------------------------------------------------------------------------------------------------------------------------|------|----|----|----|-----|-----|
|               |               | rel. expression level                                                                  |             |           |            |           | rel. expression level                                                                                                    |      |    |    |    |     |     |
| GBN           | human homolog | category                                                                               | adj_Skin XL | Keloid XL | Keloid CCD | Keloid MD | Mean                                                                                                                     | 5-8h | 2d | 4d | 7d | 14d | 28d |
| <b>M83107</b> | <b>TAGLN</b>  | <b>B</b>                                                                               |             |           |            |           |                                                                                                                          |      |    |    |    |     |     |
| V01227        | TUBA1A        | B                                                                                      |             |           |            |           |                                                                                                                          |      |    |    |    |     |     |
| AJ002967      | UTRN          | B                                                                                      |             |           |            |           |                                                                                                                          |      |    |    |    |     |     |
| AF051425      | CNMD          | B                                                                                      |             |           |            |           |                                                                                                                          |      |    |    |    |     |     |
| AJ224879      | COL2A1        | B                                                                                      |             |           |            |           |                                                                                                                          |      |    |    |    |     |     |
| <b>J04035</b> | <b>ELN</b>    | <b>B</b>                                                                               |             |           |            |           |                                                                                                                          |      |    |    |    |     |     |
| AJ009698      | EMB           | B                                                                                      |             |           |            |           |                                                                                                                          |      |    |    |    |     |     |
| L34067        | GPC1          | B                                                                                      |             |           |            |           |                                                                                                                          |      |    |    |    |     |     |
| L14851        | NRXN3         | B                                                                                      |             |           |            |           |                                                                                                                          |      |    |    |    |     |     |
| D88250        | C1S           | B                                                                                      |             |           |            |           |                                                                                                                          |      |    |    |    |     |     |
| M15768        | CD4           | B                                                                                      |             |           |            |           |                                                                                                                          |      |    |    |    |     |     |
| U17035        | CXCL10        | B                                                                                      |             |           |            |           |                                                                                                                          |      |    |    |    |     |     |
| AF010464      | IL7           | B                                                                                      |             |           |            |           |                                                                                                                          |      |    |    |    |     |     |
| M34253        | IRF1          | B                                                                                      |             |           |            |           |                                                                                                                          |      |    |    |    |     |     |
| D10754        | PSMB6         | B                                                                                      |             |           |            |           |                                                                                                                          |      |    |    |    |     |     |
| M20035        | PTMA          | B                                                                                      |             |           |            |           |                                                                                                                          |      |    |    |    |     |     |
| <b>X52498</b> | <b>TGFBI</b>  | <b>B</b>                                                                               |             |           |            |           |                                                                                                                          |      |    |    |    |     |     |
| D42117        | TNFRSF8       | B                                                                                      |             |           |            |           |                                                                                                                          |      |    |    |    |     |     |
| L38644        | KPNB1         | B                                                                                      |             |           |            |           |                                                                                                                          |      |    |    |    |     |     |
| L20822        | STX5          | B                                                                                      |             |           |            |           |                                                                                                                          |      |    |    |    |     |     |
| D17615        | YWHAZ         | B                                                                                      |             |           |            |           |                                                                                                                          |      |    |    |    |     |     |
| U53184        | LITAF         | B                                                                                      |             |           |            |           |                                                                                                                          |      |    |    |    |     |     |
| AF014503      | NUPR1         | B                                                                                      |             |           |            |           |                                                                                                                          |      |    |    |    |     |     |
| <b>J03628</b> | <b>S100A4</b> | <b>B</b>                                                                               |             |           |            |           |                                                                                                                          |      |    |    |    |     |     |
| K01934        | THRSP         | B                                                                                      |             |           |            |           |                                                                                                                          |      |    |    |    |     |     |
| L15079        | ABCB4         | B                                                                                      |             |           |            |           |                                                                                                                          |      |    |    |    |     |     |
| L06040        | ALOX15        | B                                                                                      |             |           |            |           |                                                                                                                          |      |    |    |    |     |     |
| M21730        | ANXA5         | B                                                                                      |             |           |            |           |                                                                                                                          |      |    |    |    |     |     |
| X55572        | APOD          | B                                                                                      |             |           |            |           |                                                                                                                          |      |    |    |    |     |     |
| M28647        | ATP1A1        | B                                                                                      |             |           |            |           |                                                                                                                          |      |    |    |    |     |     |
| M14512        | ATP1A2        | B                                                                                      |             |           |            |           |                                                                                                                          |      |    |    |    |     |     |
| J04629        | ATP1B2        | B                                                                                      |             |           |            |           |                                                                                                                          |      |    |    |    |     |     |
| D84450        | ATP1B3        | B                                                                                      |             |           |            |           |                                                                                                                          |      |    |    |    |     |     |
| X14209        | COX4I1        | B                                                                                      |             |           |            |           |                                                                                                                          |      |    |    |    |     |     |
| D10952        | COX5B         | B                                                                                      |             |           |            |           |                                                                                                                          |      |    |    |    |     |     |
| D13205        | CYB5A         | B                                                                                      |             |           |            |           |                                                                                                                          |      |    |    |    |     |     |
| U17697        | CYP51A1       | B                                                                                      |             |           |            |           |                                                                                                                          |      |    |    |    |     |     |
| J02773        | FABP3         | B                                                                                      |             |           |            |           |                                                                                                                          |      |    |    |    |     |     |
| U75581        | FABP4         | B                                                                                      |             |           |            |           |                                                                                                                          |      |    |    |    |     |     |
| U13253        | FABP5         | B                                                                                      |             |           |            |           |                                                                                                                          |      |    |    |    |     |     |
| U58829        | FTH1          | B                                                                                      |             |           |            |           |                                                                                                                          |      |    |    |    |     |     |
| M26161        | KCNA1         | B                                                                                      |             |           |            |           |                                                                                                                          |      |    |    |    |     |     |
| M12516        | POR           | B                                                                                      |             |           |            |           |                                                                                                                          |      |    |    |    |     |     |
| Y09164        | SCN7A         | B                                                                                      |             |           |            |           |                                                                                                                          |      |    |    |    |     |     |
| J04793        | SLC4A1        | B                                                                                      |             |           |            |           |                                                                                                                          |      |    |    |    |     |     |
| M95738        | SLC6A11       | B                                                                                      |             |           |            |           |                                                                                                                          |      |    |    |    |     |     |
| L38247        | SYT4          | B                                                                                      |             |           |            |           |                                                                                                                          |      |    |    |    |     |     |
| AJ004912      | TMED10        | B                                                                                      |             |           |            |           |                                                                                                                          |      |    |    |    |     |     |
| L12385        | ARF6          | B                                                                                      |             |           |            |           |                                                                                                                          |      |    |    |    |     |     |
| AF019109      | SORT1         | B                                                                                      |             |           |            |           |                                                                                                                          |      |    |    |    |     |     |
| U29339        | ERBB3         | C                                                                                      |             |           |            |           |                                                                                                                          |      |    |    |    |     |     |
| M25889        | MBP           | C                                                                                      |             |           |            |           |                                                                                                                          |      |    |    |    |     |     |
| K03242        | MPZ           | C                                                                                      |             |           |            |           |                                                                                                                          |      |    |    |    |     |     |
| AB019393      | MYOC          | C                                                                                      |             |           |            |           |                                                                                                                          |      |    |    |    |     |     |
| <b>M34384</b> | <b>NES</b>    | <b>C</b>                                                                               |             |           |            |           |                                                                                                                          |      |    |    |    |     |     |

Supplementary Table 8

|          |               | gene regulation in keloidal repair-like SCs compared to myelinating/nonmyelinating SCs |             |           |            |           | gene regulation after peripheral nerve lesion in rat compared to no lesion source: DOI: 10.1111/j.1471-4159.2005.03635.x |      |    |    |    |     |     |
|----------|---------------|----------------------------------------------------------------------------------------|-------------|-----------|------------|-----------|--------------------------------------------------------------------------------------------------------------------------|------|----|----|----|-----|-----|
|          |               | rel. expression level                                                                  |             |           |            |           | rel. expression level                                                                                                    |      |    |    |    |     |     |
| GBN      | human homolog | category                                                                               | adj_Skin XL | Keloid XL | Keloid CCD | Keloid MD | Mean                                                                                                                     | 5-8h | 2d | 4d | 7d | 14d | 28d |
| Z49858   | PLLP          | C                                                                                      |             |           |            |           |                                                                                                                          |      |    |    |    |     |     |
| M11185   | PLP1          | C                                                                                      |             |           |            |           |                                                                                                                          |      |    |    |    |     |     |
| M69139   | PMP22         | C                                                                                      |             |           |            |           |                                                                                                                          |      |    |    |    |     |     |
| Z29649   | PRX           | C                                                                                      |             |           |            |           |                                                                                                                          |      |    |    |    |     |     |
| M54919   | S100B         | C                                                                                      |             |           |            |           |                                                                                                                          |      |    |    |    |     |     |
| M24067   | SERPINE1      | C                                                                                      |             |           |            |           |                                                                                                                          |      |    |    |    |     |     |
| M27876   | STMN1         | C                                                                                      |             |           |            |           |                                                                                                                          |      |    |    |    |     |     |
| M12919   | ALDOA         | D                                                                                      |             |           |            |           |                                                                                                                          |      |    |    |    |     |     |
| D83479   | CDO1          | D                                                                                      |             |           |            |           |                                                                                                                          |      |    |    |    |     |     |
| D38495   | CMA1          | D                                                                                      |             |           |            |           |                                                                                                                          |      |    |    |    |     |     |
| M36320   | CTSH          | D                                                                                      |             |           |            |           |                                                                                                                          |      |    |    |    |     |     |
| S73583   | ENPEP         | D                                                                                      |             |           |            |           |                                                                                                                          |      |    |    |    |     |     |
| X79807   | F10           | D                                                                                      |             |           |            |           |                                                                                                                          |      |    |    |    |     |     |
| L03294   | LPL           | D                                                                                      |             |           |            |           |                                                                                                                          |      |    |    |    |     |     |
| U03763   | PLA2G5        | D                                                                                      |             |           |            |           |                                                                                                                          |      |    |    |    |     |     |
| M23697   | PLAT          | D                                                                                      |             |           |            |           |                                                                                                                          |      |    |    |    |     |     |
| L26043   | PLIN1         | D                                                                                      |             |           |            |           |                                                                                                                          |      |    |    |    |     |     |
| U50194   | TPP2          | D                                                                                      |             |           |            |           |                                                                                                                          |      |    |    |    |     |     |
| D90109   | ACSL1         | D                                                                                      |             |           |            |           |                                                                                                                          |      |    |    |    |     |     |
| M22413   | CA3           | D                                                                                      |             |           |            |           |                                                                                                                          |      |    |    |    |     |     |
| L33869   | CP            | D                                                                                      |             |           |            |           |                                                                                                                          |      |    |    |    |     |     |
| M95591   | FDFT1         | D                                                                                      |             |           |            |           |                                                                                                                          |      |    |    |    |     |     |
| M34477   | FDPS          | D                                                                                      |             |           |            |           |                                                                                                                          |      |    |    |    |     |     |
| M17701   | GAPDH         | D                                                                                      |             |           |            |           |                                                                                                                          |      |    |    |    |     |     |
| X62404   | GPX5          | D                                                                                      |             |           |            |           |                                                                                                                          |      |    |    |    |     |     |
| X62660   | GSTA4         | D                                                                                      |             |           |            |           |                                                                                                                          |      |    |    |    |     |     |
| J02592   | GSTM2         | D                                                                                      |             |           |            |           |                                                                                                                          |      |    |    |    |     |     |
| X02904   | GSTP1         | D                                                                                      |             |           |            |           |                                                                                                                          |      |    |    |    |     |     |
| M63983   | HPRT1         | D                                                                                      |             |           |            |           |                                                                                                                          |      |    |    |    |     |     |
| U62803   | LCAT          | D                                                                                      |             |           |            |           |                                                                                                                          |      |    |    |    |     |     |
| J03752   | MGST1         | D                                                                                      |             |           |            |           |                                                                                                                          |      |    |    |    |     |     |
| U25651   | PFKM          | D                                                                                      |             |           |            |           |                                                                                                                          |      |    |    |    |     |     |
| L02615   | PKIA          | D                                                                                      |             |           |            |           |                                                                                                                          |      |    |    |    |     |     |
| D90164   | PPP1CB        | D                                                                                      |             |           |            |           |                                                                                                                          |      |    |    |    |     |     |
| M33962   | PTPN1         | D                                                                                      |             |           |            |           |                                                                                                                          |      |    |    |    |     |     |
| D86373   | SOAT1         | D                                                                                      |             |           |            |           |                                                                                                                          |      |    |    |    |     |     |
| X74593   | SORD          | D                                                                                      |             |           |            |           |                                                                                                                          |      |    |    |    |     |     |
| M97662   | UBP1          | D                                                                                      |             |           |            |           |                                                                                                                          |      |    |    |    |     |     |
| U07683   | UGT8          | D                                                                                      |             |           |            |           |                                                                                                                          |      |    |    |    |     |     |
| X70685   | H1-0          | D                                                                                      |             |           |            |           |                                                                                                                          |      |    |    |    |     |     |
| M37584   | H2AZ1         | D                                                                                      |             |           |            |           |                                                                                                                          |      |    |    |    |     |     |
| M64986   | HMGB1         | D                                                                                      |             |           |            |           |                                                                                                                          |      |    |    |    |     |     |
| D84418   | HMGB2         | D                                                                                      |             |           |            |           |                                                                                                                          |      |    |    |    |     |     |
| M12156   | HNRNPA1       | D                                                                                      |             |           |            |           |                                                                                                                          |      |    |    |    |     |     |
| D13374   | NME1          | D                                                                                      |             |           |            |           |                                                                                                                          |      |    |    |    |     |     |
| X60790   | PTBP1         | D                                                                                      |             |           |            |           |                                                                                                                          |      |    |    |    |     |     |
| Z46372   | TOP2A         | D                                                                                      |             |           |            |           |                                                                                                                          |      |    |    |    |     |     |
| D49708   | TRA2B         | D                                                                                      |             |           |            |           |                                                                                                                          |      |    |    |    |     |     |
| M14864   | CKM           | D                                                                                      |             |           |            |           |                                                                                                                          |      |    |    |    |     |     |
| X15800   | PKM           | D                                                                                      |             |           |            |           |                                                                                                                          |      |    |    |    |     |     |
| AF017637 | CPZ           | D                                                                                      |             |           |            |           |                                                                                                                          |      |    |    |    |     |     |
| X61043   | EEF1A1        | D                                                                                      |             |           |            |           |                                                                                                                          |      |    |    |    |     |     |
| J02646   | EIF2S1        | D                                                                                      |             |           |            |           |                                                                                                                          |      |    |    |    |     |     |
| X54793   | HSPD1         | D                                                                                      |             |           |            |           |                                                                                                                          |      |    |    |    |     |     |
| M86870   | PDIA4         | D                                                                                      |             |           |            |           |                                                                                                                          |      |    |    |    |     |     |

Supplementary Table 8

|          |               | gene regulation in keloidal repair-like SCs compared to myelinating/nonmyelinating SCs |             |           |            |           | gene regulation after peripheral nerve lesion in rat compared to no lesion source: DOI: 10.1111/j.1471-4159.2005.03635.x |      |    |    |    |     |     |
|----------|---------------|----------------------------------------------------------------------------------------|-------------|-----------|------------|-----------|--------------------------------------------------------------------------------------------------------------------------|------|----|----|----|-----|-----|
|          |               | rel. expression level                                                                  |             |           |            |           | rel. expression level                                                                                                    |      |    |    |    |     |     |
| GBN      | human homolog | category                                                                               | adj_Skin XL | Keloid XL | Keloid CCD | Keloid MD | Mean                                                                                                                     | 5-8h | 2d | 4d | 7d | 14d | 28d |
| L25331   | PLOD1         | D                                                                                      |             |           |            |           |                                                                                                                          |      |    |    |    |     |     |
| X93352   | RPL10A        | D                                                                                      |             |           |            |           |                                                                                                                          |      |    |    |    |     |     |
| M20156   | RPL18         | D                                                                                      |             |           |            |           |                                                                                                                          |      |    |    |    |     |     |
| X06148   | RPL5          | D                                                                                      |             |           |            |           |                                                                                                                          |      |    |    |    |     |     |
| X52445   | RPS24         | D                                                                                      |             |           |            |           |                                                                                                                          |      |    |    |    |     |     |
| X59051   | RPS29         | D                                                                                      |             |           |            |           |                                                                                                                          |      |    |    |    |     |     |
| M84716   | RPS3A         | D                                                                                      |             |           |            |           |                                                                                                                          |      |    |    |    |     |     |
| C07039   | RPSA          | D                                                                                      |             |           |            |           |                                                                                                                          |      |    |    |    |     |     |
| M65149   | CEBPD         | E                                                                                      |             |           |            |           |                                                                                                                          |      |    |    |    |     |     |
| X14788   | CREB1         | E                                                                                      |             |           |            |           |                                                                                                                          |      |    |    |    |     |     |
| D17512   | CRIP2         | E                                                                                      |             |           |            |           |                                                                                                                          |      |    |    |    |     |     |
| U09229   | CUX1          | E                                                                                      |             |           |            |           |                                                                                                                          |      |    |    |    |     |     |
| J03179   | DBP           | E                                                                                      |             |           |            |           |                                                                                                                          |      |    |    |    |     |     |
| D31734   | DLX5          | E                                                                                      |             |           |            |           |                                                                                                                          |      |    |    |    |     |     |
| D10862   | ID1           | E                                                                                      |             |           |            |           |                                                                                                                          |      |    |    |    |     |     |
| D10863   | ID2           | E                                                                                      |             |           |            |           |                                                                                                                          |      |    |    |    |     |     |
| D10864   | ID3           | E                                                                                      |             |           |            |           |                                                                                                                          |      |    |    |    |     |     |
| X17163   | JUN           | E                                                                                      |             |           |            |           |                                                                                                                          |      |    |    |    |     |     |
| X63594   | NFKBIA        | E                                                                                      |             |           |            |           |                                                                                                                          |      |    |    |    |     |     |
| U17254   | NR4A1         | E                                                                                      |             |           |            |           |                                                                                                                          |      |    |    |    |     |     |
| AF008554 | MAGT1         | F                                                                                      |             |           |            |           |                                                                                                                          |      |    |    |    |     |     |
| AF025506 | RABAC1        | F                                                                                      |             |           |            |           |                                                                                                                          |      |    |    |    |     |     |
| U25264   | SELENOW       | F                                                                                      |             |           |            |           |                                                                                                                          |      |    |    |    |     |     |

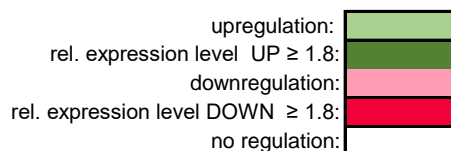

GenBank accession number: GBN

SC-Repair gene expression pattern

Category according to Bosse et al. (2006):

- A: Cell communication
- B: Cellular physiological process
- C: Development
- D: Metabolism
- E: Transcription
- F: Miscellaneous
